# Supplementary material for: Microsatellite Genome-Wide Database Development for the Commercial Blackhead Seabream (Acanthopagrus schlegelii)
Source: MDPI journal article supplement (doi:10.3390/genes14030620), 2023-03-01
Supplement: s1 [file s1]

Table S1. The number, length, frequency, and density of six different types of perfect SSRs.

| Type  | Counts | Length (bp) | Percent (%) | Average Length (bp) | Relative Abundance (loci/Mb) | Relative Density (bp/Mb) |
|-------|--------|-------------|-------------|---------------------|------------------------------|--------------------------|
| Mono  | 93792  | 1431027     | 22.74       | 15.26               | 142.87                       | 2179.84                  |
| Di    | 209890 | 4752212     | 50.9        | 22.64               | 319.72                       | 7238.89                  |
| Tri   | 41486  | 933654      | 10.06       | 22.51               | 63.19                        | 1422.2                   |
| Tetra | 28444  | 686204      | 6.9         | 24.12               | 43.33                        | 1045.27                  |
| Penta | 29365  | 526310      | 7.12        | 17.92               | 44.73                        | 801.71                   |
| Hexa  | 9404   | 184458      | 2.28        | 19.61               | 14.32                        | 280.98                   |
