# Supplementary material for: Microsatellite Genome-Wide Database Development for the Commercial Blackhead Seabream (Acanthopagrus schlegelii)
Source: MDPI journal article supplement (doi:10.3390/genes14030620), 2023-03-01
Supplement: s1 [file s1]

Table S3. Distribution of main SSR repeat number for each SSR type in blackhead seabream

| Repeat | All counts | Times | counts | Ratio(%) | times | counts | Ratio(%) |
|--------|------------|-------|--------|----------|-------|--------|----------|
| 1      | 93792      | 12-23 | 89696  | 95.63    | 12    | 23600  | 25.16    |
| 2      | 209890     | 6-20  | 191786 | 91.37    | 6     | 45329  | 21.60    |
| 3      | 41486      | 5-12  | 38444  | 92.67    | 5     | 16281  | 39.24    |
| 4      | 28444      | 4-10  | 25798  | 90.70    | 4     | 13923  | 48.95    |
| 5      | 29365      | 3-6   | 28054  | 95.54    | 3     | 22574  | 76.87    |
| 6      | 9404       | 3-6   | 9301   | 98.90    | 3     | 7767   | 82.60    |
