# Supplementary material for: Microsatellite Genome-Wide Database Development for the Commercial Blackhead Seabream (Acanthopagrus schlegelii)
Source: MDPI journal article supplement (doi:10.3390/genes14030620), 2023-03-01
Supplement: s1 [file s1]

Table S7. The alleles number of 58 known polymorphic SSRs identified by PCR and HipSTR

| no. | loci    | modif               | scaf. | start    | Na-PCR | Na-HipSTR | SSR ID | A.no.    | N  | Ref.                         |
|-----|---------|---------------------|-------|----------|--------|-----------|--------|----------|----|------------------------------|
| 1   | acs36   | (GT) <sub>10</sub>  | 71    | 674178   | 6      | 18        | 322302 | GU206877 | 16 | this study                   |
| 2   | acs146  | (CA) <sub>6</sub>   | 10    | 1940925  | 5      | 6         | 99577  | GU206878 | 22 |                              |
| 3   | acs12   | (GT) <sub>7</sub>   | 31    | 11907171 | 2      | 2         | 228328 | GU206900 | 27 |                              |
| 4   | acs145  | (AC) <sub>20</sub>  | 1     | 2580620  | 8      | 7         | 1847   | GU206881 | 9  |                              |
| 5   | acs133  | (CTC) <sub>7</sub>  | 37    | 2016884  | 7      | 9         | 250846 | GU206883 | 21 |                              |
| 6   | acs201  | (GT) <sub>9</sub>   | 11    | 491823   | 6      | 5         | 106985 | GU206884 | 11 |                              |
| 7   | acs173  | (TGA) <sub>6</sub>  | 1     | 11639371 | 2      | 3         | 6424   | GU206882 | 26 |                              |
| 8   | acs28   | (GT) <sub>7</sub>   | 11    | 9588433  | 3      | 4         | 112998 | GU206885 | 20 |                              |
| 9   | acse121 | (CA) <sub>10</sub>  | 79    | 440251   | 6      | 8         | 334041 | GU206886 | 4  |                              |
| 10  | acs199  | (GT) <sub>15</sub>  | 29    | 3536862  | 6      | 9         | 214683 | GU206887 | 6  |                              |
| 11  | acs107  | (AC) <sub>22</sub>  | 49    | 1363541  | 4      | 6         | 282692 | GU206888 | 12 |                              |
| 12  | acs16   | (CA) <sub>18</sub>  | 10    | 563205   | 9      | 4         | 98519  | GU206893 | 3  |                              |
| 13  | acs151  | (CA) <sub>6</sub>   | 51    | 1786036  | 2      | 2         | 286855 | GU206880 | 29 |                              |
| 14  | acs4    | (CA) <sub>15</sub>  | 48    | 277523   | 10     | 7         | 279624 | GU206891 | 8  |                              |
| 15  | acs75   | (AC) <sub>13</sub>  | 32    | 1905545  | 8      | 5         | 232573 | GU206897 | 11 |                              |
| 16  | acse138 | (GA) <sub>12</sub>  | 40    | 4068974  | 7      | 8         | 261164 | GU206899 | 9  |                              |
| 17  | acse141 | (TG) <sub>9</sub>   | 1     | 19443821 | 8      | 10        | 11392  | GU206902 | 17 |                              |
| 18  | acs3    | (GT) <sub>18</sub>  | 46    | 2369548  | 7      | 10        | 274857 | GU206903 | 12 |                              |
| 19  | acs78   | (GT) <sub>11</sub>  | 4     | 15914235 | 2      | 13        | 48205  | GU206905 | 20 |                              |
| 20  | acse165 | (GT) <sub>7</sub>   | 10    | 10950560 | 7      | 10        | 105160 | GU206904 | 21 |                              |
| 21  | acse76  | (GAA) <sub>15</sub> | 8     | 2630032  | 11     | 9         | 81743  | GU206906 | 18 |                              |
| 22  | HJD-118 | (AC) <sub>20</sub>  | 42    | 2870242  | 3      | 2         | 265111 | KT898198 | 16 | Mao.et al. <sup>[11]</sup>   |
| 23  | HJD-120 | (GT) <sub>11</sub>  | 7     | 9873376  | 4      | 4         | 73781  | KT898199 | 6  |                              |
| 24  | AC120   | (GT) <sub>15</sub>  | 36    | 1829946  | 12     | 13        | 247244 | GU166141 | 22 | Yang. et al. <sup>[10]</sup> |
| 25  | AC230   | (TG) <sub>13</sub>  | 22    | 7782175  | 9      | 3         | 185260 | GU166147 | 2  |                              |
| 26  | AC146   | (CA) <sub>13</sub>  | 35    | 3048985  | 19     | 8         | 243990 | GU166148 | 10 |                              |
| 27  | AC234   | (CA) <sub>17</sub>  | 105   | 672407   | 8      | 8         | 363852 | GU166149 | 11 |                              |
| 28  | AC221   | (CA) <sub>14</sub>  | 23    | 6991179  | 8      | 5         | 190163 | GU166150 | 4  |                              |
| 29  | AC123   | (GT) <sub>16</sub>  | 3     | 16419169 | 18     | 14        | 36339  | GU166151 | 8  |                              |
| 30  | AC176   | (CA) <sub>13</sub>  | 38    | 3110607  | 7      | 10        | 255032 | GU166152 | 12 |                              |
| 31  | AC87    | (GT) <sub>12</sub>  | 15    | 6781621  | 6      | 8         | 142664 | GU166153 | 12 |                              |
| 32  | AC103   | (CA) <sub>12</sub>  | 62    | 1948078  | 14     | 7         | 307256 | GU166143 | 7  |                              |
| 33  | AC229   | (TG) <sub>11</sub>  | 6     | 10449514 | 9      | 9         | 64437  | GU166144 | 17 | Jeong.et al. <sup>[26]</sup> |
| 34  | ACS3    | (CA) <sub>16</sub>  | 12    | 12517366 | 14     | 8         | 123998 | AB095008 | 12 |                              |
| 35  | ACS4    | (GT) <sub>12</sub>  | 23    | 6245505  | 7      | 7         | 189703 | AB095009 | 18 |                              |
| 36  | ACS16   | (CA) <sub>28</sub>  | 5     | 12733113 | 14     | 10        | 56481  | AB095012 | 9  |                              |
| 37  | ACS17   | (CA) <sub>24</sub>  | 4     | 10548354 | 11     | 10        | 45429  | AB095013 | 8  | Wang et al. <sup>[8]</sup>   |
| 38  | M414    | (TCTA) <sub>6</sub> | 4     | 10637724 | 5      | 3         | 45449  | MH782242 | 19 |                              |
| 39  | M448    | (GATA) <sub>7</sub> | 5     | 6905294  | 15     | 10        | 53057  | MH782245 | 14 |                              |
| 40  | M473    | (TGTC) <sub>7</sub> | 17    | 9189964  | 7      | 5         | 157893 | MH782247 | 22 |                              |
| 41  | M478    | (AAAC) <sub>4</sub> | 98    | 774280   | 10     | 9         | 357636 | MH782248 | 19 |                              |
| 42  | M432    | (AAAG) <sub>8</sub> | 7     | 7913516  | 9      | 5         | 72443  | MH782244 | 14 |                              |
| 43  | AS2-3   | (CA) <sub>10</sub>  | 102   | 84079    | 10     | 11        | 360499 | MG892348 | 16 |                              |
| 44  | AS2-6   | (AC) <sub>11</sub>  | 2     | 11235336 | 13     | 4         | 21022  | MG892351 | 12 |                              |
| 45  | AS2-7   | (AC) <sub>12</sub>  | 54    | 1364919  | 12     | 11        | 293105 | MG892352 | 21 |                              |
| 46  | AS2-9   | (GT) <sub>9</sub>   | 37    | 4849190  | 6      | 6         | 252389 | MG892354 | 8  |                              |
| 47  | AS2-10  | (TG) <sub>8</sub>   | 110   | 578725   | 5      | 5         | 368019 | MG892355 | 16 |                              |
| 48  | AS2-13  | (AC) <sub>9</sub>   | 11    | 6058827  | 8      | 9         | 110696 | MG892358 | 20 |                              |

|    |        |                     |    |          |    |    |        |          |    |                           |
|----|--------|---------------------|----|----------|----|----|--------|----------|----|---------------------------|
| 49 | AS3-3  | (CTT) <sub>18</sub> | 5  | 5323427  | 15 | 7  | 51997  | MG892361 | 15 | Wu et al. <sup>[13]</sup> |
| 50 | AS3-5  | (GAG) <sub>7</sub>  | 10 | 652695   | 2  | 2  | 98570  | MG892362 | 27 |                           |
| 51 | AS3-6  | (TTG) <sub>8</sub>  | 7  | 18401799 | 12 | 10 | 79280  | MG892363 | 25 |                           |
| 52 | AS3-7  | (TCA) <sub>8</sub>  | 5  | 6963248  | 6  | 5  | 53075  | MG892364 | 19 |                           |
| 53 | AS3-10 | (TCC) <sub>8</sub>  | 25 | 6897139  | 4  | 7  | 198684 | MG892366 | 29 |                           |
| 54 | AS3-12 | (TCC) <sub>7</sub>  | 84 | 573558   | 5  | 3  | 341982 | MG892368 | 18 |                           |
| 55 | AS3-14 | (AAT) <sub>8</sub>  | 55 | 1754052  | 9  | 5  | 295261 | MG892369 | 7  |                           |
| 56 | AS3-15 | (AGA) <sub>12</sub> | 23 | 5954963  | 7  | 5  | 189508 | MG892370 | 20 |                           |
| 57 | AS4-4  | (GAAG) <sub>5</sub> | 7  | 4079411  | 5  | 4  | 69827  | MG892373 | 26 |                           |
| 58 | AS4-5  | (AGAT) <sub>5</sub> | 36 | 4281062  | 10 | 8  | 249113 | MG892374 | 17 |                           |

scaf.:scaffold; Na-PCR:the number of alleles per locus identified by PCR; Na-HipSTR:the number of alleles per locus called by HipSTR; A.no.: ncbi accession number; N: the number of genotyped individuals
