# Supplementary material for: Microsatellite Genome-Wide Database Development for the Commercial Blackhead Seabream (Acanthopagrus schlegelii)
Source: MDPI journal article supplement (doi:10.3390/genes14030620), 2023-03-01
Supplement: s1 [file s1]

Table S6. Distribution of genotyped individuals of called microsatellite loci

| Number of<br>genotyped<br>individuals | counts |        |
|---------------------------------------|--------|--------|
| 1                                     | 2163   | 13505  |
| 2                                     | 2307   |        |
| 3                                     | 2645   |        |
| 4                                     | 2949   |        |
| 5                                     | 3441   |        |
| 6                                     | 3547   | 140777 |
| 7                                     | 4094   |        |
| 8                                     | 4296   |        |
| 9                                     | 4505   |        |
| 10                                    | 4645   |        |
| 11                                    | 5098   |        |
| 12                                    | 5383   |        |
| 13                                    | 5604   |        |
| 14                                    | 5862   |        |
| 15                                    | 6219   |        |
| 16                                    | 6291   |        |
| 17                                    | 6492   |        |
| 18                                    | 6583   |        |
| 19                                    | 6783   |        |
| 20                                    | 6701   |        |
| 21                                    | 6634   |        |
| 22                                    | 6479   |        |
| 23                                    | 6276   |        |
| 24                                    | 5969   |        |
| 25                                    | 5596   |        |
| 26                                    | 5205   |        |
| 27                                    | 4727   |        |
| 28                                    | 4129   |        |
| 29                                    | 3656   |        |
| 30                                    | 3011   |        |
| 31                                    | 2469   |        |
| 32                                    | 1951   |        |
| 33                                    | 1444   |        |
| 34                                    | 1128   |        |
| 35                                    | 780    | 1804   |
| 36                                    | 513    |        |
| 37                                    | 282    |        |
| 38                                    | 129    |        |
| 39                                    | 70     |        |
| 40                                    | 19     |        |
| 41                                    | 9      |        |
| 42                                    | 2      |        |
| Total                                 | 156086 |        |
