# Supplementary material for: Microsatellite Genome-Wide Database Development for the Commercial Blackhead Seabream (Acanthopagrus schlegelii)
Source: MDPI journal article supplement (doi:10.3390/genes14030620), 2023-03-01
Supplement: s1 [file s1]

Table S9. The polymorphic information content of 63 sites called by HipSTR

| No. | SSR ID | motif               | SCA. | START    | END      | N  | Na | PIC    |
|-----|--------|---------------------|------|----------|----------|----|----|--------|
| 1   | 367719 | (GCT) <sub>9</sub>  | 109  | 1026512  | 1026538  | 32 | 3  | 0.5853 |
| 2   | 362903 | (TTG) <sub>7</sub>  | 104  | 1011345  | 1011365  | 33 | 4  | 0.5654 |
| 3   | 387045 | (CCA) <sub>6</sub>  | 138  | 583991   | 584008   | 34 | 4  | 0.4488 |
| 4   | 18688  | (ACA) <sub>7</sub>  | 2    | 8067101  | 8067121  | 28 | 4  | 0.3539 |
| 5   | 294823 | (GT) <sub>7</sub>   | 55   | 791498   | 791511   | 31 | 4  | 0.5404 |
| 6   | 101255 | (CA) <sub>8</sub>   | 10   | 4229522  | 4229537  | 26 | 4  | 0.5314 |
| 7   | 134297 | (TGT) <sub>5</sub>  | 14   | 3401208  | 3401222  | 31 | 4  | 0.4039 |
| 8   | 17392  | (TC) <sub>6</sub>   | 2    | 6312724  | 6312735  | 31 | 4  | 0.4375 |
| 9   | 10951  | (TC) <sub>7</sub>   | 1    | 18936689 | 18936702 | 32 | 4  | 0.5278 |
| 10  | 167153 | (CAG) <sub>6</sub>  | 19   | 7029399  | 7029416  | 31 | 4  | 0.5614 |
| 11  | 6587   | (TGC) <sub>9</sub>  | 1    | 11858611 | 11858637 | 27 | 5  | 0.5430 |
| 12  | 99580  | (ATA) <sub>7</sub>  | 10   | 1946756  | 1946776  | 26 | 5  | 0.6122 |
| 13  | 371520 | (TG) <sub>8</sub>   | 113  | 862987   | 863002   | 33 | 5  | 0.4666 |
| 14  | 17     | (TG) <sub>7</sub>   | 1    | 76103    | 76116    | 24 | 5  | 0.7072 |
| 15  | 3627   | (AC) <sub>9</sub>   | 1    | 5883024  | 5883041  | 24 | 5  | 0.6130 |
| 16  | 370685 | (TC) <sub>7</sub>   | 112  | 847454   | 847467   | 31 | 5  | 0.5784 |
| 17  | 371277 | (TG) <sub>7</sub>   | 113  | 598414   | 598427   | 25 | 5  | 0.6031 |
| 18  | 246813 | (GAAC) <sub>5</sub> | 36   | 983344   | 983363   | 32 | 5  | 0.6045 |
| 19  | 372065 | (CAC) <sub>5</sub>  | 114  | 853290   | 853304   | 31 | 5  | 0.4229 |
| 20  | 387013 | (TGA) <sub>10</sub> | 138  | 532540   | 532569   | 24 | 5  | 0.6674 |
| 21  | 107491 | (TG) <sub>9</sub>   | 11   | 1238319  | 1238336  | 23 | 5  | 0.5942 |
| 22  | 4462   | (CA) <sub>8</sub>   | 1    | 7344660  | 7344675  | 27 | 5  | 0.5902 |
| 23  | 6459   | (CA) <sub>11</sub>  | 1    | 11690349 | 11690370 | 25 | 5  | 0.6380 |
| 24  | 192591 | (CA) <sub>9</sub>   | 24   | 4099516  | 4099533  | 23 | 5  | 0.6037 |
| 25  | 69122  | (AG) <sub>7</sub>   | 7    | 2781554  | 2781567  | 27 | 5  | 0.4764 |
| 26  | 123864 | (TGC) <sub>7</sub>  | 12   | 12196300 | 12196320 | 30 | 5  | 0.5336 |
| 27  | 10641  | (CTC) <sub>8</sub>  | 1    | 18564276 | 18564299 | 34 | 5  | 0.5425 |
| 28  | 132112 | (TG) <sub>9</sub>   | 14   | 109879   | 109896   | 30 | 5  | 0.5716 |
| 29  | 142229 | (AC) <sub>6</sub>   | 15   | 5749929  | 5749940  | 32 | 5  | 0.5007 |
| 30  | 152575 | (GT) <sub>9</sub>   | 17   | 1680939  | 1680956  | 29 | 5  | 0.6303 |
| 31  | 169145 | (AC) <sub>9</sub>   | 20   | 1141452  | 1141469  | 26 | 5  | 0.5061 |
| 32  | 119237 | (GT) <sub>7</sub>   | 12   | 5606828  | 5606841  | 33 | 5  | 0.4740 |
| 33  | 121223 | (GAT) <sub>6</sub>  | 12   | 7989508  | 7989525  | 34 | 5  | 0.6324 |
| 34  | 2452   | (TG) <sub>8</sub>   | 1    | 3689054  | 3689069  | 27 | 6  | 0.6570 |
| 35  | 5381   | (TCT) <sub>7</sub>  | 1    | 9282706  | 9282726  | 25 | 6  | 0.5277 |
| 36  | 127689 | (CA) <sub>9</sub>   | 13   | 4042243  | 4042260  | 27 | 6  | 0.6481 |
| 37  | 127725 | (GT) <sub>10</sub>  | 13   | 4073487  | 4073506  | 28 | 6  | 0.4944 |
| 38  | 137989 | (TCC) <sub>6</sub>  | 14   | 9752334  | 9752351  | 34 | 6  | 0.5765 |
| 39  | 132180 | (AC) <sub>9</sub>   | 14   | 273760   | 273777   | 30 | 6  | 0.6691 |
| 40  | 140140 | (AC) <sub>8</sub>   | 15   | 2668284  | 2668299  | 31 | 6  | 0.6263 |
| 41  | 145663 | (TCA) <sub>11</sub> | 16   | 552885   | 552917   | 26 | 6  | 0.7309 |

|    |        |                     |     |          |          |    |   |        |
|----|--------|---------------------|-----|----------|----------|----|---|--------|
| 42 | 153448 | (CCT) <sub>6</sub>  | 17  | 2968836  | 2968853  | 30 | 6 | 0.6437 |
| 43 | 2049   | (TG) <sub>8</sub>   | 1   | 2992202  | 2992217  | 27 | 6 | 0.6933 |
| 44 | 149362 | (TTTC) <sub>6</sub> | 16  | 6911061  | 6911084  | 25 | 6 | 0.6878 |
| 45 | 112919 | (GAT) <sub>9</sub>  | 11  | 9436954  | 9436980  | 27 | 6 | 0.6415 |
| 46 | 373027 | (TTGA) <sub>9</sub> | 116 | 288350   | 288385   | 30 | 6 | 0.7138 |
| 47 | 24062  | (AGC) <sub>8</sub>  | 2   | 16536741 | 16536764 | 33 | 6 | 0.7431 |
| 48 | 3527   | (GT) <sub>13</sub>  | 1   | 5659359  | 5659384  | 26 | 6 | 0.5550 |
| 49 | 120557 | (CA) <sub>9</sub>   | 12  | 7008773  | 7008790  | 33 | 6 | 0.5147 |
| 50 | 101191 | (AC) <sub>7</sub>   | 10  | 4097036  | 4097049  | 28 | 6 | 0.5919 |
| 51 | 153041 | (TCCA) <sub>8</sub> | 17  | 2392775  | 2392806  | 27 | 6 | 0.7312 |
| 52 | 166169 | (CT) <sub>9</sub>   | 19  | 5279101  | 5279118  | 31 | 6 | 0.6299 |
| 53 | 105284 | (GCA) <sub>5</sub>  | 10  | 11237464 | 11237478 | 29 | 6 | 0.4329 |
| 54 | 102192 | (TG) <sub>8</sub>   | 10  | 5825019  | 5825034  | 27 | 7 | 0.5697 |
| 55 | 106452 | (TG) <sub>7</sub>   | 10  | 13519024 | 13519037 | 28 | 7 | 0.4457 |
| 56 | 108603 | (CA) <sub>8</sub>   | 11  | 3118253  | 3118268  | 32 | 7 | 0.6176 |
| 57 | 133447 | (TC) <sub>11</sub>  | 14  | 2427150  | 2427171  | 27 | 7 | 0.6422 |
| 58 | 143492 | (AC) <sub>7</sub>   | 15  | 8220430  | 8220443  | 23 | 7 | 0.7380 |
| 59 | 155655 | (GA) <sub>10</sub>  | 17  | 5847037  | 5847056  | 22 | 7 | 0.6981 |
| 60 | 162790 | (TG) <sub>6</sub>   | 18  | 8354208  | 8354219  | 30 | 7 | 0.5604 |
| 61 | 20853  | (GT) <sub>10</sub>  | 2   | 10975086 | 10975105 | 27 | 7 | 0.6028 |
| 62 | 367354 | (TCC) <sub>8</sub>  | 109 | 585477   | 585500   | 29 | 7 | 0.6313 |
| 63 | 346526 | (CA) <sub>11</sub>  | 87  | 1274287  | 1274308  | 25 | 7 | 0.7936 |

SCAF: scaffold number; START: motif start point; END: motif end point;

N: the number of genotyped individuals; Na: the number of alleles per locus called by HipSTR;

PIC: polymorphic information content.
