# Supplementary material for: Microsatellite Genome-Wide Database Development for the Commercial Blackhead Seabream (Acanthopagrus schlegelii)
Source: MDPI journal article supplement (doi:10.3390/genes14030620), 2023-03-01
Supplement: s1 [file s1]

Table S5. Distribution of repeats of called microsatellite loci

| Repeat type | Times | HipSTR count | Genome count | Proportion (%) |
|-------------|-------|--------------|--------------|----------------|
| di-         | 6     | 24953        | 45329        | 55.05          |
|             | 7     | 16710        | 28271        | 59.11          |
|             | 8     | 12094        | 20287        | 59.61          |
|             | 9     | 9879         | 16650        | 59.33          |
|             | 10    | 8004         | 13386        | 59.79          |
|             | 11    | 6754         | 10983        | 61.50          |
|             | 12    | 6317         | 10092        | 62.59          |
|             | 13    | 5790         | 9263         | 62.51          |
|             | 14    | 5224         | 8320         | 62.79          |
|             | 15    | 4522         | 7302         | 61.93          |
|             | 16    | 3801         | 6187         | 61.44          |
|             | 17    | 3130         | 5238         | 59.76          |
|             | 18    | 2448         | 4154         | 58.93          |
|             | 19    | 1962         | 3451         | 56.85          |
|             | 20    | 1638         | 2873         | 57.01          |
|             | total | 113226       | 191786       | 59.04          |
| Tri-        | 5     | 8917         | 16281        | 54.77          |
|             | 6     | 4879         | 8311         | 58.71          |
|             | 7     | 2963         | 5119         | 57.88          |
|             | 8     | 1871         | 3173         | 58.97          |
|             | 9     | 1211         | 2197         | 55.12          |
|             | 10    | 800          | 1527         | 52.39          |
|             | 11    | 505          | 1035         | 48.79          |
|             | 12    | 331          | 801          | 41.32          |
|             | total | 21477        | 38444        | 55.87          |
| Tetra-      | 4     | 7375         | 13923        | 52.97          |
|             | 5     | 3154         | 5647         | 55.85          |
|             | 6     | 1545         | 2712         | 56.97          |
|             | 7     | 785          | 1455         | 53.95          |
|             | 8     | 479          | 939          | 51.01          |
|             | 9     | 298          | 631          | 47.23          |
|             | 10    | 237          | 491          | 48.27          |
|             | total | 13873        | 25798        | 53.76          |
