# Supplementary material for: Microsatellite Genome-Wide Database Development for the Commercial Blackhead Seabream (Acanthopagrus schlegelii)
Source: MDPI journal article supplement (doi:10.3390/genes14030620), 2023-03-01
Supplement: s1 [file s1]

Table S2. Frequency distribution of motif types of hexanucleotide SSR loci in the reference genome of blackhead seabream

| Motif  | Type | Counts | Percent (%) |
|--------|------|--------|-------------|
| AATCCC | 6    | 737    | 7.84        |
| AATCAG | 6    | 652    | 6.93        |
| AAAAAT | 6    | 592    | 6.3         |
| AAAAAC | 6    | 496    | 5.27        |
| AAAAAG | 6    | 468    | 4.98        |
| AAGAGG | 6    | 302    | 3.21        |
| AACCAG | 6    | 290    | 3.08        |
| ACACGC | 6    | 235    | 2.5         |
| ACCTCC | 6    | 231    | 2.46        |
| AGAGGG | 6    | 202    | 2.15        |
| ATATAG | 6    | 171    | 1.82        |
| ACCAGG | 6    | 119    | 1.27        |
| ACGAGG | 6    | 126    | 1.34        |
| AAATGT | 6    | 150    | 1.6         |
| AAACAC | 6    | 145    | 1.54        |
| ACACAG | 6    | 122    | 1.3         |
| ACAGAG | 6    | 120    | 1.28        |
| ATATAC | 6    | 109    | 1.16        |
| AATAGT | 6    | 105    | 1.12        |
| ATACAC | 6    | 103    | 1.1         |
| AAATAT | 6    | 98     | 1.04        |
| AAAGAG | 6    | 91     | 0.97        |
| ACACTC | 6    | 82     | 0.87        |
| AAAATG | 6    | 87     | 0.93        |
| AAGATG | 6    | 77     | 0.82        |
| ACCTGG | 6    | 55     | 0.58        |
| AAATAC | 6    | 69     | 0.73        |
| AAACAG | 6    | 67     | 0.71        |
| ACCCCC | 6    | 67     | 0.71        |
| AATCGT | 6    | 59     | 0.63        |
| AACACC | 6    | 53     | 0.56        |
| ATCCTC | 6    | 59     | 0.63        |
| AAGGAG | 6    | 56     | 0.6         |
| AAAATC | 6    | 59     | 0.63        |
| ACCAGC | 6    | 47     | 0.5         |
| AATACT | 6    | 48     | 0.51        |
| AATAAC | 6    | 52     | 0.55        |
| ACTCAG | 6    | 51     | 0.54        |
| AAATTC | 6    | 51     | 0.54        |
| AAACTG | 6    | 48     | 0.51        |
| ATCAGG | 6    | 39     | 0.41        |
| ACACCC | 6    | 44     | 0.47        |
| AATATT | 6    | 45     | 0.48        |

|        |   |    |      |
|--------|---|----|------|
| AAAATT | 6 | 45 | 0.48 |
| AACAAG | 6 | 38 | 0.4  |
| ATCACC | 6 | 43 | 0.46 |
| ATAGAG | 6 | 41 | 0.44 |
| AATCTG | 6 | 41 | 0.44 |
| AGGGGG | 6 | 43 | 0.46 |
| ACTCCG | 6 | 38 | 0.4  |
| AATAAG | 6 | 33 | 0.35 |
| AATTCT | 6 | 42 | 0.45 |
| AATATG | 6 | 42 | 0.45 |
| AATTAC | 6 | 42 | 0.45 |
| ATCTGG | 6 | 35 | 0.37 |
| AATATC | 6 | 40 | 0.43 |
| ATCTCC | 6 | 39 | 0.41 |
| AACATG | 6 | 35 | 0.37 |
| AAATCT | 6 | 37 | 0.39 |
| AACCTG | 6 | 35 | 0.37 |
| AAATAG | 6 | 32 | 0.34 |
| AACATC | 6 | 35 | 0.37 |
| ACCACG | 6 | 28 | 0.3  |
| AATGTG | 6 | 34 | 0.36 |
| AAATGG | 6 | 33 | 0.35 |
| ACTCTC | 6 | 29 | 0.31 |
| ATACAG | 6 | 31 | 0.33 |
| AAATCC | 6 | 28 | 0.3  |
| AGCTCC | 6 | 29 | 0.31 |
| AACAGG | 6 | 23 | 0.24 |
| AATGTC | 6 | 30 | 0.32 |
| ATGTGC | 6 | 29 | 0.31 |
| ACACCG | 6 | 27 | 0.29 |
| AATCAC | 6 | 27 | 0.29 |
| AACAGC | 6 | 27 | 0.29 |
| AATCAT | 6 | 24 | 0.26 |
| AAAGTT | 6 | 27 | 0.29 |
| ACCCTC | 6 | 26 | 0.28 |
| AGCCCG | 6 | 20 | 0.21 |
| AAGGTG | 6 | 25 | 0.27 |
| ACCTCG | 6 | 19 | 0.2  |
| ATCAGC | 6 | 21 | 0.22 |
| AAGTCT | 6 | 24 | 0.26 |
| ATGACC | 6 | 20 | 0.21 |
| AAAGTC | 6 | 23 | 0.24 |
| ACTGGG | 6 | 21 | 0.22 |
| AAATTG | 6 | 21 | 0.22 |
| ATACTG | 6 | 22 | 0.23 |
| ATGTCC | 6 | 18 | 0.19 |
| AAGACG | 6 | 21 | 0.22 |

|        |   |    |      |
|--------|---|----|------|
| ACCCAG | 6 | 20 | 0.21 |
| AAAGTG | 6 | 21 | 0.22 |
| ACTCCC | 6 | 18 | 0.19 |
| AAAACC | 6 | 19 | 0.2  |
| ACGGAG | 6 | 18 | 0.19 |
| ATCTGC | 6 | 18 | 0.19 |
| AAGGAC | 6 | 18 | 0.19 |
| AGAGCG | 6 | 18 | 0.19 |
| ACAGGG | 6 | 16 | 0.17 |
| AAAGAT | 6 | 18 | 0.19 |
| ATCCAC | 6 | 18 | 0.19 |
| AAGTCG | 6 | 17 | 0.18 |
| AATGAG | 6 | 16 | 0.17 |
| ACAGTC | 6 | 17 | 0.18 |
| ACCTGC | 6 | 14 | 0.15 |
| AAAAGG | 6 | 17 | 0.18 |
| ACCGAG | 6 | 17 | 0.18 |
| AACTTG | 6 | 16 | 0.17 |
| AGAGGC | 6 | 12 | 0.13 |
| AATGAC | 6 | 16 | 0.17 |
| ACAGTG | 6 | 16 | 0.17 |
| ACGGCG | 6 | 16 | 0.17 |
| ACCGCC | 6 | 15 | 0.16 |
| AAAGCT | 6 | 15 | 0.16 |
| ATCGAC | 6 | 15 | 0.16 |
| AAATGC | 6 | 15 | 0.16 |
| AAAAGC | 6 | 14 | 0.15 |
| AGCCGG | 6 | 9  | 0.1  |
| AACTTC | 6 | 14 | 0.15 |
| ACTCTG | 6 | 13 | 0.14 |
| AGCCCC | 6 | 14 | 0.15 |
| AAATTT | 6 | 14 | 0.15 |
| ATGAGC | 6 | 13 | 0.14 |
| ATCGTC | 6 | 12 | 0.13 |
| AAGGGG | 6 | 12 | 0.13 |
| ACGTCG | 6 | 12 | 0.13 |
| ACTCGG | 6 | 11 | 0.12 |
| ATCCCC | 6 | 12 | 0.13 |
| AAGCAC | 6 | 10 | 0.11 |
| AATCTC | 6 | 11 | 0.12 |
| AAAGGG | 6 | 10 | 0.11 |
| AACCAT | 6 | 10 | 0.11 |
| ATGACG | 6 | 11 | 0.12 |
| AACAGT | 6 | 11 | 0.12 |
| AACTCC | 6 | 11 | 0.12 |
| ACTGAG | 6 | 10 | 0.11 |
| ATAGTG | 6 | 11 | 0.12 |

|        |   |    |      |
|--------|---|----|------|
| AAACTC | 6 | 10 | 0.11 |
| AAGGCG | 6 | 8  | 0.09 |
| AGTCCG | 6 | 7  | 0.07 |
| AACTGC | 6 | 9  | 0.1  |
| AAGTGG | 6 | 8  | 0.09 |
| ATCTAC | 6 | 8  | 0.09 |
| AACCCC | 6 | 9  | 0.1  |
| AATCCT | 6 | 9  | 0.1  |
| AATTCC | 6 | 9  | 0.1  |
| AACCAC | 6 | 8  | 0.09 |
| AACTAG | 6 | 8  | 0.09 |
| AAGGAT | 6 | 8  | 0.09 |
| ACCCCG | 6 | 7  | 0.07 |
| AGGCCC | 6 | 7  | 0.07 |
| AACGTG | 6 | 7  | 0.07 |
| AATACC | 6 | 8  | 0.09 |
| ACCGGG | 6 | 8  | 0.09 |
| ATCACG | 6 | 7  | 0.07 |
| ATGTAC | 6 | 7  | 0.07 |
| AAAGCC | 6 | 7  | 0.07 |
| AGGCGG | 6 | 7  | 0.07 |
| ATACCG | 6 | 7  | 0.07 |
| ATGGAG | 6 | 7  | 0.07 |
| AACTCG | 6 | 5  | 0.05 |
| ACACGG | 6 | 7  | 0.07 |
| ACACTG | 6 | 7  | 0.07 |
| ATGCCC | 6 | 6  | 0.06 |
| AAACCC | 6 | 6  | 0.06 |
| ATCGCC | 6 | 6  | 0.06 |
| AACTAC | 6 | 6  | 0.06 |
| AATGGG | 6 | 6  | 0.06 |
| AATTAG | 6 | 6  | 0.06 |
| ACTGCC | 6 | 6  | 0.06 |
| AAGATC | 6 | 6  | 0.06 |
| AATAGC | 6 | 5  | 0.05 |
| AGGGGC | 6 | 5  | 0.05 |
| ATACTC | 6 | 6  | 0.06 |
| ATATCC | 6 | 6  | 0.06 |
| AACGCT | 6 | 5  | 0.05 |
| AATCGG | 6 | 5  | 0.05 |
| CCCCGG | 6 | 4  | 0.04 |
| ATCATG | 6 | 4  | 0.04 |
| AACACG | 6 | 4  | 0.04 |
| AACCGG | 6 | 4  | 0.04 |
| AAGCAT | 6 | 4  | 0.04 |
| AATGGT | 6 | 4  | 0.04 |
| ACGCAG | 6 | 4  | 0.04 |

|        |   |   |      |
|--------|---|---|------|
| AGCCGC | 6 | 4 | 0.04 |
| ATCGGC | 6 | 4 | 0.04 |
| AAATCG | 6 | 3 | 0.03 |
| AACCCG | 6 | 3 | 0.03 |
| AATCCG | 6 | 3 | 0.03 |
| ACCGGC | 6 | 3 | 0.03 |
| ACCGTG | 6 | 3 | 0.03 |
| ATAGGG | 6 | 3 | 0.03 |
| AACTGG | 6 | 2 | 0.02 |
| AAGAGC | 6 | 3 | 0.03 |
| AAGGGC | 6 | 3 | 0.03 |
| ACGCGC | 6 | 3 | 0.03 |
| AGCGCC | 6 | 3 | 0.03 |
| ATGGGG | 6 | 2 | 0.02 |
| ACCCGC | 6 | 2 | 0.02 |
| ACGGGC | 6 | 2 | 0.02 |
| AACGGC | 6 | 2 | 0.02 |
| AAGCCG | 6 | 2 | 0.02 |
| AAGGTC | 6 | 2 | 0.02 |
| AATTCG | 6 | 2 | 0.02 |
| ACAGCG | 6 | 2 | 0.02 |
| ACCCGG | 6 | 2 | 0.02 |
| ACGGGG | 6 | 2 | 0.02 |
| ACGTCC | 6 | 2 | 0.02 |
| ACGTGC | 6 | 2 | 0.02 |
| ACTCGC | 6 | 2 | 0.02 |
| AGCGGG | 6 | 2 | 0.02 |
| ATCCGG | 6 | 2 | 0.02 |
| ATCGCG | 6 | 2 | 0.02 |
| ATCTCG | 6 | 2 | 0.02 |
| ACGAGC | 6 | 1 | 0.01 |
| ATGGCC | 6 | 1 | 0.01 |
| AAACGG | 6 | 1 | 0.01 |
| AACCGC | 6 | 1 | 0.01 |
| AATGCC | 6 | 1 | 0.01 |
| AATTGC | 6 | 1 | 0.01 |
| ACGCGG | 6 | 1 | 0.01 |
| ACGCTC | 6 | 1 | 0.01 |
| ACTGCG | 6 | 1 | 0.01 |
| ACTGGC | 6 | 1 | 0.01 |
| AGCTCG | 6 | 1 | 0.01 |
| AGGGCG | 6 | 1 | 0.01 |
| ATAGCG | 6 | 1 | 0.01 |
| ATATCG | 6 | 1 | 0.01 |
| ATATGC | 6 | 1 | 0.01 |
| ATCCGC | 6 | 1 | 0.01 |
| ATCTAG | 6 | 1 | 0.01 |

|        |   |   |      |
|--------|---|---|------|
| ATGCGC | 6 | 1 | 0.01 |
| CCCCCG | 6 | 1 | 0.01 |
| CCCGGG | 6 | 1 | 0.01 |
