# Supplementary material for: Microsatellite Genome-Wide Database Development for the Commercial Blackhead Seabream (Acanthopagrus schlegelii)
Source: MDPI journal article supplement (doi:10.3390/genes14030620), 2023-03-01
Supplement: s1 [file s1]

Table S10. Detailed information of the full SSRs database  
(The indicators are on page 2,140th.)

| ID  | SCAF | START  | END    | TYPE | REPEAT | LEN | MOTIF | N  | Na |
|-----|------|--------|--------|------|--------|-----|-------|----|----|
| 3   | 1    | 21312  | 21338  | 3    | 9      | 27  | ATT   | 13 | 3  |
| 5   | 1    | 30921  | 30954  | 2    | 17     | 34  | AC    | 18 | 8  |
| 10  | 1    | 56994  | 57009  | 4    | 4      | 16  | CAAA  | 27 | 5  |
| 17  | 1    | 76103  | 76116  | 2    | 7      | 14  | TG    | 24 | 5  |
| 19  | 1    | 83229  | 83244  | 2    | 8      | 16  | AC    | 12 | 8  |
| 26  | 1    | 92192  | 92219  | 2    | 14     | 28  | CA    | 6  | 8  |
| 32  | 1    | 100385 | 100410 | 2    | 13     | 26  | AC    | 12 | 6  |
| 33  | 1    | 100747 | 100758 | 2    | 6      | 12  | TG    | 19 | 3  |
| 35  | 1    | 101894 | 101905 | 2    | 6      | 12  | AT    | 8  | 3  |
| 39  | 1    | 111797 | 111810 | 2    | 7      | 14  | GT    | 31 | 3  |
| 43  | 1    | 115807 | 115818 | 2    | 6      | 12  | GT    | 11 | 7  |
| 45  | 1    | 120099 | 120110 | 2    | 6      | 12  | AC    | 29 | 3  |
| 51  | 1    | 125463 | 125478 | 2    | 8      | 16  | AC    | 25 | 5  |
| 52  | 1    | 126168 | 126181 | 2    | 7      | 14  | CA    | 16 | 9  |
| 53  | 1    | 126235 | 126256 | 2    | 11     | 22  | CA    | 23 | 9  |
| 59  | 1    | 130459 | 130470 | 2    | 6      | 12  | CA    | 26 | 3  |
| 60  | 1    | 130600 | 130623 | 2    | 12     | 24  | AC    | 8  | 11 |
| 64  | 1    | 131207 | 131218 | 2    | 6      | 12  | TG    | 18 | 6  |
| 65  | 1    | 133154 | 133179 | 2    | 13     | 26  | GT    | 15 | 6  |
| 67  | 1    | 135541 | 135562 | 2    | 11     | 22  | GT    | 7  | 10 |
| 68  | 1    | 135664 | 135703 | 2    | 20     | 40  | AC    | 16 | 8  |
| 75  | 1    | 161497 | 161512 | 2    | 8      | 16  | AC    | 26 | 4  |
| 76  | 1    | 162014 | 162047 | 2    | 17     | 34  | CA    | 9  | 11 |
| 77  | 1    | 162164 | 162193 | 2    | 15     | 30  | CA    | 12 | 7  |
| 78  | 1    | 168665 | 168684 | 4    | 5      | 20  | ATTT  | 18 | 5  |
| 82  | 1    | 172771 | 172790 | 2    | 10     | 20  | TG    | 25 | 9  |
| 86  | 1    | 182032 | 182051 | 4    | 5      | 20  | AAAC  | 31 | 3  |
| 87  | 1    | 182735 | 182766 | 2    | 16     | 32  | AG    | 11 | 6  |
| 88  | 1    | 184552 | 184587 | 2    | 18     | 36  | CA    | 17 | 12 |
| 96  | 1    | 201896 | 201907 | 2    | 6      | 12  | CA    | 26 | 5  |
| 103 | 1    | 213472 | 213497 | 2    | 13     | 26  | CA    | 11 | 7  |
| 104 | 1    | 217188 | 217223 | 2    | 18     | 36  | TG    | 17 | 12 |
| 105 | 1    | 217576 | 217593 | 2    | 9      | 18  | TG    | 22 | 9  |
| 110 | 1    | 222122 | 222151 | 2    | 15     | 30  | AC    | 14 | 13 |
| 111 | 1    | 224675 | 224690 | 2    | 8      | 16  | CA    | 21 | 6  |
| 114 | 1    | 234043 | 234075 | 3    | 11     | 33  | TCT   | 26 | 7  |
| 115 | 1    | 236709 | 236738 | 2    | 15     | 30  | CA    | 10 | 4  |
| 123 | 1    | 255249 | 255260 | 2    | 6      | 12  | AT    | 18 | 3  |
| 136 | 1    | 267553 | 267567 | 3    | 5      | 15  | GCG   | 13 | 4  |
| 138 | 1    | 272069 | 272084 | 2    | 8      | 16  | GT    | 27 | 9  |
| 139 | 1    | 278636 | 278663 | 4    | 7      | 28  | TTCT  | 19 | 7  |
| 147 | 1    | 286296 | 286315 | 4    | 5      | 20  | TGAC  | 31 | 4  |
| 151 | 1    | 292530 | 292549 | 2    | 10     | 20  | GT    | 24 | 5  |
| 152 | 1    | 294301 | 294324 | 2    | 12     | 24  | TG    | 14 | 8  |
| 157 | 1    | 300270 | 300297 | 4    | 7      | 28  | GAAT  | 31 | 4  |
| 158 | 1    | 305690 | 305719 | 2    | 15     | 30  | TG    | 15 | 10 |
| 159 | 1    | 306563 | 306584 | 2    | 11     | 22  | GT    | 16 | 4  |
| 160 | 1    | 308111 | 308126 | 4    | 4      | 16  | AATA  | 15 | 14 |

|     |   |        |        |   |    |    |      |    |    |
|-----|---|--------|--------|---|----|----|------|----|----|
| 161 | 1 | 309975 | 309989 | 3 | 5  | 15 | CTT  | 6  | 4  |
| 167 | 1 | 320388 | 320399 | 2 | 6  | 12 | AC   | 24 | 5  |
| 168 | 1 | 328547 | 328566 | 2 | 10 | 20 | AC   | 8  | 9  |
| 173 | 1 | 329144 | 329161 | 2 | 9  | 18 | TG   | 23 | 4  |
| 174 | 1 | 329409 | 329426 | 2 | 9  | 18 | AC   | 19 | 4  |
| 176 | 1 | 333103 | 333126 | 4 | 6  | 24 | AAAG | 23 | 3  |
| 179 | 1 | 343107 | 343128 | 2 | 11 | 22 | TG   | 20 | 8  |
| 180 | 1 | 343470 | 343485 | 2 | 8  | 16 | AC   | 15 | 11 |
| 181 | 1 | 343681 | 343724 | 2 | 22 | 44 | AC   | 7  | 9  |
| 186 | 1 | 346271 | 346300 | 2 | 15 | 30 | TG   | 13 | 11 |
| 187 | 1 | 346912 | 346933 | 2 | 11 | 22 | GT   | 10 | 11 |
| 191 | 1 | 351039 | 351058 | 2 | 10 | 20 | TG   | 13 | 5  |
| 192 | 1 | 352195 | 352218 | 2 | 12 | 24 | AC   | 21 | 8  |
| 199 | 1 | 354793 | 354814 | 2 | 11 | 22 | CA   | 14 | 5  |
| 203 | 1 | 359011 | 359022 | 2 | 6  | 12 | CA   | 25 | 6  |
| 209 | 1 | 360168 | 360193 | 2 | 13 | 26 | CA   | 17 | 6  |
| 210 | 1 | 360340 | 360379 | 2 | 20 | 40 | CA   | 19 | 10 |
| 211 | 1 | 361866 | 361889 | 4 | 6  | 24 | CCAT | 22 | 3  |
| 215 | 1 | 365072 | 365083 | 2 | 6  | 12 | TG   | 24 | 3  |
| 216 | 1 | 365402 | 365421 | 2 | 10 | 20 | GT   | 22 | 11 |
| 220 | 1 | 367422 | 367439 | 2 | 9  | 18 | CA   | 17 | 6  |
| 221 | 1 | 369181 | 369192 | 2 | 6  | 12 | AC   | 22 | 5  |
| 224 | 1 | 369909 | 369928 | 4 | 5  | 20 | TGTA | 23 | 3  |
| 238 | 1 | 380677 | 380730 | 2 | 27 | 54 | CA   | 12 | 8  |
| 243 | 1 | 390523 | 390534 | 2 | 6  | 12 | CA   | 19 | 9  |
| 244 | 1 | 390688 | 390703 | 2 | 8  | 16 | TG   | 18 | 9  |
| 245 | 1 | 390962 | 390995 | 2 | 17 | 34 | CA   | 12 | 10 |
| 250 | 1 | 394174 | 394209 | 2 | 18 | 36 | TG   | 11 | 6  |
| 261 | 1 | 406526 | 406543 | 2 | 9  | 18 | AC   | 15 | 12 |
| 270 | 1 | 411405 | 411428 | 2 | 12 | 24 | GT   | 24 | 6  |
| 271 | 1 | 413112 | 413126 | 3 | 5  | 15 | CTC  | 20 | 3  |
| 275 | 1 | 417463 | 417496 | 2 | 17 | 34 | AC   | 6  | 5  |
| 277 | 1 | 417680 | 417699 | 2 | 10 | 20 | AC   | 6  | 4  |
| 278 | 1 | 421668 | 421685 | 2 | 9  | 18 | GT   | 20 | 6  |
| 281 | 1 | 426015 | 426034 | 2 | 10 | 20 | TG   | 16 | 9  |
| 282 | 1 | 426134 | 426151 | 2 | 9  | 18 | GT   | 18 | 4  |
| 284 | 1 | 426338 | 426377 | 2 | 20 | 40 | TG   | 10 | 13 |
| 285 | 1 | 430019 | 430066 | 4 | 12 | 48 | ATCC | 20 | 7  |
| 300 | 1 | 450347 | 450360 | 2 | 7  | 14 | CA   | 14 | 9  |
| 302 | 1 | 454479 | 454500 | 2 | 11 | 22 | TG   | 11 | 7  |
| 304 | 1 | 459066 | 459080 | 3 | 5  | 15 | CTC  | 28 | 3  |
| 308 | 1 | 475965 | 475984 | 4 | 5  | 20 | GTGA | 17 | 3  |
| 310 | 1 | 476041 | 476080 | 2 | 20 | 40 | AG   | 10 | 12 |
| 311 | 1 | 476148 | 476159 | 2 | 6  | 12 | GT   | 26 | 3  |
| 313 | 1 | 478475 | 478489 | 3 | 5  | 15 | AAG  | 21 | 5  |
| 315 | 1 | 481527 | 481576 | 2 | 25 | 50 | AC   | 11 | 10 |
| 316 | 1 | 481796 | 481811 | 2 | 8  | 16 | TG   | 12 | 3  |
| 319 | 1 | 482416 | 482435 | 2 | 10 | 20 | GT   | 20 | 10 |
| 320 | 1 | 482592 | 482607 | 2 | 8  | 16 | AC   | 29 | 4  |
| 322 | 1 | 487955 | 487982 | 2 | 14 | 28 | TG   | 19 | 10 |
| 325 | 1 | 491294 | 491309 | 2 | 8  | 16 | TG   | 26 | 5  |

|     |   |        |        |   |    |    |      |    |    |
|-----|---|--------|--------|---|----|----|------|----|----|
| 330 | 1 | 500649 | 500676 | 2 | 14 | 28 | AC   | 11 | 6  |
| 331 | 1 | 501696 | 501727 | 2 | 16 | 32 | TG   | 8  | 10 |
| 332 | 1 | 512529 | 512540 | 2 | 6  | 12 | AC   | 31 | 3  |
| 338 | 1 | 523584 | 523603 | 2 | 10 | 20 | AC   | 13 | 8  |
| 339 | 1 | 523798 | 523839 | 2 | 21 | 42 | CA   | 13 | 15 |
| 341 | 1 | 524004 | 524021 | 2 | 9  | 18 | GT   | 8  | 3  |
| 342 | 1 | 524321 | 524352 | 2 | 16 | 32 | GT   | 8  | 6  |
| 345 | 1 | 524672 | 524693 | 2 | 11 | 22 | TG   | 10 | 9  |
| 347 | 1 | 525306 | 525353 | 2 | 24 | 48 | TG   | 9  | 11 |
| 348 | 1 | 527012 | 527039 | 2 | 14 | 28 | AC   | 11 | 6  |
| 350 | 1 | 527154 | 527165 | 2 | 6  | 12 | GT   | 12 | 7  |
| 351 | 1 | 527272 | 527305 | 2 | 17 | 34 | TC   | 10 | 5  |
| 353 | 1 | 528759 | 528774 | 2 | 8  | 16 | AG   | 25 | 3  |
| 354 | 1 | 531579 | 531598 | 4 | 5  | 20 | CTTT | 28 | 9  |
| 355 | 1 | 532175 | 532190 | 2 | 8  | 16 | TG   | 14 | 7  |
| 356 | 1 | 532191 | 532202 | 2 | 6  | 12 | AG   | 9  | 3  |
| 357 | 1 | 535065 | 535102 | 2 | 19 | 38 | AC   | 10 | 11 |
| 358 | 1 | 536110 | 536141 | 2 | 16 | 32 | GT   | 17 | 8  |
| 359 | 1 | 536295 | 536322 | 2 | 14 | 28 | GT   | 13 | 10 |
| 361 | 1 | 536513 | 536544 | 2 | 16 | 32 | TG   | 9  | 10 |
| 362 | 1 | 536711 | 536734 | 2 | 12 | 24 | TG   | 18 | 9  |
| 363 | 1 | 538246 | 538260 | 3 | 5  | 15 | ATG  | 21 | 4  |
| 364 | 1 | 538433 | 538452 | 2 | 10 | 20 | TG   | 22 | 7  |
| 367 | 1 | 543392 | 543413 | 2 | 11 | 22 | CA   | 20 | 9  |
| 375 | 1 | 549463 | 549486 | 2 | 12 | 24 | GT   | 18 | 9  |
| 384 | 1 | 558749 | 558776 | 2 | 14 | 28 | TC   | 17 | 7  |
| 390 | 1 | 568627 | 568648 | 2 | 11 | 22 | GT   | 19 | 21 |
| 394 | 1 | 569748 | 569797 | 2 | 25 | 50 | CA   | 7  | 10 |
| 397 | 1 | 572026 | 572039 | 2 | 7  | 14 | TC   | 16 | 4  |
| 402 | 1 | 579708 | 579719 | 2 | 6  | 12 | GT   | 32 | 3  |
| 403 | 1 | 583425 | 583436 | 2 | 6  | 12 | AC   | 29 | 3  |
| 404 | 1 | 583567 | 583580 | 2 | 7  | 14 | GT   | 27 | 3  |
| 405 | 1 | 583996 | 584025 | 2 | 15 | 30 | CA   | 8  | 7  |
| 407 | 1 | 585563 | 585580 | 2 | 9  | 18 | CA   | 19 | 5  |
| 408 | 1 | 585873 | 585922 | 2 | 25 | 50 | GT   | 11 | 13 |
| 418 | 1 | 592227 | 592268 | 2 | 21 | 42 | GT   | 7  | 8  |
| 422 | 1 | 595440 | 595453 | 2 | 7  | 14 | CA   | 21 | 9  |
| 423 | 1 | 595456 | 595469 | 2 | 7  | 14 | CA   | 23 | 9  |
| 424 | 1 | 595870 | 595885 | 2 | 8  | 16 | AG   | 22 | 3  |
| 426 | 1 | 596041 | 596088 | 2 | 24 | 48 | GT   | 14 | 14 |
| 428 | 1 | 599113 | 599128 | 2 | 8  | 16 | CA   | 29 | 4  |
| 429 | 1 | 601106 | 601133 | 2 | 14 | 28 | CA   | 14 | 15 |
| 431 | 1 | 601933 | 601958 | 2 | 13 | 26 | GT   | 19 | 20 |
| 434 | 1 | 603723 | 603738 | 2 | 8  | 16 | CA   | 11 | 5  |
| 435 | 1 | 603740 | 603755 | 2 | 8  | 16 | AC   | 15 | 8  |
| 436 | 1 | 603834 | 603853 | 2 | 10 | 20 | GT   | 11 | 6  |
| 439 | 1 | 607192 | 607231 | 2 | 20 | 40 | CA   | 13 | 15 |
| 440 | 1 | 607488 | 607513 | 2 | 13 | 26 | AC   | 12 | 8  |
| 442 | 1 | 610530 | 610551 | 2 | 11 | 22 | AC   | 20 | 6  |
| 443 | 1 | 610887 | 610922 | 2 | 18 | 36 | TC   | 16 | 11 |
| 444 | 1 | 611473 | 611502 | 2 | 15 | 30 | AC   | 8  | 9  |

|     |   |        |        |   |    |    |      |    |    |
|-----|---|--------|--------|---|----|----|------|----|----|
| 445 | 1 | 618305 | 618318 | 2 | 7  | 14 | TC   | 28 | 4  |
| 446 | 1 | 618411 | 618424 | 2 | 7  | 14 | TG   | 21 | 3  |
| 449 | 1 | 622142 | 622169 | 2 | 14 | 28 | AC   | 16 | 9  |
| 457 | 1 | 631698 | 631717 | 4 | 5  | 20 | TCTT | 14 | 9  |
| 462 | 1 | 635919 | 635950 | 2 | 16 | 32 | TG   | 16 | 18 |
| 463 | 1 | 636110 | 636149 | 2 | 20 | 40 | GT   | 15 | 15 |
| 464 | 1 | 636411 | 636432 | 2 | 11 | 22 | GT   | 15 | 13 |
| 466 | 1 | 636521 | 636536 | 2 | 8  | 16 | TG   | 8  | 5  |
| 467 | 1 | 636542 | 636557 | 2 | 8  | 16 | GT   | 11 | 6  |
| 468 | 1 | 640127 | 640153 | 3 | 9  | 27 | CTC  | 22 | 9  |
| 471 | 1 | 642189 | 642232 | 2 | 22 | 44 | CA   | 9  | 8  |
| 479 | 1 | 653952 | 653967 | 2 | 8  | 16 | GT   | 12 | 4  |
| 481 | 1 | 654361 | 654382 | 2 | 11 | 22 | TG   | 13 | 7  |
| 484 | 1 | 658943 | 658974 | 2 | 16 | 32 | AC   | 17 | 8  |
| 485 | 1 | 661951 | 661972 | 2 | 11 | 22 | AC   | 17 | 7  |
| 487 | 1 | 664254 | 664283 | 2 | 15 | 30 | AC   | 6  | 9  |
| 490 | 1 | 666251 | 666262 | 2 | 6  | 12 | CT   | 15 | 8  |
| 494 | 1 | 668303 | 668332 | 2 | 15 | 30 | AG   | 16 | 12 |
| 495 | 1 | 668915 | 668940 | 2 | 13 | 26 | GT   | 20 | 11 |
| 497 | 1 | 672023 | 672036 | 2 | 7  | 14 | TG   | 28 | 5  |
| 498 | 1 | 677042 | 677053 | 2 | 6  | 12 | TG   | 15 | 3  |
| 506 | 1 | 695721 | 695744 | 2 | 12 | 24 | AC   | 24 | 6  |
| 510 | 1 | 700081 | 700096 | 2 | 8  | 16 | CA   | 22 | 12 |
| 511 | 1 | 700097 | 700112 | 2 | 8  | 16 | CT   | 18 | 10 |
| 519 | 1 | 705073 | 705087 | 3 | 5  | 15 | CCT  | 14 | 3  |
| 520 | 1 | 705112 | 705129 | 3 | 6  | 18 | TTA  | 10 | 3  |
| 522 | 1 | 709649 | 709664 | 2 | 8  | 16 | CA   | 24 | 9  |
| 523 | 1 | 710061 | 710098 | 2 | 19 | 38 | CA   | 14 | 11 |
| 525 | 1 | 711504 | 711541 | 2 | 19 | 38 | AC   | 12 | 10 |
| 529 | 1 | 714212 | 714245 | 2 | 17 | 34 | GT   | 16 | 12 |
| 531 | 1 | 715170 | 715191 | 2 | 11 | 22 | GT   | 16 | 7  |
| 532 | 1 | 716201 | 716214 | 2 | 7  | 14 | TG   | 24 | 3  |
| 534 | 1 | 719494 | 719523 | 2 | 15 | 30 | TG   | 11 | 11 |
| 535 | 1 | 719642 | 719695 | 2 | 27 | 54 | TG   | 7  | 7  |
| 536 | 1 | 720032 | 720055 | 2 | 12 | 24 | TG   | 14 | 11 |
| 544 | 1 | 724192 | 724217 | 2 | 13 | 26 | GT   | 17 | 9  |
| 546 | 1 | 724313 | 724328 | 2 | 8  | 16 | CA   | 30 | 4  |
| 548 | 1 | 724687 | 724720 | 2 | 17 | 34 | GT   | 13 | 10 |
| 549 | 1 | 724854 | 724873 | 2 | 10 | 20 | TG   | 8  | 3  |
| 550 | 1 | 725426 | 725447 | 2 | 11 | 22 | AC   | 21 | 4  |
| 551 | 1 | 725851 | 725866 | 4 | 4  | 16 | CCTC | 7  | 3  |
| 552 | 1 | 726036 | 726047 | 2 | 6  | 12 | AC   | 12 | 8  |
| 553 | 1 | 726198 | 726209 | 2 | 6  | 12 | TG   | 23 | 3  |
| 555 | 1 | 727247 | 727270 | 2 | 12 | 24 | CA   | 8  | 8  |
| 558 | 1 | 729659 | 729676 | 2 | 9  | 18 | GT   | 25 | 5  |
| 561 | 1 | 729989 | 730006 | 2 | 9  | 18 | TG   | 13 | 7  |
| 562 | 1 | 730067 | 730082 | 2 | 8  | 16 | TG   | 18 | 5  |
| 563 | 1 | 730217 | 730234 | 2 | 9  | 18 | GT   | 26 | 4  |
| 565 | 1 | 732099 | 732114 | 2 | 8  | 16 | GT   | 31 | 3  |
| 566 | 1 | 733004 | 733053 | 2 | 25 | 50 | CA   | 9  | 11 |
| 568 | 1 | 734293 | 734324 | 2 | 16 | 32 | TG   | 8  | 8  |



|     |   |        |        |   |    |    |      |    |    |
|-----|---|--------|--------|---|----|----|------|----|----|
| 570 | 1 | 734454 | 734469 | 2 | 8  | 16 | GT   | 25 | 3  |
| 572 | 1 | 736877 | 736894 | 2 | 9  | 18 | GA   | 13 | 3  |
| 576 | 1 | 738867 | 738890 | 2 | 12 | 24 | GT   | 15 | 5  |
| 577 | 1 | 739049 | 739066 | 2 | 9  | 18 | TG   | 17 | 11 |
| 578 | 1 | 739222 | 739241 | 2 | 10 | 20 | AC   | 19 | 12 |
| 580 | 1 | 742361 | 742374 | 2 | 7  | 14 | CT   | 16 | 3  |
| 587 | 1 | 742696 | 742709 | 2 | 7  | 14 | TG   | 8  | 3  |
| 593 | 1 | 744503 | 744552 | 2 | 25 | 50 | AC   | 9  | 8  |
| 595 | 1 | 744782 | 744795 | 2 | 7  | 14 | AC   | 25 | 3  |
| 596 | 1 | 748861 | 748872 | 2 | 6  | 12 | AC   | 13 | 5  |
| 597 | 1 | 748901 | 748914 | 2 | 7  | 14 | AC   | 8  | 6  |
| 598 | 1 | 749087 | 749102 | 2 | 8  | 16 | CA   | 21 | 4  |
| 599 | 1 | 749160 | 749179 | 2 | 10 | 20 | TG   | 18 | 5  |
| 601 | 1 | 749402 | 749429 | 2 | 14 | 28 | GT   | 18 | 9  |
| 602 | 1 | 750601 | 750616 | 2 | 8  | 16 | GA   | 17 | 4  |
| 604 | 1 | 754180 | 754195 | 2 | 8  | 16 | TG   | 24 | 6  |
| 605 | 1 | 754197 | 754208 | 2 | 6  | 12 | GT   | 23 | 5  |
| 606 | 1 | 754325 | 754342 | 2 | 9  | 18 | CA   | 18 | 7  |
| 607 | 1 | 754535 | 754552 | 2 | 9  | 18 | TG   | 12 | 3  |
| 609 | 1 | 754960 | 754979 | 2 | 10 | 20 | TG   | 12 | 7  |
| 611 | 1 | 755314 | 755333 | 2 | 10 | 20 | AC   | 25 | 6  |
| 612 | 1 | 756070 | 756117 | 2 | 24 | 48 | TG   | 7  | 8  |
| 613 | 1 | 756279 | 756300 | 2 | 11 | 22 | TG   | 8  | 4  |
| 616 | 1 | 756579 | 756610 | 2 | 16 | 32 | AC   | 8  | 12 |
| 620 | 1 | 758759 | 758770 | 2 | 6  | 12 | CA   | 21 | 4  |
| 623 | 1 | 759928 | 759939 | 2 | 6  | 12 | AG   | 16 | 4  |
| 632 | 1 | 763766 | 763785 | 2 | 10 | 20 | AC   | 11 | 9  |
| 635 | 1 | 764185 | 764222 | 2 | 19 | 38 | TG   | 8  | 9  |
| 636 | 1 | 764402 | 764413 | 2 | 6  | 12 | TG   | 7  | 5  |
| 637 | 1 | 764427 | 764442 | 2 | 8  | 16 | GT   | 9  | 3  |
| 639 | 1 | 766800 | 766827 | 2 | 14 | 28 | AC   | 24 | 6  |
| 641 | 1 | 767183 | 767194 | 2 | 6  | 12 | CA   | 15 | 4  |
| 644 | 1 | 768457 | 768478 | 2 | 11 | 22 | AC   | 6  | 8  |
| 646 | 1 | 769113 | 769124 | 2 | 6  | 12 | GA   | 17 | 3  |
| 647 | 1 | 769357 | 769400 | 2 | 22 | 44 | GT   | 6  | 8  |
| 648 | 1 | 771201 | 771214 | 2 | 7  | 14 | AC   | 29 | 9  |
| 650 | 1 | 773198 | 773211 | 2 | 7  | 14 | CA   | 8  | 5  |
| 651 | 1 | 773469 | 773502 | 2 | 17 | 34 | AC   | 8  | 12 |
| 652 | 1 | 773930 | 773941 | 2 | 6  | 12 | CA   | 27 | 4  |
| 655 | 1 | 775826 | 775845 | 2 | 10 | 20 | TG   | 26 | 13 |
| 656 | 1 | 775846 | 775857 | 2 | 6  | 12 | AG   | 7  | 5  |
| 659 | 1 | 776311 | 776328 | 2 | 9  | 18 | CA   | 13 | 5  |
| 660 | 1 | 776440 | 776453 | 2 | 7  | 14 | TG   | 17 | 8  |
| 662 | 1 | 776635 | 776656 | 2 | 11 | 22 | TG   | 15 | 7  |
| 665 | 1 | 778100 | 778121 | 2 | 11 | 22 | TG   | 21 | 7  |
| 667 | 1 | 779156 | 779171 | 4 | 4  | 16 | AAAT | 8  | 5  |
| 669 | 1 | 779773 | 779806 | 2 | 17 | 34 | CA   | 22 | 4  |
| 670 | 1 | 779929 | 779940 | 2 | 6  | 12 | TG   | 22 | 4  |
| 671 | 1 | 780616 | 780627 | 2 | 6  | 12 | AC   | 19 | 4  |
| 672 | 1 | 780863 | 780908 | 2 | 23 | 46 | AG   | 12 | 7  |
| 674 | 1 | 782009 | 782034 | 2 | 13 | 26 | AC   | 18 | 4  |

|     |   |        |        |   |    |    |      |    |    |
|-----|---|--------|--------|---|----|----|------|----|----|
| 676 | 1 | 787990 | 788003 | 2 | 7  | 14 | TG   | 24 | 6  |
| 677 | 1 | 788863 | 788876 | 2 | 7  | 14 | TG   | 23 | 4  |
| 678 | 1 | 789051 | 789070 | 2 | 10 | 20 | CA   | 15 | 7  |
| 680 | 1 | 790671 | 790686 | 2 | 8  | 16 | GT   | 24 | 3  |
| 681 | 1 | 790797 | 790808 | 2 | 6  | 12 | TC   | 26 | 3  |
| 682 | 1 | 790809 | 790822 | 2 | 7  | 14 | AC   | 27 | 3  |
| 683 | 1 | 790933 | 790948 | 2 | 8  | 16 | TG   | 22 | 13 |
| 684 | 1 | 790950 | 790963 | 2 | 7  | 14 | GT   | 18 | 9  |
| 685 | 1 | 793888 | 793899 | 2 | 6  | 12 | AC   | 15 | 3  |
| 687 | 1 | 794774 | 794787 | 2 | 7  | 14 | AC   | 20 | 4  |
| 689 | 1 | 795892 | 795911 | 2 | 10 | 20 | GT   | 16 | 3  |
| 692 | 1 | 799039 | 799054 | 4 | 4  | 16 | CCTG | 30 | 5  |
| 693 | 1 | 799282 | 799299 | 2 | 9  | 18 | AC   | 24 | 6  |
| 694 | 1 | 799403 | 799414 | 2 | 6  | 12 | AC   | 24 | 4  |
| 695 | 1 | 799420 | 799431 | 2 | 6  | 12 | CA   | 19 | 5  |
| 696 | 1 | 801541 | 801552 | 2 | 6  | 12 | CA   | 11 | 4  |
| 697 | 1 | 801555 | 801566 | 2 | 6  | 12 | CA   | 14 | 5  |
| 700 | 1 | 803200 | 803233 | 2 | 17 | 34 | GT   | 6  | 7  |
| 701 | 1 | 803498 | 803543 | 2 | 23 | 46 | GT   | 14 | 9  |
| 703 | 1 | 805608 | 805621 | 2 | 7  | 14 | AC   | 28 | 7  |
| 704 | 1 | 807951 | 807976 | 2 | 13 | 26 | GT   | 15 | 9  |
| 705 | 1 | 808063 | 808078 | 2 | 8  | 16 | CA   | 18 | 4  |
| 706 | 1 | 808260 | 808293 | 2 | 17 | 34 | GT   | 9  | 10 |
| 707 | 1 | 809580 | 809615 | 2 | 18 | 36 | TG   | 11 | 10 |
| 710 | 1 | 811486 | 811497 | 2 | 6  | 12 | GT   | 32 | 3  |
| 715 | 1 | 812281 | 812308 | 2 | 14 | 28 | AC   | 13 | 13 |
| 717 | 1 | 814607 | 814642 | 2 | 18 | 36 | TG   | 7  | 10 |
| 718 | 1 | 815054 | 815069 | 2 | 8  | 16 | TG   | 17 | 10 |
| 722 | 1 | 816305 | 816316 | 2 | 6  | 12 | AC   | 22 | 4  |
| 724 | 1 | 817443 | 817472 | 2 | 15 | 30 | AC   | 9  | 12 |
| 725 | 1 | 820471 | 820498 | 2 | 14 | 28 | GT   | 11 | 13 |
| 729 | 1 | 822006 | 822031 | 2 | 13 | 26 | TG   | 13 | 8  |
| 732 | 1 | 822157 | 822174 | 2 | 9  | 18 | CA   | 26 | 10 |
| 734 | 1 | 822677 | 822692 | 2 | 8  | 16 | AC   | 16 | 3  |
| 735 | 1 | 822921 | 822934 | 2 | 7  | 14 | AC   | 17 | 12 |
| 736 | 1 | 823075 | 823090 | 2 | 8  | 16 | CA   | 18 | 4  |
| 737 | 1 | 823864 | 823889 | 2 | 13 | 26 | AC   | 12 | 11 |
| 739 | 1 | 824000 | 824031 | 2 | 16 | 32 | TG   | 8  | 9  |
| 741 | 1 | 825226 | 825241 | 2 | 8  | 16 | TG   | 26 | 5  |
| 750 | 1 | 828117 | 828138 | 2 | 11 | 22 | TG   | 13 | 7  |
| 752 | 1 | 828681 | 828692 | 2 | 6  | 12 | TG   | 22 | 7  |
| 753 | 1 | 830624 | 830649 | 2 | 13 | 26 | GT   | 13 | 11 |
| 755 | 1 | 831179 | 831196 | 2 | 9  | 18 | GT   | 18 | 5  |
| 756 | 1 | 831318 | 831353 | 2 | 18 | 36 | GT   | 6  | 7  |
| 757 | 1 | 832654 | 832693 | 4 | 10 | 40 | TCTG | 14 | 11 |
| 758 | 1 | 833471 | 833484 | 2 | 7  | 14 | CA   | 14 | 7  |
| 759 | 1 | 833487 | 833500 | 2 | 7  | 14 | CA   | 9  | 4  |
| 761 | 1 | 834944 | 834961 | 2 | 9  | 18 | GT   | 18 | 8  |
| 762 | 1 | 835258 | 835293 | 4 | 9  | 36 | TTCT | 14 | 11 |
| 766 | 1 | 838215 | 838232 | 2 | 9  | 18 | AC   | 12 | 9  |
| 767 | 1 | 838467 | 838494 | 2 | 14 | 28 | AC   | 12 | 6  |

|     |   |        |        |   |    |    |     |    |    |
|-----|---|--------|--------|---|----|----|-----|----|----|
| 768 | 1 | 838685 | 838706 | 2 | 11 | 22 | GT  | 10 | 10 |
| 773 | 1 | 847894 | 847917 | 2 | 12 | 24 | GT  | 16 | 9  |
| 777 | 1 | 849721 | 849740 | 2 | 10 | 20 | AC  | 18 | 4  |
| 779 | 1 | 851981 | 852002 | 2 | 11 | 22 | CA  | 20 | 11 |
| 781 | 1 | 853717 | 853736 | 2 | 10 | 20 | AC  | 21 | 6  |
| 783 | 1 | 853965 | 853982 | 2 | 9  | 18 | CA  | 18 | 7  |
| 784 | 1 | 854057 | 854070 | 2 | 7  | 14 | CA  | 32 | 4  |
| 786 | 1 | 856209 | 856230 | 2 | 11 | 22 | AC  | 18 | 10 |
| 787 | 1 | 856367 | 856384 | 2 | 9  | 18 | AC  | 16 | 8  |
| 789 | 1 | 857129 | 857148 | 2 | 10 | 20 | GT  | 20 | 5  |
| 792 | 1 | 858973 | 858988 | 2 | 8  | 16 | AC  | 11 | 9  |
| 793 | 1 | 859516 | 859527 | 2 | 6  | 12 | CA  | 27 | 10 |
| 794 | 1 | 863111 | 863140 | 2 | 15 | 30 | AC  | 12 | 11 |
| 795 | 1 | 863636 | 863683 | 2 | 24 | 48 | CA  | 12 | 8  |
| 796 | 1 | 863805 | 863826 | 2 | 11 | 22 | AC  | 14 | 4  |
| 799 | 1 | 866055 | 866084 | 2 | 15 | 30 | TG  | 15 | 8  |
| 805 | 1 | 869070 | 869089 | 2 | 10 | 20 | AC  | 20 | 6  |
| 807 | 1 | 873557 | 873574 | 3 | 6  | 18 | CTC | 23 | 4  |
| 810 | 1 | 878308 | 878337 | 2 | 15 | 30 | AC  | 16 | 13 |
| 811 | 1 | 878557 | 878572 | 2 | 8  | 16 | GT  | 17 | 11 |
| 814 | 1 | 879912 | 879937 | 2 | 13 | 26 | TG  | 9  | 7  |
| 816 | 1 | 881227 | 881252 | 2 | 13 | 26 | CA  | 17 | 9  |
| 818 | 1 | 884246 | 884295 | 2 | 25 | 50 | CA  | 13 | 16 |
| 821 | 1 | 887961 | 887982 | 2 | 11 | 22 | CA  | 21 | 8  |
| 822 | 1 | 888072 | 888087 | 2 | 8  | 16 | GC  | 27 | 11 |
| 823 | 1 | 888088 | 888101 | 2 | 7  | 14 | GT  | 10 | 7  |
| 824 | 1 | 890295 | 890328 | 2 | 17 | 34 | TG  | 14 | 8  |
| 826 | 1 | 891301 | 891328 | 2 | 14 | 28 | TG  | 18 | 11 |
| 829 | 1 | 892206 | 892235 | 2 | 15 | 30 | TG  | 10 | 8  |
| 830 | 1 | 892375 | 892390 | 2 | 8  | 16 | AC  | 22 | 3  |
| 832 | 1 | 900668 | 900685 | 3 | 6  | 18 | ATT | 9  | 4  |
| 833 | 1 | 900686 | 900700 | 3 | 5  | 15 | AGT | 11 | 4  |
| 834 | 1 | 901364 | 901389 | 2 | 13 | 26 | GT  | 12 | 9  |
| 835 | 1 | 904815 | 904830 | 2 | 8  | 16 | AC  | 16 | 4  |
| 836 | 1 | 905072 | 905091 | 2 | 10 | 20 | AC  | 18 | 4  |
| 846 | 1 | 914287 | 914316 | 2 | 15 | 30 | GT  | 13 | 10 |
| 848 | 1 | 915494 | 915509 | 2 | 8  | 16 | CA  | 24 | 6  |
| 851 | 1 | 922260 | 922279 | 2 | 10 | 20 | GA  | 23 | 4  |
| 855 | 1 | 925447 | 925460 | 2 | 7  | 14 | AC  | 10 | 3  |
| 864 | 1 | 934760 | 934787 | 2 | 14 | 28 | TG  | 18 | 6  |
| 867 | 1 | 944933 | 944956 | 2 | 12 | 24 | AC  | 12 | 7  |
| 868 | 1 | 948754 | 948787 | 2 | 17 | 34 | AC  | 16 | 7  |
| 870 | 1 | 952866 | 952886 | 3 | 7  | 21 | ATT | 13 | 6  |
| 872 | 1 | 953730 | 953749 | 2 | 10 | 20 | CA  | 23 | 12 |
| 883 | 1 | 957927 | 957952 | 2 | 13 | 26 | CA  | 11 | 6  |
| 885 | 1 | 967779 | 967794 | 2 | 8  | 16 | TG  | 27 | 6  |
| 887 | 1 | 970968 | 970997 | 3 | 10 | 30 | CTC | 23 | 5  |
| 890 | 1 | 971400 | 971429 | 2 | 15 | 30 | GA  | 19 | 10 |
| 892 | 1 | 974422 | 974435 | 2 | 7  | 14 | CA  | 22 | 3  |
| 895 | 1 | 982987 | 983020 | 2 | 17 | 34 | GA  | 8  | 9  |
| 896 | 1 | 983120 | 983145 | 2 | 13 | 26 | AC  | 19 | 7  |

|      |   |         |         |   |    |    |      |    |    |
|------|---|---------|---------|---|----|----|------|----|----|
| 911  | 1 | 1001346 | 1001367 | 2 | 11 | 22 | TG   | 15 | 10 |
| 912  | 1 | 1001431 | 1001448 | 2 | 9  | 18 | TG   | 26 | 9  |
| 919  | 1 | 1009737 | 1009758 | 2 | 11 | 22 | TG   | 12 | 6  |
| 922  | 1 | 1013832 | 1013863 | 2 | 16 | 32 | AC   | 7  | 9  |
| 925  | 1 | 1021744 | 1021755 | 2 | 6  | 12 | GT   | 31 | 3  |
| 926  | 1 | 1023344 | 1023363 | 4 | 5  | 20 | GACA | 30 | 3  |
| 931  | 1 | 1027600 | 1027631 | 2 | 16 | 32 | CA   | 18 | 12 |
| 936  | 1 | 1041728 | 1041741 | 2 | 7  | 14 | TG   | 29 | 3  |
| 944  | 1 | 1045590 | 1045603 | 2 | 7  | 14 | CA   | 17 | 4  |
| 948  | 1 | 1048217 | 1048231 | 3 | 5  | 15 | TTA  | 6  | 5  |
| 954  | 1 | 1061219 | 1061236 | 2 | 9  | 18 | GT   | 15 | 4  |
| 956  | 1 | 1062165 | 1062192 | 2 | 14 | 28 | AC   | 12 | 13 |
| 958  | 1 | 1064608 | 1064621 | 2 | 7  | 14 | TG   | 24 | 9  |
| 959  | 1 | 1065172 | 1065201 | 2 | 15 | 30 | AG   | 8  | 10 |
| 960  | 1 | 1065603 | 1065618 | 4 | 4  | 16 | TTTA | 23 | 3  |
| 962  | 1 | 1068489 | 1068506 | 2 | 9  | 18 | AC   | 24 | 6  |
| 974  | 1 | 1072885 | 1072896 | 2 | 6  | 12 | GT   | 13 | 5  |
| 975  | 1 | 1073021 | 1073048 | 2 | 14 | 28 | TG   | 13 | 11 |
| 976  | 1 | 1073429 | 1073442 | 2 | 7  | 14 | GA   | 24 | 3  |
| 981  | 1 | 1076317 | 1076344 | 2 | 14 | 28 | GT   | 20 | 10 |
| 982  | 1 | 1076695 | 1076715 | 3 | 7  | 21 | TTC  | 15 | 4  |
| 989  | 1 | 1097427 | 1097438 | 2 | 6  | 12 | AC   | 21 | 5  |
| 991  | 1 | 1107657 | 1107674 | 2 | 9  | 18 | AC   | 25 | 4  |
| 994  | 1 | 1113306 | 1113321 | 2 | 8  | 16 | AC   | 14 | 9  |
| 998  | 1 | 1114604 | 1114625 | 2 | 11 | 22 | CA   | 8  | 9  |
| 999  | 1 | 1115088 | 1115105 | 3 | 6  | 18 | CTG  | 23 | 5  |
| 1000 | 1 | 1124382 | 1124420 | 3 | 13 | 39 | CTC  | 14 | 7  |
| 1003 | 1 | 1125834 | 1125869 | 2 | 18 | 36 | TG   | 23 | 8  |
| 1005 | 1 | 1128659 | 1128684 | 2 | 13 | 26 | CA   | 11 | 5  |
| 1009 | 1 | 1138126 | 1138139 | 2 | 7  | 14 | AC   | 17 | 4  |
| 1014 | 1 | 1141957 | 1141994 | 2 | 19 | 38 | CA   | 12 | 8  |
| 1032 | 1 | 1163822 | 1163839 | 3 | 6  | 18 | TGT  | 21 | 4  |
| 1043 | 1 | 1177804 | 1177815 | 2 | 6  | 12 | GA   | 18 | 3  |
| 1046 | 1 | 1193636 | 1193667 | 2 | 16 | 32 | GT   | 15 | 11 |
| 1049 | 1 | 1197541 | 1197566 | 2 | 13 | 26 | AC   | 7  | 5  |
| 1050 | 1 | 1200415 | 1200438 | 4 | 6  | 24 | AAAT | 17 | 9  |
| 1076 | 1 | 1210850 | 1210861 | 2 | 6  | 12 | GT   | 26 | 5  |
| 1078 | 1 | 1211314 | 1211334 | 3 | 7  | 21 | AGA  | 20 | 3  |
| 1079 | 1 | 1211433 | 1211468 | 2 | 18 | 36 | CT   | 10 | 9  |
| 1086 | 1 | 1234761 | 1234790 | 2 | 15 | 30 | AC   | 19 | 8  |
| 1087 | 1 | 1236381 | 1236402 | 2 | 11 | 22 | TG   | 19 | 11 |
| 1094 | 1 | 1254053 | 1254080 | 2 | 14 | 28 | AC   | 8  | 8  |
| 1099 | 1 | 1267067 | 1267090 | 2 | 12 | 24 | CA   | 18 | 9  |
| 1101 | 1 | 1273014 | 1273029 | 2 | 8  | 16 | AC   | 15 | 3  |
| 1103 | 1 | 1276156 | 1276189 | 2 | 17 | 34 | CA   | 14 | 13 |
| 1106 | 1 | 1276622 | 1276637 | 2 | 8  | 16 | AC   | 28 | 3  |
| 1107 | 1 | 1279601 | 1279615 | 3 | 5  | 15 | ATA  | 19 | 3  |
| 1114 | 1 | 1284876 | 1284891 | 2 | 8  | 16 | AC   | 23 | 9  |
| 1115 | 1 | 1287235 | 1287264 | 2 | 15 | 30 | CA   | 20 | 17 |
| 1118 | 1 | 1296517 | 1296530 | 2 | 7  | 14 | GT   | 29 | 4  |
| 1124 | 1 | 1311668 | 1311681 | 2 | 7  | 14 | CA   | 21 | 4  |

|      |   |         |         |   |    |    |      |    |    |
|------|---|---------|---------|---|----|----|------|----|----|
| 1129 | 1 | 1317729 | 1317744 | 4 | 4  | 16 | CACG | 7  | 5  |
| 1134 | 1 | 1326860 | 1326879 | 2 | 10 | 20 | AC   | 14 | 8  |
| 1136 | 1 | 1333071 | 1333114 | 2 | 22 | 44 | GT   | 7  | 8  |
| 1137 | 1 | 1333212 | 1333235 | 2 | 12 | 24 | AC   | 15 | 16 |
| 1141 | 1 | 1333570 | 1333581 | 2 | 6  | 12 | GT   | 13 | 7  |
| 1146 | 1 | 1335821 | 1335836 | 4 | 4  | 16 | GGTC | 28 | 6  |
| 1147 | 1 | 1339611 | 1339628 | 2 | 9  | 18 | TG   | 15 | 9  |
| 1151 | 1 | 1344848 | 1344875 | 2 | 14 | 28 | TC   | 19 | 11 |
| 1152 | 1 | 1344960 | 1344977 | 3 | 6  | 18 | AGC  | 13 | 4  |
| 1153 | 1 | 1345509 | 1345524 | 2 | 8  | 16 | GT   | 17 | 10 |
| 1154 | 1 | 1345527 | 1345538 | 2 | 6  | 12 | GT   | 11 | 7  |
| 1155 | 1 | 1346037 | 1346060 | 2 | 12 | 24 | AC   | 15 | 7  |
| 1162 | 1 | 1352648 | 1352685 | 2 | 19 | 38 | CA   | 9  | 9  |
| 1164 | 1 | 1362957 | 1362990 | 2 | 17 | 34 | TG   | 12 | 7  |
| 1165 | 1 | 1367557 | 1367568 | 2 | 6  | 12 | AT   | 15 | 4  |
| 1169 | 1 | 1372886 | 1372905 | 2 | 10 | 20 | CA   | 16 | 9  |
| 1172 | 1 | 1377129 | 1377140 | 2 | 6  | 12 | CA   | 26 | 6  |
| 1175 | 1 | 1377531 | 1377552 | 2 | 11 | 22 | AC   | 22 | 13 |
| 1176 | 1 | 1379025 | 1379050 | 2 | 13 | 26 | CA   | 6  | 6  |
| 1177 | 1 | 1379153 | 1379192 | 2 | 20 | 40 | AC   | 6  | 10 |
| 1178 | 1 | 1379655 | 1379674 | 2 | 10 | 20 | CA   | 14 | 5  |
| 1180 | 1 | 1380560 | 1380593 | 2 | 17 | 34 | CA   | 9  | 5  |
| 1186 | 1 | 1386818 | 1386829 | 2 | 6  | 12 | AC   | 22 | 3  |
| 1189 | 1 | 1389138 | 1389165 | 4 | 7  | 28 | CATC | 21 | 4  |
| 1195 | 1 | 1403597 | 1403626 | 2 | 15 | 30 | TG   | 13 | 8  |
| 1199 | 1 | 1406034 | 1406057 | 4 | 6  | 24 | GATG | 28 | 4  |
| 1201 | 1 | 1407797 | 1407816 | 2 | 10 | 20 | CA   | 18 | 6  |
| 1202 | 1 | 1408079 | 1408098 | 2 | 10 | 20 | TG   | 18 | 3  |
| 1207 | 1 | 1414643 | 1414672 | 2 | 15 | 30 | GT   | 22 | 13 |
| 1208 | 1 | 1415710 | 1415723 | 2 | 7  | 14 | AC   | 25 | 3  |
| 1209 | 1 | 1418870 | 1418883 | 2 | 7  | 14 | AC   | 25 | 3  |
| 1210 | 1 | 1419088 | 1419121 | 2 | 17 | 34 | TG   | 8  | 9  |
| 1211 | 1 | 1419322 | 1419335 | 2 | 7  | 14 | GT   | 11 | 3  |
| 1215 | 1 | 1422551 | 1422582 | 2 | 16 | 32 | TG   | 12 | 6  |
| 1217 | 1 | 1424003 | 1424044 | 2 | 21 | 42 | AC   | 8  | 9  |
| 1221 | 1 | 1429338 | 1429369 | 2 | 16 | 32 | CA   | 17 | 13 |
| 1230 | 1 | 1441139 | 1441168 | 3 | 10 | 30 | GAG  | 14 | 4  |
| 1233 | 1 | 1441623 | 1441643 | 3 | 7  | 21 | TGG  | 20 | 7  |
| 1234 | 1 | 1442157 | 1442172 | 4 | 4  | 16 | GTGC | 28 | 6  |
| 1235 | 1 | 1442173 | 1442184 | 2 | 6  | 12 | GT   | 28 | 4  |
| 1237 | 1 | 1448756 | 1448769 | 2 | 7  | 14 | AC   | 28 | 5  |
| 1247 | 1 | 1458596 | 1458625 | 2 | 15 | 30 | GT   | 10 | 5  |
| 1249 | 1 | 1460770 | 1460781 | 2 | 6  | 12 | AC   | 18 | 3  |
| 1253 | 1 | 1465214 | 1465243 | 2 | 15 | 30 | GT   | 6  | 6  |
| 1255 | 1 | 1465540 | 1465565 | 2 | 13 | 26 | GT   | 21 | 7  |
| 1256 | 1 | 1465728 | 1465753 | 2 | 13 | 26 | AC   | 14 | 3  |
| 1258 | 1 | 1466854 | 1466867 | 2 | 7  | 14 | GT   | 16 | 6  |
| 1262 | 1 | 1479795 | 1479824 | 2 | 15 | 30 | CA   | 13 | 10 |
| 1266 | 1 | 1486393 | 1486406 | 2 | 7  | 14 | TG   | 20 | 7  |
| 1268 | 1 | 1489713 | 1489724 | 2 | 6  | 12 | TG   | 23 | 5  |
| 1273 | 1 | 1497727 | 1497740 | 2 | 7  | 14 | TG   | 26 | 4  |

|      |   |         |         |   |    |    |      |    |    |
|------|---|---------|---------|---|----|----|------|----|----|
| 1274 | 1 | 1497766 | 1497785 | 2 | 10 | 20 | GT   | 19 | 4  |
| 1275 | 1 | 1498705 | 1498720 | 2 | 8  | 16 | AC   | 28 | 7  |
| 1286 | 1 | 1516214 | 1516228 | 3 | 5  | 15 | AGC  | 19 | 4  |
| 1289 | 1 | 1518763 | 1518788 | 2 | 13 | 26 | CT   | 15 | 5  |
| 1293 | 1 | 1521207 | 1521236 | 3 | 10 | 30 | CCT  | 28 | 6  |
| 1294 | 1 | 1522314 | 1522334 | 3 | 7  | 21 | GAG  | 13 | 4  |
| 1296 | 1 | 1526916 | 1526939 | 2 | 12 | 24 | CA   | 20 | 7  |
| 1299 | 1 | 1527086 | 1527109 | 2 | 12 | 24 | TG   | 13 | 7  |
| 1300 | 1 | 1527726 | 1527755 | 2 | 15 | 30 | CA   | 10 | 5  |
| 1301 | 1 | 1530477 | 1530488 | 2 | 6  | 12 | CA   | 11 | 6  |
| 1305 | 1 | 1535152 | 1535165 | 2 | 7  | 14 | AC   | 24 | 4  |
| 1313 | 1 | 1538353 | 1538364 | 2 | 6  | 12 | TG   | 19 | 3  |
| 1314 | 1 | 1538368 | 1538379 | 2 | 6  | 12 | GT   | 10 | 3  |
| 1315 | 1 | 1539954 | 1539973 | 2 | 10 | 20 | GT   | 16 | 12 |
| 1316 | 1 | 1540023 | 1540046 | 4 | 6  | 24 | TGTC | 17 | 3  |
| 1318 | 1 | 1543611 | 1543632 | 2 | 11 | 22 | CA   | 11 | 8  |
| 1320 | 1 | 1551229 | 1551246 | 2 | 9  | 18 | CA   | 21 | 5  |
| 1321 | 1 | 1552172 | 1552191 | 2 | 10 | 20 | CA   | 20 | 5  |
| 1324 | 1 | 1554331 | 1554360 | 2 | 15 | 30 | AC   | 15 | 11 |
| 1325 | 1 | 1554710 | 1554725 | 2 | 8  | 16 | GT   | 26 | 14 |
| 1329 | 1 | 1556800 | 1556831 | 2 | 16 | 32 | CT   | 8  | 7  |
| 1331 | 1 | 1557069 | 1557086 | 2 | 9  | 18 | AC   | 11 | 5  |
| 1333 | 1 | 1557976 | 1557993 | 2 | 9  | 18 | AT   | 21 | 10 |
| 1334 | 1 | 1558051 | 1558066 | 4 | 4  | 16 | AAAT | 22 | 9  |
| 1335 | 1 | 1558615 | 1558628 | 2 | 7  | 14 | CA   | 22 | 3  |
| 1342 | 1 | 1564275 | 1564290 | 2 | 8  | 16 | CA   | 12 | 4  |
| 1347 | 1 | 1580828 | 1580843 | 2 | 8  | 16 | AC   | 30 | 3  |
| 1348 | 1 | 1582290 | 1582301 | 2 | 6  | 12 | TG   | 19 | 8  |
| 1349 | 1 | 1583245 | 1583266 | 2 | 11 | 22 | TC   | 18 | 4  |
| 1352 | 1 | 1588839 | 1588858 | 2 | 10 | 20 | GT   | 26 | 9  |
| 1354 | 1 | 1589073 | 1589088 | 2 | 8  | 16 | CT   | 8  | 3  |
| 1359 | 1 | 1591681 | 1591698 | 2 | 9  | 18 | CA   | 27 | 10 |
| 1360 | 1 | 1592622 | 1592636 | 3 | 5  | 15 | GCG  | 31 | 9  |
| 1362 | 1 | 1593960 | 1593979 | 4 | 5  | 20 | AAAG | 23 | 5  |
| 1369 | 1 | 1624071 | 1624084 | 2 | 7  | 14 | GT   | 13 | 10 |
| 1372 | 1 | 1627990 | 1628004 | 3 | 5  | 15 | AGC  | 23 | 3  |
| 1377 | 1 | 1633804 | 1633817 | 2 | 7  | 14 | TG   | 27 | 10 |
| 1381 | 1 | 1645171 | 1645182 | 2 | 6  | 12 | GT   | 24 | 4  |
| 1386 | 1 | 1660266 | 1660279 | 2 | 7  | 14 | TG   | 20 | 12 |
| 1388 | 1 | 1664004 | 1664025 | 2 | 11 | 22 | AC   | 7  | 4  |
| 1389 | 1 | 1666240 | 1666259 | 2 | 10 | 20 | TG   | 7  | 8  |
| 1398 | 1 | 1686134 | 1686157 | 2 | 12 | 24 | GT   | 15 | 3  |
| 1404 | 1 | 1712526 | 1712549 | 3 | 8  | 24 | ACT  | 29 | 5  |
| 1416 | 1 | 1725490 | 1725507 | 2 | 9  | 18 | TG   | 25 | 7  |
| 1419 | 1 | 1727254 | 1727273 | 2 | 10 | 20 | AC   | 21 | 9  |
| 1424 | 1 | 1728876 | 1728893 | 3 | 6  | 18 | CCT  | 22 | 5  |
| 1426 | 1 | 1729465 | 1729494 | 2 | 15 | 30 | AC   | 19 | 9  |
| 1428 | 1 | 1730891 | 1730926 | 2 | 18 | 36 | AC   | 7  | 8  |
| 1429 | 1 | 1735302 | 1735335 | 2 | 17 | 34 | TC   | 17 | 6  |
| 1430 | 1 | 1736721 | 1736748 | 2 | 14 | 28 | CA   | 19 | 10 |
| 1431 | 1 | 1736875 | 1736908 | 2 | 17 | 34 | TG   | 13 | 14 |

|      |   |         |         |   |    |    |      |    |    |
|------|---|---------|---------|---|----|----|------|----|----|
| 1434 | 1 | 1739407 | 1739422 | 2 | 8  | 16 | GT   | 22 | 9  |
| 1435 | 1 | 1739424 | 1739441 | 2 | 9  | 18 | TG   | 22 | 9  |
| 1437 | 1 | 1740388 | 1740407 | 4 | 5  | 20 | TTAT | 16 | 3  |
| 1443 | 1 | 1751321 | 1751342 | 2 | 11 | 22 | CA   | 18 | 6  |
| 1444 | 1 | 1751682 | 1751707 | 2 | 13 | 26 | TG   | 30 | 6  |
| 1446 | 1 | 1753163 | 1753186 | 4 | 6  | 24 | CTGT | 21 | 4  |
| 1450 | 1 | 1771136 | 1771151 | 4 | 4  | 16 | AAAT | 17 | 6  |
| 1457 | 1 | 1786757 | 1786770 | 2 | 7  | 14 | AT   | 15 | 9  |
| 1474 | 1 | 1833251 | 1833274 | 2 | 12 | 24 | CA   | 12 | 7  |
| 1476 | 1 | 1835058 | 1835077 | 2 | 10 | 20 | TC   | 20 | 4  |
| 1477 | 1 | 1835782 | 1835793 | 2 | 6  | 12 | AC   | 24 | 4  |
| 1478 | 1 | 1836879 | 1836894 | 2 | 8  | 16 | GT   | 17 | 4  |
| 1484 | 1 | 1858385 | 1858400 | 4 | 4  | 16 | CAGA | 32 | 4  |
| 1488 | 1 | 1862317 | 1862340 | 3 | 8  | 24 | GGA  | 20 | 4  |
| 1491 | 1 | 1864262 | 1864287 | 2 | 13 | 26 | TG   | 10 | 8  |
| 1503 | 1 | 1889135 | 1889146 | 2 | 6  | 12 | AC   | 22 | 13 |
| 1504 | 1 | 1889148 | 1889163 | 2 | 8  | 16 | CA   | 20 | 14 |
| 1506 | 1 | 1894244 | 1894267 | 2 | 12 | 24 | CA   | 16 | 7  |
| 1507 | 1 | 1902282 | 1902301 | 2 | 10 | 20 | TG   | 22 | 11 |
| 1509 | 1 | 1902798 | 1902824 | 3 | 9  | 27 | GAG  | 20 | 8  |
| 1510 | 1 | 1903224 | 1903237 | 2 | 7  | 14 | AT   | 14 | 9  |
| 1512 | 1 | 1910456 | 1910485 | 3 | 10 | 30 | TGA  | 24 | 6  |
| 1521 | 1 | 1928017 | 1928031 | 3 | 5  | 15 | CTT  | 33 | 3  |
| 1528 | 1 | 1949865 | 1949888 | 4 | 6  | 24 | TGAT | 25 | 3  |
| 1538 | 1 | 2019167 | 2019202 | 3 | 12 | 36 | TGA  | 18 | 6  |
| 1539 | 1 | 2023387 | 2023416 | 2 | 15 | 30 | AC   | 17 | 6  |
| 1540 | 1 | 2032763 | 2032783 | 3 | 7  | 21 | TTA  | 8  | 3  |
| 1541 | 1 | 2038543 | 2038554 | 2 | 6  | 12 | CA   | 29 | 3  |
| 1548 | 1 | 2053485 | 2053520 | 2 | 18 | 36 | GT   | 15 | 9  |
| 1550 | 1 | 2057545 | 2057558 | 2 | 7  | 14 | TG   | 18 | 3  |
| 1553 | 1 | 2066991 | 2067020 | 3 | 10 | 30 | ATT  | 8  | 4  |
| 1554 | 1 | 2067343 | 2067366 | 2 | 12 | 24 | CA   | 19 | 5  |
| 1564 | 1 | 2100862 | 2100877 | 2 | 8  | 16 | AC   | 17 | 4  |
| 1566 | 1 | 2113973 | 2113990 | 3 | 6  | 18 | ATT  | 20 | 4  |
| 1576 | 1 | 2117296 | 2117323 | 2 | 14 | 28 | CA   | 9  | 5  |
| 1577 | 1 | 2118479 | 2118498 | 2 | 10 | 20 | CA   | 31 | 8  |
| 1578 | 1 | 2118723 | 2118750 | 2 | 14 | 28 | AC   | 16 | 4  |
| 1592 | 1 | 2128853 | 2128866 | 2 | 7  | 14 | AC   | 23 | 5  |
| 1596 | 1 | 2132049 | 2132072 | 2 | 12 | 24 | TG   | 15 | 11 |
| 1605 | 1 | 2140113 | 2140124 | 2 | 6  | 12 | TG   | 26 | 3  |
| 1609 | 1 | 2145781 | 2145792 | 2 | 6  | 12 | GT   | 17 | 6  |
| 1610 | 1 | 2146116 | 2146133 | 2 | 9  | 18 | TC   | 13 | 4  |
| 1612 | 1 | 2146964 | 2146987 | 3 | 8  | 24 | TCC  | 12 | 4  |
| 1613 | 1 | 2147158 | 2147175 | 2 | 9  | 18 | AT   | 6  | 6  |
| 1614 | 1 | 2148433 | 2148448 | 2 | 8  | 16 | CT   | 23 | 7  |
| 1615 | 1 | 2148608 | 2148623 | 2 | 8  | 16 | TC   | 22 | 4  |
| 1618 | 1 | 2153427 | 2153448 | 2 | 11 | 22 | AC   | 16 | 6  |
| 1625 | 1 | 2166078 | 2166095 | 2 | 9  | 18 | TC   | 18 | 5  |
| 1630 | 1 | 2173815 | 2173832 | 3 | 6  | 18 | ATG  | 22 | 4  |
| 1631 | 1 | 2179236 | 2179253 | 2 | 9  | 18 | AC   | 23 | 8  |
| 1632 | 1 | 2197147 | 2197164 | 2 | 9  | 18 | AC   | 24 | 6  |

|      |   |         |         |   |    |    |      |    |    |
|------|---|---------|---------|---|----|----|------|----|----|
| 1634 | 1 | 2197556 | 2197571 | 2 | 8  | 16 | GT   | 15 | 3  |
| 1635 | 1 | 2199998 | 2200009 | 2 | 6  | 12 | AC   | 30 | 3  |
| 1638 | 1 | 2208271 | 2208302 | 2 | 16 | 32 | CA   | 18 | 9  |
| 1639 | 1 | 2209918 | 2209947 | 2 | 15 | 30 | TG   | 19 | 12 |
| 1640 | 1 | 2210736 | 2210773 | 2 | 19 | 38 | GT   | 16 | 14 |
| 1641 | 1 | 2210899 | 2210932 | 2 | 17 | 34 | CA   | 13 | 9  |
| 1642 | 1 | 2211274 | 2211293 | 2 | 10 | 20 | CA   | 15 | 6  |
| 1645 | 1 | 2221701 | 2221718 | 3 | 6  | 18 | GGA  | 32 | 5  |
| 1655 | 1 | 2238372 | 2238393 | 2 | 11 | 22 | AC   | 17 | 17 |
| 1658 | 1 | 2240087 | 2240104 | 2 | 9  | 18 | CA   | 17 | 10 |
| 1675 | 1 | 2307710 | 2307729 | 4 | 5  | 20 | TTTA | 14 | 7  |
| 1677 | 1 | 2309933 | 2309950 | 3 | 6  | 18 | GTT  | 30 | 3  |
| 1697 | 1 | 2367112 | 2367131 | 4 | 5  | 20 | AACA | 18 | 6  |
| 1699 | 1 | 2369408 | 2369434 | 3 | 9  | 27 | TCC  | 28 | 4  |
| 1702 | 1 | 2372722 | 2372753 | 2 | 16 | 32 | TG   | 9  | 11 |
| 1706 | 1 | 2373749 | 2373768 | 2 | 10 | 20 | GT   | 22 | 6  |
| 1707 | 1 | 2374159 | 2374176 | 2 | 9  | 18 | TC   | 11 | 5  |
| 1715 | 1 | 2381145 | 2381159 | 3 | 5  | 15 | AAC  | 19 | 4  |
| 1716 | 1 | 2381515 | 2381534 | 4 | 5  | 20 | ACCA | 19 | 6  |
| 1723 | 1 | 2390554 | 2390579 | 2 | 13 | 26 | CA   | 11 | 14 |
| 1725 | 1 | 2392365 | 2392404 | 2 | 20 | 40 | CA   | 19 | 22 |
| 1728 | 1 | 2399397 | 2399420 | 2 | 12 | 24 | AG   | 18 | 7  |
| 1737 | 1 | 2421235 | 2421262 | 2 | 14 | 28 | CA   | 13 | 11 |
| 1748 | 1 | 2434078 | 2434107 | 2 | 15 | 30 | CA   | 12 | 9  |
| 1749 | 1 | 2437299 | 2437324 | 2 | 13 | 26 | AC   | 28 | 11 |
| 1750 | 1 | 2438224 | 2438239 | 4 | 4  | 16 | ATTT | 23 | 5  |
| 1752 | 1 | 2438703 | 2438742 | 2 | 20 | 40 | AC   | 11 | 10 |
| 1753 | 1 | 2439000 | 2439019 | 2 | 10 | 20 | TG   | 20 | 7  |
| 1760 | 1 | 2452974 | 2452989 | 2 | 8  | 16 | TC   | 15 | 4  |
| 1761 | 1 | 2453260 | 2453297 | 2 | 19 | 38 | AC   | 13 | 15 |
| 1765 | 1 | 2457113 | 2457134 | 2 | 11 | 22 | GT   | 18 | 6  |
| 1771 | 1 | 2468811 | 2468832 | 2 | 11 | 22 | TG   | 22 | 7  |
| 1774 | 1 | 2472456 | 2472479 | 2 | 12 | 24 | TG   | 6  | 4  |
| 1780 | 1 | 2481555 | 2481568 | 2 | 7  | 14 | CA   | 26 | 4  |
| 1781 | 1 | 2481796 | 2481813 | 2 | 9  | 18 | CA   | 30 | 5  |
| 1784 | 1 | 2482942 | 2482953 | 2 | 6  | 12 | TG   | 10 | 6  |
| 1785 | 1 | 2483801 | 2483816 | 2 | 8  | 16 | TG   | 14 | 4  |
| 1786 | 1 | 2485156 | 2485173 | 2 | 9  | 18 | TG   | 21 | 5  |
| 1805 | 1 | 2516501 | 2516512 | 2 | 6  | 12 | AG   | 19 | 4  |
| 1806 | 1 | 2516573 | 2516592 | 2 | 10 | 20 | CA   | 19 | 9  |
| 1816 | 1 | 2523970 | 2523983 | 2 | 7  | 14 | CA   | 24 | 3  |
| 1818 | 1 | 2524253 | 2524282 | 2 | 15 | 30 | CA   | 13 | 14 |
| 1820 | 1 | 2524531 | 2524550 | 4 | 5  | 20 | GGAT | 28 | 6  |
| 1826 | 1 | 2532446 | 2532466 | 3 | 7  | 21 | CAG  | 26 | 11 |
| 1827 | 1 | 2534271 | 2534282 | 2 | 6  | 12 | GT   | 27 | 3  |
| 1837 | 1 | 2558453 | 2558464 | 2 | 6  | 12 | AC   | 8  | 5  |
| 1839 | 1 | 2570587 | 2570601 | 3 | 5  | 15 | TGC  | 26 | 3  |
| 1840 | 1 | 2572831 | 2572850 | 2 | 10 | 20 | CT   | 14 | 5  |
| 1842 | 1 | 2578845 | 2578866 | 2 | 11 | 22 | CA   | 18 | 10 |
| 1847 | 1 | 2580620 | 2580649 | 2 | 15 | 30 | AC   | 9  | 7  |
| 1851 | 1 | 2592276 | 2592299 | 2 | 12 | 24 | AC   | 8  | 7  |



|      |   |         |         |   |    |    |      |    |    |
|------|---|---------|---------|---|----|----|------|----|----|
| 1852 | 1 | 2592384 | 2592411 | 2 | 14 | 28 | CA   | 6  | 6  |
| 1853 | 1 | 2601607 | 2601640 | 2 | 17 | 34 | GT   | 7  | 9  |
| 1859 | 1 | 2628414 | 2628429 | 2 | 8  | 16 | TG   | 13 | 10 |
| 1863 | 1 | 2655273 | 2655286 | 2 | 7  | 14 | AT   | 24 | 3  |
| 1875 | 1 | 2694467 | 2694486 | 2 | 10 | 20 | AC   | 20 | 5  |
| 1876 | 1 | 2694665 | 2694685 | 3 | 7  | 21 | TTC  | 26 | 4  |
| 1877 | 1 | 2696577 | 2696592 | 2 | 8  | 16 | AT   | 18 | 4  |
| 1888 | 1 | 2707272 | 2707289 | 2 | 9  | 18 | TG   | 31 | 5  |
| 1899 | 1 | 2731456 | 2731471 | 2 | 8  | 16 | AC   | 22 | 3  |
| 1913 | 1 | 2756093 | 2756116 | 4 | 6  | 24 | TTTA | 16 | 4  |
| 1917 | 1 | 2761884 | 2761899 | 2 | 8  | 16 | TG   | 14 | 4  |
| 1938 | 1 | 2806349 | 2806386 | 2 | 19 | 38 | CA   | 9  | 7  |
| 1945 | 1 | 2816785 | 2816826 | 2 | 21 | 42 | GT   | 8  | 5  |
| 1948 | 1 | 2822247 | 2822274 | 2 | 14 | 28 | GT   | 17 | 7  |
| 1950 | 1 | 2824864 | 2824879 | 2 | 8  | 16 | AG   | 25 | 8  |
| 1951 | 1 | 2825990 | 2826015 | 2 | 13 | 26 | CA   | 12 | 5  |
| 1956 | 1 | 2839826 | 2839847 | 2 | 11 | 22 | CA   | 17 | 6  |
| 1957 | 1 | 2840169 | 2840194 | 2 | 13 | 26 | CT   | 11 | 5  |
| 1959 | 1 | 2840638 | 2840667 | 2 | 15 | 30 | AG   | 13 | 11 |
| 1965 | 1 | 2844226 | 2844247 | 2 | 11 | 22 | CA   | 23 | 4  |
| 1967 | 1 | 2846879 | 2846906 | 2 | 14 | 28 | GT   | 21 | 14 |
| 1980 | 1 | 2868922 | 2868941 | 2 | 10 | 20 | CA   | 16 | 10 |
| 1981 | 1 | 2870512 | 2870527 | 2 | 8  | 16 | GT   | 14 | 8  |
| 1982 | 1 | 2870868 | 2870881 | 2 | 7  | 14 | CA   | 24 | 10 |
| 1994 | 1 | 2894768 | 2894779 | 2 | 6  | 12 | GT   | 26 | 4  |
| 1996 | 1 | 2895829 | 2895858 | 3 | 10 | 30 | AGA  | 30 | 11 |
| 2000 | 1 | 2897991 | 2898002 | 2 | 6  | 12 | TC   | 15 | 6  |
| 2002 | 1 | 2899510 | 2899521 | 2 | 6  | 12 | CA   | 17 | 9  |
| 2017 | 1 | 2916740 | 2916754 | 3 | 5  | 15 | CGG  | 24 | 4  |
| 2021 | 1 | 2925213 | 2925250 | 2 | 19 | 38 | AC   | 15 | 7  |
| 2022 | 1 | 2925431 | 2925452 | 2 | 11 | 22 | AC   | 12 | 5  |
| 2026 | 1 | 2931312 | 2931326 | 3 | 5  | 15 | TTC  | 28 | 3  |
| 2029 | 1 | 2937673 | 2937706 | 2 | 17 | 34 | TC   | 11 | 9  |
| 2031 | 1 | 2939675 | 2939696 | 2 | 11 | 22 | AC   | 20 | 9  |
| 2034 | 1 | 2948773 | 2948806 | 2 | 17 | 34 | TG   | 22 | 12 |
| 2039 | 1 | 2967704 | 2967723 | 2 | 10 | 20 | TG   | 14 | 18 |
| 2041 | 1 | 2971654 | 2971677 | 2 | 12 | 24 | TG   | 12 | 8  |
| 2049 | 1 | 2992202 | 2992217 | 2 | 8  | 16 | TG   | 27 | 5  |
| 2050 | 1 | 2995334 | 2995349 | 2 | 8  | 16 | TG   | 21 | 4  |
| 2052 | 1 | 2998364 | 2998389 | 2 | 13 | 26 | TC   | 26 | 6  |
| 2059 | 1 | 3011884 | 3011907 | 2 | 12 | 24 | CA   | 16 | 5  |
| 2065 | 1 | 3015743 | 3015758 | 2 | 8  | 16 | GT   | 17 | 3  |
| 2070 | 1 | 3024126 | 3024145 | 2 | 10 | 20 | AC   | 20 | 11 |
| 2084 | 1 | 3050834 | 3050848 | 3 | 5  | 15 | GTG  | 27 | 3  |
| 2087 | 1 | 3077394 | 3077409 | 4 | 4  | 16 | ATTT | 21 | 6  |
| 2091 | 1 | 3086288 | 3086311 | 3 | 8  | 24 | AAT  | 16 | 4  |
| 2096 | 1 | 3106533 | 3106550 | 3 | 6  | 18 | TTA  | 15 | 7  |
| 2107 | 1 | 3139142 | 3139171 | 2 | 15 | 30 | TG   | 6  | 4  |
| 2114 | 1 | 3148481 | 3148514 | 2 | 17 | 34 | AC   | 14 | 12 |
| 2122 | 1 | 3156690 | 3156703 | 2 | 7  | 14 | AT   | 14 | 6  |
| 2124 | 1 | 3160634 | 3160669 | 2 | 18 | 36 | GT   | 17 | 15 |

|      |   |         |         |   |    |    |      |    |    |
|------|---|---------|---------|---|----|----|------|----|----|
| 2128 | 1 | 3167639 | 3167664 | 2 | 13 | 26 | TG   | 16 | 4  |
| 2131 | 1 | 3169641 | 3169678 | 2 | 19 | 38 | AC   | 16 | 11 |
| 2135 | 1 | 3170775 | 3170796 | 2 | 11 | 22 | CA   | 22 | 7  |
| 2140 | 1 | 3184212 | 3184225 | 2 | 7  | 14 | AC   | 13 | 11 |
| 2148 | 1 | 3200224 | 3200238 | 3 | 5  | 15 | CTT  | 10 | 5  |
| 2152 | 1 | 3205286 | 3205303 | 3 | 6  | 18 | TAT  | 19 | 3  |
| 2157 | 1 | 3213616 | 3213635 | 2 | 10 | 20 | TG   | 15 | 6  |
| 2159 | 1 | 3219856 | 3219871 | 2 | 8  | 16 | GT   | 9  | 5  |
| 2162 | 1 | 3221775 | 3221798 | 4 | 6  | 24 | TGGA | 24 | 5  |
| 2167 | 1 | 3231587 | 3231606 | 4 | 5  | 20 | CATC | 27 | 4  |
| 2168 | 1 | 3232175 | 3232208 | 2 | 17 | 34 | TG   | 8  | 9  |
| 2169 | 1 | 3232501 | 3232524 | 2 | 12 | 24 | GT   | 16 | 7  |
| 2172 | 1 | 3234434 | 3234451 | 2 | 9  | 18 | TG   | 10 | 6  |
| 2173 | 1 | 3235133 | 3235178 | 2 | 23 | 46 | CA   | 19 | 8  |
| 2180 | 1 | 3246610 | 3246629 | 4 | 5  | 20 | GTTG | 27 | 3  |
| 2181 | 1 | 3259612 | 3259639 | 2 | 14 | 28 | AC   | 10 | 11 |
| 2186 | 1 | 3282012 | 3282059 | 2 | 24 | 48 | TG   | 8  | 9  |
| 2189 | 1 | 3291139 | 3291156 | 2 | 9  | 18 | TC   | 17 | 4  |
| 2194 | 1 | 3308046 | 3308061 | 2 | 8  | 16 | TG   | 19 | 4  |
| 2197 | 1 | 3313086 | 3313107 | 2 | 11 | 22 | GT   | 22 | 4  |
| 2199 | 1 | 3317184 | 3317201 | 3 | 6  | 18 | CCT  | 19 | 4  |
| 2200 | 1 | 3317256 | 3317270 | 3 | 5  | 15 | ATT  | 23 | 8  |
| 2203 | 1 | 3320584 | 3320609 | 2 | 13 | 26 | GT   | 12 | 12 |
| 2207 | 1 | 3323224 | 3323245 | 2 | 11 | 22 | GT   | 6  | 4  |
| 2216 | 1 | 3342817 | 3342838 | 2 | 11 | 22 | CA   | 22 | 8  |
| 2221 | 1 | 3363652 | 3363669 | 2 | 9  | 18 | AT   | 16 | 7  |
| 2224 | 1 | 3369992 | 3370009 | 2 | 9  | 18 | TG   | 20 | 16 |
| 2232 | 1 | 3384668 | 3384681 | 2 | 7  | 14 | GT   | 27 | 3  |
| 2233 | 1 | 3387866 | 3387877 | 2 | 6  | 12 | GT   | 23 | 6  |
| 2235 | 1 | 3395430 | 3395453 | 4 | 6  | 24 | TAGG | 26 | 6  |
| 2237 | 1 | 3397933 | 3397946 | 2 | 7  | 14 | AG   | 22 | 4  |
| 2245 | 1 | 3415522 | 3415535 | 2 | 7  | 14 | GT   | 15 | 4  |
| 2246 | 1 | 3421928 | 3421975 | 2 | 24 | 48 | TG   | 6  | 7  |
| 2249 | 1 | 3428553 | 3428570 | 2 | 9  | 18 | GA   | 21 | 4  |
| 2253 | 1 | 3431333 | 3431356 | 3 | 8  | 24 | CAG  | 22 | 4  |
| 2254 | 1 | 3435177 | 3435194 | 2 | 9  | 18 | TG   | 7  | 5  |
| 2255 | 1 | 3437859 | 3437894 | 2 | 18 | 36 | GT   | 13 | 13 |
| 2256 | 1 | 3438953 | 3438986 | 2 | 17 | 34 | GA   | 15 | 10 |
| 2266 | 1 | 3442648 | 3442674 | 3 | 9  | 27 | GCA  | 28 | 6  |
| 2268 | 1 | 3444555 | 3444580 | 2 | 13 | 26 | AC   | 17 | 13 |
| 2269 | 1 | 3447016 | 3447027 | 2 | 6  | 12 | AC   | 20 | 4  |
| 2276 | 1 | 3457120 | 3457137 | 2 | 9  | 18 | TG   | 28 | 8  |
| 2277 | 1 | 3458461 | 3458481 | 3 | 7  | 21 | GGA  | 22 | 4  |
| 2279 | 1 | 3460111 | 3460125 | 3 | 5  | 15 | CCG  | 22 | 4  |
| 2281 | 1 | 3460425 | 3460458 | 2 | 17 | 34 | TG   | 15 | 10 |
| 2288 | 1 | 3478751 | 3478774 | 2 | 12 | 24 | AC   | 24 | 8  |
| 2289 | 1 | 3478936 | 3478951 | 2 | 8  | 16 | AC   | 24 | 6  |
| 2290 | 1 | 3479081 | 3479094 | 2 | 7  | 14 | AC   | 22 | 5  |
| 2291 | 1 | 3479096 | 3479107 | 2 | 6  | 12 | CA   | 24 | 6  |
| 2293 | 1 | 3479358 | 3479381 | 2 | 12 | 24 | GA   | 13 | 7  |
| 2294 | 1 | 3481262 | 3481279 | 2 | 9  | 18 | TG   | 26 | 4  |

|      |   |         |         |   |    |    |      |    |    |
|------|---|---------|---------|---|----|----|------|----|----|
| 2295 | 1 | 3486655 | 3486666 | 2 | 6  | 12 | TA   | 23 | 3  |
| 2298 | 1 | 3490368 | 3490387 | 4 | 5  | 20 | TTCT | 6  | 4  |
| 2301 | 1 | 3492263 | 3492280 | 2 | 9  | 18 | GT   | 17 | 4  |
| 2302 | 1 | 3493538 | 3493549 | 2 | 6  | 12 | CA   | 23 | 9  |
| 2303 | 1 | 3500343 | 3500366 | 2 | 12 | 24 | AC   | 18 | 8  |
| 2307 | 1 | 3505415 | 3505442 | 2 | 14 | 28 | GT   | 13 | 8  |
| 2312 | 1 | 3511664 | 3511697 | 2 | 17 | 34 | TG   | 15 | 20 |
| 2315 | 1 | 3513707 | 3513732 | 2 | 13 | 26 | AC   | 14 | 9  |
| 2318 | 1 | 3520962 | 3520976 | 3 | 5  | 15 | GCT  | 19 | 4  |
| 2319 | 1 | 3521665 | 3521680 | 4 | 4  | 16 | ATCT | 26 | 4  |
| 2324 | 1 | 3529513 | 3529530 | 2 | 9  | 18 | CA   | 12 | 12 |
| 2325 | 1 | 3530003 | 3530018 | 4 | 4  | 16 | TATT | 24 | 4  |
| 2327 | 1 | 3530922 | 3530936 | 3 | 5  | 15 | CGC  | 24 | 6  |
| 2328 | 1 | 3530939 | 3530953 | 3 | 5  | 15 | GCT  | 25 | 6  |
| 2329 | 1 | 3532449 | 3532464 | 2 | 8  | 16 | GA   | 22 | 6  |
| 2332 | 1 | 3541580 | 3541600 | 3 | 7  | 21 | GCA  | 19 | 3  |
| 2337 | 1 | 3552028 | 3552042 | 3 | 5  | 15 | CAG  | 27 | 8  |
| 2338 | 1 | 3553674 | 3553685 | 2 | 6  | 12 | GT   | 24 | 4  |
| 2339 | 1 | 3559719 | 3559732 | 2 | 7  | 14 | TG   | 19 | 3  |
| 2353 | 1 | 3572079 | 3572098 | 2 | 10 | 20 | TC   | 10 | 7  |
| 2356 | 1 | 3572245 | 3572262 | 2 | 9  | 18 | CT   | 6  | 6  |
| 2363 | 1 | 3584138 | 3584157 | 2 | 10 | 20 | CA   | 15 | 4  |
| 2364 | 1 | 3585810 | 3585823 | 2 | 7  | 14 | TG   | 26 | 6  |
| 2371 | 1 | 3588142 | 3588186 | 3 | 15 | 45 | TCC  | 7  | 6  |
| 2382 | 1 | 3594498 | 3594531 | 2 | 17 | 34 | GT   | 12 | 10 |
| 2384 | 1 | 3602043 | 3602066 | 2 | 12 | 24 | TG   | 28 | 9  |
| 2385 | 1 | 3603958 | 3603969 | 2 | 6  | 12 | CA   | 17 | 7  |
| 2386 | 1 | 3615059 | 3615078 | 4 | 5  | 20 | ATTT | 7  | 4  |
| 2387 | 1 | 3615179 | 3615204 | 2 | 13 | 26 | AC   | 14 | 11 |
| 2389 | 1 | 3615700 | 3615715 | 4 | 4  | 16 | AAAT | 13 | 11 |
| 2394 | 1 | 3620570 | 3620585 | 4 | 4  | 16 | CAGA | 34 | 3  |
| 2395 | 1 | 3621225 | 3621245 | 3 | 7  | 21 | TGA  | 20 | 3  |
| 2399 | 1 | 3626297 | 3626310 | 2 | 7  | 14 | CA   | 27 | 7  |
| 2400 | 1 | 3630876 | 3630897 | 2 | 11 | 22 | AC   | 11 | 7  |
| 2411 | 1 | 3649536 | 3649557 | 2 | 11 | 22 | TG   | 27 | 12 |
| 2413 | 1 | 3654193 | 3654208 | 2 | 8  | 16 | TC   | 16 | 6  |
| 2420 | 1 | 3659580 | 3659597 | 3 | 6  | 18 | CTG  | 25 | 3  |
| 2421 | 1 | 3659654 | 3659677 | 4 | 6  | 24 | TTTA | 9  | 6  |
| 2424 | 1 | 3663447 | 3663468 | 2 | 11 | 22 | TG   | 21 | 10 |
| 2425 | 1 | 3663713 | 3663726 | 2 | 7  | 14 | CT   | 24 | 4  |
| 2427 | 1 | 3666307 | 3666336 | 2 | 15 | 30 | TG   | 7  | 10 |
| 2433 | 1 | 3668519 | 3668538 | 4 | 5  | 20 | CCTC | 14 | 5  |
| 2435 | 1 | 3670336 | 3670349 | 2 | 7  | 14 | TG   | 21 | 3  |
| 2436 | 1 | 3673531 | 3673554 | 3 | 8  | 24 | GGA  | 14 | 4  |
| 2437 | 1 | 3673871 | 3673884 | 2 | 7  | 14 | CA   | 12 | 6  |
| 2439 | 1 | 3674185 | 3674200 | 2 | 8  | 16 | TG   | 10 | 3  |
| 2440 | 1 | 3674312 | 3674329 | 2 | 9  | 18 | TG   | 8  | 9  |
| 2441 | 1 | 3674522 | 3674563 | 2 | 21 | 42 | AC   | 11 | 15 |
| 2447 | 1 | 3676892 | 3676915 | 4 | 6  | 24 | GGAT | 19 | 5  |
| 2452 | 1 | 3689054 | 3689069 | 2 | 8  | 16 | TG   | 27 | 5  |
| 2454 | 1 | 3692034 | 3692047 | 2 | 7  | 14 | CA   | 13 | 5  |

|      |   |         |         |   |    |    |      |    |    |
|------|---|---------|---------|---|----|----|------|----|----|
| 2462 | 1 | 3706809 | 3706838 | 2 | 15 | 30 | AC   | 7  | 5  |
| 2463 | 1 | 3707157 | 3707180 | 2 | 12 | 24 | TG   | 15 | 9  |
| 2466 | 1 | 3715583 | 3715618 | 2 | 18 | 36 | TG   | 15 | 7  |
| 2469 | 1 | 3721438 | 3721467 | 3 | 10 | 30 | TGA  | 27 | 3  |
| 2473 | 1 | 3723086 | 3723105 | 2 | 10 | 20 | TC   | 16 | 4  |
| 2474 | 1 | 3723427 | 3723458 | 2 | 16 | 32 | GT   | 12 | 10 |
| 2475 | 1 | 3725215 | 3725234 | 4 | 5  | 20 | GTCA | 32 | 3  |
| 2489 | 1 | 3767997 | 3768008 | 2 | 6  | 12 | AG   | 27 | 4  |
| 2492 | 1 | 3775377 | 3775408 | 2 | 16 | 32 | GT   | 10 | 16 |
| 2493 | 1 | 3776096 | 3776119 | 2 | 12 | 24 | TG   | 11 | 7  |
| 2494 | 1 | 3779012 | 3779037 | 2 | 13 | 26 | AC   | 8  | 5  |
| 2497 | 1 | 3795260 | 3795287 | 2 | 14 | 28 | TG   | 18 | 14 |
| 2500 | 1 | 3802673 | 3802704 | 2 | 16 | 32 | TG   | 13 | 13 |
| 2506 | 1 | 3810393 | 3810418 | 2 | 13 | 26 | TG   | 19 | 18 |
| 2508 | 1 | 3813608 | 3813625 | 3 | 6  | 18 | CAG  | 20 | 3  |
| 2510 | 1 | 3817724 | 3817759 | 2 | 18 | 36 | TG   | 8  | 8  |
| 2512 | 1 | 3818592 | 3818609 | 2 | 9  | 18 | TG   | 21 | 11 |
| 2522 | 1 | 3821199 | 3821214 | 2 | 8  | 16 | AG   | 19 | 3  |
| 2526 | 1 | 3822503 | 3822522 | 2 | 10 | 20 | AC   | 17 | 5  |
| 2527 | 1 | 3822887 | 3822900 | 2 | 7  | 14 | AC   | 13 | 3  |
| 2528 | 1 | 3823051 | 3823064 | 2 | 7  | 14 | AC   | 20 | 6  |
| 2530 | 1 | 3829602 | 3829617 | 2 | 8  | 16 | TG   | 20 | 12 |
| 2537 | 1 | 3840882 | 3840909 | 4 | 7  | 28 | ATTT | 12 | 4  |
| 2545 | 1 | 3856722 | 3856745 | 4 | 6  | 24 | ATAG | 9  | 5  |
| 2553 | 1 | 3872405 | 3872419 | 3 | 5  | 15 | CAC  | 20 | 4  |
| 2554 | 1 | 3873163 | 3873189 | 3 | 9  | 27 | CAA  | 21 | 5  |
| 2570 | 1 | 3908059 | 3908072 | 2 | 7  | 14 | GA   | 19 | 4  |
| 2571 | 1 | 3909021 | 3909036 | 2 | 8  | 16 | TC   | 25 | 4  |
| 2609 | 1 | 3952892 | 3952913 | 2 | 11 | 22 | GT   | 15 | 6  |
| 2610 | 1 | 3953078 | 3953103 | 2 | 13 | 26 | TG   | 15 | 6  |
| 2612 | 1 | 3958238 | 3958249 | 2 | 6  | 12 | GT   | 34 | 3  |
| 2615 | 1 | 3959898 | 3959915 | 2 | 9  | 18 | TG   | 25 | 5  |
| 2616 | 1 | 3960791 | 3960812 | 2 | 11 | 22 | GT   | 22 | 13 |
| 2617 | 1 | 3963421 | 3963458 | 2 | 19 | 38 | AC   | 10 | 9  |
| 2625 | 1 | 3989208 | 3989223 | 4 | 4  | 16 | TTTA | 22 | 4  |
| 2627 | 1 | 3990448 | 3990461 | 2 | 7  | 14 | CA   | 19 | 7  |
| 2628 | 1 | 3994125 | 3994142 | 2 | 9  | 18 | AC   | 20 | 14 |
| 2629 | 1 | 3994499 | 3994524 | 2 | 13 | 26 | CA   | 6  | 9  |
| 2630 | 1 | 4001269 | 4001314 | 2 | 23 | 46 | CA   | 13 | 9  |
| 2631 | 1 | 4001617 | 4001666 | 2 | 25 | 50 | TC   | 8  | 7  |
| 2633 | 1 | 4003521 | 4003536 | 2 | 8  | 16 | TA   | 7  | 6  |
| 2635 | 1 | 4003776 | 4003795 | 2 | 10 | 20 | AG   | 13 | 4  |
| 2640 | 1 | 4013568 | 4013585 | 2 | 9  | 18 | GT   | 26 | 10 |
| 2642 | 1 | 4017610 | 4017625 | 2 | 8  | 16 | CA   | 23 | 3  |
| 2644 | 1 | 4023166 | 4023177 | 2 | 6  | 12 | CA   | 19 | 4  |
| 2648 | 1 | 4040594 | 4040615 | 2 | 11 | 22 | AG   | 23 | 6  |
| 2651 | 1 | 4041536 | 4041561 | 2 | 13 | 26 | AC   | 15 | 11 |
| 2659 | 1 | 4059465 | 4059500 | 3 | 12 | 36 | AAT  | 17 | 10 |
| 2660 | 1 | 4062999 | 4063028 | 2 | 15 | 30 | TG   | 12 | 12 |
| 2663 | 1 | 4063962 | 4063979 | 2 | 9  | 18 | CA   | 7  | 5  |
| 2664 | 1 | 4064494 | 4064507 | 2 | 7  | 14 | TG   | 21 | 5  |

|      |   |         |         |   |    |    |      |    |    |
|------|---|---------|---------|---|----|----|------|----|----|
| 2668 | 1 | 4065336 | 4065349 | 2 | 7  | 14 | GT   | 23 | 7  |
| 2671 | 1 | 4069188 | 4069199 | 2 | 6  | 12 | CA   | 28 | 11 |
| 2674 | 1 | 4071885 | 4071916 | 2 | 16 | 32 | GT   | 9  | 9  |
| 2677 | 1 | 4078372 | 4078399 | 4 | 7  | 28 | CAGA | 23 | 7  |
| 2679 | 1 | 4081760 | 4081775 | 2 | 8  | 16 | CA   | 10 | 9  |
| 2683 | 1 | 4086397 | 4086420 | 2 | 12 | 24 | CA   | 21 | 10 |
| 2685 | 1 | 4093260 | 4093274 | 3 | 5  | 15 | AGC  | 32 | 3  |
| 2686 | 1 | 4095035 | 4095076 | 2 | 21 | 42 | GT   | 7  | 10 |
| 2688 | 1 | 4095214 | 4095253 | 2 | 20 | 40 | GT   | 7  | 11 |
| 2693 | 1 | 4098095 | 4098108 | 2 | 7  | 14 | TG   | 19 | 3  |
| 2694 | 1 | 4098277 | 4098300 | 2 | 12 | 24 | TG   | 22 | 9  |
| 2697 | 1 | 4099951 | 4099968 | 3 | 6  | 18 | CCA  | 31 | 4  |
| 2698 | 1 | 4100222 | 4100243 | 2 | 11 | 22 | GT   | 25 | 11 |
| 2700 | 1 | 4104093 | 4104114 | 2 | 11 | 22 | CA   | 23 | 16 |
| 2707 | 1 | 4118487 | 4118500 | 2 | 7  | 14 | TA   | 18 | 8  |
| 2715 | 1 | 4137376 | 4137393 | 3 | 6  | 18 | GCA  | 23 | 4  |
| 2716 | 1 | 4140382 | 4140407 | 2 | 13 | 26 | TG   | 22 | 7  |
| 2718 | 1 | 4142895 | 4142914 | 4 | 5  | 20 | AGTA | 18 | 4  |
| 2727 | 1 | 4161522 | 4161537 | 2 | 8  | 16 | GT   | 23 | 10 |
| 2728 | 1 | 4161803 | 4161838 | 2 | 18 | 36 | TG   | 22 | 10 |
| 2729 | 1 | 4162351 | 4162374 | 3 | 8  | 24 | CTC  | 18 | 5  |
| 2731 | 1 | 4165969 | 4165980 | 2 | 6  | 12 | AC   | 22 | 6  |
| 2739 | 1 | 4195922 | 4195945 | 3 | 8  | 24 | CCT  | 28 | 5  |
| 2741 | 1 | 4209708 | 4209731 | 2 | 12 | 24 | TG   | 12 | 10 |
| 2744 | 1 | 4223986 | 4224013 | 2 | 14 | 28 | GT   | 20 | 6  |
| 2750 | 1 | 4231717 | 4231756 | 2 | 20 | 40 | AC   | 11 | 9  |
| 2756 | 1 | 4245954 | 4245971 | 2 | 9  | 18 | GT   | 14 | 5  |
| 2758 | 1 | 4249467 | 4249481 | 3 | 5  | 15 | GAG  | 23 | 3  |
| 2777 | 1 | 4294666 | 4294701 | 2 | 18 | 36 | AG   | 22 | 4  |
| 2779 | 1 | 4304593 | 4304618 | 2 | 13 | 26 | CA   | 11 | 8  |
| 2782 | 1 | 4309449 | 4309466 | 2 | 9  | 18 | GT   | 14 | 8  |
| 2784 | 1 | 4314190 | 4314207 | 2 | 9  | 18 | TG   | 15 | 5  |
| 2785 | 1 | 4317865 | 4317892 | 2 | 14 | 28 | CT   | 17 | 12 |
| 2790 | 1 | 4335501 | 4335527 | 3 | 9  | 27 | CAG  | 13 | 10 |
| 2795 | 1 | 4350649 | 4350664 | 2 | 8  | 16 | TG   | 24 | 4  |
| 2796 | 1 | 4350807 | 4350826 | 2 | 10 | 20 | GT   | 24 | 12 |
| 2802 | 1 | 4370843 | 4370857 | 3 | 5  | 15 | CTG  | 23 | 4  |
| 2805 | 1 | 4381960 | 4381980 | 3 | 7  | 21 | TTG  | 18 | 4  |
| 2808 | 1 | 4383592 | 4383635 | 2 | 22 | 44 | CA   | 8  | 8  |
| 2811 | 1 | 4389606 | 4389629 | 2 | 12 | 24 | AC   | 20 | 8  |
| 2814 | 1 | 4396129 | 4396168 | 2 | 20 | 40 | GT   | 10 | 7  |
| 2815 | 1 | 4397847 | 4397866 | 2 | 10 | 20 | CA   | 21 | 7  |
| 2819 | 1 | 4406330 | 4406351 | 2 | 11 | 22 | CA   | 25 | 8  |
| 2821 | 1 | 4414206 | 4414245 | 4 | 10 | 40 | TCTA | 19 | 8  |
| 2824 | 1 | 4421631 | 4421646 | 2 | 8  | 16 | CA   | 27 | 10 |
| 2825 | 1 | 4421845 | 4421858 | 2 | 7  | 14 | TC   | 13 | 10 |
| 2830 | 1 | 4428947 | 4428964 | 2 | 9  | 18 | CA   | 17 | 11 |
| 2834 | 1 | 4432350 | 4432375 | 2 | 13 | 26 | CA   | 26 | 11 |
| 2836 | 1 | 4434275 | 4434290 | 2 | 8  | 16 | GA   | 8  | 4  |
| 2839 | 1 | 4437289 | 4437322 | 2 | 17 | 34 | GT   | 15 | 15 |
| 2840 | 1 | 4440960 | 4440993 | 2 | 17 | 34 | CA   | 12 | 8  |

|      |   |         |         |   |    |    |      |    |    |
|------|---|---------|---------|---|----|----|------|----|----|
| 2841 | 1 | 4441312 | 4441343 | 2 | 16 | 32 | TG   | 7  | 9  |
| 2842 | 1 | 4441524 | 4441537 | 2 | 7  | 14 | CA   | 15 | 5  |
| 2843 | 1 | 4443262 | 4443282 | 3 | 7  | 21 | CCT  | 17 | 13 |
| 2846 | 1 | 4443463 | 4443478 | 2 | 8  | 16 | AG   | 14 | 13 |
| 2848 | 1 | 4444532 | 4444555 | 4 | 6  | 24 | ATGG | 21 | 7  |
| 2849 | 1 | 4445885 | 4445923 | 3 | 13 | 39 | TGT  | 17 | 10 |
| 2850 | 1 | 4446186 | 4446217 | 2 | 16 | 32 | CA   | 15 | 7  |
| 2854 | 1 | 4454437 | 4454466 | 2 | 15 | 30 | TG   | 10 | 8  |
| 2860 | 1 | 4470490 | 4470522 | 3 | 11 | 33 | ATT  | 11 | 3  |
| 2864 | 1 | 4476215 | 4476234 | 2 | 10 | 20 | AT   | 17 | 4  |
| 2868 | 1 | 4494370 | 4494381 | 2 | 6  | 12 | CT   | 29 | 4  |
| 2869 | 1 | 4499898 | 4499945 | 2 | 24 | 48 | GT   | 9  | 7  |
| 2876 | 1 | 4509578 | 4509599 | 2 | 11 | 22 | CA   | 16 | 14 |
| 2878 | 1 | 4512890 | 4512907 | 2 | 9  | 18 | CT   | 20 | 4  |
| 2884 | 1 | 4518394 | 4518415 | 2 | 11 | 22 | CA   | 16 | 8  |
| 2889 | 1 | 4528685 | 4528698 | 2 | 7  | 14 | GT   | 15 | 4  |
| 2890 | 1 | 4530039 | 4530066 | 2 | 14 | 28 | CA   | 14 | 9  |
| 2898 | 1 | 4544077 | 4544120 | 2 | 22 | 44 | CA   | 21 | 10 |
| 2899 | 1 | 4544313 | 4544330 | 2 | 9  | 18 | CA   | 6  | 4  |
| 2902 | 1 | 4545383 | 4545396 | 2 | 7  | 14 | GT   | 18 | 7  |
| 2903 | 1 | 4545507 | 4545520 | 2 | 7  | 14 | GA   | 24 | 3  |
| 2904 | 1 | 4545825 | 4545844 | 4 | 5  | 20 | AAAT | 28 | 10 |
| 2905 | 1 | 4547014 | 4547033 | 2 | 10 | 20 | GT   | 21 | 8  |
| 2906 | 1 | 4547691 | 4547714 | 2 | 12 | 24 | TG   | 12 | 8  |
| 2910 | 1 | 4549613 | 4549636 | 3 | 8  | 24 | CAT  | 26 | 6  |
| 2911 | 1 | 4554297 | 4554326 | 2 | 15 | 30 | TG   | 18 | 7  |
| 2912 | 1 | 4556343 | 4556358 | 2 | 8  | 16 | TG   | 27 | 3  |
| 2915 | 1 | 4559356 | 4559391 | 2 | 18 | 36 | CA   | 12 | 11 |
| 2917 | 1 | 4559595 | 4559606 | 2 | 6  | 12 | GT   | 11 | 6  |
| 2918 | 1 | 4559608 | 4559627 | 4 | 5  | 20 | CGTG | 6  | 6  |
| 2920 | 1 | 4561481 | 4561502 | 2 | 11 | 22 | CA   | 13 | 10 |
| 2922 | 1 | 4563726 | 4563755 | 2 | 15 | 30 | GT   | 9  | 4  |
| 2923 | 1 | 4563880 | 4563909 | 2 | 15 | 30 | CA   | 20 | 11 |
| 2925 | 1 | 4564329 | 4564346 | 2 | 9  | 18 | AC   | 15 | 11 |
| 2930 | 1 | 4567946 | 4567969 | 2 | 12 | 24 | AC   | 16 | 12 |
| 2932 | 1 | 4568501 | 4568528 | 2 | 14 | 28 | TG   | 16 | 13 |
| 2933 | 1 | 4568941 | 4568954 | 2 | 7  | 14 | AC   | 26 | 3  |
| 2935 | 1 | 4569503 | 4569516 | 2 | 7  | 14 | GT   | 20 | 5  |
| 2938 | 1 | 4577521 | 4577556 | 2 | 18 | 36 | TG   | 8  | 11 |
| 2939 | 1 | 4578757 | 4578780 | 2 | 12 | 24 | AC   | 8  | 9  |
| 2943 | 1 | 4584337 | 4584380 | 2 | 22 | 44 | GT   | 10 | 8  |
| 2945 | 1 | 4587171 | 4587192 | 2 | 11 | 22 | CA   | 15 | 10 |
| 2946 | 1 | 4589773 | 4589806 | 2 | 17 | 34 | AC   | 8  | 9  |
| 2949 | 1 | 4593630 | 4593647 | 2 | 9  | 18 | TG   | 15 | 12 |
| 2952 | 1 | 4595542 | 4595553 | 2 | 6  | 12 | AG   | 28 | 4  |
| 2955 | 1 | 4596690 | 4596705 | 2 | 8  | 16 | AC   | 21 | 13 |
| 2956 | 1 | 4596706 | 4596719 | 2 | 7  | 14 | AG   | 19 | 9  |
| 2957 | 1 | 4596829 | 4596850 | 2 | 11 | 22 | AC   | 18 | 12 |
| 2962 | 1 | 4606675 | 4606706 | 2 | 16 | 32 | TG   | 10 | 10 |
| 2965 | 1 | 4610488 | 4610499 | 2 | 6  | 12 | TG   | 25 | 5  |
| 2968 | 1 | 4612759 | 4612784 | 2 | 13 | 26 | AC   | 7  | 7  |

|      |   |         |         |   |    |    |      |    |    |
|------|---|---------|---------|---|----|----|------|----|----|
| 2971 | 1 | 4616772 | 4616795 | 2 | 12 | 24 | TG   | 10 | 6  |
| 2973 | 1 | 4617110 | 4617133 | 2 | 12 | 24 | AC   | 14 | 7  |
| 2975 | 1 | 4620353 | 4620367 | 3 | 5  | 15 | AAG  | 21 | 3  |
| 2976 | 1 | 4620841 | 4620864 | 2 | 12 | 24 | AC   | 14 | 8  |
| 2978 | 1 | 4621086 | 4621109 | 2 | 12 | 24 | CA   | 21 | 12 |
| 2979 | 1 | 4624059 | 4624086 | 2 | 14 | 28 | CA   | 9  | 11 |
| 2980 | 1 | 4625083 | 4625120 | 2 | 19 | 38 | AC   | 10 | 12 |
| 2981 | 1 | 4628080 | 4628117 | 2 | 19 | 38 | CA   | 9  | 9  |
| 2989 | 1 | 4636117 | 4636131 | 3 | 5  | 15 | GCT  | 30 | 4  |
| 2991 | 1 | 4643668 | 4643717 | 2 | 25 | 50 | AC   | 7  | 10 |
| 2994 | 1 | 4643862 | 4643879 | 2 | 9  | 18 | TC   | 22 | 4  |
| 2995 | 1 | 4644341 | 4644355 | 3 | 5  | 15 | TTG  | 26 | 4  |
| 3002 | 1 | 4652356 | 4652377 | 2 | 11 | 22 | CA   | 13 | 9  |
| 3003 | 1 | 4652857 | 4652872 | 2 | 8  | 16 | CA   | 20 | 4  |
| 3004 | 1 | 4653692 | 4653711 | 2 | 10 | 20 | CA   | 20 | 8  |
| 3005 | 1 | 4656913 | 4656944 | 2 | 16 | 32 | TC   | 6  | 8  |
| 3009 | 1 | 4657579 | 4657598 | 2 | 10 | 20 | GT   | 19 | 4  |
| 3025 | 1 | 4671238 | 4671255 | 3 | 6  | 18 | AAC  | 27 | 3  |
| 3027 | 1 | 4672174 | 4672189 | 2 | 8  | 16 | CT   | 25 | 4  |
| 3028 | 1 | 4672295 | 4672326 | 2 | 16 | 32 | GT   | 14 | 11 |
| 3029 | 1 | 4672430 | 4672457 | 2 | 14 | 28 | AC   | 10 | 9  |
| 3030 | 1 | 4672626 | 4672681 | 2 | 28 | 56 | GT   | 7  | 12 |
| 3031 | 1 | 4672813 | 4672826 | 2 | 7  | 14 | CA   | 25 | 7  |
| 3034 | 1 | 4676583 | 4676606 | 2 | 12 | 24 | CA   | 18 | 11 |
| 3035 | 1 | 4676977 | 4676994 | 2 | 9  | 18 | CA   | 21 | 8  |
| 3040 | 1 | 4679033 | 4679054 | 2 | 11 | 22 | GT   | 7  | 9  |
| 3044 | 1 | 4683516 | 4683543 | 2 | 14 | 28 | GA   | 11 | 5  |
| 3045 | 1 | 4683645 | 4683686 | 2 | 21 | 42 | AC   | 13 | 11 |
| 3052 | 1 | 4686472 | 4686503 | 2 | 16 | 32 | AC   | 15 | 11 |
| 3055 | 1 | 4688119 | 4688136 | 2 | 9  | 18 | GT   | 21 | 9  |
| 3057 | 1 | 4693434 | 4693445 | 2 | 6  | 12 | CA   | 21 | 3  |
| 3058 | 1 | 4693447 | 4693458 | 2 | 6  | 12 | AC   | 19 | 3  |
| 3061 | 1 | 4699263 | 4699276 | 2 | 7  | 14 | CA   | 21 | 4  |
| 3062 | 1 | 4702273 | 4702288 | 2 | 8  | 16 | TG   | 20 | 6  |
| 3063 | 1 | 4703152 | 4703167 | 2 | 8  | 16 | CA   | 7  | 4  |
| 3065 | 1 | 4703555 | 4703602 | 2 | 24 | 48 | TG   | 9  | 14 |
| 3067 | 1 | 4704273 | 4704290 | 2 | 9  | 18 | CA   | 18 | 9  |
| 3068 | 1 | 4704293 | 4704306 | 2 | 7  | 14 | CA   | 19 | 7  |
| 3069 | 1 | 4704697 | 4704708 | 2 | 6  | 12 | GA   | 22 | 3  |
| 3070 | 1 | 4704810 | 4704833 | 2 | 12 | 24 | AC   | 14 | 12 |
| 3071 | 1 | 4705042 | 4705065 | 2 | 12 | 24 | TG   | 19 | 10 |
| 3077 | 1 | 4707264 | 4707291 | 2 | 14 | 28 | AG   | 19 | 14 |
| 3078 | 1 | 4707346 | 4707371 | 2 | 13 | 26 | CA   | 12 | 10 |
| 3079 | 1 | 4707553 | 4707564 | 2 | 6  | 12 | CA   | 7  | 8  |
| 3080 | 1 | 4707567 | 4707584 | 2 | 9  | 18 | CA   | 14 | 9  |
| 3081 | 1 | 4707715 | 4707732 | 2 | 9  | 18 | TG   | 23 | 7  |
| 3082 | 1 | 4708068 | 4708111 | 2 | 22 | 44 | TG   | 7  | 9  |
| 3084 | 1 | 4708524 | 4708539 | 2 | 8  | 16 | CT   | 27 | 5  |
| 3085 | 1 | 4709378 | 4709395 | 2 | 9  | 18 | CA   | 28 | 8  |
| 3087 | 1 | 4711432 | 4711459 | 4 | 7  | 28 | GTCT | 24 | 4  |
| 3088 | 1 | 4714199 | 4714216 | 2 | 9  | 18 | AC   | 21 | 7  |

|      |   |         |         |   |    |    |      |    |    |
|------|---|---------|---------|---|----|----|------|----|----|
| 3093 | 1 | 4717244 | 4717261 | 3 | 6  | 18 | GTT  | 25 | 3  |
| 3095 | 1 | 4718243 | 4718262 | 2 | 10 | 20 | CA   | 28 | 7  |
| 3099 | 1 | 4727429 | 4727452 | 2 | 12 | 24 | TG   | 6  | 8  |
| 3101 | 1 | 4728676 | 4728687 | 2 | 6  | 12 | GT   | 22 | 5  |
| 3103 | 1 | 4729641 | 4729668 | 2 | 14 | 28 | TG   | 13 | 7  |
| 3104 | 1 | 4731639 | 4731658 | 2 | 10 | 20 | AC   | 21 | 6  |
| 3107 | 1 | 4734939 | 4734956 | 2 | 9  | 18 | AC   | 6  | 3  |
| 3108 | 1 | 4735124 | 4735141 | 2 | 9  | 18 | AC   | 8  | 3  |
| 3109 | 1 | 4738633 | 4738658 | 2 | 13 | 26 | TG   | 14 | 6  |
| 3111 | 1 | 4742883 | 4742902 | 2 | 10 | 20 | GT   | 24 | 7  |
| 3113 | 1 | 4743044 | 4743077 | 2 | 17 | 34 | CA   | 17 | 5  |
| 3120 | 1 | 4758910 | 4758933 | 2 | 12 | 24 | AC   | 21 | 7  |
| 3122 | 1 | 4760549 | 4760580 | 2 | 16 | 32 | CA   | 7  | 6  |
| 3124 | 1 | 4763877 | 4763909 | 3 | 11 | 33 | AAC  | 22 | 7  |
| 3126 | 1 | 4776094 | 4776135 | 2 | 21 | 42 | TG   | 11 | 9  |
| 3131 | 1 | 4787346 | 4787363 | 3 | 6  | 18 | AAC  | 20 | 3  |
| 3137 | 1 | 4796181 | 4796204 | 4 | 6  | 24 | TCTT | 24 | 3  |
| 3138 | 1 | 4797039 | 4797060 | 2 | 11 | 22 | AC   | 15 | 8  |
| 3140 | 1 | 4801478 | 4801493 | 2 | 8  | 16 | GT   | 17 | 6  |
| 3143 | 1 | 4815850 | 4815877 | 2 | 14 | 28 | CA   | 13 | 11 |
| 3146 | 1 | 4836602 | 4836627 | 2 | 13 | 26 | AC   | 23 | 6  |
| 3157 | 1 | 4864308 | 4864327 | 4 | 5  | 20 | TGTT | 27 | 9  |
| 3165 | 1 | 4875652 | 4875667 | 4 | 4  | 16 | AAAC | 26 | 3  |
| 3167 | 1 | 4884409 | 4884426 | 3 | 6  | 18 | CTT  | 9  | 10 |
| 3168 | 1 | 4885215 | 4885238 | 2 | 12 | 24 | AC   | 18 | 15 |
| 3172 | 1 | 4888339 | 4888350 | 2 | 6  | 12 | TG   | 29 | 3  |
| 3173 | 1 | 4891608 | 4891639 | 4 | 8  | 32 | TATC | 18 | 6  |
| 3174 | 1 | 4894947 | 4894974 | 2 | 14 | 28 | GT   | 7  | 7  |
| 3176 | 1 | 4896679 | 4896700 | 2 | 11 | 22 | GT   | 25 | 10 |
| 3179 | 1 | 4902303 | 4902317 | 3 | 5  | 15 | GCT  | 13 | 3  |
| 3180 | 1 | 4905898 | 4905912 | 3 | 5  | 15 | TTG  | 28 | 3  |
| 3181 | 1 | 4910874 | 4910885 | 2 | 6  | 12 | AT   | 21 | 3  |
| 3194 | 1 | 4948248 | 4948273 | 2 | 13 | 26 | GT   | 12 | 8  |
| 3214 | 1 | 4988270 | 4988281 | 2 | 6  | 12 | AC   | 24 | 3  |
| 3216 | 1 | 4992628 | 4992645 | 3 | 6  | 18 | GGA  | 21 | 4  |
| 3220 | 1 | 4995716 | 4995729 | 2 | 7  | 14 | CA   | 21 | 7  |
| 3221 | 1 | 4996771 | 4996800 | 2 | 15 | 30 | AC   | 8  | 9  |
| 3231 | 1 | 5017197 | 5017222 | 2 | 13 | 26 | TG   | 23 | 12 |
| 3237 | 1 | 5025931 | 5025946 | 2 | 8  | 16 | GT   | 20 | 4  |
| 3238 | 1 | 5034365 | 5034376 | 2 | 6  | 12 | GT   | 18 | 4  |
| 3241 | 1 | 5034901 | 5034926 | 2 | 13 | 26 | CA   | 9  | 5  |
| 3242 | 1 | 5035080 | 5035095 | 2 | 8  | 16 | GT   | 22 | 5  |
| 3243 | 1 | 5035559 | 5035578 | 2 | 10 | 20 | CT   | 7  | 7  |
| 3246 | 1 | 5036124 | 5036153 | 2 | 15 | 30 | TG   | 17 | 9  |
| 3247 | 1 | 5036535 | 5036550 | 2 | 8  | 16 | CA   | 15 | 5  |
| 3257 | 1 | 5040836 | 5040853 | 2 | 9  | 18 | GA   | 19 | 6  |
| 3258 | 1 | 5040977 | 5040994 | 2 | 9  | 18 | TG   | 20 | 10 |
| 3261 | 1 | 5070064 | 5070075 | 2 | 6  | 12 | GT   | 29 | 3  |
| 3268 | 1 | 5097595 | 5097609 | 3 | 5  | 15 | TCA  | 29 | 3  |
| 3274 | 1 | 5125253 | 5125270 | 2 | 9  | 18 | CA   | 22 | 7  |
| 3276 | 1 | 5136309 | 5136328 | 2 | 10 | 20 | CA   | 21 | 11 |



|      |   |         |         |   |    |    |      |    |    |
|------|---|---------|---------|---|----|----|------|----|----|
| 3277 | 1 | 5136397 | 5136412 | 4 | 4  | 16 | GTGC | 22 | 27 |
| 3282 | 1 | 5141433 | 5141448 | 4 | 4  | 16 | GGAT | 32 | 3  |
| 3292 | 1 | 5165838 | 5165853 | 2 | 8  | 16 | TG   | 16 | 10 |
| 3295 | 1 | 5171360 | 5171373 | 2 | 7  | 14 | TG   | 24 | 5  |
| 3301 | 1 | 5185548 | 5185561 | 2 | 7  | 14 | CA   | 25 | 3  |
| 3303 | 1 | 5193406 | 5193433 | 2 | 14 | 28 | TG   | 19 | 16 |
| 3304 | 1 | 5200165 | 5200210 | 2 | 23 | 46 | CA   | 6  | 5  |
| 3306 | 1 | 5200487 | 5200498 | 2 | 6  | 12 | CA   | 27 | 3  |
| 3308 | 1 | 5205338 | 5205357 | 2 | 10 | 20 | AC   | 13 | 10 |
| 3314 | 1 | 5219317 | 5219348 | 4 | 8  | 32 | GATA | 12 | 9  |
| 3315 | 1 | 5221214 | 5221241 | 2 | 14 | 28 | GT   | 20 | 8  |
| 3321 | 1 | 5231792 | 5231815 | 3 | 8  | 24 | AAG  | 23 | 16 |
| 3322 | 1 | 5235861 | 5235884 | 2 | 12 | 24 | AC   | 20 | 5  |
| 3323 | 1 | 5236916 | 5236930 | 3 | 5  | 15 | GAT  | 35 | 3  |
| 3328 | 1 | 5288122 | 5288147 | 2 | 13 | 26 | AC   | 15 | 14 |
| 3330 | 1 | 5290816 | 5290851 | 2 | 18 | 36 | AC   | 7  | 8  |
| 3333 | 1 | 5295470 | 5295490 | 3 | 7  | 21 | TAT  | 18 | 13 |
| 3335 | 1 | 5297067 | 5297096 | 2 | 15 | 30 | AC   | 17 | 13 |
| 3338 | 1 | 5306226 | 5306245 | 4 | 5  | 20 | ATCC | 27 | 3  |
| 3339 | 1 | 5308173 | 5308184 | 2 | 6  | 12 | AC   | 24 | 5  |
| 3342 | 1 | 5321306 | 5321325 | 2 | 10 | 20 | TA   | 6  | 5  |
| 3350 | 1 | 5335880 | 5335895 | 4 | 4  | 16 | TTTA | 15 | 8  |
| 3353 | 1 | 5344246 | 5344261 | 2 | 8  | 16 | AC   | 23 | 6  |
| 3356 | 1 | 5354406 | 5354421 | 2 | 8  | 16 | GT   | 24 | 3  |
| 3362 | 1 | 5360899 | 5360916 | 2 | 9  | 18 | TC   | 21 | 6  |
| 3364 | 1 | 5361449 | 5361462 | 2 | 7  | 14 | TC   | 27 | 5  |
| 3368 | 1 | 5366042 | 5366057 | 4 | 4  | 16 | CTTT | 24 | 3  |
| 3369 | 1 | 5367185 | 5367214 | 2 | 15 | 30 | GT   | 11 | 8  |
| 3370 | 1 | 5368116 | 5368127 | 2 | 6  | 12 | AC   | 25 | 13 |
| 3373 | 1 | 5381450 | 5381489 | 2 | 20 | 40 | AC   | 10 | 15 |
| 3374 | 1 | 5382067 | 5382094 | 2 | 14 | 28 | GT   | 12 | 18 |
| 3379 | 1 | 5390815 | 5390832 | 2 | 9  | 18 | AC   | 20 | 8  |
| 3383 | 1 | 5401540 | 5401557 | 2 | 9  | 18 | AG   | 29 | 6  |
| 3385 | 1 | 5403563 | 5403577 | 3 | 5  | 15 | AAC  | 26 | 3  |
| 3386 | 1 | 5405741 | 5405764 | 2 | 12 | 24 | TG   | 21 | 13 |
| 3391 | 1 | 5413925 | 5413948 | 2 | 12 | 24 | TG   | 12 | 9  |
| 3394 | 1 | 5424258 | 5424275 | 2 | 9  | 18 | TG   | 8  | 9  |
| 3395 | 1 | 5424277 | 5424294 | 2 | 9  | 18 | GT   | 13 | 13 |
| 3396 | 1 | 5426223 | 5426238 | 2 | 8  | 16 | TG   | 18 | 4  |
| 3399 | 1 | 5429323 | 5429344 | 2 | 11 | 22 | GT   | 22 | 7  |
| 3404 | 1 | 5438191 | 5438217 | 3 | 9  | 27 | CCT  | 24 | 7  |
| 3407 | 1 | 5450551 | 5450566 | 2 | 8  | 16 | TC   | 27 | 4  |
| 3411 | 1 | 5461030 | 5461049 | 4 | 5  | 20 | CTAT | 23 | 4  |
| 3412 | 1 | 5467158 | 5467189 | 4 | 8  | 32 | ATGT | 21 | 11 |
| 3416 | 1 | 5471215 | 5471244 | 2 | 15 | 30 | TG   | 6  | 6  |
| 3424 | 1 | 5486553 | 5486570 | 2 | 9  | 18 | AC   | 16 | 6  |
| 3425 | 1 | 5486748 | 5486761 | 2 | 7  | 14 | TG   | 29 | 3  |
| 3427 | 1 | 5486923 | 5486940 | 2 | 9  | 18 | AC   | 24 | 10 |
| 3428 | 1 | 5487658 | 5487679 | 2 | 11 | 22 | TG   | 14 | 9  |
| 3432 | 1 | 5490996 | 5491023 | 2 | 14 | 28 | CA   | 21 | 7  |
| 3434 | 1 | 5493406 | 5493425 | 2 | 10 | 20 | TG   | 11 | 3  |

|      |   |         |         |   |    |    |      |    |    |
|------|---|---------|---------|---|----|----|------|----|----|
| 3441 | 1 | 5497347 | 5497378 | 4 | 8  | 32 | ATCC | 22 | 4  |
| 3442 | 1 | 5499421 | 5499434 | 2 | 7  | 14 | CA   | 20 | 4  |
| 3443 | 1 | 5499473 | 5499486 | 2 | 7  | 14 | AC   | 15 | 8  |
| 3448 | 1 | 5504888 | 5504903 | 2 | 8  | 16 | CT   | 26 | 5  |
| 3449 | 1 | 5507353 | 5507376 | 2 | 12 | 24 | GT   | 11 | 9  |
| 3452 | 1 | 5515490 | 5515515 | 2 | 13 | 26 | TG   | 21 | 10 |
| 3454 | 1 | 5517188 | 5517209 | 2 | 11 | 22 | TG   | 19 | 9  |
| 3455 | 1 | 5517395 | 5517406 | 2 | 6  | 12 | AC   | 24 | 5  |
| 3456 | 1 | 5517674 | 5517707 | 2 | 17 | 34 | TG   | 8  | 10 |
| 3458 | 1 | 5517909 | 5517935 | 3 | 9  | 27 | GAG  | 20 | 6  |
| 3463 | 1 | 5529861 | 5529886 | 2 | 13 | 26 | AC   | 19 | 5  |
| 3464 | 1 | 5530121 | 5530148 | 2 | 14 | 28 | CA   | 15 | 10 |
| 3472 | 1 | 5540320 | 5540331 | 2 | 6  | 12 | AC   | 18 | 5  |
| 3473 | 1 | 5543905 | 5543920 | 2 | 8  | 16 | TA   | 7  | 3  |
| 3474 | 1 | 5551251 | 5551268 | 2 | 9  | 18 | GT   | 22 | 5  |
| 3479 | 1 | 5563915 | 5563928 | 2 | 7  | 14 | AC   | 27 | 4  |
| 3481 | 1 | 5565123 | 5565166 | 2 | 22 | 44 | TG   | 11 | 13 |
| 3482 | 1 | 5567573 | 5567590 | 2 | 9  | 18 | CA   | 19 | 6  |
| 3483 | 1 | 5569887 | 5569908 | 2 | 11 | 22 | TG   | 10 | 10 |
| 3485 | 1 | 5573895 | 5573920 | 2 | 13 | 26 | AC   | 8  | 8  |
| 3486 | 1 | 5574265 | 5574280 | 2 | 8  | 16 | TG   | 7  | 4  |
| 3489 | 1 | 5590205 | 5590216 | 2 | 6  | 12 | TG   | 28 | 6  |
| 3490 | 1 | 5591747 | 5591766 | 4 | 5  | 20 | AAAG | 25 | 3  |
| 3491 | 1 | 5593355 | 5593368 | 2 | 7  | 14 | AC   | 27 | 3  |
| 3492 | 1 | 5595589 | 5595608 | 2 | 10 | 20 | GA   | 19 | 5  |
| 3493 | 1 | 5598585 | 5598608 | 2 | 12 | 24 | CA   | 12 | 8  |
| 3494 | 1 | 5598734 | 5598751 | 2 | 9  | 18 | AC   | 21 | 8  |
| 3495 | 1 | 5602304 | 5602327 | 2 | 12 | 24 | TG   | 21 | 9  |
| 3496 | 1 | 5602419 | 5602448 | 2 | 15 | 30 | CA   | 11 | 15 |
| 3500 | 1 | 5606044 | 5606069 | 2 | 13 | 26 | TG   | 11 | 14 |
| 3508 | 1 | 5616805 | 5616830 | 2 | 13 | 26 | CA   | 23 | 4  |
| 3510 | 1 | 5621043 | 5621056 | 2 | 7  | 14 | CA   | 27 | 16 |
| 3511 | 1 | 5621282 | 5621297 | 2 | 8  | 16 | CA   | 20 | 10 |
| 3512 | 1 | 5621300 | 5621317 | 2 | 9  | 18 | CA   | 20 | 8  |
| 3519 | 1 | 5645856 | 5645899 | 2 | 22 | 44 | AC   | 7  | 10 |
| 3527 | 1 | 5659359 | 5659384 | 2 | 13 | 26 | GT   | 26 | 5  |
| 3533 | 1 | 5663294 | 5663305 | 2 | 6  | 12 | TC   | 21 | 3  |
| 3534 | 1 | 5664885 | 5664902 | 2 | 9  | 18 | TC   | 27 | 6  |
| 3538 | 1 | 5673590 | 5673610 | 3 | 7  | 21 | TGT  | 22 | 4  |
| 3539 | 1 | 5679946 | 5679963 | 2 | 9  | 18 | AT   | 7  | 3  |
| 3549 | 1 | 5706839 | 5706862 | 3 | 8  | 24 | CTG  | 24 | 5  |
| 3557 | 1 | 5736761 | 5736814 | 2 | 27 | 54 | GA   | 6  | 8  |
| 3561 | 1 | 5753817 | 5753831 | 3 | 5  | 15 | CTG  | 16 | 4  |
| 3563 | 1 | 5754136 | 5754159 | 3 | 8  | 24 | GGA  | 20 | 5  |
| 3566 | 1 | 5771846 | 5771871 | 2 | 13 | 26 | AC   | 21 | 10 |
| 3569 | 1 | 5780212 | 5780223 | 2 | 6  | 12 | CA   | 11 | 6  |
| 3570 | 1 | 5781032 | 5781047 | 2 | 8  | 16 | TG   | 15 | 6  |
| 3571 | 1 | 5781160 | 5781173 | 2 | 7  | 14 | CA   | 11 | 4  |
| 3573 | 1 | 5781278 | 5781313 | 2 | 18 | 36 | CA   | 8  | 8  |
| 3575 | 1 | 5785180 | 5785203 | 4 | 6  | 24 | TTGT | 18 | 3  |
| 3584 | 1 | 5802930 | 5802959 | 2 | 15 | 30 | AC   | 9  | 10 |

|      |   |         |         |   |    |    |      |    |    |
|------|---|---------|---------|---|----|----|------|----|----|
| 3585 | 1 | 5805244 | 5805271 | 2 | 14 | 28 | GT   | 19 | 12 |
| 3586 | 1 | 5816545 | 5816556 | 2 | 6  | 12 | TG   | 20 | 3  |
| 3591 | 1 | 5819510 | 5819523 | 2 | 7  | 14 | CA   | 17 | 7  |
| 3599 | 1 | 5832177 | 5832204 | 2 | 14 | 28 | GT   | 6  | 9  |
| 3601 | 1 | 5832885 | 5832912 | 2 | 14 | 28 | TG   | 21 | 11 |
| 3603 | 1 | 5833334 | 5833357 | 3 | 8  | 24 | AGG  | 20 | 4  |
| 3604 | 1 | 5839727 | 5839766 | 2 | 20 | 40 | CA   | 20 | 9  |
| 3605 | 1 | 5840918 | 5840932 | 3 | 5  | 15 | AGC  | 27 | 5  |
| 3609 | 1 | 5848925 | 5848954 | 2 | 15 | 30 | GT   | 19 | 8  |
| 3610 | 1 | 5853275 | 5853296 | 2 | 11 | 22 | GT   | 13 | 4  |
| 3611 | 1 | 5862036 | 5862053 | 2 | 9  | 18 | CT   | 23 | 4  |
| 3612 | 1 | 5862261 | 5862272 | 2 | 6  | 12 | TG   | 13 | 8  |
| 3613 | 1 | 5862275 | 5862288 | 2 | 7  | 14 | TG   | 18 | 9  |
| 3614 | 1 | 5873191 | 5873202 | 2 | 6  | 12 | CT   | 28 | 3  |
| 3616 | 1 | 5875632 | 5875653 | 2 | 11 | 22 | AC   | 21 | 4  |
| 3618 | 1 | 5876295 | 5876318 | 2 | 12 | 24 | CA   | 12 | 7  |
| 3619 | 1 | 5876614 | 5876625 | 2 | 6  | 12 | CA   | 24 | 3  |
| 3624 | 1 | 5879017 | 5879036 | 2 | 10 | 20 | AC   | 13 | 5  |
| 3626 | 1 | 5882819 | 5882830 | 2 | 6  | 12 | GC   | 22 | 4  |
| 3627 | 1 | 5883024 | 5883041 | 2 | 9  | 18 | AC   | 24 | 5  |
| 3630 | 1 | 5883680 | 5883694 | 3 | 5  | 15 | TGC  | 26 | 5  |
| 3631 | 1 | 5883830 | 5883856 | 3 | 9  | 27 | TGC  | 22 | 5  |
| 3632 | 1 | 5884155 | 5884178 | 3 | 8  | 24 | GCG  | 23 | 8  |
| 3635 | 1 | 5887927 | 5887938 | 2 | 6  | 12 | GT   | 21 | 8  |
| 3641 | 1 | 5890772 | 5890789 | 2 | 9  | 18 | GT   | 23 | 3  |
| 3644 | 1 | 5892093 | 5892122 | 3 | 10 | 30 | AGG  | 6  | 5  |
| 3645 | 1 | 5892656 | 5892669 | 2 | 7  | 14 | AC   | 18 | 7  |
| 3646 | 1 | 5893061 | 5893072 | 2 | 6  | 12 | AG   | 27 | 9  |
| 3649 | 1 | 5899393 | 5899410 | 2 | 9  | 18 | GT   | 19 | 4  |
| 3650 | 1 | 5902043 | 5902058 | 4 | 4  | 16 | GTTG | 32 | 3  |
| 3652 | 1 | 5904250 | 5904265 | 4 | 4  | 16 | GAGG | 7  | 4  |
| 3660 | 1 | 5910487 | 5910518 | 2 | 16 | 32 | TG   | 14 | 6  |
| 3664 | 1 | 5930839 | 5930864 | 2 | 13 | 26 | GT   | 14 | 12 |
| 3666 | 1 | 5932608 | 5932621 | 2 | 7  | 14 | CT   | 33 | 3  |
| 3667 | 1 | 5932739 | 5932758 | 4 | 5  | 20 | CTGT | 27 | 3  |
| 3673 | 1 | 5949142 | 5949168 | 3 | 9  | 27 | TTC  | 24 | 4  |
| 3675 | 1 | 5965721 | 5965738 | 3 | 6  | 18 | TGT  | 21 | 4  |
| 3681 | 1 | 5978110 | 5978145 | 2 | 18 | 36 | AC   | 8  | 9  |
| 3685 | 1 | 5984080 | 5984094 | 3 | 5  | 15 | TGT  | 17 | 5  |
| 3686 | 1 | 5984457 | 5984468 | 2 | 6  | 12 | TC   | 25 | 3  |
| 3693 | 1 | 5999923 | 5999943 | 3 | 7  | 21 | AGC  | 19 | 5  |
| 3700 | 1 | 6008248 | 6008263 | 4 | 4  | 16 | TTGT | 29 | 3  |
| 3713 | 1 | 6037257 | 6037280 | 3 | 8  | 24 | AGG  | 21 | 10 |
| 3714 | 1 | 6037453 | 6037486 | 2 | 17 | 34 | AC   | 13 | 8  |
| 3718 | 1 | 6056796 | 6056825 | 3 | 10 | 30 | TTA  | 6  | 4  |
| 3723 | 1 | 6067980 | 6068003 | 3 | 8  | 24 | ATT  | 21 | 5  |
| 3732 | 1 | 6099015 | 6099032 | 2 | 9  | 18 | TG   | 21 | 6  |
| 3752 | 1 | 6130978 | 6130998 | 3 | 7  | 21 | GCA  | 27 | 5  |
| 3753 | 1 | 6138018 | 6138043 | 2 | 13 | 26 | GT   | 18 | 11 |
| 3754 | 1 | 6138261 | 6138292 | 2 | 16 | 32 | GT   | 8  | 9  |
| 3756 | 1 | 6138441 | 6138460 | 2 | 10 | 20 | CA   | 17 | 5  |

|      |   |         |         |   |    |    |      |    |    |
|------|---|---------|---------|---|----|----|------|----|----|
| 3758 | 1 | 6138768 | 6138793 | 2 | 13 | 26 | AG   | 10 | 3  |
| 3761 | 1 | 6144127 | 6144152 | 2 | 13 | 26 | AC   | 25 | 11 |
| 3762 | 1 | 6146087 | 6146106 | 2 | 10 | 20 | AC   | 16 | 5  |
| 3767 | 1 | 6150043 | 6150058 | 2 | 8  | 16 | GT   | 27 | 8  |
| 3773 | 1 | 6164509 | 6164532 | 2 | 12 | 24 | AC   | 7  | 3  |
| 3780 | 1 | 6183281 | 6183296 | 2 | 8  | 16 | AG   | 20 | 5  |
| 3785 | 1 | 6202539 | 6202558 | 2 | 10 | 20 | GA   | 24 | 7  |
| 3788 | 1 | 6213204 | 6213227 | 2 | 12 | 24 | GA   | 18 | 5  |
| 3793 | 1 | 6215030 | 6215059 | 2 | 15 | 30 | GT   | 19 | 8  |
| 3795 | 1 | 6222273 | 6222290 | 2 | 9  | 18 | AG   | 22 | 3  |
| 3799 | 1 | 6230836 | 6230859 | 3 | 8  | 24 | AAG  | 27 | 4  |
| 3805 | 1 | 6236464 | 6236481 | 2 | 9  | 18 | AC   | 14 | 10 |
| 3806 | 1 | 6238771 | 6238790 | 4 | 5  | 20 | TTTC | 31 | 4  |
| 3815 | 1 | 6267191 | 6267204 | 2 | 7  | 14 | TG   | 15 | 5  |
| 3816 | 1 | 6267206 | 6267217 | 2 | 6  | 12 | GT   | 15 | 4  |
| 3817 | 1 | 6268959 | 6268976 | 2 | 9  | 18 | CA   | 15 | 6  |
| 3821 | 1 | 6276915 | 6276936 | 2 | 11 | 22 | TG   | 17 | 10 |
| 3824 | 1 | 6277270 | 6277309 | 2 | 20 | 40 | TG   | 19 | 10 |
| 3826 | 1 | 6277568 | 6277589 | 2 | 11 | 22 | GT   | 6  | 6  |
| 3827 | 1 | 6280326 | 6280337 | 2 | 6  | 12 | GT   | 27 | 11 |
| 3829 | 1 | 6282688 | 6282709 | 2 | 11 | 22 | TG   | 23 | 6  |
| 3832 | 1 | 6284742 | 6284757 | 2 | 8  | 16 | TC   | 33 | 3  |
| 3833 | 1 | 6288070 | 6288091 | 2 | 11 | 22 | TG   | 18 | 5  |
| 3835 | 1 | 6290771 | 6290798 | 2 | 14 | 28 | CA   | 18 | 13 |
| 3837 | 1 | 6294756 | 6294795 | 2 | 20 | 40 | GT   | 11 | 10 |
| 3838 | 1 | 6295496 | 6295507 | 2 | 6  | 12 | TG   | 29 | 5  |
| 3843 | 1 | 6306730 | 6306745 | 4 | 4  | 16 | AAAT | 15 | 4  |
| 3851 | 1 | 6315355 | 6315386 | 2 | 16 | 32 | CA   | 8  | 5  |
| 3858 | 1 | 6327587 | 6327598 | 2 | 6  | 12 | GT   | 29 | 4  |
| 3863 | 1 | 6334978 | 6334997 | 2 | 10 | 20 | TC   | 26 | 5  |
| 3864 | 1 | 6339646 | 6339683 | 2 | 19 | 38 | TG   | 16 | 10 |
| 3869 | 1 | 6342425 | 6342448 | 2 | 12 | 24 | GT   | 17 | 4  |
| 3871 | 1 | 6346404 | 6346423 | 2 | 10 | 20 | CA   | 8  | 3  |
| 3875 | 1 | 6351283 | 6351296 | 2 | 7  | 14 | GT   | 20 | 6  |
| 3878 | 1 | 6360583 | 6360604 | 2 | 11 | 22 | AG   | 20 | 4  |
| 3879 | 1 | 6365355 | 6365382 | 2 | 14 | 28 | AC   | 15 | 12 |
| 3883 | 1 | 6373979 | 6374012 | 2 | 17 | 34 | AC   | 12 | 8  |
| 3884 | 1 | 6376163 | 6376176 | 2 | 7  | 14 | GT   | 18 | 6  |
| 3888 | 1 | 6382663 | 6382680 | 3 | 6  | 18 | CAG  | 29 | 3  |
| 3893 | 1 | 6395616 | 6395637 | 2 | 11 | 22 | CT   | 26 | 9  |
| 3894 | 1 | 6404132 | 6404153 | 2 | 11 | 22 | CT   | 15 | 7  |
| 3895 | 1 | 6407710 | 6407724 | 3 | 5  | 15 | TGC  | 23 | 3  |
| 3898 | 1 | 6412784 | 6412799 | 2 | 8  | 16 | AC   | 11 | 5  |
| 3899 | 1 | 6412858 | 6412891 | 2 | 17 | 34 | TG   | 8  | 8  |
| 3911 | 1 | 6448177 | 6448194 | 2 | 9  | 18 | AC   | 18 | 5  |
| 3912 | 1 | 6462786 | 6462807 | 2 | 11 | 22 | GT   | 6  | 6  |
| 3917 | 1 | 6469486 | 6469503 | 2 | 9  | 18 | CA   | 20 | 4  |
| 3920 | 1 | 6482931 | 6482950 | 2 | 10 | 20 | TG   | 30 | 19 |
| 3922 | 1 | 6493402 | 6493433 | 2 | 16 | 32 | AC   | 8  | 12 |
| 3923 | 1 | 6494725 | 6494736 | 2 | 6  | 12 | TC   | 23 | 6  |
| 3924 | 1 | 6494740 | 6494751 | 2 | 6  | 12 | CA   | 23 | 7  |

|      |   |         |         |   |    |    |      |    |    |
|------|---|---------|---------|---|----|----|------|----|----|
| 3926 | 1 | 6496989 | 6497008 | 2 | 10 | 20 | AC   | 17 | 6  |
| 3931 | 1 | 6499368 | 6499381 | 2 | 7  | 14 | TC   | 10 | 5  |
| 3932 | 1 | 6499382 | 6499393 | 2 | 6  | 12 | AC   | 9  | 5  |
| 3934 | 1 | 6499500 | 6499519 | 2 | 10 | 20 | CA   | 10 | 7  |
| 3936 | 1 | 6501088 | 6501107 | 4 | 5  | 20 | TTAT | 13 | 3  |
| 3937 | 1 | 6501796 | 6501813 | 3 | 6  | 18 | GGT  | 8  | 5  |
| 3938 | 1 | 6502580 | 6502613 | 2 | 17 | 34 | GT   | 12 | 10 |
| 3939 | 1 | 6502786 | 6502807 | 2 | 11 | 22 | GT   | 7  | 7  |
| 3941 | 1 | 6504716 | 6504735 | 4 | 5  | 20 | AAAT | 15 | 4  |
| 3943 | 1 | 6506836 | 6506853 | 2 | 9  | 18 | GT   | 13 | 9  |
| 3944 | 1 | 6511842 | 6511853 | 2 | 6  | 12 | CA   | 30 | 7  |
| 3945 | 1 | 6512085 | 6512108 | 2 | 12 | 24 | GT   | 25 | 7  |
| 3955 | 1 | 6531496 | 6531521 | 2 | 13 | 26 | TG   | 19 | 7  |
| 3962 | 1 | 6536961 | 6536972 | 2 | 6  | 12 | GT   | 15 | 9  |
| 3963 | 1 | 6536975 | 6536992 | 2 | 9  | 18 | GT   | 16 | 8  |
| 3967 | 1 | 6546654 | 6546675 | 2 | 11 | 22 | GT   | 11 | 12 |
| 3968 | 1 | 6546824 | 6546845 | 2 | 11 | 22 | GT   | 21 | 8  |
| 3969 | 1 | 6548211 | 6548226 | 2 | 8  | 16 | TG   | 21 | 11 |
| 3971 | 1 | 6548418 | 6548439 | 2 | 11 | 22 | TG   | 21 | 12 |
| 3973 | 1 | 6548666 | 6548687 | 2 | 11 | 22 | TG   | 23 | 9  |
| 3974 | 1 | 6548886 | 6548901 | 2 | 8  | 16 | TG   | 19 | 3  |
| 3978 | 1 | 6551336 | 6551367 | 2 | 16 | 32 | GT   | 14 | 10 |
| 3979 | 1 | 6551766 | 6551817 | 2 | 26 | 52 | CA   | 7  | 10 |
| 3987 | 1 | 6564241 | 6564255 | 3 | 5  | 15 | TAC  | 24 | 4  |
| 3990 | 1 | 6565155 | 6565193 | 3 | 13 | 39 | CAT  | 17 | 20 |
| 3992 | 1 | 6567974 | 6567989 | 4 | 4  | 16 | AAAG | 15 | 6  |
| 3995 | 1 | 6573051 | 6573066 | 2 | 8  | 16 | TG   | 25 | 9  |
| 3996 | 1 | 6574580 | 6574591 | 2 | 6  | 12 | CA   | 25 | 3  |
| 4000 | 1 | 6580463 | 6580474 | 2 | 6  | 12 | AC   | 19 | 5  |
| 4001 | 1 | 6580477 | 6580488 | 2 | 6  | 12 | AC   | 24 | 4  |
| 4004 | 1 | 6588086 | 6588105 | 2 | 10 | 20 | CA   | 8  | 5  |
| 4005 | 1 | 6588201 | 6588218 | 2 | 9  | 18 | CA   | 14 | 9  |
| 4006 | 1 | 6588361 | 6588387 | 3 | 9  | 27 | CCT  | 13 | 5  |
| 4007 | 1 | 6588520 | 6588539 | 4 | 5  | 20 | CTCC | 6  | 3  |
| 4008 | 1 | 6588681 | 6588692 | 2 | 6  | 12 | TC   | 18 | 5  |
| 4009 | 1 | 6588695 | 6588710 | 2 | 8  | 16 | TC   | 15 | 4  |
| 4011 | 1 | 6591889 | 6591903 | 3 | 5  | 15 | TCC  | 25 | 4  |
| 4014 | 1 | 6598138 | 6598149 | 2 | 6  | 12 | AC   | 23 | 3  |
| 4018 | 1 | 6599368 | 6599379 | 2 | 6  | 12 | TC   | 22 | 4  |
| 4032 | 1 | 6629757 | 6629771 | 3 | 5  | 15 | CAA  | 36 | 3  |
| 4040 | 1 | 6637255 | 6637266 | 2 | 6  | 12 | TG   | 15 | 3  |
| 4044 | 1 | 6638864 | 6638881 | 2 | 9  | 18 | GT   | 19 | 5  |
| 4053 | 1 | 6658302 | 6658351 | 2 | 25 | 50 | TG   | 18 | 14 |
| 4061 | 1 | 6665533 | 6665554 | 2 | 11 | 22 | GT   | 20 | 4  |
| 4062 | 1 | 6665738 | 6665767 | 2 | 15 | 30 | GT   | 10 | 5  |
| 4063 | 1 | 6665893 | 6665916 | 2 | 12 | 24 | TG   | 11 | 7  |
| 4080 | 1 | 6669386 | 6669401 | 2 | 8  | 16 | TC   | 22 | 4  |
| 4084 | 1 | 6677020 | 6677041 | 2 | 11 | 22 | AC   | 17 | 6  |
| 4085 | 1 | 6677164 | 6677177 | 2 | 7  | 14 | AC   | 20 | 9  |
| 4089 | 1 | 6687184 | 6687197 | 2 | 7  | 14 | CT   | 13 | 4  |
| 4090 | 1 | 6687199 | 6687216 | 2 | 9  | 18 | TC   | 15 | 6  |

|      |   |         |         |   |    |    |      |    |    |
|------|---|---------|---------|---|----|----|------|----|----|
| 4096 | 1 | 6692063 | 6692086 | 2 | 12 | 24 | AC   | 13 | 11 |
| 4100 | 1 | 6694943 | 6694976 | 2 | 17 | 34 | AG   | 15 | 13 |
| 4101 | 1 | 6695399 | 6695414 | 2 | 8  | 16 | GT   | 16 | 3  |
| 4103 | 1 | 6696714 | 6696725 | 2 | 6  | 12 | AG   | 10 | 9  |
| 4104 | 1 | 6696883 | 6696918 | 2 | 18 | 36 | TG   | 12 | 11 |
| 4107 | 1 | 6699174 | 6699199 | 2 | 13 | 26 | CT   | 9  | 9  |
| 4111 | 1 | 6700499 | 6700512 | 2 | 7  | 14 | TG   | 13 | 8  |
| 4112 | 1 | 6700698 | 6700713 | 2 | 8  | 16 | GT   | 19 | 6  |
| 4113 | 1 | 6701132 | 6701173 | 2 | 21 | 42 | CA   | 12 | 13 |
| 4114 | 1 | 6701302 | 6701317 | 2 | 8  | 16 | AC   | 14 | 3  |
| 4119 | 1 | 6721317 | 6721350 | 2 | 17 | 34 | CA   | 9  | 8  |
| 4120 | 1 | 6721866 | 6721893 | 2 | 14 | 28 | CA   | 19 | 9  |
| 4122 | 1 | 6722014 | 6722037 | 2 | 12 | 24 | GT   | 20 | 10 |
| 4123 | 1 | 6722370 | 6722393 | 2 | 12 | 24 | GT   | 14 | 6  |
| 4124 | 1 | 6722519 | 6722542 | 3 | 8  | 24 | AAC  | 16 | 9  |
| 4133 | 1 | 6732520 | 6732531 | 2 | 6  | 12 | TG   | 29 | 3  |
| 4134 | 1 | 6732582 | 6732621 | 2 | 20 | 40 | GT   | 6  | 4  |
| 4135 | 1 | 6732731 | 6732746 | 2 | 8  | 16 | GT   | 19 | 3  |
| 4137 | 1 | 6732936 | 6732951 | 2 | 8  | 16 | TG   | 24 | 5  |
| 4138 | 1 | 6732999 | 6733024 | 2 | 13 | 26 | TG   | 19 | 10 |
| 4139 | 1 | 6733447 | 6733470 | 2 | 12 | 24 | AG   | 16 | 5  |
| 4141 | 1 | 6736972 | 6737001 | 2 | 15 | 30 | GT   | 8  | 11 |
| 4142 | 1 | 6737089 | 6737116 | 2 | 14 | 28 | AG   | 17 | 9  |
| 4145 | 1 | 6745792 | 6745809 | 3 | 6  | 18 | AGG  | 14 | 6  |
| 4148 | 1 | 6746241 | 6746267 | 3 | 9  | 27 | TCT  | 26 | 5  |
| 4150 | 1 | 6748622 | 6748643 | 2 | 11 | 22 | GT   | 20 | 9  |
| 4152 | 1 | 6748783 | 6748802 | 2 | 10 | 20 | AC   | 13 | 8  |
| 4153 | 1 | 6750802 | 6750825 | 2 | 12 | 24 | CA   | 13 | 7  |
| 4157 | 1 | 6751915 | 6751960 | 2 | 23 | 46 | TG   | 12 | 12 |
| 4161 | 1 | 6756526 | 6756540 | 3 | 5  | 15 | TCC  | 13 | 4  |
| 4162 | 1 | 6756892 | 6756909 | 3 | 6  | 18 | TCC  | 9  | 5  |
| 4164 | 1 | 6757710 | 6757723 | 2 | 7  | 14 | CA   | 18 | 3  |
| 4166 | 1 | 6758107 | 6758138 | 2 | 16 | 32 | GT   | 13 | 8  |
| 4168 | 1 | 6762480 | 6762497 | 2 | 9  | 18 | AC   | 19 | 6  |
| 4169 | 1 | 6762759 | 6762774 | 4 | 4  | 16 | AAAT | 24 | 4  |
| 4172 | 1 | 6765370 | 6765385 | 4 | 4  | 16 | TGAC | 31 | 4  |
| 4176 | 1 | 6769707 | 6769734 | 2 | 14 | 28 | GA   | 7  | 5  |
| 4178 | 1 | 6770258 | 6770271 | 2 | 7  | 14 | GT   | 19 | 8  |
| 4180 | 1 | 6770642 | 6770655 | 2 | 7  | 14 | CA   | 22 | 3  |
| 4183 | 1 | 6770905 | 6770922 | 2 | 9  | 18 | GT   | 12 | 9  |
| 4184 | 1 | 6771225 | 6771246 | 2 | 11 | 22 | CA   | 21 | 7  |
| 4185 | 1 | 6771361 | 6771386 | 2 | 13 | 26 | TG   | 12 | 8  |
| 4186 | 1 | 6772897 | 6772912 | 2 | 8  | 16 | TG   | 20 | 6  |
| 4187 | 1 | 6773128 | 6773153 | 2 | 13 | 26 | CA   | 11 | 8  |
| 4191 | 1 | 6776415 | 6776466 | 2 | 26 | 52 | TG   | 7  | 9  |
| 4192 | 1 | 6776594 | 6776608 | 3 | 5  | 15 | GAG  | 13 | 9  |
| 4197 | 1 | 6778823 | 6778850 | 2 | 14 | 28 | TG   | 12 | 4  |
| 4203 | 1 | 6781944 | 6781955 | 2 | 6  | 12 | GA   | 7  | 5  |
| 4204 | 1 | 6782108 | 6782119 | 2 | 6  | 12 | GA   | 12 | 6  |
| 4207 | 1 | 6785822 | 6785833 | 2 | 6  | 12 | GA   | 12 | 5  |
| 4210 | 1 | 6786196 | 6786223 | 2 | 14 | 28 | GT   | 19 | 9  |

|      |   |         |         |   |    |    |      |    |    |
|------|---|---------|---------|---|----|----|------|----|----|
| 4213 | 1 | 6792390 | 6792409 | 2 | 10 | 20 | GT   | 15 | 6  |
| 4214 | 1 | 6792640 | 6792671 | 4 | 8  | 32 | GTCT | 14 | 6  |
| 4225 | 1 | 6806824 | 6806839 | 2 | 8  | 16 | GT   | 9  | 8  |
| 4226 | 1 | 6806841 | 6806856 | 2 | 8  | 16 | TG   | 9  | 7  |
| 4246 | 1 | 6819293 | 6819310 | 2 | 9  | 18 | CA   | 15 | 6  |
| 4247 | 1 | 6820757 | 6820772 | 2 | 8  | 16 | CA   | 20 | 6  |
| 4248 | 1 | 6820912 | 6820937 | 2 | 13 | 26 | CA   | 11 | 8  |
| 4250 | 1 | 6821403 | 6821420 | 2 | 9  | 18 | TG   | 15 | 6  |
| 4252 | 1 | 6823003 | 6823016 | 2 | 7  | 14 | TG   | 24 | 3  |
| 4253 | 1 | 6823646 | 6823669 | 2 | 12 | 24 | TG   | 11 | 9  |
| 4258 | 1 | 6825837 | 6825872 | 2 | 18 | 36 | AC   | 17 | 10 |
| 4260 | 1 | 6828152 | 6828171 | 2 | 10 | 20 | AG   | 15 | 5  |
| 4266 | 1 | 6829410 | 6829429 | 2 | 10 | 20 | CA   | 13 | 6  |
| 4269 | 1 | 6831364 | 6831389 | 2 | 13 | 26 | GT   | 20 | 9  |
| 4270 | 1 | 6831497 | 6831516 | 2 | 10 | 20 | GT   | 16 | 11 |
| 4271 | 1 | 6831894 | 6831933 | 2 | 20 | 40 | CA   | 20 | 10 |
| 4273 | 1 | 6835892 | 6835912 | 3 | 7  | 21 | CCT  | 17 | 3  |
| 4277 | 1 | 6840537 | 6840556 | 2 | 10 | 20 | CA   | 13 | 12 |
| 4279 | 1 | 6845762 | 6845795 | 2 | 17 | 34 | GT   | 19 | 8  |
| 4280 | 1 | 6849883 | 6849898 | 2 | 8  | 16 | TG   | 26 | 5  |
| 4281 | 1 | 6850317 | 6850328 | 2 | 6  | 12 | GT   | 22 | 5  |
| 4282 | 1 | 6850544 | 6850557 | 2 | 7  | 14 | GT   | 23 | 8  |
| 4284 | 1 | 6852946 | 6852963 | 2 | 9  | 18 | GA   | 21 | 10 |
| 4285 | 1 | 6853322 | 6853343 | 2 | 11 | 22 | TG   | 17 | 12 |
| 4287 | 1 | 6855981 | 6856028 | 2 | 24 | 48 | CA   | 11 | 8  |
| 4290 | 1 | 6862541 | 6862564 | 2 | 12 | 24 | AC   | 7  | 7  |
| 4294 | 1 | 6866171 | 6866192 | 2 | 11 | 22 | TG   | 22 | 11 |
| 4298 | 1 | 6880072 | 6880103 | 2 | 16 | 32 | AC   | 7  | 9  |
| 4300 | 1 | 6886471 | 6886490 | 4 | 5  | 20 | TTTA | 12 | 3  |
| 4302 | 1 | 6895034 | 6895047 | 2 | 7  | 14 | AT   | 15 | 5  |
| 4307 | 1 | 6920130 | 6920149 | 4 | 5  | 20 | CATT | 22 | 4  |
| 4313 | 1 | 6925551 | 6925598 | 4 | 12 | 48 | TCTT | 9  | 6  |
| 4319 | 1 | 6930348 | 6930371 | 4 | 6  | 24 | TTTG | 22 | 5  |
| 4324 | 1 | 6938281 | 6938306 | 2 | 13 | 26 | TG   | 20 | 11 |
| 4326 | 1 | 6943913 | 6943930 | 3 | 6  | 18 | TCC  | 29 | 3  |
| 4329 | 1 | 6971679 | 6971693 | 3 | 5  | 15 | AAT  | 14 | 4  |
| 4330 | 1 | 6972824 | 6972838 | 3 | 5  | 15 | CTG  | 28 | 3  |
| 4336 | 1 | 7000062 | 7000093 | 2 | 16 | 32 | AC   | 15 | 14 |
| 4339 | 1 | 7005471 | 7005496 | 2 | 13 | 26 | CA   | 12 | 8  |
| 4342 | 1 | 7008641 | 7008654 | 2 | 7  | 14 | AC   | 22 | 4  |
| 4344 | 1 | 7008803 | 7008814 | 2 | 6  | 12 | AC   | 33 | 3  |
| 4345 | 1 | 7013960 | 7013975 | 2 | 8  | 16 | CT   | 26 | 5  |
| 4355 | 1 | 7042029 | 7042049 | 3 | 7  | 21 | GAG  | 23 | 4  |
| 4368 | 1 | 7071335 | 7071354 | 2 | 10 | 20 | TG   | 15 | 5  |
| 4373 | 1 | 7076957 | 7076982 | 2 | 13 | 26 | CA   | 19 | 7  |
| 4379 | 1 | 7095555 | 7095566 | 2 | 6  | 12 | AT   | 20 | 10 |
| 4380 | 1 | 7097838 | 7097849 | 2 | 6  | 12 | AC   | 22 | 3  |
| 4386 | 1 | 7111668 | 7111682 | 3 | 5  | 15 | TTG  | 19 | 10 |
| 4389 | 1 | 7113622 | 7113637 | 2 | 8  | 16 | GT   | 24 | 9  |
| 4391 | 1 | 7122570 | 7122581 | 2 | 6  | 12 | AT   | 27 | 3  |
| 4397 | 1 | 7138692 | 7138725 | 2 | 17 | 34 | GT   | 9  | 7  |

|      |   |         |         |   |    |    |      |    |    |
|------|---|---------|---------|---|----|----|------|----|----|
| 4398 | 1 | 7138777 | 7138796 | 2 | 10 | 20 | GT   | 17 | 11 |
| 4399 | 1 | 7139053 | 7139078 | 2 | 13 | 26 | AC   | 19 | 17 |
| 4413 | 1 | 7183130 | 7183153 | 2 | 12 | 24 | AC   | 8  | 9  |
| 4419 | 1 | 7196798 | 7196809 | 2 | 6  | 12 | CT   | 19 | 4  |
| 4425 | 1 | 7228192 | 7228235 | 2 | 22 | 44 | CA   | 16 | 7  |
| 4426 | 1 | 7232217 | 7232268 | 4 | 13 | 52 | TTTC | 18 | 7  |
| 4428 | 1 | 7244421 | 7244432 | 2 | 6  | 12 | AC   | 21 | 4  |
| 4429 | 1 | 7246420 | 7246431 | 2 | 6  | 12 | GT   | 25 | 9  |
| 4449 | 1 | 7293625 | 7293651 | 3 | 9  | 27 | AAC  | 13 | 5  |
| 4450 | 1 | 7294726 | 7294761 | 4 | 9  | 36 | AAAC | 19 | 3  |
| 4451 | 1 | 7295623 | 7295646 | 3 | 8  | 24 | TAA  | 21 | 5  |
| 4453 | 1 | 7302941 | 7302970 | 2 | 15 | 30 | TG   | 12 | 8  |
| 4454 | 1 | 7302999 | 7303018 | 2 | 10 | 20 | TG   | 10 | 3  |
| 4462 | 1 | 7344660 | 7344675 | 2 | 8  | 16 | CA   | 27 | 4  |
| 4463 | 1 | 7345006 | 7345031 | 2 | 13 | 26 | GT   | 23 | 9  |
| 4467 | 1 | 7351530 | 7351547 | 2 | 9  | 18 | GT   | 17 | 13 |
| 4476 | 1 | 7384997 | 7385020 | 4 | 6  | 24 | ATTT | 16 | 12 |
| 4484 | 1 | 7400042 | 7400057 | 2 | 8  | 16 | AC   | 28 | 3  |
| 4489 | 1 | 7409564 | 7409587 | 2 | 12 | 24 | TG   | 20 | 13 |
| 4493 | 1 | 7415907 | 7415954 | 2 | 24 | 48 | AC   | 9  | 10 |
| 4494 | 1 | 7419071 | 7419082 | 2 | 6  | 12 | AC   | 24 | 10 |
| 4502 | 1 | 7454593 | 7454618 | 2 | 13 | 26 | GT   | 23 | 8  |
| 4504 | 1 | 7461030 | 7461050 | 3 | 7  | 21 | CTC  | 27 | 3  |
| 4507 | 1 | 7470655 | 7470670 | 2 | 8  | 16 | AG   | 13 | 4  |
| 4515 | 1 | 7494670 | 7494695 | 2 | 13 | 26 | CA   | 17 | 7  |
| 4521 | 1 | 7501615 | 7501630 | 2 | 8  | 16 | CA   | 20 | 5  |
| 4525 | 1 | 7512873 | 7512888 | 4 | 4  | 16 | ATTT | 17 | 6  |
| 4529 | 1 | 7518469 | 7518486 | 2 | 9  | 18 | TG   | 13 | 5  |
| 4533 | 1 | 7520632 | 7520655 | 4 | 6  | 24 | TTTA | 25 | 4  |
| 4541 | 1 | 7537845 | 7537884 | 4 | 10 | 40 | TCTT | 15 | 6  |
| 4543 | 1 | 7539417 | 7539430 | 2 | 7  | 14 | CA   | 23 | 5  |
| 4551 | 1 | 7552944 | 7552955 | 2 | 6  | 12 | CG   | 21 | 9  |
| 4552 | 1 | 7552956 | 7552975 | 2 | 10 | 20 | CA   | 21 | 11 |
| 4554 | 1 | 7555972 | 7555995 | 4 | 6  | 24 | GTTG | 19 | 3  |
| 4561 | 1 | 7566752 | 7566775 | 2 | 12 | 24 | GT   | 19 | 5  |
| 4584 | 1 | 7603086 | 7603101 | 2 | 8  | 16 | GT   | 21 | 8  |
| 4598 | 1 | 7628236 | 7628271 | 2 | 18 | 36 | AC   | 20 | 7  |
| 4609 | 1 | 7642887 | 7642908 | 2 | 11 | 22 | CA   | 9  | 8  |
| 4610 | 1 | 7643056 | 7643071 | 2 | 8  | 16 | CA   | 18 | 10 |
| 4612 | 1 | 7655389 | 7655408 | 2 | 10 | 20 | AC   | 13 | 7  |
| 4615 | 1 | 7663392 | 7663409 | 2 | 9  | 18 | CA   | 12 | 7  |
| 4621 | 1 | 7678732 | 7678746 | 3 | 5  | 15 | TGT  | 26 | 3  |
| 4622 | 1 | 7688199 | 7688222 | 2 | 12 | 24 | GT   | 8  | 10 |
| 4624 | 1 | 7690133 | 7690164 | 2 | 16 | 32 | AC   | 11 | 5  |
| 4634 | 1 | 7701628 | 7701642 | 3 | 5  | 15 | AAT  | 21 | 3  |
| 4639 | 1 | 7707800 | 7707833 | 2 | 17 | 34 | GT   | 9  | 12 |
| 4642 | 1 | 7708550 | 7708575 | 2 | 13 | 26 | GT   | 16 | 11 |
| 4643 | 1 | 7708817 | 7708838 | 2 | 11 | 22 | TG   | 17 | 9  |
| 4649 | 1 | 7720836 | 7720871 | 3 | 12 | 36 | TAA  | 10 | 8  |
| 4650 | 1 | 7724447 | 7724461 | 3 | 5  | 15 | CTC  | 13 | 5  |
| 4651 | 1 | 7724469 | 7724483 | 3 | 5  | 15 | TCC  | 14 | 4  |



|      |   |         |         |   |    |    |      |    |    |
|------|---|---------|---------|---|----|----|------|----|----|
| 4658 | 1 | 7734052 | 7734075 | 3 | 8  | 24 | AAT  | 6  | 4  |
| 4659 | 1 | 7735224 | 7735253 | 2 | 15 | 30 | CA   | 16 | 9  |
| 4673 | 1 | 7797117 | 7797130 | 2 | 7  | 14 | AC   | 16 | 4  |
| 4675 | 1 | 7798182 | 7798215 | 2 | 17 | 34 | CA   | 18 | 19 |
| 4678 | 1 | 7798902 | 7798916 | 3 | 5  | 15 | AAG  | 29 | 4  |
| 4679 | 1 | 7802034 | 7802061 | 2 | 14 | 28 | AC   | 20 | 5  |
| 4682 | 1 | 7806738 | 7806773 | 4 | 9  | 36 | TATC | 19 | 9  |
| 4685 | 1 | 7810859 | 7810878 | 4 | 5  | 20 | AGAC | 29 | 3  |
| 4687 | 1 | 7814884 | 7814913 | 2 | 15 | 30 | TG   | 9  | 9  |
| 4689 | 1 | 7819958 | 7819973 | 2 | 8  | 16 | GT   | 16 | 7  |
| 4690 | 1 | 7819974 | 7819987 | 2 | 7  | 14 | GA   | 14 | 4  |
| 4692 | 1 | 7833216 | 7833236 | 3 | 7  | 21 | ATT  | 13 | 6  |
| 4696 | 1 | 7845658 | 7845690 | 3 | 11 | 33 | GTT  | 21 | 8  |
| 4698 | 1 | 7850079 | 7850098 | 2 | 10 | 20 | TC   | 27 | 4  |
| 4699 | 1 | 7850099 | 7850118 | 4 | 5  | 20 | GTTC | 9  | 5  |
| 4701 | 1 | 7856028 | 7856045 | 3 | 6  | 18 | GGA  | 29 | 4  |
| 4702 | 1 | 7856453 | 7856473 | 3 | 7  | 21 | GGA  | 23 | 4  |
| 4715 | 1 | 7886442 | 7886457 | 2 | 8  | 16 | AC   | 22 | 5  |
| 4721 | 1 | 7902417 | 7902428 | 2 | 6  | 12 | GT   | 21 | 6  |
| 4740 | 1 | 7934651 | 7934678 | 4 | 7  | 28 | CAGG | 25 | 4  |
| 4742 | 1 | 7945505 | 7945528 | 3 | 8  | 24 | CCT  | 14 | 4  |
| 4744 | 1 | 7946303 | 7946318 | 2 | 8  | 16 | TG   | 20 | 3  |
| 4758 | 1 | 7964806 | 7964821 | 2 | 8  | 16 | TG   | 14 | 3  |
| 4759 | 1 | 7964849 | 7964864 | 2 | 8  | 16 | GA   | 11 | 7  |
| 4760 | 1 | 7964981 | 7965000 | 2 | 10 | 20 | AC   | 18 | 5  |
| 4761 | 1 | 7967568 | 7967591 | 2 | 12 | 24 | AC   | 8  | 9  |
| 4764 | 1 | 7970061 | 7970075 | 3 | 5  | 15 | TGC  | 18 | 3  |
| 4769 | 1 | 7981152 | 7981169 | 2 | 9  | 18 | TG   | 19 | 5  |
| 4772 | 1 | 7984178 | 7984213 | 3 | 12 | 36 | TCA  | 29 | 9  |
| 4774 | 1 | 7987980 | 7987993 | 2 | 7  | 14 | GA   | 29 | 3  |
| 4782 | 1 | 8004231 | 8004246 | 2 | 8  | 16 | GT   | 10 | 8  |
| 4783 | 1 | 8004662 | 8004687 | 2 | 13 | 26 | TG   | 13 | 8  |
| 4785 | 1 | 8005525 | 8005536 | 2 | 6  | 12 | GT   | 15 | 12 |
| 4787 | 1 | 8005819 | 8005834 | 2 | 8  | 16 | TG   | 19 | 8  |
| 4792 | 1 | 8028740 | 8028755 | 2 | 8  | 16 | AC   | 20 | 4  |
| 4793 | 1 | 8029347 | 8029364 | 3 | 6  | 18 | AAT  | 22 | 3  |
| 4802 | 1 | 8061792 | 8061803 | 2 | 6  | 12 | TG   | 23 | 4  |
| 4810 | 1 | 8067090 | 8067110 | 3 | 7  | 21 | TTC  | 25 | 7  |
| 4811 | 1 | 8071697 | 8071756 | 4 | 15 | 60 | ACTA | 9  | 5  |
| 4818 | 1 | 8096087 | 8096101 | 3 | 5  | 15 | AGG  | 21 | 4  |
| 4823 | 1 | 8126732 | 8126761 | 2 | 15 | 30 | GT   | 22 | 11 |
| 4829 | 1 | 8138034 | 8138051 | 2 | 9  | 18 | AG   | 20 | 4  |
| 4830 | 1 | 8138954 | 8138969 | 2 | 8  | 16 | TG   | 19 | 6  |
| 4835 | 1 | 8156503 | 8156522 | 2 | 10 | 20 | CA   | 9  | 7  |
| 4836 | 1 | 8156706 | 8156737 | 4 | 8  | 32 | GTCA | 22 | 6  |
| 4837 | 1 | 8157071 | 8157134 | 2 | 32 | 64 | GT   | 7  | 9  |
| 4842 | 1 | 8169181 | 8169198 | 3 | 6  | 18 | CCT  | 22 | 3  |
| 4847 | 1 | 8177486 | 8177513 | 4 | 7  | 28 | ATTT | 6  | 4  |
| 4855 | 1 | 8191044 | 8191061 | 2 | 9  | 18 | TG   | 9  | 9  |
| 4856 | 1 | 8191063 | 8191076 | 2 | 7  | 14 | GT   | 8  | 7  |
| 4866 | 1 | 8207456 | 8207477 | 2 | 11 | 22 | TG   | 13 | 8  |

|      |   |         |         |   |    |    |      |    |    |
|------|---|---------|---------|---|----|----|------|----|----|
| 4867 | 1 | 8207598 | 8207621 | 2 | 12 | 24 | GT   | 17 | 9  |
| 4870 | 1 | 8214325 | 8214350 | 2 | 13 | 26 | CA   | 14 | 13 |
| 4871 | 1 | 8214451 | 8214472 | 2 | 11 | 22 | TC   | 16 | 5  |
| 4875 | 1 | 8216395 | 8216412 | 2 | 9  | 18 | TG   | 26 | 7  |
| 4878 | 1 | 8225017 | 8225030 | 2 | 7  | 14 | GT   | 26 | 5  |
| 4883 | 1 | 8249557 | 8249580 | 3 | 8  | 24 | GTA  | 13 | 8  |
| 4887 | 1 | 8281594 | 8281650 | 3 | 19 | 57 | ACT  | 18 | 10 |
| 4888 | 1 | 8284958 | 8284977 | 4 | 5  | 20 | TTAT | 23 | 11 |
| 4889 | 1 | 8285516 | 8285529 | 2 | 7  | 14 | GT   | 16 | 11 |
| 4890 | 1 | 8286091 | 8286116 | 2 | 13 | 26 | TG   | 16 | 7  |
| 4891 | 1 | 8287889 | 8287918 | 2 | 15 | 30 | GT   | 10 | 11 |
| 4903 | 1 | 8316561 | 8316576 | 2 | 8  | 16 | AG   | 23 | 4  |
| 4917 | 1 | 8369036 | 8369050 | 3 | 5  | 15 | CAT  | 16 | 7  |
| 4919 | 1 | 8372545 | 8372562 | 3 | 6  | 18 | CCT  | 16 | 6  |
| 4922 | 1 | 8374309 | 8374338 | 2 | 15 | 30 | GT   | 16 | 13 |
| 4929 | 1 | 8381967 | 8381986 | 2 | 10 | 20 | TG   | 26 | 7  |
| 4931 | 1 | 8384018 | 8384044 | 3 | 9  | 27 | TCT  | 23 | 8  |
| 4939 | 1 | 8399767 | 8399787 | 3 | 7  | 21 | TCT  | 23 | 4  |
| 4948 | 1 | 8409325 | 8409338 | 2 | 7  | 14 | TG   | 14 | 12 |
| 4951 | 1 | 8409674 | 8409691 | 2 | 9  | 18 | CA   | 12 | 10 |
| 4952 | 1 | 8409860 | 8409891 | 2 | 16 | 32 | CA   | 23 | 8  |
| 4953 | 1 | 8410362 | 8410389 | 2 | 14 | 28 | CA   | 18 | 10 |
| 4954 | 1 | 8411106 | 8411123 | 3 | 6  | 18 | TGG  | 17 | 6  |
| 4968 | 1 | 8444729 | 8444752 | 3 | 8  | 24 | GGA  | 29 | 5  |
| 4970 | 1 | 8452911 | 8452934 | 4 | 6  | 24 | ATCT | 15 | 11 |
| 4973 | 1 | 8460218 | 8460232 | 3 | 5  | 15 | AAC  | 25 | 5  |
| 4978 | 1 | 8464854 | 8464871 | 2 | 9  | 18 | AC   | 17 | 11 |
| 4982 | 1 | 8476671 | 8476686 | 2 | 8  | 16 | GT   | 15 | 8  |
| 4983 | 1 | 8476689 | 8476706 | 2 | 9  | 18 | GT   | 19 | 11 |
| 4987 | 1 | 8490945 | 8490962 | 2 | 9  | 18 | AT   | 23 | 8  |
| 4990 | 1 | 8497191 | 8497204 | 2 | 7  | 14 | AT   | 23 | 5  |
| 4991 | 1 | 8500142 | 8500162 | 3 | 7  | 21 | GCA  | 27 | 10 |
| 5008 | 1 | 8529993 | 8530036 | 2 | 22 | 44 | GT   | 11 | 14 |
| 5009 | 1 | 8533434 | 8533449 | 2 | 8  | 16 | GT   | 10 | 5  |
| 5013 | 1 | 8539046 | 8539057 | 2 | 6  | 12 | CA   | 26 | 4  |
| 5015 | 1 | 8540070 | 8540091 | 2 | 11 | 22 | GT   | 9  | 8  |
| 5021 | 1 | 8548840 | 8548863 | 2 | 12 | 24 | AG   | 13 | 4  |
| 5027 | 1 | 8561977 | 8561988 | 2 | 6  | 12 | AC   | 30 | 3  |
| 5032 | 1 | 8577572 | 8577607 | 2 | 18 | 36 | AG   | 6  | 5  |
| 5051 | 1 | 8608647 | 8608662 | 2 | 8  | 16 | AC   | 19 | 3  |
| 5055 | 1 | 8610408 | 8610441 | 2 | 17 | 34 | AC   | 10 | 11 |
| 5061 | 1 | 8630166 | 8630183 | 2 | 9  | 18 | CT   | 26 | 5  |
| 5083 | 1 | 8676022 | 8676039 | 2 | 9  | 18 | AC   | 21 | 3  |
| 5088 | 1 | 8682759 | 8682776 | 2 | 9  | 18 | TC   | 20 | 4  |
| 5093 | 1 | 8692800 | 8692815 | 2 | 8  | 16 | GT   | 21 | 7  |
| 5097 | 1 | 8695179 | 8695212 | 2 | 17 | 34 | TG   | 17 | 9  |
| 5099 | 1 | 8697447 | 8697488 | 2 | 21 | 42 | AC   | 9  | 8  |
| 5101 | 1 | 8700983 | 8700998 | 4 | 4  | 16 | AGAC | 23 | 5  |
| 5107 | 1 | 8707017 | 8707040 | 2 | 12 | 24 | TG   | 18 | 11 |
| 5109 | 1 | 8710028 | 8710099 | 4 | 18 | 72 | ATCT | 19 | 8  |
| 5112 | 1 | 8717987 | 8718000 | 2 | 7  | 14 | GT   | 20 | 7  |

|      |   |         |         |   |    |    |      |    |    |
|------|---|---------|---------|---|----|----|------|----|----|
| 5117 | 1 | 8724880 | 8724897 | 2 | 9  | 18 | GT   | 24 | 7  |
| 5118 | 1 | 8724918 | 8724931 | 2 | 7  | 14 | GT   | 6  | 3  |
| 5119 | 1 | 8729784 | 8729801 | 3 | 6  | 18 | GCT  | 21 | 9  |
| 5120 | 1 | 8729802 | 8729816 | 3 | 5  | 15 | GTG  | 19 | 9  |
| 5122 | 1 | 8730540 | 8730569 | 2 | 15 | 30 | TG   | 19 | 18 |
| 5123 | 1 | 8731090 | 8731111 | 2 | 11 | 22 | TG   | 15 | 18 |
| 5124 | 1 | 8731279 | 8731292 | 2 | 7  | 14 | TG   | 21 | 8  |
| 5126 | 1 | 8738408 | 8738435 | 2 | 14 | 28 | CA   | 22 | 10 |
| 5128 | 1 | 8743612 | 8743631 | 2 | 10 | 20 | TG   | 9  | 8  |
| 5133 | 1 | 8760204 | 8760217 | 2 | 7  | 14 | GT   | 27 | 3  |
| 5134 | 1 | 8760898 | 8760949 | 2 | 26 | 52 | AC   | 9  | 11 |
| 5136 | 1 | 8773087 | 8773100 | 2 | 7  | 14 | GA   | 21 | 3  |
| 5137 | 1 | 8773263 | 8773276 | 2 | 7  | 14 | AC   | 18 | 4  |
| 5140 | 1 | 8779802 | 8779816 | 3 | 5  | 15 | CCA  | 30 | 3  |
| 5141 | 1 | 8783255 | 8783284 | 2 | 15 | 30 | AC   | 21 | 19 |
| 5143 | 1 | 8789524 | 8789538 | 3 | 5  | 15 | CCT  | 10 | 8  |
| 5144 | 1 | 8790972 | 8790989 | 2 | 9  | 18 | AC   | 20 | 6  |
| 5145 | 1 | 8791121 | 8791138 | 2 | 9  | 18 | AG   | 18 | 5  |
| 5146 | 1 | 8791337 | 8791360 | 2 | 12 | 24 | GT   | 16 | 7  |
| 5148 | 1 | 8795005 | 8795042 | 2 | 19 | 38 | CA   | 11 | 10 |
| 5150 | 1 | 8797378 | 8797401 | 2 | 12 | 24 | TG   | 8  | 7  |
| 5153 | 1 | 8805982 | 8806005 | 2 | 12 | 24 | TG   | 24 | 9  |
| 5160 | 1 | 8821768 | 8821785 | 3 | 6  | 18 | TGT  | 28 | 3  |
| 5167 | 1 | 8859263 | 8859284 | 2 | 11 | 22 | TC   | 21 | 6  |
| 5174 | 1 | 8866881 | 8866904 | 2 | 12 | 24 | TG   | 20 | 14 |
| 5187 | 1 | 8883992 | 8884003 | 2 | 6  | 12 | TG   | 16 | 4  |
| 5189 | 1 | 8896150 | 8896179 | 2 | 15 | 30 | GT   | 30 | 9  |
| 5204 | 1 | 8934838 | 8934861 | 4 | 6  | 24 | AGAC | 19 | 7  |
| 5209 | 1 | 8945710 | 8945730 | 3 | 7  | 21 | ATG  | 24 | 3  |
| 5210 | 1 | 8949811 | 8949854 | 2 | 22 | 44 | CT   | 7  | 8  |
| 5225 | 1 | 8969783 | 8969802 | 2 | 10 | 20 | CA   | 20 | 14 |
| 5226 | 1 | 8973598 | 8973615 | 2 | 9  | 18 | AG   | 23 | 3  |
| 5228 | 1 | 8980698 | 8980709 | 2 | 6  | 12 | AC   | 31 | 3  |
| 5231 | 1 | 8989939 | 8989952 | 2 | 7  | 14 | GT   | 21 | 6  |
| 5235 | 1 | 8991756 | 8991785 | 3 | 10 | 30 | AAG  | 24 | 10 |
| 5240 | 1 | 9009089 | 9009108 | 2 | 10 | 20 | TG   | 13 | 6  |
| 5245 | 1 | 9015066 | 9015095 | 2 | 15 | 30 | AC   | 18 | 6  |
| 5246 | 1 | 9017136 | 9017161 | 2 | 13 | 26 | TG   | 17 | 8  |
| 5248 | 1 | 9023005 | 9023031 | 3 | 9  | 27 | CCA  | 26 | 3  |
| 5253 | 1 | 9036404 | 9036423 | 4 | 5  | 20 | AAAT | 32 | 4  |
| 5256 | 1 | 9043439 | 9043454 | 2 | 8  | 16 | AC   | 26 | 6  |
| 5265 | 1 | 9053648 | 9053659 | 2 | 6  | 12 | CT   | 18 | 3  |
| 5280 | 1 | 9084364 | 9084387 | 2 | 12 | 24 | TG   | 9  | 4  |
| 5283 | 1 | 9089372 | 9089386 | 3 | 5  | 15 | AAT  | 16 | 5  |
| 5285 | 1 | 9094181 | 9094196 | 4 | 4  | 16 | AAAT | 27 | 4  |
| 5289 | 1 | 9097140 | 9097169 | 2 | 15 | 30 | AG   | 15 | 10 |
| 5296 | 1 | 9114537 | 9114551 | 3 | 5  | 15 | TCG  | 29 | 5  |
| 5301 | 1 | 9123815 | 9123834 | 2 | 10 | 20 | GT   | 17 | 15 |
| 5307 | 1 | 9128018 | 9128035 | 2 | 9  | 18 | CA   | 9  | 9  |
| 5312 | 1 | 9139681 | 9139698 | 2 | 9  | 18 | AC   | 15 | 9  |
| 5313 | 1 | 9140328 | 9140341 | 2 | 7  | 14 | CA   | 30 | 4  |

|      |   |         |         |   |    |    |      |    |    |
|------|---|---------|---------|---|----|----|------|----|----|
| 5324 | 1 | 9168866 | 9168883 | 2 | 9  | 18 | GT   | 14 | 9  |
| 5332 | 1 | 9183779 | 9183792 | 2 | 7  | 14 | GA   | 18 | 5  |
| 5334 | 1 | 9191916 | 9191927 | 2 | 6  | 12 | AG   | 18 | 3  |
| 5336 | 1 | 9194421 | 9194464 | 2 | 22 | 44 | TG   | 16 | 15 |
| 5339 | 1 | 9201889 | 9201904 | 2 | 8  | 16 | CT   | 18 | 7  |
| 5353 | 1 | 9219314 | 9219337 | 2 | 12 | 24 | GT   | 7  | 6  |
| 5354 | 1 | 9219625 | 9219640 | 4 | 4  | 16 | AAAC | 6  | 4  |
| 5360 | 1 | 9230315 | 9230332 | 2 | 9  | 18 | AC   | 14 | 12 |
| 5363 | 1 | 9240456 | 9240475 | 4 | 5  | 20 | TTTA | 23 | 4  |
| 5377 | 1 | 9274031 | 9274045 | 3 | 5  | 15 | TAT  | 16 | 4  |
| 5381 | 1 | 9282706 | 9282726 | 3 | 7  | 21 | TCT  | 25 | 5  |
| 5383 | 1 | 9286110 | 9286139 | 3 | 10 | 30 | TGA  | 25 | 6  |
| 5386 | 1 | 9291593 | 9291632 | 2 | 20 | 40 | CA   | 16 | 13 |
| 5392 | 1 | 9311614 | 9311625 | 2 | 6  | 12 | GT   | 20 | 4  |
| 5393 | 1 | 9334170 | 9334185 | 2 | 8  | 16 | GT   | 24 | 4  |
| 5394 | 1 | 9336950 | 9336970 | 3 | 7  | 21 | CAA  | 23 | 4  |
| 5400 | 1 | 9354716 | 9354735 | 2 | 10 | 20 | TG   | 21 | 4  |
| 5401 | 1 | 9360198 | 9360233 | 2 | 18 | 36 | TG   | 13 | 13 |
| 5403 | 1 | 9369934 | 9369945 | 2 | 6  | 12 | AT   | 28 | 3  |
| 5407 | 1 | 9375304 | 9375315 | 2 | 6  | 12 | GA   | 24 | 5  |
| 5412 | 1 | 9377234 | 9377284 | 3 | 17 | 51 | TTG  | 13 | 8  |
| 5420 | 1 | 9393284 | 9393323 | 2 | 20 | 40 | AG   | 6  | 6  |
| 5426 | 1 | 9415605 | 9415616 | 2 | 6  | 12 | CA   | 27 | 3  |
| 5427 | 1 | 9417792 | 9417809 | 2 | 9  | 18 | AC   | 26 | 6  |
| 5430 | 1 | 9425346 | 9425359 | 2 | 7  | 14 | GT   | 29 | 5  |
| 5435 | 1 | 9439398 | 9439421 | 2 | 12 | 24 | CA   | 20 | 6  |
| 5441 | 1 | 9443695 | 9443750 | 2 | 28 | 56 | GT   | 8  | 8  |
| 5453 | 1 | 9461995 | 9462006 | 2 | 6  | 12 | AC   | 23 | 5  |
| 5454 | 1 | 9462010 | 9462023 | 2 | 7  | 14 | CA   | 17 | 5  |
| 5465 | 1 | 9483037 | 9483050 | 2 | 7  | 14 | GT   | 6  | 3  |
| 5466 | 1 | 9483129 | 9483152 | 2 | 12 | 24 | TG   | 23 | 10 |
| 5469 | 1 | 9487297 | 9487312 | 4 | 4  | 16 | ATTT | 22 | 14 |
| 5475 | 1 | 9499510 | 9499531 | 2 | 11 | 22 | TC   | 21 | 4  |
| 5479 | 1 | 9510222 | 9510243 | 2 | 11 | 22 | GA   | 23 | 3  |
| 5487 | 1 | 9545406 | 9545433 | 2 | 14 | 28 | TG   | 19 | 6  |
| 5489 | 1 | 9545522 | 9545545 | 2 | 12 | 24 | GA   | 13 | 6  |
| 5491 | 1 | 9552251 | 9552264 | 2 | 7  | 14 | TG   | 25 | 5  |
| 5493 | 1 | 9559313 | 9559328 | 2 | 8  | 16 | CA   | 28 | 5  |
| 5499 | 1 | 9582102 | 9582115 | 2 | 7  | 14 | AG   | 19 | 5  |
| 5503 | 1 | 9594408 | 9594435 | 2 | 14 | 28 | GT   | 24 | 6  |
| 5508 | 1 | 9611333 | 9611372 | 2 | 20 | 40 | AG   | 21 | 12 |
| 5516 | 1 | 9643240 | 9643265 | 2 | 13 | 26 | CA   | 13 | 8  |
| 5526 | 1 | 9659307 | 9659324 | 2 | 9  | 18 | TG   | 14 | 3  |
| 5528 | 1 | 9659911 | 9659926 | 2 | 8  | 16 | TG   | 18 | 5  |
| 5536 | 1 | 9673540 | 9673559 | 2 | 10 | 20 | TG   | 18 | 9  |
| 5537 | 1 | 9673679 | 9673700 | 2 | 11 | 22 | TG   | 9  | 8  |
| 5541 | 1 | 9679214 | 9679225 | 2 | 6  | 12 | AC   | 25 | 3  |
| 5550 | 1 | 9700454 | 9700468 | 3 | 5  | 15 | CTG  | 27 | 3  |
| 5553 | 1 | 9702262 | 9702285 | 2 | 12 | 24 | TG   | 19 | 4  |
| 5554 | 1 | 9712475 | 9712488 | 2 | 7  | 14 | TG   | 8  | 10 |
| 5575 | 1 | 9772416 | 9772437 | 2 | 11 | 22 | GT   | 7  | 7  |

|      |   |          |          |   |    |    |      |    |    |
|------|---|----------|----------|---|----|----|------|----|----|
| 5581 | 1 | 9782545  | 9782574  | 2 | 15 | 30 | CA   | 6  | 8  |
| 5584 | 1 | 9791545  | 9791562  | 2 | 9  | 18 | AC   | 12 | 3  |
| 5589 | 1 | 9807442  | 9807462  | 3 | 7  | 21 | ATC  | 24 | 8  |
| 5590 | 1 | 9807682  | 9807705  | 4 | 6  | 24 | TTTG | 26 | 5  |
| 5591 | 1 | 9808301  | 9808312  | 2 | 6  | 12 | AG   | 20 | 5  |
| 5593 | 1 | 9810899  | 9810918  | 2 | 10 | 20 | GA   | 29 | 5  |
| 5594 | 1 | 9812315  | 9812330  | 2 | 8  | 16 | GA   | 13 | 3  |
| 5599 | 1 | 9812947  | 9812961  | 3 | 5  | 15 | TCC  | 17 | 7  |
| 5603 | 1 | 9820130  | 9820157  | 2 | 14 | 28 | TG   | 17 | 8  |
| 5605 | 1 | 9831694  | 9831708  | 3 | 5  | 15 | TTG  | 33 | 3  |
| 5618 | 1 | 9871042  | 9871073  | 2 | 16 | 32 | GT   | 9  | 9  |
| 5620 | 1 | 9875106  | 9875117  | 2 | 6  | 12 | GT   | 33 | 4  |
| 5621 | 1 | 9881842  | 9881873  | 2 | 16 | 32 | CA   | 10 | 10 |
| 5628 | 1 | 9894429  | 9894454  | 2 | 13 | 26 | TG   | 13 | 11 |
| 5630 | 1 | 9895943  | 9895958  | 2 | 8  | 16 | CA   | 21 | 6  |
| 5632 | 1 | 9906618  | 9906686  | 3 | 23 | 69 | AGA  | 18 | 16 |
| 5634 | 1 | 9917967  | 9917990  | 2 | 12 | 24 | AC   | 16 | 9  |
| 5635 | 1 | 9920443  | 9920470  | 2 | 14 | 28 | AC   | 11 | 8  |
| 5640 | 1 | 9927210  | 9927224  | 3 | 5  | 15 | CAA  | 11 | 3  |
| 5644 | 1 | 9938456  | 9938487  | 4 | 8  | 32 | TATC | 9  | 7  |
| 5645 | 1 | 9939473  | 9939512  | 2 | 20 | 40 | TG   | 8  | 7  |
| 5653 | 1 | 9982582  | 9982599  | 2 | 9  | 18 | GT   | 10 | 7  |
| 5654 | 1 | 9982600  | 9982617  | 2 | 9  | 18 | TG   | 11 | 7  |
| 5664 | 1 | 10016058 | 10016075 | 2 | 9  | 18 | AC   | 20 | 6  |
| 5665 | 1 | 10016960 | 10016995 | 4 | 9  | 36 | TTCT | 13 | 9  |
| 5666 | 1 | 10018141 | 10018152 | 2 | 6  | 12 | TA   | 14 | 4  |
| 5669 | 1 | 10024799 | 10024822 | 4 | 6  | 24 | AATG | 25 | 4  |
| 5671 | 1 | 10028904 | 10028918 | 3 | 5  | 15 | CTG  | 31 | 4  |
| 5673 | 1 | 10031366 | 10031380 | 3 | 5  | 15 | GCA  | 26 | 7  |
| 5674 | 1 | 10032721 | 10032736 | 2 | 8  | 16 | AC   | 24 | 5  |
| 5678 | 1 | 10047352 | 10047363 | 2 | 6  | 12 | GT   | 19 | 4  |
| 5680 | 1 | 10048840 | 10048859 | 2 | 10 | 20 | CA   | 10 | 7  |
| 5687 | 1 | 10064525 | 10064562 | 2 | 19 | 38 | CT   | 7  | 8  |
| 5691 | 1 | 10078811 | 10078831 | 3 | 7  | 21 | AGC  | 32 | 5  |
| 5696 | 1 | 10082329 | 10082346 | 2 | 9  | 18 | GT   | 13 | 7  |
| 5703 | 1 | 10107798 | 10107817 | 2 | 10 | 20 | TG   | 14 | 3  |
| 5704 | 1 | 10121909 | 10121928 | 4 | 5  | 20 | TTTG | 23 | 10 |
| 5718 | 1 | 10146653 | 10146688 | 2 | 18 | 36 | TG   | 6  | 7  |
| 5721 | 1 | 10166570 | 10166605 | 2 | 18 | 36 | TG   | 9  | 10 |
| 5724 | 1 | 10167896 | 10167921 | 2 | 13 | 26 | TG   | 19 | 8  |
| 5729 | 1 | 10191948 | 10191971 | 4 | 6  | 24 | ATTT | 13 | 3  |
| 5733 | 1 | 10198520 | 10198539 | 4 | 5  | 20 | TTGT | 19 | 4  |
| 5734 | 1 | 10218708 | 10218723 | 4 | 4  | 16 | AACA | 26 | 3  |
| 5736 | 1 | 10221360 | 10221391 | 2 | 16 | 32 | AG   | 28 | 6  |
| 5739 | 1 | 10226830 | 10226843 | 2 | 7  | 14 | AT   | 13 | 7  |
| 5746 | 1 | 10243663 | 10243680 | 3 | 6  | 18 | CCT  | 15 | 4  |
| 5747 | 1 | 10245910 | 10245921 | 2 | 6  | 12 | CA   | 26 | 6  |
| 5750 | 1 | 10252437 | 10252456 | 4 | 5  | 20 | TGAA | 23 | 3  |
| 5752 | 1 | 10253897 | 10253936 | 4 | 10 | 40 | GAAA | 21 | 6  |
| 5760 | 1 | 10287196 | 10287215 | 4 | 5  | 20 | ACAG | 29 | 4  |
| 5774 | 1 | 10305737 | 10305766 | 2 | 15 | 30 | TG   | 12 | 10 |

|      |   |          |          |   |    |    |      |    |    |
|------|---|----------|----------|---|----|----|------|----|----|
| 5777 | 1 | 10312554 | 10312565 | 2 | 6  | 12 | TG   | 30 | 4  |
| 5778 | 1 | 10313556 | 10313571 | 2 | 8  | 16 | GT   | 18 | 6  |
| 5782 | 1 | 10320694 | 10320719 | 2 | 13 | 26 | GT   | 8  | 7  |
| 5783 | 1 | 10321169 | 10321188 | 2 | 10 | 20 | GT   | 22 | 5  |
| 5784 | 1 | 10321299 | 10321314 | 2 | 8  | 16 | AC   | 22 | 7  |
| 5785 | 1 | 10321506 | 10321529 | 2 | 12 | 24 | AC   | 18 | 4  |
| 5789 | 1 | 10322899 | 10322912 | 2 | 7  | 14 | GT   | 11 | 6  |
| 5794 | 1 | 10324807 | 10324818 | 2 | 6  | 12 | GT   | 30 | 3  |
| 5800 | 1 | 10329933 | 10329950 | 3 | 6  | 18 | CCT  | 32 | 4  |
| 5806 | 1 | 10335858 | 10335909 | 2 | 26 | 52 | TG   | 6  | 9  |
| 5812 | 1 | 10346965 | 10346990 | 2 | 13 | 26 | AC   | 21 | 6  |
| 5815 | 1 | 10351617 | 10351630 | 2 | 7  | 14 | CA   | 18 | 3  |
| 5821 | 1 | 10359602 | 10359619 | 3 | 6  | 18 | TCC  | 19 | 3  |
| 5830 | 1 | 10391300 | 10391319 | 4 | 5  | 20 | AATG | 20 | 3  |
| 5833 | 1 | 10394223 | 10394240 | 2 | 9  | 18 | GT   | 11 | 7  |
| 5834 | 1 | 10394243 | 10394260 | 2 | 9  | 18 | GT   | 9  | 6  |
| 5839 | 1 | 10405024 | 10405037 | 2 | 7  | 14 | TG   | 22 | 4  |
| 5840 | 1 | 10405190 | 10405203 | 2 | 7  | 14 | GT   | 23 | 4  |
| 5844 | 1 | 10411103 | 10411126 | 3 | 8  | 24 | CAG  | 22 | 6  |
| 5845 | 1 | 10413003 | 10413014 | 2 | 6  | 12 | GT   | 28 | 3  |
| 5848 | 1 | 10421280 | 10421351 | 4 | 18 | 72 | AGAT | 19 | 9  |
| 5852 | 1 | 10423600 | 10423617 | 3 | 6  | 18 | TTG  | 7  | 4  |
| 5853 | 1 | 10426168 | 10426183 | 2 | 8  | 16 | GA   | 26 | 6  |
| 5855 | 1 | 10427051 | 10427062 | 2 | 6  | 12 | TG   | 31 | 3  |
| 5859 | 1 | 10435466 | 10435504 | 3 | 13 | 39 | GAA  | 21 | 12 |
| 5860 | 1 | 10436968 | 10437001 | 2 | 17 | 34 | AC   | 11 | 8  |
| 5861 | 1 | 10441837 | 10441866 | 3 | 10 | 30 | CCT  | 12 | 4  |
| 5863 | 1 | 10442435 | 10442460 | 2 | 13 | 26 | CA   | 16 | 5  |
| 5864 | 1 | 10442536 | 10442559 | 2 | 12 | 24 | GT   | 15 | 8  |
| 5871 | 1 | 10456594 | 10456607 | 2 | 7  | 14 | AC   | 30 | 4  |
| 5875 | 1 | 10472184 | 10472201 | 2 | 9  | 18 | CA   | 26 | 4  |
| 5876 | 1 | 10474999 | 10475038 | 2 | 20 | 40 | CA   | 12 | 11 |
| 5880 | 1 | 10480456 | 10480473 | 3 | 6  | 18 | TGT  | 20 | 4  |
| 5889 | 1 | 10542249 | 10542263 | 3 | 5  | 15 | GCA  | 22 | 4  |
| 5890 | 1 | 10547375 | 10547408 | 2 | 17 | 34 | CA   | 10 | 8  |
| 5899 | 1 | 10554785 | 10554802 | 2 | 9  | 18 | AC   | 27 | 4  |
| 5902 | 1 | 10560462 | 10560475 | 2 | 7  | 14 | GT   | 25 | 4  |
| 5906 | 1 | 10564469 | 10564482 | 2 | 7  | 14 | TG   | 19 | 3  |
| 5911 | 1 | 10584971 | 10584982 | 2 | 6  | 12 | TG   | 23 | 6  |
| 5912 | 1 | 10592288 | 10592307 | 4 | 5  | 20 | TATC | 21 | 3  |
| 5914 | 1 | 10598450 | 10598463 | 2 | 7  | 14 | CA   | 31 | 3  |
| 5922 | 1 | 10627904 | 10627927 | 3 | 8  | 24 | TTC  | 19 | 7  |
| 5924 | 1 | 10631090 | 10631119 | 2 | 15 | 30 | TG   | 13 | 5  |
| 5936 | 1 | 10661560 | 10661586 | 3 | 9  | 27 | TAA  | 12 | 10 |
| 5949 | 1 | 10698327 | 10698344 | 3 | 6  | 18 | TGA  | 13 | 3  |
| 5977 | 1 | 10757388 | 10757429 | 2 | 21 | 42 | AC   | 13 | 8  |
| 5980 | 1 | 10764930 | 10764951 | 2 | 11 | 22 | CA   | 11 | 13 |
| 5982 | 1 | 10765571 | 10765588 | 2 | 9  | 18 | GT   | 22 | 9  |
| 5983 | 1 | 10766878 | 10766895 | 2 | 9  | 18 | AC   | 27 | 3  |
| 5984 | 1 | 10767800 | 10767823 | 4 | 6  | 24 | CATA | 11 | 3  |
| 5985 | 1 | 10769431 | 10769450 | 2 | 10 | 20 | TG   | 23 | 4  |

|      |   |          |          |   |    |    |      |    |    |
|------|---|----------|----------|---|----|----|------|----|----|
| 5989 | 1 | 10775329 | 10775350 | 2 | 11 | 22 | AC   | 10 | 9  |
| 5991 | 1 | 10776163 | 10776188 | 2 | 13 | 26 | TG   | 12 | 9  |
| 5992 | 1 | 10776483 | 10776508 | 2 | 13 | 26 | GT   | 9  | 10 |
| 5994 | 1 | 10779696 | 10779707 | 2 | 6  | 12 | TC   | 30 | 3  |
| 5995 | 1 | 10779914 | 10779929 | 2 | 8  | 16 | CA   | 26 | 7  |
| 5996 | 1 | 10782065 | 10782088 | 2 | 12 | 24 | GT   | 28 | 4  |
| 5998 | 1 | 10787647 | 10787667 | 3 | 7  | 21 | GAT  | 16 | 4  |
| 6002 | 1 | 10791433 | 10791450 | 2 | 9  | 18 | GT   | 8  | 5  |
| 6003 | 1 | 10798488 | 10798520 | 3 | 11 | 33 | CAT  | 24 | 10 |
| 6004 | 1 | 10802659 | 10802670 | 2 | 6  | 12 | TA   | 18 | 5  |
| 6006 | 1 | 10808798 | 10808812 | 3 | 5  | 15 | TTG  | 24 | 7  |
| 6007 | 1 | 10817477 | 10817500 | 4 | 6  | 24 | TCTG | 24 | 4  |
| 6016 | 1 | 10835893 | 10835906 | 2 | 7  | 14 | CT   | 28 | 12 |
| 6017 | 1 | 10835907 | 10835920 | 2 | 7  | 14 | CA   | 16 | 6  |
| 6018 | 1 | 10836028 | 10836049 | 2 | 11 | 22 | TG   | 13 | 8  |
| 6024 | 1 | 10839430 | 10839441 | 2 | 6  | 12 | TG   | 33 | 8  |
| 6028 | 1 | 10862635 | 10862656 | 2 | 11 | 22 | TG   | 16 | 6  |
| 6032 | 1 | 10869214 | 10869225 | 2 | 6  | 12 | GC   | 7  | 4  |
| 6033 | 1 | 10871358 | 10871387 | 2 | 15 | 30 | TG   | 9  | 12 |
| 6034 | 1 | 10878018 | 10878029 | 2 | 6  | 12 | AC   | 26 | 4  |
| 6036 | 1 | 10880916 | 10880939 | 2 | 12 | 24 | TG   | 14 | 10 |
| 6037 | 1 | 10881078 | 10881099 | 2 | 11 | 22 | CA   | 16 | 12 |
| 6044 | 1 | 10885672 | 10885698 | 3 | 9  | 27 | AGA  | 26 | 11 |
| 6048 | 1 | 10887192 | 10887203 | 2 | 6  | 12 | TC   | 18 | 5  |
| 6050 | 1 | 10887721 | 10887742 | 2 | 11 | 22 | GT   | 26 | 10 |
| 6054 | 1 | 10890096 | 10890115 | 2 | 10 | 20 | TA   | 8  | 8  |
| 6057 | 1 | 10892378 | 10892395 | 2 | 9  | 18 | GT   | 6  | 4  |
| 6058 | 1 | 10892846 | 10892865 | 2 | 10 | 20 | GT   | 20 | 6  |
| 6061 | 1 | 10894424 | 10894435 | 2 | 6  | 12 | GT   | 22 | 11 |
| 6071 | 1 | 10927199 | 10927226 | 2 | 14 | 28 | GT   | 15 | 8  |
| 6072 | 1 | 10931267 | 10931282 | 2 | 8  | 16 | GT   | 19 | 3  |
| 6078 | 1 | 10955626 | 10955641 | 4 | 4  | 16 | CACG | 18 | 6  |
| 6090 | 1 | 10988672 | 10988691 | 2 | 10 | 20 | AC   | 14 | 12 |
| 6091 | 1 | 10988933 | 10988952 | 2 | 10 | 20 | CA   | 22 | 7  |
| 6092 | 1 | 10990671 | 10990697 | 3 | 9  | 27 | CAT  | 25 | 4  |
| 6093 | 1 | 10992948 | 10992971 | 2 | 12 | 24 | CA   | 18 | 3  |
| 6095 | 1 | 10995080 | 10995093 | 2 | 7  | 14 | CT   | 32 | 3  |
| 6096 | 1 | 10996736 | 10996763 | 2 | 14 | 28 | TG   | 9  | 10 |
| 6097 | 1 | 10996862 | 10996879 | 2 | 9  | 18 | CA   | 15 | 5  |
| 6099 | 1 | 10997437 | 10997460 | 4 | 6  | 24 | ATAA | 16 | 4  |
| 6100 | 1 | 11000493 | 11000512 | 4 | 5  | 20 | AGAC | 11 | 6  |
| 6105 | 1 | 11013851 | 11013862 | 2 | 6  | 12 | AT   | 7  | 3  |
| 6107 | 1 | 11018779 | 11018802 | 2 | 12 | 24 | TG   | 9  | 4  |
| 6108 | 1 | 11018883 | 11018918 | 2 | 18 | 36 | GT   | 10 | 11 |
| 6109 | 1 | 11019711 | 11019728 | 3 | 6  | 18 | AAC  | 17 | 7  |
| 6111 | 1 | 11026878 | 11026927 | 2 | 25 | 50 | AC   | 7  | 10 |
| 6121 | 1 | 11048540 | 11048563 | 2 | 12 | 24 | AC   | 14 | 14 |
| 6131 | 1 | 11087411 | 11087428 | 2 | 9  | 18 | AC   | 10 | 4  |
| 6134 | 1 | 11098292 | 11098309 | 3 | 6  | 18 | AAT  | 11 | 10 |
| 6135 | 1 | 11098770 | 11098785 | 4 | 4  | 16 | AAAC | 20 | 4  |
| 6142 | 1 | 11112443 | 11112457 | 3 | 5  | 15 | CAG  | 29 | 7  |

|      |   |          |          |   |    |    |      |    |    |
|------|---|----------|----------|---|----|----|------|----|----|
| 6143 | 1 | 11113756 | 11113767 | 2 | 6  | 12 | TA   | 22 | 5  |
| 6146 | 1 | 11119674 | 11119699 | 2 | 13 | 26 | GA   | 13 | 8  |
| 6150 | 1 | 11130368 | 11130391 | 4 | 6  | 24 | GAAT | 10 | 3  |
| 6155 | 1 | 11142215 | 11142228 | 2 | 7  | 14 | CA   | 21 | 3  |
| 6158 | 1 | 11149677 | 11149694 | 3 | 6  | 18 | TTG  | 10 | 7  |
| 6160 | 1 | 11158593 | 11158616 | 4 | 6  | 24 | AAAC | 23 | 4  |
| 6162 | 1 | 11159121 | 11159160 | 2 | 20 | 40 | GT   | 11 | 10 |
| 6165 | 1 | 11167718 | 11167737 | 4 | 5  | 20 | CATA | 31 | 3  |
| 6173 | 1 | 11178514 | 11178543 | 2 | 15 | 30 | CA   | 12 | 11 |
| 6191 | 1 | 11215079 | 11215092 | 2 | 7  | 14 | GT   | 16 | 11 |
| 6192 | 1 | 11218825 | 11218856 | 2 | 16 | 32 | AC   | 13 | 12 |
| 6194 | 1 | 11221803 | 11221817 | 3 | 5  | 15 | GCA  | 21 | 3  |
| 6212 | 1 | 11261933 | 11261944 | 2 | 6  | 12 | AC   | 8  | 3  |
| 6215 | 1 | 11267406 | 11267423 | 2 | 9  | 18 | AG   | 17 | 4  |
| 6219 | 1 | 11269624 | 11269635 | 2 | 6  | 12 | TG   | 30 | 3  |
| 6221 | 1 | 11271008 | 11271023 | 2 | 8  | 16 | GT   | 15 | 12 |
| 6244 | 1 | 11324189 | 11324200 | 2 | 6  | 12 | TG   | 17 | 3  |
| 6248 | 1 | 11336724 | 11336741 | 2 | 9  | 18 | GT   | 19 | 6  |
| 6249 | 1 | 11337060 | 11337083 | 2 | 12 | 24 | GT   | 17 | 8  |
| 6253 | 1 | 11340400 | 11340413 | 2 | 7  | 14 | GT   | 23 | 4  |
| 6254 | 1 | 11340621 | 11340635 | 3 | 5  | 15 | AGG  | 23 | 3  |
| 6256 | 1 | 11348496 | 11348525 | 2 | 15 | 30 | GT   | 13 | 13 |
| 6259 | 1 | 11353584 | 11353599 | 2 | 8  | 16 | AG   | 11 | 8  |
| 6261 | 1 | 11353729 | 11353744 | 4 | 4  | 16 | TTGT | 20 | 4  |
| 6264 | 1 | 11356576 | 11356607 | 2 | 16 | 32 | CT   | 13 | 12 |
| 6267 | 1 | 11359858 | 11359872 | 3 | 5  | 15 | GAG  | 17 | 5  |
| 6269 | 1 | 11360152 | 11360169 | 2 | 9  | 18 | GT   | 7  | 6  |
| 6271 | 1 | 11360533 | 11360552 | 2 | 10 | 20 | TG   | 14 | 10 |
| 6272 | 1 | 11360891 | 11360910 | 2 | 10 | 20 | AG   | 9  | 9  |
| 6282 | 1 | 11368054 | 11368065 | 2 | 6  | 12 | AC   | 17 | 10 |
| 6283 | 1 | 11368156 | 11368187 | 2 | 16 | 32 | GT   | 17 | 13 |
| 6284 | 1 | 11368322 | 11368369 | 2 | 24 | 48 | AC   | 10 | 10 |
| 6291 | 1 | 11393291 | 11393316 | 2 | 13 | 26 | GT   | 13 | 17 |
| 6294 | 1 | 11407956 | 11407975 | 2 | 10 | 20 | TG   | 19 | 6  |
| 6295 | 1 | 11408208 | 11408235 | 2 | 14 | 28 | TG   | 11 | 10 |
| 6296 | 1 | 11410041 | 11410070 | 2 | 15 | 30 | TG   | 7  | 10 |
| 6307 | 1 | 11417857 | 11417882 | 2 | 13 | 26 | CA   | 13 | 7  |
| 6309 | 1 | 11418142 | 11418185 | 2 | 22 | 44 | GT   | 15 | 12 |
| 6314 | 1 | 11433030 | 11433045 | 2 | 8  | 16 | CA   | 23 | 6  |
| 6316 | 1 | 11435682 | 11435696 | 3 | 5  | 15 | CCT  | 19 | 3  |
| 6317 | 1 | 11436437 | 11436456 | 2 | 10 | 20 | GT   | 21 | 12 |
| 6319 | 1 | 11436824 | 11436837 | 2 | 7  | 14 | AC   | 19 | 4  |
| 6321 | 1 | 11437624 | 11437637 | 2 | 7  | 14 | GT   | 18 | 11 |
| 6323 | 1 | 11441040 | 11441063 | 2 | 12 | 24 | TG   | 11 | 12 |
| 6329 | 1 | 11454888 | 11454908 | 3 | 7  | 21 | TCC  | 26 | 9  |
| 6331 | 1 | 11456273 | 11456296 | 2 | 12 | 24 | TG   | 20 | 11 |
| 6332 | 1 | 11459332 | 11459343 | 2 | 6  | 12 | TG   | 28 | 3  |
| 6335 | 1 | 11462748 | 11462763 | 2 | 8  | 16 | AC   | 22 | 5  |
| 6344 | 1 | 11506924 | 11506939 | 2 | 8  | 16 | GT   | 22 | 12 |
| 6345 | 1 | 11506942 | 11506961 | 4 | 5  | 20 | GTGC | 25 | 15 |
| 6347 | 1 | 11508405 | 11508420 | 2 | 8  | 16 | CA   | 19 | 13 |



|      |   |          |          |   |    |    |      |    |    |
|------|---|----------|----------|---|----|----|------|----|----|
| 6350 | 1 | 11516629 | 11516660 | 2 | 16 | 32 | TG   | 6  | 8  |
| 6352 | 1 | 11517725 | 11517744 | 4 | 5  | 20 | GTTT | 21 | 5  |
| 6360 | 1 | 11538788 | 11538808 | 3 | 7  | 21 | AAG  | 23 | 6  |
| 6361 | 1 | 11543681 | 11543694 | 2 | 7  | 14 | AC   | 12 | 3  |
| 6365 | 1 | 11548982 | 11549001 | 2 | 10 | 20 | GT   | 13 | 12 |
| 6367 | 1 | 11551476 | 11551491 | 4 | 4  | 16 | GACA | 24 | 4  |
| 6370 | 1 | 11562862 | 11562903 | 2 | 21 | 42 | GT   | 7  | 9  |
| 6371 | 1 | 11562993 | 11563016 | 2 | 12 | 24 | TG   | 9  | 9  |
| 6374 | 1 | 11565933 | 11565950 | 2 | 9  | 18 | TG   | 19 | 4  |
| 6377 | 1 | 11570710 | 11570733 | 2 | 12 | 24 | TG   | 15 | 7  |
| 6379 | 1 | 11576110 | 11576137 | 2 | 14 | 28 | CA   | 13 | 7  |
| 6387 | 1 | 11587787 | 11587802 | 4 | 4  | 16 | TATT | 28 | 4  |
| 6397 | 1 | 11596521 | 11596544 | 2 | 12 | 24 | TG   | 17 | 6  |
| 6398 | 1 | 11596691 | 11596710 | 2 | 10 | 20 | TG   | 17 | 5  |
| 6400 | 1 | 11598787 | 11598816 | 2 | 15 | 30 | AC   | 15 | 6  |
| 6406 | 1 | 11603731 | 11603746 | 4 | 4  | 16 | ACAA | 22 | 3  |
| 6407 | 1 | 11604128 | 11604145 | 2 | 9  | 18 | TG   | 17 | 9  |
| 6408 | 1 | 11604530 | 11604541 | 2 | 6  | 12 | CA   | 22 | 5  |
| 6410 | 1 | 11606952 | 11606973 | 2 | 11 | 22 | AC   | 15 | 13 |
| 6413 | 1 | 11610531 | 11610563 | 3 | 11 | 33 | CTC  | 28 | 7  |
| 6415 | 1 | 11613660 | 11613685 | 2 | 13 | 26 | GT   | 17 | 6  |
| 6416 | 1 | 11615853 | 11615876 | 2 | 12 | 24 | TG   | 19 | 8  |
| 6417 | 1 | 11621229 | 11621244 | 2 | 8  | 16 | GT   | 20 | 4  |
| 6422 | 1 | 11634619 | 11634630 | 2 | 6  | 12 | GT   | 30 | 3  |
| 6424 | 1 | 11639371 | 11639388 | 3 | 6  | 18 | TGA  | 26 | 3  |
| 6425 | 1 | 11639498 | 11639511 | 2 | 7  | 14 | AC   | 8  | 3  |
| 6426 | 1 | 11639770 | 11639785 | 2 | 8  | 16 | TC   | 27 | 4  |
| 6427 | 1 | 11642953 | 11642992 | 4 | 10 | 40 | TCTT | 15 | 7  |
| 6429 | 1 | 11645991 | 11646028 | 2 | 19 | 38 | GT   | 11 | 14 |
| 6438 | 1 | 11664404 | 11664431 | 4 | 7  | 28 | TCAA | 17 | 7  |
| 6439 | 1 | 11665268 | 11665283 | 2 | 8  | 16 | GT   | 11 | 6  |
| 6444 | 1 | 11676601 | 11676616 | 2 | 8  | 16 | CA   | 10 | 10 |
| 6445 | 1 | 11679006 | 11679033 | 2 | 14 | 28 | GT   | 9  | 5  |
| 6446 | 1 | 11679182 | 11679201 | 2 | 10 | 20 | CA   | 22 | 9  |
| 6450 | 1 | 11682603 | 11682626 | 4 | 6  | 24 | AACC | 15 | 7  |
| 6452 | 1 | 11684472 | 11684489 | 2 | 9  | 18 | TG   | 15 | 3  |
| 6453 | 1 | 11684601 | 11684614 | 2 | 7  | 14 | CA   | 16 | 13 |
| 6454 | 1 | 11685010 | 11685027 | 2 | 9  | 18 | GA   | 22 | 5  |
| 6455 | 1 | 11685869 | 11685886 | 2 | 9  | 18 | AC   | 27 | 5  |
| 6456 | 1 | 11686066 | 11686085 | 2 | 10 | 20 | AC   | 21 | 7  |
| 6459 | 1 | 11690349 | 11690370 | 2 | 11 | 22 | CA   | 25 | 5  |
| 6461 | 1 | 11690509 | 11690530 | 2 | 11 | 22 | AC   | 20 | 12 |
| 6470 | 1 | 11695642 | 11695685 | 4 | 11 | 44 | ATGG | 20 | 7  |
| 6474 | 1 | 11706645 | 11706658 | 2 | 7  | 14 | CA   | 12 | 9  |
| 6475 | 1 | 11706808 | 11706823 | 2 | 8  | 16 | TG   | 10 | 9  |
| 6476 | 1 | 11706964 | 11706991 | 2 | 14 | 28 | GT   | 10 | 5  |
| 6477 | 1 | 11710006 | 11710017 | 2 | 6  | 12 | GA   | 25 | 3  |
| 6478 | 1 | 11710135 | 11710162 | 2 | 14 | 28 | GT   | 11 | 12 |
| 6479 | 1 | 11715043 | 11715066 | 2 | 12 | 24 | TG   | 18 | 5  |
| 6482 | 1 | 11719691 | 11719712 | 2 | 11 | 22 | AC   | 20 | 8  |
| 6485 | 1 | 11725746 | 11725787 | 2 | 21 | 42 | AC   | 6  | 6  |

|      |   |          |          |   |    |    |      |    |    |
|------|---|----------|----------|---|----|----|------|----|----|
| 6486 | 1 | 11725891 | 11725908 | 2 | 9  | 18 | TC   | 19 | 6  |
| 6492 | 1 | 11727811 | 11727844 | 2 | 17 | 34 | GT   | 9  | 6  |
| 6497 | 1 | 11738016 | 11738055 | 2 | 20 | 40 | AC   | 11 | 12 |
| 6499 | 1 | 11741153 | 11741170 | 2 | 9  | 18 | CA   | 19 | 6  |
| 6508 | 1 | 11748363 | 11748386 | 2 | 12 | 24 | TC   | 20 | 6  |
| 6509 | 1 | 11753388 | 11753402 | 3 | 5  | 15 | TCT  | 20 | 4  |
| 6513 | 1 | 11754167 | 11754178 | 2 | 6  | 12 | AG   | 18 | 4  |
| 6514 | 1 | 11755647 | 11755686 | 4 | 10 | 40 | GATA | 21 | 11 |
| 6520 | 1 | 11767773 | 11767786 | 2 | 7  | 14 | AC   | 10 | 8  |
| 6527 | 1 | 11784040 | 11784069 | 2 | 15 | 30 | CT   | 12 | 10 |
| 6540 | 1 | 11811701 | 11811716 | 2 | 8  | 16 | GT   | 18 | 6  |
| 6543 | 1 | 11812025 | 11812036 | 2 | 6  | 12 | AC   | 20 | 10 |
| 6545 | 1 | 11812468 | 11812489 | 2 | 11 | 22 | CA   | 14 | 4  |
| 6546 | 1 | 11814283 | 11814300 | 2 | 9  | 18 | GT   | 26 | 8  |
| 6547 | 1 | 11814421 | 11814446 | 2 | 13 | 26 | GT   | 18 | 8  |
| 6555 | 1 | 11819408 | 11819428 | 3 | 7  | 21 | TCC  | 22 | 4  |
| 6556 | 1 | 11820781 | 11820794 | 2 | 7  | 14 | AC   | 27 | 5  |
| 6577 | 1 | 11844615 | 11844628 | 2 | 7  | 14 | AC   | 21 | 3  |
| 6578 | 1 | 11847274 | 11847287 | 2 | 7  | 14 | TA   | 25 | 6  |
| 6581 | 1 | 11852813 | 11852824 | 2 | 6  | 12 | AC   | 23 | 3  |
| 6587 | 1 | 11858611 | 11858637 | 3 | 9  | 27 | TGC  | 27 | 4  |
| 6592 | 1 | 11866538 | 11866573 | 2 | 18 | 36 | GT   | 13 | 9  |
| 6593 | 1 | 11866768 | 11866782 | 3 | 5  | 15 | CTC  | 22 | 4  |
| 6594 | 1 | 11876046 | 11876061 | 4 | 4  | 16 | ATTC | 23 | 3  |
| 6611 | 1 | 11933151 | 11933170 | 2 | 10 | 20 | GT   | 24 | 7  |
| 6613 | 1 | 11937041 | 11937066 | 2 | 13 | 26 | TG   | 18 | 8  |
| 6615 | 1 | 11944497 | 11944516 | 4 | 5  | 20 | AGAA | 27 | 4  |
| 6616 | 1 | 11945549 | 11945580 | 2 | 16 | 32 | TG   | 19 | 14 |
| 6620 | 1 | 11951165 | 11951186 | 2 | 11 | 22 | CA   | 17 | 10 |
| 6640 | 1 | 11972400 | 11972419 | 2 | 10 | 20 | GA   | 7  | 5  |
| 6645 | 1 | 11978940 | 11978975 | 2 | 18 | 36 | AC   | 6  | 6  |
| 6665 | 1 | 12020723 | 12020740 | 2 | 9  | 18 | AC   | 9  | 5  |
| 6666 | 1 | 12020814 | 12020828 | 3 | 5  | 15 | CAG  | 24 | 3  |
| 6677 | 1 | 12042861 | 12042899 | 3 | 13 | 39 | ATC  | 22 | 13 |
| 6683 | 1 | 12047732 | 12047765 | 2 | 17 | 34 | CT   | 10 | 10 |
| 6685 | 1 | 12051279 | 12051296 | 2 | 9  | 18 | TC   | 19 | 3  |
| 6696 | 1 | 12065132 | 12065145 | 2 | 7  | 14 | TG   | 17 | 7  |
| 6699 | 1 | 12065901 | 12065924 | 3 | 8  | 24 | GTT  | 22 | 5  |
| 6705 | 1 | 12094207 | 12094226 | 2 | 10 | 20 | TA   | 16 | 6  |
| 6709 | 1 | 12102686 | 12102699 | 2 | 7  | 14 | AC   | 13 | 5  |
| 6718 | 1 | 12113025 | 12113040 | 4 | 4  | 16 | TTTG | 19 | 4  |
| 6719 | 1 | 12113128 | 12113151 | 4 | 6  | 24 | TATT | 17 | 4  |
| 6727 | 1 | 12137506 | 12137529 | 4 | 6  | 24 | AAAC | 20 | 4  |
| 6728 | 1 | 12140226 | 12140245 | 2 | 10 | 20 | AC   | 17 | 14 |
| 6738 | 1 | 12154371 | 12154402 | 2 | 16 | 32 | CA   | 7  | 10 |
| 6742 | 1 | 12159045 | 12159066 | 2 | 11 | 22 | CA   | 16 | 7  |
| 6743 | 1 | 12159120 | 12159145 | 2 | 13 | 26 | CA   | 19 | 13 |
| 6744 | 1 | 12162213 | 12162232 | 4 | 5  | 20 | AAAC | 25 | 4  |
| 6748 | 1 | 12168259 | 12168270 | 2 | 6  | 12 | GT   | 23 | 17 |
| 6755 | 1 | 12174510 | 12174531 | 2 | 11 | 22 | AT   | 7  | 7  |
| 6756 | 1 | 12177184 | 12177199 | 4 | 4  | 16 | CAGA | 23 | 3  |

|      |   |          |          |   |    |    |      |    |    |
|------|---|----------|----------|---|----|----|------|----|----|
| 6759 | 1 | 12181003 | 12181030 | 2 | 14 | 28 | GT   | 9  | 7  |
| 6763 | 1 | 12201591 | 12201611 | 3 | 7  | 21 | CTG  | 34 | 4  |
| 6778 | 1 | 12217664 | 12217691 | 2 | 14 | 28 | AC   | 10 | 11 |
| 6781 | 1 | 12218929 | 12218946 | 3 | 6  | 18 | ATT  | 16 | 4  |
| 6785 | 1 | 12219578 | 12219591 | 2 | 7  | 14 | TG   | 15 | 8  |
| 6790 | 1 | 12224669 | 12224696 | 2 | 14 | 28 | TG   | 14 | 9  |
| 6801 | 1 | 12236272 | 12236286 | 3 | 5  | 15 | CCT  | 24 | 4  |
| 6810 | 1 | 12253268 | 12253295 | 2 | 14 | 28 | GT   | 25 | 9  |
| 6811 | 1 | 12255150 | 12255161 | 2 | 6  | 12 | CT   | 27 | 7  |
| 6813 | 1 | 12257950 | 12257965 | 4 | 4  | 16 | GACT | 15 | 6  |
| 6814 | 1 | 12257966 | 12257985 | 4 | 5  | 20 | GGCT | 16 | 7  |
| 6816 | 1 | 12260593 | 12260608 | 2 | 8  | 16 | CA   | 14 | 13 |
| 6817 | 1 | 12260611 | 12260624 | 2 | 7  | 14 | CA   | 15 | 11 |
| 6825 | 1 | 12276019 | 12276050 | 2 | 16 | 32 | TC   | 8  | 7  |
| 6829 | 1 | 12282442 | 12282453 | 2 | 6  | 12 | GT   | 35 | 3  |
| 6830 | 1 | 12286281 | 12286296 | 2 | 8  | 16 | AC   | 26 | 3  |
| 6840 | 1 | 12309394 | 12309413 | 2 | 10 | 20 | TG   | 19 | 6  |
| 6841 | 1 | 12314042 | 12314059 | 2 | 9  | 18 | CA   | 19 | 4  |
| 6861 | 1 | 12368663 | 12368690 | 2 | 14 | 28 | TG   | 14 | 9  |
| 6864 | 1 | 12369806 | 12369833 | 2 | 14 | 28 | GT   | 6  | 4  |
| 6865 | 1 | 12375172 | 12375199 | 2 | 14 | 28 | CA   | 6  | 7  |
| 6867 | 1 | 12375784 | 12375803 | 2 | 10 | 20 | TG   | 7  | 7  |
| 6869 | 1 | 12378663 | 12378676 | 2 | 7  | 14 | AC   | 18 | 5  |
| 6873 | 1 | 12384591 | 12384614 | 3 | 8  | 24 | CTG  | 20 | 3  |
| 6884 | 1 | 12389199 | 12389234 | 2 | 18 | 36 | TG   | 20 | 11 |
| 6908 | 1 | 12476335 | 12476358 | 2 | 12 | 24 | TC   | 13 | 9  |
| 6915 | 1 | 12487227 | 12487260 | 2 | 17 | 34 | AC   | 9  | 13 |
| 6918 | 1 | 12491631 | 12491646 | 4 | 4  | 16 | TCTT | 25 | 7  |
| 6938 | 1 | 12542170 | 12542187 | 2 | 9  | 18 | AC   | 17 | 13 |
| 6939 | 1 | 12542573 | 12542610 | 2 | 19 | 38 | CA   | 13 | 10 |
| 6945 | 1 | 12552828 | 12552841 | 2 | 7  | 14 | CA   | 17 | 3  |
| 6956 | 1 | 12573987 | 12573998 | 2 | 6  | 12 | AC   | 22 | 6  |
| 6965 | 1 | 12610387 | 12610404 | 3 | 6  | 18 | AAT  | 24 | 8  |
| 6970 | 1 | 12622063 | 12622078 | 2 | 8  | 16 | CA   | 18 | 7  |
| 6982 | 1 | 12643440 | 12643453 | 2 | 7  | 14 | AG   | 19 | 5  |
| 6983 | 1 | 12644003 | 12644017 | 3 | 5  | 15 | AAT  | 9  | 3  |
| 7010 | 1 | 12696268 | 12696281 | 2 | 7  | 14 | TG   | 22 | 15 |
| 7011 | 1 | 12696283 | 12696296 | 2 | 7  | 14 | GT   | 16 | 12 |
| 7018 | 1 | 12701308 | 12701323 | 4 | 4  | 16 | GGTT | 24 | 6  |
| 7023 | 1 | 12721740 | 12721754 | 3 | 5  | 15 | TCC  | 17 | 3  |
| 7024 | 1 | 12723815 | 12723836 | 2 | 11 | 22 | AC   | 9  | 9  |
| 7027 | 1 | 12732186 | 12732205 | 4 | 5  | 20 | AAAT | 19 | 6  |
| 7029 | 1 | 12741903 | 12741918 | 4 | 4  | 16 | AAAG | 25 | 3  |
| 7032 | 1 | 12743761 | 12743776 | 2 | 8  | 16 | GA   | 25 | 4  |
| 7035 | 1 | 12762374 | 12762401 | 4 | 7  | 28 | AAGA | 18 | 7  |
| 7043 | 1 | 12789750 | 12789763 | 2 | 7  | 14 | AT   | 18 | 5  |
| 7046 | 1 | 12803166 | 12803180 | 3 | 5  | 15 | AAG  | 24 | 5  |
| 7054 | 1 | 12832836 | 12832855 | 2 | 10 | 20 | AC   | 21 | 5  |
| 7059 | 1 | 12842379 | 12842390 | 2 | 6  | 12 | GT   | 17 | 5  |
| 7064 | 1 | 12852309 | 12852324 | 4 | 4  | 16 | TTTG | 20 | 5  |
| 7066 | 1 | 12854471 | 12854482 | 2 | 6  | 12 | AC   | 7  | 6  |

|      |   |          |          |   |    |    |      |    |    |
|------|---|----------|----------|---|----|----|------|----|----|
| 7095 | 1 | 12883142 | 12883173 | 2 | 16 | 32 | GT   | 14 | 6  |
| 7096 | 1 | 12883258 | 12883277 | 2 | 10 | 20 | GT   | 17 | 4  |
| 7097 | 1 | 12893584 | 12893603 | 2 | 10 | 20 | AC   | 21 | 4  |
| 7102 | 1 | 12904957 | 12904978 | 2 | 11 | 22 | GT   | 23 | 8  |
| 7108 | 1 | 12911384 | 12911409 | 2 | 13 | 26 | AG   | 18 | 5  |
| 7115 | 1 | 12959757 | 12959786 | 2 | 15 | 30 | AC   | 8  | 5  |
| 7123 | 1 | 12995860 | 12995880 | 3 | 7  | 21 | CTG  | 6  | 6  |
| 7130 | 1 | 13004221 | 13004236 | 2 | 8  | 16 | AG   | 20 | 4  |
| 7140 | 1 | 13045718 | 13045739 | 2 | 11 | 22 | GT   | 16 | 10 |
| 7146 | 1 | 13072164 | 13072178 | 3 | 5  | 15 | AAT  | 10 | 3  |
| 7161 | 1 | 13116924 | 13116943 | 2 | 10 | 20 | AC   | 18 | 6  |
| 7166 | 1 | 13132411 | 13132424 | 2 | 7  | 14 | AT   | 8  | 3  |
| 7185 | 1 | 13159708 | 13159737 | 2 | 15 | 30 | AC   | 9  | 12 |
| 7189 | 1 | 13177156 | 13177173 | 2 | 9  | 18 | AG   | 21 | 5  |
| 7194 | 1 | 13178448 | 13178473 | 2 | 13 | 26 | CA   | 11 | 6  |
| 7196 | 1 | 13178649 | 13178666 | 2 | 9  | 18 | GA   | 19 | 3  |
| 7204 | 1 | 13183856 | 13183877 | 2 | 11 | 22 | GA   | 12 | 6  |
| 7205 | 1 | 13183913 | 13183928 | 2 | 8  | 16 | GA   | 17 | 3  |
| 7207 | 1 | 13187005 | 13187020 | 4 | 4  | 16 | AAAC | 30 | 4  |
| 7240 | 1 | 13236790 | 13236805 | 2 | 8  | 16 | AC   | 26 | 3  |
| 7252 | 1 | 13266880 | 13266906 | 3 | 9  | 27 | CTC  | 24 | 4  |
| 7253 | 1 | 13267506 | 13267517 | 2 | 6  | 12 | GA   | 32 | 3  |
| 7262 | 1 | 13292740 | 13292754 | 3 | 5  | 15 | CCT  | 30 | 3  |
| 7263 | 1 | 13292921 | 13292964 | 2 | 22 | 44 | AC   | 9  | 8  |
| 7269 | 1 | 13305980 | 13305994 | 3 | 5  | 15 | CCT  | 7  | 5  |
| 7270 | 1 | 13306827 | 13306844 | 3 | 6  | 18 | AAG  | 25 | 3  |
| 7287 | 1 | 13330914 | 13330925 | 2 | 6  | 12 | CA   | 22 | 4  |
| 7288 | 1 | 13332011 | 13332034 | 2 | 12 | 24 | TC   | 18 | 8  |
| 7323 | 1 | 13384363 | 13384376 | 2 | 7  | 14 | GT   | 21 | 3  |
| 7333 | 1 | 13394446 | 13394465 | 2 | 10 | 20 | TG   | 23 | 5  |
| 7335 | 1 | 13399011 | 13399036 | 2 | 13 | 26 | TC   | 13 | 7  |
| 7337 | 1 | 13399080 | 13399091 | 2 | 6  | 12 | AC   | 13 | 8  |
| 7348 | 1 | 13417947 | 13417967 | 3 | 7  | 21 | ATT  | 14 | 4  |
| 7349 | 1 | 13420231 | 13420282 | 4 | 13 | 52 | TATC | 18 | 9  |
| 7350 | 1 | 13420463 | 13420477 | 3 | 5  | 15 | AAC  | 26 | 4  |
| 7351 | 1 | 13420607 | 13420662 | 4 | 14 | 56 | AGAT | 15 | 12 |
| 7352 | 1 | 13422011 | 13422025 | 3 | 5  | 15 | TTG  | 21 | 5  |
| 7353 | 1 | 13427369 | 13427389 | 3 | 7  | 21 | TGA  | 26 | 8  |
| 7359 | 1 | 13436890 | 13436907 | 3 | 6  | 18 | TAA  | 12 | 8  |
| 7374 | 1 | 13457359 | 13457398 | 2 | 20 | 40 | AC   | 10 | 12 |
| 7376 | 1 | 13461384 | 13461399 | 2 | 8  | 16 | AC   | 19 | 7  |
| 7385 | 1 | 13479644 | 13479669 | 2 | 13 | 26 | AC   | 10 | 7  |
| 7386 | 1 | 13481348 | 13481368 | 3 | 7  | 21 | CAG  | 28 | 8  |
| 7401 | 1 | 13493149 | 13493178 | 2 | 15 | 30 | GT   | 10 | 13 |
| 7406 | 1 | 13508038 | 13508053 | 2 | 8  | 16 | CA   | 19 | 4  |
| 7409 | 1 | 13511293 | 13511308 | 4 | 4  | 16 | AAAT | 22 | 4  |
| 7413 | 1 | 13520450 | 13520465 | 2 | 8  | 16 | TG   | 16 | 5  |
| 7417 | 1 | 13525505 | 13525516 | 2 | 6  | 12 | AC   | 33 | 3  |
| 7424 | 1 | 13547082 | 13547095 | 2 | 7  | 14 | TG   | 28 | 3  |
| 7425 | 1 | 13549541 | 13549552 | 2 | 6  | 12 | TG   | 17 | 5  |
| 7437 | 1 | 13564386 | 13564401 | 2 | 8  | 16 | AC   | 16 | 3  |

|      |   |          |          |   |    |    |      |    |    |
|------|---|----------|----------|---|----|----|------|----|----|
| 7442 | 1 | 13573084 | 13573095 | 2 | 6  | 12 | TA   | 16 | 8  |
| 7444 | 1 | 13574646 | 13574663 | 3 | 6  | 18 | AAC  | 21 | 12 |
| 7446 | 1 | 13575011 | 13575026 | 4 | 4  | 16 | CAAA | 21 | 10 |
| 7456 | 1 | 13600575 | 13600595 | 3 | 7  | 21 | AGG  | 13 | 3  |
| 7457 | 1 | 13602563 | 13602574 | 2 | 6  | 12 | CA   | 33 | 4  |
| 7458 | 1 | 13602941 | 13602964 | 2 | 12 | 24 | GT   | 27 | 3  |
| 7463 | 1 | 13613867 | 13613882 | 2 | 8  | 16 | CA   | 27 | 4  |
| 7483 | 1 | 13657252 | 13657269 | 2 | 9  | 18 | GT   | 29 | 5  |
| 7488 | 1 | 13664476 | 13664490 | 3 | 5  | 15 | GCC  | 23 | 3  |
| 7495 | 1 | 13698591 | 13698614 | 3 | 8  | 24 | TGA  | 29 | 9  |
| 7507 | 1 | 13723861 | 13723881 | 3 | 7  | 21 | AAG  | 21 | 3  |
| 7516 | 1 | 13733053 | 13733067 | 3 | 5  | 15 | TTC  | 21 | 3  |
| 7518 | 1 | 13734778 | 13734797 | 4 | 5  | 20 | TTTC | 16 | 6  |
| 7520 | 1 | 13738962 | 13738979 | 2 | 9  | 18 | TC   | 30 | 6  |
| 7521 | 1 | 13743090 | 13743107 | 2 | 9  | 18 | TG   | 20 | 7  |
| 7522 | 1 | 13744053 | 13744070 | 2 | 9  | 18 | TC   | 23 | 4  |
| 7529 | 1 | 13758995 | 13759014 | 2 | 10 | 20 | CA   | 17 | 11 |
| 7532 | 1 | 13759157 | 13759168 | 2 | 6  | 12 | GA   | 20 | 7  |
| 7533 | 1 | 13759226 | 13759241 | 2 | 8  | 16 | GA   | 22 | 3  |
| 7535 | 1 | 13771809 | 13771838 | 2 | 15 | 30 | CA   | 20 | 7  |
| 7544 | 1 | 13797429 | 13797460 | 4 | 8  | 32 | CTTT | 24 | 5  |
| 7547 | 1 | 13807125 | 13807140 | 2 | 8  | 16 | TG   | 14 | 4  |
| 7554 | 1 | 13823735 | 13823768 | 2 | 17 | 34 | AC   | 8  | 13 |
| 7555 | 1 | 13823939 | 13823962 | 4 | 6  | 24 | CAAA | 27 | 5  |
| 7557 | 1 | 13832030 | 13832047 | 2 | 9  | 18 | GT   | 27 | 7  |
| 7563 | 1 | 13840414 | 13840439 | 2 | 13 | 26 | TG   | 14 | 9  |
| 7566 | 1 | 13846116 | 13846127 | 2 | 6  | 12 | TC   | 28 | 6  |
| 7569 | 1 | 13850497 | 13850522 | 2 | 13 | 26 | GT   | 17 | 10 |
| 7570 | 1 | 13851901 | 13851916 | 2 | 8  | 16 | AC   | 22 | 5  |
| 7578 | 1 | 13869233 | 13869244 | 2 | 6  | 12 | GA   | 26 | 3  |
| 7580 | 1 | 13881150 | 13881181 | 2 | 16 | 32 | CA   | 8  | 7  |
| 7583 | 1 | 13883407 | 13883418 | 2 | 6  | 12 | AC   | 24 | 8  |
| 7584 | 1 | 13883421 | 13883434 | 2 | 7  | 14 | AC   | 22 | 8  |
| 7591 | 1 | 13888064 | 13888093 | 2 | 15 | 30 | GT   | 12 | 7  |
| 7593 | 1 | 13889562 | 13889579 | 2 | 9  | 18 | AG   | 17 | 6  |
| 7600 | 1 | 13897505 | 13897528 | 2 | 12 | 24 | GA   | 26 | 5  |
| 7602 | 1 | 13899599 | 13899618 | 4 | 5  | 20 | TTAT | 17 | 8  |
| 7606 | 1 | 13907467 | 13907478 | 2 | 6  | 12 | TG   | 25 | 3  |
| 7623 | 1 | 13944490 | 13944507 | 2 | 9  | 18 | AC   | 16 | 4  |
| 7625 | 1 | 13953824 | 13953837 | 2 | 7  | 14 | AC   | 21 | 5  |
| 7629 | 1 | 13962965 | 13962978 | 2 | 7  | 14 | CA   | 22 | 5  |
| 7647 | 1 | 13981693 | 13981710 | 3 | 6  | 18 | TGG  | 27 | 6  |
| 7651 | 1 | 13984548 | 13984573 | 2 | 13 | 26 | TG   | 14 | 6  |
| 7653 | 1 | 13984655 | 13984682 | 2 | 14 | 28 | AG   | 10 | 10 |
| 7659 | 1 | 14000870 | 14000929 | 2 | 30 | 60 | TG   | 13 | 9  |
| 7665 | 1 | 14007646 | 14007661 | 2 | 8  | 16 | TA   | 12 | 3  |
| 7667 | 1 | 14014708 | 14014731 | 3 | 8  | 24 | AGC  | 14 | 5  |
| 7673 | 1 | 14033952 | 14033975 | 2 | 12 | 24 | AC   | 26 | 5  |
| 7675 | 1 | 14037190 | 14037204 | 3 | 5  | 15 | GCT  | 30 | 3  |
| 7676 | 1 | 14056661 | 14056674 | 2 | 7  | 14 | TG   | 29 | 3  |
| 7679 | 1 | 14067931 | 14067960 | 2 | 15 | 30 | AC   | 10 | 10 |

|      |   |          |          |   |    |    |      |    |    |
|------|---|----------|----------|---|----|----|------|----|----|
| 7681 | 1 | 14076080 | 14076101 | 2 | 11 | 22 | CA   | 21 | 25 |
| 7685 | 1 | 14085319 | 14085333 | 3 | 5  | 15 | GGA  | 25 | 5  |
| 7689 | 1 | 14099180 | 14099194 | 3 | 5  | 15 | TGT  | 21 | 3  |
| 7693 | 1 | 14103590 | 14103607 | 3 | 6  | 18 | CCT  | 17 | 7  |
| 7694 | 1 | 14104288 | 14104305 | 2 | 9  | 18 | TG   | 13 | 7  |
| 7699 | 1 | 14110575 | 14110596 | 2 | 11 | 22 | TG   | 17 | 7  |
| 7704 | 1 | 14117628 | 14117641 | 2 | 7  | 14 | TG   | 20 | 3  |
| 7710 | 1 | 14127209 | 14127224 | 4 | 4  | 16 | TTTA | 32 | 4  |
| 7718 | 1 | 14140003 | 14140036 | 2 | 17 | 34 | AC   | 10 | 8  |
| 7720 | 1 | 14140518 | 14140547 | 2 | 15 | 30 | AC   | 16 | 10 |
| 7721 | 1 | 14143715 | 14143754 | 2 | 20 | 40 | CT   | 19 | 5  |
| 7727 | 1 | 14156449 | 14156462 | 2 | 7  | 14 | TG   | 22 | 8  |
| 7731 | 1 | 14165753 | 14165770 | 2 | 9  | 18 | CA   | 17 | 6  |
| 7734 | 1 | 14175642 | 14175659 | 3 | 6  | 18 | CAG  | 29 | 3  |
| 7743 | 1 | 14195443 | 14195463 | 3 | 7  | 21 | GAT  | 31 | 4  |
| 7744 | 1 | 14197663 | 14197702 | 4 | 10 | 40 | TCTT | 14 | 8  |
| 7755 | 1 | 14224163 | 14224190 | 2 | 14 | 28 | GT   | 20 | 7  |
| 7758 | 1 | 14227805 | 14227818 | 2 | 7  | 14 | AC   | 27 | 3  |
| 7768 | 1 | 14243341 | 14243362 | 2 | 11 | 22 | GA   | 6  | 6  |
| 7770 | 1 | 14246663 | 14246712 | 2 | 25 | 50 | TG   | 8  | 12 |
| 7771 | 1 | 14248684 | 14248715 | 2 | 16 | 32 | GT   | 15 | 13 |
| 7786 | 1 | 14292057 | 14292080 | 2 | 12 | 24 | TG   | 17 | 13 |
| 7788 | 1 | 14292888 | 14292902 | 3 | 5  | 15 | ACT  | 23 | 3  |
| 7796 | 1 | 14305375 | 14305404 | 2 | 15 | 30 | TG   | 6  | 7  |
| 7797 | 1 | 14305790 | 14305833 | 2 | 22 | 44 | CA   | 13 | 11 |
| 7798 | 1 | 14306700 | 14306737 | 2 | 19 | 38 | CA   | 12 | 13 |
| 7802 | 1 | 14309919 | 14309936 | 2 | 9  | 18 | CA   | 25 | 10 |
| 7803 | 1 | 14310474 | 14310499 | 2 | 13 | 26 | AC   | 20 | 10 |
| 7804 | 1 | 14311019 | 14311057 | 3 | 13 | 39 | CTT  | 9  | 10 |
| 7810 | 1 | 14312918 | 14312935 | 3 | 6  | 18 | AAG  | 15 | 4  |
| 7813 | 1 | 14316157 | 14316168 | 2 | 6  | 12 | AG   | 13 | 8  |
| 7819 | 1 | 14318154 | 14318183 | 2 | 15 | 30 | GT   | 15 | 12 |
| 7822 | 1 | 14320637 | 14320684 | 3 | 16 | 48 | GAT  | 18 | 8  |
| 7824 | 1 | 14323829 | 14323849 | 3 | 7  | 21 | ATG  | 11 | 5  |
| 7826 | 1 | 14324432 | 14324459 | 2 | 14 | 28 | AC   | 12 | 16 |
| 7836 | 1 | 14341022 | 14341057 | 2 | 18 | 36 | CT   | 8  | 7  |
| 7837 | 1 | 14347651 | 14347672 | 2 | 11 | 22 | GT   | 14 | 8  |
| 7838 | 1 | 14347732 | 14347771 | 2 | 20 | 40 | TG   | 10 | 11 |
| 7844 | 1 | 14362563 | 14362582 | 2 | 10 | 20 | AC   | 19 | 10 |
| 7854 | 1 | 14372435 | 14372458 | 2 | 12 | 24 | CA   | 14 | 5  |
| 7855 | 1 | 14372647 | 14372666 | 2 | 10 | 20 | CA   | 19 | 5  |
| 7858 | 1 | 14375118 | 14375131 | 2 | 7  | 14 | GT   | 28 | 5  |
| 7861 | 1 | 14386702 | 14386733 | 2 | 16 | 32 | TG   | 11 | 10 |
| 7864 | 1 | 14393612 | 14393639 | 2 | 14 | 28 | GT   | 17 | 7  |
| 7866 | 1 | 14396751 | 14396780 | 2 | 15 | 30 | TG   | 12 | 9  |
| 7871 | 1 | 14402230 | 14402257 | 2 | 14 | 28 | AC   | 10 | 6  |
| 7877 | 1 | 14436882 | 14436905 | 2 | 12 | 24 | TG   | 21 | 6  |
| 7880 | 1 | 14444089 | 14444118 | 3 | 10 | 30 | GAG  | 21 | 7  |
| 7881 | 1 | 14445458 | 14445469 | 2 | 6  | 12 | GT   | 22 | 3  |
| 7886 | 1 | 14450612 | 14450643 | 2 | 16 | 32 | CA   | 19 | 8  |
| 7887 | 1 | 14453363 | 14453382 | 2 | 10 | 20 | AC   | 24 | 4  |

|      |   |          |          |   |    |    |      |    |    |
|------|---|----------|----------|---|----|----|------|----|----|
| 7889 | 1 | 14455219 | 14455246 | 2 | 14 | 28 | AC   | 20 | 8  |
| 7892 | 1 | 14461287 | 14461330 | 2 | 22 | 44 | AC   | 11 | 12 |
| 7894 | 1 | 14462077 | 14462096 | 2 | 10 | 20 | GT   | 16 | 6  |
| 7896 | 1 | 14464816 | 14464829 | 2 | 7  | 14 | GT   | 11 | 4  |
| 7900 | 1 | 14467827 | 14467844 | 2 | 9  | 18 | CA   | 10 | 9  |
| 7902 | 1 | 14473232 | 14473245 | 2 | 7  | 14 | TG   | 23 | 4  |
| 7911 | 1 | 14499087 | 14499104 | 2 | 9  | 18 | AC   | 26 | 4  |
| 7913 | 1 | 14506312 | 14506326 | 3 | 5  | 15 | TCG  | 30 | 6  |
| 7925 | 1 | 14517129 | 14517152 | 4 | 6  | 24 | TCCT | 25 | 4  |
| 7930 | 1 | 14524473 | 14524484 | 2 | 6  | 12 | AC   | 28 | 5  |
| 7931 | 1 | 14524688 | 14524703 | 2 | 8  | 16 | CA   | 11 | 3  |
| 7933 | 1 | 14525533 | 14525546 | 2 | 7  | 14 | TG   | 26 | 5  |
| 7946 | 1 | 14557418 | 14557441 | 2 | 12 | 24 | TG   | 12 | 9  |
| 7948 | 1 | 14570243 | 14570260 | 2 | 9  | 18 | GA   | 18 | 9  |
| 7956 | 1 | 14575821 | 14575852 | 2 | 16 | 32 | CA   | 14 | 9  |
| 7958 | 1 | 14577092 | 14577115 | 3 | 8  | 24 | CAG  | 26 | 4  |
| 7971 | 1 | 14591473 | 14591500 | 2 | 14 | 28 | GT   | 6  | 3  |
| 7974 | 1 | 14592346 | 14592359 | 2 | 7  | 14 | GT   | 23 | 5  |
| 7978 | 1 | 14596120 | 14596135 | 4 | 4  | 16 | TCTG | 23 | 4  |
| 7982 | 1 | 14603010 | 14603025 | 2 | 8  | 16 | GA   | 12 | 5  |
| 7983 | 1 | 14603033 | 14603044 | 2 | 6  | 12 | AG   | 8  | 8  |
| 7984 | 1 | 14603049 | 14603060 | 2 | 6  | 12 | AG   | 16 | 8  |
| 7988 | 1 | 14607753 | 14607770 | 2 | 9  | 18 | AC   | 26 | 6  |
| 7989 | 1 | 14608224 | 14608253 | 3 | 10 | 30 | GTT  | 23 | 10 |
| 7991 | 1 | 14609685 | 14609702 | 3 | 6  | 18 | TTG  | 24 | 3  |
| 8000 | 1 | 14621123 | 14621152 | 2 | 15 | 30 | CT   | 9  | 8  |
| 8002 | 1 | 14621688 | 14621731 | 2 | 22 | 44 | CT   | 9  | 10 |
| 8004 | 1 | 14625270 | 14625281 | 2 | 6  | 12 | TG   | 16 | 5  |
| 8009 | 1 | 14635103 | 14635114 | 2 | 6  | 12 | GT   | 22 | 3  |
| 8016 | 1 | 14639731 | 14639746 | 2 | 8  | 16 | TC   | 24 | 3  |
| 8017 | 1 | 14642139 | 14642156 | 2 | 9  | 18 | GT   | 20 | 8  |
| 8019 | 1 | 14647324 | 14647338 | 3 | 5  | 15 | TCA  | 25 | 3  |
| 8021 | 1 | 14652359 | 14652374 | 4 | 4  | 16 | AAAT | 19 | 8  |
| 8023 | 1 | 14653537 | 14653554 | 3 | 6  | 18 | AAG  | 25 | 5  |
| 8024 | 1 | 14654333 | 14654344 | 2 | 6  | 12 | TC   | 25 | 3  |
| 8026 | 1 | 14656745 | 14656759 | 3 | 5  | 15 | ACA  | 22 | 5  |
| 8029 | 1 | 14658249 | 14658272 | 3 | 8  | 24 | GCT  | 24 | 8  |
| 8031 | 1 | 14668226 | 14668281 | 2 | 28 | 56 | GT   | 9  | 12 |
| 8032 | 1 | 14669858 | 14669869 | 2 | 6  | 12 | TA   | 15 | 4  |
| 8040 | 1 | 14678505 | 14678520 | 2 | 8  | 16 | GT   | 26 | 7  |
| 8042 | 1 | 14684867 | 14684882 | 2 | 8  | 16 | TG   | 19 | 7  |
| 8044 | 1 | 14688879 | 14688908 | 3 | 10 | 30 | CAC  | 23 | 4  |
| 8049 | 1 | 14693985 | 14694014 | 2 | 15 | 30 | TG   | 20 | 5  |
| 8050 | 1 | 14694444 | 14694461 | 2 | 9  | 18 | TG   | 23 | 5  |
| 8051 | 1 | 14695579 | 14695608 | 2 | 15 | 30 | CA   | 13 | 5  |
| 8058 | 1 | 14700814 | 14700843 | 2 | 15 | 30 | AC   | 8  | 8  |
| 8067 | 1 | 14711285 | 14711302 | 3 | 6  | 18 | AGA  | 19 | 4  |
| 8068 | 1 | 14711820 | 14711845 | 2 | 13 | 26 | AC   | 19 | 8  |
| 8069 | 1 | 14712281 | 14712310 | 2 | 15 | 30 | CT   | 17 | 10 |
| 8072 | 1 | 14724789 | 14724816 | 2 | 14 | 28 | TG   | 13 | 7  |
| 8073 | 1 | 14728040 | 14728059 | 2 | 10 | 20 | TC   | 13 | 4  |

|      |   |          |          |   |    |    |      |    |    |
|------|---|----------|----------|---|----|----|------|----|----|
| 8076 | 1 | 14728707 | 14728724 | 2 | 9  | 18 | TC   | 11 | 3  |
| 8082 | 1 | 14736169 | 14736184 | 4 | 4  | 16 | GAAA | 13 | 6  |
| 8083 | 1 | 14736699 | 14736732 | 2 | 17 | 34 | AC   | 18 | 7  |
| 8084 | 1 | 14736926 | 14736941 | 4 | 4  | 16 | GTCT | 27 | 6  |
| 8085 | 1 | 14737518 | 14737532 | 3 | 5  | 15 | TTA  | 6  | 3  |
| 8086 | 1 | 14739185 | 14739204 | 4 | 5  | 20 | ATAG | 32 | 3  |
| 8087 | 1 | 14739654 | 14739679 | 2 | 13 | 26 | TG   | 13 | 7  |
| 8088 | 1 | 14739991 | 14740014 | 2 | 12 | 24 | AG   | 22 | 7  |
| 8101 | 1 | 14750664 | 14750683 | 4 | 5  | 20 | CTAG | 20 | 3  |
| 8118 | 1 | 14790192 | 14790207 | 2 | 8  | 16 | GT   | 15 | 5  |
| 8119 | 1 | 14790347 | 14790370 | 3 | 8  | 24 | CTG  | 20 | 3  |
| 8124 | 1 | 14791624 | 14791639 | 4 | 4  | 16 | AACA | 27 | 3  |
| 8133 | 1 | 14809901 | 14809926 | 2 | 13 | 26 | GT   | 15 | 9  |
| 8135 | 1 | 14813738 | 14813753 | 2 | 8  | 16 | GA   | 15 | 11 |
| 8136 | 1 | 14813755 | 14813768 | 2 | 7  | 14 | AG   | 19 | 13 |
| 8140 | 1 | 14822646 | 14822661 | 2 | 8  | 16 | TA   | 14 | 5  |
| 8144 | 1 | 14824908 | 14824923 | 2 | 8  | 16 | GT   | 19 | 9  |
| 8145 | 1 | 14825058 | 14825089 | 2 | 16 | 32 | TG   | 19 | 8  |
| 8146 | 1 | 14825574 | 14825618 | 3 | 15 | 45 | CTT  | 22 | 9  |
| 8148 | 1 | 14829014 | 14829040 | 3 | 9  | 27 | GAG  | 29 | 5  |
| 8150 | 1 | 14832151 | 14832166 | 4 | 4  | 16 | ATTT | 10 | 3  |
| 8157 | 1 | 14840174 | 14840213 | 2 | 20 | 40 | AC   | 7  | 9  |
| 8158 | 1 | 14842307 | 14842322 | 4 | 4  | 16 | TTTA | 25 | 5  |
| 8164 | 1 | 14853181 | 14853192 | 2 | 6  | 12 | TC   | 29 | 4  |
| 8183 | 1 | 14877484 | 14877515 | 2 | 16 | 32 | CA   | 12 | 7  |
| 8185 | 1 | 14878105 | 14878124 | 4 | 5  | 20 | GGTT | 27 | 3  |
| 8189 | 1 | 14883120 | 14883131 | 2 | 6  | 12 | CT   | 23 | 3  |
| 8190 | 1 | 14887001 | 14887028 | 2 | 14 | 28 | TG   | 9  | 7  |
| 8191 | 1 | 14893786 | 14893813 | 2 | 14 | 28 | AC   | 13 | 15 |
| 8197 | 1 | 14904919 | 14904932 | 2 | 7  | 14 | TG   | 12 | 7  |
| 8198 | 1 | 14904935 | 14904952 | 2 | 9  | 18 | TG   | 8  | 4  |
| 8205 | 1 | 14915321 | 14915356 | 3 | 12 | 36 | TGA  | 13 | 6  |
| 8206 | 1 | 14921464 | 14921489 | 2 | 13 | 26 | TG   | 11 | 9  |
| 8208 | 1 | 14922211 | 14922234 | 2 | 12 | 24 | TG   | 17 | 11 |
| 8210 | 1 | 14923839 | 14923858 | 4 | 5  | 20 | CAGC | 24 | 5  |
| 8212 | 1 | 14924426 | 14924437 | 2 | 6  | 12 | CA   | 33 | 3  |
| 8213 | 1 | 14925099 | 14925124 | 2 | 13 | 26 | GT   | 9  | 8  |
| 8215 | 1 | 14929009 | 14929024 | 4 | 4  | 16 | ATTT | 19 | 4  |
| 8217 | 1 | 14932039 | 14932058 | 4 | 5  | 20 | TCCC | 12 | 5  |
| 8218 | 1 | 14932577 | 14932590 | 2 | 7  | 14 | TG   | 22 | 4  |
| 8219 | 1 | 14932943 | 14932972 | 2 | 15 | 30 | TG   | 6  | 8  |
| 8220 | 1 | 14942097 | 14942116 | 4 | 5  | 20 | CAGG | 26 | 4  |
| 8226 | 1 | 14960983 | 14960994 | 2 | 6  | 12 | TG   | 29 | 3  |
| 8232 | 1 | 14966479 | 14966504 | 2 | 13 | 26 | TG   | 19 | 8  |
| 8233 | 1 | 14968683 | 14968696 | 2 | 7  | 14 | TG   | 24 | 6  |
| 8234 | 1 | 14972190 | 14972207 | 2 | 9  | 18 | TG   | 17 | 4  |
| 8235 | 1 | 14973836 | 14973875 | 2 | 20 | 40 | CA   | 7  | 8  |
| 8236 | 1 | 14976595 | 14976606 | 2 | 6  | 12 | AC   | 23 | 6  |
| 8237 | 1 | 14976925 | 14976936 | 2 | 6  | 12 | AC   | 31 | 3  |
| 8239 | 1 | 14984784 | 14984813 | 2 | 15 | 30 | CA   | 15 | 7  |
| 8246 | 1 | 15000858 | 15000873 | 4 | 4  | 16 | TTTG | 30 | 3  |



|      |   |          |          |   |    |    |      |    |    |
|------|---|----------|----------|---|----|----|------|----|----|
| 8248 | 1 | 15002178 | 15002195 | 2 | 9  | 18 | GT   | 25 | 3  |
| 8258 | 1 | 15010579 | 15010602 | 2 | 12 | 24 | AG   | 9  | 8  |
| 8265 | 1 | 15017691 | 15017710 | 2 | 10 | 20 | GT   | 18 | 6  |
| 8274 | 1 | 15046787 | 15046816 | 3 | 10 | 30 | TCC  | 8  | 5  |
| 8280 | 1 | 15051235 | 15051258 | 4 | 6  | 24 | GTTA | 13 | 5  |
| 8288 | 1 | 15065659 | 15065670 | 2 | 6  | 12 | AC   | 22 | 3  |
| 8293 | 1 | 15070597 | 15070635 | 3 | 13 | 39 | ATC  | 13 | 7  |
| 8294 | 1 | 15078321 | 15078336 | 4 | 4  | 16 | AACA | 21 | 3  |
| 8300 | 1 | 15088738 | 15088755 | 3 | 6  | 18 | AAC  | 24 | 3  |
| 8312 | 1 | 15103375 | 15103396 | 2 | 11 | 22 | GA   | 15 | 6  |
| 8313 | 1 | 15105760 | 15105773 | 2 | 7  | 14 | GA   | 26 | 3  |
| 8314 | 1 | 15105802 | 15105813 | 2 | 6  | 12 | GT   | 23 | 4  |
| 8319 | 1 | 15114504 | 15114519 | 2 | 8  | 16 | TG   | 25 | 8  |
| 8328 | 1 | 15124986 | 15124999 | 2 | 7  | 14 | TG   | 20 | 6  |
| 8331 | 1 | 15127768 | 15127783 | 2 | 8  | 16 | GT   | 26 | 9  |
| 8333 | 1 | 15131039 | 15131052 | 2 | 7  | 14 | CA   | 22 | 4  |
| 8339 | 1 | 15133007 | 15133026 | 2 | 10 | 20 | TG   | 18 | 14 |
| 8344 | 1 | 15142758 | 15142773 | 4 | 4  | 16 | CTCG | 23 | 3  |
| 8353 | 1 | 15150179 | 15150190 | 2 | 6  | 12 | CA   | 12 | 4  |
| 8354 | 1 | 15150193 | 15150210 | 2 | 9  | 18 | CA   | 17 | 8  |
| 8356 | 1 | 15150346 | 15150357 | 2 | 6  | 12 | CA   | 19 | 8  |
| 8358 | 1 | 15151566 | 15151581 | 2 | 8  | 16 | AC   | 21 | 7  |
| 8359 | 1 | 15151584 | 15151595 | 2 | 6  | 12 | AC   | 21 | 6  |
| 8360 | 1 | 15151710 | 15151727 | 2 | 9  | 18 | TG   | 23 | 3  |
| 8365 | 1 | 15160321 | 15160348 | 2 | 14 | 28 | GT   | 6  | 5  |
| 8369 | 1 | 15163734 | 15163761 | 2 | 14 | 28 | AG   | 17 | 10 |
| 8371 | 1 | 15164809 | 15164822 | 2 | 7  | 14 | TG   | 20 | 9  |
| 8372 | 1 | 15165047 | 15165070 | 4 | 6  | 24 | AAAG | 15 | 6  |
| 8373 | 1 | 15166005 | 15166018 | 2 | 7  | 14 | CA   | 29 | 4  |
| 8375 | 1 | 15172257 | 15172280 | 4 | 6  | 24 | GTTT | 30 | 6  |
| 8380 | 1 | 15182365 | 15182376 | 2 | 6  | 12 | TG   | 21 | 3  |
| 8381 | 1 | 15183054 | 15183067 | 2 | 7  | 14 | TC   | 24 | 3  |
| 8384 | 1 | 15189510 | 15189521 | 2 | 6  | 12 | TG   | 17 | 9  |
| 8395 | 1 | 15207268 | 15207281 | 2 | 7  | 14 | GT   | 18 | 5  |
| 8399 | 1 | 15209804 | 15209817 | 2 | 7  | 14 | AG   | 15 | 3  |
| 8400 | 1 | 15212167 | 15212178 | 2 | 6  | 12 | GT   | 14 | 4  |
| 8401 | 1 | 15212552 | 15212572 | 3 | 7  | 21 | TTC  | 12 | 9  |
| 8402 | 1 | 15212925 | 15212942 | 2 | 9  | 18 | GT   | 8  | 8  |
| 8403 | 1 | 15213893 | 15213930 | 2 | 19 | 38 | GT   | 16 | 13 |
| 8404 | 1 | 15214431 | 15214448 | 2 | 9  | 18 | TG   | 18 | 10 |
| 8410 | 1 | 15217551 | 15217574 | 2 | 12 | 24 | AC   | 26 | 7  |
| 8412 | 1 | 15220254 | 15220277 | 2 | 12 | 24 | TG   | 10 | 3  |
| 8426 | 1 | 15235623 | 15235644 | 2 | 11 | 22 | AC   | 20 | 3  |
| 8427 | 1 | 15236576 | 15236590 | 3 | 5  | 15 | AGC  | 34 | 3  |
| 8433 | 1 | 15243932 | 15243961 | 2 | 15 | 30 | CA   | 6  | 6  |
| 8438 | 1 | 15259411 | 15259442 | 2 | 16 | 32 | CA   | 15 | 6  |
| 8440 | 1 | 15261400 | 15261420 | 3 | 7  | 21 | CTG  | 25 | 7  |
| 8446 | 1 | 15265555 | 15265582 | 2 | 14 | 28 | AG   | 16 | 7  |
| 8459 | 1 | 15293388 | 15293405 | 2 | 9  | 18 | AG   | 15 | 4  |
| 8465 | 1 | 15304559 | 15304570 | 2 | 6  | 12 | GT   | 25 | 6  |
| 8466 | 1 | 15304757 | 15304771 | 3 | 5  | 15 | CCA  | 7  | 4  |

|      |   |          |          |   |    |    |      |    |    |
|------|---|----------|----------|---|----|----|------|----|----|
| 8467 | 1 | 15305279 | 15305312 | 2 | 17 | 34 | TC   | 9  | 9  |
| 8468 | 1 | 15306858 | 15306877 | 2 | 10 | 20 | AC   | 16 | 5  |
| 8470 | 1 | 15310587 | 15310601 | 3 | 5  | 15 | GCG  | 25 | 8  |
| 8473 | 1 | 15312096 | 15312113 | 2 | 9  | 18 | GT   | 17 | 4  |
| 8478 | 1 | 15317340 | 15317357 | 2 | 9  | 18 | CA   | 6  | 3  |
| 8479 | 1 | 15317438 | 15317457 | 2 | 10 | 20 | CA   | 13 | 4  |
| 8486 | 1 | 15328735 | 15328750 | 2 | 8  | 16 | CA   | 22 | 8  |
| 8491 | 1 | 15333972 | 15333985 | 2 | 7  | 14 | CA   | 20 | 6  |
| 8492 | 1 | 15334955 | 15334974 | 2 | 10 | 20 | AT   | 17 | 12 |
| 8499 | 1 | 15360229 | 15360252 | 2 | 12 | 24 | GT   | 15 | 8  |
| 8503 | 1 | 15369054 | 15369075 | 2 | 11 | 22 | AC   | 12 | 9  |
| 8508 | 1 | 15384896 | 15384931 | 4 | 9  | 36 | ATAG | 13 | 12 |
| 8509 | 1 | 15390659 | 15390692 | 2 | 17 | 34 | CA   | 8  | 9  |
| 8514 | 1 | 15401315 | 15401330 | 2 | 8  | 16 | AC   | 22 | 4  |
| 8516 | 1 | 15405919 | 15405936 | 3 | 6  | 18 | ATT  | 28 | 3  |
| 8520 | 1 | 15425968 | 15425981 | 2 | 7  | 14 | AG   | 36 | 3  |
| 8528 | 1 | 15455612 | 15455627 | 2 | 8  | 16 | GT   | 25 | 3  |
| 8534 | 1 | 15481125 | 15481138 | 2 | 7  | 14 | GA   | 28 | 5  |
| 8535 | 1 | 15485404 | 15485437 | 2 | 17 | 34 | CA   | 14 | 9  |
| 8542 | 1 | 15502923 | 15502937 | 3 | 5  | 15 | GCT  | 28 | 3  |
| 8546 | 1 | 15508749 | 15508760 | 2 | 6  | 12 | GT   | 13 | 6  |
| 8547 | 1 | 15508888 | 15508913 | 2 | 13 | 26 | AC   | 9  | 9  |
| 8548 | 1 | 15510508 | 15510528 | 3 | 7  | 21 | TCC  | 16 | 3  |
| 8558 | 1 | 15514285 | 15514314 | 2 | 15 | 30 | GT   | 12 | 8  |
| 8559 | 1 | 15514491 | 15514502 | 2 | 6  | 12 | TG   | 15 | 3  |
| 8562 | 1 | 15515867 | 15515887 | 3 | 7  | 21 | CAA  | 28 | 3  |
| 8563 | 1 | 15518629 | 15518646 | 2 | 9  | 18 | GT   | 27 | 6  |
| 8565 | 1 | 15521407 | 15521422 | 2 | 8  | 16 | AC   | 25 | 5  |
| 8574 | 1 | 15540115 | 15540170 | 2 | 28 | 56 | GT   | 7  | 8  |
| 8576 | 1 | 15546329 | 15546343 | 3 | 5  | 15 | AAT  | 13 | 8  |
| 8584 | 1 | 15593134 | 15593145 | 2 | 6  | 12 | GT   | 20 | 3  |
| 8591 | 1 | 15607479 | 15607492 | 2 | 7  | 14 | CA   | 21 | 3  |
| 8593 | 1 | 15610791 | 15610820 | 2 | 15 | 30 | AC   | 6  | 7  |
| 8603 | 1 | 15624872 | 15624892 | 3 | 7  | 21 | CAG  | 26 | 3  |
| 8605 | 1 | 15625123 | 15625138 | 2 | 8  | 16 | AC   | 10 | 5  |
| 8606 | 1 | 15625518 | 15625549 | 2 | 16 | 32 | AC   | 9  | 10 |
| 8609 | 1 | 15630346 | 15630357 | 2 | 6  | 12 | GA   | 32 | 4  |
| 8614 | 1 | 15647791 | 15647810 | 2 | 10 | 20 | TG   | 13 | 10 |
| 8617 | 1 | 15654617 | 15654636 | 4 | 5  | 20 | ACAG | 18 | 7  |
| 8619 | 1 | 15660343 | 15660388 | 2 | 23 | 46 | TG   | 9  | 9  |
| 8620 | 1 | 15660536 | 15660555 | 2 | 10 | 20 | AC   | 19 | 4  |
| 8630 | 1 | 15677457 | 15677480 | 2 | 12 | 24 | GT   | 17 | 7  |
| 8635 | 1 | 15679631 | 15679645 | 3 | 5  | 15 | TGA  | 25 | 4  |
| 8636 | 1 | 15679649 | 15679663 | 3 | 5  | 15 | TGA  | 29 | 6  |
| 8637 | 1 | 15682211 | 15682230 | 2 | 10 | 20 | GT   | 9  | 7  |
| 8641 | 1 | 15684896 | 15684913 | 2 | 9  | 18 | AC   | 11 | 4  |
| 8649 | 1 | 15691545 | 15691560 | 2 | 8  | 16 | CA   | 18 | 4  |
| 8665 | 1 | 15717643 | 15717660 | 2 | 9  | 18 | TG   | 16 | 14 |
| 8666 | 1 | 15719360 | 15719375 | 2 | 8  | 16 | AC   | 16 | 14 |
| 8669 | 1 | 15726013 | 15726034 | 2 | 11 | 22 | TG   | 19 | 5  |
| 8670 | 1 | 15727297 | 15727312 | 2 | 8  | 16 | AC   | 24 | 3  |

|      |   |          |          |   |    |    |      |    |    |
|------|---|----------|----------|---|----|----|------|----|----|
| 8671 | 1 | 15734763 | 15734774 | 2 | 6  | 12 | CA   | 30 | 4  |
| 8677 | 1 | 15739639 | 15739656 | 3 | 6  | 18 | GAG  | 21 | 6  |
| 8678 | 1 | 15740706 | 15740747 | 2 | 21 | 42 | GT   | 19 | 9  |
| 8682 | 1 | 15757911 | 15757925 | 3 | 5  | 15 | CAT  | 22 | 3  |
| 8689 | 1 | 15791084 | 15791113 | 2 | 15 | 30 | CA   | 7  | 9  |
| 8693 | 1 | 15801799 | 15801813 | 3 | 5  | 15 | TTG  | 26 | 3  |
| 8694 | 1 | 15802477 | 15802500 | 2 | 12 | 24 | GT   | 10 | 6  |
| 8696 | 1 | 15806139 | 15806156 | 2 | 9  | 18 | TG   | 20 | 4  |
| 8710 | 1 | 15818121 | 15818140 | 2 | 10 | 20 | GA   | 20 | 4  |
| 8717 | 1 | 15826162 | 15826173 | 2 | 6  | 12 | GT   | 20 | 5  |
| 8719 | 1 | 15827060 | 15827075 | 2 | 8  | 16 | CA   | 14 | 3  |
| 8720 | 1 | 15827084 | 15827095 | 2 | 6  | 12 | AC   | 20 | 3  |
| 8726 | 1 | 15836218 | 15836237 | 2 | 10 | 20 | TG   | 7  | 3  |
| 8727 | 1 | 15836309 | 15836320 | 2 | 6  | 12 | AG   | 24 | 3  |
| 8730 | 1 | 15839289 | 15839306 | 2 | 9  | 18 | AC   | 22 | 3  |
| 8735 | 1 | 15846803 | 15846814 | 2 | 6  | 12 | AG   | 26 | 3  |
| 8739 | 1 | 15848131 | 15848148 | 3 | 6  | 18 | TGC  | 20 | 8  |
| 8740 | 1 | 15848325 | 15848336 | 2 | 6  | 12 | AC   | 22 | 3  |
| 8741 | 1 | 15848772 | 15848789 | 3 | 6  | 18 | CCT  | 12 | 6  |
| 8742 | 1 | 15848885 | 15848922 | 2 | 19 | 38 | GT   | 12 | 10 |
| 8744 | 1 | 15851620 | 15851679 | 3 | 20 | 60 | AGA  | 6  | 6  |
| 8747 | 1 | 15853418 | 15853429 | 2 | 6  | 12 | GT   | 21 | 5  |
| 8748 | 1 | 15854515 | 15854532 | 2 | 9  | 18 | AT   | 10 | 6  |
| 8751 | 1 | 15857033 | 15857044 | 2 | 6  | 12 | CA   | 13 | 12 |
| 8754 | 1 | 15857456 | 15857467 | 2 | 6  | 12 | GT   | 22 | 4  |
| 8755 | 1 | 15857474 | 15857487 | 2 | 7  | 14 | GT   | 24 | 5  |
| 8757 | 1 | 15857541 | 15857552 | 2 | 6  | 12 | AG   | 17 | 6  |
| 8758 | 1 | 15859153 | 15859170 | 2 | 9  | 18 | GT   | 19 | 7  |
| 8759 | 1 | 15859173 | 15859186 | 2 | 7  | 14 | GT   | 8  | 4  |
| 8767 | 1 | 15866040 | 15866055 | 2 | 8  | 16 | CT   | 14 | 5  |
| 8768 | 1 | 15866139 | 15866152 | 2 | 7  | 14 | CT   | 18 | 3  |
| 8774 | 1 | 15874372 | 15874385 | 2 | 7  | 14 | TG   | 24 | 3  |
| 8776 | 1 | 15877443 | 15877468 | 2 | 13 | 26 | AC   | 11 | 6  |
| 8779 | 1 | 15878435 | 15878460 | 2 | 13 | 26 | GT   | 18 | 5  |
| 8783 | 1 | 15891282 | 15891301 | 2 | 10 | 20 | AC   | 19 | 6  |
| 8784 | 1 | 15892610 | 15892625 | 2 | 8  | 16 | AG   | 22 | 6  |
| 8791 | 1 | 15915025 | 15915056 | 2 | 16 | 32 | GT   | 16 | 12 |
| 8796 | 1 | 15925121 | 15925134 | 2 | 7  | 14 | GT   | 24 | 12 |
| 8800 | 1 | 15929011 | 15929038 | 2 | 14 | 28 | AC   | 14 | 8  |
| 8803 | 1 | 15938007 | 15938026 | 4 | 5  | 20 | ATTT | 8  | 7  |
| 8805 | 1 | 15943376 | 15943411 | 2 | 18 | 36 | AC   | 9  | 6  |
| 8810 | 1 | 15951210 | 15951229 | 2 | 10 | 20 | AC   | 17 | 4  |
| 8812 | 1 | 15956184 | 15956195 | 2 | 6  | 12 | GA   | 23 | 6  |
| 8814 | 1 | 15956785 | 15956810 | 2 | 13 | 26 | GT   | 21 | 7  |
| 8815 | 1 | 15961724 | 15961751 | 2 | 14 | 28 | CA   | 17 | 14 |
| 8820 | 1 | 15969633 | 15969646 | 2 | 7  | 14 | AG   | 27 | 4  |
| 8825 | 1 | 15983905 | 15983919 | 3 | 5  | 15 | AGC  | 28 | 4  |
| 8830 | 1 | 15993095 | 15993124 | 2 | 15 | 30 | TG   | 10 | 9  |
| 8835 | 1 | 16006271 | 16006330 | 4 | 15 | 60 | TCTA | 15 | 8  |
| 8839 | 1 | 16017241 | 16017266 | 2 | 13 | 26 | CA   | 13 | 7  |
| 8841 | 1 | 16022274 | 16022291 | 2 | 9  | 18 | CA   | 9  | 4  |

|      |   |          |          |   |    |    |      |    |    |
|------|---|----------|----------|---|----|----|------|----|----|
| 8856 | 1 | 16061408 | 16061431 | 4 | 6  | 24 | ATTT | 14 | 6  |
| 8858 | 1 | 16065889 | 16065924 | 2 | 18 | 36 | CA   | 15 | 11 |
| 8878 | 1 | 16091441 | 16091462 | 2 | 11 | 22 | TG   | 9  | 4  |
| 8879 | 1 | 16095254 | 16095267 | 2 | 7  | 14 | AG   | 22 | 4  |
| 8882 | 1 | 16097780 | 16097793 | 2 | 7  | 14 | AC   | 24 | 12 |
| 8885 | 1 | 16100562 | 16100583 | 2 | 11 | 22 | GT   | 12 | 6  |
| 8893 | 1 | 16109030 | 16109055 | 2 | 13 | 26 | TG   | 10 | 9  |
| 8894 | 1 | 16109253 | 16109292 | 2 | 20 | 40 | AC   | 14 | 8  |
| 8896 | 1 | 16109541 | 16109570 | 3 | 10 | 30 | TCC  | 18 | 8  |
| 8900 | 1 | 16117379 | 16117398 | 2 | 10 | 20 | CA   | 32 | 7  |
| 8901 | 1 | 16117557 | 16117580 | 2 | 12 | 24 | GT   | 16 | 6  |
| 8904 | 1 | 16120240 | 16120257 | 3 | 6  | 18 | GAG  | 29 | 6  |
| 8907 | 1 | 16121891 | 16121906 | 2 | 8  | 16 | CT   | 29 | 9  |
| 8917 | 1 | 16126990 | 16127019 | 3 | 10 | 30 | CCT  | 17 | 4  |
| 8921 | 1 | 16131182 | 16131213 | 4 | 8  | 32 | ATCC | 20 | 7  |
| 8925 | 1 | 16140693 | 16140707 | 3 | 5  | 15 | CCT  | 26 | 3  |
| 8929 | 1 | 16157095 | 16157116 | 2 | 11 | 22 | TC   | 28 | 6  |
| 8931 | 1 | 16160693 | 16160706 | 2 | 7  | 14 | AG   | 21 | 3  |
| 8947 | 1 | 16207511 | 16207540 | 3 | 10 | 30 | GAT  | 29 | 14 |
| 8949 | 1 | 16213055 | 16213072 | 3 | 6  | 18 | ATA  | 19 | 4  |
| 8950 | 1 | 16213890 | 16213903 | 2 | 7  | 14 | CA   | 24 | 5  |
| 8952 | 1 | 16214880 | 16214891 | 2 | 6  | 12 | AC   | 20 | 3  |
| 8956 | 1 | 16220247 | 16220262 | 4 | 4  | 16 | CTTG | 25 | 3  |
| 8957 | 1 | 16221431 | 16221442 | 2 | 6  | 12 | AT   | 16 | 11 |
| 8958 | 1 | 16224440 | 16224466 | 3 | 9  | 27 | GAT  | 24 | 5  |
| 8960 | 1 | 16227516 | 16227531 | 2 | 8  | 16 | TG   | 31 | 5  |
| 8968 | 1 | 16238802 | 16238849 | 4 | 12 | 48 | AGAA | 15 | 9  |
| 8971 | 1 | 16241410 | 16241425 | 2 | 8  | 16 | AG   | 18 | 3  |
| 8973 | 1 | 16242563 | 16242577 | 3 | 5  | 15 | AGA  | 19 | 17 |
| 8974 | 1 | 16242581 | 16242595 | 3 | 5  | 15 | AGA  | 19 | 18 |
| 8975 | 1 | 16242982 | 16243001 | 4 | 5  | 20 | GACA | 22 | 4  |
| 8977 | 1 | 16243421 | 16243434 | 2 | 7  | 14 | GT   | 21 | 5  |
| 8989 | 1 | 16255999 | 16256028 | 3 | 10 | 30 | TGA  | 21 | 4  |
| 9000 | 1 | 16275178 | 16275197 | 2 | 10 | 20 | TG   | 17 | 6  |
| 9002 | 1 | 16275885 | 16275900 | 2 | 8  | 16 | AG   | 25 | 5  |
| 9005 | 1 | 16281487 | 16281502 | 2 | 8  | 16 | GT   | 27 | 8  |
| 9006 | 1 | 16281712 | 16281737 | 2 | 13 | 26 | GT   | 9  | 8  |
| 9011 | 1 | 16292159 | 16292170 | 2 | 6  | 12 | GT   | 23 | 4  |
| 9012 | 1 | 16292719 | 16292746 | 2 | 14 | 28 | TG   | 12 | 5  |
| 9013 | 1 | 16296216 | 16296229 | 2 | 7  | 14 | GT   | 29 | 3  |
| 9014 | 1 | 16296381 | 16296400 | 2 | 10 | 20 | TG   | 23 | 7  |
| 9015 | 1 | 16297422 | 16297443 | 2 | 11 | 22 | TG   | 20 | 6  |
| 9016 | 1 | 16298830 | 16298855 | 2 | 13 | 26 | CA   | 15 | 6  |
| 9018 | 1 | 16300281 | 16300294 | 2 | 7  | 14 | CA   | 26 | 3  |
| 9021 | 1 | 16304623 | 16304646 | 2 | 12 | 24 | CA   | 11 | 7  |
| 9024 | 1 | 16311523 | 16311536 | 2 | 7  | 14 | AC   | 28 | 5  |
| 9026 | 1 | 16311771 | 16311792 | 2 | 11 | 22 | TG   | 9  | 5  |
| 9030 | 1 | 16317485 | 16317506 | 2 | 11 | 22 | GT   | 16 | 7  |
| 9031 | 1 | 16318023 | 16318050 | 2 | 14 | 28 | TG   | 20 | 11 |
| 9032 | 1 | 16318206 | 16318231 | 2 | 13 | 26 | CA   | 15 | 11 |
| 9033 | 1 | 16318372 | 16318395 | 3 | 8  | 24 | TTC  | 16 | 5  |

|      |   |          |          |   |    |    |      |    |    |
|------|---|----------|----------|---|----|----|------|----|----|
| 9037 | 1 | 16326761 | 16326796 | 2 | 18 | 36 | CA   | 8  | 11 |
| 9040 | 1 | 16337998 | 16338018 | 3 | 7  | 21 | CAA  | 19 | 6  |
| 9048 | 1 | 16359376 | 16359389 | 2 | 7  | 14 | TC   | 10 | 8  |
| 9068 | 1 | 16384791 | 16384808 | 2 | 9  | 18 | CA   | 10 | 8  |
| 9070 | 1 | 16387388 | 16387403 | 2 | 8  | 16 | GT   | 19 | 3  |
| 9071 | 1 | 16389245 | 16389256 | 2 | 6  | 12 | GT   | 31 | 3  |
| 9074 | 1 | 16397980 | 16397995 | 2 | 8  | 16 | AC   | 20 | 6  |
| 9077 | 1 | 16402267 | 16402278 | 2 | 6  | 12 | AG   | 39 | 3  |
| 9078 | 1 | 16408850 | 16408864 | 3 | 5  | 15 | GAT  | 21 | 3  |
| 9081 | 1 | 16415996 | 16416031 | 2 | 18 | 36 | GT   | 8  | 7  |
| 9087 | 1 | 16420245 | 16420278 | 2 | 17 | 34 | AG   | 19 | 9  |
| 9088 | 1 | 16420742 | 16420757 | 2 | 8  | 16 | TG   | 24 | 6  |
| 9091 | 1 | 16425598 | 16425613 | 4 | 4  | 16 | TTTA | 10 | 4  |
| 9093 | 1 | 16438762 | 16438785 | 3 | 8  | 24 | TTA  | 12 | 10 |
| 9110 | 1 | 16457272 | 16457287 | 2 | 8  | 16 | AC   | 26 | 5  |
| 9111 | 1 | 16461647 | 16461670 | 2 | 12 | 24 | GT   | 22 | 11 |
| 9117 | 1 | 16477408 | 16477421 | 2 | 7  | 14 | AC   | 7  | 4  |
| 9118 | 1 | 16477534 | 16477551 | 2 | 9  | 18 | CT   | 14 | 9  |
| 9123 | 1 | 16481345 | 16481356 | 2 | 6  | 12 | GT   | 17 | 4  |
| 9124 | 1 | 16483894 | 16483913 | 2 | 10 | 20 | TG   | 17 | 13 |
| 9130 | 1 | 16493482 | 16493511 | 2 | 15 | 30 | GT   | 11 | 7  |
| 9131 | 1 | 16494649 | 16494676 | 4 | 7  | 28 | TTCA | 24 | 4  |
| 9134 | 1 | 16497995 | 16498009 | 3 | 5  | 15 | TCT  | 19 | 3  |
| 9138 | 1 | 16503536 | 16503557 | 2 | 11 | 22 | GT   | 22 | 7  |
| 9139 | 1 | 16503683 | 16503716 | 2 | 17 | 34 | CA   | 9  | 9  |
| 9142 | 1 | 16508061 | 16508076 | 2 | 8  | 16 | CA   | 20 | 15 |
| 9143 | 1 | 16508361 | 16508418 | 2 | 29 | 58 | AC   | 14 | 11 |
| 9151 | 1 | 16518038 | 16518057 | 4 | 5  | 20 | AGAC | 29 | 3  |
| 9156 | 1 | 16527034 | 16527051 | 2 | 9  | 18 | TA   | 10 | 3  |
| 9166 | 1 | 16547182 | 16547207 | 2 | 13 | 26 | TG   | 8  | 9  |
| 9170 | 1 | 16549766 | 16549781 | 2 | 8  | 16 | GT   | 10 | 6  |
| 9172 | 1 | 16553053 | 16553080 | 4 | 7  | 28 | CATC | 18 | 8  |
| 9173 | 1 | 16554860 | 16554885 | 2 | 13 | 26 | GT   | 17 | 7  |
| 9175 | 1 | 16562877 | 16562903 | 3 | 9  | 27 | TCA  | 23 | 4  |
| 9185 | 1 | 16580918 | 16580929 | 2 | 6  | 12 | TA   | 23 | 3  |
| 9190 | 1 | 16589391 | 16589406 | 2 | 8  | 16 | CA   | 12 | 6  |
| 9193 | 1 | 16589511 | 16589534 | 2 | 12 | 24 | AC   | 16 | 5  |
| 9195 | 1 | 16592414 | 16592431 | 2 | 9  | 18 | TG   | 22 | 7  |
| 9196 | 1 | 16592590 | 16592607 | 2 | 9  | 18 | AC   | 17 | 13 |
| 9200 | 1 | 16597935 | 16597946 | 2 | 6  | 12 | TC   | 25 | 3  |
| 9201 | 1 | 16601282 | 16601303 | 2 | 11 | 22 | TC   | 16 | 8  |
| 9202 | 1 | 16602346 | 16602363 | 3 | 6  | 18 | CTG  | 27 | 3  |
| 9208 | 1 | 16610171 | 16610188 | 2 | 9  | 18 | GA   | 22 | 6  |
| 9211 | 1 | 16618519 | 16618540 | 2 | 11 | 22 | TG   | 15 | 6  |
| 9213 | 1 | 16619422 | 16619436 | 3 | 5  | 15 | CTT  | 16 | 5  |
| 9217 | 1 | 16623708 | 16623719 | 2 | 6  | 12 | CT   | 21 | 3  |
| 9221 | 1 | 16625680 | 16625691 | 2 | 6  | 12 | AG   | 26 | 5  |
| 9230 | 1 | 16629934 | 16629949 | 4 | 4  | 16 | AACA | 26 | 4  |
| 9234 | 1 | 16634779 | 16634804 | 2 | 13 | 26 | AC   | 13 | 7  |
| 9238 | 1 | 16653008 | 16653025 | 2 | 9  | 18 | TG   | 28 | 3  |
| 9240 | 1 | 16654650 | 16654667 | 2 | 9  | 18 | CA   | 17 | 8  |

|      |   |          |          |   |    |    |      |    |    |
|------|---|----------|----------|---|----|----|------|----|----|
| 9243 | 1 | 16656698 | 16656709 | 2 | 6  | 12 | AC   | 28 | 3  |
| 9248 | 1 | 16670120 | 16670141 | 2 | 11 | 22 | GT   | 10 | 7  |
| 9252 | 1 | 16676291 | 16676308 | 2 | 9  | 18 | AC   | 21 | 5  |
| 9256 | 1 | 16685846 | 16685869 | 2 | 12 | 24 | TC   | 15 | 5  |
| 9263 | 1 | 16713232 | 16713249 | 2 | 9  | 18 | CA   | 11 | 8  |
| 9282 | 1 | 16740052 | 16740072 | 3 | 7  | 21 | GCA  | 23 | 5  |
| 9285 | 1 | 16742192 | 16742219 | 2 | 14 | 28 | AC   | 18 | 7  |
| 9286 | 1 | 16742712 | 16742727 | 4 | 4  | 16 | CTGA | 27 | 3  |
| 9287 | 1 | 16746655 | 16746690 | 2 | 18 | 36 | AC   | 19 | 8  |
| 9288 | 1 | 16748108 | 16748121 | 2 | 7  | 14 | GT   | 21 | 4  |
| 9289 | 1 | 16748222 | 16748237 | 2 | 8  | 16 | GT   | 14 | 11 |
| 9290 | 1 | 16748240 | 16748257 | 2 | 9  | 18 | GT   | 14 | 10 |
| 9294 | 1 | 16755228 | 16755247 | 2 | 10 | 20 | AG   | 27 | 4  |
| 9295 | 1 | 16757601 | 16757628 | 2 | 14 | 28 | CA   | 9  | 10 |
| 9296 | 1 | 16760362 | 16760385 | 2 | 12 | 24 | AC   | 15 | 7  |
| 9306 | 1 | 16770061 | 16770080 | 2 | 10 | 20 | CA   | 16 | 9  |
| 9307 | 1 | 16770195 | 16770212 | 3 | 6  | 18 | AGA  | 13 | 3  |
| 9318 | 1 | 16789876 | 16789889 | 2 | 7  | 14 | CA   | 22 | 3  |
| 9319 | 1 | 16790105 | 16790120 | 4 | 4  | 16 | ACAG | 30 | 3  |
| 9323 | 1 | 16792367 | 16792378 | 2 | 6  | 12 | TG   | 20 | 4  |
| 9324 | 1 | 16794718 | 16794733 | 4 | 4  | 16 | AGGA | 33 | 4  |
| 9325 | 1 | 16797053 | 16797082 | 2 | 15 | 30 | TG   | 21 | 8  |
| 9329 | 1 | 16799986 | 16800011 | 2 | 13 | 26 | CT   | 15 | 10 |
| 9332 | 1 | 16800199 | 16800222 | 2 | 12 | 24 | TG   | 12 | 4  |
| 9338 | 1 | 16802776 | 16802791 | 2 | 8  | 16 | AC   | 23 | 8  |
| 9339 | 1 | 16802877 | 16802890 | 2 | 7  | 14 | TG   | 17 | 3  |
| 9340 | 1 | 16803016 | 16803043 | 2 | 14 | 28 | TG   | 14 | 6  |
| 9341 | 1 | 16803126 | 16803141 | 2 | 8  | 16 | AC   | 21 | 11 |
| 9345 | 1 | 16817398 | 16817409 | 2 | 6  | 12 | TG   | 32 | 3  |
| 9346 | 1 | 16819481 | 16819492 | 2 | 6  | 12 | CT   | 29 | 3  |
| 9347 | 1 | 16821477 | 16821488 | 2 | 6  | 12 | AC   | 29 | 7  |
| 9349 | 1 | 16821891 | 16821918 | 2 | 14 | 28 | CA   | 9  | 7  |
| 9352 | 1 | 16825486 | 16825501 | 2 | 8  | 16 | CA   | 22 | 12 |
| 9355 | 1 | 16831066 | 16831077 | 2 | 6  | 12 | AG   | 15 | 3  |
| 9359 | 1 | 16834733 | 16834744 | 2 | 6  | 12 | TC   | 23 | 3  |
| 9360 | 1 | 16834842 | 16834861 | 2 | 10 | 20 | CA   | 12 | 4  |
| 9362 | 1 | 16836484 | 16836497 | 2 | 7  | 14 | TG   | 22 | 3  |
| 9365 | 1 | 16837225 | 16837244 | 2 | 10 | 20 | CA   | 15 | 12 |
| 9368 | 1 | 16838559 | 16838580 | 2 | 11 | 22 | AC   | 20 | 7  |
| 9369 | 1 | 16840549 | 16840564 | 2 | 8  | 16 | TC   | 26 | 5  |
| 9370 | 1 | 16840715 | 16840726 | 2 | 6  | 12 | TG   | 24 | 5  |
| 9376 | 1 | 16846913 | 16846936 | 2 | 12 | 24 | AC   | 17 | 5  |
| 9385 | 1 | 16855984 | 16856016 | 3 | 11 | 33 | ACT  | 26 | 7  |
| 9387 | 1 | 16856902 | 16856913 | 2 | 6  | 12 | GT   | 15 | 9  |
| 9388 | 1 | 16856915 | 16856934 | 2 | 10 | 20 | TG   | 11 | 9  |
| 9390 | 1 | 16857009 | 16857026 | 2 | 9  | 18 | GA   | 24 | 4  |
| 9393 | 1 | 16859276 | 16859301 | 2 | 13 | 26 | AC   | 19 | 8  |
| 9399 | 1 | 16860142 | 16860171 | 2 | 15 | 30 | GT   | 12 | 5  |
| 9410 | 1 | 16866879 | 16866896 | 2 | 9  | 18 | AG   | 18 | 3  |
| 9411 | 1 | 16867256 | 16867271 | 4 | 4  | 16 | TTTC | 20 | 3  |
| 9413 | 1 | 16868694 | 16868717 | 2 | 12 | 24 | GA   | 9  | 5  |

|      |   |          |          |   |    |    |      |    |    |
|------|---|----------|----------|---|----|----|------|----|----|
| 9414 | 1 | 16868789 | 16868806 | 3 | 6  | 18 | TGG  | 8  | 4  |
| 9417 | 1 | 16871787 | 16871802 | 4 | 4  | 16 | CAGG | 31 | 3  |
| 9419 | 1 | 16872328 | 16872345 | 2 | 9  | 18 | GT   | 10 | 10 |
| 9422 | 1 | 16872758 | 16872775 | 2 | 9  | 18 | AC   | 12 | 10 |
| 9423 | 1 | 16872778 | 16872789 | 2 | 6  | 12 | AC   | 13 | 13 |
| 9425 | 1 | 16873969 | 16873980 | 2 | 6  | 12 | GT   | 29 | 3  |
| 9426 | 1 | 16874150 | 16874189 | 2 | 20 | 40 | AC   | 20 | 8  |
| 9430 | 1 | 16875915 | 16875930 | 2 | 8  | 16 | TG   | 6  | 5  |
| 9436 | 1 | 16877575 | 16877590 | 2 | 8  | 16 | AC   | 14 | 4  |
| 9438 | 1 | 16879188 | 16879201 | 2 | 7  | 14 | TG   | 24 | 4  |
| 9439 | 1 | 16879285 | 16879330 | 2 | 23 | 46 | GT   | 7  | 6  |
| 9440 | 1 | 16879434 | 16879457 | 2 | 12 | 24 | CA   | 6  | 4  |
| 9441 | 1 | 16879498 | 16879531 | 2 | 17 | 34 | CA   | 9  | 7  |
| 9444 | 1 | 16879849 | 16879864 | 2 | 8  | 16 | TG   | 26 | 4  |
| 9451 | 1 | 16887441 | 16887478 | 2 | 19 | 38 | CA   | 8  | 10 |
| 9452 | 1 | 16887593 | 16887614 | 2 | 11 | 22 | AC   | 15 | 8  |
| 9453 | 1 | 16887788 | 16887815 | 2 | 14 | 28 | CA   | 18 | 10 |
| 9457 | 1 | 16890522 | 16890551 | 2 | 15 | 30 | GT   | 9  | 12 |
| 9459 | 1 | 16892462 | 16892473 | 2 | 6  | 12 | AT   | 24 | 4  |
| 9462 | 1 | 16892860 | 16892889 | 3 | 10 | 30 | AGG  | 9  | 3  |
| 9464 | 1 | 16893459 | 16893470 | 2 | 6  | 12 | AC   | 24 | 3  |
| 9466 | 1 | 16893610 | 16893636 | 3 | 9  | 27 | AGG  | 12 | 5  |
| 9468 | 1 | 16895821 | 16895856 | 2 | 18 | 36 | GT   | 17 | 7  |
| 9476 | 1 | 16914711 | 16914728 | 2 | 9  | 18 | TG   | 12 | 6  |
| 9481 | 1 | 16939351 | 16939382 | 4 | 8  | 32 | TTAT | 18 | 6  |
| 9505 | 1 | 16970929 | 16970948 | 4 | 5  | 20 | GACA | 27 | 3  |
| 9506 | 1 | 16976737 | 16976754 | 3 | 6  | 18 | CCT  | 28 | 3  |
| 9518 | 1 | 16986607 | 16986624 | 2 | 9  | 18 | CA   | 17 | 4  |
| 9521 | 1 | 16989244 | 16989257 | 2 | 7  | 14 | TG   | 14 | 4  |
| 9522 | 1 | 16989969 | 16989984 | 4 | 4  | 16 | AAAT | 20 | 3  |
| 9529 | 1 | 17000804 | 17000819 | 2 | 8  | 16 | GT   | 22 | 4  |
| 9533 | 1 | 17002345 | 17002364 | 2 | 10 | 20 | GT   | 15 | 4  |
| 9546 | 1 | 17007845 | 17007862 | 2 | 9  | 18 | GT   | 9  | 12 |
| 9548 | 1 | 17008550 | 17008583 | 2 | 17 | 34 | GT   | 16 | 12 |
| 9556 | 1 | 17012844 | 17012855 | 2 | 6  | 12 | CT   | 26 | 5  |
| 9558 | 1 | 17023785 | 17023798 | 2 | 7  | 14 | TC   | 28 | 4  |
| 9559 | 1 | 17024027 | 17024042 | 4 | 4  | 16 | TCAC | 23 | 5  |
| 9564 | 1 | 17036841 | 17036888 | 2 | 24 | 48 | CA   | 8  | 11 |
| 9569 | 1 | 17052531 | 17052580 | 2 | 25 | 50 | AC   | 12 | 7  |
| 9573 | 1 | 17059335 | 17059356 | 2 | 11 | 22 | AC   | 15 | 10 |
| 9574 | 1 | 17059998 | 17060018 | 3 | 7  | 21 | CCT  | 28 | 5  |
| 9577 | 1 | 17061391 | 17061404 | 2 | 7  | 14 | TG   | 9  | 7  |
| 9579 | 1 | 17062198 | 17062215 | 2 | 9  | 18 | AT   | 7  | 8  |
| 9584 | 1 | 17067585 | 17067616 | 2 | 16 | 32 | TC   | 9  | 8  |
| 9587 | 1 | 17069330 | 17069347 | 2 | 9  | 18 | TA   | 11 | 7  |
| 9588 | 1 | 17069585 | 17069602 | 3 | 6  | 18 | CCT  | 7  | 5  |
| 9597 | 1 | 17070919 | 17070932 | 2 | 7  | 14 | CA   | 22 | 3  |
| 9606 | 1 | 17074470 | 17074481 | 2 | 6  | 12 | TG   | 20 | 5  |
| 9607 | 1 | 17074484 | 17074499 | 2 | 8  | 16 | TG   | 19 | 5  |
| 9610 | 1 | 17076079 | 17076098 | 2 | 10 | 20 | CA   | 10 | 5  |
| 9611 | 1 | 17076142 | 17076159 | 3 | 6  | 18 | AGC  | 9  | 4  |

|      |   |          |          |   |    |    |      |    |    |
|------|---|----------|----------|---|----|----|------|----|----|
| 9612 | 1 | 17077304 | 17077324 | 3 | 7  | 21 | CCT  | 8  | 4  |
| 9614 | 1 | 17077530 | 17077561 | 2 | 16 | 32 | AG   | 22 | 7  |
| 9615 | 1 | 17077926 | 17077941 | 4 | 4  | 16 | CAGA | 18 | 3  |
| 9621 | 1 | 17079167 | 17079182 | 2 | 8  | 16 | CA   | 31 | 4  |
| 9641 | 1 | 17102137 | 17102164 | 2 | 14 | 28 | AC   | 15 | 7  |
| 9643 | 1 | 17105452 | 17105469 | 3 | 6  | 18 | TCA  | 23 | 4  |
| 9646 | 1 | 17108158 | 17108193 | 3 | 12 | 36 | GAG  | 15 | 11 |
| 9648 | 1 | 17113145 | 17113176 | 2 | 16 | 32 | CA   | 22 | 14 |
| 9675 | 1 | 17190735 | 17190768 | 2 | 17 | 34 | TG   | 11 | 7  |
| 9678 | 1 | 17219879 | 17219902 | 2 | 12 | 24 | GT   | 22 | 9  |
| 9680 | 1 | 17223080 | 17223101 | 2 | 11 | 22 | TG   | 29 | 6  |
| 9682 | 1 | 17224310 | 17224333 | 2 | 12 | 24 | GT   | 15 | 8  |
| 9688 | 1 | 17234747 | 17234768 | 2 | 11 | 22 | TG   | 16 | 6  |
| 9692 | 1 | 17248951 | 17248974 | 2 | 12 | 24 | CA   | 9  | 3  |
| 9693 | 1 | 17249673 | 17249688 | 2 | 8  | 16 | TG   | 32 | 3  |
| 9696 | 1 | 17256519 | 17256556 | 2 | 19 | 38 | AC   | 14 | 11 |
| 9698 | 1 | 17259551 | 17259566 | 2 | 8  | 16 | GT   | 25 | 3  |
| 9699 | 1 | 17261464 | 17261475 | 2 | 6  | 12 | GT   | 28 | 3  |
| 9701 | 1 | 17264676 | 17264691 | 4 | 4  | 16 | TTCT | 15 | 6  |
| 9707 | 1 | 17284999 | 17285016 | 2 | 9  | 18 | AC   | 24 | 4  |
| 9709 | 1 | 17286936 | 17286951 | 2 | 8  | 16 | CA   | 29 | 5  |
| 9710 | 1 | 17299188 | 17299227 | 2 | 20 | 40 | TG   | 14 | 10 |
| 9714 | 1 | 17315581 | 17315600 | 2 | 10 | 20 | AC   | 14 | 8  |
| 9715 | 1 | 17315756 | 17315773 | 2 | 9  | 18 | CA   | 26 | 6  |
| 9716 | 1 | 17319373 | 17319400 | 2 | 14 | 28 | TG   | 19 | 7  |
| 9726 | 1 | 17331736 | 17331763 | 4 | 7  | 28 | TGCC | 24 | 4  |
| 9728 | 1 | 17332861 | 17332872 | 2 | 6  | 12 | GT   | 25 | 4  |
| 9733 | 1 | 17338493 | 17338506 | 2 | 7  | 14 | GA   | 15 | 4  |
| 9734 | 1 | 17340022 | 17340043 | 2 | 11 | 22 | TC   | 13 | 7  |
| 9736 | 1 | 17340104 | 17340117 | 2 | 7  | 14 | GT   | 17 | 5  |
| 9739 | 1 | 17340436 | 17340451 | 2 | 8  | 16 | GT   | 15 | 3  |
| 9741 | 1 | 17341620 | 17341635 | 2 | 8  | 16 | TG   | 22 | 9  |
| 9767 | 1 | 17366249 | 17366276 | 2 | 14 | 28 | TC   | 13 | 8  |
| 9773 | 1 | 17373407 | 17373426 | 2 | 10 | 20 | TC   | 13 | 4  |
| 9774 | 1 | 17373427 | 17373438 | 2 | 6  | 12 | AC   | 21 | 7  |
| 9775 | 1 | 17375379 | 17375392 | 2 | 7  | 14 | TG   | 15 | 4  |
| 9779 | 1 | 17377507 | 17377538 | 2 | 16 | 32 | CA   | 19 | 11 |
| 9780 | 1 | 17377619 | 17377632 | 2 | 7  | 14 | AC   | 26 | 5  |
| 9785 | 1 | 17381996 | 17382021 | 2 | 13 | 26 | GT   | 14 | 5  |
| 9786 | 1 | 17382162 | 17382173 | 2 | 6  | 12 | CA   | 27 | 3  |
| 9787 | 1 | 17382517 | 17382534 | 2 | 9  | 18 | AC   | 21 | 8  |
| 9788 | 1 | 17384233 | 17384244 | 2 | 6  | 12 | CA   | 31 | 3  |
| 9790 | 1 | 17385073 | 17385094 | 2 | 11 | 22 | TG   | 16 | 6  |
| 9792 | 1 | 17386488 | 17386499 | 2 | 6  | 12 | TA   | 8  | 3  |
| 9796 | 1 | 17391165 | 17391188 | 4 | 6  | 24 | CTGG | 28 | 3  |
| 9797 | 1 | 17392735 | 17392755 | 3 | 7  | 21 | TCT  | 10 | 4  |
| 9800 | 1 | 17397819 | 17397830 | 2 | 6  | 12 | AC   | 19 | 3  |
| 9801 | 1 | 17397832 | 17397847 | 2 | 8  | 16 | CA   | 22 | 5  |
| 9802 | 1 | 17398220 | 17398239 | 4 | 5  | 20 | CTGC | 19 | 6  |
| 9803 | 1 | 17400990 | 17401005 | 2 | 8  | 16 | AC   | 20 | 4  |
| 9804 | 1 | 17402824 | 17402867 | 2 | 22 | 44 | AC   | 11 | 12 |



|      |   |          |          |   |    |    |      |    |    |
|------|---|----------|----------|---|----|----|------|----|----|
| 9810 | 1 | 17409435 | 17409454 | 2 | 10 | 20 | CA   | 23 | 10 |
| 9814 | 1 | 17418235 | 17418254 | 2 | 10 | 20 | TG   | 22 | 4  |
| 9816 | 1 | 17425167 | 17425178 | 2 | 6  | 12 | AG   | 27 | 3  |
| 9817 | 1 | 17428561 | 17428576 | 4 | 4  | 16 | CGTG | 28 | 3  |
| 9820 | 1 | 17431619 | 17431630 | 2 | 6  | 12 | CA   | 27 | 3  |
| 9821 | 1 | 17432857 | 17432882 | 2 | 13 | 26 | GT   | 18 | 7  |
| 9824 | 1 | 17436425 | 17436436 | 2 | 6  | 12 | AG   | 11 | 3  |
| 9827 | 1 | 17438054 | 17438075 | 2 | 11 | 22 | TG   | 27 | 5  |
| 9828 | 1 | 17438232 | 17438257 | 2 | 13 | 26 | AC   | 19 | 9  |
| 9829 | 1 | 17438458 | 17438469 | 2 | 6  | 12 | GT   | 16 | 7  |
| 9833 | 1 | 17443611 | 17443640 | 3 | 10 | 30 | GAG  | 23 | 8  |
| 9836 | 1 | 17444094 | 17444119 | 2 | 13 | 26 | AC   | 9  | 7  |
| 9838 | 1 | 17445271 | 17445292 | 2 | 11 | 22 | AG   | 20 | 4  |
| 9839 | 1 | 17445387 | 17445404 | 2 | 9  | 18 | GT   | 28 | 3  |
| 9840 | 1 | 17445517 | 17445546 | 2 | 15 | 30 | GT   | 9  | 4  |
| 9843 | 1 | 17446480 | 17446499 | 2 | 10 | 20 | GA   | 24 | 9  |
| 9844 | 1 | 17446500 | 17446519 | 2 | 10 | 20 | GT   | 21 | 7  |
| 9847 | 1 | 17448780 | 17448793 | 2 | 7  | 14 | CT   | 20 | 5  |
| 9848 | 1 | 17449481 | 17449494 | 2 | 7  | 14 | AC   | 28 | 6  |
| 9849 | 1 | 17450357 | 17450390 | 2 | 17 | 34 | TG   | 11 | 9  |
| 9850 | 1 | 17450909 | 17450924 | 2 | 8  | 16 | GT   | 17 | 8  |
| 9853 | 1 | 17453580 | 17453607 | 2 | 14 | 28 | TG   | 15 | 8  |
| 9854 | 1 | 17454248 | 17454269 | 2 | 11 | 22 | GT   | 12 | 12 |
| 9855 | 1 | 17457666 | 17457679 | 2 | 7  | 14 | CA   | 17 | 6  |
| 9862 | 1 | 17461475 | 17461506 | 2 | 16 | 32 | GT   | 13 | 10 |
| 9863 | 1 | 17461711 | 17461724 | 2 | 7  | 14 | TG   | 18 | 4  |
| 9864 | 1 | 17461765 | 17461796 | 2 | 16 | 32 | GT   | 13 | 8  |
| 9865 | 1 | 17461969 | 17461984 | 2 | 8  | 16 | CA   | 8  | 3  |
| 9870 | 1 | 17466124 | 17466139 | 4 | 4  | 16 | CTGG | 16 | 3  |
| 9876 | 1 | 17471109 | 17471144 | 2 | 18 | 36 | TG   | 13 | 9  |
| 9886 | 1 | 17477228 | 17477239 | 2 | 6  | 12 | TG   | 18 | 4  |
| 9892 | 1 | 17479045 | 17479062 | 2 | 9  | 18 | CA   | 21 | 8  |
| 9895 | 1 | 17481891 | 17481918 | 2 | 14 | 28 | GT   | 10 | 9  |
| 9899 | 1 | 17483457 | 17483472 | 4 | 4  | 16 | AAAG | 8  | 3  |
| 9900 | 1 | 17483572 | 17483593 | 2 | 11 | 22 | GT   | 18 | 8  |
| 9905 | 1 | 17491470 | 17491493 | 2 | 12 | 24 | AC   | 22 | 12 |
| 9907 | 1 | 17492063 | 17492078 | 4 | 4  | 16 | TTCC | 30 | 4  |
| 9908 | 1 | 17492198 | 17492227 | 2 | 15 | 30 | CA   | 18 | 12 |
| 9910 | 1 | 17494354 | 17494369 | 2 | 8  | 16 | AG   | 11 | 6  |
| 9912 | 1 | 17495179 | 17495204 | 2 | 13 | 26 | AC   | 12 | 13 |
| 9914 | 1 | 17495357 | 17495374 | 2 | 9  | 18 | AC   | 16 | 5  |
| 9918 | 1 | 17496682 | 17496699 | 2 | 9  | 18 | TC   | 23 | 4  |
| 9920 | 1 | 17499399 | 17499426 | 2 | 14 | 28 | GT   | 14 | 10 |
| 9925 | 1 | 17509030 | 17509055 | 2 | 13 | 26 | AC   | 12 | 5  |
| 9927 | 1 | 17510414 | 17510445 | 2 | 16 | 32 | CA   | 18 | 10 |
| 9931 | 1 | 17512729 | 17512748 | 2 | 10 | 20 | CT   | 11 | 5  |
| 9932 | 1 | 17514545 | 17514572 | 2 | 14 | 28 | CA   | 18 | 10 |
| 9934 | 1 | 17521222 | 17521235 | 2 | 7  | 14 | TG   | 23 | 4  |
| 9936 | 1 | 17522269 | 17522284 | 2 | 8  | 16 | GT   | 20 | 7  |
| 9938 | 1 | 17522417 | 17522446 | 2 | 15 | 30 | TG   | 11 | 7  |
| 9939 | 1 | 17522576 | 17522595 | 2 | 10 | 20 | TC   | 30 | 3  |

|       |   |          |          |   |    |    |      |    |    |
|-------|---|----------|----------|---|----|----|------|----|----|
| 9940  | 1 | 17522930 | 17522949 | 2 | 10 | 20 | TG   | 10 | 11 |
| 9941  | 1 | 17523117 | 17523162 | 2 | 23 | 46 | TG   | 6  | 8  |
| 9942  | 1 | 17525679 | 17525700 | 2 | 11 | 22 | TG   | 19 | 11 |
| 9946  | 1 | 17531014 | 17531027 | 2 | 7  | 14 | CA   | 26 | 5  |
| 9947  | 1 | 17531145 | 17531172 | 2 | 14 | 28 | CA   | 22 | 10 |
| 9949  | 1 | 17535269 | 17535296 | 2 | 14 | 28 | CT   | 7  | 9  |
| 9952  | 1 | 17535787 | 17535808 | 2 | 11 | 22 | GT   | 10 | 4  |
| 9957  | 1 | 17536223 | 17536236 | 2 | 7  | 14 | GT   | 29 | 10 |
| 9958  | 1 | 17536798 | 17536829 | 2 | 16 | 32 | GT   | 18 | 9  |
| 9959  | 1 | 17536970 | 17536987 | 2 | 9  | 18 | TG   | 15 | 7  |
| 9968  | 1 | 17542932 | 17542943 | 2 | 6  | 12 | TG   | 9  | 6  |
| 9971  | 1 | 17549214 | 17549229 | 2 | 8  | 16 | CT   | 27 | 4  |
| 9976  | 1 | 17554869 | 17554884 | 2 | 8  | 16 | CA   | 19 | 10 |
| 9979  | 1 | 17557544 | 17557555 | 2 | 6  | 12 | TA   | 7  | 7  |
| 9982  | 1 | 17564470 | 17564493 | 2 | 12 | 24 | TC   | 19 | 5  |
| 9988  | 1 | 17570177 | 17570194 | 3 | 6  | 18 | CCA  | 26 | 4  |
| 9996  | 1 | 17575977 | 17575988 | 2 | 6  | 12 | CT   | 23 | 6  |
| 9997  | 1 | 17575989 | 17576000 | 2 | 6  | 12 | CA   | 15 | 3  |
| 9998  | 1 | 17576133 | 17576146 | 2 | 7  | 14 | TG   | 18 | 12 |
| 10003 | 1 | 17577994 | 17578009 | 2 | 8  | 16 | CT   | 22 | 3  |
| 10006 | 1 | 17581114 | 17581139 | 2 | 13 | 26 | CA   | 14 | 8  |
| 10008 | 1 | 17581966 | 17581981 | 4 | 4  | 16 | TTTG | 23 | 4  |
| 10011 | 1 | 17591421 | 17591456 | 2 | 18 | 36 | GT   | 7  | 10 |
| 10012 | 1 | 17594334 | 17594353 | 2 | 10 | 20 | TG   | 10 | 7  |
| 10016 | 1 | 17609608 | 17609621 | 2 | 7  | 14 | CT   | 14 | 3  |
| 10024 | 1 | 17632667 | 17632684 | 2 | 9  | 18 | TG   | 16 | 9  |
| 10025 | 1 | 17632980 | 17632993 | 2 | 7  | 14 | CT   | 23 | 3  |
| 10027 | 1 | 17633346 | 17633375 | 2 | 15 | 30 | TG   | 18 | 12 |
| 10029 | 1 | 17635725 | 17635742 | 2 | 9  | 18 | AC   | 24 | 3  |
| 10030 | 1 | 17635983 | 17636002 | 2 | 10 | 20 | AC   | 23 | 5  |
| 10040 | 1 | 17644020 | 17644040 | 3 | 7  | 21 | CCT  | 17 | 3  |
| 10041 | 1 | 17644306 | 17644333 | 2 | 14 | 28 | AC   | 19 | 18 |
| 10046 | 1 | 17646006 | 17646029 | 2 | 12 | 24 | TG   | 16 | 7  |
| 10058 | 1 | 17661024 | 17661059 | 2 | 18 | 36 | TG   | 16 | 15 |
| 10064 | 1 | 17669439 | 17669462 | 2 | 12 | 24 | CA   | 15 | 9  |
| 10072 | 1 | 17679428 | 17679449 | 2 | 11 | 22 | GA   | 20 | 6  |
| 10073 | 1 | 17680135 | 17680154 | 4 | 5  | 20 | TTAT | 19 | 4  |
| 10078 | 1 | 17691261 | 17691288 | 2 | 14 | 28 | TG   | 10 | 8  |
| 10080 | 1 | 17692772 | 17692795 | 3 | 8  | 24 | AGC  | 23 | 10 |
| 10085 | 1 | 17700252 | 17700273 | 2 | 11 | 22 | GT   | 17 | 6  |
| 10086 | 1 | 17700828 | 17700839 | 2 | 6  | 12 | TG   | 29 | 6  |
| 10088 | 1 | 17712893 | 17712908 | 2 | 8  | 16 | TG   | 24 | 6  |
| 10089 | 1 | 17714792 | 17714807 | 2 | 8  | 16 | TG   | 27 | 6  |
| 10106 | 1 | 17746101 | 17746120 | 2 | 10 | 20 | GT   | 13 | 11 |
| 10108 | 1 | 17748220 | 17748234 | 3 | 5  | 15 | AAT  | 27 | 4  |
| 10112 | 1 | 17753479 | 17753500 | 2 | 11 | 22 | GT   | 26 | 7  |
| 10113 | 1 | 17754866 | 17754885 | 2 | 10 | 20 | TG   | 23 | 8  |
| 10116 | 1 | 17760397 | 17760420 | 4 | 6  | 24 | GGAT | 23 | 5  |
| 10121 | 1 | 17773250 | 17773271 | 2 | 11 | 22 | CA   | 15 | 9  |
| 10126 | 1 | 17788786 | 17788821 | 2 | 18 | 36 | TC   | 17 | 11 |
| 10148 | 1 | 17845416 | 17845430 | 3 | 5  | 15 | GGT  | 25 | 4  |

|       |   |          |          |   |    |    |      |    |    |
|-------|---|----------|----------|---|----|----|------|----|----|
| 10150 | 1 | 17846810 | 17846845 | 4 | 9  | 36 | GAAG | 15 | 9  |
| 10151 | 1 | 17849513 | 17849528 | 2 | 8  | 16 | AC   | 21 | 4  |
| 10154 | 1 | 17851814 | 17851825 | 2 | 6  | 12 | CA   | 25 | 3  |
| 10158 | 1 | 17859512 | 17859545 | 2 | 17 | 34 | CA   | 17 | 11 |
| 10170 | 1 | 17868771 | 17868782 | 2 | 6  | 12 | TA   | 9  | 5  |
| 10171 | 1 | 17869049 | 17869080 | 2 | 16 | 32 | TG   | 8  | 9  |
| 10175 | 1 | 17887226 | 17887253 | 2 | 14 | 28 | CA   | 11 | 10 |
| 10176 | 1 | 17897843 | 17897854 | 2 | 6  | 12 | CT   | 19 | 4  |
| 10177 | 1 | 17898142 | 17898157 | 2 | 8  | 16 | AC   | 21 | 6  |
| 10181 | 1 | 17902449 | 17902466 | 2 | 9  | 18 | CA   | 14 | 3  |
| 10183 | 1 | 17902508 | 17902527 | 2 | 10 | 20 | AC   | 14 | 11 |
| 10187 | 1 | 17902935 | 17902958 | 2 | 12 | 24 | GA   | 6  | 6  |
| 10189 | 1 | 17904307 | 17904324 | 2 | 9  | 18 | CA   | 22 | 3  |
| 10194 | 1 | 17907242 | 17907289 | 2 | 24 | 48 | TG   | 8  | 12 |
| 10195 | 1 | 17907472 | 17907495 | 3 | 8  | 24 | AGG  | 19 | 6  |
| 10198 | 1 | 17911520 | 17911531 | 2 | 6  | 12 | CA   | 24 | 4  |
| 10199 | 1 | 17913549 | 17913584 | 3 | 12 | 36 | GAT  | 19 | 12 |
| 10204 | 1 | 17919621 | 17919638 | 2 | 9  | 18 | AC   | 22 | 9  |
| 10206 | 1 | 17922318 | 17922357 | 2 | 20 | 40 | AC   | 9  | 13 |
| 10211 | 1 | 17938950 | 17938993 | 4 | 11 | 44 | ATCA | 18 | 6  |
| 10213 | 1 | 17942802 | 17942829 | 2 | 14 | 28 | CT   | 11 | 10 |
| 10218 | 1 | 17953800 | 17953815 | 2 | 8  | 16 | AC   | 15 | 3  |
| 10219 | 1 | 17955204 | 17955233 | 2 | 15 | 30 | AC   | 6  | 6  |
| 10221 | 1 | 17957634 | 17957672 | 3 | 13 | 39 | TCC  | 15 | 4  |
| 10223 | 1 | 17958164 | 17958175 | 2 | 6  | 12 | CA   | 29 | 4  |
| 10227 | 1 | 17964701 | 17964716 | 2 | 8  | 16 | TC   | 22 | 3  |
| 10229 | 1 | 17967071 | 17967088 | 2 | 9  | 18 | TC   | 25 | 3  |
| 10233 | 1 | 17968863 | 17968876 | 2 | 7  | 14 | AC   | 20 | 3  |
| 10234 | 1 | 17969041 | 17969072 | 2 | 16 | 32 | TC   | 8  | 5  |
| 10236 | 1 | 17969400 | 17969417 | 2 | 9  | 18 | TG   | 26 | 4  |
| 10237 | 1 | 17970283 | 17970312 | 2 | 15 | 30 | CA   | 9  | 8  |
| 10238 | 1 | 17970461 | 17970496 | 2 | 18 | 36 | AC   | 14 | 6  |
| 10239 | 1 | 17970605 | 17970622 | 2 | 9  | 18 | GT   | 25 | 10 |
| 10240 | 1 | 17970882 | 17970903 | 2 | 11 | 22 | AC   | 20 | 6  |
| 10243 | 1 | 17975799 | 17975816 | 2 | 9  | 18 | TG   | 19 | 5  |
| 10244 | 1 | 17976871 | 17976902 | 2 | 16 | 32 | TG   | 13 | 10 |
| 10251 | 1 | 17981635 | 17981656 | 2 | 11 | 22 | CT   | 18 | 7  |
| 10253 | 1 | 17982091 | 17982110 | 2 | 10 | 20 | CA   | 16 | 9  |
| 10254 | 1 | 17983673 | 17983696 | 2 | 12 | 24 | CA   | 15 | 6  |
| 10269 | 1 | 17997543 | 17997554 | 2 | 6  | 12 | TC   | 19 | 6  |
| 10271 | 1 | 17999851 | 17999882 | 4 | 8  | 32 | TAGA | 21 | 11 |
| 10272 | 1 | 18001349 | 18001366 | 2 | 9  | 18 | GT   | 14 | 5  |
| 10273 | 1 | 18001624 | 18001644 | 3 | 7  | 21 | GCA  | 21 | 4  |
| 10275 | 1 | 18002496 | 18002513 | 3 | 6  | 18 | AAC  | 23 | 3  |
| 10277 | 1 | 18003383 | 18003397 | 3 | 5  | 15 | ACA  | 19 | 4  |
| 10280 | 1 | 18012348 | 18012359 | 2 | 6  | 12 | TG   | 18 | 3  |
| 10287 | 1 | 18026105 | 18026120 | 2 | 8  | 16 | TC   | 10 | 3  |
| 10288 | 1 | 18028197 | 18028218 | 2 | 11 | 22 | GT   | 15 | 8  |
| 10289 | 1 | 18031876 | 18031887 | 2 | 6  | 12 | GA   | 21 | 4  |
| 10290 | 1 | 18032604 | 18032615 | 2 | 6  | 12 | GT   | 17 | 3  |
| 10291 | 1 | 18033054 | 18033073 | 4 | 5  | 20 | GTTG | 16 | 4  |

|       |   |          |          |   |    |    |     |    |    |
|-------|---|----------|----------|---|----|----|-----|----|----|
| 10296 | 1 | 18041580 | 18041621 | 2 | 21 | 42 | TG  | 14 | 11 |
| 10299 | 1 | 18049280 | 18049295 | 2 | 8  | 16 | GT  | 29 | 3  |
| 10300 | 1 | 18053248 | 18053261 | 2 | 7  | 14 | TC  | 19 | 4  |
| 10305 | 1 | 18068204 | 18068224 | 3 | 7  | 21 | ATT | 9  | 4  |
| 10306 | 1 | 18074122 | 18074133 | 2 | 6  | 12 | TC  | 24 | 3  |
| 10320 | 1 | 18107170 | 18107185 | 2 | 8  | 16 | AC  | 20 | 3  |
| 10322 | 1 | 18110613 | 18110632 | 2 | 10 | 20 | AG  | 26 | 7  |
| 10328 | 1 | 18118807 | 18118826 | 2 | 10 | 20 | GT  | 25 | 6  |
| 10332 | 1 | 18133678 | 18133695 | 2 | 9  | 18 | CT  | 29 | 7  |
| 10333 | 1 | 18133780 | 18133793 | 2 | 7  | 14 | TG  | 26 | 3  |
| 10334 | 1 | 18137561 | 18137596 | 2 | 18 | 36 | TG  | 8  | 10 |
| 10337 | 1 | 18142907 | 18142918 | 2 | 6  | 12 | CA  | 18 | 5  |
| 10338 | 1 | 18143083 | 18143106 | 3 | 8  | 24 | GAG | 9  | 4  |
| 10339 | 1 | 18143362 | 18143375 | 2 | 7  | 14 | GA  | 15 | 3  |
| 10342 | 1 | 18145804 | 18145823 | 2 | 10 | 20 | AC  | 19 | 8  |
| 10343 | 1 | 18145998 | 18146015 | 2 | 9  | 18 | CT  | 17 | 7  |
| 10344 | 1 | 18146610 | 18146623 | 2 | 7  | 14 | TG  | 17 | 4  |
| 10346 | 1 | 18151066 | 18151079 | 2 | 7  | 14 | CA  | 19 | 13 |
| 10347 | 1 | 18151819 | 18151848 | 3 | 10 | 30 | GAG | 6  | 5  |
| 10355 | 1 | 18160401 | 18160418 | 3 | 6  | 18 | ACA | 21 | 11 |
| 10356 | 1 | 18163042 | 18163053 | 2 | 6  | 12 | TG  | 19 | 3  |
| 10357 | 1 | 18163106 | 18163129 | 2 | 12 | 24 | TG  | 6  | 7  |
| 10358 | 1 | 18163575 | 18163590 | 2 | 8  | 16 | TC  | 22 | 5  |
| 10362 | 1 | 18169171 | 18169185 | 3 | 5  | 15 | TCC | 16 | 4  |
| 10368 | 1 | 18172290 | 18172313 | 3 | 8  | 24 | GGA | 24 | 6  |
| 10369 | 1 | 18174624 | 18174635 | 2 | 6  | 12 | TG  | 21 | 6  |
| 10370 | 1 | 18174639 | 18174650 | 2 | 6  | 12 | GT  | 18 | 6  |
| 10376 | 1 | 18180226 | 18180245 | 2 | 10 | 20 | AC  | 26 | 8  |
| 10378 | 1 | 18183266 | 18183281 | 2 | 8  | 16 | GT  | 20 | 6  |
| 10379 | 1 | 18184205 | 18184220 | 2 | 8  | 16 | TG  | 22 | 7  |
| 10380 | 1 | 18184339 | 18184352 | 2 | 7  | 14 | TG  | 17 | 3  |
| 10381 | 1 | 18184377 | 18184392 | 2 | 8  | 16 | TG  | 23 | 4  |
| 10382 | 1 | 18185025 | 18185040 | 2 | 8  | 16 | CA  | 22 | 4  |
| 10384 | 1 | 18187933 | 18187948 | 2 | 8  | 16 | GT  | 20 | 4  |
| 10385 | 1 | 18189773 | 18189787 | 3 | 5  | 15 | TTG | 26 | 4  |
| 10390 | 1 | 18194604 | 18194641 | 2 | 19 | 38 | AC  | 7  | 8  |
| 10391 | 1 | 18195033 | 18195044 | 2 | 6  | 12 | GT  | 25 | 5  |
| 10392 | 1 | 18195229 | 18195246 | 2 | 9  | 18 | CA  | 19 | 11 |
| 10394 | 1 | 18199538 | 18199553 | 2 | 8  | 16 | AC  | 29 | 4  |
| 10395 | 1 | 18199922 | 18199935 | 2 | 7  | 14 | GT  | 20 | 4  |
| 10401 | 1 | 18202746 | 18202769 | 2 | 12 | 24 | TG  | 16 | 8  |
| 10404 | 1 | 18205421 | 18205438 | 2 | 9  | 18 | AC  | 24 | 8  |
| 10405 | 1 | 18205578 | 18205609 | 2 | 16 | 32 | AC  | 6  | 11 |
| 10406 | 1 | 18205795 | 18205808 | 2 | 7  | 14 | GA  | 24 | 3  |
| 10412 | 1 | 18206960 | 18206975 | 2 | 8  | 16 | CA  | 27 | 3  |
| 10414 | 1 | 18208972 | 18209016 | 3 | 15 | 45 | TCA | 21 | 14 |
| 10417 | 1 | 18211040 | 18211067 | 2 | 14 | 28 | AC  | 21 | 14 |
| 10419 | 1 | 18213421 | 18213436 | 2 | 8  | 16 | GT  | 23 | 11 |
| 10421 | 1 | 18213919 | 18213938 | 2 | 10 | 20 | GT  | 29 | 6  |
| 10429 | 1 | 18226507 | 18226534 | 2 | 14 | 28 | TG  | 13 | 9  |
| 10430 | 1 | 18228886 | 18228901 | 2 | 8  | 16 | GT  | 26 | 6  |

|       |   |          |          |   |    |    |      |    |    |
|-------|---|----------|----------|---|----|----|------|----|----|
| 10431 | 1 | 18229341 | 18229376 | 2 | 18 | 36 | TG   | 18 | 15 |
| 10432 | 1 | 18230875 | 18230894 | 2 | 10 | 20 | TG   | 21 | 6  |
| 10436 | 1 | 18235281 | 18235294 | 2 | 7  | 14 | AG   | 31 | 7  |
| 10440 | 1 | 18236696 | 18236729 | 2 | 17 | 34 | TC   | 8  | 11 |
| 10442 | 1 | 18238537 | 18238564 | 2 | 14 | 28 | GT   | 17 | 10 |
| 10443 | 1 | 18240219 | 18240246 | 2 | 14 | 28 | AC   | 24 | 7  |
| 10447 | 1 | 18243121 | 18243141 | 3 | 7  | 21 | AAG  | 23 | 3  |
| 10449 | 1 | 18243698 | 18243724 | 3 | 9  | 27 | AAG  | 6  | 4  |
| 10452 | 1 | 18244429 | 18244452 | 2 | 12 | 24 | GA   | 17 | 11 |
| 10456 | 1 | 18244911 | 18244930 | 2 | 10 | 20 | CT   | 20 | 7  |
| 10457 | 1 | 18245281 | 18245292 | 2 | 6  | 12 | TC   | 19 | 6  |
| 10458 | 1 | 18245411 | 18245431 | 3 | 7  | 21 | TTG  | 18 | 9  |
| 10459 | 1 | 18245483 | 18245494 | 2 | 6  | 12 | GA   | 23 | 3  |
| 10461 | 1 | 18245634 | 18245657 | 2 | 12 | 24 | GT   | 18 | 7  |
| 10464 | 1 | 18268001 | 18268016 | 2 | 8  | 16 | AG   | 26 | 4  |
| 10470 | 1 | 18277776 | 18277789 | 2 | 7  | 14 | GT   | 22 | 4  |
| 10472 | 1 | 18278273 | 18278316 | 2 | 22 | 44 | CT   | 11 | 7  |
| 10475 | 1 | 18284189 | 18284228 | 2 | 20 | 40 | AC   | 16 | 9  |
| 10477 | 1 | 18286626 | 18286639 | 2 | 7  | 14 | CT   | 9  | 6  |
| 10478 | 1 | 18294569 | 18294580 | 2 | 6  | 12 | AG   | 25 | 6  |
| 10480 | 1 | 18295651 | 18295686 | 2 | 18 | 36 | CA   | 10 | 11 |
| 10481 | 1 | 18296138 | 18296169 | 2 | 16 | 32 | GT   | 19 | 7  |
| 10482 | 1 | 18296327 | 18296338 | 2 | 6  | 12 | CA   | 22 | 6  |
| 10483 | 1 | 18296340 | 18296357 | 2 | 9  | 18 | AC   | 22 | 6  |
| 10484 | 1 | 18297597 | 18297636 | 2 | 20 | 40 | TG   | 19 | 11 |
| 10490 | 1 | 18316003 | 18316014 | 2 | 6  | 12 | AC   | 21 | 3  |
| 10495 | 1 | 18324803 | 18324836 | 2 | 17 | 34 | TG   | 13 | 14 |
| 10496 | 1 | 18324961 | 18325002 | 2 | 21 | 42 | GT   | 11 | 10 |
| 10503 | 1 | 18332011 | 18332044 | 2 | 17 | 34 | CA   | 11 | 12 |
| 10504 | 1 | 18332260 | 18332293 | 2 | 17 | 34 | CA   | 11 | 9  |
| 10506 | 1 | 18333076 | 18333087 | 2 | 6  | 12 | TG   | 16 | 4  |
| 10509 | 1 | 18335692 | 18335711 | 2 | 10 | 20 | AC   | 15 | 11 |
| 10511 | 1 | 18341222 | 18341237 | 4 | 4  | 16 | TTTC | 7  | 6  |
| 10513 | 1 | 18341347 | 18341370 | 3 | 8  | 24 | TTG  | 24 | 8  |
| 10514 | 1 | 18341891 | 18341920 | 2 | 15 | 30 | AC   | 16 | 11 |
| 10515 | 1 | 18342262 | 18342275 | 2 | 7  | 14 | GA   | 23 | 4  |
| 10517 | 1 | 18343013 | 18343026 | 2 | 7  | 14 | GT   | 23 | 5  |
| 10525 | 1 | 18344573 | 18344587 | 3 | 5  | 15 | GAG  | 14 | 4  |
| 10526 | 1 | 18344591 | 18344605 | 3 | 5  | 15 | GAG  | 17 | 3  |
| 10530 | 1 | 18345466 | 18345501 | 2 | 18 | 36 | AC   | 15 | 9  |
| 10532 | 1 | 18345824 | 18345843 | 2 | 10 | 20 | TC   | 27 | 10 |
| 10536 | 1 | 18347466 | 18347492 | 3 | 9  | 27 | AGA  | 23 | 7  |
| 10540 | 1 | 18356980 | 18356999 | 2 | 10 | 20 | AT   | 7  | 7  |
| 10542 | 1 | 18359166 | 18359186 | 3 | 7  | 21 | AGA  | 25 | 9  |
| 10543 | 1 | 18363401 | 18363418 | 2 | 9  | 18 | GA   | 11 | 8  |
| 10545 | 1 | 18363876 | 18363887 | 2 | 6  | 12 | GT   | 13 | 10 |
| 10546 | 1 | 18363892 | 18363905 | 2 | 7  | 14 | GT   | 16 | 10 |
| 10548 | 1 | 18365797 | 18365812 | 2 | 8  | 16 | TG   | 16 | 7  |
| 10553 | 1 | 18370247 | 18370268 | 2 | 11 | 22 | CA   | 13 | 8  |
| 10556 | 1 | 18373124 | 18373141 | 2 | 9  | 18 | TC   | 23 | 4  |
| 10557 | 1 | 18373687 | 18373716 | 3 | 10 | 30 | GGA  | 22 | 6  |

|       |   |          |          |   |    |    |      |    |    |
|-------|---|----------|----------|---|----|----|------|----|----|
| 10559 | 1 | 18374262 | 18374277 | 2 | 8  | 16 | CA   | 24 | 4  |
| 10560 | 1 | 18374509 | 18374522 | 2 | 7  | 14 | TG   | 26 | 6  |
| 10562 | 1 | 18374767 | 18374780 | 2 | 7  | 14 | CA   | 16 | 6  |
| 10564 | 1 | 18374972 | 18375011 | 2 | 20 | 40 | CA   | 10 | 10 |
| 10567 | 1 | 18376341 | 18376356 | 2 | 8  | 16 | TC   | 22 | 4  |
| 10569 | 1 | 18380132 | 18380165 | 2 | 17 | 34 | TC   | 12 | 8  |
| 10572 | 1 | 18381167 | 18381186 | 2 | 10 | 20 | AC   | 23 | 10 |
| 10576 | 1 | 18387702 | 18387723 | 2 | 11 | 22 | TG   | 11 | 8  |
| 10577 | 1 | 18387864 | 18387903 | 2 | 20 | 40 | TG   | 7  | 10 |
| 10578 | 1 | 18388560 | 18388581 | 2 | 11 | 22 | GT   | 10 | 4  |
| 10579 | 1 | 18388757 | 18388768 | 2 | 6  | 12 | TG   | 30 | 3  |
| 10580 | 1 | 18389173 | 18389186 | 2 | 7  | 14 | TG   | 21 | 6  |
| 10582 | 1 | 18397259 | 18397276 | 2 | 9  | 18 | TG   | 25 | 9  |
| 10583 | 1 | 18398900 | 18398929 | 2 | 15 | 30 | TG   | 12 | 9  |
| 10585 | 1 | 18405296 | 18405307 | 2 | 6  | 12 | TG   | 32 | 4  |
| 10587 | 1 | 18411204 | 18411225 | 2 | 11 | 22 | AC   | 17 | 3  |
| 10589 | 1 | 18415222 | 18415247 | 2 | 13 | 26 | AC   | 7  | 7  |
| 10590 | 1 | 18415367 | 18415382 | 2 | 8  | 16 | AC   | 18 | 9  |
| 10594 | 1 | 18434806 | 18434841 | 2 | 18 | 36 | GT   | 14 | 10 |
| 10597 | 1 | 18454394 | 18454405 | 2 | 6  | 12 | AT   | 19 | 6  |
| 10600 | 1 | 18485277 | 18485290 | 2 | 7  | 14 | TC   | 15 | 5  |
| 10608 | 1 | 18508916 | 18508937 | 2 | 11 | 22 | GT   | 16 | 7  |
| 10609 | 1 | 18514027 | 18514042 | 2 | 8  | 16 | TG   | 21 | 6  |
| 10611 | 1 | 18518472 | 18518485 | 2 | 7  | 14 | AC   | 11 | 3  |
| 10615 | 1 | 18523069 | 18523080 | 2 | 6  | 12 | AC   | 26 | 3  |
| 10616 | 1 | 18530335 | 18530349 | 3 | 5  | 15 | TCT  | 27 | 6  |
| 10617 | 1 | 18530950 | 18530967 | 3 | 6  | 18 | CCT  | 26 | 4  |
| 10618 | 1 | 18531397 | 18531444 | 2 | 24 | 48 | AC   | 22 | 15 |
| 10622 | 1 | 18535268 | 18535291 | 2 | 12 | 24 | GT   | 18 | 6  |
| 10623 | 1 | 18538553 | 18538580 | 2 | 14 | 28 | CA   | 14 | 12 |
| 10624 | 1 | 18538657 | 18538668 | 2 | 6  | 12 | CA   | 29 | 4  |
| 10625 | 1 | 18541757 | 18541768 | 2 | 6  | 12 | CT   | 6  | 5  |
| 10630 | 1 | 18551347 | 18551372 | 2 | 13 | 26 | GT   | 21 | 13 |
| 10634 | 1 | 18558567 | 18558592 | 2 | 13 | 26 | AC   | 16 | 14 |
| 10637 | 1 | 18560523 | 18560548 | 2 | 13 | 26 | AC   | 8  | 12 |
| 10639 | 1 | 18562890 | 18562904 | 3 | 5  | 15 | TGG  | 22 | 6  |
| 10641 | 1 | 18564276 | 18564299 | 3 | 8  | 24 | CTC  | 34 | 5  |
| 10642 | 1 | 18564506 | 18564529 | 2 | 12 | 24 | GT   | 23 | 7  |
| 10649 | 1 | 18572192 | 18572221 | 2 | 15 | 30 | GT   | 7  | 4  |
| 10650 | 1 | 18573832 | 18573855 | 4 | 6  | 24 | AAAT | 21 | 4  |
| 10651 | 1 | 18574765 | 18574784 | 2 | 10 | 20 | CT   | 25 | 8  |
| 10654 | 1 | 18579501 | 18579516 | 2 | 8  | 16 | CA   | 19 | 17 |
| 10655 | 1 | 18583166 | 18583177 | 2 | 6  | 12 | CA   | 23 | 3  |
| 10657 | 1 | 18588711 | 18588736 | 2 | 13 | 26 | CA   | 22 | 13 |
| 10661 | 1 | 18590805 | 18590836 | 2 | 16 | 32 | AG   | 17 | 8  |
| 10664 | 1 | 18596723 | 18596744 | 2 | 11 | 22 | TG   | 23 | 9  |
| 10665 | 1 | 18598826 | 18598837 | 2 | 6  | 12 | GA   | 32 | 5  |
| 10669 | 1 | 18605800 | 18605811 | 2 | 6  | 12 | TC   | 23 | 3  |
| 10670 | 1 | 18606722 | 18606742 | 3 | 7  | 21 | GGA  | 27 | 9  |
| 10672 | 1 | 18607268 | 18607295 | 2 | 14 | 28 | GT   | 21 | 12 |
| 10676 | 1 | 18618410 | 18618441 | 2 | 16 | 32 | CA   | 17 | 9  |

|       |   |          |          |   |    |    |      |    |    |
|-------|---|----------|----------|---|----|----|------|----|----|
| 10678 | 1 | 18621198 | 18621227 | 2 | 15 | 30 | TG   | 11 | 9  |
| 10679 | 1 | 18621319 | 18621360 | 2 | 21 | 42 | AC   | 6  | 8  |
| 10681 | 1 | 18621913 | 18621936 | 4 | 6  | 24 | CAAA | 22 | 5  |
| 10683 | 1 | 18625858 | 18625885 | 2 | 14 | 28 | AC   | 15 | 9  |
| 10686 | 1 | 18628792 | 18628806 | 3 | 5  | 15 | CCT  | 20 | 7  |
| 10688 | 1 | 18629332 | 18629363 | 2 | 16 | 32 | CA   | 19 | 13 |
| 10699 | 1 | 18632065 | 18632088 | 3 | 8  | 24 | CTC  | 23 | 7  |
| 10700 | 1 | 18635015 | 18635036 | 2 | 11 | 22 | CA   | 23 | 8  |
| 10701 | 1 | 18636329 | 18636340 | 2 | 6  | 12 | GA   | 25 | 3  |
| 10704 | 1 | 18638410 | 18638429 | 2 | 10 | 20 | AC   | 8  | 10 |
| 10705 | 1 | 18638584 | 18638601 | 2 | 9  | 18 | TG   | 26 | 7  |
| 10706 | 1 | 18638658 | 18638690 | 3 | 11 | 33 | TCC  | 23 | 13 |
| 10707 | 1 | 18638846 | 18638863 | 2 | 9  | 18 | AC   | 25 | 7  |
| 10709 | 1 | 18642154 | 18642181 | 2 | 14 | 28 | AC   | 13 | 6  |
| 10713 | 1 | 18649654 | 18649665 | 2 | 6  | 12 | AT   | 27 | 5  |
| 10714 | 1 | 18652340 | 18652354 | 3 | 5  | 15 | GAG  | 9  | 9  |
| 10716 | 1 | 18653196 | 18653211 | 2 | 8  | 16 | GT   | 21 | 9  |
| 10717 | 1 | 18653334 | 18653363 | 3 | 10 | 30 | TTC  | 19 | 6  |
| 10722 | 1 | 18657904 | 18657936 | 3 | 11 | 33 | GGA  | 14 | 9  |
| 10723 | 1 | 18658812 | 18658835 | 3 | 8  | 24 | CAG  | 21 | 6  |
| 10724 | 1 | 18659046 | 18659077 | 2 | 16 | 32 | CA   | 10 | 8  |
| 10727 | 1 | 18660129 | 18660148 | 2 | 10 | 20 | CT   | 9  | 4  |
| 10728 | 1 | 18660576 | 18660597 | 2 | 11 | 22 | CA   | 15 | 12 |
| 10729 | 1 | 18661003 | 18661016 | 2 | 7  | 14 | TG   | 22 | 13 |
| 10733 | 1 | 18661554 | 18661577 | 3 | 8  | 24 | GCA  | 24 | 6  |
| 10736 | 1 | 18662056 | 18662076 | 3 | 7  | 21 | GCA  | 18 | 4  |
| 10738 | 1 | 18662876 | 18662895 | 2 | 10 | 20 | TG   | 19 | 4  |
| 10743 | 1 | 18666850 | 18666867 | 2 | 9  | 18 | CA   | 6  | 5  |
| 10745 | 1 | 18668019 | 18668042 | 3 | 8  | 24 | AGG  | 20 | 11 |
| 10748 | 1 | 18669242 | 18669263 | 2 | 11 | 22 | TC   | 22 | 7  |
| 10755 | 1 | 18673842 | 18673875 | 2 | 17 | 34 | GT   | 7  | 8  |
| 10761 | 1 | 18676195 | 18676224 | 2 | 15 | 30 | TG   | 15 | 10 |
| 10763 | 1 | 18677420 | 18677435 | 4 | 4  | 16 | TTTA | 18 | 8  |
| 10766 | 1 | 18678767 | 18678784 | 2 | 9  | 18 | TA   | 9  | 4  |
| 10768 | 1 | 18679449 | 18679468 | 2 | 10 | 20 | AC   | 13 | 7  |
| 10769 | 1 | 18679669 | 18679692 | 2 | 12 | 24 | GT   | 17 | 5  |
| 10770 | 1 | 18679783 | 18679800 | 2 | 9  | 18 | CA   | 19 | 9  |
| 10771 | 1 | 18679985 | 18680000 | 2 | 8  | 16 | TG   | 7  | 3  |
| 10775 | 1 | 18681556 | 18681575 | 2 | 10 | 20 | TG   | 17 | 4  |
| 10776 | 1 | 18682551 | 18682576 | 2 | 13 | 26 | AC   | 14 | 15 |
| 10778 | 1 | 18683935 | 18683950 | 2 | 8  | 16 | GA   | 23 | 10 |
| 10783 | 1 | 18687249 | 18687276 | 2 | 14 | 28 | TG   | 11 | 15 |
| 10786 | 1 | 18702426 | 18702443 | 3 | 6  | 18 | ATA  | 16 | 8  |
| 10787 | 1 | 18705425 | 18705438 | 2 | 7  | 14 | AT   | 12 | 3  |
| 10792 | 1 | 18715801 | 18715834 | 2 | 17 | 34 | TG   | 7  | 11 |
| 10794 | 1 | 18716867 | 18716888 | 2 | 11 | 22 | GT   | 7  | 6  |
| 10796 | 1 | 18717909 | 18717929 | 3 | 7  | 21 | TTG  | 13 | 5  |
| 10797 | 1 | 18718313 | 18718326 | 2 | 7  | 14 | AC   | 24 | 5  |
| 10799 | 1 | 18722656 | 18722687 | 2 | 16 | 32 | CA   | 7  | 8  |
| 10800 | 1 | 18727794 | 18727825 | 2 | 16 | 32 | AC   | 21 | 15 |
| 10805 | 1 | 18746970 | 18746985 | 2 | 8  | 16 | AC   | 9  | 4  |

|       |   |          |          |   |    |    |      |    |    |
|-------|---|----------|----------|---|----|----|------|----|----|
| 10806 | 1 | 18747791 | 18747802 | 2 | 6  | 12 | AT   | 20 | 3  |
| 10809 | 1 | 18753161 | 18753178 | 2 | 9  | 18 | TG   | 21 | 3  |
| 10810 | 1 | 18754299 | 18754325 | 3 | 9  | 27 | GCT  | 21 | 7  |
| 10811 | 1 | 18756718 | 18756743 | 2 | 13 | 26 | CA   | 12 | 3  |
| 10812 | 1 | 18756914 | 18756933 | 2 | 10 | 20 | AC   | 16 | 4  |
| 10818 | 1 | 18761112 | 18761141 | 2 | 15 | 30 | AC   | 13 | 12 |
| 10823 | 1 | 18766370 | 18766401 | 2 | 16 | 32 | TG   | 10 | 6  |
| 10824 | 1 | 18768405 | 18768420 | 2 | 8  | 16 | GT   | 17 | 11 |
| 10825 | 1 | 18768554 | 18768583 | 2 | 15 | 30 | CA   | 17 | 11 |
| 10827 | 1 | 18770353 | 18770367 | 3 | 5  | 15 | TCC  | 23 | 5  |
| 10828 | 1 | 18770585 | 18770602 | 2 | 9  | 18 | GT   | 20 | 5  |
| 10831 | 1 | 18779615 | 18779628 | 2 | 7  | 14 | CA   | 26 | 7  |
| 10832 | 1 | 18779942 | 18779953 | 2 | 6  | 12 | GT   | 24 | 6  |
| 10833 | 1 | 18780196 | 18780222 | 3 | 9  | 27 | TCC  | 19 | 4  |
| 10839 | 1 | 18788296 | 18788311 | 2 | 8  | 16 | GT   | 20 | 15 |
| 10841 | 1 | 18794034 | 18794053 | 2 | 10 | 20 | CA   | 9  | 12 |
| 10846 | 1 | 18811896 | 18811913 | 2 | 9  | 18 | AG   | 26 | 3  |
| 10850 | 1 | 18815658 | 18815677 | 4 | 5  | 20 | AAAT | 18 | 5  |
| 10855 | 1 | 18819742 | 18819757 | 2 | 8  | 16 | CA   | 32 | 5  |
| 10856 | 1 | 18821269 | 18821284 | 2 | 8  | 16 | GT   | 21 | 6  |
| 10857 | 1 | 18825558 | 18825573 | 2 | 8  | 16 | CT   | 23 | 5  |
| 10858 | 1 | 18827717 | 18827742 | 2 | 13 | 26 | GT   | 11 | 8  |
| 10859 | 1 | 18835993 | 18836012 | 2 | 10 | 20 | GT   | 22 | 9  |
| 10865 | 1 | 18841680 | 18841693 | 2 | 7  | 14 | GT   | 15 | 3  |
| 10867 | 1 | 18841883 | 18841898 | 2 | 8  | 16 | CT   | 26 | 7  |
| 10868 | 1 | 18844289 | 18844321 | 3 | 11 | 33 | TGT  | 20 | 7  |
| 10869 | 1 | 18846266 | 18846283 | 3 | 6  | 18 | TCC  | 28 | 9  |
| 10873 | 1 | 18847650 | 18847675 | 2 | 13 | 26 | CA   | 25 | 10 |
| 10875 | 1 | 18849079 | 18849110 | 2 | 16 | 32 | CA   | 12 | 6  |
| 10883 | 1 | 18861117 | 18861134 | 2 | 9  | 18 | CA   | 21 | 8  |
| 10884 | 1 | 18861197 | 18861212 | 2 | 8  | 16 | TC   | 21 | 3  |
| 10885 | 1 | 18861409 | 18861434 | 2 | 13 | 26 | TG   | 17 | 11 |
| 10887 | 1 | 18861567 | 18861582 | 2 | 8  | 16 | AC   | 20 | 10 |
| 10889 | 1 | 18861799 | 18861818 | 2 | 10 | 20 | AC   | 20 | 4  |
| 10892 | 1 | 18862552 | 18862567 | 2 | 8  | 16 | AG   | 24 | 9  |
| 10895 | 1 | 18863967 | 18864002 | 3 | 12 | 36 | GAG  | 13 | 7  |
| 10896 | 1 | 18864806 | 18864829 | 2 | 12 | 24 | AC   | 18 | 12 |
| 10898 | 1 | 18869771 | 18869792 | 2 | 11 | 22 | CA   | 22 | 13 |
| 10899 | 1 | 18869924 | 18869941 | 3 | 6  | 18 | CTC  | 30 | 4  |
| 10905 | 1 | 18876017 | 18876050 | 2 | 17 | 34 | CA   | 9  | 7  |
| 10907 | 1 | 18880602 | 18880621 | 4 | 5  | 20 | AATG | 26 | 5  |
| 10917 | 1 | 18890726 | 18890739 | 2 | 7  | 14 | AG   | 13 | 3  |
| 10918 | 1 | 18890749 | 18890760 | 2 | 6  | 12 | GA   | 11 | 3  |
| 10920 | 1 | 18891195 | 18891215 | 3 | 7  | 21 | AAG  | 18 | 15 |
| 10922 | 1 | 18891697 | 18891720 | 3 | 8  | 24 | GGA  | 18 | 7  |
| 10925 | 1 | 18892050 | 18892067 | 2 | 9  | 18 | CT   | 13 | 12 |
| 10928 | 1 | 18892777 | 18892800 | 2 | 12 | 24 | CA   | 14 | 6  |
| 10941 | 1 | 18917885 | 18917910 | 2 | 13 | 26 | AC   | 17 | 13 |
| 10943 | 1 | 18918370 | 18918381 | 2 | 6  | 12 | AC   | 19 | 6  |
| 10944 | 1 | 18926483 | 18926494 | 2 | 6  | 12 | GA   | 27 | 4  |
| 10946 | 1 | 18932645 | 18932665 | 3 | 7  | 21 | CCT  | 15 | 3  |



|       |   |          |          |   |    |    |      |    |    |
|-------|---|----------|----------|---|----|----|------|----|----|
| 10949 | 1 | 18935432 | 18935449 | 2 | 9  | 18 | GT   | 16 | 6  |
| 10951 | 1 | 18936689 | 18936702 | 2 | 7  | 14 | TC   | 32 | 6  |
| 10952 | 1 | 18936894 | 18936907 | 2 | 7  | 14 | CT   | 18 | 4  |
| 10956 | 1 | 18939121 | 18939146 | 2 | 13 | 26 | AC   | 11 | 9  |
| 10958 | 1 | 18939318 | 18939341 | 2 | 12 | 24 | TG   | 14 | 11 |
| 10959 | 1 | 18940511 | 18940524 | 2 | 7  | 14 | AC   | 21 | 3  |
| 10961 | 1 | 18943351 | 18943370 | 2 | 10 | 20 | TG   | 28 | 4  |
| 10963 | 1 | 18944838 | 18944859 | 2 | 11 | 22 | GT   | 24 | 9  |
| 10964 | 1 | 18946370 | 18946383 | 2 | 7  | 14 | GT   | 22 | 9  |
| 10966 | 1 | 18951597 | 18951620 | 2 | 12 | 24 | GT   | 9  | 9  |
| 10967 | 1 | 18951726 | 18951771 | 2 | 23 | 46 | AC   | 10 | 11 |
| 10970 | 1 | 18955124 | 18955147 | 2 | 12 | 24 | AC   | 20 | 8  |
| 10974 | 1 | 18959507 | 18959536 | 2 | 15 | 30 | TC   | 17 | 11 |
| 10977 | 1 | 18962280 | 18962309 | 3 | 10 | 30 | GAG  | 13 | 8  |
| 10978 | 1 | 18962671 | 18962690 | 2 | 10 | 20 | TG   | 13 | 9  |
| 10979 | 1 | 18965890 | 18965913 | 2 | 12 | 24 | GT   | 18 | 13 |
| 10981 | 1 | 18966482 | 18966495 | 2 | 7  | 14 | CT   | 15 | 5  |
| 10984 | 1 | 18969235 | 18969262 | 2 | 14 | 28 | GT   | 6  | 8  |
| 10986 | 1 | 18969648 | 18969661 | 2 | 7  | 14 | TG   | 20 | 4  |
| 10987 | 1 | 18969794 | 18969835 | 2 | 21 | 42 | TG   | 6  | 8  |
| 10988 | 1 | 18969957 | 18969982 | 2 | 13 | 26 | GT   | 14 | 10 |
| 10993 | 1 | 18976598 | 18976624 | 3 | 9  | 27 | CCT  | 11 | 5  |
| 10994 | 1 | 18976812 | 18976845 | 2 | 17 | 34 | CA   | 10 | 13 |
| 10995 | 1 | 18977683 | 18977697 | 3 | 5  | 15 | TCT  | 23 | 7  |
| 10997 | 1 | 18980049 | 18980068 | 2 | 10 | 20 | TG   | 13 | 10 |
| 10998 | 1 | 18981459 | 18981482 | 2 | 12 | 24 | CA   | 16 | 14 |
| 11000 | 1 | 18983270 | 18983293 | 2 | 12 | 24 | AC   | 10 | 9  |
| 11005 | 1 | 18996597 | 18996618 | 2 | 11 | 22 | AC   | 23 | 10 |
| 11006 | 1 | 18996941 | 18996964 | 2 | 12 | 24 | AC   | 15 | 10 |
| 11009 | 1 | 19002520 | 19002551 | 2 | 16 | 32 | CT   | 13 | 8  |
| 11013 | 1 | 19004169 | 19004184 | 2 | 8  | 16 | AC   | 17 | 4  |
| 11014 | 1 | 19004336 | 19004365 | 2 | 15 | 30 | CA   | 14 | 9  |
| 11015 | 1 | 19006518 | 19006541 | 2 | 12 | 24 | GT   | 21 | 10 |
| 11016 | 1 | 19006684 | 19006717 | 2 | 17 | 34 | CA   | 19 | 13 |
| 11022 | 1 | 19008929 | 19008974 | 2 | 23 | 46 | GT   | 12 | 12 |
| 11023 | 1 | 19009116 | 19009127 | 2 | 6  | 12 | TG   | 16 | 10 |
| 11025 | 1 | 19009415 | 19009441 | 3 | 9  | 27 | TGA  | 27 | 5  |
| 11027 | 1 | 19011457 | 19011483 | 3 | 9  | 27 | GTT  | 24 | 10 |
| 11028 | 1 | 19013492 | 19013506 | 3 | 5  | 15 | GAA  | 19 | 5  |
| 11031 | 1 | 19014054 | 19014068 | 3 | 5  | 15 | ATA  | 20 | 5  |
| 11036 | 1 | 19017409 | 19017452 | 2 | 22 | 44 | AC   | 12 | 7  |
| 11037 | 1 | 19017595 | 19017614 | 4 | 5  | 20 | AAAC | 25 | 3  |
| 11042 | 1 | 19019015 | 19019044 | 2 | 15 | 30 | AC   | 9  | 8  |
| 11044 | 1 | 19019820 | 19019851 | 4 | 8  | 32 | TTAT | 16 | 10 |
| 11047 | 1 | 19020357 | 19020384 | 2 | 14 | 28 | CA   | 12 | 7  |
| 11049 | 1 | 19020836 | 19020850 | 3 | 5  | 15 | CAC  | 16 | 3  |
| 11050 | 1 | 19021269 | 19021292 | 2 | 12 | 24 | TG   | 9  | 8  |
| 11053 | 1 | 19022969 | 19022996 | 2 | 14 | 28 | GT   | 10 | 6  |
| 11061 | 1 | 19037154 | 19037179 | 2 | 13 | 26 | AC   | 11 | 11 |
| 11063 | 1 | 19038812 | 19038841 | 2 | 15 | 30 | TG   | 8  | 8  |
| 11068 | 1 | 19040708 | 19040740 | 3 | 11 | 33 | GAG  | 13 | 5  |

|       |   |          |          |   |    |    |      |    |    |
|-------|---|----------|----------|---|----|----|------|----|----|
| 11070 | 1 | 19041020 | 19041047 | 2 | 14 | 28 | CA   | 11 | 5  |
| 11072 | 1 | 19041578 | 19041593 | 4 | 4  | 16 | TTTG | 14 | 4  |
| 11076 | 1 | 19053749 | 19053766 | 2 | 9  | 18 | AC   | 23 | 12 |
| 11077 | 1 | 19061143 | 19061156 | 2 | 7  | 14 | TC   | 23 | 7  |
| 11078 | 1 | 19061157 | 19061170 | 2 | 7  | 14 | AC   | 20 | 6  |
| 11082 | 1 | 19063320 | 19063345 | 2 | 13 | 26 | GT   | 14 | 11 |
| 11086 | 1 | 19075008 | 19075043 | 2 | 18 | 36 | AC   | 8  | 7  |
| 11089 | 1 | 19078295 | 19078315 | 3 | 7  | 21 | GAA  | 23 | 8  |
| 11091 | 1 | 19078821 | 19078840 | 2 | 10 | 20 | TG   | 29 | 5  |
| 11094 | 1 | 19080531 | 19080544 | 2 | 7  | 14 | TC   | 20 | 3  |
| 11105 | 1 | 19102714 | 19102745 | 2 | 16 | 32 | CA   | 7  | 9  |
| 11108 | 1 | 19121304 | 19121327 | 3 | 8  | 24 | GTT  | 26 | 4  |
| 11109 | 1 | 19122215 | 19122232 | 3 | 6  | 18 | AGA  | 18 | 4  |
| 11131 | 1 | 19128882 | 19128893 | 2 | 6  | 12 | TG   | 23 | 7  |
| 11132 | 1 | 19128969 | 19128986 | 2 | 9  | 18 | AG   | 18 | 5  |
| 11133 | 1 | 19129091 | 19129108 | 3 | 6  | 18 | TTA  | 23 | 6  |
| 11135 | 1 | 19132958 | 19132971 | 2 | 7  | 14 | CT   | 22 | 5  |
| 11136 | 1 | 19133373 | 19133398 | 2 | 13 | 26 | GT   | 20 | 8  |
| 11139 | 1 | 19135528 | 19135541 | 2 | 7  | 14 | TG   | 22 | 4  |
| 11141 | 1 | 19136176 | 19136203 | 2 | 14 | 28 | AC   | 12 | 11 |
| 11143 | 1 | 19138510 | 19138535 | 2 | 13 | 26 | TG   | 16 | 11 |
| 11146 | 1 | 19139468 | 19139483 | 2 | 8  | 16 | CA   | 25 | 3  |
| 11149 | 1 | 19142061 | 19142074 | 2 | 7  | 14 | AC   | 18 | 7  |
| 11151 | 1 | 19142498 | 19142513 | 2 | 8  | 16 | AG   | 28 | 3  |
| 11152 | 1 | 19143130 | 19143147 | 2 | 9  | 18 | TG   | 20 | 6  |
| 11153 | 1 | 19144859 | 19144872 | 2 | 7  | 14 | AC   | 27 | 6  |
| 11155 | 1 | 19150741 | 19150752 | 2 | 6  | 12 | AC   | 24 | 4  |
| 11156 | 1 | 19151054 | 19151067 | 2 | 7  | 14 | AC   | 31 | 4  |
| 11159 | 1 | 19168913 | 19168933 | 3 | 7  | 21 | GAG  | 24 | 5  |
| 11162 | 1 | 19172080 | 19172097 | 3 | 6  | 18 | ACA  | 26 | 7  |
| 11164 | 1 | 19174667 | 19174692 | 2 | 13 | 26 | AC   | 20 | 8  |
| 11165 | 1 | 19174828 | 19174841 | 2 | 7  | 14 | TC   | 32 | 3  |
| 11166 | 1 | 19177681 | 19177692 | 2 | 6  | 12 | TG   | 26 | 4  |
| 11167 | 1 | 19177887 | 19177902 | 4 | 4  | 16 | AAAT | 24 | 5  |
| 11170 | 1 | 19191356 | 19191373 | 3 | 6  | 18 | GCT  | 8  | 3  |
| 11171 | 1 | 19192298 | 19192313 | 2 | 8  | 16 | CA   | 14 | 11 |
| 11179 | 1 | 19206853 | 19206874 | 2 | 11 | 22 | CT   | 12 | 6  |
| 11183 | 1 | 19213085 | 19213102 | 2 | 9  | 18 | AC   | 15 | 9  |
| 11184 | 1 | 19213212 | 19213225 | 2 | 7  | 14 | TG   | 19 | 6  |
| 11189 | 1 | 19214128 | 19214143 | 4 | 4  | 16 | CTTC | 9  | 4  |
| 11192 | 1 | 19214987 | 19215002 | 4 | 4  | 16 | TCCT | 10 | 3  |
| 11201 | 1 | 19215614 | 19215633 | 4 | 5  | 20 | TTCC | 11 | 3  |
| 11206 | 1 | 19219173 | 19219208 | 2 | 18 | 36 | CA   | 20 | 10 |
| 11208 | 1 | 19223770 | 19223787 | 3 | 6  | 18 | ATC  | 22 | 5  |
| 11209 | 1 | 19224836 | 19224853 | 2 | 9  | 18 | TA   | 8  | 3  |
| 11212 | 1 | 19227345 | 19227359 | 3 | 5  | 15 | CTC  | 18 | 4  |
| 11213 | 1 | 19230550 | 19230573 | 4 | 6  | 24 | TGCG | 36 | 19 |
| 11215 | 1 | 19233072 | 19233099 | 4 | 7  | 28 | AATG | 9  | 3  |
| 11222 | 1 | 19252008 | 19252021 | 2 | 7  | 14 | AG   | 31 | 4  |
| 11226 | 1 | 19261178 | 19261191 | 2 | 7  | 14 | TG   | 28 | 4  |
| 11227 | 1 | 19261335 | 19261356 | 2 | 11 | 22 | AC   | 15 | 8  |

|       |   |          |          |   |    |    |      |    |    |
|-------|---|----------|----------|---|----|----|------|----|----|
| 11228 | 1 | 19262174 | 19262189 | 2 | 8  | 16 | CA   | 28 | 10 |
| 11231 | 1 | 19273916 | 19273937 | 2 | 11 | 22 | AC   | 16 | 10 |
| 11237 | 1 | 19287487 | 19287506 | 4 | 5  | 20 | CCCT | 7  | 4  |
| 11248 | 1 | 19311141 | 19311168 | 2 | 14 | 28 | GT   | 19 | 13 |
| 11250 | 1 | 19312121 | 19312140 | 2 | 10 | 20 | AG   | 6  | 3  |
| 11253 | 1 | 19313650 | 19313665 | 2 | 8  | 16 | TG   | 15 | 13 |
| 11257 | 1 | 19319674 | 19319691 | 2 | 9  | 18 | CA   | 16 | 10 |
| 11263 | 1 | 19331770 | 19331796 | 3 | 9  | 27 | GAG  | 25 | 9  |
| 11264 | 1 | 19332232 | 19332247 | 2 | 8  | 16 | CA   | 19 | 3  |
| 11268 | 1 | 19334410 | 19334424 | 3 | 5  | 15 | TGT  | 15 | 5  |
| 11269 | 1 | 19334830 | 19334855 | 2 | 13 | 26 | AT   | 17 | 10 |
| 11271 | 1 | 19337150 | 19337165 | 2 | 8  | 16 | AG   | 15 | 3  |
| 11275 | 1 | 19340942 | 19340971 | 2 | 15 | 30 | TC   | 9  | 5  |
| 11277 | 1 | 19341137 | 19341154 | 2 | 9  | 18 | CA   | 13 | 4  |
| 11279 | 1 | 19341264 | 19341279 | 2 | 8  | 16 | CT   | 24 | 6  |
| 11280 | 1 | 19341352 | 19341373 | 2 | 11 | 22 | CA   | 19 | 10 |
| 11286 | 1 | 19346201 | 19346214 | 2 | 7  | 14 | CA   | 27 | 3  |
| 11294 | 1 | 19352757 | 19352768 | 2 | 6  | 12 | CT   | 17 | 5  |
| 11298 | 1 | 19357218 | 19357238 | 3 | 7  | 21 | AGG  | 9  | 4  |
| 11301 | 1 | 19363026 | 19363039 | 2 | 7  | 14 | AC   | 22 | 7  |
| 11302 | 1 | 19363041 | 19363056 | 2 | 8  | 16 | CA   | 22 | 5  |
| 11303 | 1 | 19363702 | 19363715 | 2 | 7  | 14 | TC   | 17 | 4  |
| 11306 | 1 | 19366335 | 19366355 | 3 | 7  | 21 | AGA  | 27 | 6  |
| 11307 | 1 | 19367080 | 19367093 | 2 | 7  | 14 | TC   | 13 | 4  |
| 11309 | 1 | 19369218 | 19369239 | 2 | 11 | 22 | TG   | 21 | 15 |
| 11310 | 1 | 19369764 | 19369783 | 2 | 10 | 20 | AC   | 29 | 8  |
| 11311 | 1 | 19371259 | 19371282 | 3 | 8  | 24 | AAC  | 30 | 5  |
| 11312 | 1 | 19372693 | 19372707 | 3 | 5  | 15 | CTG  | 31 | 3  |
| 11313 | 1 | 19373958 | 19373993 | 2 | 18 | 36 | AC   | 12 | 8  |
| 11318 | 1 | 19380630 | 19380653 | 3 | 8  | 24 | GGT  | 30 | 5  |
| 11323 | 1 | 19387209 | 19387229 | 3 | 7  | 21 | CAT  | 20 | 5  |
| 11324 | 1 | 19389152 | 19389165 | 2 | 7  | 14 | CA   | 14 | 3  |
| 11325 | 1 | 19390032 | 19390065 | 2 | 17 | 34 | CA   | 13 | 9  |
| 11327 | 1 | 19393766 | 19393781 | 2 | 8  | 16 | GT   | 24 | 4  |
| 11328 | 1 | 19395674 | 19395697 | 4 | 6  | 24 | CAAA | 18 | 6  |
| 11332 | 1 | 19399538 | 19399551 | 2 | 7  | 14 | AC   | 24 | 5  |
| 11333 | 1 | 19400989 | 19401012 | 2 | 12 | 24 | GT   | 19 | 7  |
| 11336 | 1 | 19403772 | 19403785 | 2 | 7  | 14 | CA   | 24 | 6  |
| 11341 | 1 | 19407790 | 19407809 | 2 | 10 | 20 | GA   | 17 | 6  |
| 11351 | 1 | 19415283 | 19415304 | 2 | 11 | 22 | CA   | 11 | 12 |
| 11352 | 1 | 19415460 | 19415473 | 2 | 7  | 14 | AC   | 24 | 5  |
| 11358 | 1 | 19422767 | 19422784 | 2 | 9  | 18 | CA   | 16 | 11 |
| 11359 | 1 | 19422786 | 19422799 | 2 | 7  | 14 | AC   | 19 | 12 |
| 11361 | 1 | 19424936 | 19424959 | 2 | 12 | 24 | GT   | 23 | 8  |
| 11362 | 1 | 19425025 | 19425038 | 2 | 7  | 14 | AC   | 23 | 3  |
| 11370 | 1 | 19429357 | 19429374 | 2 | 9  | 18 | CA   | 14 | 5  |
| 11371 | 1 | 19430397 | 19430408 | 2 | 6  | 12 | CA   | 21 | 5  |
| 11376 | 1 | 19435814 | 19435831 | 2 | 9  | 18 | TC   | 24 | 6  |
| 11379 | 1 | 19439039 | 19439054 | 2 | 8  | 16 | GT   | 8  | 3  |
| 11380 | 1 | 19439055 | 19439074 | 2 | 10 | 20 | GA   | 13 | 8  |
| 11386 | 1 | 19439982 | 19440045 | 4 | 16 | 64 | GATA | 18 | 12 |

|       |   |          |          |   |    |    |      |    |    |
|-------|---|----------|----------|---|----|----|------|----|----|
| 11389 | 1 | 19442293 | 19442306 | 2 | 7  | 14 | CT   | 8  | 3  |
| 11391 | 1 | 19443655 | 19443688 | 2 | 17 | 34 | CA   | 7  | 6  |
| 11392 | 1 | 19443821 | 19443836 | 2 | 8  | 16 | CA   | 17 | 10 |
| 11397 | 1 | 19448333 | 19448360 | 2 | 14 | 28 | CA   | 20 | 14 |
| 11399 | 1 | 19449516 | 19449529 | 2 | 7  | 14 | TG   | 24 | 5  |
| 11401 | 1 | 19449728 | 19449755 | 4 | 7  | 28 | ACAA | 20 | 5  |
| 11406 | 1 | 19452795 | 19452812 | 2 | 9  | 18 | AC   | 20 | 9  |
| 11419 | 1 | 19466887 | 19466949 | 3 | 21 | 63 | GAA  | 15 | 14 |
| 11423 | 1 | 19473342 | 19473355 | 2 | 7  | 14 | AT   | 23 | 4  |
| 11424 | 1 | 19473642 | 19473667 | 2 | 13 | 26 | GT   | 10 | 4  |
| 11425 | 1 | 19477457 | 19477472 | 2 | 8  | 16 | TG   | 19 | 3  |
| 11427 | 1 | 19482476 | 19482490 | 3 | 5  | 15 | AGA  | 13 | 4  |
| 11428 | 1 | 19482983 | 19483002 | 2 | 10 | 20 | CA   | 13 | 8  |
| 11431 | 1 | 19494912 | 19494941 | 2 | 15 | 30 | TG   | 6  | 5  |
| 11434 | 1 | 19504580 | 19504603 | 3 | 8  | 24 | TTG  | 23 | 10 |
| 11436 | 1 | 19504992 | 19505033 | 3 | 14 | 42 | AGT  | 6  | 9  |
| 11437 | 1 | 19505991 | 19506004 | 2 | 7  | 14 | GT   | 25 | 3  |
| 11438 | 1 | 19509421 | 19509432 | 2 | 6  | 12 | CA   | 29 | 3  |
| 11439 | 1 | 19514393 | 19514406 | 2 | 7  | 14 | CA   | 24 | 4  |
| 11447 | 1 | 19523732 | 19523746 | 3 | 5  | 15 | ATT  | 25 | 3  |
| 11450 | 1 | 19525151 | 19525174 | 2 | 12 | 24 | GT   | 14 | 14 |
| 11452 | 1 | 19527365 | 19527390 | 2 | 13 | 26 | GT   | 13 | 12 |
| 11456 | 1 | 19531567 | 19531587 | 3 | 7  | 21 | CAG  | 29 | 3  |
| 11457 | 1 | 19531679 | 19531690 | 2 | 6  | 12 | GT   | 24 | 12 |
| 11458 | 1 | 19531699 | 19531710 | 2 | 6  | 12 | GT   | 16 | 7  |
| 11462 | 1 | 19534095 | 19534116 | 2 | 11 | 22 | GT   | 18 | 10 |
| 11463 | 1 | 19534229 | 19534246 | 2 | 9  | 18 | GT   | 14 | 17 |
| 11465 | 1 | 19534445 | 19534462 | 3 | 6  | 18 | TCT  | 20 | 3  |
| 11470 | 1 | 19541688 | 19541705 | 2 | 9  | 18 | GT   | 11 | 6  |
| 11471 | 1 | 19541707 | 19541720 | 2 | 7  | 14 | TG   | 10 | 7  |
| 11473 | 1 | 19542106 | 19542123 | 2 | 9  | 18 | TG   | 9  | 7  |
| 11475 | 1 | 19542648 | 19542659 | 2 | 6  | 12 | TG   | 21 | 5  |
| 11476 | 1 | 19542820 | 19542831 | 2 | 6  | 12 | GT   | 27 | 4  |
| 11477 | 1 | 19542984 | 19543007 | 2 | 12 | 24 | TG   | 16 | 11 |
| 11480 | 1 | 19546545 | 19546586 | 2 | 21 | 42 | TG   | 9  | 8  |
| 11482 | 1 | 19546959 | 19547014 | 2 | 28 | 56 | GT   | 8  | 12 |
| 11483 | 1 | 19548228 | 19548259 | 2 | 16 | 32 | AC   | 11 | 13 |
| 11484 | 1 | 19548773 | 19548796 | 2 | 12 | 24 | GT   | 12 | 10 |
| 11486 | 1 | 19549903 | 19549924 | 2 | 11 | 22 | AG   | 20 | 8  |
| 11487 | 1 | 19550748 | 19550763 | 2 | 8  | 16 | CA   | 9  | 9  |
| 11493 | 1 | 19552387 | 19552422 | 2 | 18 | 36 | AC   | 14 | 8  |
| 11494 | 1 | 19556001 | 19556016 | 2 | 8  | 16 | TG   | 13 | 4  |
| 11496 | 1 | 19559467 | 19559488 | 2 | 11 | 22 | AC   | 15 | 11 |
| 11500 | 1 | 19562072 | 19562095 | 2 | 12 | 24 | GA   | 6  | 6  |
| 11504 | 1 | 19562656 | 19562667 | 2 | 6  | 12 | AC   | 17 | 4  |
| 11505 | 1 | 19564283 | 19564306 | 2 | 12 | 24 | AC   | 21 | 10 |
| 11506 | 1 | 19565427 | 19565438 | 2 | 6  | 12 | AC   | 27 | 4  |
| 11508 | 1 | 19566262 | 19566285 | 2 | 12 | 24 | GT   | 10 | 7  |
| 11526 | 1 | 19588695 | 19588710 | 2 | 8  | 16 | TG   | 25 | 5  |
| 11533 | 1 | 19603799 | 19603812 | 2 | 7  | 14 | AC   | 30 | 3  |
| 11534 | 1 | 19603947 | 19603979 | 3 | 11 | 33 | CAT  | 10 | 4  |

|       |   |          |          |   |    |    |      |    |    |
|-------|---|----------|----------|---|----|----|------|----|----|
| 11544 | 1 | 19613259 | 19613284 | 2 | 13 | 26 | CA   | 10 | 7  |
| 11545 | 1 | 19613420 | 19613445 | 2 | 13 | 26 | TG   | 8  | 4  |
| 11546 | 1 | 19613510 | 19613523 | 2 | 7  | 14 | CT   | 18 | 5  |
| 11547 | 1 | 19613561 | 19613578 | 2 | 9  | 18 | CA   | 25 | 13 |
| 11550 | 1 | 19616921 | 19616946 | 2 | 13 | 26 | GT   | 10 | 7  |
| 11552 | 1 | 19617738 | 19617763 | 2 | 13 | 26 | GT   | 12 | 9  |
| 11554 | 1 | 19617947 | 19617978 | 2 | 16 | 32 | CA   | 7  | 11 |
| 11555 | 1 | 19618746 | 19618787 | 2 | 21 | 42 | GT   | 6  | 7  |
| 11557 | 1 | 19619134 | 19619157 | 2 | 12 | 24 | AC   | 21 | 8  |
| 11558 | 1 | 19621086 | 19621121 | 2 | 18 | 36 | AC   | 9  | 7  |
| 11559 | 1 | 19622263 | 19622277 | 3 | 5  | 15 | AAT  | 22 | 8  |
| 11563 | 1 | 19624158 | 19624181 | 3 | 8  | 24 | TTC  | 19 | 5  |
| 11565 | 1 | 19624926 | 19624947 | 2 | 11 | 22 | CA   | 18 | 10 |
| 11566 | 1 | 19625620 | 19625665 | 2 | 23 | 46 | TG   | 12 | 11 |
| 11567 | 1 | 19625809 | 19625836 | 2 | 14 | 28 | TG   | 15 | 14 |
| 11570 | 1 | 19628061 | 19628080 | 2 | 10 | 20 | GT   | 16 | 12 |
| 11573 | 1 | 19629358 | 19629369 | 2 | 6  | 12 | CA   | 8  | 5  |
| 11574 | 1 | 19629478 | 19629495 | 2 | 9  | 18 | CT   | 13 | 5  |
| 11576 | 1 | 19631226 | 19631239 | 2 | 7  | 14 | GT   | 19 | 9  |
| 11577 | 1 | 19631398 | 19631411 | 2 | 7  | 14 | CA   | 16 | 7  |
| 11582 | 1 | 19635473 | 19635492 | 2 | 10 | 20 | GT   | 18 | 5  |
| 11583 | 1 | 19635693 | 19635714 | 2 | 11 | 22 | GA   | 14 | 9  |
| 11592 | 1 | 19636770 | 19636799 | 2 | 15 | 30 | CA   | 6  | 6  |
| 11593 | 1 | 19636936 | 19636955 | 2 | 10 | 20 | GT   | 16 | 10 |
| 11595 | 1 | 19638119 | 19638130 | 2 | 6  | 12 | GT   | 26 | 4  |
| 11596 | 1 | 19638227 | 19638238 | 2 | 6  | 12 | GT   | 32 | 3  |
| 11598 | 1 | 19638394 | 19638407 | 2 | 7  | 14 | CA   | 18 | 3  |
| 11602 | 1 | 19639189 | 19639214 | 2 | 13 | 26 | CA   | 15 | 12 |
| 11603 | 1 | 19639585 | 19639600 | 4 | 4  | 16 | GGTT | 28 | 3  |
| 11604 | 1 | 19641246 | 19641265 | 2 | 10 | 20 | GA   | 18 | 7  |
| 11608 | 1 | 19645546 | 19645571 | 2 | 13 | 26 | TG   | 9  | 9  |
| 11611 | 1 | 19645763 | 19645788 | 2 | 13 | 26 | TG   | 9  | 8  |
| 11612 | 1 | 19646851 | 19646886 | 2 | 18 | 36 | CA   | 15 | 19 |
| 11614 | 1 | 19648208 | 19648227 | 2 | 10 | 20 | AC   | 23 | 13 |
| 11615 | 1 | 19649684 | 19649717 | 2 | 17 | 34 | GT   | 15 | 7  |
| 11617 | 1 | 19649993 | 19650012 | 2 | 10 | 20 | GT   | 24 | 3  |
| 11619 | 1 | 19650313 | 19650328 | 2 | 8  | 16 | TG   | 16 | 3  |
| 11620 | 1 | 19651011 | 19651036 | 2 | 13 | 26 | TG   | 15 | 8  |
| 11622 | 1 | 19654534 | 19654553 | 2 | 10 | 20 | GT   | 13 | 8  |
| 11623 | 1 | 19656148 | 19656173 | 2 | 13 | 26 | CA   | 15 | 6  |
| 11624 | 1 | 19656319 | 19656346 | 2 | 14 | 28 | TG   | 13 | 16 |
| 11625 | 1 | 19656442 | 19656455 | 2 | 7  | 14 | GT   | 18 | 7  |
| 11626 | 1 | 19656534 | 19656573 | 2 | 20 | 40 | CA   | 11 | 9  |
| 11627 | 1 | 19656717 | 19656738 | 2 | 11 | 22 | TG   | 17 | 9  |
| 11628 | 1 | 19657463 | 19657474 | 2 | 6  | 12 | AG   | 21 | 5  |
| 11631 | 1 | 19661101 | 19661144 | 2 | 22 | 44 | AC   | 9  | 10 |
| 11632 | 1 | 19661238 | 19661249 | 2 | 6  | 12 | TG   | 25 | 5  |
| 11634 | 1 | 19661515 | 19661530 | 2 | 8  | 16 | CT   | 21 | 11 |
| 11635 | 1 | 19661680 | 19661695 | 2 | 8  | 16 | GT   | 20 | 7  |
| 11636 | 1 | 19661762 | 19661793 | 2 | 16 | 32 | TG   | 18 | 10 |
| 11638 | 1 | 19661930 | 19661943 | 2 | 7  | 14 | CA   | 19 | 3  |

|       |   |          |          |   |    |    |    |    |    |
|-------|---|----------|----------|---|----|----|----|----|----|
| 11639 | 1 | 19662235 | 19662268 | 2 | 17 | 34 | GT | 13 | 8  |
| 11640 | 1 | 19663783 | 19663796 | 2 | 7  | 14 | TG | 19 | 9  |
| 11641 | 1 | 19663802 | 19663817 | 2 | 8  | 16 | GT | 21 | 5  |
| 11642 | 1 | 19663952 | 19663975 | 2 | 12 | 24 | CA | 13 | 6  |
| 11643 | 1 | 19664262 | 19664279 | 2 | 9  | 18 | AC | 19 | 6  |
| 11647 | 1 | 19664633 | 19664656 | 2 | 12 | 24 | AC | 10 | 7  |
| 11648 | 1 | 19664695 | 19664712 | 2 | 9  | 18 | CA | 9  | 3  |
| 11651 | 1 | 19666814 | 19666855 | 2 | 21 | 42 | CA | 8  | 9  |
| 11654 | 1 | 19667674 | 19667701 | 2 | 14 | 28 | AC | 15 | 8  |
| 11655 | 1 | 19667926 | 19667939 | 2 | 7  | 14 | TG | 24 | 7  |
| 11656 | 1 | 19668042 | 19668057 | 2 | 8  | 16 | AC | 8  | 4  |
| 11657 | 1 | 19668158 | 19668169 | 2 | 6  | 12 | CA | 14 | 8  |
| 11658 | 1 | 19668174 | 19668189 | 2 | 8  | 16 | CA | 14 | 8  |
| 11659 | 1 | 19671065 | 19671076 | 2 | 6  | 12 | CA | 24 | 3  |
| 11661 | 1 | 19673319 | 19673356 | 2 | 19 | 38 | AC | 11 | 13 |
| 11667 | 1 | 19677763 | 19677790 | 2 | 14 | 28 | CA | 12 | 8  |
| 11669 | 1 | 19678878 | 19678895 | 2 | 9  | 18 | TG | 18 | 9  |
| 11671 | 1 | 19679056 | 19679069 | 2 | 7  | 14 | CA | 20 | 6  |
| 11672 | 1 | 19679072 | 19679085 | 2 | 7  | 14 | CA | 24 | 9  |
| 11673 | 1 | 19681460 | 19681481 | 2 | 11 | 22 | AG | 29 | 8  |
| 11676 | 1 | 19682491 | 19682534 | 2 | 22 | 44 | CA | 19 | 9  |
| 11677 | 1 | 19682905 | 19682916 | 2 | 6  | 12 | CT | 26 | 3  |
| 11684 | 1 | 19686395 | 19686420 | 2 | 13 | 26 | GT | 12 | 5  |
| 11686 | 1 | 19687113 | 19687130 | 2 | 9  | 18 | AC | 11 | 9  |
| 11690 | 1 | 19688012 | 19688045 | 2 | 17 | 34 | GT | 7  | 5  |
| 11693 | 1 | 19688460 | 19688479 | 2 | 10 | 20 | CA | 11 | 10 |
| 11696 | 1 | 19691058 | 19691073 | 2 | 8  | 16 | TC | 8  | 6  |
| 11698 | 1 | 19691312 | 19691327 | 2 | 8  | 16 | AG | 13 | 5  |
| 11699 | 1 | 19691650 | 19691671 | 2 | 11 | 22 | TG | 17 | 7  |
| 11702 | 1 | 19694407 | 19694440 | 2 | 17 | 34 | AC | 20 | 14 |
| 11703 | 1 | 19694537 | 19694560 | 2 | 12 | 24 | GT | 9  | 8  |
| 11704 | 1 | 19694810 | 19694855 | 2 | 23 | 46 | GT | 8  | 11 |
| 11705 | 1 | 19694971 | 19694990 | 2 | 10 | 20 | CT | 20 | 4  |
| 11706 | 1 | 19697024 | 19697055 | 2 | 16 | 32 | CA | 17 | 11 |
| 11707 | 1 | 19698907 | 19698920 | 2 | 7  | 14 | CA | 18 | 4  |
| 11708 | 1 | 19699122 | 19699151 | 2 | 15 | 30 | GT | 19 | 10 |
| 11709 | 1 | 19699370 | 19699385 | 2 | 8  | 16 | CT | 8  | 4  |
| 11710 | 1 | 19701128 | 19701143 | 2 | 8  | 16 | TC | 13 | 4  |
| 11711 | 1 | 19701381 | 19701396 | 2 | 8  | 16 | CT | 26 | 6  |
| 11715 | 1 | 19703835 | 19703862 | 2 | 14 | 28 | CA | 6  | 6  |
| 11719 | 1 | 19706737 | 19706768 | 2 | 16 | 32 | TG | 21 | 7  |
| 11721 | 1 | 19707012 | 19707045 | 2 | 17 | 34 | GT | 12 | 11 |
| 11724 | 1 | 19707560 | 19707605 | 2 | 23 | 46 | AC | 6  | 8  |
| 11725 | 1 | 19707685 | 19707706 | 2 | 11 | 22 | AC | 12 | 11 |
| 11726 | 1 | 19707801 | 19707822 | 2 | 11 | 22 | CA | 12 | 9  |
| 11729 | 1 | 19708006 | 19708049 | 2 | 22 | 44 | TG | 9  | 10 |
| 11730 | 1 | 19708698 | 19708715 | 2 | 9  | 18 | AC | 25 | 12 |
| 11731 | 1 | 19708718 | 19708733 | 2 | 8  | 16 | AC | 18 | 11 |
| 11732 | 1 | 19708853 | 19708884 | 2 | 16 | 32 | GT | 6  | 9  |
| 11737 | 1 | 19711199 | 19711216 | 2 | 9  | 18 | CA | 23 | 5  |
| 11740 | 1 | 19713777 | 19713804 | 2 | 14 | 28 | CA | 17 | 10 |

|       |   |          |          |   |    |    |      |    |    |
|-------|---|----------|----------|---|----|----|------|----|----|
| 11741 | 1 | 19714196 | 19714221 | 2 | 13 | 26 | GT   | 13 | 7  |
| 11747 | 1 | 19719619 | 19719645 | 3 | 9  | 27 | GAT  | 23 | 6  |
| 11748 | 1 | 19721968 | 19721987 | 2 | 10 | 20 | CT   | 16 | 6  |
| 11750 | 1 | 19722777 | 19722806 | 2 | 15 | 30 | CA   | 8  | 8  |
| 11752 | 1 | 19723493 | 19723522 | 2 | 15 | 30 | AC   | 8  | 10 |
| 11758 | 1 | 19728992 | 19729007 | 2 | 8  | 16 | TG   | 24 | 4  |
| 11761 | 1 | 19732210 | 19732221 | 2 | 6  | 12 | TG   | 26 | 3  |
| 11763 | 1 | 19732549 | 19732572 | 2 | 12 | 24 | CT   | 22 | 8  |
| 11764 | 1 | 19733516 | 19733549 | 2 | 17 | 34 | CA   | 15 | 11 |
| 11765 | 1 | 19733706 | 19733727 | 2 | 11 | 22 | CA   | 17 | 11 |
| 11766 | 1 | 19737915 | 19737930 | 2 | 8  | 16 | AC   | 19 | 6  |
| 11770 | 1 | 19748635 | 19748650 | 4 | 4  | 16 | AAAG | 17 | 4  |
| 11771 | 1 | 19749173 | 19749186 | 2 | 7  | 14 | TG   | 22 | 3  |
| 11772 | 1 | 19749397 | 19749436 | 2 | 20 | 40 | AC   | 10 | 12 |
| 11775 | 1 | 19753113 | 19753170 | 2 | 29 | 58 | TG   | 6  | 7  |
| 11777 | 1 | 19754794 | 19754809 | 2 | 8  | 16 | GT   | 17 | 7  |
| 11778 | 1 | 19754976 | 19754989 | 2 | 7  | 14 | TG   | 6  | 3  |
| 11779 | 1 | 19755347 | 19755370 | 2 | 12 | 24 | TG   | 18 | 12 |
| 11788 | 1 | 19763257 | 19763280 | 2 | 12 | 24 | CA   | 23 | 13 |
| 11789 | 1 | 19763420 | 19763434 | 3 | 5  | 15 | GTA  | 36 | 3  |
| 11790 | 1 | 19763644 | 19763657 | 2 | 7  | 14 | CA   | 24 | 7  |
| 11791 | 1 | 19763763 | 19763786 | 2 | 12 | 24 | AC   | 18 | 10 |
| 11792 | 1 | 19764372 | 19764392 | 3 | 7  | 21 | TGG  | 21 | 5  |
| 11793 | 1 | 19764756 | 19764769 | 2 | 7  | 14 | GT   | 26 | 3  |
| 11794 | 1 | 19767714 | 19767729 | 2 | 8  | 16 | CA   | 16 | 12 |
| 11795 | 1 | 19771518 | 19771537 | 2 | 10 | 20 | TG   | 23 | 4  |
| 11798 | 1 | 19777428 | 19777461 | 2 | 17 | 34 | TG   | 10 | 10 |
| 11800 | 1 | 19780105 | 19780120 | 2 | 8  | 16 | CA   | 29 | 5  |
| 11801 | 1 | 19780359 | 19780374 | 2 | 8  | 16 | GA   | 24 | 6  |
| 11804 | 1 | 19788360 | 19788385 | 2 | 13 | 26 | CA   | 22 | 13 |
| 11808 | 1 | 19792007 | 19792020 | 2 | 7  | 14 | GT   | 15 | 7  |
| 11809 | 1 | 19792022 | 19792035 | 2 | 7  | 14 | TG   | 19 | 7  |
| 11812 | 1 | 19797134 | 19797147 | 2 | 7  | 14 | GA   | 24 | 3  |
| 11814 | 1 | 19798731 | 19798756 | 2 | 13 | 26 | AC   | 14 | 12 |
| 11816 | 1 | 19799398 | 19799411 | 2 | 7  | 14 | CA   | 27 | 6  |
| 11817 | 1 | 19799733 | 19799750 | 3 | 6  | 18 | TAT  | 9  | 5  |
| 11819 | 1 | 19802409 | 19802422 | 2 | 7  | 14 | CA   | 29 | 7  |
| 11821 | 1 | 19805941 | 19805956 | 2 | 8  | 16 | GT   | 24 | 12 |
| 11822 | 1 | 19806257 | 19806278 | 2 | 11 | 22 | GT   | 11 | 11 |
| 11823 | 1 | 19807134 | 19807163 | 2 | 15 | 30 | AC   | 16 | 6  |
| 11826 | 1 | 19814154 | 19814177 | 3 | 8  | 24 | TGT  | 24 | 8  |
| 11832 | 1 | 19840507 | 19840524 | 2 | 9  | 18 | AG   | 28 | 13 |
| 11833 | 1 | 19846017 | 19846028 | 2 | 6  | 12 | TG   | 27 | 3  |
| 11834 | 1 | 19847299 | 19847312 | 2 | 7  | 14 | CA   | 29 | 5  |
| 11835 | 1 | 19848555 | 19848568 | 2 | 7  | 14 | TG   | 18 | 7  |
| 11836 | 1 | 19848714 | 19848729 | 2 | 8  | 16 | TG   | 20 | 12 |
| 11837 | 1 | 19850270 | 19850313 | 2 | 22 | 44 | GT   | 6  | 9  |
| 11838 | 1 | 19850445 | 19850464 | 2 | 10 | 20 | CT   | 7  | 3  |
| 11840 | 1 | 19851514 | 19851545 | 2 | 16 | 32 | CA   | 7  | 5  |
| 11841 | 1 | 19852743 | 19852760 | 2 | 9  | 18 | AG   | 33 | 4  |
| 11842 | 1 | 19853506 | 19853523 | 2 | 9  | 18 | AC   | 19 | 7  |

|       |   |          |          |   |    |    |      |    |    |
|-------|---|----------|----------|---|----|----|------|----|----|
| 11843 | 1 | 19855233 | 19855254 | 2 | 11 | 22 | AC   | 15 | 13 |
| 11844 | 1 | 19857772 | 19857785 | 2 | 7  | 14 | TG   | 30 | 5  |
| 11846 | 1 | 19858340 | 19858359 | 2 | 10 | 20 | CA   | 21 | 8  |
| 11847 | 1 | 19858501 | 19858528 | 2 | 14 | 28 | AC   | 15 | 7  |
| 11848 | 1 | 19862674 | 19862685 | 2 | 6  | 12 | AC   | 27 | 3  |
| 11849 | 1 | 19863171 | 19863230 | 2 | 30 | 60 | GT   | 6  | 8  |
| 11852 | 1 | 19865865 | 19865876 | 2 | 6  | 12 | AC   | 12 | 3  |
| 11853 | 1 | 19866528 | 19866541 | 2 | 7  | 14 | AC   | 22 | 3  |
| 11856 | 1 | 19872546 | 19872575 | 2 | 15 | 30 | CA   | 9  | 8  |
| 11863 | 1 | 19875772 | 19875809 | 2 | 19 | 38 | TC   | 18 | 14 |
| 11865 | 1 | 19877010 | 19877021 | 2 | 6  | 12 | CT   | 22 | 3  |
| 11866 | 1 | 19879145 | 19879156 | 2 | 6  | 12 | CA   | 25 | 4  |
| 11867 | 1 | 19879345 | 19879366 | 2 | 11 | 22 | TG   | 19 | 7  |
| 11868 | 1 | 19881123 | 19881138 | 2 | 8  | 16 | AC   | 19 | 8  |
| 11870 | 1 | 19882956 | 19882967 | 2 | 6  | 12 | CA   | 25 | 4  |
| 11871 | 1 | 19883323 | 19883337 | 3 | 5  | 15 | TGC  | 23 | 6  |
| 11874 | 1 | 19886445 | 19886464 | 2 | 10 | 20 | GT   | 19 | 7  |
| 11875 | 1 | 19886610 | 19886621 | 2 | 6  | 12 | AC   | 24 | 3  |
| 11876 | 1 | 19886864 | 19886875 | 2 | 6  | 12 | AT   | 8  | 3  |
| 11881 | 1 | 19892502 | 19892519 | 3 | 6  | 18 | GAG  | 28 | 3  |
| 11882 | 1 | 19893795 | 19893806 | 2 | 6  | 12 | TG   | 27 | 5  |
| 11883 | 1 | 19896807 | 19896818 | 2 | 6  | 12 | TG   | 21 | 3  |
| 11889 | 1 | 19901886 | 19901900 | 3 | 5  | 15 | GAT  | 23 | 4  |
| 11893 | 1 | 19911184 | 19911213 | 2 | 15 | 30 | CA   | 10 | 4  |
| 11895 | 1 | 19913379 | 19913396 | 2 | 9  | 18 | AC   | 17 | 5  |
| 11896 | 1 | 19914608 | 19914627 | 2 | 10 | 20 | CA   | 23 | 9  |
| 11897 | 1 | 19915699 | 19915728 | 2 | 15 | 30 | TG   | 24 | 5  |
| 11900 | 1 | 19918355 | 19918386 | 2 | 16 | 32 | AC   | 12 | 11 |
| 11901 | 1 | 19921446 | 19921457 | 2 | 6  | 12 | GT   | 19 | 3  |
| 11902 | 1 | 19922593 | 19922610 | 2 | 9  | 18 | AC   | 19 | 4  |
| 11903 | 1 | 19922748 | 19922761 | 2 | 7  | 14 | GT   | 26 | 3  |
| 11904 | 1 | 19922805 | 19922822 | 2 | 9  | 18 | AC   | 24 | 4  |
| 11905 | 1 | 19924138 | 19924153 | 2 | 8  | 16 | AC   | 26 | 3  |
| 11906 | 1 | 19925241 | 19925272 | 2 | 16 | 32 | CA   | 7  | 6  |
| 11907 | 1 | 19925395 | 19925418 | 2 | 12 | 24 | AC   | 7  | 5  |
| 11908 | 1 | 19925634 | 19925657 | 2 | 12 | 24 | CA   | 17 | 7  |
| 11909 | 1 | 19926002 | 19926013 | 2 | 6  | 12 | AC   | 14 | 7  |
| 11910 | 1 | 19926015 | 19926030 | 2 | 8  | 16 | CA   | 14 | 4  |
| 11913 | 1 | 19932390 | 19932411 | 2 | 11 | 22 | TG   | 7  | 8  |
| 11914 | 1 | 19932544 | 19932579 | 2 | 18 | 36 | TG   | 16 | 10 |
| 11915 | 1 | 19935869 | 19935888 | 2 | 10 | 20 | AC   | 18 | 13 |
| 11920 | 1 | 19946935 | 19946949 | 3 | 5  | 15 | CAG  | 27 | 3  |
| 11925 | 1 | 19960537 | 19960551 | 3 | 5  | 15 | AAG  | 21 | 3  |
| 11926 | 1 | 19960569 | 19960583 | 3 | 5  | 15 | GAA  | 22 | 5  |
| 11928 | 1 | 19960773 | 19960794 | 2 | 11 | 22 | CA   | 17 | 7  |
| 11929 | 1 | 19960975 | 19961002 | 4 | 7  | 28 | GTGA | 18 | 8  |
| 11930 | 1 | 19961052 | 19961071 | 4 | 5  | 20 | TGAG | 15 | 3  |
| 11937 | 1 | 19992365 | 19992380 | 2 | 8  | 16 | GT   | 20 | 4  |
| 11939 | 1 | 19995988 | 19996005 | 2 | 9  | 18 | GT   | 7  | 7  |
| 11941 | 1 | 19997415 | 19997428 | 2 | 7  | 14 | AC   | 23 | 4  |
| 11942 | 1 | 19999172 | 19999186 | 3 | 5  | 15 | GGA  | 24 | 8  |



|       |   |          |          |   |    |    |      |    |    |
|-------|---|----------|----------|---|----|----|------|----|----|
| 11943 | 1 | 20006960 | 20006973 | 2 | 7  | 14 | TC   | 22 | 16 |
| 11944 | 1 | 20007284 | 20007295 | 2 | 6  | 12 | CA   | 16 | 3  |
| 11948 | 1 | 20015674 | 20015688 | 3 | 5  | 15 | CGG  | 26 | 4  |
| 11949 | 1 | 20019962 | 20019979 | 2 | 9  | 18 | CA   | 17 | 6  |
| 11950 | 1 | 20025697 | 20025726 | 3 | 10 | 30 | ATC  | 22 | 6  |
| 11953 | 1 | 20036044 | 20036077 | 2 | 17 | 34 | GT   | 12 | 9  |
| 11954 | 1 | 20037678 | 20037701 | 3 | 8  | 24 | CAG  | 29 | 10 |
| 11959 | 1 | 20045034 | 20045053 | 4 | 5  | 20 | AAAC | 21 | 5  |
| 11962 | 1 | 20047625 | 20047652 | 2 | 14 | 28 | TG   | 7  | 8  |
| 11966 | 1 | 20055341 | 20055356 | 2 | 8  | 16 | CT   | 16 | 8  |
| 11967 | 1 | 20055730 | 20055744 | 3 | 5  | 15 | TTG  | 25 | 3  |
| 11970 | 1 | 20058192 | 20058203 | 2 | 6  | 12 | CT   | 27 | 3  |
| 11972 | 1 | 20064358 | 20064371 | 2 | 7  | 14 | GT   | 22 | 3  |
| 11973 | 1 | 20068411 | 20068422 | 2 | 6  | 12 | GA   | 11 | 8  |
| 11974 | 1 | 20068424 | 20068441 | 2 | 9  | 18 | AG   | 10 | 8  |
| 11977 | 1 | 20069509 | 20069530 | 2 | 11 | 22 | CA   | 12 | 7  |
| 11986 | 1 | 20081922 | 20081943 | 2 | 11 | 22 | CT   | 25 | 3  |
| 11988 | 1 | 20083542 | 20083557 | 4 | 4  | 16 | GAAG | 24 | 3  |
| 11991 | 1 | 20085192 | 20085217 | 2 | 13 | 26 | TG   | 13 | 10 |
| 11999 | 1 | 20105824 | 20105837 | 2 | 7  | 14 | TC   | 15 | 5  |
| 12000 | 1 | 20105840 | 20105853 | 2 | 7  | 14 | TC   | 17 | 6  |
| 12002 | 1 | 20109319 | 20109346 | 2 | 14 | 28 | TG   | 19 | 8  |
| 12009 | 1 | 20124507 | 20124532 | 2 | 13 | 26 | GT   | 18 | 8  |
| 12010 | 1 | 20127287 | 20127300 | 2 | 7  | 14 | GT   | 23 | 3  |
| 12012 | 1 | 20129217 | 20129232 | 2 | 8  | 16 | CA   | 29 | 8  |
| 12014 | 1 | 20132378 | 20132421 | 2 | 22 | 44 | TG   | 14 | 9  |
| 12018 | 1 | 20136718 | 20136729 | 2 | 6  | 12 | TG   | 25 | 5  |
| 12019 | 1 | 20136732 | 20136743 | 2 | 6  | 12 | TG   | 31 | 4  |
| 12021 | 1 | 20146078 | 20146105 | 4 | 7  | 28 | TGTA | 14 | 3  |
| 12024 | 1 | 20149397 | 20149436 | 2 | 20 | 40 | GT   | 7  | 7  |
| 12025 | 1 | 20149866 | 20149889 | 2 | 12 | 24 | TG   | 17 | 11 |
| 12028 | 1 | 20154097 | 20154114 | 3 | 6  | 18 | TCC  | 27 | 4  |
| 12029 | 1 | 20160086 | 20160099 | 2 | 7  | 14 | GA   | 31 | 3  |
| 12030 | 1 | 20163327 | 20163340 | 2 | 7  | 14 | CT   | 32 | 3  |
| 12036 | 1 | 20180878 | 20180917 | 2 | 20 | 40 | AC   | 17 | 10 |
| 12053 | 1 | 20203676 | 20203687 | 2 | 6  | 12 | AG   | 26 | 6  |
| 12054 | 1 | 20210473 | 20210494 | 2 | 11 | 22 | TA   | 14 | 5  |
| 12057 | 1 | 20219686 | 20219700 | 3 | 5  | 15 | GAG  | 21 | 3  |
| 12063 | 1 | 20226836 | 20226857 | 2 | 11 | 22 | GT   | 17 | 7  |
| 12064 | 1 | 20227467 | 20227488 | 2 | 11 | 22 | TG   | 13 | 9  |
| 12065 | 1 | 20227699 | 20227722 | 3 | 8  | 24 | CTG  | 25 | 10 |
| 12066 | 1 | 20228252 | 20228266 | 3 | 5  | 15 | AAT  | 16 | 4  |
| 12074 | 1 | 20228808 | 20228827 | 4 | 5  | 20 | TGTT | 18 | 12 |
| 12079 | 1 | 20233597 | 20233620 | 2 | 12 | 24 | TG   | 6  | 8  |
| 12081 | 1 | 20235442 | 20235463 | 2 | 11 | 22 | GT   | 16 | 8  |
| 12082 | 1 | 20235654 | 20235671 | 2 | 9  | 18 | AC   | 18 | 3  |
| 12083 | 1 | 20235883 | 20235916 | 2 | 17 | 34 | TG   | 13 | 14 |
| 12085 | 1 | 20243643 | 20243680 | 2 | 19 | 38 | CA   | 12 | 12 |
| 12089 | 1 | 20252183 | 20252194 | 2 | 6  | 12 | CA   | 24 | 4  |
| 12090 | 1 | 20255299 | 20255316 | 2 | 9  | 18 | GA   | 23 | 10 |
| 12091 | 1 | 20255738 | 20255781 | 2 | 22 | 44 | TG   | 11 | 7  |

|       |   |          |          |   |    |    |      |    |    |
|-------|---|----------|----------|---|----|----|------|----|----|
| 12092 | 1 | 20256332 | 20256349 | 2 | 9  | 18 | CT   | 24 | 6  |
| 12094 | 1 | 20261149 | 20261175 | 3 | 9  | 27 | ATC  | 19 | 19 |
| 12095 | 1 | 20262252 | 20262269 | 2 | 9  | 18 | CA   | 26 | 6  |
| 12096 | 1 | 20263424 | 20263439 | 2 | 8  | 16 | CA   | 24 | 9  |
| 12098 | 1 | 20264774 | 20264793 | 2 | 10 | 20 | AC   | 13 | 14 |
| 12100 | 1 | 20269113 | 20269142 | 2 | 15 | 30 | CA   | 17 | 13 |
| 12102 | 1 | 20269964 | 20270001 | 2 | 19 | 38 | AC   | 9  | 11 |
| 12103 | 1 | 20271367 | 20271382 | 4 | 4  | 16 | GACA | 22 | 4  |
| 12105 | 1 | 20272463 | 20272510 | 2 | 24 | 48 | GT   | 12 | 13 |
| 12106 | 1 | 20275434 | 20275449 | 2 | 8  | 16 | AC   | 16 | 7  |
| 12107 | 1 | 20275598 | 20275617 | 2 | 10 | 20 | TC   | 23 | 3  |
| 12111 | 1 | 20276123 | 20276138 | 2 | 8  | 16 | TC   | 19 | 5  |
| 12112 | 1 | 20276139 | 20276150 | 2 | 6  | 12 | AC   | 21 | 5  |
| 12113 | 1 | 20277471 | 20277486 | 2 | 8  | 16 | CA   | 29 | 8  |
| 12116 | 1 | 20278170 | 20278199 | 2 | 15 | 30 | CA   | 9  | 13 |
| 12117 | 1 | 20278515 | 20278532 | 2 | 9  | 18 | AC   | 22 | 5  |
| 12118 | 1 | 20278811 | 20278824 | 2 | 7  | 14 | AG   | 16 | 3  |
| 12119 | 1 | 20278859 | 20278882 | 3 | 8  | 24 | CCT  | 11 | 7  |
| 12123 | 1 | 20279389 | 20279404 | 2 | 8  | 16 | AC   | 22 | 4  |
| 12124 | 1 | 20281220 | 20281247 | 2 | 14 | 28 | AC   | 7  | 6  |
| 12133 | 1 | 20283922 | 20283939 | 2 | 9  | 18 | AC   | 17 | 4  |
| 12136 | 1 | 20284147 | 20284166 | 4 | 5  | 20 | GGAT | 23 | 10 |
| 12137 | 1 | 20285926 | 20285945 | 2 | 10 | 20 | AC   | 19 | 11 |
| 12140 | 1 | 20290161 | 20290182 | 2 | 11 | 22 | CA   | 15 | 9  |
| 12142 | 1 | 20291814 | 20291837 | 2 | 12 | 24 | AC   | 10 | 10 |
| 12143 | 1 | 20295772 | 20295785 | 2 | 7  | 14 | AC   | 14 | 6  |
| 12144 | 1 | 20295910 | 20295931 | 2 | 11 | 22 | CA   | 16 | 8  |
| 12146 | 1 | 20296082 | 20296095 | 2 | 7  | 14 | TG   | 12 | 6  |
| 12147 | 1 | 20300156 | 20300179 | 2 | 12 | 24 | CA   | 16 | 5  |
| 12148 | 1 | 20300356 | 20300387 | 4 | 8  | 32 | CCTT | 7  | 3  |
| 12149 | 1 | 20300553 | 20300568 | 2 | 8  | 16 | AC   | 17 | 10 |
| 12151 | 1 | 20300671 | 20300690 | 2 | 10 | 20 | GT   | 17 | 8  |
| 12153 | 1 | 20300800 | 20300817 | 2 | 9  | 18 | TG   | 8  | 11 |
| 12157 | 1 | 20303155 | 20303168 | 2 | 7  | 14 | AC   | 16 | 5  |
| 12158 | 1 | 20304038 | 20304055 | 2 | 9  | 18 | GT   | 22 | 19 |
| 12161 | 1 | 20308951 | 20308972 | 2 | 11 | 22 | CA   | 13 | 9  |
| 12162 | 1 | 20309942 | 20309957 | 2 | 8  | 16 | GT   | 14 | 7  |
| 12163 | 1 | 20312655 | 20312674 | 2 | 10 | 20 | CA   | 17 | 7  |
| 12167 | 1 | 20327784 | 20327804 | 3 | 7  | 21 | ATC  | 18 | 9  |
| 12169 | 1 | 20334494 | 20334521 | 2 | 14 | 28 | GT   | 14 | 5  |
| 12173 | 1 | 20346922 | 20346936 | 3 | 5  | 15 | ACA  | 26 | 8  |
| 12174 | 1 | 20348015 | 20348035 | 3 | 7  | 21 | CAG  | 27 | 3  |
| 12175 | 1 | 20348262 | 20348277 | 2 | 8  | 16 | GA   | 19 | 3  |
| 12176 | 1 | 20348482 | 20348511 | 2 | 15 | 30 | CA   | 9  | 9  |
| 12177 | 1 | 20348543 | 20348568 | 2 | 13 | 26 | AC   | 14 | 12 |
| 12179 | 1 | 20360959 | 20360976 | 2 | 9  | 18 | GT   | 17 | 13 |
| 12181 | 1 | 20363939 | 20363959 | 3 | 7  | 21 | ATC  | 26 | 7  |
| 12183 | 1 | 20368181 | 20368198 | 2 | 9  | 18 | TG   | 24 | 12 |
| 12185 | 1 | 20380755 | 20380774 | 2 | 10 | 20 | TG   | 12 | 4  |
| 12188 | 1 | 20388517 | 20388532 | 2 | 8  | 16 | TC   | 22 | 11 |
| 12200 | 1 | 20417265 | 20417294 | 2 | 15 | 30 | GT   | 6  | 9  |

|       |   |          |          |   |    |    |      |    |    |
|-------|---|----------|----------|---|----|----|------|----|----|
| 12201 | 1 | 20417954 | 20417969 | 2 | 8  | 16 | CT   | 20 | 3  |
| 12202 | 1 | 20421812 | 20421829 | 3 | 6  | 18 | TGC  | 26 | 7  |
| 12204 | 1 | 20425213 | 20425232 | 2 | 10 | 20 | GT   | 22 | 4  |
| 12214 | 1 | 20447868 | 20447895 | 2 | 14 | 28 | AC   | 7  | 8  |
| 12219 | 1 | 20454040 | 20454063 | 2 | 12 | 24 | GT   | 18 | 10 |
| 12220 | 1 | 20454360 | 20454383 | 3 | 8  | 24 | TGA  | 12 | 5  |
| 12222 | 1 | 20456281 | 20456314 | 2 | 17 | 34 | TG   | 14 | 13 |
| 12223 | 1 | 20456411 | 20456424 | 2 | 7  | 14 | TC   | 29 | 3  |
| 12224 | 1 | 20457992 | 20458025 | 2 | 17 | 34 | GT   | 10 | 11 |
| 12225 | 1 | 20458086 | 20458097 | 2 | 6  | 12 | TC   | 23 | 3  |
| 12227 | 1 | 20462207 | 20462224 | 2 | 9  | 18 | AC   | 19 | 7  |
| 12229 | 1 | 20467670 | 20467685 | 2 | 8  | 16 | GT   | 24 | 8  |
| 12235 | 1 | 20479134 | 20479151 | 2 | 9  | 18 | CA   | 19 | 8  |
| 12240 | 1 | 20485150 | 20485164 | 3 | 5  | 15 | ATT  | 11 | 7  |
| 12241 | 1 | 20486027 | 20486044 | 3 | 6  | 18 | TGA  | 24 | 7  |
| 12245 | 1 | 20496671 | 20496682 | 2 | 6  | 12 | GT   | 16 | 10 |
| 12250 | 1 | 20501120 | 20501134 | 3 | 5  | 15 | AGC  | 25 | 4  |
| 12252 | 1 | 20503243 | 20503254 | 2 | 6  | 12 | TC   | 28 | 4  |
| 12253 | 1 | 20504232 | 20504251 | 2 | 10 | 20 | GA   | 21 | 11 |
| 12254 | 1 | 20504557 | 20504588 | 2 | 16 | 32 | GT   | 14 | 10 |
| 12255 | 1 | 20512455 | 20512468 | 2 | 7  | 14 | GA   | 31 | 3  |
| 12258 | 1 | 20514398 | 20514421 | 3 | 8  | 24 | CTC  | 15 | 7  |
| 12259 | 1 | 20514649 | 20514672 | 3 | 8  | 24 | AGA  | 24 | 3  |
| 12276 | 1 | 20542297 | 20542312 | 2 | 8  | 16 | AG   | 20 | 3  |
| 12279 | 1 | 20548900 | 20548932 | 3 | 11 | 33 | CTC  | 22 | 6  |
| 12281 | 1 | 20551929 | 20551961 | 3 | 11 | 33 | TGT  | 28 | 8  |
| 12284 | 1 | 20553170 | 20553209 | 2 | 20 | 40 | TG   | 6  | 9  |
| 12286 | 1 | 20554017 | 20554052 | 3 | 12 | 36 | CCT  | 8  | 5  |
| 12293 | 1 | 20574238 | 20574255 | 2 | 9  | 18 | CA   | 10 | 5  |
| 12295 | 1 | 20580350 | 20580376 | 3 | 9  | 27 | AAC  | 30 | 11 |
| 12297 | 1 | 20602121 | 20602148 | 2 | 14 | 28 | CA   | 21 | 15 |
| 12300 | 1 | 20606021 | 20606036 | 4 | 4  | 16 | GGAA | 24 | 5  |
| 12303 | 1 | 20610231 | 20610250 | 2 | 10 | 20 | AT   | 12 | 3  |
| 12305 | 1 | 20616910 | 20616923 | 2 | 7  | 14 | AG   | 25 | 5  |
| 12306 | 1 | 20616927 | 20616938 | 2 | 6  | 12 | GT   | 21 | 4  |
| 12307 | 1 | 20623283 | 20623312 | 2 | 15 | 30 | AC   | 11 | 9  |
| 12309 | 1 | 20626015 | 20626042 | 2 | 14 | 28 | TG   | 7  | 9  |
| 12310 | 1 | 20626274 | 20626317 | 2 | 22 | 44 | TC   | 9  | 12 |
| 12312 | 1 | 20634250 | 20634264 | 3 | 5  | 15 | TCC  | 29 | 3  |
| 12314 | 1 | 20638778 | 20638805 | 2 | 14 | 28 | CA   | 13 | 16 |
| 12316 | 1 | 20644386 | 20644412 | 3 | 9  | 27 | CCT  | 11 | 8  |
| 12318 | 1 | 20655115 | 20655146 | 2 | 16 | 32 | GT   | 15 | 8  |
| 12321 | 1 | 20661167 | 20661180 | 2 | 7  | 14 | AT   | 16 | 4  |
| 12327 | 1 | 20669477 | 20669504 | 2 | 14 | 28 | GT   | 16 | 14 |
| 12332 | 1 | 20680202 | 20680222 | 3 | 7  | 21 | AGA  | 27 | 5  |
| 12333 | 1 | 20681062 | 20681083 | 2 | 11 | 22 | AG   | 24 | 8  |
| 12334 | 1 | 20681230 | 20681257 | 2 | 14 | 28 | GT   | 15 | 10 |
| 12335 | 1 | 20683710 | 20683751 | 3 | 14 | 42 | TGA  | 20 | 11 |
| 12336 | 1 | 20685127 | 20685141 | 3 | 5  | 15 | GGT  | 22 | 3  |
| 12338 | 1 | 20689687 | 20689706 | 2 | 10 | 20 | TC   | 6  | 7  |
| 12340 | 1 | 20696869 | 20696884 | 2 | 8  | 16 | TA   | 15 | 12 |

|       |   |          |          |   |    |    |      |    |    |
|-------|---|----------|----------|---|----|----|------|----|----|
| 12346 | 1 | 20702164 | 20702178 | 3 | 5  | 15 | AAC  | 25 | 3  |
| 12348 | 1 | 20706453 | 20706472 | 2 | 10 | 20 | AT   | 11 | 7  |
| 12352 | 1 | 20709465 | 20709480 | 2 | 8  | 16 | TG   | 15 | 6  |
| 12354 | 1 | 20712984 | 20713010 | 3 | 9  | 27 | GAG  | 25 | 4  |
| 12357 | 1 | 20713843 | 20713857 | 3 | 5  | 15 | GCA  | 28 | 3  |
| 12358 | 1 | 20714275 | 20714292 | 3 | 6  | 18 | GAG  | 12 | 3  |
| 12359 | 1 | 20718340 | 20718357 | 2 | 9  | 18 | TC   | 16 | 7  |
| 12361 | 1 | 20726555 | 20726581 | 3 | 9  | 27 | GGA  | 18 | 6  |
| 12362 | 1 | 20726723 | 20726740 | 2 | 9  | 18 | GT   | 19 | 13 |
| 12366 | 1 | 20728797 | 20728811 | 3 | 5  | 15 | TCT  | 21 | 5  |
| 12370 | 1 | 20742174 | 20742191 | 2 | 9  | 18 | TC   | 25 | 5  |
| 12372 | 1 | 20743833 | 20743860 | 2 | 14 | 28 | AC   | 12 | 6  |
| 12373 | 1 | 20743970 | 20743993 | 2 | 12 | 24 | AC   | 14 | 11 |
| 12374 | 1 | 20744671 | 20744698 | 2 | 14 | 28 | GT   | 12 | 10 |
| 12386 | 1 | 20767259 | 20767290 | 4 | 8  | 32 | GATG | 28 | 12 |
| 12388 | 1 | 20768154 | 20768174 | 3 | 7  | 21 | CCT  | 9  | 7  |
| 12389 | 1 | 20770523 | 20770537 | 3 | 5  | 15 | TCC  | 20 | 5  |
| 12391 | 1 | 20773170 | 20773197 | 2 | 14 | 28 | GT   | 17 | 9  |
| 12392 | 1 | 20775433 | 20775452 | 4 | 5  | 20 | TCTT | 22 | 4  |
| 12393 | 1 | 20776193 | 20776230 | 2 | 19 | 38 | GT   | 18 | 11 |
| 12396 | 1 | 20779913 | 20779930 | 3 | 6  | 18 | TCT  | 15 | 10 |
| 12403 | 1 | 20787645 | 20787680 | 2 | 18 | 36 | AC   | 7  | 9  |
| 12404 | 1 | 20790820 | 20790833 | 2 | 7  | 14 | AG   | 24 | 4  |
| 12405 | 1 | 20791537 | 20791552 | 2 | 8  | 16 | TG   | 23 | 11 |
| 12409 | 1 | 20806986 | 20807009 | 3 | 8  | 24 | TTC  | 17 | 7  |
| 12411 | 1 | 20822011 | 20822026 | 4 | 4  | 16 | CAGT | 29 | 3  |
| 12412 | 1 | 20824384 | 20824398 | 3 | 5  | 15 | AGC  | 26 | 6  |
| 12415 | 1 | 20834270 | 20834283 | 2 | 7  | 14 | CT   | 26 | 4  |
| 12416 | 1 | 20834535 | 20834552 | 2 | 9  | 18 | TG   | 8  | 7  |
| 12417 | 1 | 20835029 | 20835046 | 3 | 6  | 18 | CCT  | 19 | 6  |
| 12418 | 1 | 20835891 | 20835908 | 3 | 6  | 18 | GGA  | 23 | 5  |
| 12422 | 1 | 20839632 | 20839658 | 3 | 9  | 27 | AAG  | 20 | 10 |
| 12431 | 1 | 20848112 | 20848127 | 4 | 4  | 16 | AAAG | 31 | 5  |
| 12436 | 1 | 20854025 | 20854056 | 4 | 8  | 32 | AAAG | 17 | 14 |
| 12440 | 1 | 20856661 | 20856681 | 3 | 7  | 21 | CCT  | 21 | 8  |
| 12441 | 1 | 20856873 | 20856890 | 3 | 6  | 18 | TCC  | 20 | 4  |
| 12442 | 1 | 20857094 | 20857126 | 3 | 11 | 33 | CTC  | 19 | 13 |
| 12448 | 1 | 20863363 | 20863380 | 2 | 9  | 18 | AC   | 15 | 8  |
| 12450 | 1 | 20863667 | 20863700 | 2 | 17 | 34 | TG   | 13 | 9  |
| 12451 | 1 | 20866177 | 20866214 | 2 | 19 | 38 | AC   | 13 | 14 |
| 12453 | 1 | 20870401 | 20870414 | 2 | 7  | 14 | CA   | 29 | 11 |
| 12455 | 1 | 20872244 | 20872273 | 2 | 15 | 30 | GT   | 14 | 10 |
| 12460 | 1 | 20887012 | 20887037 | 2 | 13 | 26 | AC   | 13 | 6  |
| 12461 | 1 | 20888454 | 20888481 | 2 | 14 | 28 | AC   | 14 | 7  |
| 12462 | 1 | 20888589 | 20888602 | 2 | 7  | 14 | CA   | 17 | 8  |
| 12463 | 1 | 20889004 | 20889051 | 4 | 12 | 48 | CATC | 17 | 14 |
| 12467 | 1 | 20895115 | 20895128 | 2 | 7  | 14 | CA   | 13 | 6  |
| 12481 | 1 | 20914996 | 20915007 | 2 | 6  | 12 | AC   | 17 | 4  |
| 12483 | 1 | 20921544 | 20921559 | 4 | 4  | 16 | AAAC | 14 | 11 |
| 12484 | 1 | 20922126 | 20922143 | 2 | 9  | 18 | GT   | 26 | 8  |
| 12485 | 1 | 20922983 | 20922997 | 3 | 5  | 15 | CCT  | 26 | 7  |

|       |   |          |          |   |    |    |      |    |    |
|-------|---|----------|----------|---|----|----|------|----|----|
| 12486 | 1 | 20923527 | 20923547 | 3 | 7  | 21 | TAA  | 9  | 9  |
| 12492 | 1 | 20939018 | 20939032 | 3 | 5  | 15 | TTA  | 25 | 4  |
| 12493 | 1 | 20944192 | 20944203 | 2 | 6  | 12 | TG   | 16 | 7  |
| 12506 | 1 | 20961277 | 20961300 | 2 | 12 | 24 | CA   | 17 | 7  |
| 12507 | 1 | 20961420 | 20961441 | 2 | 11 | 22 | CA   | 17 | 15 |
| 12509 | 1 | 20962200 | 20962217 | 2 | 9  | 18 | GA   | 24 | 5  |
| 12510 | 1 | 20964142 | 20964153 | 2 | 6  | 12 | TA   | 22 | 3  |
| 12511 | 1 | 20966272 | 20966287 | 2 | 8  | 16 | GA   | 10 | 3  |
| 12512 | 1 | 20966629 | 20966642 | 2 | 7  | 14 | TC   | 20 | 5  |
| 12518 | 1 | 20972855 | 20972874 | 2 | 10 | 20 | CA   | 12 | 10 |
| 12523 | 1 | 20976065 | 20976085 | 3 | 7  | 21 | AGG  | 19 | 5  |
| 12524 | 1 | 20977228 | 20977247 | 4 | 5  | 20 | AAGA | 18 | 5  |
| 12527 | 1 | 20983204 | 20983219 | 2 | 8  | 16 | GT   | 16 | 4  |
| 12530 | 1 | 20989205 | 20989232 | 2 | 14 | 28 | AC   | 20 | 11 |
| 12531 | 1 | 20989835 | 20989862 | 2 | 14 | 28 | CA   | 12 | 6  |
| 12534 | 1 | 20992526 | 20992549 | 3 | 8  | 24 | AAG  | 23 | 7  |
| 12535 | 1 | 20994002 | 20994023 | 2 | 11 | 22 | TG   | 10 | 12 |
| 12537 | 1 | 20995896 | 20995921 | 2 | 13 | 26 | TG   | 20 | 5  |
| 12538 | 1 | 20996081 | 20996110 | 2 | 15 | 30 | AC   | 13 | 16 |
| 12541 | 1 | 20998522 | 20998539 | 3 | 6  | 18 | CTC  | 23 | 7  |
| 12542 | 1 | 20998736 | 20998750 | 3 | 5  | 15 | GAG  | 22 | 8  |
| 12551 | 1 | 21007890 | 21007925 | 2 | 18 | 36 | AC   | 11 | 7  |
| 12552 | 1 | 21008037 | 21008074 | 2 | 19 | 38 | GT   | 16 | 10 |
| 12553 | 1 | 21008507 | 21008528 | 2 | 11 | 22 | AC   | 12 | 10 |
| 12554 | 1 | 21011057 | 21011080 | 2 | 12 | 24 | AC   | 10 | 10 |
| 12555 | 1 | 21011232 | 21011253 | 2 | 11 | 22 | CA   | 7  | 7  |
| 12557 | 1 | 21011406 | 21011421 | 2 | 8  | 16 | AC   | 7  | 5  |
| 12558 | 1 | 21011424 | 21011439 | 2 | 8  | 16 | AC   | 11 | 9  |
| 12559 | 1 | 21011535 | 21011549 | 3 | 5  | 15 | AGC  | 21 | 3  |
| 12562 | 1 | 21015040 | 21015060 | 3 | 7  | 21 | GCA  | 21 | 6  |
| 12563 | 1 | 21015755 | 21015790 | 2 | 18 | 36 | GT   | 9  | 9  |
| 12568 | 1 | 21019150 | 21019173 | 2 | 12 | 24 | TC   | 15 | 5  |
| 12569 | 1 | 21019464 | 21019479 | 4 | 4  | 16 | TCAG | 34 | 7  |
| 12571 | 1 | 21022979 | 21023002 | 2 | 12 | 24 | AC   | 13 | 11 |
| 12574 | 1 | 21023493 | 21023512 | 2 | 10 | 20 | CA   | 12 | 6  |
| 12575 | 1 | 21023595 | 21023626 | 2 | 16 | 32 | CA   | 8  | 6  |
| 12579 | 1 | 21026339 | 21026358 | 4 | 5  | 20 | CAGG | 36 | 10 |
| 12584 | 1 | 21028135 | 21028158 | 2 | 12 | 24 | GT   | 19 | 10 |
| 12598 | 1 | 21038991 | 21039032 | 2 | 21 | 42 | AG   | 13 | 8  |
| 12600 | 1 | 21040001 | 21040020 | 4 | 5  | 20 | AAAT | 28 | 3  |
| 12603 | 1 | 21040869 | 21040886 | 3 | 6  | 18 | CAG  | 23 | 3  |
| 12604 | 1 | 21042159 | 21042170 | 2 | 6  | 12 | TG   | 26 | 5  |
| 12606 | 1 | 21046237 | 21046252 | 2 | 8  | 16 | GT   | 15 | 8  |
| 12607 | 1 | 21046378 | 21046409 | 2 | 16 | 32 | TG   | 20 | 11 |
| 12610 | 1 | 21049355 | 21049384 | 2 | 15 | 30 | CA   | 22 | 6  |
| 12611 | 1 | 21053337 | 21053370 | 2 | 17 | 34 | GT   | 9  | 10 |
| 12613 | 1 | 21053561 | 21053572 | 2 | 6  | 12 | TG   | 19 | 5  |
| 12614 | 1 | 21053842 | 21053861 | 2 | 10 | 20 | AC   | 19 | 19 |
| 12615 | 1 | 21055903 | 21055923 | 3 | 7  | 21 | GAG  | 21 | 5  |
| 12616 | 1 | 21056094 | 21056109 | 2 | 8  | 16 | GA   | 24 | 3  |
| 12618 | 1 | 21058349 | 21058368 | 2 | 10 | 20 | AC   | 18 | 4  |

|       |   |          |          |   |    |    |      |    |    |
|-------|---|----------|----------|---|----|----|------|----|----|
| 12619 | 1 | 21059191 | 21059246 | 2 | 28 | 56 | GT   | 12 | 12 |
| 12620 | 1 | 21060833 | 21060860 | 2 | 14 | 28 | TG   | 17 | 9  |
| 12621 | 1 | 21061028 | 21061059 | 4 | 8  | 32 | CGGA | 25 | 15 |
| 12622 | 1 | 21061144 | 21061165 | 2 | 11 | 22 | AC   | 14 | 11 |
| 12623 | 1 | 21061222 | 21061233 | 2 | 6  | 12 | AC   | 20 | 5  |
| 12628 | 1 | 21063728 | 21063753 | 2 | 13 | 26 | CA   | 7  | 9  |
| 12629 | 1 | 21063915 | 21063960 | 2 | 23 | 46 | CA   | 7  | 12 |
| 12637 | 1 | 21087120 | 21087133 | 2 | 7  | 14 | AG   | 29 | 3  |
| 12639 | 1 | 21088052 | 21088073 | 2 | 11 | 22 | CA   | 16 | 8  |
| 12643 | 1 | 21092003 | 21092030 | 2 | 14 | 28 | CA   | 20 | 13 |
| 12644 | 1 | 21092297 | 21092318 | 2 | 11 | 22 | CT   | 23 | 5  |
| 12645 | 1 | 21092622 | 21092633 | 2 | 6  | 12 | AT   | 10 | 7  |
| 12646 | 1 | 21093222 | 21093237 | 2 | 8  | 16 | TA   | 10 | 4  |
| 12651 | 1 | 21108480 | 21108495 | 4 | 4  | 16 | AATA | 28 | 3  |
| 12652 | 1 | 21108722 | 21108741 | 2 | 10 | 20 | AC   | 22 | 6  |
| 12655 | 1 | 21114350 | 21114377 | 2 | 14 | 28 | CA   | 16 | 16 |
| 12656 | 1 | 21114647 | 21114678 | 2 | 16 | 32 | GT   | 11 | 11 |
| 12657 | 1 | 21114830 | 21114841 | 2 | 6  | 12 | GT   | 12 | 10 |
| 12658 | 1 | 21114844 | 21114861 | 2 | 9  | 18 | GT   | 15 | 10 |
| 12661 | 1 | 21117830 | 21117853 | 2 | 12 | 24 | CA   | 11 | 11 |
| 12662 | 1 | 21120503 | 21120546 | 2 | 22 | 44 | GT   | 14 | 8  |
| 12665 | 1 | 21123759 | 21123782 | 2 | 12 | 24 | CA   | 21 | 7  |
| 12666 | 1 | 21123962 | 21123987 | 2 | 13 | 26 | CA   | 13 | 9  |
| 12667 | 1 | 21124353 | 21124380 | 2 | 14 | 28 | CA   | 11 | 10 |
| 12670 | 1 | 21132280 | 21132295 | 2 | 8  | 16 | GT   | 15 | 7  |
| 12673 | 1 | 21140774 | 21140799 | 2 | 13 | 26 | CA   | 11 | 9  |
| 12676 | 1 | 21141452 | 21141481 | 2 | 15 | 30 | AC   | 11 | 9  |
| 12677 | 1 | 21141890 | 21141907 | 2 | 9  | 18 | TG   | 17 | 5  |
| 12678 | 1 | 21141937 | 21141968 | 2 | 16 | 32 | TG   | 19 | 10 |
| 12681 | 1 | 21142685 | 21142706 | 2 | 11 | 22 | AC   | 18 | 11 |
| 12683 | 1 | 21143226 | 21143257 | 2 | 16 | 32 | AC   | 11 | 7  |
| 12686 | 1 | 21149349 | 21149364 | 2 | 8  | 16 | TG   | 20 | 18 |
| 12689 | 1 | 21151136 | 21151150 | 3 | 5  | 15 | TGA  | 24 | 5  |
| 12690 | 1 | 21152730 | 21152753 | 3 | 8  | 24 | GAG  | 15 | 5  |
| 12693 | 1 | 21156725 | 21156740 | 4 | 4  | 16 | TTTA | 12 | 3  |
| 12696 | 1 | 21157829 | 21157856 | 2 | 14 | 28 | GT   | 8  | 12 |
| 12698 | 1 | 21158042 | 21158065 | 2 | 12 | 24 | AC   | 15 | 8  |
| 12700 | 1 | 21158206 | 21158245 | 2 | 20 | 40 | CA   | 9  | 10 |
| 12710 | 1 | 21173213 | 21173224 | 2 | 6  | 12 | CA   | 25 | 3  |
| 12711 | 1 | 21174811 | 21174826 | 2 | 8  | 16 | AC   | 16 | 4  |
| 12713 | 1 | 21180293 | 21180324 | 2 | 16 | 32 | GT   | 13 | 13 |
| 12716 | 1 | 21188700 | 21188711 | 2 | 6  | 12 | GT   | 19 | 6  |
| 12718 | 1 | 21191239 | 21191252 | 2 | 7  | 14 | CA   | 27 | 3  |
| 12719 | 1 | 21191695 | 21191718 | 3 | 8  | 24 | GCA  | 23 | 16 |
| 12725 | 1 | 21204420 | 21204434 | 3 | 5  | 15 | AAC  | 27 | 3  |
| 12727 | 1 | 21207039 | 21207053 | 3 | 5  | 15 | GCT  | 24 | 5  |
| 12728 | 1 | 21209377 | 21209416 | 2 | 20 | 40 | AC   | 6  | 10 |
| 12729 | 1 | 21210116 | 21210130 | 3 | 5  | 15 | AGC  | 28 | 4  |
| 12734 | 1 | 21218266 | 21218293 | 2 | 14 | 28 | GT   | 22 | 6  |
| 12735 | 1 | 21218406 | 21218437 | 2 | 16 | 32 | GT   | 12 | 16 |
| 12738 | 1 | 21219044 | 21219055 | 2 | 6  | 12 | AT   | 27 | 4  |

|       |   |          |          |   |    |    |      |    |    |
|-------|---|----------|----------|---|----|----|------|----|----|
| 12741 | 1 | 21221893 | 21221932 | 2 | 20 | 40 | AC   | 7  | 9  |
| 12745 | 1 | 21222267 | 21222298 | 2 | 16 | 32 | CA   | 13 | 12 |
| 12746 | 1 | 21222398 | 21222437 | 2 | 20 | 40 | CA   | 12 | 15 |
| 12749 | 1 | 21228650 | 21228669 | 4 | 5  | 20 | TATT | 19 | 10 |
| 12758 | 1 | 21248655 | 21248680 | 2 | 13 | 26 | TG   | 15 | 8  |
| 12760 | 1 | 21250288 | 21250299 | 2 | 6  | 12 | CA   | 12 | 6  |
| 12764 | 1 | 21256836 | 21256867 | 2 | 16 | 32 | TG   | 11 | 9  |
| 12769 | 1 | 21265955 | 21265972 | 2 | 9  | 18 | GA   | 15 | 4  |
| 12770 | 1 | 21266478 | 21266523 | 2 | 23 | 46 | TG   | 9  | 12 |
| 12771 | 1 | 21267050 | 21267077 | 2 | 14 | 28 | TG   | 8  | 8  |
| 12772 | 1 | 21269198 | 21269209 | 2 | 6  | 12 | CT   | 16 | 4  |
| 12773 | 1 | 21270939 | 21270958 | 2 | 10 | 20 | CA   | 20 | 8  |
| 12780 | 1 | 21284816 | 21284833 | 2 | 9  | 18 | GT   | 18 | 9  |
| 12785 | 1 | 21290427 | 21290448 | 2 | 11 | 22 | GT   | 18 | 6  |
| 12787 | 1 | 21297046 | 21297059 | 2 | 7  | 14 | GT   | 17 | 3  |
| 12788 | 1 | 21297242 | 21297253 | 2 | 6  | 12 | AC   | 28 | 8  |
| 12791 | 1 | 21302687 | 21302702 | 2 | 8  | 16 | GT   | 14 | 7  |
| 12794 | 1 | 21304257 | 21304278 | 2 | 11 | 22 | TG   | 21 | 5  |
| 12795 | 1 | 21304512 | 21304527 | 2 | 8  | 16 | AC   | 23 | 4  |
| 12796 | 1 | 21306421 | 21306440 | 2 | 10 | 20 | TG   | 18 | 9  |
| 12797 | 1 | 21306734 | 21306745 | 2 | 6  | 12 | GT   | 10 | 4  |
| 12798 | 1 | 21307298 | 21307309 | 2 | 6  | 12 | AC   | 27 | 3  |
| 12805 | 1 | 21317435 | 21317464 | 2 | 15 | 30 | CA   | 11 | 12 |
| 12807 | 1 | 21317673 | 21317700 | 4 | 7  | 28 | AAAG | 21 | 7  |
| 12810 | 1 | 21319710 | 21319733 | 2 | 12 | 24 | AC   | 23 | 10 |
| 12812 | 1 | 21325776 | 21325799 | 3 | 8  | 24 | TCA  | 30 | 4  |
| 12813 | 1 | 21326674 | 21326701 | 2 | 14 | 28 | TG   | 10 | 6  |
| 12815 | 1 | 21331712 | 21331739 | 2 | 14 | 28 | AC   | 11 | 9  |
| 12817 | 1 | 21338808 | 21338819 | 2 | 6  | 12 | TA   | 27 | 3  |
| 12818 | 1 | 21342142 | 21342187 | 2 | 23 | 46 | AC   | 9  | 9  |
| 12821 | 1 | 21345950 | 21345965 | 2 | 8  | 16 | GA   | 26 | 3  |
| 12827 | 1 | 21355973 | 21355986 | 2 | 7  | 14 | AC   | 26 | 4  |
| 12828 | 1 | 21356388 | 21356425 | 2 | 19 | 38 | AC   | 17 | 11 |
| 12829 | 1 | 21356629 | 21356664 | 2 | 18 | 36 | GT   | 13 | 12 |
| 12831 | 1 | 21358469 | 21358490 | 2 | 11 | 22 | CA   | 24 | 10 |
| 12832 | 1 | 21358611 | 21358650 | 2 | 20 | 40 | AC   | 7  | 8  |
| 12834 | 1 | 21359955 | 21359966 | 2 | 6  | 12 | AC   | 25 | 3  |
| 12835 | 1 | 21363896 | 21363907 | 2 | 6  | 12 | TG   | 22 | 3  |
| 12841 | 1 | 21386271 | 21386292 | 2 | 11 | 22 | CA   | 13 | 16 |
| 12843 | 1 | 21393643 | 21393656 | 2 | 7  | 14 | CT   | 33 | 3  |
| 12844 | 1 | 21398099 | 21398132 | 2 | 17 | 34 | CA   | 11 | 12 |
| 12847 | 1 | 21400491 | 21400518 | 2 | 14 | 28 | CT   | 11 | 12 |
| 12853 | 1 | 21420123 | 21420156 | 2 | 17 | 34 | GT   | 16 | 9  |
| 12860 | 1 | 21424150 | 21424161 | 2 | 6  | 12 | TC   | 16 | 8  |
| 12861 | 1 | 21426552 | 21426589 | 2 | 19 | 38 | CA   | 10 | 11 |
| 12865 | 1 | 21429706 | 21429721 | 2 | 8  | 16 | TG   | 23 | 8  |
| 12866 | 1 | 21431664 | 21431689 | 2 | 13 | 26 | TG   | 13 | 13 |
| 12868 | 1 | 21433741 | 21433755 | 3 | 5  | 15 | TGT  | 26 | 4  |
| 12871 | 1 | 21436647 | 21436658 | 2 | 6  | 12 | TA   | 19 | 6  |
| 12873 | 1 | 21439087 | 21439110 | 2 | 12 | 24 | TG   | 24 | 8  |
| 12874 | 1 | 21439223 | 21439240 | 2 | 9  | 18 | TG   | 24 | 12 |

|       |   |          |          |   |    |    |      |    |    |
|-------|---|----------|----------|---|----|----|------|----|----|
| 12875 | 1 | 21439243 | 21439256 | 2 | 7  | 14 | TG   | 11 | 9  |
| 12876 | 1 | 21444165 | 21444182 | 2 | 9  | 18 | AC   | 10 | 10 |
| 12879 | 1 | 21446678 | 21446705 | 2 | 14 | 28 | TG   | 8  | 10 |
| 12880 | 1 | 21448000 | 21448025 | 2 | 13 | 26 | CA   | 11 | 10 |
| 12885 | 1 | 21468861 | 21468882 | 2 | 11 | 22 | CA   | 22 | 8  |
| 12887 | 1 | 21471078 | 21471125 | 3 | 16 | 48 | AGA  | 10 | 14 |
| 12894 | 1 | 21477359 | 21477380 | 2 | 11 | 22 | GT   | 16 | 13 |
| 12898 | 1 | 21481190 | 21481233 | 2 | 22 | 44 | CA   | 11 | 16 |
| 12900 | 1 | 21482129 | 21482144 | 4 | 4  | 16 | GTGA | 30 | 4  |
| 12903 | 1 | 21485363 | 21485388 | 2 | 13 | 26 | CA   | 17 | 9  |
| 12904 | 1 | 21486211 | 21486238 | 2 | 14 | 28 | CA   | 16 | 17 |
| 12906 | 1 | 21486359 | 21486373 | 3 | 5  | 15 | GGA  | 23 | 5  |
| 12909 | 1 | 21494079 | 21494098 | 2 | 10 | 20 | TG   | 15 | 9  |
| 12910 | 1 | 21495601 | 21495616 | 4 | 4  | 16 | CCTC | 26 | 7  |
| 12916 | 1 | 21497617 | 21497637 | 3 | 7  | 21 | AGC  | 16 | 3  |
| 12918 | 1 | 21500223 | 21500254 | 2 | 16 | 32 | GT   | 18 | 8  |
| 12921 | 1 | 21505272 | 21505289 | 3 | 6  | 18 | GAG  | 29 | 4  |
| 12923 | 1 | 21511600 | 21511631 | 2 | 16 | 32 | AC   | 13 | 7  |
| 12927 | 1 | 21515875 | 21515902 | 2 | 14 | 28 | TG   | 10 | 10 |
| 12931 | 1 | 21522664 | 21522687 | 2 | 12 | 24 | GT   | 11 | 9  |
| 12936 | 1 | 21527775 | 21527795 | 3 | 7  | 21 | CCT  | 13 | 7  |
| 12938 | 1 | 21529728 | 21529769 | 2 | 21 | 42 | AC   | 8  | 11 |
| 12940 | 1 | 21530323 | 21530346 | 2 | 12 | 24 | AC   | 18 | 9  |
| 12941 | 1 | 21532932 | 21532961 | 2 | 15 | 30 | TG   | 20 | 7  |
| 12942 | 1 | 21534418 | 21534439 | 2 | 11 | 22 | TG   | 12 | 6  |
| 12949 | 1 | 21545346 | 21545363 | 3 | 6  | 18 | CCT  | 11 | 9  |
| 12955 | 1 | 21559028 | 21559055 | 2 | 14 | 28 | AC   | 10 | 10 |
| 12956 | 1 | 21559104 | 21559115 | 2 | 6  | 12 | TG   | 21 | 3  |
| 12968 | 1 | 21589864 | 21589875 | 2 | 6  | 12 | GT   | 12 | 7  |
| 12970 | 1 | 21592607 | 21592618 | 2 | 6  | 12 | AC   | 26 | 4  |
| 12971 | 1 | 21592923 | 21592948 | 2 | 13 | 26 | AC   | 15 | 10 |
| 12972 | 1 | 21593140 | 21593155 | 2 | 8  | 16 | CA   | 16 | 3  |
| 12973 | 1 | 21593503 | 21593514 | 2 | 6  | 12 | CA   | 19 | 6  |
| 12974 | 1 | 21593842 | 21593883 | 2 | 21 | 42 | TG   | 19 | 11 |
| 12975 | 1 | 21595433 | 21595444 | 2 | 6  | 12 | GT   | 28 | 3  |
| 12977 | 1 | 21595855 | 21595880 | 2 | 13 | 26 | GT   | 11 | 9  |
| 12981 | 1 | 21609266 | 21609291 | 2 | 13 | 26 | AC   | 23 | 7  |
| 12982 | 1 | 21609534 | 21609553 | 4 | 5  | 20 | CTGT | 12 | 10 |
| 12983 | 1 | 21609555 | 21609574 | 4 | 5  | 20 | TCTT | 17 | 11 |
| 12984 | 1 | 21609714 | 21609729 | 4 | 4  | 16 | TTTC | 10 | 3  |
| 12985 | 1 | 21609790 | 21609817 | 4 | 7  | 28 | TTCT | 15 | 8  |
| 12986 | 1 | 21610249 | 21610284 | 2 | 18 | 36 | AG   | 18 | 14 |
| 12988 | 1 | 21612893 | 21612908 | 4 | 4  | 16 | TCTT | 31 | 3  |
| 12990 | 1 | 21615866 | 21615881 | 4 | 4  | 16 | ATAC | 31 | 4  |
| 13000 | 1 | 21625522 | 21625567 | 2 | 23 | 46 | GT   | 6  | 9  |
| 13012 | 1 | 21642118 | 21642139 | 2 | 11 | 22 | CA   | 19 | 10 |
| 13015 | 1 | 21650485 | 21650498 | 2 | 7  | 14 | GT   | 23 | 5  |
| 13016 | 1 | 21650505 | 21650516 | 2 | 6  | 12 | GT   | 14 | 3  |
| 13017 | 1 | 21650663 | 21650682 | 2 | 10 | 20 | TG   | 6  | 9  |
| 13021 | 1 | 21658226 | 21658245 | 2 | 10 | 20 | TG   | 26 | 6  |
| 13022 | 1 | 21658285 | 21658304 | 2 | 10 | 20 | TG   | 23 | 10 |



|       |   |          |          |   |    |    |      |    |    |
|-------|---|----------|----------|---|----|----|------|----|----|
| 13025 | 1 | 21663989 | 21664008 | 2 | 10 | 20 | GT   | 16 | 9  |
| 13026 | 1 | 21664010 | 21664029 | 2 | 10 | 20 | TG   | 13 | 8  |
| 13027 | 1 | 21664145 | 21664170 | 2 | 13 | 26 | TG   | 10 | 16 |
| 13028 | 1 | 21665117 | 21665134 | 3 | 6  | 18 | TGT  | 30 | 5  |
| 13032 | 1 | 21670229 | 21670252 | 2 | 12 | 24 | GT   | 10 | 5  |
| 13034 | 1 | 21670938 | 21670949 | 2 | 6  | 12 | CA   | 28 | 3  |
| 13050 | 1 | 21694876 | 21694889 | 2 | 7  | 14 | AC   | 21 | 4  |
| 13053 | 1 | 21699318 | 21699341 | 4 | 6  | 24 | ATAA | 25 | 4  |
| 13056 | 1 | 21704026 | 21704049 | 3 | 8  | 24 | GGA  | 9  | 5  |
| 13057 | 1 | 21705079 | 21705096 | 3 | 6  | 18 | GAG  | 15 | 10 |
| 13060 | 1 | 21706766 | 21706797 | 2 | 16 | 32 | TG   | 7  | 9  |
| 13064 | 1 | 21712856 | 21712875 | 2 | 10 | 20 | TG   | 13 | 12 |
| 13065 | 1 | 21715681 | 21715714 | 2 | 17 | 34 | TG   | 13 | 9  |
| 13067 | 1 | 21716360 | 21716389 | 3 | 10 | 30 | CTG  | 33 | 10 |
| 13070 | 1 | 21720110 | 21720127 | 2 | 9  | 18 | GA   | 14 | 4  |
| 13071 | 1 | 21723384 | 21723405 | 2 | 11 | 22 | TG   | 16 | 6  |
| 13073 | 1 | 21724605 | 21724619 | 3 | 5  | 15 | TGA  | 27 | 5  |
| 13074 | 1 | 21724935 | 21724952 | 2 | 9  | 18 | GT   | 21 | 8  |
| 13082 | 1 | 21736083 | 21736114 | 2 | 16 | 32 | TG   | 24 | 12 |
| 13083 | 1 | 21739009 | 21739026 | 2 | 9  | 18 | TG   | 15 | 8  |
| 13084 | 1 | 21739196 | 21739209 | 2 | 7  | 14 | CA   | 27 | 10 |
| 13089 | 1 | 21751495 | 21751516 | 2 | 11 | 22 | CT   | 19 | 11 |
| 13092 | 1 | 21754532 | 21754547 | 2 | 8  | 16 | AC   | 9  | 9  |
| 13093 | 1 | 21754550 | 21754561 | 2 | 6  | 12 | AC   | 19 | 14 |
| 13094 | 1 | 21754973 | 21755002 | 2 | 15 | 30 | GT   | 11 | 12 |
| 13104 | 1 | 21763825 | 21763840 | 2 | 8  | 16 | GA   | 15 | 4  |
| 13106 | 1 | 21764838 | 21764855 | 2 | 9  | 18 | CA   | 14 | 4  |
| 13119 | 1 | 21785240 | 21785259 | 2 | 10 | 20 | AC   | 19 | 12 |
| 13122 | 1 | 21785372 | 21785385 | 2 | 7  | 14 | TG   | 16 | 8  |
| 13124 | 1 | 21786584 | 21786601 | 2 | 9  | 18 | AC   | 19 | 8  |
| 13125 | 1 | 21786794 | 21786832 | 3 | 13 | 39 | CTT  | 25 | 13 |
| 13128 | 1 | 21789840 | 21789855 | 2 | 8  | 16 | TC   | 17 | 7  |
| 13133 | 1 | 21793697 | 21793712 | 2 | 8  | 16 | GT   | 24 | 10 |
| 13139 | 1 | 21800307 | 21800340 | 2 | 17 | 34 | TG   | 7  | 7  |
| 13141 | 1 | 21805492 | 21805506 | 3 | 5  | 15 | GGT  | 22 | 4  |
| 13142 | 1 | 21807970 | 21807987 | 2 | 9  | 18 | TG   | 28 | 5  |
| 13143 | 1 | 21808714 | 21808733 | 4 | 5  | 20 | TCCA | 22 | 4  |
| 13145 | 1 | 21814002 | 21814022 | 3 | 7  | 21 | CCT  | 18 | 13 |
| 13146 | 1 | 21814207 | 21814264 | 2 | 29 | 58 | GT   | 12 | 10 |
| 13148 | 1 | 21817955 | 21817970 | 2 | 8  | 16 | TG   | 11 | 14 |
| 13149 | 1 | 21817972 | 21817987 | 2 | 8  | 16 | GT   | 8  | 11 |
| 13152 | 1 | 21822133 | 21822172 | 2 | 20 | 40 | TG   | 12 | 13 |
| 13153 | 1 | 21822308 | 21822319 | 2 | 6  | 12 | AC   | 22 | 3  |
| 13156 | 1 | 21823719 | 21823752 | 2 | 17 | 34 | CA   | 6  | 7  |
| 13157 | 1 | 21823882 | 21823923 | 2 | 21 | 42 | CA   | 7  | 12 |
| 13159 | 1 | 21825375 | 21825404 | 2 | 15 | 30 | TG   | 9  | 10 |
| 13163 | 1 | 21829828 | 21829857 | 2 | 15 | 30 | CA   | 20 | 9  |
| 13168 | 1 | 21833724 | 21833753 | 2 | 15 | 30 | CA   | 14 | 8  |
| 13171 | 1 | 21834324 | 21834355 | 2 | 16 | 32 | AC   | 10 | 7  |
| 13173 | 1 | 21838213 | 21838262 | 2 | 25 | 50 | GT   | 20 | 18 |
| 13179 | 1 | 21841861 | 21841898 | 2 | 19 | 38 | GT   | 9  | 9  |

|       |   |          |          |   |    |    |      |    |    |
|-------|---|----------|----------|---|----|----|------|----|----|
| 13180 | 1 | 21845700 | 21845723 | 3 | 8  | 24 | TGT  | 28 | 12 |
| 13184 | 1 | 21854358 | 21854397 | 2 | 20 | 40 | GT   | 8  | 7  |
| 13185 | 1 | 21854585 | 21854598 | 2 | 7  | 14 | GA   | 21 | 3  |
| 13186 | 1 | 21854645 | 21854662 | 2 | 9  | 18 | GA   | 20 | 9  |
| 13190 | 1 | 21856719 | 21856742 | 2 | 12 | 24 | GT   | 15 | 11 |
| 13191 | 1 | 21856911 | 21856936 | 2 | 13 | 26 | TG   | 8  | 7  |
| 13193 | 1 | 21857301 | 21857330 | 2 | 15 | 30 | AC   | 18 | 12 |
| 13203 | 1 | 21861497 | 21861516 | 2 | 10 | 20 | AG   | 9  | 5  |
| 13205 | 1 | 21862571 | 21862590 | 2 | 10 | 20 | CA   | 17 | 10 |
| 13209 | 1 | 21865066 | 21865077 | 2 | 6  | 12 | CA   | 32 | 3  |
| 13211 | 1 | 21868066 | 21868099 | 2 | 17 | 34 | GT   | 9  | 10 |
| 13212 | 1 | 21869067 | 21869096 | 2 | 15 | 30 | TG   | 10 | 9  |
| 13219 | 1 | 21875647 | 21875658 | 2 | 6  | 12 | TG   | 20 | 5  |
| 13224 | 1 | 21884176 | 21884189 | 2 | 7  | 14 | AC   | 22 | 12 |
| 13227 | 1 | 21890542 | 21890559 | 2 | 9  | 18 | TA   | 11 | 5  |
| 13228 | 1 | 21891257 | 21891276 | 2 | 10 | 20 | GT   | 16 | 8  |
| 13234 | 1 | 21903090 | 21903101 | 2 | 6  | 12 | CA   | 21 | 12 |
| 13236 | 1 | 21906383 | 21906412 | 2 | 15 | 30 | TG   | 8  | 8  |
| 13238 | 1 | 21910173 | 21910186 | 2 | 7  | 14 | AG   | 26 | 3  |
| 13242 | 1 | 21911931 | 21911951 | 3 | 7  | 21 | AGA  | 22 | 4  |
| 13243 | 1 | 21913415 | 21913426 | 2 | 6  | 12 | AC   | 30 | 4  |
| 13246 | 1 | 21921419 | 21921430 | 2 | 6  | 12 | CA   | 26 | 4  |
| 13247 | 1 | 21922907 | 21922921 | 3 | 5  | 15 | TGC  | 14 | 4  |
| 13248 | 1 | 21924637 | 21924650 | 2 | 7  | 14 | TG   | 25 | 6  |
| 13252 | 1 | 21928785 | 21928812 | 2 | 14 | 28 | CA   | 16 | 11 |
| 13263 | 1 | 21940701 | 21940732 | 2 | 16 | 32 | CA   | 17 | 10 |
| 13265 | 1 | 21940971 | 21941008 | 2 | 19 | 38 | GT   | 14 | 10 |
| 13275 | 1 | 21948090 | 21948101 | 2 | 6  | 12 | CA   | 16 | 6  |
| 13276 | 1 | 21948109 | 21948120 | 2 | 6  | 12 | AC   | 14 | 5  |
| 13277 | 1 | 21948240 | 21948269 | 2 | 15 | 30 | AC   | 13 | 10 |
| 13280 | 1 | 21953229 | 21953246 | 2 | 9  | 18 | AC   | 23 | 6  |
| 13284 | 1 | 21955742 | 21955769 | 2 | 14 | 28 | GT   | 17 | 11 |
| 13286 | 1 | 21956571 | 21956586 | 2 | 8  | 16 | CT   | 11 | 6  |
| 13287 | 1 | 21956606 | 21956643 | 2 | 19 | 38 | AC   | 12 | 12 |
| 13288 | 1 | 21956689 | 21956702 | 2 | 7  | 14 | AC   | 17 | 3  |
| 13290 | 1 | 21957399 | 21957424 | 2 | 13 | 26 | GA   | 13 | 6  |
| 13291 | 1 | 21957489 | 21957526 | 2 | 19 | 38 | CA   | 10 | 10 |
| 13294 | 1 | 21959752 | 21959777 | 2 | 13 | 26 | GT   | 13 | 9  |
| 13295 | 1 | 21959886 | 21959945 | 2 | 30 | 60 | GT   | 10 | 12 |
| 13296 | 1 | 21961640 | 21961655 | 2 | 8  | 16 | AC   | 20 | 4  |
| 13298 | 1 | 21963728 | 21963757 | 2 | 15 | 30 | GT   | 20 | 10 |
| 13301 | 1 | 21965224 | 21965238 | 3 | 5  | 15 | TCC  | 26 | 3  |
| 13302 | 1 | 21965242 | 21965259 | 3 | 6  | 18 | TCC  | 25 | 4  |
| 13305 | 1 | 21967832 | 21967849 | 3 | 6  | 18 | CCT  | 10 | 4  |
| 13306 | 1 | 21967904 | 21967915 | 2 | 6  | 12 | CA   | 17 | 5  |
| 13311 | 1 | 21977324 | 21977369 | 2 | 23 | 46 | CA   | 13 | 11 |
| 13313 | 1 | 21979489 | 21979508 | 4 | 5  | 20 | GAGG | 12 | 5  |
| 13315 | 1 | 21981853 | 21981876 | 2 | 12 | 24 | TG   | 24 | 9  |
| 13316 | 1 | 21981940 | 21981951 | 2 | 6  | 12 | GT   | 23 | 5  |
| 13317 | 1 | 21982044 | 21982059 | 4 | 4  | 16 | CAGA | 15 | 5  |
| 13319 | 1 | 21982513 | 21982538 | 2 | 13 | 26 | AC   | 18 | 12 |

|       |   |          |          |   |    |    |      |    |    |
|-------|---|----------|----------|---|----|----|------|----|----|
| 13322 | 1 | 21983515 | 21983546 | 2 | 16 | 32 | GT   | 7  | 10 |
| 13324 | 1 | 21983647 | 21983664 | 3 | 6  | 18 | TAT  | 17 | 5  |
| 13325 | 1 | 21983794 | 21983807 | 2 | 7  | 14 | GA   | 18 | 5  |
| 13326 | 1 | 21986002 | 21986019 | 3 | 6  | 18 | TCC  | 11 | 11 |
| 13330 | 1 | 21987454 | 21987471 | 2 | 9  | 18 | TG   | 11 | 9  |
| 13332 | 1 | 21987801 | 21987826 | 2 | 13 | 26 | CT   | 18 | 12 |
| 13333 | 1 | 21989838 | 21989852 | 3 | 5  | 15 | CCT  | 17 | 7  |
| 13334 | 1 | 21989915 | 21989938 | 2 | 12 | 24 | CA   | 8  | 6  |
| 13337 | 1 | 21991501 | 21991516 | 4 | 4  | 16 | GACA | 31 | 5  |
| 13338 | 1 | 21995026 | 21995047 | 2 | 11 | 22 | TG   | 26 | 3  |
| 13339 | 1 | 21996321 | 21996340 | 2 | 10 | 20 | AT   | 8  | 9  |
| 13343 | 1 | 21999018 | 21999033 | 4 | 4  | 16 | AAAT | 27 | 3  |
| 13345 | 1 | 22000966 | 22000979 | 2 | 7  | 14 | CA   | 19 | 8  |
| 13346 | 1 | 22000981 | 22000994 | 2 | 7  | 14 | AC   | 20 | 9  |
| 13355 | 1 | 22008454 | 22008467 | 2 | 7  | 14 | CA   | 24 | 5  |
| 13357 | 1 | 22008780 | 22008794 | 3 | 5  | 15 | CGG  | 20 | 6  |
| 13360 | 1 | 22010408 | 22010422 | 3 | 5  | 15 | TCC  | 28 | 10 |
| 13363 | 1 | 22011445 | 22011468 | 3 | 8  | 24 | GAG  | 13 | 4  |
| 13364 | 1 | 22013179 | 22013236 | 2 | 29 | 58 | CA   | 7  | 9  |
| 13365 | 1 | 22014725 | 22014740 | 2 | 8  | 16 | AG   | 23 | 7  |
| 13366 | 1 | 22015976 | 22015999 | 3 | 8  | 24 | AAG  | 6  | 5  |
| 13367 | 1 | 22016168 | 22016203 | 2 | 18 | 36 | GT   | 8  | 11 |
| 13369 | 1 | 22016331 | 22016354 | 2 | 12 | 24 | GT   | 9  | 10 |
| 13370 | 1 | 22016396 | 22016423 | 2 | 14 | 28 | TG   | 11 | 8  |
| 13371 | 1 | 22016512 | 22016549 | 2 | 19 | 38 | TG   | 12 | 13 |
| 13372 | 1 | 22016633 | 22016648 | 2 | 8  | 16 | GA   | 24 | 6  |
| 13373 | 1 | 22018001 | 22018018 | 3 | 6  | 18 | GCT  | 22 | 3  |
| 13374 | 1 | 22018212 | 22018225 | 2 | 7  | 14 | AG   | 9  | 5  |
| 13379 | 1 | 22020625 | 22020666 | 2 | 21 | 42 | GT   | 11 | 11 |
| 13391 | 1 | 22031105 | 22031119 | 3 | 5  | 15 | CTT  | 32 | 3  |
| 13397 | 1 | 22031880 | 22031893 | 2 | 7  | 14 | GT   | 14 | 9  |
| 13398 | 1 | 22032701 | 22032726 | 2 | 13 | 26 | GT   | 13 | 6  |
| 13400 | 1 | 22033720 | 22033755 | 2 | 18 | 36 | GT   | 7  | 9  |
| 13409 | 1 | 22038404 | 22038415 | 2 | 6  | 12 | AC   | 16 | 6  |
| 13413 | 1 | 22040317 | 22040349 | 3 | 11 | 33 | AGG  | 14 | 8  |
| 13418 | 1 | 22041617 | 22041652 | 2 | 18 | 36 | GT   | 9  | 10 |
| 13424 | 1 | 22056635 | 22056676 | 2 | 21 | 42 | CA   | 7  | 10 |
| 13425 | 1 | 22056815 | 22056829 | 3 | 5  | 15 | GAA  | 27 | 3  |
| 13431 | 1 | 22059498 | 22059511 | 2 | 7  | 14 | AC   | 23 | 4  |
| 13438 | 1 | 22062045 | 22062059 | 3 | 5  | 15 | AGG  | 8  | 4  |
| 13440 | 1 | 22062702 | 22062717 | 2 | 8  | 16 | TG   | 12 | 5  |
| 13441 | 1 | 22062936 | 22062950 | 3 | 5  | 15 | TCC  | 12 | 6  |
| 13442 | 1 | 22062997 | 22063014 | 3 | 6  | 18 | CCT  | 14 | 6  |
| 13449 | 1 | 22064619 | 22064648 | 2 | 15 | 30 | TG   | 16 | 6  |
| 13457 | 1 | 22066533 | 22066547 | 3 | 5  | 15 | AGG  | 13 | 3  |
| 13458 | 1 | 22066580 | 22066611 | 2 | 16 | 32 | AG   | 7  | 5  |
| 13459 | 1 | 22068310 | 22068343 | 2 | 17 | 34 | CA   | 13 | 15 |
| 13461 | 1 | 22068495 | 22068506 | 2 | 6  | 12 | TG   | 19 | 3  |
| 13466 | 1 | 22069274 | 22069293 | 2 | 10 | 20 | AC   | 9  | 11 |
| 13469 | 1 | 22071593 | 22071612 | 2 | 10 | 20 | CT   | 27 | 10 |
| 13470 | 1 | 22072906 | 22072921 | 2 | 8  | 16 | AC   | 19 | 8  |

|       |   |          |          |   |    |    |      |    |    |
|-------|---|----------|----------|---|----|----|------|----|----|
| 13475 | 1 | 22075874 | 22075909 | 2 | 18 | 36 | GT   | 13 | 15 |
| 13476 | 1 | 22076018 | 22076047 | 2 | 15 | 30 | GT   | 9  | 12 |
| 13482 | 1 | 22090011 | 22090028 | 2 | 9  | 18 | TC   | 10 | 4  |
| 13484 | 1 | 22091464 | 22091491 | 2 | 14 | 28 | CA   | 11 | 8  |
| 13485 | 1 | 22093401 | 22093424 | 2 | 12 | 24 | AC   | 18 | 11 |
| 13486 | 1 | 22094783 | 22094804 | 2 | 11 | 22 | TG   | 21 | 13 |
| 13488 | 1 | 22096404 | 22096424 | 3 | 7  | 21 | CCT  | 25 | 11 |
| 13489 | 1 | 22096599 | 22096642 | 2 | 22 | 44 | AC   | 18 | 18 |
| 13490 | 1 | 22100421 | 22100442 | 2 | 11 | 22 | CT   | 8  | 4  |
| 13491 | 1 | 22101721 | 22101738 | 2 | 9  | 18 | AC   | 22 | 6  |
| 13493 | 1 | 22106168 | 22106207 | 2 | 20 | 40 | CA   | 9  | 12 |
| 13496 | 1 | 22108933 | 22108954 | 2 | 11 | 22 | TG   | 9  | 4  |
| 13497 | 1 | 22109070 | 22109081 | 2 | 6  | 12 | AG   | 19 | 3  |
| 13498 | 1 | 22109195 | 22109215 | 3 | 7  | 21 | GGA  | 10 | 5  |
| 13504 | 1 | 22113982 | 22114015 | 2 | 17 | 34 | TG   | 18 | 15 |
| 13505 | 1 | 22115487 | 22115500 | 2 | 7  | 14 | GA   | 32 | 7  |
| 13506 | 1 | 22116741 | 22116778 | 2 | 19 | 38 | GT   | 22 | 12 |
| 13509 | 1 | 22117770 | 22117785 | 4 | 4  | 16 | ATCG | 31 | 3  |
| 13510 | 1 | 22119079 | 22119099 | 3 | 7  | 21 | TAA  | 24 | 9  |
| 13514 | 1 | 22121601 | 22121616 | 2 | 8  | 16 | GA   | 20 | 8  |
| 13515 | 1 | 22121770 | 22121784 | 3 | 5  | 15 | GGT  | 21 | 3  |
| 13517 | 1 | 22122778 | 22122795 | 2 | 9  | 18 | GT   | 8  | 11 |
| 13536 | 1 | 22134476 | 22134489 | 2 | 7  | 14 | AG   | 29 | 4  |
| 13537 | 1 | 22139386 | 22139403 | 2 | 9  | 18 | TG   | 7  | 8  |
| 13545 | 1 | 22143451 | 22143468 | 2 | 9  | 18 | AC   | 18 | 5  |
| 13546 | 1 | 22146670 | 22146685 | 4 | 4  | 16 | AAGG | 8  | 5  |
| 13550 | 1 | 22148053 | 22148070 | 3 | 6  | 18 | GCC  | 17 | 10 |
| 13553 | 1 | 22148510 | 22148524 | 3 | 5  | 15 | GCT  | 27 | 4  |
| 13554 | 1 | 22150240 | 22150257 | 3 | 6  | 18 | ATG  | 29 | 5  |
| 13557 | 1 | 22150953 | 22150968 | 2 | 8  | 16 | TC   | 28 | 3  |
| 13562 | 1 | 22152971 | 22152991 | 3 | 7  | 21 | TCA  | 21 | 14 |
| 13564 | 1 | 22156004 | 22156021 | 3 | 6  | 18 | AAG  | 22 | 5  |
| 13565 | 1 | 22157421 | 22157456 | 2 | 18 | 36 | TG   | 7  | 7  |
| 13566 | 1 | 22157557 | 22157584 | 2 | 14 | 28 | GT   | 17 | 18 |
| 13568 | 1 | 22159856 | 22159869 | 2 | 7  | 14 | CA   | 24 | 5  |
| 13571 | 1 | 22164489 | 22164515 | 3 | 9  | 27 | TCC  | 21 | 6  |
| 13576 | 1 | 22171574 | 22171593 | 4 | 5  | 20 | GAAA | 30 | 4  |
| 13580 | 1 | 22173636 | 22173673 | 2 | 19 | 38 | CA   | 14 | 11 |
| 13581 | 1 | 22173931 | 22173966 | 3 | 12 | 36 | CTC  | 15 | 7  |
| 13592 | 1 | 22188533 | 22188554 | 2 | 11 | 22 | CT   | 10 | 7  |
| 13594 | 1 | 22192900 | 22192935 | 2 | 18 | 36 | TG   | 13 | 12 |
| 13596 | 1 | 22196004 | 22196029 | 2 | 13 | 26 | CA   | 12 | 10 |
| 13600 | 1 | 22198655 | 22198684 | 2 | 15 | 30 | CA   | 7  | 8  |
| 13603 | 1 | 22202386 | 22202413 | 2 | 14 | 28 | TG   | 17 | 14 |
| 13607 | 1 | 22207738 | 22207758 | 3 | 7  | 21 | ATG  | 16 | 3  |
| 13608 | 1 | 22212067 | 22212092 | 2 | 13 | 26 | CA   | 15 | 11 |
| 13612 | 1 | 22217096 | 22217119 | 3 | 8  | 24 | GAG  | 17 | 11 |
| 13614 | 1 | 22217542 | 22217591 | 2 | 25 | 50 | CA   | 10 | 10 |
| 13618 | 1 | 22220500 | 22220531 | 2 | 16 | 32 | CA   | 8  | 8  |
| 13630 | 1 | 22225960 | 22225999 | 2 | 20 | 40 | TG   | 15 | 10 |
| 13631 | 1 | 22233559 | 22233570 | 2 | 6  | 12 | CT   | 22 | 7  |

|       |   |          |          |   |    |    |      |    |    |
|-------|---|----------|----------|---|----|----|------|----|----|
| 13632 | 1 | 22233811 | 22233846 | 2 | 18 | 36 | GT   | 9  | 9  |
| 13636 | 1 | 22243804 | 22243821 | 2 | 9  | 18 | CA   | 14 | 9  |
| 13642 | 1 | 22253473 | 22253496 | 3 | 8  | 24 | CTT  | 22 | 6  |
| 13651 | 1 | 22264422 | 22264453 | 2 | 16 | 32 | AC   | 18 | 10 |
| 13660 | 1 | 22275782 | 22275807 | 2 | 13 | 26 | CA   | 17 | 13 |
| 13663 | 1 | 22277318 | 22277335 | 2 | 9  | 18 | GT   | 22 | 11 |
| 13664 | 1 | 22278483 | 22278502 | 2 | 10 | 20 | GT   | 11 | 8  |
| 13666 | 1 | 22285721 | 22285744 | 3 | 8  | 24 | TTG  | 22 | 6  |
| 13667 | 1 | 22286206 | 22286229 | 3 | 8  | 24 | GCT  | 34 | 7  |
| 13669 | 1 | 22292885 | 22292914 | 3 | 10 | 30 | AGA  | 15 | 8  |
| 13673 | 1 | 22298381 | 22298420 | 2 | 20 | 40 | AC   | 17 | 9  |
| 13685 | 1 | 22367270 | 22367285 | 4 | 4  | 16 | TAGA | 21 | 13 |
| 13686 | 1 | 22369021 | 22369047 | 3 | 9  | 27 | ATA  | 14 | 5  |
| 13691 | 1 | 22374221 | 22374268 | 2 | 24 | 48 | GT   | 12 | 13 |
| 13694 | 1 | 22376463 | 22376478 | 2 | 8  | 16 | GT   | 26 | 5  |
| 13695 | 1 | 22376981 | 22377006 | 2 | 13 | 26 | GT   | 20 | 8  |
| 13696 | 1 | 22378451 | 22378480 | 3 | 10 | 30 | CCT  | 16 | 8  |
| 13697 | 1 | 22379092 | 22379107 | 2 | 8  | 16 | TG   | 9  | 8  |
| 13698 | 1 | 22379204 | 22379239 | 2 | 18 | 36 | TG   | 8  | 11 |
| 13699 | 1 | 22379286 | 22379303 | 2 | 9  | 18 | CA   | 12 | 10 |
| 13701 | 1 | 22380347 | 22380362 | 2 | 8  | 16 | TG   | 26 | 9  |
| 13702 | 1 | 22383056 | 22383077 | 2 | 11 | 22 | AC   | 14 | 7  |
| 13703 | 1 | 22383476 | 22383503 | 2 | 14 | 28 | AC   | 24 | 12 |
| 13704 | 1 | 22384067 | 22384092 | 2 | 13 | 26 | CA   | 6  | 10 |
| 13714 | 1 | 22398108 | 22398137 | 3 | 10 | 30 | GGA  | 18 | 4  |
| 13715 | 1 | 22399098 | 22399112 | 3 | 5  | 15 | GGC  | 28 | 6  |
| 13718 | 1 | 22400629 | 22400658 | 2 | 15 | 30 | AC   | 12 | 13 |
| 13720 | 1 | 22402242 | 22402279 | 2 | 19 | 38 | TG   | 8  | 8  |
| 13723 | 1 | 22404919 | 22404964 | 2 | 23 | 46 | CA   | 6  | 7  |
| 13724 | 1 | 22405115 | 22405152 | 2 | 19 | 38 | CA   | 6  | 8  |
| 13725 | 1 | 22405271 | 22405312 | 2 | 21 | 42 | GT   | 10 | 12 |
| 13726 | 1 | 22405439 | 22405458 | 2 | 10 | 20 | AC   | 14 | 4  |
| 13727 | 1 | 22405934 | 22405951 | 2 | 9  | 18 | TG   | 14 | 11 |
| 13728 | 1 | 22405954 | 22405967 | 2 | 7  | 14 | TG   | 14 | 10 |
| 13729 | 1 | 22409457 | 22409486 | 2 | 15 | 30 | AC   | 9  | 12 |
| 13734 | 1 | 22416701 | 22416756 | 2 | 28 | 56 | TG   | 9  | 9  |
| 13737 | 1 | 22421076 | 22421117 | 2 | 21 | 42 | AC   | 10 | 10 |
| 13738 | 1 | 22421225 | 22421254 | 2 | 15 | 30 | TC   | 11 | 14 |
| 13740 | 1 | 22421374 | 22421399 | 2 | 13 | 26 | TC   | 19 | 9  |
| 13741 | 1 | 22421533 | 22421554 | 2 | 11 | 22 | TG   | 19 | 12 |
| 13742 | 1 | 22422795 | 22422826 | 2 | 16 | 32 | TG   | 23 | 12 |
| 13743 | 1 | 22425225 | 22425250 | 2 | 13 | 26 | AC   | 12 | 8  |
| 13744 | 1 | 22425392 | 22425427 | 2 | 18 | 36 | GT   | 17 | 15 |
| 13746 | 1 | 22425590 | 22425607 | 2 | 9  | 18 | TG   | 11 | 12 |
| 13747 | 1 | 22430239 | 22430250 | 2 | 6  | 12 | AC   | 31 | 3  |
| 13750 | 1 | 22430801 | 22430838 | 2 | 19 | 38 | AC   | 10 | 10 |
| 13753 | 1 | 22441917 | 22441934 | 2 | 9  | 18 | TG   | 24 | 8  |
| 13754 | 1 | 22443134 | 22443149 | 2 | 8  | 16 | AG   | 9  | 3  |
| 13758 | 1 | 22445220 | 22445233 | 2 | 7  | 14 | AC   | 15 | 7  |
| 13760 | 1 | 22447197 | 22447226 | 2 | 15 | 30 | AC   | 9  | 7  |
| 13764 | 1 | 22449119 | 22449152 | 2 | 17 | 34 | CA   | 8  | 7  |

|       |   |          |          |   |    |    |      |    |    |
|-------|---|----------|----------|---|----|----|------|----|----|
| 13765 | 1 | 22449967 | 22449992 | 2 | 13 | 26 | AC   | 11 | 10 |
| 13766 | 1 | 22450783 | 22450814 | 2 | 16 | 32 | TG   | 16 | 13 |
| 13767 | 1 | 22450873 | 22450898 | 2 | 13 | 26 | GT   | 17 | 13 |
| 13770 | 1 | 22453799 | 22453810 | 2 | 6  | 12 | GT   | 30 | 5  |
| 13771 | 1 | 22453869 | 22453880 | 2 | 6  | 12 | TC   | 19 | 4  |
| 13772 | 1 | 22462740 | 22462767 | 2 | 14 | 28 | TG   | 15 | 11 |
| 13773 | 1 | 22464116 | 22464131 | 2 | 8  | 16 | AG   | 30 | 10 |
| 13775 | 1 | 22464375 | 22464389 | 3 | 5  | 15 | AAC  | 18 | 5  |
| 13776 | 1 | 22464561 | 22464602 | 2 | 21 | 42 | GT   | 12 | 11 |
| 13777 | 1 | 22465681 | 22465710 | 2 | 15 | 30 | TG   | 11 | 10 |
| 13782 | 1 | 22466537 | 22466566 | 2 | 15 | 30 | AC   | 13 | 5  |
| 13785 | 1 | 22467759 | 22467776 | 2 | 9  | 18 | AG   | 21 | 4  |
| 13788 | 1 | 22468686 | 22468725 | 2 | 20 | 40 | AC   | 7  | 8  |
| 13789 | 1 | 22469233 | 22469256 | 2 | 12 | 24 | AC   | 10 | 10 |
| 13790 | 1 | 22470491 | 22470512 | 2 | 11 | 22 | CA   | 12 | 10 |
| 13791 | 1 | 22470698 | 22470729 | 2 | 16 | 32 | AC   | 10 | 10 |
| 13794 | 1 | 22470876 | 22470901 | 2 | 13 | 26 | AC   | 16 | 5  |
| 13798 | 1 | 22472445 | 22472474 | 2 | 15 | 30 | CA   | 6  | 7  |
| 13805 | 1 | 22475054 | 22475083 | 2 | 15 | 30 | GT   | 12 | 12 |
| 13811 | 1 | 22478460 | 22478480 | 3 | 7  | 21 | CTC  | 23 | 6  |
| 13812 | 1 | 22480951 | 22480968 | 2 | 9  | 18 | CT   | 21 | 8  |
| 13813 | 1 | 22481220 | 22481249 | 2 | 15 | 30 | CA   | 8  | 9  |
| 13814 | 1 | 22482039 | 22482071 | 3 | 11 | 33 | CCT  | 18 | 12 |
| 13816 | 1 | 22482225 | 22482254 | 3 | 10 | 30 | CTC  | 14 | 8  |
| 13817 | 1 | 22483187 | 22483224 | 2 | 19 | 38 | TG   | 12 | 10 |
| 13818 | 1 | 22483581 | 22483614 | 2 | 17 | 34 | AC   | 10 | 7  |
| 13820 | 1 | 22486040 | 22486061 | 2 | 11 | 22 | AC   | 20 | 6  |
| 13821 | 1 | 22486122 | 22486151 | 2 | 15 | 30 | AC   | 18 | 13 |
| 13824 | 1 | 22489183 | 22489194 | 2 | 6  | 12 | GA   | 24 | 3  |
| 13825 | 1 | 22491309 | 22491344 | 3 | 12 | 36 | TCC  | 17 | 9  |
| 13828 | 1 | 22493490 | 22493539 | 2 | 25 | 50 | CA   | 6  | 8  |
| 13830 | 1 | 22493708 | 22493741 | 2 | 17 | 34 | CA   | 8  | 13 |
| 13832 | 1 | 22495052 | 22495093 | 2 | 21 | 42 | CA   | 6  | 8  |
| 13833 | 1 | 22495129 | 22495146 | 2 | 9  | 18 | AC   | 18 | 6  |
| 13834 | 1 | 22498238 | 22498270 | 3 | 11 | 33 | GGA  | 6  | 5  |
| 13839 | 1 | 22507156 | 22507173 | 2 | 9  | 18 | CA   | 22 | 11 |
| 13841 | 1 | 22507308 | 22507349 | 2 | 21 | 42 | TG   | 9  | 11 |
| 13842 | 1 | 22507537 | 22507556 | 2 | 10 | 20 | GT   | 18 | 3  |
| 13844 | 1 | 22507660 | 22507703 | 2 | 22 | 44 | AC   | 7  | 8  |
| 13847 | 1 | 22513826 | 22513845 | 2 | 10 | 20 | CA   | 19 | 4  |
| 13848 | 1 | 22514054 | 22514071 | 2 | 9  | 18 | CA   | 23 | 4  |
| 13860 | 1 | 22515817 | 22515840 | 2 | 12 | 24 | CA   | 19 | 11 |
| 13861 | 1 | 22517816 | 22517851 | 3 | 12 | 36 | TTC  | 10 | 3  |
| 13863 | 1 | 22517991 | 22518018 | 2 | 14 | 28 | CA   | 12 | 13 |
| 13864 | 1 | 22518092 | 22518113 | 2 | 11 | 22 | AC   | 19 | 7  |
| 13866 | 1 | 22518673 | 22518684 | 2 | 6  | 12 | GT   | 26 | 3  |
| 13867 | 1 | 22519846 | 22519891 | 2 | 23 | 46 | GT   | 11 | 11 |
| 13868 | 1 | 22522577 | 22522602 | 2 | 13 | 26 | GT   | 8  | 9  |
| 13869 | 1 | 22523346 | 22523387 | 2 | 21 | 42 | GT   | 12 | 10 |
| 13870 | 1 | 22523969 | 22524000 | 4 | 8  | 32 | CTTC | 23 | 6  |
| 13876 | 1 | 22529369 | 22529383 | 3 | 5  | 15 | TGA  | 29 | 5  |

|       |   |          |          |   |    |    |      |    |    |
|-------|---|----------|----------|---|----|----|------|----|----|
| 13877 | 1 | 22532160 | 22532177 | 2 | 9  | 18 | AC   | 25 | 8  |
| 13881 | 1 | 22539860 | 22539883 | 3 | 8  | 24 | TCC  | 31 | 7  |
| 13882 | 1 | 22542791 | 22542802 | 2 | 6  | 12 | AC   | 25 | 5  |
| 13883 | 1 | 22544950 | 22544973 | 3 | 8  | 24 | AAG  | 16 | 5  |
| 13884 | 1 | 22549373 | 22549408 | 2 | 18 | 36 | TG   | 9  | 11 |
| 13889 | 1 | 22552576 | 22552605 | 3 | 10 | 30 | GCT  | 21 | 5  |
| 13891 | 1 | 22553534 | 22553548 | 3 | 5  | 15 | AGC  | 30 | 5  |
| 13893 | 1 | 22553998 | 22554024 | 3 | 9  | 27 | ATC  | 17 | 5  |
| 13894 | 1 | 22554087 | 22554125 | 3 | 13 | 39 | CTT  | 7  | 6  |
| 13909 | 2 | 13550    | 13561    | 2 | 6  | 12 | GT   | 12 | 5  |
| 13910 | 2 | 13590    | 13605    | 2 | 8  | 16 | GT   | 7  | 3  |
| 13915 | 2 | 21769    | 21794    | 2 | 13 | 26 | TG   | 16 | 5  |
| 13921 | 2 | 33796    | 33811    | 2 | 8  | 16 | TA   | 17 | 8  |
| 13933 | 2 | 52373    | 52388    | 4 | 4  | 16 | GGAC | 22 | 4  |
| 13936 | 2 | 55672    | 55686    | 3 | 5  | 15 | AAC  | 7  | 4  |
| 13938 | 2 | 61240    | 61272    | 3 | 11 | 33 | CTT  | 9  | 10 |
| 13956 | 2 | 117456   | 117475   | 4 | 5  | 20 | ATAG | 10 | 8  |
| 13973 | 2 | 179689   | 179700   | 2 | 6  | 12 | AG   | 19 | 3  |
| 13991 | 2 | 230345   | 230396   | 2 | 26 | 52 | GT   | 6  | 6  |
| 13992 | 2 | 231418   | 231433   | 4 | 4  | 16 | TTAA | 26 | 4  |
| 13998 | 2 | 245682   | 245695   | 2 | 7  | 14 | TG   | 22 | 4  |
| 14009 | 2 | 259125   | 259151   | 3 | 9  | 27 | GAA  | 14 | 6  |
| 14018 | 2 | 269453   | 269466   | 2 | 7  | 14 | AC   | 22 | 4  |
| 14024 | 2 | 282282   | 282297   | 4 | 4  | 16 | TATT | 26 | 7  |
| 14025 | 2 | 283261   | 283292   | 2 | 16 | 32 | CA   | 10 | 11 |
| 14034 | 2 | 303882   | 303933   | 4 | 13 | 52 | ATAG | 12 | 9  |
| 14055 | 2 | 335737   | 335754   | 2 | 9  | 18 | CA   | 16 | 8  |
| 14063 | 2 | 340002   | 340013   | 2 | 6  | 12 | GT   | 29 | 3  |
| 14066 | 2 | 342635   | 342649   | 3 | 5  | 15 | CAT  | 9  | 6  |
| 14069 | 2 | 344538   | 344555   | 2 | 9  | 18 | AC   | 18 | 8  |
| 14071 | 2 | 349196   | 349221   | 2 | 13 | 26 | TG   | 14 | 6  |
| 14085 | 2 | 374173   | 374204   | 2 | 16 | 32 | GT   | 14 | 12 |
| 14097 | 2 | 386403   | 386414   | 2 | 6  | 12 | TA   | 19 | 3  |
| 14106 | 2 | 400050   | 400071   | 2 | 11 | 22 | TG   | 16 | 8  |
| 14110 | 2 | 405508   | 405523   | 2 | 8  | 16 | TC   | 16 | 3  |
| 14119 | 2 | 416844   | 416875   | 2 | 16 | 32 | AC   | 10 | 9  |
| 14123 | 2 | 421903   | 421938   | 2 | 18 | 36 | TG   | 19 | 19 |
| 14126 | 2 | 432517   | 432542   | 2 | 13 | 26 | CA   | 23 | 6  |
| 14140 | 2 | 457183   | 457212   | 2 | 15 | 30 | TG   | 9  | 9  |
| 14141 | 2 | 457369   | 457396   | 2 | 14 | 28 | AC   | 20 | 5  |
| 14142 | 2 | 460121   | 460136   | 2 | 8  | 16 | TG   | 14 | 4  |
| 14143 | 2 | 460328   | 460343   | 2 | 8  | 16 | CA   | 20 | 5  |
| 14144 | 2 | 460563   | 460578   | 2 | 8  | 16 | GT   | 21 | 12 |
| 14146 | 2 | 461323   | 461340   | 2 | 9  | 18 | GT   | 17 | 9  |
| 14148 | 2 | 467484   | 467499   | 2 | 8  | 16 | GT   | 24 | 5  |
| 14149 | 2 | 467537   | 467558   | 2 | 11 | 22 | TG   | 13 | 4  |
| 14152 | 2 | 473022   | 473049   | 2 | 14 | 28 | TG   | 8  | 9  |
| 14153 | 2 | 474343   | 474358   | 4 | 4  | 16 | AAAT | 22 | 3  |
| 14170 | 2 | 491074   | 491093   | 2 | 10 | 20 | AC   | 16 | 5  |
| 14171 | 2 | 491266   | 491301   | 2 | 18 | 36 | AC   | 9  | 6  |
| 14173 | 2 | 491536   | 491561   | 2 | 13 | 26 | AC   | 15 | 7  |

|       |   |        |        |   |    |    |      |    |    |
|-------|---|--------|--------|---|----|----|------|----|----|
| 14174 | 2 | 491884 | 491903 | 2 | 10 | 20 | TG   | 24 | 11 |
| 14175 | 2 | 492416 | 492431 | 2 | 8  | 16 | CA   | 19 | 7  |
| 14177 | 2 | 493529 | 493550 | 2 | 11 | 22 | AC   | 18 | 5  |
| 14180 | 2 | 495426 | 495441 | 4 | 4  | 16 | GATG | 32 | 3  |
| 14181 | 2 | 496873 | 496888 | 2 | 8  | 16 | TA   | 7  | 3  |
| 14183 | 2 | 511036 | 511059 | 2 | 12 | 24 | AC   | 21 | 7  |
| 14189 | 2 | 512651 | 512668 | 3 | 6  | 18 | ATT  | 17 | 12 |
| 14192 | 2 | 517015 | 517028 | 2 | 7  | 14 | CA   | 21 | 3  |
| 14199 | 2 | 532226 | 532237 | 2 | 6  | 12 | GT   | 25 | 4  |
| 14202 | 2 | 534874 | 534895 | 2 | 11 | 22 | TG   | 18 | 6  |
| 14205 | 2 | 550583 | 550598 | 2 | 8  | 16 | AC   | 26 | 3  |
| 14220 | 2 | 598673 | 598718 | 2 | 23 | 46 | AC   | 9  | 10 |
| 14221 | 2 | 598818 | 598845 | 2 | 14 | 28 | GT   | 20 | 8  |
| 14226 | 2 | 603659 | 603679 | 3 | 7  | 21 | TAA  | 10 | 8  |
| 14228 | 2 | 608734 | 608781 | 4 | 12 | 48 | TGTA | 9  | 6  |
| 14229 | 2 | 615438 | 615451 | 2 | 7  | 14 | TG   | 17 | 6  |
| 14231 | 2 | 619972 | 619985 | 2 | 7  | 14 | TG   | 27 | 3  |
| 14236 | 2 | 631199 | 631214 | 2 | 8  | 16 | TA   | 24 | 7  |
| 14244 | 2 | 651315 | 651346 | 2 | 16 | 32 | GT   | 10 | 9  |
| 14246 | 2 | 652927 | 652947 | 3 | 7  | 21 | GAT  | 7  | 4  |
| 14251 | 2 | 661647 | 661664 | 2 | 9  | 18 | AC   | 25 | 3  |
| 14252 | 2 | 662492 | 662517 | 2 | 13 | 26 | CA   | 11 | 11 |
| 14256 | 2 | 667747 | 667770 | 2 | 12 | 24 | CA   | 22 | 11 |
| 14262 | 2 | 679324 | 679338 | 3 | 5  | 15 | CAG  | 29 | 3  |
| 14269 | 2 | 695926 | 695947 | 2 | 11 | 22 | TG   | 17 | 13 |
| 14270 | 2 | 698480 | 698493 | 2 | 7  | 14 | TG   | 13 | 4  |
| 14276 | 2 | 711161 | 711194 | 2 | 17 | 34 | AC   | 14 | 10 |
| 14277 | 2 | 714156 | 714187 | 4 | 8  | 32 | TTAT | 20 | 7  |
| 14288 | 2 | 741603 | 741632 | 2 | 15 | 30 | CA   | 13 | 11 |
| 14290 | 2 | 751407 | 751424 | 2 | 9  | 18 | CA   | 19 | 9  |
| 14293 | 2 | 752550 | 752569 | 2 | 10 | 20 | TC   | 12 | 4  |
| 14297 | 2 | 764491 | 764505 | 3 | 5  | 15 | AAT  | 13 | 7  |
| 14298 | 2 | 764918 | 764933 | 4 | 4  | 16 | AGTG | 17 | 3  |
| 14311 | 2 | 790002 | 790015 | 2 | 7  | 14 | TG   | 26 | 3  |
| 14312 | 2 | 790183 | 790194 | 2 | 6  | 12 | CA   | 22 | 5  |
| 14313 | 2 | 790197 | 790210 | 2 | 7  | 14 | CA   | 15 | 5  |
| 14315 | 2 | 793006 | 793029 | 4 | 6  | 24 | GATG | 26 | 13 |
| 14318 | 2 | 797816 | 797827 | 2 | 6  | 12 | TG   | 11 | 5  |
| 14323 | 2 | 808793 | 808822 | 2 | 15 | 30 | CA   | 8  | 12 |
| 14330 | 2 | 819183 | 819194 | 2 | 6  | 12 | AC   | 23 | 3  |
| 14331 | 2 | 819388 | 819413 | 2 | 13 | 26 | GT   | 18 | 10 |
| 14334 | 2 | 832409 | 832426 | 2 | 9  | 18 | TG   | 19 | 3  |
| 14335 | 2 | 833970 | 833985 | 4 | 4  | 16 | AGAC | 24 | 6  |
| 14348 | 2 | 861516 | 861563 | 2 | 24 | 48 | AG   | 12 | 11 |
| 14349 | 2 | 862399 | 862420 | 2 | 11 | 22 | TG   | 18 | 8  |
| 14352 | 2 | 870413 | 870434 | 2 | 11 | 22 | GT   | 14 | 11 |
| 14353 | 2 | 870949 | 870964 | 2 | 8  | 16 | TG   | 19 | 6  |
| 14354 | 2 | 871087 | 871098 | 2 | 6  | 12 | GT   | 28 | 3  |
| 14359 | 2 | 905291 | 905320 | 2 | 15 | 30 | CA   | 9  | 12 |
| 14367 | 2 | 913753 | 913776 | 2 | 12 | 24 | GT   | 16 | 10 |
| 14368 | 2 | 915336 | 915363 | 2 | 14 | 28 | CA   | 12 | 12 |



|       |   |         |         |   |    |    |      |    |    |
|-------|---|---------|---------|---|----|----|------|----|----|
| 14378 | 2 | 928042  | 928057  | 2 | 8  | 16 | GT   | 16 | 5  |
| 14380 | 2 | 931585  | 931602  | 2 | 9  | 18 | GT   | 12 | 5  |
| 14382 | 2 | 932782  | 932801  | 2 | 10 | 20 | CA   | 25 | 8  |
| 14384 | 2 | 940445  | 940456  | 2 | 6  | 12 | GT   | 22 | 5  |
| 14386 | 2 | 945189  | 945216  | 2 | 14 | 28 | CA   | 14 | 10 |
| 14397 | 2 | 973203  | 973238  | 4 | 9  | 36 | AAAG | 11 | 11 |
| 14399 | 2 | 978248  | 978259  | 2 | 6  | 12 | CA   | 21 | 6  |
| 14402 | 2 | 980607  | 980620  | 2 | 7  | 14 | TG   | 33 | 3  |
| 14403 | 2 | 983457  | 983488  | 2 | 16 | 32 | AC   | 9  | 7  |
| 14408 | 2 | 990747  | 990758  | 2 | 6  | 12 | GT   | 16 | 5  |
| 14409 | 2 | 990761  | 990772  | 2 | 6  | 12 | GT   | 15 | 6  |
| 14414 | 2 | 996623  | 996660  | 2 | 19 | 38 | CT   | 14 | 8  |
| 14419 | 2 | 1004376 | 1004389 | 2 | 7  | 14 | AC   | 18 | 6  |
| 14421 | 2 | 1014741 | 1014770 | 2 | 15 | 30 | TG   | 14 | 9  |
| 14428 | 2 | 1044953 | 1044972 | 2 | 10 | 20 | GT   | 24 | 11 |
| 14429 | 2 | 1046071 | 1046084 | 2 | 7  | 14 | AC   | 21 | 3  |
| 14441 | 2 | 1076555 | 1076580 | 2 | 13 | 26 | GT   | 9  | 6  |
| 14448 | 2 | 1097857 | 1097872 | 4 | 4  | 16 | ACAT | 25 | 4  |
| 14449 | 2 | 1099496 | 1099513 | 3 | 6  | 18 | TCC  | 21 | 7  |
| 14454 | 2 | 1108014 | 1108025 | 2 | 6  | 12 | CA   | 28 | 4  |
| 14455 | 2 | 1108166 | 1108179 | 2 | 7  | 14 | AC   | 12 | 3  |
| 14464 | 2 | 1128837 | 1128863 | 3 | 9  | 27 | TTG  | 13 | 8  |
| 14465 | 2 | 1129531 | 1129554 | 2 | 12 | 24 | GT   | 8  | 5  |
| 14472 | 2 | 1154970 | 1154987 | 2 | 9  | 18 | AC   | 21 | 10 |
| 14473 | 2 | 1157668 | 1157709 | 2 | 21 | 42 | AC   | 13 | 17 |
| 14474 | 2 | 1158208 | 1158219 | 2 | 6  | 12 | CA   | 25 | 3  |
| 14475 | 2 | 1161025 | 1161050 | 2 | 13 | 26 | GT   | 11 | 10 |
| 14482 | 2 | 1163661 | 1163674 | 2 | 7  | 14 | TC   | 21 | 6  |
| 14483 | 2 | 1164191 | 1164214 | 2 | 12 | 24 | CA   | 16 | 11 |
| 14484 | 2 | 1165936 | 1165965 | 3 | 10 | 30 | AGA  | 16 | 9  |
| 14498 | 2 | 1183518 | 1183533 | 2 | 8  | 16 | GT   | 24 | 3  |
| 14502 | 2 | 1201995 | 1202006 | 2 | 6  | 12 | TG   | 27 | 3  |
| 14512 | 2 | 1220213 | 1220232 | 2 | 10 | 20 | CA   | 11 | 8  |
| 14514 | 2 | 1220386 | 1220407 | 2 | 11 | 22 | AC   | 11 | 8  |
| 14519 | 2 | 1230673 | 1230686 | 2 | 7  | 14 | GT   | 14 | 4  |
| 14521 | 2 | 1231277 | 1231294 | 2 | 9  | 18 | AC   | 12 | 5  |
| 14534 | 2 | 1255347 | 1255364 | 3 | 6  | 18 | TCT  | 34 | 7  |
| 14535 | 2 | 1256196 | 1256237 | 2 | 21 | 42 | AC   | 20 | 19 |
| 14542 | 2 | 1265365 | 1265392 | 2 | 14 | 28 | AC   | 10 | 9  |
| 14545 | 2 | 1274596 | 1274619 | 2 | 12 | 24 | AC   | 18 | 6  |
| 14551 | 2 | 1283064 | 1283099 | 2 | 18 | 36 | GT   | 12 | 7  |
| 14552 | 2 | 1283323 | 1283342 | 2 | 10 | 20 | AC   | 14 | 10 |
| 14557 | 2 | 1287706 | 1287733 | 2 | 14 | 28 | CA   | 11 | 8  |
| 14563 | 2 | 1306714 | 1306739 | 2 | 13 | 26 | TG   | 18 | 13 |
| 14565 | 2 | 1309640 | 1309665 | 2 | 13 | 26 | TG   | 16 | 10 |
| 14566 | 2 | 1310018 | 1310031 | 2 | 7  | 14 | TC   | 11 | 4  |
| 14567 | 2 | 1310052 | 1310063 | 2 | 6  | 12 | TC   | 22 | 6  |
| 14571 | 2 | 1316860 | 1316903 | 2 | 22 | 44 | CA   | 20 | 12 |
| 14574 | 2 | 1323613 | 1323642 | 3 | 10 | 30 | GGA  | 16 | 4  |
| 14576 | 2 | 1332886 | 1332905 | 4 | 5  | 20 | ATTT | 28 | 6  |
| 14579 | 2 | 1337328 | 1337357 | 2 | 15 | 30 | GT   | 12 | 9  |

|       |   |         |         |   |    |    |      |    |    |
|-------|---|---------|---------|---|----|----|------|----|----|
| 14580 | 2 | 1340146 | 1340179 | 2 | 17 | 34 | AC   | 18 | 13 |
| 14581 | 2 | 1340279 | 1340294 | 2 | 8  | 16 | CA   | 20 | 8  |
| 14585 | 2 | 1343606 | 1343629 | 3 | 8  | 24 | AAC  | 16 | 5  |
| 14590 | 2 | 1348936 | 1348949 | 2 | 7  | 14 | TG   | 19 | 5  |
| 14599 | 2 | 1371318 | 1371353 | 4 | 9  | 36 | ATTG | 11 | 6  |
| 14603 | 2 | 1381111 | 1381130 | 4 | 5  | 20 | TTTG | 20 | 4  |
| 14605 | 2 | 1385177 | 1385190 | 2 | 7  | 14 | CA   | 19 | 3  |
| 14613 | 2 | 1398407 | 1398428 | 2 | 11 | 22 | CA   | 18 | 9  |
| 14614 | 2 | 1399300 | 1399313 | 2 | 7  | 14 | AT   | 22 | 4  |
| 14625 | 2 | 1417978 | 1417989 | 2 | 6  | 12 | CA   | 8  | 3  |
| 14629 | 2 | 1434426 | 1434441 | 2 | 8  | 16 | CA   | 24 | 3  |
| 14631 | 2 | 1440871 | 1440912 | 2 | 21 | 42 | TG   | 9  | 10 |
| 14646 | 2 | 1466973 | 1466984 | 2 | 6  | 12 | TG   | 17 | 3  |
| 14647 | 2 | 1473007 | 1473038 | 4 | 8  | 32 | TAGA | 9  | 11 |
| 14648 | 2 | 1474219 | 1474246 | 4 | 7  | 28 | ATAG | 22 | 6  |
| 14651 | 2 | 1476091 | 1476122 | 2 | 16 | 32 | TG   | 12 | 8  |
| 14656 | 2 | 1494018 | 1494043 | 2 | 13 | 26 | AT   | 15 | 8  |
| 14659 | 2 | 1497812 | 1497831 | 4 | 5  | 20 | TTTA | 13 | 6  |
| 14660 | 2 | 1499238 | 1499251 | 2 | 7  | 14 | GT   | 21 | 3  |
| 14662 | 2 | 1507815 | 1507828 | 2 | 7  | 14 | AC   | 25 | 4  |
| 14663 | 2 | 1508094 | 1508133 | 2 | 20 | 40 | GT   | 13 | 8  |
| 14668 | 2 | 1518831 | 1518874 | 4 | 11 | 44 | ACTT | 11 | 8  |
| 14669 | 2 | 1520618 | 1520631 | 2 | 7  | 14 | GA   | 23 | 5  |
| 14672 | 2 | 1524216 | 1524229 | 2 | 7  | 14 | TG   | 11 | 3  |
| 14676 | 2 | 1531617 | 1531628 | 2 | 6  | 12 | AT   | 11 | 6  |
| 14677 | 2 | 1531850 | 1531865 | 4 | 4  | 16 | AAAT | 21 | 4  |
| 14680 | 2 | 1543184 | 1543199 | 2 | 8  | 16 | AT   | 11 | 5  |
| 14681 | 2 | 1545454 | 1545469 | 2 | 8  | 16 | TG   | 6  | 3  |
| 14692 | 2 | 1580550 | 1580573 | 2 | 12 | 24 | TG   | 11 | 11 |
| 14696 | 2 | 1585801 | 1585824 | 2 | 12 | 24 | TG   | 17 | 7  |
| 14701 | 2 | 1592282 | 1592303 | 2 | 11 | 22 | TC   | 23 | 4  |
| 14702 | 2 | 1593109 | 1593156 | 4 | 12 | 48 | CAGA | 23 | 13 |
| 14706 | 2 | 1608176 | 1608189 | 2 | 7  | 14 | TA   | 8  | 8  |
| 14707 | 2 | 1608586 | 1608615 | 2 | 15 | 30 | TG   | 15 | 7  |
| 14709 | 2 | 1610072 | 1610083 | 2 | 6  | 12 | AG   | 26 | 3  |
| 14714 | 2 | 1654109 | 1654130 | 2 | 11 | 22 | GT   | 11 | 7  |
| 14729 | 2 | 1674790 | 1674847 | 2 | 29 | 58 | AC   | 7  | 11 |
| 14730 | 2 | 1676599 | 1676630 | 2 | 16 | 32 | GT   | 11 | 6  |
| 14734 | 2 | 1683699 | 1683754 | 4 | 14 | 56 | TGAT | 6  | 5  |
| 14737 | 2 | 1688936 | 1688962 | 3 | 9  | 27 | TTG  | 23 | 7  |
| 14739 | 2 | 1691307 | 1691346 | 4 | 10 | 40 | ATAG | 19 | 10 |
| 14741 | 2 | 1692299 | 1692318 | 4 | 5  | 20 | TTAT | 18 | 3  |
| 14743 | 2 | 1708292 | 1708311 | 2 | 10 | 20 | AC   | 23 | 8  |
| 14746 | 2 | 1714015 | 1714034 | 4 | 5  | 20 | TTTA | 27 | 5  |
| 14759 | 2 | 1739661 | 1739678 | 3 | 6  | 18 | AAT  | 21 | 5  |
| 14760 | 2 | 1739870 | 1739899 | 2 | 15 | 30 | GT   | 17 | 11 |
| 14780 | 2 | 1771931 | 1771958 | 4 | 7  | 28 | TGAT | 22 | 15 |
| 14787 | 2 | 1792650 | 1792661 | 2 | 6  | 12 | GT   | 19 | 3  |
| 14792 | 2 | 1805632 | 1805687 | 4 | 14 | 56 | TCTA | 15 | 11 |
| 14798 | 2 | 1818012 | 1818047 | 2 | 18 | 36 | AC   | 10 | 15 |
| 14799 | 2 | 1823646 | 1823675 | 2 | 15 | 30 | TG   | 13 | 7  |

|       |   |         |         |   |    |    |      |    |    |
|-------|---|---------|---------|---|----|----|------|----|----|
| 14804 | 2 | 1832990 | 1833007 | 2 | 9  | 18 | TG   | 9  | 13 |
| 14809 | 2 | 1859426 | 1859441 | 4 | 4  | 16 | TGTA | 24 | 3  |
| 14813 | 2 | 1883892 | 1883907 | 2 | 8  | 16 | CA   | 21 | 6  |
| 14814 | 2 | 1884231 | 1884268 | 2 | 19 | 38 | AC   | 6  | 9  |
| 14815 | 2 | 1887830 | 1887844 | 3 | 5  | 15 | ATA  | 10 | 4  |
| 14818 | 2 | 1891920 | 1891939 | 4 | 5  | 20 | GGAC | 8  | 5  |
| 14827 | 2 | 1905603 | 1905623 | 3 | 7  | 21 | AGG  | 15 | 4  |
| 14829 | 2 | 1907939 | 1907956 | 2 | 9  | 18 | TG   | 13 | 8  |
| 14833 | 2 | 1926206 | 1926217 | 2 | 6  | 12 | GA   | 29 | 4  |
| 14834 | 2 | 1929384 | 1929415 | 2 | 16 | 32 | AC   | 14 | 6  |
| 14835 | 2 | 1930819 | 1930850 | 2 | 16 | 32 | TG   | 17 | 14 |
| 14837 | 2 | 1933357 | 1933374 | 2 | 9  | 18 | TG   | 17 | 8  |
| 14838 | 2 | 1934243 | 1934269 | 3 | 9  | 27 | ACA  | 10 | 6  |
| 14840 | 2 | 1959060 | 1959074 | 3 | 5  | 15 | TCC  | 25 | 3  |
| 14841 | 2 | 1961580 | 1961605 | 2 | 13 | 26 | TG   | 26 | 16 |
| 14842 | 2 | 1962564 | 1962577 | 2 | 7  | 14 | TC   | 26 | 3  |
| 14843 | 2 | 1964511 | 1964532 | 2 | 11 | 22 | GT   | 19 | 12 |
| 14848 | 2 | 1984365 | 1984380 | 4 | 4  | 16 | TAAA | 29 | 4  |
| 14849 | 2 | 1987606 | 1987635 | 2 | 15 | 30 | TG   | 9  | 10 |
| 14868 | 2 | 2047985 | 2048002 | 2 | 9  | 18 | AT   | 6  | 4  |
| 14870 | 2 | 2050356 | 2050393 | 2 | 19 | 38 | AG   | 6  | 11 |
| 14871 | 2 | 2065757 | 2065772 | 4 | 4  | 16 | ATCC | 27 | 5  |
| 14881 | 2 | 2080632 | 2080647 | 2 | 8  | 16 | TA   | 10 | 3  |
| 14885 | 2 | 2083343 | 2083360 | 3 | 6  | 18 | ATG  | 16 | 7  |
| 14887 | 2 | 2087198 | 2087227 | 2 | 15 | 30 | AC   | 11 | 11 |
| 14906 | 2 | 2158107 | 2158124 | 3 | 6  | 18 | TCC  | 25 | 11 |
| 14913 | 2 | 2171095 | 2171106 | 2 | 6  | 12 | AG   | 23 | 3  |
| 14925 | 2 | 2192906 | 2192949 | 2 | 22 | 44 | CA   | 8  | 9  |
| 14926 | 2 | 2193507 | 2193518 | 2 | 6  | 12 | GT   | 24 | 4  |
| 14927 | 2 | 2193732 | 2193745 | 2 | 7  | 14 | AG   | 13 | 5  |
| 14928 | 2 | 2193747 | 2193760 | 2 | 7  | 14 | GA   | 6  | 3  |
| 14939 | 2 | 2194069 | 2194086 | 2 | 9  | 18 | TC   | 7  | 6  |
| 14948 | 2 | 2200603 | 2200634 | 4 | 8  | 32 | ACAT | 6  | 7  |
| 14950 | 2 | 2201316 | 2201329 | 2 | 7  | 14 | AC   | 21 | 7  |
| 14963 | 2 | 2211938 | 2211977 | 2 | 20 | 40 | CA   | 16 | 9  |
| 14965 | 2 | 2217086 | 2217117 | 4 | 8  | 32 | CCTG | 25 | 14 |
| 14972 | 2 | 2220195 | 2220224 | 2 | 15 | 30 | AC   | 24 | 10 |
| 14973 | 2 | 2220429 | 2220444 | 2 | 8  | 16 | CA   | 19 | 10 |
| 14976 | 2 | 2225597 | 2225612 | 2 | 8  | 16 | GT   | 17 | 8  |
| 14979 | 2 | 2226163 | 2226188 | 2 | 13 | 26 | AG   | 7  | 5  |
| 14991 | 2 | 2240580 | 2240607 | 2 | 14 | 28 | CA   | 13 | 9  |
| 14992 | 2 | 2240847 | 2240888 | 2 | 21 | 42 | CA   | 8  | 11 |
| 14993 | 2 | 2242518 | 2242553 | 2 | 18 | 36 | TG   | 19 | 8  |
| 14995 | 2 | 2242863 | 2242884 | 2 | 11 | 22 | AC   | 16 | 12 |
| 14996 | 2 | 2242989 | 2243004 | 2 | 8  | 16 | AC   | 22 | 6  |
| 14998 | 2 | 2250012 | 2250026 | 3 | 5  | 15 | GAG  | 26 | 5  |
| 14999 | 2 | 2250596 | 2250615 | 2 | 10 | 20 | TG   | 21 | 5  |
| 15001 | 2 | 2250797 | 2250812 | 2 | 8  | 16 | CA   | 20 | 10 |
| 15007 | 2 | 2259188 | 2259221 | 2 | 17 | 34 | CA   | 12 | 11 |
| 15010 | 2 | 2262322 | 2262351 | 2 | 15 | 30 | TG   | 11 | 15 |
| 15012 | 2 | 2262464 | 2262477 | 2 | 7  | 14 | CA   | 25 | 4  |

|       |   |         |         |   |    |    |      |    |    |
|-------|---|---------|---------|---|----|----|------|----|----|
| 15013 | 2 | 2262743 | 2262762 | 2 | 10 | 20 | TG   | 23 | 12 |
| 15016 | 2 | 2264255 | 2264270 | 4 | 4  | 16 | GCAG | 27 | 5  |
| 15018 | 2 | 2268484 | 2268511 | 2 | 14 | 28 | AC   | 8  | 9  |
| 15019 | 2 | 2268625 | 2268642 | 2 | 9  | 18 | GA   | 15 | 5  |
| 15020 | 2 | 2268683 | 2268708 | 2 | 13 | 26 | CT   | 23 | 7  |
| 15021 | 2 | 2268752 | 2268769 | 2 | 9  | 18 | CA   | 15 | 11 |
| 15026 | 2 | 2273257 | 2273272 | 2 | 8  | 16 | TG   | 26 | 7  |
| 15027 | 2 | 2273454 | 2273483 | 2 | 15 | 30 | AC   | 11 | 10 |
| 15028 | 2 | 2273652 | 2273663 | 2 | 6  | 12 | CT   | 19 | 8  |
| 15029 | 2 | 2273666 | 2273677 | 2 | 6  | 12 | CT   | 23 | 8  |
| 15030 | 2 | 2273801 | 2273830 | 2 | 15 | 30 | TG   | 15 | 10 |
| 15031 | 2 | 2274240 | 2274255 | 2 | 8  | 16 | GT   | 23 | 11 |
| 15032 | 2 | 2274257 | 2274272 | 2 | 8  | 16 | TG   | 20 | 11 |
| 15034 | 2 | 2277524 | 2277555 | 2 | 16 | 32 | TG   | 17 | 13 |
| 15036 | 2 | 2277996 | 2278009 | 2 | 7  | 14 | AG   | 18 | 5  |
| 15048 | 2 | 2286398 | 2286417 | 2 | 10 | 20 | TC   | 10 | 3  |
| 15049 | 2 | 2287035 | 2287052 | 2 | 9  | 18 | AC   | 17 | 6  |
| 15059 | 2 | 2299272 | 2299283 | 2 | 6  | 12 | TG   | 27 | 4  |
| 15065 | 2 | 2301806 | 2301857 | 2 | 26 | 52 | GA   | 7  | 4  |
| 15069 | 2 | 2307030 | 2307057 | 2 | 14 | 28 | AC   | 26 | 6  |
| 15070 | 2 | 2307695 | 2307712 | 2 | 9  | 18 | CA   | 16 | 10 |
| 15071 | 2 | 2313422 | 2313447 | 2 | 13 | 26 | GT   | 19 | 9  |
| 15073 | 2 | 2319006 | 2319053 | 2 | 24 | 48 | AC   | 8  | 10 |
| 15081 | 2 | 2339708 | 2339737 | 2 | 15 | 30 | AC   | 15 | 9  |
| 15086 | 2 | 2355642 | 2355673 | 2 | 16 | 32 | TG   | 11 | 8  |
| 15093 | 2 | 2364134 | 2364147 | 2 | 7  | 14 | GT   | 25 | 6  |
| 15097 | 2 | 2371451 | 2371464 | 2 | 7  | 14 | AC   | 31 | 5  |
| 15098 | 2 | 2375606 | 2375619 | 2 | 7  | 14 | AG   | 10 | 8  |
| 15111 | 2 | 2392151 | 2392178 | 2 | 14 | 28 | CT   | 12 | 15 |
| 15112 | 2 | 2395370 | 2395405 | 2 | 18 | 36 | GT   | 14 | 10 |
| 15113 | 2 | 2395523 | 2395538 | 2 | 8  | 16 | AC   | 16 | 3  |
| 15114 | 2 | 2396663 | 2396690 | 2 | 14 | 28 | CA   | 19 | 9  |
| 15116 | 2 | 2404822 | 2404845 | 2 | 12 | 24 | CA   | 20 | 9  |
| 15117 | 2 | 2405138 | 2405157 | 2 | 10 | 20 | CA   | 25 | 3  |
| 15120 | 2 | 2412388 | 2412403 | 2 | 8  | 16 | TG   | 19 | 7  |
| 15123 | 2 | 2412703 | 2412726 | 2 | 12 | 24 | CA   | 20 | 6  |
| 15124 | 2 | 2412821 | 2412846 | 2 | 13 | 26 | AC   | 19 | 7  |
| 15138 | 2 | 2464869 | 2464882 | 2 | 7  | 14 | TA   | 6  | 6  |
| 15142 | 2 | 2471174 | 2471187 | 2 | 7  | 14 | GT   | 22 | 6  |
| 15145 | 2 | 2476287 | 2476298 | 2 | 6  | 12 | TG   | 26 | 3  |
| 15151 | 2 | 2486530 | 2486545 | 2 | 8  | 16 | GT   | 13 | 9  |
| 15154 | 2 | 2499322 | 2499349 | 2 | 14 | 28 | CA   | 12 | 6  |
| 15157 | 2 | 2501471 | 2501486 | 2 | 8  | 16 | GT   | 27 | 4  |
| 15166 | 2 | 2520272 | 2520303 | 2 | 16 | 32 | AC   | 13 | 7  |
| 15168 | 2 | 2520723 | 2520754 | 2 | 16 | 32 | GA   | 16 | 13 |
| 15172 | 2 | 2530567 | 2530588 | 2 | 11 | 22 | TG   | 6  | 3  |
| 15174 | 2 | 2536923 | 2536950 | 4 | 7  | 28 | AGAC | 31 | 5  |
| 15175 | 2 | 2537939 | 2537952 | 2 | 7  | 14 | AC   | 24 | 6  |
| 15176 | 2 | 2540502 | 2540529 | 2 | 14 | 28 | TG   | 17 | 9  |
| 15177 | 2 | 2540827 | 2540840 | 2 | 7  | 14 | GT   | 9  | 9  |
| 15178 | 2 | 2540844 | 2540859 | 2 | 8  | 16 | TG   | 10 | 7  |

|       |   |         |         |   |    |    |      |    |    |
|-------|---|---------|---------|---|----|----|------|----|----|
| 15179 | 2 | 2544578 | 2544601 | 2 | 12 | 24 | AC   | 24 | 11 |
| 15182 | 2 | 2547340 | 2547360 | 3 | 7  | 21 | AAC  | 7  | 5  |
| 15183 | 2 | 2550138 | 2550155 | 2 | 9  | 18 | CA   | 19 | 11 |
| 15184 | 2 | 2550319 | 2550338 | 2 | 10 | 20 | AC   | 17 | 4  |
| 15187 | 2 | 2553076 | 2553095 | 2 | 10 | 20 | CA   | 20 | 14 |
| 15188 | 2 | 2553177 | 2553220 | 2 | 22 | 44 | GT   | 12 | 15 |
| 15193 | 2 | 2559532 | 2559551 | 2 | 10 | 20 | GT   | 19 | 7  |
| 15196 | 2 | 2562232 | 2562251 | 2 | 10 | 20 | GT   | 16 | 3  |
| 15199 | 2 | 2562712 | 2562735 | 2 | 12 | 24 | AC   | 18 | 6  |
| 15208 | 2 | 2570610 | 2570645 | 3 | 12 | 36 | AAG  | 21 | 10 |
| 15210 | 2 | 2571577 | 2571596 | 2 | 10 | 20 | TG   | 8  | 8  |
| 15216 | 2 | 2578450 | 2578465 | 2 | 8  | 16 | AC   | 23 | 5  |
| 15217 | 2 | 2578795 | 2578814 | 2 | 10 | 20 | TC   | 22 | 5  |
| 15218 | 2 | 2579087 | 2579114 | 2 | 14 | 28 | CA   | 14 | 7  |
| 15219 | 2 | 2579250 | 2579265 | 2 | 8  | 16 | TG   | 15 | 9  |
| 15220 | 2 | 2580427 | 2580450 | 2 | 12 | 24 | TG   | 16 | 8  |
| 15237 | 2 | 2596649 | 2596666 | 2 | 9  | 18 | AC   | 18 | 3  |
| 15248 | 2 | 2600408 | 2600421 | 2 | 7  | 14 | CA   | 20 | 4  |
| 15250 | 2 | 2603405 | 2603446 | 2 | 21 | 42 | AC   | 11 | 11 |
| 15253 | 2 | 2611747 | 2611785 | 3 | 13 | 39 | GAT  | 23 | 6  |
| 15259 | 2 | 2616458 | 2616495 | 2 | 19 | 38 | AC   | 10 | 10 |
| 15266 | 2 | 2623429 | 2623452 | 2 | 12 | 24 | CT   | 24 | 7  |
| 15274 | 2 | 2629773 | 2629794 | 2 | 11 | 22 | GT   | 15 | 11 |
| 15281 | 2 | 2636231 | 2636256 | 2 | 13 | 26 | GA   | 10 | 11 |
| 15282 | 2 | 2636420 | 2636469 | 2 | 25 | 50 | AC   | 9  | 11 |
| 15283 | 2 | 2636494 | 2636517 | 2 | 12 | 24 | AC   | 11 | 7  |
| 15287 | 2 | 2641313 | 2641330 | 2 | 9  | 18 | TC   | 22 | 7  |
| 15288 | 2 | 2641331 | 2641348 | 2 | 9  | 18 | AC   | 26 | 10 |
| 15291 | 2 | 2649180 | 2649197 | 2 | 9  | 18 | GT   | 6  | 4  |
| 15294 | 2 | 2649341 | 2649384 | 2 | 22 | 44 | TG   | 6  | 8  |
| 15295 | 2 | 2649581 | 2649602 | 2 | 11 | 22 | AG   | 12 | 3  |
| 15313 | 2 | 2687748 | 2687771 | 4 | 6  | 24 | GAAA | 24 | 8  |
| 15324 | 2 | 2712864 | 2712875 | 2 | 6  | 12 | TG   | 18 | 4  |
| 15329 | 2 | 2722354 | 2722401 | 4 | 12 | 48 | ATAG | 11 | 13 |
| 15331 | 2 | 2726042 | 2726065 | 2 | 12 | 24 | CT   | 13 | 5  |
| 15332 | 2 | 2726159 | 2726174 | 4 | 4  | 16 | AGGC | 18 | 3  |
| 15333 | 2 | 2726317 | 2726346 | 2 | 15 | 30 | CT   | 13 | 12 |
| 15336 | 2 | 2728055 | 2728072 | 2 | 9  | 18 | AT   | 15 | 3  |
| 15342 | 2 | 2739499 | 2739522 | 3 | 8  | 24 | CCT  | 20 | 9  |
| 15348 | 2 | 2748639 | 2748670 | 2 | 16 | 32 | AC   | 12 | 5  |
| 15350 | 2 | 2751272 | 2751287 | 2 | 8  | 16 | AG   | 31 | 6  |
| 15351 | 2 | 2752878 | 2752893 | 4 | 4  | 16 | TTTG | 20 | 3  |
| 15352 | 2 | 2753820 | 2753837 | 2 | 9  | 18 | TG   | 22 | 9  |
| 15365 | 2 | 2776947 | 2776970 | 2 | 12 | 24 | TG   | 18 | 10 |
| 15370 | 2 | 2791631 | 2791660 | 2 | 15 | 30 | GT   | 24 | 9  |
| 15381 | 2 | 2837283 | 2837294 | 2 | 6  | 12 | GT   | 30 | 5  |
| 15382 | 2 | 2837344 | 2837357 | 2 | 7  | 14 | GT   | 31 | 8  |
| 15388 | 2 | 2848227 | 2848270 | 4 | 11 | 44 | CCAG | 10 | 11 |
| 15392 | 2 | 2868154 | 2868193 | 4 | 10 | 40 | AAAC | 15 | 6  |
| 15394 | 2 | 2881711 | 2881732 | 2 | 11 | 22 | GT   | 20 | 7  |
| 15396 | 2 | 2882178 | 2882197 | 4 | 5  | 20 | TGTC | 26 | 8  |

|       |   |         |         |   |    |    |      |    |    |
|-------|---|---------|---------|---|----|----|------|----|----|
| 15397 | 2 | 2885148 | 2885171 | 4 | 6  | 24 | TAAA | 22 | 4  |
| 15398 | 2 | 2890892 | 2890911 | 4 | 5  | 20 | TTTA | 18 | 6  |
| 15406 | 2 | 2899234 | 2899259 | 2 | 13 | 26 | TG   | 9  | 13 |
| 15410 | 2 | 2901980 | 2901991 | 2 | 6  | 12 | TG   | 22 | 4  |
| 15423 | 2 | 2933069 | 2933104 | 2 | 18 | 36 | GT   | 11 | 11 |
| 15428 | 2 | 2938488 | 2938501 | 2 | 7  | 14 | GT   | 28 | 4  |
| 15431 | 2 | 2940697 | 2940714 | 2 | 9  | 18 | AC   | 10 | 6  |
| 15432 | 2 | 2940717 | 2940730 | 2 | 7  | 14 | AC   | 15 | 9  |
| 15434 | 2 | 2943202 | 2943215 | 2 | 7  | 14 | CA   | 27 | 4  |
| 15436 | 2 | 2943477 | 2943488 | 2 | 6  | 12 | CA   | 18 | 4  |
| 15446 | 2 | 2951924 | 2951949 | 2 | 13 | 26 | GA   | 12 | 4  |
| 15464 | 2 | 2985900 | 2985923 | 2 | 12 | 24 | CA   | 21 | 4  |
| 15466 | 2 | 2993983 | 2993996 | 2 | 7  | 14 | AC   | 10 | 3  |
| 15471 | 2 | 2999891 | 2999910 | 2 | 10 | 20 | CA   | 14 | 9  |
| 15473 | 2 | 3000683 | 3000700 | 2 | 9  | 18 | TG   | 21 | 4  |
| 15478 | 2 | 3015891 | 3015906 | 2 | 8  | 16 | CA   | 17 | 5  |
| 15485 | 2 | 3027071 | 3027086 | 2 | 8  | 16 | TG   | 20 | 3  |
| 15486 | 2 | 3029486 | 3029499 | 2 | 7  | 14 | TG   | 28 | 3  |
| 15488 | 2 | 3038670 | 3038681 | 2 | 6  | 12 | AC   | 17 | 9  |
| 15494 | 2 | 3046721 | 3046734 | 2 | 7  | 14 | TC   | 22 | 3  |
| 15502 | 2 | 3059177 | 3059208 | 4 | 8  | 32 | GACA | 24 | 8  |
| 15506 | 2 | 3066644 | 3066663 | 2 | 10 | 20 | GT   | 19 | 4  |
| 15512 | 2 | 3075708 | 3075723 | 4 | 4  | 16 | GCAC | 23 | 3  |
| 15517 | 2 | 3078523 | 3078536 | 2 | 7  | 14 | AC   | 26 | 3  |
| 15522 | 2 | 3086199 | 3086225 | 3 | 9  | 27 | CTC  | 20 | 3  |
| 15526 | 2 | 3099183 | 3099198 | 2 | 8  | 16 | GT   | 16 | 7  |
| 15531 | 2 | 3113387 | 3113420 | 2 | 17 | 34 | AC   | 11 | 12 |
| 15542 | 2 | 3122840 | 3122857 | 2 | 9  | 18 | AG   | 8  | 3  |
| 15543 | 2 | 3122970 | 3122989 | 2 | 10 | 20 | TG   | 15 | 8  |
| 15546 | 2 | 3129425 | 3129444 | 2 | 10 | 20 | GT   | 24 | 6  |
| 15552 | 2 | 3140979 | 3141002 | 2 | 12 | 24 | AC   | 12 | 4  |
| 15555 | 2 | 3147788 | 3147799 | 2 | 6  | 12 | CA   | 31 | 3  |
| 15569 | 2 | 3171517 | 3171566 | 2 | 25 | 50 | CA   | 11 | 11 |
| 15599 | 2 | 3222011 | 3222024 | 2 | 7  | 14 | TG   | 30 | 3  |
| 15617 | 2 | 3246955 | 3246974 | 2 | 10 | 20 | AC   | 21 | 6  |
| 15618 | 2 | 3249198 | 3249209 | 2 | 6  | 12 | GT   | 26 | 6  |
| 15619 | 2 | 3249213 | 3249228 | 2 | 8  | 16 | TG   | 25 | 5  |
| 15627 | 2 | 3268889 | 3268918 | 3 | 10 | 30 | AGA  | 21 | 4  |
| 15630 | 2 | 3275003 | 3275018 | 4 | 4  | 16 | AGGC | 23 | 3  |
| 15636 | 2 | 3276183 | 3276200 | 3 | 6  | 18 | AAG  | 16 | 7  |
| 15649 | 2 | 3286290 | 3286307 | 2 | 9  | 18 | CT   | 19 | 5  |
| 15650 | 2 | 3290716 | 3290739 | 2 | 12 | 24 | AC   | 15 | 8  |
| 15654 | 2 | 3301185 | 3301210 | 2 | 13 | 26 | TG   | 17 | 10 |
| 15658 | 2 | 3304183 | 3304194 | 2 | 6  | 12 | TC   | 28 | 3  |
| 15663 | 2 | 3310856 | 3310879 | 2 | 12 | 24 | CA   | 13 | 11 |
| 15665 | 2 | 3317974 | 3317985 | 2 | 6  | 12 | CA   | 28 | 3  |
| 15667 | 2 | 3318160 | 3318179 | 2 | 10 | 20 | TG   | 16 | 9  |
| 15671 | 2 | 3325551 | 3325562 | 2 | 6  | 12 | CA   | 25 | 4  |
| 15676 | 2 | 3332487 | 3332504 | 2 | 9  | 18 | CA   | 14 | 5  |
| 15678 | 2 | 3338964 | 3338991 | 2 | 14 | 28 | TG   | 19 | 13 |
| 15683 | 2 | 3347659 | 3347686 | 2 | 14 | 28 | CT   | 20 | 12 |

|       |   |         |         |   |    |    |      |    |    |
|-------|---|---------|---------|---|----|----|------|----|----|
| 15706 | 2 | 3381023 | 3381048 | 2 | 13 | 26 | GA   | 13 | 4  |
| 15711 | 2 | 3386207 | 3386240 | 2 | 17 | 34 | TG   | 11 | 10 |
| 15712 | 2 | 3386394 | 3386419 | 2 | 13 | 26 | AG   | 21 | 7  |
| 15716 | 2 | 3390929 | 3390942 | 2 | 7  | 14 | AC   | 26 | 4  |
| 15717 | 2 | 3392379 | 3392414 | 2 | 18 | 36 | TG   | 9  | 9  |
| 15720 | 2 | 3401212 | 3401245 | 2 | 17 | 34 | AC   | 9  | 11 |
| 15721 | 2 | 3401325 | 3401350 | 2 | 13 | 26 | AC   | 17 | 10 |
| 15723 | 2 | 3402402 | 3402437 | 2 | 18 | 36 | CA   | 15 | 11 |
| 15726 | 2 | 3406685 | 3406712 | 2 | 14 | 28 | TC   | 10 | 6  |
| 15727 | 2 | 3406844 | 3406863 | 4 | 5  | 20 | GATG | 26 | 3  |
| 15751 | 2 | 3459356 | 3459385 | 3 | 10 | 30 | ATG  | 29 | 5  |
| 15755 | 2 | 3479891 | 3479904 | 2 | 7  | 14 | AT   | 25 | 3  |
| 15759 | 2 | 3514792 | 3514813 | 2 | 11 | 22 | GT   | 12 | 5  |
| 15760 | 2 | 3515424 | 3515441 | 2 | 9  | 18 | GT   | 23 | 5  |
| 15761 | 2 | 3530487 | 3530498 | 2 | 6  | 12 | GT   | 24 | 4  |
| 15762 | 2 | 3531789 | 3531809 | 3 | 7  | 21 | TGT  | 22 | 5  |
| 15766 | 2 | 3543536 | 3543565 | 2 | 15 | 30 | TG   | 15 | 10 |
| 15767 | 2 | 3543599 | 3543644 | 2 | 23 | 46 | GA   | 7  | 13 |
| 15769 | 2 | 3544194 | 3544208 | 3 | 5  | 15 | CCG  | 21 | 3  |
| 15770 | 2 | 3546460 | 3546475 | 4 | 4  | 16 | ATTT | 7  | 4  |
| 15773 | 2 | 3550365 | 3550376 | 2 | 6  | 12 | TG   | 34 | 3  |
| 15776 | 2 | 3555426 | 3555459 | 2 | 17 | 34 | TG   | 16 | 14 |
| 15781 | 2 | 3566645 | 3566658 | 2 | 7  | 14 | AC   | 22 | 11 |
| 15786 | 2 | 3580114 | 3580125 | 2 | 6  | 12 | AT   | 29 | 3  |
| 15797 | 2 | 3598756 | 3598779 | 2 | 12 | 24 | GT   | 20 | 12 |
| 15799 | 2 | 3599023 | 3599038 | 2 | 8  | 16 | AC   | 11 | 8  |
| 15808 | 2 | 3613397 | 3613414 | 3 | 6  | 18 | GAA  | 27 | 3  |
| 15809 | 2 | 3613865 | 3613892 | 2 | 14 | 28 | CA   | 11 | 10 |
| 15811 | 2 | 3627457 | 3627472 | 2 | 8  | 16 | TG   | 20 | 3  |
| 15812 | 2 | 3628249 | 3628262 | 2 | 7  | 14 | CA   | 29 | 7  |
| 15817 | 2 | 3640019 | 3640036 | 2 | 9  | 18 | TG   | 13 | 4  |
| 15820 | 2 | 3657000 | 3657029 | 2 | 15 | 30 | CA   | 12 | 9  |
| 15821 | 2 | 3657115 | 3657132 | 2 | 9  | 18 | TG   | 22 | 3  |
| 15825 | 2 | 3664990 | 3665003 | 2 | 7  | 14 | CA   | 27 | 5  |
| 15830 | 2 | 3672453 | 3672466 | 2 | 7  | 14 | GT   | 18 | 5  |
| 15833 | 2 | 3682740 | 3682759 | 2 | 10 | 20 | CT   | 19 | 6  |
| 15834 | 2 | 3683340 | 3683357 | 3 | 6  | 18 | AGC  | 26 | 4  |
| 15838 | 2 | 3693177 | 3693200 | 2 | 12 | 24 | GT   | 18 | 13 |
| 15849 | 2 | 3718639 | 3718671 | 3 | 11 | 33 | TGT  | 22 | 10 |
| 15850 | 2 | 3721443 | 3721462 | 2 | 10 | 20 | AC   | 16 | 7  |
| 15851 | 2 | 3730294 | 3730323 | 2 | 15 | 30 | AC   | 12 | 13 |
| 15855 | 2 | 3731369 | 3731390 | 2 | 11 | 22 | GT   | 9  | 9  |
| 15856 | 2 | 3731475 | 3731498 | 2 | 12 | 24 | GT   | 19 | 6  |
| 15858 | 2 | 3735367 | 3735384 | 2 | 9  | 18 | GA   | 21 | 5  |
| 15860 | 2 | 3738593 | 3738613 | 3 | 7  | 21 | TCC  | 23 | 6  |
| 15861 | 2 | 3740100 | 3740119 | 2 | 10 | 20 | GT   | 26 | 10 |
| 15863 | 2 | 3746826 | 3746851 | 2 | 13 | 26 | GT   | 13 | 7  |
| 15864 | 2 | 3747265 | 3747280 | 2 | 8  | 16 | CT   | 22 | 11 |
| 15867 | 2 | 3749038 | 3749049 | 2 | 6  | 12 | CA   | 21 | 7  |
| 15868 | 2 | 3749438 | 3749453 | 2 | 8  | 16 | GT   | 24 | 6  |
| 15873 | 2 | 3753556 | 3753577 | 2 | 11 | 22 | GT   | 20 | 11 |

|       |   |         |         |   |    |    |      |    |    |
|-------|---|---------|---------|---|----|----|------|----|----|
| 15876 | 2 | 3760515 | 3760554 | 2 | 20 | 40 | AC   | 10 | 10 |
| 15877 | 2 | 3770097 | 3770120 | 4 | 6  | 24 | ATCC | 28 | 5  |
| 15889 | 2 | 3795625 | 3795640 | 2 | 8  | 16 | CT   | 23 | 4  |
| 15895 | 2 | 3826512 | 3826527 | 4 | 4  | 16 | AAAC | 24 | 3  |
| 15901 | 2 | 3833681 | 3833698 | 2 | 9  | 18 | TG   | 18 | 5  |
| 15907 | 2 | 3853667 | 3853684 | 2 | 9  | 18 | GT   | 13 | 4  |
| 15912 | 2 | 3863070 | 3863101 | 2 | 16 | 32 | TG   | 6  | 4  |
| 15924 | 2 | 3874113 | 3874132 | 4 | 5  | 20 | CTGC | 18 | 5  |
| 15925 | 2 | 3875810 | 3875835 | 2 | 13 | 26 | TG   | 7  | 8  |
| 15932 | 2 | 3888615 | 3888642 | 2 | 14 | 28 | GA   | 8  | 8  |
| 15936 | 2 | 3890924 | 3890939 | 2 | 8  | 16 | CT   | 29 | 4  |
| 15937 | 2 | 3892316 | 3892329 | 2 | 7  | 14 | TG   | 18 | 4  |
| 15941 | 2 | 3893217 | 3893228 | 2 | 6  | 12 | AC   | 15 | 3  |
| 15942 | 2 | 3893266 | 3893279 | 2 | 7  | 14 | TG   | 14 | 7  |
| 15943 | 2 | 3893894 | 3893905 | 2 | 6  | 12 | TG   | 15 | 3  |
| 15945 | 2 | 3894453 | 3894466 | 2 | 7  | 14 | CA   | 25 | 4  |
| 15946 | 2 | 3894887 | 3894912 | 2 | 13 | 26 | GT   | 12 | 10 |
| 15947 | 2 | 3894944 | 3894957 | 2 | 7  | 14 | GA   | 22 | 7  |
| 15954 | 2 | 3899424 | 3899439 | 2 | 8  | 16 | AC   | 26 | 6  |
| 15961 | 2 | 3902163 | 3902186 | 3 | 8  | 24 | TCC  | 7  | 3  |
| 15962 | 2 | 3902427 | 3902442 | 2 | 8  | 16 | AT   | 10 | 3  |
| 15969 | 2 | 3912202 | 3912229 | 2 | 14 | 28 | TG   | 12 | 9  |
| 15970 | 2 | 3912431 | 3912442 | 2 | 6  | 12 | TG   | 12 | 4  |
| 15972 | 2 | 3912680 | 3912693 | 2 | 7  | 14 | AC   | 23 | 3  |
| 15980 | 2 | 3929074 | 3929103 | 2 | 15 | 30 | AC   | 7  | 8  |
| 15992 | 2 | 3958242 | 3958253 | 2 | 6  | 12 | AC   | 17 | 4  |
| 15996 | 2 | 3963452 | 3963467 | 2 | 8  | 16 | GT   | 10 | 7  |
| 15997 | 2 | 3963470 | 3963487 | 2 | 9  | 18 | GT   | 14 | 7  |
| 15998 | 2 | 3964391 | 3964434 | 2 | 22 | 44 | AC   | 8  | 8  |
| 16004 | 2 | 3968078 | 3968099 | 2 | 11 | 22 | TG   | 20 | 5  |
| 16012 | 2 | 3977908 | 3977923 | 4 | 4  | 16 | ATTT | 27 | 3  |
| 16013 | 2 | 3978921 | 3978950 | 2 | 15 | 30 | TG   | 13 | 9  |
| 16016 | 2 | 3980704 | 3980727 | 3 | 8  | 24 | CAC  | 19 | 4  |
| 16021 | 2 | 3988359 | 3988390 | 2 | 16 | 32 | GA   | 13 | 7  |
| 16025 | 2 | 3991437 | 3991462 | 2 | 13 | 26 | AC   | 19 | 9  |
| 16026 | 2 | 3991681 | 3991692 | 2 | 6  | 12 | GT   | 22 | 7  |
| 16029 | 2 | 3992328 | 3992341 | 2 | 7  | 14 | GT   | 14 | 10 |
| 16030 | 2 | 3992913 | 3992936 | 2 | 12 | 24 | AC   | 10 | 10 |
| 16034 | 2 | 3993325 | 3993338 | 2 | 7  | 14 | CT   | 14 | 4  |
| 16036 | 2 | 3994386 | 3994403 | 2 | 9  | 18 | GA   | 11 | 9  |
| 16041 | 2 | 3996638 | 3996661 | 3 | 8  | 24 | TCT  | 24 | 3  |
| 16043 | 2 | 3998381 | 3998418 | 2 | 19 | 38 | TG   | 6  | 8  |
| 16054 | 2 | 4011601 | 4011614 | 2 | 7  | 14 | TG   | 24 | 7  |
| 16055 | 2 | 4012663 | 4012682 | 2 | 10 | 20 | CA   | 12 | 3  |
| 16056 | 2 | 4013248 | 4013277 | 2 | 15 | 30 | CA   | 8  | 9  |
| 16061 | 2 | 4025361 | 4025376 | 2 | 8  | 16 | TG   | 24 | 3  |
| 16063 | 2 | 4033229 | 4033240 | 2 | 6  | 12 | GA   | 10 | 3  |
| 16087 | 2 | 4058104 | 4058121 | 2 | 9  | 18 | TG   | 18 | 5  |
| 16088 | 2 | 4058177 | 4058196 | 4 | 5  | 20 | GTGC | 20 | 8  |
| 16092 | 2 | 4066787 | 4066810 | 2 | 12 | 24 | CA   | 8  | 6  |
| 16110 | 2 | 4126759 | 4126778 | 2 | 10 | 20 | CA   | 18 | 7  |



|       |   |         |         |   |    |    |      |    |    |
|-------|---|---------|---------|---|----|----|------|----|----|
| 16111 | 2 | 4132155 | 4132168 | 2 | 7  | 14 | CA   | 28 | 3  |
| 16137 | 2 | 4164694 | 4164705 | 2 | 6  | 12 | AC   | 20 | 4  |
| 16139 | 2 | 4173673 | 4173684 | 2 | 6  | 12 | TG   | 25 | 3  |
| 16142 | 2 | 4184145 | 4184162 | 2 | 9  | 18 | AC   | 10 | 3  |
| 16154 | 2 | 4204662 | 4204688 | 3 | 9  | 27 | CAG  | 19 | 3  |
| 16155 | 2 | 4204773 | 4204792 | 2 | 10 | 20 | CA   | 16 | 7  |
| 16159 | 2 | 4215375 | 4215390 | 2 | 8  | 16 | AC   | 21 | 5  |
| 16161 | 2 | 4230179 | 4230208 | 2 | 15 | 30 | GA   | 12 | 8  |
| 16165 | 2 | 4234166 | 4234179 | 2 | 7  | 14 | GT   | 27 | 4  |
| 16170 | 2 | 4242814 | 4242834 | 3 | 7  | 21 | AAT  | 16 | 3  |
| 16172 | 2 | 4248857 | 4248882 | 2 | 13 | 26 | TC   | 20 | 9  |
| 16174 | 2 | 4249168 | 4249183 | 2 | 8  | 16 | TC   | 19 | 6  |
| 16176 | 2 | 4252341 | 4252356 | 4 | 4  | 16 | CAGT | 26 | 4  |
| 16179 | 2 | 4253921 | 4253952 | 2 | 16 | 32 | AC   | 14 | 8  |
| 16182 | 2 | 4254867 | 4254881 | 3 | 5  | 15 | GCA  | 8  | 3  |
| 16192 | 2 | 4274044 | 4274059 | 4 | 4  | 16 | AAAT | 28 | 3  |
| 16193 | 2 | 4275312 | 4275341 | 2 | 15 | 30 | CA   | 15 | 10 |
| 16197 | 2 | 4279858 | 4279881 | 4 | 6  | 24 | GGAT | 21 | 6  |
| 16199 | 2 | 4283898 | 4283915 | 3 | 6  | 18 | AGT  | 26 | 3  |
| 16202 | 2 | 4298227 | 4298238 | 2 | 6  | 12 | GT   | 21 | 3  |
| 16203 | 2 | 4298830 | 4298841 | 2 | 6  | 12 | CA   | 24 | 3  |
| 16208 | 2 | 4308060 | 4308081 | 2 | 11 | 22 | AC   | 13 | 9  |
| 16211 | 2 | 4312224 | 4312235 | 2 | 6  | 12 | AC   | 18 | 5  |
| 16212 | 2 | 4312377 | 4312410 | 2 | 17 | 34 | GT   | 24 | 18 |
| 16216 | 2 | 4314485 | 4314506 | 2 | 11 | 22 | CA   | 20 | 8  |
| 16218 | 2 | 4314678 | 4314695 | 2 | 9  | 18 | CA   | 9  | 6  |
| 16220 | 2 | 4317078 | 4317103 | 2 | 13 | 26 | CA   | 19 | 11 |
| 16222 | 2 | 4319353 | 4319376 | 2 | 12 | 24 | AC   | 12 | 8  |
| 16239 | 2 | 4355227 | 4355248 | 2 | 11 | 22 | CT   | 20 | 4  |
| 16245 | 2 | 4364661 | 4364682 | 2 | 11 | 22 | TG   | 8  | 9  |
| 16246 | 2 | 4365215 | 4365234 | 2 | 10 | 20 | GT   | 15 | 6  |
| 16259 | 2 | 4374341 | 4374354 | 2 | 7  | 14 | GT   | 28 | 5  |
| 16264 | 2 | 4377809 | 4377832 | 2 | 12 | 24 | AC   | 12 | 12 |
| 16267 | 2 | 4384365 | 4384396 | 2 | 16 | 32 | TC   | 10 | 8  |
| 16269 | 2 | 4385055 | 4385070 | 2 | 8  | 16 | AC   | 19 | 4  |
| 16270 | 2 | 4385508 | 4385523 | 2 | 8  | 16 | CA   | 14 | 3  |
| 16272 | 2 | 4386235 | 4386256 | 2 | 11 | 22 | CA   | 10 | 7  |
| 16277 | 2 | 4391927 | 4391942 | 2 | 8  | 16 | TC   | 9  | 3  |
| 16279 | 2 | 4392963 | 4392982 | 2 | 10 | 20 | GA   | 9  | 4  |
| 16280 | 2 | 4393275 | 4393292 | 2 | 9  | 18 | AC   | 12 | 5  |
| 16286 | 2 | 4396081 | 4396104 | 2 | 12 | 24 | TG   | 7  | 10 |
| 16289 | 2 | 4396433 | 4396450 | 2 | 9  | 18 | CA   | 8  | 3  |
| 16290 | 2 | 4397444 | 4397491 | 2 | 24 | 48 | CA   | 14 | 12 |
| 16291 | 2 | 4397550 | 4397573 | 2 | 12 | 24 | CT   | 15 | 5  |
| 16293 | 2 | 4397692 | 4397717 | 2 | 13 | 26 | TG   | 8  | 9  |
| 16294 | 2 | 4397837 | 4397856 | 2 | 10 | 20 | TG   | 17 | 6  |
| 16295 | 2 | 4398388 | 4398413 | 2 | 13 | 26 | TG   | 7  | 9  |
| 16296 | 2 | 4398570 | 4398605 | 2 | 18 | 36 | AC   | 7  | 6  |
| 16297 | 2 | 4399000 | 4399020 | 3 | 7  | 21 | CCA  | 13 | 3  |
| 16298 | 2 | 4399520 | 4399539 | 2 | 10 | 20 | GT   | 12 | 5  |
| 16314 | 2 | 4423770 | 4423781 | 2 | 6  | 12 | AG   | 27 | 3  |

|       |   |         |         |   |    |    |      |    |    |
|-------|---|---------|---------|---|----|----|------|----|----|
| 16315 | 2 | 4425204 | 4425219 | 2 | 8  | 16 | CA   | 21 | 9  |
| 16317 | 2 | 4429478 | 4429511 | 2 | 17 | 34 | CA   | 12 | 15 |
| 16321 | 2 | 4435872 | 4435889 | 2 | 9  | 18 | CA   | 23 | 4  |
| 16324 | 2 | 4440673 | 4440726 | 3 | 18 | 54 | GTA  | 20 | 8  |
| 16325 | 2 | 4444401 | 4444414 | 2 | 7  | 14 | GT   | 16 | 3  |
| 16327 | 2 | 4444923 | 4444942 | 2 | 10 | 20 | TG   | 22 | 8  |
| 16328 | 2 | 4447209 | 4447264 | 2 | 28 | 56 | CA   | 18 | 9  |
| 16330 | 2 | 4449428 | 4449441 | 2 | 7  | 14 | CA   | 25 | 3  |
| 16332 | 2 | 4451881 | 4451900 | 2 | 10 | 20 | TG   | 12 | 4  |
| 16336 | 2 | 4452622 | 4452637 | 2 | 8  | 16 | TG   | 27 | 6  |
| 16337 | 2 | 4452708 | 4452723 | 2 | 8  | 16 | AC   | 27 | 4  |
| 16338 | 2 | 4452819 | 4452830 | 2 | 6  | 12 | AC   | 26 | 6  |
| 16340 | 2 | 4457633 | 4457648 | 2 | 8  | 16 | TC   | 16 | 9  |
| 16341 | 2 | 4457650 | 4457663 | 2 | 7  | 14 | CT   | 15 | 8  |
| 16343 | 2 | 4462688 | 4462719 | 2 | 16 | 32 | TG   | 13 | 6  |
| 16344 | 2 | 4462831 | 4462851 | 3 | 7  | 21 | GGT  | 8  | 4  |
| 16345 | 2 | 4467750 | 4467779 | 2 | 15 | 30 | CA   | 13 | 8  |
| 16346 | 2 | 4470545 | 4470562 | 2 | 9  | 18 | CA   | 21 | 8  |
| 16352 | 2 | 4481274 | 4481287 | 2 | 7  | 14 | TC   | 21 | 3  |
| 16353 | 2 | 4483157 | 4483180 | 2 | 12 | 24 | AC   | 13 | 10 |
| 16367 | 2 | 4493568 | 4493597 | 2 | 15 | 30 | TG   | 8  | 7  |
| 16368 | 2 | 4494017 | 4494046 | 2 | 15 | 30 | TG   | 11 | 12 |
| 16372 | 2 | 4501158 | 4501179 | 2 | 11 | 22 | TC   | 9  | 3  |
| 16376 | 2 | 4507633 | 4507658 | 2 | 13 | 26 | GT   | 18 | 7  |
| 16395 | 2 | 4526525 | 4526552 | 2 | 14 | 28 | AC   | 10 | 7  |
| 16396 | 2 | 4527739 | 4527752 | 2 | 7  | 14 | AC   | 20 | 4  |
| 16401 | 2 | 4528197 | 4528228 | 2 | 16 | 32 | TG   | 9  | 5  |
| 16402 | 2 | 4528303 | 4528318 | 2 | 8  | 16 | GT   | 17 | 5  |
| 16404 | 2 | 4528467 | 4528500 | 2 | 17 | 34 | GT   | 17 | 10 |
| 16406 | 2 | 4532776 | 4532790 | 3 | 5  | 15 | TTG  | 19 | 4  |
| 16410 | 2 | 4534840 | 4534851 | 2 | 6  | 12 | CA   | 24 | 4  |
| 16411 | 2 | 4537513 | 4537526 | 2 | 7  | 14 | TG   | 10 | 5  |
| 16412 | 2 | 4537528 | 4537539 | 2 | 6  | 12 | GT   | 15 | 5  |
| 16413 | 2 | 4537689 | 4537714 | 2 | 13 | 26 | TG   | 15 | 10 |
| 16425 | 2 | 4551731 | 4551756 | 2 | 13 | 26 | CA   | 8  | 11 |
| 16427 | 2 | 4552185 | 4552202 | 2 | 9  | 18 | CT   | 8  | 5  |
| 16432 | 2 | 4555056 | 4555095 | 2 | 20 | 40 | GT   | 11 | 8  |
| 16435 | 2 | 4558638 | 4558657 | 2 | 10 | 20 | CA   | 23 | 7  |
| 16446 | 2 | 4564547 | 4564558 | 2 | 6  | 12 | TG   | 21 | 3  |
| 16455 | 2 | 4569570 | 4569587 | 3 | 6  | 18 | CCT  | 21 | 5  |
| 16456 | 2 | 4571201 | 4571222 | 2 | 11 | 22 | TC   | 25 | 7  |
| 16460 | 2 | 4581977 | 4582006 | 2 | 15 | 30 | TG   | 10 | 11 |
| 16461 | 2 | 4590647 | 4590660 | 2 | 7  | 14 | TG   | 8  | 4  |
| 16463 | 2 | 4592558 | 4592573 | 4 | 4  | 16 | AGAT | 23 | 4  |
| 16464 | 2 | 4594059 | 4594074 | 2 | 8  | 16 | GT   | 27 | 4  |
| 16465 | 2 | 4598666 | 4598681 | 4 | 4  | 16 | TTTG | 15 | 5  |
| 16466 | 2 | 4598808 | 4598827 | 2 | 10 | 20 | AC   | 19 | 5  |
| 16469 | 2 | 4599838 | 4599863 | 2 | 13 | 26 | CA   | 19 | 16 |
| 16475 | 2 | 4611023 | 4611040 | 3 | 6  | 18 | AGG  | 25 | 3  |
| 16476 | 2 | 4613949 | 4613964 | 2 | 8  | 16 | CT   | 23 | 8  |
| 16477 | 2 | 4613965 | 4613978 | 2 | 7  | 14 | CA   | 23 | 8  |

|       |   |         |         |   |    |    |      |    |    |
|-------|---|---------|---------|---|----|----|------|----|----|
| 16478 | 2 | 4614184 | 4614195 | 2 | 6  | 12 | TG   | 16 | 4  |
| 16479 | 2 | 4614308 | 4614327 | 2 | 10 | 20 | TG   | 10 | 9  |
| 16487 | 2 | 4619972 | 4619987 | 2 | 8  | 16 | AC   | 27 | 3  |
| 16489 | 2 | 4623797 | 4623820 | 2 | 12 | 24 | CA   | 13 | 13 |
| 16493 | 2 | 4632476 | 4632493 | 3 | 6  | 18 | TTC  | 19 | 4  |
| 16495 | 2 | 4638257 | 4638286 | 2 | 15 | 30 | TG   | 17 | 12 |
| 16496 | 2 | 4638483 | 4638497 | 3 | 5  | 15 | TGC  | 34 | 3  |
| 16497 | 2 | 4641948 | 4641961 | 2 | 7  | 14 | AG   | 20 | 5  |
| 16498 | 2 | 4642260 | 4642281 | 2 | 11 | 22 | AC   | 12 | 5  |
| 16500 | 2 | 4644488 | 4644507 | 2 | 10 | 20 | CA   | 17 | 7  |
| 16501 | 2 | 4645486 | 4645501 | 4 | 4  | 16 | CAAA | 30 | 5  |
| 16508 | 2 | 4647524 | 4647539 | 4 | 4  | 16 | AAAC | 23 | 3  |
| 16509 | 2 | 4650563 | 4650574 | 2 | 6  | 12 | TC   | 24 | 4  |
| 16513 | 2 | 4661424 | 4661441 | 3 | 6  | 18 | GAG  | 23 | 4  |
| 16537 | 2 | 4717104 | 4717127 | 3 | 8  | 24 | CCT  | 19 | 3  |
| 16553 | 2 | 4727551 | 4727565 | 3 | 5  | 15 | GCA  | 25 | 3  |
| 16554 | 2 | 4727813 | 4727840 | 4 | 7  | 28 | TTTG | 16 | 4  |
| 16560 | 2 | 4736589 | 4736620 | 2 | 16 | 32 | AC   | 15 | 12 |
| 16565 | 2 | 4746934 | 4746949 | 4 | 4  | 16 | AAAT | 22 | 3  |
| 16566 | 2 | 4746993 | 4747014 | 2 | 11 | 22 | TG   | 16 | 12 |
| 16574 | 2 | 4759597 | 4759628 | 2 | 16 | 32 | TC   | 9  | 5  |
| 16579 | 2 | 4778009 | 4778053 | 3 | 15 | 45 | ATC  | 23 | 8  |
| 16583 | 2 | 4793055 | 4793070 | 2 | 8  | 16 | AC   | 30 | 4  |
| 16584 | 2 | 4793258 | 4793277 | 4 | 5  | 20 | CATC | 21 | 3  |
| 16585 | 2 | 4794497 | 4794508 | 2 | 6  | 12 | TG   | 32 | 3  |
| 16596 | 2 | 4809577 | 4809604 | 2 | 14 | 28 | CA   | 13 | 13 |
| 16598 | 2 | 4810555 | 4810566 | 2 | 6  | 12 | GT   | 23 | 4  |
| 16601 | 2 | 4829385 | 4829408 | 2 | 12 | 24 | TG   | 12 | 7  |
| 16603 | 2 | 4840441 | 4840458 | 3 | 6  | 18 | TTC  | 9  | 4  |
| 16604 | 2 | 4841531 | 4841554 | 2 | 12 | 24 | AC   | 21 | 12 |
| 16607 | 2 | 4844894 | 4844907 | 2 | 7  | 14 | CA   | 25 | 8  |
| 16608 | 2 | 4846669 | 4846680 | 2 | 6  | 12 | AC   | 23 | 6  |
| 16618 | 2 | 4862179 | 4862194 | 2 | 8  | 16 | TG   | 22 | 3  |
| 16623 | 2 | 4880132 | 4880145 | 2 | 7  | 14 | TG   | 18 | 3  |
| 16635 | 2 | 4894291 | 4894332 | 2 | 21 | 42 | CA   | 11 | 8  |
| 16636 | 2 | 4895389 | 4895400 | 2 | 6  | 12 | TG   | 25 | 4  |
| 16639 | 2 | 4912599 | 4912628 | 3 | 10 | 30 | TCA  | 24 | 3  |
| 16640 | 2 | 4912666 | 4912680 | 3 | 5  | 15 | CAT  | 24 | 3  |
| 16641 | 2 | 4914642 | 4914677 | 2 | 18 | 36 | CA   | 9  | 11 |
| 16646 | 2 | 4929838 | 4929881 | 2 | 22 | 44 | AC   | 7  | 9  |
| 16648 | 2 | 4932435 | 4932464 | 2 | 15 | 30 | CA   | 16 | 8  |
| 16651 | 2 | 4936668 | 4936681 | 2 | 7  | 14 | CA   | 22 | 8  |
| 16653 | 2 | 4939169 | 4939192 | 2 | 12 | 24 | GA   | 23 | 8  |
| 16660 | 2 | 4952622 | 4952641 | 2 | 10 | 20 | TG   | 9  | 10 |
| 16661 | 2 | 4952844 | 4952867 | 4 | 6  | 24 | AGAT | 27 | 8  |
| 16664 | 2 | 4953638 | 4953651 | 2 | 7  | 14 | TC   | 17 | 3  |
| 16675 | 2 | 4994147 | 4994180 | 2 | 17 | 34 | CA   | 12 | 7  |
| 16679 | 2 | 5009393 | 5009410 | 2 | 9  | 18 | GA   | 27 | 5  |
| 16680 | 2 | 5010420 | 5010431 | 2 | 6  | 12 | GT   | 13 | 3  |
| 16687 | 2 | 5028474 | 5028493 | 2 | 10 | 20 | AC   | 17 | 6  |
| 16697 | 2 | 5048483 | 5048496 | 2 | 7  | 14 | GA   | 12 | 10 |

|       |   |         |         |   |    |    |      |    |    |
|-------|---|---------|---------|---|----|----|------|----|----|
| 16700 | 2 | 5060188 | 5060203 | 4 | 4  | 16 | GATG | 28 | 3  |
| 16701 | 2 | 5063904 | 5063923 | 4 | 5  | 20 | ATTT | 23 | 3  |
| 16702 | 2 | 5064035 | 5064062 | 4 | 7  | 28 | TTTA | 14 | 7  |
| 16708 | 2 | 5078942 | 5078973 | 2 | 16 | 32 | GT   | 19 | 8  |
| 16716 | 2 | 5087153 | 5087178 | 2 | 13 | 26 | CA   | 17 | 13 |
| 16720 | 2 | 5087963 | 5087974 | 2 | 6  | 12 | AG   | 13 | 3  |
| 16722 | 2 | 5088291 | 5088306 | 4 | 4  | 16 | AAAG | 18 | 4  |
| 16724 | 2 | 5089545 | 5089560 | 4 | 4  | 16 | TTTC | 12 | 4  |
| 16728 | 2 | 5097237 | 5097266 | 2 | 15 | 30 | AC   | 18 | 8  |
| 16732 | 2 | 5106866 | 5106887 | 2 | 11 | 22 | AG   | 23 | 5  |
| 16733 | 2 | 5109615 | 5109632 | 2 | 9  | 18 | TG   | 10 | 8  |
| 16739 | 2 | 5124940 | 5124955 | 2 | 8  | 16 | TG   | 27 | 5  |
| 16740 | 2 | 5135337 | 5135358 | 2 | 11 | 22 | CA   | 6  | 7  |
| 16742 | 2 | 5143282 | 5143303 | 2 | 11 | 22 | TG   | 22 | 8  |
| 16744 | 2 | 5153933 | 5153954 | 2 | 11 | 22 | GT   | 18 | 5  |
| 16755 | 2 | 5195202 | 5195215 | 2 | 7  | 14 | TG   | 25 | 7  |
| 16757 | 2 | 5201770 | 5201785 | 4 | 4  | 16 | GATT | 28 | 4  |
| 16767 | 2 | 5213482 | 5213501 | 2 | 10 | 20 | CA   | 13 | 3  |
| 16769 | 2 | 5214819 | 5214834 | 2 | 8  | 16 | CA   | 30 | 8  |
| 16776 | 2 | 5244544 | 5244564 | 3 | 7  | 21 | TCA  | 22 | 6  |
| 16783 | 2 | 5269035 | 5269072 | 2 | 19 | 38 | AC   | 15 | 14 |
| 16784 | 2 | 5275720 | 5275743 | 2 | 12 | 24 | CA   | 15 | 4  |
| 16792 | 2 | 5285064 | 5285089 | 2 | 13 | 26 | AC   | 20 | 8  |
| 16796 | 2 | 5287459 | 5287472 | 2 | 7  | 14 | AC   | 14 | 9  |
| 16800 | 2 | 5288439 | 5288478 | 2 | 20 | 40 | CT   | 6  | 10 |
| 16801 | 2 | 5288759 | 5288778 | 2 | 10 | 20 | CT   | 18 | 7  |
| 16804 | 2 | 5289586 | 5289601 | 4 | 4  | 16 | TTTA | 16 | 5  |
| 16805 | 2 | 5289778 | 5289821 | 4 | 11 | 44 | TTCT | 16 | 10 |
| 16813 | 2 | 5294008 | 5294023 | 4 | 4  | 16 | AAAC | 15 | 4  |
| 16818 | 2 | 5299424 | 5299447 | 3 | 8  | 24 | GGT  | 10 | 5  |
| 16827 | 2 | 5306743 | 5306772 | 3 | 10 | 30 | GAG  | 8  | 7  |
| 16829 | 2 | 5309283 | 5309310 | 2 | 14 | 28 | GT   | 11 | 9  |
| 16830 | 2 | 5309519 | 5309539 | 3 | 7  | 21 | ACC  | 9  | 4  |
| 16839 | 2 | 5319182 | 5319201 | 2 | 10 | 20 | GT   | 10 | 8  |
| 16855 | 2 | 5336147 | 5336168 | 2 | 11 | 22 | TG   | 15 | 11 |
| 16867 | 2 | 5348117 | 5348144 | 2 | 14 | 28 | CA   | 20 | 10 |
| 16870 | 2 | 5351385 | 5351412 | 2 | 14 | 28 | TG   | 15 | 7  |
| 16872 | 2 | 5356095 | 5356116 | 2 | 11 | 22 | GT   | 18 | 6  |
| 16874 | 2 | 5356307 | 5356322 | 2 | 8  | 16 | GA   | 27 | 5  |
| 16875 | 2 | 5356735 | 5356754 | 2 | 10 | 20 | CA   | 23 | 7  |
| 16877 | 2 | 5357650 | 5357669 | 2 | 10 | 20 | TG   | 20 | 7  |
| 16883 | 2 | 5375530 | 5375541 | 2 | 6  | 12 | GT   | 14 | 5  |
| 16890 | 2 | 5388464 | 5388481 | 3 | 6  | 18 | ATA  | 11 | 3  |
| 16897 | 2 | 5393643 | 5393658 | 4 | 4  | 16 | TTTC | 17 | 7  |
| 16898 | 2 | 5393941 | 5393958 | 2 | 9  | 18 | TG   | 22 | 16 |
| 16899 | 2 | 5393960 | 5393975 | 2 | 8  | 16 | GT   | 19 | 10 |
| 16900 | 2 | 5394201 | 5394220 | 2 | 10 | 20 | GA   | 11 | 7  |
| 16901 | 2 | 5394407 | 5394424 | 3 | 6  | 18 | CCT  | 30 | 3  |
| 16904 | 2 | 5396374 | 5396397 | 3 | 8  | 24 | CTC  | 24 | 9  |
| 16905 | 2 | 5397816 | 5397845 | 3 | 10 | 30 | AAG  | 22 | 8  |
| 16906 | 2 | 5398215 | 5398236 | 2 | 11 | 22 | GA   | 16 | 6  |

|       |   |         |         |   |    |    |      |    |    |
|-------|---|---------|---------|---|----|----|------|----|----|
| 16908 | 2 | 5400312 | 5400343 | 4 | 8  | 32 | ATCA | 29 | 4  |
| 16912 | 2 | 5406105 | 5406136 | 2 | 16 | 32 | GT   | 16 | 12 |
| 16917 | 2 | 5413223 | 5413237 | 3 | 5  | 15 | AAT  | 19 | 5  |
| 16919 | 2 | 5414796 | 5414807 | 2 | 6  | 12 | GT   | 33 | 3  |
| 16922 | 2 | 5421810 | 5421831 | 2 | 11 | 22 | GT   | 8  | 5  |
| 16934 | 2 | 5447597 | 5447644 | 4 | 12 | 48 | CTAT | 19 | 11 |
| 16945 | 2 | 5475045 | 5475056 | 2 | 6  | 12 | CA   | 19 | 6  |
| 16946 | 2 | 5475059 | 5475072 | 2 | 7  | 14 | CA   | 17 | 7  |
| 16948 | 2 | 5480452 | 5480477 | 2 | 13 | 26 | GT   | 16 | 7  |
| 16949 | 2 | 5480555 | 5480582 | 2 | 14 | 28 | TG   | 13 | 6  |
| 16950 | 2 | 5480789 | 5480808 | 2 | 10 | 20 | TG   | 8  | 10 |
| 16953 | 2 | 5481482 | 5481523 | 2 | 21 | 42 | TG   | 10 | 13 |
| 16954 | 2 | 5482919 | 5482952 | 2 | 17 | 34 | GT   | 15 | 13 |
| 16959 | 2 | 5484410 | 5484421 | 2 | 6  | 12 | TG   | 26 | 3  |
| 16966 | 2 | 5498045 | 5498080 | 2 | 18 | 36 | TC   | 21 | 11 |
| 16970 | 2 | 5516419 | 5516452 | 2 | 17 | 34 | AC   | 13 | 6  |
| 16975 | 2 | 5519989 | 5520056 | 4 | 17 | 68 | TGAT | 19 | 14 |
| 16977 | 2 | 5533165 | 5533180 | 2 | 8  | 16 | GT   | 26 | 6  |
| 16979 | 2 | 5535581 | 5535624 | 2 | 22 | 44 | AC   | 8  | 9  |
| 16981 | 2 | 5543041 | 5543070 | 2 | 15 | 30 | GT   | 19 | 6  |
| 16982 | 2 | 5543366 | 5543379 | 2 | 7  | 14 | AC   | 27 | 6  |
| 16985 | 2 | 5550399 | 5550418 | 2 | 10 | 20 | AC   | 9  | 4  |
| 16988 | 2 | 5561096 | 5561115 | 2 | 10 | 20 | CA   | 20 | 10 |
| 16993 | 2 | 5576890 | 5576949 | 4 | 15 | 60 | ATCT | 9  | 8  |
| 16995 | 2 | 5586267 | 5586294 | 2 | 14 | 28 | TG   | 14 | 12 |
| 16997 | 2 | 5591941 | 5591964 | 2 | 12 | 24 | GT   | 19 | 11 |
| 17004 | 2 | 5616325 | 5616348 | 4 | 6  | 24 | CACT | 25 | 4  |
| 17016 | 2 | 5621336 | 5621351 | 2 | 8  | 16 | GA   | 10 | 3  |
| 17017 | 2 | 5625005 | 5625022 | 2 | 9  | 18 | AC   | 18 | 5  |
| 17019 | 2 | 5633262 | 5633279 | 2 | 9  | 18 | GT   | 22 | 8  |
| 17022 | 2 | 5637611 | 5637632 | 2 | 11 | 22 | TC   | 16 | 5  |
| 17024 | 2 | 5642718 | 5642739 | 2 | 11 | 22 | GT   | 20 | 8  |
| 17025 | 2 | 5646278 | 5646295 | 2 | 9  | 18 | GA   | 23 | 4  |
| 17028 | 2 | 5662341 | 5662358 | 3 | 6  | 18 | AGG  | 17 | 4  |
| 17036 | 2 | 5683664 | 5683689 | 2 | 13 | 26 | TG   | 19 | 9  |
| 17041 | 2 | 5698278 | 5698303 | 2 | 13 | 26 | GT   | 9  | 12 |
| 17042 | 2 | 5699686 | 5699699 | 2 | 7  | 14 | TG   | 27 | 3  |
| 17051 | 2 | 5753296 | 5753325 | 2 | 15 | 30 | TG   | 18 | 6  |
| 17052 | 2 | 5753412 | 5753439 | 2 | 14 | 28 | TG   | 16 | 8  |
| 17057 | 2 | 5768665 | 5768682 | 3 | 6  | 18 | CTG  | 26 | 6  |
| 17060 | 2 | 5778951 | 5778998 | 2 | 24 | 48 | TG   | 8  | 10 |
| 17061 | 2 | 5780785 | 5780800 | 2 | 8  | 16 | AC   | 30 | 6  |
| 17062 | 2 | 5781212 | 5781225 | 2 | 7  | 14 | TG   | 27 | 3  |
| 17065 | 2 | 5786014 | 5786025 | 2 | 6  | 12 | GT   | 9  | 4  |
| 17066 | 2 | 5786028 | 5786039 | 2 | 6  | 12 | GT   | 15 | 5  |
| 17067 | 2 | 5786042 | 5786053 | 2 | 6  | 12 | GT   | 16 | 4  |
| 17068 | 2 | 5786208 | 5786234 | 3 | 9  | 27 | AGA  | 19 | 8  |
| 17069 | 2 | 5786542 | 5786567 | 2 | 13 | 26 | TG   | 14 | 8  |
| 17070 | 2 | 5787914 | 5787929 | 2 | 8  | 16 | TG   | 16 | 5  |
| 17075 | 2 | 5794659 | 5794684 | 2 | 13 | 26 | AC   | 13 | 6  |
| 17076 | 2 | 5794829 | 5794858 | 2 | 15 | 30 | TG   | 18 | 15 |

|       |   |         |         |   |    |    |      |    |    |
|-------|---|---------|---------|---|----|----|------|----|----|
| 17086 | 2 | 5806975 | 5806988 | 2 | 7  | 14 | TG   | 30 | 4  |
| 17090 | 2 | 5817138 | 5817155 | 2 | 9  | 18 | TG   | 29 | 6  |
| 17092 | 2 | 5826628 | 5826639 | 2 | 6  | 12 | CA   | 19 | 3  |
| 17099 | 2 | 5863599 | 5863614 | 2 | 8  | 16 | TG   | 25 | 4  |
| 17106 | 2 | 5872680 | 5872697 | 3 | 6  | 18 | CTC  | 24 | 4  |
| 17107 | 2 | 5876677 | 5876712 | 3 | 12 | 36 | CTC  | 15 | 8  |
| 17109 | 2 | 5879236 | 5879262 | 3 | 9  | 27 | TTA  | 13 | 6  |
| 17112 | 2 | 5884738 | 5884755 | 3 | 6  | 18 | CTC  | 22 | 3  |
| 17120 | 2 | 5928548 | 5928565 | 2 | 9  | 18 | GT   | 22 | 3  |
| 17121 | 2 | 5929063 | 5929086 | 2 | 12 | 24 | TG   | 18 | 7  |
| 17122 | 2 | 5929606 | 5929623 | 3 | 6  | 18 | AGC  | 17 | 3  |
| 17130 | 2 | 5966688 | 5966719 | 2 | 16 | 32 | GT   | 15 | 10 |
| 17134 | 2 | 5976037 | 5976051 | 3 | 5  | 15 | CTG  | 30 | 3  |
| 17135 | 2 | 5976553 | 5976594 | 2 | 21 | 42 | TG   | 7  | 7  |
| 17136 | 2 | 5978531 | 5978564 | 2 | 17 | 34 | AG   | 13 | 6  |
| 17137 | 2 | 5978973 | 5978994 | 2 | 11 | 22 | CA   | 18 | 7  |
| 17140 | 2 | 5982464 | 5982478 | 3 | 5  | 15 | CGG  | 25 | 6  |
| 17142 | 2 | 5990262 | 5990293 | 2 | 16 | 32 | TG   | 21 | 9  |
| 17147 | 2 | 6007262 | 6007273 | 2 | 6  | 12 | CA   | 30 | 5  |
| 17149 | 2 | 6013650 | 6013665 | 4 | 4  | 16 | GTGC | 16 | 7  |
| 17150 | 2 | 6013706 | 6013719 | 2 | 7  | 14 | GT   | 22 | 7  |
| 17153 | 2 | 6016740 | 6016771 | 2 | 16 | 32 | CA   | 13 | 4  |
| 17154 | 2 | 6019781 | 6019808 | 2 | 14 | 28 | CT   | 9  | 7  |
| 17155 | 2 | 6019836 | 6019859 | 4 | 6  | 24 | TGTC | 12 | 5  |
| 17156 | 2 | 6020668 | 6020681 | 2 | 7  | 14 | CA   | 20 | 5  |
| 17157 | 2 | 6022754 | 6022769 | 2 | 8  | 16 | TG   | 17 | 8  |
| 17158 | 2 | 6022772 | 6022785 | 2 | 7  | 14 | TG   | 16 | 7  |
| 17160 | 2 | 6024470 | 6024484 | 3 | 5  | 15 | TCA  | 30 | 5  |
| 17162 | 2 | 6025273 | 6025284 | 2 | 6  | 12 | AC   | 16 | 5  |
| 17172 | 2 | 6045729 | 6045756 | 2 | 14 | 28 | GT   | 17 | 12 |
| 17178 | 2 | 6047878 | 6047907 | 2 | 15 | 30 | GA   | 19 | 7  |
| 17190 | 2 | 6065243 | 6065258 | 2 | 8  | 16 | AC   | 21 | 3  |
| 17193 | 2 | 6067435 | 6067454 | 2 | 10 | 20 | AC   | 15 | 9  |
| 17197 | 2 | 6073194 | 6073223 | 3 | 10 | 30 | CCT  | 8  | 6  |
| 17203 | 2 | 6080555 | 6080582 | 2 | 14 | 28 | GT   | 11 | 10 |
| 17204 | 2 | 6080960 | 6081011 | 2 | 26 | 52 | TG   | 12 | 9  |
| 17208 | 2 | 6085461 | 6085488 | 2 | 14 | 28 | AG   | 9  | 7  |
| 17210 | 2 | 6091039 | 6091082 | 2 | 22 | 44 | GT   | 11 | 13 |
| 17212 | 2 | 6093052 | 6093077 | 2 | 13 | 26 | AC   | 16 | 5  |
| 17213 | 2 | 6103957 | 6103988 | 2 | 16 | 32 | TG   | 7  | 9  |
| 17216 | 2 | 6114238 | 6114249 | 2 | 6  | 12 | AT   | 9  | 10 |
| 17218 | 2 | 6124446 | 6124461 | 2 | 8  | 16 | CT   | 22 | 4  |
| 17221 | 2 | 6126115 | 6126132 | 3 | 6  | 18 | GAT  | 14 | 3  |
| 17222 | 2 | 6126473 | 6126484 | 2 | 6  | 12 | CA   | 25 | 5  |
| 17228 | 2 | 6138315 | 6138332 | 2 | 9  | 18 | CA   | 22 | 9  |
| 17229 | 2 | 6140395 | 6140418 | 2 | 12 | 24 | TG   | 13 | 5  |
| 17230 | 2 | 6140512 | 6140539 | 2 | 14 | 28 | CA   | 15 | 5  |
| 17239 | 2 | 6157011 | 6157032 | 2 | 11 | 22 | AC   | 22 | 11 |
| 17242 | 2 | 6158929 | 6158944 | 2 | 8  | 16 | TG   | 27 | 10 |
| 17247 | 2 | 6162042 | 6162071 | 2 | 15 | 30 | GT   | 11 | 9  |
| 17256 | 2 | 6166706 | 6166725 | 2 | 10 | 20 | CA   | 12 | 8  |

|       |   |         |         |   |    |    |      |    |    |
|-------|---|---------|---------|---|----|----|------|----|----|
| 17269 | 2 | 6175393 | 6175406 | 2 | 7  | 14 | GT   | 10 | 4  |
| 17270 | 2 | 6175429 | 6175442 | 2 | 7  | 14 | GT   | 22 | 4  |
| 17272 | 2 | 6177129 | 6177166 | 2 | 19 | 38 | GT   | 15 | 9  |
| 17280 | 2 | 6181323 | 6181338 | 2 | 8  | 16 | CA   | 25 | 3  |
| 17281 | 2 | 6183692 | 6183705 | 2 | 7  | 14 | TG   | 21 | 5  |
| 17283 | 2 | 6186748 | 6186765 | 2 | 9  | 18 | AG   | 15 | 4  |
| 17286 | 2 | 6190288 | 6190311 | 2 | 12 | 24 | AG   | 16 | 10 |
| 17317 | 2 | 6223096 | 6223119 | 2 | 12 | 24 | GT   | 7  | 4  |
| 17319 | 2 | 6224440 | 6224463 | 2 | 12 | 24 | GA   | 9  | 5  |
| 17320 | 2 | 6224734 | 6224755 | 2 | 11 | 22 | GT   | 15 | 7  |
| 17322 | 2 | 6226064 | 6226107 | 4 | 11 | 44 | TTCT | 12 | 9  |
| 17323 | 2 | 6226708 | 6226725 | 3 | 6  | 18 | GGA  | 16 | 3  |
| 17338 | 2 | 6234555 | 6234586 | 2 | 16 | 32 | TG   | 8  | 10 |
| 17340 | 2 | 6234957 | 6234990 | 2 | 17 | 34 | CA   | 12 | 12 |
| 17341 | 2 | 6238252 | 6238283 | 2 | 16 | 32 | CA   | 8  | 10 |
| 17343 | 2 | 6239601 | 6239620 | 2 | 10 | 20 | GT   | 17 | 3  |
| 17344 | 2 | 6242021 | 6242034 | 2 | 7  | 14 | AG   | 22 | 5  |
| 17354 | 2 | 6261219 | 6261246 | 2 | 14 | 28 | GT   | 17 | 16 |
| 17358 | 2 | 6266475 | 6266489 | 3 | 5  | 15 | GTG  | 15 | 4  |
| 17360 | 2 | 6270300 | 6270333 | 2 | 17 | 34 | TC   | 6  | 6  |
| 17368 | 2 | 6274896 | 6274911 | 4 | 4  | 16 | TTTG | 18 | 10 |
| 17371 | 2 | 6282827 | 6282840 | 2 | 7  | 14 | TA   | 7  | 3  |
| 17372 | 2 | 6284741 | 6284758 | 3 | 6  | 18 | ATT  | 22 | 4  |
| 17373 | 2 | 6287502 | 6287553 | 2 | 26 | 52 | CT   | 9  | 11 |
| 17374 | 2 | 6287597 | 6287614 | 2 | 9  | 18 | CA   | 14 | 4  |
| 17376 | 2 | 6288523 | 6288537 | 3 | 5  | 15 | GGT  | 26 | 3  |
| 17381 | 2 | 6295857 | 6295876 | 2 | 10 | 20 | AC   | 20 | 4  |
| 17382 | 2 | 6297586 | 6297601 | 4 | 4  | 16 | AAAT | 30 | 5  |
| 17383 | 2 | 6299857 | 6299868 | 2 | 6  | 12 | GT   | 21 | 3  |
| 17384 | 2 | 6300313 | 6300328 | 4 | 4  | 16 | AAAT | 11 | 3  |
| 17386 | 2 | 6302045 | 6302078 | 2 | 17 | 34 | AC   | 9  | 8  |
| 17390 | 2 | 6308628 | 6308641 | 2 | 7  | 14 | TG   | 23 | 4  |
| 17392 | 2 | 6312724 | 6312735 | 2 | 6  | 12 | TC   | 31 | 5  |
| 17393 | 2 | 6314391 | 6314402 | 2 | 6  | 12 | CA   | 13 | 6  |
| 17408 | 2 | 6329097 | 6329116 | 2 | 10 | 20 | GA   | 15 | 4  |
| 17413 | 2 | 6333246 | 6333257 | 2 | 6  | 12 | AC   | 6  | 5  |
| 17418 | 2 | 6341032 | 6341047 | 2 | 8  | 16 | TG   | 20 | 4  |
| 17436 | 2 | 6376556 | 6376575 | 2 | 10 | 20 | GA   | 15 | 9  |
| 17440 | 2 | 6388413 | 6388426 | 2 | 7  | 14 | TA   | 18 | 3  |
| 17445 | 2 | 6404931 | 6404951 | 3 | 7  | 21 | TGA  | 20 | 7  |
| 17456 | 2 | 6418109 | 6418124 | 4 | 4  | 16 | ATGG | 27 | 3  |
| 17458 | 2 | 6421494 | 6421507 | 2 | 7  | 14 | CA   | 20 | 5  |
| 17459 | 2 | 6421798 | 6421809 | 2 | 6  | 12 | CA   | 13 | 7  |
| 17462 | 2 | 6424794 | 6424820 | 3 | 9  | 27 | TCA  | 26 | 8  |
| 17464 | 2 | 6425648 | 6425661 | 2 | 7  | 14 | TA   | 15 | 12 |
| 17467 | 2 | 6439267 | 6439280 | 2 | 7  | 14 | TA   | 19 | 3  |
| 17471 | 2 | 6448480 | 6448491 | 2 | 6  | 12 | CA   | 25 | 4  |
| 17474 | 2 | 6456349 | 6456386 | 2 | 19 | 38 | GT   | 9  | 7  |
| 17483 | 2 | 6471593 | 6471607 | 3 | 5  | 15 | AGA  | 29 | 3  |
| 17485 | 2 | 6481317 | 6481344 | 2 | 14 | 28 | GT   | 24 | 10 |
| 17490 | 2 | 6503611 | 6503642 | 4 | 8  | 32 | AGAA | 20 | 4  |

|       |   |         |         |   |    |    |      |    |    |
|-------|---|---------|---------|---|----|----|------|----|----|
| 17491 | 2 | 6504494 | 6504505 | 2 | 6  | 12 | TG   | 20 | 3  |
| 17498 | 2 | 6511704 | 6511715 | 2 | 6  | 12 | AT   | 22 | 8  |
| 17500 | 2 | 6529414 | 6529435 | 2 | 11 | 22 | TC   | 14 | 6  |
| 17505 | 2 | 6555911 | 6555925 | 3 | 5  | 15 | ATT  | 28 | 3  |
| 17514 | 2 | 6581188 | 6581199 | 2 | 6  | 12 | CA   | 17 | 3  |
| 17515 | 2 | 6581232 | 6581246 | 3 | 5  | 15 | CCA  | 23 | 3  |
| 17517 | 2 | 6587411 | 6587430 | 2 | 10 | 20 | GT   | 12 | 9  |
| 17518 | 2 | 6587675 | 6587700 | 2 | 13 | 26 | GT   | 13 | 5  |
| 17519 | 2 | 6587752 | 6587781 | 3 | 10 | 30 | AGG  | 13 | 5  |
| 17520 | 2 | 6587870 | 6587881 | 2 | 6  | 12 | AC   | 18 | 3  |
| 17531 | 2 | 6591600 | 6591617 | 3 | 6  | 18 | TGG  | 20 | 3  |
| 17533 | 2 | 6591988 | 6592023 | 2 | 18 | 36 | GT   | 7  | 9  |
| 17535 | 2 | 6592128 | 6592159 | 2 | 16 | 32 | GT   | 14 | 7  |
| 17536 | 2 | 6592317 | 6592332 | 4 | 4  | 16 | GTGC | 23 | 3  |
| 17539 | 2 | 6595369 | 6595380 | 2 | 6  | 12 | TG   | 12 | 9  |
| 17540 | 2 | 6595676 | 6595689 | 2 | 7  | 14 | AC   | 18 | 7  |
| 17544 | 2 | 6597126 | 6597161 | 2 | 18 | 36 | GA   | 7  | 7  |
| 17545 | 2 | 6597501 | 6597515 | 3 | 5  | 15 | TGC  | 9  | 4  |
| 17551 | 2 | 6598288 | 6598305 | 2 | 9  | 18 | AC   | 16 | 7  |
| 17559 | 2 | 6604772 | 6604785 | 2 | 7  | 14 | GT   | 21 | 3  |
| 17560 | 2 | 6606001 | 6606014 | 2 | 7  | 14 | AC   | 27 | 5  |
| 17561 | 2 | 6606880 | 6606899 | 2 | 10 | 20 | CA   | 14 | 10 |
| 17563 | 2 | 6607283 | 6607304 | 2 | 11 | 22 | TG   | 16 | 9  |
| 17567 | 2 | 6609777 | 6609791 | 3 | 5  | 15 | CCT  | 21 | 4  |
| 17569 | 2 | 6611991 | 6612006 | 2 | 8  | 16 | GT   | 15 | 3  |
| 17571 | 2 | 6614285 | 6614300 | 2 | 8  | 16 | GA   | 21 | 3  |
| 17572 | 2 | 6614566 | 6614595 | 2 | 15 | 30 | TC   | 6  | 7  |
| 17576 | 2 | 6616297 | 6616320 | 2 | 12 | 24 | TC   | 12 | 9  |
| 17578 | 2 | 6616546 | 6616560 | 3 | 5  | 15 | CAA  | 30 | 3  |
| 17582 | 2 | 6619395 | 6619408 | 2 | 7  | 14 | GT   | 25 | 6  |
| 17584 | 2 | 6619710 | 6619729 | 2 | 10 | 20 | AC   | 17 | 8  |
| 17585 | 2 | 6620850 | 6620899 | 2 | 25 | 50 | GT   | 14 | 11 |
| 17586 | 2 | 6621107 | 6621124 | 2 | 9  | 18 | GT   | 20 | 4  |
| 17587 | 2 | 6621264 | 6621287 | 2 | 12 | 24 | GT   | 9  | 7  |
| 17589 | 2 | 6623252 | 6623277 | 2 | 13 | 26 | TG   | 11 | 7  |
| 17594 | 2 | 6635913 | 6635944 | 2 | 16 | 32 | CA   | 11 | 6  |
| 17596 | 2 | 6638363 | 6638378 | 2 | 8  | 16 | AC   | 27 | 3  |
| 17608 | 2 | 6644848 | 6644867 | 2 | 10 | 20 | TG   | 14 | 3  |
| 17610 | 2 | 6645894 | 6645917 | 2 | 12 | 24 | TG   | 11 | 10 |
| 17611 | 2 | 6646015 | 6646038 | 2 | 12 | 24 | AG   | 8  | 8  |
| 17612 | 2 | 6647689 | 6647706 | 2 | 9  | 18 | GT   | 25 | 8  |
| 17616 | 2 | 6650111 | 6650130 | 4 | 5  | 20 | TTAT | 26 | 3  |
| 17620 | 2 | 6655735 | 6655746 | 2 | 6  | 12 | GT   | 25 | 4  |
| 17623 | 2 | 6660587 | 6660604 | 2 | 9  | 18 | CA   | 25 | 10 |
| 17629 | 2 | 6662393 | 6662404 | 2 | 6  | 12 | AC   | 13 | 5  |
| 17632 | 2 | 6662802 | 6662822 | 3 | 7  | 21 | GAG  | 16 | 4  |
| 17633 | 2 | 6663076 | 6663087 | 2 | 6  | 12 | TG   | 15 | 3  |
| 17634 | 2 | 6663342 | 6663373 | 2 | 16 | 32 | AC   | 16 | 10 |
| 17635 | 2 | 6666385 | 6666399 | 3 | 5  | 15 | TAT  | 25 | 4  |
| 17638 | 2 | 6668930 | 6668944 | 3 | 5  | 15 | CCT  | 20 | 3  |
| 17652 | 2 | 6687529 | 6687556 | 2 | 14 | 28 | CA   | 7  | 10 |



|       |   |         |         |   |    |    |     |    |    |
|-------|---|---------|---------|---|----|----|-----|----|----|
| 17653 | 2 | 6687613 | 6687639 | 3 | 9  | 27 | CTT | 11 | 7  |
| 17654 | 2 | 6688237 | 6688250 | 2 | 7  | 14 | AC  | 24 | 5  |
| 17656 | 2 | 6693406 | 6693429 | 2 | 12 | 24 | GT  | 11 | 6  |
| 17658 | 2 | 6699073 | 6699086 | 2 | 7  | 14 | TG  | 19 | 5  |
| 17661 | 2 | 6702709 | 6702722 | 2 | 7  | 14 | AC  | 23 | 4  |
| 17663 | 2 | 6708412 | 6708439 | 2 | 14 | 28 | GT  | 12 | 10 |
| 17671 | 2 | 6713293 | 6713318 | 2 | 13 | 26 | GT  | 21 | 11 |
| 17674 | 2 | 6717384 | 6717401 | 3 | 6  | 18 | CCT | 7  | 3  |
| 17676 | 2 | 6719285 | 6719310 | 2 | 13 | 26 | CA  | 17 | 5  |
| 17683 | 2 | 6724055 | 6724069 | 3 | 5  | 15 | GGC | 22 | 4  |
| 17686 | 2 | 6724671 | 6724684 | 2 | 7  | 14 | TG  | 20 | 5  |
| 17687 | 2 | 6724857 | 6724872 | 2 | 8  | 16 | TG  | 25 | 4  |
| 17688 | 2 | 6725178 | 6725193 | 2 | 8  | 16 | TC  | 17 | 10 |
| 17689 | 2 | 6725449 | 6725466 | 2 | 9  | 18 | TC  | 16 | 9  |
| 17690 | 2 | 6725469 | 6725484 | 2 | 8  | 16 | TC  | 21 | 11 |
| 17692 | 2 | 6726190 | 6726213 | 3 | 8  | 24 | GAA | 28 | 7  |
| 17696 | 2 | 6729806 | 6729829 | 2 | 12 | 24 | TC  | 9  | 5  |
| 17698 | 2 | 6730037 | 6730058 | 2 | 11 | 22 | AC  | 21 | 4  |
| 17699 | 2 | 6730302 | 6730321 | 2 | 10 | 20 | TG  | 23 | 6  |
| 17700 | 2 | 6732522 | 6732565 | 2 | 22 | 44 | TC  | 8  | 7  |
| 17701 | 2 | 6732963 | 6732986 | 2 | 12 | 24 | CA  | 20 | 6  |
| 17703 | 2 | 6735457 | 6735468 | 2 | 6  | 12 | TC  | 14 | 7  |
| 17704 | 2 | 6735471 | 6735484 | 2 | 7  | 14 | TC  | 6  | 3  |
| 17709 | 2 | 6738378 | 6738419 | 2 | 21 | 42 | CA  | 7  | 9  |
| 17710 | 2 | 6740007 | 6740024 | 2 | 9  | 18 | CA  | 23 | 5  |
| 17713 | 2 | 6741456 | 6741483 | 2 | 14 | 28 | AC  | 16 | 7  |
| 17719 | 2 | 6743980 | 6743993 | 2 | 7  | 14 | TG  | 13 | 9  |
| 17722 | 2 | 6747140 | 6747159 | 2 | 10 | 20 | GT  | 15 | 7  |
| 17734 | 2 | 6756088 | 6756117 | 2 | 15 | 30 | TC  | 10 | 6  |
| 17737 | 2 | 6758481 | 6758498 | 2 | 9  | 18 | CA  | 20 | 8  |
| 17740 | 2 | 6764322 | 6764335 | 2 | 7  | 14 | AC  | 26 | 5  |
| 17741 | 2 | 6767826 | 6767839 | 2 | 7  | 14 | AG  | 18 | 4  |
| 17743 | 2 | 6770149 | 6770160 | 2 | 6  | 12 | TA  | 15 | 3  |
| 17744 | 2 | 6770717 | 6770734 | 2 | 9  | 18 | CT  | 26 | 5  |
| 17745 | 2 | 6773357 | 6773370 | 2 | 7  | 14 | TG  | 23 | 8  |
| 17746 | 2 | 6773557 | 6773574 | 2 | 9  | 18 | GT  | 18 | 5  |
| 17747 | 2 | 6773602 | 6773615 | 2 | 7  | 14 | TG  | 17 | 5  |
| 17748 | 2 | 6773763 | 6773778 | 2 | 8  | 16 | GT  | 18 | 3  |
| 17749 | 2 | 6774334 | 6774355 | 2 | 11 | 22 | GT  | 20 | 6  |
| 17750 | 2 | 6774510 | 6774541 | 2 | 16 | 32 | TG  | 15 | 8  |
| 17757 | 2 | 6788544 | 6788555 | 2 | 6  | 12 | CA  | 27 | 3  |
| 17758 | 2 | 6788558 | 6788569 | 2 | 6  | 12 | CA  | 25 | 3  |
| 17762 | 2 | 6794539 | 6794554 | 2 | 8  | 16 | TC  | 14 | 4  |
| 17774 | 2 | 6799988 | 6800005 | 2 | 9  | 18 | AC  | 18 | 4  |
| 17775 | 2 | 6800187 | 6800218 | 2 | 16 | 32 | AC  | 13 | 8  |
| 17776 | 2 | 6800615 | 6800652 | 2 | 19 | 38 | AC  | 13 | 8  |
| 17785 | 2 | 6812758 | 6812781 | 2 | 12 | 24 | TG  | 15 | 9  |
| 17787 | 2 | 6813886 | 6813927 | 2 | 21 | 42 | AC  | 8  | 10 |
| 17788 | 2 | 6815387 | 6815400 | 2 | 7  | 14 | CA  | 7  | 4  |
| 17791 | 2 | 6818917 | 6818950 | 2 | 17 | 34 | CA  | 14 | 9  |
| 17792 | 2 | 6819334 | 6819355 | 2 | 11 | 22 | AC  | 17 | 11 |

|       |   |         |         |   |    |    |      |    |    |
|-------|---|---------|---------|---|----|----|------|----|----|
| 17793 | 2 | 6819892 | 6819905 | 2 | 7  | 14 | GT   | 20 | 5  |
| 17794 | 2 | 6820047 | 6820076 | 2 | 15 | 30 | TG   | 15 | 8  |
| 17795 | 2 | 6820849 | 6820878 | 2 | 15 | 30 | GT   | 18 | 16 |
| 17797 | 2 | 6821556 | 6821593 | 2 | 19 | 38 | AC   | 11 | 5  |
| 17798 | 2 | 6821864 | 6821885 | 2 | 11 | 22 | CA   | 16 | 10 |
| 17802 | 2 | 6825372 | 6825397 | 2 | 13 | 26 | CA   | 14 | 6  |
| 17803 | 2 | 6825452 | 6825465 | 2 | 7  | 14 | CA   | 26 | 3  |
| 17804 | 2 | 6825998 | 6826043 | 2 | 23 | 46 | CA   | 6  | 8  |
| 17810 | 2 | 6830519 | 6830548 | 2 | 15 | 30 | GT   | 16 | 7  |
| 17815 | 2 | 6831440 | 6831467 | 2 | 14 | 28 | CA   | 18 | 10 |
| 17817 | 2 | 6831742 | 6831769 | 2 | 14 | 28 | AC   | 11 | 10 |
| 17819 | 2 | 6831821 | 6831846 | 2 | 13 | 26 | CA   | 9  | 9  |
| 17821 | 2 | 6832449 | 6832470 | 2 | 11 | 22 | AC   | 15 | 4  |
| 17823 | 2 | 6833871 | 6833906 | 2 | 18 | 36 | GT   | 8  | 9  |
| 17826 | 2 | 6836198 | 6836219 | 2 | 11 | 22 | AC   | 11 | 3  |
| 17833 | 2 | 6838918 | 6838939 | 2 | 11 | 22 | AC   | 20 | 9  |
| 17834 | 2 | 6838981 | 6838998 | 3 | 6  | 18 | GGT  | 32 | 3  |
| 17835 | 2 | 6839300 | 6839315 | 2 | 8  | 16 | CA   | 14 | 3  |
| 17839 | 2 | 6841025 | 6841052 | 2 | 14 | 28 | CA   | 15 | 10 |
| 17841 | 2 | 6841569 | 6841604 | 2 | 18 | 36 | GT   | 7  | 8  |
| 17842 | 2 | 6841782 | 6841797 | 2 | 8  | 16 | GT   | 6  | 4  |
| 17843 | 2 | 6841984 | 6842001 | 2 | 9  | 18 | CT   | 7  | 5  |
| 17844 | 2 | 6842002 | 6842015 | 2 | 7  | 14 | CA   | 7  | 3  |
| 17849 | 2 | 6843515 | 6843534 | 2 | 10 | 20 | GA   | 11 | 11 |
| 17851 | 2 | 6844702 | 6844715 | 2 | 7  | 14 | GA   | 11 | 6  |
| 17856 | 2 | 6846562 | 6846573 | 2 | 6  | 12 | AG   | 26 | 8  |
| 17862 | 2 | 6848716 | 6848737 | 2 | 11 | 22 | CA   | 24 | 10 |
| 17866 | 2 | 6851181 | 6851208 | 2 | 14 | 28 | TG   | 8  | 9  |
| 17870 | 2 | 6855817 | 6855868 | 2 | 26 | 52 | GT   | 6  | 10 |
| 17871 | 2 | 6856081 | 6856112 | 2 | 16 | 32 | CA   | 15 | 10 |
| 17875 | 2 | 6863823 | 6863861 | 3 | 13 | 39 | AGG  | 13 | 5  |
| 17881 | 2 | 6875365 | 6875398 | 2 | 17 | 34 | GT   | 12 | 6  |
| 17883 | 2 | 6876554 | 6876585 | 2 | 16 | 32 | TG   | 11 | 7  |
| 17885 | 2 | 6877289 | 6877314 | 2 | 13 | 26 | TG   | 14 | 9  |
| 17889 | 2 | 6878795 | 6878822 | 2 | 14 | 28 | AC   | 23 | 11 |
| 17892 | 2 | 6880394 | 6880420 | 3 | 9  | 27 | CAT  | 26 | 5  |
| 17893 | 2 | 6880960 | 6880989 | 2 | 15 | 30 | TG   | 15 | 10 |
| 17901 | 2 | 6889248 | 6889267 | 2 | 10 | 20 | AG   | 16 | 8  |
| 17904 | 2 | 6894276 | 6894311 | 4 | 9  | 36 | CTGC | 13 | 6  |
| 17906 | 2 | 6904202 | 6904231 | 2 | 15 | 30 | TG   | 9  | 6  |
| 17911 | 2 | 6915822 | 6915837 | 2 | 8  | 16 | GT   | 20 | 3  |
| 17914 | 2 | 6918084 | 6918095 | 2 | 6  | 12 | AC   | 18 | 7  |
| 17918 | 2 | 6924436 | 6924455 | 2 | 10 | 20 | AC   | 21 | 7  |
| 17919 | 2 | 6924606 | 6924621 | 2 | 8  | 16 | TG   | 16 | 4  |
| 17925 | 2 | 6928195 | 6928216 | 2 | 11 | 22 | GT   | 10 | 3  |
| 17927 | 2 | 6932831 | 6932844 | 2 | 7  | 14 | CA   | 19 | 10 |
| 17928 | 2 | 6932847 | 6932862 | 2 | 8  | 16 | CA   | 11 | 9  |
| 17930 | 2 | 6937384 | 6937397 | 2 | 7  | 14 | GT   | 25 | 3  |
| 17938 | 2 | 6943664 | 6943677 | 2 | 7  | 14 | AG   | 17 | 3  |
| 17940 | 2 | 6944467 | 6944506 | 2 | 20 | 40 | GT   | 13 | 9  |
| 17941 | 2 | 6944654 | 6944675 | 2 | 11 | 22 | TG   | 6  | 9  |

|       |   |         |         |   |    |    |      |    |    |
|-------|---|---------|---------|---|----|----|------|----|----|
| 17942 | 2 | 6944761 | 6944772 | 2 | 6  | 12 | AC   | 27 | 4  |
| 17957 | 2 | 6970748 | 6970771 | 2 | 12 | 24 | CT   | 17 | 8  |
| 17962 | 2 | 6975317 | 6975370 | 2 | 27 | 54 | CA   | 9  | 7  |
| 17966 | 2 | 6978620 | 6978643 | 3 | 8  | 24 | GAG  | 7  | 3  |
| 17970 | 2 | 6980383 | 6980398 | 4 | 4  | 16 | CAGG | 20 | 3  |
| 17972 | 2 | 6980466 | 6980483 | 2 | 9  | 18 | AG   | 17 | 4  |
| 17973 | 2 | 6980853 | 6980878 | 2 | 13 | 26 | AG   | 17 | 7  |
| 17982 | 2 | 6984370 | 6984383 | 2 | 7  | 14 | AC   | 23 | 3  |
| 17987 | 2 | 6986687 | 6986718 | 2 | 16 | 32 | TG   | 10 | 16 |
| 17993 | 2 | 6996081 | 6996104 | 2 | 12 | 24 | AC   | 15 | 3  |
| 17995 | 2 | 6998102 | 6998121 | 2 | 10 | 20 | AC   | 24 | 5  |
| 17996 | 2 | 6999182 | 6999201 | 2 | 10 | 20 | CT   | 24 | 3  |
| 17999 | 2 | 7001069 | 7001084 | 2 | 8  | 16 | CA   | 13 | 4  |
| 18000 | 2 | 7001119 | 7001138 | 4 | 5  | 20 | CTTT | 15 | 3  |
| 18001 | 2 | 7001477 | 7001488 | 2 | 6  | 12 | GT   | 23 | 5  |
| 18002 | 2 | 7001670 | 7001683 | 2 | 7  | 14 | TG   | 25 | 4  |
| 18003 | 2 | 7001798 | 7001831 | 2 | 17 | 34 | CA   | 9  | 7  |
| 18005 | 2 | 7006714 | 7006743 | 2 | 15 | 30 | AC   | 10 | 8  |
| 18008 | 2 | 7007745 | 7007762 | 2 | 9  | 18 | CA   | 16 | 8  |
| 18009 | 2 | 7007855 | 7007868 | 2 | 7  | 14 | AC   | 22 | 3  |
| 18011 | 2 | 7009424 | 7009449 | 2 | 13 | 26 | CA   | 15 | 3  |
| 18013 | 2 | 7011978 | 7011995 | 2 | 9  | 18 | TC   | 26 | 3  |
| 18016 | 2 | 7015163 | 7015184 | 2 | 11 | 22 | AC   | 14 | 11 |
| 18017 | 2 | 7016044 | 7016055 | 2 | 6  | 12 | AC   | 23 | 4  |
| 18019 | 2 | 7017739 | 7017756 | 2 | 9  | 18 | TC   | 14 | 9  |
| 18020 | 2 | 7018328 | 7018363 | 4 | 9  | 36 | TCTA | 19 | 8  |
| 18023 | 2 | 7022084 | 7022113 | 2 | 15 | 30 | AC   | 17 | 10 |
| 18024 | 2 | 7022234 | 7022255 | 2 | 11 | 22 | CA   | 18 | 5  |
| 18025 | 2 | 7023027 | 7023050 | 3 | 8  | 24 | GCT  | 14 | 6  |
| 18026 | 2 | 7023097 | 7023150 | 2 | 27 | 54 | TG   | 6  | 11 |
| 18028 | 2 | 7025932 | 7025955 | 2 | 12 | 24 | CA   | 19 | 5  |
| 18030 | 2 | 7027318 | 7027349 | 2 | 16 | 32 | GT   | 22 | 6  |
| 18031 | 2 | 7028067 | 7028088 | 2 | 11 | 22 | AC   | 9  | 8  |
| 18036 | 2 | 7030620 | 7030631 | 2 | 6  | 12 | AC   | 28 | 3  |
| 18038 | 2 | 7030680 | 7030691 | 2 | 6  | 12 | TG   | 21 | 4  |
| 18040 | 2 | 7031289 | 7031320 | 2 | 16 | 32 | AG   | 8  | 6  |
| 18046 | 2 | 7036170 | 7036193 | 2 | 12 | 24 | TC   | 23 | 7  |
| 18049 | 2 | 7041375 | 7041404 | 2 | 15 | 30 | CA   | 7  | 12 |
| 18051 | 2 | 7041607 | 7041652 | 2 | 23 | 46 | AC   | 6  | 9  |
| 18053 | 2 | 7043014 | 7043027 | 2 | 7  | 14 | CA   | 13 | 5  |
| 18055 | 2 | 7043182 | 7043197 | 2 | 8  | 16 | GT   | 14 | 7  |
| 18056 | 2 | 7043359 | 7043379 | 3 | 7  | 21 | CAG  | 20 | 6  |
| 18060 | 2 | 7047161 | 7047174 | 2 | 7  | 14 | TC   | 13 | 5  |
| 18069 | 2 | 7053645 | 7053684 | 2 | 20 | 40 | AG   | 8  | 7  |
| 18071 | 2 | 7055629 | 7055643 | 3 | 5  | 15 | TAA  | 31 | 3  |
| 18087 | 2 | 7080668 | 7080679 | 2 | 6  | 12 | TG   | 23 | 6  |
| 18089 | 2 | 7082939 | 7082950 | 2 | 6  | 12 | TG   | 29 | 4  |
| 18091 | 2 | 7085783 | 7085798 | 2 | 8  | 16 | CT   | 20 | 4  |
| 18101 | 2 | 7097811 | 7097824 | 2 | 7  | 14 | TG   | 11 | 5  |
| 18104 | 2 | 7098107 | 7098136 | 2 | 15 | 30 | AC   | 8  | 11 |
| 18105 | 2 | 7102438 | 7102449 | 2 | 6  | 12 | AC   | 19 | 3  |

|       |   |         |         |   |    |    |      |    |    |
|-------|---|---------|---------|---|----|----|------|----|----|
| 18106 | 2 | 7102453 | 7102466 | 2 | 7  | 14 | AC   | 18 | 3  |
| 18107 | 2 | 7102573 | 7102600 | 2 | 14 | 28 | TC   | 14 | 12 |
| 18113 | 2 | 7111222 | 7111237 | 2 | 8  | 16 | AC   | 28 | 4  |
| 18116 | 2 | 7125723 | 7125734 | 2 | 6  | 12 | AC   | 24 | 3  |
| 18117 | 2 | 7126769 | 7126782 | 2 | 7  | 14 | TG   | 24 | 3  |
| 18118 | 2 | 7126784 | 7126795 | 2 | 6  | 12 | GT   | 31 | 3  |
| 18119 | 2 | 7126989 | 7127016 | 4 | 7  | 28 | ATGG | 29 | 5  |
| 18120 | 2 | 7127880 | 7127907 | 2 | 14 | 28 | TG   | 16 | 10 |
| 18122 | 2 | 7128648 | 7128659 | 2 | 6  | 12 | GT   | 28 | 4  |
| 18125 | 2 | 7132707 | 7132724 | 2 | 9  | 18 | CT   | 21 | 4  |
| 18128 | 2 | 7135533 | 7135556 | 2 | 12 | 24 | AG   | 20 | 7  |
| 18129 | 2 | 7135594 | 7135617 | 2 | 12 | 24 | GA   | 22 | 6  |
| 18130 | 2 | 7137079 | 7137098 | 2 | 10 | 20 | GT   | 16 | 7  |
| 18131 | 2 | 7141306 | 7141321 | 2 | 8  | 16 | AC   | 26 | 4  |
| 18132 | 2 | 7143488 | 7143523 | 2 | 18 | 36 | AC   | 20 | 9  |
| 18134 | 2 | 7143943 | 7143960 | 3 | 6  | 18 | TCC  | 17 | 3  |
| 18142 | 2 | 7162204 | 7162217 | 2 | 7  | 14 | TC   | 10 | 4  |
| 18143 | 2 | 7162220 | 7162233 | 2 | 7  | 14 | TC   | 13 | 5  |
| 18145 | 2 | 7162455 | 7162470 | 2 | 8  | 16 | TC   | 12 | 4  |
| 18146 | 2 | 7165047 | 7165066 | 2 | 10 | 20 | CT   | 12 | 9  |
| 18148 | 2 | 7165736 | 7165765 | 2 | 15 | 30 | TG   | 10 | 15 |
| 18149 | 2 | 7165892 | 7165913 | 2 | 11 | 22 | TG   | 15 | 5  |
| 18150 | 2 | 7165937 | 7165950 | 2 | 7  | 14 | GT   | 18 | 3  |
| 18156 | 2 | 7174761 | 7174772 | 2 | 6  | 12 | CA   | 13 | 4  |
| 18158 | 2 | 7186406 | 7186433 | 2 | 14 | 28 | AC   | 18 | 8  |
| 18162 | 2 | 7196569 | 7196582 | 2 | 7  | 14 | AC   | 15 | 4  |
| 18164 | 2 | 7196779 | 7196804 | 2 | 13 | 26 | GA   | 10 | 9  |
| 18165 | 2 | 7196888 | 7196911 | 2 | 12 | 24 | TG   | 14 | 7  |
| 18168 | 2 | 7201464 | 7201485 | 2 | 11 | 22 | CA   | 15 | 4  |
| 18172 | 2 | 7215437 | 7215454 | 2 | 9  | 18 | CA   | 29 | 4  |
| 18173 | 2 | 7216895 | 7216908 | 2 | 7  | 14 | GT   | 21 | 7  |
| 18174 | 2 | 7219149 | 7219166 | 2 | 9  | 18 | CA   | 21 | 5  |
| 18175 | 2 | 7219386 | 7219401 | 2 | 8  | 16 | TG   | 28 | 4  |
| 18176 | 2 | 7219473 | 7219490 | 2 | 9  | 18 | AC   | 23 | 3  |
| 18177 | 2 | 7221673 | 7221684 | 2 | 6  | 12 | GT   | 21 | 5  |
| 18178 | 2 | 7231287 | 7231310 | 4 | 6  | 24 | TCTG | 27 | 3  |
| 18183 | 2 | 7242805 | 7242834 | 2 | 15 | 30 | GT   | 16 | 8  |
| 18187 | 2 | 7251186 | 7251197 | 2 | 6  | 12 | AT   | 26 | 3  |
| 18191 | 2 | 7255812 | 7255833 | 2 | 11 | 22 | CA   | 12 | 7  |
| 18193 | 2 | 7260162 | 7260173 | 2 | 6  | 12 | TC   | 31 | 3  |
| 18195 | 2 | 7262272 | 7262305 | 2 | 17 | 34 | AG   | 6  | 6  |
| 18196 | 2 | 7263616 | 7263645 | 2 | 15 | 30 | CA   | 7  | 5  |
| 18212 | 2 | 7289326 | 7289345 | 2 | 10 | 20 | AC   | 20 | 6  |
| 18214 | 2 | 7294259 | 7294288 | 2 | 15 | 30 | GT   | 11 | 10 |
| 18215 | 2 | 7294667 | 7294692 | 2 | 13 | 26 | TG   | 15 | 11 |
| 18221 | 2 | 7322006 | 7322029 | 2 | 12 | 24 | AG   | 10 | 6  |
| 18225 | 2 | 7327070 | 7327101 | 4 | 8  | 32 | TATG | 9  | 7  |
| 18229 | 2 | 7335937 | 7335956 | 2 | 10 | 20 | CA   | 13 | 9  |
| 18230 | 2 | 7339444 | 7339459 | 2 | 8  | 16 | GT   | 23 | 10 |
| 18231 | 2 | 7341075 | 7341092 | 2 | 9  | 18 | TG   | 25 | 4  |
| 18232 | 2 | 7358305 | 7358330 | 2 | 13 | 26 | CA   | 8  | 5  |

|       |   |         |         |   |    |    |      |    |    |
|-------|---|---------|---------|---|----|----|------|----|----|
| 18243 | 2 | 7373409 | 7373423 | 3 | 5  | 15 | GCT  | 27 | 4  |
| 18248 | 2 | 7378077 | 7378096 | 2 | 10 | 20 | CA   | 22 | 7  |
| 18250 | 2 | 7382186 | 7382209 | 2 | 12 | 24 | AT   | 9  | 5  |
| 18252 | 2 | 7391178 | 7391197 | 2 | 10 | 20 | AC   | 7  | 8  |
| 18253 | 2 | 7391237 | 7391260 | 3 | 8  | 24 | AAT  | 9  | 8  |
| 18260 | 2 | 7404766 | 7404781 | 2 | 8  | 16 | AC   | 17 | 8  |
| 18261 | 2 | 7423346 | 7423367 | 2 | 11 | 22 | AC   | 14 | 8  |
| 18263 | 2 | 7425482 | 7425497 | 4 | 4  | 16 | AATG | 32 | 3  |
| 18267 | 2 | 7441615 | 7441632 | 2 | 9  | 18 | CA   | 15 | 6  |
| 18269 | 2 | 7445056 | 7445081 | 2 | 13 | 26 | CA   | 15 | 16 |
| 18272 | 2 | 7449228 | 7449255 | 4 | 7  | 28 | TTTG | 18 | 6  |
| 18273 | 2 | 7452783 | 7452800 | 2 | 9  | 18 | AC   | 13 | 8  |
| 18274 | 2 | 7454835 | 7454854 | 2 | 10 | 20 | TG   | 18 | 5  |
| 18277 | 2 | 7462812 | 7462827 | 2 | 8  | 16 | AC   | 15 | 9  |
| 18278 | 2 | 7462829 | 7462848 | 2 | 10 | 20 | CA   | 19 | 16 |
| 18283 | 2 | 7464173 | 7464188 | 2 | 8  | 16 | AC   | 9  | 4  |
| 18285 | 2 | 7466112 | 7466159 | 2 | 24 | 48 | CA   | 8  | 7  |
| 18291 | 2 | 7473391 | 7473430 | 2 | 20 | 40 | AC   | 12 | 11 |
| 18293 | 2 | 7477861 | 7477882 | 2 | 11 | 22 | GT   | 19 | 5  |
| 18295 | 2 | 7480544 | 7480555 | 2 | 6  | 12 | AT   | 20 | 3  |
| 18296 | 2 | 7481998 | 7482017 | 4 | 5  | 20 | ATGG | 30 | 4  |
| 18300 | 2 | 7491868 | 7491895 | 2 | 14 | 28 | AC   | 11 | 5  |
| 18307 | 2 | 7500403 | 7500414 | 2 | 6  | 12 | CA   | 30 | 3  |
| 18308 | 2 | 7502423 | 7502437 | 3 | 5  | 15 | GCT  | 28 | 4  |
| 18315 | 2 | 7519399 | 7519412 | 2 | 7  | 14 | AT   | 8  | 6  |
| 18317 | 2 | 7523635 | 7523660 | 2 | 13 | 26 | AC   | 19 | 11 |
| 18318 | 2 | 7523856 | 7523873 | 2 | 9  | 18 | CA   | 16 | 9  |
| 18321 | 2 | 7527913 | 7527928 | 2 | 8  | 16 | AC   | 19 | 11 |
| 18323 | 2 | 7540347 | 7540386 | 2 | 20 | 40 | TG   | 6  | 5  |
| 18326 | 2 | 7542398 | 7542411 | 2 | 7  | 14 | AC   | 28 | 4  |
| 18327 | 2 | 7543423 | 7543438 | 2 | 8  | 16 | TG   | 12 | 3  |
| 18332 | 2 | 7549578 | 7549611 | 2 | 17 | 34 | GT   | 10 | 9  |
| 18333 | 2 | 7549831 | 7549845 | 3 | 5  | 15 | GCT  | 33 | 3  |
| 18338 | 2 | 7568155 | 7568182 | 2 | 14 | 28 | GT   | 13 | 7  |
| 18350 | 2 | 7580019 | 7580044 | 2 | 13 | 26 | AC   | 13 | 6  |
| 18351 | 2 | 7582251 | 7582282 | 2 | 16 | 32 | AC   | 16 | 8  |
| 18387 | 2 | 7619045 | 7619068 | 2 | 12 | 24 | CT   | 7  | 9  |
| 18391 | 2 | 7627727 | 7627742 | 2 | 8  | 16 | AC   | 22 | 6  |
| 18401 | 2 | 7657544 | 7657564 | 3 | 7  | 21 | CTA  | 21 | 5  |
| 18406 | 2 | 7664719 | 7664752 | 2 | 17 | 34 | AC   | 14 | 10 |
| 18413 | 2 | 7673817 | 7673831 | 3 | 5  | 15 | TGC  | 23 | 3  |
| 18418 | 2 | 7686596 | 7686609 | 2 | 7  | 14 | TG   | 14 | 5  |
| 18421 | 2 | 7695493 | 7695512 | 4 | 5  | 20 | AAAT | 18 | 3  |
| 18426 | 2 | 7708342 | 7708357 | 2 | 8  | 16 | GT   | 19 | 5  |
| 18427 | 2 | 7710168 | 7710185 | 3 | 6  | 18 | AAT  | 7  | 3  |
| 18445 | 2 | 7748642 | 7748679 | 2 | 19 | 38 | AC   | 11 | 11 |
| 18446 | 2 | 7750028 | 7750055 | 2 | 14 | 28 | CA   | 11 | 7  |
| 18447 | 2 | 7754766 | 7754811 | 2 | 23 | 46 | GT   | 8  | 12 |
| 18449 | 2 | 7755508 | 7755523 | 2 | 8  | 16 | GT   | 15 | 3  |
| 18452 | 2 | 7763296 | 7763333 | 2 | 19 | 38 | AC   | 7  | 8  |
| 18458 | 2 | 7777937 | 7777960 | 2 | 12 | 24 | CA   | 26 | 10 |

|       |   |         |         |   |    |    |      |    |    |
|-------|---|---------|---------|---|----|----|------|----|----|
| 18460 | 2 | 7784954 | 7784993 | 2 | 20 | 40 | AC   | 9  | 9  |
| 18463 | 2 | 7788752 | 7788791 | 2 | 20 | 40 | AC   | 8  | 8  |
| 18464 | 2 | 7796154 | 7796177 | 2 | 12 | 24 | GT   | 18 | 11 |
| 18471 | 2 | 7813241 | 7813286 | 2 | 23 | 46 | CA   | 7  | 10 |
| 18472 | 2 | 7814898 | 7814912 | 3 | 5  | 15 | ATA  | 10 | 3  |
| 18473 | 2 | 7816962 | 7816999 | 2 | 19 | 38 | AC   | 14 | 12 |
| 18476 | 2 | 7819037 | 7819072 | 2 | 18 | 36 | GT   | 6  | 7  |
| 18477 | 2 | 7819261 | 7819276 | 4 | 4  | 16 | CACG | 6  | 5  |
| 18481 | 2 | 7827708 | 7827723 | 2 | 8  | 16 | AG   | 15 | 5  |
| 18484 | 2 | 7830937 | 7830960 | 3 | 8  | 24 | TCA  | 19 | 8  |
| 18488 | 2 | 7832765 | 7832776 | 2 | 6  | 12 | AG   | 29 | 4  |
| 18491 | 2 | 7839897 | 7839914 | 2 | 9  | 18 | AC   | 26 | 3  |
| 18492 | 2 | 7840953 | 7840968 | 4 | 4  | 16 | AAAC | 21 | 4  |
| 18519 | 2 | 7877179 | 7877220 | 2 | 21 | 42 | AC   | 15 | 11 |
| 18530 | 2 | 7906937 | 7906948 | 2 | 6  | 12 | GT   | 18 | 6  |
| 18531 | 2 | 7906951 | 7906964 | 2 | 7  | 14 | GT   | 16 | 4  |
| 18534 | 2 | 7909852 | 7909863 | 2 | 6  | 12 | CA   | 29 | 3  |
| 18535 | 2 | 7909988 | 7910025 | 2 | 19 | 38 | AC   | 13 | 8  |
| 18537 | 2 | 7914738 | 7914763 | 2 | 13 | 26 | CT   | 14 | 12 |
| 18539 | 2 | 7915866 | 7915883 | 2 | 9  | 18 | CA   | 23 | 7  |
| 18546 | 2 | 7919522 | 7919539 | 2 | 9  | 18 | GT   | 22 | 11 |
| 18547 | 2 | 7919728 | 7919741 | 2 | 7  | 14 | AG   | 15 | 3  |
| 18550 | 2 | 7923739 | 7923770 | 2 | 16 | 32 | AC   | 8  | 11 |
| 18552 | 2 | 7925776 | 7925787 | 2 | 6  | 12 | CA   | 19 | 4  |
| 18557 | 2 | 7926812 | 7926823 | 2 | 6  | 12 | TG   | 14 | 3  |
| 18558 | 2 | 7929980 | 7929993 | 2 | 7  | 14 | AC   | 29 | 3  |
| 18566 | 2 | 7934822 | 7934833 | 2 | 6  | 12 | AC   | 21 | 4  |
| 18567 | 2 | 7935280 | 7935291 | 2 | 6  | 12 | GT   | 23 | 5  |
| 18571 | 2 | 7938098 | 7938125 | 2 | 14 | 28 | AC   | 11 | 11 |
| 18582 | 2 | 7956684 | 7956701 | 3 | 6  | 18 | CAA  | 24 | 4  |
| 18583 | 2 | 7957333 | 7957362 | 3 | 10 | 30 | GCA  | 15 | 9  |
| 18585 | 2 | 7961889 | 7961904 | 2 | 8  | 16 | AC   | 28 | 4  |
| 18586 | 2 | 7962537 | 7962562 | 2 | 13 | 26 | CA   | 8  | 5  |
| 18589 | 2 | 7965561 | 7965592 | 2 | 16 | 32 | CA   | 11 | 6  |
| 18597 | 2 | 7971253 | 7971270 | 2 | 9  | 18 | TG   | 24 | 7  |
| 18602 | 2 | 7975184 | 7975199 | 2 | 8  | 16 | TG   | 21 | 6  |
| 18603 | 2 | 7978551 | 7978588 | 2 | 19 | 38 | TG   | 9  | 9  |
| 18604 | 2 | 7978694 | 7978727 | 2 | 17 | 34 | CA   | 11 | 10 |
| 18605 | 2 | 7978761 | 7978774 | 2 | 7  | 14 | CA   | 25 | 3  |
| 18607 | 2 | 7980690 | 7980711 | 2 | 11 | 22 | AC   | 17 | 3  |
| 18617 | 2 | 7993786 | 7993835 | 2 | 25 | 50 | TG   | 13 | 15 |
| 18618 | 2 | 7993930 | 7993951 | 2 | 11 | 22 | CA   | 15 | 7  |
| 18628 | 2 | 8009086 | 8009139 | 2 | 27 | 54 | TG   | 6  | 6  |
| 18630 | 2 | 8009713 | 8009726 | 2 | 7  | 14 | CA   | 22 | 12 |
| 18645 | 2 | 8019508 | 8019543 | 2 | 18 | 36 | GT   | 10 | 10 |
| 18651 | 2 | 8025867 | 8025882 | 2 | 8  | 16 | AT   | 7  | 4  |
| 18652 | 2 | 8026698 | 8026717 | 4 | 5  | 20 | GACA | 28 | 3  |
| 18653 | 2 | 8026811 | 8026834 | 2 | 12 | 24 | AC   | 9  | 6  |
| 18655 | 2 | 8027279 | 8027330 | 4 | 13 | 52 | TTTC | 26 | 11 |
| 18657 | 2 | 8028152 | 8028189 | 2 | 19 | 38 | AC   | 7  | 10 |
| 18660 | 2 | 8031655 | 8031672 | 2 | 9  | 18 | CT   | 16 | 5  |

|       |   |         |         |   |    |    |      |    |    |
|-------|---|---------|---------|---|----|----|------|----|----|
| 18663 | 2 | 8032890 | 8032913 | 4 | 6  | 24 | AACA | 6  | 3  |
| 18670 | 2 | 8036880 | 8036917 | 2 | 19 | 38 | GT   | 11 | 9  |
| 18675 | 2 | 8045378 | 8045403 | 2 | 13 | 26 | CA   | 15 | 15 |
| 18677 | 2 | 8050405 | 8050446 | 3 | 14 | 42 | CAT  | 12 | 6  |
| 18684 | 2 | 8061678 | 8061723 | 2 | 23 | 46 | CA   | 7  | 11 |
| 18685 | 2 | 8062845 | 8062866 | 2 | 11 | 22 | AC   | 16 | 15 |
| 18686 | 2 | 8065017 | 8065036 | 2 | 10 | 20 | TG   | 24 | 12 |
| 18687 | 2 | 8066412 | 8066437 | 2 | 13 | 26 | GT   | 13 | 7  |
| 18688 | 2 | 8067101 | 8067121 | 3 | 7  | 21 | ACA  | 28 | 3  |
| 18690 | 2 | 8069307 | 8069322 | 2 | 8  | 16 | TG   | 19 | 4  |
| 18692 | 2 | 8071792 | 8071806 | 3 | 5  | 15 | CAG  | 31 | 3  |
| 18697 | 2 | 8095839 | 8095868 | 2 | 15 | 30 | TG   | 18 | 6  |
| 18699 | 2 | 8102939 | 8102954 | 2 | 8  | 16 | TG   | 28 | 7  |
| 18703 | 2 | 8104907 | 8104922 | 2 | 8  | 16 | CA   | 24 | 6  |
| 18704 | 2 | 8106090 | 8106105 | 2 | 8  | 16 | TG   | 26 | 4  |
| 18705 | 2 | 8106222 | 8106241 | 2 | 10 | 20 | CA   | 18 | 12 |
| 18710 | 2 | 8119681 | 8119694 | 2 | 7  | 14 | AC   | 20 | 3  |
| 18714 | 2 | 8124865 | 8124882 | 3 | 6  | 18 | TAT  | 13 | 4  |
| 18716 | 2 | 8127849 | 8127869 | 3 | 7  | 21 | TTG  | 26 | 5  |
| 18719 | 2 | 8128249 | 8128270 | 2 | 11 | 22 | CA   | 9  | 7  |
| 18720 | 2 | 8130310 | 8130341 | 2 | 16 | 32 | TG   | 8  | 9  |
| 18721 | 2 | 8130822 | 8130839 | 2 | 9  | 18 | GT   | 19 | 6  |
| 18725 | 2 | 8143847 | 8143864 | 2 | 9  | 18 | GT   | 13 | 5  |
| 18726 | 2 | 8144982 | 8144993 | 2 | 6  | 12 | AG   | 32 | 3  |
| 18727 | 2 | 8146753 | 8146802 | 2 | 25 | 50 | CA   | 6  | 9  |
| 18728 | 2 | 8146966 | 8146977 | 2 | 6  | 12 | TG   | 18 | 4  |
| 18729 | 2 | 8146980 | 8146995 | 2 | 8  | 16 | TG   | 21 | 6  |
| 18735 | 2 | 8150186 | 8150201 | 2 | 8  | 16 | GT   | 13 | 9  |
| 18736 | 2 | 8150204 | 8150219 | 2 | 8  | 16 | GT   | 14 | 9  |
| 18737 | 2 | 8150300 | 8150317 | 2 | 9  | 18 | TG   | 18 | 5  |
| 18742 | 2 | 8161053 | 8161068 | 2 | 8  | 16 | AC   | 19 | 5  |
| 18745 | 2 | 8165785 | 8165802 | 3 | 6  | 18 | ATA  | 23 | 4  |
| 18746 | 2 | 8167228 | 8167245 | 2 | 9  | 18 | GT   | 16 | 7  |
| 18754 | 2 | 8169858 | 8169875 | 3 | 6  | 18 | AGG  | 15 | 4  |
| 18755 | 2 | 8171123 | 8171158 | 3 | 12 | 36 | GAG  | 8  | 6  |
| 18757 | 2 | 8177196 | 8177209 | 2 | 7  | 14 | GT   | 22 | 5  |
| 18761 | 2 | 8180879 | 8180928 | 2 | 25 | 50 | CA   | 11 | 10 |
| 18767 | 2 | 8192602 | 8192615 | 2 | 7  | 14 | AC   | 17 | 6  |
| 18768 | 2 | 8192649 | 8192668 | 2 | 10 | 20 | CA   | 12 | 8  |
| 18770 | 2 | 8193571 | 8193598 | 2 | 14 | 28 | CT   | 18 | 7  |
| 18771 | 2 | 8193729 | 8193764 | 4 | 9  | 36 | ACAG | 23 | 5  |
| 18772 | 2 | 8195747 | 8195764 | 2 | 9  | 18 | CA   | 19 | 7  |
| 18777 | 2 | 8202332 | 8202349 | 2 | 9  | 18 | AC   | 24 | 4  |
| 18783 | 2 | 8205362 | 8205389 | 4 | 7  | 28 | TGTA | 8  | 3  |
| 18785 | 2 | 8205590 | 8205619 | 2 | 15 | 30 | AC   | 12 | 6  |
| 18786 | 2 | 8206067 | 8206090 | 4 | 6  | 24 | TGGA | 27 | 3  |
| 18790 | 2 | 8212657 | 8212674 | 2 | 9  | 18 | AC   | 26 | 11 |
| 18791 | 2 | 8215466 | 8215509 | 2 | 22 | 44 | GT   | 6  | 6  |
| 18792 | 2 | 8215702 | 8215741 | 2 | 20 | 40 | TG   | 15 | 10 |
| 18798 | 2 | 8229516 | 8229527 | 2 | 6  | 12 | GT   | 14 | 5  |
| 18800 | 2 | 8229734 | 8229751 | 2 | 9  | 18 | CA   | 15 | 4  |

|       |   |         |         |   |    |    |      |    |    |
|-------|---|---------|---------|---|----|----|------|----|----|
| 18801 | 2 | 8229911 | 8229934 | 2 | 12 | 24 | CA   | 12 | 7  |
| 18802 | 2 | 8231692 | 8231737 | 2 | 23 | 46 | GA   | 7  | 8  |
| 18809 | 2 | 8240791 | 8240802 | 2 | 6  | 12 | AC   | 23 | 5  |
| 18813 | 2 | 8245549 | 8245614 | 2 | 33 | 66 | CT   | 8  | 12 |
| 18815 | 2 | 8248128 | 8248139 | 2 | 6  | 12 | AT   | 13 | 6  |
| 18819 | 2 | 8256822 | 8256849 | 2 | 14 | 28 | TG   | 7  | 6  |
| 18820 | 2 | 8256979 | 8257012 | 2 | 17 | 34 | CA   | 10 | 6  |
| 18822 | 2 | 8257347 | 8257370 | 2 | 12 | 24 | CA   | 14 | 3  |
| 18825 | 2 | 8258819 | 8258840 | 2 | 11 | 22 | CA   | 12 | 6  |
| 18826 | 2 | 8258935 | 8258972 | 2 | 19 | 38 | AC   | 10 | 7  |
| 18830 | 2 | 8259362 | 8259379 | 2 | 9  | 18 | CA   | 16 | 12 |
| 18837 | 2 | 8280418 | 8280429 | 2 | 6  | 12 | AG   | 27 | 3  |
| 18838 | 2 | 8280500 | 8280523 | 2 | 12 | 24 | TG   | 15 | 11 |
| 18839 | 2 | 8282851 | 8282866 | 2 | 8  | 16 | GT   | 17 | 7  |
| 18840 | 2 | 8293217 | 8293252 | 2 | 18 | 36 | AC   | 8  | 9  |
| 18845 | 2 | 8299617 | 8299648 | 2 | 16 | 32 | AC   | 14 | 10 |
| 18848 | 2 | 8303639 | 8303653 | 3 | 5  | 15 | CAT  | 22 | 3  |
| 18854 | 2 | 8310785 | 8310808 | 2 | 12 | 24 | CA   | 10 | 4  |
| 18855 | 2 | 8310845 | 8310872 | 2 | 14 | 28 | CA   | 11 | 9  |
| 18861 | 2 | 8317607 | 8317628 | 2 | 11 | 22 | CA   | 19 | 6  |
| 18865 | 2 | 8321161 | 8321175 | 3 | 5  | 15 | GCA  | 25 | 3  |
| 18866 | 2 | 8322449 | 8322478 | 2 | 15 | 30 | AC   | 16 | 8  |
| 18867 | 2 | 8323359 | 8323398 | 2 | 20 | 40 | CA   | 11 | 9  |
| 18874 | 2 | 8334954 | 8334973 | 2 | 10 | 20 | GT   | 22 | 9  |
| 18876 | 2 | 8336491 | 8336524 | 2 | 17 | 34 | CA   | 17 | 12 |
| 18877 | 2 | 8337399 | 8337410 | 2 | 6  | 12 | GT   | 16 | 15 |
| 18878 | 2 | 8337412 | 8337427 | 2 | 8  | 16 | TG   | 6  | 5  |
| 18879 | 2 | 8337688 | 8337705 | 3 | 6  | 18 | AAT  | 13 | 7  |
| 18880 | 2 | 8341928 | 8341941 | 2 | 7  | 14 | TC   | 25 | 4  |
| 18884 | 2 | 8346723 | 8346742 | 2 | 10 | 20 | CA   | 25 | 6  |
| 18885 | 2 | 8347117 | 8347132 | 2 | 8  | 16 | GT   | 15 | 8  |
| 18886 | 2 | 8348876 | 8348893 | 3 | 6  | 18 | TCC  | 15 | 4  |
| 18890 | 2 | 8357588 | 8357602 | 3 | 5  | 15 | AGG  | 26 | 6  |
| 18894 | 2 | 8363919 | 8363966 | 2 | 24 | 48 | GT   | 9  | 9  |
| 18896 | 2 | 8365572 | 8365589 | 2 | 9  | 18 | CA   | 20 | 8  |
| 18898 | 2 | 8365989 | 8366008 | 2 | 10 | 20 | AC   | 8  | 5  |
| 18905 | 2 | 8373656 | 8373667 | 2 | 6  | 12 | CT   | 17 | 4  |
| 18910 | 2 | 8378541 | 8378562 | 2 | 11 | 22 | CA   | 26 | 15 |
| 18915 | 2 | 8397869 | 8397882 | 2 | 7  | 14 | CT   | 10 | 6  |
| 18916 | 2 | 8401599 | 8401614 | 4 | 4  | 16 | GTGC | 18 | 4  |
| 18917 | 2 | 8417057 | 8417074 | 2 | 9  | 18 | TC   | 17 | 6  |
| 18919 | 2 | 8418404 | 8418419 | 2 | 8  | 16 | AC   | 24 | 3  |
| 18920 | 2 | 8418421 | 8418434 | 2 | 7  | 14 | CA   | 26 | 4  |
| 18922 | 2 | 8425454 | 8425465 | 2 | 6  | 12 | AC   | 26 | 4  |
| 18923 | 2 | 8426055 | 8426070 | 2 | 8  | 16 | TG   | 23 | 4  |
| 18925 | 2 | 8441125 | 8441139 | 3 | 5  | 15 | GTT  | 29 | 3  |
| 18929 | 2 | 8470733 | 8470748 | 4 | 4  | 16 | AGGC | 7  | 3  |
| 18930 | 2 | 8471227 | 8471258 | 2 | 16 | 32 | TG   | 15 | 10 |
| 18933 | 2 | 8476728 | 8476741 | 2 | 7  | 14 | TG   | 30 | 5  |
| 18934 | 2 | 8482420 | 8482443 | 2 | 12 | 24 | TG   | 17 | 7  |
| 18941 | 2 | 8483168 | 8483183 | 2 | 8  | 16 | CA   | 21 | 5  |



|       |   |         |         |   |    |    |      |    |    |
|-------|---|---------|---------|---|----|----|------|----|----|
| 18945 | 2 | 8485247 | 8485260 | 2 | 7  | 14 | GT   | 20 | 4  |
| 18946 | 2 | 8485684 | 8485701 | 2 | 9  | 18 | GT   | 19 | 8  |
| 18947 | 2 | 8489700 | 8489713 | 2 | 7  | 14 | GT   | 20 | 4  |
| 18949 | 2 | 8497528 | 8497557 | 2 | 15 | 30 | CA   | 16 | 14 |
| 18956 | 2 | 8518106 | 8518123 | 2 | 9  | 18 | AC   | 15 | 3  |
| 18959 | 2 | 8521842 | 8521859 | 2 | 9  | 18 | TC   | 16 | 4  |
| 18960 | 2 | 8522338 | 8522369 | 4 | 8  | 32 | ATGT | 19 | 4  |
| 18969 | 2 | 8536388 | 8536411 | 2 | 12 | 24 | GA   | 18 | 8  |
| 18971 | 2 | 8541054 | 8541073 | 4 | 5  | 20 | CTGT | 22 | 3  |
| 18975 | 2 | 8543935 | 8543972 | 2 | 19 | 38 | CA   | 14 | 12 |
| 18978 | 2 | 8557039 | 8557050 | 2 | 6  | 12 | TG   | 30 | 4  |
| 18984 | 2 | 8560748 | 8560769 | 2 | 11 | 22 | GT   | 25 | 14 |
| 18998 | 2 | 8583796 | 8583823 | 2 | 14 | 28 | TG   | 10 | 4  |
| 19007 | 2 | 8594169 | 8594186 | 2 | 9  | 18 | CA   | 18 | 7  |
| 19017 | 2 | 8597623 | 8597652 | 2 | 15 | 30 | GT   | 16 | 9  |
| 19020 | 2 | 8598746 | 8598767 | 2 | 11 | 22 | GT   | 12 | 8  |
| 19021 | 2 | 8599389 | 8599400 | 2 | 6  | 12 | GT   | 32 | 3  |
| 19023 | 2 | 8608451 | 8608464 | 2 | 7  | 14 | TG   | 19 | 3  |
| 19030 | 2 | 8635315 | 8635336 | 2 | 11 | 22 | GT   | 15 | 8  |
| 19035 | 2 | 8648299 | 8648310 | 2 | 6  | 12 | TG   | 17 | 6  |
| 19036 | 2 | 8648312 | 8648327 | 2 | 8  | 16 | GT   | 21 | 8  |
| 19038 | 2 | 8657915 | 8657926 | 2 | 6  | 12 | AC   | 31 | 3  |
| 19050 | 2 | 8689484 | 8689505 | 2 | 11 | 22 | GA   | 15 | 6  |
| 19051 | 2 | 8689604 | 8689655 | 2 | 26 | 52 | TG   | 10 | 13 |
| 19052 | 2 | 8690288 | 8690319 | 4 | 8  | 32 | ATGT | 17 | 7  |
| 19053 | 2 | 8696989 | 8697004 | 2 | 8  | 16 | TG   | 23 | 3  |
| 19058 | 2 | 8721123 | 8721162 | 2 | 20 | 40 | TG   | 14 | 11 |
| 19060 | 2 | 8724127 | 8724140 | 2 | 7  | 14 | GT   | 16 | 4  |
| 19075 | 2 | 8763966 | 8764013 | 2 | 24 | 48 | CA   | 13 | 12 |
| 19077 | 2 | 8774969 | 8775000 | 2 | 16 | 32 | TC   | 7  | 6  |
| 19088 | 2 | 8804422 | 8804445 | 2 | 12 | 24 | AC   | 18 | 7  |
| 19090 | 2 | 8808817 | 8808830 | 2 | 7  | 14 | GA   | 28 | 4  |
| 19091 | 2 | 8809194 | 8809205 | 2 | 6  | 12 | TG   | 26 | 7  |
| 19092 | 2 | 8809208 | 8809221 | 2 | 7  | 14 | TG   | 19 | 6  |
| 19094 | 2 | 8809779 | 8809790 | 2 | 6  | 12 | AG   | 29 | 3  |
| 19095 | 2 | 8809831 | 8809850 | 2 | 10 | 20 | TC   | 22 | 4  |
| 19108 | 2 | 8841743 | 8841781 | 3 | 13 | 39 | TGT  | 22 | 11 |
| 19109 | 2 | 8842358 | 8842372 | 3 | 5  | 15 | GTT  | 24 | 4  |
| 19110 | 2 | 8842564 | 8842579 | 4 | 4  | 16 | TCCA | 24 | 3  |
| 19114 | 2 | 8855385 | 8855411 | 3 | 9  | 27 | TAT  | 13 | 3  |
| 19116 | 2 | 8861374 | 8861419 | 2 | 23 | 46 | TG   | 8  | 12 |
| 19117 | 2 | 8863348 | 8863361 | 2 | 7  | 14 | AT   | 23 | 3  |
| 19120 | 2 | 8881798 | 8881811 | 2 | 7  | 14 | AC   | 28 | 4  |
| 19121 | 2 | 8882770 | 8882789 | 4 | 5  | 20 | GTGC | 32 | 5  |
| 19129 | 2 | 8890878 | 8890901 | 3 | 8  | 24 | CTT  | 24 | 4  |
| 19135 | 2 | 8898257 | 8898272 | 2 | 8  | 16 | TG   | 18 | 3  |
| 19144 | 2 | 8905559 | 8905573 | 3 | 5  | 15 | CCT  | 24 | 3  |
| 19152 | 2 | 8922014 | 8922025 | 2 | 6  | 12 | TG   | 22 | 4  |
| 19171 | 2 | 8948040 | 8948051 | 2 | 6  | 12 | GT   | 21 | 3  |
| 19172 | 2 | 8948226 | 8948239 | 2 | 7  | 14 | CA   | 28 | 3  |
| 19173 | 2 | 8948566 | 8948577 | 2 | 6  | 12 | TG   | 26 | 3  |

|       |   |         |         |   |    |    |      |    |    |
|-------|---|---------|---------|---|----|----|------|----|----|
| 19176 | 2 | 8962419 | 8962456 | 2 | 19 | 38 | CA   | 16 | 13 |
| 19180 | 2 | 8965185 | 8965200 | 4 | 4  | 16 | GTGC | 25 | 10 |
| 19181 | 2 | 8965535 | 8965550 | 2 | 8  | 16 | CA   | 15 | 11 |
| 19183 | 2 | 8968071 | 8968084 | 2 | 7  | 14 | GT   | 21 | 3  |
| 19185 | 2 | 8968171 | 8968214 | 2 | 22 | 44 | TG   | 9  | 10 |
| 19186 | 2 | 8972298 | 8972309 | 2 | 6  | 12 | GT   | 29 | 3  |
| 19189 | 2 | 8972538 | 8972555 | 3 | 6  | 18 | CCT  | 18 | 3  |
| 19195 | 2 | 8979416 | 8979427 | 2 | 6  | 12 | TG   | 28 | 3  |
| 19197 | 2 | 8981095 | 8981122 | 2 | 14 | 28 | CA   | 17 | 9  |
| 19199 | 2 | 8984892 | 8984907 | 2 | 8  | 16 | GT   | 22 | 3  |
| 19202 | 2 | 8985807 | 8985842 | 2 | 18 | 36 | TG   | 15 | 9  |
| 19206 | 2 | 8988966 | 8988985 | 2 | 10 | 20 | AC   | 21 | 8  |
| 19207 | 2 | 8989006 | 8989019 | 2 | 7  | 14 | CA   | 24 | 3  |
| 19208 | 2 | 8991229 | 8991258 | 2 | 15 | 30 | CT   | 15 | 9  |
| 19213 | 2 | 8994132 | 8994157 | 2 | 13 | 26 | AC   | 11 | 6  |
| 19216 | 2 | 8996747 | 8996766 | 2 | 10 | 20 | CA   | 9  | 5  |
| 19217 | 2 | 8997014 | 8997031 | 3 | 6  | 18 | ACC  | 12 | 3  |
| 19219 | 2 | 8997090 | 8997105 | 2 | 8  | 16 | AC   | 16 | 3  |
| 19220 | 2 | 8997479 | 8997502 | 3 | 8  | 24 | CTC  | 16 | 3  |
| 19222 | 2 | 8997664 | 8997703 | 2 | 20 | 40 | GA   | 7  | 8  |
| 19223 | 2 | 8997891 | 8997917 | 3 | 9  | 27 | CCT  | 9  | 4  |
| 19228 | 2 | 9001442 | 9001453 | 2 | 6  | 12 | TG   | 18 | 3  |
| 19234 | 2 | 9002465 | 9002490 | 2 | 13 | 26 | GT   | 14 | 6  |
| 19235 | 2 | 9002615 | 9002638 | 2 | 12 | 24 | TC   | 8  | 5  |
| 19240 | 2 | 9005181 | 9005196 | 2 | 8  | 16 | AC   | 23 | 11 |
| 19241 | 2 | 9005255 | 9005278 | 4 | 6  | 24 | CTTC | 24 | 3  |
| 19242 | 2 | 9005411 | 9005422 | 2 | 6  | 12 | GT   | 22 | 5  |
| 19243 | 2 | 9005427 | 9005440 | 2 | 7  | 14 | GT   | 23 | 3  |
| 19249 | 2 | 9010644 | 9010655 | 2 | 6  | 12 | CA   | 6  | 4  |
| 19250 | 2 | 9010746 | 9010763 | 2 | 9  | 18 | CA   | 18 | 10 |
| 19251 | 2 | 9011036 | 9011049 | 2 | 7  | 14 | TG   | 23 | 4  |
| 19252 | 2 | 9011696 | 9011723 | 2 | 14 | 28 | TG   | 20 | 7  |
| 19257 | 2 | 9015061 | 9015075 | 3 | 5  | 15 | CAG  | 24 | 4  |
| 19259 | 2 | 9016185 | 9016208 | 2 | 12 | 24 | GT   | 16 | 11 |
| 19263 | 2 | 9022645 | 9022656 | 2 | 6  | 12 | CA   | 20 | 9  |
| 19265 | 2 | 9023335 | 9023349 | 3 | 5  | 15 | GGA  | 16 | 3  |
| 19271 | 2 | 9029836 | 9029847 | 2 | 6  | 12 | AT   | 16 | 3  |
| 19272 | 2 | 9030552 | 9030577 | 2 | 13 | 26 | TG   | 15 | 5  |
| 19273 | 2 | 9030686 | 9030703 | 2 | 9  | 18 | TG   | 18 | 4  |
| 19276 | 2 | 9035322 | 9035336 | 3 | 5  | 15 | AGG  | 27 | 4  |
| 19277 | 2 | 9037689 | 9037734 | 2 | 23 | 46 | CA   | 8  | 6  |
| 19286 | 2 | 9045707 | 9045740 | 2 | 17 | 34 | TC   | 12 | 12 |
| 19294 | 2 | 9052264 | 9052275 | 2 | 6  | 12 | AG   | 18 | 7  |
| 19297 | 2 | 9055664 | 9055683 | 2 | 10 | 20 | AG   | 19 | 5  |
| 19298 | 2 | 9058141 | 9058156 | 4 | 4  | 16 | TTCT | 15 | 4  |
| 19300 | 2 | 9059674 | 9059691 | 3 | 6  | 18 | AAT  | 12 | 3  |
| 19301 | 2 | 9061780 | 9061799 | 2 | 10 | 20 | GT   | 16 | 5  |
| 19304 | 2 | 9062622 | 9062645 | 2 | 12 | 24 | TG   | 9  | 10 |
| 19305 | 2 | 9063070 | 9063083 | 2 | 7  | 14 | AG   | 19 | 3  |
| 19306 | 2 | 9063343 | 9063372 | 2 | 15 | 30 | TG   | 19 | 9  |
| 19307 | 2 | 9063439 | 9063452 | 2 | 7  | 14 | GT   | 19 | 5  |

|       |   |         |         |   |    |    |      |    |    |
|-------|---|---------|---------|---|----|----|------|----|----|
| 19310 | 2 | 9070340 | 9070365 | 2 | 13 | 26 | GA   | 9  | 8  |
| 19314 | 2 | 9077706 | 9077723 | 2 | 9  | 18 | CA   | 21 | 9  |
| 19315 | 2 | 9079980 | 9080013 | 2 | 17 | 34 | TG   | 7  | 8  |
| 19317 | 2 | 9080137 | 9080154 | 2 | 9  | 18 | CA   | 22 | 10 |
| 19318 | 2 | 9081121 | 9081142 | 2 | 11 | 22 | CA   | 19 | 8  |
| 19320 | 2 | 9081256 | 9081273 | 2 | 9  | 18 | TG   | 8  | 5  |
| 19321 | 2 | 9082499 | 9082518 | 2 | 10 | 20 | TG   | 16 | 6  |
| 19325 | 2 | 9085515 | 9085526 | 2 | 6  | 12 | GA   | 17 | 5  |
| 19326 | 2 | 9085566 | 9085579 | 2 | 7  | 14 | GA   | 13 | 3  |
| 19328 | 2 | 9089526 | 9089541 | 2 | 8  | 16 | CA   | 16 | 4  |
| 19329 | 2 | 9091422 | 9091459 | 2 | 19 | 38 | TG   | 6  | 6  |
| 19330 | 2 | 9091582 | 9091619 | 2 | 19 | 38 | CA   | 7  | 4  |
| 19338 | 2 | 9095872 | 9095911 | 2 | 20 | 40 | TG   | 10 | 10 |
| 19339 | 2 | 9097265 | 9097284 | 2 | 10 | 20 | TG   | 23 | 12 |
| 19342 | 2 | 9104727 | 9104742 | 2 | 8  | 16 | TG   | 13 | 8  |
| 19343 | 2 | 9105070 | 9105099 | 2 | 15 | 30 | GT   | 27 | 9  |
| 19347 | 2 | 9110645 | 9110670 | 2 | 13 | 26 | CT   | 16 | 3  |
| 19352 | 2 | 9122647 | 9122662 | 2 | 8  | 16 | TA   | 12 | 5  |
| 19359 | 2 | 9127169 | 9127184 | 2 | 8  | 16 | AC   | 21 | 3  |
| 19364 | 2 | 9129455 | 9129474 | 2 | 10 | 20 | GT   | 23 | 4  |
| 19366 | 2 | 9131352 | 9131373 | 2 | 11 | 22 | GT   | 10 | 5  |
| 19367 | 2 | 9131570 | 9131599 | 2 | 15 | 30 | TG   | 21 | 7  |
| 19368 | 2 | 9131716 | 9131735 | 2 | 10 | 20 | TG   | 18 | 7  |
| 19376 | 2 | 9139449 | 9139470 | 2 | 11 | 22 | AC   | 15 | 6  |
| 19379 | 2 | 9154300 | 9154345 | 2 | 23 | 46 | CA   | 7  | 8  |
| 19381 | 2 | 9167032 | 9167047 | 2 | 8  | 16 | AC   | 16 | 5  |
| 19382 | 2 | 9167493 | 9167506 | 2 | 7  | 14 | TG   | 26 | 3  |
| 19388 | 2 | 9180349 | 9180396 | 2 | 24 | 48 | TG   | 8  | 9  |
| 19389 | 2 | 9181596 | 9181617 | 2 | 11 | 22 | CA   | 22 | 7  |
| 19394 | 2 | 9197090 | 9197104 | 3 | 5  | 15 | CTG  | 29 | 3  |
| 19395 | 2 | 9200729 | 9200744 | 2 | 8  | 16 | AC   | 14 | 7  |
| 19396 | 2 | 9201281 | 9201294 | 2 | 7  | 14 | GT   | 29 | 3  |
| 19401 | 2 | 9205836 | 9205862 | 3 | 9  | 27 | AAT  | 12 | 5  |
| 19406 | 2 | 9213731 | 9213752 | 2 | 11 | 22 | GT   | 21 | 8  |
| 19413 | 2 | 9221594 | 9221609 | 4 | 4  | 16 | GCAT | 27 | 3  |
| 19421 | 2 | 9224239 | 9224254 | 2 | 8  | 16 | CA   | 9  | 3  |
| 19427 | 2 | 9225416 | 9225437 | 2 | 11 | 22 | GA   | 11 | 8  |
| 19429 | 2 | 9225864 | 9225883 | 2 | 10 | 20 | GT   | 19 | 5  |
| 19431 | 2 | 9227720 | 9227753 | 2 | 17 | 34 | AC   | 13 | 12 |
| 19439 | 2 | 9234537 | 9234576 | 2 | 20 | 40 | GT   | 15 | 10 |
| 19440 | 2 | 9234749 | 9234776 | 2 | 14 | 28 | AC   | 12 | 6  |
| 19443 | 2 | 9235257 | 9235282 | 2 | 13 | 26 | CA   | 13 | 7  |
| 19445 | 2 | 9241221 | 9241240 | 2 | 10 | 20 | CA   | 14 | 5  |
| 19449 | 2 | 9245951 | 9245976 | 2 | 13 | 26 | CA   | 10 | 9  |
| 19457 | 2 | 9249991 | 9250002 | 2 | 6  | 12 | CA   | 25 | 3  |
| 19463 | 2 | 9257086 | 9257107 | 2 | 11 | 22 | CA   | 22 | 8  |
| 19464 | 2 | 9257969 | 9258016 | 2 | 24 | 48 | TG   | 7  | 9  |
| 19465 | 2 | 9258154 | 9258165 | 2 | 6  | 12 | AC   | 27 | 3  |
| 19467 | 2 | 9261198 | 9261219 | 2 | 11 | 22 | GT   | 22 | 9  |
| 19468 | 2 | 9261729 | 9261762 | 2 | 17 | 34 | CA   | 9  | 6  |
| 19470 | 2 | 9266018 | 9266029 | 2 | 6  | 12 | GT   | 19 | 3  |

|       |   |         |         |   |    |    |      |    |    |
|-------|---|---------|---------|---|----|----|------|----|----|
| 19471 | 2 | 9267022 | 9267049 | 4 | 7  | 28 | TTTA | 12 | 9  |
| 19474 | 2 | 9270642 | 9270661 | 2 | 10 | 20 | GT   | 14 | 5  |
| 19476 | 2 | 9277777 | 9277790 | 2 | 7  | 14 | AC   | 29 | 5  |
| 19480 | 2 | 9278585 | 9278622 | 2 | 19 | 38 | GT   | 11 | 14 |
| 19481 | 2 | 9280208 | 9280231 | 2 | 12 | 24 | TG   | 23 | 6  |
| 19482 | 2 | 9281574 | 9281611 | 2 | 19 | 38 | GA   | 6  | 9  |
| 19483 | 2 | 9285117 | 9285130 | 2 | 7  | 14 | AC   | 19 | 3  |
| 19486 | 2 | 9292670 | 9292703 | 2 | 17 | 34 | TG   | 10 | 7  |
| 19488 | 2 | 9292890 | 9292913 | 2 | 12 | 24 | AC   | 22 | 4  |
| 19499 | 2 | 9303422 | 9303469 | 2 | 24 | 48 | TG   | 7  | 7  |
| 19500 | 2 | 9306502 | 9306513 | 2 | 6  | 12 | AT   | 10 | 4  |
| 19504 | 2 | 9319369 | 9319394 | 2 | 13 | 26 | GT   | 10 | 11 |
| 19508 | 2 | 9326078 | 9326101 | 2 | 12 | 24 | AC   | 20 | 5  |
| 19517 | 2 | 9337081 | 9337104 | 2 | 12 | 24 | GT   | 16 | 3  |
| 19527 | 2 | 9342913 | 9342950 | 2 | 19 | 38 | TG   | 6  | 5  |
| 19529 | 2 | 9343155 | 9343194 | 2 | 20 | 40 | TG   | 6  | 7  |
| 19530 | 2 | 9343314 | 9343345 | 2 | 16 | 32 | GT   | 9  | 6  |
| 19533 | 2 | 9346344 | 9346357 | 2 | 7  | 14 | GT   | 6  | 3  |
| 19534 | 2 | 9346359 | 9346376 | 2 | 9  | 18 | TG   | 13 | 8  |
| 19546 | 2 | 9394837 | 9394848 | 2 | 6  | 12 | CA   | 27 | 3  |
| 19559 | 2 | 9419066 | 9419093 | 2 | 14 | 28 | TC   | 17 | 6  |
| 19571 | 2 | 9441287 | 9441308 | 2 | 11 | 22 | AC   | 13 | 3  |
| 19572 | 2 | 9445448 | 9445477 | 2 | 15 | 30 | TG   | 12 | 8  |
| 19586 | 2 | 9469504 | 9469515 | 2 | 6  | 12 | TG   | 13 | 3  |
| 19590 | 2 | 9497499 | 9497532 | 2 | 17 | 34 | TG   | 9  | 7  |
| 19594 | 2 | 9507377 | 9507427 | 3 | 17 | 51 | TAC  | 6  | 9  |
| 19597 | 2 | 9518071 | 9518098 | 2 | 14 | 28 | TG   | 10 | 8  |
| 19601 | 2 | 9543266 | 9543287 | 2 | 11 | 22 | CA   | 19 | 14 |
| 19604 | 2 | 9544719 | 9544734 | 4 | 4  | 16 | CAGG | 17 | 10 |
| 19609 | 2 | 9567995 | 9568028 | 2 | 17 | 34 | AC   | 12 | 7  |
| 19610 | 2 | 9570965 | 9570980 | 2 | 8  | 16 | TG   | 27 | 4  |
| 19612 | 2 | 9571279 | 9571294 | 2 | 8  | 16 | GT   | 9  | 5  |
| 19613 | 2 | 9573244 | 9573287 | 2 | 22 | 44 | GT   | 12 | 14 |
| 19617 | 2 | 9594077 | 9594088 | 2 | 6  | 12 | AC   | 29 | 4  |
| 19619 | 2 | 9607131 | 9607150 | 2 | 10 | 20 | GT   | 18 | 7  |
| 19621 | 2 | 9612566 | 9612595 | 3 | 10 | 30 | CAA  | 23 | 7  |
| 19626 | 2 | 9626316 | 9626330 | 3 | 5  | 15 | GGT  | 23 | 3  |
| 19627 | 2 | 9628338 | 9628349 | 2 | 6  | 12 | AC   | 15 | 3  |
| 19633 | 2 | 9641289 | 9641310 | 2 | 11 | 22 | CA   | 16 | 12 |
| 19639 | 2 | 9651400 | 9651414 | 3 | 5  | 15 | GCT  | 23 | 5  |
| 19642 | 2 | 9657904 | 9657915 | 2 | 6  | 12 | TA   | 16 | 5  |
| 19643 | 2 | 9658947 | 9658960 | 2 | 7  | 14 | TG   | 14 | 7  |
| 19648 | 2 | 9668744 | 9668765 | 2 | 11 | 22 | CA   | 11 | 11 |
| 19653 | 2 | 9676248 | 9676265 | 3 | 6  | 18 | GAA  | 27 | 4  |
| 19656 | 2 | 9682342 | 9682353 | 2 | 6  | 12 | TC   | 21 | 3  |
| 19658 | 2 | 9682866 | 9682885 | 2 | 10 | 20 | AC   | 6  | 6  |
| 19666 | 2 | 9697659 | 9697688 | 2 | 15 | 30 | TG   | 12 | 9  |
| 19673 | 2 | 9709490 | 9709503 | 2 | 7  | 14 | AG   | 27 | 3  |
| 19674 | 2 | 9713583 | 9713614 | 2 | 16 | 32 | AG   | 9  | 7  |
| 19676 | 2 | 9715244 | 9715259 | 2 | 8  | 16 | TG   | 24 | 3  |
| 19679 | 2 | 9721402 | 9721425 | 2 | 12 | 24 | TG   | 23 | 8  |

|       |   |         |         |   |    |    |      |    |    |
|-------|---|---------|---------|---|----|----|------|----|----|
| 19683 | 2 | 9729796 | 9729827 | 2 | 16 | 32 | TC   | 23 | 8  |
| 19684 | 2 | 9730212 | 9730225 | 2 | 7  | 14 | TG   | 23 | 3  |
| 19688 | 2 | 9738334 | 9738351 | 2 | 9  | 18 | CA   | 11 | 7  |
| 19689 | 2 | 9739931 | 9739954 | 3 | 8  | 24 | CTG  | 32 | 7  |
| 19690 | 2 | 9742296 | 9742307 | 2 | 6  | 12 | AC   | 25 | 4  |
| 19695 | 2 | 9746360 | 9746380 | 3 | 7  | 21 | CCT  | 32 | 7  |
| 19704 | 2 | 9764541 | 9764560 | 2 | 10 | 20 | AC   | 27 | 4  |
| 19706 | 2 | 9766937 | 9766990 | 2 | 27 | 54 | TG   | 6  | 9  |
| 19707 | 2 | 9769506 | 9769517 | 2 | 6  | 12 | GT   | 20 | 4  |
| 19708 | 2 | 9771349 | 9771366 | 2 | 9  | 18 | CA   | 31 | 5  |
| 19710 | 2 | 9775583 | 9775606 | 2 | 12 | 24 | TG   | 25 | 3  |
| 19711 | 2 | 9776319 | 9776330 | 2 | 6  | 12 | TC   | 17 | 6  |
| 19712 | 2 | 9776332 | 9776343 | 2 | 6  | 12 | CT   | 20 | 6  |
| 19714 | 2 | 9776508 | 9776521 | 2 | 7  | 14 | CA   | 27 | 5  |
| 19720 | 2 | 9784480 | 9784491 | 2 | 6  | 12 | GT   | 18 | 3  |
| 19723 | 2 | 9789104 | 9789135 | 4 | 8  | 32 | CCAT | 27 | 8  |
| 19726 | 2 | 9791087 | 9791110 | 2 | 12 | 24 | AC   | 11 | 11 |
| 19729 | 2 | 9796039 | 9796053 | 3 | 5  | 15 | TCT  | 21 | 3  |
| 19730 | 2 | 9796227 | 9796242 | 2 | 8  | 16 | GT   | 11 | 9  |
| 19731 | 2 | 9796568 | 9796581 | 2 | 7  | 14 | TG   | 33 | 6  |
| 19733 | 2 | 9798071 | 9798090 | 2 | 10 | 20 | AC   | 24 | 4  |
| 19734 | 2 | 9798239 | 9798256 | 2 | 9  | 18 | TG   | 26 | 6  |
| 19737 | 2 | 9801005 | 9801018 | 2 | 7  | 14 | TG   | 17 | 5  |
| 19739 | 2 | 9803113 | 9803140 | 2 | 14 | 28 | GT   | 14 | 15 |
| 19741 | 2 | 9804792 | 9804811 | 2 | 10 | 20 | GT   | 7  | 4  |
| 19745 | 2 | 9809112 | 9809133 | 2 | 11 | 22 | CA   | 16 | 6  |
| 19746 | 2 | 9809654 | 9809675 | 2 | 11 | 22 | CA   | 21 | 7  |
| 19748 | 2 | 9813036 | 9813083 | 2 | 24 | 48 | CT   | 8  | 12 |
| 19751 | 2 | 9817162 | 9817217 | 4 | 14 | 56 | AGAA | 17 | 14 |
| 19755 | 2 | 9821087 | 9821098 | 2 | 6  | 12 | AC   | 19 | 10 |
| 19758 | 2 | 9821236 | 9821263 | 2 | 14 | 28 | AC   | 11 | 10 |
| 19760 | 2 | 9821984 | 9822005 | 2 | 11 | 22 | AC   | 23 | 5  |
| 19765 | 2 | 9827743 | 9827758 | 2 | 8  | 16 | TC   | 17 | 10 |
| 19766 | 2 | 9827759 | 9827776 | 2 | 9  | 18 | AC   | 18 | 9  |
| 19767 | 2 | 9828208 | 9828240 | 3 | 11 | 33 | AGG  | 12 | 7  |
| 19771 | 2 | 9834860 | 9834891 | 2 | 16 | 32 | TG   | 14 | 9  |
| 19773 | 2 | 9842950 | 9842979 | 2 | 15 | 30 | CA   | 6  | 8  |
| 19774 | 2 | 9843081 | 9843094 | 2 | 7  | 14 | CT   | 15 | 4  |
| 19776 | 2 | 9845376 | 9845387 | 2 | 6  | 12 | TG   | 21 | 3  |
| 19777 | 2 | 9846558 | 9846575 | 2 | 9  | 18 | AC   | 15 | 4  |
| 19779 | 2 | 9849892 | 9849915 | 2 | 12 | 24 | GT   | 16 | 3  |
| 19784 | 2 | 9858668 | 9858693 | 2 | 13 | 26 | CA   | 16 | 10 |
| 19788 | 2 | 9861631 | 9861648 | 2 | 9  | 18 | GT   | 7  | 6  |
| 19789 | 2 | 9862394 | 9862411 | 2 | 9  | 18 | TG   | 13 | 12 |
| 19798 | 2 | 9880284 | 9880297 | 2 | 7  | 14 | TC   | 23 | 4  |
| 19814 | 2 | 9910768 | 9910791 | 4 | 6  | 24 | TTCC | 10 | 5  |
| 19815 | 2 | 9912193 | 9912214 | 2 | 11 | 22 | AC   | 11 | 8  |
| 19817 | 2 | 9915762 | 9915783 | 2 | 11 | 22 | TC   | 17 | 11 |
| 19818 | 2 | 9919490 | 9919505 | 4 | 4  | 16 | GACT | 30 | 4  |
| 19823 | 2 | 9921706 | 9921731 | 2 | 13 | 26 | CA   | 7  | 6  |
| 19829 | 2 | 9928288 | 9928301 | 2 | 7  | 14 | AC   | 23 | 5  |

|       |   |          |          |   |    |    |      |    |    |
|-------|---|----------|----------|---|----|----|------|----|----|
| 19830 | 2 | 9928467  | 9928482  | 2 | 8  | 16 | TG   | 22 | 3  |
| 19835 | 2 | 9935392  | 9935411  | 2 | 10 | 20 | CA   | 24 | 5  |
| 19842 | 2 | 9940956  | 9940983  | 2 | 14 | 28 | GA   | 12 | 14 |
| 19844 | 2 | 9941359  | 9941374  | 2 | 8  | 16 | AC   | 20 | 9  |
| 19849 | 2 | 9942461  | 9942480  | 2 | 10 | 20 | AG   | 6  | 3  |
| 19856 | 2 | 9945098  | 9945133  | 4 | 9  | 36 | TTCC | 23 | 9  |
| 19866 | 2 | 9949547  | 9949564  | 3 | 6  | 18 | GCT  | 25 | 5  |
| 19867 | 2 | 9950710  | 9950721  | 2 | 6  | 12 | TA   | 25 | 7  |
| 19877 | 2 | 9953301  | 9953352  | 4 | 13 | 52 | AAAG | 11 | 8  |
| 19878 | 2 | 9953581  | 9953606  | 2 | 13 | 26 | GT   | 7  | 8  |
| 19879 | 2 | 9954030  | 9954044  | 3 | 5  | 15 | AAT  | 12 | 3  |
| 19881 | 2 | 9954563  | 9954576  | 2 | 7  | 14 | GT   | 12 | 3  |
| 19886 | 2 | 9955529  | 9955568  | 2 | 20 | 40 | TG   | 19 | 14 |
| 19889 | 2 | 9959257  | 9959268  | 2 | 6  | 12 | GA   | 15 | 5  |
| 19895 | 2 | 9964281  | 9964298  | 2 | 9  | 18 | GT   | 12 | 7  |
| 19897 | 2 | 9967234  | 9967249  | 2 | 8  | 16 | TG   | 17 | 6  |
| 19901 | 2 | 9968494  | 9968529  | 4 | 9  | 36 | ATCC | 18 | 7  |
| 19906 | 2 | 9973503  | 9973524  | 2 | 11 | 22 | CA   | 8  | 8  |
| 19910 | 2 | 9978630  | 9978641  | 2 | 6  | 12 | CA   | 17 | 4  |
| 19911 | 2 | 9978643  | 9978658  | 2 | 8  | 16 | AC   | 15 | 5  |
| 19913 | 2 | 9980873  | 9980904  | 2 | 16 | 32 | CA   | 9  | 8  |
| 19914 | 2 | 9981452  | 9981475  | 2 | 12 | 24 | CA   | 18 | 8  |
| 19918 | 2 | 9986193  | 9986208  | 2 | 8  | 16 | CA   | 22 | 4  |
| 19919 | 2 | 9986352  | 9986365  | 2 | 7  | 14 | CA   | 23 | 3  |
| 19921 | 2 | 9987665  | 9987704  | 2 | 20 | 40 | GA   | 8  | 6  |
| 19923 | 2 | 9989719  | 9989730  | 2 | 6  | 12 | CA   | 25 | 3  |
| 19925 | 2 | 9990085  | 9990112  | 2 | 14 | 28 | CA   | 18 | 18 |
| 19926 | 2 | 9992104  | 9992121  | 2 | 9  | 18 | CT   | 19 | 9  |
| 19930 | 2 | 9992466  | 9992509  | 2 | 22 | 44 | GT   | 7  | 11 |
| 19931 | 2 | 9992813  | 9992830  | 2 | 9  | 18 | CA   | 22 | 8  |
| 19933 | 2 | 9993424  | 9993441  | 2 | 9  | 18 | TG   | 15 | 8  |
| 19934 | 2 | 9993585  | 9993596  | 2 | 6  | 12 | GT   | 20 | 8  |
| 19939 | 2 | 10001296 | 10001307 | 2 | 6  | 12 | GA   | 24 | 3  |
| 19953 | 2 | 10018302 | 10018325 | 3 | 8  | 24 | GAG  | 10 | 3  |
| 19957 | 2 | 10021386 | 10021399 | 2 | 7  | 14 | GT   | 30 | 5  |
| 19958 | 2 | 10021457 | 10021470 | 2 | 7  | 14 | CA   | 17 | 3  |
| 19964 | 2 | 10034651 | 10034670 | 4 | 5  | 20 | AAAC | 7  | 3  |
| 19967 | 2 | 10036245 | 10036271 | 3 | 9  | 27 | AGC  | 20 | 8  |
| 19970 | 2 | 10038127 | 10038144 | 2 | 9  | 18 | GA   | 16 | 6  |
| 19971 | 2 | 10038334 | 10038353 | 2 | 10 | 20 | GA   | 6  | 3  |
| 19972 | 2 | 10038702 | 10038721 | 2 | 10 | 20 | CT   | 21 | 5  |
| 19975 | 2 | 10041064 | 10041081 | 2 | 9  | 18 | AC   | 22 | 7  |
| 19976 | 2 | 10041503 | 10041520 | 2 | 9  | 18 | GT   | 20 | 15 |
| 19984 | 2 | 10050679 | 10050694 | 2 | 8  | 16 | TC   | 22 | 4  |
| 19985 | 2 | 10051502 | 10051517 | 2 | 8  | 16 | CA   | 16 | 11 |
| 19986 | 2 | 10051565 | 10051596 | 2 | 16 | 32 | AC   | 10 | 8  |
| 19987 | 2 | 10051848 | 10051865 | 2 | 9  | 18 | TG   | 18 | 6  |
| 19988 | 2 | 10051961 | 10051978 | 2 | 9  | 18 | GT   | 15 | 8  |
| 19989 | 2 | 10054016 | 10054043 | 2 | 14 | 28 | GT   | 11 | 9  |
| 19993 | 2 | 10057239 | 10057260 | 2 | 11 | 22 | CA   | 10 | 11 |
| 19997 | 2 | 10066902 | 10066935 | 2 | 17 | 34 | GA   | 14 | 8  |

|       |   |          |          |   |    |    |      |    |    |
|-------|---|----------|----------|---|----|----|------|----|----|
| 20005 | 2 | 10074002 | 10074043 | 2 | 21 | 42 | CA   | 19 | 12 |
| 20007 | 2 | 10075718 | 10075745 | 2 | 14 | 28 | GA   | 19 | 4  |
| 20009 | 2 | 10082646 | 10082671 | 2 | 13 | 26 | GA   | 6  | 5  |
| 20020 | 2 | 10101831 | 10101848 | 2 | 9  | 18 | AC   | 20 | 4  |
| 20021 | 2 | 10102140 | 10102169 | 2 | 15 | 30 | TG   | 12 | 11 |
| 20030 | 2 | 10110952 | 10110971 | 2 | 10 | 20 | GT   | 20 | 10 |
| 20031 | 2 | 10111114 | 10111139 | 2 | 13 | 26 | TG   | 19 | 10 |
| 20032 | 2 | 10111329 | 10111360 | 2 | 16 | 32 | GT   | 18 | 10 |
| 20038 | 2 | 10115722 | 10115737 | 4 | 4  | 16 | CTGT | 26 | 8  |
| 20048 | 2 | 10118544 | 10118559 | 2 | 8  | 16 | CT   | 14 | 5  |
| 20050 | 2 | 10119761 | 10119781 | 3 | 7  | 21 | AAT  | 14 | 6  |
| 20053 | 2 | 10121819 | 10121862 | 4 | 11 | 44 | TTGA | 13 | 10 |
| 20058 | 2 | 10122595 | 10122609 | 3 | 5  | 15 | CCA  | 21 | 3  |
| 20059 | 2 | 10122781 | 10122804 | 3 | 8  | 24 | CAG  | 27 | 12 |
| 20061 | 2 | 10123338 | 10123355 | 3 | 6  | 18 | AGC  | 20 | 3  |
| 20063 | 2 | 10123930 | 10123943 | 2 | 7  | 14 | AC   | 16 | 4  |
| 20064 | 2 | 10124035 | 10124066 | 2 | 16 | 32 | TG   | 19 | 11 |
| 20075 | 2 | 10133142 | 10133167 | 2 | 13 | 26 | CA   | 21 | 14 |
| 20078 | 2 | 10133668 | 10133693 | 2 | 13 | 26 | AG   | 7  | 8  |
| 20095 | 2 | 10148430 | 10148465 | 2 | 18 | 36 | CA   | 6  | 11 |
| 20096 | 2 | 10148629 | 10148656 | 2 | 14 | 28 | CA   | 14 | 9  |
| 20098 | 2 | 10150413 | 10150424 | 2 | 6  | 12 | TC   | 26 | 4  |
| 20099 | 2 | 10150998 | 10151015 | 2 | 9  | 18 | AC   | 18 | 6  |
| 20100 | 2 | 10151099 | 10151114 | 2 | 8  | 16 | AC   | 24 | 3  |
| 20104 | 2 | 10154597 | 10154624 | 2 | 14 | 28 | TG   | 10 | 8  |
| 20113 | 2 | 10163483 | 10163504 | 2 | 11 | 22 | CA   | 18 | 5  |
| 20115 | 2 | 10164055 | 10164068 | 2 | 7  | 14 | AC   | 24 | 4  |
| 20116 | 2 | 10164193 | 10164220 | 2 | 14 | 28 | GT   | 13 | 13 |
| 20117 | 2 | 10164376 | 10164395 | 2 | 10 | 20 | GT   | 13 | 10 |
| 20119 | 2 | 10164624 | 10164657 | 2 | 17 | 34 | AC   | 16 | 5  |
| 20124 | 2 | 10175299 | 10175312 | 2 | 7  | 14 | GT   | 26 | 5  |
| 20126 | 2 | 10181966 | 10181993 | 2 | 14 | 28 | AC   | 9  | 8  |
| 20127 | 2 | 10182528 | 10182545 | 2 | 9  | 18 | GT   | 19 | 5  |
| 20132 | 2 | 10188202 | 10188221 | 2 | 10 | 20 | AC   | 22 | 7  |
| 20135 | 2 | 10189756 | 10189815 | 4 | 15 | 60 | TATC | 18 | 9  |
| 20136 | 2 | 10190865 | 10190878 | 2 | 7  | 14 | TC   | 19 | 6  |
| 20142 | 2 | 10194816 | 10194833 | 2 | 9  | 18 | AC   | 9  | 4  |
| 20166 | 2 | 10211379 | 10211400 | 2 | 11 | 22 | CA   | 7  | 5  |
| 20168 | 2 | 10214922 | 10214941 | 2 | 10 | 20 | TG   | 12 | 10 |
| 20169 | 2 | 10220053 | 10220064 | 2 | 6  | 12 | TG   | 12 | 4  |
| 20171 | 2 | 10220469 | 10220492 | 2 | 12 | 24 | AC   | 17 | 5  |
| 20178 | 2 | 10228178 | 10228191 | 2 | 7  | 14 | GT   | 34 | 6  |
| 20182 | 2 | 10230925 | 10230950 | 2 | 13 | 26 | CA   | 19 | 10 |
| 20183 | 2 | 10232492 | 10232507 | 2 | 8  | 16 | TG   | 22 | 8  |
| 20184 | 2 | 10232713 | 10232746 | 2 | 17 | 34 | GT   | 12 | 11 |
| 20185 | 2 | 10233564 | 10233581 | 2 | 9  | 18 | GT   | 22 | 7  |
| 20191 | 2 | 10236023 | 10236058 | 2 | 18 | 36 | AC   | 17 | 10 |
| 20195 | 2 | 10241198 | 10241225 | 2 | 14 | 28 | GT   | 10 | 9  |
| 20196 | 2 | 10242225 | 10242254 | 2 | 15 | 30 | AC   | 8  | 8  |
| 20202 | 2 | 10244687 | 10244714 | 2 | 14 | 28 | TG   | 7  | 7  |
| 20207 | 2 | 10247692 | 10247717 | 2 | 13 | 26 | AG   | 24 | 8  |

|       |   |          |          |   |    |    |      |    |    |
|-------|---|----------|----------|---|----|----|------|----|----|
| 20214 | 2 | 10259226 | 10259253 | 2 | 14 | 28 | GT   | 11 | 8  |
| 20218 | 2 | 10265543 | 10265558 | 2 | 8  | 16 | TG   | 19 | 7  |
| 20221 | 2 | 10266239 | 10266254 | 4 | 4  | 16 | GGAG | 25 | 4  |
| 20230 | 2 | 10268395 | 10268414 | 4 | 5  | 20 | TTTC | 15 | 9  |
| 20232 | 2 | 10269101 | 10269112 | 2 | 6  | 12 | AT   | 16 | 8  |
| 20236 | 2 | 10272107 | 10272142 | 3 | 12 | 36 | ATT  | 6  | 5  |
| 20238 | 2 | 10274102 | 10274125 | 3 | 8  | 24 | CAG  | 25 | 5  |
| 20239 | 2 | 10274227 | 10274247 | 3 | 7  | 21 | GCC  | 25 | 8  |
| 20244 | 2 | 10276300 | 10276329 | 2 | 15 | 30 | TG   | 13 | 11 |
| 20246 | 2 | 10277924 | 10277941 | 2 | 9  | 18 | CA   | 13 | 5  |
| 20247 | 2 | 10277986 | 10278031 | 2 | 23 | 46 | CA   | 7  | 12 |
| 20251 | 2 | 10284631 | 10284644 | 2 | 7  | 14 | CA   | 16 | 7  |
| 20253 | 2 | 10286520 | 10286543 | 2 | 12 | 24 | GT   | 15 | 4  |
| 20257 | 2 | 10287095 | 10287106 | 2 | 6  | 12 | TG   | 23 | 6  |
| 20263 | 2 | 10291833 | 10291864 | 2 | 16 | 32 | TG   | 18 | 10 |
| 20267 | 2 | 10292146 | 10292175 | 2 | 15 | 30 | GT   | 10 | 7  |
| 20270 | 2 | 10294383 | 10294412 | 2 | 15 | 30 | GT   | 10 | 9  |
| 20272 | 2 | 10294614 | 10294639 | 2 | 13 | 26 | TG   | 10 | 8  |
| 20274 | 2 | 10299273 | 10299296 | 2 | 12 | 24 | GT   | 25 | 16 |
| 20280 | 2 | 10305291 | 10305308 | 3 | 6  | 18 | ATT  | 9  | 3  |
| 20281 | 2 | 10306135 | 10306156 | 2 | 11 | 22 | GT   | 24 | 6  |
| 20283 | 2 | 10307171 | 10307188 | 2 | 9  | 18 | AC   | 23 | 4  |
| 20286 | 2 | 10309176 | 10309207 | 2 | 16 | 32 | TC   | 7  | 7  |
| 20288 | 2 | 10310972 | 10310983 | 2 | 6  | 12 | GT   | 24 | 5  |
| 20290 | 2 | 10313643 | 10313656 | 2 | 7  | 14 | CA   | 22 | 9  |
| 20301 | 2 | 10328130 | 10328141 | 2 | 6  | 12 | TG   | 25 | 5  |
| 20305 | 2 | 10329971 | 10329998 | 2 | 14 | 28 | CA   | 20 | 7  |
| 20317 | 2 | 10357155 | 10357172 | 2 | 9  | 18 | TG   | 29 | 3  |
| 20319 | 2 | 10361220 | 10361245 | 2 | 13 | 26 | TG   | 12 | 8  |
| 20323 | 2 | 10382481 | 10382496 | 4 | 4  | 16 | GGAT | 24 | 4  |
| 20324 | 2 | 10383887 | 10383898 | 2 | 6  | 12 | AT   | 7  | 4  |
| 20331 | 2 | 10390237 | 10390252 | 4 | 4  | 16 | AAAC | 18 | 8  |
| 20335 | 2 | 10398087 | 10398102 | 2 | 8  | 16 | TC   | 28 | 5  |
| 20338 | 2 | 10404866 | 10404905 | 2 | 20 | 40 | GA   | 6  | 3  |
| 20339 | 2 | 10405011 | 10405022 | 2 | 6  | 12 | GT   | 13 | 3  |
| 20341 | 2 | 10406118 | 10406151 | 2 | 17 | 34 | TG   | 17 | 13 |
| 20345 | 2 | 10412603 | 10412617 | 3 | 5  | 15 | CTG  | 25 | 3  |
| 20346 | 2 | 10413387 | 10413420 | 2 | 17 | 34 | TG   | 8  | 6  |
| 20347 | 2 | 10413469 | 10413488 | 2 | 10 | 20 | AC   | 10 | 4  |
| 20354 | 2 | 10427185 | 10427208 | 2 | 12 | 24 | GT   | 17 | 5  |
| 20355 | 2 | 10427358 | 10427375 | 2 | 9  | 18 | CA   | 13 | 11 |
| 20357 | 2 | 10431271 | 10431308 | 2 | 19 | 38 | CT   | 6  | 8  |
| 20358 | 2 | 10431482 | 10431545 | 4 | 16 | 64 | AGAT | 12 | 11 |
| 20359 | 2 | 10431622 | 10431653 | 2 | 16 | 32 | CA   | 12 | 12 |
| 20360 | 2 | 10434224 | 10434251 | 2 | 14 | 28 | CT   | 16 | 13 |
| 20386 | 2 | 10455261 | 10455272 | 2 | 6  | 12 | CA   | 25 | 6  |
| 20387 | 2 | 10457433 | 10457446 | 2 | 7  | 14 | AC   | 24 | 4  |
| 20388 | 2 | 10464025 | 10464036 | 2 | 6  | 12 | GT   | 10 | 3  |
| 20390 | 2 | 10465668 | 10465685 | 2 | 9  | 18 | AC   | 19 | 7  |
| 20408 | 2 | 10486108 | 10486135 | 2 | 14 | 28 | TG   | 12 | 6  |
| 20409 | 2 | 10492958 | 10492975 | 2 | 9  | 18 | CA   | 25 | 7  |



|       |   |          |          |   |    |    |      |    |    |
|-------|---|----------|----------|---|----|----|------|----|----|
| 20410 | 2 | 10493138 | 10493153 | 2 | 8  | 16 | CA   | 17 | 5  |
| 20415 | 2 | 10502114 | 10502143 | 2 | 15 | 30 | TG   | 9  | 9  |
| 20418 | 2 | 10503166 | 10503228 | 3 | 21 | 63 | AGA  | 18 | 12 |
| 20419 | 2 | 10506058 | 10506069 | 2 | 6  | 12 | TG   | 20 | 3  |
| 20421 | 2 | 10510941 | 10510974 | 2 | 17 | 34 | GA   | 9  | 7  |
| 20422 | 2 | 10512542 | 10512559 | 3 | 6  | 18 | TGT  | 25 | 3  |
| 20423 | 2 | 10512933 | 10512958 | 2 | 13 | 26 | GT   | 17 | 5  |
| 20425 | 2 | 10514725 | 10514740 | 4 | 4  | 16 | AAAC | 22 | 5  |
| 20426 | 2 | 10514989 | 10515018 | 2 | 15 | 30 | AC   | 12 | 7  |
| 20428 | 2 | 10515154 | 10515187 | 2 | 17 | 34 | AC   | 11 | 12 |
| 20434 | 2 | 10521559 | 10521574 | 4 | 4  | 16 | AAAC | 15 | 3  |
| 20437 | 2 | 10522740 | 10522773 | 2 | 17 | 34 | CT   | 11 | 6  |
| 20438 | 2 | 10529225 | 10529244 | 2 | 10 | 20 | CA   | 19 | 4  |
| 20453 | 2 | 10546533 | 10546554 | 2 | 11 | 22 | GT   | 10 | 6  |
| 20455 | 2 | 10552833 | 10552844 | 2 | 6  | 12 | TG   | 15 | 3  |
| 20458 | 2 | 10568366 | 10568381 | 4 | 4  | 16 | GAAA | 30 | 3  |
| 20459 | 2 | 10571336 | 10571371 | 2 | 18 | 36 | TC   | 12 | 7  |
| 20462 | 2 | 10571762 | 10571787 | 2 | 13 | 26 | CT   | 10 | 4  |
| 20463 | 2 | 10575092 | 10575127 | 2 | 18 | 36 | AC   | 10 | 10 |
| 20466 | 2 | 10575433 | 10575446 | 2 | 7  | 14 | TG   | 18 | 4  |
| 20471 | 2 | 10581298 | 10581327 | 2 | 15 | 30 | CA   | 18 | 8  |
| 20473 | 2 | 10586235 | 10586248 | 2 | 7  | 14 | TG   | 14 | 3  |
| 20475 | 2 | 10586471 | 10586502 | 2 | 16 | 32 | GT   | 13 | 10 |
| 20476 | 2 | 10586615 | 10586662 | 4 | 12 | 48 | AAAG | 17 | 6  |
| 20480 | 2 | 10595622 | 10595635 | 2 | 7  | 14 | AG   | 26 | 6  |
| 20481 | 2 | 10597141 | 10597164 | 2 | 12 | 24 | TG   | 14 | 8  |
| 20486 | 2 | 10602138 | 10602153 | 4 | 4  | 16 | TGGT | 25 | 3  |
| 20490 | 2 | 10603488 | 10603515 | 2 | 14 | 28 | AC   | 14 | 3  |
| 20491 | 2 | 10606151 | 10606184 | 2 | 17 | 34 | CA   | 11 | 6  |
| 20492 | 2 | 10606301 | 10606358 | 2 | 29 | 58 | GT   | 10 | 12 |
| 20497 | 2 | 10607602 | 10607631 | 2 | 15 | 30 | CA   | 24 | 13 |
| 20499 | 2 | 10611931 | 10611956 | 2 | 13 | 26 | AC   | 20 | 4  |
| 20503 | 2 | 10612764 | 10612777 | 2 | 7  | 14 | CT   | 24 | 4  |
| 20504 | 2 | 10612916 | 10612937 | 2 | 11 | 22 | GT   | 18 | 4  |
| 20507 | 2 | 10615731 | 10615762 | 4 | 8  | 32 | TTCT | 8  | 6  |
| 20510 | 2 | 10617288 | 10617299 | 2 | 6  | 12 | CA   | 19 | 6  |
| 20511 | 2 | 10620335 | 10620350 | 2 | 8  | 16 | AC   | 23 | 5  |
| 20515 | 2 | 10622789 | 10622802 | 2 | 7  | 14 | TG   | 29 | 3  |
| 20516 | 2 | 10622919 | 10622954 | 2 | 18 | 36 | TG   | 14 | 15 |
| 20519 | 2 | 10625002 | 10625027 | 2 | 13 | 26 | TG   | 17 | 7  |
| 20520 | 2 | 10627471 | 10627486 | 4 | 4  | 16 | AGAA | 19 | 7  |
| 20523 | 2 | 10628963 | 10628980 | 2 | 9  | 18 | CT   | 20 | 4  |
| 20529 | 2 | 10638598 | 10638629 | 2 | 16 | 32 | AC   | 19 | 10 |
| 20534 | 2 | 10646808 | 10646835 | 2 | 14 | 28 | AC   | 16 | 5  |
| 20541 | 2 | 10652970 | 10652999 | 2 | 15 | 30 | TG   | 18 | 9  |
| 20543 | 2 | 10654441 | 10654454 | 2 | 7  | 14 | AC   | 21 | 3  |
| 20544 | 2 | 10655837 | 10655866 | 2 | 15 | 30 | AG   | 14 | 8  |
| 20545 | 2 | 10656198 | 10656215 | 2 | 9  | 18 | TG   | 23 | 4  |
| 20546 | 2 | 10656328 | 10656355 | 2 | 14 | 28 | CA   | 15 | 6  |
| 20547 | 2 | 10659316 | 10659337 | 2 | 11 | 22 | CA   | 20 | 6  |
| 20552 | 2 | 10664560 | 10664583 | 2 | 12 | 24 | TG   | 14 | 7  |

|       |   |          |          |   |    |    |      |    |    |
|-------|---|----------|----------|---|----|----|------|----|----|
| 20556 | 2 | 10667784 | 10667805 | 2 | 11 | 22 | GT   | 16 | 6  |
| 20559 | 2 | 10671343 | 10671370 | 2 | 14 | 28 | CA   | 16 | 8  |
| 20560 | 2 | 10671548 | 10671567 | 2 | 10 | 20 | CA   | 25 | 8  |
| 20561 | 2 | 10671673 | 10671686 | 2 | 7  | 14 | AC   | 24 | 9  |
| 20569 | 2 | 10685679 | 10685692 | 2 | 7  | 14 | CA   | 28 | 3  |
| 20570 | 2 | 10685900 | 10685915 | 4 | 4  | 16 | TTTA | 16 | 4  |
| 20571 | 2 | 10686949 | 10686960 | 2 | 6  | 12 | GT   | 28 | 5  |
| 20573 | 2 | 10687251 | 10687274 | 2 | 12 | 24 | AC   | 15 | 5  |
| 20574 | 2 | 10687444 | 10687471 | 2 | 14 | 28 | CA   | 9  | 5  |
| 20576 | 2 | 10689760 | 10689793 | 2 | 17 | 34 | CA   | 14 | 12 |
| 20580 | 2 | 10692379 | 10692404 | 2 | 13 | 26 | CA   | 10 | 8  |
| 20581 | 2 | 10692540 | 10692551 | 2 | 6  | 12 | GT   | 24 | 7  |
| 20586 | 2 | 10698367 | 10698382 | 2 | 8  | 16 | CA   | 24 | 3  |
| 20588 | 2 | 10698518 | 10698533 | 2 | 8  | 16 | AC   | 23 | 4  |
| 20593 | 2 | 10703853 | 10703874 | 2 | 11 | 22 | AC   | 14 | 9  |
| 20594 | 2 | 10703973 | 10703984 | 2 | 6  | 12 | TG   | 33 | 4  |
| 20605 | 2 | 10715722 | 10715737 | 2 | 8  | 16 | AC   | 21 | 11 |
| 20608 | 2 | 10715892 | 10715907 | 2 | 8  | 16 | GA   | 13 | 3  |
| 20613 | 2 | 10716322 | 10716341 | 2 | 10 | 20 | CA   | 24 | 7  |
| 20614 | 2 | 10717553 | 10717580 | 2 | 14 | 28 | CA   | 8  | 7  |
| 20616 | 2 | 10717718 | 10717741 | 2 | 12 | 24 | AC   | 22 | 9  |
| 20622 | 2 | 10722477 | 10722502 | 2 | 13 | 26 | AG   | 6  | 7  |
| 20623 | 2 | 10725020 | 10725033 | 2 | 7  | 14 | TA   | 20 | 3  |
| 20624 | 2 | 10725811 | 10725832 | 2 | 11 | 22 | AC   | 20 | 6  |
| 20625 | 2 | 10725910 | 10725929 | 2 | 10 | 20 | TC   | 8  | 6  |
| 20628 | 2 | 10728090 | 10728111 | 2 | 11 | 22 | AC   | 22 | 7  |
| 20632 | 2 | 10733030 | 10733055 | 2 | 13 | 26 | AC   | 18 | 6  |
| 20634 | 2 | 10737382 | 10737405 | 3 | 8  | 24 | CTC  | 20 | 5  |
| 20635 | 2 | 10737791 | 10737804 | 2 | 7  | 14 | AC   | 30 | 3  |
| 20636 | 2 | 10738489 | 10738508 | 2 | 10 | 20 | CA   | 19 | 5  |
| 20637 | 2 | 10738706 | 10738719 | 2 | 7  | 14 | GT   | 22 | 4  |
| 20638 | 2 | 10739044 | 10739071 | 2 | 14 | 28 | TG   | 11 | 12 |
| 20639 | 2 | 10740422 | 10740457 | 2 | 18 | 36 | AC   | 7  | 9  |
| 20640 | 2 | 10741164 | 10741183 | 2 | 10 | 20 | GT   | 19 | 18 |
| 20641 | 2 | 10741652 | 10741663 | 2 | 6  | 12 | AC   | 24 | 4  |
| 20646 | 2 | 10746328 | 10746351 | 2 | 12 | 24 | CA   | 22 | 5  |
| 20647 | 2 | 10751267 | 10751282 | 4 | 4  | 16 | TGTC | 31 | 6  |
| 20651 | 2 | 10756699 | 10756718 | 2 | 10 | 20 | AC   | 25 | 10 |
| 20652 | 2 | 10757774 | 10757794 | 3 | 7  | 21 | GCT  | 25 | 5  |
| 20654 | 2 | 10759338 | 10759349 | 2 | 6  | 12 | CT   | 21 | 3  |
| 20656 | 2 | 10760067 | 10760084 | 2 | 9  | 18 | CT   | 10 | 8  |
| 20658 | 2 | 10762745 | 10762756 | 2 | 6  | 12 | CA   | 34 | 3  |
| 20660 | 2 | 10764232 | 10764247 | 2 | 8  | 16 | CA   | 24 | 3  |
| 20664 | 2 | 10768936 | 10768951 | 4 | 4  | 16 | TTTG | 24 | 5  |
| 20665 | 2 | 10772191 | 10772204 | 2 | 7  | 14 | CT   | 21 | 7  |
| 20667 | 2 | 10773086 | 10773119 | 2 | 17 | 34 | GT   | 6  | 9  |
| 20669 | 2 | 10774153 | 10774178 | 2 | 13 | 26 | CT   | 6  | 6  |
| 20670 | 2 | 10774211 | 10774226 | 2 | 8  | 16 | CA   | 8  | 4  |
| 20684 | 2 | 10794582 | 10794599 | 2 | 9  | 18 | GT   | 8  | 9  |
| 20687 | 2 | 10796260 | 10796274 | 3 | 5  | 15 | CCT  | 15 | 3  |
| 20688 | 2 | 10796386 | 10796400 | 3 | 5  | 15 | AGC  | 22 | 4  |

|       |   |          |          |   |    |    |      |    |    |
|-------|---|----------|----------|---|----|----|------|----|----|
| 20690 | 2 | 10801661 | 10801678 | 2 | 9  | 18 | AC   | 24 | 5  |
| 20692 | 2 | 10802938 | 10802975 | 2 | 19 | 38 | AC   | 17 | 15 |
| 20693 | 2 | 10803415 | 10803432 | 2 | 9  | 18 | AC   | 11 | 4  |
| 20695 | 2 | 10804565 | 10804592 | 2 | 14 | 28 | GT   | 13 | 12 |
| 20696 | 2 | 10804675 | 10804698 | 2 | 12 | 24 | TG   | 14 | 11 |
| 20709 | 2 | 10816505 | 10816516 | 2 | 6  | 12 | GT   | 26 | 5  |
| 20713 | 2 | 10824437 | 10824469 | 3 | 11 | 33 | AGA  | 15 | 8  |
| 20715 | 2 | 10825633 | 10825656 | 2 | 12 | 24 | CA   | 16 | 10 |
| 20716 | 2 | 10828917 | 10828938 | 2 | 11 | 22 | CA   | 17 | 11 |
| 20717 | 2 | 10829062 | 10829113 | 2 | 26 | 52 | GT   | 7  | 8  |
| 20720 | 2 | 10831005 | 10831038 | 2 | 17 | 34 | AC   | 10 | 6  |
| 20721 | 2 | 10831177 | 10831220 | 2 | 22 | 44 | GT   | 6  | 8  |
| 20723 | 2 | 10831564 | 10831589 | 2 | 13 | 26 | GT   | 13 | 11 |
| 20727 | 2 | 10834308 | 10834331 | 2 | 12 | 24 | CA   | 13 | 11 |
| 20742 | 2 | 10855359 | 10855402 | 2 | 22 | 44 | GT   | 6  | 10 |
| 20745 | 2 | 10855723 | 10855738 | 2 | 8  | 16 | AC   | 24 | 4  |
| 20750 | 2 | 10857634 | 10857659 | 2 | 13 | 26 | CA   | 9  | 3  |
| 20751 | 2 | 10858214 | 10858225 | 2 | 6  | 12 | CA   | 27 | 4  |
| 20752 | 2 | 10859390 | 10859407 | 2 | 9  | 18 | GT   | 17 | 4  |
| 20755 | 2 | 10860036 | 10860053 | 2 | 9  | 18 | AC   | 17 | 7  |
| 20756 | 2 | 10860162 | 10860177 | 2 | 8  | 16 | AG   | 24 | 3  |
| 20758 | 2 | 10860778 | 10860789 | 2 | 6  | 12 | AG   | 23 | 6  |
| 20759 | 2 | 10860792 | 10860805 | 2 | 7  | 14 | AG   | 25 | 7  |
| 20772 | 2 | 10867045 | 10867060 | 4 | 4  | 16 | CAAA | 24 | 3  |
| 20774 | 2 | 10867874 | 10867895 | 2 | 11 | 22 | AG   | 17 | 7  |
| 20777 | 2 | 10872734 | 10872760 | 3 | 9  | 27 | TTG  | 14 | 5  |
| 20778 | 2 | 10873369 | 10873386 | 2 | 9  | 18 | GT   | 28 | 4  |
| 20779 | 2 | 10873493 | 10873518 | 2 | 13 | 26 | AC   | 12 | 12 |
| 20787 | 2 | 10877914 | 10877949 | 2 | 18 | 36 | CA   | 6  | 8  |
| 20788 | 2 | 10880027 | 10880040 | 2 | 7  | 14 | GT   | 18 | 11 |
| 20790 | 2 | 10880327 | 10880342 | 2 | 8  | 16 | CA   | 24 | 4  |
| 20797 | 2 | 10899074 | 10899091 | 2 | 9  | 18 | TG   | 13 | 7  |
| 20808 | 2 | 10907664 | 10907687 | 4 | 6  | 24 | AAAC | 18 | 5  |
| 20809 | 2 | 10908322 | 10908333 | 2 | 6  | 12 | GA   | 27 | 3  |
| 20811 | 2 | 10908660 | 10908699 | 2 | 20 | 40 | TG   | 11 | 9  |
| 20820 | 2 | 10917086 | 10917097 | 2 | 6  | 12 | CA   | 23 | 4  |
| 20821 | 2 | 10917579 | 10917620 | 2 | 21 | 42 | TG   | 11 | 11 |
| 20822 | 2 | 10921605 | 10921634 | 2 | 15 | 30 | TG   | 6  | 7  |
| 20823 | 2 | 10927702 | 10927727 | 2 | 13 | 26 | AC   | 11 | 11 |
| 20827 | 2 | 10933058 | 10933077 | 2 | 10 | 20 | CA   | 7  | 6  |
| 20832 | 2 | 10943900 | 10943917 | 2 | 9  | 18 | AC   | 17 | 6  |
| 20833 | 2 | 10945491 | 10945502 | 2 | 6  | 12 | TG   | 21 | 3  |
| 20834 | 2 | 10945946 | 10945961 | 2 | 8  | 16 | AC   | 15 | 3  |
| 20837 | 2 | 10952316 | 10952329 | 2 | 7  | 14 | GT   | 18 | 4  |
| 20841 | 2 | 10954856 | 10954895 | 2 | 20 | 40 | GT   | 9  | 9  |
| 20843 | 2 | 10957326 | 10957359 | 2 | 17 | 34 | TG   | 20 | 15 |
| 20850 | 2 | 10969752 | 10969769 | 2 | 9  | 18 | AC   | 14 | 9  |
| 20853 | 2 | 10975086 | 10975105 | 2 | 10 | 20 | GT   | 27 | 6  |
| 20855 | 2 | 10979620 | 10979655 | 4 | 9  | 36 | GACA | 20 | 9  |
| 20860 | 2 | 10982325 | 10982352 | 2 | 14 | 28 | AC   | 13 | 9  |
| 20865 | 2 | 10986119 | 10986142 | 2 | 12 | 24 | AG   | 7  | 7  |

|       |   |          |          |   |    |    |      |    |    |
|-------|---|----------|----------|---|----|----|------|----|----|
| 20867 | 2 | 10987389 | 10987416 | 2 | 14 | 28 | GT   | 13 | 11 |
| 20870 | 2 | 10993512 | 10993539 | 2 | 14 | 28 | AC   | 18 | 13 |
| 20872 | 2 | 11002158 | 11002171 | 2 | 7  | 14 | GT   | 15 | 5  |
| 20874 | 2 | 11002275 | 11002304 | 2 | 15 | 30 | AG   | 11 | 6  |
| 20875 | 2 | 11002463 | 11002474 | 2 | 6  | 12 | TG   | 29 | 3  |
| 20879 | 2 | 11008887 | 11008900 | 2 | 7  | 14 | AC   | 30 | 5  |
| 20883 | 2 | 11014316 | 11014329 | 2 | 7  | 14 | TG   | 13 | 3  |
| 20884 | 2 | 11014908 | 11014928 | 3 | 7  | 21 | CAG  | 31 | 3  |
| 20886 | 2 | 11019222 | 11019253 | 2 | 16 | 32 | GT   | 20 | 10 |
| 20889 | 2 | 11020808 | 11020831 | 2 | 12 | 24 | CA   | 14 | 5  |
| 20893 | 2 | 11031426 | 11031447 | 2 | 11 | 22 | CA   | 20 | 6  |
| 20895 | 2 | 11031593 | 11031610 | 2 | 9  | 18 | TG   | 20 | 5  |
| 20898 | 2 | 11034277 | 11034292 | 4 | 4  | 16 | ACAG | 26 | 3  |
| 20900 | 2 | 11034873 | 11034892 | 2 | 10 | 20 | GT   | 19 | 6  |
| 20901 | 2 | 11036732 | 11036761 | 2 | 15 | 30 | GT   | 8  | 12 |
| 20906 | 2 | 11037301 | 11037320 | 2 | 10 | 20 | GA   | 6  | 5  |
| 20909 | 2 | 11041762 | 11041783 | 2 | 11 | 22 | AC   | 17 | 14 |
| 20913 | 2 | 11050009 | 11050026 | 2 | 9  | 18 | AC   | 12 | 12 |
| 20915 | 2 | 11053815 | 11053834 | 4 | 5  | 20 | TTCA | 28 | 4  |
| 20919 | 2 | 11058260 | 11058283 | 4 | 6  | 24 | ACAT | 22 | 6  |
| 20921 | 2 | 11058505 | 11058544 | 4 | 10 | 40 | TCTG | 9  | 9  |
| 20922 | 2 | 11059889 | 11059940 | 2 | 26 | 52 | GT   | 8  | 7  |
| 20924 | 2 | 11060995 | 11061026 | 2 | 16 | 32 | AC   | 9  | 9  |
| 20925 | 2 | 11061461 | 11061490 | 2 | 15 | 30 | CA   | 22 | 8  |
| 20926 | 2 | 11062207 | 11062230 | 2 | 12 | 24 | TG   | 17 | 15 |
| 20929 | 2 | 11070306 | 11070325 | 2 | 10 | 20 | CA   | 26 | 6  |
| 20930 | 2 | 11070368 | 11070379 | 2 | 6  | 12 | CA   | 27 | 3  |
| 20933 | 2 | 11074229 | 11074260 | 2 | 16 | 32 | CA   | 9  | 9  |
| 20935 | 2 | 11079240 | 11079273 | 2 | 17 | 34 | TG   | 11 | 12 |
| 20936 | 2 | 11081205 | 11081232 | 2 | 14 | 28 | AC   | 14 | 16 |
| 20951 | 2 | 11091338 | 11091379 | 2 | 21 | 42 | GT   | 15 | 19 |
| 20952 | 2 | 11091653 | 11091664 | 2 | 6  | 12 | TG   | 24 | 3  |
| 20957 | 2 | 11098693 | 11098706 | 2 | 7  | 14 | AC   | 29 | 6  |
| 20961 | 2 | 11102003 | 11102014 | 2 | 6  | 12 | CA   | 28 | 3  |
| 20962 | 2 | 11102156 | 11102187 | 2 | 16 | 32 | TG   | 24 | 9  |
| 20964 | 2 | 11102525 | 11102544 | 2 | 10 | 20 | TG   | 17 | 9  |
| 20968 | 2 | 11108125 | 11108142 | 2 | 9  | 18 | AC   | 26 | 6  |
| 20970 | 2 | 11112765 | 11112810 | 2 | 23 | 46 | AC   | 12 | 12 |
| 20976 | 2 | 11119354 | 11119377 | 2 | 12 | 24 | AC   | 9  | 5  |
| 20977 | 2 | 11119519 | 11119542 | 2 | 12 | 24 | CA   | 14 | 6  |
| 20983 | 2 | 11143280 | 11143307 | 4 | 7  | 28 | ATCA | 31 | 5  |
| 20984 | 2 | 11145180 | 11145207 | 2 | 14 | 28 | GT   | 24 | 10 |
| 20986 | 2 | 11146895 | 11146914 | 4 | 5  | 20 | AAAT | 24 | 3  |
| 20990 | 2 | 11154361 | 11154372 | 2 | 6  | 12 | GT   | 13 | 3  |
| 20991 | 2 | 11155589 | 11155606 | 2 | 9  | 18 | TG   | 27 | 3  |
| 20992 | 2 | 11164571 | 11164585 | 3 | 5  | 15 | AAT  | 22 | 4  |
| 20994 | 2 | 11176608 | 11176621 | 2 | 7  | 14 | AT   | 24 | 8  |
| 20997 | 2 | 11185247 | 11185280 | 2 | 17 | 34 | GT   | 9  | 9  |
| 21007 | 2 | 11213934 | 11213945 | 2 | 6  | 12 | AC   | 15 | 8  |
| 21008 | 2 | 11214259 | 11214272 | 2 | 7  | 14 | AG   | 8  | 3  |
| 21011 | 2 | 11214880 | 11214901 | 2 | 11 | 22 | GT   | 10 | 5  |

|       |   |          |          |   |    |    |      |    |    |
|-------|---|----------|----------|---|----|----|------|----|----|
| 21014 | 2 | 11227193 | 11227204 | 2 | 6  | 12 | GT   | 27 | 4  |
| 21016 | 2 | 11227388 | 11227409 | 2 | 11 | 22 | GT   | 6  | 7  |
| 21017 | 2 | 11227922 | 11227947 | 2 | 13 | 26 | AC   | 12 | 8  |
| 21018 | 2 | 11233858 | 11233883 | 2 | 13 | 26 | GT   | 18 | 9  |
| 21022 | 2 | 11235336 | 11235359 | 2 | 12 | 24 | TG   | 12 | 4  |
| 21023 | 2 | 11237923 | 11237942 | 2 | 10 | 20 | TG   | 14 | 8  |
| 21025 | 2 | 11245694 | 11245707 | 2 | 7  | 14 | TG   | 34 | 5  |
| 21027 | 2 | 11245864 | 11245887 | 2 | 12 | 24 | AC   | 11 | 8  |
| 21030 | 2 | 11251569 | 11251584 | 2 | 8  | 16 | AC   | 26 | 9  |
| 21032 | 2 | 11262646 | 11262657 | 2 | 6  | 12 | TC   | 35 | 3  |
| 21033 | 2 | 11263074 | 11263113 | 2 | 20 | 40 | AC   | 24 | 9  |
| 21037 | 2 | 11271709 | 11271724 | 4 | 4  | 16 | TTTC | 24 | 3  |
| 21038 | 2 | 11271987 | 11272004 | 2 | 9  | 18 | CA   | 15 | 8  |
| 21039 | 2 | 11272696 | 11272719 | 4 | 6  | 24 | AAAC | 12 | 5  |
| 21044 | 2 | 11294907 | 11294924 | 2 | 9  | 18 | TG   | 23 | 7  |
| 21047 | 2 | 11296419 | 11296430 | 2 | 6  | 12 | TG   | 28 | 3  |
| 21048 | 2 | 11296616 | 11296627 | 2 | 6  | 12 | GT   | 7  | 4  |
| 21055 | 2 | 11302829 | 11302882 | 2 | 27 | 54 | AC   | 11 | 10 |
| 21056 | 2 | 11302959 | 11302984 | 2 | 13 | 26 | CA   | 8  | 12 |
| 21059 | 2 | 11305464 | 11305489 | 2 | 13 | 26 | TG   | 20 | 7  |
| 21064 | 2 | 11314041 | 11314052 | 2 | 6  | 12 | GT   | 26 | 7  |
| 21065 | 2 | 11316093 | 11316120 | 2 | 14 | 28 | AC   | 13 | 6  |
| 21067 | 2 | 11323372 | 11323393 | 2 | 11 | 22 | CA   | 18 | 4  |
| 21068 | 2 | 11323477 | 11323500 | 2 | 12 | 24 | AC   | 23 | 11 |
| 21072 | 2 | 11337645 | 11337670 | 2 | 13 | 26 | CA   | 11 | 4  |
| 21073 | 2 | 11339682 | 11339735 | 2 | 27 | 54 | CA   | 18 | 13 |
| 21075 | 2 | 11352928 | 11352947 | 2 | 10 | 20 | TG   | 20 | 4  |
| 21076 | 2 | 11353023 | 11353058 | 2 | 18 | 36 | GT   | 12 | 7  |
| 21077 | 2 | 11355289 | 11355308 | 4 | 5  | 20 | TATT | 12 | 5  |
| 21079 | 2 | 11355458 | 11355485 | 2 | 14 | 28 | GA   | 13 | 10 |
| 21080 | 2 | 11355529 | 11355566 | 2 | 19 | 38 | CT   | 8  | 9  |
| 21081 | 2 | 11355943 | 11355960 | 2 | 9  | 18 | CA   | 17 | 7  |
| 21084 | 2 | 11357059 | 11357086 | 2 | 14 | 28 | TG   | 17 | 7  |
| 21090 | 2 | 11364122 | 11364135 | 2 | 7  | 14 | AC   | 17 | 6  |
| 21091 | 2 | 11366421 | 11366446 | 2 | 13 | 26 | GT   | 16 | 5  |
| 21095 | 2 | 11367484 | 11367503 | 2 | 10 | 20 | TA   | 7  | 6  |
| 21096 | 2 | 11371046 | 11371063 | 3 | 6  | 18 | TTG  | 24 | 6  |
| 21107 | 2 | 11388601 | 11388615 | 3 | 5  | 15 | CGG  | 14 | 4  |
| 21109 | 2 | 11389084 | 11389101 | 3 | 6  | 18 | CTG  | 29 | 3  |
| 21120 | 2 | 11414845 | 11414856 | 2 | 6  | 12 | GT   | 17 | 3  |
| 21122 | 2 | 11415017 | 11415040 | 2 | 12 | 24 | CT   | 17 | 3  |
| 21123 | 2 | 11416098 | 11416113 | 2 | 8  | 16 | TC   | 28 | 7  |
| 21126 | 2 | 11421155 | 11421184 | 2 | 15 | 30 | AC   | 8  | 11 |
| 21127 | 2 | 11421435 | 11421446 | 2 | 6  | 12 | TG   | 17 | 3  |
| 21137 | 2 | 11432040 | 11432053 | 2 | 7  | 14 | TG   | 10 | 6  |
| 21139 | 2 | 11434568 | 11434587 | 2 | 10 | 20 | GT   | 7  | 8  |
| 21140 | 2 | 11439885 | 11439910 | 2 | 13 | 26 | AC   | 18 | 12 |
| 21145 | 2 | 11440526 | 11440541 | 2 | 8  | 16 | TC   | 13 | 3  |
| 21147 | 2 | 11445934 | 11445947 | 2 | 7  | 14 | GT   | 22 | 5  |
| 21153 | 2 | 11450683 | 11450718 | 2 | 18 | 36 | AC   | 9  | 13 |
| 21156 | 2 | 11453896 | 11453915 | 2 | 10 | 20 | TG   | 22 | 5  |

|       |   |          |          |   |    |    |      |    |    |
|-------|---|----------|----------|---|----|----|------|----|----|
| 21161 | 2 | 11468408 | 11468437 | 2 | 15 | 30 | TG   | 18 | 13 |
| 21174 | 2 | 11512967 | 11512986 | 4 | 5  | 20 | TGTT | 23 | 3  |
| 21175 | 2 | 11513215 | 11513228 | 2 | 7  | 14 | TA   | 24 | 3  |
| 21178 | 2 | 11515120 | 11515153 | 2 | 17 | 34 | TC   | 7  | 7  |
| 21183 | 2 | 11517772 | 11517785 | 2 | 7  | 14 | AC   | 21 | 4  |
| 21185 | 2 | 11518290 | 11518313 | 2 | 12 | 24 | GA   | 7  | 6  |
| 21186 | 2 | 11521999 | 11522038 | 2 | 20 | 40 | GT   | 17 | 14 |
| 21194 | 2 | 11529762 | 11529791 | 2 | 15 | 30 | AC   | 23 | 7  |
| 21197 | 2 | 11531375 | 11531398 | 2 | 12 | 24 | GT   | 9  | 6  |
| 21201 | 2 | 11538671 | 11538700 | 2 | 15 | 30 | GT   | 15 | 6  |
| 21205 | 2 | 11540039 | 11540070 | 2 | 16 | 32 | CA   | 14 | 10 |
| 21208 | 2 | 11547007 | 11547024 | 2 | 9  | 18 | TG   | 26 | 11 |
| 21210 | 2 | 11549411 | 11549424 | 2 | 7  | 14 | TG   | 25 | 4  |
| 21211 | 2 | 11549601 | 11549626 | 2 | 13 | 26 | AC   | 19 | 6  |
| 21212 | 2 | 11549784 | 11549809 | 2 | 13 | 26 | AC   | 14 | 8  |
| 21216 | 2 | 11558452 | 11558471 | 2 | 10 | 20 | AC   | 25 | 3  |
| 21217 | 2 | 11559081 | 11559096 | 2 | 8  | 16 | CA   | 24 | 9  |
| 21219 | 2 | 11559197 | 11559214 | 2 | 9  | 18 | AG   | 8  | 7  |
| 21222 | 2 | 11559368 | 11559399 | 2 | 16 | 32 | GA   | 14 | 9  |
| 21223 | 2 | 11559497 | 11559522 | 2 | 13 | 26 | TG   | 23 | 18 |
| 21224 | 2 | 11559661 | 11559674 | 2 | 7  | 14 | GT   | 18 | 6  |
| 21227 | 2 | 11565420 | 11565431 | 2 | 6  | 12 | TC   | 17 | 3  |
| 21228 | 2 | 11565606 | 11565637 | 4 | 8  | 32 | TGTC | 27 | 11 |
| 21230 | 2 | 11567797 | 11567824 | 2 | 14 | 28 | CA   | 6  | 7  |
| 21232 | 2 | 11568070 | 11568099 | 2 | 15 | 30 | TG   | 17 | 13 |
| 21233 | 2 | 11570066 | 11570103 | 2 | 19 | 38 | AC   | 9  | 9  |
| 21234 | 2 | 11571949 | 11571980 | 2 | 16 | 32 | CA   | 9  | 7  |
| 21235 | 2 | 11576871 | 11576886 | 2 | 8  | 16 | GT   | 23 | 3  |
| 21236 | 2 | 11577865 | 11577894 | 2 | 15 | 30 | AC   | 10 | 8  |
| 21241 | 2 | 11595769 | 11595782 | 2 | 7  | 14 | AC   | 8  | 3  |
| 21242 | 2 | 11607680 | 11607695 | 2 | 8  | 16 | CA   | 25 | 4  |
| 21243 | 2 | 11612805 | 11612828 | 3 | 8  | 24 | GCT  | 21 | 6  |
| 21247 | 2 | 11619787 | 11619802 | 2 | 8  | 16 | GT   | 27 | 6  |
| 21248 | 2 | 11620656 | 11620669 | 2 | 7  | 14 | TG   | 9  | 11 |
| 21249 | 2 | 11620672 | 11620683 | 2 | 6  | 12 | TG   | 12 | 12 |
| 21253 | 2 | 11626841 | 11626855 | 3 | 5  | 15 | AGC  | 27 | 5  |
| 21255 | 2 | 11628020 | 11628031 | 2 | 6  | 12 | CT   | 19 | 4  |
| 21260 | 2 | 11639549 | 11639568 | 4 | 5  | 20 | AAAG | 27 | 5  |
| 21268 | 2 | 11662054 | 11662069 | 2 | 8  | 16 | AC   | 13 | 7  |
| 21269 | 2 | 11662072 | 11662085 | 2 | 7  | 14 | AC   | 18 | 6  |
| 21270 | 2 | 11662434 | 11662447 | 2 | 7  | 14 | GT   | 22 | 3  |
| 21276 | 2 | 11666745 | 11666759 | 3 | 5  | 15 | GCA  | 38 | 3  |
| 21278 | 2 | 11673753 | 11673770 | 2 | 9  | 18 | AC   | 20 | 6  |
| 21279 | 2 | 11676927 | 11676940 | 2 | 7  | 14 | GT   | 30 | 3  |
| 21281 | 2 | 11679154 | 11679199 | 2 | 23 | 46 | AC   | 7  | 10 |
| 21283 | 2 | 11679875 | 11679886 | 2 | 6  | 12 | TA   | 8  | 3  |
| 21289 | 2 | 11687014 | 11687029 | 2 | 8  | 16 | TG   | 7  | 3  |
| 21293 | 2 | 11690486 | 11690503 | 2 | 9  | 18 | AG   | 27 | 5  |
| 21301 | 2 | 11703405 | 11703425 | 3 | 7  | 21 | AGG  | 22 | 4  |
| 21302 | 2 | 11703513 | 11703526 | 2 | 7  | 14 | TG   | 26 | 4  |
| 21305 | 2 | 11703896 | 11703910 | 3 | 5  | 15 | TCC  | 30 | 5  |

|       |   |          |          |   |    |    |      |    |    |
|-------|---|----------|----------|---|----|----|------|----|----|
| 21308 | 2 | 11707340 | 11707359 | 4 | 5  | 20 | TGTT | 26 | 4  |
| 21310 | 2 | 11708453 | 11708464 | 2 | 6  | 12 | AC   | 17 | 3  |
| 21312 | 2 | 11714629 | 11714660 | 2 | 16 | 32 | AC   | 14 | 14 |
| 21318 | 2 | 11722650 | 11722665 | 4 | 4  | 16 | TTTG | 10 | 4  |
| 21320 | 2 | 11726147 | 11726164 | 3 | 6  | 18 | TTC  | 22 | 4  |
| 21323 | 2 | 11740565 | 11740582 | 2 | 9  | 18 | TG   | 28 | 4  |
| 21324 | 2 | 11745627 | 11745658 | 2 | 16 | 32 | TC   | 9  | 7  |
| 21325 | 2 | 11745740 | 11745753 | 2 | 7  | 14 | GT   | 22 | 5  |
| 21328 | 2 | 11756365 | 11756384 | 2 | 10 | 20 | TG   | 17 | 15 |
| 21331 | 2 | 11758635 | 11758648 | 2 | 7  | 14 | TG   | 19 | 5  |
| 21335 | 2 | 11777535 | 11777550 | 4 | 4  | 16 | TTTC | 13 | 4  |
| 21340 | 2 | 11803288 | 11803309 | 2 | 11 | 22 | TG   | 22 | 11 |
| 21345 | 2 | 11816037 | 11816054 | 2 | 9  | 18 | TG   | 24 | 5  |
| 21346 | 2 | 11819226 | 11819251 | 2 | 13 | 26 | TG   | 19 | 12 |
| 21347 | 2 | 11819286 | 11819311 | 2 | 13 | 26 | GT   | 25 | 4  |
| 21350 | 2 | 11822940 | 11822963 | 2 | 12 | 24 | GT   | 13 | 5  |
| 21352 | 2 | 11832466 | 11832479 | 2 | 7  | 14 | CA   | 22 | 7  |
| 21370 | 2 | 11847910 | 11847939 | 2 | 15 | 30 | GT   | 13 | 8  |
| 21377 | 2 | 11862695 | 11862754 | 2 | 30 | 60 | TG   | 9  | 13 |
| 21379 | 2 | 11862924 | 11862939 | 2 | 8  | 16 | TG   | 9  | 3  |
| 21383 | 2 | 11866684 | 11866695 | 2 | 6  | 12 | TG   | 16 | 10 |
| 21388 | 2 | 11876438 | 11876455 | 3 | 6  | 18 | CCT  | 19 | 8  |
| 21390 | 2 | 11877533 | 11877544 | 2 | 6  | 12 | AC   | 16 | 4  |
| 21391 | 2 | 11877562 | 11877573 | 2 | 6  | 12 | CA   | 14 | 3  |
| 21399 | 2 | 11886340 | 11886351 | 2 | 6  | 12 | CA   | 30 | 3  |
| 21400 | 2 | 11892884 | 11892899 | 2 | 8  | 16 | CT   | 25 | 6  |
| 21403 | 2 | 11899887 | 11899912 | 2 | 13 | 26 | TG   | 16 | 6  |
| 21404 | 2 | 11900067 | 11900092 | 2 | 13 | 26 | AC   | 9  | 6  |
| 21407 | 2 | 11902279 | 11902294 | 2 | 8  | 16 | TG   | 15 | 3  |
| 21409 | 2 | 11910300 | 11910323 | 2 | 12 | 24 | AC   | 19 | 6  |
| 21412 | 2 | 11919827 | 11919848 | 2 | 11 | 22 | AT   | 8  | 7  |
| 21417 | 2 | 11925182 | 11925203 | 2 | 11 | 22 | CA   | 18 | 7  |
| 21418 | 2 | 11926675 | 11926698 | 2 | 12 | 24 | GT   | 27 | 4  |
| 21420 | 2 | 11927855 | 11927876 | 2 | 11 | 22 | CA   | 15 | 11 |
| 21422 | 2 | 11929917 | 11929932 | 4 | 4  | 16 | AAAT | 26 | 3  |
| 21423 | 2 | 11930692 | 11930725 | 2 | 17 | 34 | CA   | 9  | 8  |
| 21425 | 2 | 11931084 | 11931113 | 2 | 15 | 30 | CA   | 13 | 10 |
| 21426 | 2 | 11931136 | 11931151 | 2 | 8  | 16 | CA   | 19 | 6  |
| 21427 | 2 | 11931365 | 11931380 | 2 | 8  | 16 | AC   | 15 | 6  |
| 21436 | 2 | 11945563 | 11945576 | 2 | 7  | 14 | GT   | 23 | 6  |
| 21437 | 2 | 11945813 | 11945827 | 3 | 5  | 15 | CTC  | 19 | 6  |
| 21438 | 2 | 11945829 | 11945843 | 3 | 5  | 15 | TCC  | 22 | 9  |
| 21440 | 2 | 11946025 | 11946052 | 2 | 14 | 28 | AG   | 14 | 9  |
| 21441 | 2 | 11947781 | 11947798 | 2 | 9  | 18 | CA   | 19 | 9  |
| 21444 | 2 | 11950458 | 11950469 | 2 | 6  | 12 | CA   | 22 | 5  |
| 21446 | 2 | 11953372 | 11953389 | 3 | 6  | 18 | TCT  | 31 | 3  |
| 21447 | 2 | 11953456 | 11953481 | 2 | 13 | 26 | CA   | 10 | 9  |
| 21450 | 2 | 11954277 | 11954288 | 2 | 6  | 12 | TC   | 19 | 4  |
| 21455 | 2 | 11959518 | 11959529 | 2 | 6  | 12 | AC   | 23 | 3  |
| 21456 | 2 | 11959779 | 11959802 | 2 | 12 | 24 | AC   | 11 | 11 |
| 21457 | 2 | 11960136 | 11960149 | 2 | 7  | 14 | CA   | 29 | 5  |

|       |   |          |          |   |    |    |      |    |    |
|-------|---|----------|----------|---|----|----|------|----|----|
| 21458 | 2 | 11960235 | 11960256 | 2 | 11 | 22 | CA   | 18 | 6  |
| 21468 | 2 | 11971897 | 11971917 | 3 | 7  | 21 | TTA  | 14 | 4  |
| 21471 | 2 | 11978519 | 11978532 | 2 | 7  | 14 | CT   | 25 | 3  |
| 21472 | 2 | 11981820 | 11981843 | 2 | 12 | 24 | GT   | 20 | 6  |
| 21473 | 2 | 11981971 | 11981998 | 2 | 14 | 28 | AC   | 19 | 11 |
| 21476 | 2 | 11984469 | 11984490 | 2 | 11 | 22 | CT   | 22 | 4  |
| 21484 | 2 | 11994377 | 11994394 | 2 | 9  | 18 | GT   | 19 | 4  |
| 21486 | 2 | 11997160 | 11997173 | 2 | 7  | 14 | GA   | 21 | 6  |
| 21487 | 2 | 11997211 | 11997226 | 2 | 8  | 16 | AC   | 23 | 4  |
| 21491 | 2 | 12000721 | 12000760 | 2 | 20 | 40 | AC   | 16 | 8  |
| 21492 | 2 | 12001289 | 12001309 | 3 | 7  | 21 | TGC  | 29 | 4  |
| 21494 | 2 | 12001585 | 12001600 | 2 | 8  | 16 | AC   | 20 | 10 |
| 21512 | 2 | 12042609 | 12042650 | 2 | 21 | 42 | TG   | 9  | 7  |
| 21528 | 2 | 12059069 | 12059082 | 2 | 7  | 14 | TG   | 26 | 6  |
| 21529 | 2 | 12062942 | 12062959 | 3 | 6  | 18 | GCT  | 22 | 5  |
| 21530 | 2 | 12063254 | 12063271 | 2 | 9  | 18 | AC   | 22 | 4  |
| 21534 | 2 | 12073746 | 12073765 | 4 | 5  | 20 | TGAC | 27 | 5  |
| 21540 | 2 | 12086219 | 12086248 | 2 | 15 | 30 | AC   | 8  | 8  |
| 21545 | 2 | 12094032 | 12094047 | 2 | 8  | 16 | TA   | 25 | 4  |
| 21547 | 2 | 12104935 | 12104972 | 2 | 19 | 38 | TG   | 14 | 10 |
| 21554 | 2 | 12124346 | 12124375 | 3 | 10 | 30 | CAT  | 24 | 14 |
| 21560 | 2 | 12177998 | 12178013 | 4 | 4  | 16 | AAAC | 22 | 9  |
| 21563 | 2 | 12184910 | 12184927 | 2 | 9  | 18 | AC   | 21 | 5  |
| 21564 | 2 | 12185302 | 12185321 | 2 | 10 | 20 | GA   | 20 | 8  |
| 21565 | 2 | 12185500 | 12185511 | 2 | 6  | 12 | CG   | 21 | 18 |
| 21566 | 2 | 12185512 | 12185525 | 2 | 7  | 14 | CA   | 17 | 14 |
| 21570 | 2 | 12191143 | 12191157 | 3 | 5  | 15 | CAG  | 26 | 3  |
| 21571 | 2 | 12191258 | 12191277 | 2 | 10 | 20 | TG   | 17 | 7  |
| 21573 | 2 | 12192505 | 12192518 | 2 | 7  | 14 | GT   | 15 | 3  |
| 21579 | 2 | 12220037 | 12220060 | 2 | 12 | 24 | TG   | 18 | 9  |
| 21584 | 2 | 12231052 | 12231065 | 2 | 7  | 14 | AC   | 29 | 4  |
| 21588 | 2 | 12238578 | 12238595 | 2 | 9  | 18 | TA   | 8  | 6  |
| 21591 | 2 | 12253057 | 12253070 | 2 | 7  | 14 | GT   | 18 | 6  |
| 21592 | 2 | 12255650 | 12255673 | 3 | 8  | 24 | CAG  | 27 | 5  |
| 21594 | 2 | 12256525 | 12256536 | 2 | 6  | 12 | AC   | 23 | 14 |
| 21595 | 2 | 12257391 | 12257410 | 2 | 10 | 20 | TG   | 20 | 15 |
| 21597 | 2 | 12257617 | 12257631 | 3 | 5  | 15 | AAC  | 25 | 3  |
| 21599 | 2 | 12259387 | 12259436 | 2 | 25 | 50 | TG   | 10 | 14 |
| 21601 | 2 | 12266098 | 12266127 | 3 | 10 | 30 | ATC  | 15 | 9  |
| 21608 | 2 | 12287299 | 12287314 | 4 | 4  | 16 | TGGA | 9  | 3  |
| 21610 | 2 | 12288798 | 12288815 | 2 | 9  | 18 | AC   | 12 | 9  |
| 21612 | 2 | 12289551 | 12289565 | 3 | 5  | 15 | AAC  | 28 | 3  |
| 21613 | 2 | 12289632 | 12289655 | 2 | 12 | 24 | CA   | 10 | 8  |
| 21618 | 2 | 12309747 | 12309762 | 2 | 8  | 16 | AC   | 7  | 8  |
| 21620 | 2 | 12325052 | 12325069 | 3 | 6  | 18 | TAA  | 26 | 4  |
| 21627 | 2 | 12343815 | 12343830 | 4 | 4  | 16 | TTTC | 19 | 4  |
| 21634 | 2 | 12369171 | 12369198 | 2 | 14 | 28 | AC   | 20 | 7  |
| 21636 | 2 | 12385902 | 12385931 | 2 | 15 | 30 | AC   | 14 | 8  |
| 21637 | 2 | 12388810 | 12388831 | 2 | 11 | 22 | AC   | 16 | 3  |
| 21661 | 2 | 12413202 | 12413243 | 2 | 21 | 42 | AC   | 8  | 13 |
| 21663 | 2 | 12413995 | 12414022 | 2 | 14 | 28 | AC   | 7  | 6  |



|       |   |          |          |   |    |    |      |    |    |
|-------|---|----------|----------|---|----|----|------|----|----|
| 21665 | 2 | 12414329 | 12414348 | 2 | 10 | 20 | GT   | 22 | 17 |
| 21666 | 2 | 12414545 | 12414568 | 2 | 12 | 24 | CT   | 25 | 6  |
| 21667 | 2 | 12416304 | 12416371 | 4 | 17 | 68 | AGAT | 10 | 10 |
| 21668 | 2 | 12416560 | 12416573 | 2 | 7  | 14 | TA   | 23 | 5  |
| 21669 | 2 | 12417737 | 12417752 | 2 | 8  | 16 | GT   | 15 | 12 |
| 21671 | 2 | 12419272 | 12419299 | 2 | 14 | 28 | GT   | 21 | 12 |
| 21686 | 2 | 12458205 | 12458220 | 2 | 8  | 16 | AC   | 29 | 4  |
| 21687 | 2 | 12463484 | 12463501 | 2 | 9  | 18 | TC   | 28 | 3  |
| 21692 | 2 | 12472253 | 12472284 | 4 | 8  | 32 | AGAA | 23 | 6  |
| 21694 | 2 | 12481784 | 12481797 | 2 | 7  | 14 | CT   | 34 | 4  |
| 21700 | 2 | 12493342 | 12493356 | 3 | 5  | 15 | TTG  | 13 | 3  |
| 21703 | 2 | 12499837 | 12499850 | 2 | 7  | 14 | AG   | 21 | 5  |
| 21707 | 2 | 12505478 | 12505499 | 2 | 11 | 22 | TG   | 22 | 7  |
| 21711 | 2 | 12515557 | 12515574 | 2 | 9  | 18 | AC   | 25 | 5  |
| 21712 | 2 | 12517815 | 12517826 | 2 | 6  | 12 | AG   | 24 | 5  |
| 21722 | 2 | 12552853 | 12552864 | 2 | 6  | 12 | CA   | 23 | 3  |
| 21725 | 2 | 12569118 | 12569131 | 2 | 7  | 14 | TC   | 30 | 4  |
| 21729 | 2 | 12576020 | 12576041 | 2 | 11 | 22 | TG   | 23 | 6  |
| 21732 | 2 | 12589037 | 12589068 | 2 | 16 | 32 | GA   | 12 | 8  |
| 21733 | 2 | 12593864 | 12593875 | 2 | 6  | 12 | GT   | 30 | 3  |
| 21734 | 2 | 12597767 | 12597784 | 2 | 9  | 18 | AC   | 14 | 7  |
| 21738 | 2 | 12612061 | 12612075 | 3 | 5  | 15 | TTC  | 13 | 5  |
| 21743 | 2 | 12619535 | 12619554 | 4 | 5  | 20 | TTAT | 14 | 4  |
| 21751 | 2 | 12624421 | 12624440 | 2 | 10 | 20 | CA   | 19 | 12 |
| 21759 | 2 | 12639414 | 12639449 | 2 | 18 | 36 | CA   | 12 | 6  |
| 21761 | 2 | 12641197 | 12641220 | 2 | 12 | 24 | TG   | 19 | 12 |
| 21762 | 2 | 12643484 | 12643495 | 2 | 6  | 12 | TG   | 25 | 3  |
| 21764 | 2 | 12653055 | 12653122 | 4 | 17 | 68 | GATG | 21 | 11 |
| 21767 | 2 | 12660232 | 12660257 | 2 | 13 | 26 | GA   | 20 | 3  |
| 21773 | 2 | 12682152 | 12682167 | 2 | 8  | 16 | AT   | 12 | 4  |
| 21781 | 2 | 12703451 | 12703474 | 2 | 12 | 24 | TG   | 18 | 13 |
| 21788 | 2 | 12723067 | 12723102 | 2 | 18 | 36 | CA   | 12 | 8  |
| 21791 | 2 | 12726370 | 12726383 | 2 | 7  | 14 | TA   | 17 | 5  |
| 21799 | 2 | 12740801 | 12740812 | 2 | 6  | 12 | GT   | 27 | 4  |
| 21802 | 2 | 12746692 | 12746723 | 2 | 16 | 32 | CA   | 6  | 5  |
| 21807 | 2 | 12761243 | 12761256 | 2 | 7  | 14 | AG   | 25 | 3  |
| 21820 | 2 | 12789416 | 12789435 | 2 | 10 | 20 | TG   | 19 | 7  |
| 21821 | 2 | 12790389 | 12790430 | 2 | 21 | 42 | CA   | 8  | 6  |
| 21822 | 2 | 12790716 | 12790749 | 2 | 17 | 34 | AC   | 13 | 8  |
| 21826 | 2 | 12795098 | 12795109 | 2 | 6  | 12 | AC   | 24 | 7  |
| 21827 | 2 | 12795115 | 12795126 | 2 | 6  | 12 | CA   | 23 | 5  |
| 21829 | 2 | 12801583 | 12801594 | 2 | 6  | 12 | AT   | 22 | 9  |
| 21830 | 2 | 12801595 | 12801608 | 2 | 7  | 14 | AG   | 21 | 7  |
| 21832 | 2 | 12803611 | 12803630 | 2 | 10 | 20 | CA   | 22 | 4  |
| 21837 | 2 | 12811798 | 12811821 | 2 | 12 | 24 | GT   | 7  | 5  |
| 21839 | 2 | 12818662 | 12818681 | 2 | 10 | 20 | AC   | 19 | 7  |
| 21842 | 2 | 12834730 | 12834744 | 3 | 5  | 15 | CCT  | 20 | 4  |
| 21843 | 2 | 12837197 | 12837210 | 2 | 7  | 14 | GT   | 15 | 3  |
| 21852 | 2 | 12936675 | 12936698 | 3 | 8  | 24 | TGC  | 24 | 6  |
| 21857 | 2 | 12966091 | 12966117 | 3 | 9  | 27 | ACA  | 19 | 4  |
| 21859 | 2 | 12970762 | 12970777 | 4 | 4  | 16 | AAAT | 20 | 4  |

|       |   |          |          |   |    |    |      |    |    |
|-------|---|----------|----------|---|----|----|------|----|----|
| 21860 | 2 | 12972340 | 12972351 | 2 | 6  | 12 | AC   | 25 | 3  |
| 21873 | 2 | 12998021 | 12998050 | 2 | 15 | 30 | AC   | 9  | 7  |
| 21875 | 2 | 13001016 | 13001045 | 3 | 10 | 30 | TCA  | 28 | 5  |
| 21879 | 2 | 13004372 | 13004407 | 2 | 18 | 36 | AC   | 8  | 9  |
| 21881 | 2 | 13005414 | 13005434 | 3 | 7  | 21 | GAG  | 22 | 3  |
| 21884 | 2 | 13006968 | 13006991 | 2 | 12 | 24 | TG   | 23 | 14 |
| 21885 | 2 | 13007556 | 13007585 | 3 | 10 | 30 | TCT  | 25 | 12 |
| 21892 | 2 | 13012229 | 13012266 | 2 | 19 | 38 | GT   | 11 | 10 |
| 21894 | 2 | 13016652 | 13016672 | 3 | 7  | 21 | CTC  | 20 | 4  |
| 21897 | 2 | 13017793 | 13017818 | 2 | 13 | 26 | GT   | 18 | 6  |
| 21898 | 2 | 13018188 | 13018215 | 2 | 14 | 28 | TG   | 19 | 8  |
| 21903 | 2 | 13019253 | 13019290 | 2 | 19 | 38 | CA   | 9  | 6  |
| 21908 | 2 | 13020984 | 13020999 | 2 | 8  | 16 | TG   | 23 | 4  |
| 21912 | 2 | 13027423 | 13027450 | 2 | 14 | 28 | AC   | 13 | 12 |
| 21927 | 2 | 13048109 | 13048124 | 4 | 4  | 16 | TTCT | 32 | 4  |
| 21931 | 2 | 13055447 | 13055482 | 2 | 18 | 36 | GT   | 8  | 7  |
| 21935 | 2 | 13068173 | 13068198 | 2 | 13 | 26 | TG   | 16 | 7  |
| 21936 | 2 | 13068532 | 13068543 | 2 | 6  | 12 | TG   | 28 | 3  |
| 21939 | 2 | 13073426 | 13073439 | 2 | 7  | 14 | TG   | 28 | 4  |
| 21952 | 2 | 13098124 | 13098137 | 2 | 7  | 14 | GT   | 25 | 15 |
| 21959 | 2 | 13117556 | 13117571 | 4 | 4  | 16 | AACA | 31 | 4  |
| 21960 | 2 | 13123905 | 13123948 | 4 | 11 | 44 | CTTT | 16 | 5  |
| 21963 | 2 | 13129848 | 13129867 | 4 | 5  | 20 | TTTA | 22 | 3  |
| 21971 | 2 | 13150953 | 13150996 | 4 | 11 | 44 | TATC | 21 | 8  |
| 21977 | 2 | 13168839 | 13168854 | 4 | 4  | 16 | AAAT | 19 | 15 |
| 21981 | 2 | 13189028 | 13189051 | 4 | 6  | 24 | AAAC | 28 | 3  |
| 21985 | 2 | 13213753 | 13213780 | 2 | 14 | 28 | CT   | 14 | 6  |
| 21986 | 2 | 13217332 | 13217347 | 2 | 8  | 16 | GT   | 22 | 5  |
| 21988 | 2 | 13219182 | 13219196 | 3 | 5  | 15 | TGT  | 21 | 6  |
| 21991 | 2 | 13219345 | 13219372 | 4 | 7  | 28 | ATAG | 14 | 15 |
| 21995 | 2 | 13227379 | 13227396 | 3 | 6  | 18 | AAC  | 28 | 9  |
| 21996 | 2 | 13227803 | 13227838 | 4 | 9  | 36 | AATA | 23 | 7  |
| 21998 | 2 | 13228286 | 13228321 | 3 | 12 | 36 | AAT  | 7  | 5  |
| 21999 | 2 | 13228456 | 13228475 | 4 | 5  | 20 | GTTT | 18 | 5  |
| 22006 | 2 | 13237798 | 13237825 | 4 | 7  | 28 | AAAG | 12 | 5  |
| 22007 | 2 | 13237946 | 13237961 | 2 | 8  | 16 | AC   | 17 | 17 |
| 22010 | 2 | 13244149 | 13244174 | 2 | 13 | 26 | AG   | 10 | 5  |
| 22015 | 2 | 13261101 | 13261114 | 2 | 7  | 14 | TG   | 23 | 4  |
| 22017 | 2 | 13269873 | 13269890 | 3 | 6  | 18 | GCT  | 20 | 5  |
| 22018 | 2 | 13270469 | 13270484 | 2 | 8  | 16 | GA   | 20 | 5  |
| 22019 | 2 | 13271099 | 13271110 | 2 | 6  | 12 | AG   | 18 | 8  |
| 22021 | 2 | 13278048 | 13278067 | 2 | 10 | 20 | AC   | 18 | 9  |
| 22023 | 2 | 13282642 | 13282661 | 2 | 10 | 20 | TC   | 19 | 6  |
| 22026 | 2 | 13286022 | 13286043 | 2 | 11 | 22 | TG   | 20 | 8  |
| 22027 | 2 | 13286648 | 13286669 | 2 | 11 | 22 | CT   | 14 | 5  |
| 22033 | 2 | 13291643 | 13291662 | 2 | 10 | 20 | TC   | 19 | 6  |
| 22034 | 2 | 13291717 | 13291750 | 2 | 17 | 34 | CT   | 12 | 6  |
| 22044 | 2 | 13303092 | 13303123 | 2 | 16 | 32 | AC   | 6  | 7  |
| 22049 | 2 | 13308151 | 13308172 | 2 | 11 | 22 | TC   | 22 | 5  |
| 22052 | 2 | 13311235 | 13311258 | 3 | 8  | 24 | TCC  | 22 | 4  |
| 22053 | 2 | 13311437 | 13311448 | 2 | 6  | 12 | TG   | 25 | 6  |

|       |   |          |          |   |    |    |      |    |    |
|-------|---|----------|----------|---|----|----|------|----|----|
| 22063 | 2 | 13319947 | 13319978 | 2 | 16 | 32 | AC   | 8  | 9  |
| 22070 | 2 | 13327249 | 13327262 | 2 | 7  | 14 | TG   | 29 | 4  |
| 22074 | 2 | 13334243 | 13334256 | 2 | 7  | 14 | AC   | 25 | 3  |
| 22080 | 2 | 13339423 | 13339436 | 2 | 7  | 14 | GT   | 17 | 6  |
| 22081 | 2 | 13339460 | 13339477 | 2 | 9  | 18 | GT   | 17 | 9  |
| 22082 | 2 | 13339886 | 13339901 | 2 | 8  | 16 | TG   | 26 | 3  |
| 22088 | 2 | 13346187 | 13346208 | 2 | 11 | 22 | CA   | 24 | 5  |
| 22090 | 2 | 13347916 | 13347937 | 2 | 11 | 22 | GA   | 19 | 6  |
| 22092 | 2 | 13348676 | 13348717 | 2 | 21 | 42 | GA   | 11 | 7  |
| 22093 | 2 | 13348997 | 13349016 | 2 | 10 | 20 | GA   | 12 | 5  |
| 22097 | 2 | 13349804 | 13349833 | 2 | 15 | 30 | AC   | 15 | 9  |
| 22100 | 2 | 13351532 | 13351557 | 2 | 13 | 26 | CT   | 15 | 11 |
| 22103 | 2 | 13354448 | 13354465 | 2 | 9  | 18 | TG   | 20 | 6  |
| 22105 | 2 | 13355033 | 13355050 | 2 | 9  | 18 | GT   | 19 | 4  |
| 22109 | 2 | 13356669 | 13356686 | 2 | 9  | 18 | CT   | 19 | 13 |
| 22114 | 2 | 13359981 | 13359996 | 2 | 8  | 16 | CA   | 22 | 5  |
| 22115 | 2 | 13360417 | 13360436 | 2 | 10 | 20 | TG   | 19 | 7  |
| 22124 | 2 | 13373367 | 13373381 | 3 | 5  | 15 | GGC  | 19 | 5  |
| 22127 | 2 | 13377939 | 13377974 | 2 | 18 | 36 | CA   | 9  | 5  |
| 22132 | 2 | 13380738 | 13380751 | 2 | 7  | 14 | GT   | 15 | 4  |
| 22133 | 2 | 13384233 | 13384246 | 2 | 7  | 14 | AT   | 11 | 4  |
| 22134 | 2 | 13386629 | 13386650 | 2 | 11 | 22 | GA   | 13 | 13 |
| 22137 | 2 | 13388924 | 13388935 | 2 | 6  | 12 | GT   | 11 | 9  |
| 22138 | 2 | 13389495 | 13389514 | 2 | 10 | 20 | GT   | 18 | 7  |
| 22141 | 2 | 13390305 | 13390336 | 2 | 16 | 32 | TG   | 11 | 9  |
| 22142 | 2 | 13391305 | 13391316 | 2 | 6  | 12 | AT   | 13 | 5  |
| 22143 | 2 | 13392161 | 13392174 | 2 | 7  | 14 | TG   | 10 | 5  |
| 22153 | 2 | 13400423 | 13400434 | 2 | 6  | 12 | TG   | 27 | 3  |
| 22157 | 2 | 13402098 | 13402135 | 2 | 19 | 38 | TC   | 8  | 6  |
| 22163 | 2 | 13407334 | 13407357 | 2 | 12 | 24 | GT   | 27 | 10 |
| 22166 | 2 | 13409852 | 13409865 | 2 | 7  | 14 | CA   | 14 | 6  |
| 22168 | 2 | 13413232 | 13413243 | 2 | 6  | 12 | TA   | 23 | 3  |
| 22182 | 2 | 13426782 | 13426803 | 2 | 11 | 22 | GT   | 21 | 11 |
| 22191 | 2 | 13451362 | 13451393 | 2 | 16 | 32 | AC   | 14 | 8  |
| 22196 | 2 | 13456921 | 13456944 | 2 | 12 | 24 | TG   | 20 | 5  |
| 22197 | 2 | 13457122 | 13457135 | 2 | 7  | 14 | AC   | 6  | 5  |
| 22198 | 2 | 13459532 | 13459561 | 3 | 10 | 30 | AGA  | 21 | 11 |
| 22200 | 2 | 13461353 | 13461370 | 2 | 9  | 18 | GT   | 25 | 6  |
| 22210 | 2 | 13473704 | 13473721 | 2 | 9  | 18 | GT   | 28 | 3  |
| 22224 | 2 | 13493622 | 13493641 | 4 | 5  | 20 | AAAG | 24 | 3  |
| 22232 | 2 | 13498833 | 13498847 | 3 | 5  | 15 | TTC  | 13 | 5  |
| 22248 | 2 | 13550728 | 13550742 | 3 | 5  | 15 | TTG  | 29 | 4  |
| 22252 | 2 | 13567507 | 13567542 | 3 | 12 | 36 | AGA  | 17 | 5  |
| 22253 | 2 | 13573465 | 13573497 | 3 | 11 | 33 | TGT  | 10 | 6  |
| 22271 | 2 | 13612372 | 13612386 | 3 | 5  | 15 | TTA  | 23 | 7  |
| 22279 | 2 | 13624344 | 13624365 | 2 | 11 | 22 | GT   | 8  | 9  |
| 22281 | 2 | 13638841 | 13638852 | 2 | 6  | 12 | CA   | 34 | 3  |
| 22285 | 2 | 13649550 | 13649564 | 3 | 5  | 15 | TTG  | 21 | 3  |
| 22300 | 2 | 13682941 | 13682956 | 4 | 4  | 16 | ACCA | 30 | 3  |
| 22312 | 2 | 13717266 | 13717277 | 2 | 6  | 12 | TG   | 26 | 4  |
| 22315 | 2 | 13726182 | 13726205 | 3 | 8  | 24 | GGA  | 23 | 5  |

|       |   |          |          |   |    |    |      |    |    |
|-------|---|----------|----------|---|----|----|------|----|----|
| 22318 | 2 | 13729931 | 13729948 | 3 | 6  | 18 | CTG  | 26 | 6  |
| 22320 | 2 | 13733234 | 13733245 | 2 | 6  | 12 | CT   | 21 | 3  |
| 22322 | 2 | 13736093 | 13736107 | 3 | 5  | 15 | TCC  | 23 | 4  |
| 22330 | 2 | 13742473 | 13742490 | 2 | 9  | 18 | GT   | 17 | 6  |
| 22334 | 2 | 13753470 | 13753499 | 2 | 15 | 30 | TC   | 19 | 9  |
| 22336 | 2 | 13757942 | 13757957 | 2 | 8  | 16 | CA   | 15 | 9  |
| 22338 | 2 | 13760009 | 13760036 | 2 | 14 | 28 | TG   | 8  | 10 |
| 22348 | 2 | 13795251 | 13795268 | 2 | 9  | 18 | TG   | 20 | 4  |
| 22352 | 2 | 13801024 | 13801045 | 2 | 11 | 22 | TG   | 21 | 7  |
| 22354 | 2 | 13815291 | 13815320 | 2 | 15 | 30 | AG   | 13 | 13 |
| 22370 | 2 | 13851073 | 13851086 | 2 | 7  | 14 | CT   | 26 | 4  |
| 22376 | 2 | 13892256 | 13892287 | 2 | 16 | 32 | AC   | 10 | 11 |
| 22388 | 2 | 13923765 | 13923784 | 4 | 5  | 20 | TATG | 13 | 3  |
| 22396 | 2 | 13942262 | 13942285 | 3 | 8  | 24 | CCA  | 16 | 8  |
| 22419 | 2 | 13971225 | 13971239 | 3 | 5  | 15 | CAC  | 21 | 4  |
| 22425 | 2 | 13986150 | 13986170 | 3 | 7  | 21 | TTC  | 22 | 4  |
| 22427 | 2 | 13987690 | 13987707 | 2 | 9  | 18 | CA   | 15 | 9  |
| 22428 | 2 | 13987888 | 13987908 | 3 | 7  | 21 | CTG  | 24 | 8  |
| 22436 | 2 | 13997645 | 13997659 | 3 | 5  | 15 | AAG  | 8  | 4  |
| 22438 | 2 | 14004736 | 14004751 | 4 | 4  | 16 | TAAA | 28 | 3  |
| 22442 | 2 | 14014967 | 14014990 | 4 | 6  | 24 | ATCT | 21 | 3  |
| 22445 | 2 | 14017882 | 14017905 | 2 | 12 | 24 | GT   | 13 | 7  |
| 22446 | 2 | 14018173 | 14018188 | 2 | 8  | 16 | TG   | 11 | 5  |
| 22459 | 2 | 14024662 | 14024679 | 2 | 9  | 18 | TG   | 16 | 9  |
| 22474 | 2 | 14058466 | 14058492 | 3 | 9  | 27 | AAG  | 29 | 4  |
| 22476 | 2 | 14063873 | 14063900 | 2 | 14 | 28 | GT   | 15 | 10 |
| 22480 | 2 | 14079469 | 14079486 | 3 | 6  | 18 | TGC  | 24 | 5  |
| 22481 | 2 | 14081856 | 14081871 | 2 | 8  | 16 | AC   | 14 | 8  |
| 22484 | 2 | 14084636 | 14084662 | 3 | 9  | 27 | TTA  | 18 | 7  |
| 22488 | 2 | 14094857 | 14094868 | 2 | 6  | 12 | AC   | 20 | 3  |
| 22492 | 2 | 14110918 | 14110941 | 3 | 8  | 24 | TTG  | 27 | 7  |
| 22496 | 2 | 14133183 | 14133204 | 2 | 11 | 22 | TG   | 9  | 7  |
| 22498 | 2 | 14138227 | 14138244 | 2 | 9  | 18 | GT   | 31 | 8  |
| 22505 | 2 | 14166231 | 14166256 | 2 | 13 | 26 | CA   | 15 | 12 |
| 22509 | 2 | 14177296 | 14177331 | 4 | 9  | 36 | AAAG | 24 | 6  |
| 22510 | 2 | 14185566 | 14185625 | 4 | 15 | 60 | GATA | 13 | 11 |
| 22519 | 2 | 14208716 | 14208735 | 2 | 10 | 20 | GA   | 12 | 6  |
| 22527 | 2 | 14219800 | 14219829 | 2 | 15 | 30 | CT   | 20 | 7  |
| 22530 | 2 | 14227278 | 14227301 | 3 | 8  | 24 | ACC  | 6  | 3  |
| 22531 | 2 | 14228951 | 14228964 | 2 | 7  | 14 | CT   | 7  | 3  |
| 22534 | 2 | 14240017 | 14240028 | 2 | 6  | 12 | AC   | 29 | 3  |
| 22538 | 2 | 14245976 | 14245990 | 3 | 5  | 15 | AGA  | 20 | 4  |
| 22541 | 2 | 14253501 | 14253515 | 3 | 5  | 15 | GCT  | 25 | 5  |
| 22551 | 2 | 14277716 | 14277733 | 3 | 6  | 18 | CAG  | 18 | 5  |
| 22556 | 2 | 14294796 | 14294829 | 2 | 17 | 34 | TG   | 14 | 14 |
| 22561 | 2 | 14300611 | 14300630 | 4 | 5  | 20 | AAAT | 30 | 5  |
| 22562 | 2 | 14300976 | 14300993 | 3 | 6  | 18 | TAA  | 8  | 4  |
| 22563 | 2 | 14301211 | 14301242 | 2 | 16 | 32 | GT   | 7  | 7  |
| 22564 | 2 | 14301277 | 14301291 | 3 | 5  | 15 | CAG  | 15 | 3  |
| 22565 | 2 | 14301576 | 14301587 | 2 | 6  | 12 | AG   | 8  | 8  |
| 22567 | 2 | 14303884 | 14303907 | 3 | 8  | 24 | TTA  | 20 | 9  |

|       |   |          |          |   |    |    |      |    |    |
|-------|---|----------|----------|---|----|----|------|----|----|
| 22568 | 2 | 14304033 | 14304047 | 3 | 5  | 15 | AAT  | 28 | 3  |
| 22571 | 2 | 14305546 | 14305559 | 2 | 7  | 14 | AG   | 26 | 7  |
| 22572 | 2 | 14307263 | 14307298 | 2 | 18 | 36 | GT   | 12 | 12 |
| 22573 | 2 | 14307774 | 14307793 | 4 | 5  | 20 | TTCT | 20 | 8  |
| 22574 | 2 | 14307887 | 14307910 | 3 | 8  | 24 | CTC  | 14 | 7  |
| 22575 | 2 | 14309277 | 14309290 | 2 | 7  | 14 | TC   | 28 | 9  |
| 22578 | 2 | 14313424 | 14313441 | 3 | 6  | 18 | CTG  | 32 | 5  |
| 22582 | 2 | 14318004 | 14318021 | 2 | 9  | 18 | TG   | 9  | 5  |
| 22588 | 2 | 14324389 | 14324415 | 3 | 9  | 27 | GCA  | 27 | 11 |
| 22589 | 2 | 14326252 | 14326269 | 2 | 9  | 18 | CA   | 17 | 13 |
| 22591 | 2 | 14328949 | 14328982 | 2 | 17 | 34 | AC   | 12 | 15 |
| 22593 | 2 | 14329893 | 14329910 | 2 | 9  | 18 | AC   | 17 | 9  |
| 22596 | 2 | 14330802 | 14330817 | 2 | 8  | 16 | GT   | 22 | 10 |
| 22597 | 2 | 14331062 | 14331083 | 2 | 11 | 22 | GT   | 9  | 12 |
| 22603 | 2 | 14332171 | 14332185 | 3 | 5  | 15 | CTG  | 14 | 5  |
| 22605 | 2 | 14332630 | 14332645 | 2 | 8  | 16 | AC   | 7  | 7  |
| 22607 | 2 | 14333026 | 14333046 | 3 | 7  | 21 | GGC  | 27 | 5  |
| 22609 | 2 | 14337457 | 14337478 | 2 | 11 | 22 | AC   | 9  | 7  |
| 22610 | 2 | 14337578 | 14337595 | 3 | 6  | 18 | GCT  | 27 | 3  |
| 22611 | 2 | 14337918 | 14337931 | 2 | 7  | 14 | GT   | 13 | 10 |
| 22612 | 2 | 14337933 | 14337948 | 2 | 8  | 16 | TG   | 15 | 10 |
| 22614 | 2 | 14346874 | 14346903 | 2 | 15 | 30 | GA   | 24 | 14 |
| 22617 | 2 | 14357733 | 14357746 | 2 | 7  | 14 | AC   | 24 | 5  |
| 22620 | 2 | 14368151 | 14368168 | 2 | 9  | 18 | CA   | 23 | 11 |
| 22622 | 2 | 14368440 | 14368454 | 3 | 5  | 15 | TTC  | 8  | 3  |
| 22628 | 2 | 14374053 | 14374064 | 2 | 6  | 12 | CA   | 31 | 3  |
| 22633 | 2 | 14391120 | 14391139 | 2 | 10 | 20 | CA   | 17 | 7  |
| 22638 | 2 | 14402175 | 14402200 | 2 | 13 | 26 | GT   | 9  | 10 |
| 22641 | 2 | 14402825 | 14402836 | 2 | 6  | 12 | AC   | 30 | 3  |
| 22642 | 2 | 14404480 | 14404507 | 2 | 14 | 28 | TG   | 7  | 7  |
| 22648 | 2 | 14415946 | 14415991 | 2 | 23 | 46 | GT   | 7  | 8  |
| 22653 | 2 | 14424047 | 14424060 | 2 | 7  | 14 | TG   | 14 | 4  |
| 22661 | 2 | 14451622 | 14451643 | 2 | 11 | 22 | AC   | 14 | 10 |
| 22663 | 2 | 14456732 | 14456767 | 2 | 18 | 36 | CA   | 19 | 9  |
| 22668 | 2 | 14475856 | 14475875 | 2 | 10 | 20 | AC   | 19 | 13 |
| 22679 | 2 | 14512972 | 14512995 | 3 | 8  | 24 | AGG  | 28 | 8  |
| 22681 | 2 | 14520866 | 14520891 | 2 | 13 | 26 | TG   | 20 | 10 |
| 22682 | 2 | 14520982 | 14520999 | 3 | 6  | 18 | GTG  | 21 | 3  |
| 22688 | 2 | 14530620 | 14530649 | 2 | 15 | 30 | AC   | 10 | 11 |
| 22694 | 2 | 14540001 | 14540016 | 2 | 8  | 16 | TG   | 24 | 6  |
| 22698 | 2 | 14549535 | 14549554 | 2 | 10 | 20 | TG   | 16 | 10 |
| 22702 | 2 | 14554892 | 14554907 | 2 | 8  | 16 | AC   | 19 | 3  |
| 22703 | 2 | 14557358 | 14557369 | 2 | 6  | 12 | CA   | 25 | 3  |
| 22704 | 2 | 14558657 | 14558682 | 2 | 13 | 26 | CA   | 17 | 8  |
| 22708 | 2 | 14565548 | 14565567 | 2 | 10 | 20 | AC   | 20 | 4  |
| 22725 | 2 | 14632811 | 14632858 | 2 | 24 | 48 | GA   | 6  | 8  |
| 22726 | 2 | 14632991 | 14633008 | 3 | 6  | 18 | AAC  | 23 | 5  |
| 22730 | 2 | 14635572 | 14635597 | 2 | 13 | 26 | CA   | 15 | 19 |
| 22731 | 2 | 14635716 | 14635736 | 3 | 7  | 21 | TGC  | 27 | 3  |
| 22732 | 2 | 14636202 | 14636215 | 2 | 7  | 14 | TA   | 9  | 4  |
| 22734 | 2 | 14642484 | 14642507 | 2 | 12 | 24 | CA   | 7  | 8  |

|       |   |          |          |   |    |    |      |    |    |
|-------|---|----------|----------|---|----|----|------|----|----|
| 22735 | 2 | 14643301 | 14643315 | 3 | 5  | 15 | GCG  | 31 | 4  |
| 22740 | 2 | 14645588 | 14645621 | 2 | 17 | 34 | CA   | 18 | 12 |
| 22747 | 2 | 14662218 | 14662231 | 2 | 7  | 14 | GA   | 15 | 5  |
| 22748 | 2 | 14662359 | 14662380 | 2 | 11 | 22 | GT   | 16 | 4  |
| 22749 | 2 | 14663176 | 14663189 | 2 | 7  | 14 | TG   | 23 | 7  |
| 22753 | 2 | 14666429 | 14666440 | 2 | 6  | 12 | GT   | 18 | 7  |
| 22754 | 2 | 14666442 | 14666457 | 2 | 8  | 16 | TG   | 20 | 8  |
| 22755 | 2 | 14666719 | 14666768 | 2 | 25 | 50 | CA   | 7  | 7  |
| 22757 | 2 | 14667862 | 14667885 | 4 | 6  | 24 | TCTG | 27 | 10 |
| 22765 | 2 | 14717989 | 14718004 | 2 | 8  | 16 | GT   | 27 | 3  |
| 22768 | 2 | 14723950 | 14723961 | 2 | 6  | 12 | GT   | 14 | 5  |
| 22769 | 2 | 14724795 | 14724832 | 2 | 19 | 38 | TG   | 12 | 8  |
| 22789 | 2 | 14762231 | 14762250 | 2 | 10 | 20 | CA   | 23 | 10 |
| 22794 | 2 | 14768693 | 14768707 | 3 | 5  | 15 | ATC  | 27 | 3  |
| 22799 | 2 | 14779089 | 14779112 | 2 | 12 | 24 | GT   | 21 | 16 |
| 22802 | 2 | 14792415 | 14792436 | 2 | 11 | 22 | GT   | 21 | 7  |
| 22803 | 2 | 14792729 | 14792752 | 2 | 12 | 24 | TG   | 11 | 11 |
| 22804 | 2 | 14797255 | 14797280 | 2 | 13 | 26 | TG   | 18 | 9  |
| 22809 | 2 | 14819302 | 14819315 | 2 | 7  | 14 | GT   | 20 | 4  |
| 22812 | 2 | 14821803 | 14821822 | 2 | 10 | 20 | TG   | 27 | 11 |
| 22814 | 2 | 14822252 | 14822265 | 2 | 7  | 14 | AC   | 19 | 4  |
| 22820 | 2 | 14837015 | 14837032 | 3 | 6  | 18 | GCT  | 19 | 5  |
| 22824 | 2 | 14848943 | 14848956 | 2 | 7  | 14 | GT   | 26 | 3  |
| 22828 | 2 | 14851769 | 14851786 | 3 | 6  | 18 | GCT  | 20 | 6  |
| 22833 | 2 | 14869442 | 14869453 | 2 | 6  | 12 | AC   | 28 | 8  |
| 22835 | 2 | 14872713 | 14872730 | 3 | 6  | 18 | GTT  | 22 | 8  |
| 22846 | 2 | 14882723 | 14882762 | 4 | 10 | 40 | TTTC | 18 | 16 |
| 22849 | 2 | 14887476 | 14887491 | 2 | 8  | 16 | GT   | 7  | 4  |
| 22850 | 2 | 14888392 | 14888427 | 2 | 18 | 36 | GT   | 21 | 8  |
| 22851 | 2 | 14888568 | 14888593 | 2 | 13 | 26 | TG   | 19 | 10 |
| 22854 | 2 | 14890670 | 14890683 | 2 | 7  | 14 | GT   | 15 | 9  |
| 22860 | 2 | 14896400 | 14896415 | 2 | 8  | 16 | CA   | 17 | 19 |
| 22867 | 2 | 14905425 | 14905451 | 3 | 9  | 27 | TAT  | 16 | 8  |
| 22875 | 2 | 14926544 | 14926561 | 2 | 9  | 18 | GA   | 18 | 5  |
| 22878 | 2 | 14928361 | 14928388 | 2 | 14 | 28 | TG   | 10 | 8  |
| 22882 | 2 | 14940451 | 14940476 | 2 | 13 | 26 | TG   | 9  | 4  |
| 22883 | 2 | 14940765 | 14940802 | 2 | 19 | 38 | AG   | 6  | 5  |
| 22886 | 2 | 14952387 | 14952400 | 2 | 7  | 14 | TG   | 16 | 3  |
| 22889 | 2 | 14955931 | 14955954 | 2 | 12 | 24 | GT   | 12 | 13 |
| 22892 | 2 | 14959039 | 14959059 | 3 | 7  | 21 | AAC  | 21 | 3  |
| 22896 | 2 | 14960123 | 14960136 | 2 | 7  | 14 | TG   | 23 | 4  |
| 22898 | 2 | 14960825 | 14960850 | 2 | 13 | 26 | AC   | 7  | 9  |
| 22900 | 2 | 14963971 | 14963986 | 2 | 8  | 16 | GT   | 29 | 6  |
| 22901 | 2 | 14966653 | 14966666 | 2 | 7  | 14 | CA   | 26 | 3  |
| 22915 | 2 | 14978132 | 14978161 | 2 | 15 | 30 | TG   | 9  | 11 |
| 22916 | 2 | 14979656 | 14979671 | 2 | 8  | 16 | AC   | 7  | 3  |
| 22922 | 2 | 14983518 | 14983535 | 2 | 9  | 18 | TG   | 11 | 8  |
| 22929 | 2 | 14990978 | 14991017 | 2 | 20 | 40 | CT   | 10 | 8  |
| 22930 | 2 | 14991247 | 14991280 | 2 | 17 | 34 | CA   | 7  | 9  |
| 22931 | 2 | 14992544 | 14992571 | 2 | 14 | 28 | AC   | 14 | 9  |
| 22932 | 2 | 14992763 | 14992778 | 2 | 8  | 16 | AC   | 16 | 7  |

|       |   |          |          |   |    |    |      |    |    |
|-------|---|----------|----------|---|----|----|------|----|----|
| 22933 | 2 | 14994812 | 14994827 | 2 | 8  | 16 | GT   | 20 | 3  |
| 22935 | 2 | 14997100 | 14997141 | 2 | 21 | 42 | GT   | 9  | 10 |
| 22936 | 2 | 14997850 | 14997871 | 2 | 11 | 22 | AC   | 20 | 8  |
| 22937 | 2 | 14998272 | 14998289 | 2 | 9  | 18 | AC   | 18 | 6  |
| 22938 | 2 | 14998405 | 14998420 | 2 | 8  | 16 | TG   | 24 | 4  |
| 22944 | 2 | 15002551 | 15002566 | 2 | 8  | 16 | TG   | 19 | 8  |
| 22946 | 2 | 15005690 | 15005705 | 2 | 8  | 16 | TG   | 27 | 13 |
| 22947 | 2 | 15008109 | 15008128 | 2 | 10 | 20 | AC   | 11 | 11 |
| 22950 | 2 | 15012939 | 15012968 | 2 | 15 | 30 | AC   | 17 | 7  |
| 22956 | 2 | 15021989 | 15022030 | 2 | 21 | 42 | CA   | 7  | 8  |
| 22959 | 2 | 15024121 | 15024152 | 2 | 16 | 32 | AC   | 9  | 13 |
| 22961 | 2 | 15026183 | 15026206 | 2 | 12 | 24 | GT   | 20 | 8  |
| 22962 | 2 | 15029965 | 15029978 | 2 | 7  | 14 | TG   | 17 | 5  |
| 22963 | 2 | 15030149 | 15030166 | 2 | 9  | 18 | AC   | 21 | 7  |
| 22964 | 2 | 15030168 | 15030181 | 2 | 7  | 14 | CA   | 21 | 6  |
| 22965 | 2 | 15030357 | 15030368 | 2 | 6  | 12 | GT   | 25 | 3  |
| 22966 | 2 | 15031210 | 15031229 | 2 | 10 | 20 | GT   | 22 | 10 |
| 22967 | 2 | 15031373 | 15031394 | 2 | 11 | 22 | AC   | 12 | 6  |
| 22969 | 2 | 15037864 | 15037879 | 2 | 8  | 16 | GT   | 27 | 5  |
| 22973 | 2 | 15040179 | 15040226 | 2 | 24 | 48 | TG   | 7  | 6  |
| 22975 | 2 | 15040747 | 15040768 | 2 | 11 | 22 | TG   | 8  | 4  |
| 22976 | 2 | 15040965 | 15040976 | 2 | 6  | 12 | TG   | 25 | 4  |
| 22986 | 2 | 15061528 | 15061549 | 2 | 11 | 22 | TG   | 22 | 8  |
| 22989 | 2 | 15065427 | 15065442 | 2 | 8  | 16 | GT   | 24 | 5  |
| 22990 | 2 | 15065608 | 15065637 | 2 | 15 | 30 | CA   | 24 | 10 |
| 22991 | 2 | 15066922 | 15066935 | 2 | 7  | 14 | TG   | 33 | 3  |
| 22993 | 2 | 15069358 | 15069377 | 2 | 10 | 20 | GT   | 16 | 5  |
| 22994 | 2 | 15069535 | 15069546 | 2 | 6  | 12 | CA   | 14 | 7  |
| 22996 | 2 | 15071544 | 15071561 | 2 | 9  | 18 | TG   | 11 | 7  |
| 22997 | 2 | 15075812 | 15075875 | 4 | 16 | 64 | TAGA | 7  | 7  |
| 22998 | 2 | 15077205 | 15077224 | 4 | 5  | 20 | AAAC | 10 | 13 |
| 23000 | 2 | 15078712 | 15078733 | 2 | 11 | 22 | GT   | 9  | 9  |
| 23003 | 2 | 15079917 | 15079946 | 2 | 15 | 30 | CA   | 13 | 7  |
| 23004 | 2 | 15080214 | 15080243 | 2 | 15 | 30 | TG   | 10 | 8  |
| 23005 | 2 | 15080450 | 15080461 | 2 | 6  | 12 | AG   | 22 | 4  |
| 23006 | 2 | 15081185 | 15081226 | 2 | 21 | 42 | TG   | 12 | 10 |
| 23007 | 2 | 15082616 | 15082639 | 4 | 6  | 24 | TTGT | 14 | 9  |
| 23010 | 2 | 15085010 | 15085029 | 2 | 10 | 20 | GT   | 18 | 8  |
| 23011 | 2 | 15085489 | 15085526 | 2 | 19 | 38 | AC   | 12 | 11 |
| 23012 | 2 | 15085631 | 15085644 | 2 | 7  | 14 | AC   | 16 | 9  |
| 23014 | 2 | 15089954 | 15089980 | 3 | 9  | 27 | AAC  | 16 | 9  |
| 23016 | 2 | 15091016 | 15091031 | 2 | 8  | 16 | AC   | 25 | 3  |
| 23018 | 2 | 15096444 | 15096463 | 2 | 10 | 20 | CT   | 10 | 7  |
| 23020 | 2 | 15096804 | 15096833 | 2 | 15 | 30 | TG   | 20 | 10 |
| 23022 | 2 | 15098416 | 15098429 | 2 | 7  | 14 | CA   | 34 | 3  |
| 23023 | 2 | 15101251 | 15101282 | 2 | 16 | 32 | AG   | 18 | 16 |
| 23024 | 2 | 15101759 | 15101776 | 2 | 9  | 18 | GT   | 17 | 8  |
| 23028 | 2 | 15107415 | 15107428 | 2 | 7  | 14 | TG   | 24 | 5  |
| 23030 | 2 | 15107956 | 15107991 | 2 | 18 | 36 | AC   | 17 | 9  |
| 23031 | 2 | 15108127 | 15108154 | 2 | 14 | 28 | AC   | 8  | 5  |
| 23035 | 2 | 15109250 | 15109267 | 3 | 6  | 18 | CAG  | 26 | 7  |

|       |   |          |          |   |    |    |      |    |    |
|-------|---|----------|----------|---|----|----|------|----|----|
| 23038 | 2 | 15109670 | 15109691 | 2 | 11 | 22 | TC   | 17 | 9  |
| 23041 | 2 | 15111830 | 15111853 | 3 | 8  | 24 | TGC  | 23 | 7  |
| 23043 | 2 | 15112527 | 15112540 | 2 | 7  | 14 | CA   | 20 | 9  |
| 23048 | 2 | 15115718 | 15115729 | 2 | 6  | 12 | TG   | 24 | 5  |
| 23058 | 2 | 15127697 | 15127720 | 2 | 12 | 24 | TG   | 12 | 6  |
| 23059 | 2 | 15127852 | 15127883 | 2 | 16 | 32 | AC   | 6  | 6  |
| 23060 | 2 | 15128087 | 15128100 | 2 | 7  | 14 | AC   | 14 | 5  |
| 23067 | 2 | 15132307 | 15132318 | 2 | 6  | 12 | TG   | 16 | 7  |
| 23069 | 2 | 15132458 | 15132477 | 2 | 10 | 20 | CT   | 15 | 7  |
| 23072 | 2 | 15133364 | 15133377 | 2 | 7  | 14 | CA   | 22 | 3  |
| 23073 | 2 | 15133940 | 15133951 | 2 | 6  | 12 | TC   | 23 | 3  |
| 23074 | 2 | 15133952 | 15133969 | 2 | 9  | 18 | AC   | 25 | 4  |
| 23075 | 2 | 15134242 | 15134255 | 2 | 7  | 14 | CA   | 25 | 8  |
| 23076 | 2 | 15134403 | 15134414 | 2 | 6  | 12 | AC   | 25 | 6  |
| 23077 | 2 | 15135758 | 15135773 | 2 | 8  | 16 | TC   | 7  | 4  |
| 23080 | 2 | 15136430 | 15136459 | 2 | 15 | 30 | GA   | 14 | 12 |
| 23082 | 2 | 15139974 | 15139995 | 2 | 11 | 22 | TC   | 18 | 6  |
| 23083 | 2 | 15142673 | 15142704 | 4 | 8  | 32 | AGAA | 12 | 8  |
| 23084 | 2 | 15146722 | 15146745 | 4 | 6  | 24 | CAGA | 20 | 4  |
| 23090 | 2 | 15157753 | 15157786 | 2 | 17 | 34 | TG   | 16 | 12 |
| 23094 | 2 | 15171470 | 15171487 | 3 | 6  | 18 | TTG  | 29 | 4  |
| 23095 | 2 | 15173942 | 15173965 | 2 | 12 | 24 | GA   | 12 | 8  |
| 23097 | 2 | 15176514 | 15176543 | 2 | 15 | 30 | TG   | 22 | 13 |
| 23106 | 2 | 15195562 | 15195621 | 4 | 15 | 60 | AAAG | 13 | 15 |
| 23110 | 2 | 15207762 | 15207775 | 2 | 7  | 14 | CA   | 16 | 3  |
| 23113 | 2 | 15211243 | 15211272 | 2 | 15 | 30 | GT   | 17 | 6  |
| 23119 | 2 | 15214875 | 15214886 | 2 | 6  | 12 | AC   | 23 | 3  |
| 23120 | 2 | 15219560 | 15219597 | 2 | 19 | 38 | AC   | 14 | 13 |
| 23121 | 2 | 15219786 | 15219815 | 2 | 15 | 30 | GT   | 12 | 10 |
| 23126 | 2 | 15222555 | 15222586 | 2 | 16 | 32 | CT   | 10 | 9  |
| 23128 | 2 | 15222762 | 15222785 | 2 | 12 | 24 | AC   | 19 | 7  |
| 23129 | 2 | 15223495 | 15223508 | 2 | 7  | 14 | CA   | 25 | 3  |
| 23140 | 2 | 15240630 | 15240645 | 4 | 4  | 16 | GATA | 25 | 6  |
| 23144 | 2 | 15249053 | 15249073 | 3 | 7  | 21 | TCA  | 18 | 3  |
| 23170 | 2 | 15282214 | 15282225 | 2 | 6  | 12 | CA   | 23 | 3  |
| 23172 | 2 | 15294699 | 15294724 | 2 | 13 | 26 | AG   | 17 | 5  |
| 23177 | 2 | 15322155 | 15322190 | 2 | 18 | 36 | TG   | 13 | 10 |
| 23187 | 2 | 15340259 | 15340284 | 2 | 13 | 26 | GT   | 10 | 6  |
| 23188 | 2 | 15342061 | 15342078 | 2 | 9  | 18 | GT   | 9  | 8  |
| 23189 | 2 | 15343811 | 15343852 | 2 | 21 | 42 | GT   | 7  | 8  |
| 23194 | 2 | 15351851 | 15351870 | 2 | 10 | 20 | CA   | 19 | 6  |
| 23197 | 2 | 15356533 | 15356552 | 2 | 10 | 20 | TG   | 11 | 4  |
| 23199 | 2 | 15365397 | 15365414 | 2 | 9  | 18 | TG   | 25 | 8  |
| 23200 | 2 | 15365417 | 15365432 | 2 | 8  | 16 | TG   | 20 | 9  |
| 23203 | 2 | 15371288 | 15371305 | 2 | 9  | 18 | CA   | 23 | 5  |
| 23204 | 2 | 15371351 | 15371362 | 2 | 6  | 12 | AC   | 32 | 4  |
| 23205 | 2 | 15371987 | 15372001 | 3 | 5  | 15 | ATT  | 17 | 9  |
| 23206 | 2 | 15373513 | 15373550 | 2 | 19 | 38 | AC   | 11 | 12 |
| 23208 | 2 | 15375778 | 15375795 | 2 | 9  | 18 | AC   | 17 | 6  |
| 23215 | 2 | 15383349 | 15383370 | 2 | 11 | 22 | TG   | 21 | 8  |
| 23216 | 2 | 15383488 | 15383503 | 2 | 8  | 16 | TG   | 19 | 4  |



|       |   |          |          |   |    |    |      |    |    |
|-------|---|----------|----------|---|----|----|------|----|----|
| 23222 | 2 | 15398713 | 15398736 | 2 | 12 | 24 | CA   | 20 | 3  |
| 23223 | 2 | 15399296 | 15399323 | 2 | 14 | 28 | AC   | 16 | 12 |
| 23225 | 2 | 15402049 | 15402060 | 2 | 6  | 12 | GT   | 27 | 4  |
| 23228 | 2 | 15406190 | 15406215 | 2 | 13 | 26 | GT   | 11 | 7  |
| 23229 | 2 | 15407329 | 15407342 | 2 | 7  | 14 | GT   | 29 | 5  |
| 23230 | 2 | 15408758 | 15408787 | 2 | 15 | 30 | TG   | 10 | 12 |
| 23231 | 2 | 15408903 | 15408942 | 2 | 20 | 40 | TC   | 6  | 8  |
| 23234 | 2 | 15409077 | 15409110 | 2 | 17 | 34 | GT   | 9  | 9  |
| 23235 | 2 | 15412419 | 15412446 | 2 | 14 | 28 | TC   | 14 | 8  |
| 23238 | 2 | 15413636 | 15413655 | 2 | 10 | 20 | AG   | 18 | 5  |
| 23239 | 2 | 15414071 | 15414098 | 2 | 14 | 28 | TG   | 12 | 12 |
| 23243 | 2 | 15422754 | 15422777 | 2 | 12 | 24 | CA   | 12 | 6  |
| 23248 | 2 | 15423386 | 15423409 | 2 | 12 | 24 | TG   | 21 | 20 |
| 23249 | 2 | 15423515 | 15423530 | 2 | 8  | 16 | GT   | 11 | 4  |
| 23252 | 2 | 15430114 | 15430131 | 2 | 9  | 18 | AC   | 11 | 14 |
| 23259 | 2 | 15433893 | 15433912 | 2 | 10 | 20 | GT   | 16 | 6  |
| 23262 | 2 | 15440651 | 15440688 | 2 | 19 | 38 | GT   | 12 | 8  |
| 23264 | 2 | 15442028 | 15442047 | 2 | 10 | 20 | CA   | 10 | 9  |
| 23265 | 2 | 15442162 | 15442173 | 2 | 6  | 12 | GT   | 10 | 7  |
| 23267 | 2 | 15442328 | 15442365 | 2 | 19 | 38 | GT   | 10 | 10 |
| 23268 | 2 | 15442485 | 15442524 | 2 | 20 | 40 | GA   | 9  | 8  |
| 23269 | 2 | 15443006 | 15443025 | 4 | 5  | 20 | GTTG | 25 | 4  |
| 23272 | 2 | 15449460 | 15449489 | 2 | 15 | 30 | CA   | 7  | 7  |
| 23273 | 2 | 15451633 | 15451646 | 2 | 7  | 14 | GA   | 22 | 4  |
| 23275 | 2 | 15454366 | 15454399 | 2 | 17 | 34 | CA   | 10 | 11 |
| 23276 | 2 | 15454464 | 15454489 | 2 | 13 | 26 | AC   | 15 | 11 |
| 23278 | 2 | 15455170 | 15455185 | 4 | 4  | 16 | TCTT | 18 | 5  |
| 23280 | 2 | 15456441 | 15456468 | 2 | 14 | 28 | GT   | 18 | 5  |
| 23284 | 2 | 15458598 | 15458619 | 2 | 11 | 22 | CA   | 13 | 10 |
| 23286 | 2 | 15458769 | 15458780 | 2 | 6  | 12 | CA   | 29 | 7  |
| 23287 | 2 | 15458909 | 15458926 | 2 | 9  | 18 | CA   | 18 | 5  |
| 23288 | 2 | 15458975 | 15459004 | 2 | 15 | 30 | CA   | 16 | 10 |
| 23294 | 2 | 15465076 | 15465101 | 2 | 13 | 26 | TG   | 22 | 9  |
| 23295 | 2 | 15465211 | 15465226 | 2 | 8  | 16 | TG   | 12 | 4  |
| 23296 | 2 | 15465523 | 15465534 | 2 | 6  | 12 | CA   | 27 | 9  |
| 23297 | 2 | 15465821 | 15465858 | 2 | 19 | 38 | GT   | 6  | 8  |
| 23298 | 2 | 15465935 | 15465952 | 2 | 9  | 18 | CA   | 10 | 10 |
| 23300 | 2 | 15468356 | 15468379 | 3 | 8  | 24 | GCT  | 13 | 5  |
| 23304 | 2 | 15468545 | 15468562 | 2 | 9  | 18 | CT   | 16 | 6  |
| 23307 | 2 | 15476291 | 15476302 | 2 | 6  | 12 | AC   | 24 | 6  |
| 23312 | 2 | 15487063 | 15487074 | 2 | 6  | 12 | AC   | 25 | 3  |
| 23315 | 2 | 15490125 | 15490154 | 2 | 15 | 30 | GT   | 17 | 8  |
| 23316 | 2 | 15490466 | 15490507 | 3 | 14 | 42 | TCC  | 16 | 8  |
| 23317 | 2 | 15490713 | 15490734 | 2 | 11 | 22 | AC   | 6  | 5  |
| 23318 | 2 | 15490856 | 15490871 | 4 | 4  | 16 | GGAA | 29 | 3  |
| 23319 | 2 | 15491161 | 15491175 | 3 | 5  | 15 | GAG  | 17 | 4  |
| 23329 | 2 | 15494672 | 15494685 | 2 | 7  | 14 | GT   | 21 | 6  |
| 23330 | 2 | 15495049 | 15495072 | 2 | 12 | 24 | AC   | 15 | 9  |
| 23333 | 2 | 15497687 | 15497702 | 2 | 8  | 16 | GT   | 17 | 7  |
| 23347 | 2 | 15508568 | 15508593 | 2 | 13 | 26 | TG   | 23 | 8  |
| 23349 | 2 | 15511786 | 15511799 | 2 | 7  | 14 | AC   | 24 | 4  |

|       |   |          |          |   |    |    |      |    |    |
|-------|---|----------|----------|---|----|----|------|----|----|
| 23350 | 2 | 15514503 | 15514514 | 2 | 6  | 12 | AC   | 24 | 3  |
| 23353 | 2 | 15518142 | 15518159 | 2 | 9  | 18 | AC   | 21 | 4  |
| 23354 | 2 | 15518255 | 15518270 | 2 | 8  | 16 | GT   | 27 | 10 |
| 23356 | 2 | 15520700 | 15520723 | 2 | 12 | 24 | CA   | 21 | 10 |
| 23362 | 2 | 15525114 | 15525141 | 2 | 14 | 28 | AC   | 18 | 12 |
| 23371 | 2 | 15530024 | 15530039 | 4 | 4  | 16 | AGGA | 12 | 4  |
| 23373 | 2 | 15530141 | 15530164 | 4 | 6  | 24 | GGAA | 9  | 3  |
| 23374 | 2 | 15530291 | 15530314 | 4 | 6  | 24 | AGAA | 25 | 5  |
| 23378 | 2 | 15533145 | 15533176 | 2 | 16 | 32 | TG   | 14 | 13 |
| 23379 | 2 | 15534659 | 15534682 | 2 | 12 | 24 | TG   | 13 | 11 |
| 23380 | 2 | 15534986 | 15534999 | 2 | 7  | 14 | TG   | 13 | 5  |
| 23382 | 2 | 15536676 | 15536707 | 2 | 16 | 32 | TC   | 15 | 8  |
| 23383 | 2 | 15539590 | 15539605 | 2 | 8  | 16 | TG   | 22 | 6  |
| 23384 | 2 | 15539913 | 15539926 | 2 | 7  | 14 | CA   | 20 | 3  |
| 23385 | 2 | 15539928 | 15539943 | 2 | 8  | 16 | AC   | 21 | 4  |
| 23386 | 2 | 15540057 | 15540078 | 2 | 11 | 22 | GT   | 8  | 8  |
| 23395 | 2 | 15543986 | 15544017 | 2 | 16 | 32 | GT   | 22 | 6  |
| 23400 | 2 | 15550102 | 15550117 | 2 | 8  | 16 | CA   | 16 | 10 |
| 23401 | 2 | 15552431 | 15552442 | 2 | 6  | 12 | TG   | 32 | 3  |
| 23402 | 2 | 15553007 | 15553018 | 2 | 6  | 12 | AC   | 33 | 3  |
| 23403 | 2 | 15553244 | 15553259 | 4 | 4  | 16 | TGCA | 32 | 5  |
| 23406 | 2 | 15559008 | 15559023 | 2 | 8  | 16 | GA   | 16 | 3  |
| 23407 | 2 | 15559482 | 15559505 | 2 | 12 | 24 | TG   | 15 | 10 |
| 23410 | 2 | 15562237 | 15562248 | 2 | 6  | 12 | CT   | 28 | 4  |
| 23415 | 2 | 15571360 | 15571371 | 2 | 6  | 12 | GT   | 7  | 3  |
| 23421 | 2 | 15584453 | 15584470 | 3 | 6  | 18 | CTG  | 19 | 4  |
| 23425 | 2 | 15589969 | 15589980 | 2 | 6  | 12 | AT   | 28 | 3  |
| 23427 | 2 | 15591105 | 15591130 | 2 | 13 | 26 | TG   | 18 | 15 |
| 23437 | 2 | 15595487 | 15595504 | 2 | 9  | 18 | TG   | 22 | 4  |
| 23450 | 2 | 15613199 | 15613244 | 2 | 23 | 46 | GT   | 6  | 10 |
| 23452 | 2 | 15613719 | 15613738 | 4 | 5  | 20 | GTCT | 22 | 4  |
| 23453 | 2 | 15613781 | 15613798 | 2 | 9  | 18 | AC   | 24 | 4  |
| 23454 | 2 | 15613876 | 15613911 | 2 | 18 | 36 | AC   | 9  | 11 |
| 23461 | 2 | 15625436 | 15625447 | 2 | 6  | 12 | AC   | 26 | 7  |
| 23462 | 2 | 15626942 | 15626999 | 2 | 29 | 58 | GT   | 8  | 9  |
| 23465 | 2 | 15629339 | 15629362 | 2 | 12 | 24 | TG   | 6  | 9  |
| 23471 | 2 | 15640238 | 15640261 | 2 | 12 | 24 | TG   | 14 | 9  |
| 23477 | 2 | 15649818 | 15649829 | 2 | 6  | 12 | AC   | 24 | 5  |
| 23478 | 2 | 15649991 | 15650008 | 2 | 9  | 18 | CA   | 24 | 7  |
| 23479 | 2 | 15650077 | 15650088 | 2 | 6  | 12 | AC   | 32 | 3  |
| 23480 | 2 | 15650587 | 15650619 | 3 | 11 | 33 | TCC  | 16 | 4  |
| 23481 | 2 | 15654512 | 15654525 | 2 | 7  | 14 | AC   | 23 | 3  |
| 23494 | 2 | 15674706 | 15674727 | 2 | 11 | 22 | TG   | 21 | 16 |
| 23495 | 2 | 15677606 | 15677625 | 2 | 10 | 20 | AC   | 17 | 6  |
| 23496 | 2 | 15679617 | 15679628 | 2 | 6  | 12 | CA   | 31 | 3  |
| 23497 | 2 | 15679764 | 15679799 | 2 | 18 | 36 | TC   | 12 | 11 |
| 23504 | 2 | 15689447 | 15689470 | 2 | 12 | 24 | GT   | 15 | 9  |
| 23506 | 2 | 15691861 | 15691876 | 2 | 8  | 16 | TG   | 24 | 8  |
| 23508 | 2 | 15693988 | 15694015 | 2 | 14 | 28 | GT   | 19 | 10 |
| 23510 | 2 | 15694367 | 15694386 | 2 | 10 | 20 | CA   | 24 | 6  |
| 23511 | 2 | 15694854 | 15694877 | 2 | 12 | 24 | GT   | 9  | 8  |

|       |   |          |          |   |    |    |      |    |    |
|-------|---|----------|----------|---|----|----|------|----|----|
| 23513 | 2 | 15696106 | 15696143 | 2 | 19 | 38 | TG   | 7  | 8  |
| 23514 | 2 | 15696262 | 15696287 | 2 | 13 | 26 | TG   | 11 | 11 |
| 23518 | 2 | 15696689 | 15696720 | 2 | 16 | 32 | GT   | 12 | 10 |
| 23519 | 2 | 15696832 | 15696845 | 2 | 7  | 14 | AC   | 25 | 3  |
| 23521 | 2 | 15699249 | 15699272 | 2 | 12 | 24 | CA   | 15 | 13 |
| 23522 | 2 | 15702655 | 15702674 | 2 | 10 | 20 | TC   | 30 | 5  |
| 23523 | 2 | 15703009 | 15703024 | 2 | 8  | 16 | TG   | 26 | 4  |
| 23524 | 2 | 15703213 | 15703232 | 2 | 10 | 20 | AC   | 21 | 6  |
| 23526 | 2 | 15704782 | 15704823 | 2 | 21 | 42 | AC   | 8  | 12 |
| 23528 | 2 | 15706394 | 15706441 | 2 | 24 | 48 | GT   | 7  | 8  |
| 23529 | 2 | 15706566 | 15706577 | 2 | 6  | 12 | AC   | 18 | 8  |
| 23531 | 2 | 15707979 | 15707990 | 2 | 6  | 12 | TG   | 22 | 4  |
| 23536 | 2 | 15710144 | 15710161 | 2 | 9  | 18 | CA   | 18 | 8  |
| 23543 | 2 | 15715440 | 15715457 | 2 | 9  | 18 | GT   | 16 | 4  |
| 23545 | 2 | 15715771 | 15715802 | 2 | 16 | 32 | AC   | 20 | 7  |
| 23547 | 2 | 15720621 | 15720638 | 2 | 9  | 18 | TG   | 20 | 3  |
| 23548 | 2 | 15720779 | 15720804 | 2 | 13 | 26 | AC   | 16 | 6  |
| 23552 | 2 | 15725123 | 15725146 | 4 | 6  | 24 | ATCC | 24 | 4  |
| 23554 | 2 | 15725445 | 15725468 | 2 | 12 | 24 | AC   | 7  | 8  |
| 23555 | 2 | 15729445 | 15729462 | 2 | 9  | 18 | GT   | 26 | 3  |
| 23559 | 2 | 15734384 | 15734397 | 2 | 7  | 14 | TG   | 20 | 3  |
| 23564 | 2 | 15738105 | 15738120 | 2 | 8  | 16 | CA   | 13 | 3  |
| 23566 | 2 | 15739544 | 15739563 | 4 | 5  | 20 | CAGA | 27 | 10 |
| 23573 | 2 | 15744842 | 15744855 | 2 | 7  | 14 | GA   | 18 | 5  |
| 23579 | 2 | 15747069 | 15747082 | 2 | 7  | 14 | TG   | 16 | 7  |
| 23584 | 2 | 15748431 | 15748456 | 2 | 13 | 26 | TG   | 11 | 12 |
| 23588 | 2 | 15749179 | 15749192 | 2 | 7  | 14 | CA   | 21 | 6  |
| 23590 | 2 | 15749384 | 15749413 | 2 | 15 | 30 | GT   | 6  | 4  |
| 23591 | 2 | 15749658 | 15749673 | 2 | 8  | 16 | CA   | 19 | 8  |
| 23595 | 2 | 15751379 | 15751394 | 2 | 8  | 16 | CA   | 18 | 7  |
| 23596 | 2 | 15751627 | 15751650 | 2 | 12 | 24 | TG   | 15 | 11 |
| 23598 | 2 | 15752361 | 15752378 | 2 | 9  | 18 | TG   | 25 | 5  |
| 23599 | 2 | 15754289 | 15754304 | 2 | 8  | 16 | AC   | 22 | 4  |
| 23600 | 2 | 15754525 | 15754558 | 2 | 17 | 34 | GT   | 6  | 9  |
| 23601 | 2 | 15757363 | 15757382 | 2 | 10 | 20 | AG   | 21 | 7  |
| 23602 | 2 | 15757884 | 15757905 | 2 | 11 | 22 | TG   | 6  | 5  |
| 23603 | 2 | 15758059 | 15758090 | 2 | 16 | 32 | CA   | 16 | 9  |
| 23605 | 2 | 15761702 | 15761721 | 2 | 10 | 20 | CA   | 17 | 5  |
| 23606 | 2 | 15762323 | 15762336 | 2 | 7  | 14 | TG   | 34 | 3  |
| 23608 | 2 | 15763654 | 15763665 | 2 | 6  | 12 | CA   | 23 | 3  |
| 23613 | 2 | 15765565 | 15765578 | 2 | 7  | 14 | TG   | 18 | 4  |
| 23615 | 2 | 15765694 | 15765713 | 2 | 10 | 20 | TG   | 20 | 5  |
| 23617 | 2 | 15765996 | 15766021 | 2 | 13 | 26 | TG   | 16 | 6  |
| 23618 | 2 | 15768141 | 15768162 | 2 | 11 | 22 | TG   | 15 | 7  |
| 23619 | 2 | 15768440 | 15768465 | 2 | 13 | 26 | AC   | 13 | 10 |
| 23620 | 2 | 15768947 | 15768974 | 2 | 14 | 28 | AC   | 17 | 4  |
| 23622 | 2 | 15769603 | 15769630 | 2 | 14 | 28 | AC   | 22 | 5  |
| 23630 | 2 | 15779476 | 15779501 | 2 | 13 | 26 | CA   | 11 | 7  |
| 23634 | 2 | 15780367 | 15780390 | 2 | 12 | 24 | AC   | 12 | 8  |
| 23635 | 2 | 15782392 | 15782403 | 2 | 6  | 12 | AC   | 9  | 3  |
| 23636 | 2 | 15782590 | 15782607 | 2 | 9  | 18 | GT   | 26 | 10 |

|       |   |          |          |   |    |    |      |    |    |
|-------|---|----------|----------|---|----|----|------|----|----|
| 23637 | 2 | 15782877 | 15782892 | 2 | 8  | 16 | GT   | 20 | 5  |
| 23641 | 2 | 15792856 | 15792869 | 2 | 7  | 14 | AC   | 15 | 4  |
| 23642 | 2 | 15800323 | 15800340 | 2 | 9  | 18 | CA   | 19 | 4  |
| 23643 | 2 | 15801382 | 15801407 | 2 | 13 | 26 | GT   | 13 | 14 |
| 23645 | 2 | 15801549 | 15801568 | 2 | 10 | 20 | AC   | 11 | 5  |
| 23646 | 2 | 15801654 | 15801671 | 2 | 9  | 18 | TG   | 10 | 8  |
| 23648 | 2 | 15802750 | 15802767 | 2 | 9  | 18 | TG   | 26 | 4  |
| 23649 | 2 | 15802909 | 15802940 | 2 | 16 | 32 | AC   | 11 | 11 |
| 23653 | 2 | 15806476 | 15806503 | 2 | 14 | 28 | TG   | 9  | 8  |
| 23654 | 2 | 15806868 | 15806881 | 2 | 7  | 14 | GT   | 15 | 3  |
| 23656 | 2 | 15807133 | 15807152 | 2 | 10 | 20 | AC   | 28 | 3  |
| 23666 | 2 | 15820186 | 15820207 | 2 | 11 | 22 | CA   | 22 | 7  |
| 23667 | 2 | 15823197 | 15823208 | 2 | 6  | 12 | GT   | 25 | 4  |
| 23670 | 2 | 15844275 | 15844304 | 2 | 15 | 30 | AC   | 15 | 7  |
| 23671 | 2 | 15845050 | 15845089 | 2 | 20 | 40 | TG   | 16 | 10 |
| 23683 | 2 | 15874171 | 15874212 | 2 | 21 | 42 | TG   | 10 | 10 |
| 23692 | 2 | 15884087 | 15884101 | 3 | 5  | 15 | GAG  | 30 | 4  |
| 23693 | 2 | 15887406 | 15887421 | 2 | 8  | 16 | AC   | 24 | 6  |
| 23694 | 2 | 15890391 | 15890408 | 3 | 6  | 18 | GAG  | 29 | 6  |
| 23696 | 2 | 15893702 | 15893725 | 4 | 6  | 24 | GGAT | 25 | 3  |
| 23699 | 2 | 15920923 | 15920936 | 2 | 7  | 14 | AC   | 25 | 3  |
| 23700 | 2 | 15931551 | 15931582 | 4 | 8  | 32 | TATC | 23 | 12 |
| 23703 | 2 | 15935269 | 15935292 | 4 | 6  | 24 | TATT | 8  | 4  |
| 23707 | 2 | 15938041 | 15938062 | 2 | 11 | 22 | TG   | 14 | 8  |
| 23709 | 2 | 15940055 | 15940076 | 2 | 11 | 22 | TG   | 25 | 9  |
| 23716 | 2 | 15950066 | 15950085 | 2 | 10 | 20 | AC   | 15 | 4  |
| 23718 | 2 | 15960051 | 15960066 | 2 | 8  | 16 | CA   | 18 | 8  |
| 23722 | 2 | 15963889 | 15963906 | 2 | 9  | 18 | AC   | 21 | 4  |
| 23723 | 2 | 15966888 | 15966911 | 2 | 12 | 24 | GT   | 22 | 11 |
| 23726 | 2 | 15969307 | 15969318 | 2 | 6  | 12 | GT   | 27 | 4  |
| 23727 | 2 | 15970428 | 15970439 | 2 | 6  | 12 | GT   | 19 | 5  |
| 23729 | 2 | 15971569 | 15971595 | 3 | 9  | 27 | GAG  | 16 | 4  |
| 23731 | 2 | 15973454 | 15973468 | 3 | 5  | 15 | GCC  | 20 | 7  |
| 23732 | 2 | 15973469 | 15973483 | 3 | 5  | 15 | TCC  | 21 | 6  |
| 23733 | 2 | 15973678 | 15973698 | 3 | 7  | 21 | CCT  | 18 | 4  |
| 23734 | 2 | 15978252 | 15978273 | 2 | 11 | 22 | GT   | 16 | 14 |
| 23735 | 2 | 15981328 | 15981341 | 2 | 7  | 14 | AC   | 34 | 3  |
| 23741 | 2 | 15989714 | 15989741 | 2 | 14 | 28 | AG   | 17 | 9  |
| 23743 | 2 | 16000682 | 16000705 | 4 | 6  | 24 | CCAT | 26 | 7  |
| 23755 | 2 | 16020516 | 16020529 | 2 | 7  | 14 | CA   | 28 | 4  |
| 23757 | 2 | 16025268 | 16025288 | 3 | 7  | 21 | TTC  | 10 | 5  |
| 23760 | 2 | 16029390 | 16029403 | 2 | 7  | 14 | TG   | 25 | 5  |
| 23761 | 2 | 16033291 | 16033310 | 2 | 10 | 20 | TG   | 10 | 5  |
| 23764 | 2 | 16033490 | 16033537 | 2 | 24 | 48 | AC   | 15 | 9  |
| 23765 | 2 | 16035776 | 16035827 | 2 | 26 | 52 | TG   | 17 | 12 |
| 23766 | 2 | 16041378 | 16041401 | 2 | 12 | 24 | TG   | 16 | 9  |
| 23767 | 2 | 16041544 | 16041565 | 2 | 11 | 22 | AC   | 25 | 9  |
| 23768 | 2 | 16043201 | 16043232 | 2 | 16 | 32 | CT   | 12 | 14 |
| 23769 | 2 | 16043515 | 16043538 | 4 | 6  | 24 | AAAG | 17 | 6  |
| 23782 | 2 | 16066177 | 16066192 | 2 | 8  | 16 | TG   | 6  | 5  |
| 23784 | 2 | 16069809 | 16069824 | 2 | 8  | 16 | CA   | 18 | 8  |

|       |   |          |          |   |    |    |      |    |    |
|-------|---|----------|----------|---|----|----|------|----|----|
| 23787 | 2 | 16072854 | 16072867 | 2 | 7  | 14 | TG   | 32 | 3  |
| 23789 | 2 | 16078955 | 16078990 | 2 | 18 | 36 | AC   | 26 | 9  |
| 23790 | 2 | 16079761 | 16079804 | 2 | 22 | 44 | TG   | 7  | 9  |
| 23793 | 2 | 16086631 | 16086668 | 2 | 19 | 38 | TG   | 7  | 7  |
| 23794 | 2 | 16088744 | 16088755 | 2 | 6  | 12 | GT   | 24 | 3  |
| 23799 | 2 | 16106271 | 16106300 | 2 | 15 | 30 | TG   | 24 | 10 |
| 23802 | 2 | 16117676 | 16117693 | 2 | 9  | 18 | AC   | 25 | 6  |
| 23803 | 2 | 16117828 | 16117845 | 2 | 9  | 18 | GT   | 18 | 7  |
| 23806 | 2 | 16121028 | 16121041 | 2 | 7  | 14 | TG   | 13 | 3  |
| 23807 | 2 | 16121376 | 16121387 | 2 | 6  | 12 | TG   | 22 | 9  |
| 23818 | 2 | 16137146 | 16137159 | 2 | 7  | 14 | GT   | 15 | 10 |
| 23820 | 2 | 16143484 | 16143495 | 2 | 6  | 12 | AC   | 19 | 11 |
| 23821 | 2 | 16146568 | 16146585 | 2 | 9  | 18 | GT   | 19 | 7  |
| 23823 | 2 | 16165147 | 16165164 | 2 | 9  | 18 | GA   | 26 | 4  |
| 23825 | 2 | 16165494 | 16165523 | 2 | 15 | 30 | GT   | 17 | 11 |
| 23835 | 2 | 16171024 | 16171067 | 4 | 11 | 44 | TCTA | 15 | 10 |
| 23836 | 2 | 16175205 | 16175222 | 2 | 9  | 18 | AC   | 19 | 7  |
| 23839 | 2 | 16177055 | 16177086 | 2 | 16 | 32 | GT   | 16 | 14 |
| 23852 | 2 | 16186784 | 16186811 | 2 | 14 | 28 | TG   | 19 | 10 |
| 23853 | 2 | 16187086 | 16187099 | 2 | 7  | 14 | GT   | 21 | 4  |
| 23857 | 2 | 16191515 | 16191550 | 2 | 18 | 36 | AC   | 7  | 11 |
| 23862 | 2 | 16194091 | 16194108 | 2 | 9  | 18 | TG   | 16 | 4  |
| 23863 | 2 | 16194262 | 16194285 | 2 | 12 | 24 | AC   | 11 | 12 |
| 23865 | 2 | 16195450 | 16195461 | 2 | 6  | 12 | TA   | 14 | 3  |
| 23866 | 2 | 16197880 | 16197899 | 2 | 10 | 20 | TG   | 20 | 6  |
| 23867 | 2 | 16198037 | 16198048 | 2 | 6  | 12 | GT   | 6  | 3  |
| 23868 | 2 | 16198613 | 16198668 | 2 | 28 | 56 | AG   | 14 | 12 |
| 23872 | 2 | 16208196 | 16208207 | 2 | 6  | 12 | CA   | 24 | 5  |
| 23877 | 2 | 16213681 | 16213692 | 2 | 6  | 12 | AC   | 27 | 3  |
| 23878 | 2 | 16214867 | 16214888 | 2 | 11 | 22 | TG   | 13 | 5  |
| 23880 | 2 | 16220342 | 16220357 | 2 | 8  | 16 | CT   | 23 | 5  |
| 23882 | 2 | 16222287 | 16222308 | 2 | 11 | 22 | TG   | 24 | 7  |
| 23892 | 2 | 16237968 | 16237983 | 2 | 8  | 16 | CA   | 18 | 19 |
| 23893 | 2 | 16238084 | 16238103 | 4 | 5  | 20 | GTGA | 27 | 5  |
| 23900 | 2 | 16269655 | 16269694 | 2 | 20 | 40 | GT   | 14 | 14 |
| 23901 | 2 | 16270624 | 16270647 | 2 | 12 | 24 | TG   | 18 | 6  |
| 23912 | 2 | 16284149 | 16284164 | 2 | 8  | 16 | TC   | 13 | 6  |
| 23919 | 2 | 16297434 | 16297451 | 2 | 9  | 18 | TG   | 17 | 7  |
| 23923 | 2 | 16307087 | 16307122 | 2 | 18 | 36 | TG   | 13 | 12 |
| 23942 | 2 | 16318258 | 16318277 | 2 | 10 | 20 | AC   | 17 | 4  |
| 23943 | 2 | 16319237 | 16319251 | 3 | 5  | 15 | CAG  | 18 | 3  |
| 23946 | 2 | 16323353 | 16323384 | 2 | 16 | 32 | AC   | 15 | 7  |
| 23949 | 2 | 16331803 | 16331822 | 2 | 10 | 20 | TC   | 26 | 4  |
| 23957 | 2 | 16345432 | 16345443 | 2 | 6  | 12 | AC   | 28 | 3  |
| 23958 | 2 | 16345847 | 16345862 | 2 | 8  | 16 | CT   | 12 | 6  |
| 23959 | 2 | 16358406 | 16358435 | 3 | 10 | 30 | AAG  | 18 | 11 |
| 23960 | 2 | 16361389 | 16361408 | 2 | 10 | 20 | CA   | 13 | 15 |
| 23967 | 2 | 16383897 | 16383912 | 4 | 4  | 16 | AAAC | 22 | 3  |
| 23974 | 2 | 16392731 | 16392752 | 2 | 11 | 22 | TG   | 24 | 3  |
| 23979 | 2 | 16405848 | 16405867 | 2 | 10 | 20 | GT   | 14 | 4  |
| 23981 | 2 | 16407677 | 16407702 | 2 | 13 | 26 | CA   | 17 | 7  |

|       |   |          |          |   |    |    |      |    |    |
|-------|---|----------|----------|---|----|----|------|----|----|
| 23984 | 2 | 16413960 | 16413995 | 2 | 18 | 36 | GT   | 15 | 9  |
| 23986 | 2 | 16417333 | 16417354 | 2 | 11 | 22 | GT   | 16 | 4  |
| 23988 | 2 | 16422796 | 16422823 | 2 | 14 | 28 | CA   | 19 | 8  |
| 24003 | 2 | 16447069 | 16447094 | 2 | 13 | 26 | TC   | 19 | 8  |
| 24004 | 2 | 16450722 | 16450757 | 2 | 18 | 36 | TG   | 6  | 7  |
| 24005 | 2 | 16450879 | 16450926 | 2 | 24 | 48 | AC   | 7  | 9  |
| 24008 | 2 | 16463315 | 16463328 | 2 | 7  | 14 | CA   | 23 | 6  |
| 24009 | 2 | 16463692 | 16463705 | 2 | 7  | 14 | TG   | 26 | 5  |
| 24010 | 2 | 16465992 | 16466013 | 2 | 11 | 22 | TG   | 25 | 8  |
| 24011 | 2 | 16467244 | 16467269 | 2 | 13 | 26 | TG   | 15 | 7  |
| 24013 | 2 | 16469626 | 16469640 | 3 | 5  | 15 | CAG  | 26 | 5  |
| 24015 | 2 | 16478504 | 16478517 | 2 | 7  | 14 | TG   | 22 | 3  |
| 24016 | 2 | 16483427 | 16483444 | 2 | 9  | 18 | GT   | 26 | 5  |
| 24017 | 2 | 16493956 | 16493977 | 2 | 11 | 22 | CA   | 16 | 5  |
| 24024 | 2 | 16499026 | 16499043 | 2 | 9  | 18 | GT   | 16 | 10 |
| 24025 | 2 | 16501295 | 16501308 | 2 | 7  | 14 | AC   | 33 | 3  |
| 24026 | 2 | 16501600 | 16501649 | 2 | 25 | 50 | GT   | 7  | 4  |
| 24041 | 2 | 16514640 | 16514657 | 3 | 6  | 18 | CCT  | 6  | 4  |
| 24045 | 2 | 16515578 | 16515593 | 2 | 8  | 16 | GA   | 12 | 6  |
| 24048 | 2 | 16516435 | 16516454 | 2 | 10 | 20 | CA   | 14 | 10 |
| 24050 | 2 | 16519286 | 16519306 | 3 | 7  | 21 | AGC  | 22 | 3  |
| 24053 | 2 | 16528060 | 16528079 | 2 | 10 | 20 | CT   | 23 | 3  |
| 24055 | 2 | 16529151 | 16529180 | 2 | 15 | 30 | CA   | 9  | 7  |
| 24056 | 2 | 16529651 | 16529672 | 2 | 11 | 22 | AC   | 14 | 11 |
| 24057 | 2 | 16531962 | 16531999 | 2 | 19 | 38 | TG   | 11 | 7  |
| 24059 | 2 | 16534888 | 16534899 | 2 | 6  | 12 | AG   | 26 | 4  |
| 24060 | 2 | 16534951 | 16534971 | 3 | 7  | 21 | TCC  | 20 | 3  |
| 24062 | 2 | 16536741 | 16536764 | 3 | 8  | 24 | AGC  | 33 | 6  |
| 24063 | 2 | 16537834 | 16537849 | 2 | 8  | 16 | CT   | 24 | 4  |
| 24069 | 2 | 16539163 | 16539174 | 2 | 6  | 12 | GT   | 31 | 5  |
| 24070 | 2 | 16541509 | 16541538 | 2 | 15 | 30 | AC   | 9  | 7  |
| 24072 | 2 | 16542500 | 16542515 | 4 | 4  | 16 | TCCT | 28 | 4  |
| 24074 | 2 | 16547313 | 16547334 | 2 | 11 | 22 | AC   | 13 | 9  |
| 24076 | 2 | 16547523 | 16547548 | 2 | 13 | 26 | CA   | 18 | 8  |
| 24078 | 2 | 16550931 | 16550950 | 4 | 5  | 20 | AAAG | 31 | 6  |
| 24080 | 2 | 16555145 | 16555182 | 2 | 19 | 38 | CA   | 14 | 14 |
| 24081 | 2 | 16555410 | 16555429 | 2 | 10 | 20 | TG   | 22 | 4  |
| 24082 | 2 | 16562082 | 16562113 | 2 | 16 | 32 | CA   | 23 | 10 |
| 24090 | 2 | 16573477 | 16573490 | 2 | 7  | 14 | GT   | 30 | 4  |
| 24097 | 2 | 16585316 | 16585335 | 2 | 10 | 20 | AC   | 17 | 15 |
| 24098 | 2 | 16585337 | 16585348 | 2 | 6  | 12 | CA   | 15 | 14 |
| 24107 | 2 | 16594390 | 16594403 | 2 | 7  | 14 | TG   | 27 | 3  |
| 24112 | 2 | 16600074 | 16600087 | 2 | 7  | 14 | AC   | 29 | 3  |
| 24113 | 2 | 16600137 | 16600148 | 2 | 6  | 12 | CA   | 26 | 3  |
| 24114 | 2 | 16600512 | 16600523 | 2 | 6  | 12 | GC   | 27 | 5  |
| 24118 | 2 | 16616274 | 16616297 | 2 | 12 | 24 | GT   | 11 | 8  |
| 24126 | 2 | 16622608 | 16622623 | 2 | 8  | 16 | CA   | 14 | 9  |
| 24134 | 2 | 16627567 | 16627600 | 2 | 17 | 34 | AC   | 11 | 8  |
| 24136 | 2 | 16629253 | 16629264 | 2 | 6  | 12 | AG   | 15 | 3  |
| 24137 | 2 | 16629527 | 16629538 | 2 | 6  | 12 | AG   | 19 | 3  |
| 24138 | 2 | 16630085 | 16630098 | 2 | 7  | 14 | TG   | 25 | 5  |

|       |   |          |          |   |    |    |     |    |    |
|-------|---|----------|----------|---|----|----|-----|----|----|
| 24139 | 2 | 16630296 | 16630329 | 2 | 17 | 34 | CA  | 8  | 6  |
| 24140 | 2 | 16630497 | 16630516 | 2 | 10 | 20 | GA  | 17 | 6  |
| 24141 | 2 | 16631024 | 16631039 | 2 | 8  | 16 | GT  | 21 | 10 |
| 24144 | 2 | 16634496 | 16634515 | 2 | 10 | 20 | TG  | 18 | 7  |
| 24146 | 2 | 16634728 | 16634745 | 3 | 6  | 18 | CTC | 13 | 4  |
| 24147 | 2 | 16636892 | 16636903 | 2 | 6  | 12 | GA  | 27 | 3  |
| 24148 | 2 | 16637629 | 16637640 | 2 | 6  | 12 | GA  | 11 | 3  |
| 24150 | 2 | 16638428 | 16638451 | 2 | 12 | 24 | GT  | 24 | 9  |
| 24153 | 2 | 16638937 | 16638954 | 2 | 9  | 18 | TG  | 10 | 3  |
| 24155 | 2 | 16639295 | 16639308 | 2 | 7  | 14 | CT  | 19 | 3  |
| 24157 | 2 | 16639601 | 16639612 | 2 | 6  | 12 | CA  | 20 | 5  |
| 24163 | 2 | 16643312 | 16643333 | 2 | 11 | 22 | CA  | 19 | 9  |
| 24164 | 2 | 16643436 | 16643451 | 2 | 8  | 16 | TG  | 13 | 4  |
| 24165 | 2 | 16646387 | 16646400 | 2 | 7  | 14 | CT  | 24 | 4  |
| 24166 | 2 | 16646564 | 16646583 | 2 | 10 | 20 | CA  | 17 | 10 |
| 24174 | 2 | 16650078 | 16650127 | 2 | 25 | 50 | AC  | 12 | 10 |
| 24176 | 2 | 16650306 | 16650323 | 2 | 9  | 18 | GT  | 11 | 3  |
| 24177 | 2 | 16650691 | 16650718 | 2 | 14 | 28 | TG  | 10 | 6  |
| 24178 | 2 | 16653008 | 16653029 | 2 | 11 | 22 | TG  | 13 | 10 |
| 24183 | 2 | 16655117 | 16655144 | 2 | 14 | 28 | CA  | 8  | 9  |
| 24200 | 2 | 16671347 | 16671361 | 3 | 5  | 15 | AGA | 28 | 7  |
| 24204 | 2 | 16674068 | 16674081 | 2 | 7  | 14 | TG  | 28 | 6  |
| 24207 | 2 | 16674571 | 16674590 | 2 | 10 | 20 | CT  | 23 | 3  |
| 24208 | 2 | 16676925 | 16676960 | 3 | 12 | 36 | TCT | 16 | 9  |
| 24209 | 2 | 16677067 | 16677112 | 2 | 23 | 46 | AC  | 7  | 6  |
| 24210 | 2 | 16677162 | 16677177 | 2 | 8  | 16 | CA  | 21 | 3  |
| 24212 | 2 | 16682695 | 16682708 | 2 | 7  | 14 | TG  | 21 | 6  |
| 24213 | 2 | 16683727 | 16683746 | 2 | 10 | 20 | AC  | 14 | 9  |
| 24216 | 2 | 16686888 | 16686917 | 2 | 15 | 30 | TG  | 11 | 12 |
| 24219 | 2 | 16688108 | 16688119 | 2 | 6  | 12 | CA  | 20 | 3  |
| 24224 | 2 | 16695524 | 16695551 | 2 | 14 | 28 | TG  | 13 | 7  |
| 24226 | 2 | 16696554 | 16696565 | 2 | 6  | 12 | GT  | 22 | 4  |
| 24231 | 2 | 16699871 | 16699890 | 2 | 10 | 20 | CA  | 8  | 6  |
| 24232 | 2 | 16700014 | 16700041 | 2 | 14 | 28 | CT  | 9  | 11 |
| 24237 | 2 | 16703086 | 16703111 | 2 | 13 | 26 | GA  | 16 | 5  |
| 24238 | 2 | 16705102 | 16705121 | 2 | 10 | 20 | TG  | 21 | 10 |
| 24239 | 2 | 16705166 | 16705185 | 2 | 10 | 20 | GT  | 19 | 6  |
| 24243 | 2 | 16709237 | 16709266 | 2 | 15 | 30 | CA  | 7  | 7  |
| 24245 | 2 | 16709495 | 16709532 | 2 | 19 | 38 | TG  | 16 | 9  |
| 24248 | 2 | 16710449 | 16710462 | 2 | 7  | 14 | GT  | 22 | 6  |
| 24249 | 2 | 16710557 | 16710572 | 2 | 8  | 16 | CA  | 25 | 5  |
| 24254 | 2 | 16718169 | 16718196 | 2 | 14 | 28 | CA  | 20 | 6  |
| 24255 | 2 | 16720479 | 16720502 | 2 | 12 | 24 | TG  | 18 | 3  |
| 24259 | 2 | 16723627 | 16723656 | 2 | 15 | 30 | GT  | 9  | 7  |
| 24264 | 2 | 16726210 | 16726225 | 2 | 8  | 16 | CA  | 14 | 9  |
| 24267 | 2 | 16729181 | 16729224 | 2 | 22 | 44 | CA  | 6  | 9  |
| 24269 | 2 | 16729665 | 16729696 | 2 | 16 | 32 | AC  | 18 | 7  |
| 24271 | 2 | 16730922 | 16730947 | 2 | 13 | 26 | CA  | 9  | 5  |
| 24272 | 2 | 16731317 | 16731338 | 2 | 11 | 22 | GT  | 26 | 5  |
| 24276 | 2 | 16740889 | 16740908 | 2 | 10 | 20 | CA  | 19 | 6  |
| 24277 | 2 | 16741530 | 16741547 | 2 | 9  | 18 | CA  | 17 | 4  |

|       |   |          |          |   |    |    |     |    |    |
|-------|---|----------|----------|---|----|----|-----|----|----|
| 24278 | 2 | 16741604 | 16741625 | 2 | 11 | 22 | AC  | 21 | 7  |
| 24279 | 2 | 16742177 | 16742188 | 2 | 6  | 12 | TG  | 25 | 5  |
| 24286 | 2 | 16747013 | 16747026 | 2 | 7  | 14 | CT  | 25 | 5  |
| 24287 | 2 | 16747204 | 16747229 | 2 | 13 | 26 | TG  | 17 | 9  |
| 24293 | 2 | 16749154 | 16749171 | 2 | 9  | 18 | AC  | 13 | 5  |
| 24299 | 2 | 16753912 | 16753923 | 2 | 6  | 12 | TG  | 19 | 7  |
| 24301 | 2 | 16754005 | 16754030 | 2 | 13 | 26 | GT  | 15 | 7  |
| 24308 | 2 | 16759621 | 16759638 | 2 | 9  | 18 | GT  | 19 | 4  |
| 24311 | 2 | 16760635 | 16760650 | 2 | 8  | 16 | CT  | 17 | 4  |
| 24312 | 2 | 16763441 | 16763462 | 2 | 11 | 22 | TG  | 17 | 11 |
| 24314 | 2 | 16764007 | 16764018 | 2 | 6  | 12 | CA  | 20 | 4  |
| 24315 | 2 | 16764020 | 16764037 | 2 | 9  | 18 | AC  | 20 | 5  |
| 24316 | 2 | 16764210 | 16764223 | 2 | 7  | 14 | CT  | 15 | 3  |
| 24318 | 2 | 16764575 | 16764586 | 2 | 6  | 12 | CA  | 31 | 3  |
| 24323 | 2 | 16774186 | 16774219 | 2 | 17 | 34 | TG  | 7  | 10 |
| 24324 | 2 | 16775519 | 16775538 | 2 | 10 | 20 | GT  | 13 | 10 |
| 24328 | 2 | 16778819 | 16778846 | 2 | 14 | 28 | GT  | 16 | 11 |
| 24329 | 2 | 16778964 | 16778989 | 2 | 13 | 26 | GT  | 13 | 6  |
| 24331 | 2 | 16779066 | 16779091 | 2 | 13 | 26 | TG  | 14 | 7  |
| 24333 | 2 | 16783837 | 16783850 | 2 | 7  | 14 | GT  | 28 | 7  |
| 24334 | 2 | 16788584 | 16788601 | 2 | 9  | 18 | CA  | 18 | 14 |
| 24338 | 2 | 16796072 | 16796083 | 2 | 6  | 12 | CA  | 22 | 3  |
| 24339 | 2 | 16799245 | 16799262 | 2 | 9  | 18 | AC  | 24 | 6  |
| 24341 | 2 | 16806133 | 16806146 | 2 | 7  | 14 | TG  | 24 | 4  |
| 24342 | 2 | 16806512 | 16806537 | 2 | 13 | 26 | GT  | 10 | 9  |
| 24343 | 2 | 16808315 | 16808340 | 2 | 13 | 26 | TG  | 17 | 14 |
| 24345 | 2 | 16810655 | 16810682 | 2 | 14 | 28 | GA  | 9  | 8  |
| 24346 | 2 | 16811164 | 16811185 | 2 | 11 | 22 | GT  | 17 | 9  |
| 24352 | 2 | 16813884 | 16813907 | 2 | 12 | 24 | GT  | 12 | 5  |
| 24355 | 2 | 16816288 | 16816299 | 2 | 6  | 12 | TG  | 27 | 3  |
| 24356 | 2 | 16816789 | 16816812 | 2 | 12 | 24 | GT  | 18 | 13 |
| 24357 | 2 | 16818272 | 16818283 | 2 | 6  | 12 | GT  | 18 | 4  |
| 24361 | 2 | 16818560 | 16818571 | 2 | 6  | 12 | TG  | 23 | 4  |
| 24362 | 2 | 16818706 | 16818737 | 2 | 16 | 32 | TG  | 11 | 8  |
| 24366 | 2 | 16819715 | 16819730 | 2 | 8  | 16 | AC  | 19 | 6  |
| 24372 | 2 | 16823563 | 16823584 | 2 | 11 | 22 | CA  | 9  | 3  |
| 24374 | 2 | 16824549 | 16824570 | 2 | 11 | 22 | GT  | 24 | 9  |
| 24379 | 2 | 16837168 | 16837179 | 2 | 6  | 12 | TA  | 9  | 4  |
| 24380 | 2 | 16837678 | 16837691 | 2 | 7  | 14 | GT  | 6  | 6  |
| 24382 | 2 | 16840573 | 16840598 | 2 | 13 | 26 | AC  | 25 | 6  |
| 24383 | 2 | 16840841 | 16840870 | 2 | 15 | 30 | AC  | 11 | 11 |
| 24384 | 2 | 16843184 | 16843195 | 2 | 6  | 12 | GT  | 27 | 3  |
| 24387 | 2 | 16846248 | 16846261 | 2 | 7  | 14 | AC  | 14 | 3  |
| 24388 | 2 | 16846267 | 16846282 | 2 | 8  | 16 | CA  | 13 | 6  |
| 24389 | 2 | 16846756 | 16846773 | 3 | 6  | 18 | ATT | 15 | 5  |
| 24393 | 2 | 16855312 | 16855323 | 2 | 6  | 12 | AC  | 20 | 4  |
| 24413 | 2 | 16896943 | 16896954 | 2 | 6  | 12 | GT  | 18 | 4  |
| 24414 | 2 | 16896957 | 16896968 | 2 | 6  | 12 | GT  | 21 | 3  |
| 24415 | 2 | 16896993 | 16897004 | 2 | 6  | 12 | GT  | 22 | 3  |
| 24420 | 2 | 16905373 | 16905400 | 2 | 14 | 28 | TG  | 19 | 7  |
| 24433 | 2 | 16927218 | 16927232 | 3 | 5  | 15 | ATT | 27 | 3  |



|       |   |          |          |   |    |    |      |    |    |
|-------|---|----------|----------|---|----|----|------|----|----|
| 24434 | 2 | 16928153 | 16928182 | 2 | 15 | 30 | GT   | 11 | 5  |
| 24435 | 2 | 16928359 | 16928370 | 2 | 6  | 12 | GT   | 21 | 3  |
| 24452 | 2 | 16960166 | 16960197 | 4 | 8  | 32 | TCCT | 12 | 7  |
| 24453 | 2 | 16960474 | 16960497 | 4 | 6  | 24 | TTGT | 22 | 3  |
| 24458 | 2 | 16986056 | 16986083 | 4 | 7  | 28 | TTTG | 21 | 5  |
| 24462 | 2 | 16993465 | 16993502 | 2 | 19 | 38 | TG   | 7  | 7  |
| 24466 | 2 | 16998702 | 16998722 | 3 | 7  | 21 | GAA  | 20 | 9  |
| 24484 | 2 | 17040539 | 17040556 | 3 | 6  | 18 | GAT  | 26 | 3  |
| 24496 | 2 | 17056685 | 17056716 | 2 | 16 | 32 | GT   | 9  | 10 |
| 24505 | 2 | 17066226 | 17066239 | 2 | 7  | 14 | GA   | 27 | 3  |
| 24506 | 2 | 17066822 | 17066845 | 2 | 12 | 24 | GT   | 20 | 4  |
| 24507 | 2 | 17068902 | 17068913 | 2 | 6  | 12 | CA   | 17 | 4  |
| 24508 | 2 | 17068916 | 17068931 | 2 | 8  | 16 | TA   | 11 | 5  |
| 24509 | 2 | 17069013 | 17069046 | 2 | 17 | 34 | CT   | 7  | 6  |
| 24513 | 2 | 17075346 | 17075363 | 2 | 9  | 18 | AC   | 19 | 4  |
| 24514 | 2 | 17075454 | 17075469 | 2 | 8  | 16 | TG   | 19 | 5  |
| 24517 | 2 | 17077403 | 17077440 | 2 | 19 | 38 | TG   | 6  | 6  |
| 24519 | 2 | 17080624 | 17080645 | 2 | 11 | 22 | TG   | 13 | 9  |
| 24520 | 2 | 17080711 | 17080722 | 2 | 6  | 12 | CT   | 20 | 5  |
| 24521 | 2 | 17080724 | 17080739 | 2 | 8  | 16 | TC   | 17 | 6  |
| 24526 | 2 | 17084934 | 17084957 | 2 | 12 | 24 | AC   | 19 | 8  |
| 24532 | 2 | 17087457 | 17087472 | 4 | 4  | 16 | CGTG | 6  | 3  |
| 24538 | 2 | 17095798 | 17095817 | 2 | 10 | 20 | TG   | 15 | 13 |
| 24539 | 2 | 17095819 | 17095834 | 2 | 8  | 16 | GT   | 11 | 12 |
| 24543 | 2 | 17098463 | 17098480 | 2 | 9  | 18 | TG   | 13 | 7  |
| 24544 | 2 | 17098857 | 17098894 | 2 | 19 | 38 | GT   | 7  | 11 |
| 24547 | 2 | 17100035 | 17100066 | 2 | 16 | 32 | GA   | 16 | 11 |
| 24548 | 2 | 17100445 | 17100468 | 2 | 12 | 24 | TC   | 13 | 5  |
| 24551 | 2 | 17100660 | 17100683 | 2 | 12 | 24 | AC   | 12 | 10 |
| 24554 | 2 | 17104620 | 17104639 | 2 | 10 | 20 | GT   | 15 | 7  |
| 24563 | 2 | 17126877 | 17126890 | 2 | 7  | 14 | TG   | 20 | 6  |
| 24564 | 2 | 17127079 | 17127094 | 2 | 8  | 16 | TC   | 11 | 9  |
| 24569 | 2 | 17134315 | 17134330 | 2 | 8  | 16 | CA   | 9  | 5  |
| 24570 | 2 | 17135372 | 17135401 | 2 | 15 | 30 | CA   | 16 | 7  |
| 24577 | 2 | 17145432 | 17145446 | 3 | 5  | 15 | GAG  | 25 | 4  |
| 24579 | 2 | 17154092 | 17154109 | 3 | 6  | 18 | CCT  | 17 | 4  |
| 24581 | 2 | 17154690 | 17154701 | 2 | 6  | 12 | TG   | 26 | 3  |
| 24584 | 2 | 17161306 | 17161321 | 4 | 4  | 16 | GGAG | 22 | 3  |
| 24590 | 2 | 17172578 | 17172595 | 2 | 9  | 18 | TG   | 15 | 5  |
| 24591 | 2 | 17172626 | 17172649 | 3 | 8  | 24 | CTC  | 22 | 4  |
| 24601 | 2 | 17189774 | 17189789 | 2 | 8  | 16 | CA   | 23 | 6  |
| 24602 | 2 | 17189791 | 17189804 | 2 | 7  | 14 | AC   | 20 | 3  |
| 24625 | 2 | 17244395 | 17244420 | 2 | 13 | 26 | CA   | 24 | 11 |
| 24626 | 2 | 17246091 | 17246104 | 2 | 7  | 14 | GT   | 24 | 3  |
| 24632 | 2 | 17257669 | 17257702 | 2 | 17 | 34 | AC   | 13 | 12 |
| 24634 | 2 | 17261482 | 17261493 | 2 | 6  | 12 | CT   | 9  | 9  |
| 24638 | 2 | 17271649 | 17271674 | 2 | 13 | 26 | GT   | 11 | 6  |
| 24641 | 2 | 17273382 | 17273397 | 2 | 8  | 16 | TG   | 18 | 3  |
| 24643 | 2 | 17275410 | 17275431 | 2 | 11 | 22 | AC   | 9  | 7  |
| 24644 | 2 | 17278128 | 17278147 | 2 | 10 | 20 | AC   | 18 | 10 |
| 24646 | 2 | 17278915 | 17278944 | 2 | 15 | 30 | TG   | 9  | 5  |

|       |   |          |          |   |    |    |      |    |    |
|-------|---|----------|----------|---|----|----|------|----|----|
| 24647 | 2 | 17281317 | 17281330 | 2 | 7  | 14 | GC   | 31 | 5  |
| 24651 | 2 | 17283193 | 17283212 | 2 | 10 | 20 | TG   | 16 | 9  |
| 24657 | 2 | 17288000 | 17288023 | 2 | 12 | 24 | TG   | 8  | 8  |
| 24658 | 2 | 17288064 | 17288085 | 2 | 11 | 22 | TG   | 11 | 4  |
| 24660 | 2 | 17289280 | 17289293 | 2 | 7  | 14 | TG   | 25 | 7  |
| 24661 | 2 | 17289295 | 17289306 | 2 | 6  | 12 | GT   | 16 | 3  |
| 24665 | 2 | 17297148 | 17297159 | 2 | 6  | 12 | TG   | 21 | 6  |
| 24667 | 2 | 17308193 | 17308210 | 2 | 9  | 18 | CA   | 6  | 7  |
| 24669 | 2 | 17308499 | 17308522 | 2 | 12 | 24 | AC   | 17 | 11 |
| 24673 | 2 | 17313940 | 17313983 | 4 | 11 | 44 | ATAG | 10 | 10 |
| 24685 | 2 | 17329646 | 17329671 | 2 | 13 | 26 | AC   | 18 | 9  |
| 24692 | 2 | 17341803 | 17341836 | 2 | 17 | 34 | TG   | 13 | 10 |
| 24695 | 2 | 17353512 | 17353538 | 3 | 9  | 27 | TGT  | 23 | 8  |
| 24702 | 2 | 17373656 | 17373669 | 2 | 7  | 14 | CA   | 18 | 9  |
| 24703 | 2 | 17373757 | 17373780 | 2 | 12 | 24 | TG   | 16 | 10 |
| 24705 | 2 | 17381278 | 17381297 | 2 | 10 | 20 | TG   | 20 | 6  |
| 24707 | 2 | 17381520 | 17381533 | 2 | 7  | 14 | CA   | 14 | 8  |
| 24712 | 2 | 17391880 | 17391909 | 3 | 10 | 30 | AGC  | 25 | 11 |
| 24713 | 2 | 17392203 | 17392220 | 2 | 9  | 18 | TG   | 13 | 7  |
| 24714 | 2 | 17392272 | 17392283 | 2 | 6  | 12 | AG   | 18 | 4  |
| 24718 | 2 | 17393110 | 17393123 | 2 | 7  | 14 | TC   | 24 | 4  |
| 24720 | 2 | 17396371 | 17396384 | 2 | 7  | 14 | AG   | 24 | 3  |
| 24724 | 2 | 17404436 | 17404457 | 2 | 11 | 22 | GT   | 7  | 7  |
| 24726 | 2 | 17404593 | 17404608 | 4 | 4  | 16 | GAGG | 10 | 4  |
| 24728 | 2 | 17406501 | 17406522 | 2 | 11 | 22 | CA   | 20 | 11 |
| 24730 | 2 | 17408248 | 17408263 | 2 | 8  | 16 | AC   | 27 | 4  |
| 24731 | 2 | 17408657 | 17408684 | 2 | 14 | 28 | GT   | 12 | 6  |
| 24737 | 2 | 17412227 | 17412244 | 2 | 9  | 18 | CA   | 29 | 3  |
| 24739 | 2 | 17412601 | 17412622 | 2 | 11 | 22 | GT   | 20 | 6  |
| 24740 | 2 | 17412725 | 17412746 | 2 | 11 | 22 | GT   | 18 | 4  |
| 24741 | 2 | 17413967 | 17413996 | 2 | 15 | 30 | TG   | 16 | 9  |
| 24742 | 2 | 17414197 | 17414212 | 2 | 8  | 16 | CA   | 24 | 9  |
| 24743 | 2 | 17414364 | 17414379 | 2 | 8  | 16 | TG   | 26 | 8  |
| 24744 | 2 | 17415031 | 17415044 | 2 | 7  | 14 | AC   | 24 | 7  |
| 24745 | 2 | 17415199 | 17415226 | 2 | 14 | 28 | AG   | 14 | 5  |
| 24752 | 2 | 17428280 | 17428295 | 2 | 8  | 16 | AT   | 11 | 6  |
| 24759 | 2 | 17439797 | 17439820 | 3 | 8  | 24 | GAG  | 22 | 3  |
| 24760 | 2 | 17440049 | 17440066 | 2 | 9  | 18 | GA   | 9  | 7  |
| 24773 | 2 | 17449402 | 17449419 | 2 | 9  | 18 | CA   | 16 | 4  |
| 24774 | 2 | 17450233 | 17450258 | 2 | 13 | 26 | TC   | 13 | 5  |
| 24776 | 2 | 17450451 | 17450478 | 2 | 14 | 28 | GT   | 8  | 7  |
| 24777 | 2 | 17452412 | 17452427 | 2 | 8  | 16 | GT   | 26 | 5  |
| 24782 | 2 | 17455857 | 17455874 | 2 | 9  | 18 | CA   | 26 | 4  |
| 24784 | 2 | 17458578 | 17458589 | 2 | 6  | 12 | TG   | 28 | 4  |
| 24785 | 2 | 17459160 | 17459177 | 2 | 9  | 18 | TG   | 24 | 5  |
| 24786 | 2 | 17461586 | 17461597 | 2 | 6  | 12 | CT   | 20 | 4  |
| 24787 | 2 | 17461631 | 17461642 | 2 | 6  | 12 | TC   | 26 | 3  |
| 24790 | 2 | 17466721 | 17466746 | 2 | 13 | 26 | AC   | 9  | 8  |
| 24795 | 2 | 17479889 | 17479920 | 2 | 16 | 32 | CA   | 11 | 6  |
| 24796 | 2 | 17481165 | 17481178 | 2 | 7  | 14 | TG   | 18 | 4  |
| 24797 | 2 | 17481549 | 17481566 | 2 | 9  | 18 | GT   | 17 | 5  |

|       |   |          |          |   |    |    |      |    |    |
|-------|---|----------|----------|---|----|----|------|----|----|
| 24800 | 2 | 17489947 | 17489982 | 2 | 18 | 36 | TG   | 12 | 10 |
| 24801 | 2 | 17496872 | 17496889 | 2 | 9  | 18 | TC   | 20 | 6  |
| 24802 | 2 | 17496891 | 17496904 | 2 | 7  | 14 | CT   | 20 | 4  |
| 24805 | 2 | 17509900 | 17509917 | 3 | 6  | 18 | TCA  | 24 | 3  |
| 24812 | 2 | 17528327 | 17528342 | 2 | 8  | 16 | TG   | 22 | 4  |
| 24814 | 2 | 17535269 | 17535284 | 2 | 8  | 16 | AC   | 19 | 3  |
| 24815 | 2 | 17538599 | 17538626 | 2 | 14 | 28 | CA   | 7  | 10 |
| 24817 | 2 | 17539256 | 17539267 | 2 | 6  | 12 | GT   | 23 | 4  |
| 24818 | 2 | 17539301 | 17539316 | 2 | 8  | 16 | GT   | 20 | 4  |
| 24819 | 2 | 17541190 | 17541205 | 2 | 8  | 16 | AC   | 13 | 8  |
| 24820 | 2 | 17541562 | 17541583 | 2 | 11 | 22 | TG   | 9  | 8  |
| 24821 | 2 | 17543423 | 17543436 | 2 | 7  | 14 | GT   | 29 | 4  |
| 24824 | 2 | 17549441 | 17549472 | 2 | 16 | 32 | TG   | 16 | 11 |
| 24827 | 2 | 17555941 | 17555958 | 2 | 9  | 18 | AG   | 26 | 3  |
| 24828 | 2 | 17556955 | 17556968 | 2 | 7  | 14 | GT   | 15 | 3  |
| 24829 | 2 | 17561061 | 17561090 | 2 | 15 | 30 | TG   | 16 | 7  |
| 24832 | 2 | 17563870 | 17563895 | 2 | 13 | 26 | CA   | 21 | 12 |
| 24833 | 2 | 17564032 | 17564045 | 2 | 7  | 14 | CA   | 21 | 4  |
| 24838 | 2 | 17574527 | 17574542 | 2 | 8  | 16 | AC   | 23 | 11 |
| 24839 | 2 | 17574545 | 17574560 | 2 | 8  | 16 | AC   | 22 | 10 |
| 24843 | 2 | 17578928 | 17578941 | 2 | 7  | 14 | GT   | 24 | 4  |
| 24844 | 2 | 17579083 | 17579106 | 2 | 12 | 24 | GT   | 6  | 10 |
| 24848 | 2 | 17584406 | 17584429 | 2 | 12 | 24 | CA   | 17 | 7  |
| 24852 | 2 | 17592565 | 17592588 | 3 | 8  | 24 | ATG  | 29 | 4  |
| 24860 | 2 | 17600220 | 17600251 | 2 | 16 | 32 | TG   | 15 | 11 |
| 24862 | 2 | 17606870 | 17606897 | 2 | 14 | 28 | TG   | 12 | 9  |
| 24863 | 2 | 17609194 | 17609209 | 2 | 8  | 16 | CA   | 24 | 3  |
| 24866 | 2 | 17612080 | 17612107 | 2 | 14 | 28 | CA   | 7  | 7  |
| 24868 | 2 | 17613330 | 17613343 | 2 | 7  | 14 | TG   | 27 | 8  |
| 24873 | 2 | 17615449 | 17615474 | 2 | 13 | 26 | TG   | 10 | 3  |
| 24877 | 2 | 17620685 | 17620702 | 2 | 9  | 18 | AT   | 10 | 4  |
| 24878 | 2 | 17623779 | 17623798 | 2 | 10 | 20 | TA   | 6  | 4  |
| 24883 | 2 | 17640814 | 17640837 | 3 | 8  | 24 | GAG  | 29 | 3  |
| 24894 | 2 | 17662047 | 17662058 | 2 | 6  | 12 | AC   | 23 | 4  |
| 24898 | 2 | 17676738 | 17676753 | 2 | 8  | 16 | AC   | 28 | 5  |
| 24900 | 2 | 17683498 | 17683511 | 2 | 7  | 14 | GT   | 23 | 15 |
| 24901 | 2 | 17687237 | 17687250 | 2 | 7  | 14 | TG   | 22 | 3  |
| 24903 | 2 | 17689653 | 17689684 | 2 | 16 | 32 | TG   | 10 | 10 |
| 24905 | 2 | 17697733 | 17697759 | 3 | 9  | 27 | CTC  | 13 | 8  |
| 24908 | 2 | 17703093 | 17703106 | 2 | 7  | 14 | CA   | 27 | 6  |
| 24911 | 2 | 17706020 | 17706045 | 2 | 13 | 26 | AC   | 12 | 6  |
| 24916 | 2 | 17714192 | 17714205 | 2 | 7  | 14 | AT   | 10 | 6  |
| 24917 | 2 | 17714338 | 17714355 | 2 | 9  | 18 | TG   | 11 | 5  |
| 24929 | 2 | 17758408 | 17758440 | 3 | 11 | 33 | TCA  | 28 | 8  |
| 24932 | 2 | 17767271 | 17767300 | 3 | 10 | 30 | CCT  | 25 | 7  |
| 24936 | 2 | 17775224 | 17775238 | 3 | 5  | 15 | CCT  | 25 | 3  |
| 24939 | 2 | 17784163 | 17784218 | 4 | 14 | 56 | ATCT | 9  | 5  |
| 24940 | 2 | 17786528 | 17786563 | 3 | 12 | 36 | TGA  | 20 | 7  |
| 24941 | 2 | 17787067 | 17787081 | 3 | 5  | 15 | CAA  | 29 | 5  |
| 24943 | 2 | 17791607 | 17791622 | 2 | 8  | 16 | CT   | 28 | 3  |
| 24945 | 2 | 17799175 | 17799192 | 3 | 6  | 18 | TTG  | 29 | 5  |

|       |   |          |          |   |    |    |      |    |    |
|-------|---|----------|----------|---|----|----|------|----|----|
| 24948 | 2 | 17801982 | 17802001 | 4 | 5  | 20 | AAAC | 28 | 9  |
| 24949 | 2 | 17813235 | 17813261 | 3 | 9  | 27 | CTC  | 20 | 4  |
| 24957 | 2 | 17830049 | 17830070 | 2 | 11 | 22 | GT   | 13 | 8  |
| 24960 | 2 | 17859958 | 17859975 | 2 | 9  | 18 | TG   | 6  | 9  |
| 24961 | 2 | 17864015 | 17864034 | 2 | 10 | 20 | GT   | 22 | 5  |
| 24963 | 2 | 17869305 | 17869325 | 3 | 7  | 21 | CTC  | 19 | 5  |
| 24964 | 2 | 17872675 | 17872686 | 2 | 6  | 12 | TG   | 9  | 3  |
| 24965 | 2 | 17872688 | 17872703 | 2 | 8  | 16 | GT   | 15 | 9  |
| 24975 | 2 | 17900898 | 17900930 | 3 | 11 | 33 | GGA  | 22 | 7  |
| 24978 | 2 | 17909612 | 17909632 | 3 | 7  | 21 | CAG  | 25 | 5  |
| 24979 | 2 | 17910717 | 17910740 | 3 | 8  | 24 | CCT  | 19 | 4  |
| 25010 | 2 | 17950101 | 17950130 | 2 | 15 | 30 | AG   | 6  | 5  |
| 25015 | 2 | 17958698 | 17958709 | 2 | 6  | 12 | AC   | 16 | 3  |
| 25017 | 2 | 17960750 | 17960763 | 2 | 7  | 14 | CA   | 24 | 3  |
| 25019 | 2 | 17962503 | 17962534 | 2 | 16 | 32 | GT   | 21 | 14 |
| 25024 | 2 | 17970719 | 17970732 | 2 | 7  | 14 | GA   | 17 | 3  |
| 25026 | 2 | 17971180 | 17971195 | 2 | 8  | 16 | TG   | 19 | 4  |
| 25027 | 2 | 17971312 | 17971323 | 2 | 6  | 12 | CA   | 24 | 5  |
| 25028 | 2 | 17972125 | 17972148 | 2 | 12 | 24 | TC   | 12 | 8  |
| 25032 | 2 | 17973095 | 17973108 | 2 | 7  | 14 | AC   | 20 | 5  |
| 25037 | 2 | 17990763 | 17990783 | 3 | 7  | 21 | CAG  | 32 | 4  |
| 25038 | 2 | 17998411 | 17998432 | 2 | 11 | 22 | GA   | 15 | 5  |
| 25039 | 2 | 17999157 | 17999170 | 2 | 7  | 14 | CT   | 13 | 4  |
| 25040 | 2 | 18001300 | 18001321 | 2 | 11 | 22 | AG   | 22 | 6  |
| 25043 | 2 | 18012451 | 18012474 | 2 | 12 | 24 | TG   | 11 | 10 |
| 25045 | 2 | 18013251 | 18013270 | 4 | 5  | 20 | ACAG | 23 | 3  |
| 25048 | 2 | 18015264 | 18015283 | 2 | 10 | 20 | TG   | 15 | 5  |
| 25063 | 2 | 18035051 | 18035076 | 2 | 13 | 26 | TG   | 7  | 3  |
| 25083 | 2 | 18044860 | 18044909 | 2 | 25 | 50 | CA   | 7  | 8  |
| 25085 | 2 | 18045637 | 18045654 | 2 | 9  | 18 | GT   | 7  | 3  |
| 25089 | 2 | 18049835 | 18049850 | 2 | 8  | 16 | TG   | 23 | 5  |
| 25090 | 2 | 18050822 | 18050869 | 4 | 12 | 48 | ACAA | 15 | 13 |
| 25094 | 2 | 18054667 | 18054682 | 2 | 8  | 16 | GT   | 11 | 3  |
| 25096 | 2 | 18055764 | 18055784 | 3 | 7  | 21 | CAA  | 25 | 9  |
| 25101 | 2 | 18065414 | 18065439 | 2 | 13 | 26 | CA   | 13 | 9  |
| 25108 | 2 | 18079179 | 18079190 | 2 | 6  | 12 | AT   | 11 | 5  |
| 25110 | 2 | 18081149 | 18081164 | 2 | 8  | 16 | AC   | 23 | 8  |
| 25115 | 2 | 18084260 | 18084275 | 2 | 8  | 16 | GT   | 22 | 16 |
| 25120 | 2 | 18088800 | 18088811 | 2 | 6  | 12 | TG   | 33 | 3  |
| 25125 | 2 | 18100138 | 18100167 | 2 | 15 | 30 | AC   | 23 | 12 |
| 25126 | 2 | 18101127 | 18101140 | 2 | 7  | 14 | TG   | 23 | 3  |
| 25130 | 2 | 18107090 | 18107119 | 2 | 15 | 30 | AG   | 6  | 5  |
| 25131 | 2 | 18108393 | 18108408 | 2 | 8  | 16 | GT   | 19 | 5  |
| 25152 | 2 | 18126989 | 18127003 | 3 | 5  | 15 | TCT  | 18 | 10 |
| 25154 | 2 | 18127355 | 18127366 | 2 | 6  | 12 | AC   | 15 | 4  |
| 25155 | 2 | 18127368 | 18127381 | 2 | 7  | 14 | CA   | 11 | 5  |
| 25156 | 2 | 18127630 | 18127653 | 2 | 12 | 24 | GT   | 22 | 10 |
| 25157 | 2 | 18132373 | 18132392 | 2 | 10 | 20 | CA   | 20 | 6  |
| 25163 | 2 | 18138239 | 18138266 | 2 | 14 | 28 | AC   | 15 | 8  |
| 25166 | 2 | 18139902 | 18139923 | 2 | 11 | 22 | GT   | 17 | 6  |
| 25171 | 2 | 18143781 | 18143794 | 2 | 7  | 14 | TG   | 28 | 4  |

|       |   |          |          |   |    |    |      |    |    |
|-------|---|----------|----------|---|----|----|------|----|----|
| 25181 | 2 | 18156293 | 18156314 | 2 | 11 | 22 | TG   | 23 | 8  |
| 25184 | 2 | 18160958 | 18160981 | 2 | 12 | 24 | TG   | 17 | 6  |
| 25188 | 2 | 18169754 | 18169777 | 4 | 6  | 24 | GTGC | 16 | 12 |
| 25191 | 2 | 18172549 | 18172612 | 4 | 16 | 64 | ATCT | 15 | 10 |
| 25204 | 2 | 18184836 | 18184871 | 2 | 18 | 36 | GT   | 17 | 4  |
| 25205 | 2 | 18185214 | 18185225 | 2 | 6  | 12 | TG   | 16 | 3  |
| 25207 | 2 | 18186638 | 18186663 | 2 | 13 | 26 | CA   | 9  | 7  |
| 25213 | 2 | 18192008 | 18192027 | 4 | 5  | 20 | AGCC | 19 | 3  |
| 25216 | 2 | 18202907 | 18202924 | 2 | 9  | 18 | TG   | 20 | 4  |
| 25222 | 2 | 18208080 | 18208111 | 2 | 16 | 32 | GT   | 9  | 11 |
| 25224 | 2 | 18211285 | 18211304 | 2 | 10 | 20 | TG   | 18 | 5  |
| 25227 | 2 | 18215251 | 18215262 | 2 | 6  | 12 | CA   | 15 | 3  |
| 25228 | 2 | 18217447 | 18217476 | 2 | 15 | 30 | GT   | 16 | 7  |
| 25229 | 2 | 18217732 | 18217767 | 2 | 18 | 36 | GT   | 6  | 5  |
| 25231 | 2 | 18220216 | 18220235 | 2 | 10 | 20 | CA   | 15 | 5  |
| 25232 | 2 | 18221668 | 18221719 | 4 | 13 | 52 | CTTT | 14 | 9  |
| 25233 | 2 | 18225182 | 18225203 | 2 | 11 | 22 | AC   | 14 | 8  |
| 25236 | 2 | 18226362 | 18226373 | 2 | 6  | 12 | TC   | 18 | 4  |
| 25242 | 2 | 18228686 | 18228715 | 2 | 15 | 30 | TG   | 10 | 17 |
| 25243 | 2 | 18228755 | 18228766 | 2 | 6  | 12 | GT   | 15 | 3  |
| 25248 | 2 | 18234314 | 18234325 | 2 | 6  | 12 | GT   | 15 | 6  |
| 25249 | 2 | 18234327 | 18234344 | 2 | 9  | 18 | TG   | 15 | 5  |
| 25254 | 2 | 18238355 | 18238378 | 2 | 12 | 24 | CT   | 6  | 4  |
| 25256 | 2 | 18241781 | 18241804 | 2 | 12 | 24 | TG   | 13 | 9  |
| 25257 | 2 | 18241983 | 18241994 | 2 | 6  | 12 | TG   | 20 | 3  |
| 25258 | 2 | 18243686 | 18243699 | 2 | 7  | 14 | AG   | 16 | 5  |
| 25260 | 2 | 18247073 | 18247094 | 2 | 11 | 22 | TG   | 11 | 4  |
| 25262 | 2 | 18247433 | 18247456 | 2 | 12 | 24 | TG   | 10 | 9  |
| 25274 | 2 | 18249085 | 18249111 | 3 | 9  | 27 | TCA  | 13 | 4  |
| 25277 | 2 | 18251864 | 18251875 | 2 | 6  | 12 | TC   | 26 | 4  |
| 25278 | 2 | 18253778 | 18253803 | 2 | 13 | 26 | CA   | 25 | 5  |
| 25279 | 2 | 18254921 | 18254946 | 2 | 13 | 26 | AG   | 28 | 5  |
| 25281 | 2 | 18255378 | 18255407 | 2 | 15 | 30 | TG   | 15 | 9  |
| 25283 | 2 | 18258252 | 18258265 | 2 | 7  | 14 | CA   | 22 | 8  |
| 25285 | 2 | 18258660 | 18258685 | 2 | 13 | 26 | AC   | 25 | 6  |
| 25289 | 2 | 18265414 | 18265433 | 2 | 10 | 20 | CA   | 22 | 6  |
| 25297 | 2 | 18276113 | 18276126 | 2 | 7  | 14 | GT   | 19 | 6  |
| 25298 | 2 | 18276128 | 18276145 | 2 | 9  | 18 | TG   | 22 | 7  |
| 25301 | 2 | 18280831 | 18280842 | 2 | 6  | 12 | TG   | 26 | 5  |
| 25302 | 2 | 18281355 | 18281372 | 2 | 9  | 18 | CA   | 15 | 14 |
| 25317 | 2 | 18313531 | 18313574 | 2 | 22 | 44 | AG   | 8  | 8  |
| 25320 | 2 | 18320787 | 18320808 | 2 | 11 | 22 | GT   | 28 | 12 |
| 25326 | 2 | 18336796 | 18336809 | 2 | 7  | 14 | GT   | 24 | 6  |
| 25327 | 2 | 18339043 | 18339056 | 2 | 7  | 14 | AG   | 18 | 3  |
| 25330 | 2 | 18346607 | 18346630 | 3 | 8  | 24 | CTC  | 12 | 6  |
| 25331 | 2 | 18347258 | 18347273 | 4 | 4  | 16 | GTGC | 30 | 7  |
| 25334 | 2 | 18350054 | 18350074 | 3 | 7  | 21 | GAG  | 32 | 5  |
| 25337 | 2 | 18352652 | 18352679 | 2 | 14 | 28 | GT   | 17 | 6  |
| 25339 | 2 | 18356126 | 18356137 | 2 | 6  | 12 | AC   | 24 | 4  |
| 25347 | 2 | 18382770 | 18382819 | 2 | 25 | 50 | GT   | 21 | 9  |
| 25358 | 2 | 18402281 | 18402300 | 2 | 10 | 20 | TG   | 8  | 3  |

|       |   |          |          |   |    |    |      |    |    |
|-------|---|----------|----------|---|----|----|------|----|----|
| 25359 | 2 | 18403723 | 18403754 | 2 | 16 | 32 | TG   | 16 | 11 |
| 25364 | 2 | 18419869 | 18419880 | 2 | 6  | 12 | CA   | 24 | 3  |
| 25365 | 2 | 18420873 | 18420894 | 2 | 11 | 22 | CT   | 15 | 6  |
| 25367 | 2 | 18420984 | 18420995 | 2 | 6  | 12 | CA   | 20 | 3  |
| 25369 | 2 | 18421301 | 18421318 | 2 | 9  | 18 | CA   | 17 | 10 |
| 25371 | 2 | 18423932 | 18423946 | 3 | 5  | 15 | AAG  | 14 | 6  |
| 25377 | 2 | 18425039 | 18425072 | 2 | 17 | 34 | AC   | 16 | 10 |
| 25379 | 2 | 18425161 | 18425184 | 2 | 12 | 24 | CA   | 22 | 7  |
| 25382 | 2 | 18430271 | 18430294 | 2 | 12 | 24 | CA   | 7  | 7  |
| 25384 | 2 | 18430948 | 18430961 | 2 | 7  | 14 | TG   | 27 | 3  |
| 25385 | 2 | 18431178 | 18431201 | 3 | 8  | 24 | AGG  | 23 | 4  |
| 25387 | 2 | 18432232 | 18432253 | 2 | 11 | 22 | AC   | 16 | 4  |
| 25391 | 2 | 18439955 | 18439982 | 2 | 14 | 28 | CA   | 15 | 7  |
| 25394 | 2 | 18446594 | 18446607 | 2 | 7  | 14 | TG   | 20 | 3  |
| 25396 | 2 | 18452266 | 18452281 | 4 | 4  | 16 | TTTC | 24 | 3  |
| 25411 | 2 | 18480689 | 18480706 | 2 | 9  | 18 | AG   | 16 | 9  |
| 25412 | 2 | 18480823 | 18480866 | 2 | 22 | 44 | GT   | 6  | 9  |
| 25415 | 2 | 18486824 | 18486843 | 2 | 10 | 20 | TG   | 14 | 10 |
| 25417 | 2 | 18488509 | 18488522 | 2 | 7  | 14 | TG   | 15 | 3  |
| 25422 | 2 | 18493187 | 18493218 | 2 | 16 | 32 | AC   | 12 | 15 |
| 25424 | 2 | 18494059 | 18494076 | 2 | 9  | 18 | TG   | 14 | 8  |
| 25429 | 2 | 18509453 | 18509474 | 2 | 11 | 22 | GA   | 21 | 10 |
| 25432 | 2 | 18511515 | 18511544 | 2 | 15 | 30 | CA   | 15 | 8  |
| 25434 | 2 | 18515442 | 18515459 | 2 | 9  | 18 | GT   | 19 | 6  |
| 25436 | 2 | 18526179 | 18526202 | 2 | 12 | 24 | GT   | 6  | 8  |
| 25439 | 2 | 18536856 | 18536879 | 4 | 6  | 24 | AATC | 14 | 7  |
| 25441 | 2 | 18545383 | 18545400 | 3 | 6  | 18 | TTA  | 18 | 4  |
| 25443 | 2 | 18549806 | 18549849 | 2 | 22 | 44 | CA   | 6  | 7  |
| 25447 | 2 | 18560280 | 18560297 | 2 | 9  | 18 | AC   | 24 | 8  |
| 25457 | 2 | 18603771 | 18603796 | 2 | 13 | 26 | CA   | 9  | 6  |
| 25458 | 2 | 18605010 | 18605031 | 2 | 11 | 22 | TG   | 9  | 6  |
| 25459 | 2 | 18611378 | 18611389 | 2 | 6  | 12 | AC   | 28 | 4  |
| 25468 | 2 | 18619657 | 18619676 | 2 | 10 | 20 | GT   | 24 | 10 |
| 25469 | 2 | 18620488 | 18620537 | 2 | 25 | 50 | AC   | 8  | 11 |
| 25474 | 2 | 18627355 | 18627381 | 3 | 9  | 27 | CCT  | 14 | 5  |
| 25476 | 2 | 18634703 | 18634714 | 2 | 6  | 12 | TG   | 19 | 12 |
| 25477 | 2 | 18634716 | 18634727 | 2 | 6  | 12 | GT   | 17 | 11 |
| 25478 | 2 | 18634874 | 18634903 | 2 | 15 | 30 | CT   | 6  | 5  |
| 25479 | 2 | 18635177 | 18635194 | 2 | 9  | 18 | AC   | 25 | 7  |
| 25480 | 2 | 18637004 | 18637019 | 2 | 8  | 16 | AC   | 28 | 3  |
| 25489 | 2 | 18647812 | 18647833 | 2 | 11 | 22 | TG   | 20 | 8  |
| 25498 | 2 | 18663588 | 18663605 | 2 | 9  | 18 | TG   | 15 | 4  |
| 25499 | 2 | 18663691 | 18663718 | 2 | 14 | 28 | GT   | 13 | 12 |
| 25500 | 2 | 18665349 | 18665369 | 3 | 7  | 21 | GAG  | 16 | 4  |
| 25511 | 2 | 18678685 | 18678702 | 2 | 9  | 18 | CA   | 22 | 8  |
| 25513 | 2 | 18678838 | 18678865 | 2 | 14 | 28 | CA   | 11 | 4  |
| 25517 | 2 | 18679565 | 18679578 | 2 | 7  | 14 | GT   | 20 | 7  |
| 25518 | 2 | 18679580 | 18679591 | 2 | 6  | 12 | TG   | 18 | 4  |
| 25520 | 2 | 18680105 | 18680118 | 2 | 7  | 14 | CT   | 26 | 5  |
| 25521 | 2 | 18680120 | 18680133 | 2 | 7  | 14 | TC   | 26 | 4  |
| 25523 | 2 | 18684663 | 18684682 | 2 | 10 | 20 | TG   | 23 | 8  |

|       |   |          |          |   |    |    |      |    |    |
|-------|---|----------|----------|---|----|----|------|----|----|
| 25529 | 2 | 18689336 | 18689363 | 2 | 14 | 28 | TG   | 15 | 9  |
| 25532 | 2 | 18700851 | 18700864 | 2 | 7  | 14 | AC   | 19 | 6  |
| 25535 | 2 | 18721181 | 18721195 | 3 | 5  | 15 | GAG  | 22 | 4  |
| 25536 | 2 | 18721196 | 18721210 | 3 | 5  | 15 | CAG  | 17 | 4  |
| 25537 | 2 | 18721310 | 18721327 | 3 | 6  | 18 | GAT  | 20 | 5  |
| 25538 | 2 | 18722046 | 18722066 | 3 | 7  | 21 | GAG  | 16 | 7  |
| 25539 | 2 | 18735834 | 18735849 | 2 | 8  | 16 | TG   | 25 | 7  |
| 25540 | 2 | 18737306 | 18737319 | 2 | 7  | 14 | TG   | 16 | 8  |
| 25545 | 2 | 18750415 | 18750430 | 2 | 8  | 16 | AC   | 26 | 7  |
| 25557 | 2 | 18771960 | 18771983 | 3 | 8  | 24 | AAT  | 20 | 4  |
| 25558 | 2 | 18774034 | 18774051 | 2 | 9  | 18 | TC   | 16 | 8  |
| 25559 | 2 | 18785140 | 18785151 | 2 | 6  | 12 | TG   | 29 | 4  |
| 25563 | 2 | 18789812 | 18789845 | 2 | 17 | 34 | CA   | 9  | 8  |
| 25569 | 2 | 18795777 | 18795812 | 3 | 12 | 36 | GCA  | 31 | 10 |
| 25575 | 2 | 18811555 | 18811566 | 2 | 6  | 12 | AG   | 27 | 4  |
| 25588 | 2 | 18847366 | 18847403 | 2 | 19 | 38 | AG   | 7  | 6  |
| 25601 | 2 | 18900583 | 18900610 | 2 | 14 | 28 | GA   | 9  | 6  |
| 25602 | 2 | 18900749 | 18900766 | 2 | 9  | 18 | GA   | 20 | 3  |
| 25607 | 2 | 18914301 | 18914324 | 2 | 12 | 24 | GT   | 18 | 10 |
| 25608 | 2 | 18915389 | 18915414 | 2 | 13 | 26 | AC   | 11 | 7  |
| 25610 | 2 | 18921929 | 18921952 | 3 | 8  | 24 | ACT  | 13 | 4  |
| 25612 | 2 | 18926230 | 18926243 | 2 | 7  | 14 | CA   | 29 | 4  |
| 25624 | 2 | 18939155 | 18939166 | 2 | 6  | 12 | GC   | 22 | 9  |
| 25625 | 2 | 18939167 | 18939182 | 2 | 8  | 16 | AC   | 22 | 8  |
| 25632 | 2 | 18947768 | 18947799 | 2 | 16 | 32 | GT   | 7  | 9  |
| 25639 | 2 | 18964630 | 18964641 | 2 | 6  | 12 | AC   | 11 | 4  |
| 25658 | 2 | 18999533 | 18999544 | 2 | 6  | 12 | AC   | 31 | 3  |
| 25662 | 2 | 19010025 | 19010045 | 3 | 7  | 21 | GGA  | 24 | 3  |
| 25665 | 2 | 19010436 | 19010465 | 2 | 15 | 30 | GA   | 6  | 8  |
| 25669 | 2 | 19011678 | 19011692 | 3 | 5  | 15 | GCA  | 23 | 3  |
| 25680 | 2 | 19045928 | 19045943 | 4 | 4  | 16 | TGTT | 13 | 4  |
| 25681 | 2 | 19047220 | 19047231 | 2 | 6  | 12 | TG   | 26 | 3  |
| 25685 | 2 | 19053176 | 19053196 | 3 | 7  | 21 | CTT  | 21 | 15 |
| 25690 | 2 | 19067250 | 19067265 | 2 | 8  | 16 | AT   | 18 | 5  |
| 25693 | 2 | 19075866 | 19075879 | 2 | 7  | 14 | AT   | 10 | 4  |
| 25697 | 2 | 19077047 | 19077064 | 3 | 6  | 18 | CTG  | 20 | 3  |
| 25702 | 2 | 19081578 | 19081599 | 2 | 11 | 22 | GA   | 11 | 4  |
| 25708 | 2 | 19086770 | 19086787 | 2 | 9  | 18 | TC   | 12 | 4  |
| 25709 | 2 | 19087263 | 19087288 | 2 | 13 | 26 | CA   | 21 | 6  |
| 25715 | 2 | 19099407 | 19099418 | 2 | 6  | 12 | CA   | 30 | 5  |
| 25725 | 2 | 19110970 | 19110985 | 2 | 8  | 16 | TG   | 25 | 5  |
| 25726 | 2 | 19127822 | 19127839 | 2 | 9  | 18 | CA   | 25 | 4  |
| 25727 | 2 | 19129742 | 19129753 | 2 | 6  | 12 | TG   | 21 | 3  |
| 25735 | 2 | 19148735 | 19148748 | 2 | 7  | 14 | AT   | 11 | 4  |
| 25738 | 2 | 19173449 | 19173460 | 2 | 6  | 12 | GT   | 27 | 3  |
| 25739 | 2 | 19173553 | 19173572 | 2 | 10 | 20 | GT   | 16 | 6  |
| 25749 | 2 | 19202335 | 19202350 | 4 | 4  | 16 | ATTT | 32 | 3  |
| 25751 | 2 | 19204157 | 19204180 | 4 | 6  | 24 | ATGG | 13 | 4  |
| 25752 | 2 | 19205821 | 19205834 | 2 | 7  | 14 | GT   | 31 | 3  |
| 25754 | 2 | 19213006 | 19213045 | 4 | 10 | 40 | TTTC | 13 | 5  |
| 25765 | 2 | 19230072 | 19230091 | 2 | 10 | 20 | AC   | 13 | 9  |

|       |   |          |          |   |    |    |      |    |    |
|-------|---|----------|----------|---|----|----|------|----|----|
| 25767 | 2 | 19231287 | 19231300 | 2 | 7  | 14 | AC   | 20 | 3  |
| 25774 | 2 | 19235972 | 19235987 | 2 | 8  | 16 | GA   | 17 | 9  |
| 25775 | 2 | 19237856 | 19237889 | 2 | 17 | 34 | AC   | 18 | 10 |
| 25778 | 2 | 19239252 | 19239267 | 4 | 4  | 16 | GTCT | 20 | 3  |
| 25779 | 2 | 19239408 | 19239422 | 3 | 5  | 15 | GCT  | 26 | 11 |
| 25783 | 2 | 19239953 | 19239974 | 2 | 11 | 22 | AG   | 11 | 5  |
| 25784 | 2 | 19240246 | 19240265 | 2 | 10 | 20 | AC   | 16 | 15 |
| 25788 | 2 | 19241724 | 19241739 | 2 | 8  | 16 | CA   | 17 | 8  |
| 25790 | 2 | 19243288 | 19243319 | 2 | 16 | 32 | AC   | 12 | 6  |
| 25791 | 2 | 19243687 | 19243704 | 2 | 9  | 18 | TG   | 19 | 3  |
| 25798 | 2 | 19254026 | 19254037 | 2 | 6  | 12 | GT   | 28 | 3  |
| 25801 | 2 | 19271640 | 19271659 | 2 | 10 | 20 | AC   | 22 | 10 |
| 25803 | 2 | 19277819 | 19277850 | 2 | 16 | 32 | CA   | 18 | 8  |
| 25804 | 2 | 19278127 | 19278154 | 2 | 14 | 28 | GT   | 12 | 9  |
| 25807 | 2 | 19284708 | 19284723 | 2 | 8  | 16 | TA   | 17 | 4  |
| 25809 | 2 | 19285967 | 19285981 | 3 | 5  | 15 | TTC  | 21 | 3  |
| 25811 | 2 | 19287473 | 19287492 | 2 | 10 | 20 | CA   | 10 | 11 |
| 25814 | 2 | 19288736 | 19288753 | 2 | 9  | 18 | CA   | 21 | 12 |
| 25817 | 2 | 19289356 | 19289376 | 3 | 7  | 21 | CAG  | 34 | 10 |
| 25821 | 2 | 19292538 | 19292549 | 2 | 6  | 12 | TC   | 36 | 4  |
| 25824 | 2 | 19301095 | 19301108 | 2 | 7  | 14 | AC   | 30 | 3  |
| 25829 | 2 | 19315952 | 19315963 | 2 | 6  | 12 | TG   | 19 | 6  |
| 25838 | 2 | 19345604 | 19345624 | 3 | 7  | 21 | TTA  | 13 | 3  |
| 25842 | 2 | 19347034 | 19347053 | 4 | 5  | 20 | TATG | 18 | 3  |
| 25844 | 2 | 19352506 | 19352521 | 4 | 4  | 16 | TTTC | 28 | 3  |
| 25845 | 2 | 19360019 | 19360042 | 3 | 8  | 24 | GAT  | 34 | 5  |
| 25848 | 2 | 19372851 | 19372865 | 3 | 5  | 15 | AGG  | 23 | 3  |
| 25850 | 2 | 19373934 | 19373965 | 2 | 16 | 32 | CT   | 15 | 16 |
| 25854 | 2 | 19374844 | 19374867 | 4 | 6  | 24 | AGAA | 19 | 9  |
| 25856 | 2 | 19377490 | 19377531 | 2 | 21 | 42 | CA   | 12 | 11 |
| 25857 | 2 | 19377680 | 19377699 | 2 | 10 | 20 | TG   | 23 | 6  |
| 25859 | 2 | 19380684 | 19380698 | 3 | 5  | 15 | GTG  | 35 | 3  |
| 25861 | 2 | 19385240 | 19385251 | 2 | 6  | 12 | CA   | 21 | 5  |
| 25862 | 2 | 19387950 | 19387965 | 2 | 8  | 16 | TG   | 21 | 5  |
| 25864 | 2 | 19391295 | 19391314 | 2 | 10 | 20 | AC   | 8  | 3  |
| 25872 | 2 | 19418421 | 19418448 | 4 | 7  | 28 | TATG | 25 | 5  |
| 25874 | 2 | 19426196 | 19426223 | 2 | 14 | 28 | AC   | 11 | 13 |
| 25877 | 2 | 19427069 | 19427098 | 2 | 15 | 30 | AG   | 10 | 7  |
| 25878 | 2 | 19437224 | 19437257 | 2 | 17 | 34 | TG   | 7  | 4  |
| 25883 | 2 | 19444729 | 19444752 | 3 | 8  | 24 | AGG  | 20 | 7  |
| 25885 | 2 | 19445929 | 19445948 | 2 | 10 | 20 | GA   | 20 | 6  |
| 25893 | 2 | 19452180 | 19452201 | 2 | 11 | 22 | AC   | 16 | 5  |
| 25894 | 2 | 19453548 | 19453573 | 2 | 13 | 26 | TC   | 12 | 6  |
| 25903 | 2 | 19466943 | 19466958 | 4 | 4  | 16 | TTCA | 37 | 3  |
| 25910 | 2 | 19473667 | 19473688 | 2 | 11 | 22 | CA   | 26 | 7  |
| 25912 | 2 | 19476298 | 19476329 | 2 | 16 | 32 | TG   | 7  | 8  |
| 25918 | 2 | 19483995 | 19484016 | 2 | 11 | 22 | GT   | 17 | 8  |
| 25919 | 2 | 19485749 | 19485763 | 3 | 5  | 15 | GAG  | 27 | 4  |
| 25921 | 2 | 19487180 | 19487215 | 2 | 18 | 36 | GT   | 12 | 12 |
| 25925 | 2 | 19490506 | 19490517 | 2 | 6  | 12 | CA   | 20 | 7  |
| 25927 | 2 | 19494588 | 19494601 | 2 | 7  | 14 | AC   | 15 | 4  |



|       |   |          |          |   |    |    |      |    |    |
|-------|---|----------|----------|---|----|----|------|----|----|
| 25933 | 2 | 19495758 | 19495787 | 2 | 15 | 30 | AC   | 19 | 13 |
| 25948 | 2 | 19505792 | 19505813 | 2 | 11 | 22 | TG   | 23 | 10 |
| 25949 | 2 | 19507168 | 19507185 | 3 | 6  | 18 | CTG  | 22 | 4  |
| 25950 | 2 | 19508137 | 19508162 | 2 | 13 | 26 | TG   | 6  | 9  |
| 25951 | 2 | 19510572 | 19510605 | 2 | 17 | 34 | TG   | 7  | 10 |
| 25952 | 2 | 19510783 | 19510798 | 4 | 4  | 16 | GAGC | 10 | 4  |
| 25953 | 2 | 19510954 | 19510969 | 2 | 8  | 16 | TC   | 17 | 5  |
| 25954 | 2 | 19513381 | 19513398 | 2 | 9  | 18 | AG   | 17 | 5  |
| 25956 | 2 | 19513638 | 19513665 | 2 | 14 | 28 | AC   | 6  | 9  |
| 25959 | 2 | 19517913 | 19517928 | 2 | 8  | 16 | AC   | 22 | 6  |
| 25960 | 2 | 19518151 | 19518172 | 2 | 11 | 22 | GT   | 12 | 7  |
| 25962 | 2 | 19522760 | 19522781 | 2 | 11 | 22 | GA   | 15 | 7  |
| 25965 | 2 | 19523257 | 19523288 | 2 | 16 | 32 | CA   | 14 | 9  |
| 25972 | 2 | 19529459 | 19529470 | 2 | 6  | 12 | AC   | 20 | 3  |
| 25975 | 2 | 19531103 | 19531114 | 2 | 6  | 12 | TG   | 32 | 3  |
| 25976 | 2 | 19531302 | 19531335 | 2 | 17 | 34 | TG   | 12 | 13 |
| 25977 | 2 | 19533685 | 19533710 | 2 | 13 | 26 | GT   | 8  | 11 |
| 25985 | 2 | 19541506 | 19541523 | 3 | 6  | 18 | ATG  | 25 | 7  |
| 25986 | 2 | 19543657 | 19543684 | 2 | 14 | 28 | AC   | 9  | 10 |
| 25987 | 2 | 19543890 | 19543907 | 2 | 9  | 18 | TG   | 14 | 6  |
| 26007 | 2 | 19553380 | 19553397 | 2 | 9  | 18 | CA   | 17 | 5  |
| 26008 | 2 | 19553400 | 19553415 | 2 | 8  | 16 | CA   | 19 | 7  |
| 26012 | 2 | 19557089 | 19557115 | 3 | 9  | 27 | AGG  | 15 | 5  |
| 26026 | 2 | 19581373 | 19581386 | 2 | 7  | 14 | AC   | 26 | 3  |
| 26030 | 2 | 19600128 | 19600141 | 2 | 7  | 14 | TC   | 15 | 5  |
| 26031 | 2 | 19600142 | 19600157 | 2 | 8  | 16 | AC   | 14 | 4  |
| 26033 | 2 | 19600356 | 19600369 | 2 | 7  | 14 | GT   | 20 | 5  |
| 26046 | 2 | 19627840 | 19627855 | 2 | 8  | 16 | TC   | 23 | 4  |
| 26054 | 2 | 19638257 | 19638268 | 2 | 6  | 12 | AC   | 28 | 3  |
| 26057 | 2 | 19640698 | 19640711 | 2 | 7  | 14 | TG   | 32 | 4  |
| 26061 | 2 | 19641877 | 19641902 | 2 | 13 | 26 | CA   | 12 | 6  |
| 26066 | 2 | 19643666 | 19643697 | 2 | 16 | 32 | AC   | 13 | 9  |
| 26067 | 2 | 19644369 | 19644382 | 2 | 7  | 14 | AC   | 26 | 3  |
| 26068 | 2 | 19644543 | 19644560 | 2 | 9  | 18 | AC   | 13 | 8  |
| 26070 | 2 | 19644967 | 19644980 | 2 | 7  | 14 | CA   | 24 | 3  |
| 26071 | 2 | 19645033 | 19645068 | 2 | 18 | 36 | CA   | 17 | 8  |
| 26072 | 2 | 19647249 | 19647269 | 3 | 7  | 21 | CTC  | 30 | 4  |
| 26074 | 2 | 19648598 | 19648613 | 4 | 4  | 16 | TGCG | 16 | 5  |
| 26075 | 2 | 19648668 | 19648685 | 3 | 6  | 18 | CTT  | 21 | 4  |
| 26079 | 2 | 19651106 | 19651127 | 2 | 11 | 22 | AC   | 21 | 11 |
| 26081 | 2 | 19651966 | 19651989 | 2 | 12 | 24 | AC   | 18 | 6  |
| 26084 | 2 | 19653895 | 19653906 | 2 | 6  | 12 | TG   | 21 | 3  |
| 26085 | 2 | 19654027 | 19654046 | 2 | 10 | 20 | AC   | 15 | 5  |
| 26096 | 2 | 19658571 | 19658604 | 2 | 17 | 34 | GA   | 6  | 4  |
| 26102 | 2 | 19659504 | 19659521 | 3 | 6  | 18 | GAG  | 11 | 4  |
| 26103 | 2 | 19659884 | 19659901 | 2 | 9  | 18 | TG   | 25 | 4  |
| 26106 | 2 | 19660517 | 19660540 | 2 | 12 | 24 | TG   | 9  | 4  |
| 26110 | 2 | 19662915 | 19662942 | 2 | 14 | 28 | TG   | 12 | 9  |
| 26112 | 2 | 19665889 | 19665918 | 2 | 15 | 30 | GT   | 14 | 10 |
| 26115 | 2 | 19667572 | 19667583 | 2 | 6  | 12 | GT   | 27 | 3  |
| 26116 | 2 | 19667642 | 19667661 | 2 | 10 | 20 | GT   | 15 | 14 |

|       |   |          |          |   |    |    |      |    |    |
|-------|---|----------|----------|---|----|----|------|----|----|
| 26122 | 2 | 19669340 | 19669411 | 3 | 24 | 72 | AGA  | 11 | 10 |
| 26126 | 2 | 19670684 | 19670695 | 2 | 6  | 12 | TG   | 21 | 8  |
| 26134 | 2 | 19676464 | 19676481 | 2 | 9  | 18 | GA   | 22 | 4  |
| 26135 | 2 | 19677296 | 19677315 | 4 | 5  | 20 | TTTG | 28 | 5  |
| 26137 | 2 | 19677935 | 19677946 | 2 | 6  | 12 | AC   | 31 | 5  |
| 26141 | 2 | 19682629 | 19682652 | 3 | 8  | 24 | CAG  | 16 | 5  |
| 26146 | 2 | 19687261 | 19687282 | 2 | 11 | 22 | TG   | 19 | 7  |
| 26164 | 2 | 19694837 | 19694856 | 2 | 10 | 20 | AC   | 12 | 5  |
| 26167 | 2 | 19696640 | 19696651 | 2 | 6  | 12 | TC   | 25 | 3  |
| 26170 | 2 | 19697043 | 19697057 | 3 | 5  | 15 | ACG  | 23 | 3  |
| 26171 | 2 | 19697293 | 19697316 | 2 | 12 | 24 | GT   | 9  | 6  |
| 26172 | 2 | 19697636 | 19697653 | 2 | 9  | 18 | TG   | 20 | 9  |
| 26176 | 2 | 19702771 | 19702800 | 2 | 15 | 30 | TG   | 11 | 9  |
| 26179 | 2 | 19707610 | 19707631 | 2 | 11 | 22 | CA   | 9  | 7  |
| 26190 | 2 | 19722207 | 19722227 | 3 | 7  | 21 | GGA  | 13 | 3  |
| 26193 | 2 | 19728315 | 19728350 | 2 | 18 | 36 | TG   | 6  | 6  |
| 26195 | 2 | 19730701 | 19730726 | 2 | 13 | 26 | CA   | 17 | 8  |
| 26198 | 2 | 19736040 | 19736071 | 2 | 16 | 32 | CA   | 11 | 8  |
| 26199 | 2 | 19737254 | 19737265 | 2 | 6  | 12 | CA   | 26 | 5  |
| 26200 | 2 | 19737387 | 19737400 | 2 | 7  | 14 | CT   | 26 | 3  |
| 26201 | 2 | 19737639 | 19737676 | 2 | 19 | 38 | GT   | 7  | 10 |
| 26203 | 2 | 19739135 | 19739184 | 2 | 25 | 50 | AC   | 7  | 9  |
| 26204 | 2 | 19739634 | 19739669 | 4 | 9  | 36 | GCTG | 24 | 8  |
| 26205 | 2 | 19745045 | 19745060 | 2 | 8  | 16 | CA   | 18 | 5  |
| 26206 | 2 | 19745092 | 19745107 | 2 | 8  | 16 | CA   | 14 | 4  |
| 26208 | 2 | 19746649 | 19746676 | 2 | 14 | 28 | AC   | 15 | 6  |
| 26209 | 2 | 19746797 | 19746820 | 2 | 12 | 24 | AC   | 8  | 10 |
| 26211 | 2 | 19748913 | 19748950 | 2 | 19 | 38 | CA   | 10 | 9  |
| 26213 | 2 | 19753976 | 19753999 | 3 | 8  | 24 | GGA  | 13 | 3  |
| 26217 | 2 | 19754479 | 19754500 | 2 | 11 | 22 | AG   | 15 | 8  |
| 26218 | 2 | 19754793 | 19754820 | 2 | 14 | 28 | TG   | 12 | 8  |
| 26227 | 2 | 19763245 | 19763260 | 2 | 8  | 16 | CA   | 15 | 5  |
| 26228 | 2 | 19765743 | 19765756 | 2 | 7  | 14 | GT   | 21 | 4  |
| 26229 | 2 | 19765938 | 19765957 | 2 | 10 | 20 | AC   | 21 | 8  |
| 26230 | 2 | 19767463 | 19767496 | 2 | 17 | 34 | GT   | 16 | 8  |
| 26233 | 2 | 19770154 | 19770165 | 2 | 6  | 12 | AG   | 15 | 4  |
| 26239 | 2 | 19775154 | 19775193 | 2 | 20 | 40 | CA   | 9  | 6  |
| 26240 | 2 | 19775744 | 19775775 | 2 | 16 | 32 | TG   | 7  | 9  |
| 26242 | 2 | 19776572 | 19776589 | 2 | 9  | 18 | CT   | 14 | 3  |
| 26254 | 2 | 19782914 | 19782927 | 2 | 7  | 14 | CA   | 22 | 3  |
| 26259 | 2 | 19792268 | 19792289 | 2 | 11 | 22 | TG   | 18 | 5  |
| 26260 | 2 | 19792457 | 19792470 | 2 | 7  | 14 | TG   | 19 | 3  |
| 26261 | 2 | 19794742 | 19794785 | 2 | 22 | 44 | GT   | 8  | 10 |
| 26263 | 2 | 19794966 | 19794987 | 2 | 11 | 22 | TC   | 12 | 3  |
| 26270 | 2 | 19803274 | 19803285 | 2 | 6  | 12 | GT   | 30 | 3  |
| 26272 | 2 | 19803500 | 19803541 | 2 | 21 | 42 | GT   | 8  | 10 |
| 26283 | 2 | 19820422 | 19820471 | 2 | 25 | 50 | AC   | 10 | 10 |
| 26285 | 2 | 19822241 | 19822256 | 2 | 8  | 16 | GA   | 16 | 3  |
| 26286 | 2 | 19825013 | 19825036 | 3 | 8  | 24 | TTA  | 13 | 4  |
| 26289 | 2 | 19832212 | 19832250 | 3 | 13 | 39 | TGC  | 11 | 11 |
| 26293 | 2 | 19846870 | 19846887 | 2 | 9  | 18 | CT   | 16 | 5  |

|       |   |          |          |   |    |    |      |    |    |
|-------|---|----------|----------|---|----|----|------|----|----|
| 26301 | 2 | 19882566 | 19882579 | 2 | 7  | 14 | GT   | 18 | 6  |
| 26308 | 2 | 19891531 | 19891548 | 2 | 9  | 18 | GT   | 22 | 5  |
| 26309 | 2 | 19892490 | 19892543 | 2 | 27 | 54 | CA   | 13 | 12 |
| 26310 | 2 | 19892676 | 19892691 | 2 | 8  | 16 | CA   | 14 | 5  |
| 26319 | 2 | 19904980 | 19904991 | 2 | 6  | 12 | TG   | 19 | 4  |
| 26320 | 2 | 19904994 | 19905005 | 2 | 6  | 12 | TG   | 14 | 5  |
| 26321 | 2 | 19905093 | 19905132 | 2 | 20 | 40 | TG   | 10 | 8  |
| 26324 | 2 | 19926710 | 19926759 | 2 | 25 | 50 | TG   | 6  | 6  |
| 26328 | 2 | 19933419 | 19933472 | 2 | 27 | 54 | TG   | 9  | 10 |
| 26331 | 2 | 19937502 | 19937527 | 2 | 13 | 26 | CA   | 15 | 11 |
| 26332 | 2 | 19939768 | 19939791 | 2 | 12 | 24 | TG   | 15 | 6  |
| 26333 | 2 | 19940644 | 19940671 | 2 | 14 | 28 | CA   | 13 | 12 |
| 26334 | 2 | 19941111 | 19941128 | 2 | 9  | 18 | CA   | 23 | 7  |
| 26336 | 2 | 19941271 | 19941282 | 2 | 6  | 12 | CA   | 17 | 3  |
| 26347 | 2 | 19952680 | 19952699 | 2 | 10 | 20 | GA   | 9  | 8  |
| 26348 | 2 | 19954793 | 19954814 | 2 | 11 | 22 | AC   | 7  | 5  |
| 26349 | 2 | 19955506 | 19955517 | 2 | 6  | 12 | AC   | 19 | 4  |
| 26350 | 2 | 19955689 | 19955718 | 2 | 15 | 30 | CA   | 9  | 12 |
| 26356 | 2 | 19960520 | 19960533 | 2 | 7  | 14 | GT   | 27 | 3  |
| 26359 | 2 | 19965098 | 19965113 | 2 | 8  | 16 | CA   | 26 | 4  |
| 26369 | 2 | 19982462 | 19982497 | 2 | 18 | 36 | AC   | 10 | 7  |
| 26372 | 2 | 19986947 | 19986972 | 2 | 13 | 26 | GT   | 20 | 10 |
| 26375 | 2 | 19994926 | 19994955 | 2 | 15 | 30 | TG   | 13 | 7  |
| 26390 | 2 | 20018064 | 20018083 | 2 | 10 | 20 | TG   | 12 | 5  |
| 26395 | 2 | 20033890 | 20033904 | 3 | 5  | 15 | AAC  | 14 | 4  |
| 26417 | 2 | 20128280 | 20128311 | 2 | 16 | 32 | AG   | 6  | 6  |
| 26422 | 2 | 20139918 | 20139933 | 2 | 8  | 16 | GT   | 10 | 3  |
| 26424 | 2 | 20140655 | 20140674 | 4 | 5  | 20 | AAAC | 22 | 4  |
| 26425 | 2 | 20143989 | 20144006 | 2 | 9  | 18 | GT   | 22 | 6  |
| 26438 | 2 | 20176455 | 20176468 | 2 | 7  | 14 | GT   | 24 | 6  |
| 26453 | 2 | 20207664 | 20207675 | 2 | 6  | 12 | GT   | 25 | 5  |
| 26455 | 2 | 20225679 | 20225714 | 3 | 12 | 36 | ATA  | 11 | 6  |
| 26458 | 2 | 20242304 | 20242355 | 4 | 13 | 52 | TTTC | 18 | 10 |
| 26459 | 2 | 20242509 | 20242529 | 3 | 7  | 21 | CCT  | 21 | 6  |
| 26461 | 2 | 20244044 | 20244065 | 2 | 11 | 22 | CA   | 13 | 4  |
| 26466 | 2 | 20247915 | 20247928 | 2 | 7  | 14 | TG   | 6  | 7  |
| 26470 | 2 | 20252845 | 20252868 | 2 | 12 | 24 | TG   | 15 | 7  |
| 26473 | 2 | 20255512 | 20255523 | 2 | 6  | 12 | TG   | 6  | 3  |
| 26475 | 2 | 20255540 | 20255551 | 2 | 6  | 12 | TG   | 16 | 3  |
| 26476 | 2 | 20255971 | 20256002 | 2 | 16 | 32 | GT   | 6  | 8  |
| 26478 | 2 | 20260682 | 20260696 | 3 | 5  | 15 | AGC  | 30 | 3  |
| 26482 | 2 | 20264959 | 20264984 | 2 | 13 | 26 | AC   | 13 | 10 |
| 26483 | 2 | 20265734 | 20265757 | 2 | 12 | 24 | TG   | 23 | 7  |
| 26484 | 2 | 20267753 | 20267768 | 2 | 8  | 16 | AG   | 24 | 3  |
| 26485 | 2 | 20268521 | 20268541 | 3 | 7  | 21 | GAA  | 17 | 10 |
| 26503 | 2 | 20288940 | 20288977 | 2 | 19 | 38 | TG   | 7  | 10 |
| 26511 | 2 | 20289881 | 20289894 | 2 | 7  | 14 | GA   | 8  | 5  |
| 26516 | 2 | 20290722 | 20290733 | 2 | 6  | 12 | CT   | 20 | 4  |
| 26517 | 2 | 20290735 | 20290748 | 2 | 7  | 14 | TC   | 22 | 3  |
| 26518 | 2 | 20290785 | 20290810 | 2 | 13 | 26 | TG   | 13 | 11 |
| 26519 | 2 | 20290874 | 20290889 | 2 | 8  | 16 | TG   | 21 | 10 |

|       |   |          |          |   |    |    |      |    |    |
|-------|---|----------|----------|---|----|----|------|----|----|
| 26527 | 2 | 20293387 | 20293404 | 2 | 9  | 18 | GT   | 13 | 6  |
| 26530 | 2 | 20295232 | 20295247 | 4 | 4  | 16 | TTTG | 23 | 5  |
| 26531 | 2 | 20295424 | 20295444 | 3 | 7  | 21 | TCC  | 15 | 5  |
| 26536 | 2 | 20298834 | 20298859 | 2 | 13 | 26 | GA   | 14 | 5  |
| 26541 | 2 | 20302341 | 20302354 | 2 | 7  | 14 | CA   | 19 | 9  |
| 26542 | 2 | 20305284 | 20305297 | 2 | 7  | 14 | CT   | 17 | 7  |
| 26543 | 2 | 20305299 | 20305312 | 2 | 7  | 14 | TC   | 14 | 5  |
| 26544 | 2 | 20305564 | 20305577 | 2 | 7  | 14 | GT   | 19 | 10 |
| 26546 | 2 | 20310057 | 20310072 | 2 | 8  | 16 | AT   | 7  | 4  |
| 26549 | 2 | 20312848 | 20312873 | 2 | 13 | 26 | TG   | 18 | 10 |
| 26550 | 2 | 20313050 | 20313111 | 2 | 31 | 62 | GT   | 7  | 11 |
| 26557 | 2 | 20313665 | 20313678 | 2 | 7  | 14 | GT   | 22 | 5  |
| 26559 | 2 | 20315448 | 20315465 | 2 | 9  | 18 | GA   | 18 | 5  |
| 26561 | 2 | 20316419 | 20316432 | 2 | 7  | 14 | GC   | 28 | 3  |
| 26567 | 2 | 20323224 | 20323237 | 2 | 7  | 14 | TG   | 11 | 4  |
| 26569 | 2 | 20327161 | 20327176 | 4 | 4  | 16 | AGAA | 24 | 3  |
| 26570 | 2 | 20327219 | 20327240 | 2 | 11 | 22 | AG   | 7  | 5  |
| 26572 | 2 | 20330261 | 20330278 | 2 | 9  | 18 | CA   | 18 | 4  |
| 26578 | 2 | 20342152 | 20342163 | 2 | 6  | 12 | CA   | 25 | 3  |
| 26579 | 2 | 20342665 | 20342680 | 2 | 8  | 16 | TG   | 26 | 7  |
| 26586 | 2 | 20351939 | 20351954 | 2 | 8  | 16 | AC   | 10 | 4  |
| 26588 | 2 | 20360976 | 20360990 | 3 | 5  | 15 | CTC  | 29 | 3  |
| 26592 | 2 | 20364278 | 20364291 | 2 | 7  | 14 | AC   | 22 | 3  |
| 26598 | 2 | 20367799 | 20367842 | 2 | 22 | 44 | TG   | 10 | 8  |
| 26599 | 2 | 20371998 | 20372011 | 2 | 7  | 14 | TC   | 33 | 3  |
| 26603 | 2 | 20388619 | 20388632 | 2 | 7  | 14 | GT   | 11 | 6  |
| 26604 | 2 | 20391621 | 20391632 | 2 | 6  | 12 | TG   | 31 | 3  |
| 26605 | 2 | 20393689 | 20393714 | 2 | 13 | 26 | GT   | 14 | 8  |
| 26612 | 2 | 20395799 | 20395816 | 2 | 9  | 18 | AC   | 23 | 5  |
| 26621 | 2 | 20420218 | 20420233 | 2 | 8  | 16 | CA   | 20 | 7  |
| 26628 | 2 | 20431151 | 20431164 | 2 | 7  | 14 | TG   | 29 | 6  |
| 26629 | 2 | 20433921 | 20433936 | 4 | 4  | 16 | ATAC | 9  | 3  |
| 26630 | 2 | 20435473 | 20435514 | 2 | 21 | 42 | CA   | 15 | 8  |
| 26632 | 2 | 20437560 | 20437579 | 2 | 10 | 20 | AG   | 23 | 5  |
| 26634 | 2 | 20440655 | 20440672 | 2 | 9  | 18 | TG   | 23 | 4  |
| 26637 | 2 | 20443671 | 20443692 | 2 | 11 | 22 | GT   | 24 | 5  |
| 26638 | 2 | 20444158 | 20444173 | 2 | 8  | 16 | AC   | 19 | 4  |
| 26641 | 2 | 20447640 | 20447651 | 2 | 6  | 12 | TG   | 18 | 3  |
| 26648 | 2 | 20464415 | 20464432 | 2 | 9  | 18 | TG   | 21 | 6  |
| 26655 | 2 | 20476451 | 20476470 | 4 | 5  | 20 | ACTG | 29 | 4  |
| 26656 | 2 | 20476622 | 20476651 | 2 | 15 | 30 | TG   | 14 | 10 |
| 26658 | 2 | 20478380 | 20478401 | 2 | 11 | 22 | TG   | 8  | 12 |
| 26659 | 2 | 20478445 | 20478464 | 2 | 10 | 20 | TG   | 20 | 8  |
| 26660 | 2 | 20478572 | 20478585 | 2 | 7  | 14 | CA   | 22 | 6  |
| 26665 | 2 | 20483242 | 20483269 | 2 | 14 | 28 | CA   | 20 | 16 |
| 26671 | 2 | 20504171 | 20504198 | 4 | 7  | 28 | TTCA | 22 | 6  |
| 26676 | 2 | 20513613 | 20513632 | 4 | 5  | 20 | TGAA | 18 | 7  |
| 26677 | 2 | 20530119 | 20530134 | 2 | 8  | 16 | CA   | 14 | 7  |
| 26680 | 2 | 20536264 | 20536277 | 2 | 7  | 14 | TG   | 23 | 3  |
| 26682 | 2 | 20537756 | 20537769 | 2 | 7  | 14 | TC   | 24 | 3  |
| 26683 | 2 | 20543211 | 20543228 | 2 | 9  | 18 | CT   | 17 | 8  |

|       |   |          |          |   |    |    |      |    |    |
|-------|---|----------|----------|---|----|----|------|----|----|
| 26686 | 2 | 20547800 | 20547835 | 2 | 18 | 36 | AC   | 23 | 7  |
| 26688 | 2 | 20553346 | 20553359 | 2 | 7  | 14 | CT   | 21 | 4  |
| 26690 | 2 | 20553471 | 20553482 | 2 | 6  | 12 | AG   | 19 | 4  |
| 26707 | 2 | 20572868 | 20572901 | 2 | 17 | 34 | CT   | 10 | 9  |
| 26711 | 2 | 20608932 | 20608951 | 4 | 5  | 20 | TTTC | 16 | 4  |
| 26719 | 2 | 20628099 | 20628130 | 2 | 16 | 32 | TG   | 18 | 9  |
| 26730 | 2 | 20656389 | 20656409 | 3 | 7  | 21 | CTT  | 17 | 5  |
| 26734 | 2 | 20663520 | 20663531 | 2 | 6  | 12 | TG   | 21 | 4  |
| 26735 | 2 | 20663567 | 20663588 | 2 | 11 | 22 | GT   | 13 | 9  |
| 26736 | 2 | 20669572 | 20669585 | 2 | 7  | 14 | GA   | 24 | 6  |
| 26737 | 2 | 20672757 | 20672774 | 3 | 6  | 18 | TCC  | 28 | 3  |
| 26742 | 2 | 20683166 | 20683185 | 2 | 10 | 20 | AC   | 20 | 7  |
| 26743 | 2 | 20683322 | 20683337 | 2 | 8  | 16 | AC   | 20 | 3  |
| 26745 | 2 | 20683816 | 20683837 | 2 | 11 | 22 | TG   | 7  | 3  |
| 26746 | 2 | 20685392 | 20685429 | 2 | 19 | 38 | CA   | 11 | 7  |
| 26747 | 2 | 20687511 | 20687534 | 2 | 12 | 24 | CA   | 26 | 6  |
| 26748 | 2 | 20688257 | 20688272 | 2 | 8  | 16 | GT   | 30 | 3  |
| 26749 | 2 | 20689314 | 20689325 | 2 | 6  | 12 | CT   | 25 | 3  |
| 26750 | 2 | 20689328 | 20689341 | 2 | 7  | 14 | CT   | 22 | 3  |
| 26751 | 2 | 20691079 | 20691102 | 2 | 12 | 24 | CA   | 8  | 8  |
| 26759 | 2 | 20703416 | 20703433 | 2 | 9  | 18 | TG   | 12 | 7  |
| 26763 | 2 | 20710791 | 20710806 | 2 | 8  | 16 | CA   | 21 | 10 |
| 26764 | 2 | 20716445 | 20716458 | 2 | 7  | 14 | GT   | 8  | 3  |
| 26769 | 2 | 20719077 | 20719096 | 2 | 10 | 20 | CA   | 8  | 8  |
| 26774 | 2 | 20720093 | 20720140 | 2 | 24 | 48 | TG   | 9  | 8  |
| 26777 | 2 | 20721789 | 20721802 | 2 | 7  | 14 | CA   | 13 | 10 |
| 26778 | 2 | 20727582 | 20727597 | 2 | 8  | 16 | CT   | 22 | 3  |
| 26779 | 2 | 20728045 | 20728056 | 2 | 6  | 12 | AC   | 21 | 3  |
| 26782 | 2 | 20731394 | 20731407 | 2 | 7  | 14 | AC   | 22 | 6  |
| 26784 | 2 | 20734965 | 20734979 | 3 | 5  | 15 | GAA  | 22 | 5  |
| 26785 | 2 | 20741620 | 20741637 | 2 | 9  | 18 | AC   | 6  | 11 |
| 26786 | 2 | 20741792 | 20741827 | 2 | 18 | 36 | CA   | 11 | 8  |
| 26787 | 2 | 20743493 | 20743506 | 2 | 7  | 14 | AC   | 22 | 3  |
| 26788 | 2 | 20743595 | 20743610 | 2 | 8  | 16 | TG   | 17 | 4  |
| 26789 | 2 | 20746601 | 20746620 | 4 | 5  | 20 | CTTC | 22 | 4  |
| 26802 | 2 | 20765864 | 20765875 | 2 | 6  | 12 | AC   | 32 | 6  |
| 26806 | 2 | 20769426 | 20769437 | 2 | 6  | 12 | GA   | 19 | 6  |
| 26808 | 2 | 20771097 | 20771108 | 2 | 6  | 12 | CA   | 25 | 4  |
| 26809 | 2 | 20775577 | 20775592 | 2 | 8  | 16 | AC   | 20 | 4  |
| 26810 | 2 | 20775801 | 20775816 | 2 | 8  | 16 | AC   | 10 | 8  |
| 26812 | 2 | 20776879 | 20776900 | 2 | 11 | 22 | TG   | 25 | 8  |
| 26813 | 2 | 20777085 | 20777114 | 2 | 15 | 30 | CA   | 18 | 13 |
| 26814 | 2 | 20777904 | 20777924 | 3 | 7  | 21 | AGC  | 27 | 8  |
| 26816 | 2 | 20784878 | 20784889 | 2 | 6  | 12 | CA   | 27 | 5  |
| 26818 | 2 | 20788603 | 20788620 | 2 | 9  | 18 | CT   | 11 | 10 |
| 26824 | 2 | 20796486 | 20796505 | 2 | 10 | 20 | AG   | 15 | 4  |
| 26826 | 2 | 20800400 | 20800413 | 2 | 7  | 14 | TG   | 9  | 8  |
| 26831 | 2 | 20801622 | 20801641 | 2 | 10 | 20 | TG   | 11 | 7  |
| 26839 | 2 | 20806781 | 20806806 | 2 | 13 | 26 | CA   | 15 | 5  |
| 26840 | 2 | 20808748 | 20808761 | 2 | 7  | 14 | AC   | 26 | 5  |
| 26841 | 2 | 20809140 | 20809169 | 2 | 15 | 30 | TG   | 14 | 9  |

|       |   |          |          |   |    |    |      |    |    |
|-------|---|----------|----------|---|----|----|------|----|----|
| 26842 | 2 | 20809349 | 20809374 | 2 | 13 | 26 | AC   | 12 | 5  |
| 26850 | 2 | 20817616 | 20817667 | 2 | 26 | 52 | CA   | 6  | 9  |
| 26851 | 2 | 20817780 | 20817809 | 2 | 15 | 30 | CA   | 13 | 13 |
| 26852 | 2 | 20821944 | 20821961 | 2 | 9  | 18 | GA   | 19 | 5  |
| 26853 | 2 | 20822117 | 20822130 | 2 | 7  | 14 | GA   | 21 | 3  |
| 26858 | 2 | 20824504 | 20824517 | 2 | 7  | 14 | GT   | 17 | 4  |
| 26859 | 2 | 20828565 | 20828580 | 2 | 8  | 16 | GA   | 29 | 11 |
| 26861 | 2 | 20829222 | 20829265 | 2 | 22 | 44 | AG   | 17 | 9  |
| 26862 | 2 | 20837190 | 20837207 | 2 | 9  | 18 | CA   | 16 | 5  |
| 26871 | 2 | 20842329 | 20842346 | 2 | 9  | 18 | TC   | 24 | 5  |
| 26873 | 2 | 20847152 | 20847187 | 2 | 18 | 36 | TG   | 18 | 14 |
| 26884 | 2 | 20853010 | 20853039 | 2 | 15 | 30 | GT   | 23 | 3  |
| 26887 | 2 | 20853820 | 20853849 | 2 | 15 | 30 | CT   | 16 | 10 |
| 26888 | 2 | 20854043 | 20854066 | 2 | 12 | 24 | CA   | 16 | 8  |
| 26889 | 2 | 20854153 | 20854178 | 2 | 13 | 26 | AC   | 11 | 7  |
| 26892 | 2 | 20854498 | 20854527 | 2 | 15 | 30 | AC   | 19 | 9  |
| 26893 | 2 | 20854620 | 20854635 | 2 | 8  | 16 | CA   | 12 | 10 |
| 26894 | 2 | 20854865 | 20854886 | 2 | 11 | 22 | GA   | 19 | 4  |
| 26896 | 2 | 20856790 | 20856809 | 2 | 10 | 20 | GT   | 15 | 8  |
| 26901 | 2 | 20860718 | 20860737 | 2 | 10 | 20 | TG   | 19 | 7  |
| 26902 | 2 | 20860803 | 20860824 | 2 | 11 | 22 | CA   | 15 | 11 |
| 26904 | 2 | 20860981 | 20861016 | 2 | 18 | 36 | CA   | 17 | 11 |
| 26909 | 2 | 20864835 | 20864854 | 2 | 10 | 20 | TC   | 11 | 6  |
| 26910 | 2 | 20864883 | 20864898 | 2 | 8  | 16 | GT   | 22 | 4  |
| 26911 | 2 | 20865584 | 20865611 | 2 | 14 | 28 | CA   | 21 | 14 |
| 26912 | 2 | 20865771 | 20865782 | 2 | 6  | 12 | AC   | 26 | 3  |
| 26913 | 2 | 20866693 | 20866712 | 2 | 10 | 20 | AG   | 10 | 8  |
| 26914 | 2 | 20866916 | 20866931 | 2 | 8  | 16 | TG   | 17 | 11 |
| 26915 | 2 | 20866933 | 20866948 | 2 | 8  | 16 | GT   | 14 | 9  |
| 26916 | 2 | 20869669 | 20869688 | 2 | 10 | 20 | AC   | 19 | 5  |
| 26926 | 2 | 20880449 | 20880474 | 2 | 13 | 26 | AC   | 22 | 5  |
| 26941 | 2 | 20888802 | 20888831 | 2 | 15 | 30 | GT   | 20 | 8  |
| 26942 | 2 | 20888985 | 20888998 | 2 | 7  | 14 | CA   | 12 | 5  |
| 26943 | 2 | 20889814 | 20889845 | 2 | 16 | 32 | AC   | 14 | 9  |
| 26946 | 2 | 20891982 | 20892005 | 2 | 12 | 24 | GT   | 11 | 10 |
| 26948 | 2 | 20892341 | 20892362 | 2 | 11 | 22 | AC   | 14 | 5  |
| 26949 | 2 | 20892560 | 20892579 | 2 | 10 | 20 | AC   | 17 | 4  |
| 26950 | 2 | 20892985 | 20893006 | 2 | 11 | 22 | TC   | 13 | 4  |
| 26952 | 2 | 20896076 | 20896089 | 2 | 7  | 14 | CA   | 27 | 3  |
| 26955 | 2 | 20898817 | 20898842 | 2 | 13 | 26 | AC   | 17 | 11 |
| 26960 | 2 | 20902254 | 20902283 | 2 | 15 | 30 | CA   | 13 | 12 |
| 26976 | 2 | 20919230 | 20919251 | 2 | 11 | 22 | AC   | 14 | 11 |
| 26977 | 2 | 20920891 | 20920902 | 2 | 6  | 12 | TA   | 21 | 5  |
| 26981 | 2 | 20923190 | 20923213 | 2 | 12 | 24 | AC   | 15 | 9  |
| 26983 | 2 | 20924476 | 20924491 | 4 | 4  | 16 | AGGA | 17 | 3  |
| 26986 | 2 | 20926493 | 20926510 | 2 | 9  | 18 | AC   | 6  | 3  |
| 26987 | 2 | 20927165 | 20927192 | 2 | 14 | 28 | GA   | 10 | 6  |
| 26990 | 2 | 20928107 | 20928118 | 2 | 6  | 12 | GT   | 11 | 4  |
| 27001 | 2 | 20939060 | 20939071 | 2 | 6  | 12 | TG   | 26 | 5  |
| 27004 | 2 | 20943936 | 20943949 | 2 | 7  | 14 | CA   | 15 | 3  |
| 27018 | 2 | 20968082 | 20968117 | 2 | 18 | 36 | TG   | 13 | 9  |

|       |   |          |          |   |    |    |      |    |    |
|-------|---|----------|----------|---|----|----|------|----|----|
| 27022 | 2 | 20971348 | 20971365 | 2 | 9  | 18 | GT   | 10 | 4  |
| 27024 | 2 | 20972139 | 20972158 | 2 | 10 | 20 | AG   | 22 | 5  |
| 27028 | 2 | 20977013 | 20977030 | 2 | 9  | 18 | GT   | 8  | 6  |
| 27030 | 2 | 20977486 | 20977499 | 2 | 7  | 14 | GT   | 18 | 6  |
| 27033 | 2 | 20983269 | 20983288 | 2 | 10 | 20 | TG   | 6  | 6  |
| 27035 | 2 | 20983435 | 20983446 | 2 | 6  | 12 | CT   | 27 | 3  |
| 27038 | 2 | 20986329 | 20986342 | 2 | 7  | 14 | GT   | 23 | 3  |
| 27042 | 2 | 20989790 | 20989809 | 2 | 10 | 20 | GT   | 10 | 5  |
| 27045 | 2 | 20993196 | 20993209 | 2 | 7  | 14 | CT   | 18 | 4  |
| 27047 | 2 | 20997080 | 20997097 | 2 | 9  | 18 | AC   | 13 | 8  |
| 27052 | 2 | 21003960 | 21003980 | 3 | 7  | 21 | GGT  | 21 | 3  |
| 27060 | 2 | 21034312 | 21034331 | 4 | 5  | 20 | ATGG | 28 | 10 |
| 27064 | 2 | 21042569 | 21042580 | 2 | 6  | 12 | TG   | 24 | 4  |
| 27065 | 2 | 21042719 | 21042734 | 2 | 8  | 16 | GT   | 23 | 10 |
| 27066 | 2 | 21044245 | 21044265 | 3 | 7  | 21 | TCA  | 24 | 5  |
| 27069 | 2 | 21047883 | 21047894 | 2 | 6  | 12 | TC   | 16 | 3  |
| 27075 | 2 | 21058007 | 21058028 | 2 | 11 | 22 | CA   | 19 | 5  |
| 27076 | 2 | 21063004 | 21063021 | 3 | 6  | 18 | CCT  | 18 | 6  |
| 27077 | 2 | 21075215 | 21075242 | 4 | 7  | 28 | AAAG | 18 | 13 |
| 27078 | 2 | 21085729 | 21085750 | 2 | 11 | 22 | AC   | 12 | 6  |
| 27086 | 2 | 21092658 | 21092672 | 3 | 5  | 15 | GTT  | 22 | 3  |
| 27087 | 2 | 21093778 | 21093793 | 2 | 8  | 16 | AC   | 26 | 4  |
| 27088 | 2 | 21094112 | 21094131 | 4 | 5  | 20 | ATCT | 27 | 4  |
| 27089 | 2 | 21094314 | 21094365 | 4 | 13 | 52 | TAGA | 23 | 12 |
| 27090 | 2 | 21095352 | 21095363 | 2 | 6  | 12 | GA   | 25 | 4  |
| 27091 | 2 | 21095713 | 21095730 | 3 | 6  | 18 | AGC  | 25 | 6  |
| 27092 | 2 | 21096692 | 21096712 | 3 | 7  | 21 | CAG  | 22 | 5  |
| 27095 | 2 | 21099457 | 21099476 | 2 | 10 | 20 | GT   | 20 | 5  |
| 27096 | 2 | 21099731 | 21099752 | 2 | 11 | 22 | GT   | 9  | 4  |
| 27101 | 2 | 21101007 | 21101022 | 2 | 8  | 16 | GT   | 21 | 3  |
| 27109 | 2 | 21130236 | 21130247 | 2 | 6  | 12 | AC   | 17 | 8  |
| 27110 | 2 | 21130340 | 21130359 | 2 | 10 | 20 | AC   | 18 | 10 |
| 27111 | 2 | 21131992 | 21132003 | 2 | 6  | 12 | AC   | 34 | 3  |
| 27112 | 2 | 21132108 | 21132123 | 2 | 8  | 16 | CA   | 17 | 7  |
| 27129 | 2 | 21151468 | 21151481 | 2 | 7  | 14 | GA   | 15 | 4  |
| 27130 | 2 | 21151609 | 21151626 | 2 | 9  | 18 | TG   | 19 | 3  |
| 27133 | 2 | 21153200 | 21153217 | 2 | 9  | 18 | TG   | 19 | 7  |
| 27138 | 2 | 21155586 | 21155605 | 2 | 10 | 20 | CA   | 24 | 9  |
| 27142 | 2 | 21156076 | 21156097 | 2 | 11 | 22 | CT   | 11 | 7  |
| 27143 | 2 | 21156128 | 21156143 | 2 | 8  | 16 | CT   | 14 | 3  |
| 27144 | 2 | 21156478 | 21156491 | 2 | 7  | 14 | TG   | 17 | 4  |
| 27145 | 2 | 21156493 | 21156508 | 2 | 8  | 16 | GT   | 11 | 6  |
| 27148 | 2 | 21165899 | 21165914 | 2 | 8  | 16 | TG   | 21 | 4  |
| 27152 | 2 | 21166997 | 21167020 | 3 | 8  | 24 | CTC  | 20 | 3  |
| 27155 | 2 | 21171435 | 21171460 | 2 | 13 | 26 | CT   | 17 | 4  |
| 27156 | 2 | 21172421 | 21172442 | 2 | 11 | 22 | TC   | 21 | 7  |
| 27157 | 2 | 21172632 | 21172651 | 2 | 10 | 20 | CA   | 19 | 9  |
| 27158 | 2 | 21176629 | 21176642 | 2 | 7  | 14 | GT   | 17 | 4  |
| 27162 | 2 | 21177912 | 21177935 | 2 | 12 | 24 | TG   | 24 | 14 |
| 27163 | 2 | 21178087 | 21178102 | 4 | 4  | 16 | ACTG | 32 | 3  |
| 27174 | 2 | 21183859 | 21183876 | 2 | 9  | 18 | CA   | 13 | 3  |

|       |   |          |          |   |    |    |      |    |    |
|-------|---|----------|----------|---|----|----|------|----|----|
| 27182 | 2 | 21189925 | 21189942 | 2 | 9  | 18 | TG   | 13 | 5  |
| 27185 | 2 | 21192038 | 21192067 | 2 | 15 | 30 | CA   | 19 | 14 |
| 27191 | 2 | 21197655 | 21197666 | 2 | 6  | 12 | GT   | 22 | 8  |
| 27192 | 2 | 21197871 | 21197888 | 2 | 9  | 18 | GT   | 21 | 6  |
| 27194 | 2 | 21199990 | 21200009 | 2 | 10 | 20 | GA   | 15 | 5  |
| 27196 | 2 | 21200391 | 21200411 | 3 | 7  | 21 | CTG  | 26 | 4  |
| 27198 | 2 | 21203113 | 21203140 | 2 | 14 | 28 | AG   | 12 | 5  |
| 27200 | 2 | 21203438 | 21203451 | 2 | 7  | 14 | AC   | 13 | 3  |
| 27201 | 2 | 21203561 | 21203586 | 2 | 13 | 26 | CT   | 13 | 5  |
| 27202 | 2 | 21203638 | 21203657 | 2 | 10 | 20 | AC   | 10 | 5  |
| 27208 | 2 | 21210164 | 21210177 | 2 | 7  | 14 | TC   | 12 | 3  |
| 27215 | 2 | 21220416 | 21220429 | 2 | 7  | 14 | AG   | 10 | 4  |
| 27216 | 2 | 21220430 | 21220447 | 2 | 9  | 18 | TG   | 8  | 4  |
| 27218 | 2 | 21220471 | 21220482 | 2 | 6  | 12 | GA   | 27 | 3  |
| 27221 | 2 | 21225500 | 21225525 | 2 | 13 | 26 | TG   | 14 | 10 |
| 27228 | 2 | 21229348 | 21229369 | 2 | 11 | 22 | TG   | 21 | 8  |
| 27234 | 2 | 21232499 | 21232514 | 2 | 8  | 16 | CA   | 23 | 8  |
| 27235 | 2 | 21232872 | 21232903 | 2 | 16 | 32 | TG   | 10 | 10 |
| 27242 | 2 | 21234072 | 21234095 | 2 | 12 | 24 | CA   | 11 | 12 |
| 27243 | 2 | 21234714 | 21234749 | 2 | 18 | 36 | GT   | 6  | 5  |
| 27261 | 2 | 21249696 | 21249711 | 2 | 8  | 16 | CT   | 19 | 5  |
| 27263 | 2 | 21249753 | 21249768 | 2 | 8  | 16 | CT   | 29 | 4  |
| 27264 | 2 | 21249956 | 21250003 | 3 | 16 | 48 | TTG  | 22 | 7  |
| 27275 | 2 | 21291638 | 21291665 | 2 | 14 | 28 | AC   | 9  | 8  |
| 27278 | 2 | 21313270 | 21313285 | 4 | 4  | 16 | CAAT | 22 | 3  |
| 27292 | 2 | 21329022 | 21329036 | 3 | 5  | 15 | TGC  | 8  | 3  |
| 27295 | 2 | 21335439 | 21335478 | 4 | 10 | 40 | TGGA | 19 | 11 |
| 27296 | 2 | 21338535 | 21338550 | 4 | 4  | 16 | AAAT | 14 | 3  |
| 27299 | 2 | 21345354 | 21345399 | 2 | 23 | 46 | TG   | 27 | 4  |
| 27303 | 2 | 21351560 | 21351577 | 3 | 6  | 18 | GAA  | 21 | 3  |
| 27311 | 2 | 21375105 | 21375120 | 4 | 4  | 16 | AGCT | 28 | 3  |
| 27317 | 2 | 21394794 | 21394811 | 2 | 9  | 18 | TG   | 21 | 11 |
| 27320 | 2 | 21399954 | 21399980 | 3 | 9  | 27 | TTC  | 23 | 4  |
| 27323 | 2 | 21403649 | 21403662 | 2 | 7  | 14 | TG   | 25 | 3  |
| 27326 | 2 | 21415740 | 21415753 | 2 | 7  | 14 | TG   | 30 | 4  |
| 27327 | 2 | 21416434 | 21416445 | 2 | 6  | 12 | GT   | 27 | 3  |
| 27331 | 2 | 21429361 | 21429372 | 2 | 6  | 12 | TG   | 26 | 13 |
| 27332 | 2 | 21429536 | 21429550 | 3 | 5  | 15 | GCA  | 24 | 4  |
| 27339 | 2 | 21438776 | 21438793 | 2 | 9  | 18 | AC   | 18 | 8  |
| 27342 | 2 | 21440560 | 21440573 | 2 | 7  | 14 | TG   | 29 | 5  |
| 27345 | 2 | 21441988 | 21442023 | 3 | 12 | 36 | CAA  | 14 | 8  |
| 27347 | 2 | 21445528 | 21445539 | 2 | 6  | 12 | TA   | 15 | 5  |
| 27354 | 2 | 21453351 | 21453374 | 2 | 12 | 24 | AG   | 23 | 8  |
| 27359 | 2 | 21462980 | 21462997 | 2 | 9  | 18 | GA   | 6  | 3  |
| 27360 | 2 | 21468238 | 21468253 | 2 | 8  | 16 | AC   | 18 | 5  |
| 27364 | 2 | 21469479 | 21469500 | 2 | 11 | 22 | TC   | 12 | 3  |
| 27366 | 2 | 21470329 | 21470344 | 2 | 8  | 16 | GT   | 15 | 4  |
| 27369 | 2 | 21472183 | 21472196 | 2 | 7  | 14 | TC   | 20 | 6  |
| 27376 | 2 | 21486825 | 21486840 | 2 | 8  | 16 | CA   | 8  | 5  |
| 27393 | 2 | 21552129 | 21552142 | 2 | 7  | 14 | TG   | 21 | 5  |
| 27416 | 2 | 21595055 | 21595082 | 2 | 14 | 28 | CA   | 14 | 5  |



|       |   |          |          |   |    |    |      |    |    |
|-------|---|----------|----------|---|----|----|------|----|----|
| 27419 | 2 | 21598823 | 21598858 | 3 | 12 | 36 | ATT  | 8  | 4  |
| 27429 | 2 | 21627892 | 21627919 | 2 | 14 | 28 | AC   | 17 | 7  |
| 27435 | 3 | 3615     | 3632     | 3 | 6  | 18 | ATA  | 15 | 6  |
| 27437 | 3 | 21534    | 21565    | 2 | 16 | 32 | CA   | 11 | 13 |
| 27440 | 3 | 26028    | 26039    | 2 | 6  | 12 | GT   | 19 | 17 |
| 27443 | 3 | 26325    | 26357    | 3 | 11 | 33 | ACC  | 10 | 9  |
| 27445 | 3 | 32647    | 32668    | 2 | 11 | 22 | TG   | 19 | 9  |
| 27450 | 3 | 36668    | 36687    | 2 | 10 | 20 | TG   | 25 | 3  |
| 27451 | 3 | 36906    | 36923    | 2 | 9  | 18 | CA   | 21 | 4  |
| 27460 | 3 | 68403    | 68414    | 2 | 6  | 12 | TG   | 16 | 3  |
| 27466 | 3 | 80495    | 80516    | 2 | 11 | 22 | GT   | 19 | 9  |
| 27467 | 3 | 87149    | 87174    | 2 | 13 | 26 | CA   | 19 | 16 |
| 27472 | 3 | 104665   | 104678   | 2 | 7  | 14 | AC   | 19 | 4  |
| 27473 | 3 | 104681   | 104692   | 2 | 6  | 12 | AC   | 26 | 7  |
| 27479 | 3 | 107520   | 107531   | 2 | 6  | 12 | CA   | 25 | 4  |
| 27480 | 3 | 107668   | 107705   | 2 | 19 | 38 | GT   | 11 | 12 |
| 27481 | 3 | 108365   | 108376   | 2 | 6  | 12 | TG   | 17 | 7  |
| 27484 | 3 | 114693   | 114706   | 2 | 7  | 14 | AC   | 26 | 9  |
| 27485 | 3 | 115632   | 115647   | 2 | 8  | 16 | GT   | 21 | 3  |
| 27487 | 3 | 124835   | 124864   | 2 | 15 | 30 | GT   | 10 | 13 |
| 27488 | 3 | 124972   | 125001   | 2 | 15 | 30 | GT   | 19 | 12 |
| 27489 | 3 | 125271   | 125288   | 2 | 9  | 18 | GA   | 19 | 10 |
| 27492 | 3 | 128382   | 128425   | 2 | 22 | 44 | AC   | 13 | 14 |
| 27493 | 3 | 128809   | 128832   | 2 | 12 | 24 | CA   | 10 | 5  |
| 27497 | 3 | 131255   | 131272   | 2 | 9  | 18 | CA   | 21 | 8  |
| 27499 | 3 | 132206   | 132221   | 2 | 8  | 16 | TG   | 6  | 10 |
| 27500 | 3 | 132363   | 132378   | 2 | 8  | 16 | AC   | 8  | 6  |
| 27501 | 3 | 132383   | 132396   | 2 | 7  | 14 | AC   | 7  | 5  |
| 27503 | 3 | 133794   | 133811   | 2 | 9  | 18 | GT   | 23 | 6  |
| 27506 | 3 | 137719   | 137738   | 4 | 5  | 20 | ATGG | 33 | 4  |
| 27507 | 3 | 137782   | 137793   | 2 | 6  | 12 | AG   | 29 | 3  |
| 27508 | 3 | 138098   | 138113   | 2 | 8  | 16 | TC   | 19 | 3  |
| 27515 | 3 | 142609   | 142626   | 3 | 6  | 18 | AGA  | 18 | 4  |
| 27516 | 3 | 142766   | 142793   | 2 | 14 | 28 | CA   | 13 | 9  |
| 27519 | 3 | 144078   | 144091   | 2 | 7  | 14 | CA   | 27 | 13 |
| 27520 | 3 | 144906   | 144947   | 2 | 21 | 42 | AC   | 9  | 10 |
| 27521 | 3 | 150572   | 150589   | 2 | 9  | 18 | GA   | 24 | 4  |
| 27523 | 3 | 152029   | 152040   | 2 | 6  | 12 | TG   | 35 | 3  |
| 27524 | 3 | 153386   | 153419   | 2 | 17 | 34 | CT   | 8  | 9  |
| 27525 | 3 | 154030   | 154043   | 2 | 7  | 14 | GT   | 18 | 4  |
| 27526 | 3 | 154045   | 154056   | 2 | 6  | 12 | TG   | 20 | 7  |
| 27527 | 3 | 155339   | 155356   | 2 | 9  | 18 | CT   | 21 | 5  |
| 27528 | 3 | 155535   | 155564   | 3 | 10 | 30 | GAA  | 34 | 8  |
| 27531 | 3 | 159773   | 159804   | 2 | 16 | 32 | CA   | 14 | 13 |
| 27534 | 3 | 162914   | 162939   | 2 | 13 | 26 | TG   | 15 | 8  |
| 27535 | 3 | 167918   | 167949   | 2 | 16 | 32 | TG   | 9  | 10 |
| 27537 | 3 | 172953   | 172974   | 2 | 11 | 22 | TG   | 24 | 11 |
| 27543 | 3 | 176681   | 176728   | 2 | 24 | 48 | AC   | 11 | 15 |
| 27547 | 3 | 183325   | 183342   | 2 | 9  | 18 | CA   | 16 | 4  |
| 27550 | 3 | 184105   | 184136   | 2 | 16 | 32 | TG   | 10 | 14 |
| 27555 | 3 | 201081   | 201098   | 2 | 9  | 18 | CA   | 17 | 9  |

|       |   |        |        |   |    |    |      |    |    |
|-------|---|--------|--------|---|----|----|------|----|----|
| 27556 | 3 | 201258 | 201269 | 2 | 6  | 12 | TG   | 22 | 3  |
| 27560 | 3 | 202309 | 202330 | 2 | 11 | 22 | CT   | 23 | 5  |
| 27562 | 3 | 207108 | 207127 | 2 | 10 | 20 | TG   | 10 | 13 |
| 27565 | 3 | 213177 | 213200 | 2 | 12 | 24 | TG   | 22 | 5  |
| 27566 | 3 | 215328 | 215349 | 2 | 11 | 22 | CA   | 10 | 3  |
| 27567 | 3 | 215435 | 215449 | 3 | 5  | 15 | GAG  | 29 | 8  |
| 27568 | 3 | 216379 | 216412 | 2 | 17 | 34 | TG   | 16 | 7  |
| 27569 | 3 | 216572 | 216591 | 2 | 10 | 20 | AC   | 17 | 14 |
| 27572 | 3 | 221494 | 221529 | 2 | 18 | 36 | GT   | 6  | 8  |
| 27573 | 3 | 221705 | 221720 | 2 | 8  | 16 | CA   | 17 | 6  |
| 27578 | 3 | 233764 | 233778 | 3 | 5  | 15 | TGG  | 15 | 5  |
| 27580 | 3 | 260569 | 260586 | 3 | 6  | 18 | CAG  | 26 | 6  |
| 27581 | 3 | 265001 | 265064 | 4 | 16 | 64 | AGAT | 14 | 7  |
| 27582 | 3 | 268420 | 268453 | 2 | 17 | 34 | GT   | 12 | 8  |
| 27584 | 3 | 270666 | 270686 | 3 | 7  | 21 | TCC  | 17 | 4  |
| 27587 | 3 | 271834 | 271857 | 2 | 12 | 24 | CT   | 19 | 4  |
| 27593 | 3 | 278340 | 278379 | 4 | 10 | 40 | CATC | 27 | 7  |
| 27594 | 3 | 280842 | 280853 | 2 | 6  | 12 | TC   | 26 | 3  |
| 27595 | 3 | 283540 | 283553 | 2 | 7  | 14 | TG   | 22 | 3  |
| 27596 | 3 | 283713 | 283738 | 2 | 13 | 26 | AC   | 18 | 9  |
| 27601 | 3 | 304605 | 304632 | 4 | 7  | 28 | TACA | 16 | 6  |
| 27605 | 3 | 322740 | 322757 | 2 | 9  | 18 | AC   | 20 | 14 |
| 27608 | 3 | 330681 | 330706 | 2 | 13 | 26 | GT   | 20 | 15 |
| 27609 | 3 | 334902 | 334913 | 2 | 6  | 12 | AC   | 27 | 5  |
| 27616 | 3 | 351926 | 351941 | 2 | 8  | 16 | TA   | 22 | 4  |
| 27617 | 3 | 354429 | 354458 | 3 | 10 | 30 | CTC  | 19 | 4  |
| 27622 | 3 | 374716 | 374749 | 2 | 17 | 34 | TG   | 11 | 13 |
| 27625 | 3 | 378385 | 378408 | 2 | 12 | 24 | AC   | 11 | 6  |
| 27626 | 3 | 378610 | 378631 | 2 | 11 | 22 | CA   | 11 | 11 |
| 27627 | 3 | 378738 | 378755 | 2 | 9  | 18 | AC   | 21 | 5  |
| 27631 | 3 | 380250 | 380273 | 2 | 12 | 24 | TG   | 11 | 11 |
| 27634 | 3 | 381126 | 381145 | 2 | 10 | 20 | TC   | 20 | 4  |
| 27639 | 3 | 389679 | 389690 | 2 | 6  | 12 | GT   | 24 | 3  |
| 27641 | 3 | 391827 | 391848 | 2 | 11 | 22 | AC   | 18 | 5  |
| 27642 | 3 | 391903 | 391928 | 2 | 13 | 26 | AC   | 22 | 9  |
| 27643 | 3 | 393405 | 393420 | 2 | 8  | 16 | TG   | 17 | 4  |
| 27646 | 3 | 397835 | 397880 | 2 | 23 | 46 | AC   | 23 | 15 |
| 27647 | 3 | 397952 | 397987 | 2 | 18 | 36 | TG   | 11 | 11 |
| 27649 | 3 | 402178 | 402193 | 2 | 8  | 16 | TG   | 16 | 5  |
| 27655 | 3 | 407410 | 407424 | 3 | 5  | 15 | TTG  | 24 | 5  |
| 27681 | 3 | 485668 | 485685 | 3 | 6  | 18 | TAT  | 13 | 3  |
| 27682 | 3 | 488046 | 488065 | 4 | 5  | 20 | AAAT | 15 | 3  |
| 27690 | 3 | 532289 | 532302 | 2 | 7  | 14 | GT   | 22 | 3  |
| 27691 | 3 | 533989 | 534003 | 3 | 5  | 15 | AAT  | 23 | 5  |
| 27693 | 3 | 540101 | 540132 | 2 | 16 | 32 | CA   | 6  | 5  |
| 27694 | 3 | 541019 | 541060 | 2 | 21 | 42 | CA   | 14 | 18 |
| 27695 | 3 | 542938 | 542953 | 2 | 8  | 16 | TG   | 22 | 10 |
| 27696 | 3 | 543597 | 543628 | 2 | 16 | 32 | AC   | 13 | 9  |
| 27703 | 3 | 549378 | 549393 | 2 | 8  | 16 | AC   | 25 | 5  |
| 27704 | 3 | 549990 | 550003 | 2 | 7  | 14 | TG   | 28 | 4  |
| 27707 | 3 | 556752 | 556797 | 2 | 23 | 46 | TG   | 16 | 10 |

|       |   |        |        |   |    |    |      |    |    |
|-------|---|--------|--------|---|----|----|------|----|----|
| 27708 | 3 | 556977 | 557012 | 2 | 18 | 36 | TG   | 10 | 7  |
| 27709 | 3 | 557223 | 557242 | 2 | 10 | 20 | TG   | 22 | 6  |
| 27710 | 3 | 557490 | 557503 | 2 | 7  | 14 | TG   | 22 | 3  |
| 27711 | 3 | 558264 | 558295 | 2 | 16 | 32 | TG   | 18 | 13 |
| 27722 | 3 | 571216 | 571231 | 2 | 8  | 16 | TC   | 22 | 5  |
| 27723 | 3 | 575580 | 575593 | 2 | 7  | 14 | GA   | 26 | 4  |
| 27725 | 3 | 578536 | 578553 | 2 | 9  | 18 | TG   | 15 | 5  |
| 27727 | 3 | 603573 | 603587 | 3 | 5  | 15 | ACA  | 25 | 4  |
| 27729 | 3 | 616344 | 616369 | 2 | 13 | 26 | CA   | 22 | 5  |
| 27730 | 3 | 618215 | 618226 | 2 | 6  | 12 | GT   | 14 | 3  |
| 27731 | 3 | 618579 | 618590 | 2 | 6  | 12 | AC   | 25 | 5  |
| 27735 | 3 | 625141 | 625158 | 2 | 9  | 18 | GT   | 24 | 3  |
| 27736 | 3 | 631324 | 631341 | 2 | 9  | 18 | AT   | 12 | 4  |
| 27740 | 3 | 639841 | 639866 | 2 | 13 | 26 | GT   | 14 | 10 |
| 27742 | 3 | 642887 | 642934 | 2 | 24 | 48 | TG   | 11 | 15 |
| 27743 | 3 | 646724 | 646745 | 2 | 11 | 22 | CA   | 22 | 7  |
| 27744 | 3 | 646891 | 646922 | 2 | 16 | 32 | TG   | 15 | 10 |
| 27745 | 3 | 647485 | 647508 | 2 | 12 | 24 | TG   | 9  | 8  |
| 27751 | 3 | 653147 | 653170 | 2 | 12 | 24 | GT   | 9  | 13 |
| 27755 | 3 | 654970 | 654981 | 2 | 6  | 12 | AC   | 28 | 4  |
| 27757 | 3 | 656557 | 656577 | 3 | 7  | 21 | CAG  | 15 | 4  |
| 27759 | 3 | 658316 | 658333 | 2 | 9  | 18 | AG   | 11 | 8  |
| 27766 | 3 | 665262 | 665283 | 2 | 11 | 22 | GT   | 8  | 4  |
| 27767 | 3 | 665544 | 665563 | 2 | 10 | 20 | GT   | 18 | 6  |
| 27768 | 3 | 665728 | 665753 | 2 | 13 | 26 | GT   | 6  | 6  |
| 27774 | 3 | 681086 | 681097 | 2 | 6  | 12 | CA   | 15 | 8  |
| 27775 | 3 | 681099 | 681112 | 2 | 7  | 14 | AC   | 17 | 7  |
| 27781 | 3 | 685274 | 685299 | 2 | 13 | 26 | AC   | 13 | 11 |
| 27790 | 3 | 697433 | 697446 | 2 | 7  | 14 | TA   | 20 | 5  |
| 27791 | 3 | 699441 | 699462 | 2 | 11 | 22 | CA   | 22 | 13 |
| 27792 | 3 | 699940 | 699961 | 2 | 11 | 22 | GT   | 21 | 7  |
| 27795 | 3 | 704509 | 704544 | 4 | 9  | 36 | AGAC | 19 | 10 |
| 27796 | 3 | 704648 | 704663 | 2 | 8  | 16 | GA   | 16 | 6  |
| 27802 | 3 | 716057 | 716072 | 2 | 8  | 16 | AC   | 23 | 4  |
| 27803 | 3 | 716265 | 716302 | 2 | 19 | 38 | TG   | 11 | 12 |
| 27807 | 3 | 719121 | 719144 | 4 | 6  | 24 | CAGA | 9  | 4  |
| 27808 | 3 | 719682 | 719699 | 2 | 9  | 18 | TG   | 18 | 11 |
| 27809 | 3 | 719806 | 719831 | 2 | 13 | 26 | AC   | 17 | 15 |
| 27810 | 3 | 720178 | 720197 | 2 | 10 | 20 | TC   | 22 | 4  |
| 27811 | 3 | 720259 | 720285 | 3 | 9  | 27 | CTT  | 22 | 6  |
| 27815 | 3 | 720824 | 720851 | 2 | 14 | 28 | GT   | 21 | 9  |
| 27818 | 3 | 722940 | 722969 | 2 | 15 | 30 | GT   | 27 | 18 |
| 27819 | 3 | 723169 | 723188 | 2 | 10 | 20 | CA   | 16 | 8  |
| 27822 | 3 | 725609 | 725636 | 2 | 14 | 28 | CA   | 10 | 9  |
| 27823 | 3 | 729402 | 729415 | 2 | 7  | 14 | AG   | 27 | 3  |
| 27824 | 3 | 729515 | 729526 | 2 | 6  | 12 | TG   | 20 | 4  |
| 27825 | 3 | 730269 | 730286 | 3 | 6  | 18 | TCC  | 14 | 6  |
| 27828 | 3 | 734473 | 734502 | 3 | 10 | 30 | CTG  | 28 | 7  |
| 27829 | 3 | 736197 | 736244 | 2 | 24 | 48 | GT   | 10 | 15 |
| 27830 | 3 | 739691 | 739704 | 2 | 7  | 14 | GA   | 21 | 3  |
| 27831 | 3 | 742352 | 742369 | 3 | 6  | 18 | AGG  | 23 | 4  |

|       |   |        |        |   |    |    |      |    |    |
|-------|---|--------|--------|---|----|----|------|----|----|
| 27834 | 3 | 748605 | 748624 | 2 | 10 | 20 | TG   | 25 | 6  |
| 27836 | 3 | 750937 | 750976 | 4 | 10 | 40 | TGGA | 29 | 12 |
| 27843 | 3 | 754410 | 754437 | 2 | 14 | 28 | AC   | 13 | 8  |
| 27847 | 3 | 755597 | 755648 | 2 | 26 | 52 | GT   | 9  | 10 |
| 27848 | 3 | 755771 | 755800 | 2 | 15 | 30 | TG   | 12 | 7  |
| 27850 | 3 | 757780 | 757815 | 2 | 18 | 36 | CA   | 11 | 15 |
| 27851 | 3 | 762803 | 762824 | 2 | 11 | 22 | AC   | 21 | 7  |
| 27854 | 3 | 764149 | 764206 | 2 | 29 | 58 | TG   | 18 | 14 |
| 27861 | 3 | 769086 | 769099 | 2 | 7  | 14 | GT   | 27 | 9  |
| 27862 | 3 | 771883 | 771903 | 3 | 7  | 21 | GAG  | 23 | 3  |
| 27869 | 3 | 778162 | 778182 | 3 | 7  | 21 | AGG  | 26 | 7  |
| 27872 | 3 | 779179 | 779194 | 2 | 8  | 16 | AC   | 29 | 4  |
| 27880 | 3 | 791264 | 791277 | 2 | 7  | 14 | TG   | 28 | 3  |
| 27882 | 3 | 794874 | 794893 | 2 | 10 | 20 | GT   | 23 | 9  |
| 27885 | 3 | 795443 | 795464 | 2 | 11 | 22 | GT   | 14 | 7  |
| 27887 | 3 | 800624 | 800637 | 2 | 7  | 14 | AG   | 25 | 4  |
| 27888 | 3 | 800753 | 800768 | 2 | 8  | 16 | TG   | 24 | 4  |
| 27890 | 3 | 804042 | 804057 | 4 | 4  | 16 | AAAT | 31 | 4  |
| 27894 | 3 | 806868 | 806881 | 2 | 7  | 14 | CT   | 31 | 11 |
| 27895 | 3 | 808666 | 808691 | 2 | 13 | 26 | CA   | 15 | 10 |
| 27897 | 3 | 809880 | 809905 | 2 | 13 | 26 | TG   | 20 | 8  |
| 27898 | 3 | 810066 | 810085 | 2 | 10 | 20 | AC   | 30 | 6  |
| 27899 | 3 | 810831 | 810850 | 2 | 10 | 20 | TG   | 9  | 10 |
| 27902 | 3 | 811391 | 811404 | 2 | 7  | 14 | CA   | 29 | 6  |
| 27912 | 3 | 844125 | 844144 | 4 | 5  | 20 | TTTC | 27 | 3  |
| 27916 | 3 | 850528 | 850559 | 2 | 16 | 32 | AC   | 19 | 9  |
| 27917 | 3 | 856274 | 856287 | 2 | 7  | 14 | CT   | 24 | 4  |
| 27919 | 3 | 856863 | 856894 | 2 | 16 | 32 | CA   | 13 | 6  |
| 27922 | 3 | 860104 | 860119 | 2 | 8  | 16 | GT   | 27 | 6  |
| 27924 | 3 | 870789 | 870804 | 2 | 8  | 16 | CA   | 20 | 12 |
| 27925 | 3 | 870983 | 871010 | 2 | 14 | 28 | AC   | 9  | 6  |
| 27926 | 3 | 874542 | 874573 | 4 | 8  | 32 | TATT | 19 | 9  |
| 27927 | 3 | 874718 | 874743 | 2 | 13 | 26 | GT   | 21 | 6  |
| 27929 | 3 | 876046 | 876079 | 2 | 17 | 34 | CA   | 17 | 10 |
| 27931 | 3 | 877133 | 877166 | 2 | 17 | 34 | TG   | 13 | 8  |
| 27936 | 3 | 877747 | 877760 | 2 | 7  | 14 | CT   | 9  | 5  |
| 27937 | 3 | 878116 | 878143 | 2 | 14 | 28 | AC   | 19 | 8  |
| 27938 | 3 | 880165 | 880180 | 2 | 8  | 16 | CT   | 24 | 7  |
| 27939 | 3 | 880383 | 880394 | 2 | 6  | 12 | TG   | 13 | 6  |
| 27941 | 3 | 881502 | 881527 | 2 | 13 | 26 | CA   | 16 | 12 |
| 27945 | 3 | 888611 | 888624 | 2 | 7  | 14 | AG   | 28 | 3  |
| 27946 | 3 | 890339 | 890354 | 4 | 4  | 16 | GACA | 20 | 9  |
| 27947 | 3 | 890359 | 890374 | 4 | 4  | 16 | GACA | 8  | 3  |
| 27949 | 3 | 890466 | 890481 | 2 | 8  | 16 | AC   | 29 | 3  |
| 27952 | 3 | 896057 | 896080 | 3 | 8  | 24 | CTG  | 30 | 9  |
| 27953 | 3 | 899889 | 899920 | 2 | 16 | 32 | TG   | 21 | 14 |
| 27954 | 3 | 901030 | 901061 | 2 | 16 | 32 | TG   | 14 | 8  |
| 27958 | 3 | 907686 | 907705 | 4 | 5  | 20 | AAAT | 11 | 5  |
| 27959 | 3 | 909209 | 909222 | 2 | 7  | 14 | AC   | 26 | 5  |
| 27961 | 3 | 920548 | 920561 | 2 | 7  | 14 | AC   | 32 | 6  |
| 27962 | 3 | 923609 | 923634 | 2 | 13 | 26 | GT   | 17 | 8  |

|       |   |         |         |   |    |    |      |    |    |
|-------|---|---------|---------|---|----|----|------|----|----|
| 27963 | 3 | 925834  | 925849  | 2 | 8  | 16 | GT   | 23 | 5  |
| 27965 | 3 | 927565  | 927586  | 2 | 11 | 22 | AC   | 13 | 4  |
| 27971 | 3 | 941463  | 941490  | 2 | 14 | 28 | TG   | 7  | 8  |
| 27972 | 3 | 941647  | 941658  | 2 | 6  | 12 | GT   | 21 | 7  |
| 27974 | 3 | 945453  | 945470  | 2 | 9  | 18 | CA   | 28 | 3  |
| 27976 | 3 | 962075  | 962089  | 3 | 5  | 15 | CGC  | 25 | 3  |
| 27978 | 3 | 968703  | 968722  | 2 | 10 | 20 | AC   | 20 | 8  |
| 27979 | 3 | 969779  | 969790  | 2 | 6  | 12 | TG   | 32 | 3  |
| 27982 | 3 | 972712  | 972725  | 2 | 7  | 14 | AC   | 17 | 5  |
| 27985 | 3 | 974148  | 974171  | 2 | 12 | 24 | AC   | 15 | 9  |
| 27986 | 3 | 974925  | 974950  | 2 | 13 | 26 | GT   | 21 | 5  |
| 27987 | 3 | 975204  | 975227  | 2 | 12 | 24 | CA   | 20 | 8  |
| 27988 | 3 | 975421  | 975432  | 2 | 6  | 12 | CA   | 25 | 5  |
| 27990 | 3 | 978110  | 978151  | 2 | 21 | 42 | TG   | 14 | 7  |
| 27992 | 3 | 978258  | 978279  | 2 | 11 | 22 | CA   | 10 | 4  |
| 27993 | 3 | 978398  | 978415  | 2 | 9  | 18 | TG   | 12 | 3  |
| 27998 | 3 | 983879  | 983914  | 2 | 18 | 36 | GT   | 9  | 11 |
| 27999 | 3 | 987269  | 987298  | 2 | 15 | 30 | TG   | 16 | 11 |
| 28002 | 3 | 996618  | 996631  | 2 | 7  | 14 | TG   | 19 | 3  |
| 28005 | 3 | 1008721 | 1008738 | 3 | 6  | 18 | GCT  | 30 | 8  |
| 28010 | 3 | 1016435 | 1016458 | 4 | 6  | 24 | TTTA | 18 | 9  |
| 28011 | 3 | 1018951 | 1018978 | 2 | 14 | 28 | GT   | 12 | 7  |
| 28013 | 3 | 1027605 | 1027618 | 2 | 7  | 14 | CA   | 12 | 5  |
| 28014 | 3 | 1028879 | 1028906 | 2 | 14 | 28 | CA   | 22 | 18 |
| 28026 | 3 | 1086448 | 1086473 | 2 | 13 | 26 | GT   | 15 | 11 |
| 28027 | 3 | 1087096 | 1087121 | 2 | 13 | 26 | GT   | 16 | 10 |
| 28036 | 3 | 1097354 | 1097377 | 4 | 6  | 24 | AAAG | 14 | 4  |
| 28039 | 3 | 1100834 | 1100849 | 4 | 4  | 16 | AAAG | 21 | 5  |
| 28040 | 3 | 1101176 | 1101191 | 2 | 8  | 16 | TG   | 21 | 8  |
| 28041 | 3 | 1101997 | 1102038 | 3 | 14 | 42 | GGA  | 6  | 5  |
| 28044 | 3 | 1102967 | 1103012 | 2 | 23 | 46 | TG   | 8  | 8  |
| 28045 | 3 | 1105507 | 1105536 | 2 | 15 | 30 | TG   | 12 | 7  |
| 28046 | 3 | 1105760 | 1105789 | 2 | 15 | 30 | TG   | 6  | 7  |
| 28055 | 3 | 1116812 | 1116829 | 3 | 6  | 18 | CAC  | 21 | 8  |
| 28059 | 3 | 1118567 | 1118584 | 2 | 9  | 18 | TG   | 19 | 5  |
| 28060 | 3 | 1118641 | 1118652 | 2 | 6  | 12 | AC   | 34 | 3  |
| 28061 | 3 | 1118860 | 1118873 | 2 | 7  | 14 | TG   | 29 | 5  |
| 28062 | 3 | 1119023 | 1119038 | 2 | 8  | 16 | AC   | 22 | 7  |
| 28068 | 3 | 1125119 | 1125154 | 2 | 18 | 36 | GT   | 15 | 10 |
| 28069 | 3 | 1125751 | 1125786 | 2 | 18 | 36 | CA   | 11 | 6  |
| 28076 | 3 | 1126529 | 1126558 | 2 | 15 | 30 | TG   | 7  | 6  |
| 28078 | 3 | 1126908 | 1126921 | 2 | 7  | 14 | TC   | 15 | 4  |
| 28080 | 3 | 1127070 | 1127084 | 3 | 5  | 15 | TCC  | 20 | 4  |
| 28082 | 3 | 1127872 | 1127887 | 2 | 8  | 16 | TG   | 23 | 4  |
| 28084 | 3 | 1129886 | 1129905 | 2 | 10 | 20 | CA   | 16 | 8  |
| 28085 | 3 | 1130133 | 1130148 | 2 | 8  | 16 | GT   | 25 | 3  |
| 28086 | 3 | 1130255 | 1130278 | 2 | 12 | 24 | AC   | 20 | 10 |
| 28087 | 3 | 1131622 | 1131633 | 2 | 6  | 12 | AC   | 17 | 3  |
| 28090 | 3 | 1133649 | 1133662 | 2 | 7  | 14 | TC   | 17 | 3  |
| 28091 | 3 | 1133676 | 1133687 | 2 | 6  | 12 | CT   | 11 | 4  |
| 28094 | 3 | 1133981 | 1134012 | 2 | 16 | 32 | AC   | 9  | 7  |

|       |   |         |         |   |    |    |      |    |    |
|-------|---|---------|---------|---|----|----|------|----|----|
| 28095 | 3 | 1134918 | 1134951 | 2 | 17 | 34 | TG   | 18 | 9  |
| 28099 | 3 | 1136573 | 1136590 | 2 | 9  | 18 | GT   | 6  | 6  |
| 28101 | 3 | 1143116 | 1143136 | 3 | 7  | 21 | CTC  | 14 | 6  |
| 28103 | 3 | 1145807 | 1145820 | 2 | 7  | 14 | TG   | 29 | 3  |
| 28104 | 3 | 1146579 | 1146604 | 2 | 13 | 26 | AC   | 12 | 7  |
| 28105 | 3 | 1146649 | 1146674 | 2 | 13 | 26 | AC   | 11 | 10 |
| 28106 | 3 | 1148525 | 1148536 | 2 | 6  | 12 | AT   | 19 | 3  |
| 28110 | 3 | 1169071 | 1169108 | 2 | 19 | 38 | GT   | 12 | 9  |
| 28112 | 3 | 1174470 | 1174483 | 2 | 7  | 14 | AC   | 28 | 5  |
| 28113 | 3 | 1178177 | 1178192 | 2 | 8  | 16 | AC   | 28 | 11 |
| 28119 | 3 | 1187384 | 1187401 | 3 | 6  | 18 | GCT  | 16 | 4  |
| 28120 | 3 | 1191496 | 1191515 | 2 | 10 | 20 | CA   | 12 | 13 |
| 28121 | 3 | 1192966 | 1192979 | 2 | 7  | 14 | CA   | 18 | 5  |
| 28122 | 3 | 1196840 | 1196851 | 2 | 6  | 12 | AC   | 18 | 3  |
| 28123 | 3 | 1197092 | 1197115 | 2 | 12 | 24 | GT   | 7  | 8  |
| 28132 | 3 | 1197947 | 1197966 | 2 | 10 | 20 | CA   | 14 | 9  |
| 28135 | 3 | 1200952 | 1200969 | 2 | 9  | 18 | CA   | 20 | 9  |
| 28136 | 3 | 1201938 | 1201963 | 2 | 13 | 26 | CA   | 8  | 6  |
| 28138 | 3 | 1203948 | 1203963 | 2 | 8  | 16 | CA   | 19 | 8  |
| 28145 | 3 | 1221883 | 1221898 | 2 | 8  | 16 | TG   | 16 | 5  |
| 28148 | 3 | 1234236 | 1234287 | 2 | 26 | 52 | AC   | 9  | 9  |
| 28149 | 3 | 1237922 | 1237933 | 2 | 6  | 12 | TG   | 27 | 3  |
| 28153 | 3 | 1247093 | 1247104 | 2 | 6  | 12 | TG   | 27 | 9  |
| 28157 | 3 | 1259700 | 1259715 | 2 | 8  | 16 | CA   | 20 | 4  |
| 28158 | 3 | 1260605 | 1260624 | 4 | 5  | 20 | AAAT | 8  | 3  |
| 28163 | 3 | 1269338 | 1269349 | 2 | 6  | 12 | AG   | 12 | 4  |
| 28164 | 3 | 1269351 | 1269368 | 2 | 9  | 18 | GA   | 22 | 8  |
| 28169 | 3 | 1276830 | 1276845 | 2 | 8  | 16 | AC   | 20 | 4  |
| 28170 | 3 | 1278878 | 1278895 | 2 | 9  | 18 | TG   | 17 | 4  |
| 28172 | 3 | 1282476 | 1282489 | 2 | 7  | 14 | CT   | 17 | 3  |
| 28175 | 3 | 1283730 | 1283761 | 2 | 16 | 32 | CA   | 28 | 10 |
| 28176 | 3 | 1284922 | 1284939 | 2 | 9  | 18 | AC   | 21 | 10 |
| 28177 | 3 | 1285839 | 1285854 | 2 | 8  | 16 | CA   | 14 | 15 |
| 28183 | 3 | 1293202 | 1293219 | 2 | 9  | 18 | CA   | 22 | 6  |
| 28184 | 3 | 1294101 | 1294118 | 2 | 9  | 18 | GT   | 7  | 7  |
| 28188 | 3 | 1294393 | 1294428 | 2 | 18 | 36 | TG   | 11 | 11 |
| 28193 | 3 | 1300735 | 1300748 | 2 | 7  | 14 | TG   | 22 | 7  |
| 28195 | 3 | 1301114 | 1301145 | 2 | 16 | 32 | AC   | 12 | 12 |
| 28196 | 3 | 1301304 | 1301325 | 2 | 11 | 22 | AC   | 13 | 13 |
| 28198 | 3 | 1301555 | 1301570 | 2 | 8  | 16 | CA   | 20 | 9  |
| 28199 | 3 | 1302741 | 1302756 | 4 | 4  | 16 | AAAG | 25 | 5  |
| 28200 | 3 | 1310139 | 1310168 | 2 | 15 | 30 | CA   | 6  | 7  |
| 28202 | 3 | 1312949 | 1312960 | 2 | 6  | 12 | GT   | 7  | 4  |
| 28207 | 3 | 1328458 | 1328471 | 2 | 7  | 14 | GT   | 27 | 5  |
| 28213 | 3 | 1344244 | 1344257 | 2 | 7  | 14 | GA   | 22 | 3  |
| 28214 | 3 | 1345053 | 1345070 | 2 | 9  | 18 | GT   | 23 | 15 |
| 28216 | 3 | 1346636 | 1346663 | 2 | 14 | 28 | TG   | 17 | 12 |
| 28218 | 3 | 1348032 | 1348043 | 2 | 6  | 12 | TG   | 26 | 10 |
| 28219 | 3 | 1349401 | 1349421 | 3 | 7  | 21 | TGA  | 23 | 4  |
| 28220 | 3 | 1350502 | 1350513 | 2 | 6  | 12 | AC   | 19 | 10 |
| 28221 | 3 | 1350516 | 1350531 | 2 | 8  | 16 | AC   | 19 | 10 |

|       |   |         |         |   |    |    |     |    |    |
|-------|---|---------|---------|---|----|----|-----|----|----|
| 28222 | 3 | 1354289 | 1354302 | 2 | 7  | 14 | TG  | 14 | 7  |
| 28226 | 3 | 1357431 | 1357446 | 2 | 8  | 16 | GT  | 9  | 3  |
| 28227 | 3 | 1357492 | 1357517 | 2 | 13 | 26 | CA  | 10 | 12 |
| 28231 | 3 | 1373765 | 1373798 | 2 | 17 | 34 | CA  | 10 | 7  |
| 28232 | 3 | 1375144 | 1375163 | 2 | 10 | 20 | GA  | 15 | 7  |
| 28233 | 3 | 1375289 | 1375320 | 2 | 16 | 32 | AC  | 17 | 7  |
| 28237 | 3 | 1380588 | 1380605 | 2 | 9  | 18 | TG  | 20 | 7  |
| 28239 | 3 | 1385155 | 1385168 | 2 | 7  | 14 | TG  | 31 | 7  |
| 28241 | 3 | 1385442 | 1385457 | 2 | 8  | 16 | AC  | 25 | 3  |
| 28242 | 3 | 1385530 | 1385547 | 2 | 9  | 18 | AC  | 26 | 8  |
| 28243 | 3 | 1385803 | 1385820 | 2 | 9  | 18 | AG  | 24 | 6  |
| 28246 | 3 | 1386309 | 1386330 | 2 | 11 | 22 | AC  | 19 | 5  |
| 28247 | 3 | 1391882 | 1391903 | 2 | 11 | 22 | TG  | 16 | 10 |
| 28249 | 3 | 1394321 | 1394340 | 2 | 10 | 20 | GT  | 16 | 11 |
| 28254 | 3 | 1395306 | 1395323 | 3 | 6  | 18 | GCT | 30 | 3  |
| 28256 | 3 | 1397933 | 1397947 | 3 | 5  | 15 | GGA | 12 | 3  |
| 28258 | 3 | 1400757 | 1400780 | 2 | 12 | 24 | TG  | 11 | 11 |
| 28260 | 3 | 1406369 | 1406384 | 2 | 8  | 16 | TG  | 23 | 3  |
| 28261 | 3 | 1406413 | 1406442 | 2 | 15 | 30 | GT  | 11 | 10 |
| 28262 | 3 | 1406595 | 1406618 | 2 | 12 | 24 | CA  | 13 | 11 |
| 28265 | 3 | 1410119 | 1410136 | 2 | 9  | 18 | TG  | 20 | 4  |
| 28268 | 3 | 1410687 | 1410712 | 2 | 13 | 26 | CA  | 8  | 7  |
| 28269 | 3 | 1410952 | 1410973 | 2 | 11 | 22 | CA  | 16 | 6  |
| 28274 | 3 | 1418858 | 1418885 | 2 | 14 | 28 | CA  | 11 | 16 |
| 28275 | 3 | 1418986 | 1419011 | 2 | 13 | 26 | TG  | 21 | 10 |
| 28277 | 3 | 1419238 | 1419267 | 2 | 15 | 30 | GA  | 12 | 12 |
| 28278 | 3 | 1419526 | 1419561 | 2 | 18 | 36 | CA  | 15 | 7  |
| 28279 | 3 | 1423414 | 1423445 | 2 | 16 | 32 | GA  | 8  | 7  |
| 28282 | 3 | 1425490 | 1425507 | 2 | 9  | 18 | GA  | 22 | 4  |
| 28285 | 3 | 1435021 | 1435046 | 2 | 13 | 26 | AC  | 13 | 7  |
| 28289 | 3 | 1441436 | 1441469 | 2 | 17 | 34 | TG  | 22 | 12 |
| 28292 | 3 | 1448548 | 1448561 | 2 | 7  | 14 | TG  | 19 | 6  |
| 28295 | 3 | 1451407 | 1451434 | 2 | 14 | 28 | CA  | 15 | 11 |
| 28296 | 3 | 1452714 | 1452735 | 2 | 11 | 22 | TG  | 17 | 7  |
| 28297 | 3 | 1453385 | 1453396 | 2 | 6  | 12 | AC  | 19 | 6  |
| 28306 | 3 | 1462298 | 1462315 | 3 | 6  | 18 | GGA | 18 | 4  |
| 28308 | 3 | 1469166 | 1469193 | 2 | 14 | 28 | TG  | 19 | 11 |
| 28317 | 3 | 1476289 | 1476314 | 2 | 13 | 26 | TG  | 14 | 13 |
| 28318 | 3 | 1476473 | 1476484 | 2 | 6  | 12 | TG  | 19 | 9  |
| 28319 | 3 | 1476712 | 1476727 | 2 | 8  | 16 | CA  | 19 | 9  |
| 28326 | 3 | 1487023 | 1487036 | 2 | 7  | 14 | AC  | 25 | 8  |
| 28327 | 3 | 1487038 | 1487053 | 2 | 8  | 16 | CA  | 18 | 8  |
| 28328 | 3 | 1488058 | 1488077 | 2 | 10 | 20 | TG  | 12 | 7  |
| 28329 | 3 | 1491844 | 1491863 | 2 | 10 | 20 | TG  | 10 | 7  |
| 28330 | 3 | 1492633 | 1492648 | 2 | 8  | 16 | GT  | 25 | 5  |
| 28331 | 3 | 1492855 | 1492882 | 2 | 14 | 28 | TG  | 16 | 8  |
| 28332 | 3 | 1493194 | 1493221 | 2 | 14 | 28 | TG  | 7  | 6  |
| 28333 | 3 | 1495524 | 1495535 | 2 | 6  | 12 | CA  | 16 | 11 |
| 28334 | 3 | 1496240 | 1496255 | 2 | 8  | 16 | AC  | 12 | 5  |
| 28335 | 3 | 1496257 | 1496276 | 2 | 10 | 20 | CA  | 10 | 7  |
| 28336 | 3 | 1496390 | 1496427 | 2 | 19 | 38 | CA  | 8  | 9  |

|       |   |         |         |   |    |    |      |    |    |
|-------|---|---------|---------|---|----|----|------|----|----|
| 28338 | 3 | 1498834 | 1498849 | 2 | 8  | 16 | CT   | 15 | 6  |
| 28342 | 3 | 1499214 | 1499227 | 2 | 7  | 14 | GA   | 15 | 9  |
| 28343 | 3 | 1499362 | 1499387 | 2 | 13 | 26 | AC   | 18 | 11 |
| 28344 | 3 | 1505757 | 1505768 | 2 | 6  | 12 | AT   | 19 | 4  |
| 28347 | 3 | 1506210 | 1506225 | 2 | 8  | 16 | GT   | 21 | 11 |
| 28351 | 3 | 1510573 | 1510596 | 2 | 12 | 24 | GA   | 7  | 4  |
| 28352 | 3 | 1510622 | 1510643 | 2 | 11 | 22 | AG   | 10 | 4  |
| 28354 | 3 | 1510818 | 1510831 | 2 | 7  | 14 | TC   | 14 | 6  |
| 28358 | 3 | 1511300 | 1511321 | 2 | 11 | 22 | GT   | 11 | 7  |
| 28359 | 3 | 1511418 | 1511445 | 2 | 14 | 28 | TG   | 11 | 10 |
| 28364 | 3 | 1512163 | 1512176 | 2 | 7  | 14 | AC   | 8  | 11 |
| 28365 | 3 | 1512178 | 1512195 | 2 | 9  | 18 | CA   | 11 | 12 |
| 28372 | 3 | 1524837 | 1524866 | 2 | 15 | 30 | CA   | 13 | 9  |
| 28373 | 3 | 1524973 | 1525000 | 2 | 14 | 28 | TG   | 17 | 18 |
| 28374 | 3 | 1525856 | 1525893 | 2 | 19 | 38 | AC   | 12 | 7  |
| 28375 | 3 | 1527986 | 1528009 | 2 | 12 | 24 | CA   | 13 | 15 |
| 28379 | 3 | 1534314 | 1534335 | 2 | 11 | 22 | CA   | 15 | 6  |
| 28381 | 3 | 1535980 | 1535993 | 2 | 7  | 14 | TG   | 21 | 5  |
| 28384 | 3 | 1543023 | 1543036 | 2 | 7  | 14 | AC   | 20 | 4  |
| 28390 | 3 | 1566590 | 1566603 | 2 | 7  | 14 | GT   | 19 | 5  |
| 28391 | 3 | 1566714 | 1566747 | 2 | 17 | 34 | TG   | 8  | 10 |
| 28401 | 3 | 1594985 | 1595028 | 2 | 22 | 44 | AC   | 9  | 13 |
| 28404 | 3 | 1600757 | 1600770 | 2 | 7  | 14 | AC   | 28 | 3  |
| 28406 | 3 | 1604271 | 1604290 | 4 | 5  | 20 | AAAG | 25 | 3  |
| 28407 | 3 | 1607392 | 1607403 | 2 | 6  | 12 | AT   | 12 | 3  |
| 28409 | 3 | 1608025 | 1608036 | 2 | 6  | 12 | GT   | 13 | 8  |
| 28412 | 3 | 1613330 | 1613351 | 2 | 11 | 22 | GT   | 27 | 10 |
| 28415 | 3 | 1617325 | 1617336 | 2 | 6  | 12 | AC   | 18 | 3  |
| 28416 | 3 | 1617869 | 1617882 | 2 | 7  | 14 | CA   | 25 | 4  |
| 28417 | 3 | 1617890 | 1617901 | 2 | 6  | 12 | AT   | 23 | 5  |
| 28418 | 3 | 1620843 | 1620864 | 2 | 11 | 22 | TG   | 7  | 4  |
| 28420 | 3 | 1622516 | 1622527 | 2 | 6  | 12 | GT   | 25 | 3  |
| 28427 | 3 | 1626067 | 1626086 | 2 | 10 | 20 | AC   | 10 | 8  |
| 28439 | 3 | 1635154 | 1635173 | 2 | 10 | 20 | TG   | 13 | 7  |
| 28442 | 3 | 1638499 | 1638522 | 2 | 12 | 24 | CT   | 21 | 10 |
| 28445 | 3 | 1641819 | 1641830 | 2 | 6  | 12 | TG   | 33 | 4  |
| 28449 | 3 | 1644494 | 1644511 | 3 | 6  | 18 | CTA  | 15 | 3  |
| 28450 | 3 | 1648148 | 1648165 | 2 | 9  | 18 | AC   | 28 | 4  |
| 28452 | 3 | 1652628 | 1652645 | 2 | 9  | 18 | TG   | 27 | 3  |
| 28454 | 3 | 1656825 | 1656842 | 2 | 9  | 18 | GA   | 14 | 5  |
| 28456 | 3 | 1660367 | 1660381 | 3 | 5  | 15 | CGG  | 30 | 5  |
| 28457 | 3 | 1660690 | 1660743 | 3 | 18 | 54 | GAA  | 7  | 9  |
| 28464 | 3 | 1663161 | 1663172 | 2 | 6  | 12 | TG   | 25 | 4  |
| 28466 | 3 | 1667813 | 1667828 | 2 | 8  | 16 | AC   | 15 | 11 |
| 28467 | 3 | 1667864 | 1667877 | 2 | 7  | 14 | CA   | 19 | 7  |
| 28470 | 3 | 1678527 | 1678558 | 2 | 16 | 32 | TG   | 10 | 11 |
| 28471 | 3 | 1682203 | 1682230 | 2 | 14 | 28 | TG   | 11 | 7  |
| 28472 | 3 | 1682454 | 1682479 | 2 | 13 | 26 | CA   | 14 | 14 |
| 28476 | 3 | 1683297 | 1683326 | 2 | 15 | 30 | TG   | 26 | 19 |
| 28483 | 3 | 1699343 | 1699366 | 2 | 12 | 24 | GT   | 22 | 13 |
| 28484 | 3 | 1699669 | 1699680 | 2 | 6  | 12 | GT   | 27 | 3  |



|       |   |         |         |   |    |    |      |    |    |
|-------|---|---------|---------|---|----|----|------|----|----|
| 28485 | 3 | 1699911 | 1699950 | 2 | 20 | 40 | CA   | 12 | 7  |
| 28486 | 3 | 1700065 | 1700082 | 2 | 9  | 18 | CA   | 16 | 8  |
| 28491 | 3 | 1707043 | 1707062 | 2 | 10 | 20 | TG   | 7  | 6  |
| 28492 | 3 | 1707166 | 1707183 | 2 | 9  | 18 | GT   | 21 | 4  |
| 28495 | 3 | 1714504 | 1714539 | 2 | 18 | 36 | TG   | 13 | 9  |
| 28499 | 3 | 1716257 | 1716272 | 2 | 8  | 16 | GT   | 27 | 10 |
| 28501 | 3 | 1724981 | 1725004 | 2 | 12 | 24 | AC   | 9  | 6  |
| 28505 | 3 | 1727949 | 1727970 | 2 | 11 | 22 | GT   | 15 | 10 |
| 28507 | 3 | 1728445 | 1728480 | 2 | 18 | 36 | CA   | 6  | 10 |
| 28508 | 3 | 1728594 | 1728619 | 2 | 13 | 26 | CA   | 13 | 12 |
| 28509 | 3 | 1729385 | 1729402 | 3 | 6  | 18 | ATC  | 27 | 4  |
| 28513 | 3 | 1732954 | 1732969 | 4 | 4  | 16 | TGTC | 23 | 4  |
| 28514 | 3 | 1733126 | 1733137 | 2 | 6  | 12 | AC   | 27 | 6  |
| 28515 | 3 | 1733477 | 1733500 | 3 | 8  | 24 | TCC  | 21 | 7  |
| 28517 | 3 | 1733948 | 1733983 | 2 | 18 | 36 | CA   | 14 | 11 |
| 28518 | 3 | 1734108 | 1734121 | 2 | 7  | 14 | CA   | 15 | 11 |
| 28520 | 3 | 1735925 | 1735940 | 2 | 8  | 16 | TG   | 23 | 4  |
| 28521 | 3 | 1737085 | 1737106 | 2 | 11 | 22 | CA   | 15 | 10 |
| 28527 | 3 | 1738752 | 1738778 | 3 | 9  | 27 | GAG  | 17 | 4  |
| 28528 | 3 | 1738959 | 1738978 | 2 | 10 | 20 | GT   | 20 | 11 |
| 28530 | 3 | 1743167 | 1743196 | 2 | 15 | 30 | GT   | 6  | 5  |
| 28531 | 3 | 1745407 | 1745432 | 2 | 13 | 26 | TG   | 13 | 10 |
| 28533 | 3 | 1747667 | 1747684 | 2 | 9  | 18 | TG   | 19 | 9  |
| 28534 | 3 | 1747817 | 1747842 | 2 | 13 | 26 | TG   | 14 | 8  |
| 28537 | 3 | 1749691 | 1749716 | 2 | 13 | 26 | TG   | 12 | 8  |
| 28540 | 3 | 1752394 | 1752423 | 2 | 15 | 30 | GT   | 25 | 13 |
| 28543 | 3 | 1754156 | 1754181 | 2 | 13 | 26 | CA   | 15 | 5  |
| 28545 | 3 | 1754986 | 1755007 | 2 | 11 | 22 | CA   | 12 | 6  |
| 28546 | 3 | 1758328 | 1758349 | 2 | 11 | 22 | CA   | 19 | 8  |
| 28550 | 3 | 1763769 | 1763788 | 4 | 5  | 20 | ATTT | 23 | 3  |
| 28551 | 3 | 1765722 | 1765745 | 2 | 12 | 24 | GT   | 15 | 11 |
| 28552 | 3 | 1765869 | 1765898 | 2 | 15 | 30 | TG   | 15 | 9  |
| 28555 | 3 | 1769884 | 1769895 | 2 | 6  | 12 | GT   | 22 | 6  |
| 28556 | 3 | 1772749 | 1772776 | 2 | 14 | 28 | CA   | 16 | 13 |
| 28558 | 3 | 1775775 | 1775786 | 2 | 6  | 12 | GT   | 22 | 8  |
| 28559 | 3 | 1776044 | 1776065 | 2 | 11 | 22 | CA   | 26 | 5  |
| 28560 | 3 | 1781083 | 1781094 | 2 | 6  | 12 | GT   | 30 | 3  |
| 28562 | 3 | 1781423 | 1781434 | 2 | 6  | 12 | GT   | 9  | 7  |
| 28563 | 3 | 1781538 | 1781557 | 2 | 10 | 20 | CT   | 9  | 4  |
| 28567 | 3 | 1782928 | 1782959 | 2 | 16 | 32 | TG   | 9  | 7  |
| 28568 | 3 | 1783147 | 1783180 | 2 | 17 | 34 | CA   | 11 | 7  |
| 28569 | 3 | 1783282 | 1783297 | 2 | 8  | 16 | TG   | 25 | 12 |
| 28571 | 3 | 1783970 | 1783997 | 2 | 14 | 28 | AG   | 14 | 6  |
| 28572 | 3 | 1784391 | 1784414 | 2 | 12 | 24 | AC   | 17 | 11 |
| 28576 | 3 | 1787843 | 1787860 | 2 | 9  | 18 | CA   | 21 | 9  |
| 28577 | 3 | 1788038 | 1788065 | 2 | 14 | 28 | CA   | 13 | 11 |
| 28579 | 3 | 1789855 | 1789866 | 2 | 6  | 12 | TG   | 21 | 3  |
| 28581 | 3 | 1790749 | 1790772 | 2 | 12 | 24 | AC   | 19 | 8  |
| 28583 | 3 | 1790989 | 1791016 | 2 | 14 | 28 | CA   | 9  | 8  |
| 28587 | 3 | 1791355 | 1791380 | 2 | 13 | 26 | AC   | 13 | 5  |
| 28588 | 3 | 1794586 | 1794625 | 4 | 10 | 40 | AGAC | 16 | 10 |

|       |   |         |         |   |    |    |      |    |    |
|-------|---|---------|---------|---|----|----|------|----|----|
| 28593 | 3 | 1802540 | 1802561 | 2 | 11 | 22 | AC   | 11 | 8  |
| 28595 | 3 | 1802629 | 1802654 | 2 | 13 | 26 | AC   | 7  | 7  |
| 28596 | 3 | 1802832 | 1802847 | 2 | 8  | 16 | AG   | 22 | 3  |
| 28598 | 3 | 1804004 | 1804019 | 2 | 8  | 16 | AC   | 24 | 5  |
| 28599 | 3 | 1804743 | 1804762 | 4 | 5  | 20 | AAAT | 8  | 4  |
| 28602 | 3 | 1805338 | 1805359 | 2 | 11 | 22 | CA   | 16 | 9  |
| 28603 | 3 | 1812244 | 1812259 | 2 | 8  | 16 | CA   | 24 | 8  |
| 28605 | 3 | 1818768 | 1818803 | 2 | 18 | 36 | AC   | 13 | 10 |
| 28606 | 3 | 1821560 | 1821589 | 2 | 15 | 30 | CA   | 19 | 7  |
| 28612 | 3 | 1827647 | 1827674 | 2 | 14 | 28 | TG   | 12 | 13 |
| 28621 | 3 | 1830886 | 1830905 | 2 | 10 | 20 | GT   | 23 | 15 |
| 28622 | 3 | 1830907 | 1830918 | 2 | 6  | 12 | TG   | 20 | 14 |
| 28626 | 3 | 1838046 | 1838085 | 2 | 20 | 40 | AC   | 10 | 11 |
| 28627 | 3 | 1838303 | 1838328 | 2 | 13 | 26 | CA   | 14 | 6  |
| 28630 | 3 | 1839044 | 1839055 | 2 | 6  | 12 | AC   | 22 | 5  |
| 28632 | 3 | 1842917 | 1842928 | 2 | 6  | 12 | AT   | 18 | 12 |
| 28633 | 3 | 1847484 | 1847497 | 2 | 7  | 14 | GT   | 17 | 7  |
| 28637 | 3 | 1849496 | 1849517 | 2 | 11 | 22 | CT   | 15 | 13 |
| 28639 | 3 | 1850149 | 1850180 | 2 | 16 | 32 | AC   | 13 | 6  |
| 28641 | 3 | 1850591 | 1850608 | 2 | 9  | 18 | TC   | 20 | 3  |
| 28642 | 3 | 1850730 | 1850757 | 2 | 14 | 28 | CA   | 17 | 5  |
| 28648 | 3 | 1859546 | 1859559 | 2 | 7  | 14 | TG   | 18 | 3  |
| 28649 | 3 | 1859652 | 1859665 | 2 | 7  | 14 | CT   | 18 | 5  |
| 28653 | 3 | 1863091 | 1863105 | 3 | 5  | 15 | CAT  | 28 | 7  |
| 28656 | 3 | 1865745 | 1865774 | 2 | 15 | 30 | CA   | 8  | 4  |
| 28659 | 3 | 1874919 | 1874948 | 2 | 15 | 30 | CA   | 16 | 11 |
| 28661 | 3 | 1875062 | 1875073 | 2 | 6  | 12 | CA   | 15 | 4  |
| 28662 | 3 | 1875193 | 1875204 | 2 | 6  | 12 | CA   | 19 | 5  |
| 28663 | 3 | 1875336 | 1875349 | 2 | 7  | 14 | CA   | 16 | 9  |
| 28664 | 3 | 1875487 | 1875500 | 2 | 7  | 14 | CA   | 19 | 4  |
| 28669 | 3 | 1876907 | 1876922 | 2 | 8  | 16 | AC   | 19 | 4  |
| 28670 | 3 | 1877082 | 1877099 | 2 | 9  | 18 | TG   | 20 | 11 |
| 28671 | 3 | 1878726 | 1878755 | 2 | 15 | 30 | GA   | 16 | 15 |
| 28672 | 3 | 1881697 | 1881720 | 3 | 8  | 24 | GGA  | 21 | 5  |
| 28674 | 3 | 1887298 | 1887309 | 2 | 6  | 12 | TC   | 25 | 3  |
| 28678 | 3 | 1902596 | 1902615 | 4 | 5  | 20 | ATTG | 12 | 8  |
| 28679 | 3 | 1902688 | 1902699 | 2 | 6  | 12 | CT   | 20 | 3  |
| 28686 | 3 | 1917248 | 1917265 | 2 | 9  | 18 | GT   | 23 | 4  |
| 28688 | 3 | 1928361 | 1928372 | 2 | 6  | 12 | TG   | 15 | 4  |
| 28689 | 3 | 1930576 | 1930597 | 2 | 11 | 22 | TG   | 29 | 10 |
| 28697 | 3 | 1941467 | 1941482 | 2 | 8  | 16 | AC   | 25 | 5  |
| 28698 | 3 | 1942009 | 1942042 | 2 | 17 | 34 | TG   | 15 | 14 |
| 28699 | 3 | 1942366 | 1942395 | 2 | 15 | 30 | TG   | 20 | 9  |
| 28705 | 3 | 1956274 | 1956307 | 2 | 17 | 34 | AC   | 9  | 12 |
| 28706 | 3 | 1958448 | 1958477 | 2 | 15 | 30 | AC   | 10 | 9  |
| 28707 | 3 | 1962778 | 1962797 | 2 | 10 | 20 | AC   | 21 | 8  |
| 28709 | 3 | 1963102 | 1963137 | 2 | 18 | 36 | CT   | 6  | 5  |
| 28712 | 3 | 1963447 | 1963466 | 2 | 10 | 20 | GT   | 20 | 9  |
| 28713 | 3 | 1963585 | 1963598 | 2 | 7  | 14 | AC   | 26 | 3  |
| 28714 | 3 | 1965136 | 1965185 | 2 | 25 | 50 | GT   | 11 | 13 |
| 28715 | 3 | 1965559 | 1965582 | 2 | 12 | 24 | GT   | 15 | 13 |

|       |   |         |         |   |    |    |      |    |    |
|-------|---|---------|---------|---|----|----|------|----|----|
| 28716 | 3 | 1968038 | 1968052 | 3 | 5  | 15 | GGA  | 12 | 3  |
| 28722 | 3 | 1974283 | 1974298 | 4 | 4  | 16 | TGTT | 22 | 5  |
| 28723 | 3 | 1974495 | 1974508 | 2 | 7  | 14 | GA   | 29 | 4  |
| 28725 | 3 | 1975559 | 1975573 | 3 | 5  | 15 | TTG  | 23 | 3  |
| 28732 | 3 | 1977800 | 1977814 | 3 | 5  | 15 | CAT  | 31 | 4  |
| 28737 | 3 | 1985027 | 1985040 | 2 | 7  | 14 | GT   | 8  | 3  |
| 28738 | 3 | 1985437 | 1985458 | 2 | 11 | 22 | GT   | 20 | 7  |
| 28742 | 3 | 1988668 | 1988739 | 4 | 18 | 72 | TCTT | 10 | 7  |
| 28747 | 3 | 2002642 | 2002683 | 2 | 21 | 42 | GT   | 11 | 12 |
| 28748 | 3 | 2002936 | 2002956 | 3 | 7  | 21 | TCC  | 22 | 4  |
| 28749 | 3 | 2003052 | 2003065 | 2 | 7  | 14 | CA   | 21 | 6  |
| 28750 | 3 | 2003164 | 2003179 | 2 | 8  | 16 | CA   | 20 | 3  |
| 28751 | 3 | 2008471 | 2008508 | 2 | 19 | 38 | TG   | 10 | 13 |
| 28754 | 3 | 2009429 | 2009460 | 2 | 16 | 32 | AC   | 16 | 8  |
| 28755 | 3 | 2009674 | 2009689 | 2 | 8  | 16 | TG   | 13 | 10 |
| 28757 | 3 | 2011899 | 2011920 | 2 | 11 | 22 | GT   | 20 | 12 |
| 28758 | 3 | 2012094 | 2012121 | 2 | 14 | 28 | CA   | 12 | 6  |
| 28762 | 3 | 2017297 | 2017316 | 2 | 10 | 20 | TG   | 9  | 5  |
| 28764 | 3 | 2017501 | 2017512 | 2 | 6  | 12 | GT   | 10 | 5  |
| 28765 | 3 | 2017514 | 2017531 | 2 | 9  | 18 | TG   | 23 | 5  |
| 28766 | 3 | 2020005 | 2020040 | 2 | 18 | 36 | AC   | 8  | 5  |
| 28767 | 3 | 2021185 | 2021200 | 2 | 8  | 16 | AC   | 31 | 4  |
| 28769 | 3 | 2022831 | 2022858 | 2 | 14 | 28 | CT   | 15 | 5  |
| 28770 | 3 | 2022974 | 2022987 | 2 | 7  | 14 | CA   | 22 | 3  |
| 28771 | 3 | 2032975 | 2032995 | 3 | 7  | 21 | GAG  | 17 | 9  |
| 28774 | 3 | 2034610 | 2034635 | 2 | 13 | 26 | GT   | 13 | 11 |
| 28778 | 3 | 2043862 | 2043877 | 2 | 8  | 16 | GT   | 26 | 5  |
| 28782 | 3 | 2050325 | 2050346 | 2 | 11 | 22 | TG   | 13 | 9  |
| 28784 | 3 | 2050523 | 2050568 | 2 | 23 | 46 | CA   | 13 | 13 |
| 28787 | 3 | 2053298 | 2053321 | 2 | 12 | 24 | TG   | 8  | 9  |
| 28788 | 3 | 2054804 | 2054830 | 3 | 9  | 27 | AAT  | 12 | 10 |
| 28791 | 3 | 2056452 | 2056465 | 2 | 7  | 14 | GT   | 23 | 4  |
| 28792 | 3 | 2057181 | 2057194 | 2 | 7  | 14 | TG   | 23 | 4  |
| 28795 | 3 | 2060245 | 2060278 | 2 | 17 | 34 | TG   | 11 | 10 |
| 28797 | 3 | 2062175 | 2062190 | 2 | 8  | 16 | AC   | 16 | 3  |
| 28798 | 3 | 2062497 | 2062514 | 2 | 9  | 18 | GT   | 20 | 8  |
| 28809 | 3 | 2101027 | 2101038 | 2 | 6  | 12 | AC   | 27 | 6  |
| 28835 | 3 | 2153059 | 2153082 | 2 | 12 | 24 | CA   | 10 | 7  |
| 28841 | 3 | 2163581 | 2163596 | 4 | 4  | 16 | TTTA | 13 | 6  |
| 28844 | 3 | 2168895 | 2168912 | 2 | 9  | 18 | AC   | 19 | 3  |
| 28847 | 3 | 2172800 | 2172815 | 4 | 4  | 16 | CAAA | 20 | 6  |
| 28851 | 3 | 2176428 | 2176445 | 2 | 9  | 18 | AC   | 17 | 5  |
| 28860 | 3 | 2191548 | 2191559 | 2 | 6  | 12 | GT   | 12 | 4  |
| 28866 | 3 | 2202643 | 2202670 | 2 | 14 | 28 | CA   | 11 | 8  |
| 28867 | 3 | 2202987 | 2203006 | 2 | 10 | 20 | GT   | 19 | 4  |
| 28869 | 3 | 2205111 | 2205128 | 3 | 6  | 18 | GGT  | 26 | 4  |
| 28872 | 3 | 2208578 | 2208599 | 2 | 11 | 22 | AC   | 18 | 6  |
| 28874 | 3 | 2209580 | 2209599 | 2 | 10 | 20 | TG   | 13 | 8  |
| 28879 | 3 | 2217858 | 2217873 | 2 | 8  | 16 | TG   | 23 | 4  |
| 28885 | 3 | 2229242 | 2229275 | 2 | 17 | 34 | TG   | 18 | 11 |
| 28886 | 3 | 2230777 | 2230788 | 2 | 6  | 12 | AC   | 14 | 4  |

|       |   |         |         |   |    |    |      |    |    |
|-------|---|---------|---------|---|----|----|------|----|----|
| 28887 | 3 | 2231268 | 2231285 | 2 | 9  | 18 | AC   | 19 | 4  |
| 28888 | 3 | 2233846 | 2233859 | 2 | 7  | 14 | AC   | 23 | 3  |
| 28890 | 3 | 2234093 | 2234104 | 2 | 6  | 12 | CA   | 7  | 4  |
| 28892 | 3 | 2234967 | 2234978 | 2 | 6  | 12 | TG   | 23 | 4  |
| 28895 | 3 | 2247192 | 2247225 | 2 | 17 | 34 | GA   | 7  | 10 |
| 28897 | 3 | 2254572 | 2254585 | 2 | 7  | 14 | AC   | 26 | 3  |
| 28903 | 3 | 2255936 | 2255965 | 2 | 15 | 30 | CA   | 7  | 9  |
| 28904 | 3 | 2256101 | 2256116 | 2 | 8  | 16 | GT   | 18 | 12 |
| 28907 | 3 | 2260056 | 2260079 | 2 | 12 | 24 | GT   | 12 | 7  |
| 28909 | 3 | 2260328 | 2260371 | 2 | 22 | 44 | TG   | 7  | 7  |
| 28910 | 3 | 2263259 | 2263274 | 2 | 8  | 16 | AC   | 18 | 4  |
| 28914 | 3 | 2271114 | 2271129 | 2 | 8  | 16 | GT   | 18 | 3  |
| 28920 | 3 | 2287865 | 2287890 | 2 | 13 | 26 | GT   | 14 | 10 |
| 28921 | 3 | 2288104 | 2288123 | 2 | 10 | 20 | AC   | 17 | 7  |
| 28923 | 3 | 2290906 | 2290929 | 4 | 6  | 24 | GATG | 33 | 3  |
| 28924 | 3 | 2292092 | 2292103 | 2 | 6  | 12 | CA   | 20 | 3  |
| 28926 | 3 | 2308100 | 2308119 | 4 | 5  | 20 | AAAT | 27 | 3  |
| 28927 | 3 | 2311233 | 2311258 | 2 | 13 | 26 | TC   | 6  | 5  |
| 28930 | 3 | 2311614 | 2311639 | 2 | 13 | 26 | AC   | 8  | 8  |
| 28932 | 3 | 2311982 | 2312001 | 2 | 10 | 20 | TG   | 8  | 5  |
| 28938 | 3 | 2319165 | 2319186 | 2 | 11 | 22 | CA   | 14 | 8  |
| 28940 | 3 | 2323517 | 2323552 | 3 | 12 | 36 | GAG  | 8  | 4  |
| 28946 | 3 | 2327133 | 2327152 | 2 | 10 | 20 | GT   | 22 | 10 |
| 28948 | 3 | 2329192 | 2329206 | 3 | 5  | 15 | AAT  | 23 | 4  |
| 28950 | 3 | 2334176 | 2334191 | 2 | 8  | 16 | TG   | 25 | 11 |
| 28953 | 3 | 2340593 | 2340608 | 2 | 8  | 16 | GT   | 13 | 4  |
| 28954 | 3 | 2343808 | 2343827 | 2 | 10 | 20 | TC   | 10 | 9  |
| 28955 | 3 | 2343966 | 2343997 | 2 | 16 | 32 | CA   | 6  | 9  |
| 28956 | 3 | 2344369 | 2344388 | 2 | 10 | 20 | AC   | 25 | 5  |
| 28960 | 3 | 2351488 | 2351502 | 3 | 5  | 15 | GAA  | 24 | 4  |
| 28963 | 3 | 2356796 | 2356825 | 2 | 15 | 30 | TG   | 13 | 10 |
| 28969 | 3 | 2363189 | 2363206 | 2 | 9  | 18 | CA   | 19 | 10 |
| 28972 | 3 | 2363825 | 2363844 | 2 | 10 | 20 | GT   | 15 | 12 |
| 28973 | 3 | 2364311 | 2364338 | 2 | 14 | 28 | TG   | 15 | 12 |
| 28974 | 3 | 2366622 | 2366643 | 2 | 11 | 22 | GT   | 17 | 8  |
| 28979 | 3 | 2368321 | 2368352 | 4 | 8  | 32 | AGAA | 24 | 9  |
| 28988 | 3 | 2375569 | 2375604 | 2 | 18 | 36 | TG   | 8  | 9  |
| 28997 | 3 | 2390648 | 2390681 | 2 | 17 | 34 | CA   | 18 | 10 |
| 28999 | 3 | 2392541 | 2392564 | 2 | 12 | 24 | CA   | 17 | 15 |
| 29000 | 3 | 2392707 | 2392726 | 2 | 10 | 20 | AC   | 15 | 8  |
| 29004 | 3 | 2395620 | 2395631 | 2 | 6  | 12 | CA   | 14 | 3  |
| 29008 | 3 | 2422121 | 2422140 | 2 | 10 | 20 | TG   | 25 | 6  |
| 29015 | 3 | 2437858 | 2437871 | 2 | 7  | 14 | TG   | 15 | 4  |
| 29016 | 3 | 2437910 | 2437923 | 2 | 7  | 14 | GT   | 26 | 5  |
| 29019 | 3 | 2441477 | 2441492 | 2 | 8  | 16 | CA   | 25 | 11 |
| 29020 | 3 | 2445372 | 2445399 | 2 | 14 | 28 | GT   | 12 | 11 |
| 29021 | 3 | 2445557 | 2445572 | 2 | 8  | 16 | CA   | 20 | 5  |
| 29024 | 3 | 2448652 | 2448675 | 2 | 12 | 24 | TG   | 20 | 12 |
| 29032 | 3 | 2489197 | 2489211 | 3 | 5  | 15 | GTG  | 31 | 5  |
| 29045 | 3 | 2514611 | 2514624 | 2 | 7  | 14 | TG   | 15 | 5  |
| 29048 | 3 | 2519813 | 2519844 | 2 | 16 | 32 | TC   | 17 | 11 |

|       |   |         |         |   |    |    |      |    |    |
|-------|---|---------|---------|---|----|----|------|----|----|
| 29055 | 3 | 2542615 | 2542626 | 2 | 6  | 12 | GT   | 18 | 3  |
| 29057 | 3 | 2542653 | 2542664 | 2 | 6  | 12 | TG   | 13 | 3  |
| 29058 | 3 | 2544675 | 2544701 | 3 | 9  | 27 | GAG  | 14 | 4  |
| 29059 | 3 | 2544800 | 2544817 | 3 | 6  | 18 | TGC  | 20 | 7  |
| 29062 | 3 | 2545291 | 2545316 | 2 | 13 | 26 | CT   | 20 | 7  |
| 29063 | 3 | 2545485 | 2545500 | 2 | 8  | 16 | GT   | 24 | 7  |
| 29064 | 3 | 2547004 | 2547039 | 3 | 12 | 36 | TGA  | 23 | 8  |
| 29065 | 3 | 2547397 | 2547436 | 2 | 20 | 40 | AC   | 8  | 10 |
| 29068 | 3 | 2553273 | 2553290 | 2 | 9  | 18 | GT   | 17 | 4  |
| 29076 | 3 | 2565276 | 2565299 | 2 | 12 | 24 | TG   | 18 | 10 |
| 29077 | 3 | 2568353 | 2568364 | 2 | 6  | 12 | TG   | 19 | 11 |
| 29078 | 3 | 2571960 | 2572005 | 2 | 23 | 46 | TG   | 11 | 11 |
| 29079 | 3 | 2573631 | 2573645 | 3 | 5  | 15 | TTG  | 27 | 3  |
| 29081 | 3 | 2578360 | 2578389 | 2 | 15 | 30 | CA   | 20 | 12 |
| 29086 | 3 | 2589425 | 2589440 | 2 | 8  | 16 | AC   | 26 | 6  |
| 29087 | 3 | 2592430 | 2592445 | 4 | 4  | 16 | AACG | 29 | 3  |
| 29088 | 3 | 2594493 | 2594518 | 2 | 13 | 26 | TG   | 22 | 6  |
| 29089 | 3 | 2594919 | 2594958 | 2 | 20 | 40 | CA   | 12 | 10 |
| 29092 | 3 | 2597714 | 2597735 | 2 | 11 | 22 | CA   | 12 | 8  |
| 29096 | 3 | 2607414 | 2607445 | 2 | 16 | 32 | GT   | 8  | 11 |
| 29106 | 3 | 2629698 | 2629715 | 2 | 9  | 18 | TG   | 17 | 9  |
| 29107 | 3 | 2629842 | 2629881 | 2 | 20 | 40 | GT   | 7  | 8  |
| 29108 | 3 | 2630322 | 2630353 | 2 | 16 | 32 | CA   | 20 | 13 |
| 29113 | 3 | 2636827 | 2636847 | 3 | 7  | 21 | CCT  | 24 | 3  |
| 29114 | 3 | 2639510 | 2639524 | 3 | 5  | 15 | TTC  | 30 | 3  |
| 29115 | 3 | 2639528 | 2639542 | 3 | 5  | 15 | TTA  | 30 | 3  |
| 29121 | 3 | 2647431 | 2647444 | 2 | 7  | 14 | AC   | 21 | 3  |
| 29122 | 3 | 2647677 | 2647688 | 2 | 6  | 12 | GT   | 22 | 8  |
| 29123 | 3 | 2650268 | 2650287 | 2 | 10 | 20 | AC   | 15 | 7  |
| 29124 | 3 | 2650427 | 2650440 | 2 | 7  | 14 | CA   | 28 | 3  |
| 29127 | 3 | 2654114 | 2654127 | 2 | 7  | 14 | CT   | 20 | 11 |
| 29129 | 3 | 2654261 | 2654274 | 2 | 7  | 14 | AC   | 19 | 5  |
| 29131 | 3 | 2658402 | 2658419 | 2 | 9  | 18 | AC   | 21 | 9  |
| 29132 | 3 | 2658421 | 2658434 | 2 | 7  | 14 | CA   | 17 | 9  |
| 29133 | 3 | 2659761 | 2659774 | 2 | 7  | 14 | GA   | 20 | 8  |
| 29134 | 3 | 2662425 | 2662436 | 2 | 6  | 12 | TG   | 26 | 5  |
| 29135 | 3 | 2663384 | 2663413 | 2 | 15 | 30 | TG   | 18 | 7  |
| 29140 | 3 | 2674960 | 2674973 | 2 | 7  | 14 | AC   | 23 | 7  |
| 29144 | 3 | 2682789 | 2682812 | 2 | 12 | 24 | CA   | 26 | 11 |
| 29149 | 3 | 2696124 | 2696155 | 2 | 16 | 32 | TG   | 10 | 7  |
| 29153 | 3 | 2709437 | 2709448 | 2 | 6  | 12 | GT   | 26 | 3  |
| 29154 | 3 | 2710196 | 2710225 | 2 | 15 | 30 | TG   | 16 | 11 |
| 29156 | 3 | 2712939 | 2712990 | 2 | 26 | 52 | CA   | 9  | 11 |
| 29166 | 3 | 2731867 | 2731882 | 2 | 8  | 16 | AT   | 23 | 5  |
| 29170 | 3 | 2740884 | 2740909 | 2 | 13 | 26 | GT   | 11 | 10 |
| 29176 | 3 | 2755018 | 2755065 | 2 | 24 | 48 | GT   | 7  | 10 |
| 29177 | 3 | 2756478 | 2756503 | 2 | 13 | 26 | GT   | 16 | 14 |
| 29185 | 3 | 2772733 | 2772766 | 2 | 17 | 34 | GT   | 9  | 8  |
| 29191 | 3 | 2795769 | 2795782 | 2 | 7  | 14 | CA   | 28 | 5  |
| 29193 | 3 | 2829630 | 2829653 | 3 | 8  | 24 | TGC  | 24 | 8  |
| 29201 | 3 | 2863967 | 2863986 | 2 | 10 | 20 | CA   | 11 | 11 |

|       |   |         |         |   |    |    |      |    |    |
|-------|---|---------|---------|---|----|----|------|----|----|
| 29208 | 3 | 2917395 | 2917408 | 2 | 7  | 14 | TC   | 26 | 9  |
| 29209 | 3 | 2917411 | 2917424 | 2 | 7  | 14 | TC   | 28 | 6  |
| 29227 | 3 | 2953877 | 2953896 | 2 | 10 | 20 | GA   | 23 | 7  |
| 29228 | 3 | 2959191 | 2959214 | 2 | 12 | 24 | CA   | 21 | 7  |
| 29229 | 3 | 2960379 | 2960396 | 3 | 6  | 18 | AGC  | 24 | 3  |
| 29234 | 3 | 2974595 | 2974606 | 2 | 6  | 12 | TG   | 22 | 3  |
| 29237 | 3 | 2980143 | 2980162 | 2 | 10 | 20 | AC   | 17 | 8  |
| 29248 | 3 | 2999931 | 2999948 | 2 | 9  | 18 | CT   | 20 | 6  |
| 29249 | 3 | 3000390 | 3000416 | 3 | 9  | 27 | AGG  | 14 | 5  |
| 29250 | 3 | 3000531 | 3000548 | 2 | 9  | 18 | CT   | 10 | 7  |
| 29251 | 3 | 3000551 | 3000566 | 2 | 8  | 16 | CT   | 6  | 5  |
| 29252 | 3 | 3001318 | 3001331 | 2 | 7  | 14 | AC   | 12 | 7  |
| 29253 | 3 | 3001337 | 3001350 | 2 | 7  | 14 | GA   | 8  | 3  |
| 29255 | 3 | 3006108 | 3006128 | 3 | 7  | 21 | TTC  | 26 | 4  |
| 29264 | 3 | 3026421 | 3026450 | 2 | 15 | 30 | GT   | 9  | 6  |
| 29270 | 3 | 3037066 | 3037117 | 4 | 13 | 52 | CCAT | 27 | 13 |
| 29273 | 3 | 3039409 | 3039429 | 3 | 7  | 21 | AAT  | 14 | 4  |
| 29298 | 3 | 3094964 | 3094997 | 2 | 17 | 34 | CA   | 10 | 12 |
| 29308 | 3 | 3114967 | 3114978 | 2 | 6  | 12 | AC   | 16 | 5  |
| 29315 | 3 | 3137989 | 3138004 | 4 | 4  | 16 | TTAT | 18 | 8  |
| 29320 | 3 | 3157605 | 3157620 | 2 | 8  | 16 | CA   | 22 | 3  |
| 29321 | 3 | 3159956 | 3159975 | 4 | 5  | 20 | TATT | 21 | 3  |
| 29331 | 3 | 3177725 | 3177766 | 2 | 21 | 42 | TG   | 12 | 12 |
| 29332 | 3 | 3178338 | 3178357 | 2 | 10 | 20 | TG   | 15 | 4  |
| 29333 | 3 | 3178566 | 3178587 | 2 | 11 | 22 | TG   | 25 | 4  |
| 29352 | 3 | 3214058 | 3214081 | 4 | 6  | 24 | AAAT | 27 | 5  |
| 29359 | 3 | 3225019 | 3225034 | 2 | 8  | 16 | AT   | 7  | 3  |
| 29372 | 3 | 3257396 | 3257416 | 3 | 7  | 21 | ACA  | 23 | 4  |
| 29382 | 3 | 3286833 | 3286872 | 4 | 10 | 40 | TCCA | 30 | 11 |
| 29386 | 3 | 3297292 | 3297341 | 2 | 25 | 50 | TG   | 7  | 7  |
| 29391 | 3 | 3308992 | 3309003 | 2 | 6  | 12 | AG   | 27 | 3  |
| 29398 | 3 | 3329039 | 3329066 | 2 | 14 | 28 | CA   | 11 | 7  |
| 29404 | 3 | 3339174 | 3339197 | 2 | 12 | 24 | AC   | 18 | 6  |
| 29406 | 3 | 3347975 | 3348000 | 2 | 13 | 26 | AC   | 9  | 12 |
| 29410 | 3 | 3354970 | 3354983 | 2 | 7  | 14 | GT   | 19 | 9  |
| 29411 | 3 | 3354984 | 3355001 | 2 | 9  | 18 | GA   | 20 | 11 |
| 29413 | 3 | 3362746 | 3362766 | 3 | 7  | 21 | TAA  | 15 | 8  |
| 29414 | 3 | 3363222 | 3363237 | 2 | 8  | 16 | TC   | 18 | 4  |
| 29415 | 3 | 3365680 | 3365691 | 2 | 6  | 12 | AT   | 23 | 4  |
| 29421 | 3 | 3371889 | 3371906 | 2 | 9  | 18 | AC   | 17 | 4  |
| 29426 | 3 | 3385790 | 3385803 | 2 | 7  | 14 | CA   | 21 | 7  |
| 29429 | 3 | 3387738 | 3387763 | 2 | 13 | 26 | TG   | 20 | 8  |
| 29433 | 3 | 3396215 | 3396230 | 2 | 8  | 16 | CA   | 18 | 4  |
| 29436 | 3 | 3398526 | 3398543 | 2 | 9  | 18 | CA   | 14 | 6  |
| 29438 | 3 | 3399611 | 3399626 | 2 | 8  | 16 | TG   | 10 | 3  |
| 29441 | 3 | 3400724 | 3400753 | 2 | 15 | 30 | TC   | 7  | 8  |
| 29443 | 3 | 3400930 | 3400950 | 3 | 7  | 21 | CTG  | 26 | 3  |
| 29458 | 3 | 3462835 | 3462850 | 2 | 8  | 16 | CA   | 6  | 7  |
| 29461 | 3 | 3467488 | 3467505 | 3 | 6  | 18 | GCT  | 30 | 3  |
| 29466 | 3 | 3485538 | 3485553 | 4 | 4  | 16 | ATTT | 23 | 6  |
| 29474 | 3 | 3511648 | 3511668 | 3 | 7  | 21 | CTG  | 21 | 5  |

|       |   |         |         |   |    |    |      |    |    |
|-------|---|---------|---------|---|----|----|------|----|----|
| 29475 | 3 | 3514003 | 3514029 | 3 | 9  | 27 | AAG  | 31 | 6  |
| 29484 | 3 | 3543635 | 3543654 | 4 | 5  | 20 | GTTT | 20 | 3  |
| 29493 | 3 | 3577803 | 3577820 | 3 | 6  | 18 | TCC  | 12 | 3  |
| 29494 | 3 | 3578411 | 3578436 | 2 | 13 | 26 | TG   | 12 | 7  |
| 29495 | 3 | 3580844 | 3580859 | 2 | 8  | 16 | CA   | 21 | 9  |
| 29497 | 3 | 3582306 | 3582325 | 2 | 10 | 20 | AC   | 10 | 9  |
| 29527 | 3 | 3671487 | 3671504 | 2 | 9  | 18 | CA   | 22 | 6  |
| 29531 | 3 | 3688841 | 3688896 | 2 | 28 | 56 | GT   | 8  | 10 |
| 29535 | 3 | 3709449 | 3709464 | 2 | 8  | 16 | AC   | 6  | 6  |
| 29536 | 3 | 3709467 | 3709482 | 2 | 8  | 16 | AC   | 9  | 9  |
| 29537 | 3 | 3710812 | 3710831 | 2 | 10 | 20 | GT   | 14 | 4  |
| 29539 | 3 | 3720841 | 3720856 | 2 | 8  | 16 | AC   | 27 | 7  |
| 29543 | 3 | 3729261 | 3729276 | 4 | 4  | 16 | GCAG | 21 | 5  |
| 29544 | 3 | 3729288 | 3729303 | 4 | 4  | 16 | GGCA | 23 | 5  |
| 29546 | 3 | 3733947 | 3733970 | 2 | 12 | 24 | AC   | 6  | 7  |
| 29552 | 3 | 3776848 | 3776863 | 2 | 8  | 16 | AT   | 14 | 5  |
| 29559 | 3 | 3798916 | 3798947 | 2 | 16 | 32 | CA   | 17 | 6  |
| 29568 | 3 | 3834166 | 3834217 | 4 | 13 | 52 | TATC | 10 | 6  |
| 29574 | 3 | 3853930 | 3853949 | 4 | 5  | 20 | TATT | 11 | 3  |
| 29575 | 3 | 3855284 | 3855315 | 2 | 16 | 32 | TG   | 9  | 8  |
| 29580 | 3 | 3865287 | 3865307 | 3 | 7  | 21 | CCT  | 22 | 4  |
| 29584 | 3 | 3879090 | 3879105 | 2 | 8  | 16 | CA   | 21 | 5  |
| 29597 | 3 | 3906312 | 3906329 | 2 | 9  | 18 | AC   | 26 | 5  |
| 29605 | 3 | 3916666 | 3916685 | 2 | 10 | 20 | CT   | 19 | 8  |
| 29608 | 3 | 3918767 | 3918780 | 2 | 7  | 14 | AG   | 18 | 4  |
| 29609 | 3 | 3919019 | 3919036 | 2 | 9  | 18 | GT   | 14 | 8  |
| 29614 | 3 | 3927730 | 3927747 | 3 | 6  | 18 | GTT  | 25 | 5  |
| 29615 | 3 | 3927783 | 3927800 | 3 | 6  | 18 | TGT  | 20 | 5  |
| 29616 | 3 | 3927932 | 3927976 | 3 | 15 | 45 | CTG  | 19 | 11 |
| 29617 | 3 | 3928177 | 3928200 | 3 | 8  | 24 | GCT  | 25 | 8  |
| 29618 | 3 | 3928231 | 3928248 | 3 | 6  | 18 | GCT  | 18 | 4  |
| 29622 | 3 | 3931178 | 3931217 | 4 | 10 | 40 | TGGA | 28 | 6  |
| 29623 | 3 | 3931616 | 3931631 | 4 | 4  | 16 | ATGA | 20 | 3  |
| 29635 | 3 | 3960893 | 3960908 | 2 | 8  | 16 | AC   | 21 | 5  |
| 29636 | 3 | 3963578 | 3963593 | 4 | 4  | 16 | AAAT | 28 | 4  |
| 29644 | 3 | 3974623 | 3974636 | 2 | 7  | 14 | AC   | 27 | 5  |
| 29647 | 3 | 3980208 | 3980219 | 2 | 6  | 12 | GA   | 15 | 6  |
| 29649 | 3 | 3984385 | 3984405 | 3 | 7  | 21 | TTC  | 15 | 5  |
| 29658 | 3 | 3991634 | 3991655 | 2 | 11 | 22 | CT   | 15 | 3  |
| 29662 | 3 | 3994830 | 3994851 | 2 | 11 | 22 | TG   | 21 | 5  |
| 29665 | 3 | 3997779 | 3997804 | 2 | 13 | 26 | GT   | 15 | 16 |
| 29666 | 3 | 3998158 | 3998183 | 2 | 13 | 26 | GT   | 11 | 6  |
| 29667 | 3 | 3998787 | 3998816 | 3 | 10 | 30 | GCT  | 32 | 12 |
| 29668 | 3 | 3999425 | 3999440 | 2 | 8  | 16 | AT   | 18 | 8  |
| 29675 | 3 | 4006182 | 4006201 | 2 | 10 | 20 | TG   | 10 | 6  |
| 29680 | 3 | 4008144 | 4008157 | 2 | 7  | 14 | GT   | 16 | 11 |
| 29681 | 3 | 4008159 | 4008176 | 2 | 9  | 18 | TG   | 14 | 10 |
| 29688 | 3 | 4011293 | 4011316 | 4 | 6  | 24 | TAAA | 19 | 6  |
| 29690 | 3 | 4022458 | 4022497 | 2 | 20 | 40 | TG   | 12 | 9  |
| 29694 | 3 | 4042427 | 4042440 | 2 | 7  | 14 | TA   | 15 | 12 |
| 29698 | 3 | 4051433 | 4051447 | 3 | 5  | 15 | ATG  | 22 | 9  |

|       |   |         |         |   |    |    |      |    |    |
|-------|---|---------|---------|---|----|----|------|----|----|
| 29699 | 3 | 4061199 | 4061214 | 2 | 8  | 16 | AC   | 17 | 9  |
| 29702 | 3 | 4070195 | 4070215 | 3 | 7  | 21 | AAC  | 26 | 4  |
| 29705 | 3 | 4077383 | 4077403 | 3 | 7  | 21 | CTT  | 27 | 5  |
| 29709 | 3 | 4082161 | 4082180 | 4 | 5  | 20 | CATT | 20 | 3  |
| 29711 | 3 | 4090768 | 4090783 | 2 | 8  | 16 | GT   | 19 | 3  |
| 29712 | 3 | 4090938 | 4090951 | 2 | 7  | 14 | CA   | 17 | 8  |
| 29718 | 3 | 4095884 | 4095901 | 3 | 6  | 18 | CAT  | 25 | 3  |
| 29729 | 3 | 4119404 | 4119423 | 4 | 5  | 20 | TTGA | 29 | 3  |
| 29730 | 3 | 4119987 | 4120018 | 2 | 16 | 32 | CA   | 19 | 10 |
| 29733 | 3 | 4130322 | 4130345 | 4 | 6  | 24 | GTCA | 30 | 4  |
| 29738 | 3 | 4145096 | 4145115 | 2 | 10 | 20 | AC   | 20 | 11 |
| 29739 | 3 | 4147125 | 4147138 | 2 | 7  | 14 | TA   | 15 | 4  |
| 29744 | 3 | 4164206 | 4164231 | 2 | 13 | 26 | CA   | 7  | 6  |
| 29752 | 3 | 4189179 | 4189190 | 2 | 6  | 12 | TG   | 22 | 3  |
| 29778 | 3 | 4249689 | 4249716 | 2 | 14 | 28 | AC   | 6  | 7  |
| 29783 | 3 | 4260117 | 4260132 | 4 | 4  | 16 | TTTG | 14 | 3  |
| 29823 | 3 | 4357564 | 4357578 | 3 | 5  | 15 | GCT  | 24 | 4  |
| 29833 | 3 | 4381277 | 4381298 | 2 | 11 | 22 | AT   | 9  | 10 |
| 29848 | 3 | 4426979 | 4426998 | 2 | 10 | 20 | AC   | 16 | 8  |
| 29849 | 3 | 4427146 | 4427173 | 2 | 14 | 28 | GT   | 11 | 7  |
| 29852 | 3 | 4428580 | 4428601 | 2 | 11 | 22 | CA   | 23 | 4  |
| 29857 | 3 | 4432307 | 4432332 | 2 | 13 | 26 | TG   | 15 | 6  |
| 29861 | 3 | 4457170 | 4457211 | 2 | 21 | 42 | TG   | 7  | 8  |
| 29862 | 3 | 4457706 | 4457721 | 2 | 8  | 16 | CT   | 13 | 7  |
| 29864 | 3 | 4457823 | 4457842 | 2 | 10 | 20 | GA   | 14 | 4  |
| 29874 | 3 | 4473854 | 4473873 | 2 | 10 | 20 | AC   | 12 | 4  |
| 29885 | 3 | 4500591 | 4500605 | 3 | 5  | 15 | TAT  | 16 | 4  |
| 29888 | 3 | 4502253 | 4502268 | 2 | 8  | 16 | AC   | 24 | 4  |
| 29890 | 3 | 4503754 | 4503769 | 2 | 8  | 16 | TG   | 22 | 3  |
| 29892 | 3 | 4510539 | 4510552 | 2 | 7  | 14 | TG   | 14 | 11 |
| 29901 | 3 | 4531446 | 4531461 | 2 | 8  | 16 | CT   | 27 | 3  |
| 29902 | 3 | 4531646 | 4531665 | 4 | 5  | 20 | CAGG | 29 | 3  |
| 29903 | 3 | 4531772 | 4531789 | 2 | 9  | 18 | GA   | 24 | 4  |
| 29904 | 3 | 4535318 | 4535345 | 2 | 14 | 28 | CA   | 8  | 8  |
| 29909 | 3 | 4545217 | 4545234 | 2 | 9  | 18 | TG   | 20 | 5  |
| 29910 | 3 | 4545735 | 4545746 | 2 | 6  | 12 | AC   | 20 | 5  |
| 29916 | 3 | 4551821 | 4551836 | 4 | 4  | 16 | GACA | 17 | 3  |
| 29917 | 3 | 4552871 | 4552888 | 2 | 9  | 18 | GT   | 20 | 8  |
| 29926 | 3 | 4573486 | 4573527 | 2 | 21 | 42 | GT   | 17 | 20 |
| 29932 | 3 | 4595650 | 4595665 | 4 | 4  | 16 | TTAG | 31 | 3  |
| 29933 | 3 | 4596897 | 4596908 | 2 | 6  | 12 | TG   | 31 | 3  |
| 29935 | 3 | 4599293 | 4599304 | 2 | 6  | 12 | TC   | 30 | 6  |
| 29944 | 3 | 4638597 | 4638622 | 2 | 13 | 26 | CA   | 13 | 6  |
| 29946 | 3 | 4642295 | 4642330 | 2 | 18 | 36 | CA   | 8  | 9  |
| 29949 | 3 | 4648389 | 4648400 | 2 | 6  | 12 | TA   | 15 | 5  |
| 29963 | 3 | 4689623 | 4689668 | 2 | 23 | 46 | AC   | 7  | 9  |
| 29982 | 3 | 4722486 | 4722513 | 2 | 14 | 28 | GT   | 11 | 15 |
| 29985 | 3 | 4729098 | 4729125 | 2 | 14 | 28 | GT   | 15 | 8  |
| 29992 | 3 | 4747087 | 4747106 | 4 | 5  | 20 | CTGT | 16 | 3  |
| 29993 | 3 | 4749550 | 4749561 | 2 | 6  | 12 | GA   | 33 | 4  |
| 29997 | 3 | 4776000 | 4776017 | 2 | 9  | 18 | AT   | 10 | 3  |



|       |   |         |         |   |    |    |      |    |    |
|-------|---|---------|---------|---|----|----|------|----|----|
| 29999 | 3 | 4783683 | 4783720 | 2 | 19 | 38 | AC   | 8  | 8  |
| 30016 | 3 | 4839493 | 4839504 | 2 | 6  | 12 | AC   | 26 | 3  |
| 30028 | 3 | 4867820 | 4867833 | 2 | 7  | 14 | GT   | 29 | 5  |
| 30030 | 3 | 4880718 | 4880747 | 2 | 15 | 30 | CA   | 7  | 6  |
| 30040 | 3 | 4890655 | 4890682 | 2 | 14 | 28 | TC   | 17 | 11 |
| 30042 | 3 | 4890710 | 4890727 | 2 | 9  | 18 | GT   | 15 | 4  |
| 30047 | 3 | 4904032 | 4904045 | 2 | 7  | 14 | AG   | 18 | 4  |
| 30056 | 3 | 4926309 | 4926320 | 2 | 6  | 12 | CA   | 17 | 4  |
| 30057 | 3 | 4926538 | 4926559 | 2 | 11 | 22 | CA   | 18 | 7  |
| 30064 | 3 | 4945626 | 4945645 | 2 | 10 | 20 | TG   | 6  | 5  |
| 30070 | 3 | 4962517 | 4962530 | 2 | 7  | 14 | CA   | 28 | 3  |
| 30075 | 3 | 4978494 | 4978508 | 3 | 5  | 15 | GAG  | 18 | 3  |
| 30076 | 3 | 4980753 | 4980764 | 2 | 6  | 12 | CA   | 33 | 3  |
| 30077 | 3 | 4981647 | 4981682 | 2 | 18 | 36 | TG   | 9  | 8  |
| 30082 | 3 | 4987335 | 4987366 | 2 | 16 | 32 | TG   | 20 | 11 |
| 30095 | 3 | 5033956 | 5033971 | 2 | 8  | 16 | TG   | 20 | 10 |
| 30102 | 3 | 5047395 | 5047426 | 2 | 16 | 32 | GT   | 11 | 9  |
| 30112 | 3 | 5069031 | 5069052 | 2 | 11 | 22 | AC   | 16 | 10 |
| 30117 | 3 | 5069984 | 5070007 | 3 | 8  | 24 | CCT  | 13 | 5  |
| 30121 | 3 | 5095357 | 5095376 | 4 | 5  | 20 | TTAA | 20 | 5  |
| 30124 | 3 | 5102695 | 5102708 | 2 | 7  | 14 | AT   | 8  | 7  |
| 30133 | 3 | 5116098 | 5116142 | 3 | 15 | 45 | TAC  | 11 | 7  |
| 30137 | 3 | 5129483 | 5129502 | 2 | 10 | 20 | GT   | 17 | 8  |
| 30141 | 3 | 5155540 | 5155569 | 2 | 15 | 30 | TG   | 7  | 6  |
| 30144 | 3 | 5161196 | 5161239 | 2 | 22 | 44 | TG   | 6  | 8  |
| 30153 | 3 | 5187335 | 5187348 | 2 | 7  | 14 | CA   | 14 | 3  |
| 30159 | 3 | 5200415 | 5200434 | 2 | 10 | 20 | TG   | 16 | 8  |
| 30163 | 3 | 5206790 | 5206825 | 2 | 18 | 36 | CT   | 12 | 7  |
| 30164 | 3 | 5208194 | 5208227 | 2 | 17 | 34 | GT   | 10 | 9  |
| 30167 | 3 | 5208833 | 5208846 | 2 | 7  | 14 | AC   | 21 | 3  |
| 30185 | 3 | 5279799 | 5279814 | 2 | 8  | 16 | AC   | 30 | 5  |
| 30188 | 3 | 5283831 | 5283884 | 3 | 18 | 54 | CAG  | 23 | 12 |
| 30191 | 3 | 5287151 | 5287184 | 2 | 17 | 34 | AC   | 11 | 12 |
| 30197 | 3 | 5314935 | 5314952 | 3 | 6  | 18 | GCT  | 27 | 4  |
| 30201 | 3 | 5317158 | 5317181 | 2 | 12 | 24 | TG   | 22 | 6  |
| 30213 | 3 | 5339164 | 5339207 | 2 | 22 | 44 | AC   | 8  | 7  |
| 30220 | 3 | 5364135 | 5364180 | 2 | 23 | 46 | TG   | 8  | 8  |
| 30231 | 3 | 5385559 | 5385579 | 3 | 7  | 21 | ATA  | 15 | 4  |
| 30233 | 3 | 5389694 | 5389711 | 2 | 9  | 18 | GA   | 18 | 3  |
| 30241 | 3 | 5416783 | 5416808 | 2 | 13 | 26 | GT   | 7  | 5  |
| 30243 | 3 | 5417161 | 5417186 | 2 | 13 | 26 | AC   | 15 | 4  |
| 30245 | 3 | 5425095 | 5425140 | 2 | 23 | 46 | TG   | 6  | 6  |
| 30252 | 3 | 5438581 | 5438610 | 2 | 15 | 30 | AC   | 16 | 6  |
| 30258 | 3 | 5446435 | 5446482 | 3 | 16 | 48 | CTG  | 26 | 7  |
| 30264 | 3 | 5458324 | 5458361 | 2 | 19 | 38 | TG   | 12 | 8  |
| 30266 | 3 | 5458662 | 5458693 | 2 | 16 | 32 | TG   | 7  | 8  |
| 30274 | 3 | 5473083 | 5473102 | 4 | 5  | 20 | GTGC | 23 | 3  |
| 30289 | 3 | 5509895 | 5509910 | 2 | 8  | 16 | GT   | 16 | 6  |
| 30290 | 3 | 5509912 | 5509923 | 2 | 6  | 12 | TG   | 9  | 4  |
| 30293 | 3 | 5518893 | 5518907 | 3 | 5  | 15 | GCA  | 17 | 3  |
| 30300 | 3 | 5539379 | 5539404 | 2 | 13 | 26 | TG   | 18 | 5  |

|       |   |         |         |   |    |    |      |    |    |
|-------|---|---------|---------|---|----|----|------|----|----|
| 30302 | 3 | 5541005 | 5541036 | 2 | 16 | 32 | AC   | 10 | 6  |
| 30303 | 3 | 5541066 | 5541083 | 2 | 9  | 18 | AG   | 22 | 3  |
| 30309 | 3 | 5577912 | 5577926 | 3 | 5  | 15 | CAG  | 24 | 4  |
| 30322 | 3 | 5609088 | 5609101 | 2 | 7  | 14 | GT   | 29 | 3  |
| 30325 | 3 | 5615787 | 5615810 | 4 | 6  | 24 | CTGT | 16 | 3  |
| 30334 | 3 | 5635056 | 5635070 | 3 | 5  | 15 | CTG  | 21 | 3  |
| 30336 | 3 | 5639527 | 5639544 | 2 | 9  | 18 | TG   | 19 | 6  |
| 30344 | 3 | 5662193 | 5662208 | 2 | 8  | 16 | GT   | 16 | 5  |
| 30384 | 3 | 5754553 | 5754572 | 2 | 10 | 20 | CA   | 10 | 6  |
| 30432 | 3 | 5905372 | 5905391 | 2 | 10 | 20 | CA   | 9  | 5  |
| 30433 | 3 | 5907476 | 5907497 | 2 | 11 | 22 | GT   | 17 | 5  |
| 30446 | 3 | 5943026 | 5943051 | 2 | 13 | 26 | TG   | 19 | 3  |
| 30449 | 3 | 5943733 | 5943762 | 2 | 15 | 30 | TG   | 6  | 3  |
| 30454 | 3 | 5964764 | 5964777 | 2 | 7  | 14 | CA   | 32 | 3  |
| 30455 | 3 | 5965814 | 5965841 | 2 | 14 | 28 | GT   | 16 | 6  |
| 30466 | 3 | 5990293 | 5990316 | 4 | 6  | 24 | TAGA | 14 | 4  |
| 30469 | 3 | 6005078 | 6005107 | 2 | 15 | 30 | AC   | 9  | 4  |
| 30486 | 3 | 6063976 | 6063993 | 2 | 9  | 18 | CA   | 24 | 5  |
| 30489 | 3 | 6068649 | 6068676 | 4 | 7  | 28 | AAAG | 27 | 6  |
| 30523 | 3 | 6145028 | 6145043 | 2 | 8  | 16 | CA   | 23 | 3  |
| 30528 | 3 | 6150380 | 6150401 | 2 | 11 | 22 | CA   | 25 | 3  |
| 30531 | 3 | 6160219 | 6160236 | 2 | 9  | 18 | TG   | 13 | 3  |
| 30542 | 3 | 6210269 | 6210280 | 2 | 6  | 12 | CT   | 25 | 3  |
| 30553 | 3 | 6271873 | 6271900 | 2 | 14 | 28 | CA   | 16 | 5  |
| 30559 | 3 | 6274480 | 6274527 | 2 | 24 | 48 | TG   | 6  | 8  |
| 30560 | 3 | 6275768 | 6275782 | 3 | 5  | 15 | CTG  | 26 | 4  |
| 30564 | 3 | 6295219 | 6295236 | 2 | 9  | 18 | TG   | 20 | 5  |
| 30588 | 3 | 6362960 | 6362975 | 4 | 4  | 16 | ATTT | 9  | 3  |
| 30631 | 3 | 6510331 | 6510352 | 2 | 11 | 22 | AC   | 17 | 7  |
| 30634 | 3 | 6528760 | 6528777 | 2 | 9  | 18 | AC   | 16 | 3  |
| 30635 | 3 | 6530591 | 6530605 | 3 | 5  | 15 | AGC  | 21 | 3  |
| 30642 | 3 | 6538846 | 6538861 | 4 | 4  | 16 | TAGC | 18 | 5  |
| 30647 | 3 | 6558262 | 6558291 | 2 | 15 | 30 | CA   | 13 | 8  |
| 30651 | 3 | 6561449 | 6561464 | 4 | 4  | 16 | TTTA | 21 | 4  |
| 30653 | 3 | 6563187 | 6563220 | 2 | 17 | 34 | TG   | 10 | 11 |
| 30664 | 3 | 6571531 | 6571544 | 2 | 7  | 14 | CA   | 27 | 3  |
| 30665 | 3 | 6573905 | 6573928 | 2 | 12 | 24 | AC   | 12 | 9  |
| 30666 | 3 | 6574010 | 6574021 | 2 | 6  | 12 | CT   | 17 | 6  |
| 30667 | 3 | 6574023 | 6574038 | 2 | 8  | 16 | TC   | 16 | 7  |
| 30669 | 3 | 6575773 | 6575804 | 2 | 16 | 32 | GT   | 6  | 7  |
| 30676 | 3 | 6582537 | 6582550 | 2 | 7  | 14 | CA   | 23 | 6  |
| 30677 | 3 | 6586943 | 6586954 | 2 | 6  | 12 | CA   | 17 | 4  |
| 30678 | 3 | 6586958 | 6586973 | 2 | 8  | 16 | AC   | 18 | 7  |
| 30686 | 3 | 6598614 | 6598643 | 2 | 15 | 30 | TG   | 13 | 11 |
| 30687 | 3 | 6598908 | 6598925 | 3 | 6  | 18 | GGA  | 24 | 5  |
| 30688 | 3 | 6599432 | 6599447 | 2 | 8  | 16 | CA   | 16 | 5  |
| 30691 | 3 | 6601298 | 6601317 | 4 | 5  | 20 | AAAC | 18 | 3  |
| 30692 | 3 | 6603020 | 6603033 | 2 | 7  | 14 | TG   | 19 | 5  |
| 30694 | 3 | 6603228 | 6603261 | 2 | 17 | 34 | TG   | 7  | 8  |
| 30699 | 3 | 6606234 | 6606261 | 2 | 14 | 28 | AC   | 10 | 9  |
| 30701 | 3 | 6609566 | 6609581 | 2 | 8  | 16 | AC   | 20 | 11 |

|       |   |         |         |   |    |    |      |    |    |
|-------|---|---------|---------|---|----|----|------|----|----|
| 30702 | 3 | 6609688 | 6609705 | 2 | 9  | 18 | AC   | 22 | 6  |
| 30706 | 3 | 6623303 | 6623330 | 4 | 7  | 28 | GTGC | 25 | 10 |
| 30717 | 3 | 6642179 | 6642210 | 2 | 16 | 32 | GT   | 10 | 10 |
| 30726 | 3 | 6650285 | 6650300 | 2 | 8  | 16 | AC   | 15 | 8  |
| 30728 | 3 | 6656215 | 6656226 | 2 | 6  | 12 | AC   | 27 | 3  |
| 30729 | 3 | 6657814 | 6657843 | 2 | 15 | 30 | TG   | 20 | 12 |
| 30733 | 3 | 6665691 | 6665722 | 2 | 16 | 32 | TG   | 12 | 8  |
| 30734 | 3 | 6668085 | 6668120 | 2 | 18 | 36 | TG   | 7  | 5  |
| 30735 | 3 | 6668244 | 6668273 | 2 | 15 | 30 | AC   | 14 | 15 |
| 30736 | 3 | 6668382 | 6668393 | 2 | 6  | 12 | CA   | 31 | 4  |
| 30738 | 3 | 6672543 | 6672562 | 2 | 10 | 20 | CA   | 12 | 7  |
| 30741 | 3 | 6673067 | 6673078 | 2 | 6  | 12 | AG   | 20 | 3  |
| 30743 | 3 | 6677258 | 6677281 | 2 | 12 | 24 | CA   | 8  | 7  |
| 30744 | 3 | 6679060 | 6679075 | 4 | 4  | 16 | AAAC | 22 | 3  |
| 30746 | 3 | 6682135 | 6682160 | 2 | 13 | 26 | CA   | 16 | 9  |
| 30747 | 3 | 6682268 | 6682289 | 2 | 11 | 22 | TG   | 21 | 8  |
| 30748 | 3 | 6685651 | 6685662 | 2 | 6  | 12 | CA   | 30 | 4  |
| 30755 | 3 | 6692511 | 6692528 | 2 | 9  | 18 | AC   | 16 | 7  |
| 30759 | 3 | 6703276 | 6703293 | 2 | 9  | 18 | CA   | 15 | 6  |
| 30761 | 3 | 6705077 | 6705094 | 2 | 9  | 18 | GT   | 17 | 11 |
| 30763 | 3 | 6714091 | 6714104 | 2 | 7  | 14 | AC   | 28 | 4  |
| 30767 | 3 | 6727484 | 6727495 | 2 | 6  | 12 | CA   | 34 | 4  |
| 30770 | 3 | 6731046 | 6731087 | 2 | 21 | 42 | AC   | 18 | 13 |
| 30774 | 3 | 6736067 | 6736094 | 2 | 14 | 28 | AC   | 13 | 9  |
| 30780 | 3 | 6738989 | 6739003 | 3 | 5  | 15 | CCT  | 23 | 4  |
| 30785 | 3 | 6742412 | 6742423 | 2 | 6  | 12 | GA   | 24 | 3  |
| 30787 | 3 | 6742538 | 6742559 | 2 | 11 | 22 | GT   | 8  | 8  |
| 30789 | 3 | 6745407 | 6745432 | 2 | 13 | 26 | AC   | 8  | 10 |
| 30793 | 3 | 6762456 | 6762473 | 2 | 9  | 18 | CA   | 14 | 5  |
| 30800 | 3 | 6779886 | 6779900 | 3 | 5  | 15 | CAG  | 33 | 3  |
| 30806 | 3 | 6795072 | 6795089 | 3 | 6  | 18 | GCA  | 30 | 4  |
| 30808 | 3 | 6798880 | 6798899 | 2 | 10 | 20 | CA   | 16 | 8  |
| 30810 | 3 | 6802654 | 6802689 | 4 | 9  | 36 | AGAA | 12 | 12 |
| 30819 | 3 | 6828126 | 6828141 | 4 | 4  | 16 | AACG | 29 | 6  |
| 30820 | 3 | 6828879 | 6828894 | 4 | 4  | 16 | AAAC | 30 | 3  |
| 30825 | 3 | 6843633 | 6843660 | 2 | 14 | 28 | CT   | 26 | 5  |
| 30828 | 3 | 6849668 | 6849679 | 2 | 6  | 12 | AG   | 18 | 4  |
| 30832 | 3 | 6857770 | 6857795 | 2 | 13 | 26 | TG   | 16 | 8  |
| 30836 | 3 | 6863345 | 6863356 | 2 | 6  | 12 | CA   | 26 | 3  |
| 30837 | 3 | 6863556 | 6863579 | 2 | 12 | 24 | AC   | 16 | 6  |
| 30839 | 3 | 6864037 | 6864057 | 3 | 7  | 21 | GCT  | 20 | 7  |
| 30841 | 3 | 6864478 | 6864497 | 2 | 10 | 20 | AC   | 15 | 7  |
| 30842 | 3 | 6864749 | 6864766 | 2 | 9  | 18 | CA   | 11 | 3  |
| 30843 | 3 | 6864795 | 6864810 | 2 | 8  | 16 | CA   | 24 | 3  |
| 30847 | 3 | 6874046 | 6874071 | 2 | 13 | 26 | AG   | 21 | 6  |
| 30848 | 3 | 6877571 | 6877598 | 2 | 14 | 28 | AC   | 16 | 5  |
| 30849 | 3 | 6877723 | 6877742 | 2 | 10 | 20 | CA   | 14 | 12 |
| 30851 | 3 | 6879762 | 6879777 | 2 | 8  | 16 | CA   | 8  | 3  |
| 30852 | 3 | 6881860 | 6881881 | 2 | 11 | 22 | CA   | 25 | 9  |
| 30855 | 3 | 6882186 | 6882221 | 2 | 18 | 36 | GT   | 9  | 13 |
| 30857 | 3 | 6882571 | 6882584 | 2 | 7  | 14 | CA   | 17 | 5  |

|       |   |         |         |   |    |    |      |    |    |
|-------|---|---------|---------|---|----|----|------|----|----|
| 30858 | 3 | 6882792 | 6882813 | 2 | 11 | 22 | AC   | 20 | 17 |
| 30863 | 3 | 6899921 | 6899952 | 2 | 16 | 32 | TC   | 10 | 10 |
| 30868 | 3 | 6907405 | 6907430 | 2 | 13 | 26 | GT   | 7  | 9  |
| 30870 | 3 | 6910088 | 6910099 | 2 | 6  | 12 | GT   | 34 | 4  |
| 30871 | 3 | 6913720 | 6913735 | 2 | 8  | 16 | CA   | 21 | 7  |
| 30872 | 3 | 6920531 | 6920544 | 2 | 7  | 14 | GT   | 17 | 3  |
| 30873 | 3 | 6920677 | 6920722 | 2 | 23 | 46 | TG   | 6  | 8  |
| 30874 | 3 | 6920752 | 6920775 | 2 | 12 | 24 | GA   | 7  | 7  |
| 30877 | 3 | 6929891 | 6929908 | 2 | 9  | 18 | AC   | 29 | 8  |
| 30879 | 3 | 6931019 | 6931052 | 2 | 17 | 34 | CA   | 12 | 10 |
| 30880 | 3 | 6932428 | 6932447 | 2 | 10 | 20 | GT   | 18 | 12 |
| 30881 | 3 | 6932601 | 6932644 | 2 | 22 | 44 | TG   | 7  | 7  |
| 30882 | 3 | 6938436 | 6938449 | 2 | 7  | 14 | AC   | 30 | 3  |
| 30884 | 3 | 6944791 | 6944820 | 2 | 15 | 30 | TG   | 13 | 11 |
| 30887 | 3 | 6945299 | 6945314 | 2 | 8  | 16 | AC   | 16 | 4  |
| 30888 | 3 | 6945467 | 6945480 | 2 | 7  | 14 | GT   | 19 | 4  |
| 30892 | 3 | 6953343 | 6953396 | 2 | 27 | 54 | TG   | 10 | 13 |
| 30897 | 3 | 6957229 | 6957244 | 2 | 8  | 16 | GT   | 26 | 7  |
| 30902 | 3 | 6961744 | 6961755 | 2 | 6  | 12 | TG   | 25 | 5  |
| 30903 | 3 | 6962058 | 6962083 | 2 | 13 | 26 | GT   | 13 | 11 |
| 30906 | 3 | 6968853 | 6968880 | 2 | 14 | 28 | GT   | 15 | 10 |
| 30907 | 3 | 6969522 | 6969535 | 2 | 7  | 14 | TG   | 13 | 6  |
| 30908 | 3 | 6972144 | 6972155 | 2 | 6  | 12 | AC   | 22 | 9  |
| 30909 | 3 | 6972497 | 6972516 | 2 | 10 | 20 | CT   | 20 | 5  |
| 30910 | 3 | 6972656 | 6972687 | 2 | 16 | 32 | GT   | 16 | 10 |
| 30912 | 3 | 6975367 | 6975394 | 2 | 14 | 28 | TG   | 29 | 12 |
| 30918 | 3 | 6980426 | 6980445 | 2 | 10 | 20 | GT   | 16 | 5  |
| 30921 | 3 | 6983370 | 6983387 | 2 | 9  | 18 | AC   | 12 | 8  |
| 30932 | 3 | 6997491 | 6997512 | 2 | 11 | 22 | TG   | 19 | 9  |
| 30933 | 3 | 7000446 | 7000459 | 2 | 7  | 14 | TG   | 19 | 5  |
| 30945 | 3 | 7040408 | 7040423 | 2 | 8  | 16 | AG   | 24 | 6  |
| 30946 | 3 | 7041328 | 7041345 | 3 | 6  | 18 | CTC  | 22 | 3  |
| 30949 | 3 | 7044616 | 7044633 | 2 | 9  | 18 | AC   | 25 | 3  |
| 30951 | 3 | 7047479 | 7047520 | 2 | 21 | 42 | TG   | 10 | 11 |
| 30955 | 3 | 7058095 | 7058121 | 3 | 9  | 27 | AGG  | 28 | 4  |
| 30959 | 3 | 7073670 | 7073691 | 2 | 11 | 22 | AC   | 6  | 8  |
| 30965 | 3 | 7085490 | 7085507 | 2 | 9  | 18 | CA   | 24 | 7  |
| 30967 | 3 | 7096170 | 7096187 | 2 | 9  | 18 | TG   | 16 | 5  |
| 30968 | 3 | 7099469 | 7099483 | 3 | 5  | 15 | TTC  | 23 | 3  |
| 30969 | 3 | 7099690 | 7099717 | 2 | 14 | 28 | GT   | 14 | 5  |
| 30970 | 3 | 7100311 | 7100328 | 2 | 9  | 18 | GT   | 25 | 10 |
| 30971 | 3 | 7100381 | 7100402 | 2 | 11 | 22 | GT   | 19 | 7  |
| 30972 | 3 | 7104934 | 7104947 | 2 | 7  | 14 | GT   | 15 | 9  |
| 30973 | 3 | 7104950 | 7104961 | 2 | 6  | 12 | GT   | 12 | 9  |
| 30974 | 3 | 7105060 | 7105079 | 2 | 10 | 20 | TG   | 19 | 4  |
| 30979 | 3 | 7134700 | 7134713 | 2 | 7  | 14 | CA   | 22 | 9  |
| 30981 | 3 | 7158124 | 7158157 | 2 | 17 | 34 | TG   | 18 | 4  |
| 30983 | 3 | 7167857 | 7167876 | 4 | 5  | 20 | TTTG | 22 | 8  |
| 30984 | 3 | 7173355 | 7173366 | 2 | 6  | 12 | CA   | 31 | 4  |
| 30996 | 3 | 7195618 | 7195629 | 2 | 6  | 12 | AC   | 24 | 3  |
| 31000 | 3 | 7205703 | 7205738 | 2 | 18 | 36 | CA   | 14 | 7  |

|       |   |         |         |   |    |    |      |    |    |
|-------|---|---------|---------|---|----|----|------|----|----|
| 31001 | 3 | 7211844 | 7211857 | 2 | 7  | 14 | AC   | 7  | 4  |
| 31002 | 3 | 7211860 | 7211873 | 2 | 7  | 14 | AC   | 17 | 11 |
| 31003 | 3 | 7212065 | 7212104 | 2 | 20 | 40 | TG   | 8  | 9  |
| 31004 | 3 | 7213736 | 7213771 | 2 | 18 | 36 | AG   | 11 | 12 |
| 31006 | 3 | 7214212 | 7214249 | 2 | 19 | 38 | AG   | 8  | 11 |
| 31007 | 3 | 7217323 | 7217338 | 2 | 8  | 16 | TG   | 21 | 4  |
| 31009 | 3 | 7220705 | 7220738 | 2 | 17 | 34 | CA   | 6  | 7  |
| 31012 | 3 | 7222820 | 7222840 | 3 | 7  | 21 | TGG  | 22 | 4  |
| 31013 | 3 | 7223614 | 7223625 | 2 | 6  | 12 | TG   | 28 | 3  |
| 31016 | 3 | 7228015 | 7228044 | 2 | 15 | 30 | TG   | 6  | 6  |
| 31019 | 3 | 7229873 | 7229886 | 2 | 7  | 14 | TG   | 18 | 10 |
| 31021 | 3 | 7233923 | 7233934 | 2 | 6  | 12 | GT   | 25 | 10 |
| 31022 | 3 | 7235719 | 7235754 | 2 | 18 | 36 | CA   | 8  | 9  |
| 31023 | 3 | 7238259 | 7238294 | 2 | 18 | 36 | AC   | 14 | 9  |
| 31024 | 3 | 7238854 | 7238875 | 2 | 11 | 22 | CA   | 21 | 6  |
| 31031 | 3 | 7251334 | 7251347 | 2 | 7  | 14 | AC   | 29 | 3  |
| 31032 | 3 | 7255727 | 7255766 | 2 | 20 | 40 | CT   | 8  | 6  |
| 31033 | 3 | 7255957 | 7255976 | 2 | 10 | 20 | TG   | 15 | 7  |
| 31034 | 3 | 7257330 | 7257363 | 2 | 17 | 34 | GT   | 11 | 7  |
| 31040 | 3 | 7265164 | 7265183 | 4 | 5  | 20 | TGTA | 8  | 8  |
| 31042 | 3 | 7266319 | 7266352 | 2 | 17 | 34 | TG   | 11 | 10 |
| 31043 | 3 | 7266996 | 7267019 | 2 | 12 | 24 | TG   | 16 | 8  |
| 31047 | 3 | 7269174 | 7269189 | 2 | 8  | 16 | AC   | 19 | 9  |
| 31048 | 3 | 7270208 | 7270235 | 2 | 14 | 28 | CA   | 8  | 4  |
| 31049 | 3 | 7270464 | 7270489 | 2 | 13 | 26 | AC   | 10 | 5  |
| 31050 | 3 | 7270676 | 7270687 | 2 | 6  | 12 | GA   | 30 | 5  |
| 31052 | 3 | 7279394 | 7279419 | 2 | 13 | 26 | GT   | 21 | 9  |
| 31054 | 3 | 7281648 | 7281671 | 2 | 12 | 24 | GT   | 18 | 12 |
| 31055 | 3 | 7283332 | 7283355 | 2 | 12 | 24 | TG   | 19 | 10 |
| 31056 | 3 | 7285101 | 7285112 | 2 | 6  | 12 | AC   | 20 | 3  |
| 31062 | 3 | 7303560 | 7303585 | 2 | 13 | 26 | GT   | 11 | 7  |
| 31066 | 3 | 7308079 | 7308090 | 2 | 6  | 12 | CA   | 27 | 8  |
| 31071 | 3 | 7317664 | 7317685 | 2 | 11 | 22 | TG   | 14 | 5  |
| 31074 | 3 | 7325068 | 7325093 | 2 | 13 | 26 | TG   | 19 | 6  |
| 31077 | 3 | 7325319 | 7325350 | 4 | 8  | 32 | CACG | 8  | 7  |
| 31079 | 3 | 7326077 | 7326106 | 2 | 15 | 30 | TG   | 17 | 6  |
| 31081 | 3 | 7334811 | 7334842 | 2 | 16 | 32 | TG   | 15 | 8  |
| 31089 | 3 | 7339941 | 7339958 | 2 | 9  | 18 | TA   | 16 | 4  |
| 31091 | 3 | 7341078 | 7341107 | 2 | 15 | 30 | GT   | 21 | 9  |
| 31092 | 3 | 7341373 | 7341390 | 2 | 9  | 18 | GT   | 17 | 9  |
| 31093 | 3 | 7341489 | 7341522 | 2 | 17 | 34 | TG   | 6  | 5  |
| 31101 | 3 | 7350373 | 7350396 | 2 | 12 | 24 | TG   | 19 | 7  |
| 31105 | 3 | 7357924 | 7357950 | 3 | 9  | 27 | ATG  | 15 | 6  |
| 31113 | 3 | 7360026 | 7360037 | 2 | 6  | 12 | TG   | 29 | 3  |
| 31116 | 3 | 7370586 | 7370603 | 3 | 6  | 18 | TGC  | 6  | 3  |
| 31118 | 3 | 7370805 | 7370819 | 3 | 5  | 15 | GCT  | 31 | 4  |
| 31121 | 3 | 7375805 | 7375844 | 2 | 20 | 40 | CA   | 12 | 7  |
| 31125 | 3 | 7379024 | 7379053 | 2 | 15 | 30 | CA   | 15 | 5  |
| 31127 | 3 | 7388636 | 7388667 | 2 | 16 | 32 | TG   | 10 | 9  |
| 31128 | 3 | 7394351 | 7394362 | 2 | 6  | 12 | CA   | 32 | 3  |
| 31129 | 3 | 7399550 | 7399564 | 3 | 5  | 15 | TAC  | 27 | 4  |

|       |   |         |         |   |    |    |      |    |    |
|-------|---|---------|---------|---|----|----|------|----|----|
| 31134 | 3 | 7418191 | 7418211 | 3 | 7  | 21 | GGA  | 23 | 4  |
| 31142 | 3 | 7436674 | 7436687 | 2 | 7  | 14 | AC   | 22 | 4  |
| 31144 | 3 | 7437654 | 7437671 | 3 | 6  | 18 | ATC  | 24 | 6  |
| 31147 | 3 | 7448140 | 7448163 | 2 | 12 | 24 | TG   | 18 | 8  |
| 31149 | 3 | 7455477 | 7455514 | 2 | 19 | 38 | CA   | 17 | 9  |
| 31151 | 3 | 7463190 | 7463215 | 2 | 13 | 26 | GA   | 19 | 11 |
| 31152 | 3 | 7463607 | 7463634 | 2 | 14 | 28 | GT   | 15 | 6  |
| 31156 | 3 | 7491040 | 7491055 | 2 | 8  | 16 | TG   | 26 | 4  |
| 31159 | 3 | 7492050 | 7492069 | 2 | 10 | 20 | GT   | 20 | 7  |
| 31160 | 3 | 7500968 | 7501003 | 2 | 18 | 36 | AC   | 12 | 11 |
| 31166 | 3 | 7521103 | 7521134 | 2 | 16 | 32 | AC   | 6  | 6  |
| 31167 | 3 | 7522339 | 7522356 | 2 | 9  | 18 | CA   | 26 | 8  |
| 31168 | 3 | 7522789 | 7522820 | 4 | 8  | 32 | ATGG | 10 | 3  |
| 31170 | 3 | 7528572 | 7528589 | 3 | 6  | 18 | TAT  | 7  | 4  |
| 31172 | 3 | 7530032 | 7530063 | 2 | 16 | 32 | GA   | 10 | 10 |
| 31175 | 3 | 7533749 | 7533772 | 3 | 8  | 24 | TCT  | 27 | 5  |
| 31176 | 3 | 7534559 | 7534572 | 2 | 7  | 14 | CA   | 22 | 5  |
| 31179 | 3 | 7536529 | 7536552 | 2 | 12 | 24 | TC   | 15 | 7  |
| 31182 | 3 | 7538651 | 7538666 | 2 | 8  | 16 | CA   | 24 | 8  |
| 31183 | 3 | 7540235 | 7540256 | 2 | 11 | 22 | TC   | 20 | 11 |
| 31186 | 3 | 7544858 | 7544875 | 3 | 6  | 18 | CTG  | 20 | 3  |
| 31187 | 3 | 7546183 | 7546203 | 3 | 7  | 21 | GCA  | 20 | 4  |
| 31194 | 3 | 7550605 | 7550646 | 2 | 21 | 42 | TG   | 11 | 6  |
| 31195 | 3 | 7551979 | 7552006 | 4 | 7  | 28 | CAGG | 15 | 7  |
| 31196 | 3 | 7552157 | 7552172 | 4 | 4  | 16 | ATTT | 15 | 6  |
| 31198 | 3 | 7553400 | 7553413 | 2 | 7  | 14 | CA   | 11 | 6  |
| 31200 | 3 | 7556042 | 7556079 | 2 | 19 | 38 | AC   | 10 | 11 |
| 31203 | 3 | 7558613 | 7558632 | 2 | 10 | 20 | AC   | 13 | 10 |
| 31204 | 3 | 7562577 | 7562591 | 3 | 5  | 15 | CAT  | 31 | 4  |
| 31205 | 3 | 7562760 | 7562777 | 2 | 9  | 18 | GT   | 22 | 10 |
| 31206 | 3 | 7563039 | 7563052 | 2 | 7  | 14 | AC   | 24 | 11 |
| 31207 | 3 | 7563103 | 7563114 | 2 | 6  | 12 | TG   | 22 | 3  |
| 31208 | 3 | 7564945 | 7564974 | 3 | 10 | 30 | ATG  | 27 | 4  |
| 31209 | 3 | 7568155 | 7568176 | 2 | 11 | 22 | CT   | 16 | 10 |
| 31215 | 3 | 7583437 | 7583448 | 2 | 6  | 12 | CA   | 14 | 4  |
| 31217 | 3 | 7584785 | 7584808 | 2 | 12 | 24 | CA   | 17 | 10 |
| 31218 | 3 | 7586158 | 7586195 | 2 | 19 | 38 | CA   | 19 | 11 |
| 31221 | 3 | 7593344 | 7593369 | 2 | 13 | 26 | CA   | 15 | 7  |
| 31227 | 3 | 7611689 | 7611700 | 2 | 6  | 12 | GT   | 28 | 3  |
| 31228 | 3 | 7611744 | 7611759 | 2 | 8  | 16 | AG   | 25 | 3  |
| 31229 | 3 | 7612106 | 7612117 | 2 | 6  | 12 | AC   | 27 | 4  |
| 31238 | 3 | 7639352 | 7639366 | 3 | 5  | 15 | ATT  | 14 | 4  |
| 31241 | 3 | 7642814 | 7642835 | 2 | 11 | 22 | AC   | 18 | 13 |
| 31247 | 3 | 7659501 | 7659516 | 4 | 4  | 16 | AAAC | 22 | 3  |
| 31254 | 3 | 7673591 | 7673606 | 2 | 8  | 16 | CA   | 11 | 3  |
| 31256 | 3 | 7675601 | 7675621 | 3 | 7  | 21 | GCA  | 21 | 3  |
| 31261 | 3 | 7677416 | 7677427 | 2 | 6  | 12 | TG   | 11 | 3  |
| 31265 | 3 | 7689096 | 7689123 | 4 | 7  | 28 | TGAA | 25 | 5  |
| 31269 | 3 | 7695931 | 7695944 | 2 | 7  | 14 | TG   | 22 | 3  |
| 31274 | 3 | 7701863 | 7701878 | 2 | 8  | 16 | TG   | 25 | 5  |
| 31275 | 3 | 7702794 | 7702815 | 2 | 11 | 22 | GT   | 13 | 11 |

|       |   |         |         |   |    |    |      |    |    |
|-------|---|---------|---------|---|----|----|------|----|----|
| 31279 | 3 | 7717560 | 7717583 | 2 | 12 | 24 | CA   | 9  | 5  |
| 31280 | 3 | 7717792 | 7717805 | 2 | 7  | 14 | AC   | 26 | 8  |
| 31286 | 3 | 7738112 | 7738132 | 3 | 7  | 21 | GCA  | 23 | 9  |
| 31291 | 3 | 7747958 | 7747969 | 2 | 6  | 12 | TG   | 20 | 3  |
| 31296 | 3 | 7758043 | 7758062 | 2 | 10 | 20 | TG   | 20 | 11 |
| 31297 | 3 | 7760202 | 7760213 | 2 | 6  | 12 | AG   | 30 | 5  |
| 31298 | 3 | 7760515 | 7760530 | 2 | 8  | 16 | AG   | 11 | 10 |
| 31302 | 3 | 7777903 | 7777948 | 2 | 23 | 46 | TG   | 8  | 10 |
| 31303 | 3 | 7778327 | 7778342 | 4 | 4  | 16 | TCCA | 28 | 3  |
| 31313 | 3 | 7808818 | 7808835 | 2 | 9  | 18 | CA   | 21 | 12 |
| 31320 | 3 | 7832439 | 7832452 | 2 | 7  | 14 | CT   | 25 | 4  |
| 31321 | 3 | 7835331 | 7835348 | 2 | 9  | 18 | AC   | 23 | 11 |
| 31324 | 3 | 7838798 | 7838821 | 2 | 12 | 24 | AG   | 12 | 12 |
| 31325 | 3 | 7838946 | 7838971 | 2 | 13 | 26 | TG   | 14 | 14 |
| 31328 | 3 | 7844865 | 7844876 | 2 | 6  | 12 | AT   | 29 | 5  |
| 31331 | 3 | 7850774 | 7850809 | 3 | 12 | 36 | GCA  | 19 | 13 |
| 31333 | 3 | 7854400 | 7854411 | 2 | 6  | 12 | CA   | 20 | 4  |
| 31335 | 3 | 7858256 | 7858269 | 2 | 7  | 14 | AC   | 25 | 5  |
| 31340 | 3 | 7883764 | 7883783 | 2 | 10 | 20 | CA   | 10 | 8  |
| 31342 | 3 | 7894658 | 7894672 | 3 | 5  | 15 | TCA  | 26 | 6  |
| 31344 | 3 | 7907558 | 7907572 | 3 | 5  | 15 | CAG  | 22 | 7  |
| 31348 | 3 | 7914093 | 7914116 | 2 | 12 | 24 | AG   | 17 | 11 |
| 31349 | 3 | 7914219 | 7914258 | 2 | 20 | 40 | TG   | 6  | 10 |
| 31350 | 3 | 7919838 | 7919861 | 4 | 6  | 24 | AAAC | 21 | 4  |
| 31352 | 3 | 7923330 | 7923377 | 2 | 24 | 48 | AG   | 14 | 11 |
| 31354 | 3 | 7923822 | 7923839 | 2 | 9  | 18 | CA   | 25 | 9  |
| 31355 | 3 | 7926909 | 7926924 | 2 | 8  | 16 | AC   | 30 | 4  |
| 31363 | 3 | 7945597 | 7945616 | 2 | 10 | 20 | CA   | 8  | 5  |
| 31366 | 3 | 7950598 | 7950631 | 2 | 17 | 34 | GT   | 10 | 11 |
| 31373 | 3 | 7965389 | 7965428 | 4 | 10 | 40 | CTTT | 19 | 12 |
| 31384 | 3 | 7994865 | 7994896 | 2 | 16 | 32 | GT   | 21 | 7  |
| 31387 | 3 | 8011732 | 8011769 | 2 | 19 | 38 | AC   | 14 | 14 |
| 31401 | 3 | 8042959 | 8042991 | 3 | 11 | 33 | AAC  | 17 | 10 |
| 31412 | 3 | 8063780 | 8063797 | 2 | 9  | 18 | TG   | 24 | 9  |
| 31417 | 3 | 8071615 | 8071628 | 2 | 7  | 14 | CA   | 31 | 7  |
| 31425 | 3 | 8108793 | 8108804 | 2 | 6  | 12 | TC   | 31 | 4  |
| 31430 | 3 | 8122617 | 8122637 | 3 | 7  | 21 | TTA  | 21 | 5  |
| 31431 | 3 | 8123492 | 8123506 | 3 | 5  | 15 | AGC  | 27 | 4  |
| 31446 | 3 | 8159342 | 8159355 | 2 | 7  | 14 | GT   | 25 | 4  |
| 31448 | 3 | 8164883 | 8164912 | 2 | 15 | 30 | CA   | 8  | 9  |
| 31449 | 3 | 8167340 | 8167353 | 2 | 7  | 14 | GA   | 28 | 3  |
| 31460 | 3 | 8181960 | 8181979 | 2 | 10 | 20 | AT   | 12 | 3  |
| 31474 | 3 | 8206342 | 8206353 | 2 | 6  | 12 | TA   | 21 | 7  |
| 31477 | 3 | 8208249 | 8208263 | 3 | 5  | 15 | TTA  | 27 | 3  |
| 31490 | 3 | 8244545 | 8244558 | 2 | 7  | 14 | AT   | 7  | 9  |
| 31493 | 3 | 8250761 | 8250774 | 2 | 7  | 14 | TG   | 29 | 4  |
| 31494 | 3 | 8250816 | 8250845 | 2 | 15 | 30 | GT   | 17 | 11 |
| 31497 | 3 | 8257231 | 8257250 | 2 | 10 | 20 | CA   | 21 | 22 |
| 31498 | 3 | 8262341 | 8262358 | 2 | 9  | 18 | GT   | 21 | 5  |
| 31504 | 3 | 8274839 | 8274856 | 2 | 9  | 18 | AC   | 20 | 9  |
| 31505 | 3 | 8275787 | 8275798 | 2 | 6  | 12 | AC   | 15 | 6  |

|       |   |         |         |   |    |    |     |    |    |
|-------|---|---------|---------|---|----|----|-----|----|----|
| 31510 | 3 | 8280350 | 8280363 | 2 | 7  | 14 | CA  | 30 | 3  |
| 31513 | 3 | 8283536 | 8283547 | 2 | 6  | 12 | AC  | 20 | 3  |
| 31515 | 3 | 8284999 | 8285020 | 2 | 11 | 22 | AC  | 17 | 13 |
| 31517 | 3 | 8292817 | 8292836 | 2 | 10 | 20 | CA  | 18 | 7  |
| 31530 | 3 | 8304035 | 8304052 | 2 | 9  | 18 | TG  | 12 | 4  |
| 31533 | 3 | 8304224 | 8304237 | 2 | 7  | 14 | CA  | 19 | 5  |
| 31535 | 3 | 8304423 | 8304446 | 2 | 12 | 24 | CT  | 12 | 7  |
| 31536 | 3 | 8304508 | 8304522 | 3 | 5  | 15 | GGA | 21 | 5  |
| 31537 | 3 | 8305889 | 8305908 | 2 | 10 | 20 | AC  | 17 | 6  |
| 31540 | 3 | 8308805 | 8308816 | 2 | 6  | 12 | AC  | 19 | 5  |
| 31541 | 3 | 8308922 | 8308957 | 2 | 18 | 36 | AC  | 15 | 10 |
| 31542 | 3 | 8309125 | 8309160 | 2 | 18 | 36 | TG  | 10 | 7  |
| 31548 | 3 | 8314208 | 8314241 | 2 | 17 | 34 | CA  | 10 | 7  |
| 31550 | 3 | 8314716 | 8314735 | 2 | 10 | 20 | TG  | 22 | 5  |
| 31553 | 3 | 8316443 | 8316454 | 2 | 6  | 12 | CT  | 22 | 3  |
| 31554 | 3 | 8316552 | 8316569 | 2 | 9  | 18 | GT  | 23 | 4  |
| 31556 | 3 | 8317395 | 8317422 | 2 | 14 | 28 | AC  | 6  | 6  |
| 31557 | 3 | 8317964 | 8317991 | 2 | 14 | 28 | AC  | 14 | 11 |
| 31558 | 3 | 8319170 | 8319195 | 2 | 13 | 26 | CA  | 12 | 8  |
| 31571 | 3 | 8348296 | 8348311 | 2 | 8  | 16 | CA  | 26 | 10 |
| 31573 | 3 | 8350708 | 8350731 | 3 | 8  | 24 | TGA | 32 | 5  |
| 31574 | 3 | 8353605 | 8353618 | 2 | 7  | 14 | CT  | 28 | 4  |
| 31576 | 3 | 8355594 | 8355605 | 2 | 6  | 12 | TG  | 13 | 5  |
| 31584 | 3 | 8365852 | 8365867 | 2 | 8  | 16 | GA  | 27 | 3  |
| 31590 | 3 | 8398021 | 8398048 | 2 | 14 | 28 | TC  | 8  | 11 |
| 31610 | 3 | 8457676 | 8457691 | 2 | 8  | 16 | AG  | 11 | 4  |
| 31611 | 3 | 8457694 | 8457705 | 2 | 6  | 12 | AG  | 16 | 4  |
| 31617 | 3 | 8461582 | 8461605 | 2 | 12 | 24 | AC  | 22 | 5  |
| 31622 | 3 | 8468124 | 8468143 | 2 | 10 | 20 | CA  | 18 | 6  |
| 31626 | 3 | 8469927 | 8469946 | 2 | 10 | 20 | TG  | 19 | 9  |
| 31627 | 3 | 8470100 | 8470133 | 2 | 17 | 34 | CT  | 8  | 5  |
| 31628 | 3 | 8472534 | 8472547 | 2 | 7  | 14 | GT  | 30 | 3  |
| 31629 | 3 | 8474655 | 8474666 | 2 | 6  | 12 | GT  | 27 | 3  |
| 31637 | 3 | 8482225 | 8482238 | 2 | 7  | 14 | TC  | 13 | 4  |
| 31641 | 3 | 8488099 | 8488120 | 2 | 11 | 22 | GT  | 19 | 4  |
| 31644 | 3 | 8491753 | 8491780 | 2 | 14 | 28 | TG  | 15 | 8  |
| 31645 | 3 | 8491935 | 8491962 | 2 | 14 | 28 | AC  | 23 | 11 |
| 31649 | 3 | 8495709 | 8495728 | 2 | 10 | 20 | AC  | 16 | 7  |
| 31657 | 3 | 8501627 | 8501648 | 2 | 11 | 22 | GA  | 17 | 9  |
| 31661 | 3 | 8515720 | 8515733 | 2 | 7  | 14 | AG  | 19 | 3  |
| 31665 | 3 | 8521330 | 8521349 | 2 | 10 | 20 | AC  | 20 | 4  |
| 31666 | 3 | 8521497 | 8521518 | 2 | 11 | 22 | AC  | 22 | 7  |
| 31670 | 3 | 8529807 | 8529830 | 2 | 12 | 24 | AG  | 28 | 10 |
| 31678 | 3 | 8539553 | 8539568 | 2 | 8  | 16 | CA  | 26 | 3  |
| 31680 | 3 | 8541500 | 8541511 | 2 | 6  | 12 | GA  | 7  | 3  |
| 31683 | 3 | 8544112 | 8544137 | 2 | 13 | 26 | TG  | 7  | 5  |
| 31690 | 3 | 8555518 | 8555531 | 2 | 7  | 14 | GT  | 22 | 3  |
| 31691 | 3 | 8557825 | 8557848 | 3 | 8  | 24 | AAG | 19 | 5  |
| 31695 | 3 | 8561335 | 8561352 | 2 | 9  | 18 | AC  | 28 | 5  |
| 31696 | 3 | 8561959 | 8561974 | 2 | 8  | 16 | GT  | 24 | 9  |
| 31697 | 3 | 8562606 | 8562623 | 2 | 9  | 18 | CA  | 27 | 9  |



|       |   |         |         |   |    |    |      |    |    |
|-------|---|---------|---------|---|----|----|------|----|----|
| 31698 | 3 | 8564007 | 8564028 | 2 | 11 | 22 | AC   | 24 | 11 |
| 31699 | 3 | 8565118 | 8565141 | 2 | 12 | 24 | TG   | 21 | 8  |
| 31700 | 3 | 8565940 | 8565955 | 2 | 8  | 16 | AC   | 17 | 4  |
| 31702 | 3 | 8568034 | 8568051 | 2 | 9  | 18 | CA   | 18 | 7  |
| 31704 | 3 | 8571661 | 8571690 | 2 | 15 | 30 | TG   | 21 | 9  |
| 31706 | 3 | 8576745 | 8576768 | 4 | 6  | 24 | AAAC | 18 | 5  |
| 31725 | 3 | 8603717 | 8603732 | 4 | 4  | 16 | GCTA | 32 | 3  |
| 31731 | 3 | 8613665 | 8613692 | 4 | 7  | 28 | AAAG | 23 | 7  |
| 31732 | 3 | 8615110 | 8615125 | 2 | 8  | 16 | CA   | 19 | 3  |
| 31734 | 3 | 8616350 | 8616363 | 2 | 7  | 14 | GT   | 32 | 4  |
| 31735 | 3 | 8618943 | 8618958 | 2 | 8  | 16 | AC   | 24 | 5  |
| 31738 | 3 | 8624203 | 8624218 | 4 | 4  | 16 | CTTC | 23 | 3  |
| 31739 | 3 | 8628367 | 8628398 | 2 | 16 | 32 | CA   | 10 | 6  |
| 31742 | 3 | 8645724 | 8645737 | 2 | 7  | 14 | TG   | 26 | 3  |
| 31745 | 3 | 8648421 | 8648448 | 2 | 14 | 28 | TG   | 15 | 14 |
| 31746 | 3 | 8648593 | 8648616 | 2 | 12 | 24 | CA   | 21 | 11 |
| 31747 | 3 | 8652690 | 8652713 | 4 | 6  | 24 | ATGG | 19 | 12 |
| 31756 | 3 | 8667018 | 8667029 | 2 | 6  | 12 | AC   | 23 | 6  |
| 31768 | 3 | 8699123 | 8699148 | 2 | 13 | 26 | CA   | 17 | 9  |
| 31769 | 3 | 8699303 | 8699316 | 2 | 7  | 14 | AG   | 20 | 3  |
| 31772 | 3 | 8708919 | 8708940 | 2 | 11 | 22 | GT   | 18 | 9  |
| 31776 | 3 | 8712217 | 8712244 | 2 | 14 | 28 | AC   | 12 | 10 |
| 31777 | 3 | 8713569 | 8713588 | 2 | 10 | 20 | CA   | 17 | 11 |
| 31782 | 3 | 8722412 | 8722438 | 3 | 9  | 27 | TCC  | 21 | 5  |
| 31783 | 3 | 8729124 | 8729135 | 2 | 6  | 12 | TG   | 23 | 6  |
| 31784 | 3 | 8729136 | 8729147 | 2 | 6  | 12 | TC   | 25 | 7  |
| 31785 | 3 | 8730983 | 8731012 | 3 | 10 | 30 | GAG  | 8  | 7  |
| 31791 | 3 | 8735922 | 8735937 | 2 | 8  | 16 | AC   | 14 | 8  |
| 31795 | 3 | 8739323 | 8739338 | 4 | 4  | 16 | CTGT | 19 | 6  |
| 31797 | 3 | 8740424 | 8740445 | 2 | 11 | 22 | CA   | 14 | 12 |
| 31805 | 3 | 8749332 | 8749346 | 3 | 5  | 15 | AAT  | 23 | 5  |
| 31806 | 3 | 8750603 | 8750614 | 2 | 6  | 12 | TC   | 27 | 3  |
| 31808 | 3 | 8757210 | 8757223 | 2 | 7  | 14 | TG   | 22 | 4  |
| 31809 | 3 | 8760737 | 8760772 | 2 | 18 | 36 | AC   | 21 | 13 |
| 31823 | 3 | 8794429 | 8794456 | 2 | 14 | 28 | GT   | 16 | 9  |
| 31826 | 3 | 8796500 | 8796517 | 2 | 9  | 18 | AC   | 25 | 4  |
| 31829 | 3 | 8798925 | 8798946 | 2 | 11 | 22 | AC   | 21 | 10 |
| 31830 | 3 | 8800770 | 8800787 | 3 | 6  | 18 | AAG  | 19 | 3  |
| 31831 | 3 | 8801632 | 8801651 | 2 | 10 | 20 | AC   | 17 | 6  |
| 31832 | 3 | 8801818 | 8801855 | 2 | 19 | 38 | CA   | 8  | 8  |
| 31839 | 3 | 8811566 | 8811577 | 2 | 6  | 12 | AC   | 17 | 4  |
| 31842 | 3 | 8818910 | 8818921 | 2 | 6  | 12 | AC   | 10 | 6  |
| 31846 | 3 | 8825540 | 8825555 | 2 | 8  | 16 | TC   | 31 | 3  |
| 31848 | 3 | 8830792 | 8830815 | 2 | 12 | 24 | GT   | 16 | 14 |
| 31856 | 3 | 8864620 | 8864637 | 2 | 9  | 18 | GT   | 17 | 3  |
| 31863 | 3 | 8871768 | 8871781 | 2 | 7  | 14 | GT   | 15 | 3  |
| 31868 | 3 | 8876634 | 8876649 | 2 | 8  | 16 | GT   | 25 | 3  |
| 31869 | 3 | 8876799 | 8876814 | 2 | 8  | 16 | GT   | 23 | 5  |
| 31871 | 3 | 8877778 | 8877793 | 2 | 8  | 16 | GT   | 19 | 6  |
| 31876 | 3 | 8882197 | 8882220 | 2 | 12 | 24 | TG   | 16 | 10 |
| 31877 | 3 | 8883502 | 8883523 | 2 | 11 | 22 | TC   | 11 | 4  |

|       |   |         |         |   |    |    |      |    |    |
|-------|---|---------|---------|---|----|----|------|----|----|
| 31879 | 3 | 8884577 | 8884590 | 2 | 7  | 14 | CT   | 21 | 6  |
| 31880 | 3 | 8887945 | 8887968 | 2 | 12 | 24 | TG   | 9  | 6  |
| 31882 | 3 | 8890905 | 8890940 | 2 | 18 | 36 | GT   | 17 | 8  |
| 31883 | 3 | 8891178 | 8891191 | 2 | 7  | 14 | TC   | 23 | 4  |
| 31885 | 3 | 8893524 | 8893535 | 2 | 6  | 12 | TG   | 16 | 9  |
| 31890 | 3 | 8897362 | 8897403 | 2 | 21 | 42 | TG   | 14 | 11 |
| 31891 | 3 | 8897610 | 8897621 | 2 | 6  | 12 | TG   | 27 | 4  |
| 31892 | 3 | 8897626 | 8897637 | 2 | 6  | 12 | TG   | 25 | 4  |
| 31893 | 3 | 8898779 | 8898802 | 2 | 12 | 24 | GT   | 10 | 9  |
| 31894 | 3 | 8900460 | 8900480 | 3 | 7  | 21 | CAT  | 22 | 3  |
| 31896 | 3 | 8902123 | 8902137 | 3 | 5  | 15 | TGC  | 22 | 3  |
| 31897 | 3 | 8902207 | 8902222 | 2 | 8  | 16 | CA   | 17 | 6  |
| 31900 | 3 | 8906323 | 8906352 | 2 | 15 | 30 | TG   | 14 | 7  |
| 31902 | 3 | 8912948 | 8912971 | 3 | 8  | 24 | GCT  | 24 | 5  |
| 31903 | 3 | 8914633 | 8914654 | 2 | 11 | 22 | TC   | 11 | 7  |
| 31911 | 3 | 8927541 | 8927586 | 2 | 23 | 46 | CA   | 8  | 10 |
| 31913 | 3 | 8929212 | 8929229 | 2 | 9  | 18 | CT   | 12 | 6  |
| 31914 | 3 | 8929230 | 8929245 | 2 | 8  | 16 | CA   | 16 | 7  |
| 31917 | 3 | 8932542 | 8932555 | 2 | 7  | 14 | GT   | 18 | 9  |
| 31918 | 3 | 8932558 | 8932575 | 2 | 9  | 18 | GT   | 10 | 8  |
| 31920 | 3 | 8936208 | 8936225 | 2 | 9  | 18 | TG   | 22 | 9  |
| 31921 | 3 | 8938291 | 8938320 | 2 | 15 | 30 | CA   | 12 | 6  |
| 31923 | 3 | 8938593 | 8938618 | 2 | 13 | 26 | CA   | 23 | 6  |
| 31925 | 3 | 8942765 | 8942785 | 3 | 7  | 21 | GGA  | 11 | 4  |
| 31930 | 3 | 8947935 | 8947964 | 2 | 15 | 30 | GT   | 19 | 9  |
| 31932 | 3 | 8953370 | 8953381 | 2 | 6  | 12 | AC   | 27 | 4  |
| 31933 | 3 | 8955983 | 8956012 | 3 | 10 | 30 | ATT  | 14 | 5  |
| 31937 | 3 | 8960303 | 8960334 | 2 | 16 | 32 | AC   | 12 | 14 |
| 31939 | 3 | 8961570 | 8961591 | 2 | 11 | 22 | CA   | 17 | 22 |
| 31946 | 3 | 8965927 | 8965948 | 2 | 11 | 22 | GT   | 15 | 4  |
| 31948 | 3 | 8968379 | 8968399 | 3 | 7  | 21 | AGA  | 23 | 5  |
| 31950 | 3 | 8970729 | 8970743 | 3 | 5  | 15 | GCA  | 30 | 4  |
| 31963 | 3 | 8989015 | 8989036 | 2 | 11 | 22 | GT   | 16 | 11 |
| 31970 | 3 | 9004946 | 9004965 | 4 | 5  | 20 | TTTA | 17 | 7  |
| 31975 | 3 | 9016859 | 9016870 | 2 | 6  | 12 | TG   | 26 | 4  |
| 31977 | 3 | 9028208 | 9028229 | 2 | 11 | 22 | CA   | 24 | 5  |
| 31979 | 3 | 9032078 | 9032116 | 3 | 13 | 39 | TCT  | 11 | 9  |
| 31981 | 3 | 9036445 | 9036472 | 2 | 14 | 28 | CA   | 14 | 7  |
| 31982 | 3 | 9037099 | 9037110 | 2 | 6  | 12 | AC   | 26 | 4  |
| 31984 | 3 | 9041235 | 9041255 | 3 | 7  | 21 | AGA  | 21 | 6  |
| 31986 | 3 | 9044592 | 9044603 | 2 | 6  | 12 | CA   | 24 | 3  |
| 31991 | 3 | 9054160 | 9054199 | 4 | 10 | 40 | ATGG | 28 | 9  |
| 31992 | 3 | 9055062 | 9055083 | 2 | 11 | 22 | GT   | 24 | 6  |
| 31996 | 3 | 9057213 | 9057232 | 2 | 10 | 20 | TC   | 9  | 8  |
| 31998 | 3 | 9057442 | 9057463 | 2 | 11 | 22 | AC   | 14 | 11 |
| 32001 | 3 | 9070958 | 9070969 | 2 | 6  | 12 | AC   | 21 | 3  |
| 32003 | 3 | 9071339 | 9071352 | 2 | 7  | 14 | TG   | 25 | 6  |
| 32005 | 3 | 9075239 | 9075258 | 4 | 5  | 20 | TGTT | 24 | 3  |
| 32006 | 3 | 9080341 | 9080374 | 2 | 17 | 34 | TG   | 20 | 10 |
| 32012 | 3 | 9110657 | 9110672 | 4 | 4  | 16 | AAAT | 26 | 12 |
| 32019 | 3 | 9146197 | 9146228 | 2 | 16 | 32 | AC   | 10 | 9  |

|       |   |         |         |   |    |    |      |    |    |
|-------|---|---------|---------|---|----|----|------|----|----|
| 32027 | 3 | 9166638 | 9166695 | 2 | 29 | 58 | AG   | 9  | 6  |
| 32029 | 3 | 9168902 | 9168925 | 2 | 12 | 24 | CA   | 13 | 7  |
| 32033 | 3 | 9175625 | 9175638 | 2 | 7  | 14 | AC   | 13 | 5  |
| 32035 | 3 | 9179471 | 9179484 | 2 | 7  | 14 | CA   | 24 | 8  |
| 32036 | 3 | 9186499 | 9186516 | 2 | 9  | 18 | TG   | 16 | 6  |
| 32039 | 3 | 9188618 | 9188631 | 2 | 7  | 14 | TG   | 31 | 3  |
| 32054 | 3 | 9234327 | 9234348 | 2 | 11 | 22 | TG   | 19 | 17 |
| 32056 | 3 | 9244328 | 9244343 | 2 | 8  | 16 | TG   | 20 | 8  |
| 32057 | 3 | 9244576 | 9244601 | 2 | 13 | 26 | GT   | 11 | 10 |
| 32060 | 3 | 9246809 | 9246830 | 2 | 11 | 22 | AC   | 12 | 5  |
| 32061 | 3 | 9246855 | 9246866 | 2 | 6  | 12 | AC   | 20 | 7  |
| 32062 | 3 | 9249278 | 9249305 | 2 | 14 | 28 | AC   | 9  | 11 |
| 32066 | 3 | 9251434 | 9251449 | 2 | 8  | 16 | CT   | 18 | 6  |
| 32067 | 3 | 9251617 | 9251650 | 2 | 17 | 34 | TG   | 10 | 6  |
| 32069 | 3 | 9251679 | 9251692 | 2 | 7  | 14 | TG   | 14 | 3  |
| 32071 | 3 | 9252107 | 9252122 | 2 | 8  | 16 | CA   | 19 | 6  |
| 32075 | 3 | 9254659 | 9254682 | 2 | 12 | 24 | TG   | 14 | 9  |
| 32076 | 3 | 9255709 | 9255726 | 3 | 6  | 18 | ATC  | 21 | 6  |
| 32080 | 3 | 9256329 | 9256346 | 3 | 6  | 18 | ATG  | 24 | 7  |
| 32082 | 3 | 9257315 | 9257348 | 2 | 17 | 34 | AC   | 10 | 7  |
| 32087 | 3 | 9261377 | 9261400 | 2 | 12 | 24 | TG   | 23 | 10 |
| 32094 | 3 | 9266939 | 9266950 | 2 | 6  | 12 | GT   | 13 | 5  |
| 32095 | 3 | 9266953 | 9266968 | 2 | 8  | 16 | GT   | 11 | 3  |
| 32096 | 3 | 9269097 | 9269146 | 2 | 25 | 50 | TG   | 9  | 10 |
| 32098 | 3 | 9269781 | 9269830 | 2 | 25 | 50 | AC   | 9  | 11 |
| 32107 | 3 | 9277367 | 9277382 | 2 | 8  | 16 | GA   | 20 | 3  |
| 32108 | 3 | 9277594 | 9277608 | 3 | 5  | 15 | TTG  | 9  | 3  |
| 32119 | 3 | 9282906 | 9282932 | 3 | 9  | 27 | TCC  | 9  | 10 |
| 32122 | 3 | 9284343 | 9284366 | 3 | 8  | 24 | AAC  | 15 | 5  |
| 32123 | 3 | 9284398 | 9284429 | 2 | 16 | 32 | AG   | 11 | 10 |
| 32127 | 3 | 9285196 | 9285219 | 3 | 8  | 24 | TGA  | 17 | 6  |
| 32130 | 3 | 9285903 | 9285920 | 2 | 9  | 18 | CT   | 7  | 5  |
| 32131 | 3 | 9286113 | 9286142 | 2 | 15 | 30 | CA   | 13 | 9  |
| 32134 | 3 | 9291289 | 9291300 | 2 | 6  | 12 | GA   | 18 | 3  |
| 32137 | 3 | 9292058 | 9292077 | 4 | 5  | 20 | GGAG | 9  | 3  |
| 32138 | 3 | 9292419 | 9292432 | 2 | 7  | 14 | GT   | 24 | 5  |
| 32139 | 3 | 9292552 | 9292565 | 2 | 7  | 14 | AC   | 27 | 7  |
| 32146 | 3 | 9302091 | 9302104 | 2 | 7  | 14 | GT   | 11 | 7  |
| 32152 | 3 | 9305501 | 9305516 | 2 | 8  | 16 | CA   | 28 | 4  |
| 32155 | 3 | 9309747 | 9309782 | 2 | 18 | 36 | TG   | 12 | 8  |
| 32158 | 3 | 9313050 | 9313069 | 2 | 10 | 20 | AT   | 7  | 5  |
| 32161 | 3 | 9314702 | 9314723 | 2 | 11 | 22 | GA   | 11 | 3  |
| 32164 | 3 | 9321723 | 9321750 | 2 | 14 | 28 | GT   | 11 | 11 |
| 32173 | 3 | 9345185 | 9345214 | 2 | 15 | 30 | TG   | 16 | 8  |
| 32178 | 3 | 9355537 | 9355560 | 3 | 8  | 24 | ATT  | 11 | 5  |
| 32179 | 3 | 9356886 | 9356900 | 3 | 5  | 15 | AGC  | 29 | 3  |
| 32199 | 3 | 9387085 | 9387102 | 2 | 9  | 18 | AC   | 21 | 5  |
| 32200 | 3 | 9387246 | 9387265 | 2 | 10 | 20 | AC   | 28 | 4  |
| 32205 | 3 | 9392945 | 9392956 | 2 | 6  | 12 | AC   | 14 | 3  |
| 32206 | 3 | 9392996 | 9393029 | 2 | 17 | 34 | CA   | 10 | 6  |
| 32211 | 3 | 9394746 | 9394765 | 2 | 10 | 20 | TG   | 11 | 7  |

|       |   |         |         |   |    |    |      |    |    |
|-------|---|---------|---------|---|----|----|------|----|----|
| 32213 | 3 | 9400116 | 9400136 | 3 | 7  | 21 | AGC  | 21 | 7  |
| 32214 | 3 | 9400187 | 9400216 | 2 | 15 | 30 | GT   | 13 | 11 |
| 32218 | 3 | 9404039 | 9404062 | 3 | 8  | 24 | GGA  | 27 | 4  |
| 32219 | 3 | 9404364 | 9404379 | 2 | 8  | 16 | AT   | 13 | 6  |
| 32222 | 3 | 9406326 | 9406337 | 2 | 6  | 12 | TA   | 21 | 7  |
| 32225 | 3 | 9410437 | 9410456 | 2 | 10 | 20 | GT   | 16 | 8  |
| 32226 | 3 | 9410458 | 9410471 | 2 | 7  | 14 | TG   | 18 | 12 |
| 32229 | 3 | 9413719 | 9413738 | 2 | 10 | 20 | CT   | 13 | 8  |
| 32232 | 3 | 9418864 | 9418877 | 2 | 7  | 14 | CA   | 26 | 3  |
| 32235 | 3 | 9421141 | 9421152 | 2 | 6  | 12 | AC   | 27 | 4  |
| 32238 | 3 | 9425433 | 9425448 | 2 | 8  | 16 | CA   | 25 | 7  |
| 32241 | 3 | 9427898 | 9427917 | 2 | 10 | 20 | AC   | 30 | 9  |
| 32244 | 3 | 9431964 | 9431975 | 2 | 6  | 12 | GT   | 34 | 3  |
| 32247 | 3 | 9435765 | 9435788 | 2 | 12 | 24 | CA   | 19 | 6  |
| 32255 | 3 | 9441750 | 9441765 | 2 | 8  | 16 | AC   | 19 | 4  |
| 32260 | 3 | 9442891 | 9442914 | 2 | 12 | 24 | TG   | 18 | 14 |
| 32262 | 3 | 9444220 | 9444237 | 2 | 9  | 18 | CA   | 24 | 4  |
| 32264 | 3 | 9449494 | 9449527 | 2 | 17 | 34 | AC   | 10 | 7  |
| 32268 | 3 | 9461971 | 9461988 | 2 | 9  | 18 | CT   | 14 | 7  |
| 32272 | 3 | 9471878 | 9471895 | 2 | 9  | 18 | AC   | 19 | 10 |
| 32273 | 3 | 9473360 | 9473385 | 2 | 13 | 26 | CA   | 20 | 12 |
| 32280 | 3 | 9483496 | 9483519 | 2 | 12 | 24 | TG   | 25 | 9  |
| 32283 | 3 | 9487459 | 9487472 | 2 | 7  | 14 | AG   | 31 | 3  |
| 32289 | 3 | 9505547 | 9505560 | 2 | 7  | 14 | GT   | 19 | 7  |
| 32291 | 3 | 9507561 | 9507578 | 2 | 9  | 18 | CT   | 8  | 3  |
| 32299 | 3 | 9510627 | 9510650 | 2 | 12 | 24 | GT   | 16 | 8  |
| 32313 | 3 | 9514508 | 9514522 | 3 | 5  | 15 | CAC  | 23 | 14 |
| 32315 | 3 | 9515152 | 9515177 | 2 | 13 | 26 | AC   | 9  | 10 |
| 32320 | 3 | 9517261 | 9517288 | 2 | 14 | 28 | GT   | 15 | 8  |
| 32321 | 3 | 9517935 | 9517946 | 2 | 6  | 12 | AC   | 23 | 5  |
| 32324 | 3 | 9519471 | 9519492 | 2 | 11 | 22 | AC   | 18 | 9  |
| 32327 | 3 | 9520077 | 9520096 | 2 | 10 | 20 | AC   | 19 | 11 |
| 32329 | 3 | 9520257 | 9520274 | 2 | 9  | 18 | TG   | 17 | 11 |
| 32330 | 3 | 9520435 | 9520450 | 2 | 8  | 16 | TG   | 23 | 5  |
| 32331 | 3 | 9521049 | 9521064 | 2 | 8  | 16 | GT   | 17 | 12 |
| 32332 | 3 | 9521067 | 9521082 | 2 | 8  | 16 | GT   | 24 | 12 |
| 32335 | 3 | 9522293 | 9522308 | 2 | 8  | 16 | TG   | 18 | 5  |
| 32339 | 3 | 9522794 | 9522811 | 2 | 9  | 18 | AC   | 12 | 4  |
| 32344 | 3 | 9523729 | 9523740 | 2 | 6  | 12 | AC   | 25 | 6  |
| 32345 | 3 | 9524135 | 9524160 | 2 | 13 | 26 | AC   | 13 | 9  |
| 32351 | 3 | 9531913 | 9531938 | 2 | 13 | 26 | CA   | 17 | 5  |
| 32352 | 3 | 9532037 | 9532054 | 2 | 9  | 18 | AC   | 15 | 6  |
| 32353 | 3 | 9533871 | 9533892 | 2 | 11 | 22 | TG   | 25 | 8  |
| 32355 | 3 | 9537027 | 9537046 | 2 | 10 | 20 | CA   | 23 | 4  |
| 32360 | 3 | 9546866 | 9546889 | 2 | 12 | 24 | GT   | 11 | 10 |
| 32363 | 3 | 9548082 | 9548126 | 3 | 15 | 45 | GAG  | 20 | 8  |
| 32365 | 3 | 9550624 | 9550641 | 2 | 9  | 18 | TG   | 24 | 8  |
| 32366 | 3 | 9550854 | 9550869 | 2 | 8  | 16 | GT   | 15 | 4  |
| 32367 | 3 | 9551068 | 9551089 | 2 | 11 | 22 | GT   | 15 | 4  |
| 32369 | 3 | 9551325 | 9551340 | 2 | 8  | 16 | CA   | 19 | 10 |
| 32370 | 3 | 9552546 | 9552573 | 4 | 7  | 28 | CAGA | 26 | 5  |

|       |   |         |         |   |    |    |      |    |    |
|-------|---|---------|---------|---|----|----|------|----|----|
| 32371 | 3 | 9552730 | 9552743 | 2 | 7  | 14 | GT   | 21 | 6  |
| 32372 | 3 | 9552792 | 9552811 | 2 | 10 | 20 | TG   | 24 | 7  |
| 32374 | 3 | 9554252 | 9554275 | 2 | 12 | 24 | AC   | 15 | 8  |
| 32375 | 3 | 9554450 | 9554467 | 2 | 9  | 18 | AC   | 20 | 7  |
| 32376 | 3 | 9556057 | 9556084 | 2 | 14 | 28 | AC   | 14 | 11 |
| 32377 | 3 | 9556142 | 9556159 | 2 | 9  | 18 | AC   | 25 | 3  |
| 32379 | 3 | 9557479 | 9557500 | 2 | 11 | 22 | CT   | 28 | 7  |
| 32381 | 3 | 9558115 | 9558134 | 2 | 10 | 20 | CA   | 17 | 6  |
| 32382 | 3 | 9558266 | 9558287 | 2 | 11 | 22 | CA   | 18 | 9  |
| 32383 | 3 | 9559601 | 9559614 | 2 | 7  | 14 | AG   | 32 | 3  |
| 32384 | 3 | 9559761 | 9559778 | 2 | 9  | 18 | AC   | 15 | 3  |
| 32385 | 3 | 9559906 | 9559937 | 2 | 16 | 32 | TG   | 21 | 9  |
| 32386 | 3 | 9560067 | 9560078 | 2 | 6  | 12 | GT   | 32 | 6  |
| 32387 | 3 | 9562013 | 9562026 | 2 | 7  | 14 | AC   | 15 | 3  |
| 32389 | 3 | 9563844 | 9563855 | 2 | 6  | 12 | CA   | 23 | 10 |
| 32390 | 3 | 9564152 | 9564166 | 3 | 5  | 15 | AGA  | 31 | 3  |
| 32391 | 3 | 9565341 | 9565366 | 2 | 13 | 26 | AC   | 9  | 7  |
| 32392 | 3 | 9565672 | 9565693 | 2 | 11 | 22 | CA   | 18 | 6  |
| 32393 | 3 | 9565931 | 9565958 | 2 | 14 | 28 | GT   | 20 | 14 |
| 32394 | 3 | 9566072 | 9566089 | 2 | 9  | 18 | CA   | 30 | 4  |
| 32395 | 3 | 9566288 | 9566313 | 2 | 13 | 26 | AC   | 16 | 5  |
| 32397 | 3 | 9567912 | 9567939 | 2 | 14 | 28 | GT   | 6  | 9  |
| 32398 | 3 | 9569173 | 9569240 | 2 | 34 | 68 | TG   | 14 | 11 |
| 32399 | 3 | 9569310 | 9569329 | 2 | 10 | 20 | CA   | 22 | 4  |
| 32401 | 3 | 9571984 | 9572007 | 2 | 12 | 24 | CA   | 12 | 9  |
| 32402 | 3 | 9572223 | 9572264 | 2 | 21 | 42 | AC   | 11 | 10 |
| 32406 | 3 | 9574372 | 9574397 | 2 | 13 | 26 | TG   | 16 | 13 |
| 32408 | 3 | 9576091 | 9576110 | 2 | 10 | 20 | CA   | 12 | 10 |
| 32411 | 3 | 9577446 | 9577489 | 2 | 22 | 44 | AC   | 7  | 8  |
| 32413 | 3 | 9578758 | 9578797 | 2 | 20 | 40 | CA   | 17 | 15 |
| 32415 | 3 | 9579404 | 9579423 | 2 | 10 | 20 | CA   | 19 | 7  |
| 32417 | 3 | 9581483 | 9581494 | 2 | 6  | 12 | GT   | 21 | 3  |
| 32418 | 3 | 9581686 | 9581719 | 2 | 17 | 34 | TG   | 11 | 7  |
| 32420 | 3 | 9584166 | 9584185 | 2 | 10 | 20 | CA   | 14 | 6  |
| 32428 | 3 | 9590710 | 9590727 | 3 | 6  | 18 | AGG  | 23 | 3  |
| 32429 | 3 | 9590825 | 9590856 | 2 | 16 | 32 | GT   | 23 | 9  |
| 32430 | 3 | 9593899 | 9593914 | 2 | 8  | 16 | TG   | 21 | 4  |
| 32433 | 3 | 9597791 | 9597802 | 2 | 6  | 12 | GT   | 24 | 3  |
| 32434 | 3 | 9600624 | 9600637 | 2 | 7  | 14 | CA   | 22 | 9  |
| 32435 | 3 | 9603284 | 9603297 | 2 | 7  | 14 | GT   | 25 | 4  |
| 32436 | 3 | 9609095 | 9609110 | 2 | 8  | 16 | AC   | 20 | 7  |
| 32438 | 3 | 9618114 | 9618143 | 2 | 15 | 30 | CA   | 11 | 7  |
| 32439 | 3 | 9619086 | 9619099 | 2 | 7  | 14 | GT   | 27 | 7  |
| 32445 | 3 | 9625762 | 9625779 | 2 | 9  | 18 | CA   | 14 | 6  |
| 32446 | 3 | 9627601 | 9627626 | 2 | 13 | 26 | CA   | 14 | 13 |
| 32447 | 3 | 9631331 | 9631346 | 4 | 4  | 16 | AATT | 22 | 9  |
| 32448 | 3 | 9632121 | 9632144 | 2 | 12 | 24 | GT   | 25 | 10 |
| 32449 | 3 | 9632295 | 9632308 | 2 | 7  | 14 | GT   | 19 | 8  |
| 32450 | 3 | 9632310 | 9632321 | 2 | 6  | 12 | TG   | 20 | 6  |
| 32451 | 3 | 9632696 | 9632725 | 2 | 15 | 30 | TG   | 18 | 6  |
| 32452 | 3 | 9633200 | 9633213 | 2 | 7  | 14 | AC   | 26 | 3  |

|       |   |         |         |   |    |    |     |    |    |
|-------|---|---------|---------|---|----|----|-----|----|----|
| 32453 | 3 | 9633545 | 9633564 | 2 | 10 | 20 | TG  | 19 | 4  |
| 32461 | 3 | 9637211 | 9637270 | 3 | 20 | 60 | TTC | 7  | 8  |
| 32467 | 3 | 9643266 | 9643287 | 2 | 11 | 22 | AG  | 22 | 5  |
| 32470 | 3 | 9648432 | 9648445 | 2 | 7  | 14 | TG  | 16 | 4  |
| 32471 | 3 | 9648535 | 9648550 | 2 | 8  | 16 | CA  | 24 | 5  |
| 32474 | 3 | 9658688 | 9658729 | 2 | 21 | 42 | CA  | 7  | 10 |
| 32478 | 3 | 9666453 | 9666464 | 2 | 6  | 12 | TG  | 22 | 10 |
| 32479 | 3 | 9667062 | 9667082 | 3 | 7  | 21 | TTG | 26 | 3  |
| 32480 | 3 | 9667170 | 9667181 | 2 | 6  | 12 | CA  | 24 | 3  |
| 32482 | 3 | 9672793 | 9672828 | 3 | 12 | 36 | CTT | 11 | 9  |
| 32483 | 3 | 9672936 | 9672949 | 2 | 7  | 14 | TC  | 18 | 3  |
| 32484 | 3 | 9673000 | 9673025 | 2 | 13 | 26 | CA  | 11 | 10 |
| 32488 | 3 | 9676062 | 9676077 | 2 | 8  | 16 | CA  | 27 | 3  |
| 32491 | 3 | 9679980 | 9679993 | 2 | 7  | 14 | CA  | 22 | 4  |
| 32494 | 3 | 9686382 | 9686419 | 2 | 19 | 38 | GT  | 6  | 7  |
| 32497 | 3 | 9690410 | 9690421 | 2 | 6  | 12 | CT  | 26 | 3  |
| 32498 | 3 | 9691700 | 9691721 | 2 | 11 | 22 | GT  | 14 | 7  |
| 32499 | 3 | 9691905 | 9691926 | 2 | 11 | 22 | AC  | 20 | 7  |
| 32519 | 3 | 9714160 | 9714183 | 3 | 8  | 24 | GAG | 16 | 6  |
| 32520 | 3 | 9716585 | 9716610 | 2 | 13 | 26 | TG  | 11 | 6  |
| 32521 | 3 | 9716734 | 9716771 | 2 | 19 | 38 | AC  | 9  | 10 |
| 32523 | 3 | 9718756 | 9718791 | 2 | 18 | 36 | TG  | 8  | 10 |
| 32525 | 3 | 9722328 | 9722359 | 2 | 16 | 32 | TG  | 9  | 10 |
| 32526 | 3 | 9722666 | 9722683 | 2 | 9  | 18 | TG  | 24 | 6  |
| 32530 | 3 | 9734360 | 9734371 | 2 | 6  | 12 | CT  | 27 | 4  |
| 32531 | 3 | 9735282 | 9735297 | 2 | 8  | 16 | CA  | 22 | 7  |
| 32532 | 3 | 9735480 | 9735493 | 2 | 7  | 14 | AC  | 22 | 3  |
| 32533 | 3 | 9736423 | 9736434 | 2 | 6  | 12 | CA  | 36 | 4  |
| 32537 | 3 | 9746145 | 9746159 | 3 | 5  | 15 | GGA | 21 | 6  |
| 32538 | 3 | 9746429 | 9746440 | 2 | 6  | 12 | GT  | 20 | 14 |
| 32544 | 3 | 9758234 | 9758267 | 2 | 17 | 34 | AC  | 9  | 8  |
| 32548 | 3 | 9763452 | 9763469 | 3 | 6  | 18 | AAC | 16 | 5  |
| 32549 | 3 | 9763947 | 9763962 | 2 | 8  | 16 | AC  | 27 | 3  |
| 32550 | 3 | 9766926 | 9766959 | 2 | 17 | 34 | AC  | 12 | 9  |
| 32551 | 3 | 9772912 | 9772939 | 2 | 14 | 28 | AC  | 10 | 8  |
| 32555 | 3 | 9780702 | 9780719 | 2 | 9  | 18 | CA  | 21 | 16 |
| 32560 | 3 | 9782720 | 9782751 | 2 | 16 | 32 | CA  | 15 | 9  |
| 32561 | 3 | 9787187 | 9787218 | 2 | 16 | 32 | TC  | 7  | 5  |
| 32564 | 3 | 9797406 | 9797427 | 2 | 11 | 22 | TG  | 16 | 7  |
| 32576 | 3 | 9824027 | 9824056 | 2 | 15 | 30 | AC  | 17 | 8  |
| 32582 | 3 | 9833166 | 9833195 | 2 | 15 | 30 | CT  | 10 | 5  |
| 32584 | 3 | 9847157 | 9847172 | 2 | 8  | 16 | AG  | 13 | 15 |
| 32585 | 3 | 9847769 | 9847786 | 3 | 6  | 18 | GCT | 26 | 8  |
| 32586 | 3 | 9849088 | 9849107 | 2 | 10 | 20 | CA  | 17 | 6  |
| 32590 | 3 | 9851017 | 9851028 | 2 | 6  | 12 | CT  | 24 | 5  |
| 32591 | 3 | 9851215 | 9851244 | 2 | 15 | 30 | AC  | 7  | 5  |
| 32592 | 3 | 9851353 | 9851386 | 2 | 17 | 34 | TG  | 13 | 8  |
| 32594 | 3 | 9857778 | 9857797 | 2 | 10 | 20 | GT  | 18 | 8  |
| 32595 | 3 | 9862363 | 9862404 | 2 | 21 | 42 | GT  | 7  | 8  |
| 32599 | 3 | 9865219 | 9865232 | 2 | 7  | 14 | GT  | 20 | 6  |
| 32606 | 3 | 9894487 | 9894514 | 2 | 14 | 28 | CA  | 19 | 13 |

|       |   |          |          |   |    |    |      |    |    |
|-------|---|----------|----------|---|----|----|------|----|----|
| 32610 | 3 | 9905093  | 9905118  | 2 | 13 | 26 | TG   | 20 | 17 |
| 32613 | 3 | 9930971  | 9930994  | 2 | 12 | 24 | TG   | 24 | 8  |
| 32617 | 3 | 9937901  | 9937926  | 2 | 13 | 26 | AC   | 13 | 6  |
| 32624 | 3 | 9949947  | 9949958  | 2 | 6  | 12 | TG   | 22 | 4  |
| 32628 | 3 | 9950674  | 9950697  | 2 | 12 | 24 | TG   | 17 | 7  |
| 32637 | 3 | 9957322  | 9957339  | 2 | 9  | 18 | CA   | 15 | 13 |
| 32638 | 3 | 9957474  | 9957507  | 2 | 17 | 34 | TG   | 8  | 9  |
| 32639 | 3 | 9959954  | 9959975  | 2 | 11 | 22 | TG   | 21 | 7  |
| 32640 | 3 | 9961166  | 9961187  | 2 | 11 | 22 | TG   | 19 | 3  |
| 32662 | 3 | 9987230  | 9987269  | 2 | 20 | 40 | GA   | 7  | 6  |
| 32664 | 3 | 9988311  | 9988325  | 3 | 5  | 15 | TTC  | 12 | 3  |
| 32665 | 3 | 9988809  | 9988832  | 3 | 8  | 24 | TTA  | 13 | 4  |
| 32666 | 3 | 9988918  | 9988931  | 2 | 7  | 14 | TG   | 20 | 6  |
| 32668 | 3 | 9989697  | 9989736  | 2 | 20 | 40 | TG   | 6  | 5  |
| 32670 | 3 | 9991072  | 9991085  | 2 | 7  | 14 | GT   | 17 | 6  |
| 32679 | 3 | 9992686  | 9992697  | 2 | 6  | 12 | GT   | 8  | 10 |
| 32682 | 3 | 9993093  | 9993122  | 2 | 15 | 30 | AC   | 8  | 9  |
| 32690 | 3 | 9996876  | 9996917  | 2 | 21 | 42 | TG   | 7  | 9  |
| 32692 | 3 | 9999454  | 9999469  | 2 | 8  | 16 | CT   | 17 | 3  |
| 32693 | 3 | 10000400 | 10000429 | 2 | 15 | 30 | TG   | 16 | 5  |
| 32698 | 3 | 10004475 | 10004502 | 2 | 14 | 28 | GT   | 18 | 12 |
| 32702 | 3 | 10025790 | 10025809 | 4 | 5  | 20 | AAAC | 10 | 6  |
| 32703 | 3 | 10026403 | 10026422 | 2 | 10 | 20 | CA   | 26 | 14 |
| 32705 | 3 | 10027079 | 10027090 | 2 | 6  | 12 | GT   | 21 | 7  |
| 32706 | 3 | 10027094 | 10027109 | 2 | 8  | 16 | TG   | 14 | 4  |
| 32707 | 3 | 10027213 | 10027224 | 2 | 6  | 12 | TG   | 13 | 9  |
| 32708 | 3 | 10027226 | 10027239 | 2 | 7  | 14 | GT   | 17 | 14 |
| 32711 | 3 | 10028884 | 10028913 | 2 | 15 | 30 | CA   | 13 | 8  |
| 32714 | 3 | 10031105 | 10031138 | 2 | 17 | 34 | AC   | 6  | 5  |
| 32715 | 3 | 10033098 | 10033111 | 2 | 7  | 14 | GA   | 10 | 4  |
| 32716 | 3 | 10033491 | 10033518 | 2 | 14 | 28 | TG   | 13 | 12 |
| 32719 | 3 | 10034492 | 10034511 | 2 | 10 | 20 | AC   | 16 | 9  |
| 32720 | 3 | 10035695 | 10035710 | 4 | 4  | 16 | AAAT | 19 | 4  |
| 32722 | 3 | 10036039 | 10036050 | 2 | 6  | 12 | GT   | 35 | 3  |
| 32723 | 3 | 10036272 | 10036289 | 2 | 9  | 18 | CA   | 20 | 5  |
| 32726 | 3 | 10044082 | 10044097 | 2 | 8  | 16 | AT   | 18 | 3  |
| 32727 | 3 | 10044392 | 10044409 | 2 | 9  | 18 | AC   | 10 | 6  |
| 32730 | 3 | 10046245 | 10046282 | 2 | 19 | 38 | CA   | 9  | 9  |
| 32733 | 3 | 10049253 | 10049280 | 4 | 7  | 28 | TGTC | 28 | 5  |
| 32734 | 3 | 10049943 | 10049956 | 2 | 7  | 14 | AG   | 21 | 6  |
| 32735 | 3 | 10053785 | 10053812 | 2 | 14 | 28 | AC   | 8  | 7  |
| 32738 | 3 | 10065231 | 10065252 | 2 | 11 | 22 | TG   | 32 | 13 |
| 32745 | 3 | 10081852 | 10081865 | 2 | 7  | 14 | GT   | 25 | 8  |
| 32748 | 3 | 10089986 | 10090001 | 2 | 8  | 16 | GT   | 15 | 3  |
| 32759 | 3 | 10145476 | 10145499 | 3 | 8  | 24 | AAC  | 26 | 5  |
| 32770 | 3 | 10183924 | 10183953 | 2 | 15 | 30 | TG   | 10 | 7  |
| 32773 | 3 | 10186029 | 10186042 | 2 | 7  | 14 | TG   | 23 | 3  |
| 32774 | 3 | 10186692 | 10186703 | 2 | 6  | 12 | AG   | 26 | 4  |
| 32776 | 3 | 10189783 | 10189796 | 2 | 7  | 14 | CA   | 25 | 4  |
| 32777 | 3 | 10190410 | 10190423 | 2 | 7  | 14 | TG   | 20 | 5  |
| 32781 | 3 | 10196083 | 10196102 | 2 | 10 | 20 | GT   | 11 | 10 |

|       |   |          |          |   |    |    |      |    |    |
|-------|---|----------|----------|---|----|----|------|----|----|
| 32782 | 3 | 10196227 | 10196252 | 2 | 13 | 26 | GT   | 16 | 14 |
| 32783 | 3 | 10196365 | 10196391 | 3 | 9  | 27 | CAT  | 24 | 4  |
| 32788 | 3 | 10213478 | 10213491 | 2 | 7  | 14 | TG   | 25 | 3  |
| 32791 | 3 | 10219434 | 10219453 | 2 | 10 | 20 | GA   | 18 | 6  |
| 32792 | 3 | 10220089 | 10220100 | 2 | 6  | 12 | AC   | 34 | 3  |
| 32793 | 3 | 10220276 | 10220317 | 2 | 21 | 42 | AC   | 8  | 9  |
| 32798 | 3 | 10228772 | 10228789 | 2 | 9  | 18 | CT   | 20 | 3  |
| 32799 | 3 | 10230314 | 10230331 | 2 | 9  | 18 | TG   | 25 | 6  |
| 32800 | 3 | 10230905 | 10230931 | 3 | 9  | 27 | GTA  | 21 | 5  |
| 32801 | 3 | 10234110 | 10234127 | 2 | 9  | 18 | CA   | 25 | 5  |
| 32802 | 3 | 10234291 | 10234310 | 2 | 10 | 20 | GT   | 10 | 10 |
| 32803 | 3 | 10236561 | 10236584 | 4 | 6  | 24 | CAGG | 26 | 7  |
| 32805 | 3 | 10241741 | 10241768 | 2 | 14 | 28 | AC   | 13 | 12 |
| 32808 | 3 | 10251284 | 10251305 | 2 | 11 | 22 | AC   | 17 | 6  |
| 32820 | 3 | 10278363 | 10278377 | 3 | 5  | 15 | TCC  | 26 | 4  |
| 32827 | 3 | 10288100 | 10288119 | 4 | 5  | 20 | TTTC | 20 | 9  |
| 32832 | 3 | 10296330 | 10296345 | 4 | 4  | 16 | TTCA | 18 | 3  |
| 32838 | 3 | 10316706 | 10316739 | 2 | 17 | 34 | AC   | 12 | 10 |
| 32839 | 3 | 10317081 | 10317098 | 2 | 9  | 18 | CA   | 21 | 5  |
| 32841 | 3 | 10322229 | 10322254 | 2 | 13 | 26 | GT   | 24 | 7  |
| 32842 | 3 | 10322320 | 10322333 | 2 | 7  | 14 | GT   | 16 | 12 |
| 32857 | 3 | 10342196 | 10342209 | 2 | 7  | 14 | AC   | 28 | 3  |
| 32858 | 3 | 10346527 | 10346540 | 2 | 7  | 14 | TA   | 12 | 7  |
| 32863 | 3 | 10373099 | 10373110 | 2 | 6  | 12 | AC   | 27 | 3  |
| 32866 | 3 | 10373731 | 10373750 | 4 | 5  | 20 | TATT | 12 | 3  |
| 32867 | 3 | 10374653 | 10374710 | 2 | 29 | 58 | TG   | 11 | 12 |
| 32871 | 3 | 10387832 | 10387851 | 2 | 10 | 20 | AC   | 18 | 12 |
| 32874 | 3 | 10391917 | 10391931 | 3 | 5  | 15 | GCA  | 27 | 3  |
| 32880 | 3 | 10404104 | 10404143 | 2 | 20 | 40 | GT   | 14 | 11 |
| 32882 | 3 | 10417960 | 10417986 | 3 | 9  | 27 | GAA  | 24 | 9  |
| 32885 | 3 | 10430519 | 10430545 | 3 | 9  | 27 | ATC  | 15 | 5  |
| 32889 | 3 | 10436508 | 10436521 | 2 | 7  | 14 | CA   | 19 | 3  |
| 32890 | 3 | 10445761 | 10445778 | 2 | 9  | 18 | AC   | 15 | 3  |
| 32897 | 3 | 10459751 | 10459762 | 2 | 6  | 12 | TC   | 13 | 3  |
| 32901 | 3 | 10461916 | 10461947 | 2 | 16 | 32 | AC   | 10 | 5  |
| 32906 | 3 | 10478193 | 10478210 | 3 | 6  | 18 | TAT  | 19 | 3  |
| 32907 | 3 | 10480198 | 10480215 | 2 | 9  | 18 | GT   | 15 | 8  |
| 32908 | 3 | 10480217 | 10480228 | 2 | 6  | 12 | TG   | 16 | 8  |
| 32909 | 3 | 10480592 | 10480627 | 4 | 9  | 36 | TGAA | 36 | 9  |
| 32917 | 3 | 10508301 | 10508324 | 2 | 12 | 24 | CA   | 15 | 10 |
| 32918 | 3 | 10508365 | 10508382 | 2 | 9  | 18 | TG   | 18 | 12 |
| 32919 | 3 | 10508761 | 10508774 | 2 | 7  | 14 | CA   | 8  | 5  |
| 32920 | 3 | 10508904 | 10508929 | 2 | 13 | 26 | TG   | 18 | 9  |
| 32929 | 3 | 10514080 | 10514106 | 3 | 9  | 27 | CTG  | 23 | 7  |
| 32937 | 3 | 10516636 | 10516649 | 2 | 7  | 14 | CA   | 21 | 11 |
| 32938 | 3 | 10516873 | 10516890 | 3 | 6  | 18 | TCT  | 21 | 7  |
| 32943 | 3 | 10517782 | 10517803 | 2 | 11 | 22 | CT   | 9  | 6  |
| 32945 | 3 | 10518203 | 10518214 | 2 | 6  | 12 | GT   | 17 | 5  |
| 32946 | 3 | 10518216 | 10518227 | 2 | 6  | 12 | TG   | 11 | 3  |
| 32949 | 3 | 10518676 | 10518715 | 2 | 20 | 40 | AC   | 14 | 13 |
| 32951 | 3 | 10520454 | 10520471 | 3 | 6  | 18 | CTG  | 17 | 3  |



|       |   |          |          |   |    |    |      |    |    |
|-------|---|----------|----------|---|----|----|------|----|----|
| 32953 | 3 | 10522273 | 10522287 | 3 | 5  | 15 | AAC  | 20 | 7  |
| 32954 | 3 | 10523705 | 10523720 | 4 | 4  | 16 | CAGG | 27 | 3  |
| 32960 | 3 | 10546092 | 10546103 | 2 | 6  | 12 | AC   | 27 | 6  |
| 32961 | 3 | 10553426 | 10553449 | 3 | 8  | 24 | TTG  | 19 | 4  |
| 32964 | 3 | 10560729 | 10560742 | 2 | 7  | 14 | GT   | 27 | 3  |
| 32966 | 3 | 10563851 | 10563910 | 4 | 15 | 60 | ATAG | 6  | 5  |
| 32967 | 3 | 10566668 | 10566688 | 3 | 7  | 21 | CAG  | 22 | 6  |
| 32969 | 3 | 10568310 | 10568329 | 2 | 10 | 20 | TC   | 13 | 6  |
| 32973 | 3 | 10571137 | 10571152 | 2 | 8  | 16 | AC   | 20 | 4  |
| 32981 | 3 | 10584256 | 10584270 | 3 | 5  | 15 | CTG  | 23 | 4  |
| 32984 | 3 | 10589146 | 10589157 | 2 | 6  | 12 | CA   | 20 | 10 |
| 32986 | 3 | 10591284 | 10591301 | 3 | 6  | 18 | CCA  | 19 | 3  |
| 32991 | 3 | 10626216 | 10626233 | 2 | 9  | 18 | TG   | 23 | 6  |
| 32992 | 3 | 10628788 | 10628799 | 2 | 6  | 12 | AT   | 21 | 9  |
| 32999 | 3 | 10668796 | 10668815 | 4 | 5  | 20 | AAAC | 10 | 4  |
| 33004 | 3 | 10689281 | 10689312 | 2 | 16 | 32 | CA   | 20 | 15 |
| 33006 | 3 | 10696829 | 10696840 | 2 | 6  | 12 | TG   | 22 | 3  |
| 33013 | 3 | 10722112 | 10722133 | 2 | 11 | 22 | AC   | 19 | 4  |
| 33016 | 3 | 10727102 | 10727113 | 2 | 6  | 12 | GT   | 29 | 3  |
| 33017 | 3 | 10732323 | 10732334 | 2 | 6  | 12 | CT   | 15 | 7  |
| 33018 | 3 | 10732336 | 10732347 | 2 | 6  | 12 | TC   | 12 | 5  |
| 33022 | 3 | 10738405 | 10738431 | 3 | 9  | 27 | GAG  | 19 | 5  |
| 33023 | 3 | 10738722 | 10738747 | 2 | 13 | 26 | CA   | 9  | 13 |
| 33029 | 3 | 10751118 | 10751143 | 2 | 13 | 26 | CA   | 9  | 9  |
| 33030 | 3 | 10751788 | 10751811 | 4 | 6  | 24 | GAAG | 25 | 5  |
| 33033 | 3 | 10759943 | 10759956 | 2 | 7  | 14 | CT   | 33 | 3  |
| 33039 | 3 | 10772586 | 10772605 | 2 | 10 | 20 | GT   | 14 | 8  |
| 33040 | 3 | 10775337 | 10775354 | 3 | 6  | 18 | CCT  | 26 | 4  |
| 33049 | 3 | 10791118 | 10791133 | 2 | 8  | 16 | AC   | 21 | 8  |
| 33052 | 3 | 10794888 | 10794901 | 2 | 7  | 14 | CA   | 17 | 9  |
| 33053 | 3 | 10795089 | 10795100 | 2 | 6  | 12 | CT   | 15 | 6  |
| 33055 | 3 | 10797733 | 10797752 | 2 | 10 | 20 | CA   | 18 | 7  |
| 33059 | 3 | 10811713 | 10811730 | 2 | 9  | 18 | CA   | 19 | 7  |
| 33060 | 3 | 10812148 | 10812161 | 2 | 7  | 14 | AC   | 26 | 5  |
| 33064 | 3 | 10822031 | 10822045 | 3 | 5  | 15 | GCA  | 27 | 3  |
| 33065 | 3 | 10832373 | 10832412 | 4 | 10 | 40 | AAAG | 20 | 9  |
| 33068 | 3 | 10839740 | 10839755 | 2 | 8  | 16 | AG   | 29 | 4  |
| 33070 | 3 | 10842180 | 10842199 | 2 | 10 | 20 | AG   | 17 | 5  |
| 33071 | 3 | 10845441 | 10845454 | 2 | 7  | 14 | CA   | 19 | 3  |
| 33073 | 3 | 10845806 | 10845831 | 2 | 13 | 26 | TC   | 12 | 8  |
| 33074 | 3 | 10847266 | 10847295 | 3 | 10 | 30 | GAG  | 24 | 7  |
| 33076 | 3 | 10860140 | 10860159 | 2 | 10 | 20 | GA   | 26 | 9  |
| 33077 | 3 | 10863261 | 10863282 | 2 | 11 | 22 | GT   | 20 | 18 |
| 33091 | 3 | 10907168 | 10907187 | 2 | 10 | 20 | GT   | 23 | 5  |
| 33092 | 3 | 10909880 | 10909895 | 2 | 8  | 16 | AC   | 21 | 3  |
| 33094 | 3 | 10921009 | 10921026 | 2 | 9  | 18 | GA   | 9  | 4  |
| 33101 | 3 | 10937000 | 10937019 | 4 | 5  | 20 | TCTG | 28 | 4  |
| 33102 | 3 | 10947437 | 10947462 | 2 | 13 | 26 | AC   | 12 | 12 |
| 33107 | 3 | 10960611 | 10960655 | 3 | 15 | 45 | AGA  | 19 | 17 |
| 33111 | 3 | 10969224 | 10969247 | 4 | 6  | 24 | ATGG | 27 | 4  |
| 33113 | 3 | 10976728 | 10976749 | 2 | 11 | 22 | AC   | 21 | 10 |

|       |   |          |          |   |    |    |      |    |    |
|-------|---|----------|----------|---|----|----|------|----|----|
| 33115 | 3 | 10979366 | 10979380 | 3 | 5  | 15 | CTC  | 18 | 4  |
| 33116 | 3 | 10981664 | 10981701 | 2 | 19 | 38 | GT   | 6  | 8  |
| 33117 | 3 | 10981955 | 10981981 | 3 | 9  | 27 | TCC  | 22 | 8  |
| 33119 | 3 | 10983282 | 10983293 | 2 | 6  | 12 | CA   | 24 | 5  |
| 33120 | 3 | 10984136 | 10984159 | 4 | 6  | 24 | ATCC | 21 | 12 |
| 33122 | 3 | 10985485 | 10985499 | 3 | 5  | 15 | ACA  | 31 | 3  |
| 33123 | 3 | 10986149 | 10986172 | 2 | 12 | 24 | TG   | 15 | 14 |
| 33133 | 3 | 11009154 | 11009173 | 2 | 10 | 20 | CT   | 7  | 5  |
| 33136 | 3 | 11009497 | 11009514 | 2 | 9  | 18 | CT   | 18 | 3  |
| 33137 | 3 | 11009646 | 11009663 | 2 | 9  | 18 | AC   | 11 | 10 |
| 33139 | 3 | 11011204 | 11011233 | 2 | 15 | 30 | CT   | 16 | 8  |
| 33141 | 3 | 11011747 | 11011760 | 2 | 7  | 14 | AC   | 25 | 3  |
| 33143 | 3 | 11012292 | 11012305 | 2 | 7  | 14 | TC   | 15 | 4  |
| 33145 | 3 | 11012811 | 11012848 | 2 | 19 | 38 | CA   | 6  | 7  |
| 33150 | 3 | 11014110 | 11014127 | 3 | 6  | 18 | CAG  | 20 | 3  |
| 33152 | 3 | 11014564 | 11014595 | 2 | 16 | 32 | TG   | 6  | 8  |
| 33153 | 3 | 11014819 | 11014846 | 2 | 14 | 28 | CA   | 21 | 8  |
| 33160 | 3 | 11030347 | 11030360 | 2 | 7  | 14 | AC   | 28 | 5  |
| 33161 | 3 | 11031125 | 11031151 | 3 | 9  | 27 | AGA  | 6  | 3  |
| 33168 | 3 | 11061529 | 11061549 | 3 | 7  | 21 | TGA  | 14 | 5  |
| 33183 | 3 | 11104147 | 11104172 | 2 | 13 | 26 | TG   | 17 | 8  |
| 33184 | 3 | 11104399 | 11104422 | 4 | 6  | 24 | TTTA | 17 | 5  |
| 33185 | 3 | 11110071 | 11110082 | 2 | 6  | 12 | CA   | 18 | 4  |
| 33190 | 3 | 11117426 | 11117453 | 4 | 7  | 28 | TATT | 23 | 4  |
| 33195 | 3 | 11123817 | 11123838 | 2 | 11 | 22 | TG   | 21 | 13 |
| 33212 | 3 | 11158410 | 11158427 | 3 | 6  | 18 | TAG  | 18 | 3  |
| 33219 | 3 | 11168378 | 11168395 | 3 | 6  | 18 | TCC  | 24 | 4  |
| 33223 | 3 | 11175447 | 11175461 | 3 | 5  | 15 | CAA  | 30 | 4  |
| 33235 | 3 | 11200028 | 11200045 | 2 | 9  | 18 | AT   | 11 | 3  |
| 33236 | 3 | 11207647 | 11207666 | 2 | 10 | 20 | AG   | 14 | 4  |
| 33240 | 3 | 11209199 | 11209230 | 2 | 16 | 32 | AC   | 21 | 13 |
| 33241 | 3 | 11210244 | 11210269 | 2 | 13 | 26 | GA   | 18 | 7  |
| 33249 | 3 | 11231294 | 11231315 | 2 | 11 | 22 | AC   | 20 | 6  |
| 33253 | 3 | 11235568 | 11235585 | 3 | 6  | 18 | CGC  | 15 | 3  |
| 33254 | 3 | 11235766 | 11235783 | 3 | 6  | 18 | CTG  | 21 | 5  |
| 33255 | 3 | 11235850 | 11235871 | 2 | 11 | 22 | AC   | 15 | 8  |
| 33256 | 3 | 11236038 | 11236061 | 4 | 6  | 24 | GTTT | 18 | 3  |
| 33258 | 3 | 11242723 | 11242746 | 3 | 8  | 24 | TCA  | 8  | 8  |
| 33259 | 3 | 11243916 | 11243941 | 2 | 13 | 26 | CA   | 6  | 7  |
| 33273 | 3 | 11286308 | 11286323 | 4 | 4  | 16 | AATA | 27 | 3  |
| 33279 | 3 | 11307855 | 11307872 | 2 | 9  | 18 | AC   | 15 | 7  |
| 33280 | 3 | 11312728 | 11312741 | 2 | 7  | 14 | CA   | 26 | 4  |
| 33281 | 3 | 11313118 | 11313135 | 3 | 6  | 18 | CAG  | 23 | 4  |
| 33282 | 3 | 11313260 | 11313277 | 3 | 6  | 18 | CAG  | 32 | 4  |
| 33289 | 3 | 11324777 | 11324790 | 2 | 7  | 14 | AC   | 24 | 6  |
| 33290 | 3 | 11324969 | 11325004 | 3 | 12 | 36 | CTC  | 22 | 6  |
| 33291 | 3 | 11336141 | 11336158 | 2 | 9  | 18 | TG   | 27 | 3  |
| 33308 | 3 | 11379591 | 11379602 | 2 | 6  | 12 | AG   | 14 | 4  |
| 33309 | 3 | 11379605 | 11379616 | 2 | 6  | 12 | AG   | 19 | 9  |
| 33316 | 3 | 11392998 | 11393023 | 2 | 13 | 26 | AC   | 17 | 10 |
| 33322 | 3 | 11409802 | 11409829 | 4 | 7  | 28 | AGAA | 14 | 12 |

|       |   |          |          |   |    |    |      |    |    |
|-------|---|----------|----------|---|----|----|------|----|----|
| 33328 | 3 | 11419379 | 11419412 | 2 | 17 | 34 | TG   | 14 | 15 |
| 33329 | 3 | 11422923 | 11422946 | 3 | 8  | 24 | TGT  | 19 | 7  |
| 33340 | 3 | 11440385 | 11440396 | 2 | 6  | 12 | TG   | 22 | 6  |
| 33341 | 3 | 11440398 | 11440409 | 2 | 6  | 12 | GT   | 19 | 5  |
| 33352 | 3 | 11494087 | 11494100 | 2 | 7  | 14 | AC   | 30 | 4  |
| 33355 | 3 | 11498008 | 11498047 | 4 | 10 | 40 | ATCT | 20 | 10 |
| 33357 | 3 | 11507996 | 11508017 | 2 | 11 | 22 | AC   | 20 | 5  |
| 33359 | 3 | 11508705 | 11508728 | 2 | 12 | 24 | AG   | 8  | 9  |
| 33362 | 3 | 11510950 | 11510961 | 2 | 6  | 12 | CA   | 6  | 5  |
| 33364 | 3 | 11510999 | 11511019 | 3 | 7  | 21 | TCA  | 14 | 4  |
| 33370 | 3 | 11528596 | 11528609 | 2 | 7  | 14 | GT   | 33 | 4  |
| 33374 | 3 | 11536634 | 11536663 | 3 | 10 | 30 | TGG  | 7  | 3  |
| 33375 | 3 | 11537012 | 11537032 | 3 | 7  | 21 | TGC  | 31 | 6  |
| 33376 | 3 | 11541433 | 11541448 | 4 | 4  | 16 | TTTC | 17 | 5  |
| 33379 | 3 | 11542911 | 11542934 | 3 | 8  | 24 | GGT  | 25 | 5  |
| 33380 | 3 | 11544849 | 11544862 | 2 | 7  | 14 | AC   | 23 | 3  |
| 33382 | 3 | 11552578 | 11552591 | 2 | 7  | 14 | CA   | 16 | 7  |
| 33383 | 3 | 11552596 | 11552611 | 2 | 8  | 16 | CA   | 20 | 8  |
| 33388 | 3 | 11562859 | 11562874 | 4 | 4  | 16 | AAAT | 12 | 3  |
| 33398 | 3 | 11588278 | 11588303 | 2 | 13 | 26 | TG   | 16 | 8  |
| 33400 | 3 | 11603503 | 11603526 | 2 | 12 | 24 | AC   | 11 | 8  |
| 33401 | 3 | 11608185 | 11608204 | 2 | 10 | 20 | CA   | 21 | 4  |
| 33408 | 3 | 11621510 | 11621523 | 2 | 7  | 14 | AC   | 23 | 3  |
| 33422 | 3 | 11640407 | 11640430 | 2 | 12 | 24 | CA   | 8  | 8  |
| 33440 | 3 | 11706036 | 11706049 | 2 | 7  | 14 | TG   | 18 | 6  |
| 33441 | 3 | 11706673 | 11706684 | 2 | 6  | 12 | AT   | 24 | 3  |
| 33443 | 3 | 11722664 | 11722677 | 2 | 7  | 14 | TG   | 18 | 5  |
| 33444 | 3 | 11729644 | 11729667 | 2 | 12 | 24 | AC   | 23 | 14 |
| 33445 | 3 | 11729753 | 11729782 | 2 | 15 | 30 | CA   | 15 | 8  |
| 33446 | 3 | 11730267 | 11730290 | 3 | 8  | 24 | GAG  | 22 | 8  |
| 33448 | 3 | 11733772 | 11733783 | 2 | 6  | 12 | TG   | 26 | 6  |
| 33449 | 3 | 11734059 | 11734088 | 2 | 15 | 30 | CA   | 9  | 10 |
| 33451 | 3 | 11736842 | 11736871 | 2 | 15 | 30 | TG   | 10 | 7  |
| 33452 | 3 | 11737271 | 11737291 | 3 | 7  | 21 | AGA  | 25 | 3  |
| 33453 | 3 | 11738042 | 11738059 | 2 | 9  | 18 | CA   | 24 | 4  |
| 33456 | 3 | 11740785 | 11740816 | 2 | 16 | 32 | GA   | 8  | 9  |
| 33457 | 3 | 11741143 | 11741154 | 2 | 6  | 12 | GT   | 29 | 5  |
| 33459 | 3 | 11741637 | 11741650 | 2 | 7  | 14 | AC   | 21 | 6  |
| 33460 | 3 | 11741653 | 11741666 | 2 | 7  | 14 | AC   | 18 | 5  |
| 33463 | 3 | 11746280 | 11746297 | 2 | 9  | 18 | CT   | 14 | 3  |
| 33464 | 3 | 11746611 | 11746630 | 2 | 10 | 20 | GT   | 9  | 5  |
| 33473 | 3 | 11766898 | 11766939 | 2 | 21 | 42 | CA   | 17 | 12 |
| 33478 | 3 | 11787234 | 11787249 | 2 | 8  | 16 | CA   | 17 | 8  |
| 33479 | 3 | 11788396 | 11788409 | 2 | 7  | 14 | TG   | 16 | 4  |
| 33485 | 3 | 11795623 | 11795640 | 2 | 9  | 18 | TG   | 16 | 4  |
| 33487 | 3 | 11797007 | 11797034 | 2 | 14 | 28 | TG   | 12 | 4  |
| 33497 | 3 | 11809129 | 11809140 | 2 | 6  | 12 | GA   | 25 | 6  |
| 33499 | 3 | 11814481 | 11814504 | 2 | 12 | 24 | TG   | 20 | 8  |
| 33503 | 3 | 11821628 | 11821651 | 3 | 8  | 24 | GGA  | 6  | 5  |
| 33504 | 3 | 11822742 | 11822756 | 3 | 5  | 15 | AAC  | 31 | 8  |
| 33507 | 3 | 11824619 | 11824648 | 3 | 10 | 30 | CAG  | 20 | 3  |

|       |   |          |          |   |    |    |      |    |    |
|-------|---|----------|----------|---|----|----|------|----|----|
| 33516 | 3 | 11838223 | 11838242 | 2 | 10 | 20 | TG   | 18 | 3  |
| 33518 | 3 | 11838771 | 11838800 | 2 | 15 | 30 | TG   | 10 | 4  |
| 33519 | 3 | 11839191 | 11839214 | 4 | 6  | 24 | AGAC | 31 | 4  |
| 33520 | 3 | 11840068 | 11840085 | 3 | 6  | 18 | GCA  | 18 | 6  |
| 33521 | 3 | 11844127 | 11844147 | 3 | 7  | 21 | CAT  | 26 | 3  |
| 33531 | 3 | 11853794 | 11853811 | 2 | 9  | 18 | GA   | 22 | 4  |
| 33533 | 3 | 11855374 | 11855395 | 2 | 11 | 22 | GT   | 19 | 10 |
| 33534 | 3 | 11855629 | 11855654 | 2 | 13 | 26 | TG   | 15 | 5  |
| 33535 | 3 | 11858090 | 11858105 | 2 | 8  | 16 | CA   | 30 | 5  |
| 33536 | 3 | 11858211 | 11858238 | 2 | 14 | 28 | TG   | 18 | 8  |
| 33539 | 3 | 11861002 | 11861027 | 2 | 13 | 26 | TG   | 21 | 9  |
| 33542 | 3 | 11861572 | 11861591 | 2 | 10 | 20 | GT   | 18 | 9  |
| 33545 | 3 | 11864194 | 11864207 | 2 | 7  | 14 | GT   | 36 | 3  |
| 33546 | 3 | 11865339 | 11865354 | 2 | 8  | 16 | CT   | 15 | 7  |
| 33551 | 3 | 11883576 | 11883589 | 2 | 7  | 14 | CA   | 30 | 3  |
| 33552 | 3 | 11883999 | 11884022 | 2 | 12 | 24 | CA   | 18 | 15 |
| 33561 | 3 | 11899092 | 11899115 | 2 | 12 | 24 | GA   | 19 | 5  |
| 33565 | 3 | 11907440 | 11907459 | 2 | 10 | 20 | AG   | 8  | 6  |
| 33566 | 3 | 11908126 | 11908141 | 2 | 8  | 16 | AC   | 10 | 3  |
| 33571 | 3 | 11912585 | 11912608 | 3 | 8  | 24 | AGA  | 24 | 5  |
| 33574 | 3 | 11918431 | 11918442 | 2 | 6  | 12 | TG   | 18 | 4  |
| 33576 | 3 | 11923267 | 11923298 | 2 | 16 | 32 | GT   | 9  | 7  |
| 33578 | 3 | 11923438 | 11923463 | 2 | 13 | 26 | CA   | 9  | 9  |
| 33581 | 3 | 11926424 | 11926441 | 2 | 9  | 18 | CA   | 24 | 11 |
| 33582 | 3 | 11930081 | 11930094 | 2 | 7  | 14 | TG   | 20 | 4  |
| 33583 | 3 | 11932852 | 11932869 | 3 | 6  | 18 | GAA  | 29 | 3  |
| 33587 | 3 | 11934180 | 11934191 | 2 | 6  | 12 | CA   | 28 | 6  |
| 33612 | 3 | 11963869 | 11963882 | 2 | 7  | 14 | AC   | 27 | 4  |
| 33614 | 3 | 11965997 | 11966016 | 2 | 10 | 20 | CT   | 17 | 4  |
| 33621 | 3 | 11975106 | 11975129 | 2 | 12 | 24 | CA   | 17 | 10 |
| 33631 | 3 | 11991549 | 11991566 | 2 | 9  | 18 | GT   | 15 | 14 |
| 33638 | 3 | 12003881 | 12003892 | 2 | 6  | 12 | GA   | 27 | 4  |
| 33639 | 3 | 12005567 | 12005580 | 2 | 7  | 14 | TG   | 31 | 6  |
| 33651 | 3 | 12020885 | 12020908 | 3 | 8  | 24 | ACA  | 19 | 5  |
| 33657 | 3 | 12028783 | 12028800 | 3 | 6  | 18 | TTG  | 29 | 3  |
| 33669 | 3 | 12046516 | 12046531 | 2 | 8  | 16 | GT   | 17 | 10 |
| 33672 | 3 | 12050289 | 12050304 | 2 | 8  | 16 | TG   | 19 | 10 |
| 33673 | 3 | 12050483 | 12050494 | 2 | 6  | 12 | CA   | 20 | 4  |
| 33681 | 3 | 12062765 | 12062776 | 2 | 6  | 12 | GT   | 23 | 5  |
| 33684 | 3 | 12064087 | 12064100 | 2 | 7  | 14 | AC   | 21 | 5  |
| 33688 | 3 | 12078565 | 12078597 | 3 | 11 | 33 | TCC  | 10 | 6  |
| 33690 | 3 | 12099112 | 12099123 | 2 | 6  | 12 | AG   | 17 | 4  |
| 33691 | 3 | 12100444 | 12100459 | 2 | 8  | 16 | CA   | 10 | 10 |
| 33692 | 3 | 12100515 | 12100542 | 2 | 14 | 28 | AC   | 11 | 5  |
| 33698 | 3 | 12101274 | 12101313 | 2 | 20 | 40 | CT   | 8  | 8  |
| 33699 | 3 | 12101518 | 12101531 | 2 | 7  | 14 | AC   | 17 | 5  |
| 33701 | 3 | 12101555 | 12101586 | 2 | 16 | 32 | CA   | 10 | 7  |
| 33706 | 3 | 12108899 | 12108918 | 2 | 10 | 20 | CA   | 20 | 3  |
| 33710 | 3 | 12112592 | 12112603 | 2 | 6  | 12 | GA   | 27 | 3  |
| 33713 | 3 | 12116565 | 12116582 | 3 | 6  | 18 | GCT  | 22 | 5  |
| 33716 | 3 | 12122087 | 12122110 | 2 | 12 | 24 | GT   | 11 | 7  |

|       |   |          |          |   |    |    |      |    |    |
|-------|---|----------|----------|---|----|----|------|----|----|
| 33717 | 3 | 12122602 | 12122616 | 3 | 5  | 15 | CCA  | 19 | 8  |
| 33722 | 3 | 12128110 | 12128166 | 3 | 19 | 57 | GAA  | 14 | 14 |
| 33729 | 3 | 12146436 | 12146447 | 2 | 6  | 12 | GT   | 8  | 6  |
| 33730 | 3 | 12146448 | 12146467 | 2 | 10 | 20 | AT   | 6  | 7  |
| 33732 | 3 | 12149606 | 12149641 | 3 | 12 | 36 | CTT  | 12 | 3  |
| 33736 | 3 | 12171266 | 12171277 | 2 | 6  | 12 | CT   | 30 | 6  |
| 33737 | 3 | 12171297 | 12171310 | 2 | 7  | 14 | TG   | 24 | 4  |
| 33740 | 3 | 12175195 | 12175208 | 2 | 7  | 14 | CA   | 23 | 4  |
| 33744 | 3 | 12178137 | 12178152 | 2 | 8  | 16 | GT   | 25 | 5  |
| 33753 | 3 | 12201683 | 12201714 | 2 | 16 | 32 | CA   | 13 | 9  |
| 33758 | 3 | 12218398 | 12218439 | 2 | 21 | 42 | AC   | 8  | 8  |
| 33765 | 3 | 12240461 | 12240476 | 4 | 4  | 16 | AACC | 26 | 5  |
| 33767 | 3 | 12246679 | 12246692 | 2 | 7  | 14 | AT   | 20 | 6  |
| 33768 | 3 | 12248562 | 12248581 | 4 | 5  | 20 | AAAT | 15 | 3  |
| 33770 | 3 | 12254510 | 12254525 | 4 | 4  | 16 | TTTC | 13 | 7  |
| 33772 | 3 | 12254784 | 12254797 | 2 | 7  | 14 | GA   | 19 | 4  |
| 33784 | 3 | 12276913 | 12276926 | 2 | 7  | 14 | CA   | 40 | 3  |
| 33785 | 3 | 12279528 | 12279545 | 3 | 6  | 18 | GTC  | 24 | 6  |
| 33788 | 3 | 12282356 | 12282369 | 2 | 7  | 14 | AT   | 15 | 7  |
| 33789 | 3 | 12284283 | 12284298 | 2 | 8  | 16 | CA   | 20 | 4  |
| 33793 | 3 | 12291617 | 12291630 | 2 | 7  | 14 | TG   | 28 | 4  |
| 33809 | 3 | 12316843 | 12316896 | 2 | 27 | 54 | AC   | 13 | 11 |
| 33813 | 3 | 12321975 | 12321992 | 3 | 6  | 18 | AAG  | 34 | 6  |
| 33827 | 3 | 12360747 | 12360761 | 3 | 5  | 15 | GCA  | 25 | 3  |
| 33828 | 3 | 12375753 | 12375796 | 4 | 11 | 44 | TATC | 14 | 8  |
| 33830 | 3 | 12381863 | 12381878 | 2 | 8  | 16 | AC   | 26 | 3  |
| 33835 | 3 | 12384756 | 12384779 | 2 | 12 | 24 | TG   | 21 | 8  |
| 33838 | 3 | 12387787 | 12387806 | 4 | 5  | 20 | CACT | 26 | 3  |
| 33840 | 3 | 12395794 | 12395808 | 3 | 5  | 15 | AAG  | 19 | 3  |
| 33843 | 3 | 12408384 | 12408405 | 2 | 11 | 22 | TG   | 8  | 9  |
| 33846 | 3 | 12412777 | 12412804 | 2 | 14 | 28 | TG   | 17 | 5  |
| 33855 | 3 | 12427846 | 12427860 | 3 | 5  | 15 | AAC  | 24 | 4  |
| 33857 | 3 | 12429913 | 12429924 | 2 | 6  | 12 | TG   | 21 | 3  |
| 33859 | 3 | 12431915 | 12431952 | 2 | 19 | 38 | CA   | 7  | 7  |
| 33860 | 3 | 12433607 | 12433626 | 2 | 10 | 20 | GA   | 14 | 3  |
| 33886 | 3 | 12459049 | 12459087 | 3 | 13 | 39 | TAC  | 20 | 19 |
| 33890 | 3 | 12461370 | 12461391 | 2 | 11 | 22 | GA   | 17 | 15 |
| 33892 | 3 | 12461572 | 12461593 | 2 | 11 | 22 | CA   | 13 | 11 |
| 33894 | 3 | 12461716 | 12461737 | 2 | 11 | 22 | CA   | 14 | 16 |
| 33898 | 3 | 12464975 | 12464990 | 2 | 8  | 16 | TC   | 7  | 5  |
| 33901 | 3 | 12466149 | 12466162 | 2 | 7  | 14 | CA   | 17 | 8  |
| 33908 | 3 | 12482045 | 12482090 | 2 | 23 | 46 | AC   | 9  | 7  |
| 33911 | 3 | 12493902 | 12493923 | 2 | 11 | 22 | TG   | 8  | 12 |
| 33914 | 3 | 12497893 | 12497906 | 2 | 7  | 14 | AT   | 14 | 5  |
| 33917 | 3 | 12499064 | 12499081 | 2 | 9  | 18 | AC   | 7  | 8  |
| 33921 | 3 | 12502101 | 12502120 | 2 | 10 | 20 | AG   | 6  | 8  |
| 33923 | 3 | 12502451 | 12502464 | 2 | 7  | 14 | AG   | 12 | 3  |
| 33927 | 3 | 12503803 | 12503818 | 4 | 4  | 16 | AAAT | 24 | 3  |
| 33932 | 3 | 12506706 | 12506725 | 4 | 5  | 20 | GAGC | 18 | 9  |
| 33937 | 3 | 12507526 | 12507540 | 3 | 5  | 15 | GAT  | 13 | 3  |
| 33939 | 3 | 12508644 | 12508661 | 3 | 6  | 18 | CAT  | 20 | 8  |

|       |   |          |          |   |    |    |      |    |    |
|-------|---|----------|----------|---|----|----|------|----|----|
| 33940 | 3 | 12508740 | 12508751 | 2 | 6  | 12 | GT   | 21 | 3  |
| 33945 | 3 | 12513074 | 12513093 | 2 | 10 | 20 | AG   | 12 | 7  |
| 33954 | 3 | 12516719 | 12516738 | 2 | 10 | 20 | GT   | 16 | 4  |
| 33957 | 3 | 12517489 | 12517502 | 2 | 7  | 14 | CA   | 11 | 8  |
| 33961 | 3 | 12522980 | 12523005 | 2 | 13 | 26 | TG   | 6  | 3  |
| 33965 | 3 | 12524220 | 12524237 | 2 | 9  | 18 | GT   | 28 | 3  |
| 33966 | 3 | 12526259 | 12526288 | 2 | 15 | 30 | GT   | 9  | 15 |
| 33967 | 3 | 12529872 | 12529883 | 2 | 6  | 12 | GT   | 21 | 5  |
| 33968 | 3 | 12530140 | 12530157 | 2 | 9  | 18 | TG   | 12 | 4  |
| 33969 | 3 | 12534622 | 12534636 | 3 | 5  | 15 | TTC  | 23 | 6  |
| 33970 | 3 | 12536051 | 12536068 | 2 | 9  | 18 | TG   | 21 | 3  |
| 33971 | 3 | 12536115 | 12536128 | 2 | 7  | 14 | TG   | 27 | 3  |
| 33975 | 3 | 12544653 | 12544688 | 2 | 18 | 36 | TG   | 6  | 7  |
| 33979 | 3 | 12547025 | 12547040 | 2 | 8  | 16 | CA   | 14 | 4  |
| 33980 | 3 | 12547369 | 12547386 | 2 | 9  | 18 | TG   | 28 | 4  |
| 33984 | 3 | 12551645 | 12551686 | 2 | 21 | 42 | CA   | 8  | 13 |
| 33987 | 3 | 12554539 | 12554558 | 4 | 5  | 20 | TCTG | 27 | 5  |
| 33992 | 3 | 12562611 | 12562628 | 2 | 9  | 18 | AC   | 28 | 3  |
| 33993 | 3 | 12572221 | 12572272 | 2 | 26 | 52 | CA   | 12 | 9  |
| 33997 | 3 | 12576271 | 12576290 | 2 | 10 | 20 | TG   | 22 | 4  |
| 34000 | 3 | 12577997 | 12578020 | 2 | 12 | 24 | GT   | 23 | 6  |
| 34003 | 3 | 12580646 | 12580663 | 2 | 9  | 18 | TG   | 14 | 11 |
| 34008 | 3 | 12585815 | 12585850 | 2 | 18 | 36 | CA   | 11 | 9  |
| 34011 | 3 | 12591196 | 12591221 | 2 | 13 | 26 | GT   | 20 | 4  |
| 34012 | 3 | 12592953 | 12592976 | 2 | 12 | 24 | AC   | 18 | 9  |
| 34014 | 3 | 12593765 | 12593778 | 2 | 7  | 14 | GT   | 27 | 3  |
| 34017 | 3 | 12596714 | 12596725 | 2 | 6  | 12 | CA   | 15 | 4  |
| 34018 | 3 | 12596806 | 12596831 | 2 | 13 | 26 | CA   | 21 | 12 |
| 34019 | 3 | 12597087 | 12597106 | 4 | 5  | 20 | CCAT | 19 | 4  |
| 34037 | 3 | 12626944 | 12626963 | 2 | 10 | 20 | GT   | 19 | 7  |
| 34039 | 3 | 12629582 | 12629603 | 2 | 11 | 22 | CA   | 16 | 13 |
| 34040 | 3 | 12632645 | 12632666 | 2 | 11 | 22 | AC   | 15 | 6  |
| 34048 | 3 | 12640371 | 12640384 | 2 | 7  | 14 | AC   | 20 | 4  |
| 34049 | 3 | 12640947 | 12640976 | 3 | 10 | 30 | TTC  | 24 | 4  |
| 34050 | 3 | 12641127 | 12641146 | 2 | 10 | 20 | AC   | 19 | 5  |
| 34051 | 3 | 12641365 | 12641390 | 2 | 13 | 26 | CA   | 9  | 8  |
| 34056 | 3 | 12652090 | 12652101 | 2 | 6  | 12 | GT   | 25 | 4  |
| 34058 | 3 | 12653012 | 12653049 | 2 | 19 | 38 | TG   | 9  | 8  |
| 34059 | 3 | 12654225 | 12654242 | 2 | 9  | 18 | AC   | 26 | 7  |
| 34060 | 3 | 12657837 | 12657874 | 2 | 19 | 38 | GT   | 10 | 9  |
| 34062 | 3 | 12658742 | 12658761 | 2 | 10 | 20 | GT   | 20 | 7  |
| 34064 | 3 | 12661439 | 12661460 | 2 | 11 | 22 | AC   | 21 | 3  |
| 34065 | 3 | 12664119 | 12664130 | 2 | 6  | 12 | TG   | 22 | 9  |
| 34066 | 3 | 12664134 | 12664147 | 2 | 7  | 14 | GA   | 20 | 7  |
| 34067 | 3 | 12665364 | 12665375 | 2 | 6  | 12 | AT   | 11 | 4  |
| 34087 | 3 | 12693519 | 12693530 | 2 | 6  | 12 | TG   | 10 | 6  |
| 34089 | 3 | 12695683 | 12695706 | 2 | 12 | 24 | GA   | 12 | 5  |
| 34091 | 3 | 12695852 | 12695873 | 2 | 11 | 22 | TG   | 20 | 14 |
| 34092 | 3 | 12695931 | 12695952 | 2 | 11 | 22 | CA   | 18 | 12 |
| 34104 | 3 | 12707271 | 12707296 | 2 | 13 | 26 | AC   | 8  | 10 |
| 34105 | 3 | 12707547 | 12707570 | 2 | 12 | 24 | CA   | 19 | 9  |

|       |   |          |          |   |    |    |      |    |    |
|-------|---|----------|----------|---|----|----|------|----|----|
| 34107 | 3 | 12714725 | 12714752 | 2 | 14 | 28 | CA   | 16 | 13 |
| 34108 | 3 | 12734830 | 12734871 | 2 | 21 | 42 | GA   | 6  | 8  |
| 34109 | 3 | 12734983 | 12734994 | 2 | 6  | 12 | GA   | 18 | 6  |
| 34113 | 3 | 12740285 | 12740320 | 2 | 18 | 36 | GT   | 8  | 9  |
| 34118 | 3 | 12742985 | 12743028 | 2 | 22 | 44 | TG   | 18 | 7  |
| 34124 | 3 | 12747283 | 12747306 | 2 | 12 | 24 | AC   | 21 | 9  |
| 34126 | 3 | 12747635 | 12747664 | 3 | 10 | 30 | TCT  | 16 | 5  |
| 34130 | 3 | 12750797 | 12750826 | 2 | 15 | 30 | GT   | 13 | 8  |
| 34133 | 3 | 12751627 | 12751654 | 2 | 14 | 28 | GT   | 13 | 5  |
| 34144 | 3 | 12760920 | 12760945 | 2 | 13 | 26 | CA   | 22 | 7  |
| 34145 | 3 | 12763527 | 12763544 | 2 | 9  | 18 | GA   | 22 | 5  |
| 34146 | 3 | 12764146 | 12764173 | 2 | 14 | 28 | AG   | 16 | 5  |
| 34150 | 3 | 12768233 | 12768276 | 2 | 22 | 44 | CT   | 8  | 6  |
| 34151 | 3 | 12768736 | 12768755 | 2 | 10 | 20 | AC   | 11 | 3  |
| 34155 | 3 | 12772160 | 12772173 | 2 | 7  | 14 | CA   | 23 | 8  |
| 34158 | 3 | 12776368 | 12776383 | 2 | 8  | 16 | GT   | 30 | 5  |
| 34160 | 3 | 12781839 | 12781852 | 2 | 7  | 14 | CA   | 21 | 9  |
| 34163 | 3 | 12787339 | 12787356 | 2 | 9  | 18 | CA   | 17 | 6  |
| 34164 | 3 | 12787359 | 12787372 | 2 | 7  | 14 | CA   | 16 | 6  |
| 34167 | 3 | 12793593 | 12793620 | 2 | 14 | 28 | CA   | 11 | 6  |
| 34172 | 3 | 12798436 | 12798451 | 2 | 8  | 16 | TG   | 10 | 5  |
| 34179 | 3 | 12802780 | 12802807 | 2 | 14 | 28 | GT   | 9  | 9  |
| 34184 | 3 | 12804791 | 12804824 | 2 | 17 | 34 | TC   | 6  | 9  |
| 34188 | 3 | 12809483 | 12809500 | 2 | 9  | 18 | GA   | 19 | 6  |
| 34189 | 3 | 12811198 | 12811209 | 2 | 6  | 12 | GT   | 17 | 7  |
| 34190 | 3 | 12811211 | 12811224 | 2 | 7  | 14 | TG   | 25 | 11 |
| 34200 | 3 | 12826917 | 12826932 | 4 | 4  | 16 | AAAT | 30 | 4  |
| 34202 | 3 | 12835179 | 12835208 | 2 | 15 | 30 | AC   | 24 | 13 |
| 34206 | 3 | 12839386 | 12839415 | 2 | 15 | 30 | CA   | 12 | 7  |
| 34209 | 3 | 12840285 | 12840300 | 2 | 8  | 16 | AC   | 23 | 4  |
| 34210 | 3 | 12841280 | 12841295 | 2 | 8  | 16 | AC   | 18 | 4  |
| 34213 | 3 | 12846965 | 12846976 | 2 | 6  | 12 | AC   | 14 | 14 |
| 34214 | 3 | 12846979 | 12846994 | 2 | 8  | 16 | AC   | 16 | 13 |
| 34222 | 3 | 12861616 | 12861645 | 2 | 15 | 30 | CA   | 8  | 10 |
| 34224 | 3 | 12863011 | 12863026 | 2 | 8  | 16 | TC   | 13 | 3  |
| 34225 | 3 | 12863228 | 12863247 | 2 | 10 | 20 | GT   | 24 | 9  |
| 34227 | 3 | 12863460 | 12863483 | 2 | 12 | 24 | AG   | 26 | 6  |
| 34230 | 3 | 12864146 | 12864163 | 2 | 9  | 18 | GT   | 25 | 9  |
| 34233 | 3 | 12869611 | 12869636 | 2 | 13 | 26 | TG   | 10 | 12 |
| 34235 | 3 | 12871721 | 12871740 | 4 | 5  | 20 | AAAT | 8  | 5  |
| 34238 | 3 | 12872212 | 12872223 | 2 | 6  | 12 | AC   | 20 | 4  |
| 34248 | 3 | 12879473 | 12879492 | 2 | 10 | 20 | TG   | 26 | 6  |
| 34252 | 3 | 12883568 | 12883611 | 2 | 22 | 44 | TG   | 12 | 13 |
| 34256 | 3 | 12883824 | 12883838 | 3 | 5  | 15 | GAG  | 17 | 8  |
| 34257 | 3 | 12884034 | 12884073 | 2 | 20 | 40 | CA   | 15 | 17 |
| 34260 | 3 | 12886738 | 12886771 | 2 | 17 | 34 | AC   | 14 | 7  |
| 34268 | 3 | 12891399 | 12891412 | 2 | 7  | 14 | CA   | 29 | 6  |
| 34269 | 3 | 12891786 | 12891823 | 2 | 19 | 38 | TG   | 10 | 7  |
| 34270 | 3 | 12892677 | 12892696 | 2 | 10 | 20 | AC   | 14 | 4  |
| 34273 | 3 | 12894191 | 12894212 | 2 | 11 | 22 | GT   | 16 | 9  |
| 34277 | 3 | 12906901 | 12906915 | 3 | 5  | 15 | ATT  | 8  | 3  |

|       |   |          |          |   |    |    |      |    |    |
|-------|---|----------|----------|---|----|----|------|----|----|
| 34288 | 3 | 12925151 | 12925168 | 2 | 9  | 18 | GT   | 17 | 8  |
| 34290 | 3 | 12928590 | 12928619 | 2 | 15 | 30 | TG   | 21 | 9  |
| 34291 | 3 | 12930735 | 12930780 | 2 | 23 | 46 | TG   | 6  | 7  |
| 34292 | 3 | 12933229 | 12933242 | 2 | 7  | 14 | CA   | 24 | 4  |
| 34293 | 3 | 12935347 | 12935374 | 2 | 14 | 28 | CA   | 18 | 14 |
| 34300 | 3 | 12945476 | 12945491 | 2 | 8  | 16 | AC   | 22 | 13 |
| 34307 | 3 | 12956141 | 12956162 | 2 | 11 | 22 | GT   | 17 | 6  |
| 34309 | 3 | 12961736 | 12961749 | 2 | 7  | 14 | TA   | 7  | 3  |
| 34312 | 3 | 12963741 | 12963760 | 4 | 5  | 20 | TTTA | 30 | 17 |
| 34314 | 3 | 12979036 | 12979051 | 4 | 4  | 16 | AAAT | 19 | 3  |
| 34319 | 3 | 12997815 | 12997838 | 4 | 6  | 24 | TCCA | 15 | 3  |
| 34325 | 3 | 13002860 | 13002873 | 2 | 7  | 14 | AT   | 18 | 3  |
| 34326 | 3 | 13006659 | 13006676 | 2 | 9  | 18 | AC   | 18 | 14 |
| 34328 | 3 | 13015052 | 13015067 | 4 | 4  | 16 | AACA | 24 | 3  |
| 34329 | 3 | 13016567 | 13016586 | 4 | 5  | 20 | AAAT | 32 | 6  |
| 34332 | 3 | 13018263 | 13018280 | 3 | 6  | 18 | ATA  | 14 | 9  |
| 34335 | 3 | 13019409 | 13019423 | 3 | 5  | 15 | AAG  | 27 | 9  |
| 34337 | 3 | 13020605 | 13020622 | 3 | 6  | 18 | AGA  | 27 | 13 |
| 34341 | 3 | 13021114 | 13021125 | 2 | 6  | 12 | TC   | 21 | 3  |
| 34342 | 3 | 13021170 | 13021199 | 2 | 15 | 30 | TG   | 22 | 19 |
| 34343 | 3 | 13023866 | 13023880 | 3 | 5  | 15 | GCT  | 26 | 6  |
| 34344 | 3 | 13031988 | 13032003 | 2 | 8  | 16 | TG   | 16 | 4  |
| 34347 | 3 | 13032314 | 13032325 | 2 | 6  | 12 | AC   | 18 | 13 |
| 34352 | 3 | 13040458 | 13040481 | 2 | 12 | 24 | TC   | 12 | 7  |
| 34358 | 3 | 13047975 | 13047988 | 2 | 7  | 14 | CA   | 25 | 4  |
| 34359 | 3 | 13049283 | 13049318 | 2 | 18 | 36 | TG   | 21 | 13 |
| 34363 | 3 | 13051755 | 13051769 | 3 | 5  | 15 | CTC  | 23 | 3  |
| 34367 | 3 | 13061972 | 13062003 | 2 | 16 | 32 | TG   | 24 | 13 |
| 34368 | 3 | 13062980 | 13062993 | 2 | 7  | 14 | TA   | 11 | 5  |
| 34370 | 3 | 13064374 | 13064399 | 2 | 13 | 26 | CA   | 7  | 3  |
| 34371 | 3 | 13065902 | 13065939 | 2 | 19 | 38 | CA   | 11 | 10 |
| 34374 | 3 | 13069250 | 13069261 | 2 | 6  | 12 | GT   | 12 | 3  |
| 34380 | 3 | 13083127 | 13083162 | 4 | 9  | 36 | ATCT | 19 | 9  |
| 34394 | 3 | 13118400 | 13118417 | 3 | 6  | 18 | AGG  | 31 | 3  |
| 34399 | 3 | 13122810 | 13122849 | 2 | 20 | 40 | CA   | 15 | 16 |
| 34400 | 3 | 13122992 | 13123019 | 2 | 14 | 28 | GA   | 15 | 7  |
| 34403 | 3 | 13123594 | 13123653 | 3 | 20 | 60 | TCT  | 21 | 15 |
| 34404 | 3 | 13124168 | 13124193 | 2 | 13 | 26 | AG   | 19 | 6  |
| 34406 | 3 | 13131889 | 13131900 | 2 | 6  | 12 | GT   | 25 | 4  |
| 34409 | 3 | 13132985 | 13133020 | 3 | 12 | 36 | GAG  | 11 | 8  |
| 34412 | 3 | 13134468 | 13134479 | 2 | 6  | 12 | CA   | 8  | 3  |
| 34418 | 3 | 13144059 | 13144090 | 2 | 16 | 32 | CT   | 17 | 13 |
| 34420 | 3 | 13144892 | 13144911 | 4 | 5  | 20 | CCTG | 25 | 3  |
| 34421 | 3 | 13145392 | 13145405 | 2 | 7  | 14 | TG   | 10 | 3  |
| 34435 | 3 | 13155445 | 13155468 | 3 | 8  | 24 | TGA  | 27 | 3  |
| 34437 | 3 | 13156116 | 13156129 | 2 | 7  | 14 | TG   | 15 | 11 |
| 34442 | 3 | 13157704 | 13157721 | 2 | 9  | 18 | TG   | 10 | 10 |
| 34444 | 3 | 13157882 | 13157895 | 2 | 7  | 14 | GT   | 19 | 3  |
| 34449 | 3 | 13161126 | 13161157 | 2 | 16 | 32 | AC   | 16 | 6  |
| 34451 | 3 | 13161403 | 13161424 | 2 | 11 | 22 | TG   | 15 | 12 |
| 34453 | 3 | 13161905 | 13161928 | 2 | 12 | 24 | CA   | 16 | 12 |



|       |   |          |          |   |    |    |      |    |    |
|-------|---|----------|----------|---|----|----|------|----|----|
| 34454 | 3 | 13163390 | 13163409 | 2 | 10 | 20 | AC   | 21 | 11 |
| 34456 | 3 | 13164049 | 13164068 | 2 | 10 | 20 | TG   | 13 | 8  |
| 34461 | 3 | 13167756 | 13167769 | 2 | 7  | 14 | GT   | 19 | 4  |
| 34462 | 3 | 13167770 | 13167781 | 2 | 6  | 12 | GA   | 17 | 4  |
| 34465 | 3 | 13169776 | 13169791 | 4 | 4  | 16 | ATTT | 17 | 6  |
| 34467 | 3 | 13170145 | 13170166 | 2 | 11 | 22 | TG   | 12 | 5  |
| 34468 | 3 | 13170269 | 13170310 | 2 | 21 | 42 | AC   | 10 | 7  |
| 34478 | 3 | 13171471 | 13171488 | 2 | 9  | 18 | TG   | 12 | 12 |
| 34480 | 3 | 13171691 | 13171732 | 2 | 21 | 42 | TC   | 8  | 10 |
| 34483 | 3 | 13172171 | 13172186 | 2 | 8  | 16 | TC   | 23 | 8  |
| 34489 | 3 | 13177874 | 13177891 | 3 | 6  | 18 | CCT  | 26 | 4  |
| 34502 | 3 | 13217322 | 13217345 | 2 | 12 | 24 | AC   | 10 | 6  |
| 34504 | 3 | 13226630 | 13226641 | 2 | 6  | 12 | CA   | 13 | 4  |
| 34508 | 3 | 13230106 | 13230123 | 2 | 9  | 18 | GT   | 20 | 3  |
| 34511 | 3 | 13233927 | 13233940 | 2 | 7  | 14 | CA   | 18 | 3  |
| 34513 | 3 | 13236925 | 13236940 | 4 | 4  | 16 | TGCG | 14 | 5  |
| 34514 | 3 | 13237224 | 13237267 | 2 | 22 | 44 | GT   | 8  | 9  |
| 34527 | 3 | 13259443 | 13259474 | 2 | 16 | 32 | TG   | 12 | 10 |
| 34528 | 3 | 13260653 | 13260682 | 3 | 10 | 30 | GGA  | 21 | 4  |
| 34529 | 3 | 13268517 | 13268540 | 2 | 12 | 24 | TG   | 18 | 8  |
| 34531 | 3 | 13270960 | 13270989 | 2 | 15 | 30 | TG   | 10 | 7  |
| 34532 | 3 | 13275707 | 13275746 | 2 | 20 | 40 | CA   | 9  | 10 |
| 34534 | 3 | 13280495 | 13280506 | 2 | 6  | 12 | TG   | 18 | 3  |
| 34569 | 3 | 13317495 | 13317514 | 2 | 10 | 20 | TG   | 22 | 5  |
| 34570 | 3 | 13323233 | 13323252 | 2 | 10 | 20 | AC   | 26 | 5  |
| 34572 | 3 | 13325255 | 13325274 | 2 | 10 | 20 | TG   | 11 | 11 |
| 34575 | 3 | 13325895 | 13325910 | 2 | 8  | 16 | GT   | 22 | 7  |
| 34578 | 3 | 13328791 | 13328818 | 2 | 14 | 28 | GT   | 15 | 9  |
| 34579 | 3 | 13328901 | 13328916 | 2 | 8  | 16 | CA   | 25 | 5  |
| 34580 | 3 | 13329051 | 13329076 | 2 | 13 | 26 | TC   | 6  | 9  |
| 34583 | 3 | 13333167 | 13333178 | 2 | 6  | 12 | GT   | 24 | 7  |
| 34591 | 3 | 13353979 | 13354004 | 2 | 13 | 26 | TG   | 9  | 7  |
| 34592 | 3 | 13356236 | 13356279 | 2 | 22 | 44 | CA   | 7  | 7  |
| 34593 | 3 | 13356792 | 13356805 | 2 | 7  | 14 | AG   | 23 | 3  |
| 34595 | 3 | 13358592 | 13358629 | 2 | 19 | 38 | CA   | 8  | 11 |
| 34597 | 3 | 13363211 | 13363238 | 2 | 14 | 28 | CA   | 16 | 7  |
| 34599 | 3 | 13364560 | 13364571 | 2 | 6  | 12 | GT   | 8  | 9  |
| 34600 | 3 | 13364573 | 13364588 | 2 | 8  | 16 | TG   | 7  | 8  |
| 34604 | 3 | 13375222 | 13375259 | 2 | 19 | 38 | TG   | 15 | 13 |
| 34605 | 3 | 13376043 | 13376064 | 2 | 11 | 22 | GT   | 12 | 3  |
| 34606 | 3 | 13378420 | 13378443 | 3 | 8  | 24 | TCC  | 10 | 3  |
| 34607 | 3 | 13379080 | 13379095 | 2 | 8  | 16 | TG   | 22 | 5  |
| 34613 | 3 | 13388131 | 13388146 | 4 | 4  | 16 | TGTT | 28 | 3  |
| 34626 | 3 | 13411394 | 13411415 | 2 | 11 | 22 | TG   | 23 | 6  |
| 34639 | 3 | 13430160 | 13430187 | 2 | 14 | 28 | GT   | 12 | 6  |
| 34642 | 3 | 13442943 | 13442958 | 2 | 8  | 16 | AC   | 20 | 5  |
| 34651 | 3 | 13460229 | 13460248 | 2 | 10 | 20 | GT   | 11 | 4  |
| 34657 | 3 | 13461659 | 13461682 | 4 | 6  | 24 | TTTG | 31 | 3  |
| 34659 | 3 | 13466468 | 13466485 | 2 | 9  | 18 | CA   | 24 | 4  |
| 34663 | 3 | 13469265 | 13469280 | 4 | 4  | 16 | TTCT | 23 | 5  |
| 34667 | 3 | 13471327 | 13471340 | 2 | 7  | 14 | GT   | 20 | 8  |

|       |   |          |          |   |    |    |      |    |    |
|-------|---|----------|----------|---|----|----|------|----|----|
| 34686 | 3 | 13506244 | 13506259 | 2 | 8  | 16 | GT   | 18 | 8  |
| 34690 | 3 | 13507103 | 13507126 | 2 | 12 | 24 | GT   | 12 | 6  |
| 34691 | 3 | 13509063 | 13509086 | 2 | 12 | 24 | AC   | 24 | 6  |
| 34693 | 3 | 13510833 | 13510846 | 2 | 7  | 14 | GT   | 11 | 3  |
| 34704 | 3 | 13526481 | 13526496 | 2 | 8  | 16 | TG   | 16 | 4  |
| 34710 | 3 | 13536049 | 13536080 | 4 | 8  | 32 | AAAG | 21 | 6  |
| 34719 | 3 | 13545581 | 13545606 | 2 | 13 | 26 | TG   | 16 | 4  |
| 34722 | 3 | 13554118 | 13554145 | 2 | 14 | 28 | TG   | 12 | 14 |
| 34725 | 3 | 13558642 | 13558659 | 2 | 9  | 18 | GT   | 22 | 3  |
| 34729 | 3 | 13569572 | 13569583 | 2 | 6  | 12 | AC   | 14 | 5  |
| 34730 | 3 | 13569586 | 13569599 | 2 | 7  | 14 | AC   | 17 | 7  |
| 34731 | 3 | 13569852 | 13569863 | 2 | 6  | 12 | TC   | 29 | 5  |
| 34736 | 3 | 13579396 | 13579419 | 2 | 12 | 24 | GT   | 13 | 4  |
| 34739 | 3 | 13584098 | 13584119 | 2 | 11 | 22 | TC   | 22 | 4  |
| 34761 | 3 | 13613557 | 13613574 | 3 | 6  | 18 | AAC  | 18 | 5  |
| 34764 | 3 | 13618325 | 13618340 | 2 | 8  | 16 | CA   | 16 | 6  |
| 34765 | 3 | 13622112 | 13622141 | 2 | 15 | 30 | CA   | 12 | 11 |
| 34767 | 3 | 13634132 | 13634157 | 2 | 13 | 26 | GT   | 22 | 8  |
| 34772 | 3 | 13637567 | 13637584 | 2 | 9  | 18 | CA   | 19 | 4  |
| 34786 | 3 | 13654426 | 13654461 | 2 | 18 | 36 | GT   | 11 | 10 |
| 34787 | 3 | 13654858 | 13654879 | 2 | 11 | 22 | CA   | 18 | 8  |
| 34788 | 3 | 13655053 | 13655068 | 2 | 8  | 16 | TG   | 15 | 6  |
| 34789 | 3 | 13657642 | 13657667 | 2 | 13 | 26 | TG   | 17 | 6  |
| 34793 | 3 | 13667952 | 13667969 | 3 | 6  | 18 | ATT  | 22 | 3  |
| 34794 | 3 | 13670292 | 13670306 | 3 | 5  | 15 | TGC  | 29 | 3  |
| 34797 | 3 | 13678861 | 13678908 | 4 | 12 | 48 | GAAA | 20 | 9  |
| 34815 | 3 | 13699692 | 13699713 | 2 | 11 | 22 | GT   | 18 | 8  |
| 34817 | 3 | 13704287 | 13704300 | 2 | 7  | 14 | TG   | 20 | 4  |
| 34852 | 3 | 13818685 | 13818704 | 4 | 5  | 20 | AAAC | 18 | 4  |
| 34868 | 3 | 13844171 | 13844192 | 2 | 11 | 22 | AC   | 17 | 6  |
| 34875 | 3 | 13859671 | 13859682 | 2 | 6  | 12 | AT   | 24 | 8  |
| 34889 | 3 | 13876799 | 13876818 | 2 | 10 | 20 | TG   | 17 | 13 |
| 34901 | 3 | 13911329 | 13911348 | 2 | 10 | 20 | GT   | 9  | 10 |
| 34903 | 3 | 13911749 | 13911762 | 2 | 7  | 14 | TG   | 23 | 7  |
| 34906 | 3 | 13915388 | 13915405 | 2 | 9  | 18 | AC   | 21 | 6  |
| 34910 | 3 | 13932333 | 13932348 | 4 | 4  | 16 | GCAG | 22 | 3  |
| 34915 | 3 | 13935254 | 13935269 | 2 | 8  | 16 | TG   | 12 | 4  |
| 34917 | 3 | 13937166 | 13937186 | 3 | 7  | 21 | CTC  | 26 | 11 |
| 34921 | 3 | 13938765 | 13938779 | 3 | 5  | 15 | CCT  | 16 | 3  |
| 34924 | 3 | 13945815 | 13945854 | 2 | 20 | 40 | TC   | 12 | 11 |
| 34940 | 3 | 13972008 | 13972033 | 2 | 13 | 26 | AC   | 26 | 9  |
| 34953 | 3 | 14000604 | 14000623 | 2 | 10 | 20 | AC   | 28 | 4  |
| 34961 | 3 | 14043701 | 14043712 | 2 | 6  | 12 | AC   | 29 | 3  |
| 34963 | 3 | 14047504 | 14047537 | 2 | 17 | 34 | TG   | 12 | 7  |
| 34970 | 3 | 14061424 | 14061439 | 2 | 8  | 16 | CA   | 19 | 3  |
| 35002 | 3 | 14151116 | 14151131 | 4 | 4  | 16 | TATT | 19 | 7  |
| 35003 | 3 | 14152293 | 14152322 | 2 | 15 | 30 | GT   | 22 | 11 |
| 35007 | 3 | 14169700 | 14169726 | 3 | 9  | 27 | TAA  | 17 | 6  |
| 35018 | 3 | 14195786 | 14195797 | 2 | 6  | 12 | CA   | 13 | 4  |
| 35021 | 3 | 14200061 | 14200080 | 4 | 5  | 20 | AAAT | 23 | 3  |
| 35033 | 3 | 14226552 | 14226603 | 2 | 26 | 52 | AG   | 12 | 12 |

|       |   |          |          |   |    |    |      |    |    |
|-------|---|----------|----------|---|----|----|------|----|----|
| 35059 | 3 | 14292588 | 14292611 | 2 | 12 | 24 | GT   | 14 | 11 |
| 35061 | 3 | 14293585 | 14293604 | 4 | 5  | 20 | AAAT | 31 | 3  |
| 35063 | 3 | 14304350 | 14304363 | 2 | 7  | 14 | AG   | 24 | 4  |
| 35065 | 3 | 14306861 | 14306888 | 2 | 14 | 28 | AC   | 21 | 16 |
| 35074 | 3 | 14328480 | 14328527 | 2 | 24 | 48 | CA   | 15 | 10 |
| 35082 | 3 | 14346497 | 14346510 | 2 | 7  | 14 | GT   | 20 | 7  |
| 35084 | 3 | 14348821 | 14348836 | 2 | 8  | 16 | AT   | 7  | 7  |
| 35095 | 3 | 14360904 | 14360939 | 4 | 9  | 36 | ACAG | 21 | 4  |
| 35097 | 3 | 14365451 | 14365466 | 2 | 8  | 16 | CA   | 10 | 3  |
| 35103 | 3 | 14376552 | 14376567 | 2 | 8  | 16 | CA   | 25 | 3  |
| 35104 | 3 | 14376747 | 14376758 | 2 | 6  | 12 | TG   | 23 | 10 |
| 35110 | 3 | 14397253 | 14397284 | 2 | 16 | 32 | AC   | 17 | 8  |
| 35112 | 3 | 14409300 | 14409315 | 2 | 8  | 16 | AT   | 22 | 3  |
| 35116 | 3 | 14421121 | 14421147 | 3 | 9  | 27 | ATT  | 22 | 4  |
| 35118 | 3 | 14429092 | 14429111 | 4 | 5  | 20 | TGGT | 22 | 4  |
| 35126 | 3 | 14448168 | 14448188 | 3 | 7  | 21 | AAC  | 22 | 4  |
| 35129 | 3 | 14457889 | 14457906 | 2 | 9  | 18 | AC   | 21 | 10 |
| 35138 | 3 | 14475150 | 14475165 | 2 | 8  | 16 | CT   | 19 | 3  |
| 35140 | 3 | 14475929 | 14475944 | 2 | 8  | 16 | AG   | 22 | 3  |
| 35145 | 3 | 14502167 | 14502182 | 4 | 4  | 16 | CCTG | 19 | 4  |
| 35158 | 3 | 14534301 | 14534322 | 2 | 11 | 22 | AC   | 10 | 4  |
| 35159 | 3 | 14535105 | 14535116 | 2 | 6  | 12 | AG   | 30 | 3  |
| 35161 | 3 | 14539269 | 14539288 | 2 | 10 | 20 | AC   | 14 | 8  |
| 35168 | 3 | 14544376 | 14544407 | 2 | 16 | 32 | GT   | 13 | 15 |
| 35170 | 3 | 14546209 | 14546224 | 4 | 4  | 16 | TATT | 13 | 4  |
| 35174 | 3 | 14548353 | 14548378 | 2 | 13 | 26 | AC   | 17 | 9  |
| 35177 | 3 | 14555110 | 14555136 | 3 | 9  | 27 | ATG  | 26 | 6  |
| 35178 | 3 | 14555768 | 14555791 | 2 | 12 | 24 | TG   | 16 | 10 |
| 35181 | 3 | 14559445 | 14559472 | 2 | 14 | 28 | TG   | 6  | 7  |
| 35182 | 3 | 14563090 | 14563109 | 2 | 10 | 20 | TG   | 10 | 6  |
| 35186 | 3 | 14566892 | 14566911 | 2 | 10 | 20 | AC   | 17 | 8  |
| 35198 | 3 | 14578850 | 14578863 | 2 | 7  | 14 | GT   | 8  | 4  |
| 35200 | 3 | 14589816 | 14589835 | 2 | 10 | 20 | GT   | 16 | 17 |
| 35201 | 3 | 14590005 | 14590020 | 4 | 4  | 16 | AAAT | 28 | 12 |
| 35203 | 3 | 14592649 | 14592666 | 2 | 9  | 18 | TG   | 18 | 3  |
| 35217 | 3 | 14610064 | 14610075 | 2 | 6  | 12 | TG   | 16 | 12 |
| 35230 | 3 | 14624738 | 14624752 | 3 | 5  | 15 | AAC  | 14 | 4  |
| 35237 | 3 | 14625951 | 14625983 | 3 | 11 | 33 | TCT  | 16 | 7  |
| 35239 | 3 | 14626678 | 14626691 | 2 | 7  | 14 | GT   | 23 | 3  |
| 35240 | 3 | 14627165 | 14627196 | 2 | 16 | 32 | TG   | 7  | 6  |
| 35241 | 3 | 14629437 | 14629474 | 2 | 19 | 38 | TC   | 17 | 7  |
| 35242 | 3 | 14629621 | 14629634 | 2 | 7  | 14 | TC   | 14 | 3  |
| 35243 | 3 | 14629639 | 14629650 | 2 | 6  | 12 | TC   | 8  | 3  |
| 35244 | 3 | 14629760 | 14629785 | 2 | 13 | 26 | TG   | 10 | 6  |
| 35250 | 3 | 14642869 | 14642882 | 2 | 7  | 14 | TG   | 24 | 3  |
| 35253 | 3 | 14643262 | 14643289 | 2 | 14 | 28 | AC   | 17 | 8  |
| 35257 | 3 | 14645276 | 14645291 | 2 | 8  | 16 | CT   | 23 | 4  |
| 35259 | 3 | 14645907 | 14645927 | 3 | 7  | 21 | AGA  | 18 | 5  |
| 35260 | 3 | 14646092 | 14646112 | 3 | 7  | 21 | CTG  | 19 | 4  |
| 35267 | 3 | 14647381 | 14647398 | 3 | 6  | 18 | TTC  | 19 | 8  |
| 35270 | 3 | 14650481 | 14650512 | 2 | 16 | 32 | CA   | 20 | 7  |

|       |   |          |          |   |    |    |      |    |    |
|-------|---|----------|----------|---|----|----|------|----|----|
| 35271 | 3 | 14650669 | 14650680 | 2 | 6  | 12 | TG   | 20 | 4  |
| 35274 | 3 | 14655299 | 14655326 | 2 | 14 | 28 | CA   | 24 | 5  |
| 35286 | 3 | 14676328 | 14676345 | 2 | 9  | 18 | TG   | 21 | 8  |
| 35291 | 3 | 14693620 | 14693635 | 2 | 8  | 16 | TG   | 21 | 6  |
| 35294 | 3 | 14701360 | 14701371 | 2 | 6  | 12 | GA   | 33 | 3  |
| 35300 | 3 | 14706806 | 14706833 | 2 | 14 | 28 | AC   | 13 | 8  |
| 35301 | 3 | 14707144 | 14707173 | 2 | 15 | 30 | CA   | 22 | 7  |
| 35303 | 3 | 14711131 | 14711152 | 2 | 11 | 22 | GT   | 11 | 5  |
| 35311 | 3 | 14719506 | 14719523 | 2 | 9  | 18 | AG   | 19 | 6  |
| 35313 | 3 | 14721340 | 14721363 | 3 | 8  | 24 | CTG  | 26 | 3  |
| 35314 | 3 | 14722003 | 14722017 | 3 | 5  | 15 | GGA  | 25 | 4  |
| 35316 | 3 | 14723511 | 14723524 | 2 | 7  | 14 | GT   | 16 | 4  |
| 35317 | 3 | 14723526 | 14723537 | 2 | 6  | 12 | TG   | 18 | 5  |
| 35337 | 3 | 14780470 | 14780487 | 3 | 6  | 18 | TGT  | 31 | 4  |
| 35342 | 3 | 14787620 | 14787643 | 2 | 12 | 24 | CA   | 10 | 16 |
| 35343 | 3 | 14789797 | 14789812 | 2 | 8  | 16 | AC   | 14 | 5  |
| 35345 | 3 | 14790199 | 14790210 | 2 | 6  | 12 | AC   | 19 | 3  |
| 35346 | 3 | 14796725 | 14796758 | 2 | 17 | 34 | TG   | 18 | 8  |
| 35349 | 3 | 14797079 | 14797112 | 2 | 17 | 34 | AC   | 6  | 7  |
| 35357 | 3 | 14813365 | 14813382 | 2 | 9  | 18 | CT   | 18 | 6  |
| 35358 | 3 | 14813527 | 14813558 | 2 | 16 | 32 | TG   | 8  | 10 |
| 35360 | 3 | 14816520 | 14816533 | 2 | 7  | 14 | GT   | 19 | 8  |
| 35361 | 3 | 14816536 | 14816547 | 2 | 6  | 12 | GT   | 22 | 11 |
| 35364 | 3 | 14817255 | 14817292 | 2 | 19 | 38 | CA   | 6  | 9  |
| 35366 | 3 | 14819543 | 14819610 | 2 | 34 | 68 | CA   | 11 | 11 |
| 35370 | 3 | 14821500 | 14821523 | 2 | 12 | 24 | GT   | 13 | 5  |
| 35372 | 3 | 14822317 | 14822332 | 2 | 8  | 16 | AC   | 26 | 4  |
| 35374 | 3 | 14824209 | 14824224 | 4 | 4  | 16 | TCTT | 14 | 6  |
| 35376 | 3 | 14824839 | 14824872 | 2 | 17 | 34 | GT   | 11 | 9  |
| 35377 | 3 | 14824970 | 14824997 | 2 | 14 | 28 | AC   | 13 | 11 |
| 35378 | 3 | 14827060 | 14827093 | 2 | 17 | 34 | AC   | 15 | 18 |
| 35379 | 3 | 14829066 | 14829081 | 2 | 8  | 16 | CA   | 20 | 10 |
| 35380 | 3 | 14829850 | 14829877 | 2 | 14 | 28 | CA   | 15 | 8  |
| 35382 | 3 | 14831700 | 14831717 | 3 | 6  | 18 | GAG  | 25 | 4  |
| 35384 | 3 | 14836358 | 14836425 | 2 | 34 | 68 | AC   | 14 | 12 |
| 35387 | 3 | 14840418 | 14840447 | 2 | 15 | 30 | AC   | 6  | 6  |
| 35391 | 3 | 14848177 | 14848203 | 3 | 9  | 27 | AAC  | 22 | 12 |
| 35393 | 3 | 14851867 | 14851878 | 2 | 6  | 12 | GT   | 26 | 3  |
| 35397 | 3 | 14863287 | 14863302 | 2 | 8  | 16 | TG   | 23 | 5  |
| 35399 | 3 | 14863515 | 14863530 | 2 | 8  | 16 | AC   | 12 | 5  |
| 35400 | 3 | 14864290 | 14864309 | 2 | 10 | 20 | CA   | 18 | 7  |
| 35401 | 3 | 14866708 | 14866725 | 3 | 6  | 18 | CCT  | 25 | 4  |
| 35403 | 3 | 14867464 | 14867487 | 2 | 12 | 24 | AC   | 17 | 7  |
| 35407 | 3 | 14874042 | 14874055 | 2 | 7  | 14 | TG   | 21 | 4  |
| 35408 | 3 | 14875552 | 14875565 | 2 | 7  | 14 | CA   | 30 | 5  |
| 35420 | 3 | 14890503 | 14890520 | 2 | 9  | 18 | GA   | 26 | 4  |
| 35421 | 3 | 14893342 | 14893355 | 2 | 7  | 14 | GT   | 30 | 3  |
| 35426 | 3 | 14896069 | 14896084 | 2 | 8  | 16 | GT   | 11 | 3  |
| 35434 | 3 | 14900805 | 14900816 | 2 | 6  | 12 | AC   | 9  | 3  |
| 35437 | 3 | 14903759 | 14903779 | 3 | 7  | 21 | ATA  | 9  | 4  |
| 35438 | 3 | 14904525 | 14904545 | 3 | 7  | 21 | GAA  | 27 | 4  |

|       |   |          |          |   |    |    |      |    |    |
|-------|---|----------|----------|---|----|----|------|----|----|
| 35439 | 3 | 14904860 | 14904871 | 2 | 6  | 12 | AC   | 20 | 6  |
| 35446 | 3 | 14919153 | 14919204 | 4 | 13 | 52 | ATCT | 9  | 13 |
| 35447 | 3 | 14919314 | 14919335 | 2 | 11 | 22 | TA   | 11 | 6  |
| 35449 | 3 | 14920014 | 14920028 | 3 | 5  | 15 | GAA  | 22 | 5  |
| 35450 | 3 | 14920146 | 14920173 | 4 | 7  | 28 | GCCT | 20 | 4  |
| 35453 | 3 | 14920600 | 14920627 | 2 | 14 | 28 | AC   | 18 | 14 |
| 35457 | 3 | 14921137 | 14921163 | 3 | 9  | 27 | CTT  | 14 | 8  |
| 35461 | 3 | 14921627 | 14921640 | 2 | 7  | 14 | GA   | 12 | 13 |
| 35462 | 3 | 14921983 | 14921998 | 2 | 8  | 16 | TG   | 18 | 3  |
| 35470 | 3 | 14926817 | 14926854 | 2 | 19 | 38 | GA   | 13 | 11 |
| 35487 | 3 | 14979986 | 14980009 | 3 | 8  | 24 | CTG  | 16 | 3  |
| 35488 | 3 | 14980126 | 14980147 | 2 | 11 | 22 | AG   | 10 | 8  |
| 35490 | 3 | 14984440 | 14984489 | 2 | 25 | 50 | CA   | 6  | 5  |
| 35508 | 3 | 15021362 | 15021377 | 2 | 8  | 16 | GT   | 17 | 4  |
| 35513 | 3 | 15033751 | 15033780 | 2 | 15 | 30 | GT   | 14 | 10 |
| 35514 | 3 | 15035278 | 15035301 | 2 | 12 | 24 | TC   | 19 | 8  |
| 35519 | 3 | 15042510 | 15042541 | 2 | 16 | 32 | GT   | 6  | 5  |
| 35520 | 3 | 15043865 | 15043886 | 2 | 11 | 22 | GT   | 14 | 9  |
| 35522 | 3 | 15045102 | 15045127 | 2 | 13 | 26 | TG   | 21 | 8  |
| 35529 | 3 | 15054279 | 15054310 | 2 | 16 | 32 | TG   | 8  | 8  |
| 35533 | 3 | 15060959 | 15060974 | 4 | 4  | 16 | GTGC | 29 | 4  |
| 35535 | 3 | 15069670 | 15069695 | 2 | 13 | 26 | TG   | 13 | 7  |
| 35537 | 3 | 15074341 | 15074356 | 2 | 8  | 16 | GT   | 19 | 9  |
| 35538 | 3 | 15074447 | 15074491 | 3 | 15 | 45 | CTT  | 17 | 13 |
| 35539 | 3 | 15074551 | 15074564 | 2 | 7  | 14 | TC   | 21 | 4  |
| 35542 | 3 | 15075026 | 15075055 | 2 | 15 | 30 | TG   | 12 | 7  |
| 35544 | 3 | 15080423 | 15080442 | 2 | 10 | 20 | CA   | 15 | 10 |
| 35545 | 3 | 15081592 | 15081611 | 2 | 10 | 20 | CA   | 18 | 15 |
| 35548 | 3 | 15085340 | 15085357 | 3 | 6  | 18 | GTT  | 31 | 5  |
| 35554 | 3 | 15103035 | 15103052 | 3 | 6  | 18 | GTA  | 26 | 5  |
| 35556 | 3 | 15116007 | 15116052 | 2 | 23 | 46 | CA   | 16 | 5  |
| 35557 | 3 | 15123181 | 15123214 | 2 | 17 | 34 | GT   | 12 | 12 |
| 35558 | 3 | 15123993 | 15124008 | 2 | 8  | 16 | GT   | 24 | 4  |
| 35559 | 3 | 15129166 | 15129177 | 2 | 6  | 12 | AC   | 23 | 3  |
| 35560 | 3 | 15129370 | 15129383 | 2 | 7  | 14 | TG   | 28 | 3  |
| 35561 | 3 | 15132202 | 15132215 | 2 | 7  | 14 | CA   | 21 | 5  |
| 35562 | 3 | 15133969 | 15133992 | 4 | 6  | 24 | ATGA | 23 | 5  |
| 35564 | 3 | 15138642 | 15138655 | 2 | 7  | 14 | AG   | 18 | 3  |
| 35567 | 3 | 15143881 | 15143902 | 2 | 11 | 22 | AG   | 15 | 5  |
| 35568 | 3 | 15145017 | 15145032 | 2 | 8  | 16 | TG   | 28 | 6  |
| 35586 | 3 | 15181946 | 15181961 | 2 | 8  | 16 | AC   | 26 | 3  |
| 35589 | 3 | 15187120 | 15187135 | 4 | 4  | 16 | GGCA | 26 | 4  |
| 35590 | 3 | 15187243 | 15187257 | 3 | 5  | 15 | CAG  | 27 | 3  |
| 35591 | 3 | 15187441 | 15187461 | 3 | 7  | 21 | CAG  | 27 | 4  |
| 35593 | 3 | 15190676 | 15190690 | 3 | 5  | 15 | GCT  | 33 | 3  |
| 35595 | 3 | 15193014 | 15193039 | 2 | 13 | 26 | TG   | 12 | 8  |
| 35597 | 3 | 15195267 | 15195284 | 2 | 9  | 18 | GT   | 18 | 14 |
| 35599 | 3 | 15198352 | 15198366 | 3 | 5  | 15 | GAG  | 28 | 3  |
| 35602 | 3 | 15201761 | 15201775 | 3 | 5  | 15 | TTC  | 10 | 4  |
| 35619 | 3 | 15221216 | 15221237 | 2 | 11 | 22 | AC   | 15 | 6  |
| 35622 | 3 | 15226413 | 15226424 | 2 | 6  | 12 | CA   | 24 | 4  |

|       |   |          |          |   |    |    |      |    |    |
|-------|---|----------|----------|---|----|----|------|----|----|
| 35624 | 3 | 15232741 | 15232760 | 2 | 10 | 20 | CA   | 19 | 9  |
| 35626 | 3 | 15234286 | 15234315 | 3 | 10 | 30 | CTC  | 16 | 4  |
| 35628 | 3 | 15241844 | 15241859 | 2 | 8  | 16 | TG   | 16 | 7  |
| 35630 | 3 | 15243793 | 15243842 | 2 | 25 | 50 | CA   | 14 | 9  |
| 35635 | 3 | 15255866 | 15255885 | 2 | 10 | 20 | AT   | 20 | 10 |
| 35636 | 3 | 15257058 | 15257097 | 4 | 10 | 40 | AGTT | 16 | 4  |
| 35643 | 3 | 15260724 | 15260745 | 2 | 11 | 22 | GT   | 22 | 7  |
| 35644 | 3 | 15261413 | 15261428 | 2 | 8  | 16 | GT   | 15 | 4  |
| 35646 | 3 | 15264378 | 15264395 | 2 | 9  | 18 | TA   | 16 | 4  |
| 35647 | 3 | 15268601 | 15268627 | 3 | 9  | 27 | AGG  | 19 | 5  |
| 35651 | 3 | 15275133 | 15275150 | 2 | 9  | 18 | AC   | 12 | 7  |
| 35654 | 3 | 15276187 | 15276202 | 2 | 8  | 16 | GT   | 25 | 11 |
| 35656 | 3 | 15278373 | 15278390 | 2 | 9  | 18 | TG   | 21 | 9  |
| 35659 | 3 | 15278962 | 15278983 | 2 | 11 | 22 | CA   | 14 | 11 |
| 35661 | 3 | 15280745 | 15280759 | 3 | 5  | 15 | AGA  | 23 | 8  |
| 35662 | 3 | 15281275 | 15281286 | 2 | 6  | 12 | GT   | 19 | 5  |
| 35663 | 3 | 15281288 | 15281303 | 2 | 8  | 16 | TG   | 16 | 4  |
| 35664 | 3 | 15281453 | 15281478 | 2 | 13 | 26 | TG   | 19 | 9  |
| 35665 | 3 | 15283409 | 15283424 | 2 | 8  | 16 | GT   | 22 | 3  |
| 35667 | 3 | 15283547 | 15283574 | 2 | 14 | 28 | AC   | 10 | 7  |
| 35668 | 3 | 15283794 | 15283807 | 2 | 7  | 14 | AC   | 21 | 5  |
| 35671 | 3 | 15285326 | 15285347 | 2 | 11 | 22 | CA   | 16 | 9  |
| 35672 | 3 | 15285504 | 15285529 | 2 | 13 | 26 | CA   | 11 | 7  |
| 35676 | 3 | 15288575 | 15288594 | 4 | 5  | 20 | AAAT | 27 | 3  |
| 35677 | 3 | 15289905 | 15289928 | 2 | 12 | 24 | GT   | 25 | 8  |
| 35686 | 3 | 15304556 | 15304575 | 2 | 10 | 20 | TG   | 17 | 3  |
| 35687 | 3 | 15307080 | 15307103 | 2 | 12 | 24 | GT   | 11 | 6  |
| 35695 | 3 | 15316476 | 15316491 | 2 | 8  | 16 | TG   | 20 | 3  |
| 35699 | 3 | 15322869 | 15322896 | 2 | 14 | 28 | CA   | 21 | 6  |
| 35704 | 3 | 15328597 | 15328608 | 2 | 6  | 12 | GT   | 13 | 10 |
| 35705 | 3 | 15330442 | 15330453 | 2 | 6  | 12 | TG   | 18 | 7  |
| 35710 | 3 | 15335759 | 15335776 | 3 | 6  | 18 | GGA  | 6  | 4  |
| 35713 | 3 | 15347553 | 15347570 | 2 | 9  | 18 | CA   | 15 | 11 |
| 35714 | 3 | 15348775 | 15348796 | 2 | 11 | 22 | AC   | 23 | 5  |
| 35716 | 3 | 15349689 | 15349706 | 3 | 6  | 18 | GAG  | 20 | 4  |
| 35721 | 3 | 15355835 | 15355856 | 2 | 11 | 22 | GT   | 20 | 6  |
| 35722 | 3 | 15356092 | 15356105 | 2 | 7  | 14 | AC   | 31 | 5  |
| 35723 | 3 | 15358488 | 15358499 | 2 | 6  | 12 | CT   | 13 | 3  |
| 35724 | 3 | 15362588 | 15362603 | 2 | 8  | 16 | GT   | 26 | 3  |
| 35725 | 3 | 15363011 | 15363028 | 2 | 9  | 18 | GT   | 20 | 4  |
| 35726 | 3 | 15366567 | 15366578 | 2 | 6  | 12 | GT   | 30 | 3  |
| 35728 | 3 | 15367845 | 15367870 | 2 | 13 | 26 | CA   | 8  | 10 |
| 35732 | 3 | 15371785 | 15371805 | 3 | 7  | 21 | CCT  | 21 | 3  |
| 35733 | 3 | 15374616 | 15374631 | 2 | 8  | 16 | GA   | 22 | 3  |
| 35749 | 3 | 15405142 | 15405157 | 2 | 8  | 16 | AC   | 19 | 5  |
| 35750 | 3 | 15407890 | 15407907 | 2 | 9  | 18 | TC   | 25 | 4  |
| 35755 | 3 | 15412161 | 15412186 | 2 | 13 | 26 | TG   | 16 | 8  |
| 35756 | 3 | 15412343 | 15412362 | 2 | 10 | 20 | CT   | 21 | 3  |
| 35758 | 3 | 15413202 | 15413223 | 2 | 11 | 22 | CA   | 29 | 5  |
| 35759 | 3 | 15414204 | 15414225 | 2 | 11 | 22 | AC   | 18 | 7  |
| 35760 | 3 | 15414406 | 15414427 | 2 | 11 | 22 | CA   | 7  | 6  |

|       |   |          |          |   |    |    |      |    |    |
|-------|---|----------|----------|---|----|----|------|----|----|
| 35761 | 3 | 15414492 | 15414503 | 2 | 6  | 12 | CA   | 17 | 7  |
| 35763 | 3 | 15416546 | 15416575 | 2 | 15 | 30 | AC   | 12 | 8  |
| 35769 | 3 | 15419289 | 15419318 | 2 | 15 | 30 | CA   | 14 | 5  |
| 35770 | 3 | 15419538 | 15419559 | 2 | 11 | 22 | TC   | 25 | 5  |
| 35771 | 3 | 15419855 | 15419878 | 3 | 8  | 24 | GGA  | 23 | 3  |
| 35775 | 3 | 15420504 | 15420518 | 3 | 5  | 15 | GGA  | 19 | 5  |
| 35778 | 3 | 15421226 | 15421241 | 2 | 8  | 16 | TC   | 24 | 3  |
| 35779 | 3 | 15421768 | 15421823 | 2 | 28 | 56 | TG   | 7  | 7  |
| 35780 | 3 | 15421920 | 15421945 | 2 | 13 | 26 | CA   | 14 | 10 |
| 35781 | 3 | 15422529 | 15422552 | 3 | 8  | 24 | GCT  | 19 | 4  |
| 35782 | 3 | 15424182 | 15424227 | 2 | 23 | 46 | TG   | 11 | 16 |
| 35785 | 3 | 15425690 | 15425719 | 2 | 15 | 30 | CA   | 7  | 10 |
| 35788 | 3 | 15426039 | 15426078 | 2 | 20 | 40 | AC   | 12 | 16 |
| 35789 | 3 | 15426368 | 15426381 | 2 | 7  | 14 | AG   | 18 | 5  |
| 35797 | 3 | 15427201 | 15427216 | 4 | 4  | 16 | AAAG | 26 | 3  |
| 35798 | 3 | 15427275 | 15427286 | 2 | 6  | 12 | GA   | 16 | 14 |
| 35799 | 3 | 15427287 | 15427306 | 2 | 10 | 20 | GT   | 16 | 18 |
| 35805 | 3 | 15429299 | 15429318 | 4 | 5  | 20 | AAAT | 20 | 4  |
| 35807 | 3 | 15430139 | 15430176 | 2 | 19 | 38 | GA   | 15 | 12 |
| 35808 | 3 | 15430297 | 15430318 | 2 | 11 | 22 | AC   | 12 | 7  |
| 35809 | 3 | 15430910 | 15430939 | 3 | 10 | 30 | AGG  | 22 | 5  |
| 35812 | 3 | 15432159 | 15432178 | 4 | 5  | 20 | GAAT | 24 | 5  |
| 35813 | 3 | 15433756 | 15433769 | 2 | 7  | 14 | AC   | 30 | 3  |
| 35814 | 3 | 15433829 | 15433843 | 3 | 5  | 15 | AAG  | 27 | 3  |
| 35816 | 3 | 15436782 | 15436801 | 4 | 5  | 20 | AAAC | 21 | 3  |
| 35819 | 3 | 15441109 | 15441152 | 4 | 11 | 44 | GAAA | 14 | 12 |
| 35826 | 3 | 15452523 | 15452544 | 2 | 11 | 22 | TG   | 15 | 7  |
| 35835 | 3 | 15465754 | 15465769 | 4 | 4  | 16 | TTTG | 19 | 3  |
| 35839 | 3 | 15467062 | 15467089 | 4 | 7  | 28 | AAAC | 23 | 3  |
| 35840 | 3 | 15468045 | 15468060 | 2 | 8  | 16 | AC   | 15 | 3  |
| 35841 | 3 | 15469795 | 15469812 | 2 | 9  | 18 | GA   | 23 | 5  |
| 35845 | 3 | 15470623 | 15470670 | 2 | 24 | 48 | CA   | 11 | 11 |
| 35849 | 3 | 15473193 | 15473207 | 3 | 5  | 15 | GCT  | 30 | 5  |
| 35853 | 3 | 15478580 | 15478621 | 2 | 21 | 42 | AC   | 6  | 6  |
| 35855 | 3 | 15483151 | 15483162 | 2 | 6  | 12 | GC   | 13 | 6  |
| 35856 | 3 | 15483624 | 15483643 | 2 | 10 | 20 | TG   | 13 | 10 |
| 35857 | 3 | 15483705 | 15483746 | 3 | 14 | 42 | AGA  | 10 | 8  |
| 35860 | 3 | 15485567 | 15485590 | 2 | 12 | 24 | AC   | 13 | 10 |
| 35862 | 3 | 15488174 | 15488187 | 2 | 7  | 14 | TG   | 28 | 3  |
| 35863 | 3 | 15497610 | 15497633 | 2 | 12 | 24 | AC   | 14 | 9  |
| 35869 | 3 | 15525302 | 15525337 | 4 | 9  | 36 | GACA | 24 | 16 |
| 35873 | 3 | 15551085 | 15551100 | 2 | 8  | 16 | GA   | 24 | 9  |
| 35877 | 3 | 15554594 | 15554613 | 2 | 10 | 20 | GT   | 20 | 11 |
| 35889 | 3 | 15576556 | 15576567 | 2 | 6  | 12 | CA   | 25 | 3  |
| 35891 | 3 | 15578258 | 15578281 | 2 | 12 | 24 | GT   | 17 | 7  |
| 35892 | 3 | 15580401 | 15580416 | 4 | 4  | 16 | TTTA | 17 | 4  |
| 35895 | 3 | 15580868 | 15580882 | 3 | 5  | 15 | GCT  | 24 | 3  |
| 35897 | 3 | 15583189 | 15583216 | 2 | 14 | 28 | TG   | 8  | 8  |
| 35899 | 3 | 15584672 | 15584691 | 2 | 10 | 20 | TG   | 21 | 6  |
| 35900 | 3 | 15589934 | 15589969 | 2 | 18 | 36 | AC   | 6  | 8  |
| 35902 | 3 | 15596264 | 15596284 | 3 | 7  | 21 | TGC  | 22 | 5  |

|       |   |          |          |   |    |    |      |    |    |
|-------|---|----------|----------|---|----|----|------|----|----|
| 35904 | 3 | 15614651 | 15614662 | 2 | 6  | 12 | AG   | 20 | 3  |
| 35910 | 3 | 15634495 | 15634524 | 3 | 10 | 30 | GGA  | 20 | 3  |
| 35911 | 3 | 15634705 | 15634722 | 3 | 6  | 18 | GGA  | 12 | 3  |
| 35912 | 3 | 15634925 | 15634946 | 2 | 11 | 22 | GT   | 21 | 9  |
| 35913 | 3 | 15635004 | 15635015 | 2 | 6  | 12 | AC   | 31 | 3  |
| 35914 | 3 | 15635182 | 15635193 | 2 | 6  | 12 | CA   | 25 | 5  |
| 35915 | 3 | 15636484 | 15636499 | 2 | 8  | 16 | GT   | 9  | 10 |
| 35916 | 3 | 15637092 | 15637105 | 2 | 7  | 14 | TG   | 23 | 6  |
| 35918 | 3 | 15638931 | 15638942 | 2 | 6  | 12 | AC   | 31 | 3  |
| 35919 | 3 | 15639147 | 15639172 | 2 | 13 | 26 | TG   | 15 | 6  |
| 35924 | 3 | 15645065 | 15645078 | 2 | 7  | 14 | GT   | 18 | 5  |
| 35934 | 3 | 15666181 | 15666194 | 2 | 7  | 14 | AC   | 18 | 4  |
| 35935 | 3 | 15668556 | 15668589 | 2 | 17 | 34 | CA   | 21 | 17 |
| 35941 | 3 | 15674080 | 15674093 | 2 | 7  | 14 | AC   | 21 | 5  |
| 35944 | 3 | 15690729 | 15690742 | 2 | 7  | 14 | TA   | 14 | 3  |
| 35946 | 3 | 15696535 | 15696549 | 3 | 5  | 15 | ATT  | 28 | 5  |
| 35949 | 3 | 15700945 | 15700978 | 2 | 17 | 34 | TG   | 9  | 6  |
| 35951 | 3 | 15701915 | 15701932 | 2 | 9  | 18 | GT   | 19 | 8  |
| 35955 | 3 | 15710661 | 15710688 | 2 | 14 | 28 | TG   | 25 | 9  |
| 35956 | 3 | 15711198 | 15711223 | 2 | 13 | 26 | CA   | 20 | 18 |
| 35960 | 3 | 15716149 | 15716182 | 2 | 17 | 34 | TG   | 10 | 10 |
| 35961 | 3 | 15718988 | 15719001 | 2 | 7  | 14 | AT   | 13 | 7  |
| 35966 | 3 | 15719428 | 15719441 | 2 | 7  | 14 | TC   | 13 | 4  |
| 35968 | 3 | 15720399 | 15720414 | 2 | 8  | 16 | TG   | 10 | 7  |
| 35971 | 3 | 15722484 | 15722513 | 2 | 15 | 30 | TG   | 19 | 7  |
| 35973 | 3 | 15724431 | 15724446 | 2 | 8  | 16 | TG   | 32 | 3  |
| 35977 | 3 | 15731626 | 15731647 | 2 | 11 | 22 | AC   | 10 | 8  |
| 35978 | 3 | 15733502 | 15733519 | 2 | 9  | 18 | CA   | 33 | 3  |
| 35979 | 3 | 15733688 | 15733713 | 2 | 13 | 26 | CA   | 20 | 7  |
| 35980 | 3 | 15735266 | 15735283 | 2 | 9  | 18 | AG   | 21 | 3  |
| 35983 | 3 | 15736630 | 15736663 | 2 | 17 | 34 | TG   | 7  | 8  |
| 35990 | 3 | 15740696 | 15740719 | 2 | 12 | 24 | AG   | 16 | 9  |
| 35996 | 3 | 15747267 | 15747294 | 2 | 14 | 28 | GT   | 13 | 8  |
| 36001 | 3 | 15756265 | 15756284 | 4 | 5  | 20 | TAGA | 17 | 8  |
| 36003 | 3 | 15757065 | 15757100 | 2 | 18 | 36 | CA   | 10 | 7  |
| 36004 | 3 | 15757249 | 15757266 | 2 | 9  | 18 | GT   | 21 | 4  |
| 36006 | 3 | 15757715 | 15757740 | 2 | 13 | 26 | CA   | 18 | 9  |
| 36019 | 3 | 15772875 | 15772910 | 3 | 12 | 36 | TAA  | 14 | 8  |
| 36020 | 3 | 15776047 | 15776060 | 2 | 7  | 14 | TG   | 18 | 4  |
| 36021 | 3 | 15776227 | 15776264 | 2 | 19 | 38 | AC   | 14 | 7  |
| 36027 | 3 | 15785352 | 15785381 | 2 | 15 | 30 | CA   | 19 | 12 |
| 36029 | 3 | 15787659 | 15787694 | 2 | 18 | 36 | CA   | 6  | 7  |
| 36030 | 3 | 15798999 | 15799043 | 3 | 15 | 45 | CCT  | 9  | 5  |
| 36037 | 3 | 15802795 | 15802816 | 2 | 11 | 22 | CA   | 13 | 7  |
| 36040 | 3 | 15809937 | 15809952 | 2 | 8  | 16 | GT   | 32 | 4  |
| 36064 | 3 | 15890128 | 15890147 | 2 | 10 | 20 | AC   | 22 | 7  |
| 36070 | 3 | 15910590 | 15910613 | 4 | 6  | 24 | TTTG | 32 | 3  |
| 36076 | 3 | 15924852 | 15924907 | 2 | 28 | 56 | AC   | 11 | 14 |
| 36077 | 3 | 15925453 | 15925492 | 2 | 20 | 40 | CA   | 14 | 11 |
| 36086 | 3 | 15949136 | 15949151 | 2 | 8  | 16 | CA   | 21 | 3  |
| 36087 | 3 | 15949472 | 15949501 | 2 | 15 | 30 | GT   | 17 | 4  |



|       |   |          |          |   |    |    |      |    |    |
|-------|---|----------|----------|---|----|----|------|----|----|
| 36093 | 3 | 15954643 | 15954664 | 2 | 11 | 22 | GT   | 15 | 11 |
| 36105 | 3 | 15984679 | 15984692 | 2 | 7  | 14 | GT   | 22 | 8  |
| 36106 | 3 | 15985408 | 15985419 | 2 | 6  | 12 | GT   | 18 | 9  |
| 36108 | 3 | 15986271 | 15986300 | 2 | 15 | 30 | GA   | 18 | 6  |
| 36118 | 3 | 16003051 | 16003080 | 2 | 15 | 30 | TG   | 17 | 8  |
| 36120 | 3 | 16003643 | 16003674 | 2 | 16 | 32 | TG   | 10 | 8  |
| 36123 | 3 | 16012119 | 16012144 | 2 | 13 | 26 | AC   | 21 | 6  |
| 36124 | 3 | 16012494 | 16012507 | 2 | 7  | 14 | CA   | 21 | 3  |
| 36127 | 3 | 16018624 | 16018639 | 4 | 4  | 16 | GAGG | 36 | 3  |
| 36129 | 3 | 16021241 | 16021256 | 2 | 8  | 16 | CA   | 24 | 11 |
| 36132 | 3 | 16021760 | 16021779 | 2 | 10 | 20 | CT   | 13 | 9  |
| 36137 | 3 | 16025976 | 16025989 | 2 | 7  | 14 | AC   | 17 | 6  |
| 36138 | 3 | 16027472 | 16027491 | 2 | 10 | 20 | CA   | 16 | 9  |
| 36139 | 3 | 16028043 | 16028056 | 2 | 7  | 14 | TG   | 19 | 5  |
| 36141 | 3 | 16028298 | 16028313 | 2 | 8  | 16 | AC   | 17 | 4  |
| 36143 | 3 | 16039776 | 16039789 | 2 | 7  | 14 | GT   | 26 | 3  |
| 36149 | 3 | 16050175 | 16050198 | 4 | 6  | 24 | ATCC | 23 | 3  |
| 36152 | 3 | 16051288 | 16051307 | 2 | 10 | 20 | TG   | 10 | 4  |
| 36155 | 3 | 16054162 | 16054201 | 2 | 20 | 40 | TG   | 16 | 10 |
| 36158 | 3 | 16058978 | 16059005 | 2 | 14 | 28 | CA   | 7  | 5  |
| 36159 | 3 | 16059168 | 16059193 | 2 | 13 | 26 | CA   | 10 | 7  |
| 36162 | 3 | 16062756 | 16062767 | 2 | 6  | 12 | GA   | 10 | 3  |
| 36163 | 3 | 16064183 | 16064214 | 2 | 16 | 32 | CA   | 12 | 5  |
| 36167 | 3 | 16069845 | 16069872 | 2 | 14 | 28 | CA   | 21 | 10 |
| 36170 | 3 | 16073293 | 16073310 | 2 | 9  | 18 | GT   | 12 | 5  |
| 36172 | 3 | 16074151 | 16074162 | 2 | 6  | 12 | AC   | 17 | 4  |
| 36177 | 3 | 16076466 | 16076487 | 2 | 11 | 22 | TG   | 14 | 10 |
| 36180 | 3 | 16080102 | 16080125 | 2 | 12 | 24 | TG   | 10 | 7  |
| 36185 | 3 | 16089424 | 16089439 | 4 | 4  | 16 | AAAT | 26 | 3  |
| 36194 | 3 | 16093620 | 16093651 | 2 | 16 | 32 | CA   | 9  | 6  |
| 36195 | 3 | 16095854 | 16095889 | 2 | 18 | 36 | GT   | 12 | 8  |
| 36197 | 3 | 16096870 | 16096883 | 2 | 7  | 14 | CA   | 20 | 3  |
| 36200 | 3 | 16105175 | 16105194 | 2 | 10 | 20 | GT   | 14 | 5  |
| 36202 | 3 | 16105601 | 16105624 | 2 | 12 | 24 | GT   | 17 | 11 |
| 36211 | 3 | 16124838 | 16124849 | 2 | 6  | 12 | GT   | 19 | 3  |
| 36212 | 3 | 16126170 | 16126193 | 2 | 12 | 24 | AC   | 24 | 6  |
| 36214 | 3 | 16132941 | 16132956 | 2 | 8  | 16 | GT   | 17 | 8  |
| 36216 | 3 | 16136412 | 16136425 | 2 | 7  | 14 | GT   | 26 | 4  |
| 36218 | 3 | 16147431 | 16147444 | 2 | 7  | 14 | GT   | 28 | 5  |
| 36224 | 3 | 16161379 | 16161406 | 2 | 14 | 28 | CA   | 7  | 6  |
| 36225 | 3 | 16161572 | 16161585 | 2 | 7  | 14 | TG   | 17 | 10 |
| 36228 | 3 | 16174370 | 16174385 | 2 | 8  | 16 | AC   | 26 | 6  |
| 36230 | 3 | 16179666 | 16179687 | 2 | 11 | 22 | TG   | 18 | 11 |
| 36233 | 3 | 16196005 | 16196048 | 4 | 11 | 44 | TTCT | 9  | 4  |
| 36246 | 3 | 16229054 | 16229087 | 2 | 17 | 34 | GT   | 19 | 10 |
| 36249 | 3 | 16232394 | 16232417 | 2 | 12 | 24 | TG   | 15 | 10 |
| 36251 | 3 | 16253512 | 16253531 | 4 | 5  | 20 | ATAA | 7  | 3  |
| 36252 | 3 | 16258112 | 16258123 | 2 | 6  | 12 | TA   | 20 | 4  |
| 36263 | 3 | 16287350 | 16287363 | 2 | 7  | 14 | AC   | 29 | 3  |
| 36264 | 3 | 16287575 | 16287588 | 2 | 7  | 14 | TG   | 29 | 3  |
| 36271 | 3 | 16295550 | 16295571 | 2 | 11 | 22 | GA   | 17 | 4  |

|       |   |          |          |   |    |    |      |    |    |
|-------|---|----------|----------|---|----|----|------|----|----|
| 36272 | 3 | 16297186 | 16297201 | 2 | 8  | 16 | AG   | 17 | 3  |
| 36274 | 3 | 16299212 | 16299241 | 2 | 15 | 30 | CA   | 19 | 9  |
| 36280 | 3 | 16307843 | 16307854 | 2 | 6  | 12 | AC   | 21 | 8  |
| 36287 | 3 | 16317734 | 16317757 | 2 | 12 | 24 | GT   | 25 | 8  |
| 36288 | 3 | 16319156 | 16319167 | 2 | 6  | 12 | TC   | 26 | 3  |
| 36289 | 3 | 16324517 | 16324528 | 2 | 6  | 12 | AC   | 30 | 3  |
| 36290 | 3 | 16327587 | 16327614 | 2 | 14 | 28 | AC   | 15 | 11 |
| 36293 | 3 | 16332525 | 16332536 | 2 | 6  | 12 | AC   | 24 | 3  |
| 36294 | 3 | 16332540 | 16332557 | 2 | 9  | 18 | CA   | 21 | 4  |
| 36296 | 3 | 16332923 | 16332934 | 2 | 6  | 12 | GT   | 21 | 3  |
| 36298 | 3 | 16335384 | 16335399 | 4 | 4  | 16 | AATG | 33 | 3  |
| 36299 | 3 | 16338315 | 16338338 | 4 | 6  | 24 | TTTC | 23 | 5  |
| 36307 | 3 | 16373921 | 16373950 | 2 | 15 | 30 | CA   | 27 | 10 |
| 36310 | 3 | 16385431 | 16385445 | 3 | 5  | 15 | CAG  | 27 | 5  |
| 36325 | 3 | 16400758 | 16400771 | 2 | 7  | 14 | AC   | 20 | 5  |
| 36329 | 3 | 16409425 | 16409444 | 2 | 10 | 20 | GT   | 19 | 7  |
| 36333 | 3 | 16414842 | 16414855 | 2 | 7  | 14 | AC   | 22 | 8  |
| 36334 | 3 | 16414857 | 16414872 | 2 | 8  | 16 | CA   | 21 | 10 |
| 36335 | 3 | 16415200 | 16415215 | 4 | 4  | 16 | AAGA | 11 | 5  |
| 36336 | 3 | 16415394 | 16415429 | 2 | 18 | 36 | CA   | 11 | 8  |
| 36338 | 3 | 16417094 | 16417117 | 2 | 12 | 24 | TG   | 24 | 11 |
| 36339 | 3 | 16419169 | 16419208 | 2 | 20 | 40 | GT   | 8  | 14 |
| 36343 | 3 | 16441429 | 16441456 | 2 | 14 | 28 | GT   | 24 | 6  |
| 36345 | 3 | 16446042 | 16446069 | 2 | 14 | 28 | AC   | 16 | 11 |
| 36353 | 3 | 16463947 | 16463958 | 2 | 6  | 12 | TG   | 29 | 3  |
| 36361 | 3 | 16473754 | 16473793 | 2 | 20 | 40 | AC   | 11 | 13 |
| 36375 | 3 | 16511379 | 16511390 | 2 | 6  | 12 | GA   | 20 | 5  |
| 36376 | 3 | 16514404 | 16514421 | 3 | 6  | 18 | GGT  | 22 | 4  |
| 36378 | 3 | 16519374 | 16519399 | 2 | 13 | 26 | GT   | 20 | 12 |
| 36379 | 3 | 16529668 | 16529683 | 4 | 4  | 16 | GTCT | 27 | 6  |
| 36384 | 3 | 16551739 | 16551762 | 2 | 12 | 24 | AC   | 18 | 8  |
| 36387 | 3 | 16562281 | 16562340 | 4 | 15 | 60 | TATC | 14 | 12 |
| 36403 | 3 | 16583861 | 16583886 | 2 | 13 | 26 | CA   | 16 | 12 |
| 36410 | 3 | 16591136 | 16591151 | 2 | 8  | 16 | AT   | 10 | 4  |
| 36411 | 3 | 16597140 | 16597159 | 4 | 5  | 20 | CTGT | 28 | 5  |
| 36413 | 3 | 16607201 | 16607236 | 2 | 18 | 36 | CA   | 9  | 7  |
| 36414 | 3 | 16611928 | 16611943 | 2 | 8  | 16 | CA   | 16 | 4  |
| 36416 | 3 | 16614973 | 16614988 | 4 | 4  | 16 | CAAA | 23 | 3  |
| 36420 | 3 | 16616904 | 16616927 | 2 | 12 | 24 | GA   | 13 | 4  |
| 36423 | 3 | 16617424 | 16617453 | 3 | 10 | 30 | GGA  | 23 | 8  |
| 36424 | 3 | 16617594 | 16617609 | 4 | 4  | 16 | AAAG | 20 | 5  |
| 36425 | 3 | 16618052 | 16618071 | 4 | 5  | 20 | TTTG | 24 | 3  |
| 36428 | 3 | 16618976 | 16618999 | 2 | 12 | 24 | AG   | 18 | 9  |
| 36432 | 3 | 16627879 | 16627892 | 2 | 7  | 14 | CA   | 24 | 3  |
| 36433 | 3 | 16630928 | 16630941 | 2 | 7  | 14 | TC   | 20 | 7  |
| 36450 | 3 | 16661358 | 16661373 | 2 | 8  | 16 | GT   | 26 | 4  |
| 36457 | 3 | 16669071 | 16669084 | 2 | 7  | 14 | AT   | 18 | 5  |
| 36459 | 3 | 16675486 | 16675545 | 2 | 30 | 60 | TG   | 16 | 9  |
| 36461 | 3 | 16677114 | 16677137 | 2 | 12 | 24 | TC   | 22 | 5  |
| 36474 | 3 | 16703732 | 16703743 | 2 | 6  | 12 | GA   | 28 | 4  |
| 36476 | 3 | 16704350 | 16704367 | 2 | 9  | 18 | TG   | 22 | 6  |

|       |   |          |          |   |    |    |      |    |    |
|-------|---|----------|----------|---|----|----|------|----|----|
| 36481 | 3 | 16716206 | 16716231 | 2 | 13 | 26 | CT   | 10 | 6  |
| 36483 | 3 | 16721898 | 16721931 | 2 | 17 | 34 | AC   | 6  | 7  |
| 36485 | 3 | 16724691 | 16724723 | 3 | 11 | 33 | TCT  | 23 | 10 |
| 36488 | 3 | 16726191 | 16726211 | 3 | 7  | 21 | ACA  | 20 | 8  |
| 36491 | 3 | 16730904 | 16730924 | 3 | 7  | 21 | CTT  | 26 | 7  |
| 36492 | 3 | 16733122 | 16733148 | 3 | 9  | 27 | CCT  | 25 | 6  |
| 36496 | 3 | 16737661 | 16737678 | 2 | 9  | 18 | AG   | 20 | 6  |
| 36497 | 3 | 16737756 | 16737773 | 2 | 9  | 18 | GT   | 21 | 8  |
| 36498 | 3 | 16738078 | 16738089 | 2 | 6  | 12 | GT   | 12 | 6  |
| 36500 | 3 | 16738181 | 16738206 | 2 | 13 | 26 | TG   | 9  | 9  |
| 36501 | 3 | 16738473 | 16738494 | 2 | 11 | 22 | CA   | 20 | 7  |
| 36503 | 3 | 16741715 | 16741744 | 3 | 10 | 30 | CCA  | 9  | 4  |
| 36508 | 3 | 16752347 | 16752414 | 4 | 17 | 68 | GATA | 17 | 14 |
| 36509 | 3 | 16753645 | 16753664 | 2 | 10 | 20 | TG   | 22 | 8  |
| 36510 | 3 | 16753718 | 16753729 | 2 | 6  | 12 | AC   | 23 | 3  |
| 36512 | 3 | 16754352 | 16754389 | 2 | 19 | 38 | AC   | 11 | 10 |
| 36516 | 3 | 16758879 | 16758898 | 2 | 10 | 20 | GT   | 18 | 6  |
| 36517 | 3 | 16760180 | 16760203 | 2 | 12 | 24 | CT   | 10 | 4  |
| 36521 | 3 | 16761692 | 16761715 | 2 | 12 | 24 | TG   | 11 | 12 |
| 36522 | 3 | 16763607 | 16763624 | 2 | 9  | 18 | GA   | 23 | 6  |
| 36525 | 3 | 16769037 | 16769060 | 2 | 12 | 24 | AC   | 16 | 7  |
| 36532 | 3 | 16775131 | 16775181 | 3 | 17 | 51 | CTG  | 25 | 14 |
| 36534 | 3 | 16777631 | 16777664 | 2 | 17 | 34 | CA   | 7  | 9  |
| 36537 | 3 | 16781202 | 16781233 | 2 | 16 | 32 | CA   | 17 | 12 |
| 36539 | 3 | 16787516 | 16787547 | 2 | 16 | 32 | CA   | 21 | 10 |
| 36548 | 3 | 16800594 | 16800608 | 3 | 5  | 15 | GAA  | 25 | 4  |
| 36550 | 3 | 16804751 | 16804768 | 3 | 6  | 18 | AGT  | 21 | 4  |
| 36552 | 3 | 16809464 | 16809489 | 2 | 13 | 26 | TG   | 22 | 11 |
| 36558 | 3 | 16826798 | 16826815 | 2 | 9  | 18 | AC   | 25 | 5  |
| 36559 | 3 | 16827504 | 16827515 | 2 | 6  | 12 | GT   | 29 | 3  |
| 36560 | 3 | 16827844 | 16827873 | 2 | 15 | 30 | AC   | 19 | 11 |
| 36561 | 3 | 16829843 | 16829854 | 2 | 6  | 12 | AC   | 17 | 3  |
| 36563 | 3 | 16838171 | 16838188 | 3 | 6  | 18 | GGA  | 8  | 3  |
| 36564 | 3 | 16838573 | 16838590 | 2 | 9  | 18 | CA   | 13 | 3  |
| 36565 | 3 | 16843504 | 16843543 | 4 | 10 | 40 | TTGG | 23 | 4  |
| 36568 | 3 | 16845287 | 16845316 | 2 | 15 | 30 | AC   | 11 | 11 |
| 36574 | 3 | 16867010 | 16867041 | 2 | 16 | 32 | GT   | 17 | 10 |
| 36576 | 3 | 16867519 | 16867542 | 3 | 8  | 24 | CTC  | 22 | 3  |
| 36579 | 3 | 16871787 | 16871820 | 2 | 17 | 34 | TG   | 9  | 10 |
| 36586 | 3 | 16890223 | 16890242 | 2 | 10 | 20 | CA   | 25 | 10 |
| 36590 | 3 | 16896530 | 16896547 | 2 | 9  | 18 | TG   | 19 | 8  |
| 36591 | 3 | 16896789 | 16896803 | 3 | 5  | 15 | GGT  | 20 | 4  |
| 36596 | 3 | 16905149 | 16905164 | 2 | 8  | 16 | TC   | 21 | 3  |
| 36601 | 3 | 16910247 | 16910260 | 2 | 7  | 14 | AC   | 21 | 5  |
| 36608 | 3 | 16914555 | 16914578 | 2 | 12 | 24 | TC   | 13 | 6  |
| 36615 | 3 | 16917387 | 16917400 | 2 | 7  | 14 | GT   | 19 | 5  |
| 36616 | 3 | 16917402 | 16917415 | 2 | 7  | 14 | TG   | 15 | 3  |
| 36617 | 3 | 16917498 | 16917515 | 2 | 9  | 18 | GT   | 16 | 9  |
| 36618 | 3 | 16918570 | 16918607 | 2 | 19 | 38 | AC   | 21 | 16 |
| 36619 | 3 | 16918779 | 16918802 | 2 | 12 | 24 | CA   | 17 | 7  |
| 36628 | 3 | 16936803 | 16936820 | 2 | 9  | 18 | GT   | 22 | 11 |

|       |   |          |          |   |    |    |      |    |    |
|-------|---|----------|----------|---|----|----|------|----|----|
| 36629 | 3 | 16936965 | 16936986 | 2 | 11 | 22 | GA   | 21 | 6  |
| 36633 | 3 | 16941569 | 16941586 | 2 | 9  | 18 | TG   | 20 | 4  |
| 36634 | 3 | 16947495 | 16947506 | 2 | 6  | 12 | AG   | 33 | 4  |
| 36635 | 3 | 16951474 | 16951491 | 2 | 9  | 18 | AC   | 24 | 6  |
| 36636 | 3 | 16953405 | 16953416 | 2 | 6  | 12 | TG   | 25 | 3  |
| 36637 | 3 | 16959623 | 16959658 | 2 | 18 | 36 | TG   | 13 | 9  |
| 36638 | 3 | 16964294 | 16964319 | 2 | 13 | 26 | AG   | 24 | 5  |
| 36640 | 3 | 16964511 | 16964528 | 2 | 9  | 18 | CA   | 10 | 9  |
| 36644 | 3 | 16971771 | 16971803 | 3 | 11 | 33 | GGA  | 10 | 7  |
| 36647 | 3 | 16973090 | 16973113 | 2 | 12 | 24 | GT   | 15 | 4  |
| 36649 | 3 | 16981404 | 16981427 | 2 | 12 | 24 | CA   | 19 | 11 |
| 36650 | 3 | 16981565 | 16981606 | 3 | 14 | 42 | CTT  | 14 | 9  |
| 36656 | 3 | 16987670 | 16987695 | 2 | 13 | 26 | AC   | 12 | 5  |
| 36658 | 3 | 16990299 | 16990316 | 2 | 9  | 18 | CT   | 14 | 5  |
| 36661 | 3 | 16995326 | 16995363 | 2 | 19 | 38 | TG   | 8  | 8  |
| 36663 | 3 | 17002437 | 17002457 | 3 | 7  | 21 | TGT  | 22 | 5  |
| 36672 | 3 | 17013657 | 17013674 | 2 | 9  | 18 | GT   | 15 | 8  |
| 36675 | 3 | 17022261 | 17022286 | 2 | 13 | 26 | TG   | 9  | 11 |
| 36679 | 3 | 17051589 | 17051600 | 2 | 6  | 12 | TG   | 25 | 3  |
| 36680 | 3 | 17051700 | 17051713 | 2 | 7  | 14 | GA   | 23 | 5  |
| 36686 | 3 | 17071606 | 17071617 | 2 | 6  | 12 | AC   | 26 | 5  |
| 36687 | 3 | 17071618 | 17071632 | 3 | 5  | 15 | CAG  | 25 | 5  |
| 36688 | 3 | 17077281 | 17077295 | 3 | 5  | 15 | GCT  | 7  | 4  |
| 36694 | 3 | 17087944 | 17087961 | 2 | 9  | 18 | TG   | 14 | 4  |
| 36700 | 3 | 17099671 | 17099682 | 2 | 6  | 12 | AC   | 26 | 4  |
| 36701 | 3 | 17101410 | 17101425 | 2 | 8  | 16 | CA   | 24 | 4  |
| 36703 | 3 | 17106589 | 17106644 | 2 | 28 | 56 | TG   | 9  | 8  |
| 36708 | 3 | 17121176 | 17121187 | 2 | 6  | 12 | TC   | 24 | 15 |
| 36709 | 3 | 17121188 | 17121203 | 2 | 8  | 16 | AC   | 26 | 17 |
| 36718 | 3 | 17132971 | 17133008 | 2 | 19 | 38 | TC   | 9  | 11 |
| 36726 | 3 | 17148838 | 17148861 | 3 | 8  | 24 | GCA  | 23 | 17 |
| 36729 | 3 | 17149229 | 17149252 | 3 | 8  | 24 | ATG  | 18 | 3  |
| 36731 | 3 | 17150507 | 17150520 | 2 | 7  | 14 | TG   | 29 | 5  |
| 36732 | 3 | 17153088 | 17153099 | 2 | 6  | 12 | GA   | 20 | 3  |
| 36733 | 3 | 17158359 | 17158379 | 3 | 7  | 21 | TGT  | 27 | 5  |
| 36734 | 3 | 17166782 | 17166802 | 3 | 7  | 21 | CCT  | 30 | 7  |
| 36735 | 3 | 17170895 | 17170918 | 2 | 12 | 24 | GT   | 11 | 8  |
| 36736 | 3 | 17173952 | 17173975 | 2 | 12 | 24 | TG   | 11 | 7  |
| 36737 | 3 | 17174636 | 17174649 | 2 | 7  | 14 | AC   | 15 | 7  |
| 36747 | 3 | 17206206 | 17206232 | 3 | 9  | 27 | TGC  | 23 | 5  |
| 36750 | 3 | 17213744 | 17213785 | 2 | 21 | 42 | AG   | 6  | 6  |
| 36763 | 3 | 17257136 | 17257159 | 2 | 12 | 24 | TG   | 25 | 9  |
| 36764 | 3 | 17257570 | 17257589 | 4 | 5  | 20 | AAAG | 24 | 12 |
| 36771 | 3 | 17291655 | 17291682 | 4 | 7  | 28 | TATG | 13 | 11 |
| 36773 | 3 | 17294533 | 17294558 | 2 | 13 | 26 | AC   | 22 | 6  |
| 36777 | 3 | 17303605 | 17303636 | 4 | 8  | 32 | TGTT | 11 | 5  |
| 36778 | 3 | 17304023 | 17304049 | 3 | 9  | 27 | TGC  | 20 | 4  |
| 36780 | 3 | 17312654 | 17312681 | 4 | 7  | 28 | TTTG | 24 | 8  |
| 36781 | 3 | 17312872 | 17312891 | 4 | 5  | 20 | AAAT | 25 | 3  |
| 36782 | 3 | 17313212 | 17313227 | 2 | 8  | 16 | AG   | 11 | 3  |
| 36792 | 3 | 17332339 | 17332354 | 2 | 8  | 16 | TG   | 13 | 5  |

|       |   |          |          |   |    |    |      |    |    |
|-------|---|----------|----------|---|----|----|------|----|----|
| 36803 | 3 | 17375775 | 17375788 | 2 | 7  | 14 | AG   | 12 | 3  |
| 36805 | 3 | 17384577 | 17384590 | 2 | 7  | 14 | CA   | 18 | 3  |
| 36810 | 3 | 17410585 | 17410596 | 2 | 6  | 12 | AT   | 18 | 3  |
| 36811 | 3 | 17411623 | 17411666 | 2 | 22 | 44 | TC   | 9  | 11 |
| 36813 | 3 | 17411933 | 17411950 | 3 | 6  | 18 | AAG  | 22 | 6  |
| 36820 | 3 | 17421019 | 17421030 | 2 | 6  | 12 | GA   | 29 | 3  |
| 36821 | 3 | 17423865 | 17423894 | 2 | 15 | 30 | TG   | 12 | 9  |
| 36822 | 3 | 17424846 | 17424865 | 2 | 10 | 20 | AT   | 8  | 4  |
| 36834 | 3 | 17454375 | 17454386 | 2 | 6  | 12 | GT   | 29 | 3  |
| 36841 | 3 | 17475105 | 17475120 | 4 | 4  | 16 | CCAT | 28 | 7  |
| 36844 | 3 | 17475795 | 17475818 | 2 | 12 | 24 | GA   | 6  | 10 |
| 36846 | 3 | 17475860 | 17475871 | 2 | 6  | 12 | GA   | 14 | 3  |
| 36851 | 3 | 17481244 | 17481271 | 2 | 14 | 28 | AC   | 15 | 6  |
| 36854 | 3 | 17488304 | 17488319 | 2 | 8  | 16 | TC   | 18 | 5  |
| 36855 | 3 | 17495350 | 17495367 | 2 | 9  | 18 | GA   | 12 | 4  |
| 36861 | 3 | 17505602 | 17505622 | 3 | 7  | 21 | AAG  | 25 | 5  |
| 36869 | 3 | 17517721 | 17517738 | 3 | 6  | 18 | CTG  | 28 | 3  |
| 36872 | 3 | 17530651 | 17530664 | 2 | 7  | 14 | GT   | 30 | 5  |
| 36874 | 3 | 17533344 | 17533361 | 2 | 9  | 18 | AC   | 17 | 6  |
| 36877 | 3 | 17541287 | 17541318 | 2 | 16 | 32 | TG   | 17 | 7  |
| 36882 | 3 | 17571639 | 17571656 | 2 | 9  | 18 | TA   | 16 | 7  |
| 36884 | 3 | 17589347 | 17589370 | 4 | 6  | 24 | ATAA | 20 | 5  |
| 36886 | 3 | 17593039 | 17593052 | 2 | 7  | 14 | AC   | 10 | 8  |
| 36887 | 3 | 17593054 | 17593069 | 2 | 8  | 16 | CA   | 14 | 11 |
| 36888 | 3 | 17593370 | 17593393 | 4 | 6  | 24 | TAAA | 24 | 6  |
| 36889 | 3 | 17596046 | 17596061 | 2 | 8  | 16 | CA   | 14 | 10 |
| 36890 | 3 | 17596237 | 17596256 | 2 | 10 | 20 | CA   | 23 | 5  |
| 36899 | 3 | 17612874 | 17612894 | 3 | 7  | 21 | CTT  | 26 | 4  |
| 36901 | 3 | 17620123 | 17620138 | 4 | 4  | 16 | AAAT | 19 | 3  |
| 36908 | 3 | 17624962 | 17624983 | 2 | 11 | 22 | TG   | 17 | 11 |
| 36910 | 3 | 17625184 | 17625197 | 2 | 7  | 14 | AC   | 19 | 5  |
| 36911 | 3 | 17625281 | 17625304 | 2 | 12 | 24 | AC   | 26 | 10 |
| 36913 | 3 | 17625634 | 17625647 | 2 | 7  | 14 | CT   | 13 | 5  |
| 36915 | 3 | 17625835 | 17625850 | 2 | 8  | 16 | AG   | 16 | 4  |
| 36916 | 3 | 17626089 | 17626112 | 3 | 8  | 24 | CTG  | 28 | 8  |
| 36917 | 3 | 17626259 | 17626279 | 3 | 7  | 21 | CAA  | 29 | 5  |
| 36926 | 3 | 17640081 | 17640096 | 2 | 8  | 16 | GT   | 11 | 13 |
| 36928 | 3 | 17643732 | 17643751 | 2 | 10 | 20 | CA   | 19 | 8  |
| 36930 | 3 | 17644427 | 17644444 | 2 | 9  | 18 | GT   | 18 | 10 |
| 36939 | 3 | 17657062 | 17657077 | 2 | 8  | 16 | TC   | 14 | 6  |
| 36940 | 3 | 17657276 | 17657315 | 2 | 20 | 40 | AC   | 10 | 6  |
| 36949 | 3 | 17665012 | 17665023 | 2 | 6  | 12 | CT   | 22 | 6  |
| 36950 | 3 | 17665025 | 17665036 | 2 | 6  | 12 | TC   | 26 | 5  |
| 36951 | 3 | 17665093 | 17665114 | 2 | 11 | 22 | GA   | 27 | 7  |
| 36952 | 3 | 17666742 | 17666765 | 2 | 12 | 24 | CA   | 11 | 11 |
| 36953 | 3 | 17668403 | 17668418 | 2 | 8  | 16 | AC   | 29 | 5  |
| 36957 | 3 | 17687772 | 17687811 | 2 | 20 | 40 | CA   | 6  | 10 |
| 36964 | 3 | 17705424 | 17705441 | 2 | 9  | 18 | AT   | 11 | 3  |
| 36968 | 3 | 17712838 | 17712852 | 3 | 5  | 15 | CAG  | 9  | 4  |
| 36969 | 3 | 17713159 | 17713173 | 3 | 5  | 15 | GCG  | 25 | 6  |
| 36971 | 3 | 17714018 | 17714033 | 2 | 8  | 16 | AC   | 10 | 3  |

|       |   |          |          |   |    |    |      |    |    |
|-------|---|----------|----------|---|----|----|------|----|----|
| 36980 | 3 | 17722737 | 17722762 | 2 | 13 | 26 | CA   | 22 | 8  |
| 36981 | 3 | 17723652 | 17723671 | 2 | 10 | 20 | AC   | 8  | 7  |
| 36983 | 3 | 17729627 | 17729652 | 2 | 13 | 26 | AC   | 7  | 3  |
| 36985 | 3 | 17730593 | 17730610 | 2 | 9  | 18 | CT   | 21 | 4  |
| 36986 | 3 | 17731883 | 17731912 | 2 | 15 | 30 | CA   | 17 | 7  |
| 36989 | 3 | 17738511 | 17738530 | 2 | 10 | 20 | GT   | 7  | 8  |
| 36995 | 3 | 17744279 | 17744306 | 2 | 14 | 28 | GT   | 14 | 5  |
| 36996 | 3 | 17744859 | 17744902 | 2 | 22 | 44 | AG   | 11 | 12 |
| 37004 | 3 | 17767319 | 17767352 | 2 | 17 | 34 | TG   | 8  | 7  |
| 37022 | 3 | 17816781 | 17816795 | 3 | 5  | 15 | TTA  | 14 | 10 |
| 37024 | 3 | 17817487 | 17817526 | 2 | 20 | 40 | CT   | 6  | 5  |
| 37025 | 3 | 17817590 | 17817611 | 2 | 11 | 22 | TC   | 7  | 8  |
| 37028 | 3 | 17818672 | 17818699 | 4 | 7  | 28 | TAAC | 13 | 8  |
| 37029 | 3 | 17819817 | 17819831 | 3 | 5  | 15 | CCT  | 13 | 6  |
| 37031 | 3 | 17821598 | 17821615 | 2 | 9  | 18 | GT   | 18 | 15 |
| 37034 | 3 | 17830813 | 17830852 | 4 | 10 | 40 | AAAG | 18 | 14 |
| 37044 | 3 | 17852708 | 17852725 | 3 | 6  | 18 | ATA  | 24 | 4  |
| 37045 | 3 | 17858848 | 17858863 | 4 | 4  | 16 | CCAA | 28 | 3  |
| 37047 | 3 | 17863237 | 17863248 | 2 | 6  | 12 | CA   | 21 | 6  |
| 37049 | 3 | 17865968 | 17866005 | 2 | 19 | 38 | TG   | 14 | 12 |
| 37050 | 3 | 17868625 | 17868638 | 2 | 7  | 14 | AC   | 8  | 4  |
| 37051 | 3 | 17872178 | 17872195 | 2 | 9  | 18 | AG   | 21 | 5  |
| 37054 | 3 | 17879722 | 17879743 | 2 | 11 | 22 | GT   | 18 | 8  |
| 37055 | 3 | 17880836 | 17880877 | 2 | 21 | 42 | TG   | 15 | 10 |
| 37056 | 3 | 17882178 | 17882201 | 4 | 6  | 24 | TATG | 19 | 3  |
| 37060 | 3 | 17884600 | 17884615 | 2 | 8  | 16 | TG   | 21 | 9  |
| 37061 | 3 | 17885539 | 17885554 | 2 | 8  | 16 | GT   | 13 | 9  |
| 37062 | 3 | 17890909 | 17890930 | 2 | 11 | 22 | GT   | 21 | 5  |
| 37065 | 3 | 17892333 | 17892360 | 2 | 14 | 28 | AG   | 14 | 11 |
| 37067 | 3 | 17894925 | 17894944 | 2 | 10 | 20 | AC   | 17 | 9  |
| 37074 | 3 | 17908087 | 17908106 | 2 | 10 | 20 | CA   | 20 | 9  |
| 37095 | 3 | 17964119 | 17964132 | 2 | 7  | 14 | GT   | 22 | 6  |
| 37097 | 3 | 17965414 | 17965461 | 2 | 24 | 48 | CA   | 9  | 11 |
| 37103 | 3 | 17990011 | 17990025 | 3 | 5  | 15 | TCC  | 24 | 5  |
| 37110 | 3 | 18004911 | 18004930 | 2 | 10 | 20 | TG   | 21 | 10 |
| 37111 | 3 | 18005664 | 18005679 | 4 | 4  | 16 | GCTA | 29 | 3  |
| 37114 | 3 | 18012198 | 18012243 | 2 | 23 | 46 | GT   | 13 | 14 |
| 37115 | 3 | 18012413 | 18012428 | 2 | 8  | 16 | AC   | 20 | 5  |
| 37119 | 3 | 18017728 | 18017761 | 2 | 17 | 34 | CA   | 9  | 11 |
| 37125 | 3 | 18024400 | 18024441 | 2 | 21 | 42 | GT   | 12 | 11 |
| 37128 | 3 | 18027664 | 18027675 | 2 | 6  | 12 | CA   | 24 | 3  |
| 37138 | 3 | 18048689 | 18048704 | 2 | 8  | 16 | CA   | 20 | 10 |
| 37141 | 3 | 18055030 | 18055067 | 2 | 19 | 38 | TG   | 8  | 10 |
| 37143 | 3 | 18056957 | 18056968 | 2 | 6  | 12 | AC   | 23 | 3  |
| 37156 | 3 | 18079402 | 18079445 | 2 | 22 | 44 | AC   | 7  | 9  |
| 37170 | 3 | 18125736 | 18125751 | 4 | 4  | 16 | CCTC | 10 | 3  |
| 37178 | 3 | 18145433 | 18145447 | 3 | 5  | 15 | TCC  | 9  | 4  |
| 37182 | 3 | 18151716 | 18151736 | 3 | 7  | 21 | GGA  | 21 | 3  |
| 37183 | 3 | 18153236 | 18153259 | 2 | 12 | 24 | AC   | 17 | 9  |
| 37184 | 3 | 18153436 | 18153457 | 2 | 11 | 22 | TG   | 13 | 9  |
| 37186 | 3 | 18156890 | 18156905 | 2 | 8  | 16 | AC   | 30 | 3  |

|       |   |          |          |   |    |    |      |    |    |
|-------|---|----------|----------|---|----|----|------|----|----|
| 37193 | 3 | 18169116 | 18169131 | 2 | 8  | 16 | TG   | 20 | 3  |
| 37194 | 3 | 18169564 | 18169584 | 3 | 7  | 21 | CTG  | 29 | 8  |
| 37198 | 3 | 18181099 | 18181118 | 2 | 10 | 20 | CT   | 25 | 3  |
| 37199 | 3 | 18182882 | 18182917 | 2 | 18 | 36 | GT   | 7  | 10 |
| 37201 | 3 | 18183099 | 18183130 | 2 | 16 | 32 | TG   | 8  | 7  |
| 37205 | 3 | 18191112 | 18191126 | 3 | 5  | 15 | CTT  | 18 | 5  |
| 37209 | 3 | 18192976 | 18193009 | 2 | 17 | 34 | AC   | 16 | 9  |
| 37214 | 3 | 18198462 | 18198481 | 2 | 10 | 20 | CA   | 13 | 10 |
| 37223 | 3 | 18221812 | 18221841 | 2 | 15 | 30 | CT   | 15 | 9  |
| 37231 | 3 | 18250025 | 18250072 | 3 | 16 | 48 | CTT  | 18 | 16 |
| 37239 | 3 | 18285296 | 18285323 | 2 | 14 | 28 | CT   | 12 | 7  |
| 37240 | 3 | 18286002 | 18286021 | 2 | 10 | 20 | TG   | 19 | 9  |
| 37243 | 3 | 18320049 | 18320064 | 4 | 4  | 16 | TTAC | 14 | 8  |
| 37248 | 3 | 18332929 | 18332940 | 2 | 6  | 12 | TG   | 27 | 3  |
| 37252 | 3 | 18339616 | 18339630 | 3 | 5  | 15 | CTG  | 26 | 3  |
| 37254 | 3 | 18343427 | 18343450 | 2 | 12 | 24 | CT   | 20 | 5  |
| 37255 | 3 | 18344521 | 18344540 | 2 | 10 | 20 | TC   | 18 | 8  |
| 37256 | 3 | 18344834 | 18344851 | 2 | 9  | 18 | GA   | 20 | 9  |
| 37261 | 3 | 18362194 | 18362208 | 3 | 5  | 15 | AGC  | 23 | 6  |
| 37262 | 3 | 18362369 | 18362383 | 3 | 5  | 15 | AAC  | 30 | 5  |
| 37267 | 3 | 18370011 | 18370030 | 2 | 10 | 20 | CT   | 23 | 3  |
| 37270 | 3 | 18373630 | 18373644 | 3 | 5  | 15 | CAG  | 27 | 7  |
| 37271 | 3 | 18381699 | 18381714 | 4 | 4  | 16 | TATT | 17 | 3  |
| 37276 | 3 | 18385011 | 18385025 | 3 | 5  | 15 | CAA  | 25 | 4  |
| 37277 | 3 | 18385495 | 18385510 | 2 | 8  | 16 | CA   | 24 | 7  |
| 37278 | 3 | 18387657 | 18387678 | 2 | 11 | 22 | CT   | 24 | 5  |
| 37280 | 3 | 18390732 | 18390753 | 2 | 11 | 22 | CA   | 15 | 11 |
| 37281 | 3 | 18392990 | 18393011 | 2 | 11 | 22 | CA   | 23 | 5  |
| 37287 | 3 | 18431364 | 18431381 | 3 | 6  | 18 | CAA  | 19 | 4  |
| 37292 | 3 | 18447729 | 18447749 | 3 | 7  | 21 | TGC  | 17 | 6  |
| 37296 | 3 | 18461662 | 18461689 | 4 | 7  | 28 | AATC | 16 | 5  |
| 37313 | 3 | 18527897 | 18527944 | 4 | 12 | 48 | ATCT | 13 | 11 |
| 37322 | 3 | 18537311 | 18537328 | 3 | 6  | 18 | ATC  | 23 | 3  |
| 37324 | 3 | 18547598 | 18547612 | 3 | 5  | 15 | TGC  | 30 | 3  |
| 37329 | 3 | 18555116 | 18555131 | 4 | 4  | 16 | TTTA | 20 | 6  |
| 37330 | 3 | 18556555 | 18556584 | 2 | 15 | 30 | GT   | 16 | 12 |
| 37333 | 3 | 18561686 | 18561699 | 2 | 7  | 14 | TC   | 26 | 5  |
| 37342 | 3 | 18593443 | 18593470 | 2 | 14 | 28 | CA   | 13 | 12 |
| 37343 | 3 | 18594127 | 18594154 | 2 | 14 | 28 | CA   | 7  | 8  |
| 37345 | 3 | 18601518 | 18601532 | 3 | 5  | 15 | AGG  | 13 | 3  |
| 37360 | 3 | 18626572 | 18626585 | 2 | 7  | 14 | AC   | 25 | 4  |
| 37361 | 3 | 18629592 | 18629619 | 2 | 14 | 28 | GT   | 19 | 8  |
| 37362 | 3 | 18629704 | 18629715 | 2 | 6  | 12 | AC   | 31 | 3  |
| 37370 | 3 | 18649890 | 18649907 | 2 | 9  | 18 | CT   | 15 | 3  |
| 37375 | 3 | 18662905 | 18662922 | 2 | 9  | 18 | TA   | 16 | 4  |
| 37376 | 3 | 18664966 | 18664997 | 4 | 8  | 32 | GTCT | 22 | 16 |
| 37378 | 3 | 18669156 | 18669173 | 2 | 9  | 18 | CT   | 17 | 7  |
| 37379 | 3 | 18669174 | 18669185 | 2 | 6  | 12 | CA   | 13 | 8  |
| 37382 | 3 | 18670569 | 18670604 | 2 | 18 | 36 | TG   | 17 | 12 |
| 37387 | 3 | 18673400 | 18673415 | 4 | 4  | 16 | AAAC | 27 | 3  |
| 37392 | 3 | 18686757 | 18686772 | 2 | 8  | 16 | AC   | 20 | 9  |

|       |   |          |          |   |    |    |      |    |    |
|-------|---|----------|----------|---|----|----|------|----|----|
| 37401 | 3 | 18703834 | 18703851 | 2 | 9  | 18 | TG   | 16 | 10 |
| 37413 | 3 | 18728170 | 18728189 | 2 | 10 | 20 | CA   | 20 | 10 |
| 37422 | 3 | 18741606 | 18741617 | 2 | 6  | 12 | AC   | 25 | 3  |
| 37424 | 3 | 18742445 | 18742468 | 4 | 6  | 24 | AGAC | 30 | 4  |
| 37426 | 3 | 18747365 | 18747384 | 2 | 10 | 20 | GA   | 24 | 8  |
| 37434 | 3 | 18762740 | 18762759 | 2 | 10 | 20 | AG   | 8  | 9  |
| 37436 | 3 | 18763549 | 18763566 | 2 | 9  | 18 | AT   | 15 | 6  |
| 37437 | 3 | 18765303 | 18765326 | 2 | 12 | 24 | AC   | 17 | 7  |
| 37445 | 3 | 18768479 | 18768494 | 4 | 4  | 16 | TTTC | 18 | 3  |
| 37452 | 3 | 18774540 | 18774557 | 2 | 9  | 18 | TG   | 30 | 7  |
| 37454 | 3 | 18775428 | 18775442 | 3 | 5  | 15 | CTT  | 17 | 4  |
| 37458 | 3 | 18776765 | 18776782 | 2 | 9  | 18 | AC   | 16 | 14 |
| 37460 | 3 | 18780479 | 18780492 | 2 | 7  | 14 | CT   | 13 | 9  |
| 37463 | 3 | 18782728 | 18782755 | 2 | 14 | 28 | GT   | 20 | 9  |
| 37465 | 3 | 18783368 | 18783394 | 3 | 9  | 27 | AGA  | 20 | 8  |
| 37468 | 3 | 18796520 | 18796541 | 2 | 11 | 22 | TC   | 15 | 5  |
| 37470 | 3 | 18803080 | 18803097 | 2 | 9  | 18 | GT   | 21 | 3  |
| 37473 | 3 | 18805365 | 18805380 | 2 | 8  | 16 | GT   | 26 | 6  |
| 37474 | 3 | 18805487 | 18805506 | 2 | 10 | 20 | GA   | 23 | 4  |
| 37476 | 3 | 18807596 | 18807653 | 2 | 29 | 58 | CA   | 6  | 8  |
| 37477 | 3 | 18808042 | 18808063 | 2 | 11 | 22 | AC   | 14 | 16 |
| 37480 | 3 | 18808842 | 18808855 | 2 | 7  | 14 | GT   | 9  | 5  |
| 37483 | 3 | 18810786 | 18810799 | 2 | 7  | 14 | TG   | 23 | 6  |
| 37485 | 3 | 18814571 | 18814588 | 2 | 9  | 18 | AC   | 23 | 8  |
| 37490 | 3 | 18823619 | 18823639 | 3 | 7  | 21 | CTC  | 21 | 8  |
| 37493 | 3 | 18827611 | 18827624 | 2 | 7  | 14 | TC   | 23 | 10 |
| 37496 | 3 | 18847526 | 18847545 | 2 | 10 | 20 | AC   | 8  | 10 |
| 37502 | 3 | 18854306 | 18854317 | 2 | 6  | 12 | TC   | 25 | 4  |
| 37503 | 3 | 18855105 | 18855119 | 3 | 5  | 15 | CTG  | 24 | 4  |
| 37506 | 3 | 18857047 | 18857060 | 2 | 7  | 14 | GT   | 26 | 4  |
| 37511 | 3 | 18862317 | 18862328 | 2 | 6  | 12 | TG   | 15 | 6  |
| 37513 | 3 | 18862555 | 18862574 | 2 | 10 | 20 | AG   | 15 | 5  |
| 37515 | 3 | 18862729 | 18862740 | 2 | 6  | 12 | TC   | 19 | 7  |
| 37516 | 3 | 18868742 | 18868755 | 2 | 7  | 14 | GA   | 27 | 6  |
| 37521 | 3 | 18872166 | 18872177 | 2 | 6  | 12 | AC   | 29 | 3  |
| 37522 | 3 | 18875371 | 18875384 | 2 | 7  | 14 | TG   | 26 | 3  |
| 37537 | 3 | 18908229 | 18908252 | 2 | 12 | 24 | GT   | 21 | 11 |
| 37543 | 3 | 18932644 | 18932667 | 2 | 12 | 24 | TG   | 16 | 11 |
| 37544 | 3 | 18933938 | 18933955 | 2 | 9  | 18 | AC   | 20 | 4  |
| 37549 | 3 | 18943399 | 18943416 | 3 | 6  | 18 | CAG  | 31 | 5  |
| 37550 | 3 | 18944261 | 18944278 | 3 | 6  | 18 | AGG  | 30 | 3  |
| 37563 | 3 | 18968489 | 18968516 | 4 | 7  | 28 | GTTT | 26 | 4  |
| 37568 | 3 | 18978249 | 18978300 | 2 | 26 | 52 | AC   | 12 | 14 |
| 37572 | 3 | 19007215 | 19007229 | 3 | 5  | 15 | GAA  | 18 | 3  |
| 37573 | 3 | 19013815 | 19013840 | 2 | 13 | 26 | TG   | 18 | 9  |
| 37578 | 3 | 19025706 | 19025743 | 2 | 19 | 38 | GT   | 14 | 9  |
| 37599 | 3 | 19074504 | 19074517 | 2 | 7  | 14 | TC   | 27 | 4  |
| 37604 | 3 | 19078338 | 19078353 | 2 | 8  | 16 | TG   | 22 | 6  |
| 37606 | 3 | 19082851 | 19082864 | 2 | 7  | 14 | GT   | 21 | 5  |
| 37611 | 3 | 19101822 | 19101837 | 4 | 4  | 16 | TTTG | 25 | 3  |
| 37612 | 3 | 19102109 | 19102123 | 3 | 5  | 15 | TTA  | 11 | 3  |



|       |   |          |          |   |    |    |      |    |    |
|-------|---|----------|----------|---|----|----|------|----|----|
| 37614 | 3 | 19106645 | 19106662 | 3 | 6  | 18 | TCT  | 12 | 10 |
| 37616 | 3 | 19114875 | 19114886 | 2 | 6  | 12 | AC   | 23 | 7  |
| 37618 | 3 | 19119698 | 19119713 | 2 | 8  | 16 | AC   | 13 | 15 |
| 37621 | 3 | 19129466 | 19129480 | 3 | 5  | 15 | GTG  | 24 | 5  |
| 37624 | 3 | 19137983 | 19137998 | 4 | 4  | 16 | AAAT | 27 | 8  |
| 37634 | 3 | 19154835 | 19154848 | 2 | 7  | 14 | TG   | 21 | 4  |
| 37637 | 3 | 19169396 | 19169411 | 4 | 4  | 16 | ATTC | 30 | 3  |
| 37639 | 3 | 19187748 | 19187761 | 2 | 7  | 14 | TG   | 23 | 3  |
| 37646 | 3 | 19206114 | 19206125 | 2 | 6  | 12 | AC   | 26 | 3  |
| 37658 | 3 | 19228369 | 19228386 | 2 | 9  | 18 | GT   | 24 | 9  |
| 37660 | 3 | 19232533 | 19232550 | 2 | 9  | 18 | TG   | 16 | 9  |
| 37667 | 3 | 19245895 | 19245910 | 4 | 4  | 16 | TTCA | 35 | 3  |
| 37668 | 3 | 19248145 | 19248176 | 2 | 16 | 32 | AC   | 10 | 10 |
| 37677 | 3 | 19269025 | 19269050 | 2 | 13 | 26 | TG   | 16 | 9  |
| 37680 | 3 | 19271127 | 19271138 | 2 | 6  | 12 | TG   | 11 | 4  |
| 37681 | 3 | 19271140 | 19271155 | 2 | 8  | 16 | GT   | 12 | 4  |
| 37683 | 3 | 19273222 | 19273237 | 2 | 8  | 16 | AC   | 18 | 6  |
| 37691 | 3 | 19280931 | 19280942 | 2 | 6  | 12 | CT   | 22 | 5  |
| 37696 | 3 | 19284209 | 19284226 | 2 | 9  | 18 | GT   | 12 | 15 |
| 37698 | 3 | 19284519 | 19284536 | 2 | 9  | 18 | AC   | 9  | 3  |
| 37699 | 3 | 19284754 | 19284769 | 2 | 8  | 16 | CA   | 20 | 7  |
| 37700 | 3 | 19284942 | 19284973 | 2 | 16 | 32 | AC   | 6  | 8  |
| 37701 | 3 | 19285116 | 19285129 | 2 | 7  | 14 | AC   | 16 | 10 |
| 37708 | 3 | 19287994 | 19288007 | 2 | 7  | 14 | CT   | 7  | 4  |
| 37715 | 3 | 19303047 | 19303103 | 3 | 19 | 57 | TTC  | 17 | 12 |
| 37720 | 3 | 19311818 | 19311831 | 2 | 7  | 14 | GT   | 18 | 7  |
| 37721 | 3 | 19312018 | 19312031 | 2 | 7  | 14 | TG   | 27 | 8  |
| 37724 | 3 | 19315011 | 19315034 | 3 | 8  | 24 | CTC  | 25 | 5  |
| 37725 | 3 | 19315592 | 19315609 | 3 | 6  | 18 | GGA  | 14 | 3  |
| 37727 | 3 | 19316043 | 19316058 | 4 | 4  | 16 | CGCT | 21 | 6  |
| 37731 | 3 | 19317838 | 19317863 | 2 | 13 | 26 | TG   | 20 | 8  |
| 37735 | 3 | 19321072 | 19321111 | 2 | 20 | 40 | AC   | 10 | 8  |
| 37736 | 3 | 19321243 | 19321256 | 2 | 7  | 14 | AC   | 9  | 3  |
| 37739 | 3 | 19321286 | 19321315 | 2 | 15 | 30 | CA   | 8  | 6  |
| 37747 | 3 | 19324417 | 19324442 | 2 | 13 | 26 | AC   | 11 | 7  |
| 37750 | 3 | 19326426 | 19326453 | 2 | 14 | 28 | GA   | 23 | 11 |
| 37752 | 3 | 19327117 | 19327131 | 3 | 5  | 15 | GAG  | 6  | 4  |
| 37756 | 3 | 19329453 | 19329466 | 2 | 7  | 14 | CT   | 6  | 3  |
| 37757 | 3 | 19330087 | 19330102 | 4 | 4  | 16 | ATCT | 15 | 6  |
| 37759 | 3 | 19331673 | 19331696 | 3 | 8  | 24 | CTG  | 19 | 10 |
| 37760 | 3 | 19332420 | 19332439 | 2 | 10 | 20 | GT   | 13 | 10 |
| 37762 | 3 | 19334167 | 19334198 | 2 | 16 | 32 | AC   | 22 | 7  |
| 37763 | 3 | 19334749 | 19334770 | 2 | 11 | 22 | TG   | 9  | 6  |
| 37765 | 3 | 19335236 | 19335268 | 3 | 11 | 33 | CCT  | 14 | 10 |
| 37768 | 3 | 19337668 | 19337681 | 2 | 7  | 14 | CT   | 32 | 9  |
| 37771 | 3 | 19340139 | 19340165 | 3 | 9  | 27 | TCC  | 14 | 8  |
| 37776 | 3 | 19349879 | 19349906 | 4 | 7  | 28 | GAAA | 19 | 11 |
| 37778 | 3 | 19352573 | 19352612 | 4 | 10 | 40 | GATA | 17 | 9  |
| 37779 | 3 | 19353427 | 19353442 | 2 | 8  | 16 | CT   | 27 | 4  |
| 37780 | 3 | 19353573 | 19353586 | 2 | 7  | 14 | AC   | 22 | 12 |
| 37781 | 3 | 19354104 | 19354127 | 2 | 12 | 24 | AC   | 19 | 13 |

|       |   |          |          |   |    |    |      |    |    |
|-------|---|----------|----------|---|----|----|------|----|----|
| 37785 | 3 | 19356802 | 19356831 | 2 | 15 | 30 | CA   | 12 | 13 |
| 37786 | 3 | 19357246 | 19357257 | 2 | 6  | 12 | AT   | 16 | 3  |
| 37788 | 3 | 19357504 | 19357531 | 2 | 14 | 28 | GT   | 10 | 8  |
| 37794 | 3 | 19383892 | 19383903 | 2 | 6  | 12 | CA   | 30 | 4  |
| 37796 | 3 | 19387660 | 19387675 | 2 | 8  | 16 | TG   | 24 | 5  |
| 37798 | 3 | 19399050 | 19399065 | 2 | 8  | 16 | AC   | 29 | 3  |
| 37799 | 3 | 19400604 | 19400635 | 2 | 16 | 32 | TG   | 24 | 14 |
| 37801 | 3 | 19405078 | 19405093 | 4 | 4  | 16 | AATT | 16 | 3  |
| 37804 | 3 | 19408384 | 19408409 | 2 | 13 | 26 | GT   | 9  | 6  |
| 37809 | 3 | 19417733 | 19417758 | 2 | 13 | 26 | AC   | 19 | 10 |
| 37812 | 3 | 19419833 | 19419884 | 2 | 26 | 52 | AC   | 9  | 11 |
| 37822 | 3 | 19436252 | 19436263 | 2 | 6  | 12 | TG   | 23 | 3  |
| 37823 | 3 | 19439701 | 19439720 | 2 | 10 | 20 | CA   | 12 | 13 |
| 37825 | 3 | 19442657 | 19442671 | 3 | 5  | 15 | CGC  | 21 | 5  |
| 37831 | 3 | 19450600 | 19450633 | 2 | 17 | 34 | AC   | 23 | 13 |
| 37833 | 3 | 19453821 | 19453835 | 3 | 5  | 15 | GAT  | 11 | 5  |
| 37834 | 3 | 19453839 | 19453853 | 3 | 5  | 15 | GAT  | 8  | 3  |
| 37835 | 3 | 19456780 | 19456795 | 2 | 8  | 16 | GA   | 19 | 5  |
| 37839 | 3 | 19459316 | 19459333 | 2 | 9  | 18 | CA   | 21 | 18 |
| 37840 | 3 | 19460025 | 19460036 | 2 | 6  | 12 | CA   | 23 | 3  |
| 37841 | 3 | 19461776 | 19461789 | 2 | 7  | 14 | AC   | 8  | 3  |
| 37842 | 3 | 19461836 | 19461855 | 2 | 10 | 20 | AC   | 6  | 6  |
| 37843 | 3 | 19462066 | 19462105 | 2 | 20 | 40 | AC   | 13 | 11 |
| 37852 | 3 | 19480824 | 19480839 | 4 | 4  | 16 | TCCA | 23 | 3  |
| 37860 | 3 | 19490918 | 19490933 | 2 | 8  | 16 | AC   | 17 | 8  |
| 37861 | 3 | 19491030 | 19491061 | 2 | 16 | 32 | TG   | 14 | 12 |
| 37862 | 3 | 19491450 | 19491475 | 2 | 13 | 26 | TG   | 13 | 11 |
| 37863 | 3 | 19491907 | 19491932 | 2 | 13 | 26 | GT   | 13 | 14 |
| 37865 | 3 | 19496079 | 19496093 | 3 | 5  | 15 | CAC  | 23 | 3  |
| 37866 | 3 | 19496346 | 19496365 | 2 | 10 | 20 | AC   | 20 | 10 |
| 37867 | 3 | 19497601 | 19497638 | 2 | 19 | 38 | GT   | 10 | 15 |
| 37868 | 3 | 19497812 | 19497837 | 2 | 13 | 26 | AC   | 21 | 7  |
| 37869 | 3 | 19505778 | 19505793 | 2 | 8  | 16 | TC   | 27 | 3  |
| 37870 | 3 | 19510085 | 19510116 | 2 | 16 | 32 | CA   | 13 | 10 |
| 37875 | 3 | 19528066 | 19528083 | 2 | 9  | 18 | TG   | 14 | 5  |
| 37876 | 3 | 19528728 | 19528743 | 4 | 4  | 16 | TTTC | 23 | 4  |
| 37880 | 3 | 19534319 | 19534330 | 2 | 6  | 12 | TG   | 20 | 3  |
| 37881 | 3 | 19534758 | 19534785 | 4 | 7  | 28 | TTTC | 15 | 6  |
| 37882 | 3 | 19535198 | 19535217 | 2 | 10 | 20 | AG   | 13 | 5  |
| 37883 | 3 | 19535449 | 19535466 | 3 | 6  | 18 | TGC  | 32 | 3  |
| 37885 | 3 | 19536072 | 19536085 | 2 | 7  | 14 | TG   | 17 | 7  |
| 37886 | 3 | 19536205 | 19536218 | 2 | 7  | 14 | AT   | 13 | 4  |
| 37889 | 3 | 19537706 | 19537723 | 3 | 6  | 18 | AAG  | 13 | 4  |
| 37893 | 3 | 19549222 | 19549239 | 2 | 9  | 18 | CA   | 23 | 11 |
| 37894 | 3 | 19552097 | 19552112 | 2 | 8  | 16 | CT   | 25 | 4  |
| 37898 | 3 | 19563222 | 19563239 | 3 | 6  | 18 | TTA  | 23 | 4  |
| 37908 | 3 | 19598042 | 19598059 | 2 | 9  | 18 | TG   | 15 | 5  |
| 37909 | 3 | 19600331 | 19600364 | 2 | 17 | 34 | AC   | 15 | 8  |
| 37910 | 3 | 19600753 | 19600766 | 2 | 7  | 14 | TG   | 25 | 3  |
| 37911 | 3 | 19604071 | 19604086 | 2 | 8  | 16 | TG   | 21 | 5  |
| 37913 | 3 | 19605939 | 19605954 | 2 | 8  | 16 | GA   | 24 | 7  |

|       |   |          |          |   |    |    |      |    |    |
|-------|---|----------|----------|---|----|----|------|----|----|
| 37915 | 3 | 19606879 | 19606894 | 2 | 8  | 16 | TG   | 26 | 3  |
| 37918 | 3 | 19613462 | 19613476 | 3 | 5  | 15 | GCA  | 25 | 4  |
| 37923 | 3 | 19618019 | 19618042 | 3 | 8  | 24 | CCT  | 22 | 6  |
| 37931 | 3 | 19622821 | 19622853 | 3 | 11 | 33 | CCT  | 18 | 9  |
| 37932 | 3 | 19622928 | 19622953 | 2 | 13 | 26 | GT   | 12 | 7  |
| 37935 | 3 | 19624231 | 19624254 | 3 | 8  | 24 | CCT  | 18 | 4  |
| 37936 | 3 | 19628310 | 19628323 | 2 | 7  | 14 | CA   | 21 | 7  |
| 37937 | 3 | 19629335 | 19629366 | 4 | 8  | 32 | AACA | 25 | 9  |
| 37941 | 3 | 19638474 | 19638493 | 2 | 10 | 20 | GT   | 20 | 7  |
| 37949 | 3 | 19656405 | 19656416 | 2 | 6  | 12 | CT   | 24 | 4  |
| 37950 | 3 | 19660240 | 19660255 | 4 | 4  | 16 | TAGT | 32 | 4  |
| 37954 | 3 | 19679669 | 19679680 | 2 | 6  | 12 | TA   | 23 | 4  |
| 37958 | 3 | 19695188 | 19695251 | 4 | 16 | 64 | ATAG | 11 | 8  |
| 37962 | 3 | 19699671 | 19699684 | 2 | 7  | 14 | TG   | 27 | 3  |
| 37969 | 3 | 19722385 | 19722396 | 2 | 6  | 12 | TG   | 19 | 4  |
| 37976 | 3 | 19736024 | 19736039 | 2 | 8  | 16 | CA   | 19 | 3  |
| 37978 | 3 | 19737256 | 19737270 | 3 | 5  | 15 | GGT  | 11 | 3  |
| 37982 | 3 | 19739187 | 19739210 | 2 | 12 | 24 | TG   | 31 | 11 |
| 37985 | 3 | 19740566 | 19740581 | 4 | 4  | 16 | TTCT | 19 | 5  |
| 37989 | 3 | 19742836 | 19742851 | 2 | 8  | 16 | GT   | 18 | 4  |
| 37991 | 3 | 19744949 | 19744972 | 2 | 12 | 24 | CA   | 10 | 7  |
| 37999 | 3 | 19752537 | 19752556 | 2 | 10 | 20 | AG   | 17 | 7  |
| 38003 | 3 | 19762969 | 19762986 | 3 | 6  | 18 | CCA  | 14 | 10 |
| 38013 | 3 | 19773000 | 19773017 | 3 | 6  | 18 | TCC  | 19 | 12 |
| 38014 | 3 | 19773266 | 19773304 | 3 | 13 | 39 | CAT  | 13 | 9  |
| 38018 | 3 | 19781177 | 19781194 | 2 | 9  | 18 | CA   | 25 | 3  |
| 38019 | 3 | 19781287 | 19781301 | 3 | 5  | 15 | GAA  | 11 | 4  |
| 38021 | 3 | 19786537 | 19786568 | 2 | 16 | 32 | GT   | 14 | 11 |
| 38022 | 3 | 19792597 | 19792610 | 2 | 7  | 14 | AC   | 17 | 12 |
| 38023 | 3 | 19793883 | 19793896 | 2 | 7  | 14 | AT   | 25 | 5  |
| 38026 | 3 | 19804611 | 19804643 | 3 | 11 | 33 | CTC  | 7  | 4  |
| 38028 | 3 | 19805386 | 19805403 | 3 | 6  | 18 | CCT  | 24 | 9  |
| 38034 | 3 | 19809547 | 19809560 | 2 | 7  | 14 | AG   | 21 | 3  |
| 38035 | 3 | 19812624 | 19812635 | 2 | 6  | 12 | CA   | 27 | 5  |
| 38037 | 3 | 19815606 | 19815631 | 2 | 13 | 26 | TG   | 15 | 12 |
| 38039 | 3 | 19816646 | 19816667 | 2 | 11 | 22 | GT   | 10 | 9  |
| 38041 | 3 | 19819446 | 19819466 | 3 | 7  | 21 | GCT  | 18 | 6  |
| 38043 | 3 | 19821810 | 19821827 | 2 | 9  | 18 | AG   | 27 | 7  |
| 38045 | 3 | 19822515 | 19822530 | 2 | 8  | 16 | TG   | 18 | 6  |
| 38047 | 3 | 19824951 | 19824965 | 3 | 5  | 15 | CTG  | 26 | 3  |
| 38048 | 3 | 19827472 | 19827487 | 4 | 4  | 16 | CATC | 28 | 7  |
| 38060 | 3 | 19843784 | 19843799 | 2 | 8  | 16 | AC   | 21 | 17 |
| 38063 | 3 | 19849777 | 19849796 | 4 | 5  | 20 | ATGT | 17 | 7  |
| 38065 | 3 | 19853923 | 19853934 | 2 | 6  | 12 | AC   | 19 | 7  |
| 38067 | 3 | 19856221 | 19856236 | 2 | 8  | 16 | CA   | 25 | 7  |
| 38068 | 3 | 19859224 | 19859245 | 2 | 11 | 22 | TG   | 19 | 15 |
| 38069 | 3 | 19859745 | 19859764 | 2 | 10 | 20 | TG   | 24 | 8  |
| 38072 | 3 | 19860916 | 19860933 | 2 | 9  | 18 | GT   | 14 | 7  |
| 38073 | 3 | 19860935 | 19860954 | 2 | 10 | 20 | TG   | 24 | 13 |
| 38075 | 3 | 19862380 | 19862391 | 2 | 6  | 12 | GT   | 21 | 3  |
| 38085 | 3 | 19878801 | 19878826 | 2 | 13 | 26 | CT   | 24 | 7  |

|       |   |          |          |   |    |    |      |    |    |
|-------|---|----------|----------|---|----|----|------|----|----|
| 38088 | 3 | 19882494 | 19882519 | 2 | 13 | 26 | GT   | 21 | 6  |
| 38102 | 3 | 19889820 | 19889831 | 2 | 6  | 12 | AC   | 33 | 3  |
| 38106 | 3 | 19905190 | 19905213 | 2 | 12 | 24 | TG   | 14 | 6  |
| 38107 | 3 | 19906098 | 19906129 | 4 | 8  | 32 | CCTT | 28 | 13 |
| 38112 | 3 | 19909322 | 19909339 | 3 | 6  | 18 | TCA  | 23 | 12 |
| 38114 | 3 | 19911719 | 19911750 | 2 | 16 | 32 | AC   | 9  | 12 |
| 38116 | 3 | 19913305 | 19913370 | 3 | 22 | 66 | TCT  | 12 | 14 |
| 38117 | 3 | 19913682 | 19913705 | 3 | 8  | 24 | CCT  | 7  | 5  |
| 38118 | 3 | 19913942 | 19913971 | 2 | 15 | 30 | TG   | 14 | 10 |
| 38119 | 3 | 19914448 | 19914463 | 2 | 8  | 16 | CT   | 22 | 10 |
| 38130 | 3 | 19925289 | 19925303 | 3 | 5  | 15 | TAT  | 26 | 5  |
| 38133 | 3 | 19934499 | 19934512 | 2 | 7  | 14 | TA   | 26 | 6  |
| 38135 | 3 | 19937533 | 19937547 | 3 | 5  | 15 | CCA  | 21 | 3  |
| 38136 | 3 | 19937548 | 19937562 | 3 | 5  | 15 | CCT  | 17 | 4  |
| 38137 | 3 | 19937809 | 19937826 | 3 | 6  | 18 | TGC  | 19 | 11 |
| 38138 | 3 | 19937943 | 19937956 | 2 | 7  | 14 | TG   | 20 | 10 |
| 38139 | 3 | 19937958 | 19937969 | 2 | 6  | 12 | GT   | 21 | 8  |
| 38140 | 3 | 19938146 | 19938173 | 2 | 14 | 28 | TG   | 11 | 9  |
| 38147 | 3 | 19939941 | 19939954 | 2 | 7  | 14 | AT   | 21 | 5  |
| 38148 | 3 | 19940818 | 19940829 | 2 | 6  | 12 | GA   | 11 | 4  |
| 38149 | 3 | 19943897 | 19943922 | 2 | 13 | 26 | TG   | 13 | 5  |
| 38151 | 3 | 19944599 | 19944622 | 4 | 6  | 24 | TGAA | 14 | 5  |
| 38154 | 3 | 19945039 | 19945068 | 2 | 15 | 30 | GT   | 8  | 7  |
| 38162 | 3 | 19952017 | 19952044 | 2 | 14 | 28 | GT   | 21 | 16 |
| 38163 | 3 | 19952249 | 19952272 | 3 | 8  | 24 | GGA  | 22 | 5  |
| 38166 | 3 | 19962216 | 19962233 | 2 | 9  | 18 | AG   | 23 | 4  |
| 38171 | 3 | 19969828 | 19969861 | 2 | 17 | 34 | TG   | 15 | 11 |
| 38172 | 3 | 19970082 | 19970103 | 2 | 11 | 22 | TC   | 21 | 3  |
| 38173 | 3 | 19970222 | 19970235 | 2 | 7  | 14 | TC   | 24 | 4  |
| 38175 | 3 | 19974628 | 19974645 | 2 | 9  | 18 | CT   | 26 | 7  |
| 38188 | 3 | 19992138 | 19992171 | 2 | 17 | 34 | GT   | 8  | 7  |
| 38195 | 3 | 20002754 | 20002768 | 3 | 5  | 15 | TCA  | 26 | 3  |
| 38196 | 3 | 20003910 | 20003943 | 2 | 17 | 34 | GT   | 7  | 11 |
| 38197 | 3 | 20004002 | 20004015 | 2 | 7  | 14 | AC   | 25 | 3  |
| 38203 | 3 | 20020378 | 20020393 | 2 | 8  | 16 | GT   | 22 | 6  |
| 38204 | 3 | 20022568 | 20022587 | 2 | 10 | 20 | AC   | 21 | 3  |
| 38205 | 3 | 20024098 | 20024115 | 2 | 9  | 18 | AC   | 20 | 7  |
| 38208 | 3 | 20032065 | 20032094 | 3 | 10 | 30 | GCT  | 17 | 10 |
| 38210 | 3 | 20036495 | 20036510 | 2 | 8  | 16 | GT   | 14 | 9  |
| 38212 | 3 | 20038661 | 20038676 | 2 | 8  | 16 | TG   | 21 | 4  |
| 38215 | 3 | 20042080 | 20042094 | 3 | 5  | 15 | ACC  | 22 | 4  |
| 38216 | 3 | 20042291 | 20042302 | 2 | 6  | 12 | AT   | 15 | 5  |
| 38219 | 3 | 20046933 | 20046950 | 3 | 6  | 18 | TCA  | 30 | 3  |
| 38221 | 3 | 20052098 | 20052115 | 2 | 9  | 18 | GT   | 24 | 5  |
| 38223 | 3 | 20053701 | 20053718 | 2 | 9  | 18 | TG   | 8  | 7  |
| 38224 | 3 | 20053720 | 20053739 | 2 | 10 | 20 | TG   | 8  | 7  |
| 38241 | 3 | 20083768 | 20083785 | 3 | 6  | 18 | CTT  | 22 | 14 |
| 38249 | 3 | 20092706 | 20092717 | 2 | 6  | 12 | TC   | 33 | 3  |
| 38252 | 3 | 20097703 | 20097742 | 2 | 20 | 40 | GT   | 11 | 11 |
| 38254 | 3 | 20106661 | 20106684 | 2 | 12 | 24 | GA   | 19 | 11 |
| 38255 | 3 | 20106768 | 20106783 | 4 | 4  | 16 | AAAG | 14 | 5  |

|       |   |          |          |   |    |    |      |    |    |
|-------|---|----------|----------|---|----|----|------|----|----|
| 38260 | 3 | 20119314 | 20119329 | 4 | 4  | 16 | AGCT | 25 | 4  |
| 38261 | 3 | 20123153 | 20123170 | 3 | 6  | 18 | TTA  | 24 | 6  |
| 38266 | 3 | 20134757 | 20134783 | 3 | 9  | 27 | CAT  | 19 | 4  |
| 38267 | 3 | 20135251 | 20135265 | 3 | 5  | 15 | AAG  | 17 | 7  |
| 38286 | 3 | 20164250 | 20164271 | 2 | 11 | 22 | AC   | 21 | 11 |
| 38300 | 3 | 20174255 | 20174287 | 3 | 11 | 33 | AGA  | 19 | 10 |
| 38302 | 3 | 20174637 | 20174654 | 3 | 6  | 18 | GAA  | 19 | 7  |
| 38304 | 3 | 20175383 | 20175400 | 2 | 9  | 18 | GA   | 23 | 5  |
| 38305 | 3 | 20176017 | 20176046 | 2 | 15 | 30 | CA   | 14 | 10 |
| 38306 | 3 | 20176247 | 20176264 | 2 | 9  | 18 | CA   | 18 | 8  |
| 38309 | 3 | 20179832 | 20179855 | 2 | 12 | 24 | AC   | 22 | 11 |
| 38310 | 3 | 20179900 | 20179913 | 2 | 7  | 14 | GT   | 23 | 5  |
| 38314 | 3 | 20183264 | 20183275 | 2 | 6  | 12 | AC   | 30 | 4  |
| 38320 | 3 | 20192626 | 20192647 | 2 | 11 | 22 | CA   | 10 | 7  |
| 38326 | 3 | 20197485 | 20197520 | 2 | 18 | 36 | TG   | 10 | 10 |
| 38327 | 3 | 20198129 | 20198150 | 2 | 11 | 22 | GT   | 15 | 15 |
| 38332 | 3 | 20202545 | 20202556 | 2 | 6  | 12 | CT   | 32 | 4  |
| 38336 | 3 | 20207750 | 20207767 | 2 | 9  | 18 | AG   | 19 | 7  |
| 38338 | 3 | 20211930 | 20211947 | 2 | 9  | 18 | TG   | 19 | 9  |
| 38345 | 3 | 20225644 | 20225671 | 2 | 14 | 28 | AC   | 17 | 10 |
| 38347 | 3 | 20230421 | 20230438 | 2 | 9  | 18 | AG   | 21 | 6  |
| 38348 | 3 | 20231959 | 20231984 | 2 | 13 | 26 | CA   | 17 | 9  |
| 38350 | 3 | 20236217 | 20236230 | 2 | 7  | 14 | AC   | 18 | 5  |
| 38354 | 3 | 20244372 | 20244403 | 2 | 16 | 32 | CA   | 13 | 8  |
| 38355 | 3 | 20246494 | 20246509 | 2 | 8  | 16 | AC   | 30 | 5  |
| 38360 | 3 | 20254302 | 20254331 | 2 | 15 | 30 | TG   | 13 | 7  |
| 38364 | 3 | 20257556 | 20257569 | 2 | 7  | 14 | TG   | 18 | 3  |
| 38365 | 3 | 20259147 | 20259162 | 2 | 8  | 16 | GT   | 27 | 3  |
| 38370 | 3 | 20266291 | 20266302 | 2 | 6  | 12 | CA   | 20 | 4  |
| 38371 | 3 | 20269138 | 20269167 | 2 | 15 | 30 | CA   | 15 | 12 |
| 38372 | 3 | 20269423 | 20269434 | 2 | 6  | 12 | TG   | 8  | 5  |
| 38373 | 3 | 20269437 | 20269452 | 2 | 8  | 16 | TG   | 20 | 9  |
| 38376 | 3 | 20274087 | 20274110 | 2 | 12 | 24 | AC   | 16 | 15 |
| 38379 | 3 | 20274552 | 20274589 | 2 | 19 | 38 | AC   | 9  | 15 |
| 38384 | 3 | 20286501 | 20286524 | 2 | 12 | 24 | AC   | 13 | 10 |
| 38387 | 3 | 20293143 | 20293162 | 2 | 10 | 20 | CA   | 14 | 9  |
| 38388 | 3 | 20298878 | 20298893 | 2 | 8  | 16 | AC   | 25 | 4  |
| 38389 | 3 | 20299584 | 20299599 | 2 | 8  | 16 | TG   | 7  | 5  |
| 38390 | 3 | 20299613 | 20299626 | 2 | 7  | 14 | GT   | 7  | 6  |
| 38392 | 3 | 20299854 | 20299883 | 2 | 15 | 30 | TG   | 13 | 7  |
| 38393 | 3 | 20300115 | 20300132 | 2 | 9  | 18 | GT   | 19 | 4  |
| 38397 | 3 | 20305929 | 20305946 | 2 | 9  | 18 | AC   | 17 | 8  |
| 38400 | 3 | 20308962 | 20309013 | 4 | 13 | 52 | TATC | 14 | 7  |
| 38401 | 3 | 20311634 | 20311659 | 2 | 13 | 26 | TG   | 31 | 9  |
| 38406 | 3 | 20316408 | 20316419 | 2 | 6  | 12 | CA   | 21 | 4  |
| 38409 | 3 | 20321327 | 20321340 | 2 | 7  | 14 | TA   | 9  | 9  |
| 38410 | 3 | 20321341 | 20321360 | 2 | 10 | 20 | CA   | 9  | 11 |
| 38411 | 3 | 20328778 | 20328791 | 2 | 7  | 14 | AC   | 29 | 8  |
| 38414 | 3 | 20331295 | 20331310 | 4 | 4  | 16 | AAAT | 30 | 4  |
| 38415 | 3 | 20337619 | 20337630 | 2 | 6  | 12 | CA   | 28 | 9  |
| 38418 | 3 | 20344242 | 20344281 | 2 | 20 | 40 | TC   | 21 | 9  |

|       |   |          |          |   |    |    |      |    |    |
|-------|---|----------|----------|---|----|----|------|----|----|
| 38437 | 3 | 20373133 | 20373174 | 2 | 21 | 42 | AC   | 16 | 12 |
| 38438 | 3 | 20373733 | 20373747 | 3 | 5  | 15 | GCT  | 23 | 8  |
| 38442 | 3 | 20382205 | 20382226 | 2 | 11 | 22 | GT   | 23 | 12 |
| 38446 | 3 | 20392766 | 20392783 | 2 | 9  | 18 | TG   | 21 | 6  |
| 38448 | 3 | 20396616 | 20396633 | 3 | 6  | 18 | CAA  | 22 | 4  |
| 38449 | 3 | 20397057 | 20397072 | 2 | 8  | 16 | GT   | 17 | 4  |
| 38456 | 3 | 20402455 | 20402470 | 2 | 8  | 16 | AC   | 29 | 4  |
| 38459 | 3 | 20402755 | 20402782 | 2 | 14 | 28 | AC   | 11 | 9  |
| 38461 | 3 | 20409038 | 20409065 | 2 | 14 | 28 | GT   | 18 | 9  |
| 38462 | 3 | 20409417 | 20409448 | 2 | 16 | 32 | CA   | 10 | 9  |
| 38466 | 3 | 20414341 | 20414368 | 2 | 14 | 28 | AC   | 6  | 9  |
| 38477 | 3 | 20419356 | 20419373 | 3 | 6  | 18 | GAG  | 27 | 4  |
| 38480 | 3 | 20428768 | 20428783 | 2 | 8  | 16 | AC   | 23 | 7  |
| 38482 | 3 | 20431027 | 20431038 | 2 | 6  | 12 | GT   | 10 | 4  |
| 38488 | 3 | 20438940 | 20438953 | 2 | 7  | 14 | AG   | 24 | 5  |
| 38489 | 3 | 20439279 | 20439294 | 2 | 8  | 16 | AC   | 18 | 11 |
| 38503 | 3 | 20452235 | 20452256 | 2 | 11 | 22 | AG   | 14 | 5  |
| 38506 | 3 | 20459385 | 20459412 | 4 | 7  | 28 | GCTG | 24 | 5  |
| 38515 | 3 | 20476411 | 20476430 | 2 | 10 | 20 | TA   | 10 | 13 |
| 38520 | 3 | 20483557 | 20483586 | 2 | 15 | 30 | GT   | 19 | 10 |
| 38526 | 3 | 20487411 | 20487436 | 2 | 13 | 26 | GT   | 20 | 10 |
| 38531 | 3 | 20493131 | 20493168 | 2 | 19 | 38 | GT   | 12 | 10 |
| 38537 | 3 | 20498175 | 20498188 | 2 | 7  | 14 | CT   | 23 | 4  |
| 38539 | 3 | 20498563 | 20498582 | 2 | 10 | 20 | GT   | 21 | 6  |
| 38540 | 3 | 20498785 | 20498806 | 2 | 11 | 22 | AC   | 20 | 5  |
| 38542 | 3 | 20501127 | 20501154 | 2 | 14 | 28 | AG   | 20 | 7  |
| 38546 | 3 | 20507981 | 20508000 | 2 | 10 | 20 | AC   | 21 | 5  |
| 38548 | 3 | 20510187 | 20510200 | 2 | 7  | 14 | AC   | 14 | 5  |
| 38550 | 3 | 20512509 | 20512532 | 3 | 8  | 24 | CAT  | 23 | 5  |
| 38551 | 3 | 20512836 | 20512847 | 2 | 6  | 12 | CA   | 19 | 5  |
| 38556 | 3 | 20521983 | 20522004 | 2 | 11 | 22 | AC   | 13 | 10 |
| 38557 | 3 | 20522037 | 20522054 | 2 | 9  | 18 | AC   | 13 | 8  |
| 38558 | 3 | 20523065 | 20523080 | 4 | 4  | 16 | ATAC | 14 | 3  |
| 38560 | 3 | 20524381 | 20524394 | 2 | 7  | 14 | AC   | 10 | 12 |
| 38561 | 3 | 20524396 | 20524409 | 2 | 7  | 14 | CA   | 12 | 12 |
| 38562 | 3 | 20525125 | 20525142 | 2 | 9  | 18 | CA   | 9  | 10 |
| 38563 | 3 | 20526738 | 20526755 | 2 | 9  | 18 | TG   | 19 | 11 |
| 38568 | 3 | 20531193 | 20531214 | 2 | 11 | 22 | CA   | 16 | 11 |
| 38569 | 3 | 20531372 | 20531386 | 3 | 5  | 15 | CTT  | 33 | 9  |
| 38570 | 3 | 20531388 | 20531405 | 3 | 6  | 18 | TTC  | 26 | 6  |
| 38571 | 3 | 20531836 | 20531847 | 2 | 6  | 12 | CA   | 25 | 5  |
| 38572 | 3 | 20532643 | 20532680 | 2 | 19 | 38 | TG   | 8  | 10 |
| 38576 | 3 | 20537185 | 20537199 | 3 | 5  | 15 | ATT  | 8  | 7  |
| 38577 | 3 | 20537504 | 20537530 | 3 | 9  | 27 | TCC  | 18 | 6  |
| 38584 | 3 | 20549977 | 20549992 | 2 | 8  | 16 | TG   | 16 | 12 |
| 38585 | 3 | 20550212 | 20550247 | 2 | 18 | 36 | GT   | 9  | 13 |
| 38588 | 3 | 20550702 | 20550719 | 3 | 6  | 18 | CTG  | 29 | 3  |
| 38594 | 3 | 20553847 | 20553866 | 2 | 10 | 20 | TG   | 13 | 11 |
| 38604 | 3 | 20566343 | 20566357 | 3 | 5  | 15 | ACA  | 16 | 9  |
| 38608 | 3 | 20574953 | 20574968 | 2 | 8  | 16 | TG   | 15 | 5  |
| 38611 | 3 | 20578630 | 20578649 | 2 | 10 | 20 | CA   | 12 | 12 |

|       |   |          |          |   |    |    |      |    |    |
|-------|---|----------|----------|---|----|----|------|----|----|
| 38616 | 3 | 20582376 | 20582399 | 2 | 12 | 24 | CA   | 15 | 15 |
| 38618 | 3 | 20584822 | 20584851 | 2 | 15 | 30 | GT   | 15 | 11 |
| 38624 | 3 | 20596737 | 20596750 | 2 | 7  | 14 | AG   | 18 | 7  |
| 38639 | 3 | 20636083 | 20636100 | 3 | 6  | 18 | GGT  | 23 | 6  |
| 38640 | 3 | 20636841 | 20636855 | 3 | 5  | 15 | ACA  | 26 | 5  |
| 38641 | 3 | 20637484 | 20637499 | 4 | 4  | 16 | GAGC | 23 | 5  |
| 38642 | 3 | 20637581 | 20637618 | 2 | 19 | 38 | GT   | 8  | 10 |
| 38646 | 3 | 20643913 | 20643942 | 2 | 15 | 30 | GT   | 19 | 11 |
| 38657 | 3 | 20673692 | 20673705 | 2 | 7  | 14 | GT   | 23 | 3  |
| 38658 | 3 | 20674385 | 20674398 | 2 | 7  | 14 | GT   | 18 | 10 |
| 38666 | 3 | 20682860 | 20682889 | 2 | 15 | 30 | TG   | 16 | 9  |
| 38668 | 3 | 20686262 | 20686277 | 4 | 4  | 16 | TTGG | 26 | 3  |
| 38670 | 3 | 20690457 | 20690468 | 2 | 6  | 12 | TG   | 7  | 6  |
| 38674 | 3 | 20692808 | 20692828 | 3 | 7  | 21 | GCT  | 26 | 5  |
| 38675 | 3 | 20698541 | 20698564 | 2 | 12 | 24 | TG   | 21 | 7  |
| 38676 | 3 | 20700274 | 20700309 | 4 | 9  | 36 | GATG | 29 | 12 |
| 38677 | 3 | 20702241 | 20702268 | 2 | 14 | 28 | CA   | 13 | 8  |
| 38678 | 3 | 20708164 | 20708199 | 2 | 18 | 36 | TC   | 6  | 8  |
| 38681 | 3 | 20719588 | 20719619 | 2 | 16 | 32 | CA   | 14 | 6  |
| 38683 | 3 | 20722573 | 20722587 | 3 | 5  | 15 | CCG  | 27 | 5  |
| 38684 | 3 | 20723847 | 20723860 | 2 | 7  | 14 | TC   | 19 | 4  |
| 38695 | 3 | 20741537 | 20741566 | 3 | 10 | 30 | TCC  | 8  | 9  |
| 38697 | 3 | 20746167 | 20746188 | 2 | 11 | 22 | TG   | 10 | 6  |
| 38699 | 3 | 20749487 | 20749500 | 2 | 7  | 14 | TG   | 7  | 4  |
| 38706 | 3 | 20758705 | 20758720 | 2 | 8  | 16 | AT   | 15 | 10 |
| 38707 | 3 | 20758721 | 20758736 | 2 | 8  | 16 | GT   | 17 | 8  |
| 38728 | 3 | 20780018 | 20780029 | 2 | 6  | 12 | GT   | 20 | 4  |
| 38731 | 3 | 20782118 | 20782133 | 2 | 8  | 16 | TG   | 19 | 5  |
| 38733 | 3 | 20786820 | 20786835 | 2 | 8  | 16 | CA   | 28 | 6  |
| 38771 | 3 | 20827484 | 20827499 | 2 | 8  | 16 | TG   | 16 | 4  |
| 38772 | 3 | 20827500 | 20827515 | 4 | 4  | 16 | AGTG | 18 | 5  |
| 38773 | 3 | 20827670 | 20827693 | 2 | 12 | 24 | CA   | 19 | 9  |
| 38774 | 3 | 20829402 | 20829415 | 2 | 7  | 14 | AC   | 14 | 5  |
| 38775 | 3 | 20830138 | 20830161 | 2 | 12 | 24 | AC   | 19 | 7  |
| 38776 | 3 | 20835501 | 20835514 | 2 | 7  | 14 | TG   | 26 | 3  |
| 38782 | 3 | 20838780 | 20838791 | 2 | 6  | 12 | TC   | 27 | 4  |
| 38787 | 3 | 20842129 | 20842148 | 4 | 5  | 20 | CCTT | 29 | 3  |
| 38789 | 3 | 20845408 | 20845421 | 2 | 7  | 14 | AC   | 25 | 5  |
| 38794 | 3 | 20848913 | 20848930 | 2 | 9  | 18 | AC   | 21 | 5  |
| 38795 | 3 | 20849078 | 20849093 | 4 | 4  | 16 | TTTA | 14 | 9  |
| 38796 | 3 | 20849398 | 20849413 | 2 | 8  | 16 | GT   | 25 | 3  |
| 38803 | 3 | 20863473 | 20863492 | 2 | 10 | 20 | GT   | 21 | 8  |
| 38813 | 3 | 20890184 | 20890204 | 3 | 7  | 21 | CTC  | 28 | 5  |
| 38815 | 3 | 20892391 | 20892402 | 2 | 6  | 12 | TG   | 25 | 3  |
| 38816 | 3 | 20895103 | 20895122 | 2 | 10 | 20 | TG   | 14 | 16 |
| 38817 | 3 | 20895226 | 20895249 | 2 | 12 | 24 | CA   | 16 | 12 |
| 38818 | 3 | 20898493 | 20898508 | 4 | 4  | 16 | TATT | 11 | 10 |
| 38819 | 3 | 20901407 | 20901430 | 2 | 12 | 24 | CT   | 26 | 8  |
| 38822 | 3 | 20906010 | 20906035 | 2 | 13 | 26 | CA   | 16 | 5  |
| 38826 | 3 | 20917006 | 20917020 | 3 | 5  | 15 | GAG  | 27 | 3  |
| 38827 | 3 | 20920083 | 20920102 | 2 | 10 | 20 | GT   | 14 | 8  |

|       |   |          |          |   |    |    |      |    |    |
|-------|---|----------|----------|---|----|----|------|----|----|
| 38829 | 3 | 20920846 | 20920867 | 2 | 11 | 22 | TG   | 12 | 7  |
| 38830 | 3 | 20922300 | 20922345 | 2 | 23 | 46 | GT   | 11 | 12 |
| 38831 | 3 | 20925785 | 20925802 | 3 | 6  | 18 | TCT  | 23 | 5  |
| 38834 | 3 | 20932832 | 20932847 | 2 | 8  | 16 | CA   | 19 | 9  |
| 38835 | 3 | 20935373 | 20935416 | 2 | 22 | 44 | CA   | 18 | 13 |
| 38841 | 3 | 20950235 | 20950256 | 2 | 11 | 22 | AC   | 15 | 6  |
| 38844 | 3 | 20952961 | 20952978 | 2 | 9  | 18 | TC   | 9  | 5  |
| 38845 | 3 | 20953050 | 20953065 | 4 | 4  | 16 | CCCT | 21 | 3  |
| 38846 | 3 | 20953220 | 20953246 | 3 | 9  | 27 | AGC  | 25 | 4  |
| 38849 | 3 | 20955240 | 20955267 | 2 | 14 | 28 | AC   | 13 | 9  |
| 38850 | 3 | 20955504 | 20955517 | 2 | 7  | 14 | AC   | 14 | 4  |
| 38851 | 3 | 20958014 | 20958025 | 2 | 6  | 12 | GT   | 22 | 5  |
| 38853 | 3 | 20963751 | 20963764 | 2 | 7  | 14 | AC   | 26 | 4  |
| 38854 | 3 | 20969637 | 20969648 | 2 | 6  | 12 | TC   | 28 | 9  |
| 38855 | 3 | 20969650 | 20969665 | 2 | 8  | 16 | CT   | 26 | 9  |
| 38859 | 3 | 20977226 | 20977243 | 2 | 9  | 18 | GT   | 19 | 4  |
| 38863 | 3 | 20982611 | 20982625 | 3 | 5  | 15 | TTA  | 13 | 3  |
| 38864 | 3 | 20983497 | 20983522 | 2 | 13 | 26 | GT   | 16 | 8  |
| 38866 | 3 | 20989041 | 20989052 | 2 | 6  | 12 | AC   | 15 | 4  |
| 38867 | 3 | 20989061 | 20989074 | 2 | 7  | 14 | AT   | 16 | 6  |
| 38869 | 3 | 20989844 | 20989855 | 2 | 6  | 12 | CA   | 13 | 3  |
| 38871 | 3 | 20991197 | 20991214 | 2 | 9  | 18 | AC   | 23 | 11 |
| 38875 | 3 | 20993276 | 20993290 | 3 | 5  | 15 | CAA  | 20 | 3  |
| 38879 | 3 | 21000935 | 21000974 | 2 | 20 | 40 | AC   | 6  | 8  |
| 38882 | 3 | 21002036 | 21002051 | 4 | 4  | 16 | AACC | 36 | 4  |
| 38883 | 3 | 21003554 | 21003581 | 2 | 14 | 28 | GT   | 11 | 7  |
| 38884 | 3 | 21004494 | 21004505 | 2 | 6  | 12 | CT   | 23 | 3  |
| 38885 | 3 | 21007788 | 21007805 | 3 | 6  | 18 | CCT  | 29 | 6  |
| 38888 | 3 | 21038109 | 21038150 | 2 | 21 | 42 | AC   | 10 | 7  |
| 38910 | 4 | 46922    | 46939    | 3 | 6  | 18 | GGA  | 22 | 5  |
| 38911 | 4 | 47094    | 47108    | 3 | 5  | 15 | GCA  | 17 | 4  |
| 38913 | 4 | 53928    | 53939    | 2 | 6  | 12 | GA   | 28 | 4  |
| 38919 | 4 | 70957    | 70972    | 2 | 8  | 16 | TG   | 17 | 7  |
| 38925 | 4 | 72725    | 72738    | 2 | 7  | 14 | AC   | 19 | 3  |
| 38926 | 4 | 75468    | 75488    | 3 | 7  | 21 | TTC  | 22 | 7  |
| 38928 | 4 | 77198    | 77215    | 3 | 6  | 18 | TTG  | 23 | 4  |
| 38931 | 4 | 81764    | 81777    | 2 | 7  | 14 | CA   | 26 | 9  |
| 38932 | 4 | 83179    | 83190    | 2 | 6  | 12 | GT   | 15 | 9  |
| 38933 | 4 | 83405    | 83422    | 2 | 9  | 18 | AC   | 16 | 9  |
| 38935 | 4 | 83721    | 83735    | 3 | 5  | 15 | CTG  | 18 | 4  |
| 38936 | 4 | 85275    | 85310    | 3 | 12 | 36 | GAA  | 18 | 7  |
| 38937 | 4 | 85578    | 85591    | 2 | 7  | 14 | TG   | 24 | 3  |
| 38938 | 4 | 85674    | 85697    | 2 | 12 | 24 | AC   | 17 | 5  |
| 38940 | 4 | 87105    | 87128    | 3 | 8  | 24 | GCA  | 31 | 6  |
| 38941 | 4 | 88317    | 88336    | 2 | 10 | 20 | CA   | 20 | 8  |
| 38942 | 4 | 88408    | 88429    | 2 | 11 | 22 | CA   | 17 | 6  |
| 38944 | 4 | 90375    | 90398    | 2 | 12 | 24 | GT   | 8  | 4  |
| 38949 | 4 | 91588    | 91605    | 2 | 9  | 18 | TG   | 22 | 6  |
| 38957 | 4 | 99286    | 99301    | 4 | 4  | 16 | TTTG | 23 | 10 |
| 38967 | 4 | 140525   | 140542   | 3 | 6  | 18 | TCA  | 29 | 5  |
| 38970 | 4 | 146197   | 146211   | 3 | 5  | 15 | TTC  | 14 | 4  |



|       |   |        |        |   |    |    |      |    |    |
|-------|---|--------|--------|---|----|----|------|----|----|
| 38980 | 4 | 174314 | 174327 | 2 | 7  | 14 | AC   | 25 | 3  |
| 38984 | 4 | 183902 | 183916 | 3 | 5  | 15 | TCC  | 27 | 3  |
| 38989 | 4 | 209751 | 209792 | 2 | 21 | 42 | GT   | 13 | 10 |
| 39006 | 4 | 243534 | 243547 | 2 | 7  | 14 | CA   | 16 | 3  |
| 39007 | 4 | 244608 | 244619 | 2 | 6  | 12 | CA   | 19 | 4  |
| 39008 | 4 | 246175 | 246190 | 4 | 4  | 16 | CATC | 25 | 3  |
| 39015 | 4 | 268179 | 268194 | 2 | 8  | 16 | TG   | 26 | 5  |
| 39016 | 4 | 274701 | 274714 | 2 | 7  | 14 | CA   | 22 | 4  |
| 39017 | 4 | 275983 | 275997 | 3 | 5  | 15 | GAA  | 17 | 5  |
| 39019 | 4 | 288559 | 288572 | 2 | 7  | 14 | AG   | 20 | 5  |
| 39024 | 4 | 295950 | 295981 | 2 | 16 | 32 | GT   | 19 | 11 |
| 39027 | 4 | 305386 | 305397 | 2 | 6  | 12 | CA   | 24 | 4  |
| 39033 | 4 | 311052 | 311063 | 2 | 6  | 12 | GT   | 26 | 3  |
| 39034 | 4 | 311624 | 311655 | 2 | 16 | 32 | AC   | 26 | 6  |
| 39040 | 4 | 316448 | 316471 | 2 | 12 | 24 | CA   | 16 | 13 |
| 39041 | 4 | 316606 | 316619 | 2 | 7  | 14 | CT   | 27 | 6  |
| 39063 | 4 | 362191 | 362230 | 2 | 20 | 40 | CA   | 11 | 12 |
| 39067 | 4 | 366375 | 366404 | 2 | 15 | 30 | CA   | 15 | 8  |
| 39068 | 4 | 368166 | 368183 | 3 | 6  | 18 | GTT  | 34 | 4  |
| 39093 | 4 | 422048 | 422065 | 2 | 9  | 18 | GT   | 21 | 9  |
| 39094 | 4 | 424625 | 424638 | 2 | 7  | 14 | AC   | 25 | 3  |
| 39101 | 4 | 458376 | 458393 | 2 | 9  | 18 | CA   | 23 | 4  |
| 39108 | 4 | 476783 | 476796 | 2 | 7  | 14 | GA   | 12 | 4  |
| 39118 | 4 | 512904 | 512927 | 2 | 12 | 24 | AC   | 25 | 14 |
| 39119 | 4 | 513157 | 513172 | 2 | 8  | 16 | CT   | 24 | 5  |
| 39134 | 4 | 572964 | 572977 | 2 | 7  | 14 | GT   | 18 | 5  |
| 39140 | 4 | 580219 | 580234 | 2 | 8  | 16 | TG   | 30 | 9  |
| 39156 | 4 | 588522 | 588537 | 2 | 8  | 16 | AG   | 25 | 4  |
| 39160 | 4 | 589741 | 589758 | 2 | 9  | 18 | TC   | 14 | 6  |
| 39168 | 4 | 591123 | 591136 | 2 | 7  | 14 | TC   | 28 | 3  |
| 39170 | 4 | 593178 | 593195 | 2 | 9  | 18 | GT   | 23 | 5  |
| 39171 | 4 | 593493 | 593520 | 2 | 14 | 28 | CA   | 14 | 6  |
| 39175 | 4 | 598064 | 598083 | 2 | 10 | 20 | GT   | 17 | 6  |
| 39176 | 4 | 598112 | 598129 | 2 | 9  | 18 | GT   | 17 | 5  |
| 39180 | 4 | 600117 | 600150 | 2 | 17 | 34 | GT   | 7  | 8  |
| 39184 | 4 | 604202 | 604213 | 2 | 6  | 12 | TG   | 22 | 4  |
| 39185 | 4 | 606271 | 606284 | 2 | 7  | 14 | CA   | 26 | 8  |
| 39186 | 4 | 606317 | 606328 | 2 | 6  | 12 | CA   | 17 | 4  |
| 39192 | 4 | 626642 | 626661 | 2 | 10 | 20 | GT   | 18 | 7  |
| 39193 | 4 | 626720 | 626731 | 2 | 6  | 12 | GT   | 14 | 10 |
| 39195 | 4 | 628383 | 628404 | 2 | 11 | 22 | AG   | 24 | 4  |
| 39199 | 4 | 631597 | 631608 | 2 | 6  | 12 | AC   | 29 | 4  |
| 39200 | 4 | 632765 | 632800 | 2 | 18 | 36 | GT   | 6  | 7  |
| 39204 | 4 | 636855 | 636878 | 2 | 12 | 24 | TG   | 13 | 7  |
| 39205 | 4 | 637642 | 637661 | 2 | 10 | 20 | CA   | 8  | 3  |
| 39228 | 4 | 664513 | 664526 | 2 | 7  | 14 | CA   | 29 | 3  |
| 39230 | 4 | 664714 | 664725 | 2 | 6  | 12 | CA   | 18 | 7  |
| 39231 | 4 | 665035 | 665046 | 2 | 6  | 12 | TG   | 20 | 4  |
| 39238 | 4 | 670373 | 670388 | 4 | 4  | 16 | TTTC | 15 | 3  |
| 39240 | 4 | 674336 | 674381 | 2 | 23 | 46 | CA   | 7  | 10 |
| 39251 | 4 | 683117 | 683136 | 2 | 10 | 20 | TG   | 19 | 7  |

|       |   |        |        |   |    |    |     |    |    |
|-------|---|--------|--------|---|----|----|-----|----|----|
| 39257 | 4 | 687231 | 687254 | 2 | 12 | 24 | GT  | 15 | 12 |
| 39277 | 4 | 723874 | 723888 | 3 | 5  | 15 | TTA | 20 | 3  |
| 39291 | 4 | 733925 | 733950 | 2 | 13 | 26 | CA  | 15 | 9  |
| 39303 | 4 | 744084 | 744105 | 2 | 11 | 22 | GT  | 11 | 7  |
| 39306 | 4 | 748825 | 748866 | 2 | 21 | 42 | TC  | 8  | 7  |
| 39309 | 4 | 752426 | 752449 | 2 | 12 | 24 | CA  | 18 | 9  |
| 39315 | 4 | 756476 | 756507 | 2 | 16 | 32 | CA  | 15 | 10 |
| 39317 | 4 | 760683 | 760696 | 2 | 7  | 14 | TC  | 26 | 7  |
| 39319 | 4 | 763176 | 763197 | 2 | 11 | 22 | AC  | 21 | 6  |
| 39324 | 4 | 765132 | 765145 | 2 | 7  | 14 | CT  | 26 | 3  |
| 39326 | 4 | 765490 | 765513 | 2 | 12 | 24 | TC  | 14 | 4  |
| 39327 | 4 | 767040 | 767061 | 2 | 11 | 22 | CT  | 20 | 9  |
| 39333 | 4 | 768685 | 768704 | 2 | 10 | 20 | TG  | 18 | 6  |
| 39334 | 4 | 769016 | 769037 | 2 | 11 | 22 | AC  | 14 | 5  |
| 39335 | 4 | 769934 | 769949 | 2 | 8  | 16 | CA  | 19 | 5  |
| 39336 | 4 | 771028 | 771043 | 2 | 8  | 16 | GT  | 23 | 3  |
| 39337 | 4 | 771571 | 771582 | 2 | 6  | 12 | AC  | 20 | 7  |
| 39338 | 4 | 772386 | 772401 | 2 | 8  | 16 | GT  | 21 | 5  |
| 39340 | 4 | 776992 | 777017 | 2 | 13 | 26 | GT  | 15 | 9  |
| 39346 | 4 | 786904 | 786919 | 2 | 8  | 16 | AC  | 23 | 4  |
| 39353 | 4 | 800004 | 800033 | 2 | 15 | 30 | TG  | 11 | 10 |
| 39357 | 4 | 803058 | 803091 | 2 | 17 | 34 | AC  | 15 | 9  |
| 39359 | 4 | 807397 | 807416 | 2 | 10 | 20 | TG  | 9  | 8  |
| 39363 | 4 | 808838 | 808851 | 2 | 7  | 14 | AG  | 31 | 4  |
| 39365 | 4 | 820861 | 820884 | 3 | 8  | 24 | CCT | 20 | 6  |
| 39367 | 4 | 824816 | 824849 | 2 | 17 | 34 | TG  | 7  | 9  |
| 39371 | 4 | 830217 | 830234 | 2 | 9  | 18 | TC  | 20 | 3  |
| 39372 | 4 | 830400 | 830421 | 2 | 11 | 22 | CA  | 20 | 6  |
| 39375 | 4 | 832490 | 832519 | 2 | 15 | 30 | CA  | 12 | 10 |
| 39376 | 4 | 834763 | 834778 | 2 | 8  | 16 | TC  | 23 | 5  |
| 39383 | 4 | 843685 | 843700 | 2 | 8  | 16 | CA  | 22 | 3  |
| 39384 | 4 | 844941 | 844952 | 2 | 6  | 12 | AC  | 32 | 3  |
| 39385 | 4 | 846754 | 846769 | 2 | 8  | 16 | AC  | 14 | 12 |
| 39387 | 4 | 856756 | 856777 | 2 | 11 | 22 | GT  | 16 | 7  |
| 39390 | 4 | 858393 | 858422 | 2 | 15 | 30 | CA  | 16 | 7  |
| 39398 | 4 | 873264 | 873297 | 2 | 17 | 34 | AC  | 14 | 13 |
| 39403 | 4 | 884845 | 884890 | 2 | 23 | 46 | GT  | 7  | 6  |
| 39405 | 4 | 886749 | 886770 | 2 | 11 | 22 | GT  | 20 | 13 |
| 39407 | 4 | 889477 | 889490 | 2 | 7  | 14 | AG  | 28 | 4  |
| 39414 | 4 | 908725 | 908748 | 2 | 12 | 24 | GT  | 13 | 11 |
| 39416 | 4 | 909360 | 909381 | 2 | 11 | 22 | AT  | 11 | 5  |
| 39420 | 4 | 918038 | 918077 | 2 | 20 | 40 | TG  | 9  | 12 |
| 39421 | 4 | 918281 | 918294 | 2 | 7  | 14 | AC  | 32 | 4  |
| 39424 | 4 | 928359 | 928376 | 2 | 9  | 18 | GT  | 7  | 4  |
| 39425 | 4 | 928826 | 928839 | 2 | 7  | 14 | AT  | 13 | 6  |
| 39432 | 4 | 956017 | 956032 | 2 | 8  | 16 | AC  | 22 | 8  |
| 39436 | 4 | 959782 | 959793 | 2 | 6  | 12 | TG  | 26 | 3  |
| 39439 | 4 | 970879 | 970894 | 2 | 8  | 16 | CA  | 19 | 4  |
| 39440 | 4 | 972342 | 972357 | 2 | 8  | 16 | TG  | 19 | 4  |
| 39445 | 4 | 987586 | 987607 | 2 | 11 | 22 | TG  | 15 | 7  |
| 39446 | 4 | 988418 | 988437 | 2 | 10 | 20 | GT  | 18 | 7  |

|       |   |         |         |   |    |    |      |    |    |
|-------|---|---------|---------|---|----|----|------|----|----|
| 39447 | 4 | 988867  | 988878  | 2 | 6  | 12 | AC   | 24 | 3  |
| 39448 | 4 | 991436  | 991455  | 4 | 5  | 20 | TAGA | 8  | 3  |
| 39462 | 4 | 1012940 | 1012953 | 2 | 7  | 14 | AC   | 23 | 3  |
| 39465 | 4 | 1023739 | 1023758 | 2 | 10 | 20 | TG   | 14 | 8  |
| 39466 | 4 | 1024141 | 1024164 | 2 | 12 | 24 | CA   | 6  | 6  |
| 39468 | 4 | 1042025 | 1042040 | 2 | 8  | 16 | TG   | 9  | 4  |
| 39478 | 4 | 1056821 | 1056836 | 2 | 8  | 16 | GT   | 24 | 6  |
| 39483 | 4 | 1065647 | 1065670 | 4 | 6  | 24 | TGGA | 13 | 3  |
| 39491 | 4 | 1098407 | 1098436 | 2 | 15 | 30 | GT   | 11 | 9  |
| 39497 | 4 | 1108140 | 1108159 | 2 | 10 | 20 | TG   | 18 | 9  |
| 39498 | 4 | 1108314 | 1108325 | 2 | 6  | 12 | GT   | 15 | 7  |
| 39502 | 4 | 1109748 | 1109762 | 3 | 5  | 15 | GCA  | 19 | 3  |
| 39503 | 4 | 1109773 | 1109787 | 3 | 5  | 15 | CCT  | 15 | 3  |
| 39504 | 4 | 1110066 | 1110083 | 2 | 9  | 18 | TG   | 12 | 8  |
| 39510 | 4 | 1113863 | 1113880 | 3 | 6  | 18 | GCT  | 27 | 6  |
| 39513 | 4 | 1114196 | 1114213 | 3 | 6  | 18 | GAG  | 28 | 4  |
| 39515 | 4 | 1116561 | 1116580 | 2 | 10 | 20 | CA   | 20 | 6  |
| 39516 | 4 | 1118526 | 1118537 | 2 | 6  | 12 | AC   | 22 | 3  |
| 39518 | 4 | 1121032 | 1121043 | 2 | 6  | 12 | AT   | 26 | 4  |
| 39525 | 4 | 1127832 | 1127855 | 2 | 12 | 24 | GT   | 19 | 12 |
| 39528 | 4 | 1130080 | 1130103 | 2 | 12 | 24 | GT   | 11 | 12 |
| 39530 | 4 | 1134070 | 1134087 | 3 | 6  | 18 | CCT  | 9  | 3  |
| 39533 | 4 | 1140376 | 1140396 | 3 | 7  | 21 | CCT  | 26 | 4  |
| 39540 | 4 | 1149382 | 1149409 | 2 | 14 | 28 | GT   | 8  | 10 |
| 39549 | 4 | 1153571 | 1153588 | 2 | 9  | 18 | GT   | 14 | 11 |
| 39551 | 4 | 1155182 | 1155203 | 2 | 11 | 22 | TG   | 17 | 7  |
| 39554 | 4 | 1158130 | 1158141 | 2 | 6  | 12 | GT   | 9  | 7  |
| 39555 | 4 | 1160401 | 1160418 | 2 | 9  | 18 | TC   | 24 | 5  |
| 39557 | 4 | 1160832 | 1160857 | 2 | 13 | 26 | GT   | 12 | 9  |
| 39558 | 4 | 1161001 | 1161032 | 2 | 16 | 32 | CA   | 12 | 15 |
| 39559 | 4 | 1162449 | 1162484 | 3 | 12 | 36 | TCC  | 6  | 4  |
| 39564 | 4 | 1165470 | 1165485 | 2 | 8  | 16 | TG   | 22 | 6  |
| 39566 | 4 | 1167767 | 1167790 | 2 | 12 | 24 | CA   | 11 | 14 |
| 39570 | 4 | 1168575 | 1168590 | 2 | 8  | 16 | CA   | 20 | 4  |
| 39572 | 4 | 1169242 | 1169253 | 2 | 6  | 12 | GA   | 24 | 3  |
| 39584 | 4 | 1192247 | 1192262 | 4 | 4  | 16 | AAAT | 21 | 8  |
| 39595 | 4 | 1229065 | 1229088 | 4 | 6  | 24 | ATGA | 28 | 5  |
| 39596 | 4 | 1236322 | 1236339 | 3 | 6  | 18 | CCA  | 19 | 5  |
| 39597 | 4 | 1242680 | 1242693 | 2 | 7  | 14 | TG   | 20 | 9  |
| 39600 | 4 | 1244030 | 1244047 | 2 | 9  | 18 | GT   | 19 | 6  |
| 39601 | 4 | 1247402 | 1247413 | 2 | 6  | 12 | GT   | 22 | 10 |
| 39603 | 4 | 1247618 | 1247638 | 3 | 7  | 21 | CCT  | 21 | 8  |
| 39606 | 4 | 1259845 | 1259860 | 2 | 8  | 16 | TC   | 9  | 6  |
| 39608 | 4 | 1261216 | 1261241 | 2 | 13 | 26 | AC   | 15 | 12 |
| 39612 | 4 | 1267473 | 1267487 | 3 | 5  | 15 | CTG  | 32 | 3  |
| 39613 | 4 | 1276486 | 1276511 | 2 | 13 | 26 | GT   | 15 | 5  |
| 39614 | 4 | 1279926 | 1279971 | 2 | 23 | 46 | AC   | 6  | 8  |
| 39615 | 4 | 1280436 | 1280467 | 2 | 16 | 32 | AC   | 8  | 9  |
| 39619 | 4 | 1295192 | 1295212 | 3 | 7  | 21 | TGC  | 32 | 4  |
| 39621 | 4 | 1300405 | 1300424 | 2 | 10 | 20 | CA   | 16 | 10 |
| 39622 | 4 | 1300426 | 1300441 | 2 | 8  | 16 | AC   | 15 | 10 |

|       |   |         |         |   |    |    |      |    |    |
|-------|---|---------|---------|---|----|----|------|----|----|
| 39626 | 4 | 1306290 | 1306317 | 2 | 14 | 28 | TG   | 7  | 7  |
| 39634 | 4 | 1326301 | 1326318 | 2 | 9  | 18 | AC   | 22 | 5  |
| 39636 | 4 | 1327350 | 1327371 | 2 | 11 | 22 | GT   | 15 | 7  |
| 39646 | 4 | 1347466 | 1347477 | 2 | 6  | 12 | TG   | 28 | 5  |
| 39647 | 4 | 1349195 | 1349230 | 2 | 18 | 36 | AC   | 18 | 16 |
| 39648 | 4 | 1350812 | 1350847 | 2 | 18 | 36 | TG   | 18 | 9  |
| 39654 | 4 | 1368360 | 1368387 | 2 | 14 | 28 | CA   | 23 | 20 |
| 39655 | 4 | 1370606 | 1370617 | 2 | 6  | 12 | AG   | 26 | 4  |
| 39658 | 4 | 1372068 | 1372097 | 2 | 15 | 30 | CA   | 12 | 10 |
| 39661 | 4 | 1376187 | 1376212 | 2 | 13 | 26 | CA   | 8  | 8  |
| 39664 | 4 | 1380038 | 1380049 | 2 | 6  | 12 | AT   | 13 | 5  |
| 39666 | 4 | 1382755 | 1382796 | 2 | 21 | 42 | TG   | 18 | 14 |
| 39667 | 4 | 1392075 | 1392086 | 2 | 6  | 12 | GA   | 15 | 3  |
| 39680 | 4 | 1405473 | 1405496 | 3 | 8  | 24 | AGG  | 18 | 7  |
| 39683 | 4 | 1407261 | 1407272 | 2 | 6  | 12 | AC   | 29 | 3  |
| 39685 | 4 | 1414699 | 1414758 | 2 | 30 | 60 | AC   | 10 | 12 |
| 39687 | 4 | 1418036 | 1418065 | 2 | 15 | 30 | GT   | 16 | 7  |
| 39689 | 4 | 1422592 | 1422607 | 4 | 4  | 16 | TAAA | 27 | 3  |
| 39701 | 4 | 1455785 | 1455806 | 2 | 11 | 22 | CA   | 17 | 5  |
| 39703 | 4 | 1460435 | 1460464 | 3 | 10 | 30 | GAG  | 13 | 4  |
| 39708 | 4 | 1464580 | 1464599 | 4 | 5  | 20 | AAAT | 17 | 3  |
| 39710 | 4 | 1464908 | 1464931 | 3 | 8  | 24 | TGA  | 11 | 5  |
| 39716 | 4 | 1466364 | 1466383 | 4 | 5  | 20 | CACG | 12 | 5  |
| 39719 | 4 | 1466679 | 1466704 | 2 | 13 | 26 | TG   | 16 | 10 |
| 39722 | 4 | 1466875 | 1466895 | 3 | 7  | 21 | ATG  | 18 | 14 |
| 39725 | 4 | 1468327 | 1468348 | 2 | 11 | 22 | AC   | 15 | 9  |
| 39729 | 4 | 1470254 | 1470283 | 3 | 10 | 30 | AAT  | 12 | 4  |
| 39730 | 4 | 1470962 | 1470981 | 2 | 10 | 20 | AC   | 11 | 9  |
| 39731 | 4 | 1471194 | 1471217 | 2 | 12 | 24 | GT   | 17 | 10 |
| 39733 | 4 | 1472156 | 1472173 | 3 | 6  | 18 | ATA  | 6  | 3  |
| 39739 | 4 | 1474817 | 1474834 | 2 | 9  | 18 | AT   | 19 | 10 |
| 39744 | 4 | 1488763 | 1488780 | 2 | 9  | 18 | CA   | 17 | 4  |
| 39749 | 4 | 1493565 | 1493588 | 2 | 12 | 24 | TG   | 17 | 4  |
| 39753 | 4 | 1540015 | 1540034 | 2 | 10 | 20 | AG   | 19 | 5  |
| 39754 | 4 | 1540457 | 1540482 | 2 | 13 | 26 | GT   | 19 | 9  |
| 39755 | 4 | 1540591 | 1540606 | 2 | 8  | 16 | GT   | 18 | 11 |
| 39756 | 4 | 1540744 | 1540757 | 2 | 7  | 14 | TG   | 22 | 3  |
| 39762 | 4 | 1556826 | 1556839 | 2 | 7  | 14 | AC   | 30 | 6  |
| 39763 | 4 | 1560401 | 1560422 | 2 | 11 | 22 | CA   | 16 | 6  |
| 39766 | 4 | 1563059 | 1563078 | 2 | 10 | 20 | AC   | 19 | 4  |
| 39768 | 4 | 1565959 | 1565982 | 2 | 12 | 24 | TG   | 16 | 5  |
| 39769 | 4 | 1573837 | 1573848 | 2 | 6  | 12 | TG   | 10 | 4  |
| 39770 | 4 | 1573850 | 1573865 | 2 | 8  | 16 | GT   | 9  | 8  |
| 39780 | 4 | 1574719 | 1574736 | 3 | 6  | 18 | AGG  | 12 | 3  |
| 39781 | 4 | 1576883 | 1576906 | 2 | 12 | 24 | CA   | 20 | 5  |
| 39783 | 4 | 1577490 | 1577501 | 2 | 6  | 12 | TG   | 23 | 5  |
| 39786 | 4 | 1578293 | 1578330 | 2 | 19 | 38 | GT   | 14 | 14 |
| 39787 | 4 | 1578876 | 1578889 | 2 | 7  | 14 | CA   | 24 | 5  |
| 39791 | 4 | 1584864 | 1584877 | 2 | 7  | 14 | AT   | 17 | 7  |
| 39792 | 4 | 1585854 | 1585881 | 4 | 7  | 28 | TTTG | 21 | 8  |
| 39793 | 4 | 1587473 | 1587488 | 2 | 8  | 16 | TG   | 32 | 10 |

|       |   |         |         |   |    |    |      |    |    |
|-------|---|---------|---------|---|----|----|------|----|----|
| 39794 | 4 | 1588072 | 1588097 | 2 | 13 | 26 | GT   | 11 | 9  |
| 39796 | 4 | 1589915 | 1589926 | 2 | 6  | 12 | AC   | 16 | 3  |
| 39802 | 4 | 1593765 | 1593780 | 2 | 8  | 16 | CA   | 9  | 4  |
| 39805 | 4 | 1593960 | 1593975 | 2 | 8  | 16 | GT   | 11 | 4  |
| 39806 | 4 | 1594463 | 1594480 | 2 | 9  | 18 | GT   | 20 | 4  |
| 39809 | 4 | 1596080 | 1596123 | 2 | 22 | 44 | CA   | 9  | 10 |
| 39811 | 4 | 1597080 | 1597100 | 3 | 7  | 21 | TGA  | 6  | 5  |
| 39830 | 4 | 1642383 | 1642394 | 2 | 6  | 12 | TG   | 21 | 4  |
| 39831 | 4 | 1642396 | 1642413 | 2 | 9  | 18 | GT   | 20 | 4  |
| 39832 | 4 | 1642445 | 1642458 | 2 | 7  | 14 | TG   | 16 | 4  |
| 39834 | 4 | 1642792 | 1642815 | 2 | 12 | 24 | AC   | 11 | 9  |
| 39836 | 4 | 1644956 | 1644971 | 2 | 8  | 16 | CT   | 21 | 3  |
| 39838 | 4 | 1645348 | 1645363 | 2 | 8  | 16 | TG   | 20 | 3  |
| 39842 | 4 | 1647214 | 1647234 | 3 | 7  | 21 | TCT  | 19 | 5  |
| 39844 | 4 | 1648545 | 1648564 | 2 | 10 | 20 | CT   | 8  | 3  |
| 39848 | 4 | 1650276 | 1650293 | 2 | 9  | 18 | CA   | 18 | 6  |
| 39849 | 4 | 1650532 | 1650545 | 2 | 7  | 14 | AT   | 23 | 5  |
| 39850 | 4 | 1650546 | 1650559 | 2 | 7  | 14 | AC   | 27 | 6  |
| 39851 | 4 | 1651120 | 1651153 | 2 | 17 | 34 | CA   | 17 | 7  |
| 39853 | 4 | 1651465 | 1651500 | 2 | 18 | 36 | TG   | 10 | 8  |
| 39854 | 4 | 1651621 | 1651652 | 2 | 16 | 32 | AC   | 6  | 9  |
| 39855 | 4 | 1651745 | 1651762 | 2 | 9  | 18 | TG   | 12 | 6  |
| 39866 | 4 | 1652873 | 1652898 | 2 | 13 | 26 | AC   | 7  | 8  |
| 39868 | 4 | 1653019 | 1653050 | 2 | 16 | 32 | AC   | 15 | 10 |
| 39871 | 4 | 1653350 | 1653367 | 2 | 9  | 18 | TG   | 25 | 3  |
| 39873 | 4 | 1653505 | 1653522 | 2 | 9  | 18 | GT   | 27 | 7  |
| 39874 | 4 | 1653666 | 1653691 | 2 | 13 | 26 | AC   | 17 | 6  |
| 39876 | 4 | 1654055 | 1654074 | 2 | 10 | 20 | TC   | 9  | 3  |
| 39878 | 4 | 1657549 | 1657572 | 2 | 12 | 24 | GT   | 12 | 9  |
| 39880 | 4 | 1659720 | 1659735 | 4 | 4  | 16 | TCTT | 17 | 4  |
| 39881 | 4 | 1659829 | 1659862 | 2 | 17 | 34 | CA   | 7  | 7  |
| 39882 | 4 | 1659983 | 1659994 | 2 | 6  | 12 | CG   | 27 | 9  |
| 39883 | 4 | 1660141 | 1660180 | 2 | 20 | 40 | AC   | 11 | 8  |
| 39889 | 4 | 1665746 | 1665765 | 2 | 10 | 20 | TG   | 13 | 7  |
| 39891 | 4 | 1665901 | 1665914 | 2 | 7  | 14 | TG   | 21 | 4  |
| 39894 | 4 | 1669768 | 1669785 | 3 | 6  | 18 | TCT  | 22 | 4  |
| 39896 | 4 | 1669955 | 1669978 | 2 | 12 | 24 | AC   | 8  | 6  |
| 39899 | 4 | 1672773 | 1672790 | 2 | 9  | 18 | TG   | 21 | 4  |
| 39900 | 4 | 1674641 | 1674664 | 2 | 12 | 24 | AC   | 7  | 3  |
| 39901 | 4 | 1674782 | 1674795 | 2 | 7  | 14 | GT   | 23 | 7  |
| 39903 | 4 | 1676713 | 1676726 | 2 | 7  | 14 | AT   | 6  | 3  |
| 39908 | 4 | 1682070 | 1682081 | 2 | 6  | 12 | GT   | 31 | 3  |
| 39913 | 4 | 1700527 | 1700553 | 3 | 9  | 27 | TGA  | 20 | 4  |
| 39915 | 4 | 1702370 | 1702405 | 4 | 9  | 36 | ATAG | 20 | 8  |
| 39918 | 4 | 1712147 | 1712174 | 2 | 14 | 28 | AC   | 14 | 11 |
| 39920 | 4 | 1714598 | 1714625 | 2 | 14 | 28 | AC   | 17 | 7  |
| 39921 | 4 | 1714772 | 1714791 | 2 | 10 | 20 | CT   | 22 | 6  |
| 39923 | 4 | 1715429 | 1715444 | 2 | 8  | 16 | GA   | 17 | 5  |
| 39926 | 4 | 1716427 | 1716470 | 2 | 22 | 44 | TG   | 8  | 8  |
| 39927 | 4 | 1716778 | 1716789 | 2 | 6  | 12 | CA   | 19 | 4  |
| 39928 | 4 | 1716791 | 1716802 | 2 | 6  | 12 | AC   | 17 | 5  |

|       |   |         |         |   |    |    |      |    |    |
|-------|---|---------|---------|---|----|----|------|----|----|
| 39930 | 4 | 1718311 | 1718338 | 2 | 14 | 28 | TG   | 10 | 9  |
| 39931 | 4 | 1718480 | 1718505 | 2 | 13 | 26 | GT   | 16 | 6  |
| 39934 | 4 | 1720021 | 1720032 | 2 | 6  | 12 | GA   | 21 | 5  |
| 39939 | 4 | 1728021 | 1728038 | 2 | 9  | 18 | GT   | 23 | 6  |
| 39941 | 4 | 1732831 | 1732848 | 2 | 9  | 18 | CT   | 19 | 3  |
| 39942 | 4 | 1735555 | 1735570 | 4 | 4  | 16 | TTAT | 16 | 4  |
| 39944 | 4 | 1740006 | 1740023 | 2 | 9  | 18 | TG   | 9  | 12 |
| 39945 | 4 | 1740025 | 1740042 | 2 | 9  | 18 | GT   | 6  | 9  |
| 39950 | 4 | 1744184 | 1744198 | 3 | 5  | 15 | CCT  | 20 | 3  |
| 39951 | 4 | 1744422 | 1744465 | 2 | 22 | 44 | AG   | 7  | 6  |
| 39952 | 4 | 1746369 | 1746380 | 2 | 6  | 12 | TG   | 27 | 3  |
| 39955 | 4 | 1748725 | 1748738 | 2 | 7  | 14 | GT   | 19 | 9  |
| 39957 | 4 | 1748927 | 1748946 | 2 | 10 | 20 | AC   | 18 | 4  |
| 39958 | 4 | 1749149 | 1749178 | 2 | 15 | 30 | TC   | 9  | 6  |
| 39961 | 4 | 1749796 | 1749815 | 4 | 5  | 20 | GGCT | 13 | 4  |
| 39964 | 4 | 1750263 | 1750282 | 2 | 10 | 20 | TG   | 8  | 3  |
| 39966 | 4 | 1754834 | 1754859 | 2 | 13 | 26 | AC   | 18 | 6  |
| 39968 | 4 | 1756527 | 1756546 | 2 | 10 | 20 | GT   | 22 | 13 |
| 39969 | 4 | 1756755 | 1756780 | 2 | 13 | 26 | TG   | 23 | 10 |
| 39971 | 4 | 1758428 | 1758442 | 3 | 5  | 15 | GGA  | 16 | 4  |
| 39972 | 4 | 1758794 | 1758835 | 2 | 21 | 42 | GT   | 6  | 7  |
| 39973 | 4 | 1758979 | 1758996 | 2 | 9  | 18 | TG   | 19 | 10 |
| 39976 | 4 | 1760120 | 1760131 | 2 | 6  | 12 | TG   | 19 | 3  |
| 39981 | 4 | 1764223 | 1764238 | 2 | 8  | 16 | AC   | 18 | 7  |
| 39993 | 4 | 1801941 | 1801964 | 3 | 8  | 24 | CTG  | 28 | 6  |
| 39994 | 4 | 1802971 | 1802996 | 2 | 13 | 26 | TG   | 10 | 10 |
| 39996 | 4 | 1806020 | 1806039 | 2 | 10 | 20 | CA   | 17 | 4  |
| 39997 | 4 | 1806281 | 1806296 | 2 | 8  | 16 | GT   | 27 | 3  |
| 40004 | 4 | 1813155 | 1813174 | 2 | 10 | 20 | GT   | 16 | 15 |
| 40006 | 4 | 1815295 | 1815321 | 3 | 9  | 27 | CTG  | 23 | 5  |
| 40007 | 4 | 1815411 | 1815428 | 3 | 6  | 18 | TGT  | 26 | 5  |
| 40008 | 4 | 1815429 | 1815443 | 3 | 5  | 15 | TGA  | 28 | 7  |
| 40009 | 4 | 1817685 | 1817700 | 2 | 8  | 16 | CA   | 16 | 3  |
| 40010 | 4 | 1823837 | 1823848 | 2 | 6  | 12 | TC   | 24 | 3  |
| 40011 | 4 | 1824118 | 1824135 | 3 | 6  | 18 | TCT  | 25 | 3  |
| 40013 | 4 | 1842335 | 1842362 | 4 | 7  | 28 | GTCT | 24 | 3  |
| 40018 | 4 | 1856549 | 1856566 | 3 | 6  | 18 | TCC  | 20 | 10 |
| 40020 | 4 | 1860030 | 1860061 | 2 | 16 | 32 | TG   | 20 | 7  |
| 40023 | 4 | 1878870 | 1878899 | 2 | 15 | 30 | TG   | 17 | 12 |
| 40030 | 4 | 1888149 | 1888178 | 2 | 15 | 30 | GT   | 15 | 9  |
| 40034 | 4 | 1902898 | 1902936 | 3 | 13 | 39 | GAG  | 12 | 6  |
| 40038 | 4 | 1908960 | 1908977 | 2 | 9  | 18 | GT   | 25 | 6  |
| 40042 | 4 | 1916569 | 1916600 | 2 | 16 | 32 | AC   | 7  | 8  |
| 40043 | 4 | 1917375 | 1917395 | 3 | 7  | 21 | CTC  | 10 | 4  |
| 40046 | 4 | 1920001 | 1920030 | 2 | 15 | 30 | CA   | 15 | 15 |
| 40049 | 4 | 1927573 | 1927602 | 2 | 15 | 30 | AC   | 15 | 13 |
| 40050 | 4 | 1928040 | 1928069 | 2 | 15 | 30 | GT   | 7  | 10 |
| 40055 | 4 | 1933585 | 1933606 | 2 | 11 | 22 | CA   | 12 | 6  |
| 40057 | 4 | 1933735 | 1933762 | 2 | 14 | 28 | GT   | 10 | 8  |
| 40059 | 4 | 1934339 | 1934365 | 3 | 9  | 27 | CCT  | 25 | 8  |
| 40060 | 4 | 1936428 | 1936447 | 2 | 10 | 20 | CA   | 25 | 15 |

|       |   |         |         |   |    |    |      |    |    |
|-------|---|---------|---------|---|----|----|------|----|----|
| 40064 | 4 | 1945507 | 1945522 | 2 | 8  | 16 | TG   | 27 | 4  |
| 40065 | 4 | 1952859 | 1952874 | 2 | 8  | 16 | CA   | 23 | 6  |
| 40076 | 4 | 1979406 | 1979425 | 2 | 10 | 20 | AG   | 27 | 5  |
| 40077 | 4 | 1982695 | 1982730 | 2 | 18 | 36 | TG   | 18 | 16 |
| 40078 | 4 | 1984778 | 1984813 | 3 | 12 | 36 | GAG  | 12 | 7  |
| 40082 | 4 | 2002408 | 2002429 | 2 | 11 | 22 | CA   | 21 | 7  |
| 40088 | 4 | 2009598 | 2009621 | 3 | 8  | 24 | AAT  | 7  | 4  |
| 40091 | 4 | 2016902 | 2016913 | 2 | 6  | 12 | TG   | 23 | 3  |
| 40093 | 4 | 2019210 | 2019225 | 4 | 4  | 16 | AAGA | 17 | 4  |
| 40094 | 4 | 2019378 | 2019395 | 2 | 9  | 18 | GA   | 12 | 7  |
| 40096 | 4 | 2019734 | 2019745 | 2 | 6  | 12 | GT   | 11 | 3  |
| 40101 | 4 | 2021077 | 2021100 | 2 | 12 | 24 | GA   | 16 | 12 |
| 40102 | 4 | 2025537 | 2025548 | 2 | 6  | 12 | TG   | 22 | 4  |
| 40109 | 4 | 2035723 | 2035754 | 2 | 16 | 32 | GT   | 16 | 8  |
| 40111 | 4 | 2038287 | 2038300 | 2 | 7  | 14 | GA   | 25 | 3  |
| 40114 | 4 | 2043806 | 2043821 | 2 | 8  | 16 | GA   | 10 | 5  |
| 40116 | 4 | 2049653 | 2049686 | 2 | 17 | 34 | TG   | 7  | 12 |
| 40119 | 4 | 2056879 | 2056912 | 2 | 17 | 34 | TG   | 7  | 10 |
| 40121 | 4 | 2062359 | 2062374 | 2 | 8  | 16 | TG   | 20 | 14 |
| 40135 | 4 | 2075924 | 2075947 | 2 | 12 | 24 | AC   | 9  | 9  |
| 40143 | 4 | 2086563 | 2086592 | 3 | 10 | 30 | CTC  | 10 | 7  |
| 40144 | 4 | 2086749 | 2086762 | 2 | 7  | 14 | TG   | 10 | 6  |
| 40145 | 4 | 2086768 | 2086781 | 2 | 7  | 14 | GT   | 14 | 7  |
| 40153 | 4 | 2104989 | 2105010 | 2 | 11 | 22 | GT   | 21 | 7  |
| 40154 | 4 | 2107902 | 2107933 | 2 | 16 | 32 | CA   | 11 | 12 |
| 40156 | 4 | 2110694 | 2110709 | 4 | 4  | 16 | AAAG | 21 | 6  |
| 40159 | 4 | 2132263 | 2132276 | 2 | 7  | 14 | TG   | 22 | 10 |
| 40160 | 4 | 2132278 | 2132291 | 2 | 7  | 14 | GT   | 19 | 8  |
| 40187 | 4 | 2208239 | 2208250 | 2 | 6  | 12 | TA   | 21 | 3  |
| 40194 | 4 | 2224984 | 2225005 | 2 | 11 | 22 | CA   | 20 | 8  |
| 40197 | 4 | 2234373 | 2234387 | 3 | 5  | 15 | AAG  | 7  | 4  |
| 40198 | 4 | 2234398 | 2234409 | 2 | 6  | 12 | AG   | 11 | 7  |
| 40199 | 4 | 2234461 | 2234488 | 2 | 14 | 28 | CA   | 16 | 9  |
| 40206 | 4 | 2241249 | 2241266 | 2 | 9  | 18 | CT   | 19 | 4  |
| 40211 | 4 | 2250712 | 2250727 | 4 | 4  | 16 | GTGA | 32 | 3  |
| 40212 | 4 | 2251128 | 2251143 | 2 | 8  | 16 | AC   | 20 | 8  |
| 40214 | 4 | 2265626 | 2265649 | 4 | 6  | 24 | AATA | 18 | 11 |
| 40217 | 4 | 2280421 | 2280444 | 2 | 12 | 24 | AC   | 12 | 8  |
| 40218 | 4 | 2281808 | 2281822 | 3 | 5  | 15 | ATA  | 20 | 4  |
| 40227 | 4 | 2322339 | 2322364 | 2 | 13 | 26 | GT   | 17 | 17 |
| 40235 | 4 | 2363889 | 2363918 | 2 | 15 | 30 | CA   | 12 | 12 |
| 40239 | 4 | 2379067 | 2379084 | 2 | 9  | 18 | CA   | 10 | 11 |
| 40240 | 4 | 2379252 | 2379267 | 2 | 8  | 16 | TG   | 22 | 12 |
| 40242 | 4 | 2385395 | 2385414 | 2 | 10 | 20 | CT   | 11 | 7  |
| 40244 | 4 | 2385786 | 2385803 | 3 | 6  | 18 | TCA  | 26 | 11 |
| 40245 | 4 | 2387153 | 2387173 | 3 | 7  | 21 | GCA  | 32 | 12 |
| 40250 | 4 | 2399390 | 2399401 | 2 | 6  | 12 | TA   | 24 | 4  |
| 40262 | 4 | 2429916 | 2429931 | 2 | 8  | 16 | AC   | 22 | 7  |
| 40263 | 4 | 2430056 | 2430067 | 2 | 6  | 12 | AG   | 25 | 5  |
| 40264 | 4 | 2430281 | 2430314 | 2 | 17 | 34 | TC   | 7  | 9  |
| 40266 | 4 | 2431066 | 2431077 | 2 | 6  | 12 | CA   | 15 | 3  |

|       |   |         |         |   |    |    |      |    |    |
|-------|---|---------|---------|---|----|----|------|----|----|
| 40268 | 4 | 2431298 | 2431327 | 3 | 10 | 30 | GAG  | 13 | 7  |
| 40271 | 4 | 2431911 | 2431924 | 2 | 7  | 14 | GT   | 13 | 9  |
| 40283 | 4 | 2435952 | 2435972 | 3 | 7  | 21 | GAG  | 23 | 6  |
| 40284 | 4 | 2436412 | 2436435 | 3 | 8  | 24 | TCT  | 17 | 12 |
| 40288 | 4 | 2441794 | 2441805 | 2 | 6  | 12 | GT   | 32 | 3  |
| 40297 | 4 | 2452739 | 2452758 | 2 | 10 | 20 | GA   | 29 | 3  |
| 40299 | 4 | 2460323 | 2460354 | 2 | 16 | 32 | TG   | 8  | 7  |
| 40313 | 4 | 2503420 | 2503457 | 2 | 19 | 38 | TG   | 11 | 14 |
| 40315 | 4 | 2504693 | 2504704 | 2 | 6  | 12 | GT   | 21 | 3  |
| 40318 | 4 | 2510151 | 2510174 | 3 | 8  | 24 | TTG  | 14 | 4  |
| 40326 | 4 | 2530084 | 2530105 | 2 | 11 | 22 | CA   | 22 | 10 |
| 40329 | 4 | 2543663 | 2543680 | 3 | 6  | 18 | CCT  | 24 | 4  |
| 40337 | 4 | 2563826 | 2563857 | 2 | 16 | 32 | CA   | 20 | 8  |
| 40338 | 4 | 2563996 | 2564009 | 2 | 7  | 14 | GT   | 19 | 3  |
| 40342 | 4 | 2570441 | 2570454 | 2 | 7  | 14 | GT   | 17 | 7  |
| 40348 | 4 | 2576120 | 2576137 | 2 | 9  | 18 | TG   | 28 | 5  |
| 40350 | 4 | 2591963 | 2591977 | 3 | 5  | 15 | CTG  | 15 | 3  |
| 40361 | 4 | 2607679 | 2607700 | 2 | 11 | 22 | TG   | 23 | 3  |
| 40362 | 4 | 2608187 | 2608202 | 2 | 8  | 16 | TC   | 25 | 6  |
| 40363 | 4 | 2609614 | 2609633 | 2 | 10 | 20 | CA   | 23 | 4  |
| 40379 | 4 | 2663585 | 2663616 | 2 | 16 | 32 | GT   | 9  | 6  |
| 40382 | 4 | 2666243 | 2666260 | 2 | 9  | 18 | GT   | 11 | 7  |
| 40383 | 4 | 2666487 | 2666508 | 2 | 11 | 22 | TG   | 21 | 6  |
| 40384 | 4 | 2667021 | 2667056 | 2 | 18 | 36 | CA   | 7  | 11 |
| 40388 | 4 | 2670352 | 2670366 | 3 | 5  | 15 | CTG  | 27 | 3  |
| 40392 | 4 | 2675221 | 2675235 | 3 | 5  | 15 | CTT  | 30 | 3  |
| 40395 | 4 | 2683978 | 2684017 | 2 | 20 | 40 | TG   | 16 | 8  |
| 40398 | 4 | 2686493 | 2686508 | 4 | 4  | 16 | TTAT | 26 | 5  |
| 40400 | 4 | 2690328 | 2690341 | 2 | 7  | 14 | TC   | 8  | 7  |
| 40404 | 4 | 2695617 | 2695644 | 2 | 14 | 28 | TG   | 7  | 7  |
| 40412 | 4 | 2704928 | 2704957 | 2 | 15 | 30 | AC   | 10 | 9  |
| 40413 | 4 | 2705930 | 2705941 | 2 | 6  | 12 | TA   | 26 | 3  |
| 40418 | 4 | 2710699 | 2710724 | 2 | 13 | 26 | TG   | 19 | 14 |
| 40421 | 4 | 2713484 | 2713517 | 2 | 17 | 34 | CA   | 11 | 6  |
| 40431 | 4 | 2727528 | 2727561 | 2 | 17 | 34 | AC   | 11 | 9  |
| 40439 | 4 | 2754783 | 2754798 | 2 | 8  | 16 | GA   | 22 | 4  |
| 40452 | 4 | 2778428 | 2778445 | 2 | 9  | 18 | GT   | 22 | 5  |
| 40454 | 4 | 2781898 | 2781925 | 2 | 14 | 28 | CA   | 14 | 6  |
| 40456 | 4 | 2782703 | 2782714 | 2 | 6  | 12 | GT   | 11 | 12 |
| 40457 | 4 | 2783036 | 2783075 | 2 | 20 | 40 | CA   | 18 | 11 |
| 40462 | 4 | 2786234 | 2786275 | 3 | 14 | 42 | AGC  | 28 | 4  |
| 40466 | 4 | 2795253 | 2795282 | 2 | 15 | 30 | TG   | 22 | 17 |
| 40468 | 4 | 2808784 | 2808797 | 2 | 7  | 14 | CA   | 17 | 7  |
| 40469 | 4 | 2808800 | 2808813 | 2 | 7  | 14 | CA   | 20 | 4  |
| 40471 | 4 | 2810172 | 2810199 | 2 | 14 | 28 | CA   | 13 | 4  |
| 40474 | 4 | 2817921 | 2817940 | 2 | 10 | 20 | GT   | 6  | 6  |
| 40475 | 4 | 2818054 | 2818071 | 2 | 9  | 18 | CA   | 14 | 3  |
| 40476 | 4 | 2818334 | 2818355 | 2 | 11 | 22 | TC   | 17 | 5  |
| 40477 | 4 | 2819843 | 2819864 | 2 | 11 | 22 | GT   | 11 | 10 |
| 40480 | 4 | 2825879 | 2825894 | 2 | 8  | 16 | GT   | 18 | 3  |
| 40481 | 4 | 2825898 | 2825909 | 2 | 6  | 12 | TG   | 22 | 6  |



|       |   |         |         |   |    |    |      |    |    |
|-------|---|---------|---------|---|----|----|------|----|----|
| 40482 | 4 | 2826252 | 2826275 | 2 | 12 | 24 | CA   | 20 | 10 |
| 40496 | 4 | 2842784 | 2842811 | 2 | 14 | 28 | GT   | 6  | 7  |
| 40497 | 4 | 2843410 | 2843461 | 2 | 26 | 52 | TG   | 9  | 7  |
| 40499 | 4 | 2846454 | 2846469 | 2 | 8  | 16 | GT   | 18 | 10 |
| 40500 | 4 | 2847950 | 2847961 | 2 | 6  | 12 | TG   | 27 | 3  |
| 40505 | 4 | 2856809 | 2856846 | 2 | 19 | 38 | AC   | 10 | 10 |
| 40512 | 4 | 2865222 | 2865253 | 2 | 16 | 32 | TG   | 13 | 16 |
| 40513 | 4 | 2868018 | 2868041 | 3 | 8  | 24 | CAT  | 31 | 11 |
| 40524 | 4 | 2897078 | 2897093 | 2 | 8  | 16 | TC   | 24 | 5  |
| 40531 | 4 | 2901666 | 2901703 | 2 | 19 | 38 | GT   | 13 | 14 |
| 40532 | 4 | 2902919 | 2902940 | 2 | 11 | 22 | CA   | 16 | 8  |
| 40539 | 4 | 2933019 | 2933030 | 2 | 6  | 12 | AC   | 18 | 3  |
| 40540 | 4 | 2933301 | 2933314 | 2 | 7  | 14 | GA   | 14 | 3  |
| 40542 | 4 | 2935777 | 2935792 | 2 | 8  | 16 | GT   | 25 | 4  |
| 40543 | 4 | 2937979 | 2937994 | 2 | 8  | 16 | CA   | 18 | 6  |
| 40544 | 4 | 2938220 | 2938253 | 2 | 17 | 34 | AC   | 12 | 8  |
| 40546 | 4 | 2941864 | 2941887 | 2 | 12 | 24 | AC   | 12 | 8  |
| 40551 | 4 | 2945992 | 2946031 | 2 | 20 | 40 | AC   | 21 | 13 |
| 40552 | 4 | 2946206 | 2946235 | 2 | 15 | 30 | AC   | 10 | 11 |
| 40553 | 4 | 2949818 | 2949829 | 2 | 6  | 12 | AC   | 27 | 5  |
| 40554 | 4 | 2953165 | 2953192 | 2 | 14 | 28 | AC   | 21 | 7  |
| 40556 | 4 | 2965479 | 2965498 | 2 | 10 | 20 | GT   | 17 | 5  |
| 40557 | 4 | 2967735 | 2967754 | 2 | 10 | 20 | TG   | 7  | 3  |
| 40558 | 4 | 2968397 | 2968408 | 2 | 6  | 12 | TC   | 11 | 3  |
| 40559 | 4 | 2968410 | 2968423 | 2 | 7  | 14 | CT   | 10 | 4  |
| 40561 | 4 | 2968522 | 2968533 | 2 | 6  | 12 | CT   | 12 | 4  |
| 40568 | 4 | 2984904 | 2984925 | 2 | 11 | 22 | AC   | 7  | 5  |
| 40569 | 4 | 2987480 | 2987506 | 3 | 9  | 27 | TCT  | 30 | 4  |
| 40570 | 4 | 2990018 | 2990033 | 4 | 4  | 16 | TGTT | 26 | 3  |
| 40571 | 4 | 2990263 | 2990276 | 2 | 7  | 14 | TC   | 25 | 4  |
| 40573 | 4 | 2991692 | 2991718 | 3 | 9  | 27 | CTC  | 9  | 4  |
| 40578 | 4 | 2998144 | 2998163 | 2 | 10 | 20 | CA   | 16 | 6  |
| 40589 | 4 | 3017027 | 3017042 | 2 | 8  | 16 | AC   | 24 | 3  |
| 40591 | 4 | 3019505 | 3019518 | 2 | 7  | 14 | GT   | 31 | 3  |
| 40597 | 4 | 3031065 | 3031082 | 2 | 9  | 18 | TG   | 22 | 3  |
| 40598 | 4 | 3031186 | 3031201 | 2 | 8  | 16 | AC   | 26 | 7  |
| 40599 | 4 | 3031771 | 3031800 | 2 | 15 | 30 | GT   | 10 | 8  |
| 40603 | 4 | 3039680 | 3039691 | 2 | 6  | 12 | TC   | 18 | 7  |
| 40613 | 4 | 3096293 | 3096320 | 2 | 14 | 28 | CA   | 16 | 10 |
| 40616 | 4 | 3108870 | 3108881 | 2 | 6  | 12 | AC   | 32 | 6  |
| 40617 | 4 | 3109084 | 3109103 | 2 | 10 | 20 | CA   | 16 | 7  |
| 40618 | 4 | 3109180 | 3109227 | 2 | 24 | 48 | TG   | 13 | 14 |
| 40620 | 4 | 3110312 | 3110335 | 4 | 6  | 24 | CCTT | 13 | 4  |
| 40630 | 4 | 3136475 | 3136496 | 2 | 11 | 22 | CA   | 8  | 3  |
| 40635 | 4 | 3142439 | 3142464 | 2 | 13 | 26 | GT   | 15 | 11 |
| 40641 | 4 | 3150943 | 3150958 | 4 | 4  | 16 | TGTC | 27 | 4  |
| 40642 | 4 | 3151167 | 3151208 | 2 | 21 | 42 | CA   | 15 | 12 |
| 40643 | 4 | 3151441 | 3151454 | 2 | 7  | 14 | CA   | 17 | 3  |
| 40644 | 4 | 3153336 | 3153371 | 2 | 18 | 36 | GA   | 8  | 5  |
| 40648 | 4 | 3155460 | 3155483 | 3 | 8  | 24 | GCT  | 15 | 7  |
| 40650 | 4 | 3155616 | 3155635 | 4 | 5  | 20 | AGAC | 18 | 11 |

|       |   |         |         |   |    |    |      |    |    |
|-------|---|---------|---------|---|----|----|------|----|----|
| 40652 | 4 | 3155852 | 3155875 | 2 | 12 | 24 | GA   | 15 | 8  |
| 40674 | 4 | 3181363 | 3181382 | 2 | 10 | 20 | GT   | 20 | 4  |
| 40675 | 4 | 3182219 | 3182236 | 2 | 9  | 18 | AC   | 23 | 9  |
| 40677 | 4 | 3188532 | 3188547 | 4 | 4  | 16 | GACA | 20 | 7  |
| 40680 | 4 | 3190557 | 3190586 | 3 | 10 | 30 | GAG  | 6  | 5  |
| 40681 | 4 | 3191929 | 3191946 | 3 | 6  | 18 | ATG  | 34 | 4  |
| 40685 | 4 | 3194151 | 3194170 | 2 | 10 | 20 | AC   | 11 | 9  |
| 40686 | 4 | 3194299 | 3194320 | 2 | 11 | 22 | AC   | 18 | 3  |
| 40693 | 4 | 3208740 | 3208757 | 3 | 6  | 18 | TGC  | 20 | 8  |
| 40695 | 4 | 3211498 | 3211527 | 2 | 15 | 30 | GA   | 12 | 17 |
| 40697 | 4 | 3224723 | 3224734 | 2 | 6  | 12 | AT   | 15 | 6  |
| 40700 | 4 | 3235171 | 3235188 | 3 | 6  | 18 | TAT  | 26 | 8  |
| 40701 | 4 | 3235698 | 3235733 | 2 | 18 | 36 | AC   | 8  | 9  |
| 40705 | 4 | 3243339 | 3243360 | 2 | 11 | 22 | GT   | 22 | 13 |
| 40708 | 4 | 3246205 | 3246216 | 2 | 6  | 12 | CA   | 26 | 3  |
| 40709 | 4 | 3246360 | 3246380 | 3 | 7  | 21 | CTT  | 27 | 3  |
| 40721 | 4 | 3263125 | 3263142 | 2 | 9  | 18 | AC   | 21 | 10 |
| 40723 | 4 | 3265720 | 3265733 | 2 | 7  | 14 | CA   | 23 | 4  |
| 40725 | 4 | 3272064 | 3272087 | 4 | 6  | 24 | TATT | 12 | 4  |
| 40727 | 4 | 3275255 | 3275282 | 2 | 14 | 28 | TG   | 12 | 7  |
| 40728 | 4 | 3275361 | 3275378 | 2 | 9  | 18 | GT   | 16 | 7  |
| 40735 | 4 | 3291786 | 3291824 | 3 | 13 | 39 | TCT  | 22 | 6  |
| 40737 | 4 | 3292139 | 3292158 | 2 | 10 | 20 | GT   | 21 | 5  |
| 40738 | 4 | 3292999 | 3293016 | 2 | 9  | 18 | TG   | 31 | 7  |
| 40739 | 4 | 3293114 | 3293145 | 2 | 16 | 32 | AC   | 14 | 5  |
| 40740 | 4 | 3294292 | 3294309 | 2 | 9  | 18 | TG   | 14 | 12 |
| 40741 | 4 | 3294530 | 3294543 | 2 | 7  | 14 | TC   | 16 | 6  |
| 40742 | 4 | 3294698 | 3294713 | 2 | 8  | 16 | TG   | 11 | 3  |
| 40747 | 4 | 3297687 | 3297712 | 2 | 13 | 26 | GT   | 11 | 6  |
| 40748 | 4 | 3299446 | 3299469 | 2 | 12 | 24 | CA   | 21 | 6  |
| 40751 | 4 | 3301489 | 3301522 | 2 | 17 | 34 | TG   | 10 | 7  |
| 40761 | 4 | 3307723 | 3307734 | 2 | 6  | 12 | AC   | 20 | 3  |
| 40762 | 4 | 3307819 | 3307848 | 2 | 15 | 30 | AC   | 22 | 11 |
| 40768 | 4 | 3310130 | 3310177 | 3 | 16 | 48 | AAG  | 12 | 12 |
| 40769 | 4 | 3310627 | 3310646 | 2 | 10 | 20 | GA   | 16 | 10 |
| 40770 | 4 | 3310782 | 3310802 | 3 | 7  | 21 | CCA  | 23 | 4  |
| 40771 | 4 | 3311260 | 3311274 | 3 | 5  | 15 | GCC  | 12 | 3  |
| 40774 | 4 | 3312936 | 3312961 | 2 | 13 | 26 | AC   | 6  | 7  |
| 40779 | 4 | 3313847 | 3313867 | 3 | 7  | 21 | CTG  | 25 | 6  |
| 40780 | 4 | 3314006 | 3314031 | 2 | 13 | 26 | GT   | 18 | 5  |
| 40781 | 4 | 3315530 | 3315544 | 3 | 5  | 15 | ATA  | 25 | 3  |
| 40782 | 4 | 3315813 | 3315848 | 2 | 18 | 36 | AC   | 6  | 6  |
| 40784 | 4 | 3317125 | 3317154 | 2 | 15 | 30 | TG   | 14 | 10 |
| 40786 | 4 | 3319360 | 3319371 | 2 | 6  | 12 | TG   | 26 | 3  |
| 40787 | 4 | 3319584 | 3319611 | 2 | 14 | 28 | GT   | 14 | 12 |
| 40788 | 4 | 3323029 | 3323044 | 2 | 8  | 16 | AC   | 22 | 3  |
| 40797 | 4 | 3323758 | 3323777 | 2 | 10 | 20 | GA   | 16 | 9  |
| 40809 | 4 | 3353036 | 3353063 | 2 | 14 | 28 | TG   | 24 | 4  |
| 40820 | 4 | 3384109 | 3384148 | 2 | 20 | 40 | AC   | 24 | 13 |
| 40821 | 4 | 3385050 | 3385069 | 4 | 5  | 20 | TGAT | 29 | 8  |
| 40825 | 4 | 3393114 | 3393127 | 2 | 7  | 14 | TG   | 25 | 3  |

|       |   |         |         |   |    |    |      |    |    |
|-------|---|---------|---------|---|----|----|------|----|----|
| 40830 | 4 | 3397734 | 3397763 | 2 | 15 | 30 | CA   | 14 | 9  |
| 40833 | 4 | 3403044 | 3403057 | 2 | 7  | 14 | AG   | 28 | 5  |
| 40835 | 4 | 3412263 | 3412312 | 2 | 25 | 50 | CA   | 8  | 7  |
| 40840 | 4 | 3426616 | 3426627 | 2 | 6  | 12 | GT   | 32 | 3  |
| 40844 | 4 | 3434254 | 3434271 | 2 | 9  | 18 | GT   | 22 | 5  |
| 40845 | 4 | 3434988 | 3435002 | 3 | 5  | 15 | GGA  | 21 | 7  |
| 40849 | 4 | 3438227 | 3438246 | 4 | 5  | 20 | TTAT | 13 | 6  |
| 40850 | 4 | 3438248 | 3438263 | 4 | 4  | 16 | TATT | 13 | 8  |
| 40853 | 4 | 3446956 | 3446983 | 2 | 14 | 28 | GT   | 13 | 6  |
| 40862 | 4 | 3463007 | 3463028 | 2 | 11 | 22 | CA   | 14 | 6  |
| 40866 | 4 | 3467071 | 3467090 | 2 | 10 | 20 | AC   | 16 | 4  |
| 40871 | 4 | 3470798 | 3470811 | 2 | 7  | 14 | CA   | 15 | 6  |
| 40873 | 4 | 3471233 | 3471256 | 3 | 8  | 24 | CTT  | 13 | 12 |
| 40876 | 4 | 3472401 | 3472440 | 2 | 20 | 40 | CA   | 17 | 9  |
| 40877 | 4 | 3473687 | 3473704 | 2 | 9  | 18 | AC   | 11 | 5  |
| 40878 | 4 | 3473706 | 3473725 | 2 | 10 | 20 | CA   | 9  | 6  |
| 40879 | 4 | 3473896 | 3473945 | 2 | 25 | 50 | TG   | 16 | 14 |
| 40882 | 4 | 3474253 | 3474278 | 2 | 13 | 26 | AC   | 14 | 6  |
| 40884 | 4 | 3476457 | 3476474 | 2 | 9  | 18 | CA   | 12 | 11 |
| 40885 | 4 | 3476934 | 3476945 | 2 | 6  | 12 | TG   | 16 | 3  |
| 40887 | 4 | 3477085 | 3477108 | 2 | 12 | 24 | AC   | 21 | 5  |
| 40888 | 4 | 3479925 | 3479944 | 2 | 10 | 20 | AC   | 21 | 3  |
| 40890 | 4 | 3482420 | 3482435 | 2 | 8  | 16 | CA   | 23 | 4  |
| 40891 | 4 | 3482461 | 3482475 | 3 | 5  | 15 | CAG  | 31 | 4  |
| 40897 | 4 | 3483105 | 3483124 | 2 | 10 | 20 | TG   | 11 | 6  |
| 40900 | 4 | 3483505 | 3483518 | 2 | 7  | 14 | CA   | 18 | 5  |
| 40904 | 4 | 3485122 | 3485143 | 2 | 11 | 22 | CA   | 15 | 5  |
| 40907 | 4 | 3487256 | 3487267 | 2 | 6  | 12 | AC   | 31 | 3  |
| 40912 | 4 | 3491639 | 3491658 | 2 | 10 | 20 | CA   | 16 | 6  |
| 40915 | 4 | 3497256 | 3497283 | 2 | 14 | 28 | GA   | 10 | 5  |
| 40916 | 4 | 3498191 | 3498210 | 2 | 10 | 20 | TC   | 26 | 7  |
| 40923 | 4 | 3499862 | 3499900 | 3 | 13 | 39 | AAG  | 22 | 11 |
| 40924 | 4 | 3500014 | 3500027 | 2 | 7  | 14 | AC   | 21 | 3  |
| 40925 | 4 | 3501455 | 3501474 | 4 | 5  | 20 | ATTT | 22 | 3  |
| 40927 | 4 | 3503986 | 3504001 | 2 | 8  | 16 | TG   | 27 | 4  |
| 40931 | 4 | 3507603 | 3507617 | 3 | 5  | 15 | TAC  | 27 | 4  |
| 40932 | 4 | 3508808 | 3508827 | 2 | 10 | 20 | GT   | 20 | 7  |
| 40933 | 4 | 3508957 | 3508986 | 2 | 15 | 30 | AC   | 10 | 10 |
| 40934 | 4 | 3509127 | 3509160 | 2 | 17 | 34 | TG   | 13 | 14 |
| 40935 | 4 | 3509313 | 3509338 | 2 | 13 | 26 | TG   | 10 | 6  |
| 40939 | 4 | 3510749 | 3510776 | 2 | 14 | 28 | CA   | 8  | 5  |
| 40945 | 4 | 3514559 | 3514574 | 2 | 8  | 16 | AG   | 18 | 5  |
| 40949 | 4 | 3517197 | 3517224 | 2 | 14 | 28 | AG   | 9  | 6  |
| 40951 | 4 | 3517670 | 3517732 | 3 | 21 | 63 | GCT  | 20 | 20 |
| 40955 | 4 | 3522804 | 3522819 | 2 | 8  | 16 | GT   | 27 | 5  |
| 40956 | 4 | 3524500 | 3524527 | 2 | 14 | 28 | CA   | 9  | 6  |
| 40969 | 4 | 3533590 | 3533603 | 2 | 7  | 14 | CA   | 28 | 3  |
| 40970 | 4 | 3534228 | 3534249 | 2 | 11 | 22 | TG   | 19 | 4  |
| 40973 | 4 | 3542028 | 3542043 | 4 | 4  | 16 | GGCT | 21 | 4  |
| 40975 | 4 | 3542469 | 3542492 | 4 | 6  | 24 | CAGA | 18 | 4  |
| 40978 | 4 | 3547160 | 3547171 | 2 | 6  | 12 | AC   | 27 | 3  |

|       |   |         |         |   |    |    |      |    |    |
|-------|---|---------|---------|---|----|----|------|----|----|
| 40979 | 4 | 3547266 | 3547301 | 2 | 18 | 36 | TG   | 11 | 8  |
| 40983 | 4 | 3550304 | 3550327 | 2 | 12 | 24 | GT   | 16 | 8  |
| 40984 | 4 | 3550490 | 3550523 | 2 | 17 | 34 | AC   | 11 | 9  |
| 40985 | 4 | 3553483 | 3553500 | 2 | 9  | 18 | AC   | 25 | 9  |
| 40987 | 4 | 3554511 | 3554522 | 2 | 6  | 12 | CA   | 24 | 5  |
| 41000 | 4 | 3569372 | 3569421 | 2 | 25 | 50 | CA   | 6  | 9  |
| 41001 | 4 | 3569542 | 3569573 | 2 | 16 | 32 | AC   | 6  | 8  |
| 41003 | 4 | 3571856 | 3571867 | 2 | 6  | 12 | AC   | 31 | 5  |
| 41004 | 4 | 3572031 | 3572090 | 2 | 30 | 60 | AC   | 13 | 13 |
| 41006 | 4 | 3575203 | 3575214 | 2 | 6  | 12 | AC   | 22 | 3  |
| 41024 | 4 | 3591010 | 3591021 | 2 | 6  | 12 | AC   | 20 | 4  |
| 41025 | 4 | 3591207 | 3591246 | 2 | 20 | 40 | TG   | 6  | 7  |
| 41026 | 4 | 3591375 | 3591390 | 2 | 8  | 16 | GT   | 8  | 4  |
| 41029 | 4 | 3595371 | 3595398 | 4 | 7  | 28 | AAAT | 18 | 5  |
| 41031 | 4 | 3597837 | 3597854 | 2 | 9  | 18 | GT   | 21 | 4  |
| 41033 | 4 | 3598292 | 3598303 | 2 | 6  | 12 | AG   | 29 | 3  |
| 41034 | 4 | 3598697 | 3598714 | 2 | 9  | 18 | TG   | 21 | 8  |
| 41038 | 4 | 3605018 | 3605029 | 2 | 6  | 12 | TG   | 14 | 7  |
| 41039 | 4 | 3605031 | 3605048 | 2 | 9  | 18 | GT   | 12 | 8  |
| 41041 | 4 | 3605236 | 3605255 | 2 | 10 | 20 | CA   | 20 | 11 |
| 41042 | 4 | 3605557 | 3605589 | 3 | 11 | 33 | GAG  | 15 | 6  |
| 41046 | 4 | 3608665 | 3608698 | 2 | 17 | 34 | AC   | 8  | 10 |
| 41058 | 4 | 3613231 | 3613260 | 2 | 15 | 30 | TG   | 13 | 10 |
| 41059 | 4 | 3613950 | 3613969 | 2 | 10 | 20 | CA   | 16 | 14 |
| 41060 | 4 | 3614128 | 3614153 | 2 | 13 | 26 | GT   | 9  | 5  |
| 41064 | 4 | 3615852 | 3615871 | 2 | 10 | 20 | CA   | 23 | 7  |
| 41065 | 4 | 3616985 | 3617004 | 2 | 10 | 20 | AC   | 19 | 6  |
| 41069 | 4 | 3619645 | 3619662 | 2 | 9  | 18 | AC   | 16 | 3  |
| 41079 | 4 | 3634561 | 3634596 | 4 | 9  | 36 | TGGA | 28 | 8  |
| 41080 | 4 | 3636572 | 3636585 | 2 | 7  | 14 | CA   | 21 | 3  |
| 41081 | 4 | 3637310 | 3637323 | 2 | 7  | 14 | CA   | 20 | 4  |
| 41083 | 4 | 3639850 | 3639873 | 2 | 12 | 24 | GT   | 19 | 3  |
| 41087 | 4 | 3643146 | 3643165 | 2 | 10 | 20 | TG   | 19 | 6  |
| 41090 | 4 | 3643535 | 3643548 | 2 | 7  | 14 | TG   | 23 | 3  |
| 41097 | 4 | 3653108 | 3653135 | 2 | 14 | 28 | GT   | 12 | 11 |
| 41098 | 4 | 3653274 | 3653289 | 4 | 4  | 16 | TTTG | 12 | 5  |
| 41099 | 4 | 3655767 | 3655780 | 2 | 7  | 14 | AG   | 28 | 4  |
| 41100 | 4 | 3655836 | 3655867 | 2 | 16 | 32 | AC   | 23 | 12 |
| 41101 | 4 | 3656259 | 3656284 | 2 | 13 | 26 | AC   | 6  | 9  |
| 41104 | 4 | 3658458 | 3658489 | 4 | 8  | 32 | AGAC | 22 | 7  |
| 41108 | 4 | 3663408 | 3663419 | 2 | 6  | 12 | TG   | 18 | 4  |
| 41109 | 4 | 3663421 | 3663432 | 2 | 6  | 12 | GT   | 25 | 5  |
| 41111 | 4 | 3665982 | 3665993 | 2 | 6  | 12 | TG   | 16 | 6  |
| 41120 | 4 | 3679886 | 3679899 | 2 | 7  | 14 | GT   | 24 | 10 |
| 41122 | 4 | 3682470 | 3682489 | 2 | 10 | 20 | AC   | 16 | 4  |
| 41123 | 4 | 3683248 | 3683277 | 2 | 15 | 30 | AG   | 13 | 4  |
| 41126 | 4 | 3687060 | 3687087 | 2 | 14 | 28 | TG   | 17 | 11 |
| 41127 | 4 | 3687776 | 3687793 | 3 | 6  | 18 | CCA  | 16 | 3  |
| 41128 | 4 | 3687975 | 3687988 | 2 | 7  | 14 | CT   | 28 | 3  |
| 41129 | 4 | 3688086 | 3688101 | 2 | 8  | 16 | GA   | 22 | 4  |
| 41133 | 4 | 3699243 | 3699266 | 3 | 8  | 24 | TTA  | 18 | 6  |

|       |   |         |         |   |    |    |      |    |    |
|-------|---|---------|---------|---|----|----|------|----|----|
| 41134 | 4 | 3699342 | 3699369 | 2 | 14 | 28 | GA   | 8  | 8  |
| 41135 | 4 | 3701772 | 3701801 | 2 | 15 | 30 | CA   | 20 | 17 |
| 41138 | 4 | 3704429 | 3704452 | 4 | 6  | 24 | TCTT | 20 | 3  |
| 41139 | 4 | 3711118 | 3711137 | 2 | 10 | 20 | GT   | 22 | 4  |
| 41141 | 4 | 3713549 | 3713576 | 4 | 7  | 28 | CAGT | 20 | 3  |
| 41144 | 4 | 3718043 | 3718054 | 2 | 6  | 12 | TG   | 23 | 9  |
| 41148 | 4 | 3724122 | 3724137 | 2 | 8  | 16 | GA   | 14 | 9  |
| 41150 | 4 | 3729536 | 3729559 | 2 | 12 | 24 | AC   | 19 | 10 |
| 41153 | 4 | 3731324 | 3731335 | 2 | 6  | 12 | TC   | 23 | 4  |
| 41159 | 4 | 3738193 | 3738230 | 2 | 19 | 38 | GT   | 6  | 9  |
| 41160 | 4 | 3738369 | 3738390 | 2 | 11 | 22 | CA   | 18 | 7  |
| 41161 | 4 | 3738564 | 3738585 | 2 | 11 | 22 | AG   | 23 | 7  |
| 41165 | 4 | 3744006 | 3744017 | 2 | 6  | 12 | AG   | 25 | 3  |
| 41172 | 4 | 3758892 | 3758933 | 2 | 21 | 42 | CA   | 14 | 12 |
| 41174 | 4 | 3774640 | 3774657 | 2 | 9  | 18 | CT   | 11 | 4  |
| 41181 | 4 | 3792127 | 3792150 | 4 | 6  | 24 | GTGC | 17 | 10 |
| 41185 | 4 | 3799652 | 3799669 | 2 | 9  | 18 | AG   | 25 | 3  |
| 41201 | 4 | 3829470 | 3829489 | 4 | 5  | 20 | TGTC | 28 | 3  |
| 41204 | 4 | 3837629 | 3837650 | 2 | 11 | 22 | GT   | 13 | 11 |
| 41209 | 4 | 3856286 | 3856297 | 2 | 6  | 12 | TG   | 27 | 4  |
| 41218 | 4 | 3883037 | 3883050 | 2 | 7  | 14 | AG   | 27 | 3  |
| 41225 | 4 | 3893830 | 3893847 | 2 | 9  | 18 | CA   | 18 | 5  |
| 41230 | 4 | 3908858 | 3908873 | 2 | 8  | 16 | CA   | 16 | 8  |
| 41235 | 4 | 3911165 | 3911180 | 2 | 8  | 16 | CA   | 26 | 4  |
| 41236 | 4 | 3911279 | 3911292 | 2 | 7  | 14 | TG   | 11 | 8  |
| 41237 | 4 | 3911294 | 3911311 | 2 | 9  | 18 | GT   | 16 | 10 |
| 41238 | 4 | 3913038 | 3913049 | 2 | 6  | 12 | TG   | 15 | 5  |
| 41239 | 4 | 3913250 | 3913283 | 2 | 17 | 34 | CA   | 23 | 15 |
| 41240 | 4 | 3919087 | 3919114 | 2 | 14 | 28 | CA   | 10 | 14 |
| 41243 | 4 | 3922858 | 3922883 | 2 | 13 | 26 | TG   | 7  | 8  |
| 41246 | 4 | 3925718 | 3925733 | 4 | 4  | 16 | TTTA | 12 | 7  |
| 41247 | 4 | 3926141 | 3926160 | 2 | 10 | 20 | TG   | 23 | 5  |
| 41248 | 4 | 3929286 | 3929305 | 2 | 10 | 20 | CA   | 14 | 6  |
| 41253 | 4 | 3938569 | 3938582 | 2 | 7  | 14 | GT   | 13 | 9  |
| 41255 | 4 | 3939253 | 3939264 | 2 | 6  | 12 | AC   | 28 | 3  |
| 41259 | 4 | 3943931 | 3943950 | 2 | 10 | 20 | CA   | 28 | 5  |
| 41260 | 4 | 3946914 | 3946927 | 2 | 7  | 14 | CA   | 25 | 6  |
| 41261 | 4 | 3947011 | 3947038 | 2 | 14 | 28 | CA   | 20 | 9  |
| 41262 | 4 | 3947214 | 3947227 | 2 | 7  | 14 | AC   | 23 | 10 |
| 41264 | 4 | 3948569 | 3948584 | 2 | 8  | 16 | CA   | 11 | 9  |
| 41266 | 4 | 3949378 | 3949407 | 2 | 15 | 30 | GT   | 20 | 8  |
| 41267 | 4 | 3950138 | 3950171 | 2 | 17 | 34 | TG   | 14 | 7  |
| 41268 | 4 | 3951232 | 3951245 | 2 | 7  | 14 | GT   | 29 | 3  |
| 41269 | 4 | 3951331 | 3951354 | 2 | 12 | 24 | TG   | 7  | 3  |
| 41271 | 4 | 3951535 | 3951556 | 2 | 11 | 22 | CA   | 14 | 11 |
| 41278 | 4 | 3960738 | 3960783 | 2 | 23 | 46 | GT   | 9  | 9  |
| 41279 | 4 | 3960977 | 3960998 | 2 | 11 | 22 | GT   | 22 | 8  |
| 41282 | 4 | 3971759 | 3971796 | 2 | 19 | 38 | TG   | 6  | 6  |
| 41284 | 4 | 3973004 | 3973023 | 2 | 10 | 20 | GT   | 18 | 6  |
| 41285 | 4 | 3976297 | 3976324 | 2 | 14 | 28 | TG   | 13 | 10 |
| 41286 | 4 | 3978339 | 3978362 | 4 | 6  | 24 | CCAT | 28 | 6  |

|       |   |         |         |   |    |    |    |    |    |
|-------|---|---------|---------|---|----|----|----|----|----|
| 41287 | 4 | 3979343 | 3979358 | 2 | 8  | 16 | AC | 17 | 8  |
| 41293 | 4 | 3979751 | 3979770 | 2 | 10 | 20 | AG | 11 | 8  |
| 41296 | 4 | 3980188 | 3980201 | 2 | 7  | 14 | TG | 16 | 6  |
| 41301 | 4 | 3982586 | 3982613 | 2 | 14 | 28 | GT | 23 | 6  |
| 41305 | 4 | 3984583 | 3984596 | 2 | 7  | 14 | AC | 12 | 4  |
| 41306 | 4 | 3985835 | 3985850 | 2 | 8  | 16 | AC | 19 | 3  |
| 41307 | 4 | 4001383 | 4001398 | 2 | 8  | 16 | TC | 8  | 8  |
| 41316 | 4 | 4006424 | 4006435 | 2 | 6  | 12 | AC | 17 | 3  |
| 41320 | 4 | 4008456 | 4008473 | 2 | 9  | 18 | AC | 11 | 4  |
| 41322 | 4 | 4010358 | 4010373 | 2 | 8  | 16 | CT | 18 | 4  |
| 41323 | 4 | 4012322 | 4012345 | 2 | 12 | 24 | TG | 20 | 9  |
| 41327 | 4 | 4022738 | 4022773 | 2 | 18 | 36 | CA | 13 | 11 |
| 41334 | 4 | 4031426 | 4031453 | 2 | 14 | 28 | AC | 17 | 16 |
| 41337 | 4 | 4035881 | 4035904 | 2 | 12 | 24 | GT | 14 | 12 |
| 41339 | 4 | 4036620 | 4036651 | 2 | 16 | 32 | GT | 11 | 7  |
| 41341 | 4 | 4037233 | 4037244 | 2 | 6  | 12 | AT | 11 | 3  |
| 41342 | 4 | 4038635 | 4038650 | 2 | 8  | 16 | GT | 27 | 5  |
| 41345 | 4 | 4043551 | 4043566 | 2 | 8  | 16 | TG | 19 | 5  |
| 41346 | 4 | 4043568 | 4043587 | 2 | 10 | 20 | GT | 11 | 5  |
| 41347 | 4 | 4044285 | 4044300 | 2 | 8  | 16 | CA | 10 | 4  |
| 41348 | 4 | 4044478 | 4044503 | 2 | 13 | 26 | GT | 6  | 7  |
| 41350 | 4 | 4045525 | 4045536 | 2 | 6  | 12 | TG | 20 | 11 |
| 41353 | 4 | 4048317 | 4048336 | 2 | 10 | 20 | CA | 18 | 3  |
| 41355 | 4 | 4051529 | 4051548 | 2 | 10 | 20 | TG | 31 | 7  |
| 41359 | 4 | 4052820 | 4052851 | 2 | 16 | 32 | GT | 12 | 12 |
| 41364 | 4 | 4054048 | 4054067 | 2 | 10 | 20 | TG | 13 | 6  |
| 41368 | 4 | 4056598 | 4056619 | 2 | 11 | 22 | TG | 18 | 7  |
| 41369 | 4 | 4058139 | 4058160 | 2 | 11 | 22 | GT | 18 | 4  |
| 41371 | 4 | 4058233 | 4058250 | 2 | 9  | 18 | AC | 18 | 8  |
| 41372 | 4 | 4058460 | 4058477 | 2 | 9  | 18 | GT | 16 | 4  |
| 41376 | 4 | 4061582 | 4061613 | 2 | 16 | 32 | TG | 10 | 12 |
| 41378 | 4 | 4061752 | 4061773 | 2 | 11 | 22 | GT | 13 | 9  |
| 41379 | 4 | 4062008 | 4062019 | 2 | 6  | 12 | GT | 23 | 3  |
| 41383 | 4 | 4063915 | 4063932 | 2 | 9  | 18 | AC | 14 | 6  |
| 41384 | 4 | 4063964 | 4063981 | 2 | 9  | 18 | GT | 32 | 6  |
| 41386 | 4 | 4066175 | 4066186 | 2 | 6  | 12 | CA | 23 | 4  |
| 41387 | 4 | 4066328 | 4066357 | 2 | 15 | 30 | GT | 18 | 6  |
| 41390 | 4 | 4066635 | 4066664 | 2 | 15 | 30 | TG | 13 | 11 |
| 41391 | 4 | 4066711 | 4066732 | 2 | 11 | 22 | AC | 15 | 4  |
| 41392 | 4 | 4066947 | 4066970 | 2 | 12 | 24 | TG | 20 | 4  |
| 41394 | 4 | 4067433 | 4067450 | 2 | 9  | 18 | GA | 17 | 3  |
| 41395 | 4 | 4067475 | 4067488 | 2 | 7  | 14 | AG | 12 | 13 |
| 41399 | 4 | 4073259 | 4073278 | 2 | 10 | 20 | TG | 19 | 8  |
| 41403 | 4 | 4075385 | 4075402 | 2 | 9  | 18 | GT | 11 | 3  |
| 41407 | 4 | 4084581 | 4084602 | 2 | 11 | 22 | TG | 10 | 5  |
| 41414 | 4 | 4089458 | 4089475 | 2 | 9  | 18 | AC | 14 | 3  |
| 41418 | 4 | 4091160 | 4091177 | 2 | 9  | 18 | AC | 18 | 3  |
| 41419 | 4 | 4091452 | 4091465 | 2 | 7  | 14 | TG | 14 | 4  |
| 41425 | 4 | 4097012 | 4097035 | 2 | 12 | 24 | GA | 17 | 8  |
| 41426 | 4 | 4100226 | 4100275 | 2 | 25 | 50 | TG | 7  | 10 |
| 41427 | 4 | 4102150 | 4102189 | 2 | 20 | 40 | GT | 7  | 9  |

|       |   |         |         |   |    |    |      |    |    |
|-------|---|---------|---------|---|----|----|------|----|----|
| 41429 | 4 | 4104083 | 4104124 | 2 | 21 | 42 | TG   | 8  | 10 |
| 41433 | 4 | 4107321 | 4107334 | 2 | 7  | 14 | CA   | 6  | 4  |
| 41437 | 4 | 4109626 | 4109646 | 3 | 7  | 21 | CTC  | 19 | 4  |
| 41441 | 4 | 4110189 | 4110218 | 2 | 15 | 30 | CA   | 9  | 8  |
| 41461 | 4 | 4119652 | 4119685 | 2 | 17 | 34 | TG   | 9  | 9  |
| 41466 | 4 | 4121722 | 4121737 | 2 | 8  | 16 | CA   | 21 | 9  |
| 41469 | 4 | 4126106 | 4126119 | 2 | 7  | 14 | TG   | 25 | 6  |
| 41472 | 4 | 4128407 | 4128420 | 2 | 7  | 14 | GT   | 23 | 5  |
| 41474 | 4 | 4128999 | 4129022 | 2 | 12 | 24 | AG   | 11 | 7  |
| 41477 | 4 | 4130543 | 4130560 | 2 | 9  | 18 | AC   | 16 | 8  |
| 41481 | 4 | 4132291 | 4132302 | 2 | 6  | 12 | CA   | 27 | 4  |
| 41482 | 4 | 4134297 | 4134314 | 2 | 9  | 18 | TG   | 21 | 6  |
| 41483 | 4 | 4139484 | 4139503 | 2 | 10 | 20 | TG   | 10 | 6  |
| 41484 | 4 | 4140952 | 4140963 | 2 | 6  | 12 | GT   | 18 | 5  |
| 41495 | 4 | 4147294 | 4147315 | 2 | 11 | 22 | TG   | 21 | 4  |
| 41496 | 4 | 4147539 | 4147550 | 2 | 6  | 12 | CA   | 12 | 4  |
| 41499 | 4 | 4148634 | 4148657 | 2 | 12 | 24 | AG   | 6  | 10 |
| 41501 | 4 | 4149326 | 4149337 | 2 | 6  | 12 | CA   | 29 | 4  |
| 41502 | 4 | 4149339 | 4149354 | 2 | 8  | 16 | AC   | 26 | 5  |
| 41503 | 4 | 4154972 | 4154991 | 2 | 10 | 20 | CA   | 9  | 5  |
| 41504 | 4 | 4155271 | 4155284 | 2 | 7  | 14 | AG   | 20 | 3  |
| 41507 | 4 | 4158842 | 4158867 | 2 | 13 | 26 | CA   | 8  | 6  |
| 41508 | 4 | 4159296 | 4159333 | 2 | 19 | 38 | CA   | 21 | 12 |
| 41515 | 4 | 4162246 | 4162259 | 2 | 7  | 14 | TG   | 24 | 3  |
| 41517 | 4 | 4168012 | 4168025 | 2 | 7  | 14 | CT   | 21 | 3  |
| 41518 | 4 | 4168173 | 4168198 | 2 | 13 | 26 | GA   | 11 | 8  |
| 41519 | 4 | 4169224 | 4169235 | 2 | 6  | 12 | TG   | 20 | 4  |
| 41520 | 4 | 4169409 | 4169424 | 4 | 4  | 16 | CCTC | 20 | 3  |
| 41527 | 4 | 4177395 | 4177418 | 2 | 12 | 24 | GA   | 21 | 9  |
| 41542 | 4 | 4187451 | 4187478 | 2 | 14 | 28 | CA   | 13 | 15 |
| 41544 | 4 | 4188486 | 4188515 | 2 | 15 | 30 | GT   | 6  | 7  |
| 41548 | 4 | 4198300 | 4198317 | 2 | 9  | 18 | GT   | 18 | 6  |
| 41549 | 4 | 4198456 | 4198479 | 2 | 12 | 24 | AC   | 8  | 7  |
| 41552 | 4 | 4200625 | 4200650 | 2 | 13 | 26 | CA   | 18 | 6  |
| 41553 | 4 | 4200924 | 4200937 | 2 | 7  | 14 | GA   | 18 | 3  |
| 41555 | 4 | 4201365 | 4201385 | 3 | 7  | 21 | CCT  | 19 | 5  |
| 41557 | 4 | 4203086 | 4203111 | 2 | 13 | 26 | GT   | 10 | 11 |
| 41558 | 4 | 4203209 | 4203234 | 2 | 13 | 26 | CA   | 18 | 6  |
| 41560 | 4 | 4204572 | 4204587 | 2 | 8  | 16 | GA   | 27 | 3  |
| 41561 | 4 | 4204717 | 4204738 | 2 | 11 | 22 | AC   | 6  | 8  |
| 41562 | 4 | 4205901 | 4205938 | 2 | 19 | 38 | GT   | 12 | 7  |
| 41563 | 4 | 4208734 | 4208745 | 2 | 6  | 12 | GA   | 29 | 4  |
| 41565 | 4 | 4209263 | 4209282 | 2 | 10 | 20 | TG   | 22 | 7  |
| 41568 | 4 | 4216549 | 4216562 | 2 | 7  | 14 | AC   | 30 | 7  |
| 41569 | 4 | 4216694 | 4216705 | 2 | 6  | 12 | GT   | 22 | 7  |
| 41570 | 4 | 4216707 | 4216718 | 2 | 6  | 12 | TG   | 26 | 6  |
| 41572 | 4 | 4219492 | 4219511 | 2 | 10 | 20 | AC   | 12 | 4  |
| 41574 | 4 | 4225690 | 4225717 | 2 | 14 | 28 | CA   | 12 | 11 |
| 41575 | 4 | 4227223 | 4227240 | 3 | 6  | 18 | CCT  | 12 | 4  |
| 41578 | 4 | 4232502 | 4232529 | 2 | 14 | 28 | GT   | 9  | 8  |
| 41580 | 4 | 4232969 | 4232980 | 2 | 6  | 12 | GT   | 33 | 3  |

|       |   |         |         |   |    |    |      |    |    |
|-------|---|---------|---------|---|----|----|------|----|----|
| 41584 | 4 | 4234896 | 4234933 | 2 | 19 | 38 | CA   | 18 | 10 |
| 41585 | 4 | 4235246 | 4235279 | 2 | 17 | 34 | CA   | 7  | 8  |
| 41589 | 4 | 4236467 | 4236496 | 2 | 15 | 30 | CA   | 17 | 8  |
| 41591 | 4 | 4238298 | 4238319 | 2 | 11 | 22 | AC   | 6  | 9  |
| 41593 | 4 | 4238463 | 4238486 | 2 | 12 | 24 | CA   | 16 | 9  |
| 41638 | 4 | 4274145 | 4274162 | 2 | 9  | 18 | GA   | 17 | 9  |
| 41643 | 4 | 4277117 | 4277130 | 2 | 7  | 14 | AG   | 16 | 4  |
| 41646 | 4 | 4279884 | 4279909 | 2 | 13 | 26 | CA   | 13 | 9  |
| 41650 | 4 | 4285726 | 4285773 | 4 | 12 | 48 | AATC | 16 | 9  |
| 41651 | 4 | 4286324 | 4286337 | 2 | 7  | 14 | AG   | 13 | 5  |
| 41652 | 4 | 4286339 | 4286350 | 2 | 6  | 12 | GA   | 13 | 7  |
| 41672 | 4 | 4297161 | 4297176 | 4 | 4  | 16 | CACG | 15 | 5  |
| 41673 | 4 | 4297223 | 4297240 | 2 | 9  | 18 | CA   | 27 | 10 |
| 41674 | 4 | 4297421 | 4297434 | 2 | 7  | 14 | TG   | 19 | 7  |
| 41676 | 4 | 4297679 | 4297704 | 2 | 13 | 26 | TG   | 12 | 6  |
| 41679 | 4 | 4300393 | 4300420 | 2 | 14 | 28 | GA   | 7  | 8  |
| 41680 | 4 | 4302336 | 4302353 | 2 | 9  | 18 | CA   | 20 | 7  |
| 41683 | 4 | 4307105 | 4307118 | 2 | 7  | 14 | CA   | 16 | 6  |
| 41689 | 4 | 4314638 | 4314665 | 2 | 14 | 28 | CA   | 13 | 8  |
| 41693 | 4 | 4316232 | 4316243 | 2 | 6  | 12 | AT   | 23 | 3  |
| 41694 | 4 | 4316370 | 4316387 | 2 | 9  | 18 | CA   | 17 | 6  |
| 41695 | 4 | 4316965 | 4316992 | 2 | 14 | 28 | GT   | 21 | 5  |
| 41697 | 4 | 4318858 | 4318875 | 2 | 9  | 18 | GT   | 12 | 5  |
| 41698 | 4 | 4319821 | 4319850 | 3 | 10 | 30 | CAG  | 21 | 10 |
| 41699 | 4 | 4320512 | 4320526 | 3 | 5  | 15 | AAT  | 20 | 3  |
| 41702 | 4 | 4321372 | 4321391 | 2 | 10 | 20 | AC   | 11 | 8  |
| 41704 | 4 | 4322824 | 4322841 | 2 | 9  | 18 | GT   | 21 | 7  |
| 41705 | 4 | 4323143 | 4323176 | 2 | 17 | 34 | GT   | 22 | 8  |
| 41709 | 4 | 4332058 | 4332089 | 2 | 16 | 32 | GT   | 7  | 8  |
| 41715 | 4 | 4336671 | 4336682 | 2 | 6  | 12 | GT   | 18 | 5  |
| 41716 | 4 | 4337166 | 4337183 | 2 | 9  | 18 | TG   | 19 | 4  |
| 41717 | 4 | 4337205 | 4337218 | 2 | 7  | 14 | TG   | 14 | 5  |
| 41718 | 4 | 4337338 | 4337367 | 2 | 15 | 30 | TG   | 12 | 6  |
| 41720 | 4 | 4339128 | 4339149 | 2 | 11 | 22 | GT   | 19 | 13 |
| 41721 | 4 | 4341819 | 4341834 | 4 | 4  | 16 | AAAT | 22 | 4  |
| 41723 | 4 | 4343205 | 4343232 | 2 | 14 | 28 | CA   | 16 | 15 |
| 41727 | 4 | 4348136 | 4348171 | 2 | 18 | 36 | TC   | 10 | 9  |
| 41728 | 4 | 4348356 | 4348381 | 2 | 13 | 26 | TG   | 9  | 8  |
| 41733 | 4 | 4350219 | 4350236 | 2 | 9  | 18 | GT   | 14 | 3  |
| 41743 | 4 | 4367811 | 4367824 | 2 | 7  | 14 | GT   | 16 | 5  |
| 41745 | 4 | 4369381 | 4369416 | 2 | 18 | 36 | TC   | 10 | 10 |
| 41748 | 4 | 4370289 | 4370302 | 2 | 7  | 14 | TC   | 21 | 4  |
| 41751 | 4 | 4370494 | 4370513 | 2 | 10 | 20 | GT   | 19 | 9  |
| 41752 | 4 | 4370708 | 4370723 | 2 | 8  | 16 | AC   | 18 | 8  |
| 41753 | 4 | 4371444 | 4371455 | 2 | 6  | 12 | AC   | 27 | 3  |
| 41755 | 4 | 4373398 | 4373427 | 2 | 15 | 30 | TG   | 14 | 4  |
| 41760 | 4 | 4378026 | 4378057 | 2 | 16 | 32 | TG   | 14 | 9  |
| 41761 | 4 | 4378080 | 4378094 | 3 | 5  | 15 | ATG  | 19 | 3  |
| 41763 | 4 | 4378186 | 4378211 | 2 | 13 | 26 | GT   | 10 | 9  |
| 41765 | 4 | 4378405 | 4378416 | 2 | 6  | 12 | CA   | 11 | 4  |
| 41767 | 4 | 4380311 | 4380336 | 2 | 13 | 26 | GT   | 19 | 11 |



|       |   |         |         |   |    |    |      |    |    |
|-------|---|---------|---------|---|----|----|------|----|----|
| 41769 | 4 | 4383484 | 4383499 | 2 | 8  | 16 | TG   | 27 | 6  |
| 41771 | 4 | 4383927 | 4383952 | 2 | 13 | 26 | AC   | 8  | 11 |
| 41772 | 4 | 4384102 | 4384115 | 2 | 7  | 14 | CA   | 15 | 5  |
| 41773 | 4 | 4385334 | 4385353 | 2 | 10 | 20 | TG   | 20 | 3  |
| 41780 | 4 | 4391272 | 4391285 | 2 | 7  | 14 | TG   | 28 | 4  |
| 41788 | 4 | 4396955 | 4396976 | 2 | 11 | 22 | AC   | 22 | 13 |
| 41797 | 4 | 4403112 | 4403125 | 2 | 7  | 14 | AC   | 25 | 5  |
| 41801 | 4 | 4409396 | 4409409 | 2 | 7  | 14 | AC   | 23 | 4  |
| 41808 | 4 | 4419825 | 4419840 | 2 | 8  | 16 | GT   | 23 | 4  |
| 41811 | 4 | 4422310 | 4422329 | 2 | 10 | 20 | TG   | 17 | 5  |
| 41815 | 4 | 4427607 | 4427628 | 2 | 11 | 22 | TG   | 13 | 7  |
| 41818 | 4 | 4429530 | 4429557 | 4 | 7  | 28 | TGGA | 17 | 7  |
| 41823 | 4 | 4433800 | 4433811 | 2 | 6  | 12 | AG   | 18 | 3  |
| 41826 | 4 | 4440631 | 4440656 | 2 | 13 | 26 | CA   | 24 | 9  |
| 41827 | 4 | 4442112 | 4442145 | 2 | 17 | 34 | AC   | 14 | 9  |
| 41828 | 4 | 4442447 | 4442478 | 2 | 16 | 32 | TC   | 12 | 9  |
| 41830 | 4 | 4444107 | 4444118 | 2 | 6  | 12 | CA   | 8  | 3  |
| 41833 | 4 | 4450677 | 4450690 | 2 | 7  | 14 | CA   | 19 | 4  |
| 41834 | 4 | 4451990 | 4452005 | 2 | 8  | 16 | AC   | 14 | 6  |
| 41835 | 4 | 4452045 | 4452080 | 2 | 18 | 36 | AC   | 6  | 5  |
| 41836 | 4 | 4452208 | 4452229 | 2 | 11 | 22 | CA   | 12 | 13 |
| 41838 | 4 | 4452551 | 4452572 | 2 | 11 | 22 | AC   | 12 | 8  |
| 41839 | 4 | 4456458 | 4456469 | 2 | 6  | 12 | GT   | 24 | 7  |
| 41840 | 4 | 4456704 | 4456719 | 2 | 8  | 16 | AC   | 24 | 5  |
| 41854 | 4 | 4486978 | 4487003 | 2 | 13 | 26 | TG   | 20 | 13 |
| 41859 | 4 | 4493991 | 4494010 | 4 | 5  | 20 | ATGC | 32 | 6  |
| 41862 | 4 | 4501127 | 4501158 | 2 | 16 | 32 | TG   | 8  | 9  |
| 41863 | 4 | 4501315 | 4501338 | 2 | 12 | 24 | TG   | 17 | 9  |
| 41864 | 4 | 4501424 | 4501447 | 2 | 12 | 24 | GA   | 9  | 5  |
| 41867 | 4 | 4503923 | 4503940 | 2 | 9  | 18 | CA   | 18 | 11 |
| 41868 | 4 | 4510620 | 4510639 | 2 | 10 | 20 | CA   | 16 | 5  |
| 41869 | 4 | 4512705 | 4512742 | 2 | 19 | 38 | AC   | 7  | 8  |
| 41870 | 4 | 4513357 | 4513368 | 2 | 6  | 12 | CA   | 23 | 3  |
| 41877 | 4 | 4516424 | 4516479 | 4 | 14 | 56 | CTAT | 9  | 9  |
| 41880 | 4 | 4518716 | 4518733 | 2 | 9  | 18 | AC   | 24 | 5  |
| 41881 | 4 | 4519020 | 4519033 | 2 | 7  | 14 | CT   | 25 | 3  |
| 41883 | 4 | 4521813 | 4521830 | 2 | 9  | 18 | CA   | 14 | 8  |
| 41884 | 4 | 4524930 | 4524951 | 2 | 11 | 22 | CA   | 19 | 5  |
| 41885 | 4 | 4525060 | 4525079 | 2 | 10 | 20 | AC   | 17 | 8  |
| 41886 | 4 | 4526049 | 4526072 | 2 | 12 | 24 | AC   | 11 | 9  |
| 41887 | 4 | 4526431 | 4526454 | 2 | 12 | 24 | TG   | 22 | 13 |
| 41888 | 4 | 4529214 | 4529231 | 2 | 9  | 18 | CA   | 21 | 3  |
| 41889 | 4 | 4534101 | 4534121 | 3 | 7  | 21 | TAT  | 29 | 4  |
| 41890 | 4 | 4534879 | 4534892 | 2 | 7  | 14 | CT   | 15 | 4  |
| 41891 | 4 | 4537675 | 4537702 | 2 | 14 | 28 | CA   | 13 | 8  |
| 41897 | 4 | 4546677 | 4546694 | 2 | 9  | 18 | TC   | 17 | 8  |
| 41899 | 4 | 4553832 | 4553861 | 2 | 15 | 30 | AC   | 8  | 10 |
| 41900 | 4 | 4558975 | 4558988 | 2 | 7  | 14 | GT   | 28 | 4  |
| 41906 | 4 | 4585712 | 4585727 | 4 | 4  | 16 | TCAG | 33 | 3  |
| 41908 | 4 | 4599748 | 4599765 | 2 | 9  | 18 | TG   | 17 | 9  |
| 41912 | 4 | 4604024 | 4604037 | 2 | 7  | 14 | GT   | 16 | 3  |

|       |   |         |         |   |    |    |      |    |    |
|-------|---|---------|---------|---|----|----|------|----|----|
| 41915 | 4 | 4615147 | 4615162 | 2 | 8  | 16 | TG   | 11 | 6  |
| 41919 | 4 | 4627237 | 4627250 | 2 | 7  | 14 | GT   | 23 | 5  |
| 41925 | 4 | 4642103 | 4642122 | 2 | 10 | 20 | AC   | 19 | 4  |
| 41926 | 4 | 4642223 | 4642252 | 2 | 15 | 30 | CA   | 15 | 8  |
| 41927 | 4 | 4646312 | 4646323 | 2 | 6  | 12 | AC   | 29 | 4  |
| 41928 | 4 | 4647519 | 4647530 | 2 | 6  | 12 | GT   | 27 | 3  |
| 41929 | 4 | 4647556 | 4647569 | 2 | 7  | 14 | GT   | 11 | 3  |
| 41941 | 4 | 4668086 | 4668103 | 2 | 9  | 18 | CT   | 10 | 5  |
| 41943 | 4 | 4669575 | 4669598 | 2 | 12 | 24 | GA   | 15 | 7  |
| 41946 | 4 | 4670551 | 4670564 | 2 | 7  | 14 | TG   | 14 | 4  |
| 41948 | 4 | 4680434 | 4680447 | 2 | 7  | 14 | AC   | 19 | 11 |
| 41950 | 4 | 4680925 | 4680936 | 2 | 6  | 12 | AC   | 25 | 13 |
| 41951 | 4 | 4681402 | 4681416 | 3 | 5  | 15 | TCC  | 27 | 4  |
| 41952 | 4 | 4681532 | 4681549 | 2 | 9  | 18 | GA   | 16 | 4  |
| 41953 | 4 | 4685518 | 4685529 | 2 | 6  | 12 | CA   | 17 | 3  |
| 41958 | 4 | 4697333 | 4697346 | 2 | 7  | 14 | TG   | 15 | 3  |
| 41973 | 4 | 4728840 | 4728881 | 2 | 21 | 42 | CA   | 23 | 11 |
| 41974 | 4 | 4734361 | 4734380 | 2 | 10 | 20 | AC   | 19 | 7  |
| 41978 | 4 | 4735227 | 4735240 | 2 | 7  | 14 | AC   | 19 | 3  |
| 41981 | 4 | 4737526 | 4737537 | 2 | 6  | 12 | TG   | 21 | 5  |
| 41983 | 4 | 4738694 | 4738717 | 2 | 12 | 24 | AC   | 19 | 7  |
| 41984 | 4 | 4739078 | 4739089 | 2 | 6  | 12 | AC   | 15 | 10 |
| 41987 | 4 | 4745649 | 4745672 | 2 | 12 | 24 | TG   | 24 | 7  |
| 41997 | 4 | 4757508 | 4757523 | 2 | 8  | 16 | TG   | 19 | 3  |
| 41998 | 4 | 4763770 | 4763783 | 2 | 7  | 14 | GT   | 12 | 6  |
| 41999 | 4 | 4766781 | 4766796 | 2 | 8  | 16 | TG   | 27 | 6  |
| 42004 | 4 | 4798851 | 4798874 | 4 | 6  | 24 | TCTG | 23 | 6  |
| 42006 | 4 | 4808348 | 4808362 | 3 | 5  | 15 | GAG  | 22 | 3  |
| 42011 | 4 | 4834203 | 4834220 | 2 | 9  | 18 | GT   | 18 | 5  |
| 42013 | 4 | 4843662 | 4843673 | 2 | 6  | 12 | CT   | 28 | 6  |
| 42023 | 4 | 4868219 | 4868242 | 2 | 12 | 24 | CA   | 21 | 6  |
| 42031 | 4 | 4890990 | 4891004 | 3 | 5  | 15 | ATC  | 19 | 4  |
| 42032 | 4 | 4892110 | 4892129 | 2 | 10 | 20 | TG   | 19 | 7  |
| 42033 | 4 | 4893613 | 4893638 | 2 | 13 | 26 | AC   | 18 | 9  |
| 42037 | 4 | 4899194 | 4899207 | 2 | 7  | 14 | TG   | 20 | 4  |
| 42040 | 4 | 4901906 | 4901937 | 2 | 16 | 32 | CA   | 12 | 9  |
| 42041 | 4 | 4902232 | 4902251 | 2 | 10 | 20 | AT   | 9  | 7  |
| 42049 | 4 | 4934477 | 4934498 | 2 | 11 | 22 | TG   | 15 | 3  |
| 42051 | 4 | 4937546 | 4937572 | 3 | 9  | 27 | AAG  | 24 | 8  |
| 42052 | 4 | 4938372 | 4938392 | 3 | 7  | 21 | AAT  | 13 | 6  |
| 42053 | 4 | 4939223 | 4939242 | 4 | 5  | 20 | CATC | 20 | 5  |
| 42056 | 4 | 4941376 | 4941389 | 2 | 7  | 14 | CA   | 14 | 10 |
| 42058 | 4 | 4943060 | 4943073 | 2 | 7  | 14 | AC   | 29 | 3  |
| 42059 | 4 | 4943304 | 4943319 | 2 | 8  | 16 | AC   | 19 | 3  |
| 42068 | 4 | 4964856 | 4964881 | 2 | 13 | 26 | GT   | 22 | 10 |
| 42069 | 4 | 4966198 | 4966209 | 2 | 6  | 12 | GT   | 28 | 3  |
| 42070 | 4 | 4970573 | 4970584 | 2 | 6  | 12 | CA   | 32 | 3  |
| 42075 | 4 | 4973270 | 4973285 | 2 | 8  | 16 | GT   | 13 | 3  |
| 42081 | 4 | 4982646 | 4982673 | 2 | 14 | 28 | AC   | 19 | 6  |
| 42083 | 4 | 4987752 | 4987765 | 2 | 7  | 14 | CA   | 32 | 3  |
| 42090 | 4 | 5005776 | 5005799 | 2 | 12 | 24 | GT   | 17 | 9  |

|       |   |         |         |   |    |    |      |    |    |
|-------|---|---------|---------|---|----|----|------|----|----|
| 42091 | 4 | 5005969 | 5005980 | 2 | 6  | 12 | TG   | 22 | 4  |
| 42092 | 4 | 5006106 | 5006125 | 2 | 10 | 20 | GT   | 23 | 8  |
| 42094 | 4 | 5009430 | 5009441 | 2 | 6  | 12 | TG   | 26 | 3  |
| 42096 | 4 | 5017586 | 5017603 | 3 | 6  | 18 | TTA  | 24 | 5  |
| 42099 | 4 | 5022628 | 5022655 | 2 | 14 | 28 | TG   | 7  | 6  |
| 42100 | 4 | 5024650 | 5024665 | 2 | 8  | 16 | AT   | 19 | 5  |
| 42103 | 4 | 5026501 | 5026512 | 2 | 6  | 12 | CA   | 17 | 5  |
| 42105 | 4 | 5036296 | 5036323 | 2 | 14 | 28 | GA   | 14 | 17 |
| 42107 | 4 | 5040248 | 5040269 | 2 | 11 | 22 | CA   | 14 | 5  |
| 42108 | 4 | 5044352 | 5044409 | 2 | 29 | 58 | CA   | 8  | 13 |
| 42112 | 4 | 5047913 | 5047932 | 2 | 10 | 20 | AC   | 16 | 8  |
| 42119 | 4 | 5056679 | 5056720 | 3 | 14 | 42 | ATT  | 11 | 5  |
| 42121 | 4 | 5057534 | 5057549 | 2 | 8  | 16 | TG   | 24 | 5  |
| 42123 | 4 | 5057752 | 5057775 | 2 | 12 | 24 | TG   | 14 | 7  |
| 42124 | 4 | 5057894 | 5057921 | 2 | 14 | 28 | TG   | 17 | 9  |
| 42125 | 4 | 5064171 | 5064190 | 2 | 10 | 20 | GT   | 12 | 4  |
| 42137 | 4 | 5081941 | 5081976 | 2 | 18 | 36 | GT   | 11 | 9  |
| 42141 | 4 | 5084694 | 5084717 | 2 | 12 | 24 | AC   | 17 | 9  |
| 42142 | 4 | 5088222 | 5088243 | 2 | 11 | 22 | GT   | 26 | 12 |
| 42143 | 4 | 5093940 | 5093973 | 2 | 17 | 34 | AC   | 10 | 10 |
| 42150 | 4 | 5133233 | 5133278 | 2 | 23 | 46 | TG   | 7  | 10 |
| 42158 | 4 | 5145748 | 5145779 | 2 | 16 | 32 | CA   | 15 | 11 |
| 42159 | 4 | 5146847 | 5146876 | 2 | 15 | 30 | AC   | 13 | 6  |
| 42165 | 4 | 5158639 | 5158653 | 3 | 5  | 15 | CAG  | 26 | 3  |
| 42166 | 4 | 5161839 | 5161866 | 2 | 14 | 28 | AC   | 10 | 3  |
| 42168 | 4 | 5162251 | 5162270 | 2 | 10 | 20 | TC   | 16 | 5  |
| 42170 | 4 | 5163688 | 5163739 | 4 | 13 | 52 | TATC | 21 | 8  |
| 42172 | 4 | 5166356 | 5166395 | 2 | 20 | 40 | TG   | 7  | 7  |
| 42173 | 4 | 5166524 | 5166551 | 2 | 14 | 28 | GT   | 11 | 4  |
| 42174 | 4 | 5166677 | 5166702 | 2 | 13 | 26 | CA   | 13 | 5  |
| 42177 | 4 | 5168122 | 5168151 | 2 | 15 | 30 | CA   | 20 | 11 |
| 42178 | 4 | 5172542 | 5172567 | 2 | 13 | 26 | AC   | 16 | 7  |
| 42183 | 4 | 5180616 | 5180629 | 2 | 7  | 14 | TG   | 21 | 5  |
| 42184 | 4 | 5182207 | 5182220 | 2 | 7  | 14 | AC   | 26 | 5  |
| 42186 | 4 | 5192980 | 5193001 | 2 | 11 | 22 | CT   | 19 | 8  |
| 42191 | 4 | 5195788 | 5195815 | 2 | 14 | 28 | CA   | 17 | 15 |
| 42194 | 4 | 5207608 | 5207629 | 2 | 11 | 22 | TG   | 6  | 6  |
| 42197 | 4 | 5210723 | 5210744 | 2 | 11 | 22 | GT   | 7  | 4  |
| 42199 | 4 | 5217304 | 5217341 | 2 | 19 | 38 | TG   | 7  | 7  |
| 42201 | 4 | 5218592 | 5218619 | 2 | 14 | 28 | CA   | 10 | 9  |
| 42204 | 4 | 5223702 | 5223731 | 2 | 15 | 30 | TC   | 10 | 9  |
| 42205 | 4 | 5224033 | 5224060 | 2 | 14 | 28 | TG   | 21 | 10 |
| 42210 | 4 | 5238877 | 5238897 | 3 | 7  | 21 | GAG  | 32 | 9  |
| 42213 | 4 | 5240245 | 5240276 | 2 | 16 | 32 | GT   | 15 | 8  |
| 42214 | 4 | 5241009 | 5241026 | 3 | 6  | 18 | CTT  | 31 | 3  |
| 42217 | 4 | 5247110 | 5247127 | 2 | 9  | 18 | TG   | 13 | 11 |
| 42218 | 4 | 5247129 | 5247144 | 2 | 8  | 16 | GT   | 20 | 15 |
| 42221 | 4 | 5256834 | 5256847 | 2 | 7  | 14 | TG   | 28 | 5  |
| 42235 | 4 | 5282963 | 5282990 | 2 | 14 | 28 | AC   | 7  | 10 |
| 42239 | 4 | 5289825 | 5289840 | 2 | 8  | 16 | AC   | 29 | 6  |
| 42246 | 4 | 5312542 | 5312573 | 2 | 16 | 32 | AC   | 10 | 8  |

|       |   |         |         |   |    |    |      |    |    |
|-------|---|---------|---------|---|----|----|------|----|----|
| 42260 | 4 | 5363468 | 5363481 | 2 | 7  | 14 | TG   | 22 | 3  |
| 42263 | 4 | 5368448 | 5368483 | 2 | 18 | 36 | GT   | 7  | 9  |
| 42264 | 4 | 5374192 | 5374206 | 3 | 5  | 15 | TGT  | 26 | 5  |
| 42265 | 4 | 5378575 | 5378586 | 2 | 6  | 12 | AC   | 29 | 4  |
| 42266 | 4 | 5382876 | 5382891 | 4 | 4  | 16 | CATT | 21 | 4  |
| 42270 | 4 | 5391397 | 5391408 | 2 | 6  | 12 | GT   | 29 | 3  |
| 42272 | 4 | 5392126 | 5392137 | 2 | 6  | 12 | GT   | 20 | 3  |
| 42273 | 4 | 5394941 | 5394954 | 2 | 7  | 14 | GT   | 25 | 5  |
| 42277 | 4 | 5400386 | 5400403 | 2 | 9  | 18 | AC   | 26 | 5  |
| 42278 | 4 | 5401056 | 5401073 | 2 | 9  | 18 | GA   | 27 | 7  |
| 42279 | 4 | 5401410 | 5401427 | 2 | 9  | 18 | GA   | 15 | 4  |
| 42280 | 4 | 5402916 | 5402931 | 2 | 8  | 16 | AT   | 18 | 7  |
| 42286 | 4 | 5406975 | 5406992 | 2 | 9  | 18 | AC   | 20 | 8  |
| 42289 | 4 | 5407428 | 5407445 | 2 | 9  | 18 | TG   | 15 | 8  |
| 42290 | 4 | 5407589 | 5407600 | 2 | 6  | 12 | AC   | 22 | 10 |
| 42291 | 4 | 5407604 | 5407621 | 2 | 9  | 18 | CA   | 23 | 8  |
| 42292 | 4 | 5410110 | 5410121 | 2 | 6  | 12 | CA   | 9  | 5  |
| 42293 | 4 | 5418628 | 5418657 | 2 | 15 | 30 | CA   | 21 | 16 |
| 42296 | 4 | 5420852 | 5420887 | 2 | 18 | 36 | AC   | 8  | 8  |
| 42297 | 4 | 5423038 | 5423077 | 4 | 10 | 40 | ATCT | 12 | 11 |
| 42298 | 4 | 5423776 | 5423799 | 3 | 8  | 24 | GAT  | 28 | 4  |
| 42299 | 4 | 5424429 | 5424444 | 2 | 8  | 16 | CA   | 13 | 3  |
| 42301 | 4 | 5426491 | 5426516 | 2 | 13 | 26 | AC   | 10 | 11 |
| 42303 | 4 | 5428823 | 5428846 | 2 | 12 | 24 | CA   | 14 | 7  |
| 42304 | 4 | 5428971 | 5428982 | 2 | 6  | 12 | GT   | 20 | 5  |
| 42305 | 4 | 5428984 | 5429001 | 2 | 9  | 18 | TG   | 23 | 5  |
| 42307 | 4 | 5432001 | 5432012 | 2 | 6  | 12 | TC   | 22 | 4  |
| 42310 | 4 | 5434520 | 5434543 | 2 | 12 | 24 | TG   | 15 | 15 |
| 42312 | 4 | 5434742 | 5434759 | 2 | 9  | 18 | AC   | 23 | 6  |
| 42316 | 4 | 5442170 | 5442215 | 2 | 23 | 46 | AC   | 19 | 11 |
| 42321 | 4 | 5454319 | 5454334 | 2 | 8  | 16 | AC   | 30 | 5  |
| 42323 | 4 | 5455643 | 5455698 | 4 | 14 | 56 | TCAA | 11 | 8  |
| 42324 | 4 | 5455959 | 5455970 | 2 | 6  | 12 | AC   | 25 | 6  |
| 42326 | 4 | 5456891 | 5456916 | 2 | 13 | 26 | CA   | 7  | 9  |
| 42327 | 4 | 5457701 | 5457718 | 2 | 9  | 18 | TG   | 19 | 5  |
| 42333 | 4 | 5460981 | 5460996 | 2 | 8  | 16 | AC   | 20 | 7  |
| 42335 | 4 | 5468366 | 5468391 | 2 | 13 | 26 | AG   | 18 | 7  |
| 42336 | 4 | 5469415 | 5469440 | 2 | 13 | 26 | TG   | 15 | 12 |
| 42337 | 4 | 5469519 | 5469538 | 4 | 5  | 20 | CGCA | 19 | 16 |
| 42338 | 4 | 5469687 | 5469712 | 2 | 13 | 26 | AC   | 14 | 13 |
| 42344 | 4 | 5480892 | 5480906 | 3 | 5  | 15 | CAG  | 15 | 5  |
| 42345 | 4 | 5482202 | 5482223 | 2 | 11 | 22 | TG   | 9  | 8  |
| 42349 | 4 | 5490442 | 5490455 | 2 | 7  | 14 | CA   | 10 | 10 |
| 42350 | 4 | 5490456 | 5490467 | 2 | 6  | 12 | AC   | 9  | 8  |
| 42358 | 4 | 5505971 | 5505994 | 2 | 12 | 24 | TG   | 13 | 9  |
| 42360 | 4 | 5507254 | 5507281 | 2 | 14 | 28 | CA   | 19 | 12 |
| 42361 | 4 | 5507821 | 5507832 | 2 | 6  | 12 | GT   | 18 | 4  |
| 42362 | 4 | 5507902 | 5507913 | 2 | 6  | 12 | TG   | 13 | 5  |
| 42363 | 4 | 5508073 | 5508100 | 2 | 14 | 28 | AC   | 16 | 8  |
| 42364 | 4 | 5508222 | 5508245 | 2 | 12 | 24 | TG   | 21 | 7  |
| 42365 | 4 | 5508429 | 5508442 | 2 | 7  | 14 | AC   | 17 | 6  |

|       |   |         |         |   |    |    |      |    |    |
|-------|---|---------|---------|---|----|----|------|----|----|
| 42367 | 4 | 5511946 | 5511973 | 2 | 14 | 28 | AG   | 6  | 9  |
| 42371 | 4 | 5516999 | 5517024 | 2 | 13 | 26 | TG   | 12 | 6  |
| 42372 | 4 | 5517149 | 5517168 | 2 | 10 | 20 | TC   | 13 | 13 |
| 42375 | 4 | 5519750 | 5519773 | 2 | 12 | 24 | AC   | 14 | 10 |
| 42379 | 4 | 5522189 | 5522212 | 2 | 12 | 24 | TG   | 16 | 5  |
| 42381 | 4 | 5528617 | 5528632 | 4 | 4  | 16 | CCTT | 27 | 3  |
| 42386 | 4 | 5543424 | 5543445 | 2 | 11 | 22 | CA   | 12 | 5  |
| 42387 | 4 | 5543490 | 5543509 | 2 | 10 | 20 | AG   | 22 | 8  |
| 42389 | 4 | 5546576 | 5546591 | 2 | 8  | 16 | TC   | 27 | 5  |
| 42391 | 4 | 5564224 | 5564255 | 2 | 16 | 32 | CA   | 10 | 11 |
| 42394 | 4 | 5574826 | 5574849 | 4 | 6  | 24 | AGAC | 25 | 13 |
| 42398 | 4 | 5578781 | 5578798 | 2 | 9  | 18 | CA   | 13 | 7  |
| 42401 | 4 | 5590366 | 5590385 | 2 | 10 | 20 | GT   | 14 | 4  |
| 42402 | 4 | 5590904 | 5590917 | 2 | 7  | 14 | AC   | 25 | 8  |
| 42403 | 4 | 5590918 | 5590931 | 2 | 7  | 14 | CA   | 20 | 3  |
| 42407 | 4 | 5594283 | 5594312 | 2 | 15 | 30 | CT   | 8  | 11 |
| 42409 | 4 | 5594390 | 5594405 | 2 | 8  | 16 | GT   | 8  | 5  |
| 42410 | 4 | 5594735 | 5594750 | 2 | 8  | 16 | TG   | 19 | 8  |
| 42411 | 4 | 5594754 | 5594765 | 2 | 6  | 12 | GT   | 20 | 9  |
| 42414 | 4 | 5595668 | 5595697 | 2 | 15 | 30 | AG   | 10 | 14 |
| 42422 | 4 | 5602315 | 5602338 | 2 | 12 | 24 | CA   | 13 | 6  |
| 42425 | 4 | 5606862 | 5606873 | 2 | 6  | 12 | CA   | 11 | 4  |
| 42426 | 4 | 5606876 | 5606887 | 2 | 6  | 12 | CA   | 14 | 7  |
| 42433 | 4 | 5629033 | 5629048 | 2 | 8  | 16 | TG   | 21 | 4  |
| 42435 | 4 | 5637397 | 5637412 | 4 | 4  | 16 | AGTC | 29 | 3  |
| 42437 | 4 | 5638302 | 5638313 | 2 | 6  | 12 | CG   | 14 | 11 |
| 42440 | 4 | 5645310 | 5645353 | 2 | 22 | 44 | CA   | 14 | 11 |
| 42445 | 4 | 5653141 | 5653158 | 2 | 9  | 18 | CT   | 17 | 5  |
| 42449 | 4 | 5654458 | 5654481 | 2 | 12 | 24 | GA   | 26 | 10 |
| 42450 | 4 | 5660264 | 5660275 | 2 | 6  | 12 | TG   | 17 | 3  |
| 42455 | 4 | 5662143 | 5662174 | 2 | 16 | 32 | TC   | 8  | 6  |
| 42456 | 4 | 5662755 | 5662806 | 4 | 13 | 52 | CTTT | 17 | 8  |
| 42457 | 4 | 5662990 | 5663035 | 2 | 23 | 46 | CA   | 7  | 7  |
| 42458 | 4 | 5663169 | 5663202 | 2 | 17 | 34 | GT   | 13 | 8  |
| 42459 | 4 | 5663360 | 5663401 | 2 | 21 | 42 | TG   | 10 | 10 |
| 42466 | 4 | 5671300 | 5671329 | 3 | 10 | 30 | GCA  | 21 | 5  |
| 42469 | 4 | 5672354 | 5672374 | 3 | 7  | 21 | TGG  | 24 | 3  |
| 42474 | 4 | 5673978 | 5673995 | 2 | 9  | 18 | CA   | 24 | 9  |
| 42479 | 4 | 5677870 | 5677903 | 2 | 17 | 34 | GT   | 25 | 10 |
| 42480 | 4 | 5678338 | 5678357 | 2 | 10 | 20 | CA   | 7  | 5  |
| 42484 | 4 | 5679784 | 5679799 | 2 | 8  | 16 | GT   | 23 | 4  |
| 42488 | 4 | 5681544 | 5681579 | 2 | 18 | 36 | TG   | 6  | 6  |
| 42495 | 4 | 5692963 | 5692984 | 2 | 11 | 22 | TG   | 20 | 8  |
| 42496 | 4 | 5693249 | 5693276 | 2 | 14 | 28 | GT   | 24 | 7  |
| 42498 | 4 | 5694206 | 5694233 | 2 | 14 | 28 | AC   | 16 | 10 |
| 42500 | 4 | 5694628 | 5694661 | 2 | 17 | 34 | GT   | 6  | 6  |
| 42503 | 4 | 5694871 | 5694896 | 2 | 13 | 26 | CA   | 11 | 12 |
| 42512 | 4 | 5716903 | 5716922 | 2 | 10 | 20 | GT   | 10 | 3  |
| 42515 | 4 | 5719063 | 5719082 | 2 | 10 | 20 | TC   | 23 | 3  |
| 42517 | 4 | 5720627 | 5720638 | 2 | 6  | 12 | TG   | 30 | 3  |
| 42520 | 4 | 5724199 | 5724212 | 2 | 7  | 14 | CA   | 24 | 10 |

|       |   |         |         |   |    |    |      |    |    |
|-------|---|---------|---------|---|----|----|------|----|----|
| 42521 | 4 | 5725157 | 5725208 | 4 | 13 | 52 | TACA | 14 | 6  |
| 42522 | 4 | 5725937 | 5725958 | 2 | 11 | 22 | TG   | 14 | 7  |
| 42529 | 4 | 5732505 | 5732526 | 2 | 11 | 22 | CA   | 17 | 10 |
| 42533 | 4 | 5737259 | 5737282 | 2 | 12 | 24 | CA   | 13 | 10 |
| 42534 | 4 | 5737399 | 5737416 | 2 | 9  | 18 | AC   | 19 | 9  |
| 42543 | 4 | 5743717 | 5743738 | 2 | 11 | 22 | GT   | 10 | 7  |
| 42551 | 4 | 5749274 | 5749299 | 2 | 13 | 26 | GT   | 14 | 10 |
| 42552 | 4 | 5749984 | 5750003 | 2 | 10 | 20 | GT   | 18 | 12 |
| 42553 | 4 | 5750942 | 5750980 | 3 | 13 | 39 | GTT  | 23 | 14 |
| 42554 | 4 | 5753177 | 5753196 | 2 | 10 | 20 | CA   | 21 | 7  |
| 42556 | 4 | 5756285 | 5756320 | 2 | 18 | 36 | TG   | 20 | 8  |
| 42569 | 4 | 5776110 | 5776123 | 2 | 7  | 14 | GT   | 13 | 7  |
| 42573 | 4 | 5777536 | 5777553 | 2 | 9  | 18 | TG   | 22 | 18 |
| 42574 | 4 | 5779569 | 5779584 | 2 | 8  | 16 | AC   | 14 | 3  |
| 42577 | 4 | 5779901 | 5779924 | 2 | 12 | 24 | TG   | 17 | 10 |
| 42582 | 4 | 5783306 | 5783325 | 2 | 10 | 20 | AC   | 17 | 5  |
| 42584 | 4 | 5783700 | 5783721 | 2 | 11 | 22 | AC   | 11 | 4  |
| 42585 | 4 | 5787442 | 5787455 | 2 | 7  | 14 | AT   | 25 | 3  |
| 42592 | 4 | 5792017 | 5792044 | 4 | 7  | 28 | TTTA | 11 | 4  |
| 42594 | 4 | 5795758 | 5795785 | 2 | 14 | 28 | CT   | 15 | 8  |
| 42596 | 4 | 5796328 | 5796353 | 2 | 13 | 26 | AC   | 14 | 8  |
| 42597 | 4 | 5796529 | 5796558 | 2 | 15 | 30 | CA   | 11 | 7  |
| 42599 | 4 | 5798906 | 5798927 | 2 | 11 | 22 | AC   | 15 | 4  |
| 42600 | 4 | 5799005 | 5799024 | 2 | 10 | 20 | GT   | 15 | 6  |
| 42602 | 4 | 5802193 | 5802210 | 3 | 6  | 18 | CAC  | 26 | 6  |
| 42611 | 4 | 5817515 | 5817574 | 4 | 15 | 60 | TTTC | 14 | 13 |
| 42612 | 4 | 5818126 | 5818141 | 2 | 8  | 16 | CA   | 8  | 7  |
| 42614 | 4 | 5822593 | 5822610 | 2 | 9  | 18 | GT   | 25 | 10 |
| 42616 | 4 | 5825633 | 5825668 | 2 | 18 | 36 | TG   | 9  | 7  |
| 42617 | 4 | 5826005 | 5826038 | 2 | 17 | 34 | GT   | 12 | 10 |
| 42618 | 4 | 5826138 | 5826161 | 2 | 12 | 24 | CA   | 20 | 9  |
| 42620 | 4 | 5826369 | 5826418 | 2 | 25 | 50 | AC   | 7  | 7  |
| 42631 | 4 | 5829824 | 5829835 | 2 | 6  | 12 | TG   | 15 | 6  |
| 42634 | 4 | 5831384 | 5831401 | 2 | 9  | 18 | GT   | 12 | 8  |
| 42635 | 4 | 5831404 | 5831421 | 2 | 9  | 18 | GT   | 15 | 9  |
| 42636 | 4 | 5835331 | 5835354 | 2 | 12 | 24 | AC   | 24 | 7  |
| 42637 | 4 | 5835524 | 5835541 | 2 | 9  | 18 | TG   | 23 | 7  |
| 42640 | 4 | 5836796 | 5836833 | 2 | 19 | 38 | TG   | 6  | 6  |
| 42641 | 4 | 5837474 | 5837499 | 2 | 13 | 26 | TG   | 19 | 7  |
| 42643 | 4 | 5838889 | 5838916 | 2 | 14 | 28 | GT   | 8  | 9  |
| 42644 | 4 | 5839043 | 5839072 | 2 | 15 | 30 | CA   | 7  | 12 |
| 42645 | 4 | 5839161 | 5839190 | 2 | 15 | 30 | TG   | 9  | 7  |
| 42646 | 4 | 5839379 | 5839402 | 2 | 12 | 24 | AG   | 11 | 8  |
| 42657 | 4 | 5844426 | 5844443 | 2 | 9  | 18 | TG   | 24 | 8  |
| 42659 | 4 | 5844620 | 5844637 | 2 | 9  | 18 | TG   | 9  | 3  |
| 42664 | 4 | 5846339 | 5846350 | 2 | 6  | 12 | AC   | 23 | 4  |
| 42669 | 4 | 5855836 | 5855851 | 2 | 8  | 16 | TG   | 23 | 3  |
| 42670 | 4 | 5857952 | 5857989 | 2 | 19 | 38 | CA   | 13 | 8  |
| 42671 | 4 | 5858117 | 5858156 | 2 | 20 | 40 | CA   | 9  | 10 |
| 42674 | 4 | 5858386 | 5858415 | 2 | 15 | 30 | GT   | 8  | 9  |
| 42675 | 4 | 5859927 | 5859960 | 2 | 17 | 34 | CA   | 17 | 7  |

|       |   |         |         |   |    |    |      |    |    |
|-------|---|---------|---------|---|----|----|------|----|----|
| 42681 | 4 | 5861138 | 5861161 | 3 | 8  | 24 | AAT  | 28 | 5  |
| 42682 | 4 | 5862940 | 5862993 | 2 | 27 | 54 | AG   | 9  | 13 |
| 42683 | 4 | 5864112 | 5864139 | 2 | 14 | 28 | CA   | 18 | 6  |
| 42686 | 4 | 5869919 | 5869938 | 2 | 10 | 20 | TC   | 20 | 3  |
| 42689 | 4 | 5872497 | 5872517 | 3 | 7  | 21 | TTC  | 19 | 9  |
| 42690 | 4 | 5872977 | 5872990 | 2 | 7  | 14 | GT   | 18 | 3  |
| 42698 | 4 | 5879171 | 5879198 | 2 | 14 | 28 | AC   | 9  | 11 |
| 42701 | 4 | 5881208 | 5881225 | 2 | 9  | 18 | AC   | 20 | 6  |
| 42702 | 4 | 5881228 | 5881243 | 2 | 8  | 16 | AC   | 20 | 10 |
| 42706 | 4 | 5883590 | 5883629 | 2 | 20 | 40 | TG   | 11 | 10 |
| 42707 | 4 | 5883953 | 5883966 | 2 | 7  | 14 | TA   | 13 | 4  |
| 42710 | 4 | 5887691 | 5887708 | 3 | 6  | 18 | TGT  | 30 | 8  |
| 42712 | 4 | 5889676 | 5889697 | 2 | 11 | 22 | CA   | 8  | 9  |
| 42728 | 4 | 5914442 | 5914453 | 2 | 6  | 12 | CT   | 24 | 3  |
| 42730 | 4 | 5914529 | 5914540 | 2 | 6  | 12 | TG   | 24 | 3  |
| 42732 | 4 | 5918214 | 5918249 | 2 | 18 | 36 | GT   | 17 | 11 |
| 42736 | 4 | 5925368 | 5925383 | 2 | 8  | 16 | TG   | 17 | 5  |
| 42738 | 4 | 5929118 | 5929143 | 2 | 13 | 26 | TG   | 10 | 11 |
| 42746 | 4 | 5939443 | 5939470 | 2 | 14 | 28 | GT   | 11 | 8  |
| 42747 | 4 | 5941029 | 5941058 | 2 | 15 | 30 | AC   | 10 | 3  |
| 42749 | 4 | 5945241 | 5945296 | 4 | 14 | 56 | CACG | 20 | 10 |
| 42754 | 4 | 5949706 | 5949743 | 2 | 19 | 38 | CA   | 12 | 10 |
| 42756 | 4 | 5953039 | 5953054 | 2 | 8  | 16 | CA   | 15 | 4  |
| 42759 | 4 | 5953426 | 5953439 | 2 | 7  | 14 | TG   | 17 | 3  |
| 42760 | 4 | 5953691 | 5953704 | 2 | 7  | 14 | GT   | 21 | 7  |
| 42770 | 4 | 5967445 | 5967462 | 2 | 9  | 18 | AT   | 12 | 5  |
| 42772 | 4 | 5968333 | 5968352 | 2 | 10 | 20 | TG   | 28 | 10 |
| 42778 | 4 | 5974560 | 5974575 | 2 | 8  | 16 | AG   | 21 | 4  |
| 42780 | 4 | 5976449 | 5976462 | 2 | 7  | 14 | AC   | 24 | 3  |
| 42786 | 4 | 5981960 | 5981977 | 3 | 6  | 18 | ATT  | 8  | 6  |
| 42789 | 4 | 5985959 | 5985974 | 2 | 8  | 16 | GT   | 21 | 4  |
| 42791 | 4 | 5988668 | 5988681 | 2 | 7  | 14 | AC   | 14 | 10 |
| 42797 | 4 | 5989903 | 5989918 | 2 | 8  | 16 | TG   | 20 | 5  |
| 42799 | 4 | 5991901 | 5991918 | 2 | 9  | 18 | GT   | 24 | 5  |
| 42805 | 4 | 5994701 | 5994724 | 3 | 8  | 24 | CTC  | 24 | 4  |
| 42807 | 4 | 5995105 | 5995128 | 2 | 12 | 24 | AC   | 10 | 10 |
| 42808 | 4 | 5995719 | 5995746 | 2 | 14 | 28 | CA   | 25 | 8  |
| 42811 | 4 | 5996963 | 5996992 | 2 | 15 | 30 | TG   | 16 | 8  |
| 42814 | 4 | 5997941 | 5997952 | 2 | 6  | 12 | GT   | 30 | 4  |
| 42815 | 4 | 5998124 | 5998151 | 2 | 14 | 28 | GT   | 19 | 6  |
| 42819 | 4 | 6002200 | 6002219 | 2 | 10 | 20 | CT   | 19 | 5  |
| 42821 | 4 | 6002368 | 6002389 | 2 | 11 | 22 | CA   | 9  | 9  |
| 42824 | 4 | 6002887 | 6002932 | 2 | 23 | 46 | GT   | 11 | 10 |
| 42826 | 4 | 6003319 | 6003352 | 2 | 17 | 34 | CA   | 16 | 17 |
| 42827 | 4 | 6003402 | 6003415 | 2 | 7  | 14 | GT   | 26 | 4  |
| 42831 | 4 | 6006078 | 6006093 | 4 | 4  | 16 | TTCT | 15 | 3  |
| 42833 | 4 | 6006287 | 6006316 | 2 | 15 | 30 | AC   | 11 | 5  |
| 42836 | 4 | 6006464 | 6006481 | 3 | 6  | 18 | GGT  | 24 | 4  |
| 42839 | 4 | 6009973 | 6009987 | 3 | 5  | 15 | ATA  | 20 | 3  |
| 42841 | 4 | 6010537 | 6010564 | 2 | 14 | 28 | GT   | 12 | 11 |
| 42842 | 4 | 6012346 | 6012363 | 2 | 9  | 18 | TG   | 16 | 5  |

|       |   |         |         |   |    |    |      |    |    |
|-------|---|---------|---------|---|----|----|------|----|----|
| 42845 | 4 | 6014022 | 6014039 | 2 | 9  | 18 | AC   | 19 | 4  |
| 42847 | 4 | 6016550 | 6016567 | 2 | 9  | 18 | CA   | 18 | 3  |
| 42864 | 4 | 6042211 | 6042224 | 2 | 7  | 14 | TC   | 27 | 3  |
| 42873 | 4 | 6047191 | 6047208 | 3 | 6  | 18 | CTT  | 15 | 5  |
| 42875 | 4 | 6048756 | 6048779 | 4 | 6  | 24 | GGCA | 25 | 6  |
| 42877 | 4 | 6053092 | 6053125 | 2 | 17 | 34 | AC   | 9  | 7  |
| 42880 | 4 | 6055594 | 6055613 | 2 | 10 | 20 | GA   | 6  | 6  |
| 42881 | 4 | 6055916 | 6055927 | 2 | 6  | 12 | AC   | 24 | 3  |
| 42883 | 4 | 6059742 | 6059765 | 2 | 12 | 24 | GT   | 18 | 11 |
| 42884 | 4 | 6059862 | 6059885 | 2 | 12 | 24 | AC   | 15 | 6  |
| 42893 | 4 | 6070098 | 6070127 | 2 | 15 | 30 | TG   | 12 | 7  |
| 42895 | 4 | 6070231 | 6070266 | 2 | 18 | 36 | CA   | 11 | 9  |
| 42915 | 4 | 6085913 | 6085932 | 2 | 10 | 20 | CA   | 17 | 7  |
| 42916 | 4 | 6086067 | 6086088 | 2 | 11 | 22 | GT   | 14 | 14 |
| 42918 | 4 | 6086261 | 6086272 | 2 | 6  | 12 | CA   | 27 | 5  |
| 42919 | 4 | 6088418 | 6088435 | 2 | 9  | 18 | GT   | 19 | 8  |
| 42920 | 4 | 6088526 | 6088559 | 2 | 17 | 34 | CA   | 13 | 8  |
| 42930 | 4 | 6101086 | 6101097 | 2 | 6  | 12 | TG   | 16 | 3  |
| 42931 | 4 | 6101110 | 6101121 | 2 | 6  | 12 | TG   | 25 | 4  |
| 42933 | 4 | 6101372 | 6101397 | 2 | 13 | 26 | TG   | 11 | 8  |
| 42941 | 4 | 6103713 | 6103766 | 2 | 27 | 54 | CA   | 9  | 10 |
| 42944 | 4 | 6112394 | 6112439 | 2 | 23 | 46 | GT   | 16 | 9  |
| 42955 | 4 | 6118872 | 6118911 | 2 | 20 | 40 | AC   | 7  | 11 |
| 42970 | 4 | 6134737 | 6134756 | 2 | 10 | 20 | GT   | 14 | 12 |
| 42974 | 4 | 6138726 | 6138737 | 2 | 6  | 12 | GA   | 15 | 3  |
| 42977 | 4 | 6138969 | 6138988 | 2 | 10 | 20 | TG   | 11 | 4  |
| 42980 | 4 | 6139683 | 6139712 | 2 | 15 | 30 | CA   | 16 | 12 |
| 42983 | 4 | 6141333 | 6141346 | 2 | 7  | 14 | TG   | 22 | 3  |
| 42985 | 4 | 6141601 | 6141612 | 2 | 6  | 12 | CA   | 32 | 3  |
| 42986 | 4 | 6141687 | 6141706 | 2 | 10 | 20 | TG   | 25 | 6  |
| 42988 | 4 | 6141915 | 6141928 | 2 | 7  | 14 | GT   | 24 | 4  |
| 42989 | 4 | 6142048 | 6142081 | 2 | 17 | 34 | TG   | 9  | 11 |
| 42991 | 4 | 6146470 | 6146489 | 2 | 10 | 20 | CA   | 16 | 6  |
| 42992 | 4 | 6146536 | 6146549 | 2 | 7  | 14 | CA   | 30 | 4  |
| 42994 | 4 | 6148148 | 6148171 | 2 | 12 | 24 | GT   | 14 | 4  |
| 42997 | 4 | 6150513 | 6150542 | 2 | 15 | 30 | GT   | 13 | 10 |
| 42998 | 4 | 6152066 | 6152077 | 2 | 6  | 12 | TG   | 22 | 6  |
| 43010 | 4 | 6159661 | 6159672 | 2 | 6  | 12 | GA   | 14 | 8  |
| 43016 | 4 | 6163167 | 6163178 | 2 | 6  | 12 | AT   | 24 | 5  |
| 43018 | 4 | 6163790 | 6163811 | 2 | 11 | 22 | AG   | 6  | 7  |
| 43021 | 4 | 6173495 | 6173514 | 4 | 5  | 20 | AAAG | 22 | 5  |
| 43022 | 4 | 6173850 | 6173875 | 2 | 13 | 26 | AC   | 13 | 10 |
| 43023 | 4 | 6174102 | 6174113 | 2 | 6  | 12 | TG   | 22 | 3  |
| 43027 | 4 | 6176572 | 6176601 | 2 | 15 | 30 | AC   | 22 | 9  |
| 43029 | 4 | 6185421 | 6185432 | 2 | 6  | 12 | GT   | 23 | 5  |
| 43030 | 4 | 6185435 | 6185450 | 2 | 8  | 16 | GT   | 14 | 4  |
| 43031 | 4 | 6188627 | 6188659 | 3 | 11 | 33 | CCT  | 12 | 6  |
| 43034 | 4 | 6189257 | 6189268 | 2 | 6  | 12 | CA   | 15 | 5  |
| 43047 | 4 | 6213708 | 6213741 | 2 | 17 | 34 | CA   | 7  | 11 |
| 43048 | 4 | 6213930 | 6213951 | 2 | 11 | 22 | TG   | 20 | 7  |
| 43052 | 4 | 6216933 | 6216950 | 2 | 9  | 18 | TG   | 7  | 8  |



|       |   |         |         |   |    |    |      |    |    |
|-------|---|---------|---------|---|----|----|------|----|----|
| 43056 | 4 | 6220781 | 6220792 | 2 | 6  | 12 | TG   | 20 | 3  |
| 43058 | 4 | 6224315 | 6224326 | 2 | 6  | 12 | TG   | 19 | 3  |
| 43062 | 4 | 6227048 | 6227067 | 2 | 10 | 20 | CA   | 8  | 7  |
| 43064 | 4 | 6227207 | 6227224 | 2 | 9  | 18 | AC   | 19 | 3  |
| 43067 | 4 | 6230218 | 6230249 | 4 | 8  | 32 | GTGC | 12 | 15 |
| 43073 | 4 | 6233533 | 6233552 | 2 | 10 | 20 | CA   | 21 | 11 |
| 43078 | 4 | 6235748 | 6235769 | 2 | 11 | 22 | AC   | 21 | 6  |
| 43080 | 4 | 6236012 | 6236039 | 2 | 14 | 28 | CA   | 12 | 7  |
| 43082 | 4 | 6237288 | 6237307 | 2 | 10 | 20 | AC   | 15 | 5  |
| 43083 | 4 | 6237384 | 6237403 | 2 | 10 | 20 | GT   | 19 | 3  |
| 43085 | 4 | 6237861 | 6237888 | 2 | 14 | 28 | AC   | 8  | 4  |
| 43086 | 4 | 6238005 | 6238018 | 2 | 7  | 14 | AC   | 17 | 3  |
| 43089 | 4 | 6241555 | 6241570 | 2 | 8  | 16 | CA   | 28 | 5  |
| 43094 | 4 | 6247671 | 6247690 | 2 | 10 | 20 | GT   | 15 | 5  |
| 43095 | 4 | 6250716 | 6250729 | 2 | 7  | 14 | AC   | 21 | 5  |
| 43096 | 4 | 6250824 | 6250843 | 2 | 10 | 20 | CA   | 10 | 7  |
| 43097 | 4 | 6250994 | 6251007 | 2 | 7  | 14 | AC   | 19 | 6  |
| 43098 | 4 | 6254075 | 6254088 | 2 | 7  | 14 | CA   | 12 | 6  |
| 43099 | 4 | 6255323 | 6255336 | 2 | 7  | 14 | TG   | 25 | 6  |
| 43102 | 4 | 6256162 | 6256207 | 2 | 23 | 46 | TG   | 6  | 9  |
| 43105 | 4 | 6258421 | 6258456 | 4 | 9  | 36 | ATCA | 27 | 3  |
| 43106 | 4 | 6259296 | 6259323 | 2 | 14 | 28 | TC   | 19 | 8  |
| 43112 | 4 | 6264338 | 6264353 | 4 | 4  | 16 | TTTG | 22 | 4  |
| 43113 | 4 | 6264784 | 6264831 | 2 | 24 | 48 | TG   | 6  | 9  |
| 43116 | 4 | 6265661 | 6265674 | 2 | 7  | 14 | AC   | 15 | 3  |
| 43126 | 4 | 6280621 | 6280634 | 2 | 7  | 14 | GT   | 11 | 6  |
| 43127 | 4 | 6280636 | 6280653 | 2 | 9  | 18 | TG   | 11 | 5  |
| 43128 | 4 | 6280752 | 6280773 | 2 | 11 | 22 | AC   | 19 | 4  |
| 43131 | 4 | 6281135 | 6281160 | 2 | 13 | 26 | AC   | 11 | 6  |
| 43132 | 4 | 6282562 | 6282587 | 2 | 13 | 26 | AC   | 15 | 11 |
| 43134 | 4 | 6282789 | 6282812 | 2 | 12 | 24 | TG   | 8  | 7  |
| 43135 | 4 | 6282913 | 6282938 | 2 | 13 | 26 | CA   | 18 | 8  |
| 43138 | 4 | 6283641 | 6283658 | 3 | 6  | 18 | GGA  | 18 | 4  |
| 43142 | 4 | 6286729 | 6286740 | 2 | 6  | 12 | TG   | 17 | 4  |
| 43145 | 4 | 6288909 | 6288926 | 2 | 9  | 18 | CA   | 17 | 4  |
| 43148 | 4 | 6290772 | 6290799 | 4 | 7  | 28 | AGAA | 11 | 5  |
| 43153 | 4 | 6293848 | 6293859 | 2 | 6  | 12 | GT   | 26 | 4  |
| 43154 | 4 | 6294108 | 6294123 | 2 | 8  | 16 | GT   | 25 | 5  |
| 43156 | 4 | 6296062 | 6296077 | 2 | 8  | 16 | AC   | 15 | 4  |
| 43157 | 4 | 6296136 | 6296151 | 2 | 8  | 16 | CA   | 18 | 8  |
| 43159 | 4 | 6296270 | 6296317 | 2 | 24 | 48 | GT   | 8  | 9  |
| 43163 | 4 | 6297526 | 6297541 | 2 | 8  | 16 | GA   | 14 | 6  |
| 43166 | 4 | 6299329 | 6299354 | 2 | 13 | 26 | GT   | 17 | 4  |
| 43168 | 4 | 6300632 | 6300679 | 2 | 24 | 48 | GT   | 24 | 15 |
| 43170 | 4 | 6301652 | 6301667 | 2 | 8  | 16 | GT   | 23 | 8  |
| 43171 | 4 | 6301807 | 6301834 | 2 | 14 | 28 | CA   | 9  | 5  |
| 43176 | 4 | 6302688 | 6302705 | 2 | 9  | 18 | AC   | 13 | 3  |
| 43179 | 4 | 6303707 | 6303746 | 2 | 20 | 40 | GT   | 9  | 12 |
| 43180 | 4 | 6303832 | 6303849 | 2 | 9  | 18 | CA   | 13 | 5  |
| 43182 | 4 | 6304605 | 6304632 | 2 | 14 | 28 | AG   | 9  | 5  |
| 43184 | 4 | 6304898 | 6304917 | 2 | 10 | 20 | CA   | 21 | 5  |

|       |   |         |         |   |    |    |      |    |    |
|-------|---|---------|---------|---|----|----|------|----|----|
| 43186 | 4 | 6305221 | 6305238 | 3 | 6  | 18 | TGC  | 18 | 8  |
| 43187 | 4 | 6305268 | 6305291 | 2 | 12 | 24 | TG   | 12 | 3  |
| 43193 | 4 | 6307397 | 6307410 | 2 | 7  | 14 | TG   | 22 | 6  |
| 43194 | 4 | 6307511 | 6307534 | 2 | 12 | 24 | CA   | 12 | 7  |
| 43195 | 4 | 6307766 | 6307793 | 2 | 14 | 28 | TG   | 11 | 11 |
| 43200 | 4 | 6310881 | 6310900 | 2 | 10 | 20 | TG   | 19 | 9  |
| 43203 | 4 | 6311914 | 6311937 | 2 | 12 | 24 | CA   | 27 | 7  |
| 43205 | 4 | 6312758 | 6312771 | 2 | 7  | 14 | AC   | 20 | 7  |
| 43208 | 4 | 6313031 | 6313068 | 2 | 19 | 38 | CA   | 17 | 7  |
| 43209 | 4 | 6314243 | 6314254 | 2 | 6  | 12 | GT   | 13 | 3  |
| 43210 | 4 | 6314257 | 6314268 | 2 | 6  | 12 | GT   | 19 | 5  |
| 43211 | 4 | 6315147 | 6315166 | 2 | 10 | 20 | CA   | 20 | 7  |
| 43212 | 4 | 6315291 | 6315308 | 2 | 9  | 18 | CA   | 22 | 5  |
| 43213 | 4 | 6315604 | 6315619 | 2 | 8  | 16 | CA   | 20 | 5  |
| 43214 | 4 | 6315843 | 6315862 | 2 | 10 | 20 | TG   | 20 | 5  |
| 43215 | 4 | 6315973 | 6316006 | 2 | 17 | 34 | AC   | 15 | 9  |
| 43216 | 4 | 6316078 | 6316095 | 2 | 9  | 18 | AC   | 17 | 9  |
| 43217 | 4 | 6318024 | 6318055 | 2 | 16 | 32 | GT   | 11 | 8  |
| 43221 | 4 | 6319242 | 6319259 | 2 | 9  | 18 | GT   | 21 | 7  |
| 43222 | 4 | 6319505 | 6319516 | 2 | 6  | 12 | CA   | 20 | 3  |
| 43224 | 4 | 6319944 | 6319958 | 3 | 5  | 15 | GCT  | 24 | 3  |
| 43231 | 4 | 6321639 | 6321650 | 2 | 6  | 12 | GT   | 14 | 4  |
| 43232 | 4 | 6321788 | 6321799 | 2 | 6  | 12 | AG   | 11 | 13 |
| 43233 | 4 | 6321801 | 6321818 | 2 | 9  | 18 | GA   | 13 | 11 |
| 43234 | 4 | 6322684 | 6322704 | 3 | 7  | 21 | TGG  | 20 | 4  |
| 43240 | 4 | 6324174 | 6324197 | 4 | 6  | 24 | ATAA | 7  | 4  |
| 43242 | 4 | 6324951 | 6324971 | 3 | 7  | 21 | CTC  | 19 | 3  |
| 43250 | 4 | 6327014 | 6327037 | 2 | 12 | 24 | AC   | 17 | 9  |
| 43266 | 4 | 6341993 | 6342012 | 4 | 5  | 20 | CTGT | 25 | 4  |
| 43268 | 4 | 6345174 | 6345191 | 2 | 9  | 18 | AC   | 22 | 3  |
| 43276 | 4 | 6349919 | 6349946 | 4 | 7  | 28 | GATG | 7  | 4  |
| 43278 | 4 | 6350151 | 6350164 | 2 | 7  | 14 | TG   | 17 | 3  |
| 43279 | 4 | 6350304 | 6350337 | 2 | 17 | 34 | AC   | 10 | 10 |
| 43281 | 4 | 6357024 | 6357049 | 2 | 13 | 26 | CA   | 18 | 9  |
| 43287 | 4 | 6362429 | 6362446 | 2 | 9  | 18 | GT   | 10 | 5  |
| 43288 | 4 | 6362636 | 6362653 | 2 | 9  | 18 | TG   | 23 | 7  |
| 43296 | 4 | 6373598 | 6373625 | 2 | 14 | 28 | AC   | 6  | 8  |
| 43297 | 4 | 6373727 | 6373740 | 2 | 7  | 14 | AC   | 15 | 3  |
| 43301 | 4 | 6382291 | 6382305 | 3 | 5  | 15 | GCA  | 28 | 4  |
| 43302 | 4 | 6382715 | 6382730 | 4 | 4  | 16 | GAAT | 24 | 7  |
| 43308 | 4 | 6386654 | 6386665 | 2 | 6  | 12 | CA   | 17 | 3  |
| 43309 | 4 | 6386689 | 6386706 | 3 | 6  | 18 | CAG  | 18 | 5  |
| 43314 | 4 | 6389306 | 6389317 | 2 | 6  | 12 | GT   | 17 | 9  |
| 43315 | 4 | 6389318 | 6389331 | 2 | 7  | 14 | GA   | 14 | 8  |
| 43324 | 4 | 6401095 | 6401118 | 2 | 12 | 24 | CA   | 8  | 7  |
| 43328 | 4 | 6404722 | 6404733 | 2 | 6  | 12 | CA   | 17 | 6  |
| 43329 | 4 | 6405017 | 6405034 | 2 | 9  | 18 | TG   | 21 | 3  |
| 43336 | 4 | 6408576 | 6408591 | 2 | 8  | 16 | AG   | 17 | 3  |
| 43339 | 4 | 6416040 | 6416057 | 2 | 9  | 18 | AC   | 26 | 11 |
| 43341 | 4 | 6421822 | 6421835 | 2 | 7  | 14 | CA   | 18 | 4  |
| 43342 | 4 | 6421837 | 6421850 | 2 | 7  | 14 | AC   | 20 | 3  |

|       |   |         |         |   |    |    |      |    |    |
|-------|---|---------|---------|---|----|----|------|----|----|
| 43344 | 4 | 6422387 | 6422407 | 3 | 7  | 21 | GAG  | 9  | 5  |
| 43346 | 4 | 6423160 | 6423191 | 2 | 16 | 32 | AC   | 14 | 10 |
| 43348 | 4 | 6423339 | 6423350 | 2 | 6  | 12 | TC   | 11 | 11 |
| 43349 | 4 | 6423351 | 6423370 | 2 | 10 | 20 | AC   | 14 | 13 |
| 43362 | 4 | 6433209 | 6433222 | 2 | 7  | 14 | CA   | 29 | 3  |
| 43363 | 4 | 6436312 | 6436337 | 2 | 13 | 26 | GT   | 10 | 8  |
| 43365 | 4 | 6441305 | 6441318 | 2 | 7  | 14 | GT   | 29 | 6  |
| 43370 | 4 | 6447283 | 6447296 | 2 | 7  | 14 | CA   | 25 | 4  |
| 43372 | 4 | 6450404 | 6450437 | 2 | 17 | 34 | AG   | 15 | 13 |
| 43374 | 4 | 6451786 | 6451807 | 2 | 11 | 22 | AC   | 18 | 11 |
| 43377 | 4 | 6452115 | 6452126 | 2 | 6  | 12 | TG   | 30 | 4  |
| 43378 | 4 | 6452271 | 6452302 | 2 | 16 | 32 | GT   | 13 | 11 |
| 43382 | 4 | 6455448 | 6455471 | 4 | 6  | 24 | AGGA | 24 | 5  |
| 43385 | 4 | 6458814 | 6458835 | 2 | 11 | 22 | GT   | 21 | 7  |
| 43390 | 4 | 6474671 | 6474698 | 2 | 14 | 28 | GT   | 10 | 10 |
| 43392 | 4 | 6474873 | 6474900 | 2 | 14 | 28 | TG   | 12 | 10 |
| 43393 | 4 | 6475109 | 6475120 | 2 | 6  | 12 | GT   | 27 | 4  |
| 43406 | 4 | 6485432 | 6485452 | 3 | 7  | 21 | AGG  | 13 | 9  |
| 43407 | 4 | 6492134 | 6492147 | 2 | 7  | 14 | GA   | 33 | 3  |
| 43409 | 4 | 6493111 | 6493126 | 2 | 8  | 16 | CA   | 31 | 8  |
| 43410 | 4 | 6494111 | 6494126 | 2 | 8  | 16 | TG   | 22 | 5  |
| 43412 | 4 | 6499081 | 6499095 | 3 | 5  | 15 | ACT  | 15 | 6  |
| 43413 | 4 | 6500342 | 6500353 | 2 | 6  | 12 | CT   | 17 | 3  |
| 43414 | 4 | 6500449 | 6500470 | 2 | 11 | 22 | CT   | 8  | 4  |
| 43415 | 4 | 6500782 | 6500802 | 3 | 7  | 21 | AGG  | 20 | 6  |
| 43428 | 4 | 6523053 | 6523064 | 2 | 6  | 12 | CA   | 14 | 8  |
| 43429 | 4 | 6523066 | 6523079 | 2 | 7  | 14 | AC   | 11 | 6  |
| 43430 | 4 | 6525190 | 6525207 | 2 | 9  | 18 | CA   | 21 | 6  |
| 43431 | 4 | 6527321 | 6527334 | 2 | 7  | 14 | GT   | 32 | 5  |
| 43432 | 4 | 6528172 | 6528189 | 2 | 9  | 18 | CA   | 21 | 8  |
| 43433 | 4 | 6528330 | 6528343 | 2 | 7  | 14 | TC   | 18 | 9  |
| 43434 | 4 | 6528723 | 6528736 | 2 | 7  | 14 | TG   | 28 | 3  |
| 43439 | 4 | 6539521 | 6539536 | 2 | 8  | 16 | AC   | 25 | 3  |
| 43441 | 4 | 6546051 | 6546068 | 2 | 9  | 18 | TG   | 26 | 8  |
| 43444 | 4 | 6559244 | 6559257 | 2 | 7  | 14 | CA   | 10 | 3  |
| 43445 | 4 | 6568527 | 6568560 | 2 | 17 | 34 | AC   | 9  | 12 |
| 43446 | 4 | 6568699 | 6568726 | 2 | 14 | 28 | TG   | 14 | 15 |
| 43447 | 4 | 6568848 | 6568859 | 2 | 6  | 12 | AC   | 24 | 5  |
| 43449 | 4 | 6569360 | 6569375 | 2 | 8  | 16 | AG   | 24 | 3  |
| 43450 | 4 | 6572290 | 6572305 | 2 | 8  | 16 | CA   | 8  | 6  |
| 43452 | 4 | 6574117 | 6574158 | 2 | 21 | 42 | GA   | 16 | 9  |
| 43453 | 4 | 6574370 | 6574387 | 2 | 9  | 18 | TG   | 25 | 5  |
| 43455 | 4 | 6579109 | 6579134 | 2 | 13 | 26 | GT   | 18 | 11 |
| 43456 | 4 | 6579218 | 6579235 | 2 | 9  | 18 | GT   | 22 | 6  |
| 43457 | 4 | 6581155 | 6581166 | 2 | 6  | 12 | TG   | 22 | 4  |
| 43459 | 4 | 6583375 | 6583400 | 2 | 13 | 26 | AG   | 8  | 8  |
| 43463 | 4 | 6596730 | 6596747 | 2 | 9  | 18 | AC   | 18 | 7  |
| 43464 | 4 | 6597059 | 6597072 | 2 | 7  | 14 | AC   | 19 | 6  |
| 43465 | 4 | 6597195 | 6597208 | 2 | 7  | 14 | AC   | 25 | 6  |
| 43466 | 4 | 6597211 | 6597226 | 2 | 8  | 16 | AC   | 29 | 3  |
| 43468 | 4 | 6597397 | 6597418 | 2 | 11 | 22 | AC   | 16 | 6  |

|       |   |         |         |   |    |    |      |    |    |
|-------|---|---------|---------|---|----|----|------|----|----|
| 43469 | 4 | 6600406 | 6600451 | 2 | 23 | 46 | TG   | 7  | 9  |
| 43470 | 4 | 6600726 | 6600737 | 2 | 6  | 12 | GT   | 28 | 5  |
| 43477 | 4 | 6606789 | 6606800 | 2 | 6  | 12 | CA   | 18 | 13 |
| 43478 | 4 | 6609601 | 6609630 | 2 | 15 | 30 | AC   | 12 | 9  |
| 43479 | 4 | 6609764 | 6609793 | 2 | 15 | 30 | CA   | 8  | 4  |
| 43489 | 4 | 6628681 | 6628696 | 2 | 8  | 16 | AC   | 16 | 6  |
| 43491 | 4 | 6630807 | 6630834 | 2 | 14 | 28 | CA   | 18 | 9  |
| 43492 | 4 | 6631047 | 6631060 | 2 | 7  | 14 | GT   | 33 | 4  |
| 43495 | 4 | 6636684 | 6636695 | 2 | 6  | 12 | TC   | 7  | 6  |
| 43496 | 4 | 6636696 | 6636709 | 2 | 7  | 14 | AC   | 12 | 6  |
| 43497 | 4 | 6637876 | 6637897 | 2 | 11 | 22 | CT   | 27 | 5  |
| 43499 | 4 | 6640150 | 6640165 | 2 | 8  | 16 | CA   | 23 | 4  |
| 43502 | 4 | 6644679 | 6644704 | 2 | 13 | 26 | CA   | 23 | 11 |
| 43503 | 4 | 6647442 | 6647465 | 2 | 12 | 24 | TG   | 21 | 17 |
| 43505 | 4 | 6658856 | 6658873 | 2 | 9  | 18 | GT   | 19 | 13 |
| 43507 | 4 | 6666345 | 6666370 | 2 | 13 | 26 | GT   | 20 | 10 |
| 43508 | 4 | 6670327 | 6670370 | 2 | 22 | 44 | AC   | 14 | 11 |
| 43516 | 4 | 6680879 | 6680893 | 3 | 5  | 15 | GGA  | 14 | 4  |
| 43517 | 4 | 6682672 | 6682683 | 2 | 6  | 12 | CA   | 12 | 6  |
| 43518 | 4 | 6684256 | 6684287 | 2 | 16 | 32 | GT   | 11 | 10 |
| 43522 | 4 | 6687337 | 6687356 | 2 | 10 | 20 | AC   | 9  | 5  |
| 43524 | 4 | 6692732 | 6692745 | 2 | 7  | 14 | AC   | 22 | 5  |
| 43527 | 4 | 6694396 | 6694419 | 2 | 12 | 24 | AC   | 10 | 9  |
| 43531 | 4 | 6698190 | 6698217 | 2 | 14 | 28 | TG   | 10 | 9  |
| 43535 | 4 | 6701373 | 6701394 | 2 | 11 | 22 | AC   | 16 | 5  |
| 43536 | 4 | 6701466 | 6701493 | 2 | 14 | 28 | CA   | 11 | 10 |
| 43537 | 4 | 6701669 | 6701682 | 2 | 7  | 14 | CA   | 7  | 4  |
| 43540 | 4 | 6704653 | 6704702 | 2 | 25 | 50 | CA   | 8  | 10 |
| 43541 | 4 | 6706253 | 6706266 | 2 | 7  | 14 | TG   | 24 | 4  |
| 43542 | 4 | 6707423 | 6707434 | 2 | 6  | 12 | AC   | 15 | 4  |
| 43543 | 4 | 6707599 | 6707630 | 2 | 16 | 32 | CA   | 12 | 8  |
| 43545 | 4 | 6709598 | 6709623 | 2 | 13 | 26 | CT   | 19 | 6  |
| 43548 | 4 | 6712118 | 6712131 | 2 | 7  | 14 | AC   | 26 | 7  |
| 43549 | 4 | 6712209 | 6712228 | 2 | 10 | 20 | GT   | 28 | 9  |
| 43551 | 4 | 6715650 | 6715669 | 4 | 5  | 20 | ATTT | 16 | 6  |
| 43552 | 4 | 6717214 | 6717229 | 4 | 4  | 16 | TTGT | 28 | 7  |
| 43570 | 4 | 6778967 | 6779010 | 2 | 22 | 44 | GT   | 14 | 16 |
| 43576 | 4 | 6784603 | 6784622 | 2 | 10 | 20 | GT   | 8  | 7  |
| 43589 | 4 | 6818200 | 6818211 | 2 | 6  | 12 | GT   | 29 | 9  |
| 43597 | 4 | 6830750 | 6830769 | 2 | 10 | 20 | CA   | 14 | 6  |
| 43598 | 4 | 6831010 | 6831029 | 2 | 10 | 20 | GT   | 17 | 5  |
| 43604 | 4 | 6840136 | 6840159 | 2 | 12 | 24 | TG   | 23 | 5  |
| 43606 | 4 | 6842505 | 6842524 | 2 | 10 | 20 | TC   | 17 | 9  |
| 43610 | 4 | 6853001 | 6853012 | 2 | 6  | 12 | CA   | 24 | 11 |
| 43611 | 4 | 6853046 | 6853061 | 2 | 8  | 16 | CA   | 12 | 13 |
| 43616 | 4 | 6876905 | 6876950 | 2 | 23 | 46 | TG   | 14 | 13 |
| 43617 | 4 | 6877969 | 6877984 | 2 | 8  | 16 | TG   | 14 | 3  |
| 43620 | 4 | 6885411 | 6885426 | 4 | 4  | 16 | ATAA | 6  | 4  |
| 43621 | 4 | 6885924 | 6885935 | 2 | 6  | 12 | AC   | 16 | 10 |
| 43622 | 4 | 6887518 | 6887533 | 2 | 8  | 16 | CA   | 16 | 6  |
| 43623 | 4 | 6887535 | 6887546 | 2 | 6  | 12 | AC   | 17 | 6  |

|       |   |         |         |   |    |    |      |    |    |
|-------|---|---------|---------|---|----|----|------|----|----|
| 43625 | 4 | 6889725 | 6889742 | 2 | 9  | 18 | GT   | 24 | 6  |
| 43627 | 4 | 6892756 | 6892787 | 2 | 16 | 32 | GT   | 17 | 7  |
| 43628 | 4 | 6894320 | 6894341 | 2 | 11 | 22 | GT   | 20 | 6  |
| 43630 | 4 | 6894578 | 6894597 | 2 | 10 | 20 | AC   | 26 | 8  |
| 43631 | 4 | 6894732 | 6894757 | 2 | 13 | 26 | CA   | 21 | 12 |
| 43632 | 4 | 6894901 | 6894924 | 2 | 12 | 24 | TG   | 16 | 6  |
| 43633 | 4 | 6897010 | 6897021 | 2 | 6  | 12 | AC   | 27 | 7  |
| 43636 | 4 | 6901583 | 6901602 | 2 | 10 | 20 | AC   | 18 | 5  |
| 43637 | 4 | 6901788 | 6901801 | 2 | 7  | 14 | AC   | 15 | 15 |
| 43639 | 4 | 6902410 | 6902431 | 2 | 11 | 22 | TG   | 19 | 9  |
| 43641 | 4 | 6904405 | 6904426 | 2 | 11 | 22 | TG   | 24 | 11 |
| 43643 | 4 | 6906392 | 6906407 | 4 | 4  | 16 | GCAC | 27 | 10 |
| 43646 | 4 | 6912805 | 6912824 | 2 | 10 | 20 | TG   | 8  | 5  |
| 43648 | 4 | 6913001 | 6913024 | 3 | 8  | 24 | ATC  | 21 | 4  |
| 43651 | 4 | 6918161 | 6918192 | 2 | 16 | 32 | TG   | 7  | 6  |
| 43655 | 4 | 6919537 | 6919592 | 2 | 28 | 56 | CA   | 9  | 14 |
| 43661 | 4 | 6921376 | 6921417 | 2 | 21 | 42 | GA   | 9  | 10 |
| 43662 | 4 | 6921575 | 6921592 | 2 | 9  | 18 | AC   | 12 | 6  |
| 43663 | 4 | 6921767 | 6921778 | 2 | 6  | 12 | AC   | 21 | 4  |
| 43664 | 4 | 6924770 | 6924829 | 2 | 30 | 60 | AC   | 8  | 11 |
| 43665 | 4 | 6925126 | 6925137 | 2 | 6  | 12 | TG   | 25 | 3  |
| 43666 | 4 | 6925456 | 6925469 | 2 | 7  | 14 | TG   | 22 | 3  |
| 43670 | 4 | 6931970 | 6931985 | 2 | 8  | 16 | CA   | 24 | 7  |
| 43685 | 4 | 6944073 | 6944090 | 3 | 6  | 18 | GGA  | 23 | 3  |
| 43686 | 4 | 6944720 | 6944747 | 2 | 14 | 28 | TG   | 15 | 10 |
| 43688 | 4 | 6948946 | 6948981 | 2 | 18 | 36 | CA   | 10 | 11 |
| 43690 | 4 | 6954022 | 6954033 | 2 | 6  | 12 | GT   | 29 | 3  |
| 43691 | 4 | 6954620 | 6954635 | 2 | 8  | 16 | TG   | 21 | 3  |
| 43692 | 4 | 6957362 | 6957395 | 2 | 17 | 34 | TG   | 15 | 8  |
| 43696 | 4 | 6961592 | 6961617 | 2 | 13 | 26 | AC   | 6  | 9  |
| 43697 | 4 | 6962989 | 6963004 | 2 | 8  | 16 | AC   | 22 | 4  |
| 43701 | 4 | 6966724 | 6966741 | 2 | 9  | 18 | TG   | 17 | 5  |
| 43702 | 4 | 6967012 | 6967027 | 2 | 8  | 16 | CA   | 25 | 5  |
| 43703 | 4 | 6968042 | 6968077 | 2 | 18 | 36 | CA   | 10 | 6  |
| 43704 | 4 | 6968127 | 6968172 | 2 | 23 | 46 | CA   | 9  | 10 |
| 43709 | 4 | 6974423 | 6974450 | 2 | 14 | 28 | TG   | 22 | 9  |
| 43710 | 4 | 6976049 | 6976063 | 3 | 5  | 15 | TTC  | 15 | 5  |
| 43711 | 4 | 6976644 | 6976673 | 2 | 15 | 30 | CA   | 9  | 5  |
| 43713 | 4 | 6976797 | 6976816 | 2 | 10 | 20 | TG   | 17 | 9  |
| 43716 | 4 | 6979890 | 6979901 | 2 | 6  | 12 | TG   | 26 | 3  |
| 43717 | 4 | 6981799 | 6981810 | 2 | 6  | 12 | AC   | 25 | 4  |
| 43718 | 4 | 6982240 | 6982263 | 4 | 6  | 24 | ACAG | 31 | 3  |
| 43719 | 4 | 6983924 | 6983939 | 2 | 8  | 16 | GT   | 33 | 4  |
| 43720 | 4 | 6984109 | 6984124 | 2 | 8  | 16 | CA   | 26 | 3  |
| 43723 | 4 | 6984664 | 6984697 | 2 | 17 | 34 | CT   | 9  | 6  |
| 43724 | 4 | 6984876 | 6984895 | 2 | 10 | 20 | GT   | 15 | 9  |
| 43725 | 4 | 6985008 | 6985037 | 2 | 15 | 30 | AC   | 15 | 8  |
| 43726 | 4 | 6985262 | 6985293 | 2 | 16 | 32 | CA   | 14 | 11 |
| 43728 | 4 | 6985461 | 6985474 | 2 | 7  | 14 | TG   | 17 | 3  |
| 43731 | 4 | 6990734 | 6990757 | 2 | 12 | 24 | TG   | 19 | 7  |
| 43732 | 4 | 6990985 | 6991028 | 2 | 22 | 44 | TG   | 9  | 7  |

|       |   |         |         |   |    |    |      |    |    |
|-------|---|---------|---------|---|----|----|------|----|----|
| 43733 | 4 | 6991381 | 6991414 | 2 | 17 | 34 | TG   | 20 | 7  |
| 43736 | 4 | 6994906 | 6994925 | 2 | 10 | 20 | TG   | 19 | 8  |
| 43739 | 4 | 6997098 | 6997127 | 2 | 15 | 30 | TG   | 21 | 7  |
| 43740 | 4 | 6997274 | 6997285 | 2 | 6  | 12 | AC   | 28 | 4  |
| 43742 | 4 | 6999981 | 6999996 | 2 | 8  | 16 | CA   | 14 | 9  |
| 43753 | 4 | 7018198 | 7018215 | 3 | 6  | 18 | TCC  | 26 | 3  |
| 43754 | 4 | 7018983 | 7019004 | 2 | 11 | 22 | GT   | 23 | 4  |
| 43756 | 4 | 7021043 | 7021064 | 2 | 11 | 22 | TG   | 21 | 5  |
| 43757 | 4 | 7023033 | 7023064 | 2 | 16 | 32 | GT   | 19 | 11 |
| 43759 | 4 | 7024946 | 7024959 | 2 | 7  | 14 | CA   | 22 | 6  |
| 43760 | 4 | 7025049 | 7025064 | 4 | 4  | 16 | ACTC | 27 | 4  |
| 43762 | 4 | 7028030 | 7028047 | 2 | 9  | 18 | CA   | 25 | 6  |
| 43769 | 4 | 7038960 | 7038973 | 2 | 7  | 14 | TG   | 27 | 11 |
| 43774 | 4 | 7050896 | 7050929 | 2 | 17 | 34 | TG   | 6  | 8  |
| 43776 | 4 | 7055551 | 7055566 | 2 | 8  | 16 | CA   | 22 | 4  |
| 43777 | 4 | 7057496 | 7057523 | 2 | 14 | 28 | CA   | 9  | 4  |
| 43781 | 4 | 7058593 | 7058610 | 2 | 9  | 18 | AC   | 19 | 9  |
| 43784 | 4 | 7060467 | 7060488 | 2 | 11 | 22 | GT   | 12 | 7  |
| 43785 | 4 | 7060754 | 7060779 | 2 | 13 | 26 | GT   | 6  | 7  |
| 43790 | 4 | 7065945 | 7065968 | 2 | 12 | 24 | GT   | 15 | 9  |
| 43807 | 4 | 7084038 | 7084053 | 2 | 8  | 16 | CA   | 20 | 10 |
| 43809 | 4 | 7085634 | 7085659 | 2 | 13 | 26 | CA   | 16 | 13 |
| 43817 | 4 | 7100258 | 7100269 | 2 | 6  | 12 | GT   | 20 | 3  |
| 43818 | 4 | 7100772 | 7100789 | 2 | 9  | 18 | TG   | 20 | 7  |
| 43820 | 4 | 7104206 | 7104239 | 2 | 17 | 34 | GT   | 16 | 9  |
| 43825 | 4 | 7110709 | 7110720 | 2 | 6  | 12 | CA   | 28 | 4  |
| 43826 | 4 | 7110968 | 7110985 | 2 | 9  | 18 | AC   | 28 | 6  |
| 43827 | 4 | 7111388 | 7111401 | 2 | 7  | 14 | TG   | 29 | 3  |
| 43828 | 4 | 7111573 | 7111592 | 2 | 10 | 20 | CA   | 13 | 8  |
| 43835 | 4 | 7114060 | 7114091 | 2 | 16 | 32 | AC   | 17 | 7  |
| 43836 | 4 | 7115710 | 7115733 | 2 | 12 | 24 | CA   | 16 | 3  |
| 43838 | 4 | 7116956 | 7116977 | 2 | 11 | 22 | AC   | 13 | 4  |
| 43839 | 4 | 7117009 | 7117034 | 2 | 13 | 26 | AC   | 20 | 7  |
| 43840 | 4 | 7119102 | 7119125 | 4 | 6  | 24 | AGAC | 21 | 4  |
| 43842 | 4 | 7122357 | 7122392 | 2 | 18 | 36 | TG   | 17 | 11 |
| 43847 | 4 | 7125673 | 7125688 | 2 | 8  | 16 | CT   | 15 | 3  |
| 43848 | 4 | 7125714 | 7125737 | 2 | 12 | 24 | AC   | 21 | 8  |
| 43852 | 4 | 7128246 | 7128257 | 2 | 6  | 12 | AC   | 20 | 5  |
| 43854 | 4 | 7131319 | 7131330 | 2 | 6  | 12 | CA   | 25 | 5  |
| 43859 | 4 | 7137040 | 7137065 | 2 | 13 | 26 | GT   | 17 | 6  |
| 43861 | 4 | 7141000 | 7141015 | 4 | 4  | 16 | CTTC | 24 | 3  |
| 43862 | 4 | 7141347 | 7141378 | 2 | 16 | 32 | AC   | 17 | 8  |
| 43864 | 4 | 7143121 | 7143142 | 2 | 11 | 22 | TG   | 25 | 7  |
| 43865 | 4 | 7143591 | 7143608 | 2 | 9  | 18 | AC   | 15 | 3  |
| 43870 | 4 | 7151724 | 7151738 | 3 | 5  | 15 | GCT  | 26 | 5  |
| 43874 | 4 | 7152965 | 7152988 | 4 | 6  | 24 | TATG | 6  | 4  |
| 43875 | 4 | 7153302 | 7153316 | 3 | 5  | 15 | GCA  | 26 | 4  |
| 43877 | 4 | 7154724 | 7154755 | 2 | 16 | 32 | AG   | 18 | 9  |
| 43879 | 4 | 7159576 | 7159591 | 2 | 8  | 16 | TG   | 16 | 5  |
| 43881 | 4 | 7159673 | 7159686 | 2 | 7  | 14 | GT   | 20 | 7  |
| 43882 | 4 | 7159785 | 7159800 | 2 | 8  | 16 | GT   | 20 | 4  |

|       |   |         |         |   |    |    |      |    |    |
|-------|---|---------|---------|---|----|----|------|----|----|
| 43886 | 4 | 7166656 | 7166673 | 3 | 6  | 18 | TGG  | 23 | 4  |
| 43887 | 4 | 7167403 | 7167416 | 2 | 7  | 14 | TG   | 22 | 3  |
| 43891 | 4 | 7170641 | 7170654 | 2 | 7  | 14 | GT   | 17 | 5  |
| 43892 | 4 | 7170780 | 7170825 | 2 | 23 | 46 | AC   | 9  | 6  |
| 43894 | 4 | 7172185 | 7172220 | 2 | 18 | 36 | AC   | 15 | 8  |
| 43895 | 4 | 7173960 | 7173971 | 2 | 6  | 12 | CA   | 26 | 3  |
| 43896 | 4 | 7174132 | 7174151 | 2 | 10 | 20 | CT   | 23 | 6  |
| 43897 | 4 | 7175819 | 7175838 | 2 | 10 | 20 | AC   | 15 | 9  |
| 43898 | 4 | 7177780 | 7177815 | 2 | 18 | 36 | AC   | 13 | 11 |
| 43899 | 4 | 7178008 | 7178023 | 2 | 8  | 16 | AG   | 31 | 4  |
| 43903 | 4 | 7178545 | 7178571 | 3 | 9  | 27 | CCT  | 31 | 5  |
| 43910 | 4 | 7183686 | 7183709 | 2 | 12 | 24 | GT   | 23 | 9  |
| 43911 | 4 | 7185198 | 7185229 | 2 | 16 | 32 | CA   | 11 | 8  |
| 43916 | 4 | 7191327 | 7191354 | 4 | 7  | 28 | TGGC | 23 | 13 |
| 43919 | 4 | 7197563 | 7197586 | 2 | 12 | 24 | AC   | 7  | 7  |
| 43921 | 4 | 7200289 | 7200314 | 2 | 13 | 26 | TG   | 21 | 8  |
| 43923 | 4 | 7203883 | 7203896 | 2 | 7  | 14 | CA   | 10 | 3  |
| 43927 | 4 | 7220094 | 7220107 | 2 | 7  | 14 | AC   | 25 | 3  |
| 43930 | 4 | 7220453 | 7220470 | 3 | 6  | 18 | GAG  | 11 | 10 |
| 43931 | 4 | 7221892 | 7221903 | 2 | 6  | 12 | AC   | 31 | 5  |
| 43932 | 4 | 7228433 | 7228444 | 2 | 6  | 12 | GT   | 13 | 3  |
| 43936 | 4 | 7239105 | 7239118 | 2 | 7  | 14 | AC   | 12 | 8  |
| 43941 | 4 | 7258692 | 7258727 | 3 | 12 | 36 | ATC  | 25 | 7  |
| 43945 | 4 | 7261109 | 7261134 | 2 | 13 | 26 | TG   | 11 | 7  |
| 43950 | 4 | 7280767 | 7280782 | 4 | 4  | 16 | AACA | 21 | 3  |
| 43951 | 4 | 7281308 | 7281325 | 2 | 9  | 18 | AC   | 17 | 10 |
| 43954 | 4 | 7284156 | 7284170 | 3 | 5  | 15 | TAT  | 15 | 3  |
| 43957 | 4 | 7303710 | 7303735 | 2 | 13 | 26 | GT   | 13 | 13 |
| 43958 | 4 | 7309809 | 7309828 | 2 | 10 | 20 | CA   | 19 | 10 |
| 43965 | 4 | 7318772 | 7318839 | 4 | 17 | 68 | ATAG | 17 | 10 |
| 43969 | 4 | 7328485 | 7328496 | 2 | 6  | 12 | TC   | 18 | 3  |
| 43976 | 4 | 7335588 | 7335605 | 2 | 9  | 18 | TG   | 18 | 3  |
| 43978 | 4 | 7342474 | 7342505 | 2 | 16 | 32 | TG   | 10 | 8  |
| 43980 | 4 | 7343272 | 7343289 | 2 | 9  | 18 | TG   | 12 | 9  |
| 43984 | 4 | 7343946 | 7343973 | 2 | 14 | 28 | TG   | 11 | 8  |
| 43987 | 4 | 7346834 | 7346855 | 2 | 11 | 22 | TG   | 16 | 7  |
| 43990 | 4 | 7347192 | 7347217 | 2 | 13 | 26 | AC   | 17 | 9  |
| 43991 | 4 | 7347339 | 7347362 | 2 | 12 | 24 | AC   | 13 | 14 |
| 43992 | 4 | 7347708 | 7347737 | 2 | 15 | 30 | AC   | 10 | 11 |
| 43998 | 4 | 7352734 | 7352753 | 2 | 10 | 20 | CT   | 14 | 3  |
| 44002 | 4 | 7352956 | 7352997 | 2 | 21 | 42 | GA   | 8  | 6  |
| 44014 | 4 | 7358566 | 7358581 | 2 | 8  | 16 | TG   | 19 | 6  |
| 44019 | 4 | 7361143 | 7361164 | 2 | 11 | 22 | GT   | 20 | 4  |
| 44022 | 4 | 7365761 | 7365786 | 2 | 13 | 26 | GT   | 8  | 10 |
| 44023 | 4 | 7365867 | 7365906 | 2 | 20 | 40 | GA   | 12 | 8  |
| 44025 | 4 | 7366583 | 7366608 | 2 | 13 | 26 | GT   | 16 | 11 |
| 44035 | 4 | 7370818 | 7370833 | 4 | 4  | 16 | CGTG | 19 | 5  |
| 44036 | 4 | 7370952 | 7370963 | 2 | 6  | 12 | AC   | 26 | 6  |
| 44037 | 4 | 7371414 | 7371425 | 2 | 6  | 12 | GA   | 25 | 4  |
| 44041 | 4 | 7373153 | 7373174 | 2 | 11 | 22 | CT   | 20 | 9  |
| 44046 | 4 | 7375829 | 7375868 | 2 | 20 | 40 | CA   | 18 | 12 |

|       |   |         |         |   |    |    |      |    |    |
|-------|---|---------|---------|---|----|----|------|----|----|
| 44049 | 4 | 7377542 | 7377556 | 3 | 5  | 15 | CTG  | 26 | 3  |
| 44050 | 4 | 7379165 | 7379184 | 2 | 10 | 20 | GT   | 21 | 9  |
| 44053 | 4 | 7379757 | 7379772 | 2 | 8  | 16 | CA   | 24 | 5  |
| 44056 | 4 | 7382985 | 7383004 | 2 | 10 | 20 | GT   | 22 | 11 |
| 44061 | 4 | 7394347 | 7394362 | 4 | 4  | 16 | TTTG | 23 | 4  |
| 44065 | 4 | 7401042 | 7401059 | 2 | 9  | 18 | AC   | 16 | 13 |
| 44067 | 4 | 7405973 | 7405990 | 2 | 9  | 18 | TG   | 9  | 4  |
| 44068 | 4 | 7408210 | 7408233 | 2 | 12 | 24 | AC   | 16 | 6  |
| 44085 | 4 | 7446926 | 7446939 | 2 | 7  | 14 | GA   | 21 | 3  |
| 44092 | 4 | 7466856 | 7466881 | 2 | 13 | 26 | AC   | 15 | 7  |
| 44093 | 4 | 7468478 | 7468517 | 2 | 20 | 40 | TG   | 9  | 11 |
| 44097 | 4 | 7470564 | 7470587 | 2 | 12 | 24 | TG   | 10 | 5  |
| 44101 | 4 | 7475168 | 7475193 | 2 | 13 | 26 | CA   | 11 | 7  |
| 44103 | 4 | 7489427 | 7489444 | 2 | 9  | 18 | TG   | 9  | 12 |
| 44104 | 4 | 7492477 | 7492488 | 2 | 6  | 12 | TG   | 24 | 3  |
| 44109 | 4 | 7502116 | 7502139 | 2 | 12 | 24 | CA   | 10 | 8  |
| 44112 | 4 | 7509672 | 7509685 | 2 | 7  | 14 | AC   | 24 | 10 |
| 44113 | 4 | 7511144 | 7511167 | 2 | 12 | 24 | CA   | 26 | 9  |
| 44116 | 4 | 7515537 | 7515554 | 3 | 6  | 18 | CTT  | 26 | 6  |
| 44121 | 4 | 7521341 | 7521360 | 2 | 10 | 20 | CA   | 17 | 3  |
| 44125 | 4 | 7524897 | 7524926 | 2 | 15 | 30 | TG   | 28 | 6  |
| 44126 | 4 | 7525098 | 7525119 | 2 | 11 | 22 | AC   | 6  | 7  |
| 44128 | 4 | 7530476 | 7530495 | 2 | 10 | 20 | GT   | 16 | 10 |
| 44132 | 4 | 7538143 | 7538168 | 2 | 13 | 26 | GA   | 16 | 9  |
| 44134 | 4 | 7545286 | 7545299 | 2 | 7  | 14 | GA   | 15 | 4  |
| 44136 | 4 | 7555785 | 7555808 | 4 | 6  | 24 | ACAG | 9  | 6  |
| 44140 | 4 | 7566494 | 7566509 | 2 | 8  | 16 | GT   | 30 | 4  |
| 44142 | 4 | 7568589 | 7568602 | 2 | 7  | 14 | AC   | 23 | 3  |
| 44143 | 4 | 7569541 | 7569592 | 2 | 26 | 52 | CA   | 13 | 12 |
| 44144 | 4 | 7569785 | 7569796 | 2 | 6  | 12 | CA   | 21 | 3  |
| 44147 | 4 | 7573085 | 7573100 | 2 | 8  | 16 | TG   | 8  | 8  |
| 44150 | 4 | 7585113 | 7585136 | 2 | 12 | 24 | TG   | 21 | 6  |
| 44154 | 4 | 7596389 | 7596410 | 2 | 11 | 22 | CA   | 13 | 15 |
| 44164 | 4 | 7627124 | 7627153 | 2 | 15 | 30 | TG   | 15 | 8  |
| 44165 | 4 | 7627386 | 7627411 | 2 | 13 | 26 | GT   | 18 | 8  |
| 44166 | 4 | 7633338 | 7633351 | 2 | 7  | 14 | AC   | 28 | 3  |
| 44167 | 4 | 7633739 | 7633768 | 2 | 15 | 30 | CA   | 16 | 10 |
| 44169 | 4 | 7635504 | 7635517 | 2 | 7  | 14 | GT   | 24 | 4  |
| 44173 | 4 | 7647705 | 7647732 | 2 | 14 | 28 | CA   | 15 | 12 |
| 44174 | 4 | 7648137 | 7648150 | 2 | 7  | 14 | AC   | 22 | 4  |
| 44177 | 4 | 7650326 | 7650363 | 2 | 19 | 38 | AC   | 7  | 8  |
| 44179 | 4 | 7654656 | 7654670 | 3 | 5  | 15 | CCG  | 23 | 4  |
| 44180 | 4 | 7655109 | 7655132 | 2 | 12 | 24 | GT   | 17 | 6  |
| 44194 | 4 | 7691465 | 7691476 | 2 | 6  | 12 | CA   | 24 | 3  |
| 44200 | 4 | 7698888 | 7698907 | 2 | 10 | 20 | TG   | 12 | 8  |
| 44201 | 4 | 7701919 | 7701933 | 3 | 5  | 15 | ATT  | 26 | 3  |
| 44203 | 4 | 7702633 | 7702654 | 2 | 11 | 22 | AG   | 15 | 6  |
| 44206 | 4 | 7710478 | 7710495 | 2 | 9  | 18 | AC   | 21 | 4  |
| 44207 | 4 | 7711901 | 7711921 | 3 | 7  | 21 | ATT  | 18 | 6  |
| 44208 | 4 | 7712863 | 7712883 | 3 | 7  | 21 | CCT  | 26 | 3  |
| 44209 | 4 | 7713383 | 7713394 | 2 | 6  | 12 | CA   | 28 | 4  |



|       |   |         |         |   |    |    |      |    |    |
|-------|---|---------|---------|---|----|----|------|----|----|
| 44213 | 4 | 7717997 | 7718012 | 4 | 4  | 16 | TTTG | 17 | 4  |
| 44219 | 4 | 7732714 | 7732725 | 2 | 6  | 12 | AC   | 25 | 3  |
| 44222 | 4 | 7740230 | 7740259 | 2 | 15 | 30 | CA   | 8  | 8  |
| 44236 | 4 | 7760154 | 7760165 | 2 | 6  | 12 | AC   | 28 | 3  |
| 44237 | 4 | 7765886 | 7765911 | 2 | 13 | 26 | AC   | 7  | 8  |
| 44246 | 4 | 7781742 | 7781755 | 2 | 7  | 14 | CA   | 20 | 3  |
| 44247 | 4 | 7782764 | 7782783 | 2 | 10 | 20 | AC   | 22 | 6  |
| 44248 | 4 | 7783567 | 7783592 | 2 | 13 | 26 | GT   | 23 | 9  |
| 44252 | 4 | 7788631 | 7788648 | 2 | 9  | 18 | TG   | 24 | 9  |
| 44253 | 4 | 7788966 | 7788977 | 2 | 6  | 12 | TG   | 14 | 7  |
| 44254 | 4 | 7789030 | 7789057 | 2 | 14 | 28 | GT   | 11 | 4  |
| 44256 | 4 | 7792442 | 7792465 | 2 | 12 | 24 | TG   | 8  | 10 |
| 44259 | 4 | 7801665 | 7801690 | 2 | 13 | 26 | AC   | 10 | 7  |
| 44262 | 4 | 7805569 | 7805582 | 2 | 7  | 14 | GT   | 14 | 3  |
| 44265 | 4 | 7808111 | 7808124 | 2 | 7  | 14 | TG   | 20 | 4  |
| 44279 | 4 | 7832905 | 7832930 | 2 | 13 | 26 | TC   | 12 | 12 |
| 44280 | 4 | 7835639 | 7835666 | 2 | 14 | 28 | AC   | 7  | 8  |
| 44283 | 4 | 7843267 | 7843293 | 3 | 9  | 27 | GCA  | 19 | 7  |
| 44284 | 4 | 7844163 | 7844182 | 4 | 5  | 20 | TTTA | 28 | 7  |
| 44292 | 4 | 7871086 | 7871099 | 2 | 7  | 14 | AT   | 19 | 4  |
| 44306 | 4 | 7927141 | 7927158 | 2 | 9  | 18 | TG   | 22 | 10 |
| 44307 | 4 | 7927161 | 7927174 | 2 | 7  | 14 | TG   | 25 | 12 |
| 44310 | 4 | 7936648 | 7936677 | 3 | 10 | 30 | TGT  | 25 | 5  |
| 44321 | 4 | 7986688 | 7986701 | 2 | 7  | 14 | TG   | 25 | 3  |
| 44328 | 4 | 8002645 | 8002664 | 2 | 10 | 20 | TG   | 18 | 9  |
| 44331 | 4 | 8004827 | 8004854 | 4 | 7  | 28 | TCTT | 10 | 8  |
| 44332 | 4 | 8007639 | 8007664 | 2 | 13 | 26 | GT   | 24 | 5  |
| 44333 | 4 | 8008210 | 8008225 | 2 | 8  | 16 | AG   | 22 | 6  |
| 44337 | 4 | 8021382 | 8021403 | 2 | 11 | 22 | TG   | 8  | 7  |
| 44340 | 4 | 8033683 | 8033712 | 2 | 15 | 30 | TG   | 9  | 13 |
| 44349 | 4 | 8057325 | 8057338 | 2 | 7  | 14 | CA   | 24 | 4  |
| 44353 | 4 | 8065559 | 8065576 | 2 | 9  | 18 | CT   | 13 | 8  |
| 44361 | 4 | 8086330 | 8086341 | 2 | 6  | 12 | CA   | 14 | 3  |
| 44363 | 4 | 8087188 | 8087209 | 2 | 11 | 22 | TG   | 13 | 14 |
| 44365 | 4 | 8087360 | 8087373 | 2 | 7  | 14 | AC   | 18 | 4  |
| 44371 | 4 | 8094202 | 8094215 | 2 | 7  | 14 | CA   | 25 | 7  |
| 44377 | 4 | 8126119 | 8126144 | 2 | 13 | 26 | TG   | 14 | 7  |
| 44378 | 4 | 8127131 | 8127142 | 2 | 6  | 12 | TG   | 37 | 3  |
| 44379 | 4 | 8128400 | 8128427 | 2 | 14 | 28 | GT   | 20 | 5  |
| 44384 | 4 | 8130346 | 8130387 | 2 | 21 | 42 | CA   | 13 | 9  |
| 44385 | 4 | 8130938 | 8130969 | 2 | 16 | 32 | TG   | 15 | 10 |
| 44390 | 4 | 8137820 | 8137837 | 2 | 9  | 18 | TG   | 19 | 12 |
| 44393 | 4 | 8144569 | 8144588 | 2 | 10 | 20 | AC   | 15 | 11 |
| 44395 | 4 | 8148312 | 8148343 | 4 | 8  | 32 | AAGA | 27 | 3  |
| 44397 | 4 | 8150799 | 8150810 | 2 | 6  | 12 | AT   | 14 | 5  |
| 44400 | 4 | 8152855 | 8152878 | 2 | 12 | 24 | TG   | 23 | 9  |
| 44402 | 4 | 8153877 | 8153906 | 2 | 15 | 30 | TG   | 25 | 11 |
| 44405 | 4 | 8159754 | 8159771 | 3 | 6  | 18 | GGT  | 6  | 3  |
| 44408 | 4 | 8160835 | 8160854 | 2 | 10 | 20 | CA   | 7  | 9  |
| 44413 | 4 | 8173191 | 8173202 | 2 | 6  | 12 | GT   | 34 | 3  |
| 44418 | 4 | 8187994 | 8188026 | 3 | 11 | 33 | GGA  | 12 | 5  |

|       |   |         |         |   |    |    |      |    |    |
|-------|---|---------|---------|---|----|----|------|----|----|
| 44423 | 4 | 8195394 | 8195408 | 3 | 5  | 15 | TCT  | 29 | 5  |
| 44424 | 4 | 8203022 | 8203037 | 2 | 8  | 16 | GA   | 23 | 9  |
| 44427 | 4 | 8206445 | 8206480 | 2 | 18 | 36 | AC   | 14 | 8  |
| 44433 | 4 | 8232338 | 8232357 | 2 | 10 | 20 | CA   | 14 | 9  |
| 44441 | 4 | 8253054 | 8253071 | 3 | 6  | 18 | GCT  | 24 | 3  |
| 44449 | 4 | 8258147 | 8258166 | 2 | 10 | 20 | TG   | 15 | 4  |
| 44451 | 4 | 8265724 | 8265755 | 4 | 8  | 32 | GATG | 20 | 9  |
| 44456 | 4 | 8279657 | 8279702 | 2 | 23 | 46 | AC   | 6  | 6  |
| 44457 | 4 | 8284893 | 8284907 | 3 | 5  | 15 | TGC  | 24 | 5  |
| 44458 | 4 | 8287250 | 8287265 | 2 | 8  | 16 | TG   | 21 | 4  |
| 44462 | 4 | 8293708 | 8293721 | 2 | 7  | 14 | AG   | 13 | 3  |
| 44472 | 4 | 8303750 | 8303781 | 2 | 16 | 32 | GT   | 13 | 11 |
| 44474 | 4 | 8305287 | 8305298 | 2 | 6  | 12 | GT   | 22 | 3  |
| 44475 | 4 | 8308068 | 8308083 | 4 | 4  | 16 | GCCA | 19 | 5  |
| 44477 | 4 | 8310242 | 8310259 | 2 | 9  | 18 | AC   | 21 | 6  |
| 44478 | 4 | 8312644 | 8312661 | 2 | 9  | 18 | TG   | 21 | 6  |
| 44483 | 4 | 8318995 | 8319016 | 2 | 11 | 22 | TG   | 13 | 9  |
| 44484 | 4 | 8319197 | 8319214 | 3 | 6  | 18 | CCT  | 15 | 3  |
| 44485 | 4 | 8321146 | 8321160 | 3 | 5  | 15 | TGC  | 32 | 3  |
| 44487 | 4 | 8334260 | 8334281 | 2 | 11 | 22 | AG   | 21 | 6  |
| 44500 | 4 | 8373499 | 8373516 | 2 | 9  | 18 | TG   | 18 | 13 |
| 44502 | 4 | 8375482 | 8375505 | 2 | 12 | 24 | GT   | 6  | 8  |
| 44508 | 4 | 8391207 | 8391234 | 2 | 14 | 28 | TG   | 26 | 11 |
| 44509 | 4 | 8391407 | 8391422 | 2 | 8  | 16 | CA   | 22 | 8  |
| 44512 | 4 | 8394980 | 8395001 | 2 | 11 | 22 | TG   | 11 | 11 |
| 44515 | 4 | 8402081 | 8402098 | 2 | 9  | 18 | TG   | 24 | 3  |
| 44516 | 4 | 8402282 | 8402307 | 2 | 13 | 26 | GT   | 17 | 14 |
| 44522 | 4 | 8411454 | 8411477 | 4 | 6  | 24 | GTTG | 25 | 5  |
| 44523 | 4 | 8416202 | 8416217 | 2 | 8  | 16 | AC   | 20 | 6  |
| 44529 | 4 | 8428484 | 8428507 | 4 | 6  | 24 | TGAA | 33 | 3  |
| 44531 | 4 | 8433447 | 8433473 | 3 | 9  | 27 | GCT  | 24 | 3  |
| 44533 | 4 | 8434953 | 8434982 | 2 | 15 | 30 | AC   | 11 | 6  |
| 44540 | 4 | 8453583 | 8453598 | 4 | 4  | 16 | TTTA | 20 | 4  |
| 44552 | 4 | 8479963 | 8479988 | 2 | 13 | 26 | TG   | 11 | 6  |
| 44553 | 4 | 8480188 | 8480213 | 2 | 13 | 26 | AC   | 11 | 9  |
| 44556 | 4 | 8484214 | 8484225 | 2 | 6  | 12 | AG   | 20 | 6  |
| 44557 | 4 | 8484319 | 8484336 | 2 | 9  | 18 | CA   | 12 | 6  |
| 44558 | 4 | 8484338 | 8484353 | 2 | 8  | 16 | AC   | 20 | 5  |
| 44559 | 4 | 8485674 | 8485685 | 2 | 6  | 12 | CA   | 25 | 5  |
| 44560 | 4 | 8485687 | 8485700 | 2 | 7  | 14 | AC   | 24 | 6  |
| 44565 | 4 | 8493635 | 8493662 | 2 | 14 | 28 | GA   | 14 | 5  |
| 44573 | 4 | 8520746 | 8520759 | 2 | 7  | 14 | CA   | 21 | 6  |
| 44574 | 4 | 8520979 | 8521008 | 2 | 15 | 30 | CA   | 18 | 8  |
| 44576 | 4 | 8524357 | 8524410 | 2 | 27 | 54 | TG   | 11 | 12 |
| 44578 | 4 | 8534214 | 8534227 | 2 | 7  | 14 | AC   | 22 | 3  |
| 44579 | 4 | 8538395 | 8538420 | 2 | 13 | 26 | CT   | 18 | 6  |
| 44580 | 4 | 8543913 | 8543934 | 2 | 11 | 22 | CA   | 16 | 7  |
| 44581 | 4 | 8544101 | 8544116 | 2 | 8  | 16 | AC   | 25 | 3  |
| 44585 | 4 | 8557302 | 8557325 | 3 | 8  | 24 | TTG  | 21 | 4  |
| 44589 | 4 | 8565370 | 8565387 | 2 | 9  | 18 | AC   | 15 | 8  |
| 44595 | 4 | 8573315 | 8573340 | 2 | 13 | 26 | AC   | 14 | 7  |

|       |   |         |         |   |    |    |      |    |    |
|-------|---|---------|---------|---|----|----|------|----|----|
| 44602 | 4 | 8580147 | 8580160 | 2 | 7  | 14 | AC   | 25 | 6  |
| 44606 | 4 | 8582576 | 8582599 | 2 | 12 | 24 | CA   | 16 | 6  |
| 44608 | 4 | 8595120 | 8595137 | 2 | 9  | 18 | GT   | 27 | 9  |
| 44615 | 4 | 8614331 | 8614350 | 2 | 10 | 20 | AG   | 11 | 7  |
| 44619 | 4 | 8614679 | 8614700 | 2 | 11 | 22 | AC   | 19 | 11 |
| 44623 | 4 | 8617780 | 8617797 | 2 | 9  | 18 | TA   | 13 | 6  |
| 44624 | 4 | 8622849 | 8622869 | 3 | 7  | 21 | CAG  | 23 | 12 |
| 44629 | 4 | 8644538 | 8644549 | 2 | 6  | 12 | TG   | 21 | 5  |
| 44630 | 4 | 8645406 | 8645419 | 2 | 7  | 14 | GT   | 26 | 4  |
| 44631 | 4 | 8656787 | 8656824 | 2 | 19 | 38 | AC   | 7  | 12 |
| 44638 | 4 | 8664307 | 8664328 | 2 | 11 | 22 | GT   | 15 | 6  |
| 44640 | 4 | 8665579 | 8665590 | 2 | 6  | 12 | TG   | 24 | 4  |
| 44648 | 4 | 8686194 | 8686205 | 2 | 6  | 12 | CA   | 24 | 6  |
| 44653 | 4 | 8692796 | 8692821 | 2 | 13 | 26 | AC   | 19 | 8  |
| 44656 | 4 | 8703214 | 8703234 | 3 | 7  | 21 | GCT  | 21 | 7  |
| 44659 | 4 | 8705896 | 8705907 | 2 | 6  | 12 | CA   | 32 | 7  |
| 44661 | 4 | 8715101 | 8715128 | 2 | 14 | 28 | GT   | 7  | 10 |
| 44664 | 4 | 8735173 | 8735186 | 2 | 7  | 14 | AC   | 13 | 6  |
| 44667 | 4 | 8737199 | 8737210 | 2 | 6  | 12 | CA   | 26 | 3  |
| 44668 | 4 | 8738850 | 8738864 | 3 | 5  | 15 | ATT  | 10 | 7  |
| 44671 | 4 | 8746304 | 8746315 | 2 | 6  | 12 | TG   | 26 | 5  |
| 44675 | 4 | 8755930 | 8755962 | 3 | 11 | 33 | ATC  | 6  | 4  |
| 44678 | 4 | 8757352 | 8757369 | 2 | 9  | 18 | AG   | 21 | 7  |
| 44680 | 4 | 8763186 | 8763205 | 4 | 5  | 20 | CAAA | 9  | 3  |
| 44681 | 4 | 8764229 | 8764243 | 3 | 5  | 15 | AAT  | 23 | 4  |
| 44685 | 4 | 8768140 | 8768153 | 2 | 7  | 14 | CA   | 28 | 5  |
| 44703 | 4 | 8850737 | 8850760 | 2 | 12 | 24 | GT   | 6  | 3  |
| 44708 | 4 | 8854835 | 8854852 | 2 | 9  | 18 | CT   | 12 | 5  |
| 44709 | 4 | 8854876 | 8854897 | 2 | 11 | 22 | CT   | 12 | 5  |
| 44710 | 4 | 8855814 | 8855827 | 2 | 7  | 14 | TG   | 19 | 4  |
| 44722 | 4 | 8897339 | 8897374 | 2 | 18 | 36 | GA   | 8  | 8  |
| 44733 | 4 | 8928552 | 8928563 | 2 | 6  | 12 | GT   | 20 | 6  |
| 44734 | 4 | 8928653 | 8928692 | 2 | 20 | 40 | GT   | 6  | 10 |
| 44741 | 4 | 8929169 | 8929184 | 4 | 4  | 16 | TGTC | 11 | 4  |
| 44755 | 4 | 8949590 | 8949629 | 2 | 20 | 40 | AC   | 7  | 10 |
| 44757 | 4 | 8952325 | 8952350 | 2 | 13 | 26 | TG   | 16 | 10 |
| 44758 | 4 | 8952644 | 8952671 | 2 | 14 | 28 | TG   | 11 | 11 |
| 44768 | 4 | 8965381 | 8965402 | 2 | 11 | 22 | CA   | 24 | 13 |
| 44772 | 4 | 8980819 | 8980842 | 3 | 8  | 24 | TTC  | 19 | 8  |
| 44773 | 4 | 8983530 | 8983544 | 3 | 5  | 15 | ATC  | 16 | 5  |
| 44774 | 4 | 8987480 | 8987493 | 2 | 7  | 14 | CA   | 28 | 3  |
| 44776 | 4 | 8990244 | 8990264 | 3 | 7  | 21 | TTA  | 25 | 4  |
| 44779 | 4 | 9004790 | 9004819 | 3 | 10 | 30 | GGA  | 22 | 7  |
| 44794 | 4 | 9043615 | 9043634 | 4 | 5  | 20 | GCGT | 27 | 4  |
| 44795 | 4 | 9045895 | 9045932 | 2 | 19 | 38 | GA   | 7  | 7  |
| 44800 | 4 | 9080159 | 9080198 | 2 | 20 | 40 | GT   | 9  | 11 |
| 44807 | 4 | 9103500 | 9103521 | 2 | 11 | 22 | GA   | 32 | 3  |
| 44813 | 4 | 9132899 | 9132916 | 2 | 9  | 18 | CA   | 24 | 8  |
| 44815 | 4 | 9158477 | 9158496 | 2 | 10 | 20 | TG   | 20 | 10 |
| 44822 | 4 | 9186240 | 9186255 | 2 | 8  | 16 | AG   | 12 | 6  |
| 44829 | 4 | 9210888 | 9210911 | 2 | 12 | 24 | CA   | 15 | 9  |

|       |   |         |         |   |    |    |      |    |    |
|-------|---|---------|---------|---|----|----|------|----|----|
| 44844 | 4 | 9258831 | 9258858 | 4 | 7  | 28 | TATG | 8  | 3  |
| 44857 | 4 | 9308825 | 9308848 | 2 | 12 | 24 | TC   | 14 | 9  |
| 44860 | 4 | 9316650 | 9316661 | 2 | 6  | 12 | TG   | 20 | 3  |
| 44863 | 4 | 9324402 | 9324421 | 2 | 10 | 20 | GT   | 20 | 5  |
| 44868 | 4 | 9333883 | 9333900 | 2 | 9  | 18 | GA   | 26 | 3  |
| 44876 | 4 | 9358497 | 9358520 | 2 | 12 | 24 | TG   | 15 | 9  |
| 44877 | 4 | 9364574 | 9364591 | 3 | 6  | 18 | CAT  | 23 | 5  |
| 44879 | 4 | 9386938 | 9386949 | 2 | 6  | 12 | GA   | 23 | 5  |
| 44882 | 4 | 9399617 | 9399640 | 4 | 6  | 24 | TTTG | 14 | 4  |
| 44889 | 4 | 9409333 | 9409364 | 2 | 16 | 32 | AC   | 16 | 9  |
| 44890 | 4 | 9414555 | 9414570 | 2 | 8  | 16 | CA   | 15 | 7  |
| 44893 | 4 | 9429478 | 9429493 | 2 | 8  | 16 | TG   | 17 | 6  |
| 44894 | 4 | 9431366 | 9431379 | 2 | 7  | 14 | GT   | 15 | 3  |
| 44897 | 4 | 9436511 | 9436530 | 2 | 10 | 20 | AC   | 13 | 4  |
| 44902 | 4 | 9442314 | 9442337 | 3 | 8  | 24 | GAA  | 10 | 5  |
| 44949 | 4 | 9524302 | 9524317 | 2 | 8  | 16 | GA   | 32 | 5  |
| 44951 | 4 | 9526033 | 9526054 | 2 | 11 | 22 | TG   | 15 | 8  |
| 44962 | 4 | 9558985 | 9559014 | 2 | 15 | 30 | TG   | 13 | 12 |
| 44976 | 4 | 9584877 | 9584900 | 3 | 8  | 24 | GCA  | 22 | 5  |
| 44985 | 4 | 9596614 | 9596639 | 2 | 13 | 26 | CA   | 18 | 10 |
| 44988 | 4 | 9599150 | 9599197 | 2 | 24 | 48 | TG   | 11 | 12 |
| 44996 | 4 | 9608247 | 9608262 | 2 | 8  | 16 | AC   | 26 | 3  |
| 44997 | 4 | 9608444 | 9608489 | 2 | 23 | 46 | AC   | 8  | 12 |
| 45003 | 4 | 9612140 | 9612189 | 2 | 25 | 50 | CA   | 7  | 9  |
| 45011 | 4 | 9656938 | 9656953 | 2 | 8  | 16 | AC   | 18 | 8  |
| 45012 | 4 | 9660397 | 9660414 | 2 | 9  | 18 | AG   | 29 | 4  |
| 45016 | 4 | 9674663 | 9674682 | 4 | 5  | 20 | ATAA | 25 | 10 |
| 45018 | 4 | 9676727 | 9676748 | 2 | 11 | 22 | AG   | 10 | 8  |
| 45024 | 4 | 9717532 | 9717575 | 4 | 11 | 44 | TCTT | 11 | 6  |
| 45027 | 4 | 9725163 | 9725174 | 2 | 6  | 12 | CT   | 18 | 3  |
| 45029 | 4 | 9725531 | 9725548 | 2 | 9  | 18 | TC   | 14 | 5  |
| 45032 | 4 | 9729315 | 9729328 | 2 | 7  | 14 | CA   | 29 | 3  |
| 45034 | 4 | 9730041 | 9730056 | 4 | 4  | 16 | CTGT | 24 | 4  |
| 45039 | 4 | 9742831 | 9742852 | 2 | 11 | 22 | GT   | 23 | 7  |
| 45042 | 4 | 9756632 | 9756653 | 2 | 11 | 22 | AG   | 7  | 7  |
| 45044 | 4 | 9766121 | 9766160 | 2 | 20 | 40 | CA   | 9  | 7  |
| 45048 | 4 | 9784668 | 9784681 | 2 | 7  | 14 | GT   | 21 | 5  |
| 45050 | 4 | 9792571 | 9792594 | 4 | 6  | 24 | GGTA | 27 | 4  |
| 45051 | 4 | 9792845 | 9792864 | 2 | 10 | 20 | AC   | 19 | 12 |
| 45053 | 4 | 9819372 | 9819401 | 2 | 15 | 30 | GA   | 8  | 7  |
| 45055 | 4 | 9826206 | 9826233 | 2 | 14 | 28 | CA   | 12 | 11 |
| 45056 | 4 | 9830960 | 9830989 | 2 | 15 | 30 | GT   | 18 | 9  |
| 45071 | 4 | 9853088 | 9853115 | 2 | 14 | 28 | TG   | 15 | 9  |
| 45073 | 4 | 9857206 | 9857225 | 2 | 10 | 20 | GT   | 21 | 9  |
| 45074 | 4 | 9857453 | 9857468 | 2 | 8  | 16 | TG   | 30 | 6  |
| 45077 | 4 | 9859475 | 9859512 | 2 | 19 | 38 | TG   | 10 | 10 |
| 45078 | 4 | 9859831 | 9859856 | 2 | 13 | 26 | CA   | 17 | 10 |
| 45082 | 4 | 9867590 | 9867605 | 2 | 8  | 16 | GT   | 13 | 7  |
| 45083 | 4 | 9867608 | 9867621 | 2 | 7  | 14 | GT   | 16 | 7  |
| 45091 | 4 | 9875852 | 9875863 | 2 | 6  | 12 | CA   | 24 | 4  |
| 45098 | 4 | 9886974 | 9887005 | 2 | 16 | 32 | TG   | 8  | 10 |

|       |   |          |          |   |    |    |      |    |    |
|-------|---|----------|----------|---|----|----|------|----|----|
| 45102 | 4 | 9895759  | 9895798  | 4 | 10 | 40 | CACG | 13 | 19 |
| 45104 | 4 | 9895974  | 9895987  | 2 | 7  | 14 | CA   | 12 | 7  |
| 45105 | 4 | 9895989  | 9896004  | 4 | 4  | 16 | GCAC | 16 | 7  |
| 45108 | 4 | 9900080  | 9900097  | 2 | 9  | 18 | CA   | 21 | 8  |
| 45109 | 4 | 9901926  | 9901941  | 2 | 8  | 16 | TG   | 12 | 9  |
| 45110 | 4 | 9903408  | 9903421  | 2 | 7  | 14 | TG   | 17 | 3  |
| 45119 | 4 | 9936465  | 9936478  | 2 | 7  | 14 | AC   | 26 | 3  |
| 45121 | 4 | 9937697  | 9937716  | 2 | 10 | 20 | TG   | 22 | 12 |
| 45126 | 4 | 9952491  | 9952520  | 2 | 15 | 30 | CA   | 15 | 8  |
| 45129 | 4 | 9955580  | 9955603  | 2 | 12 | 24 | CT   | 12 | 9  |
| 45132 | 4 | 9957291  | 9957302  | 2 | 6  | 12 | AC   | 23 | 3  |
| 45142 | 4 | 9976957  | 9976998  | 2 | 21 | 42 | GT   | 12 | 10 |
| 45151 | 4 | 9990371  | 9990403  | 3 | 11 | 33 | ATA  | 8  | 7  |
| 45153 | 4 | 9994573  | 9994584  | 2 | 6  | 12 | AT   | 7  | 5  |
| 45159 | 4 | 10008148 | 10008171 | 4 | 6  | 24 | AAAT | 23 | 8  |
| 45162 | 4 | 10008806 | 10008825 | 2 | 10 | 20 | TG   | 17 | 6  |
| 45163 | 4 | 10008899 | 10008919 | 3 | 7  | 21 | CAT  | 16 | 6  |
| 45165 | 4 | 10014089 | 10014100 | 2 | 6  | 12 | GT   | 19 | 3  |
| 45167 | 4 | 10018653 | 10018676 | 2 | 12 | 24 | TG   | 8  | 8  |
| 45169 | 4 | 10024262 | 10024275 | 2 | 7  | 14 | GT   | 26 | 3  |
| 45178 | 4 | 10050283 | 10050312 | 2 | 15 | 30 | GT   | 16 | 12 |
| 45179 | 4 | 10051468 | 10051479 | 2 | 6  | 12 | AC   | 18 | 4  |
| 45197 | 4 | 10114864 | 10114878 | 3 | 5  | 15 | TGC  | 25 | 4  |
| 45205 | 4 | 10156765 | 10156788 | 2 | 12 | 24 | AC   | 21 | 8  |
| 45208 | 4 | 10158386 | 10158409 | 2 | 12 | 24 | TG   | 11 | 12 |
| 45210 | 4 | 10163655 | 10163692 | 2 | 19 | 38 | AC   | 14 | 12 |
| 45212 | 4 | 10169293 | 10169314 | 2 | 11 | 22 | CA   | 18 | 4  |
| 45220 | 4 | 10192671 | 10192684 | 2 | 7  | 14 | TG   | 27 | 4  |
| 45221 | 4 | 10195885 | 10195914 | 2 | 15 | 30 | AC   | 15 | 13 |
| 45222 | 4 | 10197410 | 10197423 | 2 | 7  | 14 | GT   | 8  | 3  |
| 45226 | 4 | 10201726 | 10201739 | 2 | 7  | 14 | AC   | 17 | 6  |
| 45229 | 4 | 10203270 | 10203285 | 2 | 8  | 16 | AT   | 29 | 3  |
| 45230 | 4 | 10203751 | 10203774 | 2 | 12 | 24 | CA   | 8  | 5  |
| 45234 | 4 | 10208282 | 10208303 | 2 | 11 | 22 | AC   | 9  | 8  |
| 45237 | 4 | 10214097 | 10214108 | 2 | 6  | 12 | AC   | 18 | 4  |
| 45243 | 4 | 10226804 | 10226818 | 3 | 5  | 15 | GCT  | 28 | 3  |
| 45244 | 4 | 10227157 | 10227178 | 2 | 11 | 22 | AC   | 24 | 7  |
| 45245 | 4 | 10229785 | 10229796 | 2 | 6  | 12 | TC   | 23 | 4  |
| 45246 | 4 | 10229797 | 10229808 | 2 | 6  | 12 | AC   | 24 | 4  |
| 45248 | 4 | 10236147 | 10236170 | 2 | 12 | 24 | CA   | 13 | 5  |
| 45250 | 4 | 10239079 | 10239094 | 2 | 8  | 16 | GA   | 16 | 9  |
| 45252 | 4 | 10245562 | 10245609 | 2 | 24 | 48 | CT   | 8  | 6  |
| 45255 | 4 | 10249629 | 10249649 | 3 | 7  | 21 | GGA  | 6  | 3  |
| 45256 | 4 | 10250557 | 10250574 | 2 | 9  | 18 | GT   | 10 | 7  |
| 45257 | 4 | 10257988 | 10258005 | 2 | 9  | 18 | CA   | 13 | 4  |
| 45258 | 4 | 10258837 | 10258854 | 2 | 9  | 18 | CA   | 23 | 6  |
| 45259 | 4 | 10260170 | 10260181 | 2 | 6  | 12 | GT   | 20 | 4  |
| 45262 | 4 | 10260665 | 10260702 | 2 | 19 | 38 | GT   | 14 | 15 |
| 45267 | 4 | 10268851 | 10268862 | 2 | 6  | 12 | CA   | 19 | 3  |
| 45271 | 4 | 10278954 | 10278981 | 2 | 14 | 28 | TG   | 18 | 6  |
| 45272 | 4 | 10279147 | 10279174 | 2 | 14 | 28 | CA   | 16 | 9  |

|       |   |          |          |   |    |    |      |    |    |
|-------|---|----------|----------|---|----|----|------|----|----|
| 45273 | 4 | 10280415 | 10280438 | 2 | 12 | 24 | GA   | 12 | 7  |
| 45274 | 4 | 10280764 | 10280777 | 2 | 7  | 14 | AG   | 23 | 3  |
| 45275 | 4 | 10282141 | 10282164 | 2 | 12 | 24 | CA   | 9  | 6  |
| 45277 | 4 | 10284584 | 10284625 | 2 | 21 | 42 | TG   | 9  | 8  |
| 45286 | 4 | 10293861 | 10293872 | 2 | 6  | 12 | AC   | 26 | 3  |
| 45288 | 4 | 10295377 | 10295396 | 2 | 10 | 20 | AC   | 30 | 8  |
| 45289 | 4 | 10295725 | 10295740 | 2 | 8  | 16 | AC   | 20 | 9  |
| 45291 | 4 | 10296249 | 10296268 | 2 | 10 | 20 | AC   | 20 | 5  |
| 45295 | 4 | 10296708 | 10296722 | 3 | 5  | 15 | AGA  | 20 | 7  |
| 45296 | 4 | 10297085 | 10297126 | 2 | 21 | 42 | TC   | 8  | 7  |
| 45299 | 4 | 10299323 | 10299340 | 2 | 9  | 18 | CA   | 20 | 6  |
| 45301 | 4 | 10300941 | 10300952 | 2 | 6  | 12 | TG   | 27 | 3  |
| 45312 | 4 | 10306152 | 10306171 | 4 | 5  | 20 | CCAA | 17 | 3  |
| 45317 | 4 | 10310316 | 10310331 | 2 | 8  | 16 | CA   | 14 | 4  |
| 45324 | 4 | 10320214 | 10320231 | 2 | 9  | 18 | CA   | 31 | 3  |
| 45326 | 4 | 10330372 | 10330383 | 2 | 6  | 12 | CA   | 24 | 4  |
| 45327 | 4 | 10330515 | 10330538 | 2 | 12 | 24 | AC   | 19 | 11 |
| 45328 | 4 | 10332446 | 10332475 | 2 | 15 | 30 | TG   | 22 | 14 |
| 45329 | 4 | 10336625 | 10336645 | 3 | 7  | 21 | AGA  | 22 | 3  |
| 45339 | 4 | 10364863 | 10364882 | 2 | 10 | 20 | GT   | 21 | 6  |
| 45341 | 4 | 10367395 | 10367406 | 2 | 6  | 12 | TG   | 21 | 4  |
| 45342 | 4 | 10367590 | 10367603 | 2 | 7  | 14 | AC   | 32 | 3  |
| 45353 | 4 | 10376814 | 10376867 | 2 | 27 | 54 | GT   | 8  | 8  |
| 45354 | 4 | 10380262 | 10380276 | 3 | 5  | 15 | AAG  | 10 | 3  |
| 45357 | 4 | 10403688 | 10403709 | 2 | 11 | 22 | CA   | 17 | 4  |
| 45369 | 4 | 10446163 | 10446226 | 4 | 16 | 64 | AAGA | 6  | 9  |
| 45371 | 4 | 10447968 | 10447991 | 2 | 12 | 24 | AC   | 19 | 10 |
| 45374 | 4 | 10449891 | 10449902 | 2 | 6  | 12 | CA   | 31 | 3  |
| 45375 | 4 | 10450927 | 10450950 | 4 | 6  | 24 | TGTA | 11 | 3  |
| 45376 | 4 | 10454952 | 10454973 | 2 | 11 | 22 | AG   | 23 | 4  |
| 45377 | 4 | 10459705 | 10459730 | 2 | 13 | 26 | CA   | 19 | 7  |
| 45378 | 4 | 10462112 | 10462135 | 2 | 12 | 24 | CA   | 22 | 8  |
| 45379 | 4 | 10468015 | 10468040 | 2 | 13 | 26 | GT   | 14 | 12 |
| 45380 | 4 | 10470401 | 10470412 | 2 | 6  | 12 | GA   | 31 | 3  |
| 45388 | 4 | 10473803 | 10473824 | 2 | 11 | 22 | AC   | 26 | 4  |
| 45391 | 4 | 10477975 | 10477998 | 3 | 8  | 24 | CCT  | 20 | 6  |
| 45392 | 4 | 10478255 | 10478270 | 2 | 8  | 16 | AC   | 19 | 7  |
| 45400 | 4 | 10485111 | 10485124 | 2 | 7  | 14 | AG   | 25 | 4  |
| 45402 | 4 | 10490235 | 10490248 | 2 | 7  | 14 | CT   | 28 | 4  |
| 45403 | 4 | 10493864 | 10493883 | 2 | 10 | 20 | AC   | 13 | 7  |
| 45407 | 4 | 10499897 | 10499912 | 2 | 8  | 16 | TG   | 20 | 4  |
| 45408 | 4 | 10500043 | 10500054 | 2 | 6  | 12 | AT   | 6  | 3  |
| 45415 | 4 | 10522146 | 10522169 | 4 | 6  | 24 | AAAC | 24 | 5  |
| 45416 | 4 | 10522817 | 10522830 | 2 | 7  | 14 | CA   | 25 | 10 |
| 45417 | 4 | 10523408 | 10523427 | 2 | 10 | 20 | GT   | 17 | 6  |
| 45419 | 4 | 10526097 | 10526112 | 4 | 4  | 16 | TGTC | 20 | 5  |
| 45420 | 4 | 10526167 | 10526188 | 2 | 11 | 22 | TG   | 23 | 7  |
| 45421 | 4 | 10528174 | 10528187 | 2 | 7  | 14 | TG   | 20 | 17 |
| 45426 | 4 | 10540113 | 10540160 | 2 | 24 | 48 | CA   | 11 | 14 |
| 45429 | 4 | 10548354 | 10548393 | 2 | 20 | 40 | CA   | 8  | 10 |
| 45430 | 4 | 10549395 | 10549412 | 2 | 9  | 18 | AC   | 21 | 12 |

|       |   |          |          |   |    |    |      |    |    |
|-------|---|----------|----------|---|----|----|------|----|----|
| 45431 | 4 | 10559157 | 10559172 | 2 | 8  | 16 | GT   | 20 | 5  |
| 45435 | 4 | 10575717 | 10575732 | 2 | 8  | 16 | AC   | 22 | 3  |
| 45444 | 4 | 10613901 | 10613912 | 2 | 6  | 12 | CA   | 20 | 3  |
| 45447 | 4 | 10620752 | 10620771 | 4 | 5  | 20 | ACAA | 31 | 6  |
| 45448 | 4 | 10628846 | 10628861 | 4 | 4  | 16 | TAAA | 21 | 4  |
| 45449 | 4 | 10637724 | 10637751 | 4 | 7  | 28 | TCTA | 19 | 3  |
| 45453 | 4 | 10655637 | 10655674 | 2 | 19 | 38 | TG   | 8  | 10 |
| 45457 | 4 | 10672874 | 10672887 | 2 | 7  | 14 | CT   | 22 | 7  |
| 45459 | 4 | 10689916 | 10689949 | 2 | 17 | 34 | CA   | 11 | 7  |
| 45462 | 4 | 10708799 | 10708824 | 2 | 13 | 26 | TG   | 13 | 8  |
| 45471 | 4 | 10737304 | 10737319 | 2 | 8  | 16 | TG   | 9  | 8  |
| 45480 | 4 | 10752964 | 10752983 | 2 | 10 | 20 | CA   | 14 | 10 |
| 45482 | 4 | 10755746 | 10755757 | 2 | 6  | 12 | CA   | 24 | 5  |
| 45483 | 4 | 10755760 | 10755771 | 2 | 6  | 12 | CA   | 26 | 5  |
| 45485 | 4 | 10758292 | 10758303 | 2 | 6  | 12 | TG   | 24 | 3  |
| 45489 | 4 | 10763204 | 10763223 | 2 | 10 | 20 | CT   | 7  | 3  |
| 45492 | 4 | 10764817 | 10764840 | 3 | 8  | 24 | TCC  | 17 | 7  |
| 45494 | 4 | 10768088 | 10768115 | 4 | 7  | 28 | AAAG | 11 | 8  |
| 45501 | 4 | 10786751 | 10786764 | 2 | 7  | 14 | CA   | 12 | 5  |
| 45504 | 4 | 10793978 | 10794001 | 2 | 12 | 24 | GT   | 14 | 5  |
| 45506 | 4 | 10795074 | 10795088 | 3 | 5  | 15 | CCA  | 30 | 4  |
| 45512 | 4 | 10826740 | 10826760 | 3 | 7  | 21 | TGC  | 31 | 3  |
| 45518 | 4 | 10837897 | 10837912 | 4 | 4  | 16 | TTAT | 18 | 3  |
| 45524 | 4 | 10858910 | 10858925 | 2 | 8  | 16 | TG   | 28 | 3  |
| 45525 | 4 | 10866056 | 10866075 | 2 | 10 | 20 | TG   | 19 | 8  |
| 45528 | 4 | 10871330 | 10871347 | 2 | 9  | 18 | GT   | 15 | 10 |
| 45533 | 4 | 10879704 | 10879715 | 2 | 6  | 12 | AC   | 10 | 7  |
| 45534 | 4 | 10879754 | 10879773 | 4 | 5  | 20 | AAAT | 27 | 5  |
| 45535 | 4 | 10879984 | 10879998 | 3 | 5  | 15 | GAA  | 20 | 12 |
| 45536 | 4 | 10880564 | 10880579 | 4 | 4  | 16 | TTGT | 17 | 4  |
| 45537 | 4 | 10880714 | 10880729 | 4 | 4  | 16 | ATTC | 28 | 5  |
| 45541 | 4 | 10885948 | 10885979 | 2 | 16 | 32 | GT   | 8  | 10 |
| 45543 | 4 | 10892664 | 10892679 | 2 | 8  | 16 | CA   | 22 | 4  |
| 45548 | 4 | 10900141 | 10900156 | 2 | 8  | 16 | CA   | 24 | 5  |
| 45551 | 4 | 10928275 | 10928318 | 2 | 22 | 44 | AG   | 6  | 7  |
| 45558 | 4 | 10948879 | 10948924 | 2 | 23 | 46 | TG   | 15 | 12 |
| 45566 | 4 | 10975155 | 10975168 | 2 | 7  | 14 | TG   | 19 | 4  |
| 45575 | 4 | 10989032 | 10989045 | 2 | 7  | 14 | TG   | 19 | 6  |
| 45576 | 4 | 10989047 | 10989062 | 2 | 8  | 16 | GT   | 25 | 5  |
| 45580 | 4 | 10997831 | 10997846 | 4 | 4  | 16 | ACTT | 29 | 3  |
| 45588 | 4 | 11038845 | 11038870 | 2 | 13 | 26 | TC   | 8  | 7  |
| 45589 | 4 | 11040241 | 11040258 | 3 | 6  | 18 | GGA  | 29 | 3  |
| 45593 | 4 | 11044464 | 11044477 | 2 | 7  | 14 | GT   | 29 | 4  |
| 45598 | 4 | 11052299 | 11052313 | 3 | 5  | 15 | GAT  | 28 | 3  |
| 45600 | 4 | 11055167 | 11055182 | 4 | 4  | 16 | TTCC | 25 | 3  |
| 45604 | 4 | 11068396 | 11068411 | 2 | 8  | 16 | GT   | 29 | 9  |
| 45606 | 4 | 11072278 | 11072291 | 2 | 7  | 14 | GT   | 22 | 3  |
| 45608 | 4 | 11074166 | 11074189 | 2 | 12 | 24 | TG   | 10 | 8  |
| 45621 | 4 | 11097584 | 11097601 | 2 | 9  | 18 | GT   | 21 | 6  |
| 45642 | 4 | 11133283 | 11133308 | 2 | 13 | 26 | TG   | 6  | 9  |
| 45647 | 4 | 11151149 | 11151176 | 2 | 14 | 28 | AC   | 21 | 7  |

|       |   |          |          |   |    |    |      |    |    |
|-------|---|----------|----------|---|----|----|------|----|----|
| 45653 | 4 | 11159312 | 11159351 | 2 | 20 | 40 | CA   | 9  | 9  |
| 45658 | 4 | 11166048 | 11166073 | 2 | 13 | 26 | CA   | 21 | 5  |
| 45662 | 4 | 11180904 | 11180931 | 4 | 7  | 28 | TATC | 24 | 3  |
| 45663 | 4 | 11181608 | 11181623 | 4 | 4  | 16 | GGAA | 22 | 5  |
| 45664 | 4 | 11184434 | 11184463 | 3 | 10 | 30 | TCC  | 17 | 4  |
| 45667 | 4 | 11186302 | 11186323 | 2 | 11 | 22 | GT   | 11 | 9  |
| 45668 | 4 | 11186728 | 11186755 | 2 | 14 | 28 | CA   | 15 | 8  |
| 45670 | 4 | 11186932 | 11186971 | 4 | 10 | 40 | ATCT | 7  | 10 |
| 45680 | 4 | 11227075 | 11227088 | 2 | 7  | 14 | TG   | 21 | 6  |
| 45682 | 4 | 11230633 | 11230654 | 2 | 11 | 22 | TC   | 12 | 4  |
| 45702 | 4 | 11331659 | 11331704 | 2 | 23 | 46 | TG   | 9  | 11 |
| 45704 | 4 | 11342684 | 11342699 | 4 | 4  | 16 | AAAT | 28 | 4  |
| 45709 | 4 | 11365928 | 11365948 | 3 | 7  | 21 | GCA  | 20 | 6  |
| 45710 | 4 | 11366526 | 11366539 | 2 | 7  | 14 | TC   | 8  | 9  |
| 45721 | 4 | 11387659 | 11387682 | 2 | 12 | 24 | CT   | 16 | 8  |
| 45723 | 4 | 11391300 | 11391315 | 2 | 8  | 16 | TG   | 27 | 4  |
| 45724 | 4 | 11392984 | 11393001 | 2 | 9  | 18 | AC   | 12 | 5  |
| 45725 | 4 | 11393838 | 11393875 | 2 | 19 | 38 | TG   | 14 | 8  |
| 45726 | 4 | 11393979 | 11393994 | 4 | 4  | 16 | CAGG | 26 | 4  |
| 45728 | 4 | 11397113 | 11397150 | 2 | 19 | 38 | TG   | 10 | 9  |
| 45734 | 4 | 11404748 | 11404765 | 3 | 6  | 18 | CCT  | 22 | 5  |
| 45738 | 4 | 11405749 | 11405768 | 2 | 10 | 20 | GA   | 7  | 4  |
| 45743 | 4 | 11411498 | 11411521 | 2 | 12 | 24 | CA   | 25 | 6  |
| 45744 | 4 | 11412193 | 11412216 | 2 | 12 | 24 | GT   | 13 | 8  |
| 45745 | 4 | 11414474 | 11414487 | 2 | 7  | 14 | GT   | 18 | 4  |
| 45746 | 4 | 11414488 | 11414499 | 2 | 6  | 12 | GA   | 19 | 3  |
| 45748 | 4 | 11416600 | 11416623 | 2 | 12 | 24 | CA   | 19 | 3  |
| 45749 | 4 | 11416991 | 11417006 | 2 | 8  | 16 | AC   | 18 | 3  |
| 45750 | 4 | 11417009 | 11417022 | 2 | 7  | 14 | AC   | 25 | 8  |
| 45753 | 4 | 11423569 | 11423596 | 2 | 14 | 28 | GT   | 11 | 8  |
| 45756 | 4 | 11425210 | 11425227 | 2 | 9  | 18 | CA   | 18 | 4  |
| 45759 | 4 | 11434255 | 11434278 | 2 | 12 | 24 | TG   | 12 | 7  |
| 45760 | 4 | 11434719 | 11434739 | 3 | 7  | 21 | CAG  | 17 | 8  |
| 45767 | 4 | 11439342 | 11439383 | 2 | 21 | 42 | GT   | 20 | 13 |
| 45771 | 4 | 11446210 | 11446235 | 2 | 13 | 26 | CA   | 22 | 8  |
| 45775 | 4 | 11450669 | 11450688 | 2 | 10 | 20 | CA   | 14 | 8  |
| 45777 | 4 | 11451799 | 11451812 | 2 | 7  | 14 | AC   | 27 | 4  |
| 45778 | 4 | 11452154 | 11452167 | 2 | 7  | 14 | TG   | 18 | 3  |
| 45782 | 4 | 11455751 | 11455770 | 2 | 10 | 20 | AC   | 12 | 13 |
| 45785 | 4 | 11457128 | 11457139 | 2 | 6  | 12 | AC   | 26 | 3  |
| 45786 | 4 | 11459551 | 11459586 | 4 | 9  | 36 | AGAA | 15 | 8  |
| 45797 | 4 | 11480442 | 11480473 | 2 | 16 | 32 | TG   | 13 | 10 |
| 45801 | 4 | 11487548 | 11487561 | 2 | 7  | 14 | CA   | 25 | 3  |
| 45805 | 4 | 11494635 | 11494646 | 2 | 6  | 12 | AC   | 25 | 4  |
| 45806 | 4 | 11502970 | 11502987 | 2 | 9  | 18 | TG   | 22 | 4  |
| 45808 | 4 | 11509641 | 11509664 | 3 | 8  | 24 | GAT  | 23 | 10 |
| 45809 | 4 | 11516162 | 11516200 | 3 | 13 | 39 | TCT  | 24 | 18 |
| 45811 | 4 | 11521286 | 11521299 | 2 | 7  | 14 | TG   | 6  | 7  |
| 45812 | 4 | 11521438 | 11521469 | 2 | 16 | 32 | CA   | 6  | 8  |
| 45814 | 4 | 11522191 | 11522206 | 2 | 8  | 16 | GT   | 32 | 4  |
| 45816 | 4 | 11524685 | 11524710 | 2 | 13 | 26 | TG   | 18 | 7  |



|       |   |          |          |   |    |    |      |    |    |
|-------|---|----------|----------|---|----|----|------|----|----|
| 45819 | 4 | 11529975 | 11530008 | 2 | 17 | 34 | TG   | 8  | 6  |
| 45820 | 4 | 11550160 | 11550183 | 2 | 12 | 24 | CA   | 11 | 9  |
| 45821 | 4 | 11550598 | 11550612 | 3 | 5  | 15 | GCA  | 21 | 11 |
| 45822 | 4 | 11550613 | 11550633 | 3 | 7  | 21 | GGA  | 11 | 12 |
| 45824 | 4 | 11550742 | 11550755 | 2 | 7  | 14 | AC   | 21 | 7  |
| 45825 | 4 | 11551199 | 11551226 | 2 | 14 | 28 | GT   | 25 | 14 |
| 45826 | 4 | 11553192 | 11553203 | 2 | 6  | 12 | AC   | 32 | 4  |
| 45827 | 4 | 11553382 | 11553393 | 2 | 6  | 12 | GT   | 20 | 15 |
| 45828 | 4 | 11555079 | 11555098 | 2 | 10 | 20 | TG   | 10 | 8  |
| 45829 | 4 | 11555233 | 11555246 | 2 | 7  | 14 | TG   | 21 | 4  |
| 45834 | 4 | 11555563 | 11555600 | 2 | 19 | 38 | GT   | 15 | 11 |
| 45836 | 4 | 11556153 | 11556166 | 2 | 7  | 14 | TC   | 25 | 5  |
| 45840 | 4 | 11560974 | 11560997 | 3 | 8  | 24 | AAG  | 21 | 8  |
| 45841 | 4 | 11565314 | 11565363 | 2 | 25 | 50 | CA   | 8  | 12 |
| 45842 | 4 | 11565879 | 11565902 | 3 | 8  | 24 | GGA  | 16 | 4  |
| 45843 | 4 | 11569419 | 11569442 | 3 | 8  | 24 | AGC  | 25 | 5  |
| 45845 | 4 | 11570045 | 11570068 | 2 | 12 | 24 | TG   | 11 | 14 |
| 45846 | 4 | 11570173 | 11570190 | 2 | 9  | 18 | CA   | 23 | 7  |
| 45849 | 4 | 11570302 | 11570313 | 2 | 6  | 12 | AC   | 11 | 6  |
| 45853 | 4 | 11578552 | 11578581 | 2 | 15 | 30 | TG   | 14 | 11 |
| 45856 | 4 | 11582263 | 11582286 | 2 | 12 | 24 | GT   | 21 | 5  |
| 45858 | 4 | 11583184 | 11583205 | 2 | 11 | 22 | AC   | 15 | 10 |
| 45859 | 4 | 11583255 | 11583270 | 2 | 8  | 16 | AG   | 19 | 3  |
| 45860 | 4 | 11586804 | 11586831 | 2 | 14 | 28 | CT   | 21 | 10 |
| 45862 | 4 | 11588419 | 11588442 | 4 | 6  | 24 | ACAG | 26 | 3  |
| 45863 | 4 | 11589516 | 11589547 | 2 | 16 | 32 | GT   | 14 | 11 |
| 45864 | 4 | 11589678 | 11589693 | 2 | 8  | 16 | GT   | 19 | 8  |
| 45874 | 4 | 11597211 | 11597226 | 2 | 8  | 16 | CA   | 22 | 4  |
| 45876 | 4 | 11597538 | 11597561 | 2 | 12 | 24 | TG   | 18 | 7  |
| 45877 | 4 | 11599094 | 11599119 | 2 | 13 | 26 | TG   | 16 | 3  |
| 45879 | 4 | 11599275 | 11599295 | 3 | 7  | 21 | GAG  | 12 | 3  |
| 45881 | 4 | 11599584 | 11599601 | 2 | 9  | 18 | CT   | 22 | 4  |
| 45883 | 4 | 11600168 | 11600185 | 3 | 6  | 18 | AGG  | 23 | 5  |
| 45885 | 4 | 11602912 | 11602927 | 2 | 8  | 16 | GT   | 22 | 4  |
| 45888 | 4 | 11619754 | 11619768 | 3 | 5  | 15 | AAC  | 29 | 3  |
| 45892 | 4 | 11627172 | 11627207 | 2 | 18 | 36 | AC   | 18 | 12 |
| 45893 | 4 | 11628868 | 11628881 | 2 | 7  | 14 | TC   | 27 | 3  |
| 45894 | 4 | 11632837 | 11632848 | 2 | 6  | 12 | TG   | 27 | 5  |
| 45896 | 4 | 11648085 | 11648096 | 2 | 6  | 12 | TG   | 29 | 4  |
| 45903 | 4 | 11664096 | 11664117 | 2 | 11 | 22 | AG   | 24 | 4  |
| 45908 | 4 | 11672401 | 11672412 | 2 | 6  | 12 | TG   | 25 | 3  |
| 45909 | 4 | 11674777 | 11674792 | 2 | 8  | 16 | TC   | 21 | 4  |
| 45920 | 4 | 11691294 | 11691305 | 2 | 6  | 12 | CA   | 23 | 3  |
| 45922 | 4 | 11691643 | 11691672 | 2 | 15 | 30 | CA   | 8  | 12 |
| 45928 | 4 | 11705235 | 11705266 | 2 | 16 | 32 | AC   | 14 | 6  |
| 45931 | 4 | 11715907 | 11715927 | 3 | 7  | 21 | TAG  | 11 | 3  |
| 45936 | 4 | 11729967 | 11729982 | 2 | 8  | 16 | AT   | 18 | 5  |
| 45937 | 4 | 11735078 | 11735107 | 2 | 15 | 30 | AC   | 14 | 10 |
| 45939 | 4 | 11744281 | 11744296 | 2 | 8  | 16 | TG   | 24 | 7  |
| 45949 | 4 | 11764697 | 11764712 | 2 | 8  | 16 | CA   | 24 | 6  |
| 45952 | 4 | 11772003 | 11772017 | 3 | 5  | 15 | CAT  | 22 | 4  |

|       |   |          |          |   |    |    |      |    |    |
|-------|---|----------|----------|---|----|----|------|----|----|
| 45957 | 4 | 11790327 | 11790372 | 2 | 23 | 46 | TG   | 11 | 13 |
| 45960 | 4 | 11802448 | 11802459 | 2 | 6  | 12 | GA   | 24 | 4  |
| 45963 | 4 | 11810823 | 11810836 | 2 | 7  | 14 | CA   | 25 | 6  |
| 45966 | 4 | 11817694 | 11817707 | 2 | 7  | 14 | TG   | 31 | 3  |
| 45968 | 4 | 11820746 | 11820795 | 2 | 25 | 50 | AG   | 8  | 7  |
| 45969 | 4 | 11821901 | 11821934 | 2 | 17 | 34 | GT   | 9  | 5  |
| 45970 | 4 | 11823800 | 11823821 | 2 | 11 | 22 | TG   | 22 | 4  |
| 45971 | 4 | 11825109 | 11825130 | 2 | 11 | 22 | GA   | 24 | 4  |
| 45974 | 4 | 11830116 | 11830141 | 2 | 13 | 26 | CA   | 14 | 8  |
| 45977 | 4 | 11834479 | 11834492 | 2 | 7  | 14 | TG   | 17 | 3  |
| 45978 | 4 | 11835693 | 11835710 | 2 | 9  | 18 | CA   | 25 | 4  |
| 45979 | 4 | 11837210 | 11837225 | 2 | 8  | 16 | AC   | 24 | 3  |
| 45982 | 4 | 11841903 | 11841926 | 3 | 8  | 24 | TGA  | 32 | 3  |
| 45996 | 4 | 11865638 | 11865665 | 2 | 14 | 28 | TG   | 8  | 8  |
| 45997 | 4 | 11867005 | 11867022 | 2 | 9  | 18 | AC   | 12 | 8  |
| 46000 | 4 | 11869158 | 11869185 | 2 | 14 | 28 | GT   | 13 | 8  |
| 46002 | 4 | 11870049 | 11870068 | 2 | 10 | 20 | GT   | 19 | 9  |
| 46009 | 4 | 11875645 | 11875670 | 2 | 13 | 26 | GT   | 8  | 11 |
| 46012 | 4 | 11886294 | 11886309 | 2 | 8  | 16 | TC   | 21 | 3  |
| 46013 | 4 | 11892087 | 11892112 | 2 | 13 | 26 | AC   | 10 | 6  |
| 46016 | 4 | 11895870 | 11895895 | 2 | 13 | 26 | GT   | 26 | 6  |
| 46018 | 4 | 11898446 | 11898459 | 2 | 7  | 14 | TG   | 12 | 6  |
| 46022 | 4 | 11901114 | 11901167 | 2 | 27 | 54 | CA   | 12 | 12 |
| 46025 | 4 | 11902290 | 11902309 | 2 | 10 | 20 | CA   | 14 | 3  |
| 46027 | 4 | 11902346 | 11902366 | 3 | 7  | 21 | GCT  | 18 | 3  |
| 46028 | 4 | 11902398 | 11902421 | 2 | 12 | 24 | CA   | 20 | 6  |
| 46032 | 4 | 11909040 | 11909067 | 2 | 14 | 28 | AC   | 23 | 9  |
| 46037 | 4 | 11916686 | 11916709 | 2 | 12 | 24 | GT   | 16 | 8  |
| 46041 | 4 | 11918709 | 11918720 | 2 | 6  | 12 | TC   | 25 | 5  |
| 46044 | 4 | 11925930 | 11925949 | 2 | 10 | 20 | GT   | 20 | 7  |
| 46046 | 4 | 11926743 | 11926754 | 2 | 6  | 12 | CA   | 23 | 6  |
| 46051 | 4 | 11933017 | 11933054 | 2 | 19 | 38 | TG   | 13 | 9  |
| 46054 | 4 | 11935669 | 11935684 | 2 | 8  | 16 | GT   | 17 | 6  |
| 46058 | 4 | 11938198 | 11938223 | 2 | 13 | 26 | AC   | 15 | 8  |
| 46059 | 4 | 11938361 | 11938376 | 2 | 8  | 16 | CA   | 20 | 4  |
| 46062 | 4 | 11944849 | 11944864 | 4 | 4  | 16 | AAAC | 26 | 3  |
| 46063 | 4 | 11948785 | 11948816 | 2 | 16 | 32 | AC   | 17 | 11 |
| 46080 | 4 | 11985700 | 11985717 | 3 | 6  | 18 | ATC  | 23 | 4  |
| 46083 | 4 | 11993033 | 11993056 | 2 | 12 | 24 | AC   | 18 | 11 |
| 46084 | 4 | 11995723 | 11995740 | 3 | 6  | 18 | TCA  | 25 | 4  |
| 46087 | 4 | 12014857 | 12014892 | 4 | 9  | 36 | TATC | 12 | 11 |
| 46089 | 4 | 12022484 | 12022501 | 2 | 9  | 18 | TG   | 21 | 3  |
| 46092 | 4 | 12025643 | 12025678 | 2 | 18 | 36 | CA   | 7  | 11 |
| 46093 | 4 | 12026556 | 12026567 | 2 | 6  | 12 | TG   | 20 | 5  |
| 46100 | 4 | 12040760 | 12040777 | 2 | 9  | 18 | AC   | 23 | 15 |
| 46104 | 4 | 12051138 | 12051161 | 2 | 12 | 24 | TG   | 20 | 6  |
| 46105 | 4 | 12054211 | 12054240 | 3 | 10 | 30 | GAA  | 23 | 9  |
| 46107 | 4 | 12055971 | 12055984 | 2 | 7  | 14 | AC   | 20 | 7  |
| 46108 | 4 | 12056007 | 12056020 | 2 | 7  | 14 | AC   | 21 | 7  |
| 46111 | 4 | 12060295 | 12060336 | 2 | 21 | 42 | TG   | 16 | 11 |
| 46112 | 4 | 12061595 | 12061622 | 2 | 14 | 28 | AC   | 17 | 11 |

|       |   |          |          |   |    |    |      |    |    |
|-------|---|----------|----------|---|----|----|------|----|----|
| 46116 | 4 | 12068332 | 12068345 | 2 | 7  | 14 | GT   | 17 | 3  |
| 46124 | 4 | 12079109 | 12079132 | 2 | 12 | 24 | TC   | 23 | 9  |
| 46125 | 4 | 12082129 | 12082140 | 2 | 6  | 12 | CA   | 26 | 5  |
| 46128 | 4 | 12084751 | 12084765 | 3 | 5  | 15 | TTC  | 31 | 3  |
| 46129 | 4 | 12087320 | 12087335 | 2 | 8  | 16 | AC   | 14 | 4  |
| 46130 | 4 | 12087384 | 12087403 | 2 | 10 | 20 | AC   | 9  | 3  |
| 46131 | 4 | 12088265 | 12088284 | 4 | 5  | 20 | AATT | 12 | 3  |
| 46135 | 4 | 12092722 | 12092737 | 2 | 8  | 16 | GT   | 22 | 9  |
| 46137 | 4 | 12096032 | 12096043 | 2 | 6  | 12 | TG   | 29 | 4  |
| 46138 | 4 | 12101186 | 12101201 | 2 | 8  | 16 | CA   | 15 | 11 |
| 46142 | 4 | 12104245 | 12104264 | 2 | 10 | 20 | AC   | 22 | 10 |
| 46143 | 4 | 12106504 | 12106527 | 2 | 12 | 24 | CA   | 16 | 9  |
| 46144 | 4 | 12106685 | 12106698 | 2 | 7  | 14 | AC   | 27 | 4  |
| 46145 | 4 | 12107000 | 12107023 | 2 | 12 | 24 | AC   | 21 | 8  |
| 46146 | 4 | 12107095 | 12107114 | 2 | 10 | 20 | GT   | 19 | 10 |
| 46150 | 4 | 12114297 | 12114310 | 2 | 7  | 14 | AC   | 24 | 9  |
| 46151 | 4 | 12116825 | 12116860 | 2 | 18 | 36 | CA   | 9  | 11 |
| 46155 | 4 | 12122655 | 12122674 | 2 | 10 | 20 | GT   | 23 | 5  |
| 46167 | 4 | 12132014 | 12132029 | 2 | 8  | 16 | GT   | 24 | 4  |
| 46168 | 4 | 12133683 | 12133706 | 2 | 12 | 24 | CA   | 16 | 7  |
| 46169 | 4 | 12133878 | 12133893 | 2 | 8  | 16 | AC   | 26 | 3  |
| 46181 | 4 | 12151741 | 12151780 | 4 | 10 | 40 | CAAT | 25 | 8  |
| 46188 | 4 | 12159087 | 12159102 | 2 | 8  | 16 | TC   | 27 | 4  |
| 46193 | 4 | 12163639 | 12163680 | 2 | 21 | 42 | AC   | 19 | 17 |
| 46194 | 4 | 12163839 | 12163856 | 2 | 9  | 18 | AC   | 21 | 4  |
| 46195 | 4 | 12164017 | 12164042 | 2 | 13 | 26 | TG   | 17 | 8  |
| 46197 | 4 | 12164825 | 12164836 | 2 | 6  | 12 | TA   | 31 | 3  |
| 46207 | 4 | 12176831 | 12176850 | 2 | 10 | 20 | CA   | 21 | 9  |
| 46208 | 4 | 12177019 | 12177054 | 2 | 18 | 36 | GT   | 16 | 6  |
| 46214 | 4 | 12184864 | 12184887 | 2 | 12 | 24 | GT   | 24 | 13 |
| 46215 | 4 | 12186648 | 12186695 | 2 | 24 | 48 | TG   | 10 | 11 |
| 46217 | 4 | 12188861 | 12188882 | 2 | 11 | 22 | TG   | 13 | 8  |
| 46218 | 4 | 12190481 | 12190536 | 2 | 28 | 56 | TG   | 13 | 11 |
| 46219 | 4 | 12190643 | 12190670 | 2 | 14 | 28 | AC   | 16 | 12 |
| 46220 | 4 | 12192408 | 12192421 | 2 | 7  | 14 | TG   | 28 | 3  |
| 46221 | 4 | 12193210 | 12193229 | 2 | 10 | 20 | GA   | 17 | 6  |
| 46223 | 4 | 12194823 | 12194844 | 2 | 11 | 22 | CA   | 14 | 5  |
| 46224 | 4 | 12197433 | 12197462 | 2 | 15 | 30 | AC   | 8  | 5  |
| 46226 | 4 | 12206350 | 12206379 | 2 | 15 | 30 | CA   | 16 | 11 |
| 46227 | 4 | 12206590 | 12206601 | 2 | 6  | 12 | TG   | 31 | 3  |
| 46228 | 4 | 12206756 | 12206769 | 2 | 7  | 14 | GT   | 28 | 4  |
| 46234 | 4 | 12211248 | 12211285 | 2 | 19 | 38 | GT   | 8  | 8  |
| 46235 | 4 | 12211387 | 12211440 | 2 | 27 | 54 | TG   | 8  | 10 |
| 46239 | 4 | 12223135 | 12223182 | 2 | 24 | 48 | CA   | 8  | 8  |
| 46240 | 4 | 12223214 | 12223227 | 2 | 7  | 14 | AC   | 24 | 4  |
| 46243 | 4 | 12223794 | 12223805 | 2 | 6  | 12 | CA   | 24 | 6  |
| 46244 | 4 | 12224365 | 12224378 | 2 | 7  | 14 | AT   | 9  | 10 |
| 46245 | 4 | 12224379 | 12224392 | 2 | 7  | 14 | AG   | 12 | 9  |
| 46253 | 4 | 12228167 | 12228202 | 2 | 18 | 36 | TG   | 7  | 9  |
| 46270 | 4 | 12242022 | 12242035 | 2 | 7  | 14 | TG   | 22 | 10 |
| 46272 | 4 | 12249102 | 12249125 | 2 | 12 | 24 | GA   | 12 | 6  |

|       |   |          |          |   |    |    |      |    |    |
|-------|---|----------|----------|---|----|----|------|----|----|
| 46273 | 4 | 12249419 | 12249448 | 2 | 15 | 30 | TC   | 21 | 11 |
| 46283 | 4 | 12261986 | 12262005 | 2 | 10 | 20 | GT   | 9  | 7  |
| 46285 | 4 | 12263023 | 12263048 | 2 | 13 | 26 | CA   | 25 | 10 |
| 46289 | 4 | 12266902 | 12266919 | 3 | 6  | 18 | GGA  | 23 | 8  |
| 46295 | 4 | 12277543 | 12277564 | 2 | 11 | 22 | CA   | 16 | 7  |
| 46297 | 4 | 12279449 | 12279493 | 3 | 15 | 45 | TGA  | 17 | 11 |
| 46298 | 4 | 12279938 | 12279965 | 4 | 7  | 28 | AGTT | 23 | 4  |
| 46302 | 4 | 12288847 | 12288874 | 2 | 14 | 28 | AC   | 7  | 3  |
| 46305 | 4 | 12291457 | 12291482 | 2 | 13 | 26 | CA   | 17 | 13 |
| 46307 | 4 | 12292339 | 12292354 | 2 | 8  | 16 | AG   | 24 | 4  |
| 46309 | 4 | 12304281 | 12304304 | 2 | 12 | 24 | CA   | 19 | 5  |
| 46313 | 4 | 12309560 | 12309583 | 2 | 12 | 24 | CA   | 18 | 5  |
| 46316 | 4 | 12310865 | 12310890 | 2 | 13 | 26 | TG   | 22 | 11 |
| 46317 | 4 | 12310928 | 12310941 | 2 | 7  | 14 | TG   | 26 | 3  |
| 46319 | 4 | 12314743 | 12314780 | 2 | 19 | 38 | AC   | 15 | 12 |
| 46320 | 4 | 12316151 | 12316172 | 2 | 11 | 22 | AC   | 16 | 9  |
| 46326 | 4 | 12322520 | 12322535 | 2 | 8  | 16 | CA   | 24 | 8  |
| 46332 | 4 | 12336765 | 12336786 | 2 | 11 | 22 | CT   | 13 | 5  |
| 46343 | 4 | 12365144 | 12365161 | 3 | 6  | 18 | CAG  | 14 | 4  |
| 46346 | 4 | 12368424 | 12368437 | 2 | 7  | 14 | GT   | 22 | 5  |
| 46347 | 4 | 12368505 | 12368522 | 2 | 9  | 18 | CT   | 16 | 6  |
| 46350 | 4 | 12370407 | 12370421 | 3 | 5  | 15 | AAT  | 7  | 6  |
| 46351 | 4 | 12371170 | 12371201 | 2 | 16 | 32 | TG   | 14 | 13 |
| 46352 | 4 | 12373450 | 12373475 | 2 | 13 | 26 | CT   | 18 | 7  |
| 46354 | 4 | 12388146 | 12388159 | 2 | 7  | 14 | AC   | 11 | 9  |
| 46355 | 4 | 12388160 | 12388173 | 2 | 7  | 14 | CA   | 13 | 8  |
| 46358 | 4 | 12396278 | 12396293 | 2 | 8  | 16 | CA   | 25 | 6  |
| 46360 | 4 | 12400665 | 12400680 | 2 | 8  | 16 | GT   | 6  | 7  |
| 46365 | 4 | 12404782 | 12404799 | 2 | 9  | 18 | CA   | 17 | 6  |
| 46372 | 4 | 12407606 | 12407629 | 2 | 12 | 24 | CA   | 8  | 7  |
| 46378 | 4 | 12410837 | 12410850 | 2 | 7  | 14 | CG   | 24 | 14 |
| 46379 | 4 | 12410851 | 12410864 | 2 | 7  | 14 | CA   | 24 | 15 |
| 46385 | 4 | 12418318 | 12418349 | 2 | 16 | 32 | AC   | 15 | 10 |
| 46386 | 4 | 12419209 | 12419228 | 2 | 10 | 20 | GT   | 14 | 9  |
| 46394 | 4 | 12423215 | 12423242 | 2 | 14 | 28 | GT   | 14 | 6  |
| 46398 | 4 | 12427233 | 12427258 | 2 | 13 | 26 | TG   | 13 | 5  |
| 46402 | 4 | 12432307 | 12432320 | 2 | 7  | 14 | GT   | 24 | 4  |
| 46404 | 4 | 12435456 | 12435473 | 3 | 6  | 18 | AAC  | 12 | 3  |
| 46407 | 4 | 12438013 | 12438052 | 2 | 20 | 40 | AC   | 11 | 11 |
| 46409 | 4 | 12447524 | 12447563 | 2 | 20 | 40 | TG   | 6  | 7  |
| 46411 | 4 | 12451303 | 12451324 | 2 | 11 | 22 | AC   | 16 | 9  |
| 46412 | 4 | 12452357 | 12452368 | 2 | 6  | 12 | GT   | 27 | 5  |
| 46414 | 4 | 12452591 | 12452618 | 2 | 14 | 28 | AC   | 12 | 7  |
| 46418 | 4 | 12459962 | 12459983 | 2 | 11 | 22 | CA   | 7  | 8  |
| 46419 | 4 | 12466164 | 12466179 | 2 | 8  | 16 | GA   | 18 | 6  |
| 46422 | 4 | 12471456 | 12471467 | 2 | 6  | 12 | CA   | 30 | 4  |
| 46423 | 4 | 12474989 | 12475000 | 2 | 6  | 12 | CA   | 16 | 6  |
| 46424 | 4 | 12478392 | 12478417 | 2 | 13 | 26 | TG   | 12 | 8  |
| 46426 | 4 | 12487973 | 12487984 | 2 | 6  | 12 | GT   | 24 | 4  |
| 46441 | 4 | 12525281 | 12525324 | 2 | 22 | 44 | TG   | 18 | 13 |
| 46444 | 4 | 12526822 | 12526837 | 4 | 4  | 16 | CTCA | 27 | 3  |

|       |   |          |          |   |    |    |     |    |    |
|-------|---|----------|----------|---|----|----|-----|----|----|
| 46448 | 4 | 12533930 | 12533955 | 2 | 13 | 26 | CA  | 14 | 8  |
| 46450 | 4 | 12539819 | 12539832 | 2 | 7  | 14 | AG  | 25 | 3  |
| 46451 | 4 | 12543100 | 12543117 | 3 | 6  | 18 | GCT | 27 | 3  |
| 46453 | 4 | 12543620 | 12543631 | 2 | 6  | 12 | GT  | 31 | 5  |
| 46454 | 4 | 12543702 | 12543723 | 2 | 11 | 22 | CA  | 19 | 7  |
| 46461 | 4 | 12554430 | 12554451 | 2 | 11 | 22 | TG  | 10 | 10 |
| 46464 | 4 | 12567172 | 12567192 | 3 | 7  | 21 | GAA | 28 | 4  |
| 46466 | 4 | 12576576 | 12576589 | 2 | 7  | 14 | TG  | 16 | 7  |
| 46474 | 4 | 12593539 | 12593550 | 2 | 6  | 12 | TC  | 18 | 8  |
| 46478 | 4 | 12598135 | 12598154 | 2 | 10 | 20 | TG  | 22 | 8  |
| 46479 | 4 | 12600567 | 12600584 | 2 | 9  | 18 | TG  | 22 | 9  |
| 46480 | 4 | 12600856 | 12600879 | 2 | 12 | 24 | TG  | 14 | 7  |
| 46481 | 4 | 12601864 | 12601877 | 2 | 7  | 14 | GT  | 23 | 7  |
| 46482 | 4 | 12603537 | 12603558 | 2 | 11 | 22 | CA  | 16 | 6  |
| 46484 | 4 | 12604037 | 12604052 | 2 | 8  | 16 | GT  | 14 | 7  |
| 46486 | 4 | 12604469 | 12604492 | 2 | 12 | 24 | AC  | 15 | 6  |
| 46487 | 4 | 12607236 | 12607249 | 2 | 7  | 14 | GT  | 22 | 5  |
| 46488 | 4 | 12607405 | 12607444 | 2 | 20 | 40 | CA  | 15 | 13 |
| 46500 | 4 | 12614353 | 12614366 | 2 | 7  | 14 | AG  | 25 | 6  |
| 46503 | 4 | 12615837 | 12615856 | 2 | 10 | 20 | GT  | 19 | 3  |
| 46505 | 4 | 12616408 | 12616419 | 2 | 6  | 12 | GT  | 28 | 4  |
| 46506 | 4 | 12616962 | 12616977 | 2 | 8  | 16 | GT  | 22 | 4  |
| 46507 | 4 | 12619340 | 12619357 | 3 | 6  | 18 | CTG | 25 | 3  |
| 46513 | 4 | 12625618 | 12625633 | 2 | 8  | 16 | GT  | 16 | 11 |
| 46529 | 4 | 12638028 | 12638043 | 2 | 8  | 16 | GT  | 24 | 7  |
| 46531 | 4 | 12640085 | 12640100 | 2 | 8  | 16 | AC  | 21 | 4  |
| 46539 | 4 | 12645794 | 12645823 | 2 | 15 | 30 | GT  | 13 | 8  |
| 46542 | 4 | 12646110 | 12646160 | 3 | 17 | 51 | CAT | 22 | 7  |
| 46543 | 4 | 12647143 | 12647170 | 2 | 14 | 28 | AC  | 14 | 11 |
| 46549 | 4 | 12649483 | 12649514 | 2 | 16 | 32 | CA  | 11 | 15 |
| 46551 | 4 | 12651780 | 12651793 | 2 | 7  | 14 | TG  | 19 | 6  |
| 46553 | 4 | 12652701 | 12652718 | 2 | 9  | 18 | CA  | 15 | 9  |
| 46554 | 4 | 12653312 | 12653325 | 2 | 7  | 14 | TG  | 20 | 7  |
| 46555 | 4 | 12653472 | 12653501 | 3 | 10 | 30 | GGA | 9  | 9  |
| 46556 | 4 | 12653621 | 12653635 | 3 | 5  | 15 | GCG | 21 | 7  |
| 46557 | 4 | 12653954 | 12653971 | 2 | 9  | 18 | AC  | 18 | 10 |
| 46558 | 4 | 12654083 | 12654114 | 2 | 16 | 32 | GT  | 14 | 11 |
| 46559 | 4 | 12654278 | 12654307 | 2 | 15 | 30 | CA  | 15 | 16 |
| 46560 | 4 | 12655756 | 12655771 | 2 | 8  | 16 | TG  | 18 | 6  |
| 46561 | 4 | 12655935 | 12655966 | 2 | 16 | 32 | TG  | 19 | 8  |
| 46565 | 4 | 12658540 | 12658551 | 2 | 6  | 12 | AC  | 30 | 4  |
| 46566 | 4 | 12658857 | 12658870 | 2 | 7  | 14 | CA  | 21 | 6  |
| 46571 | 4 | 12660825 | 12660836 | 2 | 6  | 12 | AC  | 22 | 4  |
| 46572 | 4 | 12661222 | 12661237 | 2 | 8  | 16 | CA  | 25 | 3  |
| 46573 | 4 | 12661954 | 12661974 | 3 | 7  | 21 | AAT | 19 | 5  |
| 46576 | 4 | 12663463 | 12663486 | 2 | 12 | 24 | AC  | 17 | 10 |
| 46577 | 4 | 12665007 | 12665033 | 3 | 9  | 27 | CTC | 31 | 3  |
| 46578 | 4 | 12665104 | 12665117 | 2 | 7  | 14 | AC  | 25 | 4  |
| 46580 | 4 | 12667518 | 12667541 | 2 | 12 | 24 | TG  | 16 | 12 |
| 46581 | 4 | 12667663 | 12667674 | 2 | 6  | 12 | GT  | 27 | 4  |
| 46586 | 4 | 12668758 | 12668775 | 2 | 9  | 18 | CA  | 21 | 6  |

|       |   |          |          |   |    |    |      |    |    |
|-------|---|----------|----------|---|----|----|------|----|----|
| 46587 | 4 | 12668931 | 12668946 | 2 | 8  | 16 | AC   | 27 | 4  |
| 46595 | 4 | 12673482 | 12673511 | 2 | 15 | 30 | AC   | 12 | 9  |
| 46597 | 4 | 12675258 | 12675269 | 2 | 6  | 12 | AT   | 31 | 4  |
| 46601 | 4 | 12677137 | 12677156 | 2 | 10 | 20 | AC   | 25 | 7  |
| 46603 | 4 | 12677519 | 12677536 | 2 | 9  | 18 | CA   | 15 | 4  |
| 46608 | 4 | 12679359 | 12679376 | 2 | 9  | 18 | CA   | 24 | 12 |
| 46619 | 4 | 12686025 | 12686038 | 2 | 7  | 14 | AC   | 18 | 3  |
| 46620 | 4 | 12687277 | 12687314 | 2 | 19 | 38 | CA   | 17 | 10 |
| 46621 | 4 | 12687603 | 12687626 | 2 | 12 | 24 | AC   | 9  | 9  |
| 46623 | 4 | 12688597 | 12688612 | 2 | 8  | 16 | CA   | 27 | 13 |
| 46624 | 4 | 12688732 | 12688745 | 2 | 7  | 14 | CA   | 22 | 8  |
| 46625 | 4 | 12688798 | 12688815 | 2 | 9  | 18 | AC   | 18 | 9  |
| 46626 | 4 | 12688934 | 12688963 | 2 | 15 | 30 | CA   | 18 | 7  |
| 46628 | 4 | 12689461 | 12689476 | 2 | 8  | 16 | AC   | 16 | 9  |
| 46629 | 4 | 12690034 | 12690049 | 2 | 8  | 16 | CA   | 26 | 6  |
| 46632 | 4 | 12691328 | 12691345 | 2 | 9  | 18 | AC   | 25 | 9  |
| 46634 | 4 | 12691790 | 12691810 | 3 | 7  | 21 | CTT  | 21 | 7  |
| 46635 | 4 | 12692255 | 12692272 | 2 | 9  | 18 | TC   | 11 | 12 |
| 46636 | 4 | 12692659 | 12692670 | 2 | 6  | 12 | GT   | 20 | 15 |
| 46637 | 4 | 12692845 | 12692862 | 2 | 9  | 18 | AC   | 23 | 17 |
| 46638 | 4 | 12694550 | 12694563 | 2 | 7  | 14 | AG   | 34 | 8  |
| 46660 | 4 | 12735878 | 12735889 | 2 | 6  | 12 | CA   | 23 | 3  |
| 46661 | 4 | 12735892 | 12735903 | 2 | 6  | 12 | CA   | 26 | 6  |
| 46664 | 4 | 12743292 | 12743311 | 4 | 5  | 20 | CAGA | 28 | 7  |
| 46665 | 4 | 12751070 | 12751081 | 2 | 6  | 12 | AC   | 31 | 3  |
| 46667 | 4 | 12755349 | 12755372 | 2 | 12 | 24 | AC   | 22 | 8  |
| 46669 | 4 | 12757558 | 12757573 | 4 | 4  | 16 | AATA | 29 | 11 |
| 46676 | 4 | 12771348 | 12771379 | 2 | 16 | 32 | TG   | 14 | 8  |
| 46677 | 4 | 12771507 | 12771536 | 2 | 15 | 30 | CA   | 15 | 12 |
| 46678 | 4 | 12771634 | 12771649 | 2 | 8  | 16 | AG   | 27 | 6  |
| 46679 | 4 | 12772202 | 12772229 | 2 | 14 | 28 | GT   | 12 | 12 |
| 46682 | 4 | 12774272 | 12774321 | 2 | 25 | 50 | TG   | 10 | 9  |
| 46683 | 4 | 12776106 | 12776119 | 2 | 7  | 14 | GT   | 21 | 4  |
| 46691 | 4 | 12777442 | 12777463 | 2 | 11 | 22 | GT   | 25 | 6  |
| 46692 | 4 | 12779601 | 12779632 | 2 | 16 | 32 | AC   | 18 | 9  |
| 46694 | 4 | 12782505 | 12782540 | 2 | 18 | 36 | GA   | 9  | 11 |
| 46696 | 4 | 12783981 | 12784012 | 2 | 16 | 32 | GT   | 16 | 7  |
| 46699 | 4 | 12787601 | 12787642 | 2 | 21 | 42 | CA   | 6  | 5  |
| 46701 | 4 | 12790050 | 12790093 | 2 | 22 | 44 | CA   | 14 | 12 |
| 46708 | 4 | 12797758 | 12797784 | 3 | 9  | 27 | TCT  | 18 | 4  |
| 46711 | 4 | 12799063 | 12799077 | 3 | 5  | 15 | CTT  | 14 | 3  |
| 46714 | 4 | 12803969 | 12803998 | 2 | 15 | 30 | CA   | 10 | 9  |
| 46717 | 4 | 12804741 | 12804758 | 2 | 9  | 18 | CA   | 24 | 3  |
| 46720 | 4 | 12806639 | 12806656 | 3 | 6  | 18 | TGC  | 29 | 3  |
| 46721 | 4 | 12807112 | 12807129 | 3 | 6  | 18 | GAG  | 15 | 6  |
| 46722 | 4 | 12807394 | 12807411 | 2 | 9  | 18 | AC   | 21 | 5  |
| 46724 | 4 | 12808009 | 12808042 | 2 | 17 | 34 | CT   | 12 | 8  |
| 46725 | 4 | 12808204 | 12808243 | 2 | 20 | 40 | GT   | 6  | 9  |
| 46726 | 4 | 12809066 | 12809079 | 2 | 7  | 14 | CA   | 24 | 4  |
| 46727 | 4 | 12811735 | 12811762 | 2 | 14 | 28 | AC   | 21 | 9  |
| 46728 | 4 | 12813796 | 12813816 | 3 | 7  | 21 | TGT  | 33 | 3  |

|       |   |          |          |   |    |    |      |    |    |
|-------|---|----------|----------|---|----|----|------|----|----|
| 46734 | 4 | 12814809 | 12814824 | 2 | 8  | 16 | GT   | 17 | 15 |
| 46746 | 4 | 12827411 | 12827432 | 2 | 11 | 22 | TG   | 13 | 5  |
| 46747 | 4 | 12830639 | 12830662 | 2 | 12 | 24 | TG   | 11 | 13 |
| 46752 | 4 | 12836166 | 12836183 | 2 | 9  | 18 | AC   | 20 | 6  |
| 46755 | 4 | 12839570 | 12839595 | 2 | 13 | 26 | CA   | 8  | 5  |
| 46758 | 4 | 12841151 | 12841166 | 2 | 8  | 16 | TG   | 24 | 4  |
| 46759 | 4 | 12841664 | 12841697 | 2 | 17 | 34 | CA   | 19 | 8  |
| 46760 | 4 | 12843605 | 12843620 | 2 | 8  | 16 | AC   | 10 | 9  |
| 46762 | 4 | 12844007 | 12844028 | 2 | 11 | 22 | AC   | 20 | 9  |
| 46764 | 4 | 12845828 | 12845863 | 2 | 18 | 36 | AC   | 10 | 7  |
| 46768 | 4 | 12849268 | 12849293 | 2 | 13 | 26 | GT   | 19 | 10 |
| 46775 | 4 | 12852957 | 12852988 | 2 | 16 | 32 | TG   | 16 | 11 |
| 46777 | 4 | 12854901 | 12854918 | 2 | 9  | 18 | CA   | 18 | 6  |
| 46778 | 4 | 12855446 | 12855463 | 2 | 9  | 18 | CT   | 14 | 6  |
| 46780 | 4 | 12855959 | 12855986 | 2 | 14 | 28 | CA   | 18 | 7  |
| 46781 | 4 | 12857257 | 12857278 | 2 | 11 | 22 | CA   | 16 | 6  |
| 46784 | 4 | 12857745 | 12857762 | 2 | 9  | 18 | AG   | 19 | 5  |
| 46786 | 4 | 12862944 | 12862961 | 2 | 9  | 18 | GT   | 16 | 9  |
| 46787 | 4 | 12864199 | 12864219 | 3 | 7  | 21 | TCC  | 18 | 4  |
| 46789 | 4 | 12865449 | 12865472 | 2 | 12 | 24 | CA   | 27 | 7  |
| 46792 | 4 | 12869795 | 12869812 | 2 | 9  | 18 | CA   | 21 | 8  |
| 46794 | 4 | 12875395 | 12875414 | 2 | 10 | 20 | CA   | 17 | 6  |
| 46796 | 4 | 12876035 | 12876074 | 2 | 20 | 40 | CA   | 10 | 13 |
| 46800 | 4 | 12880720 | 12880737 | 3 | 6  | 18 | CTG  | 24 | 6  |
| 46808 | 4 | 12890778 | 12890799 | 2 | 11 | 22 | CA   | 18 | 8  |
| 46809 | 4 | 12891265 | 12891296 | 4 | 8  | 32 | TTCT | 21 | 14 |
| 46810 | 4 | 12893435 | 12893452 | 2 | 9  | 18 | GT   | 6  | 7  |
| 46813 | 4 | 12897574 | 12897585 | 2 | 6  | 12 | CA   | 19 | 7  |
| 46822 | 4 | 12902371 | 12902404 | 2 | 17 | 34 | AC   | 22 | 17 |
| 46824 | 4 | 12904836 | 12904853 | 2 | 9  | 18 | GT   | 21 | 5  |
| 46829 | 4 | 12916445 | 12916480 | 2 | 18 | 36 | GT   | 19 | 10 |
| 46830 | 4 | 12919833 | 12919846 | 2 | 7  | 14 | GT   | 26 | 5  |
| 46834 | 4 | 12922508 | 12922539 | 2 | 16 | 32 | CA   | 15 | 10 |
| 46841 | 4 | 12932134 | 12932147 | 2 | 7  | 14 | CA   | 25 | 8  |
| 46843 | 4 | 12932337 | 12932364 | 2 | 14 | 28 | CA   | 15 | 10 |
| 46849 | 4 | 12947052 | 12947063 | 2 | 6  | 12 | CA   | 24 | 4  |
| 46851 | 4 | 12956716 | 12956729 | 2 | 7  | 14 | GT   | 18 | 15 |
| 46854 | 4 | 12958821 | 12958882 | 2 | 31 | 62 | GA   | 11 | 11 |
| 46855 | 4 | 12960826 | 12960843 | 2 | 9  | 18 | GA   | 25 | 4  |
| 46858 | 4 | 12966246 | 12966261 | 2 | 8  | 16 | AC   | 19 | 8  |
| 46859 | 4 | 12966397 | 12966424 | 2 | 14 | 28 | AC   | 14 | 8  |
| 46864 | 4 | 12976323 | 12976334 | 2 | 6  | 12 | GT   | 29 | 4  |
| 46867 | 4 | 12993350 | 12993373 | 2 | 12 | 24 | CT   | 13 | 6  |
| 46874 | 4 | 12998648 | 12998661 | 2 | 7  | 14 | AC   | 21 | 3  |
| 46881 | 4 | 13024220 | 13024231 | 2 | 6  | 12 | AT   | 24 | 3  |
| 46885 | 4 | 13030147 | 13030178 | 2 | 16 | 32 | AC   | 7  | 11 |
| 46886 | 4 | 13031057 | 13031074 | 2 | 9  | 18 | TG   | 24 | 11 |
| 46887 | 4 | 13033770 | 13033797 | 2 | 14 | 28 | GT   | 23 | 11 |
| 46888 | 4 | 13034660 | 13034681 | 2 | 11 | 22 | AC   | 19 | 8  |
| 46889 | 4 | 13036792 | 13036819 | 2 | 14 | 28 | TG   | 18 | 9  |
| 46890 | 4 | 13036981 | 13036992 | 2 | 6  | 12 | TG   | 25 | 8  |

|       |   |          |          |   |    |    |      |    |    |
|-------|---|----------|----------|---|----|----|------|----|----|
| 46891 | 4 | 13037982 | 13038007 | 2 | 13 | 26 | AC   | 14 | 16 |
| 46894 | 4 | 13038595 | 13038616 | 2 | 11 | 22 | CA   | 17 | 9  |
| 46895 | 4 | 13038653 | 13038670 | 2 | 9  | 18 | AC   | 19 | 10 |
| 46896 | 4 | 13039104 | 13039130 | 3 | 9  | 27 | CCT  | 23 | 8  |
| 46898 | 4 | 13048630 | 13048645 | 2 | 8  | 16 | TG   | 20 | 3  |
| 46900 | 4 | 13049748 | 13049765 | 2 | 9  | 18 | TG   | 14 | 10 |
| 46901 | 4 | 13051424 | 13051447 | 2 | 12 | 24 | TG   | 18 | 9  |
| 46904 | 4 | 13058380 | 13058395 | 2 | 8  | 16 | GT   | 9  | 4  |
| 46916 | 4 | 13080247 | 13080264 | 2 | 9  | 18 | AC   | 19 | 7  |
| 46924 | 4 | 13103509 | 13103520 | 2 | 6  | 12 | CA   | 7  | 9  |
| 46925 | 4 | 13103807 | 13103822 | 2 | 8  | 16 | CA   | 19 | 7  |
| 46927 | 4 | 13104683 | 13104702 | 2 | 10 | 20 | CA   | 15 | 9  |
| 46929 | 4 | 13106774 | 13106787 | 2 | 7  | 14 | AC   | 22 | 6  |
| 46932 | 4 | 13111616 | 13111635 | 2 | 10 | 20 | TG   | 11 | 11 |
| 46933 | 4 | 13113313 | 13113340 | 2 | 14 | 28 | CA   | 21 | 5  |
| 46935 | 4 | 13114590 | 13114617 | 2 | 14 | 28 | TG   | 18 | 11 |
| 46936 | 4 | 13114845 | 13114866 | 2 | 11 | 22 | GT   | 17 | 9  |
| 46937 | 4 | 13114991 | 13115010 | 2 | 10 | 20 | GT   | 19 | 11 |
| 46939 | 4 | 13117193 | 13117246 | 2 | 27 | 54 | TG   | 10 | 14 |
| 46942 | 4 | 13122839 | 13122858 | 2 | 10 | 20 | TG   | 27 | 10 |
| 46943 | 4 | 13123079 | 13123098 | 2 | 10 | 20 | TG   | 17 | 12 |
| 46946 | 4 | 13125360 | 13125381 | 2 | 11 | 22 | CT   | 17 | 6  |
| 46950 | 4 | 13129128 | 13129157 | 2 | 15 | 30 | GT   | 7  | 7  |
| 46951 | 4 | 13129555 | 13129570 | 2 | 8  | 16 | GA   | 16 | 3  |
| 46955 | 4 | 13134887 | 13134910 | 3 | 8  | 24 | CAG  | 18 | 5  |
| 46961 | 4 | 13145603 | 13145632 | 2 | 15 | 30 | GT   | 12 | 14 |
| 46963 | 4 | 13145788 | 13145809 | 2 | 11 | 22 | TG   | 19 | 7  |
| 46964 | 4 | 13146103 | 13146114 | 2 | 6  | 12 | GT   | 19 | 12 |
| 46965 | 4 | 13146117 | 13146132 | 2 | 8  | 16 | GT   | 15 | 11 |
| 46966 | 4 | 13148037 | 13148052 | 2 | 8  | 16 | TG   | 25 | 9  |
| 46968 | 4 | 13149576 | 13149601 | 2 | 13 | 26 | GT   | 17 | 6  |
| 46969 | 4 | 13150118 | 13150137 | 4 | 5  | 20 | GA   | 29 | 5  |
| 46970 | 4 | 13150219 | 13150240 | 2 | 11 | 22 | GT   | 15 | 6  |
| 46971 | 4 | 13154424 | 13154441 | 2 | 9  | 18 | GT   | 17 | 7  |
| 46974 | 4 | 13158974 | 13158989 | 4 | 4  | 16 | TACT | 29 | 5  |
| 46977 | 4 | 13164553 | 13164574 | 2 | 11 | 22 | AC   | 21 | 6  |
| 46983 | 4 | 13180083 | 13180112 | 2 | 15 | 30 | TG   | 12 | 12 |
| 46988 | 4 | 13186999 | 13187016 | 2 | 9  | 18 | GT   | 21 | 5  |
| 46989 | 4 | 13187543 | 13187564 | 2 | 11 | 22 | GT   | 16 | 9  |
| 46990 | 4 | 13194177 | 13194194 | 2 | 9  | 18 | TG   | 25 | 6  |
| 46991 | 4 | 13195799 | 13195824 | 2 | 13 | 26 | TG   | 18 | 10 |
| 46992 | 4 | 13195942 | 13195955 | 2 | 7  | 14 | AC   | 27 | 3  |
| 46993 | 4 | 13198037 | 13198054 | 3 | 6  | 18 | TCA  | 23 | 3  |
| 46997 | 4 | 13204758 | 13204787 | 3 | 10 | 30 | ATC  | 21 | 7  |
| 46999 | 4 | 13211699 | 13211710 | 2 | 6  | 12 | AT   | 8  | 4  |
| 47000 | 4 | 13212766 | 13212785 | 2 | 10 | 20 | CA   | 24 | 8  |
| 47002 | 4 | 13218073 | 13218108 | 4 | 9  | 36 | AGAT | 22 | 8  |
| 47004 | 4 | 13219119 | 13219142 | 2 | 12 | 24 | GT   | 23 | 10 |
| 47005 | 4 | 13219581 | 13219602 | 2 | 11 | 22 | AC   | 17 | 8  |
| 47006 | 4 | 13220470 | 13220481 | 2 | 6  | 12 | TG   | 29 | 3  |
| 47007 | 4 | 13225587 | 13225608 | 2 | 11 | 22 | TG   | 16 | 6  |



|       |   |          |          |   |    |    |      |    |    |
|-------|---|----------|----------|---|----|----|------|----|----|
| 47008 | 4 | 13225697 | 13225716 | 2 | 10 | 20 | TG   | 20 | 4  |
| 47015 | 4 | 13240503 | 13240514 | 2 | 6  | 12 | AG   | 23 | 3  |
| 47016 | 4 | 13240628 | 13240641 | 2 | 7  | 14 | CT   | 25 | 3  |
| 47017 | 4 | 13242839 | 13242856 | 2 | 9  | 18 | AC   | 20 | 7  |
| 47018 | 4 | 13243830 | 13243873 | 2 | 22 | 44 | GT   | 17 | 15 |
| 47021 | 4 | 13244857 | 13244874 | 2 | 9  | 18 | AC   | 15 | 8  |
| 47025 | 4 | 13245143 | 13245158 | 2 | 8  | 16 | CT   | 21 | 5  |
| 47031 | 4 | 13268435 | 13268454 | 2 | 10 | 20 | TG   | 26 | 15 |
| 47034 | 4 | 13271161 | 13271188 | 2 | 14 | 28 | TG   | 13 | 11 |
| 47038 | 4 | 13284557 | 13284570 | 2 | 7  | 14 | CA   | 34 | 3  |
| 47039 | 4 | 13288015 | 13288030 | 2 | 8  | 16 | GT   | 21 | 3  |
| 47040 | 4 | 13288123 | 13288146 | 2 | 12 | 24 | GT   | 19 | 5  |
| 47048 | 4 | 13303487 | 13303522 | 2 | 18 | 36 | CT   | 15 | 12 |
| 47050 | 4 | 13308979 | 13309008 | 2 | 15 | 30 | CA   | 15 | 18 |
| 47051 | 4 | 13311028 | 13311045 | 2 | 9  | 18 | CA   | 30 | 9  |
| 47054 | 4 | 13315455 | 13315475 | 3 | 7  | 21 | TTG  | 29 | 3  |
| 47055 | 4 | 13316252 | 13316267 | 2 | 8  | 16 | CT   | 20 | 6  |
| 47066 | 4 | 13340049 | 13340066 | 2 | 9  | 18 | GT   | 14 | 6  |
| 47067 | 4 | 13340136 | 13340147 | 2 | 6  | 12 | GA   | 27 | 7  |
| 47068 | 4 | 13340150 | 13340161 | 2 | 6  | 12 | GA   | 23 | 4  |
| 47069 | 4 | 13340631 | 13340654 | 4 | 6  | 24 | TTCT | 6  | 7  |
| 47076 | 4 | 13342975 | 13343002 | 2 | 14 | 28 | GT   | 10 | 6  |
| 47077 | 4 | 13343827 | 13343856 | 2 | 15 | 30 | GT   | 12 | 12 |
| 47081 | 4 | 13350193 | 13350206 | 2 | 7  | 14 | CA   | 23 | 5  |
| 47084 | 4 | 13358936 | 13358963 | 4 | 7  | 28 | ATAG | 22 | 6  |
| 47092 | 4 | 13382202 | 13382216 | 3 | 5  | 15 | TCC  | 22 | 5  |
| 47101 | 4 | 13398139 | 13398152 | 2 | 7  | 14 | AC   | 19 | 5  |
| 47103 | 4 | 13400451 | 13400466 | 4 | 4  | 16 | AATT | 12 | 4  |
| 47105 | 4 | 13401286 | 13401311 | 2 | 13 | 26 | CA   | 18 | 13 |
| 47106 | 4 | 13401885 | 13401900 | 2 | 8  | 16 | TG   | 14 | 12 |
| 47107 | 4 | 13402015 | 13402050 | 2 | 18 | 36 | GT   | 20 | 12 |
| 47112 | 4 | 13403405 | 13403418 | 2 | 7  | 14 | CA   | 13 | 3  |
| 47116 | 4 | 13411439 | 13411464 | 2 | 13 | 26 | AC   | 14 | 11 |
| 47120 | 4 | 13433042 | 13433061 | 2 | 10 | 20 | GT   | 13 | 9  |
| 47121 | 4 | 13434371 | 13434394 | 2 | 12 | 24 | TG   | 20 | 10 |
| 47125 | 4 | 13440718 | 13440751 | 2 | 17 | 34 | AC   | 20 | 13 |
| 47129 | 4 | 13446339 | 13446352 | 2 | 7  | 14 | TG   | 25 | 3  |
| 47140 | 4 | 13459720 | 13459737 | 2 | 9  | 18 | TG   | 21 | 6  |
| 47141 | 4 | 13459865 | 13459880 | 2 | 8  | 16 | AC   | 25 | 7  |
| 47143 | 4 | 13462907 | 13462922 | 2 | 8  | 16 | GT   | 20 | 5  |
| 47144 | 4 | 13465195 | 13465226 | 2 | 16 | 32 | GT   | 19 | 10 |
| 47152 | 4 | 13487615 | 13487632 | 3 | 6  | 18 | TCC  | 33 | 3  |
| 47156 | 4 | 13504909 | 13504920 | 2 | 6  | 12 | AC   | 27 | 4  |
| 47162 | 4 | 13518557 | 13518574 | 2 | 9  | 18 | GT   | 16 | 7  |
| 47167 | 4 | 13527676 | 13527687 | 2 | 6  | 12 | CT   | 28 | 4  |
| 47170 | 4 | 13535845 | 13535876 | 2 | 16 | 32 | TG   | 21 | 12 |
| 47177 | 4 | 13548620 | 13548657 | 2 | 19 | 38 | TG   | 13 | 13 |
| 47182 | 4 | 13564384 | 13564395 | 2 | 6  | 12 | AT   | 28 | 3  |
| 47183 | 4 | 13571597 | 13571618 | 2 | 11 | 22 | AC   | 8  | 10 |
| 47185 | 4 | 13578327 | 13578344 | 2 | 9  | 18 | TG   | 19 | 10 |
| 47186 | 4 | 13578536 | 13578567 | 2 | 16 | 32 | GT   | 11 | 11 |

|       |   |          |          |   |    |    |      |    |    |
|-------|---|----------|----------|---|----|----|------|----|----|
| 47195 | 4 | 13591176 | 13591199 | 2 | 12 | 24 | GT   | 15 | 7  |
| 47196 | 4 | 13591344 | 13591373 | 2 | 15 | 30 | TG   | 10 | 6  |
| 47198 | 4 | 13593322 | 13593357 | 2 | 18 | 36 | CA   | 11 | 5  |
| 47199 | 4 | 13594410 | 13594435 | 2 | 13 | 26 | AC   | 8  | 10 |
| 47203 | 4 | 13598617 | 13598646 | 2 | 15 | 30 | TG   | 15 | 9  |
| 47208 | 4 | 13606608 | 13606635 | 2 | 14 | 28 | AC   | 9  | 7  |
| 47209 | 4 | 13607063 | 13607082 | 4 | 5  | 20 | CTGC | 30 | 3  |
| 47212 | 4 | 13613244 | 13613258 | 3 | 5  | 15 | TAA  | 10 | 4  |
| 47213 | 4 | 13616175 | 13616198 | 3 | 8  | 24 | GTT  | 27 | 11 |
| 47220 | 4 | 13629631 | 13629652 | 2 | 11 | 22 | TG   | 16 | 10 |
| 47221 | 4 | 13630838 | 13630857 | 2 | 10 | 20 | CA   | 14 | 5  |
| 47226 | 4 | 13635589 | 13635612 | 3 | 8  | 24 | CTG  | 21 | 5  |
| 47228 | 4 | 13640120 | 13640149 | 3 | 10 | 30 | TTA  | 6  | 8  |
| 47229 | 4 | 13643957 | 13643968 | 2 | 6  | 12 | AT   | 26 | 3  |
| 47232 | 4 | 13662819 | 13662830 | 2 | 6  | 12 | GT   | 19 | 5  |
| 47241 | 4 | 13703990 | 13704005 | 2 | 8  | 16 | TC   | 29 | 4  |
| 47245 | 4 | 13713031 | 13713048 | 2 | 9  | 18 | GT   | 19 | 9  |
| 47265 | 4 | 13763612 | 13763659 | 4 | 12 | 48 | AGAT | 13 | 10 |
| 47267 | 4 | 13764710 | 13764725 | 4 | 4  | 16 | AAAT | 19 | 4  |
| 47268 | 4 | 13764979 | 13764992 | 2 | 7  | 14 | CA   | 22 | 4  |
| 47271 | 4 | 13771564 | 13771587 | 4 | 6  | 24 | AAAT | 18 | 4  |
| 47275 | 4 | 13786633 | 13786647 | 3 | 5  | 15 | AAG  | 29 | 3  |
| 47276 | 4 | 13787264 | 13787283 | 4 | 5  | 20 | CTTT | 25 | 9  |
| 47283 | 4 | 13807132 | 13807183 | 4 | 13 | 52 | TGTA | 9  | 7  |
| 47289 | 4 | 13824150 | 13824167 | 3 | 6  | 18 | GGA  | 10 | 9  |
| 47294 | 4 | 13837307 | 13837327 | 3 | 7  | 21 | CAG  | 28 | 3  |
| 47302 | 4 | 13849573 | 13849602 | 2 | 15 | 30 | GT   | 21 | 9  |
| 47305 | 4 | 13856410 | 13856429 | 4 | 5  | 20 | AATC | 17 | 4  |
| 47311 | 4 | 13872727 | 13872744 | 2 | 9  | 18 | GT   | 23 | 4  |
| 47315 | 4 | 13875056 | 13875071 | 2 | 8  | 16 | GT   | 33 | 3  |
| 47316 | 4 | 13881532 | 13881552 | 3 | 7  | 21 | CAG  | 25 | 6  |
| 47337 | 4 | 13937677 | 13937694 | 2 | 9  | 18 | TA   | 7  | 6  |
| 47338 | 4 | 13938023 | 13938038 | 4 | 4  | 16 | ATTG | 12 | 5  |
| 47346 | 4 | 13953339 | 13953356 | 2 | 9  | 18 | AC   | 12 | 11 |
| 47348 | 4 | 13956415 | 13956447 | 3 | 11 | 33 | AGG  | 16 | 4  |
| 47362 | 4 | 13979313 | 13979327 | 3 | 5  | 15 | GAG  | 24 | 4  |
| 47369 | 4 | 13990407 | 13990424 | 2 | 9  | 18 | TG   | 21 | 17 |
| 47371 | 4 | 13991462 | 13991477 | 2 | 8  | 16 | TA   | 7  | 4  |
| 47375 | 4 | 14026435 | 14026452 | 2 | 9  | 18 | CA   | 22 | 4  |
| 47379 | 4 | 14040675 | 14040692 | 2 | 9  | 18 | AC   | 15 | 7  |
| 47380 | 4 | 14040694 | 14040711 | 2 | 9  | 18 | CA   | 18 | 9  |
| 47381 | 4 | 14046308 | 14046343 | 2 | 18 | 36 | CA   | 24 | 12 |
| 47387 | 4 | 14065206 | 14065227 | 2 | 11 | 22 | AC   | 10 | 9  |
| 47395 | 4 | 14114397 | 14114414 | 3 | 6  | 18 | GCC  | 29 | 10 |
| 47397 | 4 | 14118545 | 14118558 | 2 | 7  | 14 | AG   | 32 | 4  |
| 47403 | 4 | 14139078 | 14139101 | 4 | 6  | 24 | GCCT | 18 | 4  |
| 47405 | 4 | 14140838 | 14140864 | 3 | 9  | 27 | TGC  | 28 | 8  |
| 47406 | 4 | 14145194 | 14145209 | 2 | 8  | 16 | CA   | 18 | 3  |
| 47409 | 4 | 14148145 | 14148164 | 2 | 10 | 20 | GT   | 25 | 16 |
| 47410 | 4 | 14152707 | 14152718 | 2 | 6  | 12 | AG   | 25 | 7  |
| 47415 | 4 | 14154958 | 14154979 | 2 | 11 | 22 | GA   | 25 | 7  |

|       |   |          |          |   |    |    |      |    |    |
|-------|---|----------|----------|---|----|----|------|----|----|
| 47416 | 4 | 14155251 | 14155266 | 2 | 8  | 16 | GA   | 24 | 5  |
| 47421 | 4 | 14174889 | 14174910 | 2 | 11 | 22 | TG   | 24 | 13 |
| 47433 | 4 | 14218115 | 14218126 | 2 | 6  | 12 | GT   | 24 | 6  |
| 47434 | 4 | 14218219 | 14218232 | 2 | 7  | 14 | CA   | 7  | 4  |
| 47441 | 4 | 14228051 | 14228092 | 3 | 14 | 42 | TGT  | 27 | 14 |
| 47452 | 4 | 14242710 | 14242721 | 2 | 6  | 12 | TG   | 30 | 3  |
| 47472 | 4 | 14274944 | 14274961 | 2 | 9  | 18 | AC   | 21 | 5  |
| 47473 | 4 | 14274989 | 14275006 | 2 | 9  | 18 | GT   | 26 | 4  |
| 47477 | 4 | 14280453 | 14280470 | 2 | 9  | 18 | TA   | 7  | 6  |
| 47480 | 4 | 14283722 | 14283742 | 3 | 7  | 21 | CAG  | 24 | 7  |
| 47481 | 4 | 14285096 | 14285113 | 2 | 9  | 18 | GT   | 19 | 9  |
| 47482 | 4 | 14285276 | 14285303 | 2 | 14 | 28 | AC   | 9  | 6  |
| 47485 | 4 | 14298594 | 14298620 | 3 | 9  | 27 | TCC  | 9  | 5  |
| 47489 | 4 | 14311391 | 14311417 | 3 | 9  | 27 | GCT  | 23 | 5  |
| 47495 | 4 | 14321529 | 14321544 | 4 | 4  | 16 | TTAT | 22 | 5  |
| 47499 | 4 | 14338219 | 14338232 | 2 | 7  | 14 | AC   | 19 | 7  |
| 47502 | 4 | 14341474 | 14341495 | 2 | 11 | 22 | AC   | 10 | 9  |
| 47503 | 4 | 14343261 | 14343280 | 4 | 5  | 20 | ATTT | 20 | 3  |
| 47504 | 4 | 14343563 | 14343578 | 2 | 8  | 16 | GT   | 7  | 3  |
| 47505 | 4 | 14343583 | 14343598 | 2 | 8  | 16 | GT   | 26 | 14 |
| 47507 | 4 | 14345568 | 14345581 | 2 | 7  | 14 | TA   | 28 | 3  |
| 47509 | 4 | 14353104 | 14353121 | 2 | 9  | 18 | AC   | 24 | 8  |
| 47510 | 4 | 14355169 | 14355194 | 2 | 13 | 26 | TG   | 20 | 12 |
| 47519 | 4 | 14369962 | 14369973 | 2 | 6  | 12 | AG   | 28 | 3  |
| 47521 | 4 | 14370495 | 14370510 | 2 | 8  | 16 | CA   | 25 | 4  |
| 47526 | 4 | 14383463 | 14383476 | 2 | 7  | 14 | TC   | 19 | 6  |
| 47532 | 4 | 14397160 | 14397181 | 2 | 11 | 22 | TG   | 9  | 8  |
| 47533 | 4 | 14397555 | 14397576 | 2 | 11 | 22 | TG   | 16 | 4  |
| 47538 | 4 | 14409680 | 14409699 | 2 | 10 | 20 | CA   | 19 | 3  |
| 47539 | 4 | 14413939 | 14413962 | 3 | 8  | 24 | AAC  | 11 | 4  |
| 47553 | 4 | 14443354 | 14443380 | 3 | 9  | 27 | AGG  | 20 | 3  |
| 47555 | 4 | 14451109 | 14451124 | 2 | 8  | 16 | GT   | 20 | 6  |
| 47569 | 4 | 14489917 | 14489940 | 3 | 8  | 24 | ATC  | 13 | 8  |
| 47570 | 4 | 14491482 | 14491521 | 4 | 10 | 40 | TCTG | 6  | 5  |
| 47579 | 4 | 14512730 | 14512744 | 3 | 5  | 15 | CAG  | 26 | 7  |
| 47581 | 4 | 14515332 | 14515353 | 2 | 11 | 22 | CA   | 12 | 5  |
| 47591 | 4 | 14525478 | 14525505 | 2 | 14 | 28 | GT   | 16 | 9  |
| 47599 | 4 | 14539636 | 14539653 | 2 | 9  | 18 | AG   | 25 | 3  |
| 47600 | 4 | 14548412 | 14548423 | 2 | 6  | 12 | TG   | 19 | 4  |
| 47608 | 4 | 14565112 | 14565135 | 2 | 12 | 24 | CT   | 14 | 9  |
| 47618 | 4 | 14584802 | 14584821 | 2 | 10 | 20 | GT   | 18 | 7  |
| 47619 | 4 | 14585045 | 14585082 | 2 | 19 | 38 | CA   | 16 | 7  |
| 47625 | 4 | 14588554 | 14588565 | 2 | 6  | 12 | TC   | 16 | 4  |
| 47630 | 4 | 14588985 | 14589000 | 4 | 4  | 16 | TTTC | 11 | 7  |
| 47632 | 4 | 14589401 | 14589414 | 2 | 7  | 14 | TC   | 17 | 3  |
| 47633 | 4 | 14589774 | 14589807 | 2 | 17 | 34 | CA   | 14 | 11 |
| 47634 | 4 | 14589902 | 14589935 | 2 | 17 | 34 | TC   | 15 | 8  |
| 47635 | 4 | 14589981 | 14589994 | 2 | 7  | 14 | AC   | 18 | 5  |
| 47641 | 4 | 14594130 | 14594149 | 2 | 10 | 20 | CA   | 17 | 10 |
| 47645 | 4 | 14605893 | 14605926 | 2 | 17 | 34 | TG   | 12 | 11 |
| 47646 | 4 | 14607238 | 14607255 | 2 | 9  | 18 | AC   | 23 | 5  |

|       |   |          |          |   |    |    |      |    |    |
|-------|---|----------|----------|---|----|----|------|----|----|
| 47664 | 4 | 14673114 | 14673127 | 2 | 7  | 14 | AC   | 29 | 4  |
| 47666 | 4 | 14673472 | 14673509 | 2 | 19 | 38 | AC   | 7  | 7  |
| 47679 | 4 | 14694786 | 14694803 | 3 | 6  | 18 | CTT  | 27 | 3  |
| 47682 | 4 | 14695236 | 14695249 | 2 | 7  | 14 | TG   | 21 | 6  |
| 47689 | 4 | 14711435 | 14711462 | 4 | 7  | 28 | TCAT | 32 | 6  |
| 47696 | 4 | 14721754 | 14721771 | 3 | 6  | 18 | GAG  | 25 | 3  |
| 47697 | 4 | 14722998 | 14723013 | 4 | 4  | 16 | TTTC | 10 | 3  |
| 47703 | 4 | 14734405 | 14734419 | 3 | 5  | 15 | TTC  | 22 | 3  |
| 47707 | 4 | 14755899 | 14755942 | 2 | 22 | 44 | TG   | 6  | 8  |
| 47710 | 4 | 14774297 | 14774310 | 2 | 7  | 14 | TG   | 25 | 3  |
| 47712 | 4 | 14788385 | 14788404 | 4 | 5  | 20 | ATTC | 19 | 3  |
| 47714 | 4 | 14792274 | 14792318 | 3 | 15 | 45 | TTA  | 6  | 7  |
| 47715 | 4 | 14800720 | 14800743 | 4 | 6  | 24 | AAAC | 23 | 9  |
| 47717 | 4 | 14804163 | 14804214 | 2 | 26 | 52 | GT   | 15 | 10 |
| 47722 | 4 | 14816316 | 14816331 | 2 | 8  | 16 | CT   | 33 | 3  |
| 47742 | 4 | 14870244 | 14870261 | 2 | 9  | 18 | GT   | 24 | 8  |
| 47743 | 4 | 14889033 | 14889046 | 2 | 7  | 14 | AC   | 11 | 3  |
| 47753 | 4 | 14919589 | 14919640 | 2 | 26 | 52 | TG   | 7  | 10 |
| 47759 | 4 | 14938150 | 14938165 | 2 | 8  | 16 | AT   | 19 | 5  |
| 47763 | 4 | 14942482 | 14942507 | 2 | 13 | 26 | CA   | 20 | 8  |
| 47769 | 4 | 14964801 | 14964812 | 2 | 6  | 12 | TA   | 16 | 3  |
| 47776 | 4 | 14978163 | 14978177 | 3 | 5  | 15 | CCT  | 26 | 3  |
| 47777 | 4 | 14978749 | 14978768 | 4 | 5  | 20 | TTAT | 28 | 5  |
| 47780 | 4 | 14990781 | 14990795 | 3 | 5  | 15 | GCT  | 17 | 4  |
| 47784 | 4 | 14998329 | 14998352 | 2 | 12 | 24 | TG   | 14 | 11 |
| 47795 | 4 | 15005487 | 15005518 | 2 | 16 | 32 | CA   | 22 | 8  |
| 47796 | 4 | 15007763 | 15007784 | 2 | 11 | 22 | CA   | 27 | 8  |
| 47798 | 4 | 15008320 | 15008335 | 2 | 8  | 16 | AG   | 8  | 3  |
| 47800 | 4 | 15010229 | 15010252 | 2 | 12 | 24 | AC   | 17 | 8  |
| 47804 | 4 | 15017515 | 15017544 | 2 | 15 | 30 | TG   | 14 | 10 |
| 47805 | 4 | 15023071 | 15023097 | 3 | 9  | 27 | TTG  | 25 | 4  |
| 47807 | 4 | 15027174 | 15027185 | 2 | 6  | 12 | AC   | 34 | 3  |
| 47816 | 4 | 15039681 | 15039698 | 2 | 9  | 18 | CA   | 28 | 11 |
| 47817 | 4 | 15042360 | 15042380 | 3 | 7  | 21 | CAG  | 29 | 3  |
| 47823 | 4 | 15059606 | 15059629 | 4 | 6  | 24 | TGCC | 19 | 10 |
| 47827 | 4 | 15066713 | 15066728 | 2 | 8  | 16 | GT   | 21 | 3  |
| 47829 | 4 | 15082001 | 15082012 | 2 | 6  | 12 | GA   | 30 | 5  |
| 47830 | 4 | 15096970 | 15096997 | 2 | 14 | 28 | TG   | 22 | 12 |
| 47836 | 4 | 15111685 | 15111696 | 2 | 6  | 12 | CT   | 8  | 4  |
| 47855 | 4 | 15139020 | 15139051 | 2 | 16 | 32 | CA   | 9  | 9  |
| 47857 | 4 | 15141167 | 15141194 | 2 | 14 | 28 | TG   | 13 | 9  |
| 47862 | 4 | 15147792 | 15147818 | 3 | 9  | 27 | GAG  | 24 | 14 |
| 47863 | 4 | 15152766 | 15152777 | 2 | 6  | 12 | AC   | 29 | 3  |
| 47866 | 4 | 15159548 | 15159565 | 2 | 9  | 18 | AT   | 11 | 5  |
| 47874 | 4 | 15196054 | 15196085 | 4 | 8  | 32 | AAGA | 22 | 5  |
| 47875 | 4 | 15199287 | 15199316 | 2 | 15 | 30 | AG   | 10 | 10 |
| 47883 | 4 | 15225435 | 15225462 | 2 | 14 | 28 | GT   | 17 | 8  |
| 47888 | 4 | 15231461 | 15231472 | 2 | 6  | 12 | GT   | 26 | 3  |
| 47897 | 4 | 15248152 | 15248163 | 2 | 6  | 12 | AC   | 24 | 3  |
| 47901 | 4 | 15251973 | 15252004 | 2 | 16 | 32 | CA   | 20 | 10 |
| 47902 | 4 | 15254199 | 15254213 | 3 | 5  | 15 | TGC  | 24 | 3  |

|       |   |          |          |   |    |    |      |    |    |
|-------|---|----------|----------|---|----|----|------|----|----|
| 47903 | 4 | 15261793 | 15261810 | 2 | 9  | 18 | CT   | 15 | 13 |
| 47923 | 4 | 15305083 | 15305094 | 2 | 6  | 12 | TG   | 8  | 3  |
| 47924 | 4 | 15305230 | 15305244 | 3 | 5  | 15 | AGC  | 22 | 3  |
| 47934 | 4 | 15343856 | 15343879 | 3 | 8  | 24 | CTG  | 29 | 5  |
| 47943 | 4 | 15386208 | 15386219 | 2 | 6  | 12 | TG   | 23 | 6  |
| 47944 | 4 | 15386221 | 15386232 | 2 | 6  | 12 | GT   | 26 | 4  |
| 47946 | 4 | 15404849 | 15404872 | 2 | 12 | 24 | TG   | 9  | 3  |
| 47956 | 4 | 15419068 | 15419085 | 3 | 6  | 18 | AGG  | 26 | 3  |
| 47957 | 4 | 15419724 | 15419739 | 4 | 4  | 16 | AGAC | 24 | 3  |
| 47963 | 4 | 15427331 | 15427360 | 2 | 15 | 30 | AG   | 16 | 5  |
| 47966 | 4 | 15437883 | 15437904 | 2 | 11 | 22 | GT   | 28 | 12 |
| 47969 | 4 | 15444788 | 15444813 | 2 | 13 | 26 | CA   | 21 | 7  |
| 47971 | 4 | 15449412 | 15449431 | 2 | 10 | 20 | TG   | 23 | 4  |
| 47985 | 4 | 15481886 | 15481925 | 2 | 20 | 40 | GT   | 13 | 6  |
| 47988 | 4 | 15482378 | 15482393 | 4 | 4  | 16 | AAAT | 32 | 3  |
| 47992 | 4 | 15491671 | 15491686 | 2 | 8  | 16 | CT   | 25 | 4  |
| 48001 | 4 | 15509899 | 15509912 | 2 | 7  | 14 | AT   | 23 | 5  |
| 48010 | 4 | 15517290 | 15517301 | 2 | 6  | 12 | CA   | 24 | 8  |
| 48014 | 4 | 15519260 | 15519297 | 2 | 19 | 38 | AG   | 7  | 7  |
| 48019 | 4 | 15534365 | 15534396 | 2 | 16 | 32 | TG   | 12 | 11 |
| 48023 | 4 | 15548603 | 15548626 | 3 | 8  | 24 | TTC  | 18 | 8  |
| 48024 | 4 | 15549275 | 15549298 | 2 | 12 | 24 | TG   | 8  | 5  |
| 48033 | 4 | 15577779 | 15577794 | 2 | 8  | 16 | AC   | 22 | 5  |
| 48035 | 4 | 15582766 | 15582801 | 2 | 18 | 36 | GT   | 9  | 8  |
| 48051 | 4 | 15599827 | 15599844 | 2 | 9  | 18 | GA   | 23 | 3  |
| 48054 | 4 | 15603035 | 15603072 | 2 | 19 | 38 | CA   | 8  | 7  |
| 48055 | 4 | 15606473 | 15606486 | 2 | 7  | 14 | AC   | 20 | 5  |
| 48060 | 4 | 15620034 | 15620049 | 2 | 8  | 16 | GT   | 22 | 9  |
| 48061 | 4 | 15620924 | 15620939 | 2 | 8  | 16 | TG   | 22 | 6  |
| 48062 | 4 | 15620940 | 15620959 | 2 | 10 | 20 | AG   | 14 | 6  |
| 48069 | 4 | 15628750 | 15628764 | 3 | 5  | 15 | TCA  | 19 | 3  |
| 48075 | 4 | 15633862 | 15633876 | 3 | 5  | 15 | TAA  | 25 | 3  |
| 48083 | 4 | 15645904 | 15645945 | 2 | 21 | 42 | AC   | 9  | 9  |
| 48084 | 4 | 15646773 | 15646796 | 2 | 12 | 24 | AG   | 17 | 12 |
| 48087 | 4 | 15648273 | 15648304 | 2 | 16 | 32 | GT   | 7  | 8  |
| 48092 | 4 | 15659925 | 15659942 | 2 | 9  | 18 | GT   | 30 | 3  |
| 48093 | 4 | 15661445 | 15661462 | 2 | 9  | 18 | CT   | 22 | 4  |
| 48094 | 4 | 15670636 | 15670657 | 2 | 11 | 22 | GT   | 22 | 8  |
| 48099 | 4 | 15682926 | 15682943 | 2 | 9  | 18 | CA   | 13 | 9  |
| 48100 | 4 | 15683495 | 15683506 | 2 | 6  | 12 | TA   | 8  | 13 |
| 48105 | 4 | 15706965 | 15706982 | 2 | 9  | 18 | TC   | 20 | 4  |
| 48109 | 4 | 15714479 | 15714498 | 4 | 5  | 20 | AAAT | 23 | 3  |
| 48114 | 4 | 15728606 | 15728637 | 2 | 16 | 32 | GT   | 8  | 8  |
| 48118 | 4 | 15744340 | 15744357 | 3 | 6  | 18 | TTG  | 20 | 3  |
| 48124 | 4 | 15758678 | 15758693 | 4 | 4  | 16 | AAAC | 15 | 7  |
| 48151 | 4 | 15808221 | 15808238 | 2 | 9  | 18 | TG   | 15 | 9  |
| 48153 | 4 | 15808972 | 15808998 | 3 | 9  | 27 | CTG  | 27 | 10 |
| 48154 | 4 | 15811188 | 15811203 | 2 | 8  | 16 | AC   | 23 | 6  |
| 48155 | 4 | 15813652 | 15813671 | 4 | 5  | 20 | ATAA | 16 | 3  |
| 48164 | 4 | 15820110 | 15820127 | 3 | 6  | 18 | CTC  | 15 | 7  |
| 48166 | 4 | 15820303 | 15820314 | 2 | 6  | 12 | AC   | 13 | 4  |

|       |   |          |          |   |    |    |      |    |    |
|-------|---|----------|----------|---|----|----|------|----|----|
| 48168 | 4 | 15828956 | 15828975 | 2 | 10 | 20 | CA   | 18 | 8  |
| 48169 | 4 | 15830887 | 15830900 | 2 | 7  | 14 | GT   | 21 | 4  |
| 48170 | 4 | 15834762 | 15834783 | 2 | 11 | 22 | GT   | 13 | 9  |
| 48177 | 4 | 15853139 | 15853154 | 4 | 4  | 16 | CCAT | 23 | 3  |
| 48178 | 4 | 15853434 | 15853448 | 3 | 5  | 15 | AAT  | 16 | 5  |
| 48186 | 4 | 15881510 | 15881524 | 3 | 5  | 15 | AGT  | 19 | 3  |
| 48188 | 4 | 15882423 | 15882440 | 2 | 9  | 18 | AC   | 24 | 5  |
| 48189 | 4 | 15882519 | 15882534 | 2 | 8  | 16 | TG   | 20 | 4  |
| 48191 | 4 | 15888122 | 15888136 | 3 | 5  | 15 | AAT  | 10 | 3  |
| 48199 | 4 | 15902208 | 15902257 | 2 | 25 | 50 | AC   | 6  | 8  |
| 48200 | 4 | 15908577 | 15908590 | 2 | 7  | 14 | AC   | 24 | 5  |
| 48204 | 4 | 15913216 | 15913247 | 2 | 16 | 32 | TG   | 14 | 8  |
| 48205 | 4 | 15914235 | 15914254 | 2 | 10 | 20 | AC   | 20 | 13 |
| 48221 | 4 | 15959011 | 15959026 | 4 | 4  | 16 | ACAT | 24 | 4  |
| 48222 | 4 | 15960814 | 15960831 | 2 | 9  | 18 | TA   | 9  | 4  |
| 48225 | 4 | 15967801 | 15967822 | 2 | 11 | 22 | CA   | 9  | 6  |
| 48230 | 4 | 15976329 | 15976361 | 3 | 11 | 33 | AGG  | 17 | 6  |
| 48233 | 4 | 15984772 | 15984789 | 2 | 9  | 18 | AC   | 16 | 6  |
| 48235 | 4 | 15986149 | 15986178 | 2 | 15 | 30 | TG   | 11 | 8  |
| 48245 | 4 | 16019278 | 16019301 | 3 | 8  | 24 | CTC  | 24 | 3  |
| 48246 | 4 | 16026344 | 16026376 | 3 | 11 | 33 | TGT  | 19 | 13 |
| 48250 | 4 | 16038329 | 16038342 | 2 | 7  | 14 | TG   | 26 | 3  |
| 48251 | 4 | 16038389 | 16038404 | 2 | 8  | 16 | GT   | 26 | 6  |
| 48253 | 4 | 16041301 | 16041314 | 2 | 7  | 14 | CA   | 13 | 15 |
| 48258 | 4 | 16043430 | 16043481 | 4 | 13 | 52 | TAGA | 17 | 10 |
| 48261 | 4 | 16053269 | 16053292 | 2 | 12 | 24 | TA   | 19 | 6  |
| 48262 | 4 | 16053738 | 16053757 | 2 | 10 | 20 | GT   | 18 | 9  |
| 48269 | 4 | 16082536 | 16082551 | 2 | 8  | 16 | GT   | 27 | 9  |
| 48276 | 4 | 16115173 | 16115187 | 3 | 5  | 15 | ACA  | 19 | 4  |
| 48285 | 4 | 16158470 | 16158485 | 4 | 4  | 16 | GACT | 29 | 5  |
| 48291 | 4 | 16186371 | 16186394 | 2 | 12 | 24 | AC   | 13 | 7  |
| 48293 | 4 | 16194274 | 16194294 | 3 | 7  | 21 | GAG  | 19 | 6  |
| 48294 | 4 | 16194939 | 16194950 | 2 | 6  | 12 | AC   | 13 | 10 |
| 48295 | 4 | 16194953 | 16194966 | 2 | 7  | 14 | AC   | 13 | 11 |
| 48298 | 4 | 16207480 | 16207509 | 2 | 15 | 30 | TG   | 20 | 14 |
| 48304 | 4 | 16215874 | 16215897 | 3 | 8  | 24 | GAG  | 16 | 6  |
| 48315 | 4 | 16224510 | 16224535 | 2 | 13 | 26 | TG   | 11 | 8  |
| 48322 | 4 | 16245533 | 16245550 | 3 | 6  | 18 | GGA  | 19 | 5  |
| 48323 | 4 | 16245859 | 16245882 | 4 | 6  | 24 | CAAA | 25 | 6  |
| 48334 | 4 | 16258501 | 16258518 | 2 | 9  | 18 | AC   | 20 | 5  |
| 48341 | 4 | 16263077 | 16263096 | 2 | 10 | 20 | CA   | 19 | 9  |
| 48346 | 4 | 16269747 | 16269761 | 3 | 5  | 15 | AGA  | 26 | 4  |
| 48350 | 4 | 16278525 | 16278552 | 4 | 7  | 28 | GTCT | 22 | 6  |
| 48355 | 4 | 16285095 | 16285108 | 2 | 7  | 14 | CA   | 21 | 6  |
| 48356 | 4 | 16285610 | 16285639 | 2 | 15 | 30 | TG   | 14 | 13 |
| 48359 | 4 | 16289284 | 16289325 | 3 | 14 | 42 | TTA  | 8  | 5  |
| 48361 | 4 | 16290896 | 16290921 | 2 | 13 | 26 | TG   | 6  | 8  |
| 48368 | 4 | 16297044 | 16297064 | 3 | 7  | 21 | TGT  | 28 | 6  |
| 48369 | 4 | 16304183 | 16304194 | 2 | 6  | 12 | TG   | 28 | 5  |
| 48375 | 4 | 16323526 | 16323540 | 3 | 5  | 15 | AAC  | 22 | 5  |
| 48376 | 4 | 16324549 | 16324560 | 2 | 6  | 12 | GT   | 25 | 12 |

|       |   |          |          |   |    |    |      |    |    |
|-------|---|----------|----------|---|----|----|------|----|----|
| 48378 | 4 | 16324957 | 16324988 | 2 | 16 | 32 | CA   | 14 | 11 |
| 48381 | 4 | 16326892 | 16326906 | 3 | 5  | 15 | TCA  | 17 | 4  |
| 48385 | 4 | 16329863 | 16329916 | 2 | 27 | 54 | GT   | 15 | 16 |
| 48390 | 4 | 16335918 | 16335933 | 2 | 8  | 16 | GT   | 31 | 4  |
| 48393 | 4 | 16336510 | 16336523 | 2 | 7  | 14 | GT   | 10 | 9  |
| 48399 | 4 | 16341228 | 16341265 | 2 | 19 | 38 | CA   | 21 | 6  |
| 48405 | 4 | 16355440 | 16355461 | 2 | 11 | 22 | CA   | 14 | 12 |
| 48406 | 4 | 16358296 | 16358307 | 2 | 6  | 12 | CA   | 7  | 3  |
| 48407 | 4 | 16358447 | 16358462 | 4 | 4  | 16 | ACAG | 29 | 3  |
| 48408 | 4 | 16358762 | 16358789 | 2 | 14 | 28 | TG   | 7  | 7  |
| 48410 | 4 | 16361787 | 16361804 | 2 | 9  | 18 | CA   | 24 | 3  |
| 48412 | 4 | 16366740 | 16366757 | 2 | 9  | 18 | GT   | 13 | 10 |
| 48419 | 4 | 16378325 | 16378336 | 2 | 6  | 12 | CA   | 26 | 10 |
| 48422 | 4 | 16388548 | 16388577 | 2 | 15 | 30 | TG   | 13 | 10 |
| 48423 | 4 | 16388620 | 16388651 | 2 | 16 | 32 | AC   | 8  | 8  |
| 48424 | 4 | 16388728 | 16388743 | 2 | 8  | 16 | AC   | 18 | 5  |
| 48425 | 4 | 16388746 | 16388757 | 2 | 6  | 12 | AC   | 23 | 4  |
| 48426 | 4 | 16388791 | 16388806 | 2 | 8  | 16 | AG   | 24 | 3  |
| 48431 | 4 | 16392654 | 16392668 | 3 | 5  | 15 | AAT  | 23 | 3  |
| 48432 | 4 | 16396215 | 16396258 | 4 | 11 | 44 | AAGA | 13 | 8  |
| 48434 | 4 | 16399794 | 16399808 | 3 | 5  | 15 | ATA  | 27 | 3  |
| 48436 | 4 | 16422899 | 16422910 | 2 | 6  | 12 | TG   | 23 | 3  |
| 48440 | 4 | 16432012 | 16432079 | 4 | 17 | 68 | ATCC | 20 | 18 |
| 48441 | 4 | 16434202 | 16434225 | 3 | 8  | 24 | CTC  | 24 | 4  |
| 48447 | 4 | 16440507 | 16440530 | 2 | 12 | 24 | GT   | 18 | 6  |
| 48450 | 4 | 16456695 | 16456709 | 3 | 5  | 15 | TGT  | 15 | 13 |
| 48451 | 4 | 16457911 | 16457926 | 4 | 4  | 16 | TTTA | 16 | 6  |
| 48452 | 4 | 16458475 | 16458501 | 3 | 9  | 27 | TTG  | 25 | 13 |
| 48453 | 4 | 16460779 | 16460794 | 2 | 8  | 16 | CA   | 29 | 7  |
| 48456 | 4 | 16465283 | 16465298 | 4 | 4  | 16 | CATC | 19 | 4  |
| 48457 | 4 | 16466852 | 16466881 | 2 | 15 | 30 | GT   | 22 | 11 |
| 48463 | 4 | 16472617 | 16472648 | 2 | 16 | 32 | AC   | 20 | 15 |
| 48466 | 4 | 16478262 | 16478277 | 2 | 8  | 16 | CA   | 14 | 5  |
| 48467 | 4 | 16479549 | 16479564 | 2 | 8  | 16 | TG   | 28 | 4  |
| 48468 | 4 | 16482370 | 16482391 | 2 | 11 | 22 | CA   | 13 | 6  |
| 48469 | 4 | 16483428 | 16483445 | 3 | 6  | 18 | TAA  | 33 | 4  |
| 48473 | 4 | 16485878 | 16485893 | 2 | 8  | 16 | TC   | 30 | 4  |
| 48474 | 4 | 16487540 | 16487565 | 2 | 13 | 26 | GT   | 6  | 8  |
| 48477 | 4 | 16488989 | 16489012 | 2 | 12 | 24 | AC   | 19 | 10 |
| 48478 | 4 | 16489250 | 16489267 | 2 | 9  | 18 | CA   | 10 | 4  |
| 48480 | 4 | 16490558 | 16490571 | 2 | 7  | 14 | GT   | 19 | 6  |
| 48482 | 4 | 16492434 | 16492455 | 2 | 11 | 22 | GT   | 18 | 10 |
| 48483 | 4 | 16493619 | 16493632 | 2 | 7  | 14 | AC   | 22 | 3  |
| 48503 | 4 | 16506185 | 16506196 | 2 | 6  | 12 | CA   | 23 | 3  |
| 48504 | 4 | 16506431 | 16506458 | 2 | 14 | 28 | AC   | 7  | 12 |
| 48505 | 4 | 16507210 | 16507229 | 2 | 10 | 20 | TG   | 8  | 8  |
| 48507 | 4 | 16507526 | 16507551 | 2 | 13 | 26 | TG   | 16 | 9  |
| 48508 | 4 | 16509786 | 16509805 | 2 | 10 | 20 | AC   | 22 | 9  |
| 48509 | 4 | 16510720 | 16510731 | 2 | 6  | 12 | GT   | 23 | 3  |
| 48510 | 4 | 16511077 | 16511092 | 2 | 8  | 16 | AC   | 17 | 6  |
| 48511 | 4 | 16511093 | 16511108 | 2 | 8  | 16 | CA   | 21 | 7  |

|       |   |          |          |   |    |    |      |    |    |
|-------|---|----------|----------|---|----|----|------|----|----|
| 48513 | 4 | 16514237 | 16514256 | 2 | 10 | 20 | CT   | 21 | 7  |
| 48516 | 4 | 16515441 | 16515452 | 2 | 6  | 12 | CA   | 28 | 3  |
| 48523 | 4 | 16523058 | 16523085 | 2 | 14 | 28 | AC   | 12 | 6  |
| 48525 | 4 | 16525282 | 16525307 | 2 | 13 | 26 | CA   | 17 | 9  |
| 48526 | 4 | 16525469 | 16525496 | 2 | 14 | 28 | CA   | 21 | 11 |
| 48527 | 4 | 16525994 | 16526019 | 2 | 13 | 26 | GT   | 7  | 6  |
| 48531 | 4 | 16527107 | 16527118 | 2 | 6  | 12 | CA   | 8  | 3  |
| 48536 | 4 | 16528781 | 16528804 | 2 | 12 | 24 | GT   | 24 | 11 |
| 48538 | 4 | 16531199 | 16531216 | 3 | 6  | 18 | CTC  | 24 | 3  |
| 48539 | 4 | 16531725 | 16531744 | 2 | 10 | 20 | CA   | 15 | 10 |
| 48540 | 4 | 16532127 | 16532154 | 2 | 14 | 28 | TG   | 19 | 9  |
| 48543 | 4 | 16534053 | 16534079 | 3 | 9  | 27 | CAG  | 31 | 4  |
| 48547 | 4 | 16537605 | 16537628 | 4 | 6  | 24 | ACAG | 23 | 5  |
| 48560 | 4 | 16549562 | 16549597 | 2 | 18 | 36 | TG   | 10 | 13 |
| 48561 | 4 | 16550880 | 16550909 | 3 | 10 | 30 | GCT  | 22 | 4  |
| 48570 | 4 | 16570285 | 16570298 | 2 | 7  | 14 | AC   | 22 | 5  |
| 48573 | 4 | 16576441 | 16576460 | 2 | 10 | 20 | GA   | 11 | 9  |
| 48575 | 4 | 16579209 | 16579256 | 2 | 24 | 48 | TG   | 16 | 14 |
| 48579 | 4 | 16585155 | 16585166 | 2 | 6  | 12 | TG   | 26 | 6  |
| 48587 | 4 | 16610473 | 16610490 | 2 | 9  | 18 | AC   | 20 | 7  |
| 48590 | 4 | 16620218 | 16620235 | 2 | 9  | 18 | GT   | 15 | 7  |
| 48594 | 4 | 16637030 | 16637041 | 2 | 6  | 12 | AC   | 23 | 3  |
| 48597 | 4 | 16641630 | 16641647 | 2 | 9  | 18 | CA   | 18 | 6  |
| 48600 | 4 | 16660548 | 16660559 | 2 | 6  | 12 | TC   | 18 | 7  |
| 48605 | 4 | 16672186 | 16672212 | 3 | 9  | 27 | GGA  | 21 | 4  |
| 48608 | 4 | 16674816 | 16674835 | 2 | 10 | 20 | AC   | 12 | 6  |
| 48609 | 4 | 16675231 | 16675266 | 2 | 18 | 36 | AC   | 9  | 10 |
| 48615 | 4 | 16692188 | 16692208 | 3 | 7  | 21 | TCC  | 17 | 10 |
| 48620 | 4 | 16697885 | 16697908 | 3 | 8  | 24 | ATC  | 20 | 6  |
| 48622 | 4 | 16698286 | 16698301 | 2 | 8  | 16 | CT   | 28 | 3  |
| 48623 | 4 | 16702968 | 16702988 | 3 | 7  | 21 | ATG  | 31 | 4  |
| 48624 | 4 | 16703159 | 16703173 | 3 | 5  | 15 | CAA  | 29 | 3  |
| 48632 | 4 | 16717238 | 16717255 | 3 | 6  | 18 | GAG  | 22 | 6  |
| 48633 | 4 | 16717896 | 16717910 | 3 | 5  | 15 | TCT  | 24 | 9  |
| 48638 | 4 | 16737250 | 16737264 | 3 | 5  | 15 | TAG  | 23 | 4  |
| 48658 | 4 | 16798186 | 16798199 | 2 | 7  | 14 | TG   | 21 | 4  |
| 48671 | 4 | 16816857 | 16816876 | 2 | 10 | 20 | AC   | 15 | 8  |
| 48680 | 4 | 16855761 | 16855776 | 4 | 4  | 16 | GACT | 12 | 6  |
| 48682 | 4 | 16857239 | 16857254 | 2 | 8  | 16 | TG   | 22 | 9  |
| 48689 | 4 | 16901124 | 16901135 | 2 | 6  | 12 | TG   | 17 | 7  |
| 48691 | 4 | 16907918 | 16907931 | 2 | 7  | 14 | GT   | 25 | 10 |
| 48697 | 4 | 16923660 | 16923671 | 2 | 6  | 12 | AC   | 23 | 3  |
| 48701 | 4 | 16929949 | 16929962 | 2 | 7  | 14 | TC   | 20 | 4  |
| 48702 | 4 | 16938706 | 16938717 | 2 | 6  | 12 | AC   | 27 | 3  |
| 48708 | 4 | 16972581 | 16972594 | 2 | 7  | 14 | GT   | 20 | 3  |
| 48722 | 4 | 17006529 | 17006544 | 2 | 8  | 16 | AC   | 23 | 4  |
| 48740 | 4 | 17049903 | 17049923 | 3 | 7  | 21 | GTA  | 16 | 3  |
| 48741 | 4 | 17050582 | 17050597 | 2 | 8  | 16 | GT   | 16 | 5  |
| 48756 | 4 | 17061377 | 17061400 | 2 | 12 | 24 | TG   | 19 | 4  |
| 48761 | 4 | 17069568 | 17069581 | 2 | 7  | 14 | CA   | 22 | 3  |
| 48763 | 4 | 17074635 | 17074649 | 3 | 5  | 15 | ATT  | 13 | 4  |



|       |   |          |          |   |    |    |      |    |    |
|-------|---|----------|----------|---|----|----|------|----|----|
| 48764 | 4 | 17074737 | 17074750 | 2 | 7  | 14 | AC   | 12 | 3  |
| 48783 | 4 | 17115624 | 17115644 | 3 | 7  | 21 | CAA  | 18 | 8  |
| 48788 | 4 | 17130378 | 17130395 | 2 | 9  | 18 | GT   | 24 | 4  |
| 48792 | 4 | 17139707 | 17139728 | 2 | 11 | 22 | AC   | 19 | 7  |
| 48794 | 4 | 17146022 | 17146037 | 2 | 8  | 16 | AC   | 25 | 4  |
| 48797 | 4 | 17150092 | 17150103 | 2 | 6  | 12 | CA   | 33 | 3  |
| 48805 | 4 | 17172332 | 17172347 | 4 | 4  | 16 | TGTC | 23 | 4  |
| 48811 | 4 | 17191041 | 17191067 | 3 | 9  | 27 | AAC  | 21 | 12 |
| 48814 | 4 | 17201583 | 17201632 | 2 | 25 | 50 | CA   | 7  | 7  |
| 48816 | 4 | 17203660 | 17203671 | 2 | 6  | 12 | AG   | 16 | 4  |
| 48817 | 4 | 17203691 | 17203702 | 2 | 6  | 12 | GA   | 20 | 4  |
| 48819 | 4 | 17205200 | 17205217 | 2 | 9  | 18 | AC   | 29 | 5  |
| 48822 | 4 | 17210115 | 17210146 | 2 | 16 | 32 | GT   | 18 | 9  |
| 48837 | 4 | 17224027 | 17224048 | 2 | 11 | 22 | CA   | 24 | 11 |
| 48845 | 4 | 17247046 | 17247065 | 4 | 5  | 20 | AGAT | 19 | 3  |
| 48847 | 4 | 17262991 | 17263010 | 2 | 10 | 20 | CA   | 22 | 8  |
| 48848 | 4 | 17263198 | 17263241 | 2 | 22 | 44 | GA   | 14 | 12 |
| 48852 | 4 | 17271367 | 17271382 | 2 | 8  | 16 | AT   | 9  | 8  |
| 48856 | 4 | 17286223 | 17286240 | 2 | 9  | 18 | TG   | 9  | 8  |
| 48857 | 4 | 17293081 | 17293096 | 2 | 8  | 16 | AC   | 18 | 13 |
| 48858 | 4 | 17293098 | 17293111 | 2 | 7  | 14 | CA   | 23 | 11 |
| 48870 | 4 | 17337743 | 17337774 | 2 | 16 | 32 | AG   | 9  | 12 |
| 48874 | 4 | 17344990 | 17345001 | 2 | 6  | 12 | AC   | 18 | 3  |
| 48875 | 4 | 17354898 | 17354936 | 3 | 13 | 39 | CAT  | 23 | 7  |
| 48877 | 4 | 17360679 | 17360705 | 3 | 9  | 27 | AAT  | 15 | 13 |
| 48879 | 4 | 17382961 | 17382988 | 4 | 7  | 28 | TTTC | 6  | 4  |
| 48886 | 4 | 17397375 | 17397404 | 2 | 15 | 30 | GA   | 12 | 7  |
| 48895 | 4 | 17407640 | 17407685 | 2 | 23 | 46 | CA   | 9  | 11 |
| 48896 | 4 | 17407871 | 17407897 | 3 | 9  | 27 | GAG  | 8  | 7  |
| 48900 | 4 | 17418606 | 17418625 | 4 | 5  | 20 | AAAT | 18 | 8  |
| 48903 | 4 | 17426813 | 17426830 | 2 | 9  | 18 | GT   | 12 | 5  |
| 48914 | 4 | 17463642 | 17463657 | 2 | 8  | 16 | TG   | 18 | 9  |
| 48916 | 4 | 17466498 | 17466539 | 2 | 21 | 42 | CA   | 9  | 9  |
| 48921 | 4 | 17488481 | 17488520 | 2 | 20 | 40 | AG   | 7  | 7  |
| 48935 | 4 | 17530701 | 17530728 | 2 | 14 | 28 | TC   | 9  | 7  |
| 48936 | 4 | 17532060 | 17532074 | 3 | 5  | 15 | TTG  | 17 | 4  |
| 48939 | 4 | 17536397 | 17536420 | 2 | 12 | 24 | TC   | 16 | 7  |
| 48951 | 4 | 17572997 | 17573012 | 2 | 8  | 16 | TG   | 27 | 5  |
| 48952 | 4 | 17577373 | 17577388 | 2 | 8  | 16 | TG   | 18 | 7  |
| 48953 | 4 | 17577390 | 17577401 | 2 | 6  | 12 | GT   | 10 | 5  |
| 48954 | 4 | 17580487 | 17580498 | 2 | 6  | 12 | TG   | 23 | 5  |
| 48955 | 4 | 17580864 | 17580879 | 2 | 8  | 16 | CA   | 12 | 9  |
| 48957 | 4 | 17583742 | 17583789 | 2 | 24 | 48 | GT   | 11 | 9  |
| 48966 | 4 | 17608572 | 17608585 | 2 | 7  | 14 | TC   | 34 | 3  |
| 48971 | 4 | 17615950 | 17615961 | 2 | 6  | 12 | GT   | 29 | 5  |
| 48972 | 4 | 17616674 | 17616701 | 2 | 14 | 28 | CA   | 10 | 9  |
| 48974 | 4 | 17621211 | 17621248 | 2 | 19 | 38 | GT   | 7  | 11 |
| 48977 | 4 | 17622501 | 17622520 | 4 | 5  | 20 | CAGT | 25 | 6  |
| 48978 | 4 | 17622614 | 17622629 | 4 | 4  | 16 | AAAC | 8  | 4  |
| 48987 | 4 | 17640952 | 17640967 | 2 | 8  | 16 | CT   | 22 | 5  |
| 48988 | 4 | 17643199 | 17643214 | 2 | 8  | 16 | GT   | 12 | 5  |

|       |   |          |          |   |    |    |      |    |    |
|-------|---|----------|----------|---|----|----|------|----|----|
| 48990 | 4 | 17647702 | 17647739 | 2 | 19 | 38 | CA   | 12 | 12 |
| 48994 | 4 | 17660181 | 17660202 | 2 | 11 | 22 | AG   | 15 | 6  |
| 48995 | 4 | 17675386 | 17675435 | 2 | 25 | 50 | CA   | 7  | 9  |
| 49000 | 4 | 17682816 | 17682831 | 2 | 8  | 16 | GT   | 22 | 4  |
| 49006 | 4 | 17701704 | 17701733 | 2 | 15 | 30 | GT   | 8  | 7  |
| 49009 | 4 | 17710996 | 17711011 | 2 | 8  | 16 | AC   | 25 | 7  |
| 49010 | 4 | 17712354 | 17712377 | 4 | 6  | 24 | CAGA | 28 | 7  |
| 49013 | 4 | 17746169 | 17746186 | 3 | 6  | 18 | GCA  | 20 | 4  |
| 49019 | 4 | 17756000 | 17756011 | 2 | 6  | 12 | CA   | 29 | 4  |
| 49020 | 4 | 17756785 | 17756804 | 4 | 5  | 20 | TTTC | 24 | 6  |
| 49025 | 4 | 17758565 | 17758586 | 2 | 11 | 22 | GT   | 24 | 6  |
| 49048 | 4 | 17834120 | 17834143 | 3 | 8  | 24 | ATC  | 14 | 5  |
| 49049 | 4 | 17834353 | 17834370 | 2 | 9  | 18 | AT   | 22 | 8  |
| 49051 | 4 | 17855186 | 17855201 | 4 | 4  | 16 | TATT | 23 | 5  |
| 49052 | 4 | 17862249 | 17862298 | 2 | 25 | 50 | CA   | 11 | 11 |
| 49054 | 4 | 17870845 | 17870880 | 2 | 18 | 36 | CA   | 15 | 8  |
| 49061 | 4 | 17885607 | 17885636 | 2 | 15 | 30 | TG   | 10 | 10 |
| 49068 | 4 | 17900485 | 17900516 | 2 | 16 | 32 | AC   | 13 | 9  |
| 49069 | 4 | 17900726 | 17900745 | 2 | 10 | 20 | CT   | 16 | 6  |
| 49070 | 4 | 17900990 | 17901007 | 2 | 9  | 18 | TG   | 21 | 5  |
| 49073 | 4 | 17903971 | 17903982 | 2 | 6  | 12 | AG   | 26 | 3  |
| 49077 | 4 | 17910077 | 17910096 | 2 | 10 | 20 | GA   | 21 | 3  |
| 49089 | 4 | 17933791 | 17933804 | 2 | 7  | 14 | AG   | 18 | 3  |
| 49090 | 4 | 17938256 | 17938279 | 4 | 6  | 24 | CAGC | 24 | 6  |
| 49091 | 4 | 17938341 | 17938354 | 2 | 7  | 14 | AC   | 25 | 3  |
| 49094 | 4 | 17939415 | 17939434 | 2 | 10 | 20 | TC   | 26 | 3  |
| 49097 | 4 | 17942404 | 17942415 | 2 | 6  | 12 | CA   | 23 | 3  |
| 49100 | 4 | 17943254 | 17943281 | 2 | 14 | 28 | CA   | 15 | 9  |
| 49101 | 4 | 17948283 | 17948306 | 2 | 12 | 24 | CA   | 21 | 8  |
| 49106 | 4 | 17956968 | 17956985 | 3 | 6  | 18 | ACA  | 34 | 3  |
| 49108 | 4 | 17961424 | 17961443 | 2 | 10 | 20 | CT   | 12 | 4  |
| 49112 | 4 | 17962485 | 17962514 | 2 | 15 | 30 | GT   | 9  | 10 |
| 49114 | 4 | 17963292 | 17963319 | 2 | 14 | 28 | AC   | 19 | 5  |
| 49115 | 4 | 17964150 | 17964171 | 2 | 11 | 22 | CT   | 10 | 7  |
| 49130 | 4 | 17975553 | 17975564 | 2 | 6  | 12 | TC   | 17 | 7  |
| 49131 | 4 | 17976013 | 17976032 | 2 | 10 | 20 | CA   | 28 | 5  |
| 49133 | 4 | 17980329 | 17980350 | 2 | 11 | 22 | AC   | 24 | 7  |
| 49134 | 4 | 17980591 | 17980612 | 2 | 11 | 22 | GT   | 18 | 10 |
| 49137 | 4 | 17984007 | 17984024 | 3 | 6  | 18 | GGT  | 27 | 3  |
| 49139 | 4 | 17984692 | 17984705 | 2 | 7  | 14 | AC   | 27 | 5  |
| 49144 | 4 | 17986354 | 17986381 | 2 | 14 | 28 | GT   | 17 | 7  |
| 49145 | 4 | 17986685 | 17986702 | 2 | 9  | 18 | CT   | 15 | 5  |
| 49149 | 4 | 17994928 | 17994939 | 2 | 6  | 12 | CA   | 6  | 3  |
| 49152 | 4 | 17995879 | 17995902 | 2 | 12 | 24 | GT   | 16 | 14 |
| 49154 | 4 | 17997086 | 17997099 | 2 | 7  | 14 | GC   | 19 | 19 |
| 49156 | 4 | 17998661 | 17998672 | 2 | 6  | 12 | CA   | 20 | 3  |
| 49157 | 4 | 18000406 | 18000417 | 2 | 6  | 12 | TG   | 19 | 3  |
| 49159 | 4 | 18004933 | 18004947 | 3 | 5  | 15 | GAG  | 28 | 3  |
| 49172 | 4 | 18021697 | 18021716 | 2 | 10 | 20 | TG   | 13 | 4  |
| 49176 | 4 | 18037375 | 18037390 | 2 | 8  | 16 | AC   | 24 | 9  |
| 49177 | 4 | 18039660 | 18039683 | 2 | 12 | 24 | CT   | 19 | 8  |

|       |   |          |          |   |    |    |      |    |    |
|-------|---|----------|----------|---|----|----|------|----|----|
| 49178 | 4 | 18039802 | 18039815 | 2 | 7  | 14 | CA   | 22 | 3  |
| 49183 | 4 | 18054088 | 18054101 | 2 | 7  | 14 | TA   | 19 | 5  |
| 49184 | 4 | 18055751 | 18055766 | 2 | 8  | 16 | CA   | 27 | 7  |
| 49185 | 4 | 18055928 | 18055941 | 2 | 7  | 14 | CA   | 23 | 7  |
| 49191 | 4 | 18075951 | 18075980 | 2 | 15 | 30 | GA   | 21 | 7  |
| 49194 | 4 | 18089017 | 18089038 | 2 | 11 | 22 | TG   | 24 | 6  |
| 49200 | 4 | 18098778 | 18098797 | 4 | 5  | 20 | CTGA | 26 | 5  |
| 49202 | 4 | 18100614 | 18100625 | 2 | 6  | 12 | AC   | 29 | 3  |
| 49204 | 4 | 18108027 | 18108046 | 4 | 5  | 20 | TTAT | 15 | 5  |
| 49210 | 4 | 18109285 | 18109296 | 2 | 6  | 12 | CG   | 15 | 12 |
| 49215 | 4 | 18112328 | 18112342 | 3 | 5  | 15 | GAG  | 21 | 5  |
| 49216 | 4 | 18113188 | 18113207 | 4 | 5  | 20 | TTTC | 31 | 3  |
| 49219 | 4 | 18117100 | 18117111 | 2 | 6  | 12 | CA   | 17 | 4  |
| 49220 | 4 | 18117614 | 18117643 | 2 | 15 | 30 | AC   | 10 | 10 |
| 49233 | 5 | 62694    | 62708    | 3 | 5  | 15 | TAA  | 12 | 3  |
| 49237 | 5 | 83062    | 83075    | 2 | 7  | 14 | TG   | 23 | 5  |
| 49243 | 5 | 92450    | 92471    | 2 | 11 | 22 | TG   | 18 | 6  |
| 49248 | 5 | 98454    | 98473    | 2 | 10 | 20 | GT   | 14 | 4  |
| 49249 | 5 | 98630    | 98655    | 2 | 13 | 26 | AC   | 12 | 8  |
| 49253 | 5 | 101094   | 101114   | 3 | 7  | 21 | AAG  | 21 | 3  |
| 49255 | 5 | 102127   | 102142   | 4 | 4  | 16 | AAAC | 26 | 3  |
| 49259 | 5 | 106055   | 106082   | 2 | 14 | 28 | TG   | 12 | 8  |
| 49260 | 5 | 107737   | 107752   | 4 | 4  | 16 | AATG | 29 | 3  |
| 49268 | 5 | 114730   | 114763   | 2 | 17 | 34 | CA   | 12 | 6  |
| 49273 | 5 | 127983   | 128022   | 2 | 20 | 40 | CA   | 9  | 11 |
| 49277 | 5 | 136559   | 136578   | 2 | 10 | 20 | GT   | 18 | 11 |
| 49281 | 5 | 144186   | 144201   | 2 | 8  | 16 | AC   | 16 | 8  |
| 49285 | 5 | 168327   | 168365   | 3 | 13 | 39 | GCA  | 25 | 9  |
| 49286 | 5 | 168386   | 168400   | 3 | 5  | 15 | GCT  | 17 | 3  |
| 49288 | 5 | 174274   | 174293   | 2 | 10 | 20 | TG   | 21 | 8  |
| 49291 | 5 | 182907   | 182922   | 2 | 8  | 16 | AC   | 24 | 5  |
| 49293 | 5 | 193795   | 193818   | 2 | 12 | 24 | TG   | 17 | 7  |
| 49300 | 5 | 243020   | 243035   | 2 | 8  | 16 | AC   | 18 | 3  |
| 49301 | 5 | 243355   | 243366   | 2 | 6  | 12 | TA   | 17 | 4  |
| 49305 | 5 | 249439   | 249478   | 2 | 20 | 40 | GT   | 14 | 9  |
| 49316 | 5 | 260972   | 260986   | 3 | 5  | 15 | GCT  | 28 | 4  |
| 49323 | 5 | 278767   | 278784   | 2 | 9  | 18 | AC   | 23 | 8  |
| 49328 | 5 | 291489   | 291512   | 3 | 8  | 24 | GCT  | 27 | 3  |
| 49334 | 5 | 308682   | 308693   | 2 | 6  | 12 | CA   | 27 | 3  |
| 49336 | 5 | 311166   | 311189   | 3 | 8  | 24 | TCC  | 23 | 7  |
| 49337 | 5 | 313519   | 313534   | 2 | 8  | 16 | AC   | 28 | 5  |
| 49339 | 5 | 315217   | 315228   | 2 | 6  | 12 | GT   | 18 | 7  |
| 49340 | 5 | 315232   | 315243   | 2 | 6  | 12 | TG   | 14 | 5  |
| 49341 | 5 | 315345   | 315356   | 2 | 6  | 12 | TG   | 8  | 7  |
| 49344 | 5 | 318910   | 318921   | 2 | 6  | 12 | GT   | 23 | 7  |
| 49348 | 5 | 325226   | 325255   | 3 | 10 | 30 | ATC  | 26 | 10 |
| 49353 | 5 | 347453   | 347464   | 2 | 6  | 12 | AC   | 27 | 3  |
| 49354 | 5 | 347842   | 347859   | 3 | 6  | 18 | CTC  | 16 | 6  |
| 49355 | 5 | 347861   | 347875   | 3 | 5  | 15 | TCC  | 17 | 9  |
| 49363 | 5 | 363070   | 363081   | 2 | 6  | 12 | CA   | 18 | 6  |
| 49366 | 5 | 368523   | 368558   | 3 | 12 | 36 | AGG  | 18 | 6  |

|       |   |        |        |   |    |    |      |    |    |
|-------|---|--------|--------|---|----|----|------|----|----|
| 49373 | 5 | 381923 | 381934 | 2 | 6  | 12 | CA   | 21 | 3  |
| 49376 | 5 | 388162 | 388173 | 2 | 6  | 12 | AC   | 23 | 4  |
| 49380 | 5 | 391987 | 392024 | 2 | 19 | 38 | TG   | 9  | 10 |
| 49390 | 5 | 398394 | 398421 | 2 | 14 | 28 | TG   | 16 | 13 |
| 49396 | 5 | 402959 | 402985 | 3 | 9  | 27 | ATA  | 16 | 5  |
| 49398 | 5 | 406690 | 406701 | 2 | 6  | 12 | TG   | 32 | 4  |
| 49403 | 5 | 412271 | 412312 | 2 | 21 | 42 | AC   | 9  | 12 |
| 49404 | 5 | 412440 | 412457 | 2 | 9  | 18 | GT   | 19 | 7  |
| 49405 | 5 | 418898 | 418923 | 2 | 13 | 26 | GT   | 21 | 17 |
| 49420 | 5 | 436188 | 436203 | 2 | 8  | 16 | TG   | 22 | 10 |
| 49422 | 5 | 438030 | 438049 | 4 | 5  | 20 | TTTG | 18 | 16 |
| 49426 | 5 | 446529 | 446540 | 2 | 6  | 12 | TA   | 21 | 4  |
| 49427 | 5 | 447484 | 447509 | 2 | 13 | 26 | TG   | 17 | 11 |
| 49428 | 5 | 448542 | 448557 | 4 | 4  | 16 | TTTA | 28 | 5  |
| 49430 | 5 | 449790 | 449815 | 2 | 13 | 26 | TG   | 15 | 12 |
| 49432 | 5 | 451567 | 451592 | 2 | 13 | 26 | AC   | 7  | 9  |
| 49433 | 5 | 451727 | 451756 | 2 | 15 | 30 | GT   | 19 | 10 |
| 49434 | 5 | 451900 | 451927 | 2 | 14 | 28 | TG   | 10 | 8  |
| 49443 | 5 | 460343 | 460354 | 2 | 6  | 12 | CA   | 23 | 3  |
| 49444 | 5 | 460449 | 460476 | 2 | 14 | 28 | CA   | 21 | 10 |
| 49454 | 5 | 478530 | 478551 | 2 | 11 | 22 | CA   | 16 | 6  |
| 49456 | 5 | 483728 | 483741 | 2 | 7  | 14 | TG   | 23 | 4  |
| 49457 | 5 | 484099 | 484110 | 2 | 6  | 12 | AC   | 23 | 7  |
| 49460 | 5 | 488675 | 488686 | 2 | 6  | 12 | TG   | 24 | 3  |
| 49463 | 5 | 490035 | 490052 | 2 | 9  | 18 | AC   | 20 | 5  |
| 49465 | 5 | 491331 | 491346 | 2 | 8  | 16 | CA   | 20 | 4  |
| 49468 | 5 | 495177 | 495200 | 2 | 12 | 24 | GT   | 17 | 11 |
| 49470 | 5 | 496275 | 496304 | 2 | 15 | 30 | AC   | 13 | 10 |
| 49484 | 5 | 511521 | 511548 | 2 | 14 | 28 | AC   | 11 | 11 |
| 49485 | 5 | 511578 | 511589 | 2 | 6  | 12 | TG   | 21 | 4  |
| 49486 | 5 | 511715 | 511728 | 2 | 7  | 14 | CA   | 24 | 3  |
| 49491 | 5 | 526071 | 526084 | 2 | 7  | 14 | AT   | 20 | 5  |
| 49492 | 5 | 530537 | 530556 | 2 | 10 | 20 | TG   | 17 | 8  |
| 49493 | 5 | 531485 | 531502 | 2 | 9  | 18 | CA   | 16 | 6  |
| 49495 | 5 | 535085 | 535102 | 2 | 9  | 18 | TG   | 18 | 11 |
| 49499 | 5 | 541045 | 541058 | 2 | 7  | 14 | AT   | 14 | 4  |
| 49508 | 5 | 544949 | 544960 | 2 | 6  | 12 | GT   | 17 | 9  |
| 49511 | 5 | 545950 | 545971 | 2 | 11 | 22 | AC   | 8  | 13 |
| 49513 | 5 | 546273 | 546300 | 2 | 14 | 28 | GT   | 6  | 6  |
| 49516 | 5 | 548772 | 548787 | 2 | 8  | 16 | CT   | 28 | 5  |
| 49518 | 5 | 554320 | 554367 | 2 | 24 | 48 | GT   | 12 | 11 |
| 49519 | 5 | 554426 | 554457 | 2 | 16 | 32 | GT   | 14 | 10 |
| 49520 | 5 | 554583 | 554620 | 2 | 19 | 38 | CA   | 12 | 9  |
| 49521 | 5 | 554795 | 554832 | 2 | 19 | 38 | TC   | 8  | 6  |
| 49526 | 5 | 567438 | 567451 | 2 | 7  | 14 | TC   | 15 | 3  |
| 49530 | 5 | 577077 | 577096 | 2 | 10 | 20 | AC   | 18 | 7  |
| 49531 | 5 | 577738 | 577755 | 3 | 6  | 18 | CCT  | 15 | 5  |
| 49532 | 5 | 577759 | 577773 | 3 | 5  | 15 | CCT  | 18 | 3  |
| 49536 | 5 | 583429 | 583444 | 4 | 4  | 16 | GCCT | 22 | 7  |
| 49540 | 5 | 585334 | 585363 | 2 | 15 | 30 | TG   | 20 | 8  |
| 49543 | 5 | 589177 | 589192 | 2 | 8  | 16 | AC   | 16 | 5  |

|       |   |        |        |   |    |    |      |    |    |
|-------|---|--------|--------|---|----|----|------|----|----|
| 49544 | 5 | 589982 | 590003 | 2 | 11 | 22 | AT   | 8  | 5  |
| 49545 | 5 | 590745 | 590756 | 2 | 6  | 12 | CA   | 31 | 6  |
| 49552 | 5 | 597478 | 597489 | 2 | 6  | 12 | CA   | 22 | 3  |
| 49554 | 5 | 598216 | 598229 | 2 | 7  | 14 | GA   | 15 | 4  |
| 49555 | 5 | 598261 | 598282 | 2 | 11 | 22 | GA   | 10 | 4  |
| 49559 | 5 | 601598 | 601615 | 2 | 9  | 18 | CA   | 19 | 5  |
| 49568 | 5 | 616410 | 616425 | 4 | 4  | 16 | TGGA | 34 | 3  |
| 49569 | 5 | 616632 | 616643 | 2 | 6  | 12 | TC   | 19 | 3  |
| 49571 | 5 | 618015 | 618038 | 4 | 6  | 24 | ATGG | 22 | 4  |
| 49572 | 5 | 619448 | 619475 | 2 | 14 | 28 | GT   | 20 | 8  |
| 49576 | 5 | 627788 | 627831 | 2 | 22 | 44 | CA   | 8  | 7  |
| 49577 | 5 | 627944 | 627955 | 2 | 6  | 12 | CA   | 28 | 8  |
| 49578 | 5 | 628203 | 628214 | 2 | 6  | 12 | GT   | 19 | 3  |
| 49585 | 5 | 651199 | 651224 | 2 | 13 | 26 | GA   | 10 | 12 |
| 49590 | 5 | 660452 | 660465 | 2 | 7  | 14 | CA   | 25 | 4  |
| 49591 | 5 | 660821 | 660840 | 2 | 10 | 20 | GT   | 14 | 4  |
| 49593 | 5 | 660980 | 661023 | 2 | 22 | 44 | AG   | 7  | 8  |
| 49595 | 5 | 670143 | 670170 | 2 | 14 | 28 | TG   | 21 | 6  |
| 49605 | 5 | 689144 | 689159 | 4 | 4  | 16 | CAGG | 30 | 3  |
| 49609 | 5 | 698339 | 698354 | 2 | 8  | 16 | GT   | 24 | 7  |
| 49610 | 5 | 698545 | 698558 | 2 | 7  | 14 | GT   | 27 | 3  |
| 49611 | 5 | 698652 | 698675 | 2 | 12 | 24 | TG   | 8  | 10 |
| 49614 | 5 | 705893 | 705912 | 4 | 5  | 20 | ATTT | 23 | 3  |
| 49620 | 5 | 721556 | 721567 | 2 | 6  | 12 | TG   | 24 | 3  |
| 49626 | 5 | 738238 | 738253 | 2 | 8  | 16 | TG   | 22 | 8  |
| 49629 | 5 | 743405 | 743422 | 2 | 9  | 18 | CA   | 24 | 7  |
| 49649 | 5 | 797853 | 797878 | 2 | 13 | 26 | TG   | 12 | 10 |
| 49650 | 5 | 798027 | 798048 | 2 | 11 | 22 | GT   | 23 | 4  |
| 49651 | 5 | 799000 | 799021 | 2 | 11 | 22 | GA   | 13 | 4  |
| 49654 | 5 | 812147 | 812168 | 2 | 11 | 22 | GA   | 21 | 4  |
| 49657 | 5 | 816864 | 816875 | 2 | 6  | 12 | CA   | 18 | 4  |
| 49666 | 5 | 843616 | 843637 | 2 | 11 | 22 | TG   | 12 | 5  |
| 49668 | 5 | 846910 | 846924 | 3 | 5  | 15 | AAT  | 25 | 8  |
| 49669 | 5 | 847896 | 847907 | 2 | 6  | 12 | CT   | 28 | 3  |
| 49670 | 5 | 848324 | 848345 | 2 | 11 | 22 | GT   | 12 | 7  |
| 49673 | 5 | 859687 | 859714 | 4 | 7  | 28 | ATGG | 20 | 6  |
| 49674 | 5 | 862956 | 862977 | 2 | 11 | 22 | CA   | 18 | 13 |
| 49676 | 5 | 865639 | 865652 | 2 | 7  | 14 | TG   | 13 | 10 |
| 49678 | 5 | 865918 | 865933 | 4 | 4  | 16 | TTTG | 17 | 3  |
| 49679 | 5 | 868764 | 868791 | 2 | 14 | 28 | GT   | 23 | 5  |
| 49681 | 5 | 871834 | 871881 | 4 | 12 | 48 | TCAA | 16 | 13 |
| 49682 | 5 | 875409 | 875422 | 2 | 7  | 14 | GA   | 16 | 5  |
| 49691 | 5 | 892284 | 892295 | 2 | 6  | 12 | CT   | 28 | 3  |
| 49694 | 5 | 894656 | 894676 | 3 | 7  | 21 | AGA  | 26 | 3  |
| 49697 | 5 | 900119 | 900134 | 4 | 4  | 16 | TTTA | 22 | 4  |
| 49702 | 5 | 913620 | 913649 | 2 | 15 | 30 | CA   | 6  | 6  |
| 49703 | 5 | 914178 | 914189 | 2 | 6  | 12 | CT   | 16 | 6  |
| 49705 | 5 | 916022 | 916035 | 2 | 7  | 14 | TG   | 30 | 4  |
| 49706 | 5 | 917935 | 917950 | 4 | 4  | 16 | TTTA | 26 | 3  |
| 49707 | 5 | 921563 | 921576 | 2 | 7  | 14 | TG   | 23 | 4  |
| 49711 | 5 | 937983 | 938010 | 4 | 7  | 28 | AATA | 16 | 6  |

|       |   |         |         |   |    |    |      |    |    |
|-------|---|---------|---------|---|----|----|------|----|----|
| 49719 | 5 | 959556  | 959571  | 2 | 8  | 16 | TC   | 25 | 3  |
| 49720 | 5 | 959683  | 959698  | 2 | 8  | 16 | CT   | 25 | 5  |
| 49725 | 5 | 969048  | 969071  | 3 | 8  | 24 | GAA  | 15 | 7  |
| 49728 | 5 | 974639  | 974654  | 2 | 8  | 16 | AG   | 20 | 4  |
| 49733 | 5 | 992301  | 992314  | 2 | 7  | 14 | AC   | 22 | 13 |
| 49754 | 5 | 1030068 | 1030085 | 3 | 6  | 18 | AGC  | 23 | 6  |
| 49760 | 5 | 1033640 | 1033663 | 2 | 12 | 24 | TG   | 17 | 5  |
| 49763 | 5 | 1034948 | 1034961 | 2 | 7  | 14 | AC   | 20 | 3  |
| 49766 | 5 | 1041230 | 1041261 | 2 | 16 | 32 | GA   | 8  | 11 |
| 49771 | 5 | 1044796 | 1044811 | 4 | 4  | 16 | AGAT | 9  | 11 |
| 49774 | 5 | 1046789 | 1046804 | 2 | 8  | 16 | CA   | 18 | 8  |
| 49784 | 5 | 1063034 | 1063073 | 4 | 10 | 40 | ATCT | 18 | 11 |
| 49786 | 5 | 1069616 | 1069659 | 2 | 22 | 44 | CA   | 12 | 11 |
| 49788 | 5 | 1071169 | 1071190 | 2 | 11 | 22 | GT   | 10 | 12 |
| 49800 | 5 | 1098596 | 1098615 | 4 | 5  | 20 | CAAA | 34 | 3  |
| 49801 | 5 | 1098754 | 1098780 | 3 | 9  | 27 | GAA  | 19 | 4  |
| 49808 | 5 | 1107178 | 1107209 | 2 | 16 | 32 | CA   | 20 | 11 |
| 49814 | 5 | 1115674 | 1115695 | 2 | 11 | 22 | CA   | 12 | 6  |
| 49816 | 5 | 1116866 | 1116913 | 2 | 24 | 48 | GA   | 10 | 9  |
| 49817 | 5 | 1117152 | 1117169 | 2 | 9  | 18 | CA   | 22 | 12 |
| 49818 | 5 | 1120663 | 1120677 | 3 | 5  | 15 | GCT  | 25 | 4  |
| 49820 | 5 | 1126729 | 1126746 | 3 | 6  | 18 | GAA  | 13 | 9  |
| 49822 | 5 | 1130153 | 1130168 | 4 | 4  | 16 | TTTG | 27 | 3  |
| 49825 | 5 | 1131510 | 1131533 | 2 | 12 | 24 | CA   | 17 | 3  |
| 49829 | 5 | 1139285 | 1139310 | 2 | 13 | 26 | CA   | 18 | 7  |
| 49834 | 5 | 1152682 | 1152699 | 2 | 9  | 18 | TC   | 17 | 5  |
| 49836 | 5 | 1155174 | 1155203 | 2 | 15 | 30 | GT   | 23 | 7  |
| 49840 | 5 | 1157969 | 1157984 | 4 | 4  | 16 | GGAA | 9  | 3  |
| 49854 | 5 | 1173324 | 1173335 | 2 | 6  | 12 | GA   | 21 | 4  |
| 49873 | 5 | 1215273 | 1215290 | 2 | 9  | 18 | AG   | 21 | 7  |
| 49877 | 5 | 1218328 | 1218354 | 3 | 9  | 27 | GGA  | 16 | 9  |
| 49878 | 5 | 1218665 | 1218696 | 2 | 16 | 32 | CA   | 12 | 4  |
| 49885 | 5 | 1222752 | 1222765 | 2 | 7  | 14 | CA   | 24 | 9  |
| 49886 | 5 | 1222807 | 1222824 | 2 | 9  | 18 | AC   | 31 | 3  |
| 49887 | 5 | 1224183 | 1224203 | 3 | 7  | 21 | AAG  | 20 | 5  |
| 49888 | 5 | 1228301 | 1228342 | 2 | 21 | 42 | AG   | 11 | 9  |
| 49889 | 5 | 1230138 | 1230153 | 2 | 8  | 16 | CA   | 25 | 3  |
| 49897 | 5 | 1240755 | 1240788 | 2 | 17 | 34 | CA   | 24 | 18 |
| 49898 | 5 | 1240813 | 1240824 | 2 | 6  | 12 | CA   | 21 | 5  |
| 49900 | 5 | 1241024 | 1241041 | 3 | 6  | 18 | AGG  | 17 | 4  |
| 49902 | 5 | 1241453 | 1241468 | 2 | 8  | 16 | AG   | 19 | 3  |
| 49907 | 5 | 1242369 | 1242388 | 2 | 10 | 20 | CA   | 12 | 5  |
| 49909 | 5 | 1242764 | 1242781 | 3 | 6  | 18 | GTG  | 17 | 5  |
| 49913 | 5 | 1255594 | 1255633 | 2 | 20 | 40 | TG   | 12 | 13 |
| 49927 | 5 | 1279144 | 1279163 | 4 | 5  | 20 | CTGG | 27 | 5  |
| 49935 | 5 | 1312844 | 1312871 | 4 | 7  | 28 | CTGT | 24 | 5  |
| 49940 | 5 | 1328330 | 1328344 | 3 | 5  | 15 | CCA  | 20 | 5  |
| 49949 | 5 | 1339175 | 1339192 | 3 | 6  | 18 | CAG  | 29 | 4  |
| 49950 | 5 | 1341100 | 1341111 | 2 | 6  | 12 | CA   | 26 | 3  |
| 49951 | 5 | 1341166 | 1341197 | 2 | 16 | 32 | TG   | 22 | 11 |
| 49955 | 5 | 1370070 | 1370081 | 2 | 6  | 12 | TA   | 19 | 5  |

|       |   |         |         |   |    |    |      |    |    |
|-------|---|---------|---------|---|----|----|------|----|----|
| 49965 | 5 | 1422604 | 1422637 | 2 | 17 | 34 | GT   | 8  | 9  |
| 49966 | 5 | 1425055 | 1425066 | 2 | 6  | 12 | TG   | 23 | 4  |
| 49970 | 5 | 1434112 | 1434133 | 2 | 11 | 22 | GT   | 10 | 5  |
| 49971 | 5 | 1434592 | 1434607 | 2 | 8  | 16 | GT   | 17 | 4  |
| 49980 | 5 | 1470610 | 1470630 | 3 | 7  | 21 | AGA  | 27 | 11 |
| 49981 | 5 | 1471027 | 1471042 | 4 | 4  | 16 | AAAG | 19 | 3  |
| 49982 | 5 | 1471512 | 1471531 | 2 | 10 | 20 | CT   | 18 | 5  |
| 49985 | 5 | 1482773 | 1482802 | 2 | 15 | 30 | GT   | 14 | 7  |
| 49989 | 5 | 1492860 | 1492891 | 4 | 8  | 32 | ATCA | 27 | 5  |
| 49991 | 5 | 1494994 | 1495015 | 2 | 11 | 22 | AC   | 16 | 4  |
| 49992 | 5 | 1497509 | 1497542 | 2 | 17 | 34 | TG   | 9  | 7  |
| 49993 | 5 | 1497739 | 1497756 | 2 | 9  | 18 | TG   | 11 | 3  |
| 50000 | 5 | 1503190 | 1503201 | 2 | 6  | 12 | CA   | 33 | 7  |
| 50001 | 5 | 1505225 | 1505244 | 2 | 10 | 20 | TG   | 17 | 7  |
| 50003 | 5 | 1505711 | 1505728 | 3 | 6  | 18 | CTT  | 20 | 3  |
| 50004 | 5 | 1511272 | 1511289 | 2 | 9  | 18 | GT   | 18 | 17 |
| 50005 | 5 | 1512310 | 1512325 | 2 | 8  | 16 | CT   | 30 | 3  |
| 50011 | 5 | 1524602 | 1524631 | 2 | 15 | 30 | AC   | 21 | 11 |
| 50012 | 5 | 1529962 | 1529976 | 3 | 5  | 15 | AGC  | 24 | 3  |
| 50026 | 5 | 1566724 | 1566739 | 2 | 8  | 16 | CA   | 26 | 3  |
| 50030 | 5 | 1573724 | 1573737 | 2 | 7  | 14 | GT   | 21 | 4  |
| 50031 | 5 | 1573947 | 1573980 | 2 | 17 | 34 | CA   | 15 | 15 |
| 50047 | 5 | 1593592 | 1593617 | 2 | 13 | 26 | TG   | 14 | 8  |
| 50048 | 5 | 1595661 | 1595680 | 2 | 10 | 20 | AC   | 15 | 14 |
| 50049 | 5 | 1595682 | 1595697 | 2 | 8  | 16 | CA   | 12 | 11 |
| 50051 | 5 | 1601221 | 1601244 | 4 | 6  | 24 | ATCT | 20 | 11 |
| 50066 | 5 | 1642570 | 1642625 | 2 | 28 | 56 | AC   | 16 | 17 |
| 50075 | 5 | 1654955 | 1654974 | 2 | 10 | 20 | CA   | 23 | 10 |
| 50081 | 5 | 1673540 | 1673555 | 4 | 4  | 16 | TGAT | 28 | 4  |
| 50082 | 5 | 1673980 | 1673995 | 2 | 8  | 16 | TC   | 24 | 3  |
| 50086 | 5 | 1693980 | 1693994 | 3 | 5  | 15 | AGC  | 30 | 3  |
| 50087 | 5 | 1697194 | 1697207 | 2 | 7  | 14 | TA   | 11 | 5  |
| 50088 | 5 | 1697975 | 1697988 | 2 | 7  | 14 | AT   | 8  | 3  |
| 50089 | 5 | 1698402 | 1698417 | 4 | 4  | 16 | TTGG | 22 | 4  |
| 50092 | 5 | 1710109 | 1710122 | 2 | 7  | 14 | CA   | 28 | 7  |
| 50093 | 5 | 1735707 | 1735746 | 2 | 20 | 40 | AC   | 7  | 9  |
| 50096 | 5 | 1744935 | 1744950 | 2 | 8  | 16 | AC   | 15 | 3  |
| 50097 | 5 | 1751015 | 1751028 | 2 | 7  | 14 | CA   | 30 | 3  |
| 50098 | 5 | 1758982 | 1758995 | 2 | 7  | 14 | AC   | 20 | 3  |
| 50099 | 5 | 1758997 | 1759010 | 2 | 7  | 14 | CA   | 20 | 3  |
| 50100 | 5 | 1760356 | 1760381 | 2 | 13 | 26 | AC   | 19 | 5  |
| 50101 | 5 | 1768200 | 1768213 | 2 | 7  | 14 | GT   | 15 | 4  |
| 50102 | 5 | 1771051 | 1771083 | 3 | 11 | 33 | TCC  | 8  | 5  |
| 50117 | 5 | 1808363 | 1808386 | 2 | 12 | 24 | CA   | 11 | 9  |
| 50127 | 5 | 1823991 | 1824036 | 2 | 23 | 46 | GT   | 6  | 9  |
| 50128 | 5 | 1824136 | 1824147 | 2 | 6  | 12 | CA   | 16 | 5  |
| 50129 | 5 | 1824149 | 1824166 | 2 | 9  | 18 | AC   | 11 | 6  |
| 50130 | 5 | 1824286 | 1824309 | 2 | 12 | 24 | CA   | 13 | 4  |
| 50131 | 5 | 1826568 | 1826581 | 2 | 7  | 14 | AC   | 22 | 6  |
| 50139 | 5 | 1833531 | 1833556 | 2 | 13 | 26 | CA   | 19 | 8  |
| 50140 | 5 | 1839231 | 1839260 | 2 | 15 | 30 | CA   | 12 | 12 |

|       |   |         |         |   |    |    |      |    |    |
|-------|---|---------|---------|---|----|----|------|----|----|
| 50148 | 5 | 1869096 | 1869111 | 2 | 8  | 16 | TG   | 22 | 8  |
| 50150 | 5 | 1881876 | 1881919 | 2 | 22 | 44 | TG   | 14 | 11 |
| 50155 | 5 | 1900885 | 1900922 | 2 | 19 | 38 | TG   | 12 | 12 |
| 50162 | 5 | 1909322 | 1909349 | 2 | 14 | 28 | GT   | 17 | 8  |
| 50172 | 5 | 1929567 | 1929594 | 2 | 14 | 28 | AC   | 16 | 12 |
| 50177 | 5 | 1938747 | 1938762 | 4 | 4  | 16 | ATCC | 16 | 5  |
| 50179 | 5 | 1939637 | 1939651 | 3 | 5  | 15 | GAG  | 21 | 4  |
| 50180 | 5 | 1942162 | 1942181 | 2 | 10 | 20 | CA   | 12 | 6  |
| 50181 | 5 | 1944775 | 1944786 | 2 | 6  | 12 | GT   | 11 | 9  |
| 50182 | 5 | 1944788 | 1944807 | 2 | 10 | 20 | TG   | 15 | 10 |
| 50185 | 5 | 1946957 | 1946998 | 3 | 14 | 42 | TCT  | 6  | 7  |
| 50188 | 5 | 1947780 | 1947795 | 4 | 4  | 16 | AAAT | 16 | 3  |
| 50190 | 5 | 1948855 | 1948870 | 2 | 8  | 16 | TG   | 18 | 4  |
| 50194 | 5 | 1951016 | 1951030 | 3 | 5  | 15 | GCT  | 24 | 4  |
| 50197 | 5 | 1956458 | 1956475 | 2 | 9  | 18 | TG   | 22 | 5  |
| 50198 | 5 | 1959754 | 1959775 | 2 | 11 | 22 | TG   | 11 | 5  |
| 50203 | 5 | 1976322 | 1976333 | 2 | 6  | 12 | GT   | 13 | 4  |
| 50206 | 5 | 1980296 | 1980319 | 3 | 8  | 24 | AAG  | 22 | 4  |
| 50207 | 5 | 1985656 | 1985673 | 3 | 6  | 18 | TTA  | 6  | 6  |
| 50209 | 5 | 1985840 | 1985875 | 2 | 18 | 36 | AC   | 8  | 6  |
| 50216 | 5 | 2021065 | 2021098 | 2 | 17 | 34 | TG   | 25 | 8  |
| 50217 | 5 | 2022953 | 2022982 | 3 | 10 | 30 | TCT  | 14 | 5  |
| 50219 | 5 | 2030605 | 2030622 | 3 | 6  | 18 | CTC  | 7  | 7  |
| 50224 | 5 | 2038877 | 2038922 | 2 | 23 | 46 | GT   | 15 | 10 |
| 50226 | 5 | 2039946 | 2039965 | 4 | 5  | 20 | CTAT | 27 | 4  |
| 50228 | 5 | 2050060 | 2050075 | 4 | 4  | 16 | AGAT | 24 | 3  |
| 50233 | 5 | 2079163 | 2079180 | 2 | 9  | 18 | CA   | 11 | 13 |
| 50239 | 5 | 2097914 | 2097943 | 2 | 15 | 30 | TG   | 12 | 11 |
| 50243 | 5 | 2122819 | 2122846 | 2 | 14 | 28 | GT   | 16 | 6  |
| 50244 | 5 | 2129818 | 2129841 | 2 | 12 | 24 | AG   | 11 | 6  |
| 50248 | 5 | 2138472 | 2138487 | 2 | 8  | 16 | CA   | 11 | 10 |
| 50252 | 5 | 2147002 | 2147021 | 4 | 5  | 20 | AAAT | 19 | 4  |
| 50254 | 5 | 2150477 | 2150534 | 2 | 29 | 58 | AC   | 13 | 9  |
| 50257 | 5 | 2151587 | 2151602 | 2 | 8  | 16 | CA   | 26 | 13 |
| 50269 | 5 | 2171277 | 2171306 | 2 | 15 | 30 | AC   | 8  | 10 |
| 50270 | 5 | 2172001 | 2172018 | 2 | 9  | 18 | GT   | 17 | 12 |
| 50271 | 5 | 2172019 | 2172030 | 2 | 6  | 12 | GC   | 14 | 7  |
| 50272 | 5 | 2172223 | 2172248 | 2 | 13 | 26 | GT   | 13 | 9  |
| 50273 | 5 | 2174226 | 2174240 | 3 | 5  | 15 | CCA  | 34 | 3  |
| 50275 | 5 | 2177054 | 2177067 | 2 | 7  | 14 | GT   | 27 | 3  |
| 50277 | 5 | 2178997 | 2179011 | 3 | 5  | 15 | CAC  | 27 | 6  |
| 50278 | 5 | 2185513 | 2185572 | 3 | 20 | 60 | TCT  | 11 | 9  |
| 50279 | 5 | 2186225 | 2186254 | 2 | 15 | 30 | CT   | 12 | 7  |
| 50282 | 5 | 2192429 | 2192462 | 2 | 17 | 34 | AC   | 14 | 9  |
| 50285 | 5 | 2212493 | 2212542 | 2 | 25 | 50 | GT   | 11 | 14 |
| 50300 | 5 | 2236637 | 2236678 | 2 | 21 | 42 | TG   | 19 | 11 |
| 50301 | 5 | 2242669 | 2242680 | 2 | 6  | 12 | CT   | 24 | 4  |
| 50304 | 5 | 2245450 | 2245481 | 2 | 16 | 32 | GT   | 20 | 14 |
| 50310 | 5 | 2268804 | 2268818 | 3 | 5  | 15 | ATA  | 24 | 3  |
| 50311 | 5 | 2272889 | 2272932 | 2 | 22 | 44 | GT   | 15 | 5  |
| 50313 | 5 | 2289297 | 2289317 | 3 | 7  | 21 | GCT  | 25 | 7  |



|       |   |         |         |   |    |    |      |    |    |
|-------|---|---------|---------|---|----|----|------|----|----|
| 50318 | 5 | 2302144 | 2302179 | 2 | 18 | 36 | GT   | 17 | 15 |
| 50321 | 5 | 2303104 | 2303121 | 2 | 9  | 18 | GT   | 17 | 4  |
| 50333 | 5 | 2330700 | 2330711 | 2 | 6  | 12 | AC   | 16 | 7  |
| 50334 | 5 | 2330895 | 2330952 | 2 | 29 | 58 | AC   | 13 | 12 |
| 50335 | 5 | 2331212 | 2331231 | 2 | 10 | 20 | GT   | 17 | 4  |
| 50336 | 5 | 2347024 | 2347037 | 2 | 7  | 14 | CA   | 31 | 4  |
| 50341 | 5 | 2358683 | 2358700 | 3 | 6  | 18 | TCT  | 24 | 4  |
| 50342 | 5 | 2358826 | 2358843 | 2 | 9  | 18 | CA   | 18 | 4  |
| 50343 | 5 | 2359018 | 2359033 | 2 | 8  | 16 | AC   | 15 | 3  |
| 50347 | 5 | 2362447 | 2362461 | 3 | 5  | 15 | GCC  | 25 | 5  |
| 50369 | 5 | 2387043 | 2387060 | 2 | 9  | 18 | CA   | 17 | 5  |
| 50371 | 5 | 2387321 | 2387332 | 2 | 6  | 12 | GT   | 25 | 3  |
| 50372 | 5 | 2387390 | 2387417 | 2 | 14 | 28 | CA   | 18 | 5  |
| 50373 | 5 | 2387728 | 2387741 | 2 | 7  | 14 | TG   | 14 | 8  |
| 50405 | 5 | 2404187 | 2404214 | 2 | 14 | 28 | CA   | 21 | 8  |
| 50408 | 5 | 2407006 | 2407027 | 2 | 11 | 22 | TC   | 22 | 6  |
| 50409 | 5 | 2407496 | 2407522 | 3 | 9  | 27 | GAT  | 16 | 6  |
| 50414 | 5 | 2413354 | 2413375 | 2 | 11 | 22 | GT   | 14 | 9  |
| 50415 | 5 | 2415735 | 2415746 | 2 | 6  | 12 | GT   | 19 | 3  |
| 50417 | 5 | 2417654 | 2417687 | 2 | 17 | 34 | TG   | 11 | 9  |
| 50421 | 5 | 2429859 | 2429890 | 2 | 16 | 32 | AC   | 12 | 11 |
| 50439 | 5 | 2460359 | 2460386 | 2 | 14 | 28 | CA   | 17 | 5  |
| 50441 | 5 | 2464518 | 2464547 | 2 | 15 | 30 | GT   | 13 | 9  |
| 50443 | 5 | 2465688 | 2465717 | 3 | 10 | 30 | GCT  | 27 | 9  |
| 50446 | 5 | 2468086 | 2468103 | 2 | 9  | 18 | CA   | 22 | 9  |
| 50447 | 5 | 2468106 | 2468119 | 2 | 7  | 14 | CA   | 21 | 7  |
| 50449 | 5 | 2468225 | 2468238 | 2 | 7  | 14 | AC   | 19 | 3  |
| 50452 | 5 | 2475446 | 2475463 | 2 | 9  | 18 | CA   | 21 | 3  |
| 50455 | 5 | 2477432 | 2477451 | 2 | 10 | 20 | TG   | 21 | 5  |
| 50457 | 5 | 2477790 | 2477843 | 3 | 18 | 54 | TCT  | 18 | 14 |
| 50472 | 5 | 2493541 | 2493556 | 2 | 8  | 16 | CA   | 20 | 6  |
| 50474 | 5 | 2504946 | 2504969 | 2 | 12 | 24 | TG   | 17 | 3  |
| 50480 | 5 | 2513108 | 2513123 | 2 | 8  | 16 | CT   | 19 | 6  |
| 50487 | 5 | 2523903 | 2523936 | 2 | 17 | 34 | AC   | 7  | 10 |
| 50488 | 5 | 2524239 | 2524259 | 3 | 7  | 21 | TTC  | 23 | 4  |
| 50489 | 5 | 2526984 | 2527001 | 3 | 6  | 18 | TTC  | 17 | 8  |
| 50493 | 5 | 2527973 | 2527994 | 2 | 11 | 22 | CA   | 12 | 5  |
| 50502 | 5 | 2537945 | 2537959 | 3 | 5  | 15 | TTC  | 15 | 5  |
| 50504 | 5 | 2539131 | 2539154 | 2 | 12 | 24 | TG   | 12 | 4  |
| 50506 | 5 | 2544598 | 2544613 | 2 | 8  | 16 | TG   | 18 | 3  |
| 50516 | 5 | 2555457 | 2555476 | 4 | 5  | 20 | TTTC | 13 | 5  |
| 50519 | 5 | 2556236 | 2556251 | 2 | 8  | 16 | GT   | 15 | 5  |
| 50521 | 5 | 2563540 | 2563555 | 2 | 8  | 16 | TG   | 21 | 4  |
| 50523 | 5 | 2563861 | 2563872 | 2 | 6  | 12 | AC   | 16 | 10 |
| 50532 | 5 | 2569872 | 2569903 | 2 | 16 | 32 | CA   | 10 | 5  |
| 50533 | 5 | 2569932 | 2569947 | 2 | 8  | 16 | CA   | 19 | 5  |
| 50536 | 5 | 2571414 | 2571453 | 2 | 20 | 40 | TG   | 6  | 7  |
| 50548 | 5 | 2581745 | 2581760 | 2 | 8  | 16 | AC   | 13 | 3  |
| 50550 | 5 | 2586627 | 2586642 | 2 | 8  | 16 | CT   | 11 | 3  |
| 50562 | 5 | 2596203 | 2596218 | 2 | 8  | 16 | GT   | 13 | 3  |
| 50568 | 5 | 2601622 | 2601639 | 2 | 9  | 18 | CA   | 13 | 4  |

|       |   |         |         |   |    |    |      |    |    |
|-------|---|---------|---------|---|----|----|------|----|----|
| 50581 | 5 | 2613549 | 2613572 | 2 | 12 | 24 | CT   | 10 | 5  |
| 50582 | 5 | 2614110 | 2614127 | 2 | 9  | 18 | GA   | 19 | 6  |
| 50584 | 5 | 2616743 | 2616780 | 2 | 19 | 38 | GT   | 12 | 6  |
| 50586 | 5 | 2618151 | 2618180 | 2 | 15 | 30 | TG   | 15 | 7  |
| 50593 | 5 | 2619653 | 2619688 | 2 | 18 | 36 | GA   | 12 | 10 |
| 50602 | 5 | 2623938 | 2623965 | 2 | 14 | 28 | TG   | 7  | 9  |
| 50606 | 5 | 2629691 | 2629708 | 3 | 6  | 18 | TTG  | 27 | 3  |
| 50612 | 5 | 2638607 | 2638622 | 2 | 8  | 16 | TG   | 27 | 5  |
| 50613 | 5 | 2639155 | 2639180 | 2 | 13 | 26 | GT   | 19 | 7  |
| 50614 | 5 | 2639361 | 2639390 | 2 | 15 | 30 | CA   | 18 | 8  |
| 50617 | 5 | 2641780 | 2641795 | 2 | 8  | 16 | TG   | 17 | 4  |
| 50623 | 5 | 2652238 | 2652273 | 2 | 18 | 36 | TG   | 19 | 8  |
| 50625 | 5 | 2655704 | 2655719 | 4 | 4  | 16 | ATGT | 14 | 4  |
| 50627 | 5 | 2656441 | 2656460 | 2 | 10 | 20 | TG   | 8  | 5  |
| 50629 | 5 | 2659784 | 2659817 | 2 | 17 | 34 | TG   | 7  | 5  |
| 50630 | 5 | 2660331 | 2660350 | 4 | 5  | 20 | CAAA | 21 | 3  |
| 50637 | 5 | 2662231 | 2662244 | 2 | 7  | 14 | GT   | 15 | 3  |
| 50639 | 5 | 2663307 | 2663324 | 2 | 9  | 18 | GT   | 19 | 3  |
| 50641 | 5 | 2664881 | 2664898 | 2 | 9  | 18 | GT   | 12 | 7  |
| 50643 | 5 | 2666001 | 2666020 | 2 | 10 | 20 | AG   | 12 | 6  |
| 50646 | 5 | 2667444 | 2667465 | 2 | 11 | 22 | CA   | 17 | 6  |
| 50651 | 5 | 2672015 | 2672028 | 2 | 7  | 14 | CA   | 13 | 4  |
| 50652 | 5 | 2672030 | 2672043 | 2 | 7  | 14 | AC   | 16 | 5  |
| 50659 | 5 | 2690056 | 2690067 | 2 | 6  | 12 | TC   | 19 | 3  |
| 50662 | 5 | 2693933 | 2693958 | 2 | 13 | 26 | TG   | 10 | 6  |
| 50663 | 5 | 2694070 | 2694093 | 2 | 12 | 24 | GA   | 13 | 7  |
| 50665 | 5 | 2698051 | 2698066 | 2 | 8  | 16 | TG   | 29 | 3  |
| 50669 | 5 | 2706357 | 2706394 | 2 | 19 | 38 | GT   | 16 | 7  |
| 50672 | 5 | 2711546 | 2711557 | 2 | 6  | 12 | AC   | 22 | 10 |
| 50673 | 5 | 2711562 | 2711577 | 2 | 8  | 16 | AC   | 18 | 9  |
| 50678 | 5 | 2729583 | 2729594 | 2 | 6  | 12 | GT   | 24 | 4  |
| 50681 | 5 | 2730024 | 2730035 | 2 | 6  | 12 | GT   | 30 | 4  |
| 50682 | 5 | 2730273 | 2730308 | 2 | 18 | 36 | AC   | 7  | 10 |
| 50687 | 5 | 2735577 | 2735588 | 2 | 6  | 12 | AC   | 20 | 3  |
| 50689 | 5 | 2736840 | 2736851 | 2 | 6  | 12 | TG   | 33 | 4  |
| 50691 | 5 | 2741407 | 2741422 | 4 | 4  | 16 | TTTA | 21 | 3  |
| 50692 | 5 | 2742971 | 2742982 | 2 | 6  | 12 | CA   | 34 | 4  |
| 50700 | 5 | 2748780 | 2748791 | 2 | 6  | 12 | CT   | 12 | 3  |
| 50703 | 5 | 2749180 | 2749191 | 2 | 6  | 12 | AC   | 11 | 7  |
| 50713 | 5 | 2762346 | 2762365 | 2 | 10 | 20 | CT   | 15 | 4  |
| 50721 | 5 | 2770306 | 2770337 | 2 | 16 | 32 | CT   | 8  | 5  |
| 50729 | 5 | 2795133 | 2795184 | 4 | 13 | 52 | GATA | 24 | 15 |
| 50732 | 5 | 2801143 | 2801163 | 3 | 7  | 21 | ATA  | 7  | 4  |
| 50734 | 5 | 2803706 | 2803735 | 2 | 15 | 30 | GT   | 6  | 10 |
| 50748 | 5 | 2842045 | 2842070 | 2 | 13 | 26 | CA   | 14 | 10 |
| 50749 | 5 | 2842570 | 2842591 | 2 | 11 | 22 | CA   | 20 | 16 |
| 50764 | 5 | 2892603 | 2892654 | 4 | 13 | 52 | AGAT | 17 | 12 |
| 50767 | 5 | 2897517 | 2897530 | 2 | 7  | 14 | TG   | 12 | 4  |
| 50768 | 5 | 2897686 | 2897727 | 2 | 21 | 42 | TG   | 10 | 10 |
| 50770 | 5 | 2899093 | 2899118 | 2 | 13 | 26 | AC   | 11 | 4  |
| 50771 | 5 | 2899774 | 2899793 | 2 | 10 | 20 | AG   | 31 | 9  |

|       |   |         |         |   |    |    |      |    |    |
|-------|---|---------|---------|---|----|----|------|----|----|
| 50780 | 5 | 2933977 | 2933990 | 2 | 7  | 14 | CA   | 26 | 3  |
| 50781 | 5 | 2936296 | 2936329 | 2 | 17 | 34 | AC   | 12 | 7  |
| 50782 | 5 | 2936732 | 2936755 | 2 | 12 | 24 | AC   | 19 | 16 |
| 50783 | 5 | 2938926 | 2938939 | 2 | 7  | 14 | CA   | 24 | 4  |
| 50794 | 5 | 2969441 | 2969454 | 2 | 7  | 14 | CT   | 28 | 4  |
| 50798 | 5 | 2979591 | 2979608 | 3 | 6  | 18 | AAT  | 19 | 5  |
| 50820 | 5 | 3015483 | 3015498 | 2 | 8  | 16 | AC   | 15 | 7  |
| 50828 | 5 | 3021700 | 3021719 | 2 | 10 | 20 | CT   | 25 | 4  |
| 50831 | 5 | 3033562 | 3033594 | 3 | 11 | 33 | CTT  | 24 | 5  |
| 50833 | 5 | 3043335 | 3043352 | 2 | 9  | 18 | TA   | 18 | 3  |
| 50834 | 5 | 3045496 | 3045510 | 3 | 5  | 15 | CTT  | 16 | 8  |
| 50835 | 5 | 3046021 | 3046034 | 2 | 7  | 14 | CT   | 15 | 7  |
| 50839 | 5 | 3054643 | 3054654 | 2 | 6  | 12 | GT   | 27 | 3  |
| 50843 | 5 | 3062689 | 3062742 | 3 | 18 | 54 | AGA  | 22 | 12 |
| 50850 | 5 | 3072073 | 3072104 | 2 | 16 | 32 | CA   | 15 | 6  |
| 50853 | 5 | 3083492 | 3083521 | 2 | 15 | 30 | AC   | 21 | 9  |
| 50864 | 5 | 3114935 | 3114955 | 3 | 7  | 21 | CCT  | 9  | 3  |
| 50871 | 5 | 3126794 | 3126832 | 3 | 13 | 39 | TCA  | 26 | 5  |
| 50872 | 5 | 3135714 | 3135739 | 2 | 13 | 26 | CA   | 17 | 7  |
| 50875 | 5 | 3153138 | 3153159 | 2 | 11 | 22 | CA   | 14 | 8  |
| 50876 | 5 | 3153754 | 3153785 | 2 | 16 | 32 | TG   | 19 | 8  |
| 50880 | 5 | 3168986 | 3169017 | 2 | 16 | 32 | AC   | 17 | 12 |
| 50881 | 5 | 3171607 | 3171626 | 4 | 5  | 20 | ACCA | 28 | 5  |
| 50884 | 5 | 3177764 | 3177781 | 2 | 9  | 18 | TG   | 16 | 11 |
| 50888 | 5 | 3199230 | 3199263 | 2 | 17 | 34 | CA   | 7  | 8  |
| 50890 | 5 | 3218698 | 3218712 | 3 | 5  | 15 | ATT  | 9  | 8  |
| 50899 | 5 | 3239123 | 3239138 | 2 | 8  | 16 | AT   | 22 | 4  |
| 50912 | 5 | 3261547 | 3261572 | 2 | 13 | 26 | AC   | 18 | 10 |
| 50913 | 5 | 3265268 | 3265287 | 2 | 10 | 20 | CA   | 18 | 4  |
| 50932 | 5 | 3304385 | 3304396 | 2 | 6  | 12 | CA   | 28 | 3  |
| 50941 | 5 | 3328079 | 3328094 | 2 | 8  | 16 | AC   | 12 | 3  |
| 50942 | 5 | 3328133 | 3328158 | 2 | 13 | 26 | CA   | 11 | 6  |
| 50944 | 5 | 3328919 | 3328932 | 2 | 7  | 14 | AC   | 23 | 8  |
| 50948 | 5 | 3332718 | 3332747 | 2 | 15 | 30 | CA   | 21 | 13 |
| 50951 | 5 | 3334877 | 3334894 | 3 | 6  | 18 | TGT  | 24 | 4  |
| 50958 | 5 | 3345989 | 3346020 | 2 | 16 | 32 | GT   | 8  | 7  |
| 50962 | 5 | 3350994 | 3351019 | 2 | 13 | 26 | GT   | 12 | 7  |
| 50963 | 5 | 3363841 | 3363861 | 3 | 7  | 21 | TAG  | 29 | 5  |
| 50967 | 5 | 3374145 | 3374160 | 2 | 8  | 16 | TG   | 21 | 5  |
| 50968 | 5 | 3380445 | 3380459 | 3 | 5  | 15 | GAT  | 22 | 5  |
| 50975 | 5 | 3394806 | 3394817 | 2 | 6  | 12 | GT   | 26 | 3  |
| 50976 | 5 | 3397765 | 3397780 | 4 | 4  | 16 | TTAT | 17 | 4  |
| 50982 | 5 | 3423048 | 3423063 | 2 | 8  | 16 | CA   | 10 | 3  |
| 50986 | 5 | 3425404 | 3425424 | 3 | 7  | 21 | GCT  | 20 | 7  |
| 50988 | 5 | 3434196 | 3434209 | 2 | 7  | 14 | CA   | 16 | 3  |
| 50992 | 5 | 3437203 | 3437223 | 3 | 7  | 21 | CTC  | 18 | 3  |
| 50998 | 5 | 3447242 | 3447262 | 3 | 7  | 21 | AGG  | 6  | 3  |
| 51003 | 5 | 3448829 | 3448840 | 2 | 6  | 12 | CT   | 31 | 3  |
| 51005 | 5 | 3451972 | 3451989 | 2 | 9  | 18 | AC   | 20 | 8  |
| 51006 | 5 | 3451991 | 3452004 | 2 | 7  | 14 | CA   | 17 | 7  |
| 51012 | 5 | 3465647 | 3465678 | 2 | 16 | 32 | GT   | 15 | 7  |

|       |   |         |         |   |    |    |      |    |    |
|-------|---|---------|---------|---|----|----|------|----|----|
| 51013 | 5 | 3465815 | 3465836 | 2 | 11 | 22 | GA   | 23 | 9  |
| 51014 | 5 | 3466140 | 3466166 | 3 | 9  | 27 | CCT  | 15 | 4  |
| 51015 | 5 | 3466251 | 3466266 | 2 | 8  | 16 | CT   | 30 | 3  |
| 51021 | 5 | 3470635 | 3470652 | 2 | 9  | 18 | AC   | 18 | 8  |
| 51029 | 5 | 3473350 | 3473387 | 2 | 19 | 38 | GA   | 9  | 5  |
| 51031 | 5 | 3477259 | 3477270 | 2 | 6  | 12 | AC   | 9  | 4  |
| 51036 | 5 | 3485347 | 3485366 | 2 | 10 | 20 | AC   | 28 | 6  |
| 51043 | 5 | 3491489 | 3491514 | 2 | 13 | 26 | CA   | 16 | 7  |
| 51047 | 5 | 3495152 | 3495175 | 2 | 12 | 24 | CT   | 18 | 6  |
| 51049 | 5 | 3501679 | 3501700 | 2 | 11 | 22 | AC   | 22 | 7  |
| 51051 | 5 | 3503130 | 3503155 | 2 | 13 | 26 | GA   | 15 | 7  |
| 51058 | 5 | 3516621 | 3516660 | 2 | 20 | 40 | AC   | 12 | 8  |
| 51061 | 5 | 3527633 | 3527660 | 2 | 14 | 28 | AG   | 9  | 8  |
| 51065 | 5 | 3532635 | 3532646 | 2 | 6  | 12 | AC   | 16 | 3  |
| 51068 | 5 | 3533370 | 3533390 | 3 | 7  | 21 | AAG  | 18 | 3  |
| 51070 | 5 | 3536698 | 3536719 | 2 | 11 | 22 | GT   | 10 | 11 |
| 51075 | 5 | 3544582 | 3544597 | 2 | 8  | 16 | AC   | 15 | 9  |
| 51081 | 5 | 3549379 | 3549390 | 2 | 6  | 12 | CA   | 26 | 8  |
| 51082 | 5 | 3549430 | 3549450 | 3 | 7  | 21 | CAA  | 19 | 6  |
| 51083 | 5 | 3551137 | 3551160 | 3 | 8  | 24 | CAG  | 26 | 3  |
| 51084 | 5 | 3551228 | 3551257 | 2 | 15 | 30 | CA   | 15 | 9  |
| 51085 | 5 | 3555446 | 3555472 | 3 | 9  | 27 | GAG  | 10 | 9  |
| 51087 | 5 | 3558390 | 3558425 | 2 | 18 | 36 | CA   | 13 | 11 |
| 51089 | 5 | 3566338 | 3566353 | 2 | 8  | 16 | TG   | 19 | 5  |
| 51092 | 5 | 3568093 | 3568106 | 2 | 7  | 14 | GT   | 12 | 4  |
| 51094 | 5 | 3574758 | 3574783 | 2 | 13 | 26 | AC   | 20 | 4  |
| 51099 | 5 | 3590503 | 3590514 | 2 | 6  | 12 | AC   | 24 | 8  |
| 51101 | 5 | 3592268 | 3592291 | 2 | 12 | 24 | AC   | 12 | 11 |
| 51106 | 5 | 3595000 | 3595017 | 3 | 6  | 18 | CCT  | 21 | 3  |
| 51108 | 5 | 3598646 | 3598661 | 4 | 4  | 16 | TAGC | 21 | 4  |
| 51111 | 5 | 3612342 | 3612362 | 3 | 7  | 21 | CCA  | 23 | 3  |
| 51116 | 5 | 3626974 | 3626988 | 3 | 5  | 15 | ATT  | 6  | 3  |
| 51117 | 5 | 3628484 | 3628517 | 2 | 17 | 34 | TG   | 20 | 16 |
| 51150 | 5 | 3688354 | 3688386 | 3 | 11 | 33 | GCA  | 14 | 7  |
| 51159 | 5 | 3702050 | 3702070 | 3 | 7  | 21 | CTG  | 24 | 6  |
| 51170 | 5 | 3716164 | 3716187 | 4 | 6  | 24 | AATA | 6  | 4  |
| 51173 | 5 | 3719173 | 3719186 | 2 | 7  | 14 | TC   | 18 | 9  |
| 51183 | 5 | 3733580 | 3733594 | 3 | 5  | 15 | AAC  | 22 | 4  |
| 51186 | 5 | 3741236 | 3741253 | 3 | 6  | 18 | TTA  | 24 | 3  |
| 51187 | 5 | 3743639 | 3743664 | 2 | 13 | 26 | AC   | 25 | 8  |
| 51188 | 5 | 3745264 | 3745290 | 3 | 9  | 27 | AAT  | 10 | 6  |
| 51190 | 5 | 3748595 | 3748618 | 3 | 8  | 24 | GAG  | 28 | 4  |
| 51191 | 5 | 3751446 | 3751460 | 3 | 5  | 15 | TTA  | 13 | 8  |
| 51192 | 5 | 3751812 | 3751837 | 2 | 13 | 26 | AC   | 8  | 9  |
| 51194 | 5 | 3754071 | 3754086 | 2 | 8  | 16 | CA   | 27 | 6  |
| 51196 | 5 | 3757626 | 3757646 | 3 | 7  | 21 | GAT  | 30 | 4  |
| 51206 | 5 | 3772691 | 3772714 | 2 | 12 | 24 | AC   | 14 | 10 |
| 51208 | 5 | 3775387 | 3775404 | 3 | 6  | 18 | GAG  | 20 | 4  |
| 51209 | 5 | 3779371 | 3779382 | 2 | 6  | 12 | GT   | 17 | 4  |
| 51210 | 5 | 3779767 | 3779778 | 2 | 6  | 12 | AT   | 27 | 10 |
| 51220 | 5 | 3811080 | 3811097 | 3 | 6  | 18 | CAC  | 27 | 3  |

|       |   |         |         |   |    |    |      |    |    |
|-------|---|---------|---------|---|----|----|------|----|----|
| 51225 | 5 | 3823878 | 3823889 | 2 | 6  | 12 | CA   | 31 | 3  |
| 51228 | 5 | 3843364 | 3843377 | 2 | 7  | 14 | AC   | 25 | 3  |
| 51230 | 5 | 3846997 | 3847014 | 3 | 6  | 18 | GAG  | 17 | 5  |
| 51232 | 5 | 3849285 | 3849296 | 2 | 6  | 12 | TA   | 7  | 3  |
| 51236 | 5 | 3860611 | 3860622 | 2 | 6  | 12 | GA   | 10 | 8  |
| 51237 | 5 | 3860624 | 3860637 | 2 | 7  | 14 | AG   | 10 | 11 |
| 51238 | 5 | 3860764 | 3860779 | 2 | 8  | 16 | CA   | 19 | 5  |
| 51244 | 5 | 3883622 | 3883648 | 3 | 9  | 27 | CTC  | 20 | 5  |
| 51245 | 5 | 3884335 | 3884367 | 3 | 11 | 33 | CAG  | 25 | 6  |
| 51252 | 5 | 3902354 | 3902373 | 4 | 5  | 20 | TTTG | 29 | 3  |
| 51255 | 5 | 3904607 | 3904620 | 2 | 7  | 14 | AC   | 11 | 9  |
| 51257 | 5 | 3908241 | 3908260 | 2 | 10 | 20 | TG   | 21 | 8  |
| 51272 | 5 | 3969316 | 3969341 | 2 | 13 | 26 | TG   | 25 | 4  |
| 51279 | 5 | 3977194 | 3977213 | 4 | 5  | 20 | TTTC | 19 | 6  |
| 51284 | 5 | 3984917 | 3984931 | 3 | 5  | 15 | AGA  | 28 | 3  |
| 51288 | 5 | 3990774 | 3990787 | 2 | 7  | 14 | CT   | 15 | 3  |
| 51290 | 5 | 3991158 | 3991175 | 3 | 6  | 18 | CTT  | 15 | 3  |
| 51299 | 5 | 4000079 | 4000099 | 3 | 7  | 21 | AAC  | 17 | 7  |
| 51313 | 5 | 4013666 | 4013679 | 2 | 7  | 14 | AG   | 19 | 4  |
| 51315 | 5 | 4014506 | 4014519 | 2 | 7  | 14 | TG   | 19 | 3  |
| 51326 | 5 | 4027466 | 4027497 | 2 | 16 | 32 | GT   | 17 | 12 |
| 51327 | 5 | 4027649 | 4027666 | 2 | 9  | 18 | CA   | 18 | 17 |
| 51328 | 5 | 4027822 | 4027837 | 2 | 8  | 16 | CA   | 21 | 5  |
| 51334 | 5 | 4029594 | 4029613 | 2 | 10 | 20 | CT   | 11 | 3  |
| 51335 | 5 | 4029635 | 4029655 | 3 | 7  | 21 | CAC  | 26 | 3  |
| 51338 | 5 | 4032466 | 4032486 | 3 | 7  | 21 | TGG  | 25 | 3  |
| 51339 | 5 | 4034235 | 4034270 | 4 | 9  | 36 | GCAG | 26 | 6  |
| 51340 | 5 | 4034706 | 4034735 | 2 | 15 | 30 | AC   | 11 | 9  |
| 51349 | 5 | 4038662 | 4038676 | 3 | 5  | 15 | AGC  | 14 | 5  |
| 51355 | 5 | 4040212 | 4040229 | 3 | 6  | 18 | GCA  | 20 | 3  |
| 51357 | 5 | 4040981 | 4040992 | 2 | 6  | 12 | AC   | 11 | 3  |
| 51359 | 5 | 4041892 | 4041915 | 2 | 12 | 24 | CA   | 21 | 12 |
| 51360 | 5 | 4042790 | 4042813 | 3 | 8  | 24 | AAT  | 10 | 4  |
| 51372 | 5 | 4076976 | 4076989 | 2 | 7  | 14 | CT   | 26 | 4  |
| 51375 | 5 | 4087009 | 4087052 | 2 | 22 | 44 | GA   | 7  | 11 |
| 51376 | 5 | 4090586 | 4090629 | 2 | 22 | 44 | GA   | 12 | 13 |
| 51383 | 5 | 4113190 | 4113203 | 2 | 7  | 14 | GA   | 32 | 3  |
| 51391 | 5 | 4127994 | 4128009 | 2 | 8  | 16 | TG   | 18 | 5  |
| 51392 | 5 | 4133565 | 4133590 | 2 | 13 | 26 | TG   | 15 | 8  |
| 51394 | 5 | 4134698 | 4134711 | 2 | 7  | 14 | TC   | 31 | 5  |
| 51405 | 5 | 4204506 | 4204523 | 2 | 9  | 18 | AC   | 22 | 7  |
| 51409 | 5 | 4206358 | 4206373 | 4 | 4  | 16 | TTTG | 30 | 4  |
| 51411 | 5 | 4212347 | 4212366 | 4 | 5  | 20 | AGGA | 28 | 5  |
| 51414 | 5 | 4216665 | 4216684 | 4 | 5  | 20 | AAAT | 13 | 4  |
| 51417 | 5 | 4218781 | 4218792 | 2 | 6  | 12 | AC   | 23 | 3  |
| 51420 | 5 | 4221498 | 4221515 | 3 | 6  | 18 | GAA  | 31 | 3  |
| 51427 | 5 | 4229736 | 4229753 | 3 | 6  | 18 | GAG  | 26 | 5  |
| 51436 | 5 | 4287680 | 4287694 | 3 | 5  | 15 | TCT  | 26 | 4  |
| 51449 | 5 | 4320700 | 4320731 | 4 | 8  | 32 | TCCA | 22 | 7  |
| 51460 | 5 | 4338511 | 4338538 | 2 | 14 | 28 | GT   | 9  | 7  |
| 51461 | 5 | 4344894 | 4344923 | 3 | 10 | 30 | CCT  | 12 | 5  |

|       |   |         |         |   |    |    |      |    |    |
|-------|---|---------|---------|---|----|----|------|----|----|
| 51462 | 5 | 4347047 | 4347062 | 2 | 8  | 16 | GT   | 20 | 4  |
| 51463 | 5 | 4350050 | 4350061 | 2 | 6  | 12 | TC   | 20 | 4  |
| 51468 | 5 | 4364958 | 4364971 | 2 | 7  | 14 | TG   | 23 | 7  |
| 51483 | 5 | 4407650 | 4407669 | 2 | 10 | 20 | AC   | 14 | 6  |
| 51484 | 5 | 4407695 | 4407706 | 2 | 6  | 12 | TG   | 30 | 11 |
| 51485 | 5 | 4408464 | 4408489 | 2 | 13 | 26 | TG   | 22 | 12 |
| 51488 | 5 | 4418215 | 4418238 | 2 | 12 | 24 | AC   | 18 | 9  |
| 51495 | 5 | 4431906 | 4431945 | 2 | 20 | 40 | AC   | 8  | 9  |
| 51497 | 5 | 4445490 | 4445507 | 2 | 9  | 18 | AC   | 20 | 4  |
| 51500 | 5 | 4457686 | 4457701 | 4 | 4  | 16 | GTCT | 28 | 3  |
| 51503 | 5 | 4465801 | 4465816 | 4 | 4  | 16 | CAGG | 25 | 4  |
| 51504 | 5 | 4466496 | 4466516 | 3 | 7  | 21 | GCT  | 23 | 4  |
| 51510 | 5 | 4474328 | 4474341 | 2 | 7  | 14 | AG   | 21 | 3  |
| 51517 | 5 | 4478898 | 4478924 | 3 | 9  | 27 | TCA  | 15 | 9  |
| 51519 | 5 | 4480457 | 4480477 | 3 | 7  | 21 | ATG  | 28 | 3  |
| 51522 | 5 | 4481942 | 4481965 | 2 | 12 | 24 | TG   | 18 | 15 |
| 51525 | 5 | 4493443 | 4493454 | 2 | 6  | 12 | CA   | 19 | 7  |
| 51526 | 5 | 4493457 | 4493470 | 2 | 7  | 14 | CA   | 15 | 4  |
| 51532 | 5 | 4507194 | 4507223 | 2 | 15 | 30 | TG   | 19 | 11 |
| 51539 | 5 | 4522905 | 4522922 | 3 | 6  | 18 | CTC  | 14 | 3  |
| 51550 | 5 | 4543715 | 4543730 | 4 | 4  | 16 | TTTG | 25 | 4  |
| 51551 | 5 | 4544314 | 4544327 | 2 | 7  | 14 | AT   | 28 | 9  |
| 51554 | 5 | 4559514 | 4559537 | 4 | 6  | 24 | CCAG | 25 | 7  |
| 51558 | 5 | 4574393 | 4574410 | 2 | 9  | 18 | CT   | 21 | 5  |
| 51560 | 5 | 4576579 | 4576605 | 3 | 9  | 27 | AGC  | 20 | 7  |
| 51563 | 5 | 4588568 | 4588585 | 2 | 9  | 18 | GT   | 9  | 5  |
| 51566 | 5 | 4597895 | 4597910 | 2 | 8  | 16 | AC   | 22 | 6  |
| 51568 | 5 | 4601736 | 4601750 | 3 | 5  | 15 | AGG  | 18 | 5  |
| 51570 | 5 | 4607460 | 4607479 | 2 | 10 | 20 | GT   | 26 | 9  |
| 51584 | 5 | 4624032 | 4624055 | 2 | 12 | 24 | CA   | 16 | 11 |
| 51588 | 5 | 4628226 | 4628243 | 2 | 9  | 18 | CT   | 10 | 3  |
| 51593 | 5 | 4632548 | 4632565 | 2 | 9  | 18 | AC   | 19 | 7  |
| 51594 | 5 | 4639227 | 4639244 | 2 | 9  | 18 | TG   | 20 | 3  |
| 51595 | 5 | 4641883 | 4641898 | 4 | 4  | 16 | GACA | 21 | 4  |
| 51597 | 5 | 4646266 | 4646281 | 2 | 8  | 16 | TG   | 17 | 5  |
| 51598 | 5 | 4647028 | 4647045 | 2 | 9  | 18 | TG   | 16 | 5  |
| 51599 | 5 | 4647522 | 4647536 | 3 | 5  | 15 | GCT  | 26 | 7  |
| 51609 | 5 | 4651131 | 4651182 | 2 | 26 | 52 | AC   | 9  | 10 |
| 51610 | 5 | 4651480 | 4651505 | 2 | 13 | 26 | AC   | 15 | 8  |
| 51612 | 5 | 4651726 | 4651751 | 2 | 13 | 26 | GT   | 13 | 3  |
| 51619 | 5 | 4656645 | 4656660 | 2 | 8  | 16 | AG   | 26 | 5  |
| 51622 | 5 | 4659513 | 4659534 | 2 | 11 | 22 | AC   | 22 | 4  |
| 51623 | 5 | 4660276 | 4660287 | 2 | 6  | 12 | TC   | 17 | 6  |
| 51624 | 5 | 4660288 | 4660307 | 2 | 10 | 20 | AC   | 19 | 7  |
| 51625 | 5 | 4662076 | 4662113 | 2 | 19 | 38 | CA   | 13 | 7  |
| 51630 | 5 | 4678201 | 4678214 | 2 | 7  | 14 | AG   | 14 | 3  |
| 51633 | 5 | 4679104 | 4679133 | 2 | 15 | 30 | TG   | 11 | 3  |
| 51660 | 5 | 4710159 | 4710179 | 3 | 7  | 21 | GAG  | 20 | 4  |
| 51661 | 5 | 4710217 | 4710230 | 2 | 7  | 14 | GT   | 16 | 3  |
| 51671 | 5 | 4730374 | 4730393 | 2 | 10 | 20 | GT   | 14 | 4  |
| 51672 | 5 | 4731553 | 4731570 | 3 | 6  | 18 | GGA  | 21 | 4  |

|       |   |         |         |   |    |    |       |    |    |
|-------|---|---------|---------|---|----|----|-------|----|----|
| 51673 | 5 | 4733036 | 4733047 | 2 | 6  | 12 | TG    | 27 | 3  |
| 51678 | 5 | 4743529 | 4743542 | 2 | 7  | 14 | AC    | 29 | 7  |
| 51679 | 5 | 4743685 | 4743710 | 2 | 13 | 26 | CA    | 11 | 9  |
| 51680 | 5 | 4743930 | 4743963 | 2 | 17 | 34 | GT    | 23 | 10 |
| 51685 | 5 | 4744849 | 4744863 | 3 | 5  | 15 | CCT   | 19 | 5  |
| 51689 | 5 | 4745551 | 4745571 | 3 | 7  | 21 | CCT   | 22 | 3  |
| 51690 | 5 | 4745888 | 4745905 | 3 | 6  | 18 | AAG   | 23 | 4  |
| 51692 | 5 | 4749270 | 4749285 | 2 | 8  | 16 | CA    | 24 | 7  |
| 51693 | 5 | 4752639 | 4752656 | 2 | 9  | 18 | TA    | 12 | 10 |
| 51707 | 5 | 4767806 | 4767821 | 2 | 8  | 16 | GT    | 10 | 3  |
| 51726 | 5 | 4793076 | 4793093 | 2 | 9  | 18 | AC    | 15 | 5  |
| 51727 | 5 | 4793558 | 4793578 | 3 | 7  | 21 | TGC   | 23 | 3  |
| 51729 | 5 | 4796101 | 4796120 | 2 | 10 | 20 | GT    | 21 | 7  |
| 51730 | 5 | 4796396 | 4796411 | 2 | 8  | 16 | TG    | 21 | 5  |
| 51731 | 5 | 4797147 | 4797164 | 3 | 6  | 18 | TCT   | 20 | 4  |
| 51732 | 5 | 4797997 | 4798020 | 3 | 8  | 24 | AAC   | 27 | 7  |
| 51733 | 5 | 4799568 | 4799583 | 2 | 8  | 16 | AT    | 7  | 4  |
| 51735 | 5 | 4808603 | 4808616 | 2 | 7  | 14 | AC    | 23 | 6  |
| 51740 | 5 | 4822086 | 4822111 | 2 | 13 | 26 | CA    | 9  | 9  |
| 51751 | 5 | 4842610 | 4842633 | 2 | 12 | 24 | TG    | 16 | 7  |
| 51754 | 5 | 4847484 | 4847499 | 2 | 8  | 16 | TG    | 20 | 3  |
| 51755 | 5 | 4851870 | 4851893 | 4 | 6  | 24 | AAAC  | 22 | 3  |
| 51765 | 5 | 4893566 | 4893613 | 4 | 12 | 48 | TG GT | 16 | 8  |
| 51767 | 5 | 4897263 | 4897276 | 2 | 7  | 14 | TA    | 13 | 4  |
| 51768 | 5 | 4900708 | 4900739 | 2 | 16 | 32 | CA    | 14 | 11 |
| 51769 | 5 | 4900870 | 4900881 | 2 | 6  | 12 | CA    | 22 | 6  |
| 51771 | 5 | 4903551 | 4903577 | 3 | 9  | 27 | CTG   | 22 | 8  |
| 51772 | 5 | 4904812 | 4904845 | 2 | 17 | 34 | AC    | 13 | 11 |
| 51773 | 5 | 4906920 | 4906940 | 3 | 7  | 21 | CCA   | 11 | 5  |
| 51776 | 5 | 4922098 | 4922109 | 2 | 6  | 12 | TG    | 29 | 4  |
| 51785 | 5 | 4945242 | 4945255 | 2 | 7  | 14 | TC    | 14 | 7  |
| 51786 | 5 | 4945435 | 4945460 | 2 | 13 | 26 | GT    | 16 | 12 |
| 51787 | 5 | 4945632 | 4945643 | 2 | 6  | 12 | CT    | 22 | 4  |
| 51788 | 5 | 4945707 | 4945721 | 3 | 5  | 15 | CTC   | 27 | 6  |
| 51791 | 5 | 4954344 | 4954369 | 2 | 13 | 26 | AC    | 20 | 8  |
| 51794 | 5 | 4956347 | 4956386 | 2 | 20 | 40 | GT    | 13 | 14 |
| 51798 | 5 | 4960335 | 4960360 | 2 | 13 | 26 | TG    | 14 | 7  |
| 51803 | 5 | 4968013 | 4968034 | 2 | 11 | 22 | GT    | 22 | 11 |
| 51804 | 5 | 4968196 | 4968229 | 2 | 17 | 34 | GT    | 11 | 11 |
| 51806 | 5 | 4975203 | 4975230 | 4 | 7  | 28 | CTTC  | 12 | 5  |
| 51812 | 5 | 4980715 | 4980740 | 2 | 13 | 26 | TC    | 7  | 5  |
| 51815 | 5 | 4988135 | 4988146 | 2 | 6  | 12 | GT    | 32 | 3  |
| 51820 | 5 | 4996676 | 4996697 | 2 | 11 | 22 | GT    | 20 | 4  |
| 51826 | 5 | 5009068 | 5009103 | 2 | 18 | 36 | CA    | 11 | 16 |
| 51828 | 5 | 5015620 | 5015637 | 2 | 9  | 18 | CA    | 17 | 8  |
| 51831 | 5 | 5025429 | 5025472 | 2 | 22 | 44 | TG    | 11 | 8  |
| 51833 | 5 | 5025644 | 5025655 | 2 | 6  | 12 | GT    | 25 | 5  |
| 51834 | 5 | 5027662 | 5027679 | 2 | 9  | 18 | TC    | 13 | 4  |
| 51839 | 5 | 5038820 | 5038833 | 2 | 7  | 14 | TC    | 19 | 3  |
| 51840 | 5 | 5039012 | 5039026 | 3 | 5  | 15 | CTT   | 14 | 8  |
| 51841 | 5 | 5041570 | 5041599 | 2 | 15 | 30 | AC    | 7  | 11 |

|       |   |         |         |   |    |    |      |    |    |
|-------|---|---------|---------|---|----|----|------|----|----|
| 51853 | 5 | 5060174 | 5060197 | 2 | 12 | 24 | AC   | 19 | 11 |
| 51854 | 5 | 5062130 | 5062169 | 2 | 20 | 40 | CA   | 18 | 7  |
| 51860 | 5 | 5064615 | 5064626 | 2 | 6  | 12 | CA   | 23 | 5  |
| 51862 | 5 | 5064798 | 5064811 | 2 | 7  | 14 | GA   | 16 | 4  |
| 51863 | 5 | 5064838 | 5064869 | 2 | 16 | 32 | GA   | 12 | 10 |
| 51864 | 5 | 5070374 | 5070411 | 2 | 19 | 38 | GT   | 9  | 10 |
| 51865 | 5 | 5074685 | 5074714 | 2 | 15 | 30 | CA   | 7  | 10 |
| 51866 | 5 | 5082189 | 5082208 | 2 | 10 | 20 | AC   | 16 | 10 |
| 51871 | 5 | 5104499 | 5104510 | 2 | 6  | 12 | AC   | 30 | 3  |
| 51879 | 5 | 5125093 | 5125107 | 3 | 5  | 15 | CAG  | 22 | 4  |
| 51887 | 5 | 5139405 | 5139432 | 2 | 14 | 28 | GT   | 8  | 9  |
| 51890 | 5 | 5140376 | 5140403 | 2 | 14 | 28 | CA   | 25 | 8  |
| 51892 | 5 | 5141092 | 5141119 | 2 | 14 | 28 | CT   | 17 | 7  |
| 51905 | 5 | 5170770 | 5170783 | 2 | 7  | 14 | TG   | 16 | 3  |
| 51906 | 5 | 5171317 | 5171344 | 2 | 14 | 28 | TG   | 26 | 17 |
| 51926 | 5 | 5217993 | 5218012 | 2 | 10 | 20 | CT   | 15 | 3  |
| 51934 | 5 | 5227577 | 5227609 | 3 | 11 | 33 | CTG  | 26 | 17 |
| 51935 | 5 | 5228922 | 5228945 | 2 | 12 | 24 | TC   | 17 | 7  |
| 51936 | 5 | 5229125 | 5229140 | 2 | 8  | 16 | GT   | 17 | 7  |
| 51940 | 5 | 5230598 | 5230627 | 2 | 15 | 30 | AC   | 14 | 13 |
| 51941 | 5 | 5231064 | 5231091 | 2 | 14 | 28 | AG   | 19 | 15 |
| 51943 | 5 | 5233720 | 5233731 | 2 | 6  | 12 | AC   | 33 | 3  |
| 51944 | 5 | 5234035 | 5234062 | 2 | 14 | 28 | TG   | 17 | 12 |
| 51945 | 5 | 5234257 | 5234270 | 2 | 7  | 14 | CA   | 14 | 3  |
| 51946 | 5 | 5235135 | 5235148 | 2 | 7  | 14 | GT   | 23 | 8  |
| 51950 | 5 | 5236774 | 5236794 | 3 | 7  | 21 | TAA  | 10 | 6  |
| 51951 | 5 | 5238065 | 5238088 | 2 | 12 | 24 | AC   | 20 | 6  |
| 51952 | 5 | 5238227 | 5238248 | 2 | 11 | 22 | TG   | 18 | 4  |
| 51955 | 5 | 5244776 | 5244793 | 2 | 9  | 18 | CA   | 24 | 3  |
| 51956 | 5 | 5245076 | 5245091 | 4 | 4  | 16 | ACAA | 17 | 4  |
| 51957 | 5 | 5245633 | 5245666 | 2 | 17 | 34 | CA   | 10 | 9  |
| 51960 | 5 | 5267189 | 5267208 | 4 | 5  | 20 | TTAT | 21 | 3  |
| 51961 | 5 | 5274348 | 5274361 | 2 | 7  | 14 | GA   | 12 | 5  |
| 51963 | 5 | 5274677 | 5274696 | 2 | 10 | 20 | CA   | 22 | 3  |
| 51972 | 5 | 5287046 | 5287069 | 2 | 12 | 24 | CA   | 15 | 9  |
| 51973 | 5 | 5287169 | 5287192 | 2 | 12 | 24 | CA   | 10 | 6  |
| 51974 | 5 | 5287672 | 5287683 | 2 | 6  | 12 | GT   | 22 | 3  |
| 51981 | 5 | 5305685 | 5305700 | 2 | 8  | 16 | GT   | 22 | 8  |
| 51990 | 5 | 5320279 | 5320296 | 3 | 6  | 18 | ACC  | 17 | 7  |
| 51991 | 5 | 5321935 | 5321962 | 2 | 14 | 28 | GT   | 14 | 8  |
| 51994 | 5 | 5322761 | 5322778 | 2 | 9  | 18 | TG   | 13 | 5  |
| 51997 | 5 | 5323427 | 5323480 | 3 | 18 | 54 | AGA  | 15 | 7  |
| 51998 | 5 | 5325693 | 5325707 | 3 | 5  | 15 | GGT  | 14 | 4  |
| 52002 | 5 | 5336288 | 5336311 | 2 | 12 | 24 | TG   | 19 | 10 |
| 52003 | 5 | 5336412 | 5336435 | 2 | 12 | 24 | AC   | 25 | 6  |
| 52005 | 5 | 5336894 | 5336909 | 2 | 8  | 16 | TG   | 21 | 5  |
| 52007 | 5 | 5338055 | 5338072 | 2 | 9  | 18 | TG   | 25 | 3  |
| 52011 | 5 | 5343511 | 5343526 | 2 | 8  | 16 | GT   | 23 | 3  |
| 52012 | 5 | 5343707 | 5343744 | 2 | 19 | 38 | AC   | 13 | 10 |
| 52016 | 5 | 5346815 | 5346842 | 2 | 14 | 28 | TG   | 18 | 11 |
| 52017 | 5 | 5347499 | 5347514 | 2 | 8  | 16 | TG   | 20 | 10 |



|       |   |         |         |   |    |    |      |    |    |
|-------|---|---------|---------|---|----|----|------|----|----|
| 52018 | 5 | 5347517 | 5347532 | 2 | 8  | 16 | TG   | 16 | 5  |
| 52019 | 5 | 5347752 | 5347765 | 2 | 7  | 14 | AC   | 21 | 4  |
| 52020 | 5 | 5349092 | 5349115 | 2 | 12 | 24 | AG   | 23 | 7  |
| 52027 | 5 | 5356388 | 5356403 | 2 | 8  | 16 | CA   | 9  | 8  |
| 52029 | 5 | 5356490 | 5356503 | 2 | 7  | 14 | TG   | 15 | 4  |
| 52031 | 5 | 5359336 | 5359365 | 2 | 15 | 30 | CT   | 8  | 6  |
| 52035 | 5 | 5362176 | 5362203 | 2 | 14 | 28 | AC   | 13 | 6  |
| 52047 | 5 | 5371859 | 5371874 | 4 | 4  | 16 | GACT | 24 | 4  |
| 52054 | 5 | 5386531 | 5386542 | 2 | 6  | 12 | GA   | 10 | 9  |
| 52058 | 5 | 5395754 | 5395767 | 2 | 7  | 14 | CA   | 14 | 3  |
| 52069 | 5 | 5408411 | 5408434 | 3 | 8  | 24 | AGC  | 29 | 6  |
| 52071 | 5 | 5409611 | 5409626 | 4 | 4  | 16 | TATC | 24 | 4  |
| 52072 | 5 | 5410858 | 5410887 | 3 | 10 | 30 | TCT  | 26 | 5  |
| 52073 | 5 | 5411202 | 5411215 | 2 | 7  | 14 | CA   | 11 | 5  |
| 52076 | 5 | 5411382 | 5411409 | 2 | 14 | 28 | GA   | 10 | 12 |
| 52077 | 5 | 5411761 | 5411780 | 2 | 10 | 20 | GT   | 21 | 7  |
| 52079 | 5 | 5412046 | 5412067 | 2 | 11 | 22 | GT   | 13 | 10 |
| 52082 | 5 | 5412670 | 5412681 | 2 | 6  | 12 | GT   | 15 | 7  |
| 52083 | 5 | 5412682 | 5412693 | 2 | 6  | 12 | GA   | 16 | 5  |
| 52085 | 5 | 5412836 | 5412847 | 2 | 6  | 12 | AC   | 22 | 3  |
| 52087 | 5 | 5414251 | 5414272 | 2 | 11 | 22 | CA   | 10 | 9  |
| 52090 | 5 | 5415719 | 5415742 | 2 | 12 | 24 | TG   | 18 | 8  |
| 52091 | 5 | 5416230 | 5416245 | 2 | 8  | 16 | TG   | 26 | 8  |
| 52096 | 5 | 5419879 | 5419896 | 2 | 9  | 18 | GT   | 23 | 5  |
| 52098 | 5 | 5420421 | 5420432 | 2 | 6  | 12 | TC   | 24 | 3  |
| 52100 | 5 | 5421166 | 5421191 | 2 | 13 | 26 | CA   | 17 | 6  |
| 52101 | 5 | 5421265 | 5421290 | 2 | 13 | 26 | CA   | 18 | 6  |
| 52104 | 5 | 5423491 | 5423506 | 4 | 4  | 16 | GTGC | 22 | 6  |
| 52105 | 5 | 5424207 | 5424220 | 2 | 7  | 14 | TG   | 16 | 3  |
| 52107 | 5 | 5425210 | 5425241 | 2 | 16 | 32 | AC   | 13 | 5  |
| 52108 | 5 | 5425374 | 5425391 | 2 | 9  | 18 | GT   | 19 | 6  |
| 52109 | 5 | 5425562 | 5425581 | 2 | 10 | 20 | CA   | 22 | 5  |
| 52110 | 5 | 5425711 | 5425728 | 2 | 9  | 18 | CA   | 23 | 7  |
| 52111 | 5 | 5428719 | 5428730 | 2 | 6  | 12 | CA   | 31 | 3  |
| 52114 | 5 | 5429100 | 5429139 | 2 | 20 | 40 | GT   | 7  | 5  |
| 52116 | 5 | 5431081 | 5431098 | 3 | 6  | 18 | AAC  | 27 | 8  |
| 52117 | 5 | 5431453 | 5431464 | 2 | 6  | 12 | TG   | 24 | 4  |
| 52121 | 5 | 5432493 | 5432514 | 2 | 11 | 22 | TC   | 14 | 7  |
| 52122 | 5 | 5432629 | 5432652 | 2 | 12 | 24 | AC   | 16 | 6  |
| 52123 | 5 | 5432694 | 5432713 | 2 | 10 | 20 | TG   | 22 | 8  |
| 52124 | 5 | 5432809 | 5432826 | 2 | 9  | 18 | CT   | 20 | 3  |
| 52130 | 5 | 5436759 | 5436773 | 3 | 5  | 15 | TGG  | 15 | 4  |
| 52131 | 5 | 5436855 | 5436868 | 2 | 7  | 14 | TG   | 24 | 4  |
| 52133 | 5 | 5438842 | 5438857 | 2 | 8  | 16 | GA   | 27 | 3  |
| 52135 | 5 | 5441594 | 5441609 | 2 | 8  | 16 | CA   | 23 | 4  |
| 52138 | 5 | 5444706 | 5444729 | 3 | 8  | 24 | GAG  | 31 | 5  |
| 52140 | 5 | 5449485 | 5449514 | 2 | 15 | 30 | CA   | 13 | 5  |
| 52143 | 5 | 5451752 | 5451763 | 2 | 6  | 12 | TG   | 18 | 5  |
| 52144 | 5 | 5452039 | 5452056 | 2 | 9  | 18 | CA   | 10 | 8  |
| 52145 | 5 | 5452167 | 5452186 | 2 | 10 | 20 | GA   | 19 | 7  |
| 52147 | 5 | 5452238 | 5452249 | 2 | 6  | 12 | GA   | 24 | 3  |

|       |   |         |         |   |    |    |      |    |    |
|-------|---|---------|---------|---|----|----|------|----|----|
| 52153 | 5 | 5455387 | 5455398 | 2 | 6  | 12 | AG   | 17 | 3  |
| 52155 | 5 | 5455862 | 5455891 | 2 | 15 | 30 | TG   | 16 | 9  |
| 52156 | 5 | 5456024 | 5456043 | 2 | 10 | 20 | AG   | 24 | 4  |
| 52158 | 5 | 5457066 | 5457087 | 2 | 11 | 22 | TG   | 9  | 4  |
| 52161 | 5 | 5461026 | 5461051 | 2 | 13 | 26 | CT   | 17 | 8  |
| 52162 | 5 | 5461152 | 5461179 | 2 | 14 | 28 | TC   | 28 | 9  |
| 52167 | 5 | 5471866 | 5471881 | 2 | 8  | 16 | CA   | 25 | 3  |
| 52170 | 5 | 5474252 | 5474263 | 2 | 6  | 12 | CA   | 21 | 7  |
| 52171 | 5 | 5474265 | 5474280 | 2 | 8  | 16 | AC   | 16 | 6  |
| 52174 | 5 | 5477508 | 5477525 | 2 | 9  | 18 | AC   | 19 | 4  |
| 52175 | 5 | 5478132 | 5478149 | 2 | 9  | 18 | CA   | 27 | 4  |
| 52176 | 5 | 5478634 | 5478653 | 4 | 5  | 20 | GTTT | 22 | 3  |
| 52178 | 5 | 5479399 | 5479416 | 2 | 9  | 18 | CT   | 24 | 4  |
| 52181 | 5 | 5483462 | 5483483 | 2 | 11 | 22 | CA   | 16 | 8  |
| 52182 | 5 | 5483627 | 5483642 | 2 | 8  | 16 | GT   | 18 | 11 |
| 52183 | 5 | 5483710 | 5483725 | 2 | 8  | 16 | AC   | 25 | 3  |
| 52185 | 5 | 5483867 | 5483884 | 2 | 9  | 18 | TG   | 10 | 8  |
| 52188 | 5 | 5485668 | 5485691 | 2 | 12 | 24 | CA   | 13 | 8  |
| 52190 | 5 | 5490128 | 5490157 | 3 | 10 | 30 | GAG  | 28 | 4  |
| 52192 | 5 | 5494364 | 5494377 | 2 | 7  | 14 | TC   | 17 | 4  |
| 52199 | 5 | 5497267 | 5497288 | 2 | 11 | 22 | GT   | 20 | 10 |
| 52201 | 5 | 5499398 | 5499427 | 2 | 15 | 30 | AC   | 17 | 9  |
| 52202 | 5 | 5499606 | 5499621 | 2 | 8  | 16 | AC   | 19 | 4  |
| 52208 | 5 | 5516329 | 5516340 | 2 | 6  | 12 | AC   | 9  | 3  |
| 52210 | 5 | 5525880 | 5525903 | 3 | 8  | 24 | CAT  | 24 | 6  |
| 52216 | 5 | 5533590 | 5533609 | 2 | 10 | 20 | CA   | 23 | 10 |
| 52219 | 5 | 5535519 | 5535530 | 2 | 6  | 12 | CA   | 22 | 3  |
| 52224 | 5 | 5545600 | 5545623 | 4 | 6  | 24 | TGTA | 8  | 3  |
| 52226 | 5 | 5548396 | 5548409 | 2 | 7  | 14 | TG   | 23 | 8  |
| 52227 | 5 | 5548590 | 5548601 | 2 | 6  | 12 | CA   | 24 | 12 |
| 52230 | 5 | 5554779 | 5554808 | 2 | 15 | 30 | TG   | 17 | 6  |
| 52233 | 5 | 5567931 | 5567957 | 3 | 9  | 27 | GAG  | 12 | 5  |
| 52234 | 5 | 5571496 | 5571509 | 2 | 7  | 14 | TA   | 16 | 8  |
| 52238 | 5 | 5580630 | 5580649 | 2 | 10 | 20 | AC   | 23 | 7  |
| 52244 | 5 | 5593116 | 5593130 | 3 | 5  | 15 | TTG  | 29 | 3  |
| 52245 | 5 | 5593461 | 5593474 | 2 | 7  | 14 | TG   | 22 | 3  |
| 52251 | 5 | 5602073 | 5602084 | 2 | 6  | 12 | GT   | 23 | 4  |
| 52254 | 5 | 5603999 | 5604019 | 3 | 7  | 21 | ACA  | 14 | 5  |
| 52255 | 5 | 5606817 | 5606836 | 2 | 10 | 20 | GT   | 13 | 6  |
| 52256 | 5 | 5607276 | 5607305 | 2 | 15 | 30 | TG   | 7  | 7  |
| 52263 | 5 | 5608327 | 5608350 | 2 | 12 | 24 | AC   | 12 | 5  |
| 52265 | 5 | 5609224 | 5609237 | 2 | 7  | 14 | CA   | 30 | 5  |
| 52269 | 5 | 5619244 | 5619275 | 2 | 16 | 32 | GT   | 14 | 10 |
| 52273 | 5 | 5624975 | 5625010 | 2 | 18 | 36 | CA   | 12 | 13 |
| 52274 | 5 | 5625321 | 5625341 | 3 | 7  | 21 | CTG  | 24 | 3  |
| 52277 | 5 | 5635291 | 5635302 | 2 | 6  | 12 | GT   | 23 | 5  |
| 52279 | 5 | 5635577 | 5635590 | 2 | 7  | 14 | TG   | 18 | 3  |
| 52280 | 5 | 5635742 | 5635761 | 2 | 10 | 20 | AC   | 12 | 11 |
| 52283 | 5 | 5638556 | 5638569 | 2 | 7  | 14 | AC   | 6  | 3  |
| 52285 | 5 | 5638739 | 5638758 | 2 | 10 | 20 | GT   | 19 | 5  |
| 52287 | 5 | 5640627 | 5640646 | 2 | 10 | 20 | TG   | 15 | 8  |

|       |   |         |         |   |    |    |      |    |    |
|-------|---|---------|---------|---|----|----|------|----|----|
| 52290 | 5 | 5642860 | 5642883 | 2 | 12 | 24 | CA   | 19 | 6  |
| 52291 | 5 | 5644056 | 5644069 | 2 | 7  | 14 | CA   | 18 | 4  |
| 52293 | 5 | 5651168 | 5651189 | 2 | 11 | 22 | GT   | 21 | 10 |
| 52294 | 5 | 5654901 | 5654914 | 2 | 7  | 14 | TG   | 14 | 6  |
| 52295 | 5 | 5654979 | 5655014 | 2 | 18 | 36 | AC   | 12 | 8  |
| 52297 | 5 | 5655093 | 5655104 | 2 | 6  | 12 | CA   | 13 | 9  |
| 52298 | 5 | 5655106 | 5655119 | 2 | 7  | 14 | TC   | 7  | 3  |
| 52301 | 5 | 5656010 | 5656025 | 2 | 8  | 16 | AC   | 14 | 4  |
| 52303 | 5 | 5656453 | 5656474 | 2 | 11 | 22 | TG   | 14 | 8  |
| 52305 | 5 | 5660414 | 5660443 | 2 | 15 | 30 | GA   | 11 | 9  |
| 52306 | 5 | 5663263 | 5663284 | 2 | 11 | 22 | AC   | 13 | 6  |
| 52307 | 5 | 5663791 | 5663814 | 4 | 6  | 24 | TAGA | 15 | 9  |
| 52308 | 5 | 5664853 | 5664866 | 2 | 7  | 14 | TG   | 24 | 4  |
| 52309 | 5 | 5664919 | 5664936 | 2 | 9  | 18 | AC   | 23 | 6  |
| 52310 | 5 | 5665336 | 5665351 | 2 | 8  | 16 | TG   | 23 | 14 |
| 52311 | 5 | 5665352 | 5665363 | 2 | 6  | 12 | AG   | 18 | 12 |
| 52313 | 5 | 5665511 | 5665526 | 2 | 8  | 16 | GT   | 25 | 4  |
| 52317 | 5 | 5670506 | 5670525 | 2 | 10 | 20 | TC   | 21 | 5  |
| 52318 | 5 | 5673934 | 5673953 | 2 | 10 | 20 | CT   | 30 | 5  |
| 52321 | 5 | 5675595 | 5675610 | 2 | 8  | 16 | GT   | 24 | 4  |
| 52326 | 5 | 5681152 | 5681169 | 2 | 9  | 18 | TG   | 20 | 7  |
| 52335 | 5 | 5684915 | 5684934 | 2 | 10 | 20 | CT   | 24 | 6  |
| 52337 | 5 | 5687394 | 5687419 | 2 | 13 | 26 | AC   | 16 | 8  |
| 52338 | 5 | 5688550 | 5688571 | 2 | 11 | 22 | TG   | 29 | 3  |
| 52339 | 5 | 5688742 | 5688759 | 2 | 9  | 18 | AC   | 21 | 7  |
| 52340 | 5 | 5688839 | 5688874 | 2 | 18 | 36 | CA   | 15 | 15 |
| 52341 | 5 | 5689023 | 5689048 | 2 | 13 | 26 | CA   | 15 | 12 |
| 52342 | 5 | 5689121 | 5689136 | 2 | 8  | 16 | CA   | 23 | 6  |
| 52343 | 5 | 5689138 | 5689153 | 2 | 8  | 16 | AC   | 21 | 6  |
| 52348 | 5 | 5690199 | 5690214 | 2 | 8  | 16 | CA   | 6  | 4  |
| 52350 | 5 | 5690266 | 5690307 | 2 | 21 | 42 | CA   | 13 | 10 |
| 52353 | 5 | 5694168 | 5694209 | 2 | 21 | 42 | GT   | 11 | 11 |
| 52355 | 5 | 5696787 | 5696798 | 2 | 6  | 12 | AC   | 24 | 3  |
| 52357 | 5 | 5697648 | 5697663 | 2 | 8  | 16 | GT   | 29 | 4  |
| 52360 | 5 | 5698259 | 5698278 | 2 | 10 | 20 | CA   | 17 | 5  |
| 52362 | 5 | 5700589 | 5700603 | 3 | 5  | 15 | TTC  | 25 | 4  |
| 52363 | 5 | 5704635 | 5704660 | 2 | 13 | 26 | CA   | 11 | 9  |
| 52365 | 5 | 5706388 | 5706403 | 2 | 8  | 16 | CT   | 12 | 4  |
| 52367 | 5 | 5713813 | 5713848 | 2 | 18 | 36 | TG   | 9  | 13 |
| 52369 | 5 | 5722340 | 5722353 | 2 | 7  | 14 | AC   | 20 | 3  |
| 52375 | 5 | 5724348 | 5724381 | 2 | 17 | 34 | AC   | 12 | 15 |
| 52376 | 5 | 5725827 | 5725856 | 2 | 15 | 30 | CA   | 20 | 4  |
| 52377 | 5 | 5725949 | 5725964 | 2 | 8  | 16 | CA   | 16 | 5  |
| 52378 | 5 | 5726191 | 5726220 | 2 | 15 | 30 | TG   | 12 | 8  |
| 52384 | 5 | 5731424 | 5731453 | 2 | 15 | 30 | AC   | 11 | 8  |
| 52385 | 5 | 5732962 | 5732987 | 2 | 13 | 26 | CA   | 19 | 6  |
| 52386 | 5 | 5733106 | 5733129 | 3 | 8  | 24 | TCT  | 32 | 7  |
| 52395 | 5 | 5735990 | 5736019 | 3 | 10 | 30 | GAG  | 20 | 6  |
| 52397 | 5 | 5743102 | 5743121 | 2 | 10 | 20 | AT   | 16 | 5  |
| 52399 | 5 | 5746844 | 5746869 | 2 | 13 | 26 | TG   | 16 | 10 |
| 52400 | 5 | 5749860 | 5749875 | 2 | 8  | 16 | AC   | 23 | 7  |

|       |   |         |         |   |    |    |      |    |    |
|-------|---|---------|---------|---|----|----|------|----|----|
| 52401 | 5 | 5751484 | 5751501 | 2 | 9  | 18 | CA   | 10 | 15 |
| 52403 | 5 | 5752705 | 5752732 | 2 | 14 | 28 | CT   | 19 | 10 |
| 52405 | 5 | 5754054 | 5754077 | 2 | 12 | 24 | CA   | 7  | 9  |
| 52408 | 5 | 5755183 | 5755196 | 2 | 7  | 14 | AC   | 20 | 6  |
| 52412 | 5 | 5759632 | 5759645 | 2 | 7  | 14 | AC   | 29 | 5  |
| 52414 | 5 | 5761764 | 5761775 | 2 | 6  | 12 | CA   | 16 | 5  |
| 52415 | 5 | 5761777 | 5761790 | 2 | 7  | 14 | AC   | 18 | 9  |
| 52419 | 5 | 5765261 | 5765280 | 2 | 10 | 20 | TG   | 20 | 3  |
| 52420 | 5 | 5768662 | 5768688 | 3 | 9  | 27 | ATC  | 23 | 16 |
| 52425 | 5 | 5778776 | 5778789 | 2 | 7  | 14 | CA   | 16 | 8  |
| 52426 | 5 | 5778792 | 5778807 | 2 | 8  | 16 | CA   | 9  | 4  |
| 52427 | 5 | 5782333 | 5782364 | 2 | 16 | 32 | AC   | 21 | 10 |
| 52428 | 5 | 5782443 | 5782480 | 2 | 19 | 38 | TG   | 10 | 14 |
| 52448 | 5 | 5818373 | 5818398 | 2 | 13 | 26 | CA   | 10 | 6  |
| 52470 | 5 | 5873008 | 5873041 | 2 | 17 | 34 | AC   | 14 | 7  |
| 52471 | 5 | 5873419 | 5873442 | 2 | 12 | 24 | GT   | 12 | 3  |
| 52472 | 5 | 5874688 | 5874719 | 2 | 16 | 32 | AC   | 14 | 10 |
| 52477 | 5 | 5877132 | 5877153 | 2 | 11 | 22 | TG   | 6  | 3  |
| 52478 | 5 | 5877363 | 5877378 | 2 | 8  | 16 | AC   | 24 | 4  |
| 52479 | 5 | 5879162 | 5879173 | 2 | 6  | 12 | AC   | 23 | 4  |
| 52490 | 5 | 5893732 | 5893763 | 2 | 16 | 32 | TG   | 19 | 9  |
| 52492 | 5 | 5895811 | 5895840 | 2 | 15 | 30 | GT   | 19 | 8  |
| 52494 | 5 | 5896439 | 5896458 | 2 | 10 | 20 | CA   | 19 | 8  |
| 52496 | 5 | 5898702 | 5898715 | 2 | 7  | 14 | CA   | 14 | 8  |
| 52500 | 5 | 5902134 | 5902147 | 2 | 7  | 14 | GT   | 7  | 5  |
| 52504 | 5 | 5902498 | 5902533 | 2 | 18 | 36 | GT   | 8  | 8  |
| 52505 | 5 | 5903007 | 5903022 | 2 | 8  | 16 | GT   | 21 | 8  |
| 52506 | 5 | 5903129 | 5903156 | 2 | 14 | 28 | TG   | 10 | 3  |
| 52507 | 5 | 5903266 | 5903293 | 2 | 14 | 28 | AC   | 12 | 7  |
| 52509 | 5 | 5906126 | 5906141 | 4 | 4  | 16 | TTGT | 24 | 3  |
| 52511 | 5 | 5907925 | 5907948 | 2 | 12 | 24 | AC   | 19 | 8  |
| 52512 | 5 | 5907992 | 5908023 | 2 | 16 | 32 | GT   | 16 | 10 |
| 52513 | 5 | 5908258 | 5908275 | 3 | 6  | 18 | TCC  | 25 | 3  |
| 52514 | 5 | 5913183 | 5913208 | 2 | 13 | 26 | CA   | 21 | 4  |
| 52515 | 5 | 5914140 | 5914173 | 2 | 17 | 34 | CA   | 13 | 12 |
| 52517 | 5 | 5914457 | 5914483 | 3 | 9  | 27 | CTC  | 13 | 3  |
| 52527 | 5 | 5922703 | 5922726 | 2 | 12 | 24 | AC   | 21 | 10 |
| 52528 | 5 | 5922819 | 5922836 | 2 | 9  | 18 | TC   | 18 | 11 |
| 52534 | 5 | 5926942 | 5926963 | 2 | 11 | 22 | GT   | 17 | 13 |
| 52535 | 5 | 5927330 | 5927369 | 4 | 10 | 40 | TTCT | 19 | 6  |
| 52549 | 5 | 5940542 | 5940565 | 2 | 12 | 24 | TG   | 15 | 7  |
| 52550 | 5 | 5940766 | 5940793 | 2 | 14 | 28 | TG   | 17 | 8  |
| 52554 | 5 | 5948824 | 5948849 | 2 | 13 | 26 | GT   | 30 | 7  |
| 52555 | 5 | 5949061 | 5949086 | 2 | 13 | 26 | CA   | 19 | 11 |
| 52556 | 5 | 5949348 | 5949375 | 2 | 14 | 28 | TG   | 13 | 16 |
| 52561 | 5 | 5954226 | 5954243 | 3 | 6  | 18 | CTC  | 29 | 5  |
| 52562 | 5 | 5956631 | 5956662 | 2 | 16 | 32 | CA   | 14 | 11 |
| 52564 | 5 | 5956819 | 5956852 | 2 | 17 | 34 | GT   | 16 | 23 |
| 52570 | 5 | 5970946 | 5970965 | 2 | 10 | 20 | CA   | 27 | 3  |
| 52572 | 5 | 5974002 | 5974021 | 2 | 10 | 20 | CA   | 25 | 5  |
| 52574 | 5 | 5977227 | 5977242 | 2 | 8  | 16 | GT   | 11 | 7  |

|       |   |         |         |   |    |    |      |    |    |
|-------|---|---------|---------|---|----|----|------|----|----|
| 52576 | 5 | 5978595 | 5978606 | 2 | 6  | 12 | TG   | 13 | 3  |
| 52578 | 5 | 5978706 | 5978721 | 2 | 8  | 16 | AC   | 17 | 3  |
| 52597 | 5 | 6008834 | 6008855 | 2 | 11 | 22 | AC   | 18 | 5  |
| 52598 | 5 | 6009061 | 6009078 | 2 | 9  | 18 | CA   | 21 | 6  |
| 52599 | 5 | 6009665 | 6009676 | 2 | 6  | 12 | GT   | 30 | 3  |
| 52603 | 5 | 6010350 | 6010363 | 2 | 7  | 14 | GT   | 23 | 5  |
| 52604 | 5 | 6010797 | 6010814 | 2 | 9  | 18 | CT   | 13 | 6  |
| 52608 | 5 | 6013730 | 6013741 | 2 | 6  | 12 | TG   | 25 | 5  |
| 52609 | 5 | 6013742 | 6013757 | 2 | 8  | 16 | AG   | 21 | 6  |
| 52612 | 5 | 6014455 | 6014474 | 4 | 5  | 20 | AAGG | 14 | 4  |
| 52615 | 5 | 6020673 | 6020690 | 2 | 9  | 18 | CA   | 27 | 7  |
| 52617 | 5 | 6024201 | 6024212 | 2 | 6  | 12 | GT   | 24 | 5  |
| 52618 | 5 | 6027084 | 6027099 | 2 | 8  | 16 | AC   | 15 | 9  |
| 52619 | 5 | 6027102 | 6027117 | 2 | 8  | 16 | AC   | 12 | 10 |
| 52620 | 5 | 6027304 | 6027321 | 2 | 9  | 18 | TG   | 29 | 9  |
| 52623 | 5 | 6029598 | 6029613 | 2 | 8  | 16 | TC   | 21 | 4  |
| 52624 | 5 | 6032404 | 6032417 | 2 | 7  | 14 | TG   | 22 | 7  |
| 52625 | 5 | 6033023 | 6033036 | 2 | 7  | 14 | CA   | 28 | 4  |
| 52626 | 5 | 6035570 | 6035589 | 2 | 10 | 20 | GT   | 20 | 7  |
| 52628 | 5 | 6043381 | 6043408 | 2 | 14 | 28 | GT   | 19 | 10 |
| 52630 | 5 | 6048697 | 6048710 | 2 | 7  | 14 | AC   | 22 | 5  |
| 52634 | 5 | 6052961 | 6052974 | 2 | 7  | 14 | AG   | 24 | 4  |
| 52635 | 5 | 6055330 | 6055341 | 2 | 6  | 12 | TG   | 18 | 14 |
| 52636 | 5 | 6055344 | 6055357 | 2 | 7  | 14 | TG   | 19 | 11 |
| 52643 | 5 | 6060812 | 6060829 | 3 | 6  | 18 | TAT  | 22 | 4  |
| 52644 | 5 | 6061806 | 6061831 | 2 | 13 | 26 | CA   | 18 | 10 |
| 52646 | 5 | 6062597 | 6062616 | 4 | 5  | 20 | TTTG | 6  | 7  |
| 52651 | 5 | 6067883 | 6067938 | 4 | 14 | 56 | AGAT | 11 | 12 |
| 52653 | 5 | 6070268 | 6070301 | 2 | 17 | 34 | GT   | 7  | 7  |
| 52654 | 5 | 6070488 | 6070523 | 2 | 18 | 36 | AC   | 8  | 6  |
| 52656 | 5 | 6076845 | 6076865 | 3 | 7  | 21 | GAG  | 26 | 4  |
| 52658 | 5 | 6078088 | 6078131 | 2 | 22 | 44 | AC   | 6  | 10 |
| 52659 | 5 | 6078214 | 6078225 | 2 | 6  | 12 | AC   | 20 | 3  |
| 52660 | 5 | 6083176 | 6083195 | 2 | 10 | 20 | GT   | 23 | 5  |
| 52661 | 5 | 6083505 | 6083528 | 2 | 12 | 24 | CA   | 16 | 10 |
| 52663 | 5 | 6084233 | 6084250 | 3 | 6  | 18 | AGG  | 24 | 3  |
| 52664 | 5 | 6085999 | 6086028 | 2 | 15 | 30 | CA   | 15 | 7  |
| 52665 | 5 | 6086151 | 6086164 | 2 | 7  | 14 | AC   | 23 | 6  |
| 52667 | 5 | 6086310 | 6086339 | 2 | 15 | 30 | AC   | 14 | 9  |
| 52668 | 5 | 6086509 | 6086544 | 2 | 18 | 36 | AC   | 10 | 9  |
| 52670 | 5 | 6089802 | 6089822 | 3 | 7  | 21 | ATC  | 24 | 4  |
| 52672 | 5 | 6090164 | 6090187 | 2 | 12 | 24 | CA   | 9  | 6  |
| 52680 | 5 | 6101666 | 6101685 | 2 | 10 | 20 | GT   | 15 | 7  |
| 52682 | 5 | 6106752 | 6106781 | 2 | 15 | 30 | TG   | 24 | 9  |
| 52686 | 5 | 6139069 | 6139095 | 3 | 9  | 27 | TCT  | 19 | 8  |
| 52688 | 5 | 6144832 | 6144847 | 4 | 4  | 16 | ACTG | 33 | 3  |
| 52695 | 5 | 6153858 | 6153883 | 2 | 13 | 26 | TG   | 16 | 6  |
| 52697 | 5 | 6154322 | 6154337 | 2 | 8  | 16 | AC   | 13 | 5  |
| 52698 | 5 | 6154483 | 6154498 | 2 | 8  | 16 | AC   | 17 | 6  |
| 52699 | 5 | 6157585 | 6157608 | 2 | 12 | 24 | CA   | 22 | 8  |
| 52701 | 5 | 6158362 | 6158385 | 2 | 12 | 24 | GT   | 12 | 12 |

|       |   |         |         |   |    |    |      |    |    |
|-------|---|---------|---------|---|----|----|------|----|----|
| 52702 | 5 | 6160293 | 6160320 | 2 | 14 | 28 | GT   | 17 | 14 |
| 52705 | 5 | 6161270 | 6161283 | 2 | 7  | 14 | TG   | 25 | 3  |
| 52706 | 5 | 6161440 | 6161451 | 2 | 6  | 12 | CA   | 23 | 5  |
| 52707 | 5 | 6161632 | 6161647 | 2 | 8  | 16 | TG   | 21 | 8  |
| 52709 | 5 | 6163417 | 6163428 | 2 | 6  | 12 | GT   | 28 | 5  |
| 52710 | 5 | 6163430 | 6163441 | 2 | 6  | 12 | TG   | 25 | 5  |
| 52712 | 5 | 6163612 | 6163639 | 2 | 14 | 28 | CA   | 10 | 5  |
| 52720 | 5 | 6165914 | 6165943 | 2 | 15 | 30 | AC   | 20 | 12 |
| 52721 | 5 | 6167944 | 6167958 | 3 | 5  | 15 | CTG  | 21 | 4  |
| 52728 | 5 | 6169361 | 6169392 | 2 | 16 | 32 | CT   | 12 | 6  |
| 52732 | 5 | 6180377 | 6180402 | 2 | 13 | 26 | GT   | 21 | 11 |
| 52738 | 5 | 6187298 | 6187311 | 2 | 7  | 14 | CT   | 8  | 3  |
| 52739 | 5 | 6187543 | 6187556 | 2 | 7  | 14 | TG   | 16 | 6  |
| 52740 | 5 | 6187812 | 6187837 | 2 | 13 | 26 | CA   | 10 | 14 |
| 52741 | 5 | 6188009 | 6188028 | 2 | 10 | 20 | AC   | 19 | 6  |
| 52742 | 5 | 6193395 | 6193406 | 2 | 6  | 12 | CA   | 7  | 10 |
| 52743 | 5 | 6193408 | 6193421 | 2 | 7  | 14 | AC   | 11 | 12 |
| 52745 | 5 | 6194735 | 6194768 | 2 | 17 | 34 | CA   | 8  | 8  |
| 52746 | 5 | 6195927 | 6195944 | 2 | 9  | 18 | CA   | 27 | 6  |
| 52749 | 5 | 6198461 | 6198472 | 2 | 6  | 12 | CT   | 20 | 6  |
| 52750 | 5 | 6198476 | 6198489 | 2 | 7  | 14 | AC   | 18 | 7  |
| 52754 | 5 | 6206055 | 6206078 | 4 | 6  | 24 | CAGA | 27 | 3  |
| 52756 | 5 | 6207857 | 6207872 | 2 | 8  | 16 | AC   | 8  | 3  |
| 52761 | 5 | 6215489 | 6215528 | 4 | 10 | 40 | ATCT | 17 | 17 |
| 52764 | 5 | 6219248 | 6219261 | 2 | 7  | 14 | AC   | 22 | 11 |
| 52765 | 5 | 6227246 | 6227263 | 3 | 6  | 18 | ATC  | 28 | 9  |
| 52766 | 5 | 6228972 | 6228987 | 2 | 8  | 16 | GA   | 19 | 4  |
| 52770 | 5 | 6235618 | 6235633 | 2 | 8  | 16 | TG   | 11 | 5  |
| 52772 | 5 | 6235790 | 6235801 | 2 | 6  | 12 | TC   | 10 | 9  |
| 52774 | 5 | 6237272 | 6237295 | 2 | 12 | 24 | AC   | 9  | 9  |
| 52775 | 5 | 6237831 | 6237854 | 2 | 12 | 24 | AC   | 16 | 5  |
| 52776 | 5 | 6239910 | 6239921 | 2 | 6  | 12 | AC   | 24 | 5  |
| 52781 | 5 | 6241536 | 6241556 | 3 | 7  | 21 | CCT  | 22 | 3  |
| 52785 | 5 | 6260726 | 6260740 | 3 | 5  | 15 | TCT  | 28 | 4  |
| 52788 | 5 | 6262395 | 6262412 | 2 | 9  | 18 | GT   | 16 | 8  |
| 52789 | 5 | 6262587 | 6262610 | 2 | 12 | 24 | TG   | 13 | 12 |
| 52790 | 5 | 6262747 | 6262766 | 2 | 10 | 20 | AG   | 17 | 9  |
| 52791 | 5 | 6266159 | 6266184 | 2 | 13 | 26 | TG   | 15 | 13 |
| 52792 | 5 | 6266291 | 6266314 | 2 | 12 | 24 | TG   | 16 | 9  |
| 52794 | 5 | 6270016 | 6270039 | 3 | 8  | 24 | ATC  | 24 | 5  |
| 52795 | 5 | 6270207 | 6270228 | 2 | 11 | 22 | AC   | 14 | 15 |
| 52798 | 5 | 6274639 | 6274650 | 2 | 6  | 12 | CA   | 22 | 4  |
| 52799 | 5 | 6275348 | 6275359 | 2 | 6  | 12 | TC   | 21 | 10 |
| 52807 | 5 | 6304285 | 6304298 | 2 | 7  | 14 | TG   | 31 | 6  |
| 52808 | 5 | 6307471 | 6307491 | 3 | 7  | 21 | CTC  | 30 | 3  |
| 52810 | 5 | 6311267 | 6311287 | 3 | 7  | 21 | CTC  | 14 | 3  |
| 52813 | 5 | 6311823 | 6311840 | 3 | 6  | 18 | GAG  | 27 | 8  |
| 52816 | 5 | 6325849 | 6325876 | 2 | 14 | 28 | GT   | 16 | 9  |
| 52818 | 5 | 6330920 | 6330935 | 2 | 8  | 16 | GT   | 24 | 6  |
| 52820 | 5 | 6331377 | 6331392 | 2 | 8  | 16 | CA   | 23 | 8  |
| 52835 | 5 | 6341148 | 6341193 | 2 | 23 | 46 | GT   | 16 | 9  |

|       |   |         |         |   |    |    |      |    |    |
|-------|---|---------|---------|---|----|----|------|----|----|
| 52842 | 5 | 6348720 | 6348735 | 2 | 8  | 16 | TG   | 23 | 4  |
| 52843 | 5 | 6354787 | 6354801 | 3 | 5  | 15 | TAT  | 17 | 5  |
| 52846 | 5 | 6356457 | 6356480 | 2 | 12 | 24 | CA   | 12 | 12 |
| 52848 | 5 | 6362360 | 6362371 | 2 | 6  | 12 | TA   | 23 | 7  |
| 52865 | 5 | 6438140 | 6438155 | 2 | 8  | 16 | TG   | 10 | 3  |
| 52874 | 5 | 6467562 | 6467576 | 3 | 5  | 15 | TCA  | 29 | 3  |
| 52875 | 5 | 6467833 | 6467846 | 2 | 7  | 14 | CT   | 26 | 5  |
| 52879 | 5 | 6480183 | 6480196 | 2 | 7  | 14 | TG   | 27 | 3  |
| 52880 | 5 | 6490813 | 6490828 | 4 | 4  | 16 | ATCC | 20 | 3  |
| 52887 | 5 | 6527091 | 6527108 | 3 | 6  | 18 | GAA  | 26 | 6  |
| 52892 | 5 | 6552264 | 6552311 | 2 | 24 | 48 | GA   | 6  | 7  |
| 52894 | 5 | 6552466 | 6552481 | 2 | 8  | 16 | AC   | 22 | 3  |
| 52895 | 5 | 6552870 | 6552893 | 3 | 8  | 24 | GAG  | 18 | 3  |
| 52897 | 5 | 6556117 | 6556136 | 2 | 10 | 20 | GT   | 18 | 9  |
| 52908 | 5 | 6613622 | 6613635 | 2 | 7  | 14 | AC   | 28 | 5  |
| 52912 | 5 | 6624150 | 6624163 | 2 | 7  | 14 | GT   | 23 | 3  |
| 52918 | 5 | 6640738 | 6640759 | 2 | 11 | 22 | TG   | 23 | 11 |
| 52920 | 5 | 6646751 | 6646770 | 2 | 10 | 20 | TG   | 18 | 5  |
| 52921 | 5 | 6648404 | 6648423 | 2 | 10 | 20 | GT   | 18 | 7  |
| 52922 | 5 | 6648648 | 6648673 | 2 | 13 | 26 | TG   | 13 | 10 |
| 52932 | 5 | 6675952 | 6675969 | 3 | 6  | 18 | AAG  | 26 | 3  |
| 52933 | 5 | 6676046 | 6676075 | 3 | 10 | 30 | TGA  | 20 | 4  |
| 52935 | 5 | 6676710 | 6676737 | 2 | 14 | 28 | AC   | 20 | 10 |
| 52938 | 5 | 6680555 | 6680580 | 2 | 13 | 26 | AC   | 15 | 11 |
| 52939 | 5 | 6684581 | 6684604 | 3 | 8  | 24 | GCA  | 20 | 5  |
| 52942 | 5 | 6690895 | 6690909 | 3 | 5  | 15 | CAC  | 14 | 5  |
| 52943 | 5 | 6691155 | 6691168 | 2 | 7  | 14 | AC   | 14 | 6  |
| 52944 | 5 | 6691216 | 6691247 | 2 | 16 | 32 | GA   | 9  | 8  |
| 52948 | 5 | 6703122 | 6703153 | 2 | 16 | 32 | GT   | 13 | 7  |
| 52949 | 5 | 6704730 | 6704749 | 2 | 10 | 20 | AC   | 20 | 8  |
| 52950 | 5 | 6704853 | 6704879 | 3 | 9  | 27 | TCT  | 22 | 7  |
| 52956 | 5 | 6712079 | 6712104 | 2 | 13 | 26 | GT   | 23 | 8  |
| 52957 | 5 | 6712699 | 6712722 | 4 | 6  | 24 | TTCT | 11 | 6  |
| 52964 | 5 | 6722957 | 6722976 | 2 | 10 | 20 | TG   | 7  | 7  |
| 52965 | 5 | 6723000 | 6723031 | 2 | 16 | 32 | TG   | 7  | 9  |
| 52966 | 5 | 6724240 | 6724257 | 2 | 9  | 18 | AC   | 8  | 9  |
| 52969 | 5 | 6724641 | 6724670 | 2 | 15 | 30 | TG   | 11 | 9  |
| 52971 | 5 | 6728527 | 6728538 | 2 | 6  | 12 | GT   | 14 | 3  |
| 52976 | 5 | 6730589 | 6730608 | 4 | 5  | 20 | TTTG | 6  | 3  |
| 52977 | 5 | 6730713 | 6730768 | 4 | 14 | 56 | CTTT | 13 | 8  |
| 52979 | 5 | 6733495 | 6733509 | 3 | 5  | 15 | CCT  | 16 | 5  |
| 52982 | 5 | 6735432 | 6735447 | 2 | 8  | 16 | CA   | 20 | 8  |
| 52988 | 5 | 6755135 | 6755158 | 3 | 8  | 24 | GCA  | 31 | 5  |
| 52989 | 5 | 6755187 | 6755200 | 2 | 7  | 14 | AC   | 20 | 4  |
| 52995 | 5 | 6764870 | 6764901 | 2 | 16 | 32 | GT   | 11 | 11 |
| 52996 | 5 | 6768172 | 6768198 | 3 | 9  | 27 | ATT  | 17 | 6  |
| 52997 | 5 | 6770594 | 6770625 | 2 | 16 | 32 | CA   | 11 | 11 |
| 53006 | 5 | 6781314 | 6781331 | 2 | 9  | 18 | AC   | 20 | 5  |
| 53009 | 5 | 6794356 | 6794373 | 2 | 9  | 18 | GT   | 19 | 7  |
| 53015 | 5 | 6808285 | 6808304 | 2 | 10 | 20 | TG   | 25 | 7  |
| 53021 | 5 | 6838067 | 6838096 | 2 | 15 | 30 | GA   | 23 | 9  |

|       |   |         |         |   |    |    |      |    |    |
|-------|---|---------|---------|---|----|----|------|----|----|
| 53053 | 5 | 6887810 | 6887837 | 2 | 14 | 28 | TG   | 11 | 11 |
| 53055 | 5 | 6896209 | 6896232 | 2 | 12 | 24 | GT   | 19 | 8  |
| 53057 | 5 | 6905294 | 6905325 | 4 | 8  | 32 | ATCT | 14 | 10 |
| 53062 | 5 | 6922389 | 6922409 | 3 | 7  | 21 | CAG  | 21 | 6  |
| 53063 | 5 | 6926902 | 6926916 | 3 | 5  | 15 | GCA  | 20 | 5  |
| 53065 | 5 | 6931449 | 6931460 | 2 | 6  | 12 | CA   | 20 | 9  |
| 53067 | 5 | 6942660 | 6942704 | 3 | 15 | 45 | AGA  | 24 | 8  |
| 53070 | 5 | 6954774 | 6954793 | 2 | 10 | 20 | TG   | 20 | 7  |
| 53075 | 5 | 6963248 | 6963271 | 3 | 8  | 24 | TCA  | 19 | 5  |
| 53076 | 5 | 6963308 | 6963323 | 4 | 4  | 16 | GTTT | 25 | 5  |
| 53080 | 5 | 6972804 | 6972823 | 4 | 5  | 20 | TTAT | 10 | 3  |
| 53082 | 5 | 6982187 | 6982198 | 2 | 6  | 12 | GT   | 23 | 3  |
| 53094 | 5 | 7000085 | 7000099 | 3 | 5  | 15 | AAT  | 17 | 3  |
| 53095 | 5 | 7001641 | 7001658 | 2 | 9  | 18 | CA   | 28 | 4  |
| 53098 | 5 | 7002709 | 7002723 | 3 | 5  | 15 | TGT  | 26 | 4  |
| 53099 | 5 | 7003896 | 7003941 | 2 | 23 | 46 | CA   | 17 | 15 |
| 53100 | 5 | 7006372 | 7006401 | 2 | 15 | 30 | CA   | 11 | 5  |
| 53104 | 5 | 7015636 | 7015667 | 2 | 16 | 32 | AC   | 13 | 13 |
| 53106 | 5 | 7017863 | 7017888 | 2 | 13 | 26 | AC   | 14 | 10 |
| 53107 | 5 | 7019472 | 7019483 | 2 | 6  | 12 | TC   | 22 | 3  |
| 53110 | 5 | 7024244 | 7024267 | 3 | 8  | 24 | CCT  | 19 | 3  |
| 53111 | 5 | 7024457 | 7024474 | 2 | 9  | 18 | TG   | 16 | 5  |
| 53113 | 5 | 7026456 | 7026467 | 2 | 6  | 12 | GA   | 32 | 3  |
| 53114 | 5 | 7026541 | 7026590 | 2 | 25 | 50 | TG   | 8  | 11 |
| 53115 | 5 | 7026992 | 7027015 | 2 | 12 | 24 | CA   | 17 | 5  |
| 53116 | 5 | 7028941 | 7028952 | 2 | 6  | 12 | GT   | 28 | 4  |
| 53118 | 5 | 7031086 | 7031099 | 2 | 7  | 14 | AC   | 8  | 8  |
| 53119 | 5 | 7031101 | 7031118 | 2 | 9  | 18 | CA   | 13 | 11 |
| 53125 | 5 | 7033490 | 7033537 | 2 | 24 | 48 | AC   | 7  | 14 |
| 53126 | 5 | 7033686 | 7033707 | 2 | 11 | 22 | AC   | 19 | 15 |
| 53131 | 5 | 7036902 | 7036925 | 2 | 12 | 24 | GT   | 23 | 23 |
| 53133 | 5 | 7040817 | 7040838 | 2 | 11 | 22 | AC   | 12 | 13 |
| 53140 | 5 | 7048497 | 7048518 | 2 | 11 | 22 | TC   | 12 | 5  |
| 53143 | 5 | 7060851 | 7060865 | 3 | 5  | 15 | CAA  | 26 | 8  |
| 53144 | 5 | 7061430 | 7061443 | 2 | 7  | 14 | AT   | 15 | 10 |
| 53147 | 5 | 7075979 | 7075993 | 3 | 5  | 15 | CAG  | 27 | 4  |
| 53156 | 5 | 7101365 | 7101379 | 3 | 5  | 15 | GCT  | 34 | 5  |
| 53157 | 5 | 7110562 | 7110576 | 3 | 5  | 15 | AGC  | 25 | 4  |
| 53158 | 5 | 7111766 | 7111779 | 2 | 7  | 14 | AC   | 27 | 6  |
| 53161 | 5 | 7126166 | 7126195 | 2 | 15 | 30 | TC   | 9  | 10 |
| 53162 | 5 | 7132286 | 7132297 | 2 | 6  | 12 | CA   | 21 | 3  |
| 53163 | 5 | 7138229 | 7138240 | 2 | 6  | 12 | GT   | 25 | 5  |
| 53170 | 5 | 7150486 | 7150497 | 2 | 6  | 12 | CA   | 28 | 5  |
| 53171 | 5 | 7155808 | 7155819 | 2 | 6  | 12 | CT   | 30 | 3  |
| 53175 | 5 | 7160838 | 7160861 | 2 | 12 | 24 | TG   | 12 | 7  |
| 53183 | 5 | 7177472 | 7177497 | 2 | 13 | 26 | CA   | 18 | 9  |
| 53184 | 5 | 7182360 | 7182380 | 3 | 7  | 21 | TTG  | 9  | 4  |
| 53186 | 5 | 7183780 | 7183797 | 2 | 9  | 18 | AC   | 14 | 3  |
| 53188 | 5 | 7187435 | 7187476 | 2 | 21 | 42 | CA   | 20 | 14 |
| 53190 | 5 | 7191541 | 7191564 | 3 | 8  | 24 | AGG  | 28 | 6  |
| 53193 | 5 | 7196362 | 7196385 | 2 | 12 | 24 | TG   | 20 | 13 |



|       |   |         |         |   |    |    |      |    |    |
|-------|---|---------|---------|---|----|----|------|----|----|
| 53194 | 5 | 7198462 | 7198485 | 2 | 12 | 24 | GT   | 22 | 12 |
| 53200 | 5 | 7216153 | 7216173 | 3 | 7  | 21 | TCC  | 21 | 11 |
| 53211 | 5 | 7233231 | 7233254 | 2 | 12 | 24 | GT   | 11 | 6  |
| 53221 | 5 | 7261429 | 7261443 | 3 | 5  | 15 | TGA  | 29 | 3  |
| 53223 | 5 | 7261799 | 7261818 | 2 | 10 | 20 | TG   | 17 | 11 |
| 53227 | 5 | 7265500 | 7265515 | 2 | 8  | 16 | AC   | 15 | 4  |
| 53230 | 5 | 7266057 | 7266068 | 2 | 6  | 12 | CA   | 13 | 8  |
| 53231 | 5 | 7266071 | 7266084 | 2 | 7  | 14 | CA   | 16 | 9  |
| 53233 | 5 | 7266213 | 7266224 | 2 | 6  | 12 | GT   | 15 | 8  |
| 53237 | 5 | 7287609 | 7287620 | 2 | 6  | 12 | AC   | 27 | 4  |
| 53238 | 5 | 7287656 | 7287673 | 2 | 9  | 18 | CA   | 23 | 9  |
| 53239 | 5 | 7293010 | 7293024 | 3 | 5  | 15 | CCG  | 27 | 6  |
| 53240 | 5 | 7293281 | 7293298 | 2 | 9  | 18 | AC   | 16 | 8  |
| 53241 | 5 | 7293301 | 7293316 | 2 | 8  | 16 | AC   | 22 | 9  |
| 53243 | 5 | 7298097 | 7298117 | 3 | 7  | 21 | GAG  | 9  | 4  |
| 53245 | 5 | 7298624 | 7298659 | 3 | 12 | 36 | CCT  | 21 | 10 |
| 53246 | 5 | 7301208 | 7301221 | 2 | 7  | 14 | CT   | 10 | 6  |
| 53247 | 5 | 7301505 | 7301520 | 2 | 8  | 16 | TC   | 22 | 10 |
| 53263 | 5 | 7308426 | 7308455 | 2 | 15 | 30 | AC   | 9  | 9  |
| 53266 | 5 | 7312814 | 7312839 | 2 | 13 | 26 | AC   | 24 | 8  |
| 53267 | 5 | 7313412 | 7313423 | 2 | 6  | 12 | CA   | 12 | 5  |
| 53274 | 5 | 7337021 | 7337052 | 4 | 8  | 32 | CAAA | 32 | 3  |
| 53275 | 5 | 7338362 | 7338383 | 2 | 11 | 22 | TG   | 14 | 8  |
| 53277 | 5 | 7338831 | 7338845 | 3 | 5  | 15 | CCA  | 20 | 7  |
| 53278 | 5 | 7338892 | 7338907 | 2 | 8  | 16 | AG   | 16 | 4  |
| 53279 | 5 | 7339764 | 7339803 | 2 | 20 | 40 | GT   | 9  | 8  |
| 53280 | 5 | 7341230 | 7341256 | 3 | 9  | 27 | TTC  | 17 | 8  |
| 53282 | 5 | 7347596 | 7347609 | 2 | 7  | 14 | TG   | 23 | 14 |
| 53291 | 5 | 7355808 | 7355821 | 2 | 7  | 14 | GT   | 24 | 6  |
| 53297 | 5 | 7359455 | 7359475 | 3 | 7  | 21 | CAG  | 25 | 6  |
| 53298 | 5 | 7367007 | 7367021 | 3 | 5  | 15 | CCG  | 26 | 7  |
| 53303 | 5 | 7371180 | 7371213 | 2 | 17 | 34 | TG   | 8  | 7  |
| 53305 | 5 | 7371455 | 7371478 | 4 | 6  | 24 | TTTA | 17 | 4  |
| 53309 | 5 | 7383092 | 7383105 | 2 | 7  | 14 | CA   | 22 | 11 |
| 53310 | 5 | 7385052 | 7385077 | 2 | 13 | 26 | TG   | 20 | 13 |
| 53311 | 5 | 7392845 | 7392864 | 2 | 10 | 20 | GT   | 29 | 4  |
| 53320 | 5 | 7414991 | 7415014 | 2 | 12 | 24 | AC   | 24 | 3  |
| 53322 | 5 | 7417537 | 7417560 | 3 | 8  | 24 | CAT  | 23 | 8  |
| 53325 | 5 | 7422559 | 7422570 | 2 | 6  | 12 | TC   | 12 | 4  |
| 53328 | 5 | 7429078 | 7429098 | 3 | 7  | 21 | TGC  | 23 | 4  |
| 53329 | 5 | 7429099 | 7429119 | 3 | 7  | 21 | TGG  | 22 | 6  |
| 53330 | 5 | 7432930 | 7432955 | 2 | 13 | 26 | CA   | 8  | 8  |
| 53331 | 5 | 7433094 | 7433107 | 2 | 7  | 14 | AG   | 22 | 8  |
| 53334 | 5 | 7440204 | 7440223 | 2 | 10 | 20 | CA   | 16 | 7  |
| 53335 | 5 | 7443909 | 7443924 | 2 | 8  | 16 | CT   | 18 | 3  |
| 53337 | 5 | 7445238 | 7445253 | 2 | 8  | 16 | AG   | 23 | 4  |
| 53338 | 5 | 7446264 | 7446290 | 3 | 9  | 27 | GAG  | 19 | 8  |
| 53339 | 5 | 7446460 | 7446480 | 3 | 7  | 21 | TGC  | 27 | 5  |
| 53342 | 5 | 7446963 | 7446986 | 3 | 8  | 24 | GGA  | 23 | 4  |
| 53344 | 5 | 7447200 | 7447220 | 3 | 7  | 21 | AAT  | 17 | 9  |
| 53348 | 5 | 7452350 | 7452379 | 2 | 15 | 30 | AC   | 9  | 8  |

|       |   |         |         |   |    |    |      |    |    |
|-------|---|---------|---------|---|----|----|------|----|----|
| 53349 | 5 | 7453109 | 7453126 | 3 | 6  | 18 | GGA  | 28 | 3  |
| 53351 | 5 | 7456441 | 7456452 | 2 | 6  | 12 | TG   | 30 | 4  |
| 53352 | 5 | 7458992 | 7459017 | 2 | 13 | 26 | TG   | 15 | 9  |
| 53355 | 5 | 7465889 | 7465908 | 2 | 10 | 20 | GT   | 17 | 8  |
| 53360 | 5 | 7482125 | 7482156 | 2 | 16 | 32 | GT   | 9  | 12 |
| 53367 | 5 | 7502643 | 7502663 | 3 | 7  | 21 | TGC  | 27 | 3  |
| 53368 | 5 | 7503739 | 7503770 | 2 | 16 | 32 | TG   | 8  | 9  |
| 53369 | 5 | 7504381 | 7504396 | 2 | 8  | 16 | GT   | 15 | 5  |
| 53370 | 5 | 7505475 | 7505495 | 3 | 7  | 21 | CCT  | 30 | 5  |
| 53374 | 5 | 7512978 | 7512989 | 2 | 6  | 12 | AC   | 25 | 9  |
| 53375 | 5 | 7513231 | 7513248 | 2 | 9  | 18 | AC   | 21 | 10 |
| 53377 | 5 | 7513367 | 7513380 | 2 | 7  | 14 | CA   | 18 | 9  |
| 53378 | 5 | 7513381 | 7513396 | 2 | 8  | 16 | AC   | 17 | 10 |
| 53380 | 5 | 7518433 | 7518456 | 2 | 12 | 24 | CA   | 19 | 8  |
| 53382 | 5 | 7522807 | 7522822 | 2 | 8  | 16 | TG   | 14 | 8  |
| 53383 | 5 | 7533268 | 7533289 | 2 | 11 | 22 | TC   | 32 | 4  |
| 53389 | 5 | 7540007 | 7540048 | 2 | 21 | 42 | TG   | 6  | 8  |
| 53393 | 5 | 7542058 | 7542069 | 2 | 6  | 12 | AG   | 13 | 3  |
| 53395 | 5 | 7549379 | 7549396 | 2 | 9  | 18 | CA   | 21 | 10 |
| 53397 | 5 | 7550165 | 7550178 | 2 | 7  | 14 | TC   | 20 | 3  |
| 53401 | 5 | 7555434 | 7555447 | 2 | 7  | 14 | CA   | 11 | 3  |
| 53402 | 5 | 7557521 | 7557536 | 4 | 4  | 16 | CTTC | 31 | 3  |
| 53404 | 5 | 7558704 | 7558735 | 2 | 16 | 32 | GT   | 12 | 11 |
| 53405 | 5 | 7558868 | 7558885 | 2 | 9  | 18 | AG   | 9  | 5  |
| 53408 | 5 | 7559748 | 7559771 | 2 | 12 | 24 | TG   | 21 | 11 |
| 53410 | 5 | 7565743 | 7565766 | 2 | 12 | 24 | CA   | 29 | 9  |
| 53413 | 5 | 7566175 | 7566194 | 2 | 10 | 20 | GA   | 28 | 4  |
| 53414 | 5 | 7566564 | 7566579 | 2 | 8  | 16 | TC   | 17 | 7  |
| 53417 | 5 | 7569437 | 7569454 | 2 | 9  | 18 | GT   | 17 | 18 |
| 53418 | 5 | 7569457 | 7569470 | 2 | 7  | 14 | GT   | 15 | 15 |
| 53419 | 5 | 7569625 | 7569644 | 2 | 10 | 20 | CA   | 25 | 6  |
| 53420 | 5 | 7569717 | 7569734 | 3 | 6  | 18 | GGT  | 26 | 6  |
| 53429 | 5 | 7573728 | 7573757 | 2 | 15 | 30 | CA   | 10 | 11 |
| 53434 | 5 | 7610779 | 7610806 | 4 | 7  | 28 | TCAT | 28 | 9  |
| 53451 | 5 | 7657079 | 7657092 | 2 | 7  | 14 | GT   | 16 | 5  |
| 53463 | 5 | 7675479 | 7675498 | 2 | 10 | 20 | TA   | 9  | 6  |
| 53464 | 5 | 7686488 | 7686503 | 2 | 8  | 16 | CA   | 24 | 6  |
| 53470 | 5 | 7708850 | 7708861 | 2 | 6  | 12 | GA   | 26 | 4  |
| 53471 | 5 | 7708863 | 7708874 | 2 | 6  | 12 | AG   | 26 | 5  |
| 53472 | 5 | 7713465 | 7713498 | 2 | 17 | 34 | AC   | 10 | 13 |
| 53475 | 5 | 7715058 | 7715073 | 4 | 4  | 16 | AAAC | 23 | 5  |
| 53477 | 5 | 7720479 | 7720494 | 4 | 4  | 16 | AAAC | 6  | 4  |
| 53482 | 5 | 7729042 | 7729063 | 2 | 11 | 22 | CA   | 7  | 8  |
| 53484 | 5 | 7739036 | 7739047 | 2 | 6  | 12 | TG   | 20 | 3  |
| 53488 | 5 | 7748574 | 7748589 | 2 | 8  | 16 | AT   | 17 | 3  |
| 53492 | 5 | 7752804 | 7752825 | 2 | 11 | 22 | CA   | 17 | 12 |
| 53493 | 5 | 7754080 | 7754095 | 2 | 8  | 16 | AC   | 13 | 5  |
| 53495 | 5 | 7759715 | 7759732 | 2 | 9  | 18 | AG   | 18 | 5  |
| 53499 | 5 | 7769132 | 7769151 | 2 | 10 | 20 | TG   | 15 | 10 |
| 53501 | 5 | 7771038 | 7771073 | 2 | 18 | 36 | AC   | 16 | 12 |
| 53502 | 5 | 7771215 | 7771232 | 2 | 9  | 18 | AC   | 21 | 7  |

|       |   |         |         |   |    |    |      |    |    |
|-------|---|---------|---------|---|----|----|------|----|----|
| 53507 | 5 | 7776415 | 7776442 | 2 | 14 | 28 | AC   | 6  | 4  |
| 53510 | 5 | 7781113 | 7781142 | 2 | 15 | 30 | CA   | 18 | 8  |
| 53513 | 5 | 7783878 | 7783927 | 2 | 25 | 50 | AC   | 8  | 7  |
| 53516 | 5 | 7786298 | 7786315 | 2 | 9  | 18 | AC   | 24 | 6  |
| 53518 | 5 | 7790030 | 7790051 | 2 | 11 | 22 | CA   | 17 | 15 |
| 53524 | 5 | 7802802 | 7802815 | 2 | 7  | 14 | CA   | 17 | 13 |
| 53526 | 5 | 7804916 | 7804933 | 2 | 9  | 18 | CA   | 17 | 7  |
| 53528 | 5 | 7808328 | 7808375 | 2 | 24 | 48 | CA   | 14 | 12 |
| 53532 | 5 | 7810541 | 7810558 | 3 | 6  | 18 | GCA  | 12 | 5  |
| 53535 | 5 | 7811356 | 7811379 | 3 | 8  | 24 | TTC  | 12 | 4  |
| 53536 | 5 | 7811403 | 7811417 | 3 | 5  | 15 | TTC  | 12 | 3  |
| 53547 | 5 | 7852485 | 7852541 | 3 | 19 | 57 | AAT  | 16 | 9  |
| 53551 | 5 | 7875565 | 7875576 | 2 | 6  | 12 | GT   | 28 | 6  |
| 53566 | 5 | 7938402 | 7938425 | 3 | 8  | 24 | ATG  | 22 | 3  |
| 53570 | 5 | 7944344 | 7944359 | 4 | 4  | 16 | AAAG | 10 | 4  |
| 53573 | 5 | 7946593 | 7946622 | 3 | 10 | 30 | GCA  | 22 | 7  |
| 53575 | 5 | 7947014 | 7947029 | 2 | 8  | 16 | GT   | 16 | 8  |
| 53577 | 5 | 7947613 | 7947639 | 3 | 9  | 27 | GAA  | 12 | 3  |
| 53578 | 5 | 7947764 | 7947777 | 2 | 7  | 14 | CT   | 26 | 3  |
| 53580 | 5 | 7948146 | 7948163 | 3 | 6  | 18 | ATT  | 12 | 5  |
| 53584 | 5 | 7950495 | 7950522 | 2 | 14 | 28 | GT   | 10 | 7  |
| 53585 | 5 | 7954534 | 7954549 | 2 | 8  | 16 | GT   | 22 | 5  |
| 53588 | 5 | 7958852 | 7958871 | 2 | 10 | 20 | CA   | 18 | 9  |
| 53614 | 5 | 7996552 | 7996563 | 2 | 6  | 12 | TG   | 25 | 8  |
| 53615 | 5 | 8001536 | 8001559 | 2 | 12 | 24 | CA   | 11 | 7  |
| 53616 | 5 | 8003615 | 8003650 | 2 | 18 | 36 | TG   | 10 | 8  |
| 53624 | 5 | 8012581 | 8012612 | 2 | 16 | 32 | GT   | 6  | 8  |
| 53625 | 5 | 8016609 | 8016626 | 3 | 6  | 18 | GCT  | 27 | 4  |
| 53628 | 5 | 8028383 | 8028408 | 2 | 13 | 26 | TG   | 20 | 8  |
| 53636 | 5 | 8059395 | 8059408 | 2 | 7  | 14 | GT   | 19 | 3  |
| 53640 | 5 | 8064506 | 8064521 | 4 | 4  | 16 | AAAT | 31 | 4  |
| 53651 | 5 | 8098692 | 8098713 | 2 | 11 | 22 | TG   | 27 | 10 |
| 53661 | 5 | 8111791 | 8111812 | 2 | 11 | 22 | AC   | 20 | 11 |
| 53672 | 5 | 8117757 | 8117780 | 2 | 12 | 24 | CA   | 20 | 9  |
| 53673 | 5 | 8121880 | 8121897 | 3 | 6  | 18 | AGC  | 28 | 3  |
| 53674 | 5 | 8129820 | 8129859 | 4 | 10 | 40 | TATC | 14 | 11 |
| 53676 | 5 | 8130431 | 8130452 | 2 | 11 | 22 | GT   | 17 | 6  |
| 53677 | 5 | 8130590 | 8130604 | 3 | 5  | 15 | AGG  | 20 | 11 |
| 53683 | 5 | 8133668 | 8133693 | 2 | 13 | 26 | AG   | 21 | 6  |
| 53686 | 5 | 8136280 | 8136321 | 2 | 21 | 42 | TG   | 9  | 8  |
| 53687 | 5 | 8141356 | 8141383 | 2 | 14 | 28 | GT   | 20 | 10 |
| 53692 | 5 | 8143165 | 8143178 | 2 | 7  | 14 | TG   | 18 | 3  |
| 53697 | 5 | 8151833 | 8151848 | 2 | 8  | 16 | CA   | 26 | 3  |
| 53698 | 5 | 8155789 | 8155806 | 2 | 9  | 18 | TA   | 16 | 6  |
| 53699 | 5 | 8157246 | 8157266 | 3 | 7  | 21 | CAG  | 27 | 3  |
| 53711 | 5 | 8173864 | 8173877 | 2 | 7  | 14 | GT   | 19 | 9  |
| 53718 | 5 | 8180597 | 8180642 | 2 | 23 | 46 | GT   | 13 | 8  |
| 53722 | 5 | 8188351 | 8188371 | 3 | 7  | 21 | AGA  | 27 | 4  |
| 53727 | 5 | 8202778 | 8202803 | 2 | 13 | 26 | CA   | 13 | 11 |
| 53739 | 5 | 8212648 | 8212675 | 2 | 14 | 28 | CA   | 17 | 9  |
| 53744 | 5 | 8214638 | 8214658 | 3 | 7  | 21 | TGC  | 19 | 3  |

|       |   |         |         |   |    |    |      |    |    |
|-------|---|---------|---------|---|----|----|------|----|----|
| 53745 | 5 | 8214873 | 8214888 | 2 | 8  | 16 | TG   | 20 | 9  |
| 53746 | 5 | 8214986 | 8214997 | 2 | 6  | 12 | AC   | 20 | 6  |
| 53747 | 5 | 8215092 | 8215121 | 2 | 15 | 30 | GT   | 12 | 13 |
| 53751 | 5 | 8218059 | 8218076 | 2 | 9  | 18 | CA   | 16 | 6  |
| 53753 | 5 | 8220200 | 8220229 | 2 | 15 | 30 | GT   | 15 | 10 |
| 53754 | 5 | 8224831 | 8224858 | 2 | 14 | 28 | TG   | 16 | 9  |
| 53756 | 5 | 8227269 | 8227280 | 2 | 6  | 12 | TA   | 23 | 6  |
| 53758 | 5 | 8230096 | 8230115 | 4 | 5  | 20 | AAAT | 21 | 3  |
| 53760 | 5 | 8230652 | 8230665 | 2 | 7  | 14 | AC   | 13 | 8  |
| 53761 | 5 | 8230798 | 8230827 | 3 | 10 | 30 | GGA  | 6  | 9  |
| 53763 | 5 | 8231231 | 8231248 | 3 | 6  | 18 | ATA  | 13 | 8  |
| 53766 | 5 | 8235877 | 8235896 | 2 | 10 | 20 | TC   | 18 | 8  |
| 53770 | 5 | 8237800 | 8237819 | 4 | 5  | 20 | AAAT | 27 | 3  |
| 53773 | 5 | 8256161 | 8256193 | 3 | 11 | 33 | CAG  | 24 | 14 |
| 53778 | 5 | 8264649 | 8264676 | 2 | 14 | 28 | TG   | 12 | 9  |
| 53781 | 5 | 8265656 | 8265676 | 3 | 7  | 21 | GAG  | 28 | 5  |
| 53782 | 5 | 8267664 | 8267677 | 2 | 7  | 14 | TG   | 26 | 5  |
| 53784 | 5 | 8267871 | 8267892 | 2 | 11 | 22 | CA   | 26 | 10 |
| 53785 | 5 | 8268055 | 8268090 | 2 | 18 | 36 | GT   | 10 | 10 |
| 53789 | 5 | 8273743 | 8273782 | 2 | 20 | 40 | GT   | 10 | 8  |
| 53795 | 5 | 8292174 | 8292188 | 3 | 5  | 15 | CCG  | 24 | 9  |
| 53796 | 5 | 8292425 | 8292440 | 4 | 4  | 16 | TTCA | 23 | 4  |
| 53797 | 5 | 8293631 | 8293644 | 2 | 7  | 14 | GT   | 28 | 3  |
| 53798 | 5 | 8296089 | 8296106 | 2 | 9  | 18 | AC   | 23 | 5  |
| 53799 | 5 | 8296192 | 8296229 | 2 | 19 | 38 | GT   | 11 | 9  |
| 53803 | 5 | 8297807 | 8297838 | 2 | 16 | 32 | CA   | 16 | 11 |
| 53804 | 5 | 8297947 | 8297961 | 3 | 5  | 15 | CTC  | 24 | 3  |
| 53805 | 5 | 8300226 | 8300245 | 2 | 10 | 20 | AG   | 24 | 8  |
| 53807 | 5 | 8302886 | 8302909 | 2 | 12 | 24 | AC   | 17 | 6  |
| 53809 | 5 | 8303035 | 8303061 | 3 | 9  | 27 | CCT  | 12 | 10 |
| 53810 | 5 | 8303627 | 8303638 | 2 | 6  | 12 | AC   | 16 | 3  |
| 53811 | 5 | 8306194 | 8306205 | 2 | 6  | 12 | TA   | 22 | 4  |
| 53812 | 5 | 8306693 | 8306708 | 2 | 8  | 16 | CA   | 21 | 4  |
| 53814 | 5 | 8310301 | 8310321 | 3 | 7  | 21 | GGA  | 29 | 6  |
| 53815 | 5 | 8311597 | 8311620 | 3 | 8  | 24 | CCT  | 12 | 3  |
| 53823 | 5 | 8313396 | 8313419 | 2 | 12 | 24 | GT   | 30 | 7  |
| 53824 | 5 | 8313558 | 8313571 | 2 | 7  | 14 | CT   | 20 | 3  |
| 53827 | 5 | 8316755 | 8316766 | 2 | 6  | 12 | AG   | 29 | 3  |
| 53828 | 5 | 8318829 | 8318844 | 2 | 8  | 16 | GA   | 25 | 4  |
| 53830 | 5 | 8321621 | 8321636 | 2 | 8  | 16 | TG   | 25 | 6  |
| 53833 | 5 | 8325088 | 8325117 | 2 | 15 | 30 | CA   | 21 | 13 |
| 53834 | 5 | 8327390 | 8327405 | 4 | 4  | 16 | TTTC | 24 | 3  |
| 53839 | 5 | 8335112 | 8335143 | 2 | 16 | 32 | TG   | 11 | 9  |
| 53841 | 5 | 8337103 | 8337120 | 2 | 9  | 18 | GT   | 20 | 8  |
| 53842 | 5 | 8337982 | 8338003 | 2 | 11 | 22 | GT   | 9  | 6  |
| 53843 | 5 | 8340730 | 8340741 | 2 | 6  | 12 | GA   | 21 | 8  |
| 53847 | 5 | 8341743 | 8341792 | 2 | 25 | 50 | AC   | 11 | 11 |
| 53848 | 5 | 8341911 | 8341922 | 2 | 6  | 12 | GT   | 17 | 8  |
| 53849 | 5 | 8342139 | 8342156 | 2 | 9  | 18 | CA   | 19 | 6  |
| 53860 | 5 | 8355646 | 8355679 | 2 | 17 | 34 | AC   | 6  | 7  |
| 53862 | 5 | 8356101 | 8356120 | 2 | 10 | 20 | TG   | 10 | 8  |

|       |   |         |         |   |    |    |      |    |    |
|-------|---|---------|---------|---|----|----|------|----|----|
| 53863 | 5 | 8358245 | 8358264 | 2 | 10 | 20 | TG   | 16 | 8  |
| 53864 | 5 | 8358323 | 8358344 | 2 | 11 | 22 | AC   | 15 | 9  |
| 53865 | 5 | 8358505 | 8358520 | 2 | 8  | 16 | TC   | 16 | 5  |
| 53868 | 5 | 8359902 | 8359927 | 2 | 13 | 26 | GT   | 17 | 7  |
| 53869 | 5 | 8360111 | 8360131 | 3 | 7  | 21 | CTG  | 23 | 4  |
| 53870 | 5 | 8361169 | 8361200 | 2 | 16 | 32 | GT   | 11 | 8  |
| 53871 | 5 | 8361386 | 8361415 | 3 | 10 | 30 | CCT  | 21 | 6  |
| 53874 | 5 | 8365171 | 8365192 | 2 | 11 | 22 | CA   | 19 | 9  |
| 53877 | 5 | 8367383 | 8367415 | 3 | 11 | 33 | GTT  | 20 | 10 |
| 53879 | 5 | 8367830 | 8367847 | 3 | 6  | 18 | CCA  | 16 | 3  |
| 53882 | 5 | 8370251 | 8370262 | 2 | 6  | 12 | AC   | 21 | 5  |
| 53883 | 5 | 8370293 | 8370306 | 2 | 7  | 14 | CA   | 21 | 3  |
| 53884 | 5 | 8370397 | 8370418 | 2 | 11 | 22 | GA   | 11 | 6  |
| 53891 | 5 | 8371501 | 8371532 | 2 | 16 | 32 | AC   | 12 | 11 |
| 53894 | 5 | 8379611 | 8379624 | 2 | 7  | 14 | AT   | 26 | 5  |
| 53902 | 5 | 8399831 | 8399842 | 2 | 6  | 12 | TG   | 27 | 3  |
| 53903 | 5 | 8401668 | 8401683 | 2 | 8  | 16 | AC   | 6  | 6  |
| 53904 | 5 | 8405192 | 8405209 | 2 | 9  | 18 | CA   | 14 | 8  |
| 53905 | 5 | 8405374 | 8405388 | 3 | 5  | 15 | CCT  | 7  | 4  |
| 53906 | 5 | 8406217 | 8406237 | 3 | 7  | 21 | GAG  | 23 | 10 |
| 53909 | 5 | 8408072 | 8408091 | 2 | 10 | 20 | GT   | 16 | 9  |
| 53922 | 5 | 8437957 | 8437990 | 2 | 17 | 34 | GT   | 14 | 9  |
| 53929 | 5 | 8451706 | 8451741 | 3 | 12 | 36 | TTC  | 20 | 6  |
| 53932 | 5 | 8455807 | 8455818 | 2 | 6  | 12 | CA   | 30 | 14 |
| 53934 | 5 | 8459232 | 8459243 | 2 | 6  | 12 | TG   | 27 | 7  |
| 53938 | 5 | 8464129 | 8464164 | 3 | 12 | 36 | CCT  | 14 | 6  |
| 53939 | 5 | 8464335 | 8464366 | 2 | 16 | 32 | CT   | 10 | 7  |
| 53941 | 5 | 8465129 | 8465164 | 2 | 18 | 36 | GT   | 11 | 12 |
| 53943 | 5 | 8467240 | 8467255 | 2 | 8  | 16 | TG   | 23 | 4  |
| 53944 | 5 | 8469789 | 8469806 | 2 | 9  | 18 | TG   | 22 | 4  |
| 53947 | 5 | 8476210 | 8476223 | 2 | 7  | 14 | CA   | 11 | 6  |
| 53949 | 5 | 8481501 | 8481515 | 3 | 5  | 15 | CAG  | 28 | 5  |
| 53955 | 5 | 8483670 | 8483699 | 3 | 10 | 30 | TTC  | 19 | 7  |
| 53957 | 5 | 8486211 | 8486232 | 2 | 11 | 22 | AC   | 11 | 6  |
| 53958 | 5 | 8488091 | 8488108 | 3 | 6  | 18 | CAG  | 25 | 8  |
| 53964 | 5 | 8496440 | 8496465 | 2 | 13 | 26 | GT   | 21 | 8  |
| 53967 | 5 | 8501961 | 8502000 | 2 | 20 | 40 | CA   | 6  | 9  |
| 53969 | 5 | 8510449 | 8510462 | 2 | 7  | 14 | GT   | 20 | 7  |
| 53970 | 5 | 8517672 | 8517685 | 2 | 7  | 14 | CA   | 28 | 3  |
| 53972 | 5 | 8519274 | 8519291 | 3 | 6  | 18 | AAG  | 12 | 6  |
| 53975 | 5 | 8522352 | 8522369 | 3 | 6  | 18 | AGG  | 24 | 5  |
| 53978 | 5 | 8522975 | 8522995 | 3 | 7  | 21 | GAG  | 24 | 4  |
| 53979 | 5 | 8523231 | 8523254 | 2 | 12 | 24 | CA   | 21 | 12 |
| 53980 | 5 | 8523361 | 8523386 | 2 | 13 | 26 | TG   | 11 | 9  |
| 53983 | 5 | 8525693 | 8525713 | 3 | 7  | 21 | CCT  | 12 | 4  |
| 53984 | 5 | 8525966 | 8526007 | 2 | 21 | 42 | GA   | 8  | 8  |
| 53985 | 5 | 8527679 | 8527694 | 4 | 4  | 16 | ATCT | 7  | 3  |
| 53989 | 5 | 8529994 | 8530019 | 2 | 13 | 26 | TG   | 18 | 9  |
| 53991 | 5 | 8532829 | 8532866 | 2 | 19 | 38 | GT   | 17 | 16 |
| 53992 | 5 | 8533940 | 8533957 | 2 | 9  | 18 | TG   | 27 | 5  |
| 53993 | 5 | 8534107 | 8534120 | 2 | 7  | 14 | TG   | 20 | 3  |

|       |   |         |         |   |    |    |     |    |    |
|-------|---|---------|---------|---|----|----|-----|----|----|
| 53994 | 5 | 8536752 | 8536765 | 2 | 7  | 14 | AC  | 24 | 5  |
| 53998 | 5 | 8537411 | 8537426 | 2 | 8  | 16 | TG  | 6  | 3  |
| 54001 | 5 | 8544263 | 8544282 | 2 | 10 | 20 | TG  | 22 | 8  |
| 54012 | 5 | 8558761 | 8558804 | 2 | 22 | 44 | CA  | 11 | 12 |
| 54017 | 5 | 8568163 | 8568176 | 2 | 7  | 14 | AC  | 22 | 5  |
| 54018 | 5 | 8569876 | 8569891 | 2 | 8  | 16 | GT  | 13 | 4  |
| 54020 | 5 | 8570009 | 8570026 | 2 | 9  | 18 | AG  | 21 | 5  |
| 54021 | 5 | 8570220 | 8570235 | 2 | 8  | 16 | TG  | 20 | 12 |
| 54023 | 5 | 8573211 | 8573230 | 2 | 10 | 20 | CA  | 10 | 9  |
| 54032 | 5 | 8581238 | 8581261 | 2 | 12 | 24 | AC  | 13 | 6  |
| 54037 | 5 | 8588063 | 8588094 | 2 | 16 | 32 | CA  | 12 | 11 |
| 54039 | 5 | 8590756 | 8590779 | 2 | 12 | 24 | CA  | 13 | 8  |
| 54040 | 5 | 8591002 | 8591017 | 2 | 8  | 16 | TC  | 18 | 5  |
| 54046 | 5 | 8594486 | 8594505 | 2 | 10 | 20 | CA  | 17 | 9  |
| 54048 | 5 | 8596968 | 8596985 | 3 | 6  | 18 | TCC | 26 | 5  |
| 54049 | 5 | 8597037 | 8597068 | 2 | 16 | 32 | GT  | 9  | 9  |
| 54050 | 5 | 8597094 | 8597123 | 2 | 15 | 30 | TG  | 15 | 4  |
| 54051 | 5 | 8597676 | 8597709 | 2 | 17 | 34 | CA  | 16 | 11 |
| 54060 | 5 | 8614012 | 8614043 | 2 | 16 | 32 | TG  | 15 | 13 |
| 54061 | 5 | 8614437 | 8614480 | 2 | 22 | 44 | TG  | 9  | 8  |
| 54063 | 5 | 8615613 | 8615632 | 2 | 10 | 20 | AC  | 24 | 6  |
| 54064 | 5 | 8616281 | 8616298 | 2 | 9  | 18 | AC  | 23 | 6  |
| 54065 | 5 | 8616948 | 8616969 | 2 | 11 | 22 | GA  | 18 | 6  |
| 54085 | 5 | 8627104 | 8627149 | 2 | 23 | 46 | GT  | 11 | 12 |
| 54086 | 5 | 8632115 | 8632138 | 2 | 12 | 24 | GT  | 18 | 19 |
| 54096 | 5 | 8647834 | 8647848 | 3 | 5  | 15 | CTC | 17 | 3  |
| 54098 | 5 | 8648124 | 8648147 | 2 | 12 | 24 | AC  | 19 | 3  |
| 54099 | 5 | 8648190 | 8648209 | 2 | 10 | 20 | TG  | 14 | 7  |
| 54100 | 5 | 8649014 | 8649031 | 3 | 6  | 18 | TCT | 10 | 6  |
| 54102 | 5 | 8650663 | 8650694 | 2 | 16 | 32 | AC  | 7  | 10 |
| 54103 | 5 | 8650790 | 8650821 | 2 | 16 | 32 | AC  | 6  | 6  |
| 54108 | 5 | 8652892 | 8652915 | 2 | 12 | 24 | TC  | 19 | 3  |
| 54109 | 5 | 8653031 | 8653050 | 2 | 10 | 20 | CT  | 18 | 7  |
| 54110 | 5 | 8654609 | 8654644 | 2 | 18 | 36 | CA  | 15 | 12 |
| 54113 | 5 | 8660268 | 8660291 | 2 | 12 | 24 | AC  | 20 | 8  |
| 54121 | 5 | 8666511 | 8666528 | 2 | 9  | 18 | CA  | 21 | 6  |
| 54122 | 5 | 8667128 | 8667145 | 2 | 9  | 18 | AC  | 26 | 4  |
| 54125 | 5 | 8667516 | 8667545 | 2 | 15 | 30 | CA  | 12 | 6  |
| 54132 | 5 | 8671621 | 8671632 | 2 | 6  | 12 | TG  | 30 | 4  |
| 54133 | 5 | 8672094 | 8672111 | 3 | 6  | 18 | GAA | 27 | 3  |
| 54134 | 5 | 8673341 | 8673352 | 2 | 6  | 12 | GT  | 19 | 4  |
| 54136 | 5 | 8674111 | 8674132 | 2 | 11 | 22 | CA  | 15 | 5  |
| 54142 | 5 | 8682170 | 8682187 | 3 | 6  | 18 | TCC | 17 | 6  |
| 54143 | 5 | 8686732 | 8686755 | 2 | 12 | 24 | CA  | 8  | 7  |
| 54145 | 5 | 8686903 | 8686920 | 3 | 6  | 18 | TTC | 17 | 3  |
| 54147 | 5 | 8688656 | 8688691 | 2 | 18 | 36 | GT  | 8  | 12 |
| 54149 | 5 | 8694781 | 8694800 | 2 | 10 | 20 | TG  | 23 | 5  |
| 54152 | 5 | 8703532 | 8703555 | 3 | 8  | 24 | ACA | 24 | 4  |
| 54154 | 5 | 8714033 | 8714056 | 3 | 8  | 24 | GAG | 20 | 5  |
| 54157 | 5 | 8715083 | 8715097 | 3 | 5  | 15 | GAG | 13 | 13 |
| 54161 | 5 | 8723223 | 8723240 | 3 | 6  | 18 | CCA | 24 | 4  |

|       |   |         |         |   |    |    |      |    |    |
|-------|---|---------|---------|---|----|----|------|----|----|
| 54162 | 5 | 8725360 | 8725375 | 2 | 8  | 16 | TG   | 17 | 5  |
| 54163 | 5 | 8725857 | 8725886 | 2 | 15 | 30 | CA   | 9  | 10 |
| 54164 | 5 | 8726488 | 8726499 | 2 | 6  | 12 | TG   | 22 | 3  |
| 54165 | 5 | 8726577 | 8726604 | 2 | 14 | 28 | TG   | 17 | 10 |
| 54167 | 5 | 8732660 | 8732685 | 2 | 13 | 26 | TG   | 10 | 8  |
| 54168 | 5 | 8732732 | 8732751 | 2 | 10 | 20 | AG   | 20 | 11 |
| 54169 | 5 | 8733932 | 8733949 | 3 | 6  | 18 | GGA  | 21 | 10 |
| 54170 | 5 | 8735742 | 8735771 | 2 | 15 | 30 | CA   | 15 | 9  |
| 54173 | 5 | 8737114 | 8737133 | 2 | 10 | 20 | TG   | 21 | 9  |
| 54175 | 5 | 8738541 | 8738561 | 3 | 7  | 21 | TAA  | 18 | 3  |
| 54177 | 5 | 8740252 | 8740272 | 3 | 7  | 21 | CCT  | 11 | 6  |
| 54179 | 5 | 8740514 | 8740533 | 2 | 10 | 20 | CT   | 22 | 7  |
| 54185 | 5 | 8744863 | 8744874 | 2 | 6  | 12 | TC   | 9  | 4  |
| 54191 | 5 | 8746680 | 8746700 | 3 | 7  | 21 | GGA  | 23 | 7  |
| 54193 | 5 | 8750133 | 8750156 | 3 | 8  | 24 | GCT  | 18 | 6  |
| 54194 | 5 | 8750737 | 8750754 | 2 | 9  | 18 | GT   | 22 | 22 |
| 54198 | 5 | 8751915 | 8751942 | 2 | 14 | 28 | CA   | 15 | 11 |
| 54199 | 5 | 8754392 | 8754403 | 2 | 6  | 12 | TC   | 22 | 9  |
| 54200 | 5 | 8754692 | 8754707 | 2 | 8  | 16 | CA   | 27 | 11 |
| 54202 | 5 | 8755079 | 8755099 | 3 | 7  | 21 | GGA  | 19 | 4  |
| 54207 | 5 | 8760980 | 8761003 | 2 | 12 | 24 | TC   | 30 | 7  |
| 54209 | 5 | 8765476 | 8765493 | 2 | 9  | 18 | CA   | 16 | 13 |
| 54220 | 5 | 8780202 | 8780228 | 3 | 9  | 27 | GGA  | 6  | 4  |
| 54222 | 5 | 8780435 | 8780449 | 3 | 5  | 15 | TCC  | 16 | 11 |
| 54223 | 5 | 8782114 | 8782139 | 2 | 13 | 26 | GT   | 10 | 7  |
| 54225 | 5 | 8782756 | 8782773 | 3 | 6  | 18 | TGA  | 31 | 4  |
| 54229 | 5 | 8796173 | 8796198 | 2 | 13 | 26 | GT   | 18 | 14 |
| 54231 | 5 | 8796739 | 8796766 | 2 | 14 | 28 | AC   | 11 | 11 |
| 54235 | 5 | 8801212 | 8801237 | 2 | 13 | 26 | TG   | 7  | 7  |
| 54236 | 5 | 8803582 | 8803615 | 2 | 17 | 34 | GT   | 10 | 11 |
| 54240 | 5 | 8808503 | 8808522 | 2 | 10 | 20 | TG   | 16 | 10 |
| 54243 | 5 | 8809764 | 8809775 | 2 | 6  | 12 | GT   | 20 | 4  |
| 54245 | 5 | 8810721 | 8810738 | 2 | 9  | 18 | GT   | 19 | 7  |
| 54246 | 5 | 8810918 | 8810937 | 2 | 10 | 20 | TG   | 9  | 6  |
| 54247 | 5 | 8811121 | 8811146 | 2 | 13 | 26 | GT   | 22 | 7  |
| 54248 | 5 | 8813705 | 8813720 | 2 | 8  | 16 | GT   | 16 | 7  |
| 54263 | 5 | 8846063 | 8846078 | 4 | 4  | 16 | GTCA | 28 | 3  |
| 54264 | 5 | 8847839 | 8847860 | 2 | 11 | 22 | AC   | 17 | 5  |
| 54272 | 5 | 8864494 | 8864511 | 2 | 9  | 18 | AC   | 20 | 7  |
| 54276 | 5 | 8873634 | 8873653 | 4 | 5  | 20 | CTAT | 6  | 3  |
| 54279 | 5 | 8877946 | 8877960 | 3 | 5  | 15 | GAA  | 16 | 4  |
| 54280 | 5 | 8879919 | 8879942 | 2 | 12 | 24 | TG   | 20 | 12 |
| 54283 | 5 | 8880959 | 8880992 | 2 | 17 | 34 | CA   | 13 | 8  |
| 54284 | 5 | 8881171 | 8881191 | 3 | 7  | 21 | GGA  | 18 | 9  |
| 54285 | 5 | 8882261 | 8882284 | 3 | 8  | 24 | AGG  | 8  | 9  |
| 54286 | 5 | 8883387 | 8883410 | 3 | 8  | 24 | CCT  | 13 | 8  |
| 54290 | 5 | 8886607 | 8886672 | 3 | 22 | 66 | AGA  | 16 | 15 |
| 54291 | 5 | 8888904 | 8888931 | 2 | 14 | 28 | TG   | 15 | 10 |
| 54296 | 5 | 8900041 | 8900060 | 4 | 5  | 20 | TTTC | 7  | 7  |
| 54304 | 5 | 8903338 | 8903373 | 3 | 12 | 36 | TGT  | 18 | 12 |
| 54305 | 5 | 8903516 | 8903539 | 3 | 8  | 24 | CCT  | 17 | 10 |

|       |   |         |         |   |    |    |      |    |    |
|-------|---|---------|---------|---|----|----|------|----|----|
| 54307 | 5 | 8906893 | 8906919 | 3 | 9  | 27 | TCT  | 18 | 9  |
| 54309 | 5 | 8908803 | 8908820 | 2 | 9  | 18 | GA   | 24 | 8  |
| 54311 | 5 | 8914144 | 8914165 | 2 | 11 | 22 | CA   | 21 | 8  |
| 54314 | 5 | 8917201 | 8917232 | 2 | 16 | 32 | TC   | 13 | 7  |
| 54315 | 5 | 8918723 | 8918737 | 3 | 5  | 15 | AAG  | 31 | 6  |
| 54316 | 5 | 8920517 | 8920530 | 2 | 7  | 14 | TG   | 20 | 5  |
| 54317 | 5 | 8922825 | 8922858 | 2 | 17 | 34 | AC   | 17 | 11 |
| 54318 | 5 | 8923747 | 8923770 | 2 | 12 | 24 | CA   | 22 | 12 |
| 54322 | 5 | 8929156 | 8929170 | 3 | 5  | 15 | GCT  | 24 | 3  |
| 54324 | 5 | 8932944 | 8932967 | 2 | 12 | 24 | AC   | 23 | 11 |
| 54326 | 5 | 8938238 | 8938252 | 3 | 5  | 15 | CGC  | 28 | 3  |
| 54331 | 5 | 8940476 | 8940499 | 4 | 6  | 24 | TATC | 13 | 4  |
| 54332 | 5 | 8941015 | 8941052 | 2 | 19 | 38 | CA   | 14 | 13 |
| 54333 | 5 | 8942327 | 8942344 | 2 | 9  | 18 | TG   | 25 | 9  |
| 54335 | 5 | 8946875 | 8946889 | 3 | 5  | 15 | GAG  | 17 | 3  |
| 54337 | 5 | 8949515 | 8949530 | 2 | 8  | 16 | TG   | 22 | 3  |
| 54339 | 5 | 8949727 | 8949756 | 2 | 15 | 30 | CA   | 13 | 8  |
| 54341 | 5 | 8953181 | 8953196 | 4 | 4  | 16 | AATA | 22 | 3  |
| 54342 | 5 | 8955722 | 8955733 | 2 | 6  | 12 | GA   | 22 | 3  |
| 54345 | 5 | 8964984 | 8964995 | 2 | 6  | 12 | AC   | 19 | 4  |
| 54351 | 5 | 8966731 | 8966754 | 2 | 12 | 24 | AC   | 16 | 12 |
| 54358 | 5 | 8980404 | 8980415 | 2 | 6  | 12 | CA   | 16 | 8  |
| 54359 | 5 | 8982316 | 8982339 | 3 | 8  | 24 | CCT  | 23 | 5  |
| 54360 | 5 | 8984817 | 8984832 | 2 | 8  | 16 | TA   | 14 | 5  |
| 54361 | 5 | 8986143 | 8986156 | 2 | 7  | 14 | CA   | 12 | 8  |
| 54363 | 5 | 8989423 | 8989438 | 4 | 4  | 16 | AAAT | 30 | 4  |
| 54364 | 5 | 8994692 | 8994706 | 3 | 5  | 15 | CTC  | 18 | 4  |
| 54367 | 5 | 9010980 | 9011003 | 2 | 12 | 24 | TG   | 12 | 6  |
| 54370 | 5 | 9013533 | 9013546 | 2 | 7  | 14 | TG   | 24 | 5  |
| 54376 | 5 | 9020655 | 9020676 | 2 | 11 | 22 | GA   | 15 | 7  |
| 54379 | 5 | 9023429 | 9023444 | 4 | 4  | 16 | GAGG | 9  | 3  |
| 54383 | 5 | 9032690 | 9032711 | 2 | 11 | 22 | AC   | 16 | 5  |
| 54385 | 5 | 9033917 | 9033928 | 2 | 6  | 12 | AC   | 15 | 6  |
| 54391 | 5 | 9047575 | 9047586 | 2 | 6  | 12 | AT   | 20 | 4  |
| 54394 | 5 | 9055905 | 9055919 | 3 | 5  | 15 | AGG  | 26 | 3  |
| 54399 | 5 | 9062591 | 9062611 | 3 | 7  | 21 | ACA  | 19 | 4  |
| 54401 | 5 | 9063912 | 9063931 | 2 | 10 | 20 | AC   | 11 | 12 |
| 54402 | 5 | 9066821 | 9066841 | 3 | 7  | 21 | CAG  | 24 | 3  |
| 54405 | 5 | 9067397 | 9067416 | 2 | 10 | 20 | GT   | 21 | 14 |
| 54406 | 5 | 9067929 | 9067946 | 2 | 9  | 18 | AT   | 15 | 10 |
| 54407 | 5 | 9068801 | 9068822 | 2 | 11 | 22 | GT   | 24 | 10 |
| 54412 | 5 | 9075580 | 9075611 | 2 | 16 | 32 | AC   | 13 | 8  |
| 54413 | 5 | 9075802 | 9075821 | 2 | 10 | 20 | AC   | 20 | 4  |
| 54416 | 5 | 9077693 | 9077724 | 2 | 16 | 32 | CA   | 15 | 13 |
| 54418 | 5 | 9077977 | 9077998 | 2 | 11 | 22 | CT   | 15 | 5  |
| 54422 | 5 | 9082874 | 9082899 | 2 | 13 | 26 | TG   | 12 | 8  |
| 54423 | 5 | 9083066 | 9083077 | 2 | 6  | 12 | AG   | 28 | 6  |
| 54435 | 5 | 9085796 | 9085822 | 3 | 9  | 27 | GGA  | 17 | 11 |
| 54436 | 5 | 9088078 | 9088099 | 2 | 11 | 22 | GT   | 13 | 5  |
| 54437 | 5 | 9088202 | 9088231 | 2 | 15 | 30 | CA   | 6  | 10 |
| 54439 | 5 | 9089092 | 9089166 | 3 | 25 | 75 | GAA  | 15 | 14 |



|       |   |         |         |   |    |    |      |    |    |
|-------|---|---------|---------|---|----|----|------|----|----|
| 54442 | 5 | 9091335 | 9091367 | 3 | 11 | 33 | CTC  | 19 | 8  |
| 54443 | 5 | 9092028 | 9092051 | 2 | 12 | 24 | TG   | 11 | 6  |
| 54446 | 5 | 9092241 | 9092264 | 2 | 12 | 24 | TG   | 12 | 9  |
| 54447 | 5 | 9093161 | 9093172 | 2 | 6  | 12 | GT   | 30 | 3  |
| 54450 | 5 | 9093255 | 9093266 | 2 | 6  | 12 | CA   | 23 | 3  |
| 54451 | 5 | 9095327 | 9095344 | 3 | 6  | 18 | AAG  | 18 | 5  |
| 54453 | 5 | 9096243 | 9096272 | 2 | 15 | 30 | CA   | 7  | 12 |
| 54483 | 5 | 9123212 | 9123239 | 2 | 14 | 28 | CA   | 14 | 11 |
| 54500 | 5 | 9135136 | 9135147 | 2 | 6  | 12 | TC   | 22 | 7  |
| 54502 | 5 | 9135588 | 9135609 | 2 | 11 | 22 | CA   | 19 | 5  |
| 54508 | 5 | 9136280 | 9136315 | 3 | 12 | 36 | CCT  | 12 | 4  |
| 54510 | 5 | 9137195 | 9137224 | 3 | 10 | 30 | AGG  | 9  | 4  |
| 54514 | 5 | 9142179 | 9142190 | 2 | 6  | 12 | CA   | 24 | 3  |
| 54516 | 5 | 9146314 | 9146334 | 3 | 7  | 21 | GGA  | 23 | 5  |
| 54517 | 5 | 9146638 | 9146651 | 2 | 7  | 14 | GA   | 21 | 4  |
| 54518 | 5 | 9146761 | 9146776 | 4 | 4  | 16 | GTCT | 28 | 3  |
| 54519 | 5 | 9148271 | 9148284 | 2 | 7  | 14 | CA   | 26 | 5  |
| 54520 | 5 | 9149682 | 9149719 | 2 | 19 | 38 | GT   | 9  | 7  |
| 54521 | 5 | 9149941 | 9149962 | 2 | 11 | 22 | AC   | 19 | 8  |
| 54522 | 5 | 9151634 | 9151648 | 3 | 5  | 15 | GGA  | 21 | 3  |
| 54523 | 5 | 9152177 | 9152214 | 2 | 19 | 38 | AG   | 11 | 12 |
| 54525 | 5 | 9154213 | 9154226 | 2 | 7  | 14 | TC   | 26 | 4  |
| 54526 | 5 | 9157930 | 9157971 | 2 | 21 | 42 | CA   | 11 | 12 |
| 54528 | 5 | 9159682 | 9159713 | 2 | 16 | 32 | GT   | 12 | 10 |
| 54530 | 5 | 9160027 | 9160048 | 2 | 11 | 22 | TG   | 17 | 5  |
| 54536 | 5 | 9163630 | 9163647 | 2 | 9  | 18 | GT   | 19 | 11 |
| 54542 | 5 | 9165831 | 9165846 | 2 | 8  | 16 | TG   | 11 | 10 |
| 54543 | 5 | 9166001 | 9166026 | 2 | 13 | 26 | CA   | 7  | 7  |
| 54544 | 5 | 9167587 | 9167620 | 2 | 17 | 34 | CA   | 11 | 12 |
| 54545 | 5 | 9168149 | 9168174 | 2 | 13 | 26 | TG   | 16 | 11 |
| 54547 | 5 | 9170337 | 9170370 | 2 | 17 | 34 | CA   | 12 | 6  |
| 54548 | 5 | 9170896 | 9170913 | 3 | 6  | 18 | AAG  | 25 | 4  |
| 54549 | 5 | 9171177 | 9171196 | 4 | 5  | 20 | TATT | 27 | 5  |
| 54550 | 5 | 9172244 | 9172257 | 2 | 7  | 14 | CA   | 22 | 3  |
| 54553 | 5 | 9174507 | 9174526 | 4 | 5  | 20 | AGTC | 27 | 3  |
| 54554 | 5 | 9174653 | 9174674 | 2 | 11 | 22 | TG   | 24 | 17 |
| 54561 | 5 | 9192157 | 9192174 | 2 | 9  | 18 | AC   | 20 | 9  |
| 54564 | 5 | 9197725 | 9197762 | 2 | 19 | 38 | GT   | 20 | 11 |
| 54566 | 5 | 9199026 | 9199043 | 3 | 6  | 18 | ACA  | 27 | 4  |
| 54572 | 5 | 9213387 | 9213410 | 2 | 12 | 24 | AG   | 11 | 10 |
| 54580 | 5 | 9222609 | 9222626 | 2 | 9  | 18 | GT   | 9  | 8  |
| 54582 | 5 | 9229191 | 9229217 | 3 | 9  | 27 | AGG  | 23 | 6  |
| 54586 | 5 | 9231822 | 9231833 | 2 | 6  | 12 | TG   | 21 | 5  |
| 54592 | 5 | 9244498 | 9244513 | 4 | 4  | 16 | CTGT | 24 | 3  |
| 54594 | 5 | 9248806 | 9248843 | 2 | 19 | 38 | AC   | 8  | 9  |
| 54614 | 5 | 9272912 | 9272957 | 2 | 23 | 46 | AC   | 12 | 12 |
| 54616 | 5 | 9278645 | 9278682 | 2 | 19 | 38 | AC   | 9  | 8  |
| 54617 | 5 | 9279111 | 9279128 | 3 | 6  | 18 | CAG  | 22 | 5  |
| 54619 | 5 | 9283557 | 9283568 | 2 | 6  | 12 | AC   | 17 | 4  |
| 54620 | 5 | 9284262 | 9284277 | 2 | 8  | 16 | AC   | 24 | 6  |
| 54621 | 5 | 9288361 | 9288400 | 2 | 20 | 40 | GT   | 18 | 8  |

|       |   |         |         |   |    |    |      |    |    |
|-------|---|---------|---------|---|----|----|------|----|----|
| 54624 | 5 | 9296786 | 9296809 | 4 | 6  | 24 | TGTT | 10 | 7  |
| 54625 | 5 | 9298029 | 9298044 | 2 | 8  | 16 | CA   | 10 | 3  |
| 54628 | 5 | 9299485 | 9299508 | 3 | 8  | 24 | TCT  | 13 | 9  |
| 54632 | 5 | 9302944 | 9302975 | 4 | 8  | 32 | GTTA | 20 | 6  |
| 54638 | 5 | 9325777 | 9325788 | 2 | 6  | 12 | AT   | 11 | 3  |
| 54639 | 5 | 9336734 | 9336759 | 2 | 13 | 26 | GT   | 14 | 11 |
| 54640 | 5 | 9338106 | 9338121 | 4 | 4  | 16 | TTCT | 25 | 3  |
| 54641 | 5 | 9341016 | 9341030 | 3 | 5  | 15 | ACT  | 28 | 3  |
| 54643 | 5 | 9357224 | 9357239 | 2 | 8  | 16 | CA   | 22 | 7  |
| 54645 | 5 | 9358954 | 9358971 | 3 | 6  | 18 | CAT  | 22 | 8  |
| 54651 | 5 | 9371561 | 9371587 | 3 | 9  | 27 | CCT  | 10 | 4  |
| 54652 | 5 | 9378199 | 9378210 | 2 | 6  | 12 | TG   | 23 | 5  |
| 54655 | 5 | 9388975 | 9388992 | 2 | 9  | 18 | TG   | 27 | 4  |
| 54658 | 5 | 9392365 | 9392384 | 4 | 5  | 20 | AAAT | 12 | 4  |
| 54666 | 5 | 9429753 | 9429768 | 2 | 8  | 16 | AT   | 16 | 5  |
| 54670 | 5 | 9433689 | 9433720 | 2 | 16 | 32 | AC   | 13 | 14 |
| 54671 | 5 | 9434617 | 9434666 | 2 | 25 | 50 | TG   | 7  | 7  |
| 54674 | 5 | 9438588 | 9438625 | 2 | 19 | 38 | GT   | 7  | 7  |
| 54677 | 5 | 9443016 | 9443031 | 2 | 8  | 16 | CA   | 20 | 11 |
| 54679 | 5 | 9443170 | 9443199 | 2 | 15 | 30 | GT   | 15 | 10 |
| 54680 | 5 | 9443313 | 9443340 | 2 | 14 | 28 | CA   | 23 | 9  |
| 54681 | 5 | 9443426 | 9443443 | 2 | 9  | 18 | TG   | 26 | 12 |
| 54682 | 5 | 9443664 | 9443681 | 2 | 9  | 18 | AC   | 10 | 9  |
| 54685 | 5 | 9447731 | 9447742 | 2 | 6  | 12 | CA   | 23 | 4  |
| 54686 | 5 | 9448348 | 9448359 | 2 | 6  | 12 | CT   | 25 | 5  |
| 54690 | 5 | 9455853 | 9455876 | 2 | 12 | 24 | CA   | 12 | 7  |
| 54692 | 5 | 9460112 | 9460127 | 2 | 8  | 16 | CA   | 21 | 7  |
| 54706 | 5 | 9483571 | 9483582 | 2 | 6  | 12 | TC   | 21 | 4  |
| 54707 | 5 | 9483666 | 9483691 | 2 | 13 | 26 | AC   | 11 | 11 |
| 54710 | 5 | 9487313 | 9487328 | 2 | 8  | 16 | AC   | 17 | 6  |
| 54723 | 5 | 9510200 | 9510223 | 3 | 8  | 24 | CAG  | 30 | 4  |
| 54725 | 5 | 9520363 | 9520410 | 4 | 12 | 48 | ATAG | 19 | 11 |
| 54727 | 5 | 9535182 | 9535226 | 3 | 15 | 45 | CCT  | 11 | 6  |
| 54734 | 5 | 9546778 | 9546798 | 3 | 7  | 21 | GAG  | 27 | 3  |
| 54740 | 5 | 9562345 | 9562364 | 2 | 10 | 20 | CA   | 12 | 8  |
| 54743 | 5 | 9565819 | 9565833 | 3 | 5  | 15 | AGC  | 26 | 6  |
| 54746 | 5 | 9570734 | 9570748 | 3 | 5  | 15 | CAG  | 10 | 3  |
| 54752 | 5 | 9621550 | 9621582 | 3 | 11 | 33 | GAG  | 12 | 7  |
| 54753 | 5 | 9621645 | 9621660 | 2 | 8  | 16 | GT   | 15 | 8  |
| 54754 | 5 | 9621663 | 9621680 | 2 | 9  | 18 | GT   | 15 | 10 |
| 54756 | 5 | 9621991 | 9622026 | 4 | 9  | 36 | TGGA | 23 | 6  |
| 54757 | 5 | 9622374 | 9622393 | 2 | 10 | 20 | TG   | 14 | 7  |
| 54764 | 5 | 9635702 | 9635727 | 2 | 13 | 26 | TG   | 20 | 8  |
| 54770 | 5 | 9654728 | 9654751 | 3 | 8  | 24 | TCC  | 20 | 3  |
| 54774 | 5 | 9667137 | 9667168 | 2 | 16 | 32 | GT   | 18 | 11 |
| 54778 | 5 | 9670756 | 9670769 | 2 | 7  | 14 | TG   | 20 | 5  |
| 54779 | 5 | 9670801 | 9670814 | 2 | 7  | 14 | TG   | 22 | 7  |
| 54782 | 5 | 9673651 | 9673678 | 2 | 14 | 28 | GT   | 8  | 9  |
| 54783 | 5 | 9676408 | 9676435 | 2 | 14 | 28 | CA   | 23 | 8  |
| 54785 | 5 | 9688469 | 9688483 | 3 | 5  | 15 | CAG  | 29 | 3  |
| 54787 | 5 | 9691151 | 9691168 | 2 | 9  | 18 | CA   | 27 | 5  |

|       |   |         |         |   |    |    |      |    |    |
|-------|---|---------|---------|---|----|----|------|----|----|
| 54789 | 5 | 9694199 | 9694214 | 2 | 8  | 16 | CT   | 27 | 5  |
| 54792 | 5 | 9696290 | 9696307 | 3 | 6  | 18 | CTC  | 20 | 6  |
| 54793 | 5 | 9697000 | 9697035 | 2 | 18 | 36 | TG   | 11 | 11 |
| 54797 | 5 | 9707864 | 9707877 | 2 | 7  | 14 | CA   | 18 | 8  |
| 54798 | 5 | 9707880 | 9707891 | 2 | 6  | 12 | CA   | 18 | 5  |
| 54800 | 5 | 9710194 | 9710220 | 3 | 9  | 27 | CTG  | 28 | 11 |
| 54801 | 5 | 9710295 | 9710309 | 3 | 5  | 15 | GGA  | 27 | 4  |
| 54803 | 5 | 9711492 | 9711512 | 3 | 7  | 21 | TTC  | 16 | 14 |
| 54805 | 5 | 9717148 | 9717163 | 4 | 4  | 16 | TCCT | 12 | 3  |
| 54806 | 5 | 9720235 | 9720248 | 2 | 7  | 14 | AC   | 14 | 4  |
| 54807 | 5 | 9720263 | 9720274 | 2 | 6  | 12 | AC   | 13 | 4  |
| 54809 | 5 | 9722712 | 9722727 | 2 | 8  | 16 | GT   | 20 | 5  |
| 54811 | 5 | 9724653 | 9724666 | 2 | 7  | 14 | AT   | 17 | 4  |
| 54814 | 5 | 9730406 | 9730425 | 4 | 5  | 20 | TTCA | 24 | 6  |
| 54816 | 5 | 9753535 | 9753550 | 4 | 4  | 16 | AAAC | 22 | 4  |
| 54818 | 5 | 9765628 | 9765645 | 2 | 9  | 18 | AC   | 16 | 5  |
| 54829 | 5 | 9796948 | 9796965 | 2 | 9  | 18 | TG   | 23 | 4  |
| 54833 | 5 | 9806133 | 9806174 | 3 | 14 | 42 | GAA  | 19 | 12 |
| 54834 | 5 | 9807920 | 9807931 | 2 | 6  | 12 | AC   | 27 | 3  |
| 54835 | 5 | 9808178 | 9808201 | 2 | 12 | 24 | CA   | 21 | 6  |
| 54836 | 5 | 9808405 | 9808424 | 2 | 10 | 20 | GA   | 19 | 3  |
| 54837 | 5 | 9811929 | 9811946 | 3 | 6  | 18 | GCA  | 11 | 7  |
| 54840 | 5 | 9814179 | 9814199 | 3 | 7  | 21 | GAG  | 19 | 8  |
| 54841 | 5 | 9814320 | 9814337 | 2 | 9  | 18 | AG   | 21 | 3  |
| 54844 | 5 | 9815946 | 9815969 | 3 | 8  | 24 | GGA  | 24 | 4  |
| 54854 | 5 | 9817571 | 9817582 | 2 | 6  | 12 | AG   | 22 | 4  |
| 54863 | 5 | 9822637 | 9822652 | 2 | 8  | 16 | TG   | 12 | 9  |
| 54866 | 5 | 9827818 | 9827841 | 2 | 12 | 24 | GT   | 19 | 16 |
| 54867 | 5 | 9828713 | 9828726 | 2 | 7  | 14 | CA   | 28 | 4  |
| 54872 | 5 | 9846911 | 9846924 | 2 | 7  | 14 | TG   | 22 | 3  |
| 54873 | 5 | 9851175 | 9851189 | 3 | 5  | 15 | CCT  | 28 | 3  |
| 54877 | 5 | 9873550 | 9873565 | 2 | 8  | 16 | AG   | 30 | 6  |
| 54881 | 5 | 9875984 | 9876010 | 3 | 9  | 27 | AGG  | 26 | 6  |
| 54882 | 5 | 9882070 | 9882083 | 2 | 7  | 14 | AG   | 26 | 11 |
| 54883 | 5 | 9885935 | 9885955 | 3 | 7  | 21 | CCT  | 27 | 6  |
| 54886 | 5 | 9894862 | 9894876 | 3 | 5  | 15 | TTG  | 23 | 6  |
| 54887 | 5 | 9898557 | 9898580 | 3 | 8  | 24 | TTC  | 18 | 6  |
| 54888 | 5 | 9898606 | 9898626 | 3 | 7  | 21 | CTC  | 23 | 6  |
| 54891 | 5 | 9903075 | 9903100 | 2 | 13 | 26 | AC   | 15 | 6  |
| 54892 | 5 | 9903428 | 9903451 | 3 | 8  | 24 | GGA  | 13 | 4  |
| 54893 | 5 | 9909338 | 9909349 | 2 | 6  | 12 | AC   | 20 | 8  |
| 54894 | 5 | 9910795 | 9910809 | 3 | 5  | 15 | AGC  | 28 | 4  |
| 54897 | 5 | 9915712 | 9915723 | 2 | 6  | 12 | GT   | 30 | 3  |
| 54898 | 5 | 9917328 | 9917357 | 2 | 15 | 30 | TG   | 10 | 13 |
| 54899 | 5 | 9917576 | 9917593 | 2 | 9  | 18 | GA   | 14 | 7  |
| 54900 | 5 | 9920041 | 9920078 | 2 | 19 | 38 | AC   | 22 | 11 |
| 54903 | 5 | 9924814 | 9924829 | 2 | 8  | 16 | AG   | 24 | 3  |
| 54906 | 5 | 9927776 | 9927789 | 2 | 7  | 14 | GT   | 27 | 10 |
| 54907 | 5 | 9927791 | 9927802 | 2 | 6  | 12 | TG   | 26 | 8  |
| 54908 | 5 | 9927947 | 9927984 | 2 | 19 | 38 | CA   | 9  | 10 |
| 54909 | 5 | 9929116 | 9929135 | 4 | 5  | 20 | ATCA | 22 | 4  |

|       |   |          |          |   |    |    |      |    |    |
|-------|---|----------|----------|---|----|----|------|----|----|
| 54911 | 5 | 9930974  | 9930994  | 3 | 7  | 21 | ATA  | 8  | 3  |
| 54914 | 5 | 9940011  | 9940024  | 2 | 7  | 14 | GA   | 28 | 5  |
| 54918 | 5 | 9941290  | 9941307  | 2 | 9  | 18 | TC   | 15 | 5  |
| 54919 | 5 | 9941534  | 9941566  | 3 | 11 | 33 | GGA  | 11 | 4  |
| 54923 | 5 | 9946809  | 9946826  | 2 | 9  | 18 | AG   | 19 | 10 |
| 54924 | 5 | 9946828  | 9946845  | 2 | 9  | 18 | GA   | 21 | 14 |
| 54927 | 5 | 9949572  | 9949604  | 3 | 11 | 33 | GAG  | 7  | 4  |
| 54929 | 5 | 9951813  | 9951830  | 3 | 6  | 18 | CTG  | 23 | 4  |
| 54930 | 5 | 9951949  | 9951972  | 2 | 12 | 24 | TG   | 14 | 6  |
| 54931 | 5 | 9954083  | 9954112  | 3 | 10 | 30 | TCC  | 20 | 3  |
| 54932 | 5 | 9955328  | 9955355  | 4 | 7  | 28 | GAAG | 24 | 10 |
| 54933 | 5 | 9956440  | 9956451  | 2 | 6  | 12 | CA   | 32 | 4  |
| 54934 | 5 | 9956495  | 9956514  | 2 | 10 | 20 | TG   | 18 | 9  |
| 54935 | 5 | 9956647  | 9956664  | 2 | 9  | 18 | AG   | 22 | 10 |
| 54937 | 5 | 9959422  | 9959451  | 2 | 15 | 30 | TG   | 8  | 7  |
| 54939 | 5 | 9961346  | 9961377  | 2 | 16 | 32 | CA   | 19 | 15 |
| 54941 | 5 | 9967141  | 9967161  | 3 | 7  | 21 | GGA  | 26 | 5  |
| 54942 | 5 | 9967637  | 9967650  | 2 | 7  | 14 | TC   | 15 | 3  |
| 54946 | 5 | 9979468  | 9979483  | 2 | 8  | 16 | CA   | 17 | 5  |
| 54948 | 5 | 9980942  | 9980971  | 2 | 15 | 30 | AC   | 10 | 8  |
| 54949 | 5 | 9984228  | 9984251  | 2 | 12 | 24 | CA   | 19 | 7  |
| 54952 | 5 | 9987994  | 9988009  | 2 | 8  | 16 | TC   | 23 | 9  |
| 54953 | 5 | 9988010  | 9988025  | 2 | 8  | 16 | AC   | 22 | 8  |
| 54954 | 5 | 9988584  | 9988597  | 2 | 7  | 14 | GT   | 23 | 5  |
| 54957 | 5 | 9992638  | 9992653  | 2 | 8  | 16 | CT   | 18 | 9  |
| 54962 | 5 | 9996616  | 9996630  | 3 | 5  | 15 | CTC  | 25 | 6  |
| 54965 | 5 | 9999955  | 9999988  | 2 | 17 | 34 | CA   | 15 | 9  |
| 54966 | 5 | 10002337 | 10002368 | 4 | 8  | 32 | AAAG | 12 | 10 |
| 54967 | 5 | 10003004 | 10003027 | 2 | 12 | 24 | GT   | 15 | 9  |
| 54972 | 5 | 10007836 | 10007859 | 2 | 12 | 24 | CA   | 22 | 14 |
| 54973 | 5 | 10014756 | 10014775 | 2 | 10 | 20 | GT   | 14 | 8  |
| 54976 | 5 | 10019317 | 10019346 | 2 | 15 | 30 | CA   | 13 | 9  |
| 54977 | 5 | 10023098 | 10023118 | 3 | 7  | 21 | AGC  | 26 | 5  |
| 54981 | 5 | 10033414 | 10033429 | 4 | 4  | 16 | AGGC | 23 | 5  |
| 54982 | 5 | 10033973 | 10033994 | 2 | 11 | 22 | AC   | 15 | 9  |
| 54992 | 5 | 10044182 | 10044201 | 2 | 10 | 20 | AC   | 25 | 6  |
| 54993 | 5 | 10046280 | 10046317 | 2 | 19 | 38 | CA   | 13 | 9  |
| 55011 | 5 | 10067024 | 10067051 | 2 | 14 | 28 | GA   | 9  | 4  |
| 55016 | 5 | 10080109 | 10080124 | 2 | 8  | 16 | CA   | 19 | 5  |
| 55019 | 5 | 10100280 | 10100291 | 2 | 6  | 12 | GT   | 27 | 3  |
| 55022 | 5 | 10104045 | 10104076 | 2 | 16 | 32 | AC   | 18 | 6  |
| 55026 | 5 | 10121715 | 10121770 | 2 | 28 | 56 | TG   | 6  | 9  |
| 55028 | 5 | 10127033 | 10127054 | 2 | 11 | 22 | GT   | 11 | 13 |
| 55032 | 5 | 10136301 | 10136312 | 2 | 6  | 12 | CA   | 19 | 3  |
| 55034 | 5 | 10139792 | 10139815 | 3 | 8  | 24 | TGC  | 31 | 3  |
| 55036 | 5 | 10142259 | 10142273 | 3 | 5  | 15 | CCG  | 12 | 5  |
| 55041 | 5 | 10149949 | 10149976 | 2 | 14 | 28 | GT   | 15 | 6  |
| 55042 | 5 | 10150176 | 10150191 | 2 | 8  | 16 | AC   | 24 | 5  |
| 55043 | 5 | 10150332 | 10150357 | 2 | 13 | 26 | TC   | 15 | 5  |
| 55044 | 5 | 10153027 | 10153046 | 2 | 10 | 20 | GT   | 22 | 6  |
| 55045 | 5 | 10155127 | 10155140 | 2 | 7  | 14 | CA   | 26 | 3  |

|       |   |          |          |   |    |    |      |    |    |
|-------|---|----------|----------|---|----|----|------|----|----|
| 55046 | 5 | 10155321 | 10155344 | 2 | 12 | 24 | AC   | 24 | 10 |
| 55048 | 5 | 10158286 | 10158299 | 2 | 7  | 14 | GT   | 24 | 3  |
| 55049 | 5 | 10158375 | 10158422 | 2 | 24 | 48 | TG   | 7  | 12 |
| 55053 | 5 | 10160775 | 10160796 | 2 | 11 | 22 | CA   | 16 | 10 |
| 55055 | 5 | 10163179 | 10163210 | 2 | 16 | 32 | AC   | 12 | 8  |
| 55056 | 5 | 10164141 | 10164162 | 2 | 11 | 22 | TG   | 16 | 8  |
| 55060 | 5 | 10166279 | 10166314 | 2 | 18 | 36 | GA   | 17 | 4  |
| 55063 | 5 | 10172230 | 10172247 | 2 | 9  | 18 | TG   | 23 | 6  |
| 55064 | 5 | 10172452 | 10172479 | 2 | 14 | 28 | GA   | 17 | 8  |
| 55065 | 5 | 10173445 | 10173456 | 2 | 6  | 12 | AT   | 21 | 3  |
| 55071 | 5 | 10192317 | 10192350 | 2 | 17 | 34 | TG   | 16 | 15 |
| 55073 | 5 | 10197071 | 10197118 | 4 | 12 | 48 | TAGA | 20 | 16 |
| 55076 | 5 | 10197646 | 10197657 | 2 | 6  | 12 | AG   | 22 | 5  |
| 55078 | 5 | 10200503 | 10200526 | 2 | 12 | 24 | CA   | 14 | 5  |
| 55079 | 5 | 10200578 | 10200629 | 2 | 26 | 52 | AC   | 7  | 9  |
| 55083 | 5 | 10222352 | 10222367 | 2 | 8  | 16 | CA   | 25 | 4  |
| 55085 | 5 | 10222724 | 10222735 | 2 | 6  | 12 | CA   | 24 | 5  |
| 55087 | 5 | 10226750 | 10226769 | 2 | 10 | 20 | TG   | 24 | 4  |
| 55097 | 5 | 10239039 | 10239060 | 2 | 11 | 22 | GT   | 21 | 7  |
| 55098 | 5 | 10249571 | 10249590 | 2 | 10 | 20 | TC   | 11 | 5  |
| 55100 | 5 | 10255184 | 10255231 | 2 | 24 | 48 | TG   | 6  | 4  |
| 55105 | 5 | 10268286 | 10268301 | 2 | 8  | 16 | GT   | 6  | 3  |
| 55106 | 5 | 10270933 | 10270968 | 2 | 18 | 36 | TG   | 6  | 7  |
| 55108 | 5 | 10282576 | 10282607 | 4 | 8  | 32 | AGAT | 18 | 7  |
| 55123 | 5 | 10307618 | 10307632 | 3 | 5  | 15 | TGT  | 26 | 3  |
| 55124 | 5 | 10308860 | 10308873 | 2 | 7  | 14 | CA   | 11 | 12 |
| 55125 | 5 | 10319165 | 10319184 | 4 | 5  | 20 | TTTG | 8  | 6  |
| 55127 | 5 | 10323764 | 10323779 | 2 | 8  | 16 | TG   | 23 | 4  |
| 55129 | 5 | 10324600 | 10324615 | 2 | 8  | 16 | TG   | 26 | 3  |
| 55130 | 5 | 10330226 | 10330237 | 2 | 6  | 12 | TG   | 26 | 3  |
| 55131 | 5 | 10336166 | 10336189 | 3 | 8  | 24 | TTC  | 12 | 10 |
| 55134 | 5 | 10340720 | 10340747 | 2 | 14 | 28 | AC   | 7  | 7  |
| 55137 | 5 | 10344683 | 10344706 | 3 | 8  | 24 | GGA  | 13 | 8  |
| 55139 | 5 | 10355551 | 10355566 | 4 | 4  | 16 | AAAC | 29 | 3  |
| 55140 | 5 | 10356349 | 10356364 | 2 | 8  | 16 | TG   | 19 | 4  |
| 55145 | 5 | 10370167 | 10370182 | 2 | 8  | 16 | TA   | 16 | 3  |
| 55146 | 5 | 10372660 | 10372675 | 2 | 8  | 16 | AT   | 13 | 4  |
| 55147 | 5 | 10373283 | 10373316 | 2 | 17 | 34 | TG   | 13 | 10 |
| 55151 | 5 | 10377774 | 10377801 | 2 | 14 | 28 | TG   | 14 | 6  |
| 55155 | 5 | 10382863 | 10382888 | 2 | 13 | 26 | CA   | 7  | 10 |
| 55156 | 5 | 10383312 | 10383331 | 4 | 5  | 20 | AAAT | 15 | 3  |
| 55158 | 5 | 10387852 | 10387885 | 2 | 17 | 34 | CA   | 20 | 12 |
| 55165 | 5 | 10403222 | 10403247 | 2 | 13 | 26 | GT   | 19 | 11 |
| 55167 | 5 | 10406504 | 10406517 | 2 | 7  | 14 | AT   | 14 | 3  |
| 55168 | 5 | 10414601 | 10414626 | 2 | 13 | 26 | AC   | 23 | 5  |
| 55170 | 5 | 10424816 | 10424829 | 2 | 7  | 14 | AC   | 21 | 5  |
| 55180 | 5 | 10451112 | 10451125 | 2 | 7  | 14 | GT   | 17 | 8  |
| 55185 | 5 | 10455930 | 10455945 | 4 | 4  | 16 | CAGT | 30 | 3  |
| 55197 | 5 | 10494656 | 10494667 | 2 | 6  | 12 | TC   | 29 | 3  |
| 55201 | 5 | 10502804 | 10502818 | 3 | 5  | 15 | TTG  | 23 | 3  |
| 55202 | 5 | 10502900 | 10502931 | 2 | 16 | 32 | AC   | 10 | 9  |

|       |   |          |          |   |    |    |      |    |    |
|-------|---|----------|----------|---|----|----|------|----|----|
| 55205 | 5 | 10506304 | 10506315 | 2 | 6  | 12 | GT   | 32 | 5  |
| 55206 | 5 | 10507735 | 10507768 | 2 | 17 | 34 | AC   | 12 | 11 |
| 55208 | 5 | 10509045 | 10509068 | 2 | 12 | 24 | AC   | 14 | 10 |
| 55216 | 5 | 10519840 | 10519857 | 3 | 6  | 18 | AAC  | 36 | 3  |
| 55217 | 5 | 10522621 | 10522644 | 2 | 12 | 24 | GT   | 19 | 4  |
| 55226 | 5 | 10546930 | 10546953 | 2 | 12 | 24 | GT   | 14 | 11 |
| 55232 | 5 | 10555993 | 10556014 | 2 | 11 | 22 | TC   | 17 | 10 |
| 55233 | 5 | 10556215 | 10556232 | 2 | 9  | 18 | TG   | 6  | 3  |
| 55241 | 5 | 10563625 | 10563640 | 2 | 8  | 16 | GT   | 27 | 6  |
| 55246 | 5 | 10575184 | 10575197 | 2 | 7  | 14 | TG   | 6  | 5  |
| 55247 | 5 | 10575402 | 10575433 | 2 | 16 | 32 | AC   | 25 | 8  |
| 55252 | 5 | 10583014 | 10583028 | 3 | 5  | 15 | TTG  | 24 | 3  |
| 55253 | 5 | 10590360 | 10590374 | 3 | 5  | 15 | TGC  | 27 | 3  |
| 55256 | 5 | 10601206 | 10601241 | 2 | 18 | 36 | CA   | 16 | 11 |
| 55257 | 5 | 10601575 | 10601616 | 2 | 21 | 42 | AG   | 8  | 10 |
| 55265 | 5 | 10617303 | 10617320 | 3 | 6  | 18 | AAC  | 29 | 3  |
| 55268 | 5 | 10622347 | 10622374 | 2 | 14 | 28 | GT   | 15 | 6  |
| 55270 | 5 | 10629789 | 10629802 | 2 | 7  | 14 | AC   | 8  | 3  |
| 55271 | 5 | 10629831 | 10629858 | 2 | 14 | 28 | CA   | 9  | 6  |
| 55277 | 5 | 10632683 | 10632700 | 2 | 9  | 18 | AC   | 20 | 7  |
| 55283 | 5 | 10644492 | 10644513 | 2 | 11 | 22 | TG   | 19 | 11 |
| 55287 | 5 | 10650018 | 10650035 | 2 | 9  | 18 | AC   | 9  | 8  |
| 55288 | 5 | 10650950 | 10650961 | 2 | 6  | 12 | GT   | 13 | 10 |
| 55289 | 5 | 10650963 | 10650978 | 2 | 8  | 16 | TG   | 9  | 10 |
| 55294 | 5 | 10655146 | 10655173 | 2 | 14 | 28 | AC   | 15 | 6  |
| 55297 | 5 | 10658942 | 10658965 | 2 | 12 | 24 | TG   | 20 | 9  |
| 55301 | 5 | 10661703 | 10661720 | 3 | 6  | 18 | GGA  | 18 | 3  |
| 55303 | 5 | 10664584 | 10664595 | 2 | 6  | 12 | TA   | 26 | 3  |
| 55304 | 5 | 10665144 | 10665159 | 4 | 4  | 16 | AAAT | 30 | 3  |
| 55308 | 5 | 10666673 | 10666686 | 2 | 7  | 14 | AC   | 20 | 4  |
| 55310 | 5 | 10667203 | 10667240 | 2 | 19 | 38 | GA   | 13 | 11 |
| 55312 | 5 | 10667710 | 10667723 | 2 | 7  | 14 | AC   | 30 | 4  |
| 55313 | 5 | 10670020 | 10670059 | 4 | 10 | 40 | ATGG | 23 | 11 |
| 55315 | 5 | 10672807 | 10672824 | 2 | 9  | 18 | GT   | 22 | 5  |
| 55319 | 5 | 10676325 | 10676370 | 2 | 23 | 46 | AG   | 14 | 11 |
| 55320 | 5 | 10676505 | 10676524 | 2 | 10 | 20 | AG   | 8  | 5  |
| 55324 | 5 | 10680205 | 10680218 | 2 | 7  | 14 | AC   | 15 | 4  |
| 55325 | 5 | 10680478 | 10680501 | 3 | 8  | 24 | TCC  | 21 | 5  |
| 55330 | 5 | 10685115 | 10685126 | 2 | 6  | 12 | AG   | 13 | 6  |
| 55331 | 5 | 10685129 | 10685140 | 2 | 6  | 12 | AG   | 8  | 9  |
| 55332 | 5 | 10687231 | 10687256 | 2 | 13 | 26 | AC   | 12 | 12 |
| 55333 | 5 | 10687555 | 10687568 | 2 | 7  | 14 | GT   | 13 | 9  |
| 55334 | 5 | 10690757 | 10690774 | 3 | 6  | 18 | AAT  | 22 | 5  |
| 55363 | 5 | 10761648 | 10761661 | 2 | 7  | 14 | CA   | 14 | 3  |
| 55366 | 5 | 10768215 | 10768232 | 2 | 9  | 18 | TG   | 24 | 4  |
| 55373 | 5 | 10781391 | 10781426 | 4 | 9  | 36 | GAAA | 15 | 9  |
| 55379 | 5 | 10794674 | 10794687 | 2 | 7  | 14 | AT   | 12 | 15 |
| 55381 | 5 | 10796362 | 10796389 | 2 | 14 | 28 | AC   | 16 | 10 |
| 55387 | 5 | 10817132 | 10817147 | 2 | 8  | 16 | TG   | 14 | 5  |
| 55388 | 5 | 10821050 | 10821063 | 2 | 7  | 14 | AC   | 21 | 5  |
| 55393 | 5 | 10829961 | 10829978 | 3 | 6  | 18 | AAG  | 18 | 3  |

|       |   |          |          |   |    |    |      |    |    |
|-------|---|----------|----------|---|----|----|------|----|----|
| 55397 | 5 | 10834577 | 10834626 | 2 | 25 | 50 | GT   | 10 | 9  |
| 55400 | 5 | 10837905 | 10837920 | 2 | 8  | 16 | AC   | 19 | 7  |
| 55413 | 5 | 10864971 | 10864986 | 2 | 8  | 16 | TG   | 28 | 3  |
| 55415 | 5 | 10871476 | 10871487 | 2 | 6  | 12 | GT   | 25 | 3  |
| 55416 | 5 | 10874464 | 10874487 | 3 | 8  | 24 | ACA  | 20 | 4  |
| 55417 | 5 | 10874834 | 10874865 | 2 | 16 | 32 | TG   | 16 | 10 |
| 55418 | 5 | 10879913 | 10879928 | 4 | 4  | 16 | AAAT | 31 | 5  |
| 55421 | 5 | 10885288 | 10885299 | 2 | 6  | 12 | TA   | 19 | 5  |
| 55433 | 5 | 10901074 | 10901089 | 4 | 4  | 16 | AAAT | 10 | 5  |
| 55434 | 5 | 10901468 | 10901487 | 2 | 10 | 20 | TG   | 17 | 5  |
| 55437 | 5 | 10905215 | 10905230 | 2 | 8  | 16 | CA   | 23 | 4  |
| 55438 | 5 | 10905544 | 10905563 | 4 | 5  | 20 | CAGA | 26 | 3  |
| 55443 | 5 | 10911564 | 10911579 | 2 | 8  | 16 | TG   | 7  | 5  |
| 55450 | 5 | 10919602 | 10919617 | 2 | 8  | 16 | TG   | 15 | 5  |
| 55451 | 5 | 10919618 | 10919631 | 2 | 7  | 14 | AG   | 13 | 5  |
| 55456 | 5 | 10925256 | 10925267 | 2 | 6  | 12 | AC   | 29 | 4  |
| 55464 | 5 | 10939086 | 10939100 | 3 | 5  | 15 | ATT  | 22 | 8  |
| 55473 | 5 | 10957413 | 10957442 | 2 | 15 | 30 | AG   | 8  | 8  |
| 55475 | 5 | 10964147 | 10964176 | 3 | 10 | 30 | TAT  | 15 | 4  |
| 55476 | 5 | 10966275 | 10966286 | 2 | 6  | 12 | GA   | 29 | 3  |
| 55477 | 5 | 10966469 | 10966486 | 2 | 9  | 18 | GT   | 19 | 5  |
| 55478 | 5 | 10966581 | 10966614 | 2 | 17 | 34 | CA   | 16 | 17 |
| 55487 | 5 | 10993595 | 10993610 | 4 | 4  | 16 | GAGT | 22 | 5  |
| 55498 | 5 | 11008058 | 11008097 | 2 | 20 | 40 | CA   | 17 | 13 |
| 55504 | 5 | 11031370 | 11031383 | 2 | 7  | 14 | CA   | 12 | 4  |
| 55505 | 5 | 11033074 | 11033089 | 4 | 4  | 16 | TAAA | 14 | 7  |
| 55522 | 5 | 11085335 | 11085348 | 2 | 7  | 14 | CA   | 26 | 5  |
| 55527 | 5 | 11100417 | 11100440 | 2 | 12 | 24 | AC   | 18 | 7  |
| 55540 | 5 | 11133405 | 11133436 | 2 | 16 | 32 | AC   | 6  | 8  |
| 55542 | 5 | 11134076 | 11134093 | 2 | 9  | 18 | CA   | 25 | 5  |
| 55554 | 5 | 11144875 | 11144902 | 2 | 14 | 28 | GT   | 15 | 7  |
| 55555 | 5 | 11145651 | 11145668 | 3 | 6  | 18 | GGA  | 22 | 5  |
| 55556 | 5 | 11146146 | 11146177 | 2 | 16 | 32 | TG   | 13 | 7  |
| 55558 | 5 | 11147890 | 11147907 | 2 | 9  | 18 | TC   | 17 | 7  |
| 55559 | 5 | 11147908 | 11147923 | 2 | 8  | 16 | AC   | 9  | 4  |
| 55560 | 5 | 11148243 | 11148266 | 2 | 12 | 24 | AC   | 18 | 8  |
| 55563 | 5 | 11152309 | 11152324 | 2 | 8  | 16 | TG   | 21 | 7  |
| 55564 | 5 | 11154963 | 11154980 | 2 | 9  | 18 | TG   | 16 | 7  |
| 55565 | 5 | 11159070 | 11159089 | 2 | 10 | 20 | GT   | 10 | 5  |
| 55567 | 5 | 11167262 | 11167279 | 2 | 9  | 18 | TG   | 20 | 5  |
| 55569 | 5 | 11167831 | 11167842 | 2 | 6  | 12 | AC   | 18 | 9  |
| 55575 | 5 | 11188121 | 11188177 | 3 | 19 | 57 | CTT  | 18 | 9  |
| 55577 | 5 | 11191743 | 11191756 | 2 | 7  | 14 | AC   | 26 | 4  |
| 55583 | 5 | 11204077 | 11204097 | 3 | 7  | 21 | CCT  | 24 | 4  |
| 55584 | 5 | 11204414 | 11204425 | 2 | 6  | 12 | CT   | 23 | 3  |
| 55586 | 5 | 11205014 | 11205025 | 2 | 6  | 12 | AT   | 7  | 3  |
| 55589 | 5 | 11207776 | 11207805 | 3 | 10 | 30 | TTA  | 10 | 11 |
| 55590 | 5 | 11210425 | 11210440 | 2 | 8  | 16 | AC   | 21 | 4  |
| 55594 | 5 | 11215079 | 11215100 | 2 | 11 | 22 | TG   | 12 | 9  |
| 55597 | 5 | 11221672 | 11221685 | 2 | 7  | 14 | GT   | 22 | 5  |
| 55598 | 5 | 11221688 | 11221699 | 2 | 6  | 12 | GT   | 24 | 4  |

|       |   |          |          |   |    |    |      |    |    |
|-------|---|----------|----------|---|----|----|------|----|----|
| 55606 | 5 | 11238037 | 11238068 | 2 | 16 | 32 | AC   | 14 | 6  |
| 55608 | 5 | 11251300 | 11251331 | 2 | 16 | 32 | GT   | 14 | 5  |
| 55609 | 5 | 11262924 | 11262947 | 2 | 12 | 24 | GT   | 10 | 10 |
| 55614 | 5 | 11271652 | 11271669 | 2 | 9  | 18 | TG   | 14 | 6  |
| 55615 | 5 | 11273464 | 11273493 | 2 | 15 | 30 | CA   | 6  | 7  |
| 55621 | 5 | 11275705 | 11275720 | 2 | 8  | 16 | GA   | 6  | 5  |
| 55626 | 5 | 11292251 | 11292265 | 3 | 5  | 15 | CTA  | 6  | 5  |
| 55630 | 5 | 11296047 | 11296060 | 2 | 7  | 14 | GT   | 6  | 5  |
| 55631 | 5 | 11296123 | 11296142 | 2 | 10 | 20 | TG   | 20 | 11 |
| 55636 | 5 | 11306132 | 11306155 | 4 | 6  | 24 | TTAG | 32 | 7  |
| 55650 | 5 | 11334213 | 11334228 | 2 | 8  | 16 | TG   | 10 | 6  |
| 55651 | 5 | 11334231 | 11334244 | 2 | 7  | 14 | TG   | 11 | 3  |
| 55652 | 5 | 11334435 | 11334446 | 2 | 6  | 12 | TA   | 18 | 7  |
| 55659 | 5 | 11340243 | 11340260 | 2 | 9  | 18 | TG   | 25 | 5  |
| 55663 | 5 | 11344493 | 11344514 | 2 | 11 | 22 | TG   | 14 | 12 |
| 55666 | 5 | 11345018 | 11345069 | 4 | 13 | 52 | GAAA | 9  | 9  |
| 55668 | 5 | 11347401 | 11347418 | 2 | 9  | 18 | CA   | 16 | 3  |
| 55669 | 5 | 11351430 | 11351455 | 2 | 13 | 26 | TC   | 6  | 7  |
| 55671 | 5 | 11352731 | 11352744 | 2 | 7  | 14 | CA   | 18 | 8  |
| 55672 | 5 | 11352746 | 11352759 | 2 | 7  | 14 | AC   | 18 | 7  |
| 55674 | 5 | 11356283 | 11356302 | 2 | 10 | 20 | TG   | 20 | 8  |
| 55676 | 5 | 11358627 | 11358654 | 2 | 14 | 28 | TC   | 10 | 10 |
| 55677 | 5 | 11365813 | 11365834 | 2 | 11 | 22 | CA   | 9  | 3  |
| 55678 | 5 | 11366006 | 11366019 | 2 | 7  | 14 | CT   | 20 | 3  |
| 55679 | 5 | 11368337 | 11368351 | 3 | 5  | 15 | TCC  | 19 | 3  |
| 55692 | 5 | 11379847 | 11379864 | 2 | 9  | 18 | AC   | 17 | 8  |
| 55700 | 5 | 11387639 | 11387650 | 2 | 6  | 12 | TG   | 15 | 10 |
| 55701 | 5 | 11387653 | 11387668 | 2 | 8  | 16 | TG   | 12 | 6  |
| 55703 | 5 | 11390837 | 11390860 | 4 | 6  | 24 | TAGA | 25 | 6  |
| 55704 | 5 | 11396135 | 11396146 | 2 | 6  | 12 | CA   | 24 | 4  |
| 55706 | 5 | 11398928 | 11398959 | 2 | 16 | 32 | CA   | 9  | 10 |
| 55710 | 5 | 11410901 | 11410918 | 2 | 9  | 18 | CA   | 20 | 4  |
| 55712 | 5 | 11414747 | 11414764 | 2 | 9  | 18 | CA   | 24 | 5  |
| 55716 | 5 | 11421552 | 11421563 | 2 | 6  | 12 | GA   | 18 | 5  |
| 55717 | 5 | 11421794 | 11421807 | 2 | 7  | 14 | GT   | 27 | 4  |
| 55720 | 5 | 11425958 | 11425984 | 3 | 9  | 27 | CCT  | 16 | 4  |
| 55723 | 5 | 11428050 | 11428085 | 2 | 18 | 36 | AC   | 11 | 10 |
| 55726 | 5 | 11429592 | 11429607 | 2 | 8  | 16 | GT   | 13 | 4  |
| 55727 | 5 | 11429609 | 11429622 | 2 | 7  | 14 | GT   | 14 | 3  |
| 55728 | 5 | 11429776 | 11429807 | 2 | 16 | 32 | AC   | 7  | 7  |
| 55729 | 5 | 11431250 | 11431265 | 4 | 4  | 16 | TTTA | 22 | 3  |
| 55730 | 5 | 11431559 | 11431578 | 2 | 10 | 20 | CA   | 23 | 6  |
| 55734 | 5 | 11435647 | 11435668 | 2 | 11 | 22 | CA   | 13 | 4  |
| 55739 | 5 | 11446859 | 11446890 | 2 | 16 | 32 | TG   | 17 | 7  |
| 55742 | 5 | 11448132 | 11448159 | 2 | 14 | 28 | AC   | 9  | 3  |
| 55745 | 5 | 11450078 | 11450109 | 2 | 16 | 32 | TG   | 7  | 8  |
| 55747 | 5 | 11453756 | 11453771 | 2 | 8  | 16 | GT   | 15 | 4  |
| 55750 | 5 | 11458220 | 11458257 | 2 | 19 | 38 | GT   | 11 | 9  |
| 55753 | 5 | 11459178 | 11459201 | 2 | 12 | 24 | AC   | 7  | 5  |
| 55755 | 5 | 11466242 | 11466256 | 3 | 5  | 15 | CAG  | 20 | 3  |
| 55756 | 5 | 11466355 | 11466382 | 2 | 14 | 28 | GT   | 8  | 9  |



|       |   |          |          |   |    |    |      |    |    |
|-------|---|----------|----------|---|----|----|------|----|----|
| 55761 | 5 | 11472684 | 11472698 | 3 | 5  | 15 | GGT  | 28 | 3  |
| 55771 | 5 | 11490678 | 11490699 | 2 | 11 | 22 | AC   | 16 | 15 |
| 55774 | 5 | 11497390 | 11497405 | 4 | 4  | 16 | GTCT | 28 | 4  |
| 55779 | 5 | 11503577 | 11503590 | 2 | 7  | 14 | TC   | 23 | 10 |
| 55780 | 5 | 11504165 | 11504194 | 2 | 15 | 30 | CA   | 10 | 8  |
| 55784 | 5 | 11508399 | 11508416 | 2 | 9  | 18 | AC   | 21 | 6  |
| 55786 | 5 | 11512546 | 11512565 | 2 | 10 | 20 | TG   | 17 | 10 |
| 55792 | 5 | 11517070 | 11517096 | 3 | 9  | 27 | CAG  | 31 | 4  |
| 55794 | 5 | 11519133 | 11519164 | 2 | 16 | 32 | TG   | 18 | 11 |
| 55797 | 5 | 11523957 | 11523974 | 3 | 6  | 18 | ACA  | 29 | 5  |
| 55803 | 5 | 11531290 | 11531313 | 4 | 6  | 24 | TTTA | 16 | 6  |
| 55809 | 5 | 11549855 | 11549872 | 2 | 9  | 18 | TG   | 27 | 7  |
| 55810 | 5 | 11549874 | 11549885 | 2 | 6  | 12 | GT   | 25 | 8  |
| 55817 | 5 | 11554978 | 11554993 | 2 | 8  | 16 | AC   | 17 | 6  |
| 55828 | 5 | 11577688 | 11577707 | 2 | 10 | 20 | CA   | 19 | 4  |
| 55830 | 5 | 11578704 | 11578731 | 2 | 14 | 28 | GA   | 11 | 5  |
| 55844 | 5 | 11604912 | 11604941 | 3 | 10 | 30 | TTG  | 16 | 9  |
| 55847 | 5 | 11613457 | 11613468 | 2 | 6  | 12 | AC   | 24 | 3  |
| 55854 | 5 | 11630784 | 11630798 | 3 | 5  | 15 | ATA  | 23 | 5  |
| 55862 | 5 | 11637855 | 11637882 | 2 | 14 | 28 | TG   | 14 | 12 |
| 55871 | 5 | 11647763 | 11647777 | 3 | 5  | 15 | CAA  | 24 | 3  |
| 55873 | 5 | 11649513 | 11649548 | 2 | 18 | 36 | CT   | 12 | 7  |
| 55876 | 5 | 11650520 | 11650541 | 2 | 11 | 22 | GT   | 15 | 9  |
| 55879 | 5 | 11651023 | 11651034 | 2 | 6  | 12 | CT   | 23 | 3  |
| 55880 | 5 | 11651210 | 11651236 | 3 | 9  | 27 | GGA  | 15 | 6  |
| 55881 | 5 | 11652425 | 11652442 | 3 | 6  | 18 | AGA  | 20 | 3  |
| 55882 | 5 | 11653622 | 11653657 | 3 | 12 | 36 | GAA  | 20 | 5  |
| 55884 | 5 | 11655550 | 11655569 | 2 | 10 | 20 | AC   | 13 | 10 |
| 55888 | 5 | 11659618 | 11659647 | 3 | 10 | 30 | TCT  | 22 | 9  |
| 55898 | 5 | 11667048 | 11667061 | 2 | 7  | 14 | TC   | 28 | 3  |
| 55899 | 5 | 11667465 | 11667486 | 2 | 11 | 22 | CA   | 18 | 6  |
| 55901 | 5 | 11668681 | 11668698 | 2 | 9  | 18 | CA   | 17 | 5  |
| 55902 | 5 | 11668955 | 11668966 | 2 | 6  | 12 | TG   | 28 | 5  |
| 55904 | 5 | 11670870 | 11670883 | 2 | 7  | 14 | TG   | 30 | 5  |
| 55905 | 5 | 11676069 | 11676090 | 2 | 11 | 22 | AG   | 21 | 7  |
| 55909 | 5 | 11680908 | 11680919 | 2 | 6  | 12 | TG   | 13 | 11 |
| 55911 | 5 | 11681963 | 11681986 | 2 | 12 | 24 | GT   | 18 | 10 |
| 55913 | 5 | 11683351 | 11683382 | 2 | 16 | 32 | CA   | 19 | 6  |
| 55918 | 5 | 11687401 | 11687430 | 2 | 15 | 30 | CA   | 20 | 15 |
| 55919 | 5 | 11689615 | 11689630 | 2 | 8  | 16 | TC   | 20 | 13 |
| 55921 | 5 | 11690386 | 11690397 | 2 | 6  | 12 | CA   | 23 | 17 |
| 55927 | 5 | 11694977 | 11694994 | 3 | 6  | 18 | AGC  | 25 | 5  |
| 55930 | 5 | 11700155 | 11700174 | 2 | 10 | 20 | AG   | 15 | 6  |
| 55933 | 5 | 11708245 | 11708262 | 2 | 9  | 18 | TG   | 20 | 9  |
| 55938 | 5 | 11710588 | 11710627 | 2 | 20 | 40 | AC   | 12 | 12 |
| 55940 | 5 | 11714342 | 11714377 | 2 | 18 | 36 | GT   | 12 | 7  |
| 55945 | 5 | 11728617 | 11728632 | 2 | 8  | 16 | GT   | 25 | 7  |
| 55947 | 5 | 11732201 | 11732240 | 2 | 20 | 40 | AC   | 19 | 10 |
| 55950 | 5 | 11744156 | 11744203 | 2 | 24 | 48 | TG   | 6  | 8  |
| 55953 | 5 | 11746377 | 11746392 | 4 | 4  | 16 | TGTT | 26 | 3  |
| 55956 | 5 | 11749660 | 11749671 | 2 | 6  | 12 | CA   | 8  | 6  |

|       |   |          |          |   |    |    |      |    |    |
|-------|---|----------|----------|---|----|----|------|----|----|
| 55957 | 5 | 11749943 | 11749976 | 2 | 17 | 34 | CA   | 13 | 9  |
| 55968 | 5 | 11764949 | 11764974 | 2 | 13 | 26 | AC   | 12 | 9  |
| 55972 | 5 | 11769111 | 11769122 | 2 | 6  | 12 | AC   | 25 | 3  |
| 55975 | 5 | 11772987 | 11773016 | 2 | 15 | 30 | AC   | 14 | 8  |
| 55976 | 5 | 11773753 | 11773764 | 2 | 6  | 12 | CT   | 24 | 4  |
| 55977 | 5 | 11773766 | 11773777 | 2 | 6  | 12 | TC   | 24 | 5  |
| 55981 | 5 | 11795358 | 11795381 | 3 | 8  | 24 | TCC  | 18 | 5  |
| 55982 | 5 | 11797450 | 11797473 | 2 | 12 | 24 | GT   | 23 | 6  |
| 55985 | 5 | 11802126 | 11802167 | 2 | 21 | 42 | CA   | 13 | 9  |
| 55987 | 5 | 11812516 | 11812527 | 2 | 6  | 12 | CA   | 14 | 4  |
| 55988 | 5 | 11812529 | 11812546 | 2 | 9  | 18 | AC   | 14 | 3  |
| 56008 | 5 | 11861957 | 11861974 | 2 | 9  | 18 | AC   | 21 | 3  |
| 56009 | 5 | 11862281 | 11862308 | 2 | 14 | 28 | TG   | 21 | 11 |
| 56014 | 5 | 11876167 | 11876182 | 2 | 8  | 16 | TG   | 16 | 10 |
| 56018 | 5 | 11879681 | 11879694 | 2 | 7  | 14 | TG   | 31 | 4  |
| 56025 | 5 | 11888943 | 11888954 | 2 | 6  | 12 | AC   | 29 | 4  |
| 56026 | 5 | 11889117 | 11889148 | 2 | 16 | 32 | GT   | 13 | 9  |
| 56029 | 5 | 11904127 | 11904146 | 2 | 10 | 20 | CA   | 18 | 7  |
| 56031 | 5 | 11904763 | 11904782 | 2 | 10 | 20 | CA   | 7  | 5  |
| 56032 | 5 | 11905787 | 11905798 | 2 | 6  | 12 | GT   | 28 | 3  |
| 56035 | 5 | 11909389 | 11909408 | 4 | 5  | 20 | AACA | 28 | 5  |
| 56038 | 5 | 11911379 | 11911394 | 2 | 8  | 16 | AC   | 12 | 3  |
| 56040 | 5 | 11913923 | 11913950 | 2 | 14 | 28 | TG   | 15 | 11 |
| 56042 | 5 | 11914192 | 11914215 | 2 | 12 | 24 | AC   | 11 | 8  |
| 56047 | 5 | 11915755 | 11915778 | 2 | 12 | 24 | GA   | 7  | 5  |
| 56050 | 5 | 11916679 | 11916704 | 2 | 13 | 26 | TG   | 10 | 10 |
| 56055 | 5 | 11927913 | 11927928 | 2 | 8  | 16 | GT   | 10 | 3  |
| 56058 | 5 | 11941741 | 11941766 | 2 | 13 | 26 | TC   | 12 | 8  |
| 56059 | 5 | 11946529 | 11946552 | 2 | 12 | 24 | GT   | 10 | 5  |
| 56060 | 5 | 11957257 | 11957284 | 2 | 14 | 28 | AC   | 21 | 8  |
| 56061 | 5 | 11958177 | 11958194 | 3 | 6  | 18 | TTG  | 22 | 5  |
| 56063 | 5 | 11965536 | 11965550 | 3 | 5  | 15 | TGC  | 15 | 3  |
| 56078 | 5 | 12022215 | 12022236 | 2 | 11 | 22 | AG   | 23 | 7  |
| 56081 | 5 | 12028371 | 12028396 | 2 | 13 | 26 | AC   | 18 | 6  |
| 56083 | 5 | 12035025 | 12035045 | 3 | 7  | 21 | TGC  | 28 | 8  |
| 56085 | 5 | 12037068 | 12037081 | 2 | 7  | 14 | GT   | 34 | 3  |
| 56086 | 5 | 12038160 | 12038185 | 2 | 13 | 26 | AC   | 12 | 14 |
| 56100 | 5 | 12053581 | 12053598 | 2 | 9  | 18 | GT   | 11 | 9  |
| 56105 | 5 | 12071663 | 12071680 | 3 | 6  | 18 | AGC  | 24 | 4  |
| 56108 | 5 | 12072165 | 12072178 | 2 | 7  | 14 | AC   | 18 | 4  |
| 56113 | 5 | 12093488 | 12093501 | 2 | 7  | 14 | CA   | 22 | 6  |
| 56114 | 5 | 12093567 | 12093584 | 2 | 9  | 18 | AG   | 23 | 7  |
| 56117 | 5 | 12096164 | 12096201 | 2 | 19 | 38 | AC   | 11 | 8  |
| 56121 | 5 | 12097767 | 12097786 | 4 | 5  | 20 | CAAA | 27 | 8  |
| 56123 | 5 | 12098946 | 12098981 | 2 | 18 | 36 | CA   | 17 | 9  |
| 56128 | 5 | 12106707 | 12106724 | 3 | 6  | 18 | TCA  | 29 | 8  |
| 56129 | 5 | 12107153 | 12107166 | 2 | 7  | 14 | GT   | 30 | 7  |
| 56130 | 5 | 12110973 | 12110998 | 2 | 13 | 26 | CA   | 13 | 9  |
| 56131 | 5 | 12111461 | 12111480 | 2 | 10 | 20 | GT   | 9  | 6  |
| 56135 | 5 | 12128785 | 12128799 | 3 | 5  | 15 | TCC  | 20 | 4  |
| 56136 | 5 | 12128803 | 12128820 | 3 | 6  | 18 | TCC  | 18 | 5  |

|       |   |          |          |   |    |    |      |    |    |
|-------|---|----------|----------|---|----|----|------|----|----|
| 56137 | 5 | 12131613 | 12131640 | 2 | 14 | 28 | TG   | 22 | 8  |
| 56140 | 5 | 12133688 | 12133699 | 2 | 6  | 12 | AT   | 20 | 9  |
| 56141 | 5 | 12133700 | 12133717 | 2 | 9  | 18 | GT   | 19 | 9  |
| 56142 | 5 | 12133884 | 12133897 | 2 | 7  | 14 | TG   | 18 | 11 |
| 56143 | 5 | 12133982 | 12133997 | 2 | 8  | 16 | GT   | 23 | 5  |
| 56146 | 5 | 12139663 | 12139686 | 2 | 12 | 24 | TG   | 16 | 9  |
| 56147 | 5 | 12142907 | 12142920 | 2 | 7  | 14 | CA   | 17 | 5  |
| 56156 | 5 | 12160591 | 12160620 | 3 | 10 | 30 | GCT  | 25 | 5  |
| 56158 | 5 | 12165691 | 12165706 | 4 | 4  | 16 | CATA | 29 | 3  |
| 56161 | 5 | 12179796 | 12179807 | 2 | 6  | 12 | AC   | 27 | 3  |
| 56165 | 5 | 12188042 | 12188061 | 2 | 10 | 20 | TG   | 20 | 6  |
| 56166 | 5 | 12188645 | 12188656 | 2 | 6  | 12 | AC   | 31 | 3  |
| 56167 | 5 | 12189203 | 12189244 | 2 | 21 | 42 | CA   | 10 | 8  |
| 56174 | 5 | 12191338 | 12191357 | 2 | 10 | 20 | AG   | 11 | 6  |
| 56175 | 5 | 12191400 | 12191413 | 2 | 7  | 14 | TG   | 16 | 5  |
| 56186 | 5 | 12212716 | 12212742 | 3 | 9  | 27 | TGC  | 24 | 6  |
| 56190 | 5 | 12230898 | 12230911 | 2 | 7  | 14 | AC   | 26 | 3  |
| 56191 | 5 | 12234758 | 12234797 | 2 | 20 | 40 | AC   | 14 | 12 |
| 56193 | 5 | 12243452 | 12243469 | 2 | 9  | 18 | AC   | 24 | 6  |
| 56195 | 5 | 12253401 | 12253421 | 3 | 7  | 21 | AGG  | 16 | 4  |
| 56196 | 5 | 12253448 | 12253471 | 2 | 12 | 24 | AG   | 12 | 3  |
| 56198 | 5 | 12254772 | 12254801 | 2 | 15 | 30 | TG   | 16 | 13 |
| 56199 | 5 | 12254919 | 12254939 | 3 | 7  | 21 | CCT  | 22 | 5  |
| 56201 | 5 | 12258076 | 12258089 | 2 | 7  | 14 | GT   | 9  | 5  |
| 56202 | 5 | 12258092 | 12258109 | 2 | 9  | 18 | GT   | 16 | 7  |
| 56204 | 5 | 12273745 | 12273758 | 2 | 7  | 14 | GT   | 26 | 3  |
| 56205 | 5 | 12278231 | 12278258 | 2 | 14 | 28 | GT   | 8  | 7  |
| 56213 | 5 | 12290840 | 12290857 | 2 | 9  | 18 | TG   | 17 | 11 |
| 56214 | 5 | 12291273 | 12291302 | 3 | 10 | 30 | GCT  | 21 | 8  |
| 56215 | 5 | 12291481 | 12291494 | 2 | 7  | 14 | TG   | 27 | 7  |
| 56219 | 5 | 12297687 | 12297712 | 2 | 13 | 26 | AC   | 13 | 3  |
| 56221 | 5 | 12303803 | 12303817 | 3 | 5  | 15 | CAG  | 28 | 5  |
| 56223 | 5 | 12308963 | 12308978 | 2 | 8  | 16 | CA   | 29 | 3  |
| 56226 | 5 | 12323022 | 12323039 | 2 | 9  | 18 | TG   | 28 | 12 |
| 56228 | 5 | 12330873 | 12330900 | 2 | 14 | 28 | CA   | 24 | 15 |
| 56232 | 5 | 12342282 | 12342319 | 2 | 19 | 38 | AC   | 28 | 9  |
| 56235 | 5 | 12344849 | 12344860 | 2 | 6  | 12 | TC   | 21 | 3  |
| 56236 | 5 | 12345220 | 12345237 | 3 | 6  | 18 | GAA  | 22 | 6  |
| 56240 | 5 | 12356471 | 12356484 | 2 | 7  | 14 | GT   | 25 | 11 |
| 56242 | 5 | 12358106 | 12358119 | 2 | 7  | 14 | CA   | 26 | 4  |
| 56245 | 5 | 12360062 | 12360077 | 2 | 8  | 16 | CT   | 26 | 10 |
| 56246 | 5 | 12360222 | 12360236 | 3 | 5  | 15 | AAG  | 15 | 5  |
| 56247 | 5 | 12372575 | 12372596 | 2 | 11 | 22 | CA   | 16 | 9  |
| 56253 | 5 | 12380307 | 12380333 | 3 | 9  | 27 | CAT  | 21 | 7  |
| 56258 | 5 | 12399065 | 12399078 | 2 | 7  | 14 | CA   | 24 | 8  |
| 56259 | 5 | 12399137 | 12399160 | 2 | 12 | 24 | AC   | 20 | 7  |
| 56261 | 5 | 12399347 | 12399358 | 2 | 6  | 12 | TC   | 12 | 10 |
| 56267 | 5 | 12400986 | 12400997 | 2 | 6  | 12 | GA   | 10 | 10 |
| 56268 | 5 | 12401399 | 12401431 | 3 | 11 | 33 | GAA  | 24 | 10 |
| 56283 | 5 | 12432972 | 12432989 | 3 | 6  | 18 | CTC  | 26 | 5  |
| 56285 | 5 | 12443602 | 12443631 | 3 | 10 | 30 | ACA  | 27 | 8  |

|       |   |          |          |   |    |    |      |    |    |
|-------|---|----------|----------|---|----|----|------|----|----|
| 56287 | 5 | 12447012 | 12447038 | 3 | 9  | 27 | CTC  | 29 | 6  |
| 56288 | 5 | 12448597 | 12448623 | 3 | 9  | 27 | AAG  | 23 | 3  |
| 56290 | 5 | 12452116 | 12452127 | 2 | 6  | 12 | GA   | 23 | 5  |
| 56293 | 5 | 12461276 | 12461291 | 2 | 8  | 16 | TA   | 8  | 4  |
| 56295 | 5 | 12462051 | 12462062 | 2 | 6  | 12 | CA   | 16 | 6  |
| 56298 | 5 | 12463992 | 12464015 | 2 | 12 | 24 | TG   | 9  | 8  |
| 56300 | 5 | 12466986 | 12467019 | 2 | 17 | 34 | TG   | 13 | 15 |
| 56301 | 5 | 12468698 | 12468711 | 2 | 7  | 14 | AG   | 30 | 3  |
| 56307 | 5 | 12473409 | 12473420 | 2 | 6  | 12 | TG   | 15 | 6  |
| 56310 | 5 | 12478477 | 12478528 | 4 | 13 | 52 | TCTA | 18 | 13 |
| 56312 | 5 | 12490062 | 12490079 | 3 | 6  | 18 | GCA  | 25 | 5  |
| 56314 | 5 | 12492373 | 12492384 | 2 | 6  | 12 | AC   | 25 | 3  |
| 56318 | 5 | 12497321 | 12497336 | 4 | 4  | 16 | TCTT | 27 | 5  |
| 56320 | 5 | 12497646 | 12497663 | 3 | 6  | 18 | CCG  | 15 | 5  |
| 56321 | 5 | 12497709 | 12497726 | 3 | 6  | 18 | GCT  | 23 | 3  |
| 56322 | 5 | 12498122 | 12498137 | 2 | 8  | 16 | TC   | 23 | 6  |
| 56323 | 5 | 12498182 | 12498205 | 4 | 6  | 24 | ATGG | 25 | 6  |
| 56324 | 5 | 12498470 | 12498483 | 2 | 7  | 14 | GT   | 20 | 8  |
| 56329 | 5 | 12505183 | 12505197 | 3 | 5  | 15 | GGA  | 9  | 6  |
| 56332 | 5 | 12511942 | 12511953 | 2 | 6  | 12 | TG   | 29 | 7  |
| 56333 | 5 | 12513317 | 12513331 | 3 | 5  | 15 | TGT  | 31 | 5  |
| 56336 | 5 | 12518832 | 12518859 | 4 | 7  | 28 | ATTT | 20 | 4  |
| 56337 | 5 | 12521884 | 12521899 | 4 | 4  | 16 | TGAA | 30 | 8  |
| 56340 | 5 | 12524733 | 12524756 | 2 | 12 | 24 | GT   | 11 | 8  |
| 56342 | 5 | 12530833 | 12530856 | 4 | 6  | 24 | AATC | 31 | 6  |
| 56351 | 5 | 12542130 | 12542147 | 2 | 9  | 18 | GT   | 11 | 6  |
| 56353 | 5 | 12545242 | 12545267 | 2 | 13 | 26 | TG   | 19 | 8  |
| 56355 | 5 | 12547228 | 12547243 | 2 | 8  | 16 | CT   | 17 | 4  |
| 56361 | 5 | 12556047 | 12556060 | 2 | 7  | 14 | TG   | 26 | 11 |
| 56362 | 5 | 12556124 | 12556135 | 2 | 6  | 12 | TG   | 15 | 5  |
| 56365 | 5 | 12562964 | 12562978 | 3 | 5  | 15 | CTG  | 21 | 3  |
| 56366 | 5 | 12563003 | 12563020 | 3 | 6  | 18 | CCT  | 6  | 3  |
| 56367 | 5 | 12563327 | 12563348 | 2 | 11 | 22 | CA   | 28 | 16 |
| 56368 | 5 | 12568011 | 12568036 | 2 | 13 | 26 | GT   | 16 | 5  |
| 56370 | 5 | 12571794 | 12571833 | 2 | 20 | 40 | GT   | 16 | 10 |
| 56371 | 5 | 12572163 | 12572182 | 2 | 10 | 20 | TG   | 21 | 6  |
| 56375 | 5 | 12582756 | 12582776 | 3 | 7  | 21 | CAT  | 31 | 5  |
| 56376 | 5 | 12585026 | 12585041 | 4 | 4  | 16 | CCAT | 24 | 4  |
| 56379 | 5 | 12589357 | 12589368 | 2 | 6  | 12 | CA   | 26 | 3  |
| 56380 | 5 | 12591421 | 12591452 | 2 | 16 | 32 | GT   | 6  | 10 |
| 56381 | 5 | 12591561 | 12591622 | 2 | 31 | 62 | GT   | 12 | 13 |
| 56382 | 5 | 12591773 | 12591800 | 2 | 14 | 28 | CA   | 20 | 11 |
| 56383 | 5 | 12601228 | 12601239 | 2 | 6  | 12 | TG   | 28 | 3  |
| 56384 | 5 | 12601381 | 12601396 | 2 | 8  | 16 | GT   | 12 | 10 |
| 56385 | 5 | 12601398 | 12601409 | 2 | 6  | 12 | TG   | 17 | 11 |
| 56386 | 5 | 12601573 | 12601608 | 2 | 18 | 36 | TG   | 10 | 12 |
| 56387 | 5 | 12603870 | 12603883 | 2 | 7  | 14 | AC   | 20 | 7  |
| 56393 | 5 | 12608439 | 12608454 | 4 | 4  | 16 | TTTA | 11 | 7  |
| 56394 | 5 | 12612127 | 12612148 | 2 | 11 | 22 | TG   | 22 | 6  |
| 56397 | 5 | 12615986 | 12616015 | 2 | 15 | 30 | CA   | 16 | 9  |
| 56399 | 5 | 12621340 | 12621351 | 2 | 6  | 12 | CA   | 21 | 4  |

|       |   |          |          |   |    |    |      |    |    |
|-------|---|----------|----------|---|----|----|------|----|----|
| 56401 | 5 | 12623962 | 12623975 | 2 | 7  | 14 | TG   | 29 | 3  |
| 56402 | 5 | 12624021 | 12624038 | 2 | 9  | 18 | TG   | 18 | 5  |
| 56406 | 5 | 12629239 | 12629268 | 3 | 10 | 30 | CCT  | 13 | 7  |
| 56412 | 5 | 12634744 | 12634775 | 2 | 16 | 32 | TG   | 12 | 9  |
| 56413 | 5 | 12635954 | 12635965 | 2 | 6  | 12 | GT   | 32 | 3  |
| 56414 | 5 | 12641852 | 12641881 | 2 | 15 | 30 | CA   | 8  | 8  |
| 56415 | 5 | 12645284 | 12645325 | 2 | 21 | 42 | TG   | 14 | 10 |
| 56423 | 5 | 12653904 | 12653923 | 2 | 10 | 20 | TG   | 19 | 9  |
| 56424 | 5 | 12654079 | 12654102 | 2 | 12 | 24 | GT   | 25 | 15 |
| 56434 | 5 | 12668690 | 12668701 | 2 | 6  | 12 | TG   | 12 | 3  |
| 56437 | 5 | 12674306 | 12674339 | 2 | 17 | 34 | CA   | 6  | 6  |
| 56438 | 5 | 12676851 | 12676864 | 2 | 7  | 14 | AC   | 29 | 13 |
| 56439 | 5 | 12677146 | 12677165 | 2 | 10 | 20 | AC   | 18 | 7  |
| 56440 | 5 | 12677924 | 12677935 | 2 | 6  | 12 | AG   | 24 | 3  |
| 56441 | 5 | 12678339 | 12678380 | 2 | 21 | 42 | TC   | 15 | 6  |
| 56442 | 5 | 12679260 | 12679299 | 2 | 20 | 40 | TG   | 9  | 13 |
| 56444 | 5 | 12680639 | 12680656 | 2 | 9  | 18 | TG   | 20 | 7  |
| 56445 | 5 | 12680912 | 12680929 | 2 | 9  | 18 | CT   | 17 | 6  |
| 56446 | 5 | 12684323 | 12684346 | 4 | 6  | 24 | CTTC | 26 | 3  |
| 56448 | 5 | 12686675 | 12686686 | 2 | 6  | 12 | TG   | 19 | 4  |
| 56452 | 5 | 12688143 | 12688156 | 2 | 7  | 14 | GT   | 27 | 4  |
| 56453 | 5 | 12688394 | 12688419 | 2 | 13 | 26 | TG   | 12 | 7  |
| 56455 | 5 | 12688565 | 12688600 | 2 | 18 | 36 | TG   | 8  | 9  |
| 56456 | 5 | 12689058 | 12689073 | 2 | 8  | 16 | TG   | 27 | 5  |
| 56458 | 5 | 12692547 | 12692560 | 2 | 7  | 14 | GT   | 25 | 6  |
| 56459 | 5 | 12694212 | 12694229 | 2 | 9  | 18 | AC   | 11 | 7  |
| 56461 | 5 | 12695812 | 12695825 | 2 | 7  | 14 | GA   | 17 | 6  |
| 56462 | 5 | 12695827 | 12695838 | 2 | 6  | 12 | AG   | 16 | 7  |
| 56463 | 5 | 12703215 | 12703236 | 2 | 11 | 22 | CA   | 23 | 12 |
| 56467 | 5 | 12704976 | 12704996 | 3 | 7  | 21 | GAA  | 31 | 4  |
| 56470 | 5 | 12708852 | 12708869 | 3 | 6  | 18 | CTT  | 23 | 3  |
| 56475 | 5 | 12712537 | 12712548 | 2 | 6  | 12 | CA   | 23 | 3  |
| 56477 | 5 | 12720139 | 12720156 | 3 | 6  | 18 | CTC  | 25 | 4  |
| 56478 | 5 | 12721235 | 12721252 | 2 | 9  | 18 | GT   | 20 | 13 |
| 56481 | 5 | 12733113 | 12733160 | 2 | 24 | 48 | TG   | 9  | 10 |
| 56486 | 5 | 12737863 | 12737896 | 2 | 17 | 34 | AC   | 7  | 9  |
| 56489 | 5 | 12745063 | 12745076 | 2 | 7  | 14 | TC   | 21 | 3  |
| 56490 | 5 | 12745268 | 12745285 | 2 | 9  | 18 | TG   | 11 | 11 |
| 56492 | 5 | 12749595 | 12749614 | 2 | 10 | 20 | TC   | 13 | 8  |
| 56494 | 5 | 12754214 | 12754253 | 2 | 20 | 40 | GT   | 13 | 13 |
| 56497 | 5 | 12754669 | 12754682 | 2 | 7  | 14 | AC   | 20 | 9  |
| 56498 | 5 | 12754684 | 12754699 | 2 | 8  | 16 | AC   | 17 | 4  |
| 56500 | 5 | 12756654 | 12756675 | 2 | 11 | 22 | AC   | 16 | 15 |
| 56512 | 5 | 12770841 | 12770858 | 3 | 6  | 18 | CCT  | 23 | 9  |
| 56525 | 5 | 12801334 | 12801353 | 2 | 10 | 20 | CA   | 17 | 9  |
| 56534 | 5 | 12808938 | 12808981 | 2 | 22 | 44 | TG   | 11 | 11 |
| 56542 | 5 | 12820459 | 12820478 | 4 | 5  | 20 | GTTT | 28 | 5  |
| 56544 | 5 | 12821399 | 12821418 | 2 | 10 | 20 | TG   | 11 | 8  |
| 56554 | 5 | 12838698 | 12838713 | 4 | 4  | 16 | CAAA | 23 | 3  |
| 56555 | 5 | 12840026 | 12840041 | 2 | 8  | 16 | AC   | 27 | 9  |
| 56556 | 5 | 12843113 | 12843124 | 2 | 6  | 12 | AC   | 26 | 3  |

|       |   |          |          |   |    |    |      |    |    |
|-------|---|----------|----------|---|----|----|------|----|----|
| 56568 | 5 | 12883431 | 12883442 | 2 | 6  | 12 | GA   | 22 | 4  |
| 56569 | 5 | 12883478 | 12883491 | 2 | 7  | 14 | AC   | 28 | 4  |
| 56572 | 5 | 12885384 | 12885401 | 2 | 9  | 18 | AC   | 16 | 4  |
| 56578 | 5 | 12903706 | 12903721 | 2 | 8  | 16 | TC   | 28 | 3  |
| 56580 | 5 | 12906239 | 12906259 | 3 | 7  | 21 | TAT  | 14 | 12 |
| 56582 | 5 | 12907557 | 12907580 | 2 | 12 | 24 | AT   | 14 | 7  |
| 56583 | 5 | 12910002 | 12910013 | 2 | 6  | 12 | AC   | 17 | 9  |
| 56584 | 5 | 12910016 | 12910027 | 2 | 6  | 12 | AC   | 13 | 7  |
| 56589 | 5 | 12911101 | 12911120 | 4 | 5  | 20 | AATA | 20 | 3  |
| 56594 | 5 | 12920774 | 12920791 | 2 | 9  | 18 | GA   | 20 | 9  |
| 56596 | 5 | 12927386 | 12927407 | 2 | 11 | 22 | GA   | 14 | 4  |
| 56597 | 5 | 12928057 | 12928076 | 2 | 10 | 20 | TC   | 20 | 3  |
| 56598 | 5 | 12928611 | 12928646 | 2 | 18 | 36 | CA   | 10 | 11 |
| 56599 | 5 | 12936868 | 12936882 | 3 | 5  | 15 | AAC  | 8  | 11 |
| 56606 | 5 | 12945167 | 12945192 | 2 | 13 | 26 | GT   | 10 | 9  |
| 56607 | 5 | 12946963 | 12946980 | 2 | 9  | 18 | CA   | 17 | 4  |
| 56610 | 5 | 12949328 | 12949363 | 3 | 12 | 36 | CAG  | 26 | 9  |
| 56612 | 5 | 12953053 | 12953084 | 2 | 16 | 32 | CA   | 8  | 5  |
| 56615 | 5 | 12956367 | 12956398 | 2 | 16 | 32 | TG   | 7  | 9  |
| 56630 | 5 | 12985462 | 12985477 | 2 | 8  | 16 | GT   | 17 | 3  |
| 56632 | 5 | 12987789 | 12987826 | 2 | 19 | 38 | CA   | 15 | 14 |
| 56633 | 5 | 12988794 | 12988825 | 2 | 16 | 32 | TG   | 12 | 11 |
| 56634 | 5 | 12989162 | 12989173 | 2 | 6  | 12 | TG   | 27 | 3  |
| 56636 | 5 | 12991172 | 12991195 | 2 | 12 | 24 | GA   | 16 | 11 |
| 56654 | 5 | 12998710 | 12998727 | 2 | 9  | 18 | AC   | 26 | 15 |
| 56655 | 5 | 12999899 | 12999962 | 4 | 16 | 64 | TCTA | 15 | 11 |
| 56657 | 5 | 13001256 | 13001277 | 2 | 11 | 22 | GA   | 17 | 5  |
| 56658 | 5 | 13001873 | 13001904 | 2 | 16 | 32 | GT   | 13 | 9  |
| 56659 | 5 | 13002060 | 13002077 | 3 | 6  | 18 | TTG  | 25 | 4  |
| 56667 | 5 | 13005451 | 13005468 | 3 | 6  | 18 | TTC  | 17 | 4  |
| 56668 | 5 | 13006597 | 13006617 | 3 | 7  | 21 | TGT  | 10 | 3  |
| 56669 | 5 | 13006668 | 13006697 | 2 | 15 | 30 | GT   | 8  | 6  |
| 56674 | 5 | 13007760 | 13007771 | 2 | 6  | 12 | AC   | 20 | 4  |
| 56675 | 5 | 13007803 | 13007818 | 2 | 8  | 16 | AC   | 18 | 8  |
| 56684 | 5 | 13011480 | 13011503 | 2 | 12 | 24 | TG   | 15 | 12 |
| 56694 | 5 | 13013773 | 13013800 | 2 | 14 | 28 | TG   | 13 | 7  |
| 56695 | 5 | 13013834 | 13013857 | 2 | 12 | 24 | TG   | 15 | 4  |
| 56697 | 5 | 13014647 | 13014674 | 4 | 7  | 28 | TCTG | 19 | 3  |
| 56716 | 5 | 13030480 | 13030500 | 3 | 7  | 21 | TCC  | 16 | 6  |
| 56724 | 5 | 13037835 | 13037852 | 2 | 9  | 18 | GT   | 25 | 3  |
| 56725 | 5 | 13041497 | 13041508 | 2 | 6  | 12 | TG   | 20 | 12 |
| 56726 | 5 | 13041511 | 13041524 | 2 | 7  | 14 | TG   | 17 | 8  |
| 56727 | 5 | 13041919 | 13041930 | 2 | 6  | 12 | TC   | 20 | 3  |
| 56732 | 5 | 13043749 | 13043772 | 4 | 6  | 24 | GTTG | 26 | 3  |
| 56736 | 5 | 13049979 | 13050004 | 2 | 13 | 26 | CA   | 11 | 16 |
| 56747 | 5 | 13061033 | 13061050 | 2 | 9  | 18 | TG   | 15 | 8  |
| 56757 | 5 | 13076058 | 13076089 | 2 | 16 | 32 | AC   | 6  | 9  |
| 56758 | 5 | 13077285 | 13077300 | 2 | 8  | 16 | TG   | 13 | 3  |
| 56759 | 5 | 13077386 | 13077405 | 4 | 5  | 20 | TTTC | 17 | 3  |
| 56760 | 5 | 13077622 | 13077636 | 3 | 5  | 15 | CTC  | 29 | 6  |
| 56761 | 5 | 13078026 | 13078043 | 3 | 6  | 18 | AAG  | 25 | 3  |

|       |   |          |          |   |    |    |      |    |    |
|-------|---|----------|----------|---|----|----|------|----|----|
| 56762 | 5 | 13078334 | 13078369 | 2 | 18 | 36 | TG   | 25 | 14 |
| 56764 | 5 | 13079053 | 13079072 | 2 | 10 | 20 | GT   | 7  | 6  |
| 56765 | 5 | 13079106 | 13079125 | 4 | 5  | 20 | TTTC | 23 | 5  |
| 56766 | 5 | 13079725 | 13079739 | 3 | 5  | 15 | TAT  | 14 | 4  |
| 56768 | 5 | 13083234 | 13083247 | 2 | 7  | 14 | GA   | 30 | 4  |
| 56769 | 5 | 13085558 | 13085573 | 2 | 8  | 16 | AG   | 24 | 5  |
| 56775 | 5 | 13089164 | 13089189 | 2 | 13 | 26 | GT   | 17 | 8  |
| 56779 | 5 | 13094536 | 13094555 | 2 | 10 | 20 | CA   | 24 | 5  |
| 56780 | 5 | 13094920 | 13094937 | 2 | 9  | 18 | CA   | 17 | 4  |
| 56781 | 5 | 13095350 | 13095361 | 2 | 6  | 12 | AC   | 19 | 4  |
| 56782 | 5 | 13095364 | 13095377 | 2 | 7  | 14 | AC   | 24 | 5  |
| 56783 | 5 | 13095925 | 13095952 | 4 | 7  | 28 | CTTT | 20 | 7  |
| 56786 | 5 | 13098527 | 13098550 | 2 | 12 | 24 | TG   | 19 | 4  |
| 56789 | 5 | 13098723 | 13098754 | 2 | 16 | 32 | CT   | 7  | 4  |
| 56790 | 5 | 13099582 | 13099615 | 2 | 17 | 34 | AC   | 9  | 9  |
| 56803 | 5 | 13117651 | 13117664 | 2 | 7  | 14 | AG   | 10 | 3  |
| 56804 | 5 | 13117720 | 13117737 | 3 | 6  | 18 | AGA  | 19 | 4  |
| 56807 | 5 | 13121430 | 13121459 | 3 | 10 | 30 | AGG  | 11 | 7  |
| 56808 | 5 | 13122068 | 13122094 | 3 | 9  | 27 | GAG  | 12 | 5  |
| 56811 | 5 | 13129580 | 13129597 | 2 | 9  | 18 | TC   | 14 | 6  |
| 56812 | 5 | 13129667 | 13129692 | 2 | 13 | 26 | CT   | 15 | 7  |
| 56813 | 5 | 13130269 | 13130292 | 3 | 8  | 24 | GCA  | 21 | 10 |
| 56819 | 5 | 13137283 | 13137298 | 4 | 4  | 16 | TCAC | 26 | 3  |
| 56824 | 5 | 13143838 | 13143865 | 2 | 14 | 28 | TC   | 12 | 10 |
| 56826 | 5 | 13146226 | 13146237 | 2 | 6  | 12 | TG   | 14 | 4  |
| 56831 | 5 | 13168390 | 13168403 | 2 | 7  | 14 | CT   | 22 | 3  |
| 56838 | 5 | 13178030 | 13178044 | 3 | 5  | 15 | GCA  | 15 | 3  |
| 56840 | 5 | 13179779 | 13179808 | 2 | 15 | 30 | GT   | 13 | 9  |
| 56841 | 5 | 13182374 | 13182407 | 2 | 17 | 34 | AC   | 11 | 14 |
| 56842 | 5 | 13182528 | 13182543 | 2 | 8  | 16 | GT   | 19 | 10 |
| 56844 | 5 | 13185682 | 13185703 | 2 | 11 | 22 | GT   | 20 | 17 |
| 56846 | 5 | 13193641 | 13193670 | 2 | 15 | 30 | TG   | 8  | 10 |
| 56847 | 5 | 13196161 | 13196172 | 2 | 6  | 12 | CA   | 23 | 11 |
| 56849 | 5 | 13196214 | 13196227 | 2 | 7  | 14 | TG   | 26 | 6  |
| 56850 | 5 | 13196334 | 13196355 | 2 | 11 | 22 | CA   | 27 | 7  |
| 56851 | 5 | 13198107 | 13198126 | 2 | 10 | 20 | AG   | 8  | 3  |
| 56852 | 5 | 13200548 | 13200561 | 2 | 7  | 14 | TG   | 12 | 6  |
| 56856 | 5 | 13204972 | 13204987 | 2 | 8  | 16 | TG   | 14 | 4  |
| 56857 | 5 | 13208923 | 13208934 | 2 | 6  | 12 | TG   | 26 | 7  |
| 56861 | 5 | 13216845 | 13216870 | 2 | 13 | 26 | CA   | 11 | 15 |
| 56863 | 5 | 13221256 | 13221267 | 2 | 6  | 12 | AG   | 28 | 3  |
| 56864 | 5 | 13224504 | 13224525 | 2 | 11 | 22 | CA   | 15 | 12 |
| 56865 | 5 | 13230367 | 13230384 | 2 | 9  | 18 | CA   | 20 | 3  |
| 56868 | 5 | 13230739 | 13230762 | 2 | 12 | 24 | AC   | 18 | 9  |
| 56869 | 5 | 13235305 | 13235320 | 2 | 8  | 16 | CA   | 26 | 6  |
| 56870 | 5 | 13236085 | 13236108 | 2 | 12 | 24 | AC   | 16 | 5  |
| 56871 | 5 | 13236735 | 13236746 | 2 | 6  | 12 | TG   | 20 | 5  |
| 56872 | 5 | 13238574 | 13238595 | 2 | 11 | 22 | TG   | 12 | 4  |
| 56873 | 5 | 13239307 | 13239326 | 2 | 10 | 20 | GT   | 15 | 13 |
| 56874 | 5 | 13239672 | 13239685 | 2 | 7  | 14 | AC   | 32 | 3  |
| 56876 | 5 | 13243183 | 13243196 | 2 | 7  | 14 | AG   | 31 | 5  |

|       |   |          |          |   |    |    |      |    |    |
|-------|---|----------|----------|---|----|----|------|----|----|
| 56878 | 5 | 13245781 | 13245796 | 4 | 4  | 16 | AGAC | 37 | 3  |
| 56882 | 5 | 13250201 | 13250216 | 2 | 8  | 16 | GA   | 16 | 10 |
| 56884 | 5 | 13253272 | 13253283 | 2 | 6  | 12 | TG   | 30 | 6  |
| 56885 | 5 | 13254892 | 13254921 | 2 | 15 | 30 | AC   | 15 | 11 |
| 56888 | 5 | 13256775 | 13256808 | 2 | 17 | 34 | CA   | 12 | 13 |
| 56901 | 5 | 13271062 | 13271073 | 2 | 6  | 12 | AG   | 25 | 3  |
| 56904 | 5 | 13271823 | 13271837 | 3 | 5  | 15 | TTG  | 16 | 5  |
| 56908 | 5 | 13282286 | 13282303 | 2 | 9  | 18 | TA   | 25 | 5  |
| 56909 | 5 | 13284217 | 13284231 | 3 | 5  | 15 | ATA  | 29 | 3  |
| 56915 | 5 | 13292748 | 13292759 | 2 | 6  | 12 | TC   | 22 | 5  |
| 56919 | 5 | 13309882 | 13309899 | 3 | 6  | 18 | GCT  | 21 | 3  |
| 56925 | 5 | 13315175 | 13315190 | 2 | 8  | 16 | TG   | 20 | 10 |
| 56926 | 5 | 13318969 | 13318986 | 3 | 6  | 18 | GCT  | 26 | 5  |
| 56931 | 5 | 13321609 | 13321620 | 2 | 6  | 12 | TG   | 27 | 4  |
| 56934 | 5 | 13326788 | 13326813 | 2 | 13 | 26 | GT   | 11 | 8  |
| 56940 | 5 | 13343738 | 13343752 | 3 | 5  | 15 | TGC  | 27 | 4  |
| 56941 | 5 | 13344565 | 13344578 | 2 | 7  | 14 | AC   | 16 | 6  |
| 56944 | 5 | 13356901 | 13356914 | 2 | 7  | 14 | TG   | 23 | 5  |
| 56945 | 5 | 13361388 | 13361403 | 4 | 4  | 16 | CCTC | 22 | 3  |
| 56958 | 5 | 13390150 | 13390170 | 3 | 7  | 21 | GAG  | 16 | 6  |
| 56959 | 5 | 13390545 | 13390558 | 2 | 7  | 14 | CA   | 31 | 5  |
| 56960 | 5 | 13391267 | 13391288 | 2 | 11 | 22 | AC   | 11 | 5  |
| 56961 | 5 | 13394171 | 13394210 | 4 | 10 | 40 | GCCT | 25 | 9  |
| 56965 | 5 | 13404684 | 13404699 | 2 | 8  | 16 | GT   | 18 | 4  |
| 56973 | 5 | 13412106 | 13412121 | 2 | 8  | 16 | CA   | 11 | 5  |
| 56982 | 5 | 13426462 | 13426475 | 2 | 7  | 14 | CA   | 18 | 11 |
| 56988 | 5 | 13430789 | 13430810 | 2 | 11 | 22 | GA   | 14 | 6  |
| 56999 | 5 | 13436925 | 13436956 | 2 | 16 | 32 | AG   | 9  | 7  |
| 57010 | 5 | 13448601 | 13448614 | 2 | 7  | 14 | TG   | 31 | 4  |
| 57018 | 5 | 13457641 | 13457654 | 2 | 7  | 14 | TA   | 16 | 8  |
| 57021 | 5 | 13459543 | 13459558 | 4 | 4  | 16 | TTTG | 17 | 3  |
| 57027 | 5 | 13486122 | 13486141 | 2 | 10 | 20 | TG   | 26 | 3  |
| 57029 | 5 | 13488223 | 13488256 | 2 | 17 | 34 | GT   | 13 | 8  |
| 57033 | 5 | 13499482 | 13499493 | 2 | 6  | 12 | GT   | 30 | 4  |
| 57034 | 5 | 13500022 | 13500049 | 4 | 7  | 28 | TTCT | 30 | 3  |
| 57045 | 5 | 13523984 | 13523999 | 2 | 8  | 16 | GT   | 19 | 7  |
| 57046 | 5 | 13524104 | 13524119 | 2 | 8  | 16 | CA   | 25 | 5  |
| 57047 | 5 | 13524451 | 13524462 | 2 | 6  | 12 | GT   | 19 | 10 |
| 57049 | 5 | 13526249 | 13526266 | 2 | 9  | 18 | TC   | 13 | 9  |
| 57050 | 5 | 13526450 | 13526463 | 2 | 7  | 14 | GT   | 19 | 6  |
| 57051 | 5 | 13526699 | 13526734 | 2 | 18 | 36 | GT   | 8  | 12 |
| 57055 | 5 | 13533546 | 13533573 | 2 | 14 | 28 | AC   | 26 | 5  |
| 57057 | 5 | 13536863 | 13536880 | 3 | 6  | 18 | TGC  | 30 | 3  |
| 57061 | 5 | 13543596 | 13543625 | 2 | 15 | 30 | CA   | 9  | 8  |
| 57066 | 5 | 13553561 | 13553581 | 3 | 7  | 21 | GAA  | 13 | 9  |
| 57070 | 5 | 13566830 | 13566849 | 2 | 10 | 20 | GT   | 13 | 7  |
| 57071 | 5 | 13572115 | 13572132 | 2 | 9  | 18 | TG   | 23 | 3  |
| 57072 | 5 | 13573897 | 13573914 | 2 | 9  | 18 | GT   | 16 | 3  |
| 57075 | 5 | 13574329 | 13574342 | 2 | 7  | 14 | TC   | 11 | 5  |
| 57076 | 5 | 13574451 | 13574480 | 2 | 15 | 30 | CT   | 10 | 4  |
| 57082 | 5 | 13579790 | 13579807 | 2 | 9  | 18 | CT   | 25 | 3  |



|       |   |          |          |   |    |    |      |    |    |
|-------|---|----------|----------|---|----|----|------|----|----|
| 57086 | 5 | 13587301 | 13587318 | 2 | 9  | 18 | AC   | 18 | 4  |
| 57093 | 5 | 13602816 | 13602847 | 2 | 16 | 32 | CA   | 12 | 11 |
| 57100 | 5 | 13613669 | 13613710 | 2 | 21 | 42 | AC   | 7  | 7  |
| 57102 | 5 | 13613985 | 13614002 | 2 | 9  | 18 | GT   | 25 | 5  |
| 57103 | 5 | 13615441 | 13615454 | 2 | 7  | 14 | CA   | 19 | 5  |
| 57104 | 5 | 13615602 | 13615629 | 2 | 14 | 28 | GT   | 17 | 11 |
| 57105 | 5 | 13621079 | 13621094 | 2 | 8  | 16 | TG   | 27 | 3  |
| 57106 | 5 | 13626084 | 13626111 | 2 | 14 | 28 | TG   | 22 | 8  |
| 57109 | 5 | 13629708 | 13629731 | 2 | 12 | 24 | GT   | 26 | 7  |
| 57111 | 5 | 13631064 | 13631077 | 2 | 7  | 14 | TG   | 27 | 5  |
| 57112 | 5 | 13634425 | 13634446 | 2 | 11 | 22 | CA   | 25 | 11 |
| 57113 | 5 | 13639299 | 13639320 | 2 | 11 | 22 | AC   | 18 | 13 |
| 57114 | 5 | 13644100 | 13644117 | 3 | 6  | 18 | TTC  | 20 | 5  |
| 57122 | 5 | 13662808 | 13662831 | 2 | 12 | 24 | AC   | 17 | 13 |
| 57125 | 5 | 13669268 | 13669291 | 2 | 12 | 24 | TG   | 7  | 6  |
| 57127 | 5 | 13672048 | 13672063 | 2 | 8  | 16 | GA   | 30 | 6  |
| 57129 | 5 | 13673982 | 13673997 | 4 | 4  | 16 | TTCC | 35 | 3  |
| 57131 | 5 | 13677274 | 13677291 | 2 | 9  | 18 | TG   | 23 | 3  |
| 57135 | 5 | 13707075 | 13707086 | 2 | 6  | 12 | CA   | 28 | 3  |
| 57140 | 5 | 13721339 | 13721366 | 2 | 14 | 28 | TG   | 19 | 13 |
| 57141 | 5 | 13721554 | 13721571 | 3 | 6  | 18 | GAA  | 18 | 12 |
| 57142 | 5 | 13726461 | 13726502 | 3 | 14 | 42 | AAG  | 14 | 10 |
| 57145 | 5 | 13733162 | 13733182 | 3 | 7  | 21 | TGA  | 22 | 6  |
| 57151 | 5 | 13756820 | 13756837 | 2 | 9  | 18 | GT   | 22 | 3  |
| 57154 | 5 | 13760971 | 13760982 | 2 | 6  | 12 | AC   | 26 | 4  |
| 57155 | 5 | 13761847 | 13761864 | 3 | 6  | 18 | AGA  | 20 | 14 |
| 57157 | 5 | 13766495 | 13766524 | 2 | 15 | 30 | CA   | 14 | 9  |
| 57159 | 5 | 13775714 | 13775725 | 2 | 6  | 12 | GT   | 28 | 5  |
| 57162 | 5 | 13783529 | 13783555 | 3 | 9  | 27 | GGA  | 30 | 8  |
| 57164 | 5 | 13788627 | 13788652 | 2 | 13 | 26 | GT   | 23 | 13 |
| 57171 | 5 | 13816715 | 13816736 | 2 | 11 | 22 | TC   | 15 | 3  |
| 57173 | 5 | 13816969 | 13816980 | 2 | 6  | 12 | CT   | 15 | 4  |
| 57176 | 5 | 13828580 | 13828591 | 2 | 6  | 12 | GT   | 31 | 4  |
| 57201 | 5 | 13841114 | 13841135 | 2 | 11 | 22 | GT   | 23 | 7  |
| 57209 | 5 | 13846535 | 13846549 | 3 | 5  | 15 | TCC  | 18 | 3  |
| 57210 | 5 | 13846953 | 13846972 | 2 | 10 | 20 | CA   | 18 | 7  |
| 57211 | 5 | 13849142 | 13849159 | 2 | 9  | 18 | AC   | 24 | 4  |
| 57212 | 5 | 13849192 | 13849219 | 2 | 14 | 28 | CA   | 28 | 14 |
| 57216 | 5 | 13859200 | 13859220 | 3 | 7  | 21 | TTG  | 24 | 8  |
| 57228 | 5 | 13873222 | 13873233 | 2 | 6  | 12 | TC   | 20 | 5  |
| 57237 | 5 | 13875665 | 13875700 | 2 | 18 | 36 | TG   | 7  | 12 |
| 57246 | 5 | 13885215 | 13885242 | 2 | 14 | 28 | CA   | 17 | 10 |
| 57248 | 5 | 13885993 | 13886032 | 2 | 20 | 40 | AC   | 10 | 6  |
| 57250 | 5 | 13892482 | 13892511 | 2 | 15 | 30 | CT   | 18 | 6  |
| 57251 | 5 | 13893011 | 13893031 | 3 | 7  | 21 | AAG  | 23 | 4  |
| 57253 | 5 | 13893196 | 13893235 | 2 | 20 | 40 | CA   | 19 | 15 |
| 57257 | 5 | 13897359 | 13897372 | 2 | 7  | 14 | TC   | 20 | 5  |
| 57264 | 5 | 13903188 | 13903207 | 4 | 5  | 20 | CTGT | 35 | 3  |
| 57265 | 5 | 13904579 | 13904590 | 2 | 6  | 12 | CA   | 28 | 7  |
| 57266 | 5 | 13907645 | 13907658 | 2 | 7  | 14 | CA   | 25 | 4  |
| 57273 | 5 | 13926381 | 13926410 | 3 | 10 | 30 | CTG  | 26 | 7  |

|       |   |          |          |   |    |    |      |    |    |
|-------|---|----------|----------|---|----|----|------|----|----|
| 57279 | 5 | 13928984 | 13929007 | 2 | 12 | 24 | CA   | 19 | 10 |
| 57288 | 5 | 13943220 | 13943245 | 2 | 13 | 26 | GT   | 6  | 6  |
| 57293 | 5 | 13959889 | 13959918 | 2 | 15 | 30 | CA   | 19 | 11 |
| 57294 | 5 | 13963949 | 13963960 | 2 | 6  | 12 | TG   | 27 | 3  |
| 57299 | 5 | 13972526 | 13972551 | 2 | 13 | 26 | TG   | 22 | 8  |
| 57305 | 5 | 13984857 | 13984872 | 2 | 8  | 16 | AG   | 27 | 3  |
| 57309 | 5 | 13990963 | 13990982 | 4 | 5  | 20 | TTAT | 16 | 4  |
| 57311 | 5 | 13995150 | 13995165 | 2 | 8  | 16 | GT   | 14 | 7  |
| 57316 | 5 | 14001690 | 14001705 | 4 | 4  | 16 | TAGT | 23 | 3  |
| 57318 | 5 | 14003223 | 14003240 | 2 | 9  | 18 | CT   | 19 | 3  |
| 57320 | 5 | 14007908 | 14007925 | 3 | 6  | 18 | TCC  | 18 | 12 |
| 57339 | 5 | 14034894 | 14034909 | 2 | 8  | 16 | TG   | 21 | 7  |
| 57340 | 5 | 14038520 | 14038537 | 3 | 6  | 18 | CAG  | 24 | 4  |
| 57348 | 5 | 14054758 | 14054769 | 2 | 6  | 12 | TG   | 23 | 4  |
| 57355 | 5 | 14071225 | 14071240 | 2 | 8  | 16 | AC   | 12 | 10 |
| 57357 | 5 | 14077153 | 14077166 | 2 | 7  | 14 | CA   | 13 | 4  |
| 57359 | 5 | 14080904 | 14080919 | 2 | 8  | 16 | AG   | 21 | 3  |
| 57360 | 5 | 14084747 | 14084768 | 2 | 11 | 22 | TG   | 18 | 8  |
| 57362 | 5 | 14091542 | 14091571 | 2 | 15 | 30 | GT   | 17 | 9  |
| 57364 | 5 | 14101628 | 14101643 | 4 | 4  | 16 | TCCC | 11 | 3  |
| 57368 | 5 | 14107248 | 14107259 | 2 | 6  | 12 | GT   | 13 | 4  |
| 57381 | 5 | 14133738 | 14133752 | 3 | 5  | 15 | AGG  | 29 | 3  |
| 57382 | 5 | 14136018 | 14136037 | 2 | 10 | 20 | TG   | 22 | 7  |
| 57384 | 5 | 14150765 | 14150784 | 2 | 10 | 20 | AC   | 23 | 7  |
| 57390 | 5 | 14155435 | 14155448 | 2 | 7  | 14 | CA   | 16 | 4  |
| 57391 | 5 | 14155906 | 14155939 | 2 | 17 | 34 | GT   | 13 | 14 |
| 57402 | 5 | 14171794 | 14171809 | 2 | 8  | 16 | TG   | 20 | 3  |
| 57404 | 5 | 14179012 | 14179035 | 3 | 8  | 24 | GTT  | 11 | 7  |
| 57409 | 5 | 14183627 | 14183642 | 4 | 4  | 16 | CTTA | 15 | 3  |
| 57410 | 5 | 14184939 | 14184956 | 2 | 9  | 18 | GT   | 27 | 5  |
| 57412 | 5 | 14187893 | 14187908 | 4 | 4  | 16 | ATCA | 32 | 3  |
| 57413 | 5 | 14198355 | 14198380 | 2 | 13 | 26 | AC   | 10 | 8  |
| 57414 | 5 | 14204215 | 14204235 | 3 | 7  | 21 | GGA  | 25 | 5  |
| 57416 | 5 | 14206628 | 14206647 | 2 | 10 | 20 | GT   | 8  | 5  |
| 57424 | 5 | 14225145 | 14225160 | 4 | 4  | 16 | GAGT | 30 | 5  |
| 57426 | 5 | 14225300 | 14225317 | 2 | 9  | 18 | GT   | 18 | 10 |
| 57427 | 5 | 14225523 | 14225552 | 2 | 15 | 30 | AC   | 23 | 11 |
| 57431 | 5 | 14228123 | 14228134 | 2 | 6  | 12 | GT   | 14 | 5  |
| 57433 | 5 | 14229062 | 14229076 | 3 | 5  | 15 | TCC  | 31 | 3  |
| 57434 | 5 | 14233014 | 14233031 | 2 | 9  | 18 | CA   | 21 | 10 |
| 57440 | 5 | 14241324 | 14241353 | 2 | 15 | 30 | CA   | 18 | 10 |
| 57441 | 5 | 14242955 | 14242981 | 3 | 9  | 27 | CAT  | 10 | 6  |
| 57442 | 5 | 14243724 | 14243737 | 2 | 7  | 14 | TC   | 22 | 10 |
| 57443 | 5 | 14243902 | 14243915 | 2 | 7  | 14 | AC   | 24 | 5  |
| 57444 | 5 | 14247699 | 14247710 | 2 | 6  | 12 | AT   | 21 | 8  |
| 57451 | 5 | 14264738 | 14264755 | 2 | 9  | 18 | GT   | 13 | 8  |
| 57452 | 5 | 14265377 | 14265416 | 2 | 20 | 40 | GT   | 8  | 13 |
| 57455 | 5 | 14267910 | 14267927 | 3 | 6  | 18 | AAC  | 31 | 3  |
| 57456 | 5 | 14269307 | 14269327 | 3 | 7  | 21 | TCC  | 25 | 6  |
| 57460 | 5 | 14293874 | 14293888 | 3 | 5  | 15 | AGC  | 16 | 7  |
| 57466 | 5 | 14312924 | 14312957 | 2 | 17 | 34 | TG   | 12 | 7  |

|       |   |          |          |   |    |    |      |    |    |
|-------|---|----------|----------|---|----|----|------|----|----|
| 57474 | 5 | 14332760 | 14332771 | 2 | 6  | 12 | AC   | 19 | 3  |
| 57475 | 5 | 14341503 | 14341538 | 2 | 18 | 36 | AC   | 13 | 14 |
| 57478 | 5 | 14344276 | 14344311 | 4 | 9  | 36 | ATAC | 19 | 9  |
| 57479 | 5 | 14345870 | 14345905 | 4 | 9  | 36 | CACT | 27 | 8  |
| 57481 | 5 | 14357015 | 14357030 | 4 | 4  | 16 | CAGA | 28 | 4  |
| 57486 | 5 | 14368716 | 14368741 | 2 | 13 | 26 | GT   | 14 | 14 |
| 57487 | 5 | 14371405 | 14371436 | 2 | 16 | 32 | AC   | 11 | 9  |
| 57488 | 5 | 14371750 | 14371761 | 2 | 6  | 12 | AG   | 26 | 3  |
| 57489 | 5 | 14378721 | 14378740 | 4 | 5  | 20 | GCTC | 28 | 3  |
| 57491 | 5 | 14387743 | 14387782 | 2 | 20 | 40 | GT   | 17 | 8  |
| 57492 | 5 | 14388280 | 14388293 | 2 | 7  | 14 | TG   | 20 | 3  |
| 57493 | 5 | 14388524 | 14388539 | 2 | 8  | 16 | AC   | 23 | 3  |
| 57494 | 5 | 14390803 | 14390852 | 2 | 25 | 50 | CA   | 11 | 10 |
| 57495 | 5 | 14390909 | 14390920 | 2 | 6  | 12 | AC   | 26 | 3  |
| 57497 | 5 | 14392898 | 14392917 | 2 | 10 | 20 | TG   | 19 | 5  |
| 57498 | 5 | 14393262 | 14393285 | 2 | 12 | 24 | GA   | 14 | 5  |
| 57499 | 5 | 14393316 | 14393330 | 3 | 5  | 15 | GGA  | 21 | 3  |
| 57500 | 5 | 14393451 | 14393480 | 2 | 15 | 30 | AC   | 17 | 9  |
| 57502 | 5 | 14394337 | 14394364 | 2 | 14 | 28 | AC   | 10 | 9  |
| 57503 | 5 | 14394537 | 14394556 | 2 | 10 | 20 | CT   | 23 | 6  |
| 57504 | 5 | 14394666 | 14394695 | 2 | 15 | 30 | AC   | 10 | 9  |
| 57505 | 5 | 14394799 | 14394810 | 2 | 6  | 12 | TG   | 23 | 3  |
| 57508 | 5 | 14397051 | 14397064 | 2 | 7  | 14 | AC   | 25 | 4  |
| 57509 | 5 | 14403340 | 14403351 | 2 | 6  | 12 | TC   | 25 | 3  |
| 57510 | 5 | 14403542 | 14403561 | 2 | 10 | 20 | GT   | 20 | 8  |
| 57513 | 5 | 14403784 | 14403803 | 2 | 10 | 20 | AC   | 23 | 4  |
| 57515 | 5 | 14404078 | 14404099 | 2 | 11 | 22 | CA   | 15 | 8  |
| 57516 | 5 | 14404290 | 14404301 | 2 | 6  | 12 | TG   | 23 | 4  |
| 57522 | 5 | 14404995 | 14405008 | 2 | 7  | 14 | TG   | 20 | 13 |
| 57523 | 5 | 14405150 | 14405165 | 2 | 8  | 16 | CA   | 26 | 9  |
| 57527 | 5 | 14409985 | 14410000 | 2 | 8  | 16 | GA   | 16 | 3  |
| 57531 | 5 | 14411006 | 14411033 | 2 | 14 | 28 | AC   | 20 | 10 |
| 57534 | 5 | 14411361 | 14411384 | 2 | 12 | 24 | TG   | 16 | 5  |
| 57535 | 5 | 14413438 | 14413452 | 3 | 5  | 15 | GTT  | 24 | 3  |
| 57540 | 5 | 14420050 | 14420061 | 2 | 6  | 12 | GT   | 22 | 3  |
| 57541 | 5 | 14420213 | 14420234 | 2 | 11 | 22 | TG   | 20 | 10 |
| 57543 | 5 | 14420448 | 14420463 | 2 | 8  | 16 | TG   | 21 | 5  |
| 57544 | 5 | 14420843 | 14420868 | 2 | 13 | 26 | AC   | 23 | 7  |
| 57546 | 5 | 14424765 | 14424782 | 2 | 9  | 18 | TG   | 28 | 7  |
| 57547 | 5 | 14424851 | 14424868 | 2 | 9  | 18 | GT   | 17 | 6  |
| 57551 | 5 | 14430099 | 14430136 | 2 | 19 | 38 | TG   | 18 | 12 |
| 57553 | 5 | 14430652 | 14430671 | 2 | 10 | 20 | GT   | 20 | 5  |
| 57555 | 5 | 14430741 | 14430770 | 2 | 15 | 30 | AC   | 17 | 7  |
| 57556 | 5 | 14430798 | 14430811 | 2 | 7  | 14 | CA   | 25 | 4  |
| 57562 | 5 | 14437198 | 14437209 | 2 | 6  | 12 | TG   | 25 | 3  |
| 57568 | 5 | 14447675 | 14447701 | 3 | 9  | 27 | GAG  | 14 | 7  |
| 57569 | 5 | 14447821 | 14447832 | 2 | 6  | 12 | GA   | 22 | 6  |
| 57575 | 5 | 14455816 | 14455863 | 2 | 24 | 48 | TG   | 13 | 9  |
| 57581 | 5 | 14483518 | 14483551 | 2 | 17 | 34 | GA   | 19 | 8  |
| 57584 | 5 | 14487120 | 14487171 | 2 | 26 | 52 | TG   | 6  | 11 |
| 57587 | 5 | 14488636 | 14488659 | 2 | 12 | 24 | AC   | 10 | 5  |

|       |   |          |          |   |    |    |      |    |    |
|-------|---|----------|----------|---|----|----|------|----|----|
| 57589 | 5 | 14489066 | 14489089 | 2 | 12 | 24 | CA   | 17 | 11 |
| 57590 | 5 | 14489265 | 14489282 | 2 | 9  | 18 | CA   | 21 | 9  |
| 57593 | 5 | 14494126 | 14494147 | 2 | 11 | 22 | GT   | 18 | 10 |
| 57594 | 5 | 14494759 | 14494774 | 2 | 8  | 16 | TG   | 17 | 3  |
| 57600 | 5 | 14498101 | 14498120 | 2 | 10 | 20 | GA   | 23 | 4  |
| 57601 | 5 | 14498195 | 14498212 | 2 | 9  | 18 | TC   | 24 | 4  |
| 57602 | 5 | 14498969 | 14498994 | 2 | 13 | 26 | GT   | 10 | 7  |
| 57603 | 5 | 14502040 | 14502053 | 2 | 7  | 14 | TG   | 22 | 3  |
| 57625 | 5 | 14517890 | 14517913 | 4 | 6  | 24 | TCTG | 14 | 4  |
| 57629 | 5 | 14520924 | 14520935 | 2 | 6  | 12 | CA   | 14 | 4  |
| 57631 | 5 | 14523957 | 14523982 | 2 | 13 | 26 | TG   | 18 | 6  |
| 57633 | 5 | 14531180 | 14531217 | 2 | 19 | 38 | TG   | 6  | 8  |
| 57634 | 5 | 14533837 | 14533870 | 2 | 17 | 34 | AC   | 11 | 8  |
| 57637 | 5 | 14538578 | 14538599 | 2 | 11 | 22 | GT   | 14 | 6  |
| 57639 | 5 | 14540474 | 14540489 | 2 | 8  | 16 | CA   | 17 | 8  |
| 57640 | 5 | 14543099 | 14543120 | 2 | 11 | 22 | GT   | 18 | 6  |
| 57641 | 5 | 14543335 | 14543346 | 2 | 6  | 12 | TA   | 28 | 6  |
| 57654 | 5 | 14553487 | 14553508 | 2 | 11 | 22 | TC   | 12 | 4  |
| 57655 | 5 | 14554332 | 14554351 | 2 | 10 | 20 | TG   | 16 | 3  |
| 57656 | 5 | 14554537 | 14554570 | 2 | 17 | 34 | AC   | 6  | 7  |
| 57657 | 5 | 14554672 | 14554705 | 2 | 17 | 34 | GT   | 10 | 8  |
| 57658 | 5 | 14555953 | 14555992 | 2 | 20 | 40 | CA   | 16 | 13 |
| 57660 | 5 | 14560064 | 14560075 | 2 | 6  | 12 | AT   | 16 | 4  |
| 57663 | 5 | 14567762 | 14567777 | 2 | 8  | 16 | CA   | 24 | 5  |
| 57665 | 5 | 14570555 | 14570570 | 2 | 8  | 16 | AC   | 22 | 5  |
| 57666 | 5 | 14570573 | 14570584 | 2 | 6  | 12 | AC   | 19 | 6  |
| 57673 | 5 | 14590414 | 14590435 | 2 | 11 | 22 | CA   | 20 | 7  |
| 57678 | 5 | 14604380 | 14604397 | 3 | 6  | 18 | AGC  | 26 | 5  |
| 57679 | 5 | 14610557 | 14610572 | 4 | 4  | 16 | TATT | 22 | 5  |
| 57680 | 5 | 14610942 | 14610957 | 4 | 4  | 16 | GCTA | 31 | 3  |
| 57681 | 5 | 14611338 | 14611358 | 3 | 7  | 21 | TCA  | 26 | 7  |
| 57682 | 5 | 14611688 | 14611705 | 2 | 9  | 18 | GT   | 18 | 6  |
| 57683 | 5 | 14614863 | 14614878 | 2 | 8  | 16 | TC   | 21 | 3  |
| 57690 | 5 | 14672418 | 14672432 | 3 | 5  | 15 | GAA  | 21 | 8  |
| 57692 | 5 | 14676654 | 14676677 | 2 | 12 | 24 | TG   | 14 | 9  |
| 57694 | 5 | 14678558 | 14678571 | 2 | 7  | 14 | AG   | 22 | 3  |
| 57695 | 5 | 14685195 | 14685209 | 3 | 5  | 15 | GCC  | 18 | 4  |
| 57700 | 5 | 14690904 | 14690924 | 3 | 7  | 21 | GGA  | 32 | 8  |
| 57703 | 5 | 14693179 | 14693211 | 3 | 11 | 33 | TCC  | 21 | 9  |
| 57706 | 5 | 14693405 | 14693416 | 2 | 6  | 12 | GA   | 34 | 3  |
| 57707 | 5 | 14693604 | 14693631 | 4 | 7  | 28 | TTCA | 16 | 5  |
| 57708 | 5 | 14693792 | 14693806 | 3 | 5  | 15 | TGG  | 29 | 3  |
| 57710 | 5 | 14694184 | 14694204 | 3 | 7  | 21 | AAT  | 20 | 6  |
| 57711 | 5 | 14697079 | 14697093 | 3 | 5  | 15 | CCT  | 18 | 6  |
| 57713 | 5 | 14699350 | 14699365 | 2 | 8  | 16 | CA   | 28 | 3  |
| 57714 | 5 | 14701834 | 14701851 | 3 | 6  | 18 | GAT  | 31 | 8  |
| 57717 | 5 | 14707047 | 14707061 | 3 | 5  | 15 | AAG  | 30 | 5  |
| 57718 | 5 | 14711055 | 14711069 | 3 | 5  | 15 | AGC  | 27 | 3  |
| 57721 | 5 | 14722578 | 14722597 | 2 | 10 | 20 | TG   | 10 | 5  |
| 57722 | 5 | 14722725 | 14722750 | 2 | 13 | 26 | CA   | 9  | 6  |
| 57723 | 5 | 14725687 | 14725706 | 4 | 5  | 20 | TTGG | 23 | 5  |

|       |   |          |          |   |    |    |      |    |    |
|-------|---|----------|----------|---|----|----|------|----|----|
| 57726 | 5 | 14732431 | 14732442 | 2 | 6  | 12 | CT   | 9  | 4  |
| 57727 | 5 | 14732711 | 14732726 | 4 | 4  | 16 | CTCC | 8  | 3  |
| 57732 | 5 | 14748609 | 14748641 | 3 | 11 | 33 | TCT  | 15 | 9  |
| 57736 | 5 | 14759422 | 14759457 | 2 | 18 | 36 | AC   | 16 | 9  |
| 57740 | 5 | 14763339 | 14763350 | 2 | 6  | 12 | TA   | 22 | 5  |
| 57741 | 5 | 14772142 | 14772163 | 2 | 11 | 22 | CA   | 15 | 8  |
| 57750 | 5 | 14794637 | 14794654 | 3 | 6  | 18 | CAC  | 32 | 8  |
| 57751 | 5 | 14794716 | 14794778 | 3 | 21 | 63 | CTT  | 19 | 22 |
| 57755 | 5 | 14800123 | 14800134 | 2 | 6  | 12 | GA   | 17 | 6  |
| 57760 | 5 | 14809497 | 14809526 | 3 | 10 | 30 | TCC  | 17 | 5  |
| 57765 | 5 | 14812448 | 14812468 | 3 | 7  | 21 | TGT  | 28 | 11 |
| 57766 | 5 | 14813748 | 14813775 | 2 | 14 | 28 | CA   | 25 | 12 |
| 57767 | 5 | 14816177 | 14816196 | 2 | 10 | 20 | GT   | 25 | 4  |
| 57768 | 5 | 14816234 | 14816248 | 3 | 5  | 15 | TGC  | 31 | 4  |
| 57771 | 5 | 14826921 | 14826966 | 2 | 23 | 46 | TG   | 6  | 8  |
| 57773 | 5 | 14827105 | 14827132 | 2 | 14 | 28 | CA   | 15 | 18 |
| 57774 | 5 | 14828135 | 14828156 | 2 | 11 | 22 | AC   | 15 | 7  |
| 57784 | 5 | 14843090 | 14843111 | 2 | 11 | 22 | TG   | 13 | 7  |
| 57785 | 5 | 14843321 | 14843332 | 2 | 6  | 12 | GT   | 19 | 7  |
| 57788 | 5 | 14844591 | 14844612 | 2 | 11 | 22 | GT   | 20 | 9  |
| 57789 | 5 | 14850933 | 14850956 | 3 | 8  | 24 | ACA  | 24 | 7  |
| 57790 | 5 | 14851473 | 14851487 | 3 | 5  | 15 | GGA  | 16 | 5  |
| 57794 | 5 | 14855909 | 14855924 | 4 | 4  | 16 | GCGA | 21 | 7  |
| 57798 | 5 | 14863053 | 14863068 | 2 | 8  | 16 | TG   | 20 | 3  |
| 57805 | 5 | 14881579 | 14881592 | 2 | 7  | 14 | AC   | 18 | 3  |
| 57816 | 5 | 14895795 | 14895809 | 3 | 5  | 15 | TTG  | 8  | 5  |
| 57827 | 5 | 14903292 | 14903315 | 2 | 12 | 24 | AG   | 11 | 6  |
| 57829 | 5 | 14903781 | 14903798 | 3 | 6  | 18 | AAT  | 17 | 4  |
| 57840 | 5 | 14916406 | 14916423 | 2 | 9  | 18 | TG   | 14 | 14 |
| 57841 | 5 | 14916425 | 14916436 | 2 | 6  | 12 | GT   | 15 | 13 |
| 57842 | 5 | 14916630 | 14916643 | 2 | 7  | 14 | AC   | 23 | 6  |
| 57843 | 5 | 14916646 | 14916661 | 2 | 8  | 16 | AC   | 21 | 6  |
| 57844 | 5 | 14916784 | 14916831 | 2 | 24 | 48 | AC   | 10 | 11 |
| 57845 | 5 | 14916940 | 14916965 | 2 | 13 | 26 | CA   | 18 | 14 |
| 57848 | 5 | 14926351 | 14926372 | 2 | 11 | 22 | TG   | 13 | 7  |
| 57849 | 5 | 14935515 | 14935535 | 3 | 7  | 21 | GAG  | 22 | 8  |
| 57850 | 5 | 14937919 | 14937939 | 3 | 7  | 21 | GCA  | 29 | 6  |
| 57855 | 5 | 14946686 | 14946701 | 2 | 8  | 16 | CT   | 27 | 3  |
| 57858 | 5 | 14952877 | 14952894 | 3 | 6  | 18 | AAG  | 31 | 3  |
| 57860 | 5 | 14954280 | 14954291 | 2 | 6  | 12 | TG   | 14 | 7  |
| 57861 | 5 | 14954460 | 14954485 | 2 | 13 | 26 | GT   | 19 | 9  |
| 57865 | 5 | 14963871 | 14963886 | 2 | 8  | 16 | TG   | 15 | 12 |
| 57867 | 5 | 14966316 | 14966363 | 4 | 12 | 48 | CCAT | 23 | 10 |
| 57868 | 5 | 14967806 | 14967823 | 3 | 6  | 18 | AAC  | 11 | 3  |
| 57870 | 5 | 14969813 | 14969842 | 2 | 15 | 30 | CA   | 10 | 10 |
| 57875 | 5 | 14979579 | 14979596 | 3 | 6  | 18 | CAG  | 30 | 3  |
| 57876 | 5 | 14980050 | 14980076 | 3 | 9  | 27 | AGC  | 27 | 6  |
| 57879 | 5 | 14980294 | 14980331 | 2 | 19 | 38 | GT   | 9  | 12 |
| 57880 | 5 | 14980444 | 14980475 | 2 | 16 | 32 | GT   | 15 | 14 |
| 57881 | 5 | 14981678 | 14981689 | 2 | 6  | 12 | AC   | 20 | 3  |
| 57882 | 5 | 14983652 | 14983673 | 2 | 11 | 22 | GT   | 19 | 14 |

|       |   |          |          |   |    |    |      |    |    |
|-------|---|----------|----------|---|----|----|------|----|----|
| 57883 | 5 | 14983771 | 14983786 | 4 | 4  | 16 | TATC | 27 | 6  |
| 57884 | 5 | 14983891 | 14983906 | 2 | 8  | 16 | CA   | 8  | 7  |
| 57885 | 5 | 14983909 | 14983922 | 2 | 7  | 14 | CA   | 18 | 12 |
| 57886 | 5 | 14984083 | 14984103 | 3 | 7  | 21 | TCT  | 21 | 7  |
| 57888 | 5 | 14985277 | 14985306 | 3 | 10 | 30 | CTC  | 8  | 6  |
| 57892 | 5 | 14987883 | 14987912 | 3 | 10 | 30 | TCT  | 20 | 8  |
| 57894 | 5 | 14991916 | 14991929 | 2 | 7  | 14 | CT   | 19 | 5  |
| 57900 | 5 | 15000402 | 15000425 | 3 | 8  | 24 | CCT  | 27 | 11 |
| 57901 | 5 | 15000599 | 15000616 | 3 | 6  | 18 | AGG  | 21 | 13 |
| 57902 | 5 | 15005952 | 15005973 | 2 | 11 | 22 | TG   | 15 | 13 |
| 57906 | 5 | 15007680 | 15007703 | 2 | 12 | 24 | GT   | 17 | 11 |
| 57910 | 5 | 15009028 | 15009049 | 2 | 11 | 22 | GT   | 19 | 7  |
| 57913 | 5 | 15011920 | 15011947 | 2 | 14 | 28 | CA   | 18 | 10 |
| 57915 | 5 | 15012437 | 15012466 | 2 | 15 | 30 | TG   | 20 | 6  |
| 57919 | 5 | 15015022 | 15015048 | 3 | 9  | 27 | CTG  | 29 | 6  |
| 57920 | 5 | 15015208 | 15015239 | 2 | 16 | 32 | AC   | 15 | 11 |
| 57921 | 5 | 15015440 | 15015459 | 2 | 10 | 20 | CA   | 22 | 3  |
| 57923 | 5 | 15018568 | 15018585 | 3 | 6  | 18 | AGA  | 15 | 4  |
| 57927 | 5 | 15021439 | 15021454 | 4 | 4  | 16 | TTTA | 27 | 6  |
| 57930 | 5 | 15026417 | 15026431 | 3 | 5  | 15 | AAG  | 11 | 7  |
| 57937 | 5 | 15031725 | 15031742 | 2 | 9  | 18 | TG   | 17 | 6  |
| 57938 | 5 | 15031797 | 15031816 | 2 | 10 | 20 | CA   | 21 | 9  |
| 57941 | 5 | 15032517 | 15032536 | 2 | 10 | 20 | GT   | 15 | 9  |
| 57946 | 5 | 15033681 | 15033694 | 2 | 7  | 14 | CA   | 22 | 4  |
| 57947 | 5 | 15034389 | 15034408 | 2 | 10 | 20 | CA   | 18 | 10 |
| 57951 | 5 | 15041205 | 15041216 | 2 | 6  | 12 | TG   | 26 | 11 |
| 57952 | 5 | 15042111 | 15042126 | 2 | 8  | 16 | GT   | 28 | 4  |
| 57954 | 5 | 15043518 | 15043550 | 3 | 11 | 33 | CCT  | 23 | 9  |
| 57958 | 5 | 15044702 | 15044721 | 2 | 10 | 20 | GT   | 10 | 5  |
| 57960 | 5 | 15048124 | 15048159 | 3 | 12 | 36 | CTC  | 25 | 7  |
| 57968 | 5 | 15054743 | 15054763 | 3 | 7  | 21 | CTC  | 16 | 3  |
| 57972 | 5 | 15060938 | 15060955 | 2 | 9  | 18 | GT   | 21 | 10 |
| 57974 | 5 | 15065031 | 15065063 | 3 | 11 | 33 | CAT  | 19 | 12 |
| 57975 | 5 | 15065092 | 15065113 | 2 | 11 | 22 | TC   | 16 | 8  |
| 57978 | 5 | 15065632 | 15065649 | 2 | 9  | 18 | TC   | 14 | 3  |
| 57979 | 5 | 15065771 | 15065790 | 2 | 10 | 20 | TC   | 24 | 6  |
| 57980 | 5 | 15066151 | 15066176 | 2 | 13 | 26 | CA   | 9  | 7  |
| 57981 | 5 | 15066252 | 15066271 | 2 | 10 | 20 | TC   | 11 | 5  |
| 57983 | 5 | 15067401 | 15067422 | 2 | 11 | 22 | GA   | 23 | 6  |
| 57984 | 5 | 15069479 | 15069496 | 2 | 9  | 18 | CA   | 18 | 3  |
| 57991 | 5 | 15072665 | 15072679 | 3 | 5  | 15 | GCC  | 20 | 5  |
| 57992 | 5 | 15072809 | 15072828 | 4 | 5  | 20 | TTTA | 18 | 6  |
| 57994 | 5 | 15074079 | 15074090 | 2 | 6  | 12 | GA   | 16 | 4  |
| 57997 | 5 | 15075516 | 15075547 | 2 | 16 | 32 | GT   | 7  | 7  |
| 57999 | 5 | 15076332 | 15076349 | 2 | 9  | 18 | CA   | 8  | 6  |
| 58000 | 5 | 15079304 | 15079327 | 3 | 8  | 24 | CTT  | 19 | 5  |
| 58001 | 5 | 15079518 | 15079535 | 3 | 6  | 18 | CAG  | 31 | 10 |
| 58004 | 5 | 15081662 | 15081677 | 2 | 8  | 16 | AC   | 17 | 11 |
| 58006 | 5 | 15083076 | 15083093 | 3 | 6  | 18 | GCT  | 29 | 3  |
| 58007 | 5 | 15089527 | 15089544 | 2 | 9  | 18 | GT   | 20 | 4  |
| 58010 | 5 | 15091453 | 15091468 | 2 | 8  | 16 | AC   | 13 | 8  |

|       |   |          |          |   |    |    |      |    |    |
|-------|---|----------|----------|---|----|----|------|----|----|
| 58011 | 5 | 15091745 | 15091762 | 2 | 9  | 18 | AG   | 16 | 3  |
| 58012 | 5 | 15092378 | 15092392 | 3 | 5  | 15 | AAG  | 19 | 4  |
| 58014 | 5 | 15099228 | 15099242 | 3 | 5  | 15 | GCA  | 23 | 4  |
| 58015 | 5 | 15099407 | 15099420 | 2 | 7  | 14 | CA   | 21 | 5  |
| 58023 | 5 | 15119267 | 15119304 | 2 | 19 | 38 | AC   | 13 | 14 |
| 58027 | 5 | 15121568 | 15121585 | 2 | 9  | 18 | CA   | 21 | 7  |
| 58029 | 5 | 15125738 | 15125761 | 2 | 12 | 24 | GT   | 11 | 10 |
| 58030 | 5 | 15125794 | 15125805 | 2 | 6  | 12 | GT   | 13 | 3  |
| 58031 | 5 | 15125833 | 15125848 | 2 | 8  | 16 | TG   | 20 | 5  |
| 58034 | 5 | 15126072 | 15126089 | 2 | 9  | 18 | TC   | 13 | 3  |
| 58035 | 5 | 15126152 | 15126185 | 2 | 17 | 34 | AC   | 6  | 9  |
| 58044 | 5 | 15131821 | 15131832 | 2 | 6  | 12 | GT   | 25 | 9  |
| 58045 | 5 | 15131834 | 15131853 | 2 | 10 | 20 | TG   | 26 | 12 |
| 58050 | 5 | 15133100 | 15133123 | 2 | 12 | 24 | AC   | 19 | 6  |
| 58051 | 5 | 15135808 | 15135829 | 2 | 11 | 22 | CA   | 7  | 7  |
| 58058 | 5 | 15136919 | 15136942 | 3 | 8  | 24 | TTG  | 16 | 3  |
| 58065 | 5 | 15156001 | 15156018 | 2 | 9  | 18 | CA   | 23 | 5  |
| 58066 | 5 | 15157088 | 15157115 | 2 | 14 | 28 | CA   | 18 | 18 |
| 58067 | 5 | 15158326 | 15158341 | 2 | 8  | 16 | AG   | 21 | 3  |
| 58068 | 5 | 15158530 | 15158551 | 2 | 11 | 22 | GT   | 18 | 12 |
| 58074 | 5 | 15161805 | 15161822 | 3 | 6  | 18 | CTT  | 19 | 4  |
| 58075 | 5 | 15163343 | 15163354 | 2 | 6  | 12 | CT   | 31 | 9  |
| 58076 | 5 | 15163499 | 15163524 | 2 | 13 | 26 | GT   | 13 | 7  |
| 58078 | 5 | 15163585 | 15163614 | 2 | 15 | 30 | CA   | 9  | 7  |
| 58080 | 5 | 15164079 | 15164112 | 2 | 17 | 34 | TG   | 8  | 10 |
| 58087 | 5 | 15166022 | 15166049 | 2 | 14 | 28 | GT   | 13 | 15 |
| 58088 | 5 | 15168184 | 15168201 | 3 | 6  | 18 | GAT  | 25 | 5  |
| 58090 | 5 | 15168612 | 15168627 | 4 | 4  | 16 | ATAA | 26 | 4  |
| 58091 | 5 | 15169847 | 15169874 | 2 | 14 | 28 | AC   | 18 | 15 |
| 58100 | 5 | 15172714 | 15172727 | 2 | 7  | 14 | AT   | 13 | 6  |
| 58101 | 5 | 15173315 | 15173334 | 2 | 10 | 20 | GT   | 15 | 14 |
| 58102 | 5 | 15173469 | 15173486 | 2 | 9  | 18 | CA   | 19 | 11 |
| 58103 | 5 | 15173511 | 15173522 | 2 | 6  | 12 | CA   | 31 | 5  |
| 58104 | 5 | 15173711 | 15173736 | 2 | 13 | 26 | AC   | 15 | 6  |
| 58109 | 5 | 15180555 | 15180572 | 2 | 9  | 18 | CA   | 11 | 4  |
| 58112 | 5 | 15181841 | 15181856 | 2 | 8  | 16 | AC   | 13 | 6  |
| 58113 | 5 | 15181899 | 15181910 | 2 | 6  | 12 | AG   | 23 | 3  |
| 58114 | 5 | 15182009 | 15182040 | 2 | 16 | 32 | CA   | 9  | 7  |
| 58117 | 5 | 15184628 | 15184641 | 2 | 7  | 14 | AC   | 30 | 3  |
| 58120 | 5 | 15186326 | 15186337 | 2 | 6  | 12 | CA   | 12 | 14 |
| 58121 | 5 | 15186339 | 15186352 | 2 | 7  | 14 | AC   | 13 | 13 |
| 58122 | 5 | 15186625 | 15186660 | 2 | 18 | 36 | TG   | 6  | 7  |
| 58125 | 5 | 15188117 | 15188134 | 2 | 9  | 18 | TG   | 16 | 9  |
| 58127 | 5 | 15198181 | 15198202 | 2 | 11 | 22 | CA   | 17 | 7  |
| 58129 | 5 | 15198894 | 15198913 | 4 | 5  | 20 | TTTC | 19 | 9  |
| 58130 | 5 | 15199702 | 15199717 | 2 | 8  | 16 | TG   | 14 | 8  |
| 58131 | 5 | 15201684 | 15201695 | 2 | 6  | 12 | CA   | 32 | 6  |
| 58132 | 5 | 15202939 | 15202958 | 2 | 10 | 20 | GT   | 24 | 6  |
| 58134 | 5 | 15205956 | 15205970 | 3 | 5  | 15 | CTC  | 25 | 5  |
| 58135 | 5 | 15206291 | 15206306 | 2 | 8  | 16 | TG   | 28 | 3  |
| 58136 | 5 | 15206892 | 15206913 | 2 | 11 | 22 | CA   | 19 | 4  |

|       |   |          |          |   |    |    |     |    |    |
|-------|---|----------|----------|---|----|----|-----|----|----|
| 58141 | 5 | 15212458 | 15212473 | 2 | 8  | 16 | TC  | 22 | 7  |
| 58142 | 5 | 15212927 | 15212941 | 3 | 5  | 15 | GAT | 20 | 3  |
| 58145 | 5 | 15216904 | 15216927 | 2 | 12 | 24 | CA  | 14 | 11 |
| 58147 | 5 | 15217585 | 15217600 | 2 | 8  | 16 | TG  | 19 | 3  |
| 58153 | 5 | 15226009 | 15226024 | 2 | 8  | 16 | CT  | 6  | 6  |
| 58158 | 5 | 15232882 | 15232897 | 2 | 8  | 16 | GA  | 24 | 6  |
| 58161 | 5 | 15237582 | 15237621 | 2 | 20 | 40 | TC  | 18 | 16 |
| 58166 | 5 | 15248243 | 15248256 | 2 | 7  | 14 | CT  | 26 | 3  |
| 58168 | 5 | 15250007 | 15250036 | 2 | 15 | 30 | TG  | 15 | 13 |
| 58169 | 5 | 15253499 | 15253514 | 2 | 8  | 16 | TG  | 9  | 3  |
| 58176 | 5 | 15262495 | 15262510 | 2 | 8  | 16 | AG  | 22 | 7  |
| 58179 | 5 | 15264666 | 15264685 | 2 | 10 | 20 | CA  | 24 | 5  |
| 58180 | 5 | 15268831 | 15268842 | 2 | 6  | 12 | AT  | 6  | 5  |
| 58181 | 5 | 15269287 | 15269312 | 2 | 13 | 26 | CA  | 9  | 5  |
| 58190 | 5 | 15277278 | 15277305 | 2 | 14 | 28 | TG  | 11 | 11 |
| 58191 | 5 | 15277466 | 15277480 | 3 | 5  | 15 | AGA | 11 | 6  |
| 58198 | 5 | 15284129 | 15284149 | 3 | 7  | 21 | GCC | 21 | 8  |
| 58203 | 5 | 15288014 | 15288027 | 2 | 7  | 14 | CT  | 25 | 4  |
| 58205 | 5 | 15296404 | 15296431 | 2 | 14 | 28 | CA  | 16 | 10 |
| 58206 | 5 | 15298405 | 15298416 | 2 | 6  | 12 | CA  | 26 | 5  |
| 58216 | 5 | 15306332 | 15306361 | 2 | 15 | 30 | GT  | 19 | 12 |
| 58220 | 5 | 15310560 | 15310591 | 2 | 16 | 32 | CA  | 8  | 9  |
| 58221 | 5 | 15310752 | 15310765 | 2 | 7  | 14 | CA  | 23 | 4  |
| 58222 | 5 | 15311415 | 15311435 | 3 | 7  | 21 | GAA | 13 | 4  |
| 58223 | 5 | 15311688 | 15311699 | 2 | 6  | 12 | TG  | 20 | 4  |
| 58224 | 5 | 15311788 | 15311825 | 2 | 19 | 38 | GT  | 16 | 12 |
| 58225 | 5 | 15311925 | 15311944 | 2 | 10 | 20 | AC  | 15 | 4  |
| 58227 | 5 | 15323521 | 15323538 | 2 | 9  | 18 | CA  | 14 | 7  |
| 58229 | 5 | 15327858 | 15327869 | 2 | 6  | 12 | GA  | 19 | 3  |
| 58230 | 5 | 15330621 | 15330638 | 2 | 9  | 18 | GT  | 26 | 4  |
| 58232 | 5 | 15332850 | 15332889 | 2 | 20 | 40 | AC  | 8  | 10 |
| 58238 | 5 | 15347295 | 15347314 | 2 | 10 | 20 | AC  | 23 | 11 |
| 58239 | 5 | 15347812 | 15347829 | 3 | 6  | 18 | GAG | 18 | 6  |
| 58241 | 5 | 15347941 | 15347962 | 2 | 11 | 22 | AC  | 13 | 4  |
| 58243 | 5 | 15348138 | 15348153 | 2 | 8  | 16 | GT  | 7  | 5  |
| 58244 | 5 | 15348289 | 15348320 | 2 | 16 | 32 | GT  | 17 | 12 |
| 58246 | 5 | 15349813 | 15349836 | 2 | 12 | 24 | AC  | 12 | 7  |
| 58247 | 5 | 15352001 | 15352018 | 2 | 9  | 18 | CA  | 7  | 4  |
| 58248 | 5 | 15352469 | 15352482 | 2 | 7  | 14 | GT  | 21 | 14 |
| 58249 | 5 | 15352485 | 15352496 | 2 | 6  | 12 | GT  | 17 | 12 |
| 58251 | 5 | 15357391 | 15357404 | 2 | 7  | 14 | TC  | 27 | 3  |
| 58252 | 5 | 15358048 | 15358081 | 2 | 17 | 34 | AC  | 8  | 7  |
| 58266 | 5 | 15362657 | 15362670 | 2 | 7  | 14 | TG  | 21 | 4  |
| 58273 | 5 | 15364557 | 15364576 | 2 | 10 | 20 | GT  | 17 | 8  |
| 58279 | 5 | 15367387 | 15367410 | 2 | 12 | 24 | AC  | 10 | 11 |
| 58284 | 5 | 15367940 | 15367954 | 3 | 5  | 15 | TCT | 22 | 3  |
| 58289 | 5 | 15369211 | 15369242 | 2 | 16 | 32 | CA  | 7  | 10 |
| 58291 | 5 | 15369630 | 15369656 | 3 | 9  | 27 | TTC | 8  | 4  |
| 58295 | 5 | 15370200 | 15370219 | 2 | 10 | 20 | CA  | 14 | 9  |
| 58298 | 5 | 15371003 | 15371022 | 2 | 10 | 20 | GT  | 9  | 9  |
| 58299 | 5 | 15371276 | 15371293 | 2 | 9  | 18 | CA  | 24 | 6  |



|       |   |          |          |   |    |    |      |    |    |
|-------|---|----------|----------|---|----|----|------|----|----|
| 58303 | 5 | 15372240 | 15372263 | 3 | 8  | 24 | GGA  | 7  | 6  |
| 58307 | 5 | 15374884 | 15374899 | 2 | 8  | 16 | GA   | 15 | 4  |
| 58313 | 5 | 15375523 | 15375548 | 2 | 13 | 26 | AC   | 9  | 4  |
| 58315 | 5 | 15375725 | 15375754 | 3 | 10 | 30 | CTC  | 6  | 6  |
| 58328 | 5 | 15391201 | 15391224 | 3 | 8  | 24 | GAG  | 23 | 8  |
| 58330 | 5 | 15391557 | 15391574 | 2 | 9  | 18 | CT   | 20 | 4  |
| 58332 | 5 | 15392376 | 15392403 | 2 | 14 | 28 | TG   | 6  | 6  |
| 58334 | 5 | 15392912 | 15392932 | 3 | 7  | 21 | GAG  | 18 | 6  |
| 58335 | 5 | 15393108 | 15393143 | 2 | 18 | 36 | GT   | 15 | 7  |
| 58336 | 5 | 15393479 | 15393502 | 2 | 12 | 24 | TC   | 6  | 3  |
| 58339 | 5 | 15394774 | 15394791 | 2 | 9  | 18 | GT   | 22 | 5  |
| 58340 | 5 | 15396524 | 15396535 | 2 | 6  | 12 | GT   | 8  | 6  |
| 58341 | 5 | 15396538 | 15396551 | 2 | 7  | 14 | GT   | 21 | 6  |
| 58343 | 5 | 15397061 | 15397078 | 2 | 9  | 18 | AC   | 15 | 7  |
| 58344 | 5 | 15397267 | 15397287 | 3 | 7  | 21 | GCG  | 29 | 14 |
| 58348 | 5 | 15399433 | 15399447 | 3 | 5  | 15 | CGC  | 19 | 7  |
| 58350 | 5 | 15401660 | 15401683 | 3 | 8  | 24 | GAG  | 18 | 3  |
| 58351 | 5 | 15403410 | 15403430 | 3 | 7  | 21 | AGG  | 23 | 5  |
| 58353 | 5 | 15403768 | 15403791 | 2 | 12 | 24 | AC   | 16 | 9  |
| 58358 | 5 | 15405752 | 15405766 | 3 | 5  | 15 | CCG  | 8  | 9  |
| 58359 | 5 | 15406946 | 15406981 | 2 | 18 | 36 | GA   | 18 | 9  |
| 58360 | 5 | 15407007 | 15407020 | 2 | 7  | 14 | GA   | 6  | 3  |
| 58361 | 5 | 15407443 | 15407458 | 4 | 4  | 16 | TTTA | 20 | 13 |
| 58365 | 5 | 15411435 | 15411454 | 2 | 10 | 20 | AG   | 21 | 5  |
| 58366 | 5 | 15412580 | 15412597 | 3 | 6  | 18 | GCC  | 17 | 10 |
| 58367 | 5 | 15412808 | 15412822 | 3 | 5  | 15 | CCT  | 23 | 6  |
| 58370 | 5 | 15415060 | 15415087 | 2 | 14 | 28 | GT   | 13 | 9  |
| 58372 | 5 | 15416975 | 15416990 | 2 | 8  | 16 | AC   | 12 | 10 |
| 58383 | 5 | 15426465 | 15426476 | 2 | 6  | 12 | TG   | 29 | 3  |
| 58384 | 5 | 15428270 | 15428293 | 2 | 12 | 24 | TG   | 14 | 10 |
| 58385 | 5 | 15428345 | 15428364 | 2 | 10 | 20 | CA   | 7  | 5  |
| 58386 | 5 | 15428366 | 15428379 | 2 | 7  | 14 | AC   | 8  | 7  |
| 58387 | 5 | 15428446 | 15428489 | 2 | 22 | 44 | TG   | 7  | 9  |
| 58390 | 5 | 15430570 | 15430591 | 2 | 11 | 22 | AC   | 13 | 4  |
| 58391 | 5 | 15430651 | 15430692 | 2 | 21 | 42 | CA   | 14 | 11 |
| 58393 | 5 | 15430837 | 15430860 | 2 | 12 | 24 | CA   | 11 | 11 |
| 58394 | 5 | 15430994 | 15431031 | 2 | 19 | 38 | GT   | 11 | 9  |
| 58395 | 5 | 15431176 | 15431201 | 2 | 13 | 26 | GT   | 18 | 10 |
| 58398 | 5 | 15431283 | 15431312 | 3 | 10 | 30 | GGA  | 20 | 5  |
| 58399 | 5 | 15431377 | 15431408 | 2 | 16 | 32 | CA   | 12 | 9  |
| 58401 | 5 | 15432796 | 15432807 | 2 | 6  | 12 | CA   | 18 | 4  |
| 58402 | 5 | 15432810 | 15432821 | 2 | 6  | 12 | CA   | 17 | 5  |
| 58406 | 5 | 15433864 | 15433893 | 3 | 10 | 30 | CTC  | 26 | 9  |
| 58407 | 5 | 15434742 | 15434771 | 2 | 15 | 30 | CA   | 15 | 9  |
| 58409 | 5 | 15436395 | 15436422 | 2 | 14 | 28 | AC   | 10 | 9  |
| 58410 | 5 | 15437214 | 15437234 | 3 | 7  | 21 | GAG  | 19 | 4  |
| 58419 | 5 | 15440002 | 15440017 | 2 | 8  | 16 | GT   | 16 | 10 |
| 58427 | 5 | 15446912 | 15446929 | 3 | 6  | 18 | CTT  | 22 | 5  |
| 58429 | 5 | 15448170 | 15448193 | 2 | 12 | 24 | TG   | 16 | 6  |
| 58430 | 5 | 15448399 | 15448434 | 2 | 18 | 36 | TC   | 9  | 10 |
| 58431 | 5 | 15449000 | 15449013 | 2 | 7  | 14 | TC   | 26 | 3  |

|       |   |          |          |   |    |    |      |    |    |
|-------|---|----------|----------|---|----|----|------|----|----|
| 58433 | 5 | 15450267 | 15450298 | 2 | 16 | 32 | GT   | 13 | 11 |
| 58449 | 5 | 15478421 | 15478447 | 3 | 9  | 27 | TCC  | 21 | 5  |
| 58450 | 5 | 15479270 | 15479295 | 2 | 13 | 26 | GT   | 17 | 10 |
| 58457 | 5 | 15482532 | 15482547 | 2 | 8  | 16 | TG   | 26 | 11 |
| 58458 | 5 | 15482713 | 15482727 | 3 | 5  | 15 | GGC  | 15 | 5  |
| 58460 | 5 | 15484176 | 15484193 | 3 | 6  | 18 | GCA  | 25 | 11 |
| 58463 | 5 | 15489577 | 15489590 | 2 | 7  | 14 | AG   | 21 | 7  |
| 58465 | 5 | 15491693 | 15491720 | 2 | 14 | 28 | GT   | 28 | 12 |
| 58473 | 5 | 15500709 | 15500722 | 2 | 7  | 14 | AC   | 19 | 5  |
| 58477 | 5 | 15507257 | 15507282 | 2 | 13 | 26 | AC   | 15 | 5  |
| 58478 | 5 | 15507379 | 15507390 | 2 | 6  | 12 | AC   | 29 | 9  |
| 58479 | 5 | 15507568 | 15507599 | 2 | 16 | 32 | CA   | 9  | 8  |
| 58481 | 5 | 15522403 | 15522417 | 3 | 5  | 15 | CAA  | 22 | 3  |
| 58482 | 5 | 15526007 | 15526020 | 2 | 7  | 14 | GT   | 22 | 5  |
| 58483 | 5 | 15526050 | 15526073 | 2 | 12 | 24 | GT   | 16 | 14 |
| 58486 | 5 | 15526931 | 15526963 | 3 | 11 | 33 | TCT  | 24 | 6  |
| 58488 | 5 | 15528839 | 15528870 | 2 | 16 | 32 | CA   | 11 | 10 |
| 58492 | 5 | 15530227 | 15530240 | 2 | 7  | 14 | TA   | 7  | 4  |
| 58497 | 5 | 15535768 | 15535789 | 2 | 11 | 22 | CA   | 27 | 9  |
| 58499 | 5 | 15536738 | 15536755 | 2 | 9  | 18 | GT   | 8  | 5  |
| 58501 | 5 | 15542896 | 15542915 | 2 | 10 | 20 | CA   | 18 | 13 |
| 58502 | 5 | 15544470 | 15544490 | 3 | 7  | 21 | CTT  | 27 | 5  |
| 58504 | 5 | 15545981 | 15546010 | 2 | 15 | 30 | TG   | 21 | 10 |
| 58505 | 5 | 15546060 | 15546087 | 2 | 14 | 28 | GT   | 15 | 10 |
| 58507 | 5 | 15546627 | 15546641 | 3 | 5  | 15 | AGG  | 21 | 11 |
| 58508 | 5 | 15546911 | 15546934 | 2 | 12 | 24 | TG   | 19 | 8  |
| 58509 | 5 | 15546991 | 15547026 | 2 | 18 | 36 | TG   | 8  | 11 |
| 58510 | 5 | 15548935 | 15548946 | 2 | 6  | 12 | GA   | 29 | 5  |
| 58517 | 5 | 15554082 | 15554096 | 3 | 5  | 15 | GGT  | 17 | 3  |
| 58518 | 5 | 15554258 | 15554271 | 2 | 7  | 14 | GT   | 21 | 4  |
| 58519 | 5 | 15554295 | 15554306 | 2 | 6  | 12 | TG   | 19 | 3  |
| 58524 | 5 | 15556202 | 15556229 | 2 | 14 | 28 | GT   | 21 | 7  |
| 58525 | 5 | 15556369 | 15556388 | 2 | 10 | 20 | GT   | 19 | 12 |
| 58527 | 5 | 15556589 | 15556606 | 2 | 9  | 18 | AC   | 15 | 10 |
| 58528 | 5 | 15557923 | 15557938 | 2 | 8  | 16 | CA   | 24 | 4  |
| 58530 | 5 | 15563837 | 15563869 | 3 | 11 | 33 | TCT  | 12 | 7  |
| 58532 | 5 | 15564265 | 15564302 | 2 | 19 | 38 | GT   | 6  | 9  |
| 58533 | 5 | 15564416 | 15564437 | 2 | 11 | 22 | TG   | 15 | 13 |
| 58536 | 5 | 15564954 | 15564971 | 3 | 6  | 18 | GCT  | 23 | 5  |
| 58539 | 5 | 15567238 | 15567249 | 2 | 6  | 12 | CA   | 20 | 5  |
| 58542 | 5 | 15569799 | 15569838 | 2 | 20 | 40 | GT   | 9  | 9  |
| 58545 | 5 | 15572433 | 15572453 | 3 | 7  | 21 | CCT  | 21 | 13 |
| 58546 | 5 | 15573886 | 15573900 | 3 | 5  | 15 | TCC  | 30 | 5  |
| 58550 | 5 | 15576942 | 15576956 | 3 | 5  | 15 | GGT  | 14 | 5  |
| 58553 | 5 | 15578883 | 15578902 | 2 | 10 | 20 | AC   | 19 | 7  |
| 58555 | 5 | 15579029 | 15579052 | 3 | 8  | 24 | CCT  | 8  | 8  |
| 58556 | 5 | 15579854 | 15579869 | 4 | 4  | 16 | TCTT | 13 | 5  |
| 58562 | 5 | 15586997 | 15587012 | 2 | 8  | 16 | TG   | 10 | 11 |
| 58567 | 5 | 15590524 | 15590535 | 2 | 6  | 12 | AC   | 27 | 6  |
| 58571 | 5 | 15593132 | 15593143 | 2 | 6  | 12 | TA   | 24 | 7  |
| 58579 | 5 | 15604557 | 15604590 | 2 | 17 | 34 | CA   | 9  | 13 |

|       |   |          |          |   |    |    |      |    |    |
|-------|---|----------|----------|---|----|----|------|----|----|
| 58582 | 5 | 15607574 | 15607588 | 3 | 5  | 15 | CTT  | 27 | 8  |
| 58585 | 5 | 15613353 | 15613367 | 3 | 5  | 15 | AGA  | 17 | 6  |
| 58586 | 5 | 15613368 | 15613382 | 3 | 5  | 15 | GGA  | 15 | 5  |
| 58587 | 5 | 15619603 | 15619620 | 3 | 6  | 18 | GCC  | 19 | 3  |
| 58592 | 5 | 15620857 | 15620889 | 3 | 11 | 33 | CCT  | 15 | 7  |
| 58595 | 5 | 15622932 | 15622947 | 4 | 4  | 16 | GGTT | 15 | 6  |
| 58598 | 5 | 15626752 | 15626763 | 2 | 6  | 12 | GA   | 26 | 4  |
| 58599 | 5 | 15628929 | 15628943 | 3 | 5  | 15 | ACC  | 28 | 3  |
| 58602 | 5 | 15633402 | 15633428 | 3 | 9  | 27 | GCT  | 26 | 8  |
| 58605 | 5 | 15635931 | 15635948 | 2 | 9  | 18 | AC   | 12 | 5  |
| 58606 | 5 | 15636004 | 15636029 | 2 | 13 | 26 | AC   | 21 | 10 |
| 58608 | 5 | 15639175 | 15639206 | 2 | 16 | 32 | GT   | 13 | 9  |
| 58609 | 5 | 15639355 | 15639382 | 2 | 14 | 28 | CA   | 15 | 15 |
| 58612 | 5 | 15640340 | 15640354 | 3 | 5  | 15 | CAC  | 9  | 3  |
| 58613 | 5 | 15640587 | 15640628 | 2 | 21 | 42 | CA   | 9  | 10 |
| 58614 | 5 | 15640757 | 15640794 | 2 | 19 | 38 | GT   | 15 | 15 |
| 58617 | 5 | 15642034 | 15642065 | 2 | 16 | 32 | CA   | 13 | 8  |
| 58618 | 5 | 15642233 | 15642254 | 2 | 11 | 22 | TG   | 21 | 11 |
| 58620 | 5 | 15642318 | 15642343 | 2 | 13 | 26 | GT   | 14 | 13 |
| 58621 | 5 | 15642921 | 15642968 | 2 | 24 | 48 | TG   | 6  | 8  |
| 58624 | 5 | 15643257 | 15643276 | 2 | 10 | 20 | AC   | 6  | 4  |
| 58625 | 5 | 15643313 | 15643354 | 2 | 21 | 42 | GT   | 13 | 12 |
| 58643 | 5 | 15659518 | 15659538 | 3 | 7  | 21 | CTT  | 10 | 6  |
| 58646 | 5 | 15664366 | 15664389 | 3 | 8  | 24 | CCT  | 17 | 11 |
| 58648 | 5 | 15666174 | 15666203 | 2 | 15 | 30 | AC   | 22 | 11 |
| 58652 | 5 | 15669121 | 15669138 | 3 | 6  | 18 | GAA  | 25 | 7  |
| 58653 | 5 | 15670955 | 15670966 | 2 | 6  | 12 | TG   | 17 | 3  |
| 58655 | 5 | 15670993 | 15671008 | 2 | 8  | 16 | TG   | 20 | 4  |
| 58656 | 5 | 15672242 | 15672256 | 3 | 5  | 15 | GGA  | 22 | 14 |
| 58658 | 5 | 15672685 | 15672705 | 3 | 7  | 21 | AGA  | 21 | 6  |
| 58659 | 5 | 15674480 | 15674495 | 4 | 4  | 16 | GAGG | 11 | 3  |
| 58661 | 5 | 15675922 | 15675941 | 2 | 10 | 20 | AC   | 17 | 3  |
| 58663 | 5 | 15677217 | 15677231 | 3 | 5  | 15 | TAA  | 14 | 10 |
| 58665 | 5 | 15680958 | 15680984 | 3 | 9  | 27 | CAT  | 20 | 7  |
| 58666 | 5 | 15681263 | 15681276 | 2 | 7  | 14 | AC   | 17 | 4  |
| 58667 | 5 | 15681466 | 15681489 | 2 | 12 | 24 | GT   | 22 | 8  |
| 58670 | 5 | 15682476 | 15682502 | 3 | 9  | 27 | GAA  | 26 | 5  |
| 58676 | 5 | 15687479 | 15687512 | 2 | 17 | 34 | AC   | 6  | 7  |
| 58677 | 5 | 15689098 | 15689112 | 3 | 5  | 15 | GAT  | 24 | 3  |
| 58684 | 5 | 15693543 | 15693569 | 3 | 9  | 27 | TCC  | 17 | 6  |
| 58686 | 5 | 15693937 | 15693957 | 3 | 7  | 21 | GAG  | 14 | 9  |
| 58687 | 5 | 15695324 | 15695337 | 2 | 7  | 14 | TC   | 29 | 7  |
| 58691 | 5 | 15698670 | 15698685 | 4 | 4  | 16 | ACAG | 25 | 5  |
| 58694 | 5 | 15701906 | 15701920 | 3 | 5  | 15 | GAG  | 26 | 7  |
| 58695 | 5 | 15704122 | 15704137 | 4 | 4  | 16 | CCTC | 15 | 7  |
| 58699 | 5 | 15712550 | 15712561 | 2 | 6  | 12 | GT   | 16 | 9  |
| 58703 | 5 | 15718067 | 15718093 | 3 | 9  | 27 | CTT  | 16 | 7  |
| 58706 | 5 | 15718299 | 15718319 | 3 | 7  | 21 | GAG  | 14 | 8  |
| 58707 | 5 | 15718481 | 15718495 | 3 | 5  | 15 | GCG  | 24 | 4  |
| 58709 | 5 | 15720275 | 15720292 | 3 | 6  | 18 | CTG  | 6  | 4  |
| 58710 | 5 | 15721809 | 15721838 | 3 | 10 | 30 | CCT  | 21 | 9  |

|       |   |          |          |   |    |    |      |    |    |
|-------|---|----------|----------|---|----|----|------|----|----|
| 58712 | 5 | 15726676 | 15726708 | 3 | 11 | 33 | TCC  | 19 | 8  |
| 58714 | 5 | 15726970 | 15726989 | 2 | 10 | 20 | AC   | 17 | 13 |
| 58716 | 5 | 15730825 | 15730858 | 2 | 17 | 34 | AC   | 17 | 11 |
| 58719 | 5 | 15731091 | 15731118 | 2 | 14 | 28 | TG   | 19 | 12 |
| 58720 | 5 | 15732049 | 15732076 | 2 | 14 | 28 | TG   | 17 | 9  |
| 58721 | 5 | 15734588 | 15734607 | 2 | 10 | 20 | CA   | 15 | 12 |
| 58735 | 6 | 42769    | 42789    | 3 | 7  | 21 | ATA  | 25 | 3  |
| 58739 | 6 | 49905    | 49916    | 2 | 6  | 12 | CA   | 20 | 5  |
| 58750 | 6 | 79944    | 79970    | 3 | 9  | 27 | TTA  | 6  | 3  |
| 58761 | 6 | 97575    | 97588    | 2 | 7  | 14 | CA   | 24 | 3  |
| 58771 | 6 | 117281   | 117292   | 2 | 6  | 12 | AC   | 19 | 3  |
| 58774 | 6 | 129495   | 129506   | 2 | 6  | 12 | CA   | 29 | 3  |
| 58775 | 6 | 129868   | 129885   | 2 | 9  | 18 | AT   | 6  | 3  |
| 58781 | 6 | 146057   | 146096   | 2 | 20 | 40 | GA   | 6  | 3  |
| 58792 | 6 | 171357   | 171384   | 2 | 14 | 28 | TG   | 14 | 6  |
| 58793 | 6 | 174526   | 174543   | 2 | 9  | 18 | TG   | 21 | 7  |
| 58798 | 6 | 180652   | 180687   | 4 | 9  | 36 | CCAA | 16 | 4  |
| 58822 | 6 | 238196   | 238239   | 4 | 11 | 44 | GAAA | 14 | 7  |
| 58826 | 6 | 256629   | 256661   | 3 | 11 | 33 | AAC  | 20 | 4  |
| 58830 | 6 | 266229   | 266246   | 2 | 9  | 18 | TG   | 16 | 3  |
| 58834 | 6 | 286546   | 286565   | 2 | 10 | 20 | AC   | 13 | 3  |
| 58847 | 6 | 322019   | 322066   | 4 | 12 | 48 | TATC | 14 | 10 |
| 58862 | 6 | 354146   | 354175   | 3 | 10 | 30 | AAT  | 12 | 7  |
| 58888 | 6 | 438156   | 438189   | 2 | 17 | 34 | AC   | 12 | 5  |
| 58891 | 6 | 444016   | 444031   | 4 | 4  | 16 | AAAC | 23 | 6  |
| 58895 | 6 | 450007   | 450022   | 2 | 8  | 16 | TG   | 21 | 5  |
| 58911 | 6 | 483968   | 484001   | 2 | 17 | 34 | GT   | 16 | 7  |
| 58917 | 6 | 502737   | 502752   | 2 | 8  | 16 | CT   | 28 | 3  |
| 58942 | 6 | 587094   | 587109   | 2 | 8  | 16 | CA   | 11 | 3  |
| 58948 | 6 | 594345   | 594380   | 2 | 18 | 36 | AG   | 10 | 7  |
| 58952 | 6 | 601602   | 601623   | 2 | 11 | 22 | AC   | 22 | 3  |
| 58972 | 6 | 633477   | 633488   | 2 | 6  | 12 | TG   | 15 | 4  |
| 58973 | 6 | 633503   | 633516   | 2 | 7  | 14 | TG   | 22 | 3  |
| 59001 | 6 | 671284   | 671327   | 2 | 22 | 44 | TG   | 10 | 9  |
| 59020 | 6 | 703392   | 703407   | 4 | 4  | 16 | AAAT | 19 | 5  |
| 59022 | 6 | 705718   | 705739   | 2 | 11 | 22 | AC   | 17 | 3  |
| 59042 | 6 | 746859   | 746872   | 2 | 7  | 14 | TG   | 20 | 3  |
| 59045 | 6 | 751120   | 751135   | 2 | 8  | 16 | GT   | 8  | 4  |
| 59057 | 6 | 768307   | 768342   | 2 | 18 | 36 | GA   | 12 | 6  |
| 59072 | 6 | 789498   | 789529   | 4 | 8  | 32 | TGTC | 17 | 4  |
| 59073 | 6 | 790226   | 790239   | 2 | 7  | 14 | AT   | 8  | 3  |
| 59088 | 6 | 811714   | 811727   | 2 | 7  | 14 | GT   | 32 | 3  |
| 59096 | 6 | 829477   | 829496   | 2 | 10 | 20 | GT   | 27 | 3  |
| 59108 | 6 | 841050   | 841063   | 2 | 7  | 14 | CA   | 23 | 3  |
| 59123 | 6 | 868983   | 868996   | 2 | 7  | 14 | GT   | 24 | 4  |
| 59134 | 6 | 900169   | 900216   | 4 | 12 | 48 | GATG | 12 | 6  |
| 59135 | 6 | 900287   | 900318   | 2 | 16 | 32 | TC   | 6  | 7  |
| 59137 | 6 | 902422   | 902449   | 2 | 14 | 28 | AT   | 15 | 6  |
| 59145 | 6 | 914892   | 914907   | 2 | 8  | 16 | GT   | 26 | 4  |
| 59150 | 6 | 930815   | 930828   | 2 | 7  | 14 | AC   | 24 | 5  |
| 59154 | 6 | 942477   | 942508   | 4 | 8  | 32 | TGTT | 25 | 7  |

|       |   |         |         |   |    |    |      |    |    |
|-------|---|---------|---------|---|----|----|------|----|----|
| 59155 | 6 | 945673  | 945698  | 2 | 13 | 26 | AG   | 21 | 5  |
| 59164 | 6 | 963768  | 963783  | 4 | 4  | 16 | AATG | 12 | 3  |
| 59186 | 6 | 987146  | 987159  | 2 | 7  | 14 | TA   | 8  | 4  |
| 59198 | 6 | 1020940 | 1020959 | 4 | 5  | 20 | CATA | 29 | 4  |
| 59209 | 6 | 1035073 | 1035086 | 2 | 7  | 14 | AT   | 11 | 3  |
| 59227 | 6 | 1088769 | 1088780 | 2 | 6  | 12 | TG   | 26 | 4  |
| 59235 | 6 | 1103101 | 1103118 | 2 | 9  | 18 | AC   | 19 | 3  |
| 59245 | 6 | 1128937 | 1128958 | 2 | 11 | 22 | CA   | 16 | 12 |
| 59248 | 6 | 1131153 | 1131174 | 2 | 11 | 22 | CA   | 13 | 5  |
| 59251 | 6 | 1136540 | 1136569 | 2 | 15 | 30 | AC   | 13 | 8  |
| 59252 | 6 | 1139701 | 1139714 | 2 | 7  | 14 | GA   | 18 | 3  |
| 59257 | 6 | 1149670 | 1149691 | 2 | 11 | 22 | TG   | 19 | 8  |
| 59265 | 6 | 1168864 | 1168893 | 2 | 15 | 30 | CA   | 17 | 7  |
| 59277 | 6 | 1190134 | 1190148 | 3 | 5  | 15 | GCA  | 21 | 4  |
| 59278 | 6 | 1190556 | 1190579 | 4 | 6  | 24 | GACA | 32 | 5  |
| 59289 | 6 | 1209284 | 1209311 | 4 | 7  | 28 | AAAC | 20 | 10 |
| 59298 | 6 | 1223621 | 1223640 | 2 | 10 | 20 | CA   | 12 | 4  |
| 59316 | 6 | 1279986 | 1280005 | 2 | 10 | 20 | TG   | 16 | 7  |
| 59325 | 6 | 1295986 | 1296019 | 2 | 17 | 34 | GT   | 11 | 13 |
| 59340 | 6 | 1336263 | 1336278 | 2 | 8  | 16 | AC   | 24 | 6  |
| 59346 | 6 | 1351075 | 1351090 | 2 | 8  | 16 | AC   | 9  | 5  |
| 59347 | 6 | 1351093 | 1351108 | 2 | 8  | 16 | AC   | 10 | 5  |
| 59349 | 6 | 1357016 | 1357035 | 2 | 10 | 20 | CA   | 20 | 5  |
| 59353 | 6 | 1361518 | 1361543 | 2 | 13 | 26 | AC   | 20 | 4  |
| 59365 | 6 | 1376179 | 1376202 | 2 | 12 | 24 | AC   | 11 | 7  |
| 59377 | 6 | 1386417 | 1386438 | 2 | 11 | 22 | GT   | 12 | 9  |
| 59386 | 6 | 1406775 | 1406802 | 2 | 14 | 28 | AC   | 14 | 8  |
| 59392 | 6 | 1414899 | 1414916 | 2 | 9  | 18 | TG   | 25 | 5  |
| 59420 | 6 | 1456982 | 1457001 | 4 | 5  | 20 | ATGG | 14 | 5  |
| 59426 | 6 | 1472297 | 1472308 | 2 | 6  | 12 | GT   | 24 | 4  |
| 59431 | 6 | 1478987 | 1479004 | 2 | 9  | 18 | CA   | 22 | 5  |
| 59432 | 6 | 1481016 | 1481033 | 3 | 6  | 18 | ACT  | 25 | 5  |
| 59433 | 6 | 1481433 | 1481454 | 2 | 11 | 22 | TG   | 22 | 5  |
| 59438 | 6 | 1491824 | 1491837 | 2 | 7  | 14 | AC   | 11 | 3  |
| 59440 | 6 | 1494462 | 1494485 | 2 | 12 | 24 | TG   | 14 | 4  |
| 59443 | 6 | 1500824 | 1500841 | 2 | 9  | 18 | CT   | 25 | 5  |
| 59444 | 6 | 1505898 | 1505919 | 2 | 11 | 22 | CA   | 17 | 6  |
| 59447 | 6 | 1507109 | 1507122 | 2 | 7  | 14 | TG   | 24 | 6  |
| 59457 | 6 | 1515432 | 1515469 | 2 | 19 | 38 | AC   | 11 | 8  |
| 59458 | 6 | 1515639 | 1515668 | 2 | 15 | 30 | AC   | 25 | 7  |
| 59459 | 6 | 1517254 | 1517275 | 2 | 11 | 22 | AC   | 19 | 5  |
| 59465 | 6 | 1528341 | 1528370 | 2 | 15 | 30 | AC   | 9  | 10 |
| 59470 | 6 | 1541904 | 1541915 | 2 | 6  | 12 | AC   | 7  | 4  |
| 59480 | 6 | 1560857 | 1560880 | 2 | 12 | 24 | CA   | 16 | 13 |
| 59487 | 6 | 1566858 | 1566875 | 3 | 6  | 18 | TGC  | 35 | 7  |
| 59495 | 6 | 1579269 | 1579288 | 4 | 5  | 20 | TTTG | 26 | 4  |
| 59500 | 6 | 1596734 | 1596753 | 2 | 10 | 20 | TC   | 21 | 8  |
| 59505 | 6 | 1598432 | 1598451 | 2 | 10 | 20 | CA   | 19 | 6  |
| 59506 | 6 | 1599110 | 1599139 | 2 | 15 | 30 | CA   | 24 | 10 |
| 59508 | 6 | 1605898 | 1605911 | 2 | 7  | 14 | TG   | 28 | 4  |
| 59512 | 6 | 1607446 | 1607459 | 2 | 7  | 14 | AC   | 18 | 9  |

|       |   |         |         |   |    |    |      |    |    |
|-------|---|---------|---------|---|----|----|------|----|----|
| 59513 | 6 | 1607462 | 1607473 | 2 | 6  | 12 | AC   | 6  | 4  |
| 59514 | 6 | 1608770 | 1608781 | 2 | 6  | 12 | TC   | 19 | 8  |
| 59515 | 6 | 1608782 | 1608793 | 2 | 6  | 12 | AC   | 18 | 8  |
| 59517 | 6 | 1609396 | 1609407 | 2 | 6  | 12 | TG   | 22 | 3  |
| 59518 | 6 | 1609410 | 1609421 | 2 | 6  | 12 | TG   | 22 | 3  |
| 59520 | 6 | 1610798 | 1610815 | 2 | 9  | 18 | AT   | 7  | 5  |
| 59529 | 6 | 1630054 | 1630065 | 2 | 6  | 12 | TC   | 10 | 3  |
| 59530 | 6 | 1631550 | 1631575 | 2 | 13 | 26 | AC   | 18 | 11 |
| 59531 | 6 | 1633940 | 1633953 | 2 | 7  | 14 | CT   | 20 | 6  |
| 59532 | 6 | 1634159 | 1634206 | 2 | 24 | 48 | TG   | 12 | 11 |
| 59537 | 6 | 1639043 | 1639070 | 2 | 14 | 28 | TG   | 15 | 12 |
| 59538 | 6 | 1639192 | 1639227 | 2 | 18 | 36 | AC   | 10 | 9  |
| 59539 | 6 | 1640729 | 1640750 | 2 | 11 | 22 | GT   | 10 | 10 |
| 59540 | 6 | 1640879 | 1640914 | 2 | 18 | 36 | TG   | 6  | 10 |
| 59543 | 6 | 1647100 | 1647111 | 2 | 6  | 12 | CA   | 23 | 5  |
| 59544 | 6 | 1647114 | 1647125 | 2 | 6  | 12 | CA   | 18 | 3  |
| 59545 | 6 | 1647327 | 1647344 | 2 | 9  | 18 | AC   | 22 | 4  |
| 59548 | 6 | 1650293 | 1650332 | 4 | 10 | 40 | GAAA | 11 | 15 |
| 59549 | 6 | 1650397 | 1650418 | 2 | 11 | 22 | GT   | 16 | 13 |
| 59550 | 6 | 1650538 | 1650563 | 2 | 13 | 26 | AC   | 8  | 9  |
| 59553 | 6 | 1652285 | 1652300 | 2 | 8  | 16 | TC   | 16 | 4  |
| 59554 | 6 | 1652461 | 1652494 | 2 | 17 | 34 | AC   | 15 | 7  |
| 59557 | 6 | 1664906 | 1664937 | 2 | 16 | 32 | CA   | 6  | 9  |
| 59559 | 6 | 1681861 | 1681878 | 2 | 9  | 18 | AC   | 9  | 5  |
| 59562 | 6 | 1687292 | 1687318 | 3 | 9  | 27 | CCT  | 7  | 4  |
| 59567 | 6 | 1701251 | 1701266 | 2 | 8  | 16 | CT   | 20 | 7  |
| 59569 | 6 | 1703690 | 1703703 | 2 | 7  | 14 | TG   | 10 | 5  |
| 59571 | 6 | 1712947 | 1712985 | 3 | 13 | 39 | TCC  | 12 | 5  |
| 59573 | 6 | 1716453 | 1716464 | 2 | 6  | 12 | AT   | 28 | 6  |
| 59579 | 6 | 1722621 | 1722634 | 2 | 7  | 14 | CA   | 30 | 3  |
| 59580 | 6 | 1728637 | 1728652 | 4 | 4  | 16 | ATTT | 21 | 9  |
| 59583 | 6 | 1735562 | 1735575 | 2 | 7  | 14 | TA   | 24 | 4  |
| 59589 | 6 | 1739665 | 1739676 | 2 | 6  | 12 | TG   | 34 | 4  |
| 59591 | 6 | 1747983 | 1748010 | 2 | 14 | 28 | AC   | 18 | 16 |
| 59601 | 6 | 1772215 | 1772230 | 2 | 8  | 16 | AC   | 16 | 4  |
| 59604 | 6 | 1776958 | 1776975 | 2 | 9  | 18 | AC   | 21 | 4  |
| 59627 | 6 | 1802957 | 1802972 | 2 | 8  | 16 | TG   | 28 | 3  |
| 59630 | 6 | 1816009 | 1816072 | 2 | 32 | 64 | GA   | 9  | 12 |
| 59633 | 6 | 1817088 | 1817107 | 2 | 10 | 20 | GA   | 9  | 3  |
| 59641 | 6 | 1830221 | 1830250 | 3 | 10 | 30 | ATC  | 30 | 5  |
| 59651 | 6 | 1868297 | 1868323 | 3 | 9  | 27 | AGC  | 20 | 5  |
| 59654 | 6 | 1873206 | 1873223 | 2 | 9  | 18 | GA   | 15 | 4  |
| 59656 | 6 | 1873883 | 1873902 | 2 | 10 | 20 | GA   | 12 | 5  |
| 59658 | 6 | 1873929 | 1873942 | 2 | 7  | 14 | GA   | 14 | 3  |
| 59659 | 6 | 1874070 | 1874083 | 2 | 7  | 14 | AC   | 13 | 9  |
| 59660 | 6 | 1878782 | 1878819 | 2 | 19 | 38 | CA   | 11 | 8  |
| 59665 | 6 | 1887108 | 1887123 | 2 | 8  | 16 | TG   | 21 | 4  |
| 59674 | 6 | 1917755 | 1917794 | 2 | 20 | 40 | GT   | 7  | 9  |
| 59683 | 6 | 1962526 | 1962543 | 2 | 9  | 18 | TG   | 23 | 10 |
| 59687 | 6 | 1966921 | 1966936 | 4 | 4  | 16 | AAAG | 27 | 5  |
| 59689 | 6 | 1970755 | 1970778 | 3 | 8  | 24 | TGT  | 23 | 5  |

|       |   |         |         |   |    |    |      |    |    |
|-------|---|---------|---------|---|----|----|------|----|----|
| 59691 | 6 | 1972242 | 1972253 | 2 | 6  | 12 | AT   | 28 | 4  |
| 59694 | 6 | 1976356 | 1976375 | 4 | 5  | 20 | ATTT | 18 | 7  |
| 59704 | 6 | 1995030 | 1995049 | 4 | 5  | 20 | TTCT | 13 | 3  |
| 59707 | 6 | 1996217 | 1996272 | 4 | 14 | 56 | GAAA | 10 | 8  |
| 59709 | 6 | 2001389 | 2001418 | 3 | 10 | 30 | ATG  | 22 | 3  |
| 59714 | 6 | 2006887 | 2006900 | 2 | 7  | 14 | AG   | 7  | 6  |
| 59723 | 6 | 2017065 | 2017106 | 2 | 21 | 42 | GT   | 8  | 7  |
| 59725 | 6 | 2017173 | 2017194 | 2 | 11 | 22 | GA   | 11 | 7  |
| 59727 | 6 | 2017916 | 2017933 | 3 | 6  | 18 | AAG  | 25 | 5  |
| 59730 | 6 | 2021320 | 2021346 | 3 | 9  | 27 | TCT  | 21 | 5  |
| 59739 | 6 | 2052302 | 2052313 | 2 | 6  | 12 | TG   | 22 | 4  |
| 59741 | 6 | 2062281 | 2062296 | 2 | 8  | 16 | GA   | 26 | 3  |
| 59748 | 6 | 2084998 | 2085017 | 2 | 10 | 20 | TG   | 19 | 5  |
| 59750 | 6 | 2087975 | 2088018 | 2 | 22 | 44 | AC   | 9  | 11 |
| 59757 | 6 | 2098572 | 2098589 | 2 | 9  | 18 | GT   | 23 | 5  |
| 59759 | 6 | 2102794 | 2102811 | 3 | 6  | 18 | TTC  | 12 | 10 |
| 59768 | 6 | 2141052 | 2141067 | 4 | 4  | 16 | CCTG | 23 | 3  |
| 59769 | 6 | 2141240 | 2141253 | 2 | 7  | 14 | TG   | 30 | 3  |
| 59771 | 6 | 2146059 | 2146082 | 2 | 12 | 24 | TG   | 7  | 8  |
| 59776 | 6 | 2155801 | 2155816 | 2 | 8  | 16 | TG   | 23 | 13 |
| 59779 | 6 | 2158782 | 2158797 | 2 | 8  | 16 | CA   | 31 | 3  |
| 59782 | 6 | 2163902 | 2163921 | 2 | 10 | 20 | TG   | 31 | 7  |
| 59785 | 6 | 2178238 | 2178253 | 2 | 8  | 16 | TG   | 26 | 4  |
| 59787 | 6 | 2212157 | 2212168 | 2 | 6  | 12 | GT   | 28 | 3  |
| 59795 | 6 | 2236377 | 2236418 | 2 | 21 | 42 | AC   | 6  | 6  |
| 59800 | 6 | 2247818 | 2247835 | 3 | 6  | 18 | AGC  | 26 | 5  |
| 59803 | 6 | 2253154 | 2253167 | 2 | 7  | 14 | AT   | 14 | 4  |
| 59815 | 6 | 2264804 | 2264823 | 2 | 10 | 20 | AC   | 20 | 5  |
| 59816 | 6 | 2266113 | 2266124 | 2 | 6  | 12 | CA   | 15 | 6  |
| 59817 | 6 | 2266362 | 2266377 | 2 | 8  | 16 | GT   | 27 | 3  |
| 59820 | 6 | 2268838 | 2268877 | 4 | 10 | 40 | TGTA | 16 | 9  |
| 59832 | 6 | 2286212 | 2286227 | 2 | 8  | 16 | GA   | 7  | 3  |
| 59836 | 6 | 2292696 | 2292723 | 4 | 7  | 28 | TCCA | 22 | 5  |
| 59841 | 6 | 2318232 | 2318249 | 2 | 9  | 18 | TG   | 10 | 6  |
| 59842 | 6 | 2318252 | 2318263 | 2 | 6  | 12 | TG   | 12 | 7  |
| 59844 | 6 | 2327209 | 2327241 | 3 | 11 | 33 | ATT  | 8  | 5  |
| 59851 | 6 | 2342766 | 2342777 | 2 | 6  | 12 | CA   | 31 | 3  |
| 59852 | 6 | 2344153 | 2344180 | 2 | 14 | 28 | AC   | 6  | 9  |
| 59853 | 6 | 2345089 | 2345106 | 2 | 9  | 18 | CA   | 18 | 11 |
| 59855 | 6 | 2345631 | 2345668 | 2 | 19 | 38 | GT   | 15 | 11 |
| 59857 | 6 | 2347216 | 2347231 | 2 | 8  | 16 | CA   | 20 | 9  |
| 59858 | 6 | 2347441 | 2347468 | 4 | 7  | 28 | TTCT | 12 | 9  |
| 59862 | 6 | 2348839 | 2348854 | 2 | 8  | 16 | GT   | 19 | 3  |
| 59881 | 6 | 2387093 | 2387108 | 4 | 4  | 16 | TGTC | 27 | 4  |
| 59886 | 6 | 2400096 | 2400139 | 2 | 22 | 44 | TG   | 17 | 10 |
| 59888 | 6 | 2401021 | 2401041 | 3 | 7  | 21 | CCT  | 18 | 4  |
| 59890 | 6 | 2402137 | 2402180 | 4 | 11 | 44 | ATCT | 17 | 15 |
| 59892 | 6 | 2403161 | 2403178 | 3 | 6  | 18 | GCA  | 31 | 3  |
| 59902 | 6 | 2422053 | 2422067 | 3 | 5  | 15 | CCT  | 30 | 3  |
| 59904 | 6 | 2425298 | 2425309 | 2 | 6  | 12 | CA   | 14 | 6  |
| 59910 | 6 | 2437783 | 2437796 | 2 | 7  | 14 | TA   | 17 | 3  |

|       |   |         |         |   |    |    |      |    |    |
|-------|---|---------|---------|---|----|----|------|----|----|
| 59924 | 6 | 2495665 | 2495692 | 2 | 14 | 28 | TG   | 12 | 9  |
| 59925 | 6 | 2496448 | 2496461 | 2 | 7  | 14 | TC   | 19 | 3  |
| 59926 | 6 | 2499218 | 2499241 | 4 | 6  | 24 | TTTA | 20 | 3  |
| 59929 | 6 | 2505896 | 2505931 | 2 | 18 | 36 | GT   | 22 | 12 |
| 59932 | 6 | 2508647 | 2508662 | 4 | 4  | 16 | GTCT | 28 | 3  |
| 59935 | 6 | 2524485 | 2524506 | 2 | 11 | 22 | TC   | 24 | 7  |
| 59944 | 6 | 2545977 | 2545988 | 2 | 6  | 12 | AC   | 18 | 3  |
| 59946 | 6 | 2556653 | 2556666 | 2 | 7  | 14 | CA   | 27 | 3  |
| 59947 | 6 | 2561911 | 2561936 | 2 | 13 | 26 | AG   | 20 | 8  |
| 59948 | 6 | 2563606 | 2563623 | 2 | 9  | 18 | TC   | 25 | 6  |
| 59950 | 6 | 2565940 | 2565959 | 4 | 5  | 20 | ATAA | 20 | 4  |
| 59953 | 6 | 2585730 | 2585744 | 3 | 5  | 15 | GCT  | 29 | 3  |
| 59962 | 6 | 2603536 | 2603550 | 3 | 5  | 15 | GAA  | 14 | 6  |
| 59965 | 6 | 2606017 | 2606028 | 2 | 6  | 12 | GT   | 19 | 3  |
| 59969 | 6 | 2612230 | 2612247 | 2 | 9  | 18 | GA   | 15 | 3  |
| 59970 | 6 | 2612470 | 2612495 | 2 | 13 | 26 | AG   | 8  | 6  |
| 59973 | 6 | 2612944 | 2612955 | 2 | 6  | 12 | AT   | 13 | 4  |
| 59974 | 6 | 2613148 | 2613171 | 2 | 12 | 24 | CA   | 15 | 10 |
| 59986 | 6 | 2626475 | 2626490 | 4 | 4  | 16 | TTAT | 23 | 4  |
| 59995 | 6 | 2638913 | 2638928 | 2 | 8  | 16 | TG   | 14 | 8  |
| 59996 | 6 | 2639181 | 2639196 | 2 | 8  | 16 | TG   | 19 | 6  |
| 59998 | 6 | 2645624 | 2645639 | 4 | 4  | 16 | ATGG | 10 | 6  |
| 60002 | 6 | 2657091 | 2657112 | 2 | 11 | 22 | CA   | 13 | 5  |
| 60003 | 6 | 2657228 | 2657255 | 2 | 14 | 28 | AC   | 18 | 12 |
| 60006 | 6 | 2660032 | 2660073 | 3 | 14 | 42 | GAA  | 21 | 10 |
| 60007 | 6 | 2660387 | 2660401 | 3 | 5  | 15 | CGG  | 30 | 3  |
| 60010 | 6 | 2662916 | 2662961 | 2 | 23 | 46 | AC   | 10 | 9  |
| 60023 | 6 | 2671022 | 2671057 | 2 | 18 | 36 | CA   | 8  | 10 |
| 60025 | 6 | 2671533 | 2671544 | 2 | 6  | 12 | TG   | 10 | 4  |
| 60026 | 6 | 2671546 | 2671561 | 2 | 8  | 16 | GT   | 11 | 3  |
| 60035 | 6 | 2682078 | 2682095 | 2 | 9  | 18 | AC   | 27 | 6  |
| 60043 | 6 | 2700280 | 2700291 | 2 | 6  | 12 | TA   | 27 | 3  |
| 60046 | 6 | 2702480 | 2702499 | 2 | 10 | 20 | AC   | 15 | 4  |
| 60053 | 6 | 2726370 | 2726395 | 2 | 13 | 26 | CA   | 14 | 11 |
| 60068 | 6 | 2755419 | 2755444 | 2 | 13 | 26 | GT   | 10 | 7  |
| 60083 | 6 | 2787451 | 2787466 | 2 | 8  | 16 | GT   | 10 | 12 |
| 60086 | 6 | 2794762 | 2794773 | 2 | 6  | 12 | AC   | 31 | 7  |
| 60089 | 6 | 2805364 | 2805409 | 2 | 23 | 46 | TG   | 8  | 9  |
| 60094 | 6 | 2818065 | 2818088 | 2 | 12 | 24 | AC   | 22 | 12 |
| 60096 | 6 | 2823905 | 2823922 | 2 | 9  | 18 | GA   | 15 | 5  |
| 60098 | 6 | 2825184 | 2825205 | 2 | 11 | 22 | CA   | 15 | 8  |
| 60100 | 6 | 2825367 | 2825388 | 2 | 11 | 22 | TG   | 18 | 8  |
| 60102 | 6 | 2829194 | 2829214 | 3 | 7  | 21 | CAA  | 20 | 8  |
| 60121 | 6 | 2845201 | 2845220 | 2 | 10 | 20 | CA   | 20 | 10 |
| 60122 | 6 | 2845222 | 2845237 | 2 | 8  | 16 | AC   | 13 | 9  |
| 60124 | 6 | 2845665 | 2845688 | 2 | 12 | 24 | TG   | 23 | 9  |
| 60126 | 6 | 2846679 | 2846696 | 3 | 6  | 18 | CTG  | 24 | 3  |
| 60128 | 6 | 2846777 | 2846794 | 3 | 6  | 18 | ACA  | 20 | 8  |
| 60131 | 6 | 2851241 | 2851270 | 2 | 15 | 30 | TG   | 17 | 11 |
| 60136 | 6 | 2855292 | 2855315 | 2 | 12 | 24 | CT   | 18 | 13 |
| 60138 | 6 | 2856832 | 2856853 | 2 | 11 | 22 | CA   | 26 | 11 |



|       |   |         |         |   |    |    |      |    |    |
|-------|---|---------|---------|---|----|----|------|----|----|
| 60140 | 6 | 2858387 | 2858410 | 4 | 6  | 24 | ATCC | 21 | 3  |
| 60141 | 6 | 2858548 | 2858563 | 2 | 8  | 16 | GT   | 23 | 6  |
| 60142 | 6 | 2862158 | 2862179 | 2 | 11 | 22 | AC   | 18 | 9  |
| 60143 | 6 | 2862200 | 2862229 | 3 | 10 | 30 | CCT  | 19 | 5  |
| 60144 | 6 | 2868717 | 2868744 | 2 | 14 | 28 | TC   | 13 | 4  |
| 60147 | 6 | 2870824 | 2870879 | 4 | 14 | 56 | ATCT | 16 | 12 |
| 60149 | 6 | 2872586 | 2872600 | 3 | 5  | 15 | CCT  | 14 | 5  |
| 60153 | 6 | 2884175 | 2884195 | 3 | 7  | 21 | GCA  | 26 | 3  |
| 60156 | 6 | 2889293 | 2889326 | 2 | 17 | 34 | TG   | 17 | 13 |
| 60157 | 6 | 2889525 | 2889540 | 2 | 8  | 16 | GT   | 18 | 10 |
| 60163 | 6 | 2917284 | 2917307 | 2 | 12 | 24 | AG   | 19 | 7  |
| 60164 | 6 | 2917647 | 2917666 | 2 | 10 | 20 | GT   | 17 | 8  |
| 60167 | 6 | 2938879 | 2938894 | 2 | 8  | 16 | AC   | 20 | 12 |
| 60172 | 6 | 2964055 | 2964070 | 2 | 8  | 16 | TG   | 25 | 15 |
| 60183 | 6 | 2991437 | 2991448 | 2 | 6  | 12 | CA   | 15 | 5  |
| 60184 | 6 | 2991451 | 2991462 | 2 | 6  | 12 | CA   | 22 | 6  |
| 60188 | 6 | 2996749 | 2996762 | 2 | 7  | 14 | CA   | 11 | 10 |
| 60219 | 6 | 3073411 | 3073425 | 3 | 5  | 15 | TTG  | 7  | 5  |
| 60235 | 6 | 3103087 | 3103101 | 3 | 5  | 15 | GCA  | 9  | 4  |
| 60238 | 6 | 3104024 | 3104038 | 3 | 5  | 15 | TAT  | 18 | 4  |
| 60244 | 6 | 3119942 | 3119971 | 2 | 15 | 30 | TG   | 12 | 9  |
| 60247 | 6 | 3124295 | 3124310 | 4 | 4  | 16 | CAGG | 29 | 3  |
| 60248 | 6 | 3131267 | 3131278 | 2 | 6  | 12 | TG   | 16 | 3  |
| 60255 | 6 | 3138239 | 3138258 | 2 | 10 | 20 | TG   | 16 | 5  |
| 60263 | 6 | 3144437 | 3144458 | 2 | 11 | 22 | TG   | 21 | 3  |
| 60278 | 6 | 3167407 | 3167418 | 2 | 6  | 12 | CA   | 20 | 3  |
| 60281 | 6 | 3168732 | 3168749 | 2 | 9  | 18 | AG   | 8  | 6  |
| 60283 | 6 | 3174971 | 3174982 | 2 | 6  | 12 | AC   | 14 | 3  |
| 60285 | 6 | 3179948 | 3179977 | 2 | 15 | 30 | GT   | 13 | 8  |
| 60301 | 6 | 3220803 | 3220826 | 2 | 12 | 24 | CA   | 15 | 11 |
| 60302 | 6 | 3223484 | 3223498 | 3 | 5  | 15 | CTA  | 21 | 3  |
| 60307 | 6 | 3241985 | 3242018 | 2 | 17 | 34 | TG   | 13 | 10 |
| 60308 | 6 | 3242570 | 3242590 | 3 | 7  | 21 | GGT  | 11 | 5  |
| 60310 | 6 | 3243476 | 3243493 | 2 | 9  | 18 | AC   | 22 | 10 |
| 60312 | 6 | 3248039 | 3248056 | 2 | 9  | 18 | AC   | 20 | 9  |
| 60325 | 6 | 3273831 | 3273856 | 2 | 13 | 26 | AC   | 14 | 10 |
| 60326 | 6 | 3278392 | 3278407 | 2 | 8  | 16 | CA   | 21 | 5  |
| 60328 | 6 | 3278714 | 3278725 | 2 | 6  | 12 | GT   | 24 | 8  |
| 60332 | 6 | 3314540 | 3314561 | 2 | 11 | 22 | AC   | 14 | 5  |
| 60338 | 6 | 3322214 | 3322233 | 2 | 10 | 20 | GT   | 18 | 4  |
| 60339 | 6 | 3323658 | 3323679 | 2 | 11 | 22 | AG   | 13 | 6  |
| 60340 | 6 | 3323745 | 3323760 | 4 | 4  | 16 | TTTA | 18 | 6  |
| 60341 | 6 | 3324057 | 3324076 | 2 | 10 | 20 | TA   | 10 | 5  |
| 60344 | 6 | 3326109 | 3326134 | 2 | 13 | 26 | GT   | 8  | 8  |
| 60346 | 6 | 3327702 | 3327713 | 2 | 6  | 12 | GT   | 20 | 7  |
| 60347 | 6 | 3330141 | 3330166 | 2 | 13 | 26 | GT   | 22 | 11 |
| 60352 | 6 | 3340345 | 3340356 | 2 | 6  | 12 | AT   | 12 | 4  |
| 60357 | 6 | 3343010 | 3343025 | 2 | 8  | 16 | GA   | 9  | 5  |
| 60365 | 6 | 3354843 | 3354860 | 2 | 9  | 18 | GT   | 17 | 7  |
| 60367 | 6 | 3355583 | 3355626 | 2 | 22 | 44 | GT   | 6  | 9  |
| 60371 | 6 | 3364144 | 3364161 | 2 | 9  | 18 | TC   | 7  | 4  |

|       |   |         |         |   |    |    |      |    |    |
|-------|---|---------|---------|---|----|----|------|----|----|
| 60380 | 6 | 3425532 | 3425546 | 3 | 5  | 15 | TTA  | 22 | 8  |
| 60386 | 6 | 3433088 | 3433105 | 2 | 9  | 18 | TG   | 22 | 10 |
| 60389 | 6 | 3434727 | 3434742 | 4 | 4  | 16 | AAAT | 23 | 9  |
| 60390 | 6 | 3435878 | 3435891 | 2 | 7  | 14 | AT   | 14 | 3  |
| 60391 | 6 | 3437296 | 3437317 | 2 | 11 | 22 | CT   | 10 | 6  |
| 60392 | 6 | 3437534 | 3437545 | 2 | 6  | 12 | CA   | 12 | 5  |
| 60393 | 6 | 3437548 | 3437559 | 2 | 6  | 12 | CA   | 13 | 6  |
| 60394 | 6 | 3438391 | 3438404 | 2 | 7  | 14 | GT   | 17 | 5  |
| 60396 | 6 | 3442601 | 3442622 | 2 | 11 | 22 | AC   | 11 | 4  |
| 60400 | 6 | 3446415 | 3446428 | 2 | 7  | 14 | AT   | 18 | 3  |
| 60402 | 6 | 3448139 | 3448168 | 3 | 10 | 30 | CTC  | 15 | 5  |
| 60405 | 6 | 3450852 | 3450867 | 2 | 8  | 16 | TG   | 17 | 8  |
| 60409 | 6 | 3452418 | 3452431 | 2 | 7  | 14 | TG   | 13 | 3  |
| 60413 | 6 | 3455642 | 3455665 | 2 | 12 | 24 | CA   | 20 | 16 |
| 60416 | 6 | 3459655 | 3459684 | 2 | 15 | 30 | TG   | 10 | 8  |
| 60417 | 6 | 3460320 | 3460337 | 2 | 9  | 18 | TC   | 17 | 5  |
| 60419 | 6 | 3463967 | 3463990 | 2 | 12 | 24 | CT   | 10 | 5  |
| 60423 | 6 | 3481938 | 3481949 | 2 | 6  | 12 | CA   | 12 | 11 |
| 60424 | 6 | 3481952 | 3481969 | 2 | 9  | 18 | CA   | 14 | 11 |
| 60425 | 6 | 3482921 | 3482940 | 2 | 10 | 20 | CA   | 24 | 4  |
| 60442 | 6 | 3510619 | 3510638 | 2 | 10 | 20 | TG   | 12 | 3  |
| 60446 | 6 | 3513409 | 3513438 | 2 | 15 | 30 | CA   | 15 | 7  |
| 60451 | 6 | 3518929 | 3518944 | 2 | 8  | 16 | CA   | 28 | 8  |
| 60453 | 6 | 3525444 | 3525455 | 2 | 6  | 12 | GT   | 14 | 3  |
| 60454 | 6 | 3525780 | 3525791 | 2 | 6  | 12 | AC   | 27 | 5  |
| 60456 | 6 | 3532546 | 3532561 | 2 | 8  | 16 | AC   | 23 | 6  |
| 60457 | 6 | 3532596 | 3532611 | 2 | 8  | 16 | AC   | 15 | 6  |
| 60458 | 6 | 3534594 | 3534611 | 2 | 9  | 18 | CA   | 15 | 6  |
| 60466 | 6 | 3563061 | 3563092 | 2 | 16 | 32 | CA   | 6  | 5  |
| 60469 | 6 | 3564846 | 3564877 | 2 | 16 | 32 | CA   | 12 | 7  |
| 60478 | 6 | 3597167 | 3597186 | 2 | 10 | 20 | CA   | 18 | 11 |
| 60479 | 6 | 3597431 | 3597450 | 2 | 10 | 20 | GT   | 20 | 6  |
| 60480 | 6 | 3598094 | 3598115 | 2 | 11 | 22 | AC   | 9  | 7  |
| 60481 | 6 | 3607564 | 3607575 | 2 | 6  | 12 | CA   | 23 | 3  |
| 60487 | 6 | 3620931 | 3620944 | 2 | 7  | 14 | CA   | 24 | 5  |
| 60490 | 6 | 3627604 | 3627627 | 2 | 12 | 24 | GT   | 6  | 6  |
| 60500 | 6 | 3635183 | 3635200 | 2 | 9  | 18 | AC   | 16 | 4  |
| 60503 | 6 | 3639366 | 3639389 | 2 | 12 | 24 | AC   | 19 | 10 |
| 60508 | 6 | 3661393 | 3661418 | 2 | 13 | 26 | AG   | 22 | 5  |
| 60515 | 6 | 3694636 | 3694661 | 2 | 13 | 26 | AC   | 11 | 6  |
| 60516 | 6 | 3695269 | 3695298 | 2 | 15 | 30 | GT   | 22 | 14 |
| 60525 | 6 | 3724638 | 3724679 | 2 | 21 | 42 | TG   | 7  | 6  |
| 60532 | 6 | 3735083 | 3735108 | 2 | 13 | 26 | GT   | 23 | 9  |
| 60533 | 6 | 3739676 | 3739701 | 2 | 13 | 26 | GT   | 18 | 6  |
| 60538 | 6 | 3744608 | 3744655 | 2 | 24 | 48 | GT   | 13 | 10 |
| 60539 | 6 | 3746966 | 3746989 | 4 | 6  | 24 | TATC | 14 | 5  |
| 60547 | 6 | 3756854 | 3756867 | 2 | 7  | 14 | AC   | 11 | 3  |
| 60548 | 6 | 3757879 | 3757898 | 2 | 10 | 20 | AC   | 17 | 7  |
| 60554 | 6 | 3761769 | 3761780 | 2 | 6  | 12 | AT   | 13 | 3  |
| 60559 | 6 | 3764031 | 3764044 | 2 | 7  | 14 | TG   | 7  | 7  |
| 60564 | 6 | 3787103 | 3787114 | 2 | 6  | 12 | AC   | 25 | 4  |

|       |   |         |         |   |    |    |      |    |    |
|-------|---|---------|---------|---|----|----|------|----|----|
| 60571 | 6 | 3800073 | 3800086 | 2 | 7  | 14 | TG   | 26 | 3  |
| 60572 | 6 | 3803472 | 3803486 | 3 | 5  | 15 | AAT  | 20 | 4  |
| 60573 | 6 | 3806428 | 3806448 | 3 | 7  | 21 | GGA  | 21 | 12 |
| 60575 | 6 | 3821187 | 3821202 | 2 | 8  | 16 | GA   | 28 | 3  |
| 60578 | 6 | 3828800 | 3828813 | 2 | 7  | 14 | TG   | 23 | 3  |
| 60580 | 6 | 3838314 | 3838325 | 2 | 6  | 12 | CA   | 28 | 5  |
| 60590 | 6 | 3856166 | 3856195 | 2 | 15 | 30 | TG   | 17 | 9  |
| 60595 | 6 | 3864088 | 3864105 | 3 | 6  | 18 | TGT  | 29 | 3  |
| 60597 | 6 | 3878467 | 3878478 | 2 | 6  | 12 | TG   | 29 | 3  |
| 60599 | 6 | 3885573 | 3885604 | 2 | 16 | 32 | TG   | 19 | 11 |
| 60600 | 6 | 3891880 | 3891897 | 3 | 6  | 18 | CAT  | 22 | 3  |
| 60606 | 6 | 3904161 | 3904180 | 2 | 10 | 20 | TG   | 19 | 13 |
| 60608 | 6 | 3911730 | 3911747 | 3 | 6  | 18 | AAG  | 19 | 6  |
| 60611 | 6 | 3916891 | 3916902 | 2 | 6  | 12 | AC   | 17 | 3  |
| 60612 | 6 | 3921429 | 3921444 | 2 | 8  | 16 | AC   | 11 | 4  |
| 60614 | 6 | 3924395 | 3924414 | 4 | 5  | 20 | ACAG | 16 | 5  |
| 60615 | 6 | 3926504 | 3926519 | 2 | 8  | 16 | TG   | 19 | 17 |
| 60616 | 6 | 3926522 | 3926533 | 2 | 6  | 12 | TG   | 23 | 14 |
| 60623 | 6 | 3937545 | 3937562 | 2 | 9  | 18 | GT   | 18 | 9  |
| 60626 | 6 | 3940496 | 3940509 | 2 | 7  | 14 | CT   | 25 | 3  |
| 60629 | 6 | 3946388 | 3946399 | 2 | 6  | 12 | AC   | 6  | 5  |
| 60634 | 6 | 3962490 | 3962523 | 2 | 17 | 34 | CA   | 8  | 11 |
| 60657 | 6 | 4051680 | 4051700 | 3 | 7  | 21 | TAG  | 21 | 4  |
| 60659 | 6 | 4053335 | 4053356 | 2 | 11 | 22 | GT   | 29 | 5  |
| 60670 | 6 | 4085755 | 4085770 | 2 | 8  | 16 | GT   | 21 | 3  |
| 60675 | 6 | 4094387 | 4094406 | 2 | 10 | 20 | TG   | 6  | 6  |
| 60678 | 6 | 4102375 | 4102389 | 3 | 5  | 15 | AAT  | 11 | 6  |
| 60680 | 6 | 4108221 | 4108254 | 2 | 17 | 34 | CA   | 22 | 14 |
| 60685 | 6 | 4125926 | 4125945 | 2 | 10 | 20 | AC   | 11 | 11 |
| 60686 | 6 | 4126206 | 4126229 | 2 | 12 | 24 | CA   | 20 | 10 |
| 60692 | 6 | 4151418 | 4151431 | 2 | 7  | 14 | CA   | 28 | 6  |
| 60697 | 6 | 4163381 | 4163404 | 4 | 6  | 24 | AGAT | 21 | 3  |
| 60701 | 6 | 4170434 | 4170448 | 3 | 5  | 15 | ACC  | 24 | 5  |
| 60705 | 6 | 4177097 | 4177118 | 2 | 11 | 22 | AC   | 19 | 7  |
| 60710 | 6 | 4190559 | 4190570 | 2 | 6  | 12 | AT   | 15 | 4  |
| 60716 | 6 | 4206048 | 4206063 | 2 | 8  | 16 | GT   | 18 | 5  |
| 60718 | 6 | 4221920 | 4221937 | 3 | 6  | 18 | CAG  | 24 | 3  |
| 60719 | 6 | 4224652 | 4224677 | 2 | 13 | 26 | CA   | 11 | 13 |
| 60724 | 6 | 4230909 | 4230932 | 2 | 12 | 24 | CA   | 11 | 6  |
| 60727 | 6 | 4243133 | 4243176 | 2 | 22 | 44 | TG   | 6  | 8  |
| 60731 | 6 | 4253556 | 4253587 | 4 | 8  | 32 | ATGG | 22 | 4  |
| 60734 | 6 | 4258131 | 4258162 | 4 | 8  | 32 | GACA | 23 | 5  |
| 60737 | 6 | 4268438 | 4268459 | 2 | 11 | 22 | AG   | 24 | 3  |
| 60738 | 6 | 4271791 | 4271816 | 2 | 13 | 26 | GT   | 24 | 18 |
| 60741 | 6 | 4283058 | 4283069 | 2 | 6  | 12 | GA   | 30 | 4  |
| 60742 | 6 | 4291454 | 4291505 | 2 | 26 | 52 | GT   | 10 | 11 |
| 60750 | 6 | 4314993 | 4315018 | 2 | 13 | 26 | CA   | 14 | 9  |
| 60751 | 6 | 4317707 | 4317718 | 2 | 6  | 12 | TG   | 28 | 3  |
| 60755 | 6 | 4323736 | 4323777 | 2 | 21 | 42 | AC   | 11 | 15 |
| 60756 | 6 | 4325623 | 4325636 | 2 | 7  | 14 | AC   | 24 | 4  |
| 60757 | 6 | 4329738 | 4329753 | 2 | 8  | 16 | AC   | 19 | 4  |

|       |   |         |         |   |    |    |      |    |    |
|-------|---|---------|---------|---|----|----|------|----|----|
| 60786 | 6 | 4387007 | 4387022 | 2 | 8  | 16 | AG   | 29 | 4  |
| 60789 | 6 | 4390110 | 4390127 | 2 | 9  | 18 | CA   | 18 | 6  |
| 60790 | 6 | 4390361 | 4390378 | 2 | 9  | 18 | AC   | 17 | 6  |
| 60795 | 6 | 4400250 | 4400273 | 2 | 12 | 24 | TG   | 19 | 5  |
| 60797 | 6 | 4402017 | 4402036 | 4 | 5  | 20 | ATTT | 27 | 5  |
| 60798 | 6 | 4403739 | 4403758 | 2 | 10 | 20 | TG   | 13 | 7  |
| 60799 | 6 | 4403831 | 4403850 | 4 | 5  | 20 | TAAA | 21 | 8  |
| 60803 | 6 | 4405181 | 4405202 | 2 | 11 | 22 | GA   | 11 | 6  |
| 60804 | 6 | 4407382 | 4407407 | 2 | 13 | 26 | TG   | 14 | 9  |
| 60805 | 6 | 4407735 | 4407760 | 2 | 13 | 26 | CA   | 19 | 11 |
| 60809 | 6 | 4418701 | 4418726 | 2 | 13 | 26 | AG   | 13 | 5  |
| 60810 | 6 | 4419504 | 4419519 | 4 | 4  | 16 | AAAT | 18 | 3  |
| 60811 | 6 | 4420476 | 4420487 | 2 | 6  | 12 | CA   | 16 | 3  |
| 60812 | 6 | 4421111 | 4421156 | 2 | 23 | 46 | CA   | 7  | 9  |
| 60816 | 6 | 4427908 | 4427928 | 3 | 7  | 21 | CCT  | 24 | 8  |
| 60820 | 6 | 4435593 | 4435608 | 2 | 8  | 16 | TC   | 25 | 3  |
| 60823 | 6 | 4439167 | 4439178 | 2 | 6  | 12 | AC   | 28 | 3  |
| 60824 | 6 | 4439911 | 4439931 | 3 | 7  | 21 | TGC  | 24 | 7  |
| 60830 | 6 | 4455421 | 4455434 | 2 | 7  | 14 | TG   | 27 | 4  |
| 60836 | 6 | 4465167 | 4465188 | 2 | 11 | 22 | CA   | 13 | 3  |
| 60840 | 6 | 4475972 | 4475986 | 3 | 5  | 15 | TGG  | 26 | 6  |
| 60845 | 6 | 4476665 | 4476682 | 2 | 9  | 18 | CA   | 12 | 12 |
| 60848 | 6 | 4477608 | 4477643 | 2 | 18 | 36 | CA   | 6  | 8  |
| 60849 | 6 | 4477708 | 4477719 | 2 | 6  | 12 | AC   | 17 | 3  |
| 60850 | 6 | 4481382 | 4481397 | 2 | 8  | 16 | TG   | 30 | 5  |
| 60852 | 6 | 4483571 | 4483584 | 2 | 7  | 14 | AC   | 28 | 4  |
| 60856 | 6 | 4487257 | 4487286 | 2 | 15 | 30 | CA   | 19 | 8  |
| 60857 | 6 | 4493736 | 4493775 | 4 | 10 | 40 | TCAA | 12 | 11 |
| 60858 | 6 | 4494210 | 4494260 | 3 | 17 | 51 | AGA  | 12 | 12 |
| 60859 | 6 | 4497955 | 4497970 | 2 | 8  | 16 | TG   | 8  | 5  |
| 60864 | 6 | 4509765 | 4509784 | 4 | 5  | 20 | AAAG | 15 | 4  |
| 60865 | 6 | 4516843 | 4516866 | 3 | 8  | 24 | ATA  | 20 | 3  |
| 60879 | 6 | 4526509 | 4526528 | 2 | 10 | 20 | CA   | 19 | 8  |
| 60884 | 6 | 4539071 | 4539086 | 2 | 8  | 16 | CA   | 15 | 3  |
| 60893 | 6 | 4544548 | 4544563 | 2 | 8  | 16 | TG   | 21 | 5  |
| 60894 | 6 | 4544731 | 4544770 | 2 | 20 | 40 | CA   | 15 | 6  |
| 60902 | 6 | 4558269 | 4558280 | 2 | 6  | 12 | TG   | 25 | 3  |
| 60904 | 6 | 4558734 | 4558753 | 2 | 10 | 20 | CA   | 21 | 16 |
| 60908 | 6 | 4562129 | 4562140 | 2 | 6  | 12 | CA   | 20 | 4  |
| 60910 | 6 | 4562653 | 4562670 | 2 | 9  | 18 | AC   | 11 | 5  |
| 60912 | 6 | 4562696 | 4562709 | 2 | 7  | 14 | CA   | 12 | 4  |
| 60913 | 6 | 4567696 | 4567715 | 2 | 10 | 20 | GT   | 7  | 6  |
| 60920 | 6 | 4571488 | 4571499 | 2 | 6  | 12 | GT   | 21 | 3  |
| 60924 | 6 | 4576415 | 4576426 | 2 | 6  | 12 | CA   | 26 | 4  |
| 60925 | 6 | 4578565 | 4578590 | 2 | 13 | 26 | AC   | 12 | 8  |
| 60927 | 6 | 4580382 | 4580397 | 2 | 8  | 16 | CA   | 19 | 5  |
| 60930 | 6 | 4584800 | 4584827 | 2 | 14 | 28 | TG   | 12 | 7  |
| 60931 | 6 | 4584956 | 4585013 | 2 | 29 | 58 | CA   | 8  | 10 |
| 60936 | 6 | 4594971 | 4594986 | 2 | 8  | 16 | AT   | 15 | 10 |
| 60937 | 6 | 4599389 | 4599428 | 2 | 20 | 40 | CA   | 15 | 14 |
| 60940 | 6 | 4608174 | 4608187 | 2 | 7  | 14 | GT   | 27 | 3  |

|       |   |         |         |   |    |    |      |    |    |
|-------|---|---------|---------|---|----|----|------|----|----|
| 60945 | 6 | 4622554 | 4622569 | 2 | 8  | 16 | AC   | 29 | 6  |
| 60951 | 6 | 4644375 | 4644386 | 2 | 6  | 12 | TC   | 19 | 6  |
| 60953 | 6 | 4644587 | 4644610 | 2 | 12 | 24 | TC   | 15 | 7  |
| 60958 | 6 | 4659223 | 4659242 | 2 | 10 | 20 | CA   | 19 | 10 |
| 60965 | 6 | 4676371 | 4676382 | 2 | 6  | 12 | GT   | 26 | 3  |
| 60978 | 6 | 4700059 | 4700079 | 3 | 7  | 21 | CCT  | 23 | 4  |
| 60985 | 6 | 4703281 | 4703295 | 3 | 5  | 15 | AAC  | 15 | 4  |
| 60996 | 6 | 4714431 | 4714444 | 2 | 7  | 14 | AC   | 21 | 4  |
| 60997 | 6 | 4715187 | 4715210 | 2 | 12 | 24 | TG   | 20 | 9  |
| 60999 | 6 | 4717032 | 4717046 | 3 | 5  | 15 | TGC  | 25 | 6  |
| 61001 | 6 | 4724931 | 4724958 | 2 | 14 | 28 | TG   | 14 | 12 |
| 61003 | 6 | 4725415 | 4725435 | 3 | 7  | 21 | TCT  | 17 | 5  |
| 61008 | 6 | 4731103 | 4731128 | 2 | 13 | 26 | AG   | 21 | 6  |
| 61011 | 6 | 4732496 | 4732509 | 2 | 7  | 14 | AC   | 24 | 4  |
| 61013 | 6 | 4736207 | 4736232 | 2 | 13 | 26 | AG   | 8  | 10 |
| 61015 | 6 | 4737483 | 4737496 | 2 | 7  | 14 | TC   | 22 | 7  |
| 61016 | 6 | 4737637 | 4737662 | 2 | 13 | 26 | AC   | 10 | 10 |
| 61017 | 6 | 4742547 | 4742574 | 2 | 14 | 28 | AC   | 13 | 5  |
| 61019 | 6 | 4746193 | 4746204 | 2 | 6  | 12 | AC   | 22 | 6  |
| 61020 | 6 | 4746206 | 4746219 | 2 | 7  | 14 | CA   | 28 | 8  |
| 61021 | 6 | 4746370 | 4746383 | 2 | 7  | 14 | GT   | 24 | 3  |
| 61023 | 6 | 4746852 | 4746871 | 2 | 10 | 20 | AC   | 19 | 8  |
| 61026 | 6 | 4747600 | 4747623 | 2 | 12 | 24 | GT   | 7  | 8  |
| 61028 | 6 | 4749919 | 4749932 | 2 | 7  | 14 | TG   | 23 | 4  |
| 61032 | 6 | 4770096 | 4770113 | 2 | 9  | 18 | AC   | 27 | 4  |
| 61037 | 6 | 4774016 | 4774041 | 2 | 13 | 26 | TG   | 19 | 9  |
| 61038 | 6 | 4774741 | 4774752 | 2 | 6  | 12 | TA   | 9  | 3  |
| 61039 | 6 | 4777297 | 4777334 | 2 | 19 | 38 | TG   | 11 | 9  |
| 61040 | 6 | 4778028 | 4778045 | 2 | 9  | 18 | GT   | 15 | 3  |
| 61048 | 6 | 4785777 | 4785802 | 2 | 13 | 26 | AC   | 20 | 13 |
| 61050 | 6 | 4785963 | 4785980 | 3 | 6  | 18 | GCT  | 10 | 4  |
| 61052 | 6 | 4786314 | 4786329 | 2 | 8  | 16 | AC   | 20 | 3  |
| 61055 | 6 | 4786890 | 4786903 | 2 | 7  | 14 | GA   | 16 | 7  |
| 61057 | 6 | 4787304 | 4787327 | 4 | 6  | 24 | TATT | 18 | 3  |
| 61059 | 6 | 4787632 | 4787645 | 2 | 7  | 14 | AC   | 8  | 3  |
| 61066 | 6 | 4807083 | 4807104 | 2 | 11 | 22 | CA   | 27 | 5  |
| 61068 | 6 | 4808189 | 4808200 | 2 | 6  | 12 | AT   | 16 | 7  |
| 61070 | 6 | 4814130 | 4814147 | 3 | 6  | 18 | TTA  | 24 | 3  |
| 61078 | 6 | 4869094 | 4869107 | 2 | 7  | 14 | TG   | 24 | 3  |
| 61088 | 6 | 4890801 | 4890812 | 2 | 6  | 12 | TG   | 23 | 8  |
| 61089 | 6 | 4890814 | 4890825 | 2 | 6  | 12 | GT   | 23 | 8  |
| 61090 | 6 | 4891028 | 4891039 | 2 | 6  | 12 | GT   | 7  | 3  |
| 61091 | 6 | 4892950 | 4892967 | 3 | 6  | 18 | CTC  | 23 | 3  |
| 61093 | 6 | 4894725 | 4894762 | 2 | 19 | 38 | TG   | 6  | 10 |
| 61095 | 6 | 4897157 | 4897174 | 3 | 6  | 18 | TTG  | 24 | 3  |
| 61097 | 6 | 4897809 | 4897826 | 2 | 9  | 18 | CA   | 20 | 10 |
| 61100 | 6 | 4899268 | 4899287 | 4 | 5  | 20 | TGAT | 30 | 3  |
| 61103 | 6 | 4900940 | 4900961 | 2 | 11 | 22 | CA   | 26 | 22 |
| 61104 | 6 | 4901444 | 4901455 | 2 | 6  | 12 | TA   | 26 | 4  |
| 61106 | 6 | 4903813 | 4903838 | 2 | 13 | 26 | CA   | 9  | 7  |
| 61108 | 6 | 4908077 | 4908094 | 2 | 9  | 18 | TG   | 17 | 10 |

|       |   |         |         |   |    |    |      |    |    |
|-------|---|---------|---------|---|----|----|------|----|----|
| 61111 | 6 | 4911929 | 4911944 | 4 | 4  | 16 | TCTT | 16 | 6  |
| 61114 | 6 | 4918041 | 4918056 | 2 | 8  | 16 | AC   | 19 | 12 |
| 61116 | 6 | 4918394 | 4918419 | 2 | 13 | 26 | TG   | 21 | 15 |
| 61120 | 6 | 4919079 | 4919090 | 2 | 6  | 12 | AT   | 6  | 3  |
| 61126 | 6 | 4920618 | 4920651 | 2 | 17 | 34 | CT   | 10 | 8  |
| 61127 | 6 | 4920685 | 4920712 | 2 | 14 | 28 | TG   | 17 | 10 |
| 61129 | 6 | 4921365 | 4921382 | 3 | 6  | 18 | GCT  | 26 | 5  |
| 61130 | 6 | 4921573 | 4921608 | 3 | 12 | 36 | TCC  | 23 | 6  |
| 61137 | 6 | 4928033 | 4928046 | 2 | 7  | 14 | CT   | 23 | 5  |
| 61139 | 6 | 4937769 | 4937784 | 2 | 8  | 16 | TG   | 20 | 8  |
| 61141 | 6 | 4938453 | 4938474 | 2 | 11 | 22 | TG   | 8  | 11 |
| 61142 | 6 | 4940928 | 4940941 | 2 | 7  | 14 | TC   | 27 | 3  |
| 61145 | 6 | 4945006 | 4945029 | 2 | 12 | 24 | GT   | 20 | 7  |
| 61146 | 6 | 4945161 | 4945198 | 2 | 19 | 38 | CA   | 14 | 8  |
| 61148 | 6 | 4951841 | 4951868 | 2 | 14 | 28 | TG   | 7  | 9  |
| 61149 | 6 | 4952080 | 4952101 | 2 | 11 | 22 | AC   | 18 | 7  |
| 61150 | 6 | 4952271 | 4952282 | 2 | 6  | 12 | GT   | 20 | 7  |
| 61151 | 6 | 4952418 | 4952431 | 2 | 7  | 14 | AC   | 28 | 4  |
| 61157 | 6 | 4971009 | 4971028 | 2 | 10 | 20 | TG   | 13 | 6  |
| 61161 | 6 | 4972182 | 4972195 | 2 | 7  | 14 | GT   | 25 | 3  |
| 61167 | 6 | 4984706 | 4984725 | 2 | 10 | 20 | TG   | 25 | 5  |
| 61168 | 6 | 4984875 | 4984892 | 2 | 9  | 18 | GT   | 19 | 8  |
| 61169 | 6 | 4985112 | 4985127 | 2 | 8  | 16 | GT   | 20 | 11 |
| 61172 | 6 | 4987690 | 4987707 | 2 | 9  | 18 | TG   | 9  | 9  |
| 61181 | 6 | 5005155 | 5005170 | 2 | 8  | 16 | CA   | 12 | 8  |
| 61182 | 6 | 5005368 | 5005395 | 2 | 14 | 28 | CA   | 6  | 4  |
| 61195 | 6 | 5024262 | 5024289 | 2 | 14 | 28 | AC   | 13 | 10 |
| 61201 | 6 | 5031717 | 5031732 | 4 | 4  | 16 | TGAA | 32 | 5  |
| 61203 | 6 | 5034502 | 5034515 | 2 | 7  | 14 | TG   | 29 | 4  |
| 61206 | 6 | 5039170 | 5039193 | 3 | 8  | 24 | TTG  | 23 | 9  |
| 61207 | 6 | 5044066 | 5044099 | 2 | 17 | 34 | AC   | 8  | 7  |
| 61211 | 6 | 5049414 | 5049434 | 3 | 7  | 21 | TCC  | 22 | 3  |
| 61212 | 6 | 5053005 | 5053020 | 2 | 8  | 16 | GT   | 7  | 6  |
| 61213 | 6 | 5053022 | 5053039 | 2 | 9  | 18 | TG   | 13 | 7  |
| 61214 | 6 | 5053189 | 5053200 | 2 | 6  | 12 | AT   | 16 | 4  |
| 61221 | 6 | 5067540 | 5067551 | 2 | 6  | 12 | AC   | 14 | 4  |
| 61224 | 6 | 5069247 | 5069268 | 2 | 11 | 22 | AC   | 12 | 3  |
| 61226 | 6 | 5070985 | 5071028 | 2 | 22 | 44 | TG   | 18 | 13 |
| 61227 | 6 | 5071125 | 5071144 | 2 | 10 | 20 | AC   | 22 | 6  |
| 61230 | 6 | 5072503 | 5072526 | 3 | 8  | 24 | AAT  | 18 | 3  |
| 61236 | 6 | 5090975 | 5090992 | 3 | 6  | 18 | AAT  | 14 | 9  |
| 61237 | 6 | 5091096 | 5091119 | 2 | 12 | 24 | AC   | 15 | 11 |
| 61238 | 6 | 5091237 | 5091254 | 3 | 6  | 18 | GGA  | 10 | 7  |
| 61254 | 6 | 5121802 | 5121829 | 2 | 14 | 28 | TG   | 14 | 8  |
| 61260 | 6 | 5129113 | 5129148 | 2 | 18 | 36 | TG   | 7  | 9  |
| 61264 | 6 | 5131563 | 5131610 | 2 | 24 | 48 | GT   | 12 | 16 |
| 61265 | 6 | 5131732 | 5131749 | 2 | 9  | 18 | TC   | 13 | 4  |
| 61267 | 6 | 5143654 | 5143669 | 2 | 8  | 16 | AC   | 23 | 3  |
| 61270 | 6 | 5145709 | 5145735 | 3 | 9  | 27 | CTC  | 19 | 3  |
| 61271 | 6 | 5145890 | 5145901 | 2 | 6  | 12 | TG   | 15 | 5  |
| 61272 | 6 | 5153424 | 5153441 | 3 | 6  | 18 | GCA  | 22 | 7  |

|       |   |         |         |   |    |    |      |    |    |
|-------|---|---------|---------|---|----|----|------|----|----|
| 61277 | 6 | 5163406 | 5163423 | 3 | 6  | 18 | GGA  | 31 | 3  |
| 61279 | 6 | 5166670 | 5166689 | 2 | 10 | 20 | AC   | 15 | 12 |
| 61281 | 6 | 5167594 | 5167619 | 2 | 13 | 26 | TG   | 25 | 13 |
| 61284 | 6 | 5174921 | 5174938 | 2 | 9  | 18 | GT   | 9  | 6  |
| 61285 | 6 | 5176710 | 5176737 | 2 | 14 | 28 | CA   | 23 | 7  |
| 61286 | 6 | 5177331 | 5177350 | 2 | 10 | 20 | CA   | 19 | 13 |
| 61288 | 6 | 5182843 | 5182854 | 2 | 6  | 12 | AG   | 11 | 11 |
| 61290 | 6 | 5186365 | 5186388 | 3 | 8  | 24 | CTC  | 22 | 8  |
| 61292 | 6 | 5189779 | 5189810 | 2 | 16 | 32 | CA   | 16 | 7  |
| 61306 | 6 | 5198134 | 5198149 | 2 | 8  | 16 | CT   | 15 | 6  |
| 61309 | 6 | 5204876 | 5204901 | 2 | 13 | 26 | TG   | 17 | 12 |
| 61310 | 6 | 5206301 | 5206326 | 2 | 13 | 26 | GT   | 12 | 8  |
| 61311 | 6 | 5209297 | 5209316 | 2 | 10 | 20 | GT   | 19 | 4  |
| 61313 | 6 | 5214163 | 5214190 | 2 | 14 | 28 | AC   | 10 | 6  |
| 61318 | 6 | 5218375 | 5218400 | 2 | 13 | 26 | TC   | 11 | 11 |
| 61320 | 6 | 5218523 | 5218538 | 2 | 8  | 16 | CT   | 20 | 6  |
| 61321 | 6 | 5225192 | 5225223 | 4 | 8  | 32 | TCTG | 25 | 12 |
| 61326 | 6 | 5238846 | 5238867 | 2 | 11 | 22 | AC   | 12 | 9  |
| 61330 | 6 | 5252385 | 5252400 | 2 | 8  | 16 | CA   | 13 | 7  |
| 61334 | 6 | 5256172 | 5256195 | 2 | 12 | 24 | TG   | 12 | 11 |
| 61339 | 6 | 5279135 | 5279150 | 2 | 8  | 16 | TG   | 24 | 5  |
| 61341 | 6 | 5282530 | 5282553 | 2 | 12 | 24 | GT   | 12 | 15 |
| 61343 | 6 | 5292254 | 5292268 | 3 | 5  | 15 | GAG  | 21 | 5  |
| 61345 | 6 | 5308671 | 5308686 | 2 | 8  | 16 | GT   | 17 | 4  |
| 61346 | 6 | 5315420 | 5315441 | 2 | 11 | 22 | TG   | 10 | 12 |
| 61349 | 6 | 5328672 | 5328683 | 2 | 6  | 12 | GA   | 23 | 4  |
| 61353 | 6 | 5333598 | 5333615 | 3 | 6  | 18 | AAC  | 22 | 7  |
| 61354 | 6 | 5335982 | 5336009 | 2 | 14 | 28 | GT   | 21 | 11 |
| 61357 | 6 | 5339162 | 5339179 | 3 | 6  | 18 | CTG  | 32 | 6  |
| 61358 | 6 | 5353033 | 5353046 | 2 | 7  | 14 | AT   | 24 | 11 |
| 61360 | 6 | 5357110 | 5357147 | 2 | 19 | 38 | TG   | 7  | 9  |
| 61361 | 6 | 5360687 | 5360700 | 2 | 7  | 14 | AC   | 22 | 6  |
| 61363 | 6 | 5361242 | 5361255 | 2 | 7  | 14 | AC   | 20 | 6  |
| 61365 | 6 | 5363539 | 5363562 | 2 | 12 | 24 | TG   | 19 | 11 |
| 61366 | 6 | 5363599 | 5363616 | 2 | 9  | 18 | GT   | 22 | 7  |
| 61368 | 6 | 5367766 | 5367781 | 2 | 8  | 16 | CA   | 23 | 5  |
| 61373 | 6 | 5372039 | 5372058 | 2 | 10 | 20 | AT   | 6  | 3  |
| 61374 | 6 | 5372930 | 5372949 | 2 | 10 | 20 | AC   | 23 | 5  |
| 61375 | 6 | 5373338 | 5373355 | 2 | 9  | 18 | AC   | 23 | 5  |
| 61377 | 6 | 5379013 | 5379032 | 2 | 10 | 20 | CA   | 16 | 6  |
| 61387 | 6 | 5391633 | 5391652 | 2 | 10 | 20 | AC   | 16 | 7  |
| 61389 | 6 | 5394676 | 5394690 | 3 | 5  | 15 | GCA  | 26 | 7  |
| 61392 | 6 | 5397096 | 5397117 | 2 | 11 | 22 | CA   | 22 | 11 |
| 61393 | 6 | 5397480 | 5397493 | 2 | 7  | 14 | TG   | 15 | 3  |
| 61394 | 6 | 5397760 | 5397775 | 2 | 8  | 16 | TG   | 14 | 5  |
| 61396 | 6 | 5398450 | 5398463 | 2 | 7  | 14 | GT   | 13 | 5  |
| 61398 | 6 | 5401197 | 5401208 | 2 | 6  | 12 | AG   | 28 | 3  |
| 61401 | 6 | 5404281 | 5404310 | 2 | 15 | 30 | GT   | 16 | 8  |
| 61403 | 6 | 5406937 | 5406952 | 2 | 8  | 16 | TC   | 6  | 5  |
| 61408 | 6 | 5414808 | 5414837 | 2 | 15 | 30 | AC   | 18 | 9  |
| 61423 | 6 | 5428110 | 5428139 | 2 | 15 | 30 | GT   | 14 | 7  |

|       |   |         |         |   |    |    |      |    |    |
|-------|---|---------|---------|---|----|----|------|----|----|
| 61424 | 6 | 5428418 | 5428435 | 2 | 9  | 18 | CA   | 18 | 7  |
| 61425 | 6 | 5434673 | 5434690 | 2 | 9  | 18 | CA   | 17 | 4  |
| 61433 | 6 | 5449463 | 5449474 | 2 | 6  | 12 | GT   | 16 | 3  |
| 61434 | 6 | 5449494 | 5449523 | 2 | 15 | 30 | GT   | 11 | 4  |
| 61437 | 6 | 5462281 | 5462298 | 2 | 9  | 18 | TG   | 17 | 5  |
| 61438 | 6 | 5463124 | 5463139 | 2 | 8  | 16 | CA   | 20 | 4  |
| 61442 | 6 | 5486674 | 5486701 | 4 | 7  | 28 | TTCT | 20 | 4  |
| 61448 | 6 | 5495481 | 5495501 | 3 | 7  | 21 | GAG  | 24 | 5  |
| 61451 | 6 | 5502901 | 5502922 | 2 | 11 | 22 | TG   | 24 | 8  |
| 61477 | 6 | 5545548 | 5545595 | 2 | 24 | 48 | TG   | 9  | 9  |
| 61478 | 6 | 5547310 | 5547333 | 2 | 12 | 24 | TG   | 22 | 11 |
| 61479 | 6 | 5547878 | 5547893 | 2 | 8  | 16 | AC   | 19 | 5  |
| 61480 | 6 | 5548444 | 5548464 | 3 | 7  | 21 | CTC  | 28 | 5  |
| 61486 | 6 | 5563692 | 5563707 | 4 | 4  | 16 | TTTA | 12 | 6  |
| 61489 | 6 | 5566703 | 5566718 | 4 | 4  | 16 | AATC | 22 | 5  |
| 61505 | 6 | 5591977 | 5591988 | 2 | 6  | 12 | AG   | 24 | 4  |
| 61507 | 6 | 5593148 | 5593163 | 4 | 4  | 16 | AGCT | 17 | 5  |
| 61510 | 6 | 5605841 | 5605860 | 2 | 10 | 20 | AC   | 16 | 13 |
| 61512 | 6 | 5617344 | 5617361 | 2 | 9  | 18 | TC   | 25 | 5  |
| 61514 | 6 | 5621042 | 5621055 | 2 | 7  | 14 | AC   | 27 | 3  |
| 61522 | 6 | 5645048 | 5645061 | 2 | 7  | 14 | GT   | 25 | 6  |
| 61525 | 6 | 5653488 | 5653503 | 4 | 4  | 16 | TTTG | 24 | 4  |
| 61532 | 6 | 5674886 | 5674903 | 3 | 6  | 18 | GAA  | 25 | 3  |
| 61542 | 6 | 5694225 | 5694236 | 2 | 6  | 12 | TG   | 21 | 9  |
| 61543 | 6 | 5694248 | 5694263 | 4 | 4  | 16 | TTTA | 19 | 3  |
| 61544 | 6 | 5694783 | 5694797 | 3 | 5  | 15 | GAG  | 25 | 8  |
| 61547 | 6 | 5700052 | 5700063 | 2 | 6  | 12 | GT   | 20 | 5  |
| 61550 | 6 | 5702811 | 5702828 | 2 | 9  | 18 | TC   | 25 | 3  |
| 61552 | 6 | 5704262 | 5704282 | 3 | 7  | 21 | AGT  | 33 | 7  |
| 61553 | 6 | 5705005 | 5705034 | 3 | 10 | 30 | AAT  | 7  | 3  |
| 61555 | 6 | 5706061 | 5706074 | 2 | 7  | 14 | GA   | 22 | 6  |
| 61570 | 6 | 5716864 | 5716879 | 2 | 8  | 16 | CT   | 13 | 8  |
| 61571 | 6 | 5717039 | 5717054 | 2 | 8  | 16 | CA   | 19 | 4  |
| 61574 | 6 | 5734221 | 5734241 | 3 | 7  | 21 | CAA  | 28 | 3  |
| 61575 | 6 | 5741379 | 5741402 | 2 | 12 | 24 | AC   | 19 | 7  |
| 61576 | 6 | 5741870 | 5741887 | 2 | 9  | 18 | AT   | 8  | 4  |
| 61579 | 6 | 5749984 | 5749997 | 2 | 7  | 14 | AC   | 23 | 7  |
| 61588 | 6 | 5765364 | 5765431 | 4 | 17 | 68 | TAGA | 19 | 14 |
| 61589 | 6 | 5766609 | 5766628 | 4 | 5  | 20 | GACA | 24 | 4  |
| 61595 | 6 | 5789922 | 5789949 | 2 | 14 | 28 | TG   | 21 | 6  |
| 61596 | 6 | 5790478 | 5790501 | 2 | 12 | 24 | TG   | 8  | 9  |
| 61598 | 6 | 5793005 | 5793022 | 3 | 6  | 18 | GAG  | 12 | 4  |
| 61607 | 6 | 5820718 | 5820729 | 2 | 6  | 12 | GA   | 17 | 4  |
| 61612 | 6 | 5830382 | 5830411 | 2 | 15 | 30 | TC   | 23 | 5  |
| 61620 | 6 | 5861123 | 5861148 | 2 | 13 | 26 | AC   | 21 | 6  |
| 61624 | 6 | 5883050 | 5883067 | 2 | 9  | 18 | CT   | 21 | 4  |
| 61625 | 6 | 5883226 | 5883261 | 2 | 18 | 36 | CA   | 8  | 7  |
| 61627 | 6 | 5885434 | 5885451 | 2 | 9  | 18 | AC   | 21 | 11 |
| 61628 | 6 | 5887939 | 5887954 | 2 | 8  | 16 | AC   | 24 | 6  |
| 61638 | 6 | 5899675 | 5899714 | 2 | 20 | 40 | AC   | 18 | 10 |
| 61646 | 6 | 5915827 | 5915838 | 2 | 6  | 12 | TG   | 23 | 3  |



|       |   |         |         |   |    |    |      |    |    |
|-------|---|---------|---------|---|----|----|------|----|----|
| 61657 | 6 | 5943310 | 5943329 | 2 | 10 | 20 | GT   | 18 | 4  |
| 61659 | 6 | 5958462 | 5958475 | 2 | 7  | 14 | AG   | 28 | 4  |
| 61678 | 6 | 6000124 | 6000157 | 2 | 17 | 34 | GT   | 21 | 10 |
| 61680 | 6 | 6000728 | 6000739 | 2 | 6  | 12 | AG   | 19 | 3  |
| 61681 | 6 | 6000742 | 6000759 | 2 | 9  | 18 | AG   | 16 | 3  |
| 61682 | 6 | 6005676 | 6005721 | 2 | 23 | 46 | GT   | 8  | 9  |
| 61684 | 6 | 6027765 | 6027780 | 2 | 8  | 16 | AC   | 6  | 3  |
| 61697 | 6 | 6048554 | 6048585 | 2 | 16 | 32 | CA   | 12 | 7  |
| 61699 | 6 | 6057181 | 6057192 | 2 | 6  | 12 | GT   | 25 | 4  |
| 61700 | 6 | 6060292 | 6060311 | 2 | 10 | 20 | CA   | 11 | 5  |
| 61701 | 6 | 6060461 | 6060496 | 2 | 18 | 36 | TG   | 16 | 9  |
| 61703 | 6 | 6060876 | 6060903 | 2 | 14 | 28 | TG   | 15 | 8  |
| 61704 | 6 | 6064972 | 6064983 | 2 | 6  | 12 | TG   | 26 | 3  |
| 61706 | 6 | 6067121 | 6067150 | 2 | 15 | 30 | AC   | 21 | 8  |
| 61713 | 6 | 6081207 | 6081220 | 2 | 7  | 14 | CA   | 19 | 3  |
| 61714 | 6 | 6082940 | 6082959 | 2 | 10 | 20 | CA   | 24 | 7  |
| 61715 | 6 | 6083890 | 6083937 | 2 | 24 | 48 | AC   | 9  | 11 |
| 61719 | 6 | 6089402 | 6089427 | 2 | 13 | 26 | AC   | 20 | 6  |
| 61721 | 6 | 6092590 | 6092611 | 2 | 11 | 22 | CT   | 21 | 3  |
| 61722 | 6 | 6092638 | 6092657 | 2 | 10 | 20 | CT   | 13 | 3  |
| 61724 | 6 | 6093268 | 6093289 | 2 | 11 | 22 | AC   | 24 | 6  |
| 61725 | 6 | 6093566 | 6093579 | 2 | 7  | 14 | AC   | 27 | 6  |
| 61726 | 6 | 6093624 | 6093643 | 2 | 10 | 20 | GT   | 15 | 7  |
| 61728 | 6 | 6094957 | 6094972 | 2 | 8  | 16 | AC   | 23 | 4  |
| 61729 | 6 | 6095128 | 6095147 | 2 | 10 | 20 | CA   | 26 | 6  |
| 61732 | 6 | 6095680 | 6095697 | 2 | 9  | 18 | TG   | 23 | 7  |
| 61733 | 6 | 6096328 | 6096357 | 2 | 15 | 30 | TG   | 15 | 16 |
| 61734 | 6 | 6098042 | 6098053 | 2 | 6  | 12 | CA   | 35 | 3  |
| 61736 | 6 | 6098289 | 6098300 | 2 | 6  | 12 | AC   | 22 | 4  |
| 61738 | 6 | 6099985 | 6099998 | 2 | 7  | 14 | AC   | 24 | 3  |
| 61739 | 6 | 6103062 | 6103087 | 2 | 13 | 26 | CA   | 23 | 10 |
| 61745 | 6 | 6127326 | 6127349 | 3 | 8  | 24 | AAC  | 20 | 6  |
| 61748 | 6 | 6131519 | 6131542 | 3 | 8  | 24 | CTT  | 21 | 4  |
| 61749 | 6 | 6132006 | 6132032 | 3 | 9  | 27 | TTC  | 23 | 7  |
| 61755 | 6 | 6156157 | 6156190 | 2 | 17 | 34 | TG   | 8  | 14 |
| 61757 | 6 | 6158908 | 6158929 | 2 | 11 | 22 | TG   | 11 | 9  |
| 61764 | 6 | 6162017 | 6162036 | 2 | 10 | 20 | GA   | 12 | 4  |
| 61765 | 6 | 6163006 | 6163021 | 4 | 4  | 16 | AAAT | 25 | 6  |
| 61771 | 6 | 6171672 | 6171683 | 2 | 6  | 12 | GT   | 22 | 3  |
| 61772 | 6 | 6172624 | 6172639 | 2 | 8  | 16 | AG   | 28 | 6  |
| 61774 | 6 | 6176012 | 6176029 | 2 | 9  | 18 | AC   | 28 | 4  |
| 61777 | 6 | 6180672 | 6180687 | 2 | 8  | 16 | GT   | 22 | 3  |
| 61779 | 6 | 6180848 | 6180867 | 2 | 10 | 20 | CA   | 30 | 3  |
| 61783 | 6 | 6188048 | 6188063 | 2 | 8  | 16 | AC   | 20 | 5  |
| 61789 | 6 | 6194372 | 6194401 | 2 | 15 | 30 | AC   | 15 | 8  |
| 61794 | 6 | 6201159 | 6201190 | 2 | 16 | 32 | AC   | 9  | 5  |
| 61795 | 6 | 6204563 | 6204580 | 2 | 9  | 18 | AC   | 15 | 14 |
| 61806 | 6 | 6217455 | 6217466 | 2 | 6  | 12 | AC   | 29 | 3  |
| 61808 | 6 | 6219314 | 6219329 | 2 | 8  | 16 | TG   | 12 | 7  |
| 61814 | 6 | 6237393 | 6237426 | 2 | 17 | 34 | AC   | 15 | 11 |
| 61821 | 6 | 6245327 | 6245346 | 2 | 10 | 20 | TG   | 15 | 10 |

|       |   |         |         |   |    |    |      |    |    |
|-------|---|---------|---------|---|----|----|------|----|----|
| 61836 | 6 | 6279389 | 6279404 | 2 | 8  | 16 | GT   | 7  | 7  |
| 61838 | 6 | 6284421 | 6284440 | 2 | 10 | 20 | CA   | 16 | 12 |
| 61840 | 6 | 6295782 | 6295799 | 2 | 9  | 18 | GT   | 17 | 11 |
| 61843 | 6 | 6304234 | 6304257 | 2 | 12 | 24 | CA   | 20 | 6  |
| 61856 | 6 | 6319298 | 6319321 | 2 | 12 | 24 | TG   | 16 | 7  |
| 61857 | 6 | 6321179 | 6321198 | 2 | 10 | 20 | GA   | 12 | 8  |
| 61863 | 6 | 6332584 | 6332599 | 4 | 4  | 16 | ATTT | 11 | 4  |
| 61865 | 6 | 6344235 | 6344276 | 2 | 21 | 42 | AC   | 6  | 10 |
| 61869 | 6 | 6350553 | 6350568 | 2 | 8  | 16 | TG   | 27 | 5  |
| 61872 | 6 | 6355707 | 6355722 | 2 | 8  | 16 | CA   | 21 | 3  |
| 61873 | 6 | 6355832 | 6355855 | 2 | 12 | 24 | TG   | 11 | 14 |
| 61879 | 6 | 6361250 | 6361265 | 2 | 8  | 16 | CT   | 13 | 3  |
| 61881 | 6 | 6361469 | 6361484 | 2 | 8  | 16 | AC   | 14 | 3  |
| 61882 | 6 | 6362562 | 6362582 | 3 | 7  | 21 | TGT  | 32 | 4  |
| 61886 | 6 | 6365555 | 6365570 | 2 | 8  | 16 | CA   | 22 | 6  |
| 61910 | 6 | 6420197 | 6420212 | 2 | 8  | 16 | TA   | 15 | 9  |
| 61911 | 6 | 6423894 | 6423920 | 3 | 9  | 27 | GAT  | 21 | 5  |
| 61914 | 6 | 6435796 | 6435807 | 2 | 6  | 12 | GT   | 15 | 10 |
| 61916 | 6 | 6445102 | 6445135 | 2 | 17 | 34 | TG   | 11 | 12 |
| 61918 | 6 | 6452084 | 6452104 | 3 | 7  | 21 | GAG  | 25 | 5  |
| 61919 | 6 | 6453419 | 6453438 | 4 | 5  | 20 | TTGT | 20 | 4  |
| 61921 | 6 | 6454791 | 6454812 | 2 | 11 | 22 | AG   | 19 | 8  |
| 61922 | 6 | 6456404 | 6456415 | 2 | 6  | 12 | AC   | 20 | 16 |
| 61923 | 6 | 6456572 | 6456586 | 3 | 5  | 15 | CCT  | 18 | 3  |
| 61924 | 6 | 6457796 | 6457813 | 3 | 6  | 18 | TTA  | 22 | 6  |
| 61929 | 6 | 6473523 | 6473538 | 2 | 8  | 16 | AC   | 25 | 4  |
| 61936 | 6 | 6481233 | 6481248 | 2 | 8  | 16 | TG   | 19 | 5  |
| 61937 | 6 | 6481830 | 6481843 | 2 | 7  | 14 | TG   | 29 | 4  |
| 61941 | 6 | 6490198 | 6490239 | 2 | 21 | 42 | AC   | 7  | 9  |
| 61942 | 6 | 6493101 | 6493124 | 2 | 12 | 24 | TG   | 11 | 12 |
| 61943 | 6 | 6493266 | 6493279 | 2 | 7  | 14 | TG   | 25 | 3  |
| 61944 | 6 | 6495403 | 6495417 | 3 | 5  | 15 | GTT  | 28 | 4  |
| 61946 | 6 | 6496708 | 6496719 | 2 | 6  | 12 | CA   | 6  | 6  |
| 61947 | 6 | 6497415 | 6497426 | 2 | 6  | 12 | AG   | 22 | 4  |
| 61953 | 6 | 6508842 | 6508859 | 2 | 9  | 18 | AG   | 17 | 4  |
| 61954 | 6 | 6509466 | 6509479 | 2 | 7  | 14 | CT   | 25 | 7  |
| 61961 | 6 | 6521190 | 6521219 | 2 | 15 | 30 | GT   | 13 | 10 |
| 61963 | 6 | 6522404 | 6522427 | 3 | 8  | 24 | CAG  | 15 | 5  |
| 61964 | 6 | 6523674 | 6523707 | 2 | 17 | 34 | TG   | 8  | 7  |
| 61965 | 6 | 6524106 | 6524123 | 2 | 9  | 18 | AG   | 23 | 5  |
| 61969 | 6 | 6526980 | 6527011 | 2 | 16 | 32 | CA   | 6  | 8  |
| 61973 | 6 | 6539536 | 6539575 | 2 | 20 | 40 | TG   | 7  | 8  |
| 61974 | 6 | 6544165 | 6544176 | 2 | 6  | 12 | AT   | 25 | 3  |
| 61976 | 6 | 6547394 | 6547415 | 2 | 11 | 22 | CA   | 10 | 4  |
| 61977 | 6 | 6549427 | 6549456 | 2 | 15 | 30 | GA   | 15 | 4  |
| 61978 | 6 | 6549645 | 6549658 | 2 | 7  | 14 | GT   | 26 | 7  |
| 61979 | 6 | 6550270 | 6550281 | 2 | 6  | 12 | GT   | 23 | 4  |
| 61987 | 6 | 6556041 | 6556056 | 2 | 8  | 16 | AC   | 25 | 7  |
| 61989 | 6 | 6558330 | 6558359 | 3 | 10 | 30 | TAT  | 16 | 5  |
| 61991 | 6 | 6559782 | 6559801 | 2 | 10 | 20 | AG   | 18 | 4  |
| 61996 | 6 | 6565928 | 6565949 | 2 | 11 | 22 | CA   | 23 | 7  |

|       |   |         |         |   |    |    |      |    |    |
|-------|---|---------|---------|---|----|----|------|----|----|
| 61999 | 6 | 6570611 | 6570622 | 2 | 6  | 12 | TG   | 25 | 5  |
| 62000 | 6 | 6570808 | 6570829 | 2 | 11 | 22 | CA   | 15 | 9  |
| 62004 | 6 | 6576547 | 6576570 | 2 | 12 | 24 | GT   | 22 | 10 |
| 62008 | 6 | 6578298 | 6578321 | 2 | 12 | 24 | AC   | 22 | 7  |
| 62016 | 6 | 6585876 | 6585899 | 2 | 12 | 24 | GT   | 16 | 14 |
| 62017 | 6 | 6586074 | 6586101 | 2 | 14 | 28 | TG   | 11 | 7  |
| 62018 | 6 | 6586219 | 6586242 | 2 | 12 | 24 | TG   | 14 | 13 |
| 62019 | 6 | 6586394 | 6586405 | 2 | 6  | 12 | TC   | 17 | 3  |
| 62021 | 6 | 6591113 | 6591140 | 2 | 14 | 28 | TG   | 14 | 12 |
| 62030 | 6 | 6597478 | 6597505 | 2 | 14 | 28 | CA   | 7  | 6  |
| 62032 | 6 | 6603148 | 6603173 | 2 | 13 | 26 | TG   | 19 | 14 |
| 62033 | 6 | 6603929 | 6603942 | 2 | 7  | 14 | TG   | 21 | 5  |
| 62034 | 6 | 6604254 | 6604277 | 2 | 12 | 24 | AC   | 18 | 11 |
| 62035 | 6 | 6606480 | 6606523 | 2 | 22 | 44 | CT   | 7  | 7  |
| 62039 | 6 | 6618466 | 6618483 | 2 | 9  | 18 | GT   | 20 | 7  |
| 62040 | 6 | 6618822 | 6618841 | 2 | 10 | 20 | GT   | 23 | 8  |
| 62043 | 6 | 6633097 | 6633110 | 2 | 7  | 14 | CA   | 25 | 11 |
| 62046 | 6 | 6639146 | 6639159 | 2 | 7  | 14 | GT   | 21 | 4  |
| 62048 | 6 | 6640965 | 6641000 | 4 | 9  | 36 | TGAG | 25 | 6  |
| 62051 | 6 | 6646438 | 6646459 | 2 | 11 | 22 | CA   | 18 | 13 |
| 62052 | 6 | 6648229 | 6648244 | 2 | 8  | 16 | AC   | 17 | 11 |
| 62056 | 6 | 6655298 | 6655317 | 2 | 10 | 20 | GT   | 13 | 3  |
| 62067 | 6 | 6671453 | 6671470 | 2 | 9  | 18 | TG   | 20 | 3  |
| 62071 | 6 | 6673550 | 6673567 | 3 | 6  | 18 | TCC  | 9  | 5  |
| 62075 | 6 | 6674040 | 6674055 | 2 | 8  | 16 | CT   | 14 | 4  |
| 62078 | 6 | 6676099 | 6676113 | 3 | 5  | 15 | GGC  | 27 | 4  |
| 62083 | 6 | 6677864 | 6677881 | 2 | 9  | 18 | CA   | 18 | 10 |
| 62093 | 6 | 6704432 | 6704443 | 2 | 6  | 12 | AC   | 22 | 4  |
| 62095 | 6 | 6714008 | 6714025 | 3 | 6  | 18 | GGA  | 9  | 4  |
| 62096 | 6 | 6714104 | 6714127 | 2 | 12 | 24 | CA   | 16 | 18 |
| 62098 | 6 | 6714276 | 6714289 | 2 | 7  | 14 | CT   | 23 | 3  |
| 62112 | 6 | 6723336 | 6723349 | 2 | 7  | 14 | GA   | 26 | 4  |
| 62114 | 6 | 6728433 | 6728448 | 2 | 8  | 16 | TG   | 23 | 6  |
| 62117 | 6 | 6730088 | 6730101 | 2 | 7  | 14 | CA   | 17 | 6  |
| 62118 | 6 | 6730172 | 6730187 | 2 | 8  | 16 | CA   | 20 | 4  |
| 62119 | 6 | 6730351 | 6730370 | 2 | 10 | 20 | CA   | 19 | 7  |
| 62120 | 6 | 6730966 | 6730977 | 2 | 6  | 12 | CA   | 16 | 4  |
| 62122 | 6 | 6733198 | 6733236 | 3 | 13 | 39 | TCT  | 23 | 10 |
| 62124 | 6 | 6736105 | 6736118 | 2 | 7  | 14 | TG   | 24 | 3  |
| 62126 | 6 | 6739255 | 6739278 | 2 | 12 | 24 | TG   | 12 | 4  |
| 62131 | 6 | 6741750 | 6741771 | 2 | 11 | 22 | TG   | 10 | 4  |
| 62132 | 6 | 6741833 | 6741858 | 2 | 13 | 26 | GT   | 13 | 9  |
| 62137 | 6 | 6746819 | 6746864 | 2 | 23 | 46 | CT   | 15 | 5  |
| 62139 | 6 | 6747144 | 6747164 | 3 | 7  | 21 | ATC  | 16 | 3  |
| 62144 | 6 | 6748792 | 6748811 | 2 | 10 | 20 | CT   | 15 | 4  |
| 62145 | 6 | 6748998 | 6749027 | 2 | 15 | 30 | CA   | 14 | 9  |
| 62159 | 6 | 6756788 | 6756819 | 2 | 16 | 32 | GT   | 17 | 12 |
| 62171 | 6 | 6764725 | 6764738 | 2 | 7  | 14 | GA   | 12 | 3  |
| 62174 | 6 | 6770083 | 6770097 | 3 | 5  | 15 | GAG  | 19 | 3  |
| 62180 | 6 | 6775253 | 6775278 | 2 | 13 | 26 | TG   | 19 | 13 |
| 62182 | 6 | 6776875 | 6776889 | 3 | 5  | 15 | GCA  | 29 | 3  |

|       |   |         |         |   |    |    |      |    |    |
|-------|---|---------|---------|---|----|----|------|----|----|
| 62185 | 6 | 6785110 | 6785125 | 4 | 4  | 16 | AGAA | 12 | 4  |
| 62188 | 6 | 6786357 | 6786370 | 2 | 7  | 14 | GT   | 16 | 7  |
| 62189 | 6 | 6787313 | 6787339 | 3 | 9  | 27 | GCA  | 27 | 6  |
| 62191 | 6 | 6788595 | 6788630 | 4 | 9  | 36 | CAGG | 28 | 18 |
| 62197 | 6 | 6799727 | 6799742 | 2 | 8  | 16 | CA   | 17 | 5  |
| 62199 | 6 | 6800884 | 6800898 | 3 | 5  | 15 | GGA  | 20 | 3  |
| 62202 | 6 | 6804952 | 6804971 | 2 | 10 | 20 | CA   | 31 | 6  |
| 62210 | 6 | 6820842 | 6820855 | 2 | 7  | 14 | AT   | 22 | 3  |
| 62212 | 6 | 6822047 | 6822066 | 2 | 10 | 20 | CA   | 24 | 12 |
| 62215 | 6 | 6828767 | 6828798 | 2 | 16 | 32 | TG   | 10 | 7  |
| 62217 | 6 | 6830149 | 6830164 | 4 | 4  | 16 | TTTA | 14 | 8  |
| 62219 | 6 | 6841768 | 6841779 | 2 | 6  | 12 | GT   | 21 | 3  |
| 62220 | 6 | 6842797 | 6842832 | 2 | 18 | 36 | CA   | 9  | 10 |
| 62222 | 6 | 6846395 | 6846410 | 4 | 4  | 16 | TTTG | 31 | 3  |
| 62223 | 6 | 6847246 | 6847265 | 2 | 10 | 20 | TG   | 24 | 9  |
| 62225 | 6 | 6850019 | 6850038 | 2 | 10 | 20 | AC   | 18 | 9  |
| 62238 | 6 | 6889108 | 6889119 | 2 | 6  | 12 | TG   | 26 | 5  |
| 62243 | 6 | 6895066 | 6895083 | 2 | 9  | 18 | TC   | 22 | 3  |
| 62251 | 6 | 6897335 | 6897346 | 2 | 6  | 12 | TC   | 11 | 4  |
| 62256 | 6 | 6902730 | 6902751 | 2 | 11 | 22 | GA   | 16 | 8  |
| 62257 | 6 | 6903643 | 6903666 | 3 | 8  | 24 | GCT  | 27 | 9  |
| 62258 | 6 | 6905013 | 6905030 | 2 | 9  | 18 | CA   | 32 | 3  |
| 62269 | 6 | 6929409 | 6929428 | 2 | 10 | 20 | CA   | 19 | 7  |
| 62272 | 6 | 6930385 | 6930400 | 2 | 8  | 16 | AG   | 15 | 8  |
| 62280 | 6 | 6946478 | 6946503 | 2 | 13 | 26 | GT   | 8  | 9  |
| 62283 | 6 | 6950473 | 6950490 | 3 | 6  | 18 | CAA  | 24 | 3  |
| 62293 | 6 | 6966768 | 6966787 | 4 | 5  | 20 | CTGT | 13 | 6  |
| 62297 | 6 | 6971112 | 6971127 | 2 | 8  | 16 | GT   | 11 | 5  |
| 62298 | 6 | 6971335 | 6971346 | 2 | 6  | 12 | TC   | 30 | 4  |
| 62301 | 6 | 6983380 | 6983394 | 3 | 5  | 15 | TTG  | 12 | 15 |
| 62306 | 6 | 6997022 | 6997057 | 2 | 18 | 36 | CA   | 21 | 15 |
| 62308 | 6 | 6999464 | 6999483 | 2 | 10 | 20 | CT   | 22 | 5  |
| 62309 | 6 | 7003065 | 7003082 | 2 | 9  | 18 | TG   | 16 | 10 |
| 62324 | 6 | 7027698 | 7027711 | 2 | 7  | 14 | CA   | 25 | 4  |
| 62328 | 6 | 7031240 | 7031263 | 2 | 12 | 24 | TG   | 21 | 5  |
| 62331 | 6 | 7035153 | 7035174 | 2 | 11 | 22 | CA   | 13 | 7  |
| 62332 | 6 | 7040663 | 7040683 | 3 | 7  | 21 | GAT  | 19 | 5  |
| 62338 | 6 | 7046045 | 7046078 | 2 | 17 | 34 | TG   | 11 | 11 |
| 62339 | 6 | 7050162 | 7050173 | 2 | 6  | 12 | AC   | 26 | 3  |
| 62340 | 6 | 7052641 | 7052670 | 2 | 15 | 30 | TC   | 10 | 11 |
| 62346 | 6 | 7061732 | 7061751 | 2 | 10 | 20 | AC   | 25 | 10 |
| 62351 | 6 | 7071115 | 7071130 | 2 | 8  | 16 | TG   | 17 | 6  |
| 62352 | 6 | 7071199 | 7071230 | 2 | 16 | 32 | GT   | 12 | 8  |
| 62353 | 6 | 7071330 | 7071357 | 2 | 14 | 28 | TG   | 21 | 13 |
| 62362 | 6 | 7083890 | 7083905 | 4 | 4  | 16 | TTTA | 13 | 3  |
| 62369 | 6 | 7092276 | 7092313 | 2 | 19 | 38 | GA   | 6  | 7  |
| 62373 | 6 | 7095334 | 7095355 | 2 | 11 | 22 | AC   | 17 | 8  |
| 62374 | 6 | 7097515 | 7097536 | 2 | 11 | 22 | AC   | 17 | 8  |
| 62376 | 6 | 7104069 | 7104088 | 2 | 10 | 20 | CA   | 20 | 12 |
| 62377 | 6 | 7106035 | 7106064 | 2 | 15 | 30 | CA   | 11 | 11 |
| 62380 | 6 | 7108261 | 7108286 | 2 | 13 | 26 | TG   | 12 | 9  |

|       |   |         |         |   |    |    |      |    |    |
|-------|---|---------|---------|---|----|----|------|----|----|
| 62382 | 6 | 7109783 | 7109798 | 4 | 4  | 16 | TCCC | 13 | 3  |
| 62383 | 6 | 7111428 | 7111453 | 2 | 13 | 26 | CA   | 13 | 6  |
| 62384 | 6 | 7111520 | 7111531 | 2 | 6  | 12 | CA   | 20 | 4  |
| 62385 | 6 | 7111780 | 7111797 | 2 | 9  | 18 | CA   | 18 | 6  |
| 62395 | 6 | 7119952 | 7119975 | 2 | 12 | 24 | GT   | 14 | 8  |
| 62398 | 6 | 7120841 | 7120866 | 2 | 13 | 26 | GT   | 14 | 4  |
| 62399 | 6 | 7121028 | 7121051 | 2 | 12 | 24 | CT   | 14 | 5  |
| 62402 | 6 | 7122458 | 7122469 | 2 | 6  | 12 | GT   | 15 | 3  |
| 62403 | 6 | 7123646 | 7123669 | 2 | 12 | 24 | TG   | 21 | 18 |
| 62404 | 6 | 7124782 | 7124801 | 4 | 5  | 20 | TATC | 14 | 6  |
| 62407 | 6 | 7129538 | 7129561 | 3 | 8  | 24 | CTC  | 20 | 6  |
| 62410 | 6 | 7133584 | 7133598 | 3 | 5  | 15 | GGT  | 13 | 7  |
| 62411 | 6 | 7134684 | 7134701 | 3 | 6  | 18 | CAA  | 24 | 5  |
| 62416 | 6 | 7145458 | 7145473 | 2 | 8  | 16 | AC   | 24 | 5  |
| 62422 | 6 | 7157552 | 7157583 | 2 | 16 | 32 | AC   | 15 | 14 |
| 62424 | 6 | 7159972 | 7159987 | 2 | 8  | 16 | AC   | 20 | 5  |
| 62425 | 6 | 7160165 | 7160194 | 2 | 15 | 30 | CA   | 17 | 11 |
| 62429 | 6 | 7166308 | 7166333 | 2 | 13 | 26 | CA   | 16 | 10 |
| 62433 | 6 | 7173513 | 7173566 | 2 | 27 | 54 | CA   | 15 | 9  |
| 62440 | 6 | 7183594 | 7183621 | 2 | 14 | 28 | TG   | 16 | 10 |
| 62442 | 6 | 7187114 | 7187149 | 2 | 18 | 36 | TG   | 7  | 7  |
| 62444 | 6 | 7188686 | 7188725 | 2 | 20 | 40 | TG   | 10 | 10 |
| 62446 | 6 | 7189064 | 7189081 | 2 | 9  | 18 | TC   | 17 | 3  |
| 62452 | 6 | 7206125 | 7206150 | 2 | 13 | 26 | GT   | 18 | 10 |
| 62455 | 6 | 7216770 | 7216817 | 2 | 24 | 48 | CA   | 6  | 11 |
| 62461 | 6 | 7223503 | 7223518 | 2 | 8  | 16 | TC   | 21 | 4  |
| 62467 | 6 | 7229426 | 7229445 | 2 | 10 | 20 | TG   | 21 | 11 |
| 62471 | 6 | 7234897 | 7234910 | 2 | 7  | 14 | AC   | 9  | 6  |
| 62475 | 6 | 7243011 | 7243032 | 2 | 11 | 22 | TG   | 15 | 11 |
| 62477 | 6 | 7246241 | 7246252 | 2 | 6  | 12 | GT   | 13 | 6  |
| 62478 | 6 | 7246267 | 7246282 | 2 | 8  | 16 | GT   | 7  | 3  |
| 62483 | 6 | 7248389 | 7248402 | 2 | 7  | 14 | GT   | 6  | 4  |
| 62485 | 6 | 7256298 | 7256313 | 2 | 8  | 16 | GT   | 26 | 3  |
| 62487 | 6 | 7259870 | 7259881 | 2 | 6  | 12 | GT   | 21 | 10 |
| 62488 | 6 | 7260340 | 7260351 | 2 | 6  | 12 | GT   | 26 | 3  |
| 62489 | 6 | 7261578 | 7261589 | 2 | 6  | 12 | CA   | 20 | 10 |
| 62492 | 6 | 7266819 | 7266870 | 2 | 26 | 52 | AC   | 11 | 13 |
| 62493 | 6 | 7269005 | 7269020 | 2 | 8  | 16 | GT   | 24 | 4  |
| 62496 | 6 | 7272458 | 7272475 | 2 | 9  | 18 | AC   | 17 | 7  |
| 62505 | 6 | 7282151 | 7282182 | 2 | 16 | 32 | CA   | 11 | 7  |
| 62508 | 6 | 7285976 | 7285990 | 3 | 5  | 15 | GGA  | 30 | 4  |
| 62515 | 6 | 7299618 | 7299645 | 2 | 14 | 28 | GT   | 23 | 15 |
| 62516 | 6 | 7300354 | 7300365 | 2 | 6  | 12 | CA   | 20 | 7  |
| 62524 | 6 | 7316457 | 7316474 | 2 | 9  | 18 | AC   | 7  | 3  |
| 62527 | 6 | 7321715 | 7321728 | 2 | 7  | 14 | AC   | 25 | 3  |
| 62530 | 6 | 7329888 | 7329908 | 3 | 7  | 21 | GAT  | 27 | 5  |
| 62531 | 6 | 7335580 | 7335591 | 2 | 6  | 12 | GT   | 29 | 4  |
| 62533 | 6 | 7346384 | 7346401 | 2 | 9  | 18 | GT   | 26 | 7  |
| 62538 | 6 | 7358519 | 7358545 | 3 | 9  | 27 | TCC  | 24 | 9  |
| 62560 | 6 | 7388133 | 7388146 | 2 | 7  | 14 | GT   | 26 | 6  |
| 62564 | 6 | 7394727 | 7394764 | 2 | 19 | 38 | AG   | 9  | 6  |

|       |   |         |         |   |    |    |      |    |    |
|-------|---|---------|---------|---|----|----|------|----|----|
| 62565 | 6 | 7395959 | 7395978 | 2 | 10 | 20 | GT   | 20 | 5  |
| 62567 | 6 | 7398137 | 7398152 | 2 | 8  | 16 | AC   | 15 | 6  |
| 62571 | 6 | 7414530 | 7414551 | 2 | 11 | 22 | TG   | 19 | 9  |
| 62575 | 6 | 7422914 | 7422955 | 2 | 21 | 42 | CA   | 17 | 15 |
| 62581 | 6 | 7439402 | 7439417 | 4 | 4  | 16 | GACA | 21 | 5  |
| 62584 | 6 | 7441442 | 7441455 | 2 | 7  | 14 | GT   | 32 | 6  |
| 62588 | 6 | 7442733 | 7442756 | 2 | 12 | 24 | CA   | 20 | 8  |
| 62589 | 6 | 7442972 | 7442985 | 2 | 7  | 14 | AC   | 26 | 3  |
| 62591 | 6 | 7443203 | 7443224 | 2 | 11 | 22 | AG   | 23 | 5  |
| 62594 | 6 | 7443592 | 7443605 | 2 | 7  | 14 | GT   | 26 | 5  |
| 62595 | 6 | 7444249 | 7444290 | 2 | 21 | 42 | AG   | 7  | 9  |
| 62596 | 6 | 7444404 | 7444433 | 2 | 15 | 30 | TG   | 12 | 10 |
| 62598 | 6 | 7445947 | 7445978 | 2 | 16 | 32 | TG   | 14 | 9  |
| 62600 | 6 | 7446901 | 7446928 | 2 | 14 | 28 | TG   | 17 | 9  |
| 62601 | 6 | 7448323 | 7448346 | 4 | 6  | 24 | TTCC | 20 | 3  |
| 62602 | 6 | 7448558 | 7448577 | 2 | 10 | 20 | GT   | 15 | 6  |
| 62607 | 6 | 7451472 | 7451489 | 2 | 9  | 18 | GT   | 6  | 6  |
| 62609 | 6 | 7455446 | 7455463 | 3 | 6  | 18 | GCA  | 24 | 4  |
| 62610 | 6 | 7458671 | 7458690 | 2 | 10 | 20 | TG   | 29 | 7  |
| 62611 | 6 | 7459944 | 7459961 | 2 | 9  | 18 | GA   | 26 | 6  |
| 62613 | 6 | 7460765 | 7460782 | 2 | 9  | 18 | TG   | 17 | 5  |
| 62615 | 6 | 7461794 | 7461819 | 2 | 13 | 26 | GT   | 14 | 12 |
| 62617 | 6 | 7465973 | 7466006 | 2 | 17 | 34 | AC   | 13 | 12 |
| 62623 | 6 | 7472839 | 7472858 | 2 | 10 | 20 | TG   | 19 | 10 |
| 62625 | 6 | 7474656 | 7474679 | 2 | 12 | 24 | AC   | 13 | 6  |
| 62626 | 6 | 7484136 | 7484151 | 2 | 8  | 16 | TC   | 15 | 3  |
| 62627 | 6 | 7484236 | 7484249 | 2 | 7  | 14 | CA   | 21 | 4  |
| 62629 | 6 | 7487052 | 7487065 | 2 | 7  | 14 | TG   | 24 | 4  |
| 62630 | 6 | 7487103 | 7487116 | 2 | 7  | 14 | TG   | 24 | 9  |
| 62631 | 6 | 7488916 | 7488936 | 3 | 7  | 21 | TCC  | 20 | 5  |
| 62636 | 6 | 7494194 | 7494231 | 2 | 19 | 38 | GA   | 7  | 9  |
| 62637 | 6 | 7498469 | 7498482 | 2 | 7  | 14 | TG   | 11 | 6  |
| 62639 | 6 | 7499445 | 7499462 | 2 | 9  | 18 | AC   | 31 | 4  |
| 62641 | 6 | 7503868 | 7503882 | 3 | 5  | 15 | TCT  | 28 | 3  |
| 62648 | 6 | 7514201 | 7514224 | 2 | 12 | 24 | CA   | 18 | 5  |
| 62651 | 6 | 7517772 | 7517789 | 3 | 6  | 18 | ATT  | 17 | 8  |
| 62653 | 6 | 7525160 | 7525179 | 2 | 10 | 20 | TC   | 18 | 11 |
| 62654 | 6 | 7525389 | 7525414 | 2 | 13 | 26 | TG   | 19 | 6  |
| 62656 | 6 | 7547970 | 7547990 | 3 | 7  | 21 | TTG  | 21 | 4  |
| 62657 | 6 | 7548208 | 7548223 | 4 | 4  | 16 | TTTA | 21 | 3  |
| 62659 | 6 | 7551662 | 7551677 | 4 | 4  | 16 | ATTT | 20 | 5  |
| 62660 | 6 | 7551984 | 7552009 | 2 | 13 | 26 | TG   | 20 | 7  |
| 62664 | 6 | 7557050 | 7557065 | 2 | 8  | 16 | TA   | 14 | 5  |
| 62666 | 6 | 7558008 | 7558019 | 2 | 6  | 12 | AC   | 24 | 4  |
| 62674 | 6 | 7567226 | 7567246 | 3 | 7  | 21 | GCA  | 21 | 7  |
| 62676 | 6 | 7570200 | 7570211 | 2 | 6  | 12 | AT   | 26 | 5  |
| 62681 | 6 | 7573161 | 7573180 | 2 | 10 | 20 | CA   | 18 | 9  |
| 62683 | 6 | 7573680 | 7573691 | 2 | 6  | 12 | GT   | 25 | 6  |
| 62684 | 6 | 7578701 | 7578730 | 2 | 15 | 30 | TG   | 21 | 10 |
| 62686 | 6 | 7579459 | 7579478 | 2 | 10 | 20 | TG   | 13 | 12 |
| 62690 | 6 | 7585325 | 7585338 | 2 | 7  | 14 | GT   | 20 | 4  |

|       |   |         |         |   |    |    |      |    |    |
|-------|---|---------|---------|---|----|----|------|----|----|
| 62692 | 6 | 7591600 | 7591614 | 3 | 5  | 15 | ATT  | 18 | 11 |
| 62694 | 6 | 7591967 | 7591982 | 2 | 8  | 16 | GT   | 8  | 6  |
| 62695 | 6 | 7592228 | 7592241 | 2 | 7  | 14 | AC   | 28 | 6  |
| 62700 | 6 | 7596488 | 7596503 | 2 | 8  | 16 | CA   | 22 | 3  |
| 62702 | 6 | 7600374 | 7600400 | 3 | 9  | 27 | GAT  | 23 | 3  |
| 62703 | 6 | 7601256 | 7601275 | 2 | 10 | 20 | CT   | 9  | 3  |
| 62706 | 6 | 7605029 | 7605042 | 2 | 7  | 14 | CA   | 30 | 3  |
| 62711 | 6 | 7609212 | 7609245 | 2 | 17 | 34 | TG   | 14 | 12 |
| 62713 | 6 | 7611645 | 7611664 | 4 | 5  | 20 | AAAG | 6  | 5  |
| 62714 | 6 | 7612217 | 7612242 | 2 | 13 | 26 | AC   | 13 | 11 |
| 62716 | 6 | 7612680 | 7612693 | 2 | 7  | 14 | CA   | 12 | 12 |
| 62725 | 6 | 7634185 | 7634198 | 2 | 7  | 14 | AT   | 24 | 3  |
| 62726 | 6 | 7635561 | 7635584 | 2 | 12 | 24 | AC   | 16 | 8  |
| 62729 | 6 | 7637855 | 7637868 | 2 | 7  | 14 | GT   | 27 | 7  |
| 62730 | 6 | 7638146 | 7638165 | 2 | 10 | 20 | AC   | 14 | 4  |
| 62735 | 6 | 7647001 | 7647018 | 3 | 6  | 18 | TGT  | 17 | 8  |
| 62739 | 6 | 7655477 | 7655488 | 2 | 6  | 12 | TC   | 20 | 3  |
| 62742 | 6 | 7662339 | 7662354 | 4 | 4  | 16 | TTTA | 24 | 7  |
| 62748 | 6 | 7681473 | 7681514 | 2 | 21 | 42 | CT   | 22 | 10 |
| 62751 | 6 | 7687397 | 7687414 | 2 | 9  | 18 | TG   | 8  | 9  |
| 62771 | 6 | 7714546 | 7714565 | 2 | 10 | 20 | TG   | 25 | 10 |
| 62772 | 6 | 7714915 | 7714948 | 2 | 17 | 34 | TC   | 7  | 7  |
| 62776 | 6 | 7715985 | 7715999 | 3 | 5  | 15 | CCT  | 10 | 3  |
| 62777 | 6 | 7716601 | 7716627 | 3 | 9  | 27 | TGA  | 28 | 6  |
| 62780 | 6 | 7720725 | 7720748 | 2 | 12 | 24 | AC   | 11 | 11 |
| 62784 | 6 | 7723382 | 7723399 | 2 | 9  | 18 | GT   | 23 | 6  |
| 62791 | 6 | 7726103 | 7726122 | 2 | 10 | 20 | GA   | 27 | 4  |
| 62793 | 6 | 7726900 | 7726917 | 2 | 9  | 18 | GA   | 22 | 7  |
| 62794 | 6 | 7730410 | 7730431 | 2 | 11 | 22 | GT   | 16 | 9  |
| 62798 | 6 | 7735435 | 7735450 | 2 | 8  | 16 | AG   | 26 | 6  |
| 62801 | 6 | 7739696 | 7739713 | 2 | 9  | 18 | AG   | 15 | 6  |
| 62803 | 6 | 7744268 | 7744283 | 2 | 8  | 16 | TA   | 10 | 3  |
| 62807 | 6 | 7750063 | 7750086 | 2 | 12 | 24 | CT   | 16 | 7  |
| 62808 | 6 | 7750918 | 7750935 | 2 | 9  | 18 | TG   | 19 | 4  |
| 62817 | 6 | 7758825 | 7758840 | 2 | 8  | 16 | AT   | 11 | 4  |
| 62822 | 6 | 7776892 | 7776921 | 2 | 15 | 30 | TG   | 16 | 12 |
| 62828 | 6 | 7786227 | 7786260 | 2 | 17 | 34 | GT   | 10 | 12 |
| 62835 | 6 | 7801850 | 7801873 | 3 | 8  | 24 | CTG  | 23 | 8  |
| 62838 | 6 | 7805877 | 7805890 | 2 | 7  | 14 | AC   | 28 | 3  |
| 62846 | 6 | 7825439 | 7825460 | 2 | 11 | 22 | CA   | 15 | 9  |
| 62860 | 6 | 7840412 | 7840423 | 2 | 6  | 12 | TG   | 24 | 3  |
| 62868 | 6 | 7848970 | 7848984 | 3 | 5  | 15 | CAA  | 23 | 4  |
| 62870 | 6 | 7861624 | 7861635 | 2 | 6  | 12 | CT   | 18 | 4  |
| 62874 | 6 | 7874857 | 7874871 | 3 | 5  | 15 | GTT  | 6  | 3  |
| 62891 | 6 | 7908523 | 7908536 | 2 | 7  | 14 | AG   | 21 | 5  |
| 62893 | 6 | 7910373 | 7910384 | 2 | 6  | 12 | CA   | 13 | 7  |
| 62902 | 6 | 7922930 | 7922965 | 2 | 18 | 36 | AC   | 6  | 6  |
| 62907 | 6 | 7925907 | 7925934 | 2 | 14 | 28 | CA   | 10 | 8  |
| 62910 | 6 | 7934946 | 7934969 | 2 | 12 | 24 | CA   | 6  | 8  |
| 62913 | 6 | 7938365 | 7938380 | 4 | 4  | 16 | AAAC | 31 | 4  |
| 62914 | 6 | 7938651 | 7938674 | 3 | 8  | 24 | GCT  | 22 | 7  |

|       |   |         |         |   |    |    |      |    |    |
|-------|---|---------|---------|---|----|----|------|----|----|
| 62915 | 6 | 7939313 | 7939328 | 2 | 8  | 16 | TG   | 18 | 4  |
| 62916 | 6 | 7939994 | 7940031 | 2 | 19 | 38 | AC   | 11 | 10 |
| 62917 | 6 | 7942118 | 7942141 | 2 | 12 | 24 | GA   | 12 | 9  |
| 62918 | 6 | 7942312 | 7942331 | 2 | 10 | 20 | TG   | 18 | 6  |
| 62936 | 6 | 7957788 | 7957807 | 2 | 10 | 20 | TG   | 12 | 5  |
| 62937 | 6 | 7958326 | 7958349 | 2 | 12 | 24 | AC   | 21 | 10 |
| 62938 | 6 | 7959674 | 7959688 | 3 | 5  | 15 | AAC  | 27 | 11 |
| 62939 | 6 | 7959948 | 7959965 | 3 | 6  | 18 | CTG  | 13 | 6  |
| 62942 | 6 | 7960444 | 7960464 | 3 | 7  | 21 | TCC  | 17 | 4  |
| 62948 | 6 | 7971186 | 7971199 | 2 | 7  | 14 | AC   | 23 | 3  |
| 62950 | 6 | 7976919 | 7976948 | 2 | 15 | 30 | AC   | 10 | 8  |
| 62953 | 6 | 7981397 | 7981422 | 2 | 13 | 26 | CA   | 14 | 17 |
| 62954 | 6 | 7984498 | 7984511 | 2 | 7  | 14 | TG   | 27 | 4  |
| 62955 | 6 | 7987820 | 7987835 | 2 | 8  | 16 | CA   | 24 | 12 |
| 62957 | 6 | 7995047 | 7995062 | 4 | 4  | 16 | ATAG | 19 | 10 |
| 62959 | 6 | 8000762 | 8000773 | 2 | 6  | 12 | CA   | 25 | 3  |
| 62969 | 6 | 8019672 | 8019697 | 2 | 13 | 26 | TG   | 18 | 8  |
| 62971 | 6 | 8030005 | 8030040 | 2 | 18 | 36 | AC   | 8  | 11 |
| 62972 | 6 | 8030634 | 8030647 | 2 | 7  | 14 | GA   | 19 | 4  |
| 62983 | 6 | 8040980 | 8040999 | 2 | 10 | 20 | GT   | 9  | 9  |
| 62985 | 6 | 8048766 | 8048783 | 3 | 6  | 18 | ATA  | 22 | 4  |
| 62988 | 6 | 8053160 | 8053183 | 2 | 12 | 24 | TG   | 14 | 9  |
| 62992 | 6 | 8054484 | 8054497 | 2 | 7  | 14 | TG   | 24 | 7  |
| 62993 | 6 | 8056218 | 8056265 | 2 | 24 | 48 | TC   | 7  | 11 |
| 62995 | 6 | 8062673 | 8062708 | 4 | 9  | 36 | TATT | 13 | 5  |
| 63002 | 6 | 8079008 | 8079019 | 2 | 6  | 12 | AC   | 15 | 11 |
| 63003 | 6 | 8079159 | 8079182 | 2 | 12 | 24 | AC   | 14 | 19 |
| 63005 | 6 | 8080693 | 8080716 | 2 | 12 | 24 | AC   | 10 | 6  |
| 63006 | 6 | 8082450 | 8082473 | 2 | 12 | 24 | GT   | 15 | 6  |
| 63012 | 6 | 8090789 | 8090812 | 2 | 12 | 24 | CA   | 23 | 7  |
| 63015 | 6 | 8094715 | 8094730 | 2 | 8  | 16 | CA   | 6  | 7  |
| 63016 | 6 | 8097259 | 8097270 | 2 | 6  | 12 | CA   | 17 | 3  |
| 63017 | 6 | 8098165 | 8098180 | 4 | 4  | 16 | TTTG | 18 | 4  |
| 63018 | 6 | 8099426 | 8099443 | 2 | 9  | 18 | AC   | 19 | 12 |
| 63023 | 6 | 8102451 | 8102468 | 2 | 9  | 18 | AG   | 11 | 3  |
| 63025 | 6 | 8104410 | 8104427 | 2 | 9  | 18 | CA   | 22 | 11 |
| 63026 | 6 | 8104430 | 8104443 | 2 | 7  | 14 | CA   | 19 | 12 |
| 63027 | 6 | 8104554 | 8104571 | 2 | 9  | 18 | TG   | 16 | 4  |
| 63031 | 6 | 8111113 | 8111156 | 4 | 11 | 44 | GATA | 13 | 6  |
| 63032 | 6 | 8111315 | 8111342 | 2 | 14 | 28 | CA   | 19 | 8  |
| 63041 | 6 | 8119575 | 8119604 | 2 | 15 | 30 | TG   | 13 | 8  |
| 63043 | 6 | 8120286 | 8120313 | 2 | 14 | 28 | GT   | 22 | 10 |
| 63044 | 6 | 8123275 | 8123292 | 2 | 9  | 18 | AC   | 17 | 8  |
| 63045 | 6 | 8126799 | 8126834 | 2 | 18 | 36 | TG   | 19 | 12 |
| 63048 | 6 | 8129226 | 8129257 | 2 | 16 | 32 | AC   | 8  | 8  |
| 63049 | 6 | 8129384 | 8129401 | 2 | 9  | 18 | AC   | 7  | 3  |
| 63051 | 6 | 8132619 | 8132638 | 2 | 10 | 20 | CA   | 16 | 5  |
| 63053 | 6 | 8132891 | 8132902 | 2 | 6  | 12 | GT   | 13 | 6  |
| 63055 | 6 | 8136718 | 8136729 | 2 | 6  | 12 | TG   | 29 | 6  |
| 63059 | 6 | 8139035 | 8139074 | 2 | 20 | 40 | CA   | 10 | 7  |
| 63062 | 6 | 8147898 | 8147925 | 2 | 14 | 28 | AC   | 7  | 6  |



|       |   |         |         |   |    |    |      |    |    |
|-------|---|---------|---------|---|----|----|------|----|----|
| 63064 | 6 | 8149662 | 8149681 | 4 | 5  | 20 | TATC | 23 | 3  |
| 63066 | 6 | 8152297 | 8152318 | 2 | 11 | 22 | AC   | 21 | 6  |
| 63067 | 6 | 8153014 | 8153041 | 2 | 14 | 28 | CA   | 7  | 7  |
| 63081 | 6 | 8172273 | 8172302 | 2 | 15 | 30 | CA   | 18 | 8  |
| 63085 | 6 | 8175941 | 8175958 | 2 | 9  | 18 | TG   | 16 | 4  |
| 63090 | 6 | 8197322 | 8197335 | 2 | 7  | 14 | AC   | 18 | 3  |
| 63091 | 6 | 8198315 | 8198370 | 2 | 28 | 56 | TG   | 6  | 7  |
| 63092 | 6 | 8198664 | 8198677 | 2 | 7  | 14 | GC   | 23 | 7  |
| 63093 | 6 | 8201879 | 8201904 | 2 | 13 | 26 | CA   | 23 | 12 |
| 63100 | 6 | 8206123 | 8206148 | 2 | 13 | 26 | CA   | 11 | 10 |
| 63101 | 6 | 8206331 | 8206366 | 3 | 12 | 36 | ATC  | 15 | 6  |
| 63108 | 6 | 8209424 | 8209439 | 2 | 8  | 16 | TG   | 17 | 10 |
| 63110 | 6 | 8210056 | 8210079 | 2 | 12 | 24 | CA   | 8  | 6  |
| 63113 | 6 | 8210808 | 8210835 | 2 | 14 | 28 | TC   | 7  | 4  |
| 63120 | 6 | 8214069 | 8214080 | 2 | 6  | 12 | TG   | 20 | 5  |
| 63122 | 6 | 8216881 | 8216906 | 2 | 13 | 26 | TG   | 16 | 10 |
| 63124 | 6 | 8218467 | 8218482 | 2 | 8  | 16 | TG   | 12 | 5  |
| 63127 | 6 | 8218945 | 8218962 | 2 | 9  | 18 | CA   | 23 | 8  |
| 63131 | 6 | 8225648 | 8225661 | 2 | 7  | 14 | CT   | 28 | 3  |
| 63134 | 6 | 8227160 | 8227201 | 3 | 14 | 42 | GAA  | 6  | 7  |
| 63136 | 6 | 8227721 | 8227754 | 2 | 17 | 34 | AC   | 9  | 10 |
| 63142 | 6 | 8234690 | 8234709 | 2 | 10 | 20 | GT   | 22 | 4  |
| 63143 | 6 | 8235254 | 8235273 | 2 | 10 | 20 | GT   | 14 | 6  |
| 63146 | 6 | 8247252 | 8247281 | 2 | 15 | 30 | CT   | 6  | 6  |
| 63147 | 6 | 8248644 | 8248661 | 2 | 9  | 18 | GT   | 14 | 8  |
| 63150 | 6 | 8248923 | 8248950 | 2 | 14 | 28 | TG   | 25 | 9  |
| 63153 | 6 | 8250666 | 8250681 | 4 | 4  | 16 | TACA | 16 | 4  |
| 63154 | 6 | 8253418 | 8253445 | 2 | 14 | 28 | CA   | 19 | 8  |
| 63162 | 6 | 8259002 | 8259023 | 2 | 11 | 22 | GT   | 17 | 9  |
| 63164 | 6 | 8262491 | 8262506 | 2 | 8  | 16 | CA   | 20 | 6  |
| 63165 | 6 | 8262847 | 8262864 | 2 | 9  | 18 | AC   | 8  | 4  |
| 63168 | 6 | 8263511 | 8263526 | 2 | 8  | 16 | TC   | 28 | 3  |
| 63169 | 6 | 8265657 | 8265672 | 2 | 8  | 16 | AC   | 18 | 3  |
| 63173 | 6 | 8268965 | 8269002 | 2 | 19 | 38 | GT   | 12 | 8  |
| 63174 | 6 | 8269181 | 8269202 | 2 | 11 | 22 | AC   | 21 | 8  |
| 63176 | 6 | 8271001 | 8271026 | 2 | 13 | 26 | CA   | 20 | 14 |
| 63183 | 6 | 8279060 | 8279085 | 2 | 13 | 26 | GA   | 22 | 13 |
| 63185 | 6 | 8279636 | 8279663 | 2 | 14 | 28 | TG   | 6  | 8  |
| 63188 | 6 | 8282708 | 8282723 | 4 | 4  | 16 | TTTC | 15 | 3  |
| 63190 | 6 | 8285289 | 8285304 | 2 | 8  | 16 | AC   | 20 | 5  |
| 63192 | 6 | 8286660 | 8286673 | 2 | 7  | 14 | AC   | 30 | 4  |
| 63197 | 6 | 8291058 | 8291069 | 2 | 6  | 12 | AC   | 8  | 3  |
| 63201 | 6 | 8293091 | 8293134 | 2 | 22 | 44 | TG   | 17 | 14 |
| 63202 | 6 | 8293813 | 8293828 | 4 | 4  | 16 | TTAT | 25 | 4  |
| 63206 | 6 | 8295652 | 8295677 | 2 | 13 | 26 | TG   | 11 | 12 |
| 63209 | 6 | 8296160 | 8296187 | 2 | 14 | 28 | TG   | 13 | 7  |
| 63210 | 6 | 8296483 | 8296502 | 2 | 10 | 20 | CA   | 13 | 4  |
| 63219 | 6 | 8302039 | 8302068 | 2 | 15 | 30 | TG   | 14 | 12 |
| 63220 | 6 | 8306239 | 8306264 | 2 | 13 | 26 | TG   | 23 | 9  |
| 63222 | 6 | 8309887 | 8309900 | 2 | 7  | 14 | CA   | 22 | 5  |
| 63230 | 6 | 8318413 | 8318432 | 4 | 5  | 20 | TGGT | 18 | 3  |

|       |   |         |         |   |    |    |      |    |    |
|-------|---|---------|---------|---|----|----|------|----|----|
| 63232 | 6 | 8319065 | 8319090 | 2 | 13 | 26 | TG   | 6  | 9  |
| 63234 | 6 | 8319667 | 8319686 | 2 | 10 | 20 | AC   | 17 | 6  |
| 63235 | 6 | 8320105 | 8320158 | 2 | 27 | 54 | AC   | 6  | 7  |
| 63239 | 6 | 8324249 | 8324262 | 2 | 7  | 14 | TG   | 22 | 9  |
| 63242 | 6 | 8337774 | 8337797 | 2 | 12 | 24 | TG   | 19 | 7  |
| 63243 | 6 | 8338351 | 8338365 | 3 | 5  | 15 | CCA  | 19 | 3  |
| 63244 | 6 | 8338668 | 8338679 | 2 | 6  | 12 | AC   | 30 | 4  |
| 63246 | 6 | 8344407 | 8344422 | 2 | 8  | 16 | CA   | 26 | 4  |
| 63249 | 6 | 8347332 | 8347343 | 2 | 6  | 12 | TG   | 7  | 3  |
| 63250 | 6 | 8347756 | 8347773 | 2 | 9  | 18 | TC   | 20 | 4  |
| 63260 | 6 | 8366861 | 8366896 | 2 | 18 | 36 | AC   | 8  | 9  |
| 63264 | 6 | 8370318 | 8370341 | 2 | 12 | 24 | TC   | 13 | 7  |
| 63266 | 6 | 8371916 | 8371941 | 2 | 13 | 26 | TG   | 15 | 5  |
| 63271 | 6 | 8378213 | 8378230 | 2 | 9  | 18 | GT   | 30 | 8  |
| 63273 | 6 | 8378913 | 8378948 | 2 | 18 | 36 | GT   | 12 | 5  |
| 63275 | 6 | 8381418 | 8381441 | 2 | 12 | 24 | TG   | 14 | 15 |
| 63277 | 6 | 8382460 | 8382489 | 2 | 15 | 30 | CA   | 17 | 14 |
| 63282 | 6 | 8383763 | 8383774 | 2 | 6  | 12 | AG   | 27 | 3  |
| 63283 | 6 | 8383777 | 8383788 | 2 | 6  | 12 | AG   | 28 | 3  |
| 63287 | 6 | 8389551 | 8389576 | 2 | 13 | 26 | AC   | 13 | 13 |
| 63289 | 6 | 8394790 | 8394807 | 2 | 9  | 18 | CA   | 20 | 8  |
| 63290 | 6 | 8395530 | 8395544 | 3 | 5  | 15 | CAG  | 24 | 3  |
| 63293 | 6 | 8397265 | 8397298 | 2 | 17 | 34 | CA   | 14 | 7  |
| 63294 | 6 | 8397613 | 8397628 | 2 | 8  | 16 | GT   | 17 | 7  |
| 63297 | 6 | 8403958 | 8403979 | 2 | 11 | 22 | AC   | 24 | 7  |
| 63300 | 6 | 8407677 | 8407688 | 2 | 6  | 12 | CA   | 24 | 5  |
| 63301 | 6 | 8407848 | 8407863 | 2 | 8  | 16 | GA   | 22 | 6  |
| 63303 | 6 | 8410762 | 8410783 | 2 | 11 | 22 | TG   | 25 | 6  |
| 63308 | 6 | 8419950 | 8419961 | 2 | 6  | 12 | GT   | 31 | 6  |
| 63314 | 6 | 8429324 | 8429335 | 2 | 6  | 12 | AC   | 16 | 6  |
| 63315 | 6 | 8429338 | 8429353 | 2 | 8  | 16 | AC   | 20 | 10 |
| 63319 | 6 | 8433292 | 8433309 | 3 | 6  | 18 | TTG  | 16 | 4  |
| 63323 | 6 | 8443137 | 8443148 | 2 | 6  | 12 | AC   | 18 | 8  |
| 63326 | 6 | 8446976 | 8446995 | 2 | 10 | 20 | TG   | 16 | 10 |
| 63327 | 6 | 8447197 | 8447218 | 2 | 11 | 22 | TG   | 8  | 5  |
| 63329 | 6 | 8453906 | 8453923 | 3 | 6  | 18 | TTG  | 15 | 3  |
| 63330 | 6 | 8454308 | 8454325 | 3 | 6  | 18 | TGT  | 21 | 3  |
| 63332 | 6 | 8455285 | 8455308 | 3 | 8  | 24 | TCC  | 16 | 5  |
| 63339 | 6 | 8458002 | 8458019 | 3 | 6  | 18 | TCT  | 21 | 3  |
| 63342 | 6 | 8462027 | 8462050 | 2 | 12 | 24 | AC   | 22 | 10 |
| 63345 | 6 | 8464321 | 8464334 | 2 | 7  | 14 | GT   | 13 | 4  |
| 63347 | 6 | 8464479 | 8464506 | 2 | 14 | 28 | AC   | 11 | 9  |
| 63354 | 6 | 8469583 | 8469596 | 2 | 7  | 14 | CA   | 15 | 3  |
| 63355 | 6 | 8469793 | 8469808 | 2 | 8  | 16 | TG   | 27 | 6  |
| 63356 | 6 | 8470957 | 8470974 | 2 | 9  | 18 | CA   | 19 | 7  |
| 63360 | 6 | 8475299 | 8475322 | 2 | 12 | 24 | AC   | 13 | 8  |
| 63371 | 6 | 8499985 | 8499996 | 2 | 6  | 12 | CA   | 12 | 4  |
| 63372 | 6 | 8500311 | 8500340 | 2 | 15 | 30 | GT   | 8  | 8  |
| 63374 | 6 | 8506721 | 8506735 | 3 | 5  | 15 | TTG  | 24 | 3  |
| 63376 | 6 | 8508981 | 8508998 | 3 | 6  | 18 | TTA  | 14 | 7  |
| 63382 | 6 | 8521950 | 8521965 | 4 | 4  | 16 | TTGT | 30 | 3  |

|       |   |         |         |   |    |    |      |    |    |
|-------|---|---------|---------|---|----|----|------|----|----|
| 63384 | 6 | 8522820 | 8522843 | 2 | 12 | 24 | AC   | 25 | 14 |
| 63385 | 6 | 8524059 | 8524102 | 2 | 22 | 44 | GT   | 12 | 10 |
| 63387 | 6 | 8532422 | 8532449 | 2 | 14 | 28 | CA   | 6  | 5  |
| 63390 | 6 | 8534111 | 8534134 | 2 | 12 | 24 | AC   | 19 | 7  |
| 63394 | 6 | 8536350 | 8536367 | 3 | 6  | 18 | GCT  | 31 | 3  |
| 63395 | 6 | 8536954 | 8536967 | 2 | 7  | 14 | CA   | 22 | 3  |
| 63397 | 6 | 8538049 | 8538066 | 2 | 9  | 18 | TG   | 19 | 3  |
| 63398 | 6 | 8538463 | 8538494 | 2 | 16 | 32 | TG   | 19 | 13 |
| 63399 | 6 | 8540147 | 8540164 | 2 | 9  | 18 | AC   | 21 | 3  |
| 63400 | 6 | 8540412 | 8540423 | 2 | 6  | 12 | TG   | 16 | 3  |
| 63402 | 6 | 8542409 | 8542426 | 2 | 9  | 18 | TG   | 20 | 6  |
| 63403 | 6 | 8542429 | 8542442 | 2 | 7  | 14 | TG   | 20 | 9  |
| 63409 | 6 | 8544099 | 8544114 | 2 | 8  | 16 | TC   | 7  | 6  |
| 63411 | 6 | 8549818 | 8549841 | 2 | 12 | 24 | CA   | 24 | 5  |
| 63413 | 6 | 8555280 | 8555295 | 2 | 8  | 16 | AC   | 22 | 4  |
| 63420 | 6 | 8568855 | 8568872 | 2 | 9  | 18 | TG   | 10 | 6  |
| 63425 | 6 | 8578537 | 8578568 | 2 | 16 | 32 | AC   | 8  | 10 |
| 63430 | 6 | 8583764 | 8583775 | 2 | 6  | 12 | CA   | 24 | 4  |
| 63431 | 6 | 8586307 | 8586322 | 2 | 8  | 16 | TC   | 26 | 6  |
| 63432 | 6 | 8587317 | 8587330 | 2 | 7  | 14 | CT   | 21 | 4  |
| 63433 | 6 | 8587925 | 8587952 | 2 | 14 | 28 | AC   | 14 | 10 |
| 63436 | 6 | 8591779 | 8591810 | 2 | 16 | 32 | AG   | 24 | 5  |
| 63439 | 6 | 8596529 | 8596546 | 2 | 9  | 18 | CA   | 28 | 7  |
| 63440 | 6 | 8596548 | 8596559 | 2 | 6  | 12 | AC   | 28 | 7  |
| 63442 | 6 | 8597767 | 8597786 | 2 | 10 | 20 | TG   | 25 | 7  |
| 63443 | 6 | 8603351 | 8603374 | 2 | 12 | 24 | AC   | 12 | 7  |
| 63447 | 6 | 8614815 | 8614852 | 2 | 19 | 38 | AC   | 13 | 9  |
| 63449 | 6 | 8617547 | 8617566 | 2 | 10 | 20 | CA   | 16 | 4  |
| 63451 | 6 | 8620618 | 8620633 | 2 | 8  | 16 | TG   | 23 | 4  |
| 63453 | 6 | 8624709 | 8624722 | 2 | 7  | 14 | TG   | 27 | 3  |
| 63457 | 6 | 8630307 | 8630350 | 2 | 22 | 44 | TG   | 8  | 6  |
| 63462 | 6 | 8634036 | 8634053 | 3 | 6  | 18 | CCT  | 22 | 4  |
| 63467 | 6 | 8636608 | 8636631 | 4 | 6  | 24 | AAAG | 8  | 4  |
| 63468 | 6 | 8636900 | 8636927 | 2 | 14 | 28 | CT   | 22 | 8  |
| 63475 | 6 | 8642130 | 8642147 | 2 | 9  | 18 | TG   | 25 | 9  |
| 63477 | 6 | 8642795 | 8642816 | 2 | 11 | 22 | GT   | 19 | 8  |
| 63478 | 6 | 8643101 | 8643134 | 2 | 17 | 34 | AC   | 18 | 16 |
| 63480 | 6 | 8644678 | 8644691 | 2 | 7  | 14 | TG   | 20 | 4  |
| 63482 | 6 | 8646926 | 8646967 | 3 | 14 | 42 | CTT  | 25 | 9  |
| 63484 | 6 | 8647818 | 8647849 | 2 | 16 | 32 | TG   | 16 | 11 |
| 63491 | 6 | 8658357 | 8658372 | 2 | 8  | 16 | CA   | 23 | 8  |
| 63500 | 6 | 8662366 | 8662381 | 2 | 8  | 16 | GT   | 8  | 7  |
| 63506 | 6 | 8665758 | 8665775 | 2 | 9  | 18 | CT   | 13 | 6  |
| 63507 | 6 | 8665777 | 8665796 | 2 | 10 | 20 | TC   | 10 | 6  |
| 63524 | 6 | 8703373 | 8703388 | 2 | 8  | 16 | GT   | 10 | 11 |
| 63529 | 6 | 8710554 | 8710593 | 2 | 20 | 40 | TC   | 11 | 11 |
| 63550 | 6 | 8749753 | 8749766 | 2 | 7  | 14 | GT   | 23 | 7  |
| 63560 | 6 | 8789454 | 8789477 | 4 | 6  | 24 | AAAT | 18 | 5  |
| 63563 | 6 | 8796324 | 8796349 | 2 | 13 | 26 | TG   | 14 | 11 |
| 63564 | 6 | 8796956 | 8796971 | 2 | 8  | 16 | AC   | 11 | 7  |
| 63566 | 6 | 8800221 | 8800250 | 2 | 15 | 30 | CA   | 15 | 12 |

|       |   |         |         |   |    |    |      |    |    |
|-------|---|---------|---------|---|----|----|------|----|----|
| 63568 | 6 | 8803690 | 8803707 | 3 | 6  | 18 | TAA  | 23 | 9  |
| 63577 | 6 | 8812705 | 8812716 | 2 | 6  | 12 | TG   | 29 | 3  |
| 63578 | 6 | 8815726 | 8815765 | 2 | 20 | 40 | CA   | 8  | 7  |
| 63581 | 6 | 8816611 | 8816622 | 2 | 6  | 12 | AC   | 23 | 7  |
| 63582 | 6 | 8816624 | 8816639 | 2 | 8  | 16 | CA   | 22 | 4  |
| 63583 | 6 | 8816806 | 8816825 | 2 | 10 | 20 | CA   | 14 | 9  |
| 63584 | 6 | 8827691 | 8827708 | 2 | 9  | 18 | TG   | 23 | 4  |
| 63593 | 6 | 8841684 | 8841697 | 2 | 7  | 14 | CA   | 23 | 4  |
| 63597 | 6 | 8849330 | 8849347 | 2 | 9  | 18 | GT   | 17 | 3  |
| 63601 | 6 | 8859201 | 8859216 | 2 | 8  | 16 | TG   | 18 | 3  |
| 63602 | 6 | 8862261 | 8862280 | 4 | 5  | 20 | AGGA | 30 | 3  |
| 63606 | 6 | 8866872 | 8866891 | 2 | 10 | 20 | TG   | 17 | 4  |
| 63608 | 6 | 8867954 | 8867979 | 2 | 13 | 26 | GT   | 13 | 4  |
| 63610 | 6 | 8869704 | 8869731 | 2 | 14 | 28 | TG   | 17 | 8  |
| 63614 | 6 | 8872833 | 8872856 | 4 | 6  | 24 | AACC | 21 | 4  |
| 63617 | 6 | 8880090 | 8880125 | 2 | 18 | 36 | TG   | 12 | 11 |
| 63620 | 6 | 8884250 | 8884275 | 2 | 13 | 26 | GT   | 19 | 7  |
| 63621 | 6 | 8885853 | 8885876 | 2 | 12 | 24 | CA   | 17 | 7  |
| 63622 | 6 | 8902355 | 8902381 | 3 | 9  | 27 | CAG  | 21 | 5  |
| 63623 | 6 | 8910464 | 8910477 | 2 | 7  | 14 | AC   | 20 | 7  |
| 63625 | 6 | 8917561 | 8917572 | 2 | 6  | 12 | TG   | 15 | 3  |
| 63628 | 6 | 8922458 | 8922471 | 2 | 7  | 14 | TG   | 22 | 4  |
| 63630 | 6 | 8925019 | 8925032 | 2 | 7  | 14 | TC   | 18 | 8  |
| 63633 | 6 | 8927445 | 8927462 | 3 | 6  | 18 | TCC  | 18 | 3  |
| 63634 | 6 | 8927973 | 8927988 | 2 | 8  | 16 | TG   | 16 | 7  |
| 63635 | 6 | 8931222 | 8931245 | 2 | 12 | 24 | GT   | 20 | 8  |
| 63638 | 6 | 8939952 | 8939967 | 4 | 4  | 16 | GCTA | 23 | 6  |
| 63643 | 6 | 8951812 | 8951831 | 2 | 10 | 20 | GT   | 14 | 15 |
| 63645 | 6 | 8952050 | 8952063 | 2 | 7  | 14 | CA   | 29 | 4  |
| 63646 | 6 | 8957226 | 8957243 | 2 | 9  | 18 | GT   | 27 | 5  |
| 63652 | 6 | 8962646 | 8962659 | 2 | 7  | 14 | CT   | 21 | 3  |
| 63654 | 6 | 8962790 | 8962807 | 2 | 9  | 18 | GT   | 16 | 8  |
| 63656 | 6 | 8965469 | 8965502 | 2 | 17 | 34 | TG   | 20 | 9  |
| 63661 | 6 | 8979313 | 8979334 | 2 | 11 | 22 | GT   | 15 | 9  |
| 63668 | 6 | 8999791 | 8999812 | 2 | 11 | 22 | CA   | 18 | 12 |
| 63671 | 6 | 9003887 | 9003900 | 2 | 7  | 14 | GT   | 30 | 8  |
| 63673 | 6 | 9005561 | 9005611 | 3 | 17 | 51 | CAG  | 24 | 7  |
| 63675 | 6 | 9011558 | 9011577 | 2 | 10 | 20 | GT   | 17 | 8  |
| 63677 | 6 | 9013900 | 9013915 | 2 | 8  | 16 | CT   | 28 | 5  |
| 63679 | 6 | 9016762 | 9016789 | 4 | 7  | 28 | ACAG | 30 | 11 |
| 63681 | 6 | 9020593 | 9020607 | 3 | 5  | 15 | CTC  | 25 | 6  |
| 63683 | 6 | 9026716 | 9026735 | 4 | 5  | 20 | TTTA | 24 | 4  |
| 63684 | 6 | 9027653 | 9027664 | 2 | 6  | 12 | CA   | 28 | 5  |
| 63685 | 6 | 9028226 | 9028243 | 2 | 9  | 18 | CA   | 25 | 4  |
| 63692 | 6 | 9034957 | 9034974 | 2 | 9  | 18 | CA   | 13 | 7  |
| 63708 | 6 | 9070212 | 9070237 | 2 | 13 | 26 | GA   | 6  | 9  |
| 63723 | 6 | 9115847 | 9115870 | 2 | 12 | 24 | CA   | 26 | 6  |
| 63732 | 6 | 9118551 | 9118580 | 2 | 15 | 30 | AC   | 10 | 11 |
| 63748 | 6 | 9145633 | 9145648 | 4 | 4  | 16 | TCCA | 27 | 4  |
| 63751 | 6 | 9150888 | 9150899 | 2 | 6  | 12 | CA   | 20 | 3  |
| 63758 | 6 | 9164833 | 9164864 | 2 | 16 | 32 | AC   | 14 | 11 |

|       |   |         |         |   |    |    |      |    |    |
|-------|---|---------|---------|---|----|----|------|----|----|
| 63765 | 6 | 9172911 | 9172926 | 2 | 8  | 16 | AT   | 23 | 14 |
| 63768 | 6 | 9185151 | 9185222 | 4 | 18 | 72 | GATA | 11 | 9  |
| 63771 | 6 | 9193957 | 9193970 | 2 | 7  | 14 | AC   | 27 | 9  |
| 63777 | 6 | 9215663 | 9215686 | 4 | 6  | 24 | AACC | 26 | 6  |
| 63780 | 6 | 9228147 | 9228162 | 2 | 8  | 16 | CA   | 20 | 6  |
| 63783 | 6 | 9230325 | 9230342 | 2 | 9  | 18 | CA   | 19 | 4  |
| 63785 | 6 | 9232331 | 9232348 | 3 | 6  | 18 | GCA  | 25 | 5  |
| 63795 | 6 | 9244965 | 9244992 | 2 | 14 | 28 | AC   | 7  | 8  |
| 63800 | 6 | 9262466 | 9262483 | 3 | 6  | 18 | CAG  | 29 | 5  |
| 63812 | 6 | 9277260 | 9277281 | 2 | 11 | 22 | AC   | 18 | 10 |
| 63822 | 6 | 9295822 | 9295835 | 2 | 7  | 14 | AC   | 12 | 5  |
| 63823 | 6 | 9297637 | 9297662 | 2 | 13 | 26 | TG   | 22 | 9  |
| 63824 | 6 | 9298764 | 9298779 | 2 | 8  | 16 | CA   | 24 | 6  |
| 63826 | 6 | 9300858 | 9300869 | 2 | 6  | 12 | GA   | 8  | 3  |
| 63832 | 6 | 9305588 | 9305602 | 3 | 5  | 15 | CTG  | 29 | 3  |
| 63833 | 6 | 9305941 | 9305958 | 2 | 9  | 18 | AG   | 27 | 6  |
| 63838 | 6 | 9318973 | 9318990 | 2 | 9  | 18 | TG   | 13 | 8  |
| 63845 | 6 | 9327746 | 9327765 | 4 | 5  | 20 | GCAG | 17 | 7  |
| 63850 | 6 | 9329167 | 9329184 | 3 | 6  | 18 | AAG  | 13 | 4  |
| 63852 | 6 | 9332427 | 9332440 | 2 | 7  | 14 | AG   | 12 | 4  |
| 63853 | 6 | 9332684 | 9332707 | 3 | 8  | 24 | GCT  | 28 | 6  |
| 63860 | 6 | 9342986 | 9343003 | 2 | 9  | 18 | AC   | 11 | 6  |
| 63865 | 6 | 9346546 | 9346560 | 3 | 5  | 15 | GGC  | 29 | 4  |
| 63867 | 6 | 9348309 | 9348324 | 2 | 8  | 16 | AC   | 20 | 7  |
| 63868 | 6 | 9348658 | 9348673 | 2 | 8  | 16 | AG   | 15 | 3  |
| 63877 | 6 | 9350527 | 9350560 | 2 | 17 | 34 | GT   | 8  | 6  |
| 63881 | 6 | 9353413 | 9353448 | 2 | 18 | 36 | AC   | 6  | 5  |
| 63885 | 6 | 9360218 | 9360237 | 2 | 10 | 20 | TG   | 21 | 6  |
| 63902 | 6 | 9373407 | 9373426 | 4 | 5  | 20 | CAGC | 27 | 4  |
| 63913 | 6 | 9384957 | 9384977 | 3 | 7  | 21 | AAC  | 28 | 4  |
| 63914 | 6 | 9385159 | 9385174 | 2 | 8  | 16 | AG   | 20 | 8  |
| 63919 | 6 | 9386221 | 9386238 | 2 | 9  | 18 | GT   | 24 | 4  |
| 63920 | 6 | 9386472 | 9386486 | 3 | 5  | 15 | CCA  | 27 | 3  |
| 63924 | 6 | 9391398 | 9391421 | 4 | 6  | 24 | CTGT | 15 | 6  |
| 63925 | 6 | 9392175 | 9392188 | 2 | 7  | 14 | GT   | 18 | 6  |
| 63926 | 6 | 9392199 | 9392210 | 2 | 6  | 12 | GT   | 18 | 3  |
| 63928 | 6 | 9393015 | 9393026 | 2 | 6  | 12 | TG   | 24 | 4  |
| 63929 | 6 | 9393641 | 9393670 | 3 | 10 | 30 | CAG  | 30 | 5  |
| 63931 | 6 | 9394074 | 9394085 | 2 | 6  | 12 | CA   | 27 | 5  |
| 63932 | 6 | 9394268 | 9394283 | 2 | 8  | 16 | GT   | 22 | 3  |
| 63936 | 6 | 9402385 | 9402422 | 2 | 19 | 38 | GT   | 9  | 12 |
| 63937 | 6 | 9402469 | 9402482 | 2 | 7  | 14 | GT   | 15 | 4  |
| 63939 | 6 | 9402990 | 9403011 | 2 | 11 | 22 | TG   | 20 | 4  |
| 63940 | 6 | 9403115 | 9403148 | 2 | 17 | 34 | TG   | 12 | 11 |
| 63941 | 6 | 9403368 | 9403399 | 2 | 16 | 32 | CA   | 10 | 8  |
| 63947 | 6 | 9406008 | 9406025 | 3 | 6  | 18 | TGT  | 18 | 4  |
| 63948 | 6 | 9407167 | 9407194 | 4 | 7  | 28 | ATTC | 18 | 4  |
| 63949 | 6 | 9409171 | 9409202 | 2 | 16 | 32 | CA   | 15 | 9  |
| 63953 | 6 | 9409772 | 9409801 | 2 | 15 | 30 | CA   | 6  | 5  |
| 63955 | 6 | 9410059 | 9410098 | 2 | 20 | 40 | AC   | 10 | 11 |
| 63956 | 6 | 9410896 | 9410919 | 3 | 8  | 24 | CCT  | 7  | 5  |

|       |   |         |         |   |    |    |      |    |    |
|-------|---|---------|---------|---|----|----|------|----|----|
| 63964 | 6 | 9417241 | 9417274 | 2 | 17 | 34 | GT   | 13 | 12 |
| 63971 | 6 | 9423300 | 9423327 | 2 | 14 | 28 | CA   | 12 | 8  |
| 63973 | 6 | 9424055 | 9424078 | 3 | 8  | 24 | TGA  | 21 | 5  |
| 63974 | 6 | 9426043 | 9426070 | 2 | 14 | 28 | AC   | 19 | 8  |
| 63992 | 6 | 9455492 | 9455505 | 2 | 7  | 14 | TG   | 17 | 4  |
| 63993 | 6 | 9456649 | 9456664 | 2 | 8  | 16 | GT   | 15 | 5  |
| 63994 | 6 | 9457190 | 9457204 | 3 | 5  | 15 | AAT  | 9  | 5  |
| 63997 | 6 | 9460788 | 9460805 | 3 | 6  | 18 | CAC  | 10 | 4  |
| 63999 | 6 | 9462550 | 9462613 | 4 | 16 | 64 | ATCT | 8  | 11 |
| 64010 | 6 | 9476177 | 9476226 | 2 | 25 | 50 | CA   | 6  | 7  |
| 64012 | 6 | 9480514 | 9480543 | 2 | 15 | 30 | AC   | 9  | 9  |
| 64015 | 6 | 9485579 | 9485594 | 4 | 4  | 16 | ACGG | 21 | 5  |
| 64017 | 6 | 9486037 | 9486066 | 2 | 15 | 30 | TG   | 17 | 11 |
| 64020 | 6 | 9487569 | 9487586 | 2 | 9  | 18 | GT   | 17 | 5  |
| 64022 | 6 | 9487937 | 9487956 | 2 | 10 | 20 | GA   | 16 | 6  |
| 64025 | 6 | 9490550 | 9490613 | 4 | 16 | 64 | TCTA | 10 | 8  |
| 64029 | 6 | 9497951 | 9497974 | 4 | 6  | 24 | TATT | 11 | 3  |
| 64032 | 6 | 9498549 | 9498569 | 3 | 7  | 21 | CAG  | 7  | 3  |
| 64033 | 6 | 9498602 | 9498633 | 4 | 8  | 32 | CCTG | 9  | 4  |
| 64035 | 6 | 9499075 | 9499098 | 3 | 8  | 24 | GCT  | 10 | 4  |
| 64038 | 6 | 9502734 | 9502769 | 3 | 12 | 36 | GCT  | 27 | 10 |
| 64041 | 6 | 9505809 | 9505829 | 3 | 7  | 21 | GCA  | 28 | 10 |
| 64042 | 6 | 9505982 | 9505995 | 2 | 7  | 14 | AC   | 22 | 4  |
| 64043 | 6 | 9509327 | 9509348 | 2 | 11 | 22 | TG   | 16 | 6  |
| 64044 | 6 | 9509427 | 9509462 | 2 | 18 | 36 | TG   | 11 | 11 |
| 64046 | 6 | 9514491 | 9514514 | 4 | 6  | 24 | ACAG | 20 | 5  |
| 64053 | 6 | 9540768 | 9540819 | 2 | 26 | 52 | TG   | 6  | 7  |
| 64054 | 6 | 9549257 | 9549274 | 2 | 9  | 18 | TC   | 15 | 10 |
| 64057 | 6 | 9555180 | 9555191 | 2 | 6  | 12 | CA   | 28 | 4  |
| 64076 | 6 | 9672858 | 9672885 | 2 | 14 | 28 | TG   | 26 | 8  |
| 64078 | 6 | 9680634 | 9680657 | 4 | 6  | 24 | TATT | 12 | 4  |
| 64079 | 6 | 9683432 | 9683475 | 2 | 22 | 44 | TG   | 8  | 9  |
| 64090 | 6 | 9712777 | 9712812 | 3 | 12 | 36 | GAG  | 25 | 4  |
| 64092 | 6 | 9713936 | 9713947 | 2 | 6  | 12 | CT   | 34 | 3  |
| 64093 | 6 | 9714011 | 9714022 | 2 | 6  | 12 | GT   | 23 | 5  |
| 64100 | 6 | 9734264 | 9734289 | 2 | 13 | 26 | TG   | 9  | 10 |
| 64102 | 6 | 9740368 | 9740387 | 2 | 10 | 20 | CA   | 26 | 9  |
| 64112 | 6 | 9762067 | 9762078 | 2 | 6  | 12 | CA   | 23 | 7  |
| 64119 | 6 | 9782119 | 9782142 | 4 | 6  | 24 | TTTG | 23 | 7  |
| 64126 | 6 | 9800389 | 9800434 | 2 | 23 | 46 | AC   | 7  | 9  |
| 64127 | 6 | 9800996 | 9801016 | 3 | 7  | 21 | GAG  | 31 | 14 |
| 64128 | 6 | 9811938 | 9811958 | 3 | 7  | 21 | CTG  | 12 | 5  |
| 64134 | 6 | 9819588 | 9819605 | 2 | 9  | 18 | AC   | 17 | 3  |
| 64137 | 6 | 9823497 | 9823510 | 2 | 7  | 14 | AC   | 27 | 4  |
| 64140 | 6 | 9825720 | 9825735 | 4 | 4  | 16 | ATTG | 28 | 13 |
| 64142 | 6 | 9835961 | 9835976 | 2 | 8  | 16 | CA   | 21 | 3  |
| 64144 | 6 | 9842943 | 9842968 | 2 | 13 | 26 | AC   | 12 | 14 |
| 64149 | 6 | 9850073 | 9850098 | 2 | 13 | 26 | AC   | 15 | 11 |
| 64150 | 6 | 9854874 | 9854891 | 2 | 9  | 18 | AC   | 25 | 8  |
| 64153 | 6 | 9869875 | 9869898 | 2 | 12 | 24 | AC   | 22 | 8  |
| 64161 | 6 | 9910045 | 9910058 | 2 | 7  | 14 | CT   | 10 | 3  |

|       |   |          |          |   |    |    |      |    |    |
|-------|---|----------|----------|---|----|----|------|----|----|
| 64163 | 6 | 9922319  | 9922352  | 2 | 17 | 34 | CA   | 9  | 10 |
| 64165 | 6 | 9929121  | 9929150  | 2 | 15 | 30 | AC   | 11 | 10 |
| 64171 | 6 | 9966276  | 9966289  | 2 | 7  | 14 | TG   | 24 | 6  |
| 64172 | 6 | 9967290  | 9967313  | 2 | 12 | 24 | GT   | 15 | 11 |
| 64175 | 6 | 9979030  | 9979053  | 4 | 6  | 24 | GTCA | 28 | 3  |
| 64184 | 6 | 9996897  | 9996928  | 2 | 16 | 32 | TG   | 20 | 9  |
| 64186 | 6 | 10001544 | 10001564 | 3 | 7  | 21 | CCT  | 25 | 6  |
| 64188 | 6 | 10004157 | 10004188 | 2 | 16 | 32 | TG   | 14 | 15 |
| 64189 | 6 | 10008357 | 10008410 | 2 | 27 | 54 | TG   | 11 | 12 |
| 64190 | 6 | 10008945 | 10008968 | 2 | 12 | 24 | AC   | 17 | 10 |
| 64196 | 6 | 10013436 | 10013447 | 2 | 6  | 12 | TC   | 24 | 3  |
| 64198 | 6 | 10019030 | 10019049 | 2 | 10 | 20 | CA   | 23 | 8  |
| 64199 | 6 | 10019360 | 10019393 | 2 | 17 | 34 | GT   | 7  | 6  |
| 64200 | 6 | 10026804 | 10026819 | 2 | 8  | 16 | AC   | 26 | 3  |
| 64201 | 6 | 10030714 | 10030725 | 2 | 6  | 12 | AG   | 26 | 3  |
| 64202 | 6 | 10032807 | 10032818 | 2 | 6  | 12 | CA   | 13 | 4  |
| 64203 | 6 | 10033032 | 10033057 | 2 | 13 | 26 | AC   | 11 | 7  |
| 64209 | 6 | 10043102 | 10043117 | 2 | 8  | 16 | TC   | 28 | 3  |
| 64210 | 6 | 10043237 | 10043252 | 2 | 8  | 16 | AG   | 22 | 3  |
| 64212 | 6 | 10046089 | 10046104 | 2 | 8  | 16 | AC   | 28 | 4  |
| 64219 | 6 | 10057572 | 10057585 | 2 | 7  | 14 | AG   | 22 | 4  |
| 64220 | 6 | 10058637 | 10058654 | 3 | 6  | 18 | GTT  | 20 | 4  |
| 64224 | 6 | 10063046 | 10063073 | 2 | 14 | 28 | GT   | 22 | 8  |
| 64231 | 6 | 10067778 | 10067813 | 2 | 18 | 36 | TG   | 13 | 8  |
| 64232 | 6 | 10069081 | 10069106 | 2 | 13 | 26 | AC   | 8  | 6  |
| 64236 | 6 | 10076384 | 10076407 | 2 | 12 | 24 | CA   | 20 | 3  |
| 64245 | 6 | 10089861 | 10089880 | 2 | 10 | 20 | CA   | 16 | 4  |
| 64249 | 6 | 10090824 | 10090841 | 2 | 9  | 18 | CT   | 13 | 4  |
| 64259 | 6 | 10113686 | 10113713 | 2 | 14 | 28 | TG   | 9  | 7  |
| 64261 | 6 | 10113852 | 10113881 | 2 | 15 | 30 | AC   | 15 | 10 |
| 64265 | 6 | 10115678 | 10115717 | 2 | 20 | 40 | AC   | 7  | 8  |
| 64270 | 6 | 10122442 | 10122493 | 2 | 26 | 52 | AG   | 8  | 5  |
| 64271 | 6 | 10124931 | 10124946 | 2 | 8  | 16 | GT   | 15 | 7  |
| 64272 | 6 | 10124948 | 10124959 | 2 | 6  | 12 | TG   | 18 | 8  |
| 64274 | 6 | 10126112 | 10126127 | 2 | 8  | 16 | GT   | 13 | 4  |
| 64285 | 6 | 10149707 | 10149724 | 2 | 9  | 18 | AG   | 23 | 4  |
| 64286 | 6 | 10151196 | 10151227 | 4 | 8  | 32 | GAAT | 17 | 3  |
| 64289 | 6 | 10161864 | 10161875 | 2 | 6  | 12 | TG   | 28 | 3  |
| 64296 | 6 | 10173854 | 10173874 | 3 | 7  | 21 | ATT  | 15 | 3  |
| 64297 | 6 | 10175684 | 10175697 | 2 | 7  | 14 | TG   | 18 | 4  |
| 64301 | 6 | 10187350 | 10187385 | 2 | 18 | 36 | CA   | 14 | 12 |
| 64304 | 6 | 10188984 | 10189001 | 2 | 9  | 18 | AC   | 14 | 4  |
| 64306 | 6 | 10207177 | 10207212 | 2 | 18 | 36 | TG   | 12 | 14 |
| 64313 | 6 | 10228982 | 10229001 | 2 | 10 | 20 | CA   | 13 | 5  |
| 64321 | 6 | 10245460 | 10245475 | 2 | 8  | 16 | GT   | 16 | 6  |
| 64323 | 6 | 10247616 | 10247633 | 2 | 9  | 18 | TC   | 27 | 4  |
| 64325 | 6 | 10251506 | 10251541 | 2 | 18 | 36 | GT   | 9  | 10 |
| 64329 | 6 | 10256737 | 10256754 | 2 | 9  | 18 | CA   | 32 | 5  |
| 64331 | 6 | 10260549 | 10260564 | 2 | 8  | 16 | TG   | 22 | 5  |
| 64336 | 6 | 10261407 | 10261428 | 2 | 11 | 22 | TG   | 6  | 4  |
| 64337 | 6 | 10261513 | 10261528 | 2 | 8  | 16 | GT   | 16 | 4  |

|       |   |          |          |   |    |    |      |    |    |
|-------|---|----------|----------|---|----|----|------|----|----|
| 64342 | 6 | 10272310 | 10272331 | 2 | 11 | 22 | GA   | 22 | 9  |
| 64345 | 6 | 10275718 | 10275729 | 2 | 6  | 12 | CT   | 25 | 3  |
| 64348 | 6 | 10279210 | 10279224 | 3 | 5  | 15 | GAT  | 29 | 7  |
| 64352 | 6 | 10291427 | 10291441 | 3 | 5  | 15 | TCT  | 34 | 9  |
| 64353 | 6 | 10298877 | 10298890 | 2 | 7  | 14 | TA   | 21 | 9  |
| 64361 | 6 | 10308215 | 10308236 | 2 | 11 | 22 | AG   | 19 | 3  |
| 64368 | 6 | 10316640 | 10316657 | 2 | 9  | 18 | AC   | 18 | 4  |
| 64374 | 6 | 10331654 | 10331667 | 2 | 7  | 14 | TG   | 20 | 5  |
| 64375 | 6 | 10335636 | 10335653 | 3 | 6  | 18 | CCT  | 17 | 3  |
| 64376 | 6 | 10338760 | 10338779 | 2 | 10 | 20 | CT   | 26 | 5  |
| 64382 | 6 | 10356126 | 10356159 | 2 | 17 | 34 | TG   | 11 | 10 |
| 64383 | 6 | 10356409 | 10356440 | 2 | 16 | 32 | CA   | 8  | 6  |
| 64384 | 6 | 10359417 | 10359436 | 2 | 10 | 20 | TG   | 18 | 5  |
| 64389 | 6 | 10365542 | 10365562 | 3 | 7  | 21 | CTC  | 20 | 3  |
| 64391 | 6 | 10366468 | 10366507 | 2 | 20 | 40 | TG   | 8  | 9  |
| 64392 | 6 | 10366842 | 10366869 | 4 | 7  | 28 | TGCC | 23 | 6  |
| 64398 | 6 | 10383636 | 10383647 | 2 | 6  | 12 | CT   | 33 | 3  |
| 64399 | 6 | 10385114 | 10385127 | 2 | 7  | 14 | GT   | 9  | 7  |
| 64400 | 6 | 10385520 | 10385537 | 2 | 9  | 18 | TG   | 25 | 4  |
| 64402 | 6 | 10387035 | 10387054 | 2 | 10 | 20 | GT   | 15 | 3  |
| 64412 | 6 | 10405405 | 10405428 | 2 | 12 | 24 | CA   | 21 | 15 |
| 64415 | 6 | 10410887 | 10410902 | 4 | 4  | 16 | TCTT | 22 | 3  |
| 64421 | 6 | 10421038 | 10421049 | 2 | 6  | 12 | GT   | 26 | 4  |
| 64423 | 6 | 10424470 | 10424487 | 2 | 9  | 18 | CT   | 7  | 4  |
| 64428 | 6 | 10432918 | 10432945 | 4 | 7  | 28 | CCAT | 23 | 5  |
| 64431 | 6 | 10434003 | 10434016 | 2 | 7  | 14 | GT   | 23 | 8  |
| 64434 | 6 | 10443264 | 10443281 | 3 | 6  | 18 | TGC  | 23 | 4  |
| 64435 | 6 | 10446661 | 10446684 | 4 | 6  | 24 | CATC | 26 | 3  |
| 64437 | 6 | 10449514 | 10449533 | 2 | 10 | 20 | TG   | 17 | 9  |
| 64440 | 6 | 10452354 | 10452368 | 3 | 5  | 15 | AGC  | 33 | 3  |
| 64458 | 6 | 10480128 | 10480153 | 2 | 13 | 26 | AC   | 18 | 6  |
| 64463 | 6 | 10505236 | 10505263 | 2 | 14 | 28 | CA   | 8  | 6  |
| 64465 | 6 | 10512246 | 10512265 | 4 | 5  | 20 | CAGG | 14 | 3  |
| 64468 | 6 | 10513316 | 10513336 | 3 | 7  | 21 | GAT  | 17 | 4  |
| 64470 | 6 | 10516342 | 10516355 | 2 | 7  | 14 | AC   | 25 | 11 |
| 64471 | 6 | 10516602 | 10516619 | 2 | 9  | 18 | AC   | 22 | 9  |
| 64472 | 6 | 10517121 | 10517134 | 2 | 7  | 14 | AC   | 18 | 7  |
| 64478 | 6 | 10539784 | 10539799 | 4 | 4  | 16 | TTTG | 24 | 4  |
| 64492 | 6 | 10568872 | 10568899 | 2 | 14 | 28 | AG   | 12 | 4  |
| 64502 | 6 | 10596033 | 10596068 | 3 | 12 | 36 | GTT  | 23 | 8  |
| 64505 | 6 | 10599995 | 10600014 | 2 | 10 | 20 | TG   | 23 | 4  |
| 64511 | 6 | 10602155 | 10602182 | 2 | 14 | 28 | TG   | 12 | 10 |
| 64514 | 6 | 10603120 | 10603135 | 4 | 4  | 16 | TTTC | 11 | 10 |
| 64515 | 6 | 10605630 | 10605647 | 2 | 9  | 18 | GT   | 16 | 13 |
| 64516 | 6 | 10605818 | 10605845 | 4 | 7  | 28 | AAAT | 20 | 9  |
| 64521 | 6 | 10610249 | 10610266 | 2 | 9  | 18 | GT   | 16 | 12 |
| 64528 | 6 | 10622310 | 10622327 | 3 | 6  | 18 | AGC  | 21 | 5  |
| 64529 | 6 | 10622464 | 10622484 | 3 | 7  | 21 | CTG  | 29 | 10 |
| 64531 | 6 | 10627571 | 10627592 | 2 | 11 | 22 | TG   | 15 | 11 |
| 64534 | 6 | 10629365 | 10629388 | 2 | 12 | 24 | CT   | 11 | 13 |
| 64539 | 6 | 10630245 | 10630259 | 3 | 5  | 15 | CTG  | 25 | 3  |



|       |   |          |          |   |    |    |      |    |    |
|-------|---|----------|----------|---|----|----|------|----|----|
| 64543 | 6 | 10648596 | 10648635 | 4 | 10 | 40 | TTTC | 8  | 6  |
| 64545 | 6 | 10649706 | 10649731 | 2 | 13 | 26 | CA   | 7  | 9  |
| 64551 | 6 | 10662183 | 10662196 | 2 | 7  | 14 | TA   | 10 | 4  |
| 64568 | 6 | 10703145 | 10703170 | 2 | 13 | 26 | GT   | 19 | 7  |
| 64575 | 6 | 10716425 | 10716439 | 3 | 5  | 15 | TTC  | 17 | 4  |
| 64576 | 6 | 10716470 | 10716481 | 2 | 6  | 12 | AG   | 24 | 6  |
| 64578 | 6 | 10721524 | 10721550 | 3 | 9  | 27 | ACT  | 13 | 6  |
| 64584 | 6 | 10728720 | 10728735 | 2 | 8  | 16 | GT   | 20 | 3  |
| 64585 | 6 | 10731280 | 10731295 | 4 | 4  | 16 | GCAG | 20 | 3  |
| 64598 | 6 | 10769565 | 10769576 | 2 | 6  | 12 | CA   | 23 | 4  |
| 64599 | 6 | 10769683 | 10769702 | 4 | 5  | 20 | AAAT | 21 | 3  |
| 64606 | 6 | 10797614 | 10797628 | 3 | 5  | 15 | GAG  | 26 | 8  |
| 64609 | 6 | 10804847 | 10804864 | 2 | 9  | 18 | CA   | 20 | 8  |
| 64610 | 6 | 10804866 | 10804881 | 2 | 8  | 16 | AC   | 17 | 10 |
| 64611 | 6 | 10807029 | 10807040 | 2 | 6  | 12 | AG   | 32 | 4  |
| 64615 | 6 | 10812398 | 10812415 | 2 | 9  | 18 | GT   | 16 | 4  |
| 64617 | 6 | 10813213 | 10813228 | 2 | 8  | 16 | AC   | 19 | 10 |
| 64618 | 6 | 10813508 | 10813541 | 2 | 17 | 34 | AC   | 12 | 12 |
| 64619 | 6 | 10814017 | 10814043 | 3 | 9  | 27 | TCC  | 16 | 9  |
| 64621 | 6 | 10814342 | 10814359 | 2 | 9  | 18 | GT   | 18 | 8  |
| 64622 | 6 | 10816319 | 10816342 | 3 | 8  | 24 | TCT  | 17 | 3  |
| 64625 | 6 | 10819743 | 10819758 | 2 | 8  | 16 | TG   | 15 | 7  |
| 64628 | 6 | 10822417 | 10822436 | 4 | 5  | 20 | TTGT | 23 | 7  |
| 64631 | 6 | 10823635 | 10823648 | 2 | 7  | 14 | AC   | 14 | 3  |
| 64632 | 6 | 10823880 | 10823891 | 2 | 6  | 12 | GT   | 30 | 3  |
| 64635 | 6 | 10827552 | 10827577 | 2 | 13 | 26 | GT   | 16 | 13 |
| 64637 | 6 | 10832559 | 10832582 | 3 | 8  | 24 | TCT  | 18 | 7  |
| 64638 | 6 | 10833341 | 10833358 | 3 | 6  | 18 | CCT  | 23 | 4  |
| 64639 | 6 | 10834857 | 10834876 | 2 | 10 | 20 | AG   | 21 | 7  |
| 64640 | 6 | 10836159 | 10836172 | 2 | 7  | 14 | AC   | 25 | 3  |
| 64641 | 6 | 10836444 | 10836461 | 2 | 9  | 18 | GT   | 18 | 3  |
| 64642 | 6 | 10841194 | 10841211 | 3 | 6  | 18 | CTG  | 30 | 3  |
| 64644 | 6 | 10842088 | 10842117 | 2 | 15 | 30 | TC   | 21 | 10 |
| 64645 | 6 | 10842171 | 10842196 | 2 | 13 | 26 | AC   | 14 | 10 |
| 64656 | 6 | 10861383 | 10861396 | 2 | 7  | 14 | AC   | 25 | 8  |
| 64660 | 6 | 10862923 | 10862936 | 2 | 7  | 14 | GT   | 25 | 4  |
| 64662 | 6 | 10870554 | 10870569 | 4 | 4  | 16 | AAAT | 9  | 4  |
| 64664 | 6 | 10877070 | 10877085 | 2 | 8  | 16 | TG   | 24 | 6  |
| 64668 | 6 | 10880568 | 10880581 | 2 | 7  | 14 | GT   | 20 | 6  |
| 64669 | 6 | 10880624 | 10880647 | 2 | 12 | 24 | TG   | 13 | 8  |
| 64670 | 6 | 10880832 | 10880853 | 2 | 11 | 22 | AG   | 14 | 5  |
| 64673 | 6 | 10884498 | 10884521 | 2 | 12 | 24 | GA   | 16 | 8  |
| 64677 | 6 | 10891802 | 10891815 | 2 | 7  | 14 | GT   | 22 | 3  |
| 64680 | 6 | 10894451 | 10894484 | 2 | 17 | 34 | GT   | 7  | 12 |
| 64681 | 6 | 10895122 | 10895161 | 2 | 20 | 40 | CA   | 19 | 15 |
| 64682 | 6 | 10895449 | 10895460 | 2 | 6  | 12 | CA   | 24 | 3  |
| 64687 | 6 | 10896134 | 10896148 | 3 | 5  | 15 | CAG  | 23 | 6  |
| 64688 | 6 | 10896672 | 10896687 | 2 | 8  | 16 | GT   | 18 | 9  |
| 64689 | 6 | 10896691 | 10896704 | 2 | 7  | 14 | TG   | 11 | 5  |
| 64690 | 6 | 10896947 | 10896964 | 2 | 9  | 18 | CT   | 13 | 10 |
| 64691 | 6 | 10897021 | 10897040 | 2 | 10 | 20 | CT   | 12 | 12 |

|       |   |          |          |   |    |    |      |    |    |
|-------|---|----------|----------|---|----|----|------|----|----|
| 64694 | 6 | 10907039 | 10907054 | 2 | 8  | 16 | AC   | 10 | 3  |
| 64697 | 6 | 10916850 | 10916873 | 2 | 12 | 24 | GT   | 16 | 10 |
| 64698 | 6 | 10917388 | 10917411 | 2 | 12 | 24 | TG   | 12 | 3  |
| 64701 | 6 | 10924657 | 10924674 | 2 | 9  | 18 | AC   | 21 | 9  |
| 64702 | 6 | 10926918 | 10926937 | 2 | 10 | 20 | AC   | 22 | 3  |
| 64703 | 6 | 10928432 | 10928471 | 2 | 20 | 40 | CT   | 9  | 11 |
| 64708 | 6 | 10940792 | 10940809 | 2 | 9  | 18 | GA   | 24 | 3  |
| 64709 | 6 | 10941035 | 10941062 | 2 | 14 | 28 | TG   | 12 | 14 |
| 64723 | 6 | 10976578 | 10976603 | 2 | 13 | 26 | AC   | 6  | 6  |
| 64727 | 6 | 10977398 | 10977415 | 2 | 9  | 18 | TG   | 21 | 5  |
| 64736 | 6 | 10994796 | 10994810 | 3 | 5  | 15 | AAG  | 19 | 3  |
| 64737 | 6 | 10995720 | 10995751 | 2 | 16 | 32 | CA   | 7  | 8  |
| 64739 | 6 | 10997947 | 10997960 | 2 | 7  | 14 | AC   | 24 | 6  |
| 64742 | 6 | 10999922 | 10999936 | 3 | 5  | 15 | GAA  | 24 | 5  |
| 64744 | 6 | 11001197 | 11001217 | 3 | 7  | 21 | TTG  | 21 | 4  |
| 64751 | 6 | 11029445 | 11029462 | 2 | 9  | 18 | CA   | 18 | 4  |
| 64757 | 6 | 11036131 | 11036151 | 3 | 7  | 21 | TCT  | 13 | 9  |
| 64758 | 6 | 11037896 | 11037907 | 2 | 6  | 12 | CT   | 18 | 3  |
| 64759 | 6 | 11041125 | 11041144 | 4 | 5  | 20 | GACA | 31 | 4  |
| 64760 | 6 | 11053424 | 11053447 | 2 | 12 | 24 | AC   | 15 | 7  |
| 64761 | 6 | 11054140 | 11054161 | 2 | 11 | 22 | CA   | 6  | 6  |
| 64766 | 6 | 11083657 | 11083668 | 2 | 6  | 12 | CA   | 27 | 4  |
| 64767 | 6 | 11083941 | 11083958 | 3 | 6  | 18 | CAT  | 31 | 3  |
| 64772 | 6 | 11096815 | 11096844 | 2 | 15 | 30 | AC   | 20 | 7  |
| 64779 | 6 | 11112884 | 11112907 | 2 | 12 | 24 | GT   | 21 | 7  |
| 64783 | 6 | 11113729 | 11113746 | 2 | 9  | 18 | CT   | 24 | 3  |
| 64784 | 6 | 11115240 | 11115253 | 2 | 7  | 14 | AC   | 27 | 3  |
| 64786 | 6 | 11116251 | 11116282 | 2 | 16 | 32 | AC   | 22 | 15 |
| 64794 | 6 | 11123459 | 11123472 | 2 | 7  | 14 | GT   | 19 | 13 |
| 64797 | 6 | 11127450 | 11127461 | 2 | 6  | 12 | AC   | 19 | 6  |
| 64803 | 6 | 11133674 | 11133705 | 4 | 8  | 32 | CTGT | 25 | 6  |
| 64810 | 6 | 11149208 | 11149225 | 2 | 9  | 18 | TC   | 15 | 4  |
| 64811 | 6 | 11149227 | 11149238 | 2 | 6  | 12 | CT   | 16 | 5  |
| 64813 | 6 | 11151638 | 11151649 | 2 | 6  | 12 | AT   | 9  | 3  |
| 64814 | 6 | 11156824 | 11156837 | 2 | 7  | 14 | AC   | 30 | 3  |
| 64817 | 6 | 11162934 | 11162945 | 2 | 6  | 12 | CA   | 24 | 5  |
| 64829 | 6 | 11184121 | 11184144 | 2 | 12 | 24 | GT   | 18 | 8  |
| 64836 | 6 | 11197772 | 11197791 | 2 | 10 | 20 | GA   | 13 | 4  |
| 64841 | 6 | 11202558 | 11202581 | 2 | 12 | 24 | AC   | 10 | 7  |
| 64843 | 6 | 11207685 | 11207700 | 2 | 8  | 16 | TG   | 22 | 4  |
| 64846 | 6 | 11210465 | 11210492 | 2 | 14 | 28 | CA   | 23 | 7  |
| 64849 | 6 | 11212187 | 11212201 | 3 | 5  | 15 | GTG  | 24 | 5  |
| 64855 | 6 | 11222365 | 11222378 | 2 | 7  | 14 | CT   | 30 | 4  |
| 64863 | 6 | 11235444 | 11235469 | 2 | 13 | 26 | CA   | 13 | 10 |
| 64866 | 6 | 11246272 | 11246295 | 3 | 8  | 24 | TGT  | 30 | 3  |
| 64872 | 6 | 11260711 | 11260740 | 3 | 10 | 30 | GCT  | 17 | 6  |
| 64873 | 6 | 11280425 | 11280440 | 4 | 4  | 16 | TCCA | 30 | 3  |
| 64876 | 6 | 11287916 | 11287931 | 2 | 8  | 16 | TC   | 23 | 5  |
| 64879 | 6 | 11301261 | 11301276 | 2 | 8  | 16 | GT   | 15 | 5  |
| 64882 | 6 | 11313198 | 11313218 | 3 | 7  | 21 | CTG  | 22 | 3  |
| 64884 | 6 | 11316456 | 11316475 | 4 | 5  | 20 | AAAT | 12 | 7  |

|       |   |          |          |   |    |    |      |    |    |
|-------|---|----------|----------|---|----|----|------|----|----|
| 64885 | 6 | 11318450 | 11318473 | 2 | 12 | 24 | TC   | 20 | 9  |
| 64895 | 6 | 11336339 | 11336356 | 3 | 6  | 18 | TTG  | 25 | 3  |
| 64897 | 6 | 11337166 | 11337209 | 4 | 11 | 44 | AAGA | 17 | 8  |
| 64902 | 6 | 11352966 | 11352977 | 2 | 6  | 12 | AC   | 13 | 4  |
| 64906 | 6 | 11357138 | 11357149 | 2 | 6  | 12 | CT   | 25 | 3  |
| 64909 | 6 | 11368977 | 11368990 | 2 | 7  | 14 | GT   | 27 | 5  |
| 64914 | 6 | 11373542 | 11373567 | 2 | 13 | 26 | TG   | 7  | 7  |
| 64919 | 6 | 11383927 | 11383938 | 2 | 6  | 12 | CA   | 29 | 4  |
| 64921 | 6 | 11386909 | 11386922 | 2 | 7  | 14 | AC   | 18 | 4  |
| 64922 | 6 | 11386968 | 11386985 | 2 | 9  | 18 | CA   | 19 | 3  |
| 64933 | 6 | 11393556 | 11393575 | 2 | 10 | 20 | TG   | 12 | 5  |
| 64937 | 6 | 11394725 | 11394774 | 2 | 25 | 50 | GT   | 16 | 14 |
| 64948 | 6 | 11403253 | 11403268 | 2 | 8  | 16 | AC   | 10 | 3  |
| 64950 | 6 | 11403327 | 11403352 | 2 | 13 | 26 | CA   | 15 | 12 |
| 64954 | 6 | 11417216 | 11417237 | 2 | 11 | 22 | CA   | 18 | 10 |
| 64957 | 6 | 11424299 | 11424314 | 2 | 8  | 16 | AC   | 8  | 6  |
| 64958 | 6 | 11432534 | 11432545 | 2 | 6  | 12 | AC   | 24 | 3  |
| 64960 | 6 | 11441754 | 11441765 | 2 | 6  | 12 | GA   | 22 | 3  |
| 64964 | 6 | 11454570 | 11454595 | 2 | 13 | 26 | GT   | 13 | 7  |
| 64981 | 6 | 11484143 | 11484157 | 3 | 5  | 15 | TGA  | 34 | 3  |
| 64987 | 6 | 11487451 | 11487482 | 2 | 16 | 32 | CA   | 15 | 11 |
| 64989 | 6 | 11488885 | 11488908 | 3 | 8  | 24 | GGT  | 15 | 3  |
| 64990 | 6 | 11489604 | 11489645 | 2 | 21 | 42 | TG   | 12 | 8  |
| 64996 | 6 | 11499740 | 11499751 | 2 | 6  | 12 | AC   | 17 | 4  |
| 64997 | 6 | 11499754 | 11499769 | 2 | 8  | 16 | AC   | 21 | 5  |
| 65002 | 6 | 11508493 | 11508507 | 3 | 5  | 15 | GAA  | 16 | 3  |
| 65015 | 6 | 11531483 | 11531510 | 2 | 14 | 28 | CA   | 16 | 10 |
| 65016 | 6 | 11534178 | 11534213 | 3 | 12 | 36 | AGG  | 13 | 6  |
| 65019 | 6 | 11537086 | 11537127 | 3 | 14 | 42 | AGC  | 20 | 10 |
| 65024 | 6 | 11544650 | 11544661 | 2 | 6  | 12 | AC   | 23 | 4  |
| 65035 | 6 | 11569051 | 11569064 | 2 | 7  | 14 | AC   | 16 | 5  |
| 65043 | 6 | 11602021 | 11602044 | 2 | 12 | 24 | CA   | 16 | 10 |
| 65044 | 6 | 11603472 | 11603485 | 2 | 7  | 14 | GA   | 11 | 5  |
| 65047 | 6 | 11609296 | 11609319 | 2 | 12 | 24 | TG   | 18 | 8  |
| 65049 | 6 | 11610487 | 11610508 | 2 | 11 | 22 | AC   | 19 | 7  |
| 65052 | 6 | 11614372 | 11614407 | 2 | 18 | 36 | CA   | 17 | 10 |
| 65058 | 6 | 11622384 | 11622407 | 3 | 8  | 24 | CCT  | 26 | 9  |
| 65059 | 6 | 11622893 | 11622910 | 2 | 9  | 18 | GT   | 14 | 9  |
| 65060 | 6 | 11624516 | 11624541 | 2 | 13 | 26 | GT   | 17 | 6  |
| 65061 | 6 | 11625192 | 11625212 | 3 | 7  | 21 | TGG  | 21 | 3  |
| 65062 | 6 | 11625399 | 11625414 | 2 | 8  | 16 | TG   | 18 | 5  |
| 65068 | 6 | 11641524 | 11641549 | 2 | 13 | 26 | TC   | 12 | 6  |
| 65071 | 6 | 11661908 | 11661931 | 2 | 12 | 24 | AC   | 10 | 8  |
| 65073 | 6 | 11670082 | 11670101 | 2 | 10 | 20 | GA   | 23 | 3  |
| 65074 | 6 | 11684617 | 11684642 | 2 | 13 | 26 | TG   | 20 | 10 |
| 65076 | 6 | 11685496 | 11685515 | 2 | 10 | 20 | TG   | 25 | 15 |
| 65081 | 6 | 11701369 | 11701388 | 2 | 10 | 20 | CA   | 14 | 10 |
| 65086 | 6 | 11732572 | 11732585 | 2 | 7  | 14 | TG   | 33 | 5  |
| 65088 | 6 | 11734397 | 11734422 | 2 | 13 | 26 | GT   | 22 | 9  |
| 65089 | 6 | 11735126 | 11735153 | 4 | 7  | 28 | AAAC | 18 | 5  |
| 65091 | 6 | 11736123 | 11736136 | 2 | 7  | 14 | AC   | 30 | 3  |

|       |   |          |          |   |    |    |      |    |    |
|-------|---|----------|----------|---|----|----|------|----|----|
| 65098 | 6 | 11750559 | 11750590 | 2 | 16 | 32 | CA   | 8  | 7  |
| 65099 | 6 | 11750865 | 11750888 | 4 | 6  | 24 | TTTC | 26 | 3  |
| 65101 | 6 | 11757222 | 11757241 | 2 | 10 | 20 | CA   | 15 | 7  |
| 65102 | 6 | 11768685 | 11768696 | 2 | 6  | 12 | AC   | 24 | 4  |
| 65107 | 6 | 11777153 | 11777172 | 2 | 10 | 20 | GT   | 25 | 6  |
| 65109 | 6 | 11777441 | 11777468 | 2 | 14 | 28 | GT   | 18 | 8  |
| 65117 | 6 | 11807545 | 11807560 | 4 | 4  | 16 | ATAG | 16 | 7  |
| 65119 | 6 | 11807667 | 11807680 | 2 | 7  | 14 | AC   | 19 | 5  |
| 65123 | 6 | 11808024 | 11808047 | 3 | 8  | 24 | CAG  | 8  | 7  |
| 65128 | 6 | 11808405 | 11808424 | 4 | 5  | 20 | CCGA | 28 | 4  |
| 65129 | 6 | 11809184 | 11809205 | 2 | 11 | 22 | AC   | 18 | 15 |
| 65132 | 6 | 11814276 | 11814302 | 3 | 9  | 27 | TCT  | 19 | 5  |
| 65139 | 6 | 11831673 | 11831706 | 2 | 17 | 34 | GA   | 22 | 12 |
| 65148 | 6 | 11857478 | 11857507 | 2 | 15 | 30 | AC   | 8  | 9  |
| 65149 | 6 | 11857913 | 11857934 | 2 | 11 | 22 | AC   | 22 | 5  |
| 65151 | 6 | 11865520 | 11865535 | 4 | 4  | 16 | ATAA | 10 | 3  |
| 65158 | 6 | 11883950 | 11883961 | 2 | 6  | 12 | AT   | 12 | 4  |
| 65163 | 6 | 11888981 | 11888998 | 2 | 9  | 18 | AC   | 18 | 17 |
| 65167 | 6 | 11896778 | 11896791 | 2 | 7  | 14 | GT   | 10 | 8  |
| 65171 | 6 | 11914702 | 11914716 | 3 | 5  | 15 | TGC  | 29 | 4  |
| 65176 | 6 | 11936832 | 11936843 | 2 | 6  | 12 | GT   | 30 | 10 |
| 65191 | 6 | 11960365 | 11960376 | 2 | 6  | 12 | CT   | 19 | 6  |
| 65201 | 6 | 11982634 | 11982649 | 4 | 4  | 16 | CTCA | 29 | 3  |
| 65203 | 6 | 12002728 | 12002763 | 4 | 9  | 36 | TATC | 22 | 12 |
| 65208 | 6 | 12013076 | 12013099 | 2 | 12 | 24 | GT   | 21 | 8  |
| 65211 | 6 | 12013648 | 12013663 | 2 | 8  | 16 | TG   | 15 | 4  |
| 65218 | 6 | 12024701 | 12024726 | 2 | 13 | 26 | AG   | 14 | 7  |
| 65225 | 6 | 12027073 | 12027092 | 2 | 10 | 20 | GT   | 26 | 5  |
| 65226 | 6 | 12027667 | 12027682 | 2 | 8  | 16 | TG   | 21 | 12 |
| 65230 | 6 | 12030075 | 12030090 | 2 | 8  | 16 | AC   | 22 | 4  |
| 65231 | 6 | 12031110 | 12031121 | 2 | 6  | 12 | TG   | 30 | 3  |
| 65233 | 6 | 12031427 | 12031440 | 2 | 7  | 14 | GT   | 24 | 7  |
| 65239 | 6 | 12035197 | 12035220 | 2 | 12 | 24 | TG   | 16 | 7  |
| 65241 | 6 | 12035386 | 12035403 | 2 | 9  | 18 | CA   | 6  | 5  |
| 65242 | 6 | 12039129 | 12039162 | 2 | 17 | 34 | TG   | 18 | 12 |
| 65243 | 6 | 12039429 | 12039442 | 2 | 7  | 14 | CA   | 19 | 8  |
| 65246 | 6 | 12042348 | 12042369 | 2 | 11 | 22 | AC   | 14 | 7  |
| 65247 | 6 | 12042540 | 12042559 | 2 | 10 | 20 | CA   | 20 | 5  |
| 65248 | 6 | 12043938 | 12043961 | 2 | 12 | 24 | GA   | 18 | 5  |
| 65264 | 6 | 12055261 | 12055288 | 2 | 14 | 28 | CA   | 11 | 13 |
| 65270 | 6 | 12059520 | 12059543 | 2 | 12 | 24 | CA   | 14 | 5  |
| 65275 | 6 | 12061306 | 12061320 | 3 | 5  | 15 | CAG  | 17 | 4  |
| 65276 | 6 | 12061434 | 12061469 | 2 | 18 | 36 | GT   | 12 | 13 |
| 65280 | 6 | 12070235 | 12070252 | 2 | 9  | 18 | AG   | 15 | 3  |
| 65282 | 6 | 12071957 | 12071976 | 4 | 5  | 20 | AACC | 12 | 3  |
| 65283 | 6 | 12077301 | 12077326 | 2 | 13 | 26 | AC   | 12 | 10 |
| 65286 | 6 | 12078057 | 12078071 | 3 | 5  | 15 | GAG  | 11 | 3  |
| 65287 | 6 | 12082997 | 12083011 | 3 | 5  | 15 | TCA  | 34 | 4  |
| 65288 | 6 | 12083177 | 12083194 | 2 | 9  | 18 | CA   | 18 | 8  |
| 65290 | 6 | 12088388 | 12088405 | 3 | 6  | 18 | AAT  | 18 | 5  |
| 65293 | 6 | 12097600 | 12097623 | 2 | 12 | 24 | AC   | 19 | 6  |

|       |   |          |          |   |    |    |      |    |    |
|-------|---|----------|----------|---|----|----|------|----|----|
| 65297 | 6 | 12110055 | 12110072 | 2 | 9  | 18 | CA   | 27 | 6  |
| 65298 | 6 | 12110594 | 12110605 | 2 | 6  | 12 | AC   | 34 | 5  |
| 65300 | 6 | 12114531 | 12114566 | 3 | 12 | 36 | TGC  | 21 | 12 |
| 65303 | 6 | 12114834 | 12114867 | 2 | 17 | 34 | AG   | 11 | 6  |
| 65304 | 6 | 12115145 | 12115166 | 2 | 11 | 22 | TC   | 12 | 5  |
| 65308 | 6 | 12118129 | 12118143 | 3 | 5  | 15 | AAG  | 25 | 4  |
| 65311 | 6 | 12122987 | 12123002 | 2 | 8  | 16 | AG   | 8  | 3  |
| 65312 | 6 | 12125715 | 12125734 | 2 | 10 | 20 | TG   | 32 | 13 |
| 65315 | 6 | 12135644 | 12135669 | 2 | 13 | 26 | CA   | 28 | 7  |
| 65316 | 6 | 12135771 | 12135786 | 2 | 8  | 16 | AC   | 25 | 4  |
| 65319 | 6 | 12141387 | 12141402 | 4 | 4  | 16 | ATGT | 13 | 3  |
| 65322 | 6 | 12142493 | 12142504 | 2 | 6  | 12 | AT   | 18 | 3  |
| 65328 | 6 | 12147477 | 12147498 | 2 | 11 | 22 | CA   | 15 | 6  |
| 65329 | 6 | 12147723 | 12147738 | 2 | 8  | 16 | AC   | 18 | 4  |
| 65339 | 6 | 12165842 | 12165861 | 2 | 10 | 20 | TG   | 15 | 16 |
| 65374 | 6 | 12229076 | 12229091 | 2 | 8  | 16 | GT   | 29 | 3  |
| 65390 | 6 | 12261458 | 12261469 | 2 | 6  | 12 | CA   | 20 | 4  |
| 65393 | 6 | 12268634 | 12268647 | 2 | 7  | 14 | AT   | 14 | 4  |
| 65395 | 6 | 12277325 | 12277342 | 2 | 9  | 18 | CA   | 20 | 6  |
| 65409 | 6 | 12327694 | 12327709 | 2 | 8  | 16 | GT   | 28 | 4  |
| 65411 | 6 | 12329521 | 12329550 | 2 | 15 | 30 | TG   | 22 | 7  |
| 65416 | 6 | 12344500 | 12344511 | 2 | 6  | 12 | GT   | 17 | 6  |
| 65417 | 6 | 12351467 | 12351480 | 2 | 7  | 14 | AG   | 29 | 3  |
| 65424 | 6 | 12358077 | 12358103 | 3 | 9  | 27 | TCC  | 13 | 13 |
| 65426 | 6 | 12358224 | 12358241 | 3 | 6  | 18 | TCC  | 11 | 6  |
| 65428 | 6 | 12368517 | 12368528 | 2 | 6  | 12 | TA   | 14 | 4  |
| 65430 | 6 | 12377261 | 12377276 | 2 | 8  | 16 | AC   | 22 | 7  |
| 65432 | 6 | 12377416 | 12377427 | 2 | 6  | 12 | TG   | 30 | 3  |
| 65434 | 6 | 12382155 | 12382182 | 2 | 14 | 28 | CA   | 16 | 15 |
| 65442 | 6 | 12406226 | 12406245 | 2 | 10 | 20 | AT   | 12 | 7  |
| 65444 | 6 | 12413621 | 12413632 | 2 | 6  | 12 | AT   | 21 | 3  |
| 65446 | 6 | 12416468 | 12416500 | 3 | 11 | 33 | CAG  | 21 | 10 |
| 65447 | 6 | 12417346 | 12417402 | 3 | 19 | 57 | CAG  | 16 | 12 |
| 65448 | 6 | 12419802 | 12419822 | 3 | 7  | 21 | CAG  | 22 | 5  |
| 65449 | 6 | 12422745 | 12422760 | 4 | 4  | 16 | AAAC | 21 | 3  |
| 65451 | 6 | 12423692 | 12423721 | 2 | 15 | 30 | TG   | 6  | 7  |
| 65457 | 6 | 12448021 | 12448034 | 2 | 7  | 14 | TA   | 15 | 6  |
| 65460 | 6 | 12452142 | 12452155 | 2 | 7  | 14 | CA   | 12 | 13 |
| 65462 | 6 | 12461481 | 12461492 | 2 | 6  | 12 | AC   | 32 | 4  |
| 65467 | 6 | 12465450 | 12465473 | 4 | 6  | 24 | ATTT | 11 | 6  |
| 65468 | 6 | 12468448 | 12468467 | 2 | 10 | 20 | TG   | 21 | 6  |
| 65469 | 6 | 12470907 | 12470926 | 2 | 10 | 20 | TG   | 24 | 9  |
| 65472 | 6 | 12474054 | 12474095 | 2 | 21 | 42 | GT   | 9  | 10 |
| 65476 | 6 | 12480972 | 12480995 | 2 | 12 | 24 | AC   | 8  | 9  |
| 65477 | 6 | 12481967 | 12481984 | 2 | 9  | 18 | TC   | 10 | 11 |
| 65479 | 6 | 12485112 | 12485125 | 2 | 7  | 14 | TC   | 31 | 3  |
| 65480 | 6 | 12485665 | 12485676 | 2 | 6  | 12 | TG   | 15 | 10 |
| 65481 | 6 | 12485899 | 12485916 | 2 | 9  | 18 | TG   | 24 | 16 |
| 65488 | 6 | 12495341 | 12495356 | 4 | 4  | 16 | ATGC | 27 | 4  |
| 65498 | 6 | 12514736 | 12514759 | 3 | 8  | 24 | AAT  | 22 | 7  |
| 65499 | 6 | 12516910 | 12516930 | 3 | 7  | 21 | GCT  | 22 | 4  |

|       |   |          |          |   |    |    |      |    |    |
|-------|---|----------|----------|---|----|----|------|----|----|
| 65508 | 6 | 12533494 | 12533511 | 2 | 9  | 18 | GA   | 23 | 3  |
| 65516 | 6 | 12559456 | 12559469 | 2 | 7  | 14 | AC   | 25 | 4  |
| 65521 | 6 | 12580574 | 12580589 | 4 | 4  | 16 | ACGC | 14 | 4  |
| 65522 | 6 | 12582603 | 12582629 | 3 | 9  | 27 | TCA  | 22 | 10 |
| 65523 | 6 | 12583106 | 12583126 | 3 | 7  | 21 | CAT  | 28 | 6  |
| 65524 | 6 | 12590019 | 12590032 | 2 | 7  | 14 | CG   | 29 | 10 |
| 65525 | 6 | 12591654 | 12591665 | 2 | 6  | 12 | AT   | 7  | 3  |
| 65552 | 6 | 12622420 | 12622435 | 4 | 4  | 16 | CTTT | 22 | 8  |
| 65560 | 6 | 12647801 | 12647820 | 2 | 10 | 20 | GT   | 15 | 7  |
| 65566 | 6 | 12653458 | 12653493 | 2 | 18 | 36 | GT   | 15 | 13 |
| 65569 | 6 | 12657543 | 12657574 | 2 | 16 | 32 | AC   | 8  | 6  |
| 65571 | 6 | 12659792 | 12659809 | 2 | 9  | 18 | AC   | 17 | 5  |
| 65573 | 6 | 12662639 | 12662666 | 4 | 7  | 28 | AAAC | 18 | 3  |
| 65575 | 6 | 12664769 | 12664788 | 2 | 10 | 20 | GT   | 16 | 9  |
| 65576 | 6 | 12664971 | 12664988 | 3 | 6  | 18 | CCT  | 19 | 5  |
| 65578 | 6 | 12665380 | 12665391 | 2 | 6  | 12 | AT   | 11 | 6  |
| 65612 | 6 | 12697948 | 12697961 | 2 | 7  | 14 | AT   | 10 | 5  |
| 65617 | 6 | 12704642 | 12704659 | 2 | 9  | 18 | AG   | 24 | 4  |
| 65618 | 6 | 12706455 | 12706472 | 2 | 9  | 18 | TG   | 24 | 4  |
| 65619 | 6 | 12706539 | 12706550 | 2 | 6  | 12 | TC   | 22 | 4  |
| 65630 | 6 | 12729197 | 12729208 | 2 | 6  | 12 | AC   | 25 | 6  |
| 65635 | 6 | 12734772 | 12734789 | 2 | 9  | 18 | GT   | 23 | 4  |
| 65640 | 6 | 12742378 | 12742405 | 2 | 14 | 28 | GT   | 8  | 10 |
| 65643 | 6 | 12744543 | 12744556 | 2 | 7  | 14 | AG   | 27 | 4  |
| 65648 | 6 | 12757109 | 12757126 | 2 | 9  | 18 | TC   | 17 | 7  |
| 65654 | 6 | 12763831 | 12763850 | 2 | 10 | 20 | TG   | 19 | 3  |
| 65655 | 6 | 12765322 | 12765335 | 2 | 7  | 14 | GT   | 25 | 4  |
| 65658 | 6 | 12767823 | 12767846 | 3 | 8  | 24 | CTC  | 21 | 4  |
| 65659 | 6 | 12768419 | 12768442 | 2 | 12 | 24 | AG   | 9  | 5  |
| 65661 | 6 | 12771327 | 12771342 | 2 | 8  | 16 | CA   | 24 | 3  |
| 65663 | 6 | 12772431 | 12772448 | 2 | 9  | 18 | CA   | 22 | 10 |
| 65665 | 6 | 12772890 | 12772904 | 3 | 5  | 15 | GAG  | 26 | 3  |
| 65670 | 6 | 12778336 | 12778371 | 3 | 12 | 36 | AAT  | 9  | 6  |
| 65682 | 6 | 12787176 | 12787197 | 2 | 11 | 22 | TC   | 16 | 5  |
| 65685 | 6 | 12791525 | 12791536 | 2 | 6  | 12 | TC   | 14 | 5  |
| 65688 | 6 | 12795961 | 12795976 | 2 | 8  | 16 | TG   | 20 | 4  |
| 65698 | 6 | 12809576 | 12809607 | 2 | 16 | 32 | TG   | 14 | 7  |
| 65701 | 6 | 12813626 | 12813637 | 2 | 6  | 12 | GA   | 18 | 4  |
| 65702 | 6 | 12816119 | 12816132 | 2 | 7  | 14 | AC   | 10 | 5  |
| 65703 | 6 | 12820192 | 12820206 | 3 | 5  | 15 | GAG  | 29 | 3  |
| 65713 | 6 | 12835581 | 12835614 | 2 | 17 | 34 | AC   | 11 | 11 |
| 65715 | 6 | 12836481 | 12836528 | 2 | 24 | 48 | GT   | 7  | 12 |
| 65719 | 6 | 12840565 | 12840582 | 3 | 6  | 18 | CTC  | 29 | 8  |
| 65721 | 6 | 12842216 | 12842239 | 2 | 12 | 24 | CA   | 17 | 9  |
| 65722 | 6 | 12842735 | 12842770 | 2 | 18 | 36 | AC   | 6  | 5  |
| 65727 | 6 | 12854107 | 12854118 | 2 | 6  | 12 | CA   | 16 | 7  |
| 65728 | 6 | 12854864 | 12854875 | 2 | 6  | 12 | GT   | 16 | 5  |
| 65738 | 6 | 12864082 | 12864093 | 2 | 6  | 12 | AC   | 14 | 4  |
| 65739 | 6 | 12864095 | 12864108 | 2 | 7  | 14 | CA   | 24 | 8  |
| 65745 | 6 | 12871325 | 12871362 | 2 | 19 | 38 | GT   | 14 | 15 |
| 65748 | 6 | 12873544 | 12873559 | 2 | 8  | 16 | TG   | 24 | 5  |

|       |   |          |          |   |    |    |      |    |    |
|-------|---|----------|----------|---|----|----|------|----|----|
| 65749 | 6 | 12873993 | 12874010 | 2 | 9  | 18 | AG   | 15 | 4  |
| 65751 | 6 | 12874280 | 12874293 | 2 | 7  | 14 | TG   | 18 | 3  |
| 65756 | 6 | 12878677 | 12878698 | 2 | 11 | 22 | AC   | 17 | 7  |
| 65757 | 6 | 12878860 | 12878871 | 2 | 6  | 12 | GA   | 20 | 5  |
| 65778 | 6 | 12913065 | 12913082 | 2 | 9  | 18 | AG   | 16 | 6  |
| 65781 | 6 | 12921193 | 12921226 | 2 | 17 | 34 | AC   | 9  | 10 |
| 65782 | 6 | 12921283 | 12921296 | 2 | 7  | 14 | CA   | 17 | 5  |
| 65783 | 6 | 12921298 | 12921313 | 2 | 8  | 16 | AC   | 20 | 3  |
| 65786 | 6 | 12925303 | 12925317 | 3 | 5  | 15 | GAG  | 8  | 3  |
| 65788 | 6 | 12927833 | 12927852 | 4 | 5  | 20 | ATGT | 30 | 3  |
| 65790 | 6 | 12929082 | 12929096 | 3 | 5  | 15 | TGT  | 20 | 4  |
| 65794 | 6 | 12930593 | 12930608 | 2 | 8  | 16 | AC   | 25 | 8  |
| 65795 | 6 | 12930761 | 12930776 | 4 | 4  | 16 | CAGG | 20 | 5  |
| 65808 | 6 | 12939236 | 12939249 | 2 | 7  | 14 | AC   | 17 | 5  |
| 65809 | 6 | 12939480 | 12939507 | 2 | 14 | 28 | GA   | 17 | 10 |
| 65812 | 6 | 12945474 | 12945487 | 2 | 7  | 14 | CA   | 25 | 4  |
| 65813 | 6 | 12945637 | 12945652 | 2 | 8  | 16 | AG   | 24 | 3  |
| 65824 | 6 | 12960063 | 12960074 | 2 | 6  | 12 | AC   | 22 | 5  |
| 65826 | 6 | 12960985 | 12961000 | 2 | 8  | 16 | TG   | 15 | 3  |
| 65828 | 6 | 12970501 | 12970522 | 2 | 11 | 22 | AG   | 16 | 5  |
| 65829 | 6 | 12971207 | 12971226 | 2 | 10 | 20 | AG   | 23 | 9  |
| 65830 | 6 | 12971497 | 12971508 | 2 | 6  | 12 | TG   | 13 | 6  |
| 65832 | 6 | 12971680 | 12971703 | 2 | 12 | 24 | GA   | 7  | 6  |
| 65835 | 6 | 12974526 | 12974553 | 2 | 14 | 28 | GT   | 21 | 13 |
| 65846 | 6 | 12992377 | 12992404 | 2 | 14 | 28 | GT   | 19 | 10 |
| 65848 | 6 | 12993238 | 12993255 | 2 | 9  | 18 | CA   | 18 | 8  |
| 65850 | 6 | 12995065 | 12995076 | 2 | 6  | 12 | CT   | 26 | 5  |
| 65874 | 6 | 13052288 | 13052305 | 2 | 9  | 18 | CA   | 27 | 3  |
| 65875 | 6 | 13052624 | 13052643 | 2 | 10 | 20 | AC   | 22 | 9  |
| 65878 | 6 | 13059387 | 13059418 | 2 | 16 | 32 | AC   | 10 | 7  |
| 65879 | 6 | 13064134 | 13064157 | 2 | 12 | 24 | GA   | 17 | 7  |
| 65880 | 6 | 13064729 | 13064752 | 2 | 12 | 24 | GT   | 14 | 5  |
| 65890 | 6 | 13081449 | 13081470 | 2 | 11 | 22 | TG   | 27 | 8  |
| 65893 | 6 | 13092999 | 13093022 | 4 | 6  | 24 | AACC | 23 | 6  |
| 65900 | 6 | 13108340 | 13108355 | 2 | 8  | 16 | TC   | 21 | 5  |
| 65906 | 6 | 13130934 | 13130955 | 2 | 11 | 22 | GT   | 19 | 9  |
| 65910 | 6 | 13133096 | 13133113 | 2 | 9  | 18 | CA   | 12 | 3  |
| 65913 | 6 | 13135927 | 13135946 | 2 | 10 | 20 | TG   | 13 | 3  |
| 65916 | 6 | 13136225 | 13136238 | 2 | 7  | 14 | GA   | 21 | 3  |
| 65921 | 6 | 13136371 | 13136382 | 2 | 6  | 12 | GA   | 22 | 4  |
| 65925 | 6 | 13138010 | 13138033 | 3 | 8  | 24 | CCT  | 32 | 3  |
| 65938 | 6 | 13154391 | 13154402 | 2 | 6  | 12 | TG   | 23 | 3  |
| 65948 | 6 | 13161130 | 13161143 | 2 | 7  | 14 | TA   | 22 | 5  |
| 65956 | 6 | 13169306 | 13169337 | 2 | 16 | 32 | TG   | 7  | 5  |
| 65964 | 6 | 13176673 | 13176718 | 2 | 23 | 46 | GA   | 6  | 9  |
| 65967 | 6 | 13177446 | 13177469 | 2 | 12 | 24 | AC   | 15 | 9  |
| 65971 | 6 | 13180953 | 13180988 | 3 | 12 | 36 | AAC  | 13 | 7  |
| 65981 | 6 | 13197340 | 13197351 | 2 | 6  | 12 | TC   | 22 | 3  |
| 65984 | 6 | 13205867 | 13205888 | 2 | 11 | 22 | GT   | 19 | 5  |
| 65986 | 6 | 13210062 | 13210091 | 2 | 15 | 30 | CA   | 13 | 7  |
| 65990 | 6 | 13221041 | 13221072 | 2 | 16 | 32 | TG   | 12 | 8  |

|       |   |          |          |   |    |    |      |    |    |
|-------|---|----------|----------|---|----|----|------|----|----|
| 65994 | 6 | 13226814 | 13226859 | 2 | 23 | 46 | GT   | 13 | 8  |
| 66001 | 6 | 13242535 | 13242546 | 2 | 6  | 12 | AC   | 23 | 3  |
| 66010 | 6 | 13266588 | 13266599 | 2 | 6  | 12 | CA   | 23 | 7  |
| 66011 | 6 | 13268812 | 13268831 | 2 | 10 | 20 | GT   | 17 | 6  |
| 66013 | 6 | 13269870 | 13269889 | 4 | 5  | 20 | TGGA | 25 | 3  |
| 66029 | 6 | 13300462 | 13300485 | 2 | 12 | 24 | GT   | 13 | 7  |
| 66030 | 6 | 13300539 | 13300550 | 2 | 6  | 12 | AC   | 26 | 4  |
| 66036 | 6 | 13313826 | 13313840 | 3 | 5  | 15 | AAG  | 14 | 3  |
| 66045 | 6 | 13318079 | 13318096 | 3 | 6  | 18 | CAC  | 27 | 5  |
| 66054 | 6 | 13328856 | 13328891 | 4 | 9  | 36 | AGGC | 31 | 3  |
| 66073 | 6 | 13366753 | 13366784 | 4 | 8  | 32 | CCAT | 25 | 5  |
| 66075 | 6 | 13371845 | 13371864 | 2 | 10 | 20 | GA   | 15 | 12 |
| 66085 | 6 | 13388306 | 13388323 | 2 | 9  | 18 | CT   | 20 | 4  |
| 66087 | 6 | 13395964 | 13395977 | 2 | 7  | 14 | TG   | 24 | 5  |
| 66089 | 6 | 13398134 | 13398154 | 3 | 7  | 21 | GAG  | 17 | 3  |
| 66095 | 6 | 13411835 | 13411864 | 2 | 15 | 30 | AG   | 14 | 10 |
| 66101 | 6 | 13422650 | 13422663 | 2 | 7  | 14 | TG   | 20 | 3  |
| 66103 | 6 | 13429569 | 13429595 | 3 | 9  | 27 | CTG  | 28 | 12 |
| 66106 | 6 | 13443431 | 13443448 | 2 | 9  | 18 | GA   | 20 | 6  |
| 66108 | 6 | 13445190 | 13445201 | 2 | 6  | 12 | GT   | 30 | 3  |
| 66109 | 6 | 13447084 | 13447095 | 2 | 6  | 12 | GT   | 16 | 4  |
| 66110 | 6 | 13447098 | 13447113 | 2 | 8  | 16 | GT   | 16 | 7  |
| 66114 | 6 | 13455696 | 13455711 | 2 | 8  | 16 | CA   | 20 | 4  |
| 66126 | 6 | 13479388 | 13479417 | 2 | 15 | 30 | GT   | 14 | 9  |
| 66128 | 6 | 13481801 | 13481812 | 2 | 6  | 12 | TG   | 29 | 5  |
| 66137 | 6 | 13489543 | 13489558 | 2 | 8  | 16 | CT   | 22 | 8  |
| 66138 | 6 | 13493662 | 13493675 | 2 | 7  | 14 | TA   | 19 | 6  |
| 66141 | 6 | 13497889 | 13497936 | 2 | 24 | 48 | CA   | 9  | 12 |
| 66142 | 6 | 13497978 | 13497991 | 2 | 7  | 14 | AC   | 14 | 4  |
| 66143 | 6 | 13501721 | 13501738 | 2 | 9  | 18 | GA   | 8  | 4  |
| 66146 | 6 | 13516716 | 13516737 | 2 | 11 | 22 | TG   | 24 | 9  |
| 66148 | 6 | 13519274 | 13519295 | 2 | 11 | 22 | TG   | 15 | 8  |
| 66150 | 6 | 13519873 | 13519906 | 2 | 17 | 34 | GT   | 17 | 13 |
| 66151 | 6 | 13520584 | 13520615 | 2 | 16 | 32 | GT   | 12 | 8  |
| 66163 | 6 | 13535315 | 13535328 | 2 | 7  | 14 | TA   | 10 | 6  |
| 66165 | 6 | 13536527 | 13536540 | 2 | 7  | 14 | GT   | 31 | 6  |
| 66167 | 6 | 13538038 | 13538061 | 3 | 8  | 24 | CCT  | 24 | 8  |
| 66173 | 6 | 13547242 | 13547253 | 2 | 6  | 12 | GT   | 25 | 6  |
| 66176 | 6 | 13561484 | 13561505 | 2 | 11 | 22 | TG   | 10 | 10 |
| 66179 | 6 | 13569847 | 13569868 | 2 | 11 | 22 | TG   | 17 | 4  |
| 66184 | 6 | 13578437 | 13578462 | 2 | 13 | 26 | GT   | 15 | 7  |
| 66186 | 6 | 13579217 | 13579232 | 4 | 4  | 16 | AAAC | 13 | 5  |
| 66187 | 6 | 13581083 | 13581094 | 2 | 6  | 12 | GA   | 22 | 4  |
| 66188 | 6 | 13581267 | 13581292 | 2 | 13 | 26 | AC   | 15 | 7  |
| 66189 | 6 | 13583546 | 13583569 | 2 | 12 | 24 | CA   | 18 | 4  |
| 66194 | 6 | 13586882 | 13586897 | 2 | 8  | 16 | CA   | 21 | 6  |
| 66196 | 6 | 13587703 | 13587714 | 2 | 6  | 12 | CA   | 29 | 3  |
| 66200 | 6 | 13594384 | 13594395 | 2 | 6  | 12 | CA   | 25 | 3  |
| 66201 | 6 | 13594670 | 13594685 | 4 | 4  | 16 | AAAT | 17 | 4  |
| 66203 | 6 | 13595590 | 13595615 | 2 | 13 | 26 | GT   | 14 | 13 |
| 66207 | 6 | 13604207 | 13604220 | 2 | 7  | 14 | TG   | 15 | 4  |



|       |   |          |          |   |    |    |      |    |    |
|-------|---|----------|----------|---|----|----|------|----|----|
| 66209 | 6 | 13610137 | 13610160 | 2 | 12 | 24 | GT   | 17 | 19 |
| 66211 | 6 | 13612363 | 13612374 | 2 | 6  | 12 | AT   | 12 | 3  |
| 66213 | 6 | 13615237 | 13615254 | 3 | 6  | 18 | GTG  | 15 | 6  |
| 66215 | 6 | 13615524 | 13615541 | 3 | 6  | 18 | TTC  | 19 | 3  |
| 66216 | 6 | 13616539 | 13616556 | 2 | 9  | 18 | TG   | 24 | 13 |
| 66217 | 6 | 13619406 | 13619427 | 2 | 11 | 22 | GT   | 23 | 7  |
| 66218 | 6 | 13623620 | 13623635 | 2 | 8  | 16 | AG   | 23 | 3  |
| 66227 | 6 | 13663284 | 13663299 | 2 | 8  | 16 | CA   | 26 | 6  |
| 66249 | 6 | 13729468 | 13729485 | 2 | 9  | 18 | GA   | 31 | 5  |
| 66250 | 6 | 13731428 | 13731447 | 2 | 10 | 20 | GT   | 14 | 7  |
| 66258 | 6 | 13739743 | 13739758 | 2 | 8  | 16 | TG   | 22 | 9  |
| 66266 | 6 | 13750057 | 13750078 | 2 | 11 | 22 | CA   | 7  | 8  |
| 66267 | 6 | 13750243 | 13750266 | 2 | 12 | 24 | AC   | 9  | 7  |
| 66269 | 6 | 13752301 | 13752318 | 2 | 9  | 18 | CA   | 15 | 10 |
| 66270 | 6 | 13752320 | 13752333 | 2 | 7  | 14 | AC   | 13 | 9  |
| 66280 | 6 | 13768087 | 13768098 | 2 | 6  | 12 | TA   | 7  | 3  |
| 66281 | 6 | 13768553 | 13768570 | 3 | 6  | 18 | TTA  | 14 | 6  |
| 66291 | 6 | 13783272 | 13783285 | 2 | 7  | 14 | TC   | 22 | 3  |
| 66302 | 6 | 13795381 | 13795416 | 2 | 18 | 36 | CA   | 15 | 10 |
| 66315 | 6 | 13811736 | 13811747 | 2 | 6  | 12 | GT   | 23 | 3  |
| 66320 | 6 | 13829860 | 13829899 | 4 | 10 | 40 | AGAT | 24 | 11 |
| 66322 | 6 | 13830414 | 13830428 | 3 | 5  | 15 | ATA  | 10 | 3  |
| 66323 | 6 | 13831513 | 13831530 | 3 | 6  | 18 | CCT  | 22 | 3  |
| 66329 | 6 | 13833787 | 13833800 | 2 | 7  | 14 | AG   | 17 | 7  |
| 66337 | 6 | 13852012 | 13852035 | 2 | 12 | 24 | GA   | 14 | 5  |
| 66345 | 6 | 13864402 | 13864419 | 3 | 6  | 18 | AAT  | 20 | 6  |
| 66347 | 6 | 13868943 | 13868975 | 3 | 11 | 33 | TTC  | 16 | 6  |
| 66351 | 6 | 13874158 | 13874181 | 2 | 12 | 24 | AC   | 16 | 10 |
| 66352 | 6 | 13878070 | 13878093 | 2 | 12 | 24 | TG   | 8  | 10 |
| 66366 | 6 | 13914429 | 13914443 | 3 | 5  | 15 | ACA  | 30 | 3  |
| 66375 | 6 | 13932458 | 13932481 | 2 | 12 | 24 | CA   | 13 | 9  |
| 66376 | 6 | 13932517 | 13932528 | 2 | 6  | 12 | AC   | 31 | 6  |
| 66379 | 6 | 13939623 | 13939638 | 2 | 8  | 16 | TG   | 14 | 7  |
| 66381 | 6 | 13941210 | 13941241 | 2 | 16 | 32 | AC   | 11 | 9  |
| 66385 | 6 | 13946461 | 13946474 | 2 | 7  | 14 | TG   | 15 | 6  |
| 66386 | 6 | 13950028 | 13950041 | 2 | 7  | 14 | AT   | 25 | 4  |
| 66388 | 6 | 13951812 | 13951823 | 2 | 6  | 12 | GT   | 16 | 3  |
| 66390 | 6 | 13961022 | 13961045 | 2 | 12 | 24 | GA   | 23 | 11 |
| 66396 | 6 | 13973392 | 13973407 | 4 | 4  | 16 | TTTA | 20 | 4  |
| 66408 | 6 | 13985244 | 13985279 | 2 | 18 | 36 | AC   | 24 | 15 |
| 66412 | 6 | 14000977 | 14000990 | 2 | 7  | 14 | AC   | 23 | 3  |
| 66413 | 6 | 14001010 | 14001021 | 2 | 6  | 12 | AC   | 18 | 3  |
| 66414 | 6 | 14001387 | 14001408 | 2 | 11 | 22 | CA   | 14 | 10 |
| 66416 | 6 | 14002402 | 14002421 | 2 | 10 | 20 | AC   | 20 | 6  |
| 66417 | 6 | 14002586 | 14002597 | 2 | 6  | 12 | CT   | 18 | 4  |
| 66421 | 6 | 14010026 | 14010037 | 2 | 6  | 12 | GA   | 25 | 7  |
| 66422 | 6 | 14017777 | 14017792 | 4 | 4  | 16 | TTTA | 19 | 5  |
| 66424 | 6 | 14018686 | 14018707 | 2 | 11 | 22 | GT   | 10 | 7  |
| 66427 | 6 | 14025863 | 14025886 | 2 | 12 | 24 | CA   | 16 | 8  |
| 66430 | 6 | 14028968 | 14028979 | 2 | 6  | 12 | CA   | 30 | 5  |
| 66440 | 6 | 14046332 | 14046353 | 2 | 11 | 22 | GT   | 9  | 8  |

|       |   |          |          |   |    |    |      |    |    |
|-------|---|----------|----------|---|----|----|------|----|----|
| 66443 | 6 | 14048444 | 14048461 | 2 | 9  | 18 | AC   | 21 | 8  |
| 66449 | 6 | 14062784 | 14062809 | 2 | 13 | 26 | AC   | 9  | 9  |
| 66451 | 6 | 14063666 | 14063677 | 2 | 6  | 12 | GT   | 13 | 3  |
| 66454 | 6 | 14068944 | 14068958 | 3 | 5  | 15 | TTC  | 25 | 3  |
| 66460 | 6 | 14089660 | 14089695 | 2 | 18 | 36 | TG   | 14 | 12 |
| 66468 | 6 | 14098748 | 14098795 | 2 | 24 | 48 | CA   | 23 | 15 |
| 66471 | 6 | 14106006 | 14106025 | 2 | 10 | 20 | GA   | 26 | 4  |
| 66472 | 6 | 14108276 | 14108303 | 2 | 14 | 28 | CA   | 21 | 10 |
| 66477 | 6 | 14114353 | 14114368 | 2 | 8  | 16 | AC   | 25 | 5  |
| 66480 | 6 | 14118639 | 14118658 | 2 | 10 | 20 | AC   | 23 | 10 |
| 66481 | 6 | 14119276 | 14119293 | 2 | 9  | 18 | AT   | 24 | 5  |
| 66483 | 6 | 14122559 | 14122573 | 3 | 5  | 15 | ATG  | 21 | 3  |
| 66491 | 6 | 14134161 | 14134188 | 2 | 14 | 28 | AC   | 20 | 8  |
| 66494 | 6 | 14136870 | 14136893 | 2 | 12 | 24 | GA   | 14 | 3  |
| 66504 | 6 | 14164720 | 14164739 | 2 | 10 | 20 | CA   | 15 | 11 |
| 66505 | 6 | 14169337 | 14169348 | 2 | 6  | 12 | CA   | 22 | 4  |
| 66506 | 6 | 14170326 | 14170359 | 2 | 17 | 34 | AC   | 7  | 3  |
| 66522 | 6 | 14182438 | 14182469 | 2 | 16 | 32 | AC   | 12 | 10 |
| 66524 | 6 | 14183980 | 14183997 | 3 | 6  | 18 | GCT  | 28 | 4  |
| 66528 | 6 | 14190850 | 14190861 | 2 | 6  | 12 | CA   | 19 | 4  |
| 66529 | 6 | 14197222 | 14197237 | 4 | 4  | 16 | TGGT | 15 | 4  |
| 66535 | 6 | 14214479 | 14214492 | 2 | 7  | 14 | CT   | 21 | 3  |
| 66540 | 6 | 14218724 | 14218745 | 2 | 11 | 22 | TG   | 12 | 6  |
| 66542 | 6 | 14222296 | 14222319 | 2 | 12 | 24 | TG   | 19 | 11 |
| 66543 | 6 | 14222415 | 14222446 | 2 | 16 | 32 | TG   | 12 | 9  |
| 66544 | 6 | 14223089 | 14223116 | 2 | 14 | 28 | AC   | 18 | 6  |
| 66554 | 6 | 14237358 | 14237387 | 2 | 15 | 30 | GT   | 23 | 11 |
| 66557 | 6 | 14240869 | 14240888 | 2 | 10 | 20 | GT   | 20 | 14 |
| 66558 | 6 | 14241845 | 14241858 | 2 | 7  | 14 | TG   | 16 | 11 |
| 66559 | 6 | 14245389 | 14245412 | 3 | 8  | 24 | TCT  | 9  | 5  |
| 66564 | 6 | 14247604 | 14247627 | 3 | 8  | 24 | CTC  | 22 | 4  |
| 66577 | 6 | 14263062 | 14263082 | 3 | 7  | 21 | CCA  | 20 | 4  |
| 66578 | 6 | 14263314 | 14263331 | 2 | 9  | 18 | GA   | 19 | 9  |
| 66579 | 6 | 14263443 | 14263462 | 2 | 10 | 20 | AG   | 12 | 5  |
| 66580 | 6 | 14263524 | 14263537 | 2 | 7  | 14 | GT   | 8  | 5  |
| 66583 | 6 | 14263903 | 14263920 | 2 | 9  | 18 | TG   | 12 | 13 |
| 66585 | 6 | 14264877 | 14264894 | 2 | 9  | 18 | CA   | 27 | 3  |
| 66586 | 6 | 14265738 | 14265759 | 2 | 11 | 22 | TG   | 11 | 7  |
| 66589 | 6 | 14269148 | 14269183 | 2 | 18 | 36 | TG   | 15 | 8  |
| 66603 | 6 | 14306068 | 14306083 | 2 | 8  | 16 | GT   | 17 | 11 |
| 66604 | 6 | 14306697 | 14306710 | 2 | 7  | 14 | GT   | 21 | 3  |
| 66607 | 6 | 14309626 | 14309639 | 2 | 7  | 14 | CA   | 25 | 5  |
| 66611 | 6 | 14316226 | 14316285 | 4 | 15 | 60 | AGAT | 14 | 10 |
| 66618 | 6 | 14318562 | 14318573 | 2 | 6  | 12 | GA   | 14 | 3  |
| 66620 | 6 | 14321857 | 14321876 | 2 | 10 | 20 | CA   | 21 | 6  |
| 66622 | 6 | 14326988 | 14327007 | 2 | 10 | 20 | AC   | 12 | 12 |
| 66624 | 6 | 14328173 | 14328190 | 3 | 6  | 18 | TCC  | 23 | 10 |
| 66630 | 6 | 14334092 | 14334105 | 2 | 7  | 14 | AT   | 24 | 4  |
| 66632 | 6 | 14336277 | 14336288 | 2 | 6  | 12 | TG   | 29 | 9  |
| 66637 | 6 | 14352961 | 14353016 | 4 | 14 | 56 | TATC | 18 | 10 |
| 66638 | 6 | 14353628 | 14353655 | 2 | 14 | 28 | GT   | 15 | 8  |

|       |   |          |          |   |    |    |      |    |    |
|-------|---|----------|----------|---|----|----|------|----|----|
| 66639 | 6 | 14353723 | 14353755 | 3 | 11 | 33 | CTC  | 22 | 10 |
| 66641 | 6 | 14354318 | 14354333 | 4 | 4  | 16 | AAAT | 28 | 5  |
| 66656 | 6 | 14374255 | 14374278 | 4 | 6  | 24 | TGTT | 20 | 5  |
| 66657 | 6 | 14376455 | 14376466 | 2 | 6  | 12 | CA   | 29 | 3  |
| 66658 | 6 | 14380978 | 14380999 | 2 | 11 | 22 | CA   | 16 | 10 |
| 66662 | 6 | 14385309 | 14385326 | 3 | 6  | 18 | GCA  | 33 | 5  |
| 66664 | 6 | 14400426 | 14400445 | 4 | 5  | 20 | AAAT | 25 | 5  |
| 66667 | 6 | 14403372 | 14403393 | 2 | 11 | 22 | AC   | 22 | 6  |
| 66668 | 6 | 14404862 | 14404879 | 3 | 6  | 18 | GTG  | 28 | 5  |
| 66673 | 6 | 14414047 | 14414076 | 3 | 10 | 30 | AAG  | 21 | 8  |
| 66677 | 6 | 14423203 | 14423214 | 2 | 6  | 12 | TG   | 26 | 4  |
| 66678 | 6 | 14423628 | 14423641 | 2 | 7  | 14 | AC   | 14 | 4  |
| 66680 | 6 | 14425935 | 14425958 | 3 | 8  | 24 | ATG  | 17 | 7  |
| 66682 | 6 | 14427415 | 14427438 | 2 | 12 | 24 | CT   | 8  | 4  |
| 66688 | 6 | 14428443 | 14428466 | 3 | 8  | 24 | GAG  | 18 | 4  |
| 66689 | 6 | 14428759 | 14428773 | 3 | 5  | 15 | TCA  | 22 | 4  |
| 66694 | 6 | 14434529 | 14434542 | 2 | 7  | 14 | CT   | 14 | 3  |
| 66695 | 6 | 14434937 | 14434950 | 2 | 7  | 14 | CA   | 26 | 3  |
| 66701 | 6 | 14445295 | 14445314 | 2 | 10 | 20 | GT   | 11 | 4  |
| 66703 | 6 | 14450030 | 14450065 | 3 | 12 | 36 | ATG  | 11 | 6  |
| 66704 | 6 | 14450778 | 14450795 | 2 | 9  | 18 | TC   | 16 | 3  |
| 66708 | 6 | 14451991 | 14452004 | 2 | 7  | 14 | TG   | 19 | 7  |
| 66709 | 6 | 14452215 | 14452241 | 3 | 9  | 27 | TTA  | 15 | 5  |
| 66712 | 6 | 14458725 | 14458736 | 2 | 6  | 12 | AT   | 7  | 5  |
| 66713 | 6 | 14459205 | 14459219 | 3 | 5  | 15 | ACA  | 11 | 3  |
| 66715 | 6 | 14459782 | 14459809 | 2 | 14 | 28 | CA   | 13 | 7  |
| 66717 | 6 | 14463008 | 14463033 | 2 | 13 | 26 | GT   | 13 | 8  |
| 66723 | 6 | 14471684 | 14471715 | 2 | 16 | 32 | GT   | 14 | 10 |
| 66724 | 6 | 14473194 | 14473221 | 2 | 14 | 28 | TG   | 16 | 9  |
| 66728 | 6 | 14484055 | 14484068 | 2 | 7  | 14 | GA   | 20 | 3  |
| 66729 | 6 | 14484099 | 14484125 | 3 | 9  | 27 | CTG  | 18 | 5  |
| 66730 | 6 | 14484280 | 14484297 | 2 | 9  | 18 | TG   | 18 | 7  |
| 66732 | 6 | 14484850 | 14484879 | 3 | 10 | 30 | AAC  | 7  | 5  |
| 66733 | 6 | 14485033 | 14485068 | 2 | 18 | 36 | TG   | 17 | 9  |
| 66746 | 6 | 14509983 | 14510003 | 3 | 7  | 21 | TTG  | 32 | 6  |
| 66750 | 6 | 14527278 | 14527291 | 2 | 7  | 14 | AG   | 17 | 9  |
| 66759 | 6 | 14541794 | 14541807 | 2 | 7  | 14 | TG   | 19 | 7  |
| 66760 | 6 | 14542234 | 14542266 | 3 | 11 | 33 | CCT  | 23 | 9  |
| 66761 | 6 | 14542872 | 14542927 | 2 | 28 | 56 | GT   | 9  | 8  |
| 66762 | 6 | 14543855 | 14543870 | 2 | 8  | 16 | CT   | 25 | 4  |
| 66763 | 6 | 14545654 | 14545673 | 2 | 10 | 20 | GT   | 21 | 14 |
| 66774 | 6 | 14563570 | 14563589 | 2 | 10 | 20 | TA   | 7  | 7  |
| 66785 | 6 | 14581136 | 14581153 | 2 | 9  | 18 | TG   | 16 | 6  |
| 66786 | 6 | 14581900 | 14581913 | 2 | 7  | 14 | CT   | 18 | 3  |
| 66787 | 6 | 14583069 | 14583108 | 2 | 20 | 40 | CA   | 18 | 14 |
| 66791 | 6 | 14590042 | 14590062 | 3 | 7  | 21 | ACA  | 23 | 3  |
| 66798 | 6 | 14602506 | 14602521 | 2 | 8  | 16 | GT   | 23 | 8  |
| 66799 | 6 | 14605507 | 14605524 | 3 | 6  | 18 | TTA  | 22 | 9  |
| 66801 | 6 | 14616566 | 14616585 | 2 | 10 | 20 | AT   | 29 | 9  |
| 66802 | 6 | 14621399 | 14621414 | 2 | 8  | 16 | TC   | 23 | 5  |
| 66806 | 6 | 14625270 | 14625305 | 2 | 18 | 36 | GT   | 7  | 9  |

|       |   |          |          |   |    |    |      |    |    |
|-------|---|----------|----------|---|----|----|------|----|----|
| 66810 | 6 | 14631891 | 14631924 | 2 | 17 | 34 | TC   | 13 | 9  |
| 66811 | 6 | 14636067 | 14636088 | 2 | 11 | 22 | TG   | 10 | 7  |
| 66814 | 6 | 14637313 | 14637326 | 2 | 7  | 14 | TC   | 19 | 4  |
| 66815 | 6 | 14637564 | 14637578 | 3 | 5  | 15 | GAA  | 19 | 5  |
| 66816 | 6 | 14637579 | 14637596 | 3 | 6  | 18 | GGA  | 25 | 7  |
| 66818 | 6 | 14639310 | 14639330 | 3 | 7  | 21 | GCA  | 28 | 8  |
| 66824 | 6 | 14650144 | 14650163 | 4 | 5  | 20 | ATTT | 21 | 7  |
| 66825 | 6 | 14655510 | 14655523 | 2 | 7  | 14 | AT   | 24 | 4  |
| 66826 | 6 | 14661731 | 14661748 | 3 | 6  | 18 | GAG  | 30 | 3  |
| 66828 | 6 | 14662698 | 14662712 | 3 | 5  | 15 | CAT  | 24 | 6  |
| 66831 | 6 | 14667963 | 14667978 | 2 | 8  | 16 | AT   | 17 | 11 |
| 66834 | 6 | 14674042 | 14674053 | 2 | 6  | 12 | TA   | 8  | 6  |
| 66837 | 6 | 14681788 | 14681807 | 2 | 10 | 20 | CA   | 19 | 8  |
| 66842 | 6 | 14686939 | 14686964 | 2 | 13 | 26 | AC   | 15 | 7  |
| 66843 | 6 | 14687145 | 14687165 | 3 | 7  | 21 | AGC  | 26 | 5  |
| 66844 | 6 | 14689405 | 14689420 | 2 | 8  | 16 | GA   | 30 | 8  |
| 66846 | 6 | 14690695 | 14690722 | 2 | 14 | 28 | GT   | 9  | 7  |
| 66848 | 6 | 14695788 | 14695803 | 4 | 4  | 16 | GGAT | 10 | 6  |
| 66857 | 6 | 14700742 | 14700771 | 2 | 15 | 30 | AC   | 23 | 11 |
| 66858 | 6 | 14700947 | 14700961 | 3 | 5  | 15 | CTT  | 31 | 3  |
| 66859 | 6 | 14701469 | 14701482 | 2 | 7  | 14 | AT   | 15 | 7  |
| 66863 | 6 | 14714726 | 14714740 | 3 | 5  | 15 | CCT  | 25 | 3  |
| 66871 | 6 | 14730933 | 14730958 | 2 | 13 | 26 | CA   | 19 | 6  |
| 66872 | 6 | 14731798 | 14731811 | 2 | 7  | 14 | AC   | 27 | 5  |
| 66874 | 6 | 14738140 | 14738153 | 2 | 7  | 14 | AT   | 11 | 4  |
| 66877 | 6 | 14744096 | 14744115 | 2 | 10 | 20 | CA   | 26 | 8  |
| 66880 | 6 | 14749154 | 14749171 | 2 | 9  | 18 | AC   | 20 | 9  |
| 66885 | 6 | 14753308 | 14753325 | 2 | 9  | 18 | GA   | 18 | 6  |
| 66886 | 6 | 14753718 | 14753753 | 2 | 18 | 36 | CT   | 8  | 10 |
| 66888 | 6 | 14754205 | 14754228 | 3 | 8  | 24 | ATA  | 15 | 5  |
| 66890 | 6 | 14758128 | 14758151 | 4 | 6  | 24 | AAGA | 21 | 4  |
| 66892 | 6 | 14760577 | 14760592 | 2 | 8  | 16 | TG   | 12 | 10 |
| 66902 | 6 | 14767135 | 14767152 | 2 | 9  | 18 | TG   | 14 | 6  |
| 66903 | 6 | 14767614 | 14767634 | 3 | 7  | 21 | AAG  | 17 | 4  |
| 66906 | 6 | 14769122 | 14769153 | 2 | 16 | 32 | CA   | 7  | 8  |
| 66911 | 6 | 14776713 | 14776730 | 2 | 9  | 18 | CT   | 15 | 6  |
| 66913 | 6 | 14777120 | 14777149 | 3 | 10 | 30 | GCA  | 22 | 7  |
| 66920 | 6 | 14784624 | 14784638 | 3 | 5  | 15 | CTT  | 28 | 5  |
| 66924 | 6 | 14790307 | 14790321 | 3 | 5  | 15 | AAG  | 24 | 5  |
| 66928 | 6 | 14791508 | 14791527 | 2 | 10 | 20 | AC   | 23 | 8  |
| 66939 | 6 | 14806602 | 14806629 | 2 | 14 | 28 | AC   | 9  | 8  |
| 66946 | 6 | 14812161 | 14812178 | 3 | 6  | 18 | CTG  | 25 | 4  |
| 66949 | 6 | 14818491 | 14818512 | 2 | 11 | 22 | CA   | 6  | 7  |
| 66951 | 6 | 14819115 | 14819135 | 3 | 7  | 21 | GAG  | 19 | 6  |
| 66956 | 6 | 14820264 | 14820296 | 3 | 11 | 33 | TAT  | 11 | 5  |
| 66957 | 6 | 14832177 | 14832191 | 3 | 5  | 15 | AAC  | 29 | 6  |
| 66959 | 6 | 14846797 | 14846810 | 2 | 7  | 14 | AT   | 21 | 9  |
| 66961 | 6 | 14852568 | 14852613 | 2 | 23 | 46 | CA   | 8  | 11 |
| 66967 | 6 | 14883634 | 14883648 | 3 | 5  | 15 | AAG  | 20 | 4  |
| 66969 | 6 | 14885347 | 14885360 | 2 | 7  | 14 | TC   | 22 | 4  |
| 66973 | 6 | 14887631 | 14887646 | 2 | 8  | 16 | AG   | 18 | 5  |

|       |   |          |          |   |    |    |      |    |    |
|-------|---|----------|----------|---|----|----|------|----|----|
| 66974 | 6 | 14887849 | 14887872 | 2 | 12 | 24 | GT   | 17 | 10 |
| 66976 | 6 | 14892486 | 14892505 | 2 | 10 | 20 | AC   | 11 | 4  |
| 66984 | 6 | 14907328 | 14907342 | 3 | 5  | 15 | GAG  | 17 | 7  |
| 66988 | 6 | 14921569 | 14921594 | 2 | 13 | 26 | GT   | 19 | 8  |
| 66990 | 6 | 14924259 | 14924282 | 2 | 12 | 24 | CA   | 19 | 12 |
| 66991 | 6 | 14924383 | 14924396 | 2 | 7  | 14 | TG   | 15 | 5  |
| 66992 | 6 | 14924504 | 14924523 | 2 | 10 | 20 | CA   | 10 | 8  |
| 66993 | 6 | 14924652 | 14924667 | 2 | 8  | 16 | CA   | 14 | 11 |
| 66995 | 6 | 14926746 | 14926767 | 2 | 11 | 22 | CA   | 13 | 3  |
| 66996 | 6 | 14929477 | 14929490 | 2 | 7  | 14 | CA   | 11 | 3  |
| 66998 | 6 | 14935047 | 14935061 | 3 | 5  | 15 | TGT  | 27 | 3  |
| 67004 | 6 | 14941339 | 14941360 | 2 | 11 | 22 | CA   | 20 | 7  |
| 67005 | 6 | 14941806 | 14941835 | 3 | 10 | 30 | GGA  | 18 | 4  |
| 67011 | 6 | 14943994 | 14944013 | 2 | 10 | 20 | GA   | 7  | 8  |
| 67014 | 6 | 14944404 | 14944417 | 2 | 7  | 14 | TC   | 9  | 7  |
| 67015 | 6 | 14944458 | 14944481 | 2 | 12 | 24 | TG   | 23 | 5  |
| 67017 | 6 | 14954453 | 14954466 | 2 | 7  | 14 | GA   | 22 | 3  |
| 67018 | 6 | 14954493 | 14954516 | 2 | 12 | 24 | GA   | 17 | 9  |
| 67019 | 6 | 14954795 | 14954809 | 3 | 5  | 15 | GCG  | 18 | 10 |
| 67021 | 6 | 14956674 | 14956687 | 2 | 7  | 14 | TC   | 26 | 4  |
| 67022 | 6 | 14958920 | 14958937 | 2 | 9  | 18 | CA   | 19 | 6  |
| 67023 | 6 | 14960195 | 14960254 | 3 | 20 | 60 | AGA  | 17 | 13 |
| 67025 | 6 | 14983392 | 14983407 | 4 | 4  | 16 | ATGA | 19 | 8  |
| 67026 | 6 | 14983410 | 14983429 | 4 | 5  | 20 | GAAT | 25 | 13 |
| 67029 | 6 | 14987003 | 14987030 | 2 | 14 | 28 | CA   | 22 | 20 |
| 67032 | 6 | 15013112 | 15013137 | 2 | 13 | 26 | GT   | 19 | 12 |
| 67033 | 6 | 15013291 | 15013304 | 2 | 7  | 14 | TG   | 21 | 11 |
| 67035 | 6 | 15014893 | 15014904 | 2 | 6  | 12 | AG   | 25 | 3  |
| 67036 | 6 | 15016369 | 15016398 | 2 | 15 | 30 | TG   | 19 | 7  |
| 67037 | 6 | 15017843 | 15017858 | 2 | 8  | 16 | GT   | 24 | 7  |
| 67039 | 6 | 15018512 | 15018537 | 2 | 13 | 26 | TG   | 17 | 4  |
| 67040 | 6 | 15018823 | 15018852 | 2 | 15 | 30 | GT   | 16 | 12 |
| 67041 | 6 | 15019021 | 15019052 | 2 | 16 | 32 | TG   | 12 | 6  |
| 67045 | 6 | 15021003 | 15021022 | 2 | 10 | 20 | CA   | 21 | 12 |
| 67048 | 6 | 15021553 | 15021582 | 2 | 15 | 30 | CA   | 14 | 14 |
| 67049 | 6 | 15022015 | 15022042 | 2 | 14 | 28 | AC   | 8  | 10 |
| 67051 | 6 | 15023610 | 15023631 | 2 | 11 | 22 | AC   | 19 | 7  |
| 67052 | 6 | 15023826 | 15023837 | 2 | 6  | 12 | AC   | 21 | 6  |
| 67053 | 6 | 15023840 | 15023855 | 2 | 8  | 16 | AC   | 15 | 3  |
| 67054 | 6 | 15026969 | 15027002 | 2 | 17 | 34 | GT   | 17 | 11 |
| 67056 | 6 | 15027852 | 15027863 | 2 | 6  | 12 | GT   | 28 | 4  |
| 67062 | 6 | 15033207 | 15033234 | 4 | 7  | 28 | CAGA | 11 | 9  |
| 67063 | 6 | 15033590 | 15033615 | 2 | 13 | 26 | AC   | 9  | 5  |
| 67064 | 6 | 15033777 | 15033796 | 2 | 10 | 20 | AG   | 9  | 4  |
| 67070 | 6 | 15040094 | 15040108 | 3 | 5  | 15 | AGC  | 26 | 7  |
| 67073 | 6 | 15043127 | 15043138 | 2 | 6  | 12 | AC   | 29 | 3  |
| 67074 | 6 | 15043345 | 15043362 | 2 | 9  | 18 | AG   | 19 | 5  |
| 67076 | 6 | 15047921 | 15047935 | 3 | 5  | 15 | GAG  | 26 | 6  |
| 67077 | 6 | 15048664 | 15048689 | 2 | 13 | 26 | CA   | 21 | 9  |
| 67080 | 6 | 15049067 | 15049090 | 2 | 12 | 24 | AC   | 13 | 6  |
| 67083 | 6 | 15051224 | 15051245 | 2 | 11 | 22 | AC   | 8  | 16 |

|       |   |          |          |   |    |    |      |    |    |
|-------|---|----------|----------|---|----|----|------|----|----|
| 67084 | 6 | 15051385 | 15051406 | 2 | 11 | 22 | TG   | 15 | 11 |
| 67086 | 6 | 15053003 | 15053018 | 2 | 8  | 16 | TG   | 11 | 7  |
| 67087 | 6 | 15053137 | 15053192 | 2 | 28 | 56 | TG   | 6  | 7  |
| 67088 | 6 | 15053357 | 15053382 | 2 | 13 | 26 | CA   | 8  | 6  |
| 67091 | 6 | 15054272 | 15054289 | 2 | 9  | 18 | CA   | 9  | 11 |
| 67092 | 6 | 15054855 | 15054881 | 3 | 9  | 27 | GAG  | 17 | 6  |
| 67094 | 6 | 15054972 | 15055011 | 2 | 20 | 40 | TG   | 10 | 6  |
| 67095 | 6 | 15055212 | 15055235 | 2 | 12 | 24 | AC   | 17 | 13 |
| 67102 | 6 | 15060914 | 15060947 | 2 | 17 | 34 | GT   | 13 | 7  |
| 67103 | 6 | 15061227 | 15061238 | 2 | 6  | 12 | GT   | 24 | 4  |
| 67104 | 6 | 15061242 | 15061255 | 2 | 7  | 14 | TG   | 26 | 4  |
| 67106 | 6 | 15061593 | 15061614 | 2 | 11 | 22 | AC   | 11 | 9  |
| 67107 | 6 | 15062680 | 15062697 | 3 | 6  | 18 | AGA  | 23 | 3  |
| 67108 | 6 | 15062931 | 15062958 | 2 | 14 | 28 | GT   | 9  | 6  |
| 67110 | 6 | 15063106 | 15063135 | 3 | 10 | 30 | GAA  | 12 | 6  |
| 67115 | 6 | 15063470 | 15063511 | 2 | 21 | 42 | AC   | 13 | 14 |
| 67116 | 6 | 15063667 | 15063694 | 2 | 14 | 28 | CA   | 13 | 12 |
| 67117 | 6 | 15064710 | 15064755 | 2 | 23 | 46 | TG   | 6  | 8  |
| 67119 | 6 | 15065725 | 15065758 | 2 | 17 | 34 | AC   | 10 | 11 |
| 67122 | 6 | 15066866 | 15066895 | 2 | 15 | 30 | TG   | 13 | 6  |
| 67125 | 6 | 15069272 | 15069299 | 2 | 14 | 28 | TG   | 18 | 9  |
| 67126 | 6 | 15070495 | 15070524 | 2 | 15 | 30 | CA   | 8  | 6  |
| 67128 | 6 | 15073150 | 15073177 | 2 | 14 | 28 | AC   | 16 | 10 |
| 67130 | 6 | 15076011 | 15076044 | 2 | 17 | 34 | TG   | 18 | 6  |
| 67131 | 6 | 15077627 | 15077640 | 2 | 7  | 14 | TC   | 18 | 4  |
| 67132 | 6 | 15077986 | 15078003 | 2 | 9  | 18 | AC   | 23 | 7  |
| 67133 | 6 | 15078298 | 15078317 | 2 | 10 | 20 | AC   | 20 | 14 |
| 67134 | 6 | 15080626 | 15080641 | 2 | 8  | 16 | AC   | 21 | 3  |
| 67135 | 6 | 15082940 | 15082957 | 3 | 6  | 18 | GGA  | 26 | 10 |
| 67137 | 6 | 15087956 | 15087970 | 3 | 5  | 15 | CCT  | 15 | 3  |
| 67139 | 6 | 15089876 | 15089899 | 4 | 6  | 24 | AAAT | 22 | 4  |
| 67140 | 6 | 15091225 | 15091242 | 2 | 9  | 18 | GT   | 22 | 8  |
| 67142 | 6 | 15091426 | 15091449 | 4 | 6  | 24 | GGAG | 12 | 4  |
| 67143 | 6 | 15091756 | 15091779 | 2 | 12 | 24 | GT   | 22 | 7  |
| 67144 | 6 | 15093858 | 15093878 | 3 | 7  | 21 | CTG  | 19 | 6  |
| 67145 | 6 | 15094788 | 15094814 | 3 | 9  | 27 | CCT  | 16 | 8  |
| 67147 | 6 | 15096314 | 15096329 | 4 | 4  | 16 | ATTT | 28 | 7  |
| 67148 | 6 | 15096379 | 15096396 | 2 | 9  | 18 | GT   | 21 | 25 |
| 67152 | 6 | 15100596 | 15100613 | 2 | 9  | 18 | CT   | 18 | 14 |
| 67153 | 6 | 15100614 | 15100629 | 2 | 8  | 16 | CA   | 19 | 12 |
| 67155 | 6 | 15109489 | 15109506 | 2 | 9  | 18 | AC   | 27 | 11 |
| 67168 | 6 | 15199432 | 15199451 | 2 | 10 | 20 | AG   | 20 | 5  |
| 67170 | 6 | 15202746 | 15202785 | 2 | 20 | 40 | GT   | 12 | 8  |
| 67172 | 6 | 15215849 | 15215866 | 3 | 6  | 18 | CCT  | 25 | 4  |
| 67176 | 6 | 15221095 | 15221120 | 2 | 13 | 26 | GT   | 16 | 14 |
| 67177 | 6 | 15221336 | 15221371 | 3 | 12 | 36 | TCT  | 11 | 8  |
| 67180 | 6 | 15223765 | 15223806 | 2 | 21 | 42 | GT   | 13 | 8  |
| 67183 | 6 | 15230093 | 15230116 | 2 | 12 | 24 | GT   | 17 | 10 |
| 67189 | 6 | 15248024 | 15248053 | 2 | 15 | 30 | TG   | 13 | 9  |
| 67190 | 6 | 15248099 | 15248116 | 2 | 9  | 18 | TG   | 19 | 13 |
| 67191 | 6 | 15248277 | 15248302 | 2 | 13 | 26 | TG   | 18 | 5  |

|       |   |          |          |   |    |    |      |    |    |
|-------|---|----------|----------|---|----|----|------|----|----|
| 67197 | 6 | 15256327 | 15256342 | 4 | 4  | 16 | TAAA | 16 | 4  |
| 67201 | 6 | 15259112 | 15259129 | 2 | 9  | 18 | GT   | 7  | 9  |
| 67206 | 6 | 15266723 | 15266740 | 3 | 6  | 18 | GAG  | 29 | 5  |
| 67208 | 6 | 15270880 | 15270894 | 3 | 5  | 15 | GAG  | 22 | 6  |
| 67211 | 6 | 15272646 | 15272665 | 4 | 5  | 20 | AAAG | 33 | 10 |
| 67212 | 6 | 15273126 | 15273155 | 2 | 15 | 30 | TG   | 7  | 7  |
| 67213 | 6 | 15277025 | 15277068 | 2 | 22 | 44 | TG   | 9  | 13 |
| 67218 | 6 | 15280768 | 15280787 | 2 | 10 | 20 | GA   | 11 | 6  |
| 67221 | 6 | 15282888 | 15282911 | 2 | 12 | 24 | CA   | 24 | 15 |
| 67223 | 6 | 15287400 | 15287429 | 2 | 15 | 30 | TG   | 12 | 7  |
| 67226 | 6 | 15293249 | 15293276 | 2 | 14 | 28 | TG   | 12 | 9  |
| 67231 | 6 | 15294734 | 15294757 | 2 | 12 | 24 | GT   | 8  | 6  |
| 67233 | 6 | 15299100 | 15299121 | 2 | 11 | 22 | AC   | 18 | 6  |
| 67234 | 6 | 15299327 | 15299348 | 2 | 11 | 22 | CA   | 26 | 7  |
| 67236 | 6 | 15299886 | 15299925 | 2 | 20 | 40 | GT   | 8  | 7  |
| 67242 | 6 | 15305714 | 15305731 | 2 | 9  | 18 | CT   | 26 | 4  |
| 67244 | 6 | 15306435 | 15306446 | 2 | 6  | 12 | AC   | 13 | 4  |
| 67253 | 6 | 15312657 | 15312690 | 2 | 17 | 34 | AC   | 8  | 6  |
| 67256 | 6 | 15314630 | 15314645 | 2 | 8  | 16 | AG   | 28 | 3  |
| 67263 | 6 | 15318603 | 15318630 | 4 | 7  | 28 | ATAA | 22 | 16 |
| 67268 | 6 | 15321186 | 15321211 | 2 | 13 | 26 | CA   | 6  | 9  |
| 67270 | 6 | 15321435 | 15321452 | 2 | 9  | 18 | CA   | 13 | 5  |
| 67272 | 6 | 15322135 | 15322160 | 2 | 13 | 26 | CA   | 19 | 12 |
| 67275 | 6 | 15329069 | 15329080 | 2 | 6  | 12 | AC   | 20 | 3  |
| 67278 | 6 | 15331910 | 15331925 | 2 | 8  | 16 | CT   | 24 | 4  |
| 67281 | 6 | 15336080 | 15336103 | 3 | 8  | 24 | AGG  | 23 | 5  |
| 67282 | 6 | 15337642 | 15337683 | 2 | 21 | 42 | GT   | 7  | 6  |
| 67283 | 6 | 15342409 | 15342424 | 4 | 4  | 16 | ATAG | 32 | 3  |
| 67284 | 6 | 15344954 | 15344977 | 4 | 6  | 24 | ATCA | 23 | 4  |
| 67286 | 6 | 15345687 | 15345707 | 3 | 7  | 21 | ATA  | 10 | 5  |
| 67288 | 6 | 15349763 | 15349802 | 2 | 20 | 40 | AC   | 7  | 13 |
| 67289 | 6 | 15351220 | 15351251 | 2 | 16 | 32 | AC   | 17 | 7  |
| 67291 | 6 | 15353398 | 15353413 | 2 | 8  | 16 | AC   | 20 | 6  |
| 67295 | 6 | 15362718 | 15362749 | 2 | 16 | 32 | TG   | 20 | 10 |
| 67298 | 6 | 15364762 | 15364787 | 2 | 13 | 26 | TG   | 18 | 6  |
| 67299 | 6 | 15364991 | 15365006 | 2 | 8  | 16 | TA   | 16 | 7  |
| 67302 | 6 | 15369594 | 15369625 | 2 | 16 | 32 | GT   | 7  | 10 |
| 67304 | 6 | 15370202 | 15370219 | 2 | 9  | 18 | AC   | 16 | 12 |
| 67305 | 6 | 15375197 | 15375212 | 2 | 8  | 16 | AC   | 13 | 6  |
| 67306 | 6 | 15375623 | 15375654 | 2 | 16 | 32 | TG   | 14 | 14 |
| 67307 | 6 | 15377683 | 15377696 | 2 | 7  | 14 | GT   | 17 | 6  |
| 67308 | 6 | 15377723 | 15377736 | 2 | 7  | 14 | AC   | 21 | 5  |
| 67309 | 6 | 15380074 | 15380091 | 3 | 6  | 18 | ATA  | 14 | 4  |
| 67310 | 6 | 15381045 | 15381086 | 2 | 21 | 42 | AC   | 9  | 7  |
| 67311 | 6 | 15381306 | 15381321 | 2 | 8  | 16 | CA   | 22 | 12 |
| 67312 | 6 | 15381443 | 15381472 | 2 | 15 | 30 | AC   | 19 | 12 |
| 67316 | 6 | 15386407 | 15386448 | 2 | 21 | 42 | TG   | 7  | 12 |
| 67317 | 6 | 15386625 | 15386642 | 3 | 6  | 18 | CTC  | 22 | 3  |
| 67318 | 6 | 15386957 | 15386986 | 2 | 15 | 30 | TG   | 12 | 10 |
| 67319 | 6 | 15387207 | 15387230 | 3 | 8  | 24 | TCC  | 28 | 16 |
| 67321 | 6 | 15387595 | 15387624 | 2 | 15 | 30 | CA   | 6  | 7  |

|       |   |          |          |   |    |    |      |    |    |
|-------|---|----------|----------|---|----|----|------|----|----|
| 67328 | 6 | 15387979 | 15387993 | 3 | 5  | 15 | CAT  | 9  | 5  |
| 67339 | 6 | 15398780 | 15398791 | 2 | 6  | 12 | CA   | 23 | 3  |
| 67341 | 6 | 15400484 | 15400503 | 2 | 10 | 20 | AG   | 21 | 3  |
| 67344 | 6 | 15409314 | 15409325 | 2 | 6  | 12 | TC   | 34 | 4  |
| 67345 | 6 | 15409833 | 15409856 | 2 | 12 | 24 | AC   | 12 | 8  |
| 67351 | 6 | 15418330 | 15418353 | 3 | 8  | 24 | TGT  | 24 | 8  |
| 67357 | 6 | 15427892 | 15427933 | 2 | 21 | 42 | AG   | 11 | 11 |
| 67358 | 6 | 15429568 | 15429581 | 2 | 7  | 14 | TG   | 13 | 3  |
| 67363 | 6 | 15438444 | 15438473 | 2 | 15 | 30 | GT   | 16 | 5  |
| 67367 | 6 | 15439439 | 15439464 | 2 | 13 | 26 | CA   | 20 | 7  |
| 67368 | 6 | 15439863 | 15439884 | 2 | 11 | 22 | GT   | 20 | 7  |
| 67375 | 6 | 15443497 | 15443510 | 2 | 7  | 14 | AC   | 28 | 5  |
| 67377 | 6 | 15451404 | 15451419 | 2 | 8  | 16 | TA   | 12 | 3  |
| 67378 | 6 | 15456056 | 15456067 | 2 | 6  | 12 | GT   | 27 | 3  |
| 67382 | 6 | 15460327 | 15460356 | 2 | 15 | 30 | AC   | 17 | 11 |
| 67383 | 6 | 15461759 | 15461782 | 2 | 12 | 24 | GT   | 18 | 8  |
| 67386 | 6 | 15465191 | 15465216 | 2 | 13 | 26 | TG   | 19 | 11 |
| 67388 | 6 | 15471084 | 15471115 | 2 | 16 | 32 | CA   | 10 | 7  |
| 67389 | 6 | 15473299 | 15473332 | 2 | 17 | 34 | CA   | 10 | 8  |
| 67391 | 6 | 15473877 | 15473894 | 2 | 9  | 18 | CA   | 26 | 14 |
| 67394 | 6 | 15479555 | 15479576 | 2 | 11 | 22 | AC   | 16 | 15 |
| 67399 | 6 | 15483518 | 15483531 | 2 | 7  | 14 | GT   | 6  | 5  |
| 67400 | 6 | 15486707 | 15486718 | 2 | 6  | 12 | TA   | 12 | 3  |
| 67405 | 6 | 15513580 | 15513611 | 2 | 16 | 32 | CA   | 20 | 8  |
| 67408 | 6 | 15524309 | 15524324 | 4 | 4  | 16 | GTCA | 26 | 4  |
| 67410 | 6 | 15527634 | 15527671 | 2 | 19 | 38 | AC   | 9  | 9  |
| 67412 | 6 | 15529602 | 15529625 | 2 | 12 | 24 | CA   | 27 | 8  |
| 67414 | 6 | 15529952 | 15529977 | 2 | 13 | 26 | CA   | 16 | 11 |
| 67416 | 6 | 15531175 | 15531202 | 2 | 14 | 28 | CA   | 16 | 11 |
| 67417 | 6 | 15536981 | 15536992 | 2 | 6  | 12 | CA   | 23 | 6  |
| 67420 | 6 | 15539144 | 15539159 | 4 | 4  | 16 | ATAC | 11 | 3  |
| 67421 | 6 | 15539853 | 15539890 | 2 | 19 | 38 | GT   | 18 | 18 |
| 67426 | 6 | 15546949 | 15546980 | 2 | 16 | 32 | AC   | 16 | 12 |
| 67428 | 6 | 15548800 | 15548814 | 3 | 5  | 15 | CTG  | 28 | 8  |
| 67433 | 6 | 15559026 | 15559041 | 2 | 8  | 16 | TC   | 26 | 8  |
| 67434 | 6 | 15560129 | 15560156 | 4 | 7  | 28 | TGTC | 31 | 6  |
| 67441 | 6 | 15590661 | 15590680 | 2 | 10 | 20 | TG   | 11 | 11 |
| 67442 | 6 | 15590750 | 15590767 | 2 | 9  | 18 | GT   | 19 | 8  |
| 67443 | 6 | 15590840 | 15590861 | 2 | 11 | 22 | AC   | 16 | 8  |
| 67445 | 6 | 15592801 | 15592812 | 2 | 6  | 12 | CA   | 16 | 5  |
| 67446 | 6 | 15592815 | 15592826 | 2 | 6  | 12 | CA   | 12 | 5  |
| 67447 | 6 | 15593464 | 15593475 | 2 | 6  | 12 | TA   | 31 | 3  |
| 67448 | 6 | 15594130 | 15594153 | 2 | 12 | 24 | GT   | 14 | 16 |
| 67449 | 6 | 15594681 | 15594700 | 2 | 10 | 20 | CA   | 21 | 7  |
| 67450 | 6 | 15599313 | 15599330 | 3 | 6  | 18 | CCT  | 21 | 4  |
| 67453 | 6 | 15613702 | 15613721 | 2 | 10 | 20 | TG   | 15 | 7  |
| 67455 | 6 | 15622838 | 15622851 | 2 | 7  | 14 | AT   | 16 | 3  |
| 67457 | 6 | 15628422 | 15628439 | 2 | 9  | 18 | CA   | 22 | 15 |
| 67470 | 6 | 15639006 | 15639035 | 2 | 15 | 30 | TG   | 11 | 9  |
| 67471 | 6 | 15641769 | 15641780 | 2 | 6  | 12 | GT   | 25 | 3  |
| 67472 | 6 | 15644184 | 15644199 | 2 | 8  | 16 | CT   | 25 | 6  |



|       |   |          |          |   |    |    |      |    |    |
|-------|---|----------|----------|---|----|----|------|----|----|
| 67473 | 6 | 15644381 | 15644410 | 2 | 15 | 30 | TG   | 15 | 10 |
| 67477 | 6 | 15646260 | 15646307 | 2 | 24 | 48 | AC   | 6  | 7  |
| 67479 | 6 | 15647324 | 15647339 | 2 | 8  | 16 | GA   | 12 | 7  |
| 67481 | 6 | 15648053 | 15648080 | 2 | 14 | 28 | AC   | 19 | 9  |
| 67483 | 6 | 15648984 | 15648999 | 2 | 8  | 16 | CA   | 26 | 14 |
| 67484 | 6 | 15649465 | 15649491 | 3 | 9  | 27 | GAG  | 21 | 7  |
| 67486 | 6 | 15650083 | 15650109 | 3 | 9  | 27 | GAG  | 9  | 12 |
| 67487 | 6 | 15650174 | 15650203 | 2 | 15 | 30 | GT   | 13 | 9  |
| 67489 | 6 | 15650554 | 15650577 | 3 | 8  | 24 | CTC  | 28 | 13 |
| 67490 | 6 | 15653018 | 15653038 | 3 | 7  | 21 | TGA  | 25 | 8  |
| 67493 | 6 | 15653718 | 15653733 | 4 | 4  | 16 | CTGA | 31 | 4  |
| 67495 | 6 | 15656818 | 15656829 | 2 | 6  | 12 | AT   | 23 | 7  |
| 67498 | 6 | 15658036 | 15658057 | 2 | 11 | 22 | CA   | 13 | 8  |
| 67499 | 6 | 15658578 | 15658595 | 2 | 9  | 18 | CA   | 8  | 3  |
| 67500 | 6 | 15658668 | 15658691 | 2 | 12 | 24 | CA   | 9  | 7  |
| 67501 | 6 | 15658888 | 15658907 | 2 | 10 | 20 | AC   | 10 | 7  |
| 67503 | 6 | 15663986 | 15664011 | 2 | 13 | 26 | CA   | 16 | 9  |
| 67504 | 6 | 15664213 | 15664260 | 2 | 24 | 48 | GT   | 9  | 14 |
| 67505 | 6 | 15664851 | 15664868 | 3 | 6  | 18 | TTG  | 28 | 3  |
| 67506 | 6 | 15667612 | 15667639 | 2 | 14 | 28 | CA   | 21 | 10 |
| 67507 | 6 | 15668027 | 15668048 | 2 | 11 | 22 | AC   | 7  | 9  |
| 67511 | 6 | 15674463 | 15674476 | 2 | 7  | 14 | AC   | 12 | 4  |
| 67521 | 6 | 15699757 | 15699772 | 2 | 8  | 16 | TC   | 17 | 4  |
| 67523 | 6 | 15701868 | 15701885 | 2 | 9  | 18 | TA   | 12 | 8  |
| 67530 | 6 | 15727671 | 15727700 | 2 | 15 | 30 | CA   | 17 | 10 |
| 67532 | 6 | 15736253 | 15736268 | 2 | 8  | 16 | AC   | 29 | 3  |
| 67535 | 6 | 15742896 | 15742915 | 2 | 10 | 20 | TG   | 10 | 3  |
| 67538 | 6 | 15745161 | 15745188 | 2 | 14 | 28 | CA   | 11 | 13 |
| 67564 | 6 | 15809654 | 15809674 | 3 | 7  | 21 | GAA  | 23 | 7  |
| 67567 | 6 | 15821784 | 15821799 | 4 | 4  | 16 | AAAT | 18 | 12 |
| 67568 | 6 | 15827767 | 15827786 | 2 | 10 | 20 | CT   | 17 | 11 |
| 67569 | 6 | 15827877 | 15827900 | 2 | 12 | 24 | AC   | 14 | 10 |
| 67570 | 6 | 15830352 | 15830367 | 2 | 8  | 16 | AC   | 23 | 4  |
| 67572 | 6 | 15833927 | 15833954 | 2 | 14 | 28 | AC   | 11 | 8  |
| 67579 | 6 | 15867708 | 15867733 | 2 | 13 | 26 | GA   | 12 | 6  |
| 67580 | 6 | 15878065 | 15878080 | 4 | 4  | 16 | CTAG | 23 | 3  |
| 67586 | 6 | 15894498 | 15894513 | 4 | 4  | 16 | TTAT | 9  | 3  |
| 67587 | 6 | 15894985 | 15895004 | 2 | 10 | 20 | GT   | 24 | 3  |
| 67588 | 6 | 15895648 | 15895669 | 2 | 11 | 22 | CA   | 19 | 10 |
| 67596 | 6 | 15936256 | 15936270 | 3 | 5  | 15 | TTG  | 19 | 3  |
| 67605 | 6 | 15968313 | 15968336 | 3 | 8  | 24 | CTC  | 18 | 3  |
| 67607 | 6 | 15970203 | 15970232 | 2 | 15 | 30 | TG   | 18 | 7  |
| 67615 | 6 | 15989508 | 15989547 | 2 | 20 | 40 | CA   | 6  | 7  |
| 67629 | 6 | 16004601 | 16004622 | 2 | 11 | 22 | AC   | 22 | 5  |
| 67634 | 6 | 16010282 | 16010311 | 3 | 10 | 30 | TTC  | 21 | 7  |
| 67635 | 6 | 16014393 | 16014408 | 2 | 8  | 16 | TG   | 23 | 4  |
| 67636 | 6 | 16024335 | 16024348 | 2 | 7  | 14 | CT   | 27 | 3  |
| 67647 | 6 | 16055065 | 16055098 | 2 | 17 | 34 | TC   | 12 | 9  |
| 67652 | 6 | 16063724 | 16063735 | 2 | 6  | 12 | CA   | 26 | 3  |
| 67674 | 6 | 16080643 | 16080656 | 2 | 7  | 14 | GT   | 22 | 5  |
| 67675 | 6 | 16080658 | 16080673 | 2 | 8  | 16 | TG   | 21 | 5  |

|       |   |          |          |   |    |    |      |    |    |
|-------|---|----------|----------|---|----|----|------|----|----|
| 67684 | 6 | 16110221 | 16110240 | 2 | 10 | 20 | TG   | 16 | 5  |
| 67690 | 6 | 16120553 | 16120570 | 2 | 9  | 18 | TG   | 23 | 8  |
| 67693 | 6 | 16123833 | 16123860 | 2 | 14 | 28 | TG   | 16 | 3  |
| 67695 | 6 | 16126429 | 16126454 | 2 | 13 | 26 | AC   | 14 | 9  |
| 67697 | 6 | 16132046 | 16132077 | 2 | 16 | 32 | AC   | 9  | 6  |
| 67704 | 6 | 16169391 | 16169402 | 2 | 6  | 12 | CA   | 20 | 4  |
| 67710 | 6 | 16181565 | 16181604 | 2 | 20 | 40 | GT   | 16 | 10 |
| 67711 | 6 | 16181801 | 16181812 | 2 | 6  | 12 | GC   | 23 | 7  |
| 67712 | 6 | 16181813 | 16181828 | 2 | 8  | 16 | GT   | 24 | 10 |
| 67715 | 6 | 16184183 | 16184200 | 2 | 9  | 18 | AC   | 17 | 6  |
| 67721 | 6 | 16186961 | 16186996 | 2 | 18 | 36 | CA   | 11 | 7  |
| 67723 | 6 | 16189342 | 16189357 | 2 | 8  | 16 | GT   | 23 | 3  |
| 67731 | 6 | 16213973 | 16213987 | 3 | 5  | 15 | GCA  | 27 | 3  |
| 67735 | 6 | 16220131 | 16220158 | 2 | 14 | 28 | GT   | 13 | 6  |
| 67740 | 7 | 15639    | 15665    | 3 | 9  | 27 | TAA  | 13 | 5  |
| 67743 | 7 | 24084    | 24105    | 2 | 11 | 22 | GA   | 13 | 6  |
| 67747 | 7 | 38744    | 38775    | 2 | 16 | 32 | CA   | 11 | 8  |
| 67756 | 7 | 69880    | 69894    | 3 | 5  | 15 | ACA  | 26 | 4  |
| 67759 | 7 | 76972    | 76993    | 2 | 11 | 22 | CA   | 7  | 5  |
| 67764 | 7 | 93370    | 93399    | 3 | 10 | 30 | TCC  | 22 | 8  |
| 67776 | 7 | 116405   | 116440   | 2 | 18 | 36 | AC   | 7  | 8  |
| 67778 | 7 | 118156   | 118169   | 2 | 7  | 14 | TG   | 10 | 5  |
| 67779 | 7 | 118172   | 118187   | 2 | 8  | 16 | TG   | 10 | 5  |
| 67781 | 7 | 121517   | 121534   | 3 | 6  | 18 | TTG  | 22 | 7  |
| 67785 | 7 | 136980   | 137005   | 2 | 13 | 26 | TG   | 11 | 7  |
| 67786 | 7 | 139914   | 139941   | 2 | 14 | 28 | TG   | 18 | 9  |
| 67794 | 7 | 164955   | 164972   | 2 | 9  | 18 | CA   | 21 | 7  |
| 67809 | 7 | 217832   | 217857   | 2 | 13 | 26 | CA   | 11 | 10 |
| 67811 | 7 | 222328   | 222353   | 2 | 13 | 26 | GT   | 10 | 10 |
| 67812 | 7 | 223935   | 223961   | 3 | 9  | 27 | TCC  | 18 | 4  |
| 67813 | 7 | 224046   | 224060   | 3 | 5  | 15 | TCC  | 17 | 3  |
| 67814 | 7 | 229240   | 229255   | 2 | 8  | 16 | AC   | 25 | 7  |
| 67823 | 7 | 250027   | 250054   | 2 | 14 | 28 | CA   | 19 | 18 |
| 67826 | 7 | 259620   | 259659   | 2 | 20 | 40 | CA   | 16 | 14 |
| 67827 | 7 | 261487   | 261500   | 2 | 7  | 14 | AT   | 20 | 4  |
| 67831 | 7 | 279583   | 279626   | 4 | 11 | 44 | TATC | 8  | 9  |
| 67848 | 7 | 311049   | 311064   | 4 | 4  | 16 | CAAA | 27 | 4  |
| 67852 | 7 | 322383   | 322406   | 3 | 8  | 24 | TGG  | 19 | 9  |
| 67854 | 7 | 327441   | 327455   | 3 | 5  | 15 | ATT  | 21 | 11 |
| 67856 | 7 | 337912   | 337939   | 4 | 7  | 28 | TCTT | 18 | 7  |
| 67857 | 7 | 338693   | 338704   | 2 | 6  | 12 | TG   | 22 | 4  |
| 67858 | 7 | 339656   | 339669   | 2 | 7  | 14 | TG   | 22 | 10 |
| 67861 | 7 | 362550   | 362569   | 2 | 10 | 20 | AC   | 23 | 14 |
| 67862 | 7 | 364597   | 364623   | 3 | 9  | 27 | CTG  | 32 | 6  |
| 67867 | 7 | 371949   | 371968   | 2 | 10 | 20 | AG   | 19 | 4  |
| 67868 | 7 | 372089   | 372106   | 2 | 9  | 18 | AC   | 17 | 8  |
| 67871 | 7 | 374557   | 374586   | 3 | 10 | 30 | CCT  | 9  | 6  |
| 67873 | 7 | 375783   | 375797   | 3 | 5  | 15 | TGC  | 34 | 4  |
| 67874 | 7 | 375999   | 376020   | 2 | 11 | 22 | TG   | 17 | 16 |
| 67875 | 7 | 376126   | 376137   | 2 | 6  | 12 | TG   | 28 | 4  |
| 67876 | 7 | 377995   | 378010   | 4 | 4  | 16 | TATT | 16 | 8  |

|       |   |        |        |   |    |    |      |    |    |
|-------|---|--------|--------|---|----|----|------|----|----|
| 67877 | 7 | 380901 | 380920 | 2 | 10 | 20 | TG   | 18 | 7  |
| 67880 | 7 | 384014 | 384049 | 4 | 9  | 36 | TTCT | 14 | 11 |
| 67884 | 7 | 390895 | 390910 | 4 | 4  | 16 | TAGC | 24 | 3  |
| 67890 | 7 | 402277 | 402296 | 4 | 5  | 20 | ACTG | 17 | 3  |
| 67895 | 7 | 407147 | 407178 | 2 | 16 | 32 | CA   | 6  | 9  |
| 67903 | 7 | 430404 | 430421 | 2 | 9  | 18 | TG   | 25 | 17 |
| 67904 | 7 | 433393 | 433407 | 3 | 5  | 15 | ATA  | 19 | 3  |
| 67909 | 7 | 449721 | 449744 | 2 | 12 | 24 | TG   | 9  | 12 |
| 67911 | 7 | 451298 | 451327 | 3 | 10 | 30 | GAT  | 19 | 4  |
| 67913 | 7 | 452942 | 452955 | 2 | 7  | 14 | TG   | 22 | 9  |
| 67916 | 7 | 466462 | 466479 | 2 | 9  | 18 | TG   | 17 | 9  |
| 67919 | 7 | 476999 | 477019 | 3 | 7  | 21 | AAT  | 21 | 5  |
| 67921 | 7 | 481870 | 481901 | 2 | 16 | 32 | TG   | 15 | 10 |
| 67928 | 7 | 500222 | 500233 | 2 | 6  | 12 | CA   | 18 | 3  |
| 67932 | 7 | 510901 | 510932 | 2 | 16 | 32 | CA   | 7  | 6  |
| 67936 | 7 | 524329 | 524350 | 2 | 11 | 22 | AG   | 14 | 12 |
| 67937 | 7 | 527889 | 527918 | 2 | 15 | 30 | GT   | 10 | 10 |
| 67941 | 7 | 540667 | 540680 | 2 | 7  | 14 | GA   | 16 | 4  |
| 67942 | 7 | 541693 | 541708 | 4 | 4  | 16 | TCTG | 19 | 3  |
| 67943 | 7 | 544818 | 544841 | 2 | 12 | 24 | CA   | 10 | 5  |
| 67946 | 7 | 556457 | 556472 | 2 | 8  | 16 | CA   | 27 | 6  |
| 67947 | 7 | 557909 | 557948 | 2 | 20 | 40 | TG   | 11 | 13 |
| 67965 | 7 | 613905 | 613916 | 2 | 6  | 12 | CA   | 30 | 5  |
| 67972 | 7 | 628336 | 628367 | 2 | 16 | 32 | AC   | 8  | 10 |
| 67974 | 7 | 639053 | 639068 | 4 | 4  | 16 | TTAT | 22 | 4  |
| 67982 | 7 | 657262 | 657285 | 3 | 8  | 24 | CTG  | 21 | 10 |
| 67986 | 7 | 666048 | 666063 | 2 | 8  | 16 | AC   | 20 | 7  |
| 67987 | 7 | 666540 | 666551 | 2 | 6  | 12 | GT   | 24 | 7  |
| 67989 | 7 | 674690 | 674703 | 2 | 7  | 14 | GT   | 13 | 7  |
| 67990 | 7 | 674709 | 674720 | 2 | 6  | 12 | TA   | 15 | 7  |
| 67996 | 7 | 702928 | 702941 | 2 | 7  | 14 | AG   | 21 | 4  |
| 68000 | 7 | 708826 | 708839 | 2 | 7  | 14 | CA   | 22 | 3  |
| 68003 | 7 | 711226 | 711263 | 2 | 19 | 38 | AC   | 6  | 10 |
| 68004 | 7 | 714648 | 714661 | 2 | 7  | 14 | CA   | 19 | 4  |
| 68018 | 7 | 732011 | 732026 | 2 | 8  | 16 | AC   | 12 | 5  |
| 68019 | 7 | 732140 | 732169 | 2 | 15 | 30 | GT   | 13 | 12 |
| 68020 | 7 | 738529 | 738542 | 2 | 7  | 14 | TG   | 17 | 4  |
| 68022 | 7 | 743759 | 743776 | 3 | 6  | 18 | ATA  | 20 | 5  |
| 68024 | 7 | 745814 | 745841 | 2 | 14 | 28 | CA   | 14 | 14 |
| 68027 | 7 | 750765 | 750792 | 2 | 14 | 28 | AC   | 16 | 11 |
| 68030 | 7 | 752424 | 752451 | 2 | 14 | 28 | GT   | 16 | 7  |
| 68031 | 7 | 752635 | 752654 | 2 | 10 | 20 | GA   | 22 | 6  |
| 68032 | 7 | 752850 | 752869 | 2 | 10 | 20 | AC   | 17 | 7  |
| 68034 | 7 | 753010 | 753027 | 2 | 9  | 18 | TG   | 20 | 10 |
| 68035 | 7 | 753186 | 753203 | 2 | 9  | 18 | CA   | 24 | 7  |
| 68037 | 7 | 757621 | 757640 | 4 | 5  | 20 | GTTG | 24 | 3  |
| 68041 | 7 | 760210 | 760227 | 2 | 9  | 18 | TG   | 23 | 8  |
| 68045 | 7 | 766644 | 766683 | 2 | 20 | 40 | GT   | 6  | 9  |
| 68046 | 7 | 767508 | 767527 | 2 | 10 | 20 | GT   | 24 | 7  |
| 68057 | 7 | 778838 | 778861 | 2 | 12 | 24 | CA   | 15 | 14 |
| 68063 | 7 | 785070 | 785129 | 2 | 30 | 60 | TG   | 7  | 8  |

|       |   |         |         |   |    |    |      |    |    |
|-------|---|---------|---------|---|----|----|------|----|----|
| 68066 | 7 | 785322  | 785335  | 2 | 7  | 14 | TG   | 9  | 5  |
| 68067 | 7 | 785431  | 785456  | 2 | 13 | 26 | CA   | 13 | 6  |
| 68070 | 7 | 793479  | 793512  | 2 | 17 | 34 | CA   | 9  | 8  |
| 68071 | 7 | 793697  | 793724  | 2 | 14 | 28 | TG   | 16 | 7  |
| 68077 | 7 | 800787  | 800820  | 2 | 17 | 34 | CA   | 7  | 7  |
| 68078 | 7 | 800978  | 801001  | 2 | 12 | 24 | GT   | 28 | 9  |
| 68093 | 7 | 827916  | 827933  | 2 | 9  | 18 | AC   | 12 | 6  |
| 68099 | 7 | 830292  | 830323  | 2 | 16 | 32 | AC   | 7  | 6  |
| 68105 | 7 | 848672  | 848687  | 2 | 8  | 16 | TG   | 7  | 4  |
| 68106 | 7 | 848688  | 848699  | 2 | 6  | 12 | AG   | 16 | 6  |
| 68112 | 7 | 856800  | 856815  | 2 | 8  | 16 | CA   | 15 | 10 |
| 68120 | 7 | 875364  | 875381  | 2 | 9  | 18 | AC   | 25 | 10 |
| 68128 | 7 | 900155  | 900188  | 2 | 17 | 34 | CA   | 8  | 9  |
| 68129 | 7 | 901799  | 901830  | 2 | 16 | 32 | CA   | 17 | 12 |
| 68130 | 7 | 902883  | 902897  | 3 | 5  | 15 | TCC  | 32 | 5  |
| 68132 | 7 | 906404  | 906417  | 2 | 7  | 14 | TC   | 31 | 3  |
| 68136 | 7 | 907329  | 907344  | 4 | 4  | 16 | GGAC | 24 | 3  |
| 68138 | 7 | 913611  | 913630  | 2 | 10 | 20 | AC   | 17 | 11 |
| 68139 | 7 | 913795  | 913820  | 2 | 13 | 26 | TG   | 19 | 11 |
| 68140 | 7 | 923841  | 923856  | 2 | 8  | 16 | AC   | 25 | 7  |
| 68141 | 7 | 924347  | 924376  | 2 | 15 | 30 | GT   | 11 | 11 |
| 68142 | 7 | 924573  | 924604  | 2 | 16 | 32 | AC   | 17 | 8  |
| 68153 | 7 | 932711  | 932732  | 2 | 11 | 22 | GT   | 10 | 11 |
| 68160 | 7 | 943523  | 943552  | 2 | 15 | 30 | GT   | 13 | 7  |
| 68162 | 7 | 952495  | 952518  | 2 | 12 | 24 | GT   | 7  | 8  |
| 68163 | 7 | 963425  | 963446  | 2 | 11 | 22 | TG   | 15 | 11 |
| 68164 | 7 | 963597  | 963632  | 2 | 18 | 36 | GT   | 9  | 8  |
| 68167 | 7 | 964784  | 964817  | 2 | 17 | 34 | GT   | 6  | 6  |
| 68171 | 7 | 972130  | 972151  | 2 | 11 | 22 | AC   | 18 | 5  |
| 68172 | 7 | 974790  | 974807  | 2 | 9  | 18 | GT   | 22 | 11 |
| 68177 | 7 | 981647  | 981674  | 2 | 14 | 28 | AC   | 12 | 6  |
| 68180 | 7 | 985629  | 985644  | 4 | 4  | 16 | TTAT | 24 | 3  |
| 68186 | 7 | 1000997 | 1001012 | 4 | 4  | 16 | GATC | 34 | 4  |
| 68187 | 7 | 1001388 | 1001443 | 2 | 28 | 56 | TG   | 10 | 12 |
| 68196 | 7 | 1013254 | 1013268 | 3 | 5  | 15 | CTC  | 25 | 4  |
| 68198 | 7 | 1013839 | 1013850 | 2 | 6  | 12 | AC   | 15 | 6  |
| 68202 | 7 | 1023705 | 1023720 | 2 | 8  | 16 | AC   | 30 | 4  |
| 68208 | 7 | 1036110 | 1036137 | 4 | 7  | 28 | GATG | 19 | 11 |
| 68209 | 7 | 1038544 | 1038569 | 2 | 13 | 26 | CA   | 6  | 8  |
| 68216 | 7 | 1048866 | 1048897 | 2 | 16 | 32 | AC   | 6  | 7  |
| 68217 | 7 | 1052628 | 1052639 | 2 | 6  | 12 | CT   | 12 | 6  |
| 68221 | 7 | 1060545 | 1060566 | 2 | 11 | 22 | TG   | 23 | 9  |
| 68222 | 7 | 1065818 | 1065833 | 2 | 8  | 16 | CA   | 7  | 10 |
| 68228 | 7 | 1095305 | 1095328 | 4 | 6  | 24 | TGAG | 24 | 5  |
| 68233 | 7 | 1108216 | 1108227 | 2 | 6  | 12 | GT   | 29 | 3  |
| 68236 | 7 | 1114294 | 1114323 | 3 | 10 | 30 | CAT  | 23 | 10 |
| 68242 | 7 | 1131079 | 1131102 | 3 | 8  | 24 | AAT  | 15 | 10 |
| 68243 | 7 | 1131302 | 1131319 | 3 | 6  | 18 | AGC  | 21 | 5  |
| 68244 | 7 | 1131678 | 1131689 | 2 | 6  | 12 | CA   | 33 | 4  |
| 68250 | 7 | 1140717 | 1140728 | 2 | 6  | 12 | GA   | 21 | 7  |
| 68252 | 7 | 1142792 | 1142815 | 4 | 6  | 24 | AGAC | 25 | 10 |

|       |   |         |         |   |    |    |      |    |    |
|-------|---|---------|---------|---|----|----|------|----|----|
| 68255 | 7 | 1146282 | 1146302 | 3 | 7  | 21 | AAT  | 15 | 4  |
| 68256 | 7 | 1146756 | 1146767 | 2 | 6  | 12 | GT   | 25 | 4  |
| 68257 | 7 | 1148883 | 1148900 | 2 | 9  | 18 | GT   | 12 | 9  |
| 68261 | 7 | 1155705 | 1155716 | 2 | 6  | 12 | AT   | 15 | 3  |
| 68262 | 7 | 1160260 | 1160285 | 2 | 13 | 26 | TG   | 27 | 6  |
| 68268 | 7 | 1169640 | 1169665 | 2 | 13 | 26 | CA   | 18 | 8  |
| 68274 | 7 | 1182479 | 1182514 | 2 | 18 | 36 | AC   | 16 | 10 |
| 68278 | 7 | 1193444 | 1193461 | 2 | 9  | 18 | GT   | 21 | 10 |
| 68279 | 7 | 1196507 | 1196522 | 2 | 8  | 16 | TA   | 12 | 9  |
| 68289 | 7 | 1214594 | 1214625 | 2 | 16 | 32 | GT   | 7  | 8  |
| 68290 | 7 | 1217290 | 1217313 | 4 | 6  | 24 | TCTA | 26 | 9  |
| 68335 | 7 | 1342371 | 1342400 | 2 | 15 | 30 | GT   | 25 | 12 |
| 68339 | 7 | 1346924 | 1346941 | 3 | 6  | 18 | AGC  | 33 | 6  |
| 68341 | 7 | 1366836 | 1366847 | 2 | 6  | 12 | CA   | 10 | 4  |
| 68344 | 7 | 1382283 | 1382297 | 3 | 5  | 15 | GTA  | 17 | 4  |
| 68345 | 7 | 1401077 | 1401090 | 2 | 7  | 14 | TG   | 10 | 8  |
| 68355 | 7 | 1421235 | 1421273 | 3 | 13 | 39 | ATG  | 18 | 8  |
| 68359 | 7 | 1429489 | 1429510 | 2 | 11 | 22 | GT   | 13 | 8  |
| 68360 | 7 | 1431200 | 1431219 | 2 | 10 | 20 | GT   | 12 | 10 |
| 68362 | 7 | 1431604 | 1431641 | 2 | 19 | 38 | GT   | 17 | 12 |
| 68367 | 7 | 1447542 | 1447557 | 4 | 4  | 16 | ACAG | 18 | 5  |
| 68371 | 7 | 1447815 | 1447842 | 2 | 14 | 28 | TG   | 12 | 10 |
| 68373 | 7 | 1458292 | 1458312 | 3 | 7  | 21 | GAG  | 21 | 4  |
| 68376 | 7 | 1461101 | 1461115 | 3 | 5  | 15 | AGG  | 27 | 6  |
| 68381 | 7 | 1464506 | 1464525 | 2 | 10 | 20 | TC   | 7  | 3  |
| 68383 | 7 | 1466402 | 1466443 | 2 | 21 | 42 | GT   | 9  | 11 |
| 68385 | 7 | 1469108 | 1469125 | 2 | 9  | 18 | AC   | 23 | 6  |
| 68386 | 7 | 1471152 | 1471165 | 2 | 7  | 14 | GT   | 29 | 3  |
| 68391 | 7 | 1478172 | 1478187 | 4 | 4  | 16 | ATTC | 29 | 3  |
| 68392 | 7 | 1479901 | 1479918 | 3 | 6  | 18 | TAC  | 24 | 4  |
| 68395 | 7 | 1486697 | 1486708 | 2 | 6  | 12 | TG   | 26 | 3  |
| 68401 | 7 | 1514404 | 1514421 | 3 | 6  | 18 | GCA  | 32 | 7  |
| 68402 | 7 | 1516094 | 1516107 | 2 | 7  | 14 | TG   | 19 | 5  |
| 68404 | 7 | 1517362 | 1517375 | 2 | 7  | 14 | AT   | 15 | 16 |
| 68405 | 7 | 1517804 | 1517821 | 2 | 9  | 18 | TG   | 20 | 6  |
| 68413 | 7 | 1538240 | 1538255 | 4 | 4  | 16 | AGAT | 18 | 5  |
| 68416 | 7 | 1547286 | 1547305 | 4 | 5  | 20 | ATGG | 25 | 4  |
| 68417 | 7 | 1549056 | 1549070 | 3 | 5  | 15 | AAC  | 15 | 6  |
| 68431 | 7 | 1638567 | 1638578 | 2 | 6  | 12 | TG   | 27 | 5  |
| 68435 | 7 | 1648309 | 1648336 | 4 | 7  | 28 | AATA | 6  | 4  |
| 68436 | 7 | 1655564 | 1655599 | 4 | 9  | 36 | TTTC | 23 | 13 |
| 68439 | 7 | 1662411 | 1662426 | 4 | 4  | 16 | TTCT | 17 | 4  |
| 68440 | 7 | 1664710 | 1664729 | 2 | 10 | 20 | GT   | 19 | 11 |
| 68441 | 7 | 1664933 | 1664954 | 2 | 11 | 22 | TG   | 13 | 5  |
| 68451 | 7 | 1694144 | 1694171 | 2 | 14 | 28 | AC   | 11 | 11 |
| 68457 | 7 | 1700363 | 1700386 | 4 | 6  | 24 | GATA | 12 | 10 |
| 68459 | 7 | 1703896 | 1703921 | 2 | 13 | 26 | GT   | 6  | 7  |
| 68473 | 7 | 1733109 | 1733140 | 2 | 16 | 32 | CA   | 10 | 11 |
| 68474 | 7 | 1734198 | 1734229 | 4 | 8  | 32 | AATC | 11 | 5  |
| 68480 | 7 | 1743891 | 1743911 | 3 | 7  | 21 | ATC  | 20 | 5  |
| 68483 | 7 | 1745448 | 1745463 | 2 | 8  | 16 | GA   | 17 | 6  |

|       |   |         |         |   |    |    |      |    |    |
|-------|---|---------|---------|---|----|----|------|----|----|
| 68484 | 7 | 1745464 | 1745483 | 2 | 10 | 20 | GT   | 21 | 6  |
| 68488 | 7 | 1751131 | 1751148 | 2 | 9  | 18 | TG   | 16 | 9  |
| 68489 | 7 | 1751232 | 1751269 | 2 | 19 | 38 | CA   | 10 | 9  |
| 68493 | 7 | 1756527 | 1756556 | 2 | 15 | 30 | AC   | 6  | 6  |
| 68496 | 7 | 1759039 | 1759064 | 2 | 13 | 26 | CA   | 8  | 7  |
| 68497 | 7 | 1761034 | 1761055 | 2 | 11 | 22 | GT   | 11 | 11 |
| 68505 | 7 | 1764233 | 1764266 | 2 | 17 | 34 | AC   | 10 | 8  |
| 68506 | 7 | 1764460 | 1764479 | 2 | 10 | 20 | AC   | 6  | 7  |
| 68509 | 7 | 1783947 | 1783978 | 2 | 16 | 32 | GT   | 8  | 10 |
| 68510 | 7 | 1784020 | 1784037 | 2 | 9  | 18 | AG   | 19 | 3  |
| 68518 | 7 | 1798537 | 1798552 | 2 | 8  | 16 | AC   | 13 | 7  |
| 68519 | 7 | 1798884 | 1798903 | 2 | 10 | 20 | CA   | 14 | 8  |
| 68520 | 7 | 1799910 | 1799921 | 2 | 6  | 12 | CA   | 23 | 6  |
| 68521 | 7 | 1801180 | 1801203 | 2 | 12 | 24 | TC   | 8  | 3  |
| 68528 | 7 | 1809072 | 1809085 | 2 | 7  | 14 | CA   | 21 | 4  |
| 68530 | 7 | 1811657 | 1811676 | 4 | 5  | 20 | CACG | 12 | 7  |
| 68531 | 7 | 1811677 | 1811694 | 2 | 9  | 18 | CA   | 11 | 4  |
| 68534 | 7 | 1817571 | 1817584 | 2 | 7  | 14 | TA   | 13 | 9  |
| 68535 | 7 | 1817585 | 1817600 | 2 | 8  | 16 | TG   | 13 | 8  |
| 68537 | 7 | 1819070 | 1819087 | 2 | 9  | 18 | CA   | 14 | 6  |
| 68538 | 7 | 1820171 | 1820190 | 2 | 10 | 20 | GT   | 14 | 12 |
| 68539 | 7 | 1825222 | 1825236 | 3 | 5  | 15 | AGT  | 31 | 3  |
| 68541 | 7 | 1828992 | 1829009 | 2 | 9  | 18 | TG   | 16 | 8  |
| 68549 | 7 | 1847310 | 1847329 | 4 | 5  | 20 | TGAG | 17 | 4  |
| 68555 | 7 | 1854879 | 1854890 | 2 | 6  | 12 | AC   | 25 | 5  |
| 68556 | 7 | 1854994 | 1855009 | 2 | 8  | 16 | GT   | 24 | 5  |
| 68557 | 7 | 1855912 | 1855929 | 2 | 9  | 18 | GT   | 11 | 5  |
| 68558 | 7 | 1857112 | 1857125 | 2 | 7  | 14 | AC   | 26 | 3  |
| 68559 | 7 | 1864256 | 1864282 | 3 | 9  | 27 | GGA  | 17 | 3  |
| 68563 | 7 | 1869493 | 1869510 | 2 | 9  | 18 | GA   | 23 | 7  |
| 68564 | 7 | 1870144 | 1870207 | 2 | 32 | 64 | AC   | 15 | 12 |
| 68577 | 7 | 1896179 | 1896192 | 2 | 7  | 14 | GT   | 15 | 4  |
| 68578 | 7 | 1896839 | 1896850 | 2 | 6  | 12 | GA   | 18 | 3  |
| 68579 | 7 | 1897744 | 1897775 | 2 | 16 | 32 | GT   | 7  | 9  |
| 68589 | 7 | 1916872 | 1916885 | 2 | 7  | 14 | TG   | 9  | 6  |
| 68591 | 7 | 1917099 | 1917128 | 2 | 15 | 30 | AG   | 22 | 13 |
| 68592 | 7 | 1917271 | 1917282 | 2 | 6  | 12 | TG   | 20 | 4  |
| 68597 | 7 | 1918773 | 1918786 | 2 | 7  | 14 | TG   | 21 | 6  |
| 68599 | 7 | 1921296 | 1921325 | 2 | 15 | 30 | GA   | 8  | 7  |
| 68600 | 7 | 1923612 | 1923645 | 2 | 17 | 34 | AG   | 7  | 7  |
| 68601 | 7 | 1923949 | 1923960 | 2 | 6  | 12 | GT   | 31 | 4  |
| 68603 | 7 | 1927556 | 1927607 | 4 | 13 | 52 | TTGG | 21 | 9  |
| 68616 | 7 | 1942017 | 1942036 | 4 | 5  | 20 | ACAT | 30 | 5  |
| 68617 | 7 | 1947586 | 1947613 | 2 | 14 | 28 | TG   | 6  | 10 |
| 68629 | 7 | 1964305 | 1964324 | 4 | 5  | 20 | CTGG | 30 | 6  |
| 68630 | 7 | 1964531 | 1964548 | 3 | 6  | 18 | CTG  | 20 | 3  |
| 68633 | 7 | 1965721 | 1965738 | 2 | 9  | 18 | GT   | 14 | 6  |
| 68635 | 7 | 1965796 | 1965815 | 2 | 10 | 20 | AG   | 14 | 6  |
| 68637 | 7 | 1965915 | 1965944 | 2 | 15 | 30 | GA   | 17 | 12 |
| 68649 | 7 | 1992194 | 1992213 | 2 | 10 | 20 | CT   | 10 | 6  |
| 68655 | 7 | 2001638 | 2001651 | 2 | 7  | 14 | GT   | 20 | 6  |

|       |   |         |         |   |    |    |      |    |    |
|-------|---|---------|---------|---|----|----|------|----|----|
| 68656 | 7 | 2001653 | 2001664 | 2 | 6  | 12 | TG   | 18 | 7  |
| 68659 | 7 | 2003061 | 2003088 | 4 | 7  | 28 | ACAT | 19 | 9  |
| 68679 | 7 | 2022697 | 2022722 | 2 | 13 | 26 | AC   | 20 | 11 |
| 68682 | 7 | 2034595 | 2034610 | 2 | 8  | 16 | TG   | 19 | 10 |
| 68687 | 7 | 2062775 | 2062788 | 2 | 7  | 14 | GT   | 12 | 10 |
| 68689 | 7 | 2069274 | 2069288 | 3 | 5  | 15 | GCA  | 25 | 4  |
| 68690 | 7 | 2073827 | 2073854 | 2 | 14 | 28 | AC   | 15 | 15 |
| 68692 | 7 | 2076151 | 2076180 | 2 | 15 | 30 | TG   | 11 | 9  |
| 68694 | 7 | 2080858 | 2080885 | 2 | 14 | 28 | GT   | 16 | 6  |
| 68696 | 7 | 2083310 | 2083335 | 2 | 13 | 26 | TG   | 16 | 14 |
| 68697 | 7 | 2087770 | 2087793 | 2 | 12 | 24 | AG   | 15 | 9  |
| 68701 | 7 | 2093154 | 2093181 | 2 | 14 | 28 | AC   | 14 | 8  |
| 68704 | 7 | 2097104 | 2097127 | 2 | 12 | 24 | GT   | 19 | 5  |
| 68707 | 7 | 2100298 | 2100325 | 2 | 14 | 28 | AC   | 9  | 8  |
| 68714 | 7 | 2109539 | 2109558 | 2 | 10 | 20 | AC   | 11 | 9  |
| 68715 | 7 | 2109788 | 2109801 | 2 | 7  | 14 | GT   | 20 | 5  |
| 68716 | 7 | 2111286 | 2111331 | 2 | 23 | 46 | AC   | 7  | 9  |
| 68717 | 7 | 2112479 | 2112498 | 2 | 10 | 20 | CA   | 20 | 6  |
| 68718 | 7 | 2114245 | 2114262 | 2 | 9  | 18 | CA   | 7  | 3  |
| 68719 | 7 | 2114492 | 2114527 | 2 | 18 | 36 | TG   | 16 | 13 |
| 68728 | 7 | 2134845 | 2134880 | 2 | 18 | 36 | TG   | 11 | 10 |
| 68732 | 7 | 2139296 | 2139311 | 2 | 8  | 16 | AC   | 26 | 8  |
| 68733 | 7 | 2143062 | 2143089 | 2 | 14 | 28 | TG   | 8  | 12 |
| 68763 | 7 | 2175944 | 2175967 | 2 | 12 | 24 | CA   | 12 | 8  |
| 68769 | 7 | 2184020 | 2184041 | 2 | 11 | 22 | AC   | 17 | 7  |
| 68778 | 7 | 2190999 | 2191024 | 2 | 13 | 26 | TG   | 21 | 17 |
| 68779 | 7 | 2191825 | 2191844 | 4 | 5  | 20 | AACC | 23 | 5  |
| 68782 | 7 | 2193615 | 2193632 | 2 | 9  | 18 | GA   | 23 | 6  |
| 68785 | 7 | 2194145 | 2194172 | 2 | 14 | 28 | AC   | 18 | 9  |
| 68786 | 7 | 2194319 | 2194346 | 4 | 7  | 28 | AACA | 27 | 5  |
| 68790 | 7 | 2200467 | 2200492 | 2 | 13 | 26 | TG   | 11 | 11 |
| 68792 | 7 | 2203226 | 2203239 | 2 | 7  | 14 | AC   | 15 | 4  |
| 68799 | 7 | 2214321 | 2214338 | 2 | 9  | 18 | TG   | 17 | 4  |
| 68803 | 7 | 2221161 | 2221178 | 2 | 9  | 18 | AC   | 20 | 8  |
| 68814 | 7 | 2233796 | 2233839 | 2 | 22 | 44 | AC   | 14 | 11 |
| 68815 | 7 | 2235700 | 2235743 | 2 | 22 | 44 | GT   | 10 | 9  |
| 68818 | 7 | 2237066 | 2237087 | 2 | 11 | 22 | TG   | 18 | 8  |
| 68820 | 7 | 2237657 | 2237684 | 2 | 14 | 28 | CA   | 19 | 12 |
| 68821 | 7 | 2240139 | 2240166 | 4 | 7  | 28 | AAAG | 9  | 6  |
| 68824 | 7 | 2250416 | 2250448 | 3 | 11 | 33 | ATT  | 14 | 8  |
| 68830 | 7 | 2261068 | 2261087 | 2 | 10 | 20 | CA   | 27 | 10 |
| 68832 | 7 | 2261384 | 2261399 | 2 | 8  | 16 | CA   | 19 | 7  |
| 68833 | 7 | 2261632 | 2261647 | 2 | 8  | 16 | TG   | 13 | 6  |
| 68834 | 7 | 2262794 | 2262808 | 3 | 5  | 15 | TAA  | 17 | 3  |
| 68837 | 7 | 2272903 | 2272922 | 4 | 5  | 20 | ATAG | 24 | 4  |
| 68846 | 7 | 2290880 | 2290900 | 3 | 7  | 21 | ATT  | 11 | 3  |
| 68847 | 7 | 2291136 | 2291156 | 3 | 7  | 21 | TCA  | 27 | 9  |
| 68857 | 7 | 2298952 | 2298979 | 2 | 14 | 28 | AC   | 7  | 8  |
| 68858 | 7 | 2299084 | 2299103 | 2 | 10 | 20 | GA   | 12 | 7  |
| 68861 | 7 | 2302334 | 2302363 | 2 | 15 | 30 | CA   | 9  | 14 |
| 68863 | 7 | 2303496 | 2303513 | 2 | 9  | 18 | GT   | 27 | 3  |

|       |   |         |         |   |    |    |      |    |    |
|-------|---|---------|---------|---|----|----|------|----|----|
| 68879 | 7 | 2329750 | 2329777 | 2 | 14 | 28 | AC   | 18 | 10 |
| 68882 | 7 | 2331681 | 2331704 | 2 | 12 | 24 | TC   | 17 | 4  |
| 68883 | 7 | 2331820 | 2331837 | 2 | 9  | 18 | TG   | 16 | 4  |
| 68884 | 7 | 2331934 | 2331969 | 2 | 18 | 36 | GT   | 11 | 7  |
| 68885 | 7 | 2332087 | 2332108 | 2 | 11 | 22 | TG   | 19 | 15 |
| 68888 | 7 | 2333868 | 2333891 | 2 | 12 | 24 | GT   | 12 | 6  |
| 68890 | 7 | 2334025 | 2334048 | 2 | 12 | 24 | AC   | 15 | 13 |
| 68894 | 7 | 2335950 | 2335969 | 2 | 10 | 20 | AC   | 19 | 7  |
| 68895 | 7 | 2336127 | 2336152 | 2 | 13 | 26 | CA   | 14 | 9  |
| 68897 | 7 | 2336285 | 2336296 | 2 | 6  | 12 | GT   | 23 | 4  |
| 68898 | 7 | 2336430 | 2336451 | 2 | 11 | 22 | AC   | 23 | 12 |
| 68900 | 7 | 2336506 | 2336525 | 2 | 10 | 20 | GT   | 13 | 9  |
| 68902 | 7 | 2338774 | 2338801 | 2 | 14 | 28 | AC   | 21 | 8  |
| 68903 | 7 | 2339445 | 2339462 | 2 | 9  | 18 | TG   | 22 | 6  |
| 68904 | 7 | 2340586 | 2340617 | 2 | 16 | 32 | TG   | 12 | 5  |
| 68907 | 7 | 2346264 | 2346279 | 2 | 8  | 16 | TG   | 18 | 5  |
| 68908 | 7 | 2346448 | 2346485 | 2 | 19 | 38 | TG   | 8  | 8  |
| 68913 | 7 | 2353147 | 2353182 | 2 | 18 | 36 | CA   | 16 | 10 |
| 68914 | 7 | 2353882 | 2353909 | 2 | 14 | 28 | GT   | 6  | 6  |
| 68915 | 7 | 2354450 | 2354461 | 2 | 6  | 12 | GT   | 18 | 8  |
| 68917 | 7 | 2355302 | 2355329 | 2 | 14 | 28 | CA   | 17 | 9  |
| 68922 | 7 | 2369626 | 2369651 | 2 | 13 | 26 | TG   | 17 | 10 |
| 68923 | 7 | 2369683 | 2369696 | 2 | 7  | 14 | AC   | 23 | 4  |
| 68926 | 7 | 2381868 | 2381883 | 2 | 8  | 16 | TG   | 27 | 5  |
| 68931 | 7 | 2403084 | 2403099 | 4 | 4  | 16 | TGTA | 27 | 4  |
| 68951 | 7 | 2435525 | 2435542 | 3 | 6  | 18 | TCT  | 18 | 3  |
| 68953 | 7 | 2438223 | 2438242 | 2 | 10 | 20 | AC   | 22 | 6  |
| 68957 | 7 | 2442867 | 2442882 | 2 | 8  | 16 | AT   | 19 | 7  |
| 68958 | 7 | 2443778 | 2443795 | 2 | 9  | 18 | CA   | 13 | 9  |
| 68959 | 7 | 2443911 | 2443922 | 2 | 6  | 12 | AC   | 25 | 3  |
| 68962 | 7 | 2450690 | 2450704 | 3 | 5  | 15 | CTG  | 25 | 5  |
| 68963 | 7 | 2450706 | 2450723 | 3 | 6  | 18 | TTA  | 28 | 5  |
| 68965 | 7 | 2454970 | 2454997 | 2 | 14 | 28 | AC   | 17 | 6  |
| 68966 | 7 | 2456934 | 2456953 | 2 | 10 | 20 | CA   | 15 | 5  |
| 68968 | 7 | 2463416 | 2463431 | 2 | 8  | 16 | AC   | 30 | 4  |
| 68969 | 7 | 2463630 | 2463659 | 2 | 15 | 30 | CA   | 12 | 10 |
| 68971 | 7 | 2466781 | 2466818 | 2 | 19 | 38 | TG   | 6  | 5  |
| 68972 | 7 | 2472649 | 2472670 | 2 | 11 | 22 | CA   | 15 | 5  |
| 68973 | 7 | 2474753 | 2474772 | 2 | 10 | 20 | TG   | 19 | 15 |
| 68974 | 7 | 2474928 | 2474963 | 2 | 18 | 36 | AC   | 14 | 12 |
| 68978 | 7 | 2479499 | 2479519 | 3 | 7  | 21 | CTC  | 30 | 8  |
| 68980 | 7 | 2483984 | 2484015 | 4 | 8  | 32 | TCTT | 20 | 8  |
| 68993 | 7 | 2527256 | 2527273 | 3 | 6  | 18 | CAC  | 30 | 3  |
| 68998 | 7 | 2537637 | 2537674 | 2 | 19 | 38 | TG   | 18 | 6  |
| 69013 | 7 | 2563172 | 2563201 | 2 | 15 | 30 | CA   | 23 | 12 |
| 69018 | 7 | 2579688 | 2579739 | 2 | 26 | 52 | GT   | 13 | 18 |
| 69020 | 7 | 2582738 | 2582757 | 2 | 10 | 20 | TG   | 18 | 6  |
| 69021 | 7 | 2582888 | 2582903 | 2 | 8  | 16 | TG   | 21 | 5  |
| 69023 | 7 | 2589035 | 2589080 | 2 | 23 | 46 | CA   | 10 | 9  |
| 69035 | 7 | 2629173 | 2629202 | 2 | 15 | 30 | CA   | 9  | 9  |
| 69039 | 7 | 2631582 | 2631597 | 2 | 8  | 16 | GT   | 20 | 3  |



|       |   |         |         |   |    |    |      |    |    |
|-------|---|---------|---------|---|----|----|------|----|----|
| 69043 | 7 | 2634963 | 2634992 | 2 | 15 | 30 | GT   | 11 | 9  |
| 69050 | 7 | 2643166 | 2643179 | 2 | 7  | 14 | GA   | 13 | 5  |
| 69052 | 7 | 2643606 | 2643626 | 3 | 7  | 21 | CCT  | 18 | 7  |
| 69054 | 7 | 2644434 | 2644447 | 2 | 7  | 14 | CA   | 18 | 6  |
| 69055 | 7 | 2644754 | 2644775 | 2 | 11 | 22 | AC   | 11 | 8  |
| 69056 | 7 | 2657699 | 2657716 | 3 | 6  | 18 | GCA  | 22 | 3  |
| 69078 | 7 | 2697117 | 2697132 | 2 | 8  | 16 | GT   | 18 | 3  |
| 69091 | 7 | 2716538 | 2716549 | 2 | 6  | 12 | GT   | 25 | 4  |
| 69100 | 7 | 2731958 | 2731985 | 4 | 7  | 28 | AACC | 24 | 4  |
| 69106 | 7 | 2749820 | 2749831 | 2 | 6  | 12 | GT   | 16 | 7  |
| 69107 | 7 | 2749834 | 2749851 | 2 | 9  | 18 | GT   | 14 | 8  |
| 69109 | 7 | 2759964 | 2760021 | 2 | 29 | 58 | GT   | 10 | 13 |
| 69112 | 7 | 2767587 | 2767600 | 2 | 7  | 14 | GT   | 22 | 11 |
| 69113 | 7 | 2767780 | 2767795 | 2 | 8  | 16 | TC   | 25 | 5  |
| 69122 | 7 | 2781554 | 2781567 | 2 | 7  | 14 | AG   | 27 | 4  |
| 69126 | 7 | 2795921 | 2795942 | 2 | 11 | 22 | AC   | 12 | 11 |
| 69127 | 7 | 2797898 | 2797912 | 3 | 5  | 15 | CAG  | 35 | 5  |
| 69136 | 7 | 2804289 | 2804304 | 2 | 8  | 16 | CA   | 25 | 8  |
| 69137 | 7 | 2805732 | 2805759 | 2 | 14 | 28 | GT   | 10 | 10 |
| 69138 | 7 | 2805917 | 2805928 | 2 | 6  | 12 | CA   | 22 | 7  |
| 69140 | 7 | 2811187 | 2811234 | 4 | 12 | 48 | TCAA | 28 | 8  |
| 69143 | 7 | 2820412 | 2820429 | 2 | 9  | 18 | AC   | 20 | 8  |
| 69149 | 7 | 2837075 | 2837088 | 2 | 7  | 14 | GT   | 15 | 4  |
| 69152 | 7 | 2842937 | 2842951 | 3 | 5  | 15 | TCT  | 18 | 9  |
| 69155 | 7 | 2843965 | 2843996 | 2 | 16 | 32 | AC   | 6  | 9  |
| 69158 | 7 | 2846002 | 2846015 | 2 | 7  | 14 | AC   | 23 | 3  |
| 69165 | 7 | 2863213 | 2863226 | 2 | 7  | 14 | TG   | 19 | 10 |
| 69166 | 7 | 2863522 | 2863541 | 2 | 10 | 20 | GT   | 16 | 5  |
| 69169 | 7 | 2869731 | 2869748 | 2 | 9  | 18 | AC   | 10 | 9  |
| 69170 | 7 | 2869750 | 2869763 | 2 | 7  | 14 | CA   | 14 | 10 |
| 69172 | 7 | 2871985 | 2871996 | 2 | 6  | 12 | CA   | 10 | 4  |
| 69173 | 7 | 2873434 | 2873453 | 2 | 10 | 20 | CA   | 18 | 6  |
| 69175 | 7 | 2879267 | 2879292 | 2 | 13 | 26 | GT   | 10 | 7  |
| 69177 | 7 | 2884722 | 2884745 | 2 | 12 | 24 | CA   | 26 | 8  |
| 69179 | 7 | 2890758 | 2890777 | 2 | 10 | 20 | AC   | 16 | 8  |
| 69180 | 7 | 2890800 | 2890825 | 2 | 13 | 26 | CA   | 24 | 5  |
| 69181 | 7 | 2890909 | 2890938 | 2 | 15 | 30 | CA   | 15 | 13 |
| 69184 | 7 | 2893905 | 2893918 | 2 | 7  | 14 | GT   | 18 | 7  |
| 69186 | 7 | 2902582 | 2902595 | 2 | 7  | 14 | CA   | 25 | 3  |
| 69187 | 7 | 2906593 | 2906610 | 2 | 9  | 18 | TG   | 23 | 7  |
| 69192 | 7 | 2928289 | 2928306 | 2 | 9  | 18 | GT   | 15 | 5  |
| 69194 | 7 | 2930196 | 2930213 | 2 | 9  | 18 | CT   | 27 | 4  |
| 69200 | 7 | 2935436 | 2935473 | 2 | 19 | 38 | AC   | 22 | 9  |
| 69202 | 7 | 2939522 | 2939537 | 2 | 8  | 16 | CA   | 19 | 8  |
| 69204 | 7 | 2940134 | 2940153 | 2 | 10 | 20 | TG   | 15 | 7  |
| 69210 | 7 | 2947772 | 2947813 | 3 | 14 | 42 | GAA  | 20 | 15 |
| 69216 | 7 | 2956630 | 2956659 | 3 | 10 | 30 | TCC  | 17 | 8  |
| 69230 | 7 | 3002693 | 3002707 | 3 | 5  | 15 | TGA  | 17 | 3  |
| 69232 | 7 | 3010661 | 3010688 | 4 | 7  | 28 | TTTG | 20 | 7  |
| 69233 | 7 | 3013664 | 3013725 | 2 | 31 | 62 | GT   | 13 | 10 |
| 69236 | 7 | 3020400 | 3020415 | 2 | 8  | 16 | AC   | 26 | 9  |

|       |   |         |         |   |    |    |      |    |    |
|-------|---|---------|---------|---|----|----|------|----|----|
| 69238 | 7 | 3036766 | 3036789 | 2 | 12 | 24 | CA   | 22 | 5  |
| 69240 | 7 | 3051178 | 3051193 | 2 | 8  | 16 | AT   | 18 | 13 |
| 69247 | 7 | 3064491 | 3064514 | 2 | 12 | 24 | AC   | 18 | 7  |
| 69250 | 7 | 3074557 | 3074576 | 2 | 10 | 20 | GA   | 25 | 5  |
| 69255 | 7 | 3082077 | 3082090 | 2 | 7  | 14 | CA   | 22 | 12 |
| 69256 | 7 | 3082242 | 3082253 | 2 | 6  | 12 | AT   | 20 | 3  |
| 69257 | 7 | 3083938 | 3083967 | 2 | 15 | 30 | TG   | 11 | 11 |
| 69260 | 7 | 3089925 | 3089939 | 3 | 5  | 15 | TAA  | 21 | 3  |
| 69261 | 7 | 3090851 | 3090880 | 2 | 15 | 30 | GT   | 15 | 8  |
| 69264 | 7 | 3092950 | 3092961 | 2 | 6  | 12 | CA   | 25 | 4  |
| 69265 | 7 | 3097866 | 3097885 | 2 | 10 | 20 | AC   | 22 | 16 |
| 69266 | 7 | 3097887 | 3097898 | 2 | 6  | 12 | CA   | 20 | 12 |
| 69267 | 7 | 3101527 | 3101542 | 2 | 8  | 16 | CA   | 17 | 6  |
| 69272 | 7 | 3112128 | 3112139 | 2 | 6  | 12 | CA   | 23 | 3  |
| 69274 | 7 | 3112486 | 3112517 | 2 | 16 | 32 | AC   | 15 | 11 |
| 69275 | 7 | 3112627 | 3112642 | 2 | 8  | 16 | AT   | 10 | 14 |
| 69277 | 7 | 3113567 | 3113588 | 2 | 11 | 22 | GT   | 11 | 7  |
| 69278 | 7 | 3114811 | 3114826 | 4 | 4  | 16 | TGGT | 26 | 4  |
| 69287 | 7 | 3121859 | 3121900 | 2 | 21 | 42 | GT   | 23 | 9  |
| 69288 | 7 | 3124132 | 3124151 | 2 | 10 | 20 | AC   | 20 | 6  |
| 69293 | 7 | 3153561 | 3153580 | 2 | 10 | 20 | GT   | 22 | 6  |
| 69296 | 7 | 3157058 | 3157075 | 3 | 6  | 18 | GTG  | 25 | 6  |
| 69307 | 7 | 3177964 | 3178005 | 2 | 21 | 42 | TG   | 6  | 7  |
| 69311 | 7 | 3208398 | 3208425 | 2 | 14 | 28 | GT   | 19 | 11 |
| 69312 | 7 | 3211331 | 3211344 | 2 | 7  | 14 | GT   | 34 | 5  |
| 69330 | 7 | 3273680 | 3273691 | 2 | 6  | 12 | AC   | 12 | 6  |
| 69331 | 7 | 3273693 | 3273712 | 2 | 10 | 20 | CA   | 16 | 8  |
| 69339 | 7 | 3298523 | 3298550 | 4 | 7  | 28 | TATC | 17 | 11 |
| 69341 | 7 | 3302733 | 3302752 | 2 | 10 | 20 | TC   | 15 | 9  |
| 69342 | 7 | 3302945 | 3302968 | 2 | 12 | 24 | TC   | 13 | 8  |
| 69344 | 7 | 3323373 | 3323384 | 2 | 6  | 12 | GA   | 25 | 4  |
| 69348 | 7 | 3335182 | 3335193 | 2 | 6  | 12 | AC   | 28 | 9  |
| 69350 | 7 | 3339344 | 3339361 | 3 | 6  | 18 | CTC  | 18 | 3  |
| 69353 | 7 | 3341846 | 3341861 | 2 | 8  | 16 | AG   | 17 | 4  |
| 69355 | 7 | 3363583 | 3363594 | 2 | 6  | 12 | CA   | 32 | 3  |
| 69357 | 7 | 3371847 | 3371862 | 2 | 8  | 16 | TG   | 12 | 5  |
| 69358 | 7 | 3372723 | 3372746 | 4 | 6  | 24 | TCCA | 32 | 5  |
| 69364 | 7 | 3375516 | 3375543 | 2 | 14 | 28 | CA   | 9  | 7  |
| 69373 | 7 | 3392796 | 3392819 | 3 | 8  | 24 | GTA  | 11 | 4  |
| 69378 | 7 | 3398988 | 3399003 | 2 | 8  | 16 | TG   | 12 | 4  |
| 69382 | 7 | 3411549 | 3411562 | 2 | 7  | 14 | CT   | 23 | 3  |
| 69385 | 7 | 3421696 | 3421713 | 3 | 6  | 18 | ATT  | 18 | 3  |
| 69386 | 7 | 3422031 | 3422057 | 3 | 9  | 27 | TAT  | 14 | 5  |
| 69387 | 7 | 3426365 | 3426379 | 3 | 5  | 15 | GCA  | 25 | 4  |
| 69392 | 7 | 3436496 | 3436515 | 2 | 10 | 20 | GT   | 12 | 3  |
| 69408 | 7 | 3463748 | 3463769 | 2 | 11 | 22 | AG   | 10 | 7  |
| 69416 | 7 | 3472423 | 3472452 | 2 | 15 | 30 | CA   | 8  | 12 |
| 69417 | 7 | 3473707 | 3473720 | 2 | 7  | 14 | AC   | 25 | 5  |
| 69420 | 7 | 3482566 | 3482579 | 2 | 7  | 14 | GA   | 15 | 3  |
| 69424 | 7 | 3486286 | 3486333 | 2 | 24 | 48 | AC   | 10 | 10 |
| 69438 | 7 | 3505464 | 3505481 | 3 | 6  | 18 | CTG  | 32 | 5  |

|       |   |         |         |   |    |    |      |    |    |
|-------|---|---------|---------|---|----|----|------|----|----|
| 69440 | 7 | 3514275 | 3514296 | 2 | 11 | 22 | TC   | 10 | 4  |
| 69441 | 7 | 3514343 | 3514366 | 2 | 12 | 24 | CT   | 18 | 7  |
| 69442 | 7 | 3517943 | 3517960 | 2 | 9  | 18 | CT   | 26 | 4  |
| 69443 | 7 | 3518319 | 3518336 | 2 | 9  | 18 | CT   | 6  | 3  |
| 69445 | 7 | 3521957 | 3521996 | 2 | 20 | 40 | TG   | 7  | 8  |
| 69447 | 7 | 3526254 | 3526267 | 2 | 7  | 14 | AC   | 23 | 5  |
| 69452 | 7 | 3532615 | 3532630 | 4 | 4  | 16 | AAAT | 21 | 4  |
| 69457 | 7 | 3544218 | 3544233 | 2 | 8  | 16 | GA   | 21 | 8  |
| 69458 | 7 | 3546783 | 3546826 | 2 | 22 | 44 | CA   | 20 | 12 |
| 69466 | 7 | 3561246 | 3561269 | 2 | 12 | 24 | TG   | 14 | 7  |
| 69471 | 7 | 3561800 | 3561832 | 3 | 11 | 33 | CTC  | 26 | 3  |
| 69476 | 7 | 3562961 | 3562980 | 2 | 10 | 20 | TG   | 9  | 4  |
| 69478 | 7 | 3563040 | 3563065 | 2 | 13 | 26 | GT   | 18 | 8  |
| 69482 | 7 | 3565674 | 3565697 | 2 | 12 | 24 | GT   | 10 | 5  |
| 69484 | 7 | 3566259 | 3566274 | 2 | 8  | 16 | TG   | 12 | 10 |
| 69495 | 7 | 3577746 | 3577763 | 3 | 6  | 18 | CCA  | 12 | 4  |
| 69496 | 7 | 3578114 | 3578129 | 2 | 8  | 16 | AC   | 27 | 6  |
| 69497 | 7 | 3578340 | 3578359 | 4 | 5  | 20 | CTCC | 9  | 6  |
| 69499 | 7 | 3583567 | 3583594 | 2 | 14 | 28 | CA   | 16 | 10 |
| 69506 | 7 | 3602085 | 3602124 | 2 | 20 | 40 | AC   | 8  | 8  |
| 69510 | 7 | 3606062 | 3606073 | 2 | 6  | 12 | CA   | 22 | 6  |
| 69527 | 7 | 3625941 | 3625952 | 2 | 6  | 12 | TG   | 31 | 4  |
| 69528 | 7 | 3626013 | 3626040 | 2 | 14 | 28 | AC   | 11 | 7  |
| 69545 | 7 | 3650271 | 3650304 | 2 | 17 | 34 | GT   | 11 | 8  |
| 69555 | 7 | 3662864 | 3662891 | 2 | 14 | 28 | CA   | 15 | 13 |
| 69558 | 7 | 3665158 | 3665172 | 3 | 5  | 15 | TTG  | 21 | 3  |
| 69565 | 7 | 3670212 | 3670235 | 4 | 6  | 24 | AAAT | 23 | 6  |
| 69566 | 7 | 3671135 | 3671150 | 2 | 8  | 16 | AC   | 22 | 6  |
| 69568 | 7 | 3671498 | 3671509 | 2 | 6  | 12 | AC   | 27 | 3  |
| 69571 | 7 | 3673094 | 3673115 | 2 | 11 | 22 | TG   | 11 | 8  |
| 69573 | 7 | 3674041 | 3674084 | 2 | 22 | 44 | GT   | 11 | 11 |
| 69576 | 7 | 3674902 | 3674915 | 2 | 7  | 14 | GT   | 22 | 6  |
| 69578 | 7 | 3680385 | 3680414 | 2 | 15 | 30 | GT   | 13 | 11 |
| 69579 | 7 | 3683421 | 3683432 | 2 | 6  | 12 | AC   | 23 | 6  |
| 69598 | 7 | 3700096 | 3700111 | 2 | 8  | 16 | AT   | 6  | 6  |
| 69599 | 7 | 3702886 | 3702897 | 2 | 6  | 12 | AT   | 18 | 3  |
| 69600 | 7 | 3703977 | 3703992 | 2 | 8  | 16 | GT   | 27 | 13 |
| 69601 | 7 | 3704118 | 3704143 | 2 | 13 | 26 | CA   | 16 | 7  |
| 69602 | 7 | 3705744 | 3705761 | 3 | 6  | 18 | TCT  | 22 | 5  |
| 69608 | 7 | 3708976 | 3708989 | 2 | 7  | 14 | GA   | 14 | 3  |
| 69612 | 7 | 3709642 | 3709673 | 2 | 16 | 32 | TG   | 11 | 10 |
| 69614 | 7 | 3711309 | 3711330 | 2 | 11 | 22 | TG   | 23 | 5  |
| 69618 | 7 | 3714462 | 3714485 | 2 | 12 | 24 | GT   | 6  | 9  |
| 69619 | 7 | 3716102 | 3716113 | 2 | 6  | 12 | GT   | 10 | 3  |
| 69625 | 7 | 3721940 | 3721966 | 3 | 9  | 27 | CTC  | 22 | 7  |
| 69628 | 7 | 3726940 | 3726965 | 2 | 13 | 26 | TG   | 12 | 8  |
| 69638 | 7 | 3734446 | 3734475 | 2 | 15 | 30 | TG   | 17 | 17 |
| 69639 | 7 | 3734715 | 3734726 | 2 | 6  | 12 | GT   | 25 | 3  |
| 69642 | 7 | 3735113 | 3735134 | 2 | 11 | 22 | TG   | 16 | 5  |
| 69661 | 7 | 3751170 | 3751199 | 2 | 15 | 30 | AC   | 11 | 6  |
| 69679 | 7 | 3770522 | 3770543 | 2 | 11 | 22 | TG   | 11 | 6  |

|       |   |         |         |   |    |    |      |    |    |
|-------|---|---------|---------|---|----|----|------|----|----|
| 69680 | 7 | 3771842 | 3771859 | 2 | 9  | 18 | CA   | 8  | 5  |
| 69683 | 7 | 3773826 | 3773843 | 2 | 9  | 18 | TG   | 21 | 4  |
| 69689 | 7 | 3779228 | 3779247 | 2 | 10 | 20 | AC   | 15 | 12 |
| 69690 | 7 | 3779504 | 3779515 | 2 | 6  | 12 | CA   | 23 | 20 |
| 69693 | 7 | 3780526 | 3780543 | 2 | 9  | 18 | CA   | 15 | 6  |
| 69698 | 7 | 3780889 | 3780910 | 2 | 11 | 22 | CA   | 13 | 7  |
| 69699 | 7 | 3782521 | 3782548 | 2 | 14 | 28 | GT   | 16 | 16 |
| 69701 | 7 | 3783421 | 3783432 | 2 | 6  | 12 | TG   | 25 | 5  |
| 69705 | 7 | 3786954 | 3786965 | 2 | 6  | 12 | GT   | 24 | 5  |
| 69706 | 7 | 3788976 | 3788989 | 2 | 7  | 14 | GT   | 22 | 6  |
| 69711 | 7 | 3796195 | 3796214 | 2 | 10 | 20 | TG   | 25 | 10 |
| 69713 | 7 | 3797752 | 3797767 | 2 | 8  | 16 | TG   | 24 | 7  |
| 69715 | 7 | 3806569 | 3806592 | 3 | 8  | 24 | AGC  | 26 | 3  |
| 69717 | 7 | 3807682 | 3807709 | 2 | 14 | 28 | GT   | 23 | 14 |
| 69722 | 7 | 3811695 | 3811718 | 2 | 12 | 24 | TG   | 19 | 7  |
| 69723 | 7 | 3814807 | 3814827 | 3 | 7  | 21 | CTC  | 17 | 4  |
| 69726 | 7 | 3815607 | 3815626 | 2 | 10 | 20 | GT   | 13 | 12 |
| 69727 | 7 | 3818168 | 3818181 | 2 | 7  | 14 | TG   | 20 | 3  |
| 69730 | 7 | 3825489 | 3825506 | 2 | 9  | 18 | GT   | 20 | 6  |
| 69736 | 7 | 3842940 | 3842963 | 2 | 12 | 24 | GA   | 13 | 9  |
| 69739 | 7 | 3845662 | 3845683 | 2 | 11 | 22 | GT   | 7  | 4  |
| 69741 | 7 | 3845713 | 3845738 | 2 | 13 | 26 | AG   | 12 | 4  |
| 69742 | 7 | 3845996 | 3846039 | 2 | 22 | 44 | TG   | 6  | 9  |
| 69743 | 7 | 3846148 | 3846175 | 2 | 14 | 28 | GT   | 6  | 6  |
| 69748 | 7 | 3852039 | 3852054 | 2 | 8  | 16 | GT   | 29 | 3  |
| 69749 | 7 | 3852703 | 3852714 | 2 | 6  | 12 | GT   | 23 | 5  |
| 69751 | 7 | 3855547 | 3855562 | 2 | 8  | 16 | CA   | 20 | 10 |
| 69753 | 7 | 3857326 | 3857353 | 2 | 14 | 28 | CA   | 13 | 12 |
| 69754 | 7 | 3857598 | 3857615 | 2 | 9  | 18 | TG   | 17 | 5  |
| 69756 | 7 | 3859106 | 3859153 | 2 | 24 | 48 | TC   | 8  | 6  |
| 69767 | 7 | 3888631 | 3888642 | 2 | 6  | 12 | TG   | 23 | 3  |
| 69770 | 7 | 3900105 | 3900116 | 2 | 6  | 12 | TG   | 28 | 3  |
| 69775 | 7 | 3910980 | 3911007 | 2 | 14 | 28 | AC   | 19 | 9  |
| 69777 | 7 | 3918268 | 3918295 | 2 | 14 | 28 | AC   | 13 | 6  |
| 69779 | 7 | 3921039 | 3921064 | 2 | 13 | 26 | CA   | 12 | 11 |
| 69780 | 7 | 3921804 | 3921815 | 2 | 6  | 12 | CA   | 32 | 4  |
| 69781 | 7 | 3923326 | 3923346 | 3 | 7  | 21 | GAT  | 29 | 6  |
| 69782 | 7 | 3924934 | 3924949 | 2 | 8  | 16 | GT   | 10 | 9  |
| 69783 | 7 | 3938026 | 3938041 | 2 | 8  | 16 | AG   | 23 | 5  |
| 69790 | 7 | 3956927 | 3956938 | 2 | 6  | 12 | TA   | 7  | 3  |
| 69794 | 7 | 3969666 | 3969681 | 2 | 8  | 16 | GT   | 25 | 10 |
| 69804 | 7 | 3998114 | 3998125 | 2 | 6  | 12 | AT   | 26 | 4  |
| 69805 | 7 | 3999095 | 3999114 | 4 | 5  | 20 | AAAC | 19 | 3  |
| 69806 | 7 | 4001043 | 4001060 | 2 | 9  | 18 | CA   | 9  | 7  |
| 69814 | 7 | 4046568 | 4046583 | 2 | 8  | 16 | TG   | 6  | 4  |
| 69815 | 7 | 4053988 | 4054021 | 2 | 17 | 34 | AC   | 7  | 6  |
| 69817 | 7 | 4057375 | 4057394 | 2 | 10 | 20 | CA   | 15 | 4  |
| 69827 | 7 | 4079411 | 4079426 | 4 | 4  | 16 | GAAG | 26 | 4  |
| 69829 | 7 | 4080893 | 4080916 | 2 | 12 | 24 | AC   | 19 | 10 |
| 69831 | 7 | 4081470 | 4081495 | 2 | 13 | 26 | GT   | 15 | 9  |
| 69833 | 7 | 4082064 | 4082081 | 2 | 9  | 18 | CA   | 21 | 3  |

|       |   |         |         |   |    |    |      |    |    |
|-------|---|---------|---------|---|----|----|------|----|----|
| 69839 | 7 | 4090695 | 4090706 | 2 | 6  | 12 | AT   | 27 | 3  |
| 69840 | 7 | 4093704 | 4093717 | 2 | 7  | 14 | AC   | 22 | 4  |
| 69845 | 7 | 4102062 | 4102089 | 4 | 7  | 28 | AAAT | 20 | 11 |
| 69848 | 7 | 4109767 | 4109786 | 2 | 10 | 20 | GT   | 10 | 11 |
| 69849 | 7 | 4113949 | 4113962 | 2 | 7  | 14 | GT   | 24 | 10 |
| 69852 | 7 | 4121464 | 4121483 | 2 | 10 | 20 | GA   | 27 | 4  |
| 69854 | 7 | 4122528 | 4122542 | 3 | 5  | 15 | CAG  | 26 | 4  |
| 69858 | 7 | 4127388 | 4127408 | 3 | 7  | 21 | CTT  | 29 | 3  |
| 69859 | 7 | 4127791 | 4127812 | 2 | 11 | 22 | CA   | 33 | 6  |
| 69869 | 7 | 4147958 | 4147989 | 2 | 16 | 32 | GA   | 16 | 5  |
| 69872 | 7 | 4153622 | 4153645 | 4 | 6  | 24 | AGTG | 26 | 3  |
| 69874 | 7 | 4158916 | 4158939 | 2 | 12 | 24 | AC   | 24 | 6  |
| 69877 | 7 | 4164021 | 4164042 | 2 | 11 | 22 | AT   | 22 | 11 |
| 69880 | 7 | 4174305 | 4174330 | 2 | 13 | 26 | GT   | 18 | 11 |
| 69881 | 7 | 4174589 | 4174620 | 2 | 16 | 32 | AC   | 18 | 10 |
| 69890 | 7 | 4186376 | 4186431 | 4 | 14 | 56 | ATCT | 17 | 9  |
| 69891 | 7 | 4186557 | 4186578 | 2 | 11 | 22 | GT   | 18 | 7  |
| 69896 | 7 | 4194495 | 4194514 | 2 | 10 | 20 | CT   | 22 | 6  |
| 69897 | 7 | 4197991 | 4198008 | 2 | 9  | 18 | GT   | 20 | 6  |
| 69898 | 7 | 4200385 | 4200405 | 3 | 7  | 21 | CAG  | 27 | 7  |
| 69899 | 7 | 4200967 | 4200978 | 2 | 6  | 12 | CA   | 26 | 4  |
| 69900 | 7 | 4201184 | 4201207 | 2 | 12 | 24 | CA   | 14 | 8  |
| 69904 | 7 | 4205572 | 4205609 | 2 | 19 | 38 | TG   | 13 | 8  |
| 69905 | 7 | 4206018 | 4206032 | 3 | 5  | 15 | TCT  | 6  | 3  |
| 69906 | 7 | 4206135 | 4206146 | 2 | 6  | 12 | GA   | 26 | 8  |
| 69907 | 7 | 4206682 | 4206697 | 2 | 8  | 16 | CT   | 19 | 8  |
| 69908 | 7 | 4206698 | 4206717 | 2 | 10 | 20 | CA   | 21 | 7  |
| 69911 | 7 | 4213993 | 4214006 | 2 | 7  | 14 | TG   | 10 | 4  |
| 69914 | 7 | 4219699 | 4219714 | 2 | 8  | 16 | TA   | 9  | 3  |
| 69929 | 7 | 4246096 | 4246117 | 2 | 11 | 22 | AC   | 16 | 5  |
| 69933 | 7 | 4251705 | 4251746 | 2 | 21 | 42 | TG   | 13 | 9  |
| 69934 | 7 | 4251880 | 4251899 | 2 | 10 | 20 | GT   | 21 | 6  |
| 69937 | 7 | 4253499 | 4253518 | 2 | 10 | 20 | GA   | 17 | 9  |
| 69938 | 7 | 4253520 | 4253535 | 2 | 8  | 16 | AG   | 21 | 10 |
| 69940 | 7 | 4253729 | 4253754 | 2 | 13 | 26 | GT   | 12 | 6  |
| 69945 | 7 | 4255295 | 4255310 | 2 | 8  | 16 | TG   | 15 | 7  |
| 69955 | 7 | 4265269 | 4265286 | 2 | 9  | 18 | AG   | 13 | 4  |
| 69960 | 7 | 4269028 | 4269047 | 4 | 5  | 20 | TTTG | 19 | 14 |
| 69961 | 7 | 4279544 | 4279571 | 2 | 14 | 28 | AC   | 20 | 10 |
| 69963 | 7 | 4289953 | 4289974 | 2 | 11 | 22 | GT   | 13 | 6  |
| 69967 | 7 | 4292563 | 4292582 | 2 | 10 | 20 | CA   | 17 | 9  |
| 69968 | 7 | 4297152 | 4297169 | 3 | 6  | 18 | CTG  | 28 | 5  |
| 69970 | 7 | 4299906 | 4299926 | 3 | 7  | 21 | ATC  | 10 | 9  |
| 69975 | 7 | 4314743 | 4314760 | 2 | 9  | 18 | GA   | 17 | 8  |
| 69987 | 7 | 4342392 | 4342411 | 4 | 5  | 20 | TTTG | 23 | 4  |
| 69988 | 7 | 4344072 | 4344087 | 2 | 8  | 16 | AC   | 27 | 7  |
| 69989 | 7 | 4346965 | 4346976 | 2 | 6  | 12 | TG   | 7  | 4  |
| 69993 | 7 | 4352494 | 4352511 | 3 | 6  | 18 | AAT  | 9  | 3  |
| 69997 | 7 | 4359757 | 4359776 | 4 | 5  | 20 | ATTT | 20 | 5  |
| 70006 | 7 | 4365597 | 4365614 | 2 | 9  | 18 | GT   | 8  | 8  |
| 70008 | 7 | 4367060 | 4367071 | 2 | 6  | 12 | TA   | 26 | 4  |

|       |   |         |         |   |    |    |      |    |    |
|-------|---|---------|---------|---|----|----|------|----|----|
| 70010 | 7 | 4368241 | 4368258 | 2 | 9  | 18 | GT   | 20 | 5  |
| 70013 | 7 | 4374517 | 4374534 | 3 | 6  | 18 | AGG  | 21 | 4  |
| 70016 | 7 | 4381982 | 4381995 | 2 | 7  | 14 | AT   | 21 | 4  |
| 70017 | 7 | 4384466 | 4384481 | 4 | 4  | 16 | TAAA | 29 | 4  |
| 70019 | 7 | 4385240 | 4385257 | 2 | 9  | 18 | AG   | 14 | 8  |
| 70021 | 7 | 4392722 | 4392739 | 2 | 9  | 18 | GT   | 20 | 7  |
| 70030 | 7 | 4400400 | 4400437 | 2 | 19 | 38 | TG   | 12 | 8  |
| 70034 | 7 | 4413608 | 4413622 | 3 | 5  | 15 | GTT  | 30 | 3  |
| 70039 | 7 | 4427722 | 4427741 | 2 | 10 | 20 | GT   | 21 | 15 |
| 70040 | 7 | 4429025 | 4429052 | 4 | 7  | 28 | TTTC | 10 | 9  |
| 70042 | 7 | 4437745 | 4437759 | 3 | 5  | 15 | CAA  | 23 | 4  |
| 70051 | 7 | 4461667 | 4461680 | 2 | 7  | 14 | AG   | 22 | 3  |
| 70056 | 7 | 4466017 | 4466038 | 2 | 11 | 22 | CA   | 15 | 10 |
| 70058 | 7 | 4468106 | 4468123 | 2 | 9  | 18 | CA   | 23 | 3  |
| 70059 | 7 | 4468806 | 4468827 | 2 | 11 | 22 | AC   | 21 | 9  |
| 70060 | 7 | 4470077 | 4470100 | 2 | 12 | 24 | GT   | 17 | 7  |
| 70062 | 7 | 4475922 | 4475945 | 2 | 12 | 24 | GT   | 19 | 13 |
| 70063 | 7 | 4476399 | 4476434 | 2 | 18 | 36 | AG   | 6  | 6  |
| 70064 | 7 | 4476626 | 4476651 | 2 | 13 | 26 | CA   | 19 | 7  |
| 70065 | 7 | 4477844 | 4477859 | 2 | 8  | 16 | AC   | 28 | 6  |
| 70071 | 7 | 4481728 | 4481779 | 4 | 13 | 52 | AGAT | 17 | 7  |
| 70072 | 7 | 4482464 | 4482487 | 3 | 8  | 24 | ATG  | 29 | 7  |
| 70075 | 7 | 4484670 | 4484705 | 2 | 18 | 36 | CA   | 6  | 10 |
| 70077 | 7 | 4484986 | 4485007 | 2 | 11 | 22 | TG   | 22 | 10 |
| 70078 | 7 | 4485721 | 4485772 | 2 | 26 | 52 | GT   | 8  | 12 |
| 70079 | 7 | 4486795 | 4486808 | 2 | 7  | 14 | GA   | 27 | 4  |
| 70086 | 7 | 4493866 | 4493885 | 2 | 10 | 20 | AC   | 9  | 9  |
| 70087 | 7 | 4495166 | 4495186 | 3 | 7  | 21 | CAA  | 30 | 7  |
| 70091 | 7 | 4497737 | 4497754 | 2 | 9  | 18 | GT   | 18 | 15 |
| 70098 | 7 | 4504553 | 4504576 | 2 | 12 | 24 | GA   | 18 | 7  |
| 70099 | 7 | 4505157 | 4505186 | 3 | 10 | 30 | TGT  | 20 | 5  |
| 70103 | 7 | 4513402 | 4513413 | 2 | 6  | 12 | TG   | 25 | 3  |
| 70104 | 7 | 4513815 | 4513830 | 2 | 8  | 16 | TG   | 25 | 5  |
| 70111 | 7 | 4526326 | 4526341 | 2 | 8  | 16 | GT   | 23 | 6  |
| 70113 | 7 | 4530232 | 4530291 | 2 | 30 | 60 | AC   | 10 | 12 |
| 70114 | 7 | 4530970 | 4530985 | 2 | 8  | 16 | CA   | 12 | 14 |
| 70116 | 7 | 4532796 | 4532825 | 2 | 15 | 30 | CA   | 18 | 10 |
| 70117 | 7 | 4533017 | 4533042 | 2 | 13 | 26 | CA   | 11 | 6  |
| 70122 | 7 | 4542306 | 4542317 | 2 | 6  | 12 | CT   | 21 | 3  |
| 70123 | 7 | 4546274 | 4546285 | 2 | 6  | 12 | GT   | 25 | 4  |
| 70125 | 7 | 4547394 | 4547415 | 2 | 11 | 22 | CA   | 10 | 10 |
| 70126 | 7 | 4547521 | 4547532 | 2 | 6  | 12 | AC   | 21 | 5  |
| 70127 | 7 | 4547611 | 4547622 | 2 | 6  | 12 | TG   | 24 | 3  |
| 70129 | 7 | 4548978 | 4549011 | 2 | 17 | 34 | TG   | 7  | 5  |
| 70131 | 7 | 4549715 | 4549726 | 2 | 6  | 12 | CT   | 36 | 3  |
| 70132 | 7 | 4549975 | 4550000 | 2 | 13 | 26 | TG   | 19 | 8  |
| 70136 | 7 | 4557270 | 4557289 | 2 | 10 | 20 | TG   | 14 | 10 |
| 70137 | 7 | 4557563 | 4557577 | 3 | 5  | 15 | AGC  | 29 | 3  |
| 70138 | 7 | 4562454 | 4562481 | 2 | 14 | 28 | GT   | 22 | 7  |
| 70147 | 7 | 4567360 | 4567373 | 2 | 7  | 14 | GT   | 12 | 5  |
| 70148 | 7 | 4567375 | 4567390 | 2 | 8  | 16 | TG   | 13 | 6  |

|       |   |         |         |   |    |    |      |    |    |
|-------|---|---------|---------|---|----|----|------|----|----|
| 70151 | 7 | 4570718 | 4570733 | 2 | 8  | 16 | CA   | 6  | 4  |
| 70153 | 7 | 4572844 | 4572863 | 2 | 10 | 20 | TG   | 17 | 14 |
| 70159 | 7 | 4586287 | 4586326 | 2 | 20 | 40 | AC   | 18 | 14 |
| 70160 | 7 | 4588770 | 4588785 | 4 | 4  | 16 | CTGT | 22 | 4  |
| 70162 | 7 | 4592440 | 4592453 | 2 | 7  | 14 | AC   | 27 | 6  |
| 70170 | 7 | 4598164 | 4598181 | 2 | 9  | 18 | CA   | 19 | 9  |
| 70172 | 7 | 4603510 | 4603525 | 2 | 8  | 16 | TG   | 13 | 8  |
| 70175 | 7 | 4603846 | 4603871 | 2 | 13 | 26 | AC   | 7  | 8  |
| 70178 | 7 | 4611461 | 4611472 | 2 | 6  | 12 | TC   | 18 | 13 |
| 70182 | 7 | 4620288 | 4620315 | 2 | 14 | 28 | GT   | 10 | 9  |
| 70184 | 7 | 4621760 | 4621792 | 3 | 11 | 33 | GCT  | 26 | 19 |
| 70186 | 7 | 4624924 | 4624947 | 3 | 8  | 24 | ATT  | 16 | 6  |
| 70188 | 7 | 4630683 | 4630726 | 2 | 22 | 44 | GT   | 11 | 7  |
| 70189 | 7 | 4633268 | 4633285 | 2 | 9  | 18 | GT   | 19 | 9  |
| 70190 | 7 | 4633287 | 4633302 | 2 | 8  | 16 | TG   | 18 | 8  |
| 70193 | 7 | 4639980 | 4640001 | 2 | 11 | 22 | CT   | 15 | 4  |
| 70197 | 7 | 4642455 | 4642484 | 2 | 15 | 30 | AC   | 20 | 15 |
| 70207 | 7 | 4670900 | 4670911 | 2 | 6  | 12 | TG   | 9  | 7  |
| 70208 | 7 | 4671770 | 4671785 | 2 | 8  | 16 | GT   | 24 | 5  |
| 70213 | 7 | 4675423 | 4675436 | 2 | 7  | 14 | CA   | 31 | 5  |
| 70214 | 7 | 4675490 | 4675519 | 2 | 15 | 30 | GT   | 20 | 9  |
| 70221 | 7 | 4688093 | 4688114 | 2 | 11 | 22 | TG   | 7  | 6  |
| 70225 | 7 | 4698692 | 4698713 | 2 | 11 | 22 | AC   | 14 | 9  |
| 70230 | 7 | 4710323 | 4710336 | 2 | 7  | 14 | TG   | 23 | 5  |
| 70231 | 7 | 4711376 | 4711389 | 2 | 7  | 14 | GT   | 25 | 15 |
| 70234 | 7 | 4713973 | 4713992 | 2 | 10 | 20 | CA   | 8  | 7  |
| 70238 | 7 | 4715547 | 4715574 | 2 | 14 | 28 | TG   | 21 | 13 |
| 70239 | 7 | 4717483 | 4717508 | 2 | 13 | 26 | GT   | 21 | 10 |
| 70244 | 7 | 4725204 | 4725215 | 2 | 6  | 12 | GT   | 23 | 15 |
| 70245 | 7 | 4725358 | 4725387 | 2 | 15 | 30 | GT   | 13 | 10 |
| 70246 | 7 | 4725481 | 4725492 | 2 | 6  | 12 | TG   | 14 | 6  |
| 70247 | 7 | 4726781 | 4726810 | 2 | 15 | 30 | GT   | 14 | 6  |
| 70248 | 7 | 4726917 | 4726944 | 2 | 14 | 28 | GT   | 24 | 13 |
| 70252 | 7 | 4734774 | 4734787 | 2 | 7  | 14 | GT   | 19 | 9  |
| 70254 | 7 | 4739200 | 4739213 | 2 | 7  | 14 | GT   | 22 | 10 |
| 70256 | 7 | 4739443 | 4739456 | 2 | 7  | 14 | GT   | 21 | 13 |
| 70259 | 7 | 4759094 | 4759109 | 2 | 8  | 16 | GA   | 27 | 6  |
| 70261 | 7 | 4763217 | 4763234 | 2 | 9  | 18 | TG   | 21 | 13 |
| 70264 | 7 | 4775472 | 4775487 | 2 | 8  | 16 | GT   | 23 | 6  |
| 70265 | 7 | 4776118 | 4776129 | 2 | 6  | 12 | CA   | 22 | 10 |
| 70267 | 7 | 4783554 | 4783583 | 2 | 15 | 30 | TG   | 23 | 14 |
| 70269 | 7 | 4791108 | 4791121 | 2 | 7  | 14 | CT   | 7  | 4  |
| 70278 | 7 | 4803935 | 4803956 | 2 | 11 | 22 | GT   | 15 | 11 |
| 70279 | 7 | 4805176 | 4805187 | 2 | 6  | 12 | AC   | 9  | 4  |
| 70286 | 7 | 4815742 | 4815761 | 2 | 10 | 20 | AC   | 14 | 4  |
| 70288 | 7 | 4817151 | 4817168 | 3 | 6  | 18 | AGG  | 18 | 4  |
| 70289 | 7 | 4817342 | 4817355 | 2 | 7  | 14 | GT   | 7  | 3  |
| 70290 | 7 | 4821110 | 4821135 | 2 | 13 | 26 | CA   | 9  | 8  |
| 70292 | 7 | 4822268 | 4822279 | 2 | 6  | 12 | AT   | 22 | 3  |
| 70293 | 7 | 4827107 | 4827138 | 2 | 16 | 32 | CA   | 16 | 7  |
| 70294 | 7 | 4828946 | 4828965 | 4 | 5  | 20 | AAGA | 15 | 6  |

|       |   |         |         |   |    |    |      |    |    |
|-------|---|---------|---------|---|----|----|------|----|----|
| 70298 | 7 | 4831650 | 4831675 | 2 | 13 | 26 | TG   | 17 | 15 |
| 70299 | 7 | 4831824 | 4831857 | 2 | 17 | 34 | AC   | 19 | 14 |
| 70300 | 7 | 4832012 | 4832047 | 2 | 18 | 36 | CA   | 16 | 10 |
| 70301 | 7 | 4838046 | 4838075 | 2 | 15 | 30 | AC   | 8  | 6  |
| 70302 | 7 | 4838468 | 4838479 | 2 | 6  | 12 | AC   | 24 | 4  |
| 70306 | 7 | 4840172 | 4840209 | 2 | 19 | 38 | TG   | 13 | 11 |
| 70311 | 7 | 4843265 | 4843276 | 2 | 6  | 12 | GT   | 24 | 4  |
| 70315 | 7 | 4850473 | 4850493 | 3 | 7  | 21 | CAT  | 32 | 5  |
| 70323 | 7 | 4864910 | 4864925 | 4 | 4  | 16 | TCAC | 30 | 3  |
| 70328 | 7 | 4878849 | 4878872 | 2 | 12 | 24 | CA   | 10 | 6  |
| 70329 | 7 | 4879352 | 4879377 | 2 | 13 | 26 | GT   | 17 | 13 |
| 70331 | 7 | 4885768 | 4885787 | 2 | 10 | 20 | GT   | 16 | 5  |
| 70334 | 7 | 4890928 | 4890949 | 2 | 11 | 22 | CA   | 17 | 8  |
| 70335 | 7 | 4894669 | 4894696 | 2 | 14 | 28 | AC   | 20 | 10 |
| 70338 | 7 | 4908313 | 4908342 | 2 | 15 | 30 | AC   | 14 | 14 |
| 70361 | 7 | 4954429 | 4954443 | 3 | 5  | 15 | TTC  | 25 | 6  |
| 70363 | 7 | 4956861 | 4956874 | 2 | 7  | 14 | TG   | 24 | 9  |
| 70364 | 7 | 4957923 | 4957952 | 2 | 15 | 30 | AC   | 9  | 5  |
| 70368 | 7 | 4960844 | 4960861 | 3 | 6  | 18 | GAG  | 27 | 5  |
| 70373 | 7 | 4964308 | 4964331 | 2 | 12 | 24 | GT   | 16 | 9  |
| 70378 | 7 | 4965715 | 4965734 | 2 | 10 | 20 | CA   | 13 | 10 |
| 70382 | 7 | 4968081 | 4968110 | 2 | 15 | 30 | TG   | 7  | 8  |
| 70384 | 7 | 4970231 | 4970248 | 2 | 9  | 18 | CA   | 21 | 4  |
| 70385 | 7 | 4970380 | 4970399 | 2 | 10 | 20 | GT   | 20 | 5  |
| 70389 | 7 | 4976314 | 4976325 | 2 | 6  | 12 | CA   | 26 | 3  |
| 70390 | 7 | 4976650 | 4976667 | 2 | 9  | 18 | AC   | 28 | 4  |
| 70391 | 7 | 4979430 | 4979443 | 2 | 7  | 14 | GT   | 21 | 8  |
| 70392 | 7 | 4979446 | 4979457 | 2 | 6  | 12 | GT   | 21 | 8  |
| 70393 | 7 | 4980446 | 4980463 | 2 | 9  | 18 | CA   | 19 | 3  |
| 70394 | 7 | 4982210 | 4982229 | 2 | 10 | 20 | CT   | 19 | 4  |
| 70396 | 7 | 4984370 | 4984393 | 2 | 12 | 24 | TG   | 7  | 9  |
| 70398 | 7 | 4986307 | 4986342 | 2 | 18 | 36 | AC   | 19 | 9  |
| 70402 | 7 | 4988955 | 4988976 | 2 | 11 | 22 | GT   | 20 | 7  |
| 70405 | 7 | 4995785 | 4995808 | 2 | 12 | 24 | TG   | 20 | 9  |
| 70406 | 7 | 4996037 | 4996050 | 2 | 7  | 14 | AC   | 13 | 10 |
| 70407 | 7 | 4996053 | 4996070 | 2 | 9  | 18 | AC   | 14 | 9  |
| 70408 | 7 | 4997834 | 4997871 | 2 | 19 | 38 | AC   | 10 | 10 |
| 70411 | 7 | 5009069 | 5009088 | 2 | 10 | 20 | TG   | 20 | 12 |
| 70416 | 7 | 5012961 | 5012982 | 2 | 11 | 22 | CA   | 12 | 9  |
| 70417 | 7 | 5013086 | 5013111 | 2 | 13 | 26 | TG   | 19 | 13 |
| 70419 | 7 | 5014484 | 5014539 | 2 | 28 | 56 | TG   | 6  | 7  |
| 70420 | 7 | 5015641 | 5015652 | 2 | 6  | 12 | TG   | 12 | 3  |
| 70421 | 7 | 5015657 | 5015670 | 2 | 7  | 14 | TG   | 26 | 5  |
| 70432 | 7 | 5022019 | 5022046 | 2 | 14 | 28 | AC   | 15 | 12 |
| 70447 | 7 | 5033710 | 5033725 | 2 | 8  | 16 | CA   | 20 | 3  |
| 70448 | 7 | 5033765 | 5033786 | 2 | 11 | 22 | AC   | 12 | 6  |
| 70449 | 7 | 5033864 | 5033895 | 2 | 16 | 32 | CA   | 23 | 10 |
| 70450 | 7 | 5035492 | 5035519 | 2 | 14 | 28 | AC   | 14 | 8  |
| 70451 | 7 | 5035635 | 5035654 | 2 | 10 | 20 | GT   | 20 | 6  |
| 70455 | 7 | 5040146 | 5040169 | 2 | 12 | 24 | TG   | 10 | 11 |
| 70456 | 7 | 5040350 | 5040367 | 2 | 9  | 18 | GT   | 15 | 10 |



|       |   |         |         |   |    |    |      |    |    |
|-------|---|---------|---------|---|----|----|------|----|----|
| 70458 | 7 | 5040507 | 5040530 | 2 | 12 | 24 | AC   | 16 | 16 |
| 70460 | 7 | 5041333 | 5041350 | 3 | 6  | 18 | AGA  | 17 | 6  |
| 70461 | 7 | 5042945 | 5042956 | 2 | 6  | 12 | GT   | 22 | 11 |
| 70463 | 7 | 5043054 | 5043077 | 2 | 12 | 24 | CA   | 15 | 6  |
| 70467 | 7 | 5048600 | 5048613 | 2 | 7  | 14 | TG   | 23 | 6  |
| 70469 | 7 | 5050919 | 5050934 | 2 | 8  | 16 | CA   | 21 | 3  |
| 70471 | 7 | 5057080 | 5057091 | 2 | 6  | 12 | AT   | 15 | 4  |
| 70473 | 7 | 5058478 | 5058495 | 2 | 9  | 18 | AC   | 6  | 5  |
| 70476 | 7 | 5060323 | 5060348 | 2 | 13 | 26 | AC   | 30 | 4  |
| 70481 | 7 | 5070585 | 5070604 | 2 | 10 | 20 | AG   | 28 | 6  |
| 70484 | 7 | 5079849 | 5079892 | 2 | 22 | 44 | TG   | 6  | 9  |
| 70487 | 7 | 5081021 | 5081038 | 2 | 9  | 18 | GT   | 9  | 3  |
| 70490 | 7 | 5082296 | 5082325 | 2 | 15 | 30 | CA   | 8  | 7  |
| 70494 | 7 | 5087344 | 5087357 | 2 | 7  | 14 | GT   | 28 | 4  |
| 70496 | 7 | 5087659 | 5087672 | 2 | 7  | 14 | GT   | 19 | 11 |
| 70497 | 7 | 5090496 | 5090533 | 2 | 19 | 38 | GT   | 9  | 6  |
| 70500 | 7 | 5093138 | 5093149 | 2 | 6  | 12 | TC   | 24 | 6  |
| 70501 | 7 | 5093549 | 5093564 | 2 | 8  | 16 | GT   | 16 | 4  |
| 70504 | 7 | 5094076 | 5094087 | 2 | 6  | 12 | GT   | 29 | 3  |
| 70505 | 7 | 5095557 | 5095578 | 2 | 11 | 22 | CA   | 18 | 6  |
| 70508 | 7 | 5097232 | 5097259 | 2 | 14 | 28 | AC   | 13 | 8  |
| 70510 | 7 | 5105772 | 5105799 | 2 | 14 | 28 | TG   | 12 | 5  |
| 70512 | 7 | 5109583 | 5109598 | 4 | 4  | 16 | ATGT | 27 | 4  |
| 70525 | 7 | 5137836 | 5137847 | 2 | 6  | 12 | TG   | 21 | 3  |
| 70530 | 7 | 5145566 | 5145597 | 2 | 16 | 32 | GT   | 13 | 9  |
| 70531 | 7 | 5145814 | 5145829 | 4 | 4  | 16 | TTTA | 21 | 4  |
| 70532 | 7 | 5146154 | 5146165 | 2 | 6  | 12 | GT   | 27 | 3  |
| 70533 | 7 | 5146305 | 5146334 | 2 | 15 | 30 | AC   | 16 | 14 |
| 70534 | 7 | 5146389 | 5146410 | 2 | 11 | 22 | CA   | 13 | 7  |
| 70535 | 7 | 5146560 | 5146573 | 2 | 7  | 14 | CG   | 7  | 5  |
| 70537 | 7 | 5146685 | 5146710 | 2 | 13 | 26 | AC   | 7  | 5  |
| 70539 | 7 | 5157427 | 5157442 | 2 | 8  | 16 | TG   | 33 | 4  |
| 70540 | 7 | 5159975 | 5160000 | 2 | 13 | 26 | AC   | 12 | 6  |
| 70547 | 7 | 5201007 | 5201022 | 2 | 8  | 16 | GT   | 31 | 3  |
| 70550 | 7 | 5206608 | 5206625 | 2 | 9  | 18 | TG   | 17 | 4  |
| 70554 | 7 | 5237293 | 5237332 | 4 | 10 | 40 | CTAT | 13 | 11 |
| 70555 | 7 | 5239615 | 5239642 | 4 | 7  | 28 | AATA | 14 | 5  |
| 70562 | 7 | 5243723 | 5243748 | 2 | 13 | 26 | CT   | 6  | 7  |
| 70564 | 7 | 5245925 | 5245964 | 2 | 20 | 40 | GT   | 8  | 9  |
| 70565 | 7 | 5247800 | 5247813 | 2 | 7  | 14 | CT   | 25 | 4  |
| 70568 | 7 | 5249709 | 5249732 | 2 | 12 | 24 | TG   | 16 | 7  |
| 70572 | 7 | 5267920 | 5267933 | 2 | 7  | 14 | AC   | 26 | 6  |
| 70573 | 7 | 5268208 | 5268223 | 4 | 4  | 16 | TTTC | 12 | 6  |
| 70575 | 7 | 5269812 | 5269837 | 2 | 13 | 26 | CT   | 15 | 5  |
| 70579 | 7 | 5287683 | 5287703 | 3 | 7  | 21 | CTT  | 27 | 3  |
| 70580 | 7 | 5293333 | 5293344 | 2 | 6  | 12 | CT   | 16 | 4  |
| 70581 | 7 | 5293612 | 5293645 | 2 | 17 | 34 | CA   | 13 | 16 |
| 70583 | 7 | 5299971 | 5299986 | 2 | 8  | 16 | AC   | 26 | 6  |
| 70585 | 7 | 5302018 | 5302033 | 2 | 8  | 16 | GA   | 18 | 4  |
| 70595 | 7 | 5319759 | 5319776 | 2 | 9  | 18 | GA   | 19 | 3  |
| 70597 | 7 | 5327993 | 5328004 | 2 | 6  | 12 | GA   | 25 | 3  |

|       |   |         |         |   |    |    |      |    |    |
|-------|---|---------|---------|---|----|----|------|----|----|
| 70598 | 7 | 5329441 | 5329456 | 2 | 8  | 16 | GT   | 31 | 3  |
| 70599 | 7 | 5337002 | 5337045 | 2 | 22 | 44 | AC   | 12 | 12 |
| 70600 | 7 | 5338523 | 5338534 | 2 | 6  | 12 | CA   | 29 | 4  |
| 70604 | 7 | 5351535 | 5351568 | 2 | 17 | 34 | TG   | 18 | 17 |
| 70606 | 7 | 5352166 | 5352187 | 2 | 11 | 22 | CA   | 18 | 6  |
| 70608 | 7 | 5352448 | 5352461 | 2 | 7  | 14 | AT   | 21 | 8  |
| 70614 | 7 | 5369918 | 5369931 | 2 | 7  | 14 | GT   | 24 | 6  |
| 70615 | 7 | 5370045 | 5370080 | 2 | 18 | 36 | TG   | 15 | 8  |
| 70619 | 7 | 5392317 | 5392340 | 2 | 12 | 24 | AC   | 17 | 8  |
| 70620 | 7 | 5395495 | 5395510 | 2 | 8  | 16 | AG   | 26 | 3  |
| 70622 | 7 | 5409066 | 5409085 | 2 | 10 | 20 | TG   | 23 | 5  |
| 70634 | 7 | 5432729 | 5432752 | 3 | 8  | 24 | TCT  | 15 | 5  |
| 70641 | 7 | 5438740 | 5438759 | 4 | 5  | 20 | GAAA | 26 | 3  |
| 70643 | 7 | 5444370 | 5444393 | 2 | 12 | 24 | AC   | 19 | 10 |
| 70644 | 7 | 5446863 | 5446882 | 4 | 5  | 20 | AAAG | 16 | 3  |
| 70647 | 7 | 5454998 | 5455013 | 2 | 8  | 16 | TG   | 12 | 7  |
| 70650 | 7 | 5455459 | 5455491 | 3 | 11 | 33 | CTT  | 20 | 10 |
| 70652 | 7 | 5456030 | 5456041 | 2 | 6  | 12 | CA   | 21 | 7  |
| 70654 | 7 | 5460812 | 5460843 | 2 | 16 | 32 | CA   | 11 | 15 |
| 70662 | 7 | 5466868 | 5466887 | 2 | 10 | 20 | TG   | 17 | 9  |
| 70663 | 7 | 5466936 | 5466949 | 2 | 7  | 14 | TC   | 23 | 3  |
| 70664 | 7 | 5467058 | 5467071 | 2 | 7  | 14 | GT   | 20 | 4  |
| 70667 | 7 | 5471009 | 5471023 | 3 | 5  | 15 | TCC  | 27 | 4  |
| 70669 | 7 | 5475932 | 5475949 | 3 | 6  | 18 | CTC  | 20 | 6  |
| 70671 | 7 | 5477046 | 5477079 | 2 | 17 | 34 | TG   | 11 | 10 |
| 70673 | 7 | 5481877 | 5481892 | 2 | 8  | 16 | GT   | 27 | 4  |
| 70675 | 7 | 5486559 | 5486600 | 2 | 21 | 42 | AC   | 12 | 10 |
| 70683 | 7 | 5501228 | 5501243 | 2 | 8  | 16 | GT   | 19 | 14 |
| 70685 | 7 | 5511471 | 5511498 | 2 | 14 | 28 | CA   | 22 | 9  |
| 70696 | 7 | 5526196 | 5526234 | 3 | 13 | 39 | CAA  | 21 | 14 |
| 70725 | 7 | 5592000 | 5592031 | 2 | 16 | 32 | CA   | 9  | 11 |
| 70730 | 7 | 5599762 | 5599785 | 2 | 12 | 24 | CA   | 6  | 4  |
| 70732 | 7 | 5600646 | 5600661 | 4 | 4  | 16 | CCTC | 16 | 3  |
| 70740 | 7 | 5612659 | 5612682 | 2 | 12 | 24 | GT   | 12 | 6  |
| 70742 | 7 | 5616597 | 5616610 | 2 | 7  | 14 | GT   | 20 | 15 |
| 70749 | 7 | 5631365 | 5631376 | 2 | 6  | 12 | TG   | 22 | 4  |
| 70751 | 7 | 5636914 | 5636928 | 3 | 5  | 15 | GGT  | 26 | 4  |
| 70752 | 7 | 5638379 | 5638414 | 4 | 9  | 36 | ATCT | 26 | 15 |
| 70755 | 7 | 5641823 | 5641840 | 3 | 6  | 18 | AAC  | 21 | 4  |
| 70763 | 7 | 5658133 | 5658154 | 2 | 11 | 22 | AC   | 21 | 7  |
| 70765 | 7 | 5659506 | 5659517 | 2 | 6  | 12 | AC   | 12 | 7  |
| 70767 | 7 | 5662303 | 5662346 | 2 | 22 | 44 | CA   | 11 | 9  |
| 70768 | 7 | 5662503 | 5662534 | 2 | 16 | 32 | TG   | 9  | 11 |
| 70772 | 7 | 5668737 | 5668760 | 2 | 12 | 24 | CA   | 19 | 9  |
| 70773 | 7 | 5668952 | 5668977 | 2 | 13 | 26 | GT   | 6  | 8  |
| 70774 | 7 | 5671725 | 5671739 | 3 | 5  | 15 | ATT  | 12 | 3  |
| 70786 | 7 | 5699789 | 5699806 | 2 | 9  | 18 | GT   | 24 | 9  |
| 70792 | 7 | 5708605 | 5708622 | 2 | 9  | 18 | CA   | 18 | 6  |
| 70793 | 7 | 5714263 | 5714298 | 2 | 18 | 36 | TG   | 11 | 10 |
| 70794 | 7 | 5714486 | 5714501 | 4 | 4  | 16 | CCTC | 7  | 3  |
| 70795 | 7 | 5714631 | 5714644 | 2 | 7  | 14 | CA   | 20 | 13 |

|       |   |         |         |   |    |    |      |    |    |
|-------|---|---------|---------|---|----|----|------|----|----|
| 70804 | 7 | 5735684 | 5735715 | 4 | 8  | 32 | GGAT | 23 | 6  |
| 70809 | 7 | 5741994 | 5742007 | 2 | 7  | 14 | CA   | 18 | 3  |
| 70813 | 7 | 5748065 | 5748080 | 2 | 8  | 16 | GT   | 13 | 7  |
| 70817 | 7 | 5753368 | 5753399 | 2 | 16 | 32 | AC   | 17 | 12 |
| 70820 | 7 | 5756781 | 5756820 | 2 | 20 | 40 | TG   | 9  | 8  |
| 70826 | 7 | 5776261 | 5776275 | 3 | 5  | 15 | AGA  | 25 | 5  |
| 70827 | 7 | 5777701 | 5777732 | 2 | 16 | 32 | AC   | 21 | 7  |
| 70830 | 7 | 5780883 | 5780906 | 4 | 6  | 24 | CAGA | 21 | 6  |
| 70831 | 7 | 5781178 | 5781201 | 4 | 6  | 24 | TTTC | 10 | 4  |
| 70832 | 7 | 5781417 | 5781450 | 2 | 17 | 34 | AC   | 12 | 10 |
| 70837 | 7 | 5784241 | 5784252 | 2 | 6  | 12 | AC   | 27 | 6  |
| 70838 | 7 | 5784255 | 5784266 | 2 | 6  | 12 | AC   | 21 | 3  |
| 70844 | 7 | 5796095 | 5796130 | 2 | 18 | 36 | AC   | 6  | 8  |
| 70846 | 7 | 5802047 | 5802058 | 2 | 6  | 12 | CA   | 22 | 9  |
| 70847 | 7 | 5802061 | 5802072 | 2 | 6  | 12 | CA   | 24 | 9  |
| 70856 | 7 | 5811718 | 5811741 | 2 | 12 | 24 | CA   | 7  | 5  |
| 70859 | 7 | 5815307 | 5815330 | 3 | 8  | 24 | GAG  | 20 | 4  |
| 70863 | 7 | 5824843 | 5824898 | 2 | 28 | 56 | AC   | 7  | 12 |
| 70870 | 7 | 5839038 | 5839051 | 2 | 7  | 14 | TG   | 24 | 11 |
| 70875 | 7 | 5845200 | 5845221 | 2 | 11 | 22 | GT   | 18 | 6  |
| 70880 | 7 | 5859679 | 5859702 | 3 | 8  | 24 | ATC  | 21 | 6  |
| 70883 | 7 | 5864640 | 5864661 | 2 | 11 | 22 | TC   | 14 | 6  |
| 70886 | 7 | 5864700 | 5864719 | 2 | 10 | 20 | AC   | 14 | 10 |
| 70889 | 7 | 5871764 | 5871815 | 2 | 26 | 52 | TG   | 13 | 12 |
| 70895 | 7 | 5895780 | 5895806 | 3 | 9  | 27 | TGC  | 29 | 8  |
| 70899 | 7 | 5908180 | 5908203 | 2 | 12 | 24 | GT   | 10 | 8  |
| 70900 | 7 | 5908290 | 5908307 | 2 | 9  | 18 | AC   | 16 | 5  |
| 70901 | 7 | 5909367 | 5909380 | 2 | 7  | 14 | GT   | 24 | 3  |
| 70903 | 7 | 5916202 | 5916213 | 2 | 6  | 12 | AC   | 27 | 5  |
| 70904 | 7 | 5916416 | 5916427 | 2 | 6  | 12 | CA   | 25 | 3  |
| 70915 | 7 | 5929654 | 5929669 | 2 | 8  | 16 | AC   | 29 | 5  |
| 70921 | 7 | 5942251 | 5942270 | 2 | 10 | 20 | CA   | 28 | 6  |
| 70923 | 7 | 5945709 | 5945720 | 2 | 6  | 12 | AG   | 25 | 3  |
| 70924 | 7 | 5945883 | 5945900 | 3 | 6  | 18 | GAG  | 20 | 3  |
| 70927 | 7 | 5949387 | 5949400 | 2 | 7  | 14 | CA   | 10 | 7  |
| 70928 | 7 | 5949403 | 5949416 | 2 | 7  | 14 | CA   | 13 | 11 |
| 70929 | 7 | 5949529 | 5949550 | 2 | 11 | 22 | AC   | 21 | 15 |
| 70937 | 7 | 5951621 | 5951648 | 2 | 14 | 28 | TG   | 18 | 12 |
| 70938 | 7 | 5952594 | 5952613 | 4 | 5  | 20 | TTTA | 29 | 9  |
| 70940 | 7 | 5953537 | 5953552 | 2 | 8  | 16 | CA   | 28 | 6  |
| 70941 | 7 | 5953844 | 5953859 | 4 | 4  | 16 | TCTT | 15 | 9  |
| 70945 | 7 | 5955674 | 5955693 | 4 | 5  | 20 | CTGT | 23 | 5  |
| 70946 | 7 | 5955777 | 5955822 | 2 | 23 | 46 | AC   | 7  | 9  |
| 70949 | 7 | 5956868 | 5956879 | 2 | 6  | 12 | TG   | 12 | 3  |
| 70950 | 7 | 5957030 | 5957069 | 2 | 20 | 40 | CA   | 11 | 6  |
| 70951 | 7 | 5957174 | 5957187 | 2 | 7  | 14 | TG   | 16 | 3  |
| 70954 | 7 | 5957583 | 5957596 | 2 | 7  | 14 | GT   | 27 | 3  |
| 70955 | 7 | 5957667 | 5957682 | 2 | 8  | 16 | TG   | 25 | 3  |
| 70956 | 7 | 5957733 | 5957744 | 2 | 6  | 12 | TG   | 14 | 4  |
| 70957 | 7 | 5957747 | 5957760 | 2 | 7  | 14 | TG   | 13 | 5  |
| 70958 | 7 | 5957906 | 5957923 | 2 | 9  | 18 | TG   | 19 | 4  |

|       |   |         |         |   |    |    |     |    |    |
|-------|---|---------|---------|---|----|----|-----|----|----|
| 70960 | 7 | 5959589 | 5959616 | 2 | 14 | 28 | TC  | 16 | 6  |
| 70961 | 7 | 5962775 | 5962790 | 2 | 8  | 16 | TG  | 14 | 11 |
| 70962 | 7 | 5962908 | 5962922 | 3 | 5  | 15 | CCA | 21 | 5  |
| 70964 | 7 | 5964970 | 5964991 | 2 | 11 | 22 | TG  | 12 | 7  |
| 70968 | 7 | 5969676 | 5969699 | 2 | 12 | 24 | TG  | 25 | 5  |
| 70969 | 7 | 5969836 | 5969855 | 2 | 10 | 20 | AC  | 16 | 10 |
| 70972 | 7 | 5973297 | 5973318 | 2 | 11 | 22 | TG  | 19 | 6  |
| 70974 | 7 | 5976591 | 5976616 | 2 | 13 | 26 | GT  | 15 | 10 |
| 70975 | 7 | 5976756 | 5976783 | 2 | 14 | 28 | TC  | 27 | 5  |
| 70977 | 7 | 5980194 | 5980211 | 2 | 9  | 18 | AC  | 21 | 3  |
| 70981 | 7 | 5983660 | 5983677 | 2 | 9  | 18 | GT  | 18 | 6  |
| 70983 | 7 | 5986989 | 5987026 | 2 | 19 | 38 | AC  | 8  | 6  |
| 70985 | 7 | 5988534 | 5988553 | 2 | 10 | 20 | GT  | 17 | 11 |
| 70991 | 7 | 5994523 | 5994544 | 2 | 11 | 22 | AG  | 17 | 4  |
| 70992 | 7 | 5994661 | 5994694 | 2 | 17 | 34 | TG  | 14 | 8  |
| 70993 | 7 | 5999980 | 6000003 | 2 | 12 | 24 | TG  | 18 | 4  |
| 70994 | 7 | 6003251 | 6003288 | 2 | 19 | 38 | CA  | 7  | 3  |
| 70998 | 7 | 6006201 | 6006214 | 2 | 7  | 14 | AC  | 18 | 3  |
| 70999 | 7 | 6007731 | 6007752 | 2 | 11 | 22 | TG  | 12 | 9  |
| 71006 | 7 | 6015035 | 6015054 | 2 | 10 | 20 | GT  | 17 | 3  |
| 71012 | 7 | 6023244 | 6023263 | 2 | 10 | 20 | GT  | 17 | 5  |
| 71017 | 7 | 6028440 | 6028465 | 2 | 13 | 26 | TG  | 14 | 6  |
| 71021 | 7 | 6030523 | 6030550 | 2 | 14 | 28 | TG  | 14 | 8  |
| 71029 | 7 | 6037951 | 6037964 | 2 | 7  | 14 | CA  | 14 | 4  |
| 71030 | 7 | 6038756 | 6038773 | 2 | 9  | 18 | GT  | 17 | 5  |
| 71032 | 7 | 6043376 | 6043411 | 2 | 18 | 36 | TG  | 13 | 7  |
| 71033 | 7 | 6043584 | 6043617 | 2 | 17 | 34 | AC  | 15 | 11 |
| 71034 | 7 | 6043773 | 6043784 | 2 | 6  | 12 | GT  | 18 | 3  |
| 71035 | 7 | 6043926 | 6043943 | 2 | 9  | 18 | TG  | 20 | 7  |
| 71036 | 7 | 6043944 | 6043955 | 2 | 6  | 12 | CG  | 17 | 7  |
| 71040 | 7 | 6054199 | 6054222 | 2 | 12 | 24 | GT  | 11 | 8  |
| 71052 | 7 | 6067773 | 6067784 | 2 | 6  | 12 | TG  | 24 | 5  |
| 71054 | 7 | 6072771 | 6072788 | 2 | 9  | 18 | CA  | 7  | 5  |
| 71055 | 7 | 6072887 | 6072914 | 2 | 14 | 28 | CA  | 17 | 4  |
| 71056 | 7 | 6073070 | 6073087 | 2 | 9  | 18 | GT  | 16 | 11 |
| 71057 | 7 | 6073089 | 6073102 | 2 | 7  | 14 | TG  | 22 | 14 |
| 71058 | 7 | 6073224 | 6073245 | 2 | 11 | 22 | TG  | 24 | 7  |
| 71064 | 7 | 6081381 | 6081394 | 2 | 7  | 14 | AG  | 22 | 5  |
| 71066 | 7 | 6091234 | 6091257 | 2 | 12 | 24 | GT  | 10 | 5  |
| 71068 | 7 | 6096996 | 6097022 | 3 | 9  | 27 | TTA | 7  | 4  |
| 71070 | 7 | 6097675 | 6097692 | 2 | 9  | 18 | TG  | 17 | 4  |
| 71072 | 7 | 6099252 | 6099271 | 2 | 10 | 20 | TG  | 30 | 6  |
| 71073 | 7 | 6099731 | 6099752 | 2 | 11 | 22 | GT  | 25 | 4  |
| 71075 | 7 | 6101800 | 6101823 | 2 | 12 | 24 | GA  | 10 | 6  |
| 71077 | 7 | 6101998 | 6102017 | 2 | 10 | 20 | TG  | 25 | 3  |
| 71079 | 7 | 6107558 | 6107573 | 2 | 8  | 16 | GT  | 22 | 3  |
| 71085 | 7 | 6114933 | 6114968 | 2 | 18 | 36 | GT  | 15 | 8  |
| 71088 | 7 | 6118976 | 6118989 | 2 | 7  | 14 | GA  | 25 | 3  |
| 71089 | 7 | 6120296 | 6120313 | 2 | 9  | 18 | GT  | 17 | 4  |
| 71090 | 7 | 6120585 | 6120614 | 2 | 15 | 30 | AC  | 10 | 10 |
| 71094 | 7 | 6124178 | 6124199 | 2 | 11 | 22 | AG  | 14 | 4  |

|       |   |         |         |   |    |    |     |    |    |
|-------|---|---------|---------|---|----|----|-----|----|----|
| 71095 | 7 | 6124389 | 6124406 | 2 | 9  | 18 | CA  | 19 | 5  |
| 71097 | 7 | 6124610 | 6124621 | 2 | 6  | 12 | GT  | 16 | 3  |
| 71098 | 7 | 6125524 | 6125539 | 2 | 8  | 16 | AC  | 20 | 5  |
| 71101 | 7 | 6125990 | 6126025 | 2 | 18 | 36 | GT  | 14 | 13 |
| 71102 | 7 | 6126184 | 6126216 | 3 | 11 | 33 | TTC | 11 | 5  |
| 71109 | 7 | 6129477 | 6129490 | 2 | 7  | 14 | TG  | 22 | 3  |
| 71116 | 7 | 6130191 | 6130202 | 2 | 6  | 12 | TG  | 27 | 3  |
| 71117 | 7 | 6130862 | 6130879 | 2 | 9  | 18 | AG  | 15 | 5  |
| 71118 | 7 | 6130945 | 6130970 | 2 | 13 | 26 | AC  | 16 | 7  |
| 71123 | 7 | 6134646 | 6134669 | 2 | 12 | 24 | AC  | 11 | 4  |
| 71139 | 7 | 6150426 | 6150437 | 2 | 6  | 12 | CA  | 13 | 6  |
| 71140 | 7 | 6151626 | 6151643 | 2 | 9  | 18 | CT  | 19 | 6  |
| 71143 | 7 | 6152211 | 6152228 | 2 | 9  | 18 | GA  | 20 | 3  |
| 71144 | 7 | 6156737 | 6156758 | 2 | 11 | 22 | CA  | 8  | 3  |
| 71146 | 7 | 6157097 | 6157120 | 2 | 12 | 24 | AC  | 8  | 8  |
| 71148 | 7 | 6157298 | 6157309 | 2 | 6  | 12 | AC  | 29 | 3  |
| 71149 | 7 | 6157564 | 6157603 | 2 | 20 | 40 | GT  | 17 | 12 |
| 71150 | 7 | 6157755 | 6157772 | 2 | 9  | 18 | CA  | 20 | 4  |
| 71153 | 7 | 6159189 | 6159200 | 2 | 6  | 12 | CA  | 30 | 3  |
| 71155 | 7 | 6159839 | 6159866 | 2 | 14 | 28 | CA  | 16 | 9  |
| 71161 | 7 | 6166599 | 6166614 | 2 | 8  | 16 | AC  | 15 | 3  |
| 71162 | 7 | 6166617 | 6166630 | 2 | 7  | 14 | AC  | 17 | 8  |
| 71164 | 7 | 6169037 | 6169052 | 2 | 8  | 16 | AC  | 18 | 5  |
| 71165 | 7 | 6169393 | 6169422 | 2 | 15 | 30 | TG  | 17 | 8  |
| 71167 | 7 | 6171343 | 6171372 | 2 | 15 | 30 | CA  | 21 | 8  |
| 71173 | 7 | 6176064 | 6176091 | 2 | 14 | 28 | TC  | 12 | 6  |
| 71178 | 7 | 6178432 | 6178449 | 2 | 9  | 18 | TG  | 23 | 5  |
| 71181 | 7 | 6178835 | 6178848 | 2 | 7  | 14 | TG  | 16 | 5  |
| 71183 | 7 | 6178995 | 6179012 | 2 | 9  | 18 | GT  | 17 | 4  |
| 71189 | 7 | 6181418 | 6181429 | 2 | 6  | 12 | TG  | 24 | 3  |
| 71192 | 7 | 6183184 | 6183207 | 2 | 12 | 24 | AC  | 15 | 4  |
| 71193 | 7 | 6183684 | 6183695 | 2 | 6  | 12 | CA  | 25 | 3  |
| 71194 | 7 | 6184006 | 6184029 | 2 | 12 | 24 | CA  | 14 | 9  |
| 71196 | 7 | 6185657 | 6185668 | 2 | 6  | 12 | AC  | 18 | 4  |
| 71198 | 7 | 6187486 | 6187505 | 2 | 10 | 20 | AC  | 19 | 3  |
| 71201 | 7 | 6188352 | 6188367 | 2 | 8  | 16 | GT  | 25 | 6  |
| 71202 | 7 | 6189224 | 6189241 | 2 | 9  | 18 | CA  | 22 | 6  |
| 71205 | 7 | 6190218 | 6190259 | 2 | 21 | 42 | TG  | 10 | 7  |
| 71206 | 7 | 6190369 | 6190396 | 2 | 14 | 28 | TC  | 17 | 7  |
| 71207 | 7 | 6191735 | 6191748 | 2 | 7  | 14 | CA  | 25 | 3  |
| 71209 | 7 | 6192671 | 6192684 | 2 | 7  | 14 | AC  | 18 | 9  |
| 71211 | 7 | 6194500 | 6194515 | 2 | 8  | 16 | GT  | 21 | 3  |
| 71215 | 7 | 6197531 | 6197542 | 2 | 6  | 12 | TC  | 16 | 3  |
| 71217 | 7 | 6203509 | 6203542 | 2 | 17 | 34 | CA  | 17 | 9  |
| 71218 | 7 | 6203598 | 6203613 | 2 | 8  | 16 | CA  | 16 | 3  |
| 71219 | 7 | 6203615 | 6203628 | 2 | 7  | 14 | AC  | 18 | 5  |
| 71220 | 7 | 6203915 | 6203938 | 2 | 12 | 24 | AC  | 16 | 8  |
| 71222 | 7 | 6204213 | 6204230 | 2 | 9  | 18 | GT  | 19 | 5  |
| 71223 | 7 | 6204611 | 6204628 | 3 | 6  | 18 | CAG | 29 | 3  |
| 71224 | 7 | 6205248 | 6205287 | 2 | 20 | 40 | AG  | 12 | 9  |
| 71228 | 7 | 6208326 | 6208341 | 2 | 8  | 16 | CA  | 25 | 3  |

|       |   |         |         |   |    |    |      |    |    |
|-------|---|---------|---------|---|----|----|------|----|----|
| 71229 | 7 | 6209039 | 6209064 | 2 | 13 | 26 | AC   | 16 | 10 |
| 71230 | 7 | 6209119 | 6209138 | 2 | 10 | 20 | AC   | 20 | 4  |
| 71232 | 7 | 6210186 | 6210213 | 2 | 14 | 28 | CA   | 8  | 8  |
| 71233 | 7 | 6210394 | 6210409 | 4 | 4  | 16 | GCAC | 28 | 6  |
| 71234 | 7 | 6210459 | 6210472 | 2 | 7  | 14 | AC   | 21 | 5  |
| 71236 | 7 | 6211008 | 6211027 | 2 | 10 | 20 | CA   | 28 | 3  |
| 71237 | 7 | 6212551 | 6212574 | 3 | 8  | 24 | CTG  | 21 | 5  |
| 71246 | 7 | 6220426 | 6220439 | 2 | 7  | 14 | CA   | 18 | 10 |
| 71247 | 7 | 6221195 | 6221222 | 2 | 14 | 28 | AC   | 17 | 11 |
| 71248 | 7 | 6222011 | 6222024 | 2 | 7  | 14 | AC   | 23 | 3  |
| 71249 | 7 | 6222135 | 6222150 | 2 | 8  | 16 | AC   | 21 | 7  |
| 71254 | 7 | 6225044 | 6225055 | 2 | 6  | 12 | CA   | 25 | 4  |
| 71258 | 7 | 6227761 | 6227790 | 2 | 15 | 30 | CA   | 17 | 5  |
| 71260 | 7 | 6230045 | 6230059 | 3 | 5  | 15 | CGG  | 27 | 6  |
| 71262 | 7 | 6235614 | 6235629 | 2 | 8  | 16 | TG   | 7  | 6  |
| 71266 | 7 | 6239948 | 6239959 | 2 | 6  | 12 | TG   | 33 | 3  |
| 71267 | 7 | 6240044 | 6240061 | 2 | 9  | 18 | TG   | 18 | 9  |
| 71269 | 7 | 6241294 | 6241321 | 2 | 14 | 28 | GT   | 8  | 6  |
| 71273 | 7 | 6241829 | 6241840 | 2 | 6  | 12 | GT   | 10 | 7  |
| 71274 | 7 | 6241961 | 6241992 | 2 | 16 | 32 | GT   | 13 | 10 |
| 71276 | 7 | 6245347 | 6245378 | 2 | 16 | 32 | AC   | 16 | 19 |
| 71281 | 7 | 6251558 | 6251573 | 2 | 8  | 16 | GT   | 25 | 4  |
| 71283 | 7 | 6253393 | 6253410 | 3 | 6  | 18 | AGC  | 25 | 4  |
| 71284 | 7 | 6253563 | 6253576 | 2 | 7  | 14 | TC   | 21 | 5  |
| 71290 | 7 | 6266338 | 6266377 | 2 | 20 | 40 | CA   | 10 | 10 |
| 71298 | 7 | 6293011 | 6293030 | 2 | 10 | 20 | AT   | 14 | 4  |
| 71302 | 7 | 6310961 | 6310986 | 2 | 13 | 26 | AC   | 21 | 6  |
| 71305 | 7 | 6315375 | 6315395 | 3 | 7  | 21 | TCT  | 19 | 3  |
| 71307 | 7 | 6324712 | 6324726 | 3 | 5  | 15 | GTT  | 27 | 3  |
| 71312 | 7 | 6347299 | 6347325 | 3 | 9  | 27 | TGT  | 22 | 3  |
| 71314 | 7 | 6352686 | 6352719 | 2 | 17 | 34 | CA   | 15 | 14 |
| 71318 | 7 | 6354401 | 6354424 | 4 | 6  | 24 | TTTA | 26 | 3  |
| 71320 | 7 | 6359185 | 6359199 | 3 | 5  | 15 | AAT  | 24 | 4  |
| 71321 | 7 | 6362669 | 6362683 | 3 | 5  | 15 | TTA  | 20 | 4  |
| 71322 | 7 | 6362885 | 6362899 | 3 | 5  | 15 | CCG  | 18 | 5  |
| 71329 | 7 | 6374448 | 6374459 | 2 | 6  | 12 | GT   | 9  | 3  |
| 71330 | 7 | 6375799 | 6375818 | 2 | 10 | 20 | AC   | 15 | 8  |
| 71334 | 7 | 6390408 | 6390421 | 2 | 7  | 14 | TG   | 20 | 10 |
| 71337 | 7 | 6394918 | 6394929 | 2 | 6  | 12 | TG   | 26 | 3  |
| 71338 | 7 | 6396479 | 6396518 | 4 | 10 | 40 | ATCC | 21 | 5  |
| 71343 | 7 | 6398946 | 6398969 | 2 | 12 | 24 | GT   | 18 | 6  |
| 71345 | 7 | 6401102 | 6401117 | 2 | 8  | 16 | GT   | 9  | 7  |
| 71346 | 7 | 6401119 | 6401132 | 2 | 7  | 14 | TG   | 16 | 8  |
| 71347 | 7 | 6401288 | 6401313 | 2 | 13 | 26 | TG   | 11 | 10 |
| 71348 | 7 | 6403006 | 6403017 | 2 | 6  | 12 | TG   | 30 | 3  |
| 71349 | 7 | 6403098 | 6403117 | 2 | 10 | 20 | GT   | 26 | 7  |
| 71352 | 7 | 6409344 | 6409357 | 2 | 7  | 14 | TG   | 16 | 10 |
| 71357 | 7 | 6412460 | 6412471 | 2 | 6  | 12 | TG   | 24 | 4  |
| 71358 | 7 | 6412901 | 6412938 | 2 | 19 | 38 | CA   | 22 | 19 |
| 71362 | 7 | 6417509 | 6417530 | 2 | 11 | 22 | TG   | 15 | 9  |
| 71373 | 7 | 6440066 | 6440077 | 2 | 6  | 12 | GT   | 24 | 7  |

|       |   |         |         |   |    |    |      |    |    |
|-------|---|---------|---------|---|----|----|------|----|----|
| 71374 | 7 | 6440172 | 6440183 | 2 | 6  | 12 | TC   | 14 | 3  |
| 71376 | 7 | 6441639 | 6441654 | 2 | 8  | 16 | AC   | 29 | 5  |
| 71378 | 7 | 6445966 | 6445981 | 2 | 8  | 16 | GT   | 23 | 5  |
| 71379 | 7 | 6445983 | 6445998 | 2 | 8  | 16 | TG   | 21 | 4  |
| 71383 | 7 | 6456977 | 6456998 | 2 | 11 | 22 | TG   | 15 | 14 |
| 71384 | 7 | 6458245 | 6458292 | 4 | 12 | 48 | TTCT | 23 | 10 |
| 71385 | 7 | 6460166 | 6460177 | 2 | 6  | 12 | TG   | 24 | 3  |
| 71389 | 7 | 6462049 | 6462062 | 2 | 7  | 14 | TG   | 26 | 12 |
| 71390 | 7 | 6462068 | 6462083 | 4 | 4  | 16 | GTGC | 24 | 9  |
| 71391 | 7 | 6462496 | 6462521 | 2 | 13 | 26 | GT   | 9  | 9  |
| 71393 | 7 | 6464855 | 6464882 | 2 | 14 | 28 | TG   | 17 | 13 |
| 71397 | 7 | 6472447 | 6472464 | 2 | 9  | 18 | AC   | 16 | 7  |
| 71401 | 7 | 6476986 | 6477035 | 2 | 25 | 50 | AC   | 13 | 9  |
| 71407 | 7 | 6487133 | 6487159 | 3 | 9  | 27 | TTC  | 25 | 9  |
| 71408 | 7 | 6491644 | 6491659 | 2 | 8  | 16 | CA   | 30 | 5  |
| 71411 | 7 | 6500783 | 6500802 | 2 | 10 | 20 | TG   | 9  | 6  |
| 71414 | 7 | 6501100 | 6501123 | 2 | 12 | 24 | CA   | 10 | 6  |
| 71415 | 7 | 6501281 | 6501304 | 2 | 12 | 24 | CA   | 24 | 5  |
| 71417 | 7 | 6502724 | 6502743 | 4 | 5  | 20 | TTTG | 27 | 3  |
| 71420 | 7 | 6503307 | 6503320 | 2 | 7  | 14 | GA   | 23 | 5  |
| 71422 | 7 | 6503715 | 6503734 | 4 | 5  | 20 | TATT | 28 | 4  |
| 71425 | 7 | 6508027 | 6508038 | 2 | 6  | 12 | AC   | 22 | 3  |
| 71427 | 7 | 6515134 | 6515147 | 2 | 7  | 14 | AC   | 28 | 4  |
| 71429 | 7 | 6516149 | 6516164 | 2 | 8  | 16 | TG   | 26 | 3  |
| 71430 | 7 | 6516269 | 6516280 | 2 | 6  | 12 | TG   | 18 | 4  |
| 71433 | 7 | 6518705 | 6518726 | 2 | 11 | 22 | AG   | 10 | 3  |
| 71434 | 7 | 6521482 | 6521493 | 2 | 6  | 12 | GT   | 25 | 6  |
| 71435 | 7 | 6527777 | 6527796 | 4 | 5  | 20 | CACG | 23 | 14 |
| 71437 | 7 | 6530285 | 6530306 | 2 | 11 | 22 | TG   | 18 | 8  |
| 71439 | 7 | 6534868 | 6534881 | 2 | 7  | 14 | CA   | 24 | 4  |
| 71442 | 7 | 6545448 | 6545463 | 2 | 8  | 16 | TG   | 22 | 3  |
| 71444 | 7 | 6547075 | 6547118 | 2 | 22 | 44 | GT   | 6  | 8  |
| 71449 | 7 | 6557492 | 6557509 | 2 | 9  | 18 | AC   | 21 | 3  |
| 71462 | 7 | 6561500 | 6561531 | 2 | 16 | 32 | CA   | 12 | 7  |
| 71464 | 7 | 6563573 | 6563592 | 2 | 10 | 20 | TG   | 32 | 4  |
| 71465 | 7 | 6563795 | 6563822 | 2 | 14 | 28 | GT   | 20 | 8  |
| 71471 | 7 | 6573384 | 6573401 | 2 | 9  | 18 | TG   | 24 | 7  |
| 71477 | 7 | 6584276 | 6584289 | 2 | 7  | 14 | AC   | 18 | 4  |
| 71480 | 7 | 6587703 | 6587722 | 4 | 5  | 20 | TCTG | 24 | 3  |
| 71482 | 7 | 6592503 | 6592547 | 3 | 15 | 45 | ATT  | 11 | 8  |
| 71483 | 7 | 6593565 | 6593580 | 2 | 8  | 16 | TG   | 13 | 11 |
| 71485 | 7 | 6596382 | 6596425 | 2 | 22 | 44 | TC   | 8  | 9  |
| 71487 | 7 | 6598446 | 6598475 | 2 | 15 | 30 | CA   | 8  | 5  |
| 71493 | 7 | 6601494 | 6601517 | 2 | 12 | 24 | TG   | 17 | 9  |
| 71494 | 7 | 6601658 | 6601677 | 2 | 10 | 20 | TG   | 21 | 5  |
| 71501 | 7 | 6622843 | 6622866 | 3 | 8  | 24 | AGG  | 20 | 6  |
| 71502 | 7 | 6629302 | 6629333 | 2 | 16 | 32 | CA   | 10 | 10 |
| 71503 | 7 | 6631108 | 6631129 | 2 | 11 | 22 | TG   | 16 | 6  |
| 71505 | 7 | 6633596 | 6633622 | 3 | 9  | 27 | TCC  | 11 | 5  |
| 71506 | 7 | 6634752 | 6634777 | 2 | 13 | 26 | TG   | 18 | 10 |
| 71507 | 7 | 6635493 | 6635507 | 3 | 5  | 15 | GGT  | 15 | 3  |

|       |   |         |         |   |    |    |      |    |    |
|-------|---|---------|---------|---|----|----|------|----|----|
| 71509 | 7 | 6639205 | 6639234 | 2 | 15 | 30 | GT   | 18 | 13 |
| 71512 | 7 | 6645244 | 6645257 | 2 | 7  | 14 | TG   | 21 | 5  |
| 71513 | 7 | 6645369 | 6645394 | 2 | 13 | 26 | AC   | 11 | 12 |
| 71520 | 7 | 6655786 | 6655817 | 2 | 16 | 32 | AC   | 10 | 8  |
| 71524 | 7 | 6658695 | 6658718 | 2 | 12 | 24 | GT   | 27 | 7  |
| 71526 | 7 | 6660688 | 6660705 | 2 | 9  | 18 | TG   | 25 | 6  |
| 71527 | 7 | 6663527 | 6663566 | 2 | 20 | 40 | CA   | 13 | 15 |
| 71529 | 7 | 6667086 | 6667153 | 4 | 17 | 68 | TTCT | 9  | 11 |
| 71530 | 7 | 6669804 | 6669831 | 2 | 14 | 28 | AC   | 10 | 8  |
| 71531 | 7 | 6670447 | 6670470 | 2 | 12 | 24 | TG   | 24 | 12 |
| 71534 | 7 | 6671745 | 6671792 | 2 | 24 | 48 | TG   | 11 | 13 |
| 71535 | 7 | 6676257 | 6676276 | 2 | 10 | 20 | TG   | 18 | 5  |
| 71543 | 7 | 6681254 | 6681275 | 2 | 11 | 22 | CA   | 13 | 8  |
| 71547 | 7 | 6684888 | 6684931 | 2 | 22 | 44 | GT   | 9  | 10 |
| 71548 | 7 | 6685250 | 6685265 | 2 | 8  | 16 | AC   | 20 | 3  |
| 71549 | 7 | 6685267 | 6685286 | 2 | 10 | 20 | CA   | 18 | 5  |
| 71551 | 7 | 6685883 | 6685924 | 2 | 21 | 42 | TG   | 12 | 15 |
| 71553 | 7 | 6696337 | 6696376 | 2 | 20 | 40 | GT   | 8  | 12 |
| 71558 | 7 | 6705766 | 6705785 | 2 | 10 | 20 | AC   | 25 | 12 |
| 71560 | 7 | 6707181 | 6707198 | 2 | 9  | 18 | TG   | 17 | 11 |
| 71563 | 7 | 6708011 | 6708022 | 2 | 6  | 12 | CA   | 17 | 4  |
| 71564 | 7 | 6710756 | 6710771 | 2 | 8  | 16 | GT   | 24 | 4  |
| 71565 | 7 | 6710925 | 6710938 | 2 | 7  | 14 | AC   | 21 | 4  |
| 71566 | 7 | 6715150 | 6715165 | 4 | 4  | 16 | TCCC | 17 | 4  |
| 71567 | 7 | 6715782 | 6715819 | 2 | 19 | 38 | CA   | 13 | 9  |
| 71569 | 7 | 6719085 | 6719112 | 2 | 14 | 28 | TG   | 7  | 7  |
| 71571 | 7 | 6721018 | 6721037 | 2 | 10 | 20 | GT   | 18 | 5  |
| 71578 | 7 | 6734703 | 6734720 | 3 | 6  | 18 | CTC  | 27 | 4  |
| 71581 | 7 | 6739929 | 6739944 | 2 | 8  | 16 | AC   | 18 | 5  |
| 71586 | 7 | 6745314 | 6745345 | 2 | 16 | 32 | GT   | 13 | 6  |
| 71587 | 7 | 6750707 | 6750718 | 2 | 6  | 12 | CA   | 27 | 4  |
| 71589 | 7 | 6752636 | 6752657 | 2 | 11 | 22 | AG   | 18 | 5  |
| 71594 | 7 | 6756636 | 6756695 | 2 | 30 | 60 | GT   | 10 | 11 |
| 71595 | 7 | 6761063 | 6761080 | 2 | 9  | 18 | TG   | 16 | 5  |
| 71600 | 7 | 6770815 | 6770826 | 2 | 6  | 12 | GT   | 21 | 4  |
| 71606 | 7 | 6778769 | 6778788 | 4 | 5  | 20 | AACC | 32 | 5  |
| 71608 | 7 | 6780471 | 6780490 | 2 | 10 | 20 | AC   | 15 | 7  |
| 71611 | 7 | 6781802 | 6781833 | 2 | 16 | 32 | AC   | 13 | 4  |
| 71614 | 7 | 6783782 | 6783807 | 2 | 13 | 26 | CA   | 8  | 12 |
| 71615 | 7 | 6783895 | 6783916 | 2 | 11 | 22 | GT   | 20 | 10 |
| 71616 | 7 | 6786170 | 6786195 | 2 | 13 | 26 | GT   | 23 | 9  |
| 71617 | 7 | 6786890 | 6786913 | 2 | 12 | 24 | GT   | 20 | 16 |
| 71619 | 7 | 6789115 | 6789130 | 4 | 4  | 16 | ATCC | 26 | 4  |
| 71620 | 7 | 6791072 | 6791089 | 2 | 9  | 18 | TG   | 21 | 12 |
| 71622 | 7 | 6794841 | 6794852 | 2 | 6  | 12 | TG   | 26 | 8  |
| 71624 | 7 | 6795687 | 6795698 | 2 | 6  | 12 | CA   | 8  | 7  |
| 71625 | 7 | 6795839 | 6795864 | 2 | 13 | 26 | AC   | 12 | 10 |
| 71628 | 7 | 6798932 | 6798959 | 2 | 14 | 28 | GT   | 24 | 10 |
| 71630 | 7 | 6799150 | 6799175 | 2 | 13 | 26 | CA   | 17 | 9  |
| 71631 | 7 | 6799253 | 6799268 | 2 | 8  | 16 | TG   | 17 | 4  |
| 71632 | 7 | 6799322 | 6799347 | 2 | 13 | 26 | GT   | 22 | 9  |



|       |   |         |         |   |    |    |      |    |    |
|-------|---|---------|---------|---|----|----|------|----|----|
| 71633 | 7 | 6799837 | 6799866 | 2 | 15 | 30 | CT   | 12 | 10 |
| 71639 | 7 | 6803862 | 6803891 | 3 | 10 | 30 | GGA  | 15 | 8  |
| 71640 | 7 | 6805487 | 6805506 | 2 | 10 | 20 | AC   | 23 | 8  |
| 71642 | 7 | 6806712 | 6806737 | 2 | 13 | 26 | AC   | 14 | 12 |
| 71643 | 7 | 6807023 | 6807048 | 2 | 13 | 26 | AC   | 18 | 6  |
| 71647 | 7 | 6818109 | 6818124 | 2 | 8  | 16 | AC   | 21 | 7  |
| 71648 | 7 | 6819448 | 6819473 | 2 | 13 | 26 | CA   | 17 | 8  |
| 71655 | 7 | 6828808 | 6828843 | 2 | 18 | 36 | AG   | 6  | 10 |
| 71656 | 7 | 6829074 | 6829103 | 2 | 15 | 30 | CA   | 13 | 12 |
| 71661 | 7 | 6832648 | 6832691 | 2 | 22 | 44 | AC   | 9  | 8  |
| 71663 | 7 | 6834454 | 6834465 | 2 | 6  | 12 | GT   | 21 | 4  |
| 71667 | 7 | 6850477 | 6850494 | 2 | 9  | 18 | AC   | 13 | 6  |
| 71683 | 7 | 6879414 | 6879433 | 2 | 10 | 20 | TG   | 19 | 6  |
| 71687 | 7 | 6880448 | 6880459 | 2 | 6  | 12 | GT   | 29 | 3  |
| 71692 | 7 | 6888589 | 6888608 | 2 | 10 | 20 | AC   | 15 | 7  |
| 71701 | 7 | 6901519 | 6901538 | 2 | 10 | 20 | GT   | 22 | 4  |
| 71711 | 7 | 6916935 | 6916946 | 2 | 6  | 12 | GT   | 34 | 3  |
| 71715 | 7 | 6917833 | 6917850 | 2 | 9  | 18 | TG   | 19 | 6  |
| 71717 | 7 | 6920296 | 6920317 | 2 | 11 | 22 | TC   | 10 | 6  |
| 71721 | 7 | 6926377 | 6926388 | 2 | 6  | 12 | GT   | 22 | 6  |
| 71726 | 7 | 6934986 | 6934997 | 2 | 6  | 12 | GT   | 9  | 4  |
| 71727 | 7 | 6935000 | 6935013 | 2 | 7  | 14 | GT   | 24 | 4  |
| 71729 | 7 | 6938282 | 6938299 | 2 | 9  | 18 | AC   | 17 | 8  |
| 71733 | 7 | 6940501 | 6940518 | 2 | 9  | 18 | AC   | 22 | 8  |
| 71743 | 7 | 6946540 | 6946561 | 2 | 11 | 22 | TG   | 16 | 9  |
| 71745 | 7 | 6947808 | 6947822 | 3 | 5  | 15 | TCC  | 26 | 4  |
| 71749 | 7 | 6952747 | 6952764 | 2 | 9  | 18 | GT   | 19 | 7  |
| 71758 | 7 | 6969034 | 6969061 | 2 | 14 | 28 | TC   | 15 | 6  |
| 71765 | 7 | 6989798 | 6989811 | 2 | 7  | 14 | TA   | 23 | 7  |
| 71766 | 7 | 6990685 | 6990714 | 3 | 10 | 30 | CCT  | 22 | 12 |
| 71769 | 7 | 6991137 | 6991148 | 2 | 6  | 12 | AT   | 23 | 5  |
| 71773 | 7 | 6994249 | 6994282 | 2 | 17 | 34 | AC   | 10 | 7  |
| 71774 | 7 | 6994328 | 6994347 | 2 | 10 | 20 | AC   | 11 | 8  |
| 71775 | 7 | 6994399 | 6994418 | 2 | 10 | 20 | CA   | 26 | 10 |
| 71776 | 7 | 6995119 | 6995134 | 2 | 8  | 16 | TG   | 22 | 7  |
| 71778 | 7 | 6995372 | 6995401 | 2 | 15 | 30 | CA   | 17 | 8  |
| 71782 | 7 | 6999021 | 6999036 | 4 | 4  | 16 | TTTG | 17 | 3  |
| 71784 | 7 | 7000418 | 7000445 | 2 | 14 | 28 | TG   | 6  | 6  |
| 71785 | 7 | 7000596 | 7000611 | 2 | 8  | 16 | GT   | 18 | 7  |
| 71791 | 7 | 7012982 | 7013003 | 2 | 11 | 22 | GA   | 13 | 10 |
| 71794 | 7 | 7017148 | 7017169 | 2 | 11 | 22 | GA   | 14 | 9  |
| 71796 | 7 | 7023848 | 7023867 | 2 | 10 | 20 | AC   | 12 | 8  |
| 71797 | 7 | 7024090 | 7024101 | 2 | 6  | 12 | CA   | 25 | 3  |
| 71799 | 7 | 7025670 | 7025697 | 2 | 14 | 28 | CA   | 17 | 4  |
| 71803 | 7 | 7035277 | 7035288 | 2 | 6  | 12 | AC   | 26 | 4  |
| 71813 | 7 | 7059502 | 7059517 | 2 | 8  | 16 | TG   | 28 | 5  |
| 71823 | 7 | 7070017 | 7070030 | 2 | 7  | 14 | AC   | 19 | 3  |
| 71824 | 7 | 7070034 | 7070045 | 2 | 6  | 12 | CA   | 24 | 4  |
| 71825 | 7 | 7070385 | 7070412 | 2 | 14 | 28 | TG   | 14 | 9  |
| 71854 | 7 | 7123929 | 7123942 | 2 | 7  | 14 | GT   | 23 | 4  |
| 71863 | 7 | 7137156 | 7137171 | 2 | 8  | 16 | AC   | 20 | 3  |

|       |   |         |         |   |    |    |      |    |    |
|-------|---|---------|---------|---|----|----|------|----|----|
| 71865 | 7 | 7140500 | 7140531 | 2 | 16 | 32 | TG   | 20 | 6  |
| 71875 | 7 | 7156383 | 7156400 | 3 | 6  | 18 | TAC  | 25 | 5  |
| 71876 | 7 | 7156743 | 7156760 | 3 | 6  | 18 | CTT  | 20 | 3  |
| 71883 | 7 | 7157824 | 7157845 | 2 | 11 | 22 | CA   | 20 | 14 |
| 71888 | 7 | 7159878 | 7159893 | 2 | 8  | 16 | GT   | 8  | 6  |
| 71889 | 7 | 7160216 | 7160230 | 3 | 5  | 15 | CCA  | 19 | 3  |
| 71895 | 7 | 7163048 | 7163073 | 2 | 13 | 26 | GA   | 17 | 9  |
| 71905 | 7 | 7176338 | 7176355 | 2 | 9  | 18 | GT   | 25 | 7  |
| 71907 | 7 | 7179408 | 7179437 | 2 | 15 | 30 | CA   | 11 | 11 |
| 71908 | 7 | 7182500 | 7182527 | 2 | 14 | 28 | CA   | 17 | 5  |
| 71918 | 7 | 7205092 | 7205115 | 2 | 12 | 24 | GT   | 15 | 9  |
| 71921 | 7 | 7205710 | 7205725 | 2 | 8  | 16 | GT   | 22 | 6  |
| 71934 | 7 | 7222190 | 7222205 | 4 | 4  | 16 | GGAG | 26 | 3  |
| 71936 | 7 | 7223895 | 7223914 | 2 | 10 | 20 | TG   | 20 | 3  |
| 71939 | 7 | 7227282 | 7227313 | 2 | 16 | 32 | TG   | 9  | 12 |
| 71940 | 7 | 7227966 | 7227989 | 2 | 12 | 24 | AC   | 21 | 6  |
| 71941 | 7 | 7228034 | 7228053 | 2 | 10 | 20 | AC   | 23 | 10 |
| 71944 | 7 | 7231960 | 7231971 | 2 | 6  | 12 | AC   | 31 | 4  |
| 71945 | 7 | 7232099 | 7232110 | 2 | 6  | 12 | GT   | 21 | 3  |
| 71946 | 7 | 7232142 | 7232155 | 2 | 7  | 14 | TG   | 25 | 6  |
| 71947 | 7 | 7232306 | 7232329 | 2 | 12 | 24 | CA   | 15 | 12 |
| 71954 | 7 | 7233220 | 7233235 | 2 | 8  | 16 | TG   | 15 | 4  |
| 71955 | 7 | 7233445 | 7233464 | 2 | 10 | 20 | AC   | 19 | 8  |
| 71960 | 7 | 7236134 | 7236147 | 2 | 7  | 14 | GT   | 24 | 3  |
| 71974 | 7 | 7257861 | 7257918 | 2 | 29 | 58 | TG   | 9  | 12 |
| 71975 | 7 | 7260878 | 7260923 | 2 | 23 | 46 | TG   | 7  | 7  |
| 71978 | 7 | 7263240 | 7263275 | 2 | 18 | 36 | TG   | 12 | 13 |
| 71979 | 7 | 7263392 | 7263431 | 2 | 20 | 40 | TG   | 9  | 11 |
| 71990 | 7 | 7278102 | 7278121 | 2 | 10 | 20 | TC   | 13 | 5  |
| 71992 | 7 | 7280504 | 7280533 | 2 | 15 | 30 | AC   | 10 | 9  |
| 71994 | 7 | 7283801 | 7283822 | 2 | 11 | 22 | TG   | 22 | 4  |
| 71996 | 7 | 7287611 | 7287622 | 2 | 6  | 12 | GA   | 20 | 3  |
| 71998 | 7 | 7288221 | 7288242 | 2 | 11 | 22 | GT   | 20 | 10 |
| 71999 | 7 | 7288431 | 7288452 | 2 | 11 | 22 | TC   | 15 | 10 |
| 72003 | 7 | 7290300 | 7290311 | 2 | 6  | 12 | TG   | 18 | 3  |
| 72008 | 7 | 7296686 | 7296705 | 2 | 10 | 20 | GT   | 10 | 4  |
| 72010 | 7 | 7299314 | 7299346 | 3 | 11 | 33 | CTC  | 18 | 3  |
| 72011 | 7 | 7300371 | 7300390 | 2 | 10 | 20 | CA   | 23 | 3  |
| 72015 | 7 | 7308174 | 7308191 | 2 | 9  | 18 | CA   | 22 | 5  |
| 72016 | 7 | 7311053 | 7311078 | 2 | 13 | 26 | AC   | 10 | 5  |
| 72018 | 7 | 7313987 | 7314008 | 2 | 11 | 22 | GT   | 22 | 4  |
| 72021 | 7 | 7314454 | 7314485 | 2 | 16 | 32 | TG   | 15 | 11 |
| 72023 | 7 | 7315738 | 7315757 | 2 | 10 | 20 | AC   | 16 | 9  |
| 72024 | 7 | 7315991 | 7316004 | 2 | 7  | 14 | GT   | 23 | 5  |
| 72026 | 7 | 7319381 | 7319396 | 2 | 8  | 16 | GT   | 22 | 7  |
| 72028 | 7 | 7324625 | 7324638 | 2 | 7  | 14 | TC   | 21 | 3  |
| 72029 | 7 | 7325951 | 7325966 | 2 | 8  | 16 | AT   | 10 | 7  |
| 72030 | 7 | 7327197 | 7327216 | 2 | 10 | 20 | CA   | 27 | 12 |
| 72031 | 7 | 7327447 | 7327470 | 2 | 12 | 24 | TG   | 13 | 10 |
| 72032 | 7 | 7327584 | 7327595 | 2 | 6  | 12 | CA   | 19 | 4  |
| 72034 | 7 | 7328033 | 7328064 | 2 | 16 | 32 | TG   | 14 | 9  |

|       |   |         |         |   |    |    |      |    |    |
|-------|---|---------|---------|---|----|----|------|----|----|
| 72042 | 7 | 7346633 | 7346650 | 2 | 9  | 18 | GA   | 13 | 7  |
| 72046 | 7 | 7355954 | 7355965 | 2 | 6  | 12 | GT   | 25 | 5  |
| 72050 | 7 | 7365337 | 7365352 | 2 | 8  | 16 | CA   | 17 | 4  |
| 72052 | 7 | 7372916 | 7372947 | 2 | 16 | 32 | CA   | 11 | 10 |
| 72058 | 7 | 7380862 | 7380877 | 2 | 8  | 16 | TC   | 21 | 5  |
| 72081 | 7 | 7405567 | 7405582 | 2 | 8  | 16 | AC   | 25 | 7  |
| 72082 | 7 | 7405734 | 7405745 | 2 | 6  | 12 | TG   | 26 | 3  |
| 72095 | 7 | 7429119 | 7429152 | 2 | 17 | 34 | CA   | 7  | 13 |
| 72096 | 7 | 7430838 | 7430853 | 2 | 8  | 16 | TG   | 28 | 4  |
| 72097 | 7 | 7433690 | 7433703 | 2 | 7  | 14 | CA   | 17 | 7  |
| 72102 | 7 | 7435964 | 7435977 | 2 | 7  | 14 | AC   | 26 | 3  |
| 72103 | 7 | 7439812 | 7439835 | 2 | 12 | 24 | AC   | 14 | 12 |
| 72104 | 7 | 7446489 | 7446502 | 2 | 7  | 14 | CA   | 9  | 4  |
| 72106 | 7 | 7446879 | 7446898 | 4 | 5  | 20 | AAAT | 20 | 6  |
| 72117 | 7 | 7468778 | 7468795 | 2 | 9  | 18 | TG   | 21 | 8  |
| 72118 | 7 | 7469709 | 7469728 | 2 | 10 | 20 | CA   | 20 | 11 |
| 72121 | 7 | 7480867 | 7480892 | 2 | 13 | 26 | GT   | 11 | 10 |
| 72124 | 7 | 7483595 | 7483612 | 2 | 9  | 18 | AC   | 15 | 7  |
| 72131 | 7 | 7502729 | 7502752 | 2 | 12 | 24 | GA   | 11 | 6  |
| 72135 | 7 | 7511932 | 7511947 | 2 | 8  | 16 | GT   | 21 | 10 |
| 72146 | 7 | 7532279 | 7532290 | 2 | 6  | 12 | GT   | 27 | 6  |
| 72147 | 7 | 7532597 | 7532620 | 2 | 12 | 24 | GT   | 20 | 8  |
| 72148 | 7 | 7537180 | 7537195 | 2 | 8  | 16 | GT   | 20 | 12 |
| 72157 | 7 | 7546090 | 7546109 | 2 | 10 | 20 | CA   | 15 | 4  |
| 72159 | 7 | 7546257 | 7546276 | 2 | 10 | 20 | AC   | 16 | 7  |
| 72164 | 7 | 7549439 | 7549460 | 2 | 11 | 22 | CA   | 20 | 6  |
| 72167 | 7 | 7549958 | 7549972 | 3 | 5  | 15 | AGG  | 22 | 3  |
| 72173 | 7 | 7556062 | 7556079 | 2 | 9  | 18 | GA   | 10 | 3  |
| 72174 | 7 | 7557692 | 7557719 | 4 | 7  | 28 | TGCC | 28 | 5  |
| 72175 | 7 | 7558079 | 7558094 | 4 | 4  | 16 | AGAC | 30 | 3  |
| 72179 | 7 | 7567357 | 7567374 | 3 | 6  | 18 | TCC  | 19 | 4  |
| 72184 | 7 | 7577487 | 7577504 | 3 | 6  | 18 | GCA  | 17 | 5  |
| 72187 | 7 | 7579206 | 7579219 | 2 | 7  | 14 | TG   | 17 | 3  |
| 72190 | 7 | 7587508 | 7587521 | 2 | 7  | 14 | GT   | 20 | 13 |
| 72197 | 7 | 7597961 | 7597980 | 2 | 10 | 20 | AC   | 15 | 6  |
| 72199 | 7 | 7601367 | 7601393 | 3 | 9  | 27 | AGG  | 13 | 8  |
| 72203 | 7 | 7607872 | 7607885 | 2 | 7  | 14 | CA   | 24 | 4  |
| 72206 | 7 | 7614155 | 7614180 | 2 | 13 | 26 | TG   | 21 | 13 |
| 72208 | 7 | 7616955 | 7616966 | 2 | 6  | 12 | TG   | 25 | 4  |
| 72210 | 7 | 7617369 | 7617384 | 4 | 4  | 16 | ACGC | 36 | 6  |
| 72212 | 7 | 7617808 | 7617821 | 2 | 7  | 14 | AC   | 10 | 4  |
| 72215 | 7 | 7622292 | 7622311 | 2 | 10 | 20 | CA   | 15 | 5  |
| 72217 | 7 | 7623958 | 7623973 | 2 | 8  | 16 | TG   | 19 | 6  |
| 72218 | 7 | 7624125 | 7624142 | 3 | 6  | 18 | GGA  | 13 | 7  |
| 72220 | 7 | 7624698 | 7624711 | 2 | 7  | 14 | AG   | 22 | 4  |
| 72230 | 7 | 7637137 | 7637148 | 2 | 6  | 12 | AC   | 14 | 4  |
| 72231 | 7 | 7638989 | 7639004 | 2 | 8  | 16 | TA   | 13 | 3  |
| 72233 | 7 | 7640944 | 7640957 | 2 | 7  | 14 | TG   | 8  | 5  |
| 72234 | 7 | 7640964 | 7640977 | 2 | 7  | 14 | TG   | 11 | 3  |
| 72235 | 7 | 7641073 | 7641096 | 2 | 12 | 24 | CA   | 16 | 3  |
| 72237 | 7 | 7643469 | 7643498 | 2 | 15 | 30 | CT   | 10 | 6  |

|       |   |         |         |   |    |    |     |    |    |
|-------|---|---------|---------|---|----|----|-----|----|----|
| 72240 | 7 | 7650249 | 7650288 | 2 | 20 | 40 | AC  | 8  | 7  |
| 72242 | 7 | 7653675 | 7653700 | 2 | 13 | 26 | AC  | 17 | 10 |
| 72243 | 7 | 7653758 | 7653769 | 2 | 6  | 12 | CA  | 21 | 3  |
| 72244 | 7 | 7653953 | 7653964 | 2 | 6  | 12 | CA  | 20 | 5  |
| 72247 | 7 | 7660930 | 7660957 | 2 | 14 | 28 | AC  | 18 | 11 |
| 72248 | 7 | 7661142 | 7661167 | 2 | 13 | 26 | GT  | 21 | 11 |
| 72257 | 7 | 7672462 | 7672477 | 2 | 8  | 16 | GT  | 12 | 3  |
| 72259 | 7 | 7674082 | 7674093 | 2 | 6  | 12 | CT  | 19 | 3  |
| 72262 | 7 | 7676256 | 7676281 | 2 | 13 | 26 | GT  | 7  | 6  |
| 72264 | 7 | 7676783 | 7676820 | 2 | 19 | 38 | TG  | 20 | 12 |
| 72266 | 7 | 7679686 | 7679713 | 2 | 14 | 28 | TG  | 15 | 8  |
| 72268 | 7 | 7681841 | 7681860 | 2 | 10 | 20 | CT  | 20 | 5  |
| 72273 | 7 | 7694625 | 7694651 | 3 | 9  | 27 | TGA | 19 | 10 |
| 72283 | 7 | 7703255 | 7703278 | 2 | 12 | 24 | CA  | 17 | 14 |
| 72288 | 7 | 7705874 | 7705887 | 2 | 7  | 14 | TC  | 23 | 3  |
| 72292 | 7 | 7707786 | 7707805 | 2 | 10 | 20 | CA  | 9  | 7  |
| 72293 | 7 | 7707909 | 7707928 | 2 | 10 | 20 | CA  | 20 | 13 |
| 72307 | 7 | 7725319 | 7725334 | 2 | 8  | 16 | CA  | 27 | 7  |
| 72309 | 7 | 7728935 | 7728962 | 2 | 14 | 28 | CA  | 14 | 7  |
| 72310 | 7 | 7729068 | 7729103 | 2 | 18 | 36 | GT  | 9  | 10 |
| 72311 | 7 | 7729213 | 7729224 | 2 | 6  | 12 | TG  | 9  | 3  |
| 72313 | 7 | 7732049 | 7732076 | 2 | 14 | 28 | GT  | 10 | 7  |
| 72314 | 7 | 7732313 | 7732324 | 2 | 6  | 12 | GT  | 24 | 5  |
| 72315 | 7 | 7732470 | 7732481 | 2 | 6  | 12 | TG  | 25 | 9  |
| 72316 | 7 | 7732482 | 7732493 | 2 | 6  | 12 | AG  | 18 | 3  |
| 72319 | 7 | 7739193 | 7739222 | 2 | 15 | 30 | CA  | 10 | 11 |
| 72321 | 7 | 7739577 | 7739598 | 2 | 11 | 22 | GT  | 14 | 8  |
| 72322 | 7 | 7739785 | 7739820 | 2 | 18 | 36 | TG  | 6  | 4  |
| 72323 | 7 | 7740343 | 7740354 | 2 | 6  | 12 | AC  | 18 | 4  |
| 72324 | 7 | 7740466 | 7740477 | 2 | 6  | 12 | CA  | 33 | 3  |
| 72325 | 7 | 7741462 | 7741491 | 2 | 15 | 30 | GT  | 20 | 13 |
| 72326 | 7 | 7741902 | 7741929 | 2 | 14 | 28 | TG  | 19 | 8  |
| 72327 | 7 | 7748729 | 7748748 | 2 | 10 | 20 | TG  | 23 | 7  |
| 72328 | 7 | 7750537 | 7750558 | 2 | 11 | 22 | GT  | 15 | 5  |
| 72329 | 7 | 7750890 | 7750919 | 2 | 15 | 30 | AC  | 18 | 8  |
| 72334 | 7 | 7757475 | 7757508 | 2 | 17 | 34 | TG  | 17 | 10 |
| 72335 | 7 | 7757618 | 7757633 | 2 | 8  | 16 | CA  | 25 | 3  |
| 72336 | 7 | 7759543 | 7759564 | 2 | 11 | 22 | AC  | 12 | 6  |
| 72337 | 7 | 7759723 | 7759746 | 2 | 12 | 24 | AC  | 22 | 11 |
| 72338 | 7 | 7759895 | 7759912 | 2 | 9  | 18 | TG  | 17 | 6  |
| 72341 | 7 | 7762743 | 7762760 | 2 | 9  | 18 | AC  | 22 | 6  |
| 72342 | 7 | 7765332 | 7765347 | 2 | 8  | 16 | AC  | 25 | 9  |
| 72344 | 7 | 7767941 | 7767960 | 2 | 10 | 20 | AC  | 7  | 8  |
| 72345 | 7 | 7768105 | 7768124 | 2 | 10 | 20 | TG  | 12 | 3  |
| 72346 | 7 | 7768527 | 7768544 | 2 | 9  | 18 | GT  | 21 | 6  |
| 72347 | 7 | 7768597 | 7768612 | 2 | 8  | 16 | GT  | 20 | 3  |
| 72348 | 7 | 7768715 | 7768728 | 2 | 7  | 14 | GT  | 30 | 4  |
| 72350 | 7 | 7775038 | 7775073 | 2 | 18 | 36 | CA  | 19 | 12 |
| 72351 | 7 | 7776253 | 7776278 | 2 | 13 | 26 | GT  | 15 | 12 |
| 72352 | 7 | 7776603 | 7776616 | 2 | 7  | 14 | AG  | 22 | 3  |
| 72354 | 7 | 7777234 | 7777263 | 2 | 15 | 30 | CA  | 22 | 14 |

|       |   |         |         |   |    |    |      |    |    |
|-------|---|---------|---------|---|----|----|------|----|----|
| 72355 | 7 | 7777399 | 7777418 | 2 | 10 | 20 | CA   | 18 | 6  |
| 72361 | 7 | 7784388 | 7784403 | 2 | 8  | 16 | AC   | 24 | 6  |
| 72366 | 7 | 7786005 | 7786036 | 2 | 16 | 32 | TG   | 20 | 15 |
| 72367 | 7 | 7788136 | 7788151 | 2 | 8  | 16 | TG   | 24 | 3  |
| 72368 | 7 | 7790075 | 7790094 | 2 | 10 | 20 | CA   | 19 | 6  |
| 72373 | 7 | 7797076 | 7797091 | 2 | 8  | 16 | CA   | 28 | 4  |
| 72376 | 7 | 7797384 | 7797407 | 2 | 12 | 24 | TG   | 22 | 15 |
| 72377 | 7 | 7799506 | 7799529 | 2 | 12 | 24 | CA   | 15 | 6  |
| 72378 | 7 | 7800955 | 7800970 | 2 | 8  | 16 | AC   | 21 | 3  |
| 72380 | 7 | 7804758 | 7804773 | 2 | 8  | 16 | CA   | 18 | 5  |
| 72383 | 7 | 7805083 | 7805102 | 2 | 10 | 20 | AC   | 8  | 4  |
| 72384 | 7 | 7805256 | 7805271 | 2 | 8  | 16 | AC   | 16 | 3  |
| 72385 | 7 | 7806620 | 7806637 | 2 | 9  | 18 | GT   | 31 | 12 |
| 72387 | 7 | 7807052 | 7807073 | 2 | 11 | 22 | AG   | 20 | 5  |
| 72388 | 7 | 7807292 | 7807307 | 2 | 8  | 16 | CA   | 23 | 4  |
| 72396 | 7 | 7825357 | 7825372 | 4 | 4  | 16 | AAGT | 22 | 3  |
| 72398 | 7 | 7834472 | 7834519 | 4 | 12 | 48 | TATC | 13 | 9  |
| 72401 | 7 | 7837078 | 7837098 | 3 | 7  | 21 | GAT  | 20 | 7  |
| 72405 | 7 | 7842877 | 7842900 | 2 | 12 | 24 | CA   | 18 | 7  |
| 72406 | 7 | 7843633 | 7843646 | 2 | 7  | 14 | AC   | 22 | 7  |
| 72411 | 7 | 7859685 | 7859716 | 2 | 16 | 32 | AC   | 12 | 9  |
| 72412 | 7 | 7859792 | 7859807 | 2 | 8  | 16 | GT   | 20 | 7  |
| 72422 | 7 | 7877298 | 7877312 | 3 | 5  | 15 | GCA  | 32 | 6  |
| 72423 | 7 | 7877656 | 7877669 | 2 | 7  | 14 | AT   | 20 | 5  |
| 72424 | 7 | 7877823 | 7877834 | 2 | 6  | 12 | AC   | 20 | 7  |
| 72425 | 7 | 7877836 | 7877851 | 2 | 8  | 16 | CA   | 15 | 5  |
| 72427 | 7 | 7881516 | 7881553 | 2 | 19 | 38 | TG   | 7  | 8  |
| 72433 | 7 | 7891988 | 7892023 | 2 | 18 | 36 | AC   | 9  | 12 |
| 72435 | 7 | 7901820 | 7901834 | 3 | 5  | 15 | TTG  | 18 | 3  |
| 72438 | 7 | 7905677 | 7905690 | 2 | 7  | 14 | GT   | 20 | 3  |
| 72439 | 7 | 7906303 | 7906318 | 2 | 8  | 16 | TG   | 29 | 5  |
| 72443 | 7 | 7913516 | 7913543 | 4 | 7  | 28 | AAAG | 14 | 5  |
| 72444 | 7 | 7914177 | 7914191 | 3 | 5  | 15 | TGC  | 29 | 3  |
| 72446 | 7 | 7927909 | 7927936 | 4 | 7  | 28 | AATA | 20 | 8  |
| 72447 | 7 | 7934959 | 7934978 | 2 | 10 | 20 | TG   | 20 | 6  |
| 72448 | 7 | 7936293 | 7936336 | 2 | 22 | 44 | TG   | 18 | 7  |
| 72462 | 7 | 7981704 | 7981721 | 2 | 9  | 18 | CT   | 16 | 6  |
| 72464 | 7 | 7989753 | 7989764 | 2 | 6  | 12 | CA   | 28 | 4  |
| 72467 | 7 | 7993023 | 7993040 | 3 | 6  | 18 | CTC  | 20 | 3  |
| 72469 | 7 | 7994046 | 7994073 | 2 | 14 | 28 | GT   | 13 | 15 |
| 72472 | 7 | 7994522 | 7994579 | 2 | 29 | 58 | CA   | 17 | 15 |
| 72473 | 7 | 7995965 | 7995979 | 3 | 5  | 15 | AAT  | 30 | 4  |
| 72474 | 7 | 8000105 | 8000118 | 2 | 7  | 14 | GA   | 24 | 5  |
| 72478 | 7 | 8005688 | 8005707 | 4 | 5  | 20 | AGAT | 23 | 7  |
| 72486 | 7 | 8013100 | 8013131 | 2 | 16 | 32 | CA   | 11 | 5  |
| 72490 | 7 | 8020937 | 8020956 | 2 | 10 | 20 | CT   | 9  | 8  |
| 72491 | 7 | 8022038 | 8022051 | 2 | 7  | 14 | GT   | 22 | 3  |
| 72493 | 7 | 8024201 | 8024232 | 2 | 16 | 32 | AC   | 9  | 8  |
| 72495 | 7 | 8024874 | 8024897 | 2 | 12 | 24 | GT   | 10 | 7  |
| 72496 | 7 | 8025203 | 8025214 | 2 | 6  | 12 | GC   | 12 | 5  |
| 72498 | 7 | 8025765 | 8025792 | 2 | 14 | 28 | TG   | 7  | 7  |

|       |   |         |         |   |    |    |      |    |    |
|-------|---|---------|---------|---|----|----|------|----|----|
| 72499 | 7 | 8025820 | 8025837 | 2 | 9  | 18 | TG   | 15 | 4  |
| 72500 | 7 | 8026054 | 8026067 | 2 | 7  | 14 | GT   | 22 | 4  |
| 72504 | 7 | 8048080 | 8048113 | 2 | 17 | 34 | GT   | 7  | 5  |
| 72506 | 7 | 8054131 | 8054146 | 4 | 4  | 16 | CTTT | 22 | 5  |
| 72507 | 7 | 8054310 | 8054330 | 3 | 7  | 21 | GGA  | 15 | 3  |
| 72513 | 7 | 8062724 | 8062744 | 3 | 7  | 21 | GAA  | 14 | 3  |
| 72514 | 7 | 8063032 | 8063057 | 2 | 13 | 26 | AC   | 16 | 11 |
| 72515 | 7 | 8063160 | 8063171 | 2 | 6  | 12 | GT   | 25 | 7  |
| 72517 | 7 | 8068231 | 8068244 | 2 | 7  | 14 | CA   | 23 | 3  |
| 72518 | 7 | 8068442 | 8068469 | 2 | 14 | 28 | GA   | 8  | 5  |
| 72519 | 7 | 8072252 | 8072267 | 2 | 8  | 16 | CA   | 24 | 4  |
| 72527 | 7 | 8099935 | 8099949 | 3 | 5  | 15 | TTA  | 6  | 3  |
| 72532 | 7 | 8105843 | 8105882 | 4 | 10 | 40 | TTTC | 9  | 6  |
| 72534 | 7 | 8106473 | 8106488 | 2 | 8  | 16 | GA   | 21 | 3  |
| 72535 | 7 | 8106959 | 8106970 | 2 | 6  | 12 | AC   | 19 | 4  |
| 72536 | 7 | 8106973 | 8106986 | 2 | 7  | 14 | AC   | 22 | 6  |
| 72537 | 7 | 8107471 | 8107488 | 2 | 9  | 18 | AC   | 17 | 6  |
| 72539 | 7 | 8108159 | 8108176 | 2 | 9  | 18 | TG   | 13 | 8  |
| 72540 | 7 | 8108396 | 8108421 | 2 | 13 | 26 | TC   | 28 | 8  |
| 72541 | 7 | 8112917 | 8112928 | 2 | 6  | 12 | AC   | 26 | 3  |
| 72560 | 7 | 8133984 | 8134003 | 2 | 10 | 20 | CT   | 14 | 12 |
| 72564 | 7 | 8137252 | 8137267 | 2 | 8  | 16 | GT   | 20 | 3  |
| 72568 | 7 | 8144074 | 8144105 | 2 | 16 | 32 | CA   | 6  | 6  |
| 72573 | 7 | 8153063 | 8153089 | 3 | 9  | 27 | CCT  | 15 | 7  |
| 72575 | 7 | 8176385 | 8176398 | 2 | 7  | 14 | TG   | 23 | 6  |
| 72580 | 7 | 8182939 | 8182964 | 2 | 13 | 26 | TC   | 11 | 12 |
| 72585 | 7 | 8183402 | 8183429 | 2 | 14 | 28 | TG   | 18 | 10 |
| 72588 | 7 | 8195574 | 8195594 | 3 | 7  | 21 | CAG  | 30 | 6  |
| 72591 | 7 | 8210522 | 8210539 | 2 | 9  | 18 | AG   | 19 | 8  |
| 72596 | 7 | 8218868 | 8218881 | 2 | 7  | 14 | GT   | 25 | 3  |
| 72600 | 7 | 8221767 | 8221778 | 2 | 6  | 12 | TG   | 24 | 4  |
| 72601 | 7 | 8221888 | 8221903 | 4 | 4  | 16 | TGAA | 32 | 3  |
| 72602 | 7 | 8225318 | 8225332 | 3 | 5  | 15 | CAT  | 31 | 4  |
| 72604 | 7 | 8239456 | 8239477 | 2 | 11 | 22 | GT   | 28 | 5  |
| 72605 | 7 | 8240025 | 8240036 | 2 | 6  | 12 | TC   | 24 | 4  |
| 72607 | 7 | 8240126 | 8240161 | 2 | 18 | 36 | GT   | 9  | 9  |
| 72608 | 7 | 8240745 | 8240772 | 2 | 14 | 28 | GT   | 13 | 9  |
| 72610 | 7 | 8245538 | 8245559 | 2 | 11 | 22 | GT   | 19 | 13 |
| 72614 | 7 | 8251393 | 8251406 | 2 | 7  | 14 | AT   | 8  | 3  |
| 72615 | 7 | 8252317 | 8252346 | 2 | 15 | 30 | AC   | 13 | 11 |
| 72617 | 7 | 8256994 | 8257008 | 3 | 5  | 15 | GGA  | 28 | 3  |
| 72618 | 7 | 8257322 | 8257345 | 4 | 6  | 24 | ATGT | 14 | 5  |
| 72620 | 7 | 8259183 | 8259196 | 2 | 7  | 14 | GT   | 24 | 8  |
| 72621 | 7 | 8259690 | 8259701 | 2 | 6  | 12 | GA   | 22 | 5  |
| 72626 | 7 | 8269521 | 8269534 | 2 | 7  | 14 | AC   | 30 | 5  |
| 72628 | 7 | 8270421 | 8270440 | 2 | 10 | 20 | CA   | 22 | 4  |
| 72631 | 7 | 8272006 | 8272055 | 2 | 25 | 50 | TC   | 7  | 9  |
| 72634 | 7 | 8278357 | 8278394 | 2 | 19 | 38 | TG   | 12 | 12 |
| 72636 | 7 | 8280984 | 8281011 | 2 | 14 | 28 | TG   | 20 | 14 |
| 72637 | 7 | 8281171 | 8281190 | 2 | 10 | 20 | AC   | 21 | 5  |
| 72641 | 7 | 8284736 | 8284747 | 2 | 6  | 12 | TG   | 29 | 3  |

|       |   |         |         |   |    |    |      |    |    |
|-------|---|---------|---------|---|----|----|------|----|----|
| 72643 | 7 | 8285516 | 8285531 | 2 | 8  | 16 | CA   | 31 | 5  |
| 72646 | 7 | 8290578 | 8290593 | 2 | 8  | 16 | GT   | 23 | 5  |
| 72647 | 7 | 8291663 | 8291680 | 2 | 9  | 18 | CT   | 26 | 4  |
| 72650 | 7 | 8306914 | 8306927 | 2 | 7  | 14 | TC   | 19 | 3  |
| 72651 | 7 | 8311026 | 8311040 | 3 | 5  | 15 | CCT  | 12 | 4  |
| 72653 | 7 | 8313275 | 8313306 | 4 | 8  | 32 | GATG | 19 | 11 |
| 72655 | 7 | 8316041 | 8316058 | 2 | 9  | 18 | CT   | 24 | 12 |
| 72658 | 7 | 8324597 | 8324610 | 2 | 7  | 14 | AC   | 21 | 11 |
| 72659 | 7 | 8326987 | 8327018 | 2 | 16 | 32 | CA   | 19 | 11 |
| 72665 | 7 | 8331196 | 8331219 | 2 | 12 | 24 | AC   | 19 | 14 |
| 72666 | 7 | 8331769 | 8331784 | 2 | 8  | 16 | TC   | 17 | 11 |
| 72667 | 7 | 8332976 | 8332990 | 3 | 5  | 15 | GGT  | 25 | 6  |
| 72668 | 7 | 8333414 | 8333433 | 2 | 10 | 20 | TC   | 22 | 5  |
| 72682 | 7 | 8354732 | 8354745 | 2 | 7  | 14 | CA   | 21 | 6  |
| 72692 | 7 | 8369392 | 8369405 | 2 | 7  | 14 | GA   | 20 | 3  |
| 72693 | 7 | 8371000 | 8371013 | 2 | 7  | 14 | CA   | 21 | 4  |
| 72694 | 7 | 8371096 | 8371107 | 2 | 6  | 12 | AC   | 17 | 3  |
| 72698 | 7 | 8392712 | 8392735 | 2 | 12 | 24 | AG   | 23 | 5  |
| 72717 | 7 | 8435344 | 8435387 | 2 | 22 | 44 | AC   | 8  | 9  |
| 72722 | 7 | 8438466 | 8438483 | 2 | 9  | 18 | AC   | 20 | 3  |
| 72728 | 7 | 8443387 | 8443410 | 2 | 12 | 24 | TG   | 22 | 12 |
| 72729 | 7 | 8445919 | 8445946 | 2 | 14 | 28 | AC   | 19 | 8  |
| 72732 | 7 | 8453869 | 8453898 | 2 | 15 | 30 | TG   | 19 | 15 |
| 72736 | 7 | 8468088 | 8468115 | 2 | 14 | 28 | GT   | 14 | 7  |
| 72737 | 7 | 8470379 | 8470400 | 2 | 11 | 22 | TG   | 16 | 3  |
| 72750 | 7 | 8496877 | 8496892 | 2 | 8  | 16 | GT   | 13 | 6  |
| 72753 | 7 | 8498469 | 8498506 | 2 | 19 | 38 | CA   | 13 | 10 |
| 72755 | 7 | 8500922 | 8500933 | 2 | 6  | 12 | GT   | 27 | 5  |
| 72766 | 7 | 8530833 | 8530852 | 2 | 10 | 20 | CA   | 24 | 8  |
| 72767 | 7 | 8533488 | 8533499 | 2 | 6  | 12 | CT   | 17 | 4  |
| 72769 | 7 | 8533973 | 8533986 | 2 | 7  | 14 | TG   | 24 | 4  |
| 72776 | 7 | 8552305 | 8552360 | 4 | 14 | 56 | CTTT | 15 | 12 |
| 72780 | 7 | 8560677 | 8560688 | 2 | 6  | 12 | AC   | 21 | 3  |
| 72781 | 7 | 8561065 | 8561094 | 2 | 15 | 30 | TG   | 20 | 12 |
| 72783 | 7 | 8561302 | 8561313 | 2 | 6  | 12 | CA   | 20 | 8  |
| 72784 | 7 | 8561534 | 8561545 | 2 | 6  | 12 | CT   | 25 | 3  |
| 72792 | 7 | 8583215 | 8583248 | 2 | 17 | 34 | AC   | 11 | 8  |
| 72795 | 7 | 8595512 | 8595557 | 2 | 23 | 46 | CA   | 9  | 8  |
| 72797 | 7 | 8596909 | 8596924 | 2 | 8  | 16 | CA   | 22 | 4  |
| 72799 | 7 | 8598096 | 8598123 | 4 | 7  | 28 | ATCC | 27 | 10 |
| 72800 | 7 | 8598302 | 8598317 | 4 | 4  | 16 | TCCA | 25 | 3  |
| 72802 | 7 | 8601958 | 8601981 | 2 | 12 | 24 | TG   | 13 | 14 |
| 72803 | 7 | 8605203 | 8605220 | 2 | 9  | 18 | AC   | 22 | 9  |
| 72805 | 7 | 8607173 | 8607199 | 3 | 9  | 27 | TCC  | 7  | 4  |
| 72812 | 7 | 8616667 | 8616684 | 3 | 6  | 18 | GAG  | 24 | 4  |
| 72813 | 7 | 8617849 | 8617886 | 2 | 19 | 38 | CA   | 12 | 12 |
| 72814 | 7 | 8618089 | 8618104 | 2 | 8  | 16 | GT   | 19 | 5  |
| 72815 | 7 | 8618518 | 8618541 | 2 | 12 | 24 | CA   | 13 | 5  |
| 72816 | 7 | 8618602 | 8618625 | 2 | 12 | 24 | AC   | 13 | 7  |
| 72821 | 7 | 8626986 | 8627001 | 2 | 8  | 16 | AT   | 17 | 7  |
| 72824 | 7 | 8630809 | 8630820 | 2 | 6  | 12 | AC   | 26 | 3  |

|       |   |         |         |   |    |    |      |    |    |
|-------|---|---------|---------|---|----|----|------|----|----|
| 72825 | 7 | 8631646 | 8631673 | 2 | 14 | 28 | CA   | 9  | 8  |
| 72830 | 7 | 8646201 | 8646221 | 3 | 7  | 21 | GCA  | 24 | 6  |
| 72833 | 7 | 8649205 | 8649220 | 4 | 4  | 16 | AACT | 19 | 3  |
| 72848 | 7 | 8677845 | 8677858 | 2 | 7  | 14 | GT   | 8  | 3  |
| 72850 | 7 | 8678021 | 8678034 | 2 | 7  | 14 | CA   | 22 | 6  |
| 72851 | 7 | 8678110 | 8678121 | 2 | 6  | 12 | AC   | 27 | 3  |
| 72858 | 7 | 8699960 | 8699973 | 2 | 7  | 14 | GA   | 30 | 3  |
| 72859 | 7 | 8701835 | 8701848 | 2 | 7  | 14 | TG   | 25 | 4  |
| 72865 | 7 | 8706848 | 8706863 | 2 | 8  | 16 | GT   | 19 | 8  |
| 72869 | 7 | 8711480 | 8711497 | 2 | 9  | 18 | GT   | 26 | 7  |
| 72870 | 7 | 8711761 | 8711774 | 2 | 7  | 14 | AC   | 7  | 4  |
| 72875 | 7 | 8716118 | 8716151 | 2 | 17 | 34 | CA   | 6  | 8  |
| 72877 | 7 | 8718422 | 8718435 | 2 | 7  | 14 | AC   | 19 | 6  |
| 72883 | 7 | 8725954 | 8725977 | 4 | 6  | 24 | CAGA | 33 | 4  |
| 72890 | 7 | 8736459 | 8736486 | 4 | 7  | 28 | TGAT | 30 | 17 |
| 72891 | 7 | 8737094 | 8737115 | 2 | 11 | 22 | GT   | 21 | 11 |
| 72892 | 7 | 8740214 | 8740229 | 2 | 8  | 16 | GT   | 22 | 11 |
| 72903 | 7 | 8751520 | 8751535 | 2 | 8  | 16 | GA   | 25 | 3  |
| 72905 | 7 | 8752210 | 8752227 | 2 | 9  | 18 | AC   | 16 | 8  |
| 72919 | 7 | 8772955 | 8772968 | 2 | 7  | 14 | AC   | 28 | 4  |
| 72927 | 7 | 8780987 | 8781004 | 2 | 9  | 18 | AC   | 8  | 4  |
| 72929 | 7 | 8786247 | 8786258 | 2 | 6  | 12 | GT   | 26 | 3  |
| 72934 | 7 | 8789147 | 8789166 | 2 | 10 | 20 | AT   | 6  | 6  |
| 72938 | 7 | 8796178 | 8796195 | 2 | 9  | 18 | AC   | 22 | 4  |
| 72942 | 7 | 8799401 | 8799416 | 2 | 8  | 16 | CA   | 25 | 15 |
| 72945 | 7 | 8803063 | 8803074 | 2 | 6  | 12 | TG   | 18 | 4  |
| 72946 | 7 | 8803076 | 8803087 | 2 | 6  | 12 | TG   | 16 | 4  |
| 72950 | 7 | 8808781 | 8808796 | 2 | 8  | 16 | TG   | 22 | 7  |
| 72951 | 7 | 8808941 | 8808998 | 2 | 29 | 58 | AC   | 6  | 7  |
| 72953 | 7 | 8816311 | 8816330 | 2 | 10 | 20 | TG   | 26 | 4  |
| 72957 | 7 | 8820590 | 8820609 | 2 | 10 | 20 | GT   | 6  | 6  |
| 72958 | 7 | 8820735 | 8820748 | 2 | 7  | 14 | AC   | 18 | 3  |
| 72959 | 7 | 8820771 | 8820800 | 2 | 15 | 30 | CA   | 19 | 8  |
| 72960 | 7 | 8825708 | 8825747 | 2 | 20 | 40 | TG   | 6  | 7  |
| 72962 | 7 | 8827252 | 8827265 | 2 | 7  | 14 | AC   | 22 | 3  |
| 72964 | 7 | 8827437 | 8827460 | 2 | 12 | 24 | AC   | 13 | 9  |
| 72971 | 7 | 8837788 | 8837799 | 2 | 6  | 12 | TG   | 10 | 4  |
| 72972 | 7 | 8837933 | 8837956 | 2 | 12 | 24 | AC   | 19 | 6  |
| 72973 | 7 | 8838046 | 8838061 | 2 | 8  | 16 | TG   | 23 | 6  |
| 72975 | 7 | 8845335 | 8845362 | 2 | 14 | 28 | CA   | 19 | 15 |
| 72984 | 7 | 8850767 | 8850780 | 2 | 7  | 14 | TG   | 23 | 3  |
| 72987 | 7 | 8853114 | 8853133 | 2 | 10 | 20 | CA   | 15 | 10 |
| 72991 | 7 | 8856471 | 8856492 | 2 | 11 | 22 | GT   | 15 | 7  |
| 72994 | 7 | 8859202 | 8859227 | 2 | 13 | 26 | TG   | 17 | 9  |
| 72995 | 7 | 8859371 | 8859386 | 2 | 8  | 16 | CA   | 19 | 9  |
| 72997 | 7 | 8859467 | 8859478 | 2 | 6  | 12 | CA   | 26 | 4  |
| 73000 | 7 | 8863553 | 8863566 | 2 | 7  | 14 | GT   | 23 | 4  |
| 73001 | 7 | 8864168 | 8864203 | 2 | 18 | 36 | AC   | 25 | 17 |
| 73003 | 7 | 8864959 | 8864984 | 2 | 13 | 26 | GT   | 11 | 11 |
| 73008 | 7 | 8868348 | 8868365 | 2 | 9  | 18 | GA   | 20 | 3  |
| 73014 | 7 | 8874062 | 8874089 | 2 | 14 | 28 | GA   | 21 | 9  |



|       |   |         |         |   |    |    |      |    |    |
|-------|---|---------|---------|---|----|----|------|----|----|
| 73015 | 7 | 8874472 | 8874491 | 2 | 10 | 20 | GA   | 8  | 5  |
| 73016 | 7 | 8884772 | 8884791 | 2 | 10 | 20 | CT   | 27 | 9  |
| 73023 | 7 | 8893646 | 8893673 | 2 | 14 | 28 | AC   | 12 | 9  |
| 73025 | 7 | 8897820 | 8897833 | 2 | 7  | 14 | GT   | 30 | 6  |
| 73026 | 7 | 8898449 | 8898474 | 2 | 13 | 26 | AC   | 18 | 9  |
| 73031 | 7 | 8899470 | 8899483 | 2 | 7  | 14 | AC   | 22 | 6  |
| 73033 | 7 | 8899878 | 8899895 | 3 | 6  | 18 | GCT  | 16 | 3  |
| 73036 | 7 | 8901144 | 8901183 | 4 | 10 | 40 | AGAA | 7  | 8  |
| 73039 | 7 | 8903168 | 8903183 | 4 | 4  | 16 | AAAT | 23 | 3  |
| 73040 | 7 | 8907067 | 8907080 | 2 | 7  | 14 | CA   | 24 | 4  |
| 73045 | 7 | 8912273 | 8912288 | 2 | 8  | 16 | AG   | 14 | 9  |
| 73050 | 7 | 8916349 | 8916364 | 2 | 8  | 16 | CA   | 25 | 9  |
| 73053 | 7 | 8917914 | 8917931 | 2 | 9  | 18 | TG   | 21 | 7  |
| 73054 | 7 | 8918071 | 8918082 | 2 | 6  | 12 | CA   | 27 | 7  |
| 73055 | 7 | 8918970 | 8918996 | 3 | 9  | 27 | CTT  | 16 | 5  |
| 73057 | 7 | 8921227 | 8921252 | 2 | 13 | 26 | CA   | 8  | 9  |
| 73059 | 7 | 8924677 | 8924698 | 2 | 11 | 22 | TG   | 15 | 7  |
| 73060 | 7 | 8926965 | 8926982 | 2 | 9  | 18 | CT   | 14 | 6  |
| 73061 | 7 | 8926985 | 8926998 | 2 | 7  | 14 | CT   | 14 | 6  |
| 73062 | 7 | 8927482 | 8927496 | 3 | 5  | 15 | AGC  | 27 | 6  |
| 73065 | 7 | 8931131 | 8931144 | 2 | 7  | 14 | CA   | 15 | 5  |
| 73066 | 7 | 8932503 | 8932518 | 4 | 4  | 16 | TTTG | 15 | 11 |
| 73069 | 7 | 8941530 | 8941551 | 2 | 11 | 22 | GT   | 21 | 8  |
| 73070 | 7 | 8941719 | 8941738 | 2 | 10 | 20 | AC   | 25 | 7  |
| 73071 | 7 | 8941890 | 8941909 | 4 | 5  | 20 | CCTT | 28 | 4  |
| 73072 | 7 | 8942325 | 8942348 | 2 | 12 | 24 | CA   | 14 | 15 |
| 73075 | 7 | 8944968 | 8944991 | 3 | 8  | 24 | CCT  | 26 | 7  |
| 73078 | 7 | 8947253 | 8947268 | 2 | 8  | 16 | TG   | 29 | 4  |
| 73079 | 7 | 8947378 | 8947397 | 2 | 10 | 20 | CA   | 14 | 5  |
| 73080 | 7 | 8948038 | 8948061 | 2 | 12 | 24 | GT   | 12 | 7  |
| 73085 | 7 | 8957889 | 8957908 | 2 | 10 | 20 | AC   | 21 | 12 |
| 73086 | 7 | 8958565 | 8958582 | 2 | 9  | 18 | AC   | 22 | 6  |
| 73088 | 7 | 8959649 | 8959669 | 3 | 7  | 21 | CCT  | 18 | 3  |
| 73090 | 7 | 8960059 | 8960085 | 3 | 9  | 27 | AAT  | 7  | 4  |
| 73091 | 7 | 8962042 | 8962073 | 2 | 16 | 32 | GT   | 27 | 7  |
| 73092 | 7 | 8962499 | 8962512 | 2 | 7  | 14 | GT   | 13 | 9  |
| 73094 | 7 | 8962896 | 8962907 | 2 | 6  | 12 | TA   | 15 | 3  |
| 73099 | 7 | 8967359 | 8967374 | 4 | 4  | 16 | AAAT | 19 | 6  |
| 73101 | 7 | 8967659 | 8967672 | 2 | 7  | 14 | AC   | 14 | 3  |
| 73102 | 7 | 8969273 | 8969286 | 2 | 7  | 14 | CT   | 25 | 4  |
| 73109 | 7 | 8974781 | 8974794 | 2 | 7  | 14 | GT   | 22 | 6  |
| 73112 | 7 | 8982631 | 8982650 | 2 | 10 | 20 | CA   | 23 | 10 |
| 73115 | 7 | 8983551 | 8983566 | 2 | 8  | 16 | TG   | 24 | 6  |
| 73122 | 7 | 9000709 | 9000732 | 3 | 8  | 24 | CAT  | 16 | 3  |
| 73123 | 7 | 9000875 | 9000898 | 2 | 12 | 24 | CA   | 19 | 8  |
| 73129 | 7 | 9008626 | 9008641 | 2 | 8  | 16 | GA   | 22 | 7  |
| 73133 | 7 | 9013546 | 9013557 | 2 | 6  | 12 | AG   | 11 | 3  |
| 73134 | 7 | 9014205 | 9014222 | 2 | 9  | 18 | CA   | 13 | 3  |
| 73136 | 7 | 9018405 | 9018426 | 2 | 11 | 22 | CA   | 20 | 12 |
| 73143 | 7 | 9031136 | 9031161 | 2 | 13 | 26 | CA   | 19 | 13 |
| 73147 | 7 | 9034999 | 9035013 | 3 | 5  | 15 | TCC  | 10 | 3  |

|       |   |         |         |   |    |    |      |    |    |
|-------|---|---------|---------|---|----|----|------|----|----|
| 73149 | 7 | 9035759 | 9035782 | 2 | 12 | 24 | TG   | 14 | 8  |
| 73157 | 7 | 9042612 | 9042627 | 4 | 4  | 16 | GCAC | 14 | 4  |
| 73158 | 7 | 9042683 | 9042700 | 2 | 9  | 18 | CA   | 12 | 10 |
| 73159 | 7 | 9042703 | 9042716 | 2 | 7  | 14 | CA   | 15 | 7  |
| 73180 | 7 | 9051897 | 9051914 | 3 | 6  | 18 | CTC  | 24 | 5  |
| 73181 | 7 | 9053188 | 9053203 | 2 | 8  | 16 | TC   | 10 | 4  |
| 73182 | 7 | 9054443 | 9054466 | 2 | 12 | 24 | TG   | 12 | 9  |
| 73184 | 7 | 9057185 | 9057200 | 2 | 8  | 16 | CA   | 16 | 6  |
| 73189 | 7 | 9065907 | 9065930 | 2 | 12 | 24 | TG   | 11 | 6  |
| 73192 | 7 | 9067290 | 9067309 | 4 | 5  | 20 | TCCC | 9  | 3  |
| 73194 | 7 | 9072052 | 9072071 | 2 | 10 | 20 | GT   | 23 | 5  |
| 73199 | 7 | 9074957 | 9074992 | 2 | 18 | 36 | GT   | 13 | 12 |
| 73203 | 7 | 9075745 | 9075768 | 2 | 12 | 24 | AC   | 9  | 7  |
| 73204 | 7 | 9075948 | 9075961 | 2 | 7  | 14 | GA   | 22 | 3  |
| 73207 | 7 | 9078753 | 9078780 | 2 | 14 | 28 | GT   | 15 | 9  |
| 73208 | 7 | 9080589 | 9080612 | 2 | 12 | 24 | TG   | 30 | 8  |
| 73212 | 7 | 9085161 | 9085176 | 2 | 8  | 16 | TA   | 12 | 3  |
| 73214 | 7 | 9100143 | 9100154 | 2 | 6  | 12 | AT   | 12 | 6  |
| 73215 | 7 | 9100634 | 9100651 | 3 | 6  | 18 | GAA  | 10 | 5  |
| 73217 | 7 | 9101790 | 9101817 | 2 | 14 | 28 | GT   | 14 | 15 |
| 73219 | 7 | 9102028 | 9102055 | 2 | 14 | 28 | AG   | 9  | 5  |
| 73226 | 7 | 9111036 | 9111075 | 2 | 20 | 40 | CA   | 8  | 8  |
| 73245 | 7 | 9143554 | 9143573 | 2 | 10 | 20 | TC   | 12 | 3  |
| 73251 | 7 | 9148075 | 9148092 | 2 | 9  | 18 | CA   | 11 | 4  |
| 73266 | 7 | 9163664 | 9163689 | 2 | 13 | 26 | AG   | 10 | 7  |
| 73267 | 7 | 9164640 | 9164677 | 2 | 19 | 38 | TG   | 6  | 5  |
| 73270 | 7 | 9165627 | 9165642 | 2 | 8  | 16 | CT   | 7  | 4  |
| 73271 | 7 | 9165895 | 9165908 | 2 | 7  | 14 | AC   | 8  | 9  |
| 73278 | 7 | 9172386 | 9172397 | 2 | 6  | 12 | TG   | 31 | 5  |
| 73279 | 7 | 9172602 | 9172619 | 2 | 9  | 18 | AC   | 17 | 3  |
| 73280 | 7 | 9172641 | 9172652 | 2 | 6  | 12 | CA   | 29 | 7  |
| 73281 | 7 | 9172654 | 9172665 | 2 | 6  | 12 | AC   | 27 | 5  |
| 73282 | 7 | 9176925 | 9176944 | 2 | 10 | 20 | CA   | 21 | 6  |
| 73287 | 7 | 9185990 | 9186015 | 2 | 13 | 26 | TG   | 13 | 5  |
| 73288 | 7 | 9186057 | 9186106 | 2 | 25 | 50 | AC   | 7  | 8  |
| 73291 | 7 | 9186691 | 9186706 | 2 | 8  | 16 | TG   | 20 | 4  |
| 73294 | 7 | 9191858 | 9191873 | 2 | 8  | 16 | CA   | 25 | 4  |
| 73295 | 7 | 9192708 | 9192729 | 2 | 11 | 22 | CT   | 13 | 4  |
| 73298 | 7 | 9199058 | 9199075 | 2 | 9  | 18 | AC   | 20 | 6  |
| 73305 | 7 | 9205389 | 9205400 | 2 | 6  | 12 | CA   | 23 | 5  |
| 73306 | 7 | 9205460 | 9205485 | 2 | 13 | 26 | AC   | 14 | 4  |
| 73310 | 7 | 9208085 | 9208096 | 2 | 6  | 12 | CA   | 30 | 3  |
| 73312 | 7 | 9209706 | 9209731 | 2 | 13 | 26 | GT   | 13 | 9  |
| 73318 | 7 | 9213787 | 9213800 | 2 | 7  | 14 | GT   | 26 | 3  |
| 73320 | 7 | 9214506 | 9214527 | 2 | 11 | 22 | AC   | 14 | 6  |
| 73324 | 7 | 9218829 | 9218846 | 2 | 9  | 18 | CA   | 21 | 9  |
| 73325 | 7 | 9219012 | 9219023 | 2 | 6  | 12 | AC   | 20 | 4  |
| 73326 | 7 | 9222212 | 9222229 | 2 | 9  | 18 | AC   | 26 | 5  |
| 73339 | 7 | 9234359 | 9234394 | 2 | 18 | 36 | AC   | 6  | 6  |
| 73347 | 7 | 9239206 | 9239221 | 2 | 8  | 16 | TG   | 26 | 3  |
| 73348 | 7 | 9239350 | 9239371 | 2 | 11 | 22 | AC   | 19 | 7  |

|       |   |         |         |   |    |    |     |    |    |
|-------|---|---------|---------|---|----|----|-----|----|----|
| 73350 | 7 | 9239403 | 9239422 | 2 | 10 | 20 | CA  | 26 | 4  |
| 73351 | 7 | 9239644 | 9239661 | 2 | 9  | 18 | TC  | 29 | 7  |
| 73352 | 7 | 9239759 | 9239782 | 3 | 8  | 24 | GAA | 18 | 6  |
| 73354 | 7 | 9240656 | 9240676 | 3 | 7  | 21 | AAG | 16 | 3  |
| 73360 | 7 | 9243337 | 9243351 | 3 | 5  | 15 | CTT | 9  | 6  |
| 73366 | 7 | 9249611 | 9249628 | 2 | 9  | 18 | AG  | 11 | 3  |
| 73367 | 7 | 9249658 | 9249685 | 2 | 14 | 28 | AG  | 6  | 8  |
| 73368 | 7 | 9249797 | 9249814 | 2 | 9  | 18 | GT  | 19 | 7  |
| 73371 | 7 | 9255137 | 9255150 | 2 | 7  | 14 | GT  | 23 | 5  |
| 73372 | 7 | 9257634 | 9257651 | 2 | 9  | 18 | GT  | 16 | 8  |
| 73373 | 7 | 9261001 | 9261024 | 2 | 12 | 24 | GT  | 21 | 7  |
| 73374 | 7 | 9264338 | 9264353 | 2 | 8  | 16 | TG  | 17 | 5  |
| 73378 | 7 | 9267294 | 9267305 | 2 | 6  | 12 | TG  | 16 | 5  |
| 73379 | 7 | 9271100 | 9271123 | 2 | 12 | 24 | TG  | 10 | 8  |
| 73380 | 7 | 9272603 | 9272616 | 2 | 7  | 14 | TG  | 27 | 3  |
| 73381 | 7 | 9275920 | 9275931 | 2 | 6  | 12 | AC  | 29 | 3  |
| 73383 | 7 | 9280825 | 9280848 | 2 | 12 | 24 | GT  | 12 | 8  |
| 73387 | 7 | 9289161 | 9289182 | 2 | 11 | 22 | AG  | 26 | 5  |
| 73390 | 7 | 9293617 | 9293638 | 2 | 11 | 22 | AC  | 16 | 4  |
| 73392 | 7 | 9297730 | 9297744 | 3 | 5  | 15 | TCT | 27 | 4  |
| 73394 | 7 | 9300912 | 9300927 | 2 | 8  | 16 | AC  | 20 | 3  |
| 73395 | 7 | 9301112 | 9301123 | 2 | 6  | 12 | TG  | 27 | 5  |
| 73396 | 7 | 9302939 | 9302962 | 3 | 8  | 24 | AGG | 24 | 4  |
| 73406 | 7 | 9312557 | 9312568 | 2 | 6  | 12 | CT  | 21 | 3  |
| 73413 | 7 | 9315542 | 9315561 | 2 | 10 | 20 | AC  | 19 | 11 |
| 73419 | 7 | 9319724 | 9319737 | 2 | 7  | 14 | TA  | 11 | 3  |
| 73420 | 7 | 9320284 | 9320315 | 2 | 16 | 32 | CA  | 13 | 7  |
| 73430 | 7 | 9329246 | 9329263 | 2 | 9  | 18 | TG  | 27 | 8  |
| 73431 | 7 | 9329539 | 9329578 | 2 | 20 | 40 | TG  | 9  | 9  |
| 73434 | 7 | 9335030 | 9335047 | 2 | 9  | 18 | TG  | 17 | 10 |
| 73435 | 7 | 9338223 | 9338240 | 2 | 9  | 18 | AG  | 16 | 4  |
| 73440 | 7 | 9342482 | 9342519 | 2 | 19 | 38 | AC  | 14 | 11 |
| 73441 | 7 | 9342853 | 9342870 | 3 | 6  | 18 | AGG | 26 | 5  |
| 73450 | 7 | 9353588 | 9353605 | 2 | 9  | 18 | GT  | 15 | 14 |
| 73451 | 7 | 9353926 | 9353957 | 2 | 16 | 32 | CA  | 6  | 7  |
| 73452 | 7 | 9357735 | 9357762 | 2 | 14 | 28 | GT  | 15 | 11 |
| 73456 | 7 | 9360957 | 9360992 | 2 | 18 | 36 | GT  | 11 | 10 |
| 73461 | 7 | 9365620 | 9365631 | 2 | 6  | 12 | CA  | 22 | 5  |
| 73462 | 7 | 9365819 | 9365832 | 2 | 7  | 14 | AC  | 22 | 3  |
| 73469 | 7 | 9372583 | 9372598 | 2 | 8  | 16 | TC  | 23 | 8  |
| 73473 | 7 | 9373165 | 9373176 | 2 | 6  | 12 | GT  | 32 | 3  |
| 73474 | 7 | 9373688 | 9373713 | 2 | 13 | 26 | TG  | 17 | 8  |
| 73477 | 7 | 9375723 | 9375734 | 2 | 6  | 12 | TG  | 21 | 6  |
| 73478 | 7 | 9377171 | 9377196 | 2 | 13 | 26 | CA  | 12 | 4  |
| 73482 | 7 | 9379523 | 9379544 | 2 | 11 | 22 | AG  | 12 | 3  |
| 73486 | 7 | 9382594 | 9382607 | 2 | 7  | 14 | AG  | 13 | 4  |
| 73489 | 7 | 9383081 | 9383098 | 3 | 6  | 18 | AGA | 17 | 4  |
| 73490 | 7 | 9383907 | 9383918 | 2 | 6  | 12 | GA  | 17 | 4  |
| 73491 | 7 | 9383923 | 9383938 | 2 | 8  | 16 | GA  | 10 | 3  |
| 73509 | 7 | 9404825 | 9404842 | 2 | 9  | 18 | CA  | 10 | 7  |
| 73531 | 7 | 9430614 | 9430637 | 3 | 8  | 24 | TCC | 15 | 3  |

|       |   |         |         |   |    |    |      |    |    |
|-------|---|---------|---------|---|----|----|------|----|----|
| 73535 | 7 | 9433001 | 9433014 | 2 | 7  | 14 | CA   | 24 | 3  |
| 73536 | 7 | 9433161 | 9433174 | 2 | 7  | 14 | AC   | 22 | 6  |
| 73538 | 7 | 9446761 | 9446778 | 3 | 6  | 18 | AGC  | 33 | 3  |
| 73542 | 7 | 9451713 | 9451734 | 2 | 11 | 22 | AC   | 22 | 8  |
| 73543 | 7 | 9456157 | 9456174 | 3 | 6  | 18 | CCT  | 15 | 4  |
| 73547 | 7 | 9458414 | 9458441 | 2 | 14 | 28 | CA   | 13 | 7  |
| 73548 | 7 | 9458686 | 9458718 | 3 | 11 | 33 | CCT  | 17 | 5  |
| 73550 | 7 | 9459212 | 9459265 | 2 | 27 | 54 | CA   | 10 | 12 |
| 73556 | 7 | 9461555 | 9461578 | 2 | 12 | 24 | GT   | 22 | 12 |
| 73557 | 7 | 9461881 | 9461920 | 2 | 20 | 40 | CA   | 9  | 8  |
| 73559 | 7 | 9463258 | 9463291 | 2 | 17 | 34 | CA   | 12 | 11 |
| 73567 | 7 | 9474418 | 9474433 | 2 | 8  | 16 | GT   | 15 | 8  |
| 73569 | 7 | 9477172 | 9477195 | 2 | 12 | 24 | GA   | 24 | 7  |
| 73570 | 7 | 9477450 | 9477483 | 2 | 17 | 34 | TG   | 7  | 8  |
| 73573 | 7 | 9481131 | 9481160 | 2 | 15 | 30 | TG   | 7  | 8  |
| 73574 | 7 | 9481358 | 9481383 | 2 | 13 | 26 | AC   | 10 | 10 |
| 73575 | 7 | 9481524 | 9481541 | 2 | 9  | 18 | CA   | 23 | 4  |
| 73577 | 7 | 9482284 | 9482303 | 4 | 5  | 20 | TCCT | 29 | 3  |
| 73579 | 7 | 9485392 | 9485406 | 3 | 5  | 15 | TAA  | 8  | 8  |
| 73580 | 7 | 9486848 | 9486862 | 3 | 5  | 15 | AGG  | 8  | 6  |
| 73583 | 7 | 9488754 | 9488781 | 2 | 14 | 28 | AC   | 17 | 7  |
| 73588 | 7 | 9490131 | 9490146 | 2 | 8  | 16 | CA   | 17 | 3  |
| 73590 | 7 | 9490511 | 9490530 | 2 | 10 | 20 | TG   | 16 | 9  |
| 73601 | 7 | 9512859 | 9512885 | 3 | 9  | 27 | TGT  | 25 | 9  |
| 73604 | 7 | 9521468 | 9521491 | 3 | 8  | 24 | CTG  | 31 | 5  |
| 73605 | 7 | 9524172 | 9524207 | 2 | 18 | 36 | AC   | 10 | 9  |
| 73607 | 7 | 9525615 | 9525642 | 2 | 14 | 28 | GT   | 11 | 11 |
| 73610 | 7 | 9530649 | 9530664 | 4 | 4  | 16 | ACAG | 28 | 4  |
| 73614 | 7 | 9539638 | 9539653 | 2 | 8  | 16 | CT   | 21 | 3  |
| 73620 | 7 | 9555175 | 9555194 | 2 | 10 | 20 | AC   | 23 | 3  |
| 73622 | 7 | 9562816 | 9562849 | 2 | 17 | 34 | CA   | 19 | 10 |
| 73630 | 7 | 9580866 | 9580886 | 3 | 7  | 21 | CCT  | 27 | 5  |
| 73634 | 7 | 9592901 | 9592912 | 2 | 6  | 12 | CG   | 22 | 9  |
| 73635 | 7 | 9594724 | 9594738 | 3 | 5  | 15 | GAA  | 27 | 3  |
| 73637 | 7 | 9597886 | 9597919 | 2 | 17 | 34 | TG   | 7  | 7  |
| 73640 | 7 | 9607292 | 9607313 | 2 | 11 | 22 | AC   | 20 | 4  |
| 73642 | 7 | 9609016 | 9609037 | 2 | 11 | 22 | CA   | 12 | 9  |
| 73643 | 7 | 9609872 | 9609898 | 3 | 9  | 27 | TTC  | 14 | 7  |
| 73645 | 7 | 9611344 | 9611365 | 2 | 11 | 22 | TG   | 22 | 8  |
| 73653 | 7 | 9624618 | 9624641 | 2 | 12 | 24 | TG   | 21 | 9  |
| 73666 | 7 | 9643132 | 9643155 | 2 | 12 | 24 | CT   | 14 | 6  |
| 73670 | 7 | 9649058 | 9649079 | 2 | 11 | 22 | CA   | 17 | 5  |
| 73671 | 7 | 9651107 | 9651130 | 2 | 12 | 24 | TG   | 14 | 9  |
| 73674 | 7 | 9657349 | 9657360 | 2 | 6  | 12 | TG   | 21 | 5  |
| 73675 | 7 | 9657794 | 9657815 | 2 | 11 | 22 | GT   | 11 | 9  |
| 73676 | 7 | 9658274 | 9658305 | 2 | 16 | 32 | AC   | 23 | 11 |
| 73680 | 7 | 9674747 | 9674774 | 2 | 14 | 28 | GT   | 7  | 6  |
| 73683 | 7 | 9676963 | 9676986 | 2 | 12 | 24 | GT   | 17 | 6  |
| 73685 | 7 | 9680018 | 9680031 | 2 | 7  | 14 | TG   | 21 | 3  |
| 73687 | 7 | 9681277 | 9681309 | 3 | 11 | 33 | GGA  | 21 | 11 |
| 73696 | 7 | 9717197 | 9717226 | 2 | 15 | 30 | TG   | 13 | 14 |

|       |   |         |         |   |    |    |      |    |    |
|-------|---|---------|---------|---|----|----|------|----|----|
| 73701 | 7 | 9724181 | 9724196 | 2 | 8  | 16 | GT   | 18 | 3  |
| 73703 | 7 | 9727471 | 9727502 | 2 | 16 | 32 | CA   | 23 | 8  |
| 73704 | 7 | 9729746 | 9729763 | 2 | 9  | 18 | AC   | 13 | 5  |
| 73709 | 7 | 9731183 | 9731197 | 3 | 5  | 15 | CCT  | 30 | 6  |
| 73714 | 7 | 9738593 | 9738614 | 2 | 11 | 22 | CA   | 16 | 10 |
| 73717 | 7 | 9741635 | 9741668 | 2 | 17 | 34 | CA   | 9  | 7  |
| 73718 | 7 | 9742806 | 9742823 | 2 | 9  | 18 | AC   | 23 | 4  |
| 73723 | 7 | 9751329 | 9751350 | 2 | 11 | 22 | TG   | 16 | 7  |
| 73727 | 7 | 9763446 | 9763469 | 2 | 12 | 24 | TG   | 16 | 8  |
| 73731 | 7 | 9773463 | 9773480 | 2 | 9  | 18 | CA   | 24 | 12 |
| 73733 | 7 | 9775864 | 9775875 | 2 | 6  | 12 | CA   | 10 | 5  |
| 73734 | 7 | 9785151 | 9785168 | 2 | 9  | 18 | CA   | 24 | 6  |
| 73736 | 7 | 9789477 | 9789500 | 2 | 12 | 24 | GT   | 8  | 8  |
| 73738 | 7 | 9791683 | 9791694 | 2 | 6  | 12 | AG   | 30 | 3  |
| 73746 | 7 | 9819473 | 9819510 | 2 | 19 | 38 | GT   | 15 | 16 |
| 73747 | 7 | 9819792 | 9819805 | 2 | 7  | 14 | CA   | 13 | 4  |
| 73750 | 7 | 9824675 | 9824690 | 2 | 8  | 16 | GT   | 27 | 3  |
| 73752 | 7 | 9824933 | 9824952 | 2 | 10 | 20 | CA   | 19 | 9  |
| 73754 | 7 | 9827732 | 9827747 | 2 | 8  | 16 | CA   | 26 | 6  |
| 73756 | 7 | 9829863 | 9829886 | 2 | 12 | 24 | CA   | 16 | 5  |
| 73757 | 7 | 9830162 | 9830181 | 2 | 10 | 20 | CA   | 17 | 6  |
| 73760 | 7 | 9831167 | 9831186 | 2 | 10 | 20 | GA   | 10 | 5  |
| 73773 | 7 | 9854168 | 9854183 | 2 | 8  | 16 | CA   | 24 | 3  |
| 73778 | 7 | 9872199 | 9872222 | 2 | 12 | 24 | CA   | 13 | 6  |
| 73781 | 7 | 9873376 | 9873391 | 2 | 8  | 16 | CA   | 6  | 4  |
| 73783 | 7 | 9878731 | 9878746 | 2 | 8  | 16 | AC   | 20 | 11 |
| 73784 | 7 | 9879345 | 9879362 | 2 | 9  | 18 | TG   | 24 | 8  |
| 73785 | 7 | 9879442 | 9879473 | 2 | 16 | 32 | CA   | 14 | 8  |
| 73786 | 7 | 9882429 | 9882456 | 2 | 14 | 28 | CA   | 20 | 7  |
| 73787 | 7 | 9883728 | 9883763 | 2 | 18 | 36 | CA   | 7  | 9  |
| 73789 | 7 | 9887512 | 9887543 | 2 | 16 | 32 | TG   | 16 | 12 |
| 73790 | 7 | 9887686 | 9887715 | 2 | 15 | 30 | AC   | 15 | 11 |
| 73792 | 7 | 9893280 | 9893305 | 2 | 13 | 26 | GT   | 23 | 8  |
| 73799 | 7 | 9895466 | 9895483 | 2 | 9  | 18 | CA   | 22 | 4  |
| 73800 | 7 | 9896814 | 9896833 | 2 | 10 | 20 | TC   | 8  | 7  |
| 73802 | 7 | 9897403 | 9897424 | 2 | 11 | 22 | CA   | 8  | 5  |
| 73812 | 7 | 9912133 | 9912146 | 2 | 7  | 14 | GT   | 27 | 4  |
| 73813 | 7 | 9912280 | 9912303 | 2 | 12 | 24 | TG   | 17 | 9  |
| 73815 | 7 | 9918547 | 9918576 | 2 | 15 | 30 | TG   | 12 | 10 |
| 73816 | 7 | 9918889 | 9918900 | 2 | 6  | 12 | TG   | 24 | 4  |
| 73817 | 7 | 9920260 | 9920299 | 4 | 10 | 40 | GATA | 16 | 9  |
| 73829 | 7 | 9942234 | 9942265 | 2 | 16 | 32 | TG   | 20 | 7  |
| 73830 | 7 | 9943964 | 9944003 | 2 | 20 | 40 | TG   | 8  | 10 |
| 73834 | 7 | 9953135 | 9953174 | 4 | 10 | 40 | TTTC | 17 | 7  |
| 73837 | 7 | 9961396 | 9961413 | 2 | 9  | 18 | AC   | 19 | 11 |
| 73838 | 7 | 9961443 | 9961462 | 2 | 10 | 20 | AC   | 22 | 7  |
| 73839 | 7 | 9962139 | 9962158 | 2 | 10 | 20 | TC   | 17 | 3  |
| 73841 | 7 | 9972391 | 9972410 | 4 | 5  | 20 | AAAT | 32 | 3  |
| 73845 | 7 | 9977016 | 9977031 | 4 | 4  | 16 | GTGC | 6  | 5  |
| 73847 | 7 | 9978054 | 9978077 | 4 | 6  | 24 | TATC | 23 | 8  |
| 73852 | 7 | 9993518 | 9993543 | 2 | 13 | 26 | AC   | 16 | 8  |

|       |   |          |          |   |    |    |      |    |    |
|-------|---|----------|----------|---|----|----|------|----|----|
| 73855 | 7 | 9997725  | 9997766  | 2 | 21 | 42 | AG   | 7  | 6  |
| 73857 | 7 | 9998819  | 9998842  | 2 | 12 | 24 | GT   | 6  | 10 |
| 73858 | 7 | 10001568 | 10001597 | 2 | 15 | 30 | TG   | 23 | 15 |
| 73861 | 7 | 10010570 | 10010593 | 2 | 12 | 24 | CA   | 19 | 7  |
| 73871 | 7 | 10027901 | 10027936 | 2 | 18 | 36 | TG   | 7  | 10 |
| 73872 | 7 | 10031303 | 10031316 | 2 | 7  | 14 | AC   | 31 | 3  |
| 73873 | 7 | 10032876 | 10032890 | 3 | 5  | 15 | GCA  | 24 | 8  |
| 73875 | 7 | 10034691 | 10034716 | 2 | 13 | 26 | TG   | 12 | 8  |
| 73876 | 7 | 10035134 | 10035151 | 2 | 9  | 18 | AC   | 23 | 3  |
| 73877 | 7 | 10035454 | 10035469 | 2 | 8  | 16 | CA   | 18 | 4  |
| 73881 | 7 | 10037107 | 10037118 | 2 | 6  | 12 | CT   | 12 | 3  |
| 73882 | 7 | 10037253 | 10037274 | 2 | 11 | 22 | AC   | 10 | 14 |
| 73883 | 7 | 10037431 | 10037448 | 2 | 9  | 18 | TG   | 18 | 4  |
| 73890 | 7 | 10048048 | 10048077 | 3 | 10 | 30 | TTG  | 20 | 5  |
| 73894 | 7 | 10054388 | 10054423 | 2 | 18 | 36 | GT   | 17 | 15 |
| 73895 | 7 | 10054626 | 10054653 | 2 | 14 | 28 | CA   | 17 | 10 |
| 73900 | 7 | 10058832 | 10058847 | 2 | 8  | 16 | AC   | 19 | 5  |
| 73905 | 7 | 10081608 | 10081627 | 2 | 10 | 20 | CA   | 11 | 7  |
| 73909 | 7 | 10090880 | 10090903 | 3 | 8  | 24 | TGA  | 27 | 4  |
| 73911 | 7 | 10096324 | 10096338 | 3 | 5  | 15 | ATT  | 23 | 3  |
| 73912 | 7 | 10096975 | 10096989 | 3 | 5  | 15 | AAC  | 33 | 4  |
| 73920 | 7 | 10113778 | 10113793 | 2 | 8  | 16 | TG   | 17 | 13 |
| 73926 | 7 | 10123436 | 10123449 | 2 | 7  | 14 | GT   | 22 | 3  |
| 73929 | 7 | 10124197 | 10124208 | 2 | 6  | 12 | CA   | 29 | 6  |
| 73934 | 7 | 10132774 | 10132785 | 2 | 6  | 12 | GT   | 28 | 8  |
| 73938 | 7 | 10138106 | 10138135 | 2 | 15 | 30 | AG   | 6  | 4  |
| 73948 | 7 | 10148935 | 10148964 | 2 | 15 | 30 | GT   | 6  | 7  |
| 73954 | 7 | 10163997 | 10164011 | 3 | 5  | 15 | GAG  | 31 | 4  |
| 73956 | 7 | 10170132 | 10170143 | 2 | 6  | 12 | GT   | 33 | 3  |
| 73958 | 7 | 10174627 | 10174659 | 3 | 11 | 33 | TGA  | 27 | 11 |
| 73961 | 7 | 10176169 | 10176182 | 2 | 7  | 14 | AC   | 27 | 5  |
| 73963 | 7 | 10179236 | 10179251 | 2 | 8  | 16 | AC   | 28 | 3  |
| 73964 | 7 | 10180300 | 10180311 | 2 | 6  | 12 | GT   | 33 | 3  |
| 73966 | 7 | 10182250 | 10182271 | 2 | 11 | 22 | AC   | 19 | 14 |
| 73968 | 7 | 10185811 | 10185822 | 2 | 6  | 12 | CA   | 9  | 6  |
| 73972 | 7 | 10188838 | 10188851 | 2 | 7  | 14 | GT   | 21 | 8  |
| 73978 | 7 | 10192463 | 10192484 | 2 | 11 | 22 | CA   | 23 | 9  |
| 73979 | 7 | 10194305 | 10194319 | 3 | 5  | 15 | GCT  | 20 | 3  |
| 73980 | 7 | 10194552 | 10194571 | 4 | 5  | 20 | AAGG | 31 | 4  |
| 73981 | 7 | 10195056 | 10195089 | 2 | 17 | 34 | GT   | 13 | 13 |
| 73986 | 7 | 10201726 | 10201741 | 2 | 8  | 16 | GA   | 30 | 3  |
| 73988 | 7 | 10203907 | 10203920 | 2 | 7  | 14 | GA   | 9  | 6  |
| 73994 | 7 | 10210182 | 10210197 | 2 | 8  | 16 | AC   | 28 | 4  |
| 73996 | 7 | 10212458 | 10212475 | 2 | 9  | 18 | CA   | 16 | 8  |
| 73997 | 7 | 10212606 | 10212625 | 2 | 10 | 20 | CA   | 17 | 14 |
| 74000 | 7 | 10215960 | 10215983 | 4 | 6  | 24 | CAGG | 29 | 5  |
| 74002 | 7 | 10216714 | 10216737 | 2 | 12 | 24 | AC   | 9  | 11 |
| 74003 | 7 | 10216864 | 10216877 | 2 | 7  | 14 | AC   | 23 | 3  |
| 74004 | 7 | 10217141 | 10217192 | 2 | 26 | 52 | CA   | 10 | 10 |
| 74005 | 7 | 10217940 | 10217957 | 2 | 9  | 18 | TG   | 23 | 3  |
| 74008 | 7 | 10231519 | 10231538 | 2 | 10 | 20 | TC   | 8  | 7  |

|       |   |          |          |   |    |    |      |    |    |
|-------|---|----------|----------|---|----|----|------|----|----|
| 74010 | 7 | 10239140 | 10239155 | 4 | 4  | 16 | TTAT | 25 | 11 |
| 74012 | 7 | 10242077 | 10242094 | 3 | 6  | 18 | TTG  | 12 | 3  |
| 74016 | 7 | 10248458 | 10248475 | 2 | 9  | 18 | GT   | 28 | 8  |
| 74018 | 7 | 10251121 | 10251132 | 2 | 6  | 12 | TG   | 18 | 4  |
| 74019 | 7 | 10259162 | 10259215 | 2 | 27 | 54 | TG   | 6  | 9  |
| 74028 | 7 | 10276963 | 10276982 | 2 | 10 | 20 | TG   | 10 | 13 |
| 74033 | 7 | 10287986 | 10288003 | 3 | 6  | 18 | CTG  | 28 | 7  |
| 74034 | 7 | 10288319 | 10288334 | 4 | 4  | 16 | TATT | 17 | 3  |
| 74037 | 7 | 10291558 | 10291585 | 2 | 14 | 28 | TG   | 22 | 7  |
| 74040 | 7 | 10293408 | 10293429 | 2 | 11 | 22 | TG   | 16 | 8  |
| 74041 | 7 | 10293901 | 10293918 | 2 | 9  | 18 | TG   | 17 | 9  |
| 74043 | 7 | 10294205 | 10294224 | 2 | 10 | 20 | GT   | 24 | 4  |
| 74044 | 7 | 10294374 | 10294389 | 2 | 8  | 16 | TG   | 18 | 13 |
| 74045 | 7 | 10294558 | 10294571 | 2 | 7  | 14 | AC   | 25 | 4  |
| 74046 | 7 | 10294697 | 10294708 | 2 | 6  | 12 | GT   | 21 | 5  |
| 74048 | 7 | 10296619 | 10296634 | 2 | 8  | 16 | GT   | 22 | 5  |
| 74049 | 7 | 10296838 | 10296857 | 2 | 10 | 20 | AC   | 18 | 5  |
| 74052 | 7 | 10299236 | 10299249 | 2 | 7  | 14 | AC   | 31 | 6  |
| 74053 | 7 | 10299403 | 10299416 | 2 | 7  | 14 | GT   | 28 | 3  |
| 74054 | 7 | 10301783 | 10301800 | 2 | 9  | 18 | AC   | 20 | 8  |
| 74056 | 7 | 10304550 | 10304565 | 2 | 8  | 16 | AG   | 20 | 5  |
| 74058 | 7 | 10308570 | 10308585 | 2 | 8  | 16 | GT   | 28 | 5  |
| 74065 | 7 | 10317408 | 10317419 | 2 | 6  | 12 | AC   | 31 | 4  |
| 74066 | 7 | 10317549 | 10317560 | 2 | 6  | 12 | TG   | 25 | 4  |
| 74067 | 7 | 10317699 | 10317742 | 2 | 22 | 44 | GT   | 8  | 11 |
| 74070 | 7 | 10322908 | 10322925 | 2 | 9  | 18 | AC   | 26 | 8  |
| 74071 | 7 | 10325162 | 10325173 | 2 | 6  | 12 | GT   | 23 | 4  |
| 74074 | 7 | 10327745 | 10327764 | 2 | 10 | 20 | CA   | 9  | 5  |
| 74075 | 7 | 10327934 | 10327947 | 2 | 7  | 14 | AC   | 26 | 8  |
| 74077 | 7 | 10330639 | 10330674 | 2 | 18 | 36 | CA   | 6  | 6  |
| 74080 | 7 | 10331608 | 10331631 | 2 | 12 | 24 | GT   | 22 | 8  |
| 74082 | 7 | 10332724 | 10332737 | 2 | 7  | 14 | AG   | 24 | 7  |
| 74083 | 7 | 10333868 | 10333897 | 2 | 15 | 30 | TG   | 13 | 11 |
| 74084 | 7 | 10335996 | 10336021 | 2 | 13 | 26 | TG   | 16 | 8  |
| 74085 | 7 | 10336106 | 10336121 | 2 | 8  | 16 | TG   | 24 | 6  |
| 74086 | 7 | 10336163 | 10336178 | 2 | 8  | 16 | TG   | 21 | 3  |
| 74087 | 7 | 10336275 | 10336302 | 2 | 14 | 28 | AC   | 17 | 11 |
| 74088 | 7 | 10336442 | 10336457 | 2 | 8  | 16 | TG   | 20 | 7  |
| 74089 | 7 | 10336516 | 10336533 | 2 | 9  | 18 | TG   | 21 | 8  |
| 74106 | 7 | 10345280 | 10345301 | 2 | 11 | 22 | AC   | 20 | 8  |
| 74108 | 7 | 10345585 | 10345616 | 2 | 16 | 32 | TG   | 14 | 15 |
| 74109 | 7 | 10345819 | 10345836 | 2 | 9  | 18 | AC   | 14 | 5  |
| 74110 | 7 | 10345969 | 10345984 | 2 | 8  | 16 | CA   | 15 | 3  |
| 74116 | 7 | 10350580 | 10350597 | 2 | 9  | 18 | AC   | 13 | 7  |
| 74122 | 7 | 10359301 | 10359314 | 2 | 7  | 14 | CA   | 24 | 8  |
| 74123 | 7 | 10359552 | 10359563 | 2 | 6  | 12 | TG   | 23 | 6  |
| 74124 | 7 | 10361863 | 10361878 | 2 | 8  | 16 | GT   | 19 | 4  |
| 74126 | 7 | 10362803 | 10362848 | 2 | 23 | 46 | TG   | 9  | 11 |
| 74134 | 7 | 10375055 | 10375090 | 2 | 18 | 36 | AC   | 7  | 9  |
| 74137 | 7 | 10377393 | 10377412 | 2 | 10 | 20 | TG   | 19 | 5  |
| 74139 | 7 | 10377478 | 10377491 | 2 | 7  | 14 | GT   | 18 | 4  |

|       |   |          |          |   |    |    |      |    |    |
|-------|---|----------|----------|---|----|----|------|----|----|
| 74140 | 7 | 10385127 | 10385166 | 2 | 20 | 40 | GT   | 13 | 10 |
| 74143 | 7 | 10386603 | 10386616 | 2 | 7  | 14 | TG   | 30 | 4  |
| 74145 | 7 | 10390731 | 10390752 | 2 | 11 | 22 | TG   | 28 | 6  |
| 74146 | 7 | 10390880 | 10390895 | 4 | 4  | 16 | CAGT | 26 | 3  |
| 74150 | 7 | 10396964 | 10396981 | 2 | 9  | 18 | TG   | 19 | 5  |
| 74156 | 7 | 10408412 | 10408427 | 2 | 8  | 16 | TC   | 21 | 4  |
| 74159 | 7 | 10410034 | 10410061 | 2 | 14 | 28 | CA   | 9  | 14 |
| 74165 | 7 | 10412552 | 10412572 | 3 | 7  | 21 | CTG  | 23 | 4  |
| 74167 | 7 | 10419722 | 10419735 | 2 | 7  | 14 | GT   | 14 | 5  |
| 74168 | 7 | 10419869 | 10419896 | 2 | 14 | 28 | TG   | 6  | 9  |
| 74170 | 7 | 10420222 | 10420247 | 2 | 13 | 26 | GT   | 19 | 11 |
| 74175 | 7 | 10421360 | 10421399 | 2 | 20 | 40 | TG   | 7  | 8  |
| 74176 | 7 | 10421883 | 10421897 | 3 | 5  | 15 | TGG  | 28 | 4  |
| 74179 | 7 | 10426357 | 10426378 | 2 | 11 | 22 | GA   | 22 | 5  |
| 74183 | 7 | 10428605 | 10428632 | 2 | 14 | 28 | TG   | 18 | 7  |
| 74186 | 7 | 10432191 | 10432210 | 2 | 10 | 20 | AC   | 16 | 9  |
| 74189 | 7 | 10433324 | 10433349 | 2 | 13 | 26 | CT   | 15 | 10 |
| 74193 | 7 | 10438117 | 10438156 | 2 | 20 | 40 | GT   | 7  | 6  |
| 74195 | 7 | 10440673 | 10440708 | 2 | 18 | 36 | TG   | 17 | 10 |
| 74196 | 7 | 10443817 | 10443838 | 2 | 11 | 22 | CA   | 20 | 7  |
| 74197 | 7 | 10446016 | 10446053 | 2 | 19 | 38 | TG   | 7  | 7  |
| 74198 | 7 | 10446155 | 10446168 | 2 | 7  | 14 | TG   | 19 | 5  |
| 74205 | 7 | 10453522 | 10453543 | 2 | 11 | 22 | GT   | 14 | 11 |
| 74211 | 7 | 10455052 | 10455063 | 2 | 6  | 12 | AC   | 25 | 9  |
| 74213 | 7 | 10457279 | 10457312 | 2 | 17 | 34 | AC   | 11 | 13 |
| 74214 | 7 | 10457634 | 10457647 | 2 | 7  | 14 | GT   | 30 | 3  |
| 74219 | 7 | 10459561 | 10459572 | 2 | 6  | 12 | GT   | 15 | 8  |
| 74223 | 7 | 10466907 | 10466920 | 2 | 7  | 14 | GT   | 33 | 4  |
| 74226 | 7 | 10470417 | 10470448 | 2 | 16 | 32 | AC   | 10 | 9  |
| 74228 | 7 | 10471708 | 10471721 | 2 | 7  | 14 | AC   | 25 | 4  |
| 74231 | 7 | 10473821 | 10473836 | 4 | 4  | 16 | ATTT | 12 | 10 |
| 74236 | 7 | 10477558 | 10477579 | 2 | 11 | 22 | AC   | 9  | 11 |
| 74241 | 7 | 10482958 | 10482969 | 2 | 6  | 12 | GT   | 34 | 6  |
| 74242 | 7 | 10489927 | 10489960 | 2 | 17 | 34 | AC   | 12 | 5  |
| 74244 | 7 | 10492201 | 10492220 | 4 | 5  | 20 | GAGG | 13 | 4  |
| 74246 | 7 | 10496740 | 10496751 | 2 | 6  | 12 | GT   | 27 | 3  |
| 74253 | 7 | 10502298 | 10502311 | 2 | 7  | 14 | CA   | 27 | 3  |
| 74254 | 7 | 10503887 | 10503912 | 2 | 13 | 26 | CA   | 21 | 7  |
| 74256 | 7 | 10504690 | 10504707 | 2 | 9  | 18 | GA   | 26 | 8  |
| 74257 | 7 | 10504709 | 10504720 | 2 | 6  | 12 | AG   | 20 | 9  |
| 74260 | 7 | 10506097 | 10506110 | 2 | 7  | 14 | GT   | 26 | 3  |
| 74261 | 7 | 10506482 | 10506509 | 2 | 14 | 28 | CA   | 13 | 7  |
| 74264 | 7 | 10514600 | 10514613 | 2 | 7  | 14 | TG   | 15 | 5  |
| 74270 | 7 | 10518314 | 10518329 | 2 | 8  | 16 | AC   | 11 | 9  |
| 74271 | 7 | 10518864 | 10518879 | 2 | 8  | 16 | CA   | 30 | 3  |
| 74282 | 7 | 10536574 | 10536594 | 3 | 7  | 21 | AGA  | 6  | 5  |
| 74286 | 7 | 10545007 | 10545032 | 2 | 13 | 26 | TG   | 26 | 7  |
| 74287 | 7 | 10545148 | 10545161 | 2 | 7  | 14 | AC   | 18 | 6  |
| 74289 | 7 | 10545720 | 10545746 | 3 | 9  | 27 | AGG  | 19 | 4  |
| 74295 | 7 | 10562477 | 10562504 | 2 | 14 | 28 | TG   | 14 | 5  |
| 74298 | 7 | 10569474 | 10569491 | 2 | 9  | 18 | GT   | 19 | 8  |



|       |   |          |          |   |    |    |      |    |    |
|-------|---|----------|----------|---|----|----|------|----|----|
| 74304 | 7 | 10602898 | 10602913 | 2 | 8  | 16 | CT   | 9  | 6  |
| 74308 | 7 | 10607800 | 10607833 | 2 | 17 | 34 | AC   | 12 | 11 |
| 74312 | 7 | 10610318 | 10610335 | 2 | 9  | 18 | GT   | 22 | 4  |
| 74316 | 7 | 10621104 | 10621115 | 2 | 6  | 12 | TG   | 28 | 3  |
| 74320 | 7 | 10624998 | 10625037 | 2 | 20 | 40 | TG   | 11 | 12 |
| 74325 | 7 | 10631179 | 10631194 | 4 | 4  | 16 | AAAT | 19 | 8  |
| 74327 | 7 | 10634375 | 10634392 | 2 | 9  | 18 | GA   | 17 | 10 |
| 74328 | 7 | 10634490 | 10634505 | 4 | 4  | 16 | GAGC | 13 | 3  |
| 74331 | 7 | 10637032 | 10637053 | 2 | 11 | 22 | TG   | 9  | 13 |
| 74341 | 7 | 10648214 | 10648235 | 2 | 11 | 22 | CA   | 19 | 7  |
| 74346 | 7 | 10656499 | 10656522 | 2 | 12 | 24 | TG   | 8  | 8  |
| 74350 | 7 | 10661205 | 10661226 | 2 | 11 | 22 | CA   | 20 | 9  |
| 74351 | 7 | 10661537 | 10661566 | 2 | 15 | 30 | GT   | 26 | 10 |
| 74362 | 7 | 10683998 | 10684017 | 2 | 10 | 20 | TC   | 20 | 3  |
| 74363 | 7 | 10687042 | 10687057 | 4 | 4  | 16 | CTTC | 35 | 6  |
| 74370 | 7 | 10694515 | 10694534 | 2 | 10 | 20 | AC   | 17 | 11 |
| 74372 | 7 | 10696397 | 10696412 | 2 | 8  | 16 | AC   | 9  | 3  |
| 74373 | 7 | 10697906 | 10697919 | 2 | 7  | 14 | TG   | 17 | 13 |
| 74377 | 7 | 10701387 | 10701404 | 2 | 9  | 18 | TG   | 15 | 8  |
| 74379 | 7 | 10708704 | 10708723 | 2 | 10 | 20 | CA   | 20 | 5  |
| 74382 | 7 | 10714984 | 10715017 | 2 | 17 | 34 | CA   | 8  | 10 |
| 74383 | 7 | 10716790 | 10716815 | 2 | 13 | 26 | TG   | 11 | 10 |
| 74386 | 7 | 10718280 | 10718293 | 2 | 7  | 14 | GT   | 25 | 12 |
| 74391 | 7 | 10724802 | 10724815 | 2 | 7  | 14 | TC   | 22 | 3  |
| 74402 | 7 | 10735310 | 10735323 | 2 | 7  | 14 | TC   | 12 | 9  |
| 74403 | 7 | 10735324 | 10735341 | 2 | 9  | 18 | AC   | 13 | 14 |
| 74409 | 7 | 10737792 | 10737813 | 2 | 11 | 22 | TG   | 28 | 8  |
| 74410 | 7 | 10738838 | 10738853 | 2 | 8  | 16 | GT   | 21 | 7  |
| 74414 | 7 | 10743518 | 10743535 | 2 | 9  | 18 | TG   | 17 | 12 |
| 74415 | 7 | 10743538 | 10743549 | 2 | 6  | 12 | TG   | 6  | 5  |
| 74416 | 7 | 10743640 | 10743661 | 2 | 11 | 22 | GT   | 16 | 12 |
| 74421 | 7 | 10758533 | 10758548 | 2 | 8  | 16 | AC   | 25 | 6  |
| 74425 | 7 | 10761132 | 10761143 | 2 | 6  | 12 | GT   | 21 | 4  |
| 74430 | 7 | 10772217 | 10772242 | 2 | 13 | 26 | TG   | 16 | 8  |
| 74431 | 7 | 10772873 | 10772896 | 3 | 8  | 24 | TTG  | 18 | 4  |
| 74432 | 7 | 10773319 | 10773333 | 3 | 5  | 15 | CCT  | 21 | 3  |
| 74435 | 7 | 10774905 | 10774919 | 3 | 5  | 15 | CTC  | 24 | 6  |
| 74437 | 7 | 10782434 | 10782449 | 2 | 8  | 16 | CA   | 18 | 4  |
| 74443 | 7 | 10785363 | 10785386 | 3 | 8  | 24 | GGA  | 16 | 6  |
| 74445 | 7 | 10785701 | 10785715 | 3 | 5  | 15 | CTG  | 24 | 4  |
| 74446 | 7 | 10787727 | 10787744 | 2 | 9  | 18 | CA   | 22 | 9  |
| 74447 | 7 | 10789269 | 10789280 | 2 | 6  | 12 | GT   | 21 | 6  |
| 74450 | 7 | 10791438 | 10791463 | 2 | 13 | 26 | CA   | 18 | 11 |
| 74452 | 7 | 10791672 | 10791693 | 2 | 11 | 22 | CA   | 28 | 11 |
| 74456 | 7 | 10795161 | 10795172 | 2 | 6  | 12 | CT   | 30 | 3  |
| 74458 | 7 | 10797002 | 10797033 | 2 | 16 | 32 | GT   | 18 | 10 |
| 74459 | 7 | 10797409 | 10797422 | 2 | 7  | 14 | CA   | 6  | 5  |
| 74462 | 7 | 10797761 | 10797786 | 2 | 13 | 26 | TG   | 14 | 9  |
| 74463 | 7 | 10797827 | 10797846 | 2 | 10 | 20 | CA   | 21 | 5  |
| 74468 | 7 | 10802912 | 10802931 | 2 | 10 | 20 | TC   | 20 | 6  |
| 74469 | 7 | 10806149 | 10806166 | 2 | 9  | 18 | GA   | 24 | 3  |

|       |   |          |          |   |    |    |      |    |    |
|-------|---|----------|----------|---|----|----|------|----|----|
| 74470 | 7 | 10806641 | 10806656 | 2 | 8  | 16 | GT   | 22 | 6  |
| 74471 | 7 | 10806841 | 10806852 | 2 | 6  | 12 | GT   | 22 | 7  |
| 74472 | 7 | 10811172 | 10811191 | 2 | 10 | 20 | GT   | 17 | 9  |
| 74475 | 7 | 10819339 | 10819374 | 2 | 18 | 36 | AC   | 12 | 12 |
| 74476 | 7 | 10820305 | 10820320 | 2 | 8  | 16 | CA   | 27 | 4  |
| 74479 | 7 | 10822915 | 10822930 | 2 | 8  | 16 | CA   | 18 | 8  |
| 74481 | 7 | 10823119 | 10823140 | 2 | 11 | 22 | CA   | 12 | 10 |
| 74482 | 7 | 10825227 | 10825250 | 2 | 12 | 24 | TG   | 16 | 7  |
| 74489 | 7 | 10832506 | 10832529 | 2 | 12 | 24 | CA   | 14 | 8  |
| 74490 | 7 | 10832640 | 10832671 | 2 | 16 | 32 | AC   | 14 | 6  |
| 74491 | 7 | 10832754 | 10832771 | 2 | 9  | 18 | TG   | 15 | 9  |
| 74492 | 7 | 10832827 | 10832844 | 2 | 9  | 18 | GT   | 22 | 7  |
| 74494 | 7 | 10833309 | 10833328 | 4 | 5  | 20 | AGAT | 25 | 3  |
| 74497 | 7 | 10835252 | 10835271 | 2 | 10 | 20 | AC   | 31 | 8  |
| 74498 | 7 | 10837006 | 10837021 | 2 | 8  | 16 | GA   | 18 | 7  |
| 74500 | 7 | 10837380 | 10837399 | 2 | 10 | 20 | TG   | 17 | 7  |
| 74502 | 7 | 10838893 | 10838914 | 2 | 11 | 22 | TG   | 19 | 12 |
| 74503 | 7 | 10839054 | 10839065 | 2 | 6  | 12 | CA   | 31 | 6  |
| 74505 | 7 | 10845476 | 10845487 | 2 | 6  | 12 | CA   | 24 | 10 |
| 74507 | 7 | 10848980 | 10848991 | 2 | 6  | 12 | GT   | 19 | 5  |
| 74508 | 7 | 10850770 | 10850797 | 2 | 14 | 28 | CA   | 16 | 8  |
| 74513 | 7 | 10855768 | 10855803 | 2 | 18 | 36 | GT   | 14 | 12 |
| 74514 | 7 | 10855915 | 10855926 | 2 | 6  | 12 | GA   | 17 | 8  |
| 74521 | 7 | 10868124 | 10868155 | 2 | 16 | 32 | AC   | 9  | 10 |
| 74522 | 7 | 10871439 | 10871458 | 2 | 10 | 20 | CA   | 15 | 9  |
| 74523 | 7 | 10872795 | 10872806 | 2 | 6  | 12 | AC   | 27 | 3  |
| 74524 | 7 | 10873234 | 10873281 | 4 | 12 | 48 | ATCT | 11 | 10 |
| 74527 | 7 | 10879685 | 10879700 | 2 | 8  | 16 | GT   | 24 | 4  |
| 74529 | 7 | 10885224 | 10885238 | 3 | 5  | 15 | GAA  | 28 | 5  |
| 74531 | 7 | 10890737 | 10890758 | 2 | 11 | 22 | TG   | 10 | 14 |
| 74532 | 7 | 10896886 | 10896903 | 2 | 9  | 18 | TG   | 14 | 7  |
| 74533 | 7 | 10897738 | 10897749 | 2 | 6  | 12 | CA   | 24 | 10 |
| 74534 | 7 | 10900189 | 10900202 | 2 | 7  | 14 | TG   | 17 | 9  |
| 74535 | 7 | 10900205 | 10900218 | 2 | 7  | 14 | TG   | 16 | 9  |
| 74536 | 7 | 10901217 | 10901230 | 2 | 7  | 14 | GT   | 24 | 7  |
| 74537 | 7 | 10903092 | 10903113 | 2 | 11 | 22 | TG   | 21 | 10 |
| 74539 | 7 | 10907811 | 10907826 | 2 | 8  | 16 | TG   | 32 | 5  |
| 74540 | 7 | 10908973 | 10908984 | 2 | 6  | 12 | TG   | 24 | 5  |
| 74541 | 7 | 10910785 | 10910802 | 2 | 9  | 18 | GT   | 23 | 9  |
| 74555 | 7 | 10931599 | 10931613 | 3 | 5  | 15 | GTT  | 31 | 4  |
| 74556 | 7 | 10933414 | 10933431 | 2 | 9  | 18 | CT   | 24 | 6  |
| 74557 | 7 | 10933434 | 10933445 | 2 | 6  | 12 | CT   | 21 | 8  |
| 74558 | 7 | 10941704 | 10941718 | 3 | 5  | 15 | TCC  | 10 | 3  |
| 74559 | 7 | 10946408 | 10946419 | 2 | 6  | 12 | GT   | 24 | 3  |
| 74562 | 7 | 10951292 | 10951307 | 4 | 4  | 16 | TTTG | 22 | 3  |
| 74570 | 7 | 10960267 | 10960280 | 2 | 7  | 14 | TG   | 26 | 16 |
| 74574 | 7 | 10978483 | 10978497 | 3 | 5  | 15 | ACA  | 21 | 5  |
| 74578 | 7 | 10997479 | 10997494 | 4 | 4  | 16 | TAAA | 10 | 3  |
| 74582 | 7 | 11007131 | 11007146 | 2 | 8  | 16 | CT   | 26 | 7  |
| 74583 | 7 | 11007149 | 11007160 | 2 | 6  | 12 | CT   | 24 | 6  |
| 74587 | 7 | 11018627 | 11018644 | 2 | 9  | 18 | TG   | 20 | 11 |

|       |   |          |          |   |    |    |      |    |    |
|-------|---|----------|----------|---|----|----|------|----|----|
| 74588 | 7 | 11021914 | 11021925 | 2 | 6  | 12 | CA   | 14 | 5  |
| 74589 | 7 | 11043259 | 11043276 | 3 | 6  | 18 | GTG  | 28 | 3  |
| 74590 | 7 | 11045654 | 11045671 | 3 | 6  | 18 | TGA  | 25 | 4  |
| 74592 | 7 | 11049514 | 11049546 | 3 | 11 | 33 | ATT  | 14 | 12 |
| 74596 | 7 | 11055335 | 11055355 | 3 | 7  | 21 | CCT  | 17 | 5  |
| 74598 | 7 | 11055895 | 11055916 | 2 | 11 | 22 | TG   | 16 | 7  |
| 74599 | 7 | 11056065 | 11056076 | 2 | 6  | 12 | TG   | 24 | 6  |
| 74600 | 7 | 11056078 | 11056091 | 2 | 7  | 14 | GT   | 20 | 6  |
| 74603 | 7 | 11063263 | 11063280 | 2 | 9  | 18 | TG   | 19 | 3  |
| 74611 | 7 | 11092514 | 11092537 | 2 | 12 | 24 | TG   | 20 | 10 |
| 74615 | 7 | 11106374 | 11106400 | 3 | 9  | 27 | AAT  | 6  | 4  |
| 74616 | 7 | 11107679 | 11107690 | 2 | 6  | 12 | GA   | 29 | 3  |
| 74625 | 7 | 11117163 | 11117182 | 4 | 5  | 20 | GATG | 27 | 4  |
| 74630 | 7 | 11122846 | 11122865 | 2 | 10 | 20 | GT   | 12 | 6  |
| 74631 | 7 | 11126054 | 11126079 | 2 | 13 | 26 | CA   | 20 | 7  |
| 74635 | 7 | 11131189 | 11131230 | 2 | 21 | 42 | AC   | 14 | 10 |
| 74636 | 7 | 11132224 | 11132237 | 2 | 7  | 14 | AT   | 6  | 5  |
| 74640 | 7 | 11139560 | 11139571 | 2 | 6  | 12 | TA   | 20 | 5  |
| 74641 | 7 | 11140358 | 11140369 | 2 | 6  | 12 | GT   | 15 | 3  |
| 74642 | 7 | 11141810 | 11141835 | 2 | 13 | 26 | CA   | 14 | 7  |
| 74645 | 7 | 11144329 | 11144348 | 2 | 10 | 20 | TG   | 20 | 9  |
| 74646 | 7 | 11144530 | 11144561 | 2 | 16 | 32 | CA   | 15 | 10 |
| 74647 | 7 | 11149827 | 11149838 | 2 | 6  | 12 | TG   | 20 | 6  |
| 74650 | 7 | 11153456 | 11153473 | 3 | 6  | 18 | GAA  | 24 | 3  |
| 74651 | 7 | 11153630 | 11153644 | 3 | 5  | 15 | CAG  | 20 | 4  |
| 74654 | 7 | 11155663 | 11155684 | 2 | 11 | 22 | TG   | 18 | 8  |
| 74655 | 7 | 11159542 | 11159567 | 2 | 13 | 26 | AC   | 20 | 12 |
| 74658 | 7 | 11166943 | 11166966 | 2 | 12 | 24 | GT   | 14 | 6  |
| 74659 | 7 | 11170946 | 11170959 | 2 | 7  | 14 | TG   | 23 | 7  |
| 74661 | 7 | 11171134 | 11171153 | 2 | 10 | 20 | AC   | 6  | 3  |
| 74663 | 7 | 11171473 | 11171496 | 2 | 12 | 24 | CA   | 20 | 5  |
| 74666 | 7 | 11181219 | 11181232 | 2 | 7  | 14 | CA   | 15 | 4  |
| 74667 | 7 | 11181361 | 11181386 | 2 | 13 | 26 | AC   | 17 | 5  |
| 74669 | 7 | 11185753 | 11185770 | 2 | 9  | 18 | TG   | 10 | 7  |
| 74674 | 7 | 11194160 | 11194207 | 4 | 12 | 48 | GATA | 15 | 13 |
| 74675 | 7 | 11194606 | 11194627 | 2 | 11 | 22 | CA   | 10 | 7  |
| 74679 | 7 | 11197177 | 11197190 | 2 | 7  | 14 | TA   | 9  | 6  |
| 74680 | 7 | 11197778 | 11197801 | 2 | 12 | 24 | GA   | 18 | 12 |
| 74684 | 7 | 11211583 | 11211610 | 2 | 14 | 28 | CA   | 22 | 10 |
| 74688 | 7 | 11217553 | 11217568 | 2 | 8  | 16 | CA   | 14 | 10 |
| 74689 | 7 | 11217630 | 11217647 | 2 | 9  | 18 | AC   | 17 | 15 |
| 74692 | 7 | 11224870 | 11224887 | 3 | 6  | 18 | TAA  | 11 | 4  |
| 74695 | 7 | 11231001 | 11231015 | 3 | 5  | 15 | AGC  | 24 | 6  |
| 74698 | 7 | 11236533 | 11236556 | 3 | 8  | 24 | CTG  | 32 | 5  |
| 74699 | 7 | 11241357 | 11241372 | 2 | 8  | 16 | GT   | 21 | 7  |
| 74705 | 7 | 11247630 | 11247649 | 4 | 5  | 20 | ATGG | 19 | 5  |
| 74707 | 7 | 11249637 | 11249660 | 2 | 12 | 24 | GT   | 15 | 7  |
| 74711 | 7 | 11252522 | 11252553 | 2 | 16 | 32 | AC   | 11 | 8  |
| 74721 | 7 | 11261157 | 11261170 | 2 | 7  | 14 | TA   | 19 | 3  |
| 74722 | 7 | 11264812 | 11264829 | 2 | 9  | 18 | GT   | 29 | 4  |
| 74723 | 7 | 11265017 | 11265032 | 2 | 8  | 16 | CA   | 24 | 3  |

|       |   |          |          |   |    |    |     |    |    |
|-------|---|----------|----------|---|----|----|-----|----|----|
| 74725 | 7 | 11266661 | 11266674 | 2 | 7  | 14 | TG  | 14 | 3  |
| 74732 | 7 | 11269370 | 11269385 | 2 | 8  | 16 | CA  | 20 | 3  |
| 74734 | 7 | 11270810 | 11270829 | 2 | 10 | 20 | TG  | 21 | 6  |
| 74735 | 7 | 11271193 | 11271230 | 2 | 19 | 38 | TG  | 12 | 11 |
| 74739 | 7 | 11279115 | 11279138 | 2 | 12 | 24 | GT  | 25 | 6  |
| 74740 | 7 | 11281407 | 11281424 | 2 | 9  | 18 | AC  | 15 | 10 |
| 74747 | 7 | 11289848 | 11289863 | 2 | 8  | 16 | TG  | 26 | 6  |
| 74749 | 7 | 11295549 | 11295572 | 2 | 12 | 24 | AC  | 17 | 9  |
| 74751 | 7 | 11301325 | 11301338 | 2 | 7  | 14 | CT  | 34 | 3  |
| 74753 | 7 | 11301785 | 11301806 | 2 | 11 | 22 | GT  | 21 | 3  |
| 74758 | 7 | 11306063 | 11306110 | 2 | 24 | 48 | TC  | 6  | 7  |
| 74759 | 7 | 11306653 | 11306676 | 3 | 8  | 24 | ATG | 15 | 6  |
| 74762 | 7 | 11308258 | 11308279 | 2 | 11 | 22 | AC  | 20 | 6  |
| 74766 | 7 | 11316947 | 11316960 | 2 | 7  | 14 | GT  | 27 | 3  |
| 74770 | 7 | 11322372 | 11322383 | 2 | 6  | 12 | AG  | 26 | 3  |
| 74772 | 7 | 11322767 | 11322786 | 2 | 10 | 20 | TG  | 7  | 11 |
| 74776 | 7 | 11326319 | 11326362 | 2 | 22 | 44 | AC  | 8  | 10 |
| 74777 | 7 | 11328814 | 11328835 | 2 | 11 | 22 | TG  | 7  | 6  |
| 74786 | 7 | 11333002 | 11333025 | 2 | 12 | 24 | AC  | 24 | 8  |
| 74788 | 7 | 11334975 | 11334996 | 2 | 11 | 22 | AC  | 9  | 6  |
| 74789 | 7 | 11335079 | 11335108 | 2 | 15 | 30 | AC  | 17 | 5  |
| 74790 | 7 | 11341607 | 11341620 | 2 | 7  | 14 | TC  | 23 | 5  |
| 74791 | 7 | 11341622 | 11341639 | 2 | 9  | 18 | CT  | 21 | 5  |
| 74792 | 7 | 11341966 | 11341997 | 2 | 16 | 32 | TG  | 13 | 10 |
| 74794 | 7 | 11346000 | 11346020 | 3 | 7  | 21 | AGG | 19 | 5  |
| 74798 | 7 | 11351202 | 11351221 | 2 | 10 | 20 | CA  | 13 | 7  |
| 74799 | 7 | 11352657 | 11352672 | 2 | 8  | 16 | CA  | 13 | 5  |
| 74800 | 7 | 11352673 | 11352687 | 3 | 5  | 15 | CTG | 12 | 4  |
| 74803 | 7 | 11361262 | 11361291 | 2 | 15 | 30 | CA  | 7  | 7  |
| 74804 | 7 | 11361433 | 11361446 | 2 | 7  | 14 | GT  | 32 | 4  |
| 74805 | 7 | 11362757 | 11362776 | 2 | 10 | 20 | TG  | 18 | 9  |
| 74808 | 7 | 11365466 | 11365477 | 2 | 6  | 12 | TG  | 15 | 10 |
| 74810 | 7 | 11367590 | 11367605 | 2 | 8  | 16 | CA  | 26 | 11 |
| 74812 | 7 | 11370643 | 11370657 | 3 | 5  | 15 | CAG | 34 | 3  |
| 74813 | 7 | 11371301 | 11371324 | 2 | 12 | 24 | TG  | 14 | 10 |
| 74816 | 7 | 11375917 | 11375938 | 2 | 11 | 22 | CT  | 22 | 6  |
| 74817 | 7 | 11378359 | 11378388 | 2 | 15 | 30 | TG  | 17 | 16 |
| 74827 | 7 | 11384159 | 11384174 | 2 | 8  | 16 | CA  | 25 | 4  |
| 74828 | 7 | 11384321 | 11384342 | 2 | 11 | 22 | CA  | 16 | 12 |
| 74829 | 7 | 11384984 | 11385045 | 2 | 31 | 62 | GT  | 24 | 11 |
| 74832 | 7 | 11391496 | 11391545 | 2 | 25 | 50 | GT  | 13 | 11 |
| 74833 | 7 | 11392561 | 11392600 | 2 | 20 | 40 | GT  | 13 | 13 |
| 74834 | 7 | 11392886 | 11392903 | 3 | 6  | 18 | TGT | 24 | 7  |
| 74841 | 7 | 11400100 | 11400121 | 2 | 11 | 22 | TG  | 19 | 3  |
| 74842 | 7 | 11400957 | 11400984 | 2 | 14 | 28 | GT  | 7  | 10 |
| 74843 | 7 | 11403227 | 11403244 | 3 | 6  | 18 | GAG | 25 | 5  |
| 74845 | 7 | 11403638 | 11403661 | 2 | 12 | 24 | AC  | 13 | 9  |
| 74846 | 7 | 11403756 | 11403767 | 2 | 6  | 12 | GT  | 29 | 5  |
| 74847 | 7 | 11403971 | 11403998 | 2 | 14 | 28 | TG  | 12 | 12 |
| 74848 | 7 | 11404061 | 11404072 | 2 | 6  | 12 | CA  | 24 | 6  |
| 74861 | 7 | 11418792 | 11418805 | 2 | 7  | 14 | CT  | 22 | 4  |

|       |   |          |          |   |    |    |      |    |    |
|-------|---|----------|----------|---|----|----|------|----|----|
| 74863 | 7 | 11422839 | 11422852 | 2 | 7  | 14 | AC   | 24 | 6  |
| 74864 | 7 | 11431112 | 11431127 | 2 | 8  | 16 | AC   | 20 | 11 |
| 74866 | 7 | 11431976 | 11432003 | 2 | 14 | 28 | GT   | 7  | 7  |
| 74873 | 7 | 11440914 | 11440943 | 2 | 15 | 30 | GT   | 10 | 12 |
| 74876 | 7 | 11442326 | 11442341 | 2 | 8  | 16 | TG   | 18 | 7  |
| 74877 | 7 | 11442766 | 11442777 | 2 | 6  | 12 | TG   | 12 | 9  |
| 74880 | 7 | 11443141 | 11443170 | 2 | 15 | 30 | GT   | 27 | 8  |
| 74881 | 7 | 11443411 | 11443450 | 2 | 20 | 40 | TG   | 13 | 11 |
| 74882 | 7 | 11444640 | 11444665 | 2 | 13 | 26 | AC   | 14 | 5  |
| 74884 | 7 | 11446547 | 11446562 | 4 | 4  | 16 | CAGA | 33 | 5  |
| 74887 | 7 | 11452096 | 11452107 | 2 | 6  | 12 | GT   | 32 | 3  |
| 74891 | 7 | 11453390 | 11453415 | 2 | 13 | 26 | CA   | 6  | 6  |
| 74895 | 7 | 11459459 | 11459502 | 2 | 22 | 44 | AC   | 11 | 10 |
| 74903 | 7 | 11461950 | 11461977 | 2 | 14 | 28 | AC   | 11 | 8  |
| 74906 | 7 | 11464287 | 11464310 | 2 | 12 | 24 | CA   | 21 | 7  |
| 74907 | 7 | 11464542 | 11464553 | 2 | 6  | 12 | CT   | 25 | 3  |
| 74909 | 7 | 11464790 | 11464821 | 2 | 16 | 32 | CA   | 10 | 4  |
| 74910 | 7 | 11466470 | 11466511 | 2 | 21 | 42 | CT   | 7  | 7  |
| 74914 | 7 | 11466739 | 11466762 | 2 | 12 | 24 | AC   | 9  | 5  |
| 74915 | 7 | 11466893 | 11466920 | 2 | 14 | 28 | AC   | 14 | 5  |
| 74916 | 7 | 11468079 | 11468092 | 2 | 7  | 14 | CT   | 19 | 6  |
| 74917 | 7 | 11468587 | 11468612 | 2 | 13 | 26 | TG   | 16 | 8  |
| 74924 | 7 | 11476510 | 11476533 | 4 | 6  | 24 | TGTC | 20 | 3  |
| 74933 | 7 | 11481824 | 11481837 | 2 | 7  | 14 | AC   | 25 | 7  |
| 74934 | 7 | 11481969 | 11481980 | 2 | 6  | 12 | AC   | 23 | 4  |
| 74935 | 7 | 11483798 | 11483811 | 2 | 7  | 14 | AC   | 19 | 3  |
| 74937 | 7 | 11486042 | 11486061 | 2 | 10 | 20 | CA   | 13 | 5  |
| 74938 | 7 | 11487045 | 11487064 | 2 | 10 | 20 | TG   | 24 | 9  |
| 74945 | 7 | 11492150 | 11492191 | 2 | 21 | 42 | CA   | 12 | 12 |
| 74946 | 7 | 11492690 | 11492710 | 3 | 7  | 21 | CTC  | 18 | 5  |
| 74947 | 7 | 11492940 | 11492957 | 2 | 9  | 18 | TC   | 14 | 4  |
| 74949 | 7 | 11493143 | 11493174 | 2 | 16 | 32 | CA   | 8  | 11 |
| 74954 | 7 | 11496219 | 11496240 | 2 | 11 | 22 | AC   | 22 | 9  |
| 74955 | 7 | 11499434 | 11499485 | 2 | 26 | 52 | GT   | 10 | 12 |
| 74958 | 7 | 11499969 | 11499984 | 2 | 8  | 16 | GT   | 12 | 8  |
| 74959 | 7 | 11501656 | 11501679 | 4 | 6  | 24 | TCTT | 24 | 5  |
| 74961 | 7 | 11501929 | 11501960 | 2 | 16 | 32 | CT   | 12 | 9  |
| 74964 | 7 | 11502455 | 11502475 | 3 | 7  | 21 | TCC  | 25 | 3  |
| 74966 | 7 | 11503971 | 11504006 | 3 | 12 | 36 | TTC  | 15 | 11 |
| 74967 | 7 | 11504059 | 11504079 | 3 | 7  | 21 | TCC  | 8  | 3  |
| 74981 | 7 | 11511949 | 11511974 | 2 | 13 | 26 | AC   | 14 | 8  |
| 74982 | 7 | 11512618 | 11512633 | 2 | 8  | 16 | TG   | 22 | 8  |
| 74983 | 7 | 11514802 | 11514827 | 2 | 13 | 26 | TG   | 11 | 7  |
| 74986 | 7 | 11516725 | 11516742 | 2 | 9  | 18 | AC   | 21 | 11 |
| 74990 | 7 | 11517379 | 11517396 | 2 | 9  | 18 | CA   | 18 | 16 |
| 74992 | 7 | 11518034 | 11518049 | 4 | 4  | 16 | CAGG | 21 | 5  |
| 74996 | 7 | 11521834 | 11521847 | 2 | 7  | 14 | CA   | 22 | 13 |
| 74997 | 7 | 11522441 | 11522466 | 2 | 13 | 26 | AC   | 25 | 7  |
| 74999 | 7 | 11522868 | 11522891 | 3 | 8  | 24 | GAG  | 14 | 4  |
| 75006 | 7 | 11528422 | 11528435 | 2 | 7  | 14 | GT   | 20 | 8  |
| 75007 | 7 | 11529201 | 11529226 | 2 | 13 | 26 | TG   | 9  | 8  |

|       |   |          |          |   |    |    |      |    |    |
|-------|---|----------|----------|---|----|----|------|----|----|
| 75010 | 7 | 11530086 | 11530100 | 3 | 5  | 15 | AAT  | 22 | 4  |
| 75013 | 7 | 11532171 | 11532184 | 2 | 7  | 14 | AC   | 13 | 3  |
| 75014 | 7 | 11532199 | 11532210 | 2 | 6  | 12 | AC   | 19 | 7  |
| 75015 | 7 | 11532436 | 11532449 | 2 | 7  | 14 | GT   | 26 | 5  |
| 75018 | 7 | 11536036 | 11536049 | 2 | 7  | 14 | GT   | 24 | 6  |
| 75019 | 7 | 11536219 | 11536234 | 2 | 8  | 16 | GA   | 21 | 6  |
| 75020 | 7 | 11538312 | 11538343 | 2 | 16 | 32 | GT   | 18 | 6  |
| 75022 | 7 | 11540223 | 11540248 | 2 | 13 | 26 | TG   | 12 | 10 |
| 75027 | 7 | 11544571 | 11544582 | 2 | 6  | 12 | AC   | 31 | 3  |
| 75029 | 7 | 11546881 | 11546892 | 2 | 6  | 12 | GT   | 28 | 3  |
| 75030 | 7 | 11549536 | 11549549 | 2 | 7  | 14 | CG   | 13 | 12 |
| 75034 | 7 | 11550860 | 11550879 | 2 | 10 | 20 | CA   | 14 | 5  |
| 75035 | 7 | 11551052 | 11551075 | 2 | 12 | 24 | AC   | 21 | 8  |
| 75040 | 7 | 11553823 | 11553840 | 3 | 6  | 18 | AAT  | 22 | 3  |
| 75041 | 7 | 11556762 | 11556787 | 2 | 13 | 26 | AC   | 10 | 6  |
| 75043 | 7 | 11557330 | 11557349 | 2 | 10 | 20 | TG   | 22 | 5  |
| 75044 | 7 | 11557478 | 11557491 | 2 | 7  | 14 | GT   | 30 | 4  |
| 75045 | 7 | 11557827 | 11557838 | 2 | 6  | 12 | AC   | 26 | 4  |
| 75049 | 7 | 11566215 | 11566248 | 2 | 17 | 34 | TG   | 12 | 8  |
| 75055 | 7 | 11572853 | 11572866 | 2 | 7  | 14 | CA   | 22 | 4  |
| 75057 | 7 | 11573013 | 11573024 | 2 | 6  | 12 | AC   | 17 | 7  |
| 75059 | 7 | 11573204 | 11573225 | 2 | 11 | 22 | CA   | 10 | 9  |
| 75064 | 7 | 11574459 | 11574492 | 2 | 17 | 34 | GT   | 15 | 12 |
| 75070 | 7 | 11577541 | 11577558 | 2 | 9  | 18 | AC   | 33 | 6  |
| 75071 | 7 | 11577706 | 11577721 | 4 | 4  | 16 | TGTC | 24 | 6  |
| 75072 | 7 | 11577722 | 11577735 | 2 | 7  | 14 | TG   | 24 | 5  |
| 75073 | 7 | 11577883 | 11577898 | 2 | 8  | 16 | TG   | 27 | 8  |
| 75074 | 7 | 11581917 | 11581932 | 2 | 8  | 16 | AC   | 23 | 6  |
| 75076 | 7 | 11582074 | 11582109 | 2 | 18 | 36 | GT   | 7  | 6  |
| 75077 | 7 | 11582281 | 11582294 | 2 | 7  | 14 | AC   | 27 | 5  |
| 75078 | 7 | 11584177 | 11584192 | 2 | 8  | 16 | AC   | 22 | 7  |
| 75079 | 7 | 11586008 | 11586025 | 2 | 9  | 18 | AC   | 24 | 4  |
| 75083 | 7 | 11588489 | 11588514 | 2 | 13 | 26 | CA   | 18 | 12 |
| 75086 | 7 | 11589096 | 11589107 | 2 | 6  | 12 | TG   | 22 | 3  |
| 75089 | 7 | 11596191 | 11596202 | 2 | 6  | 12 | GA   | 28 | 4  |
| 75095 | 7 | 11604511 | 11604534 | 2 | 12 | 24 | GA   | 13 | 5  |
| 75097 | 7 | 11605613 | 11605628 | 2 | 8  | 16 | CT   | 20 | 3  |
| 75104 | 7 | 11612352 | 11612367 | 2 | 8  | 16 | AC   | 9  | 8  |
| 75106 | 7 | 11612501 | 11612514 | 2 | 7  | 14 | AC   | 17 | 4  |
| 75108 | 7 | 11615080 | 11615112 | 3 | 11 | 33 | GGA  | 11 | 8  |
| 75109 | 7 | 11615436 | 11615481 | 2 | 23 | 46 | TG   | 11 | 11 |
| 75110 | 7 | 11616998 | 11617011 | 2 | 7  | 14 | GT   | 25 | 3  |
| 75111 | 7 | 11617928 | 11617945 | 2 | 9  | 18 | CA   | 19 | 9  |
| 75112 | 7 | 11618104 | 11618115 | 2 | 6  | 12 | GT   | 30 | 3  |
| 75113 | 7 | 11618671 | 11618688 | 2 | 9  | 18 | CA   | 21 | 3  |
| 75122 | 7 | 11631166 | 11631177 | 2 | 6  | 12 | CA   | 28 | 5  |
| 75123 | 7 | 11631346 | 11631361 | 2 | 8  | 16 | CA   | 24 | 3  |
| 75129 | 7 | 11634774 | 11634801 | 2 | 14 | 28 | CT   | 7  | 7  |
| 75141 | 7 | 11641900 | 11641911 | 2 | 6  | 12 | AC   | 34 | 4  |
| 75143 | 7 | 11642582 | 11642607 | 2 | 13 | 26 | AC   | 10 | 6  |
| 75145 | 7 | 11644845 | 11644874 | 2 | 15 | 30 | GT   | 13 | 7  |

|       |   |          |          |   |    |    |     |    |    |
|-------|---|----------|----------|---|----|----|-----|----|----|
| 75146 | 7 | 11645044 | 11645057 | 2 | 7  | 14 | CA  | 21 | 3  |
| 75149 | 7 | 11651202 | 11651215 | 2 | 7  | 14 | CA  | 26 | 3  |
| 75150 | 7 | 11651505 | 11651520 | 2 | 8  | 16 | AG  | 23 | 4  |
| 75152 | 7 | 11651818 | 11651839 | 2 | 11 | 22 | GT  | 16 | 12 |
| 75157 | 7 | 11659287 | 11659314 | 2 | 14 | 28 | CA  | 26 | 7  |
| 75162 | 7 | 11667198 | 11667217 | 2 | 10 | 20 | CA  | 20 | 9  |
| 75166 | 7 | 11673798 | 11673813 | 2 | 8  | 16 | CA  | 18 | 8  |
| 75169 | 7 | 11676405 | 11676430 | 2 | 13 | 26 | CA  | 14 | 12 |
| 75171 | 7 | 11680380 | 11680393 | 2 | 7  | 14 | GT  | 22 | 4  |
| 75173 | 7 | 11680638 | 11680653 | 2 | 8  | 16 | AC  | 17 | 7  |
| 75174 | 7 | 11682011 | 11682042 | 2 | 16 | 32 | AC  | 12 | 8  |
| 75175 | 7 | 11682421 | 11682434 | 2 | 7  | 14 | CT  | 25 | 4  |
| 75176 | 7 | 11683735 | 11683754 | 2 | 10 | 20 | CA  | 19 | 10 |
| 75177 | 7 | 11684617 | 11684654 | 2 | 19 | 38 | TG  | 11 | 10 |
| 75178 | 7 | 11686245 | 11686274 | 2 | 15 | 30 | TG  | 14 | 9  |
| 75179 | 7 | 11686402 | 11686419 | 2 | 9  | 18 | TG  | 18 | 10 |
| 75180 | 7 | 11690818 | 11690837 | 2 | 10 | 20 | TG  | 16 | 8  |
| 75181 | 7 | 11690839 | 11690852 | 2 | 7  | 14 | GT  | 15 | 9  |
| 75182 | 7 | 11692983 | 11693006 | 2 | 12 | 24 | AC  | 22 | 13 |
| 75183 | 7 | 11693055 | 11693066 | 2 | 6  | 12 | CA  | 22 | 3  |
| 75185 | 7 | 11696304 | 11696319 | 2 | 8  | 16 | CA  | 21 | 7  |
| 75186 | 7 | 11696411 | 11696428 | 2 | 9  | 18 | AC  | 23 | 4  |
| 75188 | 7 | 11700870 | 11700881 | 2 | 6  | 12 | AC  | 19 | 3  |
| 75191 | 7 | 11704474 | 11704495 | 2 | 11 | 22 | CA  | 11 | 9  |
| 75192 | 7 | 11704643 | 11704664 | 2 | 11 | 22 | GT  | 18 | 8  |
| 75193 | 7 | 11705394 | 11705411 | 2 | 9  | 18 | AC  | 24 | 3  |
| 75201 | 7 | 11723177 | 11723200 | 2 | 12 | 24 | CA  | 21 | 16 |
| 75203 | 7 | 11725784 | 11725803 | 2 | 10 | 20 | AG  | 27 | 3  |
| 75207 | 7 | 11727872 | 11727895 | 2 | 12 | 24 | AC  | 16 | 7  |
| 75211 | 7 | 11738274 | 11738293 | 2 | 10 | 20 | GT  | 15 | 7  |
| 75212 | 7 | 11738384 | 11738417 | 2 | 17 | 34 | AC  | 7  | 7  |
| 75214 | 7 | 11741198 | 11741235 | 2 | 19 | 38 | GT  | 7  | 9  |
| 75217 | 7 | 11741753 | 11741764 | 2 | 6  | 12 | TG  | 27 | 3  |
| 75218 | 7 | 11741963 | 11741976 | 2 | 7  | 14 | TC  | 24 | 3  |
| 75219 | 7 | 11744516 | 11744537 | 2 | 11 | 22 | TG  | 6  | 5  |
| 75221 | 7 | 11745733 | 11745746 | 2 | 7  | 14 | TG  | 16 | 4  |
| 75222 | 7 | 11749143 | 11749168 | 2 | 13 | 26 | AG  | 14 | 4  |
| 75226 | 7 | 11750444 | 11750459 | 2 | 8  | 16 | GA  | 22 | 5  |
| 75229 | 7 | 11756402 | 11756417 | 2 | 8  | 16 | CA  | 23 | 5  |
| 75232 | 7 | 11756701 | 11756714 | 2 | 7  | 14 | TG  | 8  | 3  |
| 75233 | 7 | 11761336 | 11761347 | 2 | 6  | 12 | TG  | 23 | 4  |
| 75238 | 7 | 11766296 | 11766337 | 2 | 21 | 42 | CA  | 8  | 11 |
| 75240 | 7 | 11766978 | 11766995 | 3 | 6  | 18 | GCC | 26 | 4  |
| 75244 | 7 | 11770228 | 11770255 | 2 | 14 | 28 | TG  | 14 | 8  |
| 75245 | 7 | 11770995 | 11771014 | 2 | 10 | 20 | AC  | 22 | 4  |
| 75256 | 7 | 11783593 | 11783606 | 2 | 7  | 14 | GT  | 26 | 4  |
| 75261 | 7 | 11788400 | 11788414 | 3 | 5  | 15 | GCA | 25 | 6  |
| 75262 | 7 | 11788415 | 11788432 | 3 | 6  | 18 | ACA | 12 | 3  |
| 75269 | 7 | 11808478 | 11808495 | 2 | 9  | 18 | AC  | 24 | 4  |
| 75270 | 7 | 11812132 | 11812149 | 2 | 9  | 18 | TG  | 24 | 4  |
| 75271 | 7 | 11812307 | 11812322 | 2 | 8  | 16 | TG  | 13 | 5  |

|       |   |          |          |   |    |    |      |    |    |
|-------|---|----------|----------|---|----|----|------|----|----|
| 75279 | 7 | 11821395 | 11821406 | 2 | 6  | 12 | AC   | 24 | 3  |
| 75282 | 7 | 11824902 | 11824925 | 2 | 12 | 24 | AC   | 9  | 9  |
| 75290 | 7 | 11829906 | 11829925 | 2 | 10 | 20 | TG   | 14 | 4  |
| 75291 | 7 | 11833169 | 11833194 | 2 | 13 | 26 | CA   | 16 | 10 |
| 75292 | 7 | 11833681 | 11833692 | 2 | 6  | 12 | AC   | 29 | 3  |
| 75293 | 7 | 11834532 | 11834545 | 2 | 7  | 14 | AC   | 21 | 3  |
| 75299 | 7 | 11835485 | 11835496 | 2 | 6  | 12 | TG   | 27 | 3  |
| 75303 | 7 | 11839775 | 11839788 | 2 | 7  | 14 | GT   | 20 | 3  |
| 75304 | 7 | 11854835 | 11854856 | 2 | 11 | 22 | AC   | 20 | 8  |
| 75311 | 7 | 11865494 | 11865513 | 2 | 10 | 20 | GA   | 18 | 11 |
| 75313 | 7 | 11873042 | 11873063 | 2 | 11 | 22 | GT   | 14 | 9  |
| 75320 | 7 | 11907131 | 11907160 | 2 | 15 | 30 | AC   | 8  | 9  |
| 75323 | 7 | 11911237 | 11911250 | 2 | 7  | 14 | AC   | 26 | 5  |
| 75326 | 7 | 11912760 | 11912775 | 4 | 4  | 16 | AAAT | 7  | 6  |
| 75327 | 7 | 11916426 | 11916437 | 2 | 6  | 12 | CA   | 23 | 3  |
| 75333 | 7 | 11925891 | 11925922 | 2 | 16 | 32 | CA   | 6  | 9  |
| 75334 | 7 | 11926047 | 11926102 | 2 | 28 | 56 | CA   | 10 | 9  |
| 75337 | 7 | 11927902 | 11927945 | 2 | 22 | 44 | AC   | 9  | 8  |
| 75341 | 7 | 11933415 | 11933444 | 2 | 15 | 30 | GT   | 17 | 9  |
| 75342 | 7 | 11935473 | 11935508 | 2 | 18 | 36 | CA   | 6  | 9  |
| 75343 | 7 | 11935823 | 11935846 | 2 | 12 | 24 | TG   | 21 | 6  |
| 75344 | 7 | 11937386 | 11937417 | 2 | 16 | 32 | AC   | 19 | 9  |
| 75346 | 7 | 11937918 | 11937933 | 2 | 8  | 16 | AC   | 21 | 3  |
| 75348 | 7 | 11938194 | 11938223 | 2 | 15 | 30 | TC   | 14 | 5  |
| 75349 | 7 | 11938259 | 11938272 | 2 | 7  | 14 | CA   | 16 | 3  |
| 75350 | 7 | 11938668 | 11938679 | 2 | 6  | 12 | AT   | 9  | 5  |
| 75351 | 7 | 11939847 | 11939858 | 2 | 6  | 12 | AT   | 11 | 3  |
| 75354 | 7 | 11947410 | 11947423 | 2 | 7  | 14 | AC   | 20 | 3  |
| 75355 | 7 | 11950219 | 11950232 | 2 | 7  | 14 | TG   | 18 | 4  |
| 75356 | 7 | 11951255 | 11951266 | 2 | 6  | 12 | AC   | 23 | 6  |
| 75358 | 7 | 11951867 | 11951880 | 2 | 7  | 14 | TG   | 32 | 3  |
| 75360 | 7 | 11952697 | 11952724 | 2 | 14 | 28 | TG   | 15 | 6  |
| 75363 | 7 | 11957588 | 11957605 | 2 | 9  | 18 | CA   | 14 | 4  |
| 75367 | 7 | 11969898 | 11969917 | 2 | 10 | 20 | GT   | 20 | 3  |
| 75368 | 7 | 11970544 | 11970571 | 2 | 14 | 28 | AC   | 19 | 12 |
| 75371 | 7 | 11978812 | 11978835 | 4 | 6  | 24 | TATT | 18 | 3  |
| 75372 | 7 | 11980027 | 11980050 | 2 | 12 | 24 | CA   | 24 | 10 |
| 75373 | 7 | 11981703 | 11981718 | 2 | 8  | 16 | TG   | 18 | 7  |
| 75375 | 7 | 11985070 | 11985083 | 2 | 7  | 14 | AC   | 19 | 4  |
| 75378 | 7 | 11986675 | 11986688 | 2 | 7  | 14 | AC   | 24 | 15 |
| 75380 | 7 | 11987497 | 11987508 | 2 | 6  | 12 | TG   | 30 | 3  |
| 75382 | 7 | 11989793 | 11989822 | 2 | 15 | 30 | AC   | 11 | 13 |
| 75383 | 7 | 11993254 | 11993277 | 2 | 12 | 24 | AC   | 16 | 6  |
| 75385 | 7 | 11994141 | 11994156 | 2 | 8  | 16 | CT   | 16 | 3  |
| 75386 | 7 | 11994821 | 11994858 | 2 | 19 | 38 | CA   | 13 | 18 |
| 75387 | 7 | 11995826 | 11995845 | 2 | 10 | 20 | CA   | 18 | 4  |
| 75388 | 7 | 11995968 | 11995979 | 2 | 6  | 12 | CA   | 11 | 8  |
| 75391 | 7 | 11997677 | 11997708 | 4 | 8  | 32 | TTCT | 19 | 7  |
| 75396 | 7 | 12002047 | 12002061 | 3 | 5  | 15 | TCT  | 15 | 5  |
| 75399 | 7 | 12004222 | 12004237 | 2 | 8  | 16 | GA   | 29 | 3  |
| 75400 | 7 | 12004437 | 12004454 | 3 | 6  | 18 | TCC  | 8  | 3  |



|       |   |          |          |   |    |    |      |    |    |
|-------|---|----------|----------|---|----|----|------|----|----|
| 75403 | 7 | 12011401 | 12011424 | 2 | 12 | 24 | GT   | 20 | 5  |
| 75407 | 7 | 12016739 | 12016752 | 2 | 7  | 14 | AC   | 12 | 7  |
| 75409 | 7 | 12019430 | 12019463 | 2 | 17 | 34 | GT   | 16 | 7  |
| 75411 | 7 | 12019659 | 12019688 | 2 | 15 | 30 | CA   | 7  | 10 |
| 75412 | 7 | 12019785 | 12019800 | 2 | 8  | 16 | CA   | 17 | 7  |
| 75413 | 7 | 12019859 | 12019885 | 3 | 9  | 27 | CAT  | 13 | 3  |
| 75414 | 7 | 12019958 | 12019983 | 2 | 13 | 26 | CA   | 14 | 8  |
| 75417 | 7 | 12020161 | 12020184 | 4 | 6  | 24 | CAGA | 22 | 13 |
| 75420 | 7 | 12021144 | 12021157 | 2 | 7  | 14 | CT   | 15 | 4  |
| 75423 | 7 | 12022665 | 12022686 | 2 | 11 | 22 | GT   | 18 | 5  |
| 75424 | 7 | 12022794 | 12022814 | 3 | 7  | 21 | CAT  | 32 | 5  |
| 75426 | 7 | 12024872 | 12024883 | 2 | 6  | 12 | CT   | 33 | 3  |
| 75427 | 7 | 12025295 | 12025314 | 2 | 10 | 20 | CA   | 15 | 9  |
| 75432 | 7 | 12032416 | 12032437 | 2 | 11 | 22 | TG   | 21 | 5  |
| 75433 | 7 | 12033034 | 12033057 | 2 | 12 | 24 | AC   | 18 | 8  |
| 75434 | 7 | 12033165 | 12033184 | 2 | 10 | 20 | TG   | 21 | 4  |
| 75440 | 7 | 12037538 | 12037557 | 2 | 10 | 20 | GA   | 13 | 3  |
| 75447 | 7 | 12046871 | 12046890 | 2 | 10 | 20 | CA   | 19 | 6  |
| 75449 | 7 | 12047314 | 12047345 | 2 | 16 | 32 | GT   | 21 | 6  |
| 75452 | 7 | 12051049 | 12051064 | 2 | 8  | 16 | AC   | 19 | 6  |
| 75454 | 7 | 12051394 | 12051409 | 2 | 8  | 16 | TG   | 26 | 4  |
| 75456 | 7 | 12051667 | 12051682 | 2 | 8  | 16 | GT   | 25 | 4  |
| 75460 | 7 | 12053490 | 12053503 | 2 | 7  | 14 | TC   | 20 | 3  |
| 75462 | 7 | 12054396 | 12054413 | 2 | 9  | 18 | GT   | 18 | 3  |
| 75467 | 7 | 12057746 | 12057765 | 2 | 10 | 20 | TG   | 20 | 10 |
| 75468 | 7 | 12058407 | 12058428 | 2 | 11 | 22 | GT   | 17 | 3  |
| 75470 | 7 | 12058734 | 12058755 | 2 | 11 | 22 | TG   | 15 | 8  |
| 75471 | 7 | 12058843 | 12058862 | 2 | 10 | 20 | CA   | 13 | 7  |
| 75472 | 7 | 12059108 | 12059121 | 2 | 7  | 14 | GT   | 25 | 4  |
| 75473 | 7 | 12060272 | 12060287 | 2 | 8  | 16 | GT   | 22 | 4  |
| 75475 | 7 | 12060493 | 12060506 | 2 | 7  | 14 | AG   | 22 | 3  |
| 75476 | 7 | 12060614 | 12060629 | 2 | 8  | 16 | AC   | 20 | 9  |
| 75477 | 7 | 12061191 | 12061206 | 2 | 8  | 16 | GT   | 20 | 4  |
| 75479 | 7 | 12061455 | 12061472 | 2 | 9  | 18 | AC   | 21 | 3  |
| 75481 | 7 | 12063493 | 12063520 | 2 | 14 | 28 | CA   | 26 | 6  |
| 75483 | 7 | 12066422 | 12066439 | 2 | 9  | 18 | TG   | 21 | 6  |
| 75486 | 7 | 12068728 | 12068739 | 2 | 6  | 12 | AC   | 25 | 4  |
| 75488 | 7 | 12070002 | 12070033 | 2 | 16 | 32 | AG   | 13 | 9  |
| 75489 | 7 | 12070188 | 12070208 | 3 | 7  | 21 | TCC  | 7  | 6  |
| 75490 | 7 | 12070278 | 12070301 | 3 | 8  | 24 | TCC  | 12 | 3  |
| 75491 | 7 | 12070345 | 12070358 | 2 | 7  | 14 | TC   | 18 | 6  |
| 75495 | 7 | 12072997 | 12073010 | 2 | 7  | 14 | AG   | 8  | 4  |
| 75499 | 7 | 12075697 | 12075718 | 2 | 11 | 22 | CA   | 22 | 5  |
| 75506 | 7 | 12078000 | 12078021 | 2 | 11 | 22 | CT   | 14 | 5  |
| 75508 | 7 | 12083110 | 12083141 | 2 | 16 | 32 | TG   | 14 | 8  |
| 75509 | 7 | 12083338 | 12083349 | 2 | 6  | 12 | CA   | 32 | 3  |
| 75510 | 7 | 12092422 | 12092435 | 2 | 7  | 14 | GT   | 25 | 3  |
| 75519 | 7 | 12100358 | 12100369 | 2 | 6  | 12 | GT   | 25 | 3  |
| 75520 | 7 | 12101287 | 12101318 | 2 | 16 | 32 | TG   | 16 | 6  |
| 75521 | 7 | 12101434 | 12101455 | 2 | 11 | 22 | AC   | 17 | 4  |
| 75525 | 7 | 12106509 | 12106542 | 2 | 17 | 34 | CA   | 11 | 8  |

|       |   |          |          |   |    |    |      |    |    |
|-------|---|----------|----------|---|----|----|------|----|----|
| 75531 | 7 | 12112354 | 12112371 | 2 | 9  | 18 | GT   | 22 | 4  |
| 75532 | 7 | 12112933 | 12112952 | 2 | 10 | 20 | GT   | 21 | 10 |
| 75535 | 7 | 12115149 | 12115164 | 2 | 8  | 16 | GT   | 20 | 3  |
| 75538 | 7 | 12119976 | 12120011 | 2 | 18 | 36 | CA   | 14 | 9  |
| 75539 | 7 | 12120136 | 12120151 | 2 | 8  | 16 | CA   | 25 | 5  |
| 75548 | 7 | 12132182 | 12132207 | 2 | 13 | 26 | GT   | 20 | 3  |
| 75549 | 7 | 12132282 | 12132297 | 2 | 8  | 16 | CA   | 12 | 7  |
| 75550 | 7 | 12137864 | 12137887 | 2 | 12 | 24 | AC   | 19 | 8  |
| 75552 | 7 | 12138453 | 12138470 | 2 | 9  | 18 | GT   | 17 | 5  |
| 75556 | 7 | 12138737 | 12138750 | 2 | 7  | 14 | AC   | 18 | 4  |
| 75557 | 7 | 12139276 | 12139287 | 2 | 6  | 12 | GT   | 26 | 4  |
| 75562 | 7 | 12140381 | 12140392 | 2 | 6  | 12 | GT   | 18 | 3  |
| 75564 | 7 | 12142484 | 12142497 | 2 | 7  | 14 | AC   | 23 | 5  |
| 75565 | 7 | 12142697 | 12142732 | 2 | 18 | 36 | CT   | 7  | 3  |
| 75567 | 7 | 12143728 | 12143739 | 2 | 6  | 12 | AC   | 25 | 4  |
| 75568 | 7 | 12143744 | 12143755 | 2 | 6  | 12 | AC   | 12 | 3  |
| 75570 | 7 | 12143907 | 12143938 | 2 | 16 | 32 | TG   | 7  | 7  |
| 75571 | 7 | 12144044 | 12144079 | 2 | 18 | 36 | AC   | 16 | 12 |
| 75574 | 7 | 12148115 | 12148130 | 2 | 8  | 16 | AC   | 27 | 4  |
| 75575 | 7 | 12149628 | 12149665 | 2 | 19 | 38 | GT   | 13 | 9  |
| 75577 | 7 | 12155714 | 12155735 | 2 | 11 | 22 | CA   | 12 | 5  |
| 75579 | 7 | 12161248 | 12161259 | 2 | 6  | 12 | CA   | 28 | 3  |
| 75582 | 7 | 12165215 | 12165228 | 2 | 7  | 14 | CA   | 24 | 5  |
| 75587 | 7 | 12187472 | 12187501 | 3 | 10 | 30 | CCT  | 15 | 5  |
| 75605 | 7 | 12201764 | 12201775 | 2 | 6  | 12 | TG   | 28 | 5  |
| 75607 | 7 | 12206285 | 12206300 | 2 | 8  | 16 | TG   | 14 | 4  |
| 75613 | 7 | 12211132 | 12211147 | 2 | 8  | 16 | AC   | 22 | 3  |
| 75614 | 7 | 12212735 | 12212768 | 2 | 17 | 34 | GT   | 12 | 17 |
| 75616 | 7 | 12213009 | 12213028 | 2 | 10 | 20 | TG   | 16 | 5  |
| 75618 | 7 | 12213070 | 12213081 | 2 | 6  | 12 | GT   | 18 | 3  |
| 75623 | 7 | 12221535 | 12221552 | 3 | 6  | 18 | TTC  | 18 | 3  |
| 75628 | 7 | 12232645 | 12232656 | 2 | 6  | 12 | GT   | 20 | 4  |
| 75635 | 7 | 12235780 | 12235801 | 2 | 11 | 22 | CA   | 32 | 10 |
| 75636 | 7 | 12235974 | 12235997 | 2 | 12 | 24 | AC   | 17 | 14 |
| 75639 | 7 | 12236409 | 12236426 | 3 | 6  | 18 | TGT  | 10 | 9  |
| 75641 | 7 | 12246935 | 12246955 | 3 | 7  | 21 | CCT  | 18 | 9  |
| 75650 | 7 | 12275869 | 12275880 | 2 | 6  | 12 | CA   | 24 | 3  |
| 75651 | 7 | 12281290 | 12281315 | 2 | 13 | 26 | CT   | 17 | 10 |
| 75653 | 7 | 12283486 | 12283499 | 2 | 7  | 14 | TG   | 21 | 6  |
| 75656 | 7 | 12297813 | 12297826 | 2 | 7  | 14 | CA   | 9  | 7  |
| 75663 | 7 | 12304700 | 12304719 | 4 | 5  | 20 | ATGG | 6  | 3  |
| 75669 | 7 | 12306581 | 12306596 | 4 | 4  | 16 | TAAA | 13 | 4  |
| 75676 | 7 | 12312714 | 12312739 | 2 | 13 | 26 | CA   | 21 | 7  |
| 75678 | 7 | 12314736 | 12314751 | 4 | 4  | 16 | AGAC | 28 | 3  |
| 75680 | 7 | 12315425 | 12315440 | 4 | 4  | 16 | TTTA | 17 | 4  |
| 75683 | 7 | 12322776 | 12322796 | 3 | 7  | 21 | ACA  | 30 | 6  |
| 75688 | 7 | 12354128 | 12354153 | 2 | 13 | 26 | GT   | 18 | 10 |
| 75690 | 7 | 12359919 | 12359952 | 2 | 17 | 34 | TG   | 9  | 9  |
| 75691 | 7 | 12365174 | 12365223 | 2 | 25 | 50 | GT   | 7  | 7  |
| 75692 | 7 | 12372915 | 12372944 | 2 | 15 | 30 | CA   | 14 | 9  |
| 75693 | 7 | 12375422 | 12375433 | 2 | 6  | 12 | GT   | 26 | 3  |

|       |   |          |          |   |    |    |    |    |    |
|-------|---|----------|----------|---|----|----|----|----|----|
| 75702 | 7 | 12409607 | 12409618 | 2 | 6  | 12 | AC | 25 | 3  |
| 75703 | 7 | 12409740 | 12409751 | 2 | 6  | 12 | CA | 25 | 4  |
| 75705 | 7 | 12417424 | 12417451 | 2 | 14 | 28 | GT | 12 | 9  |
| 75707 | 7 | 12427610 | 12427627 | 2 | 9  | 18 | AC | 22 | 5  |
| 75708 | 7 | 12439350 | 12439377 | 2 | 14 | 28 | AC | 11 | 8  |
| 75724 | 7 | 12459336 | 12459357 | 2 | 11 | 22 | TG | 17 | 4  |
| 75725 | 7 | 12464687 | 12464708 | 2 | 11 | 22 | TC | 23 | 6  |
| 75726 | 7 | 12467706 | 12467717 | 2 | 6  | 12 | TA | 16 | 3  |
| 75727 | 7 | 12471733 | 12471752 | 2 | 10 | 20 | TG | 18 | 3  |
| 75728 | 7 | 12473181 | 12473196 | 2 | 8  | 16 | GT | 26 | 7  |
| 75730 | 7 | 12478155 | 12478182 | 2 | 14 | 28 | TG | 13 | 12 |
| 75737 | 7 | 12490740 | 12490751 | 2 | 6  | 12 | CT | 27 | 4  |
| 75738 | 7 | 12494390 | 12494403 | 2 | 7  | 14 | AC | 20 | 3  |
| 75741 | 7 | 12496930 | 12496943 | 2 | 7  | 14 | CA | 22 | 4  |
| 75744 | 7 | 12504157 | 12504170 | 2 | 7  | 14 | AC | 29 | 4  |
| 75750 | 7 | 12509537 | 12509552 | 2 | 8  | 16 | GT | 19 | 6  |
| 75751 | 7 | 12513711 | 12513724 | 2 | 7  | 14 | AC | 12 | 4  |
| 75760 | 7 | 12517528 | 12517539 | 2 | 6  | 12 | TG | 26 | 3  |
| 75762 | 7 | 12521504 | 12521517 | 2 | 7  | 14 | TG | 26 | 4  |
| 75763 | 7 | 12521816 | 12521827 | 2 | 6  | 12 | AC | 21 | 8  |
| 75770 | 7 | 12533564 | 12533577 | 2 | 7  | 14 | CA | 34 | 4  |
| 75772 | 7 | 12541705 | 12541764 | 2 | 30 | 60 | TG | 10 | 16 |
| 75773 | 7 | 12543141 | 12543180 | 2 | 20 | 40 | TG | 7  | 9  |
| 75774 | 7 | 12543299 | 12543310 | 2 | 6  | 12 | CA | 31 | 3  |
| 75776 | 7 | 12543756 | 12543793 | 2 | 19 | 38 | GT | 14 | 8  |
| 75778 | 7 | 12547997 | 12548010 | 2 | 7  | 14 | AG | 24 | 3  |
| 75779 | 7 | 12548537 | 12548590 | 2 | 27 | 54 | GT | 8  | 12 |
| 75780 | 7 | 12548862 | 12548877 | 2 | 8  | 16 | TG | 25 | 7  |
| 75781 | 7 | 12550122 | 12550137 | 2 | 8  | 16 | TG | 21 | 8  |
| 75782 | 7 | 12550140 | 12550153 | 2 | 7  | 14 | TG | 18 | 5  |
| 75783 | 7 | 12550824 | 12550851 | 2 | 14 | 28 | CA | 13 | 9  |
| 75785 | 7 | 12554338 | 12554349 | 2 | 6  | 12 | CA | 31 | 3  |
| 75787 | 7 | 12557177 | 12557198 | 2 | 11 | 22 | TG | 12 | 9  |
| 75789 | 7 | 12557989 | 12558030 | 2 | 21 | 42 | TC | 17 | 8  |
| 75792 | 7 | 12566442 | 12566457 | 2 | 8  | 16 | CA | 21 | 6  |
| 75799 | 7 | 12568805 | 12568834 | 2 | 15 | 30 | CA | 10 | 14 |
| 75800 | 7 | 12573530 | 12573553 | 2 | 12 | 24 | TG | 16 | 5  |
| 75802 | 7 | 12579883 | 12579904 | 2 | 11 | 22 | TG | 20 | 9  |
| 75807 | 7 | 12582679 | 12582692 | 2 | 7  | 14 | TG | 19 | 5  |
| 75809 | 7 | 12586619 | 12586642 | 2 | 12 | 24 | CA | 22 | 10 |
| 75812 | 7 | 12586903 | 12586962 | 2 | 30 | 60 | GA | 11 | 11 |
| 75814 | 7 | 12587361 | 12587380 | 2 | 10 | 20 | AC | 21 | 13 |
| 75815 | 7 | 12592553 | 12592566 | 2 | 7  | 14 | CT | 18 | 7  |
| 75820 | 7 | 12603173 | 12603216 | 2 | 22 | 44 | GT | 15 | 13 |
| 75821 | 7 | 12604093 | 12604104 | 2 | 6  | 12 | GT | 25 | 10 |
| 75822 | 7 | 12609373 | 12609406 | 2 | 17 | 34 | GT | 24 | 8  |
| 75823 | 7 | 12612349 | 12612368 | 2 | 10 | 20 | GT | 22 | 4  |
| 75832 | 7 | 12624171 | 12624204 | 2 | 17 | 34 | GT | 7  | 7  |
| 75833 | 7 | 12624621 | 12624638 | 2 | 9  | 18 | AC | 21 | 5  |
| 75838 | 7 | 12630633 | 12630652 | 2 | 10 | 20 | CA | 13 | 7  |
| 75840 | 7 | 12636308 | 12636331 | 2 | 12 | 24 | TG | 15 | 4  |

|       |   |          |          |   |    |    |      |    |    |
|-------|---|----------|----------|---|----|----|------|----|----|
| 75842 | 7 | 12638657 | 12638671 | 3 | 5  | 15 | CAG  | 30 | 3  |
| 75844 | 7 | 12644408 | 12644437 | 2 | 15 | 30 | AC   | 13 | 9  |
| 75845 | 7 | 12644575 | 12644588 | 2 | 7  | 14 | AC   | 20 | 5  |
| 75846 | 7 | 12644848 | 12644867 | 2 | 10 | 20 | AC   | 7  | 5  |
| 75847 | 7 | 12646061 | 12646075 | 3 | 5  | 15 | GCT  | 15 | 3  |
| 75853 | 7 | 12651933 | 12651992 | 4 | 15 | 60 | TGAA | 15 | 12 |
| 75855 | 7 | 12655338 | 12655359 | 2 | 11 | 22 | AC   | 20 | 7  |
| 75856 | 7 | 12656490 | 12656507 | 2 | 9  | 18 | AC   | 20 | 14 |
| 75859 | 7 | 12662612 | 12662629 | 2 | 9  | 18 | GA   | 17 | 6  |
| 75860 | 7 | 12664149 | 12664162 | 2 | 7  | 14 | GA   | 29 | 3  |
| 75865 | 7 | 12674280 | 12674297 | 2 | 9  | 18 | TG   | 21 | 8  |
| 75866 | 7 | 12675824 | 12675839 | 4 | 4  | 16 | AAAT | 28 | 7  |
| 75868 | 7 | 12677480 | 12677495 | 4 | 4  | 16 | AATA | 29 | 3  |
| 75869 | 7 | 12680539 | 12680554 | 2 | 8  | 16 | TG   | 13 | 8  |
| 75874 | 7 | 12682762 | 12682781 | 2 | 10 | 20 | AC   | 13 | 3  |
| 75875 | 7 | 12682910 | 12682925 | 2 | 8  | 16 | AC   | 24 | 5  |
| 75876 | 7 | 12683108 | 12683141 | 2 | 17 | 34 | AC   | 21 | 14 |
| 75877 | 7 | 12684794 | 12684829 | 2 | 18 | 36 | CA   | 8  | 8  |
| 75878 | 7 | 12685322 | 12685339 | 2 | 9  | 18 | GT   | 25 | 9  |
| 75880 | 7 | 12685534 | 12685559 | 2 | 13 | 26 | TG   | 23 | 5  |
| 75881 | 7 | 12687237 | 12687258 | 2 | 11 | 22 | CA   | 14 | 7  |
| 75882 | 7 | 12687444 | 12687461 | 2 | 9  | 18 | CA   | 23 | 6  |
| 75883 | 7 | 12688116 | 12688129 | 2 | 7  | 14 | CA   | 22 | 6  |
| 75885 | 7 | 12690554 | 12690575 | 2 | 11 | 22 | TG   | 6  | 3  |
| 75893 | 7 | 12696265 | 12696278 | 2 | 7  | 14 | TG   | 16 | 12 |
| 75894 | 7 | 12696419 | 12696440 | 2 | 11 | 22 | CA   | 13 | 6  |
| 75897 | 7 | 12699027 | 12699038 | 2 | 6  | 12 | TG   | 21 | 10 |
| 75898 | 7 | 12702286 | 12702331 | 2 | 23 | 46 | AC   | 7  | 7  |
| 75900 | 7 | 12702604 | 12702635 | 2 | 16 | 32 | CT   | 12 | 8  |
| 75901 | 7 | 12702706 | 12702721 | 2 | 8  | 16 | CA   | 23 | 12 |
| 75902 | 7 | 12703160 | 12703197 | 2 | 19 | 38 | AC   | 8  | 10 |
| 75915 | 7 | 12717478 | 12717493 | 2 | 8  | 16 | TG   | 22 | 5  |
| 75916 | 7 | 12719820 | 12719839 | 4 | 5  | 20 | TTTC | 16 | 5  |
| 75918 | 7 | 12722412 | 12722447 | 2 | 18 | 36 | GT   | 14 | 9  |
| 75925 | 7 | 12735519 | 12735542 | 2 | 12 | 24 | AC   | 11 | 9  |
| 75930 | 7 | 12743152 | 12743177 | 2 | 13 | 26 | AC   | 22 | 7  |
| 75933 | 7 | 12752029 | 12752044 | 2 | 8  | 16 | TG   | 21 | 4  |
| 75936 | 7 | 12758007 | 12758020 | 2 | 7  | 14 | CA   | 18 | 11 |
| 75937 | 7 | 12758137 | 12758148 | 2 | 6  | 12 | TG   | 18 | 5  |
| 75938 | 7 | 12759117 | 12759128 | 2 | 6  | 12 | CA   | 28 | 4  |
| 75939 | 7 | 12762140 | 12762151 | 2 | 6  | 12 | GA   | 24 | 3  |
| 75942 | 7 | 12767682 | 12767693 | 2 | 6  | 12 | TG   | 29 | 6  |
| 75943 | 7 | 12767697 | 12767708 | 2 | 6  | 12 | GT   | 25 | 5  |
| 75950 | 7 | 12780343 | 12780363 | 3 | 7  | 21 | AGG  | 18 | 4  |
| 75951 | 7 | 12780615 | 12780632 | 3 | 6  | 18 | GAG  | 23 | 3  |
| 75957 | 7 | 12794156 | 12794181 | 2 | 13 | 26 | AC   | 8  | 9  |
| 75959 | 7 | 12796668 | 12796679 | 2 | 6  | 12 | TG   | 23 | 3  |
| 75963 | 7 | 12801506 | 12801519 | 2 | 7  | 14 | GT   | 19 | 4  |
| 75971 | 7 | 12818454 | 12818479 | 2 | 13 | 26 | AC   | 9  | 9  |
| 75972 | 7 | 12822453 | 12822479 | 3 | 9  | 27 | GAG  | 24 | 6  |
| 75974 | 7 | 12824811 | 12824828 | 2 | 9  | 18 | CA   | 16 | 10 |

|       |   |          |          |   |    |    |      |    |    |
|-------|---|----------|----------|---|----|----|------|----|----|
| 75975 | 7 | 12824831 | 12824844 | 2 | 7  | 14 | CA   | 7  | 6  |
| 75976 | 7 | 12829799 | 12829820 | 2 | 11 | 22 | GT   | 21 | 7  |
| 75977 | 7 | 12830040 | 12830061 | 2 | 11 | 22 | AC   | 21 | 8  |
| 75978 | 7 | 12830546 | 12830569 | 2 | 12 | 24 | GA   | 15 | 5  |
| 75979 | 7 | 12831638 | 12831681 | 2 | 22 | 44 | AC   | 12 | 11 |
| 75985 | 7 | 12840918 | 12840931 | 2 | 7  | 14 | AC   | 29 | 4  |
| 75987 | 7 | 12843025 | 12843048 | 4 | 6  | 24 | ATTT | 20 | 3  |
| 75992 | 7 | 12846016 | 12846059 | 2 | 22 | 44 | AC   | 9  | 11 |
| 75993 | 7 | 12846096 | 12846115 | 2 | 10 | 20 | CA   | 13 | 4  |
| 75994 | 7 | 12850419 | 12850432 | 2 | 7  | 14 | AG   | 20 | 3  |
| 75995 | 7 | 12852593 | 12852604 | 2 | 6  | 12 | GT   | 33 | 4  |
| 75996 | 7 | 12853414 | 12853427 | 2 | 7  | 14 | GT   | 23 | 3  |
| 75998 | 7 | 12855309 | 12855320 | 2 | 6  | 12 | AC   | 23 | 4  |
| 75999 | 7 | 12855459 | 12855470 | 2 | 6  | 12 | CA   | 26 | 4  |
| 76001 | 7 | 12857355 | 12857384 | 2 | 15 | 30 | GT   | 9  | 8  |
| 76003 | 7 | 12859788 | 12859835 | 2 | 24 | 48 | AC   | 17 | 17 |
| 76005 | 7 | 12862930 | 12862945 | 4 | 4  | 16 | TATT | 21 | 3  |
| 76009 | 7 | 12869844 | 12869863 | 2 | 10 | 20 | CA   | 23 | 5  |
| 76010 | 7 | 12870261 | 12870272 | 2 | 6  | 12 | TG   | 23 | 3  |
| 76013 | 7 | 12878032 | 12878055 | 2 | 12 | 24 | CA   | 21 | 10 |
| 76014 | 7 | 12884066 | 12884079 | 2 | 7  | 14 | GT   | 25 | 4  |
| 76016 | 7 | 12885582 | 12885593 | 2 | 6  | 12 | CA   | 18 | 3  |
| 76018 | 7 | 12888868 | 12888891 | 2 | 12 | 24 | AC   | 14 | 10 |
| 76021 | 7 | 12893107 | 12893122 | 2 | 8  | 16 | TG   | 28 | 6  |
| 76023 | 7 | 12895806 | 12895827 | 2 | 11 | 22 | TG   | 20 | 10 |
| 76032 | 7 | 12901106 | 12901117 | 2 | 6  | 12 | AC   | 6  | 5  |
| 76039 | 7 | 12908802 | 12908817 | 2 | 8  | 16 | GT   | 12 | 12 |
| 76040 | 7 | 12908819 | 12908832 | 2 | 7  | 14 | TG   | 25 | 20 |
| 76046 | 7 | 12920840 | 12920851 | 2 | 6  | 12 | TG   | 15 | 8  |
| 76047 | 7 | 12922695 | 12922710 | 2 | 8  | 16 | CA   | 22 | 4  |
| 76049 | 7 | 12930592 | 12930611 | 2 | 10 | 20 | CA   | 14 | 8  |
| 76050 | 7 | 12930716 | 12930735 | 2 | 10 | 20 | TG   | 10 | 11 |
| 76058 | 7 | 12942161 | 12942208 | 2 | 24 | 48 | CT   | 6  | 6  |
| 76061 | 7 | 12967903 | 12967930 | 4 | 7  | 28 | TTTG | 26 | 4  |
| 76069 | 7 | 12993133 | 12993166 | 2 | 17 | 34 | AC   | 7  | 8  |
| 76079 | 7 | 13006096 | 13006113 | 3 | 6  | 18 | TCC  | 32 | 6  |
| 76088 | 7 | 13017927 | 13017948 | 2 | 11 | 22 | AC   | 24 | 11 |
| 76096 | 7 | 13031990 | 13032003 | 2 | 7  | 14 | AG   | 19 | 4  |
| 76098 | 7 | 13033185 | 13033200 | 2 | 8  | 16 | AT   | 8  | 4  |
| 76101 | 7 | 13042747 | 13042770 | 3 | 8  | 24 | CTG  | 29 | 5  |
| 76105 | 7 | 13065417 | 13065438 | 2 | 11 | 22 | TC   | 20 | 11 |
| 76112 | 7 | 13077415 | 13077428 | 2 | 7  | 14 | TG   | 27 | 4  |
| 76114 | 7 | 13081452 | 13081465 | 2 | 7  | 14 | TG   | 20 | 3  |
| 76115 | 7 | 13086086 | 13086097 | 2 | 6  | 12 | GC   | 33 | 6  |
| 76116 | 7 | 13089735 | 13089778 | 4 | 11 | 44 | AAAG | 9  | 8  |
| 76117 | 7 | 13091335 | 13091360 | 2 | 13 | 26 | GT   | 8  | 6  |
| 76118 | 7 | 13091595 | 13091616 | 2 | 11 | 22 | AC   | 10 | 12 |
| 76119 | 7 | 13091827 | 13091858 | 2 | 16 | 32 | TG   | 14 | 6  |
| 76121 | 7 | 13094913 | 13094926 | 2 | 7  | 14 | TA   | 15 | 4  |
| 76122 | 7 | 13097652 | 13097669 | 3 | 6  | 18 | AGC  | 24 | 3  |
| 76125 | 7 | 13103056 | 13103075 | 2 | 10 | 20 | AC   | 14 | 5  |

|       |   |          |          |   |    |    |      |    |    |
|-------|---|----------|----------|---|----|----|------|----|----|
| 76126 | 7 | 13103158 | 13103175 | 2 | 9  | 18 | TG   | 15 | 5  |
| 76132 | 7 | 13105457 | 13105470 | 2 | 7  | 14 | AC   | 16 | 5  |
| 76135 | 7 | 13113901 | 13113916 | 2 | 8  | 16 | AC   | 17 | 5  |
| 76136 | 7 | 13114720 | 13114737 | 2 | 9  | 18 | TG   | 27 | 9  |
| 76137 | 7 | 13120374 | 13120415 | 2 | 21 | 42 | GA   | 9  | 9  |
| 76149 | 7 | 13144901 | 13144920 | 2 | 10 | 20 | GT   | 10 | 8  |
| 76150 | 7 | 13145855 | 13145872 | 2 | 9  | 18 | AG   | 21 | 6  |
| 76151 | 7 | 13147937 | 13147968 | 2 | 16 | 32 | TG   | 14 | 12 |
| 76155 | 7 | 13153932 | 13153949 | 2 | 9  | 18 | TG   | 19 | 4  |
| 76159 | 7 | 13160750 | 13160771 | 2 | 11 | 22 | TC   | 23 | 3  |
| 76160 | 7 | 13160886 | 13160901 | 2 | 8  | 16 | AC   | 21 | 5  |
| 76161 | 7 | 13161242 | 13161271 | 3 | 10 | 30 | TGC  | 23 | 6  |
| 76163 | 7 | 13161912 | 13161929 | 2 | 9  | 18 | CT   | 12 | 5  |
| 76165 | 7 | 13163442 | 13163459 | 2 | 9  | 18 | GA   | 15 | 4  |
| 76172 | 7 | 13172122 | 13172159 | 2 | 19 | 38 | AC   | 8  | 10 |
| 76174 | 7 | 13175688 | 13175707 | 2 | 10 | 20 | AC   | 14 | 14 |
| 76175 | 7 | 13176843 | 13176868 | 2 | 13 | 26 | CA   | 24 | 11 |
| 76176 | 7 | 13176958 | 13176971 | 2 | 7  | 14 | CA   | 22 | 3  |
| 76180 | 7 | 13185283 | 13185298 | 2 | 8  | 16 | GT   | 20 | 9  |
| 76181 | 7 | 13185481 | 13185494 | 2 | 7  | 14 | AC   | 19 | 3  |
| 76183 | 7 | 13188370 | 13188385 | 2 | 8  | 16 | TG   | 17 | 15 |
| 76184 | 7 | 13188576 | 13188593 | 2 | 9  | 18 | CA   | 18 | 6  |
| 76186 | 7 | 13195535 | 13195555 | 3 | 7  | 21 | AAT  | 9  | 3  |
| 76190 | 7 | 13203139 | 13203164 | 2 | 13 | 26 | CA   | 12 | 10 |
| 76194 | 7 | 13208212 | 13208225 | 2 | 7  | 14 | CA   | 29 | 5  |
| 76196 | 7 | 13211385 | 13211400 | 2 | 8  | 16 | TC   | 19 | 4  |
| 76197 | 7 | 13214180 | 13214207 | 2 | 14 | 28 | AC   | 9  | 11 |
| 76201 | 7 | 13220787 | 13220801 | 3 | 5  | 15 | TCT  | 14 | 10 |
| 76203 | 7 | 13224410 | 13224441 | 2 | 16 | 32 | GT   | 12 | 9  |
| 76205 | 7 | 13226281 | 13226295 | 3 | 5  | 15 | CCT  | 34 | 3  |
| 76210 | 7 | 13232744 | 13232781 | 2 | 19 | 38 | GT   | 12 | 14 |
| 76220 | 7 | 13242984 | 13243015 | 4 | 8  | 32 | TAAA | 16 | 6  |
| 76222 | 7 | 13243828 | 13243842 | 3 | 5  | 15 | CAC  | 17 | 4  |
| 76225 | 7 | 13244059 | 13244073 | 3 | 5  | 15 | CAC  | 19 | 8  |
| 76226 | 7 | 13248109 | 13248124 | 4 | 4  | 16 | GCTC | 25 | 6  |
| 76230 | 7 | 13256572 | 13256583 | 2 | 6  | 12 | GT   | 22 | 4  |
| 76231 | 7 | 13258286 | 13258297 | 2 | 6  | 12 | TC   | 16 | 9  |
| 76234 | 7 | 13260944 | 13260958 | 3 | 5  | 15 | GCT  | 23 | 5  |
| 76240 | 7 | 13267511 | 13267532 | 2 | 11 | 22 | CA   | 21 | 10 |
| 76243 | 7 | 13272302 | 13272329 | 2 | 14 | 28 | CA   | 24 | 8  |
| 76245 | 7 | 13276395 | 13276424 | 2 | 15 | 30 | CA   | 6  | 6  |
| 76246 | 7 | 13278889 | 13278916 | 2 | 14 | 28 | CA   | 11 | 6  |
| 76247 | 7 | 13279488 | 13279503 | 4 | 4  | 16 | TTTA | 19 | 4  |
| 76249 | 7 | 13281497 | 13281522 | 2 | 13 | 26 | TG   | 26 | 8  |
| 76250 | 7 | 13289665 | 13289676 | 2 | 6  | 12 | CA   | 23 | 3  |
| 76253 | 7 | 13295029 | 13295048 | 2 | 10 | 20 | TG   | 23 | 6  |
| 76259 | 7 | 13307688 | 13307708 | 3 | 7  | 21 | GCA  | 25 | 4  |
| 76262 | 7 | 13314198 | 13314233 | 2 | 18 | 36 | GA   | 18 | 9  |
| 76266 | 7 | 13326692 | 13326707 | 4 | 4  | 16 | TTTG | 8  | 3  |
| 76267 | 7 | 13327297 | 13327342 | 2 | 23 | 46 | AC   | 7  | 9  |
| 76268 | 7 | 13327807 | 13327830 | 2 | 12 | 24 | TG   | 18 | 8  |

|       |   |          |          |   |    |    |      |    |    |
|-------|---|----------|----------|---|----|----|------|----|----|
| 76269 | 7 | 13329182 | 13329197 | 2 | 8  | 16 | TG   | 23 | 3  |
| 76271 | 7 | 13329569 | 13329620 | 2 | 26 | 52 | AC   | 11 | 13 |
| 76275 | 7 | 13342658 | 13342685 | 2 | 14 | 28 | GT   | 14 | 9  |
| 76279 | 7 | 13348144 | 13348155 | 2 | 6  | 12 | CA   | 14 | 3  |
| 76280 | 7 | 13348496 | 13348510 | 3 | 5  | 15 | CAC  | 20 | 7  |
| 76281 | 7 | 13348511 | 13348528 | 3 | 6  | 18 | CAA  | 21 | 8  |
| 76284 | 7 | 13349453 | 13349464 | 2 | 6  | 12 | TG   | 28 | 4  |
| 76285 | 7 | 13349659 | 13349674 | 4 | 4  | 16 | TTTG | 35 | 5  |
| 76289 | 7 | 13355285 | 13355296 | 2 | 6  | 12 | GT   | 38 | 3  |
| 76292 | 7 | 13361354 | 13361392 | 3 | 13 | 39 | ATC  | 24 | 7  |
| 76296 | 7 | 13373794 | 13373813 | 2 | 10 | 20 | AC   | 15 | 3  |
| 76297 | 7 | 13390365 | 13390406 | 2 | 21 | 42 | AG   | 9  | 5  |
| 76304 | 7 | 13398065 | 13398094 | 2 | 15 | 30 | CA   | 12 | 9  |
| 76305 | 7 | 13403141 | 13403156 | 2 | 8  | 16 | CT   | 27 | 4  |
| 76306 | 7 | 13404168 | 13404213 | 2 | 23 | 46 | TG   | 8  | 10 |
| 76313 | 7 | 13430970 | 13430981 | 2 | 6  | 12 | GT   | 25 | 4  |
| 76319 | 7 | 13456267 | 13456292 | 2 | 13 | 26 | CA   | 20 | 10 |
| 76321 | 7 | 13457951 | 13457964 | 2 | 7  | 14 | AC   | 29 | 5  |
| 76322 | 7 | 13458208 | 13458239 | 2 | 16 | 32 | AC   | 16 | 13 |
| 76323 | 7 | 13459227 | 13459246 | 4 | 5  | 20 | ATTC | 31 | 3  |
| 76324 | 7 | 13459991 | 13460002 | 2 | 6  | 12 | CA   | 21 | 3  |
| 76326 | 7 | 13462094 | 13462121 | 2 | 14 | 28 | TG   | 12 | 6  |
| 76328 | 7 | 13463758 | 13463777 | 2 | 10 | 20 | TC   | 34 | 9  |
| 76330 | 7 | 13466392 | 13466417 | 2 | 13 | 26 | TG   | 7  | 12 |
| 76337 | 7 | 13486310 | 13486333 | 2 | 12 | 24 | CA   | 7  | 7  |
| 76345 | 7 | 13505614 | 13505641 | 2 | 14 | 28 | GT   | 18 | 12 |
| 76350 | 7 | 13507583 | 13507597 | 3 | 5  | 15 | CTC  | 25 | 5  |
| 76351 | 7 | 13508536 | 13508549 | 2 | 7  | 14 | AC   | 25 | 5  |
| 76353 | 7 | 13510897 | 13510911 | 3 | 5  | 15 | GAT  | 25 | 5  |
| 76354 | 7 | 13512079 | 13512112 | 2 | 17 | 34 | TG   | 13 | 13 |
| 76356 | 7 | 13521384 | 13521401 | 2 | 9  | 18 | TG   | 18 | 7  |
| 76359 | 7 | 13530597 | 13530608 | 2 | 6  | 12 | AC   | 10 | 5  |
| 76360 | 7 | 13530611 | 13530624 | 2 | 7  | 14 | AC   | 25 | 7  |
| 76362 | 7 | 13530824 | 13530861 | 2 | 19 | 38 | TG   | 10 | 10 |
| 76365 | 7 | 13539527 | 13539547 | 3 | 7  | 21 | GAA  | 11 | 5  |
| 76368 | 7 | 13539941 | 13539955 | 3 | 5  | 15 | TAT  | 30 | 3  |
| 76376 | 7 | 13556999 | 13557026 | 2 | 14 | 28 | TG   | 13 | 12 |
| 76380 | 7 | 13568212 | 13568223 | 2 | 6  | 12 | AC   | 21 | 3  |
| 76383 | 7 | 13578346 | 13578373 | 2 | 14 | 28 | CA   | 8  | 13 |
| 76391 | 7 | 13608789 | 13608808 | 2 | 10 | 20 | CA   | 23 | 3  |
| 76395 | 7 | 13619701 | 13619728 | 2 | 14 | 28 | TG   | 25 | 9  |
| 76404 | 7 | 13633848 | 13633861 | 2 | 7  | 14 | TG   | 14 | 6  |
| 76405 | 7 | 13633864 | 13633879 | 2 | 8  | 16 | TG   | 21 | 7  |
| 76407 | 7 | 13638621 | 13638648 | 2 | 14 | 28 | GA   | 14 | 18 |
| 76410 | 7 | 13643206 | 13643219 | 2 | 7  | 14 | CA   | 27 | 3  |
| 76421 | 7 | 13651917 | 13651930 | 2 | 7  | 14 | GT   | 13 | 3  |
| 76422 | 7 | 13651935 | 13651948 | 2 | 7  | 14 | TG   | 17 | 4  |
| 76428 | 7 | 13655296 | 13655307 | 2 | 6  | 12 | TG   | 18 | 3  |
| 76429 | 7 | 13656227 | 13656246 | 2 | 10 | 20 | AC   | 14 | 4  |
| 76432 | 7 | 13658122 | 13658141 | 2 | 10 | 20 | TG   | 23 | 6  |
| 76433 | 7 | 13658268 | 13658283 | 2 | 8  | 16 | GT   | 15 | 3  |

|       |   |          |          |   |    |    |      |    |    |
|-------|---|----------|----------|---|----|----|------|----|----|
| 76434 | 7 | 13658443 | 13658460 | 2 | 9  | 18 | GT   | 23 | 3  |
| 76435 | 7 | 13658594 | 13658615 | 2 | 11 | 22 | GT   | 22 | 4  |
| 76437 | 7 | 13659608 | 13659621 | 2 | 7  | 14 | AC   | 21 | 3  |
| 76443 | 7 | 13668195 | 13668216 | 2 | 11 | 22 | CA   | 11 | 8  |
| 76446 | 7 | 13675689 | 13675702 | 2 | 7  | 14 | AC   | 17 | 3  |
| 76447 | 7 | 13675883 | 13675920 | 2 | 19 | 38 | GT   | 11 | 9  |
| 76464 | 7 | 13687801 | 13687812 | 2 | 6  | 12 | TG   | 29 | 3  |
| 76465 | 7 | 13689178 | 13689199 | 2 | 11 | 22 | TG   | 14 | 8  |
| 76474 | 7 | 13699919 | 13699932 | 2 | 7  | 14 | GT   | 19 | 10 |
| 76475 | 7 | 13700326 | 13700349 | 3 | 8  | 24 | GAG  | 26 | 5  |
| 76478 | 7 | 13703519 | 13703542 | 3 | 8  | 24 | CTT  | 23 | 8  |
| 76479 | 7 | 13703863 | 13703878 | 2 | 8  | 16 | TG   | 29 | 4  |
| 76484 | 7 | 13704573 | 13704600 | 2 | 14 | 28 | AC   | 15 | 13 |
| 76485 | 7 | 13704812 | 13704823 | 2 | 6  | 12 | TG   | 16 | 3  |
| 76487 | 7 | 13712793 | 13712814 | 2 | 11 | 22 | TG   | 21 | 6  |
| 76488 | 7 | 13714896 | 13714913 | 2 | 9  | 18 | AC   | 24 | 7  |
| 76494 | 7 | 13725229 | 13725276 | 2 | 24 | 48 | TG   | 8  | 11 |
| 76501 | 7 | 13760481 | 13760494 | 2 | 7  | 14 | GT   | 26 | 3  |
| 76502 | 7 | 13760652 | 13760701 | 2 | 25 | 50 | CA   | 15 | 18 |
| 76504 | 7 | 13762375 | 13762392 | 2 | 9  | 18 | CA   | 18 | 3  |
| 76513 | 7 | 13776684 | 13776701 | 2 | 9  | 18 | AC   | 23 | 19 |
| 76516 | 7 | 13781811 | 13781832 | 2 | 11 | 22 | CA   | 22 | 11 |
| 76519 | 7 | 13787027 | 13787040 | 2 | 7  | 14 | CT   | 22 | 3  |
| 76522 | 7 | 13789376 | 13789415 | 2 | 20 | 40 | TG   | 8  | 10 |
| 76525 | 7 | 13800668 | 13800679 | 2 | 6  | 12 | CA   | 24 | 3  |
| 76527 | 7 | 13802045 | 13802058 | 2 | 7  | 14 | CA   | 26 | 3  |
| 76529 | 7 | 13809556 | 13809581 | 2 | 13 | 26 | TG   | 15 | 9  |
| 76532 | 7 | 13813189 | 13813204 | 2 | 8  | 16 | CA   | 22 | 5  |
| 76535 | 7 | 13815652 | 13815675 | 2 | 12 | 24 | GT   | 27 | 6  |
| 76540 | 7 | 13821985 | 13822000 | 2 | 8  | 16 | GT   | 13 | 6  |
| 76541 | 7 | 13822806 | 13822817 | 2 | 6  | 12 | TG   | 25 | 4  |
| 76544 | 7 | 13827052 | 13827083 | 2 | 16 | 32 | TG   | 14 | 9  |
| 76545 | 7 | 13827584 | 13827599 | 2 | 8  | 16 | GT   | 18 | 3  |
| 76548 | 7 | 13830013 | 13830024 | 2 | 6  | 12 | AG   | 22 | 3  |
| 76550 | 7 | 13832753 | 13832768 | 2 | 8  | 16 | CA   | 18 | 8  |
| 76551 | 7 | 13832771 | 13832784 | 2 | 7  | 14 | CA   | 6  | 5  |
| 76552 | 7 | 13834757 | 13834772 | 2 | 8  | 16 | CA   | 9  | 3  |
| 76554 | 7 | 13837783 | 13837794 | 2 | 6  | 12 | AC   | 22 | 3  |
| 76555 | 7 | 13840412 | 13840447 | 2 | 18 | 36 | GT   | 8  | 11 |
| 76560 | 7 | 13849053 | 13849074 | 2 | 11 | 22 | TG   | 13 | 6  |
| 76562 | 7 | 13849117 | 13849140 | 2 | 12 | 24 | TG   | 8  | 7  |
| 76567 | 7 | 13857049 | 13857080 | 2 | 16 | 32 | TG   | 7  | 7  |
| 76568 | 7 | 13857246 | 13857281 | 2 | 18 | 36 | GT   | 8  | 10 |
| 76569 | 7 | 13857465 | 13857504 | 2 | 20 | 40 | CA   | 7  | 11 |
| 76570 | 7 | 13857665 | 13857684 | 2 | 10 | 20 | AC   | 17 | 5  |
| 76571 | 7 | 13859574 | 13859589 | 2 | 8  | 16 | TC   | 26 | 4  |
| 76573 | 7 | 13861046 | 13861077 | 2 | 16 | 32 | AC   | 18 | 9  |
| 76584 | 7 | 13877377 | 13877400 | 4 | 6  | 24 | GGAT | 25 | 5  |
| 76586 | 7 | 13880917 | 13880932 | 2 | 8  | 16 | CA   | 19 | 9  |
| 76588 | 7 | 13881273 | 13881298 | 2 | 13 | 26 | TG   | 19 | 6  |
| 76589 | 7 | 13882304 | 13882321 | 2 | 9  | 18 | GT   | 22 | 4  |



|       |   |          |          |   |    |    |      |    |    |
|-------|---|----------|----------|---|----|----|------|----|----|
| 76590 | 7 | 13882589 | 13882604 | 2 | 8  | 16 | GT   | 21 | 9  |
| 76591 | 7 | 13882607 | 13882620 | 2 | 7  | 14 | GT   | 20 | 8  |
| 76592 | 7 | 13882680 | 13882709 | 2 | 15 | 30 | GT   | 11 | 8  |
| 76593 | 7 | 13890007 | 13890020 | 2 | 7  | 14 | CA   | 27 | 6  |
| 76595 | 7 | 13890296 | 13890333 | 2 | 19 | 38 | AC   | 9  | 9  |
| 76596 | 7 | 13895116 | 13895145 | 2 | 15 | 30 | GT   | 14 | 7  |
| 76605 | 7 | 13912613 | 13912632 | 2 | 10 | 20 | AC   | 15 | 6  |
| 76608 | 7 | 13922973 | 13922992 | 2 | 10 | 20 | CA   | 24 | 5  |
| 76617 | 7 | 13944103 | 13944126 | 3 | 8  | 24 | AGC  | 27 | 11 |
| 76622 | 7 | 13954058 | 13954089 | 2 | 16 | 32 | AC   | 12 | 8  |
| 76623 | 7 | 13954442 | 13954467 | 2 | 13 | 26 | GT   | 22 | 4  |
| 76627 | 7 | 13960709 | 13960720 | 2 | 6  | 12 | GT   | 23 | 3  |
| 76636 | 7 | 13985066 | 13985101 | 2 | 18 | 36 | TG   | 17 | 9  |
| 76638 | 7 | 13987210 | 13987227 | 2 | 9  | 18 | GA   | 23 | 7  |
| 76640 | 7 | 13989355 | 13989370 | 2 | 8  | 16 | CA   | 6  | 11 |
| 76651 | 7 | 13999391 | 13999434 | 2 | 22 | 44 | TG   | 15 | 10 |
| 76666 | 7 | 14034084 | 14034121 | 2 | 19 | 38 | CT   | 6  | 5  |
| 76667 | 7 | 14035325 | 14035338 | 2 | 7  | 14 | TG   | 23 | 6  |
| 76668 | 7 | 14035343 | 14035356 | 2 | 7  | 14 | TG   | 18 | 3  |
| 76671 | 7 | 14037573 | 14037588 | 2 | 8  | 16 | CA   | 27 | 6  |
| 76672 | 7 | 14037705 | 14037716 | 2 | 6  | 12 | AC   | 21 | 4  |
| 76691 | 7 | 14060873 | 14060892 | 2 | 10 | 20 | TG   | 20 | 5  |
| 76698 | 7 | 14080945 | 14080992 | 2 | 24 | 48 | AC   | 7  | 8  |
| 76699 | 7 | 14081895 | 14081910 | 2 | 8  | 16 | CT   | 16 | 3  |
| 76701 | 7 | 14084401 | 14084430 | 2 | 15 | 30 | AC   | 7  | 5  |
| 76702 | 7 | 14086034 | 14086049 | 2 | 8  | 16 | GT   | 23 | 8  |
| 76704 | 7 | 14092254 | 14092269 | 4 | 4  | 16 | TTTA | 26 | 6  |
| 76711 | 7 | 14107635 | 14107652 | 2 | 9  | 18 | CA   | 26 | 5  |
| 76717 | 7 | 14115568 | 14115581 | 2 | 7  | 14 | TG   | 22 | 4  |
| 76721 | 7 | 14118343 | 14118358 | 2 | 8  | 16 | CA   | 14 | 3  |
| 76722 | 7 | 14118510 | 14118539 | 2 | 15 | 30 | CA   | 10 | 10 |
| 76723 | 7 | 14118726 | 14118751 | 2 | 13 | 26 | GT   | 12 | 11 |
| 76725 | 7 | 14122683 | 14122698 | 4 | 4  | 16 | CCCT | 18 | 6  |
| 76726 | 7 | 14124732 | 14124751 | 4 | 5  | 20 | TTTA | 17 | 4  |
| 76728 | 7 | 14126041 | 14126054 | 2 | 7  | 14 | AC   | 22 | 4  |
| 76729 | 7 | 14126123 | 14126152 | 2 | 15 | 30 | AC   | 14 | 6  |
| 76734 | 7 | 14131197 | 14131212 | 4 | 4  | 16 | AAAG | 9  | 4  |
| 76740 | 7 | 14135342 | 14135365 | 2 | 12 | 24 | TG   | 12 | 9  |
| 76751 | 7 | 14147405 | 14147430 | 2 | 13 | 26 | AC   | 15 | 6  |
| 76758 | 7 | 14167630 | 14167649 | 2 | 10 | 20 | CA   | 20 | 10 |
| 76759 | 7 | 14167830 | 14167847 | 2 | 9  | 18 | GT   | 17 | 9  |
| 76760 | 7 | 14167850 | 14167863 | 2 | 7  | 14 | GT   | 17 | 12 |
| 76763 | 7 | 14174423 | 14174438 | 2 | 8  | 16 | TG   | 23 | 3  |
| 76773 | 7 | 14188134 | 14188161 | 2 | 14 | 28 | GT   | 9  | 9  |
| 76775 | 7 | 14192537 | 14192548 | 2 | 6  | 12 | CA   | 28 | 3  |
| 76777 | 7 | 14193948 | 14193973 | 2 | 13 | 26 | GT   | 21 | 9  |
| 76778 | 7 | 14199820 | 14199857 | 2 | 19 | 38 | CA   | 18 | 7  |
| 76779 | 7 | 14202041 | 14202098 | 2 | 29 | 58 | AC   | 9  | 14 |
| 76780 | 7 | 14204103 | 14204116 | 2 | 7  | 14 | TG   | 23 | 3  |
| 76783 | 7 | 14206833 | 14206844 | 2 | 6  | 12 | CT   | 31 | 3  |
| 76802 | 7 | 14240818 | 14240845 | 4 | 7  | 28 | AGTC | 29 | 5  |

|       |   |          |          |   |    |    |      |    |    |
|-------|---|----------|----------|---|----|----|------|----|----|
| 76803 | 7 | 14241384 | 14241403 | 2 | 10 | 20 | AC   | 10 | 6  |
| 76804 | 7 | 14243052 | 14243067 | 2 | 8  | 16 | CA   | 22 | 7  |
| 76805 | 7 | 14243162 | 14243185 | 2 | 12 | 24 | AC   | 15 | 12 |
| 76806 | 7 | 14243354 | 14243373 | 2 | 10 | 20 | CA   | 7  | 5  |
| 76811 | 7 | 14256431 | 14256446 | 4 | 4  | 16 | GAGG | 12 | 4  |
| 76814 | 7 | 14258559 | 14258576 | 2 | 9  | 18 | AC   | 22 | 5  |
| 76816 | 7 | 14260853 | 14260876 | 2 | 12 | 24 | AG   | 11 | 12 |
| 76833 | 7 | 14293122 | 14293149 | 2 | 14 | 28 | CA   | 16 | 8  |
| 76836 | 7 | 14296958 | 14296973 | 2 | 8  | 16 | AC   | 14 | 6  |
| 76838 | 7 | 14301416 | 14301427 | 2 | 6  | 12 | GT   | 25 | 7  |
| 76841 | 7 | 14304363 | 14304394 | 2 | 16 | 32 | GT   | 6  | 5  |
| 76845 | 7 | 14315061 | 14315096 | 4 | 9  | 36 | AGGA | 17 | 11 |
| 76857 | 7 | 14330500 | 14330513 | 2 | 7  | 14 | GA   | 14 | 5  |
| 76862 | 7 | 14336974 | 14336999 | 2 | 13 | 26 | GT   | 14 | 17 |
| 76865 | 7 | 14342686 | 14342705 | 2 | 10 | 20 | CA   | 23 | 16 |
| 76867 | 7 | 14344215 | 14344226 | 2 | 6  | 12 | TC   | 24 | 4  |
| 76868 | 7 | 14345597 | 14345610 | 2 | 7  | 14 | AC   | 20 | 4  |
| 76869 | 7 | 14347090 | 14347115 | 2 | 13 | 26 | AC   | 13 | 8  |
| 76870 | 7 | 14347582 | 14347613 | 2 | 16 | 32 | TG   | 11 | 11 |
| 76879 | 7 | 14357210 | 14357225 | 2 | 8  | 16 | CA   | 27 | 8  |
| 76880 | 7 | 14358367 | 14358382 | 2 | 8  | 16 | TG   | 19 | 7  |
| 76881 | 7 | 14359411 | 14359446 | 3 | 12 | 36 | GAA  | 28 | 8  |
| 76882 | 7 | 14361375 | 14361390 | 4 | 4  | 16 | CACG | 16 | 7  |
| 76885 | 7 | 14362314 | 14362340 | 3 | 9  | 27 | GAG  | 6  | 5  |
| 76887 | 7 | 14362921 | 14362944 | 3 | 8  | 24 | AAC  | 23 | 9  |
| 76891 | 7 | 14372007 | 14372018 | 2 | 6  | 12 | AT   | 17 | 5  |
| 76895 | 7 | 14374099 | 14374118 | 2 | 10 | 20 | TG   | 6  | 3  |
| 76896 | 7 | 14374162 | 14374176 | 3 | 5  | 15 | AGA  | 16 | 7  |
| 76897 | 7 | 14374225 | 14374248 | 2 | 12 | 24 | CA   | 14 | 10 |
| 76900 | 7 | 14374570 | 14374593 | 4 | 6  | 24 | TCCA | 13 | 3  |
| 76903 | 7 | 14375462 | 14375479 | 3 | 6  | 18 | TCT  | 32 | 3  |
| 76909 | 7 | 14399319 | 14399342 | 2 | 12 | 24 | AC   | 18 | 4  |
| 76913 | 7 | 14406467 | 14406478 | 2 | 6  | 12 | CA   | 14 | 3  |
| 76916 | 7 | 14406608 | 14406627 | 2 | 10 | 20 | GT   | 22 | 7  |
| 76917 | 7 | 14406815 | 14406826 | 2 | 6  | 12 | GT   | 13 | 8  |
| 76923 | 7 | 14419333 | 14419352 | 4 | 5  | 20 | AAAG | 30 | 4  |
| 76928 | 7 | 14427092 | 14427103 | 2 | 6  | 12 | AC   | 16 | 4  |
| 76929 | 7 | 14432347 | 14432364 | 2 | 9  | 18 | CA   | 19 | 9  |
| 76930 | 7 | 14432407 | 14432418 | 2 | 6  | 12 | AC   | 26 | 4  |
| 76935 | 7 | 14445142 | 14445162 | 3 | 7  | 21 | CTC  | 16 | 3  |
| 76936 | 7 | 14448395 | 14448406 | 2 | 6  | 12 | GT   | 21 | 11 |
| 76937 | 7 | 14450669 | 14450690 | 2 | 11 | 22 | GT   | 32 | 6  |
| 76940 | 7 | 14456324 | 14456344 | 3 | 7  | 21 | GCT  | 28 | 7  |
| 76943 | 7 | 14467651 | 14467680 | 2 | 15 | 30 | AC   | 15 | 11 |
| 76944 | 7 | 14467826 | 14467877 | 2 | 26 | 52 | TG   | 8  | 6  |
| 76946 | 7 | 14468507 | 14468536 | 2 | 15 | 30 | CA   | 10 | 10 |
| 76949 | 7 | 14485985 | 14486012 | 2 | 14 | 28 | CA   | 11 | 7  |
| 76950 | 7 | 14486439 | 14486468 | 2 | 15 | 30 | CA   | 7  | 10 |
| 76952 | 7 | 14487771 | 14487786 | 2 | 8  | 16 | TG   | 20 | 4  |
| 76954 | 7 | 14489594 | 14489605 | 2 | 6  | 12 | GT   | 24 | 7  |
| 76955 | 7 | 14489780 | 14489817 | 2 | 19 | 38 | CA   | 16 | 12 |

|       |   |          |          |   |    |    |      |    |    |
|-------|---|----------|----------|---|----|----|------|----|----|
| 76956 | 7 | 14491778 | 14491803 | 2 | 13 | 26 | AC   | 21 | 7  |
| 76957 | 7 | 14491970 | 14491985 | 2 | 8  | 16 | CA   | 20 | 10 |
| 76958 | 7 | 14493640 | 14493661 | 2 | 11 | 22 | TG   | 20 | 8  |
| 76960 | 7 | 14502433 | 14502458 | 2 | 13 | 26 | TG   | 16 | 12 |
| 76962 | 7 | 14504533 | 14504560 | 2 | 14 | 28 | TC   | 9  | 10 |
| 76964 | 7 | 14506964 | 14506987 | 2 | 12 | 24 | CA   | 22 | 10 |
| 76968 | 7 | 14519838 | 14519859 | 2 | 11 | 22 | GT   | 18 | 9  |
| 76969 | 7 | 14521145 | 14521164 | 2 | 10 | 20 | GT   | 14 | 8  |
| 76971 | 7 | 14522822 | 14522837 | 2 | 8  | 16 | TG   | 23 | 6  |
| 76972 | 7 | 14522884 | 14522907 | 3 | 8  | 24 | CCT  | 19 | 5  |
| 76983 | 7 | 14538752 | 14538783 | 2 | 16 | 32 | TG   | 25 | 7  |
| 76988 | 7 | 14543846 | 14543867 | 2 | 11 | 22 | CA   | 11 | 13 |
| 76989 | 7 | 14543908 | 14543921 | 2 | 7  | 14 | TG   | 29 | 3  |
| 76992 | 7 | 14546974 | 14546993 | 2 | 10 | 20 | CA   | 15 | 10 |
| 77002 | 7 | 14560178 | 14560191 | 2 | 7  | 14 | AG   | 30 | 5  |
| 77006 | 7 | 14564577 | 14564598 | 2 | 11 | 22 | AG   | 9  | 7  |
| 77012 | 7 | 14570484 | 14570503 | 2 | 10 | 20 | GA   | 21 | 6  |
| 77013 | 7 | 14570911 | 14570922 | 2 | 6  | 12 | GT   | 29 | 4  |
| 77017 | 7 | 14575150 | 14575161 | 2 | 6  | 12 | GT   | 11 | 11 |
| 77019 | 7 | 14575376 | 14575403 | 2 | 14 | 28 | TG   | 14 | 7  |
| 77020 | 7 | 14575598 | 14575612 | 3 | 5  | 15 | TTG  | 24 | 3  |
| 77022 | 7 | 14576415 | 14576430 | 4 | 4  | 16 | GCGG | 24 | 5  |
| 77023 | 7 | 14577218 | 14577231 | 2 | 7  | 14 | TG   | 20 | 8  |
| 77026 | 7 | 14579040 | 14579059 | 2 | 10 | 20 | AC   | 16 | 9  |
| 77028 | 7 | 14579491 | 14579512 | 2 | 11 | 22 | GT   | 16 | 5  |
| 77029 | 7 | 14579733 | 14579748 | 2 | 8  | 16 | AC   | 17 | 5  |
| 77033 | 7 | 14581523 | 14581558 | 2 | 18 | 36 | GA   | 11 | 12 |
| 77034 | 7 | 14581970 | 14581989 | 2 | 10 | 20 | CA   | 10 | 7  |
| 77036 | 7 | 14583996 | 14584015 | 2 | 10 | 20 | AC   | 17 | 8  |
| 77037 | 7 | 14585665 | 14585682 | 2 | 9  | 18 | GT   | 25 | 11 |
| 77040 | 7 | 14590741 | 14590768 | 2 | 14 | 28 | AC   | 13 | 9  |
| 77042 | 7 | 14592780 | 14592803 | 4 | 6  | 24 | CAGA | 23 | 9  |
| 77043 | 7 | 14593197 | 14593226 | 3 | 10 | 30 | CCT  | 15 | 8  |
| 77049 | 7 | 14598628 | 14598663 | 2 | 18 | 36 | GT   | 16 | 13 |
| 77050 | 7 | 14598861 | 14598882 | 2 | 11 | 22 | CA   | 19 | 6  |
| 77051 | 7 | 14603170 | 14603187 | 3 | 6  | 18 | CCA  | 25 | 3  |
| 77053 | 7 | 14608762 | 14608777 | 2 | 8  | 16 | AC   | 17 | 5  |
| 77055 | 7 | 14610199 | 14610222 | 3 | 8  | 24 | AGA  | 24 | 6  |
| 77056 | 7 | 14611286 | 14611315 | 2 | 15 | 30 | CA   | 24 | 11 |
| 77059 | 7 | 14613452 | 14613471 | 2 | 10 | 20 | AC   | 17 | 8  |
| 77060 | 7 | 14618086 | 14618111 | 2 | 13 | 26 | CA   | 21 | 10 |
| 77061 | 7 | 14618461 | 14618498 | 2 | 19 | 38 | TG   | 24 | 12 |
| 77063 | 7 | 14621761 | 14621782 | 2 | 11 | 22 | AC   | 20 | 7  |
| 77067 | 7 | 14624476 | 14624497 | 2 | 11 | 22 | CA   | 22 | 10 |
| 77068 | 7 | 14624726 | 14624741 | 2 | 8  | 16 | GT   | 30 | 4  |
| 77069 | 7 | 14626914 | 14626928 | 3 | 5  | 15 | CTT  | 25 | 3  |
| 77073 | 7 | 14637861 | 14637875 | 3 | 5  | 15 | TAG  | 28 | 3  |
| 77074 | 7 | 14642134 | 14642163 | 2 | 15 | 30 | CA   | 14 | 10 |
| 77075 | 7 | 14642546 | 14642571 | 2 | 13 | 26 | AC   | 16 | 11 |
| 77079 | 7 | 14652763 | 14652776 | 2 | 7  | 14 | TG   | 30 | 12 |
| 77080 | 7 | 14655597 | 14655623 | 3 | 9  | 27 | TCA  | 26 | 4  |

|       |   |          |          |   |    |    |      |    |    |
|-------|---|----------|----------|---|----|----|------|----|----|
| 77083 | 7 | 14659127 | 14659148 | 2 | 11 | 22 | TG   | 21 | 9  |
| 77084 | 7 | 14659356 | 14659385 | 2 | 15 | 30 | TG   | 8  | 11 |
| 77088 | 7 | 14664165 | 14664185 | 3 | 7  | 21 | CTT  | 18 | 4  |
| 77090 | 7 | 14665330 | 14665345 | 4 | 4  | 16 | GAGG | 21 | 3  |
| 77091 | 7 | 14665533 | 14665546 | 2 | 7  | 14 | TC   | 12 | 5  |
| 77094 | 7 | 14665920 | 14665931 | 2 | 6  | 12 | CA   | 24 | 4  |
| 77099 | 7 | 14685166 | 14685197 | 2 | 16 | 32 | CA   | 17 | 10 |
| 77102 | 7 | 14689359 | 14689396 | 2 | 19 | 38 | TG   | 16 | 12 |
| 77107 | 7 | 14715082 | 14715143 | 2 | 31 | 62 | TG   | 16 | 13 |
| 77108 | 7 | 14715629 | 14715648 | 2 | 10 | 20 | TG   | 17 | 3  |
| 77109 | 7 | 14715682 | 14715695 | 2 | 7  | 14 | TG   | 20 | 6  |
| 77110 | 7 | 14715834 | 14715851 | 2 | 9  | 18 | AC   | 17 | 5  |
| 77111 | 7 | 14716266 | 14716289 | 2 | 12 | 24 | GT   | 13 | 7  |
| 77113 | 7 | 14717155 | 14717174 | 2 | 10 | 20 | GT   | 21 | 7  |
| 77117 | 7 | 14727111 | 14727131 | 3 | 7  | 21 | GAG  | 31 | 5  |
| 77119 | 7 | 14730244 | 14730259 | 4 | 4  | 16 | CCTC | 31 | 3  |
| 77120 | 7 | 14731702 | 14731717 | 2 | 8  | 16 | AC   | 15 | 3  |
| 77132 | 7 | 14757850 | 14757864 | 3 | 5  | 15 | TTA  | 24 | 3  |
| 77138 | 7 | 14793612 | 14793637 | 2 | 13 | 26 | AG   | 22 | 6  |
| 77158 | 7 | 14818048 | 14818063 | 4 | 4  | 16 | AAAT | 19 | 3  |
| 77159 | 7 | 14820152 | 14820175 | 4 | 6  | 24 | TTTC | 22 | 7  |
| 77161 | 7 | 14822074 | 14822093 | 2 | 10 | 20 | TC   | 10 | 3  |
| 77164 | 7 | 14824725 | 14824744 | 2 | 10 | 20 | TG   | 8  | 3  |
| 77167 | 7 | 14830107 | 14830128 | 2 | 11 | 22 | TG   | 17 | 7  |
| 77168 | 7 | 14830791 | 14830804 | 2 | 7  | 14 | GT   | 22 | 3  |
| 77169 | 7 | 14831940 | 14831955 | 2 | 8  | 16 | GT   | 28 | 4  |
| 77172 | 7 | 14836765 | 14836782 | 2 | 9  | 18 | CA   | 17 | 7  |
| 77174 | 7 | 14837008 | 14837041 | 2 | 17 | 34 | AC   | 11 | 11 |
| 77176 | 7 | 14843829 | 14843862 | 2 | 17 | 34 | TG   | 15 | 10 |
| 77179 | 7 | 14848767 | 14848784 | 2 | 9  | 18 | AC   | 24 | 6  |
| 77182 | 7 | 14849707 | 14849748 | 2 | 21 | 42 | CA   | 6  | 9  |
| 77191 | 7 | 14855942 | 14855959 | 2 | 9  | 18 | GT   | 17 | 7  |
| 77192 | 7 | 14858130 | 14858145 | 2 | 8  | 16 | TG   | 31 | 7  |
| 77194 | 7 | 14859191 | 14859210 | 2 | 10 | 20 | GT   | 22 | 5  |
| 77196 | 7 | 14861654 | 14861669 | 2 | 8  | 16 | AC   | 13 | 8  |
| 77198 | 7 | 14861972 | 14861999 | 2 | 14 | 28 | AC   | 6  | 4  |
| 77199 | 7 | 14862177 | 14862192 | 2 | 8  | 16 | AC   | 26 | 5  |
| 77200 | 7 | 14862334 | 14862383 | 2 | 25 | 50 | TG   | 6  | 10 |
| 77204 | 7 | 14869854 | 14869865 | 2 | 6  | 12 | TC   | 27 | 4  |
| 77206 | 7 | 14870684 | 14870723 | 2 | 20 | 40 | GT   | 12 | 9  |
| 77211 | 7 | 14878952 | 14878969 | 2 | 9  | 18 | GT   | 22 | 3  |
| 77212 | 7 | 14883556 | 14883583 | 2 | 14 | 28 | GT   | 19 | 6  |
| 77213 | 7 | 14884943 | 14884954 | 2 | 6  | 12 | CA   | 29 | 3  |
| 77217 | 7 | 14891464 | 14891481 | 2 | 9  | 18 | CA   | 15 | 12 |
| 77218 | 7 | 14893887 | 14893900 | 2 | 7  | 14 | TG   | 24 | 6  |
| 77221 | 7 | 14901563 | 14901574 | 2 | 6  | 12 | GT   | 33 | 4  |
| 77222 | 7 | 14904320 | 14904340 | 3 | 7  | 21 | CAG  | 16 | 3  |
| 77225 | 7 | 14912374 | 14912417 | 2 | 22 | 44 | AC   | 15 | 18 |
| 77227 | 7 | 14912894 | 14912929 | 2 | 18 | 36 | CA   | 8  | 9  |
| 77228 | 7 | 14913098 | 14913115 | 2 | 9  | 18 | TG   | 19 | 4  |
| 77231 | 7 | 14916337 | 14916356 | 2 | 10 | 20 | CT   | 10 | 7  |

|       |   |          |          |   |    |    |     |    |    |
|-------|---|----------|----------|---|----|----|-----|----|----|
| 77232 | 7 | 14916393 | 14916407 | 3 | 5  | 15 | TCC | 20 | 3  |
| 77235 | 7 | 14918919 | 14918946 | 2 | 14 | 28 | AC  | 12 | 11 |
| 77236 | 7 | 14919142 | 14919169 | 2 | 14 | 28 | AC  | 25 | 7  |
| 77238 | 7 | 14922875 | 14922890 | 2 | 8  | 16 | AC  | 19 | 3  |
| 77239 | 7 | 14922932 | 14922963 | 2 | 16 | 32 | TG  | 8  | 12 |
| 77242 | 7 | 14923265 | 14923278 | 2 | 7  | 14 | TC  | 21 | 4  |
| 77243 | 7 | 14923341 | 14923352 | 2 | 6  | 12 | CA  | 28 | 3  |
| 77245 | 7 | 14924556 | 14924567 | 2 | 6  | 12 | AC  | 27 | 6  |
| 77246 | 7 | 14927871 | 14927884 | 2 | 7  | 14 | CA  | 24 | 3  |
| 77248 | 7 | 14930462 | 14930479 | 2 | 9  | 18 | AC  | 22 | 3  |
| 77263 | 7 | 14941977 | 14941996 | 2 | 10 | 20 | CT  | 15 | 9  |
| 77264 | 7 | 14942196 | 14942241 | 2 | 23 | 46 | CA  | 12 | 11 |
| 77268 | 7 | 14951428 | 14951453 | 2 | 13 | 26 | GT  | 10 | 3  |
| 77270 | 7 | 14951818 | 14951839 | 2 | 11 | 22 | TG  | 9  | 8  |
| 77271 | 7 | 14956256 | 14956273 | 2 | 9  | 18 | TG  | 20 | 6  |
| 77272 | 7 | 14957597 | 14957620 | 2 | 12 | 24 | TG  | 14 | 8  |
| 77276 | 7 | 14963543 | 14963564 | 2 | 11 | 22 | AC  | 17 | 3  |
| 77278 | 7 | 14968070 | 14968089 | 2 | 10 | 20 | GA  | 22 | 3  |
| 77280 | 7 | 14970875 | 14970886 | 2 | 6  | 12 | TG  | 27 | 4  |
| 77281 | 7 | 14974391 | 14974424 | 2 | 17 | 34 | TG  | 8  | 10 |
| 77282 | 7 | 14976358 | 14976371 | 2 | 7  | 14 | GT  | 8  | 8  |
| 77285 | 7 | 14976587 | 14976604 | 2 | 9  | 18 | AC  | 8  | 8  |
| 77286 | 7 | 14979977 | 14980004 | 2 | 14 | 28 | AC  | 17 | 9  |
| 77287 | 7 | 14981297 | 14981312 | 2 | 8  | 16 | GT  | 22 | 8  |
| 77292 | 7 | 14982959 | 14982986 | 2 | 14 | 28 | AC  | 9  | 11 |
| 77293 | 7 | 14984952 | 14984979 | 2 | 14 | 28 | AC  | 14 | 10 |
| 77297 | 7 | 14985575 | 14985592 | 2 | 9  | 18 | TG  | 20 | 10 |
| 77298 | 7 | 14985654 | 14985669 | 2 | 8  | 16 | GT  | 20 | 11 |
| 77299 | 7 | 14985670 | 14985685 | 2 | 8  | 16 | GA  | 23 | 12 |
| 77300 | 7 | 14991800 | 14991811 | 2 | 6  | 12 | AG  | 24 | 4  |
| 77308 | 7 | 15001244 | 15001283 | 2 | 20 | 40 | GT  | 18 | 10 |
| 77313 | 7 | 15007239 | 15007260 | 2 | 11 | 22 | CA  | 19 | 7  |
| 77314 | 7 | 15009131 | 15009150 | 2 | 10 | 20 | CT  | 18 | 5  |
| 77316 | 7 | 15009529 | 15009552 | 2 | 12 | 24 | AC  | 14 | 13 |
| 77317 | 7 | 15010225 | 15010252 | 2 | 14 | 28 | GA  | 14 | 5  |
| 77319 | 7 | 15010649 | 15010674 | 2 | 13 | 26 | AC  | 13 | 7  |
| 77326 | 7 | 15014561 | 15014574 | 2 | 7  | 14 | CA  | 23 | 5  |
| 77327 | 7 | 15014632 | 15014643 | 2 | 6  | 12 | GT  | 23 | 7  |
| 77334 | 7 | 15017939 | 15017950 | 2 | 6  | 12 | TG  | 15 | 4  |
| 77335 | 7 | 15019882 | 15019899 | 2 | 9  | 18 | CT  | 15 | 4  |
| 77337 | 7 | 15023513 | 15023528 | 2 | 8  | 16 | AC  | 18 | 13 |
| 77340 | 7 | 15026898 | 15026917 | 2 | 10 | 20 | AC  | 12 | 5  |
| 77343 | 7 | 15027892 | 15027905 | 2 | 7  | 14 | CT  | 16 | 3  |
| 77344 | 7 | 15027916 | 15027927 | 2 | 6  | 12 | CA  | 7  | 4  |
| 77345 | 7 | 15027929 | 15027944 | 2 | 8  | 16 | AC  | 25 | 8  |
| 77348 | 7 | 15030154 | 15030169 | 2 | 8  | 16 | CA  | 20 | 3  |
| 77349 | 7 | 15030309 | 15030324 | 2 | 8  | 16 | AC  | 21 | 8  |
| 77351 | 7 | 15032521 | 15032544 | 3 | 8  | 24 | TCC | 23 | 8  |
| 77352 | 7 | 15032659 | 15032674 | 2 | 8  | 16 | AC  | 24 | 10 |
| 77356 | 7 | 15040758 | 15040775 | 3 | 6  | 18 | GAG | 26 | 3  |
| 77357 | 7 | 15041247 | 15041288 | 2 | 21 | 42 | CA  | 11 | 11 |

|       |   |          |          |   |    |    |      |    |    |
|-------|---|----------|----------|---|----|----|------|----|----|
| 77359 | 7 | 15043813 | 15043832 | 2 | 10 | 20 | CA   | 21 | 6  |
| 77362 | 7 | 15046023 | 15046050 | 2 | 14 | 28 | GT   | 7  | 5  |
| 77370 | 7 | 15061653 | 15061674 | 2 | 11 | 22 | AC   | 20 | 5  |
| 77374 | 7 | 15070642 | 15070662 | 3 | 7  | 21 | TGG  | 23 | 3  |
| 77377 | 7 | 15076378 | 15076397 | 2 | 10 | 20 | AC   | 23 | 11 |
| 77378 | 7 | 15076421 | 15076432 | 2 | 6  | 12 | GT   | 28 | 6  |
| 77379 | 7 | 15079880 | 15079905 | 2 | 13 | 26 | TG   | 16 | 7  |
| 77386 | 7 | 15088237 | 15088248 | 2 | 6  | 12 | AC   | 36 | 3  |
| 77390 | 7 | 15091872 | 15091919 | 2 | 24 | 48 | TG   | 9  | 9  |
| 77393 | 7 | 15092080 | 15092095 | 2 | 8  | 16 | GT   | 8  | 11 |
| 77395 | 7 | 15094642 | 15094653 | 2 | 6  | 12 | GA   | 20 | 3  |
| 77396 | 7 | 15097858 | 15097869 | 2 | 6  | 12 | AC   | 28 | 3  |
| 77398 | 7 | 15102712 | 15102735 | 2 | 12 | 24 | CA   | 18 | 3  |
| 77399 | 7 | 15102844 | 15102857 | 2 | 7  | 14 | AC   | 21 | 3  |
| 77402 | 7 | 15104909 | 15104940 | 2 | 16 | 32 | TG   | 17 | 10 |
| 77408 | 7 | 15106857 | 15106892 | 2 | 18 | 36 | CA   | 7  | 10 |
| 77409 | 7 | 15107892 | 15107905 | 2 | 7  | 14 | TG   | 25 | 7  |
| 77410 | 7 | 15108042 | 15108055 | 2 | 7  | 14 | CA   | 22 | 6  |
| 77411 | 7 | 15108291 | 15108324 | 2 | 17 | 34 | AC   | 17 | 10 |
| 77413 | 7 | 15109979 | 15110016 | 2 | 19 | 38 | GT   | 8  | 11 |
| 77415 | 7 | 15114195 | 15114212 | 3 | 6  | 18 | TGC  | 29 | 8  |
| 77416 | 7 | 15115113 | 15115136 | 4 | 6  | 24 | TTTG | 9  | 7  |
| 77419 | 7 | 15117282 | 15117309 | 2 | 14 | 28 | AC   | 14 | 5  |
| 77420 | 7 | 15117434 | 15117454 | 3 | 7  | 21 | CAG  | 23 | 8  |
| 77422 | 7 | 15119290 | 15119331 | 3 | 14 | 42 | AGG  | 8  | 8  |
| 77427 | 7 | 15122344 | 15122355 | 2 | 6  | 12 | AT   | 20 | 4  |
| 77428 | 7 | 15124198 | 15124227 | 2 | 15 | 30 | GA   | 16 | 10 |
| 77429 | 7 | 15124491 | 15124510 | 2 | 10 | 20 | CA   | 7  | 6  |
| 77432 | 7 | 15125067 | 15125080 | 2 | 7  | 14 | GA   | 24 | 7  |
| 77433 | 7 | 15125463 | 15125480 | 2 | 9  | 18 | CA   | 21 | 20 |
| 77437 | 7 | 15129482 | 15129507 | 2 | 13 | 26 | AC   | 19 | 14 |
| 77438 | 7 | 15129737 | 15129748 | 2 | 6  | 12 | AG   | 21 | 3  |
| 77446 | 7 | 15159541 | 15159572 | 2 | 16 | 32 | AC   | 9  | 10 |
| 77447 | 7 | 15163419 | 15163446 | 2 | 14 | 28 | AC   | 14 | 12 |
| 77449 | 7 | 15166655 | 15166672 | 3 | 6  | 18 | AGC  | 27 | 8  |
| 77450 | 7 | 15166751 | 15166768 | 3 | 6  | 18 | TGC  | 8  | 7  |
| 77457 | 7 | 15197694 | 15197713 | 2 | 10 | 20 | AC   | 22 | 3  |
| 77460 | 7 | 15204791 | 15204802 | 2 | 6  | 12 | AC   | 25 | 8  |
| 77461 | 7 | 15204806 | 15204821 | 2 | 8  | 16 | CA   | 23 | 8  |
| 77466 | 7 | 15227114 | 15227129 | 2 | 8  | 16 | CT   | 23 | 8  |
| 77473 | 7 | 15242550 | 15242573 | 2 | 12 | 24 | TC   | 25 | 7  |
| 77479 | 7 | 15269845 | 15269856 | 2 | 6  | 12 | AC   | 27 | 3  |
| 77482 | 7 | 15275908 | 15275955 | 2 | 24 | 48 | CA   | 7  | 7  |
| 77498 | 7 | 15333818 | 15333829 | 2 | 6  | 12 | GT   | 22 | 5  |
| 77499 | 7 | 15334610 | 15334649 | 4 | 10 | 40 | CTAT | 18 | 14 |
| 77500 | 7 | 15334794 | 15334813 | 2 | 10 | 20 | GT   | 14 | 9  |
| 77502 | 7 | 15344445 | 15344456 | 2 | 6  | 12 | GT   | 33 | 3  |
| 77506 | 7 | 15350430 | 15350455 | 2 | 13 | 26 | CA   | 16 | 15 |
| 77512 | 7 | 15381717 | 15381730 | 2 | 7  | 14 | TG   | 30 | 3  |
| 77516 | 7 | 15386869 | 15386895 | 3 | 9  | 27 | CTC  | 13 | 9  |
| 77517 | 7 | 15387923 | 15387940 | 2 | 9  | 18 | AC   | 20 | 10 |

|       |   |          |          |   |    |    |      |    |    |
|-------|---|----------|----------|---|----|----|------|----|----|
| 77519 | 7 | 15388266 | 15388301 | 2 | 18 | 36 | AC   | 8  | 9  |
| 77523 | 7 | 15401722 | 15401735 | 2 | 7  | 14 | AT   | 13 | 8  |
| 77527 | 7 | 15411169 | 15411182 | 2 | 7  | 14 | AC   | 22 | 6  |
| 77528 | 7 | 15412200 | 15412211 | 2 | 6  | 12 | CT   | 22 | 4  |
| 77529 | 7 | 15417228 | 15417248 | 3 | 7  | 21 | GCA  | 34 | 5  |
| 77533 | 7 | 15426202 | 15426216 | 3 | 5  | 15 | CCT  | 13 | 3  |
| 77544 | 7 | 15451260 | 15451274 | 3 | 5  | 15 | TCA  | 28 | 3  |
| 77547 | 7 | 15463913 | 15463926 | 2 | 7  | 14 | TA   | 17 | 3  |
| 77549 | 7 | 15486706 | 15486731 | 2 | 13 | 26 | GT   | 19 | 13 |
| 77552 | 7 | 15493772 | 15493791 | 2 | 10 | 20 | GT   | 15 | 16 |
| 77558 | 7 | 15511607 | 15511622 | 4 | 4  | 16 | AATA | 32 | 3  |
| 77559 | 7 | 15512124 | 15512141 | 2 | 9  | 18 | CA   | 8  | 7  |
| 77560 | 7 | 15512707 | 15512736 | 2 | 15 | 30 | GT   | 6  | 5  |
| 77567 | 7 | 15522848 | 15522863 | 2 | 8  | 16 | TG   | 15 | 8  |
| 77568 | 7 | 15523129 | 15523144 | 2 | 8  | 16 | GT   | 21 | 4  |
| 77570 | 7 | 15524881 | 15524894 | 2 | 7  | 14 | GA   | 17 | 5  |
| 77571 | 7 | 15525508 | 15525522 | 3 | 5  | 15 | GCA  | 25 | 9  |
| 77573 | 7 | 15527887 | 15527904 | 2 | 9  | 18 | GT   | 23 | 5  |
| 77574 | 7 | 15528129 | 15528152 | 2 | 12 | 24 | CA   | 13 | 11 |
| 77575 | 7 | 15530306 | 15530329 | 2 | 12 | 24 | CA   | 22 | 12 |
| 77580 | 7 | 15538472 | 15538491 | 2 | 10 | 20 | AG   | 7  | 5  |
| 77581 | 7 | 15538705 | 15538726 | 2 | 11 | 22 | GT   | 26 | 22 |
| 77584 | 7 | 15539792 | 15539806 | 3 | 5  | 15 | CAG  | 13 | 3  |
| 77591 | 7 | 15548361 | 15548381 | 3 | 7  | 21 | GCT  | 8  | 3  |
| 77618 | 7 | 15634242 | 15634273 | 2 | 16 | 32 | CA   | 11 | 11 |
| 77620 | 7 | 15637137 | 15637152 | 2 | 8  | 16 | GT   | 28 | 3  |
| 77621 | 7 | 15639382 | 15639409 | 2 | 14 | 28 | TG   | 12 | 4  |
| 77622 | 7 | 15640869 | 15640892 | 2 | 12 | 24 | GA   | 6  | 3  |
| 77627 | 7 | 15645835 | 15645862 | 4 | 7  | 28 | AATA | 12 | 10 |
| 77632 | 7 | 15656082 | 15656101 | 2 | 10 | 20 | AG   | 24 | 11 |
| 77633 | 7 | 15657268 | 15657279 | 2 | 6  | 12 | AT   | 23 | 3  |
| 77634 | 7 | 15658953 | 15658972 | 2 | 10 | 20 | CA   | 20 | 5  |
| 77635 | 7 | 15660728 | 15660742 | 3 | 5  | 15 | CCT  | 27 | 4  |
| 77637 | 7 | 15660937 | 15660952 | 2 | 8  | 16 | GT   | 20 | 4  |
| 77639 | 7 | 15661307 | 15661338 | 2 | 16 | 32 | AC   | 6  | 8  |
| 77640 | 7 | 15663715 | 15663732 | 2 | 9  | 18 | CA   | 18 | 11 |
| 77647 | 7 | 15674332 | 15674345 | 2 | 7  | 14 | CA   | 20 | 9  |
| 77649 | 7 | 15675648 | 15675677 | 2 | 15 | 30 | CA   | 21 | 12 |
| 77651 | 7 | 15676063 | 15676074 | 2 | 6  | 12 | CA   | 15 | 13 |
| 77654 | 7 | 15686033 | 15686046 | 2 | 7  | 14 | AC   | 26 | 4  |
| 77655 | 7 | 15686362 | 15686375 | 2 | 7  | 14 | TC   | 22 | 6  |
| 77660 | 7 | 15694272 | 15694287 | 4 | 4  | 16 | TTCC | 38 | 3  |
| 77661 | 7 | 15698191 | 15698218 | 4 | 7  | 28 | CCAT | 25 | 5  |
| 77663 | 7 | 15700542 | 15700559 | 2 | 9  | 18 | GA   | 25 | 5  |
| 77667 | 7 | 15706398 | 15706411 | 2 | 7  | 14 | TG   | 28 | 3  |
| 77668 | 7 | 15706640 | 15706669 | 2 | 15 | 30 | GA   | 11 | 9  |
| 77678 | 7 | 15735760 | 15735771 | 2 | 6  | 12 | CA   | 24 | 7  |
| 77679 | 7 | 15735774 | 15735787 | 2 | 7  | 14 | CA   | 21 | 4  |
| 77681 | 7 | 15736513 | 15736524 | 2 | 6  | 12 | TG   | 29 | 4  |
| 77682 | 7 | 15737779 | 15737790 | 2 | 6  | 12 | CA   | 11 | 4  |
| 77684 | 7 | 15738227 | 15738250 | 2 | 12 | 24 | TC   | 22 | 6  |

|       |   |          |          |   |    |    |      |    |    |
|-------|---|----------|----------|---|----|----|------|----|----|
| 77686 | 7 | 15741381 | 15741394 | 2 | 7  | 14 | AC   | 31 | 4  |
| 77688 | 7 | 15743084 | 15743105 | 2 | 11 | 22 | AC   | 13 | 8  |
| 77689 | 7 | 15744452 | 15744477 | 2 | 13 | 26 | CA   | 10 | 7  |
| 77691 | 7 | 15750218 | 15750237 | 2 | 10 | 20 | TG   | 18 | 7  |
| 77692 | 7 | 15750969 | 15750995 | 3 | 9  | 27 | GGA  | 9  | 5  |
| 77693 | 7 | 15755059 | 15755076 | 2 | 9  | 18 | AG   | 19 | 4  |
| 77696 | 7 | 15765012 | 15765037 | 2 | 13 | 26 | AC   | 9  | 11 |
| 77698 | 7 | 15765844 | 15765857 | 2 | 7  | 14 | AC   | 24 | 3  |
| 77699 | 7 | 15774185 | 15774218 | 2 | 17 | 34 | GT   | 17 | 12 |
| 77700 | 7 | 15774682 | 15774713 | 2 | 16 | 32 | GT   | 11 | 13 |
| 77704 | 7 | 15777101 | 15777112 | 2 | 6  | 12 | AG   | 30 | 3  |
| 77706 | 7 | 15779008 | 15779022 | 3 | 5  | 15 | AAG  | 26 | 5  |
| 77710 | 7 | 15785392 | 15785421 | 2 | 15 | 30 | GT   | 15 | 6  |
| 77713 | 7 | 15795171 | 15795198 | 4 | 7  | 28 | CAAC | 18 | 5  |
| 77714 | 7 | 15795224 | 15795247 | 4 | 6  | 24 | CAAC | 19 | 6  |
| 77716 | 7 | 15803998 | 15804017 | 2 | 10 | 20 | AC   | 26 | 10 |
| 77721 | 7 | 15822508 | 15822525 | 3 | 6  | 18 | TGC  | 29 | 3  |
| 77722 | 7 | 15825221 | 15825244 | 2 | 12 | 24 | CA   | 26 | 5  |
| 77724 | 7 | 15833068 | 15833085 | 2 | 9  | 18 | CT   | 29 | 3  |
| 77726 | 7 | 15838906 | 15838917 | 2 | 6  | 12 | TC   | 28 | 4  |
| 77731 | 7 | 15844762 | 15844777 | 2 | 8  | 16 | CA   | 22 | 5  |
| 77739 | 7 | 15852075 | 15852090 | 2 | 8  | 16 | CA   | 9  | 6  |
| 77741 | 7 | 15855510 | 15855557 | 2 | 24 | 48 | CA   | 11 | 10 |
| 77742 | 7 | 15855963 | 15855982 | 4 | 5  | 20 | CCAG | 21 | 4  |
| 77746 | 7 | 15856242 | 15856257 | 2 | 8  | 16 | AG   | 24 | 5  |
| 77748 | 7 | 15857277 | 15857288 | 2 | 6  | 12 | GT   | 13 | 6  |
| 77751 | 7 | 15859612 | 15859629 | 2 | 9  | 18 | GT   | 26 | 3  |
| 77756 | 7 | 15879155 | 15879180 | 2 | 13 | 26 | TG   | 7  | 6  |
| 77758 | 7 | 15887509 | 15887522 | 2 | 7  | 14 | TG   | 25 | 5  |
| 77759 | 7 | 15889369 | 15889388 | 4 | 5  | 20 | GCCT | 23 | 3  |
| 77765 | 7 | 15913914 | 15913925 | 2 | 6  | 12 | AG   | 30 | 3  |
| 77768 | 7 | 15922479 | 15922490 | 2 | 6  | 12 | TA   | 11 | 6  |
| 77770 | 7 | 15922780 | 15922797 | 3 | 6  | 18 | GGA  | 15 | 4  |
| 77776 | 7 | 15938747 | 15938778 | 2 | 16 | 32 | AC   | 13 | 9  |
| 77779 | 7 | 15953925 | 15953936 | 2 | 6  | 12 | AC   | 24 | 3  |
| 77780 | 7 | 15954128 | 15954141 | 2 | 7  | 14 | AC   | 17 | 5  |
| 77781 | 7 | 15954785 | 15954812 | 4 | 7  | 28 | ACAG | 20 | 10 |
| 77782 | 7 | 15956142 | 15956171 | 2 | 15 | 30 | AC   | 12 | 11 |
| 77785 | 7 | 15959705 | 15959722 | 2 | 9  | 18 | TG   | 25 | 9  |
| 77798 | 7 | 15971793 | 15971816 | 3 | 8  | 24 | GGA  | 11 | 7  |
| 77801 | 7 | 15981166 | 15981205 | 2 | 20 | 40 | GT   | 11 | 10 |
| 77802 | 7 | 15981676 | 15981691 | 2 | 8  | 16 | GT   | 25 | 4  |
| 77803 | 7 | 15984246 | 15984269 | 2 | 12 | 24 | CA   | 6  | 8  |
| 77806 | 7 | 15989403 | 15989424 | 2 | 11 | 22 | CA   | 25 | 12 |
| 77809 | 7 | 15994599 | 15994614 | 2 | 8  | 16 | TG   | 13 | 13 |
| 77810 | 7 | 15994617 | 15994630 | 2 | 7  | 14 | TG   | 17 | 12 |
| 77811 | 7 | 16004578 | 16004591 | 2 | 7  | 14 | CT   | 24 | 3  |
| 77821 | 7 | 16017931 | 16017942 | 2 | 6  | 12 | CA   | 22 | 3  |
| 77824 | 7 | 16021368 | 16021393 | 2 | 13 | 26 | CA   | 10 | 9  |
| 77825 | 7 | 16028222 | 16028259 | 2 | 19 | 38 | TG   | 6  | 5  |
| 77826 | 7 | 16034905 | 16034916 | 2 | 6  | 12 | AC   | 34 | 5  |



|       |   |          |          |   |    |    |      |    |    |
|-------|---|----------|----------|---|----|----|------|----|----|
| 77833 | 7 | 16061737 | 16061757 | 3 | 7  | 21 | GAG  | 29 | 3  |
| 77835 | 7 | 16066488 | 16066503 | 4 | 4  | 16 | TCCA | 20 | 7  |
| 77839 | 7 | 16078368 | 16078397 | 2 | 15 | 30 | CA   | 6  | 7  |
| 77840 | 7 | 16078803 | 16078814 | 2 | 6  | 12 | TG   | 8  | 3  |
| 77841 | 7 | 16079749 | 16079762 | 2 | 7  | 14 | AC   | 29 | 7  |
| 77847 | 7 | 16086723 | 16086742 | 2 | 10 | 20 | TG   | 16 | 8  |
| 77852 | 7 | 16092071 | 16092086 | 4 | 4  | 16 | GCTC | 21 | 3  |
| 77854 | 7 | 16093757 | 16093774 | 3 | 6  | 18 | GGT  | 23 | 4  |
| 77856 | 7 | 16099360 | 16099387 | 2 | 14 | 28 | GT   | 11 | 8  |
| 77858 | 7 | 16104368 | 16104387 | 4 | 5  | 20 | CTAT | 27 | 6  |
| 77860 | 7 | 16107190 | 16107205 | 2 | 8  | 16 | TG   | 22 | 9  |
| 77864 | 7 | 16130083 | 16130104 | 2 | 11 | 22 | CA   | 7  | 7  |
| 77868 | 7 | 16137932 | 16137961 | 2 | 15 | 30 | TC   | 21 | 7  |
| 77869 | 7 | 16139471 | 16139485 | 3 | 5  | 15 | AAT  | 8  | 4  |
| 77870 | 7 | 16141317 | 16141344 | 2 | 14 | 28 | GT   | 21 | 8  |
| 77875 | 7 | 16148569 | 16148592 | 2 | 12 | 24 | TG   | 7  | 5  |
| 77881 | 7 | 16159959 | 16159970 | 2 | 6  | 12 | TG   | 25 | 3  |
| 77882 | 7 | 16163423 | 16163440 | 2 | 9  | 18 | AC   | 20 | 6  |
| 77887 | 7 | 16169643 | 16169658 | 2 | 8  | 16 | GT   | 28 | 9  |
| 77888 | 7 | 16171860 | 16171879 | 2 | 10 | 20 | TG   | 16 | 5  |
| 77890 | 7 | 16174408 | 16174431 | 2 | 12 | 24 | GT   | 18 | 8  |
| 77892 | 7 | 16176007 | 16176032 | 2 | 13 | 26 | TG   | 18 | 7  |
| 77897 | 7 | 16188122 | 16188133 | 2 | 6  | 12 | GT   | 27 | 3  |
| 77898 | 7 | 16190552 | 16190565 | 2 | 7  | 14 | GT   | 22 | 4  |
| 77901 | 7 | 16194600 | 16194623 | 2 | 12 | 24 | CA   | 9  | 7  |
| 77902 | 7 | 16196752 | 16196778 | 3 | 9  | 27 | GGA  | 21 | 8  |
| 77903 | 7 | 16196960 | 16197001 | 2 | 21 | 42 | GT   | 11 | 12 |
| 77911 | 7 | 16220427 | 16220442 | 4 | 4  | 16 | AAAT | 22 | 8  |
| 77915 | 7 | 16231373 | 16231394 | 2 | 11 | 22 | AC   | 15 | 5  |
| 77925 | 7 | 16250536 | 16250549 | 2 | 7  | 14 | TC   | 11 | 13 |
| 77926 | 7 | 16250550 | 16250565 | 2 | 8  | 16 | AC   | 12 | 13 |
| 77927 | 7 | 16250860 | 16250880 | 3 | 7  | 21 | GAG  | 20 | 6  |
| 77928 | 7 | 16251391 | 16251408 | 2 | 9  | 18 | TC   | 6  | 8  |
| 77933 | 7 | 16254165 | 16254178 | 2 | 7  | 14 | AC   | 20 | 19 |
| 77934 | 7 | 16256060 | 16256085 | 2 | 13 | 26 | CA   | 15 | 7  |
| 77939 | 7 | 16270300 | 16270335 | 3 | 12 | 36 | ATC  | 22 | 8  |
| 77949 | 7 | 16288121 | 16288156 | 2 | 18 | 36 | CA   | 15 | 17 |
| 77959 | 7 | 16293914 | 16293927 | 2 | 7  | 14 | TC   | 25 | 3  |
| 77963 | 7 | 16300693 | 16300707 | 3 | 5  | 15 | GCA  | 25 | 3  |
| 77970 | 7 | 16307808 | 16307823 | 2 | 8  | 16 | GT   | 23 | 9  |
| 77975 | 7 | 16312112 | 16312127 | 2 | 8  | 16 | GT   | 26 | 11 |
| 77977 | 7 | 16313149 | 16313170 | 2 | 11 | 22 | GT   | 18 | 5  |
| 77981 | 7 | 16333575 | 16333590 | 2 | 8  | 16 | GT   | 7  | 10 |
| 77992 | 7 | 16340614 | 16340635 | 2 | 11 | 22 | GT   | 16 | 12 |
| 77997 | 7 | 16350997 | 16351010 | 2 | 7  | 14 | GA   | 17 | 7  |
| 78001 | 7 | 16353498 | 16353529 | 2 | 16 | 32 | GT   | 7  | 12 |
| 78005 | 7 | 16363480 | 16363493 | 2 | 7  | 14 | GA   | 16 | 3  |
| 78006 | 7 | 16366961 | 16366978 | 2 | 9  | 18 | CA   | 18 | 4  |
| 78008 | 7 | 16367538 | 16367555 | 3 | 6  | 18 | AAC  | 26 | 4  |
| 78012 | 7 | 16370602 | 16370619 | 2 | 9  | 18 | TC   | 20 | 7  |
| 78027 | 7 | 16388171 | 16388185 | 3 | 5  | 15 | TGT  | 26 | 3  |

|       |   |          |          |   |    |    |      |    |    |
|-------|---|----------|----------|---|----|----|------|----|----|
| 78033 | 7 | 16393848 | 16393861 | 2 | 7  | 14 | GA   | 21 | 3  |
| 78036 | 7 | 16399811 | 16399838 | 2 | 14 | 28 | AC   | 26 | 10 |
| 78045 | 7 | 16410440 | 16410453 | 2 | 7  | 14 | TG   | 10 | 8  |
| 78046 | 7 | 16410997 | 16411008 | 2 | 6  | 12 | AC   | 18 | 8  |
| 78048 | 7 | 16412210 | 16412227 | 2 | 9  | 18 | GT   | 19 | 4  |
| 78052 | 7 | 16419924 | 16419939 | 4 | 4  | 16 | GTCA | 25 | 3  |
| 78053 | 7 | 16420676 | 16420687 | 2 | 6  | 12 | TA   | 19 | 7  |
| 78054 | 7 | 16422889 | 16422902 | 2 | 7  | 14 | TG   | 29 | 5  |
| 78058 | 7 | 16428943 | 16428968 | 2 | 13 | 26 | GT   | 19 | 7  |
| 78059 | 7 | 16429155 | 16429172 | 2 | 9  | 18 | TA   | 11 | 8  |
| 78064 | 7 | 16431732 | 16431753 | 2 | 11 | 22 | GA   | 25 | 3  |
| 78065 | 7 | 16433154 | 16433171 | 2 | 9  | 18 | CA   | 21 | 7  |
| 78071 | 7 | 16439341 | 16439354 | 2 | 7  | 14 | AG   | 22 | 3  |
| 78072 | 7 | 16439622 | 16439637 | 2 | 8  | 16 | AC   | 31 | 3  |
| 78082 | 7 | 16457076 | 16457099 | 4 | 6  | 24 | TGTA | 16 | 7  |
| 78086 | 7 | 16470540 | 16470551 | 2 | 6  | 12 | AC   | 19 | 4  |
| 78087 | 7 | 16471411 | 16471444 | 2 | 17 | 34 | CA   | 18 | 12 |
| 78094 | 7 | 16478487 | 16478514 | 2 | 14 | 28 | CA   | 14 | 12 |
| 78095 | 7 | 16482110 | 16482161 | 2 | 26 | 52 | AC   | 7  | 12 |
| 78104 | 7 | 16507524 | 16507538 | 3 | 5  | 15 | CTG  | 25 | 5  |
| 78106 | 7 | 16510721 | 16510732 | 2 | 6  | 12 | CT   | 11 | 5  |
| 78107 | 7 | 16510733 | 16510746 | 2 | 7  | 14 | CA   | 11 | 5  |
| 78109 | 7 | 16511224 | 16511253 | 2 | 15 | 30 | CA   | 8  | 6  |
| 78111 | 7 | 16511418 | 16511431 | 2 | 7  | 14 | TG   | 8  | 3  |
| 78113 | 7 | 16511662 | 16511695 | 2 | 17 | 34 | TG   | 8  | 11 |
| 78114 | 7 | 16511797 | 16511826 | 3 | 10 | 30 | AGG  | 17 | 4  |
| 78115 | 7 | 16511861 | 16511878 | 2 | 9  | 18 | CA   | 19 | 11 |
| 78118 | 7 | 16512573 | 16512604 | 2 | 16 | 32 | AC   | 14 | 8  |
| 78123 | 7 | 16516687 | 16516704 | 3 | 6  | 18 | GCT  | 30 | 5  |
| 78124 | 7 | 16521079 | 16521092 | 2 | 7  | 14 | CA   | 25 | 4  |
| 78126 | 7 | 16524839 | 16524856 | 2 | 9  | 18 | TG   | 22 | 9  |
| 78128 | 7 | 16533048 | 16533063 | 4 | 4  | 16 | GATG | 16 | 4  |
| 78129 | 7 | 16533997 | 16534017 | 3 | 7  | 21 | TGC  | 27 | 7  |
| 78135 | 7 | 16543190 | 16543215 | 2 | 13 | 26 | GT   | 15 | 4  |
| 78136 | 7 | 16543389 | 16543404 | 4 | 4  | 16 | CCAA | 12 | 3  |
| 78139 | 7 | 16549418 | 16549439 | 2 | 11 | 22 | TG   | 17 | 8  |
| 78140 | 7 | 16550558 | 16550593 | 2 | 18 | 36 | CA   | 12 | 10 |
| 78143 | 7 | 16551160 | 16551171 | 2 | 6  | 12 | TC   | 28 | 3  |
| 78146 | 7 | 16552990 | 16553005 | 2 | 8  | 16 | AC   | 18 | 4  |
| 78148 | 7 | 16563215 | 16563242 | 2 | 14 | 28 | CA   | 17 | 11 |
| 78150 | 7 | 16568441 | 16568464 | 3 | 8  | 24 | GCT  | 26 | 3  |
| 78151 | 7 | 16570328 | 16570351 | 2 | 12 | 24 | CA   | 22 | 9  |
| 78157 | 7 | 16575285 | 16575299 | 3 | 5  | 15 | TCT  | 21 | 5  |
| 78162 | 7 | 16582560 | 16582577 | 2 | 9  | 18 | TG   | 12 | 5  |
| 78166 | 7 | 16588503 | 16588518 | 2 | 8  | 16 | CA   | 28 | 6  |
| 78167 | 7 | 16591917 | 16591932 | 4 | 4  | 16 | AAAT | 29 | 4  |
| 78173 | 7 | 16605742 | 16605756 | 3 | 5  | 15 | CAG  | 27 | 4  |
| 78175 | 7 | 16611554 | 16611569 | 4 | 4  | 16 | GTCT | 24 | 5  |
| 78177 | 7 | 16614289 | 16614302 | 2 | 7  | 14 | GA   | 24 | 3  |
| 78180 | 7 | 16625095 | 16625106 | 2 | 6  | 12 | TG   | 29 | 4  |
| 78183 | 7 | 16630336 | 16630350 | 3 | 5  | 15 | TCT  | 27 | 3  |

|       |   |          |          |   |    |    |      |    |    |
|-------|---|----------|----------|---|----|----|------|----|----|
| 78185 | 7 | 16634291 | 16634308 | 3 | 6  | 18 | GTT  | 28 | 8  |
| 78189 | 7 | 16637199 | 16637225 | 3 | 9  | 27 | GGT  | 8  | 5  |
| 78191 | 7 | 16639206 | 16639227 | 2 | 11 | 22 | TG   | 14 | 9  |
| 78200 | 7 | 16659851 | 16659864 | 2 | 7  | 14 | TG   | 21 | 4  |
| 78204 | 7 | 16660632 | 16660651 | 2 | 10 | 20 | CT   | 13 | 3  |
| 78209 | 7 | 16661663 | 16661688 | 2 | 13 | 26 | TG   | 11 | 5  |
| 78210 | 7 | 16662760 | 16662773 | 2 | 7  | 14 | TG   | 15 | 4  |
| 78212 | 7 | 16662996 | 16663015 | 2 | 10 | 20 | AC   | 24 | 7  |
| 78217 | 7 | 16670692 | 16670703 | 2 | 6  | 12 | CT   | 27 | 3  |
| 78222 | 7 | 16677431 | 16677446 | 2 | 8  | 16 | AG   | 16 | 8  |
| 78226 | 7 | 16686200 | 16686214 | 3 | 5  | 15 | GAG  | 27 | 4  |
| 78228 | 7 | 16691629 | 16691646 | 2 | 9  | 18 | AC   | 18 | 16 |
| 78231 | 7 | 16695292 | 16695305 | 2 | 7  | 14 | AC   | 18 | 12 |
| 78233 | 7 | 16697940 | 16697953 | 2 | 7  | 14 | TG   | 24 | 3  |
| 78237 | 7 | 16705588 | 16705607 | 2 | 10 | 20 | AC   | 35 | 8  |
| 78240 | 7 | 16713721 | 16713760 | 2 | 20 | 40 | TG   | 12 | 10 |
| 78242 | 7 | 16726758 | 16726781 | 2 | 12 | 24 | GT   | 7  | 7  |
| 78244 | 7 | 16729097 | 16729117 | 3 | 7  | 21 | CTG  | 28 | 6  |
| 78245 | 7 | 16732942 | 16732965 | 4 | 6  | 24 | GAGG | 6  | 4  |
| 78248 | 7 | 16736828 | 16736859 | 2 | 16 | 32 | GT   | 21 | 15 |
| 78250 | 7 | 16740050 | 16740070 | 3 | 7  | 21 | GCA  | 28 | 8  |
| 78255 | 7 | 16750696 | 16750713 | 2 | 9  | 18 | TC   | 9  | 4  |
| 78265 | 7 | 16769712 | 16769731 | 2 | 10 | 20 | AG   | 20 | 11 |
| 78266 | 7 | 16769786 | 16769801 | 4 | 4  | 16 | GAGG | 7  | 4  |
| 78269 | 7 | 16775097 | 16775108 | 2 | 6  | 12 | TC   | 16 | 3  |
| 78272 | 7 | 16781106 | 16781117 | 2 | 6  | 12 | CT   | 29 | 5  |
| 78281 | 7 | 16794918 | 16794947 | 2 | 15 | 30 | AC   | 16 | 9  |
| 78282 | 7 | 16796230 | 16796245 | 4 | 4  | 16 | AAAG | 26 | 3  |
| 78283 | 7 | 16798352 | 16798387 | 2 | 18 | 36 | TG   | 15 | 10 |
| 78292 | 7 | 16815531 | 16815554 | 2 | 12 | 24 | CA   | 16 | 5  |
| 78293 | 7 | 16818501 | 16818524 | 2 | 12 | 24 | CA   | 17 | 6  |
| 78294 | 7 | 16818755 | 16818775 | 3 | 7  | 21 | GGA  | 28 | 7  |
| 78295 | 7 | 16819106 | 16819125 | 2 | 10 | 20 | GT   | 14 | 12 |
| 78296 | 7 | 16820596 | 16820615 | 2 | 10 | 20 | AG   | 25 | 5  |
| 78297 | 7 | 16826904 | 16826921 | 2 | 9  | 18 | AG   | 21 | 9  |
| 78298 | 7 | 16827112 | 16827137 | 2 | 13 | 26 | TC   | 23 | 5  |
| 78307 | 7 | 16848867 | 16848914 | 2 | 24 | 48 | TG   | 10 | 11 |
| 78309 | 7 | 16855293 | 16855306 | 2 | 7  | 14 | AT   | 10 | 5  |
| 78312 | 7 | 16857176 | 16857193 | 2 | 9  | 18 | GT   | 19 | 9  |
| 78313 | 7 | 16857354 | 16857373 | 2 | 10 | 20 | CA   | 16 | 8  |
| 78319 | 7 | 16865440 | 16865457 | 2 | 9  | 18 | GT   | 23 | 8  |
| 78322 | 7 | 16871918 | 16871935 | 3 | 6  | 18 | CCT  | 25 | 4  |
| 78325 | 7 | 16889096 | 16889123 | 4 | 7  | 28 | TATT | 16 | 7  |
| 78328 | 7 | 16891215 | 16891230 | 2 | 8  | 16 | TG   | 27 | 8  |
| 78330 | 7 | 16892287 | 16892316 | 3 | 10 | 30 | CCT  | 13 | 7  |
| 78331 | 7 | 16892500 | 16892511 | 2 | 6  | 12 | TG   | 26 | 5  |
| 78380 | 7 | 16921044 | 16921077 | 2 | 17 | 34 | GT   | 14 | 15 |
| 78385 | 7 | 16929320 | 16929335 | 4 | 4  | 16 | GGAG | 17 | 4  |
| 78387 | 7 | 16935143 | 16935164 | 2 | 11 | 22 | AC   | 30 | 6  |
| 78390 | 7 | 16941146 | 16941175 | 2 | 15 | 30 | CT   | 13 | 6  |
| 78391 | 7 | 16944520 | 16944537 | 2 | 9  | 18 | TC   | 24 | 5  |

|       |   |          |          |   |    |    |      |    |    |
|-------|---|----------|----------|---|----|----|------|----|----|
| 78399 | 7 | 16989711 | 16989724 | 2 | 7  | 14 | GA   | 24 | 14 |
| 78404 | 7 | 16996695 | 16996714 | 2 | 10 | 20 | AC   | 20 | 13 |
| 78406 | 7 | 16996967 | 16996986 | 2 | 10 | 20 | CA   | 16 | 9  |
| 78408 | 7 | 16997860 | 16997883 | 3 | 8  | 24 | CCT  | 19 | 10 |
| 78409 | 7 | 16997979 | 16997994 | 2 | 8  | 16 | CA   | 27 | 5  |
| 78410 | 7 | 16998322 | 16998342 | 3 | 7  | 21 | GAG  | 29 | 5  |
| 78412 | 7 | 16999845 | 16999872 | 2 | 14 | 28 | TG   | 12 | 13 |
| 78415 | 7 | 17018273 | 17018294 | 2 | 11 | 22 | TG   | 7  | 8  |
| 78416 | 7 | 17018889 | 17018914 | 2 | 13 | 26 | TC   | 7  | 4  |
| 78418 | 7 | 17018953 | 17018984 | 2 | 16 | 32 | TC   | 7  | 6  |
| 78421 | 7 | 17038806 | 17038825 | 4 | 5  | 20 | TGCC | 27 | 5  |
| 78422 | 7 | 17046419 | 17046468 | 2 | 25 | 50 | AC   | 6  | 5  |
| 78424 | 7 | 17049077 | 17049112 | 2 | 18 | 36 | TG   | 7  | 7  |
| 78430 | 7 | 17066628 | 17066643 | 2 | 8  | 16 | TG   | 16 | 5  |
| 78432 | 7 | 17081649 | 17081660 | 2 | 6  | 12 | AC   | 29 | 3  |
| 78434 | 7 | 17089142 | 17089153 | 2 | 6  | 12 | GA   | 24 | 3  |
| 78435 | 7 | 17095127 | 17095150 | 2 | 12 | 24 | AG   | 12 | 5  |
| 78436 | 7 | 17095509 | 17095520 | 2 | 6  | 12 | GT   | 26 | 3  |
| 78437 | 7 | 17101414 | 17101429 | 2 | 8  | 16 | TC   | 23 | 3  |
| 78440 | 7 | 17113073 | 17113084 | 2 | 6  | 12 | AC   | 30 | 4  |
| 78442 | 7 | 17124500 | 17124517 | 3 | 6  | 18 | GAA  | 25 | 3  |
| 78447 | 7 | 17136366 | 17136383 | 2 | 9  | 18 | AC   | 23 | 3  |
| 78448 | 7 | 17141372 | 17141389 | 2 | 9  | 18 | CA   | 16 | 7  |
| 78451 | 7 | 17148752 | 17148769 | 2 | 9  | 18 | TG   | 19 | 12 |
| 78452 | 7 | 17148771 | 17148786 | 2 | 8  | 16 | GT   | 20 | 12 |
| 78453 | 7 | 17154244 | 17154257 | 2 | 7  | 14 | CT   | 17 | 3  |
| 78455 | 7 | 17161818 | 17161845 | 2 | 14 | 28 | CA   | 20 | 14 |
| 78458 | 7 | 17172158 | 17172179 | 2 | 11 | 22 | AC   | 18 | 6  |
| 78468 | 7 | 17240479 | 17240498 | 2 | 10 | 20 | AC   | 21 | 5  |
| 78471 | 7 | 17251699 | 17251728 | 2 | 15 | 30 | TC   | 18 | 7  |
| 78475 | 7 | 17265831 | 17265850 | 4 | 5  | 20 | TTTA | 23 | 4  |
| 78485 | 7 | 17291425 | 17291448 | 2 | 12 | 24 | GT   | 11 | 6  |
| 78488 | 7 | 17294862 | 17294882 | 3 | 7  | 21 | CCT  | 27 | 3  |
| 78493 | 7 | 17303111 | 17303134 | 2 | 12 | 24 | TG   | 11 | 8  |
| 78500 | 7 | 17324638 | 17324663 | 2 | 13 | 26 | CA   | 17 | 12 |
| 78502 | 7 | 17331581 | 17331600 | 2 | 10 | 20 | AC   | 23 | 12 |
| 78503 | 7 | 17332133 | 17332148 | 4 | 4  | 16 | ATCC | 20 | 4  |
| 78507 | 7 | 17368925 | 17368944 | 2 | 10 | 20 | GT   | 7  | 7  |
| 78513 | 7 | 17377392 | 17377411 | 2 | 10 | 20 | AC   | 14 | 7  |
| 78521 | 7 | 17386410 | 17386429 | 2 | 10 | 20 | AG   | 20 | 4  |
| 78526 | 7 | 17407041 | 17407058 | 3 | 6  | 18 | CCT  | 17 | 7  |
| 78528 | 7 | 17407569 | 17407586 | 2 | 9  | 18 | TG   | 23 | 6  |
| 78529 | 7 | 17412907 | 17412918 | 2 | 6  | 12 | TC   | 22 | 3  |
| 78533 | 7 | 17423014 | 17423025 | 2 | 6  | 12 | GA   | 24 | 5  |
| 78538 | 7 | 17433426 | 17433437 | 2 | 6  | 12 | TA   | 12 | 7  |
| 78539 | 7 | 17436153 | 17436190 | 2 | 19 | 38 | AC   | 10 | 7  |
| 78541 | 7 | 17442148 | 17442165 | 2 | 9  | 18 | TG   | 12 | 16 |
| 78551 | 7 | 17448215 | 17448250 | 2 | 18 | 36 | AC   | 9  | 12 |
| 78552 | 7 | 17451024 | 17451037 | 2 | 7  | 14 | AG   | 16 | 5  |
| 78553 | 7 | 17453090 | 17453103 | 2 | 7  | 14 | AC   | 23 | 7  |
| 78561 | 7 | 17475014 | 17475041 | 2 | 14 | 28 | TG   | 19 | 14 |

|       |   |          |          |   |    |    |      |    |    |
|-------|---|----------|----------|---|----|----|------|----|----|
| 78566 | 7 | 17482973 | 17482996 | 2 | 12 | 24 | CA   | 11 | 10 |
| 78568 | 7 | 17484992 | 17485009 | 2 | 9  | 18 | CT   | 22 | 8  |
| 78569 | 7 | 17486385 | 17486428 | 4 | 11 | 44 | TAGA | 15 | 9  |
| 78573 | 7 | 17489355 | 17489376 | 2 | 11 | 22 | TG   | 12 | 11 |
| 78575 | 7 | 17492175 | 17492194 | 2 | 10 | 20 | GA   | 20 | 6  |
| 78576 | 7 | 17492395 | 17492412 | 2 | 9  | 18 | TG   | 20 | 9  |
| 78587 | 7 | 17506042 | 17506068 | 3 | 9  | 27 | TCT  | 25 | 5  |
| 78590 | 7 | 17510674 | 17510685 | 2 | 6  | 12 | CA   | 18 | 4  |
| 78596 | 7 | 17525788 | 17525811 | 2 | 12 | 24 | TG   | 8  | 8  |
| 78598 | 7 | 17526655 | 17526681 | 3 | 9  | 27 | TCT  | 14 | 13 |
| 78603 | 7 | 17530255 | 17530270 | 4 | 4  | 16 | TCTT | 6  | 6  |
| 78605 | 7 | 17535609 | 17535620 | 2 | 6  | 12 | TC   | 16 | 7  |
| 78606 | 7 | 17535622 | 17535635 | 2 | 7  | 14 | CT   | 15 | 5  |
| 78609 | 7 | 17538178 | 17538235 | 2 | 29 | 58 | TC   | 9  | 7  |
| 78616 | 7 | 17550651 | 17550666 | 2 | 8  | 16 | CT   | 26 | 5  |
| 78624 | 7 | 17559188 | 17559211 | 3 | 8  | 24 | AGC  | 22 | 11 |
| 78625 | 7 | 17559490 | 17559501 | 2 | 6  | 12 | GT   | 23 | 3  |
| 78628 | 7 | 17564072 | 17564087 | 4 | 4  | 16 | AGGA | 24 | 3  |
| 78629 | 7 | 17568517 | 17568536 | 2 | 10 | 20 | GT   | 19 | 7  |
| 78631 | 7 | 17569627 | 17569646 | 4 | 5  | 20 | AGCT | 9  | 4  |
| 78632 | 7 | 17571784 | 17571795 | 2 | 6  | 12 | TG   | 25 | 5  |
| 78635 | 7 | 17578475 | 17578494 | 2 | 10 | 20 | TG   | 18 | 11 |
| 78644 | 7 | 17600278 | 17600292 | 3 | 5  | 15 | TCC  | 13 | 3  |
| 78646 | 7 | 17603283 | 17603306 | 2 | 12 | 24 | AC   | 8  | 9  |
| 78647 | 7 | 17603668 | 17603679 | 2 | 6  | 12 | CA   | 24 | 11 |
| 78648 | 7 | 17603682 | 17603695 | 2 | 7  | 14 | CA   | 22 | 8  |
| 78653 | 7 | 17618948 | 17618974 | 3 | 9  | 27 | TCC  | 20 | 8  |
| 78657 | 7 | 17645421 | 17645442 | 2 | 11 | 22 | AC   | 24 | 4  |
| 78659 | 7 | 17647388 | 17647399 | 2 | 6  | 12 | TG   | 27 | 3  |
| 78661 | 7 | 17650963 | 17650996 | 2 | 17 | 34 | GT   | 13 | 9  |
| 78662 | 7 | 17651383 | 17651414 | 2 | 16 | 32 | CA   | 10 | 7  |
| 78663 | 7 | 17657546 | 17657573 | 2 | 14 | 28 | AC   | 20 | 15 |
| 78664 | 7 | 17658124 | 17658141 | 2 | 9  | 18 | TG   | 23 | 3  |
| 78665 | 7 | 17659558 | 17659585 | 2 | 14 | 28 | GT   | 12 | 11 |
| 78666 | 7 | 17660096 | 17660113 | 3 | 6  | 18 | GAA  | 12 | 3  |
| 78670 | 7 | 17672282 | 17672299 | 2 | 9  | 18 | GT   | 24 | 4  |
| 78672 | 7 | 17673984 | 17673997 | 2 | 7  | 14 | GT   | 27 | 4  |
| 78673 | 7 | 17674571 | 17674586 | 2 | 8  | 16 | AC   | 17 | 4  |
| 78675 | 7 | 17677135 | 17677146 | 2 | 6  | 12 | TG   | 31 | 3  |
| 78676 | 7 | 17678775 | 17678800 | 2 | 13 | 26 | GT   | 11 | 9  |
| 78680 | 7 | 17681895 | 17681912 | 3 | 6  | 18 | TGA  | 30 | 6  |
| 78689 | 7 | 17700740 | 17700765 | 2 | 13 | 26 | GT   | 23 | 9  |
| 78692 | 7 | 17701308 | 17701321 | 2 | 7  | 14 | TG   | 21 | 5  |
| 78693 | 7 | 17701322 | 17701333 | 2 | 6  | 12 | AG   | 17 | 6  |
| 78694 | 7 | 17701716 | 17701736 | 3 | 7  | 21 | GCT  | 28 | 6  |
| 78697 | 7 | 17716022 | 17716033 | 2 | 6  | 12 | GT   | 23 | 5  |
| 78698 | 7 | 17716911 | 17716964 | 2 | 27 | 54 | CA   | 7  | 8  |
| 78699 | 7 | 17720487 | 17720504 | 2 | 9  | 18 | CT   | 25 | 6  |
| 78700 | 7 | 17720570 | 17720593 | 2 | 12 | 24 | TG   | 20 | 4  |
| 78705 | 7 | 17734415 | 17734430 | 2 | 8  | 16 | CT   | 31 | 6  |
| 78713 | 7 | 17742047 | 17742061 | 3 | 5  | 15 | GGC  | 17 | 6  |

|       |   |          |          |   |    |    |      |    |    |
|-------|---|----------|----------|---|----|----|------|----|----|
| 78715 | 7 | 17744920 | 17744961 | 2 | 21 | 42 | CA   | 14 | 13 |
| 78716 | 7 | 17745918 | 17745941 | 3 | 8  | 24 | TGC  | 37 | 3  |
| 78717 | 7 | 17746579 | 17746590 | 2 | 6  | 12 | AT   | 21 | 9  |
| 78718 | 7 | 17750346 | 17750369 | 2 | 12 | 24 | TC   | 12 | 9  |
| 78720 | 7 | 17750417 | 17750430 | 2 | 7  | 14 | TC   | 18 | 5  |
| 78727 | 7 | 17760994 | 17761005 | 2 | 6  | 12 | AC   | 27 | 3  |
| 78730 | 7 | 17765165 | 17765204 | 2 | 20 | 40 | TG   | 10 | 9  |
| 78732 | 7 | 17768745 | 17768766 | 2 | 11 | 22 | AC   | 17 | 17 |
| 78737 | 7 | 17787385 | 17787396 | 2 | 6  | 12 | TG   | 28 | 3  |
| 78738 | 7 | 17787560 | 17787575 | 2 | 8  | 16 | AC   | 13 | 13 |
| 78740 | 7 | 17791488 | 17791503 | 2 | 8  | 16 | GT   | 24 | 5  |
| 78744 | 7 | 17800961 | 17800978 | 3 | 6  | 18 | AGC  | 15 | 3  |
| 78747 | 7 | 17801256 | 17801279 | 3 | 8  | 24 | TCA  | 11 | 8  |
| 78751 | 7 | 17806399 | 17806414 | 2 | 8  | 16 | TG   | 7  | 8  |
| 78753 | 7 | 17806545 | 17806570 | 2 | 13 | 26 | AC   | 8  | 7  |
| 78754 | 7 | 17806596 | 17806621 | 2 | 13 | 26 | CA   | 9  | 10 |
| 78755 | 7 | 17808646 | 17808661 | 2 | 8  | 16 | AC   | 22 | 4  |
| 78756 | 7 | 17808901 | 17808920 | 4 | 5  | 20 | GAGG | 10 | 6  |
| 78762 | 7 | 17816607 | 17816640 | 2 | 17 | 34 | AC   | 9  | 10 |
| 78766 | 7 | 17818712 | 17818741 | 2 | 15 | 30 | GT   | 18 | 5  |
| 78767 | 7 | 17818919 | 17818932 | 2 | 7  | 14 | AC   | 17 | 5  |
| 78768 | 7 | 17821989 | 17822016 | 2 | 14 | 28 | GT   | 11 | 15 |
| 78769 | 7 | 17822229 | 17822258 | 2 | 15 | 30 | TG   | 13 | 7  |
| 78771 | 7 | 17824320 | 17824335 | 2 | 8  | 16 | AC   | 25 | 4  |
| 78772 | 7 | 17824404 | 17824433 | 2 | 15 | 30 | AC   | 9  | 9  |
| 78773 | 7 | 17824545 | 17824560 | 2 | 8  | 16 | CA   | 14 | 3  |
| 78779 | 7 | 17826889 | 17826916 | 2 | 14 | 28 | TG   | 9  | 9  |
| 78782 | 7 | 17827044 | 17827083 | 2 | 20 | 40 | GT   | 8  | 9  |
| 78784 | 7 | 17827258 | 17827277 | 2 | 10 | 20 | CA   | 21 | 6  |
| 78786 | 7 | 17828557 | 17828590 | 2 | 17 | 34 | CA   | 13 | 9  |
| 78788 | 7 | 17828726 | 17828747 | 2 | 11 | 22 | CA   | 11 | 4  |
| 78797 | 7 | 17835955 | 17835976 | 2 | 11 | 22 | GT   | 15 | 11 |
| 78798 | 7 | 17836154 | 17836173 | 2 | 10 | 20 | CA   | 16 | 6  |
| 78799 | 7 | 17836482 | 17836493 | 2 | 6  | 12 | TG   | 15 | 4  |
| 78801 | 7 | 17838295 | 17838321 | 3 | 9  | 27 | ACA  | 7  | 3  |
| 78805 | 7 | 17843197 | 17843236 | 2 | 20 | 40 | CA   | 16 | 11 |
| 78807 | 7 | 17844220 | 17844237 | 2 | 9  | 18 | GT   | 20 | 9  |
| 78809 | 7 | 17848195 | 17848209 | 3 | 5  | 15 | GAG  | 20 | 3  |
| 78810 | 7 | 17848593 | 17848612 | 2 | 10 | 20 | GT   | 21 | 9  |
| 78815 | 7 | 17867165 | 17867186 | 2 | 11 | 22 | TG   | 25 | 5  |
| 78822 | 7 | 17883010 | 17883027 | 3 | 6  | 18 | GAA  | 24 | 4  |
| 78823 | 7 | 17888269 | 17888282 | 2 | 7  | 14 | TG   | 19 | 3  |
| 78824 | 7 | 17888726 | 17888745 | 2 | 10 | 20 | GT   | 13 | 6  |
| 78825 | 7 | 17888880 | 17888897 | 2 | 9  | 18 | GT   | 17 | 6  |
| 78831 | 7 | 17908019 | 17908046 | 2 | 14 | 28 | CA   | 13 | 12 |
| 78835 | 7 | 17915209 | 17915226 | 2 | 9  | 18 | TC   | 19 | 4  |
| 78836 | 7 | 17919160 | 17919189 | 2 | 15 | 30 | GT   | 9  | 9  |
| 78837 | 7 | 17919310 | 17919349 | 2 | 20 | 40 | TG   | 6  | 7  |
| 78838 | 7 | 17919955 | 17919988 | 2 | 17 | 34 | TC   | 10 | 10 |
| 78840 | 7 | 17932236 | 17932255 | 2 | 10 | 20 | GT   | 14 | 5  |
| 78841 | 7 | 17932348 | 17932359 | 2 | 6  | 12 | TG   | 13 | 7  |

|       |   |          |          |   |    |    |      |    |    |
|-------|---|----------|----------|---|----|----|------|----|----|
| 78848 | 7 | 17945264 | 17945285 | 2 | 11 | 22 | GT   | 18 | 10 |
| 78850 | 7 | 17948841 | 17948856 | 2 | 8  | 16 | AG   | 23 | 13 |
| 78863 | 7 | 17973902 | 17973916 | 3 | 5  | 15 | AGA  | 7  | 6  |
| 78867 | 7 | 17977476 | 17977513 | 2 | 19 | 38 | TG   | 7  | 7  |
| 78869 | 7 | 17979634 | 17979659 | 2 | 13 | 26 | GT   | 8  | 5  |
| 78872 | 7 | 17983707 | 17983722 | 2 | 8  | 16 | GT   | 33 | 5  |
| 78873 | 7 | 17985052 | 17985085 | 2 | 17 | 34 | TG   | 22 | 20 |
| 78875 | 7 | 17988635 | 17988652 | 3 | 6  | 18 | AGG  | 9  | 4  |
| 78876 | 7 | 17988808 | 17988829 | 2 | 11 | 22 | GT   | 14 | 13 |
| 78877 | 7 | 17991363 | 17991374 | 2 | 6  | 12 | GT   | 23 | 4  |
| 78879 | 7 | 17993162 | 17993189 | 2 | 14 | 28 | GT   | 12 | 12 |
| 78882 | 7 | 17994928 | 17994957 | 3 | 10 | 30 | CTT  | 16 | 8  |
| 78883 | 7 | 17995054 | 17995077 | 3 | 8  | 24 | CAG  | 27 | 8  |
| 78889 | 7 | 17996910 | 17996927 | 2 | 9  | 18 | TG   | 21 | 11 |
| 78892 | 7 | 17997618 | 17997631 | 2 | 7  | 14 | GT   | 25 | 4  |
| 78897 | 7 | 18000322 | 18000353 | 2 | 16 | 32 | GT   | 14 | 11 |
| 78901 | 7 | 18014148 | 18014165 | 2 | 9  | 18 | GT   | 6  | 6  |
| 78903 | 7 | 18023438 | 18023459 | 2 | 11 | 22 | CA   | 18 | 11 |
| 78907 | 7 | 18028068 | 18028081 | 2 | 7  | 14 | GT   | 19 | 3  |
| 78908 | 7 | 18028717 | 18028730 | 2 | 7  | 14 | GT   | 28 | 5  |
| 78910 | 7 | 18031434 | 18031451 | 3 | 6  | 18 | TCC  | 26 | 3  |
| 78913 | 7 | 18038005 | 18038016 | 2 | 6  | 12 | CA   | 33 | 3  |
| 78914 | 7 | 18038173 | 18038186 | 2 | 7  | 14 | TC   | 34 | 3  |
| 78918 | 7 | 18042167 | 18042199 | 3 | 11 | 33 | GAT  | 16 | 8  |
| 78923 | 7 | 18047160 | 18047185 | 2 | 13 | 26 | AC   | 18 | 12 |
| 78924 | 7 | 18049145 | 18049176 | 2 | 16 | 32 | TG   | 12 | 8  |
| 78925 | 7 | 18049338 | 18049361 | 2 | 12 | 24 | TG   | 8  | 7  |
| 78927 | 7 | 18050354 | 18050375 | 2 | 11 | 22 | GT   | 16 | 4  |
| 78928 | 7 | 18053712 | 18053735 | 2 | 12 | 24 | GT   | 11 | 11 |
| 78932 | 7 | 18060440 | 18060455 | 2 | 8  | 16 | GT   | 7  | 8  |
| 78935 | 7 | 18065573 | 18065590 | 2 | 9  | 18 | TG   | 22 | 11 |
| 78938 | 7 | 18068509 | 18068534 | 2 | 13 | 26 | GT   | 9  | 8  |
| 78939 | 7 | 18070077 | 18070092 | 2 | 8  | 16 | AG   | 19 | 3  |
| 78943 | 7 | 18070795 | 18070814 | 4 | 5  | 20 | CTGT | 24 | 3  |
| 78944 | 7 | 18071191 | 18071218 | 2 | 14 | 28 | GA   | 29 | 11 |
| 78945 | 7 | 18072638 | 18072663 | 2 | 13 | 26 | TG   | 13 | 11 |
| 78948 | 7 | 18073331 | 18073369 | 3 | 13 | 39 | TCC  | 8  | 6  |
| 78950 | 7 | 18074189 | 18074203 | 3 | 5  | 15 | TTC  | 21 | 3  |
| 78953 | 7 | 18075153 | 18075188 | 2 | 18 | 36 | TG   | 8  | 8  |
| 78954 | 7 | 18075884 | 18075907 | 2 | 12 | 24 | TG   | 9  | 8  |
| 78956 | 7 | 18076189 | 18076232 | 2 | 22 | 44 | CA   | 8  | 11 |
| 78959 | 7 | 18080366 | 18080377 | 2 | 6  | 12 | AC   | 22 | 3  |
| 78965 | 7 | 18082509 | 18082523 | 3 | 5  | 15 | TTA  | 18 | 3  |
| 78966 | 7 | 18082781 | 18082795 | 3 | 5  | 15 | TTC  | 24 | 6  |
| 78968 | 7 | 18083111 | 18083149 | 3 | 13 | 39 | AGG  | 18 | 10 |
| 78969 | 7 | 18083343 | 18083370 | 2 | 14 | 28 | AC   | 14 | 10 |
| 78973 | 7 | 18087855 | 18087884 | 2 | 15 | 30 | TG   | 7  | 11 |
| 78974 | 7 | 18087995 | 18088018 | 2 | 12 | 24 | GT   | 14 | 9  |
| 78975 | 7 | 18088177 | 18088192 | 2 | 8  | 16 | TG   | 21 | 5  |
| 78981 | 7 | 18088739 | 18088770 | 2 | 16 | 32 | CA   | 12 | 9  |
| 78982 | 7 | 18089247 | 18089264 | 2 | 9  | 18 | AC   | 19 | 5  |

|       |   |          |          |   |    |    |      |    |    |
|-------|---|----------|----------|---|----|----|------|----|----|
| 78983 | 7 | 18089323 | 18089344 | 2 | 11 | 22 | CA   | 6  | 4  |
| 78991 | 7 | 18095327 | 18095340 | 2 | 7  | 14 | AC   | 15 | 6  |
| 78996 | 7 | 18097113 | 18097134 | 2 | 11 | 22 | AC   | 19 | 11 |
| 78999 | 7 | 18097316 | 18097333 | 2 | 9  | 18 | TG   | 12 | 6  |
| 79000 | 7 | 18097541 | 18097556 | 2 | 8  | 16 | TG   | 21 | 5  |
| 79001 | 7 | 18101202 | 18101219 | 2 | 9  | 18 | TG   | 25 | 3  |
| 79003 | 7 | 18107747 | 18107762 | 2 | 8  | 16 | GT   | 24 | 3  |
| 79005 | 7 | 18113019 | 18113036 | 2 | 9  | 18 | CA   | 11 | 6  |
| 79008 | 7 | 18117441 | 18117464 | 3 | 8  | 24 | GAT  | 25 | 9  |
| 79010 | 7 | 18118331 | 18118348 | 2 | 9  | 18 | AC   | 23 | 8  |
| 79013 | 7 | 18119977 | 18119988 | 2 | 6  | 12 | GT   | 19 | 7  |
| 79016 | 7 | 18121371 | 18121392 | 2 | 11 | 22 | CA   | 23 | 7  |
| 79017 | 7 | 18121524 | 18121545 | 2 | 11 | 22 | TG   | 18 | 17 |
| 79018 | 7 | 18122897 | 18122920 | 2 | 12 | 24 | CA   | 12 | 9  |
| 79021 | 7 | 18125592 | 18125605 | 2 | 7  | 14 | CA   | 32 | 4  |
| 79024 | 7 | 18127982 | 18128002 | 3 | 7  | 21 | GGA  | 13 | 3  |
| 79025 | 7 | 18128159 | 18128182 | 3 | 8  | 24 | GAG  | 16 | 6  |
| 79026 | 7 | 18129377 | 18129410 | 2 | 17 | 34 | TG   | 19 | 12 |
| 79027 | 7 | 18129535 | 18129560 | 2 | 13 | 26 | TG   | 12 | 10 |
| 79028 | 7 | 18129748 | 18129773 | 2 | 13 | 26 | CA   | 13 | 10 |
| 79029 | 7 | 18129868 | 18129887 | 2 | 10 | 20 | GT   | 12 | 7  |
| 79031 | 7 | 18130666 | 18130683 | 2 | 9  | 18 | GT   | 22 | 10 |
| 79032 | 7 | 18130807 | 18130818 | 2 | 6  | 12 | TG   | 19 | 4  |
| 79033 | 7 | 18130972 | 18131001 | 2 | 15 | 30 | CA   | 13 | 9  |
| 79035 | 7 | 18131702 | 18131719 | 2 | 9  | 18 | GA   | 24 | 4  |
| 79036 | 7 | 18131913 | 18131926 | 2 | 7  | 14 | GA   | 26 | 3  |
| 79037 | 7 | 18134709 | 18134750 | 2 | 21 | 42 | AC   | 13 | 11 |
| 79039 | 7 | 18136702 | 18136735 | 2 | 17 | 34 | TG   | 15 | 16 |
| 79040 | 7 | 18138687 | 18138700 | 2 | 7  | 14 | CA   | 6  | 5  |
| 79041 | 7 | 18138704 | 18138721 | 2 | 9  | 18 | AC   | 8  | 4  |
| 79045 | 7 | 18140554 | 18140585 | 2 | 16 | 32 | TG   | 9  | 8  |
| 79049 | 7 | 18145710 | 18145754 | 3 | 15 | 45 | TCT  | 25 | 15 |
| 79052 | 7 | 18150112 | 18150125 | 2 | 7  | 14 | CT   | 19 | 4  |
| 79054 | 7 | 18153673 | 18153700 | 2 | 14 | 28 | CA   | 10 | 8  |
| 79055 | 7 | 18153972 | 18153986 | 3 | 5  | 15 | AAG  | 28 | 5  |
| 79058 | 7 | 18155114 | 18155125 | 2 | 6  | 12 | TG   | 28 | 3  |
| 79059 | 7 | 18155425 | 18155440 | 4 | 4  | 16 | ATAA | 25 | 3  |
| 79060 | 7 | 18156752 | 18156785 | 2 | 17 | 34 | GT   | 10 | 9  |
| 79061 | 7 | 18157084 | 18157098 | 3 | 5  | 15 | AGA  | 29 | 3  |
| 79064 | 7 | 18166023 | 18166054 | 2 | 16 | 32 | TG   | 6  | 5  |
| 79066 | 7 | 18166207 | 18166234 | 2 | 14 | 28 | GT   | 12 | 8  |
| 79072 | 7 | 18171536 | 18171547 | 2 | 6  | 12 | TG   | 11 | 6  |
| 79073 | 7 | 18180098 | 18180115 | 2 | 9  | 18 | GT   | 23 | 7  |
| 79074 | 7 | 18181423 | 18181444 | 2 | 11 | 22 | TC   | 24 | 4  |
| 79075 | 7 | 18181821 | 18181844 | 2 | 12 | 24 | TG   | 11 | 8  |
| 79076 | 7 | 18181897 | 18181918 | 2 | 11 | 22 | AC   | 18 | 9  |
| 79077 | 7 | 18182046 | 18182069 | 2 | 12 | 24 | TG   | 20 | 9  |
| 79078 | 7 | 18182679 | 18182706 | 2 | 14 | 28 | GT   | 11 | 11 |
| 79079 | 7 | 18182876 | 18182905 | 2 | 15 | 30 | CA   | 19 | 17 |
| 79080 | 7 | 18183784 | 18183795 | 2 | 6  | 12 | GT   | 10 | 11 |
| 79081 | 7 | 18183797 | 18183812 | 2 | 8  | 16 | TG   | 12 | 16 |



|       |   |          |          |   |    |    |      |    |    |
|-------|---|----------|----------|---|----|----|------|----|----|
| 79083 | 7 | 18184155 | 18184174 | 2 | 10 | 20 | TG   | 13 | 12 |
| 79085 | 7 | 18185287 | 18185314 | 2 | 14 | 28 | AC   | 19 | 18 |
| 79086 | 7 | 18185753 | 18185784 | 2 | 16 | 32 | AC   | 18 | 14 |
| 79087 | 7 | 18185923 | 18185944 | 2 | 11 | 22 | GT   | 11 | 11 |
| 79089 | 7 | 18187336 | 18187367 | 2 | 16 | 32 | AC   | 24 | 12 |
| 79090 | 7 | 18187721 | 18187742 | 2 | 11 | 22 | TG   | 14 | 12 |
| 79094 | 7 | 18190136 | 18190153 | 2 | 9  | 18 | CA   | 15 | 5  |
| 79095 | 7 | 18190261 | 18190274 | 2 | 7  | 14 | GT   | 27 | 5  |
| 79096 | 7 | 18191992 | 18192013 | 2 | 11 | 22 | AG   | 22 | 17 |
| 79099 | 7 | 18194358 | 18194381 | 2 | 12 | 24 | CA   | 18 | 13 |
| 79100 | 7 | 18194490 | 18194503 | 2 | 7  | 14 | AC   | 10 | 12 |
| 79101 | 7 | 18198243 | 18198254 | 2 | 6  | 12 | TG   | 29 | 5  |
| 79102 | 7 | 18198434 | 18198475 | 2 | 21 | 42 | AC   | 10 | 10 |
| 79103 | 7 | 18198671 | 18198685 | 3 | 5  | 15 | GGA  | 25 | 7  |
| 79104 | 7 | 18198763 | 18198786 | 2 | 12 | 24 | TG   | 20 | 18 |
| 79106 | 7 | 18201551 | 18201578 | 2 | 14 | 28 | AC   | 16 | 5  |
| 79111 | 7 | 18204925 | 18204936 | 2 | 6  | 12 | TG   | 23 | 4  |
| 79112 | 7 | 18205105 | 18205116 | 2 | 6  | 12 | TG   | 29 | 3  |
| 79114 | 7 | 18206851 | 18206865 | 3 | 5  | 15 | CAG  | 31 | 4  |
| 79115 | 7 | 18208481 | 18208502 | 2 | 11 | 22 | CA   | 14 | 5  |
| 79116 | 7 | 18211878 | 18211919 | 2 | 21 | 42 | CA   | 13 | 10 |
| 79121 | 7 | 18216643 | 18216660 | 2 | 9  | 18 | TG   | 21 | 5  |
| 79122 | 7 | 18216973 | 18216984 | 2 | 6  | 12 | TG   | 26 | 3  |
| 79123 | 7 | 18220206 | 18220217 | 2 | 6  | 12 | AC   | 22 | 7  |
| 79124 | 7 | 18222487 | 18222502 | 2 | 8  | 16 | CA   | 7  | 11 |
| 79126 | 7 | 18224934 | 18224961 | 2 | 14 | 28 | CA   | 26 | 11 |
| 79130 | 7 | 18229438 | 18229470 | 3 | 11 | 33 | CAG  | 28 | 18 |
| 79131 | 7 | 18231805 | 18231822 | 3 | 6  | 18 | TCC  | 17 | 11 |
| 79132 | 7 | 18231824 | 18231838 | 3 | 5  | 15 | CCT  | 14 | 11 |
| 79133 | 7 | 18233493 | 18233508 | 2 | 8  | 16 | AC   | 20 | 11 |
| 79139 | 7 | 18237968 | 18237985 | 3 | 6  | 18 | GAT  | 21 | 7  |
| 79141 | 7 | 18239763 | 18239786 | 3 | 8  | 24 | TGT  | 22 | 8  |
| 79144 | 7 | 18241224 | 18241253 | 3 | 10 | 30 | TTG  | 27 | 8  |
| 79147 | 7 | 18242735 | 18242761 | 3 | 9  | 27 | CCT  | 16 | 6  |
| 79148 | 7 | 18243348 | 18243359 | 2 | 6  | 12 | TA   | 20 | 5  |
| 79149 | 7 | 18245455 | 18245480 | 2 | 13 | 26 | AC   | 13 | 18 |
| 79151 | 7 | 18247021 | 18247036 | 2 | 8  | 16 | AG   | 25 | 4  |
| 79152 | 7 | 18247166 | 18247191 | 2 | 13 | 26 | AC   | 20 | 12 |
| 79154 | 7 | 18248472 | 18248501 | 2 | 15 | 30 | TG   | 20 | 15 |
| 79157 | 7 | 18250693 | 18250713 | 3 | 7  | 21 | TCA  | 24 | 5  |
| 79158 | 7 | 18251406 | 18251420 | 3 | 5  | 15 | AAC  | 19 | 5  |
| 79160 | 7 | 18254593 | 18254616 | 2 | 12 | 24 | TG   | 9  | 8  |
| 79165 | 7 | 18269734 | 18269754 | 3 | 7  | 21 | GCA  | 27 | 12 |
| 79168 | 7 | 18272201 | 18272252 | 4 | 13 | 52 | CCTT | 6  | 7  |
| 79169 | 7 | 18272607 | 18272621 | 3 | 5  | 15 | GAG  | 25 | 3  |
| 79174 | 7 | 18293347 | 18293378 | 2 | 16 | 32 | AC   | 21 | 13 |
| 79175 | 7 | 18295007 | 18295021 | 3 | 5  | 15 | AGG  | 27 | 3  |
| 79176 | 7 | 18299410 | 18299433 | 3 | 8  | 24 | AAG  | 30 | 5  |
| 79177 | 7 | 18300067 | 18300084 | 2 | 9  | 18 | GT   | 24 | 5  |
| 79178 | 7 | 18300261 | 18300296 | 2 | 18 | 36 | AC   | 21 | 7  |
| 79183 | 7 | 18308516 | 18308533 | 3 | 6  | 18 | CAA  | 14 | 12 |

|       |   |          |          |   |    |    |      |    |    |
|-------|---|----------|----------|---|----|----|------|----|----|
| 79184 | 7 | 18310197 | 18310220 | 3 | 8  | 24 | GGA  | 27 | 5  |
| 79185 | 7 | 18310297 | 18310314 | 2 | 9  | 18 | GA   | 24 | 3  |
| 79189 | 7 | 18311804 | 18311817 | 2 | 7  | 14 | GT   | 28 | 3  |
| 79190 | 7 | 18311851 | 18311888 | 2 | 19 | 38 | GT   | 16 | 8  |
| 79193 | 7 | 18315277 | 18315306 | 2 | 15 | 30 | AC   | 17 | 14 |
| 79194 | 7 | 18315424 | 18315461 | 2 | 19 | 38 | GT   | 12 | 13 |
| 79195 | 7 | 18315493 | 18315504 | 2 | 6  | 12 | AG   | 17 | 6  |
| 79197 | 7 | 18318152 | 18318172 | 3 | 7  | 21 | AGA  | 25 | 6  |
| 79202 | 7 | 18323830 | 18323850 | 3 | 7  | 21 | CTT  | 6  | 9  |
| 79204 | 7 | 18324501 | 18324526 | 2 | 13 | 26 | AC   | 18 | 8  |
| 79205 | 7 | 18324761 | 18324774 | 2 | 7  | 14 | CA   | 20 | 7  |
| 79209 | 7 | 18329818 | 18329829 | 2 | 6  | 12 | TG   | 16 | 9  |
| 79211 | 7 | 18332925 | 18332954 | 2 | 15 | 30 | TG   | 9  | 9  |
| 79212 | 7 | 18333102 | 18333113 | 2 | 6  | 12 | AC   | 14 | 12 |
| 79216 | 7 | 18337691 | 18337714 | 2 | 12 | 24 | TG   | 19 | 6  |
| 79217 | 7 | 18337773 | 18337794 | 2 | 11 | 22 | AC   | 14 | 7  |
| 79225 | 7 | 18354601 | 18354632 | 2 | 16 | 32 | AG   | 12 | 8  |
| 79226 | 7 | 18354652 | 18354701 | 2 | 25 | 50 | CA   | 12 | 11 |
| 79233 | 7 | 18360617 | 18360638 | 2 | 11 | 22 | AC   | 19 | 18 |
| 79235 | 7 | 18365218 | 18365235 | 3 | 6  | 18 | GCT  | 25 | 6  |
| 79237 | 7 | 18365841 | 18365852 | 2 | 6  | 12 | CT   | 20 | 8  |
| 79238 | 7 | 18367556 | 18367587 | 2 | 16 | 32 | CA   | 10 | 6  |
| 79240 | 7 | 18367769 | 18367784 | 2 | 8  | 16 | CA   | 23 | 3  |
| 79242 | 7 | 18370491 | 18370506 | 2 | 8  | 16 | TG   | 23 | 3  |
| 79244 | 7 | 18370773 | 18370792 | 2 | 10 | 20 | TG   | 21 | 5  |
| 79245 | 7 | 18370892 | 18370924 | 3 | 11 | 33 | GAG  | 16 | 7  |
| 79249 | 7 | 18373191 | 18373220 | 2 | 15 | 30 | TG   | 9  | 10 |
| 79266 | 7 | 18386972 | 18386983 | 2 | 6  | 12 | TA   | 12 | 5  |
| 79267 | 7 | 18388222 | 18388233 | 2 | 6  | 12 | TG   | 15 | 6  |
| 79268 | 7 | 18388963 | 18388980 | 3 | 6  | 18 | AAG  | 21 | 5  |
| 79278 | 7 | 18398267 | 18398298 | 2 | 16 | 32 | AC   | 7  | 10 |
| 79280 | 7 | 18401799 | 18401822 | 3 | 8  | 24 | TTG  | 25 | 10 |
| 79284 | 7 | 18408288 | 18408315 | 2 | 14 | 28 | AC   | 13 | 9  |
| 79285 | 7 | 18409326 | 18409343 | 3 | 6  | 18 | CTG  | 29 | 3  |
| 79288 | 7 | 18412212 | 18412225 | 2 | 7  | 14 | TG   | 19 | 5  |
| 79289 | 7 | 18416721 | 18416742 | 2 | 11 | 22 | GT   | 20 | 6  |
| 79290 | 7 | 18416933 | 18416950 | 2 | 9  | 18 | AG   | 24 | 5  |
| 79292 | 7 | 18421145 | 18421162 | 2 | 9  | 18 | AC   | 9  | 8  |
| 79316 | 7 | 18486710 | 18486727 | 2 | 9  | 18 | TG   | 24 | 5  |
| 79317 | 7 | 18487702 | 18487721 | 2 | 10 | 20 | CA   | 20 | 4  |
| 79318 | 7 | 18493402 | 18493421 | 4 | 5  | 20 | GTGC | 7  | 9  |
| 79321 | 7 | 18497290 | 18497339 | 2 | 25 | 50 | CA   | 18 | 8  |
| 79324 | 7 | 18508813 | 18508824 | 2 | 6  | 12 | GT   | 22 | 7  |
| 79325 | 7 | 18509211 | 18509246 | 2 | 18 | 36 | GT   | 11 | 10 |
| 79326 | 7 | 18509925 | 18509940 | 4 | 4  | 16 | AGCT | 25 | 3  |
| 79328 | 7 | 18512437 | 18512457 | 3 | 7  | 21 | ATA  | 24 | 3  |
| 79334 | 7 | 18518911 | 18518926 | 2 | 8  | 16 | AG   | 29 | 3  |
| 79336 | 7 | 18521426 | 18521465 | 2 | 20 | 40 | AC   | 21 | 15 |
| 79339 | 7 | 18530938 | 18530959 | 2 | 11 | 22 | GT   | 18 | 8  |
| 79342 | 7 | 18537465 | 18537485 | 3 | 7  | 21 | GCA  | 23 | 4  |
| 79347 | 7 | 18546602 | 18546625 | 3 | 8  | 24 | ACA  | 21 | 3  |

|       |   |          |          |   |    |    |      |    |    |
|-------|---|----------|----------|---|----|----|------|----|----|
| 79357 | 7 | 18562502 | 18562513 | 2 | 6  | 12 | CA   | 30 | 6  |
| 79362 | 7 | 18563427 | 18563446 | 2 | 10 | 20 | GT   | 8  | 7  |
| 79364 | 7 | 18568863 | 18568878 | 2 | 8  | 16 | AC   | 21 | 4  |
| 79374 | 7 | 18581982 | 18581997 | 4 | 4  | 16 | AAAC | 15 | 3  |
| 79375 | 7 | 18591832 | 18591855 | 2 | 12 | 24 | AC   | 12 | 7  |
| 79376 | 7 | 18592248 | 18592301 | 2 | 27 | 54 | TG   | 10 | 11 |
| 79377 | 7 | 18596485 | 18596502 | 2 | 9  | 18 | TG   | 22 | 3  |
| 79381 | 7 | 18597574 | 18597589 | 2 | 8  | 16 | CA   | 10 | 3  |
| 79384 | 7 | 18600381 | 18600395 | 3 | 5  | 15 | CTG  | 32 | 3  |
| 79386 | 7 | 18602617 | 18602650 | 2 | 17 | 34 | AC   | 13 | 9  |
| 79388 | 7 | 18608252 | 18608265 | 2 | 7  | 14 | CT   | 22 | 6  |
| 79391 | 7 | 18612407 | 18612430 | 2 | 12 | 24 | TG   | 13 | 10 |
| 79396 | 7 | 18617292 | 18617311 | 2 | 10 | 20 | AC   | 20 | 10 |
| 79399 | 7 | 18621056 | 18621103 | 2 | 24 | 48 | AC   | 10 | 11 |
| 79401 | 7 | 18621406 | 18621441 | 2 | 18 | 36 | AC   | 17 | 8  |
| 79403 | 7 | 18623203 | 18623232 | 2 | 15 | 30 | AC   | 13 | 6  |
| 79405 | 7 | 18623679 | 18623702 | 4 | 6  | 24 | GATG | 25 | 3  |
| 79410 | 7 | 18629830 | 18629861 | 2 | 16 | 32 | AC   | 15 | 8  |
| 79411 | 7 | 18629978 | 18630009 | 2 | 16 | 32 | GT   | 9  | 7  |
| 79412 | 7 | 18630823 | 18630836 | 2 | 7  | 14 | GT   | 21 | 4  |
| 79414 | 7 | 18631074 | 18631097 | 2 | 12 | 24 | CA   | 18 | 6  |
| 79415 | 7 | 18631220 | 18631233 | 2 | 7  | 14 | CA   | 22 | 3  |
| 79416 | 7 | 18633293 | 18633316 | 2 | 12 | 24 | GT   | 16 | 13 |
| 79417 | 7 | 18633787 | 18633814 | 2 | 14 | 28 | GT   | 22 | 8  |
| 79423 | 7 | 18640324 | 18640339 | 2 | 8  | 16 | AC   | 25 | 4  |
| 79424 | 7 | 18640432 | 18640447 | 2 | 8  | 16 | AC   | 24 | 7  |
| 79426 | 7 | 18643727 | 18643784 | 2 | 29 | 58 | GT   | 6  | 9  |
| 79428 | 7 | 18645051 | 18645076 | 2 | 13 | 26 | AC   | 14 | 8  |
| 79436 | 7 | 18662946 | 18662969 | 3 | 8  | 24 | TGC  | 17 | 6  |
| 79437 | 7 | 18663062 | 18663087 | 2 | 13 | 26 | CA   | 15 | 8  |
| 79438 | 7 | 18663413 | 18663440 | 2 | 14 | 28 | GT   | 16 | 9  |
| 79439 | 7 | 18669733 | 18669758 | 2 | 13 | 26 | CA   | 15 | 8  |
| 79443 | 7 | 18682160 | 18682191 | 4 | 8  | 32 | ATAG | 17 | 10 |
| 79445 | 7 | 18686144 | 18686175 | 2 | 16 | 32 | TG   | 9  | 7  |
| 79447 | 7 | 18695370 | 18695383 | 2 | 7  | 14 | TG   | 25 | 4  |
| 79454 | 7 | 18725252 | 18725279 | 2 | 14 | 28 | AG   | 26 | 7  |
| 79467 | 7 | 18769034 | 18769087 | 2 | 27 | 54 | AC   | 6  | 7  |
| 79472 | 7 | 18773274 | 18773297 | 2 | 12 | 24 | GT   | 16 | 4  |
| 79473 | 7 | 18773411 | 18773422 | 2 | 6  | 12 | GT   | 19 | 5  |
| 79476 | 7 | 18775884 | 18775899 | 2 | 8  | 16 | CA   | 13 | 13 |
| 79478 | 7 | 18776809 | 18776826 | 3 | 6  | 18 | CTC  | 26 | 3  |
| 79479 | 7 | 18777018 | 18777029 | 2 | 6  | 12 | AC   | 20 | 7  |
| 79492 | 7 | 18796858 | 18796885 | 2 | 14 | 28 | TG   | 17 | 11 |
| 79494 | 7 | 18802441 | 18802455 | 3 | 5  | 15 | ATT  | 19 | 11 |
| 79502 | 7 | 18811532 | 18811559 | 2 | 14 | 28 | AC   | 10 | 8  |
| 79503 | 7 | 18814674 | 18814689 | 2 | 8  | 16 | CA   | 15 | 4  |
| 79505 | 7 | 18818015 | 18818040 | 2 | 13 | 26 | AC   | 13 | 10 |
| 79507 | 7 | 18819953 | 18819978 | 2 | 13 | 26 | CA   | 8  | 6  |
| 79508 | 7 | 18820493 | 18820512 | 4 | 5  | 20 | TGAC | 29 | 5  |
| 79513 | 7 | 18830610 | 18830629 | 2 | 10 | 20 | GA   | 7  | 3  |
| 79521 | 7 | 18841745 | 18841762 | 2 | 9  | 18 | CA   | 10 | 9  |

|       |   |          |          |   |    |    |      |    |    |
|-------|---|----------|----------|---|----|----|------|----|----|
| 79524 | 7 | 18844357 | 18844370 | 2 | 7  | 14 | GT   | 26 | 3  |
| 79540 | 7 | 18866610 | 18866645 | 2 | 18 | 36 | CA   | 13 | 11 |
| 79542 | 7 | 18871438 | 18871470 | 3 | 11 | 33 | TCT  | 31 | 3  |
| 79543 | 7 | 18873902 | 18873927 | 2 | 13 | 26 | CA   | 9  | 8  |
| 79548 | 7 | 18888663 | 18888674 | 2 | 6  | 12 | TG   | 17 | 4  |
| 79554 | 7 | 18890858 | 18890869 | 2 | 6  | 12 | GT   | 9  | 4  |
| 79557 | 7 | 18896065 | 18896086 | 2 | 11 | 22 | AC   | 19 | 6  |
| 79561 | 7 | 18902226 | 18902253 | 2 | 14 | 28 | CA   | 17 | 12 |
| 79562 | 7 | 18907971 | 18907998 | 2 | 14 | 28 | CA   | 14 | 8  |
| 79564 | 7 | 18917878 | 18917921 | 2 | 22 | 44 | CA   | 10 | 13 |
| 79578 | 7 | 18940715 | 18940728 | 2 | 7  | 14 | AC   | 22 | 5  |
| 79583 | 7 | 18955777 | 18955816 | 2 | 20 | 40 | AC   | 7  | 9  |
| 79587 | 7 | 18958967 | 18958987 | 3 | 7  | 21 | AAT  | 7  | 3  |
| 79588 | 7 | 18960548 | 18960559 | 2 | 6  | 12 | AC   | 24 | 10 |
| 79590 | 7 | 18971101 | 18971115 | 3 | 5  | 15 | ATT  | 30 | 3  |
| 79605 | 7 | 19023514 | 19023529 | 4 | 4  | 16 | TTGT | 13 | 3  |
| 79607 | 7 | 19027110 | 19027125 | 4 | 4  | 16 | GGGA | 16 | 3  |
| 79611 | 7 | 19037013 | 19037026 | 2 | 7  | 14 | CA   | 16 | 4  |
| 79612 | 7 | 19037116 | 19037151 | 2 | 18 | 36 | CA   | 17 | 14 |
| 79619 | 7 | 19052668 | 19052697 | 2 | 15 | 30 | AC   | 17 | 18 |
| 79622 | 7 | 19057125 | 19057139 | 3 | 5  | 15 | TTA  | 21 | 4  |
| 79624 | 7 | 19060643 | 19060660 | 2 | 9  | 18 | TG   | 9  | 6  |
| 79625 | 7 | 19061835 | 19061849 | 3 | 5  | 15 | GGT  | 20 | 5  |
| 79638 | 7 | 19092706 | 19092727 | 2 | 11 | 22 | AC   | 6  | 9  |
| 79639 | 7 | 19092883 | 19092914 | 2 | 16 | 32 | CA   | 6  | 8  |
| 79641 | 7 | 19095329 | 19095360 | 2 | 16 | 32 | AC   | 11 | 13 |
| 79643 | 7 | 19097765 | 19097790 | 2 | 13 | 26 | TG   | 16 | 11 |
| 79646 | 7 | 19103817 | 19103838 | 2 | 11 | 22 | GT   | 14 | 9  |
| 79648 | 7 | 19110543 | 19110556 | 2 | 7  | 14 | AC   | 31 | 3  |
| 79649 | 7 | 19111708 | 19111733 | 2 | 13 | 26 | GT   | 6  | 6  |
| 79650 | 7 | 19117611 | 19117622 | 2 | 6  | 12 | AT   | 8  | 11 |
| 79651 | 7 | 19118459 | 19118480 | 2 | 11 | 22 | GT   | 24 | 11 |
| 79661 | 7 | 19142432 | 19142443 | 2 | 6  | 12 | GT   | 19 | 16 |
| 79662 | 7 | 19144501 | 19144512 | 2 | 6  | 12 | AT   | 21 | 4  |
| 79669 | 7 | 19176165 | 19176185 | 3 | 7  | 21 | CTC  | 23 | 4  |
| 79670 | 7 | 19177075 | 19177088 | 2 | 7  | 14 | TG   | 13 | 5  |
| 79672 | 7 | 19182647 | 19182658 | 2 | 6  | 12 | AC   | 23 | 10 |
| 79673 | 7 | 19183136 | 19183147 | 2 | 6  | 12 | TG   | 29 | 4  |
| 79674 | 7 | 19184329 | 19184343 | 3 | 5  | 15 | AAT  | 8  | 4  |
| 79682 | 7 | 19197123 | 19197136 | 2 | 7  | 14 | AC   | 16 | 5  |
| 79688 | 7 | 19220446 | 19220460 | 3 | 5  | 15 | TGT  | 26 | 3  |
| 79692 | 7 | 19228587 | 19228602 | 4 | 4  | 16 | TTTG | 24 | 3  |
| 79696 | 7 | 19232722 | 19232757 | 2 | 18 | 36 | CA   | 12 | 8  |
| 79700 | 7 | 19242301 | 19242324 | 2 | 12 | 24 | GT   | 8  | 3  |
| 79701 | 7 | 19244552 | 19244599 | 2 | 24 | 48 | TG   | 13 | 15 |
| 79702 | 7 | 19247188 | 19247199 | 2 | 6  | 12 | GT   | 27 | 3  |
| 79703 | 7 | 19248889 | 19248914 | 2 | 13 | 26 | GT   | 14 | 4  |
| 79704 | 7 | 19249047 | 19249072 | 2 | 13 | 26 | GT   | 6  | 3  |
| 79705 | 7 | 19253159 | 19253172 | 2 | 7  | 14 | AG   | 29 | 3  |
| 79719 | 7 | 19287857 | 19287878 | 2 | 11 | 22 | GA   | 19 | 8  |
| 79724 | 7 | 19332775 | 19332786 | 2 | 6  | 12 | TG   | 26 | 4  |

|       |   |          |          |   |    |    |      |    |    |
|-------|---|----------|----------|---|----|----|------|----|----|
| 79726 | 7 | 19361537 | 19361550 | 2 | 7  | 14 | GT   | 26 | 4  |
| 79727 | 7 | 19363722 | 19363736 | 3 | 5  | 15 | AAT  | 26 | 4  |
| 79728 | 7 | 19365153 | 19365168 | 4 | 4  | 16 | GATG | 28 | 3  |
| 79729 | 7 | 19365600 | 19365629 | 2 | 15 | 30 | AC   | 12 | 9  |
| 79730 | 7 | 19366729 | 19366748 | 2 | 10 | 20 | AC   | 18 | 7  |
| 79734 | 7 | 19379566 | 19379579 | 2 | 7  | 14 | AC   | 23 | 3  |
| 79744 | 7 | 19395651 | 19395668 | 3 | 6  | 18 | TTG  | 25 | 4  |
| 79754 | 7 | 19406998 | 19407039 | 2 | 21 | 42 | GT   | 8  | 12 |
| 79765 | 7 | 19425297 | 19425310 | 2 | 7  | 14 | GT   | 16 | 9  |
| 79766 | 7 | 19425605 | 19425616 | 2 | 6  | 12 | GT   | 25 | 7  |
| 79768 | 7 | 19430933 | 19430956 | 3 | 8  | 24 | ATA  | 11 | 9  |
| 79770 | 7 | 19440169 | 19440198 | 2 | 15 | 30 | TG   | 14 | 11 |
| 79771 | 7 | 19442720 | 19442739 | 4 | 5  | 20 | TCTG | 32 | 3  |
| 79777 | 7 | 19461515 | 19461538 | 2 | 12 | 24 | GA   | 17 | 6  |
| 79779 | 7 | 19461610 | 19461627 | 2 | 9  | 18 | GA   | 13 | 9  |
| 79784 | 7 | 19462851 | 19462864 | 2 | 7  | 14 | CA   | 22 | 7  |
| 79785 | 7 | 19462965 | 19462985 | 3 | 7  | 21 | GAG  | 26 | 10 |
| 79789 | 7 | 19469581 | 19469595 | 3 | 5  | 15 | CAG  | 27 | 4  |
| 79790 | 7 | 19470239 | 19470256 | 3 | 6  | 18 | TGC  | 28 | 4  |
| 79791 | 7 | 19474586 | 19474605 | 2 | 10 | 20 | CT   | 10 | 10 |
| 79796 | 7 | 19482908 | 19482935 | 2 | 14 | 28 | GT   | 14 | 12 |
| 79807 | 7 | 19496823 | 19496852 | 2 | 15 | 30 | AC   | 9  | 8  |
| 79808 | 7 | 19502825 | 19502838 | 2 | 7  | 14 | TG   | 31 | 3  |
| 79810 | 7 | 19503972 | 19503995 | 2 | 12 | 24 | TG   | 20 | 15 |
| 79812 | 7 | 19504530 | 19504565 | 2 | 18 | 36 | TG   | 11 | 14 |
| 79813 | 7 | 19504668 | 19504679 | 2 | 6  | 12 | AC   | 16 | 8  |
| 79814 | 7 | 19504682 | 19504695 | 2 | 7  | 14 | AC   | 12 | 7  |
| 79824 | 7 | 19524435 | 19524452 | 3 | 6  | 18 | ATT  | 9  | 4  |
| 79834 | 7 | 19541418 | 19541437 | 4 | 5  | 20 | TTTC | 8  | 3  |
| 79835 | 7 | 19549365 | 19549382 | 3 | 6  | 18 | CAT  | 21 | 3  |
| 79836 | 7 | 19561036 | 19561053 | 2 | 9  | 18 | AC   | 19 | 6  |
| 79837 | 7 | 19561223 | 19561246 | 2 | 12 | 24 | TG   | 19 | 5  |
| 79841 | 7 | 19566444 | 19566487 | 2 | 22 | 44 | CA   | 15 | 10 |
| 79844 | 7 | 19573982 | 19573999 | 3 | 6  | 18 | ATC  | 25 | 11 |
| 79856 | 7 | 19588512 | 19588523 | 2 | 6  | 12 | TA   | 18 | 3  |
| 79863 | 7 | 19602452 | 19602466 | 3 | 5  | 15 | TTG  | 28 | 3  |
| 79873 | 7 | 19638403 | 19638416 | 2 | 7  | 14 | TC   | 24 | 3  |
| 79878 | 7 | 19647601 | 19647624 | 2 | 12 | 24 | TC   | 11 | 10 |
| 79881 | 7 | 19657520 | 19657555 | 2 | 18 | 36 | AC   | 9  | 10 |
| 79885 | 7 | 19663677 | 19663702 | 2 | 13 | 26 | TG   | 6  | 5  |
| 79892 | 7 | 19671067 | 19671082 | 2 | 8  | 16 | GT   | 11 | 4  |
| 79893 | 7 | 19671092 | 19671103 | 2 | 6  | 12 | TG   | 15 | 8  |
| 79898 | 7 | 19695371 | 19695382 | 2 | 6  | 12 | CA   | 24 | 3  |
| 79899 | 7 | 19701742 | 19701767 | 2 | 13 | 26 | CA   | 15 | 5  |
| 79902 | 7 | 19701990 | 19702001 | 2 | 6  | 12 | CA   | 22 | 3  |
| 79904 | 7 | 19702721 | 19702760 | 2 | 20 | 40 | AC   | 15 | 8  |
| 79905 | 7 | 19703446 | 19703477 | 2 | 16 | 32 | AC   | 10 | 10 |
| 79908 | 7 | 19706397 | 19706416 | 2 | 10 | 20 | TG   | 14 | 9  |
| 79912 | 7 | 19710899 | 19710924 | 2 | 13 | 26 | AC   | 13 | 11 |
| 79913 | 7 | 19712292 | 19712303 | 2 | 6  | 12 | GT   | 25 | 3  |
| 79914 | 7 | 19712473 | 19712486 | 2 | 7  | 14 | GT   | 18 | 5  |

|       |   |          |          |   |    |    |      |    |    |
|-------|---|----------|----------|---|----|----|------|----|----|
| 79918 | 7 | 19712897 | 19712920 | 2 | 12 | 24 | CA   | 17 | 8  |
| 79919 | 7 | 19712984 | 19713001 | 2 | 9  | 18 | AC   | 17 | 9  |
| 79920 | 7 | 19713828 | 19713863 | 2 | 18 | 36 | TG   | 6  | 7  |
| 79921 | 7 | 19715144 | 19715161 | 3 | 6  | 18 | ATT  | 18 | 3  |
| 79926 | 7 | 19718230 | 19718259 | 2 | 15 | 30 | CA   | 16 | 9  |
| 79927 | 7 | 19720628 | 19720643 | 2 | 8  | 16 | TC   | 24 | 3  |
| 79931 | 7 | 19728028 | 19728047 | 2 | 10 | 20 | CA   | 14 | 7  |
| 79933 | 7 | 19728201 | 19728216 | 2 | 8  | 16 | GT   | 28 | 4  |
| 79934 | 7 | 19729043 | 19729068 | 2 | 13 | 26 | TG   | 11 | 10 |
| 79935 | 7 | 19729269 | 19729302 | 2 | 17 | 34 | AC   | 10 | 7  |
| 79939 | 7 | 19738409 | 19738422 | 2 | 7  | 14 | GT   | 35 | 6  |
| 79941 | 7 | 19745923 | 19745936 | 2 | 7  | 14 | AG   | 24 | 5  |
| 79942 | 7 | 19745939 | 19745952 | 2 | 7  | 14 | AG   | 22 | 5  |
| 79946 | 7 | 19753772 | 19753783 | 2 | 6  | 12 | CA   | 12 | 13 |
| 79947 | 7 | 19753786 | 19753801 | 2 | 8  | 16 | CA   | 16 | 10 |
| 79949 | 7 | 19757923 | 19757948 | 2 | 13 | 26 | AC   | 19 | 10 |
| 79950 | 7 | 19760082 | 19760095 | 2 | 7  | 14 | TG   | 25 | 8  |
| 79951 | 7 | 19761571 | 19761592 | 2 | 11 | 22 | CA   | 15 | 7  |
| 79952 | 7 | 19768215 | 19768228 | 2 | 7  | 14 | AC   | 26 | 10 |
| 79953 | 7 | 19768407 | 19768420 | 2 | 7  | 14 | CA   | 7  | 10 |
| 79954 | 7 | 19768423 | 19768438 | 2 | 8  | 16 | CA   | 8  | 8  |
| 79956 | 7 | 19771666 | 19771679 | 2 | 7  | 14 | CT   | 24 | 3  |
| 79957 | 7 | 19772609 | 19772628 | 2 | 10 | 20 | AC   | 17 | 9  |
| 79959 | 7 | 19774242 | 19774255 | 2 | 7  | 14 | CA   | 18 | 12 |
| 79960 | 7 | 19774257 | 19774272 | 2 | 8  | 16 | AC   | 10 | 8  |
| 79961 | 7 | 19776312 | 19776327 | 2 | 8  | 16 | TG   | 33 | 5  |
| 79962 | 7 | 19776983 | 19776998 | 2 | 8  | 16 | TG   | 17 | 6  |
| 79963 | 7 | 19777164 | 19777197 | 2 | 17 | 34 | AC   | 16 | 9  |
| 79964 | 7 | 19777996 | 19778027 | 2 | 16 | 32 | GT   | 17 | 11 |
| 79966 | 7 | 19779053 | 19779080 | 2 | 14 | 28 | GT   | 14 | 5  |
| 79967 | 7 | 19780467 | 19780478 | 2 | 6  | 12 | TG   | 19 | 3  |
| 79969 | 7 | 19789724 | 19789745 | 2 | 11 | 22 | AC   | 19 | 11 |
| 79982 | 7 | 19797326 | 19797357 | 2 | 16 | 32 | AC   | 8  | 10 |
| 79983 | 7 | 19797585 | 19797608 | 2 | 12 | 24 | GT   | 19 | 6  |
| 79984 | 7 | 19797657 | 19797670 | 2 | 7  | 14 | TG   | 20 | 6  |
| 79985 | 7 | 19797895 | 19797914 | 2 | 10 | 20 | GT   | 10 | 9  |
| 79986 | 7 | 19799209 | 19799220 | 2 | 6  | 12 | CA   | 28 | 5  |
| 79987 | 7 | 19799619 | 19799642 | 2 | 12 | 24 | CA   | 24 | 6  |
| 79990 | 7 | 19802524 | 19802539 | 4 | 4  | 16 | TTTC | 6  | 4  |
| 79992 | 7 | 19811068 | 19811095 | 2 | 14 | 28 | CA   | 9  | 8  |
| 79997 | 7 | 19817671 | 19817700 | 2 | 15 | 30 | GT   | 6  | 6  |
| 79999 | 7 | 19817881 | 19817896 | 2 | 8  | 16 | CA   | 16 | 5  |
| 80002 | 7 | 19819735 | 19819762 | 2 | 14 | 28 | AG   | 12 | 12 |
| 80003 | 7 | 19819914 | 19819925 | 2 | 6  | 12 | AC   | 16 | 3  |
| 80007 | 7 | 19826956 | 19826981 | 2 | 13 | 26 | AC   | 8  | 8  |
| 80008 | 7 | 19827069 | 19827088 | 2 | 10 | 20 | CT   | 7  | 6  |
| 80009 | 7 | 19827089 | 19827106 | 2 | 9  | 18 | CA   | 15 | 12 |
| 80012 | 7 | 19829055 | 19829069 | 3 | 5  | 15 | GCA  | 29 | 3  |
| 80015 | 7 | 19831475 | 19831489 | 3 | 5  | 15 | AGG  | 23 | 4  |
| 80016 | 7 | 19831895 | 19831926 | 2 | 16 | 32 | GT   | 20 | 14 |
| 80021 | 7 | 19851368 | 19851379 | 2 | 6  | 12 | TG   | 29 | 4  |

|       |   |          |          |   |    |    |      |    |    |
|-------|---|----------|----------|---|----|----|------|----|----|
| 80029 | 7 | 19854377 | 19854404 | 4 | 7  | 28 | TTTC | 29 | 3  |
| 80031 | 7 | 19862472 | 19862501 | 2 | 15 | 30 | GT   | 22 | 12 |
| 80033 | 7 | 19870071 | 19870092 | 2 | 11 | 22 | CA   | 12 | 8  |
| 80034 | 7 | 19872174 | 19872199 | 2 | 13 | 26 | AC   | 21 | 9  |
| 80037 | 7 | 19876596 | 19876629 | 2 | 17 | 34 | AC   | 19 | 9  |
| 80038 | 7 | 19877347 | 19877366 | 2 | 10 | 20 | AC   | 25 | 8  |
| 80040 | 7 | 19879957 | 19880000 | 2 | 22 | 44 | GT   | 7  | 10 |
| 80041 | 7 | 19880611 | 19880626 | 2 | 8  | 16 | AC   | 18 | 3  |
| 80056 | 7 | 19914680 | 19914699 | 4 | 5  | 20 | TCCA | 27 | 3  |
| 80060 | 7 | 19920391 | 19920410 | 2 | 10 | 20 | GT   | 26 | 3  |
| 80061 | 7 | 19922825 | 19922846 | 2 | 11 | 22 | GT   | 24 | 5  |
| 80065 | 7 | 19930546 | 19930569 | 2 | 12 | 24 | CA   | 28 | 10 |
| 80069 | 7 | 19935362 | 19935381 | 4 | 5  | 20 | TATC | 14 | 3  |
| 80070 | 7 | 19936256 | 19936267 | 2 | 6  | 12 | GT   | 25 | 4  |
| 80072 | 7 | 19960401 | 19960415 | 3 | 5  | 15 | GAG  | 28 | 4  |
| 80075 | 7 | 19969960 | 19969979 | 2 | 10 | 20 | GT   | 7  | 8  |
| 80080 | 7 | 19975500 | 19975511 | 2 | 6  | 12 | AT   | 9  | 3  |
| 80085 | 7 | 20003424 | 20003438 | 3 | 5  | 15 | GTT  | 26 | 5  |
| 80087 | 7 | 20010324 | 20010341 | 2 | 9  | 18 | TG   | 21 | 16 |
| 80107 | 7 | 20061031 | 20061050 | 2 | 10 | 20 | GT   | 19 | 8  |
| 80109 | 7 | 20061428 | 20061453 | 2 | 13 | 26 | AC   | 14 | 9  |
| 80110 | 7 | 20061647 | 20061664 | 2 | 9  | 18 | CA   | 7  | 7  |
| 80114 | 7 | 20075790 | 20075805 | 2 | 8  | 16 | TC   | 17 | 4  |
| 80117 | 7 | 20076632 | 20076653 | 2 | 11 | 22 | AC   | 10 | 10 |
| 80121 | 7 | 20084560 | 20084591 | 2 | 16 | 32 | TG   | 14 | 14 |
| 80128 | 7 | 20097718 | 20097733 | 4 | 4  | 16 | TTTG | 33 | 4  |
| 80133 | 7 | 20102327 | 20102350 | 2 | 12 | 24 | TG   | 12 | 9  |
| 80141 | 7 | 20127842 | 20127859 | 3 | 6  | 18 | TGG  | 12 | 4  |
| 80143 | 7 | 20137280 | 20137303 | 3 | 8  | 24 | GGA  | 6  | 5  |
| 80146 | 7 | 20139541 | 20139578 | 2 | 19 | 38 | AC   | 6  | 9  |
| 80148 | 7 | 20143433 | 20143453 | 3 | 7  | 21 | TGC  | 20 | 4  |
| 80149 | 7 | 20147156 | 20147179 | 2 | 12 | 24 | AC   | 7  | 9  |
| 80153 | 7 | 20150814 | 20150839 | 2 | 13 | 26 | TG   | 12 | 13 |
| 80155 | 7 | 20151189 | 20151200 | 2 | 6  | 12 | TG   | 21 | 5  |
| 80156 | 7 | 20154351 | 20154364 | 2 | 7  | 14 | CA   | 24 | 6  |
| 80158 | 7 | 20160312 | 20160327 | 2 | 8  | 16 | GT   | 25 | 8  |
| 80160 | 7 | 20161318 | 20161344 | 3 | 9  | 27 | CAA  | 22 | 4  |
| 80168 | 7 | 20176892 | 20176917 | 2 | 13 | 26 | GT   | 6  | 6  |
| 80169 | 7 | 20178021 | 20178036 | 4 | 4  | 16 | AAAT | 26 | 3  |
| 80170 | 7 | 20180617 | 20180652 | 2 | 18 | 36 | GT   | 15 | 6  |
| 80171 | 7 | 20182621 | 20182644 | 2 | 12 | 24 | GT   | 11 | 8  |
| 80172 | 7 | 20182867 | 20182888 | 2 | 11 | 22 | CA   | 10 | 6  |
| 80173 | 7 | 20183521 | 20183536 | 4 | 4  | 16 | ATTT | 11 | 8  |
| 80181 | 7 | 20201396 | 20201421 | 2 | 13 | 26 | TG   | 7  | 8  |
| 80182 | 7 | 20203180 | 20203239 | 2 | 30 | 60 | AC   | 10 | 10 |
| 80184 | 7 | 20204679 | 20204730 | 4 | 13 | 52 | AAAC | 25 | 7  |
| 80185 | 7 | 20206782 | 20206815 | 2 | 17 | 34 | AC   | 8  | 7  |
| 80191 | 7 | 20214229 | 20214248 | 2 | 10 | 20 | AC   | 26 | 8  |
| 80199 | 7 | 20225193 | 20225226 | 2 | 17 | 34 | TG   | 10 | 10 |
| 80200 | 7 | 20240462 | 20240495 | 2 | 17 | 34 | AC   | 13 | 10 |
| 80203 | 7 | 20241589 | 20241618 | 2 | 15 | 30 | TG   | 16 | 12 |

|       |   |          |          |   |    |    |      |    |    |
|-------|---|----------|----------|---|----|----|------|----|----|
| 80205 | 7 | 20248228 | 20248247 | 2 | 10 | 20 | CA   | 18 | 6  |
| 80206 | 7 | 20248992 | 20249011 | 2 | 10 | 20 | AC   | 22 | 7  |
| 80207 | 7 | 20254639 | 20254652 | 2 | 7  | 14 | AG   | 21 | 4  |
| 80208 | 7 | 20256190 | 20256209 | 4 | 5  | 20 | AAAC | 25 | 4  |
| 80216 | 7 | 20277663 | 20277676 | 2 | 7  | 14 | TG   | 9  | 3  |
| 80217 | 7 | 20278116 | 20278155 | 2 | 20 | 40 | AG   | 7  | 7  |
| 80223 | 7 | 20303749 | 20303768 | 4 | 5  | 20 | TCCC | 9  | 3  |
| 80225 | 7 | 20308693 | 20308710 | 3 | 6  | 18 | CAG  | 23 | 3  |
| 80227 | 7 | 20313424 | 20313439 | 2 | 8  | 16 | AT   | 6  | 5  |
| 80237 | 7 | 20332871 | 20332908 | 2 | 19 | 38 | GT   | 9  | 11 |
| 80238 | 7 | 20334119 | 20334132 | 2 | 7  | 14 | TC   | 8  | 4  |
| 80239 | 7 | 20334134 | 20334147 | 2 | 7  | 14 | CA   | 15 | 8  |
| 80241 | 7 | 20349869 | 20349896 | 2 | 14 | 28 | TG   | 16 | 16 |
| 80242 | 7 | 20369042 | 20369067 | 2 | 13 | 26 | GT   | 26 | 7  |
| 80243 | 7 | 20369615 | 20369638 | 3 | 8  | 24 | AAT  | 24 | 9  |
| 80244 | 7 | 20378252 | 20378263 | 2 | 6  | 12 | AC   | 23 | 8  |
| 80248 | 7 | 20386975 | 20387008 | 2 | 17 | 34 | GT   | 9  | 9  |
| 80251 | 7 | 20388806 | 20388823 | 2 | 9  | 18 | GT   | 11 | 11 |
| 80256 | 7 | 20396198 | 20396239 | 2 | 21 | 42 | TG   | 8  | 11 |
| 80257 | 7 | 20401281 | 20401312 | 2 | 16 | 32 | TG   | 18 | 5  |
| 80258 | 7 | 20402639 | 20402650 | 2 | 6  | 12 | GT   | 21 | 3  |
| 80262 | 7 | 20407425 | 20407436 | 2 | 6  | 12 | TG   | 11 | 3  |
| 80263 | 7 | 20411829 | 20411848 | 2 | 10 | 20 | GT   | 22 | 14 |
| 80265 | 7 | 20413009 | 20413038 | 2 | 15 | 30 | TG   | 13 | 10 |
| 80267 | 7 | 20413756 | 20413773 | 2 | 9  | 18 | CT   | 16 | 6  |
| 80270 | 7 | 20415947 | 20415962 | 2 | 8  | 16 | TC   | 21 | 8  |
| 80273 | 7 | 20423180 | 20423195 | 4 | 4  | 16 | CACG | 14 | 9  |
| 80275 | 7 | 20424648 | 20424659 | 2 | 6  | 12 | AC   | 31 | 4  |
| 80277 | 7 | 20428731 | 20428752 | 2 | 11 | 22 | AC   | 11 | 8  |
| 80279 | 7 | 20428920 | 20428933 | 2 | 7  | 14 | CA   | 25 | 4  |
| 80283 | 7 | 20432234 | 20432257 | 2 | 12 | 24 | AC   | 10 | 10 |
| 80286 | 7 | 20437467 | 20437510 | 2 | 22 | 44 | CA   | 8  | 8  |
| 80288 | 7 | 20437661 | 20437684 | 2 | 12 | 24 | CA   | 8  | 3  |
| 80294 | 7 | 20464229 | 20464240 | 2 | 6  | 12 | TG   | 14 | 5  |
| 80298 | 7 | 20465819 | 20465846 | 2 | 14 | 28 | AC   | 11 | 14 |
| 80300 | 7 | 20466575 | 20466588 | 2 | 7  | 14 | AC   | 6  | 4  |
| 80304 | 7 | 20470205 | 20470220 | 2 | 8  | 16 | GT   | 21 | 14 |
| 80305 | 7 | 20470663 | 20470690 | 2 | 14 | 28 | CA   | 14 | 10 |
| 80306 | 7 | 20470841 | 20470860 | 2 | 10 | 20 | AC   | 17 | 9  |
| 80317 | 7 | 20482900 | 20482935 | 2 | 18 | 36 | GT   | 15 | 12 |
| 80318 | 7 | 20483262 | 20483283 | 2 | 11 | 22 | CA   | 16 | 8  |
| 80320 | 7 | 20487286 | 20487313 | 2 | 14 | 28 | AC   | 18 | 14 |
| 80330 | 7 | 20493149 | 20493164 | 4 | 4  | 16 | TTTA | 24 | 3  |
| 80332 | 7 | 20495325 | 20495358 | 2 | 17 | 34 | TG   | 13 | 10 |
| 80333 | 7 | 20496196 | 20496219 | 2 | 12 | 24 | AC   | 20 | 7  |
| 80334 | 7 | 20496395 | 20496408 | 2 | 7  | 14 | CA   | 23 | 11 |
| 80337 | 7 | 20497957 | 20497986 | 2 | 15 | 30 | TG   | 13 | 6  |
| 80342 | 7 | 20500114 | 20500125 | 2 | 6  | 12 | GT   | 7  | 3  |
| 80351 | 7 | 20525436 | 20525449 | 2 | 7  | 14 | CT   | 7  | 4  |
| 80353 | 7 | 20525587 | 20525612 | 2 | 13 | 26 | AC   | 13 | 11 |
| 80354 | 7 | 20528093 | 20528110 | 2 | 9  | 18 | TG   | 10 | 7  |



|       |   |          |          |   |    |    |      |    |    |
|-------|---|----------|----------|---|----|----|------|----|----|
| 80355 | 7 | 20528244 | 20528255 | 2 | 6  | 12 | TC   | 16 | 6  |
| 80356 | 7 | 20528258 | 20528269 | 2 | 6  | 12 | TC   | 15 | 5  |
| 80358 | 7 | 20529839 | 20529878 | 4 | 10 | 40 | CAGA | 17 | 13 |
| 80361 | 7 | 20551116 | 20551155 | 2 | 20 | 40 | CA   | 12 | 12 |
| 80362 | 7 | 20551419 | 20551439 | 3 | 7  | 21 | GAG  | 18 | 3  |
| 80363 | 7 | 20553505 | 20553522 | 2 | 9  | 18 | GT   | 15 | 6  |
| 80365 | 7 | 20565075 | 20565098 | 2 | 12 | 24 | CA   | 19 | 9  |
| 80366 | 7 | 20570205 | 20570246 | 2 | 21 | 42 | CA   | 10 | 9  |
| 80369 | 7 | 20576738 | 20576755 | 2 | 9  | 18 | GT   | 6  | 6  |
| 80370 | 7 | 20576845 | 20576860 | 2 | 8  | 16 | GT   | 23 | 9  |
| 80375 | 7 | 20583812 | 20583823 | 2 | 6  | 12 | GA   | 13 | 4  |
| 80377 | 7 | 20586866 | 20586885 | 4 | 5  | 20 | TCTG | 24 | 6  |
| 80380 | 7 | 20590672 | 20590683 | 2 | 6  | 12 | TG   | 21 | 6  |
| 80383 | 7 | 20598418 | 20598431 | 2 | 7  | 14 | CT   | 27 | 4  |
| 80384 | 7 | 20604772 | 20604801 | 2 | 15 | 30 | AC   | 13 | 8  |
| 80390 | 7 | 20611277 | 20611300 | 4 | 6  | 24 | TAGG | 25 | 3  |
| 80399 | 7 | 20624019 | 20624042 | 2 | 12 | 24 | CA   | 21 | 8  |
| 80403 | 7 | 20625538 | 20625557 | 2 | 10 | 20 | GT   | 29 | 5  |
| 80404 | 7 | 20626926 | 20626959 | 2 | 17 | 34 | TG   | 11 | 7  |
| 80406 | 7 | 20628064 | 20628107 | 2 | 22 | 44 | CA   | 9  | 9  |
| 80416 | 7 | 20638138 | 20638151 | 2 | 7  | 14 | GT   | 21 | 5  |
| 80417 | 7 | 20639464 | 20639513 | 2 | 25 | 50 | CA   | 13 | 15 |
| 80418 | 7 | 20639611 | 20639630 | 2 | 10 | 20 | AC   | 19 | 8  |
| 80419 | 7 | 20641035 | 20641068 | 2 | 17 | 34 | TG   | 6  | 8  |
| 80420 | 7 | 20642131 | 20642158 | 2 | 14 | 28 | GT   | 12 | 10 |
| 80421 | 7 | 20642241 | 20642258 | 2 | 9  | 18 | GT   | 19 | 6  |
| 80428 | 7 | 20655926 | 20655963 | 2 | 19 | 38 | GT   | 14 | 12 |
| 80432 | 7 | 20661541 | 20661556 | 2 | 8  | 16 | GT   | 16 | 8  |
| 80440 | 7 | 20671280 | 20671299 | 2 | 10 | 20 | CA   | 14 | 12 |
| 80441 | 7 | 20673227 | 20673244 | 3 | 6  | 18 | ATC  | 18 | 14 |
| 80445 | 7 | 20680973 | 20680988 | 2 | 8  | 16 | AT   | 9  | 4  |
| 80446 | 7 | 20681501 | 20681520 | 2 | 10 | 20 | AC   | 27 | 5  |
| 80451 | 7 | 20686578 | 20686593 | 4 | 4  | 16 | AAAT | 15 | 4  |
| 80454 | 7 | 20699891 | 20699906 | 2 | 8  | 16 | GT   | 20 | 6  |
| 80455 | 7 | 20703928 | 20703941 | 2 | 7  | 14 | GT   | 26 | 4  |
| 80457 | 7 | 20705662 | 20705673 | 2 | 6  | 12 | TG   | 26 | 5  |
| 80460 | 7 | 20721283 | 20721300 | 2 | 9  | 18 | CA   | 7  | 6  |
| 80465 | 7 | 20744518 | 20744563 | 2 | 23 | 46 | GT   | 8  | 11 |
| 80478 | 7 | 20769441 | 20769452 | 2 | 6  | 12 | AC   | 15 | 4  |
| 80492 | 7 | 20788007 | 20788020 | 2 | 7  | 14 | AC   | 8  | 7  |
| 80493 | 7 | 20788022 | 20788039 | 2 | 9  | 18 | CA   | 12 | 8  |
| 80497 | 7 | 20796141 | 20796154 | 2 | 7  | 14 | AC   | 23 | 6  |
| 80501 | 7 | 20799234 | 20799248 | 3 | 5  | 15 | GGA  | 23 | 9  |
| 80504 | 7 | 20804880 | 20804891 | 2 | 6  | 12 | AC   | 31 | 3  |
| 80505 | 7 | 20805130 | 20805153 | 3 | 8  | 24 | AGG  | 32 | 4  |
| 80509 | 7 | 20810137 | 20810176 | 2 | 20 | 40 | GT   | 12 | 12 |
| 80512 | 7 | 20817363 | 20817382 | 2 | 10 | 20 | CA   | 18 | 6  |
| 80513 | 7 | 20819580 | 20819599 | 2 | 10 | 20 | GT   | 18 | 9  |
| 80515 | 7 | 20825439 | 20825459 | 3 | 7  | 21 | AAC  | 24 | 3  |
| 80516 | 7 | 20826128 | 20826147 | 2 | 10 | 20 | CA   | 19 | 8  |
| 80527 | 7 | 20864872 | 20864885 | 2 | 7  | 14 | GT   | 24 | 5  |

|       |   |          |          |   |    |    |      |    |    |
|-------|---|----------|----------|---|----|----|------|----|----|
| 80528 | 7 | 20869045 | 20869068 | 4 | 6  | 24 | TATC | 24 | 4  |
| 80530 | 7 | 20875089 | 20875118 | 2 | 15 | 30 | TG   | 7  | 7  |
| 80538 | 7 | 20880899 | 20880930 | 2 | 16 | 32 | AC   | 9  | 9  |
| 80544 | 7 | 20893926 | 20893941 | 2 | 8  | 16 | AC   | 17 | 7  |
| 80545 | 7 | 20893943 | 20893958 | 2 | 8  | 16 | CA   | 25 | 11 |
| 80550 | 7 | 20904185 | 20904212 | 4 | 7  | 28 | ATCT | 17 | 8  |
| 80554 | 7 | 20914929 | 20914942 | 2 | 7  | 14 | TC   | 26 | 4  |
| 80555 | 7 | 20923795 | 20923818 | 2 | 12 | 24 | CA   | 23 | 6  |
| 80558 | 7 | 20926437 | 20926448 | 2 | 6  | 12 | CA   | 24 | 7  |
| 80563 | 7 | 20931393 | 20931418 | 2 | 13 | 26 | TG   | 25 | 9  |
| 80569 | 7 | 20938426 | 20938457 | 2 | 16 | 32 | GT   | 9  | 14 |
| 80570 | 7 | 20940840 | 20940871 | 2 | 16 | 32 | GT   | 10 | 9  |
| 80571 | 7 | 20941020 | 20941061 | 2 | 21 | 42 | GT   | 12 | 7  |
| 80578 | 7 | 20949796 | 20949825 | 2 | 15 | 30 | AC   | 8  | 9  |
| 80593 | 7 | 21014630 | 21014653 | 3 | 8  | 24 | ATA  | 14 | 4  |
| 80595 | 8 | 36056    | 36067    | 2 | 6  | 12 | AC   | 18 | 3  |
| 80596 | 8 | 36092    | 36103    | 2 | 6  | 12 | AT   | 8  | 6  |
| 80597 | 8 | 38014    | 38049    | 4 | 9  | 36 | TGTA | 13 | 12 |
| 80598 | 8 | 43508    | 43527    | 4 | 5  | 20 | CTTA | 27 | 6  |
| 80603 | 8 | 51240    | 51259    | 4 | 5  | 20 | GAAT | 12 | 5  |
| 80606 | 8 | 66261    | 66276    | 2 | 8  | 16 | CA   | 23 | 10 |
| 80614 | 8 | 69632    | 69649    | 2 | 9  | 18 | GT   | 16 | 5  |
| 80618 | 8 | 78908    | 78928    | 3 | 7  | 21 | GAT  | 29 | 3  |
| 80622 | 8 | 84852    | 84865    | 2 | 7  | 14 | AC   | 10 | 7  |
| 80624 | 8 | 89530    | 89541    | 2 | 6  | 12 | TC   | 16 | 9  |
| 80626 | 8 | 103063   | 103078   | 2 | 8  | 16 | GT   | 25 | 6  |
| 80632 | 8 | 112674   | 112687   | 2 | 7  | 14 | AC   | 23 | 4  |
| 80633 | 8 | 112804   | 112825   | 2 | 11 | 22 | TG   | 15 | 9  |
| 80636 | 8 | 118796   | 118825   | 2 | 15 | 30 | CA   | 22 | 9  |
| 80644 | 8 | 129438   | 129469   | 2 | 16 | 32 | TG   | 15 | 9  |
| 80646 | 8 | 133577   | 133588   | 2 | 6  | 12 | AC   | 31 | 3  |
| 80647 | 8 | 136911   | 136924   | 2 | 7  | 14 | CA   | 16 | 6  |
| 80648 | 8 | 137125   | 137140   | 2 | 8  | 16 | GT   | 22 | 5  |
| 80649 | 8 | 137143   | 137156   | 2 | 7  | 14 | GT   | 18 | 4  |
| 80651 | 8 | 143914   | 143937   | 2 | 12 | 24 | TG   | 15 | 9  |
| 80655 | 8 | 154972   | 155011   | 2 | 20 | 40 | GT   | 10 | 13 |
| 80656 | 8 | 155218   | 155237   | 2 | 10 | 20 | TG   | 16 | 8  |
| 80660 | 8 | 158787   | 158808   | 2 | 11 | 22 | CA   | 19 | 14 |
| 80662 | 8 | 166913   | 166945   | 3 | 11 | 33 | AGA  | 15 | 10 |
| 80663 | 8 | 170207   | 170240   | 2 | 17 | 34 | GT   | 13 | 7  |
| 80665 | 8 | 172835   | 172882   | 2 | 24 | 48 | AC   | 11 | 10 |
| 80666 | 8 | 178588   | 178599   | 2 | 6  | 12 | GT   | 20 | 12 |
| 80668 | 8 | 195993   | 196016   | 2 | 12 | 24 | AC   | 23 | 6  |
| 80672 | 8 | 200669   | 200716   | 2 | 24 | 48 | TG   | 7  | 8  |
| 80674 | 8 | 201086   | 201111   | 2 | 13 | 26 | CA   | 21 | 6  |
| 80675 | 8 | 201521   | 201541   | 3 | 7  | 21 | GCA  | 23 | 7  |
| 80677 | 8 | 202014   | 202031   | 2 | 9  | 18 | GT   | 10 | 8  |
| 80680 | 8 | 218881   | 218894   | 2 | 7  | 14 | TA   | 9  | 4  |
| 80682 | 8 | 223663   | 223678   | 2 | 8  | 16 | AC   | 10 | 8  |
| 80684 | 8 | 226495   | 226532   | 2 | 19 | 38 | CA   | 9  | 11 |
| 80690 | 8 | 237302   | 237331   | 2 | 15 | 30 | AC   | 21 | 11 |

|       |   |        |        |   |    |    |      |    |    |
|-------|---|--------|--------|---|----|----|------|----|----|
| 80691 | 8 | 245146 | 245169 | 2 | 12 | 24 | AG   | 18 | 8  |
| 80692 | 8 | 247811 | 247834 | 4 | 6  | 24 | GTCT | 26 | 3  |
| 80693 | 8 | 249459 | 249494 | 2 | 18 | 36 | AC   | 12 | 10 |
| 80696 | 8 | 250634 | 250647 | 2 | 7  | 14 | GT   | 6  | 4  |
| 80698 | 8 | 250840 | 250859 | 2 | 10 | 20 | CA   | 21 | 12 |
| 80699 | 8 | 252029 | 252073 | 3 | 15 | 45 | AGA  | 11 | 11 |
| 80704 | 8 | 267249 | 267266 | 2 | 9  | 18 | TG   | 18 | 10 |
| 80705 | 8 | 267269 | 267280 | 2 | 6  | 12 | TG   | 20 | 14 |
| 80709 | 8 | 277007 | 277026 | 4 | 5  | 20 | TGTT | 15 | 3  |
| 80710 | 8 | 280461 | 280472 | 2 | 6  | 12 | AT   | 32 | 3  |
| 80715 | 8 | 292326 | 292339 | 2 | 7  | 14 | AC   | 31 | 3  |
| 80721 | 8 | 318251 | 318286 | 2 | 18 | 36 | GT   | 9  | 9  |
| 80725 | 8 | 325988 | 326005 | 3 | 6  | 18 | GGA  | 7  | 3  |
| 80726 | 8 | 326702 | 326717 | 2 | 8  | 16 | AC   | 16 | 8  |
| 80730 | 8 | 334996 | 335016 | 3 | 7  | 21 | CTG  | 28 | 6  |
| 80731 | 8 | 336143 | 336157 | 3 | 5  | 15 | GAA  | 32 | 3  |
| 80735 | 8 | 341273 | 341326 | 2 | 27 | 54 | CA   | 7  | 12 |
| 80736 | 8 | 344094 | 344111 | 3 | 6  | 18 | ATA  | 9  | 3  |
| 80740 | 8 | 346402 | 346415 | 2 | 7  | 14 | AC   | 23 | 12 |
| 80741 | 8 | 346417 | 346432 | 2 | 8  | 16 | CA   | 26 | 10 |
| 80742 | 8 | 346520 | 346531 | 2 | 6  | 12 | GT   | 25 | 9  |
| 80743 | 8 | 346534 | 346545 | 2 | 6  | 12 | GT   | 23 | 8  |
| 80744 | 8 | 351203 | 351220 | 2 | 9  | 18 | AC   | 23 | 8  |
| 80748 | 8 | 356125 | 356148 | 2 | 12 | 24 | GT   | 19 | 6  |
| 80749 | 8 | 356193 | 356220 | 2 | 14 | 28 | TG   | 16 | 6  |
| 80761 | 8 | 401604 | 401627 | 2 | 12 | 24 | TG   | 17 | 5  |
| 80769 | 8 | 439155 | 439170 | 2 | 8  | 16 | GT   | 13 | 5  |
| 80779 | 8 | 464171 | 464196 | 2 | 13 | 26 | CA   | 12 | 8  |
| 80781 | 8 | 464571 | 464604 | 2 | 17 | 34 | TG   | 9  | 9  |
| 80786 | 8 | 471262 | 471285 | 2 | 12 | 24 | TG   | 9  | 8  |
| 80788 | 8 | 478935 | 478958 | 2 | 12 | 24 | TG   | 17 | 9  |
| 80789 | 8 | 479307 | 479318 | 2 | 6  | 12 | GT   | 24 | 8  |
| 80791 | 8 | 479873 | 479892 | 2 | 10 | 20 | GT   | 14 | 4  |
| 80801 | 8 | 493350 | 493367 | 2 | 9  | 18 | TG   | 18 | 5  |
| 80810 | 8 | 497504 | 497517 | 2 | 7  | 14 | CA   | 26 | 3  |
| 80811 | 8 | 499402 | 499422 | 3 | 7  | 21 | ACA  | 19 | 3  |
| 80816 | 8 | 514880 | 514907 | 2 | 14 | 28 | TG   | 17 | 5  |
| 80817 | 8 | 515007 | 515034 | 2 | 14 | 28 | AC   | 18 | 9  |
| 80819 | 8 | 518207 | 518248 | 2 | 21 | 42 | TG   | 8  | 9  |
| 80821 | 8 | 520625 | 520654 | 2 | 15 | 30 | GT   | 10 | 7  |
| 80822 | 8 | 521129 | 521154 | 2 | 13 | 26 | TG   | 10 | 9  |
| 80827 | 8 | 534841 | 534866 | 2 | 13 | 26 | TG   | 11 | 12 |
| 80829 | 8 | 538616 | 538633 | 3 | 6  | 18 | CAG  | 16 | 4  |
| 80831 | 8 | 542432 | 542449 | 2 | 9  | 18 | GT   | 23 | 7  |
| 80833 | 8 | 544828 | 544841 | 2 | 7  | 14 | AC   | 22 | 3  |
| 80837 | 8 | 550355 | 550368 | 2 | 7  | 14 | TG   | 25 | 3  |
| 80844 | 8 | 570559 | 570578 | 4 | 5  | 20 | TGAT | 27 | 3  |
| 80846 | 8 | 575150 | 575171 | 2 | 11 | 22 | CA   | 20 | 10 |
| 80848 | 8 | 578327 | 578359 | 3 | 11 | 33 | TAT  | 13 | 6  |
| 80851 | 8 | 582967 | 582990 | 2 | 12 | 24 | AC   | 20 | 9  |
| 80852 | 8 | 586706 | 586717 | 2 | 6  | 12 | AC   | 32 | 3  |

|       |   |        |        |   |    |    |      |    |    |
|-------|---|--------|--------|---|----|----|------|----|----|
| 80854 | 8 | 592144 | 592167 | 3 | 8  | 24 | ATT  | 9  | 3  |
| 80859 | 8 | 596667 | 596694 | 2 | 14 | 28 | TG   | 13 | 8  |
| 80861 | 8 | 597992 | 598027 | 2 | 18 | 36 | TG   | 6  | 8  |
| 80865 | 8 | 607406 | 607425 | 2 | 10 | 20 | TG   | 15 | 6  |
| 80866 | 8 | 607450 | 607479 | 2 | 15 | 30 | AC   | 12 | 6  |
| 80869 | 8 | 610375 | 610394 | 2 | 10 | 20 | AC   | 14 | 7  |
| 80870 | 8 | 612387 | 612414 | 2 | 14 | 28 | AC   | 18 | 8  |
| 80871 | 8 | 612658 | 612669 | 2 | 6  | 12 | CA   | 24 | 5  |
| 80872 | 8 | 612754 | 612767 | 2 | 7  | 14 | AC   | 14 | 7  |
| 80873 | 8 | 612770 | 612785 | 2 | 8  | 16 | AC   | 14 | 9  |
| 80877 | 8 | 616179 | 616200 | 2 | 11 | 22 | TG   | 23 | 8  |
| 80878 | 8 | 618654 | 618673 | 4 | 5  | 20 | TTTG | 24 | 3  |
| 80880 | 8 | 621550 | 621563 | 2 | 7  | 14 | GT   | 22 | 5  |
| 80881 | 8 | 622522 | 622536 | 3 | 5  | 15 | GTG  | 20 | 3  |
| 80882 | 8 | 622907 | 622922 | 2 | 8  | 16 | GT   | 26 | 6  |
| 80886 | 8 | 625590 | 625627 | 2 | 19 | 38 | AC   | 24 | 12 |
| 80887 | 8 | 628791 | 628808 | 2 | 9  | 18 | GT   | 23 | 13 |
| 80888 | 8 | 635508 | 635527 | 4 | 5  | 20 | CAAT | 28 | 4  |
| 80891 | 8 | 648073 | 648090 | 2 | 9  | 18 | AC   | 23 | 6  |
| 80904 | 8 | 689512 | 689527 | 2 | 8  | 16 | TG   | 29 | 3  |
| 80906 | 8 | 704211 | 704222 | 2 | 6  | 12 | AT   | 11 | 6  |
| 80908 | 8 | 708310 | 708345 | 2 | 18 | 36 | TG   | 7  | 9  |
| 80909 | 8 | 708472 | 708503 | 2 | 16 | 32 | GT   | 6  | 5  |
| 80913 | 8 | 720321 | 720334 | 2 | 7  | 14 | TG   | 23 | 4  |
| 80917 | 8 | 728742 | 728795 | 2 | 27 | 54 | CA   | 8  | 10 |
| 80923 | 8 | 736276 | 736287 | 2 | 6  | 12 | TC   | 23 | 3  |
| 80928 | 8 | 744865 | 744878 | 2 | 7  | 14 | CA   | 26 | 4  |
| 80930 | 8 | 747998 | 748021 | 2 | 12 | 24 | TG   | 11 | 6  |
| 80931 | 8 | 749977 | 749996 | 2 | 10 | 20 | TG   | 22 | 5  |
| 80936 | 8 | 757058 | 757081 | 2 | 12 | 24 | CA   | 18 | 9  |
| 80938 | 8 | 757220 | 757241 | 2 | 11 | 22 | AC   | 15 | 10 |
| 80944 | 8 | 766227 | 766272 | 2 | 23 | 46 | AC   | 6  | 8  |
| 80945 | 8 | 766321 | 766338 | 2 | 9  | 18 | GT   | 17 | 4  |
| 80947 | 8 | 775393 | 775418 | 2 | 13 | 26 | GT   | 10 | 7  |
| 80948 | 8 | 780635 | 780662 | 2 | 14 | 28 | GT   | 11 | 11 |
| 80950 | 8 | 781656 | 781675 | 2 | 10 | 20 | AC   | 24 | 5  |
| 80958 | 8 | 787683 | 787696 | 2 | 7  | 14 | TG   | 26 | 4  |
| 80967 | 8 | 795606 | 795621 | 2 | 8  | 16 | TG   | 25 | 5  |
| 80986 | 8 | 821413 | 821430 | 2 | 9  | 18 | TG   | 20 | 8  |
| 80989 | 8 | 828653 | 828668 | 4 | 4  | 16 | GGCA | 25 | 4  |
| 80997 | 8 | 854680 | 854697 | 3 | 6  | 18 | CCT  | 20 | 6  |
| 81000 | 8 | 858792 | 858805 | 2 | 7  | 14 | CA   | 27 | 6  |
| 81002 | 8 | 862071 | 862084 | 2 | 7  | 14 | AC   | 17 | 3  |
| 81008 | 8 | 870849 | 870888 | 2 | 20 | 40 | GT   | 7  | 7  |
| 81009 | 8 | 871007 | 871022 | 2 | 8  | 16 | GT   | 19 | 4  |
| 81025 | 8 | 922955 | 922972 | 2 | 9  | 18 | GT   | 23 | 8  |
| 81028 | 8 | 940952 | 940969 | 3 | 6  | 18 | GCA  | 19 | 3  |
| 81034 | 8 | 947303 | 947322 | 2 | 10 | 20 | AC   | 18 | 10 |
| 81038 | 8 | 948885 | 948902 | 2 | 9  | 18 | TC   | 22 | 3  |
| 81039 | 8 | 950101 | 950112 | 2 | 6  | 12 | GT   | 27 | 5  |
| 81050 | 8 | 976344 | 976365 | 2 | 11 | 22 | TG   | 14 | 8  |

|       |   |         |         |   |    |    |      |    |    |
|-------|---|---------|---------|---|----|----|------|----|----|
| 81052 | 8 | 977050  | 977061  | 2 | 6  | 12 | AG   | 33 | 3  |
| 81054 | 8 | 993505  | 993518  | 2 | 7  | 14 | TC   | 14 | 4  |
| 81056 | 8 | 993983  | 994002  | 2 | 10 | 20 | TG   | 17 | 8  |
| 81059 | 8 | 994126  | 994145  | 2 | 10 | 20 | TG   | 9  | 3  |
| 81066 | 8 | 1002760 | 1002775 | 2 | 8  | 16 | CA   | 19 | 5  |
| 81070 | 8 | 1006267 | 1006302 | 2 | 18 | 36 | TG   | 11 | 7  |
| 81071 | 8 | 1006409 | 1006424 | 2 | 8  | 16 | CA   | 12 | 4  |
| 81076 | 8 | 1021081 | 1021112 | 2 | 16 | 32 | CA   | 10 | 8  |
| 81077 | 8 | 1023441 | 1023466 | 2 | 13 | 26 | TG   | 14 | 6  |
| 81084 | 8 | 1031778 | 1031792 | 3 | 5  | 15 | CTG  | 31 | 4  |
| 81092 | 8 | 1052744 | 1052761 | 2 | 9  | 18 | CA   | 16 | 9  |
| 81106 | 8 | 1068645 | 1068706 | 2 | 31 | 62 | AC   | 8  | 11 |
| 81108 | 8 | 1078186 | 1078207 | 2 | 11 | 22 | AC   | 18 | 10 |
| 81109 | 8 | 1083997 | 1084022 | 2 | 13 | 26 | AC   | 16 | 10 |
| 81113 | 8 | 1094236 | 1094249 | 2 | 7  | 14 | GT   | 21 | 5  |
| 81119 | 8 | 1104055 | 1104072 | 3 | 6  | 18 | CAT  | 21 | 3  |
| 81124 | 8 | 1108837 | 1108874 | 2 | 19 | 38 | AC   | 8  | 9  |
| 81125 | 8 | 1108943 | 1108968 | 2 | 13 | 26 | AC   | 13 | 8  |
| 81127 | 8 | 1110366 | 1110383 | 3 | 6  | 18 | AAT  | 22 | 9  |
| 81136 | 8 | 1123244 | 1123263 | 2 | 10 | 20 | GA   | 18 | 5  |
| 81139 | 8 | 1137141 | 1137168 | 2 | 14 | 28 | TG   | 7  | 7  |
| 81149 | 8 | 1183104 | 1183123 | 2 | 10 | 20 | CA   | 26 | 6  |
| 81151 | 8 | 1187387 | 1187401 | 3 | 5  | 15 | TTG  | 25 | 3  |
| 81158 | 8 | 1204171 | 1204182 | 2 | 6  | 12 | TG   | 21 | 7  |
| 81159 | 8 | 1204184 | 1204195 | 2 | 6  | 12 | GT   | 21 | 6  |
| 81160 | 8 | 1204259 | 1204273 | 3 | 5  | 15 | GCC  | 30 | 5  |
| 81164 | 8 | 1207799 | 1207858 | 2 | 30 | 60 | TC   | 12 | 9  |
| 81171 | 8 | 1240492 | 1240509 | 3 | 6  | 18 | ATT  | 8  | 4  |
| 81179 | 8 | 1277542 | 1277553 | 2 | 6  | 12 | TG   | 29 | 3  |
| 81183 | 8 | 1279835 | 1279854 | 2 | 10 | 20 | TG   | 24 | 11 |
| 81186 | 8 | 1286007 | 1286030 | 3 | 8  | 24 | AAT  | 9  | 3  |
| 81192 | 8 | 1313248 | 1313269 | 2 | 11 | 22 | CA   | 16 | 5  |
| 81203 | 8 | 1393030 | 1393053 | 2 | 12 | 24 | TG   | 11 | 5  |
| 81204 | 8 | 1395057 | 1395090 | 2 | 17 | 34 | CA   | 9  | 13 |
| 81210 | 8 | 1414328 | 1414349 | 2 | 11 | 22 | CA   | 17 | 6  |
| 81212 | 8 | 1417470 | 1417499 | 2 | 15 | 30 | TG   | 13 | 15 |
| 81216 | 8 | 1421493 | 1421504 | 2 | 6  | 12 | TG   | 6  | 7  |
| 81219 | 8 | 1431554 | 1431581 | 4 | 7  | 28 | TAGA | 22 | 4  |
| 81222 | 8 | 1446874 | 1446907 | 2 | 17 | 34 | CA   | 14 | 13 |
| 81228 | 8 | 1453820 | 1453833 | 2 | 7  | 14 | AT   | 22 | 3  |
| 81229 | 8 | 1454195 | 1454220 | 2 | 13 | 26 | AC   | 16 | 4  |
| 81230 | 8 | 1454343 | 1454376 | 2 | 17 | 34 | TC   | 8  | 8  |
| 81234 | 8 | 1459755 | 1459794 | 4 | 10 | 40 | AATC | 13 | 12 |
| 81246 | 8 | 1484198 | 1484215 | 2 | 9  | 18 | AC   | 21 | 9  |
| 81247 | 8 | 1488879 | 1488896 | 2 | 9  | 18 | CA   | 26 | 5  |
| 81248 | 8 | 1488898 | 1488915 | 2 | 9  | 18 | AC   | 21 | 7  |
| 81249 | 8 | 1492348 | 1492361 | 2 | 7  | 14 | AT   | 18 | 5  |
| 81255 | 8 | 1505173 | 1505190 | 3 | 6  | 18 | TGT  | 19 | 4  |
| 81257 | 8 | 1518651 | 1518674 | 2 | 12 | 24 | AC   | 18 | 16 |
| 81265 | 8 | 1536633 | 1536644 | 2 | 6  | 12 | TA   | 8  | 7  |
| 81269 | 8 | 1542271 | 1542288 | 2 | 9  | 18 | TG   | 24 | 9  |

|       |   |         |         |   |    |    |      |    |    |
|-------|---|---------|---------|---|----|----|------|----|----|
| 81291 | 8 | 1579524 | 1579535 | 2 | 6  | 12 | AT   | 15 | 7  |
| 81299 | 8 | 1596322 | 1596349 | 2 | 14 | 28 | AC   | 18 | 8  |
| 81303 | 8 | 1600805 | 1600818 | 2 | 7  | 14 | TG   | 22 | 4  |
| 81306 | 8 | 1601551 | 1601570 | 4 | 5  | 20 | TTTG | 11 | 4  |
| 81309 | 8 | 1606080 | 1606097 | 2 | 9  | 18 | TG   | 17 | 3  |
| 81314 | 8 | 1623360 | 1623385 | 2 | 13 | 26 | AC   | 13 | 10 |
| 81319 | 8 | 1635502 | 1635529 | 2 | 14 | 28 | CA   | 15 | 7  |
| 81321 | 8 | 1641952 | 1641993 | 2 | 21 | 42 | GA   | 15 | 8  |
| 81328 | 8 | 1660357 | 1660370 | 2 | 7  | 14 | AC   | 8  | 11 |
| 81348 | 8 | 1699717 | 1699734 | 2 | 9  | 18 | GA   | 29 | 4  |
| 81353 | 8 | 1714740 | 1714759 | 4 | 5  | 20 | GTTG | 27 | 6  |
| 81355 | 8 | 1721975 | 1721998 | 4 | 6  | 24 | ATCC | 25 | 8  |
| 81360 | 8 | 1732482 | 1732495 | 2 | 7  | 14 | GT   | 7  | 4  |
| 81364 | 8 | 1734902 | 1734921 | 2 | 10 | 20 | AC   | 24 | 8  |
| 81365 | 8 | 1737679 | 1737716 | 2 | 19 | 38 | TG   | 11 | 12 |
| 81374 | 8 | 1746039 | 1746086 | 4 | 12 | 48 | TCTT | 21 | 9  |
| 81388 | 8 | 1774210 | 1774221 | 2 | 6  | 12 | CA   | 26 | 3  |
| 81397 | 8 | 1803557 | 1803592 | 3 | 12 | 36 | GAT  | 24 | 7  |
| 81399 | 8 | 1809266 | 1809325 | 4 | 15 | 60 | GAAA | 10 | 6  |
| 81403 | 8 | 1817778 | 1817793 | 2 | 8  | 16 | GT   | 8  | 3  |
| 81406 | 8 | 1818254 | 1818283 | 2 | 15 | 30 | TG   | 7  | 8  |
| 81408 | 8 | 1821025 | 1821062 | 2 | 19 | 38 | GT   | 15 | 7  |
| 81415 | 8 | 1861918 | 1861935 | 3 | 6  | 18 | TCC  | 28 | 3  |
| 81434 | 8 | 1908643 | 1908658 | 2 | 8  | 16 | TG   | 19 | 3  |
| 81441 | 8 | 1943888 | 1943905 | 2 | 9  | 18 | TG   | 11 | 13 |
| 81455 | 8 | 1948945 | 1948959 | 3 | 5  | 15 | GTT  | 27 | 4  |
| 81456 | 8 | 1955145 | 1955165 | 3 | 7  | 21 | CTC  | 28 | 4  |
| 81457 | 8 | 1956725 | 1956742 | 3 | 6  | 18 | GCT  | 30 | 4  |
| 81458 | 8 | 1957370 | 1957381 | 2 | 6  | 12 | AC   | 20 | 7  |
| 81459 | 8 | 1957537 | 1957562 | 2 | 13 | 26 | AC   | 10 | 6  |
| 81460 | 8 | 1957710 | 1957727 | 2 | 9  | 18 | AC   | 14 | 5  |
| 81461 | 8 | 1959850 | 1959865 | 2 | 8  | 16 | CA   | 17 | 3  |
| 81462 | 8 | 1960262 | 1960273 | 2 | 6  | 12 | CA   | 18 | 7  |
| 81465 | 8 | 1968795 | 1968808 | 2 | 7  | 14 | TG   | 17 | 4  |
| 81466 | 8 | 1968889 | 1968916 | 2 | 14 | 28 | GT   | 17 | 6  |
| 81470 | 8 | 1972365 | 1972382 | 2 | 9  | 18 | CA   | 12 | 10 |
| 81472 | 8 | 1972545 | 1972576 | 2 | 16 | 32 | CT   | 14 | 7  |
| 81475 | 8 | 1980042 | 1980055 | 2 | 7  | 14 | CA   | 18 | 3  |
| 81480 | 8 | 1983912 | 1983935 | 2 | 12 | 24 | TC   | 15 | 10 |
| 81492 | 8 | 2017621 | 2017636 | 4 | 4  | 16 | TTAT | 21 | 6  |
| 81497 | 8 | 2033175 | 2033194 | 2 | 10 | 20 | AC   | 22 | 9  |
| 81503 | 8 | 2035123 | 2035146 | 3 | 8  | 24 | TAA  | 12 | 4  |
| 81504 | 8 | 2041246 | 2041257 | 2 | 6  | 12 | AT   | 11 | 3  |
| 81513 | 8 | 2087749 | 2087766 | 3 | 6  | 18 | AAT  | 26 | 4  |
| 81515 | 8 | 2092760 | 2092789 | 2 | 15 | 30 | AG   | 15 | 12 |
| 81524 | 8 | 2111218 | 2111256 | 3 | 13 | 39 | CTC  | 8  | 6  |
| 81528 | 8 | 2128044 | 2128055 | 2 | 6  | 12 | TA   | 13 | 4  |
| 81529 | 8 | 2129970 | 2129983 | 2 | 7  | 14 | AC   | 18 | 12 |
| 81534 | 8 | 2136744 | 2136759 | 2 | 8  | 16 | TG   | 10 | 4  |
| 81535 | 8 | 2136762 | 2136773 | 2 | 6  | 12 | TG   | 23 | 6  |
| 81545 | 8 | 2214423 | 2214449 | 3 | 9  | 27 | TCA  | 24 | 13 |

|       |   |         |         |   |    |    |      |    |    |
|-------|---|---------|---------|---|----|----|------|----|----|
| 81549 | 8 | 2220184 | 2220207 | 2 | 12 | 24 | AC   | 11 | 13 |
| 81554 | 8 | 2226116 | 2226137 | 2 | 11 | 22 | TG   | 11 | 10 |
| 81561 | 8 | 2247702 | 2247741 | 4 | 10 | 40 | ATAG | 31 | 11 |
| 81563 | 8 | 2271045 | 2271056 | 2 | 6  | 12 | TG   | 27 | 4  |
| 81569 | 8 | 2306269 | 2306286 | 3 | 6  | 18 | AAG  | 22 | 3  |
| 81570 | 8 | 2310567 | 2310590 | 3 | 8  | 24 | TAT  | 12 | 9  |
| 81573 | 8 | 2323099 | 2323130 | 2 | 16 | 32 | TG   | 11 | 9  |
| 81574 | 8 | 2324023 | 2324050 | 2 | 14 | 28 | TG   | 15 | 7  |
| 81586 | 8 | 2357159 | 2357186 | 2 | 14 | 28 | AC   | 13 | 11 |
| 81599 | 8 | 2372246 | 2372260 | 3 | 5  | 15 | CTT  | 23 | 6  |
| 81602 | 8 | 2399332 | 2399345 | 2 | 7  | 14 | CT   | 19 | 3  |
| 81615 | 8 | 2416311 | 2416334 | 2 | 12 | 24 | CA   | 8  | 6  |
| 81617 | 8 | 2423833 | 2423852 | 2 | 10 | 20 | TG   | 25 | 3  |
| 81618 | 8 | 2427189 | 2427216 | 4 | 7  | 28 | GAAA | 18 | 3  |
| 81621 | 8 | 2431677 | 2431710 | 2 | 17 | 34 | TG   | 11 | 11 |
| 81624 | 8 | 2440019 | 2440036 | 2 | 9  | 18 | CA   | 15 | 6  |
| 81630 | 8 | 2444768 | 2444785 | 2 | 9  | 18 | AC   | 16 | 11 |
| 81637 | 8 | 2447158 | 2447173 | 2 | 8  | 16 | TC   | 20 | 4  |
| 81647 | 8 | 2480757 | 2480770 | 2 | 7  | 14 | AC   | 17 | 4  |
| 81652 | 8 | 2512812 | 2512825 | 2 | 7  | 14 | AC   | 26 | 7  |
| 81666 | 8 | 2529450 | 2529483 | 2 | 17 | 34 | AC   | 18 | 7  |
| 81667 | 8 | 2529537 | 2529558 | 2 | 11 | 22 | CA   | 15 | 4  |
| 81668 | 8 | 2530416 | 2530487 | 4 | 18 | 72 | TGAT | 14 | 13 |
| 81670 | 8 | 2533199 | 2533216 | 2 | 9  | 18 | AC   | 28 | 4  |
| 81676 | 8 | 2544254 | 2544285 | 4 | 8  | 32 | TCTG | 25 | 4  |
| 81692 | 8 | 2552761 | 2552796 | 3 | 12 | 36 | GAG  | 16 | 9  |
| 81696 | 8 | 2555563 | 2555576 | 2 | 7  | 14 | AC   | 21 | 7  |
| 81719 | 8 | 2582065 | 2582078 | 2 | 7  | 14 | CA   | 29 | 5  |
| 81720 | 8 | 2585997 | 2586008 | 2 | 6  | 12 | AG   | 26 | 4  |
| 81732 | 8 | 2623609 | 2623632 | 2 | 12 | 24 | CA   | 21 | 9  |
| 81735 | 8 | 2624704 | 2624737 | 2 | 17 | 34 | GT   | 9  | 7  |
| 81741 | 8 | 2628281 | 2628294 | 2 | 7  | 14 | TG   | 26 | 6  |
| 81743 | 8 | 2630032 | 2630070 | 3 | 13 | 39 | TGT  | 18 | 9  |
| 81744 | 8 | 2630090 | 2630140 | 3 | 17 | 51 | TTC  | 7  | 9  |
| 81746 | 8 | 2633629 | 2633640 | 2 | 6  | 12 | AC   | 19 | 10 |
| 81751 | 8 | 2645112 | 2645141 | 2 | 15 | 30 | TG   | 21 | 9  |
| 81765 | 8 | 2671166 | 2671183 | 2 | 9  | 18 | GT   | 11 | 8  |
| 81768 | 8 | 2672821 | 2672836 | 4 | 4  | 16 | TGTT | 26 | 3  |
| 81772 | 8 | 2676929 | 2676944 | 2 | 8  | 16 | CA   | 27 | 4  |
| 81778 | 8 | 2682890 | 2682901 | 2 | 6  | 12 | AC   | 8  | 3  |
| 81791 | 8 | 2699981 | 2700008 | 2 | 14 | 28 | TG   | 10 | 9  |
| 81792 | 8 | 2700138 | 2700169 | 2 | 16 | 32 | TG   | 17 | 13 |
| 81813 | 8 | 2758837 | 2758850 | 2 | 7  | 14 | AG   | 24 | 3  |
| 81825 | 8 | 2784259 | 2784292 | 2 | 17 | 34 | CA   | 17 | 9  |
| 81826 | 8 | 2791417 | 2791436 | 2 | 10 | 20 | AC   | 25 | 3  |
| 81833 | 8 | 2807880 | 2807909 | 2 | 15 | 30 | GT   | 6  | 6  |
| 81847 | 8 | 2836491 | 2836508 | 2 | 9  | 18 | AC   | 19 | 6  |
| 81853 | 8 | 2855810 | 2855821 | 2 | 6  | 12 | GA   | 33 | 5  |
| 81857 | 8 | 2879745 | 2879756 | 2 | 6  | 12 | GT   | 24 | 3  |
| 81858 | 8 | 2882922 | 2882935 | 2 | 7  | 14 | GT   | 20 | 7  |
| 81864 | 8 | 2913148 | 2913167 | 4 | 5  | 20 | GTTT | 30 | 6  |

|       |   |         |         |   |    |    |      |    |    |
|-------|---|---------|---------|---|----|----|------|----|----|
| 81867 | 8 | 2931212 | 2931229 | 3 | 6  | 18 | TTG  | 22 | 7  |
| 81868 | 8 | 2933799 | 2933825 | 3 | 9  | 27 | GAT  | 22 | 5  |
| 81871 | 8 | 2938267 | 2938286 | 4 | 5  | 20 | CAGC | 18 | 7  |
| 81872 | 8 | 2938325 | 2938340 | 4 | 4  | 16 | CGCA | 19 | 3  |
| 81883 | 8 | 2948302 | 2948315 | 2 | 7  | 14 | CA   | 20 | 4  |
| 81890 | 8 | 2953079 | 2953098 | 2 | 10 | 20 | CG   | 8  | 7  |
| 81901 | 8 | 2965737 | 2965757 | 3 | 7  | 21 | GCA  | 22 | 3  |
| 81907 | 8 | 2968401 | 2968416 | 2 | 8  | 16 | AG   | 26 | 4  |
| 81910 | 8 | 2980522 | 2980557 | 2 | 18 | 36 | TG   | 13 | 9  |
| 81911 | 8 | 2980731 | 2980754 | 2 | 12 | 24 | CA   | 17 | 7  |
| 81912 | 8 | 2980891 | 2980916 | 2 | 13 | 26 | GT   | 12 | 9  |
| 81914 | 8 | 2983868 | 2983883 | 2 | 8  | 16 | AT   | 19 | 5  |
| 81915 | 8 | 2984094 | 2984113 | 4 | 5  | 20 | ATGG | 12 | 8  |
| 81917 | 8 | 2986902 | 2986916 | 3 | 5  | 15 | TTC  | 25 | 3  |
| 81922 | 8 | 2988947 | 2988968 | 2 | 11 | 22 | AC   | 16 | 9  |
| 81924 | 8 | 2989284 | 2989295 | 2 | 6  | 12 | AC   | 22 | 3  |
| 81930 | 8 | 2994527 | 2994542 | 2 | 8  | 16 | TG   | 19 | 4  |
| 81933 | 8 | 3000091 | 3000102 | 2 | 6  | 12 | GT   | 22 | 5  |
| 81934 | 8 | 3000130 | 3000141 | 2 | 6  | 12 | TG   | 19 | 4  |
| 81938 | 8 | 3003125 | 3003156 | 2 | 16 | 32 | TG   | 18 | 7  |
| 81941 | 8 | 3003740 | 3003757 | 2 | 9  | 18 | GT   | 17 | 4  |
| 81945 | 8 | 3004415 | 3004456 | 2 | 21 | 42 | GT   | 12 | 8  |
| 81947 | 8 | 3005258 | 3005285 | 2 | 14 | 28 | TG   | 9  | 11 |
| 81951 | 8 | 3007617 | 3007646 | 2 | 15 | 30 | GT   | 6  | 6  |
| 81952 | 8 | 3007716 | 3007727 | 2 | 6  | 12 | GT   | 16 | 5  |
| 81953 | 8 | 3007728 | 3007739 | 2 | 6  | 12 | GA   | 14 | 4  |
| 81954 | 8 | 3008259 | 3008279 | 3 | 7  | 21 | GTT  | 26 | 4  |
| 81955 | 8 | 3008829 | 3008852 | 2 | 12 | 24 | GT   | 9  | 10 |
| 81960 | 8 | 3013293 | 3013306 | 2 | 7  | 14 | CA   | 22 | 4  |
| 81961 | 8 | 3014166 | 3014181 | 2 | 8  | 16 | GT   | 27 | 5  |
| 81962 | 8 | 3016058 | 3016071 | 2 | 7  | 14 | TG   | 16 | 3  |
| 81963 | 8 | 3016749 | 3016763 | 3 | 5  | 15 | GCA  | 24 | 3  |
| 81966 | 8 | 3017814 | 3017839 | 2 | 13 | 26 | AC   | 16 | 12 |
| 81967 | 8 | 3022506 | 3022521 | 2 | 8  | 16 | GT   | 26 | 4  |
| 81975 | 8 | 3034225 | 3034242 | 2 | 9  | 18 | GT   | 15 | 7  |
| 81976 | 8 | 3043145 | 3043156 | 2 | 6  | 12 | AT   | 15 | 3  |
| 81979 | 8 | 3054412 | 3054427 | 2 | 8  | 16 | AT   | 27 | 3  |
| 81985 | 8 | 3070758 | 3070772 | 3 | 5  | 15 | CAT  | 29 | 4  |
| 81993 | 8 | 3106497 | 3106508 | 2 | 6  | 12 | TG   | 18 | 3  |
| 82000 | 8 | 3124860 | 3124873 | 2 | 7  | 14 | GA   | 28 | 5  |
| 82007 | 8 | 3143189 | 3143210 | 2 | 11 | 22 | AC   | 12 | 5  |
| 82022 | 8 | 3197726 | 3197747 | 2 | 11 | 22 | GT   | 21 | 9  |
| 82024 | 8 | 3201386 | 3201415 | 2 | 15 | 30 | AC   | 17 | 6  |
| 82027 | 8 | 3215106 | 3215127 | 2 | 11 | 22 | TG   | 16 | 13 |
| 82029 | 8 | 3218571 | 3218584 | 2 | 7  | 14 | AG   | 29 | 4  |
| 82032 | 8 | 3222489 | 3222509 | 3 | 7  | 21 | AAG  | 24 | 6  |
| 82035 | 8 | 3225773 | 3225786 | 2 | 7  | 14 | GT   | 26 | 5  |
| 82049 | 8 | 3267165 | 3267178 | 2 | 7  | 14 | GT   | 28 | 11 |
| 82055 | 8 | 3273308 | 3273327 | 2 | 10 | 20 | TA   | 8  | 3  |
| 82058 | 8 | 3283651 | 3283674 | 3 | 8  | 24 | CCT  | 18 | 6  |
| 82059 | 8 | 3289694 | 3289713 | 4 | 5  | 20 | TTTC | 30 | 7  |



|       |   |         |         |   |    |    |      |    |    |
|-------|---|---------|---------|---|----|----|------|----|----|
| 82063 | 8 | 3293760 | 3293783 | 2 | 12 | 24 | GA   | 22 | 4  |
| 82064 | 8 | 3300273 | 3300284 | 2 | 6  | 12 | AG   | 16 | 5  |
| 82066 | 8 | 3302342 | 3302355 | 2 | 7  | 14 | CA   | 29 | 4  |
| 82081 | 8 | 3339841 | 3339860 | 2 | 10 | 20 | TG   | 16 | 7  |
| 82083 | 8 | 3343837 | 3343856 | 2 | 10 | 20 | AC   | 23 | 7  |
| 82084 | 8 | 3344065 | 3344078 | 2 | 7  | 14 | CA   | 17 | 4  |
| 82086 | 8 | 3344603 | 3344620 | 3 | 6  | 18 | CAT  | 31 | 3  |
| 82088 | 8 | 3347542 | 3347557 | 2 | 8  | 16 | GT   | 23 | 4  |
| 82089 | 8 | 3350014 | 3350039 | 2 | 13 | 26 | CT   | 12 | 10 |
| 82090 | 8 | 3350699 | 3350713 | 3 | 5  | 15 | ATC  | 22 | 5  |
| 82094 | 8 | 3359738 | 3359751 | 2 | 7  | 14 | GA   | 25 | 3  |
| 82098 | 8 | 3367789 | 3367800 | 2 | 6  | 12 | TG   | 18 | 3  |
| 82099 | 8 | 3367803 | 3367814 | 2 | 6  | 12 | TG   | 24 | 3  |
| 82105 | 8 | 3377934 | 3377945 | 2 | 6  | 12 | CA   | 26 | 3  |
| 82106 | 8 | 3382495 | 3382528 | 2 | 17 | 34 | CA   | 10 | 9  |
| 82128 | 8 | 3432043 | 3432070 | 2 | 14 | 28 | TG   | 9  | 6  |
| 82129 | 8 | 3432193 | 3432207 | 3 | 5  | 15 | CAA  | 19 | 12 |
| 82132 | 8 | 3457585 | 3457614 | 3 | 10 | 30 | GAA  | 18 | 3  |
| 82133 | 8 | 3457908 | 3457919 | 2 | 6  | 12 | CA   | 25 | 5  |
| 82136 | 8 | 3460761 | 3460793 | 3 | 11 | 33 | CTC  | 16 | 6  |
| 82137 | 8 | 3461160 | 3461181 | 2 | 11 | 22 | CA   | 19 | 10 |
| 82139 | 8 | 3475155 | 3475168 | 2 | 7  | 14 | CA   | 27 | 3  |
| 82140 | 8 | 3478557 | 3478574 | 3 | 6  | 18 | GCT  | 22 | 4  |
| 82142 | 8 | 3483068 | 3483082 | 3 | 5  | 15 | TCC  | 25 | 9  |
| 82145 | 8 | 3492070 | 3492083 | 2 | 7  | 14 | AC   | 31 | 3  |
| 82146 | 8 | 3492273 | 3492288 | 2 | 8  | 16 | AG   | 24 | 3  |
| 82147 | 8 | 3495236 | 3495257 | 2 | 11 | 22 | GT   | 13 | 4  |
| 82149 | 8 | 3495292 | 3495325 | 2 | 17 | 34 | GT   | 7  | 6  |
| 82158 | 8 | 3504323 | 3504350 | 2 | 14 | 28 | GT   | 12 | 6  |
| 82160 | 8 | 3508336 | 3508347 | 2 | 6  | 12 | GT   | 19 | 7  |
| 82161 | 8 | 3508551 | 3508562 | 2 | 6  | 12 | TG   | 19 | 4  |
| 82163 | 8 | 3511750 | 3511779 | 2 | 15 | 30 | TG   | 20 | 8  |
| 82166 | 8 | 3522705 | 3522720 | 2 | 8  | 16 | AC   | 27 | 6  |
| 82167 | 8 | 3529548 | 3529571 | 2 | 12 | 24 | CA   | 12 | 11 |
| 82177 | 8 | 3531664 | 3531687 | 3 | 8  | 24 | AAG  | 18 | 8  |
| 82178 | 8 | 3532480 | 3532505 | 2 | 13 | 26 | TG   | 17 | 8  |
| 82179 | 8 | 3536365 | 3536382 | 2 | 9  | 18 | TG   | 22 | 6  |
| 82180 | 8 | 3536566 | 3536587 | 2 | 11 | 22 | GT   | 21 | 12 |
| 82182 | 8 | 3537528 | 3537551 | 2 | 12 | 24 | CA   | 17 | 12 |
| 82183 | 8 | 3538172 | 3538185 | 2 | 7  | 14 | AT   | 10 | 7  |
| 82188 | 8 | 3540291 | 3540310 | 2 | 10 | 20 | CT   | 14 | 12 |
| 82190 | 8 | 3541854 | 3541891 | 2 | 19 | 38 | GT   | 15 | 11 |
| 82193 | 8 | 3552523 | 3552538 | 4 | 4  | 16 | AACC | 25 | 3  |
| 82204 | 8 | 3569407 | 3569424 | 2 | 9  | 18 | AG   | 26 | 4  |
| 82210 | 8 | 3576501 | 3576524 | 2 | 12 | 24 | CA   | 10 | 8  |
| 82212 | 8 | 3577655 | 3577682 | 2 | 14 | 28 | GT   | 8  | 10 |
| 82214 | 8 | 3578925 | 3578942 | 2 | 9  | 18 | GT   | 31 | 7  |
| 82222 | 8 | 3589429 | 3589444 | 2 | 8  | 16 | AC   | 10 | 4  |
| 82235 | 8 | 3605596 | 3605613 | 2 | 9  | 18 | CA   | 15 | 6  |
| 82237 | 8 | 3608280 | 3608303 | 4 | 6  | 24 | GGCT | 27 | 3  |
| 82238 | 8 | 3614413 | 3614428 | 2 | 8  | 16 | AC   | 27 | 9  |

|       |   |         |         |   |    |    |      |    |    |
|-------|---|---------|---------|---|----|----|------|----|----|
| 82239 | 8 | 3614513 | 3614530 | 3 | 6  | 18 | GCA  | 21 | 3  |
| 82246 | 8 | 3615579 | 3615594 | 4 | 4  | 16 | CTGC | 20 | 3  |
| 82247 | 8 | 3615881 | 3615892 | 2 | 6  | 12 | AC   | 15 | 8  |
| 82248 | 8 | 3615895 | 3615906 | 2 | 6  | 12 | AC   | 19 | 11 |
| 82250 | 8 | 3617028 | 3617043 | 4 | 4  | 16 | GTTT | 19 | 3  |
| 82251 | 8 | 3618075 | 3618098 | 2 | 12 | 24 | TG   | 28 | 8  |
| 82269 | 8 | 3651880 | 3651893 | 2 | 7  | 14 | CA   | 32 | 3  |
| 82274 | 8 | 3668437 | 3668452 | 2 | 8  | 16 | CA   | 25 | 5  |
| 82275 | 8 | 3669287 | 3669310 | 4 | 6  | 24 | AAAG | 20 | 8  |
| 82276 | 8 | 3682748 | 3682767 | 4 | 5  | 20 | ATTG | 26 | 3  |
| 82277 | 8 | 3689718 | 3689729 | 2 | 6  | 12 | AT   | 11 | 4  |
| 82278 | 8 | 3690338 | 3690351 | 2 | 7  | 14 | TG   | 28 | 4  |
| 82279 | 8 | 3692252 | 3692271 | 2 | 10 | 20 | GT   | 18 | 8  |
| 82287 | 8 | 3716651 | 3716662 | 2 | 6  | 12 | AC   | 26 | 3  |
| 82288 | 8 | 3716883 | 3716896 | 2 | 7  | 14 | GT   | 30 | 3  |
| 82290 | 8 | 3733988 | 3734002 | 3 | 5  | 15 | CCT  | 36 | 3  |
| 82313 | 8 | 3820571 | 3820590 | 2 | 10 | 20 | CA   | 23 | 10 |
| 82316 | 8 | 3825033 | 3825052 | 2 | 10 | 20 | GT   | 10 | 10 |
| 82319 | 8 | 3843561 | 3843574 | 2 | 7  | 14 | GT   | 31 | 3  |
| 82321 | 8 | 3852220 | 3852251 | 2 | 16 | 32 | GT   | 7  | 9  |
| 82326 | 8 | 3870701 | 3870728 | 2 | 14 | 28 | CA   | 13 | 10 |
| 82333 | 8 | 3899583 | 3899610 | 2 | 14 | 28 | CA   | 6  | 8  |
| 82334 | 8 | 3901906 | 3901925 | 2 | 10 | 20 | TC   | 6  | 6  |
| 82335 | 8 | 3902548 | 3902563 | 4 | 4  | 16 | AAAC | 23 | 5  |
| 82336 | 8 | 3907487 | 3907516 | 3 | 10 | 30 | ACT  | 30 | 15 |
| 82343 | 8 | 3936040 | 3936065 | 2 | 13 | 26 | CA   | 11 | 11 |
| 82349 | 8 | 3953865 | 3953882 | 2 | 9  | 18 | AC   | 13 | 10 |
| 82350 | 8 | 3963197 | 3963208 | 2 | 6  | 12 | AC   | 36 | 4  |
| 82368 | 8 | 4030409 | 4030428 | 2 | 10 | 20 | CA   | 15 | 11 |
| 82371 | 8 | 4038766 | 4038780 | 3 | 5  | 15 | TTG  | 26 | 4  |
| 82373 | 8 | 4052312 | 4052329 | 2 | 9  | 18 | CA   | 19 | 13 |
| 82374 | 8 | 4056645 | 4056656 | 2 | 6  | 12 | TG   | 26 | 3  |
| 82395 | 8 | 4097447 | 4097458 | 2 | 6  | 12 | AT   | 28 | 5  |
| 82396 | 8 | 4097849 | 4097866 | 3 | 6  | 18 | GAG  | 18 | 3  |
| 82398 | 8 | 4103232 | 4103259 | 4 | 7  | 28 | TCAT | 23 | 5  |
| 82399 | 8 | 4103882 | 4103897 | 2 | 8  | 16 | CT   | 26 | 5  |
| 82404 | 8 | 4117736 | 4117751 | 2 | 8  | 16 | GT   | 23 | 16 |
| 82405 | 8 | 4118913 | 4118927 | 3 | 5  | 15 | TGT  | 28 | 11 |
| 82413 | 8 | 4130871 | 4130884 | 2 | 7  | 14 | AC   | 15 | 3  |
| 82416 | 8 | 4131298 | 4131319 | 2 | 11 | 22 | TG   | 20 | 8  |
| 82418 | 8 | 4137519 | 4137530 | 2 | 6  | 12 | AG   | 22 | 5  |
| 82420 | 8 | 4154955 | 4154990 | 2 | 18 | 36 | CA   | 7  | 7  |
| 82424 | 8 | 4158395 | 4158409 | 3 | 5  | 15 | TGT  | 15 | 5  |
| 82425 | 8 | 4158429 | 4158450 | 2 | 11 | 22 | GA   | 16 | 7  |
| 82429 | 8 | 4165820 | 4165831 | 2 | 6  | 12 | TG   | 32 | 4  |
| 82433 | 8 | 4175367 | 4175380 | 2 | 7  | 14 | AT   | 15 | 6  |
| 82437 | 8 | 4186805 | 4186837 | 3 | 11 | 33 | TGA  | 26 | 7  |
| 82447 | 8 | 4221397 | 4221423 | 3 | 9  | 27 | TTA  | 10 | 3  |
| 82449 | 8 | 4222006 | 4222033 | 2 | 14 | 28 | AC   | 6  | 12 |
| 82450 | 8 | 4222312 | 4222347 | 2 | 18 | 36 | TG   | 12 | 10 |
| 82451 | 8 | 4223431 | 4223464 | 2 | 17 | 34 | GT   | 14 | 14 |

|       |   |         |         |   |    |    |      |    |    |
|-------|---|---------|---------|---|----|----|------|----|----|
| 82461 | 8 | 4276186 | 4276197 | 2 | 6  | 12 | TA   | 30 | 3  |
| 82462 | 8 | 4281948 | 4281975 | 4 | 7  | 28 | AAAT | 16 | 3  |
| 82473 | 8 | 4289490 | 4289501 | 2 | 6  | 12 | AG   | 19 | 3  |
| 82475 | 8 | 4299657 | 4299676 | 2 | 10 | 20 | GT   | 10 | 3  |
| 82476 | 8 | 4300481 | 4300500 | 2 | 10 | 20 | TC   | 23 | 4  |
| 82477 | 8 | 4301606 | 4301617 | 2 | 6  | 12 | CA   | 27 | 4  |
| 82484 | 8 | 4313963 | 4313980 | 2 | 9  | 18 | CA   | 24 | 8  |
| 82489 | 8 | 4323421 | 4323432 | 2 | 6  | 12 | CA   | 33 | 4  |
| 82516 | 8 | 4404574 | 4404587 | 2 | 7  | 14 | AC   | 18 | 10 |
| 82517 | 8 | 4404728 | 4404751 | 2 | 12 | 24 | GA   | 10 | 12 |
| 82530 | 8 | 4406884 | 4406901 | 2 | 9  | 18 | TG   | 20 | 7  |
| 82532 | 8 | 4407206 | 4407232 | 3 | 9  | 27 | AGC  | 23 | 7  |
| 82536 | 8 | 4411680 | 4411699 | 4 | 5  | 20 | TCTG | 25 | 3  |
| 82539 | 8 | 4417948 | 4417969 | 2 | 11 | 22 | CA   | 21 | 5  |
| 82548 | 8 | 4441425 | 4441484 | 4 | 15 | 60 | ATTG | 24 | 10 |
| 82552 | 8 | 4451925 | 4451944 | 2 | 10 | 20 | AC   | 9  | 8  |
| 82568 | 8 | 4497983 | 4498000 | 2 | 9  | 18 | CA   | 23 | 8  |
| 82570 | 8 | 4507100 | 4507149 | 2 | 25 | 50 | CA   | 15 | 12 |
| 82571 | 8 | 4507652 | 4507667 | 2 | 8  | 16 | GA   | 21 | 7  |
| 82594 | 8 | 4559508 | 4559545 | 2 | 19 | 38 | GT   | 15 | 10 |
| 82596 | 8 | 4571178 | 4571203 | 2 | 13 | 26 | CA   | 7  | 7  |
| 82597 | 8 | 4571953 | 4571972 | 4 | 5  | 20 | GGAT | 13 | 4  |
| 82598 | 8 | 4578064 | 4578090 | 3 | 9  | 27 | GCT  | 17 | 5  |
| 82599 | 8 | 4579939 | 4579950 | 2 | 6  | 12 | TG   | 20 | 3  |
| 82600 | 8 | 4580354 | 4580401 | 3 | 16 | 48 | TTA  | 12 | 9  |
| 82601 | 8 | 4583876 | 4583901 | 2 | 13 | 26 | TG   | 16 | 6  |
| 82610 | 8 | 4616045 | 4616058 | 2 | 7  | 14 | GT   | 25 | 6  |
| 82611 | 8 | 4618300 | 4618315 | 2 | 8  | 16 | CA   | 27 | 5  |
| 82614 | 8 | 4623357 | 4623377 | 3 | 7  | 21 | TCC  | 22 | 4  |
| 82615 | 8 | 4627677 | 4627710 | 2 | 17 | 34 | GT   | 15 | 7  |
| 82621 | 8 | 4634075 | 4634094 | 2 | 10 | 20 | GT   | 19 | 8  |
| 82636 | 8 | 4657602 | 4657615 | 2 | 7  | 14 | TG   | 15 | 14 |
| 82637 | 8 | 4657617 | 4657630 | 2 | 7  | 14 | GT   | 20 | 18 |
| 82638 | 8 | 4659237 | 4659260 | 2 | 12 | 24 | CA   | 13 | 10 |
| 82639 | 8 | 4669954 | 4669968 | 3 | 5  | 15 | TTA  | 11 | 10 |
| 82647 | 8 | 4689417 | 4689438 | 2 | 11 | 22 | AC   | 13 | 7  |
| 82656 | 8 | 4703161 | 4703186 | 2 | 13 | 26 | GT   | 19 | 5  |
| 82674 | 8 | 4775645 | 4775658 | 2 | 7  | 14 | CA   | 24 | 3  |
| 82675 | 8 | 4783883 | 4783896 | 2 | 7  | 14 | GT   | 33 | 3  |
| 82678 | 8 | 4790245 | 4790265 | 3 | 7  | 21 | GTA  | 18 | 3  |
| 82680 | 8 | 4792540 | 4792554 | 3 | 5  | 15 | GAG  | 31 | 5  |
| 82685 | 8 | 4800469 | 4800500 | 2 | 16 | 32 | TG   | 8  | 10 |
| 82686 | 8 | 4800778 | 4800807 | 3 | 10 | 30 | TCC  | 21 | 7  |
| 82687 | 8 | 4800902 | 4800919 | 3 | 6  | 18 | CCT  | 14 | 6  |
| 82689 | 8 | 4801050 | 4801064 | 3 | 5  | 15 | TCC  | 16 | 4  |
| 82690 | 8 | 4801205 | 4801228 | 3 | 8  | 24 | CTC  | 28 | 7  |
| 82693 | 8 | 4803245 | 4803276 | 2 | 16 | 32 | CA   | 12 | 6  |
| 82704 | 8 | 4824970 | 4824989 | 2 | 10 | 20 | GT   | 13 | 8  |
| 82714 | 8 | 4884358 | 4884381 | 2 | 12 | 24 | CA   | 20 | 8  |
| 82720 | 8 | 4896463 | 4896482 | 2 | 10 | 20 | TA   | 11 | 7  |
| 82721 | 8 | 4905079 | 4905096 | 2 | 9  | 18 | TG   | 30 | 3  |

|       |   |         |         |   |    |    |      |    |    |
|-------|---|---------|---------|---|----|----|------|----|----|
| 82727 | 8 | 4910736 | 4910750 | 3 | 5  | 15 | AGG  | 20 | 5  |
| 82731 | 8 | 4914087 | 4914120 | 2 | 17 | 34 | CA   | 8  | 10 |
| 82733 | 8 | 4914205 | 4914232 | 2 | 14 | 28 | TG   | 9  | 10 |
| 82734 | 8 | 4914508 | 4914541 | 2 | 17 | 34 | GT   | 13 | 9  |
| 82737 | 8 | 4915551 | 4915580 | 2 | 15 | 30 | GT   | 15 | 10 |
| 82738 | 8 | 4918681 | 4918698 | 3 | 6  | 18 | CTG  | 27 | 6  |
| 82739 | 8 | 4919869 | 4919900 | 2 | 16 | 32 | AC   | 16 | 10 |
| 82740 | 8 | 4920032 | 4920075 | 2 | 22 | 44 | AC   | 7  | 7  |
| 82741 | 8 | 4921331 | 4921358 | 2 | 14 | 28 | GT   | 16 | 11 |
| 82742 | 8 | 4922151 | 4922168 | 3 | 6  | 18 | CAA  | 21 | 3  |
| 82749 | 8 | 4931860 | 4931877 | 2 | 9  | 18 | AC   | 18 | 5  |
| 82753 | 8 | 4937184 | 4937197 | 2 | 7  | 14 | GT   | 27 | 8  |
| 82754 | 8 | 4938322 | 4938339 | 2 | 9  | 18 | TG   | 18 | 6  |
| 82755 | 8 | 4938341 | 4938352 | 2 | 6  | 12 | GT   | 25 | 4  |
| 82763 | 8 | 4948815 | 4948852 | 2 | 19 | 38 | CA   | 13 | 13 |
| 82766 | 8 | 4950914 | 4950943 | 2 | 15 | 30 | CA   | 20 | 10 |
| 82767 | 8 | 4954315 | 4954344 | 2 | 15 | 30 | GT   | 7  | 10 |
| 82770 | 8 | 4963777 | 4963794 | 2 | 9  | 18 | AC   | 18 | 5  |
| 82772 | 8 | 4967694 | 4967735 | 2 | 21 | 42 | GT   | 9  | 8  |
| 82776 | 8 | 4976167 | 4976188 | 2 | 11 | 22 | TG   | 19 | 9  |
| 82778 | 8 | 4978609 | 4978620 | 2 | 6  | 12 | GT   | 25 | 4  |
| 82779 | 8 | 4979919 | 4979934 | 4 | 4  | 16 | ATTT | 9  | 6  |
| 82783 | 8 | 4987111 | 4987122 | 2 | 6  | 12 | CA   | 16 | 3  |
| 82785 | 8 | 4987734 | 4987747 | 2 | 7  | 14 | GT   | 13 | 8  |
| 82787 | 8 | 4989711 | 4989736 | 2 | 13 | 26 | GT   | 14 | 10 |
| 82789 | 8 | 4993150 | 4993161 | 2 | 6  | 12 | GT   | 15 | 4  |
| 82790 | 8 | 4993164 | 4993177 | 2 | 7  | 14 | GT   | 14 | 4  |
| 82792 | 8 | 4993626 | 4993646 | 3 | 7  | 21 | GAA  | 26 | 9  |
| 82794 | 8 | 4998265 | 4998282 | 2 | 9  | 18 | AC   | 17 | 7  |
| 82797 | 8 | 5004229 | 5004240 | 2 | 6  | 12 | TG   | 29 | 3  |
| 82799 | 8 | 5004638 | 5004649 | 2 | 6  | 12 | AC   | 28 | 4  |
| 82802 | 8 | 5009460 | 5009497 | 2 | 19 | 38 | AC   | 11 | 14 |
| 82806 | 8 | 5012672 | 5012685 | 2 | 7  | 14 | AC   | 15 | 11 |
| 82817 | 8 | 5021461 | 5021476 | 4 | 4  | 16 | CACG | 16 | 13 |
| 82819 | 8 | 5025528 | 5025543 | 2 | 8  | 16 | AC   | 10 | 5  |
| 82820 | 8 | 5040633 | 5040644 | 2 | 6  | 12 | TC   | 20 | 5  |
| 82831 | 8 | 5066640 | 5066663 | 4 | 6  | 24 | AAAT | 8  | 4  |
| 82840 | 8 | 5091054 | 5091089 | 2 | 18 | 36 | TG   | 12 | 10 |
| 82855 | 8 | 5113493 | 5113530 | 2 | 19 | 38 | CA   | 7  | 9  |
| 82862 | 8 | 5137767 | 5137787 | 3 | 7  | 21 | TCA  | 28 | 5  |
| 82863 | 8 | 5144729 | 5144740 | 2 | 6  | 12 | TA   | 20 | 4  |
| 82866 | 8 | 5173312 | 5173323 | 2 | 6  | 12 | TC   | 22 | 3  |
| 82871 | 8 | 5187833 | 5187858 | 2 | 13 | 26 | AC   | 13 | 5  |
| 82873 | 8 | 5189685 | 5189720 | 4 | 9  | 36 | AAAC | 14 | 7  |
| 82878 | 8 | 5213483 | 5213504 | 2 | 11 | 22 | TG   | 20 | 8  |
| 82881 | 8 | 5219221 | 5219238 | 3 | 6  | 18 | AAG  | 19 | 3  |
| 82883 | 8 | 5222565 | 5222624 | 4 | 15 | 60 | CTTT | 18 | 15 |
| 82889 | 8 | 5237318 | 5237335 | 2 | 9  | 18 | CA   | 28 | 6  |
| 82890 | 8 | 5241011 | 5241026 | 2 | 8  | 16 | TG   | 11 | 5  |
| 82891 | 8 | 5241028 | 5241039 | 2 | 6  | 12 | GT   | 10 | 5  |
| 82893 | 8 | 5243261 | 5243290 | 2 | 15 | 30 | GT   | 15 | 13 |

|       |   |         |         |   |    |    |      |    |    |
|-------|---|---------|---------|---|----|----|------|----|----|
| 82895 | 8 | 5245907 | 5245920 | 2 | 7  | 14 | TG   | 28 | 5  |
| 82901 | 8 | 5257679 | 5257706 | 2 | 14 | 28 | CA   | 15 | 7  |
| 82903 | 8 | 5259857 | 5259886 | 2 | 15 | 30 | GT   | 7  | 8  |
| 82904 | 8 | 5260074 | 5260095 | 2 | 11 | 22 | TG   | 18 | 5  |
| 82906 | 8 | 5262860 | 5262879 | 2 | 10 | 20 | CA   | 13 | 6  |
| 82908 | 8 | 5262967 | 5263008 | 2 | 21 | 42 | TG   | 7  | 8  |
| 82913 | 8 | 5268232 | 5268247 | 4 | 4  | 16 | TCCC | 7  | 3  |
| 82914 | 8 | 5268591 | 5268606 | 2 | 8  | 16 | GT   | 15 | 4  |
| 82918 | 8 | 5279337 | 5279362 | 2 | 13 | 26 | CA   | 21 | 11 |
| 82919 | 8 | 5281005 | 5281026 | 2 | 11 | 22 | CA   | 24 | 5  |
| 82928 | 8 | 5295201 | 5295212 | 2 | 6  | 12 | AG   | 11 | 6  |
| 82930 | 8 | 5301512 | 5301557 | 2 | 23 | 46 | CA   | 16 | 14 |
| 82934 | 8 | 5317161 | 5317200 | 2 | 20 | 40 | GT   | 20 | 13 |
| 82938 | 8 | 5332270 | 5332287 | 2 | 9  | 18 | AG   | 19 | 4  |
| 82944 | 8 | 5342741 | 5342764 | 3 | 8  | 24 | TCA  | 23 | 4  |
| 82945 | 8 | 5344983 | 5344998 | 2 | 8  | 16 | AT   | 11 | 11 |
| 82946 | 8 | 5347856 | 5347869 | 2 | 7  | 14 | AC   | 19 | 4  |
| 82947 | 8 | 5347871 | 5347882 | 2 | 6  | 12 | CA   | 13 | 4  |
| 82948 | 8 | 5352526 | 5352543 | 3 | 6  | 18 | AAG  | 13 | 3  |
| 82964 | 8 | 5386552 | 5386579 | 2 | 14 | 28 | TG   | 15 | 13 |
| 82965 | 8 | 5386763 | 5386774 | 2 | 6  | 12 | GT   | 20 | 6  |
| 82974 | 8 | 5401101 | 5401124 | 3 | 8  | 24 | TCT  | 18 | 3  |
| 82975 | 8 | 5402369 | 5402396 | 2 | 14 | 28 | AC   | 8  | 7  |
| 82983 | 8 | 5413139 | 5413166 | 2 | 14 | 28 | GT   | 15 | 9  |
| 82984 | 8 | 5421787 | 5421802 | 2 | 8  | 16 | TG   | 15 | 11 |
| 82988 | 8 | 5428678 | 5428691 | 2 | 7  | 14 | GT   | 29 | 4  |
| 82991 | 8 | 5439145 | 5439182 | 2 | 19 | 38 | AC   | 7  | 9  |
| 82992 | 8 | 5443015 | 5443029 | 3 | 5  | 15 | CCA  | 31 | 3  |
| 82993 | 8 | 5445154 | 5445175 | 2 | 11 | 22 | TG   | 22 | 12 |
| 82995 | 8 | 5447540 | 5447557 | 2 | 9  | 18 | TG   | 20 | 8  |
| 83006 | 8 | 5473763 | 5473786 | 3 | 8  | 24 | GAA  | 16 | 3  |
| 83011 | 8 | 5480131 | 5480166 | 2 | 18 | 36 | TG   | 21 | 8  |
| 83013 | 8 | 5490636 | 5490655 | 2 | 10 | 20 | TA   | 19 | 11 |
| 83020 | 8 | 5511821 | 5511842 | 2 | 11 | 22 | AC   | 10 | 5  |
| 83021 | 8 | 5515571 | 5515596 | 2 | 13 | 26 | GA   | 7  | 6  |
| 83022 | 8 | 5521831 | 5521842 | 2 | 6  | 12 | CA   | 14 | 3  |
| 83023 | 8 | 5523371 | 5523392 | 2 | 11 | 22 | AC   | 21 | 11 |
| 83024 | 8 | 5523685 | 5523720 | 2 | 18 | 36 | AC   | 18 | 10 |
| 83027 | 8 | 5528193 | 5528238 | 2 | 23 | 46 | CA   | 16 | 19 |
| 83029 | 8 | 5540686 | 5540699 | 2 | 7  | 14 | TG   | 18 | 6  |
| 83030 | 8 | 5540700 | 5540715 | 2 | 8  | 16 | AG   | 20 | 6  |
| 83035 | 8 | 5542589 | 5542615 | 3 | 9  | 27 | CCT  | 18 | 5  |
| 83038 | 8 | 5549018 | 5549035 | 2 | 9  | 18 | CA   | 21 | 16 |
| 83040 | 8 | 5553230 | 5553253 | 3 | 8  | 24 | TTC  | 9  | 3  |
| 83042 | 8 | 5560872 | 5560899 | 2 | 14 | 28 | TG   | 14 | 6  |
| 83049 | 8 | 5570190 | 5570205 | 4 | 4  | 16 | AAAG | 24 | 5  |
| 83051 | 8 | 5570614 | 5570637 | 3 | 8  | 24 | ACA  | 6  | 3  |
| 83053 | 8 | 5572875 | 5572904 | 2 | 15 | 30 | GT   | 15 | 6  |
| 83055 | 8 | 5574736 | 5574763 | 2 | 14 | 28 | GT   | 15 | 10 |
| 83057 | 8 | 5576880 | 5576906 | 3 | 9  | 27 | ATG  | 25 | 10 |
| 83060 | 8 | 5580609 | 5580623 | 3 | 5  | 15 | TTG  | 13 | 7  |

|       |   |         |         |   |    |    |      |    |    |
|-------|---|---------|---------|---|----|----|------|----|----|
| 83065 | 8 | 5586464 | 5586481 | 3 | 6  | 18 | TGA  | 27 | 3  |
| 83071 | 8 | 5594337 | 5594354 | 2 | 9  | 18 | TG   | 22 | 12 |
| 83075 | 8 | 5595042 | 5595071 | 2 | 15 | 30 | CT   | 11 | 8  |
| 83078 | 8 | 5595834 | 5595847 | 2 | 7  | 14 | CT   | 25 | 5  |
| 83080 | 8 | 5598511 | 5598532 | 2 | 11 | 22 | TG   | 15 | 6  |
| 83084 | 8 | 5603784 | 5603805 | 2 | 11 | 22 | TC   | 21 | 6  |
| 83089 | 8 | 5611746 | 5611773 | 4 | 7  | 28 | GTTG | 25 | 8  |
| 83090 | 8 | 5612198 | 5612239 | 2 | 21 | 42 | GT   | 8  | 8  |
| 83092 | 8 | 5615763 | 5615796 | 2 | 17 | 34 | AC   | 15 | 9  |
| 83094 | 8 | 5622420 | 5622443 | 3 | 8  | 24 | CCT  | 23 | 5  |
| 83095 | 8 | 5623361 | 5623380 | 2 | 10 | 20 | CT   | 24 | 5  |
| 83096 | 8 | 5630560 | 5630587 | 2 | 14 | 28 | CA   | 19 | 11 |
| 83101 | 8 | 5644751 | 5644782 | 2 | 16 | 32 | TG   | 14 | 10 |
| 83105 | 8 | 5654339 | 5654358 | 2 | 10 | 20 | CA   | 15 | 14 |
| 83109 | 8 | 5658935 | 5658962 | 2 | 14 | 28 | TG   | 19 | 10 |
| 83112 | 8 | 5664294 | 5664314 | 3 | 7  | 21 | CCT  | 16 | 5  |
| 83113 | 8 | 5664752 | 5664785 | 2 | 17 | 34 | TG   | 10 | 9  |
| 83114 | 8 | 5664844 | 5664865 | 2 | 11 | 22 | GA   | 16 | 5  |
| 83115 | 8 | 5664976 | 5665015 | 2 | 20 | 40 | GT   | 14 | 18 |
| 83120 | 8 | 5666891 | 5666906 | 2 | 8  | 16 | GA   | 14 | 4  |
| 83122 | 8 | 5667856 | 5667885 | 2 | 15 | 30 | GT   | 16 | 9  |
| 83134 | 8 | 5675037 | 5675066 | 2 | 15 | 30 | TG   | 19 | 10 |
| 83135 | 8 | 5675102 | 5675122 | 3 | 7  | 21 | ATG  | 14 | 3  |
| 83141 | 8 | 5680067 | 5680090 | 3 | 8  | 24 | AGC  | 31 | 5  |
| 83142 | 8 | 5682276 | 5682329 | 2 | 27 | 54 | CA   | 8  | 13 |
| 83148 | 8 | 5691019 | 5691036 | 2 | 9  | 18 | CA   | 17 | 6  |
| 83153 | 8 | 5691464 | 5691493 | 2 | 15 | 30 | CA   | 10 | 6  |
| 83155 | 8 | 5693141 | 5693166 | 2 | 13 | 26 | CA   | 7  | 12 |
| 83160 | 8 | 5694509 | 5694548 | 2 | 20 | 40 | AG   | 7  | 7  |
| 83163 | 8 | 5696710 | 5696725 | 2 | 8  | 16 | TG   | 21 | 4  |
| 83165 | 8 | 5700933 | 5700948 | 2 | 8  | 16 | AC   | 17 | 13 |
| 83172 | 8 | 5709879 | 5709898 | 2 | 10 | 20 | TG   | 14 | 8  |
| 83178 | 8 | 5715294 | 5715305 | 2 | 6  | 12 | GT   | 27 | 3  |
| 83183 | 8 | 5719133 | 5719160 | 2 | 14 | 28 | CA   | 14 | 13 |
| 83184 | 8 | 5721594 | 5721611 | 2 | 9  | 18 | CT   | 24 | 6  |
| 83188 | 8 | 5728431 | 5728456 | 2 | 13 | 26 | AC   | 11 | 7  |
| 83198 | 8 | 5741072 | 5741101 | 2 | 15 | 30 | GT   | 7  | 7  |
| 83199 | 8 | 5743967 | 5743992 | 2 | 13 | 26 | CA   | 23 | 12 |
| 83204 | 8 | 5748179 | 5748216 | 2 | 19 | 38 | TG   | 7  | 6  |
| 83215 | 8 | 5768127 | 5768146 | 2 | 10 | 20 | AC   | 22 | 7  |
| 83217 | 8 | 5770478 | 5770513 | 2 | 18 | 36 | TG   | 11 | 9  |
| 83218 | 8 | 5770904 | 5770929 | 2 | 13 | 26 | TG   | 10 | 8  |
| 83219 | 8 | 5771070 | 5771081 | 2 | 6  | 12 | CA   | 19 | 10 |
| 83221 | 8 | 5773117 | 5773138 | 2 | 11 | 22 | GT   | 8  | 8  |
| 83222 | 8 | 5773415 | 5773430 | 2 | 8  | 16 | TG   | 29 | 3  |
| 83223 | 8 | 5774791 | 5774818 | 2 | 14 | 28 | TG   | 10 | 9  |
| 83224 | 8 | 5776345 | 5776358 | 2 | 7  | 14 | GA   | 22 | 3  |
| 83229 | 8 | 5780310 | 5780336 | 3 | 9  | 27 | AAG  | 18 | 4  |
| 83231 | 8 | 5781114 | 5781125 | 2 | 6  | 12 | AG   | 28 | 3  |
| 83234 | 8 | 5784763 | 5784780 | 2 | 9  | 18 | TG   | 25 | 5  |
| 83238 | 8 | 5787220 | 5787246 | 3 | 9  | 27 | CTC  | 11 | 6  |

|       |   |         |         |   |    |    |      |    |    |
|-------|---|---------|---------|---|----|----|------|----|----|
| 83240 | 8 | 5789445 | 5789478 | 2 | 17 | 34 | TG   | 8  | 8  |
| 83241 | 8 | 5789539 | 5789550 | 2 | 6  | 12 | GT   | 13 | 3  |
| 83242 | 8 | 5789719 | 5789742 | 2 | 12 | 24 | CA   | 18 | 11 |
| 83244 | 8 | 5790229 | 5790248 | 2 | 10 | 20 | TC   | 14 | 6  |
| 83250 | 8 | 5797589 | 5797604 | 2 | 8  | 16 | TG   | 12 | 9  |
| 83256 | 8 | 5808076 | 5808091 | 4 | 4  | 16 | AAAC | 25 | 3  |
| 83260 | 8 | 5812996 | 5813007 | 2 | 6  | 12 | GT   | 29 | 6  |
| 83262 | 8 | 5814730 | 5814755 | 2 | 13 | 26 | TC   | 24 | 5  |
| 83263 | 8 | 5817395 | 5817418 | 2 | 12 | 24 | AC   | 14 | 8  |
| 83265 | 8 | 5819331 | 5819350 | 2 | 10 | 20 | AC   | 15 | 7  |
| 83267 | 8 | 5824127 | 5824170 | 2 | 22 | 44 | TG   | 14 | 13 |
| 83269 | 8 | 5825489 | 5825503 | 3 | 5  | 15 | TTG  | 20 | 14 |
| 83282 | 8 | 5837338 | 5837369 | 4 | 8  | 32 | ACAG | 27 | 13 |
| 83286 | 8 | 5840292 | 5840307 | 2 | 8  | 16 | GT   | 16 | 4  |
| 83290 | 8 | 5841215 | 5841232 | 2 | 9  | 18 | AG   | 18 | 4  |
| 83293 | 8 | 5843496 | 5843509 | 2 | 7  | 14 | CA   | 10 | 7  |
| 83296 | 8 | 5846065 | 5846076 | 2 | 6  | 12 | AC   | 23 | 3  |
| 83299 | 8 | 5853048 | 5853073 | 2 | 13 | 26 | AC   | 18 | 5  |
| 83302 | 8 | 5858273 | 5858290 | 2 | 9  | 18 | AG   | 16 | 8  |
| 83303 | 8 | 5858293 | 5858304 | 2 | 6  | 12 | AG   | 10 | 6  |
| 83307 | 8 | 5874737 | 5874788 | 2 | 26 | 52 | CA   | 7  | 12 |
| 83308 | 8 | 5876973 | 5876990 | 2 | 9  | 18 | TG   | 15 | 6  |
| 83310 | 8 | 5880323 | 5880336 | 2 | 7  | 14 | AC   | 21 | 4  |
| 83313 | 8 | 5894739 | 5894754 | 4 | 4  | 16 | AAAT | 18 | 3  |
| 83314 | 8 | 5895829 | 5895852 | 3 | 8  | 24 | ATT  | 11 | 4  |
| 83317 | 8 | 5905283 | 5905303 | 3 | 7  | 21 | GTG  | 22 | 6  |
| 83327 | 8 | 5928800 | 5928819 | 2 | 10 | 20 | CA   | 22 | 5  |
| 83330 | 8 | 5933131 | 5933164 | 2 | 17 | 34 | TC   | 21 | 13 |
| 83333 | 8 | 5937834 | 5937865 | 2 | 16 | 32 | AC   | 11 | 10 |
| 83337 | 8 | 5944504 | 5944521 | 2 | 9  | 18 | CA   | 20 | 8  |
| 83338 | 8 | 5944612 | 5944623 | 2 | 6  | 12 | AC   | 28 | 4  |
| 83339 | 8 | 5944725 | 5944742 | 2 | 9  | 18 | AC   | 17 | 9  |
| 83343 | 8 | 5947960 | 5947979 | 2 | 10 | 20 | CA   | 10 | 12 |
| 83378 | 8 | 5982511 | 5982526 | 4 | 4  | 16 | TATC | 17 | 3  |
| 83384 | 8 | 5999455 | 5999478 | 3 | 8  | 24 | AGG  | 16 | 4  |
| 83393 | 8 | 6011649 | 6011678 | 2 | 15 | 30 | TG   | 11 | 10 |
| 83394 | 8 | 6013534 | 6013561 | 2 | 14 | 28 | AC   | 14 | 10 |
| 83396 | 8 | 6015584 | 6015597 | 2 | 7  | 14 | GT   | 23 | 4  |
| 83401 | 8 | 6019679 | 6019690 | 2 | 6  | 12 | TA   | 16 | 9  |
| 83430 | 8 | 6053270 | 6053293 | 2 | 12 | 24 | GT   | 18 | 6  |
| 83433 | 8 | 6055882 | 6055903 | 2 | 11 | 22 | GT   | 17 | 8  |
| 83434 | 8 | 6056071 | 6056082 | 2 | 6  | 12 | GT   | 11 | 6  |
| 83435 | 8 | 6056085 | 6056102 | 2 | 9  | 18 | GT   | 13 | 12 |
| 83436 | 8 | 6056211 | 6056234 | 2 | 12 | 24 | TG   | 12 | 6  |
| 83447 | 8 | 6075831 | 6075846 | 2 | 8  | 16 | CA   | 12 | 11 |
| 83448 | 8 | 6075929 | 6075962 | 2 | 17 | 34 | CA   | 7  | 8  |
| 83452 | 8 | 6087077 | 6087114 | 2 | 19 | 38 | AC   | 15 | 9  |
| 83453 | 8 | 6089586 | 6089601 | 2 | 8  | 16 | GT   | 21 | 6  |
| 83454 | 8 | 6089753 | 6089768 | 2 | 8  | 16 | TG   | 17 | 3  |
| 83456 | 8 | 6090566 | 6090589 | 3 | 8  | 24 | CCT  | 19 | 3  |
| 83459 | 8 | 6091427 | 6091448 | 2 | 11 | 22 | TG   | 15 | 3  |

|       |   |         |         |   |    |    |      |    |    |
|-------|---|---------|---------|---|----|----|------|----|----|
| 83461 | 8 | 6095497 | 6095522 | 2 | 13 | 26 | CA   | 11 | 8  |
| 83479 | 8 | 6115096 | 6115119 | 2 | 12 | 24 | AC   | 18 | 8  |
| 83481 | 8 | 6118108 | 6118139 | 2 | 16 | 32 | GT   | 15 | 9  |
| 83486 | 8 | 6125856 | 6125877 | 2 | 11 | 22 | CA   | 17 | 11 |
| 83491 | 8 | 6138614 | 6138643 | 2 | 15 | 30 | TG   | 12 | 10 |
| 83496 | 8 | 6150230 | 6150243 | 2 | 7  | 14 | AG   | 25 | 11 |
| 83497 | 8 | 6150246 | 6150259 | 2 | 7  | 14 | AG   | 16 | 6  |
| 83498 | 8 | 6150561 | 6150586 | 2 | 13 | 26 | GT   | 16 | 14 |
| 83499 | 8 | 6150744 | 6150759 | 2 | 8  | 16 | TG   | 22 | 3  |
| 83502 | 8 | 6155797 | 6155824 | 2 | 14 | 28 | AC   | 13 | 7  |
| 83503 | 8 | 6155940 | 6155959 | 2 | 10 | 20 | CA   | 26 | 3  |
| 83513 | 8 | 6175417 | 6175428 | 2 | 6  | 12 | AT   | 22 | 4  |
| 83514 | 8 | 6178844 | 6178861 | 2 | 9  | 18 | CA   | 21 | 6  |
| 83516 | 8 | 6183758 | 6183775 | 2 | 9  | 18 | GT   | 20 | 13 |
| 83521 | 8 | 6214643 | 6214658 | 2 | 8  | 16 | AG   | 25 | 3  |
| 83525 | 8 | 6226683 | 6226694 | 2 | 6  | 12 | CA   | 23 | 5  |
| 83526 | 8 | 6230067 | 6230086 | 2 | 10 | 20 | TG   | 18 | 12 |
| 83533 | 8 | 6243033 | 6243058 | 2 | 13 | 26 | TG   | 14 | 3  |
| 83534 | 8 | 6246796 | 6246821 | 2 | 13 | 26 | GT   | 14 | 7  |
| 83536 | 8 | 6249796 | 6249809 | 2 | 7  | 14 | AC   | 22 | 8  |
| 83537 | 8 | 6249947 | 6249958 | 2 | 6  | 12 | TG   | 27 | 4  |
| 83538 | 8 | 6249961 | 6249972 | 2 | 6  | 12 | TG   | 29 | 3  |
| 83544 | 8 | 6261856 | 6261869 | 2 | 7  | 14 | AG   | 31 | 4  |
| 83548 | 8 | 6276571 | 6276585 | 3 | 5  | 15 | GTT  | 27 | 3  |
| 83556 | 8 | 6311328 | 6311347 | 2 | 10 | 20 | CA   | 13 | 8  |
| 83559 | 8 | 6313094 | 6313119 | 2 | 13 | 26 | CT   | 16 | 11 |
| 83564 | 8 | 6321586 | 6321601 | 2 | 8  | 16 | GT   | 27 | 5  |
| 83571 | 8 | 6326008 | 6326019 | 2 | 6  | 12 | GT   | 22 | 3  |
| 83575 | 8 | 6328027 | 6328038 | 2 | 6  | 12 | TG   | 28 | 5  |
| 83577 | 8 | 6329289 | 6329320 | 2 | 16 | 32 | TG   | 14 | 15 |
| 83578 | 8 | 6329470 | 6329485 | 2 | 8  | 16 | TC   | 16 | 6  |
| 83579 | 8 | 6330470 | 6330481 | 2 | 6  | 12 | GA   | 21 | 3  |
| 83580 | 8 | 6330835 | 6330852 | 2 | 9  | 18 | GT   | 23 | 8  |
| 83583 | 8 | 6334659 | 6334688 | 2 | 15 | 30 | CA   | 12 | 11 |
| 83584 | 8 | 6335576 | 6335609 | 2 | 17 | 34 | CA   | 14 | 9  |
| 83585 | 8 | 6336372 | 6336389 | 2 | 9  | 18 | CT   | 17 | 6  |
| 83594 | 8 | 6348582 | 6348613 | 2 | 16 | 32 | TC   | 6  | 8  |
| 83597 | 8 | 6352603 | 6352623 | 3 | 7  | 21 | CCT  | 19 | 5  |
| 83601 | 8 | 6375013 | 6375040 | 4 | 7  | 28 | ATGT | 20 | 3  |
| 83602 | 8 | 6375835 | 6375852 | 2 | 9  | 18 | CA   | 22 | 9  |
| 83603 | 8 | 6376575 | 6376592 | 2 | 9  | 18 | GT   | 15 | 10 |
| 83607 | 8 | 6382701 | 6382716 | 2 | 8  | 16 | TG   | 14 | 7  |
| 83613 | 8 | 6387361 | 6387380 | 4 | 5  | 20 | AAAT | 25 | 7  |
| 83616 | 8 | 6393007 | 6393026 | 2 | 10 | 20 | AC   | 11 | 6  |
| 83620 | 8 | 6399855 | 6399872 | 3 | 6  | 18 | TAT  | 16 | 3  |
| 83621 | 8 | 6406863 | 6406878 | 2 | 8  | 16 | TC   | 22 | 5  |
| 83624 | 8 | 6418605 | 6418626 | 2 | 11 | 22 | GT   | 17 | 4  |
| 83625 | 8 | 6418687 | 6418722 | 2 | 18 | 36 | TG   | 10 | 12 |
| 83628 | 8 | 6422421 | 6422436 | 2 | 8  | 16 | AC   | 29 | 7  |
| 83635 | 8 | 6439129 | 6439150 | 2 | 11 | 22 | CT   | 19 | 6  |
| 83637 | 8 | 6440082 | 6440097 | 2 | 8  | 16 | GT   | 30 | 3  |



|       |   |         |         |   |    |    |      |    |    |
|-------|---|---------|---------|---|----|----|------|----|----|
| 83638 | 8 | 6440302 | 6440319 | 2 | 9  | 18 | TG   | 27 | 6  |
| 83640 | 8 | 6444096 | 6444111 | 2 | 8  | 16 | AC   | 19 | 4  |
| 83642 | 8 | 6451532 | 6451547 | 2 | 8  | 16 | TG   | 26 | 5  |
| 83643 | 8 | 6452195 | 6452226 | 4 | 8  | 32 | GCCT | 25 | 5  |
| 83644 | 8 | 6465518 | 6465533 | 2 | 8  | 16 | AC   | 26 | 4  |
| 83645 | 8 | 6468129 | 6468144 | 2 | 8  | 16 | TG   | 12 | 4  |
| 83647 | 8 | 6491282 | 6491319 | 2 | 19 | 38 | GT   | 7  | 7  |
| 83649 | 8 | 6496433 | 6496446 | 2 | 7  | 14 | AC   | 25 | 4  |
| 83653 | 8 | 6504845 | 6504864 | 4 | 5  | 20 | TTTA | 15 | 3  |
| 83657 | 8 | 6511666 | 6511681 | 2 | 8  | 16 | GT   | 30 | 5  |
| 83658 | 8 | 6512697 | 6512726 | 2 | 15 | 30 | GT   | 16 | 11 |
| 83659 | 8 | 6513296 | 6513335 | 2 | 20 | 40 | GT   | 13 | 13 |
| 83662 | 8 | 6518355 | 6518368 | 2 | 7  | 14 | TG   | 26 | 3  |
| 83663 | 8 | 6518387 | 6518400 | 2 | 7  | 14 | TG   | 20 | 4  |
| 83666 | 8 | 6522288 | 6522311 | 2 | 12 | 24 | TC   | 21 | 5  |
| 83670 | 8 | 6536417 | 6536430 | 2 | 7  | 14 | GT   | 18 | 3  |
| 83681 | 8 | 6558255 | 6558292 | 2 | 19 | 38 | CA   | 6  | 9  |
| 83682 | 8 | 6558593 | 6558612 | 2 | 10 | 20 | GT   | 21 | 3  |
| 83686 | 8 | 6571178 | 6571195 | 2 | 9  | 18 | AC   | 9  | 10 |
| 83688 | 8 | 6582482 | 6582493 | 2 | 6  | 12 | CA   | 31 | 3  |
| 83690 | 8 | 6585957 | 6585977 | 3 | 7  | 21 | CAG  | 23 | 5  |
| 83694 | 8 | 6591895 | 6591910 | 2 | 8  | 16 | TG   | 30 | 4  |
| 83695 | 8 | 6592022 | 6592041 | 2 | 10 | 20 | CA   | 20 | 6  |
| 83697 | 8 | 6595810 | 6595827 | 3 | 6  | 18 | ATG  | 30 | 3  |
| 83703 | 8 | 6605245 | 6605262 | 2 | 9  | 18 | GT   | 24 | 6  |
| 83705 | 8 | 6606056 | 6606067 | 2 | 6  | 12 | CT   | 20 | 4  |
| 83708 | 8 | 6608432 | 6608445 | 2 | 7  | 14 | TG   | 25 | 4  |
| 83709 | 8 | 6608579 | 6608593 | 3 | 5  | 15 | AAT  | 16 | 6  |
| 83710 | 8 | 6608961 | 6608978 | 3 | 6  | 18 | CTT  | 24 | 4  |
| 83715 | 8 | 6623475 | 6623500 | 2 | 13 | 26 | AC   | 8  | 9  |
| 83717 | 8 | 6645285 | 6645298 | 2 | 7  | 14 | TG   | 19 | 7  |
| 83718 | 8 | 6645829 | 6645848 | 4 | 5  | 20 | ATTT | 19 | 4  |
| 83720 | 8 | 6648387 | 6648420 | 2 | 17 | 34 | GA   | 19 | 8  |
| 83727 | 8 | 6652354 | 6652365 | 2 | 6  | 12 | AG   | 25 | 4  |
| 83728 | 8 | 6652743 | 6652760 | 2 | 9  | 18 | AG   | 21 | 6  |
| 83729 | 8 | 6652916 | 6652931 | 4 | 4  | 16 | CTGC | 27 | 4  |
| 83730 | 8 | 6653119 | 6653132 | 2 | 7  | 14 | TG   | 8  | 3  |
| 83732 | 8 | 6653613 | 6653636 | 2 | 12 | 24 | TG   | 14 | 15 |
| 83739 | 8 | 6663255 | 6663272 | 2 | 9  | 18 | TG   | 22 | 5  |
| 83742 | 8 | 6670729 | 6670740 | 2 | 6  | 12 | GT   | 27 | 3  |
| 83744 | 8 | 6673669 | 6673702 | 2 | 17 | 34 | GT   | 7  | 11 |
| 83746 | 8 | 6677304 | 6677318 | 3 | 5  | 15 | TGC  | 29 | 4  |
| 83747 | 8 | 6678082 | 6678102 | 3 | 7  | 21 | CAT  | 25 | 3  |
| 83750 | 8 | 6679697 | 6679724 | 2 | 14 | 28 | AC   | 16 | 6  |
| 83752 | 8 | 6684314 | 6684347 | 2 | 17 | 34 | TG   | 21 | 5  |
| 83755 | 8 | 6686390 | 6686405 | 2 | 8  | 16 | TC   | 28 | 4  |
| 83756 | 8 | 6687010 | 6687041 | 2 | 16 | 32 | TG   | 12 | 9  |
| 83757 | 8 | 6688847 | 6688858 | 2 | 6  | 12 | TG   | 18 | 5  |
| 83758 | 8 | 6689063 | 6689074 | 2 | 6  | 12 | CA   | 25 | 3  |
| 83779 | 8 | 6715518 | 6715535 | 3 | 6  | 18 | AGC  | 24 | 4  |
| 83780 | 8 | 6720349 | 6720366 | 2 | 9  | 18 | TG   | 17 | 5  |

|       |   |         |         |   |    |    |      |    |    |
|-------|---|---------|---------|---|----|----|------|----|----|
| 83782 | 8 | 6721082 | 6721095 | 2 | 7  | 14 | TG   | 23 | 3  |
| 83799 | 8 | 6758053 | 6758064 | 2 | 6  | 12 | AC   | 14 | 11 |
| 83800 | 8 | 6758066 | 6758083 | 2 | 9  | 18 | CA   | 17 | 13 |
| 83802 | 8 | 6764586 | 6764609 | 3 | 8  | 24 | AAG  | 25 | 7  |
| 83807 | 8 | 6768876 | 6768889 | 2 | 7  | 14 | CA   | 20 | 5  |
| 83812 | 8 | 6778331 | 6778357 | 3 | 9  | 27 | AAC  | 19 | 5  |
| 83818 | 8 | 6792495 | 6792528 | 2 | 17 | 34 | AG   | 15 | 8  |
| 83828 | 8 | 6799776 | 6799805 | 2 | 15 | 30 | AC   | 12 | 13 |
| 83831 | 8 | 6805809 | 6805826 | 2 | 9  | 18 | AC   | 15 | 12 |
| 83832 | 8 | 6805881 | 6805904 | 2 | 12 | 24 | AC   | 10 | 5  |
| 83837 | 8 | 6808694 | 6808713 | 2 | 10 | 20 | AC   | 21 | 11 |
| 83841 | 8 | 6813384 | 6813411 | 2 | 14 | 28 | AC   | 8  | 5  |
| 83865 | 8 | 6829715 | 6829732 | 2 | 9  | 18 | TG   | 21 | 7  |
| 83867 | 8 | 6831388 | 6831399 | 2 | 6  | 12 | TA   | 25 | 5  |
| 83871 | 8 | 6837469 | 6837480 | 2 | 6  | 12 | GT   | 12 | 3  |
| 83874 | 8 | 6840994 | 6841029 | 2 | 18 | 36 | AC   | 6  | 9  |
| 83880 | 8 | 6858184 | 6858205 | 2 | 11 | 22 | CA   | 9  | 7  |
| 83882 | 8 | 6860469 | 6860486 | 2 | 9  | 18 | TG   | 26 | 6  |
| 83889 | 8 | 6879102 | 6879125 | 3 | 8  | 24 | GAT  | 19 | 5  |
| 83892 | 8 | 6893696 | 6893740 | 3 | 15 | 45 | CTC  | 10 | 7  |
| 83896 | 8 | 6900036 | 6900059 | 2 | 12 | 24 | AC   | 15 | 7  |
| 83903 | 8 | 6917429 | 6917444 | 2 | 8  | 16 | TG   | 6  | 4  |
| 83910 | 8 | 6931436 | 6931459 | 2 | 12 | 24 | GT   | 15 | 6  |
| 83912 | 8 | 6932980 | 6933015 | 2 | 18 | 36 | TG   | 10 | 11 |
| 83913 | 8 | 6935047 | 6935082 | 2 | 18 | 36 | CA   | 9  | 10 |
| 83914 | 8 | 6936374 | 6936389 | 2 | 8  | 16 | CA   | 19 | 6  |
| 83916 | 8 | 6936758 | 6936769 | 2 | 6  | 12 | CA   | 28 | 3  |
| 83917 | 8 | 6939421 | 6939448 | 2 | 14 | 28 | AC   | 8  | 4  |
| 83918 | 8 | 6944156 | 6944169 | 2 | 7  | 14 | TG   | 23 | 3  |
| 83919 | 8 | 6946359 | 6946373 | 3 | 5  | 15 | TTA  | 7  | 3  |
| 83938 | 8 | 6989193 | 6989218 | 2 | 13 | 26 | TG   | 9  | 11 |
| 83941 | 8 | 6994273 | 6994306 | 2 | 17 | 34 | GT   | 13 | 13 |
| 83946 | 8 | 7010364 | 7010395 | 4 | 8  | 32 | AGAC | 21 | 12 |
| 83949 | 8 | 7018278 | 7018289 | 2 | 6  | 12 | GT   | 29 | 4  |
| 83950 | 8 | 7018610 | 7018623 | 2 | 7  | 14 | AT   | 12 | 8  |
| 83953 | 8 | 7031958 | 7031969 | 2 | 6  | 12 | AC   | 13 | 4  |
| 83954 | 8 | 7031971 | 7031984 | 2 | 7  | 14 | CA   | 23 | 6  |
| 83961 | 8 | 7046316 | 7046357 | 2 | 21 | 42 | TG   | 14 | 18 |
| 83965 | 8 | 7049718 | 7049737 | 2 | 10 | 20 | AC   | 21 | 5  |
| 83974 | 8 | 7079189 | 7079224 | 4 | 9  | 36 | GGAT | 19 | 13 |
| 83976 | 8 | 7104661 | 7104678 | 2 | 9  | 18 | AC   | 14 | 7  |
| 83977 | 8 | 7104681 | 7104694 | 2 | 7  | 14 | AC   | 18 | 7  |
| 83982 | 8 | 7119193 | 7119222 | 2 | 15 | 30 | CT   | 12 | 9  |
| 83984 | 8 | 7122016 | 7122047 | 4 | 8  | 32 | TCTA | 11 | 9  |
| 83995 | 8 | 7160646 | 7160663 | 2 | 9  | 18 | AC   | 10 | 4  |
| 84005 | 8 | 7172197 | 7172208 | 2 | 6  | 12 | GT   | 27 | 3  |
| 84006 | 8 | 7176102 | 7176135 | 2 | 17 | 34 | CA   | 8  | 8  |
| 84008 | 8 | 7179561 | 7179581 | 3 | 7  | 21 | CCT  | 25 | 3  |
| 84017 | 8 | 7202733 | 7202752 | 2 | 10 | 20 | TC   | 26 | 5  |
| 84026 | 8 | 7213219 | 7213236 | 3 | 6  | 18 | GTG  | 14 | 5  |
| 84027 | 8 | 7214008 | 7214025 | 3 | 6  | 18 | CAG  | 35 | 3  |

|       |   |         |         |   |    |    |      |    |    |
|-------|---|---------|---------|---|----|----|------|----|----|
| 84028 | 8 | 7214073 | 7214086 | 2 | 7  | 14 | AC   | 28 | 4  |
| 84029 | 8 | 7214513 | 7214526 | 2 | 7  | 14 | CA   | 20 | 4  |
| 84030 | 8 | 7219373 | 7219386 | 2 | 7  | 14 | AC   | 20 | 8  |
| 84031 | 8 | 7219388 | 7219399 | 2 | 6  | 12 | CA   | 22 | 7  |
| 84034 | 8 | 7228194 | 7228217 | 2 | 12 | 24 | GT   | 7  | 5  |
| 84037 | 8 | 7239848 | 7239859 | 2 | 6  | 12 | AC   | 32 | 5  |
| 84038 | 8 | 7244005 | 7244022 | 2 | 9  | 18 | TG   | 24 | 5  |
| 84042 | 8 | 7251318 | 7251333 | 2 | 8  | 16 | CA   | 26 | 4  |
| 84043 | 8 | 7251388 | 7251409 | 2 | 11 | 22 | TG   | 25 | 4  |
| 84044 | 8 | 7252110 | 7252130 | 3 | 7  | 21 | ATC  | 26 | 5  |
| 84045 | 8 | 7254759 | 7254776 | 2 | 9  | 18 | AG   | 18 | 9  |
| 84046 | 8 | 7254778 | 7254797 | 2 | 10 | 20 | GA   | 16 | 8  |
| 84049 | 8 | 7262062 | 7262079 | 2 | 9  | 18 | TC   | 20 | 4  |
| 84052 | 8 | 7268265 | 7268284 | 2 | 10 | 20 | GT   | 11 | 7  |
| 84053 | 8 | 7268286 | 7268301 | 2 | 8  | 16 | TG   | 13 | 7  |
| 84054 | 8 | 7268629 | 7268652 | 2 | 12 | 24 | AC   | 12 | 6  |
| 84055 | 8 | 7268848 | 7268861 | 2 | 7  | 14 | CA   | 19 | 4  |
| 84057 | 8 | 7271077 | 7271091 | 3 | 5  | 15 | AAG  | 20 | 3  |
| 84062 | 8 | 7287112 | 7287127 | 4 | 4  | 16 | TATC | 7  | 3  |
| 84068 | 8 | 7305700 | 7305715 | 4 | 4  | 16 | AAAT | 25 | 7  |
| 84078 | 8 | 7320683 | 7320720 | 2 | 19 | 38 | CA   | 12 | 12 |
| 84079 | 8 | 7325674 | 7325713 | 2 | 20 | 40 | TG   | 12 | 8  |
| 84082 | 8 | 7329968 | 7329991 | 2 | 12 | 24 | TC   | 14 | 5  |
| 84083 | 8 | 7330412 | 7330437 | 2 | 13 | 26 | AC   | 7  | 5  |
| 84093 | 8 | 7355951 | 7355964 | 2 | 7  | 14 | CA   | 19 | 3  |
| 84094 | 8 | 7356040 | 7356061 | 2 | 11 | 22 | CA   | 23 | 10 |
| 84095 | 8 | 7356325 | 7356336 | 2 | 6  | 12 | CA   | 27 | 4  |
| 84097 | 8 | 7357645 | 7357666 | 2 | 11 | 22 | CA   | 12 | 14 |
| 84098 | 8 | 7358992 | 7359011 | 2 | 10 | 20 | CA   | 26 | 6  |
| 84100 | 8 | 7361330 | 7361347 | 2 | 9  | 18 | AT   | 20 | 4  |
| 84102 | 8 | 7364820 | 7364843 | 2 | 12 | 24 | GT   | 10 | 7  |
| 84105 | 8 | 7372527 | 7372550 | 2 | 12 | 24 | TG   | 13 | 9  |
| 84109 | 8 | 7381766 | 7381789 | 2 | 12 | 24 | AC   | 12 | 8  |
| 84111 | 8 | 7383729 | 7383746 | 2 | 9  | 18 | AT   | 11 | 5  |
| 84115 | 8 | 7389460 | 7389473 | 2 | 7  | 14 | AC   | 23 | 4  |
| 84116 | 8 | 7391799 | 7391838 | 2 | 20 | 40 | CA   | 9  | 10 |
| 84117 | 8 | 7399282 | 7399293 | 2 | 6  | 12 | AC   | 9  | 5  |
| 84118 | 8 | 7405725 | 7405736 | 2 | 6  | 12 | CA   | 35 | 3  |
| 84120 | 8 | 7410886 | 7410917 | 2 | 16 | 32 | GA   | 7  | 8  |
| 84121 | 8 | 7419217 | 7419228 | 2 | 6  | 12 | CA   | 15 | 6  |
| 84123 | 8 | 7421827 | 7421842 | 2 | 8  | 16 | CT   | 21 | 3  |
| 84129 | 8 | 7433871 | 7433926 | 2 | 28 | 56 | GT   | 12 | 14 |
| 84133 | 8 | 7442003 | 7442016 | 2 | 7  | 14 | CA   | 23 | 5  |
| 84134 | 8 | 7444245 | 7444264 | 2 | 10 | 20 | CA   | 23 | 6  |
| 84135 | 8 | 7444424 | 7444439 | 2 | 8  | 16 | TG   | 23 | 4  |
| 84138 | 8 | 7446497 | 7446512 | 2 | 8  | 16 | GA   | 29 | 4  |
| 84144 | 8 | 7462897 | 7462910 | 2 | 7  | 14 | TG   | 26 | 6  |
| 84147 | 8 | 7467273 | 7467288 | 4 | 4  | 16 | CACG | 19 | 5  |
| 84162 | 8 | 7518865 | 7518882 | 3 | 6  | 18 | AAC  | 27 | 3  |
| 84163 | 8 | 7520067 | 7520078 | 2 | 6  | 12 | GA   | 32 | 3  |
| 84166 | 8 | 7523630 | 7523645 | 2 | 8  | 16 | GT   | 34 | 3  |

|       |   |         |         |   |    |    |      |    |    |
|-------|---|---------|---------|---|----|----|------|----|----|
| 84181 | 8 | 7579000 | 7579011 | 2 | 6  | 12 | TC   | 31 | 3  |
| 84193 | 8 | 7611627 | 7611640 | 2 | 7  | 14 | GA   | 11 | 5  |
| 84194 | 8 | 7619485 | 7619502 | 3 | 6  | 18 | GAG  | 22 | 4  |
| 84196 | 8 | 7619800 | 7619826 | 3 | 9  | 27 | GGA  | 7  | 3  |
| 84201 | 8 | 7625670 | 7625693 | 3 | 8  | 24 | TGC  | 27 | 3  |
| 84203 | 8 | 7628609 | 7628636 | 2 | 14 | 28 | GT   | 12 | 7  |
| 84214 | 8 | 7661588 | 7661599 | 2 | 6  | 12 | GT   | 15 | 3  |
| 84217 | 8 | 7664650 | 7664687 | 2 | 19 | 38 | AC   | 8  | 7  |
| 84222 | 8 | 7685722 | 7685745 | 4 | 6  | 24 | TATT | 13 | 7  |
| 84223 | 8 | 7686401 | 7686414 | 2 | 7  | 14 | GT   | 20 | 4  |
| 84231 | 8 | 7715924 | 7715944 | 3 | 7  | 21 | AGA  | 30 | 3  |
| 84232 | 8 | 7718038 | 7718049 | 2 | 6  | 12 | AT   | 26 | 5  |
| 84233 | 8 | 7718206 | 7718223 | 3 | 6  | 18 | CTG  | 30 | 7  |
| 84239 | 8 | 7724255 | 7724274 | 2 | 10 | 20 | AG   | 25 | 3  |
| 84240 | 8 | 7724409 | 7724422 | 2 | 7  | 14 | TG   | 25 | 5  |
| 84241 | 8 | 7724530 | 7724545 | 2 | 8  | 16 | AG   | 28 | 3  |
| 84243 | 8 | 7724962 | 7724994 | 3 | 11 | 33 | TCT  | 26 | 8  |
| 84250 | 8 | 7738484 | 7738519 | 2 | 18 | 36 | AG   | 11 | 8  |
| 84257 | 8 | 7754166 | 7754181 | 4 | 4  | 16 | TATC | 13 | 8  |
| 84266 | 8 | 7790847 | 7790870 | 3 | 8  | 24 | GAT  | 24 | 4  |
| 84274 | 8 | 7803020 | 7803037 | 2 | 9  | 18 | TG   | 19 | 6  |
| 84277 | 8 | 7819795 | 7819816 | 2 | 11 | 22 | TC   | 17 | 4  |
| 84284 | 8 | 7841039 | 7841065 | 3 | 9  | 27 | GAG  | 22 | 6  |
| 84288 | 8 | 7841567 | 7841596 | 2 | 15 | 30 | TG   | 22 | 12 |
| 84290 | 8 | 7843483 | 7843503 | 3 | 7  | 21 | TCC  | 33 | 3  |
| 84295 | 8 | 7854410 | 7854433 | 2 | 12 | 24 | AC   | 12 | 6  |
| 84298 | 8 | 7855653 | 7855673 | 3 | 7  | 21 | TCT  | 16 | 3  |
| 84300 | 8 | 7859415 | 7859446 | 4 | 8  | 32 | ATAG | 15 | 7  |
| 84301 | 8 | 7870760 | 7870791 | 2 | 16 | 32 | AC   | 13 | 13 |
| 84302 | 8 | 7870972 | 7870995 | 2 | 12 | 24 | GT   | 9  | 9  |
| 84307 | 8 | 7881753 | 7881786 | 2 | 17 | 34 | GT   | 7  | 7  |
| 84308 | 8 | 7886421 | 7886452 | 2 | 16 | 32 | CA   | 9  | 13 |
| 84313 | 8 | 7891503 | 7891518 | 2 | 8  | 16 | CA   | 22 | 5  |
| 84318 | 8 | 7899446 | 7899473 | 4 | 7  | 28 | TTGG | 24 | 4  |
| 84319 | 8 | 7899550 | 7899575 | 2 | 13 | 26 | AG   | 17 | 8  |
| 84321 | 8 | 7904884 | 7904901 | 2 | 9  | 18 | CT   | 17 | 9  |
| 84325 | 8 | 7909545 | 7909566 | 2 | 11 | 22 | GT   | 14 | 6  |
| 84362 | 8 | 7939641 | 7939656 | 2 | 8  | 16 | TC   | 22 | 3  |
| 84363 | 8 | 7945778 | 7945804 | 3 | 9  | 27 | AGC  | 24 | 3  |
| 84376 | 8 | 7983097 | 7983122 | 2 | 13 | 26 | AC   | 22 | 9  |
| 84378 | 8 | 7983754 | 7983775 | 2 | 11 | 22 | TG   | 17 | 13 |
| 84381 | 8 | 7984062 | 7984079 | 2 | 9  | 18 | GT   | 8  | 8  |
| 84385 | 8 | 7985055 | 7985066 | 2 | 6  | 12 | TC   | 13 | 3  |
| 84387 | 8 | 7985977 | 7985992 | 4 | 4  | 16 | GTTT | 23 | 3  |
| 84395 | 8 | 8000450 | 8000469 | 4 | 5  | 20 | CTTA | 29 | 7  |
| 84396 | 8 | 8001146 | 8001160 | 3 | 5  | 15 | CCT  | 19 | 5  |
| 84401 | 8 | 8029192 | 8029205 | 2 | 7  | 14 | CA   | 25 | 11 |
| 84402 | 8 | 8029270 | 8029281 | 2 | 6  | 12 | GT   | 24 | 4  |
| 84403 | 8 | 8029656 | 8029673 | 2 | 9  | 18 | AC   | 23 | 6  |
| 84406 | 8 | 8033690 | 8033707 | 2 | 9  | 18 | TG   | 13 | 9  |
| 84408 | 8 | 8043686 | 8043706 | 3 | 7  | 21 | GCA  | 22 | 3  |

|       |   |         |         |   |    |    |      |    |    |
|-------|---|---------|---------|---|----|----|------|----|----|
| 84409 | 8 | 8044387 | 8044398 | 2 | 6  | 12 | AC   | 22 | 3  |
| 84411 | 8 | 8047577 | 8047592 | 4 | 4  | 16 | GACA | 31 | 3  |
| 84412 | 8 | 8047742 | 8047763 | 2 | 11 | 22 | TG   | 18 | 9  |
| 84413 | 8 | 8047905 | 8047920 | 2 | 8  | 16 | CA   | 18 | 6  |
| 84420 | 8 | 8055859 | 8055902 | 2 | 22 | 44 | GA   | 6  | 8  |
| 84422 | 8 | 8056176 | 8056191 | 2 | 8  | 16 | TC   | 11 | 4  |
| 84423 | 8 | 8056199 | 8056212 | 2 | 7  | 14 | CT   | 9  | 3  |
| 84424 | 8 | 8056391 | 8056404 | 2 | 7  | 14 | GT   | 24 | 3  |
| 84425 | 8 | 8056408 | 8056419 | 2 | 6  | 12 | TG   | 18 | 3  |
| 84429 | 8 | 8057854 | 8057873 | 2 | 10 | 20 | TC   | 23 | 3  |
| 84435 | 8 | 8070443 | 8070488 | 2 | 23 | 46 | AC   | 10 | 10 |
| 84436 | 8 | 8071304 | 8071333 | 2 | 15 | 30 | TG   | 12 | 8  |
| 84437 | 8 | 8074860 | 8074881 | 2 | 11 | 22 | CA   | 12 | 7  |
| 84438 | 8 | 8075014 | 8075029 | 2 | 8  | 16 | TA   | 19 | 3  |
| 84442 | 8 | 8085600 | 8085627 | 2 | 14 | 28 | CA   | 24 | 8  |
| 84444 | 8 | 8088020 | 8088045 | 2 | 13 | 26 | AC   | 17 | 5  |
| 84453 | 8 | 8106902 | 8106927 | 2 | 13 | 26 | CA   | 8  | 6  |
| 84457 | 8 | 8113103 | 8113118 | 2 | 8  | 16 | AC   | 16 | 14 |
| 84458 | 8 | 8113121 | 8113136 | 2 | 8  | 16 | AC   | 14 | 11 |
| 84459 | 8 | 8114648 | 8114661 | 2 | 7  | 14 | CA   | 26 | 4  |
| 84464 | 8 | 8121079 | 8121104 | 2 | 13 | 26 | CA   | 19 | 7  |
| 84465 | 8 | 8121733 | 8121746 | 2 | 7  | 14 | CA   | 21 | 3  |
| 84468 | 8 | 8127136 | 8127147 | 2 | 6  | 12 | GT   | 22 | 8  |
| 84474 | 8 | 8134253 | 8134284 | 4 | 8  | 32 | AAAT | 12 | 6  |
| 84476 | 8 | 8134959 | 8134980 | 2 | 11 | 22 | CA   | 12 | 11 |
| 84477 | 8 | 8135118 | 8135137 | 2 | 10 | 20 | TC   | 9  | 4  |
| 84479 | 8 | 8135352 | 8135383 | 2 | 16 | 32 | AG   | 10 | 11 |
| 84481 | 8 | 8137481 | 8137494 | 2 | 7  | 14 | AC   | 22 | 3  |
| 84486 | 8 | 8138175 | 8138195 | 3 | 7  | 21 | TCC  | 18 | 7  |
| 84487 | 8 | 8138350 | 8138371 | 2 | 11 | 22 | GT   | 15 | 4  |
| 84501 | 8 | 8164027 | 8164044 | 2 | 9  | 18 | GT   | 21 | 6  |
| 84510 | 8 | 8190771 | 8190802 | 4 | 8  | 32 | ATTG | 25 | 6  |
| 84512 | 8 | 8201126 | 8201161 | 3 | 12 | 36 | GTA  | 12 | 12 |
| 84519 | 8 | 8212110 | 8212124 | 3 | 5  | 15 | CAG  | 23 | 4  |
| 84521 | 8 | 8214716 | 8214729 | 2 | 7  | 14 | TG   | 9  | 7  |
| 84524 | 8 | 8215126 | 8215143 | 2 | 9  | 18 | AT   | 21 | 4  |
| 84525 | 8 | 8218543 | 8218558 | 2 | 8  | 16 | GT   | 22 | 4  |
| 84528 | 8 | 8222493 | 8222508 | 4 | 4  | 16 | CATT | 25 | 3  |
| 84533 | 8 | 8235936 | 8235953 | 3 | 6  | 18 | AAC  | 21 | 3  |
| 84545 | 8 | 8256405 | 8256440 | 2 | 18 | 36 | CA   | 9  | 9  |
| 84548 | 8 | 8266332 | 8266351 | 2 | 10 | 20 | CA   | 23 | 7  |
| 84555 | 8 | 8281467 | 8281482 | 2 | 8  | 16 | TG   | 19 | 6  |
| 84558 | 8 | 8289165 | 8289188 | 2 | 12 | 24 | AC   | 20 | 7  |
| 84562 | 8 | 8305874 | 8305901 | 2 | 14 | 28 | AC   | 19 | 7  |
| 84569 | 8 | 8319384 | 8319401 | 2 | 9  | 18 | TG   | 10 | 3  |
| 84571 | 8 | 8321827 | 8321846 | 4 | 5  | 20 | AAAC | 26 | 3  |
| 84572 | 8 | 8323161 | 8323186 | 2 | 13 | 26 | AC   | 22 | 4  |
| 84577 | 8 | 8326669 | 8326692 | 4 | 6  | 24 | CTGT | 18 | 5  |
| 84587 | 8 | 8360230 | 8360261 | 2 | 16 | 32 | GT   | 18 | 10 |
| 84589 | 8 | 8362294 | 8362317 | 4 | 6  | 24 | AAAT | 18 | 18 |
| 84591 | 8 | 8366065 | 8366090 | 2 | 13 | 26 | AC   | 14 | 12 |

|       |   |         |         |   |    |    |      |    |    |
|-------|---|---------|---------|---|----|----|------|----|----|
| 84592 | 8 | 8371021 | 8371044 | 2 | 12 | 24 | AC   | 6  | 6  |
| 84598 | 8 | 8379804 | 8379835 | 2 | 16 | 32 | TG   | 8  | 10 |
| 84614 | 8 | 8397183 | 8397206 | 2 | 12 | 24 | CA   | 12 | 4  |
| 84615 | 8 | 8397661 | 8397676 | 2 | 8  | 16 | AC   | 11 | 7  |
| 84618 | 8 | 8401498 | 8401515 | 2 | 9  | 18 | TG   | 27 | 3  |
| 84620 | 8 | 8404616 | 8404639 | 2 | 12 | 24 | TG   | 23 | 8  |
| 84623 | 8 | 8406447 | 8406476 | 2 | 15 | 30 | TG   | 11 | 9  |
| 84624 | 8 | 8406907 | 8406934 | 2 | 14 | 28 | AC   | 6  | 8  |
| 84625 | 8 | 8409350 | 8409361 | 2 | 6  | 12 | AC   | 21 | 5  |
| 84626 | 8 | 8409363 | 8409378 | 2 | 8  | 16 | CA   | 9  | 4  |
| 84628 | 8 | 8410955 | 8410966 | 2 | 6  | 12 | CA   | 28 | 4  |
| 84629 | 8 | 8411374 | 8411403 | 2 | 15 | 30 | AC   | 18 | 7  |
| 84635 | 8 | 8418639 | 8418654 | 4 | 4  | 16 | AAAT | 21 | 7  |
| 84641 | 8 | 8423079 | 8423098 | 2 | 10 | 20 | AC   | 16 | 5  |
| 84642 | 8 | 8430070 | 8430105 | 4 | 9  | 36 | TGAT | 18 | 13 |
| 84645 | 8 | 8437844 | 8437858 | 3 | 5  | 15 | AAC  | 27 | 3  |
| 84647 | 8 | 8439191 | 8439220 | 3 | 10 | 30 | GAG  | 10 | 6  |
| 84648 | 8 | 8440226 | 8440253 | 2 | 14 | 28 | CA   | 19 | 9  |
| 84652 | 8 | 8448397 | 8448412 | 2 | 8  | 16 | GT   | 15 | 6  |
| 84653 | 8 | 8448533 | 8448560 | 2 | 14 | 28 | AG   | 14 | 6  |
| 84656 | 8 | 8458607 | 8458632 | 2 | 13 | 26 | TG   | 11 | 5  |
| 84657 | 8 | 8459371 | 8459394 | 2 | 12 | 24 | GT   | 6  | 5  |
| 84658 | 8 | 8460343 | 8460358 | 2 | 8  | 16 | AG   | 24 | 3  |
| 84660 | 8 | 8470993 | 8471012 | 2 | 10 | 20 | AC   | 25 | 5  |
| 84661 | 8 | 8471136 | 8471161 | 2 | 13 | 26 | CA   | 11 | 9  |
| 84663 | 8 | 8472182 | 8472199 | 2 | 9  | 18 | CA   | 21 | 14 |
| 84664 | 8 | 8474559 | 8474572 | 2 | 7  | 14 | GT   | 30 | 5  |
| 84665 | 8 | 8485302 | 8485315 | 2 | 7  | 14 | CA   | 21 | 3  |
| 84666 | 8 | 8489134 | 8489147 | 2 | 7  | 14 | TG   | 30 | 4  |
| 84672 | 8 | 8492702 | 8492745 | 4 | 11 | 44 | TATC | 16 | 8  |
| 84673 | 8 | 8493422 | 8493451 | 3 | 10 | 30 | CAA  | 23 | 7  |
| 84676 | 8 | 8504095 | 8504130 | 2 | 18 | 36 | AC   | 11 | 9  |
| 84692 | 8 | 8548072 | 8548083 | 2 | 6  | 12 | CA   | 22 | 3  |
| 84696 | 8 | 8581775 | 8581804 | 2 | 15 | 30 | CA   | 12 | 13 |
| 84698 | 8 | 8597002 | 8597027 | 2 | 13 | 26 | GT   | 11 | 10 |
| 84701 | 8 | 8606827 | 8606848 | 2 | 11 | 22 | AC   | 20 | 5  |
| 84712 | 8 | 8621513 | 8621533 | 3 | 7  | 21 | GAG  | 28 | 3  |
| 84713 | 8 | 8623543 | 8623558 | 2 | 8  | 16 | CT   | 24 | 3  |
| 84715 | 8 | 8623710 | 8623727 | 2 | 9  | 18 | GA   | 9  | 10 |
| 84719 | 8 | 8625930 | 8625957 | 2 | 14 | 28 | TG   | 16 | 9  |
| 84720 | 8 | 8629954 | 8630011 | 2 | 29 | 58 | GA   | 12 | 11 |
| 84722 | 8 | 8631834 | 8631863 | 2 | 15 | 30 | CA   | 14 | 13 |
| 84724 | 8 | 8632572 | 8632583 | 2 | 6  | 12 | GT   | 23 | 4  |
| 84725 | 8 | 8632765 | 8632782 | 2 | 9  | 18 | AG   | 16 | 5  |
| 84729 | 8 | 8643385 | 8643400 | 2 | 8  | 16 | AC   | 23 | 7  |
| 84753 | 8 | 8682405 | 8682440 | 2 | 18 | 36 | TG   | 8  | 6  |
| 84754 | 8 | 8682603 | 8682620 | 2 | 9  | 18 | AC   | 23 | 8  |
| 84764 | 8 | 8696160 | 8696179 | 2 | 10 | 20 | GA   | 16 | 5  |
| 84769 | 8 | 8702355 | 8702378 | 2 | 12 | 24 | TC   | 13 | 5  |
| 84776 | 8 | 8709018 | 8709057 | 2 | 20 | 40 | GT   | 6  | 8  |
| 84777 | 8 | 8711201 | 8711228 | 2 | 14 | 28 | CA   | 12 | 5  |

|       |   |         |         |   |    |    |      |    |    |
|-------|---|---------|---------|---|----|----|------|----|----|
| 84778 | 8 | 8711401 | 8711412 | 2 | 6  | 12 | CA   | 12 | 4  |
| 84781 | 8 | 8714914 | 8714925 | 2 | 6  | 12 | CA   | 29 | 4  |
| 84784 | 8 | 8716658 | 8716681 | 2 | 12 | 24 | AC   | 11 | 6  |
| 84786 | 8 | 8720104 | 8720135 | 2 | 16 | 32 | TG   | 21 | 11 |
| 84787 | 8 | 8720271 | 8720282 | 2 | 6  | 12 | GT   | 27 | 6  |
| 84789 | 8 | 8722621 | 8722648 | 2 | 14 | 28 | CA   | 23 | 10 |
| 84790 | 8 | 8722793 | 8722804 | 2 | 6  | 12 | CA   | 23 | 3  |
| 84793 | 8 | 8724061 | 8724082 | 2 | 11 | 22 | TG   | 19 | 10 |
| 84794 | 8 | 8724811 | 8724836 | 2 | 13 | 26 | TG   | 14 | 6  |
| 84802 | 8 | 8731553 | 8731564 | 2 | 6  | 12 | AT   | 19 | 6  |
| 84803 | 8 | 8732107 | 8732138 | 2 | 16 | 32 | TG   | 16 | 14 |
| 84806 | 8 | 8735664 | 8735681 | 2 | 9  | 18 | TG   | 27 | 6  |
| 84807 | 8 | 8737473 | 8737520 | 2 | 24 | 48 | CA   | 8  | 10 |
| 84810 | 8 | 8738050 | 8738065 | 2 | 8  | 16 | AC   | 14 | 8  |
| 84814 | 8 | 8739483 | 8739514 | 2 | 16 | 32 | CA   | 18 | 11 |
| 84818 | 8 | 8753617 | 8753650 | 2 | 17 | 34 | GT   | 13 | 9  |
| 84825 | 8 | 8758286 | 8758303 | 2 | 9  | 18 | CA   | 10 | 6  |
| 84827 | 8 | 8758847 | 8758864 | 2 | 9  | 18 | TG   | 20 | 7  |
| 84836 | 8 | 8766729 | 8766768 | 2 | 20 | 40 | TG   | 11 | 9  |
| 84838 | 8 | 8767250 | 8767267 | 3 | 6  | 18 | CTC  | 30 | 3  |
| 84844 | 8 | 8781844 | 8781861 | 2 | 9  | 18 | AC   | 14 | 5  |
| 84849 | 8 | 8788796 | 8788809 | 2 | 7  | 14 | AT   | 12 | 9  |
| 84857 | 8 | 8805381 | 8805410 | 2 | 15 | 30 | GT   | 23 | 11 |
| 84861 | 8 | 8829768 | 8829787 | 2 | 10 | 20 | AC   | 14 | 9  |
| 84863 | 8 | 8834450 | 8834482 | 3 | 11 | 33 | TTG  | 17 | 9  |
| 84879 | 8 | 8885150 | 8885183 | 2 | 17 | 34 | TG   | 23 | 14 |
| 84881 | 8 | 8892467 | 8892482 | 2 | 8  | 16 | TG   | 20 | 8  |
| 84882 | 8 | 8896332 | 8896347 | 4 | 4  | 16 | TTTG | 9  | 3  |
| 84893 | 8 | 8932556 | 8932571 | 2 | 8  | 16 | TG   | 31 | 6  |
| 84895 | 8 | 8932878 | 8932899 | 2 | 11 | 22 | CA   | 12 | 4  |
| 84898 | 8 | 8935702 | 8935719 | 2 | 9  | 18 | GT   | 27 | 8  |
| 84899 | 8 | 8936117 | 8936136 | 2 | 10 | 20 | TG   | 6  | 5  |
| 84900 | 8 | 8939833 | 8939854 | 2 | 11 | 22 | CA   | 19 | 7  |
| 84902 | 8 | 8941291 | 8941326 | 3 | 12 | 36 | CCT  | 23 | 7  |
| 84903 | 8 | 8941957 | 8941976 | 2 | 10 | 20 | TG   | 10 | 9  |
| 84905 | 8 | 8942144 | 8942187 | 2 | 22 | 44 | TG   | 14 | 11 |
| 84906 | 8 | 8942264 | 8942275 | 2 | 6  | 12 | TC   | 25 | 3  |
| 84907 | 8 | 8942277 | 8942288 | 2 | 6  | 12 | CT   | 24 | 4  |
| 84909 | 8 | 8952561 | 8952572 | 2 | 6  | 12 | AC   | 31 | 4  |
| 84911 | 8 | 8954903 | 8954929 | 3 | 9  | 27 | GAG  | 22 | 5  |
| 84913 | 8 | 8957997 | 8958020 | 2 | 12 | 24 | TG   | 11 | 8  |
| 84917 | 8 | 8961932 | 8961949 | 3 | 6  | 18 | GTT  | 26 | 5  |
| 84918 | 8 | 8963644 | 8963677 | 2 | 17 | 34 | TG   | 13 | 8  |
| 84921 | 8 | 8972173 | 8972184 | 2 | 6  | 12 | AT   | 21 | 3  |
| 84926 | 8 | 8994299 | 8994326 | 2 | 14 | 28 | GT   | 13 | 9  |
| 84927 | 8 | 8996809 | 8996824 | 2 | 8  | 16 | TG   | 12 | 8  |
| 84936 | 8 | 9018382 | 9018408 | 3 | 9  | 27 | TAT  | 11 | 5  |
| 84937 | 8 | 9019410 | 9019431 | 2 | 11 | 22 | AC   | 20 | 11 |
| 84940 | 8 | 9024000 | 9024013 | 2 | 7  | 14 | GT   | 21 | 11 |
| 84944 | 8 | 9030577 | 9030590 | 2 | 7  | 14 | CA   | 11 | 3  |
| 84961 | 8 | 9041037 | 9041078 | 2 | 21 | 42 | TG   | 9  | 6  |

|       |   |         |         |   |    |    |      |    |    |
|-------|---|---------|---------|---|----|----|------|----|----|
| 84963 | 8 | 9043408 | 9043431 | 2 | 12 | 24 | CA   | 27 | 4  |
| 84964 | 8 | 9058783 | 9058800 | 3 | 6  | 18 | TGC  | 29 | 4  |
| 84979 | 8 | 9102904 | 9102919 | 4 | 4  | 16 | AAAC | 28 | 4  |
| 84989 | 8 | 9143307 | 9143324 | 3 | 6  | 18 | GCT  | 17 | 4  |
| 84990 | 8 | 9145423 | 9145438 | 2 | 8  | 16 | AC   | 24 | 6  |
| 85000 | 8 | 9178963 | 9178980 | 3 | 6  | 18 | AAT  | 14 | 3  |
| 85003 | 8 | 9182010 | 9182033 | 2 | 12 | 24 | CA   | 21 | 15 |
| 85007 | 8 | 9195953 | 9195970 | 2 | 9  | 18 | CA   | 10 | 3  |
| 85008 | 8 | 9198234 | 9198251 | 2 | 9  | 18 | TA   | 11 | 4  |
| 85011 | 8 | 9208430 | 9208461 | 2 | 16 | 32 | AC   | 6  | 6  |
| 85012 | 8 | 9208780 | 9208815 | 2 | 18 | 36 | TC   | 9  | 6  |
| 85015 | 8 | 9210824 | 9210841 | 3 | 6  | 18 | GCT  | 18 | 6  |
| 85026 | 8 | 9237143 | 9237166 | 3 | 8  | 24 | AAT  | 18 | 4  |
| 85032 | 8 | 9247213 | 9247230 | 2 | 9  | 18 | CA   | 17 | 5  |
| 85034 | 8 | 9261038 | 9261055 | 2 | 9  | 18 | AC   | 24 | 6  |
| 85035 | 8 | 9268940 | 9268959 | 2 | 10 | 20 | CA   | 7  | 5  |
| 85038 | 8 | 9276547 | 9276561 | 3 | 5  | 15 | AAT  | 16 | 4  |
| 85048 | 8 | 9303808 | 9303851 | 4 | 11 | 44 | GATG | 7  | 5  |
| 85049 | 8 | 9309417 | 9309430 | 2 | 7  | 14 | GT   | 23 | 8  |
| 85051 | 8 | 9324983 | 9324998 | 2 | 8  | 16 | CA   | 22 | 8  |
| 85052 | 8 | 9324999 | 9325014 | 4 | 4  | 16 | CGCA | 21 | 6  |
| 85053 | 8 | 9325062 | 9325073 | 2 | 6  | 12 | TC   | 28 | 3  |
| 85054 | 8 | 9325191 | 9325218 | 4 | 7  | 28 | TTTA | 19 | 10 |
| 85055 | 8 | 9327078 | 9327089 | 2 | 6  | 12 | TG   | 17 | 4  |
| 85060 | 8 | 9355769 | 9355786 | 2 | 9  | 18 | GT   | 24 | 5  |
| 85069 | 8 | 9420516 | 9420529 | 2 | 7  | 14 | CA   | 15 | 8  |
| 85070 | 8 | 9433136 | 9433156 | 3 | 7  | 21 | GCA  | 25 | 4  |
| 85076 | 8 | 9455701 | 9455716 | 2 | 8  | 16 | CA   | 18 | 10 |
| 85077 | 8 | 9456264 | 9456293 | 3 | 10 | 30 | GCT  | 22 | 9  |
| 85080 | 8 | 9460779 | 9460799 | 3 | 7  | 21 | GAG  | 23 | 3  |
| 85085 | 8 | 9463971 | 9463982 | 2 | 6  | 12 | CA   | 18 | 3  |
| 85087 | 8 | 9468594 | 9468625 | 2 | 16 | 32 | CA   | 8  | 9  |
| 85090 | 8 | 9470214 | 9470243 | 2 | 15 | 30 | GT   | 15 | 10 |
| 85091 | 8 | 9470475 | 9470492 | 2 | 9  | 18 | CA   | 16 | 8  |
| 85093 | 8 | 9474352 | 9474403 | 4 | 13 | 52 | AAAG | 9  | 8  |
| 85097 | 8 | 9483781 | 9483810 | 2 | 15 | 30 | AC   | 7  | 11 |
| 85100 | 8 | 9493662 | 9493689 | 2 | 14 | 28 | TG   | 18 | 9  |
| 85103 | 8 | 9502329 | 9502340 | 2 | 6  | 12 | TG   | 32 | 3  |
| 85116 | 8 | 9539881 | 9539904 | 3 | 8  | 24 | TCC  | 27 | 3  |
| 85136 | 8 | 9579260 | 9579289 | 3 | 10 | 30 | AAG  | 27 | 6  |
| 85139 | 8 | 9581935 | 9581954 | 2 | 10 | 20 | TG   | 19 | 12 |
| 85140 | 8 | 9582289 | 9582304 | 4 | 4  | 16 | AAAC | 27 | 8  |
| 85142 | 8 | 9582808 | 9582827 | 4 | 5  | 20 | TGTT | 21 | 3  |
| 85144 | 8 | 9585013 | 9585028 | 2 | 8  | 16 | AT   | 13 | 3  |
| 85147 | 8 | 9595659 | 9595676 | 3 | 6  | 18 | CAG  | 10 | 3  |
| 85152 | 8 | 9601941 | 9601952 | 2 | 6  | 12 | AC   | 28 | 7  |
| 85154 | 8 | 9617537 | 9617558 | 2 | 11 | 22 | TG   | 8  | 3  |
| 85161 | 8 | 9628208 | 9628237 | 2 | 15 | 30 | AC   | 10 | 12 |
| 85162 | 8 | 9631980 | 9631999 | 2 | 10 | 20 | AC   | 25 | 14 |
| 85167 | 8 | 9658224 | 9658241 | 3 | 6  | 18 | CCT  | 16 | 4  |
| 85168 | 8 | 9659020 | 9659035 | 2 | 8  | 16 | TG   | 13 | 12 |



|       |   |          |          |   |    |    |      |    |    |
|-------|---|----------|----------|---|----|----|------|----|----|
| 85171 | 8 | 9662270  | 9662290  | 3 | 7  | 21 | CCT  | 24 | 3  |
| 85174 | 8 | 9684861  | 9684876  | 2 | 8  | 16 | CA   | 27 | 4  |
| 85193 | 8 | 9731732  | 9731745  | 2 | 7  | 14 | TC   | 23 | 7  |
| 85194 | 8 | 9731746  | 9731759  | 2 | 7  | 14 | AC   | 23 | 9  |
| 85204 | 8 | 9781743  | 9781757  | 3 | 5  | 15 | CCT  | 22 | 8  |
| 85211 | 8 | 9809951  | 9809966  | 4 | 4  | 16 | GTAA | 27 | 4  |
| 85212 | 8 | 9814287  | 9814304  | 3 | 6  | 18 | AGG  | 27 | 4  |
| 85214 | 8 | 9817167  | 9817178  | 2 | 6  | 12 | AT   | 28 | 3  |
| 85215 | 8 | 9818729  | 9818770  | 3 | 14 | 42 | AAG  | 11 | 9  |
| 85217 | 8 | 9818994  | 9819011  | 3 | 6  | 18 | GCT  | 31 | 8  |
| 85218 | 8 | 9819440  | 9819453  | 2 | 7  | 14 | GT   | 17 | 9  |
| 85226 | 8 | 9837304  | 9837335  | 2 | 16 | 32 | CA   | 9  | 12 |
| 85237 | 8 | 9848035  | 9848068  | 2 | 17 | 34 | GT   | 11 | 13 |
| 85238 | 8 | 9848982  | 9849005  | 3 | 8  | 24 | TAT  | 11 | 4  |
| 85240 | 8 | 9849669  | 9849712  | 4 | 11 | 44 | ATCT | 16 | 17 |
| 85246 | 8 | 9866039  | 9866054  | 4 | 4  | 16 | TTGA | 25 | 5  |
| 85247 | 8 | 9868824  | 9868837  | 2 | 7  | 14 | AT   | 16 | 12 |
| 85248 | 8 | 9888316  | 9888333  | 2 | 9  | 18 | GT   | 23 | 7  |
| 85257 | 8 | 9913623  | 9913658  | 2 | 18 | 36 | CA   | 10 | 9  |
| 85267 | 8 | 9931133  | 9931144  | 2 | 6  | 12 | TA   | 24 | 4  |
| 85271 | 8 | 9939691  | 9939714  | 3 | 8  | 24 | TGA  | 23 | 10 |
| 85275 | 8 | 9942278  | 9942301  | 4 | 6  | 24 | AAAG | 23 | 7  |
| 85290 | 8 | 9951779  | 9951814  | 2 | 18 | 36 | CA   | 9  | 11 |
| 85293 | 8 | 9956143  | 9956158  | 4 | 4  | 16 | AAAC | 9  | 3  |
| 85295 | 8 | 9962816  | 9962829  | 2 | 7  | 14 | AC   | 30 | 4  |
| 85323 | 8 | 10087940 | 10087971 | 2 | 16 | 32 | AC   | 22 | 11 |
| 85328 | 8 | 10101721 | 10101748 | 2 | 14 | 28 | AC   | 11 | 7  |
| 85335 | 8 | 10132462 | 10132476 | 3 | 5  | 15 | AGC  | 27 | 6  |
| 85339 | 8 | 10151829 | 10151842 | 2 | 7  | 14 | CT   | 23 | 4  |
| 85340 | 8 | 10151876 | 10151891 | 4 | 4  | 16 | GGAT | 30 | 3  |
| 85343 | 8 | 10156049 | 10156060 | 2 | 6  | 12 | AC   | 24 | 5  |
| 85350 | 8 | 10189799 | 10189819 | 3 | 7  | 21 | TCC  | 31 | 4  |
| 85353 | 8 | 10202848 | 10202861 | 2 | 7  | 14 | GT   | 23 | 5  |
| 85354 | 8 | 10209519 | 10209542 | 4 | 6  | 24 | ATTT | 26 | 3  |
| 85369 | 8 | 10226972 | 10226987 | 2 | 8  | 16 | GA   | 11 | 5  |
| 85370 | 8 | 10227386 | 10227400 | 3 | 5  | 15 | GCG  | 21 | 7  |
| 85371 | 8 | 10227401 | 10227418 | 3 | 6  | 18 | GCA  | 20 | 7  |
| 85374 | 8 | 10234358 | 10234381 | 2 | 12 | 24 | GT   | 9  | 7  |
| 85380 | 8 | 10243771 | 10243800 | 2 | 15 | 30 | CA   | 12 | 12 |
| 85381 | 8 | 10245988 | 10246011 | 2 | 12 | 24 | TG   | 6  | 6  |
| 85392 | 8 | 10260272 | 10260287 | 2 | 8  | 16 | AC   | 28 | 6  |
| 85395 | 8 | 10263455 | 10263472 | 2 | 9  | 18 | GT   | 15 | 5  |
| 85398 | 8 | 10267123 | 10267138 | 4 | 4  | 16 | CTTT | 10 | 8  |
| 85412 | 8 | 10306500 | 10306525 | 2 | 13 | 26 | TG   | 11 | 7  |
| 85414 | 8 | 10310644 | 10310665 | 2 | 11 | 22 | TG   | 14 | 12 |
| 85415 | 8 | 10310995 | 10311018 | 2 | 12 | 24 | GT   | 12 | 9  |
| 85416 | 8 | 10311402 | 10311413 | 2 | 6  | 12 | TG   | 21 | 3  |
| 85417 | 8 | 10312772 | 10312783 | 2 | 6  | 12 | CA   | 33 | 3  |
| 85421 | 8 | 10314770 | 10314783 | 2 | 7  | 14 | AC   | 17 | 3  |
| 85424 | 8 | 10321306 | 10321319 | 2 | 7  | 14 | GT   | 16 | 11 |
| 85439 | 8 | 10349421 | 10349448 | 2 | 14 | 28 | CA   | 17 | 10 |

|       |   |          |          |   |    |    |      |    |    |
|-------|---|----------|----------|---|----|----|------|----|----|
| 85440 | 8 | 10351754 | 10351773 | 2 | 10 | 20 | AC   | 21 | 7  |
| 85441 | 8 | 10352013 | 10352026 | 2 | 7  | 14 | GT   | 29 | 3  |
| 85446 | 8 | 10364369 | 10364384 | 4 | 4  | 16 | AAAT | 13 | 4  |
| 85455 | 8 | 10373821 | 10373832 | 2 | 6  | 12 | AT   | 17 | 7  |
| 85457 | 8 | 10374805 | 10374818 | 2 | 7  | 14 | AC   | 29 | 3  |
| 85458 | 8 | 10376907 | 10376922 | 2 | 8  | 16 | AT   | 6  | 4  |
| 85468 | 8 | 10392005 | 10392018 | 2 | 7  | 14 | CA   | 26 | 6  |
| 85469 | 8 | 10393145 | 10393174 | 2 | 15 | 30 | AC   | 15 | 7  |
| 85473 | 8 | 10396971 | 10397010 | 2 | 20 | 40 | GT   | 7  | 7  |
| 85475 | 8 | 10397886 | 10397903 | 2 | 9  | 18 | AG   | 24 | 4  |
| 85476 | 8 | 10404921 | 10404940 | 2 | 10 | 20 | TG   | 23 | 4  |
| 85478 | 8 | 10415117 | 10415132 | 4 | 4  | 16 | TTTG | 20 | 5  |
| 85485 | 8 | 10433611 | 10433622 | 2 | 6  | 12 | TA   | 17 | 3  |
| 85487 | 8 | 10438615 | 10438634 | 4 | 5  | 20 | AGCT | 32 | 3  |
| 85501 | 8 | 10509229 | 10509242 | 2 | 7  | 14 | TG   | 27 | 3  |
| 85503 | 8 | 10509893 | 10509916 | 2 | 12 | 24 | GT   | 16 | 5  |
| 85513 | 8 | 10531597 | 10531611 | 3 | 5  | 15 | GGT  | 22 | 5  |
| 85515 | 8 | 10536419 | 10536430 | 2 | 6  | 12 | CA   | 18 | 3  |
| 85518 | 8 | 10541923 | 10541937 | 3 | 5  | 15 | AAC  | 34 | 3  |
| 85519 | 8 | 10542983 | 10542997 | 3 | 5  | 15 | TAC  | 31 | 3  |
| 85528 | 8 | 10575194 | 10575213 | 2 | 10 | 20 | GT   | 15 | 5  |
| 85534 | 8 | 10592304 | 10592317 | 2 | 7  | 14 | CA   | 19 | 3  |
| 85536 | 8 | 10596273 | 10596290 | 2 | 9  | 18 | TC   | 20 | 5  |
| 85543 | 8 | 10604984 | 10604997 | 2 | 7  | 14 | CA   | 26 | 3  |
| 85544 | 8 | 10611224 | 10611237 | 2 | 7  | 14 | AC   | 21 | 4  |
| 85545 | 8 | 10613598 | 10613617 | 2 | 10 | 20 | GA   | 14 | 3  |
| 85547 | 8 | 10616926 | 10616943 | 2 | 9  | 18 | TC   | 6  | 7  |
| 85549 | 8 | 10618113 | 10618124 | 2 | 6  | 12 | AC   | 15 | 9  |
| 85550 | 8 | 10618126 | 10618143 | 2 | 9  | 18 | CA   | 15 | 9  |
| 85551 | 8 | 10618434 | 10618447 | 2 | 7  | 14 | AG   | 15 | 4  |
| 85552 | 8 | 10618450 | 10618467 | 2 | 9  | 18 | AG   | 29 | 5  |
| 85555 | 8 | 10620127 | 10620138 | 2 | 6  | 12 | AG   | 26 | 3  |
| 85556 | 8 | 10620882 | 10620905 | 3 | 8  | 24 | CTC  | 18 | 5  |
| 85559 | 8 | 10627064 | 10627099 | 2 | 18 | 36 | CA   | 11 | 12 |
| 85562 | 8 | 10635190 | 10635223 | 2 | 17 | 34 | AC   | 7  | 7  |
| 85567 | 8 | 10660689 | 10660704 | 4 | 4  | 16 | AAAC | 29 | 6  |
| 85574 | 8 | 10665471 | 10665491 | 3 | 7  | 21 | TCC  | 22 | 3  |
| 85583 | 8 | 10669616 | 10669641 | 2 | 13 | 26 | GT   | 7  | 7  |
| 85588 | 8 | 10672202 | 10672219 | 2 | 9  | 18 | CA   | 28 | 6  |
| 85605 | 8 | 10729128 | 10729153 | 2 | 13 | 26 | TG   | 20 | 5  |
| 85606 | 8 | 10729291 | 10729318 | 2 | 14 | 28 | AC   | 12 | 7  |
| 85609 | 8 | 10747818 | 10747829 | 2 | 6  | 12 | CA   | 34 | 4  |
| 85610 | 8 | 10750389 | 10750412 | 4 | 6  | 24 | CTGC | 9  | 3  |
| 85615 | 8 | 10755337 | 10755352 | 2 | 8  | 16 | TG   | 12 | 5  |
| 85619 | 8 | 10761676 | 10761693 | 2 | 9  | 18 | AG   | 25 | 3  |
| 85624 | 8 | 10764093 | 10764116 | 2 | 12 | 24 | TG   | 7  | 4  |
| 85630 | 8 | 10770480 | 10770497 | 3 | 6  | 18 | GCA  | 23 | 4  |
| 85635 | 8 | 10774954 | 10774971 | 2 | 9  | 18 | CA   | 18 | 7  |
| 85637 | 8 | 10777182 | 10777209 | 2 | 14 | 28 | GT   | 17 | 10 |
| 85643 | 8 | 10793731 | 10793752 | 2 | 11 | 22 | AG   | 20 | 5  |
| 85662 | 8 | 10857656 | 10857671 | 2 | 8  | 16 | AG   | 14 | 4  |

|       |   |          |          |   |    |    |      |    |    |
|-------|---|----------|----------|---|----|----|------|----|----|
| 85669 | 8 | 10864844 | 10864864 | 3 | 7  | 21 | GGA  | 29 | 5  |
| 85672 | 8 | 10866843 | 10866884 | 2 | 21 | 42 | GT   | 12 | 14 |
| 85678 | 8 | 10892746 | 10892775 | 2 | 15 | 30 | AC   | 18 | 9  |
| 85679 | 8 | 10893138 | 10893153 | 2 | 8  | 16 | CA   | 20 | 4  |
| 85682 | 8 | 10897870 | 10897887 | 2 | 9  | 18 | TC   | 23 | 3  |
| 85690 | 8 | 10904429 | 10904460 | 2 | 16 | 32 | TG   | 7  | 8  |
| 85692 | 8 | 10905207 | 10905226 | 2 | 10 | 20 | CA   | 15 | 11 |
| 85704 | 8 | 10930552 | 10930569 | 2 | 9  | 18 | TG   | 10 | 9  |
| 85705 | 8 | 10930572 | 10930585 | 2 | 7  | 14 | TG   | 8  | 7  |
| 85709 | 8 | 10934771 | 10934790 | 2 | 10 | 20 | TG   | 15 | 5  |
| 85710 | 8 | 10936589 | 10936604 | 2 | 8  | 16 | AC   | 29 | 13 |
| 85711 | 8 | 10936892 | 10936929 | 2 | 19 | 38 | GT   | 20 | 14 |
| 85716 | 8 | 10954088 | 10954127 | 2 | 20 | 40 | CA   | 13 | 12 |
| 85722 | 8 | 10971356 | 10971375 | 2 | 10 | 20 | GT   | 22 | 11 |
| 85730 | 8 | 10984737 | 10984750 | 2 | 7  | 14 | GA   | 27 | 3  |
| 85735 | 8 | 11000936 | 11000949 | 2 | 7  | 14 | GT   | 15 | 5  |
| 85745 | 8 | 11043864 | 11043877 | 2 | 7  | 14 | AC   | 21 | 5  |
| 85750 | 8 | 11053719 | 11053754 | 4 | 9  | 36 | TCTA | 10 | 8  |
| 85753 | 8 | 11058596 | 11058613 | 2 | 9  | 18 | CA   | 10 | 7  |
| 85770 | 8 | 11110622 | 11110633 | 2 | 6  | 12 | TA   | 19 | 4  |
| 85779 | 8 | 11173249 | 11173272 | 2 | 12 | 24 | AC   | 13 | 10 |
| 85780 | 8 | 11173356 | 11173381 | 2 | 13 | 26 | AC   | 25 | 7  |
| 85782 | 8 | 11178759 | 11178776 | 2 | 9  | 18 | GT   | 19 | 6  |
| 85802 | 8 | 11232565 | 11232576 | 2 | 6  | 12 | TA   | 22 | 4  |
| 85806 | 8 | 11245901 | 11245912 | 2 | 6  | 12 | CA   | 19 | 4  |
| 85808 | 8 | 11255049 | 11255060 | 2 | 6  | 12 | AT   | 24 | 5  |
| 85809 | 8 | 11257192 | 11257207 | 4 | 4  | 16 | TTTC | 26 | 3  |
| 85811 | 8 | 11263735 | 11263746 | 2 | 6  | 12 | AC   | 31 | 3  |
| 85820 | 8 | 11284403 | 11284442 | 4 | 10 | 40 | TAGA | 10 | 11 |
| 85822 | 8 | 11287961 | 11287980 | 2 | 10 | 20 | GT   | 14 | 3  |
| 85827 | 8 | 11300705 | 11300722 | 3 | 6  | 18 | CCA  | 25 | 3  |
| 85828 | 8 | 11301659 | 11301674 | 2 | 8  | 16 | CT   | 30 | 5  |
| 85831 | 8 | 11305010 | 11305039 | 3 | 10 | 30 | GCA  | 16 | 6  |
| 85835 | 8 | 11309928 | 11309941 | 2 | 7  | 14 | TG   | 20 | 3  |
| 85841 | 8 | 11315245 | 11315259 | 3 | 5  | 15 | AAT  | 23 | 4  |
| 85842 | 8 | 11315284 | 11315317 | 2 | 17 | 34 | GT   | 7  | 7  |
| 85846 | 8 | 11318147 | 11318162 | 2 | 8  | 16 | TG   | 23 | 5  |
| 85847 | 8 | 11320062 | 11320073 | 2 | 6  | 12 | TC   | 17 | 3  |
| 85848 | 8 | 11320276 | 11320297 | 2 | 11 | 22 | CA   | 17 | 7  |
| 85849 | 8 | 11320457 | 11320474 | 2 | 9  | 18 | TC   | 14 | 3  |
| 85855 | 8 | 11330365 | 11330379 | 3 | 5  | 15 | GCC  | 29 | 3  |
| 85859 | 8 | 11338256 | 11338279 | 2 | 12 | 24 | GA   | 20 | 6  |
| 85860 | 8 | 11342161 | 11342176 | 2 | 8  | 16 | AC   | 12 | 7  |
| 85862 | 8 | 11351486 | 11351497 | 2 | 6  | 12 | CA   | 23 | 5  |
| 85863 | 8 | 11351499 | 11351510 | 2 | 6  | 12 | AC   | 22 | 4  |
| 85867 | 8 | 11356269 | 11356288 | 4 | 5  | 20 | TCTT | 31 | 3  |
| 85871 | 8 | 11365967 | 11365984 | 2 | 9  | 18 | TG   | 24 | 7  |
| 85872 | 8 | 11366164 | 11366225 | 2 | 31 | 62 | AC   | 11 | 11 |
| 85874 | 8 | 11369460 | 11369475 | 2 | 8  | 16 | CT   | 21 | 5  |
| 85875 | 8 | 11370831 | 11370852 | 2 | 11 | 22 | AC   | 18 | 5  |
| 85876 | 8 | 11378502 | 11378513 | 2 | 6  | 12 | AC   | 22 | 3  |

|       |   |          |          |   |    |    |      |    |    |
|-------|---|----------|----------|---|----|----|------|----|----|
| 85878 | 8 | 11385416 | 11385431 | 4 | 4  | 16 | CCAA | 26 | 3  |
| 85880 | 8 | 11386641 | 11386661 | 3 | 7  | 21 | TGC  | 25 | 9  |
| 85881 | 8 | 11386662 | 11386676 | 3 | 5  | 15 | TGT  | 28 | 8  |
| 85882 | 8 | 11386800 | 11386811 | 2 | 6  | 12 | AG   | 26 | 3  |
| 85886 | 8 | 11389665 | 11389688 | 2 | 12 | 24 | GT   | 16 | 11 |
| 85888 | 8 | 11405244 | 11405259 | 4 | 4  | 16 | CGAG | 19 | 4  |
| 85889 | 8 | 11405260 | 11405279 | 4 | 5  | 20 | CAAG | 25 | 8  |
| 85890 | 8 | 11410970 | 11410989 | 4 | 5  | 20 | GTTT | 25 | 12 |
| 85893 | 8 | 11414746 | 11414761 | 2 | 8  | 16 | AT   | 11 | 3  |
| 85895 | 8 | 11426043 | 11426057 | 3 | 5  | 15 | GGA  | 36 | 3  |
| 85896 | 8 | 11426904 | 11426921 | 2 | 9  | 18 | CA   | 22 | 4  |
| 85899 | 8 | 11430581 | 11430598 | 3 | 6  | 18 | CTG  | 24 | 4  |
| 85902 | 8 | 11436081 | 11436102 | 2 | 11 | 22 | AT   | 11 | 6  |
| 85905 | 8 | 11438289 | 11438321 | 3 | 11 | 33 | AGG  | 13 | 6  |
| 85914 | 8 | 11447434 | 11447448 | 3 | 5  | 15 | AAT  | 10 | 3  |
| 85919 | 8 | 11453449 | 11453468 | 2 | 10 | 20 | AG   | 13 | 10 |
| 85926 | 8 | 11458442 | 11458456 | 3 | 5  | 15 | CAC  | 23 | 3  |
| 85951 | 8 | 11491222 | 11491241 | 2 | 10 | 20 | TG   | 20 | 6  |
| 85954 | 8 | 11496325 | 11496342 | 2 | 9  | 18 | GA   | 28 | 3  |
| 85955 | 8 | 11502683 | 11502698 | 2 | 8  | 16 | TG   | 21 | 3  |
| 85957 | 8 | 11504420 | 11504435 | 4 | 4  | 16 | TGTC | 29 | 5  |
| 85969 | 8 | 11525685 | 11525702 | 3 | 6  | 18 | GCA  | 24 | 3  |
| 85970 | 8 | 11525766 | 11525783 | 2 | 9  | 18 | GT   | 15 | 11 |
| 85976 | 8 | 11532806 | 11532826 | 3 | 7  | 21 | CCT  | 31 | 7  |
| 85985 | 8 | 11544997 | 11545026 | 3 | 10 | 30 | AAG  | 30 | 4  |
| 85988 | 8 | 11548797 | 11548817 | 3 | 7  | 21 | TCC  | 26 | 4  |
| 85992 | 8 | 11558973 | 11558986 | 2 | 7  | 14 | AC   | 22 | 5  |
| 85994 | 8 | 11565853 | 11565876 | 3 | 8  | 24 | ATT  | 18 | 7  |
| 86014 | 8 | 11629394 | 11629407 | 2 | 7  | 14 | TG   | 26 | 4  |
| 86015 | 8 | 11633865 | 11633886 | 2 | 11 | 22 | CA   | 9  | 8  |
| 86016 | 8 | 11634019 | 11634042 | 4 | 6  | 24 | ATAG | 16 | 3  |
| 86039 | 8 | 11648835 | 11648846 | 2 | 6  | 12 | GT   | 28 | 4  |
| 86045 | 8 | 11660238 | 11660265 | 2 | 14 | 28 | TG   | 14 | 8  |
| 86050 | 8 | 11665972 | 11666021 | 2 | 25 | 50 | CA   | 11 | 9  |
| 86052 | 8 | 11669743 | 11669757 | 3 | 5  | 15 | CCT  | 28 | 4  |
| 86054 | 8 | 11670827 | 11670853 | 3 | 9  | 27 | TCT  | 25 | 6  |
| 86059 | 8 | 11671776 | 11671795 | 2 | 10 | 20 | TG   | 10 | 6  |
| 86061 | 8 | 11673675 | 11673713 | 3 | 13 | 39 | GCA  | 23 | 8  |
| 86067 | 8 | 11687604 | 11687627 | 4 | 6  | 24 | TAAA | 22 | 6  |
| 86070 | 8 | 11692587 | 11692598 | 2 | 6  | 12 | GA   | 24 | 3  |
| 86074 | 8 | 11696657 | 11696670 | 2 | 7  | 14 | CT   | 20 | 6  |
| 86077 | 8 | 11701256 | 11701271 | 4 | 4  | 16 | TTTA | 23 | 6  |
| 86079 | 8 | 11702826 | 11702855 | 3 | 10 | 30 | GGT  | 16 | 5  |
| 86080 | 8 | 11704968 | 11704985 | 2 | 9  | 18 | TG   | 6  | 6  |
| 86085 | 8 | 11708135 | 11708164 | 2 | 15 | 30 | GT   | 16 | 11 |
| 86088 | 8 | 11711637 | 11711656 | 4 | 5  | 20 | GCCT | 28 | 6  |
| 86095 | 8 | 11724702 | 11724719 | 2 | 9  | 18 | AC   | 18 | 15 |
| 86096 | 8 | 11728071 | 11728096 | 2 | 13 | 26 | TC   | 16 | 11 |
| 86108 | 8 | 11743733 | 11743746 | 2 | 7  | 14 | TC   | 17 | 4  |
| 86121 | 8 | 11755131 | 11755158 | 2 | 14 | 28 | TG   | 10 | 10 |
| 86122 | 8 | 11756863 | 11756884 | 2 | 11 | 22 | TG   | 9  | 6  |

|       |   |          |          |   |    |    |      |    |    |
|-------|---|----------|----------|---|----|----|------|----|----|
| 86123 | 8 | 11757113 | 11757130 | 2 | 9  | 18 | TA   | 18 | 4  |
| 86128 | 8 | 11760872 | 11760904 | 3 | 11 | 33 | TAA  | 9  | 3  |
| 86149 | 8 | 11797283 | 11797322 | 4 | 10 | 40 | CTGG | 25 | 20 |
| 86161 | 8 | 11811604 | 11811636 | 3 | 11 | 33 | TCC  | 15 | 6  |
| 86181 | 8 | 11836946 | 11836965 | 2 | 10 | 20 | TG   | 11 | 4  |
| 86187 | 8 | 11838928 | 11838951 | 4 | 6  | 24 | TTTA | 25 | 7  |
| 86190 | 8 | 11849660 | 11849675 | 2 | 8  | 16 | AC   | 18 | 4  |
| 86193 | 8 | 11851750 | 11851771 | 2 | 11 | 22 | GT   | 13 | 14 |
| 86195 | 8 | 11851825 | 11851838 | 2 | 7  | 14 | AC   | 29 | 3  |
| 86200 | 8 | 11860676 | 11860689 | 2 | 7  | 14 | AG   | 15 | 3  |
| 86202 | 8 | 11862938 | 11862957 | 2 | 10 | 20 | AG   | 16 | 3  |
| 86204 | 8 | 11865861 | 11865888 | 2 | 14 | 28 | AC   | 16 | 10 |
| 86220 | 8 | 11898164 | 11898189 | 2 | 13 | 26 | TG   | 18 | 10 |
| 86222 | 8 | 11898643 | 11898654 | 2 | 6  | 12 | AC   | 18 | 3  |
| 86223 | 8 | 11898677 | 11898694 | 2 | 9  | 18 | AC   | 11 | 6  |
| 86224 | 8 | 11899851 | 11899871 | 3 | 7  | 21 | CAT  | 19 | 3  |
| 86241 | 8 | 11937725 | 11937752 | 2 | 14 | 28 | AC   | 9  | 6  |
| 86245 | 8 | 11945116 | 11945127 | 2 | 6  | 12 | GT   | 15 | 3  |
| 86252 | 8 | 11964310 | 11964325 | 2 | 8  | 16 | TG   | 21 | 6  |
| 86255 | 8 | 11964947 | 11964964 | 3 | 6  | 18 | TTA  | 13 | 3  |
| 86265 | 8 | 11990788 | 11990801 | 2 | 7  | 14 | GT   | 22 | 8  |
| 86266 | 8 | 11992995 | 11993012 | 3 | 6  | 18 | ATT  | 11 | 3  |
| 86270 | 8 | 12000638 | 12000649 | 2 | 6  | 12 | TC   | 25 | 3  |
| 86273 | 8 | 12003474 | 12003497 | 2 | 12 | 24 | TG   | 15 | 6  |
| 86276 | 8 | 12006108 | 12006139 | 2 | 16 | 32 | CA   | 10 | 11 |
| 86278 | 8 | 12007077 | 12007092 | 2 | 8  | 16 | AC   | 20 | 4  |
| 86279 | 8 | 12009901 | 12009936 | 2 | 18 | 36 | GA   | 15 | 11 |
| 86281 | 8 | 12013249 | 12013269 | 3 | 7  | 21 | CTC  | 17 | 3  |
| 86292 | 8 | 12039895 | 12039918 | 2 | 12 | 24 | TG   | 11 | 12 |
| 86294 | 8 | 12040159 | 12040200 | 2 | 21 | 42 | CA   | 19 | 13 |
| 86299 | 8 | 12048369 | 12048383 | 3 | 5  | 15 | AAC  | 34 | 3  |
| 86309 | 8 | 12069065 | 12069079 | 3 | 5  | 15 | ACA  | 32 | 3  |
| 86313 | 8 | 12079555 | 12079572 | 2 | 9  | 18 | CA   | 22 | 3  |
| 86316 | 8 | 12084517 | 12084530 | 2 | 7  | 14 | GT   | 23 | 10 |
| 86319 | 8 | 12086954 | 12086981 | 2 | 14 | 28 | CA   | 8  | 13 |
| 86323 | 8 | 12098890 | 12098939 | 2 | 25 | 50 | TG   | 16 | 21 |
| 86342 | 8 | 12130564 | 12130583 | 2 | 10 | 20 | GT   | 18 | 6  |
| 86343 | 8 | 12134408 | 12134435 | 4 | 7  | 28 | ACTG | 24 | 6  |
| 86349 | 8 | 12152371 | 12152391 | 3 | 7  | 21 | GAA  | 17 | 3  |
| 86359 | 8 | 12164147 | 12164168 | 2 | 11 | 22 | TG   | 7  | 7  |
| 86367 | 8 | 12179802 | 12179827 | 2 | 13 | 26 | AC   | 13 | 20 |
| 86373 | 8 | 12193443 | 12193456 | 2 | 7  | 14 | CT   | 22 | 3  |
| 86385 | 8 | 12243185 | 12243199 | 3 | 5  | 15 | AAT  | 25 | 12 |
| 86386 | 8 | 12243991 | 12244006 | 4 | 4  | 16 | TCTT | 15 | 7  |
| 86401 | 8 | 12302313 | 12302336 | 2 | 12 | 24 | CA   | 15 | 7  |
| 86404 | 8 | 12306805 | 12306828 | 2 | 12 | 24 | AG   | 11 | 7  |
| 86405 | 8 | 12307023 | 12307037 | 3 | 5  | 15 | AAC  | 22 | 4  |
| 86406 | 8 | 12308093 | 12308122 | 2 | 15 | 30 | AG   | 9  | 7  |
| 86408 | 8 | 12312351 | 12312368 | 2 | 9  | 18 | GT   | 15 | 5  |
| 86410 | 8 | 12327327 | 12327359 | 3 | 11 | 33 | TCT  | 16 | 6  |
| 86412 | 8 | 12328238 | 12328267 | 3 | 10 | 30 | AGC  | 21 | 7  |

|       |   |          |          |   |    |    |      |    |    |
|-------|---|----------|----------|---|----|----|------|----|----|
| 86415 | 8 | 12333155 | 12333170 | 2 | 8  | 16 | TG   | 20 | 8  |
| 86416 | 8 | 12346543 | 12346556 | 2 | 7  | 14 | CA   | 28 | 3  |
| 86417 | 8 | 12348843 | 12348856 | 2 | 7  | 14 | AG   | 27 | 5  |
| 86426 | 8 | 12361263 | 12361282 | 2 | 10 | 20 | TG   | 22 | 9  |
| 86428 | 8 | 12362517 | 12362532 | 2 | 8  | 16 | CA   | 11 | 5  |
| 86432 | 8 | 12368461 | 12368472 | 2 | 6  | 12 | TC   | 20 | 3  |
| 86434 | 8 | 12388028 | 12388060 | 3 | 11 | 33 | ATC  | 25 | 5  |
| 86438 | 8 | 12394196 | 12394211 | 4 | 4  | 16 | GACA | 27 | 6  |
| 86439 | 8 | 12397160 | 12397187 | 2 | 14 | 28 | AC   | 12 | 10 |
| 86445 | 8 | 12404435 | 12404452 | 3 | 6  | 18 | ACA  | 27 | 5  |
| 86446 | 8 | 12407661 | 12407674 | 2 | 7  | 14 | CT   | 27 | 3  |
| 86448 | 8 | 12409174 | 12409189 | 2 | 8  | 16 | AC   | 10 | 9  |
| 86450 | 8 | 12409923 | 12409952 | 3 | 10 | 30 | ATT  | 8  | 3  |
| 86454 | 8 | 12413893 | 12413912 | 2 | 10 | 20 | CT   | 23 | 5  |
| 86459 | 8 | 12414971 | 12414984 | 2 | 7  | 14 | CA   | 22 | 9  |
| 86470 | 8 | 12431028 | 12431049 | 2 | 11 | 22 | AC   | 25 | 7  |
| 86472 | 8 | 12440830 | 12440847 | 3 | 6  | 18 | CAT  | 28 | 3  |
| 86475 | 8 | 12443481 | 12443498 | 3 | 6  | 18 | CAG  | 23 | 3  |
| 86476 | 8 | 12443943 | 12443960 | 2 | 9  | 18 | AG   | 20 | 5  |
| 86477 | 8 | 12445188 | 12445205 | 2 | 9  | 18 | GT   | 19 | 6  |
| 86478 | 8 | 12452578 | 12452598 | 3 | 7  | 21 | GGA  | 14 | 3  |
| 86481 | 8 | 12456074 | 12456087 | 2 | 7  | 14 | AT   | 21 | 10 |
| 86488 | 8 | 12463824 | 12463841 | 3 | 6  | 18 | TCA  | 25 | 3  |
| 86492 | 8 | 12473271 | 12473282 | 2 | 6  | 12 | TG   | 22 | 5  |
| 86508 | 8 | 12496148 | 12496197 | 2 | 25 | 50 | GT   | 7  | 11 |
| 86509 | 8 | 12496346 | 12496369 | 4 | 6  | 24 | AAAT | 17 | 4  |
| 86512 | 8 | 12498720 | 12498737 | 2 | 9  | 18 | GT   | 13 | 5  |
| 86519 | 8 | 12510372 | 12510413 | 2 | 21 | 42 | GA   | 8  | 7  |
| 86521 | 8 | 12512360 | 12512375 | 4 | 4  | 16 | TTTA | 8  | 3  |
| 86523 | 8 | 12512897 | 12512920 | 2 | 12 | 24 | GT   | 23 | 14 |
| 86533 | 8 | 12552249 | 12552264 | 2 | 8  | 16 | TG   | 15 | 9  |
| 86534 | 8 | 12552266 | 12552283 | 2 | 9  | 18 | GT   | 19 | 12 |
| 86537 | 8 | 12564656 | 12564667 | 2 | 6  | 12 | GT   | 33 | 3  |
| 86539 | 8 | 12565970 | 12566035 | 3 | 22 | 66 | ATC  | 23 | 11 |
| 86540 | 8 | 12575470 | 12575489 | 4 | 5  | 20 | AAAT | 12 | 6  |
| 86542 | 8 | 12583139 | 12583154 | 2 | 8  | 16 | TG   | 25 | 4  |
| 86559 | 8 | 12630128 | 12630155 | 2 | 14 | 28 | TG   | 12 | 6  |
| 86560 | 8 | 12633750 | 12633777 | 2 | 14 | 28 | AC   | 12 | 7  |
| 86565 | 8 | 12645751 | 12645766 | 4 | 4  | 16 | TGCG | 31 | 3  |
| 86566 | 8 | 12646039 | 12646064 | 2 | 13 | 26 | TG   | 16 | 8  |
| 86572 | 8 | 12654476 | 12654490 | 3 | 5  | 15 | TTG  | 23 | 3  |
| 86574 | 8 | 12658382 | 12658401 | 2 | 10 | 20 | AC   | 16 | 7  |
| 86576 | 8 | 12660990 | 12661005 | 4 | 4  | 16 | AAAG | 23 | 4  |
| 86585 | 8 | 12690326 | 12690339 | 2 | 7  | 14 | CA   | 25 | 5  |
| 86590 | 8 | 12714260 | 12714275 | 4 | 4  | 16 | ATCC | 30 | 3  |
| 86603 | 8 | 12752032 | 12752058 | 3 | 9  | 27 | CTC  | 15 | 7  |
| 86604 | 8 | 12752647 | 12752660 | 2 | 7  | 14 | TA   | 19 | 5  |
| 86605 | 8 | 12753681 | 12753704 | 2 | 12 | 24 | GT   | 14 | 6  |
| 86609 | 8 | 12764288 | 12764313 | 2 | 13 | 26 | CA   | 14 | 5  |
| 86613 | 8 | 12767755 | 12767781 | 3 | 9  | 27 | AGG  | 17 | 3  |
| 86614 | 8 | 12767904 | 12767927 | 3 | 8  | 24 | GAA  | 24 | 5  |

|       |   |          |          |   |    |    |      |    |    |
|-------|---|----------|----------|---|----|----|------|----|----|
| 86618 | 8 | 12774079 | 12774108 | 2 | 15 | 30 | GA   | 12 | 6  |
| 86623 | 8 | 12778015 | 12778040 | 2 | 13 | 26 | CA   | 13 | 8  |
| 86632 | 8 | 12788739 | 12788754 | 2 | 8  | 16 | TC   | 29 | 4  |
| 86639 | 8 | 12806960 | 12806987 | 2 | 14 | 28 | TG   | 16 | 6  |
| 86640 | 8 | 12807187 | 12807200 | 2 | 7  | 14 | TG   | 32 | 3  |
| 86644 | 8 | 12814393 | 12814422 | 2 | 15 | 30 | CA   | 23 | 8  |
| 86645 | 8 | 12814735 | 12814746 | 2 | 6  | 12 | AG   | 19 | 3  |
| 86646 | 8 | 12814806 | 12814821 | 4 | 4  | 16 | CACT | 15 | 12 |
| 86647 | 8 | 12814822 | 12814835 | 2 | 7  | 14 | CA   | 16 | 11 |
| 86651 | 8 | 12815534 | 12815553 | 2 | 10 | 20 | GT   | 11 | 8  |
| 86653 | 8 | 12815726 | 12815757 | 2 | 16 | 32 | CA   | 14 | 10 |
| 86656 | 8 | 12816687 | 12816702 | 2 | 8  | 16 | CA   | 21 | 3  |
| 86659 | 8 | 12818903 | 12818936 | 2 | 17 | 34 | GT   | 14 | 11 |
| 86661 | 8 | 12820481 | 12820502 | 2 | 11 | 22 | GT   | 13 | 7  |
| 86666 | 8 | 12833686 | 12833700 | 3 | 5  | 15 | AAT  | 19 | 3  |
| 86669 | 8 | 12840486 | 12840503 | 3 | 6  | 18 | AAC  | 29 | 4  |
| 86679 | 8 | 12877875 | 12877902 | 2 | 14 | 28 | CA   | 12 | 13 |
| 86680 | 8 | 12880821 | 12880834 | 2 | 7  | 14 | CA   | 23 | 6  |
| 86682 | 8 | 12884911 | 12884922 | 2 | 6  | 12 | AG   | 31 | 3  |
| 86684 | 8 | 12888399 | 12888422 | 2 | 12 | 24 | TC   | 12 | 5  |
| 86686 | 8 | 12889526 | 12889546 | 3 | 7  | 21 | GCT  | 21 | 7  |
| 86687 | 8 | 12889682 | 12889699 | 2 | 9  | 18 | CA   | 22 | 9  |
| 86695 | 8 | 12911056 | 12911067 | 2 | 6  | 12 | TG   | 19 | 4  |
| 86698 | 8 | 12919206 | 12919217 | 2 | 6  | 12 | AC   | 31 | 3  |
| 86714 | 8 | 12963355 | 12963368 | 2 | 7  | 14 | AC   | 8  | 3  |
| 86716 | 8 | 12964335 | 12964376 | 2 | 21 | 42 | CA   | 6  | 5  |
| 86717 | 8 | 12967659 | 12967674 | 2 | 8  | 16 | AC   | 26 | 3  |
| 86721 | 8 | 12971902 | 12971921 | 2 | 10 | 20 | CA   | 12 | 8  |
| 86724 | 8 | 12980711 | 12980724 | 2 | 7  | 14 | AG   | 28 | 5  |
| 86725 | 8 | 12981072 | 12981095 | 2 | 12 | 24 | GA   | 14 | 7  |
| 86730 | 8 | 12992254 | 12992271 | 3 | 6  | 18 | TTA  | 8  | 9  |
| 86741 | 8 | 13008127 | 13008140 | 2 | 7  | 14 | GT   | 20 | 4  |
| 86742 | 8 | 13009490 | 13009501 | 2 | 6  | 12 | TG   | 26 | 3  |
| 86743 | 8 | 13012291 | 13012306 | 2 | 8  | 16 | TC   | 28 | 4  |
| 86749 | 8 | 13027706 | 13027717 | 2 | 6  | 12 | TG   | 7  | 3  |
| 86750 | 8 | 13028003 | 13028020 | 2 | 9  | 18 | AC   | 18 | 4  |
| 86751 | 8 | 13030875 | 13030888 | 2 | 7  | 14 | TG   | 6  | 6  |
| 86762 | 8 | 13049121 | 13049132 | 2 | 6  | 12 | GT   | 26 | 3  |
| 86766 | 8 | 13054634 | 13054647 | 2 | 7  | 14 | GT   | 31 | 3  |
| 86769 | 8 | 13059090 | 13059122 | 3 | 11 | 33 | TAC  | 14 | 8  |
| 86774 | 8 | 13072235 | 13072258 | 4 | 6  | 24 | GCAC | 20 | 7  |
| 86775 | 8 | 13075218 | 13075249 | 2 | 16 | 32 | AC   | 13 | 9  |
| 86777 | 8 | 13084572 | 13084593 | 2 | 11 | 22 | AG   | 11 | 3  |
| 86780 | 8 | 13097609 | 13097620 | 2 | 6  | 12 | TG   | 13 | 3  |
| 86785 | 8 | 13114978 | 13115001 | 4 | 6  | 24 | TAGA | 26 | 4  |
| 86792 | 8 | 13125567 | 13125581 | 3 | 5  | 15 | ATT  | 25 | 3  |
| 86794 | 8 | 13130225 | 13130248 | 2 | 12 | 24 | AG   | 12 | 3  |
| 86823 | 8 | 13188615 | 13188632 | 2 | 9  | 18 | TA   | 7  | 3  |
| 86824 | 8 | 13189347 | 13189366 | 2 | 10 | 20 | TG   | 24 | 4  |
| 86826 | 8 | 13190013 | 13190032 | 4 | 5  | 20 | TATT | 23 | 3  |
| 86833 | 8 | 13208370 | 13208389 | 2 | 10 | 20 | AT   | 7  | 5  |

|       |   |          |          |   |    |    |      |    |    |
|-------|---|----------|----------|---|----|----|------|----|----|
| 86840 | 8 | 13211717 | 13211736 | 2 | 10 | 20 | GT   | 17 | 10 |
| 86841 | 8 | 13211819 | 13211848 | 3 | 10 | 30 | TCC  | 9  | 3  |
| 86842 | 8 | 13212672 | 13212691 | 2 | 10 | 20 | GT   | 20 | 9  |
| 86843 | 8 | 13213687 | 13213710 | 2 | 12 | 24 | CA   | 19 | 8  |
| 86864 | 8 | 13220103 | 13220114 | 2 | 6  | 12 | AC   | 28 | 5  |
| 86865 | 8 | 13220173 | 13220200 | 2 | 14 | 28 | GT   | 20 | 5  |
| 86866 | 8 | 13220299 | 13220326 | 2 | 14 | 28 | CT   | 15 | 9  |
| 86868 | 8 | 13220572 | 13220586 | 3 | 5  | 15 | ATT  | 18 | 3  |
| 86870 | 8 | 13220768 | 13220787 | 2 | 10 | 20 | CA   | 11 | 11 |
| 86871 | 8 | 13221761 | 13221798 | 2 | 19 | 38 | AC   | 9  | 7  |
| 86874 | 8 | 13222495 | 13222506 | 2 | 6  | 12 | TG   | 18 | 7  |
| 86875 | 8 | 13222508 | 13222519 | 2 | 6  | 12 | GT   | 20 | 7  |
| 86876 | 8 | 13222525 | 13222536 | 2 | 6  | 12 | GT   | 11 | 3  |
| 86877 | 8 | 13222786 | 13222813 | 4 | 7  | 28 | CATC | 24 | 5  |
| 86878 | 8 | 13222886 | 13222903 | 2 | 9  | 18 | GT   | 14 | 8  |
| 86885 | 8 | 13224488 | 13224511 | 3 | 8  | 24 | CCT  | 27 | 3  |
| 86886 | 8 | 13224709 | 13224780 | 3 | 24 | 72 | GAA  | 9  | 10 |
| 86893 | 8 | 13226575 | 13226606 | 2 | 16 | 32 | GT   | 15 | 13 |
| 86902 | 8 | 13231593 | 13231607 | 3 | 5  | 15 | GGT  | 15 | 3  |
| 86904 | 8 | 13234170 | 13234205 | 2 | 18 | 36 | AC   | 9  | 9  |
| 86919 | 8 | 13245557 | 13245574 | 3 | 6  | 18 | CTC  | 17 | 5  |
| 86920 | 8 | 13246467 | 13246502 | 3 | 12 | 36 | AAC  | 17 | 5  |
| 86928 | 8 | 13265250 | 13265267 | 2 | 9  | 18 | TC   | 23 | 8  |
| 86932 | 8 | 13269818 | 13269839 | 2 | 11 | 22 | TG   | 16 | 9  |
| 86934 | 8 | 13270652 | 13270681 | 2 | 15 | 30 | TG   | 10 | 7  |
| 86944 | 8 | 13283064 | 13283075 | 2 | 6  | 12 | CT   | 30 | 3  |
| 86948 | 8 | 13292365 | 13292379 | 3 | 5  | 15 | GCA  | 28 | 5  |
| 86951 | 8 | 13295842 | 13295869 | 2 | 14 | 28 | AC   | 11 | 10 |
| 86953 | 8 | 13297014 | 13297043 | 2 | 15 | 30 | AG   | 13 | 7  |
| 86975 | 8 | 13342856 | 13342869 | 2 | 7  | 14 | AC   | 6  | 3  |
| 86986 | 8 | 13360354 | 13360367 | 2 | 7  | 14 | GT   | 12 | 3  |
| 86988 | 8 | 13360496 | 13360527 | 2 | 16 | 32 | AC   | 7  | 7  |
| 86992 | 8 | 13370764 | 13370797 | 2 | 17 | 34 | CA   | 12 | 8  |
| 86996 | 8 | 13375767 | 13375794 | 2 | 14 | 28 | TG   | 21 | 11 |
| 86998 | 8 | 13381177 | 13381200 | 2 | 12 | 24 | TG   | 20 | 5  |
| 86999 | 8 | 13381328 | 13381345 | 2 | 9  | 18 | GT   | 14 | 3  |
| 87008 | 8 | 13406426 | 13406440 | 3 | 5  | 15 | GCG  | 24 | 3  |
| 87013 | 8 | 13416647 | 13416667 | 3 | 7  | 21 | AGC  | 30 | 6  |
| 87032 | 8 | 13451433 | 13451444 | 2 | 6  | 12 | AG   | 26 | 3  |
| 87038 | 8 | 13460785 | 13460806 | 2 | 11 | 22 | CA   | 23 | 10 |
| 87039 | 8 | 13460927 | 13460940 | 2 | 7  | 14 | GT   | 23 | 6  |
| 87044 | 8 | 13474377 | 13474409 | 3 | 11 | 33 | TTG  | 21 | 6  |
| 87062 | 8 | 13500845 | 13500856 | 2 | 6  | 12 | TC   | 31 | 3  |
| 87063 | 8 | 13502877 | 13502888 | 2 | 6  | 12 | TC   | 32 | 3  |
| 87070 | 8 | 13523316 | 13523339 | 2 | 12 | 24 | TC   | 21 | 5  |
| 87073 | 8 | 13526521 | 13526556 | 2 | 18 | 36 | CA   | 12 | 8  |
| 87076 | 8 | 13529757 | 13529784 | 2 | 14 | 28 | GT   | 9  | 7  |
| 87106 | 8 | 13558008 | 13558028 | 3 | 7  | 21 | CTG  | 24 | 4  |
| 87111 | 8 | 13563880 | 13563891 | 2 | 6  | 12 | AT   | 24 | 5  |
| 87117 | 8 | 13565893 | 13565916 | 2 | 12 | 24 | CT   | 11 | 9  |
| 87132 | 8 | 13594554 | 13594591 | 2 | 19 | 38 | CA   | 10 | 7  |



|       |   |          |          |   |    |    |      |    |    |
|-------|---|----------|----------|---|----|----|------|----|----|
| 87135 | 8 | 13596611 | 13596642 | 2 | 16 | 32 | GT   | 16 | 7  |
| 87136 | 8 | 13600603 | 13600617 | 3 | 5  | 15 | CTG  | 29 | 3  |
| 87147 | 8 | 13618129 | 13618144 | 2 | 8  | 16 | GT   | 21 | 6  |
| 87148 | 8 | 13625221 | 13625253 | 3 | 11 | 33 | AGG  | 8  | 5  |
| 87157 | 8 | 13641723 | 13641736 | 2 | 7  | 14 | AC   | 22 | 3  |
| 87169 | 8 | 13666460 | 13666477 | 2 | 9  | 18 | CA   | 24 | 3  |
| 87178 | 8 | 13671732 | 13671773 | 2 | 21 | 42 | AC   | 8  | 8  |
| 87179 | 8 | 13678187 | 13678213 | 3 | 9  | 27 | CCT  | 14 | 6  |
| 87181 | 8 | 13678432 | 13678453 | 2 | 11 | 22 | AC   | 12 | 6  |
| 87186 | 8 | 13685214 | 13685245 | 2 | 16 | 32 | AC   | 13 | 6  |
| 87192 | 8 | 13688432 | 13688463 | 2 | 16 | 32 | CA   | 21 | 10 |
| 87201 | 8 | 13703039 | 13703058 | 2 | 10 | 20 | CA   | 27 | 5  |
| 87202 | 8 | 13703153 | 13703166 | 2 | 7  | 14 | GT   | 18 | 4  |
| 87203 | 8 | 13703168 | 13703179 | 2 | 6  | 12 | TG   | 21 | 4  |
| 87204 | 8 | 13703333 | 13703356 | 2 | 12 | 24 | CA   | 11 | 7  |
| 87209 | 8 | 13705728 | 13705739 | 2 | 6  | 12 | AC   | 31 | 3  |
| 87218 | 8 | 13713435 | 13713452 | 2 | 9  | 18 | CA   | 17 | 9  |
| 87223 | 8 | 13716576 | 13716608 | 3 | 11 | 33 | CCT  | 13 | 4  |
| 87224 | 8 | 13719455 | 13719474 | 2 | 10 | 20 | AC   | 19 | 5  |
| 87225 | 8 | 13720204 | 13720231 | 2 | 14 | 28 | CT   | 22 | 8  |
| 87227 | 8 | 13721100 | 13721113 | 2 | 7  | 14 | CA   | 34 | 3  |
| 87233 | 8 | 13725716 | 13725730 | 3 | 5  | 15 | ATT  | 15 | 7  |
| 87236 | 8 | 13729511 | 13729544 | 2 | 17 | 34 | AG   | 13 | 7  |
| 87238 | 8 | 13731495 | 13731506 | 2 | 6  | 12 | CA   | 20 | 4  |
| 87241 | 8 | 13743761 | 13743774 | 2 | 7  | 14 | TC   | 14 | 5  |
| 87242 | 8 | 13743777 | 13743790 | 2 | 7  | 14 | TC   | 12 | 4  |
| 87243 | 8 | 13745899 | 13745918 | 2 | 10 | 20 | GT   | 18 | 9  |
| 87245 | 8 | 13748032 | 13748043 | 2 | 6  | 12 | AC   | 21 | 3  |
| 87247 | 8 | 13751133 | 13751164 | 2 | 16 | 32 | CA   | 10 | 8  |
| 87249 | 8 | 13754687 | 13754716 | 2 | 15 | 30 | AC   | 19 | 8  |
| 87250 | 8 | 13761907 | 13761928 | 2 | 11 | 22 | AC   | 19 | 6  |
| 87255 | 8 | 13770642 | 13770677 | 2 | 18 | 36 | TG   | 13 | 9  |
| 87256 | 8 | 13773281 | 13773316 | 4 | 9  | 36 | AATG | 32 | 7  |
| 87261 | 8 | 13779874 | 13779901 | 2 | 14 | 28 | TG   | 11 | 11 |
| 87263 | 8 | 13784719 | 13784734 | 2 | 8  | 16 | CA   | 7  | 6  |
| 87264 | 8 | 13786291 | 13786312 | 2 | 11 | 22 | TG   | 25 | 7  |
| 87271 | 8 | 13803266 | 13803279 | 2 | 7  | 14 | TG   | 21 | 5  |
| 87275 | 8 | 13804838 | 13804857 | 2 | 10 | 20 | AC   | 25 | 7  |
| 87276 | 8 | 13807320 | 13807343 | 2 | 12 | 24 | GT   | 22 | 15 |
| 87282 | 8 | 13823211 | 13823236 | 2 | 13 | 26 | CA   | 15 | 5  |
| 87284 | 8 | 13827717 | 13827734 | 2 | 9  | 18 | CA   | 26 | 5  |
| 87285 | 8 | 13828182 | 13828197 | 4 | 4  | 16 | TTTA | 20 | 5  |
| 87286 | 8 | 13828459 | 13828472 | 2 | 7  | 14 | AT   | 16 | 12 |
| 87288 | 8 | 13828770 | 13828787 | 2 | 9  | 18 | TG   | 21 | 5  |
| 87289 | 8 | 13829848 | 13829867 | 2 | 10 | 20 | CA   | 20 | 5  |
| 87291 | 8 | 13837122 | 13837147 | 2 | 13 | 26 | CA   | 19 | 8  |
| 87298 | 8 | 13847250 | 13847265 | 2 | 8  | 16 | CA   | 23 | 7  |
| 87301 | 8 | 13855336 | 13855365 | 2 | 15 | 30 | TC   | 12 | 10 |
| 87303 | 8 | 13865322 | 13865349 | 4 | 7  | 28 | TTTG | 27 | 3  |
| 87304 | 8 | 13866683 | 13866718 | 2 | 18 | 36 | AG   | 20 | 9  |
| 87305 | 8 | 13868351 | 13868368 | 2 | 9  | 18 | AC   | 31 | 7  |

|       |   |          |          |   |    |    |      |    |    |
|-------|---|----------|----------|---|----|----|------|----|----|
| 87306 | 8 | 13868473 | 13868506 | 2 | 17 | 34 | AC   | 9  | 9  |
| 87309 | 8 | 13870369 | 13870384 | 2 | 8  | 16 | GT   | 23 | 5  |
| 87311 | 8 | 13876342 | 13876368 | 3 | 9  | 27 | ACA  | 21 | 7  |
| 87314 | 8 | 13881141 | 13881158 | 2 | 9  | 18 | AC   | 16 | 7  |
| 87323 | 8 | 13905351 | 13905362 | 2 | 6  | 12 | AG   | 12 | 5  |
| 87324 | 8 | 13905365 | 13905378 | 2 | 7  | 14 | AG   | 14 | 4  |
| 87327 | 8 | 13908178 | 13908193 | 2 | 8  | 16 | AC   | 21 | 9  |
| 87329 | 8 | 13908998 | 13909011 | 2 | 7  | 14 | CA   | 19 | 6  |
| 87330 | 8 | 13910313 | 13910338 | 2 | 13 | 26 | GT   | 15 | 11 |
| 87332 | 8 | 13917267 | 13917284 | 3 | 6  | 18 | CCT  | 26 | 4  |
| 87334 | 8 | 13922150 | 13922165 | 4 | 4  | 16 | GACA | 26 | 3  |
| 87335 | 8 | 13922398 | 13922413 | 2 | 8  | 16 | CA   | 21 | 5  |
| 87336 | 8 | 13922519 | 13922530 | 2 | 6  | 12 | GA   | 25 | 3  |
| 87337 | 8 | 13922894 | 13922911 | 2 | 9  | 18 | TG   | 19 | 8  |
| 87340 | 8 | 13926279 | 13926294 | 2 | 8  | 16 | TG   | 8  | 3  |
| 87347 | 8 | 13933784 | 13933799 | 2 | 8  | 16 | GT   | 19 | 10 |
| 87348 | 8 | 13933987 | 13933998 | 2 | 6  | 12 | CT   | 16 | 3  |
| 87349 | 8 | 13934000 | 13934015 | 2 | 8  | 16 | TC   | 17 | 4  |
| 87350 | 8 | 13934235 | 13934248 | 2 | 7  | 14 | AC   | 22 | 4  |
| 87351 | 8 | 13934375 | 13934396 | 2 | 11 | 22 | CA   | 19 | 12 |
| 87353 | 8 | 13938545 | 13938574 | 2 | 15 | 30 | CA   | 13 | 8  |
| 87354 | 8 | 13939303 | 13939316 | 2 | 7  | 14 | GA   | 10 | 3  |
| 87367 | 8 | 13946660 | 13946683 | 2 | 12 | 24 | TG   | 21 | 7  |
| 87374 | 8 | 13960407 | 13960440 | 2 | 17 | 34 | TG   | 7  | 8  |
| 87375 | 8 | 13960607 | 13960627 | 3 | 7  | 21 | TCA  | 22 | 8  |
| 87393 | 8 | 13984686 | 13984701 | 4 | 4  | 16 | AAAC | 18 | 7  |
| 87396 | 8 | 13988934 | 13988945 | 2 | 6  | 12 | GT   | 31 | 4  |
| 87397 | 8 | 13990614 | 13990631 | 2 | 9  | 18 | GT   | 21 | 4  |
| 87408 | 8 | 14025364 | 14025385 | 2 | 11 | 22 | TG   | 9  | 7  |
| 87415 | 8 | 14040383 | 14040398 | 2 | 8  | 16 | TG   | 22 | 3  |
| 87423 | 8 | 14051078 | 14051092 | 3 | 5  | 15 | AGG  | 9  | 3  |
| 87427 | 8 | 14056998 | 14057027 | 2 | 15 | 30 | TC   | 7  | 5  |
| 87428 | 8 | 14057702 | 14057721 | 2 | 10 | 20 | CA   | 22 | 6  |
| 87429 | 8 | 14057827 | 14057846 | 2 | 10 | 20 | GT   | 15 | 10 |
| 87432 | 8 | 14060315 | 14060334 | 2 | 10 | 20 | GT   | 21 | 13 |
| 87433 | 8 | 14061817 | 14061838 | 2 | 11 | 22 | TG   | 21 | 4  |
| 87436 | 8 | 14063587 | 14063610 | 2 | 12 | 24 | GT   | 18 | 13 |
| 87440 | 8 | 14066115 | 14066132 | 3 | 6  | 18 | GGA  | 22 | 4  |
| 87442 | 8 | 14068740 | 14068771 | 2 | 16 | 32 | GT   | 21 | 10 |
| 87444 | 8 | 14073633 | 14073644 | 2 | 6  | 12 | CA   | 23 | 3  |
| 87446 | 8 | 14076988 | 14076999 | 2 | 6  | 12 | AC   | 23 | 4  |
| 87447 | 8 | 14077161 | 14077172 | 2 | 6  | 12 | CA   | 9  | 4  |
| 87448 | 8 | 14077477 | 14077494 | 3 | 6  | 18 | AAC  | 32 | 5  |
| 87451 | 8 | 14078005 | 14078022 | 2 | 9  | 18 | CA   | 18 | 4  |
| 87452 | 8 | 14079482 | 14079515 | 2 | 17 | 34 | TG   | 17 | 9  |
| 87453 | 8 | 14079741 | 14079762 | 2 | 11 | 22 | CA   | 21 | 7  |
| 87454 | 8 | 14080050 | 14080071 | 2 | 11 | 22 | AC   | 21 | 11 |
| 87456 | 8 | 14081880 | 14081897 | 2 | 9  | 18 | TG   | 20 | 5  |
| 87458 | 8 | 14083940 | 14083967 | 2 | 14 | 28 | CA   | 18 | 9  |
| 87472 | 8 | 14110150 | 14110171 | 2 | 11 | 22 | GT   | 10 | 14 |
| 87473 | 8 | 14112864 | 14112875 | 2 | 6  | 12 | AC   | 34 | 3  |

|       |   |          |          |   |    |    |      |    |    |
|-------|---|----------|----------|---|----|----|------|----|----|
| 87474 | 8 | 14113226 | 14113255 | 2 | 15 | 30 | AC   | 16 | 7  |
| 87479 | 8 | 14125053 | 14125066 | 2 | 7  | 14 | GT   | 24 | 3  |
| 87481 | 8 | 14137125 | 14137138 | 2 | 7  | 14 | TC   | 31 | 3  |
| 87482 | 8 | 14139101 | 14139118 | 2 | 9  | 18 | TC   | 18 | 3  |
| 87483 | 8 | 14140876 | 14140901 | 2 | 13 | 26 | GT   | 12 | 5  |
| 87490 | 8 | 14157483 | 14157510 | 2 | 14 | 28 | CA   | 15 | 11 |
| 87494 | 8 | 14160059 | 14160082 | 2 | 12 | 24 | CT   | 8  | 8  |
| 87495 | 8 | 14161079 | 14161118 | 2 | 20 | 40 | AC   | 8  | 10 |
| 87496 | 8 | 14161158 | 14161181 | 2 | 12 | 24 | AC   | 12 | 14 |
| 87498 | 8 | 14161773 | 14161787 | 3 | 5  | 15 | AGG  | 14 | 6  |
| 87500 | 8 | 14185256 | 14185267 | 2 | 6  | 12 | TG   | 27 | 3  |
| 87501 | 8 | 14189882 | 14189897 | 2 | 8  | 16 | TG   | 16 | 3  |
| 87503 | 8 | 14190217 | 14190250 | 2 | 17 | 34 | GT   | 17 | 10 |
| 87505 | 8 | 14199017 | 14199032 | 4 | 4  | 16 | AAAT | 26 | 9  |
| 87506 | 8 | 14203053 | 14203070 | 2 | 9  | 18 | TG   | 23 | 6  |
| 87507 | 8 | 14205796 | 14205813 | 2 | 9  | 18 | GT   | 24 | 5  |
| 87511 | 8 | 14210637 | 14210660 | 2 | 12 | 24 | CA   | 13 | 5  |
| 87512 | 8 | 14211365 | 14211400 | 3 | 12 | 36 | TCA  | 16 | 5  |
| 87513 | 8 | 14212707 | 14212742 | 2 | 18 | 36 | AC   | 14 | 13 |
| 87515 | 8 | 14213847 | 14213864 | 2 | 9  | 18 | TG   | 21 | 6  |
| 87517 | 8 | 14215942 | 14215953 | 2 | 6  | 12 | CA   | 26 | 3  |
| 87518 | 8 | 14216774 | 14216791 | 2 | 9  | 18 | GT   | 24 | 5  |
| 87519 | 8 | 14216912 | 14216929 | 2 | 9  | 18 | GT   | 16 | 6  |
| 87520 | 8 | 14218633 | 14218658 | 2 | 13 | 26 | AC   | 25 | 13 |
| 87521 | 8 | 14218847 | 14218860 | 2 | 7  | 14 | AC   | 19 | 7  |
| 87522 | 8 | 14218861 | 14218874 | 2 | 7  | 14 | CA   | 13 | 3  |
| 87523 | 8 | 14218932 | 14218947 | 2 | 8  | 16 | GA   | 29 | 3  |
| 87526 | 8 | 14219255 | 14219268 | 2 | 7  | 14 | CA   | 18 | 4  |
| 87528 | 8 | 14220264 | 14220277 | 2 | 7  | 14 | AC   | 16 | 3  |
| 87529 | 8 | 14220492 | 14220503 | 2 | 6  | 12 | CA   | 16 | 4  |
| 87532 | 8 | 14226302 | 14226313 | 2 | 6  | 12 | AT   | 21 | 3  |
| 87533 | 8 | 14226790 | 14226809 | 4 | 5  | 20 | GTCC | 30 | 8  |
| 87534 | 8 | 14229937 | 14229954 | 2 | 9  | 18 | TG   | 13 | 9  |
| 87535 | 8 | 14230082 | 14230111 | 2 | 15 | 30 | AC   | 17 | 7  |
| 87538 | 8 | 14231370 | 14231403 | 2 | 17 | 34 | GT   | 16 | 14 |
| 87542 | 8 | 14233068 | 14233106 | 3 | 13 | 39 | CAG  | 23 | 14 |
| 87544 | 8 | 14233660 | 14233677 | 2 | 9  | 18 | GA   | 13 | 3  |
| 87548 | 8 | 14237590 | 14237607 | 3 | 6  | 18 | GTG  | 17 | 6  |
| 87549 | 8 | 14238942 | 14238971 | 2 | 15 | 30 | TG   | 14 | 16 |
| 87550 | 8 | 14239134 | 14239153 | 2 | 10 | 20 | TG   | 19 | 11 |
| 87554 | 8 | 14249432 | 14249449 | 2 | 9  | 18 | GT   | 16 | 6  |
| 87562 | 8 | 14255062 | 14255073 | 2 | 6  | 12 | GT   | 23 | 4  |
| 87567 | 8 | 14256826 | 14256840 | 3 | 5  | 15 | CAG  | 19 | 4  |
| 87574 | 8 | 14263923 | 14263938 | 2 | 8  | 16 | TG   | 33 | 3  |
| 87576 | 8 | 14267627 | 14267646 | 2 | 10 | 20 | GT   | 12 | 8  |
| 87583 | 8 | 14272387 | 14272402 | 2 | 8  | 16 | GT   | 15 | 9  |
| 87584 | 8 | 14272806 | 14272825 | 2 | 10 | 20 | TG   | 20 | 12 |
| 87585 | 8 | 14273016 | 14273035 | 2 | 10 | 20 | GT   | 20 | 8  |
| 87588 | 8 | 14277708 | 14277727 | 2 | 10 | 20 | AC   | 17 | 8  |
| 87589 | 8 | 14278425 | 14278438 | 2 | 7  | 14 | GA   | 31 | 3  |
| 87590 | 8 | 14278595 | 14278620 | 2 | 13 | 26 | AC   | 17 | 11 |

|       |   |          |          |   |    |    |      |    |    |
|-------|---|----------|----------|---|----|----|------|----|----|
| 87592 | 8 | 14278990 | 14279007 | 3 | 6  | 18 | AGG  | 20 | 3  |
| 87594 | 8 | 14279420 | 14279437 | 2 | 9  | 18 | CA   | 24 | 3  |
| 87600 | 8 | 14285539 | 14285558 | 2 | 10 | 20 | GT   | 13 | 6  |
| 87601 | 8 | 14285833 | 14285856 | 2 | 12 | 24 | GT   | 18 | 6  |
| 87603 | 8 | 14288305 | 14288326 | 2 | 11 | 22 | TG   | 15 | 12 |
| 87604 | 8 | 14288786 | 14288801 | 2 | 8  | 16 | GT   | 25 | 8  |
| 87607 | 8 | 14294004 | 14294017 | 2 | 7  | 14 | GT   | 14 | 10 |
| 87608 | 8 | 14294090 | 14294115 | 2 | 13 | 26 | GT   | 14 | 9  |
| 87612 | 8 | 14298479 | 14298496 | 2 | 9  | 18 | CA   | 11 | 3  |
| 87613 | 8 | 14298523 | 14298548 | 2 | 13 | 26 | CA   | 8  | 4  |
| 87615 | 8 | 14298927 | 14298942 | 2 | 8  | 16 | CA   | 20 | 5  |
| 87616 | 8 | 14299124 | 14299147 | 2 | 12 | 24 | AC   | 18 | 5  |
| 87619 | 8 | 14300032 | 14300065 | 2 | 17 | 34 | GT   | 12 | 10 |
| 87621 | 8 | 14300140 | 14300154 | 3 | 5  | 15 | CTC  | 18 | 4  |
| 87622 | 8 | 14300282 | 14300301 | 4 | 5  | 20 | ATTT | 23 | 6  |
| 87624 | 8 | 14300979 | 14301000 | 2 | 11 | 22 | GA   | 12 | 11 |
| 87626 | 8 | 14301639 | 14301682 | 2 | 22 | 44 | AC   | 11 | 13 |
| 87627 | 8 | 14301707 | 14301730 | 2 | 12 | 24 | TC   | 11 | 5  |
| 87628 | 8 | 14301790 | 14301825 | 2 | 18 | 36 | CA   | 12 | 10 |
| 87631 | 8 | 14302423 | 14302456 | 2 | 17 | 34 | AC   | 14 | 12 |
| 87632 | 8 | 14304722 | 14304751 | 2 | 15 | 30 | GT   | 6  | 6  |
| 87633 | 8 | 14305825 | 14305840 | 4 | 4  | 16 | CACT | 34 | 15 |
| 87635 | 8 | 14309019 | 14309036 | 2 | 9  | 18 | CA   | 9  | 3  |
| 87638 | 8 | 14310681 | 14310702 | 2 | 11 | 22 | TG   | 17 | 4  |
| 87640 | 8 | 14312433 | 14312458 | 2 | 13 | 26 | GT   | 19 | 7  |
| 87641 | 8 | 14314114 | 14314139 | 2 | 13 | 26 | TG   | 19 | 8  |
| 87643 | 8 | 14315335 | 14315364 | 2 | 15 | 30 | CA   | 9  | 12 |
| 87644 | 8 | 14316971 | 14316994 | 2 | 12 | 24 | GT   | 26 | 4  |
| 87645 | 8 | 14317577 | 14317588 | 2 | 6  | 12 | TG   | 26 | 5  |
| 87646 | 8 | 14317902 | 14317941 | 4 | 10 | 40 | ATAG | 13 | 8  |
| 87650 | 8 | 14318951 | 14318972 | 2 | 11 | 22 | GA   | 16 | 6  |
| 87652 | 8 | 14321098 | 14321109 | 2 | 6  | 12 | AC   | 31 | 3  |
| 87653 | 8 | 14321239 | 14321250 | 2 | 6  | 12 | AC   | 30 | 3  |
| 87654 | 8 | 14321287 | 14321312 | 2 | 13 | 26 | AC   | 13 | 13 |
| 87656 | 8 | 14323996 | 14324017 | 2 | 11 | 22 | GT   | 14 | 16 |
| 87657 | 8 | 14324330 | 14324357 | 2 | 14 | 28 | AC   | 26 | 9  |
| 87661 | 8 | 14326255 | 14326266 | 2 | 6  | 12 | GA   | 22 | 5  |
| 87665 | 8 | 14328676 | 14328687 | 2 | 6  | 12 | TG   | 18 | 3  |
| 87666 | 8 | 14329315 | 14329328 | 2 | 7  | 14 | GT   | 26 | 3  |
| 87667 | 8 | 14330184 | 14330199 | 2 | 8  | 16 | AC   | 6  | 6  |
| 87668 | 8 | 14330940 | 14330963 | 2 | 12 | 24 | CA   | 12 | 9  |
| 87669 | 8 | 14331157 | 14331172 | 2 | 8  | 16 | CA   | 11 | 9  |
| 87673 | 8 | 14333119 | 14333142 | 2 | 12 | 24 | TG   | 14 | 4  |
| 87675 | 8 | 14336864 | 14336883 | 2 | 10 | 20 | GT   | 23 | 5  |
| 87684 | 8 | 14348189 | 14348222 | 2 | 17 | 34 | GT   | 7  | 6  |
| 87685 | 8 | 14349987 | 14350002 | 2 | 8  | 16 | AC   | 20 | 8  |
| 87686 | 8 | 14351551 | 14351570 | 2 | 10 | 20 | GA   | 17 | 8  |
| 87689 | 8 | 14367937 | 14367952 | 2 | 8  | 16 | CA   | 18 | 4  |
| 87690 | 8 | 14368218 | 14368231 | 2 | 7  | 14 | AG   | 21 | 3  |
| 87695 | 8 | 14378875 | 14378890 | 2 | 8  | 16 | GA   | 20 | 6  |
| 87696 | 8 | 14378892 | 14378905 | 2 | 7  | 14 | AG   | 12 | 3  |

|       |   |          |          |   |    |    |      |    |    |
|-------|---|----------|----------|---|----|----|------|----|----|
| 87698 | 8 | 14379350 | 14379395 | 2 | 23 | 46 | TG   | 7  | 7  |
| 87700 | 8 | 14383503 | 14383530 | 2 | 14 | 28 | TG   | 17 | 10 |
| 87703 | 8 | 14385184 | 14385205 | 2 | 11 | 22 | GT   | 30 | 5  |
| 87704 | 8 | 14385916 | 14385931 | 2 | 8  | 16 | TC   | 27 | 3  |
| 87705 | 8 | 14386147 | 14386172 | 2 | 13 | 26 | TG   | 12 | 15 |
| 87706 | 8 | 14386831 | 14386866 | 2 | 18 | 36 | CA   | 9  | 10 |
| 87707 | 8 | 14386995 | 14387008 | 2 | 7  | 14 | AC   | 19 | 10 |
| 87708 | 8 | 14387012 | 14387025 | 2 | 7  | 14 | AC   | 17 | 9  |
| 87727 | 8 | 14407579 | 14407614 | 2 | 18 | 36 | CA   | 10 | 7  |
| 87729 | 8 | 14408043 | 14408062 | 2 | 10 | 20 | TG   | 15 | 5  |
| 87732 | 8 | 14409462 | 14409495 | 2 | 17 | 34 | TG   | 15 | 14 |
| 87733 | 8 | 14409962 | 14409977 | 2 | 8  | 16 | TG   | 19 | 3  |
| 87734 | 8 | 14410230 | 14410241 | 2 | 6  | 12 | CA   | 27 | 9  |
| 87735 | 8 | 14411409 | 14411424 | 2 | 8  | 16 | TG   | 28 | 5  |
| 87737 | 8 | 14413794 | 14413817 | 2 | 12 | 24 | TG   | 20 | 5  |
| 87738 | 8 | 14415692 | 14415705 | 2 | 7  | 14 | TG   | 20 | 3  |
| 87741 | 8 | 14422387 | 14422398 | 2 | 6  | 12 | AC   | 17 | 3  |
| 87743 | 8 | 14422644 | 14422673 | 2 | 15 | 30 | AC   | 11 | 7  |
| 87744 | 8 | 14424771 | 14424800 | 2 | 15 | 30 | TG   | 17 | 11 |
| 87747 | 8 | 14426921 | 14426940 | 2 | 10 | 20 | CA   | 17 | 7  |
| 87748 | 8 | 14426942 | 14426955 | 2 | 7  | 14 | AC   | 20 | 8  |
| 87750 | 8 | 14431068 | 14431093 | 2 | 13 | 26 | CA   | 6  | 6  |
| 87752 | 8 | 14431253 | 14431270 | 2 | 9  | 18 | AC   | 20 | 10 |
| 87754 | 8 | 14433071 | 14433082 | 2 | 6  | 12 | CA   | 23 | 4  |
| 87761 | 8 | 14447848 | 14447875 | 2 | 14 | 28 | AC   | 13 | 5  |
| 87762 | 8 | 14448665 | 14448688 | 2 | 12 | 24 | CA   | 20 | 6  |
| 87763 | 8 | 14449134 | 14449157 | 2 | 12 | 24 | AC   | 22 | 9  |
| 87765 | 8 | 14451348 | 14451381 | 2 | 17 | 34 | AC   | 9  | 7  |
| 87766 | 8 | 14451509 | 14451534 | 2 | 13 | 26 | TG   | 14 | 13 |
| 87769 | 8 | 14453532 | 14453547 | 2 | 8  | 16 | GA   | 20 | 5  |
| 87773 | 8 | 14468217 | 14468240 | 2 | 12 | 24 | GT   | 12 | 11 |
| 87775 | 8 | 14468590 | 14468616 | 3 | 9  | 27 | GCT  | 22 | 5  |
| 87776 | 8 | 14470373 | 14470402 | 3 | 10 | 30 | CAG  | 23 | 5  |
| 87780 | 8 | 14472675 | 14472695 | 3 | 7  | 21 | TGC  | 21 | 3  |
| 87782 | 8 | 14472720 | 14472734 | 3 | 5  | 15 | TGA  | 19 | 3  |
| 87789 | 8 | 14486902 | 14486937 | 2 | 18 | 36 | CA   | 12 | 11 |
| 87802 | 8 | 14501829 | 14501848 | 4 | 5  | 20 | TTAT | 32 | 5  |
| 87806 | 8 | 14504599 | 14504626 | 2 | 14 | 28 | GT   | 8  | 12 |
| 87810 | 8 | 14509944 | 14509979 | 2 | 18 | 36 | TG   | 7  | 9  |
| 87811 | 8 | 14510137 | 14510178 | 2 | 21 | 42 | GT   | 12 | 13 |
| 87813 | 8 | 14511575 | 14511602 | 2 | 14 | 28 | TG   | 19 | 9  |
| 87814 | 8 | 14514699 | 14514730 | 2 | 16 | 32 | AC   | 9  | 12 |
| 87815 | 8 | 14516344 | 14516363 | 2 | 10 | 20 | CA   | 29 | 6  |
| 87816 | 8 | 14517075 | 14517090 | 2 | 8  | 16 | TG   | 29 | 5  |
| 87819 | 8 | 14530749 | 14530766 | 2 | 9  | 18 | GT   | 32 | 5  |
| 87828 | 8 | 14543481 | 14543514 | 2 | 17 | 34 | AC   | 10 | 12 |
| 87836 | 8 | 14582443 | 14582462 | 4 | 5  | 20 | ATTT | 14 | 5  |
| 87837 | 8 | 14597112 | 14597135 | 2 | 12 | 24 | AC   | 19 | 13 |
| 87840 | 8 | 14601630 | 14601689 | 4 | 15 | 60 | TAGA | 18 | 11 |
| 87847 | 8 | 14612531 | 14612542 | 2 | 6  | 12 | CA   | 12 | 7  |
| 87848 | 8 | 14612587 | 14612630 | 2 | 22 | 44 | CA   | 6  | 8  |

|       |   |          |          |   |    |    |      |    |    |
|-------|---|----------|----------|---|----|----|------|----|----|
| 87849 | 8 | 14613139 | 14613156 | 2 | 9  | 18 | TG   | 26 | 6  |
| 87850 | 8 | 14613534 | 14613563 | 2 | 15 | 30 | AG   | 9  | 6  |
| 87854 | 8 | 14617884 | 14617901 | 2 | 9  | 18 | TG   | 24 | 4  |
| 87855 | 8 | 14618538 | 14618549 | 2 | 6  | 12 | AC   | 22 | 5  |
| 87862 | 8 | 14628508 | 14628519 | 2 | 6  | 12 | TC   | 31 | 4  |
| 87863 | 8 | 14628591 | 14628620 | 2 | 15 | 30 | GT   | 10 | 9  |
| 87871 | 8 | 14637416 | 14637449 | 2 | 17 | 34 | TG   | 11 | 9  |
| 87876 | 8 | 14641837 | 14641857 | 3 | 7  | 21 | AAC  | 23 | 4  |
| 87878 | 8 | 14648291 | 14648316 | 2 | 13 | 26 | TG   | 11 | 9  |
| 87879 | 8 | 14650117 | 14650134 | 2 | 9  | 18 | GT   | 20 | 5  |
| 87880 | 8 | 14650761 | 14650778 | 2 | 9  | 18 | CA   | 25 | 7  |
| 87891 | 8 | 14659928 | 14659948 | 3 | 7  | 21 | CAG  | 17 | 5  |
| 87901 | 8 | 14671593 | 14671616 | 3 | 8  | 24 | TTC  | 22 | 4  |
| 87902 | 8 | 14676930 | 14676944 | 3 | 5  | 15 | GCT  | 26 | 5  |
| 87903 | 8 | 14677369 | 14677382 | 2 | 7  | 14 | TG   | 23 | 4  |
| 87907 | 8 | 14687125 | 14687150 | 2 | 13 | 26 | AC   | 13 | 7  |
| 87908 | 8 | 14690308 | 14690319 | 2 | 6  | 12 | AC   | 21 | 5  |
| 87912 | 8 | 14699099 | 14699112 | 2 | 7  | 14 | GA   | 21 | 5  |
| 87913 | 8 | 14699488 | 14699501 | 2 | 7  | 14 | TG   | 27 | 8  |
| 87915 | 8 | 14700637 | 14700664 | 2 | 14 | 28 | TG   | 6  | 7  |
| 87917 | 8 | 14702615 | 14702646 | 2 | 16 | 32 | GT   | 15 | 14 |
| 87918 | 8 | 14704237 | 14704268 | 2 | 16 | 32 | AC   | 21 | 8  |
| 87919 | 8 | 14705019 | 14705042 | 2 | 12 | 24 | CA   | 14 | 5  |
| 87921 | 8 | 14706488 | 14706511 | 2 | 12 | 24 | TG   | 14 | 8  |
| 87925 | 8 | 14708285 | 14708300 | 2 | 8  | 16 | AC   | 25 | 4  |
| 87926 | 8 | 14708884 | 14708899 | 2 | 8  | 16 | CT   | 24 | 4  |
| 87928 | 8 | 14714024 | 14714037 | 2 | 7  | 14 | AC   | 24 | 3  |
| 87931 | 8 | 14717834 | 14717855 | 2 | 11 | 22 | TG   | 21 | 5  |
| 87932 | 8 | 14720971 | 14720984 | 2 | 7  | 14 | TG   | 26 | 4  |
| 87933 | 8 | 14721736 | 14721759 | 2 | 12 | 24 | CA   | 20 | 16 |
| 87935 | 8 | 14722186 | 14722199 | 2 | 7  | 14 | AC   | 10 | 3  |
| 87936 | 8 | 14722202 | 14722213 | 2 | 6  | 12 | AC   | 22 | 5  |
| 87937 | 8 | 14722401 | 14722418 | 2 | 9  | 18 | CA   | 31 | 5  |
| 87938 | 8 | 14722551 | 14722576 | 2 | 13 | 26 | TG   | 14 | 14 |
| 87941 | 8 | 14723542 | 14723565 | 2 | 12 | 24 | GT   | 13 | 6  |
| 87944 | 8 | 14730435 | 14730470 | 2 | 18 | 36 | GT   | 9  | 11 |
| 87945 | 8 | 14730533 | 14730550 | 2 | 9  | 18 | TG   | 17 | 8  |
| 87949 | 8 | 14734992 | 14735031 | 2 | 20 | 40 | AC   | 13 | 9  |
| 87951 | 8 | 14736845 | 14736860 | 4 | 4  | 16 | AAAT | 22 | 3  |
| 87952 | 8 | 14738143 | 14738160 | 2 | 9  | 18 | GT   | 24 | 6  |
| 87955 | 8 | 14743522 | 14743551 | 2 | 15 | 30 | AC   | 12 | 12 |
| 87956 | 8 | 14743666 | 14743693 | 2 | 14 | 28 | TG   | 7  | 8  |
| 87960 | 8 | 14744115 | 14744129 | 3 | 5  | 15 | CAT  | 17 | 3  |
| 87961 | 8 | 14744638 | 14744659 | 2 | 11 | 22 | GT   | 11 | 5  |
| 87963 | 8 | 14745004 | 14745033 | 2 | 15 | 30 | TG   | 14 | 7  |
| 87964 | 8 | 14745158 | 14745173 | 2 | 8  | 16 | TG   | 17 | 3  |
| 87965 | 8 | 14745269 | 14745282 | 2 | 7  | 14 | AC   | 16 | 5  |
| 87967 | 8 | 14745418 | 14745437 | 2 | 10 | 20 | CA   | 15 | 5  |
| 87970 | 8 | 14748222 | 14748249 | 2 | 14 | 28 | CA   | 17 | 16 |
| 87972 | 8 | 14748782 | 14748807 | 2 | 13 | 26 | TG   | 13 | 7  |
| 87973 | 8 | 14749078 | 14749093 | 2 | 8  | 16 | CA   | 22 | 3  |

|       |   |          |          |   |    |    |      |    |    |
|-------|---|----------|----------|---|----|----|------|----|----|
| 87976 | 8 | 14758086 | 14758101 | 2 | 8  | 16 | AC   | 19 | 4  |
| 87982 | 8 | 14766521 | 14766540 | 2 | 10 | 20 | GA   | 14 | 6  |
| 87983 | 8 | 14766862 | 14766885 | 2 | 12 | 24 | AG   | 9  | 3  |
| 87984 | 8 | 14766947 | 14766984 | 2 | 19 | 38 | GA   | 15 | 15 |
| 87985 | 8 | 14767799 | 14767834 | 2 | 18 | 36 | TG   | 6  | 8  |
| 87987 | 8 | 14768341 | 14768382 | 3 | 14 | 42 | CTC  | 11 | 10 |
| 87991 | 8 | 14772206 | 14772237 | 2 | 16 | 32 | TG   | 11 | 10 |
| 87992 | 8 | 14772902 | 14772915 | 2 | 7  | 14 | AG   | 28 | 4  |
| 87994 | 8 | 14776504 | 14776519 | 2 | 8  | 16 | TG   | 20 | 7  |
| 88002 | 8 | 14786095 | 14786120 | 2 | 13 | 26 | GT   | 9  | 6  |
| 88009 | 8 | 14796807 | 14796838 | 2 | 16 | 32 | AC   | 18 | 8  |
| 88011 | 8 | 14801196 | 14801209 | 2 | 7  | 14 | CA   | 18 | 6  |
| 88012 | 8 | 14801279 | 14801308 | 2 | 15 | 30 | AC   | 14 | 8  |
| 88013 | 8 | 14801442 | 14801485 | 2 | 22 | 44 | GT   | 13 | 16 |
| 88014 | 8 | 14804712 | 14804739 | 2 | 14 | 28 | CA   | 12 | 7  |
| 88022 | 8 | 14812514 | 14812549 | 2 | 18 | 36 | GT   | 10 | 15 |
| 88023 | 8 | 14813724 | 14813739 | 2 | 8  | 16 | AC   | 29 | 3  |
| 88026 | 8 | 14816543 | 14816558 | 2 | 8  | 16 | TG   | 22 | 4  |
| 88027 | 8 | 14816923 | 14816958 | 2 | 18 | 36 | CT   | 12 | 8  |
| 88031 | 8 | 14823131 | 14823144 | 2 | 7  | 14 | TC   | 22 | 3  |
| 88038 | 8 | 14827754 | 14827775 | 2 | 11 | 22 | TG   | 21 | 7  |
| 88041 | 8 | 14829577 | 14829616 | 2 | 20 | 40 | GT   | 8  | 9  |
| 88050 | 8 | 14844187 | 14844206 | 2 | 10 | 20 | AC   | 18 | 5  |
| 88051 | 8 | 14844733 | 14844746 | 2 | 7  | 14 | CA   | 20 | 3  |
| 88054 | 8 | 14847506 | 14847521 | 2 | 8  | 16 | CA   | 17 | 9  |
| 88063 | 8 | 14860886 | 14860905 | 2 | 10 | 20 | CT   | 7  | 3  |
| 88064 | 8 | 14863040 | 14863061 | 2 | 11 | 22 | GT   | 20 | 15 |
| 88065 | 8 | 14866391 | 14866420 | 2 | 15 | 30 | GT   | 11 | 9  |
| 88066 | 8 | 14866566 | 14866579 | 2 | 7  | 14 | AC   | 22 | 4  |
| 88068 | 8 | 14867309 | 14867324 | 4 | 4  | 16 | AAAT | 27 | 4  |
| 88069 | 8 | 14869708 | 14869723 | 2 | 8  | 16 | GT   | 26 | 4  |
| 88070 | 8 | 14870240 | 14870261 | 2 | 11 | 22 | CA   | 21 | 6  |
| 88071 | 8 | 14870415 | 14870430 | 2 | 8  | 16 | TG   | 15 | 5  |
| 88074 | 8 | 14879418 | 14879447 | 2 | 15 | 30 | CA   | 14 | 9  |
| 88075 | 8 | 14879557 | 14879598 | 2 | 21 | 42 | TG   | 12 | 9  |
| 88079 | 8 | 14883490 | 14883505 | 4 | 4  | 16 | GTAC | 29 | 5  |
| 88080 | 8 | 14884700 | 14884713 | 2 | 7  | 14 | AC   | 27 | 3  |
| 88092 | 8 | 14887737 | 14887762 | 2 | 13 | 26 | TG   | 8  | 9  |
| 88096 | 8 | 14888557 | 14888586 | 2 | 15 | 30 | AC   | 7  | 5  |
| 88107 | 8 | 14901778 | 14901805 | 2 | 14 | 28 | AC   | 8  | 5  |
| 88110 | 8 | 14907727 | 14907744 | 3 | 6  | 18 | TCT  | 16 | 6  |
| 88121 | 8 | 14935536 | 14935561 | 2 | 13 | 26 | TG   | 18 | 7  |
| 88122 | 8 | 14935747 | 14935762 | 2 | 8  | 16 | CA   | 17 | 3  |
| 88123 | 8 | 14937756 | 14937769 | 2 | 7  | 14 | GT   | 27 | 5  |
| 88131 | 8 | 14958515 | 14958529 | 3 | 5  | 15 | ACA  | 8  | 3  |
| 88134 | 9 | 7607     | 7636     | 2 | 15 | 30 | GT   | 9  | 5  |
| 88136 | 9 | 10589    | 10600    | 2 | 6  | 12 | GT   | 27 | 5  |
| 88137 | 9 | 10869    | 10888    | 2 | 10 | 20 | TG   | 22 | 6  |
| 88139 | 9 | 11649    | 11664    | 2 | 8  | 16 | CA   | 17 | 9  |
| 88144 | 9 | 22408    | 22419    | 2 | 6  | 12 | GT   | 14 | 4  |
| 88145 | 9 | 22422    | 22435    | 2 | 7  | 14 | GT   | 21 | 6  |

|       |   |        |        |   |    |    |      |    |    |
|-------|---|--------|--------|---|----|----|------|----|----|
| 88147 | 9 | 22752  | 22779  | 2 | 14 | 28 | CA   | 11 | 12 |
| 88149 | 9 | 22949  | 22966  | 2 | 9  | 18 | AC   | 16 | 12 |
| 88153 | 9 | 23299  | 23324  | 2 | 13 | 26 | GT   | 18 | 15 |
| 88156 | 9 | 29497  | 29512  | 2 | 8  | 16 | AC   | 21 | 11 |
| 88157 | 9 | 29628  | 29651  | 2 | 12 | 24 | TG   | 11 | 7  |
| 88158 | 9 | 30060  | 30073  | 2 | 7  | 14 | GT   | 14 | 9  |
| 88159 | 9 | 30241  | 30284  | 2 | 22 | 44 | TG   | 8  | 7  |
| 88160 | 9 | 32661  | 32684  | 2 | 12 | 24 | GT   | 11 | 8  |
| 88166 | 9 | 38607  | 38622  | 2 | 8  | 16 | AC   | 21 | 3  |
| 88167 | 9 | 38771  | 38802  | 2 | 16 | 32 | TG   | 8  | 8  |
| 88169 | 9 | 40156  | 40179  | 2 | 12 | 24 | GT   | 19 | 12 |
| 88174 | 9 | 49182  | 49199  | 3 | 6  | 18 | CTT  | 9  | 6  |
| 88179 | 9 | 50825  | 50850  | 2 | 13 | 26 | GT   | 11 | 9  |
| 88180 | 9 | 50923  | 50937  | 3 | 5  | 15 | GCT  | 20 | 7  |
| 88182 | 9 | 52654  | 52665  | 2 | 6  | 12 | TA   | 6  | 3  |
| 88185 | 9 | 55432  | 55446  | 3 | 5  | 15 | TTC  | 25 | 4  |
| 88186 | 9 | 56327  | 56338  | 2 | 6  | 12 | TA   | 16 | 3  |
| 88187 | 9 | 56339  | 56352  | 2 | 7  | 14 | CA   | 18 | 8  |
| 88192 | 9 | 60763  | 60798  | 2 | 18 | 36 | TC   | 9  | 10 |
| 88194 | 9 | 61044  | 61070  | 3 | 9  | 27 | CTC  | 17 | 7  |
| 88205 | 9 | 70666  | 70689  | 4 | 6  | 24 | AAGG | 7  | 5  |
| 88208 | 9 | 71004  | 71023  | 2 | 10 | 20 | CA   | 10 | 8  |
| 88211 | 9 | 76608  | 76623  | 4 | 4  | 16 | TGGA | 11 | 12 |
| 88213 | 9 | 77419  | 77433  | 3 | 5  | 15 | CTG  | 27 | 3  |
| 88218 | 9 | 83568  | 83585  | 2 | 9  | 18 | GA   | 17 | 4  |
| 88220 | 9 | 85392  | 85419  | 2 | 14 | 28 | GT   | 15 | 16 |
| 88221 | 9 | 88220  | 88237  | 2 | 9  | 18 | GT   | 22 | 12 |
| 88222 | 9 | 88336  | 88347  | 2 | 6  | 12 | GT   | 17 | 4  |
| 88223 | 9 | 88378  | 88425  | 2 | 24 | 48 | GT   | 8  | 11 |
| 88224 | 9 | 88551  | 88586  | 2 | 18 | 36 | TG   | 8  | 6  |
| 88225 | 9 | 89224  | 89255  | 2 | 16 | 32 | GT   | 13 | 8  |
| 88226 | 9 | 89428  | 89479  | 2 | 26 | 52 | CA   | 15 | 12 |
| 88230 | 9 | 91227  | 91253  | 3 | 9  | 27 | TTC  | 20 | 9  |
| 88239 | 9 | 94020  | 94045  | 2 | 13 | 26 | AC   | 11 | 9  |
| 88240 | 9 | 94978  | 95005  | 2 | 14 | 28 | GT   | 10 | 9  |
| 88241 | 9 | 95145  | 95168  | 4 | 6  | 24 | ATTT | 12 | 6  |
| 88242 | 9 | 98348  | 98383  | 2 | 18 | 36 | GT   | 10 | 13 |
| 88243 | 9 | 98490  | 98541  | 2 | 26 | 52 | TG   | 9  | 10 |
| 88244 | 9 | 101044 | 101061 | 3 | 6  | 18 | GGA  | 15 | 5  |
| 88248 | 9 | 101780 | 101793 | 2 | 7  | 14 | GA   | 13 | 4  |
| 88257 | 9 | 105717 | 105770 | 2 | 27 | 54 | TG   | 8  | 9  |
| 88260 | 9 | 107042 | 107063 | 2 | 11 | 22 | CT   | 25 | 4  |
| 88262 | 9 | 108960 | 108989 | 2 | 15 | 30 | GT   | 11 | 12 |
| 88264 | 9 | 110046 | 110063 | 2 | 9  | 18 | AC   | 18 | 10 |
| 88269 | 9 | 112964 | 112985 | 2 | 11 | 22 | AC   | 7  | 4  |
| 88276 | 9 | 115372 | 115413 | 2 | 21 | 42 | TG   | 10 | 12 |
| 88279 | 9 | 118500 | 118523 | 3 | 8  | 24 | TTG  | 23 | 4  |
| 88280 | 9 | 119130 | 119143 | 2 | 7  | 14 | CT   | 27 | 3  |
| 88284 | 9 | 120349 | 120382 | 2 | 17 | 34 | AC   | 8  | 8  |
| 88286 | 9 | 121727 | 121760 | 2 | 17 | 34 | GT   | 11 | 12 |
| 88288 | 9 | 121942 | 121961 | 2 | 10 | 20 | TG   | 12 | 4  |



|       |   |        |        |   |    |    |      |    |    |
|-------|---|--------|--------|---|----|----|------|----|----|
| 88290 | 9 | 129114 | 129127 | 2 | 7  | 14 | AG   | 19 | 3  |
| 88293 | 9 | 135952 | 135969 | 3 | 6  | 18 | TTA  | 20 | 3  |
| 88299 | 9 | 141325 | 141346 | 2 | 11 | 22 | AC   | 16 | 10 |
| 88302 | 9 | 144336 | 144361 | 2 | 13 | 26 | GT   | 17 | 7  |
| 88314 | 9 | 157611 | 157640 | 2 | 15 | 30 | AC   | 8  | 8  |
| 88315 | 9 | 157743 | 157776 | 2 | 17 | 34 | AC   | 8  | 10 |
| 88326 | 9 | 176253 | 176264 | 2 | 6  | 12 | TC   | 31 | 5  |
| 88340 | 9 | 192958 | 192971 | 2 | 7  | 14 | GA   | 7  | 3  |
| 88341 | 9 | 192972 | 192985 | 2 | 7  | 14 | GT   | 10 | 3  |
| 88343 | 9 | 201282 | 201295 | 2 | 7  | 14 | CA   | 29 | 6  |
| 88345 | 9 | 212567 | 212578 | 2 | 6  | 12 | CA   | 26 | 3  |
| 88346 | 9 | 215194 | 215217 | 2 | 12 | 24 | TG   | 7  | 7  |
| 88347 | 9 | 223055 | 223069 | 3 | 5  | 15 | ACA  | 16 | 3  |
| 88349 | 9 | 233565 | 233579 | 3 | 5  | 15 | TCT  | 35 | 3  |
| 88356 | 9 | 251262 | 251279 | 2 | 9  | 18 | CA   | 21 | 4  |
| 88357 | 9 | 252749 | 252776 | 2 | 14 | 28 | CA   | 13 | 9  |
| 88358 | 9 | 253506 | 253521 | 2 | 8  | 16 | AC   | 27 | 11 |
| 88360 | 9 | 261216 | 261233 | 3 | 6  | 18 | TTA  | 19 | 6  |
| 88362 | 9 | 262186 | 262213 | 4 | 7  | 28 | GAAG | 21 | 7  |
| 88363 | 9 | 262541 | 262572 | 2 | 16 | 32 | AC   | 11 | 5  |
| 88365 | 9 | 263658 | 263669 | 2 | 6  | 12 | GT   | 25 | 18 |
| 88368 | 9 | 266839 | 266874 | 2 | 18 | 36 | CA   | 9  | 8  |
| 88369 | 9 | 266995 | 267036 | 2 | 21 | 42 | AC   | 9  | 12 |
| 88370 | 9 | 269466 | 269489 | 2 | 12 | 24 | CA   | 22 | 12 |
| 88378 | 9 | 284655 | 284681 | 3 | 9  | 27 | GAA  | 27 | 10 |
| 88383 | 9 | 286887 | 286906 | 2 | 10 | 20 | TG   | 8  | 9  |
| 88385 | 9 | 286945 | 286962 | 2 | 9  | 18 | TG   | 12 | 3  |
| 88391 | 9 | 289459 | 289500 | 2 | 21 | 42 | GT   | 8  | 9  |
| 88392 | 9 | 290001 | 290016 | 2 | 8  | 16 | TG   | 23 | 10 |
| 88393 | 9 | 290397 | 290412 | 2 | 8  | 16 | AG   | 23 | 5  |
| 88397 | 9 | 293753 | 293790 | 2 | 19 | 38 | TG   | 15 | 11 |
| 88398 | 9 | 293928 | 293939 | 2 | 6  | 12 | GT   | 25 | 3  |
| 88400 | 9 | 296263 | 296276 | 2 | 7  | 14 | GA   | 19 | 5  |
| 88402 | 9 | 297012 | 297027 | 2 | 8  | 16 | AT   | 7  | 3  |
| 88403 | 9 | 298149 | 298162 | 2 | 7  | 14 | AC   | 23 | 4  |
| 88404 | 9 | 298360 | 298371 | 2 | 6  | 12 | GA   | 11 | 4  |
| 88405 | 9 | 299729 | 299748 | 2 | 10 | 20 | AC   | 20 | 6  |
| 88406 | 9 | 299903 | 299934 | 2 | 16 | 32 | GT   | 13 | 10 |
| 88408 | 9 | 300992 | 301021 | 2 | 15 | 30 | TG   | 14 | 13 |
| 88409 | 9 | 301092 | 301105 | 2 | 7  | 14 | CT   | 18 | 3  |
| 88414 | 9 | 305176 | 305189 | 2 | 7  | 14 | CA   | 19 | 3  |
| 88417 | 9 | 307389 | 307412 | 2 | 12 | 24 | CA   | 17 | 13 |
| 88418 | 9 | 307512 | 307523 | 2 | 6  | 12 | GT   | 19 | 6  |
| 88419 | 9 | 307555 | 307584 | 2 | 15 | 30 | TG   | 10 | 7  |
| 88420 | 9 | 307688 | 307701 | 2 | 7  | 14 | CA   | 22 | 10 |
| 88421 | 9 | 307806 | 307853 | 2 | 24 | 48 | GT   | 6  | 8  |
| 88422 | 9 | 307911 | 307936 | 2 | 13 | 26 | GT   | 18 | 8  |
| 88423 | 9 | 309246 | 309281 | 2 | 18 | 36 | GT   | 6  | 6  |
| 88424 | 9 | 309376 | 309393 | 2 | 9  | 18 | AC   | 18 | 10 |
| 88426 | 9 | 309454 | 309471 | 2 | 9  | 18 | TG   | 6  | 5  |
| 88427 | 9 | 309639 | 309654 | 2 | 8  | 16 | GT   | 19 | 10 |

|       |   |        |        |   |    |    |      |    |    |
|-------|---|--------|--------|---|----|----|------|----|----|
| 88435 | 9 | 315691 | 315710 | 2 | 10 | 20 | CA   | 10 | 3  |
| 88437 | 9 | 320337 | 320360 | 2 | 12 | 24 | AC   | 21 | 5  |
| 88452 | 9 | 329956 | 329973 | 2 | 9  | 18 | TC   | 12 | 3  |
| 88454 | 9 | 332363 | 332384 | 2 | 11 | 22 | GT   | 19 | 8  |
| 88455 | 9 | 334200 | 334217 | 2 | 9  | 18 | TG   | 24 | 7  |
| 88458 | 9 | 339592 | 339612 | 3 | 7  | 21 | GCT  | 28 | 8  |
| 88465 | 9 | 343467 | 343488 | 2 | 11 | 22 | TG   | 8  | 5  |
| 88466 | 9 | 343663 | 343694 | 2 | 16 | 32 | CA   | 10 | 8  |
| 88467 | 9 | 343883 | 343898 | 2 | 8  | 16 | AC   | 28 | 4  |
| 88468 | 9 | 343943 | 343964 | 2 | 11 | 22 | GT   | 22 | 3  |
| 88469 | 9 | 345612 | 345627 | 4 | 4  | 16 | CTGT | 31 | 4  |
| 88472 | 9 | 346035 | 346052 | 2 | 9  | 18 | GT   | 11 | 8  |
| 88478 | 9 | 346690 | 346707 | 3 | 6  | 18 | GGT  | 12 | 4  |
| 88479 | 9 | 346798 | 346815 | 2 | 9  | 18 | AC   | 15 | 6  |
| 88486 | 9 | 356309 | 356350 | 2 | 21 | 42 | TG   | 10 | 11 |
| 88487 | 9 | 358690 | 358713 | 3 | 8  | 24 | GAA  | 26 | 5  |
| 88488 | 9 | 361038 | 361052 | 3 | 5  | 15 | GGT  | 14 | 4  |
| 88496 | 9 | 375992 | 376005 | 2 | 7  | 14 | TG   | 14 | 6  |
| 88497 | 9 | 376149 | 376176 | 2 | 14 | 28 | GT   | 8  | 8  |
| 88498 | 9 | 377926 | 377953 | 4 | 7  | 28 | TAGA | 13 | 14 |
| 88501 | 9 | 383349 | 383370 | 2 | 11 | 22 | TG   | 10 | 12 |
| 88502 | 9 | 383596 | 383607 | 2 | 6  | 12 | GT   | 14 | 6  |
| 88503 | 9 | 388197 | 388216 | 2 | 10 | 20 | AC   | 12 | 12 |
| 88512 | 9 | 391074 | 391097 | 3 | 8  | 24 | AGG  | 11 | 10 |
| 88517 | 9 | 395909 | 395923 | 3 | 5  | 15 | CAG  | 25 | 11 |
| 88524 | 9 | 403887 | 403906 | 4 | 5  | 20 | AAAG | 18 | 4  |
| 88528 | 9 | 415335 | 415349 | 3 | 5  | 15 | GAT  | 31 | 7  |
| 88529 | 9 | 416896 | 416917 | 2 | 11 | 22 | TG   | 24 | 9  |
| 88531 | 9 | 418540 | 418561 | 2 | 11 | 22 | GT   | 22 | 13 |
| 88532 | 9 | 420479 | 420506 | 2 | 14 | 28 | GT   | 20 | 13 |
| 88533 | 9 | 421699 | 421718 | 2 | 10 | 20 | GT   | 20 | 4  |
| 88534 | 9 | 422720 | 422749 | 2 | 15 | 30 | GT   | 11 | 12 |
| 88537 | 9 | 426014 | 426041 | 2 | 14 | 28 | TG   | 16 | 9  |
| 88538 | 9 | 426553 | 426584 | 4 | 8  | 32 | CTTT | 28 | 7  |
| 88541 | 9 | 426912 | 426925 | 2 | 7  | 14 | AC   | 19 | 18 |
| 88544 | 9 | 430668 | 430687 | 2 | 10 | 20 | AC   | 8  | 9  |
| 88545 | 9 | 430689 | 430702 | 2 | 7  | 14 | CA   | 8  | 9  |
| 88546 | 9 | 430826 | 430849 | 2 | 12 | 24 | AC   | 22 | 8  |
| 88547 | 9 | 432612 | 432649 | 2 | 19 | 38 | CA   | 10 | 10 |
| 88548 | 9 | 432740 | 432783 | 2 | 22 | 44 | CA   | 16 | 15 |
| 88549 | 9 | 433795 | 433814 | 2 | 10 | 20 | AC   | 22 | 11 |
| 88550 | 9 | 433969 | 433988 | 2 | 10 | 20 | CA   | 18 | 13 |
| 88551 | 9 | 434091 | 434130 | 2 | 20 | 40 | GT   | 9  | 8  |
| 88552 | 9 | 435534 | 435561 | 2 | 14 | 28 | TG   | 19 | 10 |
| 88553 | 9 | 435723 | 435752 | 2 | 15 | 30 | TG   | 11 | 8  |
| 88555 | 9 | 438765 | 438786 | 2 | 11 | 22 | GT   | 18 | 12 |
| 88556 | 9 | 439240 | 439273 | 2 | 17 | 34 | TG   | 15 | 9  |
| 88560 | 9 | 445315 | 445329 | 3 | 5  | 15 | GAA  | 25 | 3  |
| 88561 | 9 | 446154 | 446179 | 2 | 13 | 26 | AC   | 21 | 10 |
| 88562 | 9 | 446254 | 446273 | 4 | 5  | 20 | GTCA | 29 | 3  |
| 88565 | 9 | 450331 | 450350 | 2 | 10 | 20 | GT   | 23 | 4  |

|       |   |        |        |   |    |    |      |    |    |
|-------|---|--------|--------|---|----|----|------|----|----|
| 88566 | 9 | 450579 | 450598 | 2 | 10 | 20 | CA   | 14 | 8  |
| 88568 | 9 | 450789 | 450812 | 2 | 12 | 24 | CT   | 15 | 7  |
| 88569 | 9 | 450900 | 450917 | 2 | 9  | 18 | TC   | 19 | 6  |
| 88570 | 9 | 451554 | 451587 | 2 | 17 | 34 | GT   | 23 | 10 |
| 88571 | 9 | 452099 | 452113 | 3 | 5  | 15 | CTG  | 33 | 7  |
| 88573 | 9 | 454058 | 454081 | 4 | 6  | 24 | GGAG | 6  | 4  |
| 88575 | 9 | 454608 | 454634 | 3 | 9  | 27 | GAG  | 27 | 8  |
| 88576 | 9 | 457660 | 457687 | 2 | 14 | 28 | TG   | 22 | 8  |
| 88578 | 9 | 460225 | 460240 | 2 | 8  | 16 | TG   | 24 | 10 |
| 88579 | 9 | 461425 | 461438 | 2 | 7  | 14 | CT   | 24 | 6  |
| 88580 | 9 | 463295 | 463322 | 2 | 14 | 28 | AC   | 18 | 8  |
| 88582 | 9 | 464417 | 464430 | 2 | 7  | 14 | TC   | 31 | 3  |
| 88585 | 9 | 467408 | 467427 | 4 | 5  | 20 | CTGT | 21 | 5  |
| 88586 | 9 | 469368 | 469397 | 2 | 15 | 30 | CA   | 10 | 9  |
| 88587 | 9 | 472672 | 472705 | 2 | 17 | 34 | GT   | 11 | 10 |
| 88588 | 9 | 473062 | 473079 | 3 | 6  | 18 | AGA  | 34 | 8  |
| 88589 | 9 | 473294 | 473305 | 2 | 6  | 12 | TG   | 25 | 3  |
| 88590 | 9 | 473536 | 473561 | 2 | 13 | 26 | GT   | 13 | 7  |
| 88600 | 9 | 476536 | 476567 | 2 | 16 | 32 | GT   | 21 | 9  |
| 88601 | 9 | 478088 | 478111 | 2 | 12 | 24 | TG   | 25 | 4  |
| 88602 | 9 | 478498 | 478517 | 2 | 10 | 20 | CA   | 12 | 7  |
| 88603 | 9 | 479433 | 479466 | 2 | 17 | 34 | AC   | 12 | 11 |
| 88608 | 9 | 486669 | 486724 | 4 | 14 | 56 | TTTC | 9  | 7  |
| 88609 | 9 | 486767 | 486786 | 4 | 5  | 20 | TCTT | 13 | 6  |
| 88611 | 9 | 488109 | 488140 | 2 | 16 | 32 | GT   | 10 | 12 |
| 88612 | 9 | 488427 | 488442 | 2 | 8  | 16 | TG   | 22 | 5  |
| 88613 | 9 | 489395 | 489421 | 3 | 9  | 27 | TTC  | 20 | 8  |
| 88615 | 9 | 489783 | 489804 | 2 | 11 | 22 | AC   | 17 | 8  |
| 88620 | 9 | 501252 | 501267 | 2 | 8  | 16 | TC   | 12 | 3  |
| 88623 | 9 | 501520 | 501535 | 2 | 8  | 16 | CA   | 22 | 11 |
| 88624 | 9 | 504504 | 504525 | 2 | 11 | 22 | GT   | 16 | 5  |
| 88625 | 9 | 506464 | 506487 | 3 | 8  | 24 | TCC  | 15 | 6  |
| 88628 | 9 | 510949 | 510982 | 2 | 17 | 34 | GT   | 11 | 7  |
| 88629 | 9 | 513138 | 513167 | 2 | 15 | 30 | TG   | 15 | 10 |
| 88630 | 9 | 514737 | 514748 | 2 | 6  | 12 | AT   | 24 | 11 |
| 88631 | 9 | 514789 | 514804 | 4 | 4  | 16 | GATT | 24 | 3  |
| 88633 | 9 | 517254 | 517273 | 2 | 10 | 20 | AC   | 16 | 8  |
| 88634 | 9 | 517529 | 517546 | 2 | 9  | 18 | AC   | 16 | 13 |
| 88635 | 9 | 519469 | 519484 | 2 | 8  | 16 | AG   | 19 | 3  |
| 88637 | 9 | 519540 | 519569 | 2 | 15 | 30 | GT   | 11 | 8  |
| 88638 | 9 | 519669 | 519690 | 2 | 11 | 22 | GT   | 19 | 13 |
| 88640 | 9 | 521661 | 521678 | 3 | 6  | 18 | GCA  | 23 | 6  |
| 88645 | 9 | 530759 | 530780 | 2 | 11 | 22 | GT   | 23 | 8  |
| 88647 | 9 | 532341 | 532356 | 4 | 4  | 16 | GATA | 18 | 5  |
| 88649 | 9 | 534886 | 534937 | 4 | 13 | 52 | GATA | 21 | 9  |
| 88652 | 9 | 545148 | 545159 | 2 | 6  | 12 | AC   | 21 | 3  |
| 88653 | 9 | 545775 | 545794 | 2 | 10 | 20 | GT   | 23 | 4  |
| 88654 | 9 | 545952 | 545977 | 2 | 13 | 26 | CA   | 14 | 10 |
| 88657 | 9 | 547713 | 547750 | 2 | 19 | 38 | GT   | 11 | 14 |
| 88658 | 9 | 551146 | 551165 | 2 | 10 | 20 | GT   | 9  | 8  |
| 88659 | 9 | 552004 | 552017 | 2 | 7  | 14 | CA   | 31 | 3  |

|       |   |        |        |   |    |    |      |    |    |
|-------|---|--------|--------|---|----|----|------|----|----|
| 88660 | 9 | 552042 | 552097 | 2 | 28 | 56 | TG   | 15 | 11 |
| 88661 | 9 | 557709 | 557722 | 2 | 7  | 14 | GA   | 21 | 3  |
| 88667 | 9 | 569662 | 569695 | 2 | 17 | 34 | GT   | 24 | 15 |
| 88668 | 9 | 570403 | 570426 | 2 | 12 | 24 | CA   | 12 | 15 |
| 88669 | 9 | 575531 | 575564 | 2 | 17 | 34 | GT   | 14 | 7  |
| 88672 | 9 | 582746 | 582781 | 2 | 18 | 36 | TG   | 15 | 16 |
| 88673 | 9 | 582867 | 582886 | 4 | 5  | 20 | GATG | 10 | 3  |
| 88674 | 9 | 582955 | 582984 | 2 | 15 | 30 | CA   | 31 | 9  |
| 88675 | 9 | 585318 | 585335 | 2 | 9  | 18 | GT   | 15 | 4  |
| 88676 | 9 | 586126 | 586140 | 3 | 5  | 15 | TCT  | 31 | 3  |
| 88678 | 9 | 592393 | 592418 | 2 | 13 | 26 | TG   | 20 | 7  |
| 88679 | 9 | 594636 | 594647 | 2 | 6  | 12 | TG   | 30 | 3  |
| 88686 | 9 | 626162 | 626175 | 2 | 7  | 14 | GT   | 21 | 3  |
| 88688 | 9 | 628257 | 628283 | 3 | 9  | 27 | AGG  | 20 | 4  |
| 88690 | 9 | 637720 | 637733 | 2 | 7  | 14 | CT   | 19 | 3  |
| 88697 | 9 | 643477 | 643494 | 3 | 6  | 18 | CAG  | 24 | 11 |
| 88701 | 9 | 647748 | 647779 | 2 | 16 | 32 | GT   | 11 | 9  |
| 88713 | 9 | 654190 | 654231 | 2 | 21 | 42 | GT   | 6  | 6  |
| 88714 | 9 | 654273 | 654292 | 2 | 10 | 20 | CA   | 18 | 8  |
| 88724 | 9 | 662853 | 662890 | 2 | 19 | 38 | TG   | 7  | 10 |
| 88725 | 9 | 662977 | 662988 | 2 | 6  | 12 | AC   | 9  | 4  |
| 88729 | 9 | 663180 | 663199 | 2 | 10 | 20 | AC   | 20 | 9  |
| 88730 | 9 | 663361 | 663378 | 2 | 9  | 18 | AC   | 19 | 6  |
| 88733 | 9 | 670744 | 670757 | 2 | 7  | 14 | AT   | 18 | 6  |
| 88750 | 9 | 681841 | 681855 | 3 | 5  | 15 | TTA  | 19 | 5  |
| 88753 | 9 | 682674 | 682697 | 4 | 6  | 24 | AATA | 15 | 6  |
| 88758 | 9 | 694813 | 694844 | 2 | 16 | 32 | AC   | 18 | 8  |
| 88762 | 9 | 695231 | 695254 | 2 | 12 | 24 | CA   | 21 | 7  |
| 88763 | 9 | 695411 | 695472 | 2 | 31 | 62 | CA   | 8  | 11 |
| 88764 | 9 | 698219 | 698234 | 2 | 8  | 16 | GT   | 19 | 6  |
| 88766 | 9 | 698486 | 698505 | 2 | 10 | 20 | TG   | 23 | 6  |
| 88770 | 9 | 704253 | 704276 | 3 | 8  | 24 | GCT  | 21 | 7  |
| 88771 | 9 | 707268 | 707291 | 2 | 12 | 24 | GT   | 17 | 5  |
| 88772 | 9 | 707468 | 707485 | 2 | 9  | 18 | AC   | 17 | 14 |
| 88774 | 9 | 710848 | 710861 | 2 | 7  | 14 | AC   | 25 | 4  |
| 88776 | 9 | 716579 | 716612 | 2 | 17 | 34 | CA   | 15 | 8  |
| 88777 | 9 | 716722 | 716753 | 2 | 16 | 32 | CA   | 6  | 7  |
| 88778 | 9 | 716871 | 716884 | 2 | 7  | 14 | CA   | 10 | 13 |
| 88779 | 9 | 717117 | 717144 | 2 | 14 | 28 | GT   | 17 | 6  |
| 88782 | 9 | 718956 | 718989 | 2 | 17 | 34 | CA   | 7  | 9  |
| 88785 | 9 | 720177 | 720194 | 2 | 9  | 18 | TG   | 19 | 10 |
| 88793 | 9 | 725096 | 725113 | 2 | 9  | 18 | TG   | 13 | 8  |
| 88797 | 9 | 732664 | 732685 | 2 | 11 | 22 | CA   | 20 | 11 |
| 88799 | 9 | 732958 | 732973 | 2 | 8  | 16 | TG   | 17 | 13 |
| 88800 | 9 | 736028 | 736055 | 2 | 14 | 28 | AC   | 13 | 10 |
| 88801 | 9 | 736244 | 736281 | 2 | 19 | 38 | CA   | 8  | 10 |
| 88806 | 9 | 742123 | 742144 | 2 | 11 | 22 | AC   | 22 | 7  |
| 88808 | 9 | 742304 | 742327 | 2 | 12 | 24 | CA   | 16 | 16 |
| 88809 | 9 | 744054 | 744081 | 2 | 14 | 28 | TG   | 9  | 8  |
| 88810 | 9 | 745906 | 745921 | 2 | 8  | 16 | AC   | 20 | 12 |
| 88815 | 9 | 746305 | 746342 | 2 | 19 | 38 | CA   | 8  | 12 |

|       |   |        |        |   |    |    |      |    |    |
|-------|---|--------|--------|---|----|----|------|----|----|
| 88817 | 9 | 746643 | 746668 | 2 | 13 | 26 | CA   | 14 | 9  |
| 88818 | 9 | 746726 | 746739 | 2 | 7  | 14 | GT   | 31 | 3  |
| 88819 | 9 | 751520 | 751531 | 2 | 6  | 12 | TG   | 27 | 4  |
| 88821 | 9 | 751873 | 751886 | 2 | 7  | 14 | CA   | 8  | 5  |
| 88822 | 9 | 752034 | 752051 | 2 | 9  | 18 | AC   | 16 | 6  |
| 88833 | 9 | 759012 | 759029 | 2 | 9  | 18 | CT   | 24 | 4  |
| 88835 | 9 | 762629 | 762654 | 2 | 13 | 26 | CA   | 10 | 7  |
| 88836 | 9 | 762955 | 762980 | 2 | 13 | 26 | CA   | 18 | 9  |
| 88838 | 9 | 764835 | 764848 | 2 | 7  | 14 | AG   | 19 | 3  |
| 88839 | 9 | 764891 | 764906 | 2 | 8  | 16 | GA   | 22 | 3  |
| 88844 | 9 | 769787 | 769800 | 2 | 7  | 14 | CT   | 17 | 4  |
| 88861 | 9 | 783232 | 783245 | 2 | 7  | 14 | AG   | 13 | 5  |
| 88862 | 9 | 785229 | 785248 | 2 | 10 | 20 | GT   | 18 | 13 |
| 88864 | 9 | 787361 | 787380 | 2 | 10 | 20 | CT   | 19 | 11 |
| 88865 | 9 | 791314 | 791358 | 3 | 15 | 45 | TGA  | 17 | 8  |
| 88867 | 9 | 793114 | 793129 | 4 | 4  | 16 | TCTT | 32 | 12 |
| 88868 | 9 | 793236 | 793251 | 2 | 8  | 16 | CA   | 19 | 13 |
| 88869 | 9 | 797303 | 797316 | 2 | 7  | 14 | CT   | 25 | 3  |
| 88871 | 9 | 797917 | 797940 | 4 | 6  | 24 | TCCA | 19 | 10 |
| 88872 | 9 | 798082 | 798105 | 2 | 12 | 24 | CA   | 17 | 5  |
| 88884 | 9 | 815444 | 815457 | 2 | 7  | 14 | TA   | 22 | 3  |
| 88887 | 9 | 823619 | 823656 | 2 | 19 | 38 | AC   | 12 | 11 |
| 88888 | 9 | 824617 | 824632 | 2 | 8  | 16 | CA   | 21 | 13 |
| 88889 | 9 | 824658 | 824677 | 4 | 5  | 20 | CATA | 7  | 5  |
| 88890 | 9 | 824772 | 824797 | 2 | 13 | 26 | AC   | 10 | 8  |
| 88893 | 9 | 825052 | 825063 | 2 | 6  | 12 | AC   | 20 | 4  |
| 88895 | 9 | 827145 | 827168 | 3 | 8  | 24 | GAA  | 17 | 6  |
| 88896 | 9 | 827225 | 827254 | 2 | 15 | 30 | CA   | 9  | 6  |
| 88897 | 9 | 827316 | 827331 | 2 | 8  | 16 | CA   | 24 | 5  |
| 88898 | 9 | 827384 | 827397 | 2 | 7  | 14 | CA   | 15 | 5  |
| 88899 | 9 | 827399 | 827418 | 2 | 10 | 20 | AC   | 19 | 7  |
| 88903 | 9 | 827661 | 827687 | 3 | 9  | 27 | TCT  | 21 | 5  |
| 88904 | 9 | 827732 | 827745 | 2 | 7  | 14 | GA   | 11 | 3  |
| 88906 | 9 | 827974 | 828009 | 2 | 18 | 36 | TC   | 12 | 7  |
| 88908 | 9 | 833002 | 833019 | 2 | 9  | 18 | TA   | 16 | 5  |
| 88912 | 9 | 834266 | 834293 | 2 | 14 | 28 | AC   | 12 | 14 |
| 88913 | 9 | 834401 | 834412 | 2 | 6  | 12 | AC   | 20 | 3  |
| 88916 | 9 | 835199 | 835220 | 2 | 11 | 22 | TG   | 26 | 11 |
| 88917 | 9 | 835439 | 835484 | 2 | 23 | 46 | AC   | 11 | 12 |
| 88919 | 9 | 838251 | 838270 | 2 | 10 | 20 | AC   | 20 | 8  |
| 88920 | 9 | 838272 | 838287 | 2 | 8  | 16 | CA   | 18 | 6  |
| 88924 | 9 | 838892 | 838919 | 2 | 14 | 28 | GT   | 7  | 8  |
| 88936 | 9 | 858859 | 858872 | 2 | 7  | 14 | CA   | 16 | 5  |
| 88939 | 9 | 862529 | 862560 | 2 | 16 | 32 | AC   | 12 | 12 |
| 88940 | 9 | 862764 | 862783 | 2 | 10 | 20 | AC   | 16 | 10 |
| 88942 | 9 | 863510 | 863529 | 2 | 10 | 20 | TC   | 6  | 3  |
| 88946 | 9 | 864268 | 864281 | 2 | 7  | 14 | CA   | 10 | 3  |
| 88947 | 9 | 864342 | 864377 | 2 | 18 | 36 | CA   | 9  | 10 |
| 88949 | 9 | 868814 | 868827 | 2 | 7  | 14 | CA   | 22 | 7  |
| 88951 | 9 | 871730 | 871757 | 2 | 14 | 28 | AC   | 15 | 9  |
| 88953 | 9 | 873713 | 873736 | 2 | 12 | 24 | CA   | 17 | 12 |

|       |   |        |        |   |    |    |      |    |    |
|-------|---|--------|--------|---|----|----|------|----|----|
| 88954 | 9 | 873857 | 873868 | 2 | 6  | 12 | GT   | 11 | 8  |
| 88956 | 9 | 875321 | 875346 | 2 | 13 | 26 | TG   | 20 | 5  |
| 88957 | 9 | 876431 | 876464 | 2 | 17 | 34 | TG   | 12 | 10 |
| 88958 | 9 | 876564 | 876593 | 2 | 15 | 30 | GT   | 10 | 10 |
| 88961 | 9 | 887981 | 888002 | 2 | 11 | 22 | AC   | 26 | 8  |
| 88964 | 9 | 889612 | 889645 | 2 | 17 | 34 | GT   | 6  | 7  |
| 88968 | 9 | 893721 | 893756 | 2 | 18 | 36 | AC   | 10 | 9  |
| 88969 | 9 | 893838 | 893871 | 2 | 17 | 34 | AC   | 12 | 10 |
| 88971 | 9 | 896968 | 896979 | 2 | 6  | 12 | AG   | 31 | 3  |
| 88972 | 9 | 897355 | 897375 | 3 | 7  | 21 | TCC  | 22 | 6  |
| 88974 | 9 | 897547 | 897560 | 2 | 7  | 14 | AC   | 15 | 4  |
| 88976 | 9 | 898319 | 898362 | 2 | 22 | 44 | CA   | 10 | 9  |
| 88977 | 9 | 898398 | 898411 | 2 | 7  | 14 | AC   | 20 | 4  |
| 88978 | 9 | 898516 | 898563 | 2 | 24 | 48 | CA   | 15 | 15 |
| 88980 | 9 | 901485 | 901508 | 3 | 8  | 24 | CAA  | 18 | 10 |
| 88981 | 9 | 903611 | 903656 | 2 | 23 | 46 | CA   | 9  | 12 |
| 88983 | 9 | 908434 | 908453 | 4 | 5  | 20 | TCTT | 25 | 8  |
| 88985 | 9 | 910518 | 910529 | 2 | 6  | 12 | CA   | 8  | 6  |
| 88990 | 9 | 911449 | 911504 | 2 | 28 | 56 | TG   | 13 | 15 |
| 88995 | 9 | 912011 | 912048 | 2 | 19 | 38 | AC   | 13 | 13 |
| 88996 | 9 | 912100 | 912111 | 2 | 6  | 12 | TC   | 10 | 4  |
| 88998 | 9 | 912198 | 912213 | 2 | 8  | 16 | CT   | 18 | 7  |
| 88999 | 9 | 912255 | 912280 | 2 | 13 | 26 | AC   | 17 | 6  |
| 89000 | 9 | 912392 | 912445 | 2 | 27 | 54 | AC   | 20 | 13 |
| 89002 | 9 | 915070 | 915115 | 2 | 23 | 46 | AC   | 6  | 9  |
| 89006 | 9 | 919470 | 919502 | 3 | 11 | 33 | CTC  | 11 | 5  |
| 89007 | 9 | 919604 | 919621 | 2 | 9  | 18 | CA   | 21 | 11 |
| 89010 | 9 | 927717 | 927752 | 2 | 18 | 36 | GT   | 6  | 7  |
| 89012 | 9 | 930150 | 930173 | 2 | 12 | 24 | TG   | 16 | 8  |
| 89014 | 9 | 932191 | 932204 | 2 | 7  | 14 | GT   | 23 | 5  |
| 89015 | 9 | 932380 | 932395 | 2 | 8  | 16 | TG   | 28 | 8  |
| 89016 | 9 | 932485 | 932498 | 2 | 7  | 14 | TG   | 21 | 3  |
| 89017 | 9 | 932526 | 932549 | 3 | 8  | 24 | GCC  | 23 | 5  |
| 89020 | 9 | 934501 | 934520 | 2 | 10 | 20 | TG   | 19 | 12 |
| 89021 | 9 | 936021 | 936060 | 2 | 20 | 40 | CA   | 11 | 11 |
| 89027 | 9 | 942385 | 942414 | 2 | 15 | 30 | AC   | 11 | 14 |
| 89030 | 9 | 943692 | 943717 | 2 | 13 | 26 | CA   | 15 | 6  |
| 89032 | 9 | 948106 | 948129 | 4 | 6  | 24 | AATA | 27 | 5  |
| 89033 | 9 | 948242 | 948271 | 2 | 15 | 30 | GT   | 10 | 10 |
| 89035 | 9 | 951322 | 951341 | 2 | 10 | 20 | AC   | 13 | 10 |
| 89036 | 9 | 951674 | 951703 | 2 | 15 | 30 | AC   | 11 | 6  |
| 89037 | 9 | 951870 | 951887 | 2 | 9  | 18 | CA   | 25 | 13 |
| 89038 | 9 | 954783 | 954804 | 2 | 11 | 22 | TC   | 19 | 5  |
| 89039 | 9 | 954843 | 954870 | 2 | 14 | 28 | AC   | 14 | 10 |
| 89045 | 9 | 960104 | 960121 | 2 | 9  | 18 | CA   | 18 | 7  |
| 89047 | 9 | 961275 | 961286 | 2 | 6  | 12 | AC   | 20 | 5  |
| 89051 | 9 | 966081 | 966095 | 3 | 5  | 15 | CCT  | 24 | 7  |
| 89053 | 9 | 967519 | 967533 | 3 | 5  | 15 | CCA  | 27 | 7  |
| 89054 | 9 | 967726 | 967741 | 2 | 8  | 16 | CT   | 19 | 3  |
| 89055 | 9 | 967796 | 967807 | 2 | 6  | 12 | CA   | 15 | 4  |
| 89056 | 9 | 967871 | 967894 | 2 | 12 | 24 | AC   | 18 | 6  |

|       |   |         |         |   |    |    |      |    |    |
|-------|---|---------|---------|---|----|----|------|----|----|
| 89060 | 9 | 973008  | 973022  | 3 | 5  | 15 | GGT  | 26 | 3  |
| 89061 | 9 | 973147  | 973167  | 3 | 7  | 21 | TCT  | 20 | 10 |
| 89066 | 9 | 976901  | 976920  | 2 | 10 | 20 | CA   | 16 | 6  |
| 89067 | 9 | 978223  | 978248  | 2 | 13 | 26 | CA   | 16 | 9  |
| 89068 | 9 | 978427  | 978440  | 2 | 7  | 14 | AC   | 23 | 9  |
| 89070 | 9 | 978538  | 978567  | 2 | 15 | 30 | CA   | 13 | 13 |
| 89074 | 9 | 981407  | 981420  | 2 | 7  | 14 | CT   | 13 | 4  |
| 89079 | 9 | 995939  | 995954  | 2 | 8  | 16 | TG   | 22 | 5  |
| 89081 | 9 | 998060  | 998083  | 2 | 12 | 24 | AC   | 10 | 5  |
| 89086 | 9 | 1003054 | 1003077 | 2 | 12 | 24 | TG   | 6  | 7  |
| 89088 | 9 | 1009327 | 1009340 | 2 | 7  | 14 | CA   | 13 | 3  |
| 89090 | 9 | 1012129 | 1012155 | 3 | 9  | 27 | AGA  | 26 | 8  |
| 89091 | 9 | 1012279 | 1012296 | 2 | 9  | 18 | AC   | 10 | 9  |
| 89095 | 9 | 1015274 | 1015309 | 3 | 12 | 36 | GAG  | 17 | 7  |
| 89098 | 9 | 1015682 | 1015713 | 2 | 16 | 32 | TG   | 13 | 11 |
| 89099 | 9 | 1015794 | 1015807 | 2 | 7  | 14 | GT   | 18 | 6  |
| 89100 | 9 | 1015871 | 1015890 | 2 | 10 | 20 | TG   | 10 | 11 |
| 89101 | 9 | 1016960 | 1016999 | 2 | 20 | 40 | AC   | 6  | 9  |
| 89107 | 9 | 1025892 | 1025912 | 3 | 7  | 21 | AGC  | 23 | 11 |
| 89108 | 9 | 1026231 | 1026242 | 2 | 6  | 12 | TG   | 7  | 5  |
| 89109 | 9 | 1026245 | 1026256 | 2 | 6  | 12 | TG   | 6  | 6  |
| 89111 | 9 | 1029496 | 1029525 | 2 | 15 | 30 | GT   | 16 | 7  |
| 89112 | 9 | 1029600 | 1029637 | 2 | 19 | 38 | TG   | 7  | 9  |
| 89115 | 9 | 1030186 | 1030203 | 2 | 9  | 18 | GT   | 20 | 8  |
| 89121 | 9 | 1033531 | 1033572 | 2 | 21 | 42 | CA   | 8  | 8  |
| 89126 | 9 | 1037723 | 1037742 | 2 | 10 | 20 | AC   | 16 | 12 |
| 89129 | 9 | 1043437 | 1043451 | 3 | 5  | 15 | GCT  | 26 | 3  |
| 89131 | 9 | 1044044 | 1044067 | 2 | 12 | 24 | AC   | 14 | 4  |
| 89132 | 9 | 1044197 | 1044218 | 2 | 11 | 22 | TG   | 11 | 11 |
| 89133 | 9 | 1044636 | 1044651 | 4 | 4  | 16 | ACAA | 22 | 3  |
| 89143 | 9 | 1049073 | 1049086 | 2 | 7  | 14 | CA   | 24 | 6  |
| 89145 | 9 | 1049622 | 1049659 | 2 | 19 | 38 | TG   | 8  | 7  |
| 89147 | 9 | 1050935 | 1050952 | 3 | 6  | 18 | GCA  | 23 | 5  |
| 89149 | 9 | 1051606 | 1051629 | 2 | 12 | 24 | GT   | 19 | 18 |
| 89161 | 9 | 1054519 | 1054539 | 3 | 7  | 21 | GAG  | 21 | 6  |
| 89162 | 9 | 1054738 | 1054777 | 2 | 20 | 40 | TG   | 10 | 10 |
| 89164 | 9 | 1054990 | 1055003 | 2 | 7  | 14 | TG   | 7  | 7  |
| 89165 | 9 | 1055073 | 1055096 | 2 | 12 | 24 | AG   | 6  | 7  |
| 89166 | 9 | 1055159 | 1055174 | 2 | 8  | 16 | GT   | 20 | 7  |
| 89170 | 9 | 1059112 | 1059135 | 2 | 12 | 24 | AG   | 13 | 6  |
| 89175 | 9 | 1060693 | 1060710 | 2 | 9  | 18 | CT   | 6  | 6  |
| 89176 | 9 | 1061379 | 1061393 | 3 | 5  | 15 | GAG  | 22 | 3  |
| 89180 | 9 | 1065942 | 1065961 | 2 | 10 | 20 | AG   | 15 | 9  |
| 89181 | 9 | 1066118 | 1066139 | 2 | 11 | 22 | TG   | 15 | 13 |
| 89183 | 9 | 1066304 | 1066315 | 2 | 6  | 12 | TC   | 21 | 3  |
| 89185 | 9 | 1066462 | 1066491 | 2 | 15 | 30 | GT   | 23 | 9  |
| 89186 | 9 | 1067070 | 1067089 | 4 | 5  | 20 | AAAT | 19 | 3  |
| 89187 | 9 | 1068454 | 1068467 | 2 | 7  | 14 | AC   | 27 | 6  |
| 89188 | 9 | 1068575 | 1068604 | 2 | 15 | 30 | AC   | 13 | 13 |
| 89189 | 9 | 1068716 | 1068727 | 2 | 6  | 12 | TG   | 24 | 4  |
| 89193 | 9 | 1069230 | 1069249 | 2 | 10 | 20 | GT   | 6  | 7  |

|       |   |         |         |   |    |    |      |    |    |
|-------|---|---------|---------|---|----|----|------|----|----|
| 89194 | 9 | 1069330 | 1069363 | 2 | 17 | 34 | GT   | 14 | 11 |
| 89200 | 9 | 1071966 | 1072001 | 2 | 18 | 36 | GT   | 9  | 4  |
| 89201 | 9 | 1072041 | 1072058 | 2 | 9  | 18 | TG   | 17 | 9  |
| 89202 | 9 | 1072258 | 1072289 | 2 | 16 | 32 | AC   | 14 | 8  |
| 89203 | 9 | 1073120 | 1073143 | 2 | 12 | 24 | CT   | 19 | 6  |
| 89205 | 9 | 1073342 | 1073369 | 2 | 14 | 28 | TG   | 16 | 9  |
| 89207 | 9 | 1074693 | 1074726 | 2 | 17 | 34 | AC   | 11 | 7  |
| 89209 | 9 | 1075608 | 1075633 | 2 | 13 | 26 | GT   | 8  | 6  |
| 89210 | 9 | 1075719 | 1075746 | 2 | 14 | 28 | GT   | 25 | 8  |
| 89212 | 9 | 1078657 | 1078674 | 2 | 9  | 18 | CA   | 17 | 7  |
| 89213 | 9 | 1078750 | 1078767 | 2 | 9  | 18 | GT   | 24 | 5  |
| 89216 | 9 | 1081147 | 1081168 | 2 | 11 | 22 | TG   | 6  | 7  |
| 89218 | 9 | 1081279 | 1081308 | 2 | 15 | 30 | TG   | 14 | 10 |
| 89221 | 9 | 1081675 | 1081686 | 2 | 6  | 12 | AC   | 23 | 6  |
| 89222 | 9 | 1081921 | 1081960 | 2 | 20 | 40 | CA   | 8  | 8  |
| 89223 | 9 | 1082087 | 1082100 | 2 | 7  | 14 | CA   | 14 | 12 |
| 89226 | 9 | 1083780 | 1083819 | 2 | 20 | 40 | AC   | 9  | 10 |
| 89227 | 9 | 1083941 | 1083968 | 2 | 14 | 28 | AC   | 11 | 11 |
| 89229 | 9 | 1084190 | 1084213 | 2 | 12 | 24 | AC   | 13 | 10 |
| 89230 | 9 | 1084343 | 1084362 | 2 | 10 | 20 | GA   | 15 | 12 |
| 89231 | 9 | 1084501 | 1084520 | 2 | 10 | 20 | GT   | 21 | 9  |
| 89232 | 9 | 1085458 | 1085485 | 2 | 14 | 28 | TG   | 16 | 13 |
| 89233 | 9 | 1085525 | 1085546 | 2 | 11 | 22 | GT   | 24 | 5  |
| 89234 | 9 | 1087217 | 1087234 | 2 | 9  | 18 | AC   | 20 | 6  |
| 89235 | 9 | 1087378 | 1087419 | 2 | 21 | 42 | CA   | 18 | 11 |
| 89236 | 9 | 1088190 | 1088207 | 2 | 9  | 18 | AC   | 20 | 10 |
| 89237 | 9 | 1089470 | 1089490 | 3 | 7  | 21 | AGG  | 21 | 7  |
| 89238 | 9 | 1089685 | 1089708 | 3 | 8  | 24 | AGG  | 9  | 4  |
| 89240 | 9 | 1090601 | 1090632 | 2 | 16 | 32 | TG   | 11 | 8  |
| 89241 | 9 | 1090713 | 1090746 | 2 | 17 | 34 | TG   | 6  | 8  |
| 89242 | 9 | 1090885 | 1090904 | 2 | 10 | 20 | GT   | 11 | 7  |
| 89245 | 9 | 1091339 | 1091360 | 2 | 11 | 22 | GT   | 18 | 11 |
| 89247 | 9 | 1092544 | 1092559 | 2 | 8  | 16 | GT   | 22 | 9  |
| 89248 | 9 | 1092752 | 1092781 | 2 | 15 | 30 | GT   | 6  | 9  |
| 89249 | 9 | 1092936 | 1092963 | 2 | 14 | 28 | AC   | 13 | 8  |
| 89250 | 9 | 1093816 | 1093835 | 2 | 10 | 20 | AC   | 15 | 4  |
| 89251 | 9 | 1094405 | 1094426 | 2 | 11 | 22 | GT   | 18 | 7  |
| 89252 | 9 | 1094940 | 1094953 | 2 | 7  | 14 | CA   | 28 | 4  |
| 89254 | 9 | 1096986 | 1097001 | 4 | 4  | 16 | TTAA | 24 | 3  |
| 89255 | 9 | 1097338 | 1097355 | 2 | 9  | 18 | TG   | 20 | 8  |
| 89257 | 9 | 1097602 | 1097615 | 2 | 7  | 14 | AC   | 31 | 5  |
| 89258 | 9 | 1097617 | 1097628 | 2 | 6  | 12 | CA   | 30 | 5  |
| 89259 | 9 | 1097803 | 1097832 | 2 | 15 | 30 | AC   | 22 | 10 |
| 89260 | 9 | 1099854 | 1099873 | 2 | 10 | 20 | TC   | 7  | 5  |
| 89263 | 9 | 1102396 | 1102413 | 2 | 9  | 18 | AC   | 17 | 3  |
| 89266 | 9 | 1106120 | 1106157 | 2 | 19 | 38 | CA   | 12 | 9  |
| 89267 | 9 | 1106343 | 1106356 | 2 | 7  | 14 | AG   | 12 | 4  |
| 89271 | 9 | 1110641 | 1110688 | 2 | 24 | 48 | GT   | 6  | 9  |
| 89273 | 9 | 1114703 | 1114716 | 2 | 7  | 14 | AC   | 30 | 4  |
| 89274 | 9 | 1114951 | 1114962 | 2 | 6  | 12 | TG   | 28 | 6  |
| 89275 | 9 | 1115280 | 1115305 | 2 | 13 | 26 | GT   | 16 | 11 |



|       |   |         |         |   |    |    |      |    |    |
|-------|---|---------|---------|---|----|----|------|----|----|
| 89276 | 9 | 1119045 | 1119078 | 2 | 17 | 34 | GT   | 13 | 10 |
| 89277 | 9 | 1119197 | 1119224 | 2 | 14 | 28 | AC   | 7  | 7  |
| 89279 | 9 | 1119592 | 1119611 | 2 | 10 | 20 | TG   | 8  | 5  |
| 89280 | 9 | 1119752 | 1119775 | 2 | 12 | 24 | AC   | 12 | 7  |
| 89281 | 9 | 1120035 | 1120052 | 2 | 9  | 18 | CA   | 14 | 3  |
| 89282 | 9 | 1121022 | 1121037 | 2 | 8  | 16 | AC   | 25 | 4  |
| 89284 | 9 | 1122073 | 1122124 | 2 | 26 | 52 | AC   | 20 | 15 |
| 89287 | 9 | 1123674 | 1123699 | 2 | 13 | 26 | CA   | 17 | 10 |
| 89289 | 9 | 1125796 | 1125833 | 2 | 19 | 38 | GT   | 14 | 12 |
| 89290 | 9 | 1125909 | 1125944 | 3 | 12 | 36 | TGA  | 22 | 10 |
| 89291 | 9 | 1126001 | 1126020 | 2 | 10 | 20 | TG   | 25 | 9  |
| 89293 | 9 | 1126537 | 1126556 | 2 | 10 | 20 | TG   | 21 | 6  |
| 89294 | 9 | 1126634 | 1126661 | 2 | 14 | 28 | CA   | 18 | 10 |
| 89295 | 9 | 1127909 | 1127924 | 2 | 8  | 16 | TG   | 23 | 4  |
| 89298 | 9 | 1129597 | 1129628 | 2 | 16 | 32 | GT   | 10 | 9  |
| 89299 | 9 | 1130193 | 1130224 | 2 | 16 | 32 | GT   | 9  | 13 |
| 89304 | 9 | 1133405 | 1133430 | 2 | 13 | 26 | AC   | 15 | 12 |
| 89307 | 9 | 1135160 | 1135183 | 2 | 12 | 24 | GT   | 17 | 14 |
| 89308 | 9 | 1136060 | 1136073 | 2 | 7  | 14 | AC   | 26 | 3  |
| 89310 | 9 | 1137017 | 1137030 | 2 | 7  | 14 | GT   | 27 | 3  |
| 89312 | 9 | 1138551 | 1138578 | 4 | 7  | 28 | TCTT | 17 | 8  |
| 89313 | 9 | 1138691 | 1138714 | 2 | 12 | 24 | TG   | 13 | 11 |
| 89314 | 9 | 1144586 | 1144601 | 2 | 8  | 16 | TA   | 10 | 7  |
| 89317 | 9 | 1144828 | 1144843 | 2 | 8  | 16 | TG   | 16 | 5  |
| 89318 | 9 | 1144845 | 1144856 | 2 | 6  | 12 | GT   | 17 | 6  |
| 89319 | 9 | 1145337 | 1145368 | 2 | 16 | 32 | TG   | 13 | 10 |
| 89320 | 9 | 1147058 | 1147083 | 2 | 13 | 26 | CA   | 9  | 10 |
| 89323 | 9 | 1147495 | 1147530 | 2 | 18 | 36 | GT   | 13 | 5  |
| 89324 | 9 | 1147644 | 1147661 | 2 | 9  | 18 | TG   | 23 | 4  |
| 89327 | 9 | 1148897 | 1148912 | 2 | 8  | 16 | GT   | 24 | 9  |
| 89328 | 9 | 1150549 | 1150562 | 2 | 7  | 14 | TG   | 26 | 4  |
| 89329 | 9 | 1150718 | 1150741 | 4 | 6  | 24 | TTTC | 20 | 7  |
| 89334 | 9 | 1152213 | 1152230 | 2 | 9  | 18 | TG   | 12 | 3  |
| 89337 | 9 | 1154230 | 1154279 | 2 | 25 | 50 | AC   | 11 | 16 |
| 89339 | 9 | 1159553 | 1159570 | 2 | 9  | 18 | TG   | 23 | 14 |
| 89340 | 9 | 1159733 | 1159748 | 4 | 4  | 16 | CTTC | 25 | 4  |
| 89342 | 9 | 1160445 | 1160456 | 2 | 6  | 12 | TG   | 22 | 4  |
| 89343 | 9 | 1161338 | 1161365 | 2 | 14 | 28 | GT   | 13 | 10 |
| 89346 | 9 | 1166771 | 1166798 | 2 | 14 | 28 | GT   | 26 | 8  |
| 89348 | 9 | 1168505 | 1168516 | 2 | 6  | 12 | CA   | 14 | 12 |
| 89350 | 9 | 1168799 | 1168856 | 2 | 29 | 58 | CA   | 7  | 9  |
| 89351 | 9 | 1169035 | 1169046 | 2 | 6  | 12 | AC   | 22 | 5  |
| 89352 | 9 | 1169362 | 1169383 | 2 | 11 | 22 | CA   | 13 | 6  |
| 89354 | 9 | 1170545 | 1170572 | 2 | 14 | 28 | TG   | 12 | 11 |
| 89356 | 9 | 1172893 | 1172908 | 2 | 8  | 16 | AC   | 29 | 3  |
| 89359 | 9 | 1176148 | 1176163 | 2 | 8  | 16 | AC   | 26 | 9  |
| 89360 | 9 | 1176322 | 1176335 | 2 | 7  | 14 | AC   | 23 | 8  |
| 89365 | 9 | 1178362 | 1178373 | 2 | 6  | 12 | AC   | 32 | 4  |
| 89369 | 9 | 1182316 | 1182331 | 2 | 8  | 16 | GT   | 18 | 9  |
| 89371 | 9 | 1182499 | 1182528 | 2 | 15 | 30 | TG   | 6  | 7  |
| 89372 | 9 | 1182701 | 1182712 | 2 | 6  | 12 | TG   | 12 | 8  |

|       |   |         |         |   |    |    |      |    |    |
|-------|---|---------|---------|---|----|----|------|----|----|
| 89373 | 9 | 1182715 | 1182726 | 2 | 6  | 12 | TG   | 16 | 10 |
| 89378 | 9 | 1183494 | 1183515 | 2 | 11 | 22 | AG   | 19 | 12 |
| 89380 | 9 | 1190503 | 1190526 | 2 | 12 | 24 | TG   | 28 | 5  |
| 89381 | 9 | 1194265 | 1194286 | 2 | 11 | 22 | AC   | 13 | 4  |
| 89386 | 9 | 1198485 | 1198514 | 2 | 15 | 30 | AC   | 10 | 10 |
| 89388 | 9 | 1199725 | 1199736 | 2 | 6  | 12 | AC   | 27 | 5  |
| 89391 | 9 | 1204161 | 1204200 | 2 | 20 | 40 | GT   | 8  | 11 |
| 89393 | 9 | 1210115 | 1210172 | 2 | 29 | 58 | GT   | 15 | 8  |
| 89394 | 9 | 1211013 | 1211048 | 2 | 18 | 36 | AC   | 8  | 8  |
| 89395 | 9 | 1211120 | 1211131 | 2 | 6  | 12 | AC   | 22 | 3  |
| 89399 | 9 | 1216458 | 1216477 | 2 | 10 | 20 | GA   | 22 | 4  |
| 89401 | 9 | 1218358 | 1218377 | 2 | 10 | 20 | TC   | 21 | 8  |
| 89404 | 9 | 1226060 | 1226089 | 2 | 15 | 30 | AC   | 13 | 11 |
| 89408 | 9 | 1227187 | 1227204 | 2 | 9  | 18 | AC   | 17 | 3  |
| 89413 | 9 | 1233084 | 1233097 | 2 | 7  | 14 | CA   | 18 | 9  |
| 89417 | 9 | 1236856 | 1236885 | 2 | 15 | 30 | CA   | 6  | 5  |
| 89423 | 9 | 1243626 | 1243639 | 2 | 7  | 14 | AT   | 8  | 3  |
| 89424 | 9 | 1245854 | 1245873 | 4 | 5  | 20 | AACC | 22 | 3  |
| 89428 | 9 | 1249221 | 1249236 | 2 | 8  | 16 | CA   | 19 | 6  |
| 89429 | 9 | 1250864 | 1250881 | 2 | 9  | 18 | CA   | 16 | 8  |
| 89433 | 9 | 1261672 | 1261685 | 2 | 7  | 14 | AG   | 19 | 5  |
| 89434 | 9 | 1263223 | 1263238 | 2 | 8  | 16 | AC   | 28 | 3  |
| 89439 | 9 | 1271051 | 1271068 | 2 | 9  | 18 | CA   | 21 | 4  |
| 89443 | 9 | 1272496 | 1272507 | 2 | 6  | 12 | GT   | 15 | 5  |
| 89444 | 9 | 1272634 | 1272647 | 2 | 7  | 14 | TG   | 17 | 11 |
| 89445 | 9 | 1272738 | 1272755 | 2 | 9  | 18 | GT   | 13 | 5  |
| 89446 | 9 | 1274818 | 1274835 | 2 | 9  | 18 | GT   | 7  | 4  |
| 89449 | 9 | 1274960 | 1274983 | 2 | 12 | 24 | GT   | 19 | 8  |
| 89450 | 9 | 1275055 | 1275072 | 2 | 9  | 18 | TG   | 26 | 4  |
| 89451 | 9 | 1275192 | 1275207 | 2 | 8  | 16 | CA   | 22 | 3  |
| 89458 | 9 | 1291960 | 1291985 | 2 | 13 | 26 | TG   | 23 | 6  |
| 89459 | 9 | 1293259 | 1293276 | 2 | 9  | 18 | CA   | 15 | 8  |
| 89460 | 9 | 1294694 | 1294711 | 2 | 9  | 18 | AC   | 29 | 4  |
| 89461 | 9 | 1294917 | 1294936 | 2 | 10 | 20 | TG   | 22 | 6  |
| 89464 | 9 | 1297182 | 1297217 | 2 | 18 | 36 | GT   | 13 | 15 |
| 89465 | 9 | 1297249 | 1297270 | 2 | 11 | 22 | CA   | 20 | 8  |
| 89469 | 9 | 1301483 | 1301512 | 2 | 15 | 30 | AC   | 20 | 15 |
| 89470 | 9 | 1303998 | 1304019 | 2 | 11 | 22 | CA   | 7  | 9  |
| 89472 | 9 | 1304181 | 1304206 | 2 | 13 | 26 | CA   | 14 | 5  |
| 89473 | 9 | 1304353 | 1304384 | 2 | 16 | 32 | CA   | 18 | 13 |
| 89477 | 9 | 1306041 | 1306070 | 2 | 15 | 30 | CA   | 14 | 8  |
| 89479 | 9 | 1309226 | 1309249 | 2 | 12 | 24 | GT   | 10 | 9  |
| 89481 | 9 | 1310431 | 1310450 | 4 | 5  | 20 | GTGA | 13 | 6  |
| 89483 | 9 | 1311733 | 1311748 | 2 | 8  | 16 | TG   | 23 | 6  |
| 89484 | 9 | 1311910 | 1311937 | 2 | 14 | 28 | CA   | 9  | 9  |
| 89487 | 9 | 1312104 | 1312129 | 2 | 13 | 26 | AC   | 8  | 5  |
| 89490 | 9 | 1313947 | 1313962 | 2 | 8  | 16 | TG   | 24 | 3  |
| 89496 | 9 | 1318779 | 1318796 | 2 | 9  | 18 | TG   | 22 | 10 |
| 89505 | 9 | 1325574 | 1325599 | 2 | 13 | 26 | CA   | 18 | 11 |
| 89506 | 9 | 1325639 | 1325652 | 2 | 7  | 14 | AC   | 28 | 3  |
| 89509 | 9 | 1329890 | 1329903 | 2 | 7  | 14 | AG   | 10 | 3  |

|       |   |         |         |   |    |    |      |    |    |
|-------|---|---------|---------|---|----|----|------|----|----|
| 89510 | 9 | 1334575 | 1334596 | 2 | 11 | 22 | AC   | 14 | 15 |
| 89511 | 9 | 1334970 | 1334987 | 3 | 6  | 18 | TTC  | 24 | 3  |
| 89515 | 9 | 1336447 | 1336470 | 2 | 12 | 24 | GT   | 13 | 7  |
| 89517 | 9 | 1336621 | 1336644 | 2 | 12 | 24 | TG   | 14 | 11 |
| 89521 | 9 | 1340256 | 1340267 | 2 | 6  | 12 | TG   | 22 | 5  |
| 89522 | 9 | 1340271 | 1340282 | 2 | 6  | 12 | GT   | 21 | 3  |
| 89523 | 9 | 1340371 | 1340390 | 2 | 10 | 20 | AC   | 17 | 15 |
| 89525 | 9 | 1345704 | 1345715 | 2 | 6  | 12 | CA   | 15 | 3  |
| 89526 | 9 | 1345829 | 1345843 | 3 | 5  | 15 | CCA  | 13 | 3  |
| 89528 | 9 | 1346457 | 1346480 | 2 | 12 | 24 | GT   | 18 | 7  |
| 89529 | 9 | 1347274 | 1347291 | 2 | 9  | 18 | CT   | 18 | 6  |
| 89533 | 9 | 1349629 | 1349668 | 2 | 20 | 40 | GT   | 10 | 14 |
| 89534 | 9 | 1349824 | 1349841 | 2 | 9  | 18 | TG   | 21 | 5  |
| 89535 | 9 | 1349862 | 1349877 | 2 | 8  | 16 | GT   | 15 | 5  |
| 89536 | 9 | 1350000 | 1350013 | 2 | 7  | 14 | AG   | 27 | 6  |
| 89537 | 9 | 1350110 | 1350121 | 2 | 6  | 12 | GA   | 8  | 3  |
| 89540 | 9 | 1354652 | 1354665 | 2 | 7  | 14 | GA   | 22 | 4  |
| 89542 | 9 | 1355777 | 1355800 | 2 | 12 | 24 | CA   | 20 | 8  |
| 89546 | 9 | 1362203 | 1362236 | 2 | 17 | 34 | CA   | 11 | 7  |
| 89548 | 9 | 1363989 | 1364008 | 2 | 10 | 20 | GT   | 17 | 3  |
| 89550 | 9 | 1364116 | 1364139 | 2 | 12 | 24 | CA   | 11 | 7  |
| 89557 | 9 | 1369574 | 1369591 | 2 | 9  | 18 | CA   | 20 | 6  |
| 89566 | 9 | 1378185 | 1378202 | 2 | 9  | 18 | AG   | 18 | 12 |
| 89570 | 9 | 1379901 | 1379916 | 2 | 8  | 16 | GT   | 20 | 8  |
| 89571 | 9 | 1380200 | 1380215 | 2 | 8  | 16 | GT   | 23 | 6  |
| 89572 | 9 | 1380339 | 1380368 | 2 | 15 | 30 | AC   | 6  | 7  |
| 89573 | 9 | 1380504 | 1380531 | 2 | 14 | 28 | TG   | 13 | 10 |
| 89574 | 9 | 1380698 | 1380713 | 4 | 4  | 16 | AAAG | 26 | 8  |
| 89578 | 9 | 1381964 | 1382023 | 2 | 30 | 60 | AC   | 8  | 11 |
| 89579 | 9 | 1382154 | 1382185 | 2 | 16 | 32 | GT   | 6  | 8  |
| 89580 | 9 | 1382342 | 1382373 | 2 | 16 | 32 | TG   | 8  | 7  |
| 89581 | 9 | 1385069 | 1385086 | 2 | 9  | 18 | AC   | 16 | 9  |
| 89582 | 9 | 1385263 | 1385292 | 2 | 15 | 30 | AC   | 12 | 15 |
| 89583 | 9 | 1385429 | 1385452 | 2 | 12 | 24 | AC   | 21 | 7  |
| 89585 | 9 | 1390312 | 1390337 | 2 | 13 | 26 | CA   | 18 | 12 |
| 89586 | 9 | 1392495 | 1392520 | 2 | 13 | 26 | TG   | 13 | 6  |
| 89589 | 9 | 1395339 | 1395358 | 2 | 10 | 20 | TC   | 14 | 10 |
| 89593 | 9 | 1398471 | 1398482 | 2 | 6  | 12 | AC   | 25 | 10 |
| 89594 | 9 | 1399814 | 1399843 | 2 | 15 | 30 | GT   | 14 | 13 |
| 89596 | 9 | 1399969 | 1399996 | 2 | 14 | 28 | AC   | 10 | 12 |
| 89597 | 9 | 1400122 | 1400149 | 2 | 14 | 28 | AC   | 17 | 11 |
| 89598 | 9 | 1402083 | 1402096 | 2 | 7  | 14 | CA   | 22 | 3  |
| 89600 | 9 | 1403321 | 1403352 | 2 | 16 | 32 | TG   | 9  | 10 |
| 89602 | 9 | 1405042 | 1405061 | 2 | 10 | 20 | GT   | 13 | 12 |
| 89603 | 9 | 1405608 | 1405629 | 2 | 11 | 22 | CT   | 15 | 8  |
| 89604 | 9 | 1405800 | 1405825 | 2 | 13 | 26 | TC   | 14 | 4  |
| 89605 | 9 | 1406029 | 1406050 | 2 | 11 | 22 | GT   | 19 | 9  |
| 89608 | 9 | 1407998 | 1408019 | 2 | 11 | 22 | GT   | 14 | 5  |
| 89610 | 9 | 1408365 | 1408376 | 2 | 6  | 12 | TG   | 30 | 5  |
| 89612 | 9 | 1409615 | 1409648 | 2 | 17 | 34 | GT   | 6  | 8  |
| 89615 | 9 | 1413684 | 1413704 | 3 | 7  | 21 | GAA  | 25 | 6  |

|       |   |         |         |   |    |    |      |    |    |
|-------|---|---------|---------|---|----|----|------|----|----|
| 89616 | 9 | 1413930 | 1413949 | 2 | 10 | 20 | AG   | 16 | 6  |
| 89617 | 9 | 1414299 | 1414324 | 2 | 13 | 26 | GT   | 20 | 12 |
| 89618 | 9 | 1415509 | 1415532 | 4 | 6  | 24 | TTTA | 29 | 3  |
| 89620 | 9 | 1417261 | 1417276 | 2 | 8  | 16 | AG   | 19 | 3  |
| 89622 | 9 | 1419018 | 1419051 | 2 | 17 | 34 | AC   | 7  | 5  |
| 89626 | 9 | 1424737 | 1424750 | 2 | 7  | 14 | CA   | 9  | 7  |
| 89627 | 9 | 1424843 | 1424858 | 2 | 8  | 16 | CA   | 19 | 6  |
| 89628 | 9 | 1425002 | 1425037 | 2 | 18 | 36 | TG   | 7  | 6  |
| 89629 | 9 | 1425254 | 1425273 | 2 | 10 | 20 | AT   | 21 | 10 |
| 89632 | 9 | 1430971 | 1430994 | 4 | 6  | 24 | AGGC | 11 | 4  |
| 89646 | 9 | 1447843 | 1447868 | 2 | 13 | 26 | CA   | 12 | 15 |
| 89647 | 9 | 1447919 | 1447970 | 2 | 26 | 52 | AC   | 6  | 8  |
| 89650 | 9 | 1448329 | 1448340 | 2 | 6  | 12 | TA   | 17 | 8  |
| 89651 | 9 | 1448472 | 1448501 | 2 | 15 | 30 | AC   | 20 | 11 |
| 89652 | 9 | 1448695 | 1448718 | 2 | 12 | 24 | CA   | 16 | 9  |
| 89653 | 9 | 1450857 | 1450868 | 2 | 6  | 12 | GA   | 20 | 5  |
| 89654 | 9 | 1451951 | 1451962 | 2 | 6  | 12 | TA   | 22 | 6  |
| 89655 | 9 | 1452077 | 1452092 | 4 | 4  | 16 | CTGA | 14 | 4  |
| 89657 | 9 | 1453979 | 1454002 | 4 | 6  | 24 | GTGC | 12 | 13 |
| 89659 | 9 | 1454105 | 1454140 | 2 | 18 | 36 | GT   | 8  | 5  |
| 89662 | 9 | 1456019 | 1456034 | 2 | 8  | 16 | CA   | 16 | 12 |
| 89667 | 9 | 1459634 | 1459647 | 2 | 7  | 14 | CA   | 19 | 9  |
| 89669 | 9 | 1468051 | 1468064 | 2 | 7  | 14 | AT   | 20 | 3  |
| 89670 | 9 | 1468146 | 1468157 | 2 | 6  | 12 | CA   | 29 | 7  |
| 89676 | 9 | 1470310 | 1470325 | 2 | 8  | 16 | GT   | 27 | 5  |
| 89677 | 9 | 1471479 | 1471490 | 2 | 6  | 12 | GT   | 23 | 5  |
| 89679 | 9 | 1471794 | 1471807 | 2 | 7  | 14 | AC   | 24 | 6  |
| 89681 | 9 | 1472477 | 1472504 | 2 | 14 | 28 | AC   | 24 | 7  |
| 89686 | 9 | 1473769 | 1473789 | 3 | 7  | 21 | CTC  | 24 | 6  |
| 89694 | 9 | 1481123 | 1481149 | 3 | 9  | 27 | AAC  | 23 | 3  |
| 89695 | 9 | 1481347 | 1481373 | 3 | 9  | 27 | CTC  | 23 | 7  |
| 89696 | 9 | 1481624 | 1481635 | 2 | 6  | 12 | GT   | 9  | 6  |
| 89698 | 9 | 1483968 | 1484006 | 3 | 13 | 39 | ATC  | 24 | 15 |
| 89704 | 9 | 1488795 | 1488814 | 2 | 10 | 20 | AG   | 8  | 6  |
| 89705 | 9 | 1488910 | 1488927 | 2 | 9  | 18 | AC   | 20 | 10 |
| 89708 | 9 | 1495171 | 1495192 | 2 | 11 | 22 | AC   | 20 | 11 |
| 89709 | 9 | 1495289 | 1495318 | 2 | 15 | 30 | CA   | 14 | 12 |
| 89712 | 9 | 1497702 | 1497713 | 2 | 6  | 12 | TG   | 20 | 3  |
| 89714 | 9 | 1498534 | 1498547 | 2 | 7  | 14 | AC   | 16 | 3  |
| 89715 | 9 | 1498670 | 1498685 | 2 | 8  | 16 | CA   | 23 | 8  |
| 89717 | 9 | 1500260 | 1500277 | 3 | 6  | 18 | CCT  | 19 | 5  |
| 89718 | 9 | 1501324 | 1501353 | 2 | 15 | 30 | AC   | 18 | 16 |
| 89719 | 9 | 1501430 | 1501451 | 2 | 11 | 22 | GT   | 24 | 13 |
| 89720 | 9 | 1501529 | 1501556 | 2 | 14 | 28 | AC   | 16 | 10 |
| 89721 | 9 | 1503312 | 1503331 | 2 | 10 | 20 | CA   | 24 | 9  |
| 89722 | 9 | 1503368 | 1503381 | 2 | 7  | 14 | CA   | 24 | 6  |
| 89723 | 9 | 1503513 | 1503526 | 2 | 7  | 14 | GT   | 21 | 9  |
| 89724 | 9 | 1503677 | 1503712 | 2 | 18 | 36 | GT   | 16 | 15 |
| 89725 | 9 | 1505362 | 1505397 | 2 | 18 | 36 | CA   | 8  | 7  |
| 89728 | 9 | 1510027 | 1510050 | 2 | 12 | 24 | TG   | 19 | 15 |
| 89729 | 9 | 1510194 | 1510205 | 2 | 6  | 12 | CA   | 18 | 4  |

|       |   |         |         |   |    |    |      |    |    |
|-------|---|---------|---------|---|----|----|------|----|----|
| 89739 | 9 | 1524124 | 1524138 | 3 | 5  | 15 | TGT  | 26 | 8  |
| 89740 | 9 | 1527270 | 1527293 | 2 | 12 | 24 | CA   | 11 | 6  |
| 89742 | 9 | 1527545 | 1527586 | 2 | 21 | 42 | CA   | 10 | 9  |
| 89743 | 9 | 1527654 | 1527671 | 2 | 9  | 18 | TG   | 20 | 7  |
| 89744 | 9 | 1529842 | 1529859 | 2 | 9  | 18 | GT   | 21 | 7  |
| 89745 | 9 | 1532808 | 1532829 | 2 | 11 | 22 | TG   | 17 | 7  |
| 89747 | 9 | 1534224 | 1534239 | 2 | 8  | 16 | CT   | 21 | 4  |
| 89748 | 9 | 1535499 | 1535514 | 2 | 8  | 16 | AT   | 18 | 3  |
| 89749 | 9 | 1535673 | 1535700 | 2 | 14 | 28 | CA   | 15 | 6  |
| 89753 | 9 | 1559085 | 1559108 | 4 | 6  | 24 | AAAT | 16 | 4  |
| 89754 | 9 | 1561687 | 1561706 | 2 | 10 | 20 | TG   | 24 | 8  |
| 89755 | 9 | 1566010 | 1566024 | 3 | 5  | 15 | CTG  | 19 | 4  |
| 89758 | 9 | 1569789 | 1569808 | 2 | 10 | 20 | TG   | 24 | 12 |
| 89759 | 9 | 1571238 | 1571255 | 2 | 9  | 18 | GT   | 24 | 15 |
| 89760 | 9 | 1571420 | 1571437 | 2 | 9  | 18 | TG   | 18 | 12 |
| 89764 | 9 | 1577864 | 1577884 | 3 | 7  | 21 | TTG  | 16 | 4  |
| 89765 | 9 | 1578680 | 1578703 | 3 | 8  | 24 | TAA  | 19 | 7  |
| 89766 | 9 | 1580287 | 1580304 | 2 | 9  | 18 | GA   | 18 | 5  |
| 89767 | 9 | 1580852 | 1580869 | 3 | 6  | 18 | GAA  | 23 | 3  |
| 89768 | 9 | 1581322 | 1581336 | 3 | 5  | 15 | AAC  | 29 | 5  |
| 89775 | 9 | 1585868 | 1585903 | 3 | 12 | 36 | AAT  | 10 | 5  |
| 89791 | 9 | 1613249 | 1613268 | 2 | 10 | 20 | AC   | 11 | 6  |
| 89801 | 9 | 1622354 | 1622368 | 3 | 5  | 15 | ATC  | 32 | 3  |
| 89802 | 9 | 1623280 | 1623293 | 2 | 7  | 14 | AG   | 29 | 3  |
| 89805 | 9 | 1629295 | 1629320 | 2 | 13 | 26 | TG   | 16 | 5  |
| 89810 | 9 | 1642285 | 1642298 | 2 | 7  | 14 | CA   | 19 | 4  |
| 89815 | 9 | 1651027 | 1651046 | 2 | 10 | 20 | CA   | 22 | 7  |
| 89816 | 9 | 1651324 | 1651351 | 2 | 14 | 28 | CA   | 19 | 7  |
| 89817 | 9 | 1656285 | 1656304 | 2 | 10 | 20 | CA   | 17 | 6  |
| 89818 | 9 | 1656376 | 1656393 | 2 | 9  | 18 | CA   | 7  | 7  |
| 89820 | 9 | 1656532 | 1656557 | 2 | 13 | 26 | AC   | 8  | 6  |
| 89823 | 9 | 1658308 | 1658321 | 2 | 7  | 14 | AC   | 6  | 4  |
| 89825 | 9 | 1663072 | 1663107 | 3 | 12 | 36 | CAA  | 7  | 8  |
| 89826 | 9 | 1665935 | 1665980 | 2 | 23 | 46 | GT   | 13 | 9  |
| 89831 | 9 | 1676092 | 1676103 | 2 | 6  | 12 | GT   | 25 | 3  |
| 89836 | 9 | 1685016 | 1685031 | 2 | 8  | 16 | AC   | 18 | 4  |
| 89840 | 9 | 1685239 | 1685254 | 4 | 4  | 16 | AGCC | 11 | 4  |
| 89841 | 9 | 1685398 | 1685415 | 2 | 9  | 18 | TC   | 16 | 5  |
| 89843 | 9 | 1685580 | 1685597 | 3 | 6  | 18 | GTT  | 20 | 7  |
| 89846 | 9 | 1689805 | 1689822 | 2 | 9  | 18 | CA   | 22 | 6  |
| 89848 | 9 | 1693935 | 1693958 | 4 | 6  | 24 | TAAA | 18 | 5  |
| 89849 | 9 | 1695461 | 1695484 | 3 | 8  | 24 | CCT  | 27 | 6  |
| 89850 | 9 | 1700573 | 1700606 | 2 | 17 | 34 | AC   | 17 | 13 |
| 89851 | 9 | 1700724 | 1700761 | 2 | 19 | 38 | GT   | 6  | 8  |
| 89852 | 9 | 1700873 | 1700912 | 2 | 20 | 40 | TG   | 13 | 10 |
| 89854 | 9 | 1703051 | 1703070 | 2 | 10 | 20 | GA   | 7  | 8  |
| 89860 | 9 | 1706745 | 1706778 | 2 | 17 | 34 | GT   | 7  | 9  |
| 89862 | 9 | 1707153 | 1707172 | 2 | 10 | 20 | GT   | 16 | 8  |
| 89863 | 9 | 1707728 | 1707748 | 3 | 7  | 21 | AAT  | 8  | 4  |
| 89868 | 9 | 1709836 | 1709859 | 2 | 12 | 24 | AC   | 16 | 13 |
| 89869 | 9 | 1716512 | 1716527 | 4 | 4  | 16 | TATC | 8  | 3  |

|       |   |         |         |   |    |    |      |    |    |
|-------|---|---------|---------|---|----|----|------|----|----|
| 89870 | 9 | 1716888 | 1716921 | 2 | 17 | 34 | AC   | 20 | 7  |
| 89877 | 9 | 1723212 | 1723243 | 2 | 16 | 32 | AG   | 16 | 10 |
| 89879 | 9 | 1724951 | 1724966 | 2 | 8  | 16 | GT   | 22 | 7  |
| 89880 | 9 | 1727325 | 1727360 | 2 | 18 | 36 | TG   | 19 | 17 |
| 89884 | 9 | 1728206 | 1728231 | 2 | 13 | 26 | AC   | 20 | 11 |
| 89885 | 9 | 1728802 | 1728817 | 2 | 8  | 16 | CA   | 25 | 7  |
| 89886 | 9 | 1729024 | 1729061 | 2 | 19 | 38 | TG   | 10 | 15 |
| 89889 | 9 | 1729361 | 1729384 | 2 | 12 | 24 | AC   | 11 | 9  |
| 89890 | 9 | 1731837 | 1731851 | 3 | 5  | 15 | CTC  | 28 | 5  |
| 89892 | 9 | 1733511 | 1733538 | 2 | 14 | 28 | TG   | 19 | 8  |
| 89893 | 9 | 1737766 | 1737780 | 3 | 5  | 15 | AAT  | 17 | 5  |
| 89895 | 9 | 1739996 | 1740017 | 2 | 11 | 22 | CA   | 16 | 9  |
| 89896 | 9 | 1740365 | 1740382 | 3 | 6  | 18 | CAT  | 30 | 3  |
| 89899 | 9 | 1745228 | 1745239 | 2 | 6  | 12 | AT   | 22 | 5  |
| 89903 | 9 | 1747417 | 1747454 | 2 | 19 | 38 | AC   | 19 | 14 |
| 89904 | 9 | 1748101 | 1748120 | 2 | 10 | 20 | CA   | 24 | 8  |
| 89905 | 9 | 1748753 | 1748776 | 2 | 12 | 24 | CA   | 7  | 8  |
| 89907 | 9 | 1748924 | 1748945 | 2 | 11 | 22 | CA   | 18 | 8  |
| 89910 | 9 | 1751864 | 1751887 | 3 | 8  | 24 | AGA  | 26 | 8  |
| 89912 | 9 | 1752810 | 1752825 | 2 | 8  | 16 | CT   | 21 | 5  |
| 89913 | 9 | 1753808 | 1753823 | 2 | 8  | 16 | GT   | 20 | 13 |
| 89915 | 9 | 1754016 | 1754033 | 3 | 6  | 18 | ACA  | 11 | 3  |
| 89916 | 9 | 1754089 | 1754108 | 4 | 5  | 20 | TCCT | 24 | 3  |
| 89918 | 9 | 1755483 | 1755502 | 2 | 10 | 20 | GT   | 21 | 7  |
| 89920 | 9 | 1758754 | 1758775 | 2 | 11 | 22 | CA   | 18 | 7  |
| 89925 | 9 | 1771352 | 1771378 | 3 | 9  | 27 | TTC  | 23 | 3  |
| 89926 | 9 | 1771867 | 1771878 | 2 | 6  | 12 | GT   | 25 | 4  |
| 89927 | 9 | 1772854 | 1772877 | 2 | 12 | 24 | TG   | 14 | 11 |
| 89928 | 9 | 1773042 | 1773061 | 2 | 10 | 20 | CA   | 18 | 12 |
| 89931 | 9 | 1778090 | 1778128 | 3 | 13 | 39 | TGA  | 24 | 9  |
| 89932 | 9 | 1780259 | 1780288 | 3 | 10 | 30 | GGA  | 14 | 10 |
| 89933 | 9 | 1780347 | 1780364 | 2 | 9  | 18 | CT   | 23 | 6  |
| 89935 | 9 | 1781945 | 1781959 | 3 | 5  | 15 | ACA  | 25 | 3  |
| 89940 | 9 | 1785350 | 1785369 | 4 | 5  | 20 | TATT | 15 | 4  |
| 89944 | 9 | 1788924 | 1788938 | 3 | 5  | 15 | AGG  | 33 | 3  |
| 89946 | 9 | 1791474 | 1791511 | 2 | 19 | 38 | CA   | 22 | 13 |
| 89947 | 9 | 1792873 | 1792887 | 3 | 5  | 15 | AGA  | 28 | 6  |
| 89948 | 9 | 1795938 | 1795955 | 3 | 6  | 18 | CCT  | 21 | 3  |
| 89953 | 9 | 1804772 | 1804787 | 4 | 4  | 16 | CAAA | 26 | 5  |
| 89956 | 9 | 1809787 | 1809800 | 2 | 7  | 14 | GT   | 19 | 4  |
| 89959 | 9 | 1811376 | 1811401 | 2 | 13 | 26 | CA   | 19 | 7  |
| 89960 | 9 | 1811523 | 1811546 | 2 | 12 | 24 | AG   | 23 | 15 |
| 89961 | 9 | 1811590 | 1811613 | 3 | 8  | 24 | CTC  | 16 | 7  |
| 89962 | 9 | 1811948 | 1811965 | 3 | 6  | 18 | GAG  | 19 | 5  |
| 89963 | 9 | 1812122 | 1812137 | 2 | 8  | 16 | GT   | 28 | 7  |
| 89964 | 9 | 1812927 | 1812968 | 2 | 21 | 42 | TG   | 9  | 8  |
| 89965 | 9 | 1813103 | 1813140 | 2 | 19 | 38 | GT   | 7  | 6  |
| 89967 | 9 | 1814179 | 1814200 | 2 | 11 | 22 | AC   | 17 | 11 |
| 89974 | 9 | 1819160 | 1819189 | 2 | 15 | 30 | TG   | 12 | 7  |
| 89976 | 9 | 1819384 | 1819409 | 2 | 13 | 26 | CA   | 24 | 10 |
| 89978 | 9 | 1825261 | 1825275 | 3 | 5  | 15 | TGC  | 24 | 3  |

|       |   |         |         |   |    |    |      |    |    |
|-------|---|---------|---------|---|----|----|------|----|----|
| 89979 | 9 | 1826925 | 1826936 | 2 | 6  | 12 | TG   | 26 | 5  |
| 89980 | 9 | 1832502 | 1832522 | 3 | 7  | 21 | CTG  | 25 | 7  |
| 89981 | 9 | 1834226 | 1834253 | 2 | 14 | 28 | CA   | 16 | 17 |
| 89982 | 9 | 1834405 | 1834428 | 2 | 12 | 24 | CA   | 15 | 11 |
| 89985 | 9 | 1835667 | 1835682 | 2 | 8  | 16 | GA   | 12 | 10 |
| 89988 | 9 | 1836173 | 1836188 | 4 | 4  | 16 | AAGA | 13 | 4  |
| 89989 | 9 | 1836913 | 1836942 | 2 | 15 | 30 | AC   | 9  | 8  |
| 89992 | 9 | 1845852 | 1845873 | 2 | 11 | 22 | AC   | 30 | 7  |
| 89993 | 9 | 1851602 | 1851625 | 2 | 12 | 24 | TG   | 15 | 7  |
| 89994 | 9 | 1852093 | 1852140 | 2 | 24 | 48 | GA   | 10 | 11 |
| 89995 | 9 | 1853066 | 1853079 | 2 | 7  | 14 | AC   | 26 | 5  |
| 89997 | 9 | 1854276 | 1854287 | 2 | 6  | 12 | TG   | 26 | 8  |
| 90000 | 9 | 1869115 | 1869160 | 2 | 23 | 46 | GT   | 12 | 13 |
| 90002 | 9 | 1871784 | 1871799 | 2 | 8  | 16 | AC   | 22 | 12 |
| 90003 | 9 | 1872021 | 1872034 | 2 | 7  | 14 | TG   | 29 | 4  |
| 90007 | 9 | 1894942 | 1894959 | 3 | 6  | 18 | AGG  | 20 | 6  |
| 90011 | 9 | 1897278 | 1897319 | 3 | 14 | 42 | AAG  | 13 | 7  |
| 90012 | 9 | 1897731 | 1897746 | 4 | 4  | 16 | TTTA | 16 | 6  |
| 90015 | 9 | 1906808 | 1906839 | 4 | 8  | 32 | TTTA | 18 | 9  |
| 90019 | 9 | 1919846 | 1919866 | 3 | 7  | 21 | CCT  | 16 | 6  |
| 90020 | 9 | 1920732 | 1920761 | 2 | 15 | 30 | TG   | 11 | 7  |
| 90030 | 9 | 1935723 | 1935744 | 2 | 11 | 22 | GT   | 24 | 7  |
| 90033 | 9 | 1941747 | 1941772 | 2 | 13 | 26 | AG   | 10 | 8  |
| 90034 | 9 | 1941820 | 1941837 | 2 | 9  | 18 | GT   | 19 | 9  |
| 90036 | 9 | 1941960 | 1941983 | 2 | 12 | 24 | TG   | 16 | 12 |
| 90037 | 9 | 1942118 | 1942149 | 2 | 16 | 32 | CA   | 13 | 13 |
| 90039 | 9 | 1944878 | 1944897 | 2 | 10 | 20 | GT   | 22 | 4  |
| 90040 | 9 | 1948154 | 1948173 | 2 | 10 | 20 | GT   | 9  | 9  |
| 90041 | 9 | 1948345 | 1948372 | 2 | 14 | 28 | AC   | 21 | 8  |
| 90043 | 9 | 1948832 | 1948847 | 2 | 8  | 16 | GT   | 6  | 5  |
| 90044 | 9 | 1948941 | 1948962 | 2 | 11 | 22 | TG   | 15 | 6  |
| 90052 | 9 | 1956143 | 1956176 | 2 | 17 | 34 | GT   | 10 | 10 |
| 90053 | 9 | 1956274 | 1956289 | 2 | 8  | 16 | TG   | 19 | 4  |
| 90054 | 9 | 1956360 | 1956375 | 2 | 8  | 16 | CA   | 24 | 7  |
| 90055 | 9 | 1957924 | 1957937 | 2 | 7  | 14 | CA   | 21 | 10 |
| 90057 | 9 | 1959716 | 1959747 | 2 | 16 | 32 | AC   | 20 | 16 |
| 90059 | 9 | 1960803 | 1960818 | 2 | 8  | 16 | TG   | 12 | 5  |
| 90062 | 9 | 1965016 | 1965051 | 2 | 18 | 36 | CA   | 15 | 17 |
| 90069 | 9 | 1968730 | 1968745 | 2 | 8  | 16 | AC   | 24 | 16 |
| 90073 | 9 | 1974900 | 1974915 | 2 | 8  | 16 | AC   | 20 | 11 |
| 90074 | 9 | 1974986 | 1975009 | 3 | 8  | 24 | CAT  | 27 | 8  |
| 90075 | 9 | 1977429 | 1977460 | 2 | 16 | 32 | AC   | 9  | 11 |
| 90076 | 9 | 1978683 | 1978720 | 2 | 19 | 38 | CA   | 10 | 10 |
| 90078 | 9 | 1979331 | 1979351 | 3 | 7  | 21 | AGA  | 21 | 7  |
| 90080 | 9 | 1979702 | 1979727 | 2 | 13 | 26 | CA   | 11 | 7  |
| 90082 | 9 | 1981899 | 1981916 | 2 | 9  | 18 | TG   | 19 | 10 |
| 90087 | 9 | 1986968 | 1986983 | 2 | 8  | 16 | AC   | 13 | 10 |
| 90089 | 9 | 1987122 | 1987133 | 2 | 6  | 12 | CA   | 21 | 8  |
| 90090 | 9 | 1987404 | 1987439 | 2 | 18 | 36 | CA   | 9  | 8  |
| 90095 | 9 | 1994515 | 1994542 | 2 | 14 | 28 | AC   | 15 | 11 |
| 90096 | 9 | 1995375 | 1995400 | 2 | 13 | 26 | AC   | 17 | 9  |

|       |   |         |         |   |    |    |      |    |    |
|-------|---|---------|---------|---|----|----|------|----|----|
| 90097 | 9 | 1996478 | 1996495 | 3 | 6  | 18 | CAT  | 23 | 5  |
| 90098 | 9 | 1996741 | 1996764 | 2 | 12 | 24 | AC   | 10 | 9  |
| 90104 | 9 | 2000095 | 2000112 | 2 | 9  | 18 | TG   | 22 | 6  |
| 90107 | 9 | 2003477 | 2003494 | 3 | 6  | 18 | ATG  | 19 | 7  |
| 90116 | 9 | 2007601 | 2007628 | 2 | 14 | 28 | AC   | 25 | 13 |
| 90117 | 9 | 2010866 | 2010883 | 2 | 9  | 18 | TG   | 20 | 13 |
| 90118 | 9 | 2011318 | 2011357 | 2 | 20 | 40 | CA   | 11 | 11 |
| 90120 | 9 | 2012115 | 2012132 | 2 | 9  | 18 | CA   | 14 | 7  |
| 90121 | 9 | 2020186 | 2020200 | 3 | 5  | 15 | AAC  | 29 | 4  |
| 90122 | 9 | 2021925 | 2021940 | 2 | 8  | 16 | AG   | 26 | 4  |
| 90123 | 9 | 2027031 | 2027056 | 2 | 13 | 26 | TG   | 8  | 5  |
| 90124 | 9 | 2027089 | 2027110 | 2 | 11 | 22 | AC   | 22 | 7  |
| 90125 | 9 | 2031659 | 2031682 | 2 | 12 | 24 | CA   | 15 | 9  |
| 90128 | 9 | 2034862 | 2034889 | 2 | 14 | 28 | GT   | 15 | 7  |
| 90131 | 9 | 2040681 | 2040692 | 2 | 6  | 12 | AC   | 33 | 3  |
| 90132 | 9 | 2040931 | 2040950 | 2 | 10 | 20 | CA   | 20 | 10 |
| 90134 | 9 | 2041336 | 2041353 | 2 | 9  | 18 | AC   | 25 | 6  |
| 90137 | 9 | 2055201 | 2055212 | 2 | 6  | 12 | GT   | 20 | 4  |
| 90140 | 9 | 2066104 | 2066117 | 2 | 7  | 14 | CT   | 30 | 3  |
| 90141 | 9 | 2066868 | 2066885 | 2 | 9  | 18 | TG   | 15 | 9  |
| 90142 | 9 | 2066888 | 2066901 | 2 | 7  | 14 | TG   | 14 | 7  |
| 90145 | 9 | 2068039 | 2068062 | 2 | 12 | 24 | TG   | 22 | 6  |
| 90146 | 9 | 2068486 | 2068505 | 4 | 5  | 20 | TCTG | 25 | 9  |
| 90150 | 9 | 2072635 | 2072652 | 2 | 9  | 18 | TG   | 17 | 5  |
| 90151 | 9 | 2073381 | 2073418 | 2 | 19 | 38 | AC   | 15 | 12 |
| 90155 | 9 | 2076759 | 2076773 | 3 | 5  | 15 | TTA  | 13 | 3  |
| 90165 | 9 | 2089124 | 2089157 | 2 | 17 | 34 | AC   | 6  | 7  |
| 90169 | 9 | 2096226 | 2096249 | 2 | 12 | 24 | TG   | 10 | 10 |
| 90178 | 9 | 2107756 | 2107773 | 2 | 9  | 18 | TG   | 10 | 4  |
| 90183 | 9 | 2111734 | 2111771 | 2 | 19 | 38 | AC   | 9  | 7  |
| 90189 | 9 | 2117299 | 2117328 | 2 | 15 | 30 | AC   | 8  | 6  |
| 90191 | 9 | 2120500 | 2120545 | 2 | 23 | 46 | AC   | 11 | 14 |
| 90192 | 9 | 2120574 | 2120585 | 2 | 6  | 12 | GT   | 21 | 4  |
| 90193 | 9 | 2120637 | 2120670 | 2 | 17 | 34 | GT   | 21 | 10 |
| 90195 | 9 | 2121998 | 2122021 | 3 | 8  | 24 | TCC  | 10 | 8  |
| 90196 | 9 | 2122157 | 2122168 | 2 | 6  | 12 | TG   | 21 | 4  |
| 90198 | 9 | 2122870 | 2122883 | 2 | 7  | 14 | CT   | 12 | 3  |
| 90199 | 9 | 2123786 | 2123803 | 3 | 6  | 18 | GAG  | 14 | 3  |
| 90200 | 9 | 2124389 | 2124418 | 3 | 10 | 30 | CCT  | 18 | 11 |
| 90201 | 9 | 2124698 | 2124715 | 2 | 9  | 18 | TC   | 15 | 5  |
| 90202 | 9 | 2125173 | 2125206 | 2 | 17 | 34 | GT   | 15 | 14 |
| 90204 | 9 | 2125314 | 2125333 | 2 | 10 | 20 | GT   | 8  | 10 |
| 90206 | 9 | 2127500 | 2127513 | 2 | 7  | 14 | TC   | 22 | 3  |
| 90211 | 9 | 2136316 | 2136351 | 2 | 18 | 36 | AC   | 8  | 8  |
| 90216 | 9 | 2138369 | 2138388 | 4 | 5  | 20 | CTGT | 29 | 5  |
| 90217 | 9 | 2138472 | 2138495 | 2 | 12 | 24 | AG   | 15 | 8  |
| 90218 | 9 | 2138581 | 2138610 | 2 | 15 | 30 | CA   | 16 | 9  |
| 90219 | 9 | 2141436 | 2141479 | 2 | 22 | 44 | TG   | 10 | 9  |
| 90220 | 9 | 2143887 | 2143920 | 2 | 17 | 34 | AC   | 8  | 10 |
| 90221 | 9 | 2144016 | 2144031 | 2 | 8  | 16 | TG   | 15 | 5  |
| 90222 | 9 | 2144057 | 2144100 | 2 | 22 | 44 | GT   | 15 | 11 |



|       |   |         |         |   |    |    |      |    |    |
|-------|---|---------|---------|---|----|----|------|----|----|
| 90224 | 9 | 2144260 | 2144283 | 2 | 12 | 24 | CA   | 16 | 6  |
| 90225 | 9 | 2144498 | 2144511 | 2 | 7  | 14 | GT   | 20 | 7  |
| 90226 | 9 | 2144518 | 2144529 | 2 | 6  | 12 | GT   | 14 | 5  |
| 90227 | 9 | 2145299 | 2145331 | 3 | 11 | 33 | TTC  | 21 | 10 |
| 90229 | 9 | 2147640 | 2147673 | 2 | 17 | 34 | AC   | 13 | 9  |
| 90237 | 9 | 2155195 | 2155230 | 2 | 18 | 36 | GT   | 13 | 8  |
| 90238 | 9 | 2155721 | 2155746 | 2 | 13 | 26 | TG   | 23 | 7  |
| 90244 | 9 | 2163019 | 2163040 | 2 | 11 | 22 | GT   | 10 | 11 |
| 90246 | 9 | 2168810 | 2168829 | 4 | 5  | 20 | AAAG | 24 | 4  |
| 90247 | 9 | 2169075 | 2169090 | 4 | 4  | 16 | AAAC | 30 | 7  |
| 90252 | 9 | 2199855 | 2199869 | 3 | 5  | 15 | AAG  | 27 | 4  |
| 90253 | 9 | 2202240 | 2202283 | 2 | 22 | 44 | GT   | 7  | 4  |
| 90254 | 9 | 2202384 | 2202404 | 3 | 7  | 21 | GGA  | 24 | 6  |
| 90256 | 9 | 2203817 | 2203840 | 3 | 8  | 24 | CCT  | 24 | 6  |
| 90257 | 9 | 2204624 | 2204637 | 2 | 7  | 14 | AC   | 18 | 4  |
| 90264 | 9 | 2217406 | 2217423 | 3 | 6  | 18 | GAT  | 13 | 6  |
| 90269 | 9 | 2222300 | 2222311 | 2 | 6  | 12 | TG   | 17 | 3  |
| 90270 | 9 | 2222341 | 2222364 | 2 | 12 | 24 | TG   | 12 | 8  |
| 90271 | 9 | 2222519 | 2222534 | 2 | 8  | 16 | TG   | 21 | 4  |
| 90273 | 9 | 2226118 | 2226133 | 2 | 8  | 16 | TG   | 19 | 6  |
| 90274 | 9 | 2228318 | 2228335 | 2 | 9  | 18 | GT   | 21 | 6  |
| 90276 | 9 | 2233843 | 2233860 | 2 | 9  | 18 | GT   | 20 | 6  |
| 90281 | 9 | 2241778 | 2241793 | 2 | 8  | 16 | AC   | 29 | 6  |
| 90283 | 9 | 2244242 | 2244265 | 2 | 12 | 24 | GT   | 17 | 5  |
| 90284 | 9 | 2246925 | 2246942 | 2 | 9  | 18 | GA   | 25 | 7  |
| 90288 | 9 | 2249686 | 2249743 | 2 | 29 | 58 | CA   | 13 | 6  |
| 90289 | 9 | 2249860 | 2249895 | 2 | 18 | 36 | AC   | 8  | 11 |
| 90290 | 9 | 2260769 | 2260784 | 2 | 8  | 16 | TG   | 21 | 4  |
| 90291 | 9 | 2263409 | 2263424 | 4 | 4  | 16 | TCTG | 22 | 3  |
| 90292 | 9 | 2266704 | 2266729 | 2 | 13 | 26 | AC   | 14 | 12 |
| 90293 | 9 | 2281302 | 2281325 | 4 | 6  | 24 | TGTC | 29 | 4  |
| 90297 | 9 | 2291705 | 2291728 | 2 | 12 | 24 | TG   | 7  | 5  |
| 90305 | 9 | 2304758 | 2304769 | 2 | 6  | 12 | AC   | 22 | 3  |
| 90306 | 9 | 2308853 | 2308866 | 2 | 7  | 14 | AT   | 21 | 10 |
| 90308 | 9 | 2316863 | 2316890 | 2 | 14 | 28 | TG   | 19 | 11 |
| 90309 | 9 | 2319541 | 2319567 | 3 | 9  | 27 | GAG  | 22 | 12 |
| 90310 | 9 | 2320077 | 2320100 | 2 | 12 | 24 | TG   | 17 | 14 |
| 90311 | 9 | 2322321 | 2322344 | 2 | 12 | 24 | CA   | 19 | 7  |
| 90313 | 9 | 2324815 | 2324832 | 2 | 9  | 18 | TG   | 22 | 12 |
| 90324 | 9 | 2337322 | 2337341 | 2 | 10 | 20 | TG   | 18 | 10 |
| 90325 | 9 | 2339197 | 2339210 | 2 | 7  | 14 | TG   | 12 | 7  |
| 90327 | 9 | 2339955 | 2339974 | 2 | 10 | 20 | AC   | 19 | 4  |
| 90328 | 9 | 2342837 | 2342848 | 2 | 6  | 12 | GT   | 20 | 9  |
| 90329 | 9 | 2343426 | 2343459 | 2 | 17 | 34 | TG   | 15 | 13 |
| 90330 | 9 | 2343646 | 2343689 | 2 | 22 | 44 | AC   | 8  | 8  |
| 90331 | 9 | 2343766 | 2343795 | 2 | 15 | 30 | TG   | 9  | 9  |
| 90334 | 9 | 2348763 | 2348798 | 4 | 9  | 36 | TCTG | 27 | 7  |
| 90342 | 9 | 2360700 | 2360739 | 2 | 20 | 40 | TG   | 13 | 12 |
| 90343 | 9 | 2360891 | 2360904 | 2 | 7  | 14 | TC   | 31 | 3  |
| 90344 | 9 | 2362115 | 2362134 | 2 | 10 | 20 | TG   | 18 | 7  |
| 90345 | 9 | 2363779 | 2363796 | 2 | 9  | 18 | AC   | 22 | 9  |

|       |   |         |         |   |    |    |      |    |    |
|-------|---|---------|---------|---|----|----|------|----|----|
| 90346 | 9 | 2372288 | 2372299 | 2 | 6  | 12 | AT   | 24 | 5  |
| 90353 | 9 | 2381157 | 2381182 | 2 | 13 | 26 | GT   | 18 | 8  |
| 90363 | 9 | 2410144 | 2410158 | 3 | 5  | 15 | CAA  | 26 | 9  |
| 90366 | 9 | 2414074 | 2414087 | 2 | 7  | 14 | CA   | 14 | 7  |
| 90370 | 9 | 2422398 | 2422411 | 2 | 7  | 14 | TG   | 20 | 5  |
| 90371 | 9 | 2424742 | 2424757 | 2 | 8  | 16 | GT   | 11 | 4  |
| 90372 | 9 | 2424909 | 2424944 | 2 | 18 | 36 | AC   | 14 | 12 |
| 90374 | 9 | 2426975 | 2426990 | 2 | 8  | 16 | CA   | 8  | 3  |
| 90375 | 9 | 2429018 | 2429038 | 3 | 7  | 21 | AAC  | 29 | 8  |
| 90378 | 9 | 2433145 | 2433164 | 4 | 5  | 20 | GACA | 33 | 3  |
| 90379 | 9 | 2437485 | 2437502 | 2 | 9  | 18 | AC   | 12 | 8  |
| 90381 | 9 | 2438410 | 2438421 | 2 | 6  | 12 | CA   | 17 | 3  |
| 90382 | 9 | 2439284 | 2439305 | 2 | 11 | 22 | AG   | 16 | 4  |
| 90384 | 9 | 2440560 | 2440579 | 2 | 10 | 20 | GT   | 15 | 8  |
| 90385 | 9 | 2442947 | 2442980 | 2 | 17 | 34 | CA   | 18 | 15 |
| 90393 | 9 | 2453544 | 2453569 | 2 | 13 | 26 | GT   | 11 | 7  |
| 90400 | 9 | 2462622 | 2462633 | 2 | 6  | 12 | CA   | 31 | 4  |
| 90403 | 9 | 2465987 | 2466006 | 2 | 10 | 20 | CA   | 19 | 8  |
| 90404 | 9 | 2470137 | 2470148 | 2 | 6  | 12 | AT   | 13 | 4  |
| 90405 | 9 | 2472909 | 2472930 | 2 | 11 | 22 | TG   | 16 | 6  |
| 90408 | 9 | 2478619 | 2478648 | 2 | 15 | 30 | AC   | 9  | 11 |
| 90418 | 9 | 2493562 | 2493591 | 2 | 15 | 30 | CA   | 18 | 9  |
| 90419 | 9 | 2495410 | 2495425 | 2 | 8  | 16 | AG   | 27 | 3  |
| 90420 | 9 | 2496861 | 2496910 | 2 | 25 | 50 | GT   | 13 | 10 |
| 90424 | 9 | 2504609 | 2504636 | 2 | 14 | 28 | GT   | 13 | 11 |
| 90426 | 9 | 2507600 | 2507626 | 3 | 9  | 27 | CCT  | 19 | 7  |
| 90427 | 9 | 2508087 | 2508110 | 3 | 8  | 24 | TCC  | 20 | 3  |
| 90428 | 9 | 2508710 | 2508721 | 2 | 6  | 12 | TA   | 18 | 10 |
| 90430 | 9 | 2511654 | 2511674 | 3 | 7  | 21 | GAG  | 22 | 5  |
| 90431 | 9 | 2512210 | 2512223 | 2 | 7  | 14 | CA   | 28 | 4  |
| 90433 | 9 | 2525914 | 2525937 | 3 | 8  | 24 | AGC  | 20 | 8  |
| 90437 | 9 | 2531518 | 2531541 | 2 | 12 | 24 | AC   | 23 | 12 |
| 90438 | 9 | 2533263 | 2533286 | 3 | 8  | 24 | TGA  | 28 | 6  |
| 90443 | 9 | 2535512 | 2535531 | 2 | 10 | 20 | CA   | 13 | 15 |
| 90445 | 9 | 2542639 | 2542677 | 3 | 13 | 39 | CCT  | 7  | 6  |
| 90449 | 9 | 2552497 | 2552511 | 3 | 5  | 15 | TTC  | 25 | 8  |
| 90450 | 9 | 2552960 | 2552979 | 2 | 10 | 20 | CA   | 15 | 4  |
| 90455 | 9 | 2562451 | 2562468 | 3 | 6  | 18 | TTA  | 18 | 4  |
| 90456 | 9 | 2564420 | 2564431 | 2 | 6  | 12 | TG   | 24 | 4  |
| 90458 | 9 | 2571341 | 2571364 | 4 | 6  | 24 | TTTA | 22 | 6  |
| 90459 | 9 | 2573035 | 2573064 | 2 | 15 | 30 | GT   | 25 | 12 |
| 90461 | 9 | 2574687 | 2574714 | 2 | 14 | 28 | GT   | 17 | 7  |
| 90463 | 9 | 2578364 | 2578399 | 2 | 18 | 36 | TG   | 15 | 17 |
| 90465 | 9 | 2581666 | 2581679 | 2 | 7  | 14 | GT   | 24 | 4  |
| 90466 | 9 | 2586348 | 2586375 | 2 | 14 | 28 | TG   | 17 | 12 |
| 90467 | 9 | 2586481 | 2586496 | 4 | 4  | 16 | TTTC | 21 | 8  |
| 90468 | 9 | 2588369 | 2588386 | 2 | 9  | 18 | CT   | 26 | 13 |
| 90473 | 9 | 2590544 | 2590555 | 2 | 6  | 12 | TC   | 26 | 8  |
| 90474 | 9 | 2592319 | 2592344 | 2 | 13 | 26 | AC   | 17 | 9  |
| 90477 | 9 | 2599772 | 2599803 | 4 | 8  | 32 | CTGT | 28 | 8  |
| 90481 | 9 | 2615167 | 2615181 | 3 | 5  | 15 | TTC  | 22 | 7  |

|       |   |         |         |   |    |    |      |    |    |
|-------|---|---------|---------|---|----|----|------|----|----|
| 90484 | 9 | 2619253 | 2619266 | 2 | 7  | 14 | TG   | 16 | 12 |
| 90485 | 9 | 2620088 | 2620103 | 2 | 8  | 16 | AC   | 23 | 7  |
| 90487 | 9 | 2629276 | 2629287 | 2 | 6  | 12 | AC   | 16 | 4  |
| 90491 | 9 | 2645225 | 2645240 | 2 | 8  | 16 | AT   | 20 | 9  |
| 90492 | 9 | 2663367 | 2663382 | 2 | 8  | 16 | CA   | 25 | 8  |
| 90496 | 9 | 2672890 | 2672905 | 2 | 8  | 16 | GT   | 15 | 7  |
| 90497 | 9 | 2674056 | 2674076 | 3 | 7  | 21 | CCT  | 25 | 5  |
| 90500 | 9 | 2682251 | 2682274 | 4 | 6  | 24 | CAAT | 21 | 6  |
| 90507 | 9 | 2695540 | 2695563 | 2 | 12 | 24 | TG   | 12 | 7  |
| 90508 | 9 | 2695722 | 2695753 | 2 | 16 | 32 | GT   | 10 | 9  |
| 90511 | 9 | 2697375 | 2697410 | 2 | 18 | 36 | TG   | 10 | 9  |
| 90512 | 9 | 2697491 | 2697510 | 2 | 10 | 20 | CT   | 12 | 10 |
| 90514 | 9 | 2698069 | 2698096 | 2 | 14 | 28 | CT   | 19 | 10 |
| 90519 | 9 | 2702538 | 2702552 | 3 | 5  | 15 | CAG  | 28 | 4  |
| 90520 | 9 | 2704706 | 2704725 | 2 | 10 | 20 | GT   | 20 | 6  |
| 90523 | 9 | 2706987 | 2707010 | 3 | 8  | 24 | CTT  | 15 | 3  |
| 90525 | 9 | 2707831 | 2707860 | 2 | 15 | 30 | AC   | 19 | 9  |
| 90526 | 9 | 2708685 | 2708699 | 3 | 5  | 15 | AAC  | 18 | 3  |
| 90532 | 9 | 2715661 | 2715708 | 2 | 24 | 48 | AG   | 14 | 12 |
| 90535 | 9 | 2720519 | 2720530 | 2 | 6  | 12 | TA   | 6  | 3  |
| 90537 | 9 | 2727255 | 2727284 | 2 | 15 | 30 | GT   | 15 | 6  |
| 90539 | 9 | 2729833 | 2729844 | 2 | 6  | 12 | AC   | 26 | 4  |
| 90540 | 9 | 2729846 | 2729863 | 2 | 9  | 18 | CA   | 18 | 4  |
| 90541 | 9 | 2729995 | 2730012 | 2 | 9  | 18 | AC   | 27 | 6  |
| 90543 | 9 | 2731741 | 2731768 | 2 | 14 | 28 | GT   | 13 | 9  |
| 90547 | 9 | 2735830 | 2735851 | 2 | 11 | 22 | TG   | 15 | 9  |
| 90548 | 9 | 2735969 | 2736002 | 2 | 17 | 34 | TG   | 13 | 11 |
| 90549 | 9 | 2736129 | 2736162 | 2 | 17 | 34 | CA   | 17 | 17 |
| 90550 | 9 | 2743545 | 2743564 | 4 | 5  | 20 | ATTT | 29 | 5  |
| 90558 | 9 | 2763205 | 2763228 | 3 | 8  | 24 | GTT  | 25 | 8  |
| 90559 | 9 | 2763687 | 2763706 | 2 | 10 | 20 | AC   | 14 | 5  |
| 90560 | 9 | 2765732 | 2765791 | 2 | 30 | 60 | TG   | 20 | 18 |
| 90562 | 9 | 2767025 | 2767046 | 2 | 11 | 22 | TG   | 10 | 9  |
| 90568 | 9 | 2781087 | 2781118 | 2 | 16 | 32 | CA   | 13 | 9  |
| 90572 | 9 | 2783037 | 2783048 | 2 | 6  | 12 | TG   | 19 | 6  |
| 90573 | 9 | 2784539 | 2784550 | 2 | 6  | 12 | CA   | 15 | 7  |
| 90574 | 9 | 2784612 | 2784629 | 2 | 9  | 18 | AC   | 15 | 6  |
| 90579 | 9 | 2786426 | 2786453 | 2 | 14 | 28 | GT   | 20 | 19 |
| 90580 | 9 | 2786754 | 2786769 | 4 | 4  | 16 | ATAA | 8  | 7  |
| 90581 | 9 | 2789747 | 2789772 | 2 | 13 | 26 | GT   | 17 | 13 |
| 90585 | 9 | 2792303 | 2792314 | 2 | 6  | 12 | AC   | 21 | 9  |
| 90586 | 9 | 2792457 | 2792478 | 2 | 11 | 22 | TG   | 11 | 15 |
| 90587 | 9 | 2794274 | 2794291 | 2 | 9  | 18 | TG   | 25 | 3  |
| 90588 | 9 | 2794321 | 2794360 | 2 | 20 | 40 | AC   | 15 | 8  |
| 90591 | 9 | 2796874 | 2796895 | 2 | 11 | 22 | CA   | 9  | 9  |
| 90594 | 9 | 2808049 | 2808062 | 2 | 7  | 14 | TC   | 28 | 3  |
| 90597 | 9 | 2809131 | 2809148 | 2 | 9  | 18 | AC   | 21 | 6  |
| 90601 | 9 | 2824787 | 2824813 | 3 | 9  | 27 | CAT  | 26 | 12 |
| 90603 | 9 | 2828795 | 2828820 | 2 | 13 | 26 | CA   | 18 | 9  |
| 90606 | 9 | 2829234 | 2829247 | 2 | 7  | 14 | CT   | 22 | 3  |
| 90607 | 9 | 2829272 | 2829301 | 2 | 15 | 30 | CA   | 13 | 12 |

|       |   |         |         |   |    |    |      |    |    |
|-------|---|---------|---------|---|----|----|------|----|----|
| 90611 | 9 | 2834109 | 2834132 | 2 | 12 | 24 | GT   | 18 | 8  |
| 90612 | 9 | 2835191 | 2835216 | 2 | 13 | 26 | GT   | 12 | 11 |
| 90613 | 9 | 2835814 | 2835840 | 3 | 9  | 27 | CCT  | 16 | 10 |
| 90615 | 9 | 2839989 | 2840016 | 4 | 7  | 28 | AAGA | 26 | 9  |
| 90617 | 9 | 2841620 | 2841639 | 2 | 10 | 20 | AC   | 15 | 13 |
| 90618 | 9 | 2841820 | 2841845 | 2 | 13 | 26 | AC   | 8  | 9  |
| 90620 | 9 | 2842256 | 2842271 | 4 | 4  | 16 | TTGA | 17 | 9  |
| 90621 | 9 | 2843902 | 2843941 | 2 | 20 | 40 | TG   | 6  | 9  |
| 90622 | 9 | 2843970 | 2843981 | 2 | 6  | 12 | GT   | 12 | 5  |
| 90623 | 9 | 2844008 | 2844029 | 2 | 11 | 22 | GT   | 16 | 8  |
| 90627 | 9 | 2846103 | 2846120 | 3 | 6  | 18 | TCC  | 17 | 7  |
| 90629 | 9 | 2851009 | 2851020 | 2 | 6  | 12 | CA   | 29 | 4  |
| 90631 | 9 | 2853566 | 2853577 | 2 | 6  | 12 | TA   | 25 | 8  |
| 90634 | 9 | 2858878 | 2858891 | 2 | 7  | 14 | TG   | 21 | 5  |
| 90635 | 9 | 2860072 | 2860098 | 3 | 9  | 27 | CTG  | 25 | 8  |
| 90638 | 9 | 2864151 | 2864164 | 2 | 7  | 14 | TG   | 7  | 5  |
| 90642 | 9 | 2873434 | 2873451 | 2 | 9  | 18 | GT   | 18 | 6  |
| 90643 | 9 | 2873480 | 2873495 | 2 | 8  | 16 | TG   | 22 | 4  |
| 90644 | 9 | 2883685 | 2883699 | 3 | 5  | 15 | TCT  | 21 | 3  |
| 90646 | 9 | 2884927 | 2884941 | 3 | 5  | 15 | TCT  | 37 | 4  |
| 90647 | 9 | 2887136 | 2887147 | 2 | 6  | 12 | AG   | 24 | 3  |
| 90649 | 9 | 2889507 | 2889536 | 2 | 15 | 30 | AC   | 13 | 9  |
| 90650 | 9 | 2890618 | 2890633 | 2 | 8  | 16 | TC   | 21 | 3  |
| 90656 | 9 | 2909015 | 2909026 | 2 | 6  | 12 | TG   | 20 | 7  |
| 90659 | 9 | 2913414 | 2913431 | 2 | 9  | 18 | CA   | 28 | 7  |
| 90661 | 9 | 2915892 | 2915915 | 2 | 12 | 24 | AC   | 17 | 10 |
| 90663 | 9 | 2919786 | 2919801 | 2 | 8  | 16 | GT   | 17 | 13 |
| 90665 | 9 | 2919913 | 2919924 | 2 | 6  | 12 | AC   | 24 | 3  |
| 90666 | 9 | 2919956 | 2919967 | 2 | 6  | 12 | AC   | 28 | 3  |
| 90668 | 9 | 2921346 | 2921373 | 4 | 7  | 28 | CTGT | 31 | 7  |
| 90669 | 9 | 2921665 | 2921692 | 2 | 14 | 28 | GT   | 13 | 9  |
| 90672 | 9 | 2923313 | 2923352 | 2 | 20 | 40 | TG   | 9  | 9  |
| 90674 | 9 | 2923510 | 2923533 | 2 | 12 | 24 | TG   | 6  | 5  |
| 90675 | 9 | 2923643 | 2923670 | 2 | 14 | 28 | AC   | 18 | 6  |
| 90677 | 9 | 2924756 | 2924779 | 4 | 6  | 24 | TCTG | 29 | 5  |
| 90678 | 9 | 2928189 | 2928245 | 3 | 19 | 57 | CAT  | 21 | 13 |
| 90679 | 9 | 2929234 | 2929257 | 4 | 6  | 24 | TCTG | 27 | 3  |
| 90681 | 9 | 2930938 | 2930963 | 2 | 13 | 26 | CT   | 15 | 15 |
| 90687 | 9 | 2938102 | 2938119 | 2 | 9  | 18 | CA   | 21 | 15 |
| 90688 | 9 | 2939721 | 2939760 | 2 | 20 | 40 | TG   | 9  | 6  |
| 90689 | 9 | 2939874 | 2939907 | 2 | 17 | 34 | AC   | 13 | 8  |
| 90691 | 9 | 2942360 | 2942373 | 2 | 7  | 14 | AG   | 18 | 8  |
| 90715 | 9 | 2958727 | 2958750 | 3 | 8  | 24 | ATC  | 17 | 7  |
| 90716 | 9 | 2958802 | 2958819 | 3 | 6  | 18 | TCT  | 11 | 3  |
| 90717 | 9 | 2959075 | 2959098 | 2 | 12 | 24 | TC   | 8  | 7  |
| 90718 | 9 | 2959267 | 2959298 | 2 | 16 | 32 | TG   | 16 | 12 |
| 90722 | 9 | 2961393 | 2961416 | 4 | 6  | 24 | TTGA | 10 | 3  |
| 90745 | 9 | 2976442 | 2976455 | 2 | 7  | 14 | GT   | 8  | 10 |
| 90746 | 9 | 2976865 | 2976880 | 4 | 4  | 16 | TTTA | 20 | 3  |
| 90748 | 9 | 2982090 | 2982115 | 2 | 13 | 26 | CA   | 21 | 23 |
| 90750 | 9 | 2984410 | 2984429 | 2 | 10 | 20 | AC   | 21 | 11 |

|       |   |         |         |   |    |    |      |    |    |
|-------|---|---------|---------|---|----|----|------|----|----|
| 90755 | 9 | 2994430 | 2994449 | 2 | 10 | 20 | GT   | 16 | 12 |
| 90756 | 9 | 2994546 | 2994567 | 2 | 11 | 22 | CA   | 19 | 11 |
| 90764 | 9 | 3006454 | 3006487 | 2 | 17 | 34 | AC   | 14 | 12 |
| 90765 | 9 | 3006922 | 3006937 | 4 | 4  | 16 | GAGG | 7  | 3  |
| 90768 | 9 | 3012821 | 3012850 | 3 | 10 | 30 | TAA  | 15 | 6  |
| 90769 | 9 | 3013755 | 3013774 | 2 | 10 | 20 | GT   | 14 | 8  |
| 90770 | 9 | 3015632 | 3015651 | 2 | 10 | 20 | CA   | 22 | 7  |
| 90771 | 9 | 3016168 | 3016181 | 2 | 7  | 14 | AC   | 13 | 6  |
| 90781 | 9 | 3026633 | 3026646 | 2 | 7  | 14 | TG   | 15 | 5  |
| 90785 | 9 | 3028513 | 3028532 | 2 | 10 | 20 | TG   | 11 | 3  |
| 90788 | 9 | 3032287 | 3032312 | 2 | 13 | 26 | AC   | 19 | 12 |
| 90789 | 9 | 3036366 | 3036393 | 4 | 7  | 28 | CTAA | 22 | 6  |
| 90791 | 9 | 3037840 | 3037865 | 2 | 13 | 26 | TG   | 9  | 6  |
| 90792 | 9 | 3037908 | 3037927 | 2 | 10 | 20 | TG   | 18 | 7  |
| 90794 | 9 | 3040091 | 3040104 | 2 | 7  | 14 | TA   | 19 | 3  |
| 90796 | 9 | 3043063 | 3043084 | 2 | 11 | 22 | GT   | 17 | 5  |
| 90797 | 9 | 3043244 | 3043279 | 4 | 9  | 36 | ATCA | 20 | 8  |
| 90804 | 9 | 3047989 | 3048016 | 2 | 14 | 28 | TG   | 9  | 8  |
| 90805 | 9 | 3048189 | 3048216 | 2 | 14 | 28 | TG   | 10 | 7  |
| 90806 | 9 | 3048923 | 3048937 | 3 | 5  | 15 | CAT  | 34 | 4  |
| 90809 | 9 | 3050928 | 3050941 | 2 | 7  | 14 | GT   | 13 | 3  |
| 90810 | 9 | 3051086 | 3051129 | 2 | 22 | 44 | TG   | 7  | 10 |
| 90815 | 9 | 3057602 | 3057635 | 2 | 17 | 34 | GT   | 17 | 14 |
| 90816 | 9 | 3057917 | 3057938 | 2 | 11 | 22 | GT   | 27 | 10 |
| 90817 | 9 | 3058004 | 3058023 | 2 | 10 | 20 | CA   | 23 | 6  |
| 90822 | 9 | 3065457 | 3065492 | 2 | 18 | 36 | AC   | 11 | 5  |
| 90824 | 9 | 3065722 | 3065767 | 2 | 23 | 46 | TG   | 7  | 10 |
| 90826 | 9 | 3068782 | 3068843 | 2 | 31 | 62 | CA   | 9  | 9  |
| 90827 | 9 | 3068949 | 3068980 | 2 | 16 | 32 | GT   | 13 | 11 |
| 90828 | 9 | 3069095 | 3069106 | 2 | 6  | 12 | AC   | 31 | 4  |
| 90830 | 9 | 3069292 | 3069325 | 2 | 17 | 34 | CA   | 12 | 9  |
| 90835 | 9 | 3073209 | 3073228 | 4 | 5  | 20 | GACA | 25 | 3  |
| 90836 | 9 | 3073381 | 3073400 | 4 | 5  | 20 | TTAA | 28 | 4  |
| 90838 | 9 | 3074864 | 3074885 | 2 | 11 | 22 | TG   | 15 | 11 |
| 90839 | 9 | 3075035 | 3075054 | 2 | 10 | 20 | TG   | 25 | 12 |
| 90840 | 9 | 3075296 | 3075325 | 3 | 10 | 30 | AGG  | 17 | 8  |
| 90841 | 9 | 3080411 | 3080424 | 2 | 7  | 14 | GT   | 8  | 3  |
| 90843 | 9 | 3081186 | 3081203 | 2 | 9  | 18 | GA   | 23 | 5  |
| 90844 | 9 | 3082005 | 3082036 | 2 | 16 | 32 | GT   | 21 | 16 |
| 90846 | 9 | 3082476 | 3082497 | 2 | 11 | 22 | GA   | 9  | 8  |
| 90847 | 9 | 3082952 | 3082963 | 2 | 6  | 12 | CA   | 19 | 7  |
| 90848 | 9 | 3083026 | 3083043 | 2 | 9  | 18 | GT   | 22 | 9  |
| 90849 | 9 | 3085150 | 3085163 | 2 | 7  | 14 | AC   | 26 | 8  |
| 90851 | 9 | 3087884 | 3087897 | 2 | 7  | 14 | TG   | 23 | 8  |
| 90852 | 9 | 3089189 | 3089202 | 2 | 7  | 14 | TC   | 23 | 10 |
| 90853 | 9 | 3091192 | 3091251 | 3 | 20 | 60 | TCT  | 15 | 22 |
| 90855 | 9 | 3100651 | 3100666 | 2 | 8  | 16 | AC   | 26 | 3  |
| 90857 | 9 | 3100934 | 3100949 | 2 | 8  | 16 | AC   | 8  | 3  |
| 90868 | 9 | 3110818 | 3110845 | 2 | 14 | 28 | AC   | 20 | 11 |
| 90880 | 9 | 3205739 | 3205759 | 3 | 7  | 21 | TAT  | 22 | 3  |
| 90881 | 9 | 3206059 | 3206078 | 2 | 10 | 20 | CA   | 25 | 16 |

|       |   |         |         |   |    |    |      |    |    |
|-------|---|---------|---------|---|----|----|------|----|----|
| 90883 | 9 | 3211618 | 3211631 | 2 | 7  | 14 | CA   | 13 | 11 |
| 90884 | 9 | 3211907 | 3211922 | 4 | 4  | 16 | AACA | 17 | 3  |
| 90885 | 9 | 3212567 | 3212594 | 2 | 14 | 28 | CA   | 6  | 5  |
| 90888 | 9 | 3213612 | 3213639 | 2 | 14 | 28 | CA   | 15 | 9  |
| 90889 | 9 | 3213817 | 3213832 | 2 | 8  | 16 | TC   | 15 | 5  |
| 90890 | 9 | 3213902 | 3213925 | 3 | 8  | 24 | TCC  | 11 | 4  |
| 90891 | 9 | 3214052 | 3214071 | 2 | 10 | 20 | TG   | 16 | 15 |
| 90899 | 9 | 3220345 | 3220356 | 2 | 6  | 12 | AG   | 27 | 8  |
| 90901 | 9 | 3221190 | 3221222 | 3 | 11 | 33 | CCT  | 11 | 7  |
| 90902 | 9 | 3221404 | 3221429 | 2 | 13 | 26 | CA   | 12 | 9  |
| 90903 | 9 | 3221591 | 3221624 | 2 | 17 | 34 | AC   | 8  | 12 |
| 90904 | 9 | 3221726 | 3221755 | 2 | 15 | 30 | TG   | 14 | 10 |
| 90905 | 9 | 3224721 | 3224747 | 3 | 9  | 27 | CCT  | 18 | 3  |
| 90911 | 9 | 3242208 | 3242223 | 4 | 4  | 16 | CTAC | 28 | 3  |
| 90912 | 9 | 3244574 | 3244601 | 4 | 7  | 28 | GTCT | 31 | 3  |
| 90918 | 9 | 3254852 | 3254872 | 3 | 7  | 21 | TTC  | 15 | 9  |
| 90924 | 9 | 3261399 | 3261419 | 3 | 7  | 21 | TCT  | 22 | 12 |
| 90925 | 9 | 3263465 | 3263491 | 3 | 9  | 27 | AGA  | 16 | 7  |
| 90927 | 9 | 3267103 | 3267132 | 2 | 15 | 30 | AC   | 7  | 7  |
| 90933 | 9 | 3274787 | 3274810 | 2 | 12 | 24 | AC   | 17 | 8  |
| 90934 | 9 | 3275072 | 3275095 | 2 | 12 | 24 | GA   | 14 | 4  |
| 90938 | 9 | 3281125 | 3281152 | 4 | 7  | 28 | CAAA | 31 | 5  |
| 90940 | 9 | 3288359 | 3288376 | 3 | 6  | 18 | TAT  | 10 | 3  |
| 90941 | 9 | 3290206 | 3290217 | 2 | 6  | 12 | GT   | 28 | 3  |
| 90957 | 9 | 3328872 | 3328887 | 2 | 8  | 16 | GT   | 13 | 5  |
| 90958 | 9 | 3329016 | 3329029 | 2 | 7  | 14 | CA   | 8  | 3  |
| 90960 | 9 | 3333414 | 3333445 | 2 | 16 | 32 | AC   | 6  | 4  |
| 90961 | 9 | 3333564 | 3333583 | 4 | 5  | 20 | TCTT | 12 | 6  |
| 90965 | 9 | 3334726 | 3334747 | 2 | 11 | 22 | GT   | 7  | 3  |
| 90966 | 9 | 3334774 | 3334791 | 3 | 6  | 18 | TGG  | 6  | 3  |
| 90970 | 9 | 3335232 | 3335253 | 2 | 11 | 22 | AC   | 10 | 6  |
| 90971 | 9 | 3335397 | 3335416 | 2 | 10 | 20 | CA   | 15 | 8  |
| 90972 | 9 | 3335480 | 3335521 | 2 | 21 | 42 | AC   | 7  | 7  |
| 90975 | 9 | 3339628 | 3339647 | 2 | 10 | 20 | GT   | 12 | 8  |
| 90984 | 9 | 3360269 | 3360290 | 2 | 11 | 22 | TG   | 14 | 11 |
| 90988 | 9 | 3366647 | 3366685 | 3 | 13 | 39 | TAT  | 9  | 3  |
| 90990 | 9 | 3368285 | 3368302 | 2 | 9  | 18 | AC   | 20 | 7  |
| 90991 | 9 | 3371296 | 3371311 | 2 | 8  | 16 | AG   | 18 | 5  |
| 90992 | 9 | 3371812 | 3371826 | 3 | 5  | 15 | GGA  | 7  | 3  |
| 90999 | 9 | 3386764 | 3386775 | 2 | 6  | 12 | AT   | 7  | 4  |
| 91000 | 9 | 3386777 | 3386794 | 2 | 9  | 18 | TA   | 9  | 6  |
| 91004 | 9 | 3389550 | 3389567 | 2 | 9  | 18 | TG   | 12 | 3  |
| 91005 | 9 | 3390025 | 3390040 | 4 | 4  | 16 | TCTT | 24 | 7  |
| 91007 | 9 | 3391235 | 3391250 | 2 | 8  | 16 | AC   | 15 | 3  |
| 91008 | 9 | 3392563 | 3392583 | 3 | 7  | 21 | GCT  | 20 | 5  |
| 91010 | 9 | 3394303 | 3394323 | 3 | 7  | 21 | CAG  | 23 | 6  |
| 91011 | 9 | 3394832 | 3394849 | 2 | 9  | 18 | AC   | 16 | 8  |
| 91012 | 9 | 3394852 | 3394867 | 2 | 8  | 16 | AC   | 21 | 10 |
| 91015 | 9 | 3396941 | 3396956 | 2 | 8  | 16 | GT   | 30 | 9  |
| 91019 | 9 | 3400280 | 3400311 | 2 | 16 | 32 | CA   | 12 | 9  |
| 91024 | 9 | 3403421 | 3403446 | 2 | 13 | 26 | CA   | 14 | 8  |

|       |   |         |         |   |    |    |      |    |    |
|-------|---|---------|---------|---|----|----|------|----|----|
| 91027 | 9 | 3411626 | 3411640 | 3 | 5  | 15 | TCT  | 29 | 3  |
| 91028 | 9 | 3411905 | 3411924 | 2 | 10 | 20 | AC   | 14 | 11 |
| 91031 | 9 | 3413602 | 3413627 | 2 | 13 | 26 | TC   | 20 | 5  |
| 91032 | 9 | 3414122 | 3414136 | 3 | 5  | 15 | TCT  | 25 | 5  |
| 91036 | 9 | 3422321 | 3422340 | 2 | 10 | 20 | AC   | 17 | 8  |
| 91037 | 9 | 3424299 | 3424310 | 2 | 6  | 12 | TG   | 30 | 4  |
| 91038 | 9 | 3425953 | 3425978 | 2 | 13 | 26 | TC   | 15 | 3  |
| 91039 | 9 | 3428070 | 3428091 | 2 | 11 | 22 | AG   | 21 | 7  |
| 91044 | 9 | 3435536 | 3435555 | 2 | 10 | 20 | AC   | 18 | 5  |
| 91050 | 9 | 3449928 | 3449961 | 2 | 17 | 34 | GT   | 11 | 10 |
| 91052 | 9 | 3450619 | 3450634 | 2 | 8  | 16 | GT   | 9  | 6  |
| 91055 | 9 | 3451366 | 3451389 | 2 | 12 | 24 | GT   | 13 | 5  |
| 91065 | 9 | 3463562 | 3463589 | 2 | 14 | 28 | GT   | 16 | 9  |
| 91070 | 9 | 3471027 | 3471044 | 2 | 9  | 18 | CA   | 24 | 4  |
| 91079 | 9 | 3479989 | 3480024 | 2 | 18 | 36 | AC   | 19 | 10 |
| 91081 | 9 | 3484010 | 3484035 | 2 | 13 | 26 | TG   | 12 | 8  |
| 91084 | 9 | 3487921 | 3487932 | 2 | 6  | 12 | AG   | 28 | 3  |
| 91086 | 9 | 3491611 | 3491626 | 4 | 4  | 16 | ATTT | 21 | 4  |
| 91108 | 9 | 3537655 | 3537686 | 2 | 16 | 32 | TG   | 11 | 10 |
| 91113 | 9 | 3557517 | 3557536 | 2 | 10 | 20 | GT   | 25 | 5  |
| 91115 | 9 | 3561437 | 3561448 | 2 | 6  | 12 | TG   | 18 | 6  |
| 91120 | 9 | 3574785 | 3574804 | 4 | 5  | 20 | ATAA | 17 | 6  |
| 91130 | 9 | 3595166 | 3595179 | 2 | 7  | 14 | TC   | 21 | 6  |
| 91135 | 9 | 3603604 | 3603631 | 2 | 14 | 28 | CT   | 10 | 6  |
| 91142 | 9 | 3614184 | 3614197 | 2 | 7  | 14 | AG   | 14 | 5  |
| 91143 | 9 | 3616731 | 3616748 | 3 | 6  | 18 | AAC  | 28 | 4  |
| 91150 | 9 | 3639592 | 3639615 | 3 | 8  | 24 | CTC  | 24 | 4  |
| 91151 | 9 | 3643738 | 3643759 | 2 | 11 | 22 | AC   | 14 | 10 |
| 91152 | 9 | 3645046 | 3645061 | 2 | 8  | 16 | TG   | 7  | 3  |
| 91154 | 9 | 3648753 | 3648778 | 2 | 13 | 26 | GT   | 7  | 7  |
| 91160 | 9 | 3662382 | 3662399 | 2 | 9  | 18 | AC   | 27 | 4  |
| 91167 | 9 | 3668115 | 3668128 | 2 | 7  | 14 | TG   | 24 | 7  |
| 91168 | 9 | 3668277 | 3668292 | 2 | 8  | 16 | CA   | 8  | 4  |
| 91170 | 9 | 3669092 | 3669105 | 2 | 7  | 14 | CA   | 18 | 3  |
| 91171 | 9 | 3669210 | 3669243 | 2 | 17 | 34 | CA   | 17 | 11 |
| 91172 | 9 | 3669618 | 3669633 | 4 | 4  | 16 | TTTG | 31 | 3  |
| 91175 | 9 | 3673929 | 3673943 | 3 | 5  | 15 | AGA  | 30 | 3  |
| 91188 | 9 | 3692853 | 3692868 | 2 | 8  | 16 | AC   | 22 | 6  |
| 91192 | 9 | 3696316 | 3696329 | 2 | 7  | 14 | TG   | 30 | 3  |
| 91200 | 9 | 3711831 | 3711890 | 4 | 15 | 60 | AGAT | 16 | 8  |
| 91201 | 9 | 3711990 | 3712013 | 4 | 6  | 24 | ATGG | 33 | 10 |
| 91202 | 9 | 3712584 | 3712609 | 2 | 13 | 26 | AC   | 11 | 9  |
| 91213 | 9 | 3733843 | 3733854 | 2 | 6  | 12 | TC   | 24 | 7  |
| 91219 | 9 | 3736494 | 3736511 | 2 | 9  | 18 | GT   | 22 | 4  |
| 91230 | 9 | 3767986 | 3768005 | 4 | 5  | 20 | TGGA | 20 | 5  |
| 91234 | 9 | 3770909 | 3770928 | 2 | 10 | 20 | AC   | 23 | 6  |
| 91236 | 9 | 3775221 | 3775232 | 2 | 6  | 12 | GT   | 10 | 3  |
| 91242 | 9 | 3789635 | 3789656 | 2 | 11 | 22 | CA   | 11 | 13 |
| 91247 | 9 | 3795384 | 3795411 | 2 | 14 | 28 | CA   | 13 | 7  |
| 91254 | 9 | 3802207 | 3802250 | 4 | 11 | 44 | ATCT | 20 | 10 |
| 91265 | 9 | 3816960 | 3816987 | 4 | 7  | 28 | GTTG | 22 | 3  |

|       |   |         |         |   |    |    |      |    |    |
|-------|---|---------|---------|---|----|----|------|----|----|
| 91266 | 9 | 3823586 | 3823601 | 4 | 4  | 16 | AATA | 23 | 3  |
| 91267 | 9 | 3826367 | 3826386 | 4 | 5  | 20 | TAAA | 13 | 4  |
| 91274 | 9 | 3834810 | 3834835 | 2 | 13 | 26 | CA   | 21 | 8  |
| 91280 | 9 | 3854262 | 3854293 | 2 | 16 | 32 | AC   | 11 | 5  |
| 91287 | 9 | 3858679 | 3858690 | 2 | 6  | 12 | GT   | 29 | 3  |
| 91288 | 9 | 3863306 | 3863321 | 2 | 8  | 16 | TG   | 21 | 10 |
| 91290 | 9 | 3865132 | 3865155 | 2 | 12 | 24 | GT   | 16 | 10 |
| 91293 | 9 | 3867958 | 3867979 | 2 | 11 | 22 | AC   | 20 | 6  |
| 91296 | 9 | 3876402 | 3876429 | 2 | 14 | 28 | AC   | 16 | 10 |
| 91309 | 9 | 3897757 | 3897774 | 3 | 6  | 18 | TTC  | 27 | 3  |
| 91310 | 9 | 3898259 | 3898270 | 2 | 6  | 12 | CA   | 15 | 4  |
| 91311 | 9 | 3898272 | 3898285 | 2 | 7  | 14 | AC   | 24 | 5  |
| 91312 | 9 | 3898637 | 3898648 | 2 | 6  | 12 | GT   | 29 | 6  |
| 91315 | 9 | 3902620 | 3902631 | 2 | 6  | 12 | CA   | 23 | 3  |
| 91317 | 9 | 3906375 | 3906394 | 2 | 10 | 20 | TG   | 23 | 14 |
| 91319 | 9 | 3911973 | 3911994 | 2 | 11 | 22 | AC   | 16 | 4  |
| 91333 | 9 | 3940803 | 3940820 | 3 | 6  | 18 | TTG  | 21 | 5  |
| 91344 | 9 | 3962737 | 3962750 | 2 | 7  | 14 | GT   | 26 | 3  |
| 91350 | 9 | 3983296 | 3983311 | 2 | 8  | 16 | AC   | 17 | 6  |
| 91351 | 9 | 3983313 | 3983326 | 2 | 7  | 14 | CA   | 12 | 4  |
| 91360 | 9 | 3999898 | 3999915 | 3 | 6  | 18 | CCA  | 23 | 6  |
| 91362 | 9 | 4002491 | 4002506 | 4 | 4  | 16 | GGGA | 11 | 3  |
| 91370 | 9 | 4005735 | 4005766 | 2 | 16 | 32 | GT   | 20 | 12 |
| 91373 | 9 | 4007401 | 4007416 | 2 | 8  | 16 | AC   | 25 | 5  |
| 91374 | 9 | 4008506 | 4008523 | 3 | 6  | 18 | AGA  | 12 | 3  |
| 91375 | 9 | 4008580 | 4008607 | 4 | 7  | 28 | ATCT | 17 | 5  |
| 91376 | 9 | 4012641 | 4012654 | 2 | 7  | 14 | CT   | 29 | 3  |
| 91378 | 9 | 4024438 | 4024449 | 2 | 6  | 12 | CA   | 26 | 3  |
| 91394 | 9 | 4057547 | 4057558 | 2 | 6  | 12 | CA   | 17 | 6  |
| 91402 | 9 | 4094000 | 4094023 | 2 | 12 | 24 | GA   | 17 | 5  |
| 91404 | 9 | 4099127 | 4099142 | 2 | 8  | 16 | TC   | 26 | 4  |
| 91405 | 9 | 4099583 | 4099606 | 2 | 12 | 24 | GT   | 16 | 13 |
| 91408 | 9 | 4108980 | 4108995 | 2 | 8  | 16 | TG   | 24 | 4  |
| 91409 | 9 | 4115197 | 4115208 | 2 | 6  | 12 | AT   | 24 | 12 |
| 91426 | 9 | 4152242 | 4152257 | 4 | 4  | 16 | TTTG | 27 | 3  |
| 91427 | 9 | 4153065 | 4153076 | 2 | 6  | 12 | CA   | 27 | 3  |
| 91428 | 9 | 4153078 | 4153091 | 2 | 7  | 14 | AC   | 26 | 3  |
| 91429 | 9 | 4155138 | 4155161 | 2 | 12 | 24 | GT   | 11 | 7  |
| 91430 | 9 | 4155303 | 4155316 | 2 | 7  | 14 | TG   | 12 | 6  |
| 91433 | 9 | 4158861 | 4158896 | 2 | 18 | 36 | TG   | 12 | 12 |
| 91434 | 9 | 4159093 | 4159106 | 2 | 7  | 14 | CA   | 20 | 8  |
| 91435 | 9 | 4160610 | 4160639 | 2 | 15 | 30 | TG   | 12 | 11 |
| 91437 | 9 | 4162540 | 4162553 | 2 | 7  | 14 | AG   | 17 | 4  |
| 91439 | 9 | 4165896 | 4165919 | 2 | 12 | 24 | GT   | 14 | 9  |
| 91441 | 9 | 4168377 | 4168404 | 2 | 14 | 28 | CA   | 8  | 11 |
| 91442 | 9 | 4168764 | 4168789 | 2 | 13 | 26 | GT   | 17 | 12 |
| 91443 | 9 | 4168905 | 4168931 | 3 | 9  | 27 | GCT  | 26 | 6  |
| 91445 | 9 | 4171578 | 4171593 | 4 | 4  | 16 | AAGA | 14 | 4  |
| 91446 | 9 | 4173835 | 4173868 | 2 | 17 | 34 | TG   | 16 | 12 |
| 91449 | 9 | 4177859 | 4177876 | 2 | 9  | 18 | GT   | 12 | 6  |
| 91451 | 9 | 4178262 | 4178279 | 2 | 9  | 18 | AC   | 11 | 6  |



|       |   |         |         |   |    |    |      |    |    |
|-------|---|---------|---------|---|----|----|------|----|----|
| 91457 | 9 | 4183189 | 4183212 | 2 | 12 | 24 | GT   | 16 | 5  |
| 91468 | 9 | 4207931 | 4207946 | 2 | 8  | 16 | AC   | 16 | 9  |
| 91471 | 9 | 4211313 | 4211328 | 4 | 4  | 16 | ATTT | 38 | 3  |
| 91472 | 9 | 4216349 | 4216370 | 2 | 11 | 22 | TG   | 16 | 7  |
| 91482 | 9 | 4233914 | 4233935 | 2 | 11 | 22 | GT   | 10 | 11 |
| 91486 | 9 | 4238969 | 4238986 | 2 | 9  | 18 | CA   | 27 | 7  |
| 91488 | 9 | 4245096 | 4245111 | 2 | 8  | 16 | AC   | 23 | 4  |
| 91489 | 9 | 4258112 | 4258123 | 2 | 6  | 12 | CT   | 8  | 3  |
| 91494 | 9 | 4271056 | 4271081 | 2 | 13 | 26 | GT   | 13 | 13 |
| 91495 | 9 | 4275012 | 4275065 | 2 | 27 | 54 | AG   | 13 | 14 |
| 91497 | 9 | 4275431 | 4275448 | 3 | 6  | 18 | TTG  | 16 | 10 |
| 91501 | 9 | 4281630 | 4281653 | 2 | 12 | 24 | CA   | 18 | 7  |
| 91503 | 9 | 4297659 | 4297676 | 2 | 9  | 18 | AT   | 10 | 6  |
| 91504 | 9 | 4298980 | 4299018 | 3 | 13 | 39 | TTA  | 8  | 6  |
| 91505 | 9 | 4299605 | 4299620 | 4 | 4  | 16 | TTTA | 8  | 4  |
| 91506 | 9 | 4299801 | 4299820 | 4 | 5  | 20 | AATA | 7  | 3  |
| 91510 | 9 | 4307942 | 4307953 | 2 | 6  | 12 | TG   | 22 | 9  |
| 91511 | 9 | 4307956 | 4307967 | 2 | 6  | 12 | TG   | 19 | 6  |
| 91513 | 9 | 4320027 | 4320040 | 2 | 7  | 14 | TG   | 10 | 4  |
| 91514 | 9 | 4320044 | 4320057 | 2 | 7  | 14 | GT   | 20 | 9  |
| 91515 | 9 | 4324090 | 4324119 | 2 | 15 | 30 | CA   | 22 | 9  |
| 91520 | 9 | 4341160 | 4341177 | 2 | 9  | 18 | TG   | 6  | 6  |
| 91521 | 9 | 4341772 | 4341799 | 4 | 7  | 28 | TCCT | 24 | 4  |
| 91533 | 9 | 4376076 | 4376089 | 2 | 7  | 14 | AC   | 20 | 3  |
| 91535 | 9 | 4377046 | 4377059 | 2 | 7  | 14 | GT   | 22 | 11 |
| 91536 | 9 | 4377314 | 4377331 | 3 | 6  | 18 | AGA  | 16 | 7  |
| 91539 | 9 | 4378872 | 4378885 | 2 | 7  | 14 | TG   | 34 | 3  |
| 91540 | 9 | 4381068 | 4381083 | 2 | 8  | 16 | GT   | 20 | 4  |
| 91541 | 9 | 4381692 | 4381715 | 4 | 6  | 24 | TATG | 28 | 4  |
| 91545 | 9 | 4390036 | 4390047 | 2 | 6  | 12 | GT   | 25 | 3  |
| 91546 | 9 | 4393249 | 4393260 | 2 | 6  | 12 | CA   | 10 | 4  |
| 91553 | 9 | 4417886 | 4417909 | 4 | 6  | 24 | AACA | 24 | 4  |
| 91558 | 9 | 4422818 | 4422833 | 4 | 4  | 16 | AATA | 11 | 3  |
| 91562 | 9 | 4425132 | 4425151 | 2 | 10 | 20 | AC   | 26 | 8  |
| 91563 | 9 | 4427414 | 4427429 | 2 | 8  | 16 | TC   | 21 | 9  |
| 91566 | 9 | 4434865 | 4434884 | 2 | 10 | 20 | CT   | 19 | 7  |
| 91575 | 9 | 4457494 | 4457508 | 3 | 5  | 15 | GAG  | 25 | 5  |
| 91587 | 9 | 4480742 | 4480781 | 4 | 10 | 40 | GCAG | 24 | 7  |
| 91589 | 9 | 4484723 | 4484758 | 4 | 9  | 36 | AACC | 16 | 7  |
| 91590 | 9 | 4485595 | 4485610 | 2 | 8  | 16 | TG   | 14 | 8  |
| 91592 | 9 | 4488466 | 4488481 | 2 | 8  | 16 | GT   | 26 | 5  |
| 91596 | 9 | 4491555 | 4491566 | 2 | 6  | 12 | TG   | 28 | 3  |
| 91598 | 9 | 4492108 | 4492137 | 2 | 15 | 30 | GA   | 9  | 7  |
| 91600 | 9 | 4493139 | 4493164 | 2 | 13 | 26 | GT   | 11 | 6  |
| 91601 | 9 | 4493336 | 4493355 | 2 | 10 | 20 | GA   | 18 | 5  |
| 91602 | 9 | 4495443 | 4495466 | 2 | 12 | 24 | TG   | 19 | 7  |
| 91603 | 9 | 4495656 | 4495673 | 2 | 9  | 18 | TC   | 24 | 4  |
| 91608 | 9 | 4499549 | 4499569 | 3 | 7  | 21 | TTC  | 16 | 3  |
| 91615 | 9 | 4513052 | 4513067 | 2 | 8  | 16 | AC   | 21 | 4  |
| 91619 | 9 | 4515317 | 4515338 | 2 | 11 | 22 | CA   | 16 | 10 |
| 91624 | 9 | 4522287 | 4522301 | 3 | 5  | 15 | TGA  | 27 | 4  |

|       |   |         |         |   |    |    |      |    |    |
|-------|---|---------|---------|---|----|----|------|----|----|
| 91626 | 9 | 4523614 | 4523631 | 3 | 6  | 18 | AGG  | 25 | 3  |
| 91628 | 9 | 4525401 | 4525424 | 2 | 12 | 24 | CA   | 26 | 7  |
| 91636 | 9 | 4531864 | 4531877 | 2 | 7  | 14 | TC   | 28 | 3  |
| 91657 | 9 | 4567344 | 4567361 | 2 | 9  | 18 | TG   | 26 | 3  |
| 91662 | 9 | 4584462 | 4584487 | 2 | 13 | 26 | TC   | 21 | 7  |
| 91665 | 9 | 4591513 | 4591530 | 2 | 9  | 18 | TG   | 28 | 5  |
| 91670 | 9 | 4593146 | 4593169 | 2 | 12 | 24 | GT   | 11 | 6  |
| 91671 | 9 | 4593322 | 4593337 | 2 | 8  | 16 | AC   | 21 | 4  |
| 91676 | 9 | 4598468 | 4598493 | 2 | 13 | 26 | AC   | 6  | 3  |
| 91677 | 9 | 4600288 | 4600303 | 2 | 8  | 16 | AG   | 29 | 3  |
| 91678 | 9 | 4600713 | 4600730 | 3 | 6  | 18 | CTT  | 35 | 7  |
| 91679 | 9 | 4602084 | 4602101 | 3 | 6  | 18 | CTC  | 7  | 4  |
| 91680 | 9 | 4602273 | 4602292 | 2 | 10 | 20 | TG   | 22 | 8  |
| 91692 | 9 | 4612989 | 4613006 | 2 | 9  | 18 | GT   | 27 | 6  |
| 91693 | 9 | 4613196 | 4613217 | 2 | 11 | 22 | TG   | 29 | 6  |
| 91695 | 9 | 4622595 | 4622622 | 2 | 14 | 28 | CA   | 15 | 15 |
| 91714 | 9 | 4650295 | 4650306 | 2 | 6  | 12 | AG   | 25 | 3  |
| 91715 | 9 | 4651127 | 4651141 | 3 | 5  | 15 | GAT  | 25 | 4  |
| 91720 | 9 | 4655010 | 4655023 | 2 | 7  | 14 | GT   | 11 | 6  |
| 91723 | 9 | 4670855 | 4670870 | 4 | 4  | 16 | ATGG | 27 | 3  |
| 91727 | 9 | 4679663 | 4679680 | 2 | 9  | 18 | CT   | 24 | 4  |
| 91728 | 9 | 4680036 | 4680047 | 2 | 6  | 12 | TC   | 12 | 5  |
| 91738 | 9 | 4693771 | 4693788 | 2 | 9  | 18 | CA   | 13 | 4  |
| 91743 | 9 | 4703545 | 4703570 | 2 | 13 | 26 | CA   | 16 | 8  |
| 91744 | 9 | 4703984 | 4703999 | 2 | 8  | 16 | AG   | 14 | 3  |
| 91745 | 9 | 4705198 | 4705215 | 2 | 9  | 18 | AC   | 28 | 9  |
| 91746 | 9 | 4705391 | 4705408 | 3 | 6  | 18 | GTG  | 11 | 6  |
| 91747 | 9 | 4705789 | 4705806 | 3 | 6  | 18 | CTG  | 27 | 4  |
| 91750 | 9 | 4707799 | 4707812 | 2 | 7  | 14 | CA   | 27 | 3  |
| 91751 | 9 | 4710672 | 4710687 | 2 | 8  | 16 | TG   | 19 | 7  |
| 91755 | 9 | 4716984 | 4717005 | 2 | 11 | 22 | TC   | 14 | 5  |
| 91756 | 9 | 4717153 | 4717166 | 2 | 7  | 14 | TC   | 15 | 7  |
| 91763 | 9 | 4729569 | 4729580 | 2 | 6  | 12 | GT   | 16 | 7  |
| 91764 | 9 | 4729583 | 4729594 | 2 | 6  | 12 | GT   | 16 | 8  |
| 91765 | 9 | 4729772 | 4729786 | 3 | 5  | 15 | AAG  | 25 | 3  |
| 91766 | 9 | 4732064 | 4732085 | 2 | 11 | 22 | GT   | 7  | 9  |
| 91771 | 9 | 4741055 | 4741082 | 2 | 14 | 28 | TC   | 17 | 11 |
| 91772 | 9 | 4742027 | 4742046 | 2 | 10 | 20 | AC   | 16 | 7  |
| 91780 | 9 | 4753563 | 4753578 | 2 | 8  | 16 | CA   | 13 | 6  |
| 91781 | 9 | 4753580 | 4753595 | 2 | 8  | 16 | AC   | 15 | 7  |
| 91783 | 9 | 4755043 | 4755066 | 2 | 12 | 24 | AC   | 18 | 5  |
| 91785 | 9 | 4755666 | 4755679 | 2 | 7  | 14 | CA   | 10 | 6  |
| 91786 | 9 | 4755692 | 4755705 | 2 | 7  | 14 | CA   | 13 | 6  |
| 91787 | 9 | 4756358 | 4756377 | 2 | 10 | 20 | AG   | 13 | 6  |
| 91788 | 9 | 4758299 | 4758318 | 4 | 5  | 20 | CCAT | 29 | 3  |
| 91790 | 9 | 4761234 | 4761249 | 2 | 8  | 16 | TG   | 16 | 4  |
| 91796 | 9 | 4763309 | 4763354 | 2 | 23 | 46 | TC   | 11 | 12 |
| 91799 | 9 | 4767924 | 4767947 | 2 | 12 | 24 | AC   | 12 | 6  |
| 91800 | 9 | 4769694 | 4769709 | 2 | 8  | 16 | AC   | 9  | 9  |
| 91803 | 9 | 4770206 | 4770235 | 2 | 15 | 30 | CA   | 10 | 7  |
| 91810 | 9 | 4775493 | 4775508 | 4 | 4  | 16 | TTAT | 22 | 6  |

|       |   |         |         |   |    |    |      |    |    |
|-------|---|---------|---------|---|----|----|------|----|----|
| 91813 | 9 | 4782256 | 4782267 | 2 | 6  | 12 | AT   | 18 | 4  |
| 91820 | 9 | 4788141 | 4788172 | 2 | 16 | 32 | AC   | 17 | 8  |
| 91823 | 9 | 4793609 | 4793628 | 4 | 5  | 20 | TGTT | 25 | 3  |
| 91827 | 9 | 4805453 | 4805468 | 2 | 8  | 16 | CA   | 24 | 7  |
| 91828 | 9 | 4805657 | 4805688 | 2 | 16 | 32 | GT   | 13 | 10 |
| 91829 | 9 | 4811679 | 4811710 | 4 | 8  | 32 | ATGG | 32 | 8  |
| 91836 | 9 | 4821369 | 4821384 | 2 | 8  | 16 | CA   | 21 | 5  |
| 91837 | 9 | 4822228 | 4822247 | 2 | 10 | 20 | CA   | 13 | 13 |
| 91838 | 9 | 4822396 | 4822449 | 2 | 27 | 54 | GA   | 8  | 11 |
| 91840 | 9 | 4822831 | 4822846 | 2 | 8  | 16 | GT   | 28 | 7  |
| 91843 | 9 | 4828248 | 4828265 | 2 | 9  | 18 | TC   | 23 | 4  |
| 91844 | 9 | 4828362 | 4828375 | 2 | 7  | 14 | AC   | 21 | 11 |
| 91854 | 9 | 4856029 | 4856060 | 2 | 16 | 32 | AC   | 12 | 6  |
| 91858 | 9 | 4864087 | 4864104 | 2 | 9  | 18 | GA   | 22 | 5  |
| 91860 | 9 | 4869371 | 4869388 | 2 | 9  | 18 | AC   | 22 | 4  |
| 91865 | 9 | 4879996 | 4880009 | 2 | 7  | 14 | AC   | 30 | 4  |
| 91867 | 9 | 4883910 | 4883937 | 2 | 14 | 28 | TG   | 16 | 8  |
| 91872 | 9 | 4888324 | 4888343 | 4 | 5  | 20 | AATA | 15 | 5  |
| 91875 | 9 | 4889274 | 4889285 | 2 | 6  | 12 | TG   | 20 | 5  |
| 91881 | 9 | 4897181 | 4897212 | 2 | 16 | 32 | AC   | 7  | 7  |
| 91884 | 9 | 4900960 | 4900977 | 3 | 6  | 18 | TTC  | 18 | 3  |
| 91885 | 9 | 4903438 | 4903469 | 4 | 8  | 32 | CATC | 25 | 5  |
| 91891 | 9 | 4911196 | 4911222 | 3 | 9  | 27 | TCA  | 20 | 3  |
| 91892 | 9 | 4911612 | 4911639 | 2 | 14 | 28 | CA   | 13 | 10 |
| 91894 | 9 | 4920925 | 4920942 | 3 | 6  | 18 | CTG  | 32 | 5  |
| 91899 | 9 | 4924813 | 4924840 | 2 | 14 | 28 | TG   | 18 | 13 |
| 91914 | 9 | 4956775 | 4956790 | 2 | 8  | 16 | CT   | 25 | 6  |
| 91916 | 9 | 4956987 | 4957001 | 3 | 5  | 15 | GAG  | 12 | 3  |
| 91919 | 9 | 4962179 | 4962192 | 2 | 7  | 14 | AG   | 31 | 5  |
| 91920 | 9 | 4966721 | 4966744 | 3 | 8  | 24 | GAG  | 23 | 8  |
| 91922 | 9 | 4970222 | 4970237 | 4 | 4  | 16 | AAGA | 28 | 4  |
| 91927 | 9 | 4986664 | 4986699 | 2 | 18 | 36 | AC   | 12 | 12 |
| 91928 | 9 | 4990485 | 4990526 | 3 | 14 | 42 | GAA  | 17 | 13 |
| 91929 | 9 | 4990654 | 4990675 | 2 | 11 | 22 | GT   | 20 | 7  |
| 91932 | 9 | 4994334 | 4994353 | 4 | 5  | 20 | CAGG | 19 | 3  |
| 91933 | 9 | 4996521 | 4996532 | 2 | 6  | 12 | TG   | 19 | 8  |
| 91939 | 9 | 5007150 | 5007165 | 2 | 8  | 16 | TC   | 27 | 3  |
| 91942 | 9 | 5015652 | 5015669 | 2 | 9  | 18 | GT   | 19 | 3  |
| 91944 | 9 | 5016753 | 5016764 | 2 | 6  | 12 | AC   | 21 | 6  |
| 91945 | 9 | 5018933 | 5018944 | 2 | 6  | 12 | AC   | 33 | 3  |
| 91948 | 9 | 5020169 | 5020192 | 2 | 12 | 24 | TG   | 14 | 12 |
| 91952 | 9 | 5032369 | 5032398 | 3 | 10 | 30 | ATA  | 14 | 8  |
| 91954 | 9 | 5035052 | 5035081 | 2 | 15 | 30 | TG   | 9  | 10 |
| 91961 | 9 | 5050761 | 5050787 | 3 | 9  | 27 | ACA  | 16 | 4  |
| 91963 | 9 | 5051223 | 5051249 | 3 | 9  | 27 | GCT  | 28 | 7  |
| 91973 | 9 | 5108801 | 5108814 | 2 | 7  | 14 | CT   | 23 | 3  |
| 91976 | 9 | 5118140 | 5118154 | 3 | 5  | 15 | ATT  | 30 | 4  |
| 91977 | 9 | 5118414 | 5118427 | 2 | 7  | 14 | TG   | 13 | 5  |
| 91978 | 9 | 5121603 | 5121647 | 3 | 15 | 45 | AGC  | 26 | 9  |
| 91985 | 9 | 5142368 | 5142387 | 2 | 10 | 20 | TC   | 22 | 7  |
| 91993 | 9 | 5147955 | 5147969 | 3 | 5  | 15 | GGT  | 9  | 3  |

|       |   |         |         |   |    |    |      |    |    |
|-------|---|---------|---------|---|----|----|------|----|----|
| 91995 | 9 | 5150419 | 5150456 | 2 | 19 | 38 | GT   | 7  | 12 |
| 92005 | 9 | 5173134 | 5173149 | 2 | 8  | 16 | TC   | 20 | 4  |
| 92008 | 9 | 5184179 | 5184193 | 3 | 5  | 15 | ATA  | 19 | 4  |
| 92009 | 9 | 5184194 | 5184208 | 3 | 5  | 15 | AGA  | 18 | 11 |
| 92010 | 9 | 5185689 | 5185728 | 2 | 20 | 40 | AC   | 11 | 13 |
| 92020 | 9 | 5193109 | 5193132 | 4 | 6  | 24 | AAAT | 13 | 7  |
| 92031 | 9 | 5238189 | 5238230 | 2 | 21 | 42 | CA   | 6  | 7  |
| 92033 | 9 | 5240963 | 5240986 | 2 | 12 | 24 | TG   | 18 | 13 |
| 92036 | 9 | 5246674 | 5246691 | 2 | 9  | 18 | CT   | 13 | 4  |
| 92041 | 9 | 5252367 | 5252392 | 2 | 13 | 26 | TG   | 16 | 9  |
| 92052 | 9 | 5277816 | 5277831 | 2 | 8  | 16 | AC   | 16 | 5  |
| 92060 | 9 | 5293894 | 5293914 | 3 | 7  | 21 | CTG  | 24 | 5  |
| 92064 | 9 | 5297664 | 5297675 | 2 | 6  | 12 | AT   | 15 | 4  |
| 92072 | 9 | 5320118 | 5320129 | 2 | 6  | 12 | AC   | 19 | 7  |
| 92077 | 9 | 5325064 | 5325078 | 3 | 5  | 15 | CCA  | 19 | 8  |
| 92084 | 9 | 5326660 | 5326677 | 3 | 6  | 18 | GAG  | 13 | 3  |
| 92086 | 9 | 5328459 | 5328474 | 2 | 8  | 16 | TG   | 16 | 5  |
| 92088 | 9 | 5333387 | 5333406 | 2 | 10 | 20 | GT   | 13 | 3  |
| 92089 | 9 | 5335073 | 5335116 | 4 | 11 | 44 | AGAT | 18 | 7  |
| 92102 | 9 | 5373864 | 5373881 | 3 | 6  | 18 | GCT  | 24 | 4  |
| 92114 | 9 | 5391998 | 5392011 | 2 | 7  | 14 | TA   | 15 | 3  |
| 92120 | 9 | 5410416 | 5410430 | 3 | 5  | 15 | CTT  | 27 | 3  |
| 92123 | 9 | 5418762 | 5418775 | 2 | 7  | 14 | GT   | 17 | 4  |
| 92140 | 9 | 5489486 | 5489501 | 4 | 4  | 16 | AACA | 28 | 4  |
| 92164 | 9 | 5579262 | 5579281 | 2 | 10 | 20 | GT   | 23 | 6  |
| 92165 | 9 | 5579602 | 5579613 | 2 | 6  | 12 | TA   | 30 | 3  |
| 92168 | 9 | 5586714 | 5586731 | 3 | 6  | 18 | CTG  | 21 | 3  |
| 92171 | 9 | 5602505 | 5602536 | 2 | 16 | 32 | TG   | 24 | 10 |
| 92173 | 9 | 5608254 | 5608269 | 4 | 4  | 16 | TTTG | 27 | 4  |
| 92190 | 9 | 5671349 | 5671369 | 3 | 7  | 21 | CTG  | 26 | 8  |
| 92192 | 9 | 5677325 | 5677368 | 2 | 22 | 44 | CA   | 11 | 7  |
| 92202 | 9 | 5693071 | 5693122 | 2 | 26 | 52 | TG   | 15 | 14 |
| 92207 | 9 | 5705181 | 5705204 | 2 | 12 | 24 | TG   | 18 | 7  |
| 92208 | 9 | 5705327 | 5705346 | 2 | 10 | 20 | CA   | 26 | 5  |
| 92213 | 9 | 5711034 | 5711061 | 2 | 14 | 28 | CT   | 20 | 5  |
| 92221 | 9 | 5721323 | 5721342 | 2 | 10 | 20 | AC   | 22 | 9  |
| 92223 | 9 | 5723515 | 5723528 | 2 | 7  | 14 | GT   | 35 | 3  |
| 92233 | 9 | 5733665 | 5733712 | 3 | 16 | 48 | TGC  | 26 | 9  |
| 92239 | 9 | 5746909 | 5746923 | 3 | 5  | 15 | GAG  | 23 | 5  |
| 92243 | 9 | 5750954 | 5750969 | 2 | 8  | 16 | TA   | 13 | 6  |
| 92248 | 9 | 5763845 | 5763859 | 3 | 5  | 15 | TTC  | 26 | 3  |
| 92254 | 9 | 5780386 | 5780405 | 4 | 5  | 20 | AAAT | 18 | 6  |
| 92260 | 9 | 5787254 | 5787267 | 2 | 7  | 14 | CT   | 7  | 4  |
| 92261 | 9 | 5787319 | 5787346 | 2 | 14 | 28 | AC   | 16 | 9  |
| 92271 | 9 | 5814146 | 5814159 | 2 | 7  | 14 | AC   | 8  | 4  |
| 92281 | 9 | 5833802 | 5833821 | 2 | 10 | 20 | AC   | 15 | 7  |
| 92283 | 9 | 5836666 | 5836689 | 2 | 12 | 24 | AC   | 9  | 4  |
| 92286 | 9 | 5839706 | 5839719 | 2 | 7  | 14 | CA   | 19 | 4  |
| 92296 | 9 | 5854842 | 5854855 | 2 | 7  | 14 | CA   | 20 | 3  |
| 92297 | 9 | 5856071 | 5856094 | 2 | 12 | 24 | GT   | 17 | 5  |
| 92298 | 9 | 5867314 | 5867343 | 3 | 10 | 30 | GGA  | 7  | 8  |

|       |   |         |         |   |    |    |      |    |    |
|-------|---|---------|---------|---|----|----|------|----|----|
| 92307 | 9 | 5881081 | 5881094 | 2 | 7  | 14 | GT   | 29 | 3  |
| 92312 | 9 | 5891499 | 5891526 | 2 | 14 | 28 | AC   | 10 | 8  |
| 92326 | 9 | 5920265 | 5920284 | 2 | 10 | 20 | CT   | 15 | 7  |
| 92328 | 9 | 5920857 | 5920882 | 2 | 13 | 26 | GT   | 17 | 7  |
| 92330 | 9 | 5920989 | 5921012 | 2 | 12 | 24 | AC   | 6  | 6  |
| 92334 | 9 | 5925197 | 5925226 | 2 | 15 | 30 | TG   | 16 | 5  |
| 92339 | 9 | 5936494 | 5936509 | 2 | 8  | 16 | AC   | 13 | 6  |
| 92341 | 9 | 5937078 | 5937089 | 2 | 6  | 12 | CA   | 19 | 6  |
| 92342 | 9 | 5938143 | 5938154 | 2 | 6  | 12 | AC   | 24 | 4  |
| 92343 | 9 | 5938226 | 5938251 | 2 | 13 | 26 | CA   | 17 | 9  |
| 92344 | 9 | 5940397 | 5940432 | 4 | 9  | 36 | AGAT | 17 | 5  |
| 92345 | 9 | 5940735 | 5940760 | 2 | 13 | 26 | TG   | 16 | 12 |
| 92348 | 9 | 5941967 | 5941980 | 2 | 7  | 14 | GT   | 19 | 5  |
| 92351 | 9 | 5955205 | 5955220 | 2 | 8  | 16 | AC   | 26 | 8  |
| 92355 | 9 | 5964737 | 5964752 | 2 | 8  | 16 | GA   | 17 | 6  |
| 92360 | 9 | 5983973 | 5983993 | 3 | 7  | 21 | CAA  | 20 | 4  |
| 92367 | 9 | 6009655 | 6009672 | 2 | 9  | 18 | GA   | 9  | 3  |
| 92373 | 9 | 6027966 | 6027983 | 2 | 9  | 18 | AC   | 28 | 4  |
| 92375 | 9 | 6030904 | 6030925 | 2 | 11 | 22 | GT   | 20 | 6  |
| 92376 | 9 | 6032803 | 6032820 | 2 | 9  | 18 | AC   | 15 | 5  |
| 92378 | 9 | 6033447 | 6033470 | 3 | 8  | 24 | TCC  | 23 | 5  |
| 92380 | 9 | 6035304 | 6035319 | 2 | 8  | 16 | TC   | 19 | 3  |
| 92386 | 9 | 6037632 | 6037643 | 2 | 6  | 12 | GT   | 24 | 4  |
| 92388 | 9 | 6038533 | 6038548 | 2 | 8  | 16 | AT   | 11 | 3  |
| 92389 | 9 | 6041344 | 6041370 | 3 | 9  | 27 | TGC  | 23 | 10 |
| 92391 | 9 | 6041915 | 6041944 | 3 | 10 | 30 | GGA  | 17 | 5  |
| 92393 | 9 | 6042208 | 6042219 | 2 | 6  | 12 | TG   | 19 | 8  |
| 92396 | 9 | 6048561 | 6048586 | 2 | 13 | 26 | AC   | 18 | 9  |
| 92397 | 9 | 6050088 | 6050120 | 3 | 11 | 33 | ATC  | 25 | 7  |
| 92398 | 9 | 6055072 | 6055083 | 2 | 6  | 12 | CA   | 27 | 5  |
| 92399 | 9 | 6055110 | 6055135 | 2 | 13 | 26 | AC   | 26 | 9  |
| 92406 | 9 | 6066341 | 6066354 | 2 | 7  | 14 | CA   | 24 | 4  |
| 92408 | 9 | 6070731 | 6070748 | 3 | 6  | 18 | GAG  | 15 | 3  |
| 92411 | 9 | 6075423 | 6075438 | 2 | 8  | 16 | AC   | 8  | 7  |
| 92412 | 9 | 6075440 | 6075459 | 2 | 10 | 20 | CA   | 12 | 10 |
| 92420 | 9 | 6088316 | 6088345 | 2 | 15 | 30 | CA   | 15 | 5  |
| 92422 | 9 | 6095633 | 6095653 | 3 | 7  | 21 | CAA  | 27 | 4  |
| 92423 | 9 | 6096976 | 6096989 | 2 | 7  | 14 | AT   | 17 | 4  |
| 92426 | 9 | 6108837 | 6108876 | 4 | 10 | 40 | GGAT | 17 | 3  |
| 92442 | 9 | 6186989 | 6187034 | 2 | 23 | 46 | GT   | 9  | 11 |
| 92443 | 9 | 6188082 | 6188143 | 2 | 31 | 62 | AC   | 18 | 16 |
| 92445 | 9 | 6197614 | 6197633 | 4 | 5  | 20 | CCAT | 27 | 8  |
| 92456 | 9 | 6213620 | 6213647 | 2 | 14 | 28 | TG   | 14 | 11 |
| 92458 | 9 | 6221805 | 6221816 | 2 | 6  | 12 | TG   | 17 | 3  |
| 92474 | 9 | 6253338 | 6253353 | 2 | 8  | 16 | TA   | 24 | 7  |
| 92475 | 9 | 6257200 | 6257213 | 2 | 7  | 14 | TG   | 8  | 3  |
| 92479 | 9 | 6262689 | 6262702 | 2 | 7  | 14 | TG   | 22 | 8  |
| 92480 | 9 | 6266420 | 6266435 | 2 | 8  | 16 | AC   | 24 | 4  |
| 92481 | 9 | 6266614 | 6266637 | 3 | 8  | 24 | GAG  | 29 | 4  |
| 92484 | 9 | 6277679 | 6277696 | 3 | 6  | 18 | GAA  | 18 | 4  |
| 92485 | 9 | 6280772 | 6280783 | 2 | 6  | 12 | AC   | 23 | 3  |

|       |   |         |         |   |    |    |      |    |    |
|-------|---|---------|---------|---|----|----|------|----|----|
| 92500 | 9 | 6326636 | 6326650 | 3 | 5  | 15 | TAA  | 23 | 3  |
| 92511 | 9 | 6353569 | 6353586 | 2 | 9  | 18 | CT   | 27 | 5  |
| 92512 | 9 | 6354709 | 6354723 | 3 | 5  | 15 | AAT  | 29 | 3  |
| 92513 | 9 | 6356484 | 6356501 | 2 | 9  | 18 | AC   | 8  | 7  |
| 92517 | 9 | 6372922 | 6372948 | 3 | 9  | 27 | TGC  | 20 | 6  |
| 92519 | 9 | 6382719 | 6382734 | 4 | 4  | 16 | AAAT | 14 | 6  |
| 92521 | 9 | 6382873 | 6382910 | 2 | 19 | 38 | GT   | 15 | 9  |
| 92525 | 9 | 6386011 | 6386032 | 2 | 11 | 22 | CA   | 17 | 8  |
| 92527 | 9 | 6387785 | 6387812 | 2 | 14 | 28 | CA   | 8  | 6  |
| 92529 | 9 | 6389598 | 6389637 | 2 | 20 | 40 | AC   | 10 | 7  |
| 92533 | 9 | 6396360 | 6396373 | 2 | 7  | 14 | GT   | 27 | 6  |
| 92542 | 9 | 6414169 | 6414188 | 4 | 5  | 20 | TATT | 18 | 3  |
| 92543 | 9 | 6415910 | 6415927 | 2 | 9  | 18 | AC   | 21 | 5  |
| 92544 | 9 | 6416239 | 6416256 | 3 | 6  | 18 | TCC  | 23 | 8  |
| 92545 | 9 | 6417144 | 6417159 | 4 | 4  | 16 | TTTG | 18 | 5  |
| 92547 | 9 | 6418224 | 6418267 | 4 | 11 | 44 | TAGA | 13 | 11 |
| 92549 | 9 | 6418574 | 6418597 | 3 | 8  | 24 | CTG  | 24 | 7  |
| 92550 | 9 | 6418718 | 6418751 | 2 | 17 | 34 | AC   | 12 | 8  |
| 92553 | 9 | 6422013 | 6422024 | 2 | 6  | 12 | CA   | 29 | 3  |
| 92561 | 9 | 6429484 | 6429498 | 3 | 5  | 15 | CCT  | 20 | 4  |
| 92568 | 9 | 6439056 | 6439069 | 2 | 7  | 14 | CA   | 30 | 3  |
| 92570 | 9 | 6442032 | 6442067 | 2 | 18 | 36 | TC   | 14 | 5  |
| 92571 | 9 | 6443751 | 6443776 | 2 | 13 | 26 | TG   | 24 | 7  |
| 92574 | 9 | 6461384 | 6461401 | 3 | 6  | 18 | AAT  | 9  | 3  |
| 92577 | 9 | 6462260 | 6462275 | 2 | 8  | 16 | GT   | 19 | 5  |
| 92578 | 9 | 6462779 | 6462802 | 3 | 8  | 24 | TTG  | 16 | 15 |
| 92582 | 9 | 6470677 | 6470691 | 3 | 5  | 15 | GAA  | 24 | 3  |
| 92584 | 9 | 6476167 | 6476184 | 3 | 6  | 18 | CCT  | 26 | 5  |
| 92602 | 9 | 6510061 | 6510074 | 2 | 7  | 14 | TG   | 23 | 10 |
| 92608 | 9 | 6520133 | 6520150 | 3 | 6  | 18 | CCT  | 22 | 5  |
| 92615 | 9 | 6537220 | 6537243 | 3 | 8  | 24 | GAG  | 19 | 8  |
| 92619 | 9 | 6549854 | 6549883 | 2 | 15 | 30 | AC   | 19 | 10 |
| 92620 | 9 | 6550050 | 6550097 | 2 | 24 | 48 | TG   | 14 | 13 |
| 92622 | 9 | 6556273 | 6556290 | 2 | 9  | 18 | GA   | 19 | 3  |
| 92623 | 9 | 6558652 | 6558669 | 2 | 9  | 18 | AT   | 8  | 5  |
| 92624 | 9 | 6559346 | 6559361 | 2 | 8  | 16 | AC   | 17 | 3  |
| 92630 | 9 | 6572063 | 6572078 | 2 | 8  | 16 | AC   | 15 | 13 |
| 92631 | 9 | 6572080 | 6572099 | 2 | 10 | 20 | CA   | 17 | 13 |
| 92639 | 9 | 6582231 | 6582248 | 2 | 9  | 18 | GT   | 21 | 7  |
| 92643 | 9 | 6583260 | 6583283 | 2 | 12 | 24 | TG   | 16 | 9  |
| 92653 | 9 | 6595093 | 6595138 | 2 | 23 | 46 | GT   | 7  | 8  |
| 92660 | 9 | 6605673 | 6605688 | 2 | 8  | 16 | GT   | 16 | 4  |
| 92666 | 9 | 6612182 | 6612225 | 4 | 11 | 44 | GGAT | 24 | 8  |
| 92674 | 9 | 6617319 | 6617364 | 2 | 23 | 46 | GT   | 6  | 9  |
| 92675 | 9 | 6617569 | 6617588 | 2 | 10 | 20 | CA   | 18 | 12 |
| 92681 | 9 | 6623318 | 6623359 | 2 | 21 | 42 | AG   | 9  | 5  |
| 92683 | 9 | 6628708 | 6628725 | 2 | 9  | 18 | TG   | 24 | 6  |
| 92686 | 9 | 6629169 | 6629189 | 3 | 7  | 21 | GAG  | 24 | 3  |
| 92688 | 9 | 6638401 | 6638426 | 2 | 13 | 26 | CA   | 14 | 5  |
| 92693 | 9 | 6639054 | 6639077 | 2 | 12 | 24 | TG   | 12 | 7  |
| 92700 | 9 | 6651881 | 6651896 | 2 | 8  | 16 | GT   | 22 | 6  |

|       |   |         |         |   |    |    |      |    |    |
|-------|---|---------|---------|---|----|----|------|----|----|
| 92705 | 9 | 6659985 | 6660000 | 4 | 4  | 16 | CACT | 22 | 3  |
| 92707 | 9 | 6660077 | 6660092 | 2 | 8  | 16 | CA   | 17 | 7  |
| 92711 | 9 | 6665598 | 6665621 | 4 | 6  | 24 | GATG | 25 | 4  |
| 92715 | 9 | 6672629 | 6672648 | 2 | 10 | 20 | AC   | 23 | 3  |
| 92716 | 9 | 6673968 | 6673985 | 3 | 6  | 18 | ATA  | 9  | 4  |
| 92730 | 9 | 6719472 | 6719493 | 2 | 11 | 22 | CA   | 25 | 9  |
| 92738 | 9 | 6727173 | 6727190 | 2 | 9  | 18 | AC   | 12 | 3  |
| 92741 | 9 | 6727412 | 6727427 | 2 | 8  | 16 | AC   | 9  | 6  |
| 92746 | 9 | 6730051 | 6730072 | 2 | 11 | 22 | AC   | 14 | 9  |
| 92747 | 9 | 6730225 | 6730236 | 2 | 6  | 12 | CA   | 19 | 4  |
| 92757 | 9 | 6744056 | 6744067 | 2 | 6  | 12 | AC   | 18 | 12 |
| 92758 | 9 | 6744068 | 6744085 | 2 | 9  | 18 | GC   | 14 | 12 |
| 92769 | 9 | 6769079 | 6769098 | 4 | 5  | 20 | AAAT | 21 | 3  |
| 92770 | 9 | 6769271 | 6769292 | 2 | 11 | 22 | TC   | 23 | 6  |
| 92771 | 9 | 6774583 | 6774596 | 2 | 7  | 14 | TG   | 22 | 12 |
| 92773 | 9 | 6776742 | 6776759 | 2 | 9  | 18 | TC   | 12 | 14 |
| 92774 | 9 | 6776760 | 6776773 | 2 | 7  | 14 | AC   | 14 | 17 |
| 92778 | 9 | 6778756 | 6778769 | 2 | 7  | 14 | CT   | 18 | 4  |
| 92782 | 9 | 6787957 | 6787974 | 2 | 9  | 18 | TC   | 15 | 5  |
| 92784 | 9 | 6790770 | 6790799 | 2 | 15 | 30 | AC   | 11 | 13 |
| 92789 | 9 | 6801345 | 6801370 | 2 | 13 | 26 | GT   | 10 | 9  |
| 92790 | 9 | 6801558 | 6801573 | 2 | 8  | 16 | CA   | 28 | 7  |
| 92791 | 9 | 6805370 | 6805397 | 2 | 14 | 28 | CA   | 7  | 4  |
| 92792 | 9 | 6807657 | 6807684 | 2 | 14 | 28 | CA   | 14 | 9  |
| 92793 | 9 | 6807979 | 6807996 | 2 | 9  | 18 | AC   | 24 | 7  |
| 92794 | 9 | 6810144 | 6810177 | 2 | 17 | 34 | GT   | 17 | 13 |
| 92796 | 9 | 6811493 | 6811519 | 3 | 9  | 27 | GAG  | 25 | 6  |
| 92801 | 9 | 6816701 | 6816726 | 2 | 13 | 26 | CA   | 20 | 9  |
| 92809 | 9 | 6826591 | 6826630 | 2 | 20 | 40 | GT   | 14 | 8  |
| 92811 | 9 | 6830371 | 6830386 | 2 | 8  | 16 | GT   | 12 | 9  |
| 92812 | 9 | 6830594 | 6830609 | 2 | 8  | 16 | GT   | 18 | 6  |
| 92813 | 9 | 6830713 | 6830736 | 2 | 12 | 24 | TG   | 16 | 8  |
| 92814 | 9 | 6833263 | 6833274 | 2 | 6  | 12 | TG   | 32 | 3  |
| 92815 | 9 | 6834633 | 6834648 | 2 | 8  | 16 | CA   | 16 | 9  |
| 92816 | 9 | 6834681 | 6834714 | 2 | 17 | 34 | TC   | 18 | 8  |
| 92818 | 9 | 6834802 | 6834813 | 2 | 6  | 12 | CA   | 27 | 3  |
| 92820 | 9 | 6834923 | 6834938 | 2 | 8  | 16 | AG   | 26 | 9  |
| 92822 | 9 | 6840618 | 6840633 | 2 | 8  | 16 | TG   | 20 | 8  |
| 92823 | 9 | 6842785 | 6842802 | 2 | 9  | 18 | AC   | 12 | 7  |
| 92824 | 9 | 6843207 | 6843226 | 2 | 10 | 20 | TG   | 17 | 7  |
| 92843 | 9 | 6883113 | 6883124 | 2 | 6  | 12 | CT   | 20 | 5  |
| 92850 | 9 | 6902793 | 6902812 | 2 | 10 | 20 | AC   | 14 | 7  |
| 92851 | 9 | 6912387 | 6912398 | 2 | 6  | 12 | CT   | 20 | 3  |
| 92858 | 9 | 6920148 | 6920161 | 2 | 7  | 14 | TG   | 29 | 6  |
| 92862 | 9 | 6929254 | 6929279 | 2 | 13 | 26 | AC   | 15 | 8  |
| 92864 | 9 | 6944505 | 6944518 | 2 | 7  | 14 | GT   | 22 | 13 |
| 92867 | 9 | 6950688 | 6950711 | 2 | 12 | 24 | TC   | 21 | 12 |
| 92879 | 9 | 6977140 | 6977157 | 2 | 9  | 18 | AC   | 24 | 5  |
| 92881 | 9 | 6978739 | 6978752 | 2 | 7  | 14 | TC   | 11 | 4  |
| 92882 | 9 | 6978756 | 6978771 | 2 | 8  | 16 | CT   | 8  | 5  |
| 92885 | 9 | 6979272 | 6979287 | 2 | 8  | 16 | CA   | 16 | 4  |

|       |   |         |         |   |    |    |      |    |    |
|-------|---|---------|---------|---|----|----|------|----|----|
| 92886 | 9 | 6979464 | 6979487 | 2 | 12 | 24 | TG   | 17 | 7  |
| 92888 | 9 | 6982335 | 6982350 | 2 | 8  | 16 | TC   | 29 | 12 |
| 92889 | 9 | 6987638 | 6987651 | 2 | 7  | 14 | GA   | 21 | 3  |
| 92890 | 9 | 6987966 | 6987993 | 2 | 14 | 28 | AG   | 25 | 6  |
| 92899 | 9 | 7017635 | 7017656 | 2 | 11 | 22 | CA   | 13 | 4  |
| 92900 | 9 | 7018450 | 7018463 | 2 | 7  | 14 | TC   | 23 | 5  |
| 92901 | 9 | 7024820 | 7024849 | 2 | 15 | 30 | AC   | 14 | 8  |
| 92903 | 9 | 7031875 | 7031886 | 2 | 6  | 12 | CA   | 23 | 4  |
| 92905 | 9 | 7035086 | 7035099 | 2 | 7  | 14 | CT   | 27 | 9  |
| 92907 | 9 | 7039400 | 7039438 | 3 | 13 | 39 | AGG  | 14 | 8  |
| 92912 | 9 | 7065377 | 7065408 | 2 | 16 | 32 | GT   | 10 | 10 |
| 92915 | 9 | 7067264 | 7067287 | 2 | 12 | 24 | AC   | 8  | 7  |
| 92919 | 9 | 7088767 | 7088800 | 2 | 17 | 34 | TG   | 15 | 11 |
| 92921 | 9 | 7097209 | 7097220 | 2 | 6  | 12 | CA   | 20 | 3  |
| 92922 | 9 | 7097341 | 7097360 | 2 | 10 | 20 | AC   | 16 | 4  |
| 92923 | 9 | 7097799 | 7097822 | 2 | 12 | 24 | TG   | 22 | 8  |
| 92927 | 9 | 7105838 | 7105853 | 2 | 8  | 16 | AG   | 25 | 3  |
| 92929 | 9 | 7107728 | 7107777 | 2 | 25 | 50 | AC   | 9  | 8  |
| 92931 | 9 | 7108749 | 7108772 | 2 | 12 | 24 | CA   | 8  | 5  |
| 92935 | 9 | 7127648 | 7127669 | 2 | 11 | 22 | CA   | 23 | 10 |
| 92939 | 9 | 7131458 | 7131483 | 2 | 13 | 26 | CT   | 9  | 5  |
| 92946 | 9 | 7148571 | 7148594 | 2 | 12 | 24 | CA   | 14 | 6  |
| 92959 | 9 | 7190298 | 7190333 | 2 | 18 | 36 | GT   | 12 | 11 |
| 92961 | 9 | 7195753 | 7195778 | 2 | 13 | 26 | TG   | 14 | 11 |
| 92963 | 9 | 7199051 | 7199066 | 2 | 8  | 16 | AC   | 19 | 3  |
| 92970 | 9 | 7215542 | 7215561 | 4 | 5  | 20 | AAGG | 17 | 3  |
| 92974 | 9 | 7216999 | 7217014 | 2 | 8  | 16 | CA   | 17 | 7  |
| 92983 | 9 | 7233787 | 7233818 | 2 | 16 | 32 | TC   | 11 | 4  |
| 92984 | 9 | 7238853 | 7238896 | 2 | 22 | 44 | AC   | 11 | 12 |
| 92987 | 9 | 7248757 | 7248771 | 3 | 5  | 15 | AAT  | 25 | 4  |
| 92991 | 9 | 7262307 | 7262322 | 2 | 8  | 16 | CA   | 24 | 4  |
| 92994 | 9 | 7268089 | 7268110 | 2 | 11 | 22 | GT   | 13 | 8  |
| 92995 | 9 | 7268756 | 7268775 | 4 | 5  | 20 | AAAC | 26 | 4  |
| 93004 | 9 | 7282455 | 7282490 | 2 | 18 | 36 | AC   | 16 | 14 |
| 93011 | 9 | 7285170 | 7285193 | 3 | 8  | 24 | AGG  | 23 | 3  |
| 93012 | 9 | 7285481 | 7285498 | 2 | 9  | 18 | GA   | 15 | 5  |
| 93017 | 9 | 7287221 | 7287236 | 4 | 4  | 16 | AAAT | 21 | 4  |
| 93019 | 9 | 7287502 | 7287519 | 3 | 6  | 18 | GAA  | 20 | 6  |
| 93020 | 9 | 7287688 | 7287717 | 3 | 10 | 30 | TCC  | 14 | 4  |
| 93021 | 9 | 7287753 | 7287782 | 2 | 15 | 30 | TG   | 12 | 4  |
| 93022 | 9 | 7287829 | 7287879 | 3 | 17 | 51 | TTC  | 14 | 16 |
| 93023 | 9 | 7288119 | 7288156 | 2 | 19 | 38 | GT   | 18 | 15 |
| 93027 | 9 | 7302587 | 7302610 | 3 | 8  | 24 | AAG  | 21 | 5  |
| 93028 | 9 | 7311462 | 7311489 | 2 | 14 | 28 | AC   | 14 | 5  |
| 93029 | 9 | 7314050 | 7314064 | 3 | 5  | 15 | GTG  | 11 | 4  |
| 93037 | 9 | 7320710 | 7320727 | 2 | 9  | 18 | TG   | 20 | 5  |
| 93043 | 9 | 7335714 | 7335728 | 3 | 5  | 15 | CAG  | 27 | 4  |
| 93047 | 9 | 7344379 | 7344396 | 2 | 9  | 18 | GT   | 26 | 4  |
| 93049 | 9 | 7346726 | 7346745 | 2 | 10 | 20 | AC   | 22 | 3  |
| 93057 | 9 | 7354307 | 7354338 | 2 | 16 | 32 | AG   | 21 | 8  |
| 93058 | 9 | 7355027 | 7355050 | 4 | 6  | 24 | TTTC | 12 | 5  |



|       |   |         |         |   |    |    |      |    |    |
|-------|---|---------|---------|---|----|----|------|----|----|
| 93080 | 9 | 7372434 | 7372448 | 3 | 5  | 15 | CCT  | 12 | 4  |
| 93081 | 9 | 7374815 | 7374838 | 3 | 8  | 24 | AGG  | 22 | 8  |
| 93083 | 9 | 7376203 | 7376214 | 2 | 6  | 12 | AT   | 16 | 5  |
| 93090 | 9 | 7382319 | 7382346 | 2 | 14 | 28 | TG   | 13 | 6  |
| 93093 | 9 | 7382563 | 7382578 | 2 | 8  | 16 | AG   | 17 | 3  |
| 93094 | 9 | 7383024 | 7383037 | 2 | 7  | 14 | GT   | 16 | 5  |
| 93100 | 9 | 7389249 | 7389284 | 2 | 18 | 36 | AC   | 8  | 13 |
| 93101 | 9 | 7389364 | 7389377 | 2 | 7  | 14 | AC   | 30 | 3  |
| 93102 | 9 | 7389759 | 7389778 | 2 | 10 | 20 | CA   | 24 | 7  |
| 93103 | 9 | 7391678 | 7391719 | 2 | 21 | 42 | TG   | 24 | 12 |
| 93109 | 9 | 7398688 | 7398703 | 2 | 8  | 16 | GT   | 28 | 5  |
| 93117 | 9 | 7402653 | 7402702 | 2 | 25 | 50 | CA   | 16 | 12 |
| 93119 | 9 | 7404237 | 7404284 | 2 | 24 | 48 | AC   | 16 | 11 |
| 93120 | 9 | 7404780 | 7404803 | 2 | 12 | 24 | GT   | 19 | 16 |
| 93122 | 9 | 7405502 | 7405519 | 2 | 9  | 18 | GA   | 11 | 4  |
| 93124 | 9 | 7405656 | 7405679 | 2 | 12 | 24 | GT   | 20 | 5  |
| 93129 | 9 | 7411871 | 7411908 | 2 | 19 | 38 | CA   | 12 | 10 |
| 93130 | 9 | 7412086 | 7412103 | 2 | 9  | 18 | GT   | 19 | 6  |
| 93132 | 9 | 7413312 | 7413329 | 2 | 9  | 18 | GA   | 21 | 7  |
| 93134 | 9 | 7415358 | 7415381 | 2 | 12 | 24 | GA   | 10 | 10 |
| 93139 | 9 | 7423081 | 7423116 | 2 | 18 | 36 | AC   | 11 | 9  |
| 93144 | 9 | 7431018 | 7431037 | 2 | 10 | 20 | CT   | 17 | 6  |
| 93145 | 9 | 7431039 | 7431050 | 2 | 6  | 12 | TC   | 25 | 8  |
| 93149 | 9 | 7432117 | 7432146 | 2 | 15 | 30 | AC   | 18 | 14 |
| 93150 | 9 | 7433806 | 7433819 | 2 | 7  | 14 | GA   | 22 | 5  |
| 93155 | 9 | 7435326 | 7435347 | 2 | 11 | 22 | GT   | 12 | 6  |
| 93177 | 9 | 7467859 | 7467876 | 2 | 9  | 18 | AG   | 28 | 4  |
| 93179 | 9 | 7473024 | 7473065 | 2 | 21 | 42 | TG   | 12 | 13 |
| 93181 | 9 | 7474133 | 7474178 | 2 | 23 | 46 | CA   | 8  | 5  |
| 93188 | 9 | 7483697 | 7483712 | 4 | 4  | 16 | TTTA | 22 | 6  |
| 93189 | 9 | 7485312 | 7485331 | 4 | 5  | 20 | CAAT | 24 | 5  |
| 93191 | 9 | 7486337 | 7486354 | 2 | 9  | 18 | AC   | 20 | 5  |
| 93198 | 9 | 7493656 | 7493691 | 2 | 18 | 36 | AC   | 11 | 16 |
| 93200 | 9 | 7498501 | 7498522 | 2 | 11 | 22 | CA   | 22 | 8  |
| 93202 | 9 | 7502646 | 7502667 | 2 | 11 | 22 | AG   | 20 | 9  |
| 93212 | 9 | 7523412 | 7523427 | 4 | 4  | 16 | ACCA | 25 | 3  |
| 93223 | 9 | 7549569 | 7549620 | 2 | 26 | 52 | CA   | 6  | 7  |
| 93235 | 9 | 7573211 | 7573230 | 2 | 10 | 20 | GT   | 14 | 9  |
| 93238 | 9 | 7580401 | 7580428 | 2 | 14 | 28 | GA   | 9  | 4  |
| 93245 | 9 | 7592267 | 7592280 | 2 | 7  | 14 | TG   | 20 | 13 |
| 93246 | 9 | 7592282 | 7592301 | 2 | 10 | 20 | GT   | 17 | 13 |
| 93248 | 9 | 7594238 | 7594261 | 2 | 12 | 24 | GT   | 9  | 10 |
| 93252 | 9 | 7599370 | 7599385 | 2 | 8  | 16 | AT   | 7  | 3  |
| 93253 | 9 | 7601910 | 7601927 | 2 | 9  | 18 | CA   | 7  | 8  |
| 93257 | 9 | 7612411 | 7612464 | 2 | 27 | 54 | TC   | 12 | 11 |
| 93258 | 9 | 7612724 | 7612737 | 2 | 7  | 14 | GA   | 18 | 5  |
| 93261 | 9 | 7617019 | 7617044 | 2 | 13 | 26 | GT   | 17 | 7  |
| 93263 | 9 | 7621346 | 7621359 | 2 | 7  | 14 | GA   | 23 | 4  |
| 93273 | 9 | 7641094 | 7641127 | 2 | 17 | 34 | AC   | 11 | 7  |
| 93276 | 9 | 7644705 | 7644718 | 2 | 7  | 14 | AC   | 28 | 11 |
| 93287 | 9 | 7655922 | 7655935 | 2 | 7  | 14 | AG   | 10 | 3  |

|       |   |         |         |   |    |    |      |    |    |
|-------|---|---------|---------|---|----|----|------|----|----|
| 93294 | 9 | 7663468 | 7663497 | 2 | 15 | 30 | CT   | 16 | 8  |
| 93295 | 9 | 7664233 | 7664264 | 2 | 16 | 32 | AC   | 21 | 11 |
| 93304 | 9 | 7669155 | 7669170 | 2 | 8  | 16 | AC   | 21 | 3  |
| 93308 | 9 | 7673037 | 7673050 | 2 | 7  | 14 | GA   | 14 | 5  |
| 93313 | 9 | 7677589 | 7677612 | 3 | 8  | 24 | AAT  | 12 | 6  |
| 93314 | 9 | 7681699 | 7681720 | 2 | 11 | 22 | AC   | 13 | 8  |
| 93316 | 9 | 7685370 | 7685383 | 2 | 7  | 14 | CA   | 25 | 3  |
| 93322 | 9 | 7694977 | 7695008 | 2 | 16 | 32 | CA   | 19 | 9  |
| 93323 | 9 | 7695822 | 7695854 | 3 | 11 | 33 | GTA  | 24 | 12 |
| 93328 | 9 | 7700695 | 7700708 | 2 | 7  | 14 | AC   | 6  | 6  |
| 93334 | 9 | 7717582 | 7717613 | 2 | 16 | 32 | CT   | 7  | 8  |
| 93336 | 9 | 7718116 | 7718145 | 2 | 15 | 30 | TG   | 19 | 5  |
| 93344 | 9 | 7723965 | 7724000 | 4 | 9  | 36 | AAGA | 25 | 9  |
| 93346 | 9 | 7725706 | 7725735 | 2 | 15 | 30 | AG   | 9  | 11 |
| 93348 | 9 | 7726901 | 7726928 | 2 | 14 | 28 | CA   | 19 | 6  |
| 93350 | 9 | 7731870 | 7731899 | 2 | 15 | 30 | CA   | 8  | 5  |
| 93352 | 9 | 7734720 | 7734737 | 3 | 6  | 18 | AGG  | 30 | 6  |
| 93353 | 9 | 7735297 | 7735316 | 2 | 10 | 20 | AG   | 16 | 5  |
| 93355 | 9 | 7736278 | 7736289 | 2 | 6  | 12 | GT   | 21 | 3  |
| 93356 | 9 | 7736317 | 7736348 | 2 | 16 | 32 | GT   | 13 | 8  |
| 93359 | 9 | 7741685 | 7741696 | 2 | 6  | 12 | GT   | 23 | 14 |
| 93365 | 9 | 7742507 | 7742548 | 2 | 21 | 42 | GT   | 6  | 9  |
| 93370 | 9 | 7744842 | 7744861 | 2 | 10 | 20 | CA   | 18 | 6  |
| 93378 | 9 | 7758212 | 7758235 | 2 | 12 | 24 | GT   | 17 | 6  |
| 93379 | 9 | 7760070 | 7760103 | 2 | 17 | 34 | TG   | 9  | 10 |
| 93382 | 9 | 7763022 | 7763033 | 2 | 6  | 12 | AC   | 21 | 3  |
| 93385 | 9 | 7766607 | 7766646 | 2 | 20 | 40 | CA   | 6  | 8  |
| 93387 | 9 | 7772527 | 7772562 | 4 | 9  | 36 | TAGA | 27 | 11 |
| 93388 | 9 | 7773051 | 7773066 | 2 | 8  | 16 | CA   | 25 | 3  |
| 93392 | 9 | 7776015 | 7776032 | 2 | 9  | 18 | AG   | 20 | 4  |
| 93393 | 9 | 7777148 | 7777161 | 2 | 7  | 14 | GT   | 25 | 3  |
| 93402 | 9 | 7790236 | 7790250 | 3 | 5  | 15 | TCA  | 29 | 3  |
| 93403 | 9 | 7790833 | 7790856 | 2 | 12 | 24 | AG   | 13 | 6  |
| 93406 | 9 | 7792051 | 7792070 | 2 | 10 | 20 | TC   | 17 | 7  |
| 93410 | 9 | 7806586 | 7806609 | 4 | 6  | 24 | ATAG | 27 | 8  |
| 93411 | 9 | 7806674 | 7806689 | 2 | 8  | 16 | CT   | 28 | 4  |
| 93412 | 9 | 7807354 | 7807369 | 2 | 8  | 16 | TG   | 17 | 9  |
| 93413 | 9 | 7807801 | 7807822 | 2 | 11 | 22 | AC   | 22 | 11 |
| 93414 | 9 | 7808048 | 7808061 | 2 | 7  | 14 | GA   | 28 | 8  |
| 93419 | 9 | 7819250 | 7819283 | 2 | 17 | 34 | TG   | 7  | 9  |
| 93431 | 9 | 7830454 | 7830475 | 2 | 11 | 22 | TG   | 17 | 7  |
| 93433 | 9 | 7832999 | 7833034 | 2 | 18 | 36 | TG   | 6  | 6  |
| 93435 | 9 | 7833585 | 7833602 | 2 | 9  | 18 | GT   | 11 | 5  |
| 93437 | 9 | 7838106 | 7838119 | 2 | 7  | 14 | GT   | 32 | 5  |
| 93438 | 9 | 7848404 | 7848429 | 2 | 13 | 26 | AC   | 17 | 9  |
| 93446 | 9 | 7859966 | 7859977 | 2 | 6  | 12 | TG   | 25 | 6  |
| 93451 | 9 | 7867904 | 7867925 | 2 | 11 | 22 | AC   | 30 | 9  |
| 93452 | 9 | 7869526 | 7869540 | 3 | 5  | 15 | TTG  | 25 | 3  |
| 93453 | 9 | 7870216 | 7870239 | 2 | 12 | 24 | CA   | 10 | 8  |
| 93458 | 9 | 7873974 | 7873988 | 3 | 5  | 15 | CAG  | 25 | 3  |
| 93459 | 9 | 7874265 | 7874292 | 2 | 14 | 28 | GT   | 19 | 8  |

|       |   |         |         |   |    |    |      |    |    |
|-------|---|---------|---------|---|----|----|------|----|----|
| 93460 | 9 | 7874431 | 7874448 | 2 | 9  | 18 | CA   | 15 | 7  |
| 93461 | 9 | 7874477 | 7874506 | 2 | 15 | 30 | AC   | 13 | 5  |
| 93463 | 9 | 7874617 | 7874634 | 2 | 9  | 18 | AC   | 14 | 4  |
| 93464 | 9 | 7875143 | 7875158 | 4 | 4  | 16 | TCTT | 21 | 4  |
| 93467 | 9 | 7880774 | 7880791 | 2 | 9  | 18 | CT   | 26 | 4  |
| 93471 | 9 | 7893457 | 7893476 | 2 | 10 | 20 | TG   | 20 | 5  |
| 93474 | 9 | 7896422 | 7896439 | 2 | 9  | 18 | TC   | 23 | 3  |
| 93478 | 9 | 7900296 | 7900309 | 2 | 7  | 14 | AC   | 23 | 6  |
| 93479 | 9 | 7900312 | 7900323 | 2 | 6  | 12 | AC   | 20 | 5  |
| 93481 | 9 | 7900572 | 7900589 | 2 | 9  | 18 | TG   | 29 | 9  |
| 93485 | 9 | 7903056 | 7903069 | 2 | 7  | 14 | TA   | 15 | 6  |
| 93487 | 9 | 7905524 | 7905543 | 2 | 10 | 20 | CA   | 27 | 5  |
| 93490 | 9 | 7909648 | 7909675 | 2 | 14 | 28 | CA   | 13 | 12 |
| 93492 | 9 | 7910351 | 7910374 | 2 | 12 | 24 | TG   | 18 | 14 |
| 93496 | 9 | 7912519 | 7912534 | 2 | 8  | 16 | TG   | 29 | 5  |
| 93509 | 9 | 7926525 | 7926548 | 2 | 12 | 24 | CT   | 16 | 10 |
| 93510 | 9 | 7929806 | 7929825 | 4 | 5  | 20 | CAGG | 31 | 3  |
| 93511 | 9 | 7931707 | 7931736 | 2 | 15 | 30 | CA   | 11 | 13 |
| 93512 | 9 | 7931849 | 7931868 | 2 | 10 | 20 | AC   | 24 | 15 |
| 93513 | 9 | 7932135 | 7932160 | 2 | 13 | 26 | CA   | 12 | 8  |
| 93515 | 9 | 7932359 | 7932374 | 2 | 8  | 16 | TG   | 29 | 6  |
| 93516 | 9 | 7932448 | 7932471 | 4 | 6  | 24 | GCCT | 34 | 3  |
| 93517 | 9 | 7935237 | 7935272 | 2 | 18 | 36 | AC   | 10 | 14 |
| 93524 | 9 | 7940855 | 7940868 | 2 | 7  | 14 | AC   | 15 | 3  |
| 93526 | 9 | 7941076 | 7941105 | 2 | 15 | 30 | CA   | 17 | 7  |
| 93528 | 9 | 7943372 | 7943389 | 2 | 9  | 18 | AC   | 27 | 4  |
| 93531 | 9 | 7947213 | 7947238 | 2 | 13 | 26 | CA   | 6  | 6  |
| 93532 | 9 | 7947378 | 7947393 | 2 | 8  | 16 | GT   | 21 | 7  |
| 93533 | 9 | 7949336 | 7949349 | 2 | 7  | 14 | CA   | 27 | 5  |
| 93538 | 9 | 7953501 | 7953512 | 2 | 6  | 12 | TG   | 29 | 3  |
| 93544 | 9 | 7967550 | 7967581 | 2 | 16 | 32 | TG   | 14 | 14 |
| 93545 | 9 | 7967663 | 7967684 | 2 | 11 | 22 | CA   | 24 | 7  |
| 93555 | 9 | 7974305 | 7974330 | 2 | 13 | 26 | CA   | 8  | 7  |
| 93561 | 9 | 7987632 | 7987649 | 3 | 6  | 18 | CAA  | 27 | 3  |
| 93563 | 9 | 7992975 | 7992986 | 2 | 6  | 12 | AG   | 23 | 4  |
| 93565 | 9 | 7996997 | 7997032 | 2 | 18 | 36 | TG   | 9  | 7  |
| 93569 | 9 | 7998628 | 7998655 | 2 | 14 | 28 | GA   | 11 | 12 |
| 93572 | 9 | 8012933 | 8012960 | 2 | 14 | 28 | TC   | 19 | 6  |
| 93578 | 9 | 8020696 | 8020717 | 2 | 11 | 22 | GT   | 15 | 9  |
| 93582 | 9 | 8024099 | 8024112 | 2 | 7  | 14 | AG   | 19 | 3  |
| 93583 | 9 | 8024192 | 8024221 | 2 | 15 | 30 | TC   | 14 | 5  |
| 93584 | 9 | 8024264 | 8024287 | 2 | 12 | 24 | GA   | 25 | 5  |
| 93592 | 9 | 8031062 | 8031073 | 2 | 6  | 12 | CT   | 21 | 5  |
| 93611 | 9 | 8043266 | 8043283 | 2 | 9  | 18 | TG   | 17 | 6  |
| 93620 | 9 | 8048749 | 8048766 | 3 | 6  | 18 | CTT  | 33 | 3  |
| 93621 | 9 | 8049286 | 8049299 | 2 | 7  | 14 | CA   | 26 | 4  |
| 93622 | 9 | 8050644 | 8050663 | 2 | 10 | 20 | TG   | 18 | 5  |
| 93627 | 9 | 8055889 | 8055900 | 2 | 6  | 12 | GA   | 23 | 4  |
| 93646 | 9 | 8074570 | 8074613 | 2 | 22 | 44 | TC   | 7  | 8  |
| 93654 | 9 | 8078946 | 8078957 | 2 | 6  | 12 | CT   | 28 | 3  |
| 93656 | 9 | 8080766 | 8080791 | 2 | 13 | 26 | TG   | 20 | 14 |

|       |   |         |         |   |    |    |      |    |    |
|-------|---|---------|---------|---|----|----|------|----|----|
| 93659 | 9 | 8082987 | 8083010 | 2 | 12 | 24 | GA   | 9  | 8  |
| 93666 | 9 | 8087462 | 8087473 | 2 | 6  | 12 | GA   | 24 | 3  |
| 93667 | 9 | 8089112 | 8089131 | 4 | 5  | 20 | TATC | 13 | 3  |
| 93670 | 9 | 8091998 | 8092009 | 2 | 6  | 12 | GA   | 32 | 3  |
| 93671 | 9 | 8092017 | 8092028 | 2 | 6  | 12 | AG   | 24 | 4  |
| 93684 | 9 | 8097942 | 8097971 | 2 | 15 | 30 | AG   | 16 | 14 |
| 93685 | 9 | 8098189 | 8098210 | 2 | 11 | 22 | AG   | 22 | 3  |
| 93686 | 9 | 8098320 | 8098343 | 2 | 12 | 24 | TG   | 13 | 7  |
| 93691 | 9 | 8099374 | 8099397 | 2 | 12 | 24 | AC   | 21 | 11 |
| 93696 | 9 | 8104590 | 8104609 | 4 | 5  | 20 | TTAT | 14 | 3  |
| 93699 | 9 | 8105274 | 8105297 | 2 | 12 | 24 | AG   | 15 | 5  |
| 93705 | 9 | 8110057 | 8110090 | 2 | 17 | 34 | TG   | 15 | 9  |
| 93714 | 9 | 8121790 | 8121801 | 2 | 6  | 12 | GT   | 20 | 3  |
| 93718 | 9 | 8124939 | 8124954 | 2 | 8  | 16 | GT   | 22 | 7  |
| 93720 | 9 | 8125169 | 8125206 | 2 | 19 | 38 | CA   | 13 | 7  |
| 93721 | 9 | 8125654 | 8125693 | 2 | 20 | 40 | TG   | 18 | 8  |
| 93737 | 9 | 8141689 | 8141700 | 2 | 6  | 12 | TC   | 11 | 3  |
| 93745 | 9 | 8146202 | 8146223 | 2 | 11 | 22 | CT   | 8  | 4  |
| 93746 | 9 | 8146360 | 8146383 | 4 | 6  | 24 | AGAC | 22 | 7  |
| 93752 | 9 | 8151049 | 8151066 | 3 | 6  | 18 | CAG  | 28 | 3  |
| 93753 | 9 | 8151316 | 8151335 | 2 | 10 | 20 | TG   | 22 | 5  |
| 93754 | 9 | 8151529 | 8151554 | 2 | 13 | 26 | GT   | 15 | 11 |
| 93759 | 9 | 8155735 | 8155764 | 2 | 15 | 30 | AC   | 16 | 11 |
| 93760 | 9 | 8156078 | 8156111 | 2 | 17 | 34 | TG   | 11 | 10 |
| 93761 | 9 | 8156952 | 8156963 | 2 | 6  | 12 | GT   | 26 | 3  |
| 93762 | 9 | 8157212 | 8157229 | 2 | 9  | 18 | CT   | 27 | 5  |
| 93765 | 9 | 8162251 | 8162268 | 2 | 9  | 18 | GA   | 15 | 5  |
| 93767 | 9 | 8164259 | 8164286 | 4 | 7  | 28 | TGTT | 18 | 8  |
| 93771 | 9 | 8167989 | 8168012 | 2 | 12 | 24 | TG   | 28 | 6  |
| 93775 | 9 | 8174466 | 8174481 | 2 | 8  | 16 | GT   | 24 | 6  |
| 93785 | 9 | 8184576 | 8184591 | 4 | 4  | 16 | AATT | 9  | 4  |
| 93789 | 9 | 8191019 | 8191064 | 2 | 23 | 46 | AC   | 8  | 5  |
| 93792 | 9 | 8203587 | 8203602 | 4 | 4  | 16 | GATG | 26 | 3  |
| 93796 | 9 | 8212480 | 8212495 | 2 | 8  | 16 | TG   | 20 | 7  |
| 93800 | 9 | 8223167 | 8223187 | 3 | 7  | 21 | AGG  | 23 | 11 |
| 93808 | 9 | 8239238 | 8239258 | 3 | 7  | 21 | TAA  | 14 | 6  |
| 93813 | 9 | 8246063 | 8246100 | 2 | 19 | 38 | CA   | 14 | 6  |
| 93818 | 9 | 8264684 | 8264699 | 2 | 8  | 16 | TG   | 21 | 4  |
| 93825 | 9 | 8276389 | 8276404 | 2 | 8  | 16 | GT   | 10 | 5  |
| 93833 | 9 | 8291865 | 8291878 | 2 | 7  | 14 | GT   | 14 | 4  |
| 93835 | 9 | 8293505 | 8293522 | 2 | 9  | 18 | AC   | 25 | 4  |
| 93836 | 9 | 8293864 | 8293885 | 2 | 11 | 22 | CT   | 14 | 4  |
| 93839 | 9 | 8299841 | 8299860 | 2 | 10 | 20 | AG   | 23 | 12 |
| 93840 | 9 | 8300118 | 8300141 | 2 | 12 | 24 | TG   | 6  | 4  |
| 93842 | 9 | 8304714 | 8304735 | 2 | 11 | 22 | GT   | 19 | 6  |
| 93851 | 9 | 8326504 | 8326523 | 2 | 10 | 20 | GT   | 20 | 8  |
| 93852 | 9 | 8329277 | 8329300 | 2 | 12 | 24 | GT   | 9  | 6  |
| 93853 | 9 | 8330408 | 8330431 | 4 | 6  | 24 | AAAG | 22 | 14 |
| 93864 | 9 | 8367008 | 8367045 | 2 | 19 | 38 | CA   | 9  | 8  |
| 93867 | 9 | 8372683 | 8372696 | 2 | 7  | 14 | CT   | 20 | 6  |
| 93868 | 9 | 8375493 | 8375508 | 2 | 8  | 16 | AC   | 15 | 7  |

|       |   |         |         |   |    |    |      |    |    |
|-------|---|---------|---------|---|----|----|------|----|----|
| 93876 | 9 | 8388346 | 8388365 | 2 | 10 | 20 | CA   | 20 | 6  |
| 93879 | 9 | 8392431 | 8392444 | 2 | 7  | 14 | AG   | 15 | 3  |
| 93880 | 9 | 8392492 | 8392507 | 2 | 8  | 16 | AC   | 18 | 4  |
| 93886 | 9 | 8408195 | 8408232 | 2 | 19 | 38 | AC   | 17 | 10 |
| 93888 | 9 | 8410342 | 8410371 | 2 | 15 | 30 | TG   | 9  | 9  |
| 93891 | 9 | 8414872 | 8414887 | 2 | 8  | 16 | AC   | 15 | 5  |
| 93892 | 9 | 8414945 | 8414982 | 2 | 19 | 38 | CA   | 15 | 8  |
| 93895 | 9 | 8419251 | 8419274 | 3 | 8  | 24 | GAG  | 20 | 8  |
| 93896 | 9 | 8419363 | 8419374 | 2 | 6  | 12 | GT   | 22 | 4  |
| 93898 | 9 | 8427515 | 8427530 | 2 | 8  | 16 | TG   | 32 | 5  |
| 93899 | 9 | 8427737 | 8427788 | 4 | 13 | 52 | CTAT | 21 | 15 |
| 93901 | 9 | 8427987 | 8428000 | 2 | 7  | 14 | CA   | 17 | 9  |
| 93903 | 9 | 8429423 | 8429450 | 2 | 14 | 28 | GT   | 12 | 11 |
| 93904 | 9 | 8437813 | 8437834 | 2 | 11 | 22 | GT   | 17 | 11 |
| 93907 | 9 | 8444098 | 8444115 | 3 | 6  | 18 | TGC  | 22 | 3  |
| 93909 | 9 | 8448599 | 8448610 | 2 | 6  | 12 | AT   | 19 | 4  |
| 93912 | 9 | 8455589 | 8455604 | 4 | 4  | 16 | TCAG | 25 | 11 |
| 93913 | 9 | 8455609 | 8455624 | 4 | 4  | 16 | TCAC | 29 | 12 |
| 93915 | 9 | 8456047 | 8456073 | 3 | 9  | 27 | ACT  | 16 | 13 |
| 93916 | 9 | 8461584 | 8461613 | 3 | 10 | 30 | AAG  | 25 | 15 |
| 93921 | 9 | 8472288 | 8472319 | 2 | 16 | 32 | GA   | 24 | 6  |
| 93923 | 9 | 8474304 | 8474335 | 4 | 8  | 32 | AATC | 22 | 5  |
| 93925 | 9 | 8479386 | 8479409 | 4 | 6  | 24 | TATT | 19 | 7  |
| 93929 | 9 | 8483228 | 8483239 | 2 | 6  | 12 | TG   | 21 | 5  |
| 93934 | 9 | 8491879 | 8491898 | 2 | 10 | 20 | GA   | 13 | 3  |
| 93937 | 9 | 8506295 | 8506320 | 2 | 13 | 26 | GT   | 16 | 5  |
| 93938 | 9 | 8508818 | 8508832 | 3 | 5  | 15 | ATG  | 24 | 4  |
| 93939 | 9 | 8508836 | 8508850 | 3 | 5  | 15 | ATG  | 24 | 3  |
| 93942 | 9 | 8514953 | 8514972 | 2 | 10 | 20 | TG   | 14 | 10 |
| 93944 | 9 | 8515827 | 8515844 | 2 | 9  | 18 | GT   | 20 | 7  |
| 93945 | 9 | 8515926 | 8515941 | 2 | 8  | 16 | TG   | 17 | 3  |
| 93946 | 9 | 8515943 | 8515954 | 2 | 6  | 12 | GT   | 18 | 4  |
| 93948 | 9 | 8519405 | 8519418 | 2 | 7  | 14 | CA   | 13 | 7  |
| 93950 | 9 | 8520904 | 8520921 | 2 | 9  | 18 | TG   | 16 | 9  |
| 93953 | 9 | 8524507 | 8524540 | 2 | 17 | 34 | AC   | 15 | 13 |
| 93954 | 9 | 8524593 | 8524614 | 2 | 11 | 22 | AC   | 23 | 15 |
| 93955 | 9 | 8525203 | 8525224 | 2 | 11 | 22 | CA   | 14 | 8  |
| 93957 | 9 | 8525772 | 8525801 | 2 | 15 | 30 | AG   | 7  | 10 |
| 93963 | 9 | 8528665 | 8528679 | 3 | 5  | 15 | AAC  | 31 | 3  |
| 93986 | 9 | 8550555 | 8550566 | 2 | 6  | 12 | CT   | 27 | 5  |
| 93987 | 9 | 8550808 | 8550840 | 3 | 11 | 33 | TTA  | 6  | 7  |
| 93989 | 9 | 8550917 | 8550937 | 3 | 7  | 21 | AAG  | 11 | 3  |
| 93991 | 9 | 8551214 | 8551231 | 3 | 6  | 18 | TGG  | 17 | 3  |
| 93995 | 9 | 8553991 | 8554004 | 2 | 7  | 14 | AC   | 21 | 7  |
| 93996 | 9 | 8554006 | 8554019 | 2 | 7  | 14 | CA   | 26 | 10 |
| 94005 | 9 | 8570186 | 8570203 | 3 | 6  | 18 | TCA  | 22 | 3  |
| 94006 | 9 | 8570519 | 8570533 | 3 | 5  | 15 | GCT  | 20 | 3  |
| 94007 | 9 | 8578542 | 8578559 | 2 | 9  | 18 | TG   | 15 | 8  |
| 94011 | 9 | 8582734 | 8582753 | 4 | 5  | 20 | TCAT | 22 | 4  |
| 94013 | 9 | 8583738 | 8583758 | 3 | 7  | 21 | CTC  | 16 | 5  |
| 94014 | 9 | 8585100 | 8585119 | 2 | 10 | 20 | TG   | 24 | 10 |

|       |   |         |         |   |    |    |      |    |    |
|-------|---|---------|---------|---|----|----|------|----|----|
| 94016 | 9 | 8585492 | 8585503 | 2 | 6  | 12 | AG   | 12 | 3  |
| 94017 | 9 | 8585905 | 8585920 | 2 | 8  | 16 | AG   | 17 | 3  |
| 94021 | 9 | 8588011 | 8588030 | 2 | 10 | 20 | TG   | 33 | 3  |
| 94027 | 9 | 8596928 | 8596943 | 4 | 4  | 16 | AAGA | 21 | 3  |
| 94028 | 9 | 8599226 | 8599259 | 2 | 17 | 34 | TG   | 20 | 9  |
| 94031 | 9 | 8599813 | 8599828 | 2 | 8  | 16 | TG   | 14 | 9  |
| 94033 | 9 | 8599875 | 8599890 | 2 | 8  | 16 | AG   | 24 | 4  |
| 94036 | 9 | 8600891 | 8600908 | 2 | 9  | 18 | CT   | 16 | 4  |
| 94037 | 9 | 8601172 | 8601189 | 3 | 6  | 18 | TTC  | 10 | 4  |
| 94038 | 9 | 8601442 | 8601461 | 4 | 5  | 20 | TTCT | 12 | 4  |
| 94040 | 9 | 8601963 | 8601990 | 2 | 14 | 28 | AC   | 26 | 6  |
| 94041 | 9 | 8602081 | 8602116 | 2 | 18 | 36 | TG   | 15 | 11 |
| 94044 | 9 | 8605998 | 8606015 | 3 | 6  | 18 | GCT  | 21 | 5  |
| 94045 | 9 | 8607759 | 8607774 | 2 | 8  | 16 | CA   | 15 | 9  |
| 94050 | 9 | 8614421 | 8614440 | 2 | 10 | 20 | TG   | 14 | 4  |
| 94051 | 9 | 8614598 | 8614609 | 2 | 6  | 12 | AC   | 20 | 3  |
| 94055 | 9 | 8638279 | 8638296 | 3 | 6  | 18 | TTG  | 14 | 3  |
| 94063 | 9 | 8657626 | 8657639 | 2 | 7  | 14 | AC   | 12 | 5  |
| 94065 | 9 | 8660035 | 8660048 | 2 | 7  | 14 | AC   | 20 | 5  |
| 94069 | 9 | 8664795 | 8664816 | 2 | 11 | 22 | GT   | 7  | 9  |
| 94071 | 9 | 8664996 | 8665033 | 2 | 19 | 38 | GT   | 14 | 9  |
| 94075 | 9 | 8668896 | 8668915 | 2 | 10 | 20 | GA   | 21 | 6  |
| 94084 | 9 | 8682887 | 8682908 | 2 | 11 | 22 | CA   | 15 | 4  |
| 94085 | 9 | 8683054 | 8683067 | 2 | 7  | 14 | TG   | 23 | 4  |
| 94086 | 9 | 8683724 | 8683735 | 2 | 6  | 12 | AT   | 27 | 3  |
| 94093 | 9 | 8695364 | 8695383 | 2 | 10 | 20 | TG   | 15 | 9  |
| 94095 | 9 | 8699177 | 8699202 | 2 | 13 | 26 | TC   | 13 | 5  |
| 94097 | 9 | 8703654 | 8703671 | 2 | 9  | 18 | TG   | 28 | 3  |
| 94098 | 9 | 8703796 | 8703833 | 2 | 19 | 38 | TG   | 16 | 11 |
| 94104 | 9 | 8722769 | 8722780 | 2 | 6  | 12 | CT   | 22 | 5  |
| 94111 | 9 | 8735665 | 8735688 | 2 | 12 | 24 | AC   | 20 | 6  |
| 94117 | 9 | 8753352 | 8753369 | 2 | 9  | 18 | AC   | 10 | 4  |
| 94118 | 9 | 8757800 | 8757845 | 2 | 23 | 46 | AC   | 24 | 8  |
| 94122 | 9 | 8764980 | 8764993 | 2 | 7  | 14 | TG   | 9  | 5  |
| 94149 | 9 | 8805364 | 8805385 | 2 | 11 | 22 | GA   | 13 | 9  |
| 94150 | 9 | 8807957 | 8807974 | 3 | 6  | 18 | ATC  | 16 | 4  |
| 94151 | 9 | 8810353 | 8810370 | 2 | 9  | 18 | TG   | 10 | 5  |
| 94153 | 9 | 8810776 | 8810787 | 2 | 6  | 12 | TG   | 32 | 3  |
| 94154 | 9 | 8811045 | 8811082 | 2 | 19 | 38 | GT   | 16 | 9  |
| 94157 | 9 | 8811823 | 8811838 | 4 | 4  | 16 | ATTT | 24 | 3  |
| 94165 | 9 | 8827473 | 8827488 | 2 | 8  | 16 | AC   | 25 | 4  |
| 94167 | 9 | 8829464 | 8829483 | 2 | 10 | 20 | TG   | 21 | 6  |
| 94169 | 9 | 8837012 | 8837023 | 2 | 6  | 12 | GT   | 21 | 3  |
| 94171 | 9 | 8838011 | 8838028 | 2 | 9  | 18 | TG   | 27 | 7  |
| 94172 | 9 | 8840233 | 8840244 | 2 | 6  | 12 | CT   | 15 | 3  |
| 94181 | 9 | 8849529 | 8849548 | 2 | 10 | 20 | AC   | 18 | 17 |
| 94182 | 9 | 8849678 | 8849707 | 2 | 15 | 30 | TG   | 16 | 11 |
| 94185 | 9 | 8865831 | 8865854 | 2 | 12 | 24 | AC   | 13 | 12 |
| 94192 | 9 | 8884988 | 8885007 | 2 | 10 | 20 | CA   | 18 | 13 |
| 94196 | 9 | 8893548 | 8893567 | 4 | 5  | 20 | AAAG | 30 | 3  |
| 94198 | 9 | 8899427 | 8899440 | 2 | 7  | 14 | CA   | 14 | 7  |

|       |   |         |         |   |    |    |      |    |    |
|-------|---|---------|---------|---|----|----|------|----|----|
| 94199 | 9 | 8900247 | 8900262 | 4 | 4  | 16 | TGCC | 29 | 6  |
| 94200 | 9 | 8900421 | 8900438 | 2 | 9  | 18 | CA   | 15 | 11 |
| 94202 | 9 | 8902174 | 8902191 | 2 | 9  | 18 | AC   | 21 | 7  |
| 94204 | 9 | 8903064 | 8903105 | 2 | 21 | 42 | AC   | 9  | 10 |
| 94205 | 9 | 8904305 | 8904319 | 3 | 5  | 15 | ACA  | 26 | 3  |
| 94210 | 9 | 8918005 | 8918019 | 3 | 5  | 15 | AGA  | 26 | 3  |
| 94217 | 9 | 8926393 | 8926422 | 2 | 15 | 30 | GT   | 16 | 9  |
| 94221 | 9 | 8937917 | 8937976 | 4 | 15 | 60 | GATA | 11 | 9  |
| 94225 | 9 | 8955719 | 8955736 | 2 | 9  | 18 | TG   | 25 | 3  |
| 94231 | 9 | 8965789 | 8965802 | 2 | 7  | 14 | AT   | 19 | 8  |
| 94233 | 9 | 8972491 | 8972524 | 2 | 17 | 34 | AC   | 12 | 7  |
| 94240 | 9 | 8977850 | 8977861 | 2 | 6  | 12 | CA   | 24 | 3  |
| 94254 | 9 | 9003788 | 9003835 | 4 | 12 | 48 | TGTA | 14 | 4  |
| 94257 | 9 | 9007560 | 9007589 | 2 | 15 | 30 | AG   | 11 | 6  |
| 94264 | 9 | 9011221 | 9011272 | 2 | 26 | 52 | TG   | 7  | 9  |
| 94265 | 9 | 9011481 | 9011530 | 2 | 25 | 50 | AC   | 12 | 6  |
| 94266 | 9 | 9012045 | 9012082 | 2 | 19 | 38 | TG   | 7  | 8  |
| 94268 | 9 | 9014017 | 9014036 | 2 | 10 | 20 | AG   | 11 | 5  |
| 94271 | 9 | 9017484 | 9017499 | 4 | 4  | 16 | AAAT | 25 | 3  |
| 94273 | 9 | 9020537 | 9020574 | 2 | 19 | 38 | AC   | 6  | 8  |
| 94278 | 9 | 9030295 | 9030322 | 2 | 14 | 28 | AC   | 11 | 7  |
| 94280 | 9 | 9032814 | 9032833 | 2 | 10 | 20 | TG   | 18 | 5  |
| 94285 | 9 | 9035445 | 9035468 | 2 | 12 | 24 | TG   | 14 | 9  |
| 94293 | 9 | 9069135 | 9069152 | 3 | 6  | 18 | GCT  | 24 | 4  |
| 94297 | 9 | 9073507 | 9073542 | 4 | 9  | 36 | TATC | 14 | 6  |
| 94299 | 9 | 9073981 | 9074016 | 2 | 18 | 36 | TG   | 16 | 17 |
| 94302 | 9 | 9078905 | 9078922 | 2 | 9  | 18 | CA   | 17 | 6  |
| 94305 | 9 | 9093978 | 9093989 | 2 | 6  | 12 | TG   | 28 | 4  |
| 94306 | 9 | 9098313 | 9098328 | 2 | 8  | 16 | AC   | 25 | 5  |
| 94307 | 9 | 9098819 | 9098830 | 2 | 6  | 12 | GC   | 25 | 8  |
| 94311 | 9 | 9111770 | 9111781 | 2 | 6  | 12 | TA   | 9  | 3  |
| 94313 | 9 | 9113298 | 9113323 | 2 | 13 | 26 | CT   | 24 | 6  |
| 94315 | 9 | 9121301 | 9121315 | 3 | 5  | 15 | ACA  | 19 | 6  |
| 94319 | 9 | 9122396 | 9122413 | 3 | 6  | 18 | GTT  | 23 | 6  |
| 94320 | 9 | 9123301 | 9123326 | 2 | 13 | 26 | AC   | 15 | 10 |
| 94321 | 9 | 9124106 | 9124120 | 3 | 5  | 15 | TCC  | 14 | 4  |
| 94322 | 9 | 9124121 | 9124135 | 3 | 5  | 15 | CTC  | 13 | 4  |
| 94329 | 9 | 9129326 | 9129359 | 2 | 17 | 34 | GT   | 21 | 9  |
| 94331 | 9 | 9129763 | 9129776 | 2 | 7  | 14 | TG   | 24 | 3  |
| 94333 | 9 | 9132315 | 9132332 | 2 | 9  | 18 | AG   | 20 | 4  |
| 94335 | 9 | 9134097 | 9134114 | 3 | 6  | 18 | CTT  | 27 | 3  |
| 94336 | 9 | 9135709 | 9135738 | 3 | 10 | 30 | TCC  | 19 | 4  |
| 94337 | 9 | 9141009 | 9141026 | 2 | 9  | 18 | CA   | 23 | 6  |
| 94341 | 9 | 9145306 | 9145323 | 2 | 9  | 18 | GA   | 25 | 8  |
| 94347 | 9 | 9152465 | 9152478 | 2 | 7  | 14 | GT   | 27 | 5  |
| 94348 | 9 | 9152619 | 9152646 | 2 | 14 | 28 | TG   | 21 | 7  |
| 94349 | 9 | 9152719 | 9152734 | 4 | 4  | 16 | GTGC | 28 | 7  |
| 94350 | 9 | 9152735 | 9152748 | 2 | 7  | 14 | GT   | 28 | 6  |
| 94351 | 9 | 9154883 | 9154914 | 2 | 16 | 32 | GT   | 15 | 10 |
| 94357 | 9 | 9157906 | 9157935 | 2 | 15 | 30 | TC   | 19 | 10 |
| 94362 | 9 | 9161172 | 9161191 | 2 | 10 | 20 | GA   | 9  | 4  |

|       |   |         |         |   |    |    |      |    |    |
|-------|---|---------|---------|---|----|----|------|----|----|
| 94363 | 9 | 9164881 | 9164898 | 2 | 9  | 18 | CA   | 28 | 5  |
| 94367 | 9 | 9173917 | 9173934 | 3 | 6  | 18 | GGA  | 33 | 3  |
| 94369 | 9 | 9182695 | 9182716 | 2 | 11 | 22 | TG   | 27 | 6  |
| 94373 | 9 | 9185536 | 9185551 | 2 | 8  | 16 | AG   | 26 | 16 |
| 94379 | 9 | 9196128 | 9196141 | 2 | 7  | 14 | CA   | 27 | 3  |
| 94380 | 9 | 9196269 | 9196308 | 2 | 20 | 40 | TG   | 10 | 10 |
| 94386 | 9 | 9201024 | 9201059 | 2 | 18 | 36 | TG   | 10 | 8  |
| 94394 | 9 | 9209578 | 9209589 | 2 | 6  | 12 | AC   | 21 | 3  |
| 94396 | 9 | 9214104 | 9214130 | 3 | 9  | 27 | GGA  | 15 | 3  |
| 94397 | 9 | 9215602 | 9215627 | 2 | 13 | 26 | AC   | 16 | 7  |
| 94398 | 9 | 9217581 | 9217620 | 4 | 10 | 40 | AAGA | 19 | 11 |
| 94400 | 9 | 9218865 | 9218878 | 2 | 7  | 14 | TA   | 18 | 6  |
| 94416 | 9 | 9236751 | 9236765 | 3 | 5  | 15 | TTG  | 26 | 3  |
| 94417 | 9 | 9237172 | 9237192 | 3 | 7  | 21 | CAT  | 29 | 9  |
| 94418 | 9 | 9237193 | 9237207 | 3 | 5  | 15 | CAG  | 31 | 9  |
| 94422 | 9 | 9243785 | 9243812 | 2 | 14 | 28 | GT   | 7  | 6  |
| 94426 | 9 | 9246775 | 9246800 | 2 | 13 | 26 | TG   | 22 | 12 |
| 94427 | 9 | 9247243 | 9247268 | 2 | 13 | 26 | GT   | 6  | 6  |
| 94428 | 9 | 9247373 | 9247393 | 3 | 7  | 21 | TCT  | 25 | 4  |
| 94433 | 9 | 9256606 | 9256621 | 2 | 8  | 16 | CA   | 20 | 4  |
| 94437 | 9 | 9263952 | 9263973 | 2 | 11 | 22 | AC   | 18 | 9  |
| 94441 | 9 | 9285599 | 9285610 | 2 | 6  | 12 | GA   | 32 | 3  |
| 94444 | 9 | 9289519 | 9289552 | 2 | 17 | 34 | AC   | 15 | 7  |
| 94445 | 9 | 9290770 | 9290787 | 3 | 6  | 18 | CTG  | 19 | 3  |
| 94453 | 9 | 9299633 | 9299646 | 2 | 7  | 14 | CA   | 21 | 4  |
| 94455 | 9 | 9300966 | 9300985 | 2 | 10 | 20 | AC   | 13 | 14 |
| 94457 | 9 | 9302346 | 9302369 | 2 | 12 | 24 | AC   | 24 | 8  |
| 94459 | 9 | 9305810 | 9305824 | 3 | 5  | 15 | TTG  | 25 | 15 |
| 94460 | 9 | 9309140 | 9309163 | 4 | 6  | 24 | TAAA | 31 | 4  |
| 94463 | 9 | 9317617 | 9317634 | 2 | 9  | 18 | GA   | 8  | 8  |
| 94464 | 9 | 9317637 | 9317652 | 2 | 8  | 16 | GA   | 14 | 11 |
| 94473 | 9 | 9323987 | 9324018 | 2 | 16 | 32 | GT   | 14 | 7  |
| 94476 | 9 | 9337187 | 9337200 | 2 | 7  | 14 | AG   | 22 | 6  |
| 94479 | 9 | 9343890 | 9343907 | 2 | 9  | 18 | AC   | 21 | 6  |
| 94485 | 9 | 9372986 | 9373007 | 2 | 11 | 22 | CT   | 7  | 4  |
| 94486 | 9 | 9376058 | 9376087 | 2 | 15 | 30 | TG   | 14 | 10 |
| 94487 | 9 | 9376251 | 9376262 | 2 | 6  | 12 | TG   | 21 | 3  |
| 94491 | 9 | 9383420 | 9383461 | 2 | 21 | 42 | AC   | 10 | 10 |
| 94492 | 9 | 9385786 | 9385819 | 2 | 17 | 34 | TG   | 7  | 6  |
| 94495 | 9 | 9390941 | 9390954 | 2 | 7  | 14 | TC   | 17 | 3  |
| 94499 | 9 | 9395075 | 9395098 | 3 | 8  | 24 | CTG  | 30 | 11 |
| 94504 | 9 | 9401961 | 9401972 | 2 | 6  | 12 | TG   | 21 | 4  |
| 94516 | 9 | 9424734 | 9424753 | 2 | 10 | 20 | GT   | 22 | 4  |
| 94517 | 9 | 9425079 | 9425093 | 3 | 5  | 15 | CCT  | 30 | 3  |
| 94518 | 9 | 9427483 | 9427494 | 2 | 6  | 12 | AG   | 29 | 4  |
| 94521 | 9 | 9439497 | 9439530 | 2 | 17 | 34 | TG   | 9  | 10 |
| 94522 | 9 | 9439751 | 9439772 | 2 | 11 | 22 | CA   | 17 | 7  |
| 94523 | 9 | 9440107 | 9440124 | 2 | 9  | 18 | TG   | 26 | 8  |
| 94527 | 9 | 9449430 | 9449441 | 2 | 6  | 12 | TG   | 29 | 3  |
| 94534 | 9 | 9454164 | 9454185 | 2 | 11 | 22 | TC   | 17 | 6  |
| 94536 | 9 | 9462274 | 9462285 | 2 | 6  | 12 | CT   | 23 | 4  |



|       |   |         |         |   |    |    |      |    |    |
|-------|---|---------|---------|---|----|----|------|----|----|
| 94552 | 9 | 9494525 | 9494539 | 3 | 5  | 15 | GTG  | 25 | 4  |
| 94556 | 9 | 9499714 | 9499737 | 2 | 12 | 24 | GT   | 14 | 9  |
| 94557 | 9 | 9499826 | 9499843 | 3 | 6  | 18 | GCA  | 25 | 7  |
| 94558 | 9 | 9499978 | 9500003 | 2 | 13 | 26 | AC   | 20 | 11 |
| 94573 | 9 | 9529666 | 9529686 | 3 | 7  | 21 | GTA  | 7  | 8  |
| 94574 | 9 | 9532098 | 9532127 | 3 | 10 | 30 | CAG  | 25 | 5  |
| 94576 | 9 | 9537827 | 9537844 | 2 | 9  | 18 | AT   | 21 | 6  |
| 94578 | 9 | 9542810 | 9542824 | 3 | 5  | 15 | ATA  | 11 | 6  |
| 94581 | 9 | 9546116 | 9546133 | 3 | 6  | 18 | ACT  | 14 | 5  |
| 94589 | 9 | 9550546 | 9550560 | 3 | 5  | 15 | TTG  | 25 | 3  |
| 94591 | 9 | 9556911 | 9556926 | 2 | 8  | 16 | GT   | 23 | 5  |
| 94597 | 9 | 9565821 | 9565838 | 2 | 9  | 18 | GT   | 25 | 5  |
| 94600 | 9 | 9568150 | 9568161 | 2 | 6  | 12 | CA   | 21 | 3  |
| 94604 | 9 | 9569788 | 9569805 | 3 | 6  | 18 | GAG  | 26 | 3  |
| 94605 | 9 | 9572871 | 9572900 | 2 | 15 | 30 | TG   | 16 | 11 |
| 94608 | 9 | 9573345 | 9573360 | 2 | 8  | 16 | TG   | 22 | 4  |
| 94609 | 9 | 9573638 | 9573655 | 2 | 9  | 18 | CA   | 18 | 13 |
| 94611 | 9 | 9575924 | 9575937 | 2 | 7  | 14 | AC   | 13 | 6  |
| 94612 | 9 | 9575940 | 9575955 | 2 | 8  | 16 | AC   | 10 | 5  |
| 94613 | 9 | 9575968 | 9575983 | 2 | 8  | 16 | CT   | 7  | 3  |
| 94623 | 9 | 9595153 | 9595164 | 2 | 6  | 12 | TG   | 36 | 3  |
| 94625 | 9 | 9600444 | 9600455 | 2 | 6  | 12 | GT   | 31 | 3  |
| 94629 | 9 | 9608470 | 9608485 | 2 | 8  | 16 | AC   | 13 | 5  |
| 94633 | 9 | 9610389 | 9610404 | 2 | 8  | 16 | TG   | 15 | 9  |
| 94635 | 9 | 9611941 | 9611964 | 4 | 6  | 24 | CAGT | 17 | 4  |
| 94637 | 9 | 9612635 | 9612656 | 2 | 11 | 22 | AG   | 24 | 7  |
| 94644 | 9 | 9627570 | 9627583 | 2 | 7  | 14 | CA   | 31 | 3  |
| 94647 | 9 | 9632331 | 9632346 | 4 | 4  | 16 | AAAC | 23 | 11 |
| 94651 | 9 | 9658340 | 9658357 | 2 | 9  | 18 | CT   | 20 | 5  |
| 94652 | 9 | 9660103 | 9660122 | 2 | 10 | 20 | GT   | 18 | 6  |
| 94659 | 9 | 9667287 | 9667322 | 3 | 12 | 36 | CAG  | 24 | 4  |
| 94661 | 9 | 9670873 | 9670884 | 2 | 6  | 12 | CT   | 26 | 5  |
| 94664 | 9 | 9680509 | 9680554 | 2 | 23 | 46 | GA   | 6  | 4  |
| 94668 | 9 | 9692094 | 9692121 | 4 | 7  | 28 | CAAC | 20 | 9  |
| 94669 | 9 | 9694888 | 9694913 | 2 | 13 | 26 | TG   | 11 | 8  |
| 94670 | 9 | 9697459 | 9697470 | 2 | 6  | 12 | GT   | 21 | 4  |
| 94672 | 9 | 9699490 | 9699513 | 2 | 12 | 24 | AC   | 13 | 5  |
| 94678 | 9 | 9724916 | 9724935 | 2 | 10 | 20 | CA   | 16 | 4  |
| 94692 | 9 | 9755984 | 9756009 | 2 | 13 | 26 | CA   | 20 | 6  |
| 94698 | 9 | 9771049 | 9771068 | 4 | 5  | 20 | AAGA | 22 | 5  |
| 94699 | 9 | 9771966 | 9771986 | 3 | 7  | 21 | GGA  | 7  | 6  |
| 94701 | 9 | 9776151 | 9776178 | 4 | 7  | 28 | ATGA | 19 | 9  |
| 94703 | 9 | 9776802 | 9776817 | 4 | 4  | 16 | CATA | 17 | 5  |
| 94704 | 9 | 9779306 | 9779317 | 2 | 6  | 12 | CA   | 11 | 5  |
| 94705 | 9 | 9780732 | 9780753 | 2 | 11 | 22 | AC   | 12 | 13 |
| 94706 | 9 | 9786282 | 9786297 | 2 | 8  | 16 | TG   | 23 | 14 |
| 94707 | 9 | 9786299 | 9786310 | 2 | 6  | 12 | GT   | 21 | 9  |
| 94709 | 9 | 9788308 | 9788364 | 3 | 19 | 57 | TAG  | 13 | 10 |
| 94710 | 9 | 9790723 | 9790749 | 3 | 9  | 27 | TCA  | 9  | 9  |
| 94712 | 9 | 9793220 | 9793261 | 2 | 21 | 42 | AC   | 12 | 12 |
| 94713 | 9 | 9796008 | 9796047 | 2 | 20 | 40 | CA   | 7  | 11 |

|       |   |          |          |   |    |    |      |    |    |
|-------|---|----------|----------|---|----|----|------|----|----|
| 94724 | 9 | 9805826  | 9805852  | 3 | 9  | 27 | AGG  | 21 | 7  |
| 94725 | 9 | 9809537  | 9809568  | 2 | 16 | 32 | CA   | 15 | 13 |
| 94726 | 9 | 9810244  | 9810259  | 2 | 8  | 16 | CT   | 22 | 4  |
| 94728 | 9 | 9817599  | 9817618  | 2 | 10 | 20 | GT   | 24 | 4  |
| 94729 | 9 | 9817758  | 9817783  | 2 | 13 | 26 | AC   | 10 | 3  |
| 94733 | 9 | 9819218  | 9819268  | 3 | 17 | 51 | TCT  | 19 | 10 |
| 94738 | 9 | 9833210  | 9833233  | 2 | 12 | 24 | CA   | 13 | 5  |
| 94745 | 9 | 9851250  | 9851277  | 2 | 14 | 28 | GT   | 16 | 9  |
| 94747 | 9 | 9852409  | 9852434  | 2 | 13 | 26 | AC   | 7  | 3  |
| 94748 | 9 | 9853476  | 9853521  | 2 | 23 | 46 | AC   | 11 | 11 |
| 94749 | 9 | 9853611  | 9853638  | 2 | 14 | 28 | CA   | 17 | 4  |
| 94753 | 9 | 9854532  | 9854575  | 2 | 22 | 44 | CA   | 7  | 8  |
| 94756 | 9 | 9856617  | 9856654  | 2 | 19 | 38 | TG   | 14 | 10 |
| 94757 | 9 | 9856808  | 9856825  | 2 | 9  | 18 | AG   | 19 | 4  |
| 94761 | 9 | 9863895  | 9863908  | 2 | 7  | 14 | GA   | 25 | 3  |
| 94764 | 9 | 9865556  | 9865583  | 2 | 14 | 28 | AC   | 21 | 5  |
| 94777 | 9 | 9884052  | 9884071  | 2 | 10 | 20 | GT   | 18 | 7  |
| 94786 | 9 | 9905158  | 9905179  | 2 | 11 | 22 | CA   | 17 | 8  |
| 94804 | 9 | 9927227  | 9927286  | 2 | 30 | 60 | TG   | 8  | 9  |
| 94805 | 9 | 9930661  | 9930682  | 2 | 11 | 22 | CA   | 10 | 10 |
| 94808 | 9 | 9934294  | 9934309  | 2 | 8  | 16 | AC   | 23 | 3  |
| 94809 | 9 | 9935313  | 9935332  | 2 | 10 | 20 | TA   | 13 | 5  |
| 94810 | 9 | 9938273  | 9938310  | 2 | 19 | 38 | TG   | 14 | 11 |
| 94812 | 9 | 9939152  | 9939165  | 2 | 7  | 14 | AG   | 21 | 3  |
| 94813 | 9 | 9939531  | 9939542  | 2 | 6  | 12 | AC   | 30 | 4  |
| 94821 | 9 | 9952503  | 9952514  | 2 | 6  | 12 | CA   | 23 | 3  |
| 94827 | 9 | 9961168  | 9961181  | 2 | 7  | 14 | AC   | 19 | 6  |
| 94828 | 9 | 9961414  | 9961433  | 2 | 10 | 20 | TG   | 11 | 11 |
| 94830 | 9 | 9961543  | 9961560  | 2 | 9  | 18 | TG   | 23 | 3  |
| 94834 | 9 | 9963526  | 9963555  | 2 | 15 | 30 | AC   | 9  | 7  |
| 94838 | 9 | 9965248  | 9965265  | 2 | 9  | 18 | GT   | 17 | 7  |
| 94839 | 9 | 9967756  | 9967769  | 2 | 7  | 14 | TG   | 27 | 8  |
| 94842 | 9 | 9970035  | 9970062  | 2 | 14 | 28 | GT   | 11 | 5  |
| 94843 | 9 | 9972098  | 9972111  | 2 | 7  | 14 | AC   | 36 | 3  |
| 94845 | 9 | 9976423  | 9976448  | 2 | 13 | 26 | GT   | 13 | 8  |
| 94847 | 9 | 9981772  | 9981785  | 2 | 7  | 14 | AC   | 12 | 4  |
| 94848 | 9 | 9981816  | 9981843  | 2 | 14 | 28 | AG   | 22 | 9  |
| 94849 | 9 | 9982182  | 9982199  | 3 | 6  | 18 | GCT  | 15 | 10 |
| 94851 | 9 | 9983061  | 9983076  | 4 | 4  | 16 | AACA | 20 | 3  |
| 94854 | 9 | 9987054  | 9987067  | 2 | 7  | 14 | GA   | 20 | 8  |
| 94862 | 9 | 9997139  | 9997156  | 2 | 9  | 18 | AT   | 8  | 5  |
| 94867 | 9 | 10008662 | 10008691 | 2 | 15 | 30 | AC   | 13 | 7  |
| 94868 | 9 | 10010957 | 10010974 | 2 | 9  | 18 | CA   | 24 | 3  |
| 94871 | 9 | 10015717 | 10015734 | 3 | 6  | 18 | GCT  | 27 | 4  |
| 94873 | 9 | 10017640 | 10017651 | 2 | 6  | 12 | GT   | 31 | 3  |
| 94880 | 9 | 10024969 | 10024994 | 2 | 13 | 26 | TG   | 11 | 4  |
| 94881 | 9 | 10025134 | 10025153 | 2 | 10 | 20 | TG   | 11 | 5  |
| 94886 | 9 | 10029109 | 10029134 | 2 | 13 | 26 | CA   | 21 | 7  |
| 94887 | 9 | 10029231 | 10029254 | 2 | 12 | 24 | CA   | 16 | 11 |
| 94889 | 9 | 10029636 | 10029667 | 4 | 8  | 32 | CAGG | 21 | 8  |
| 94890 | 9 | 10029740 | 10029755 | 2 | 8  | 16 | AT   | 14 | 7  |

|       |   |          |          |   |    |    |      |    |    |
|-------|---|----------|----------|---|----|----|------|----|----|
| 94893 | 9 | 10032697 | 10032711 | 3 | 5  | 15 | TTG  | 32 | 3  |
| 94896 | 9 | 10036861 | 10036890 | 2 | 15 | 30 | CA   | 11 | 11 |
| 94897 | 9 | 10037279 | 10037290 | 2 | 6  | 12 | CT   | 34 | 3  |
| 94922 | 9 | 10094812 | 10094829 | 2 | 9  | 18 | AT   | 6  | 5  |
| 94923 | 9 | 10100315 | 10100340 | 2 | 13 | 26 | TG   | 9  | 9  |
| 94955 | 9 | 10153549 | 10153568 | 4 | 5  | 20 | GCGT | 24 | 11 |
| 94968 | 9 | 10181056 | 10181067 | 2 | 6  | 12 | TG   | 22 | 4  |
| 94972 | 9 | 10192836 | 10192857 | 2 | 11 | 22 | GT   | 12 | 5  |
| 94974 | 9 | 10193781 | 10193792 | 2 | 6  | 12 | AG   | 27 | 3  |
| 94975 | 9 | 10199114 | 10199131 | 2 | 9  | 18 | CA   | 14 | 9  |
| 94979 | 9 | 10200824 | 10200847 | 2 | 12 | 24 | CA   | 19 | 11 |
| 94983 | 9 | 10204167 | 10204184 | 2 | 9  | 18 | CT   | 20 | 3  |
| 94985 | 9 | 10205459 | 10205472 | 2 | 7  | 14 | AC   | 25 | 3  |
| 94995 | 9 | 10221517 | 10221534 | 2 | 9  | 18 | TG   | 16 | 6  |
| 95009 | 9 | 10233304 | 10233321 | 3 | 6  | 18 | GGA  | 19 | 4  |
| 95011 | 9 | 10235773 | 10235786 | 2 | 7  | 14 | TG   | 29 | 3  |
| 95013 | 9 | 10244079 | 10244098 | 2 | 10 | 20 | GT   | 23 | 7  |
| 95014 | 9 | 10245515 | 10245538 | 2 | 12 | 24 | CA   | 23 | 7  |
| 95018 | 9 | 10256031 | 10256054 | 3 | 8  | 24 | ATG  | 24 | 4  |
| 95019 | 9 | 10256472 | 10256495 | 3 | 8  | 24 | GAG  | 17 | 6  |
| 95026 | 9 | 10267307 | 10267330 | 2 | 12 | 24 | GT   | 15 | 7  |
| 95037 | 9 | 10278106 | 10278137 | 2 | 16 | 32 | TG   | 20 | 14 |
| 95042 | 9 | 10280890 | 10280903 | 2 | 7  | 14 | TG   | 29 | 5  |
| 95043 | 9 | 10283235 | 10283254 | 4 | 5  | 20 | AGAC | 24 | 4  |
| 95044 | 9 | 10285342 | 10285357 | 2 | 8  | 16 | GT   | 24 | 8  |
| 95051 | 9 | 10322672 | 10322691 | 2 | 10 | 20 | CT   | 27 | 4  |
| 95052 | 9 | 10322872 | 10322893 | 2 | 11 | 22 | TG   | 22 | 6  |
| 95058 | 9 | 10329815 | 10329838 | 2 | 12 | 24 | CA   | 22 | 3  |
| 95059 | 9 | 10330078 | 10330107 | 2 | 15 | 30 | TG   | 14 | 9  |
| 95071 | 9 | 10356017 | 10356034 | 2 | 9  | 18 | AC   | 19 | 8  |
| 95078 | 9 | 10367788 | 10367805 | 2 | 9  | 18 | AG   | 18 | 8  |
| 95082 | 9 | 10376271 | 10376285 | 3 | 5  | 15 | ACA  | 22 | 4  |
| 95085 | 9 | 10388507 | 10388528 | 2 | 11 | 22 | AC   | 16 | 4  |
| 95089 | 9 | 10393023 | 10393036 | 2 | 7  | 14 | CT   | 22 | 3  |
| 95091 | 9 | 10395225 | 10395238 | 2 | 7  | 14 | CA   | 25 | 5  |
| 95093 | 9 | 10407533 | 10407544 | 2 | 6  | 12 | GA   | 35 | 3  |
| 95096 | 9 | 10413515 | 10413554 | 2 | 20 | 40 | GT   | 11 | 7  |
| 95098 | 9 | 10421968 | 10421981 | 2 | 7  | 14 | GT   | 15 | 3  |
| 95099 | 9 | 10422182 | 10422199 | 2 | 9  | 18 | CA   | 21 | 5  |
| 95100 | 9 | 10422923 | 10422940 | 2 | 9  | 18 | AT   | 8  | 6  |
| 95104 | 9 | 10425519 | 10425538 | 2 | 10 | 20 | AG   | 14 | 9  |
| 95108 | 9 | 10430192 | 10430203 | 2 | 6  | 12 | TG   | 6  | 4  |
| 95114 | 9 | 10433122 | 10433137 | 2 | 8  | 16 | GA   | 12 | 7  |
| 95118 | 9 | 10453967 | 10453986 | 4 | 5  | 20 | GTGC | 20 | 4  |
| 95119 | 9 | 10454825 | 10454844 | 2 | 10 | 20 | CA   | 10 | 10 |
| 95126 | 9 | 10472116 | 10472129 | 2 | 7  | 14 | TG   | 23 | 5  |
| 95131 | 9 | 10476846 | 10476867 | 2 | 11 | 22 | TG   | 12 | 6  |
| 95136 | 9 | 10479807 | 10479842 | 2 | 18 | 36 | AC   | 13 | 8  |
| 95142 | 9 | 10489355 | 10489374 | 2 | 10 | 20 | CA   | 22 | 7  |
| 95148 | 9 | 10497472 | 10497487 | 2 | 8  | 16 | CA   | 25 | 3  |
| 95149 | 9 | 10499326 | 10499343 | 2 | 9  | 18 | AC   | 26 | 6  |

|       |   |          |          |   |    |    |      |    |    |
|-------|---|----------|----------|---|----|----|------|----|----|
| 95150 | 9 | 10505418 | 10505437 | 4 | 5  | 20 | GTCT | 31 | 5  |
| 95152 | 9 | 10509711 | 10509728 | 2 | 9  | 18 | TG   | 20 | 4  |
| 95157 | 9 | 10519333 | 10519382 | 2 | 25 | 50 | CA   | 10 | 9  |
| 95162 | 9 | 10523395 | 10523408 | 2 | 7  | 14 | AT   | 21 | 3  |
| 95163 | 9 | 10524011 | 10524022 | 2 | 6  | 12 | CA   | 21 | 4  |
| 95164 | 9 | 10524662 | 10524679 | 2 | 9  | 18 | CA   | 19 | 3  |
| 95171 | 9 | 10528048 | 10528061 | 2 | 7  | 14 | AG   | 16 | 8  |
| 95172 | 9 | 10528465 | 10528479 | 3 | 5  | 15 | GAG  | 33 | 3  |
| 95173 | 9 | 10530148 | 10530159 | 2 | 6  | 12 | AC   | 28 | 4  |
| 95178 | 9 | 10537753 | 10537767 | 3 | 5  | 15 | TAA  | 22 | 6  |
| 95180 | 9 | 10539380 | 10539399 | 4 | 5  | 20 | TTTA | 8  | 3  |
| 95188 | 9 | 10548298 | 10548321 | 4 | 6  | 24 | AGTG | 31 | 13 |
| 95189 | 9 | 10550981 | 10550996 | 2 | 8  | 16 | GT   | 21 | 3  |
| 95196 | 9 | 10558098 | 10558118 | 3 | 7  | 21 | ACT  | 20 | 5  |
| 95198 | 9 | 10576565 | 10576584 | 2 | 10 | 20 | AC   | 23 | 5  |
| 95200 | 9 | 10578460 | 10578473 | 2 | 7  | 14 | TG   | 22 | 3  |
| 95202 | 9 | 10581998 | 10582013 | 2 | 8  | 16 | AG   | 25 | 3  |
| 95203 | 9 | 10582791 | 10582808 | 3 | 6  | 18 | TCC  | 32 | 5  |
| 95204 | 9 | 10588469 | 10588484 | 2 | 8  | 16 | AC   | 19 | 3  |
| 95206 | 9 | 10604046 | 10604059 | 2 | 7  | 14 | GT   | 14 | 4  |
| 95207 | 9 | 10604249 | 10604266 | 2 | 9  | 18 | TG   | 20 | 6  |
| 95218 | 9 | 10616768 | 10616787 | 2 | 10 | 20 | GA   | 20 | 6  |
| 95223 | 9 | 10631373 | 10631398 | 2 | 13 | 26 | AC   | 18 | 4  |
| 95228 | 9 | 10650902 | 10650953 | 4 | 13 | 52 | ATAG | 22 | 15 |
| 95231 | 9 | 10656025 | 10656058 | 2 | 17 | 34 | AC   | 9  | 8  |
| 95237 | 9 | 10673669 | 10673680 | 2 | 6  | 12 | AT   | 13 | 3  |
| 95238 | 9 | 10675011 | 10675031 | 3 | 7  | 21 | AGC  | 18 | 3  |
| 95244 | 9 | 10677773 | 10677798 | 2 | 13 | 26 | TC   | 9  | 11 |
| 95260 | 9 | 10704553 | 10704576 | 2 | 12 | 24 | TG   | 22 | 8  |
| 95262 | 9 | 10707903 | 10707922 | 2 | 10 | 20 | AC   | 15 | 7  |
| 95263 | 9 | 10708072 | 10708097 | 2 | 13 | 26 | CA   | 9  | 11 |
| 95271 | 9 | 10732420 | 10732433 | 2 | 7  | 14 | AC   | 21 | 8  |
| 95274 | 9 | 10739324 | 10739339 | 2 | 8  | 16 | TC   | 26 | 4  |
| 95280 | 9 | 10755617 | 10755634 | 2 | 9  | 18 | AT   | 15 | 5  |
| 95281 | 9 | 10757844 | 10757859 | 2 | 8  | 16 | GT   | 13 | 10 |
| 95282 | 9 | 10757861 | 10757878 | 2 | 9  | 18 | TG   | 12 | 10 |
| 95285 | 9 | 10773837 | 10773848 | 2 | 6  | 12 | TG   | 23 | 4  |
| 95294 | 9 | 10808040 | 10808059 | 2 | 10 | 20 | GT   | 13 | 6  |
| 95296 | 9 | 10819414 | 10819433 | 4 | 5  | 20 | ACAG | 21 | 9  |
| 95307 | 9 | 10858777 | 10858788 | 2 | 6  | 12 | TC   | 35 | 3  |
| 95314 | 9 | 10867857 | 10867868 | 2 | 6  | 12 | AC   | 15 | 11 |
| 95319 | 9 | 10868865 | 10868888 | 3 | 8  | 24 | AAG  | 19 | 12 |
| 95321 | 9 | 10871579 | 10871618 | 2 | 20 | 40 | AC   | 12 | 15 |
| 95322 | 9 | 10872013 | 10872026 | 2 | 7  | 14 | AC   | 23 | 4  |
| 95323 | 9 | 10872243 | 10872274 | 2 | 16 | 32 | AC   | 8  | 6  |
| 95339 | 9 | 10892554 | 10892569 | 2 | 8  | 16 | TG   | 20 | 7  |
| 95340 | 9 | 10893288 | 10893301 | 2 | 7  | 14 | TG   | 18 | 3  |
| 95342 | 9 | 10895130 | 10895149 | 2 | 10 | 20 | CA   | 18 | 5  |
| 95345 | 9 | 10899392 | 10899411 | 2 | 10 | 20 | CA   | 15 | 11 |
| 95351 | 9 | 10915048 | 10915061 | 2 | 7  | 14 | AC   | 24 | 6  |
| 95360 | 9 | 10933610 | 10933637 | 2 | 14 | 28 | CT   | 21 | 6  |

|       |   |          |          |   |    |    |      |    |    |
|-------|---|----------|----------|---|----|----|------|----|----|
| 95363 | 9 | 10944250 | 10944263 | 2 | 7  | 14 | AC   | 30 | 4  |
| 95366 | 9 | 10955016 | 10955039 | 3 | 8  | 24 | GCA  | 36 | 3  |
| 95374 | 9 | 10979409 | 10979436 | 2 | 14 | 28 | TC   | 7  | 5  |
| 95376 | 9 | 10983164 | 10983199 | 2 | 18 | 36 | GT   | 11 | 10 |
| 95386 | 9 | 11002190 | 11002209 | 2 | 10 | 20 | GT   | 10 | 7  |
| 95389 | 9 | 11002402 | 11002421 | 2 | 10 | 20 | GT   | 13 | 8  |
| 95403 | 9 | 11011078 | 11011099 | 2 | 11 | 22 | GT   | 15 | 6  |
| 95409 | 9 | 11018689 | 11018708 | 4 | 5  | 20 | TTAT | 23 | 7  |
| 95411 | 9 | 11018945 | 11018960 | 2 | 8  | 16 | CT   | 14 | 4  |
| 95422 | 9 | 11042056 | 11042070 | 3 | 5  | 15 | CCT  | 29 | 4  |
| 95427 | 9 | 11043832 | 11043845 | 2 | 7  | 14 | AC   | 18 | 4  |
| 95431 | 9 | 11047313 | 11047324 | 2 | 6  | 12 | GT   | 24 | 6  |
| 95437 | 9 | 11052007 | 11052024 | 2 | 9  | 18 | CA   | 14 | 9  |
| 95442 | 9 | 11053624 | 11053657 | 2 | 17 | 34 | TC   | 11 | 12 |
| 95448 | 9 | 11056774 | 11056789 | 4 | 4  | 16 | TTTC | 24 | 3  |
| 95452 | 9 | 11061770 | 11061797 | 2 | 14 | 28 | GT   | 12 | 8  |
| 95454 | 9 | 11068210 | 11068229 | 2 | 10 | 20 | CA   | 22 | 3  |
| 95457 | 9 | 11075770 | 11075793 | 3 | 8  | 24 | AAG  | 17 | 3  |
| 95459 | 9 | 11078889 | 11078906 | 2 | 9  | 18 | AG   | 29 | 5  |
| 95466 | 9 | 11109609 | 11109624 | 2 | 8  | 16 | CA   | 27 | 8  |
| 95468 | 9 | 11110658 | 11110685 | 2 | 14 | 28 | CA   | 25 | 9  |
| 95469 | 9 | 11111615 | 11111642 | 4 | 7  | 28 | GATG | 19 | 5  |
| 95472 | 9 | 11117429 | 11117444 | 2 | 8  | 16 | TG   | 25 | 4  |
| 95475 | 9 | 11125173 | 11125194 | 2 | 11 | 22 | AC   | 25 | 8  |
| 95477 | 9 | 11126250 | 11126265 | 2 | 8  | 16 | CT   | 27 | 4  |
| 95483 | 9 | 11130126 | 11130137 | 2 | 6  | 12 | CA   | 27 | 3  |
| 95485 | 9 | 11133334 | 11133361 | 2 | 14 | 28 | AC   | 10 | 10 |
| 95491 | 9 | 11143265 | 11143294 | 2 | 15 | 30 | CA   | 24 | 8  |
| 95494 | 9 | 11151507 | 11151544 | 2 | 19 | 38 | GT   | 9  | 9  |
| 95509 | 9 | 11180595 | 11180609 | 3 | 5  | 15 | GCT  | 28 | 3  |
| 95514 | 9 | 11183932 | 11183945 | 2 | 7  | 14 | GT   | 26 | 4  |
| 95515 | 9 | 11184588 | 11184627 | 2 | 20 | 40 | CA   | 11 | 13 |
| 95521 | 9 | 11208033 | 11208046 | 2 | 7  | 14 | AC   | 27 | 3  |
| 95522 | 9 | 11208231 | 11208246 | 2 | 8  | 16 | AC   | 27 | 3  |
| 95523 | 9 | 11210331 | 11210356 | 2 | 13 | 26 | GT   | 15 | 7  |
| 95526 | 9 | 11216558 | 11216585 | 2 | 14 | 28 | TG   | 22 | 8  |
| 95527 | 9 | 11217448 | 11217465 | 2 | 9  | 18 | TG   | 21 | 4  |
| 95532 | 9 | 11256723 | 11256744 | 2 | 11 | 22 | AC   | 16 | 4  |
| 95535 | 9 | 11272696 | 11272707 | 2 | 6  | 12 | CA   | 14 | 7  |
| 95536 | 9 | 11273281 | 11273292 | 2 | 6  | 12 | AG   | 28 | 3  |
| 95556 | 9 | 11311901 | 11311920 | 2 | 10 | 20 | GT   | 25 | 7  |
| 95558 | 9 | 11315596 | 11315613 | 3 | 6  | 18 | TTC  | 9  | 5  |
| 95564 | 9 | 11323387 | 11323418 | 2 | 16 | 32 | GT   | 17 | 13 |
| 95567 | 9 | 11333234 | 11333247 | 2 | 7  | 14 | GA   | 6  | 3  |
| 95573 | 9 | 11337321 | 11337336 | 4 | 4  | 16 | AAAC | 29 | 3  |
| 95576 | 9 | 11339454 | 11339474 | 3 | 7  | 21 | TGT  | 25 | 6  |
| 95584 | 9 | 11372323 | 11372336 | 2 | 7  | 14 | TA   | 18 | 6  |
| 95586 | 9 | 11379649 | 11379668 | 4 | 5  | 20 | CAAA | 20 | 5  |
| 95587 | 9 | 11379670 | 11379689 | 4 | 5  | 20 | AAAC | 21 | 8  |
| 95599 | 9 | 11397704 | 11397724 | 3 | 7  | 21 | AAC  | 26 | 4  |
| 95614 | 9 | 11439601 | 11439628 | 2 | 14 | 28 | TG   | 10 | 7  |

|       |   |          |          |   |    |    |      |    |    |
|-------|---|----------|----------|---|----|----|------|----|----|
| 95616 | 9 | 11442312 | 11442331 | 2 | 10 | 20 | CA   | 14 | 3  |
| 95619 | 9 | 11449139 | 11449158 | 2 | 10 | 20 | AC   | 13 | 3  |
| 95624 | 9 | 11453650 | 11453663 | 2 | 7  | 14 | CA   | 21 | 4  |
| 95625 | 9 | 11453860 | 11453893 | 2 | 17 | 34 | TG   | 11 | 9  |
| 95635 | 9 | 11472092 | 11472151 | 3 | 20 | 60 | AGA  | 15 | 13 |
| 95639 | 9 | 11482392 | 11482407 | 2 | 8  | 16 | CA   | 10 | 6  |
| 95646 | 9 | 11498743 | 11498758 | 4 | 4  | 16 | TTTG | 29 | 6  |
| 95649 | 9 | 11503610 | 11503625 | 2 | 8  | 16 | TA   | 19 | 15 |
| 95650 | 9 | 11503626 | 11503641 | 2 | 8  | 16 | CA   | 19 | 15 |
| 95651 | 9 | 11504221 | 11504250 | 2 | 15 | 30 | TG   | 13 | 10 |
| 95653 | 9 | 11509568 | 11509581 | 2 | 7  | 14 | GA   | 20 | 3  |
| 95663 | 9 | 11545100 | 11545119 | 2 | 10 | 20 | GT   | 18 | 5  |
| 95668 | 9 | 11557345 | 11557360 | 4 | 4  | 16 | GCTA | 24 | 6  |
| 95671 | 9 | 11584265 | 11584290 | 2 | 13 | 26 | GT   | 20 | 8  |
| 95679 | 9 | 11601779 | 11601802 | 2 | 12 | 24 | GT   | 17 | 4  |
| 95687 | 9 | 11614395 | 11614424 | 2 | 15 | 30 | AC   | 18 | 11 |
| 95690 | 9 | 11622156 | 11622173 | 3 | 6  | 18 | TGG  | 26 | 5  |
| 95695 | 9 | 11632376 | 11632389 | 2 | 7  | 14 | TG   | 20 | 9  |
| 95699 | 9 | 11642161 | 11642186 | 2 | 13 | 26 | GT   | 7  | 11 |
| 95703 | 9 | 11645765 | 11645798 | 2 | 17 | 34 | GA   | 6  | 7  |
| 95705 | 9 | 11647169 | 11647188 | 2 | 10 | 20 | TG   | 12 | 8  |
| 95707 | 9 | 11647632 | 11647661 | 2 | 15 | 30 | TG   | 11 | 5  |
| 95709 | 9 | 11647746 | 11647775 | 2 | 15 | 30 | GT   | 11 | 9  |
| 95713 | 9 | 11655035 | 11655058 | 3 | 8  | 24 | CTC  | 26 | 5  |
| 95715 | 9 | 11655254 | 11655283 | 2 | 15 | 30 | AC   | 8  | 5  |
| 95723 | 9 | 11659954 | 11659971 | 3 | 6  | 18 | AGA  | 22 | 4  |
| 95724 | 9 | 11660014 | 11660031 | 3 | 6  | 18 | CAC  | 32 | 4  |
| 95729 | 9 | 11664772 | 11664793 | 2 | 11 | 22 | AC   | 13 | 9  |
| 95731 | 9 | 11668270 | 11668285 | 2 | 8  | 16 | CA   | 25 | 4  |
| 95732 | 9 | 11669026 | 11669045 | 2 | 10 | 20 | TG   | 20 | 4  |
| 95733 | 9 | 11669418 | 11669465 | 2 | 24 | 48 | AG   | 8  | 9  |
| 95734 | 9 | 11672776 | 11672791 | 2 | 8  | 16 | GA   | 14 | 4  |
| 95736 | 9 | 11674965 | 11674992 | 2 | 14 | 28 | AC   | 15 | 4  |
| 95737 | 9 | 11675760 | 11675781 | 2 | 11 | 22 | CA   | 20 | 7  |
| 95744 | 9 | 11692549 | 11692568 | 4 | 5  | 20 | AGAC | 31 | 3  |
| 95748 | 9 | 11699046 | 11699061 | 2 | 8  | 16 | CA   | 24 | 3  |
| 95756 | 9 | 11730947 | 11730962 | 2 | 8  | 16 | AT   | 14 | 3  |
| 95757 | 9 | 11731258 | 11731277 | 4 | 5  | 20 | GCTA | 30 | 3  |
| 95758 | 9 | 11735288 | 11735301 | 2 | 7  | 14 | CA   | 14 | 11 |
| 95766 | 9 | 11756286 | 11756299 | 2 | 7  | 14 | TG   | 23 | 3  |
| 95768 | 9 | 11758570 | 11758589 | 2 | 10 | 20 | TG   | 23 | 8  |
| 95769 | 9 | 11761750 | 11761765 | 4 | 4  | 16 | CTTT | 25 | 3  |
| 95771 | 9 | 11777482 | 11777502 | 3 | 7  | 21 | AAG  | 23 | 4  |
| 95773 | 9 | 11792949 | 11792968 | 4 | 5  | 20 | TCTT | 33 | 9  |
| 95778 | 9 | 11808508 | 11808528 | 3 | 7  | 21 | CAT  | 30 | 4  |
| 95780 | 9 | 11813309 | 11813334 | 2 | 13 | 26 | GT   | 16 | 11 |
| 95789 | 9 | 11820105 | 11820124 | 2 | 10 | 20 | AC   | 20 | 7  |
| 95790 | 9 | 11826495 | 11826518 | 2 | 12 | 24 | TG   | 15 | 11 |
| 95794 | 9 | 11831652 | 11831663 | 2 | 6  | 12 | TG   | 24 | 4  |
| 95801 | 9 | 11843611 | 11843626 | 2 | 8  | 16 | TG   | 17 | 4  |
| 95803 | 9 | 11844851 | 11844872 | 2 | 11 | 22 | CA   | 20 | 5  |

|       |   |          |          |   |    |    |      |    |    |
|-------|---|----------|----------|---|----|----|------|----|----|
| 95804 | 9 | 11846161 | 11846178 | 2 | 9  | 18 | TG   | 23 | 5  |
| 95809 | 9 | 11851974 | 11851995 | 2 | 11 | 22 | AC   | 16 | 7  |
| 95812 | 9 | 11852832 | 11852843 | 2 | 6  | 12 | GT   | 23 | 3  |
| 95814 | 9 | 11856121 | 11856152 | 2 | 16 | 32 | TG   | 9  | 9  |
| 95821 | 9 | 11867807 | 11867836 | 2 | 15 | 30 | AG   | 15 | 6  |
| 95827 | 9 | 11874045 | 11874062 | 2 | 9  | 18 | GT   | 14 | 7  |
| 95828 | 9 | 11874064 | 11874075 | 2 | 6  | 12 | TG   | 12 | 5  |
| 95829 | 9 | 11875836 | 11875861 | 2 | 13 | 26 | TG   | 21 | 8  |
| 95831 | 9 | 11881374 | 11881389 | 2 | 8  | 16 | TG   | 24 | 4  |
| 95833 | 9 | 11886193 | 11886204 | 2 | 6  | 12 | TC   | 17 | 4  |
| 95834 | 9 | 11886207 | 11886220 | 2 | 7  | 14 | TC   | 18 | 6  |
| 95837 | 9 | 11902499 | 11902514 | 4 | 4  | 16 | TTTA | 29 | 3  |
| 95842 | 9 | 11907800 | 11907811 | 2 | 6  | 12 | TA   | 7  | 6  |
| 95843 | 9 | 11911547 | 11911588 | 2 | 21 | 42 | TG   | 11 | 14 |
| 95850 | 9 | 11920714 | 11920737 | 2 | 12 | 24 | CA   | 14 | 12 |
| 95851 | 9 | 11931725 | 11931744 | 2 | 10 | 20 | CA   | 20 | 6  |
| 95852 | 9 | 11931892 | 11931911 | 2 | 10 | 20 | CA   | 20 | 5  |
| 95857 | 9 | 11936441 | 11936467 | 3 | 9  | 27 | TCC  | 14 | 5  |
| 95864 | 9 | 11947678 | 11947711 | 2 | 17 | 34 | TG   | 11 | 10 |
| 95871 | 9 | 11954037 | 11954058 | 2 | 11 | 22 | TG   | 7  | 8  |
| 95879 | 9 | 11974206 | 11974220 | 3 | 5  | 15 | ACC  | 21 | 4  |
| 95880 | 9 | 11982398 | 11982419 | 2 | 11 | 22 | GT   | 14 | 9  |
| 95888 | 9 | 12001581 | 12001608 | 2 | 14 | 28 | AC   | 9  | 6  |
| 95891 | 9 | 12008435 | 12008474 | 2 | 20 | 40 | CA   | 14 | 17 |
| 95894 | 9 | 12020952 | 12020979 | 2 | 14 | 28 | CT   | 18 | 9  |
| 95897 | 9 | 12032384 | 12032395 | 2 | 6  | 12 | AC   | 20 | 8  |
| 95899 | 9 | 12033360 | 12033379 | 2 | 10 | 20 | TC   | 12 | 5  |
| 95900 | 9 | 12033690 | 12033745 | 2 | 28 | 56 | TG   | 13 | 6  |
| 95911 | 9 | 12050845 | 12050895 | 3 | 17 | 51 | TCT  | 16 | 11 |
| 95913 | 9 | 12051380 | 12051415 | 2 | 18 | 36 | CT   | 15 | 13 |
| 95916 | 9 | 12055876 | 12055901 | 2 | 13 | 26 | GT   | 17 | 6  |
| 95920 | 9 | 12066162 | 12066179 | 3 | 6  | 18 | CTC  | 28 | 4  |
| 95921 | 9 | 12068157 | 12068168 | 2 | 6  | 12 | TG   | 35 | 3  |
| 95929 | 9 | 12071500 | 12071520 | 3 | 7  | 21 | TCT  | 12 | 6  |
| 95931 | 9 | 12071850 | 12071867 | 2 | 9  | 18 | GA   | 10 | 7  |
| 95933 | 9 | 12071920 | 12071937 | 2 | 9  | 18 | GA   | 13 | 4  |
| 95944 | 9 | 12091570 | 12091595 | 2 | 13 | 26 | AC   | 9  | 4  |
| 95963 | 9 | 12143576 | 12143595 | 2 | 10 | 20 | GT   | 19 | 9  |
| 95988 | 9 | 12219410 | 12219439 | 2 | 15 | 30 | GT   | 12 | 8  |
| 95989 | 9 | 12222063 | 12222098 | 4 | 9  | 36 | TAGA | 17 | 7  |
| 95993 | 9 | 12229241 | 12229256 | 2 | 8  | 16 | TG   | 14 | 4  |
| 95994 | 9 | 12229889 | 12229918 | 2 | 15 | 30 | AG   | 14 | 4  |
| 95998 | 9 | 12246109 | 12246120 | 2 | 6  | 12 | GT   | 15 | 4  |
| 96000 | 9 | 12253416 | 12253437 | 2 | 11 | 22 | GT   | 12 | 11 |
| 96001 | 9 | 12254034 | 12254061 | 2 | 14 | 28 | GA   | 12 | 7  |
| 96005 | 9 | 12258755 | 12258775 | 3 | 7  | 21 | GCA  | 26 | 5  |
| 96008 | 9 | 12263895 | 12263912 | 2 | 9  | 18 | TG   | 21 | 7  |
| 96009 | 9 | 12269508 | 12269529 | 2 | 11 | 22 | CA   | 6  | 5  |
| 96014 | 9 | 12272947 | 12272966 | 4 | 5  | 20 | GGAG | 8  | 3  |
| 96018 | 9 | 12275150 | 12275173 | 2 | 12 | 24 | TG   | 17 | 8  |
| 96023 | 9 | 12277698 | 12277715 | 2 | 9  | 18 | CA   | 26 | 3  |

|       |   |          |          |   |    |    |      |    |    |
|-------|---|----------|----------|---|----|----|------|----|----|
| 96024 | 9 | 12279693 | 12279710 | 2 | 9  | 18 | TC   | 30 | 3  |
| 96026 | 9 | 12282671 | 12282684 | 2 | 7  | 14 | TG   | 23 | 5  |
| 96028 | 9 | 12284470 | 12284485 | 2 | 8  | 16 | TG   | 26 | 5  |
| 96035 | 9 | 12300360 | 12300379 | 2 | 10 | 20 | CA   | 12 | 12 |
| 96036 | 9 | 12300881 | 12300916 | 2 | 18 | 36 | AC   | 19 | 13 |
| 96038 | 9 | 12302329 | 12302358 | 3 | 10 | 30 | GAG  | 15 | 7  |
| 96041 | 9 | 12306112 | 12306129 | 2 | 9  | 18 | TG   | 21 | 5  |
| 96048 | 9 | 12329076 | 12329089 | 2 | 7  | 14 | AG   | 28 | 5  |
| 96049 | 9 | 12332106 | 12332137 | 2 | 16 | 32 | AC   | 17 | 9  |
| 96050 | 9 | 12332288 | 12332301 | 2 | 7  | 14 | GT   | 19 | 7  |
| 96052 | 9 | 12343957 | 12343986 | 3 | 10 | 30 | GTT  | 21 | 8  |
| 96054 | 9 | 12362024 | 12362035 | 2 | 6  | 12 | TC   | 22 | 3  |
| 96058 | 9 | 12366078 | 12366115 | 2 | 19 | 38 | GT   | 11 | 10 |
| 96059 | 9 | 12366787 | 12366842 | 2 | 28 | 56 | AG   | 7  | 7  |
| 96068 | 9 | 12419249 | 12419262 | 2 | 7  | 14 | TG   | 28 | 3  |
| 96071 | 9 | 12420898 | 12420913 | 4 | 4  | 16 | TAAA | 28 | 3  |
| 96073 | 9 | 12421676 | 12421691 | 2 | 8  | 16 | GT   | 14 | 8  |
| 96074 | 9 | 12421742 | 12421753 | 2 | 6  | 12 | TG   | 13 | 4  |
| 96075 | 9 | 12422082 | 12422101 | 2 | 10 | 20 | AG   | 25 | 13 |
| 96078 | 9 | 12436619 | 12436634 | 2 | 8  | 16 | TG   | 15 | 3  |
| 96083 | 9 | 12455632 | 12455658 | 3 | 9  | 27 | TTG  | 22 | 6  |
| 96084 | 9 | 12460947 | 12460958 | 2 | 6  | 12 | TG   | 19 | 3  |
| 96085 | 9 | 12460959 | 12460970 | 2 | 6  | 12 | AG   | 17 | 4  |
| 96087 | 9 | 12462264 | 12462297 | 2 | 17 | 34 | AC   | 12 | 14 |
| 96093 | 9 | 12473647 | 12473660 | 2 | 7  | 14 | AT   | 9  | 8  |
| 96101 | 9 | 12501010 | 12501035 | 2 | 13 | 26 | TG   | 21 | 12 |
| 96103 | 9 | 12505198 | 12505211 | 2 | 7  | 14 | TG   | 20 | 6  |
| 96104 | 9 | 12511160 | 12511174 | 3 | 5  | 15 | ATC  | 20 | 6  |
| 96107 | 9 | 12513777 | 12513792 | 2 | 8  | 16 | GT   | 23 | 6  |
| 96110 | 9 | 12520371 | 12520382 | 2 | 6  | 12 | GT   | 20 | 3  |
| 96112 | 9 | 12524188 | 12524217 | 2 | 15 | 30 | TG   | 20 | 11 |
| 96114 | 9 | 12547121 | 12547134 | 2 | 7  | 14 | CT   | 18 | 8  |
| 96117 | 9 | 12550504 | 12550515 | 2 | 6  | 12 | GT   | 16 | 3  |
| 96120 | 9 | 12553290 | 12553309 | 2 | 10 | 20 | GT   | 7  | 8  |
| 96126 | 9 | 12561199 | 12561236 | 2 | 19 | 38 | TG   | 8  | 10 |
| 96127 | 9 | 12564115 | 12564136 | 2 | 11 | 22 | TG   | 13 | 6  |
| 96133 | 9 | 12583551 | 12583565 | 3 | 5  | 15 | CAC  | 28 | 3  |
| 96139 | 9 | 12609168 | 12609231 | 4 | 16 | 64 | TAGA | 12 | 12 |
| 96140 | 9 | 12609382 | 12609399 | 2 | 9  | 18 | AC   | 31 | 5  |
| 96141 | 9 | 12611604 | 12611621 | 2 | 9  | 18 | GT   | 16 | 3  |
| 96142 | 9 | 12611850 | 12611877 | 2 | 14 | 28 | GT   | 14 | 13 |
| 96159 | 9 | 12645659 | 12645694 | 4 | 9  | 36 | CTTT | 20 | 3  |
| 96160 | 9 | 12645901 | 12645912 | 2 | 6  | 12 | TG   | 29 | 5  |
| 96161 | 9 | 12645915 | 12645928 | 2 | 7  | 14 | TG   | 26 | 5  |
| 96163 | 9 | 12646972 | 12646989 | 3 | 6  | 18 | AAG  | 26 | 4  |
| 96167 | 9 | 12650117 | 12650140 | 2 | 12 | 24 | AC   | 12 | 5  |
| 96169 | 9 | 12650713 | 12650728 | 2 | 8  | 16 | TG   | 23 | 7  |
| 96173 | 9 | 12656962 | 12656983 | 2 | 11 | 22 | TG   | 19 | 5  |
| 96198 | 9 | 12731473 | 12731487 | 3 | 5  | 15 | GGT  | 25 | 5  |
| 96211 | 9 | 12768263 | 12768294 | 2 | 16 | 32 | AC   | 19 | 9  |
| 96215 | 9 | 12779043 | 12779068 | 2 | 13 | 26 | CA   | 11 | 8  |



|       |   |          |          |   |    |    |      |    |    |
|-------|---|----------|----------|---|----|----|------|----|----|
| 96216 | 9 | 12784973 | 12784992 | 4 | 5  | 20 | GAGG | 12 | 5  |
| 96219 | 9 | 12791276 | 12791295 | 2 | 10 | 20 | AG   | 26 | 5  |
| 96221 | 9 | 12794667 | 12794694 | 2 | 14 | 28 | CA   | 13 | 10 |
| 96222 | 9 | 12795016 | 12795027 | 2 | 6  | 12 | CT   | 21 | 3  |
| 96223 | 9 | 12795100 | 12795120 | 3 | 7  | 21 | CAG  | 22 | 4  |
| 96227 | 9 | 12795917 | 12795964 | 4 | 12 | 48 | TCTA | 19 | 14 |
| 96235 | 9 | 12814246 | 12814266 | 3 | 7  | 21 | AGC  | 25 | 8  |
| 96238 | 9 | 12822711 | 12822730 | 2 | 10 | 20 | GT   | 21 | 7  |
| 96241 | 9 | 12827211 | 12827228 | 2 | 9  | 18 | AC   | 15 | 6  |
| 96250 | 9 | 12845100 | 12845113 | 2 | 7  | 14 | GT   | 20 | 3  |
| 96252 | 9 | 12849143 | 12849156 | 2 | 7  | 14 | TG   | 20 | 5  |
| 96253 | 9 | 12849158 | 12849169 | 2 | 6  | 12 | GT   | 13 | 4  |
| 96255 | 9 | 12850038 | 12850061 | 4 | 6  | 24 | AGAT | 34 | 3  |
| 96256 | 9 | 12851763 | 12851794 | 2 | 16 | 32 | GT   | 15 | 10 |
| 96264 | 9 | 12872672 | 12872683 | 2 | 6  | 12 | TC   | 27 | 4  |
| 96268 | 9 | 12883567 | 12883592 | 2 | 13 | 26 | AC   | 7  | 8  |
| 96288 | 9 | 12907703 | 12907740 | 2 | 19 | 38 | GT   | 10 | 7  |
| 96291 | 9 | 12910932 | 12910949 | 2 | 9  | 18 | TG   | 22 | 3  |
| 96294 | 9 | 12913075 | 12913106 | 2 | 16 | 32 | TG   | 14 | 11 |
| 96297 | 9 | 12914276 | 12914303 | 2 | 14 | 28 | TG   | 12 | 6  |
| 96299 | 9 | 12917041 | 12917060 | 2 | 10 | 20 | TG   | 27 | 3  |
| 96300 | 9 | 12918616 | 12918642 | 3 | 9  | 27 | GAG  | 22 | 4  |
| 96305 | 9 | 12923006 | 12923035 | 3 | 10 | 30 | TAT  | 11 | 4  |
| 96308 | 9 | 12930145 | 12930172 | 2 | 14 | 28 | TC   | 9  | 4  |
| 96311 | 9 | 12941628 | 12941649 | 2 | 11 | 22 | CA   | 15 | 3  |
| 96313 | 9 | 12943225 | 12943238 | 2 | 7  | 14 | AT   | 6  | 4  |
| 96322 | 9 | 12991051 | 12991074 | 2 | 12 | 24 | TG   | 7  | 4  |
| 96326 | 9 | 12992953 | 12992970 | 2 | 9  | 18 | TG   | 14 | 4  |
| 96335 | 9 | 13013569 | 13013588 | 4 | 5  | 20 | AAAC | 22 | 5  |
| 96336 | 9 | 13013745 | 13013760 | 2 | 8  | 16 | GA   | 24 | 4  |
| 96338 | 9 | 13019443 | 13019460 | 3 | 6  | 18 | CTG  | 14 | 6  |
| 96341 | 9 | 13027567 | 13027604 | 2 | 19 | 38 | TG   | 16 | 11 |
| 96347 | 9 | 13036714 | 13036737 | 2 | 12 | 24 | GT   | 22 | 10 |
| 96348 | 9 | 13038414 | 13038427 | 2 | 7  | 14 | GT   | 22 | 3  |
| 96355 | 9 | 13047480 | 13047493 | 2 | 7  | 14 | AG   | 26 | 11 |
| 96358 | 9 | 13052582 | 13052599 | 3 | 6  | 18 | TTG  | 20 | 3  |
| 96362 | 9 | 13062562 | 13062589 | 2 | 14 | 28 | AC   | 11 | 6  |
| 96388 | 9 | 13105900 | 13105914 | 3 | 5  | 15 | CCA  | 16 | 9  |
| 96399 | 9 | 13130630 | 13130643 | 2 | 7  | 14 | AT   | 21 | 6  |
| 96401 | 9 | 13135267 | 13135282 | 4 | 4  | 16 | AACC | 28 | 5  |
| 96402 | 9 | 13135697 | 13135708 | 2 | 6  | 12 | GT   | 22 | 6  |
| 96404 | 9 | 13144625 | 13144644 | 2 | 10 | 20 | TG   | 20 | 6  |
| 96408 | 9 | 13153450 | 13153473 | 4 | 6  | 24 | TCCA | 12 | 7  |
| 96424 | 9 | 13208422 | 13208435 | 2 | 7  | 14 | GT   | 17 | 4  |
| 96435 | 9 | 13226958 | 13226977 | 2 | 10 | 20 | TG   | 10 | 6  |
| 96441 | 9 | 13234765 | 13234776 | 2 | 6  | 12 | TC   | 21 | 3  |
| 96444 | 9 | 13239976 | 13240009 | 2 | 17 | 34 | AC   | 13 | 12 |
| 96455 | 9 | 13246577 | 13246594 | 2 | 9  | 18 | AC   | 22 | 3  |
| 96465 | 9 | 13251842 | 13251856 | 3 | 5  | 15 | AAT  | 13 | 7  |
| 96478 | 9 | 13277292 | 13277309 | 2 | 9  | 18 | CA   | 14 | 3  |
| 96481 | 9 | 13278695 | 13278710 | 4 | 4  | 16 | AAAT | 27 | 5  |

|       |   |          |          |   |    |    |      |    |    |
|-------|---|----------|----------|---|----|----|------|----|----|
| 96486 | 9 | 13288460 | 13288480 | 3 | 7  | 21 | GCA  | 12 | 4  |
| 96498 | 9 | 13306523 | 13306534 | 2 | 6  | 12 | TC   | 18 | 3  |
| 96500 | 9 | 13316847 | 13316861 | 3 | 5  | 15 | ACC  | 24 | 7  |
| 96501 | 9 | 13317404 | 13317415 | 2 | 6  | 12 | GT   | 23 | 8  |
| 96505 | 9 | 13321583 | 13321594 | 2 | 6  | 12 | GT   | 21 | 3  |
| 96506 | 9 | 13321596 | 13321609 | 2 | 7  | 14 | TG   | 19 | 3  |
| 96507 | 9 | 13322024 | 13322049 | 2 | 13 | 26 | AC   | 16 | 8  |
| 96547 | 9 | 13393135 | 13393154 | 2 | 10 | 20 | GT   | 20 | 18 |
| 96553 | 9 | 13402829 | 13402858 | 2 | 15 | 30 | CA   | 16 | 12 |
| 96564 | 9 | 13448401 | 13448414 | 2 | 7  | 14 | CA   | 11 | 9  |
| 96572 | 9 | 13454194 | 13454221 | 4 | 7  | 28 | TTTG | 19 | 6  |
| 96575 | 9 | 13462990 | 13463007 | 2 | 9  | 18 | GT   | 14 | 3  |
| 96577 | 9 | 13463497 | 13463529 | 3 | 11 | 33 | CTG  | 24 | 5  |
| 96582 | 9 | 13465018 | 13465031 | 2 | 7  | 14 | AG   | 20 | 5  |
| 96589 | 9 | 13466330 | 13466341 | 2 | 6  | 12 | AT   | 18 | 3  |
| 96600 | 9 | 13508050 | 13508065 | 2 | 8  | 16 | CA   | 24 | 5  |
| 96604 | 9 | 13516318 | 13516338 | 3 | 7  | 21 | AGC  | 14 | 5  |
| 96611 | 9 | 13525192 | 13525211 | 4 | 5  | 20 | TGTC | 29 | 4  |
| 96613 | 9 | 13532461 | 13532493 | 3 | 11 | 33 | TCT  | 11 | 7  |
| 96651 | 9 | 13612457 | 13612482 | 2 | 13 | 26 | GT   | 15 | 7  |
| 96652 | 9 | 13618251 | 13618265 | 3 | 5  | 15 | AGC  | 36 | 3  |
| 96661 | 9 | 13626949 | 13626974 | 2 | 13 | 26 | TG   | 28 | 8  |
| 96664 | 9 | 13637533 | 13637552 | 2 | 10 | 20 | CA   | 17 | 6  |
| 96671 | 9 | 13666251 | 13666278 | 4 | 7  | 28 | GATG | 19 | 3  |
| 96679 | 9 | 13682962 | 13682985 | 2 | 12 | 24 | AC   | 18 | 10 |
| 96688 | 9 | 13723086 | 13723105 | 4 | 5  | 20 | ACCA | 14 | 3  |
| 96689 | 9 | 13727386 | 13727399 | 2 | 7  | 14 | GT   | 18 | 4  |
| 96692 | 9 | 13734736 | 13734750 | 3 | 5  | 15 | TGC  | 24 | 5  |
| 96695 | 9 | 13746063 | 13746080 | 2 | 9  | 18 | GT   | 22 | 8  |
| 96696 | 9 | 13746082 | 13746095 | 2 | 7  | 14 | TG   | 14 | 5  |
| 96705 | 9 | 13783462 | 13783483 | 2 | 11 | 22 | GT   | 14 | 9  |
| 96715 | 9 | 13820773 | 13820784 | 2 | 6  | 12 | TA   | 23 | 4  |
| 96716 | 9 | 13821650 | 13821675 | 2 | 13 | 26 | TG   | 24 | 14 |
| 96717 | 9 | 13825965 | 13825990 | 2 | 13 | 26 | AG   | 11 | 9  |
| 96718 | 9 | 13826284 | 13826309 | 2 | 13 | 26 | CT   | 14 | 6  |
| 96721 | 9 | 13831020 | 13831037 | 2 | 9  | 18 | GA   | 14 | 10 |
| 96725 | 9 | 13842616 | 13842647 | 2 | 16 | 32 | TG   | 6  | 5  |
| 96728 | 9 | 13852259 | 13852322 | 4 | 16 | 64 | TCTA | 8  | 6  |
| 96729 | 9 | 13852527 | 13852550 | 3 | 8  | 24 | GAG  | 14 | 6  |
| 96733 | 9 | 13854244 | 13854255 | 2 | 6  | 12 | CT   | 26 | 8  |
| 96734 | 9 | 13868145 | 13868162 | 3 | 6  | 18 | ACA  | 23 | 7  |
| 96739 | 9 | 13882234 | 13882247 | 2 | 7  | 14 | AC   | 27 | 4  |
| 96746 | 9 | 13903871 | 13903890 | 2 | 10 | 20 | GT   | 23 | 5  |
| 96753 | 9 | 13926167 | 13926182 | 2 | 8  | 16 | AC   | 24 | 6  |
| 96754 | 9 | 13929009 | 13929030 | 2 | 11 | 22 | GA   | 18 | 4  |
| 96758 | 9 | 13931441 | 13931456 | 4 | 4  | 16 | TCAG | 30 | 4  |
| 96759 | 9 | 13932023 | 13932048 | 2 | 13 | 26 | AC   | 10 | 12 |
| 96766 | 9 | 13943994 | 13944011 | 2 | 9  | 18 | AG   | 14 | 6  |
| 96774 | 9 | 13952781 | 13952840 | 4 | 15 | 60 | AGAT | 18 | 7  |
| 96775 | 9 | 13955352 | 13955377 | 2 | 13 | 26 | TG   | 14 | 8  |
| 96778 | 9 | 13963035 | 13963060 | 2 | 13 | 26 | CA   | 13 | 8  |

|       |   |          |          |   |    |    |      |    |    |
|-------|---|----------|----------|---|----|----|------|----|----|
| 96781 | 9 | 13975725 | 13975754 | 2 | 15 | 30 | CA   | 18 | 11 |
| 96782 | 9 | 13977571 | 13977592 | 2 | 11 | 22 | AC   | 10 | 5  |
| 96784 | 9 | 13982923 | 13982949 | 3 | 9  | 27 | TCA  | 10 | 3  |
| 96800 | 9 | 14005107 | 14005134 | 4 | 7  | 28 | TGTA | 16 | 10 |
| 96803 | 9 | 14016697 | 14016716 | 4 | 5  | 20 | CCAA | 29 | 4  |
| 96804 | 9 | 14017062 | 14017079 | 3 | 6  | 18 | CAG  | 25 | 10 |
| 96806 | 9 | 14022765 | 14022779 | 3 | 5  | 15 | CAC  | 29 | 3  |
| 96813 | 9 | 14039348 | 14039375 | 2 | 14 | 28 | TG   | 11 | 11 |
| 96815 | 9 | 14041126 | 14041153 | 2 | 14 | 28 | TG   | 17 | 7  |
| 96818 | 9 | 14054901 | 14054912 | 2 | 6  | 12 | AC   | 16 | 3  |
| 96819 | 9 | 14059517 | 14059528 | 2 | 6  | 12 | CA   | 21 | 3  |
| 96829 | 9 | 14076406 | 14076425 | 2 | 10 | 20 | AC   | 30 | 4  |
| 96830 | 9 | 14076577 | 14076590 | 2 | 7  | 14 | AT   | 13 | 4  |
| 96835 | 9 | 14080571 | 14080594 | 4 | 6  | 24 | TCTG | 12 | 8  |
| 96839 | 9 | 14088713 | 14088724 | 2 | 6  | 12 | GT   | 26 | 4  |
| 96842 | 9 | 14100383 | 14100394 | 2 | 6  | 12 | TA   | 19 | 3  |
| 96844 | 9 | 14111927 | 14111946 | 2 | 10 | 20 | AC   | 12 | 3  |
| 96849 | 9 | 14117242 | 14117269 | 4 | 7  | 28 | AGAT | 18 | 7  |
| 96853 | 9 | 14125461 | 14125478 | 3 | 6  | 18 | GGA  | 24 | 5  |
| 96858 | 9 | 14137431 | 14137444 | 2 | 7  | 14 | TG   | 22 | 3  |
| 96886 | 9 | 14184583 | 14184594 | 2 | 6  | 12 | AC   | 20 | 4  |
| 96887 | 9 | 14187976 | 14188005 | 3 | 10 | 30 | CCT  | 20 | 11 |
| 96890 | 9 | 14191899 | 14191919 | 3 | 7  | 21 | GCA  | 22 | 4  |
| 96891 | 9 | 14193197 | 14193210 | 2 | 7  | 14 | GT   | 21 | 9  |
| 96906 | 9 | 14230548 | 14230561 | 2 | 7  | 14 | TG   | 11 | 3  |
| 96907 | 9 | 14231878 | 14231897 | 2 | 10 | 20 | AC   | 14 | 6  |
| 96910 | 9 | 14232826 | 14232851 | 2 | 13 | 26 | TG   | 9  | 8  |
| 96915 | 9 | 14240752 | 14240779 | 2 | 14 | 28 | GT   | 6  | 6  |
| 96922 | 9 | 14246860 | 14246871 | 2 | 6  | 12 | TC   | 21 | 3  |
| 96923 | 9 | 14250357 | 14250384 | 2 | 14 | 28 | AC   | 14 | 7  |
| 96927 | 9 | 14260131 | 14260154 | 2 | 12 | 24 | CA   | 17 | 7  |
| 96929 | 9 | 14260406 | 14260431 | 2 | 13 | 26 | CT   | 10 | 4  |
| 96946 | 9 | 14290352 | 14290369 | 3 | 6  | 18 | GGA  | 22 | 7  |
| 96951 | 9 | 14295936 | 14295961 | 2 | 13 | 26 | GT   | 22 | 14 |
| 96954 | 9 | 14302622 | 14302635 | 2 | 7  | 14 | TG   | 26 | 5  |
| 96960 | 9 | 14310939 | 14310956 | 2 | 9  | 18 | CA   | 23 | 12 |
| 96961 | 9 | 14310959 | 14310972 | 2 | 7  | 14 | CA   | 20 | 7  |
| 96963 | 9 | 14311420 | 14311431 | 2 | 6  | 12 | CA   | 17 | 4  |
| 96965 | 9 | 14320452 | 14320469 | 2 | 9  | 18 | TG   | 15 | 5  |
| 96970 | 9 | 14350351 | 14350364 | 2 | 7  | 14 | GT   | 15 | 8  |
| 96976 | 9 | 14361795 | 14361808 | 2 | 7  | 14 | AT   | 8  | 3  |
| 96980 | 9 | 14371367 | 14371378 | 2 | 6  | 12 | AG   | 27 | 5  |
| 96981 | 9 | 14375683 | 14375710 | 2 | 14 | 28 | GT   | 9  | 4  |
| 96983 | 9 | 14377183 | 14377197 | 3 | 5  | 15 | AAG  | 29 | 4  |
| 96984 | 9 | 14383951 | 14383976 | 2 | 13 | 26 | CA   | 18 | 9  |
| 96985 | 9 | 14388489 | 14388500 | 2 | 6  | 12 | TG   | 13 | 8  |
| 96995 | 9 | 14425716 | 14425729 | 2 | 7  | 14 | TG   | 24 | 12 |
| 97002 | 9 | 14454441 | 14454452 | 2 | 6  | 12 | TG   | 14 | 11 |
| 97003 | 9 | 14454455 | 14454472 | 2 | 9  | 18 | TG   | 17 | 15 |
| 97007 | 9 | 14460650 | 14460685 | 2 | 18 | 36 | TC   | 7  | 5  |
| 97009 | 9 | 14464062 | 14464076 | 3 | 5  | 15 | CAG  | 24 | 3  |

|       |   |          |          |   |    |    |      |    |    |
|-------|---|----------|----------|---|----|----|------|----|----|
| 97010 | 9 | 14468403 | 14468420 | 3 | 6  | 18 | GAA  | 22 | 3  |
| 97014 | 9 | 14475945 | 14475964 | 2 | 10 | 20 | AC   | 21 | 4  |
| 97017 | 9 | 14490881 | 14490895 | 3 | 5  | 15 | ATC  | 27 | 3  |
| 97027 | 9 | 14504881 | 14504894 | 2 | 7  | 14 | CA   | 11 | 5  |
| 97043 | 9 | 14545719 | 14545736 | 2 | 9  | 18 | AC   | 23 | 13 |
| 97046 | 9 | 14561357 | 14561383 | 3 | 9  | 27 | CCA  | 17 | 4  |
| 97048 | 9 | 14576301 | 14576316 | 4 | 4  | 16 | TTAT | 11 | 4  |
| 97050 | 9 | 14581057 | 14581080 | 3 | 8  | 24 | TCC  | 26 | 6  |
| 97051 | 9 | 14582567 | 14582580 | 2 | 7  | 14 | TG   | 17 | 11 |
| 97053 | 9 | 14589790 | 14589809 | 4 | 5  | 20 | CTTT | 29 | 4  |
| 97054 | 9 | 14599379 | 14599400 | 2 | 11 | 22 | AC   | 20 | 7  |
| 97056 | 9 | 14604501 | 14604524 | 2 | 12 | 24 | TG   | 13 | 6  |
| 97058 | 9 | 14607400 | 14607413 | 2 | 7  | 14 | AC   | 25 | 6  |
| 97085 | 9 | 14642372 | 14642403 | 4 | 8  | 32 | AATA | 22 | 11 |
| 97087 | 9 | 14644136 | 14644153 | 2 | 9  | 18 | TA   | 7  | 4  |
| 97092 | 9 | 14647253 | 14647274 | 2 | 11 | 22 | CT   | 25 | 4  |
| 97093 | 9 | 14648098 | 14648113 | 4 | 4  | 16 | AACC | 33 | 3  |
| 97095 | 9 | 14655882 | 14655893 | 2 | 6  | 12 | TG   | 21 | 3  |
| 97096 | 9 | 14659914 | 14659933 | 2 | 10 | 20 | AC   | 11 | 9  |
| 97098 | 9 | 14666619 | 14666634 | 2 | 8  | 16 | TG   | 17 | 8  |
| 97100 | 9 | 14671349 | 14671360 | 2 | 6  | 12 | GT   | 29 | 3  |
| 97102 | 9 | 14672123 | 14672134 | 2 | 6  | 12 | GT   | 36 | 3  |
| 97105 | 9 | 14682497 | 14682512 | 2 | 8  | 16 | AC   | 23 | 8  |
| 97108 | 9 | 14685013 | 14685036 | 2 | 12 | 24 | TG   | 12 | 6  |
| 97109 | 9 | 14687823 | 14687838 | 2 | 8  | 16 | AC   | 14 | 4  |
| 97110 | 9 | 14687840 | 14687851 | 2 | 6  | 12 | CA   | 11 | 4  |
| 97111 | 9 | 14687874 | 14687887 | 2 | 7  | 14 | CA   | 23 | 13 |
| 97115 | 9 | 14702834 | 14702849 | 2 | 8  | 16 | TG   | 27 | 4  |
| 97116 | 9 | 14705844 | 14705857 | 2 | 7  | 14 | GA   | 30 | 3  |
| 97117 | 9 | 14705985 | 14705996 | 2 | 6  | 12 | AC   | 27 | 3  |
| 97124 | 9 | 14714440 | 14714453 | 2 | 7  | 14 | GT   | 18 | 6  |
| 97128 | 9 | 14722950 | 14722965 | 2 | 8  | 16 | AT   | 12 | 9  |
| 97129 | 9 | 14722966 | 14722985 | 2 | 10 | 20 | GT   | 12 | 10 |
| 97131 | 9 | 14728695 | 14728706 | 2 | 6  | 12 | TC   | 14 | 3  |
| 97136 | 9 | 14745395 | 14745414 | 2 | 10 | 20 | TC   | 12 | 5  |
| 97143 | 9 | 14770170 | 14770207 | 2 | 19 | 38 | GT   | 9  | 10 |
| 97147 | 9 | 14781394 | 14781411 | 3 | 6  | 18 | GAG  | 22 | 5  |
| 97152 | 9 | 14804823 | 14804834 | 2 | 6  | 12 | AC   | 27 | 6  |
| 97153 | 9 | 14806437 | 14806448 | 2 | 6  | 12 | CT   | 22 | 3  |
| 97155 | 9 | 14809098 | 14809131 | 2 | 17 | 34 | AC   | 8  | 9  |
| 97165 | 9 | 14875632 | 14875667 | 3 | 12 | 36 | ATT  | 6  | 6  |
| 97166 | 9 | 14876846 | 14876869 | 3 | 8  | 24 | TTG  | 22 | 6  |
| 97168 | 9 | 14877574 | 14877585 | 2 | 6  | 12 | AT   | 13 | 4  |
| 97173 | 9 | 14882802 | 14882834 | 3 | 11 | 33 | CCT  | 12 | 9  |
| 97176 | 9 | 14885261 | 14885296 | 2 | 18 | 36 | AC   | 12 | 11 |
| 97179 | 9 | 14886864 | 14886890 | 3 | 9  | 27 | CAA  | 15 | 11 |
| 97181 | 9 | 14887235 | 14887261 | 3 | 9  | 27 | TCC  | 11 | 3  |
| 97187 | 9 | 14890225 | 14890236 | 2 | 6  | 12 | AC   | 18 | 4  |
| 97189 | 9 | 14898949 | 14898960 | 2 | 6  | 12 | AC   | 21 | 5  |
| 97195 | 9 | 14931541 | 14931574 | 2 | 17 | 34 | CA   | 15 | 10 |
| 97199 | 9 | 14936399 | 14936414 | 2 | 8  | 16 | AC   | 13 | 5  |

|       |   |          |          |   |    |    |      |    |    |
|-------|---|----------|----------|---|----|----|------|----|----|
| 97200 | 9 | 14936679 | 14936690 | 2 | 6  | 12 | CA   | 26 | 9  |
| 97202 | 9 | 14940734 | 14940745 | 2 | 6  | 12 | TG   | 21 | 3  |
| 97203 | 9 | 14941734 | 14941765 | 2 | 16 | 32 | AC   | 9  | 9  |
| 97204 | 9 | 14944124 | 14944181 | 2 | 29 | 58 | CA   | 12 | 16 |
| 97207 | 9 | 14946221 | 14946284 | 4 | 16 | 64 | AGAT | 25 | 11 |
| 97208 | 9 | 14946748 | 14946762 | 3 | 5  | 15 | TTG  | 20 | 3  |
| 97220 | 9 | 14977573 | 14977600 | 2 | 14 | 28 | GT   | 24 | 6  |
| 97222 | 9 | 14980856 | 14980885 | 2 | 15 | 30 | GT   | 12 | 7  |
| 97224 | 9 | 14985626 | 14985657 | 2 | 16 | 32 | CA   | 23 | 10 |
| 97225 | 9 | 14985974 | 14985991 | 3 | 6  | 18 | CAG  | 18 | 7  |
| 97226 | 9 | 14986138 | 14986151 | 2 | 7  | 14 | CT   | 21 | 6  |
| 97227 | 9 | 14986153 | 14986170 | 2 | 9  | 18 | TC   | 25 | 8  |
| 97230 | 9 | 14994888 | 14994903 | 2 | 8  | 16 | CA   | 22 | 7  |
| 97233 | 9 | 15002052 | 15002063 | 2 | 6  | 12 | AT   | 12 | 3  |
| 97239 | 9 | 15016636 | 15016671 | 2 | 18 | 36 | TG   | 8  | 11 |
| 97255 | 9 | 15069191 | 15069236 | 2 | 23 | 46 | CA   | 6  | 9  |
| 97263 | 9 | 15095737 | 15095756 | 4 | 5  | 20 | TCCA | 11 | 3  |
| 97265 | 9 | 15103730 | 15103741 | 2 | 6  | 12 | CA   | 13 | 4  |
| 97271 | 9 | 15124580 | 15124615 | 2 | 18 | 36 | CA   | 10 | 10 |
| 97273 | 9 | 15129134 | 15129149 | 2 | 8  | 16 | GT   | 12 | 7  |
| 97276 | 9 | 15133890 | 15133925 | 2 | 18 | 36 | GT   | 20 | 8  |
| 97284 | 9 | 15142835 | 15142854 | 2 | 10 | 20 | TG   | 19 | 5  |
| 97292 | 9 | 15168526 | 15168547 | 2 | 11 | 22 | GT   | 23 | 10 |
| 97294 | 9 | 15179877 | 15179892 | 4 | 4  | 16 | TTTG | 11 | 10 |
| 97295 | 9 | 15179893 | 15179908 | 4 | 4  | 16 | TTTC | 7  | 5  |
| 97300 | 9 | 15184597 | 15184620 | 2 | 12 | 24 | AC   | 12 | 5  |
| 97302 | 9 | 15187828 | 15187843 | 2 | 8  | 16 | GT   | 26 | 4  |
| 97303 | 9 | 15188455 | 15188468 | 2 | 7  | 14 | GA   | 24 | 10 |
| 97309 | 9 | 15189360 | 15189379 | 2 | 10 | 20 | GT   | 24 | 7  |
| 97311 | 9 | 15189797 | 15189820 | 4 | 6  | 24 | GGAT | 23 | 3  |
| 97313 | 9 | 15193690 | 15193711 | 2 | 11 | 22 | CA   | 19 | 4  |
| 97320 | 9 | 15212199 | 15212212 | 2 | 7  | 14 | CA   | 12 | 6  |
| 97321 | 9 | 15214165 | 15214182 | 2 | 9  | 18 | GT   | 23 | 7  |
| 97325 | 9 | 15223770 | 15223803 | 2 | 17 | 34 | TG   | 8  | 7  |
| 97328 | 9 | 15233330 | 15233347 | 3 | 6  | 18 | GGA  | 19 | 7  |
| 97336 | 9 | 15252581 | 15252618 | 2 | 19 | 38 | TG   | 13 | 10 |
| 97337 | 9 | 15258863 | 15258874 | 2 | 6  | 12 | CA   | 26 | 3  |
| 97339 | 9 | 15260719 | 15260750 | 4 | 8  | 32 | AAAG | 25 | 5  |
| 97344 | 9 | 15280698 | 15280743 | 2 | 23 | 46 | AC   | 8  | 13 |
| 97352 | 9 | 15288779 | 15288806 | 4 | 7  | 28 | TATG | 17 | 5  |
| 97354 | 9 | 15294521 | 15294532 | 2 | 6  | 12 | CA   | 32 | 3  |
| 97376 | 9 | 15343135 | 15343154 | 4 | 5  | 20 | AGTT | 14 | 5  |
| 97381 | 9 | 15348664 | 15348695 | 2 | 16 | 32 | GT   | 11 | 12 |
| 97382 | 9 | 15350615 | 15350632 | 3 | 6  | 18 | AGG  | 26 | 4  |
| 97384 | 9 | 15352675 | 15352690 | 2 | 8  | 16 | AC   | 7  | 3  |
| 97386 | 9 | 15352726 | 15352749 | 2 | 12 | 24 | AC   | 6  | 5  |
| 97392 | 9 | 15359925 | 15359944 | 2 | 10 | 20 | TG   | 17 | 15 |
| 97393 | 9 | 15361258 | 15361279 | 2 | 11 | 22 | GT   | 10 | 3  |
| 97401 | 9 | 15397759 | 15397782 | 3 | 8  | 24 | TGC  | 25 | 8  |
| 97405 | 9 | 15403848 | 15403871 | 2 | 12 | 24 | CA   | 19 | 13 |
| 97418 | 9 | 15412990 | 15413007 | 2 | 9  | 18 | CT   | 18 | 9  |

|       |   |          |          |   |    |    |      |    |    |
|-------|---|----------|----------|---|----|----|------|----|----|
| 97419 | 9 | 15413010 | 15413025 | 2 | 8  | 16 | CT   | 6  | 4  |
| 97423 | 9 | 15425195 | 15425209 | 3 | 5  | 15 | GAT  | 22 | 5  |
| 97424 | 9 | 15433400 | 15433429 | 3 | 10 | 30 | AGA  | 21 | 6  |
| 97425 | 9 | 15439058 | 15439087 | 2 | 15 | 30 | CA   | 12 | 10 |
| 97426 | 9 | 15450889 | 15450906 | 2 | 9  | 18 | CA   | 25 | 10 |
| 97427 | 9 | 15451063 | 15451078 | 2 | 8  | 16 | AC   | 16 | 6  |
| 97434 | 9 | 15477303 | 15477322 | 2 | 10 | 20 | CA   | 30 | 4  |
| 97442 | 9 | 15494134 | 15494165 | 4 | 8  | 32 | AAAG | 12 | 9  |
| 97454 | 9 | 15520119 | 15520134 | 4 | 4  | 16 | TAAA | 20 | 6  |
| 97457 | 9 | 15520784 | 15520815 | 2 | 16 | 32 | AC   | 14 | 13 |
| 97462 | 9 | 15543946 | 15543961 | 4 | 4  | 16 | AAAT | 28 | 3  |
| 97467 | 9 | 15564921 | 15564932 | 2 | 6  | 12 | TG   | 7  | 6  |
| 97468 | 9 | 15565470 | 15565484 | 3 | 5  | 15 | TGG  | 19 | 4  |
| 97473 | 9 | 15579124 | 15579135 | 2 | 6  | 12 | TG   | 10 | 3  |
| 97476 | 9 | 15580436 | 15580453 | 2 | 9  | 18 | CA   | 17 | 5  |
| 97477 | 9 | 15581559 | 15581600 | 3 | 14 | 42 | CTT  | 16 | 13 |
| 97480 | 9 | 15592524 | 15592535 | 2 | 6  | 12 | AG   | 16 | 3  |
| 97482 | 9 | 15594308 | 15594355 | 2 | 24 | 48 | GT   | 9  | 10 |
| 97489 | 9 | 15603024 | 15603055 | 2 | 16 | 32 | TC   | 22 | 6  |
| 97494 | 9 | 15607353 | 15607368 | 4 | 4  | 16 | TTAA | 20 | 3  |
| 97498 | 9 | 15608943 | 15608963 | 3 | 7  | 21 | TGC  | 16 | 4  |
| 97509 | 9 | 15633289 | 15633330 | 2 | 21 | 42 | TG   | 8  | 12 |
| 97512 | 9 | 15652726 | 15652747 | 2 | 11 | 22 | TG   | 9  | 11 |
| 97513 | 9 | 15654765 | 15654798 | 2 | 17 | 34 | TG   | 22 | 11 |
| 97514 | 9 | 15661783 | 15661802 | 4 | 5  | 20 | TCTG | 25 | 4  |
| 97521 | 9 | 15683670 | 15683693 | 4 | 6  | 24 | ATCT | 21 | 10 |
| 97523 | 9 | 15685259 | 15685274 | 4 | 4  | 16 | TTTC | 25 | 3  |
| 97538 | 9 | 15714980 | 15715005 | 2 | 13 | 26 | GT   | 10 | 7  |
| 97540 | 9 | 15718368 | 15718387 | 2 | 10 | 20 | CT   | 22 | 6  |
| 97544 | 9 | 15757395 | 15757414 | 2 | 10 | 20 | CT   | 28 | 7  |
| 97545 | 9 | 15757695 | 15757730 | 2 | 18 | 36 | GT   | 14 | 10 |
| 97553 | 9 | 15778162 | 15778201 | 2 | 20 | 40 | GT   | 8  | 9  |
| 97561 | 9 | 15791338 | 15791359 | 2 | 11 | 22 | TG   | 10 | 3  |
| 97570 | 9 | 15802933 | 15802950 | 2 | 9  | 18 | TG   | 9  | 3  |
| 97572 | 9 | 15803901 | 15803926 | 2 | 13 | 26 | TC   | 6  | 9  |
| 97575 | 9 | 15804650 | 15804664 | 3 | 5  | 15 | CCT  | 29 | 4  |
| 97577 | 9 | 15809253 | 15809270 | 2 | 9  | 18 | TC   | 16 | 3  |
| 97583 | 9 | 15818571 | 15818590 | 2 | 10 | 20 | AC   | 25 | 13 |
| 97584 | 9 | 15819080 | 15819091 | 2 | 6  | 12 | GT   | 6  | 7  |
| 97588 | 9 | 15828344 | 15828389 | 2 | 23 | 46 | TG   | 9  | 9  |
| 97591 | 9 | 15834957 | 15835004 | 2 | 24 | 48 | AC   | 15 | 15 |
| 97592 | 9 | 15836310 | 15836324 | 3 | 5  | 15 | GAA  | 26 | 5  |
| 97593 | 9 | 15837365 | 15837380 | 2 | 8  | 16 | GT   | 15 | 8  |
| 97594 | 9 | 15837639 | 15837672 | 2 | 17 | 34 | GA   | 11 | 9  |
| 97598 | 9 | 15842895 | 15842912 | 2 | 9  | 18 | TG   | 10 | 6  |
| 97600 | 9 | 15860462 | 15860487 | 2 | 13 | 26 | AC   | 12 | 11 |
| 97604 | 9 | 15862095 | 15862112 | 2 | 9  | 18 | TG   | 18 | 4  |
| 97605 | 9 | 15868316 | 15868327 | 2 | 6  | 12 | CA   | 32 | 3  |
| 97607 | 9 | 15875151 | 15875171 | 3 | 7  | 21 | GAG  | 24 | 4  |
| 97608 | 9 | 15880316 | 15880327 | 2 | 6  | 12 | AC   | 24 | 7  |
| 97614 | 9 | 15889373 | 15889390 | 3 | 6  | 18 | AGA  | 16 | 5  |

|       |   |          |          |   |    |    |      |    |    |
|-------|---|----------|----------|---|----|----|------|----|----|
| 97618 | 9 | 15910752 | 15910769 | 2 | 9  | 18 | TC   | 21 | 7  |
| 97619 | 9 | 15911321 | 15911346 | 2 | 13 | 26 | GT   | 17 | 11 |
| 97622 | 9 | 15924776 | 15924799 | 4 | 6  | 24 | TGTT | 16 | 6  |
| 97623 | 9 | 15934023 | 15934050 | 2 | 14 | 28 | TG   | 17 | 9  |
| 97626 | 9 | 15943115 | 15943154 | 2 | 20 | 40 | CA   | 6  | 9  |
| 97627 | 9 | 15948069 | 15948084 | 2 | 8  | 16 | GT   | 10 | 3  |
| 97632 | 9 | 15973267 | 15973288 | 2 | 11 | 22 | TG   | 14 | 9  |
| 97635 | 9 | 15975601 | 15975632 | 2 | 16 | 32 | AC   | 8  | 6  |
| 97636 | 9 | 15976243 | 15976260 | 2 | 9  | 18 | CA   | 7  | 7  |
| 97638 | 9 | 15978670 | 15978691 | 2 | 11 | 22 | TG   | 15 | 6  |
| 97639 | 9 | 15978811 | 15978826 | 2 | 8  | 16 | TG   | 7  | 4  |
| 97641 | 9 | 15983463 | 15983500 | 2 | 19 | 38 | CA   | 7  | 8  |
| 97643 | 9 | 15983753 | 15983778 | 2 | 13 | 26 | GT   | 11 | 8  |
| 97647 | 9 | 15985343 | 15985393 | 3 | 17 | 51 | CAT  | 7  | 9  |
| 97648 | 9 | 15985778 | 15985807 | 3 | 10 | 30 | ATC  | 15 | 6  |
| 97650 | 9 | 15986174 | 15986191 | 3 | 6  | 18 | CCT  | 26 | 3  |
| 97651 | 9 | 15986327 | 15986346 | 4 | 5  | 20 | ATGA | 16 | 6  |
| 97652 | 9 | 15987314 | 15987343 | 2 | 15 | 30 | AC   | 7  | 8  |
| 97657 | 9 | 15990189 | 15990210 | 2 | 11 | 22 | AC   | 15 | 9  |
| 97661 | 9 | 15991035 | 15991060 | 2 | 13 | 26 | TG   | 19 | 10 |
| 97664 | 9 | 15994854 | 15994880 | 3 | 9  | 27 | GCA  | 22 | 6  |
| 97665 | 9 | 15995832 | 15995843 | 2 | 6  | 12 | TG   | 26 | 5  |
| 97666 | 9 | 15997372 | 15997395 | 3 | 8  | 24 | GCA  | 21 | 7  |
| 97680 | 9 | 16022075 | 16022086 | 2 | 6  | 12 | GT   | 25 | 3  |
| 97683 | 9 | 16031680 | 16031697 | 2 | 9  | 18 | CA   | 19 | 9  |
| 97684 | 9 | 16032446 | 16032481 | 4 | 9  | 36 | CATC | 23 | 10 |
| 97687 | 9 | 16035473 | 16035498 | 2 | 13 | 26 | CA   | 13 | 7  |
| 97692 | 9 | 16039260 | 16039287 | 2 | 14 | 28 | AC   | 7  | 8  |
| 97693 | 9 | 16042049 | 16042068 | 2 | 10 | 20 | TG   | 18 | 5  |
| 97694 | 9 | 16043274 | 16043297 | 2 | 12 | 24 | CA   | 27 | 5  |
| 97698 | 9 | 16058992 | 16059005 | 2 | 7  | 14 | CA   | 19 | 4  |
| 97700 | 9 | 16060094 | 16060119 | 2 | 13 | 26 | CT   | 13 | 10 |
| 97701 | 9 | 16062550 | 16062571 | 2 | 11 | 22 | GT   | 20 | 7  |
| 97711 | 9 | 16102629 | 16102640 | 2 | 6  | 12 | GA   | 25 | 6  |
| 97718 | 9 | 16104849 | 16104862 | 2 | 7  | 14 | AC   | 23 | 4  |
| 97738 | 9 | 16180342 | 16180355 | 2 | 7  | 14 | CA   | 7  | 5  |
| 97742 | 9 | 16188676 | 16188715 | 4 | 10 | 40 | TATC | 18 | 10 |
| 97747 | 9 | 16205454 | 16205477 | 3 | 8  | 24 | GCT  | 26 | 7  |
| 97749 | 9 | 16215039 | 16215056 | 3 | 6  | 18 | AAC  | 9  | 3  |
| 97752 | 9 | 16215455 | 16215474 | 2 | 10 | 20 | CA   | 17 | 5  |
| 97756 | 9 | 16217134 | 16217163 | 2 | 15 | 30 | GT   | 21 | 8  |
| 97759 | 9 | 16223843 | 16223858 | 2 | 8  | 16 | TG   | 31 | 5  |
| 97765 | 9 | 16231762 | 16231800 | 3 | 13 | 39 | TCC  | 16 | 7  |
| 97766 | 9 | 16233464 | 16233520 | 3 | 19 | 57 | AGC  | 11 | 8  |
| 97768 | 9 | 16234377 | 16234388 | 2 | 6  | 12 | TG   | 23 | 3  |
| 97775 | 9 | 16245972 | 16245999 | 2 | 14 | 28 | TC   | 10 | 6  |
| 97778 | 9 | 16256233 | 16256254 | 2 | 11 | 22 | CA   | 13 | 9  |
| 97783 | 9 | 16288418 | 16288473 | 4 | 14 | 56 | ATCT | 21 | 10 |
| 97788 | 9 | 16296889 | 16296908 | 2 | 10 | 20 | AT   | 7  | 4  |
| 97793 | 9 | 16306516 | 16306529 | 2 | 7  | 14 | CT   | 8  | 3  |
| 97799 | 9 | 16314462 | 16314487 | 2 | 13 | 26 | CA   | 14 | 8  |

|       |   |          |          |   |    |    |      |    |    |
|-------|---|----------|----------|---|----|----|------|----|----|
| 97800 | 9 | 16318257 | 16318270 | 2 | 7  | 14 | AG   | 30 | 3  |
| 97803 | 9 | 16328763 | 16328782 | 2 | 10 | 20 | TG   | 28 | 3  |
| 97808 | 9 | 16346028 | 16346043 | 4 | 4  | 16 | CTTT | 18 | 3  |
| 97809 | 9 | 16348517 | 16348534 | 3 | 6  | 18 | GCA  | 25 | 5  |
| 97818 | 9 | 16372522 | 16372541 | 2 | 10 | 20 | AC   | 21 | 7  |
| 97819 | 9 | 16373715 | 16373746 | 2 | 16 | 32 | AC   | 18 | 6  |
| 97822 | 9 | 16392439 | 16392456 | 2 | 9  | 18 | TG   | 6  | 8  |
| 97823 | 9 | 16392457 | 16392474 | 2 | 9  | 18 | TA   | 7  | 9  |
| 97839 | 9 | 16467036 | 16467087 | 2 | 26 | 52 | TG   | 7  | 8  |
| 97846 | 9 | 16480626 | 16480640 | 3 | 5  | 15 | AGC  | 29 | 6  |
| 97849 | 9 | 16482326 | 16482349 | 2 | 12 | 24 | TG   | 20 | 10 |
| 97850 | 9 | 16486431 | 16486442 | 2 | 6  | 12 | CA   | 28 | 4  |
| 97851 | 9 | 16488905 | 16488928 | 2 | 12 | 24 | CT   | 8  | 9  |
| 97857 | 9 | 16492613 | 16492626 | 2 | 7  | 14 | GT   | 6  | 4  |
| 97861 | 9 | 16499301 | 16499316 | 2 | 8  | 16 | TG   | 31 | 6  |
| 97863 | 9 | 16502650 | 16502689 | 2 | 20 | 40 | AG   | 10 | 10 |
| 97866 | 9 | 16507420 | 16507451 | 2 | 16 | 32 | TG   | 17 | 11 |
| 97869 | 9 | 16515032 | 16515059 | 2 | 14 | 28 | GA   | 17 | 10 |
| 97870 | 9 | 16522718 | 16522733 | 2 | 8  | 16 | GT   | 13 | 7  |
| 97873 | 9 | 16529953 | 16529968 | 2 | 8  | 16 | AT   | 19 | 3  |
| 97881 | 9 | 16541599 | 16541622 | 2 | 12 | 24 | GT   | 19 | 9  |
| 97882 | 9 | 16541817 | 16541834 | 2 | 9  | 18 | TG   | 15 | 6  |
| 97888 | 9 | 16560079 | 16560100 | 2 | 11 | 22 | AC   | 8  | 6  |
| 97889 | 9 | 16562640 | 16562667 | 2 | 14 | 28 | AC   | 8  | 9  |
| 97896 | 9 | 16567578 | 16567593 | 2 | 8  | 16 | TC   | 19 | 3  |
| 97904 | 9 | 16578816 | 16578841 | 2 | 13 | 26 | GT   | 15 | 6  |
| 97905 | 9 | 16579911 | 16579922 | 2 | 6  | 12 | AC   | 24 | 3  |
| 97906 | 9 | 16581888 | 16581899 | 2 | 6  | 12 | AC   | 20 | 3  |
| 97907 | 9 | 16581902 | 16581915 | 2 | 7  | 14 | AC   | 24 | 3  |
| 97914 | 9 | 16593258 | 16593295 | 2 | 19 | 38 | AC   | 9  | 7  |
| 97917 | 9 | 16594279 | 16594298 | 2 | 10 | 20 | TG   | 10 | 8  |
| 97918 | 9 | 16594300 | 16594317 | 2 | 9  | 18 | GT   | 10 | 7  |
| 97919 | 9 | 16594450 | 16594463 | 2 | 7  | 14 | AC   | 20 | 6  |
| 97920 | 9 | 16595755 | 16595776 | 2 | 11 | 22 | GT   | 21 | 5  |
| 97921 | 9 | 16595936 | 16595955 | 2 | 10 | 20 | TG   | 19 | 10 |
| 97930 | 9 | 16635548 | 16635562 | 3 | 5  | 15 | AAC  | 19 | 7  |
| 97934 | 9 | 16644664 | 16644679 | 2 | 8  | 16 | TG   | 15 | 10 |
| 97935 | 9 | 16644680 | 16644691 | 2 | 6  | 12 | TA   | 7  | 6  |
| 97936 | 9 | 16646370 | 16646381 | 2 | 6  | 12 | TG   | 23 | 4  |
| 97937 | 9 | 16650699 | 16650714 | 2 | 8  | 16 | TC   | 15 | 3  |
| 97938 | 9 | 16654408 | 16654425 | 2 | 9  | 18 | TG   | 20 | 6  |
| 97940 | 9 | 16656982 | 16657007 | 2 | 13 | 26 | GT   | 17 | 13 |
| 97946 | 9 | 16666477 | 16666488 | 2 | 6  | 12 | AT   | 7  | 5  |
| 97974 | 9 | 16755775 | 16755790 | 2 | 8  | 16 | GT   | 16 | 3  |
| 97976 | 9 | 16758748 | 16758769 | 2 | 11 | 22 | TG   | 11 | 11 |
| 97981 | 9 | 16787211 | 16787224 | 2 | 7  | 14 | TG   | 22 | 6  |
| 97986 | 9 | 16807169 | 16807180 | 2 | 6  | 12 | CT   | 25 | 4  |
| 97987 | 9 | 16807181 | 16807192 | 2 | 6  | 12 | CA   | 25 | 3  |
| 97990 | 9 | 16812961 | 16813004 | 2 | 22 | 44 | TC   | 13 | 13 |
| 97991 | 9 | 16813180 | 16813201 | 2 | 11 | 22 | TG   | 17 | 8  |
| 97992 | 9 | 16813843 | 16813878 | 2 | 18 | 36 | AC   | 8  | 6  |



|       |    |          |          |   |    |    |      |    |    |
|-------|----|----------|----------|---|----|----|------|----|----|
| 97994 | 9  | 16814769 | 16814792 | 2 | 12 | 24 | GT   | 11 | 12 |
| 97995 | 9  | 16814909 | 16814936 | 2 | 14 | 28 | GA   | 12 | 9  |
| 97996 | 9  | 16816585 | 16816604 | 2 | 10 | 20 | CA   | 27 | 13 |
| 97999 | 9  | 16832504 | 16832517 | 2 | 7  | 14 | CT   | 27 | 9  |
| 98000 | 9  | 16832629 | 16832642 | 2 | 7  | 14 | AC   | 19 | 3  |
| 98001 | 9  | 16833615 | 16833644 | 2 | 15 | 30 | TG   | 21 | 9  |
| 98003 | 9  | 16837525 | 16837542 | 2 | 9  | 18 | CA   | 21 | 7  |
| 98005 | 9  | 16839142 | 16839153 | 2 | 6  | 12 | CA   | 19 | 6  |
| 98006 | 9  | 16839155 | 16839170 | 2 | 8  | 16 | AC   | 19 | 6  |
| 98008 | 9  | 16840609 | 16840636 | 2 | 14 | 28 | GT   | 16 | 8  |
| 98009 | 9  | 16840788 | 16840807 | 2 | 10 | 20 | TG   | 14 | 6  |
| 98012 | 9  | 16844596 | 16844607 | 2 | 6  | 12 | AC   | 21 | 6  |
| 98013 | 9  | 16850923 | 16850938 | 4 | 4  | 16 | TTTG | 26 | 3  |
| 98015 | 9  | 16853333 | 16853376 | 4 | 11 | 44 | ATCT | 22 | 17 |
| 98016 | 9  | 16853506 | 16853525 | 2 | 10 | 20 | AC   | 31 | 9  |
| 98018 | 9  | 16854265 | 16854282 | 2 | 9  | 18 | CA   | 17 | 7  |
| 98030 | 9  | 16878011 | 16878026 | 2 | 8  | 16 | CA   | 11 | 9  |
| 98032 | 9  | 16882938 | 16882987 | 2 | 25 | 50 | GT   | 6  | 8  |
| 98035 | 9  | 16886362 | 16886399 | 2 | 19 | 38 | TG   | 6  | 7  |
| 98037 | 9  | 16890775 | 16890798 | 2 | 12 | 24 | AC   | 10 | 7  |
| 98039 | 9  | 16896271 | 16896288 | 3 | 6  | 18 | AGC  | 23 | 4  |
| 98047 | 9  | 16905759 | 16905772 | 2 | 7  | 14 | CT   | 29 | 4  |
| 98053 | 9  | 16920280 | 16920297 | 2 | 9  | 18 | AC   | 17 | 4  |
| 98061 | 9  | 16935204 | 16935235 | 2 | 16 | 32 | TG   | 11 | 10 |
| 98063 | 9  | 16942941 | 16942972 | 2 | 16 | 32 | AC   | 13 | 6  |
| 98064 | 9  | 16943777 | 16943804 | 2 | 14 | 28 | AC   | 13 | 10 |
| 98065 | 9  | 16945890 | 16945903 | 2 | 7  | 14 | GT   | 17 | 8  |
| 98073 | 9  | 16962329 | 16962354 | 2 | 13 | 26 | GT   | 20 | 10 |
| 98076 | 9  | 16967201 | 16967215 | 3 | 5  | 15 | ATT  | 14 | 4  |
| 98078 | 9  | 16969136 | 16969159 | 3 | 8  | 24 | GAT  | 21 | 7  |
| 98079 | 9  | 16969528 | 16969543 | 2 | 8  | 16 | TG   | 9  | 8  |
| 98080 | 9  | 16969902 | 16969916 | 3 | 5  | 15 | TCC  | 28 | 3  |
| 98085 | 9  | 16973200 | 16973219 | 4 | 5  | 20 | ATAA | 8  | 5  |
| 98087 | 9  | 16985906 | 16985923 | 2 | 9  | 18 | TG   | 14 | 5  |
| 98088 | 9  | 16987428 | 16987439 | 2 | 6  | 12 | CA   | 22 | 7  |
| 98094 | 9  | 16994622 | 16994653 | 2 | 16 | 32 | GT   | 9  | 8  |
| 98098 | 9  | 17002894 | 17002917 | 2 | 12 | 24 | GT   | 14 | 11 |
| 98103 | 9  | 17030544 | 17030573 | 2 | 15 | 30 | CA   | 10 | 7  |
| 98131 | 10 | 33154    | 33165    | 2 | 6  | 12 | AC   | 6  | 3  |
| 98132 | 10 | 34892    | 34915    | 2 | 12 | 24 | AC   | 14 | 8  |
| 98133 | 10 | 37961    | 37978    | 3 | 6  | 18 | AAG  | 25 | 3  |
| 98135 | 10 | 40933    | 40965    | 3 | 11 | 33 | CTG  | 20 | 10 |
| 98136 | 10 | 44097    | 44110    | 2 | 7  | 14 | AC   | 28 | 3  |
| 98137 | 10 | 46508    | 46537    | 2 | 15 | 30 | CA   | 15 | 12 |
| 98138 | 10 | 48351    | 48366    | 2 | 8  | 16 | TG   | 23 | 3  |
| 98139 | 10 | 52307    | 52336    | 2 | 15 | 30 | GT   | 12 | 9  |
| 98146 | 10 | 66586    | 66601    | 2 | 8  | 16 | GA   | 19 | 3  |
| 98149 | 10 | 76811    | 76822    | 2 | 6  | 12 | CA   | 33 | 3  |
| 98154 | 10 | 86402    | 86431    | 2 | 15 | 30 | TG   | 17 | 8  |
| 98156 | 10 | 87363    | 87378    | 2 | 8  | 16 | GT   | 27 | 3  |
| 98157 | 10 | 88950    | 88973    | 2 | 12 | 24 | AG   | 27 | 3  |

|       |    |        |        |   |    |    |      |    |    |
|-------|----|--------|--------|---|----|----|------|----|----|
| 98160 | 10 | 98236  | 98261  | 2 | 13 | 26 | CT   | 7  | 9  |
| 98165 | 10 | 121562 | 121589 | 2 | 14 | 28 | TG   | 16 | 10 |
| 98166 | 10 | 132114 | 132128 | 3 | 5  | 15 | CTG  | 33 | 5  |
| 98171 | 10 | 144554 | 144567 | 2 | 7  | 14 | GT   | 10 | 4  |
| 98172 | 10 | 144570 | 144585 | 2 | 8  | 16 | GT   | 8  | 5  |
| 98180 | 10 | 151524 | 151561 | 2 | 19 | 38 | GA   | 12 | 11 |
| 98182 | 10 | 152721 | 152734 | 2 | 7  | 14 | AT   | 20 | 3  |
| 98188 | 10 | 156857 | 156874 | 2 | 9  | 18 | CT   | 15 | 6  |
| 98195 | 10 | 163344 | 163355 | 2 | 6  | 12 | AT   | 7  | 5  |
| 98196 | 10 | 167384 | 167407 | 3 | 8  | 24 | TTC  | 27 | 4  |
| 98199 | 10 | 180605 | 180616 | 2 | 6  | 12 | GT   | 27 | 3  |
| 98200 | 10 | 185900 | 185915 | 4 | 4  | 16 | TTTG | 24 | 3  |
| 98205 | 10 | 187382 | 187399 | 2 | 9  | 18 | CA   | 16 | 3  |
| 98206 | 10 | 187626 | 187641 | 2 | 8  | 16 | TG   | 21 | 3  |
| 98208 | 10 | 190618 | 190629 | 2 | 6  | 12 | GA   | 29 | 3  |
| 98213 | 10 | 193169 | 193180 | 2 | 6  | 12 | AG   | 25 | 3  |
| 98214 | 10 | 194971 | 194982 | 2 | 6  | 12 | GT   | 25 | 3  |
| 98216 | 10 | 198045 | 198059 | 3 | 5  | 15 | TTG  | 24 | 3  |
| 98221 | 10 | 201159 | 201197 | 3 | 13 | 39 | GAT  | 25 | 8  |
| 98225 | 10 | 205398 | 205429 | 2 | 16 | 32 | CA   | 8  | 8  |
| 98233 | 10 | 209849 | 209860 | 2 | 6  | 12 | GT   | 19 | 5  |
| 98239 | 10 | 217852 | 217867 | 2 | 8  | 16 | TG   | 25 | 9  |
| 98243 | 10 | 220140 | 220157 | 2 | 9  | 18 | GA   | 24 | 3  |
| 98244 | 10 | 220237 | 220250 | 2 | 7  | 14 | AG   | 23 | 3  |
| 98245 | 10 | 220252 | 220263 | 2 | 6  | 12 | GA   | 21 | 3  |
| 98246 | 10 | 223589 | 223606 | 2 | 9  | 18 | TG   | 22 | 3  |
| 98251 | 10 | 226624 | 226643 | 2 | 10 | 20 | CA   | 19 | 10 |
| 98254 | 10 | 231690 | 231709 | 2 | 10 | 20 | AC   | 23 | 7  |
| 98256 | 10 | 232369 | 232382 | 2 | 7  | 14 | GT   | 15 | 4  |
| 98257 | 10 | 232385 | 232396 | 2 | 6  | 12 | GT   | 17 | 6  |
| 98262 | 10 | 258094 | 258114 | 3 | 7  | 21 | GAG  | 21 | 4  |
| 98264 | 10 | 260928 | 260951 | 2 | 12 | 24 | AC   | 18 | 4  |
| 98267 | 10 | 262926 | 262961 | 2 | 18 | 36 | AC   | 9  | 10 |
| 98268 | 10 | 263069 | 263080 | 2 | 6  | 12 | AC   | 24 | 4  |
| 98271 | 10 | 266423 | 266454 | 2 | 16 | 32 | CA   | 19 | 9  |
| 98273 | 10 | 267461 | 267484 | 3 | 8  | 24 | CTC  | 20 | 4  |
| 98274 | 10 | 268072 | 268089 | 2 | 9  | 18 | TG   | 17 | 5  |
| 98279 | 10 | 275882 | 275893 | 2 | 6  | 12 | TA   | 13 | 3  |
| 98280 | 10 | 277746 | 277769 | 2 | 12 | 24 | CA   | 15 | 6  |
| 98283 | 10 | 278937 | 278952 | 2 | 8  | 16 | CA   | 16 | 4  |
| 98285 | 10 | 279580 | 279599 | 2 | 10 | 20 | GA   | 9  | 5  |
| 98290 | 10 | 283376 | 283399 | 2 | 12 | 24 | TG   | 21 | 6  |
| 98291 | 10 | 283537 | 283576 | 2 | 20 | 40 | AC   | 10 | 10 |
| 98292 | 10 | 283616 | 283627 | 2 | 6  | 12 | TG   | 19 | 3  |
| 98310 | 10 | 299791 | 299818 | 4 | 7  | 28 | ATGG | 28 | 8  |
| 98316 | 10 | 306719 | 306734 | 2 | 8  | 16 | GA   | 6  | 6  |
| 98327 | 10 | 340372 | 340407 | 2 | 18 | 36 | CA   | 8  | 9  |
| 98329 | 10 | 346285 | 346311 | 3 | 9  | 27 | AGG  | 25 | 3  |
| 98331 | 10 | 352065 | 352084 | 2 | 10 | 20 | CA   | 14 | 7  |
| 98336 | 10 | 364138 | 364152 | 3 | 5  | 15 | AGA  | 20 | 4  |
| 98338 | 10 | 365957 | 365968 | 2 | 6  | 12 | GT   | 27 | 4  |

|       |    |        |        |   |    |    |      |    |    |
|-------|----|--------|--------|---|----|----|------|----|----|
| 98339 | 10 | 366227 | 366254 | 2 | 14 | 28 | TC   | 14 | 8  |
| 98340 | 10 | 366590 | 366611 | 2 | 11 | 22 | GT   | 20 | 6  |
| 98341 | 10 | 369637 | 369654 | 2 | 9  | 18 | TA   | 11 | 6  |
| 98356 | 10 | 385132 | 385159 | 2 | 14 | 28 | CA   | 18 | 7  |
| 98359 | 10 | 388007 | 388026 | 2 | 10 | 20 | AC   | 13 | 7  |
| 98363 | 10 | 393367 | 393381 | 3 | 5  | 15 | TGA  | 24 | 3  |
| 98364 | 10 | 399983 | 400000 | 2 | 9  | 18 | CA   | 18 | 3  |
| 98366 | 10 | 403267 | 403286 | 2 | 10 | 20 | GA   | 13 | 4  |
| 98367 | 10 | 403497 | 403547 | 3 | 17 | 51 | GAA  | 17 | 11 |
| 98368 | 10 | 403795 | 403824 | 3 | 10 | 30 | CCT  | 11 | 9  |
| 98374 | 10 | 406623 | 406646 | 2 | 12 | 24 | TG   | 19 | 10 |
| 98385 | 10 | 413435 | 413464 | 2 | 15 | 30 | CA   | 12 | 9  |
| 98386 | 10 | 413588 | 413613 | 2 | 13 | 26 | AC   | 12 | 7  |
| 98387 | 10 | 415046 | 415065 | 2 | 10 | 20 | GT   | 14 | 10 |
| 98388 | 10 | 415179 | 415192 | 2 | 7  | 14 | CT   | 16 | 11 |
| 98389 | 10 | 415334 | 415351 | 2 | 9  | 18 | TG   | 18 | 7  |
| 98393 | 10 | 416902 | 416916 | 3 | 5  | 15 | GAG  | 19 | 6  |
| 98394 | 10 | 418141 | 418166 | 2 | 13 | 26 | TG   | 20 | 6  |
| 98396 | 10 | 421253 | 421296 | 2 | 22 | 44 | AC   | 6  | 7  |
| 98399 | 10 | 424020 | 424057 | 2 | 19 | 38 | TG   | 7  | 9  |
| 98400 | 10 | 424651 | 424692 | 2 | 21 | 42 | GA   | 7  | 7  |
| 98401 | 10 | 424791 | 424822 | 2 | 16 | 32 | AC   | 11 | 10 |
| 98402 | 10 | 425327 | 425358 | 4 | 8  | 32 | TGTC | 19 | 6  |
| 98405 | 10 | 427975 | 427988 | 2 | 7  | 14 | TC   | 17 | 3  |
| 98407 | 10 | 430680 | 430705 | 2 | 13 | 26 | TG   | 8  | 5  |
| 98409 | 10 | 431271 | 431306 | 2 | 18 | 36 | AC   | 9  | 5  |
| 98411 | 10 | 432229 | 432260 | 4 | 8  | 32 | CCTG | 30 | 8  |
| 98412 | 10 | 432612 | 432631 | 2 | 10 | 20 | TG   | 27 | 5  |
| 98414 | 10 | 435894 | 435917 | 3 | 8  | 24 | AGG  | 11 | 4  |
| 98416 | 10 | 436498 | 436519 | 2 | 11 | 22 | AG   | 15 | 6  |
| 98418 | 10 | 437582 | 437609 | 2 | 14 | 28 | GT   | 15 | 5  |
| 98420 | 10 | 438676 | 438695 | 2 | 10 | 20 | TG   | 8  | 6  |
| 98422 | 10 | 441093 | 441122 | 3 | 10 | 30 | TGC  | 28 | 4  |
| 98425 | 10 | 443919 | 443942 | 2 | 12 | 24 | AC   | 6  | 5  |
| 98428 | 10 | 445370 | 445391 | 2 | 11 | 22 | GT   | 15 | 6  |
| 98432 | 10 | 445694 | 445717 | 2 | 12 | 24 | CA   | 18 | 8  |
| 98440 | 10 | 448601 | 448615 | 3 | 5  | 15 | TGG  | 24 | 4  |
| 98453 | 10 | 457629 | 457656 | 2 | 14 | 28 | TG   | 12 | 4  |
| 98454 | 10 | 457910 | 457927 | 2 | 9  | 18 | AC   | 27 | 7  |
| 98457 | 10 | 460532 | 460545 | 2 | 7  | 14 | TG   | 13 | 3  |
| 98458 | 10 | 460548 | 460561 | 2 | 7  | 14 | TG   | 19 | 3  |
| 98460 | 10 | 462056 | 462079 | 2 | 12 | 24 | GT   | 11 | 9  |
| 98461 | 10 | 462999 | 463028 | 2 | 15 | 30 | TG   | 13 | 9  |
| 98465 | 10 | 464512 | 464549 | 2 | 19 | 38 | CA   | 9  | 11 |
| 98468 | 10 | 469889 | 469922 | 2 | 17 | 34 | TG   | 9  | 9  |
| 98469 | 10 | 471379 | 471394 | 2 | 8  | 16 | AC   | 22 | 7  |
| 98475 | 10 | 494132 | 494151 | 2 | 10 | 20 | CA   | 24 | 5  |
| 98476 | 10 | 494291 | 494308 | 2 | 9  | 18 | CA   | 14 | 11 |
| 98477 | 10 | 494418 | 494433 | 2 | 8  | 16 | AG   | 24 | 4  |
| 98478 | 10 | 498619 | 498654 | 2 | 18 | 36 | CA   | 21 | 16 |
| 98483 | 10 | 512367 | 512386 | 4 | 5  | 20 | TTTA | 23 | 5  |

|       |    |        |        |   |    |    |      |    |    |
|-------|----|--------|--------|---|----|----|------|----|----|
| 98484 | 10 | 512962 | 512975 | 2 | 7  | 14 | TG   | 24 | 3  |
| 98485 | 10 | 513074 | 513088 | 3 | 5  | 15 | GTG  | 28 | 3  |
| 98486 | 10 | 513319 | 513348 | 2 | 15 | 30 | TG   | 13 | 6  |
| 98487 | 10 | 513474 | 513485 | 2 | 6  | 12 | AC   | 27 | 3  |
| 98488 | 10 | 513578 | 513595 | 2 | 9  | 18 | TG   | 18 | 7  |
| 98489 | 10 | 513971 | 513991 | 3 | 7  | 21 | TTC  | 21 | 11 |
| 98491 | 10 | 520229 | 520250 | 2 | 11 | 22 | AG   | 16 | 6  |
| 98492 | 10 | 522853 | 522866 | 2 | 7  | 14 | TG   | 16 | 3  |
| 98496 | 10 | 526349 | 526374 | 2 | 13 | 26 | TG   | 9  | 6  |
| 98498 | 10 | 526799 | 526813 | 3 | 5  | 15 | GAC  | 36 | 5  |
| 98499 | 10 | 527817 | 527831 | 3 | 5  | 15 | TCA  | 26 | 4  |
| 98500 | 10 | 530241 | 530256 | 2 | 8  | 16 | GT   | 22 | 10 |
| 98501 | 10 | 533322 | 533336 | 3 | 5  | 15 | CCT  | 27 | 3  |
| 98502 | 10 | 536597 | 536622 | 2 | 13 | 26 | CT   | 18 | 6  |
| 98503 | 10 | 537682 | 537695 | 2 | 7  | 14 | CA   | 23 | 6  |
| 98504 | 10 | 541662 | 541697 | 2 | 18 | 36 | TC   | 17 | 8  |
| 98505 | 10 | 542604 | 542633 | 2 | 15 | 30 | CA   | 8  | 5  |
| 98507 | 10 | 544933 | 544976 | 2 | 22 | 44 | GT   | 17 | 8  |
| 98513 | 10 | 551195 | 551220 | 2 | 13 | 26 | CA   | 15 | 6  |
| 98514 | 10 | 553247 | 553262 | 2 | 8  | 16 | CA   | 28 | 7  |
| 98515 | 10 | 554057 | 554080 | 2 | 12 | 24 | CA   | 16 | 6  |
| 98523 | 10 | 564137 | 564148 | 2 | 6  | 12 | TG   | 23 | 4  |
| 98524 | 10 | 565508 | 565521 | 2 | 7  | 14 | GT   | 20 | 12 |
| 98529 | 10 | 569739 | 569772 | 2 | 17 | 34 | CA   | 14 | 16 |
| 98535 | 10 | 579443 | 579456 | 2 | 7  | 14 | TG   | 29 | 7  |
| 98538 | 10 | 589972 | 589995 | 4 | 6  | 24 | AGAT | 17 | 7  |
| 98541 | 10 | 590696 | 590722 | 3 | 9  | 27 | CAT  | 20 | 7  |
| 98547 | 10 | 603024 | 603039 | 2 | 8  | 16 | GT   | 30 | 3  |
| 98548 | 10 | 603190 | 603217 | 2 | 14 | 28 | AC   | 14 | 8  |
| 98551 | 10 | 612297 | 612326 | 2 | 15 | 30 | TG   | 6  | 10 |
| 98556 | 10 | 640827 | 640840 | 2 | 7  | 14 | GT   | 19 | 4  |
| 98560 | 10 | 643020 | 643031 | 2 | 6  | 12 | CA   | 30 | 4  |
| 98563 | 10 | 646256 | 646267 | 2 | 6  | 12 | TG   | 15 | 3  |
| 98567 | 10 | 649513 | 649550 | 2 | 19 | 38 | CA   | 14 | 6  |
| 98569 | 10 | 652304 | 652325 | 2 | 11 | 22 | AC   | 14 | 5  |
| 98572 | 10 | 653549 | 653582 | 2 | 17 | 34 | TG   | 9  | 7  |
| 98574 | 10 | 654681 | 654700 | 2 | 10 | 20 | AC   | 16 | 7  |
| 98575 | 10 | 655718 | 655741 | 2 | 12 | 24 | TG   | 16 | 9  |
| 98576 | 10 | 657549 | 657582 | 2 | 17 | 34 | GT   | 13 | 15 |
| 98577 | 10 | 657694 | 657713 | 2 | 10 | 20 | GT   | 15 | 3  |
| 98581 | 10 | 659473 | 659488 | 2 | 8  | 16 | AC   | 22 | 4  |
| 98590 | 10 | 662610 | 662629 | 4 | 5  | 20 | GTCT | 16 | 5  |
| 98591 | 10 | 662685 | 662702 | 2 | 9  | 18 | TG   | 20 | 3  |
| 98596 | 10 | 670383 | 670402 | 2 | 10 | 20 | AC   | 13 | 7  |
| 98599 | 10 | 671622 | 671645 | 2 | 12 | 24 | AG   | 19 | 4  |
| 98604 | 10 | 678386 | 678411 | 2 | 13 | 26 | AG   | 22 | 3  |
| 98605 | 10 | 678655 | 678680 | 2 | 13 | 26 | TG   | 24 | 6  |
| 98607 | 10 | 678940 | 678965 | 2 | 13 | 26 | TG   | 16 | 7  |
| 98612 | 10 | 682524 | 682549 | 2 | 13 | 26 | CA   | 10 | 5  |
| 98618 | 10 | 690173 | 690188 | 2 | 8  | 16 | GT   | 20 | 5  |
| 98625 | 10 | 699896 | 699907 | 2 | 6  | 12 | CA   | 32 | 5  |

|       |    |        |        |   |    |    |      |    |    |
|-------|----|--------|--------|---|----|----|------|----|----|
| 98630 | 10 | 701976 | 701996 | 3 | 7  | 21 | CCT  | 26 | 4  |
| 98633 | 10 | 704825 | 704848 | 2 | 12 | 24 | AC   | 14 | 11 |
| 98635 | 10 | 706332 | 706349 | 3 | 6  | 18 | TTA  | 10 | 3  |
| 98637 | 10 | 708586 | 708619 | 2 | 17 | 34 | GA   | 9  | 9  |
| 98639 | 10 | 708922 | 708947 | 2 | 13 | 26 | GT   | 14 | 10 |
| 98642 | 10 | 712093 | 712128 | 2 | 18 | 36 | CA   | 11 | 11 |
| 98643 | 10 | 712790 | 712813 | 2 | 12 | 24 | TG   | 7  | 5  |
| 98644 | 10 | 714195 | 714230 | 4 | 9  | 36 | CTGT | 13 | 5  |
| 98645 | 10 | 715238 | 715273 | 4 | 9  | 36 | TCTT | 14 | 8  |
| 98648 | 10 | 721947 | 721960 | 2 | 7  | 14 | AT   | 25 | 5  |
| 98649 | 10 | 722273 | 722287 | 3 | 5  | 15 | TGA  | 27 | 3  |
| 98652 | 10 | 726517 | 726542 | 2 | 13 | 26 | TG   | 18 | 5  |
| 98653 | 10 | 726706 | 726735 | 2 | 15 | 30 | GT   | 10 | 11 |
| 98657 | 10 | 728676 | 728703 | 2 | 14 | 28 | TC   | 18 | 9  |
| 98658 | 10 | 728906 | 728937 | 2 | 16 | 32 | CA   | 14 | 7  |
| 98662 | 10 | 735769 | 735780 | 2 | 6  | 12 | TC   | 22 | 6  |
| 98667 | 10 | 738884 | 738895 | 2 | 6  | 12 | AT   | 18 | 5  |
| 98670 | 10 | 741177 | 741197 | 3 | 7  | 21 | AAC  | 14 | 8  |
| 98677 | 10 | 743896 | 743909 | 2 | 7  | 14 | CA   | 25 | 4  |
| 98680 | 10 | 745968 | 745989 | 2 | 11 | 22 | GT   | 21 | 3  |
| 98681 | 10 | 746135 | 746156 | 2 | 11 | 22 | AC   | 14 | 6  |
| 98686 | 10 | 748924 | 748944 | 3 | 7  | 21 | TCC  | 25 | 3  |
| 98690 | 10 | 751819 | 751832 | 2 | 7  | 14 | GT   | 24 | 4  |
| 98691 | 10 | 753276 | 753295 | 2 | 10 | 20 | AC   | 19 | 6  |
| 98692 | 10 | 754079 | 754090 | 2 | 6  | 12 | GA   | 29 | 3  |
| 98695 | 10 | 757441 | 757470 | 2 | 15 | 30 | AC   | 17 | 11 |
| 98696 | 10 | 758174 | 758201 | 2 | 14 | 28 | AC   | 12 | 6  |
| 98697 | 10 | 758338 | 758355 | 2 | 9  | 18 | CA   | 23 | 9  |
| 98699 | 10 | 759263 | 759290 | 2 | 14 | 28 | TG   | 12 | 10 |
| 98700 | 10 | 760459 | 760480 | 2 | 11 | 22 | CA   | 17 | 12 |
| 98701 | 10 | 761227 | 761238 | 2 | 6  | 12 | TG   | 10 | 4  |
| 98703 | 10 | 761482 | 761493 | 2 | 6  | 12 | AC   | 20 | 5  |
| 98704 | 10 | 761738 | 761775 | 2 | 19 | 38 | CA   | 12 | 8  |
| 98707 | 10 | 764080 | 764097 | 3 | 6  | 18 | GAG  | 20 | 3  |
| 98709 | 10 | 764612 | 764623 | 2 | 6  | 12 | CA   | 11 | 3  |
| 98713 | 10 | 767028 | 767039 | 2 | 6  | 12 | GA   | 17 | 8  |
| 98716 | 10 | 770158 | 770171 | 2 | 7  | 14 | TG   | 34 | 3  |
| 98717 | 10 | 770246 | 770269 | 2 | 12 | 24 | GT   | 19 | 6  |
| 98719 | 10 | 775127 | 775159 | 3 | 11 | 33 | ATC  | 19 | 5  |
| 98721 | 10 | 776448 | 776467 | 2 | 10 | 20 | GA   | 19 | 3  |
| 98722 | 10 | 776857 | 776872 | 2 | 8  | 16 | CA   | 11 | 3  |
| 98731 | 10 | 783037 | 783066 | 3 | 10 | 30 | TTG  | 14 | 7  |
| 98733 | 10 | 784860 | 784877 | 2 | 9  | 18 | GT   | 18 | 7  |
| 98735 | 10 | 786713 | 786742 | 2 | 15 | 30 | GT   | 20 | 6  |
| 98736 | 10 | 787038 | 787053 | 2 | 8  | 16 | AC   | 20 | 3  |
| 98737 | 10 | 787704 | 787715 | 2 | 6  | 12 | CA   | 23 | 5  |
| 98739 | 10 | 791891 | 791908 | 2 | 9  | 18 | GT   | 13 | 4  |
| 98745 | 10 | 801591 | 801606 | 2 | 8  | 16 | CA   | 24 | 3  |
| 98746 | 10 | 801923 | 801934 | 2 | 6  | 12 | GT   | 22 | 4  |
| 98747 | 10 | 801937 | 801948 | 2 | 6  | 12 | GT   | 18 | 4  |
| 98748 | 10 | 802082 | 802103 | 2 | 11 | 22 | TG   | 20 | 14 |

|       |    |         |         |   |    |    |      |    |    |
|-------|----|---------|---------|---|----|----|------|----|----|
| 98758 | 10 | 822861  | 822882  | 2 | 11 | 22 | CT   | 6  | 6  |
| 98762 | 10 | 823836  | 823847  | 2 | 6  | 12 | AC   | 24 | 3  |
| 98763 | 10 | 824339  | 824354  | 4 | 4  | 16 | AAAT | 22 | 10 |
| 98765 | 10 | 825785  | 825812  | 2 | 14 | 28 | AC   | 16 | 6  |
| 98766 | 10 | 825855  | 825880  | 2 | 13 | 26 | TG   | 9  | 3  |
| 98767 | 10 | 825902  | 825937  | 2 | 18 | 36 | GA   | 10 | 8  |
| 98769 | 10 | 826256  | 826293  | 2 | 19 | 38 | TG   | 14 | 13 |
| 98771 | 10 | 830602  | 830653  | 2 | 26 | 52 | AC   | 9  | 13 |
| 98777 | 10 | 840372  | 840387  | 2 | 8  | 16 | GT   | 22 | 11 |
| 98786 | 10 | 854904  | 854929  | 2 | 13 | 26 | GT   | 14 | 4  |
| 98788 | 10 | 855103  | 855116  | 2 | 7  | 14 | TG   | 13 | 4  |
| 98793 | 10 | 881232  | 881269  | 2 | 19 | 38 | AC   | 7  | 6  |
| 98794 | 10 | 881931  | 881945  | 3 | 5  | 15 | AGC  | 28 | 3  |
| 98798 | 10 | 888801  | 888814  | 2 | 7  | 14 | CA   | 28 | 5  |
| 98805 | 10 | 897499  | 897512  | 2 | 7  | 14 | CA   | 23 | 3  |
| 98806 | 10 | 897757  | 897784  | 2 | 14 | 28 | CA   | 16 | 4  |
| 98812 | 10 | 906215  | 906264  | 2 | 25 | 50 | CA   | 6  | 7  |
| 98813 | 10 | 909773  | 909792  | 4 | 5  | 20 | TTGA | 27 | 3  |
| 98815 | 10 | 912906  | 912917  | 2 | 6  | 12 | AC   | 29 | 3  |
| 98820 | 10 | 928148  | 928175  | 2 | 14 | 28 | AC   | 11 | 7  |
| 98821 | 10 | 931058  | 931072  | 3 | 5  | 15 | CCA  | 26 | 5  |
| 98824 | 10 | 934836  | 934851  | 2 | 8  | 16 | AC   | 8  | 6  |
| 98829 | 10 | 973606  | 973639  | 2 | 17 | 34 | TG   | 8  | 6  |
| 98831 | 10 | 974096  | 974109  | 2 | 7  | 14 | GT   | 30 | 3  |
| 98846 | 10 | 988970  | 988985  | 2 | 8  | 16 | AC   | 11 | 6  |
| 98851 | 10 | 997148  | 997163  | 2 | 8  | 16 | CA   | 17 | 3  |
| 98854 | 10 | 999606  | 999619  | 2 | 7  | 14 | GT   | 29 | 4  |
| 98856 | 10 | 1002144 | 1002169 | 2 | 13 | 26 | GT   | 20 | 3  |
| 98872 | 10 | 1043799 | 1043820 | 2 | 11 | 22 | CA   | 14 | 11 |
| 98881 | 10 | 1063058 | 1063078 | 3 | 7  | 21 | AAT  | 9  | 5  |
| 98887 | 10 | 1081904 | 1081929 | 2 | 13 | 26 | CA   | 8  | 7  |
| 98889 | 10 | 1093150 | 1093169 | 2 | 10 | 20 | AC   | 12 | 11 |
| 98896 | 10 | 1104520 | 1104533 | 2 | 7  | 14 | AC   | 26 | 5  |
| 98899 | 10 | 1110023 | 1110036 | 2 | 7  | 14 | GA   | 32 | 3  |
| 98900 | 10 | 1110664 | 1110683 | 4 | 5  | 20 | TTTA | 23 | 6  |
| 98902 | 10 | 1111243 | 1111264 | 2 | 11 | 22 | TG   | 19 | 8  |
| 98909 | 10 | 1117106 | 1117123 | 2 | 9  | 18 | TG   | 24 | 7  |
| 98910 | 10 | 1117126 | 1117137 | 2 | 6  | 12 | TG   | 11 | 3  |
| 98912 | 10 | 1118155 | 1118190 | 2 | 18 | 36 | GA   | 12 | 6  |
| 98919 | 10 | 1122675 | 1122692 | 2 | 9  | 18 | GA   | 18 | 6  |
| 98920 | 10 | 1124029 | 1124055 | 3 | 9  | 27 | TTG  | 13 | 11 |
| 98925 | 10 | 1127302 | 1127319 | 2 | 9  | 18 | AG   | 20 | 5  |
| 98931 | 10 | 1135248 | 1135263 | 2 | 8  | 16 | AC   | 35 | 3  |
| 98942 | 10 | 1151525 | 1151542 | 2 | 9  | 18 | CT   | 13 | 4  |
| 98945 | 10 | 1153156 | 1153173 | 3 | 6  | 18 | GAG  | 11 | 4  |
| 98947 | 10 | 1155116 | 1155127 | 2 | 6  | 12 | CA   | 22 | 4  |
| 98949 | 10 | 1155330 | 1155347 | 2 | 9  | 18 | TG   | 16 | 5  |
| 98953 | 10 | 1159322 | 1159337 | 2 | 8  | 16 | TC   | 21 | 3  |
| 98955 | 10 | 1163360 | 1163407 | 4 | 12 | 48 | GATA | 21 | 17 |
| 98957 | 10 | 1169954 | 1169968 | 3 | 5  | 15 | GTA  | 20 | 5  |
| 98959 | 10 | 1172730 | 1172747 | 2 | 9  | 18 | AC   | 17 | 10 |

|       |    |         |         |   |    |    |      |    |    |
|-------|----|---------|---------|---|----|----|------|----|----|
| 98962 | 10 | 1175440 | 1175471 | 2 | 16 | 32 | TG   | 12 | 8  |
| 98975 | 10 | 1188635 | 1188658 | 2 | 12 | 24 | AG   | 7  | 6  |
| 98981 | 10 | 1189956 | 1189982 | 3 | 9  | 27 | TCT  | 18 | 7  |
| 98985 | 10 | 1196885 | 1196899 | 3 | 5  | 15 | CTG  | 17 | 3  |
| 98992 | 10 | 1200583 | 1200596 | 2 | 7  | 14 | AC   | 26 | 6  |
| 98993 | 10 | 1200787 | 1200808 | 2 | 11 | 22 | TG   | 18 | 11 |
| 98995 | 10 | 1206435 | 1206446 | 2 | 6  | 12 | AC   | 13 | 3  |
| 99004 | 10 | 1210897 | 1210916 | 2 | 10 | 20 | TG   | 10 | 13 |
| 99008 | 10 | 1216675 | 1216686 | 2 | 6  | 12 | TG   | 13 | 4  |
| 99009 | 10 | 1216688 | 1216701 | 2 | 7  | 14 | GT   | 7  | 4  |
| 99013 | 10 | 1222052 | 1222067 | 2 | 8  | 16 | GT   | 21 | 5  |
| 99016 | 10 | 1228552 | 1228571 | 2 | 10 | 20 | CA   | 20 | 4  |
| 99018 | 10 | 1232794 | 1232819 | 2 | 13 | 26 | TG   | 16 | 7  |
| 99022 | 10 | 1236762 | 1236775 | 2 | 7  | 14 | GA   | 25 | 5  |
| 99023 | 10 | 1236776 | 1236787 | 2 | 6  | 12 | GT   | 21 | 3  |
| 99026 | 10 | 1240724 | 1240735 | 2 | 6  | 12 | GT   | 22 | 9  |
| 99044 | 10 | 1261984 | 1262005 | 2 | 11 | 22 | TG   | 25 | 4  |
| 99054 | 10 | 1276887 | 1276900 | 2 | 7  | 14 | TG   | 17 | 6  |
| 99055 | 10 | 1277037 | 1277052 | 2 | 8  | 16 | GT   | 24 | 5  |
| 99056 | 10 | 1277218 | 1277233 | 2 | 8  | 16 | AC   | 13 | 4  |
| 99057 | 10 | 1277662 | 1277679 | 2 | 9  | 18 | AG   | 26 | 7  |
| 99060 | 10 | 1280952 | 1280967 | 4 | 4  | 16 | TTCT | 25 | 4  |
| 99061 | 10 | 1281029 | 1281042 | 2 | 7  | 14 | TC   | 27 | 4  |
| 99062 | 10 | 1281205 | 1281250 | 2 | 23 | 46 | TG   | 12 | 13 |
| 99063 | 10 | 1281360 | 1281375 | 2 | 8  | 16 | TG   | 23 | 4  |
| 99064 | 10 | 1282960 | 1282977 | 3 | 6  | 18 | AAC  | 14 | 3  |
| 99065 | 10 | 1283695 | 1283738 | 4 | 11 | 44 | GAAA | 18 | 6  |
| 99066 | 10 | 1283792 | 1283807 | 2 | 8  | 16 | TC   | 17 | 3  |
| 99068 | 10 | 1285168 | 1285195 | 2 | 14 | 28 | TG   | 17 | 6  |
| 99070 | 10 | 1287457 | 1287488 | 2 | 16 | 32 | GA   | 11 | 10 |
| 99074 | 10 | 1295578 | 1295605 | 2 | 14 | 28 | AC   | 12 | 12 |
| 99078 | 10 | 1298798 | 1298825 | 2 | 14 | 28 | CT   | 17 | 11 |
| 99081 | 10 | 1301787 | 1301798 | 2 | 6  | 12 | CA   | 22 | 8  |
| 99083 | 10 | 1303100 | 1303117 | 2 | 9  | 18 | CA   | 15 | 6  |
| 99085 | 10 | 1305126 | 1305139 | 2 | 7  | 14 | TG   | 14 | 3  |
| 99088 | 10 | 1306205 | 1306220 | 4 | 4  | 16 | GCCA | 27 | 3  |
| 99094 | 10 | 1311584 | 1311623 | 2 | 20 | 40 | AC   | 7  | 8  |
| 99095 | 10 | 1311674 | 1311685 | 2 | 6  | 12 | CA   | 12 | 3  |
| 99097 | 10 | 1312659 | 1312670 | 2 | 6  | 12 | TG   | 10 | 9  |
| 99104 | 10 | 1317960 | 1317971 | 2 | 6  | 12 | TC   | 25 | 3  |
| 99107 | 10 | 1318584 | 1318599 | 2 | 8  | 16 | AC   | 23 | 3  |
| 99110 | 10 | 1320973 | 1320988 | 2 | 8  | 16 | GT   | 21 | 4  |
| 99113 | 10 | 1321236 | 1321253 | 2 | 9  | 18 | AC   | 15 | 9  |
| 99114 | 10 | 1322599 | 1322612 | 2 | 7  | 14 | TG   | 23 | 6  |
| 99116 | 10 | 1323744 | 1323783 | 2 | 20 | 40 | GT   | 9  | 12 |
| 99124 | 10 | 1328663 | 1328680 | 2 | 9  | 18 | GT   | 6  | 5  |
| 99125 | 10 | 1328812 | 1328831 | 2 | 10 | 20 | AC   | 23 | 3  |
| 99126 | 10 | 1329445 | 1329482 | 2 | 19 | 38 | CA   | 6  | 5  |
| 99128 | 10 | 1330215 | 1330238 | 2 | 12 | 24 | TG   | 14 | 6  |
| 99142 | 10 | 1340078 | 1340101 | 2 | 12 | 24 | CA   | 13 | 10 |
| 99144 | 10 | 1340532 | 1340557 | 2 | 13 | 26 | GT   | 13 | 7  |

|       |    |         |         |   |    |    |      |    |    |
|-------|----|---------|---------|---|----|----|------|----|----|
| 99146 | 10 | 1341489 | 1341518 | 2 | 15 | 30 | TG   | 8  | 7  |
| 99147 | 10 | 1341639 | 1341662 | 2 | 12 | 24 | CA   | 20 | 6  |
| 99150 | 10 | 1342131 | 1342158 | 2 | 14 | 28 | CA   | 15 | 21 |
| 99155 | 10 | 1343167 | 1343186 | 2 | 10 | 20 | CA   | 27 | 7  |
| 99159 | 10 | 1345180 | 1345207 | 2 | 14 | 28 | CA   | 15 | 9  |
| 99160 | 10 | 1345422 | 1345435 | 2 | 7  | 14 | TC   | 21 | 3  |
| 99161 | 10 | 1347462 | 1347473 | 2 | 6  | 12 | GT   | 16 | 8  |
| 99162 | 10 | 1347477 | 1347494 | 2 | 9  | 18 | TG   | 18 | 7  |
| 99166 | 10 | 1352541 | 1352560 | 2 | 10 | 20 | AC   | 20 | 6  |
| 99167 | 10 | 1353933 | 1353952 | 2 | 10 | 20 | CA   | 11 | 9  |
| 99173 | 10 | 1362381 | 1362394 | 2 | 7  | 14 | TG   | 34 | 3  |
| 99174 | 10 | 1363360 | 1363373 | 2 | 7  | 14 | GA   | 16 | 4  |
| 99179 | 10 | 1367866 | 1367899 | 2 | 17 | 34 | CA   | 13 | 8  |
| 99180 | 10 | 1368270 | 1368287 | 2 | 9  | 18 | CA   | 13 | 3  |
| 99182 | 10 | 1369512 | 1369527 | 2 | 8  | 16 | CA   | 16 | 7  |
| 99187 | 10 | 1370588 | 1370607 | 2 | 10 | 20 | AG   | 14 | 7  |
| 99189 | 10 | 1371499 | 1371520 | 2 | 11 | 22 | AC   | 8  | 4  |
| 99192 | 10 | 1373242 | 1373267 | 2 | 13 | 26 | TG   | 12 | 10 |
| 99193 | 10 | 1374255 | 1374266 | 2 | 6  | 12 | GT   | 28 | 5  |
| 99194 | 10 | 1374694 | 1374711 | 2 | 9  | 18 | GA   | 16 | 8  |
| 99195 | 10 | 1376693 | 1376726 | 2 | 17 | 34 | AG   | 9  | 6  |
| 99196 | 10 | 1377535 | 1377550 | 2 | 8  | 16 | AC   | 26 | 5  |
| 99199 | 10 | 1379120 | 1379149 | 2 | 15 | 30 | CT   | 8  | 3  |
| 99200 | 10 | 1379333 | 1379360 | 2 | 14 | 28 | AG   | 25 | 8  |
| 99210 | 10 | 1386007 | 1386036 | 3 | 10 | 30 | CTC  | 13 | 5  |
| 99211 | 10 | 1389323 | 1389352 | 3 | 10 | 30 | GAA  | 18 | 6  |
| 99215 | 10 | 1391959 | 1391997 | 3 | 13 | 39 | ATT  | 8  | 11 |
| 99217 | 10 | 1392352 | 1392366 | 3 | 5  | 15 | AGC  | 11 | 3  |
| 99225 | 10 | 1397045 | 1397060 | 4 | 4  | 16 | TTTC | 21 | 3  |
| 99226 | 10 | 1397718 | 1397743 | 2 | 13 | 26 | AC   | 18 | 8  |
| 99244 | 10 | 1432111 | 1432126 | 4 | 4  | 16 | GCAC | 32 | 5  |
| 99246 | 10 | 1432600 | 1432617 | 2 | 9  | 18 | GA   | 12 | 7  |
| 99247 | 10 | 1432748 | 1432759 | 2 | 6  | 12 | CT   | 20 | 3  |
| 99248 | 10 | 1434270 | 1434297 | 2 | 14 | 28 | CT   | 6  | 6  |
| 99256 | 10 | 1457792 | 1457811 | 2 | 10 | 20 | TG   | 18 | 8  |
| 99259 | 10 | 1466493 | 1466506 | 2 | 7  | 14 | AT   | 15 | 4  |
| 99262 | 10 | 1483160 | 1483179 | 2 | 10 | 20 | TC   | 13 | 7  |
| 99265 | 10 | 1486195 | 1486208 | 2 | 7  | 14 | AG   | 16 | 3  |
| 99268 | 10 | 1488424 | 1488441 | 2 | 9  | 18 | AC   | 21 | 5  |
| 99274 | 10 | 1496151 | 1496166 | 4 | 4  | 16 | TGCG | 25 | 7  |
| 99278 | 10 | 1504712 | 1504735 | 3 | 8  | 24 | TCC  | 14 | 4  |
| 99279 | 10 | 1505527 | 1505548 | 2 | 11 | 22 | GT   | 16 | 6  |
| 99294 | 10 | 1529678 | 1529697 | 2 | 10 | 20 | AC   | 18 | 7  |
| 99295 | 10 | 1529796 | 1529819 | 2 | 12 | 24 | AC   | 13 | 6  |
| 99299 | 10 | 1535119 | 1535136 | 2 | 9  | 18 | TC   | 27 | 3  |
| 99300 | 10 | 1535831 | 1535844 | 2 | 7  | 14 | GT   | 25 | 6  |
| 99301 | 10 | 1535957 | 1535988 | 2 | 16 | 32 | GT   | 16 | 4  |
| 99302 | 10 | 1536108 | 1536127 | 2 | 10 | 20 | GT   | 15 | 9  |
| 99304 | 10 | 1538713 | 1538762 | 2 | 25 | 50 | TG   | 11 | 14 |
| 99338 | 10 | 1601358 | 1601375 | 3 | 6  | 18 | AAC  | 9  | 5  |
| 99344 | 10 | 1615234 | 1615253 | 2 | 10 | 20 | AC   | 21 | 6  |



|       |    |         |         |   |    |    |      |    |    |
|-------|----|---------|---------|---|----|----|------|----|----|
| 99351 | 10 | 1626915 | 1626946 | 2 | 16 | 32 | CA   | 7  | 8  |
| 99354 | 10 | 1628420 | 1628437 | 3 | 6  | 18 | TAA  | 12 | 5  |
| 99355 | 10 | 1628441 | 1628455 | 3 | 5  | 15 | TAA  | 14 | 8  |
| 99356 | 10 | 1633692 | 1633706 | 3 | 5  | 15 | AAC  | 26 | 5  |
| 99357 | 10 | 1634492 | 1634507 | 2 | 8  | 16 | AG   | 20 | 5  |
| 99359 | 10 | 1639862 | 1639877 | 2 | 8  | 16 | CA   | 18 | 3  |
| 99363 | 10 | 1645781 | 1645800 | 2 | 10 | 20 | GT   | 18 | 8  |
| 99366 | 10 | 1647539 | 1647554 | 4 | 4  | 16 | AACA | 26 | 4  |
| 99367 | 10 | 1647717 | 1647728 | 2 | 6  | 12 | GT   | 26 | 4  |
| 99368 | 10 | 1647731 | 1647742 | 2 | 6  | 12 | GT   | 25 | 6  |
| 99370 | 10 | 1648212 | 1648237 | 2 | 13 | 26 | AG   | 25 | 8  |
| 99377 | 10 | 1655810 | 1655829 | 2 | 10 | 20 | GT   | 25 | 4  |
| 99382 | 10 | 1667308 | 1667339 | 2 | 16 | 32 | AC   | 23 | 17 |
| 99383 | 10 | 1670113 | 1670128 | 2 | 8  | 16 | AC   | 18 | 5  |
| 99395 | 10 | 1711838 | 1711855 | 2 | 9  | 18 | TG   | 24 | 5  |
| 99397 | 10 | 1713775 | 1713796 | 2 | 11 | 22 | CA   | 11 | 10 |
| 99398 | 10 | 1714119 | 1714146 | 2 | 14 | 28 | GT   | 22 | 7  |
| 99400 | 10 | 1715676 | 1715693 | 3 | 6  | 18 | TTC  | 12 | 9  |
| 99401 | 10 | 1716179 | 1716211 | 3 | 11 | 33 | TTC  | 16 | 6  |
| 99409 | 10 | 1725274 | 1725299 | 2 | 13 | 26 | CT   | 13 | 4  |
| 99412 | 10 | 1727783 | 1727804 | 2 | 11 | 22 | AC   | 13 | 7  |
| 99413 | 10 | 1727841 | 1727860 | 2 | 10 | 20 | TG   | 15 | 5  |
| 99415 | 10 | 1728192 | 1728227 | 3 | 12 | 36 | TCT  | 15 | 8  |
| 99418 | 10 | 1728473 | 1728506 | 2 | 17 | 34 | GT   | 11 | 10 |
| 99420 | 10 | 1729508 | 1729531 | 2 | 12 | 24 | GT   | 14 | 5  |
| 99433 | 10 | 1732917 | 1732936 | 4 | 5  | 20 | AATA | 6  | 3  |
| 99441 | 10 | 1734104 | 1734117 | 2 | 7  | 14 | GT   | 6  | 6  |
| 99442 | 10 | 1734535 | 1734546 | 2 | 6  | 12 | GT   | 29 | 4  |
| 99443 | 10 | 1734866 | 1734880 | 3 | 5  | 15 | CCA  | 19 | 4  |
| 99444 | 10 | 1735563 | 1735580 | 2 | 9  | 18 | AC   | 21 | 5  |
| 99447 | 10 | 1738749 | 1738762 | 2 | 7  | 14 | CT   | 14 | 3  |
| 99448 | 10 | 1738763 | 1738776 | 2 | 7  | 14 | CA   | 11 | 3  |
| 99452 | 10 | 1740062 | 1740077 | 4 | 4  | 16 | GAGG | 27 | 5  |
| 99456 | 10 | 1741616 | 1741633 | 3 | 6  | 18 | TCC  | 24 | 7  |
| 99458 | 10 | 1742762 | 1742775 | 2 | 7  | 14 | TG   | 16 | 3  |
| 99461 | 10 | 1743522 | 1743549 | 2 | 14 | 28 | AC   | 23 | 11 |
| 99464 | 10 | 1745285 | 1745310 | 2 | 13 | 26 | TG   | 12 | 7  |
| 99467 | 10 | 1746119 | 1746138 | 4 | 5  | 20 | AAAT | 23 | 3  |
| 99469 | 10 | 1746819 | 1746836 | 3 | 6  | 18 | AAT  | 17 | 11 |
| 99470 | 10 | 1747629 | 1747654 | 2 | 13 | 26 | GT   | 11 | 8  |
| 99474 | 10 | 1752203 | 1752240 | 2 | 19 | 38 | CA   | 7  | 7  |
| 99477 | 10 | 1752571 | 1752586 | 2 | 8  | 16 | CA   | 19 | 6  |
| 99480 | 10 | 1755029 | 1755040 | 2 | 6  | 12 | GA   | 32 | 3  |
| 99488 | 10 | 1778784 | 1778799 | 2 | 8  | 16 | TG   | 29 | 3  |
| 99490 | 10 | 1786919 | 1786930 | 2 | 6  | 12 | TG   | 27 | 3  |
| 99500 | 10 | 1826653 | 1826690 | 2 | 19 | 38 | CA   | 7  | 10 |
| 99517 | 10 | 1843414 | 1843427 | 2 | 7  | 14 | GT   | 27 | 7  |
| 99518 | 10 | 1849974 | 1850007 | 2 | 17 | 34 | AC   | 6  | 9  |
| 99519 | 10 | 1850383 | 1850410 | 2 | 14 | 28 | GT   | 13 | 9  |
| 99522 | 10 | 1850924 | 1850935 | 2 | 6  | 12 | GT   | 15 | 4  |
| 99523 | 10 | 1850961 | 1850978 | 2 | 9  | 18 | GT   | 16 | 9  |

|       |    |         |         |   |    |    |      |    |    |
|-------|----|---------|---------|---|----|----|------|----|----|
| 99524 | 10 | 1851030 | 1851051 | 2 | 11 | 22 | CT   | 9  | 6  |
| 99528 | 10 | 1852216 | 1852239 | 4 | 6  | 24 | ATAA | 17 | 7  |
| 99532 | 10 | 1859752 | 1859772 | 3 | 7  | 21 | GGA  | 24 | 3  |
| 99533 | 10 | 1860019 | 1860030 | 2 | 6  | 12 | GT   | 34 | 3  |
| 99541 | 10 | 1867773 | 1867792 | 2 | 10 | 20 | GT   | 10 | 7  |
| 99542 | 10 | 1868309 | 1868322 | 2 | 7  | 14 | GA   | 25 | 3  |
| 99543 | 10 | 1869461 | 1869490 | 2 | 15 | 30 | TG   | 8  | 8  |
| 99549 | 10 | 1878303 | 1878316 | 2 | 7  | 14 | GT   | 19 | 3  |
| 99553 | 10 | 1885264 | 1885281 | 3 | 6  | 18 | GAA  | 25 | 8  |
| 99554 | 10 | 1891882 | 1891917 | 2 | 18 | 36 | TG   | 7  | 8  |
| 99556 | 10 | 1902954 | 1902981 | 2 | 14 | 28 | TG   | 9  | 9  |
| 99561 | 10 | 1910815 | 1910826 | 2 | 6  | 12 | TA   | 22 | 4  |
| 99563 | 10 | 1913349 | 1913364 | 2 | 8  | 16 | CA   | 20 | 4  |
| 99569 | 10 | 1917472 | 1917492 | 3 | 7  | 21 | GAG  | 21 | 3  |
| 99570 | 10 | 1917679 | 1917693 | 3 | 5  | 15 | GAG  | 19 | 3  |
| 99575 | 10 | 1939658 | 1939689 | 4 | 8  | 32 | GAAA | 26 | 8  |
| 99577 | 10 | 1940925 | 1940940 | 2 | 8  | 16 | CA   | 22 | 6  |
| 99580 | 10 | 1946756 | 1946776 | 3 | 7  | 21 | ATA  | 26 | 4  |
| 99581 | 10 | 1950926 | 1950937 | 2 | 6  | 12 | GT   | 28 | 4  |
| 99588 | 10 | 1973618 | 1973637 | 4 | 5  | 20 | GTGC | 22 | 9  |
| 99596 | 10 | 1992207 | 1992226 | 2 | 10 | 20 | GT   | 11 | 7  |
| 99604 | 10 | 1998014 | 1998039 | 2 | 13 | 26 | GT   | 13 | 8  |
| 99609 | 10 | 2003544 | 2003563 | 2 | 10 | 20 | GA   | 20 | 4  |
| 99610 | 10 | 2004201 | 2004226 | 2 | 13 | 26 | GT   | 13 | 9  |
| 99615 | 10 | 2006677 | 2006698 | 2 | 11 | 22 | AC   | 6  | 5  |
| 99616 | 10 | 2008044 | 2008073 | 2 | 15 | 30 | CA   | 7  | 6  |
| 99620 | 10 | 2017268 | 2017282 | 3 | 5  | 15 | CAG  | 27 | 3  |
| 99621 | 10 | 2017688 | 2017703 | 2 | 8  | 16 | GT   | 27 | 3  |
| 99622 | 10 | 2017784 | 2017797 | 2 | 7  | 14 | AC   | 21 | 4  |
| 99625 | 10 | 2018516 | 2018527 | 2 | 6  | 12 | AG   | 31 | 6  |
| 99626 | 10 | 2018643 | 2018670 | 2 | 14 | 28 | AC   | 14 | 7  |
| 99628 | 10 | 2018802 | 2018815 | 2 | 7  | 14 | AC   | 12 | 5  |
| 99632 | 10 | 2021204 | 2021215 | 2 | 6  | 12 | GT   | 28 | 3  |
| 99633 | 10 | 2021679 | 2021698 | 2 | 10 | 20 | GT   | 15 | 6  |
| 99637 | 10 | 2023953 | 2023964 | 2 | 6  | 12 | GT   | 24 | 5  |
| 99641 | 10 | 2025865 | 2025886 | 2 | 11 | 22 | AC   | 13 | 7  |
| 99642 | 10 | 2026049 | 2026060 | 2 | 6  | 12 | TG   | 28 | 4  |
| 99645 | 10 | 2027650 | 2027677 | 2 | 14 | 28 | CA   | 8  | 6  |
| 99646 | 10 | 2027704 | 2027737 | 2 | 17 | 34 | AC   | 7  | 6  |
| 99648 | 10 | 2029548 | 2029561 | 2 | 7  | 14 | GT   | 25 | 5  |
| 99650 | 10 | 2029756 | 2029777 | 2 | 11 | 22 | AC   | 14 | 7  |
| 99662 | 10 | 2035419 | 2035456 | 2 | 19 | 38 | TG   | 14 | 11 |
| 99672 | 10 | 2038630 | 2038657 | 2 | 14 | 28 | TG   | 16 | 8  |
| 99673 | 10 | 2038838 | 2038877 | 2 | 20 | 40 | AC   | 6  | 8  |
| 99677 | 10 | 2041248 | 2041263 | 2 | 8  | 16 | CA   | 16 | 6  |
| 99681 | 10 | 2041777 | 2041800 | 3 | 8  | 24 | AGG  | 18 | 3  |
| 99682 | 10 | 2041911 | 2041928 | 2 | 9  | 18 | TG   | 15 | 4  |
| 99683 | 10 | 2042104 | 2042119 | 2 | 8  | 16 | AC   | 23 | 5  |
| 99684 | 10 | 2042262 | 2042275 | 2 | 7  | 14 | AC   | 21 | 3  |
| 99687 | 10 | 2044623 | 2044650 | 2 | 14 | 28 | CA   | 8  | 6  |
| 99688 | 10 | 2045160 | 2045191 | 2 | 16 | 32 | CA   | 13 | 9  |

|       |    |         |         |   |    |    |      |    |    |
|-------|----|---------|---------|---|----|----|------|----|----|
| 99691 | 10 | 2045570 | 2045585 | 2 | 8  | 16 | AG   | 10 | 3  |
| 99694 | 10 | 2050072 | 2050095 | 2 | 12 | 24 | CA   | 7  | 8  |
| 99695 | 10 | 2051417 | 2051430 | 2 | 7  | 14 | GT   | 21 | 5  |
| 99696 | 10 | 2051855 | 2051870 | 2 | 8  | 16 | TG   | 14 | 3  |
| 99697 | 10 | 2051907 | 2051938 | 2 | 16 | 32 | TG   | 9  | 10 |
| 99700 | 10 | 2056173 | 2056212 | 2 | 20 | 40 | CA   | 6  | 7  |
| 99702 | 10 | 2059078 | 2059099 | 2 | 11 | 22 | GT   | 13 | 3  |
| 99704 | 10 | 2060023 | 2060056 | 2 | 17 | 34 | AC   | 16 | 6  |
| 99707 | 10 | 2062367 | 2062378 | 2 | 6  | 12 | TG   | 26 | 3  |
| 99708 | 10 | 2063368 | 2063381 | 2 | 7  | 14 | AC   | 24 | 4  |
| 99709 | 10 | 2063590 | 2063613 | 2 | 12 | 24 | CA   | 11 | 9  |
| 99712 | 10 | 2068200 | 2068213 | 2 | 7  | 14 | GT   | 24 | 3  |
| 99716 | 10 | 2081205 | 2081226 | 2 | 11 | 22 | CA   | 20 | 5  |
| 99717 | 10 | 2081350 | 2081361 | 2 | 6  | 12 | CA   | 23 | 4  |
| 99718 | 10 | 2083165 | 2083176 | 2 | 6  | 12 | GT   | 28 | 5  |
| 99720 | 10 | 2084000 | 2084011 | 2 | 6  | 12 | GT   | 21 | 4  |
| 99721 | 10 | 2084099 | 2084114 | 2 | 8  | 16 | GT   | 22 | 5  |
| 99727 | 10 | 2093206 | 2093265 | 2 | 30 | 60 | TG   | 8  | 10 |
| 99730 | 10 | 2096391 | 2096410 | 2 | 10 | 20 | AC   | 16 | 11 |
| 99731 | 10 | 2097123 | 2097140 | 2 | 9  | 18 | AC   | 19 | 6  |
| 99733 | 10 | 2097636 | 2097651 | 2 | 8  | 16 | AC   | 10 | 6  |
| 99739 | 10 | 2098469 | 2098489 | 3 | 7  | 21 | GGA  | 10 | 6  |
| 99742 | 10 | 2103138 | 2103161 | 4 | 6  | 24 | ATGT | 29 | 8  |
| 99746 | 10 | 2106252 | 2106266 | 3 | 5  | 15 | AAG  | 32 | 3  |
| 99747 | 10 | 2106318 | 2106341 | 2 | 12 | 24 | AG   | 16 | 7  |
| 99749 | 10 | 2106470 | 2106485 | 2 | 8  | 16 | CA   | 23 | 3  |
| 99768 | 10 | 2123457 | 2123470 | 2 | 7  | 14 | GT   | 18 | 4  |
| 99772 | 10 | 2132998 | 2133013 | 2 | 8  | 16 | CA   | 9  | 3  |
| 99829 | 10 | 2180116 | 2180141 | 2 | 13 | 26 | TG   | 21 | 14 |
| 99832 | 10 | 2186643 | 2186670 | 2 | 14 | 28 | CA   | 18 | 8  |
| 99833 | 10 | 2186814 | 2186829 | 2 | 8  | 16 | GA   | 24 | 4  |
| 99835 | 10 | 2190720 | 2190734 | 3 | 5  | 15 | TCC  | 25 | 3  |
| 99836 | 10 | 2191106 | 2191129 | 2 | 12 | 24 | AC   | 21 | 8  |
| 99837 | 10 | 2191168 | 2191195 | 2 | 14 | 28 | CA   | 20 | 8  |
| 99838 | 10 | 2193673 | 2193688 | 2 | 8  | 16 | AC   | 19 | 4  |
| 99842 | 10 | 2199413 | 2199428 | 2 | 8  | 16 | GT   | 23 | 8  |
| 99843 | 10 | 2200585 | 2200604 | 2 | 10 | 20 | AC   | 17 | 6  |
| 99844 | 10 | 2200774 | 2200801 | 2 | 14 | 28 | CA   | 10 | 6  |
| 99845 | 10 | 2201264 | 2201275 | 2 | 6  | 12 | AG   | 31 | 3  |
| 99848 | 10 | 2207455 | 2207490 | 4 | 9  | 36 | CAGA | 23 | 6  |
| 99849 | 10 | 2208121 | 2208138 | 3 | 6  | 18 | GAG  | 24 | 7  |
| 99850 | 10 | 2208729 | 2208740 | 2 | 6  | 12 | CA   | 19 | 15 |
| 99851 | 10 | 2208743 | 2208754 | 2 | 6  | 12 | CA   | 17 | 11 |
| 99852 | 10 | 2209009 | 2209032 | 3 | 8  | 24 | GCT  | 20 | 11 |
| 99853 | 10 | 2209064 | 2209078 | 3 | 5  | 15 | TGC  | 17 | 5  |
| 99856 | 10 | 2209181 | 2209212 | 2 | 16 | 32 | AC   | 16 | 7  |
| 99868 | 10 | 2216982 | 2217005 | 2 | 12 | 24 | CA   | 21 | 4  |
| 99870 | 10 | 2220327 | 2220338 | 2 | 6  | 12 | CT   | 21 | 3  |
| 99874 | 10 | 2225821 | 2225844 | 4 | 6  | 24 | CTGA | 24 | 4  |
| 99876 | 10 | 2227196 | 2227213 | 2 | 9  | 18 | TG   | 20 | 8  |
| 99878 | 10 | 2229492 | 2229511 | 2 | 10 | 20 | CA   | 26 | 9  |

|        |    |         |         |   |    |    |      |    |    |
|--------|----|---------|---------|---|----|----|------|----|----|
| 99880  | 10 | 2233799 | 2233832 | 2 | 17 | 34 | AC   | 16 | 9  |
| 99881  | 10 | 2238552 | 2238585 | 2 | 17 | 34 | AC   | 7  | 6  |
| 99884  | 10 | 2242467 | 2242478 | 2 | 6  | 12 | TG   | 17 | 3  |
| 99888  | 10 | 2258773 | 2258794 | 2 | 11 | 22 | CA   | 14 | 6  |
| 99891  | 10 | 2267137 | 2267168 | 2 | 16 | 32 | TG   | 12 | 9  |
| 99895  | 10 | 2285047 | 2285073 | 3 | 9  | 27 | CTC  | 17 | 3  |
| 99899  | 10 | 2296535 | 2296558 | 3 | 8  | 24 | GAG  | 28 | 3  |
| 99900  | 10 | 2298880 | 2298911 | 2 | 16 | 32 | TG   | 14 | 8  |
| 99905  | 10 | 2304543 | 2304563 | 3 | 7  | 21 | TCT  | 25 | 4  |
| 99909  | 10 | 2311523 | 2311544 | 2 | 11 | 22 | AC   | 15 | 5  |
| 99914  | 10 | 2317733 | 2317760 | 4 | 7  | 28 | AAGA | 25 | 7  |
| 99925  | 10 | 2333744 | 2333757 | 2 | 7  | 14 | CT   | 19 | 4  |
| 99926  | 10 | 2334038 | 2334055 | 3 | 6  | 18 | GTT  | 18 | 3  |
| 99928  | 10 | 2334173 | 2334196 | 2 | 12 | 24 | GT   | 8  | 7  |
| 99929  | 10 | 2334336 | 2334361 | 2 | 13 | 26 | AC   | 15 | 8  |
| 99930  | 10 | 2334511 | 2334528 | 3 | 6  | 18 | CTG  | 21 | 7  |
| 99935  | 10 | 2335317 | 2335331 | 3 | 5  | 15 | ATC  | 28 | 3  |
| 99937  | 10 | 2335676 | 2335689 | 2 | 7  | 14 | TG   | 25 | 6  |
| 99938  | 10 | 2336032 | 2336051 | 2 | 10 | 20 | TG   | 10 | 7  |
| 99940  | 10 | 2341772 | 2341783 | 2 | 6  | 12 | TG   | 29 | 4  |
| 99941  | 10 | 2344255 | 2344276 | 2 | 11 | 22 | GT   | 16 | 10 |
| 99945  | 10 | 2349027 | 2349044 | 3 | 6  | 18 | ATG  | 29 | 3  |
| 99953  | 10 | 2354918 | 2354945 | 2 | 14 | 28 | TG   | 11 | 10 |
| 99960  | 10 | 2356025 | 2356036 | 2 | 6  | 12 | TG   | 28 | 4  |
| 99961  | 10 | 2356255 | 2356282 | 2 | 14 | 28 | CA   | 12 | 9  |
| 99962  | 10 | 2356423 | 2356448 | 2 | 13 | 26 | GT   | 14 | 9  |
| 99965  | 10 | 2358888 | 2358909 | 2 | 11 | 22 | AC   | 21 | 5  |
| 99967  | 10 | 2359842 | 2359859 | 2 | 9  | 18 | CA   | 25 | 3  |
| 99968  | 10 | 2360191 | 2360226 | 2 | 18 | 36 | GT   | 19 | 9  |
| 99969  | 10 | 2361772 | 2361803 | 2 | 16 | 32 | TG   | 11 | 14 |
| 99975  | 10 | 2364639 | 2364659 | 3 | 7  | 21 | GAA  | 27 | 5  |
| 99977  | 10 | 2365345 | 2365368 | 2 | 12 | 24 | AC   | 22 | 10 |
| 99978  | 10 | 2366930 | 2366949 | 2 | 10 | 20 | AG   | 18 | 9  |
| 99979  | 10 | 2367128 | 2367147 | 2 | 10 | 20 | TG   | 23 | 6  |
| 99981  | 10 | 2369442 | 2369457 | 2 | 8  | 16 | GT   | 20 | 5  |
| 99982  | 10 | 2369667 | 2369684 | 2 | 9  | 18 | CA   | 19 | 4  |
| 99987  | 10 | 2375621 | 2375638 | 2 | 9  | 18 | GT   | 28 | 6  |
| 99990  | 10 | 2384857 | 2384884 | 2 | 14 | 28 | AC   | 9  | 7  |
| 99993  | 10 | 2387822 | 2387845 | 2 | 12 | 24 | GT   | 22 | 5  |
| 99994  | 10 | 2387959 | 2387984 | 2 | 13 | 26 | GT   | 10 | 5  |
| 99995  | 10 | 2388307 | 2388320 | 2 | 7  | 14 | TG   | 24 | 3  |
| 99997  | 10 | 2391060 | 2391077 | 2 | 9  | 18 | TG   | 20 | 4  |
| 99998  | 10 | 2392862 | 2392881 | 2 | 10 | 20 | TG   | 15 | 6  |
| 99999  | 10 | 2393035 | 2393058 | 2 | 12 | 24 | CA   | 19 | 11 |
| 100003 | 10 | 2400658 | 2400671 | 2 | 7  | 14 | CA   | 26 | 3  |
| 100004 | 10 | 2400796 | 2400809 | 2 | 7  | 14 | AC   | 26 | 4  |
| 100005 | 10 | 2400925 | 2400952 | 2 | 14 | 28 | CA   | 18 | 9  |
| 100006 | 10 | 2402300 | 2402343 | 2 | 22 | 44 | TC   | 6  | 8  |
| 100007 | 10 | 2402741 | 2402752 | 2 | 6  | 12 | TA   | 16 | 5  |
| 100008 | 10 | 2402753 | 2402766 | 2 | 7  | 14 | TG   | 15 | 6  |
| 100012 | 10 | 2408213 | 2408236 | 2 | 12 | 24 | GT   | 15 | 5  |

|        |    |         |         |   |    |    |      |    |    |
|--------|----|---------|---------|---|----|----|------|----|----|
| 100014 | 10 | 2408268 | 2408279 | 2 | 6  | 12 | TG   | 14 | 4  |
| 100015 | 10 | 2408285 | 2408296 | 2 | 6  | 12 | GT   | 23 | 3  |
| 100016 | 10 | 2408403 | 2408416 | 2 | 7  | 14 | AC   | 25 | 3  |
| 100019 | 10 | 2414946 | 2414957 | 2 | 6  | 12 | TA   | 17 | 3  |
| 100021 | 10 | 2415840 | 2415866 | 3 | 9  | 27 | AGG  | 18 | 6  |
| 100022 | 10 | 2415923 | 2415950 | 2 | 14 | 28 | AG   | 18 | 6  |
| 100024 | 10 | 2421061 | 2421088 | 4 | 7  | 28 | AAAC | 21 | 6  |
| 100029 | 10 | 2423171 | 2423200 | 3 | 10 | 30 | TGT  | 26 | 6  |
| 100033 | 10 | 2426389 | 2426415 | 3 | 9  | 27 | GAG  | 14 | 9  |
| 100035 | 10 | 2437641 | 2437652 | 2 | 6  | 12 | GT   | 30 | 3  |
| 100036 | 10 | 2440348 | 2440379 | 2 | 16 | 32 | GT   | 14 | 5  |
| 100037 | 10 | 2440592 | 2440621 | 2 | 15 | 30 | AC   | 14 | 8  |
| 100044 | 10 | 2459653 | 2459668 | 2 | 8  | 16 | AC   | 27 | 4  |
| 100051 | 10 | 2468824 | 2468857 | 2 | 17 | 34 | TG   | 10 | 10 |
| 100057 | 10 | 2482662 | 2482699 | 2 | 19 | 38 | CA   | 7  | 8  |
| 100067 | 10 | 2498585 | 2498598 | 2 | 7  | 14 | GA   | 15 | 9  |
| 100068 | 10 | 2498626 | 2498637 | 2 | 6  | 12 | TG   | 15 | 3  |
| 100069 | 10 | 2498835 | 2498852 | 3 | 6  | 18 | CTT  | 11 | 3  |
| 100070 | 10 | 2498967 | 2498986 | 2 | 10 | 20 | TG   | 12 | 7  |
| 100079 | 10 | 2501803 | 2501832 | 2 | 15 | 30 | GT   | 11 | 17 |
| 100081 | 10 | 2504456 | 2504475 | 2 | 10 | 20 | CA   | 11 | 13 |
| 100083 | 10 | 2504516 | 2504527 | 2 | 6  | 12 | CA   | 18 | 4  |
| 100086 | 10 | 2505504 | 2505527 | 2 | 12 | 24 | AC   | 14 | 4  |
| 100087 | 10 | 2506789 | 2506814 | 2 | 13 | 26 | CA   | 8  | 10 |
| 100095 | 10 | 2511126 | 2511137 | 2 | 6  | 12 | TG   | 28 | 4  |
| 100096 | 10 | 2511352 | 2511369 | 2 | 9  | 18 | CA   | 13 | 9  |
| 100097 | 10 | 2511854 | 2511869 | 2 | 8  | 16 | GT   | 22 | 6  |
| 100100 | 10 | 2514417 | 2514428 | 2 | 6  | 12 | GT   | 25 | 3  |
| 100101 | 10 | 2515735 | 2515752 | 2 | 9  | 18 | TG   | 24 | 8  |
| 100103 | 10 | 2516949 | 2516980 | 2 | 16 | 32 | TG   | 16 | 9  |
| 100104 | 10 | 2517513 | 2517526 | 2 | 7  | 14 | TG   | 10 | 3  |
| 100105 | 10 | 2517532 | 2517545 | 2 | 7  | 14 | GT   | 22 | 3  |
| 100106 | 10 | 2519190 | 2519219 | 2 | 15 | 30 | AC   | 15 | 8  |
| 100109 | 10 | 2521807 | 2521822 | 2 | 8  | 16 | TG   | 20 | 5  |
| 100113 | 10 | 2523711 | 2523728 | 2 | 9  | 18 | TC   | 22 | 5  |
| 100114 | 10 | 2525991 | 2526018 | 2 | 14 | 28 | CA   | 18 | 5  |
| 100116 | 10 | 2529292 | 2529305 | 2 | 7  | 14 | AC   | 28 | 5  |
| 100120 | 10 | 2536874 | 2536893 | 2 | 10 | 20 | TC   | 14 | 4  |
| 100123 | 10 | 2538194 | 2538229 | 3 | 12 | 36 | CCT  | 14 | 7  |
| 100124 | 10 | 2538440 | 2538459 | 2 | 10 | 20 | CA   | 16 | 5  |
| 100127 | 10 | 2543471 | 2543492 | 2 | 11 | 22 | TG   | 16 | 5  |
| 100132 | 10 | 2553582 | 2553597 | 2 | 8  | 16 | TC   | 19 | 6  |
| 100135 | 10 | 2559289 | 2559300 | 2 | 6  | 12 | AC   | 16 | 3  |
| 100137 | 10 | 2559841 | 2559862 | 2 | 11 | 22 | AC   | 14 | 13 |
| 100139 | 10 | 2561863 | 2561880 | 2 | 9  | 18 | TG   | 22 | 6  |
| 100140 | 10 | 2562452 | 2562493 | 2 | 21 | 42 | CT   | 9  | 8  |
| 100141 | 10 | 2563322 | 2563351 | 2 | 15 | 30 | CA   | 18 | 7  |
| 100147 | 10 | 2572582 | 2572601 | 2 | 10 | 20 | GT   | 29 | 6  |
| 100155 | 10 | 2577231 | 2577252 | 2 | 11 | 22 | AC   | 19 | 9  |
| 100160 | 10 | 2579273 | 2579286 | 2 | 7  | 14 | AC   | 19 | 3  |
| 100161 | 10 | 2580200 | 2580229 | 2 | 15 | 30 | AC   | 9  | 9  |

|        |    |         |         |   |    |    |      |    |    |
|--------|----|---------|---------|---|----|----|------|----|----|
| 100162 | 10 | 2580417 | 2580448 | 2 | 16 | 32 | CA   | 9  | 7  |
| 100163 | 10 | 2580645 | 2580658 | 2 | 7  | 14 | AC   | 24 | 3  |
| 100165 | 10 | 2580944 | 2580967 | 2 | 12 | 24 | CA   | 15 | 5  |
| 100166 | 10 | 2584706 | 2584729 | 2 | 12 | 24 | TG   | 15 | 15 |
| 100167 | 10 | 2586040 | 2586065 | 2 | 13 | 26 | TG   | 6  | 8  |
| 100174 | 10 | 2591673 | 2591694 | 2 | 11 | 22 | AG   | 11 | 5  |
| 100175 | 10 | 2595056 | 2595071 | 2 | 8  | 16 | TG   | 23 | 5  |
| 100176 | 10 | 2597544 | 2597555 | 2 | 6  | 12 | AC   | 17 | 10 |
| 100178 | 10 | 2600026 | 2600037 | 2 | 6  | 12 | AC   | 16 | 3  |
| 100180 | 10 | 2602383 | 2602412 | 2 | 15 | 30 | GT   | 11 | 4  |
| 100182 | 10 | 2605882 | 2605897 | 2 | 8  | 16 | AT   | 20 | 5  |
| 100183 | 10 | 2608195 | 2608230 | 2 | 18 | 36 | AC   | 17 | 10 |
| 100184 | 10 | 2609125 | 2609138 | 2 | 7  | 14 | GT   | 18 | 6  |
| 100187 | 10 | 2612749 | 2612760 | 2 | 6  | 12 | CT   | 27 | 4  |
| 100192 | 10 | 2616314 | 2616331 | 2 | 9  | 18 | TG   | 18 | 8  |
| 100196 | 10 | 2622428 | 2622459 | 2 | 16 | 32 | AC   | 22 | 13 |
| 100199 | 10 | 2625156 | 2625171 | 2 | 8  | 16 | AC   | 13 | 3  |
| 100201 | 10 | 2625515 | 2625548 | 2 | 17 | 34 | TG   | 10 | 10 |
| 100213 | 10 | 2635805 | 2635828 | 2 | 12 | 24 | AC   | 15 | 9  |
| 100215 | 10 | 2638247 | 2638270 | 3 | 8  | 24 | GGA  | 14 | 5  |
| 100226 | 10 | 2655983 | 2656004 | 2 | 11 | 22 | TG   | 15 | 14 |
| 100231 | 10 | 2663354 | 2663377 | 4 | 6  | 24 | TTAT | 12 | 3  |
| 100232 | 10 | 2664884 | 2664899 | 4 | 4  | 16 | AGGG | 29 | 3  |
| 100233 | 10 | 2665309 | 2665334 | 2 | 13 | 26 | TG   | 11 | 11 |
| 100235 | 10 | 2669440 | 2669459 | 2 | 10 | 20 | GA   | 19 | 6  |
| 100236 | 10 | 2673206 | 2673221 | 2 | 8  | 16 | AC   | 16 | 7  |
| 100242 | 10 | 2694027 | 2694050 | 2 | 12 | 24 | TG   | 19 | 12 |
| 100251 | 10 | 2700687 | 2700702 | 4 | 4  | 16 | AAAT | 14 | 5  |
| 100252 | 10 | 2701597 | 2701616 | 2 | 10 | 20 | AC   | 14 | 7  |
| 100254 | 10 | 2711215 | 2711256 | 2 | 21 | 42 | TG   | 6  | 7  |
| 100272 | 10 | 2731967 | 2731990 | 3 | 8  | 24 | GCT  | 27 | 4  |
| 100273 | 10 | 2734658 | 2734675 | 2 | 9  | 18 | AC   | 20 | 7  |
| 100277 | 10 | 2738940 | 2738957 | 3 | 6  | 18 | TGC  | 22 | 4  |
| 100278 | 10 | 2739247 | 2739268 | 2 | 11 | 22 | TG   | 20 | 9  |
| 100279 | 10 | 2740176 | 2740201 | 2 | 13 | 26 | GT   | 22 | 11 |
| 100282 | 10 | 2745604 | 2745623 | 2 | 10 | 20 | AC   | 6  | 3  |
| 100285 | 10 | 2752005 | 2752022 | 2 | 9  | 18 | TG   | 21 | 3  |
| 100287 | 10 | 2752693 | 2752706 | 2 | 7  | 14 | AC   | 23 | 5  |
| 100288 | 10 | 2753107 | 2753126 | 2 | 10 | 20 | CA   | 20 | 6  |
| 100294 | 10 | 2766053 | 2766074 | 2 | 11 | 22 | CA   | 25 | 5  |
| 100296 | 10 | 2778033 | 2778046 | 2 | 7  | 14 | AC   | 27 | 5  |
| 100298 | 10 | 2789527 | 2789541 | 3 | 5  | 15 | GAG  | 29 | 3  |
| 100305 | 10 | 2800641 | 2800678 | 2 | 19 | 38 | AC   | 20 | 14 |
| 100307 | 10 | 2805711 | 2805732 | 2 | 11 | 22 | CA   | 15 | 10 |
| 100311 | 10 | 2813847 | 2813860 | 2 | 7  | 14 | TC   | 31 | 3  |
| 100315 | 10 | 2834146 | 2834161 | 2 | 8  | 16 | TA   | 14 | 7  |
| 100316 | 10 | 2835157 | 2835168 | 2 | 6  | 12 | CT   | 23 | 3  |
| 100317 | 10 | 2843022 | 2843037 | 2 | 8  | 16 | TG   | 29 | 4  |
| 100325 | 10 | 2878162 | 2878181 | 2 | 10 | 20 | CA   | 10 | 11 |
| 100329 | 10 | 2887912 | 2887925 | 2 | 7  | 14 | GT   | 18 | 8  |
| 100333 | 10 | 2901940 | 2901975 | 2 | 18 | 36 | AC   | 9  | 9  |

|        |    |         |         |   |    |    |      |    |    |
|--------|----|---------|---------|---|----|----|------|----|----|
| 100334 | 10 | 2904976 | 2904993 | 3 | 6  | 18 | ATC  | 25 | 8  |
| 100337 | 10 | 2914851 | 2914864 | 2 | 7  | 14 | GT   | 16 | 6  |
| 100339 | 10 | 2926439 | 2926452 | 2 | 7  | 14 | AC   | 24 | 3  |
| 100340 | 10 | 2927052 | 2927071 | 2 | 10 | 20 | TG   | 16 | 4  |
| 100342 | 10 | 2929133 | 2929166 | 2 | 17 | 34 | GT   | 18 | 14 |
| 100343 | 10 | 2929444 | 2929459 | 2 | 8  | 16 | CA   | 18 | 10 |
| 100344 | 10 | 2929901 | 2929926 | 2 | 13 | 26 | TG   | 12 | 11 |
| 100351 | 10 | 2932347 | 2932362 | 2 | 8  | 16 | TC   | 9  | 6  |
| 100354 | 10 | 2943225 | 2943245 | 3 | 7  | 21 | AAC  | 19 | 7  |
| 100360 | 10 | 2953727 | 2953744 | 2 | 9  | 18 | TA   | 16 | 5  |
| 100364 | 10 | 2972012 | 2972027 | 2 | 8  | 16 | TC   | 15 | 4  |
| 100366 | 10 | 2975471 | 2975484 | 2 | 7  | 14 | TG   | 28 | 6  |
| 100370 | 10 | 2987209 | 2987220 | 2 | 6  | 12 | CA   | 20 | 4  |
| 100378 | 10 | 3004700 | 3004735 | 2 | 18 | 36 | TC   | 6  | 6  |
| 100383 | 10 | 3009456 | 3009481 | 2 | 13 | 26 | CA   | 17 | 9  |
| 100389 | 10 | 3021015 | 3021036 | 2 | 11 | 22 | TG   | 16 | 3  |
| 100394 | 10 | 3032486 | 3032499 | 2 | 7  | 14 | AC   | 21 | 7  |
| 100396 | 10 | 3036944 | 3036959 | 2 | 8  | 16 | GT   | 10 | 3  |
| 100398 | 10 | 3036984 | 3036999 | 4 | 4  | 16 | GTGC | 21 | 5  |
| 100400 | 10 | 3043711 | 3043722 | 2 | 6  | 12 | AT   | 17 | 8  |
| 100411 | 10 | 3081592 | 3081609 | 2 | 9  | 18 | CA   | 17 | 6  |
| 100412 | 10 | 3088663 | 3088680 | 2 | 9  | 18 | GT   | 23 | 4  |
| 100420 | 10 | 3091941 | 3091952 | 2 | 6  | 12 | GT   | 13 | 5  |
| 100421 | 10 | 3106305 | 3106324 | 2 | 10 | 20 | CT   | 18 | 7  |
| 100425 | 10 | 3109379 | 3109400 | 2 | 11 | 22 | CA   | 16 | 8  |
| 100426 | 10 | 3117697 | 3117724 | 2 | 14 | 28 | TG   | 15 | 9  |
| 100430 | 10 | 3122053 | 3122070 | 2 | 9  | 18 | CA   | 14 | 8  |
| 100431 | 10 | 3122270 | 3122305 | 2 | 18 | 36 | GT   | 10 | 9  |
| 100436 | 10 | 3135452 | 3135469 | 3 | 6  | 18 | GAG  | 13 | 5  |
| 100439 | 10 | 3136180 | 3136203 | 3 | 8  | 24 | CCT  | 21 | 5  |
| 100445 | 10 | 3139063 | 3139078 | 2 | 8  | 16 | AC   | 10 | 9  |
| 100446 | 10 | 3139080 | 3139091 | 2 | 6  | 12 | CA   | 12 | 14 |
| 100447 | 10 | 3139979 | 3139992 | 2 | 7  | 14 | CT   | 17 | 4  |
| 100450 | 10 | 3144403 | 3144418 | 2 | 8  | 16 | TC   | 14 | 3  |
| 100454 | 10 | 3150110 | 3150121 | 2 | 6  | 12 | GT   | 22 | 3  |
| 100461 | 10 | 3175749 | 3175760 | 2 | 6  | 12 | AC   | 13 | 5  |
| 100469 | 10 | 3194236 | 3194251 | 2 | 8  | 16 | GA   | 24 | 4  |
| 100476 | 10 | 3203137 | 3203160 | 4 | 6  | 24 | AATA | 24 | 4  |
| 100480 | 10 | 3209733 | 3209772 | 2 | 20 | 40 | TG   | 22 | 14 |
| 100481 | 10 | 3210024 | 3210049 | 2 | 13 | 26 | TG   | 9  | 7  |
| 100484 | 10 | 3224442 | 3224467 | 2 | 13 | 26 | AC   | 18 | 8  |
| 100485 | 10 | 3224510 | 3224521 | 2 | 6  | 12 | AC   | 28 | 4  |
| 100488 | 10 | 3225378 | 3225391 | 2 | 7  | 14 | AC   | 18 | 6  |
| 100499 | 10 | 3266390 | 3266404 | 3 | 5  | 15 | GCA  | 30 | 6  |
| 100518 | 10 | 3315344 | 3315367 | 2 | 12 | 24 | GT   | 9  | 3  |
| 100521 | 10 | 3317781 | 3317800 | 2 | 10 | 20 | TC   | 19 | 3  |
| 100527 | 10 | 3329328 | 3329351 | 4 | 6  | 24 | ATCC | 20 | 7  |
| 100530 | 10 | 3333421 | 3333452 | 2 | 16 | 32 | GA   | 14 | 7  |
| 100536 | 10 | 3339879 | 3339910 | 2 | 16 | 32 | GA   | 20 | 6  |
| 100538 | 10 | 3343901 | 3343918 | 2 | 9  | 18 | TG   | 19 | 4  |
| 100546 | 10 | 3350360 | 3350379 | 2 | 10 | 20 | TC   | 15 | 7  |

|        |    |         |         |   |    |    |      |    |    |
|--------|----|---------|---------|---|----|----|------|----|----|
| 100551 | 10 | 3353575 | 3353589 | 3 | 5  | 15 | TTC  | 29 | 3  |
| 100555 | 10 | 3355745 | 3355764 | 2 | 10 | 20 | GT   | 22 | 4  |
| 100561 | 10 | 3373507 | 3373521 | 3 | 5  | 15 | CAG  | 28 | 6  |
| 100563 | 10 | 3375428 | 3375467 | 4 | 10 | 40 | TCTT | 26 | 8  |
| 100576 | 10 | 3423057 | 3423096 | 2 | 20 | 40 | AC   | 14 | 9  |
| 100581 | 10 | 3431337 | 3431364 | 2 | 14 | 28 | GT   | 15 | 6  |
| 100586 | 10 | 3435575 | 3435594 | 2 | 10 | 20 | TA   | 8  | 3  |
| 100592 | 10 | 3442375 | 3442396 | 2 | 11 | 22 | TG   | 18 | 9  |
| 100593 | 10 | 3442522 | 3442539 | 3 | 6  | 18 | GCA  | 27 | 3  |
| 100600 | 10 | 3444782 | 3444808 | 3 | 9  | 27 | AGA  | 18 | 10 |
| 100603 | 10 | 3451706 | 3451721 | 2 | 8  | 16 | GT   | 18 | 4  |
| 100606 | 10 | 3456799 | 3456826 | 2 | 14 | 28 | TG   | 10 | 7  |
| 100607 | 10 | 3457026 | 3457039 | 2 | 7  | 14 | AG   | 23 | 7  |
| 100610 | 10 | 3461997 | 3462018 | 2 | 11 | 22 | AG   | 11 | 4  |
| 100611 | 10 | 3462505 | 3462524 | 2 | 10 | 20 | AC   | 29 | 4  |
| 100612 | 10 | 3464976 | 3465003 | 2 | 14 | 28 | TG   | 7  | 7  |
| 100617 | 10 | 3465716 | 3465737 | 2 | 11 | 22 | TG   | 14 | 9  |
| 100619 | 10 | 3467419 | 3467432 | 2 | 7  | 14 | GA   | 18 | 4  |
| 100620 | 10 | 3467891 | 3467902 | 2 | 6  | 12 | AC   | 26 | 4  |
| 100621 | 10 | 3467998 | 3468041 | 2 | 22 | 44 | TG   | 10 | 14 |
| 100622 | 10 | 3468532 | 3468549 | 2 | 9  | 18 | TG   | 24 | 7  |
| 100624 | 10 | 3469940 | 3469955 | 2 | 8  | 16 | AC   | 15 | 3  |
| 100625 | 10 | 3472547 | 3472568 | 2 | 11 | 22 | GT   | 14 | 7  |
| 100633 | 10 | 3482995 | 3483018 | 2 | 12 | 24 | AG   | 15 | 5  |
| 100634 | 10 | 3483446 | 3483465 | 2 | 10 | 20 | AC   | 12 | 8  |
| 100635 | 10 | 3483732 | 3483753 | 2 | 11 | 22 | TC   | 19 | 6  |
| 100637 | 10 | 3491618 | 3491637 | 2 | 10 | 20 | GT   | 18 | 7  |
| 100642 | 10 | 3495195 | 3495232 | 2 | 19 | 38 | CT   | 8  | 9  |
| 100646 | 10 | 3499462 | 3499477 | 2 | 8  | 16 | AC   | 22 | 5  |
| 100649 | 10 | 3506140 | 3506163 | 2 | 12 | 24 | CA   | 25 | 14 |
| 100650 | 10 | 3507564 | 3507579 | 2 | 8  | 16 | CA   | 26 | 3  |
| 100654 | 10 | 3521773 | 3521792 | 2 | 10 | 20 | CA   | 10 | 9  |
| 100655 | 10 | 3521909 | 3521928 | 2 | 10 | 20 | GT   | 20 | 5  |
| 100656 | 10 | 3523206 | 3523223 | 2 | 9  | 18 | CA   | 23 | 5  |
| 100665 | 10 | 3530411 | 3530438 | 2 | 14 | 28 | CA   | 16 | 11 |
| 100667 | 10 | 3531405 | 3531430 | 2 | 13 | 26 | TC   | 14 | 6  |
| 100670 | 10 | 3533687 | 3533701 | 3 | 5  | 15 | CCT  | 17 | 3  |
| 100674 | 10 | 3536236 | 3536257 | 2 | 11 | 22 | CA   | 7  | 4  |
| 100683 | 10 | 3541831 | 3541858 | 2 | 14 | 28 | GA   | 12 | 3  |
| 100690 | 10 | 3544930 | 3544969 | 2 | 20 | 40 | CT   | 7  | 9  |
| 100691 | 10 | 3545247 | 3545267 | 3 | 7  | 21 | ACA  | 22 | 6  |
| 100699 | 10 | 3556346 | 3556357 | 2 | 6  | 12 | TG   | 29 | 3  |
| 100701 | 10 | 3559855 | 3559892 | 2 | 19 | 38 | CA   | 11 | 8  |
| 100702 | 10 | 3560075 | 3560098 | 3 | 8  | 24 | TCC  | 14 | 4  |
| 100704 | 10 | 3561388 | 3561409 | 2 | 11 | 22 | CA   | 21 | 7  |
| 100708 | 10 | 3564032 | 3564055 | 2 | 12 | 24 | GT   | 9  | 9  |
| 100709 | 10 | 3565285 | 3565314 | 2 | 15 | 30 | CA   | 9  | 9  |
| 100710 | 10 | 3567950 | 3567965 | 2 | 8  | 16 | AC   | 20 | 6  |
| 100715 | 10 | 3573260 | 3573275 | 2 | 8  | 16 | AC   | 16 | 10 |
| 100724 | 10 | 3582578 | 3582597 | 2 | 10 | 20 | TC   | 18 | 3  |
| 100729 | 10 | 3587630 | 3587653 | 2 | 12 | 24 | GA   | 12 | 5  |



|        |    |         |         |   |    |    |      |    |    |
|--------|----|---------|---------|---|----|----|------|----|----|
| 100730 | 10 | 3587765 | 3587784 | 2 | 10 | 20 | CA   | 22 | 3  |
| 100731 | 10 | 3587894 | 3587915 | 2 | 11 | 22 | TC   | 26 | 7  |
| 100733 | 10 | 3592109 | 3592122 | 2 | 7  | 14 | TC   | 20 | 3  |
| 100734 | 10 | 3592626 | 3592643 | 3 | 6  | 18 | CCT  | 19 | 3  |
| 100746 | 10 | 3604808 | 3604839 | 2 | 16 | 32 | TG   | 15 | 10 |
| 100753 | 10 | 3608962 | 3608985 | 2 | 12 | 24 | TG   | 15 | 8  |
| 100758 | 10 | 3612595 | 3612614 | 2 | 10 | 20 | CT   | 16 | 10 |
| 100761 | 10 | 3613973 | 3614000 | 2 | 14 | 28 | TG   | 11 | 10 |
| 100762 | 10 | 3614167 | 3614196 | 2 | 15 | 30 | AC   | 12 | 11 |
| 100779 | 10 | 3628416 | 3628447 | 2 | 16 | 32 | CA   | 17 | 6  |
| 100780 | 10 | 3628552 | 3628563 | 2 | 6  | 12 | CT   | 26 | 7  |
| 100781 | 10 | 3628564 | 3628577 | 2 | 7  | 14 | CA   | 7  | 3  |
| 100782 | 10 | 3630348 | 3630361 | 2 | 7  | 14 | GT   | 24 | 4  |
| 100785 | 10 | 3631009 | 3631034 | 2 | 13 | 26 | AC   | 15 | 10 |
| 100789 | 10 | 3643615 | 3643630 | 2 | 8  | 16 | AC   | 17 | 5  |
| 100791 | 10 | 3644226 | 3644239 | 2 | 7  | 14 | GA   | 15 | 4  |
| 100796 | 10 | 3656053 | 3656080 | 2 | 14 | 28 | TG   | 18 | 11 |
| 100798 | 10 | 3660889 | 3660910 | 2 | 11 | 22 | GT   | 19 | 8  |
| 100799 | 10 | 3662476 | 3662493 | 2 | 9  | 18 | GT   | 14 | 8  |
| 100801 | 10 | 3665329 | 3665358 | 2 | 15 | 30 | GT   | 10 | 6  |
| 100806 | 10 | 3681670 | 3681681 | 2 | 6  | 12 | TG   | 10 | 4  |
| 100809 | 10 | 3683802 | 3683825 | 4 | 6  | 24 | GTGC | 13 | 6  |
| 100810 | 10 | 3685280 | 3685291 | 2 | 6  | 12 | GT   | 31 | 4  |
| 100813 | 10 | 3691959 | 3691974 | 2 | 8  | 16 | GT   | 25 | 4  |
| 100814 | 10 | 3692658 | 3692673 | 2 | 8  | 16 | TG   | 26 | 4  |
| 100817 | 10 | 3693646 | 3693661 | 2 | 8  | 16 | AC   | 23 | 6  |
| 100818 | 10 | 3693726 | 3693749 | 2 | 12 | 24 | CA   | 21 | 9  |
| 100820 | 10 | 3708290 | 3708303 | 2 | 7  | 14 | AC   | 27 | 4  |
| 100823 | 10 | 3709691 | 3709728 | 2 | 19 | 38 | AG   | 8  | 7  |
| 100824 | 10 | 3714439 | 3714454 | 2 | 8  | 16 | CT   | 16 | 4  |
| 100829 | 10 | 3717897 | 3717912 | 2 | 8  | 16 | CA   | 22 | 6  |
| 100835 | 10 | 3732511 | 3732538 | 2 | 14 | 28 | AC   | 20 | 9  |
| 100839 | 10 | 3744013 | 3744024 | 2 | 6  | 12 | TG   | 28 | 3  |
| 100846 | 10 | 3759623 | 3759642 | 2 | 10 | 20 | AG   | 17 | 7  |
| 100848 | 10 | 3761829 | 3761852 | 2 | 12 | 24 | TG   | 8  | 10 |
| 100849 | 10 | 3763514 | 3763535 | 2 | 11 | 22 | TG   | 23 | 11 |
| 100850 | 10 | 3771661 | 3771682 | 2 | 11 | 22 | AC   | 24 | 9  |
| 100852 | 10 | 3777260 | 3777271 | 2 | 6  | 12 | TG   | 24 | 4  |
| 100853 | 10 | 3777437 | 3777448 | 2 | 6  | 12 | CA   | 17 | 8  |
| 100858 | 10 | 3781300 | 3781323 | 2 | 12 | 24 | AC   | 18 | 8  |
| 100870 | 10 | 3800292 | 3800305 | 2 | 7  | 14 | TG   | 18 | 11 |
| 100877 | 10 | 3812206 | 3812219 | 2 | 7  | 14 | AC   | 25 | 4  |
| 100878 | 10 | 3812764 | 3812775 | 2 | 6  | 12 | CA   | 24 | 6  |
| 100884 | 10 | 3819385 | 3819426 | 2 | 21 | 42 | AC   | 13 | 13 |
| 100886 | 10 | 3822507 | 3822522 | 2 | 8  | 16 | AC   | 13 | 9  |
| 100888 | 10 | 3825541 | 3825560 | 2 | 10 | 20 | GT   | 20 | 9  |
| 100889 | 10 | 3829480 | 3829499 | 2 | 10 | 20 | AC   | 25 | 12 |
| 100891 | 10 | 3839852 | 3839877 | 2 | 13 | 26 | TG   | 13 | 9  |
| 100893 | 10 | 3847139 | 3847154 | 4 | 4  | 16 | AAAG | 28 | 5  |
| 100894 | 10 | 3847483 | 3847497 | 3 | 5  | 15 | AAG  | 24 | 3  |
| 100895 | 10 | 3847587 | 3847610 | 4 | 6  | 24 | TTTG | 29 | 4  |

|        |    |         |         |   |    |    |      |    |    |
|--------|----|---------|---------|---|----|----|------|----|----|
| 100902 | 10 | 3859293 | 3859308 | 2 | 8  | 16 | AG   | 28 | 6  |
| 100909 | 10 | 3873306 | 3873335 | 2 | 15 | 30 | CA   | 22 | 11 |
| 100911 | 10 | 3876109 | 3876159 | 3 | 17 | 51 | GAA  | 15 | 8  |
| 100940 | 10 | 3896320 | 3896363 | 2 | 22 | 44 | CA   | 11 | 16 |
| 100943 | 10 | 3904219 | 3904238 | 2 | 10 | 20 | GT   | 21 | 6  |
| 100946 | 10 | 3908272 | 3908301 | 2 | 15 | 30 | TG   | 9  | 8  |
| 100947 | 10 | 3911895 | 3911948 | 2 | 27 | 54 | CA   | 7  | 10 |
| 100948 | 10 | 3912083 | 3912098 | 2 | 8  | 16 | GT   | 19 | 9  |
| 100950 | 10 | 3912413 | 3912442 | 2 | 15 | 30 | GT   | 15 | 11 |
| 100951 | 10 | 3914393 | 3914426 | 2 | 17 | 34 | TG   | 7  | 11 |
| 100957 | 10 | 3916753 | 3916780 | 2 | 14 | 28 | CA   | 9  | 9  |
| 100960 | 10 | 3920179 | 3920192 | 2 | 7  | 14 | GA   | 16 | 5  |
| 100961 | 10 | 3920328 | 3920343 | 4 | 4  | 16 | CAGA | 22 | 5  |
| 100964 | 10 | 3923031 | 3923056 | 2 | 13 | 26 | AC   | 19 | 22 |
| 100977 | 10 | 3927537 | 3927562 | 2 | 13 | 26 | TG   | 16 | 14 |
| 100978 | 10 | 3927629 | 3927640 | 2 | 6  | 12 | TG   | 15 | 3  |
| 100979 | 10 | 3927790 | 3927823 | 2 | 17 | 34 | AC   | 20 | 18 |
| 100985 | 10 | 3931704 | 3931721 | 3 | 6  | 18 | CTC  | 19 | 4  |
| 100988 | 10 | 3935149 | 3935162 | 2 | 7  | 14 | AC   | 25 | 7  |
| 100990 | 10 | 3939410 | 3939435 | 2 | 13 | 26 | AC   | 18 | 6  |
| 100992 | 10 | 3941241 | 3941256 | 2 | 8  | 16 | GT   | 26 | 5  |
| 100995 | 10 | 3942100 | 3942113 | 2 | 7  | 14 | AG   | 21 | 9  |
| 101000 | 10 | 3945723 | 3945736 | 2 | 7  | 14 | TG   | 21 | 3  |
| 101001 | 10 | 3945780 | 3945797 | 2 | 9  | 18 | TG   | 18 | 3  |
| 101005 | 10 | 3947400 | 3947415 | 4 | 4  | 16 | CCTC | 27 | 3  |
| 101009 | 10 | 3949451 | 3949476 | 2 | 13 | 26 | GT   | 16 | 7  |
| 101010 | 10 | 3952684 | 3952697 | 2 | 7  | 14 | AG   | 27 | 3  |
| 101016 | 10 | 3958377 | 3958414 | 2 | 19 | 38 | CA   | 13 | 14 |
| 101019 | 10 | 3961402 | 3961431 | 2 | 15 | 30 | GA   | 18 | 8  |
| 101026 | 10 | 3965494 | 3965521 | 2 | 14 | 28 | AC   | 12 | 10 |
| 101027 | 10 | 3968060 | 3968091 | 2 | 16 | 32 | AC   | 16 | 6  |
| 101030 | 10 | 3973242 | 3973273 | 2 | 16 | 32 | CA   | 10 | 9  |
| 101031 | 10 | 3973838 | 3973851 | 2 | 7  | 14 | CT   | 17 | 15 |
| 101032 | 10 | 3973852 | 3973871 | 2 | 10 | 20 | CA   | 17 | 13 |
| 101035 | 10 | 3975897 | 3975936 | 2 | 20 | 40 | CA   | 10 | 12 |
| 101037 | 10 | 3980138 | 3980152 | 3 | 5  | 15 | CCT  | 22 | 3  |
| 101038 | 10 | 3980406 | 3980421 | 2 | 8  | 16 | AC   | 18 | 7  |
| 101039 | 10 | 3980423 | 3980438 | 2 | 8  | 16 | CA   | 22 | 7  |
| 101047 | 10 | 3983337 | 3983368 | 2 | 16 | 32 | CA   | 25 | 8  |
| 101051 | 10 | 3988160 | 3988174 | 3 | 5  | 15 | GAG  | 9  | 6  |
| 101053 | 10 | 3988520 | 3988546 | 3 | 9  | 27 | GAG  | 14 | 4  |
| 101054 | 10 | 3988631 | 3988664 | 2 | 17 | 34 | TC   | 15 | 11 |
| 101055 | 10 | 3989244 | 3989255 | 2 | 6  | 12 | CT   | 22 | 3  |
| 101056 | 10 | 3989729 | 3989746 | 3 | 6  | 18 | CTC  | 13 | 3  |
| 101063 | 10 | 3997891 | 3997908 | 2 | 9  | 18 | CA   | 23 | 8  |
| 101069 | 10 | 4002845 | 4002858 | 2 | 7  | 14 | GT   | 16 | 7  |
| 101070 | 10 | 4002860 | 4002871 | 2 | 6  | 12 | GT   | 10 | 3  |
| 101079 | 10 | 4010817 | 4010837 | 3 | 7  | 21 | CAG  | 15 | 10 |
| 101086 | 10 | 4017435 | 4017452 | 2 | 9  | 18 | AC   | 25 | 6  |
| 101092 | 10 | 4022199 | 4022212 | 2 | 7  | 14 | AC   | 18 | 4  |
| 101093 | 10 | 4023983 | 4023996 | 2 | 7  | 14 | AC   | 25 | 6  |

|        |    |         |         |   |    |    |      |    |    |
|--------|----|---------|---------|---|----|----|------|----|----|
| 101096 | 10 | 4024987 | 4025006 | 4 | 5  | 20 | TGTC | 8  | 3  |
| 101098 | 10 | 4025780 | 4025803 | 2 | 12 | 24 | CA   | 14 | 10 |
| 101100 | 10 | 4026643 | 4026662 | 2 | 10 | 20 | GA   | 18 | 3  |
| 101101 | 10 | 4032773 | 4032804 | 2 | 16 | 32 | CA   | 14 | 15 |
| 101105 | 10 | 4033030 | 4033045 | 2 | 8  | 16 | AC   | 8  | 6  |
| 101106 | 10 | 4034672 | 4034709 | 2 | 19 | 38 | CA   | 14 | 7  |
| 101108 | 10 | 4035110 | 4035123 | 2 | 7  | 14 | GT   | 27 | 3  |
| 101112 | 10 | 4039323 | 4039354 | 2 | 16 | 32 | GT   | 9  | 9  |
| 101113 | 10 | 4039481 | 4039508 | 2 | 14 | 28 | AC   | 14 | 14 |
| 101114 | 10 | 4039550 | 4039585 | 2 | 18 | 36 | GT   | 15 | 7  |
| 101115 | 10 | 4043199 | 4043210 | 2 | 6  | 12 | AC   | 26 | 6  |
| 101116 | 10 | 4043321 | 4043342 | 2 | 11 | 22 | AC   | 19 | 11 |
| 101120 | 10 | 4044225 | 4044252 | 2 | 14 | 28 | TG   | 24 | 7  |
| 101121 | 10 | 4044494 | 4044513 | 2 | 10 | 20 | GT   | 17 | 7  |
| 101122 | 10 | 4044641 | 4044670 | 2 | 15 | 30 | TG   | 13 | 10 |
| 101123 | 10 | 4044778 | 4044801 | 4 | 6  | 24 | TCCA | 18 | 10 |
| 101125 | 10 | 4044942 | 4044957 | 4 | 4  | 16 | CCAT | 23 | 4  |
| 101126 | 10 | 4044990 | 4045005 | 4 | 4  | 16 | CATC | 29 | 3  |
| 101127 | 10 | 4047029 | 4047050 | 2 | 11 | 22 | GT   | 23 | 14 |
| 101136 | 10 | 4051754 | 4051777 | 2 | 12 | 24 | GT   | 10 | 4  |
| 101137 | 10 | 4051858 | 4051875 | 2 | 9  | 18 | TG   | 19 | 8  |
| 101140 | 10 | 4053469 | 4053504 | 4 | 9  | 36 | AAGA | 16 | 8  |
| 101141 | 10 | 4053907 | 4053932 | 2 | 13 | 26 | AG   | 11 | 9  |
| 101142 | 10 | 4054021 | 4054042 | 2 | 11 | 22 | CA   | 10 | 8  |
| 101143 | 10 | 4054133 | 4054146 | 2 | 7  | 14 | GT   | 13 | 4  |
| 101144 | 10 | 4054341 | 4054354 | 2 | 7  | 14 | AG   | 14 | 4  |
| 101150 | 10 | 4057919 | 4057938 | 2 | 10 | 20 | CA   | 16 | 13 |
| 101151 | 10 | 4058059 | 4058080 | 2 | 11 | 22 | TG   | 23 | 10 |
| 101152 | 10 | 4059968 | 4059985 | 2 | 9  | 18 | AC   | 13 | 6  |
| 101153 | 10 | 4061047 | 4061060 | 2 | 7  | 14 | GT   | 23 | 5  |
| 101154 | 10 | 4061536 | 4061547 | 2 | 6  | 12 | TG   | 31 | 5  |
| 101156 | 10 | 4066465 | 4066476 | 2 | 6  | 12 | AC   | 20 | 4  |
| 101157 | 10 | 4066985 | 4067012 | 2 | 14 | 28 | TG   | 19 | 16 |
| 101158 | 10 | 4067611 | 4067628 | 3 | 6  | 18 | ATT  | 9  | 3  |
| 101163 | 10 | 4070693 | 4070704 | 2 | 6  | 12 | AC   | 17 | 7  |
| 101164 | 10 | 4070798 | 4070809 | 2 | 6  | 12 | TG   | 23 | 3  |
| 101167 | 10 | 4070971 | 4070986 | 2 | 8  | 16 | TG   | 22 | 5  |
| 101168 | 10 | 4071052 | 4071065 | 2 | 7  | 14 | GT   | 12 | 6  |
| 101175 | 10 | 4074791 | 4074824 | 2 | 17 | 34 | AC   | 15 | 12 |
| 101176 | 10 | 4075033 | 4075066 | 2 | 17 | 34 | GT   | 12 | 11 |
| 101178 | 10 | 4076793 | 4076812 | 2 | 10 | 20 | TG   | 13 | 4  |
| 101181 | 10 | 4090017 | 4090030 | 2 | 7  | 14 | CA   | 24 | 3  |
| 101185 | 10 | 4091778 | 4091799 | 2 | 11 | 22 | GA   | 6  | 4  |
| 101191 | 10 | 4097036 | 4097049 | 2 | 7  | 14 | AC   | 28 | 5  |
| 101192 | 10 | 4097100 | 4097123 | 2 | 12 | 24 | GT   | 15 | 9  |
| 101195 | 10 | 4108563 | 4108576 | 2 | 7  | 14 | GT   | 25 | 5  |
| 101196 | 10 | 4108609 | 4108620 | 2 | 6  | 12 | CT   | 24 | 3  |
| 101202 | 10 | 4128024 | 4128051 | 2 | 14 | 28 | TG   | 12 | 7  |
| 101204 | 10 | 4142917 | 4142944 | 2 | 14 | 28 | CA   | 15 | 6  |
| 101206 | 10 | 4149286 | 4149337 | 4 | 13 | 52 | CTTT | 17 | 11 |
| 101207 | 10 | 4149733 | 4149762 | 2 | 15 | 30 | AC   | 14 | 13 |

|        |    |         |         |   |    |    |      |    |    |
|--------|----|---------|---------|---|----|----|------|----|----|
| 101216 | 10 | 4159965 | 4159982 | 2 | 9  | 18 | TG   | 24 | 14 |
| 101217 | 10 | 4163173 | 4163192 | 2 | 10 | 20 | AC   | 21 | 5  |
| 101218 | 10 | 4163527 | 4163538 | 2 | 6  | 12 | TG   | 28 | 6  |
| 101222 | 10 | 4187477 | 4187490 | 2 | 7  | 14 | TG   | 14 | 4  |
| 101227 | 10 | 4193917 | 4193934 | 2 | 9  | 18 | AC   | 25 | 3  |
| 101228 | 10 | 4195431 | 4195442 | 2 | 6  | 12 | AT   | 23 | 3  |
| 101231 | 10 | 4199228 | 4199247 | 4 | 5  | 20 | CTTT | 12 | 4  |
| 101233 | 10 | 4199636 | 4199655 | 4 | 5  | 20 | TGTT | 23 | 4  |
| 101237 | 10 | 4204502 | 4204527 | 2 | 13 | 26 | CA   | 11 | 7  |
| 101240 | 10 | 4206098 | 4206109 | 2 | 6  | 12 | TC   | 22 | 5  |
| 101243 | 10 | 4209245 | 4209258 | 2 | 7  | 14 | TC   | 30 | 3  |
| 101249 | 10 | 4222737 | 4222751 | 3 | 5  | 15 | AAC  | 29 | 5  |
| 101251 | 10 | 4223705 | 4223716 | 2 | 6  | 12 | AC   | 21 | 3  |
| 101252 | 10 | 4223721 | 4223734 | 2 | 7  | 14 | AC   | 22 | 4  |
| 101253 | 10 | 4226268 | 4226283 | 2 | 8  | 16 | GT   | 24 | 6  |
| 101254 | 10 | 4229075 | 4229104 | 2 | 15 | 30 | CA   | 17 | 10 |
| 101255 | 10 | 4229522 | 4229537 | 2 | 8  | 16 | CA   | 26 | 5  |
| 101262 | 10 | 4238258 | 4238271 | 2 | 7  | 14 | AC   | 24 | 10 |
| 101263 | 10 | 4240891 | 4240920 | 3 | 10 | 30 | AGA  | 20 | 6  |
| 101265 | 10 | 4244419 | 4244436 | 3 | 6  | 18 | TAT  | 31 | 3  |
| 101266 | 10 | 4245066 | 4245083 | 2 | 9  | 18 | TG   | 19 | 6  |
| 101267 | 10 | 4245881 | 4245898 | 2 | 9  | 18 | CA   | 20 | 4  |
| 101273 | 10 | 4272499 | 4272513 | 3 | 5  | 15 | CTC  | 28 | 3  |
| 101275 | 10 | 4283220 | 4283247 | 2 | 14 | 28 | GT   | 12 | 7  |
| 101279 | 10 | 4288877 | 4288924 | 4 | 12 | 48 | ATAG | 15 | 7  |
| 101280 | 10 | 4291733 | 4291750 | 3 | 6  | 18 | TTA  | 18 | 8  |
| 101282 | 10 | 4299212 | 4299235 | 2 | 12 | 24 | TG   | 15 | 11 |
| 101284 | 10 | 4311793 | 4311810 | 3 | 6  | 18 | GCA  | 14 | 4  |
| 101285 | 10 | 4312144 | 4312155 | 2 | 6  | 12 | TA   | 17 | 5  |
| 101298 | 10 | 4357706 | 4357721 | 2 | 8  | 16 | AC   | 22 | 4  |
| 101301 | 10 | 4360702 | 4360731 | 2 | 15 | 30 | GT   | 22 | 10 |
| 101302 | 10 | 4361002 | 4361031 | 2 | 15 | 30 | AC   | 17 | 6  |
| 101308 | 10 | 4370119 | 4370132 | 2 | 7  | 14 | CA   | 17 | 5  |
| 101311 | 10 | 4377645 | 4377672 | 2 | 14 | 28 | CA   | 12 | 7  |
| 101312 | 10 | 4377716 | 4377743 | 2 | 14 | 28 | AC   | 15 | 7  |
| 101313 | 10 | 4379981 | 4379992 | 2 | 6  | 12 | AC   | 27 | 3  |
| 101314 | 10 | 4383350 | 4383361 | 2 | 6  | 12 | TC   | 23 | 4  |
| 101315 | 10 | 4383362 | 4383373 | 2 | 6  | 12 | TG   | 25 | 6  |
| 101316 | 10 | 4387794 | 4387819 | 2 | 13 | 26 | CA   | 10 | 9  |
| 101317 | 10 | 4387872 | 4387897 | 2 | 13 | 26 | TG   | 14 | 9  |
| 101319 | 10 | 4389479 | 4389490 | 2 | 6  | 12 | AG   | 16 | 3  |
| 101323 | 10 | 4400468 | 4400483 | 2 | 8  | 16 | TC   | 15 | 3  |
| 101325 | 10 | 4401799 | 4401810 | 2 | 6  | 12 | AC   | 28 | 3  |
| 101335 | 10 | 4410661 | 4410681 | 3 | 7  | 21 | AGT  | 25 | 4  |
| 101338 | 10 | 4420217 | 4420249 | 3 | 11 | 33 | TTA  | 7  | 5  |
| 101341 | 10 | 4427520 | 4427535 | 2 | 8  | 16 | TG   | 10 | 9  |
| 101342 | 10 | 4436191 | 4436218 | 2 | 14 | 28 | GT   | 16 | 9  |
| 101357 | 10 | 4477559 | 4477584 | 2 | 13 | 26 | TG   | 24 | 13 |
| 101366 | 10 | 4496926 | 4496977 | 4 | 13 | 52 | CTAT | 24 | 10 |
| 101373 | 10 | 4521237 | 4521248 | 2 | 6  | 12 | GT   | 29 | 5  |
| 101379 | 10 | 4527153 | 4527168 | 2 | 8  | 16 | TC   | 24 | 4  |

|        |    |         |         |   |    |    |     |    |    |
|--------|----|---------|---------|---|----|----|-----|----|----|
| 101381 | 10 | 4536304 | 4536321 | 3 | 6  | 18 | TGA | 27 | 3  |
| 101383 | 10 | 4541104 | 4541125 | 2 | 11 | 22 | AC  | 16 | 4  |
| 101385 | 10 | 4541493 | 4541516 | 2 | 12 | 24 | AC  | 20 | 6  |
| 101394 | 10 | 4551270 | 4551285 | 2 | 8  | 16 | GT  | 9  | 7  |
| 101397 | 10 | 4559684 | 4559701 | 2 | 9  | 18 | AC  | 30 | 11 |
| 101402 | 10 | 4564035 | 4564048 | 2 | 7  | 14 | CA  | 23 | 6  |
| 101403 | 10 | 4564384 | 4564405 | 2 | 11 | 22 | CA  | 22 | 9  |
| 101404 | 10 | 4564604 | 4564615 | 2 | 6  | 12 | AC  | 23 | 4  |
| 101406 | 10 | 4566198 | 4566215 | 2 | 9  | 18 | AC  | 22 | 5  |
| 101408 | 10 | 4566422 | 4566433 | 2 | 6  | 12 | CA  | 27 | 3  |
| 101409 | 10 | 4570840 | 4570865 | 2 | 13 | 26 | TG  | 11 | 8  |
| 101411 | 10 | 4571860 | 4571903 | 2 | 22 | 44 | AC  | 8  | 10 |
| 101418 | 10 | 4578781 | 4578792 | 2 | 6  | 12 | TC  | 28 | 3  |
| 101419 | 10 | 4586239 | 4586258 | 2 | 10 | 20 | TG  | 25 | 7  |
| 101420 | 10 | 4586412 | 4586427 | 2 | 8  | 16 | AC  | 21 | 3  |
| 101421 | 10 | 4588493 | 4588518 | 2 | 13 | 26 | AC  | 9  | 6  |
| 101426 | 10 | 4591949 | 4591968 | 2 | 10 | 20 | GT  | 16 | 5  |
| 101429 | 10 | 4594814 | 4594831 | 2 | 9  | 18 | TG  | 10 | 6  |
| 101430 | 10 | 4594833 | 4594844 | 2 | 6  | 12 | GT  | 12 | 6  |
| 101435 | 10 | 4599829 | 4599840 | 2 | 6  | 12 | TG  | 26 | 5  |
| 101439 | 10 | 4604384 | 4604413 | 3 | 10 | 30 | GAG | 8  | 5  |
| 101442 | 10 | 4604723 | 4604758 | 2 | 18 | 36 | TG  | 16 | 13 |
| 101443 | 10 | 4608134 | 4608145 | 2 | 6  | 12 | CT  | 14 | 3  |
| 101444 | 10 | 4608146 | 4608161 | 2 | 8  | 16 | CA  | 24 | 7  |
| 101445 | 10 | 4608428 | 4608451 | 2 | 12 | 24 | AC  | 17 | 9  |
| 101447 | 10 | 4612429 | 4612450 | 2 | 11 | 22 | TG  | 29 | 11 |
| 101449 | 10 | 4615172 | 4615185 | 2 | 7  | 14 | AT  | 25 | 4  |
| 101450 | 10 | 4616052 | 4616063 | 2 | 6  | 12 | TG  | 14 | 7  |
| 101459 | 10 | 4645623 | 4645640 | 2 | 9  | 18 | AC  | 18 | 4  |
| 101466 | 10 | 4652509 | 4652520 | 2 | 6  | 12 | GC  | 18 | 13 |
| 101467 | 10 | 4652521 | 4652540 | 2 | 10 | 20 | AC  | 6  | 7  |
| 101477 | 10 | 4674184 | 4674219 | 2 | 18 | 36 | CT  | 11 | 6  |
| 101479 | 10 | 4677231 | 4677244 | 2 | 7  | 14 | CA  | 20 | 3  |
| 101485 | 10 | 4693266 | 4693285 | 2 | 10 | 20 | CA  | 21 | 6  |
| 101488 | 10 | 4697107 | 4697124 | 2 | 9  | 18 | AC  | 23 | 6  |
| 101489 | 10 | 4697714 | 4697751 | 2 | 19 | 38 | CA  | 13 | 8  |
| 101492 | 10 | 4700757 | 4700776 | 2 | 10 | 20 | AC  | 11 | 3  |
| 101493 | 10 | 4701122 | 4701151 | 2 | 15 | 30 | CA  | 8  | 5  |
| 101503 | 10 | 4704431 | 4704458 | 2 | 14 | 28 | TG  | 13 | 9  |
| 101504 | 10 | 4708779 | 4708792 | 2 | 7  | 14 | CA  | 21 | 3  |
| 101517 | 10 | 4719797 | 4719826 | 2 | 15 | 30 | AC  | 9  | 7  |
| 101519 | 10 | 4720946 | 4720977 | 2 | 16 | 32 | AC  | 12 | 8  |
| 101530 | 10 | 4733932 | 4733961 | 2 | 15 | 30 | TG  | 11 | 8  |
| 101533 | 10 | 4739125 | 4739158 | 2 | 17 | 34 | GT  | 14 | 7  |
| 101536 | 10 | 4740076 | 4740109 | 2 | 17 | 34 | AC  | 23 | 7  |
| 101552 | 10 | 4762329 | 4762350 | 2 | 11 | 22 | AC  | 14 | 3  |
| 101553 | 10 | 4762563 | 4762600 | 2 | 19 | 38 | AC  | 10 | 14 |
| 101554 | 10 | 4763224 | 4763235 | 2 | 6  | 12 | GT  | 30 | 3  |
| 101555 | 10 | 4767699 | 4767714 | 2 | 8  | 16 | TG  | 20 | 7  |
| 101560 | 10 | 4771571 | 4771582 | 2 | 6  | 12 | AG  | 29 | 5  |
| 101567 | 10 | 4777146 | 4777163 | 2 | 9  | 18 | AG  | 16 | 4  |

|        |    |         |         |   |    |    |      |    |    |
|--------|----|---------|---------|---|----|----|------|----|----|
| 101569 | 10 | 4782329 | 4782342 | 2 | 7  | 14 | AG   | 22 | 4  |
| 101571 | 10 | 4790808 | 4790835 | 2 | 14 | 28 | CA   | 18 | 6  |
| 101572 | 10 | 4793802 | 4793817 | 2 | 8  | 16 | TG   | 26 | 3  |
| 101575 | 10 | 4797276 | 4797293 | 2 | 9  | 18 | AG   | 26 | 3  |
| 101579 | 10 | 4808660 | 4808679 | 2 | 10 | 20 | CA   | 23 | 3  |
| 101581 | 10 | 4813135 | 4813146 | 2 | 6  | 12 | TC   | 22 | 3  |
| 101582 | 10 | 4813434 | 4813463 | 2 | 15 | 30 | CA   | 12 | 9  |
| 101586 | 10 | 4816206 | 4816217 | 2 | 6  | 12 | TG   | 20 | 4  |
| 101587 | 10 | 4816339 | 4816352 | 2 | 7  | 14 | AC   | 21 | 3  |
| 101588 | 10 | 4817718 | 4817737 | 4 | 5  | 20 | AATC | 20 | 4  |
| 101593 | 10 | 4823374 | 4823399 | 2 | 13 | 26 | AC   | 10 | 4  |
| 101594 | 10 | 4823707 | 4823720 | 2 | 7  | 14 | TC   | 28 | 3  |
| 101614 | 10 | 4865843 | 4865862 | 2 | 10 | 20 | GA   | 25 | 4  |
| 101620 | 10 | 4867397 | 4867422 | 2 | 13 | 26 | GT   | 11 | 7  |
| 101625 | 10 | 4873818 | 4873843 | 2 | 13 | 26 | TG   | 16 | 9  |
| 101627 | 10 | 4877409 | 4877452 | 2 | 22 | 44 | GT   | 7  | 9  |
| 101633 | 10 | 4881102 | 4881123 | 2 | 11 | 22 | TG   | 25 | 9  |
| 101635 | 10 | 4882547 | 4882576 | 2 | 15 | 30 | GT   | 21 | 14 |
| 101637 | 10 | 4888327 | 4888366 | 2 | 20 | 40 | CT   | 8  | 7  |
| 101642 | 10 | 4890855 | 4890866 | 2 | 6  | 12 | AC   | 25 | 3  |
| 101655 | 10 | 4908847 | 4908864 | 3 | 6  | 18 | CTC  | 9  | 5  |
| 101661 | 10 | 4919708 | 4919745 | 2 | 19 | 38 | AC   | 11 | 12 |
| 101662 | 10 | 4923296 | 4923313 | 2 | 9  | 18 | CA   | 16 | 11 |
| 101669 | 10 | 4931892 | 4931923 | 2 | 16 | 32 | TG   | 15 | 13 |
| 101673 | 10 | 4938484 | 4938499 | 2 | 8  | 16 | GA   | 20 | 5  |
| 101679 | 10 | 4947798 | 4947823 | 2 | 13 | 26 | GT   | 16 | 8  |
| 101684 | 10 | 4957726 | 4957745 | 2 | 10 | 20 | CA   | 19 | 4  |
| 101690 | 10 | 4969503 | 4969540 | 2 | 19 | 38 | CA   | 13 | 11 |
| 101691 | 10 | 4969701 | 4969716 | 2 | 8  | 16 | CA   | 13 | 13 |
| 101692 | 10 | 4969719 | 4969736 | 2 | 9  | 18 | CA   | 11 | 12 |
| 101695 | 10 | 4977542 | 4977569 | 2 | 14 | 28 | AG   | 15 | 5  |
| 101697 | 10 | 4979997 | 4980020 | 2 | 12 | 24 | GT   | 19 | 5  |
| 101698 | 10 | 4984295 | 4984322 | 2 | 14 | 28 | GA   | 15 | 8  |
| 101699 | 10 | 4987672 | 4987727 | 4 | 14 | 56 | GTGC | 24 | 11 |
| 101700 | 10 | 4993652 | 4993691 | 2 | 20 | 40 | CA   | 8  | 9  |
| 101705 | 10 | 4994289 | 4994320 | 2 | 16 | 32 | CA   | 17 | 12 |
| 101706 | 10 | 4994441 | 4994468 | 2 | 14 | 28 | GT   | 12 | 5  |
| 101708 | 10 | 4999928 | 4999945 | 2 | 9  | 18 | AC   | 25 | 3  |
| 101710 | 10 | 5003011 | 5003022 | 2 | 6  | 12 | CA   | 20 | 6  |
| 101712 | 10 | 5003247 | 5003268 | 2 | 11 | 22 | AC   | 8  | 6  |
| 101713 | 10 | 5003428 | 5003467 | 2 | 20 | 40 | GT   | 18 | 14 |
| 101715 | 10 | 5010495 | 5010506 | 2 | 6  | 12 | TA   | 26 | 6  |
| 101717 | 10 | 5011907 | 5011942 | 2 | 18 | 36 | CA   | 20 | 11 |
| 101718 | 10 | 5012874 | 5012905 | 2 | 16 | 32 | GT   | 9  | 10 |
| 101719 | 10 | 5012965 | 5012976 | 2 | 6  | 12 | TG   | 23 | 6  |
| 101721 | 10 | 5013661 | 5013674 | 2 | 7  | 14 | AC   | 26 | 6  |
| 101736 | 10 | 5033758 | 5033783 | 2 | 13 | 26 | CA   | 8  | 4  |
| 101738 | 10 | 5034119 | 5034132 | 2 | 7  | 14 | GC   | 12 | 7  |
| 101739 | 10 | 5034135 | 5034150 | 2 | 8  | 16 | AG   | 8  | 3  |
| 101746 | 10 | 5037161 | 5037187 | 3 | 9  | 27 | GGA  | 6  | 3  |
| 101748 | 10 | 5037365 | 5037376 | 2 | 6  | 12 | AC   | 7  | 8  |

|        |    |         |         |   |    |    |      |    |    |
|--------|----|---------|---------|---|----|----|------|----|----|
| 101749 | 10 | 5037914 | 5037933 | 4 | 5  | 20 | TCCA | 17 | 11 |
| 101751 | 10 | 5040210 | 5040229 | 4 | 5  | 20 | TAAA | 21 | 5  |
| 101759 | 10 | 5042242 | 5042263 | 2 | 11 | 22 | TG   | 16 | 7  |
| 101761 | 10 | 5045853 | 5045890 | 2 | 19 | 38 | TG   | 13 | 13 |
| 101774 | 10 | 5072939 | 5072954 | 4 | 4  | 16 | AAAT | 33 | 3  |
| 101775 | 10 | 5074463 | 5074484 | 2 | 11 | 22 | GT   | 24 | 7  |
| 101782 | 10 | 5096307 | 5096320 | 2 | 7  | 14 | AC   | 24 | 3  |
| 101785 | 10 | 5099079 | 5099092 | 2 | 7  | 14 | CA   | 25 | 4  |
| 101794 | 10 | 5127435 | 5127474 | 4 | 10 | 40 | TTCT | 24 | 6  |
| 101796 | 10 | 5129781 | 5129804 | 2 | 12 | 24 | TG   | 8  | 14 |
| 101803 | 10 | 5138802 | 5138825 | 2 | 12 | 24 | CA   | 20 | 15 |
| 101805 | 10 | 5145796 | 5145819 | 2 | 12 | 24 | AC   | 24 | 14 |
| 101806 | 10 | 5148318 | 5148337 | 2 | 10 | 20 | CT   | 19 | 8  |
| 101807 | 10 | 5148460 | 5148491 | 2 | 16 | 32 | CA   | 14 | 15 |
| 101810 | 10 | 5160399 | 5160419 | 3 | 7  | 21 | TTG  | 16 | 3  |
| 101813 | 10 | 5163564 | 5163578 | 3 | 5  | 15 | AAC  | 34 | 3  |
| 101821 | 10 | 5176116 | 5176127 | 2 | 6  | 12 | AG   | 15 | 3  |
| 101823 | 10 | 5176281 | 5176292 | 2 | 6  | 12 | AC   | 23 | 3  |
| 101825 | 10 | 5181414 | 5181427 | 2 | 7  | 14 | TG   | 19 | 6  |
| 101829 | 10 | 5182913 | 5182930 | 2 | 9  | 18 | GT   | 25 | 10 |
| 101835 | 10 | 5186572 | 5186589 | 3 | 6  | 18 | CAA  | 35 | 3  |
| 101841 | 10 | 5200422 | 5200447 | 2 | 13 | 26 | TG   | 16 | 8  |
| 101844 | 10 | 5206487 | 5206508 | 2 | 11 | 22 | AC   | 16 | 7  |
| 101854 | 10 | 5242326 | 5242339 | 2 | 7  | 14 | AC   | 23 | 6  |
| 101857 | 10 | 5255154 | 5255165 | 2 | 6  | 12 | AC   | 26 | 3  |
| 101859 | 10 | 5257422 | 5257435 | 2 | 7  | 14 | TG   | 20 | 7  |
| 101861 | 10 | 5258947 | 5258960 | 2 | 7  | 14 | CA   | 28 | 4  |
| 101868 | 10 | 5266603 | 5266620 | 2 | 9  | 18 | AC   | 22 | 7  |
| 101871 | 10 | 5272475 | 5272495 | 3 | 7  | 21 | TGC  | 22 | 12 |
| 101876 | 10 | 5277577 | 5277591 | 3 | 5  | 15 | ACC  | 22 | 4  |
| 101877 | 10 | 5278654 | 5278668 | 3 | 5  | 15 | AGG  | 26 | 3  |
| 101878 | 10 | 5283003 | 5283016 | 2 | 7  | 14 | GA   | 29 | 4  |
| 101885 | 10 | 5322093 | 5322106 | 2 | 7  | 14 | CA   | 8  | 4  |
| 101894 | 10 | 5341215 | 5341236 | 2 | 11 | 22 | AC   | 15 | 9  |
| 101897 | 10 | 5354534 | 5354551 | 3 | 6  | 18 | TCC  | 32 | 8  |
| 101901 | 10 | 5359979 | 5359993 | 3 | 5  | 15 | TCT  | 30 | 3  |
| 101902 | 10 | 5362324 | 5362345 | 2 | 11 | 22 | CT   | 23 | 5  |
| 101904 | 10 | 5365332 | 5365379 | 4 | 12 | 48 | GAAA | 12 | 10 |
| 101907 | 10 | 5374945 | 5375008 | 4 | 16 | 64 | AAAG | 27 | 12 |
| 101908 | 10 | 5380418 | 5380447 | 2 | 15 | 30 | AC   | 22 | 10 |
| 101911 | 10 | 5387425 | 5387442 | 2 | 9  | 18 | GT   | 26 | 7  |
| 101923 | 10 | 5399339 | 5399354 | 4 | 4  | 16 | GAGG | 21 | 4  |
| 101927 | 10 | 5402988 | 5403003 | 2 | 8  | 16 | CA   | 19 | 5  |
| 101928 | 10 | 5403297 | 5403348 | 2 | 26 | 52 | TG   | 13 | 15 |
| 101929 | 10 | 5403449 | 5403492 | 2 | 22 | 44 | AC   | 19 | 18 |
| 101933 | 10 | 5408657 | 5408682 | 2 | 13 | 26 | TG   | 15 | 6  |
| 101937 | 10 | 5415631 | 5415658 | 2 | 14 | 28 | TG   | 14 | 9  |
| 101939 | 10 | 5417109 | 5417120 | 2 | 6  | 12 | GT   | 23 | 8  |
| 101942 | 10 | 5420349 | 5420372 | 2 | 12 | 24 | TG   | 25 | 17 |
| 101946 | 10 | 5428134 | 5428157 | 2 | 12 | 24 | CA   | 11 | 3  |
| 101951 | 10 | 5433793 | 5433808 | 2 | 8  | 16 | CA   | 6  | 4  |

|        |    |         |         |   |    |    |      |    |    |
|--------|----|---------|---------|---|----|----|------|----|----|
| 101954 | 10 | 5437011 | 5437026 | 4 | 4  | 16 | GACA | 23 | 3  |
| 101955 | 10 | 5439054 | 5439071 | 2 | 9  | 18 | AC   | 22 | 5  |
| 101958 | 10 | 5448468 | 5448481 | 2 | 7  | 14 | AC   | 12 | 7  |
| 101960 | 10 | 5456757 | 5456784 | 2 | 14 | 28 | CA   | 24 | 22 |
| 101970 | 10 | 5483513 | 5483524 | 2 | 6  | 12 | AC   | 30 | 3  |
| 101975 | 10 | 5494999 | 5495014 | 4 | 4  | 16 | AATA | 28 | 3  |
| 101976 | 10 | 5495545 | 5495577 | 3 | 11 | 33 | ATT  | 16 | 5  |
| 101981 | 10 | 5502410 | 5502433 | 4 | 6  | 24 | TGCC | 8  | 4  |
| 101989 | 10 | 5514006 | 5514019 | 2 | 7  | 14 | CA   | 17 | 4  |
| 101996 | 10 | 5521322 | 5521337 | 2 | 8  | 16 | GT   | 30 | 5  |
| 101998 | 10 | 5523242 | 5523259 | 3 | 6  | 18 | GAG  | 28 | 5  |
| 101999 | 10 | 5525706 | 5525735 | 2 | 15 | 30 | AC   | 12 | 15 |
| 102000 | 10 | 5525862 | 5525887 | 2 | 13 | 26 | CA   | 7  | 7  |
| 102007 | 10 | 5528231 | 5528246 | 2 | 8  | 16 | TG   | 18 | 8  |
| 102009 | 10 | 5529743 | 5529776 | 2 | 17 | 34 | GT   | 11 | 11 |
| 102010 | 10 | 5530848 | 5530865 | 3 | 6  | 18 | CTG  | 23 | 4  |
| 102011 | 10 | 5530923 | 5530943 | 3 | 7  | 21 | GAG  | 24 | 9  |
| 102017 | 10 | 5532312 | 5532351 | 4 | 10 | 40 | ATGG | 27 | 12 |
| 102025 | 10 | 5536409 | 5536420 | 2 | 6  | 12 | GT   | 11 | 3  |
| 102027 | 10 | 5536781 | 5536804 | 3 | 8  | 24 | GTT  | 20 | 3  |
| 102029 | 10 | 5537751 | 5537772 | 2 | 11 | 22 | AC   | 20 | 11 |
| 102033 | 10 | 5538551 | 5538564 | 2 | 7  | 14 | TG   | 25 | 5  |
| 102036 | 10 | 5539936 | 5539961 | 2 | 13 | 26 | TG   | 14 | 11 |
| 102040 | 10 | 5541118 | 5541138 | 3 | 7  | 21 | CTC  | 18 | 3  |
| 102053 | 10 | 5559917 | 5559938 | 2 | 11 | 22 | TG   | 24 | 6  |
| 102062 | 10 | 5563233 | 5563252 | 2 | 10 | 20 | GT   | 10 | 12 |
| 102065 | 10 | 5566994 | 5567015 | 2 | 11 | 22 | TG   | 19 | 10 |
| 102067 | 10 | 5567527 | 5567550 | 2 | 12 | 24 | CA   | 18 | 9  |
| 102076 | 10 | 5577251 | 5577286 | 2 | 18 | 36 | GT   | 14 | 16 |
| 102077 | 10 | 5578921 | 5578932 | 2 | 6  | 12 | GT   | 27 | 3  |
| 102079 | 10 | 5581149 | 5581174 | 2 | 13 | 26 | TG   | 16 | 8  |
| 102082 | 10 | 5584716 | 5584727 | 2 | 6  | 12 | AC   | 21 | 7  |
| 102084 | 10 | 5585678 | 5585689 | 2 | 6  | 12 | CT   | 27 | 3  |
| 102086 | 10 | 5589235 | 5589248 | 2 | 7  | 14 | CA   | 26 | 5  |
| 102088 | 10 | 5592229 | 5592264 | 2 | 18 | 36 | CA   | 11 | 8  |
| 102089 | 10 | 5592396 | 5592407 | 2 | 6  | 12 | GT   | 36 | 3  |
| 102090 | 10 | 5592572 | 5592589 | 2 | 9  | 18 | CA   | 24 | 14 |
| 102093 | 10 | 5605165 | 5605185 | 3 | 7  | 21 | GAG  | 18 | 5  |
| 102095 | 10 | 5608293 | 5608320 | 2 | 14 | 28 | CA   | 11 | 10 |
| 102102 | 10 | 5624486 | 5624517 | 2 | 16 | 32 | AC   | 14 | 15 |
| 102104 | 10 | 5628233 | 5628252 | 4 | 5  | 20 | GTCT | 22 | 4  |
| 102113 | 10 | 5641340 | 5641371 | 2 | 16 | 32 | AC   | 12 | 9  |
| 102116 | 10 | 5648454 | 5648469 | 2 | 8  | 16 | AC   | 17 | 4  |
| 102119 | 10 | 5657021 | 5657042 | 2 | 11 | 22 | TG   | 11 | 9  |
| 102121 | 10 | 5657235 | 5657248 | 2 | 7  | 14 | TG   | 14 | 5  |
| 102122 | 10 | 5657254 | 5657265 | 2 | 6  | 12 | GT   | 14 | 4  |
| 102123 | 10 | 5660676 | 5660691 | 4 | 4  | 16 | AGAC | 24 | 4  |
| 102126 | 10 | 5663063 | 5663074 | 2 | 6  | 12 | CA   | 25 | 7  |
| 102127 | 10 | 5663563 | 5663576 | 2 | 7  | 14 | TG   | 20 | 9  |
| 102128 | 10 | 5663581 | 5663596 | 2 | 8  | 16 | GT   | 17 | 7  |
| 102132 | 10 | 5669829 | 5669854 | 2 | 13 | 26 | AC   | 14 | 5  |



|        |    |         |         |   |    |    |      |    |    |
|--------|----|---------|---------|---|----|----|------|----|----|
| 102135 | 10 | 5674449 | 5674464 | 2 | 8  | 16 | TG   | 25 | 6  |
| 102136 | 10 | 5674845 | 5674862 | 2 | 9  | 18 | CA   | 15 | 9  |
| 102138 | 10 | 5679681 | 5679698 | 3 | 6  | 18 | CTG  | 16 | 4  |
| 102143 | 10 | 5704314 | 5704365 | 4 | 13 | 52 | AGAT | 21 | 14 |
| 102144 | 10 | 5704511 | 5704538 | 4 | 7  | 28 | TTTC | 17 | 5  |
| 102146 | 10 | 5707315 | 5707330 | 2 | 8  | 16 | TG   | 22 | 3  |
| 102150 | 10 | 5724214 | 5724229 | 2 | 8  | 16 | AC   | 23 | 5  |
| 102158 | 10 | 5735767 | 5735790 | 3 | 8  | 24 | AAC  | 23 | 8  |
| 102161 | 10 | 5736819 | 5736840 | 2 | 11 | 22 | CA   | 7  | 10 |
| 102163 | 10 | 5741590 | 5741604 | 3 | 5  | 15 | CCT  | 30 | 6  |
| 102164 | 10 | 5742578 | 5742593 | 2 | 8  | 16 | TC   | 18 | 4  |
| 102170 | 10 | 5770118 | 5770165 | 2 | 24 | 48 | TG   | 8  | 8  |
| 102171 | 10 | 5770621 | 5770644 | 3 | 8  | 24 | CCT  | 12 | 9  |
| 102172 | 10 | 5771506 | 5771523 | 3 | 6  | 18 | CCT  | 27 | 7  |
| 102173 | 10 | 5775898 | 5775927 | 2 | 15 | 30 | TG   | 17 | 8  |
| 102178 | 10 | 5790116 | 5790129 | 2 | 7  | 14 | CA   | 20 | 9  |
| 102187 | 10 | 5821417 | 5821434 | 2 | 9  | 18 | TC   | 20 | 3  |
| 102191 | 10 | 5824272 | 5824299 | 2 | 14 | 28 | AC   | 15 | 8  |
| 102192 | 10 | 5825019 | 5825034 | 2 | 8  | 16 | TG   | 27 | 6  |
| 102193 | 10 | 5825516 | 5825537 | 2 | 11 | 22 | TG   | 18 | 6  |
| 102196 | 10 | 5829260 | 5829273 | 2 | 7  | 14 | AC   | 19 | 3  |
| 102198 | 10 | 5831262 | 5831279 | 3 | 6  | 18 | CCA  | 20 | 4  |
| 102199 | 10 | 5834127 | 5834142 | 2 | 8  | 16 | TG   | 33 | 3  |
| 102200 | 10 | 5837222 | 5837235 | 2 | 7  | 14 | GA   | 23 | 3  |
| 102201 | 10 | 5837889 | 5837912 | 3 | 8  | 24 | AGG  | 29 | 4  |
| 102205 | 10 | 5857275 | 5857290 | 2 | 8  | 16 | AG   | 14 | 3  |
| 102217 | 10 | 5869504 | 5869529 | 2 | 13 | 26 | CA   | 14 | 10 |
| 102218 | 10 | 5881394 | 5881411 | 2 | 9  | 18 | AC   | 24 | 6  |
| 102219 | 10 | 5882772 | 5882793 | 2 | 11 | 22 | TG   | 16 | 8  |
| 102224 | 10 | 5897500 | 5897519 | 2 | 10 | 20 | AC   | 19 | 13 |
| 102226 | 10 | 5901934 | 5901945 | 2 | 6  | 12 | GT   | 27 | 3  |
| 102229 | 10 | 5904742 | 5904753 | 2 | 6  | 12 | TC   | 15 | 3  |
| 102236 | 10 | 5916886 | 5916909 | 2 | 12 | 24 | GT   | 19 | 6  |
| 102237 | 10 | 5917482 | 5917493 | 2 | 6  | 12 | TG   | 24 | 3  |
| 102238 | 10 | 5923302 | 5923319 | 2 | 9  | 18 | GT   | 20 | 6  |
| 102239 | 10 | 5924873 | 5924914 | 2 | 21 | 42 | CA   | 6  | 8  |
| 102243 | 10 | 5930459 | 5930498 | 2 | 20 | 40 | AC   | 8  | 8  |
| 102244 | 10 | 5935910 | 5935924 | 3 | 5  | 15 | ATT  | 15 | 3  |
| 102246 | 10 | 5945807 | 5945868 | 2 | 31 | 62 | AC   | 9  | 10 |
| 102247 | 10 | 5946866 | 5946887 | 2 | 11 | 22 | CA   | 13 | 9  |
| 102251 | 10 | 5954288 | 5954301 | 2 | 7  | 14 | TG   | 24 | 3  |
| 102258 | 10 | 5986672 | 5986719 | 2 | 24 | 48 | GT   | 7  | 8  |
| 102261 | 10 | 5994211 | 5994224 | 2 | 7  | 14 | TG   | 21 | 3  |
| 102262 | 10 | 5994523 | 5994546 | 2 | 12 | 24 | AC   | 18 | 9  |
| 102274 | 10 | 6024069 | 6024083 | 3 | 5  | 15 | GTT  | 29 | 13 |
| 102275 | 10 | 6028610 | 6028625 | 4 | 4  | 16 | TTTG | 9  | 4  |
| 102277 | 10 | 6029423 | 6029446 | 4 | 6  | 24 | GGCT | 31 | 6  |
| 102278 | 10 | 6031058 | 6031073 | 2 | 8  | 16 | TC   | 19 | 6  |
| 102282 | 10 | 6032968 | 6032985 | 2 | 9  | 18 | CT   | 14 | 8  |
| 102285 | 10 | 6034240 | 6034269 | 2 | 15 | 30 | TG   | 15 | 7  |
| 102289 | 10 | 6037873 | 6037890 | 2 | 9  | 18 | GT   | 20 | 9  |

|        |    |         |         |   |    |    |      |    |    |
|--------|----|---------|---------|---|----|----|------|----|----|
| 102295 | 10 | 6044093 | 6044118 | 2 | 13 | 26 | TG   | 7  | 6  |
| 102299 | 10 | 6051062 | 6051075 | 2 | 7  | 14 | AC   | 26 | 7  |
| 102300 | 10 | 6053812 | 6053823 | 2 | 6  | 12 | GT   | 27 | 3  |
| 102302 | 10 | 6055607 | 6055624 | 2 | 9  | 18 | AC   | 14 | 11 |
| 102305 | 10 | 6056630 | 6056657 | 2 | 14 | 28 | CA   | 14 | 13 |
| 102314 | 10 | 6073407 | 6073434 | 2 | 14 | 28 | GT   | 12 | 10 |
| 102317 | 10 | 6078012 | 6078047 | 2 | 18 | 36 | CA   | 8  | 9  |
| 102319 | 10 | 6081512 | 6081529 | 2 | 9  | 18 | CA   | 25 | 4  |
| 102320 | 10 | 6081783 | 6081800 | 2 | 9  | 18 | TG   | 23 | 8  |
| 102321 | 10 | 6086352 | 6086365 | 2 | 7  | 14 | TC   | 28 | 3  |
| 102322 | 10 | 6086976 | 6086989 | 2 | 7  | 14 | CT   | 20 | 3  |
| 102327 | 10 | 6091892 | 6091905 | 2 | 7  | 14 | CA   | 22 | 4  |
| 102330 | 10 | 6098019 | 6098044 | 2 | 13 | 26 | GT   | 15 | 11 |
| 102334 | 10 | 6100329 | 6100342 | 2 | 7  | 14 | GA   | 25 | 4  |
| 102335 | 10 | 6106502 | 6106521 | 2 | 10 | 20 | TG   | 29 | 4  |
| 102336 | 10 | 6106577 | 6106590 | 2 | 7  | 14 | GT   | 23 | 4  |
| 102337 | 10 | 6106853 | 6106867 | 3 | 5  | 15 | AGG  | 26 | 4  |
| 102341 | 10 | 6111752 | 6111763 | 2 | 6  | 12 | CA   | 29 | 4  |
| 102344 | 10 | 6113873 | 6113888 | 2 | 8  | 16 | TG   | 21 | 9  |
| 102345 | 10 | 6114087 | 6114114 | 2 | 14 | 28 | AC   | 17 | 11 |
| 102348 | 10 | 6116224 | 6116235 | 2 | 6  | 12 | GT   | 13 | 5  |
| 102349 | 10 | 6116237 | 6116248 | 2 | 6  | 12 | GT   | 15 | 7  |
| 102350 | 10 | 6121476 | 6121501 | 2 | 13 | 26 | GT   | 13 | 10 |
| 102361 | 10 | 6136216 | 6136257 | 2 | 21 | 42 | CA   | 6  | 10 |
| 102362 | 10 | 6137687 | 6137719 | 3 | 11 | 33 | TCC  | 13 | 11 |
| 102368 | 10 | 6140763 | 6140780 | 3 | 6  | 18 | TCC  | 19 | 3  |
| 102371 | 10 | 6146268 | 6146297 | 2 | 15 | 30 | CA   | 14 | 14 |
| 102372 | 10 | 6148211 | 6148242 | 2 | 16 | 32 | CA   | 12 | 7  |
| 102374 | 10 | 6152465 | 6152498 | 2 | 17 | 34 | TG   | 20 | 5  |
| 102375 | 10 | 6154322 | 6154355 | 2 | 17 | 34 | GT   | 9  | 12 |
| 102377 | 10 | 6156678 | 6156695 | 2 | 9  | 18 | TA   | 20 | 4  |
| 102378 | 10 | 6157062 | 6157076 | 3 | 5  | 15 | GGC  | 30 | 3  |
| 102382 | 10 | 6161124 | 6161135 | 2 | 6  | 12 | CT   | 21 | 4  |
| 102383 | 10 | 6161141 | 6161152 | 2 | 6  | 12 | CT   | 20 | 4  |
| 102384 | 10 | 6161318 | 6161347 | 3 | 10 | 30 | TTG  | 25 | 6  |
| 102390 | 10 | 6175087 | 6175104 | 2 | 9  | 18 | AC   | 6  | 8  |
| 102392 | 10 | 6181622 | 6181673 | 2 | 26 | 52 | AC   | 14 | 12 |
| 102394 | 10 | 6192028 | 6192039 | 2 | 6  | 12 | AC   | 18 | 4  |
| 102396 | 10 | 6192366 | 6192381 | 2 | 8  | 16 | GT   | 19 | 4  |
| 102398 | 10 | 6200109 | 6200128 | 2 | 10 | 20 | CA   | 28 | 13 |
| 102399 | 10 | 6200343 | 6200366 | 2 | 12 | 24 | TG   | 16 | 5  |
| 102404 | 10 | 6205611 | 6205648 | 2 | 19 | 38 | AC   | 12 | 10 |
| 102407 | 10 | 6213790 | 6213821 | 2 | 16 | 32 | GT   | 7  | 7  |
| 102410 | 10 | 6220374 | 6220387 | 2 | 7  | 14 | GT   | 31 | 6  |
| 102418 | 10 | 6239560 | 6239571 | 2 | 6  | 12 | AC   | 30 | 5  |
| 102419 | 10 | 6240320 | 6240357 | 2 | 19 | 38 | TG   | 8  | 11 |
| 102421 | 10 | 6246197 | 6246216 | 4 | 5  | 20 | ATGA | 29 | 5  |
| 102422 | 10 | 6247498 | 6247509 | 2 | 6  | 12 | CA   | 18 | 4  |
| 102424 | 10 | 6248970 | 6248985 | 2 | 8  | 16 | AG   | 19 | 5  |
| 102425 | 10 | 6257694 | 6257713 | 2 | 10 | 20 | GA   | 22 | 6  |
| 102426 | 10 | 6257955 | 6257968 | 2 | 7  | 14 | GT   | 22 | 3  |

|        |    |         |         |   |    |    |      |    |    |
|--------|----|---------|---------|---|----|----|------|----|----|
| 102427 | 10 | 6258043 | 6258054 | 2 | 6  | 12 | GT   | 23 | 5  |
| 102431 | 10 | 6261719 | 6261742 | 2 | 12 | 24 | AC   | 15 | 9  |
| 102432 | 10 | 6262354 | 6262371 | 3 | 6  | 18 | CCA  | 6  | 4  |
| 102437 | 10 | 6262586 | 6262606 | 3 | 7  | 21 | CAT  | 14 | 5  |
| 102441 | 10 | 6279009 | 6279024 | 2 | 8  | 16 | GT   | 27 | 6  |
| 102458 | 10 | 6297606 | 6297633 | 4 | 7  | 28 | GGCT | 26 | 8  |
| 102459 | 10 | 6299361 | 6299374 | 2 | 7  | 14 | AC   | 20 | 5  |
| 102461 | 10 | 6300654 | 6300665 | 2 | 6  | 12 | AG   | 11 | 5  |
| 102468 | 10 | 6304914 | 6304925 | 2 | 6  | 12 | TG   | 28 | 5  |
| 102469 | 10 | 6305308 | 6305321 | 2 | 7  | 14 | CA   | 10 | 8  |
| 102470 | 10 | 6308299 | 6308319 | 3 | 7  | 21 | TCC  | 28 | 4  |
| 102474 | 10 | 6316869 | 6316894 | 2 | 13 | 26 | CA   | 12 | 7  |
| 102475 | 10 | 6317189 | 6317202 | 2 | 7  | 14 | CA   | 20 | 3  |
| 102478 | 10 | 6317520 | 6317549 | 2 | 15 | 30 | CA   | 9  | 6  |
| 102479 | 10 | 6319446 | 6319461 | 4 | 4  | 16 | AGAC | 23 | 4  |
| 102480 | 10 | 6323845 | 6323864 | 4 | 5  | 20 | TCTT | 18 | 4  |
| 102482 | 10 | 6327100 | 6327117 | 2 | 9  | 18 | CA   | 11 | 6  |
| 102483 | 10 | 6327298 | 6327315 | 2 | 9  | 18 | CA   | 20 | 5  |
| 102485 | 10 | 6329089 | 6329112 | 2 | 12 | 24 | CA   | 20 | 8  |
| 102488 | 10 | 6337223 | 6337234 | 2 | 6  | 12 | TA   | 8  | 3  |
| 102489 | 10 | 6339018 | 6339041 | 2 | 12 | 24 | CA   | 17 | 9  |
| 102492 | 10 | 6341336 | 6341347 | 2 | 6  | 12 | TG   | 23 | 3  |
| 102495 | 10 | 6344631 | 6344670 | 2 | 20 | 40 | CA   | 15 | 13 |
| 102496 | 10 | 6348294 | 6348305 | 2 | 6  | 12 | TC   | 20 | 6  |
| 102500 | 10 | 6355498 | 6355512 | 3 | 5  | 15 | CAT  | 33 | 3  |
| 102501 | 10 | 6357676 | 6357689 | 2 | 7  | 14 | GT   | 27 | 3  |
| 102508 | 10 | 6362784 | 6362817 | 2 | 17 | 34 | TG   | 22 | 7  |
| 102509 | 10 | 6364385 | 6364398 | 2 | 7  | 14 | TG   | 19 | 5  |
| 102515 | 10 | 6372371 | 6372394 | 4 | 6  | 24 | AATG | 12 | 7  |
| 102516 | 10 | 6373190 | 6373201 | 2 | 6  | 12 | GT   | 18 | 6  |
| 102517 | 10 | 6373203 | 6373222 | 2 | 10 | 20 | TG   | 15 | 6  |
| 102518 | 10 | 6373846 | 6373859 | 2 | 7  | 14 | GA   | 31 | 4  |
| 102525 | 10 | 6381031 | 6381046 | 2 | 8  | 16 | GT   | 15 | 6  |
| 102529 | 10 | 6383972 | 6383989 | 2 | 9  | 18 | GT   | 17 | 6  |
| 102532 | 10 | 6392403 | 6392464 | 2 | 31 | 62 | AC   | 9  | 9  |
| 102533 | 10 | 6394048 | 6394071 | 2 | 12 | 24 | AC   | 11 | 14 |
| 102537 | 10 | 6402184 | 6402207 | 2 | 12 | 24 | GT   | 8  | 3  |
| 102539 | 10 | 6406325 | 6406340 | 2 | 8  | 16 | CA   | 21 | 6  |
| 102542 | 10 | 6421307 | 6421356 | 2 | 25 | 50 | CA   | 12 | 11 |
| 102544 | 10 | 6423393 | 6423408 | 2 | 8  | 16 | AG   | 23 | 6  |
| 102549 | 10 | 6429230 | 6429268 | 3 | 13 | 39 | CTT  | 13 | 9  |
| 102550 | 10 | 6429469 | 6429480 | 2 | 6  | 12 | AC   | 22 | 4  |
| 102551 | 10 | 6429482 | 6429495 | 2 | 7  | 14 | CA   | 23 | 4  |
| 102553 | 10 | 6430145 | 6430174 | 2 | 15 | 30 | TG   | 15 | 7  |
| 102554 | 10 | 6430356 | 6430385 | 2 | 15 | 30 | TG   | 16 | 7  |
| 102555 | 10 | 6430482 | 6430493 | 2 | 6  | 12 | TG   | 27 | 4  |
| 102556 | 10 | 6430745 | 6430786 | 2 | 21 | 42 | AC   | 10 | 9  |
| 102557 | 10 | 6432617 | 6432642 | 2 | 13 | 26 | GT   | 18 | 5  |
| 102562 | 10 | 6434517 | 6434550 | 2 | 17 | 34 | TG   | 14 | 10 |
| 102565 | 10 | 6436440 | 6436473 | 2 | 17 | 34 | CA   | 18 | 9  |
| 102566 | 10 | 6437401 | 6437428 | 4 | 7  | 28 | GGCT | 18 | 7  |

|        |    |         |         |   |    |    |      |    |    |
|--------|----|---------|---------|---|----|----|------|----|----|
| 102569 | 10 | 6439486 | 6439503 | 2 | 9  | 18 | AC   | 24 | 4  |
| 102572 | 10 | 6441511 | 6441534 | 2 | 12 | 24 | CA   | 19 | 6  |
| 102573 | 10 | 6441989 | 6442006 | 2 | 9  | 18 | AC   | 20 | 10 |
| 102581 | 10 | 6444680 | 6444699 | 2 | 10 | 20 | AC   | 18 | 7  |
| 102584 | 10 | 6447343 | 6447356 | 2 | 7  | 14 | GT   | 12 | 5  |
| 102586 | 10 | 6451457 | 6451484 | 2 | 14 | 28 | TG   | 19 | 11 |
| 102587 | 10 | 6451647 | 6451666 | 2 | 10 | 20 | GA   | 20 | 3  |
| 102588 | 10 | 6451780 | 6451793 | 2 | 7  | 14 | CT   | 24 | 4  |
| 102589 | 10 | 6451848 | 6451871 | 2 | 12 | 24 | GT   | 18 | 10 |
| 102590 | 10 | 6451916 | 6451943 | 2 | 14 | 28 | AC   | 20 | 6  |
| 102592 | 10 | 6454029 | 6454056 | 2 | 14 | 28 | AC   | 10 | 7  |
| 102593 | 10 | 6454115 | 6454138 | 2 | 12 | 24 | AC   | 14 | 6  |
| 102595 | 10 | 6455819 | 6455862 | 2 | 22 | 44 | AC   | 9  | 14 |
| 102596 | 10 | 6457234 | 6457247 | 2 | 7  | 14 | GT   | 29 | 5  |
| 102599 | 10 | 6459414 | 6459441 | 2 | 14 | 28 | AC   | 10 | 5  |
| 102601 | 10 | 6463195 | 6463206 | 2 | 6  | 12 | GA   | 27 | 3  |
| 102603 | 10 | 6463480 | 6463513 | 2 | 17 | 34 | CA   | 15 | 9  |
| 102604 | 10 | 6463855 | 6463868 | 2 | 7  | 14 | GA   | 17 | 4  |
| 102607 | 10 | 6466611 | 6466628 | 2 | 9  | 18 | CA   | 13 | 4  |
| 102608 | 10 | 6466769 | 6466800 | 2 | 16 | 32 | TG   | 6  | 8  |
| 102609 | 10 | 6466974 | 6467017 | 2 | 22 | 44 | TG   | 6  | 7  |
| 102611 | 10 | 6470381 | 6470401 | 3 | 7  | 21 | GAG  | 23 | 5  |
| 102613 | 10 | 6474393 | 6474419 | 3 | 9  | 27 | CAG  | 13 | 7  |
| 102614 | 10 | 6475432 | 6475471 | 2 | 20 | 40 | TG   | 12 | 8  |
| 102615 | 10 | 6475622 | 6475655 | 2 | 17 | 34 | CA   | 8  | 5  |
| 102617 | 10 | 6479320 | 6479333 | 2 | 7  | 14 | AT   | 6  | 3  |
| 102618 | 10 | 6479555 | 6479570 | 2 | 8  | 16 | AC   | 17 | 8  |
| 102623 | 10 | 6485662 | 6485675 | 2 | 7  | 14 | AC   | 19 | 5  |
| 102629 | 10 | 6541680 | 6541694 | 3 | 5  | 15 | AGA  | 26 | 7  |
| 102630 | 10 | 6542825 | 6542844 | 2 | 10 | 20 | TC   | 26 | 3  |
| 102631 | 10 | 6550260 | 6550274 | 3 | 5  | 15 | AAG  | 24 | 11 |
| 102632 | 10 | 6550896 | 6550915 | 2 | 10 | 20 | GT   | 20 | 9  |
| 102633 | 10 | 6550986 | 6551013 | 2 | 14 | 28 | GA   | 11 | 10 |
| 102639 | 10 | 6563000 | 6563013 | 2 | 7  | 14 | AC   | 21 | 3  |
| 102642 | 10 | 6583009 | 6583026 | 3 | 6  | 18 | AAC  | 25 | 8  |
| 102643 | 10 | 6583735 | 6583746 | 2 | 6  | 12 | GC   | 24 | 5  |
| 102648 | 10 | 6593714 | 6593737 | 3 | 8  | 24 | GTT  | 22 | 4  |
| 102649 | 10 | 6595091 | 6595108 | 2 | 9  | 18 | AC   | 11 | 8  |
| 102656 | 10 | 6602720 | 6602740 | 3 | 7  | 21 | AGG  | 28 | 8  |
| 102657 | 10 | 6604787 | 6604798 | 2 | 6  | 12 | CA   | 24 | 5  |
| 102658 | 10 | 6604996 | 6605013 | 2 | 9  | 18 | AC   | 17 | 9  |
| 102659 | 10 | 6605247 | 6605270 | 3 | 8  | 24 | TGC  | 32 | 3  |
| 102660 | 10 | 6605471 | 6605486 | 2 | 8  | 16 | AT   | 6  | 3  |
| 102679 | 10 | 6623307 | 6623348 | 2 | 21 | 42 | CA   | 12 | 12 |
| 102686 | 10 | 6640583 | 6640616 | 2 | 17 | 34 | AC   | 18 | 11 |
| 102689 | 10 | 6641760 | 6641791 | 2 | 16 | 32 | TG   | 9  | 15 |
| 102699 | 10 | 6661799 | 6661812 | 2 | 7  | 14 | TG   | 19 | 7  |
| 102714 | 10 | 6701789 | 6701804 | 4 | 4  | 16 | AACA | 28 | 3  |
| 102726 | 10 | 6719540 | 6719559 | 2 | 10 | 20 | AG   | 21 | 6  |
| 102727 | 10 | 6724456 | 6724467 | 2 | 6  | 12 | CA   | 31 | 11 |
| 102734 | 10 | 6739339 | 6739372 | 2 | 17 | 34 | AC   | 6  | 9  |

|        |    |         |         |   |    |    |      |    |    |
|--------|----|---------|---------|---|----|----|------|----|----|
| 102737 | 10 | 6746670 | 6746684 | 3 | 5  | 15 | CAG  | 9  | 8  |
| 102743 | 10 | 6749553 | 6749566 | 2 | 7  | 14 | CA   | 16 | 10 |
| 102745 | 10 | 6752014 | 6752025 | 2 | 6  | 12 | AC   | 14 | 3  |
| 102750 | 10 | 6764878 | 6764901 | 4 | 6  | 24 | CATA | 16 | 4  |
| 102751 | 10 | 6772739 | 6772770 | 2 | 16 | 32 | TG   | 16 | 11 |
| 102752 | 10 | 6773769 | 6773800 | 2 | 16 | 32 | AC   | 10 | 11 |
| 102756 | 10 | 6777134 | 6777153 | 4 | 5  | 20 | TATC | 27 | 3  |
| 102757 | 10 | 6777694 | 6777708 | 3 | 5  | 15 | TCT  | 19 | 3  |
| 102760 | 10 | 6778940 | 6778973 | 2 | 17 | 34 | CA   | 8  | 9  |
| 102761 | 10 | 6780940 | 6780955 | 4 | 4  | 16 | AAAT | 19 | 3  |
| 102763 | 10 | 6787444 | 6787463 | 4 | 5  | 20 | AGAC | 17 | 5  |
| 102767 | 10 | 6791407 | 6791430 | 4 | 6  | 24 | TTTA | 20 | 4  |
| 102768 | 10 | 6791752 | 6791769 | 2 | 9  | 18 | TG   | 21 | 12 |
| 102774 | 10 | 6810034 | 6810053 | 2 | 10 | 20 | GT   | 22 | 11 |
| 102776 | 10 | 6813593 | 6813610 | 2 | 9  | 18 | TG   | 19 | 10 |
| 102780 | 10 | 6820443 | 6820481 | 3 | 13 | 39 | GTA  | 30 | 9  |
| 102784 | 10 | 6824166 | 6824213 | 2 | 24 | 48 | CA   | 8  | 8  |
| 102786 | 10 | 6828502 | 6828525 | 3 | 8  | 24 | CCT  | 12 | 5  |
| 102789 | 10 | 6831990 | 6832013 | 3 | 8  | 24 | TGC  | 18 | 4  |
| 102791 | 10 | 6838750 | 6838773 | 4 | 6  | 24 | TTGG | 26 | 3  |
| 102792 | 10 | 6843555 | 6843582 | 2 | 14 | 28 | GT   | 14 | 5  |
| 102806 | 10 | 6863539 | 6863562 | 3 | 8  | 24 | GAG  | 24 | 7  |
| 102813 | 10 | 6887458 | 6887487 | 2 | 15 | 30 | GT   | 10 | 9  |
| 102815 | 10 | 6887602 | 6887619 | 2 | 9  | 18 | TG   | 19 | 3  |
| 102822 | 10 | 6905685 | 6905710 | 2 | 13 | 26 | CA   | 21 | 7  |
| 102826 | 10 | 6911984 | 6911995 | 2 | 6  | 12 | CA   | 22 | 3  |
| 102827 | 10 | 6912351 | 6912384 | 2 | 17 | 34 | GT   | 9  | 10 |
| 102828 | 10 | 6912494 | 6912519 | 2 | 13 | 26 | AC   | 10 | 6  |
| 102832 | 10 | 6927785 | 6927796 | 2 | 6  | 12 | GA   | 28 | 3  |
| 102839 | 10 | 6958402 | 6958425 | 2 | 12 | 24 | AG   | 14 | 14 |
| 102840 | 10 | 6958965 | 6958984 | 2 | 10 | 20 | AC   | 17 | 8  |
| 102852 | 10 | 6997653 | 6997674 | 2 | 11 | 22 | GT   | 9  | 3  |
| 102859 | 10 | 7006038 | 7006061 | 4 | 6  | 24 | TTGA | 20 | 4  |
| 102862 | 10 | 7008881 | 7008895 | 3 | 5  | 15 | CTA  | 25 | 4  |
| 102865 | 10 | 7016350 | 7016364 | 3 | 5  | 15 | CAA  | 27 | 3  |
| 102867 | 10 | 7029423 | 7029434 | 2 | 6  | 12 | TG   | 24 | 5  |
| 102869 | 10 | 7038030 | 7038047 | 3 | 6  | 18 | AGG  | 27 | 3  |
| 102870 | 10 | 7042249 | 7042269 | 3 | 7  | 21 | AAG  | 28 | 4  |
| 102871 | 10 | 7042811 | 7042822 | 2 | 6  | 12 | GT   | 35 | 3  |
| 102879 | 10 | 7050433 | 7050448 | 4 | 4  | 16 | TCTG | 25 | 3  |
| 102881 | 10 | 7053859 | 7053870 | 2 | 6  | 12 | TG   | 31 | 3  |
| 102891 | 10 | 7068880 | 7068899 | 2 | 10 | 20 | CT   | 6  | 8  |
| 102892 | 10 | 7068900 | 7068913 | 2 | 7  | 14 | CA   | 13 | 16 |
| 102894 | 10 | 7070231 | 7070245 | 3 | 5  | 15 | TTG  | 22 | 3  |
| 102896 | 10 | 7071345 | 7071360 | 4 | 4  | 16 | TATC | 20 | 3  |
| 102900 | 10 | 7075529 | 7075542 | 2 | 7  | 14 | AG   | 24 | 4  |
| 102901 | 10 | 7077525 | 7077578 | 2 | 27 | 54 | AC   | 18 | 15 |
| 102903 | 10 | 7081462 | 7081475 | 2 | 7  | 14 | CA   | 26 | 5  |
| 102905 | 10 | 7082917 | 7082940 | 2 | 12 | 24 | CA   | 14 | 11 |
| 102927 | 10 | 7150651 | 7150670 | 4 | 5  | 20 | TCTG | 17 | 7  |
| 102930 | 10 | 7157983 | 7158003 | 3 | 7  | 21 | TCC  | 20 | 8  |

|        |    |         |         |   |    |    |      |    |    |
|--------|----|---------|---------|---|----|----|------|----|----|
| 102936 | 10 | 7182027 | 7182042 | 4 | 4  | 16 | TTTC | 18 | 3  |
| 102942 | 10 | 7204569 | 7204608 | 4 | 10 | 40 | AGAA | 6  | 6  |
| 102944 | 10 | 7206284 | 7206319 | 4 | 9  | 36 | CTAT | 23 | 10 |
| 102952 | 10 | 7223506 | 7223529 | 2 | 12 | 24 | CT   | 19 | 9  |
| 102959 | 10 | 7244875 | 7244892 | 2 | 9  | 18 | AC   | 26 | 4  |
| 102962 | 10 | 7256318 | 7256341 | 2 | 12 | 24 | GT   | 9  | 7  |
| 102965 | 10 | 7257268 | 7257295 | 2 | 14 | 28 | TG   | 14 | 6  |
| 102966 | 10 | 7258262 | 7258287 | 2 | 13 | 26 | GT   | 13 | 11 |
| 102968 | 10 | 7258429 | 7258440 | 2 | 6  | 12 | CA   | 20 | 6  |
| 102971 | 10 | 7259707 | 7259746 | 2 | 20 | 40 | CA   | 12 | 10 |
| 102972 | 10 | 7259899 | 7259922 | 2 | 12 | 24 | CA   | 14 | 8  |
| 102977 | 10 | 7262610 | 7262631 | 2 | 11 | 22 | TG   | 8  | 5  |
| 102986 | 10 | 7274439 | 7274456 | 2 | 9  | 18 | TG   | 17 | 7  |
| 102987 | 10 | 7277308 | 7277345 | 2 | 19 | 38 | CA   | 7  | 6  |
| 102989 | 10 | 7286388 | 7286413 | 2 | 13 | 26 | TG   | 13 | 7  |
| 102992 | 10 | 7288341 | 7288364 | 2 | 12 | 24 | TG   | 6  | 6  |
| 102993 | 10 | 7288573 | 7288586 | 2 | 7  | 14 | CA   | 27 | 3  |
| 102997 | 10 | 7296983 | 7297042 | 2 | 30 | 60 | CA   | 6  | 9  |
| 103003 | 10 | 7316936 | 7316953 | 2 | 9  | 18 | GT   | 23 | 7  |
| 103004 | 10 | 7316955 | 7316968 | 2 | 7  | 14 | TG   | 20 | 8  |
| 103005 | 10 | 7318784 | 7318805 | 2 | 11 | 22 | CA   | 15 | 5  |
| 103006 | 10 | 7319239 | 7319258 | 2 | 10 | 20 | CA   | 25 | 15 |
| 103007 | 10 | 7319443 | 7319470 | 2 | 14 | 28 | CA   | 23 | 8  |
| 103010 | 10 | 7322291 | 7322302 | 2 | 6  | 12 | GT   | 30 | 4  |
| 103011 | 10 | 7326954 | 7326968 | 3 | 5  | 15 | GAG  | 36 | 3  |
| 103013 | 10 | 7331096 | 7331107 | 2 | 6  | 12 | AG   | 18 | 11 |
| 103018 | 10 | 7338204 | 7338225 | 2 | 11 | 22 | TG   | 19 | 10 |
| 103019 | 10 | 7340433 | 7340446 | 2 | 7  | 14 | CT   | 25 | 3  |
| 103020 | 10 | 7340934 | 7340963 | 2 | 15 | 30 | CA   | 8  | 7  |
| 103021 | 10 | 7341026 | 7341037 | 2 | 6  | 12 | TC   | 18 | 4  |
| 103025 | 10 | 7343056 | 7343095 | 2 | 20 | 40 | GA   | 13 | 6  |
| 103026 | 10 | 7343917 | 7343952 | 2 | 18 | 36 | CA   | 6  | 10 |
| 103028 | 10 | 7345433 | 7345450 | 2 | 9  | 18 | CT   | 19 | 3  |
| 103030 | 10 | 7347474 | 7347493 | 2 | 10 | 20 | TG   | 22 | 5  |
| 103031 | 10 | 7348301 | 7348312 | 2 | 6  | 12 | GA   | 12 | 3  |
| 103035 | 10 | 7349145 | 7349160 | 2 | 8  | 16 | TC   | 14 | 3  |
| 103039 | 10 | 7350168 | 7350194 | 3 | 9  | 27 | TCT  | 24 | 7  |
| 103040 | 10 | 7350534 | 7350579 | 2 | 23 | 46 | TG   | 9  | 8  |
| 103046 | 10 | 7357104 | 7357117 | 2 | 7  | 14 | AG   | 13 | 3  |
| 103066 | 10 | 7368342 | 7368359 | 2 | 9  | 18 | AC   | 29 | 8  |
| 103067 | 10 | 7368699 | 7368714 | 2 | 8  | 16 | CA   | 17 | 11 |
| 103068 | 10 | 7368716 | 7368727 | 2 | 6  | 12 | AC   | 16 | 12 |
| 103071 | 10 | 7370999 | 7371014 | 2 | 8  | 16 | AC   | 18 | 11 |
| 103072 | 10 | 7371473 | 7371492 | 2 | 10 | 20 | AC   | 28 | 5  |
| 103074 | 10 | 7373207 | 7373220 | 2 | 7  | 14 | GT   | 22 | 4  |
| 103079 | 10 | 7376714 | 7376725 | 2 | 6  | 12 | GT   | 23 | 6  |
| 103081 | 10 | 7377476 | 7377493 | 2 | 9  | 18 | AC   | 18 | 16 |
| 103085 | 10 | 7382073 | 7382084 | 2 | 6  | 12 | CA   | 28 | 4  |
| 103090 | 10 | 7405205 | 7405222 | 2 | 9  | 18 | AT   | 13 | 12 |
| 103093 | 10 | 7410811 | 7410832 | 2 | 11 | 22 | CA   | 17 | 7  |
| 103097 | 10 | 7413862 | 7413875 | 2 | 7  | 14 | AT   | 26 | 3  |

|        |    |         |         |   |    |    |      |    |    |
|--------|----|---------|---------|---|----|----|------|----|----|
| 103105 | 10 | 7430039 | 7430054 | 2 | 8  | 16 | CA   | 26 | 5  |
| 103107 | 10 | 7432029 | 7432054 | 2 | 13 | 26 | TG   | 17 | 8  |
| 103122 | 10 | 7443867 | 7443880 | 2 | 7  | 14 | CA   | 21 | 5  |
| 103123 | 10 | 7443883 | 7443896 | 2 | 7  | 14 | CA   | 19 | 5  |
| 103131 | 10 | 7459855 | 7459904 | 2 | 25 | 50 | CA   | 12 | 10 |
| 103133 | 10 | 7463326 | 7463351 | 2 | 13 | 26 | TG   | 21 | 5  |
| 103139 | 10 | 7470419 | 7470438 | 4 | 5  | 20 | GCCA | 17 | 7  |
| 103142 | 10 | 7470884 | 7470895 | 2 | 6  | 12 | GT   | 17 | 4  |
| 103143 | 10 | 7470903 | 7470916 | 2 | 7  | 14 | TG   | 20 | 4  |
| 103148 | 10 | 7482264 | 7482275 | 2 | 6  | 12 | AC   | 27 | 4  |
| 103149 | 10 | 7483452 | 7483471 | 4 | 5  | 20 | ATGA | 17 | 3  |
| 103162 | 10 | 7528513 | 7528536 | 2 | 12 | 24 | CA   | 16 | 18 |
| 103183 | 10 | 7541728 | 7541745 | 2 | 9  | 18 | GA   | 11 | 6  |
| 103186 | 10 | 7543149 | 7543162 | 2 | 7  | 14 | TA   | 10 | 8  |
| 103190 | 10 | 7545313 | 7545330 | 2 | 9  | 18 | AC   | 24 | 7  |
| 103191 | 10 | 7545867 | 7545882 | 2 | 8  | 16 | AC   | 31 | 5  |
| 103221 | 10 | 7598602 | 7598619 | 2 | 9  | 18 | TG   | 27 | 6  |
| 103228 | 10 | 7610359 | 7610374 | 2 | 8  | 16 | GT   | 16 | 7  |
| 103250 | 10 | 7643666 | 7643683 | 2 | 9  | 18 | TC   | 11 | 3  |
| 103257 | 10 | 7647089 | 7647108 | 4 | 5  | 20 | AAAT | 19 | 3  |
| 103280 | 10 | 7658761 | 7658778 | 2 | 9  | 18 | TG   | 8  | 7  |
| 103283 | 10 | 7660154 | 7660181 | 2 | 14 | 28 | GT   | 6  | 9  |
| 103288 | 10 | 7666141 | 7666158 | 3 | 6  | 18 | GGA  | 28 | 5  |
| 103289 | 10 | 7666251 | 7666270 | 2 | 10 | 20 | TC   | 17 | 5  |
| 103306 | 10 | 7694177 | 7694200 | 4 | 6  | 24 | TCAT | 24 | 4  |
| 103310 | 10 | 7695763 | 7695792 | 2 | 15 | 30 | CA   | 12 | 13 |
| 103322 | 10 | 7719516 | 7719531 | 2 | 8  | 16 | CA   | 16 | 10 |
| 103323 | 10 | 7719536 | 7719549 | 2 | 7  | 14 | CA   | 11 | 7  |
| 103329 | 10 | 7731369 | 7731388 | 2 | 10 | 20 | CA   | 8  | 4  |
| 103330 | 10 | 7732821 | 7732841 | 3 | 7  | 21 | CAA  | 12 | 5  |
| 103338 | 10 | 7745692 | 7745709 | 2 | 9  | 18 | AC   | 7  | 5  |
| 103350 | 10 | 7765597 | 7765636 | 2 | 20 | 40 | CT   | 18 | 6  |
| 103373 | 10 | 7812447 | 7812474 | 2 | 14 | 28 | AC   | 14 | 10 |
| 103395 | 10 | 7849106 | 7849125 | 2 | 10 | 20 | TG   | 17 | 8  |
| 103396 | 10 | 7850257 | 7850288 | 4 | 8  | 32 | TTCT | 14 | 9  |
| 103399 | 10 | 7853597 | 7853610 | 2 | 7  | 14 | AC   | 25 | 4  |
| 103401 | 10 | 7855618 | 7855645 | 2 | 14 | 28 | AC   | 18 | 12 |
| 103402 | 10 | 7858301 | 7858344 | 2 | 22 | 44 | AC   | 9  | 9  |
| 103419 | 10 | 7881695 | 7881716 | 2 | 11 | 22 | AC   | 9  | 7  |
| 103428 | 10 | 7899147 | 7899164 | 2 | 9  | 18 | TG   | 6  | 3  |
| 103431 | 10 | 7902226 | 7902245 | 4 | 5  | 20 | AAAT | 9  | 4  |
| 103439 | 10 | 7921665 | 7921696 | 2 | 16 | 32 | AG   | 10 | 11 |
| 103440 | 10 | 7921791 | 7921832 | 2 | 21 | 42 | GT   | 6  | 7  |
| 103441 | 10 | 7921980 | 7921995 | 2 | 8  | 16 | GT   | 18 | 6  |
| 103447 | 10 | 7958141 | 7958158 | 2 | 9  | 18 | GT   | 23 | 6  |
| 103451 | 10 | 7991323 | 7991366 | 2 | 22 | 44 | TG   | 7  | 11 |
| 103459 | 10 | 8016164 | 8016175 | 2 | 6  | 12 | CT   | 26 | 7  |
| 103464 | 10 | 8041080 | 8041127 | 2 | 24 | 48 | GT   | 6  | 6  |
| 103465 | 10 | 8043878 | 8043891 | 2 | 7  | 14 | TG   | 26 | 6  |
| 103474 | 10 | 8051250 | 8051261 | 2 | 6  | 12 | AG   | 9  | 3  |
| 103476 | 10 | 8052148 | 8052175 | 2 | 14 | 28 | TG   | 10 | 5  |

|        |    |         |         |   |    |    |      |    |    |
|--------|----|---------|---------|---|----|----|------|----|----|
| 103489 | 10 | 8067207 | 8067221 | 3 | 5  | 15 | AAT  | 16 | 5  |
| 103495 | 10 | 8086569 | 8086580 | 2 | 6  | 12 | TA   | 20 | 4  |
| 103498 | 10 | 8090480 | 8090493 | 2 | 7  | 14 | AC   | 28 | 4  |
| 103503 | 10 | 8113094 | 8113123 | 2 | 15 | 30 | AC   | 16 | 11 |
| 103504 | 10 | 8115982 | 8115995 | 2 | 7  | 14 | TA   | 13 | 6  |
| 103505 | 10 | 8116665 | 8116700 | 2 | 18 | 36 | TG   | 10 | 10 |
| 103519 | 10 | 8147226 | 8147240 | 3 | 5  | 15 | ATA  | 26 | 3  |
| 103523 | 10 | 8159525 | 8159554 | 3 | 10 | 30 | CAT  | 14 | 7  |
| 103524 | 10 | 8160531 | 8160546 | 4 | 4  | 16 | TCTG | 18 | 3  |
| 103525 | 10 | 8173207 | 8173220 | 2 | 7  | 14 | TA   | 12 | 4  |
| 103526 | 10 | 8174932 | 8174959 | 4 | 7  | 28 | ATAA | 11 | 3  |
| 103527 | 10 | 8184691 | 8184712 | 2 | 11 | 22 | GT   | 17 | 10 |
| 103538 | 10 | 8239000 | 8239013 | 2 | 7  | 14 | TG   | 17 | 7  |
| 103545 | 10 | 8250727 | 8250756 | 2 | 15 | 30 | AC   | 8  | 9  |
| 103546 | 10 | 8251670 | 8251685 | 4 | 4  | 16 | ATTC | 23 | 4  |
| 103547 | 10 | 8251689 | 8251704 | 4 | 4  | 16 | CATT | 18 | 3  |
| 103550 | 10 | 8257010 | 8257021 | 2 | 6  | 12 | AT   | 21 | 3  |
| 103551 | 10 | 8259752 | 8259763 | 2 | 6  | 12 | TA   | 20 | 5  |
| 103559 | 10 | 8288257 | 8288268 | 2 | 6  | 12 | TG   | 24 | 8  |
| 103562 | 10 | 8295890 | 8295925 | 2 | 18 | 36 | CA   | 8  | 7  |
| 103563 | 10 | 8296395 | 8296408 | 2 | 7  | 14 | CA   | 21 | 10 |
| 103564 | 10 | 8303931 | 8303942 | 2 | 6  | 12 | CT   | 20 | 4  |
| 103568 | 10 | 8316901 | 8316928 | 2 | 14 | 28 | AC   | 14 | 9  |
| 103570 | 10 | 8320764 | 8320791 | 2 | 14 | 28 | TG   | 7  | 7  |
| 103578 | 10 | 8342670 | 8342689 | 2 | 10 | 20 | TG   | 22 | 10 |
| 103583 | 10 | 8349912 | 8349923 | 2 | 6  | 12 | AC   | 22 | 8  |
| 103584 | 10 | 8349924 | 8349937 | 2 | 7  | 14 | AT   | 22 | 8  |
| 103585 | 10 | 8354160 | 8354177 | 2 | 9  | 18 | CA   | 20 | 9  |
| 103587 | 10 | 8355714 | 8355725 | 2 | 6  | 12 | GT   | 20 | 11 |
| 103588 | 10 | 8355728 | 8355741 | 2 | 7  | 14 | GT   | 10 | 5  |
| 103590 | 10 | 8355868 | 8355885 | 2 | 9  | 18 | AC   | 12 | 10 |
| 103591 | 10 | 8356027 | 8356038 | 2 | 6  | 12 | AC   | 11 | 5  |
| 103592 | 10 | 8356263 | 8356288 | 2 | 13 | 26 | GA   | 20 | 9  |
| 103594 | 10 | 8358836 | 8358847 | 2 | 6  | 12 | TG   | 32 | 3  |
| 103595 | 10 | 8359361 | 8359375 | 3 | 5  | 15 | GTT  | 29 | 4  |
| 103597 | 10 | 8367290 | 8367301 | 2 | 6  | 12 | AC   | 27 | 4  |
| 103598 | 10 | 8367304 | 8367317 | 2 | 7  | 14 | AC   | 21 | 3  |
| 103601 | 10 | 8368475 | 8368500 | 2 | 13 | 26 | AC   | 7  | 8  |
| 103602 | 10 | 8369568 | 8369583 | 2 | 8  | 16 | TG   | 22 | 8  |
| 103603 | 10 | 8370487 | 8370504 | 3 | 6  | 18 | AGC  | 27 | 7  |
| 103605 | 10 | 8375672 | 8375701 | 2 | 15 | 30 | AC   | 11 | 9  |
| 103606 | 10 | 8375755 | 8375793 | 3 | 13 | 39 | GCT  | 23 | 6  |
| 103612 | 10 | 8380159 | 8380182 | 3 | 8  | 24 | TTG  | 28 | 6  |
| 103622 | 10 | 8400685 | 8400700 | 4 | 4  | 16 | TTTC | 22 | 11 |
| 103625 | 10 | 8416572 | 8416617 | 2 | 23 | 46 | CA   | 12 | 13 |
| 103633 | 10 | 8462005 | 8462036 | 2 | 16 | 32 | AC   | 6  | 11 |
| 103642 | 10 | 8473249 | 8473274 | 2 | 13 | 26 | GA   | 19 | 8  |
| 103644 | 10 | 8474120 | 8474143 | 3 | 8  | 24 | TCC  | 24 | 3  |
| 103647 | 10 | 8478944 | 8478969 | 2 | 13 | 26 | GT   | 24 | 6  |
| 103650 | 10 | 8491246 | 8491263 | 2 | 9  | 18 | AC   | 21 | 9  |
| 103651 | 10 | 8491387 | 8491402 | 2 | 8  | 16 | TG   | 9  | 10 |



|        |    |         |         |   |    |    |      |    |    |
|--------|----|---------|---------|---|----|----|------|----|----|
| 103652 | 10 | 8491405 | 8491420 | 2 | 8  | 16 | TG   | 11 | 9  |
| 103653 | 10 | 8492555 | 8492570 | 2 | 8  | 16 | TG   | 20 | 5  |
| 103654 | 10 | 8494051 | 8494072 | 2 | 11 | 22 | GT   | 19 | 12 |
| 103655 | 10 | 8495518 | 8495549 | 2 | 16 | 32 | TG   | 14 | 7  |
| 103656 | 10 | 8496631 | 8496646 | 2 | 8  | 16 | AC   | 18 | 5  |
| 103659 | 10 | 8496991 | 8497032 | 2 | 21 | 42 | AC   | 15 | 11 |
| 103664 | 10 | 8506121 | 8506140 | 2 | 10 | 20 | CA   | 20 | 5  |
| 103665 | 10 | 8507650 | 8507664 | 3 | 5  | 15 | GGT  | 27 | 10 |
| 103666 | 10 | 8507741 | 8507760 | 4 | 5  | 20 | GGGA | 7  | 9  |
| 103673 | 10 | 8513303 | 8513324 | 2 | 11 | 22 | AC   | 23 | 8  |
| 103678 | 10 | 8516646 | 8516667 | 2 | 11 | 22 | CA   | 14 | 11 |
| 103679 | 10 | 8519009 | 8519022 | 2 | 7  | 14 | AC   | 18 | 3  |
| 103680 | 10 | 8519160 | 8519183 | 4 | 6  | 24 | TTTA | 9  | 4  |
| 103681 | 10 | 8519706 | 8519733 | 4 | 7  | 28 | AGTT | 25 | 5  |
| 103682 | 10 | 8520102 | 8520117 | 4 | 4  | 16 | GTTA | 13 | 5  |
| 103690 | 10 | 8544469 | 8544496 | 4 | 7  | 28 | AGTC | 24 | 3  |
| 103691 | 10 | 8545067 | 8545082 | 4 | 4  | 16 | CCAC | 12 | 4  |
| 103692 | 10 | 8548566 | 8548595 | 2 | 15 | 30 | AC   | 14 | 6  |
| 103699 | 10 | 8554212 | 8554223 | 2 | 6  | 12 | GT   | 19 | 3  |
| 103700 | 10 | 8554763 | 8554782 | 2 | 10 | 20 | TG   | 21 | 4  |
| 103706 | 10 | 8558307 | 8558328 | 2 | 11 | 22 | TG   | 24 | 7  |
| 103707 | 10 | 8558451 | 8558482 | 2 | 16 | 32 | CA   | 16 | 8  |
| 103708 | 10 | 8559211 | 8559226 | 2 | 8  | 16 | GA   | 28 | 3  |
| 103715 | 10 | 8565898 | 8565909 | 2 | 6  | 12 | AC   | 28 | 4  |
| 103716 | 10 | 8570014 | 8570057 | 2 | 22 | 44 | TG   | 13 | 13 |
| 103721 | 10 | 8571673 | 8571690 | 2 | 9  | 18 | GT   | 12 | 9  |
| 103722 | 10 | 8571693 | 8571708 | 2 | 8  | 16 | GT   | 10 | 7  |
| 103724 | 10 | 8572057 | 8572082 | 2 | 13 | 26 | AC   | 13 | 8  |
| 103726 | 10 | 8572872 | 8572921 | 2 | 25 | 50 | CA   | 6  | 5  |
| 103727 | 10 | 8577180 | 8577201 | 2 | 11 | 22 | GT   | 14 | 3  |
| 103731 | 10 | 8582890 | 8582903 | 2 | 7  | 14 | TG   | 20 | 5  |
| 103732 | 10 | 8583017 | 8583036 | 2 | 10 | 20 | TG   | 16 | 9  |
| 103733 | 10 | 8583345 | 8583360 | 2 | 8  | 16 | TC   | 23 | 5  |
| 103734 | 10 | 8583361 | 8583374 | 2 | 7  | 14 | AC   | 26 | 5  |
| 103736 | 10 | 8587050 | 8587061 | 2 | 6  | 12 | TG   | 22 | 3  |
| 103737 | 10 | 8588036 | 8588050 | 3 | 5  | 15 | CCG  | 9  | 3  |
| 103739 | 10 | 8591388 | 8591405 | 3 | 6  | 18 | CAA  | 23 | 4  |
| 103745 | 10 | 8597562 | 8597577 | 2 | 8  | 16 | TG   | 14 | 7  |
| 103746 | 10 | 8597578 | 8597589 | 2 | 6  | 12 | AG   | 17 | 4  |
| 103748 | 10 | 8599712 | 8599727 | 2 | 8  | 16 | GT   | 17 | 3  |
| 103751 | 10 | 8604477 | 8604498 | 2 | 11 | 22 | GT   | 23 | 6  |
| 103752 | 10 | 8604543 | 8604570 | 2 | 14 | 28 | TG   | 18 | 9  |
| 103761 | 10 | 8616849 | 8616862 | 2 | 7  | 14 | TG   | 28 | 3  |
| 103762 | 10 | 8616895 | 8616906 | 2 | 6  | 12 | TG   | 25 | 3  |
| 103764 | 10 | 8618383 | 8618394 | 2 | 6  | 12 | GT   | 15 | 4  |
| 103765 | 10 | 8620006 | 8620021 | 2 | 8  | 16 | TG   | 25 | 4  |
| 103770 | 10 | 8622012 | 8622037 | 2 | 13 | 26 | AC   | 14 | 5  |
| 103771 | 10 | 8622482 | 8622499 | 2 | 9  | 18 | AC   | 29 | 7  |
| 103774 | 10 | 8622819 | 8622832 | 2 | 7  | 14 | TG   | 20 | 5  |
| 103777 | 10 | 8628341 | 8628376 | 2 | 18 | 36 | TG   | 17 | 12 |
| 103782 | 10 | 8634687 | 8634710 | 2 | 12 | 24 | CA   | 13 | 7  |

|        |    |         |         |   |    |    |      |    |    |
|--------|----|---------|---------|---|----|----|------|----|----|
| 103785 | 10 | 8637161 | 8637188 | 2 | 14 | 28 | CA   | 18 | 9  |
| 103786 | 10 | 8637265 | 8637278 | 2 | 7  | 14 | GT   | 9  | 7  |
| 103789 | 10 | 8638536 | 8638565 | 2 | 15 | 30 | GT   | 8  | 7  |
| 103791 | 10 | 8641362 | 8641385 | 2 | 12 | 24 | CA   | 16 | 10 |
| 103792 | 10 | 8642471 | 8642486 | 2 | 8  | 16 | TG   | 24 | 5  |
| 103793 | 10 | 8646554 | 8646575 | 2 | 11 | 22 | CA   | 14 | 14 |
| 103800 | 10 | 8661984 | 8661998 | 3 | 5  | 15 | TTG  | 23 | 4  |
| 103802 | 10 | 8697401 | 8697424 | 4 | 6  | 24 | ATTT | 25 | 3  |
| 103803 | 10 | 8698259 | 8698286 | 4 | 7  | 28 | ATTT | 20 | 6  |
| 103804 | 10 | 8699150 | 8699161 | 2 | 6  | 12 | TG   | 21 | 9  |
| 103805 | 10 | 8700185 | 8700198 | 2 | 7  | 14 | AC   | 27 | 3  |
| 103806 | 10 | 8703833 | 8703856 | 3 | 8  | 24 | CCT  | 17 | 10 |
| 103807 | 10 | 8703987 | 8704018 | 2 | 16 | 32 | GT   | 6  | 5  |
| 103808 | 10 | 8709559 | 8709572 | 2 | 7  | 14 | AC   | 29 | 5  |
| 103812 | 10 | 8725152 | 8725163 | 2 | 6  | 12 | GT   | 13 | 5  |
| 103813 | 10 | 8725168 | 8725181 | 2 | 7  | 14 | GT   | 8  | 3  |
| 103814 | 10 | 8728831 | 8728852 | 2 | 11 | 22 | AC   | 28 | 4  |
| 103821 | 10 | 8768924 | 8768938 | 3 | 5  | 15 | ATG  | 31 | 3  |
| 103827 | 10 | 8779501 | 8779524 | 3 | 8  | 24 | TCT  | 21 | 3  |
| 103832 | 10 | 8785277 | 8785291 | 3 | 5  | 15 | ATC  | 26 | 5  |
| 103845 | 10 | 8817686 | 8817719 | 2 | 17 | 34 | AC   | 9  | 8  |
| 103846 | 10 | 8820107 | 8820126 | 2 | 10 | 20 | CA   | 18 | 9  |
| 103848 | 10 | 8820310 | 8820331 | 2 | 11 | 22 | CA   | 14 | 6  |
| 103849 | 10 | 8820439 | 8820450 | 2 | 6  | 12 | CA   | 13 | 3  |
| 103853 | 10 | 8820660 | 8820675 | 2 | 8  | 16 | TG   | 16 | 4  |
| 103863 | 10 | 8827548 | 8827593 | 2 | 23 | 46 | AC   | 24 | 11 |
| 103865 | 10 | 8831168 | 8831191 | 2 | 12 | 24 | AC   | 11 | 7  |
| 103866 | 10 | 8831439 | 8831492 | 2 | 27 | 54 | CA   | 11 | 14 |
| 103867 | 10 | 8831613 | 8831630 | 2 | 9  | 18 | CA   | 26 | 9  |
| 103869 | 10 | 8833254 | 8833279 | 2 | 13 | 26 | AC   | 11 | 7  |
| 103871 | 10 | 8836610 | 8836625 | 2 | 8  | 16 | TG   | 19 | 4  |
| 103872 | 10 | 8840218 | 8840261 | 2 | 22 | 44 | TG   | 9  | 10 |
| 103874 | 10 | 8842338 | 8842349 | 2 | 6  | 12 | CA   | 29 | 8  |
| 103875 | 10 | 8843061 | 8843086 | 2 | 13 | 26 | AC   | 20 | 5  |
| 103876 | 10 | 8845089 | 8845108 | 2 | 10 | 20 | GA   | 17 | 6  |
| 103888 | 10 | 8867140 | 8867155 | 4 | 4  | 16 | AAAT | 28 | 3  |
| 103890 | 10 | 8871456 | 8871479 | 2 | 12 | 24 | TG   | 16 | 12 |
| 103899 | 10 | 8896967 | 8896984 | 3 | 6  | 18 | GTA  | 29 | 3  |
| 103906 | 10 | 8912151 | 8912165 | 3 | 5  | 15 | GGA  | 24 | 3  |
| 103907 | 10 | 8912373 | 8912392 | 2 | 10 | 20 | CA   | 10 | 7  |
| 103911 | 10 | 8920573 | 8920593 | 3 | 7  | 21 | AAC  | 27 | 4  |
| 103923 | 10 | 8928646 | 8928671 | 2 | 13 | 26 | TG   | 13 | 3  |
| 103926 | 10 | 8931810 | 8931841 | 2 | 16 | 32 | AC   | 9  | 10 |
| 103928 | 10 | 8935976 | 8935999 | 2 | 12 | 24 | CT   | 21 | 6  |
| 103930 | 10 | 8949119 | 8949136 | 2 | 9  | 18 | TG   | 19 | 4  |
| 103931 | 10 | 8949458 | 8949473 | 2 | 8  | 16 | TC   | 10 | 3  |
| 103936 | 10 | 8959127 | 8959140 | 2 | 7  | 14 | GT   | 13 | 6  |
| 103941 | 10 | 8984237 | 8984257 | 3 | 7  | 21 | TTA  | 11 | 4  |
| 103943 | 10 | 8990598 | 8990613 | 4 | 4  | 16 | AACA | 28 | 3  |
| 103949 | 10 | 9012762 | 9012781 | 4 | 5  | 20 | TAAA | 23 | 3  |
| 103956 | 10 | 9047847 | 9047876 | 2 | 15 | 30 | AC   | 15 | 6  |

|        |    |         |         |   |    |    |      |    |    |
|--------|----|---------|---------|---|----|----|------|----|----|
| 103976 | 10 | 9105128 | 9105157 | 2 | 15 | 30 | CA   | 14 | 8  |
| 103978 | 10 | 9108774 | 9108785 | 2 | 6  | 12 | TC   | 27 | 4  |
| 103981 | 10 | 9114380 | 9114393 | 2 | 7  | 14 | TG   | 21 | 4  |
| 103986 | 10 | 9151203 | 9151232 | 2 | 15 | 30 | CA   | 19 | 11 |
| 103990 | 10 | 9170378 | 9170399 | 2 | 11 | 22 | TG   | 16 | 7  |
| 103998 | 10 | 9183714 | 9183733 | 2 | 10 | 20 | AC   | 17 | 10 |
| 104000 | 10 | 9187505 | 9187530 | 2 | 13 | 26 | AC   | 13 | 9  |
| 104001 | 10 | 9187593 | 9187608 | 2 | 8  | 16 | CA   | 18 | 5  |
| 104007 | 10 | 9209247 | 9209274 | 2 | 14 | 28 | CA   | 18 | 7  |
| 104009 | 10 | 9217539 | 9217552 | 2 | 7  | 14 | AG   | 24 | 3  |
| 104018 | 10 | 9227899 | 9227912 | 2 | 7  | 14 | AC   | 32 | 3  |
| 104020 | 10 | 9233355 | 9233374 | 2 | 10 | 20 | GT   | 15 | 14 |
| 104022 | 10 | 9238916 | 9238933 | 2 | 9  | 18 | AG   | 24 | 5  |
| 104023 | 10 | 9239023 | 9239076 | 2 | 27 | 54 | AC   | 11 | 14 |
| 104029 | 10 | 9254972 | 9254989 | 2 | 9  | 18 | GA   | 14 | 5  |
| 104035 | 10 | 9259885 | 9259898 | 2 | 7  | 14 | TG   | 21 | 4  |
| 104041 | 10 | 9268134 | 9268157 | 2 | 12 | 24 | AG   | 16 | 12 |
| 104044 | 10 | 9276051 | 9276090 | 4 | 10 | 40 | TTGA | 16 | 14 |
| 104053 | 10 | 9295872 | 9295885 | 2 | 7  | 14 | AC   | 16 | 9  |
| 104054 | 10 | 9295887 | 9295898 | 2 | 6  | 12 | CA   | 20 | 9  |
| 104067 | 10 | 9312861 | 9312884 | 4 | 6  | 24 | CTTA | 21 | 4  |
| 104070 | 10 | 9320677 | 9320688 | 2 | 6  | 12 | TG   | 26 | 4  |
| 104071 | 10 | 9320690 | 9320705 | 2 | 8  | 16 | GT   | 26 | 4  |
| 104072 | 10 | 9321012 | 9321026 | 3 | 5  | 15 | CCA  | 25 | 4  |
| 104073 | 10 | 9322508 | 9322529 | 2 | 11 | 22 | TG   | 24 | 3  |
| 104075 | 10 | 9330908 | 9330921 | 2 | 7  | 14 | GT   | 30 | 3  |
| 104076 | 10 | 9332040 | 9332059 | 4 | 5  | 20 | AAAC | 28 | 5  |
| 104079 | 10 | 9334524 | 9334541 | 3 | 6  | 18 | GAG  | 24 | 8  |
| 104083 | 10 | 9340404 | 9340437 | 2 | 17 | 34 | TG   | 10 | 7  |
| 104084 | 10 | 9340789 | 9340803 | 3 | 5  | 15 | AGC  | 22 | 4  |
| 104086 | 10 | 9345148 | 9345169 | 2 | 11 | 22 | GT   | 15 | 7  |
| 104087 | 10 | 9347193 | 9347214 | 2 | 11 | 22 | GT   | 16 | 5  |
| 104089 | 10 | 9353924 | 9353955 | 2 | 16 | 32 | TG   | 13 | 6  |
| 104093 | 10 | 9361020 | 9361053 | 2 | 17 | 34 | AG   | 9  | 10 |
| 104096 | 10 | 9361761 | 9361772 | 2 | 6  | 12 | CT   | 16 | 5  |
| 104098 | 10 | 9365177 | 9365192 | 2 | 8  | 16 | CA   | 13 | 10 |
| 104099 | 10 | 9365195 | 9365208 | 2 | 7  | 14 | CA   | 16 | 10 |
| 104100 | 10 | 9365425 | 9365444 | 2 | 10 | 20 | AC   | 13 | 8  |
| 104107 | 10 | 9378070 | 9378083 | 2 | 7  | 14 | CA   | 23 | 3  |
| 104112 | 10 | 9380531 | 9380546 | 2 | 8  | 16 | TG   | 19 | 16 |
| 104114 | 10 | 9381314 | 9381335 | 2 | 11 | 22 | TG   | 20 | 13 |
| 104116 | 10 | 9384823 | 9384837 | 3 | 5  | 15 | GGT  | 33 | 4  |
| 104121 | 10 | 9388409 | 9388434 | 2 | 13 | 26 | AC   | 16 | 15 |
| 104122 | 10 | 9388562 | 9388585 | 2 | 12 | 24 | GT   | 13 | 7  |
| 104123 | 10 | 9388639 | 9388658 | 2 | 10 | 20 | GT   | 12 | 8  |
| 104126 | 10 | 9391189 | 9391204 | 2 | 8  | 16 | AT   | 6  | 3  |
| 104130 | 10 | 9392919 | 9392930 | 2 | 6  | 12 | AT   | 14 | 5  |
| 104132 | 10 | 9395569 | 9395583 | 3 | 5  | 15 | TTG  | 23 | 3  |
| 104133 | 10 | 9396447 | 9396460 | 2 | 7  | 14 | TC   | 9  | 3  |
| 104134 | 10 | 9396700 | 9396713 | 2 | 7  | 14 | TC   | 24 | 4  |
| 104142 | 10 | 9398817 | 9398854 | 2 | 19 | 38 | AG   | 9  | 12 |

|        |    |         |         |   |    |    |      |    |    |
|--------|----|---------|---------|---|----|----|------|----|----|
| 104143 | 10 | 9399575 | 9399589 | 3 | 5  | 15 | AGA  | 16 | 9  |
| 104144 | 10 | 9400121 | 9400146 | 2 | 13 | 26 | GT   | 13 | 6  |
| 104145 | 10 | 9400397 | 9400440 | 4 | 11 | 44 | ATCT | 11 | 10 |
| 104149 | 10 | 9404965 | 9404988 | 2 | 12 | 24 | CA   | 17 | 8  |
| 104150 | 10 | 9405577 | 9405596 | 2 | 10 | 20 | AC   | 15 | 9  |
| 104154 | 10 | 9412829 | 9412844 | 2 | 8  | 16 | CA   | 27 | 6  |
| 104155 | 10 | 9415698 | 9415715 | 2 | 9  | 18 | AC   | 22 | 4  |
| 104156 | 10 | 9417057 | 9417076 | 2 | 10 | 20 | AG   | 17 | 8  |
| 104159 | 10 | 9417289 | 9417314 | 2 | 13 | 26 | TG   | 14 | 5  |
| 104161 | 10 | 9417735 | 9417766 | 2 | 16 | 32 | AC   | 7  | 10 |
| 104162 | 10 | 9417968 | 9417988 | 3 | 7  | 21 | AGG  | 20 | 4  |
| 104163 | 10 | 9418138 | 9418151 | 2 | 7  | 14 | AC   | 20 | 3  |
| 104169 | 10 | 9419659 | 9419674 | 2 | 8  | 16 | AC   | 25 | 4  |
| 104171 | 10 | 9420827 | 9420844 | 2 | 9  | 18 | CA   | 16 | 6  |
| 104173 | 10 | 9423106 | 9423141 | 2 | 18 | 36 | AC   | 13 | 14 |
| 104174 | 10 | 9423346 | 9423379 | 2 | 17 | 34 | CA   | 17 | 16 |
| 104176 | 10 | 9423959 | 9423982 | 2 | 12 | 24 | GT   | 17 | 11 |
| 104177 | 10 | 9424098 | 9424119 | 2 | 11 | 22 | GT   | 17 | 8  |
| 104181 | 10 | 9426502 | 9426525 | 2 | 12 | 24 | AC   | 23 | 5  |
| 104182 | 10 | 9426583 | 9426612 | 2 | 15 | 30 | CA   | 15 | 8  |
| 104183 | 10 | 9426723 | 9426750 | 2 | 14 | 28 | AC   | 21 | 7  |
| 104185 | 10 | 9426913 | 9426948 | 2 | 18 | 36 | TG   | 10 | 6  |
| 104187 | 10 | 9428445 | 9428458 | 2 | 7  | 14 | GT   | 29 | 5  |
| 104188 | 10 | 9428995 | 9429010 | 2 | 8  | 16 | GT   | 7  | 10 |
| 104192 | 10 | 9430758 | 9430773 | 2 | 8  | 16 | GT   | 25 | 5  |
| 104193 | 10 | 9432025 | 9432050 | 2 | 13 | 26 | AC   | 12 | 9  |
| 104194 | 10 | 9435353 | 9435364 | 2 | 6  | 12 | GT   | 25 | 4  |
| 104195 | 10 | 9435518 | 9435532 | 3 | 5  | 15 | TTC  | 29 | 4  |
| 104196 | 10 | 9437105 | 9437118 | 2 | 7  | 14 | GT   | 18 | 9  |
| 104198 | 10 | 9437815 | 9437828 | 2 | 7  | 14 | CT   | 16 | 5  |
| 104199 | 10 | 9438526 | 9438537 | 2 | 6  | 12 | CA   | 27 | 4  |
| 104211 | 10 | 9451785 | 9451810 | 2 | 13 | 26 | CT   | 9  | 3  |
| 104214 | 10 | 9457671 | 9457685 | 3 | 5  | 15 | CCA  | 24 | 3  |
| 104217 | 10 | 9459156 | 9459171 | 2 | 8  | 16 | TG   | 19 | 8  |
| 104222 | 10 | 9463811 | 9463840 | 2 | 15 | 30 | TG   | 15 | 9  |
| 104223 | 10 | 9463904 | 9463921 | 2 | 9  | 18 | TG   | 22 | 6  |
| 104227 | 10 | 9466705 | 9466722 | 2 | 9  | 18 | TG   | 21 | 8  |
| 104236 | 10 | 9482214 | 9482249 | 2 | 18 | 36 | CA   | 16 | 15 |
| 104241 | 10 | 9490364 | 9490379 | 4 | 4  | 16 | ACTC | 30 | 3  |
| 104244 | 10 | 9493020 | 9493047 | 2 | 14 | 28 | CA   | 12 | 4  |
| 104248 | 10 | 9497097 | 9497116 | 2 | 10 | 20 | TG   | 16 | 7  |
| 104255 | 10 | 9507103 | 9507114 | 2 | 6  | 12 | GA   | 34 | 3  |
| 104259 | 10 | 9512085 | 9512114 | 2 | 15 | 30 | CA   | 14 | 17 |
| 104261 | 10 | 9519351 | 9519366 | 4 | 4  | 16 | CAAA | 27 | 6  |
| 104263 | 10 | 9526824 | 9526835 | 2 | 6  | 12 | GT   | 26 | 5  |
| 104264 | 10 | 9528815 | 9528829 | 3 | 5  | 15 | TGC  | 25 | 3  |
| 104265 | 10 | 9535028 | 9535048 | 3 | 7  | 21 | GAG  | 15 | 6  |
| 104266 | 10 | 9539029 | 9539042 | 2 | 7  | 14 | TG   | 23 | 8  |
| 104271 | 10 | 9546380 | 9546401 | 2 | 11 | 22 | AC   | 17 | 13 |
| 104273 | 10 | 9547657 | 9547670 | 2 | 7  | 14 | TG   | 20 | 3  |
| 104274 | 10 | 9547790 | 9547837 | 2 | 24 | 48 | AC   | 6  | 7  |

|        |    |         |         |   |    |    |      |    |    |
|--------|----|---------|---------|---|----|----|------|----|----|
| 104276 | 10 | 9550121 | 9550162 | 2 | 21 | 42 | GT   | 14 | 12 |
| 104277 | 10 | 9550239 | 9550272 | 2 | 17 | 34 | CT   | 19 | 8  |
| 104280 | 10 | 9552057 | 9552078 | 2 | 11 | 22 | GT   | 17 | 9  |
| 104281 | 10 | 9554632 | 9554661 | 2 | 15 | 30 | CA   | 15 | 10 |
| 104282 | 10 | 9554796 | 9554827 | 2 | 16 | 32 | TG   | 14 | 12 |
| 104285 | 10 | 9560237 | 9560248 | 2 | 6  | 12 | CT   | 11 | 4  |
| 104291 | 10 | 9568864 | 9568907 | 2 | 22 | 44 | TG   | 6  | 10 |
| 104299 | 10 | 9576274 | 9576291 | 3 | 6  | 18 | TCC  | 26 | 5  |
| 104300 | 10 | 9576604 | 9576629 | 2 | 13 | 26 | GT   | 15 | 8  |
| 104310 | 10 | 9590886 | 9590925 | 2 | 20 | 40 | CA   | 11 | 9  |
| 104312 | 10 | 9596042 | 9596059 | 3 | 6  | 18 | AGA  | 17 | 4  |
| 104314 | 10 | 9596320 | 9596343 | 2 | 12 | 24 | CA   | 18 | 11 |
| 104315 | 10 | 9596601 | 9596624 | 2 | 12 | 24 | AC   | 15 | 8  |
| 104316 | 10 | 9596649 | 9596660 | 2 | 6  | 12 | CA   | 23 | 4  |
| 104317 | 10 | 9596786 | 9596797 | 2 | 6  | 12 | CA   | 17 | 5  |
| 104319 | 10 | 9597077 | 9597092 | 4 | 4  | 16 | CACG | 15 | 8  |
| 104320 | 10 | 9597093 | 9597110 | 2 | 9  | 18 | CA   | 12 | 10 |
| 104325 | 10 | 9623856 | 9623881 | 2 | 13 | 26 | AC   | 21 | 10 |
| 104326 | 10 | 9624798 | 9624833 | 2 | 18 | 36 | AC   | 16 | 11 |
| 104327 | 10 | 9626115 | 9626128 | 2 | 7  | 14 | AC   | 30 | 3  |
| 104328 | 10 | 9626451 | 9626468 | 3 | 6  | 18 | ATT  | 16 | 4  |
| 104333 | 10 | 9650187 | 9650220 | 2 | 17 | 34 | AG   | 12 | 7  |
| 104334 | 10 | 9650428 | 9650439 | 2 | 6  | 12 | AC   | 17 | 9  |
| 104345 | 10 | 9665253 | 9665273 | 3 | 7  | 21 | ACA  | 23 | 7  |
| 104349 | 10 | 9675885 | 9675906 | 2 | 11 | 22 | CA   | 18 | 9  |
| 104350 | 10 | 9678735 | 9678766 | 4 | 8  | 32 | TAGA | 28 | 9  |
| 104356 | 10 | 9707273 | 9707290 | 2 | 9  | 18 | GA   | 17 | 3  |
| 104357 | 10 | 9715405 | 9715424 | 2 | 10 | 20 | AC   | 15 | 9  |
| 104359 | 10 | 9719585 | 9719608 | 2 | 12 | 24 | AC   | 10 | 8  |
| 104363 | 10 | 9723889 | 9723916 | 2 | 14 | 28 | AC   | 8  | 9  |
| 104369 | 10 | 9736423 | 9736442 | 2 | 10 | 20 | CT   | 11 | 3  |
| 104374 | 10 | 9742485 | 9742498 | 2 | 7  | 14 | CA   | 12 | 4  |
| 104376 | 10 | 9744552 | 9744593 | 2 | 21 | 42 | GT   | 13 | 12 |
| 104377 | 10 | 9744915 | 9744930 | 2 | 8  | 16 | TG   | 18 | 12 |
| 104381 | 10 | 9748738 | 9748763 | 2 | 13 | 26 | GT   | 28 | 9  |
| 104400 | 10 | 9797445 | 9797498 | 2 | 27 | 54 | AC   | 10 | 10 |
| 104403 | 10 | 9807956 | 9807977 | 2 | 11 | 22 | GT   | 22 | 4  |
| 104408 | 10 | 9820995 | 9821015 | 3 | 7  | 21 | TGA  | 15 | 5  |
| 104414 | 10 | 9828145 | 9828170 | 2 | 13 | 26 | TG   | 15 | 8  |
| 104420 | 10 | 9845324 | 9845341 | 3 | 6  | 18 | ATC  | 22 | 3  |
| 104427 | 10 | 9862142 | 9862156 | 3 | 5  | 15 | CAA  | 27 | 3  |
| 104431 | 10 | 9878980 | 9878995 | 2 | 8  | 16 | CT   | 16 | 5  |
| 104433 | 10 | 9880195 | 9880216 | 2 | 11 | 22 | TG   | 13 | 3  |
| 104446 | 10 | 9927763 | 9927774 | 2 | 6  | 12 | AC   | 23 | 5  |
| 104450 | 10 | 9937371 | 9937382 | 2 | 6  | 12 | GT   | 15 | 10 |
| 104461 | 10 | 9952006 | 9952041 | 3 | 12 | 36 | TCC  | 6  | 4  |
| 104465 | 10 | 9958304 | 9958347 | 2 | 22 | 44 | TG   | 10 | 13 |
| 104467 | 10 | 9964049 | 9964062 | 2 | 7  | 14 | CA   | 19 | 5  |
| 104472 | 10 | 9971341 | 9971372 | 4 | 8  | 32 | GTCT | 21 | 4  |
| 104479 | 10 | 9980200 | 9980225 | 2 | 13 | 26 | TG   | 15 | 9  |
| 104481 | 10 | 9980358 | 9980371 | 2 | 7  | 14 | GT   | 33 | 3  |

|        |    |          |          |   |    |    |      |    |    |
|--------|----|----------|----------|---|----|----|------|----|----|
| 104486 | 10 | 10000722 | 10000748 | 3 | 9  | 27 | GTA  | 11 | 10 |
| 104490 | 10 | 10015977 | 10016000 | 2 | 12 | 24 | GA   | 10 | 7  |
| 104493 | 10 | 10017906 | 10017923 | 2 | 9  | 18 | GT   | 15 | 8  |
| 104495 | 10 | 10018965 | 10018992 | 2 | 14 | 28 | CT   | 14 | 11 |
| 104499 | 10 | 10021333 | 10021366 | 2 | 17 | 34 | CA   | 6  | 9  |
| 104502 | 10 | 10022194 | 10022238 | 3 | 15 | 45 | GAA  | 26 | 13 |
| 104504 | 10 | 10025105 | 10025116 | 2 | 6  | 12 | TC   | 28 | 8  |
| 104505 | 10 | 10025926 | 10025937 | 2 | 6  | 12 | AT   | 9  | 3  |
| 104508 | 10 | 10026876 | 10026921 | 2 | 23 | 46 | CA   | 10 | 9  |
| 104511 | 10 | 10027716 | 10027742 | 3 | 9  | 27 | TCC  | 20 | 9  |
| 104512 | 10 | 10029211 | 10029224 | 2 | 7  | 14 | TG   | 23 | 8  |
| 104513 | 10 | 10029998 | 10030017 | 2 | 10 | 20 | AC   | 32 | 5  |
| 104515 | 10 | 10035785 | 10035796 | 2 | 6  | 12 | AC   | 18 | 4  |
| 104516 | 10 | 10036672 | 10036689 | 2 | 9  | 18 | TG   | 21 | 4  |
| 104517 | 10 | 10036758 | 10036771 | 2 | 7  | 14 | CA   | 22 | 3  |
| 104518 | 10 | 10036924 | 10036935 | 2 | 6  | 12 | GT   | 22 | 3  |
| 104520 | 10 | 10037316 | 10037333 | 3 | 6  | 18 | AGG  | 22 | 4  |
| 104521 | 10 | 10038011 | 10038026 | 2 | 8  | 16 | AC   | 13 | 8  |
| 104523 | 10 | 10038361 | 10038380 | 2 | 10 | 20 | TG   | 13 | 4  |
| 104524 | 10 | 10039069 | 10039080 | 2 | 6  | 12 | CA   | 23 | 3  |
| 104536 | 10 | 10051239 | 10051250 | 2 | 6  | 12 | GT   | 19 | 3  |
| 104537 | 10 | 10051328 | 10051351 | 2 | 12 | 24 | CA   | 27 | 7  |
| 104538 | 10 | 10051464 | 10051481 | 3 | 6  | 18 | AGA  | 22 | 4  |
| 104542 | 10 | 10053802 | 10053829 | 2 | 14 | 28 | AC   | 22 | 7  |
| 104545 | 10 | 10056895 | 10056918 | 2 | 12 | 24 | TG   | 13 | 6  |
| 104550 | 10 | 10063674 | 10063687 | 2 | 7  | 14 | AC   | 26 | 3  |
| 104556 | 10 | 10067538 | 10067555 | 2 | 9  | 18 | AC   | 10 | 3  |
| 104558 | 10 | 10070186 | 10070207 | 2 | 11 | 22 | GA   | 14 | 6  |
| 104562 | 10 | 10074472 | 10074489 | 2 | 9  | 18 | TG   | 13 | 7  |
| 104567 | 10 | 10089518 | 10089553 | 2 | 18 | 36 | GT   | 19 | 14 |
| 104569 | 10 | 10091876 | 10091893 | 2 | 9  | 18 | GT   | 15 | 9  |
| 104572 | 10 | 10093751 | 10093772 | 2 | 11 | 22 | CA   | 22 | 9  |
| 104573 | 10 | 10094056 | 10094091 | 2 | 18 | 36 | TG   | 13 | 10 |
| 104585 | 10 | 10110905 | 10110926 | 2 | 11 | 22 | GT   | 6  | 5  |
| 104587 | 10 | 10111100 | 10111125 | 2 | 13 | 26 | GT   | 18 | 16 |
| 104594 | 10 | 10120446 | 10120459 | 2 | 7  | 14 | GT   | 17 | 3  |
| 104595 | 10 | 10120562 | 10120591 | 2 | 15 | 30 | GT   | 13 | 7  |
| 104596 | 10 | 10121500 | 10121559 | 4 | 15 | 60 | AGAA | 9  | 7  |
| 104609 | 10 | 10130213 | 10130233 | 3 | 7  | 21 | TAG  | 20 | 6  |
| 104618 | 10 | 10137233 | 10137264 | 2 | 16 | 32 | GT   | 16 | 11 |
| 104621 | 10 | 10143974 | 10143989 | 2 | 8  | 16 | CA   | 13 | 6  |
| 104631 | 10 | 10165409 | 10165438 | 2 | 15 | 30 | GT   | 13 | 12 |
| 104636 | 10 | 10169897 | 10169914 | 2 | 9  | 18 | TG   | 20 | 8  |
| 104642 | 10 | 10173607 | 10173620 | 2 | 7  | 14 | GT   | 21 | 8  |
| 104643 | 10 | 10173805 | 10173838 | 2 | 17 | 34 | CT   | 13 | 12 |
| 104645 | 10 | 10174052 | 10174063 | 2 | 6  | 12 | CT   | 13 | 3  |
| 104646 | 10 | 10175014 | 10175033 | 2 | 10 | 20 | TC   | 21 | 16 |
| 104648 | 10 | 10175791 | 10175810 | 2 | 10 | 20 | CA   | 12 | 5  |
| 104657 | 10 | 10178777 | 10178798 | 2 | 11 | 22 | CA   | 23 | 11 |
| 104659 | 10 | 10179453 | 10179467 | 3 | 5  | 15 | TTC  | 14 | 4  |
| 104660 | 10 | 10180038 | 10180065 | 2 | 14 | 28 | GT   | 12 | 8  |

|        |    |          |          |   |    |    |      |    |    |
|--------|----|----------|----------|---|----|----|------|----|----|
| 104667 | 10 | 10180987 | 10181000 | 2 | 7  | 14 | GT   | 27 | 5  |
| 104669 | 10 | 10181996 | 10182013 | 2 | 9  | 18 | GT   | 13 | 5  |
| 104670 | 10 | 10182484 | 10182499 | 2 | 8  | 16 | CA   | 21 | 6  |
| 104671 | 10 | 10182628 | 10182649 | 2 | 11 | 22 | CA   | 14 | 9  |
| 104676 | 10 | 10187982 | 10188011 | 2 | 15 | 30 | AC   | 10 | 14 |
| 104679 | 10 | 10189566 | 10189601 | 2 | 18 | 36 | GT   | 14 | 14 |
| 104691 | 10 | 10198766 | 10198783 | 2 | 9  | 18 | CA   | 6  | 6  |
| 104692 | 10 | 10199543 | 10199572 | 2 | 15 | 30 | TG   | 19 | 7  |
| 104694 | 10 | 10200081 | 10200100 | 2 | 10 | 20 | CA   | 14 | 6  |
| 104696 | 10 | 10200827 | 10200838 | 2 | 6  | 12 | TG   | 16 | 4  |
| 104734 | 10 | 10233307 | 10233322 | 2 | 8  | 16 | TG   | 18 | 6  |
| 104735 | 10 | 10234006 | 10234019 | 2 | 7  | 14 | TG   | 15 | 6  |
| 104736 | 10 | 10234084 | 10234127 | 2 | 22 | 44 | TG   | 16 | 9  |
| 104737 | 10 | 10234332 | 10234345 | 2 | 7  | 14 | GT   | 17 | 10 |
| 104738 | 10 | 10235490 | 10235515 | 2 | 13 | 26 | CA   | 17 | 9  |
| 104740 | 10 | 10237940 | 10237965 | 2 | 13 | 26 | TG   | 13 | 8  |
| 104747 | 10 | 10246567 | 10246590 | 2 | 12 | 24 | CA   | 7  | 6  |
| 104752 | 10 | 10248572 | 10248607 | 4 | 9  | 36 | TCTA | 6  | 6  |
| 104756 | 10 | 10250859 | 10250870 | 2 | 6  | 12 | CA   | 27 | 11 |
| 104757 | 10 | 10251357 | 10251368 | 2 | 6  | 12 | GT   | 10 | 4  |
| 104758 | 10 | 10251371 | 10251388 | 2 | 9  | 18 | GT   | 7  | 5  |
| 104760 | 10 | 10252960 | 10252981 | 2 | 11 | 22 | TC   | 16 | 8  |
| 104762 | 10 | 10256280 | 10256297 | 3 | 6  | 18 | AAC  | 24 | 3  |
| 104768 | 10 | 10261258 | 10261287 | 2 | 15 | 30 | TG   | 11 | 11 |
| 104769 | 10 | 10262983 | 10263012 | 2 | 15 | 30 | GA   | 11 | 6  |
| 104773 | 10 | 10268209 | 10268230 | 2 | 11 | 22 | TG   | 10 | 8  |
| 104775 | 10 | 10270243 | 10270256 | 2 | 7  | 14 | CA   | 26 | 4  |
| 104776 | 10 | 10270394 | 10270409 | 2 | 8  | 16 | TG   | 16 | 9  |
| 104778 | 10 | 10270646 | 10270673 | 2 | 14 | 28 | CA   | 28 | 8  |
| 104794 | 10 | 10291751 | 10291768 | 2 | 9  | 18 | GT   | 20 | 7  |
| 104805 | 10 | 10320864 | 10320887 | 2 | 12 | 24 | AG   | 8  | 6  |
| 104811 | 10 | 10331595 | 10331616 | 2 | 11 | 22 | TG   | 20 | 12 |
| 104813 | 10 | 10334770 | 10334785 | 2 | 8  | 16 | CA   | 13 | 6  |
| 104822 | 10 | 10341532 | 10341565 | 2 | 17 | 34 | AC   | 15 | 9  |
| 104828 | 10 | 10350765 | 10350776 | 2 | 6  | 12 | TG   | 25 | 4  |
| 104837 | 10 | 10387229 | 10387252 | 2 | 12 | 24 | GT   | 19 | 9  |
| 104845 | 10 | 10404225 | 10404238 | 2 | 7  | 14 | CA   | 22 | 9  |
| 104849 | 10 | 10411500 | 10411517 | 2 | 9  | 18 | GT   | 17 | 3  |
| 104852 | 10 | 10416150 | 10416163 | 2 | 7  | 14 | TG   | 20 | 3  |
| 104856 | 10 | 10432942 | 10432981 | 2 | 20 | 40 | TG   | 11 | 13 |
| 104861 | 10 | 10444378 | 10444392 | 3 | 5  | 15 | TTC  | 6  | 5  |
| 104867 | 10 | 10453576 | 10453595 | 2 | 10 | 20 | AC   | 21 | 9  |
| 104868 | 10 | 10459490 | 10459507 | 2 | 9  | 18 | TG   | 24 | 6  |
| 104869 | 10 | 10459665 | 10459676 | 2 | 6  | 12 | GT   | 23 | 6  |
| 104870 | 10 | 10461351 | 10461370 | 2 | 10 | 20 | GT   | 18 | 9  |
| 104872 | 10 | 10464454 | 10464467 | 2 | 7  | 14 | GT   | 19 | 7  |
| 104874 | 10 | 10468327 | 10468358 | 2 | 16 | 32 | AC   | 19 | 20 |
| 104878 | 10 | 10488903 | 10488924 | 2 | 11 | 22 | TC   | 15 | 15 |
| 104879 | 10 | 10489504 | 10489515 | 2 | 6  | 12 | AT   | 11 | 6  |
| 104890 | 10 | 10533718 | 10533729 | 2 | 6  | 12 | GT   | 32 | 3  |
| 104891 | 10 | 10533731 | 10533748 | 2 | 9  | 18 | TG   | 26 | 3  |

|        |    |          |          |   |    |    |      |    |    |
|--------|----|----------|----------|---|----|----|------|----|----|
| 104894 | 10 | 10535934 | 10535973 | 2 | 20 | 40 | AC   | 14 | 12 |
| 104895 | 10 | 10537369 | 10537414 | 2 | 23 | 46 | AC   | 8  | 7  |
| 104903 | 10 | 10551809 | 10551836 | 2 | 14 | 28 | TG   | 19 | 9  |
| 104904 | 10 | 10552655 | 10552666 | 2 | 6  | 12 | GT   | 29 | 3  |
| 104907 | 10 | 10555292 | 10555307 | 2 | 8  | 16 | TG   | 23 | 6  |
| 104909 | 10 | 10558432 | 10558461 | 2 | 15 | 30 | GT   | 14 | 11 |
| 104910 | 10 | 10558642 | 10558661 | 2 | 10 | 20 | TG   | 6  | 5  |
| 104913 | 10 | 10561182 | 10561197 | 2 | 8  | 16 | TG   | 22 | 4  |
| 104914 | 10 | 10561517 | 10561537 | 3 | 7  | 21 | CTC  | 20 | 6  |
| 104916 | 10 | 10566600 | 10566645 | 2 | 23 | 46 | AG   | 11 | 11 |
| 104923 | 10 | 10579050 | 10579065 | 2 | 8  | 16 | GT   | 17 | 4  |
| 104935 | 10 | 10596725 | 10596754 | 2 | 15 | 30 | TG   | 7  | 6  |
| 104947 | 10 | 10622862 | 10622887 | 2 | 13 | 26 | TG   | 6  | 5  |
| 104959 | 10 | 10637175 | 10637212 | 2 | 19 | 38 | CT   | 11 | 10 |
| 104960 | 10 | 10640589 | 10640628 | 4 | 10 | 40 | CTTT | 13 | 9  |
| 104976 | 10 | 10662212 | 10662237 | 2 | 13 | 26 | CA   | 18 | 11 |
| 104979 | 10 | 10667878 | 10667897 | 2 | 10 | 20 | TG   | 17 | 8  |
| 104982 | 10 | 10670310 | 10670327 | 2 | 9  | 18 | AC   | 12 | 4  |
| 104983 | 10 | 10670477 | 10670488 | 2 | 6  | 12 | TG   | 13 | 3  |
| 104984 | 10 | 10670491 | 10670502 | 2 | 6  | 12 | TG   | 12 | 4  |
| 104989 | 10 | 10680258 | 10680269 | 2 | 6  | 12 | CA   | 27 | 5  |
| 104993 | 10 | 10685516 | 10685537 | 2 | 11 | 22 | TG   | 11 | 8  |
| 104994 | 10 | 10685713 | 10685728 | 2 | 8  | 16 | GT   | 14 | 5  |
| 105002 | 10 | 10694690 | 10694711 | 2 | 11 | 22 | TG   | 11 | 6  |
| 105005 | 10 | 10698640 | 10698685 | 2 | 23 | 46 | AC   | 7  | 8  |
| 105007 | 10 | 10701480 | 10701509 | 2 | 15 | 30 | AG   | 12 | 9  |
| 105012 | 10 | 10704481 | 10704500 | 2 | 10 | 20 | GA   | 25 | 3  |
| 105018 | 10 | 10706780 | 10706823 | 2 | 22 | 44 | CA   | 14 | 12 |
| 105019 | 10 | 10708689 | 10708718 | 2 | 15 | 30 | CA   | 10 | 10 |
| 105020 | 10 | 10709069 | 10709086 | 2 | 9  | 18 | CA   | 13 | 10 |
| 105021 | 10 | 10709088 | 10709103 | 2 | 8  | 16 | AC   | 10 | 5  |
| 105023 | 10 | 10710661 | 10710672 | 2 | 6  | 12 | AC   | 21 | 6  |
| 105024 | 10 | 10710674 | 10710691 | 2 | 9  | 18 | CA   | 17 | 8  |
| 105025 | 10 | 10710865 | 10710882 | 2 | 9  | 18 | TG   | 19 | 3  |
| 105027 | 10 | 10712527 | 10712548 | 2 | 11 | 22 | GT   | 19 | 10 |
| 105030 | 10 | 10715178 | 10715215 | 2 | 19 | 38 | GA   | 7  | 7  |
| 105031 | 10 | 10718190 | 10718201 | 2 | 6  | 12 | CA   | 22 | 5  |
| 105033 | 10 | 10723345 | 10723382 | 2 | 19 | 38 | GT   | 16 | 19 |
| 105035 | 10 | 10725056 | 10725071 | 2 | 8  | 16 | AC   | 22 | 5  |
| 105038 | 10 | 10730322 | 10730345 | 3 | 8  | 24 | TCC  | 22 | 3  |
| 105039 | 10 | 10730419 | 10730438 | 4 | 5  | 20 | AAAT | 16 | 4  |
| 105043 | 10 | 10736913 | 10736936 | 2 | 12 | 24 | CA   | 19 | 7  |
| 105044 | 10 | 10739612 | 10739623 | 2 | 6  | 12 | TG   | 35 | 4  |
| 105045 | 10 | 10739843 | 10739886 | 4 | 11 | 44 | CTGC | 29 | 18 |
| 105048 | 10 | 10744534 | 10744554 | 3 | 7  | 21 | CTT  | 25 | 7  |
| 105051 | 10 | 10747445 | 10747471 | 3 | 9  | 27 | GAG  | 12 | 7  |
| 105054 | 10 | 10751609 | 10751622 | 2 | 7  | 14 | GT   | 24 | 8  |
| 105055 | 10 | 10752626 | 10752651 | 2 | 13 | 26 | AC   | 12 | 10 |
| 105056 | 10 | 10752774 | 10752795 | 2 | 11 | 22 | CA   | 21 | 5  |
| 105059 | 10 | 10755961 | 10755978 | 2 | 9  | 18 | TA   | 24 | 5  |
| 105075 | 10 | 10774644 | 10774691 | 2 | 24 | 48 | CT   | 10 | 7  |



|        |    |          |          |   |    |    |      |    |    |
|--------|----|----------|----------|---|----|----|------|----|----|
| 105079 | 10 | 10776399 | 10776422 | 2 | 12 | 24 | CA   | 14 | 8  |
| 105080 | 10 | 10777543 | 10777562 | 2 | 10 | 20 | CA   | 19 | 10 |
| 105086 | 10 | 10788952 | 10788981 | 2 | 15 | 30 | TG   | 13 | 13 |
| 105101 | 10 | 10796772 | 10796803 | 4 | 8  | 32 | AGAA | 17 | 11 |
| 105102 | 10 | 10797960 | 10797973 | 2 | 7  | 14 | TA   | 21 | 6  |
| 105105 | 10 | 10803773 | 10803802 | 2 | 15 | 30 | CA   | 20 | 13 |
| 105109 | 10 | 10810774 | 10810813 | 2 | 20 | 40 | AC   | 8  | 12 |
| 105112 | 10 | 10823825 | 10823845 | 3 | 7  | 21 | ACC  | 24 | 6  |
| 105115 | 10 | 10829062 | 10829095 | 2 | 17 | 34 | AC   | 12 | 10 |
| 105116 | 10 | 10841450 | 10841473 | 4 | 6  | 24 | AACA | 25 | 4  |
| 105134 | 10 | 10870137 | 10870150 | 2 | 7  | 14 | TA   | 7  | 3  |
| 105137 | 10 | 10875308 | 10875323 | 2 | 8  | 16 | CA   | 23 | 9  |
| 105138 | 10 | 10876479 | 10876510 | 2 | 16 | 32 | AC   | 17 | 8  |
| 105142 | 10 | 10884731 | 10884748 | 3 | 6  | 18 | TGA  | 16 | 6  |
| 105144 | 10 | 10894519 | 10894539 | 3 | 7  | 21 | CAA  | 21 | 4  |
| 105146 | 10 | 10909537 | 10909560 | 3 | 8  | 24 | GAG  | 19 | 7  |
| 105150 | 10 | 10924881 | 10924894 | 2 | 7  | 14 | GA   | 18 | 4  |
| 105156 | 10 | 10941738 | 10941763 | 2 | 13 | 26 | AC   | 6  | 8  |
| 105158 | 10 | 10948727 | 10948742 | 2 | 8  | 16 | AC   | 25 | 3  |
| 105160 | 10 | 10950560 | 10950577 | 2 | 9  | 18 | TG   | 21 | 10 |
| 105161 | 10 | 10951456 | 10951467 | 2 | 6  | 12 | GT   | 29 | 5  |
| 105166 | 10 | 10958167 | 10958182 | 2 | 8  | 16 | CT   | 27 | 4  |
| 105169 | 10 | 10959656 | 10959669 | 2 | 7  | 14 | GT   | 24 | 3  |
| 105173 | 10 | 10970145 | 10970164 | 2 | 10 | 20 | CA   | 20 | 6  |
| 105175 | 10 | 10976066 | 10976105 | 2 | 20 | 40 | GT   | 13 | 12 |
| 105179 | 10 | 10981247 | 10981264 | 3 | 6  | 18 | GGT  | 25 | 8  |
| 105181 | 10 | 10981805 | 10981818 | 2 | 7  | 14 | CA   | 23 | 7  |
| 105187 | 10 | 10990673 | 10990686 | 2 | 7  | 14 | CA   | 22 | 3  |
| 105190 | 10 | 10997128 | 10997163 | 2 | 18 | 36 | AC   | 11 | 6  |
| 105191 | 10 | 10997475 | 10997488 | 2 | 7  | 14 | TG   | 29 | 4  |
| 105201 | 10 | 11007796 | 11007809 | 2 | 7  | 14 | AC   | 16 | 7  |
| 105202 | 10 | 11007812 | 11007825 | 2 | 7  | 14 | AC   | 15 | 7  |
| 105204 | 10 | 11019465 | 11019492 | 4 | 7  | 28 | TACA | 28 | 5  |
| 105215 | 10 | 11050322 | 11050339 | 3 | 6  | 18 | CTC  | 21 | 3  |
| 105216 | 10 | 11050618 | 11050655 | 2 | 19 | 38 | AC   | 14 | 14 |
| 105225 | 10 | 11067454 | 11067471 | 3 | 6  | 18 | TAC  | 29 | 5  |
| 105227 | 10 | 11069316 | 11069329 | 2 | 7  | 14 | AC   | 23 | 6  |
| 105231 | 10 | 11083397 | 11083440 | 2 | 22 | 44 | GT   | 6  | 11 |
| 105236 | 10 | 11095283 | 11095314 | 4 | 8  | 32 | ATCT | 12 | 7  |
| 105240 | 10 | 11105164 | 11105179 | 2 | 8  | 16 | TG   | 11 | 13 |
| 105241 | 10 | 11105180 | 11105195 | 4 | 4  | 16 | CGTG | 13 | 13 |
| 105242 | 10 | 11105225 | 11105236 | 2 | 6  | 12 | GT   | 13 | 3  |
| 105247 | 10 | 11116329 | 11116344 | 2 | 8  | 16 | GT   | 26 | 5  |
| 105277 | 10 | 11224963 | 11224984 | 2 | 11 | 22 | CA   | 20 | 11 |
| 105281 | 10 | 11226956 | 11226971 | 2 | 8  | 16 | GT   | 15 | 11 |
| 105282 | 10 | 11226974 | 11226989 | 2 | 8  | 16 | GT   | 15 | 13 |
| 105284 | 10 | 11237464 | 11237478 | 3 | 5  | 15 | GCA  | 29 | 6  |
| 105287 | 10 | 11240661 | 11240678 | 2 | 9  | 18 | TG   | 21 | 10 |
| 105293 | 10 | 11248740 | 11248755 | 2 | 8  | 16 | TG   | 23 | 14 |
| 105300 | 10 | 11256658 | 11256681 | 3 | 8  | 24 | AAT  | 13 | 3  |
| 105304 | 10 | 11270915 | 11270930 | 2 | 8  | 16 | CT   | 24 | 3  |

|        |    |          |          |   |    |    |      |    |    |
|--------|----|----------|----------|---|----|----|------|----|----|
| 105306 | 10 | 11273177 | 11273200 | 3 | 8  | 24 | GAA  | 14 | 12 |
| 105307 | 10 | 11276602 | 11276629 | 2 | 14 | 28 | GT   | 23 | 3  |
| 105309 | 10 | 11278924 | 11278935 | 2 | 6  | 12 | AG   | 31 | 6  |
| 105311 | 10 | 11294229 | 11294248 | 2 | 10 | 20 | CA   | 19 | 5  |
| 105340 | 10 | 11359480 | 11359493 | 2 | 7  | 14 | GT   | 16 | 5  |
| 105341 | 10 | 11359590 | 11359609 | 2 | 10 | 20 | TG   | 17 | 4  |
| 105356 | 10 | 11423891 | 11423912 | 2 | 11 | 22 | TG   | 12 | 9  |
| 105363 | 10 | 11432073 | 11432088 | 2 | 8  | 16 | AC   | 24 | 4  |
| 105375 | 10 | 11461038 | 11461061 | 2 | 12 | 24 | TG   | 20 | 15 |
| 105378 | 10 | 11466052 | 11466067 | 2 | 8  | 16 | CA   | 18 | 3  |
| 105383 | 10 | 11477293 | 11477308 | 2 | 8  | 16 | GT   | 23 | 7  |
| 105384 | 10 | 11477789 | 11477803 | 3 | 5  | 15 | CTG  | 19 | 3  |
| 105386 | 10 | 11482703 | 11482718 | 2 | 8  | 16 | CA   | 25 | 5  |
| 105389 | 10 | 11483752 | 11483772 | 3 | 7  | 21 | GAA  | 20 | 3  |
| 105391 | 10 | 11484894 | 11484929 | 3 | 12 | 36 | GAA  | 17 | 9  |
| 105392 | 10 | 11485212 | 11485231 | 2 | 10 | 20 | TG   | 17 | 9  |
| 105393 | 10 | 11485370 | 11485385 | 4 | 4  | 16 | GTGC | 15 | 5  |
| 105394 | 10 | 11485389 | 11485406 | 2 | 9  | 18 | TG   | 15 | 5  |
| 105396 | 10 | 11486387 | 11486412 | 2 | 13 | 26 | TG   | 12 | 10 |
| 105398 | 10 | 11487501 | 11487520 | 4 | 5  | 20 | AAAT | 20 | 13 |
| 105401 | 10 | 11488413 | 11488424 | 2 | 6  | 12 | AC   | 30 | 4  |
| 105408 | 10 | 11502339 | 11502350 | 2 | 6  | 12 | AG   | 28 | 3  |
| 105410 | 10 | 11505289 | 11505308 | 2 | 10 | 20 | TG   | 22 | 13 |
| 105411 | 10 | 11506376 | 11506405 | 2 | 15 | 30 | TG   | 11 | 8  |
| 105412 | 10 | 11510118 | 11510133 | 4 | 4  | 16 | AAAG | 31 | 3  |
| 105413 | 10 | 11516170 | 11516205 | 2 | 18 | 36 | AC   | 8  | 7  |
| 105416 | 10 | 11523256 | 11523275 | 4 | 5  | 20 | TTTC | 27 | 3  |
| 105417 | 10 | 11524455 | 11524478 | 2 | 12 | 24 | AG   | 8  | 4  |
| 105420 | 10 | 11528061 | 11528081 | 3 | 7  | 21 | TTG  | 21 | 5  |
| 105421 | 10 | 11528225 | 11528245 | 3 | 7  | 21 | AAT  | 17 | 5  |
| 105425 | 10 | 11539202 | 11539217 | 4 | 4  | 16 | AAAT | 17 | 5  |
| 105432 | 10 | 11562364 | 11562377 | 2 | 7  | 14 | CA   | 25 | 3  |
| 105433 | 10 | 11563658 | 11563673 | 4 | 4  | 16 | ATTG | 31 | 4  |
| 105436 | 10 | 11591388 | 11591403 | 4 | 4  | 16 | TTCG | 27 | 3  |
| 105437 | 10 | 11591732 | 11591759 | 4 | 7  | 28 | TTTA | 8  | 9  |
| 105444 | 10 | 11613459 | 11613474 | 4 | 4  | 16 | GATT | 27 | 4  |
| 105446 | 10 | 11617064 | 11617079 | 2 | 8  | 16 | TG   | 16 | 11 |
| 105453 | 10 | 11631282 | 11631327 | 2 | 23 | 46 | TG   | 12 | 8  |
| 105460 | 10 | 11651824 | 11651851 | 2 | 14 | 28 | CA   | 26 | 7  |
| 105464 | 10 | 11666616 | 11666649 | 2 | 17 | 34 | TG   | 17 | 14 |
| 105472 | 10 | 11724114 | 11724139 | 2 | 13 | 26 | AC   | 12 | 9  |
| 105474 | 10 | 11726619 | 11726638 | 2 | 10 | 20 | TC   | 16 | 9  |
| 105479 | 10 | 11756576 | 11756591 | 2 | 8  | 16 | GT   | 19 | 5  |
| 105485 | 10 | 11763369 | 11763400 | 2 | 16 | 32 | AC   | 8  | 7  |
| 105488 | 10 | 11765379 | 11765410 | 2 | 16 | 32 | AC   | 17 | 9  |
| 105489 | 10 | 11768269 | 11768292 | 3 | 8  | 24 | CAG  | 16 | 3  |
| 105494 | 10 | 11777934 | 11777960 | 3 | 9  | 27 | TAG  | 19 | 12 |
| 105495 | 10 | 11779444 | 11779458 | 3 | 5  | 15 | TAT  | 29 | 3  |
| 105500 | 10 | 11788751 | 11788774 | 3 | 8  | 24 | CTC  | 19 | 6  |
| 105507 | 10 | 11808779 | 11808800 | 2 | 11 | 22 | GT   | 14 | 8  |
| 105508 | 10 | 11813997 | 11814022 | 2 | 13 | 26 | TG   | 15 | 6  |

|        |    |          |          |   |    |    |      |    |    |
|--------|----|----------|----------|---|----|----|------|----|----|
| 105514 | 10 | 11818668 | 11818693 | 2 | 13 | 26 | AC   | 7  | 5  |
| 105515 | 10 | 11821705 | 11821728 | 4 | 6  | 24 | ATCC | 27 | 4  |
| 105523 | 10 | 11834353 | 11834372 | 4 | 5  | 20 | GATA | 17 | 14 |
| 105525 | 10 | 11837826 | 11837861 | 2 | 18 | 36 | AC   | 22 | 14 |
| 105531 | 10 | 11848237 | 11848260 | 4 | 6  | 24 | TCAG | 29 | 4  |
| 105540 | 10 | 11882844 | 11882861 | 2 | 9  | 18 | AC   | 16 | 4  |
| 105542 | 10 | 11883784 | 11883803 | 2 | 10 | 20 | CT   | 23 | 8  |
| 105545 | 10 | 11897645 | 11897658 | 2 | 7  | 14 | GT   | 9  | 6  |
| 105546 | 10 | 11897839 | 11897852 | 2 | 7  | 14 | TC   | 24 | 4  |
| 105548 | 10 | 11900770 | 11900793 | 2 | 12 | 24 | TG   | 19 | 9  |
| 105556 | 10 | 11906138 | 11906163 | 2 | 13 | 26 | CA   | 18 | 12 |
| 105558 | 10 | 11910410 | 11910421 | 2 | 6  | 12 | CA   | 12 | 4  |
| 105559 | 10 | 11914505 | 11914516 | 2 | 6  | 12 | AC   | 31 | 3  |
| 105566 | 10 | 11927081 | 11927100 | 2 | 10 | 20 | AC   | 12 | 11 |
| 105567 | 10 | 11935204 | 11935235 | 2 | 16 | 32 | GT   | 14 | 11 |
| 105575 | 10 | 11958662 | 11958699 | 2 | 19 | 38 | TG   | 7  | 10 |
| 105577 | 10 | 11979464 | 11979475 | 2 | 6  | 12 | AC   | 22 | 10 |
| 105580 | 10 | 11996391 | 11996404 | 2 | 7  | 14 | AG   | 29 | 3  |
| 105585 | 10 | 12009650 | 12009664 | 3 | 5  | 15 | GGA  | 18 | 4  |
| 105588 | 10 | 12013297 | 12013314 | 2 | 9  | 18 | CA   | 21 | 7  |
| 105599 | 10 | 12032257 | 12032276 | 4 | 5  | 20 | GCAC | 22 | 15 |
| 105600 | 10 | 12032445 | 12032478 | 2 | 17 | 34 | AC   | 10 | 15 |
| 105606 | 10 | 12041314 | 12041335 | 2 | 11 | 22 | TG   | 16 | 12 |
| 105609 | 10 | 12047031 | 12047042 | 2 | 6  | 12 | CT   | 25 | 4  |
| 105615 | 10 | 12063212 | 12063235 | 2 | 12 | 24 | AG   | 21 | 6  |
| 105619 | 10 | 12069032 | 12069049 | 3 | 6  | 18 | AGG  | 20 | 3  |
| 105621 | 10 | 12069882 | 12069897 | 2 | 8  | 16 | TC   | 16 | 7  |
| 105622 | 10 | 12069898 | 12069913 | 4 | 4  | 16 | GCTC | 15 | 5  |
| 105625 | 10 | 12073914 | 12073933 | 2 | 10 | 20 | GT   | 10 | 5  |
| 105626 | 10 | 12076481 | 12076496 | 2 | 8  | 16 | AC   | 25 | 9  |
| 105629 | 10 | 12079476 | 12079491 | 2 | 8  | 16 | GT   | 31 | 4  |
| 105630 | 10 | 12080681 | 12080696 | 2 | 8  | 16 | CA   | 7  | 8  |
| 105634 | 10 | 12083112 | 12083125 | 2 | 7  | 14 | TC   | 26 | 3  |
| 105636 | 10 | 12084736 | 12084761 | 2 | 13 | 26 | CA   | 25 | 20 |
| 105643 | 10 | 12088835 | 12088854 | 4 | 5  | 20 | ATAA | 29 | 5  |
| 105644 | 10 | 12089819 | 12089862 | 2 | 22 | 44 | GT   | 11 | 10 |
| 105646 | 10 | 12090482 | 12090507 | 2 | 13 | 26 | TC   | 17 | 10 |
| 105649 | 10 | 12093741 | 12093770 | 2 | 15 | 30 | TC   | 12 | 6  |
| 105652 | 10 | 12100838 | 12100859 | 2 | 11 | 22 | AC   | 21 | 3  |
| 105653 | 10 | 12102519 | 12102552 | 2 | 17 | 34 | GT   | 14 | 7  |
| 105654 | 10 | 12104178 | 12104199 | 2 | 11 | 22 | AC   | 15 | 7  |
| 105656 | 10 | 12104317 | 12104350 | 2 | 17 | 34 | AC   | 16 | 7  |
| 105657 | 10 | 12105664 | 12105687 | 2 | 12 | 24 | TG   | 17 | 12 |
| 105658 | 10 | 12108226 | 12108237 | 2 | 6  | 12 | CA   | 27 | 4  |
| 105664 | 10 | 12114770 | 12114817 | 2 | 24 | 48 | AC   | 9  | 15 |
| 105667 | 10 | 12117035 | 12117070 | 2 | 18 | 36 | CA   | 6  | 7  |
| 105675 | 10 | 12131072 | 12131098 | 3 | 9  | 27 | AAG  | 23 | 7  |
| 105676 | 10 | 12135433 | 12135452 | 2 | 10 | 20 | GT   | 23 | 9  |
| 105679 | 10 | 12140315 | 12140326 | 2 | 6  | 12 | AC   | 22 | 3  |
| 105680 | 10 | 12140674 | 12140689 | 2 | 8  | 16 | GT   | 21 | 10 |
| 105681 | 10 | 12140861 | 12140886 | 2 | 13 | 26 | CA   | 19 | 6  |

|        |    |          |          |   |    |    |      |    |    |
|--------|----|----------|----------|---|----|----|------|----|----|
| 105684 | 10 | 12146857 | 12146884 | 2 | 14 | 28 | AC   | 13 | 7  |
| 105686 | 10 | 12154047 | 12154060 | 2 | 7  | 14 | CA   | 21 | 4  |
| 105687 | 10 | 12155063 | 12155086 | 2 | 12 | 24 | AG   | 21 | 13 |
| 105691 | 10 | 12159009 | 12159040 | 2 | 16 | 32 | CA   | 14 | 11 |
| 105699 | 10 | 12166664 | 12166687 | 2 | 12 | 24 | AC   | 10 | 10 |
| 105700 | 10 | 12166802 | 12166825 | 2 | 12 | 24 | AC   | 9  | 7  |
| 105708 | 10 | 12181393 | 12181406 | 2 | 7  | 14 | AC   | 27 | 6  |
| 105709 | 10 | 12182078 | 12182092 | 3 | 5  | 15 | GAG  | 23 | 4  |
| 105712 | 10 | 12187754 | 12187773 | 2 | 10 | 20 | TC   | 28 | 4  |
| 105713 | 10 | 12188725 | 12188750 | 2 | 13 | 26 | AC   | 7  | 6  |
| 105723 | 10 | 12214705 | 12214722 | 2 | 9  | 18 | GT   | 20 | 6  |
| 105724 | 10 | 12214918 | 12214955 | 2 | 19 | 38 | AC   | 21 | 12 |
| 105726 | 10 | 12219049 | 12219062 | 2 | 7  | 14 | CA   | 23 | 3  |
| 105728 | 10 | 12223099 | 12223122 | 4 | 6  | 24 | AAAC | 12 | 3  |
| 105729 | 10 | 12224512 | 12224547 | 2 | 18 | 36 | GT   | 11 | 12 |
| 105732 | 10 | 12230302 | 12230317 | 2 | 8  | 16 | AC   | 18 | 3  |
| 105734 | 10 | 12237978 | 12237992 | 3 | 5  | 15 | AGG  | 31 | 6  |
| 105736 | 10 | 12240473 | 12240502 | 2 | 15 | 30 | AG   | 8  | 11 |
| 105745 | 10 | 12249830 | 12249843 | 2 | 7  | 14 | AC   | 29 | 7  |
| 105746 | 10 | 12250541 | 12250552 | 2 | 6  | 12 | GT   | 25 | 5  |
| 105749 | 10 | 12250932 | 12250963 | 2 | 16 | 32 | CA   | 12 | 6  |
| 105750 | 10 | 12251860 | 12251885 | 2 | 13 | 26 | AC   | 16 | 8  |
| 105751 | 10 | 12252078 | 12252103 | 2 | 13 | 26 | CA   | 18 | 8  |
| 105753 | 10 | 12254191 | 12254206 | 2 | 8  | 16 | AC   | 26 | 6  |
| 105754 | 10 | 12255408 | 12255437 | 2 | 15 | 30 | TG   | 13 | 9  |
| 105755 | 10 | 12255744 | 12255783 | 2 | 20 | 40 | CA   | 14 | 10 |
| 105756 | 10 | 12258142 | 12258161 | 2 | 10 | 20 | AC   | 23 | 11 |
| 105757 | 10 | 12259552 | 12259583 | 2 | 16 | 32 | AC   | 11 | 6  |
| 105758 | 10 | 12260835 | 12260854 | 4 | 5  | 20 | TGGT | 29 | 6  |
| 105766 | 10 | 12284560 | 12284573 | 2 | 7  | 14 | TG   | 23 | 7  |
| 105767 | 10 | 12286066 | 12286095 | 2 | 15 | 30 | CA   | 22 | 8  |
| 105768 | 10 | 12286244 | 12286261 | 2 | 9  | 18 | CA   | 21 | 8  |
| 105770 | 10 | 12291012 | 12291043 | 4 | 8  | 32 | TCCA | 20 | 4  |
| 105771 | 10 | 12292178 | 12292193 | 2 | 8  | 16 | AC   | 18 | 5  |
| 105772 | 10 | 12292328 | 12292359 | 2 | 16 | 32 | CA   | 13 | 12 |
| 105774 | 10 | 12295173 | 12295184 | 2 | 6  | 12 | CT   | 17 | 4  |
| 105775 | 10 | 12296364 | 12296379 | 4 | 4  | 16 | GTGC | 23 | 5  |
| 105776 | 10 | 12297302 | 12297313 | 2 | 6  | 12 | TG   | 26 | 4  |
| 105793 | 10 | 12309564 | 12309611 | 2 | 24 | 48 | AC   | 8  | 6  |
| 105794 | 10 | 12312804 | 12312817 | 2 | 7  | 14 | CA   | 19 | 4  |
| 105797 | 10 | 12314792 | 12314807 | 2 | 8  | 16 | AC   | 17 | 3  |
| 105799 | 10 | 12314972 | 12314985 | 2 | 7  | 14 | TG   | 17 | 3  |
| 105800 | 10 | 12315089 | 12315100 | 2 | 6  | 12 | GT   | 22 | 3  |
| 105803 | 10 | 12317394 | 12317413 | 2 | 10 | 20 | CA   | 18 | 7  |
| 105809 | 10 | 12321523 | 12321546 | 3 | 8  | 24 | TCA  | 13 | 3  |
| 105822 | 10 | 12322300 | 12322335 | 3 | 12 | 36 | TCA  | 13 | 7  |
| 105826 | 10 | 12325591 | 12325642 | 4 | 13 | 52 | GAAA | 19 | 6  |
| 105834 | 10 | 12339439 | 12339450 | 2 | 6  | 12 | AC   | 18 | 5  |
| 105840 | 10 | 12352466 | 12352483 | 2 | 9  | 18 | TG   | 20 | 5  |
| 105846 | 10 | 12365505 | 12365516 | 2 | 6  | 12 | CA   | 22 | 4  |
| 105853 | 10 | 12381625 | 12381648 | 2 | 12 | 24 | AC   | 22 | 9  |

|        |    |          |          |   |    |    |      |    |    |
|--------|----|----------|----------|---|----|----|------|----|----|
| 105862 | 10 | 12392974 | 12393007 | 2 | 17 | 34 | AC   | 8  | 9  |
| 105864 | 10 | 12396138 | 12396165 | 2 | 14 | 28 | TG   | 7  | 9  |
| 105870 | 10 | 12401470 | 12401495 | 2 | 13 | 26 | CT   | 8  | 3  |
| 105873 | 10 | 12403721 | 12403744 | 3 | 8  | 24 | TTG  | 14 | 6  |
| 105876 | 10 | 12407063 | 12407074 | 2 | 6  | 12 | CA   | 24 | 4  |
| 105887 | 10 | 12433759 | 12433784 | 2 | 13 | 26 | GT   | 15 | 8  |
| 105894 | 10 | 12470618 | 12470637 | 2 | 10 | 20 | GT   | 17 | 12 |
| 105898 | 10 | 12489825 | 12489844 | 4 | 5  | 20 | ACTT | 22 | 3  |
| 105903 | 10 | 12511844 | 12511859 | 2 | 8  | 16 | GT   | 16 | 9  |
| 105904 | 10 | 12516633 | 12516650 | 3 | 6  | 18 | CAG  | 30 | 3  |
| 105905 | 10 | 12517560 | 12517575 | 4 | 4  | 16 | GAAA | 18 | 4  |
| 105907 | 10 | 12518928 | 12518941 | 2 | 7  | 14 | AC   | 10 | 10 |
| 105911 | 10 | 12519698 | 12519717 | 2 | 10 | 20 | AC   | 23 | 6  |
| 105917 | 10 | 12542247 | 12542260 | 2 | 7  | 14 | AC   | 15 | 4  |
| 105918 | 10 | 12544343 | 12544358 | 4 | 4  | 16 | GCGT | 23 | 6  |
| 105919 | 10 | 12544362 | 12544373 | 2 | 6  | 12 | TG   | 23 | 6  |
| 105920 | 10 | 12544597 | 12544616 | 2 | 10 | 20 | TG   | 25 | 6  |
| 105930 | 10 | 12567260 | 12567271 | 2 | 6  | 12 | AC   | 17 | 3  |
| 105942 | 10 | 12600094 | 12600105 | 2 | 6  | 12 | AT   | 23 | 5  |
| 105945 | 10 | 12605460 | 12605480 | 3 | 7  | 21 | GAA  | 21 | 6  |
| 105948 | 10 | 12610919 | 12610936 | 3 | 6  | 18 | ATT  | 28 | 10 |
| 105958 | 10 | 12646605 | 12646644 | 2 | 20 | 40 | CA   | 15 | 9  |
| 105959 | 10 | 12660667 | 12660688 | 2 | 11 | 22 | GT   | 20 | 17 |
| 105961 | 10 | 12662428 | 12662461 | 2 | 17 | 34 | TG   | 7  | 4  |
| 105962 | 10 | 12664354 | 12664373 | 2 | 10 | 20 | TG   | 15 | 4  |
| 105973 | 10 | 12686966 | 12686980 | 3 | 5  | 15 | CCT  | 23 | 3  |
| 105975 | 10 | 12695786 | 12695812 | 3 | 9  | 27 | GGA  | 27 | 4  |
| 105977 | 10 | 12705292 | 12705305 | 2 | 7  | 14 | AC   | 15 | 5  |
| 105985 | 10 | 12722684 | 12722697 | 2 | 7  | 14 | CA   | 20 | 3  |
| 105986 | 10 | 12728149 | 12728176 | 4 | 7  | 28 | CTAT | 15 | 8  |
| 105987 | 10 | 12730041 | 12730052 | 2 | 6  | 12 | AC   | 21 | 6  |
| 105992 | 10 | 12735581 | 12735610 | 2 | 15 | 30 | GT   | 19 | 12 |
| 105993 | 10 | 12735676 | 12735691 | 2 | 8  | 16 | TG   | 16 | 3  |
| 105997 | 10 | 12741254 | 12741271 | 2 | 9  | 18 | TG   | 30 | 5  |
| 106000 | 10 | 12754761 | 12754772 | 2 | 6  | 12 | GT   | 22 | 3  |
| 106002 | 10 | 12758467 | 12758478 | 2 | 6  | 12 | GT   | 27 | 3  |
| 106005 | 10 | 12762161 | 12762174 | 2 | 7  | 14 | CA   | 16 | 6  |
| 106007 | 10 | 12766827 | 12766858 | 2 | 16 | 32 | GA   | 12 | 9  |
| 106009 | 10 | 12770598 | 12770637 | 4 | 10 | 40 | GGAT | 24 | 9  |
| 106010 | 10 | 12775529 | 12775554 | 2 | 13 | 26 | AC   | 16 | 8  |
| 106014 | 10 | 12788589 | 12788608 | 4 | 5  | 20 | AAAC | 21 | 5  |
| 106021 | 10 | 12803419 | 12803434 | 2 | 8  | 16 | TG   | 22 | 5  |
| 106026 | 10 | 12820691 | 12820702 | 2 | 6  | 12 | GT   | 28 | 3  |
| 106027 | 10 | 12820874 | 12820889 | 2 | 8  | 16 | AC   | 29 | 4  |
| 106034 | 10 | 12830704 | 12830719 | 2 | 8  | 16 | CG   | 17 | 15 |
| 106035 | 10 | 12830720 | 12830739 | 2 | 10 | 20 | CA   | 16 | 13 |
| 106036 | 10 | 12831582 | 12831605 | 2 | 12 | 24 | TG   | 24 | 7  |
| 106039 | 10 | 12842519 | 12842538 | 2 | 10 | 20 | AC   | 19 | 6  |
| 106040 | 10 | 12843470 | 12843495 | 2 | 13 | 26 | AC   | 7  | 10 |
| 106043 | 10 | 12843781 | 12843792 | 2 | 6  | 12 | TG   | 20 | 4  |
| 106047 | 10 | 12845855 | 12845866 | 2 | 6  | 12 | AC   | 9  | 3  |

|        |    |          |          |   |    |    |      |    |    |
|--------|----|----------|----------|---|----|----|------|----|----|
| 106049 | 10 | 12848014 | 12848027 | 2 | 7  | 14 | CT   | 14 | 5  |
| 106052 | 10 | 12861936 | 12861950 | 3 | 5  | 15 | GCT  | 30 | 3  |
| 106053 | 10 | 12870293 | 12870318 | 2 | 13 | 26 | AG   | 18 | 7  |
| 106059 | 10 | 12875348 | 12875369 | 2 | 11 | 22 | CA   | 16 | 9  |
| 106062 | 10 | 12877676 | 12877695 | 2 | 10 | 20 | GT   | 23 | 7  |
| 106065 | 10 | 12878677 | 12878696 | 2 | 10 | 20 | TG   | 15 | 4  |
| 106066 | 10 | 12884746 | 12884761 | 4 | 4  | 16 | AAAT | 18 | 4  |
| 106069 | 10 | 12898568 | 12898587 | 2 | 10 | 20 | TG   | 13 | 9  |
| 106078 | 10 | 12940241 | 12940266 | 2 | 13 | 26 | TG   | 8  | 7  |
| 106079 | 10 | 12941317 | 12941338 | 2 | 11 | 22 | TC   | 23 | 7  |
| 106081 | 10 | 12946722 | 12946748 | 3 | 9  | 27 | CAA  | 27 | 6  |
| 106084 | 10 | 12948390 | 12948411 | 2 | 11 | 22 | TG   | 19 | 7  |
| 106098 | 10 | 12997593 | 12997608 | 4 | 4  | 16 | ACAG | 33 | 3  |
| 106120 | 10 | 13017034 | 13017063 | 3 | 10 | 30 | CTA  | 23 | 7  |
| 106132 | 10 | 13049147 | 13049160 | 2 | 7  | 14 | TC   | 19 | 3  |
| 106133 | 10 | 13049806 | 13049817 | 2 | 6  | 12 | AG   | 18 | 4  |
| 106134 | 10 | 13050350 | 13050381 | 2 | 16 | 32 | CA   | 14 | 11 |
| 106137 | 10 | 13054578 | 13054595 | 2 | 9  | 18 | GT   | 20 | 5  |
| 106153 | 10 | 13099079 | 13099123 | 3 | 15 | 45 | GCA  | 15 | 17 |
| 106154 | 10 | 13100670 | 13100685 | 4 | 4  | 16 | CTGC | 30 | 5  |
| 106157 | 10 | 13102805 | 13102832 | 2 | 14 | 28 | TG   | 8  | 8  |
| 106176 | 10 | 13145781 | 13145806 | 2 | 13 | 26 | TG   | 11 | 5  |
| 106177 | 10 | 13145956 | 13145971 | 2 | 8  | 16 | TC   | 14 | 3  |
| 106184 | 10 | 13151535 | 13151546 | 2 | 6  | 12 | GA   | 25 | 3  |
| 106189 | 10 | 13160945 | 13160956 | 2 | 6  | 12 | TG   | 26 | 3  |
| 106190 | 10 | 13165033 | 13165047 | 3 | 5  | 15 | CAT  | 30 | 4  |
| 106191 | 10 | 13165583 | 13165598 | 2 | 8  | 16 | CA   | 9  | 5  |
| 106195 | 10 | 13178715 | 13178738 | 4 | 6  | 24 | ATTC | 24 | 3  |
| 106207 | 10 | 13197368 | 13197379 | 2 | 6  | 12 | CA   | 22 | 6  |
| 106215 | 10 | 13219817 | 13219831 | 3 | 5  | 15 | TTC  | 26 | 4  |
| 106245 | 10 | 13249869 | 13249896 | 2 | 14 | 28 | GT   | 17 | 11 |
| 106250 | 10 | 13253213 | 13253242 | 2 | 15 | 30 | CA   | 12 | 9  |
| 106252 | 10 | 13253604 | 13253623 | 2 | 10 | 20 | CA   | 10 | 11 |
| 106254 | 10 | 13257940 | 13257959 | 2 | 10 | 20 | TG   | 16 | 8  |
| 106255 | 10 | 13258072 | 13258091 | 2 | 10 | 20 | GT   | 15 | 8  |
| 106257 | 10 | 13258179 | 13258190 | 2 | 6  | 12 | AC   | 26 | 3  |
| 106261 | 10 | 13265340 | 13265351 | 2 | 6  | 12 | TG   | 28 | 3  |
| 106263 | 10 | 13265407 | 13265418 | 2 | 6  | 12 | CA   | 28 | 3  |
| 106267 | 10 | 13267720 | 13267739 | 2 | 10 | 20 | GT   | 11 | 4  |
| 106268 | 10 | 13268170 | 13268183 | 2 | 7  | 14 | TG   | 30 | 4  |
| 106271 | 10 | 13283268 | 13283282 | 3 | 5  | 15 | CAT  | 11 | 3  |
| 106274 | 10 | 13285718 | 13285749 | 2 | 16 | 32 | TG   | 7  | 10 |
| 106275 | 10 | 13290048 | 13290085 | 2 | 19 | 38 | TG   | 7  | 5  |
| 106278 | 10 | 13295970 | 13295989 | 2 | 10 | 20 | TG   | 7  | 5  |
| 106289 | 10 | 13325621 | 13325658 | 2 | 19 | 38 | GT   | 17 | 12 |
| 106290 | 10 | 13332201 | 13332222 | 2 | 11 | 22 | TG   | 22 | 13 |
| 106296 | 10 | 13332785 | 13332796 | 2 | 6  | 12 | CA   | 26 | 3  |
| 106299 | 10 | 13337231 | 13337252 | 2 | 11 | 22 | GT   | 16 | 5  |
| 106302 | 10 | 13341715 | 13341736 | 2 | 11 | 22 | GA   | 13 | 5  |
| 106311 | 10 | 13352628 | 13352643 | 2 | 8  | 16 | AC   | 14 | 6  |
| 106317 | 10 | 13357503 | 13357516 | 2 | 7  | 14 | CG   | 31 | 11 |

|        |    |          |          |   |    |    |      |    |    |
|--------|----|----------|----------|---|----|----|------|----|----|
| 106336 | 10 | 13395813 | 13395838 | 2 | 13 | 26 | AC   | 18 | 9  |
| 106337 | 10 | 13396037 | 13396062 | 2 | 13 | 26 | AC   | 14 | 7  |
| 106341 | 10 | 13398651 | 13398672 | 2 | 11 | 22 | TG   | 11 | 6  |
| 106342 | 10 | 13398771 | 13398803 | 3 | 11 | 33 | TTG  | 21 | 4  |
| 106365 | 10 | 13412622 | 13412651 | 2 | 15 | 30 | TG   | 9  | 8  |
| 106372 | 10 | 13417245 | 13417262 | 3 | 6  | 18 | AGG  | 16 | 5  |
| 106375 | 10 | 13419956 | 13419967 | 2 | 6  | 12 | TC   | 26 | 3  |
| 106379 | 10 | 13422083 | 13422114 | 4 | 8  | 32 | AAAC | 15 | 5  |
| 106382 | 10 | 13434158 | 13434201 | 4 | 11 | 44 | AAAT | 9  | 10 |
| 106384 | 10 | 13436253 | 13436268 | 4 | 4  | 16 | AAAT | 21 | 4  |
| 106390 | 10 | 13449797 | 13449810 | 2 | 7  | 14 | AC   | 23 | 4  |
| 106393 | 10 | 13459361 | 13459372 | 2 | 6  | 12 | GT   | 27 | 6  |
| 106394 | 10 | 13459929 | 13459940 | 2 | 6  | 12 | TC   | 23 | 3  |
| 106396 | 10 | 13462925 | 13462942 | 2 | 9  | 18 | CT   | 27 | 4  |
| 106398 | 10 | 13463036 | 13463051 | 4 | 4  | 16 | GTGC | 20 | 3  |
| 106399 | 10 | 13463244 | 13463271 | 2 | 14 | 28 | TC   | 14 | 8  |
| 106403 | 10 | 13463529 | 13463552 | 3 | 8  | 24 | CTC  | 19 | 3  |
| 106405 | 10 | 13465285 | 13465322 | 2 | 19 | 38 | TG   | 9  | 9  |
| 106410 | 10 | 13467593 | 13467614 | 2 | 11 | 22 | TC   | 9  | 7  |
| 106411 | 10 | 13470255 | 13470266 | 2 | 6  | 12 | TG   | 24 | 3  |
| 106414 | 10 | 13472783 | 13472794 | 2 | 6  | 12 | GT   | 16 | 3  |
| 106415 | 10 | 13472797 | 13472812 | 2 | 8  | 16 | GT   | 18 | 5  |
| 106420 | 10 | 13478566 | 13478585 | 4 | 5  | 20 | CTGC | 17 | 3  |
| 106421 | 10 | 13479290 | 13479303 | 2 | 7  | 14 | CA   | 31 | 4  |
| 106423 | 10 | 13481290 | 13481307 | 2 | 9  | 18 | GT   | 24 | 8  |
| 106424 | 10 | 13481505 | 13481540 | 2 | 18 | 36 | CA   | 12 | 11 |
| 106433 | 10 | 13485750 | 13485799 | 2 | 25 | 50 | TG   | 7  | 7  |
| 106434 | 10 | 13486016 | 13486033 | 2 | 9  | 18 | TC   | 12 | 3  |
| 106441 | 10 | 13506532 | 13506545 | 2 | 7  | 14 | TG   | 8  | 7  |
| 106443 | 10 | 13510678 | 13510689 | 2 | 6  | 12 | CT   | 33 | 4  |
| 106444 | 10 | 13512818 | 13512831 | 2 | 7  | 14 | CA   | 23 | 5  |
| 106450 | 10 | 13514603 | 13514658 | 2 | 28 | 56 | GT   | 11 | 8  |
| 106452 | 10 | 13519024 | 13519037 | 2 | 7  | 14 | TG   | 28 | 6  |
| 106453 | 10 | 13519218 | 13519231 | 2 | 7  | 14 | CA   | 20 | 5  |
| 106455 | 10 | 13520029 | 13520090 | 2 | 31 | 62 | AC   | 9  | 10 |
| 106456 | 10 | 13520253 | 13520264 | 2 | 6  | 12 | AC   | 25 | 5  |
| 106459 | 10 | 13524465 | 13524476 | 2 | 6  | 12 | AC   | 21 | 3  |
| 106462 | 10 | 13525744 | 13525757 | 2 | 7  | 14 | AC   | 18 | 4  |
| 106465 | 10 | 13536003 | 13536029 | 3 | 9  | 27 | CTC  | 11 | 5  |
| 106469 | 10 | 13546290 | 13546307 | 2 | 9  | 18 | TG   | 14 | 4  |
| 106470 | 10 | 13546415 | 13546448 | 2 | 17 | 34 | CA   | 16 | 8  |
| 106471 | 10 | 13548256 | 13548271 | 2 | 8  | 16 | AC   | 12 | 11 |
| 106472 | 10 | 13548429 | 13548452 | 2 | 12 | 24 | TC   | 10 | 7  |
| 106478 | 10 | 13551603 | 13551616 | 2 | 7  | 14 | GT   | 28 | 4  |
| 106480 | 10 | 13552324 | 13552349 | 2 | 13 | 26 | TG   | 12 | 5  |
| 106488 | 10 | 13565311 | 13565354 | 4 | 11 | 44 | TCTG | 25 | 8  |
| 106491 | 10 | 13571053 | 13571070 | 2 | 9  | 18 | CA   | 17 | 10 |
| 106494 | 10 | 13572194 | 13572213 | 2 | 10 | 20 | CA   | 18 | 9  |
| 106495 | 10 | 13572342 | 13572359 | 2 | 9  | 18 | TG   | 17 | 12 |
| 106497 | 10 | 13574573 | 13574590 | 2 | 9  | 18 | AG   | 25 | 7  |
| 106499 | 10 | 13576297 | 13576322 | 2 | 13 | 26 | CA   | 7  | 8  |

|        |    |          |          |   |    |    |      |    |    |
|--------|----|----------|----------|---|----|----|------|----|----|
| 106500 | 10 | 13578326 | 13578343 | 3 | 6  | 18 | AGA  | 14 | 3  |
| 106507 | 10 | 13591436 | 13591450 | 3 | 5  | 15 | ATG  | 29 | 5  |
| 106508 | 10 | 13591824 | 13591855 | 2 | 16 | 32 | CA   | 18 | 10 |
| 106509 | 10 | 13592785 | 13592810 | 2 | 13 | 26 | CT   | 6  | 6  |
| 106511 | 10 | 13593333 | 13593360 | 4 | 7  | 28 | TAGA | 18 | 10 |
| 106516 | 10 | 13611346 | 13611361 | 2 | 8  | 16 | AC   | 15 | 5  |
| 106518 | 10 | 13620755 | 13620766 | 2 | 6  | 12 | AC   | 20 | 7  |
| 106519 | 10 | 13622688 | 13622701 | 2 | 7  | 14 | AC   | 25 | 6  |
| 106532 | 10 | 13657071 | 13657091 | 3 | 7  | 21 | AAG  | 24 | 8  |
| 106533 | 10 | 13658330 | 13658367 | 2 | 19 | 38 | CA   | 7  | 10 |
| 106534 | 10 | 13659458 | 13659477 | 2 | 10 | 20 | GT   | 21 | 7  |
| 106536 | 10 | 13670940 | 13670959 | 2 | 10 | 20 | AC   | 26 | 6  |
| 106538 | 10 | 13672357 | 13672376 | 2 | 10 | 20 | AG   | 16 | 4  |
| 106540 | 10 | 13674091 | 13674104 | 2 | 7  | 14 | GT   | 25 | 3  |
| 106546 | 10 | 13678079 | 13678100 | 2 | 11 | 22 | TG   | 17 | 11 |
| 106570 | 10 | 13729305 | 13729316 | 2 | 6  | 12 | AT   | 13 | 10 |
| 106573 | 10 | 13739408 | 13739422 | 3 | 5  | 15 | CCA  | 10 | 4  |
| 106575 | 10 | 13750575 | 13750604 | 2 | 15 | 30 | GT   | 18 | 8  |
| 106576 | 10 | 13751348 | 13751399 | 4 | 13 | 52 | GATA | 20 | 7  |
| 106579 | 10 | 13761211 | 13761228 | 3 | 6  | 18 | GGA  | 12 | 4  |
| 106583 | 10 | 13777297 | 13777332 | 2 | 18 | 36 | CA   | 8  | 7  |
| 106584 | 10 | 13777435 | 13777450 | 2 | 8  | 16 | TG   | 12 | 5  |
| 106585 | 10 | 13778870 | 13778889 | 2 | 10 | 20 | TG   | 25 | 3  |
| 106587 | 10 | 13782862 | 13782877 | 2 | 8  | 16 | TG   | 21 | 10 |
| 106591 | 10 | 13792611 | 13792624 | 2 | 7  | 14 | TG   | 22 | 4  |
| 106598 | 10 | 13805934 | 13805957 | 2 | 12 | 24 | GT   | 7  | 7  |
| 106599 | 10 | 13806717 | 13806728 | 2 | 6  | 12 | CA   | 22 | 3  |
| 106604 | 10 | 13813403 | 13813432 | 2 | 15 | 30 | TG   | 7  | 6  |
| 106605 | 10 | 13817874 | 13817889 | 2 | 8  | 16 | TG   | 17 | 6  |
| 106635 | 11 | 23369    | 23380    | 2 | 6  | 12 | GT   | 27 | 4  |
| 106636 | 11 | 24082    | 24093    | 2 | 6  | 12 | GT   | 20 | 3  |
| 106639 | 11 | 31413    | 31446    | 2 | 17 | 34 | TG   | 10 | 11 |
| 106642 | 11 | 32975    | 32990    | 2 | 8  | 16 | TG   | 11 | 7  |
| 106645 | 11 | 37758    | 37771    | 2 | 7  | 14 | GT   | 7  | 5  |
| 106649 | 11 | 40850    | 40867    | 3 | 6  | 18 | TAT  | 11 | 3  |
| 106657 | 11 | 56864    | 56893    | 2 | 15 | 30 | TG   | 22 | 8  |
| 106658 | 11 | 63609    | 63622    | 2 | 7  | 14 | GT   | 19 | 6  |
| 106659 | 11 | 63752    | 63779    | 2 | 14 | 28 | TC   | 10 | 6  |
| 106661 | 11 | 63835    | 63854    | 2 | 10 | 20 | TG   | 7  | 8  |
| 106662 | 11 | 64026    | 64051    | 2 | 13 | 26 | CA   | 22 | 8  |
| 106663 | 11 | 65045    | 65064    | 4 | 5  | 20 | AGTT | 33 | 3  |
| 106665 | 11 | 70605    | 70620    | 2 | 8  | 16 | TG   | 21 | 8  |
| 106666 | 11 | 70622    | 70637    | 2 | 8  | 16 | GT   | 24 | 10 |
| 106667 | 11 | 75000    | 75017    | 2 | 9  | 18 | AG   | 22 | 5  |
| 106668 | 11 | 76207    | 76234    | 2 | 14 | 28 | TG   | 21 | 14 |
| 106669 | 11 | 76363    | 76388    | 2 | 13 | 26 | AC   | 14 | 9  |
| 106674 | 11 | 83215    | 83238    | 2 | 12 | 24 | AC   | 12 | 7  |
| 106675 | 11 | 83569    | 83590    | 2 | 11 | 22 | GT   | 17 | 7  |
| 106680 | 11 | 85748    | 85765    | 2 | 9  | 18 | CT   | 18 | 3  |
| 106692 | 11 | 110363   | 110378   | 2 | 8  | 16 | TG   | 16 | 4  |
| 106693 | 11 | 110464   | 110501   | 2 | 19 | 38 | GT   | 7  | 11 |



|        |    |        |        |   |    |    |      |    |    |
|--------|----|--------|--------|---|----|----|------|----|----|
| 106696 | 11 | 111445 | 111460 | 4 | 4  | 16 | TTAA | 22 | 3  |
| 106697 | 11 | 112186 | 112199 | 2 | 7  | 14 | TC   | 8  | 3  |
| 106701 | 11 | 117344 | 117367 | 2 | 12 | 24 | CA   | 9  | 6  |
| 106704 | 11 | 119358 | 119381 | 2 | 12 | 24 | TG   | 8  | 9  |
| 106706 | 11 | 121046 | 121081 | 2 | 18 | 36 | AC   | 18 | 10 |
| 106710 | 11 | 129772 | 129795 | 2 | 12 | 24 | TG   | 17 | 7  |
| 106715 | 11 | 135128 | 135157 | 2 | 15 | 30 | TG   | 9  | 13 |
| 106716 | 11 | 135489 | 135502 | 2 | 7  | 14 | AC   | 26 | 3  |
| 106721 | 11 | 139107 | 139122 | 2 | 8  | 16 | GA   | 14 | 6  |
| 106723 | 11 | 146165 | 146188 | 4 | 6  | 24 | GATG | 28 | 9  |
| 106726 | 11 | 147355 | 147366 | 2 | 6  | 12 | GT   | 22 | 6  |
| 106731 | 11 | 149331 | 149350 | 2 | 10 | 20 | AC   | 22 | 4  |
| 106733 | 11 | 154422 | 154433 | 2 | 6  | 12 | AC   | 6  | 7  |
| 106738 | 11 | 158710 | 158727 | 2 | 9  | 18 | GA   | 21 | 6  |
| 106740 | 11 | 159460 | 159495 | 4 | 9  | 36 | GTTT | 18 | 7  |
| 106741 | 11 | 164490 | 164507 | 2 | 9  | 18 | CA   | 18 | 6  |
| 106745 | 11 | 170972 | 171007 | 4 | 9  | 36 | GATA | 12 | 9  |
| 106748 | 11 | 183994 | 184008 | 3 | 5  | 15 | ATT  | 19 | 9  |
| 106758 | 11 | 196255 | 196286 | 2 | 16 | 32 | GT   | 13 | 11 |
| 106765 | 11 | 220805 | 220822 | 3 | 6  | 18 | ACT  | 25 | 4  |
| 106766 | 11 | 225811 | 225824 | 2 | 7  | 14 | AC   | 21 | 4  |
| 106767 | 11 | 225953 | 225996 | 4 | 11 | 44 | GAAA | 11 | 9  |
| 106768 | 11 | 226220 | 226239 | 2 | 10 | 20 | AC   | 19 | 13 |
| 106775 | 11 | 231463 | 231474 | 2 | 6  | 12 | TC   | 7  | 6  |
| 106779 | 11 | 231720 | 231735 | 2 | 8  | 16 | AC   | 9  | 6  |
| 106781 | 11 | 234702 | 234728 | 3 | 9  | 27 | TCA  | 12 | 9  |
| 106782 | 11 | 235742 | 235761 | 2 | 10 | 20 | AC   | 6  | 5  |
| 106783 | 11 | 240873 | 240884 | 2 | 6  | 12 | CA   | 22 | 13 |
| 106784 | 11 | 240887 | 240904 | 2 | 9  | 18 | CA   | 16 | 7  |
| 106786 | 11 | 242113 | 242132 | 2 | 10 | 20 | TG   | 14 | 4  |
| 106787 | 11 | 243169 | 243202 | 2 | 17 | 34 | GA   | 12 | 9  |
| 106789 | 11 | 243411 | 243438 | 2 | 14 | 28 | GT   | 19 | 7  |
| 106791 | 11 | 243536 | 243555 | 2 | 10 | 20 | TG   | 23 | 6  |
| 106792 | 11 | 245126 | 245143 | 2 | 9  | 18 | GA   | 18 | 4  |
| 106793 | 11 | 245192 | 245219 | 2 | 14 | 28 | GA   | 16 | 11 |
| 106794 | 11 | 245354 | 245375 | 2 | 11 | 22 | GA   | 15 | 5  |
| 106797 | 11 | 246954 | 246967 | 2 | 7  | 14 | GA   | 27 | 5  |
| 106798 | 11 | 247059 | 247084 | 2 | 13 | 26 | AC   | 16 | 7  |
| 106799 | 11 | 247313 | 247326 | 2 | 7  | 14 | AC   | 6  | 5  |
| 106800 | 11 | 249162 | 249181 | 2 | 10 | 20 | GT   | 17 | 10 |
| 106801 | 11 | 249287 | 249316 | 2 | 15 | 30 | TG   | 21 | 16 |
| 106806 | 11 | 256711 | 256730 | 2 | 10 | 20 | TC   | 15 | 4  |
| 106809 | 11 | 256813 | 256826 | 2 | 7  | 14 | GA   | 15 | 4  |
| 106810 | 11 | 256903 | 256946 | 2 | 22 | 44 | TG   | 12 | 11 |
| 106811 | 11 | 257447 | 257473 | 3 | 9  | 27 | TCT  | 12 | 9  |
| 106813 | 11 | 258722 | 258741 | 2 | 10 | 20 | TG   | 22 | 8  |
| 106814 | 11 | 260071 | 260110 | 2 | 20 | 40 | CT   | 6  | 6  |
| 106815 | 11 | 260307 | 260320 | 2 | 7  | 14 | GT   | 24 | 4  |
| 106817 | 11 | 260480 | 260499 | 2 | 10 | 20 | CA   | 15 | 14 |
| 106819 | 11 | 261764 | 261795 | 2 | 16 | 32 | TG   | 11 | 10 |
| 106820 | 11 | 261964 | 261993 | 2 | 15 | 30 | AC   | 19 | 13 |

|        |    |        |        |   |    |    |      |    |    |
|--------|----|--------|--------|---|----|----|------|----|----|
| 106821 | 11 | 263238 | 263263 | 2 | 13 | 26 | TG   | 23 | 10 |
| 106822 | 11 | 263353 | 263400 | 4 | 12 | 48 | TCTT | 21 | 9  |
| 106823 | 11 | 267106 | 267119 | 2 | 7  | 14 | AC   | 18 | 13 |
| 106825 | 11 | 268154 | 268169 | 2 | 8  | 16 | AG   | 25 | 6  |
| 106826 | 11 | 268537 | 268562 | 2 | 13 | 26 | CA   | 17 | 15 |
| 106829 | 11 | 273411 | 273432 | 2 | 11 | 22 | TG   | 10 | 7  |
| 106835 | 11 | 275973 | 275992 | 2 | 10 | 20 | TG   | 6  | 5  |
| 106838 | 11 | 278305 | 278322 | 2 | 9  | 18 | CA   | 7  | 5  |
| 106843 | 11 | 286123 | 286178 | 4 | 14 | 56 | ACAT | 18 | 8  |
| 106845 | 11 | 289136 | 289159 | 3 | 8  | 24 | TGA  | 18 | 10 |
| 106849 | 11 | 297333 | 297352 | 4 | 5  | 20 | TAGA | 26 | 6  |
| 106850 | 11 | 301793 | 301807 | 3 | 5  | 15 | AGT  | 31 | 4  |
| 106851 | 11 | 310998 | 311011 | 2 | 7  | 14 | CA   | 22 | 12 |
| 106864 | 11 | 324214 | 324241 | 2 | 14 | 28 | TG   | 7  | 7  |
| 106869 | 11 | 326235 | 326268 | 2 | 17 | 34 | AC   | 11 | 7  |
| 106871 | 11 | 336647 | 336698 | 2 | 26 | 52 | AC   | 13 | 15 |
| 106876 | 11 | 344898 | 344921 | 2 | 12 | 24 | GT   | 12 | 9  |
| 106878 | 11 | 349409 | 349436 | 4 | 7  | 28 | GTTT | 17 | 3  |
| 106879 | 11 | 350261 | 350278 | 2 | 9  | 18 | CA   | 24 | 9  |
| 106880 | 11 | 351963 | 351980 | 2 | 9  | 18 | AC   | 24 | 11 |
| 106881 | 11 | 351982 | 351993 | 2 | 6  | 12 | CA   | 21 | 8  |
| 106887 | 11 | 364332 | 364343 | 2 | 6  | 12 | AC   | 28 | 4  |
| 106889 | 11 | 372994 | 373031 | 2 | 19 | 38 | TG   | 7  | 9  |
| 106890 | 11 | 373259 | 373272 | 2 | 7  | 14 | GT   | 29 | 5  |
| 106892 | 11 | 375423 | 375458 | 2 | 18 | 36 | GT   | 10 | 6  |
| 106897 | 11 | 378728 | 378775 | 4 | 12 | 48 | TTTC | 8  | 6  |
| 106899 | 11 | 379740 | 379757 | 3 | 6  | 18 | TTA  | 19 | 3  |
| 106900 | 11 | 380964 | 380995 | 2 | 16 | 32 | CA   | 11 | 6  |
| 106903 | 11 | 381594 | 381623 | 2 | 15 | 30 | AC   | 16 | 11 |
| 106907 | 11 | 385469 | 385488 | 2 | 10 | 20 | AC   | 23 | 9  |
| 106909 | 11 | 385872 | 385889 | 2 | 9  | 18 | AC   | 25 | 4  |
| 106913 | 11 | 397007 | 397022 | 2 | 8  | 16 | TG   | 21 | 4  |
| 106920 | 11 | 402361 | 402380 | 2 | 10 | 20 | CA   | 12 | 11 |
| 106921 | 11 | 402530 | 402559 | 2 | 15 | 30 | TG   | 14 | 16 |
| 106922 | 11 | 402654 | 402703 | 2 | 25 | 50 | TG   | 7  | 9  |
| 106930 | 11 | 420518 | 420543 | 2 | 13 | 26 | TG   | 10 | 8  |
| 106942 | 11 | 429229 | 429252 | 3 | 8  | 24 | CCT  | 6  | 3  |
| 106944 | 11 | 430453 | 430479 | 3 | 9  | 27 | TGA  | 24 | 8  |
| 106945 | 11 | 432268 | 432295 | 4 | 7  | 28 | AGGA | 9  | 9  |
| 106948 | 11 | 433980 | 434001 | 2 | 11 | 22 | CT   | 15 | 9  |
| 106954 | 11 | 443351 | 443368 | 3 | 6  | 18 | CAG  | 35 | 4  |
| 106959 | 11 | 451178 | 451199 | 2 | 11 | 22 | TG   | 22 | 11 |
| 106960 | 11 | 451343 | 451366 | 2 | 12 | 24 | CA   | 14 | 9  |
| 106961 | 11 | 455486 | 455543 | 2 | 29 | 58 | AC   | 8  | 7  |
| 106964 | 11 | 464837 | 464857 | 3 | 7  | 21 | TTG  | 22 | 6  |
| 106970 | 11 | 476128 | 476149 | 2 | 11 | 22 | AC   | 23 | 6  |
| 106974 | 11 | 486727 | 486742 | 2 | 8  | 16 | AT   | 18 | 7  |
| 106975 | 11 | 486865 | 486878 | 2 | 7  | 14 | GT   | 20 | 9  |
| 106976 | 11 | 487084 | 487105 | 2 | 11 | 22 | TG   | 22 | 7  |
| 106983 | 11 | 490906 | 490926 | 3 | 7  | 21 | GGA  | 11 | 4  |
| 106985 | 11 | 491823 | 491840 | 2 | 9  | 18 | GT   | 11 | 5  |

|        |    |        |        |   |    |    |      |    |    |
|--------|----|--------|--------|---|----|----|------|----|----|
| 106986 | 11 | 491878 | 491899 | 2 | 11 | 22 | TG   | 25 | 9  |
| 106989 | 11 | 494274 | 494297 | 2 | 12 | 24 | AC   | 34 | 8  |
| 106990 | 11 | 496188 | 496235 | 2 | 24 | 48 | CA   | 8  | 8  |
| 106993 | 11 | 502319 | 502348 | 2 | 15 | 30 | AC   | 9  | 9  |
| 106999 | 11 | 517241 | 517254 | 2 | 7  | 14 | GT   | 21 | 8  |
| 107000 | 11 | 521984 | 522007 | 2 | 12 | 24 | CA   | 12 | 8  |
| 107002 | 11 | 522236 | 522253 | 2 | 9  | 18 | AC   | 19 | 15 |
| 107004 | 11 | 522281 | 522300 | 2 | 10 | 20 | CA   | 7  | 6  |
| 107006 | 11 | 524797 | 524808 | 2 | 6  | 12 | GT   | 30 | 3  |
| 107009 | 11 | 530739 | 530750 | 2 | 6  | 12 | GT   | 25 | 3  |
| 107012 | 11 | 539499 | 539548 | 2 | 25 | 50 | CA   | 10 | 5  |
| 107013 | 11 | 547385 | 547402 | 2 | 9  | 18 | AC   | 18 | 8  |
| 107016 | 11 | 552584 | 552611 | 2 | 14 | 28 | TG   | 18 | 13 |
| 107030 | 11 | 569394 | 569407 | 2 | 7  | 14 | TG   | 17 | 3  |
| 107031 | 11 | 569695 | 569710 | 2 | 8  | 16 | AC   | 23 | 9  |
| 107032 | 11 | 569712 | 569731 | 2 | 10 | 20 | CA   | 22 | 8  |
| 107038 | 11 | 578658 | 578683 | 2 | 13 | 26 | GT   | 8  | 10 |
| 107041 | 11 | 589364 | 589383 | 2 | 10 | 20 | GT   | 16 | 5  |
| 107042 | 11 | 590339 | 590360 | 2 | 11 | 22 | GT   | 19 | 3  |
| 107045 | 11 | 596127 | 596150 | 2 | 12 | 24 | CA   | 9  | 11 |
| 107049 | 11 | 598220 | 598235 | 2 | 8  | 16 | TC   | 10 | 3  |
| 107056 | 11 | 605007 | 605026 | 2 | 10 | 20 | CA   | 14 | 3  |
| 107072 | 11 | 609800 | 609827 | 2 | 14 | 28 | TG   | 11 | 8  |
| 107073 | 11 | 615185 | 615214 | 2 | 15 | 30 | CA   | 11 | 6  |
| 107075 | 11 | 619351 | 619368 | 3 | 6  | 18 | GGT  | 26 | 4  |
| 107082 | 11 | 628821 | 628832 | 2 | 6  | 12 | AC   | 22 | 7  |
| 107083 | 11 | 628999 | 629016 | 2 | 9  | 18 | TG   | 7  | 5  |
| 107084 | 11 | 631544 | 631571 | 2 | 14 | 28 | AC   | 14 | 7  |
| 107086 | 11 | 635327 | 635340 | 2 | 7  | 14 | CA   | 24 | 7  |
| 107087 | 11 | 635343 | 635360 | 2 | 9  | 18 | CA   | 18 | 7  |
| 107090 | 11 | 637467 | 637480 | 2 | 7  | 14 | TG   | 27 | 5  |
| 107093 | 11 | 640649 | 640669 | 3 | 7  | 21 | ATG  | 22 | 3  |
| 107096 | 11 | 643297 | 643310 | 2 | 7  | 14 | TG   | 34 | 4  |
| 107102 | 11 | 655373 | 655390 | 2 | 9  | 18 | GT   | 12 | 11 |
| 107103 | 11 | 655760 | 655771 | 2 | 6  | 12 | TG   | 29 | 3  |
| 107104 | 11 | 656336 | 656359 | 3 | 8  | 24 | AGG  | 21 | 6  |
| 107109 | 11 | 658337 | 658350 | 2 | 7  | 14 | CT   | 11 | 6  |
| 107114 | 11 | 664346 | 664373 | 2 | 14 | 28 | TG   | 18 | 8  |
| 107117 | 11 | 667055 | 667068 | 2 | 7  | 14 | GT   | 24 | 10 |
| 107122 | 11 | 672388 | 672399 | 2 | 6  | 12 | CT   | 25 | 3  |
| 107129 | 11 | 684414 | 684443 | 2 | 15 | 30 | AC   | 10 | 8  |
| 107133 | 11 | 686967 | 686986 | 4 | 5  | 20 | TTTG | 23 | 3  |
| 107139 | 11 | 703280 | 703299 | 2 | 10 | 20 | CA   | 16 | 4  |
| 107140 | 11 | 706611 | 706638 | 2 | 14 | 28 | GT   | 8  | 10 |
| 107145 | 11 | 729623 | 729644 | 2 | 11 | 22 | GT   | 13 | 10 |
| 107146 | 11 | 730812 | 730859 | 2 | 24 | 48 | GT   | 20 | 6  |
| 107151 | 11 | 747949 | 747966 | 3 | 6  | 18 | TTG  | 24 | 3  |
| 107153 | 11 | 753364 | 753389 | 2 | 13 | 26 | TG   | 17 | 11 |
| 107158 | 11 | 766266 | 766283 | 2 | 9  | 18 | CA   | 24 | 15 |
| 107161 | 11 | 781644 | 781659 | 2 | 8  | 16 | AC   | 19 | 8  |
| 107162 | 11 | 781996 | 782021 | 2 | 13 | 26 | TG   | 16 | 15 |

|        |    |         |         |   |    |    |      |    |    |
|--------|----|---------|---------|---|----|----|------|----|----|
| 107164 | 11 | 782107  | 782118  | 2 | 6  | 12 | GT   | 27 | 3  |
| 107167 | 11 | 790065  | 790094  | 2 | 15 | 30 | GT   | 10 | 10 |
| 107168 | 11 | 790798  | 790817  | 2 | 10 | 20 | TG   | 29 | 13 |
| 107172 | 11 | 800151  | 800190  | 2 | 20 | 40 | TG   | 14 | 12 |
| 107175 | 11 | 821751  | 821768  | 3 | 6  | 18 | GCA  | 20 | 5  |
| 107179 | 11 | 833815  | 833836  | 2 | 11 | 22 | GT   | 17 | 6  |
| 107183 | 11 | 838361  | 838388  | 2 | 14 | 28 | AC   | 19 | 9  |
| 107186 | 11 | 846582  | 846617  | 2 | 18 | 36 | AC   | 16 | 13 |
| 107187 | 11 | 848087  | 848107  | 3 | 7  | 21 | AAT  | 13 | 6  |
| 107192 | 11 | 860484  | 860499  | 2 | 8  | 16 | AC   | 8  | 4  |
| 107193 | 11 | 860509  | 860522  | 2 | 7  | 14 | CA   | 11 | 8  |
| 107204 | 11 | 888880  | 888891  | 2 | 6  | 12 | GT   | 29 | 6  |
| 107214 | 11 | 910282  | 910296  | 3 | 5  | 15 | TTG  | 30 | 4  |
| 107217 | 11 | 922241  | 922256  | 4 | 4  | 16 | ATTT | 13 | 3  |
| 107220 | 11 | 927149  | 927160  | 2 | 6  | 12 | TG   | 25 | 10 |
| 107221 | 11 | 927521  | 927532  | 2 | 6  | 12 | TC   | 25 | 4  |
| 107228 | 11 | 934996  | 935031  | 2 | 18 | 36 | AG   | 7  | 10 |
| 107229 | 11 | 935571  | 935582  | 2 | 6  | 12 | GT   | 25 | 8  |
| 107230 | 11 | 935650  | 935661  | 2 | 6  | 12 | TG   | 31 | 3  |
| 107231 | 11 | 935818  | 935845  | 2 | 14 | 28 | GT   | 12 | 10 |
| 107243 | 11 | 971805  | 971830  | 2 | 13 | 26 | AC   | 11 | 11 |
| 107249 | 11 | 976578  | 976591  | 2 | 7  | 14 | AT   | 11 | 3  |
| 107256 | 11 | 981811  | 981824  | 2 | 7  | 14 | GT   | 30 | 15 |
| 107257 | 11 | 982115  | 982144  | 2 | 15 | 30 | AC   | 20 | 8  |
| 107260 | 11 | 983154  | 983185  | 2 | 16 | 32 | GT   | 12 | 7  |
| 107261 | 11 | 983340  | 983385  | 2 | 23 | 46 | TG   | 18 | 14 |
| 107266 | 11 | 991716  | 991727  | 2 | 6  | 12 | TG   | 27 | 5  |
| 107268 | 11 | 994286  | 994315  | 2 | 15 | 30 | AC   | 20 | 7  |
| 107271 | 11 | 996813  | 996840  | 2 | 14 | 28 | CA   | 15 | 7  |
| 107273 | 11 | 997074  | 997089  | 2 | 8  | 16 | CA   | 13 | 8  |
| 107275 | 11 | 998820  | 998839  | 2 | 10 | 20 | CA   | 20 | 10 |
| 107277 | 11 | 1000177 | 1000192 | 2 | 8  | 16 | AC   | 24 | 4  |
| 107279 | 11 | 1000855 | 1000874 | 2 | 10 | 20 | GA   | 22 | 3  |
| 107281 | 11 | 1003258 | 1003269 | 2 | 6  | 12 | TG   | 27 | 3  |
| 107286 | 11 | 1010743 | 1010762 | 2 | 10 | 20 | AC   | 23 | 8  |
| 107287 | 11 | 1011588 | 1011603 | 2 | 8  | 16 | TG   | 26 | 5  |
| 107290 | 11 | 1015575 | 1015586 | 2 | 6  | 12 | GT   | 25 | 8  |
| 107295 | 11 | 1025290 | 1025303 | 2 | 7  | 14 | CA   | 15 | 7  |
| 107297 | 11 | 1027198 | 1027224 | 3 | 9  | 27 | GCA  | 25 | 7  |
| 107298 | 11 | 1028105 | 1028125 | 3 | 7  | 21 | TGA  | 21 | 6  |
| 107300 | 11 | 1028538 | 1028549 | 2 | 6  | 12 | AG   | 26 | 3  |
| 107305 | 11 | 1032271 | 1032284 | 2 | 7  | 14 | GT   | 19 | 6  |
| 107306 | 11 | 1032286 | 1032303 | 2 | 9  | 18 | TG   | 16 | 10 |
| 107307 | 11 | 1032414 | 1032441 | 2 | 14 | 28 | AC   | 16 | 13 |
| 107312 | 11 | 1036839 | 1036854 | 2 | 8  | 16 | CA   | 17 | 6  |
| 107313 | 11 | 1036954 | 1036971 | 2 | 9  | 18 | GT   | 22 | 5  |
| 107314 | 11 | 1038389 | 1038406 | 2 | 9  | 18 | TG   | 31 | 3  |
| 107315 | 11 | 1040454 | 1040473 | 2 | 10 | 20 | AC   | 21 | 8  |
| 107316 | 11 | 1042945 | 1042958 | 2 | 7  | 14 | TG   | 23 | 4  |
| 107317 | 11 | 1043092 | 1043113 | 2 | 11 | 22 | CT   | 15 | 4  |
| 107319 | 11 | 1043273 | 1043292 | 2 | 10 | 20 | TG   | 12 | 13 |

|        |    |         |         |   |    |    |      |    |    |
|--------|----|---------|---------|---|----|----|------|----|----|
| 107321 | 11 | 1046052 | 1046071 | 2 | 10 | 20 | AC   | 10 | 12 |
| 107326 | 11 | 1048317 | 1048330 | 2 | 7  | 14 | AG   | 14 | 4  |
| 107327 | 11 | 1048467 | 1048512 | 2 | 23 | 46 | TG   | 7  | 9  |
| 107329 | 11 | 1050750 | 1050765 | 2 | 8  | 16 | AC   | 19 | 13 |
| 107330 | 11 | 1050766 | 1050779 | 2 | 7  | 14 | CA   | 17 | 10 |
| 107332 | 11 | 1051925 | 1051944 | 2 | 10 | 20 | AC   | 22 | 6  |
| 107337 | 11 | 1056449 | 1056462 | 2 | 7  | 14 | TG   | 26 | 4  |
| 107339 | 11 | 1058463 | 1058474 | 2 | 6  | 12 | GT   | 24 | 3  |
| 107342 | 11 | 1064116 | 1064131 | 2 | 8  | 16 | TG   | 28 | 6  |
| 107343 | 11 | 1066415 | 1066438 | 2 | 12 | 24 | CA   | 15 | 7  |
| 107344 | 11 | 1066658 | 1066703 | 2 | 23 | 46 | GT   | 9  | 10 |
| 107353 | 11 | 1071994 | 1072015 | 2 | 11 | 22 | AC   | 8  | 9  |
| 107354 | 11 | 1072116 | 1072135 | 2 | 10 | 20 | TG   | 6  | 4  |
| 107357 | 11 | 1075400 | 1075421 | 2 | 11 | 22 | AC   | 15 | 7  |
| 107360 | 11 | 1077360 | 1077373 | 2 | 7  | 14 | CA   | 24 | 3  |
| 107368 | 11 | 1083429 | 1083464 | 2 | 18 | 36 | TG   | 12 | 8  |
| 107370 | 11 | 1085962 | 1086007 | 2 | 23 | 46 | CA   | 17 | 13 |
| 107371 | 11 | 1088708 | 1088723 | 2 | 8  | 16 | CA   | 19 | 5  |
| 107373 | 11 | 1091574 | 1091585 | 2 | 6  | 12 | GT   | 22 | 7  |
| 107375 | 11 | 1091888 | 1091901 | 2 | 7  | 14 | AC   | 23 | 6  |
| 107378 | 11 | 1096314 | 1096325 | 2 | 6  | 12 | TG   | 30 | 6  |
| 107379 | 11 | 1096469 | 1096494 | 2 | 13 | 26 | AC   | 19 | 8  |
| 107380 | 11 | 1097026 | 1097045 | 2 | 10 | 20 | GT   | 19 | 7  |
| 107385 | 11 | 1101668 | 1101695 | 4 | 7  | 28 | ATGG | 21 | 4  |
| 107391 | 11 | 1111413 | 1111436 | 2 | 12 | 24 | GT   | 13 | 8  |
| 107399 | 11 | 1116665 | 1116680 | 2 | 8  | 16 | GT   | 27 | 10 |
| 107400 | 11 | 1118004 | 1118015 | 2 | 6  | 12 | GT   | 29 | 4  |
| 107403 | 11 | 1120486 | 1120497 | 2 | 6  | 12 | TG   | 31 | 7  |
| 107404 | 11 | 1120928 | 1120939 | 2 | 6  | 12 | TG   | 34 | 4  |
| 107406 | 11 | 1120987 | 1120998 | 2 | 6  | 12 | GA   | 27 | 3  |
| 107408 | 11 | 1123000 | 1123029 | 3 | 10 | 30 | GGA  | 14 | 5  |
| 107417 | 11 | 1126607 | 1126630 | 2 | 12 | 24 | CA   | 14 | 11 |
| 107419 | 11 | 1127478 | 1127501 | 2 | 12 | 24 | TC   | 11 | 4  |
| 107422 | 11 | 1128370 | 1128393 | 2 | 12 | 24 | CA   | 19 | 8  |
| 107426 | 11 | 1132362 | 1132375 | 2 | 7  | 14 | GT   | 19 | 3  |
| 107427 | 11 | 1135339 | 1135359 | 3 | 7  | 21 | TAA  | 14 | 5  |
| 107429 | 11 | 1137440 | 1137451 | 2 | 6  | 12 | TG   | 25 | 4  |
| 107431 | 11 | 1139017 | 1139030 | 2 | 7  | 14 | CA   | 21 | 12 |
| 107434 | 11 | 1148824 | 1148835 | 2 | 6  | 12 | CT   | 32 | 4  |
| 107439 | 11 | 1153770 | 1153789 | 2 | 10 | 20 | CA   | 16 | 6  |
| 107443 | 11 | 1161521 | 1161532 | 2 | 6  | 12 | AT   | 27 | 3  |
| 107444 | 11 | 1167187 | 1167204 | 3 | 6  | 18 | CCT  | 24 | 4  |
| 107445 | 11 | 1173462 | 1173489 | 2 | 14 | 28 | CA   | 7  | 6  |
| 107449 | 11 | 1179937 | 1179966 | 2 | 15 | 30 | AC   | 14 | 7  |
| 107455 | 11 | 1187199 | 1187212 | 2 | 7  | 14 | AC   | 24 | 4  |
| 107458 | 11 | 1193770 | 1193793 | 2 | 12 | 24 | TG   | 15 | 8  |
| 107459 | 11 | 1195515 | 1195534 | 2 | 10 | 20 | CA   | 26 | 11 |
| 107460 | 11 | 1195646 | 1195675 | 3 | 10 | 30 | GAG  | 29 | 9  |
| 107461 | 11 | 1196935 | 1196954 | 4 | 5  | 20 | TTTA | 15 | 8  |
| 107462 | 11 | 1197526 | 1197551 | 2 | 13 | 26 | AC   | 14 | 5  |
| 107464 | 11 | 1199105 | 1199118 | 2 | 7  | 14 | CA   | 7  | 7  |

|        |    |         |         |   |    |    |      |    |    |
|--------|----|---------|---------|---|----|----|------|----|----|
| 107472 | 11 | 1209358 | 1209369 | 2 | 6  | 12 | TG   | 23 | 9  |
| 107475 | 11 | 1220930 | 1220956 | 3 | 9  | 27 | GAG  | 18 | 4  |
| 107476 | 11 | 1221174 | 1221207 | 2 | 17 | 34 | CA   | 7  | 8  |
| 107481 | 11 | 1225854 | 1225877 | 2 | 12 | 24 | GT   | 18 | 7  |
| 107491 | 11 | 1238319 | 1238336 | 2 | 9  | 18 | TG   | 23 | 5  |
| 107497 | 11 | 1245786 | 1245809 | 2 | 12 | 24 | AC   | 14 | 6  |
| 107500 | 11 | 1246497 | 1246516 | 2 | 10 | 20 | TG   | 14 | 8  |
| 107501 | 11 | 1246791 | 1246814 | 3 | 8  | 24 | TCC  | 21 | 5  |
| 107505 | 11 | 1248887 | 1248900 | 2 | 7  | 14 | AC   | 19 | 10 |
| 107506 | 11 | 1248902 | 1248919 | 2 | 9  | 18 | CA   | 11 | 9  |
| 107509 | 11 | 1256717 | 1256730 | 2 | 7  | 14 | TG   | 28 | 7  |
| 107510 | 11 | 1257370 | 1257397 | 2 | 14 | 28 | CA   | 16 | 9  |
| 107512 | 11 | 1259667 | 1259678 | 2 | 6  | 12 | CA   | 38 | 3  |
| 107514 | 11 | 1260106 | 1260131 | 2 | 13 | 26 | AC   | 20 | 6  |
| 107523 | 11 | 1266151 | 1266168 | 3 | 6  | 18 | GGA  | 10 | 4  |
| 107524 | 11 | 1266768 | 1266809 | 2 | 21 | 42 | GT   | 7  | 9  |
| 107526 | 11 | 1268659 | 1268684 | 2 | 13 | 26 | TG   | 20 | 8  |
| 107527 | 11 | 1268802 | 1268825 | 2 | 12 | 24 | AC   | 16 | 7  |
| 107528 | 11 | 1269040 | 1269053 | 2 | 7  | 14 | AG   | 24 | 3  |
| 107529 | 11 | 1269081 | 1269100 | 2 | 10 | 20 | AG   | 17 | 8  |
| 107531 | 11 | 1270808 | 1270821 | 2 | 7  | 14 | GT   | 26 | 5  |
| 107532 | 11 | 1271034 | 1271045 | 2 | 6  | 12 | TG   | 26 | 3  |
| 107533 | 11 | 1271276 | 1271293 | 2 | 9  | 18 | AC   | 18 | 10 |
| 107536 | 11 | 1274911 | 1274936 | 2 | 13 | 26 | AC   | 15 | 10 |
| 107537 | 11 | 1275234 | 1275245 | 2 | 6  | 12 | GT   | 21 | 4  |
| 107540 | 11 | 1279783 | 1279802 | 2 | 10 | 20 | CT   | 15 | 4  |
| 107543 | 11 | 1282526 | 1282540 | 3 | 5  | 15 | TCT  | 25 | 4  |
| 107545 | 11 | 1287840 | 1287867 | 2 | 14 | 28 | TG   | 12 | 7  |
| 107546 | 11 | 1288002 | 1288021 | 2 | 10 | 20 | AC   | 15 | 5  |
| 107547 | 11 | 1288231 | 1288242 | 2 | 6  | 12 | GA   | 19 | 3  |
| 107552 | 11 | 1290756 | 1290773 | 2 | 9  | 18 | TG   | 14 | 5  |
| 107567 | 11 | 1306934 | 1306955 | 2 | 11 | 22 | CA   | 26 | 3  |
| 107569 | 11 | 1308675 | 1308696 | 2 | 11 | 22 | CA   | 17 | 9  |
| 107570 | 11 | 1309010 | 1309021 | 2 | 6  | 12 | CA   | 28 | 3  |
| 107576 | 11 | 1314960 | 1314977 | 2 | 9  | 18 | GT   | 13 | 12 |
| 107580 | 11 | 1318276 | 1318302 | 3 | 9  | 27 | GAA  | 15 | 13 |
| 107594 | 11 | 1328042 | 1328071 | 2 | 15 | 30 | CA   | 10 | 12 |
| 107595 | 11 | 1328396 | 1328429 | 2 | 17 | 34 | TC   | 22 | 7  |
| 107597 | 11 | 1329491 | 1329506 | 2 | 8  | 16 | GT   | 26 | 3  |
| 107599 | 11 | 1330704 | 1330729 | 2 | 13 | 26 | GT   | 12 | 11 |
| 107600 | 11 | 1330817 | 1330842 | 2 | 13 | 26 | GT   | 15 | 12 |
| 107602 | 11 | 1331450 | 1331485 | 2 | 18 | 36 | TG   | 9  | 6  |
| 107610 | 11 | 1333445 | 1333460 | 2 | 8  | 16 | CA   | 11 | 7  |
| 107626 | 11 | 1348140 | 1348153 | 2 | 7  | 14 | CA   | 18 | 9  |
| 107632 | 11 | 1356792 | 1356817 | 2 | 13 | 26 | TC   | 20 | 6  |
| 107633 | 11 | 1357259 | 1357276 | 2 | 9  | 18 | TG   | 14 | 8  |
| 107635 | 11 | 1357438 | 1357473 | 2 | 18 | 36 | CA   | 8  | 8  |
| 107637 | 11 | 1359728 | 1359757 | 2 | 15 | 30 | GT   | 11 | 7  |
| 107643 | 11 | 1360564 | 1360578 | 3 | 5  | 15 | AGA  | 12 | 3  |
| 107644 | 11 | 1360689 | 1360700 | 2 | 6  | 12 | GT   | 7  | 4  |
| 107647 | 11 | 1361145 | 1361184 | 4 | 10 | 40 | TTTC | 12 | 9  |

|        |    |         |         |   |    |    |      |    |    |
|--------|----|---------|---------|---|----|----|------|----|----|
| 107648 | 11 | 1361569 | 1361596 | 2 | 14 | 28 | CA   | 17 | 11 |
| 107655 | 11 | 1362014 | 1362039 | 2 | 13 | 26 | AC   | 10 | 9  |
| 107659 | 11 | 1363868 | 1363899 | 2 | 16 | 32 | AC   | 19 | 6  |
| 107660 | 11 | 1363941 | 1363968 | 2 | 14 | 28 | AC   | 17 | 7  |
| 107661 | 11 | 1364123 | 1364146 | 2 | 12 | 24 | CA   | 12 | 7  |
| 107666 | 11 | 1365306 | 1365325 | 4 | 5  | 20 | AAAG | 7  | 3  |
| 107668 | 11 | 1365858 | 1365897 | 2 | 20 | 40 | CA   | 15 | 10 |
| 107669 | 11 | 1366338 | 1366365 | 2 | 14 | 28 | CA   | 12 | 11 |
| 107670 | 11 | 1367690 | 1367709 | 2 | 10 | 20 | GT   | 17 | 5  |
| 107671 | 11 | 1368847 | 1368868 | 2 | 11 | 22 | AC   | 18 | 7  |
| 107673 | 11 | 1369562 | 1369577 | 2 | 8  | 16 | AC   | 25 | 4  |
| 107674 | 11 | 1369731 | 1369750 | 2 | 10 | 20 | CA   | 21 | 3  |
| 107675 | 11 | 1369969 | 1369986 | 2 | 9  | 18 | CA   | 33 | 3  |
| 107676 | 11 | 1370954 | 1370981 | 2 | 14 | 28 | TG   | 14 | 6  |
| 107680 | 11 | 1376333 | 1376344 | 2 | 6  | 12 | CA   | 21 | 6  |
| 107681 | 11 | 1376346 | 1376361 | 2 | 8  | 16 | AC   | 23 | 10 |
| 107685 | 11 | 1379008 | 1379029 | 2 | 11 | 22 | CT   | 17 | 5  |
| 107686 | 11 | 1380102 | 1380117 | 2 | 8  | 16 | TA   | 15 | 8  |
| 107688 | 11 | 1382783 | 1382797 | 3 | 5  | 15 | GCT  | 28 | 4  |
| 107690 | 11 | 1384859 | 1384870 | 2 | 6  | 12 | GT   | 26 | 5  |
| 107694 | 11 | 1385885 | 1385900 | 2 | 8  | 16 | TC   | 12 | 3  |
| 107698 | 11 | 1394241 | 1394276 | 2 | 18 | 36 | GT   | 8  | 7  |
| 107702 | 11 | 1397742 | 1397756 | 3 | 5  | 15 | AGG  | 24 | 3  |
| 107704 | 11 | 1398460 | 1398481 | 2 | 11 | 22 | TG   | 17 | 13 |
| 107705 | 11 | 1398883 | 1398914 | 2 | 16 | 32 | TG   | 11 | 8  |
| 107710 | 11 | 1402758 | 1402775 | 2 | 9  | 18 | CT   | 21 | 4  |
| 107726 | 11 | 1418003 | 1418018 | 2 | 8  | 16 | AT   | 10 | 7  |
| 107727 | 11 | 1423879 | 1423890 | 2 | 6  | 12 | TG   | 32 | 3  |
| 107742 | 11 | 1470327 | 1470338 | 2 | 6  | 12 | TG   | 23 | 4  |
| 107746 | 11 | 1477222 | 1477236 | 3 | 5  | 15 | GAA  | 32 | 3  |
| 107748 | 11 | 1479209 | 1479258 | 2 | 25 | 50 | AC   | 8  | 10 |
| 107757 | 11 | 1501724 | 1501759 | 2 | 18 | 36 | AC   | 6  | 6  |
| 107764 | 11 | 1514232 | 1514251 | 2 | 10 | 20 | CA   | 24 | 11 |
| 107765 | 11 | 1517720 | 1517735 | 2 | 8  | 16 | AC   | 17 | 9  |
| 107769 | 11 | 1521888 | 1521907 | 2 | 10 | 20 | AG   | 18 | 7  |
| 107774 | 11 | 1532450 | 1532461 | 2 | 6  | 12 | AC   | 31 | 4  |
| 107778 | 11 | 1542129 | 1542154 | 2 | 13 | 26 | CA   | 10 | 11 |
| 107781 | 11 | 1546233 | 1546254 | 2 | 11 | 22 | AC   | 18 | 11 |
| 107783 | 11 | 1548574 | 1548605 | 2 | 16 | 32 | CA   | 15 | 8  |
| 107784 | 11 | 1548796 | 1548823 | 2 | 14 | 28 | GT   | 16 | 11 |
| 107785 | 11 | 1549104 | 1549143 | 2 | 20 | 40 | TG   | 8  | 10 |
| 107791 | 11 | 1552718 | 1552743 | 2 | 13 | 26 | AC   | 10 | 12 |
| 107795 | 11 | 1557355 | 1557370 | 2 | 8  | 16 | CT   | 24 | 3  |
| 107802 | 11 | 1561241 | 1561262 | 2 | 11 | 22 | AC   | 23 | 9  |
| 107805 | 11 | 1562416 | 1562431 | 2 | 8  | 16 | CA   | 21 | 15 |
| 107806 | 11 | 1562462 | 1562477 | 2 | 8  | 16 | CA   | 18 | 5  |
| 107807 | 11 | 1563059 | 1563072 | 2 | 7  | 14 | AG   | 29 | 3  |
| 107808 | 11 | 1563192 | 1563236 | 3 | 15 | 45 | GAA  | 22 | 11 |
| 107815 | 11 | 1565224 | 1565239 | 2 | 8  | 16 | CA   | 26 | 4  |
| 107816 | 11 | 1566307 | 1566336 | 3 | 10 | 30 | GAG  | 9  | 4  |
| 107819 | 11 | 1571641 | 1571654 | 2 | 7  | 14 | GT   | 30 | 12 |

|        |    |         |         |   |    |    |      |    |    |
|--------|----|---------|---------|---|----|----|------|----|----|
| 107820 | 11 | 1571841 | 1571912 | 4 | 18 | 72 | AGAT | 6  | 6  |
| 107822 | 11 | 1572660 | 1572719 | 4 | 15 | 60 | TAGA | 6  | 10 |
| 107824 | 11 | 1574949 | 1574980 | 2 | 16 | 32 | CA   | 18 | 12 |
| 107830 | 11 | 1579189 | 1579204 | 2 | 8  | 16 | AC   | 23 | 6  |
| 107831 | 11 | 1579268 | 1579281 | 2 | 7  | 14 | CA   | 22 | 5  |
| 107832 | 11 | 1580745 | 1580760 | 2 | 8  | 16 | AT   | 7  | 3  |
| 107833 | 11 | 1581291 | 1581308 | 2 | 9  | 18 | TG   | 17 | 8  |
| 107834 | 11 | 1581311 | 1581322 | 2 | 6  | 12 | TG   | 20 | 9  |
| 107836 | 11 | 1582081 | 1582100 | 2 | 10 | 20 | TG   | 18 | 5  |
| 107841 | 11 | 1599153 | 1599184 | 2 | 16 | 32 | GA   | 8  | 7  |
| 107846 | 11 | 1602926 | 1602937 | 2 | 6  | 12 | CA   | 27 | 5  |
| 107847 | 11 | 1603591 | 1603610 | 2 | 10 | 20 | GA   | 17 | 4  |
| 107848 | 11 | 1603802 | 1603813 | 2 | 6  | 12 | AG   | 21 | 3  |
| 107852 | 11 | 1628707 | 1628740 | 2 | 17 | 34 | GT   | 14 | 10 |
| 107859 | 11 | 1636889 | 1636902 | 2 | 7  | 14 | CA   | 20 | 4  |
| 107860 | 11 | 1637687 | 1637718 | 2 | 16 | 32 | AC   | 12 | 12 |
| 107862 | 11 | 1638102 | 1638116 | 3 | 5  | 15 | GCA  | 31 | 5  |
| 107872 | 11 | 1656589 | 1656602 | 2 | 7  | 14 | CA   | 22 | 10 |
| 107874 | 11 | 1666698 | 1666709 | 2 | 6  | 12 | TG   | 29 | 4  |
| 107883 | 11 | 1684812 | 1684827 | 4 | 4  | 16 | AAAT | 19 | 7  |
| 107886 | 11 | 1702938 | 1702963 | 2 | 13 | 26 | CA   | 23 | 21 |
| 107888 | 11 | 1710004 | 1710015 | 2 | 6  | 12 | CA   | 31 | 3  |
| 107890 | 11 | 1712056 | 1712076 | 3 | 7  | 21 | GAT  | 15 | 3  |
| 107893 | 11 | 1715905 | 1715920 | 2 | 8  | 16 | AC   | 18 | 4  |
| 107895 | 11 | 1718348 | 1718365 | 2 | 9  | 18 | GT   | 8  | 4  |
| 107899 | 11 | 1722616 | 1722635 | 2 | 10 | 20 | GT   | 7  | 3  |
| 107905 | 11 | 1725341 | 1725362 | 2 | 11 | 22 | AG   | 18 | 5  |
| 107907 | 11 | 1732057 | 1732071 | 3 | 5  | 15 | CAG  | 25 | 3  |
| 107911 | 11 | 1738033 | 1738059 | 3 | 9  | 27 | GCT  | 22 | 5  |
| 107912 | 11 | 1739501 | 1739526 | 2 | 13 | 26 | CA   | 22 | 7  |
| 107914 | 11 | 1740396 | 1740411 | 2 | 8  | 16 | AC   | 15 | 9  |
| 107917 | 11 | 1741941 | 1741968 | 2 | 14 | 28 | GT   | 13 | 6  |
| 107919 | 11 | 1746424 | 1746456 | 3 | 11 | 33 | CTT  | 27 | 5  |
| 107920 | 11 | 1747726 | 1747755 | 2 | 15 | 30 | CA   | 14 | 6  |
| 107922 | 11 | 1750285 | 1750312 | 2 | 14 | 28 | CA   | 17 | 6  |
| 107923 | 11 | 1751521 | 1751548 | 2 | 14 | 28 | GA   | 15 | 9  |
| 107930 | 11 | 1761814 | 1761835 | 2 | 11 | 22 | GT   | 22 | 5  |
| 107931 | 11 | 1763941 | 1763960 | 2 | 10 | 20 | CA   | 8  | 8  |
| 107940 | 11 | 1798390 | 1798404 | 3 | 5  | 15 | AAT  | 30 | 6  |
| 107948 | 11 | 1819246 | 1819279 | 2 | 17 | 34 | TC   | 6  | 9  |
| 107949 | 11 | 1821439 | 1821450 | 2 | 6  | 12 | AT   | 26 | 5  |
| 107964 | 11 | 1856431 | 1856452 | 2 | 11 | 22 | GT   | 20 | 5  |
| 107974 | 11 | 1890295 | 1890308 | 2 | 7  | 14 | CA   | 15 | 4  |
| 107976 | 11 | 1891618 | 1891631 | 2 | 7  | 14 | CA   | 9  | 5  |
| 107985 | 11 | 1905360 | 1905377 | 3 | 6  | 18 | GGA  | 16 | 4  |
| 107986 | 11 | 1906240 | 1906254 | 3 | 5  | 15 | GCT  | 26 | 4  |
| 107994 | 11 | 1926723 | 1926743 | 3 | 7  | 21 | GAA  | 20 | 5  |
| 107999 | 11 | 1930553 | 1930580 | 4 | 7  | 28 | ATGT | 18 | 4  |
| 108003 | 11 | 1936996 | 1937019 | 2 | 12 | 24 | AC   | 20 | 5  |
| 108008 | 11 | 1945293 | 1945304 | 2 | 6  | 12 | GT   | 18 | 3  |
| 108009 | 11 | 1945308 | 1945319 | 2 | 6  | 12 | GT   | 19 | 3  |



|        |    |         |         |   |    |    |      |    |    |
|--------|----|---------|---------|---|----|----|------|----|----|
| 108017 | 11 | 1955402 | 1955413 | 2 | 6  | 12 | CA   | 22 | 4  |
| 108019 | 11 | 1956597 | 1956614 | 2 | 9  | 18 | TG   | 22 | 6  |
| 108020 | 11 | 1956616 | 1956627 | 2 | 6  | 12 | GT   | 26 | 4  |
| 108021 | 11 | 1959284 | 1959295 | 2 | 6  | 12 | AG   | 31 | 3  |
| 108022 | 11 | 1959386 | 1959419 | 2 | 17 | 34 | CA   | 13 | 8  |
| 108024 | 11 | 1968291 | 1968318 | 2 | 14 | 28 | GT   | 8  | 8  |
| 108030 | 11 | 1984744 | 1984757 | 2 | 7  | 14 | AC   | 20 | 13 |
| 108036 | 11 | 2013272 | 2013283 | 2 | 6  | 12 | GT   | 12 | 8  |
| 108037 | 11 | 2013285 | 2013300 | 2 | 8  | 16 | TG   | 15 | 9  |
| 108038 | 11 | 2017142 | 2017171 | 2 | 15 | 30 | GT   | 15 | 10 |
| 108041 | 11 | 2022820 | 2022833 | 2 | 7  | 14 | AC   | 22 | 4  |
| 108042 | 11 | 2024982 | 2025007 | 2 | 13 | 26 | TG   | 8  | 13 |
| 108046 | 11 | 2028571 | 2028594 | 2 | 12 | 24 | GA   | 19 | 4  |
| 108047 | 11 | 2030530 | 2030569 | 2 | 20 | 40 | CA   | 10 | 8  |
| 108050 | 11 | 2031806 | 2031833 | 2 | 14 | 28 | TG   | 7  | 8  |
| 108054 | 11 | 2036891 | 2036904 | 2 | 7  | 14 | AC   | 17 | 3  |
| 108055 | 11 | 2038678 | 2038701 | 2 | 12 | 24 | TG   | 13 | 12 |
| 108056 | 11 | 2039174 | 2039191 | 2 | 9  | 18 | GT   | 17 | 10 |
| 108057 | 11 | 2039318 | 2039333 | 4 | 4  | 16 | ACAG | 33 | 4  |
| 108063 | 11 | 2044954 | 2044968 | 3 | 5  | 15 | AGG  | 35 | 3  |
| 108064 | 11 | 2047983 | 2047998 | 2 | 8  | 16 | GT   | 21 | 3  |
| 108068 | 11 | 2052174 | 2052189 | 4 | 4  | 16 | GTGC | 17 | 8  |
| 108073 | 11 | 2059460 | 2059499 | 2 | 20 | 40 | TG   | 16 | 9  |
| 108078 | 11 | 2077728 | 2077751 | 2 | 12 | 24 | AC   | 21 | 9  |
| 108081 | 11 | 2085499 | 2085522 | 4 | 6  | 24 | AATG | 16 | 5  |
| 108083 | 11 | 2090422 | 2090433 | 2 | 6  | 12 | CA   | 25 | 9  |
| 108086 | 11 | 2097689 | 2097710 | 2 | 11 | 22 | GT   | 15 | 7  |
| 108089 | 11 | 2105441 | 2105472 | 2 | 16 | 32 | TG   | 13 | 10 |
| 108093 | 11 | 2116143 | 2116178 | 4 | 9  | 36 | ATTC | 24 | 8  |
| 108099 | 11 | 2123034 | 2123053 | 2 | 10 | 20 | AG   | 18 | 5  |
| 108100 | 11 | 2123475 | 2123492 | 2 | 9  | 18 | GA   | 19 | 4  |
| 108105 | 11 | 2135759 | 2135782 | 4 | 6  | 24 | GATG | 23 | 9  |
| 108109 | 11 | 2152781 | 2152804 | 4 | 6  | 24 | TTTG | 19 | 6  |
| 108112 | 11 | 2164293 | 2164304 | 2 | 6  | 12 | CA   | 6  | 3  |
| 108120 | 11 | 2180370 | 2180381 | 2 | 6  | 12 | TG   | 23 | 4  |
| 108124 | 11 | 2192721 | 2192750 | 2 | 15 | 30 | CA   | 21 | 11 |
| 108126 | 11 | 2193801 | 2193820 | 4 | 5  | 20 | CTGC | 27 | 5  |
| 108128 | 11 | 2194858 | 2194871 | 2 | 7  | 14 | AG   | 35 | 4  |
| 108132 | 11 | 2214367 | 2214384 | 3 | 6  | 18 | GAG  | 22 | 6  |
| 108141 | 11 | 2222278 | 2222299 | 2 | 11 | 22 | CA   | 21 | 6  |
| 108142 | 11 | 2222503 | 2222526 | 3 | 8  | 24 | TGC  | 24 | 7  |
| 108143 | 11 | 2223949 | 2223968 | 2 | 10 | 20 | AC   | 10 | 12 |
| 108146 | 11 | 2230442 | 2230471 | 2 | 15 | 30 | CA   | 12 | 10 |
| 108147 | 11 | 2233389 | 2233402 | 2 | 7  | 14 | GT   | 28 | 4  |
| 108148 | 11 | 2233513 | 2233546 | 2 | 17 | 34 | GT   | 11 | 8  |
| 108149 | 11 | 2233718 | 2233735 | 2 | 9  | 18 | CA   | 21 | 4  |
| 108150 | 11 | 2238582 | 2238601 | 2 | 10 | 20 | AC   | 19 | 9  |
| 108152 | 11 | 2241533 | 2241558 | 2 | 13 | 26 | GT   | 18 | 6  |
| 108154 | 11 | 2242907 | 2242944 | 2 | 19 | 38 | CA   | 8  | 9  |
| 108164 | 11 | 2266058 | 2266073 | 2 | 8  | 16 | AT   | 8  | 6  |
| 108165 | 11 | 2266895 | 2266914 | 2 | 10 | 20 | TG   | 18 | 14 |

|        |    |         |         |   |    |    |      |    |    |
|--------|----|---------|---------|---|----|----|------|----|----|
| 108166 | 11 | 2266915 | 2266926 | 2 | 6  | 12 | AG   | 19 | 11 |
| 108168 | 11 | 2267202 | 2267221 | 2 | 10 | 20 | GT   | 17 | 9  |
| 108169 | 11 | 2267361 | 2267382 | 2 | 11 | 22 | AC   | 10 | 13 |
| 108175 | 11 | 2281908 | 2281939 | 2 | 16 | 32 | AC   | 6  | 7  |
| 108180 | 11 | 2285099 | 2285114 | 2 | 8  | 16 | TG   | 25 | 3  |
| 108188 | 11 | 2291495 | 2291522 | 2 | 14 | 28 | TC   | 12 | 14 |
| 108189 | 11 | 2291683 | 2291696 | 2 | 7  | 14 | CT   | 7  | 3  |
| 108192 | 11 | 2292016 | 2292057 | 2 | 21 | 42 | CT   | 7  | 6  |
| 108194 | 11 | 2298525 | 2298540 | 2 | 8  | 16 | TG   | 21 | 4  |
| 108195 | 11 | 2300222 | 2300247 | 2 | 13 | 26 | GT   | 20 | 6  |
| 108196 | 11 | 2302368 | 2302385 | 3 | 6  | 18 | CAG  | 33 | 3  |
| 108197 | 11 | 2302481 | 2302500 | 2 | 10 | 20 | AC   | 13 | 14 |
| 108198 | 11 | 2302626 | 2302641 | 2 | 8  | 16 | GT   | 20 | 5  |
| 108199 | 11 | 2302751 | 2302774 | 3 | 8  | 24 | TTG  | 27 | 4  |
| 108200 | 11 | 2304067 | 2304106 | 2 | 20 | 40 | TG   | 19 | 15 |
| 108212 | 11 | 2315174 | 2315194 | 3 | 7  | 21 | GTG  | 23 | 5  |
| 108213 | 11 | 2315557 | 2315582 | 2 | 13 | 26 | GT   | 15 | 15 |
| 108214 | 11 | 2315819 | 2315860 | 3 | 14 | 42 | CAT  | 23 | 12 |
| 108215 | 11 | 2317235 | 2317266 | 2 | 16 | 32 | TG   | 6  | 7  |
| 108217 | 11 | 2317366 | 2317389 | 2 | 12 | 24 | AC   | 10 | 13 |
| 108218 | 11 | 2322566 | 2322579 | 2 | 7  | 14 | AC   | 33 | 4  |
| 108219 | 11 | 2322748 | 2322763 | 2 | 8  | 16 | AC   | 26 | 5  |
| 108222 | 11 | 2326443 | 2326454 | 2 | 6  | 12 | GT   | 8  | 7  |
| 108223 | 11 | 2326872 | 2326899 | 2 | 14 | 28 | TG   | 19 | 15 |
| 108228 | 11 | 2330740 | 2330763 | 2 | 12 | 24 | TG   | 18 | 8  |
| 108229 | 11 | 2330842 | 2330853 | 2 | 6  | 12 | AC   | 18 | 4  |
| 108232 | 11 | 2332856 | 2332879 | 3 | 8  | 24 | CTG  | 23 | 4  |
| 108233 | 11 | 2333173 | 2333190 | 2 | 9  | 18 | TC   | 17 | 3  |
| 108238 | 11 | 2334129 | 2334152 | 2 | 12 | 24 | TG   | 14 | 12 |
| 108240 | 11 | 2335928 | 2336003 | 4 | 19 | 76 | TAGA | 15 | 12 |
| 108241 | 11 | 2336398 | 2336409 | 2 | 6  | 12 | TG   | 16 | 7  |
| 108242 | 11 | 2336412 | 2336427 | 2 | 8  | 16 | TG   | 21 | 10 |
| 108244 | 11 | 2346827 | 2346846 | 2 | 10 | 20 | TG   | 24 | 9  |
| 108247 | 11 | 2357419 | 2357439 | 3 | 7  | 21 | TTC  | 7  | 7  |
| 108251 | 11 | 2375233 | 2375248 | 2 | 8  | 16 | TG   | 15 | 13 |
| 108253 | 11 | 2390269 | 2390296 | 2 | 14 | 28 | CA   | 13 | 7  |
| 108257 | 11 | 2393804 | 2393823 | 2 | 10 | 20 | TG   | 9  | 7  |
| 108267 | 11 | 2437299 | 2437319 | 3 | 7  | 21 | GGA  | 11 | 3  |
| 108268 | 11 | 2437754 | 2437767 | 2 | 7  | 14 | CT   | 19 | 5  |
| 108280 | 11 | 2459953 | 2459966 | 2 | 7  | 14 | TG   | 10 | 4  |
| 108282 | 11 | 2467525 | 2467540 | 2 | 8  | 16 | AC   | 22 | 4  |
| 108284 | 11 | 2468862 | 2468879 | 2 | 9  | 18 | TG   | 23 | 11 |
| 108290 | 11 | 2477536 | 2477557 | 2 | 11 | 22 | CT   | 15 | 13 |
| 108291 | 11 | 2477941 | 2477973 | 3 | 11 | 33 | CTT  | 6  | 9  |
| 108292 | 11 | 2479026 | 2479039 | 2 | 7  | 14 | TG   | 13 | 9  |
| 108295 | 11 | 2481632 | 2481651 | 2 | 10 | 20 | GT   | 11 | 6  |
| 108296 | 11 | 2481733 | 2481762 | 2 | 15 | 30 | CA   | 10 | 8  |
| 108303 | 11 | 2488388 | 2488407 | 2 | 10 | 20 | CT   | 18 | 7  |
| 108305 | 11 | 2489263 | 2489298 | 2 | 18 | 36 | TG   | 17 | 12 |
| 108307 | 11 | 2490903 | 2490918 | 2 | 8  | 16 | AG   | 20 | 5  |
| 108310 | 11 | 2493743 | 2493760 | 3 | 6  | 18 | AGG  | 17 | 3  |

|        |    |         |         |   |    |    |      |    |    |
|--------|----|---------|---------|---|----|----|------|----|----|
| 108323 | 11 | 2500085 | 2500102 | 3 | 6  | 18 | TGC  | 26 | 14 |
| 108324 | 11 | 2500103 | 2500116 | 2 | 7  | 14 | TG   | 21 | 14 |
| 108328 | 11 | 2503023 | 2503038 | 4 | 4  | 16 | TTTC | 15 | 5  |
| 108332 | 11 | 2503424 | 2503445 | 2 | 11 | 22 | GT   | 12 | 13 |
| 108334 | 11 | 2505000 | 2505015 | 2 | 8  | 16 | GT   | 26 | 3  |
| 108335 | 11 | 2505440 | 2505457 | 2 | 9  | 18 | AC   | 11 | 10 |
| 108338 | 11 | 2506535 | 2506548 | 2 | 7  | 14 | TC   | 15 | 3  |
| 108339 | 11 | 2507098 | 2507125 | 2 | 14 | 28 | CT   | 20 | 8  |
| 108342 | 11 | 2507349 | 2507366 | 2 | 9  | 18 | AG   | 12 | 4  |
| 108347 | 11 | 2518935 | 2518948 | 2 | 7  | 14 | CA   | 21 | 14 |
| 108348 | 11 | 2519914 | 2519933 | 2 | 10 | 20 | CA   | 13 | 13 |
| 108350 | 11 | 2523525 | 2523546 | 2 | 11 | 22 | AC   | 22 | 13 |
| 108352 | 11 | 2533716 | 2533735 | 2 | 10 | 20 | GT   | 19 | 9  |
| 108359 | 11 | 2558162 | 2558182 | 3 | 7  | 21 | CTG  | 26 | 5  |
| 108361 | 11 | 2563225 | 2563240 | 2 | 8  | 16 | GT   | 15 | 4  |
| 108362 | 11 | 2563243 | 2563254 | 2 | 6  | 12 | GT   | 12 | 3  |
| 108364 | 11 | 2563330 | 2563361 | 2 | 16 | 32 | AC   | 16 | 11 |
| 108365 | 11 | 2563814 | 2563845 | 2 | 16 | 32 | TG   | 8  | 6  |
| 108377 | 11 | 2583151 | 2583162 | 2 | 6  | 12 | AG   | 34 | 4  |
| 108378 | 11 | 2590085 | 2590096 | 2 | 6  | 12 | CA   | 27 | 3  |
| 108380 | 11 | 2590292 | 2590307 | 2 | 8  | 16 | CA   | 28 | 11 |
| 108390 | 11 | 2611877 | 2611891 | 3 | 5  | 15 | AGG  | 20 | 5  |
| 108392 | 11 | 2614715 | 2614732 | 2 | 9  | 18 | AC   | 10 | 7  |
| 108395 | 11 | 2617531 | 2617544 | 2 | 7  | 14 | CA   | 23 | 6  |
| 108400 | 11 | 2632292 | 2632311 | 2 | 10 | 20 | CA   | 20 | 11 |
| 108401 | 11 | 2633655 | 2633688 | 2 | 17 | 34 | AC   | 6  | 7  |
| 108403 | 11 | 2638438 | 2638459 | 2 | 11 | 22 | TG   | 23 | 12 |
| 108404 | 11 | 2640068 | 2640083 | 2 | 8  | 16 | GT   | 18 | 7  |
| 108405 | 11 | 2640112 | 2640135 | 2 | 12 | 24 | GT   | 13 | 4  |
| 108410 | 11 | 2646607 | 2646632 | 2 | 13 | 26 | CA   | 12 | 10 |
| 108412 | 11 | 2646905 | 2646928 | 2 | 12 | 24 | AC   | 14 | 9  |
| 108417 | 11 | 2677933 | 2677966 | 2 | 17 | 34 | AC   | 22 | 13 |
| 108420 | 11 | 2681551 | 2681566 | 2 | 8  | 16 | TG   | 13 | 4  |
| 108421 | 11 | 2681756 | 2681783 | 2 | 14 | 28 | CA   | 19 | 9  |
| 108422 | 11 | 2685893 | 2685906 | 2 | 7  | 14 | TA   | 17 | 3  |
| 108428 | 11 | 2705638 | 2705683 | 2 | 23 | 46 | CA   | 6  | 8  |
| 108429 | 11 | 2708331 | 2708346 | 4 | 4  | 16 | GGGA | 10 | 4  |
| 108434 | 11 | 2720805 | 2720820 | 2 | 8  | 16 | CT   | 27 | 3  |
| 108436 | 11 | 2722849 | 2722862 | 2 | 7  | 14 | TG   | 19 | 4  |
| 108438 | 11 | 2735115 | 2735128 | 2 | 7  | 14 | CT   | 29 | 5  |
| 108440 | 11 | 2741833 | 2741844 | 2 | 6  | 12 | AG   | 28 | 4  |
| 108442 | 11 | 2743942 | 2743961 | 2 | 10 | 20 | AC   | 28 | 7  |
| 108443 | 11 | 2746217 | 2746236 | 4 | 5  | 20 | TGTT | 29 | 3  |
| 108446 | 11 | 2763812 | 2763825 | 2 | 7  | 14 | CA   | 24 | 4  |
| 108448 | 11 | 2767649 | 2767676 | 4 | 7  | 28 | ATTG | 15 | 15 |
| 108453 | 11 | 2788075 | 2788106 | 2 | 16 | 32 | AC   | 26 | 9  |
| 108457 | 11 | 2804863 | 2804884 | 2 | 11 | 22 | AC   | 17 | 9  |
| 108458 | 11 | 2813380 | 2813403 | 2 | 12 | 24 | GT   | 14 | 16 |
| 108460 | 11 | 2815699 | 2815712 | 2 | 7  | 14 | AC   | 27 | 3  |
| 108463 | 11 | 2820218 | 2820232 | 3 | 5  | 15 | CAA  | 25 | 3  |
| 108465 | 11 | 2820398 | 2820415 | 2 | 9  | 18 | AG   | 14 | 5  |

|        |    |         |         |   |    |    |      |    |    |
|--------|----|---------|---------|---|----|----|------|----|----|
| 108473 | 11 | 2847786 | 2847812 | 3 | 9  | 27 | CAA  | 12 | 8  |
| 108483 | 11 | 2882019 | 2882036 | 3 | 6  | 18 | AGG  | 32 | 3  |
| 108485 | 11 | 2888138 | 2888157 | 2 | 10 | 20 | GT   | 24 | 11 |
| 108486 | 11 | 2893725 | 2893772 | 2 | 24 | 48 | TG   | 9  | 7  |
| 108489 | 11 | 2897342 | 2897367 | 2 | 13 | 26 | CA   | 8  | 7  |
| 108490 | 11 | 2899751 | 2899766 | 2 | 8  | 16 | TG   | 23 | 8  |
| 108492 | 11 | 2902277 | 2902320 | 2 | 22 | 44 | AC   | 8  | 9  |
| 108493 | 11 | 2903484 | 2903501 | 3 | 6  | 18 | CCT  | 8  | 3  |
| 108500 | 11 | 2918737 | 2918752 | 4 | 4  | 16 | AATG | 15 | 3  |
| 108511 | 11 | 2948641 | 2948674 | 2 | 17 | 34 | GT   | 21 | 7  |
| 108513 | 11 | 2970639 | 2970652 | 2 | 7  | 14 | CT   | 19 | 3  |
| 108514 | 11 | 2971208 | 2971235 | 2 | 14 | 28 | GT   | 22 | 9  |
| 108515 | 11 | 2972025 | 2972050 | 2 | 13 | 26 | AC   | 22 | 10 |
| 108517 | 11 | 2973594 | 2973614 | 3 | 7  | 21 | AGA  | 24 | 6  |
| 108518 | 11 | 2975083 | 2975100 | 2 | 9  | 18 | CA   | 28 | 3  |
| 108522 | 11 | 2994153 | 2994164 | 2 | 6  | 12 | AG   | 25 | 3  |
| 108527 | 11 | 2999798 | 2999833 | 2 | 18 | 36 | GT   | 11 | 9  |
| 108528 | 11 | 3001153 | 3001164 | 2 | 6  | 12 | TG   | 23 | 3  |
| 108530 | 11 | 3005226 | 3005289 | 2 | 32 | 64 | GT   | 8  | 11 |
| 108537 | 11 | 3016163 | 3016208 | 2 | 23 | 46 | CT   | 9  | 7  |
| 108538 | 11 | 3021337 | 3021352 | 2 | 8  | 16 | AG   | 25 | 3  |
| 108539 | 11 | 3022986 | 3022997 | 2 | 6  | 12 | GA   | 26 | 3  |
| 108541 | 11 | 3025988 | 3026002 | 3 | 5  | 15 | AAC  | 28 | 4  |
| 108542 | 11 | 3026212 | 3026229 | 3 | 6  | 18 | GCT  | 20 | 5  |
| 108546 | 11 | 3031310 | 3031321 | 2 | 6  | 12 | TA   | 11 | 4  |
| 108547 | 11 | 3031725 | 3031739 | 3 | 5  | 15 | CAT  | 14 | 5  |
| 108556 | 11 | 3050288 | 3050326 | 3 | 13 | 39 | ATA  | 6  | 7  |
| 108557 | 11 | 3050965 | 3050982 | 3 | 6  | 18 | ACA  | 24 | 4  |
| 108563 | 11 | 3064253 | 3064294 | 2 | 21 | 42 | CA   | 7  | 12 |
| 108565 | 11 | 3064482 | 3064497 | 2 | 8  | 16 | AC   | 25 | 4  |
| 108566 | 11 | 3064626 | 3064639 | 2 | 7  | 14 | TG   | 13 | 4  |
| 108567 | 11 | 3064641 | 3064652 | 2 | 6  | 12 | GT   | 25 | 11 |
| 108571 | 11 | 3070826 | 3070853 | 2 | 14 | 28 | GT   | 17 | 9  |
| 108576 | 11 | 3078427 | 3078450 | 4 | 6  | 24 | TTCC | 25 | 6  |
| 108582 | 11 | 3098474 | 3098487 | 2 | 7  | 14 | GT   | 23 | 3  |
| 108586 | 11 | 3101771 | 3101786 | 2 | 8  | 16 | AT   | 7  | 8  |
| 108587 | 11 | 3103158 | 3103181 | 2 | 12 | 24 | GT   | 15 | 13 |
| 108588 | 11 | 3105422 | 3105445 | 2 | 12 | 24 | TG   | 14 | 9  |
| 108591 | 11 | 3106517 | 3106532 | 4 | 4  | 16 | TAAA | 29 | 8  |
| 108593 | 11 | 3108187 | 3108200 | 2 | 7  | 14 | AC   | 20 | 3  |
| 108603 | 11 | 3118253 | 3118268 | 2 | 8  | 16 | CA   | 32 | 6  |
| 108608 | 11 | 3126459 | 3126482 | 2 | 12 | 24 | GT   | 17 | 5  |
| 108610 | 11 | 3129151 | 3129168 | 2 | 9  | 18 | CA   | 28 | 3  |
| 108613 | 11 | 3135933 | 3135948 | 2 | 8  | 16 | CA   | 21 | 3  |
| 108615 | 11 | 3139153 | 3139182 | 2 | 15 | 30 | TG   | 10 | 10 |
| 108618 | 11 | 3145718 | 3145735 | 2 | 9  | 18 | AG   | 14 | 7  |
| 108620 | 11 | 3145888 | 3145903 | 2 | 8  | 16 | AG   | 20 | 4  |
| 108621 | 11 | 3151500 | 3151511 | 2 | 6  | 12 | GA   | 22 | 3  |
| 108622 | 11 | 3151585 | 3151599 | 3 | 5  | 15 | AGA  | 16 | 3  |
| 108623 | 11 | 3151601 | 3151621 | 3 | 7  | 21 | GAA  | 17 | 7  |
| 108624 | 11 | 3152815 | 3152829 | 3 | 5  | 15 | CCA  | 17 | 4  |

|        |    |         |         |   |    |    |      |    |    |
|--------|----|---------|---------|---|----|----|------|----|----|
| 108625 | 11 | 3153991 | 3154002 | 2 | 6  | 12 | AC   | 13 | 4  |
| 108626 | 11 | 3154006 | 3154019 | 2 | 7  | 14 | CA   | 22 | 6  |
| 108627 | 11 | 3154152 | 3154175 | 2 | 12 | 24 | TG   | 17 | 10 |
| 108629 | 11 | 3167602 | 3167617 | 4 | 4  | 16 | AAAC | 6  | 3  |
| 108632 | 11 | 3174532 | 3174549 | 3 | 6  | 18 | GAA  | 27 | 4  |
| 108636 | 11 | 3181448 | 3181467 | 2 | 10 | 20 | TG   | 16 | 5  |
| 108643 | 11 | 3186894 | 3186911 | 2 | 9  | 18 | GT   | 18 | 8  |
| 108644 | 11 | 3187507 | 3187522 | 2 | 8  | 16 | GT   | 12 | 11 |
| 108645 | 11 | 3188148 | 3188167 | 2 | 10 | 20 | TG   | 19 | 11 |
| 108646 | 11 | 3188286 | 3188307 | 2 | 11 | 22 | TG   | 13 | 8  |
| 108647 | 11 | 3189341 | 3189360 | 2 | 10 | 20 | CA   | 26 | 8  |
| 108652 | 11 | 3201192 | 3201217 | 2 | 13 | 26 | AC   | 17 | 7  |
| 108657 | 11 | 3207563 | 3207577 | 3 | 5  | 15 | GCT  | 27 | 4  |
| 108660 | 11 | 3218620 | 3218639 | 4 | 5  | 20 | TTTC | 13 | 6  |
| 108662 | 11 | 3219288 | 3219323 | 2 | 18 | 36 | AC   | 11 | 9  |
| 108674 | 11 | 3228316 | 3228333 | 2 | 9  | 18 | TG   | 6  | 7  |
| 108676 | 11 | 3229898 | 3229915 | 2 | 9  | 18 | AC   | 16 | 6  |
| 108679 | 11 | 3234230 | 3234247 | 2 | 9  | 18 | GA   | 20 | 7  |
| 108680 | 11 | 3234395 | 3234406 | 2 | 6  | 12 | TG   | 34 | 3  |
| 108684 | 11 | 3237139 | 3237150 | 2 | 6  | 12 | TA   | 19 | 6  |
| 108685 | 11 | 3239707 | 3239722 | 2 | 8  | 16 | GT   | 13 | 7  |
| 108692 | 11 | 3249629 | 3249648 | 2 | 10 | 20 | CA   | 14 | 11 |
| 108693 | 11 | 3251324 | 3251339 | 2 | 8  | 16 | AC   | 8  | 8  |
| 108694 | 11 | 3251341 | 3251352 | 2 | 6  | 12 | CA   | 11 | 7  |
| 108697 | 11 | 3251633 | 3251658 | 2 | 13 | 26 | CA   | 11 | 7  |
| 108702 | 11 | 3259350 | 3259379 | 2 | 15 | 30 | TG   | 8  | 9  |
| 108708 | 11 | 3272578 | 3272589 | 2 | 6  | 12 | AC   | 27 | 3  |
| 108714 | 11 | 3278412 | 3278427 | 2 | 8  | 16 | CA   | 22 | 6  |
| 108716 | 11 | 3280760 | 3280775 | 2 | 8  | 16 | AC   | 24 | 3  |
| 108721 | 11 | 3284411 | 3284436 | 2 | 13 | 26 | AC   | 16 | 7  |
| 108724 | 11 | 3292618 | 3292673 | 2 | 28 | 56 | AC   | 10 | 15 |
| 108725 | 11 | 3298351 | 3298362 | 2 | 6  | 12 | TG   | 18 | 5  |
| 108744 | 11 | 3312766 | 3312787 | 2 | 11 | 22 | AC   | 14 | 6  |
| 108745 | 11 | 3313064 | 3313077 | 2 | 7  | 14 | CT   | 22 | 3  |
| 108746 | 11 | 3315260 | 3315299 | 2 | 20 | 40 | CT   | 12 | 7  |
| 108748 | 11 | 3315439 | 3315486 | 2 | 24 | 48 | CA   | 14 | 9  |
| 108752 | 11 | 3320356 | 3320367 | 2 | 6  | 12 | AC   | 13 | 6  |
| 108753 | 11 | 3320368 | 3320379 | 2 | 6  | 12 | GC   | 10 | 6  |
| 108767 | 11 | 3332210 | 3332223 | 2 | 7  | 14 | GT   | 22 | 4  |
| 108776 | 11 | 3338430 | 3338445 | 2 | 8  | 16 | CA   | 22 | 7  |
| 108781 | 11 | 3341287 | 3341306 | 2 | 10 | 20 | TG   | 22 | 8  |
| 108783 | 11 | 3342117 | 3342132 | 2 | 8  | 16 | AC   | 19 | 5  |
| 108786 | 11 | 3347989 | 3348010 | 2 | 11 | 22 | AG   | 19 | 7  |
| 108787 | 11 | 3348125 | 3348164 | 2 | 20 | 40 | AC   | 9  | 9  |
| 108800 | 11 | 3363184 | 3363195 | 2 | 6  | 12 | TG   | 26 | 3  |
| 108802 | 11 | 3364190 | 3364227 | 2 | 19 | 38 | AC   | 8  | 10 |
| 108804 | 11 | 3365316 | 3365341 | 2 | 13 | 26 | CA   | 9  | 9  |
| 108812 | 11 | 3370436 | 3370455 | 2 | 10 | 20 | CA   | 7  | 5  |
| 108814 | 11 | 3370871 | 3370930 | 2 | 30 | 60 | CA   | 11 | 9  |
| 108816 | 11 | 3376227 | 3376256 | 2 | 15 | 30 | AC   | 12 | 8  |
| 108826 | 11 | 3381346 | 3381363 | 3 | 6  | 18 | ACA  | 24 | 8  |

|        |    |         |         |   |    |    |      |    |    |
|--------|----|---------|---------|---|----|----|------|----|----|
| 108830 | 11 | 3389942 | 3389955 | 2 | 7  | 14 | GT   | 23 | 5  |
| 108831 | 11 | 3390154 | 3390179 | 2 | 13 | 26 | AC   | 28 | 7  |
| 108834 | 11 | 3410424 | 3410444 | 3 | 7  | 21 | AAC  | 19 | 10 |
| 108838 | 11 | 3426998 | 3427013 | 2 | 8  | 16 | AC   | 27 | 3  |
| 108839 | 11 | 3435616 | 3435633 | 3 | 6  | 18 | CCT  | 15 | 6  |
| 108840 | 11 | 3436675 | 3436694 | 4 | 5  | 20 | AATC | 18 | 4  |
| 108842 | 11 | 3448413 | 3448424 | 2 | 6  | 12 | CA   | 33 | 4  |
| 108847 | 11 | 3459067 | 3459096 | 2 | 15 | 30 | AC   | 16 | 12 |
| 108854 | 11 | 3474730 | 3474743 | 2 | 7  | 14 | TG   | 26 | 4  |
| 108859 | 11 | 3487123 | 3487142 | 2 | 10 | 20 | AC   | 17 | 6  |
| 108860 | 11 | 3487524 | 3487541 | 3 | 6  | 18 | GGC  | 24 | 7  |
| 108861 | 11 | 3487864 | 3487877 | 2 | 7  | 14 | CT   | 32 | 5  |
| 108867 | 11 | 3500677 | 3500706 | 2 | 15 | 30 | CA   | 7  | 13 |
| 108870 | 11 | 3503389 | 3503410 | 2 | 11 | 22 | AC   | 16 | 9  |
| 108874 | 11 | 3505944 | 3505957 | 2 | 7  | 14 | CA   | 20 | 12 |
| 108879 | 11 | 3517758 | 3517773 | 2 | 8  | 16 | GT   | 11 | 3  |
| 108880 | 11 | 3521569 | 3521590 | 2 | 11 | 22 | AC   | 19 | 5  |
| 108882 | 11 | 3523763 | 3523774 | 2 | 6  | 12 | AC   | 22 | 4  |
| 108883 | 11 | 3524101 | 3524118 | 2 | 9  | 18 | TG   | 19 | 3  |
| 108886 | 11 | 3528869 | 3528888 | 2 | 10 | 20 | AC   | 24 | 7  |
| 108888 | 11 | 3538222 | 3538237 | 2 | 8  | 16 | CA   | 12 | 6  |
| 108891 | 11 | 3541083 | 3541104 | 2 | 11 | 22 | AC   | 29 | 9  |
| 108902 | 11 | 3556481 | 3556496 | 2 | 8  | 16 | TG   | 19 | 4  |
| 108905 | 11 | 3561623 | 3561643 | 3 | 7  | 21 | CAG  | 26 | 4  |
| 108913 | 11 | 3574150 | 3574161 | 2 | 6  | 12 | TG   | 31 | 4  |
| 108920 | 11 | 3592928 | 3592939 | 2 | 6  | 12 | TG   | 22 | 3  |
| 108922 | 11 | 3594208 | 3594233 | 2 | 13 | 26 | TG   | 6  | 6  |
| 108924 | 11 | 3594391 | 3594410 | 2 | 10 | 20 | TG   | 14 | 12 |
| 108930 | 11 | 3603522 | 3603577 | 4 | 14 | 56 | TAGA | 7  | 6  |
| 108936 | 11 | 3622620 | 3622646 | 3 | 9  | 27 | CTG  | 21 | 7  |
| 108944 | 11 | 3649415 | 3649429 | 3 | 5  | 15 | TAC  | 13 | 5  |
| 108950 | 11 | 3665789 | 3665812 | 3 | 8  | 24 | AAT  | 8  | 7  |
| 108952 | 11 | 3667725 | 3667738 | 2 | 7  | 14 | CA   | 22 | 6  |
| 108955 | 11 | 3672062 | 3672088 | 3 | 9  | 27 | AAC  | 25 | 4  |
| 108958 | 11 | 3685719 | 3685742 | 3 | 8  | 24 | GCT  | 24 | 4  |
| 108959 | 11 | 3691940 | 3691954 | 3 | 5  | 15 | GGA  | 28 | 4  |
| 108964 | 11 | 3710004 | 3710031 | 4 | 7  | 28 | TCTG | 23 | 5  |
| 108970 | 11 | 3716797 | 3716808 | 2 | 6  | 12 | GT   | 37 | 3  |
| 108971 | 11 | 3716955 | 3716974 | 2 | 10 | 20 | CA   | 28 | 5  |
| 108973 | 11 | 3717436 | 3717456 | 3 | 7  | 21 | GCA  | 24 | 6  |
| 108974 | 11 | 3720253 | 3720276 | 2 | 12 | 24 | TG   | 7  | 5  |
| 108980 | 11 | 3722714 | 3722727 | 2 | 7  | 14 | AG   | 27 | 5  |
| 108993 | 11 | 3782037 | 3782057 | 3 | 7  | 21 | TGT  | 18 | 3  |
| 109001 | 11 | 3819943 | 3819972 | 3 | 10 | 30 | TGT  | 29 | 6  |
| 109004 | 11 | 3821020 | 3821049 | 2 | 15 | 30 | GT   | 13 | 11 |
| 109007 | 11 | 3827743 | 3827768 | 2 | 13 | 26 | CA   | 12 | 8  |
| 109009 | 11 | 3830105 | 3830118 | 2 | 7  | 14 | GT   | 21 | 3  |
| 109011 | 11 | 3834430 | 3834445 | 2 | 8  | 16 | TG   | 12 | 5  |
| 109012 | 11 | 3841307 | 3841334 | 4 | 7  | 28 | AAGA | 15 | 9  |
| 109013 | 11 | 3841924 | 3841951 | 2 | 14 | 28 | CA   | 12 | 12 |
| 109014 | 11 | 3842671 | 3842686 | 2 | 8  | 16 | CA   | 24 | 8  |

|        |    |         |         |   |    |    |      |    |    |
|--------|----|---------|---------|---|----|----|------|----|----|
| 109015 | 11 | 3843817 | 3843848 | 2 | 16 | 32 | CA   | 17 | 15 |
| 109017 | 11 | 3847279 | 3847312 | 2 | 17 | 34 | TG   | 12 | 11 |
| 109032 | 11 | 3876021 | 3876036 | 2 | 8  | 16 | CT   | 24 | 4  |
| 109037 | 11 | 3886422 | 3886443 | 2 | 11 | 22 | GT   | 6  | 6  |
| 109038 | 11 | 3886917 | 3886948 | 2 | 16 | 32 | TG   | 8  | 9  |
| 109039 | 11 | 3887662 | 3887685 | 2 | 12 | 24 | TG   | 14 | 7  |
| 109042 | 11 | 3901762 | 3901789 | 2 | 14 | 28 | CA   | 16 | 10 |
| 109045 | 11 | 3906230 | 3906243 | 2 | 7  | 14 | CA   | 16 | 10 |
| 109046 | 11 | 3907424 | 3907435 | 2 | 6  | 12 | TG   | 29 | 5  |
| 109047 | 11 | 3907478 | 3907499 | 2 | 11 | 22 | TG   | 20 | 5  |
| 109049 | 11 | 3914739 | 3914750 | 2 | 6  | 12 | CA   | 28 | 6  |
| 109051 | 11 | 3916650 | 3916665 | 4 | 4  | 16 | CTGT | 24 | 3  |
| 109056 | 11 | 3924420 | 3924434 | 3 | 5  | 15 | ATC  | 33 | 3  |
| 109057 | 11 | 3925209 | 3925220 | 2 | 6  | 12 | AG   | 19 | 3  |
| 109058 | 11 | 3926627 | 3926638 | 2 | 6  | 12 | TG   | 27 | 3  |
| 109062 | 11 | 3932652 | 3932663 | 2 | 6  | 12 | AT   | 20 | 6  |
| 109064 | 11 | 3934205 | 3934220 | 4 | 4  | 16 | GTCT | 11 | 6  |
| 109065 | 11 | 3934225 | 3934240 | 4 | 4  | 16 | GTCT | 16 | 10 |
| 109070 | 11 | 3939987 | 3940001 | 3 | 5  | 15 | TCC  | 24 | 7  |
| 109072 | 11 | 3940139 | 3940159 | 3 | 7  | 21 | AGT  | 20 | 4  |
| 109073 | 11 | 3943086 | 3943105 | 2 | 10 | 20 | CA   | 18 | 4  |
| 109074 | 11 | 3950035 | 3950048 | 2 | 7  | 14 | TG   | 14 | 5  |
| 109076 | 11 | 3962471 | 3962500 | 3 | 10 | 30 | AAC  | 29 | 8  |
| 109081 | 11 | 3974132 | 3974147 | 2 | 8  | 16 | AC   | 17 | 10 |
| 109083 | 11 | 3990587 | 3990602 | 2 | 8  | 16 | CA   | 29 | 3  |
| 109084 | 11 | 3993202 | 3993229 | 2 | 14 | 28 | CA   | 23 | 10 |
| 109095 | 11 | 4025140 | 4025151 | 2 | 6  | 12 | TG   | 19 | 4  |
| 109098 | 11 | 4040966 | 4040980 | 3 | 5  | 15 | CAA  | 23 | 4  |
| 109099 | 11 | 4041032 | 4041049 | 3 | 6  | 18 | CAA  | 24 | 16 |
| 109100 | 11 | 4047147 | 4047170 | 3 | 8  | 24 | CTG  | 21 | 8  |
| 109101 | 11 | 4047323 | 4047350 | 2 | 14 | 28 | CA   | 16 | 18 |
| 109108 | 11 | 4057323 | 4057338 | 2 | 8  | 16 | CA   | 19 | 7  |
| 109111 | 11 | 4062459 | 4062488 | 3 | 10 | 30 | TCC  | 21 | 5  |
| 109117 | 11 | 4082843 | 4082856 | 2 | 7  | 14 | TG   | 21 | 3  |
| 109118 | 11 | 4082919 | 4082964 | 2 | 23 | 46 | CA   | 6  | 5  |
| 109128 | 11 | 4112751 | 4112772 | 2 | 11 | 22 | AC   | 12 | 12 |
| 109129 | 11 | 4112961 | 4112978 | 2 | 9  | 18 | CA   | 20 | 3  |
| 109130 | 11 | 4113083 | 4113110 | 2 | 14 | 28 | GT   | 9  | 7  |
| 109134 | 11 | 4118942 | 4118953 | 2 | 6  | 12 | CA   | 19 | 3  |
| 109138 | 11 | 4119751 | 4119780 | 2 | 15 | 30 | TG   | 18 | 11 |
| 109143 | 11 | 4122016 | 4122041 | 2 | 13 | 26 | CA   | 8  | 6  |
| 109145 | 11 | 4122325 | 4122354 | 3 | 10 | 30 | AGA  | 18 | 8  |
| 109148 | 11 | 4129103 | 4129122 | 2 | 10 | 20 | GT   | 17 | 15 |
| 109156 | 11 | 4136882 | 4136901 | 2 | 10 | 20 | GT   | 26 | 7  |
| 109158 | 11 | 4137261 | 4137284 | 2 | 12 | 24 | TG   | 9  | 6  |
| 109159 | 11 | 4137393 | 4137418 | 2 | 13 | 26 | GT   | 9  | 8  |
| 109161 | 11 | 4142972 | 4142983 | 2 | 6  | 12 | AC   | 21 | 6  |
| 109165 | 11 | 4148517 | 4148544 | 2 | 14 | 28 | TG   | 8  | 6  |
| 109166 | 11 | 4148603 | 4148636 | 2 | 17 | 34 | TG   | 9  | 8  |
| 109169 | 11 | 4151260 | 4151271 | 2 | 6  | 12 | AG   | 25 | 3  |
| 109170 | 11 | 4152979 | 4153004 | 2 | 13 | 26 | TG   | 13 | 11 |

|        |    |         |         |   |    |    |     |    |    |
|--------|----|---------|---------|---|----|----|-----|----|----|
| 109171 | 11 | 4153135 | 4153158 | 2 | 12 | 24 | AC  | 16 | 14 |
| 109172 | 11 | 4153331 | 4153348 | 2 | 9  | 18 | CA  | 10 | 8  |
| 109174 | 11 | 4155107 | 4155134 | 2 | 14 | 28 | AC  | 21 | 6  |
| 109177 | 11 | 4155637 | 4155648 | 2 | 6  | 12 | CA  | 24 | 9  |
| 109180 | 11 | 4157759 | 4157776 | 2 | 9  | 18 | CT  | 7  | 3  |
| 109187 | 11 | 4159271 | 4159315 | 3 | 15 | 45 | TCA | 24 | 11 |
| 109189 | 11 | 4160787 | 4160802 | 2 | 8  | 16 | TG  | 21 | 3  |
| 109190 | 11 | 4160930 | 4160949 | 2 | 10 | 20 | GT  | 18 | 5  |
| 109193 | 11 | 4166084 | 4166117 | 2 | 17 | 34 | CA  | 22 | 11 |
| 109194 | 11 | 4166206 | 4166227 | 2 | 11 | 22 | AC  | 26 | 7  |
| 109195 | 11 | 4166441 | 4166456 | 2 | 8  | 16 | TG  | 10 | 6  |
| 109197 | 11 | 4167394 | 4167407 | 2 | 7  | 14 | AC  | 30 | 3  |
| 109198 | 11 | 4169410 | 4169424 | 3 | 5  | 15 | GAT | 34 | 4  |
| 109199 | 11 | 4169574 | 4169591 | 2 | 9  | 18 | CA  | 31 | 7  |
| 109200 | 11 | 4169807 | 4169826 | 2 | 10 | 20 | TG  | 29 | 10 |
| 109202 | 11 | 4170314 | 4170335 | 2 | 11 | 22 | AC  | 24 | 7  |
| 109203 | 11 | 4170639 | 4170659 | 3 | 7  | 21 | GAG | 20 | 5  |
| 109206 | 11 | 4172163 | 4172188 | 2 | 13 | 26 | AC  | 14 | 10 |
| 109213 | 11 | 4183860 | 4183879 | 2 | 10 | 20 | GT  | 22 | 4  |
| 109217 | 11 | 4187063 | 4187074 | 2 | 6  | 12 | CT  | 20 | 4  |
| 109218 | 11 | 4187385 | 4187398 | 2 | 7  | 14 | AC  | 30 | 3  |
| 109222 | 11 | 4193275 | 4193290 | 2 | 8  | 16 | AC  | 28 | 6  |
| 109224 | 11 | 4193458 | 4193471 | 2 | 7  | 14 | GT  | 22 | 6  |
| 109225 | 11 | 4193484 | 4193495 | 2 | 6  | 12 | TG  | 12 | 3  |
| 109228 | 11 | 4196744 | 4196787 | 2 | 22 | 44 | AC  | 7  | 9  |
| 109229 | 11 | 4196989 | 4197026 | 2 | 19 | 38 | CA  | 8  | 9  |
| 109232 | 11 | 4197595 | 4197642 | 2 | 24 | 48 | CA  | 6  | 8  |
| 109233 | 11 | 4197811 | 4197830 | 2 | 10 | 20 | AC  | 11 | 12 |
| 109235 | 11 | 4198053 | 4198066 | 2 | 7  | 14 | AC  | 20 | 6  |
| 109236 | 11 | 4199356 | 4199367 | 2 | 6  | 12 | AC  | 28 | 4  |
| 109237 | 11 | 4199899 | 4199914 | 2 | 8  | 16 | CA  | 29 | 6  |
| 109238 | 11 | 4200302 | 4200315 | 2 | 7  | 14 | TG  | 21 | 5  |
| 109241 | 11 | 4202345 | 4202364 | 2 | 10 | 20 | AC  | 19 | 7  |
| 109243 | 11 | 4204066 | 4204093 | 2 | 14 | 28 | CA  | 11 | 10 |
| 109244 | 11 | 4204867 | 4204881 | 3 | 5  | 15 | GCT | 22 | 3  |
| 109246 | 11 | 4207259 | 4207273 | 3 | 5  | 15 | TGC | 27 | 5  |
| 109252 | 11 | 4212065 | 4212092 | 2 | 14 | 28 | CT  | 18 | 8  |
| 109254 | 11 | 4213262 | 4213276 | 3 | 5  | 15 | AGC | 24 | 5  |
| 109259 | 11 | 4221206 | 4221233 | 2 | 14 | 28 | CT  | 12 | 8  |
| 109260 | 11 | 4223104 | 4223115 | 2 | 6  | 12 | GT  | 29 | 4  |
| 109261 | 11 | 4223494 | 4223507 | 2 | 7  | 14 | AT  | 9  | 4  |
| 109262 | 11 | 4225955 | 4225980 | 2 | 13 | 26 | AC  | 17 | 7  |
| 109263 | 11 | 4227675 | 4227706 | 2 | 16 | 32 | TG  | 15 | 8  |
| 109264 | 11 | 4227800 | 4227823 | 2 | 12 | 24 | AC  | 14 | 8  |
| 109270 | 11 | 4229545 | 4229574 | 2 | 15 | 30 | TG  | 21 | 7  |
| 109272 | 11 | 4232087 | 4232100 | 2 | 7  | 14 | TG  | 19 | 4  |
| 109273 | 11 | 4232466 | 4232497 | 2 | 16 | 32 | TG  | 7  | 6  |
| 109274 | 11 | 4232608 | 4232635 | 2 | 14 | 28 | GT  | 15 | 8  |
| 109276 | 11 | 4234897 | 4234912 | 2 | 8  | 16 | AC  | 17 | 6  |
| 109278 | 11 | 4235505 | 4235540 | 2 | 18 | 36 | CA  | 19 | 8  |
| 109279 | 11 | 4235734 | 4235757 | 3 | 8  | 24 | GTA | 12 | 4  |



|        |    |         |         |   |    |    |      |    |    |
|--------|----|---------|---------|---|----|----|------|----|----|
| 109283 | 11 | 4236321 | 4236334 | 2 | 7  | 14 | GT   | 18 | 3  |
| 109285 | 11 | 4237146 | 4237157 | 2 | 6  | 12 | TA   | 16 | 5  |
| 109286 | 11 | 4238427 | 4238466 | 2 | 20 | 40 | TG   | 16 | 12 |
| 109287 | 11 | 4238815 | 4238850 | 2 | 18 | 36 | GT   | 21 | 11 |
| 109291 | 11 | 4241755 | 4241782 | 2 | 14 | 28 | CA   | 8  | 8  |
| 109293 | 11 | 4242139 | 4242166 | 2 | 14 | 28 | CA   | 8  | 11 |
| 109295 | 11 | 4242326 | 4242343 | 2 | 9  | 18 | CA   | 9  | 9  |
| 109296 | 11 | 4242540 | 4242559 | 2 | 10 | 20 | AC   | 11 | 5  |
| 109304 | 11 | 4249250 | 4249261 | 2 | 6  | 12 | TG   | 26 | 3  |
| 109306 | 11 | 4249458 | 4249469 | 2 | 6  | 12 | AG   | 28 | 4  |
| 109310 | 11 | 4251496 | 4251527 | 2 | 16 | 32 | AC   | 11 | 17 |
| 109318 | 11 | 4257510 | 4257527 | 2 | 9  | 18 | TG   | 22 | 8  |
| 109319 | 11 | 4257888 | 4257907 | 2 | 10 | 20 | TG   | 22 | 10 |
| 109321 | 11 | 4258502 | 4258525 | 2 | 12 | 24 | TG   | 7  | 6  |
| 109322 | 11 | 4258821 | 4258836 | 4 | 4  | 16 | GGTT | 28 | 3  |
| 109326 | 11 | 4262685 | 4262710 | 2 | 13 | 26 | AC   | 22 | 11 |
| 109327 | 11 | 4263258 | 4263291 | 2 | 17 | 34 | GT   | 13 | 12 |
| 109331 | 11 | 4268608 | 4268637 | 3 | 10 | 30 | TGA  | 19 | 8  |
| 109332 | 11 | 4269137 | 4269148 | 2 | 6  | 12 | CA   | 28 | 3  |
| 109336 | 11 | 4271107 | 4271142 | 2 | 18 | 36 | CA   | 8  | 9  |
| 109342 | 11 | 4271811 | 4271848 | 2 | 19 | 38 | TG   | 13 | 11 |
| 109343 | 11 | 4271998 | 4272024 | 3 | 9  | 27 | GGA  | 26 | 6  |
| 109345 | 11 | 4273814 | 4273847 | 2 | 17 | 34 | CA   | 13 | 9  |
| 109346 | 11 | 4274161 | 4274174 | 2 | 7  | 14 | TG   | 31 | 3  |
| 109347 | 11 | 4275527 | 4275540 | 2 | 7  | 14 | CA   | 15 | 6  |
| 109348 | 11 | 4275543 | 4275556 | 2 | 7  | 14 | CA   | 22 | 7  |
| 109351 | 11 | 4282418 | 4282438 | 3 | 7  | 21 | TCC  | 26 | 7  |
| 109352 | 11 | 4282947 | 4282958 | 2 | 6  | 12 | TG   | 24 | 3  |
| 109353 | 11 | 4283028 | 4283045 | 2 | 9  | 18 | TG   | 14 | 14 |
| 109354 | 11 | 4283378 | 4283398 | 3 | 7  | 21 | AGG  | 13 | 5  |
| 109355 | 11 | 4283624 | 4283643 | 2 | 10 | 20 | GT   | 16 | 5  |
| 109357 | 11 | 4284580 | 4284609 | 2 | 15 | 30 | TG   | 15 | 11 |
| 109360 | 11 | 4287157 | 4287174 | 2 | 9  | 18 | GT   | 14 | 5  |
| 109364 | 11 | 4292013 | 4292048 | 2 | 18 | 36 | TG   | 8  | 10 |
| 109371 | 11 | 4300547 | 4300558 | 2 | 6  | 12 | CA   | 26 | 3  |
| 109375 | 11 | 4305415 | 4305478 | 2 | 32 | 64 | GT   | 13 | 15 |
| 109378 | 11 | 4311072 | 4311099 | 2 | 14 | 28 | CA   | 19 | 10 |
| 109380 | 11 | 4314983 | 4314994 | 2 | 6  | 12 | AC   | 24 | 5  |
| 109381 | 11 | 4315281 | 4315308 | 2 | 14 | 28 | CT   | 15 | 11 |
| 109382 | 11 | 4317189 | 4317203 | 3 | 5  | 15 | AGA  | 24 | 3  |
| 109383 | 11 | 4318053 | 4318072 | 2 | 10 | 20 | GT   | 18 | 17 |
| 109387 | 11 | 4321176 | 4321189 | 2 | 7  | 14 | AC   | 15 | 12 |
| 109388 | 11 | 4321506 | 4321517 | 2 | 6  | 12 | CA   | 35 | 3  |
| 109391 | 11 | 4322781 | 4322798 | 3 | 6  | 18 | GCA  | 32 | 3  |
| 109393 | 11 | 4325422 | 4325483 | 2 | 31 | 62 | GT   | 13 | 16 |
| 109397 | 11 | 4327965 | 4327996 | 2 | 16 | 32 | CA   | 9  | 8  |
| 109402 | 11 | 4332755 | 4332784 | 2 | 15 | 30 | AC   | 19 | 9  |
| 109403 | 11 | 4332914 | 4332925 | 2 | 6  | 12 | TG   | 18 | 4  |
| 109405 | 11 | 4335052 | 4335101 | 2 | 25 | 50 | GT   | 8  | 9  |
| 109408 | 11 | 4339676 | 4339691 | 2 | 8  | 16 | AC   | 29 | 4  |
| 109409 | 11 | 4340207 | 4340220 | 2 | 7  | 14 | TG   | 29 | 4  |

|        |    |         |         |   |    |    |      |    |    |
|--------|----|---------|---------|---|----|----|------|----|----|
| 109411 | 11 | 4341861 | 4341874 | 2 | 7  | 14 | AC   | 11 | 4  |
| 109414 | 11 | 4343475 | 4343504 | 2 | 15 | 30 | TG   | 17 | 14 |
| 109417 | 11 | 4353596 | 4353607 | 2 | 6  | 12 | GT   | 27 | 4  |
| 109422 | 11 | 4356748 | 4356761 | 2 | 7  | 14 | TG   | 11 | 3  |
| 109424 | 11 | 4357332 | 4357349 | 2 | 9  | 18 | TG   | 26 | 7  |
| 109425 | 11 | 4358045 | 4358072 | 2 | 14 | 28 | GT   | 13 | 11 |
| 109426 | 11 | 4358182 | 4358209 | 2 | 14 | 28 | AC   | 8  | 10 |
| 109427 | 11 | 4358362 | 4358397 | 2 | 18 | 36 | AC   | 8  | 7  |
| 109433 | 11 | 4359419 | 4359434 | 2 | 8  | 16 | AC   | 23 | 9  |
| 109434 | 11 | 4359583 | 4359602 | 2 | 10 | 20 | CA   | 20 | 4  |
| 109435 | 11 | 4360602 | 4360623 | 2 | 11 | 22 | AC   | 21 | 5  |
| 109441 | 11 | 4366565 | 4366582 | 3 | 6  | 18 | TGC  | 27 | 4  |
| 109442 | 11 | 4367467 | 4367478 | 2 | 6  | 12 | GT   | 21 | 3  |
| 109445 | 11 | 4372922 | 4372939 | 2 | 9  | 18 | GA   | 24 | 3  |
| 109446 | 11 | 4376302 | 4376325 | 2 | 12 | 24 | CT   | 11 | 5  |
| 109447 | 11 | 4376402 | 4376423 | 2 | 11 | 22 | TC   | 7  | 5  |
| 109448 | 11 | 4376655 | 4376669 | 3 | 5  | 15 | AAG  | 18 | 3  |
| 109453 | 11 | 4380725 | 4380739 | 3 | 5  | 15 | CTT  | 27 | 4  |
| 109456 | 11 | 4382980 | 4382991 | 2 | 6  | 12 | GT   | 26 | 4  |
| 109460 | 11 | 4389329 | 4389344 | 2 | 8  | 16 | TG   | 25 | 9  |
| 109464 | 11 | 4391295 | 4391324 | 2 | 15 | 30 | AC   | 18 | 8  |
| 109467 | 11 | 4393821 | 4393844 | 2 | 12 | 24 | GT   | 25 | 6  |
| 109468 | 11 | 4398878 | 4398895 | 2 | 9  | 18 | GT   | 16 | 3  |
| 109474 | 11 | 4406278 | 4406289 | 2 | 6  | 12 | GT   | 21 | 11 |
| 109475 | 11 | 4406292 | 4406305 | 2 | 7  | 14 | GT   | 23 | 13 |
| 109476 | 11 | 4406429 | 4406458 | 2 | 15 | 30 | TG   | 20 | 12 |
| 109478 | 11 | 4407088 | 4407103 | 2 | 8  | 16 | AT   | 13 | 5  |
| 109479 | 11 | 4407635 | 4407649 | 3 | 5  | 15 | GGA  | 27 | 3  |
| 109482 | 11 | 4423909 | 4423920 | 2 | 6  | 12 | CT   | 12 | 10 |
| 109484 | 11 | 4423981 | 4424001 | 3 | 7  | 21 | GAG  | 19 | 3  |
| 109485 | 11 | 4424436 | 4424451 | 4 | 4  | 16 | AACA | 32 | 4  |
| 109487 | 11 | 4426437 | 4426466 | 2 | 15 | 30 | AC   | 21 | 8  |
| 109490 | 11 | 4429401 | 4429428 | 2 | 14 | 28 | TC   | 13 | 11 |
| 109493 | 11 | 4431687 | 4431712 | 2 | 13 | 26 | AC   | 9  | 8  |
| 109494 | 11 | 4431787 | 4431800 | 2 | 7  | 14 | CT   | 15 | 4  |
| 109495 | 11 | 4431801 | 4431816 | 2 | 8  | 16 | CA   | 18 | 4  |
| 109499 | 11 | 4440438 | 4440467 | 2 | 15 | 30 | CA   | 15 | 10 |
| 109502 | 11 | 4443437 | 4443452 | 2 | 8  | 16 | TC   | 18 | 3  |
| 109503 | 11 | 4443609 | 4443634 | 2 | 13 | 26 | GA   | 19 | 7  |
| 109504 | 11 | 4443704 | 4443733 | 3 | 10 | 30 | CCT  | 21 | 4  |
| 109512 | 11 | 4470357 | 4470388 | 2 | 16 | 32 | TG   | 13 | 5  |
| 109515 | 11 | 4488883 | 4488896 | 2 | 7  | 14 | CA   | 11 | 7  |
| 109523 | 11 | 4497652 | 4497669 | 2 | 9  | 18 | TG   | 25 | 5  |
| 109525 | 11 | 4506513 | 4506538 | 2 | 13 | 26 | TG   | 10 | 6  |
| 109528 | 11 | 4520538 | 4520553 | 2 | 8  | 16 | GA   | 7  | 10 |
| 109533 | 11 | 4536215 | 4536232 | 3 | 6  | 18 | TGG  | 6  | 8  |
| 109535 | 11 | 4540690 | 4540701 | 2 | 6  | 12 | TG   | 27 | 3  |
| 109536 | 11 | 4540787 | 4540798 | 2 | 6  | 12 | CT   | 29 | 4  |
| 109537 | 11 | 4540799 | 4540810 | 2 | 6  | 12 | CA   | 29 | 3  |
| 109538 | 11 | 4541946 | 4541971 | 2 | 13 | 26 | AC   | 17 | 7  |
| 109539 | 11 | 4542445 | 4542476 | 2 | 16 | 32 | CA   | 16 | 6  |

|        |    |         |         |   |    |    |      |    |    |
|--------|----|---------|---------|---|----|----|------|----|----|
| 109540 | 11 | 4542903 | 4542916 | 2 | 7  | 14 | GT   | 22 | 3  |
| 109542 | 11 | 4543864 | 4543897 | 2 | 17 | 34 | GT   | 11 | 10 |
| 109543 | 11 | 4544184 | 4544205 | 2 | 11 | 22 | AG   | 13 | 4  |
| 109547 | 11 | 4550156 | 4550193 | 2 | 19 | 38 | AC   | 10 | 15 |
| 109548 | 11 | 4552771 | 4552782 | 2 | 6  | 12 | TG   | 26 | 4  |
| 109549 | 11 | 4554425 | 4554436 | 2 | 6  | 12 | AC   | 23 | 5  |
| 109550 | 11 | 4554771 | 4554790 | 2 | 10 | 20 | GT   | 14 | 11 |
| 109551 | 11 | 4555032 | 4555057 | 2 | 13 | 26 | CA   | 10 | 8  |
| 109559 | 11 | 4563474 | 4563491 | 3 | 6  | 18 | GCT  | 23 | 12 |
| 109566 | 11 | 4575864 | 4575893 | 2 | 15 | 30 | GT   | 8  | 9  |
| 109569 | 11 | 4577900 | 4577915 | 4 | 4  | 16 | AAAC | 19 | 3  |
| 109570 | 11 | 4580617 | 4580634 | 2 | 9  | 18 | AG   | 29 | 4  |
| 109572 | 11 | 4585783 | 4585798 | 4 | 4  | 16 | TGAT | 25 | 4  |
| 109573 | 11 | 4587142 | 4587155 | 2 | 7  | 14 | AG   | 30 | 5  |
| 109577 | 11 | 4592783 | 4592798 | 2 | 8  | 16 | TC   | 22 | 4  |
| 109583 | 11 | 4597020 | 4597033 | 2 | 7  | 14 | TC   | 25 | 4  |
| 109585 | 11 | 4600096 | 4600115 | 2 | 10 | 20 | GT   | 28 | 9  |
| 109586 | 11 | 4600737 | 4600754 | 2 | 9  | 18 | TG   | 24 | 4  |
| 109591 | 11 | 4604408 | 4604419 | 2 | 6  | 12 | GT   | 14 | 5  |
| 109596 | 11 | 4612352 | 4612363 | 2 | 6  | 12 | CT   | 13 | 3  |
| 109597 | 11 | 4612621 | 4612636 | 2 | 8  | 16 | TG   | 16 | 6  |
| 109599 | 11 | 4615556 | 4615577 | 2 | 11 | 22 | CA   | 20 | 8  |
| 109601 | 11 | 4615760 | 4615783 | 2 | 12 | 24 | AC   | 22 | 6  |
| 109602 | 11 | 4616541 | 4616562 | 2 | 11 | 22 | GT   | 8  | 5  |
| 109612 | 11 | 4623396 | 4623417 | 2 | 11 | 22 | AC   | 24 | 10 |
| 109613 | 11 | 4623587 | 4623604 | 2 | 9  | 18 | CA   | 15 | 15 |
| 109614 | 11 | 4623607 | 4623620 | 2 | 7  | 14 | CA   | 12 | 9  |
| 109615 | 11 | 4623982 | 4623995 | 2 | 7  | 14 | TG   | 24 | 3  |
| 109619 | 11 | 4627817 | 4627828 | 2 | 6  | 12 | TG   | 13 | 3  |
| 109622 | 11 | 4639607 | 4639634 | 2 | 14 | 28 | AC   | 17 | 12 |
| 109625 | 11 | 4641485 | 4641496 | 2 | 6  | 12 | AC   | 19 | 4  |
| 109626 | 11 | 4641600 | 4641639 | 2 | 20 | 40 | CA   | 7  | 10 |
| 109628 | 11 | 4646941 | 4646966 | 2 | 13 | 26 | GT   | 17 | 11 |
| 109644 | 11 | 4673761 | 4673796 | 4 | 9  | 36 | TCTT | 17 | 8  |
| 109650 | 11 | 4684244 | 4684265 | 2 | 11 | 22 | CT   | 19 | 4  |
| 109651 | 11 | 4693043 | 4693092 | 2 | 25 | 50 | GT   | 8  | 11 |
| 109652 | 11 | 4705214 | 4705241 | 2 | 14 | 28 | GT   | 14 | 8  |
| 109654 | 11 | 4706198 | 4706209 | 2 | 6  | 12 | AC   | 13 | 3  |
| 109655 | 11 | 4711328 | 4711345 | 2 | 9  | 18 | AG   | 21 | 6  |
| 109657 | 11 | 4711894 | 4711914 | 3 | 7  | 21 | AGC  | 26 | 5  |
| 109658 | 11 | 4712201 | 4712238 | 2 | 19 | 38 | CA   | 9  | 10 |
| 109662 | 11 | 4717554 | 4717571 | 3 | 6  | 18 | CCT  | 26 | 5  |
| 109666 | 11 | 4737168 | 4737183 | 4 | 4  | 16 | CTGT | 28 | 4  |
| 109667 | 11 | 4737225 | 4737240 | 4 | 4  | 16 | TAGA | 23 | 3  |
| 109668 | 11 | 4743737 | 4743752 | 2 | 8  | 16 | TG   | 30 | 3  |
| 109671 | 11 | 4745980 | 4745997 | 2 | 9  | 18 | TG   | 16 | 3  |
| 109672 | 11 | 4746145 | 4746165 | 3 | 7  | 21 | GAG  | 30 | 5  |
| 109673 | 11 | 4746293 | 4746306 | 2 | 7  | 14 | GT   | 25 | 9  |
| 109675 | 11 | 4756651 | 4756698 | 3 | 16 | 48 | AGA  | 26 | 14 |
| 109679 | 11 | 4778719 | 4778742 | 2 | 12 | 24 | TG   | 12 | 6  |
| 109686 | 11 | 4795147 | 4795206 | 3 | 20 | 60 | TCA  | 7  | 6  |

|        |    |         |         |   |    |    |      |    |    |
|--------|----|---------|---------|---|----|----|------|----|----|
| 109688 | 11 | 4798269 | 4798298 | 2 | 15 | 30 | TG   | 8  | 8  |
| 109693 | 11 | 4816366 | 4816380 | 3 | 5  | 15 | CAA  | 29 | 4  |
| 109696 | 11 | 4819918 | 4819933 | 2 | 8  | 16 | GT   | 16 | 7  |
| 109705 | 11 | 4841088 | 4841109 | 2 | 11 | 22 | TG   | 21 | 7  |
| 109708 | 11 | 4854864 | 4854879 | 4 | 4  | 16 | ATTT | 27 | 3  |
| 109710 | 11 | 4863013 | 4863040 | 2 | 14 | 28 | AC   | 9  | 5  |
| 109719 | 11 | 4874479 | 4874494 | 2 | 8  | 16 | CA   | 14 | 12 |
| 109721 | 11 | 4876254 | 4876269 | 2 | 8  | 16 | GA   | 19 | 4  |
| 109722 | 11 | 4876553 | 4876564 | 2 | 6  | 12 | GT   | 13 | 4  |
| 109723 | 11 | 4876567 | 4876578 | 2 | 6  | 12 | GT   | 11 | 5  |
| 109726 | 11 | 4876991 | 4877030 | 2 | 20 | 40 | AC   | 22 | 8  |
| 109728 | 11 | 4877394 | 4877413 | 2 | 10 | 20 | AG   | 18 | 8  |
| 109729 | 11 | 4881423 | 4881476 | 3 | 18 | 54 | TCA  | 26 | 17 |
| 109731 | 11 | 4883663 | 4883688 | 2 | 13 | 26 | GT   | 14 | 9  |
| 109732 | 11 | 4885580 | 4885591 | 2 | 6  | 12 | CA   | 27 | 3  |
| 109733 | 11 | 4886411 | 4886440 | 2 | 15 | 30 | AC   | 14 | 6  |
| 109736 | 11 | 4888640 | 4888673 | 2 | 17 | 34 | GT   | 15 | 11 |
| 109741 | 11 | 4895180 | 4895219 | 2 | 20 | 40 | GT   | 16 | 10 |
| 109742 | 11 | 4898884 | 4898905 | 2 | 11 | 22 | CA   | 16 | 10 |
| 109744 | 11 | 4900003 | 4900048 | 2 | 23 | 46 | AC   | 10 | 13 |
| 109746 | 11 | 4906280 | 4906294 | 3 | 5  | 15 | CTC  | 26 | 4  |
| 109750 | 11 | 4907069 | 4907083 | 3 | 5  | 15 | TCT  | 18 | 4  |
| 109752 | 11 | 4907617 | 4907652 | 2 | 18 | 36 | CA   | 16 | 13 |
| 109753 | 11 | 4907958 | 4907995 | 2 | 19 | 38 | GA   | 7  | 9  |
| 109769 | 11 | 4923576 | 4923603 | 2 | 14 | 28 | TG   | 11 | 12 |
| 109770 | 11 | 4923769 | 4923798 | 2 | 15 | 30 | AC   | 19 | 8  |
| 109775 | 11 | 4931100 | 4931121 | 2 | 11 | 22 | CA   | 16 | 6  |
| 109778 | 11 | 4932859 | 4932876 | 2 | 9  | 18 | AC   | 20 | 4  |
| 109779 | 11 | 4941409 | 4941422 | 2 | 7  | 14 | GT   | 28 | 4  |
| 109784 | 11 | 4945898 | 4945913 | 2 | 8  | 16 | GT   | 30 | 10 |
| 109791 | 11 | 4960633 | 4960658 | 2 | 13 | 26 | AC   | 16 | 10 |
| 109792 | 11 | 4960957 | 4960976 | 2 | 10 | 20 | CA   | 22 | 9  |
| 109793 | 11 | 4960978 | 4960991 | 2 | 7  | 14 | AC   | 8  | 4  |
| 109799 | 11 | 4967355 | 4967390 | 2 | 18 | 36 | TG   | 9  | 9  |
| 109801 | 11 | 4972068 | 4972083 | 2 | 8  | 16 | AC   | 16 | 11 |
| 109804 | 11 | 4974310 | 4974321 | 2 | 6  | 12 | CA   | 6  | 10 |
| 109809 | 11 | 4975923 | 4975940 | 2 | 9  | 18 | AC   | 23 | 9  |
| 109811 | 11 | 4981211 | 4981222 | 2 | 6  | 12 | TG   | 20 | 3  |
| 109812 | 11 | 4981235 | 4981246 | 2 | 6  | 12 | TA   | 19 | 3  |
| 109818 | 11 | 4983503 | 4983528 | 2 | 13 | 26 | TG   | 11 | 8  |
| 109821 | 11 | 4985704 | 4985729 | 2 | 13 | 26 | AC   | 22 | 11 |
| 109823 | 11 | 4986190 | 4986209 | 4 | 5  | 20 | TTTC | 8  | 5  |
| 109825 | 11 | 4990920 | 4990931 | 2 | 6  | 12 | GT   | 22 | 4  |
| 109827 | 11 | 4991319 | 4991348 | 2 | 15 | 30 | TC   | 8  | 6  |
| 109833 | 11 | 4995833 | 4995856 | 2 | 12 | 24 | CA   | 15 | 6  |
| 109834 | 11 | 4995936 | 4995947 | 2 | 6  | 12 | CA   | 28 | 3  |
| 109835 | 11 | 4995997 | 4996012 | 2 | 8  | 16 | CA   | 25 | 3  |
| 109836 | 11 | 4998293 | 4998322 | 2 | 15 | 30 | TG   | 10 | 11 |
| 109839 | 11 | 5000498 | 5000525 | 2 | 14 | 28 | AC   | 9  | 5  |
| 109843 | 11 | 5002047 | 5002078 | 2 | 16 | 32 | AC   | 12 | 14 |
| 109844 | 11 | 5002128 | 5002175 | 2 | 24 | 48 | CA   | 13 | 12 |

|        |    |         |         |   |    |    |      |    |    |
|--------|----|---------|---------|---|----|----|------|----|----|
| 109846 | 11 | 5003393 | 5003416 | 3 | 8  | 24 | CAG  | 11 | 6  |
| 109847 | 11 | 5003642 | 5003673 | 2 | 16 | 32 | AC   | 20 | 10 |
| 109849 | 11 | 5009200 | 5009243 | 2 | 22 | 44 | CT   | 14 | 11 |
| 109850 | 11 | 5010606 | 5010620 | 3 | 5  | 15 | AAT  | 28 | 3  |
| 109851 | 11 | 5011189 | 5011212 | 2 | 12 | 24 | CA   | 25 | 9  |
| 109866 | 11 | 5032446 | 5032461 | 2 | 8  | 16 | AC   | 30 | 4  |
| 109867 | 11 | 5033574 | 5033593 | 2 | 10 | 20 | TG   | 16 | 4  |
| 109868 | 11 | 5033735 | 5033758 | 2 | 12 | 24 | TC   | 14 | 8  |
| 109869 | 11 | 5035034 | 5035045 | 2 | 6  | 12 | AT   | 21 | 4  |
| 109870 | 11 | 5037355 | 5037378 | 2 | 12 | 24 | AC   | 9  | 11 |
| 109871 | 11 | 5040996 | 5041027 | 2 | 16 | 32 | TG   | 7  | 4  |
| 109872 | 11 | 5046794 | 5046811 | 2 | 9  | 18 | GT   | 18 | 7  |
| 109873 | 11 | 5046974 | 5047001 | 2 | 14 | 28 | TC   | 19 | 7  |
| 109875 | 11 | 5049597 | 5049608 | 2 | 6  | 12 | TG   | 21 | 5  |
| 109878 | 11 | 5055861 | 5055872 | 2 | 6  | 12 | TG   | 22 | 7  |
| 109882 | 11 | 5062653 | 5062676 | 4 | 6  | 24 | ATGA | 25 | 5  |
| 109890 | 11 | 5090018 | 5090031 | 2 | 7  | 14 | TG   | 27 | 3  |
| 109905 | 11 | 5104200 | 5104213 | 2 | 7  | 14 | CA   | 7  | 5  |
| 109908 | 11 | 5106676 | 5106690 | 3 | 5  | 15 | AGA  | 27 | 4  |
| 109909 | 11 | 5108440 | 5108451 | 2 | 6  | 12 | CA   | 21 | 3  |
| 109912 | 11 | 5112618 | 5112641 | 2 | 12 | 24 | AC   | 14 | 13 |
| 109913 | 11 | 5112769 | 5112788 | 2 | 10 | 20 | CA   | 12 | 6  |
| 109917 | 11 | 5117716 | 5117747 | 2 | 16 | 32 | TC   | 20 | 7  |
| 109920 | 11 | 5122666 | 5122679 | 2 | 7  | 14 | CA   | 17 | 6  |
| 109921 | 11 | 5123342 | 5123356 | 3 | 5  | 15 | GCT  | 18 | 5  |
| 109923 | 11 | 5125409 | 5125426 | 2 | 9  | 18 | AC   | 13 | 7  |
| 109924 | 11 | 5125528 | 5125553 | 2 | 13 | 26 | AC   | 19 | 7  |
| 109925 | 11 | 5126606 | 5126639 | 2 | 17 | 34 | CA   | 21 | 15 |
| 109926 | 11 | 5127797 | 5127816 | 2 | 10 | 20 | AC   | 15 | 7  |
| 109930 | 11 | 5130848 | 5130859 | 2 | 6  | 12 | AC   | 10 | 4  |
| 109936 | 11 | 5137712 | 5137725 | 2 | 7  | 14 | GT   | 21 | 8  |
| 109939 | 11 | 5143581 | 5143612 | 2 | 16 | 32 | CA   | 13 | 12 |
| 109940 | 11 | 5146333 | 5146352 | 2 | 10 | 20 | AC   | 18 | 5  |
| 109941 | 11 | 5147862 | 5147875 | 2 | 7  | 14 | AC   | 20 | 3  |
| 109947 | 11 | 5155084 | 5155149 | 2 | 33 | 66 | GT   | 15 | 10 |
| 109950 | 11 | 5168252 | 5168273 | 2 | 11 | 22 | AC   | 21 | 5  |
| 109952 | 11 | 5169081 | 5169102 | 2 | 11 | 22 | CA   | 16 | 10 |
| 109954 | 11 | 5170498 | 5170515 | 2 | 9  | 18 | CA   | 15 | 15 |
| 109955 | 11 | 5170518 | 5170529 | 2 | 6  | 12 | CA   | 19 | 19 |
| 109958 | 11 | 5173336 | 5173353 | 2 | 9  | 18 | AC   | 15 | 10 |
| 109959 | 11 | 5173683 | 5173704 | 2 | 11 | 22 | CA   | 17 | 8  |
| 109960 | 11 | 5173829 | 5173846 | 2 | 9  | 18 | CA   | 25 | 14 |
| 109962 | 11 | 5176912 | 5176937 | 2 | 13 | 26 | CA   | 17 | 15 |
| 109964 | 11 | 5177198 | 5177215 | 2 | 9  | 18 | CT   | 15 | 8  |
| 109965 | 11 | 5180606 | 5180625 | 4 | 5  | 20 | ACAT | 11 | 3  |
| 109969 | 11 | 5195787 | 5195798 | 2 | 6  | 12 | CA   | 20 | 3  |
| 109979 | 11 | 5212023 | 5212054 | 2 | 16 | 32 | GT   | 8  | 9  |
| 109983 | 11 | 5216484 | 5216503 | 4 | 5  | 20 | AAAG | 19 | 15 |
| 109985 | 11 | 5219924 | 5219937 | 2 | 7  | 14 | AG   | 18 | 7  |
| 109986 | 11 | 5219940 | 5219957 | 2 | 9  | 18 | AG   | 18 | 4  |
| 109988 | 11 | 5227255 | 5227266 | 2 | 6  | 12 | CA   | 24 | 4  |

|        |    |         |         |   |    |    |      |    |    |
|--------|----|---------|---------|---|----|----|------|----|----|
| 109989 | 11 | 5229864 | 5229879 | 2 | 8  | 16 | CA   | 30 | 3  |
| 109990 | 11 | 5230049 | 5230064 | 4 | 4  | 16 | ATAC | 30 | 5  |
| 109991 | 11 | 5243738 | 5243769 | 4 | 8  | 32 | TGTC | 26 | 7  |
| 109993 | 11 | 5244254 | 5244269 | 2 | 8  | 16 | AC   | 16 | 3  |
| 109998 | 11 | 5253763 | 5253790 | 2 | 14 | 28 | CT   | 15 | 9  |
| 109999 | 11 | 5253961 | 5253975 | 3 | 5  | 15 | AAC  | 27 | 3  |
| 110004 | 11 | 5256234 | 5256255 | 2 | 11 | 22 | AC   | 16 | 10 |
| 110006 | 11 | 5260486 | 5260515 | 2 | 15 | 30 | CA   | 16 | 8  |
| 110007 | 11 | 5262697 | 5262714 | 2 | 9  | 18 | AC   | 22 | 6  |
| 110008 | 11 | 5262803 | 5262820 | 2 | 9  | 18 | CA   | 28 | 11 |
| 110009 | 11 | 5264092 | 5264113 | 2 | 11 | 22 | GT   | 23 | 15 |
| 110010 | 11 | 5264286 | 5264299 | 2 | 7  | 14 | AC   | 19 | 8  |
| 110012 | 11 | 5267647 | 5267670 | 2 | 12 | 24 | CA   | 17 | 10 |
| 110013 | 11 | 5267790 | 5267819 | 2 | 15 | 30 | CA   | 21 | 7  |
| 110015 | 11 | 5270499 | 5270532 | 2 | 17 | 34 | AC   | 12 | 8  |
| 110016 | 11 | 5272094 | 5272107 | 2 | 7  | 14 | AC   | 24 | 3  |
| 110020 | 11 | 5275549 | 5275584 | 2 | 18 | 36 | AC   | 12 | 8  |
| 110021 | 11 | 5275707 | 5275726 | 2 | 10 | 20 | CA   | 26 | 11 |
| 110022 | 11 | 5275779 | 5275796 | 2 | 9  | 18 | GT   | 17 | 12 |
| 110023 | 11 | 5275853 | 5275870 | 2 | 9  | 18 | CA   | 24 | 5  |
| 110031 | 11 | 5277291 | 5277310 | 2 | 10 | 20 | AC   | 20 | 6  |
| 110032 | 11 | 5280059 | 5280079 | 3 | 7  | 21 | TTA  | 20 | 6  |
| 110035 | 11 | 5284237 | 5284250 | 2 | 7  | 14 | AT   | 24 | 6  |
| 110037 | 11 | 5291368 | 5291385 | 2 | 9  | 18 | AG   | 23 | 9  |
| 110039 | 11 | 5306163 | 5306189 | 3 | 9  | 27 | TAG  | 16 | 13 |
| 110043 | 11 | 5318501 | 5318522 | 2 | 11 | 22 | AC   | 19 | 13 |
| 110046 | 11 | 5326077 | 5326098 | 2 | 11 | 22 | TG   | 20 | 7  |
| 110048 | 11 | 5336069 | 5336098 | 2 | 15 | 30 | TG   | 12 | 9  |
| 110053 | 11 | 5344206 | 5344219 | 2 | 7  | 14 | AC   | 23 | 5  |
| 110054 | 11 | 5346165 | 5346190 | 2 | 13 | 26 | GT   | 12 | 12 |
| 110055 | 11 | 5355257 | 5355294 | 2 | 19 | 38 | GT   | 14 | 11 |
| 110058 | 11 | 5358284 | 5358301 | 2 | 9  | 18 | AC   | 11 | 4  |
| 110061 | 11 | 5362379 | 5362394 | 4 | 4  | 16 | TGTC | 34 | 3  |
| 110067 | 11 | 5372634 | 5372651 | 2 | 9  | 18 | GT   | 10 | 11 |
| 110074 | 11 | 5383478 | 5383493 | 2 | 8  | 16 | AC   | 15 | 12 |
| 110077 | 11 | 5391045 | 5391064 | 2 | 10 | 20 | AC   | 20 | 7  |
| 110079 | 11 | 5391934 | 5391951 | 2 | 9  | 18 | AC   | 15 | 7  |
| 110086 | 11 | 5398006 | 5398021 | 2 | 8  | 16 | GT   | 21 | 4  |
| 110087 | 11 | 5399337 | 5399363 | 3 | 9  | 27 | TGC  | 23 | 5  |
| 110090 | 11 | 5412877 | 5412890 | 2 | 7  | 14 | GT   | 22 | 6  |
| 110092 | 11 | 5414730 | 5414753 | 2 | 12 | 24 | GT   | 11 | 9  |
| 110093 | 11 | 5415983 | 5415994 | 2 | 6  | 12 | GA   | 23 | 5  |
| 110095 | 11 | 5418790 | 5418813 | 2 | 12 | 24 | TG   | 8  | 3  |
| 110103 | 11 | 5432778 | 5432819 | 2 | 21 | 42 | AC   | 10 | 8  |
| 110104 | 11 | 5433063 | 5433080 | 2 | 9  | 18 | CA   | 17 | 7  |
| 110105 | 11 | 5433329 | 5433344 | 2 | 8  | 16 | TG   | 10 | 5  |
| 110106 | 11 | 5433477 | 5433548 | 3 | 24 | 72 | CTT  | 13 | 15 |
| 110107 | 11 | 5433771 | 5433782 | 2 | 6  | 12 | CA   | 21 | 4  |
| 110110 | 11 | 5438838 | 5438849 | 2 | 6  | 12 | GT   | 29 | 4  |
| 110111 | 11 | 5438906 | 5438935 | 2 | 15 | 30 | GT   | 12 | 7  |
| 110113 | 11 | 5439259 | 5439280 | 2 | 11 | 22 | CA   | 26 | 5  |

|        |    |         |         |   |    |    |      |    |    |
|--------|----|---------|---------|---|----|----|------|----|----|
| 110116 | 11 | 5444666 | 5444677 | 2 | 6  | 12 | GA   | 16 | 3  |
| 110120 | 11 | 5447420 | 5447441 | 2 | 11 | 22 | AC   | 21 | 8  |
| 110121 | 11 | 5447532 | 5447567 | 2 | 18 | 36 | AC   | 7  | 8  |
| 110127 | 11 | 5450915 | 5450952 | 2 | 19 | 38 | AC   | 9  | 12 |
| 110128 | 11 | 5451077 | 5451092 | 2 | 8  | 16 | CA   | 19 | 4  |
| 110131 | 11 | 5453607 | 5453622 | 4 | 4  | 16 | AAAG | 16 | 4  |
| 110132 | 11 | 5453804 | 5453827 | 4 | 6  | 24 | CTGT | 20 | 5  |
| 110133 | 11 | 5454825 | 5454840 | 4 | 4  | 16 | AAAC | 29 | 4  |
| 110136 | 11 | 5466690 | 5466705 | 2 | 8  | 16 | GT   | 35 | 4  |
| 110137 | 11 | 5467699 | 5467716 | 2 | 9  | 18 | CA   | 20 | 4  |
| 110139 | 11 | 5471541 | 5471562 | 2 | 11 | 22 | TA   | 7  | 4  |
| 110141 | 11 | 5480415 | 5480434 | 2 | 10 | 20 | GT   | 17 | 10 |
| 110144 | 11 | 5481879 | 5481900 | 2 | 11 | 22 | CA   | 12 | 9  |
| 110145 | 11 | 5482253 | 5482282 | 2 | 15 | 30 | GT   | 17 | 10 |
| 110146 | 11 | 5484615 | 5484662 | 4 | 12 | 48 | GATA | 13 | 14 |
| 110148 | 11 | 5484856 | 5484877 | 2 | 11 | 22 | TG   | 13 | 4  |
| 110149 | 11 | 5487569 | 5487582 | 2 | 7  | 14 | TG   | 26 | 5  |
| 110150 | 11 | 5487993 | 5488018 | 2 | 13 | 26 | TG   | 22 | 11 |
| 110151 | 11 | 5488101 | 5488114 | 2 | 7  | 14 | GT   | 13 | 4  |
| 110153 | 11 | 5490850 | 5490861 | 2 | 6  | 12 | CA   | 31 | 4  |
| 110154 | 11 | 5490946 | 5490961 | 2 | 8  | 16 | TG   | 18 | 3  |
| 110162 | 11 | 5498683 | 5498696 | 2 | 7  | 14 | CA   | 29 | 6  |
| 110164 | 11 | 5499911 | 5499934 | 2 | 12 | 24 | AG   | 15 | 5  |
| 110168 | 11 | 5502827 | 5502848 | 2 | 11 | 22 | TG   | 12 | 9  |
| 110170 | 11 | 5503104 | 5503115 | 2 | 6  | 12 | GA   | 6  | 3  |
| 110171 | 11 | 5505218 | 5505231 | 2 | 7  | 14 | AC   | 28 | 5  |
| 110179 | 11 | 5508957 | 5508974 | 3 | 6  | 18 | ATT  | 16 | 8  |
| 110183 | 11 | 5516874 | 5516901 | 2 | 14 | 28 | TG   | 19 | 13 |
| 110186 | 11 | 5520158 | 5520179 | 2 | 11 | 22 | CA   | 25 | 8  |
| 110188 | 11 | 5521393 | 5521416 | 3 | 8  | 24 | CAG  | 23 | 8  |
| 110197 | 11 | 5523151 | 5523194 | 4 | 11 | 44 | CTTT | 9  | 10 |
| 110198 | 11 | 5523716 | 5523733 | 2 | 9  | 18 | GT   | 24 | 14 |
| 110199 | 11 | 5525487 | 5525501 | 3 | 5  | 15 | TGC  | 32 | 3  |
| 110202 | 11 | 5525872 | 5525898 | 3 | 9  | 27 | GAG  | 12 | 4  |
| 110203 | 11 | 5525964 | 5526002 | 3 | 13 | 39 | GGA  | 28 | 9  |
| 110205 | 11 | 5526719 | 5526732 | 2 | 7  | 14 | AG   | 23 | 4  |
| 110211 | 11 | 5531705 | 5531724 | 2 | 10 | 20 | TA   | 11 | 5  |
| 110213 | 11 | 5531945 | 5531974 | 2 | 15 | 30 | TG   | 8  | 7  |
| 110215 | 11 | 5532277 | 5532290 | 2 | 7  | 14 | TG   | 14 | 4  |
| 110221 | 11 | 5542325 | 5542336 | 2 | 6  | 12 | GA   | 26 | 6  |
| 110222 | 11 | 5542436 | 5542449 | 2 | 7  | 14 | AC   | 28 | 3  |
| 110223 | 11 | 5542610 | 5542623 | 2 | 7  | 14 | CT   | 19 | 3  |
| 110227 | 11 | 5556880 | 5556897 | 2 | 9  | 18 | GT   | 13 | 7  |
| 110228 | 11 | 5559348 | 5559361 | 2 | 7  | 14 | GT   | 20 | 5  |
| 110231 | 11 | 5559632 | 5559647 | 2 | 8  | 16 | TC   | 29 | 5  |
| 110232 | 11 | 5559651 | 5559666 | 2 | 8  | 16 | CT   | 18 | 3  |
| 110234 | 11 | 5561325 | 5561338 | 2 | 7  | 14 | GT   | 17 | 4  |
| 110238 | 11 | 5562215 | 5562232 | 2 | 9  | 18 | TG   | 27 | 8  |
| 110239 | 11 | 5562352 | 5562395 | 2 | 22 | 44 | TG   | 6  | 6  |
| 110240 | 11 | 5562682 | 5562693 | 2 | 6  | 12 | AC   | 22 | 3  |
| 110241 | 11 | 5562819 | 5562842 | 2 | 12 | 24 | TG   | 15 | 12 |

|        |    |         |         |   |    |    |      |    |    |
|--------|----|---------|---------|---|----|----|------|----|----|
| 110242 | 11 | 5562943 | 5562960 | 2 | 9  | 18 | AG   | 9  | 10 |
| 110244 | 11 | 5563497 | 5563510 | 2 | 7  | 14 | TG   | 23 | 4  |
| 110245 | 11 | 5568279 | 5568316 | 2 | 19 | 38 | TG   | 16 | 9  |
| 110253 | 11 | 5575369 | 5575386 | 2 | 9  | 18 | AC   | 16 | 4  |
| 110255 | 11 | 5575729 | 5575744 | 2 | 8  | 16 | CT   | 15 | 9  |
| 110256 | 11 | 5575747 | 5575758 | 2 | 6  | 12 | CT   | 10 | 6  |
| 110261 | 11 | 5578436 | 5578469 | 2 | 17 | 34 | AC   | 12 | 7  |
| 110262 | 11 | 5579980 | 5579991 | 2 | 6  | 12 | GT   | 27 | 5  |
| 110263 | 11 | 5581644 | 5581675 | 2 | 16 | 32 | AC   | 12 | 8  |
| 110266 | 11 | 5585514 | 5585555 | 2 | 21 | 42 | GT   | 14 | 13 |
| 110267 | 11 | 5587912 | 5587935 | 2 | 12 | 24 | GT   | 21 | 9  |
| 110268 | 11 | 5588050 | 5588067 | 2 | 9  | 18 | GA   | 22 | 4  |
| 110272 | 11 | 5596263 | 5596278 | 2 | 8  | 16 | TG   | 17 | 12 |
| 110274 | 11 | 5596629 | 5596656 | 2 | 14 | 28 | TG   | 17 | 14 |
| 110276 | 11 | 5597056 | 5597077 | 2 | 11 | 22 | GT   | 22 | 7  |
| 110277 | 11 | 5597203 | 5597218 | 2 | 8  | 16 | TG   | 19 | 4  |
| 110278 | 11 | 5597284 | 5597307 | 2 | 12 | 24 | GT   | 14 | 7  |
| 110281 | 11 | 5600796 | 5600811 | 2 | 8  | 16 | AC   | 32 | 7  |
| 110282 | 11 | 5600954 | 5600965 | 2 | 6  | 12 | CA   | 21 | 7  |
| 110286 | 11 | 5604739 | 5604768 | 2 | 15 | 30 | CA   | 15 | 10 |
| 110287 | 11 | 5604990 | 5605005 | 2 | 8  | 16 | AT   | 11 | 3  |
| 110288 | 11 | 5612581 | 5612592 | 2 | 6  | 12 | CA   | 25 | 3  |
| 110293 | 11 | 5625691 | 5625720 | 2 | 15 | 30 | TC   | 15 | 9  |
| 110296 | 11 | 5627552 | 5627565 | 2 | 7  | 14 | TG   | 31 | 4  |
| 110298 | 11 | 5630424 | 5630447 | 3 | 8  | 24 | TCT  | 26 | 5  |
| 110307 | 11 | 5635338 | 5635349 | 2 | 6  | 12 | AC   | 17 | 5  |
| 110308 | 11 | 5635927 | 5635946 | 2 | 10 | 20 | AC   | 12 | 9  |
| 110309 | 11 | 5637044 | 5637057 | 2 | 7  | 14 | TC   | 24 | 3  |
| 110310 | 11 | 5640872 | 5640883 | 2 | 6  | 12 | AC   | 24 | 5  |
| 110312 | 11 | 5644360 | 5644391 | 2 | 16 | 32 | TG   | 20 | 17 |
| 110315 | 11 | 5645952 | 5645985 | 2 | 17 | 34 | CA   | 13 | 8  |
| 110316 | 11 | 5647255 | 5647287 | 3 | 11 | 33 | CCT  | 8  | 6  |
| 110317 | 11 | 5648043 | 5648070 | 2 | 14 | 28 | TG   | 12 | 11 |
| 110318 | 11 | 5650430 | 5650499 | 2 | 35 | 70 | GT   | 15 | 15 |
| 110319 | 11 | 5650640 | 5650661 | 2 | 11 | 22 | CA   | 22 | 7  |
| 110321 | 11 | 5651185 | 5651208 | 4 | 6  | 24 | AGAT | 22 | 5  |
| 110322 | 11 | 5651564 | 5651590 | 3 | 9  | 27 | GGA  | 20 | 8  |
| 110329 | 11 | 5653078 | 5653113 | 2 | 18 | 36 | AC   | 8  | 12 |
| 110330 | 11 | 5655668 | 5655687 | 2 | 10 | 20 | CA   | 24 | 10 |
| 110334 | 11 | 5658572 | 5658617 | 2 | 23 | 46 | CA   | 12 | 14 |
| 110335 | 11 | 5658843 | 5658854 | 2 | 6  | 12 | CT   | 32 | 3  |
| 110336 | 11 | 5659457 | 5659484 | 2 | 14 | 28 | CA   | 16 | 7  |
| 110337 | 11 | 5661519 | 5661564 | 2 | 23 | 46 | AG   | 7  | 9  |
| 110339 | 11 | 5661659 | 5661682 | 2 | 12 | 24 | TC   | 14 | 6  |
| 110340 | 11 | 5666137 | 5666162 | 2 | 13 | 26 | AC   | 16 | 6  |
| 110342 | 11 | 5670371 | 5670390 | 2 | 10 | 20 | GT   | 17 | 3  |
| 110353 | 11 | 5688251 | 5688276 | 2 | 13 | 26 | GT   | 11 | 5  |
| 110354 | 11 | 5688440 | 5688455 | 2 | 8  | 16 | CA   | 22 | 12 |
| 110359 | 11 | 5693094 | 5693111 | 3 | 6  | 18 | TGA  | 28 | 3  |
| 110361 | 11 | 5694941 | 5694964 | 2 | 12 | 24 | CA   | 18 | 3  |
| 110366 | 11 | 5698010 | 5698023 | 2 | 7  | 14 | CA   | 8  | 6  |



|        |    |         |         |   |    |    |      |    |    |
|--------|----|---------|---------|---|----|----|------|----|----|
| 110367 | 11 | 5698187 | 5698202 | 2 | 8  | 16 | GT   | 21 | 4  |
| 110380 | 11 | 5715978 | 5715989 | 2 | 6  | 12 | GT   | 18 | 3  |
| 110381 | 11 | 5721550 | 5721573 | 2 | 12 | 24 | TG   | 17 | 7  |
| 110383 | 11 | 5723410 | 5723445 | 2 | 18 | 36 | AC   | 8  | 10 |
| 110385 | 11 | 5725486 | 5725501 | 2 | 8  | 16 | AC   | 22 | 3  |
| 110386 | 11 | 5725965 | 5725998 | 2 | 17 | 34 | TG   | 13 | 17 |
| 110388 | 11 | 5726343 | 5726354 | 2 | 6  | 12 | GA   | 27 | 3  |
| 110392 | 11 | 5728061 | 5728078 | 2 | 9  | 18 | TG   | 23 | 7  |
| 110397 | 11 | 5736818 | 5736845 | 2 | 14 | 28 | AC   | 19 | 6  |
| 110402 | 11 | 5747310 | 5747343 | 2 | 17 | 34 | CT   | 13 | 5  |
| 110403 | 11 | 5747910 | 5747931 | 2 | 11 | 22 | GT   | 20 | 11 |
| 110405 | 11 | 5749644 | 5749694 | 3 | 17 | 51 | TCA  | 21 | 9  |
| 110415 | 11 | 5763017 | 5763044 | 2 | 14 | 28 | CA   | 27 | 10 |
| 110418 | 11 | 5771516 | 5771539 | 2 | 12 | 24 | CA   | 21 | 9  |
| 110419 | 11 | 5775594 | 5775617 | 2 | 12 | 24 | GT   | 21 | 9  |
| 110422 | 11 | 5777586 | 5777605 | 4 | 5  | 20 | ATAG | 25 | 3  |
| 110426 | 11 | 5783665 | 5783682 | 2 | 9  | 18 | GT   | 12 | 9  |
| 110427 | 11 | 5785522 | 5785559 | 2 | 19 | 38 | AC   | 13 | 12 |
| 110428 | 11 | 5785656 | 5785673 | 2 | 9  | 18 | CA   | 14 | 4  |
| 110429 | 11 | 5786673 | 5786696 | 3 | 8  | 24 | TCC  | 19 | 4  |
| 110430 | 11 | 5788208 | 5788235 | 2 | 14 | 28 | GT   | 18 | 7  |
| 110436 | 11 | 5791239 | 5791250 | 2 | 6  | 12 | AC   | 25 | 5  |
| 110437 | 11 | 5791252 | 5791263 | 2 | 6  | 12 | CA   | 25 | 3  |
| 110438 | 11 | 5791329 | 5791372 | 2 | 22 | 44 | TG   | 9  | 7  |
| 110440 | 11 | 5793810 | 5793831 | 2 | 11 | 22 | TG   | 15 | 8  |
| 110441 | 11 | 5793994 | 5794007 | 2 | 7  | 14 | TG   | 27 | 4  |
| 110443 | 11 | 5796704 | 5796717 | 2 | 7  | 14 | AG   | 24 | 3  |
| 110446 | 11 | 5798152 | 5798169 | 2 | 9  | 18 | GT   | 19 | 7  |
| 110447 | 11 | 5799965 | 5799976 | 2 | 6  | 12 | AC   | 16 | 3  |
| 110448 | 11 | 5800120 | 5800135 | 2 | 8  | 16 | CA   | 24 | 4  |
| 110450 | 11 | 5800728 | 5800745 | 3 | 6  | 18 | AGT  | 23 | 5  |
| 110453 | 11 | 5801684 | 5801709 | 2 | 13 | 26 | AG   | 17 | 3  |
| 110455 | 11 | 5801893 | 5801936 | 2 | 22 | 44 | AC   | 7  | 9  |
| 110457 | 11 | 5803848 | 5803877 | 2 | 15 | 30 | TG   | 12 | 3  |
| 110458 | 11 | 5804308 | 5804323 | 2 | 8  | 16 | GT   | 23 | 3  |
| 110459 | 11 | 5804512 | 5804527 | 2 | 8  | 16 | GT   | 25 | 7  |
| 110461 | 11 | 5805516 | 5805529 | 2 | 7  | 14 | TG   | 12 | 10 |
| 110463 | 11 | 5807007 | 5807024 | 3 | 6  | 18 | TTC  | 27 | 5  |
| 110464 | 11 | 5807358 | 5807379 | 2 | 11 | 22 | AC   | 14 | 6  |
| 110465 | 11 | 5808932 | 5808969 | 2 | 19 | 38 | AC   | 14 | 12 |
| 110469 | 11 | 5812897 | 5812912 | 2 | 8  | 16 | GT   | 28 | 4  |
| 110476 | 11 | 5820596 | 5820627 | 2 | 16 | 32 | AC   | 11 | 12 |
| 110479 | 11 | 5828257 | 5828274 | 2 | 9  | 18 | TG   | 17 | 9  |
| 110482 | 11 | 5838015 | 5838028 | 2 | 7  | 14 | GT   | 15 | 7  |
| 110486 | 11 | 5843870 | 5843885 | 2 | 8  | 16 | TG   | 18 | 11 |
| 110488 | 11 | 5844048 | 5844059 | 2 | 6  | 12 | TC   | 13 | 4  |
| 110489 | 11 | 5844061 | 5844076 | 2 | 8  | 16 | CT   | 21 | 5  |
| 110490 | 11 | 5844119 | 5844150 | 2 | 16 | 32 | AC   | 16 | 9  |
| 110491 | 11 | 5844325 | 5844340 | 2 | 8  | 16 | TG   | 22 | 3  |
| 110492 | 11 | 5847297 | 5847308 | 2 | 6  | 12 | GA   | 30 | 3  |
| 110494 | 11 | 5850770 | 5850785 | 2 | 8  | 16 | CA   | 19 | 7  |

|        |    |         |         |   |    |    |      |    |    |
|--------|----|---------|---------|---|----|----|------|----|----|
| 110495 | 11 | 5852142 | 5852167 | 2 | 13 | 26 | CA   | 20 | 16 |
| 110496 | 11 | 5852290 | 5852301 | 2 | 6  | 12 | AC   | 28 | 3  |
| 110501 | 11 | 5855088 | 5855113 | 2 | 13 | 26 | GT   | 8  | 7  |
| 110505 | 11 | 5856039 | 5856068 | 2 | 15 | 30 | AC   | 25 | 7  |
| 110507 | 11 | 5858545 | 5858564 | 2 | 10 | 20 | GT   | 26 | 4  |
| 110515 | 11 | 5867814 | 5867835 | 2 | 11 | 22 | TG   | 22 | 6  |
| 110516 | 11 | 5870063 | 5870078 | 2 | 8  | 16 | GT   | 16 | 8  |
| 110517 | 11 | 5871466 | 5871491 | 2 | 13 | 26 | AC   | 12 | 8  |
| 110518 | 11 | 5873453 | 5873470 | 2 | 9  | 18 | TG   | 16 | 9  |
| 110520 | 11 | 5880721 | 5880784 | 4 | 16 | 64 | ATCT | 12 | 8  |
| 110524 | 11 | 5886095 | 5886106 | 2 | 6  | 12 | AG   | 26 | 5  |
| 110526 | 11 | 5888283 | 5888296 | 2 | 7  | 14 | GT   | 27 | 5  |
| 110527 | 11 | 5888400 | 5888413 | 2 | 7  | 14 | GT   | 29 | 3  |
| 110528 | 11 | 5888608 | 5888623 | 2 | 8  | 16 | TG   | 24 | 5  |
| 110534 | 11 | 5892902 | 5892935 | 2 | 17 | 34 | TG   | 15 | 4  |
| 110535 | 11 | 5893064 | 5893101 | 2 | 19 | 38 | AC   | 16 | 13 |
| 110537 | 11 | 5895580 | 5895597 | 2 | 9  | 18 | GT   | 15 | 6  |
| 110539 | 11 | 5897536 | 5897547 | 2 | 6  | 12 | AC   | 24 | 3  |
| 110540 | 11 | 5897837 | 5897848 | 2 | 6  | 12 | AC   | 31 | 3  |
| 110541 | 11 | 5900153 | 5900170 | 2 | 9  | 18 | GT   | 20 | 10 |
| 110542 | 11 | 5906719 | 5906734 | 2 | 8  | 16 | AC   | 22 | 7  |
| 110543 | 11 | 5907632 | 5907663 | 4 | 8  | 32 | GATA | 20 | 9  |
| 110544 | 11 | 5908576 | 5908591 | 2 | 8  | 16 | TG   | 17 | 11 |
| 110545 | 11 | 5908858 | 5908873 | 2 | 8  | 16 | TG   | 28 | 4  |
| 110546 | 11 | 5909005 | 5909022 | 2 | 9  | 18 | GT   | 17 | 8  |
| 110547 | 11 | 5909903 | 5909918 | 2 | 8  | 16 | TG   | 20 | 4  |
| 110550 | 11 | 5913260 | 5913277 | 2 | 9  | 18 | TG   | 17 | 10 |
| 110551 | 11 | 5913340 | 5913353 | 2 | 7  | 14 | GT   | 26 | 6  |
| 110552 | 11 | 5913432 | 5913443 | 2 | 6  | 12 | GT   | 26 | 4  |
| 110554 | 11 | 5920390 | 5920417 | 2 | 14 | 28 | TG   | 14 | 5  |
| 110555 | 11 | 5920751 | 5920784 | 2 | 17 | 34 | AC   | 9  | 8  |
| 110558 | 11 | 5924911 | 5924936 | 2 | 13 | 26 | AC   | 11 | 10 |
| 110559 | 11 | 5925105 | 5925136 | 2 | 16 | 32 | AC   | 6  | 8  |
| 110560 | 11 | 5925278 | 5925297 | 2 | 10 | 20 | TG   | 15 | 10 |
| 110562 | 11 | 5926328 | 5926347 | 2 | 10 | 20 | TG   | 19 | 6  |
| 110563 | 11 | 5928846 | 5928859 | 2 | 7  | 14 | AC   | 25 | 4  |
| 110564 | 11 | 5928986 | 5929013 | 2 | 14 | 28 | CA   | 21 | 10 |
| 110569 | 11 | 5933385 | 5933420 | 2 | 18 | 36 | TG   | 23 | 10 |
| 110571 | 11 | 5935203 | 5935220 | 2 | 9  | 18 | GT   | 9  | 4  |
| 110572 | 11 | 5935360 | 5935385 | 2 | 13 | 26 | GT   | 11 | 9  |
| 110574 | 11 | 5935592 | 5935625 | 2 | 17 | 34 | AC   | 7  | 12 |
| 110577 | 11 | 5936077 | 5936097 | 3 | 7  | 21 | TGC  | 24 | 5  |
| 110578 | 11 | 5938548 | 5938565 | 2 | 9  | 18 | GT   | 31 | 8  |
| 110580 | 11 | 5940638 | 5940655 | 2 | 9  | 18 | CA   | 24 | 4  |
| 110582 | 11 | 5944063 | 5944088 | 2 | 13 | 26 | CT   | 6  | 8  |
| 110585 | 11 | 5949230 | 5949249 | 2 | 10 | 20 | CA   | 20 | 11 |
| 110588 | 11 | 5951847 | 5951868 | 2 | 11 | 22 | CA   | 12 | 5  |
| 110591 | 11 | 5956808 | 5956831 | 2 | 12 | 24 | CA   | 14 | 7  |
| 110593 | 11 | 5958329 | 5958354 | 2 | 13 | 26 | CA   | 13 | 12 |
| 110594 | 11 | 5958518 | 5958529 | 2 | 6  | 12 | GT   | 27 | 3  |
| 110597 | 11 | 5962332 | 5962346 | 3 | 5  | 15 | TAC  | 8  | 6  |

|        |    |         |         |   |    |    |      |    |    |
|--------|----|---------|---------|---|----|----|------|----|----|
| 110598 | 11 | 5962347 | 5962361 | 3 | 5  | 15 | TAA  | 19 | 8  |
| 110599 | 11 | 5963267 | 5963280 | 2 | 7  | 14 | TG   | 21 | 5  |
| 110602 | 11 | 5965027 | 5965048 | 2 | 11 | 22 | AC   | 27 | 5  |
| 110607 | 11 | 5976255 | 5976266 | 2 | 6  | 12 | GT   | 17 | 8  |
| 110608 | 11 | 5976267 | 5976284 | 2 | 9  | 18 | GA   | 6  | 5  |
| 110610 | 11 | 5976619 | 5976648 | 2 | 15 | 30 | TG   | 11 | 10 |
| 110611 | 11 | 5976744 | 5976767 | 2 | 12 | 24 | AC   | 13 | 9  |
| 110612 | 11 | 5976869 | 5976884 | 2 | 8  | 16 | CA   | 20 | 4  |
| 110613 | 11 | 5976997 | 5977018 | 2 | 11 | 22 | TG   | 19 | 9  |
| 110614 | 11 | 5977472 | 5977489 | 2 | 9  | 18 | AC   | 20 | 8  |
| 110615 | 11 | 5977492 | 5977503 | 2 | 6  | 12 | AC   | 22 | 7  |
| 110616 | 11 | 5977941 | 5977992 | 2 | 26 | 52 | GT   | 6  | 7  |
| 110618 | 11 | 5978246 | 5978259 | 2 | 7  | 14 | CA   | 18 | 6  |
| 110622 | 11 | 5983666 | 5983691 | 2 | 13 | 26 | GT   | 14 | 14 |
| 110623 | 11 | 5983901 | 5983922 | 2 | 11 | 22 | GT   | 26 | 5  |
| 110624 | 11 | 5984725 | 5984752 | 2 | 14 | 28 | AC   | 18 | 7  |
| 110625 | 11 | 5987138 | 5987157 | 2 | 10 | 20 | AC   | 18 | 13 |
| 110631 | 11 | 5990257 | 5990280 | 2 | 12 | 24 | GT   | 20 | 14 |
| 110634 | 11 | 5993938 | 5993959 | 2 | 11 | 22 | CT   | 18 | 7  |
| 110638 | 11 | 6003439 | 6003450 | 2 | 6  | 12 | AC   | 29 | 7  |
| 110639 | 11 | 6003452 | 6003463 | 2 | 6  | 12 | CA   | 28 | 6  |
| 110640 | 11 | 6003651 | 6003668 | 2 | 9  | 18 | TG   | 24 | 4  |
| 110642 | 11 | 6006369 | 6006390 | 2 | 11 | 22 | TG   | 17 | 8  |
| 110643 | 11 | 6006508 | 6006527 | 2 | 10 | 20 | AC   | 23 | 7  |
| 110644 | 11 | 6007784 | 6007807 | 2 | 12 | 24 | CA   | 26 | 9  |
| 110645 | 11 | 6008064 | 6008103 | 2 | 20 | 40 | CA   | 14 | 12 |
| 110648 | 11 | 6013740 | 6013765 | 2 | 13 | 26 | CA   | 12 | 11 |
| 110650 | 11 | 6013917 | 6013938 | 2 | 11 | 22 | CA   | 18 | 12 |
| 110656 | 11 | 6018212 | 6018225 | 2 | 7  | 14 | TG   | 19 | 5  |
| 110658 | 11 | 6018638 | 6018659 | 2 | 11 | 22 | CA   | 18 | 8  |
| 110662 | 11 | 6023315 | 6023330 | 2 | 8  | 16 | TG   | 15 | 4  |
| 110668 | 11 | 6028597 | 6028611 | 3 | 5  | 15 | CTC  | 25 | 3  |
| 110671 | 11 | 6035158 | 6035173 | 2 | 8  | 16 | AC   | 19 | 5  |
| 110672 | 11 | 6035321 | 6035352 | 2 | 16 | 32 | TG   | 15 | 10 |
| 110673 | 11 | 6035600 | 6035611 | 2 | 6  | 12 | AC   | 22 | 6  |
| 110674 | 11 | 6038203 | 6038232 | 2 | 15 | 30 | AC   | 11 | 8  |
| 110676 | 11 | 6040654 | 6040673 | 2 | 10 | 20 | TG   | 27 | 6  |
| 110681 | 11 | 6050643 | 6050656 | 2 | 7  | 14 | TG   | 21 | 4  |
| 110685 | 11 | 6052857 | 6052870 | 2 | 7  | 14 | CA   | 22 | 4  |
| 110686 | 11 | 6052979 | 6052994 | 4 | 4  | 16 | AAAT | 17 | 3  |
| 110688 | 11 | 6054908 | 6054919 | 2 | 6  | 12 | TG   | 21 | 6  |
| 110690 | 11 | 6055219 | 6055260 | 2 | 21 | 42 | TG   | 8  | 6  |
| 110692 | 11 | 6055526 | 6055547 | 2 | 11 | 22 | TG   | 19 | 6  |
| 110694 | 11 | 6057906 | 6057929 | 2 | 12 | 24 | TG   | 13 | 8  |
| 110696 | 11 | 6058827 | 6058852 | 2 | 13 | 26 | GT   | 20 | 9  |
| 110700 | 11 | 6060889 | 6060910 | 2 | 11 | 22 | GT   | 12 | 10 |
| 110701 | 11 | 6061548 | 6061559 | 2 | 6  | 12 | TG   | 13 | 3  |
| 110702 | 11 | 6061561 | 6061574 | 2 | 7  | 14 | GT   | 15 | 4  |
| 110705 | 11 | 6063094 | 6063105 | 2 | 6  | 12 | GT   | 23 | 3  |
| 110706 | 11 | 6063426 | 6063447 | 2 | 11 | 22 | TC   | 20 | 6  |
| 110708 | 11 | 6063489 | 6063528 | 2 | 20 | 40 | GT   | 10 | 14 |

|        |    |         |         |   |    |    |      |    |    |
|--------|----|---------|---------|---|----|----|------|----|----|
| 110710 | 11 | 6066152 | 6066177 | 2 | 13 | 26 | GT   | 7  | 7  |
| 110711 | 11 | 6066331 | 6066360 | 2 | 15 | 30 | AC   | 12 | 11 |
| 110712 | 11 | 6067378 | 6067389 | 2 | 6  | 12 | CA   | 30 | 5  |
| 110713 | 11 | 6067645 | 6067674 | 2 | 15 | 30 | AC   | 10 | 4  |
| 110714 | 11 | 6068871 | 6068898 | 2 | 14 | 28 | CA   | 12 | 7  |
| 110716 | 11 | 6069684 | 6069711 | 2 | 14 | 28 | AC   | 14 | 9  |
| 110719 | 11 | 6069941 | 6069962 | 2 | 11 | 22 | GT   | 20 | 12 |
| 110720 | 11 | 6071687 | 6071716 | 2 | 15 | 30 | CA   | 25 | 9  |
| 110721 | 11 | 6071886 | 6071897 | 2 | 6  | 12 | CA   | 19 | 11 |
| 110722 | 11 | 6072412 | 6072447 | 2 | 18 | 36 | TG   | 18 | 12 |
| 110725 | 11 | 6076087 | 6076116 | 2 | 15 | 30 | CA   | 14 | 14 |
| 110727 | 11 | 6081831 | 6081866 | 2 | 18 | 36 | TG   | 7  | 9  |
| 110732 | 11 | 6086310 | 6086327 | 2 | 9  | 18 | CA   | 29 | 3  |
| 110733 | 11 | 6086448 | 6086469 | 2 | 11 | 22 | AC   | 16 | 7  |
| 110738 | 11 | 6090284 | 6090299 | 2 | 8  | 16 | AG   | 19 | 4  |
| 110740 | 11 | 6093964 | 6093987 | 2 | 12 | 24 | CA   | 15 | 10 |
| 110749 | 11 | 6102637 | 6102678 | 3 | 14 | 42 | CTC  | 15 | 8  |
| 110750 | 11 | 6104450 | 6104489 | 2 | 20 | 40 | CA   | 16 | 13 |
| 110751 | 11 | 6104920 | 6104943 | 2 | 12 | 24 | TG   | 25 | 7  |
| 110752 | 11 | 6105551 | 6105570 | 2 | 10 | 20 | TG   | 13 | 10 |
| 110753 | 11 | 6105672 | 6105701 | 2 | 15 | 30 | TG   | 7  | 7  |
| 110755 | 11 | 6107212 | 6107241 | 2 | 15 | 30 | AC   | 10 | 6  |
| 110756 | 11 | 6107338 | 6107367 | 2 | 15 | 30 | GT   | 14 | 5  |
| 110757 | 11 | 6107487 | 6107518 | 2 | 16 | 32 | GT   | 14 | 7  |
| 110758 | 11 | 6107550 | 6107561 | 2 | 6  | 12 | GA   | 23 | 3  |
| 110761 | 11 | 6111403 | 6111434 | 2 | 16 | 32 | TG   | 8  | 11 |
| 110762 | 11 | 6111631 | 6111646 | 4 | 4  | 16 | CTCG | 20 | 3  |
| 110766 | 11 | 6115912 | 6115937 | 2 | 13 | 26 | CA   | 17 | 6  |
| 110769 | 11 | 6116316 | 6116331 | 2 | 8  | 16 | CA   | 19 | 5  |
| 110772 | 11 | 6118612 | 6118633 | 2 | 11 | 22 | AG   | 13 | 5  |
| 110773 | 11 | 6118758 | 6118779 | 2 | 11 | 22 | AC   | 16 | 6  |
| 110781 | 11 | 6123579 | 6123598 | 2 | 10 | 20 | AG   | 9  | 4  |
| 110782 | 11 | 6123722 | 6123741 | 2 | 10 | 20 | CT   | 16 | 6  |
| 110784 | 11 | 6123992 | 6124007 | 2 | 8  | 16 | AC   | 17 | 8  |
| 110791 | 11 | 6126557 | 6126584 | 2 | 14 | 28 | CA   | 17 | 14 |
| 110795 | 11 | 6130338 | 6130387 | 2 | 25 | 50 | GT   | 14 | 14 |
| 110801 | 11 | 6136761 | 6136787 | 3 | 9  | 27 | CAT  | 23 | 6  |
| 110802 | 11 | 6138930 | 6138957 | 2 | 14 | 28 | AC   | 14 | 12 |
| 110804 | 11 | 6140223 | 6140236 | 2 | 7  | 14 | CA   | 18 | 7  |
| 110806 | 11 | 6142347 | 6142370 | 2 | 12 | 24 | TG   | 19 | 7  |
| 110808 | 11 | 6142928 | 6142945 | 2 | 9  | 18 | AC   | 8  | 10 |
| 110810 | 11 | 6145325 | 6145342 | 2 | 9  | 18 | AC   | 22 | 6  |
| 110814 | 11 | 6147392 | 6147415 | 2 | 12 | 24 | AC   | 16 | 4  |
| 110816 | 11 | 6147623 | 6147634 | 2 | 6  | 12 | CA   | 12 | 5  |
| 110817 | 11 | 6149669 | 6149688 | 2 | 10 | 20 | CA   | 14 | 10 |
| 110819 | 11 | 6150173 | 6150190 | 2 | 9  | 18 | CA   | 18 | 3  |
| 110820 | 11 | 6150303 | 6150332 | 2 | 15 | 30 | CT   | 16 | 9  |
| 110822 | 11 | 6150686 | 6150717 | 2 | 16 | 32 | TG   | 6  | 9  |
| 110825 | 11 | 6152074 | 6152127 | 2 | 27 | 54 | TG   | 7  | 8  |
| 110841 | 11 | 6161777 | 6161792 | 2 | 8  | 16 | CA   | 20 | 6  |
| 110858 | 11 | 6169117 | 6169142 | 2 | 13 | 26 | GT   | 10 | 7  |

|        |    |         |         |   |    |    |      |    |    |
|--------|----|---------|---------|---|----|----|------|----|----|
| 110860 | 11 | 6173449 | 6173486 | 2 | 19 | 38 | CA   | 20 | 12 |
| 110862 | 11 | 6173990 | 6174007 | 2 | 9  | 18 | GT   | 27 | 11 |
| 110864 | 11 | 6175914 | 6175925 | 2 | 6  | 12 | GT   | 27 | 19 |
| 110867 | 11 | 6177030 | 6177043 | 2 | 7  | 14 | AT   | 24 | 7  |
| 110868 | 11 | 6178883 | 6178926 | 2 | 22 | 44 | GT   | 18 | 15 |
| 110869 | 11 | 6179319 | 6179330 | 2 | 6  | 12 | GA   | 22 | 4  |
| 110870 | 11 | 6187125 | 6187142 | 2 | 9  | 18 | AG   | 17 | 3  |
| 110871 | 11 | 6187281 | 6187296 | 2 | 8  | 16 | CA   | 20 | 3  |
| 110875 | 11 | 6187766 | 6187785 | 2 | 10 | 20 | TG   | 16 | 6  |
| 110877 | 11 | 6189329 | 6189344 | 2 | 8  | 16 | CT   | 15 | 4  |
| 110878 | 11 | 6189346 | 6189357 | 2 | 6  | 12 | TC   | 17 | 3  |
| 110880 | 11 | 6190349 | 6190380 | 2 | 16 | 32 | TG   | 8  | 7  |
| 110882 | 11 | 6191057 | 6191082 | 2 | 13 | 26 | CA   | 15 | 10 |
| 110883 | 11 | 6191207 | 6191236 | 2 | 15 | 30 | AC   | 17 | 13 |
| 110886 | 11 | 6192945 | 6192970 | 2 | 13 | 26 | CT   | 11 | 11 |
| 110892 | 11 | 6195329 | 6195364 | 4 | 9  | 36 | ATCT | 13 | 11 |
| 110895 | 11 | 6195816 | 6195831 | 4 | 4  | 16 | AAAG | 27 | 3  |
| 110898 | 11 | 6203713 | 6203738 | 2 | 13 | 26 | CA   | 22 | 11 |
| 110906 | 11 | 6220112 | 6220125 | 2 | 7  | 14 | TG   | 25 | 3  |
| 110907 | 11 | 6220393 | 6220422 | 2 | 15 | 30 | AC   | 15 | 10 |
| 110915 | 11 | 6227875 | 6227892 | 2 | 9  | 18 | TG   | 21 | 5  |
| 110922 | 11 | 6234979 | 6235010 | 2 | 16 | 32 | TG   | 8  | 9  |
| 110923 | 11 | 6235160 | 6235177 | 2 | 9  | 18 | CA   | 23 | 6  |
| 110924 | 11 | 6235179 | 6235194 | 2 | 8  | 16 | AC   | 19 | 5  |
| 110925 | 11 | 6235360 | 6235377 | 2 | 9  | 18 | CA   | 27 | 8  |
| 110926 | 11 | 6238932 | 6238961 | 2 | 15 | 30 | TG   | 14 | 13 |
| 110927 | 11 | 6239462 | 6239473 | 2 | 6  | 12 | AC   | 29 | 3  |
| 110930 | 11 | 6243369 | 6243388 | 4 | 5  | 20 | AAAC | 26 | 4  |
| 110932 | 11 | 6247173 | 6247210 | 2 | 19 | 38 | CA   | 9  | 7  |
| 110933 | 11 | 6247354 | 6247383 | 2 | 15 | 30 | GT   | 12 | 7  |
| 110935 | 11 | 6247833 | 6247844 | 2 | 6  | 12 | GT   | 13 | 3  |
| 110937 | 11 | 6252275 | 6252288 | 2 | 7  | 14 | CA   | 24 | 4  |
| 110943 | 11 | 6259508 | 6259537 | 2 | 15 | 30 | GT   | 10 | 10 |
| 110949 | 11 | 6271106 | 6271117 | 2 | 6  | 12 | CA   | 16 | 5  |
| 110953 | 11 | 6272593 | 6272622 | 2 | 15 | 30 | GT   | 9  | 8  |
| 110955 | 11 | 6278078 | 6278119 | 2 | 21 | 42 | CA   | 6  | 8  |
| 110957 | 11 | 6282287 | 6282300 | 2 | 7  | 14 | AC   | 19 | 4  |
| 110958 | 11 | 6282516 | 6282543 | 2 | 14 | 28 | CA   | 12 | 11 |
| 110962 | 11 | 6288716 | 6288759 | 2 | 22 | 44 | TG   | 10 | 12 |
| 110971 | 11 | 6291028 | 6291039 | 2 | 6  | 12 | CT   | 8  | 3  |
| 110972 | 11 | 6291042 | 6291059 | 2 | 9  | 18 | CT   | 10 | 4  |
| 110976 | 11 | 6293379 | 6293390 | 2 | 6  | 12 | AC   | 22 | 3  |
| 110977 | 11 | 6295268 | 6295287 | 2 | 10 | 20 | GT   | 20 | 8  |
| 110983 | 11 | 6300024 | 6300049 | 2 | 13 | 26 | TG   | 15 | 7  |
| 110984 | 11 | 6300149 | 6300162 | 2 | 7  | 14 | AC   | 23 | 8  |
| 110986 | 11 | 6300490 | 6300527 | 2 | 19 | 38 | AC   | 14 | 10 |
| 110987 | 11 | 6300819 | 6300836 | 2 | 9  | 18 | CA   | 28 | 8  |
| 110992 | 11 | 6306537 | 6306568 | 2 | 16 | 32 | GT   | 6  | 7  |
| 110996 | 11 | 6308461 | 6308498 | 2 | 19 | 38 | CA   | 7  | 9  |
| 110997 | 11 | 6308625 | 6308652 | 2 | 14 | 28 | AC   | 11 | 10 |
| 111003 | 11 | 6310976 | 6310997 | 2 | 11 | 22 | AC   | 10 | 10 |

|        |    |         |         |   |    |    |      |    |    |
|--------|----|---------|---------|---|----|----|------|----|----|
| 111004 | 11 | 6313377 | 6313400 | 2 | 12 | 24 | AC   | 24 | 9  |
| 111005 | 11 | 6313513 | 6313544 | 2 | 16 | 32 | AC   | 13 | 10 |
| 111009 | 11 | 6316001 | 6316026 | 2 | 13 | 26 | CA   | 9  | 9  |
| 111010 | 11 | 6316115 | 6316132 | 2 | 9  | 18 | CA   | 15 | 12 |
| 111011 | 11 | 6316135 | 6316150 | 2 | 8  | 16 | CA   | 13 | 10 |
| 111015 | 11 | 6318798 | 6318817 | 2 | 10 | 20 | GA   | 9  | 4  |
| 111016 | 11 | 6319699 | 6319738 | 2 | 20 | 40 | TG   | 18 | 16 |
| 111017 | 11 | 6320012 | 6320035 | 2 | 12 | 24 | GT   | 12 | 10 |
| 111018 | 11 | 6321387 | 6321398 | 2 | 6  | 12 | CA   | 21 | 3  |
| 111020 | 11 | 6321898 | 6321925 | 2 | 14 | 28 | CA   | 18 | 13 |
| 111022 | 11 | 6322122 | 6322143 | 2 | 11 | 22 | AC   | 14 | 12 |
| 111023 | 11 | 6322880 | 6322893 | 2 | 7  | 14 | CT   | 23 | 3  |
| 111026 | 11 | 6323259 | 6323276 | 2 | 9  | 18 | TG   | 24 | 6  |
| 111028 | 11 | 6323861 | 6323880 | 2 | 10 | 20 | CA   | 32 | 4  |
| 111032 | 11 | 6327014 | 6327053 | 2 | 20 | 40 | AC   | 7  | 9  |
| 111035 | 11 | 6328579 | 6328596 | 2 | 9  | 18 | AC   | 15 | 4  |
| 111036 | 11 | 6328687 | 6328728 | 2 | 21 | 42 | AC   | 11 | 9  |
| 111040 | 11 | 6336449 | 6336466 | 3 | 6  | 18 | CTC  | 28 | 4  |
| 111041 | 11 | 6337414 | 6337431 | 2 | 9  | 18 | CA   | 11 | 4  |
| 111051 | 11 | 6347375 | 6347408 | 2 | 17 | 34 | CA   | 11 | 9  |
| 111052 | 11 | 6347493 | 6347504 | 2 | 6  | 12 | CA   | 18 | 3  |
| 111053 | 11 | 6347628 | 6347639 | 2 | 6  | 12 | AG   | 23 | 3  |
| 111055 | 11 | 6352001 | 6352012 | 2 | 6  | 12 | GT   | 30 | 5  |
| 111059 | 11 | 6352488 | 6352519 | 2 | 16 | 32 | TG   | 11 | 8  |
| 111065 | 11 | 6357937 | 6357948 | 2 | 6  | 12 | GT   | 11 | 3  |
| 111067 | 11 | 6358202 | 6358227 | 2 | 13 | 26 | AG   | 7  | 6  |
| 111069 | 11 | 6361948 | 6361961 | 2 | 7  | 14 | AC   | 25 | 4  |
| 111071 | 11 | 6362237 | 6362258 | 2 | 11 | 22 | AG   | 16 | 7  |
| 111072 | 11 | 6362406 | 6362439 | 2 | 17 | 34 | TG   | 12 | 7  |
| 111077 | 11 | 6369113 | 6369130 | 2 | 9  | 18 | CA   | 21 | 7  |
| 111079 | 11 | 6372679 | 6372698 | 2 | 10 | 20 | GA   | 10 | 6  |
| 111080 | 11 | 6373264 | 6373289 | 2 | 13 | 26 | CA   | 8  | 10 |
| 111085 | 11 | 6389823 | 6389838 | 2 | 8  | 16 | TG   | 26 | 5  |
| 111091 | 11 | 6393367 | 6393386 | 2 | 10 | 20 | GT   | 22 | 9  |
| 111093 | 11 | 6394240 | 6394253 | 2 | 7  | 14 | AG   | 15 | 3  |
| 111102 | 11 | 6405650 | 6405661 | 2 | 6  | 12 | GT   | 22 | 4  |
| 111104 | 11 | 6410890 | 6410911 | 2 | 11 | 22 | TG   | 24 | 7  |
| 111107 | 11 | 6416016 | 6416031 | 2 | 8  | 16 | TG   | 23 | 6  |
| 111108 | 11 | 6416092 | 6416119 | 2 | 14 | 28 | TG   | 22 | 11 |
| 111126 | 11 | 6427672 | 6427695 | 2 | 12 | 24 | TG   | 16 | 12 |
| 111128 | 11 | 6427783 | 6427806 | 2 | 12 | 24 | CT   | 12 | 7  |
| 111130 | 11 | 6428074 | 6428087 | 2 | 7  | 14 | TG   | 15 | 6  |
| 111131 | 11 | 6428223 | 6428238 | 4 | 4  | 16 | TCTG | 19 | 6  |
| 111135 | 11 | 6433530 | 6433543 | 2 | 7  | 14 | TG   | 15 | 6  |
| 111136 | 11 | 6433672 | 6433691 | 2 | 10 | 20 | CA   | 22 | 4  |
| 111143 | 11 | 6441955 | 6441980 | 2 | 13 | 26 | AC   | 16 | 8  |
| 111148 | 11 | 6444630 | 6444667 | 2 | 19 | 38 | TG   | 16 | 8  |
| 111158 | 11 | 6456113 | 6456136 | 2 | 12 | 24 | GT   | 23 | 6  |
| 111159 | 11 | 6456610 | 6456625 | 4 | 4  | 16 | ATTT | 25 | 7  |
| 111161 | 11 | 6458685 | 6458714 | 2 | 15 | 30 | AC   | 9  | 11 |
| 111162 | 11 | 6459038 | 6459049 | 2 | 6  | 12 | TG   | 26 | 6  |

|        |    |         |         |   |    |    |      |    |    |
|--------|----|---------|---------|---|----|----|------|----|----|
| 111163 | 11 | 6459092 | 6459105 | 2 | 7  | 14 | GT   | 17 | 4  |
| 111168 | 11 | 6461866 | 6461885 | 4 | 5  | 20 | CTGA | 21 | 4  |
| 111170 | 11 | 6463782 | 6463797 | 2 | 8  | 16 | AC   | 24 | 6  |
| 111176 | 11 | 6475875 | 6475894 | 4 | 5  | 20 | CTGT | 14 | 3  |
| 111179 | 11 | 6481112 | 6481127 | 2 | 8  | 16 | CA   | 29 | 8  |
| 111180 | 11 | 6481295 | 6481308 | 2 | 7  | 14 | AC   | 25 | 8  |
| 111181 | 11 | 6481459 | 6481488 | 2 | 15 | 30 | CA   | 12 | 7  |
| 111182 | 11 | 6481562 | 6481593 | 2 | 16 | 32 | CA   | 15 | 10 |
| 111192 | 11 | 6488912 | 6488933 | 2 | 11 | 22 | AC   | 20 | 8  |
| 111196 | 11 | 6499655 | 6499674 | 2 | 10 | 20 | TG   | 18 | 6  |
| 111198 | 11 | 6502010 | 6502023 | 2 | 7  | 14 | TA   | 11 | 5  |
| 111202 | 11 | 6509655 | 6509692 | 2 | 19 | 38 | TG   | 16 | 16 |
| 111205 | 11 | 6512422 | 6512435 | 2 | 7  | 14 | TG   | 20 | 10 |
| 111206 | 11 | 6512437 | 6512448 | 2 | 6  | 12 | GT   | 12 | 5  |
| 111209 | 11 | 6516462 | 6516479 | 2 | 9  | 18 | CA   | 22 | 6  |
| 111210 | 11 | 6516850 | 6516867 | 3 | 6  | 18 | GAG  | 31 | 3  |
| 111216 | 11 | 6529077 | 6529096 | 2 | 10 | 20 | TG   | 25 | 8  |
| 111218 | 11 | 6538035 | 6538050 | 2 | 8  | 16 | AC   | 23 | 3  |
| 111220 | 11 | 6541418 | 6541431 | 2 | 7  | 14 | CA   | 7  | 7  |
| 111232 | 11 | 6568825 | 6568844 | 4 | 5  | 20 | AAAC | 15 | 4  |
| 111238 | 11 | 6579442 | 6579469 | 2 | 14 | 28 | CA   | 18 | 12 |
| 111240 | 11 | 6590947 | 6590970 | 2 | 12 | 24 | CA   | 18 | 11 |
| 111243 | 11 | 6598799 | 6598816 | 3 | 6  | 18 | AAT  | 15 | 3  |
| 111244 | 11 | 6599794 | 6599821 | 4 | 7  | 28 | TTTA | 8  | 11 |
| 111246 | 11 | 6603770 | 6603787 | 2 | 9  | 18 | GT   | 24 | 11 |
| 111249 | 11 | 6618453 | 6618480 | 2 | 14 | 28 | TG   | 10 | 7  |
| 111255 | 11 | 6632717 | 6632746 | 2 | 15 | 30 | TG   | 10 | 7  |
| 111257 | 11 | 6640054 | 6640089 | 2 | 18 | 36 | TG   | 9  | 8  |
| 111266 | 11 | 6656297 | 6656312 | 2 | 8  | 16 | AC   | 20 | 12 |
| 111268 | 11 | 6659723 | 6659738 | 2 | 8  | 16 | AC   | 11 | 3  |
| 111270 | 11 | 6660844 | 6660855 | 2 | 6  | 12 | AC   | 20 | 3  |
| 111272 | 11 | 6670349 | 6670360 | 2 | 6  | 12 | CA   | 25 | 3  |
| 111273 | 11 | 6671325 | 6671364 | 2 | 20 | 40 | TG   | 9  | 14 |
| 111276 | 11 | 6674032 | 6674051 | 2 | 10 | 20 | GA   | 21 | 6  |
| 111277 | 11 | 6675575 | 6675626 | 4 | 13 | 52 | TAGA | 19 | 11 |
| 111278 | 11 | 6677375 | 6677406 | 2 | 16 | 32 | CA   | 17 | 10 |
| 111282 | 11 | 6684097 | 6684108 | 2 | 6  | 12 | AC   | 25 | 5  |
| 111286 | 11 | 6692720 | 6692731 | 2 | 6  | 12 | CA   | 25 | 8  |
| 111287 | 11 | 6695935 | 6695946 | 2 | 6  | 12 | AC   | 33 | 3  |
| 111288 | 11 | 6696973 | 6697000 | 4 | 7  | 28 | CATC | 30 | 3  |
| 111294 | 11 | 6725896 | 6725907 | 2 | 6  | 12 | AC   | 25 | 3  |
| 111300 | 11 | 6743145 | 6743164 | 2 | 10 | 20 | GT   | 12 | 7  |
| 111302 | 11 | 6744501 | 6744518 | 3 | 6  | 18 | CAG  | 21 | 7  |
| 111307 | 11 | 6756715 | 6756738 | 2 | 12 | 24 | TG   | 9  | 11 |
| 111310 | 11 | 6757556 | 6757571 | 4 | 4  | 16 | TTGG | 25 | 7  |
| 111315 | 11 | 6766165 | 6766182 | 2 | 9  | 18 | GT   | 23 | 5  |
| 111323 | 11 | 6776419 | 6776442 | 2 | 12 | 24 | AC   | 7  | 5  |
| 111326 | 11 | 6780225 | 6780264 | 2 | 20 | 40 | GT   | 7  | 9  |
| 111327 | 11 | 6780390 | 6780403 | 2 | 7  | 14 | GT   | 24 | 6  |
| 111328 | 11 | 6780902 | 6780917 | 2 | 8  | 16 | GT   | 26 | 7  |
| 111330 | 11 | 6785331 | 6785348 | 2 | 9  | 18 | TG   | 29 | 7  |

|        |    |         |         |   |    |    |      |    |    |
|--------|----|---------|---------|---|----|----|------|----|----|
| 111331 | 11 | 6787301 | 6787318 | 2 | 9  | 18 | GT   | 17 | 12 |
| 111335 | 11 | 6795001 | 6795014 | 2 | 7  | 14 | TG   | 10 | 6  |
| 111336 | 11 | 6795136 | 6795163 | 2 | 14 | 28 | CA   | 9  | 12 |
| 111342 | 11 | 6803386 | 6803409 | 3 | 8  | 24 | TCC  | 23 | 5  |
| 111345 | 11 | 6808185 | 6808200 | 2 | 8  | 16 | AC   | 31 | 3  |
| 111352 | 11 | 6819705 | 6819736 | 2 | 16 | 32 | CA   | 6  | 5  |
| 111355 | 11 | 6822971 | 6822982 | 2 | 6  | 12 | CT   | 21 | 3  |
| 111356 | 11 | 6823710 | 6823729 | 2 | 10 | 20 | CA   | 17 | 6  |
| 111357 | 11 | 6825594 | 6825613 | 4 | 5  | 20 | GATG | 19 | 4  |
| 111358 | 11 | 6825692 | 6825703 | 2 | 6  | 12 | AT   | 15 | 3  |
| 111359 | 11 | 6831204 | 6831215 | 2 | 6  | 12 | TA   | 30 | 4  |
| 111360 | 11 | 6831869 | 6831902 | 2 | 17 | 34 | CA   | 18 | 11 |
| 111363 | 11 | 6836094 | 6836113 | 2 | 10 | 20 | TG   | 20 | 5  |
| 111364 | 11 | 6836224 | 6836247 | 2 | 12 | 24 | CA   | 20 | 8  |
| 111370 | 11 | 6845373 | 6845390 | 2 | 9  | 18 | AG   | 17 | 4  |
| 111379 | 11 | 6868923 | 6868938 | 2 | 8  | 16 | AG   | 28 | 6  |
| 111381 | 11 | 6875736 | 6875749 | 2 | 7  | 14 | TG   | 26 | 4  |
| 111382 | 11 | 6876624 | 6876635 | 2 | 6  | 12 | GT   | 16 | 3  |
| 111383 | 11 | 6877380 | 6877397 | 3 | 6  | 18 | CCT  | 24 | 3  |
| 111385 | 11 | 6887088 | 6887123 | 4 | 9  | 36 | AGAA | 18 | 6  |
| 111388 | 11 | 6890765 | 6890796 | 4 | 8  | 32 | CTTT | 21 | 5  |
| 111392 | 11 | 6898589 | 6898612 | 2 | 12 | 24 | GT   | 13 | 12 |
| 111395 | 11 | 6902751 | 6902776 | 2 | 13 | 26 | CA   | 20 | 9  |
| 111399 | 11 | 6913217 | 6913249 | 3 | 11 | 33 | AGC  | 20 | 7  |
| 111400 | 11 | 6914909 | 6914928 | 2 | 10 | 20 | AT   | 11 | 8  |
| 111401 | 11 | 6917797 | 6917814 | 3 | 6  | 18 | AGG  | 31 | 4  |
| 111402 | 11 | 6918048 | 6918065 | 3 | 6  | 18 | GGA  | 26 | 7  |
| 111403 | 11 | 6918204 | 6918217 | 2 | 7  | 14 | AC   | 23 | 12 |
| 111405 | 11 | 6918791 | 6918834 | 2 | 22 | 44 | TG   | 9  | 12 |
| 111406 | 11 | 6919039 | 6919058 | 2 | 10 | 20 | AG   | 24 | 16 |
| 111412 | 11 | 6923483 | 6923508 | 2 | 13 | 26 | AC   | 6  | 7  |
| 111415 | 11 | 6927330 | 6927353 | 3 | 8  | 24 | GGA  | 6  | 4  |
| 111420 | 11 | 6943532 | 6943561 | 2 | 15 | 30 | CA   | 10 | 9  |
| 111421 | 11 | 6943729 | 6943762 | 2 | 17 | 34 | TG   | 16 | 9  |
| 111422 | 11 | 6946103 | 6946114 | 2 | 6  | 12 | GA   | 31 | 3  |
| 111430 | 11 | 6969050 | 6969070 | 3 | 7  | 21 | AGG  | 28 | 5  |
| 111432 | 11 | 6970903 | 6970918 | 2 | 8  | 16 | CA   | 20 | 3  |
| 111433 | 11 | 6971413 | 6971444 | 2 | 16 | 32 | AC   | 14 | 12 |
| 111434 | 11 | 6972118 | 6972129 | 2 | 6  | 12 | CA   | 12 | 7  |
| 111438 | 11 | 6974143 | 6974156 | 2 | 7  | 14 | TG   | 20 | 5  |
| 111442 | 11 | 6977061 | 6977100 | 2 | 20 | 40 | TG   | 9  | 12 |
| 111450 | 11 | 6990653 | 6990668 | 2 | 8  | 16 | AC   | 23 | 5  |
| 111451 | 11 | 6990739 | 6990756 | 3 | 6  | 18 | CAG  | 24 | 5  |
| 111452 | 11 | 6991169 | 6991183 | 3 | 5  | 15 | AGC  | 28 | 5  |
| 111457 | 11 | 6994525 | 6994548 | 2 | 12 | 24 | AC   | 7  | 7  |
| 111459 | 11 | 6995389 | 6995416 | 2 | 14 | 28 | GA   | 15 | 9  |
| 111460 | 11 | 6995593 | 6995620 | 2 | 14 | 28 | GT   | 18 | 11 |
| 111462 | 11 | 6996860 | 6996873 | 2 | 7  | 14 | TG   | 22 | 4  |
| 111465 | 11 | 7002581 | 7002596 | 2 | 8  | 16 | CA   | 23 | 5  |
| 111473 | 11 | 7010957 | 7010978 | 2 | 11 | 22 | CA   | 22 | 11 |
| 111474 | 11 | 7011249 | 7011266 | 2 | 9  | 18 | TG   | 26 | 5  |



|        |    |         |         |   |    |    |      |    |    |
|--------|----|---------|---------|---|----|----|------|----|----|
| 111475 | 11 | 7013005 | 7013022 | 2 | 9  | 18 | CA   | 26 | 6  |
| 111478 | 11 | 7015625 | 7015640 | 2 | 8  | 16 | GT   | 27 | 4  |
| 111481 | 11 | 7017688 | 7017699 | 2 | 6  | 12 | TG   | 24 | 3  |
| 111482 | 11 | 7018753 | 7018764 | 2 | 6  | 12 | GT   | 28 | 3  |
| 111484 | 11 | 7021033 | 7021062 | 2 | 15 | 30 | TG   | 11 | 8  |
| 111489 | 11 | 7022843 | 7022864 | 2 | 11 | 22 | GT   | 20 | 9  |
| 111491 | 11 | 7023056 | 7023075 | 2 | 10 | 20 | GT   | 8  | 11 |
| 111492 | 11 | 7023127 | 7023144 | 2 | 9  | 18 | TG   | 14 | 7  |
| 111493 | 11 | 7023285 | 7023308 | 2 | 12 | 24 | CA   | 22 | 5  |
| 111497 | 11 | 7027400 | 7027417 | 2 | 9  | 18 | CA   | 12 | 6  |
| 111498 | 11 | 7029004 | 7029015 | 2 | 6  | 12 | TG   | 26 | 5  |
| 111499 | 11 | 7030955 | 7030972 | 3 | 6  | 18 | ATA  | 11 | 3  |
| 111501 | 11 | 7031961 | 7031978 | 2 | 9  | 18 | AG   | 15 | 3  |
| 111507 | 11 | 7035345 | 7035378 | 2 | 17 | 34 | TG   | 7  | 8  |
| 111508 | 11 | 7035907 | 7035924 | 2 | 9  | 18 | CT   | 22 | 6  |
| 111511 | 11 | 7036998 | 7037019 | 2 | 11 | 22 | CA   | 24 | 15 |
| 111515 | 11 | 7048344 | 7048355 | 2 | 6  | 12 | GT   | 27 | 3  |
| 111523 | 11 | 7067738 | 7067767 | 2 | 15 | 30 | CA   | 20 | 8  |
| 111525 | 11 | 7076715 | 7076726 | 2 | 6  | 12 | GT   | 28 | 3  |
| 111526 | 11 | 7078921 | 7078936 | 2 | 8  | 16 | CT   | 21 | 4  |
| 111531 | 11 | 7088198 | 7088227 | 2 | 15 | 30 | TG   | 15 | 9  |
| 111532 | 11 | 7088514 | 7088531 | 2 | 9  | 18 | CA   | 24 | 8  |
| 111534 | 11 | 7090840 | 7090869 | 2 | 15 | 30 | AG   | 11 | 9  |
| 111535 | 11 | 7095067 | 7095086 | 2 | 10 | 20 | GT   | 17 | 7  |
| 111544 | 11 | 7108711 | 7108724 | 2 | 7  | 14 | AC   | 17 | 5  |
| 111546 | 11 | 7115909 | 7115920 | 2 | 6  | 12 | GT   | 16 | 5  |
| 111549 | 11 | 7139422 | 7139445 | 3 | 8  | 24 | AGG  | 8  | 4  |
| 111551 | 11 | 7143149 | 7143162 | 2 | 7  | 14 | CA   | 32 | 4  |
| 111552 | 11 | 7144586 | 7144597 | 2 | 6  | 12 | TG   | 29 | 4  |
| 111553 | 11 | 7145588 | 7145607 | 2 | 10 | 20 | TG   | 20 | 4  |
| 111562 | 11 | 7157451 | 7157468 | 2 | 9  | 18 | AC   | 23 | 6  |
| 111565 | 11 | 7166580 | 7166599 | 2 | 10 | 20 | CA   | 26 | 10 |
| 111575 | 11 | 7191434 | 7191447 | 2 | 7  | 14 | GT   | 22 | 6  |
| 111577 | 11 | 7196972 | 7196991 | 2 | 10 | 20 | AC   | 19 | 4  |
| 111580 | 11 | 7225654 | 7225665 | 2 | 6  | 12 | TG   | 16 | 3  |
| 111591 | 11 | 7248094 | 7248111 | 2 | 9  | 18 | CA   | 16 | 11 |
| 111592 | 11 | 7252720 | 7252739 | 2 | 10 | 20 | TG   | 23 | 5  |
| 111595 | 11 | 7281857 | 7281878 | 2 | 11 | 22 | GT   | 16 | 10 |
| 111600 | 11 | 7296374 | 7296397 | 4 | 6  | 24 | AAAC | 10 | 3  |
| 111602 | 11 | 7298299 | 7298338 | 2 | 20 | 40 | AC   | 11 | 13 |
| 111611 | 11 | 7313734 | 7313753 | 4 | 5  | 20 | ATGG | 20 | 4  |
| 111614 | 11 | 7315413 | 7315434 | 2 | 11 | 22 | CT   | 7  | 5  |
| 111615 | 11 | 7315470 | 7315501 | 2 | 16 | 32 | AC   | 14 | 10 |
| 111621 | 11 | 7329563 | 7329586 | 2 | 12 | 24 | TG   | 13 | 10 |
| 111630 | 11 | 7367712 | 7367729 | 2 | 9  | 18 | AC   | 14 | 4  |
| 111647 | 11 | 7427709 | 7427744 | 2 | 18 | 36 | AC   | 14 | 10 |
| 111649 | 11 | 7438233 | 7438252 | 2 | 10 | 20 | TG   | 24 | 4  |
| 111651 | 11 | 7440098 | 7440113 | 4 | 4  | 16 | AAAC | 27 | 3  |
| 111653 | 11 | 7442049 | 7442068 | 2 | 10 | 20 | GT   | 18 | 3  |
| 111655 | 11 | 7445474 | 7445488 | 3 | 5  | 15 | CTG  | 13 | 3  |
| 111666 | 11 | 7470129 | 7470146 | 2 | 9  | 18 | CA   | 27 | 7  |

|        |    |         |         |   |    |    |      |    |    |
|--------|----|---------|---------|---|----|----|------|----|----|
| 111674 | 11 | 7487093 | 7487110 | 3 | 6  | 18 | CTG  | 26 | 5  |
| 111677 | 11 | 7497707 | 7497738 | 2 | 16 | 32 | AC   | 17 | 10 |
| 111681 | 11 | 7506067 | 7506080 | 2 | 7  | 14 | GT   | 23 | 5  |
| 111690 | 11 | 7522403 | 7522428 | 2 | 13 | 26 | AC   | 20 | 11 |
| 111697 | 11 | 7538362 | 7538383 | 2 | 11 | 22 | TG   | 12 | 4  |
| 111698 | 11 | 7539865 | 7539886 | 2 | 11 | 22 | CA   | 14 | 14 |
| 111700 | 11 | 7542826 | 7542859 | 2 | 17 | 34 | TG   | 13 | 9  |
| 111706 | 11 | 7570790 | 7570803 | 2 | 7  | 14 | CA   | 24 | 4  |
| 111707 | 11 | 7571887 | 7571900 | 2 | 7  | 14 | GT   | 18 | 4  |
| 111708 | 11 | 7572052 | 7572103 | 2 | 26 | 52 | TG   | 9  | 8  |
| 111712 | 11 | 7581065 | 7581078 | 2 | 7  | 14 | CA   | 14 | 4  |
| 111716 | 11 | 7592100 | 7592111 | 2 | 6  | 12 | GT   | 25 | 3  |
| 111717 | 11 | 7595680 | 7595695 | 4 | 4  | 16 | GACA | 19 | 5  |
| 111720 | 11 | 7601052 | 7601081 | 2 | 15 | 30 | AC   | 14 | 9  |
| 111722 | 11 | 7603269 | 7603298 | 2 | 15 | 30 | TG   | 8  | 4  |
| 111726 | 11 | 7605707 | 7605732 | 2 | 13 | 26 | TG   | 10 | 7  |
| 111730 | 11 | 7609539 | 7609556 | 2 | 9  | 18 | GT   | 9  | 3  |
| 111749 | 11 | 7640052 | 7640063 | 2 | 6  | 12 | GT   | 24 | 3  |
| 111756 | 11 | 7653444 | 7653477 | 2 | 17 | 34 | GT   | 14 | 10 |
| 111759 | 11 | 7658196 | 7658219 | 4 | 6  | 24 | AGAA | 26 | 4  |
| 111763 | 11 | 7659077 | 7659108 | 2 | 16 | 32 | CA   | 17 | 11 |
| 111765 | 11 | 7659466 | 7659497 | 2 | 16 | 32 | AC   | 19 | 11 |
| 111768 | 11 | 7661199 | 7661220 | 2 | 11 | 22 | TG   | 13 | 7  |
| 111769 | 11 | 7661313 | 7661344 | 2 | 16 | 32 | AC   | 11 | 10 |
| 111770 | 11 | 7661394 | 7661405 | 2 | 6  | 12 | TG   | 25 | 3  |
| 111771 | 11 | 7663399 | 7663436 | 2 | 19 | 38 | CA   | 10 | 11 |
| 111775 | 11 | 7670241 | 7670255 | 3 | 5  | 15 | GAG  | 20 | 7  |
| 111776 | 11 | 7672347 | 7672360 | 2 | 7  | 14 | AC   | 25 | 3  |
| 111777 | 11 | 7672454 | 7672497 | 2 | 22 | 44 | AC   | 13 | 10 |
| 111778 | 11 | 7672567 | 7672578 | 2 | 6  | 12 | TG   | 16 | 9  |
| 111779 | 11 | 7672582 | 7672599 | 2 | 9  | 18 | GT   | 17 | 10 |
| 111780 | 11 | 7672722 | 7672741 | 2 | 10 | 20 | CA   | 21 | 10 |
| 111781 | 11 | 7673412 | 7673423 | 2 | 6  | 12 | TG   | 27 | 3  |
| 111782 | 11 | 7673498 | 7673513 | 2 | 8  | 16 | AC   | 27 | 6  |
| 111784 | 11 | 7676639 | 7676654 | 2 | 8  | 16 | GA   | 24 | 3  |
| 111785 | 11 | 7676701 | 7676720 | 2 | 10 | 20 | GT   | 22 | 12 |
| 111786 | 11 | 7676906 | 7676929 | 3 | 8  | 24 | TCC  | 23 | 6  |
| 111787 | 11 | 7676993 | 7677014 | 2 | 11 | 22 | TG   | 23 | 11 |
| 111788 | 11 | 7678533 | 7678562 | 2 | 15 | 30 | TG   | 23 | 12 |
| 111789 | 11 | 7679523 | 7679542 | 2 | 10 | 20 | AC   | 14 | 3  |
| 111790 | 11 | 7679967 | 7679978 | 2 | 6  | 12 | TG   | 11 | 4  |
| 111792 | 11 | 7680298 | 7680317 | 4 | 5  | 20 | CTGA | 31 | 7  |
| 111793 | 11 | 7680397 | 7680428 | 2 | 16 | 32 | GT   | 21 | 9  |
| 111794 | 11 | 7682541 | 7682554 | 2 | 7  | 14 | GT   | 10 | 11 |
| 111796 | 11 | 7682766 | 7682791 | 2 | 13 | 26 | CA   | 11 | 6  |
| 111803 | 11 | 7688435 | 7688452 | 2 | 9  | 18 | TG   | 28 | 4  |
| 111806 | 11 | 7692552 | 7692569 | 3 | 6  | 18 | AGG  | 25 | 6  |
| 111807 | 11 | 7692823 | 7692838 | 4 | 4  | 16 | AAAT | 21 | 5  |
| 111815 | 11 | 7700879 | 7700924 | 2 | 23 | 46 | AC   | 8  | 11 |
| 111816 | 11 | 7701478 | 7701501 | 3 | 8  | 24 | CAA  | 23 | 10 |
| 111818 | 11 | 7701946 | 7701969 | 2 | 12 | 24 | AG   | 8  | 11 |

|        |    |         |         |   |    |    |      |    |    |
|--------|----|---------|---------|---|----|----|------|----|----|
| 111819 | 11 | 7702477 | 7702494 | 3 | 6  | 18 | GGA  | 20 | 4  |
| 111824 | 11 | 7710574 | 7710587 | 2 | 7  | 14 | AC   | 16 | 9  |
| 111825 | 11 | 7710590 | 7710603 | 2 | 7  | 14 | AC   | 12 | 5  |
| 111827 | 11 | 7710865 | 7710878 | 2 | 7  | 14 | GT   | 12 | 5  |
| 111829 | 11 | 7710959 | 7710972 | 2 | 7  | 14 | CA   | 21 | 4  |
| 111830 | 11 | 7711107 | 7711118 | 2 | 6  | 12 | CA   | 25 | 3  |
| 111832 | 11 | 7712117 | 7712130 | 2 | 7  | 14 | AC   | 16 | 4  |
| 111835 | 11 | 7715590 | 7715613 | 2 | 12 | 24 | TG   | 8  | 9  |
| 111836 | 11 | 7715734 | 7715761 | 2 | 14 | 28 | GT   | 7  | 10 |
| 111837 | 11 | 7718262 | 7718273 | 2 | 6  | 12 | TG   | 18 | 6  |
| 111838 | 11 | 7718310 | 7718329 | 2 | 10 | 20 | TG   | 15 | 9  |
| 111841 | 11 | 7725570 | 7725583 | 2 | 7  | 14 | CA   | 22 | 5  |
| 111843 | 11 | 7727508 | 7727529 | 2 | 11 | 22 | CT   | 18 | 11 |
| 111844 | 11 | 7727583 | 7727596 | 2 | 7  | 14 | CA   | 20 | 7  |
| 111845 | 11 | 7727764 | 7727809 | 2 | 23 | 46 | CA   | 7  | 10 |
| 111846 | 11 | 7727962 | 7727989 | 2 | 14 | 28 | TG   | 8  | 10 |
| 111850 | 11 | 7730137 | 7730180 | 2 | 22 | 44 | TC   | 9  | 8  |
| 111851 | 11 | 7730238 | 7730253 | 2 | 8  | 16 | GT   | 15 | 5  |
| 111852 | 11 | 7730321 | 7730350 | 2 | 15 | 30 | AC   | 6  | 7  |
| 111857 | 11 | 7733941 | 7733954 | 2 | 7  | 14 | AG   | 27 | 4  |
| 111858 | 11 | 7734086 | 7734097 | 2 | 6  | 12 | TC   | 25 | 5  |
| 111859 | 11 | 7734607 | 7734628 | 2 | 11 | 22 | GT   | 15 | 10 |
| 111860 | 11 | 7735005 | 7735016 | 2 | 6  | 12 | CT   | 24 | 3  |
| 111861 | 11 | 7735711 | 7735740 | 2 | 15 | 30 | GT   | 7  | 6  |
| 111862 | 11 | 7735924 | 7735953 | 2 | 15 | 30 | GT   | 17 | 12 |
| 111867 | 11 | 7739659 | 7739678 | 2 | 10 | 20 | GA   | 15 | 3  |
| 111868 | 11 | 7739716 | 7739727 | 2 | 6  | 12 | GT   | 21 | 4  |
| 111874 | 11 | 7746720 | 7746749 | 3 | 10 | 30 | GGA  | 24 | 6  |
| 111875 | 11 | 7747033 | 7747046 | 2 | 7  | 14 | GT   | 19 | 6  |
| 111877 | 11 | 7748319 | 7748342 | 4 | 6  | 24 | TCCA | 25 | 8  |
| 111878 | 11 | 7748818 | 7748831 | 2 | 7  | 14 | CT   | 17 | 5  |
| 111879 | 11 | 7748833 | 7748846 | 2 | 7  | 14 | TC   | 24 | 4  |
| 111881 | 11 | 7748941 | 7748954 | 2 | 7  | 14 | CA   | 35 | 3  |
| 111883 | 11 | 7752496 | 7752533 | 2 | 19 | 38 | TG   | 8  | 6  |
| 111885 | 11 | 7753851 | 7753870 | 2 | 10 | 20 | GT   | 23 | 4  |
| 111887 | 11 | 7754087 | 7754100 | 2 | 7  | 14 | TG   | 19 | 3  |
| 111888 | 11 | 7754348 | 7754369 | 2 | 11 | 22 | TG   | 17 | 5  |
| 111889 | 11 | 7754479 | 7754504 | 2 | 13 | 26 | CA   | 16 | 10 |
| 111896 | 11 | 7760308 | 7760353 | 2 | 23 | 46 | AC   | 20 | 12 |
| 111906 | 11 | 7765120 | 7765131 | 2 | 6  | 12 | GT   | 16 | 4  |
| 111908 | 11 | 7772045 | 7772064 | 2 | 10 | 20 | GT   | 21 | 10 |
| 111914 | 11 | 7787396 | 7787416 | 3 | 7  | 21 | AGA  | 26 | 5  |
| 111920 | 11 | 7799705 | 7799722 | 2 | 9  | 18 | TG   | 18 | 4  |
| 111922 | 11 | 7800950 | 7800985 | 2 | 18 | 36 | AC   | 17 | 12 |
| 111933 | 11 | 7816038 | 7816077 | 2 | 20 | 40 | TG   | 7  | 7  |
| 111934 | 11 | 7817815 | 7817838 | 2 | 12 | 24 | TG   | 23 | 13 |
| 111937 | 11 | 7819121 | 7819136 | 2 | 8  | 16 | TG   | 26 | 4  |
| 111942 | 11 | 7822215 | 7822234 | 2 | 10 | 20 | AC   | 14 | 6  |
| 111945 | 11 | 7825438 | 7825461 | 2 | 12 | 24 | TC   | 20 | 7  |
| 111947 | 11 | 7826175 | 7826194 | 4 | 5  | 20 | CCAT | 14 | 5  |
| 111948 | 11 | 7826898 | 7826911 | 2 | 7  | 14 | GT   | 13 | 4  |

|        |    |         |         |   |    |    |      |    |    |
|--------|----|---------|---------|---|----|----|------|----|----|
| 111949 | 11 | 7826913 | 7826924 | 2 | 6  | 12 | TG   | 13 | 3  |
| 111957 | 11 | 7831463 | 7831510 | 2 | 24 | 48 | TG   | 9  | 9  |
| 111958 | 11 | 7831681 | 7831694 | 2 | 7  | 14 | GT   | 25 | 4  |
| 111968 | 11 | 7837746 | 7837769 | 2 | 12 | 24 | CA   | 11 | 7  |
| 111969 | 11 | 7837925 | 7837940 | 2 | 8  | 16 | CA   | 25 | 4  |
| 111974 | 11 | 7839123 | 7839142 | 2 | 10 | 20 | CA   | 7  | 8  |
| 111976 | 11 | 7841286 | 7841305 | 2 | 10 | 20 | CA   | 13 | 5  |
| 111981 | 11 | 7844573 | 7844602 | 2 | 15 | 30 | AC   | 12 | 8  |
| 111983 | 11 | 7848564 | 7848581 | 2 | 9  | 18 | AC   | 20 | 6  |
| 111989 | 11 | 7853391 | 7853404 | 2 | 7  | 14 | CA   | 16 | 9  |
| 111991 | 11 | 7853592 | 7853613 | 2 | 11 | 22 | TC   | 19 | 6  |
| 111994 | 11 | 7859152 | 7859183 | 2 | 16 | 32 | AC   | 15 | 10 |
| 111996 | 11 | 7860602 | 7860628 | 3 | 9  | 27 | GAA  | 18 | 4  |
| 111999 | 11 | 7861689 | 7861712 | 2 | 12 | 24 | CA   | 13 | 6  |
| 112000 | 11 | 7861925 | 7861936 | 2 | 6  | 12 | CG   | 22 | 4  |
| 112001 | 11 | 7862052 | 7862083 | 2 | 16 | 32 | AG   | 18 | 8  |
| 112006 | 11 | 7862799 | 7862828 | 2 | 15 | 30 | AC   | 11 | 9  |
| 112007 | 11 | 7863008 | 7863021 | 2 | 7  | 14 | TG   | 27 | 4  |
| 112008 | 11 | 7866297 | 7866328 | 2 | 16 | 32 | AC   | 17 | 7  |
| 112016 | 11 | 7869867 | 7869884 | 2 | 9  | 18 | TG   | 10 | 9  |
| 112017 | 11 | 7869888 | 7869903 | 2 | 8  | 16 | GT   | 10 | 9  |
| 112019 | 11 | 7870802 | 7870813 | 2 | 6  | 12 | GT   | 21 | 5  |
| 112021 | 11 | 7872934 | 7872955 | 2 | 11 | 22 | CA   | 16 | 6  |
| 112022 | 11 | 7873121 | 7873144 | 2 | 12 | 24 | GT   | 10 | 5  |
| 112023 | 11 | 7873339 | 7873352 | 2 | 7  | 14 | GT   | 24 | 3  |
| 112024 | 11 | 7875467 | 7875486 | 2 | 10 | 20 | CA   | 19 | 8  |
| 112025 | 11 | 7875635 | 7875654 | 2 | 10 | 20 | AC   | 21 | 6  |
| 112026 | 11 | 7875852 | 7875879 | 2 | 14 | 28 | TG   | 14 | 8  |
| 112027 | 11 | 7876010 | 7876023 | 2 | 7  | 14 | GT   | 22 | 8  |
| 112028 | 11 | 7876122 | 7876145 | 2 | 12 | 24 | CA   | 18 | 9  |
| 112032 | 11 | 7883268 | 7883311 | 2 | 22 | 44 | GA   | 8  | 11 |
| 112036 | 11 | 7885339 | 7885365 | 3 | 9  | 27 | CTG  | 10 | 3  |
| 112037 | 11 | 7885554 | 7885589 | 3 | 12 | 36 | AGG  | 7  | 6  |
| 112040 | 11 | 7885930 | 7885945 | 2 | 8  | 16 | CA   | 19 | 10 |
| 112041 | 11 | 7886123 | 7886150 | 2 | 14 | 28 | AC   | 16 | 10 |
| 112044 | 11 | 7886413 | 7886438 | 2 | 13 | 26 | GT   | 10 | 6  |
| 112047 | 11 | 7888095 | 7888122 | 2 | 14 | 28 | TG   | 7  | 7  |
| 112048 | 11 | 7888329 | 7888358 | 3 | 10 | 30 | CTC  | 21 | 7  |
| 112049 | 11 | 7889715 | 7889728 | 2 | 7  | 14 | TA   | 7  | 3  |
| 112055 | 11 | 7894764 | 7894783 | 2 | 10 | 20 | TG   | 22 | 10 |
| 112056 | 11 | 7895267 | 7895278 | 2 | 6  | 12 | TC   | 19 | 6  |
| 112081 | 11 | 7924212 | 7924229 | 3 | 6  | 18 | AAC  | 25 | 3  |
| 112093 | 11 | 7942192 | 7942207 | 2 | 8  | 16 | AT   | 32 | 3  |
| 112102 | 11 | 7958749 | 7958762 | 2 | 7  | 14 | TG   | 20 | 3  |
| 112126 | 11 | 7995644 | 7995671 | 2 | 14 | 28 | AC   | 19 | 9  |
| 112127 | 11 | 7998954 | 7998967 | 2 | 7  | 14 | CA   | 19 | 5  |
| 112128 | 11 | 7999457 | 7999476 | 4 | 5  | 20 | TTTC | 18 | 3  |
| 112129 | 11 | 8000044 | 8000059 | 2 | 8  | 16 | GT   | 15 | 4  |
| 112130 | 11 | 8001700 | 8001721 | 2 | 11 | 22 | AC   | 13 | 10 |
| 112131 | 11 | 8008724 | 8008735 | 2 | 6  | 12 | TG   | 24 | 3  |
| 112133 | 11 | 8009248 | 8009271 | 4 | 6  | 24 | AGAT | 20 | 7  |

|        |    |         |         |   |    |    |      |    |    |
|--------|----|---------|---------|---|----|----|------|----|----|
| 112135 | 11 | 8014020 | 8014037 | 2 | 9  | 18 | GT   | 17 | 3  |
| 112137 | 11 | 8021936 | 8021947 | 2 | 6  | 12 | GT   | 23 | 4  |
| 112140 | 11 | 8034160 | 8034185 | 2 | 13 | 26 | GT   | 13 | 5  |
| 112141 | 11 | 8034293 | 8034306 | 2 | 7  | 14 | GT   | 27 | 4  |
| 112145 | 11 | 8037038 | 8037051 | 2 | 7  | 14 | CA   | 21 | 3  |
| 112151 | 11 | 8066966 | 8066985 | 4 | 5  | 20 | GAGT | 23 | 8  |
| 112153 | 11 | 8067996 | 8068025 | 3 | 10 | 30 | TCC  | 11 | 6  |
| 112155 | 11 | 8071664 | 8071690 | 3 | 9  | 27 | GCT  | 22 | 5  |
| 112156 | 11 | 8072029 | 8072048 | 2 | 10 | 20 | CA   | 22 | 7  |
| 112157 | 11 | 8073272 | 8073298 | 3 | 9  | 27 | CTG  | 21 | 11 |
| 112160 | 11 | 8078112 | 8078131 | 2 | 10 | 20 | AC   | 19 | 7  |
| 112163 | 11 | 8084341 | 8084364 | 2 | 12 | 24 | GT   | 22 | 13 |
| 112165 | 11 | 8085007 | 8085022 | 2 | 8  | 16 | GT   | 14 | 3  |
| 112171 | 11 | 8091713 | 8091728 | 4 | 4  | 16 | GAAA | 29 | 3  |
| 112172 | 11 | 8093031 | 8093046 | 2 | 8  | 16 | TG   | 22 | 3  |
| 112184 | 11 | 8112372 | 8112391 | 2 | 10 | 20 | CA   | 24 | 8  |
| 112185 | 11 | 8117444 | 8117473 | 2 | 15 | 30 | AC   | 7  | 6  |
| 112189 | 11 | 8123531 | 8123556 | 2 | 13 | 26 | CA   | 8  | 6  |
| 112193 | 11 | 8128934 | 8128951 | 2 | 9  | 18 | AC   | 11 | 6  |
| 112207 | 11 | 8139348 | 8139359 | 2 | 6  | 12 | AC   | 20 | 3  |
| 112208 | 11 | 8141137 | 8141148 | 2 | 6  | 12 | AT   | 7  | 4  |
| 112214 | 11 | 8150032 | 8150045 | 2 | 7  | 14 | TG   | 30 | 3  |
| 112221 | 11 | 8154693 | 8154720 | 4 | 7  | 28 | CATC | 20 | 5  |
| 112222 | 11 | 8154766 | 8154797 | 4 | 8  | 32 | CCAT | 20 | 6  |
| 112223 | 11 | 8155744 | 8155759 | 2 | 8  | 16 | CT   | 15 | 6  |
| 112226 | 11 | 8162112 | 8162143 | 2 | 16 | 32 | TG   | 12 | 8  |
| 112227 | 11 | 8165184 | 8165195 | 2 | 6  | 12 | CT   | 23 | 4  |
| 112229 | 11 | 8171972 | 8171993 | 2 | 11 | 22 | GT   | 16 | 4  |
| 112231 | 11 | 8183975 | 8183992 | 2 | 9  | 18 | GA   | 21 | 11 |
| 112232 | 11 | 8194054 | 8194077 | 2 | 12 | 24 | TG   | 21 | 4  |
| 112233 | 11 | 8202970 | 8202983 | 2 | 7  | 14 | GT   | 27 | 5  |
| 112234 | 11 | 8203849 | 8203900 | 2 | 26 | 52 | TG   | 7  | 8  |
| 112251 | 11 | 8233939 | 8233962 | 2 | 12 | 24 | GT   | 18 | 7  |
| 112252 | 11 | 8234369 | 8234384 | 2 | 8  | 16 | AC   | 21 | 4  |
| 112256 | 11 | 8244812 | 8244823 | 2 | 6  | 12 | AC   | 19 | 5  |
| 112260 | 11 | 8246242 | 8246259 | 2 | 9  | 18 | AC   | 21 | 9  |
| 112264 | 11 | 8252264 | 8252303 | 2 | 20 | 40 | TG   | 6  | 7  |
| 112265 | 11 | 8252438 | 8252455 | 2 | 9  | 18 | CA   | 17 | 7  |
| 112267 | 11 | 8252664 | 8252675 | 2 | 6  | 12 | AC   | 26 | 4  |
| 112269 | 11 | 8260200 | 8260217 | 2 | 9  | 18 | TG   | 26 | 3  |
| 112270 | 11 | 8260290 | 8260305 | 2 | 8  | 16 | GT   | 15 | 5  |
| 112286 | 11 | 8299550 | 8299573 | 2 | 12 | 24 | CA   | 9  | 6  |
| 112311 | 11 | 8378714 | 8378743 | 2 | 15 | 30 | TC   | 7  | 7  |
| 112317 | 11 | 8393218 | 8393231 | 2 | 7  | 14 | GT   | 19 | 11 |
| 112318 | 11 | 8393234 | 8393247 | 2 | 7  | 14 | GT   | 16 | 8  |
| 112328 | 11 | 8415288 | 8415303 | 4 | 4  | 16 | TATC | 20 | 7  |
| 112332 | 11 | 8426812 | 8426837 | 2 | 13 | 26 | CA   | 12 | 8  |
| 112333 | 11 | 8427740 | 8427757 | 3 | 6  | 18 | ATC  | 24 | 3  |
| 112338 | 11 | 8454280 | 8454325 | 2 | 23 | 46 | GT   | 6  | 10 |
| 112344 | 11 | 8468084 | 8468113 | 2 | 15 | 30 | CA   | 19 | 7  |
| 112345 | 11 | 8468354 | 8468397 | 2 | 22 | 44 | CA   | 7  | 8  |

|        |    |         |         |   |    |    |      |    |    |
|--------|----|---------|---------|---|----|----|------|----|----|
| 112347 | 11 | 8470956 | 8470967 | 2 | 6  | 12 | CA   | 10 | 4  |
| 112355 | 11 | 8483164 | 8483183 | 4 | 5  | 20 | GACA | 30 | 3  |
| 112357 | 11 | 8485104 | 8485129 | 2 | 13 | 26 | TG   | 21 | 12 |
| 112358 | 11 | 8486919 | 8486930 | 2 | 6  | 12 | CA   | 25 | 10 |
| 112362 | 11 | 8498729 | 8498748 | 2 | 10 | 20 | TG   | 22 | 5  |
| 112363 | 11 | 8499010 | 8499041 | 2 | 16 | 32 | GT   | 8  | 11 |
| 112374 | 11 | 8521131 | 8521150 | 4 | 5  | 20 | TGGA | 24 | 3  |
| 112376 | 11 | 8527364 | 8527389 | 2 | 13 | 26 | TG   | 17 | 10 |
| 112378 | 11 | 8546084 | 8546097 | 2 | 7  | 14 | CA   | 22 | 8  |
| 112380 | 11 | 8549834 | 8549863 | 2 | 15 | 30 | TG   | 10 | 8  |
| 112382 | 11 | 8561697 | 8561722 | 2 | 13 | 26 | AC   | 20 | 4  |
| 112385 | 11 | 8579679 | 8579694 | 2 | 8  | 16 | AC   | 16 | 4  |
| 112395 | 11 | 8589671 | 8589684 | 2 | 7  | 14 | AC   | 27 | 9  |
| 112396 | 11 | 8589918 | 8589951 | 2 | 17 | 34 | AC   | 26 | 8  |
| 112404 | 11 | 8607264 | 8607287 | 2 | 12 | 24 | GT   | 14 | 5  |
| 112407 | 11 | 8610880 | 8610901 | 2 | 11 | 22 | GT   | 10 | 6  |
| 112412 | 11 | 8623051 | 8623080 | 3 | 10 | 30 | TTG  | 31 | 6  |
| 112416 | 11 | 8630697 | 8630708 | 2 | 6  | 12 | GT   | 25 | 4  |
| 112418 | 11 | 8645420 | 8645437 | 2 | 9  | 18 | CT   | 21 | 4  |
| 112423 | 11 | 8671612 | 8671647 | 2 | 18 | 36 | AC   | 9  | 11 |
| 112425 | 11 | 8678125 | 8678136 | 2 | 6  | 12 | TC   | 22 | 7  |
| 112435 | 11 | 8695159 | 8695186 | 2 | 14 | 28 | AC   | 15 | 4  |
| 112446 | 11 | 8724789 | 8724808 | 2 | 10 | 20 | AC   | 21 | 5  |
| 112448 | 11 | 8729048 | 8729069 | 2 | 11 | 22 | GT   | 13 | 7  |
| 112452 | 11 | 8739783 | 8739798 | 2 | 8  | 16 | CA   | 23 | 3  |
| 112454 | 11 | 8740390 | 8740407 | 2 | 9  | 18 | GA   | 10 | 4  |
| 112480 | 11 | 8788852 | 8788871 | 2 | 10 | 20 | TG   | 17 | 4  |
| 112481 | 11 | 8789229 | 8789250 | 2 | 11 | 22 | CA   | 21 | 6  |
| 112489 | 11 | 8803615 | 8803632 | 3 | 6  | 18 | GGT  | 9  | 3  |
| 112490 | 11 | 8803673 | 8803690 | 3 | 6  | 18 | GTG  | 20 | 4  |
| 112494 | 11 | 8808026 | 8808053 | 2 | 14 | 28 | AC   | 9  | 6  |
| 112498 | 11 | 8810782 | 8810796 | 3 | 5  | 15 | GGT  | 21 | 4  |
| 112499 | 11 | 8810991 | 8811024 | 2 | 17 | 34 | AC   | 16 | 10 |
| 112500 | 11 | 8811201 | 8811226 | 2 | 13 | 26 | TG   | 8  | 7  |
| 112501 | 11 | 8816554 | 8816565 | 2 | 6  | 12 | CT   | 34 | 3  |
| 112502 | 11 | 8816951 | 8816986 | 2 | 18 | 36 | CA   | 7  | 8  |
| 112505 | 11 | 8817447 | 8817468 | 2 | 11 | 22 | AC   | 14 | 3  |
| 112506 | 11 | 8817583 | 8817600 | 3 | 6  | 18 | GAG  | 34 | 3  |
| 112507 | 11 | 8817860 | 8817879 | 2 | 10 | 20 | AC   | 15 | 14 |
| 112509 | 11 | 8819102 | 8819115 | 2 | 7  | 14 | AC   | 20 | 6  |
| 112510 | 11 | 8819660 | 8819675 | 4 | 4  | 16 | GCAC | 31 | 4  |
| 112511 | 11 | 8819704 | 8819719 | 2 | 8  | 16 | GA   | 20 | 3  |
| 112512 | 11 | 8819720 | 8819731 | 2 | 6  | 12 | AG   | 21 | 3  |
| 112514 | 11 | 8820189 | 8820200 | 2 | 6  | 12 | AG   | 28 | 3  |
| 112515 | 11 | 8820660 | 8820680 | 3 | 7  | 21 | GAG  | 19 | 6  |
| 112528 | 11 | 8841264 | 8841295 | 2 | 16 | 32 | GT   | 20 | 9  |
| 112533 | 11 | 8848093 | 8848110 | 2 | 9  | 18 | CT   | 14 | 5  |
| 112535 | 11 | 8852892 | 8852911 | 2 | 10 | 20 | GT   | 20 | 7  |
| 112542 | 11 | 8863766 | 8863777 | 2 | 6  | 12 | CA   | 32 | 5  |
| 112552 | 11 | 8881631 | 8881650 | 2 | 10 | 20 | GT   | 19 | 4  |
| 112558 | 11 | 8888864 | 8888878 | 3 | 5  | 15 | GTT  | 17 | 4  |

|        |    |         |         |   |    |    |      |    |    |
|--------|----|---------|---------|---|----|----|------|----|----|
| 112559 | 11 | 8890278 | 8890309 | 2 | 16 | 32 | CA   | 6  | 8  |
| 112561 | 11 | 8890626 | 8890655 | 2 | 15 | 30 | GT   | 7  | 5  |
| 112562 | 11 | 8890858 | 8890877 | 2 | 10 | 20 | GT   | 24 | 8  |
| 112563 | 11 | 8891022 | 8891049 | 2 | 14 | 28 | CA   | 20 | 12 |
| 112564 | 11 | 8891178 | 8891203 | 2 | 13 | 26 | TG   | 12 | 8  |
| 112566 | 11 | 8891275 | 8891296 | 2 | 11 | 22 | TG   | 12 | 9  |
| 112568 | 11 | 8894130 | 8894163 | 2 | 17 | 34 | CA   | 18 | 19 |
| 112569 | 11 | 8894597 | 8894626 | 2 | 15 | 30 | CT   | 11 | 8  |
| 112574 | 11 | 8902121 | 8902132 | 2 | 6  | 12 | CA   | 27 | 3  |
| 112577 | 11 | 8902593 | 8902606 | 2 | 7  | 14 | GT   | 20 | 7  |
| 112578 | 11 | 8902687 | 8902700 | 2 | 7  | 14 | CA   | 21 | 8  |
| 112579 | 11 | 8902702 | 8902715 | 2 | 7  | 14 | AC   | 16 | 8  |
| 112582 | 11 | 8904593 | 8904620 | 2 | 14 | 28 | GT   | 24 | 9  |
| 112586 | 11 | 8907651 | 8907670 | 2 | 10 | 20 | TG   | 25 | 9  |
| 112588 | 11 | 8908528 | 8908551 | 2 | 12 | 24 | AC   | 17 | 11 |
| 112598 | 11 | 8924917 | 8924932 | 2 | 8  | 16 | GT   | 25 | 6  |
| 112600 | 11 | 8927636 | 8927649 | 2 | 7  | 14 | TG   | 28 | 3  |
| 112612 | 11 | 8938443 | 8938456 | 2 | 7  | 14 | TG   | 22 | 7  |
| 112613 | 11 | 8938607 | 8938620 | 2 | 7  | 14 | GT   | 22 | 6  |
| 112622 | 11 | 8951276 | 8951303 | 2 | 14 | 28 | AC   | 6  | 9  |
| 112625 | 11 | 8952060 | 8952071 | 2 | 6  | 12 | TG   | 25 | 4  |
| 112626 | 11 | 8952253 | 8952278 | 2 | 13 | 26 | TG   | 14 | 8  |
| 112628 | 11 | 8953352 | 8953371 | 2 | 10 | 20 | AC   | 11 | 10 |
| 112632 | 11 | 8953868 | 8953879 | 2 | 6  | 12 | TC   | 13 | 5  |
| 112633 | 11 | 8953882 | 8953895 | 2 | 7  | 14 | TC   | 13 | 7  |
| 112634 | 11 | 8953975 | 8953994 | 2 | 10 | 20 | CA   | 23 | 5  |
| 112635 | 11 | 8955915 | 8955940 | 2 | 13 | 26 | TG   | 16 | 3  |
| 112639 | 11 | 8956423 | 8956438 | 2 | 8  | 16 | TG   | 15 | 4  |
| 112640 | 11 | 8956583 | 8956632 | 2 | 25 | 50 | CA   | 11 | 10 |
| 112641 | 11 | 8956718 | 8956739 | 2 | 11 | 22 | GT   | 13 | 11 |
| 112642 | 11 | 8956861 | 8956896 | 2 | 18 | 36 | GT   | 22 | 15 |
| 112655 | 11 | 8970568 | 8970581 | 2 | 7  | 14 | GA   | 16 | 3  |
| 112656 | 11 | 8971490 | 8971521 | 2 | 16 | 32 | CA   | 11 | 4  |
| 112662 | 11 | 8978828 | 8978849 | 2 | 11 | 22 | TG   | 18 | 4  |
| 112663 | 11 | 8980611 | 8980642 | 4 | 8  | 32 | TGGA | 25 | 8  |
| 112666 | 11 | 8987159 | 8987190 | 4 | 8  | 32 | GGTT | 33 | 5  |
| 112667 | 11 | 8987705 | 8987718 | 2 | 7  | 14 | TG   | 21 | 3  |
| 112670 | 11 | 8988489 | 8988502 | 2 | 7  | 14 | AG   | 25 | 4  |
| 112671 | 11 | 8988869 | 8988884 | 4 | 4  | 16 | GCCT | 30 | 5  |
| 112672 | 11 | 8990480 | 8990491 | 2 | 6  | 12 | TA   | 7  | 4  |
| 112675 | 11 | 8994766 | 8994785 | 4 | 5  | 20 | ATGG | 27 | 7  |
| 112681 | 11 | 9003693 | 9003740 | 2 | 24 | 48 | AC   | 7  | 9  |
| 112693 | 11 | 9018920 | 9018965 | 2 | 23 | 46 | AC   | 9  | 11 |
| 112694 | 11 | 9019114 | 9019129 | 2 | 8  | 16 | AC   | 20 | 4  |
| 112697 | 11 | 9022174 | 9022225 | 2 | 26 | 52 | AC   | 19 | 10 |
| 112698 | 11 | 9022416 | 9022441 | 2 | 13 | 26 | CA   | 12 | 9  |
| 112699 | 11 | 9022674 | 9022685 | 2 | 6  | 12 | CA   | 27 | 5  |
| 112705 | 11 | 9030576 | 9030599 | 2 | 12 | 24 | AC   | 7  | 5  |
| 112712 | 11 | 9039050 | 9039071 | 2 | 11 | 22 | TG   | 12 | 7  |
| 112720 | 11 | 9060654 | 9060671 | 2 | 9  | 18 | CA   | 30 | 5  |
| 112723 | 11 | 9064518 | 9064531 | 2 | 7  | 14 | GT   | 25 | 5  |

|        |    |         |         |   |    |    |      |    |    |
|--------|----|---------|---------|---|----|----|------|----|----|
| 112725 | 11 | 9069483 | 9069494 | 2 | 6  | 12 | GT   | 13 | 8  |
| 112734 | 11 | 9075656 | 9075670 | 3 | 5  | 15 | TGG  | 23 | 3  |
| 112735 | 11 | 9079448 | 9079467 | 2 | 10 | 20 | GT   | 21 | 5  |
| 112739 | 11 | 9089044 | 9089077 | 2 | 17 | 34 | CA   | 9  | 8  |
| 112740 | 11 | 9089352 | 9089387 | 2 | 18 | 36 | CA   | 8  | 8  |
| 112750 | 11 | 9120420 | 9120431 | 2 | 6  | 12 | GT   | 23 | 3  |
| 112760 | 11 | 9156069 | 9156086 | 2 | 9  | 18 | CA   | 14 | 9  |
| 112762 | 11 | 9160375 | 9160386 | 2 | 6  | 12 | CA   | 18 | 5  |
| 112765 | 11 | 9175219 | 9175232 | 2 | 7  | 14 | CA   | 35 | 3  |
| 112766 | 11 | 9181867 | 9181887 | 3 | 7  | 21 | TTG  | 33 | 4  |
| 112767 | 11 | 9183918 | 9183933 | 4 | 4  | 16 | CCCT | 13 | 3  |
| 112768 | 11 | 9184660 | 9184683 | 3 | 8  | 24 | TTC  | 18 | 6  |
| 112772 | 11 | 9199350 | 9199363 | 2 | 7  | 14 | CA   | 17 | 5  |
| 112777 | 11 | 9201025 | 9201040 | 4 | 4  | 16 | TATT | 17 | 3  |
| 112778 | 11 | 9205980 | 9206006 | 3 | 9  | 27 | CCT  | 22 | 9  |
| 112779 | 11 | 9206079 | 9206102 | 3 | 8  | 24 | CCT  | 21 | 6  |
| 112781 | 11 | 9207484 | 9207523 | 2 | 20 | 40 | AC   | 12 | 9  |
| 112787 | 11 | 9215173 | 9215186 | 2 | 7  | 14 | GT   | 23 | 10 |
| 112790 | 11 | 9218084 | 9218097 | 2 | 7  | 14 | GA   | 20 | 5  |
| 112795 | 11 | 9225446 | 9225459 | 2 | 7  | 14 | AT   | 9  | 9  |
| 112799 | 11 | 9232190 | 9232219 | 2 | 15 | 30 | TG   | 15 | 6  |
| 112800 | 11 | 9232329 | 9232346 | 2 | 9  | 18 | CA   | 19 | 10 |
| 112801 | 11 | 9232612 | 9232635 | 3 | 8  | 24 | GGA  | 24 | 6  |
| 112802 | 11 | 9232779 | 9232804 | 2 | 13 | 26 | TG   | 6  | 6  |
| 112806 | 11 | 9233238 | 9233252 | 3 | 5  | 15 | GCC  | 23 | 5  |
| 112811 | 11 | 9234308 | 9234322 | 3 | 5  | 15 | GCT  | 23 | 3  |
| 112817 | 11 | 9243179 | 9243196 | 2 | 9  | 18 | TC   | 15 | 3  |
| 112819 | 11 | 9245119 | 9245138 | 2 | 10 | 20 | TG   | 24 | 4  |
| 112823 | 11 | 9260351 | 9260365 | 3 | 5  | 15 | TGG  | 14 | 4  |
| 112824 | 11 | 9265068 | 9265079 | 2 | 6  | 12 | CT   | 22 | 4  |
| 112828 | 11 | 9273884 | 9273898 | 3 | 5  | 15 | CCT  | 25 | 6  |
| 112829 | 11 | 9277458 | 9277469 | 2 | 6  | 12 | AC   | 26 | 4  |
| 112832 | 11 | 9279761 | 9279784 | 2 | 12 | 24 | AC   | 18 | 10 |
| 112837 | 11 | 9286293 | 9286312 | 2 | 10 | 20 | TC   | 26 | 3  |
| 112845 | 11 | 9293765 | 9293788 | 4 | 6  | 24 | AAAT | 21 | 4  |
| 112847 | 11 | 9302637 | 9302664 | 2 | 14 | 28 | GT   | 8  | 10 |
| 112862 | 11 | 9318992 | 9319013 | 2 | 11 | 22 | CA   | 18 | 6  |
| 112865 | 11 | 9320993 | 9321006 | 2 | 7  | 14 | GT   | 19 | 4  |
| 112883 | 11 | 9332559 | 9332570 | 2 | 6  | 12 | TG   | 31 | 5  |
| 112884 | 11 | 9332679 | 9332692 | 2 | 7  | 14 | AG   | 15 | 3  |
| 112887 | 11 | 9342724 | 9342747 | 2 | 12 | 24 | TG   | 28 | 9  |
| 112889 | 11 | 9346148 | 9346159 | 2 | 6  | 12 | GA   | 23 | 3  |
| 112895 | 11 | 9381879 | 9381898 | 2 | 10 | 20 | GT   | 9  | 6  |
| 112896 | 11 | 9385344 | 9385355 | 2 | 6  | 12 | CT   | 33 | 3  |
| 112900 | 11 | 9390299 | 9390338 | 4 | 10 | 40 | TGGA | 33 | 6  |
| 112901 | 11 | 9390602 | 9390619 | 2 | 9  | 18 | TG   | 16 | 5  |
| 112904 | 11 | 9394548 | 9394567 | 2 | 10 | 20 | CA   | 21 | 13 |
| 112905 | 11 | 9395066 | 9395093 | 2 | 14 | 28 | CA   | 18 | 15 |
| 112906 | 11 | 9395196 | 9395211 | 2 | 8  | 16 | GT   | 26 | 9  |
| 112907 | 11 | 9402259 | 9402286 | 4 | 7  | 28 | AATC | 24 | 9  |
| 112917 | 11 | 9431124 | 9431151 | 4 | 7  | 28 | CTAT | 14 | 8  |



|        |    |         |         |   |    |    |      |    |    |
|--------|----|---------|---------|---|----|----|------|----|----|
| 112919 | 11 | 9436954 | 9436980 | 3 | 9  | 27 | GAT  | 27 | 6  |
| 112920 | 11 | 9437849 | 9437864 | 2 | 8  | 16 | GT   | 16 | 7  |
| 112921 | 11 | 9446736 | 9446751 | 4 | 4  | 16 | AGCT | 19 | 4  |
| 112924 | 11 | 9449725 | 9449748 | 2 | 12 | 24 | GT   | 15 | 5  |
| 112925 | 11 | 9449937 | 9449956 | 2 | 10 | 20 | CT   | 20 | 9  |
| 112926 | 11 | 9450333 | 9450359 | 3 | 9  | 27 | GAG  | 20 | 5  |
| 112927 | 11 | 9450646 | 9450681 | 2 | 18 | 36 | GT   | 9  | 8  |
| 112935 | 11 | 9452371 | 9452390 | 4 | 5  | 20 | AAAT | 18 | 3  |
| 112936 | 11 | 9452672 | 9452687 | 2 | 8  | 16 | TG   | 22 | 9  |
| 112937 | 11 | 9453021 | 9453046 | 2 | 13 | 26 | TG   | 20 | 15 |
| 112938 | 11 | 9453147 | 9453160 | 2 | 7  | 14 | CA   | 25 | 5  |
| 112942 | 11 | 9465252 | 9465279 | 2 | 14 | 28 | TG   | 10 | 6  |
| 112943 | 11 | 9465362 | 9465387 | 2 | 13 | 26 | GT   | 17 | 12 |
| 112944 | 11 | 9465452 | 9465471 | 2 | 10 | 20 | CA   | 11 | 9  |
| 112945 | 11 | 9465533 | 9465566 | 2 | 17 | 34 | AC   | 13 | 9  |
| 112965 | 11 | 9516539 | 9516562 | 2 | 12 | 24 | TG   | 9  | 9  |
| 112969 | 11 | 9534960 | 9534971 | 2 | 6  | 12 | CA   | 9  | 3  |
| 112975 | 11 | 9540279 | 9540290 | 2 | 6  | 12 | AC   | 15 | 3  |
| 112976 | 11 | 9540457 | 9540472 | 4 | 4  | 16 | TTTC | 14 | 5  |
| 112982 | 11 | 9548096 | 9548110 | 3 | 5  | 15 | TTA  | 22 | 8  |
| 112986 | 11 | 9553445 | 9553470 | 2 | 13 | 26 | CA   | 9  | 9  |
| 112994 | 11 | 9571619 | 9571654 | 2 | 18 | 36 | GT   | 7  | 12 |
| 112996 | 11 | 9581753 | 9581768 | 4 | 4  | 16 | AGAA | 33 | 3  |
| 112998 | 11 | 9588433 | 9588448 | 2 | 8  | 16 | GT   | 20 | 4  |
| 113020 | 11 | 9621911 | 9621942 | 2 | 16 | 32 | AC   | 17 | 13 |
| 113022 | 11 | 9623567 | 9623606 | 2 | 20 | 40 | TG   | 6  | 9  |
| 113023 | 11 | 9626874 | 9626900 | 3 | 9  | 27 | GGA  | 17 | 3  |
| 113024 | 11 | 9628973 | 9629000 | 2 | 14 | 28 | GT   | 18 | 7  |
| 113037 | 11 | 9646348 | 9646369 | 2 | 11 | 22 | AC   | 12 | 9  |
| 113038 | 11 | 9647697 | 9647712 | 2 | 8  | 16 | TA   | 10 | 4  |
| 113039 | 11 | 9652287 | 9652312 | 2 | 13 | 26 | AC   | 20 | 9  |
| 113040 | 11 | 9669464 | 9669481 | 2 | 9  | 18 | GT   | 13 | 10 |
| 113042 | 11 | 9672489 | 9672503 | 3 | 5  | 15 | ATT  | 10 | 6  |
| 113045 | 11 | 9678328 | 9678357 | 3 | 10 | 30 | GAA  | 23 | 3  |
| 113046 | 11 | 9678403 | 9678417 | 3 | 5  | 15 | CTT  | 29 | 5  |
| 113049 | 11 | 9688800 | 9688821 | 2 | 11 | 22 | AC   | 16 | 8  |
| 113050 | 11 | 9690190 | 9690201 | 2 | 6  | 12 | CA   | 31 | 5  |
| 113052 | 11 | 9697976 | 9697987 | 2 | 6  | 12 | CA   | 31 | 6  |
| 113054 | 11 | 9699145 | 9699156 | 2 | 6  | 12 | CT   | 24 | 3  |
| 113055 | 11 | 9699546 | 9699569 | 2 | 12 | 24 | TG   | 32 | 4  |
| 113058 | 11 | 9705814 | 9705825 | 2 | 6  | 12 | AC   | 28 | 4  |
| 113067 | 11 | 9750779 | 9750790 | 2 | 6  | 12 | AT   | 28 | 3  |
| 113071 | 11 | 9767157 | 9767182 | 2 | 13 | 26 | TG   | 10 | 9  |
| 113076 | 11 | 9774544 | 9774573 | 2 | 15 | 30 | AC   | 17 | 12 |
| 113077 | 11 | 9779159 | 9779170 | 2 | 6  | 12 | AC   | 20 | 5  |
| 113078 | 11 | 9787681 | 9787704 | 2 | 12 | 24 | GT   | 17 | 8  |
| 113079 | 11 | 9788050 | 9788065 | 4 | 4  | 16 | AAAT | 29 | 5  |
| 113082 | 11 | 9794868 | 9794883 | 2 | 8  | 16 | AT   | 12 | 5  |
| 113089 | 11 | 9808855 | 9808876 | 2 | 11 | 22 | AC   | 18 | 9  |
| 113092 | 11 | 9810213 | 9810224 | 2 | 6  | 12 | GA   | 19 | 4  |
| 113098 | 11 | 9817419 | 9817434 | 4 | 4  | 16 | ATTT | 14 | 4  |

|        |    |          |          |   |    |    |      |    |    |
|--------|----|----------|----------|---|----|----|------|----|----|
| 113107 | 11 | 9839359  | 9839374  | 2 | 8  | 16 | CA   | 27 | 3  |
| 113109 | 11 | 9839673  | 9839690  | 2 | 9  | 18 | AG   | 18 | 8  |
| 113110 | 11 | 9840660  | 9840685  | 2 | 13 | 26 | AC   | 14 | 8  |
| 113111 | 11 | 9841830  | 9841856  | 3 | 9  | 27 | GAG  | 17 | 6  |
| 113114 | 11 | 9845463  | 9845484  | 2 | 11 | 22 | AC   | 18 | 11 |
| 113116 | 11 | 9850416  | 9850451  | 3 | 12 | 36 | GGA  | 17 | 10 |
| 113119 | 11 | 9858150  | 9858201  | 2 | 26 | 52 | CA   | 7  | 12 |
| 113124 | 11 | 9863513  | 9863528  | 2 | 8  | 16 | TG   | 11 | 10 |
| 113132 | 11 | 9902138  | 9902149  | 2 | 6  | 12 | CT   | 26 | 6  |
| 113133 | 11 | 9903018  | 9903035  | 2 | 9  | 18 | GT   | 18 | 6  |
| 113135 | 11 | 9903312  | 9903329  | 2 | 9  | 18 | TG   | 23 | 3  |
| 113160 | 11 | 9971338  | 9971351  | 2 | 7  | 14 | CA   | 25 | 3  |
| 113168 | 11 | 9993326  | 9993337  | 2 | 6  | 12 | AT   | 12 | 9  |
| 113172 | 11 | 10023946 | 10023966 | 3 | 7  | 21 | AAC  | 14 | 5  |
| 113174 | 11 | 10032377 | 10032408 | 2 | 16 | 32 | GT   | 15 | 10 |
| 113176 | 11 | 10037071 | 10037084 | 2 | 7  | 14 | TA   | 14 | 3  |
| 113177 | 11 | 10038538 | 10038551 | 2 | 7  | 14 | GT   | 19 | 4  |
| 113178 | 11 | 10044197 | 10044210 | 2 | 7  | 14 | CT   | 21 | 4  |
| 113206 | 11 | 10101635 | 10101652 | 3 | 6  | 18 | AGA  | 28 | 3  |
| 113216 | 11 | 10112482 | 10112501 | 4 | 5  | 20 | GTGC | 29 | 6  |
| 113217 | 11 | 10112742 | 10112769 | 2 | 14 | 28 | TG   | 10 | 8  |
| 113218 | 11 | 10115879 | 10115914 | 4 | 9  | 36 | ACAA | 18 | 6  |
| 113225 | 11 | 10130486 | 10130503 | 2 | 9  | 18 | TG   | 13 | 6  |
| 113226 | 11 | 10130504 | 10130517 | 2 | 7  | 14 | TC   | 13 | 5  |
| 113231 | 11 | 10141283 | 10141297 | 3 | 5  | 15 | CCA  | 6  | 5  |
| 113236 | 11 | 10157083 | 10157098 | 4 | 4  | 16 | GCGA | 21 | 6  |
| 113248 | 11 | 10177691 | 10177702 | 2 | 6  | 12 | CA   | 6  | 5  |
| 113249 | 11 | 10177704 | 10177723 | 2 | 10 | 20 | AC   | 10 | 7  |
| 113252 | 11 | 10179183 | 10179210 | 2 | 14 | 28 | TG   | 9  | 5  |
| 113256 | 11 | 10192010 | 10192021 | 2 | 6  | 12 | AC   | 29 | 3  |
| 113261 | 11 | 10205341 | 10205360 | 2 | 10 | 20 | TG   | 15 | 6  |
| 113276 | 11 | 10246999 | 10247022 | 3 | 8  | 24 | GCA  | 17 | 5  |
| 113278 | 11 | 10248696 | 10248709 | 2 | 7  | 14 | GT   | 31 | 3  |
| 113280 | 11 | 10253669 | 10253708 | 2 | 20 | 40 | TG   | 13 | 10 |
| 113287 | 11 | 10267672 | 10267685 | 2 | 7  | 14 | TC   | 8  | 4  |
| 113288 | 11 | 10267688 | 10267699 | 2 | 6  | 12 | TC   | 15 | 4  |
| 113295 | 11 | 10272984 | 10273023 | 2 | 20 | 40 | TG   | 10 | 11 |
| 113297 | 11 | 10275174 | 10275211 | 2 | 19 | 38 | TG   | 6  | 6  |
| 113298 | 11 | 10276420 | 10276437 | 2 | 9  | 18 | CA   | 23 | 8  |
| 113300 | 11 | 10277228 | 10277245 | 2 | 9  | 18 | GT   | 28 | 8  |
| 113301 | 11 | 10278713 | 10278732 | 2 | 10 | 20 | GA   | 24 | 5  |
| 113305 | 11 | 10290466 | 10290501 | 4 | 9  | 36 | GATT | 29 | 9  |
| 113307 | 11 | 10292223 | 10292240 | 3 | 6  | 18 | CTC  | 25 | 5  |
| 113309 | 11 | 10292521 | 10292546 | 2 | 13 | 26 | CA   | 16 | 11 |
| 113312 | 11 | 10300211 | 10300226 | 2 | 8  | 16 | TG   | 31 | 3  |
| 113313 | 11 | 10301299 | 10301312 | 2 | 7  | 14 | AT   | 19 | 4  |
| 113317 | 11 | 10308529 | 10308540 | 2 | 6  | 12 | CA   | 22 | 4  |
| 113318 | 11 | 10309224 | 10309238 | 3 | 5  | 15 | GAA  | 14 | 5  |
| 113320 | 11 | 10311590 | 10311623 | 2 | 17 | 34 | CA   | 11 | 9  |
| 113324 | 11 | 10313751 | 10313766 | 2 | 8  | 16 | TG   | 20 | 5  |
| 113331 | 11 | 10328685 | 10328702 | 2 | 9  | 18 | AC   | 26 | 10 |

|        |    |          |          |   |    |    |      |    |    |
|--------|----|----------|----------|---|----|----|------|----|----|
| 113333 | 11 | 10336229 | 10336240 | 2 | 6  | 12 | TG   | 21 | 7  |
| 113334 | 11 | 10336242 | 10336259 | 2 | 9  | 18 | GT   | 17 | 8  |
| 113342 | 11 | 10357517 | 10357556 | 4 | 10 | 40 | GATA | 13 | 14 |
| 113343 | 11 | 10358268 | 10358287 | 4 | 5  | 20 | AAAG | 22 | 3  |
| 113348 | 11 | 10363830 | 10363851 | 2 | 11 | 22 | CA   | 20 | 12 |
| 113349 | 11 | 10366253 | 10366278 | 2 | 13 | 26 | GT   | 14 | 8  |
| 113361 | 11 | 10411239 | 10411254 | 2 | 8  | 16 | AC   | 23 | 4  |
| 113363 | 11 | 10420271 | 10420282 | 2 | 6  | 12 | CA   | 26 | 4  |
| 113365 | 11 | 10422558 | 10422587 | 2 | 15 | 30 | TG   | 15 | 11 |
| 113370 | 11 | 10433436 | 10433449 | 2 | 7  | 14 | TG   | 16 | 5  |
| 113371 | 11 | 10433664 | 10433727 | 2 | 32 | 64 | CA   | 9  | 12 |
| 113372 | 11 | 10434080 | 10434105 | 2 | 13 | 26 | TG   | 10 | 13 |
| 113374 | 11 | 10441021 | 10441040 | 2 | 10 | 20 | GT   | 21 | 6  |
| 113380 | 11 | 10451523 | 10451548 | 2 | 13 | 26 | CA   | 22 | 10 |
| 113390 | 11 | 10460998 | 10461009 | 2 | 6  | 12 | CA   | 25 | 10 |
| 113393 | 11 | 10463597 | 10463617 | 3 | 7  | 21 | TTG  | 23 | 4  |
| 113402 | 11 | 10490784 | 10490799 | 2 | 8  | 16 | CA   | 18 | 4  |
| 113404 | 11 | 10490899 | 10490930 | 2 | 16 | 32 | CA   | 18 | 12 |
| 113409 | 11 | 10503112 | 10503125 | 2 | 7  | 14 | CA   | 22 | 8  |
| 113410 | 11 | 10503741 | 10503760 | 4 | 5  | 20 | AATG | 27 | 4  |
| 113417 | 11 | 10534748 | 10534787 | 4 | 10 | 40 | GAAA | 16 | 13 |
| 113418 | 11 | 10535143 | 10535182 | 2 | 20 | 40 | CA   | 9  | 6  |
| 113420 | 11 | 10538385 | 10538402 | 2 | 9  | 18 | TG   | 16 | 5  |
| 113421 | 11 | 10538595 | 10538614 | 2 | 10 | 20 | TG   | 15 | 11 |
| 113423 | 11 | 10541646 | 10541667 | 2 | 11 | 22 | AC   | 14 | 8  |
| 113425 | 11 | 10544363 | 10544398 | 2 | 18 | 36 | CA   | 7  | 10 |
| 113427 | 11 | 10550505 | 10550528 | 2 | 12 | 24 | GT   | 18 | 14 |
| 113435 | 11 | 10574538 | 10574552 | 3 | 5  | 15 | AAT  | 12 | 5  |
| 113437 | 11 | 10578843 | 10578864 | 2 | 11 | 22 | TG   | 28 | 12 |
| 113448 | 11 | 10613613 | 10613642 | 2 | 15 | 30 | CA   | 20 | 10 |
| 113455 | 11 | 10638473 | 10638492 | 4 | 5  | 20 | AAAC | 24 | 4  |
| 113456 | 11 | 10639626 | 10639661 | 3 | 12 | 36 | CAA  | 22 | 8  |
| 113459 | 11 | 10648635 | 10648652 | 3 | 6  | 18 | CCA  | 15 | 5  |
| 113463 | 11 | 10660512 | 10660539 | 2 | 14 | 28 | GT   | 17 | 8  |
| 113466 | 11 | 10665184 | 10665213 | 2 | 15 | 30 | CA   | 7  | 6  |
| 113471 | 11 | 10695591 | 10695620 | 2 | 15 | 30 | TG   | 16 | 16 |
| 113472 | 11 | 10696018 | 10696031 | 2 | 7  | 14 | AG   | 21 | 4  |
| 113474 | 11 | 10711500 | 10711517 | 2 | 9  | 18 | TG   | 18 | 7  |
| 113476 | 11 | 10715300 | 10715311 | 2 | 6  | 12 | AC   | 26 | 4  |
| 113478 | 11 | 10715461 | 10715478 | 2 | 9  | 18 | AC   | 15 | 9  |
| 113479 | 11 | 10720178 | 10720191 | 2 | 7  | 14 | TG   | 13 | 3  |
| 113490 | 11 | 10747274 | 10747287 | 2 | 7  | 14 | CA   | 24 | 3  |
| 113491 | 11 | 10747367 | 10747378 | 2 | 6  | 12 | CA   | 19 | 4  |
| 113492 | 11 | 10751470 | 10751489 | 2 | 10 | 20 | TG   | 15 | 6  |
| 113504 | 11 | 10778231 | 10778246 | 2 | 8  | 16 | AC   | 29 | 4  |
| 113512 | 11 | 10800123 | 10800140 | 2 | 9  | 18 | CA   | 22 | 6  |
| 113514 | 11 | 10802131 | 10802148 | 2 | 9  | 18 | AC   | 25 | 5  |
| 113522 | 11 | 10837028 | 10837039 | 2 | 6  | 12 | GA   | 27 | 5  |
| 113523 | 11 | 10838445 | 10838458 | 2 | 7  | 14 | CA   | 24 | 4  |
| 113524 | 11 | 10838460 | 10838471 | 2 | 6  | 12 | AC   | 21 | 3  |
| 113533 | 11 | 10851293 | 10851310 | 2 | 9  | 18 | TG   | 18 | 3  |

|        |    |          |          |   |    |    |      |    |    |
|--------|----|----------|----------|---|----|----|------|----|----|
| 113546 | 11 | 10863364 | 10863375 | 2 | 6  | 12 | CT   | 13 | 5  |
| 113547 | 11 | 10863377 | 10863390 | 2 | 7  | 14 | TG   | 9  | 7  |
| 113548 | 11 | 10865014 | 10865045 | 4 | 8  | 32 | GACA | 22 | 5  |
| 113549 | 11 | 10865924 | 10865937 | 2 | 7  | 14 | GT   | 26 | 6  |
| 113551 | 11 | 10867999 | 10868024 | 2 | 13 | 26 | CA   | 10 | 10 |
| 113556 | 11 | 10870376 | 10870397 | 2 | 11 | 22 | GT   | 14 | 6  |
| 113558 | 11 | 10870619 | 10870634 | 4 | 4  | 16 | AAAC | 16 | 3  |
| 113559 | 11 | 10870663 | 10870688 | 2 | 13 | 26 | AG   | 6  | 4  |
| 113562 | 11 | 10881585 | 10881606 | 2 | 11 | 22 | TG   | 23 | 5  |
| 113563 | 11 | 10883451 | 10883488 | 2 | 19 | 38 | AC   | 10 | 9  |
| 113564 | 11 | 10885950 | 10885961 | 2 | 6  | 12 | CA   | 20 | 5  |
| 113566 | 11 | 10888632 | 10888657 | 2 | 13 | 26 | AC   | 26 | 8  |
| 113567 | 11 | 10888802 | 10888823 | 2 | 11 | 22 | GT   | 20 | 7  |
| 113571 | 11 | 10892081 | 10892106 | 2 | 13 | 26 | TG   | 26 | 11 |
| 113575 | 11 | 10892600 | 10892619 | 2 | 10 | 20 | TG   | 22 | 13 |
| 113578 | 11 | 10894344 | 10894361 | 3 | 6  | 18 | GGA  | 16 | 3  |
| 113579 | 11 | 10895757 | 10895792 | 2 | 18 | 36 | CA   | 14 | 10 |
| 113581 | 11 | 10896648 | 10896671 | 2 | 12 | 24 | AC   | 26 | 6  |
| 113582 | 11 | 10896779 | 10896808 | 2 | 15 | 30 | CA   | 16 | 16 |
| 113583 | 11 | 10896860 | 10896871 | 2 | 6  | 12 | GT   | 21 | 10 |
| 113587 | 11 | 10900325 | 10900358 | 2 | 17 | 34 | AC   | 6  | 9  |
| 113589 | 11 | 10901900 | 10901923 | 2 | 12 | 24 | AC   | 15 | 16 |
| 113590 | 11 | 10905278 | 10905291 | 2 | 7  | 14 | CT   | 25 | 5  |
| 113595 | 11 | 10914046 | 10914063 | 2 | 9  | 18 | CA   | 7  | 7  |
| 113596 | 11 | 10914199 | 10914214 | 2 | 8  | 16 | GT   | 16 | 5  |
| 113604 | 11 | 10920520 | 10920531 | 2 | 6  | 12 | CT   | 18 | 8  |
| 113610 | 11 | 10924255 | 10924270 | 2 | 8  | 16 | GT   | 18 | 7  |
| 113612 | 11 | 10925422 | 10925439 | 2 | 9  | 18 | CA   | 24 | 7  |
| 113615 | 11 | 10930751 | 10930780 | 2 | 15 | 30 | TG   | 6  | 5  |
| 113617 | 11 | 10931034 | 10931085 | 2 | 26 | 52 | GT   | 7  | 8  |
| 113620 | 11 | 10932504 | 10932517 | 2 | 7  | 14 | AC   | 28 | 6  |
| 113621 | 11 | 10932692 | 10932709 | 2 | 9  | 18 | AC   | 19 | 8  |
| 113625 | 11 | 10935549 | 10935566 | 2 | 9  | 18 | GA   | 18 | 5  |
| 113626 | 11 | 10935976 | 10935989 | 2 | 7  | 14 | TC   | 16 | 3  |
| 113629 | 11 | 10936119 | 10936136 | 2 | 9  | 18 | GT   | 8  | 5  |
| 113631 | 11 | 10937233 | 10937282 | 2 | 25 | 50 | AC   | 10 | 9  |
| 113637 | 11 | 10939484 | 10939515 | 2 | 16 | 32 | CA   | 8  | 10 |
| 113640 | 11 | 10940018 | 10940037 | 2 | 10 | 20 | AC   | 17 | 7  |
| 113642 | 11 | 10942389 | 10942408 | 2 | 10 | 20 | TG   | 21 | 10 |
| 113643 | 11 | 10942753 | 10942788 | 2 | 18 | 36 | GT   | 6  | 11 |
| 113650 | 11 | 10949519 | 10949548 | 2 | 15 | 30 | CT   | 13 | 10 |
| 113654 | 11 | 10954506 | 10954519 | 2 | 7  | 14 | TG   | 21 | 3  |
| 113658 | 11 | 10966696 | 10966729 | 2 | 17 | 34 | GT   | 13 | 7  |
| 113660 | 11 | 10966892 | 10966903 | 2 | 6  | 12 | TC   | 31 | 3  |
| 113661 | 11 | 10968919 | 10968942 | 4 | 6  | 24 | GAAT | 24 | 4  |
| 113663 | 11 | 10972898 | 10972913 | 2 | 8  | 16 | GT   | 11 | 10 |
| 113664 | 11 | 10972914 | 10972933 | 4 | 5  | 20 | GCGT | 16 | 12 |
| 113665 | 11 | 10974414 | 10974425 | 2 | 6  | 12 | GT   | 24 | 4  |
| 113673 | 11 | 10984076 | 10984087 | 2 | 6  | 12 | TG   | 24 | 4  |
| 113674 | 11 | 10985539 | 10985553 | 3 | 5  | 15 | TCA  | 18 | 9  |
| 113678 | 11 | 10988599 | 10988620 | 2 | 11 | 22 | AC   | 18 | 10 |

|        |    |          |          |   |    |    |      |    |    |
|--------|----|----------|----------|---|----|----|------|----|----|
| 113681 | 11 | 10992269 | 10992282 | 2 | 7  | 14 | AC   | 27 | 4  |
| 113682 | 11 | 10992285 | 10992296 | 2 | 6  | 12 | AC   | 26 | 4  |
| 113686 | 11 | 11000776 | 11000787 | 2 | 6  | 12 | AC   | 24 | 5  |
| 113688 | 11 | 11004979 | 11005036 | 2 | 29 | 58 | AC   | 6  | 9  |
| 113689 | 11 | 11006596 | 11006613 | 2 | 9  | 18 | GT   | 25 | 6  |
| 113698 | 11 | 11044539 | 11044553 | 3 | 5  | 15 | AAC  | 21 | 3  |
| 113699 | 11 | 11045297 | 11045324 | 2 | 14 | 28 | TG   | 6  | 8  |
| 113701 | 11 | 11047993 | 11048010 | 3 | 6  | 18 | ATG  | 27 | 4  |
| 113703 | 11 | 11050634 | 11050645 | 2 | 6  | 12 | CA   | 26 | 3  |
| 113704 | 11 | 11051175 | 11051208 | 2 | 17 | 34 | GT   | 12 | 9  |
| 113705 | 11 | 11052162 | 11052175 | 2 | 7  | 14 | TG   | 33 | 6  |
| 113706 | 11 | 11055030 | 11055047 | 2 | 9  | 18 | GT   | 7  | 9  |
| 113710 | 11 | 11057056 | 11057079 | 2 | 12 | 24 | TG   | 11 | 9  |
| 113711 | 11 | 11057745 | 11057760 | 2 | 8  | 16 | TG   | 22 | 7  |
| 113721 | 11 | 11064441 | 11064472 | 2 | 16 | 32 | GA   | 9  | 12 |
| 113722 | 11 | 11065468 | 11065479 | 2 | 6  | 12 | GT   | 27 | 6  |
| 113724 | 11 | 11065699 | 11065716 | 2 | 9  | 18 | CA   | 17 | 3  |
| 113728 | 11 | 11067616 | 11067635 | 2 | 10 | 20 | AG   | 17 | 6  |
| 113730 | 11 | 11068350 | 11068367 | 2 | 9  | 18 | TG   | 24 | 10 |
| 113731 | 11 | 11070877 | 11070896 | 2 | 10 | 20 | AG   | 25 | 5  |
| 113736 | 11 | 11074242 | 11074253 | 2 | 6  | 12 | GT   | 24 | 3  |
| 113738 | 11 | 11074789 | 11074802 | 2 | 7  | 14 | CA   | 10 | 3  |
| 113743 | 11 | 11080053 | 11080070 | 3 | 6  | 18 | CTG  | 32 | 3  |
| 113746 | 11 | 11082289 | 11082302 | 2 | 7  | 14 | TG   | 20 | 5  |
| 113747 | 11 | 11086706 | 11086731 | 2 | 13 | 26 | TG   | 11 | 7  |
| 113748 | 11 | 11088182 | 11088229 | 3 | 16 | 48 | GCT  | 17 | 13 |
| 113755 | 11 | 11095480 | 11095493 | 2 | 7  | 14 | CA   | 19 | 5  |
| 113757 | 11 | 11101007 | 11101040 | 2 | 17 | 34 | CA   | 11 | 10 |
| 113758 | 11 | 11101124 | 11101145 | 2 | 11 | 22 | CA   | 9  | 3  |
| 113761 | 11 | 11101356 | 11101377 | 2 | 11 | 22 | AC   | 13 | 9  |
| 113765 | 11 | 11106083 | 11106102 | 2 | 10 | 20 | GT   | 7  | 5  |
| 113769 | 11 | 11107538 | 11107563 | 2 | 13 | 26 | CA   | 16 | 7  |
| 113772 | 11 | 11114127 | 11114150 | 2 | 12 | 24 | CA   | 22 | 9  |
| 113774 | 11 | 11119169 | 11119184 | 2 | 8  | 16 | TC   | 29 | 3  |
| 113776 | 11 | 11121155 | 11121176 | 2 | 11 | 22 | AC   | 21 | 14 |
| 113778 | 11 | 11121496 | 11121533 | 2 | 19 | 38 | TC   | 8  | 6  |
| 113781 | 11 | 11126726 | 11126739 | 2 | 7  | 14 | TG   | 14 | 8  |
| 113784 | 11 | 11131644 | 11131671 | 2 | 14 | 28 | TG   | 8  | 8  |
| 113785 | 11 | 11131768 | 11131793 | 2 | 13 | 26 | AC   | 23 | 7  |
| 113792 | 11 | 11134861 | 11134898 | 2 | 19 | 38 | TG   | 12 | 13 |
| 113793 | 11 | 11138002 | 11138025 | 3 | 8  | 24 | GCA  | 17 | 5  |
| 113794 | 11 | 11139876 | 11139891 | 2 | 8  | 16 | TC   | 10 | 3  |
| 113805 | 11 | 11150884 | 11150903 | 2 | 10 | 20 | AT   | 8  | 9  |
| 113806 | 11 | 11151131 | 11151148 | 2 | 9  | 18 | TC   | 21 | 3  |
| 113809 | 11 | 11155110 | 11155131 | 2 | 11 | 22 | AC   | 22 | 6  |
| 113812 | 11 | 11155281 | 11155298 | 2 | 9  | 18 | CA   | 21 | 6  |
| 113815 | 11 | 11156351 | 11156374 | 3 | 8  | 24 | CAT  | 13 | 5  |
| 113818 | 11 | 11158301 | 11158315 | 3 | 5  | 15 | AAT  | 8  | 6  |
| 113822 | 11 | 11173195 | 11173214 | 4 | 5  | 20 | TTAT | 14 | 5  |
| 113823 | 11 | 11173845 | 11173860 | 2 | 8  | 16 | GT   | 27 | 6  |
| 113826 | 11 | 11181220 | 11181233 | 2 | 7  | 14 | GT   | 25 | 10 |

|        |    |          |          |   |    |    |      |    |    |
|--------|----|----------|----------|---|----|----|------|----|----|
| 113827 | 11 | 11184633 | 11184658 | 2 | 13 | 26 | GT   | 11 | 12 |
| 113828 | 11 | 11184816 | 11184863 | 2 | 24 | 48 | CT   | 9  | 4  |
| 113830 | 11 | 11195005 | 11195024 | 2 | 10 | 20 | TG   | 23 | 6  |
| 113833 | 11 | 11196969 | 11196998 | 2 | 15 | 30 | AC   | 6  | 6  |
| 113834 | 11 | 11197091 | 11197102 | 2 | 6  | 12 | TG   | 19 | 6  |
| 113836 | 11 | 11199990 | 11200003 | 2 | 7  | 14 | GT   | 23 | 5  |
| 113837 | 11 | 11200137 | 11200152 | 4 | 4  | 16 | GTGC | 23 | 15 |
| 113838 | 11 | 11200153 | 11200170 | 2 | 9  | 18 | GT   | 25 | 14 |
| 113839 | 11 | 11200305 | 11200318 | 2 | 7  | 14 | AC   | 32 | 3  |
| 113840 | 11 | 11201729 | 11201744 | 2 | 8  | 16 | TG   | 28 | 4  |
| 113845 | 11 | 11213304 | 11213321 | 3 | 6  | 18 | TCC  | 9  | 3  |
| 113846 | 11 | 11213418 | 11213443 | 2 | 13 | 26 | TC   | 26 | 10 |
| 113847 | 11 | 11213537 | 11213550 | 2 | 7  | 14 | CA   | 22 | 4  |
| 113848 | 11 | 11213668 | 11213687 | 2 | 10 | 20 | TG   | 10 | 7  |
| 113849 | 11 | 11214651 | 11214668 | 2 | 9  | 18 | AC   | 20 | 4  |
| 113850 | 11 | 11214964 | 11214995 | 2 | 16 | 32 | TG   | 7  | 8  |
| 113853 | 11 | 11220137 | 11220154 | 2 | 9  | 18 | GA   | 18 | 8  |
| 113861 | 11 | 11229138 | 11229163 | 2 | 13 | 26 | GT   | 11 | 7  |
| 113865 | 11 | 11229468 | 11229483 | 2 | 8  | 16 | TG   | 12 | 7  |
| 113868 | 11 | 11235925 | 11235950 | 2 | 13 | 26 | AC   | 13 | 5  |
| 113869 | 11 | 11236075 | 11236090 | 2 | 8  | 16 | AC   | 14 | 6  |
| 113870 | 11 | 11236312 | 11236325 | 2 | 7  | 14 | AC   | 23 | 4  |
| 113872 | 11 | 11238475 | 11238486 | 2 | 6  | 12 | AC   | 26 | 5  |
| 113874 | 11 | 11247776 | 11247796 | 3 | 7  | 21 | TGA  | 24 | 3  |
| 113877 | 11 | 11252083 | 11252096 | 2 | 7  | 14 | AC   | 29 | 3  |
| 113884 | 11 | 11259836 | 11259853 | 2 | 9  | 18 | CA   | 18 | 4  |
| 113889 | 11 | 11285246 | 11285283 | 2 | 19 | 38 | TG   | 8  | 12 |
| 113891 | 11 | 11285844 | 11285859 | 4 | 4  | 16 | CCTG | 32 | 3  |
| 113892 | 11 | 11286019 | 11286032 | 2 | 7  | 14 | TC   | 20 | 3  |
| 113893 | 11 | 11287986 | 11288013 | 2 | 14 | 28 | TG   | 14 | 9  |
| 113894 | 11 | 11291275 | 11291302 | 2 | 14 | 28 | AG   | 14 | 14 |
| 113898 | 11 | 11294212 | 11294223 | 2 | 6  | 12 | GT   | 26 | 3  |
| 113903 | 11 | 11301912 | 11301931 | 2 | 10 | 20 | GT   | 25 | 7  |
| 113904 | 11 | 11303216 | 11303227 | 2 | 6  | 12 | TG   | 31 | 4  |
| 113905 | 11 | 11304930 | 11304973 | 2 | 22 | 44 | AC   | 14 | 7  |
| 113907 | 11 | 11306356 | 11306381 | 2 | 13 | 26 | GT   | 9  | 10 |
| 113908 | 11 | 11306494 | 11306525 | 2 | 16 | 32 | GT   | 11 | 6  |
| 113910 | 11 | 11307061 | 11307078 | 2 | 9  | 18 | TG   | 15 | 4  |
| 113914 | 11 | 11313775 | 11313812 | 2 | 19 | 38 | AC   | 16 | 10 |
| 113919 | 11 | 11323018 | 11323035 | 2 | 9  | 18 | GT   | 26 | 7  |
| 113921 | 11 | 11325972 | 11325999 | 2 | 14 | 28 | CA   | 13 | 12 |
| 113923 | 11 | 11326341 | 11326360 | 2 | 10 | 20 | TG   | 22 | 6  |
| 113926 | 11 | 11334790 | 11334827 | 2 | 19 | 38 | GT   | 7  | 12 |
| 113927 | 11 | 11336852 | 11336873 | 2 | 11 | 22 | TG   | 20 | 6  |
| 113933 | 11 | 11344709 | 11344732 | 2 | 12 | 24 | CA   | 6  | 6  |
| 113938 | 11 | 11351794 | 11351807 | 2 | 7  | 14 | GT   | 25 | 8  |
| 113939 | 11 | 11357297 | 11357332 | 4 | 9  | 36 | AGAT | 17 | 13 |
| 113940 | 11 | 11359734 | 11359751 | 3 | 6  | 18 | GAG  | 22 | 8  |
| 113942 | 11 | 11364304 | 11364323 | 2 | 10 | 20 | GT   | 22 | 5  |
| 113944 | 11 | 11382518 | 11382547 | 3 | 10 | 30 | ATA  | 10 | 8  |
| 113945 | 11 | 11383187 | 11383213 | 3 | 9  | 27 | CTG  | 24 | 7  |

|        |    |          |          |   |    |    |      |    |    |
|--------|----|----------|----------|---|----|----|------|----|----|
| 113946 | 11 | 11383398 | 11383433 | 4 | 9  | 36 | TTGA | 25 | 7  |
| 113949 | 11 | 11392258 | 11392281 | 3 | 8  | 24 | GAT  | 29 | 8  |
| 113950 | 11 | 11393962 | 11393973 | 2 | 6  | 12 | AG   | 24 | 5  |
| 113951 | 11 | 11394003 | 11394018 | 2 | 8  | 16 | AC   | 10 | 8  |
| 113953 | 11 | 11394704 | 11394715 | 2 | 6  | 12 | TG   | 26 | 4  |
| 113954 | 11 | 11394833 | 11394858 | 2 | 13 | 26 | TG   | 9  | 9  |
| 113956 | 11 | 11395328 | 11395349 | 2 | 11 | 22 | TG   | 16 | 8  |
| 113960 | 11 | 11401628 | 11401653 | 2 | 13 | 26 | GT   | 11 | 6  |
| 113962 | 11 | 11407838 | 11407855 | 2 | 9  | 18 | CA   | 21 | 8  |
| 113963 | 11 | 11407879 | 11407912 | 2 | 17 | 34 | GT   | 9  | 13 |
| 113974 | 11 | 11422813 | 11422836 | 2 | 12 | 24 | AC   | 13 | 8  |
| 113975 | 11 | 11423059 | 11423092 | 2 | 17 | 34 | TG   | 6  | 6  |
| 113979 | 11 | 11425201 | 11425234 | 2 | 17 | 34 | GA   | 9  | 9  |
| 113983 | 11 | 11425635 | 11425656 | 2 | 11 | 22 | GT   | 6  | 7  |
| 113985 | 11 | 11427648 | 11427699 | 2 | 26 | 52 | TG   | 9  | 6  |
| 113987 | 11 | 11428805 | 11428816 | 2 | 6  | 12 | CA   | 30 | 3  |
| 113990 | 11 | 11431142 | 11431165 | 2 | 12 | 24 | AC   | 14 | 6  |
| 113991 | 11 | 11434424 | 11434451 | 2 | 14 | 28 | AC   | 17 | 10 |
| 113992 | 11 | 11434975 | 11434994 | 2 | 10 | 20 | TG   | 18 | 9  |
| 113994 | 11 | 11440978 | 11440997 | 4 | 5  | 20 | TCCA | 29 | 3  |
| 113995 | 11 | 11441894 | 11441920 | 3 | 9  | 27 | TCA  | 21 | 5  |
| 113999 | 11 | 11444927 | 11444940 | 2 | 7  | 14 | AC   | 10 | 3  |
| 114001 | 11 | 11444970 | 11444997 | 2 | 14 | 28 | CT   | 18 | 10 |
| 114002 | 11 | 11445148 | 11445175 | 2 | 14 | 28 | CA   | 8  | 8  |
| 114003 | 11 | 11445343 | 11445366 | 3 | 8  | 24 | TCC  | 9  | 3  |
| 114005 | 11 | 11445756 | 11445782 | 3 | 9  | 27 | CTT  | 8  | 3  |
| 114008 | 11 | 11447784 | 11447795 | 2 | 6  | 12 | GT   | 22 | 6  |
| 114010 | 11 | 11448234 | 11448247 | 2 | 7  | 14 | AC   | 17 | 3  |
| 114014 | 11 | 11459259 | 11459270 | 2 | 6  | 12 | TG   | 10 | 4  |
| 114015 | 11 | 11461390 | 11461401 | 2 | 6  | 12 | GT   | 29 | 3  |
| 114016 | 11 | 11470819 | 11470838 | 2 | 10 | 20 | GT   | 24 | 13 |
| 114017 | 11 | 11471135 | 11471154 | 2 | 10 | 20 | TG   | 16 | 11 |
| 114021 | 11 | 11479590 | 11479603 | 2 | 7  | 14 | CA   | 19 | 5  |
| 114023 | 11 | 11485709 | 11485738 | 3 | 10 | 30 | GTA  | 20 | 15 |
| 114029 | 11 | 11504223 | 11504238 | 2 | 8  | 16 | AC   | 24 | 6  |
| 114032 | 11 | 11509917 | 11509930 | 2 | 7  | 14 | AC   | 24 | 5  |
| 114037 | 11 | 11518858 | 11518877 | 2 | 10 | 20 | AC   | 20 | 9  |
| 114041 | 11 | 11523550 | 11523561 | 2 | 6  | 12 | TG   | 32 | 4  |
| 114044 | 11 | 11528026 | 11528051 | 2 | 13 | 26 | CA   | 17 | 8  |
| 114053 | 11 | 11539551 | 11539566 | 2 | 8  | 16 | TC   | 10 | 5  |
| 114054 | 11 | 11539672 | 11539707 | 2 | 18 | 36 | CA   | 11 | 9  |
| 114055 | 11 | 11540436 | 11540459 | 2 | 12 | 24 | GA   | 18 | 5  |
| 114056 | 11 | 11543038 | 11543051 | 2 | 7  | 14 | GT   | 31 | 3  |
| 114057 | 11 | 11543081 | 11543094 | 2 | 7  | 14 | TG   | 22 | 3  |
| 114058 | 11 | 11543201 | 11543226 | 2 | 13 | 26 | AC   | 14 | 10 |
| 114059 | 11 | 11543604 | 11543639 | 2 | 18 | 36 | TG   | 11 | 7  |
| 114061 | 11 | 11543727 | 11543738 | 2 | 6  | 12 | CA   | 15 | 4  |
| 114062 | 11 | 11543984 | 11544027 | 2 | 22 | 44 | AC   | 10 | 10 |
| 114065 | 11 | 11547329 | 11547356 | 2 | 14 | 28 | GT   | 10 | 7  |
| 114089 | 11 | 11561826 | 11561843 | 2 | 9  | 18 | TG   | 23 | 7  |
| 114091 | 11 | 11564211 | 11564232 | 2 | 11 | 22 | TG   | 24 | 11 |

|        |    |          |          |   |    |    |      |    |    |
|--------|----|----------|----------|---|----|----|------|----|----|
| 114094 | 11 | 11564884 | 11564919 | 2 | 18 | 36 | TG   | 16 | 12 |
| 114096 | 11 | 11574865 | 11574885 | 3 | 7  | 21 | GCA  | 19 | 4  |
| 114097 | 11 | 11574925 | 11574945 | 3 | 7  | 21 | GCT  | 23 | 6  |
| 114098 | 11 | 11575193 | 11575218 | 2 | 13 | 26 | TG   | 23 | 10 |
| 114099 | 11 | 11575334 | 11575359 | 2 | 13 | 26 | GT   | 17 | 8  |
| 114100 | 11 | 11582536 | 11582579 | 2 | 22 | 44 | TG   | 20 | 9  |
| 114101 | 11 | 11582610 | 11582631 | 2 | 11 | 22 | TG   | 14 | 5  |
| 114102 | 11 | 11582972 | 11583003 | 2 | 16 | 32 | GT   | 15 | 6  |
| 114103 | 11 | 11584872 | 11584895 | 2 | 12 | 24 | TG   | 18 | 14 |
| 114105 | 11 | 11588155 | 11588174 | 2 | 10 | 20 | GT   | 21 | 10 |
| 114108 | 11 | 11594822 | 11594833 | 2 | 6  | 12 | CA   | 28 | 4  |
| 114110 | 11 | 11595872 | 11595887 | 4 | 4  | 16 | GGAG | 18 | 3  |
| 114111 | 11 | 11595983 | 11596002 | 2 | 10 | 20 | GT   | 17 | 5  |
| 114112 | 11 | 11596125 | 11596148 | 2 | 12 | 24 | TG   | 13 | 11 |
| 114113 | 11 | 11597093 | 11597113 | 3 | 7  | 21 | GGA  | 21 | 3  |
| 114115 | 11 | 11599036 | 11599051 | 2 | 8  | 16 | TG   | 22 | 7  |
| 114116 | 11 | 11599169 | 11599202 | 2 | 17 | 34 | TG   | 9  | 10 |
| 114142 | 11 | 11619285 | 11619300 | 2 | 8  | 16 | TG   | 24 | 3  |
| 114144 | 11 | 11621469 | 11621488 | 2 | 10 | 20 | TC   | 11 | 8  |
| 114145 | 11 | 11621646 | 11621661 | 2 | 8  | 16 | AC   | 31 | 4  |
| 114147 | 11 | 11626900 | 11626925 | 2 | 13 | 26 | AC   | 13 | 9  |
| 114149 | 11 | 11631469 | 11631480 | 2 | 6  | 12 | AG   | 24 | 3  |
| 114150 | 11 | 11631527 | 11631550 | 2 | 12 | 24 | GT   | 25 | 5  |
| 114154 | 11 | 11632383 | 11632398 | 4 | 4  | 16 | ATGA | 22 | 3  |
| 114160 | 11 | 11633945 | 11633958 | 2 | 7  | 14 | GT   | 10 | 3  |
| 114165 | 11 | 11638361 | 11638378 | 2 | 9  | 18 | TC   | 16 | 5  |
| 114166 | 11 | 11639598 | 11639613 | 2 | 8  | 16 | TG   | 27 | 4  |
| 114167 | 11 | 11641340 | 11641355 | 2 | 8  | 16 | TG   | 25 | 3  |
| 114179 | 11 | 11649567 | 11649584 | 3 | 6  | 18 | AGC  | 24 | 8  |
| 114184 | 11 | 11650502 | 11650517 | 2 | 8  | 16 | TG   | 17 | 5  |
| 114195 | 11 | 11661091 | 11661112 | 2 | 11 | 22 | CA   | 17 | 12 |
| 114196 | 11 | 11661184 | 11661197 | 2 | 7  | 14 | TC   | 15 | 3  |
| 114197 | 11 | 11661225 | 11661236 | 2 | 6  | 12 | AC   | 16 | 3  |
| 114198 | 11 | 11661362 | 11661375 | 2 | 7  | 14 | CA   | 23 | 3  |
| 114200 | 11 | 11663634 | 11663649 | 2 | 8  | 16 | AT   | 12 | 4  |
| 114202 | 11 | 11667038 | 11667053 | 2 | 8  | 16 | GT   | 24 | 8  |
| 114203 | 11 | 11667201 | 11667236 | 2 | 18 | 36 | CA   | 6  | 9  |
| 114209 | 11 | 11676537 | 11676562 | 2 | 13 | 26 | TG   | 12 | 11 |
| 114221 | 11 | 11701861 | 11701886 | 2 | 13 | 26 | CA   | 14 | 9  |
| 114222 | 11 | 11705562 | 11705585 | 2 | 12 | 24 | CT   | 16 | 7  |
| 114223 | 11 | 11705808 | 11705839 | 2 | 16 | 32 | TG   | 19 | 15 |
| 114225 | 11 | 11706353 | 11706380 | 2 | 14 | 28 | TG   | 8  | 11 |
| 114229 | 11 | 11707583 | 11707600 | 2 | 9  | 18 | AC   | 23 | 7  |
| 114232 | 11 | 11708517 | 11708552 | 2 | 18 | 36 | TG   | 9  | 13 |
| 114233 | 11 | 11708740 | 11708751 | 2 | 6  | 12 | CA   | 30 | 3  |
| 114237 | 11 | 11711119 | 11711154 | 3 | 12 | 36 | TCC  | 10 | 4  |
| 114238 | 11 | 11714374 | 11714391 | 2 | 9  | 18 | CA   | 11 | 10 |
| 114239 | 11 | 11716838 | 11716869 | 2 | 16 | 32 | CA   | 16 | 12 |
| 114243 | 11 | 11721456 | 11721489 | 2 | 17 | 34 | AC   | 20 | 15 |
| 114247 | 11 | 11731846 | 11731857 | 2 | 6  | 12 | AC   | 25 | 4  |
| 114248 | 11 | 11734073 | 11734086 | 2 | 7  | 14 | AT   | 20 | 11 |



|        |    |          |          |   |    |    |      |    |    |
|--------|----|----------|----------|---|----|----|------|----|----|
| 114251 | 11 | 11737153 | 11737186 | 2 | 17 | 34 | AC   | 8  | 4  |
| 114252 | 11 | 11737334 | 11737349 | 2 | 8  | 16 | TG   | 29 | 3  |
| 114259 | 11 | 11741071 | 11741100 | 2 | 15 | 30 | GT   | 18 | 5  |
| 114261 | 11 | 11744103 | 11744146 | 2 | 22 | 44 | AC   | 7  | 6  |
| 114264 | 11 | 11748133 | 11748154 | 2 | 11 | 22 | TG   | 16 | 5  |
| 114269 | 11 | 11755884 | 11755909 | 2 | 13 | 26 | AC   | 7  | 3  |
| 114270 | 11 | 11755986 | 11755999 | 2 | 7  | 14 | CT   | 15 | 4  |
| 114271 | 11 | 11756000 | 11756011 | 2 | 6  | 12 | CA   | 17 | 3  |
| 114273 | 11 | 11756119 | 11756142 | 2 | 12 | 24 | GA   | 14 | 7  |
| 114274 | 11 | 11757253 | 11757274 | 2 | 11 | 22 | AC   | 13 | 6  |
| 114281 | 11 | 11759980 | 11759993 | 2 | 7  | 14 | CA   | 24 | 3  |
| 114283 | 11 | 11761957 | 11761974 | 2 | 9  | 18 | TG   | 26 | 10 |
| 114288 | 11 | 11778841 | 11778852 | 2 | 6  | 12 | TG   | 25 | 3  |
| 114289 | 11 | 11784331 | 11784346 | 2 | 8  | 16 | TG   | 13 | 9  |
| 114292 | 11 | 11784631 | 11784658 | 2 | 14 | 28 | GT   | 8  | 6  |
| 114294 | 11 | 11785558 | 11785605 | 2 | 24 | 48 | TG   | 8  | 8  |
| 114296 | 11 | 11789831 | 11789850 | 2 | 10 | 20 | TC   | 20 | 4  |
| 114297 | 11 | 11794731 | 11794762 | 4 | 8  | 32 | TCTG | 24 | 7  |
| 114298 | 11 | 11795259 | 11795274 | 4 | 4  | 16 | AGAC | 14 | 3  |
| 114304 | 11 | 11804562 | 11804573 | 2 | 6  | 12 | AG   | 18 | 4  |
| 114305 | 11 | 11804634 | 11804661 | 2 | 14 | 28 | CA   | 16 | 8  |
| 114307 | 11 | 11804845 | 11804880 | 2 | 18 | 36 | TG   | 6  | 8  |
| 114308 | 11 | 11804965 | 11804992 | 2 | 14 | 28 | TG   | 18 | 3  |
| 114309 | 11 | 11805550 | 11805593 | 2 | 22 | 44 | TG   | 6  | 7  |
| 114324 | 11 | 11819887 | 11819912 | 2 | 13 | 26 | CA   | 26 | 6  |
| 114325 | 11 | 11821179 | 11821210 | 2 | 16 | 32 | TG   | 11 | 8  |
| 114326 | 11 | 11821238 | 11821255 | 2 | 9  | 18 | GT   | 10 | 4  |
| 114327 | 11 | 11821358 | 11821397 | 2 | 20 | 40 | TG   | 8  | 6  |
| 114338 | 11 | 11840214 | 11840229 | 2 | 8  | 16 | TG   | 16 | 5  |
| 114340 | 11 | 11844266 | 11844279 | 2 | 7  | 14 | AC   | 28 | 4  |
| 114341 | 11 | 11845095 | 11845110 | 2 | 8  | 16 | CA   | 25 | 4  |
| 114342 | 11 | 11845257 | 11845271 | 3 | 5  | 15 | GTG  | 33 | 3  |
| 114346 | 11 | 11854994 | 11855015 | 2 | 11 | 22 | AC   | 21 | 5  |
| 114349 | 11 | 11857636 | 11857653 | 2 | 9  | 18 | TG   | 22 | 9  |
| 114361 | 11 | 11869524 | 11869539 | 4 | 4  | 16 | CTGT | 27 | 4  |
| 114363 | 11 | 11871657 | 11871676 | 2 | 10 | 20 | AC   | 15 | 7  |
| 114364 | 11 | 11872693 | 11872714 | 2 | 11 | 22 | TG   | 18 | 6  |
| 114372 | 11 | 11881173 | 11881198 | 2 | 13 | 26 | CA   | 18 | 12 |
| 114373 | 11 | 11881485 | 11881508 | 4 | 6  | 24 | CAGA | 22 | 5  |
| 114374 | 11 | 11883133 | 11883146 | 2 | 7  | 14 | AC   | 22 | 4  |
| 114376 | 11 | 11883495 | 11883508 | 2 | 7  | 14 | TG   | 33 | 3  |
| 114377 | 11 | 11883654 | 11883665 | 2 | 6  | 12 | CA   | 24 | 3  |
| 114378 | 11 | 11886206 | 11886225 | 2 | 10 | 20 | AC   | 17 | 5  |
| 114381 | 11 | 11889899 | 11889932 | 2 | 17 | 34 | AC   | 6  | 8  |
| 114382 | 11 | 11890412 | 11890432 | 3 | 7  | 21 | GAG  | 27 | 4  |
| 114383 | 11 | 11890569 | 11890580 | 2 | 6  | 12 | AC   | 28 | 13 |
| 114389 | 11 | 11898374 | 11898403 | 2 | 15 | 30 | AC   | 20 | 6  |
| 114390 | 11 | 11899077 | 11899100 | 2 | 12 | 24 | AC   | 21 | 8  |
| 114391 | 11 | 11899159 | 11899184 | 2 | 13 | 26 | GT   | 14 | 9  |
| 114395 | 11 | 11902877 | 11902902 | 2 | 13 | 26 | CA   | 15 | 9  |
| 114396 | 11 | 11903231 | 11903258 | 2 | 14 | 28 | TG   | 21 | 9  |

|        |    |          |          |   |    |    |      |    |    |
|--------|----|----------|----------|---|----|----|------|----|----|
| 114409 | 11 | 11905217 | 11905238 | 2 | 11 | 22 | GT   | 20 | 6  |
| 114410 | 11 | 11906713 | 11906736 | 2 | 12 | 24 | CA   | 20 | 7  |
| 114419 | 11 | 11913382 | 11913399 | 2 | 9  | 18 | GA   | 14 | 4  |
| 114420 | 11 | 11914098 | 11914123 | 2 | 13 | 26 | CA   | 10 | 12 |
| 114424 | 11 | 11917725 | 11917756 | 2 | 16 | 32 | AC   | 19 | 7  |
| 114425 | 11 | 11917840 | 11917855 | 2 | 8  | 16 | CA   | 15 | 10 |
| 114426 | 11 | 11918051 | 11918070 | 2 | 10 | 20 | TG   | 20 | 3  |
| 114427 | 11 | 11918290 | 11918334 | 3 | 15 | 45 | TTC  | 17 | 8  |
| 114429 | 11 | 11918988 | 11919038 | 3 | 17 | 51 | GAA  | 10 | 7  |
| 114431 | 11 | 11919360 | 11919385 | 2 | 13 | 26 | AC   | 11 | 5  |
| 114434 | 11 | 11919907 | 11919940 | 2 | 17 | 34 | TG   | 18 | 9  |
| 114437 | 11 | 11922154 | 11922169 | 2 | 8  | 16 | GT   | 20 | 3  |
| 114440 | 11 | 11924746 | 11924775 | 2 | 15 | 30 | AC   | 16 | 6  |
| 114446 | 11 | 11930352 | 11930363 | 2 | 6  | 12 | CA   | 24 | 3  |
| 114447 | 11 | 11930565 | 11930584 | 2 | 10 | 20 | CA   | 14 | 10 |
| 114448 | 11 | 11930794 | 11930819 | 2 | 13 | 26 | AC   | 11 | 5  |
| 114450 | 11 | 11931056 | 11931083 | 2 | 14 | 28 | CA   | 19 | 8  |
| 114454 | 11 | 11932951 | 11932970 | 2 | 10 | 20 | AC   | 16 | 7  |
| 114456 | 11 | 11933248 | 11933289 | 2 | 21 | 42 | TG   | 7  | 8  |
| 114457 | 11 | 11933645 | 11933662 | 2 | 9  | 18 | CA   | 19 | 7  |
| 114458 | 11 | 11935140 | 11935157 | 2 | 9  | 18 | AC   | 21 | 8  |
| 114461 | 11 | 11941568 | 11941583 | 4 | 4  | 16 | GACA | 30 | 3  |
| 114487 | 11 | 11945991 | 11946006 | 2 | 8  | 16 | GT   | 15 | 6  |
| 114489 | 11 | 11947194 | 11947213 | 2 | 10 | 20 | CA   | 21 | 8  |
| 114497 | 11 | 11960185 | 11960205 | 3 | 7  | 21 | TGA  | 25 | 4  |
| 114498 | 11 | 11960429 | 11960458 | 2 | 15 | 30 | GT   | 9  | 4  |
| 114499 | 11 | 11960735 | 11960786 | 2 | 26 | 52 | GT   | 7  | 9  |
| 114503 | 11 | 11962128 | 11962151 | 2 | 12 | 24 | GT   | 24 | 4  |
| 114504 | 11 | 11964452 | 11964479 | 2 | 14 | 28 | AC   | 8  | 6  |
| 114506 | 11 | 11966716 | 11966735 | 2 | 10 | 20 | CA   | 19 | 7  |
| 114507 | 11 | 11966869 | 11966880 | 2 | 6  | 12 | TG   | 27 | 3  |
| 114508 | 11 | 11967188 | 11967213 | 2 | 13 | 26 | GT   | 21 | 7  |
| 114510 | 11 | 11971905 | 11971922 | 3 | 6  | 18 | GGA  | 24 | 7  |
| 114518 | 11 | 11972216 | 11972227 | 2 | 6  | 12 | TG   | 13 | 6  |
| 114519 | 11 | 11973288 | 11973323 | 2 | 18 | 36 | AC   | 14 | 13 |
| 114524 | 11 | 11982722 | 11982743 | 2 | 11 | 22 | CA   | 12 | 6  |
| 114526 | 11 | 11984632 | 11984667 | 2 | 18 | 36 | CA   | 9  | 9  |
| 114527 | 11 | 11984745 | 11984780 | 2 | 18 | 36 | TG   | 8  | 6  |
| 114529 | 11 | 11986054 | 11986089 | 2 | 18 | 36 | GT   | 12 | 11 |
| 114530 | 11 | 11986384 | 11986405 | 2 | 11 | 22 | GT   | 19 | 8  |
| 114531 | 11 | 11987531 | 11987558 | 4 | 7  | 28 | ACAG | 19 | 5  |
| 114533 | 11 | 11989324 | 11989339 | 2 | 8  | 16 | AG   | 14 | 5  |
| 114536 | 11 | 11994824 | 11994883 | 4 | 15 | 60 | TCAA | 12 | 8  |
| 114537 | 11 | 12004775 | 12004786 | 2 | 6  | 12 | CA   | 21 | 18 |
| 114538 | 11 | 12004879 | 12004906 | 2 | 14 | 28 | CA   | 11 | 5  |
| 114539 | 11 | 12005216 | 12005259 | 2 | 22 | 44 | CA   | 11 | 14 |
| 114547 | 11 | 12006542 | 12006592 | 3 | 17 | 51 | AGA  | 19 | 16 |
| 114554 | 11 | 12015940 | 12015965 | 2 | 13 | 26 | CA   | 13 | 8  |
| 114556 | 11 | 12016814 | 12016833 | 2 | 10 | 20 | AC   | 11 | 3  |
| 114565 | 11 | 12021652 | 12021667 | 2 | 8  | 16 | AC   | 26 | 7  |
| 114567 | 11 | 12022055 | 12022080 | 2 | 13 | 26 | TG   | 12 | 13 |

|        |    |          |          |   |    |    |      |    |    |
|--------|----|----------|----------|---|----|----|------|----|----|
| 114569 | 11 | 12023462 | 12023475 | 2 | 7  | 14 | TG   | 24 | 4  |
| 114570 | 11 | 12023478 | 12023491 | 2 | 7  | 14 | TG   | 20 | 4  |
| 114571 | 11 | 12023536 | 12023551 | 2 | 8  | 16 | AG   | 19 | 5  |
| 114572 | 11 | 12023659 | 12023680 | 2 | 11 | 22 | CA   | 12 | 12 |
| 114575 | 11 | 12023868 | 12023881 | 2 | 7  | 14 | AC   | 9  | 3  |
| 114576 | 11 | 12025478 | 12025499 | 2 | 11 | 22 | TC   | 13 | 3  |
| 114578 | 11 | 12026402 | 12026429 | 2 | 14 | 28 | CA   | 9  | 13 |
| 114579 | 11 | 12026516 | 12026535 | 2 | 10 | 20 | GT   | 25 | 6  |
| 114586 | 11 | 12035781 | 12035826 | 2 | 23 | 46 | TG   | 7  | 9  |
| 114587 | 11 | 12036394 | 12036423 | 2 | 15 | 30 | TG   | 14 | 9  |
| 114599 | 11 | 12040084 | 12040121 | 2 | 19 | 38 | CA   | 13 | 10 |
| 114600 | 11 | 12041565 | 12041592 | 2 | 14 | 28 | TG   | 13 | 4  |
| 114601 | 11 | 12041623 | 12041654 | 2 | 16 | 32 | AC   | 8  | 9  |
| 114602 | 11 | 12041717 | 12041737 | 3 | 7  | 21 | ATG  | 25 | 3  |
| 114603 | 11 | 12043007 | 12043020 | 2 | 7  | 14 | TG   | 20 | 5  |
| 114604 | 11 | 12043140 | 12043155 | 2 | 8  | 16 | AC   | 16 | 3  |
| 114605 | 11 | 12043307 | 12043344 | 2 | 19 | 38 | AC   | 9  | 8  |
| 114606 | 11 | 12043951 | 12043988 | 2 | 19 | 38 | AC   | 10 | 8  |
| 114608 | 11 | 12045438 | 12045453 | 2 | 8  | 16 | GT   | 21 | 7  |
| 114609 | 11 | 12045507 | 12045530 | 2 | 12 | 24 | GT   | 7  | 5  |
| 114617 | 11 | 12048136 | 12048159 | 2 | 12 | 24 | GT   | 14 | 9  |
| 114620 | 11 | 12048727 | 12048748 | 2 | 11 | 22 | CA   | 10 | 6  |
| 114624 | 11 | 12051090 | 12051101 | 2 | 6  | 12 | GT   | 20 | 5  |
| 114625 | 11 | 12051103 | 12051118 | 2 | 8  | 16 | TG   | 22 | 3  |
| 114626 | 11 | 12051706 | 12051723 | 3 | 6  | 18 | TCC  | 27 | 4  |
| 114632 | 11 | 12054175 | 12054216 | 2 | 21 | 42 | GT   | 11 | 7  |
| 114633 | 11 | 12054293 | 12054312 | 2 | 10 | 20 | CA   | 21 | 4  |
| 114634 | 11 | 12054314 | 12054331 | 2 | 9  | 18 | TG   | 19 | 6  |
| 114637 | 11 | 12055240 | 12055281 | 2 | 21 | 42 | AC   | 7  | 10 |
| 114638 | 11 | 12055376 | 12055395 | 4 | 5  | 20 | CAGA | 18 | 5  |
| 114640 | 11 | 12055522 | 12055563 | 2 | 21 | 42 | AC   | 12 | 6  |
| 114642 | 11 | 12057125 | 12057144 | 2 | 10 | 20 | CA   | 13 | 10 |
| 114643 | 11 | 12057225 | 12057248 | 2 | 12 | 24 | CA   | 16 | 9  |
| 114648 | 11 | 12058347 | 12058366 | 2 | 10 | 20 | GT   | 13 | 9  |
| 114649 | 11 | 12058603 | 12058616 | 2 | 7  | 14 | GT   | 21 | 7  |
| 114651 | 11 | 12059931 | 12059942 | 2 | 6  | 12 | CA   | 8  | 3  |
| 114652 | 11 | 12059949 | 12059960 | 2 | 6  | 12 | CA   | 23 | 7  |
| 114655 | 11 | 12060476 | 12060503 | 2 | 14 | 28 | TG   | 13 | 8  |
| 114662 | 11 | 12065573 | 12065600 | 2 | 14 | 28 | TG   | 17 | 10 |
| 114664 | 11 | 12065815 | 12065858 | 2 | 22 | 44 | TG   | 14 | 8  |
| 114665 | 11 | 12065945 | 12065972 | 2 | 14 | 28 | GT   | 15 | 8  |
| 114674 | 11 | 12075573 | 12075602 | 2 | 15 | 30 | AC   | 14 | 10 |
| 114677 | 11 | 12076701 | 12076734 | 2 | 17 | 34 | CA   | 15 | 10 |
| 114678 | 11 | 12076830 | 12076863 | 2 | 17 | 34 | TG   | 12 | 10 |
| 114683 | 11 | 12079098 | 12079125 | 2 | 14 | 28 | CA   | 9  | 7  |
| 114685 | 11 | 12079331 | 12079350 | 2 | 10 | 20 | CA   | 19 | 9  |
| 114686 | 11 | 12079641 | 12079654 | 2 | 7  | 14 | TG   | 27 | 9  |
| 114687 | 11 | 12079851 | 12079868 | 3 | 6  | 18 | TCA  | 36 | 3  |
| 114688 | 11 | 12084592 | 12084627 | 3 | 12 | 36 | CCT  | 7  | 5  |
| 114692 | 11 | 12090679 | 12090714 | 2 | 18 | 36 | GT   | 12 | 7  |
| 114694 | 11 | 12090860 | 12090887 | 2 | 14 | 28 | TG   | 15 | 7  |

|        |    |          |          |   |    |    |     |    |    |
|--------|----|----------|----------|---|----|----|-----|----|----|
| 114699 | 11 | 12091835 | 12091854 | 2 | 10 | 20 | TG  | 14 | 5  |
| 114700 | 11 | 12091902 | 12091933 | 2 | 16 | 32 | CA  | 13 | 7  |
| 114703 | 11 | 12092075 | 12092106 | 2 | 16 | 32 | TG  | 15 | 8  |
| 114711 | 11 | 12093724 | 12093749 | 2 | 13 | 26 | AC  | 21 | 9  |
| 114712 | 11 | 12097073 | 12097090 | 2 | 9  | 18 | CA  | 29 | 3  |
| 114723 | 11 | 12098054 | 12098079 | 2 | 13 | 26 | AC  | 9  | 11 |
| 114725 | 11 | 12100208 | 12100233 | 2 | 13 | 26 | GT  | 10 | 7  |
| 114726 | 11 | 12101694 | 12101711 | 2 | 9  | 18 | TG  | 21 | 4  |
| 114729 | 11 | 12107772 | 12107783 | 2 | 6  | 12 | CA  | 31 | 3  |
| 114730 | 11 | 12107898 | 12107919 | 2 | 11 | 22 | GT  | 17 | 7  |
| 114733 | 11 | 12112437 | 12112456 | 2 | 10 | 20 | CA  | 21 | 4  |
| 114741 | 11 | 12113642 | 12113679 | 2 | 19 | 38 | TG  | 9  | 9  |
| 114742 | 11 | 12113824 | 12113837 | 2 | 7  | 14 | TG  | 18 | 5  |
| 114746 | 11 | 12115296 | 12115323 | 2 | 14 | 28 | CA  | 17 | 10 |
| 114747 | 11 | 12115406 | 12115417 | 2 | 6  | 12 | CA  | 20 | 3  |
| 114748 | 11 | 12115512 | 12115529 | 2 | 9  | 18 | CA  | 18 | 4  |
| 114749 | 11 | 12115641 | 12115670 | 2 | 15 | 30 | GT  | 17 | 6  |
| 114750 | 11 | 12118049 | 12118062 | 2 | 7  | 14 | TG  | 18 | 4  |
| 114754 | 11 | 12118912 | 12118939 | 2 | 14 | 28 | AC  | 11 | 10 |
| 114756 | 11 | 12119942 | 12119953 | 2 | 6  | 12 | TG  | 16 | 7  |
| 114757 | 11 | 12120053 | 12120082 | 2 | 15 | 30 | TG  | 17 | 6  |
| 114759 | 11 | 12122110 | 12122167 | 2 | 29 | 58 | GT  | 7  | 10 |
| 114765 | 11 | 12124875 | 12124904 | 2 | 15 | 30 | AC  | 16 | 7  |
| 114766 | 11 | 12126336 | 12126347 | 2 | 6  | 12 | CT  | 25 | 3  |
| 114770 | 11 | 12126906 | 12126917 | 2 | 6  | 12 | AC  | 12 | 4  |
| 114776 | 11 | 12128179 | 12128224 | 2 | 23 | 46 | AC  | 9  | 11 |
| 114777 | 11 | 12128499 | 12128531 | 3 | 11 | 33 | ATT | 7  | 5  |
| 114778 | 11 | 12128666 | 12128715 | 2 | 25 | 50 | CA  | 18 | 11 |
| 114781 | 11 | 12129331 | 12129360 | 2 | 15 | 30 | GT  | 9  | 5  |
| 114784 | 11 | 12132641 | 12132670 | 2 | 15 | 30 | CA  | 9  | 9  |
| 114795 | 11 | 12138615 | 12138644 | 2 | 15 | 30 | CA  | 20 | 11 |
| 114809 | 11 | 12141515 | 12141538 | 2 | 12 | 24 | CA  | 18 | 6  |
| 114819 | 11 | 12147860 | 12147879 | 2 | 10 | 20 | AC  | 9  | 7  |
| 114820 | 11 | 12148043 | 12148088 | 2 | 23 | 46 | CA  | 9  | 9  |
| 114824 | 11 | 12150524 | 12150535 | 2 | 6  | 12 | CA  | 13 | 10 |
| 114852 | 11 | 12161173 | 12161194 | 2 | 11 | 22 | AC  | 22 | 4  |
| 114853 | 11 | 12161287 | 12161310 | 2 | 12 | 24 | CA  | 15 | 8  |
| 114856 | 11 | 12163789 | 12163814 | 2 | 13 | 26 | TG  | 19 | 9  |
| 114857 | 11 | 12163910 | 12163921 | 2 | 6  | 12 | AG  | 25 | 3  |
| 114860 | 11 | 12167358 | 12167372 | 3 | 5  | 15 | ATA | 16 | 4  |
| 114861 | 11 | 12168070 | 12168093 | 3 | 8  | 24 | AGG | 20 | 5  |
| 114862 | 11 | 12168799 | 12168850 | 2 | 26 | 52 | AC  | 10 | 7  |
| 114865 | 11 | 12172081 | 12172106 | 2 | 13 | 26 | GT  | 7  | 7  |
| 114871 | 11 | 12173463 | 12173488 | 2 | 13 | 26 | AC  | 16 | 8  |
| 114872 | 11 | 12174085 | 12174118 | 2 | 17 | 34 | TG  | 15 | 13 |
| 114873 | 11 | 12179698 | 12179711 | 2 | 7  | 14 | TG  | 21 | 3  |
| 114874 | 11 | 12180704 | 12180718 | 3 | 5  | 15 | GGA | 30 | 4  |
| 114879 | 11 | 12182143 | 12182163 | 3 | 7  | 21 | ATT | 12 | 5  |
| 114881 | 11 | 12183286 | 12183318 | 3 | 11 | 33 | GTT | 16 | 6  |
| 114883 | 11 | 12183482 | 12183495 | 2 | 7  | 14 | TG  | 11 | 11 |
| 114884 | 11 | 12185639 | 12185656 | 3 | 6  | 18 | TTG | 8  | 3  |

|        |    |          |          |   |    |    |     |    |    |
|--------|----|----------|----------|---|----|----|-----|----|----|
| 114886 | 11 | 12190269 | 12190298 | 2 | 15 | 30 | TG  | 17 | 13 |
| 114887 | 11 | 12192371 | 12192398 | 2 | 14 | 28 | AC  | 13 | 6  |
| 114888 | 11 | 12192454 | 12192475 | 2 | 11 | 22 | AC  | 16 | 11 |
| 114889 | 11 | 12193898 | 12193925 | 2 | 14 | 28 | GT  | 10 | 14 |
| 114890 | 11 | 12194055 | 12194108 | 2 | 27 | 54 | TG  | 12 | 12 |
| 114892 | 11 | 12195437 | 12195470 | 2 | 17 | 34 | TG  | 7  | 5  |
| 114894 | 11 | 12195959 | 12195978 | 2 | 10 | 20 | AC  | 18 | 3  |
| 114895 | 11 | 12197324 | 12197351 | 2 | 14 | 28 | AC  | 15 | 8  |
| 114898 | 11 | 12197826 | 12197857 | 2 | 16 | 32 | TG  | 6  | 7  |
| 114899 | 11 | 12198456 | 12198485 | 2 | 15 | 30 | TG  | 25 | 13 |
| 114900 | 11 | 12198596 | 12198615 | 2 | 10 | 20 | AC  | 20 | 7  |
| 114901 | 11 | 12199218 | 12199243 | 2 | 13 | 26 | AC  | 17 | 7  |
| 114902 | 11 | 12199743 | 12199766 | 3 | 8  | 24 | TTC | 26 | 3  |
| 114942 | 11 | 12205104 | 12205129 | 2 | 13 | 26 | AC  | 13 | 8  |
| 114943 | 11 | 12205238 | 12205271 | 2 | 17 | 34 | TG  | 9  | 12 |
| 114944 | 11 | 12205811 | 12205834 | 2 | 12 | 24 | AC  | 18 | 10 |
| 114946 | 11 | 12207008 | 12207025 | 2 | 9  | 18 | AC  | 16 | 3  |
| 114960 | 11 | 12217724 | 12217744 | 3 | 7  | 21 | CTG | 14 | 10 |
| 114964 | 11 | 12220725 | 12220750 | 2 | 13 | 26 | GT  | 19 | 8  |
| 114965 | 11 | 12221385 | 12221424 | 2 | 20 | 40 | CA  | 11 | 11 |
| 114966 | 11 | 12221832 | 12221852 | 3 | 7  | 21 | TCC | 17 | 8  |
| 114980 | 11 | 12228474 | 12228503 | 2 | 15 | 30 | TG  | 14 | 6  |
| 114981 | 11 | 12229695 | 12229722 | 2 | 14 | 28 | AC  | 9  | 4  |
| 114982 | 11 | 12230328 | 12230349 | 2 | 11 | 22 | TG  | 12 | 7  |
| 114983 | 11 | 12230493 | 12230534 | 2 | 21 | 42 | AC  | 8  | 6  |
| 114984 | 11 | 12230715 | 12230740 | 2 | 13 | 26 | GT  | 19 | 8  |
| 114988 | 11 | 12238701 | 12238718 | 2 | 9  | 18 | TG  | 22 | 4  |
| 114989 | 11 | 12239111 | 12239128 | 2 | 9  | 18 | AC  | 18 | 4  |
| 114993 | 11 | 12243275 | 12243302 | 2 | 14 | 28 | GT  | 18 | 9  |
| 115023 | 11 | 12295813 | 12295824 | 2 | 6  | 12 | GT  | 7  | 6  |
| 115028 | 11 | 12298090 | 12298121 | 2 | 16 | 32 | TG  | 13 | 12 |
| 115042 | 11 | 12316010 | 12316047 | 2 | 19 | 38 | AC  | 12 | 8  |
| 115043 | 11 | 12318381 | 12318404 | 3 | 8  | 24 | CTC | 15 | 7  |
| 115049 | 11 | 12323520 | 12323540 | 3 | 7  | 21 | AAT | 13 | 6  |
| 115050 | 11 | 12332247 | 12332274 | 2 | 14 | 28 | CA  | 12 | 8  |
| 115052 | 11 | 12339219 | 12339244 | 2 | 13 | 26 | CA  | 6  | 6  |
| 115053 | 11 | 12339273 | 12339298 | 2 | 13 | 26 | TG  | 7  | 5  |
| 115054 | 11 | 12339526 | 12339573 | 2 | 24 | 48 | GT  | 10 | 8  |
| 115055 | 11 | 12341977 | 12341988 | 2 | 6  | 12 | TG  | 22 | 5  |
| 115056 | 11 | 12342175 | 12342194 | 2 | 10 | 20 | GT  | 25 | 9  |
| 115061 | 11 | 12345098 | 12345155 | 2 | 29 | 58 | TG  | 6  | 8  |
| 115062 | 11 | 12347507 | 12347540 | 2 | 17 | 34 | CA  | 20 | 12 |
| 115063 | 11 | 12348256 | 12348267 | 2 | 6  | 12 | AC  | 14 | 7  |
| 115064 | 11 | 12348412 | 12348427 | 2 | 8  | 16 | AG  | 19 | 8  |
| 115065 | 11 | 12348691 | 12348708 | 3 | 6  | 18 | ATT | 20 | 3  |
| 115083 | 11 | 12356952 | 12356981 | 2 | 15 | 30 | AC  | 9  | 10 |
| 115088 | 11 | 12358560 | 12358583 | 2 | 12 | 24 | CA  | 9  | 7  |
| 115090 | 11 | 12358677 | 12358704 | 2 | 14 | 28 | AC  | 15 | 10 |
| 115111 | 11 | 12370862 | 12370891 | 3 | 10 | 30 | GGA | 20 | 5  |
| 115125 | 11 | 12377471 | 12377496 | 2 | 13 | 26 | AC  | 11 | 5  |
| 115126 | 11 | 12377601 | 12377642 | 2 | 21 | 42 | CA  | 11 | 7  |

|        |    |          |          |   |    |    |     |    |    |
|--------|----|----------|----------|---|----|----|-----|----|----|
| 115127 | 11 | 12377664 | 12377675 | 2 | 6  | 12 | AC  | 28 | 3  |
| 115128 | 11 | 12377784 | 12377819 | 2 | 18 | 36 | AG  | 12 | 12 |
| 115136 | 11 | 12380575 | 12380610 | 2 | 18 | 36 | GT  | 21 | 13 |
| 115137 | 11 | 12383831 | 12383854 | 3 | 8  | 24 | ATG | 16 | 4  |
| 115146 | 11 | 12411077 | 12411096 | 2 | 10 | 20 | AC  | 13 | 10 |
| 115147 | 11 | 12411218 | 12411261 | 2 | 22 | 44 | CA  | 10 | 10 |
| 115148 | 11 | 12411915 | 12411959 | 3 | 15 | 45 | AGA | 25 | 13 |
| 115158 | 11 | 12439661 | 12439684 | 3 | 8  | 24 | AGA | 9  | 8  |
| 115162 | 11 | 12439875 | 12439908 | 2 | 17 | 34 | GT  | 12 | 10 |
| 115163 | 11 | 12441845 | 12441877 | 3 | 11 | 33 | CCT | 24 | 7  |
| 115164 | 11 | 12443094 | 12443131 | 2 | 19 | 38 | CA  | 6  | 8  |
| 115171 | 11 | 12451791 | 12451826 | 2 | 18 | 36 | TG  | 11 | 13 |
| 115175 | 11 | 12459464 | 12459483 | 2 | 10 | 20 | CA  | 9  | 3  |
| 115179 | 11 | 12461888 | 12461927 | 2 | 20 | 40 | GT  | 10 | 13 |
| 115200 | 11 | 12467963 | 12468000 | 2 | 19 | 38 | AC  | 11 | 7  |
| 115202 | 11 | 12471579 | 12471602 | 2 | 12 | 24 | AC  | 6  | 5  |
| 115210 | 11 | 12473998 | 12474025 | 2 | 14 | 28 | GT  | 10 | 8  |
| 115215 | 11 | 12476397 | 12476420 | 2 | 12 | 24 | AC  | 20 | 3  |
| 115225 | 11 | 12491302 | 12491353 | 2 | 26 | 52 | TG  | 7  | 7  |
| 115226 | 11 | 12493435 | 12493450 | 2 | 8  | 16 | AC  | 16 | 3  |
| 115236 | 11 | 12495295 | 12495306 | 2 | 6  | 12 | GT  | 12 | 8  |
| 115242 | 11 | 12496413 | 12496440 | 2 | 14 | 28 | CA  | 11 | 8  |
| 115243 | 11 | 12496792 | 12496831 | 2 | 20 | 40 | GT  | 14 | 10 |
| 115244 | 11 | 12498507 | 12498518 | 2 | 6  | 12 | CA  | 27 | 13 |
| 115245 | 11 | 12498826 | 12498871 | 2 | 23 | 46 | GT  | 8  | 9  |
| 115248 | 11 | 12501990 | 12502007 | 2 | 9  | 18 | TG  | 19 | 3  |
| 115249 | 11 | 12502119 | 12502150 | 2 | 16 | 32 | GT  | 9  | 9  |
| 115252 | 11 | 12502570 | 12502609 | 2 | 20 | 40 | CA  | 9  | 7  |
| 115253 | 11 | 12502773 | 12502796 | 2 | 12 | 24 | GT  | 25 | 11 |
| 115254 | 11 | 12503118 | 12503155 | 2 | 19 | 38 | TG  | 11 | 6  |
| 115255 | 11 | 12503345 | 12503360 | 2 | 8  | 16 | CA  | 18 | 5  |
| 115263 | 11 | 12506650 | 12506685 | 2 | 18 | 36 | GT  | 10 | 8  |
| 115264 | 11 | 12506803 | 12506830 | 2 | 14 | 28 | GT  | 6  | 4  |
| 115277 | 11 | 12510170 | 12510205 | 2 | 18 | 36 | TG  | 15 | 11 |
| 115280 | 11 | 12513122 | 12513136 | 3 | 5  | 15 | AGG | 17 | 3  |
| 115281 | 11 | 12513685 | 12513700 | 2 | 8  | 16 | TC  | 18 | 12 |
| 115284 | 11 | 12517791 | 12517810 | 2 | 10 | 20 | AC  | 25 | 3  |
| 115286 | 11 | 12519632 | 12519675 | 2 | 22 | 44 | GT  | 8  | 9  |
| 115289 | 11 | 12521721 | 12521752 | 2 | 16 | 32 | TG  | 13 | 7  |
| 115290 | 11 | 12522755 | 12522778 | 3 | 8  | 24 | ATT | 19 | 5  |
| 115292 | 11 | 12523638 | 12523671 | 2 | 17 | 34 | AC  | 17 | 9  |
| 115300 | 11 | 12524206 | 12524217 | 2 | 6  | 12 | CA  | 11 | 6  |
| 115303 | 11 | 12537196 | 12537207 | 2 | 6  | 12 | TG  | 8  | 4  |
| 115305 | 11 | 12537249 | 12537266 | 2 | 9  | 18 | GT  | 7  | 6  |
| 115307 | 11 | 12538870 | 12538897 | 2 | 14 | 28 | CA  | 21 | 7  |
| 115308 | 11 | 12539432 | 12539459 | 2 | 14 | 28 | TG  | 11 | 9  |
| 115310 | 11 | 12540155 | 12540166 | 2 | 6  | 12 | AC  | 23 | 4  |
| 115311 | 11 | 12540168 | 12540179 | 2 | 6  | 12 | CA  | 27 | 3  |
| 115314 | 11 | 12540314 | 12540333 | 2 | 10 | 20 | AC  | 20 | 4  |
| 115315 | 11 | 12541898 | 12541915 | 2 | 9  | 18 | GT  | 14 | 14 |
| 115317 | 11 | 12545968 | 12545982 | 3 | 5  | 15 | AGA | 17 | 3  |

|        |    |          |          |   |    |    |      |    |    |
|--------|----|----------|----------|---|----|----|------|----|----|
| 115318 | 11 | 12548498 | 12548537 | 2 | 20 | 40 | AC   | 12 | 10 |
| 115320 | 11 | 12556694 | 12556725 | 2 | 16 | 32 | TG   | 9  | 7  |
| 115321 | 11 | 12560584 | 12560603 | 4 | 5  | 20 | TTTA | 9  | 3  |
| 115324 | 11 | 12564062 | 12564095 | 2 | 17 | 34 | CA   | 13 | 10 |
| 115325 | 11 | 12564198 | 12564225 | 2 | 14 | 28 | AC   | 8  | 8  |
| 115327 | 11 | 12564294 | 12564314 | 3 | 7  | 21 | TGA  | 19 | 5  |
| 115328 | 11 | 12564394 | 12564407 | 2 | 7  | 14 | CA   | 12 | 8  |
| 115344 | 11 | 12572999 | 12573016 | 2 | 9  | 18 | AC   | 21 | 5  |
| 115345 | 11 | 12573054 | 12573065 | 2 | 6  | 12 | AC   | 24 | 5  |
| 115346 | 11 | 12578978 | 12579011 | 2 | 17 | 34 | GT   | 20 | 12 |
| 115348 | 11 | 12586427 | 12586452 | 2 | 13 | 26 | AC   | 9  | 6  |
| 115350 | 11 | 12598237 | 12598257 | 3 | 7  | 21 | AGA  | 21 | 6  |
| 115352 | 11 | 12599955 | 12599982 | 2 | 14 | 28 | GT   | 7  | 7  |
| 115354 | 11 | 12600133 | 12600158 | 2 | 13 | 26 | TG   | 17 | 11 |
| 115355 | 11 | 12600252 | 12600263 | 2 | 6  | 12 | TG   | 24 | 5  |
| 115356 | 11 | 12600958 | 12600981 | 3 | 8  | 24 | CTC  | 16 | 5  |
| 115358 | 11 | 12602523 | 12602540 | 3 | 6  | 18 | TGT  | 27 | 10 |
| 115359 | 11 | 12603810 | 12603839 | 3 | 10 | 30 | CTC  | 20 | 10 |
| 115361 | 11 | 12606013 | 12606036 | 3 | 8  | 24 | CTC  | 24 | 3  |
| 115362 | 11 | 12606683 | 12606708 | 2 | 13 | 26 | GT   | 25 | 7  |
| 115363 | 11 | 12608466 | 12608480 | 3 | 5  | 15 | TCA  | 24 | 5  |
| 115364 | 11 | 12619135 | 12619150 | 4 | 4  | 16 | ATGG | 24 | 3  |
| 115366 | 11 | 12631673 | 12631702 | 3 | 10 | 30 | GAT  | 18 | 4  |
| 115377 | 11 | 12660873 | 12660898 | 2 | 13 | 26 | GT   | 17 | 7  |
| 115383 | 11 | 12674158 | 12674179 | 2 | 11 | 22 | GT   | 16 | 9  |
| 115385 | 11 | 12675379 | 12675402 | 2 | 12 | 24 | GT   | 10 | 10 |
| 115395 | 11 | 12679679 | 12679712 | 2 | 17 | 34 | GT   | 17 | 13 |
| 115396 | 11 | 12680555 | 12680608 | 2 | 27 | 54 | GT   | 15 | 14 |
| 115418 | 11 | 12689272 | 12689323 | 2 | 26 | 52 | AC   | 8  | 10 |
| 115425 | 11 | 12702267 | 12702298 | 2 | 16 | 32 | GT   | 12 | 6  |
| 115428 | 11 | 12702611 | 12702630 | 2 | 10 | 20 | AC   | 15 | 8  |
| 115429 | 11 | 12702632 | 12702649 | 2 | 9  | 18 | CA   | 21 | 12 |
| 115465 | 11 | 12726933 | 12726980 | 2 | 24 | 48 | CA   | 7  | 10 |
| 115471 | 11 | 12735163 | 12735174 | 2 | 6  | 12 | CA   | 26 | 8  |
| 115474 | 11 | 12738982 | 12739017 | 2 | 18 | 36 | AC   | 15 | 12 |
| 115481 | 11 | 12741735 | 12741762 | 2 | 14 | 28 | CA   | 6  | 9  |
| 115483 | 11 | 12747773 | 12747811 | 3 | 13 | 39 | AAG  | 26 | 17 |
| 115484 | 11 | 12748434 | 12748467 | 2 | 17 | 34 | CA   | 10 | 11 |
| 115486 | 11 | 12751955 | 12751982 | 2 | 14 | 28 | GT   | 15 | 6  |
| 115488 | 11 | 12756136 | 12756150 | 3 | 5  | 15 | GCA  | 18 | 3  |
| 115503 | 11 | 12772990 | 12773037 | 2 | 24 | 48 | TG   | 9  | 10 |
| 115510 | 11 | 12791735 | 12791755 | 3 | 7  | 21 | CAA  | 11 | 5  |
| 115518 | 12 | 21283    | 21302    | 2 | 10 | 20 | GT   | 19 | 8  |
| 115528 | 12 | 53880    | 53899    | 2 | 10 | 20 | AC   | 23 | 4  |
| 115529 | 12 | 57027    | 57062    | 2 | 18 | 36 | CA   | 11 | 11 |
| 115530 | 12 | 60902    | 60913    | 2 | 6  | 12 | AC   | 26 | 9  |
| 115535 | 12 | 67137    | 67158    | 2 | 11 | 22 | TG   | 17 | 5  |
| 115536 | 12 | 68031    | 68056    | 2 | 13 | 26 | TG   | 9  | 13 |
| 115541 | 12 | 71104    | 71127    | 2 | 12 | 24 | CA   | 11 | 4  |
| 115546 | 12 | 79774    | 79797    | 2 | 12 | 24 | GT   | 19 | 13 |
| 115547 | 12 | 79897    | 79914    | 2 | 9  | 18 | GT   | 7  | 6  |

|        |    |        |        |   |    |    |      |    |    |
|--------|----|--------|--------|---|----|----|------|----|----|
| 115549 | 12 | 83782  | 83803  | 2 | 11 | 22 | CA   | 21 | 14 |
| 115550 | 12 | 84557  | 84586  | 2 | 15 | 30 | GT   | 19 | 8  |
| 115558 | 12 | 112296 | 112313 | 2 | 9  | 18 | GT   | 18 | 5  |
| 115559 | 12 | 112344 | 112397 | 2 | 27 | 54 | TC   | 14 | 11 |
| 115561 | 12 | 116823 | 116834 | 2 | 6  | 12 | AC   | 24 | 4  |
| 115563 | 12 | 119149 | 119160 | 2 | 6  | 12 | AC   | 18 | 7  |
| 115566 | 12 | 128340 | 128351 | 2 | 6  | 12 | AC   | 27 | 5  |
| 115569 | 12 | 130350 | 130361 | 2 | 6  | 12 | AC   | 19 | 4  |
| 115573 | 12 | 134590 | 134601 | 2 | 6  | 12 | TG   | 18 | 4  |
| 115574 | 12 | 134604 | 134619 | 2 | 8  | 16 | TG   | 18 | 3  |
| 115575 | 12 | 137136 | 137159 | 2 | 12 | 24 | CA   | 19 | 7  |
| 115576 | 12 | 141118 | 141135 | 2 | 9  | 18 | TG   | 22 | 5  |
| 115577 | 12 | 141563 | 141598 | 2 | 18 | 36 | AC   | 12 | 8  |
| 115587 | 12 | 149253 | 149276 | 4 | 6  | 24 | AGAA | 29 | 3  |
| 115588 | 12 | 150613 | 150639 | 3 | 9  | 27 | TCT  | 16 | 3  |
| 115589 | 12 | 150836 | 150877 | 2 | 21 | 42 | CT   | 9  | 11 |
| 115590 | 12 | 151861 | 151888 | 2 | 14 | 28 | GT   | 15 | 6  |
| 115591 | 12 | 153545 | 153578 | 2 | 17 | 34 | TG   | 10 | 9  |
| 115592 | 12 | 154019 | 154036 | 3 | 6  | 18 | ACA  | 16 | 9  |
| 115594 | 12 | 154447 | 154470 | 3 | 8  | 24 | CTC  | 21 | 6  |
| 115596 | 12 | 157323 | 157340 | 3 | 6  | 18 | AAT  | 16 | 9  |
| 115598 | 12 | 159928 | 159951 | 2 | 12 | 24 | TG   | 19 | 5  |
| 115616 | 12 | 218170 | 218189 | 4 | 5  | 20 | AGTA | 16 | 4  |
| 115619 | 12 | 242920 | 242945 | 2 | 13 | 26 | AC   | 18 | 8  |
| 115626 | 12 | 279028 | 279047 | 4 | 5  | 20 | TTTA | 7  | 3  |
| 115635 | 12 | 326255 | 326286 | 2 | 16 | 32 | TG   | 13 | 11 |
| 115641 | 12 | 342889 | 342904 | 4 | 4  | 16 | TGTT | 15 | 4  |
| 115651 | 12 | 395313 | 395340 | 2 | 14 | 28 | AC   | 16 | 8  |
| 115655 | 12 | 402512 | 402535 | 3 | 8  | 24 | TCC  | 25 | 5  |
| 115659 | 12 | 412342 | 412367 | 2 | 13 | 26 | TG   | 24 | 12 |
| 115661 | 12 | 421454 | 421467 | 2 | 7  | 14 | TC   | 30 | 3  |
| 115672 | 12 | 447086 | 447154 | 3 | 23 | 69 | AGC  | 14 | 14 |
| 115700 | 12 | 512125 | 512140 | 2 | 8  | 16 | TG   | 16 | 9  |
| 115710 | 12 | 535067 | 535092 | 2 | 13 | 26 | CA   | 11 | 12 |
| 115716 | 12 | 541767 | 541804 | 2 | 19 | 38 | AC   | 14 | 12 |
| 115718 | 12 | 544189 | 544206 | 2 | 9  | 18 | TG   | 27 | 3  |
| 115719 | 12 | 556109 | 556130 | 2 | 11 | 22 | CT   | 9  | 8  |
| 115743 | 12 | 618369 | 618410 | 2 | 21 | 42 | TG   | 22 | 7  |
| 115748 | 12 | 637574 | 637591 | 3 | 6  | 18 | AAT  | 11 | 3  |
| 115753 | 12 | 644093 | 644128 | 4 | 9  | 36 | ATAC | 9  | 6  |
| 115766 | 12 | 672262 | 672279 | 2 | 9  | 18 | AC   | 22 | 14 |
| 115768 | 12 | 674020 | 674039 | 4 | 5  | 20 | AAAC | 13 | 3  |
| 115770 | 12 | 677302 | 677315 | 2 | 7  | 14 | CA   | 15 | 15 |
| 115771 | 12 | 677871 | 677896 | 2 | 13 | 26 | CA   | 14 | 7  |
| 115774 | 12 | 679673 | 679702 | 2 | 15 | 30 | AC   | 6  | 5  |
| 115781 | 12 | 705019 | 705034 | 4 | 4  | 16 | ATTC | 22 | 4  |
| 115784 | 12 | 715360 | 715373 | 2 | 7  | 14 | AC   | 18 | 7  |
| 115794 | 12 | 726081 | 726100 | 2 | 10 | 20 | CA   | 7  | 4  |
| 115797 | 12 | 732440 | 732479 | 2 | 20 | 40 | CA   | 11 | 13 |
| 115798 | 12 | 733008 | 733035 | 2 | 14 | 28 | AC   | 18 | 14 |
| 115799 | 12 | 735655 | 735666 | 2 | 6  | 12 | TG   | 25 | 3  |



|        |    |         |         |   |    |    |      |    |    |
|--------|----|---------|---------|---|----|----|------|----|----|
| 115805 | 12 | 748327  | 748338  | 2 | 6  | 12 | TG   | 30 | 3  |
| 115815 | 12 | 755663  | 755696  | 2 | 17 | 34 | GT   | 13 | 6  |
| 115821 | 12 | 765020  | 765051  | 2 | 16 | 32 | AC   | 11 | 3  |
| 115824 | 12 | 790215  | 790230  | 4 | 4  | 16 | AAAC | 24 | 4  |
| 115841 | 12 | 837668  | 837679  | 2 | 6  | 12 | AC   | 26 | 4  |
| 115850 | 12 | 875088  | 875103  | 4 | 4  | 16 | TTTC | 21 | 3  |
| 115852 | 12 | 879581  | 879598  | 2 | 9  | 18 | TC   | 17 | 3  |
| 115865 | 12 | 899978  | 900005  | 2 | 14 | 28 | AC   | 7  | 6  |
| 115870 | 12 | 905511  | 905526  | 4 | 4  | 16 | AAAC | 19 | 5  |
| 115872 | 12 | 923391  | 923430  | 2 | 20 | 40 | AC   | 12 | 9  |
| 115883 | 12 | 944736  | 944749  | 2 | 7  | 14 | AC   | 18 | 5  |
| 115887 | 12 | 950561  | 950582  | 2 | 11 | 22 | GT   | 18 | 12 |
| 115893 | 12 | 964189  | 964203  | 3 | 5  | 15 | ACT  | 19 | 5  |
| 115894 | 12 | 968105  | 968120  | 4 | 4  | 16 | GTTT | 20 | 5  |
| 115904 | 12 | 986007  | 986034  | 2 | 14 | 28 | GT   | 19 | 11 |
| 115907 | 12 | 1007602 | 1007625 | 2 | 12 | 24 | AC   | 16 | 6  |
| 115908 | 12 | 1014442 | 1014461 | 4 | 5  | 20 | CATG | 18 | 4  |
| 115910 | 12 | 1018289 | 1018306 | 2 | 9  | 18 | TG   | 8  | 4  |
| 115918 | 12 | 1048712 | 1048732 | 3 | 7  | 21 | TAA  | 15 | 4  |
| 115920 | 12 | 1050764 | 1050789 | 2 | 13 | 26 | TG   | 6  | 5  |
| 115922 | 12 | 1051942 | 1051969 | 2 | 14 | 28 | TG   | 9  | 9  |
| 115925 | 12 | 1055320 | 1055331 | 2 | 6  | 12 | CA   | 19 | 3  |
| 115927 | 12 | 1055894 | 1055917 | 2 | 12 | 24 | AC   | 16 | 12 |
| 115928 | 12 | 1058533 | 1058544 | 2 | 6  | 12 | AT   | 8  | 3  |
| 115936 | 12 | 1081791 | 1081812 | 2 | 11 | 22 | CA   | 18 | 10 |
| 115941 | 12 | 1095520 | 1095533 | 2 | 7  | 14 | TG   | 20 | 5  |
| 115942 | 12 | 1095663 | 1095716 | 2 | 27 | 54 | GA   | 7  | 8  |
| 115951 | 12 | 1105791 | 1105850 | 4 | 15 | 60 | GAAA | 14 | 6  |
| 115953 | 12 | 1108069 | 1108086 | 2 | 9  | 18 | TG   | 10 | 4  |
| 115965 | 12 | 1127902 | 1127913 | 2 | 6  | 12 | GT   | 17 | 3  |
| 115983 | 12 | 1162209 | 1162244 | 4 | 9  | 36 | GATT | 19 | 9  |
| 115993 | 12 | 1197392 | 1197437 | 2 | 23 | 46 | AC   | 8  | 8  |
| 116007 | 12 | 1222279 | 1222304 | 2 | 13 | 26 | GT   | 15 | 8  |
| 116012 | 12 | 1231605 | 1231624 | 2 | 10 | 20 | CA   | 20 | 9  |
| 116014 | 12 | 1234056 | 1234076 | 3 | 7  | 21 | TGC  | 26 | 7  |
| 116019 | 12 | 1240379 | 1240402 | 4 | 6  | 24 | AATT | 23 | 3  |
| 116041 | 12 | 1282564 | 1282583 | 4 | 5  | 20 | AGAA | 33 | 5  |
| 116043 | 12 | 1286862 | 1286895 | 2 | 17 | 34 | CA   | 8  | 8  |
| 116047 | 12 | 1295964 | 1295975 | 2 | 6  | 12 | GA   | 26 | 3  |
| 116052 | 12 | 1317809 | 1317832 | 4 | 6  | 24 | TTTA | 13 | 4  |
| 116060 | 12 | 1337201 | 1337218 | 2 | 9  | 18 | CA   | 27 | 6  |
| 116066 | 12 | 1352323 | 1352334 | 2 | 6  | 12 | CA   | 31 | 5  |
| 116069 | 12 | 1354588 | 1354599 | 2 | 6  | 12 | TG   | 25 | 3  |
| 116071 | 12 | 1372137 | 1372162 | 2 | 13 | 26 | CA   | 14 | 8  |
| 116080 | 12 | 1389612 | 1389627 | 2 | 8  | 16 | AG   | 22 | 6  |
| 116089 | 12 | 1412659 | 1412678 | 2 | 10 | 20 | AC   | 24 | 6  |
| 116100 | 12 | 1450353 | 1450368 | 2 | 8  | 16 | TG   | 25 | 10 |
| 116109 | 12 | 1481773 | 1481802 | 3 | 10 | 30 | TGT  | 6  | 6  |
| 116113 | 12 | 1488745 | 1488760 | 4 | 4  | 16 | ATGT | 31 | 11 |
| 116115 | 12 | 1503632 | 1503667 | 2 | 18 | 36 | AC   | 7  | 8  |
| 116116 | 12 | 1505718 | 1505733 | 2 | 8  | 16 | AT   | 17 | 5  |

|        |    |         |         |   |    |    |      |    |    |
|--------|----|---------|---------|---|----|----|------|----|----|
| 116130 | 12 | 1538780 | 1538797 | 3 | 6  | 18 | AAT  | 22 | 9  |
| 116147 | 12 | 1581488 | 1581507 | 4 | 5  | 20 | ATTT | 16 | 6  |
| 116151 | 12 | 1584427 | 1584454 | 2 | 14 | 28 | TG   | 17 | 9  |
| 116155 | 12 | 1593405 | 1593418 | 2 | 7  | 14 | CT   | 33 | 3  |
| 116157 | 12 | 1595768 | 1595781 | 2 | 7  | 14 | GT   | 21 | 6  |
| 116158 | 12 | 1596513 | 1596556 | 4 | 11 | 44 | GGAT | 26 | 8  |
| 116160 | 12 | 1597104 | 1597131 | 4 | 7  | 28 | GATG | 19 | 6  |
| 116163 | 12 | 1598797 | 1598816 | 2 | 10 | 20 | AC   | 8  | 8  |
| 116166 | 12 | 1599585 | 1599604 | 2 | 10 | 20 | AC   | 18 | 11 |
| 116173 | 12 | 1634529 | 1634544 | 4 | 4  | 16 | AGAA | 20 | 5  |
| 116174 | 12 | 1636814 | 1636833 | 2 | 10 | 20 | AC   | 27 | 6  |
| 116190 | 12 | 1680092 | 1680103 | 2 | 6  | 12 | TA   | 22 | 3  |
| 116196 | 12 | 1685040 | 1685051 | 2 | 6  | 12 | AG   | 8  | 3  |
| 116200 | 12 | 1689461 | 1689476 | 2 | 8  | 16 | AC   | 21 | 3  |
| 116203 | 12 | 1698275 | 1698308 | 2 | 17 | 34 | TG   | 9  | 6  |
| 116205 | 12 | 1705897 | 1705912 | 2 | 8  | 16 | GT   | 23 | 3  |
| 116210 | 12 | 1721870 | 1721890 | 3 | 7  | 21 | TAT  | 24 | 4  |
| 116213 | 12 | 1727135 | 1727150 | 4 | 4  | 16 | TATC | 35 | 3  |
| 116217 | 12 | 1731949 | 1731963 | 3 | 5  | 15 | AAC  | 24 | 4  |
| 116219 | 12 | 1735310 | 1735323 | 2 | 7  | 14 | CA   | 26 | 8  |
| 116223 | 12 | 1746298 | 1746309 | 2 | 6  | 12 | TA   | 17 | 5  |
| 116230 | 12 | 1762501 | 1762524 | 2 | 12 | 24 | CA   | 20 | 15 |
| 116231 | 12 | 1762818 | 1762843 | 2 | 13 | 26 | GT   | 11 | 8  |
| 116235 | 12 | 1763298 | 1763323 | 2 | 13 | 26 | CA   | 12 | 13 |
| 116236 | 12 | 1763659 | 1763676 | 3 | 6  | 18 | GGA  | 20 | 7  |
| 116241 | 12 | 1776575 | 1776589 | 3 | 5  | 15 | AAT  | 24 | 5  |
| 116244 | 12 | 1780407 | 1780418 | 2 | 6  | 12 | CA   | 30 | 6  |
| 116255 | 12 | 1814979 | 1814999 | 3 | 7  | 21 | GAA  | 15 | 12 |
| 116272 | 12 | 1870988 | 1871003 | 2 | 8  | 16 | TG   | 19 | 5  |
| 116274 | 12 | 1874821 | 1874836 | 4 | 4  | 16 | CAGA | 27 | 4  |
| 116275 | 12 | 1876555 | 1876574 | 4 | 5  | 20 | CGGT | 27 | 5  |
| 116277 | 12 | 1877257 | 1877272 | 4 | 4  | 16 | GTTA | 29 | 4  |
| 116287 | 12 | 1898346 | 1898357 | 2 | 6  | 12 | AC   | 23 | 4  |
| 116289 | 12 | 1903938 | 1903961 | 3 | 8  | 24 | CCT  | 26 | 5  |
| 116290 | 12 | 1904934 | 1904948 | 3 | 5  | 15 | CTA  | 15 | 3  |
| 116295 | 12 | 1937126 | 1937149 | 2 | 12 | 24 | GT   | 12 | 12 |
| 116296 | 12 | 1939225 | 1939240 | 4 | 4  | 16 | AGAC | 27 | 6  |
| 116298 | 12 | 1944378 | 1944398 | 3 | 7  | 21 | GAT  | 21 | 5  |
| 116299 | 12 | 1948847 | 1948882 | 2 | 18 | 36 | GT   | 7  | 5  |
| 116300 | 12 | 1950741 | 1950764 | 4 | 6  | 24 | TATG | 17 | 8  |
| 116301 | 12 | 1952401 | 1952414 | 2 | 7  | 14 | TG   | 25 | 4  |
| 116308 | 12 | 1982925 | 1982964 | 2 | 20 | 40 | TG   | 17 | 12 |
| 116309 | 12 | 1985798 | 1985819 | 2 | 11 | 22 | AC   | 18 | 9  |
| 116312 | 12 | 1987870 | 1987885 | 4 | 4  | 16 | ACCA | 23 | 3  |
| 116313 | 12 | 1988582 | 1988605 | 2 | 12 | 24 | GT   | 33 | 21 |
| 116316 | 12 | 1992790 | 1992810 | 3 | 7  | 21 | CCT  | 16 | 7  |
| 116318 | 12 | 1993674 | 1993697 | 2 | 12 | 24 | CA   | 16 | 15 |
| 116327 | 12 | 2013877 | 2013928 | 4 | 13 | 52 | CCTT | 14 | 11 |
| 116329 | 12 | 2015201 | 2015212 | 2 | 6  | 12 | TG   | 16 | 3  |
| 116332 | 12 | 2018380 | 2018391 | 2 | 6  | 12 | AG   | 16 | 7  |
| 116339 | 12 | 2033761 | 2033806 | 2 | 23 | 46 | GT   | 7  | 8  |

|        |    |         |         |   |    |    |      |    |    |
|--------|----|---------|---------|---|----|----|------|----|----|
| 116342 | 12 | 2043742 | 2043763 | 2 | 11 | 22 | TG   | 22 | 7  |
| 116347 | 12 | 2049198 | 2049217 | 2 | 10 | 20 | CA   | 19 | 13 |
| 116354 | 12 | 2058939 | 2058952 | 2 | 7  | 14 | TG   | 26 | 3  |
| 116380 | 12 | 2128773 | 2128796 | 2 | 12 | 24 | TG   | 11 | 8  |
| 116381 | 12 | 2128993 | 2129016 | 2 | 12 | 24 | CA   | 9  | 10 |
| 116382 | 12 | 2129064 | 2129083 | 2 | 10 | 20 | AC   | 11 | 4  |
| 116388 | 12 | 2145278 | 2145293 | 2 | 8  | 16 | AT   | 15 | 9  |
| 116400 | 12 | 2193353 | 2193392 | 2 | 20 | 40 | GA   | 9  | 7  |
| 116405 | 12 | 2209486 | 2209507 | 2 | 11 | 22 | CA   | 21 | 16 |
| 116409 | 12 | 2226961 | 2226976 | 2 | 8  | 16 | GA   | 17 | 5  |
| 116410 | 12 | 2227409 | 2227432 | 2 | 12 | 24 | GT   | 21 | 20 |
| 116411 | 12 | 2227476 | 2227487 | 2 | 6  | 12 | TG   | 22 | 3  |
| 116412 | 12 | 2227894 | 2227923 | 2 | 15 | 30 | GT   | 11 | 11 |
| 116414 | 12 | 2230214 | 2230239 | 2 | 13 | 26 | TG   | 15 | 8  |
| 116417 | 12 | 2235285 | 2235298 | 2 | 7  | 14 | TG   | 14 | 3  |
| 116418 | 12 | 2235650 | 2235663 | 2 | 7  | 14 | TC   | 17 | 3  |
| 116420 | 12 | 2235690 | 2235711 | 2 | 11 | 22 | TC   | 14 | 8  |
| 116427 | 12 | 2251746 | 2251761 | 2 | 8  | 16 | CT   | 13 | 3  |
| 116428 | 12 | 2252046 | 2252061 | 4 | 4  | 16 | GCTG | 25 | 3  |
| 116430 | 12 | 2255448 | 2255483 | 2 | 18 | 36 | CA   | 9  | 9  |
| 116431 | 12 | 2258364 | 2258379 | 2 | 8  | 16 | CA   | 17 | 4  |
| 116432 | 12 | 2259439 | 2259454 | 2 | 8  | 16 | CA   | 29 | 4  |
| 116434 | 12 | 2261962 | 2262007 | 2 | 23 | 46 | CA   | 11 | 10 |
| 116445 | 12 | 2286548 | 2286565 | 3 | 6  | 18 | GGA  | 23 | 3  |
| 116446 | 12 | 2288026 | 2288041 | 2 | 8  | 16 | CA   | 32 | 10 |
| 116449 | 12 | 2289830 | 2289843 | 2 | 7  | 14 | AC   | 16 | 11 |
| 116450 | 12 | 2289845 | 2289856 | 2 | 6  | 12 | CA   | 24 | 13 |
| 116451 | 12 | 2289984 | 2290003 | 2 | 10 | 20 | GT   | 12 | 8  |
| 116453 | 12 | 2290257 | 2290276 | 2 | 10 | 20 | TG   | 7  | 8  |
| 116465 | 12 | 2305154 | 2305183 | 2 | 15 | 30 | AC   | 12 | 8  |
| 116469 | 12 | 2313844 | 2313859 | 2 | 8  | 16 | CA   | 28 | 8  |
| 116470 | 12 | 2314063 | 2314078 | 4 | 4  | 16 | TGTA | 33 | 4  |
| 116471 | 12 | 2319030 | 2319063 | 2 | 17 | 34 | TG   | 21 | 12 |
| 116473 | 12 | 2321867 | 2321902 | 2 | 18 | 36 | CA   | 13 | 10 |
| 116474 | 12 | 2322268 | 2322309 | 2 | 21 | 42 | TG   | 17 | 16 |
| 116485 | 12 | 2335497 | 2335516 | 2 | 10 | 20 | TC   | 27 | 4  |
| 116492 | 12 | 2339080 | 2339099 | 2 | 10 | 20 | GA   | 17 | 5  |
| 116495 | 12 | 2345764 | 2345781 | 3 | 6  | 18 | GCA  | 26 | 4  |
| 116496 | 12 | 2345923 | 2345936 | 2 | 7  | 14 | GT   | 20 | 8  |
| 116498 | 12 | 2347971 | 2347988 | 2 | 9  | 18 | GT   | 17 | 5  |
| 116499 | 12 | 2351904 | 2351931 | 2 | 14 | 28 | TG   | 20 | 9  |
| 116502 | 12 | 2355451 | 2355462 | 2 | 6  | 12 | GT   | 17 | 3  |
| 116503 | 12 | 2355465 | 2355476 | 2 | 6  | 12 | GT   | 16 | 4  |
| 116506 | 12 | 2356958 | 2356969 | 2 | 6  | 12 | CA   | 30 | 7  |
| 116508 | 12 | 2362595 | 2362614 | 2 | 10 | 20 | CA   | 20 | 9  |
| 116512 | 12 | 2365504 | 2365533 | 2 | 15 | 30 | CT   | 9  | 4  |
| 116514 | 12 | 2367314 | 2367339 | 2 | 13 | 26 | CA   | 12 | 8  |
| 116516 | 12 | 2371593 | 2371607 | 3 | 5  | 15 | TTA  | 14 | 3  |
| 116518 | 12 | 2373396 | 2373419 | 3 | 8  | 24 | CAT  | 27 | 7  |
| 116519 | 12 | 2373540 | 2373569 | 2 | 15 | 30 | TG   | 14 | 10 |
| 116520 | 12 | 2374349 | 2374390 | 2 | 21 | 42 | AG   | 11 | 13 |

|        |    |         |         |   |    |    |      |    |    |
|--------|----|---------|---------|---|----|----|------|----|----|
| 116521 | 12 | 2376619 | 2376636 | 2 | 9  | 18 | TG   | 18 | 6  |
| 116526 | 12 | 2385621 | 2385638 | 2 | 9  | 18 | TG   | 23 | 7  |
| 116537 | 12 | 2398394 | 2398423 | 2 | 15 | 30 | CA   | 16 | 13 |
| 116539 | 12 | 2401431 | 2401460 | 2 | 15 | 30 | GT   | 13 | 14 |
| 116546 | 12 | 2418860 | 2418883 | 2 | 12 | 24 | TG   | 25 | 10 |
| 116549 | 12 | 2419801 | 2419814 | 2 | 7  | 14 | TG   | 26 | 4  |
| 116554 | 12 | 2427280 | 2427291 | 2 | 6  | 12 | AT   | 14 | 6  |
| 116557 | 12 | 2430955 | 2430990 | 2 | 18 | 36 | TG   | 10 | 8  |
| 116562 | 12 | 2442427 | 2442444 | 2 | 9  | 18 | TC   | 13 | 3  |
| 116563 | 12 | 2443210 | 2443229 | 2 | 10 | 20 | CA   | 24 | 8  |
| 116581 | 12 | 2484960 | 2484975 | 2 | 8  | 16 | AC   | 17 | 4  |
| 116583 | 12 | 2487220 | 2487253 | 2 | 17 | 34 | GA   | 8  | 5  |
| 116584 | 12 | 2487906 | 2487953 | 2 | 24 | 48 | TG   | 6  | 6  |
| 116585 | 12 | 2488479 | 2488496 | 2 | 9  | 18 | GT   | 14 | 13 |
| 116587 | 12 | 2490532 | 2490547 | 2 | 8  | 16 | GT   | 29 | 7  |
| 116588 | 12 | 2492125 | 2492156 | 2 | 16 | 32 | AG   | 15 | 11 |
| 116591 | 12 | 2494314 | 2494335 | 2 | 11 | 22 | AC   | 9  | 6  |
| 116596 | 12 | 2500313 | 2500328 | 4 | 4  | 16 | ACGC | 15 | 5  |
| 116599 | 12 | 2500518 | 2500533 | 2 | 8  | 16 | CA   | 25 | 6  |
| 116600 | 12 | 2500709 | 2500722 | 2 | 7  | 14 | TC   | 25 | 5  |
| 116608 | 12 | 2507363 | 2507382 | 2 | 10 | 20 | CA   | 15 | 4  |
| 116609 | 12 | 2507644 | 2507663 | 2 | 10 | 20 | GT   | 18 | 4  |
| 116612 | 12 | 2511574 | 2511591 | 2 | 9  | 18 | TC   | 15 | 4  |
| 116624 | 12 | 2531932 | 2531955 | 2 | 12 | 24 | CT   | 18 | 5  |
| 116626 | 12 | 2537615 | 2537642 | 4 | 7  | 28 | GTGC | 22 | 6  |
| 116628 | 12 | 2539784 | 2539797 | 2 | 7  | 14 | GT   | 18 | 10 |
| 116629 | 12 | 2542417 | 2542476 | 4 | 15 | 60 | AGAA | 7  | 9  |
| 116630 | 12 | 2545059 | 2545072 | 2 | 7  | 14 | AT   | 13 | 3  |
| 116631 | 12 | 2546238 | 2546259 | 2 | 11 | 22 | AC   | 15 | 7  |
| 116634 | 12 | 2548825 | 2548846 | 2 | 11 | 22 | CA   | 18 | 10 |
| 116635 | 12 | 2548916 | 2548927 | 2 | 6  | 12 | CA   | 17 | 4  |
| 116642 | 12 | 2559576 | 2559589 | 2 | 7  | 14 | AT   | 9  | 4  |
| 116644 | 12 | 2560518 | 2560531 | 2 | 7  | 14 | TG   | 20 | 11 |
| 116650 | 12 | 2569767 | 2569788 | 2 | 11 | 22 | GT   | 19 | 8  |
| 116659 | 12 | 2578819 | 2578848 | 2 | 15 | 30 | AC   | 18 | 8  |
| 116661 | 12 | 2579091 | 2579104 | 2 | 7  | 14 | CA   | 19 | 5  |
| 116662 | 12 | 2583233 | 2583250 | 2 | 9  | 18 | CA   | 24 | 6  |
| 116663 | 12 | 2586963 | 2586977 | 3 | 5  | 15 | CTC  | 13 | 4  |
| 116665 | 12 | 2590892 | 2590925 | 2 | 17 | 34 | TG   | 10 | 13 |
| 116674 | 12 | 2608689 | 2608704 | 2 | 8  | 16 | CA   | 12 | 7  |
| 116676 | 12 | 2612647 | 2612658 | 2 | 6  | 12 | GT   | 24 | 4  |
| 116678 | 12 | 2613263 | 2613282 | 2 | 10 | 20 | CA   | 24 | 3  |
| 116681 | 12 | 2618269 | 2618302 | 2 | 17 | 34 | AG   | 12 | 11 |
| 116687 | 12 | 2622754 | 2622777 | 2 | 12 | 24 | AC   | 23 | 8  |
| 116690 | 12 | 2628349 | 2628372 | 2 | 12 | 24 | CA   | 13 | 9  |
| 116696 | 12 | 2635445 | 2635470 | 2 | 13 | 26 | CA   | 21 | 11 |
| 116699 | 12 | 2636112 | 2636127 | 2 | 8  | 16 | CT   | 19 | 4  |
| 116700 | 12 | 2636510 | 2636521 | 2 | 6  | 12 | TC   | 16 | 4  |
| 116704 | 12 | 2652534 | 2652547 | 2 | 7  | 14 | AC   | 23 | 10 |
| 116710 | 12 | 2663369 | 2663383 | 3 | 5  | 15 | GCA  | 30 | 5  |
| 116717 | 12 | 2675429 | 2675443 | 3 | 5  | 15 | GCT  | 18 | 3  |

|        |    |         |         |   |    |    |      |    |    |
|--------|----|---------|---------|---|----|----|------|----|----|
| 116724 | 12 | 2680197 | 2680214 | 2 | 9  | 18 | TG   | 17 | 14 |
| 116725 | 12 | 2680782 | 2680815 | 2 | 17 | 34 | TG   | 11 | 8  |
| 116726 | 12 | 2682389 | 2682410 | 2 | 11 | 22 | CA   | 22 | 10 |
| 116729 | 12 | 2686105 | 2686126 | 2 | 11 | 22 | TG   | 14 | 8  |
| 116733 | 12 | 2688207 | 2688222 | 2 | 8  | 16 | GT   | 19 | 13 |
| 116734 | 12 | 2688224 | 2688239 | 2 | 8  | 16 | TG   | 20 | 10 |
| 116739 | 12 | 2693167 | 2693188 | 2 | 11 | 22 | GA   | 27 | 10 |
| 116745 | 12 | 2702276 | 2702299 | 4 | 6  | 24 | GGTT | 29 | 12 |
| 116746 | 12 | 2704038 | 2704067 | 2 | 15 | 30 | CA   | 11 | 9  |
| 116747 | 12 | 2705447 | 2705462 | 2 | 8  | 16 | CT   | 11 | 4  |
| 116753 | 12 | 2715094 | 2715117 | 3 | 8  | 24 | TCC  | 24 | 5  |
| 116754 | 12 | 2715440 | 2715465 | 2 | 13 | 26 | GT   | 17 | 15 |
| 116755 | 12 | 2715716 | 2715727 | 2 | 6  | 12 | TG   | 31 | 5  |
| 116756 | 12 | 2719157 | 2719168 | 2 | 6  | 12 | CA   | 25 | 3  |
| 116757 | 12 | 2719636 | 2719651 | 2 | 8  | 16 | GT   | 21 | 11 |
| 116759 | 12 | 2721145 | 2721160 | 2 | 8  | 16 | TC   | 12 | 6  |
| 116762 | 12 | 2723845 | 2723864 | 2 | 10 | 20 | GT   | 23 | 12 |
| 116763 | 12 | 2723922 | 2723939 | 2 | 9  | 18 | AC   | 24 | 4  |
| 116764 | 12 | 2723974 | 2723988 | 3 | 5  | 15 | GCA  | 22 | 3  |
| 116766 | 12 | 2724297 | 2724311 | 3 | 5  | 15 | CAG  | 28 | 3  |
| 116768 | 12 | 2724667 | 2724678 | 2 | 6  | 12 | CA   | 27 | 3  |
| 116769 | 12 | 2727344 | 2727363 | 4 | 5  | 20 | TTAT | 18 | 3  |
| 116770 | 12 | 2730243 | 2730256 | 2 | 7  | 14 | GT   | 20 | 4  |
| 116776 | 12 | 2734227 | 2734240 | 2 | 7  | 14 | CA   | 12 | 7  |
| 116777 | 12 | 2735689 | 2735702 | 2 | 7  | 14 | TG   | 22 | 3  |
| 116779 | 12 | 2735968 | 2735999 | 2 | 16 | 32 | CA   | 14 | 12 |
| 116783 | 12 | 2743509 | 2743526 | 2 | 9  | 18 | GT   | 18 | 6  |
| 116786 | 12 | 2751893 | 2751924 | 2 | 16 | 32 | AC   | 9  | 6  |
| 116793 | 12 | 2763674 | 2763699 | 2 | 13 | 26 | TG   | 12 | 16 |
| 116795 | 12 | 2764206 | 2764227 | 2 | 11 | 22 | GT   | 12 | 8  |
| 116796 | 12 | 2764670 | 2764697 | 2 | 14 | 28 | AC   | 16 | 10 |
| 116799 | 12 | 2765720 | 2765763 | 2 | 22 | 44 | GT   | 6  | 9  |
| 116803 | 12 | 2768250 | 2768263 | 2 | 7  | 14 | TG   | 21 | 4  |
| 116804 | 12 | 2768566 | 2768581 | 2 | 8  | 16 | GT   | 23 | 8  |
| 116808 | 12 | 2785515 | 2785536 | 2 | 11 | 22 | AC   | 13 | 7  |
| 116809 | 12 | 2787483 | 2787498 | 2 | 8  | 16 | GT   | 10 | 8  |
| 116811 | 12 | 2793543 | 2793558 | 2 | 8  | 16 | TG   | 24 | 8  |
| 116816 | 12 | 2802089 | 2802114 | 2 | 13 | 26 | GT   | 11 | 6  |
| 116819 | 12 | 2812024 | 2812050 | 3 | 9  | 27 | CTC  | 27 | 4  |
| 116823 | 12 | 2821650 | 2821661 | 2 | 6  | 12 | TG   | 26 | 3  |
| 116826 | 12 | 2825867 | 2825886 | 4 | 5  | 20 | TTAT | 12 | 4  |
| 116829 | 12 | 2829008 | 2829037 | 3 | 10 | 30 | AGT  | 11 | 4  |
| 116835 | 12 | 2834596 | 2834609 | 2 | 7  | 14 | AT   | 26 | 3  |
| 116836 | 12 | 2836657 | 2836680 | 4 | 6  | 24 | GATG | 29 | 4  |
| 116842 | 12 | 2842713 | 2842726 | 2 | 7  | 14 | AC   | 20 | 4  |
| 116846 | 12 | 2848685 | 2848698 | 2 | 7  | 14 | AC   | 22 | 8  |
| 116848 | 12 | 2855074 | 2855093 | 2 | 10 | 20 | GT   | 18 | 4  |
| 116853 | 12 | 2859667 | 2859680 | 2 | 7  | 14 | AG   | 26 | 3  |
| 116858 | 12 | 2875509 | 2875528 | 2 | 10 | 20 | TC   | 6  | 4  |
| 116859 | 12 | 2875848 | 2875859 | 2 | 6  | 12 | CA   | 31 | 4  |
| 116863 | 12 | 2878697 | 2878712 | 2 | 8  | 16 | AC   | 25 | 5  |

|        |    |         |         |   |    |    |      |    |    |
|--------|----|---------|---------|---|----|----|------|----|----|
| 116865 | 12 | 2879337 | 2879348 | 2 | 6  | 12 | TC   | 16 | 3  |
| 116869 | 12 | 2879682 | 2879715 | 2 | 17 | 34 | GA   | 13 | 8  |
| 116870 | 12 | 2880265 | 2880280 | 2 | 8  | 16 | GT   | 16 | 7  |
| 116871 | 12 | 2880281 | 2880292 | 2 | 6  | 12 | GA   | 17 | 4  |
| 116872 | 12 | 2880548 | 2880563 | 2 | 8  | 16 | CT   | 16 | 3  |
| 116873 | 12 | 2881096 | 2881109 | 2 | 7  | 14 | TG   | 16 | 3  |
| 116874 | 12 | 2881134 | 2881161 | 2 | 14 | 28 | TG   | 17 | 8  |
| 116875 | 12 | 2882629 | 2882656 | 2 | 14 | 28 | AC   | 21 | 7  |
| 116877 | 12 | 2882767 | 2882784 | 2 | 9  | 18 | AC   | 18 | 8  |
| 116878 | 12 | 2882964 | 2882997 | 2 | 17 | 34 | AC   | 14 | 10 |
| 116879 | 12 | 2883167 | 2883194 | 4 | 7  | 28 | CAGA | 17 | 3  |
| 116881 | 12 | 2883903 | 2883930 | 2 | 14 | 28 | GT   | 19 | 7  |
| 116882 | 12 | 2886162 | 2886179 | 2 | 9  | 18 | TG   | 27 | 3  |
| 116887 | 12 | 2894783 | 2894794 | 2 | 6  | 12 | AC   | 26 | 3  |
| 116890 | 12 | 2899861 | 2899872 | 2 | 6  | 12 | CA   | 23 | 4  |
| 116891 | 12 | 2900146 | 2900161 | 2 | 8  | 16 | CA   | 27 | 5  |
| 116892 | 12 | 2902578 | 2902597 | 2 | 10 | 20 | AC   | 25 | 3  |
| 116903 | 12 | 2922611 | 2922642 | 2 | 16 | 32 | CT   | 17 | 8  |
| 116905 | 12 | 2923679 | 2923692 | 2 | 7  | 14 | TG   | 24 | 3  |
| 116906 | 12 | 2924602 | 2924621 | 2 | 10 | 20 | GT   | 19 | 10 |
| 116907 | 12 | 2926645 | 2926658 | 2 | 7  | 14 | TG   | 22 | 10 |
| 116908 | 12 | 2927220 | 2927239 | 2 | 10 | 20 | TG   | 20 | 4  |
| 116911 | 12 | 2939446 | 2939463 | 3 | 6  | 18 | CTC  | 21 | 3  |
| 116916 | 12 | 2948766 | 2948777 | 2 | 6  | 12 | GT   | 10 | 3  |
| 116918 | 12 | 2949910 | 2949921 | 2 | 6  | 12 | CA   | 24 | 4  |
| 116919 | 12 | 2949964 | 2949983 | 2 | 10 | 20 | CA   | 22 | 9  |
| 116921 | 12 | 2950258 | 2950269 | 2 | 6  | 12 | AC   | 26 | 6  |
| 116922 | 12 | 2950585 | 2950604 | 2 | 10 | 20 | AC   | 12 | 3  |
| 116927 | 12 | 2951835 | 2951864 | 2 | 15 | 30 | GT   | 6  | 9  |
| 116930 | 12 | 2952989 | 2953008 | 2 | 10 | 20 | TG   | 21 | 5  |
| 116939 | 12 | 2960892 | 2960906 | 3 | 5  | 15 | GAG  | 25 | 8  |
| 116940 | 12 | 2961009 | 2961020 | 2 | 6  | 12 | AC   | 18 | 3  |
| 116941 | 12 | 2961022 | 2961037 | 2 | 8  | 16 | CA   | 21 | 4  |
| 116944 | 12 | 2964524 | 2964539 | 2 | 8  | 16 | GT   | 20 | 5  |
| 116945 | 12 | 2964636 | 2964651 | 2 | 8  | 16 | AC   | 27 | 4  |
| 116947 | 12 | 2966133 | 2966178 | 2 | 23 | 46 | GT   | 9  | 10 |
| 116948 | 12 | 2966339 | 2966364 | 2 | 13 | 26 | CA   | 6  | 7  |
| 116951 | 12 | 2968278 | 2968295 | 2 | 9  | 18 | GT   | 15 | 6  |
| 116953 | 12 | 2968557 | 2968592 | 2 | 18 | 36 | AC   | 15 | 8  |
| 116962 | 12 | 2974175 | 2974196 | 2 | 11 | 22 | AG   | 12 | 7  |
| 116965 | 12 | 2974623 | 2974634 | 2 | 6  | 12 | TG   | 19 | 4  |
| 116981 | 12 | 2981609 | 2981620 | 2 | 6  | 12 | CA   | 25 | 7  |
| 116982 | 12 | 2981730 | 2981753 | 2 | 12 | 24 | CA   | 20 | 4  |
| 116983 | 12 | 2984783 | 2984806 | 2 | 12 | 24 | CA   | 17 | 7  |
| 116989 | 12 | 2985979 | 2985996 | 2 | 9  | 18 | TG   | 13 | 9  |
| 116990 | 12 | 2986133 | 2986150 | 2 | 9  | 18 | TG   | 24 | 4  |
| 116991 | 12 | 2989249 | 2989266 | 2 | 9  | 18 | AC   | 27 | 3  |
| 116993 | 12 | 2989800 | 2989813 | 2 | 7  | 14 | CT   | 17 | 10 |
| 116995 | 12 | 2990312 | 2990339 | 2 | 14 | 28 | GT   | 13 | 8  |
| 116999 | 12 | 2992363 | 2992380 | 2 | 9  | 18 | AC   | 18 | 10 |
| 117002 | 12 | 2992828 | 2992849 | 2 | 11 | 22 | CA   | 9  | 6  |

|        |    |         |         |   |    |    |     |    |    |
|--------|----|---------|---------|---|----|----|-----|----|----|
| 117003 | 12 | 2993073 | 2993087 | 3 | 5  | 15 | GCT | 9  | 4  |
| 117013 | 12 | 2999214 | 2999229 | 2 | 8  | 16 | GT  | 19 | 3  |
| 117014 | 12 | 2999995 | 3000016 | 2 | 11 | 22 | GT  | 23 | 13 |
| 117015 | 12 | 3000185 | 3000211 | 3 | 9  | 27 | GAG | 30 | 8  |
| 117018 | 12 | 3014349 | 3014380 | 2 | 16 | 32 | CA  | 17 | 17 |
| 117023 | 12 | 3025295 | 3025321 | 3 | 9  | 27 | CTC | 18 | 8  |
| 117027 | 12 | 3026859 | 3026874 | 2 | 8  | 16 | AG  | 25 | 9  |
| 117028 | 12 | 3029744 | 3029771 | 2 | 14 | 28 | AC  | 17 | 6  |
| 117037 | 12 | 3031670 | 3031689 | 2 | 10 | 20 | CA  | 19 | 5  |
| 117038 | 12 | 3032029 | 3032043 | 3 | 5  | 15 | GAG | 16 | 4  |
| 117039 | 12 | 3032703 | 3032723 | 3 | 7  | 21 | GAG | 11 | 3  |
| 117043 | 12 | 3035808 | 3035819 | 2 | 6  | 12 | AC  | 17 | 6  |
| 117045 | 12 | 3035869 | 3035884 | 2 | 8  | 16 | CA  | 18 | 4  |
| 117049 | 12 | 3041125 | 3041154 | 2 | 15 | 30 | AC  | 20 | 9  |
| 117052 | 12 | 3048136 | 3048161 | 2 | 13 | 26 | CA  | 26 | 5  |
| 117056 | 12 | 3049585 | 3049608 | 2 | 12 | 24 | TG  | 10 | 10 |
| 117057 | 12 | 3050848 | 3050873 | 2 | 13 | 26 | AC  | 11 | 7  |
| 117058 | 12 | 3054499 | 3054530 | 2 | 16 | 32 | TG  | 15 | 17 |
| 117059 | 12 | 3054658 | 3054673 | 2 | 8  | 16 | AC  | 16 | 8  |
| 117063 | 12 | 3054998 | 3055027 | 2 | 15 | 30 | GT  | 25 | 9  |
| 117066 | 12 | 3057065 | 3057080 | 2 | 8  | 16 | TG  | 19 | 11 |
| 117068 | 12 | 3058781 | 3058806 | 2 | 13 | 26 | CA  | 25 | 11 |
| 117069 | 12 | 3059068 | 3059081 | 2 | 7  | 14 | TG  | 28 | 4  |
| 117070 | 12 | 3061174 | 3061185 | 2 | 6  | 12 | CA  | 28 | 4  |
| 117071 | 12 | 3061342 | 3061355 | 2 | 7  | 14 | GT  | 25 | 3  |
| 117074 | 12 | 3064897 | 3064916 | 2 | 10 | 20 | GT  | 15 | 7  |
| 117075 | 12 | 3065594 | 3065611 | 3 | 6  | 18 | TCC | 27 | 5  |
| 117083 | 12 | 3081303 | 3081320 | 3 | 6  | 18 | GAG | 16 | 5  |
| 117084 | 12 | 3081475 | 3081488 | 2 | 7  | 14 | AC  | 17 | 5  |
| 117085 | 12 | 3081534 | 3081557 | 2 | 12 | 24 | CA  | 12 | 7  |
| 117087 | 12 | 3082359 | 3082374 | 2 | 8  | 16 | TG  | 23 | 7  |
| 117089 | 12 | 3083883 | 3083914 | 2 | 16 | 32 | GT  | 19 | 9  |
| 117091 | 12 | 3084191 | 3084206 | 2 | 8  | 16 | GT  | 15 | 6  |
| 117092 | 12 | 3085979 | 3085994 | 2 | 8  | 16 | GT  | 23 | 5  |
| 117094 | 12 | 3086395 | 3086408 | 2 | 7  | 14 | GT  | 19 | 6  |
| 117095 | 12 | 3086657 | 3086672 | 2 | 8  | 16 | AG  | 19 | 5  |
| 117105 | 12 | 3101587 | 3101624 | 2 | 19 | 38 | AC  | 22 | 12 |
| 117107 | 12 | 3105385 | 3105399 | 3 | 5  | 15 | GAG | 14 | 4  |
| 117111 | 12 | 3111361 | 3111372 | 2 | 6  | 12 | AC  | 33 | 3  |
| 117112 | 12 | 3111528 | 3111551 | 2 | 12 | 24 | GT  | 18 | 18 |
| 117117 | 12 | 3116882 | 3116921 | 2 | 20 | 40 | AC  | 14 | 10 |
| 117119 | 12 | 3117641 | 3117667 | 3 | 9  | 27 | TCC | 18 | 4  |
| 117120 | 12 | 3118578 | 3118591 | 2 | 7  | 14 | AC  | 14 | 4  |
| 117121 | 12 | 3118707 | 3118734 | 2 | 14 | 28 | AC  | 17 | 9  |
| 117123 | 12 | 3119118 | 3119131 | 2 | 7  | 14 | AC  | 13 | 3  |
| 117131 | 12 | 3128267 | 3128282 | 2 | 8  | 16 | AT  | 19 | 3  |
| 117134 | 12 | 3138731 | 3138758 | 2 | 14 | 28 | AC  | 18 | 17 |
| 117142 | 12 | 3146557 | 3146568 | 2 | 6  | 12 | GA  | 35 | 3  |
| 117143 | 12 | 3149624 | 3149651 | 2 | 14 | 28 | CA  | 23 | 8  |
| 117145 | 12 | 3152895 | 3152912 | 2 | 9  | 18 | TG  | 22 | 6  |
| 117146 | 12 | 3153770 | 3153784 | 3 | 5  | 15 | AAC | 22 | 4  |

|        |    |         |         |   |    |    |      |    |    |
|--------|----|---------|---------|---|----|----|------|----|----|
| 117149 | 12 | 3157313 | 3157338 | 2 | 13 | 26 | CA   | 17 | 15 |
| 117160 | 12 | 3175798 | 3175817 | 2 | 10 | 20 | AC   | 23 | 6  |
| 117161 | 12 | 3176834 | 3176857 | 4 | 6  | 24 | AAAT | 16 | 5  |
| 117163 | 12 | 3180291 | 3180306 | 2 | 8  | 16 | CA   | 23 | 4  |
| 117165 | 12 | 3182652 | 3182666 | 3 | 5  | 15 | ATT  | 18 | 6  |
| 117167 | 12 | 3187212 | 3187225 | 2 | 7  | 14 | CA   | 34 | 3  |
| 117168 | 12 | 3190052 | 3190077 | 2 | 13 | 26 | CT   | 13 | 9  |
| 117172 | 12 | 3198801 | 3198814 | 2 | 7  | 14 | TC   | 23 | 3  |
| 117173 | 12 | 3199780 | 3199795 | 2 | 8  | 16 | AC   | 24 | 6  |
| 117177 | 12 | 3202758 | 3202777 | 2 | 10 | 20 | AC   | 25 | 8  |
| 117180 | 12 | 3206613 | 3206632 | 2 | 10 | 20 | TG   | 23 | 8  |
| 117183 | 12 | 3211983 | 3212042 | 2 | 30 | 60 | AC   | 10 | 12 |
| 117184 | 12 | 3213620 | 3213633 | 2 | 7  | 14 | TG   | 10 | 3  |
| 117186 | 12 | 3216535 | 3216554 | 4 | 5  | 20 | ACAG | 30 | 5  |
| 117187 | 12 | 3216930 | 3216945 | 2 | 8  | 16 | AC   | 28 | 7  |
| 117188 | 12 | 3217216 | 3217227 | 2 | 6  | 12 | AG   | 23 | 3  |
| 117189 | 12 | 3217434 | 3217445 | 2 | 6  | 12 | GT   | 24 | 6  |
| 117190 | 12 | 3217821 | 3217834 | 2 | 7  | 14 | CA   | 14 | 9  |
| 117191 | 12 | 3223165 | 3223188 | 2 | 12 | 24 | TG   | 25 | 7  |
| 117192 | 12 | 3223335 | 3223350 | 2 | 8  | 16 | CA   | 12 | 7  |
| 117193 | 12 | 3223452 | 3223463 | 2 | 6  | 12 | CA   | 11 | 6  |
| 117197 | 12 | 3230933 | 3230948 | 2 | 8  | 16 | AG   | 14 | 3  |
| 117198 | 12 | 3231218 | 3231231 | 2 | 7  | 14 | GA   | 18 | 11 |
| 117199 | 12 | 3231343 | 3231370 | 4 | 7  | 28 | ATGG | 17 | 3  |
| 117202 | 12 | 3241244 | 3241257 | 2 | 7  | 14 | GT   | 19 | 8  |
| 117203 | 12 | 3242383 | 3242394 | 2 | 6  | 12 | GA   | 33 | 4  |
| 117204 | 12 | 3244407 | 3244428 | 2 | 11 | 22 | TG   | 15 | 4  |
| 117206 | 12 | 3247276 | 3247317 | 2 | 21 | 42 | CA   | 19 | 15 |
| 117209 | 12 | 3247678 | 3247699 | 2 | 11 | 22 | TG   | 15 | 7  |
| 117214 | 12 | 3254911 | 3254928 | 3 | 6  | 18 | CCA  | 26 | 6  |
| 117215 | 12 | 3255176 | 3255191 | 2 | 8  | 16 | AC   | 19 | 5  |
| 117216 | 12 | 3255441 | 3255458 | 3 | 6  | 18 | CCT  | 14 | 4  |
| 117217 | 12 | 3256156 | 3256185 | 2 | 15 | 30 | CA   | 13 | 14 |
| 117259 | 12 | 3323570 | 3323603 | 2 | 17 | 34 | CA   | 14 | 9  |
| 117265 | 12 | 3349384 | 3349397 | 2 | 7  | 14 | TG   | 19 | 5  |
| 117266 | 12 | 3349400 | 3349411 | 2 | 6  | 12 | TG   | 19 | 3  |
| 117268 | 12 | 3350891 | 3350930 | 2 | 20 | 40 | CA   | 20 | 11 |
| 117270 | 12 | 3354679 | 3354700 | 2 | 11 | 22 | AC   | 22 | 8  |
| 117275 | 12 | 3360897 | 3360929 | 3 | 11 | 33 | TAA  | 10 | 6  |
| 117279 | 12 | 3361479 | 3361502 | 2 | 12 | 24 | TG   | 16 | 12 |
| 117283 | 12 | 3372668 | 3372681 | 2 | 7  | 14 | GT   | 17 | 4  |
| 117284 | 12 | 3377983 | 3377998 | 2 | 8  | 16 | AC   | 14 | 9  |
| 117290 | 12 | 3406595 | 3406633 | 3 | 13 | 39 | GCA  | 19 | 14 |
| 117294 | 12 | 3410987 | 3411014 | 4 | 7  | 28 | AAAC | 14 | 7  |
| 117295 | 12 | 3411403 | 3411428 | 2 | 13 | 26 | CA   | 18 | 10 |
| 117296 | 12 | 3411591 | 3411614 | 4 | 6  | 24 | AGAC | 27 | 4  |
| 117298 | 12 | 3411917 | 3411934 | 3 | 6  | 18 | TTG  | 15 | 8  |
| 117299 | 12 | 3416273 | 3416304 | 2 | 16 | 32 | GT   | 15 | 9  |
| 117302 | 12 | 3425764 | 3425781 | 3 | 6  | 18 | TTG  | 22 | 3  |
| 117304 | 12 | 3442092 | 3442103 | 2 | 6  | 12 | GA   | 24 | 4  |
| 117306 | 12 | 3452210 | 3452227 | 2 | 9  | 18 | GA   | 18 | 5  |



|        |    |         |         |   |    |    |      |    |    |
|--------|----|---------|---------|---|----|----|------|----|----|
| 117310 | 12 | 3454737 | 3454752 | 4 | 4  | 16 | GAGC | 24 | 9  |
| 117311 | 12 | 3454753 | 3454768 | 4 | 4  | 16 | GAGG | 18 | 5  |
| 117313 | 12 | 3455881 | 3455894 | 2 | 7  | 14 | CT   | 16 | 3  |
| 117317 | 12 | 3458391 | 3458410 | 2 | 10 | 20 | AC   | 36 | 7  |
| 117321 | 12 | 3465222 | 3465243 | 2 | 11 | 22 | TG   | 23 | 4  |
| 117328 | 12 | 3480393 | 3480408 | 4 | 4  | 16 | TTTC | 9  | 5  |
| 117339 | 12 | 3494924 | 3494949 | 2 | 13 | 26 | TG   | 16 | 12 |
| 117340 | 12 | 3495067 | 3495082 | 2 | 8  | 16 | TG   | 19 | 10 |
| 117341 | 12 | 3495518 | 3495532 | 3 | 5  | 15 | GGA  | 15 | 7  |
| 117342 | 12 | 3495968 | 3495999 | 2 | 16 | 32 | TC   | 12 | 6  |
| 117343 | 12 | 3496215 | 3496230 | 2 | 8  | 16 | TC   | 22 | 7  |
| 117349 | 12 | 3500878 | 3500895 | 2 | 9  | 18 | AC   | 27 | 7  |
| 117350 | 12 | 3502859 | 3502884 | 2 | 13 | 26 | TG   | 8  | 10 |
| 117351 | 12 | 3503034 | 3503045 | 2 | 6  | 12 | GT   | 21 | 5  |
| 117353 | 12 | 3503805 | 3503826 | 2 | 11 | 22 | GT   | 25 | 8  |
| 117354 | 12 | 3504128 | 3504165 | 2 | 19 | 38 | CA   | 14 | 15 |
| 117355 | 12 | 3506351 | 3506370 | 4 | 5  | 20 | CTTT | 19 | 11 |
| 117358 | 12 | 3512731 | 3512742 | 2 | 6  | 12 | GT   | 23 | 7  |
| 117359 | 12 | 3513693 | 3513713 | 3 | 7  | 21 | TGC  | 20 | 3  |
| 117360 | 12 | 3516084 | 3516117 | 2 | 17 | 34 | CA   | 13 | 8  |
| 117361 | 12 | 3516672 | 3516683 | 2 | 6  | 12 | CT   | 33 | 3  |
| 117365 | 12 | 3520833 | 3520850 | 2 | 9  | 18 | GT   | 22 | 7  |
| 117366 | 12 | 3521931 | 3521962 | 4 | 8  | 32 | TATC | 23 | 17 |
| 117368 | 12 | 3522747 | 3522774 | 2 | 14 | 28 | CA   | 20 | 8  |
| 117371 | 12 | 3523877 | 3523894 | 3 | 6  | 18 | CCT  | 11 | 4  |
| 117373 | 12 | 3524802 | 3524813 | 2 | 6  | 12 | GT   | 26 | 8  |
| 117374 | 12 | 3525125 | 3525138 | 2 | 7  | 14 | TG   | 25 | 4  |
| 117379 | 12 | 3532851 | 3532871 | 3 | 7  | 21 | TCT  | 10 | 13 |
| 117383 | 12 | 3539452 | 3539469 | 2 | 9  | 18 | CT   | 27 | 5  |
| 117385 | 12 | 3544555 | 3544574 | 2 | 10 | 20 | GA   | 22 | 7  |
| 117386 | 12 | 3544602 | 3544623 | 2 | 11 | 22 | TG   | 16 | 7  |
| 117390 | 12 | 3549122 | 3549157 | 2 | 18 | 36 | TG   | 13 | 12 |
| 117393 | 12 | 3549962 | 3549973 | 2 | 6  | 12 | CA   | 33 | 3  |
| 117395 | 12 | 3551631 | 3551652 | 2 | 11 | 22 | TG   | 17 | 6  |
| 117403 | 12 | 3560469 | 3560486 | 2 | 9  | 18 | CA   | 7  | 9  |
| 117404 | 12 | 3561151 | 3561166 | 2 | 8  | 16 | GT   | 16 | 9  |
| 117406 | 12 | 3562524 | 3562537 | 2 | 7  | 14 | TG   | 24 | 9  |
| 117407 | 12 | 3562713 | 3562732 | 2 | 10 | 20 | TG   | 22 | 5  |
| 117408 | 12 | 3562886 | 3562905 | 2 | 10 | 20 | GT   | 21 | 5  |
| 117409 | 12 | 3564054 | 3564077 | 2 | 12 | 24 | AC   | 22 | 6  |
| 117412 | 12 | 3569711 | 3569732 | 2 | 11 | 22 | GT   | 15 | 4  |
| 117413 | 12 | 3570035 | 3570062 | 2 | 14 | 28 | CA   | 16 | 12 |
| 117414 | 12 | 3570205 | 3570224 | 2 | 10 | 20 | TG   | 16 | 13 |
| 117425 | 12 | 3582938 | 3582951 | 2 | 7  | 14 | GT   | 23 | 9  |
| 117428 | 12 | 3585369 | 3585388 | 2 | 10 | 20 | AG   | 21 | 6  |
| 117429 | 12 | 3585574 | 3585587 | 2 | 7  | 14 | GT   | 22 | 6  |
| 117433 | 12 | 3596051 | 3596064 | 2 | 7  | 14 | TA   | 6  | 3  |
| 117438 | 12 | 3599226 | 3599245 | 2 | 10 | 20 | TG   | 21 | 11 |
| 117439 | 12 | 3599391 | 3599410 | 2 | 10 | 20 | TG   | 13 | 13 |
| 117441 | 12 | 3604141 | 3604162 | 2 | 11 | 22 | AC   | 11 | 10 |
| 117442 | 12 | 3604257 | 3604276 | 2 | 10 | 20 | TG   | 20 | 10 |

|        |    |         |         |   |    |    |      |    |    |
|--------|----|---------|---------|---|----|----|------|----|----|
| 117448 | 12 | 3608016 | 3608031 | 2 | 8  | 16 | GT   | 23 | 12 |
| 117449 | 12 | 3608102 | 3608129 | 2 | 14 | 28 | TG   | 16 | 10 |
| 117452 | 12 | 3614505 | 3614520 | 2 | 8  | 16 | TG   | 20 | 4  |
| 117456 | 12 | 3617289 | 3617306 | 2 | 9  | 18 | AC   | 24 | 8  |
| 117458 | 12 | 3619929 | 3619946 | 2 | 9  | 18 | TG   | 15 | 4  |
| 117471 | 12 | 3637006 | 3637021 | 4 | 4  | 16 | ATAA | 24 | 5  |
| 117472 | 12 | 3637022 | 3637035 | 2 | 7  | 14 | AC   | 24 | 7  |
| 117476 | 12 | 3648724 | 3648735 | 2 | 6  | 12 | TA   | 27 | 4  |
| 117478 | 12 | 3650012 | 3650027 | 4 | 4  | 16 | AAAT | 20 | 11 |
| 117479 | 12 | 3651690 | 3651701 | 2 | 6  | 12 | AC   | 23 | 6  |
| 117481 | 12 | 3653787 | 3653800 | 2 | 7  | 14 | TG   | 22 | 5  |
| 117482 | 12 | 3653870 | 3653891 | 2 | 11 | 22 | TG   | 20 | 11 |
| 117490 | 12 | 3677634 | 3677660 | 3 | 9  | 27 | AGC  | 21 | 5  |
| 117491 | 12 | 3677734 | 3677753 | 2 | 10 | 20 | CA   | 28 | 9  |
| 117493 | 12 | 3679211 | 3679230 | 2 | 10 | 20 | GA   | 23 | 5  |
| 117494 | 12 | 3679560 | 3679580 | 3 | 7  | 21 | TAA  | 19 | 12 |
| 117497 | 12 | 3684240 | 3684267 | 2 | 14 | 28 | CA   | 13 | 9  |
| 117498 | 12 | 3684590 | 3684601 | 2 | 6  | 12 | GA   | 23 | 3  |
| 117499 | 12 | 3686659 | 3686680 | 2 | 11 | 22 | GA   | 19 | 8  |
| 117500 | 12 | 3689156 | 3689167 | 2 | 6  | 12 | CA   | 15 | 12 |
| 117501 | 12 | 3691622 | 3691645 | 2 | 12 | 24 | CA   | 6  | 6  |
| 117506 | 12 | 3693552 | 3693569 | 2 | 9  | 18 | GA   | 15 | 3  |
| 117507 | 12 | 3693826 | 3693849 | 2 | 12 | 24 | GA   | 14 | 4  |
| 117508 | 12 | 3694255 | 3694272 | 2 | 9  | 18 | GA   | 13 | 6  |
| 117516 | 12 | 3702744 | 3702769 | 2 | 13 | 26 | GA   | 13 | 5  |
| 117518 | 12 | 3705359 | 3705372 | 2 | 7  | 14 | AT   | 19 | 11 |
| 117520 | 12 | 3710306 | 3710317 | 2 | 6  | 12 | AC   | 26 | 4  |
| 117523 | 12 | 3712799 | 3712830 | 2 | 16 | 32 | CA   | 15 | 6  |
| 117524 | 12 | 3712939 | 3712952 | 2 | 7  | 14 | TG   | 20 | 6  |
| 117525 | 12 | 3713049 | 3713066 | 2 | 9  | 18 | TC   | 6  | 5  |
| 117526 | 12 | 3713287 | 3713310 | 2 | 12 | 24 | CA   | 23 | 17 |
| 117528 | 12 | 3714690 | 3714707 | 2 | 9  | 18 | CA   | 16 | 7  |
| 117531 | 12 | 3715503 | 3715524 | 2 | 11 | 22 | AC   | 16 | 5  |
| 117532 | 12 | 3715681 | 3715698 | 2 | 9  | 18 | TG   | 18 | 10 |
| 117539 | 12 | 3718580 | 3718605 | 2 | 13 | 26 | GA   | 21 | 10 |
| 117541 | 12 | 3719166 | 3719180 | 3 | 5  | 15 | GAG  | 26 | 7  |
| 117544 | 12 | 3723233 | 3723250 | 3 | 6  | 18 | GAG  | 20 | 3  |
| 117546 | 12 | 3723759 | 3723774 | 2 | 8  | 16 | TG   | 16 | 10 |
| 117548 | 12 | 3726177 | 3726198 | 2 | 11 | 22 | AC   | 18 | 6  |
| 117549 | 12 | 3727866 | 3727885 | 2 | 10 | 20 | CA   | 13 | 9  |
| 117553 | 12 | 3731649 | 3731662 | 2 | 7  | 14 | CA   | 26 | 7  |
| 117554 | 12 | 3731985 | 3732006 | 2 | 11 | 22 | CA   | 20 | 6  |
| 117555 | 12 | 3732182 | 3732197 | 2 | 8  | 16 | CT   | 16 | 4  |
| 117557 | 12 | 3734538 | 3734557 | 2 | 10 | 20 | AC   | 19 | 6  |
| 117562 | 12 | 3738134 | 3738153 | 2 | 10 | 20 | CA   | 21 | 13 |
| 117564 | 12 | 3738463 | 3738478 | 2 | 8  | 16 | AC   | 18 | 9  |
| 117565 | 12 | 3738664 | 3738675 | 2 | 6  | 12 | CA   | 16 | 4  |
| 117567 | 12 | 3739478 | 3739489 | 2 | 6  | 12 | AC   | 26 | 5  |
| 117571 | 12 | 3741019 | 3741040 | 2 | 11 | 22 | GT   | 14 | 5  |
| 117574 | 12 | 3743014 | 3743029 | 2 | 8  | 16 | TG   | 26 | 8  |
| 117576 | 12 | 3744346 | 3744369 | 2 | 12 | 24 | AC   | 21 | 7  |

|        |    |         |         |   |    |    |      |    |    |
|--------|----|---------|---------|---|----|----|------|----|----|
| 117577 | 12 | 3744582 | 3744607 | 2 | 13 | 26 | TG   | 20 | 8  |
| 117578 | 12 | 3745452 | 3745469 | 2 | 9  | 18 | GT   | 19 | 5  |
| 117582 | 12 | 3745944 | 3745955 | 2 | 6  | 12 | TG   | 17 | 3  |
| 117583 | 12 | 3745959 | 3745970 | 2 | 6  | 12 | GT   | 16 | 3  |
| 117595 | 12 | 3752433 | 3752456 | 2 | 12 | 24 | TG   | 19 | 7  |
| 117601 | 12 | 3754788 | 3754808 | 3 | 7  | 21 | TCT  | 20 | 10 |
| 117602 | 12 | 3754895 | 3754910 | 2 | 8  | 16 | CT   | 14 | 9  |
| 117603 | 12 | 3754912 | 3754925 | 2 | 7  | 14 | TC   | 16 | 8  |
| 117605 | 12 | 3755452 | 3755465 | 2 | 7  | 14 | CT   | 10 | 3  |
| 117607 | 12 | 3755694 | 3755715 | 2 | 11 | 22 | GT   | 23 | 5  |
| 117608 | 12 | 3755884 | 3755901 | 2 | 9  | 18 | AC   | 16 | 6  |
| 117609 | 12 | 3756180 | 3756193 | 2 | 7  | 14 | CA   | 28 | 10 |
| 117615 | 12 | 3756530 | 3756561 | 2 | 16 | 32 | GT   | 9  | 11 |
| 117616 | 12 | 3756646 | 3756663 | 2 | 9  | 18 | TG   | 17 | 8  |
| 117617 | 12 | 3756836 | 3756856 | 3 | 7  | 21 | GAA  | 29 | 4  |
| 117620 | 12 | 3757310 | 3757331 | 2 | 11 | 22 | CA   | 10 | 8  |
| 117624 | 12 | 3758542 | 3758553 | 2 | 6  | 12 | TC   | 6  | 3  |
| 117627 | 12 | 3758844 | 3758857 | 2 | 7  | 14 | AC   | 13 | 4  |
| 117628 | 12 | 3758864 | 3758875 | 2 | 6  | 12 | AC   | 17 | 6  |
| 117630 | 12 | 3760013 | 3760027 | 3 | 5  | 15 | TAA  | 22 | 3  |
| 117634 | 12 | 3760828 | 3760848 | 3 | 7  | 21 | AAC  | 16 | 4  |
| 117636 | 12 | 3761869 | 3761889 | 3 | 7  | 21 | GAG  | 12 | 5  |
| 117637 | 12 | 3763205 | 3763222 | 2 | 9  | 18 | CA   | 24 | 8  |
| 117643 | 12 | 3764417 | 3764434 | 2 | 9  | 18 | TG   | 16 | 9  |
| 117644 | 12 | 3764527 | 3764538 | 2 | 6  | 12 | AC   | 18 | 6  |
| 117646 | 12 | 3764706 | 3764725 | 2 | 10 | 20 | CA   | 14 | 10 |
| 117647 | 12 | 3766687 | 3766712 | 2 | 13 | 26 | TC   | 11 | 4  |
| 117659 | 12 | 3780372 | 3780385 | 2 | 7  | 14 | AG   | 36 | 3  |
| 117671 | 12 | 3792894 | 3792931 | 2 | 19 | 38 | AC   | 18 | 13 |
| 117672 | 12 | 3793778 | 3793801 | 2 | 12 | 24 | GT   | 18 | 9  |
| 117673 | 12 | 3794018 | 3794037 | 2 | 10 | 20 | GT   | 17 | 3  |
| 117678 | 12 | 3801464 | 3801481 | 2 | 9  | 18 | AC   | 18 | 5  |
| 117679 | 12 | 3802339 | 3802368 | 2 | 15 | 30 | GT   | 18 | 10 |
| 117680 | 12 | 3803202 | 3803241 | 2 | 20 | 40 | CA   | 9  | 6  |
| 117685 | 12 | 3806499 | 3806530 | 2 | 16 | 32 | AC   | 11 | 14 |
| 117687 | 12 | 3808245 | 3808260 | 2 | 8  | 16 | AG   | 20 | 9  |
| 117689 | 12 | 3809191 | 3809218 | 2 | 14 | 28 | GT   | 11 | 8  |
| 117690 | 12 | 3809333 | 3809356 | 2 | 12 | 24 | TG   | 20 | 16 |
| 117692 | 12 | 3809745 | 3809788 | 2 | 22 | 44 | AC   | 9  | 12 |
| 117693 | 12 | 3811661 | 3811688 | 4 | 7  | 28 | CATC | 16 | 5  |
| 117694 | 12 | 3812540 | 3812563 | 2 | 12 | 24 | TG   | 20 | 9  |
| 117699 | 12 | 3814894 | 3814925 | 2 | 16 | 32 | CA   | 9  | 10 |
| 117710 | 12 | 3819660 | 3819677 | 2 | 9  | 18 | CA   | 23 | 6  |
| 117712 | 12 | 3820170 | 3820185 | 2 | 8  | 16 | CT   | 16 | 4  |
| 117713 | 12 | 3820400 | 3820415 | 2 | 8  | 16 | GA   | 17 | 4  |
| 117715 | 12 | 3820951 | 3820968 | 2 | 9  | 18 | TC   | 22 | 5  |
| 117719 | 12 | 3836803 | 3836836 | 2 | 17 | 34 | GT   | 22 | 9  |
| 117724 | 12 | 3842206 | 3842233 | 2 | 14 | 28 | TG   | 9  | 11 |
| 117725 | 12 | 3842430 | 3842455 | 2 | 13 | 26 | GT   | 9  | 9  |
| 117726 | 12 | 3842627 | 3842646 | 2 | 10 | 20 | GT   | 22 | 6  |
| 117727 | 12 | 3842647 | 3842658 | 2 | 6  | 12 | GA   | 7  | 3  |

|        |    |         |         |   |    |    |      |    |    |
|--------|----|---------|---------|---|----|----|------|----|----|
| 117729 | 12 | 3844644 | 3844661 | 3 | 6  | 18 | TGG  | 29 | 4  |
| 117730 | 12 | 3845990 | 3846001 | 2 | 6  | 12 | CA   | 23 | 14 |
| 117731 | 12 | 3846351 | 3846362 | 2 | 6  | 12 | GA   | 15 | 5  |
| 117733 | 12 | 3846527 | 3846546 | 2 | 10 | 20 | AC   | 13 | 6  |
| 117740 | 12 | 3851447 | 3851478 | 2 | 16 | 32 | AC   | 6  | 7  |
| 117741 | 12 | 3851750 | 3851773 | 2 | 12 | 24 | TG   | 14 | 11 |
| 117742 | 12 | 3852291 | 3852342 | 4 | 13 | 52 | ATAG | 12 | 9  |
| 117743 | 12 | 3853914 | 3853931 | 2 | 9  | 18 | CA   | 22 | 3  |
| 117744 | 12 | 3858622 | 3858635 | 2 | 7  | 14 | GT   | 23 | 10 |
| 117745 | 12 | 3858819 | 3858854 | 2 | 18 | 36 | CA   | 23 | 12 |
| 117746 | 12 | 3860525 | 3860550 | 2 | 13 | 26 | TG   | 6  | 9  |
| 117747 | 12 | 3860635 | 3860660 | 2 | 13 | 26 | AC   | 8  | 5  |
| 117748 | 12 | 3860681 | 3860692 | 2 | 6  | 12 | AC   | 25 | 5  |
| 117749 | 12 | 3860871 | 3860898 | 2 | 14 | 28 | TG   | 15 | 14 |
| 117750 | 12 | 3862511 | 3862532 | 2 | 11 | 22 | GT   | 14 | 9  |
| 117752 | 12 | 3866095 | 3866108 | 2 | 7  | 14 | GT   | 18 | 11 |
| 117760 | 12 | 3875966 | 3875985 | 2 | 10 | 20 | CA   | 12 | 10 |
| 117762 | 12 | 3877702 | 3877728 | 3 | 9  | 27 | TCT  | 26 | 7  |
| 117763 | 12 | 3877992 | 3878011 | 2 | 10 | 20 | CT   | 19 | 7  |
| 117766 | 12 | 3880725 | 3880736 | 2 | 6  | 12 | GT   | 19 | 8  |
| 117779 | 12 | 3907319 | 3907334 | 2 | 8  | 16 | TA   | 10 | 4  |
| 117786 | 12 | 3916437 | 3916456 | 2 | 10 | 20 | AC   | 11 | 4  |
| 117789 | 12 | 3925153 | 3925174 | 2 | 11 | 22 | TC   | 21 | 7  |
| 117791 | 12 | 3928721 | 3928750 | 2 | 15 | 30 | TC   | 10 | 7  |
| 117799 | 12 | 3934185 | 3934210 | 2 | 13 | 26 | AC   | 20 | 11 |
| 117800 | 12 | 3938703 | 3938736 | 2 | 17 | 34 | AC   | 22 | 10 |
| 117801 | 12 | 3942005 | 3942019 | 3 | 5  | 15 | CAA  | 26 | 6  |
| 117802 | 12 | 3943148 | 3943163 | 4 | 4  | 16 | ATAG | 23 | 4  |
| 117803 | 12 | 3944047 | 3944070 | 2 | 12 | 24 | GT   | 12 | 11 |
| 117804 | 12 | 3947546 | 3947569 | 2 | 12 | 24 | AC   | 12 | 8  |
| 117812 | 12 | 3952783 | 3952806 | 3 | 8  | 24 | GAA  | 22 | 3  |
| 117815 | 12 | 3954897 | 3954916 | 2 | 10 | 20 | AG   | 13 | 10 |
| 117816 | 12 | 3955037 | 3955056 | 4 | 5  | 20 | TTTC | 16 | 5  |
| 117818 | 12 | 3955254 | 3955269 | 4 | 4  | 16 | AAAT | 20 | 6  |
| 117820 | 12 | 3956091 | 3956114 | 2 | 12 | 24 | GT   | 14 | 6  |
| 117821 | 12 | 3956579 | 3956598 | 2 | 10 | 20 | TC   | 21 | 4  |
| 117828 | 12 | 3964460 | 3964487 | 2 | 14 | 28 | GA   | 12 | 4  |
| 117830 | 12 | 3966920 | 3966941 | 2 | 11 | 22 | CA   | 18 | 4  |
| 117831 | 12 | 3967050 | 3967061 | 2 | 6  | 12 | CA   | 26 | 7  |
| 117835 | 12 | 3969921 | 3969950 | 2 | 15 | 30 | GT   | 17 | 14 |
| 117836 | 12 | 3970104 | 3970139 | 2 | 18 | 36 | GT   | 20 | 16 |
| 117844 | 12 | 3980119 | 3980140 | 2 | 11 | 22 | TC   | 10 | 8  |
| 117850 | 12 | 3983443 | 3983472 | 2 | 15 | 30 | AC   | 9  | 7  |
| 117853 | 12 | 3983686 | 3983705 | 2 | 10 | 20 | CA   | 15 | 5  |
| 117860 | 12 | 3995417 | 3995436 | 2 | 10 | 20 | TG   | 22 | 7  |
| 117861 | 12 | 3995967 | 3995986 | 2 | 10 | 20 | GT   | 16 | 5  |
| 117864 | 12 | 3996851 | 3996862 | 2 | 6  | 12 | GT   | 22 | 5  |
| 117865 | 12 | 3997654 | 3997673 | 2 | 10 | 20 | TG   | 25 | 5  |
| 117867 | 12 | 3998719 | 3998736 | 2 | 9  | 18 | GA   | 21 | 6  |
| 117868 | 12 | 3999619 | 3999648 | 2 | 15 | 30 | GT   | 13 | 7  |
| 117872 | 12 | 4000266 | 4000293 | 2 | 14 | 28 | TG   | 10 | 9  |

|        |    |         |         |   |    |    |      |    |    |
|--------|----|---------|---------|---|----|----|------|----|----|
| 117875 | 12 | 4001736 | 4001763 | 2 | 14 | 28 | GT   | 23 | 15 |
| 117876 | 12 | 4002085 | 4002100 | 2 | 8  | 16 | AC   | 20 | 5  |
| 117877 | 12 | 4002221 | 4002242 | 2 | 11 | 22 | AC   | 23 | 9  |
| 117881 | 12 | 4005138 | 4005153 | 2 | 8  | 16 | TG   | 19 | 6  |
| 117884 | 12 | 4007638 | 4007653 | 2 | 8  | 16 | GT   | 20 | 4  |
| 117888 | 12 | 4017171 | 4017190 | 2 | 10 | 20 | TG   | 21 | 9  |
| 117889 | 12 | 4018957 | 4018980 | 3 | 8  | 24 | CCT  | 20 | 11 |
| 117893 | 12 | 4021791 | 4021804 | 2 | 7  | 14 | AC   | 21 | 4  |
| 117895 | 12 | 4022019 | 4022036 | 2 | 9  | 18 | CA   | 16 | 5  |
| 117896 | 12 | 4022929 | 4022948 | 4 | 5  | 20 | TTTG | 26 | 6  |
| 117899 | 12 | 4025531 | 4025542 | 2 | 6  | 12 | CA   | 26 | 7  |
| 117900 | 12 | 4026274 | 4026297 | 2 | 12 | 24 | AC   | 16 | 10 |
| 117904 | 12 | 4032979 | 4032994 | 2 | 8  | 16 | CA   | 24 | 6  |
| 117905 | 12 | 4033882 | 4033901 | 2 | 10 | 20 | CA   | 13 | 5  |
| 117907 | 12 | 4034175 | 4034194 | 2 | 10 | 20 | AC   | 25 | 9  |
| 117910 | 12 | 4035457 | 4035472 | 4 | 4  | 16 | GCTC | 9  | 5  |
| 117922 | 12 | 4038002 | 4038015 | 2 | 7  | 14 | GT   | 16 | 3  |
| 117924 | 12 | 4038267 | 4038284 | 2 | 9  | 18 | CA   | 25 | 12 |
| 117925 | 12 | 4038615 | 4038644 | 3 | 10 | 30 | GAG  | 11 | 6  |
| 117927 | 12 | 4038713 | 4038728 | 2 | 8  | 16 | GT   | 21 | 4  |
| 117929 | 12 | 4039267 | 4039288 | 2 | 11 | 22 | CA   | 17 | 12 |
| 117930 | 12 | 4039462 | 4039487 | 2 | 13 | 26 | GA   | 15 | 10 |
| 117932 | 12 | 4040227 | 4040252 | 2 | 13 | 26 | GT   | 9  | 9  |
| 117933 | 12 | 4040434 | 4040449 | 2 | 8  | 16 | CA   | 26 | 8  |
| 117942 | 12 | 4044810 | 4044827 | 2 | 9  | 18 | TG   | 23 | 4  |
| 117949 | 12 | 4059368 | 4059389 | 2 | 11 | 22 | TG   | 18 | 11 |
| 117950 | 12 | 4059669 | 4059686 | 2 | 9  | 18 | GA   | 9  | 5  |
| 117961 | 12 | 4077140 | 4077155 | 2 | 8  | 16 | AC   | 17 | 12 |
| 117962 | 12 | 4077396 | 4077417 | 2 | 11 | 22 | GA   | 6  | 5  |
| 117963 | 12 | 4077847 | 4077864 | 3 | 6  | 18 | CAC  | 15 | 5  |
| 117964 | 12 | 4078794 | 4078808 | 3 | 5  | 15 | CCG  | 20 | 6  |
| 117967 | 12 | 4083027 | 4083056 | 3 | 10 | 30 | TAA  | 9  | 4  |
| 117968 | 12 | 4087257 | 4087271 | 3 | 5  | 15 | AAT  | 13 | 5  |
| 117969 | 12 | 4089812 | 4089839 | 2 | 14 | 28 | AC   | 7  | 6  |
| 117970 | 12 | 4089900 | 4089913 | 2 | 7  | 14 | GT   | 30 | 7  |
| 117971 | 12 | 4091640 | 4091651 | 2 | 6  | 12 | CT   | 25 | 3  |
| 117974 | 12 | 4104454 | 4104474 | 3 | 7  | 21 | ACA  | 27 | 4  |
| 117977 | 12 | 4113894 | 4113909 | 2 | 8  | 16 | CT   | 24 | 5  |
| 117980 | 12 | 4120469 | 4120486 | 2 | 9  | 18 | TG   | 21 | 7  |
| 117983 | 12 | 4123467 | 4123484 | 2 | 9  | 18 | TC   | 26 | 6  |
| 117995 | 12 | 4158009 | 4158026 | 3 | 6  | 18 | GCT  | 22 | 3  |
| 117997 | 12 | 4160090 | 4160107 | 2 | 9  | 18 | CA   | 11 | 13 |
| 117998 | 12 | 4166391 | 4166414 | 4 | 6  | 24 | GACA | 27 | 4  |
| 118009 | 12 | 4197211 | 4197228 | 3 | 6  | 18 | CCG  | 22 | 9  |
| 118011 | 12 | 4203766 | 4203791 | 2 | 13 | 26 | TC   | 20 | 11 |
| 118012 | 12 | 4210660 | 4210674 | 3 | 5  | 15 | CAT  | 20 | 6  |
| 118013 | 12 | 4212483 | 4212494 | 2 | 6  | 12 | GT   | 27 | 3  |
| 118015 | 12 | 4212925 | 4212944 | 2 | 10 | 20 | CT   | 30 | 4  |
| 118017 | 12 | 4217739 | 4217750 | 2 | 6  | 12 | AC   | 17 | 3  |
| 118020 | 12 | 4226105 | 4226146 | 2 | 21 | 42 | CA   | 7  | 10 |
| 118022 | 12 | 4229324 | 4229337 | 2 | 7  | 14 | GT   | 29 | 4  |

|        |    |         |         |   |    |    |      |    |    |
|--------|----|---------|---------|---|----|----|------|----|----|
| 118023 | 12 | 4231214 | 4231240 | 3 | 9  | 27 | TCC  | 17 | 4  |
| 118024 | 12 | 4232209 | 4232232 | 2 | 12 | 24 | AC   | 17 | 7  |
| 118025 | 12 | 4232270 | 4232281 | 2 | 6  | 12 | GT   | 15 | 4  |
| 118026 | 12 | 4232593 | 4232606 | 2 | 7  | 14 | TG   | 13 | 6  |
| 118031 | 12 | 4238905 | 4238938 | 2 | 17 | 34 | CA   | 17 | 11 |
| 118035 | 12 | 4240754 | 4240799 | 2 | 23 | 46 | CA   | 8  | 10 |
| 118037 | 12 | 4243308 | 4243327 | 2 | 10 | 20 | CA   | 19 | 6  |
| 118041 | 12 | 4245044 | 4245073 | 2 | 15 | 30 | AC   | 14 | 15 |
| 118042 | 12 | 4246785 | 4246796 | 2 | 6  | 12 | GA   | 24 | 3  |
| 118044 | 12 | 4249389 | 4249403 | 3 | 5  | 15 | GAG  | 7  | 3  |
| 118049 | 12 | 4250673 | 4250692 | 2 | 10 | 20 | TG   | 17 | 5  |
| 118050 | 12 | 4250917 | 4250938 | 2 | 11 | 22 | CA   | 9  | 7  |
| 118051 | 12 | 4251865 | 4251892 | 2 | 14 | 28 | CA   | 7  | 5  |
| 118060 | 12 | 4297432 | 4297449 | 2 | 9  | 18 | CA   | 19 | 9  |
| 118066 | 12 | 4312165 | 4312191 | 3 | 9  | 27 | AGG  | 20 | 7  |
| 118067 | 12 | 4312845 | 4312862 | 2 | 9  | 18 | CA   | 18 | 9  |
| 118071 | 12 | 4317728 | 4317742 | 3 | 5  | 15 | AGA  | 27 | 5  |
| 118073 | 12 | 4320477 | 4320488 | 2 | 6  | 12 | CT   | 18 | 3  |
| 118074 | 12 | 4320601 | 4320622 | 2 | 11 | 22 | TG   | 25 | 10 |
| 118075 | 12 | 4320710 | 4320723 | 2 | 7  | 14 | TG   | 22 | 3  |
| 118080 | 12 | 4321964 | 4321993 | 2 | 15 | 30 | CA   | 7  | 8  |
| 118081 | 12 | 4322035 | 4322056 | 2 | 11 | 22 | CT   | 7  | 6  |
| 118084 | 12 | 4323241 | 4323258 | 2 | 9  | 18 | CA   | 7  | 3  |
| 118085 | 12 | 4323505 | 4323524 | 2 | 10 | 20 | TC   | 17 | 5  |
| 118086 | 12 | 4323756 | 4323817 | 2 | 31 | 62 | AC   | 9  | 9  |
| 118088 | 12 | 4330685 | 4330706 | 2 | 11 | 22 | TG   | 16 | 8  |
| 118093 | 12 | 4343126 | 4343149 | 4 | 6  | 24 | TCTT | 24 | 5  |
| 118123 | 12 | 4371478 | 4371505 | 2 | 14 | 28 | AC   | 18 | 8  |
| 118127 | 12 | 4373788 | 4373801 | 2 | 7  | 14 | AG   | 14 | 8  |
| 118131 | 12 | 4374488 | 4374511 | 3 | 8  | 24 | CAG  | 29 | 6  |
| 118132 | 12 | 4374963 | 4374978 | 4 | 4  | 16 | TGGA | 27 | 9  |
| 118133 | 12 | 4374980 | 4374995 | 4 | 4  | 16 | GGAT | 27 | 7  |
| 118134 | 12 | 4375615 | 4375642 | 2 | 14 | 28 | TG   | 7  | 5  |
| 118135 | 12 | 4376589 | 4376609 | 3 | 7  | 21 | CTC  | 24 | 8  |
| 118141 | 12 | 4384041 | 4384061 | 3 | 7  | 21 | GCT  | 19 | 6  |
| 118146 | 12 | 4392325 | 4392348 | 4 | 6  | 24 | AATC | 24 | 12 |
| 118149 | 12 | 4408285 | 4408312 | 4 | 7  | 28 | TTAT | 20 | 10 |
| 118154 | 12 | 4423580 | 4423603 | 2 | 12 | 24 | TG   | 13 | 10 |
| 118158 | 12 | 4426385 | 4426406 | 2 | 11 | 22 | CA   | 19 | 4  |
| 118159 | 12 | 4427237 | 4427252 | 4 | 4  | 16 | AATA | 22 | 3  |
| 118161 | 12 | 4438006 | 4438035 | 2 | 15 | 30 | AC   | 11 | 9  |
| 118162 | 12 | 4438772 | 4438783 | 2 | 6  | 12 | AT   | 18 | 4  |
| 118164 | 12 | 4440087 | 4440112 | 2 | 13 | 26 | GT   | 16 | 14 |
| 118166 | 12 | 4440913 | 4440926 | 2 | 7  | 14 | CA   | 24 | 3  |
| 118169 | 12 | 4447047 | 4447058 | 2 | 6  | 12 | CT   | 23 | 3  |
| 118170 | 12 | 4447475 | 4447501 | 3 | 9  | 27 | TTG  | 28 | 11 |
| 118173 | 12 | 4450811 | 4450858 | 2 | 24 | 48 | TC   | 13 | 8  |
| 118183 | 12 | 4466129 | 4466155 | 3 | 9  | 27 | AGG  | 18 | 6  |
| 118185 | 12 | 4468948 | 4468959 | 2 | 6  | 12 | TG   | 29 | 3  |
| 118186 | 12 | 4469201 | 4469215 | 3 | 5  | 15 | CCT  | 17 | 8  |
| 118188 | 12 | 4471445 | 4471476 | 2 | 16 | 32 | TC   | 21 | 10 |

|        |    |         |         |   |    |    |      |    |    |
|--------|----|---------|---------|---|----|----|------|----|----|
| 118193 | 12 | 4475632 | 4475661 | 2 | 15 | 30 | TG   | 14 | 10 |
| 118194 | 12 | 4475765 | 4475786 | 2 | 11 | 22 | AC   | 23 | 16 |
| 118197 | 12 | 4480430 | 4480449 | 2 | 10 | 20 | AG   | 22 | 3  |
| 118202 | 12 | 4486610 | 4486625 | 2 | 8  | 16 | TG   | 20 | 5  |
| 118203 | 12 | 4486810 | 4486839 | 3 | 10 | 30 | AGG  | 10 | 7  |
| 118204 | 12 | 4489158 | 4489181 | 2 | 12 | 24 | TG   | 7  | 6  |
| 118205 | 12 | 4489282 | 4489299 | 2 | 9  | 18 | CA   | 10 | 6  |
| 118206 | 12 | 4489756 | 4489767 | 2 | 6  | 12 | GT   | 30 | 5  |
| 118211 | 12 | 4492312 | 4492331 | 4 | 5  | 20 | TATC | 16 | 4  |
| 118212 | 12 | 4492681 | 4492696 | 2 | 8  | 16 | CA   | 18 | 8  |
| 118217 | 12 | 4507401 | 4507424 | 2 | 12 | 24 | GA   | 23 | 15 |
| 118218 | 12 | 4510205 | 4510228 | 4 | 6  | 24 | CAGA | 15 | 11 |
| 118224 | 12 | 4523854 | 4523873 | 4 | 5  | 20 | TTGA | 31 | 5  |
| 118227 | 12 | 4530975 | 4530990 | 2 | 8  | 16 | AC   | 22 | 4  |
| 118228 | 12 | 4532773 | 4532790 | 2 | 9  | 18 | CA   | 16 | 12 |
| 118230 | 12 | 4533368 | 4533391 | 3 | 8  | 24 | GGA  | 15 | 5  |
| 118232 | 12 | 4548711 | 4548734 | 3 | 8  | 24 | GAG  | 24 | 19 |
| 118244 | 12 | 4560166 | 4560187 | 2 | 11 | 22 | AC   | 19 | 17 |
| 118245 | 12 | 4562392 | 4562403 | 2 | 6  | 12 | AC   | 13 | 3  |
| 118247 | 12 | 4563513 | 4563527 | 3 | 5  | 15 | AGG  | 27 | 3  |
| 118251 | 12 | 4566299 | 4566316 | 2 | 9  | 18 | TG   | 24 | 4  |
| 118252 | 12 | 4566655 | 4566690 | 2 | 18 | 36 | CA   | 7  | 12 |
| 118255 | 12 | 4568829 | 4568843 | 3 | 5  | 15 | ACA  | 24 | 4  |
| 118256 | 12 | 4570357 | 4570390 | 2 | 17 | 34 | CA   | 9  | 12 |
| 118257 | 12 | 4570498 | 4570517 | 2 | 10 | 20 | TG   | 18 | 7  |
| 118258 | 12 | 4570767 | 4570790 | 2 | 12 | 24 | AC   | 13 | 6  |
| 118260 | 12 | 4572160 | 4572183 | 2 | 12 | 24 | AC   | 20 | 9  |
| 118261 | 12 | 4572339 | 4572352 | 2 | 7  | 14 | GT   | 32 | 5  |
| 118262 | 12 | 4572472 | 4572497 | 2 | 13 | 26 | TG   | 21 | 9  |
| 118270 | 12 | 4578730 | 4578749 | 4 | 5  | 20 | ACAA | 10 | 4  |
| 118272 | 12 | 4585293 | 4585356 | 2 | 32 | 64 | TG   | 10 | 13 |
| 118274 | 12 | 4588163 | 4588190 | 2 | 14 | 28 | AC   | 22 | 9  |
| 118275 | 12 | 4588571 | 4588596 | 2 | 13 | 26 | TG   | 17 | 7  |
| 118276 | 12 | 4590713 | 4590728 | 2 | 8  | 16 | AC   | 20 | 7  |
| 118285 | 12 | 4600485 | 4600500 | 2 | 8  | 16 | GT   | 14 | 8  |
| 118286 | 12 | 4600626 | 4600639 | 2 | 7  | 14 | CA   | 27 | 8  |
| 118287 | 12 | 4602907 | 4602922 | 2 | 8  | 16 | CT   | 14 | 6  |
| 118288 | 12 | 4602923 | 4602942 | 2 | 10 | 20 | CA   | 9  | 6  |
| 118292 | 12 | 4606116 | 4606145 | 2 | 15 | 30 | CA   | 19 | 12 |
| 118293 | 12 | 4606617 | 4606632 | 2 | 8  | 16 | TG   | 10 | 8  |
| 118294 | 12 | 4606727 | 4606738 | 2 | 6  | 12 | TC   | 17 | 6  |
| 118298 | 12 | 4609515 | 4609566 | 2 | 26 | 52 | CA   | 8  | 8  |
| 118299 | 12 | 4609730 | 4609749 | 2 | 10 | 20 | CA   | 14 | 10 |
| 118300 | 12 | 4610716 | 4610729 | 2 | 7  | 14 | GT   | 26 | 6  |
| 118301 | 12 | 4612884 | 4612897 | 2 | 7  | 14 | GT   | 26 | 4  |
| 118306 | 12 | 4623662 | 4623675 | 2 | 7  | 14 | GT   | 26 | 6  |
| 118307 | 12 | 4624026 | 4624065 | 2 | 20 | 40 | TG   | 14 | 11 |
| 118323 | 12 | 4645108 | 4645121 | 2 | 7  | 14 | GT   | 28 | 3  |
| 118324 | 12 | 4645404 | 4645433 | 2 | 15 | 30 | TG   | 15 | 7  |
| 118325 | 12 | 4646285 | 4646304 | 4 | 5  | 20 | TGGA | 32 | 7  |
| 118335 | 12 | 4665002 | 4665016 | 3 | 5  | 15 | AAG  | 6  | 5  |

|        |    |         |         |   |    |    |      |    |    |
|--------|----|---------|---------|---|----|----|------|----|----|
| 118337 | 12 | 4665309 | 4665322 | 2 | 7  | 14 | TG   | 14 | 11 |
| 118338 | 12 | 4665637 | 4665666 | 3 | 10 | 30 | CTC  | 23 | 7  |
| 118345 | 12 | 4682953 | 4682972 | 4 | 5  | 20 | ACAT | 15 | 3  |
| 118363 | 12 | 4699481 | 4699500 | 2 | 10 | 20 | TG   | 14 | 4  |
| 118364 | 12 | 4699501 | 4699512 | 2 | 6  | 12 | AG   | 18 | 4  |
| 118365 | 12 | 4699623 | 4699648 | 2 | 13 | 26 | GT   | 17 | 7  |
| 118369 | 12 | 4702333 | 4702347 | 3 | 5  | 15 | TCC  | 23 | 3  |
| 118373 | 12 | 4705593 | 4705612 | 2 | 10 | 20 | TG   | 23 | 6  |
| 118375 | 12 | 4706903 | 4706914 | 2 | 6  | 12 | CA   | 19 | 11 |
| 118378 | 12 | 4707124 | 4707157 | 2 | 17 | 34 | AC   | 11 | 11 |
| 118379 | 12 | 4707239 | 4707268 | 2 | 15 | 30 | CA   | 8  | 9  |
| 118380 | 12 | 4707446 | 4707467 | 2 | 11 | 22 | AC   | 16 | 7  |
| 118382 | 12 | 4707561 | 4707576 | 2 | 8  | 16 | AC   | 17 | 7  |
| 118385 | 12 | 4711233 | 4711246 | 2 | 7  | 14 | GT   | 21 | 3  |
| 118386 | 12 | 4711286 | 4711303 | 3 | 6  | 18 | GCA  | 22 | 3  |
| 118387 | 12 | 4711401 | 4711418 | 2 | 9  | 18 | GT   | 18 | 5  |
| 118390 | 12 | 4713360 | 4713383 | 2 | 12 | 24 | GT   | 17 | 10 |
| 118393 | 12 | 4714838 | 4714849 | 2 | 6  | 12 | AC   | 19 | 4  |
| 118395 | 12 | 4715084 | 4715103 | 2 | 10 | 20 | CA   | 17 | 7  |
| 118398 | 12 | 4715880 | 4715901 | 2 | 11 | 22 | AG   | 15 | 6  |
| 118400 | 12 | 4720381 | 4720394 | 2 | 7  | 14 | CA   | 23 | 7  |
| 118401 | 12 | 4720837 | 4720864 | 2 | 14 | 28 | AC   | 15 | 13 |
| 118402 | 12 | 4721032 | 4721049 | 2 | 9  | 18 | AC   | 19 | 10 |
| 118407 | 12 | 4724120 | 4724153 | 2 | 17 | 34 | GT   | 19 | 6  |
| 118408 | 12 | 4724328 | 4724353 | 2 | 13 | 26 | GT   | 7  | 8  |
| 118410 | 12 | 4724447 | 4724460 | 2 | 7  | 14 | AC   | 21 | 5  |
| 118412 | 12 | 4724596 | 4724617 | 2 | 11 | 22 | CA   | 10 | 9  |
| 118415 | 12 | 4726716 | 4726739 | 2 | 12 | 24 | GT   | 11 | 5  |
| 118417 | 12 | 4728281 | 4728330 | 2 | 25 | 50 | GT   | 11 | 10 |
| 118418 | 12 | 4728441 | 4728478 | 2 | 19 | 38 | GT   | 7  | 9  |
| 118420 | 12 | 4730038 | 4730053 | 2 | 8  | 16 | TG   | 21 | 8  |
| 118421 | 12 | 4730247 | 4730268 | 2 | 11 | 22 | CA   | 21 | 7  |
| 118423 | 12 | 4731285 | 4731296 | 2 | 6  | 12 | GT   | 22 | 9  |
| 118424 | 12 | 4731385 | 4731408 | 2 | 12 | 24 | CA   | 15 | 8  |
| 118434 | 12 | 4733103 | 4733116 | 2 | 7  | 14 | AC   | 25 | 6  |
| 118435 | 12 | 4733173 | 4733214 | 2 | 21 | 42 | TG   | 9  | 7  |
| 118437 | 12 | 4733303 | 4733326 | 2 | 12 | 24 | CA   | 6  | 3  |
| 118438 | 12 | 4733347 | 4733366 | 2 | 10 | 20 | CA   | 13 | 5  |
| 118442 | 12 | 4733691 | 4733720 | 2 | 15 | 30 | CA   | 16 | 9  |
| 118445 | 12 | 4733985 | 4734004 | 2 | 10 | 20 | TG   | 18 | 10 |
| 118446 | 12 | 4734168 | 4734183 | 2 | 8  | 16 | GT   | 15 | 9  |
| 118448 | 12 | 4734651 | 4734689 | 3 | 13 | 39 | AAG  | 23 | 9  |
| 118449 | 12 | 4736195 | 4736232 | 2 | 19 | 38 | CA   | 6  | 11 |
| 118450 | 12 | 4736294 | 4736323 | 2 | 15 | 30 | TG   | 8  | 7  |
| 118452 | 12 | 4738537 | 4738558 | 2 | 11 | 22 | AG   | 15 | 8  |
| 118455 | 12 | 4739795 | 4739810 | 2 | 8  | 16 | TG   | 23 | 4  |
| 118457 | 12 | 4744984 | 4744999 | 2 | 8  | 16 | TG   | 24 | 4  |
| 118458 | 12 | 4745061 | 4745074 | 2 | 7  | 14 | GT   | 22 | 8  |
| 118459 | 12 | 4745291 | 4745308 | 2 | 9  | 18 | TG   | 25 | 5  |
| 118461 | 12 | 4748337 | 4748348 | 2 | 6  | 12 | TC   | 26 | 3  |
| 118466 | 12 | 4766261 | 4766292 | 4 | 8  | 32 | ATGT | 22 | 6  |



|        |    |         |         |   |    |    |      |    |    |
|--------|----|---------|---------|---|----|----|------|----|----|
| 118472 | 12 | 4776006 | 4776017 | 2 | 6  | 12 | GT   | 32 | 3  |
| 118474 | 12 | 4777286 | 4777313 | 2 | 14 | 28 | TG   | 14 | 16 |
| 118476 | 12 | 4779255 | 4779294 | 2 | 20 | 40 | GT   | 7  | 11 |
| 118477 | 12 | 4783738 | 4783761 | 2 | 12 | 24 | CA   | 12 | 10 |
| 118480 | 12 | 4786788 | 4786805 | 3 | 6  | 18 | CTT  | 23 | 4  |
| 118481 | 12 | 4787593 | 4787616 | 2 | 12 | 24 | AC   | 18 | 7  |
| 118482 | 12 | 4787829 | 4787854 | 2 | 13 | 26 | TG   | 7  | 6  |
| 118483 | 12 | 4788099 | 4788114 | 4 | 4  | 16 | TGGT | 16 | 3  |
| 118487 | 12 | 4800995 | 4801006 | 2 | 6  | 12 | TG   | 22 | 7  |
| 118493 | 12 | 4805926 | 4805953 | 2 | 14 | 28 | TG   | 9  | 7  |
| 118498 | 12 | 4810534 | 4810549 | 2 | 8  | 16 | GT   | 21 | 8  |
| 118499 | 12 | 4810677 | 4810688 | 2 | 6  | 12 | GT   | 23 | 5  |
| 118500 | 12 | 4811271 | 4811288 | 2 | 9  | 18 | TG   | 18 | 4  |
| 118503 | 12 | 4813387 | 4813400 | 2 | 7  | 14 | GT   | 24 | 7  |
| 118512 | 12 | 4820544 | 4820585 | 2 | 21 | 42 | GT   | 9  | 13 |
| 118513 | 12 | 4821856 | 4821871 | 2 | 8  | 16 | TG   | 16 | 5  |
| 118516 | 12 | 4824483 | 4824510 | 2 | 14 | 28 | AC   | 12 | 9  |
| 118517 | 12 | 4825897 | 4825948 | 2 | 26 | 52 | GT   | 19 | 13 |
| 118521 | 12 | 4827150 | 4827173 | 2 | 12 | 24 | AC   | 8  | 4  |
| 118525 | 12 | 4827503 | 4827522 | 2 | 10 | 20 | GA   | 17 | 8  |
| 118526 | 12 | 4828437 | 4828464 | 2 | 14 | 28 | GT   | 18 | 9  |
| 118527 | 12 | 4828557 | 4828580 | 2 | 12 | 24 | AC   | 7  | 6  |
| 118528 | 12 | 4828689 | 4828702 | 2 | 7  | 14 | AC   | 22 | 6  |
| 118531 | 12 | 4831117 | 4831128 | 2 | 6  | 12 | CA   | 12 | 11 |
| 118532 | 12 | 4831834 | 4831849 | 2 | 8  | 16 | GT   | 13 | 4  |
| 118535 | 12 | 4832368 | 4832385 | 2 | 9  | 18 | GT   | 18 | 7  |
| 118536 | 12 | 4832490 | 4832521 | 2 | 16 | 32 | CA   | 9  | 7  |
| 118539 | 12 | 4835118 | 4835131 | 2 | 7  | 14 | AC   | 24 | 4  |
| 118540 | 12 | 4844701 | 4844728 | 2 | 14 | 28 | CA   | 16 | 15 |
| 118543 | 12 | 4847464 | 4847475 | 2 | 6  | 12 | TG   | 15 | 11 |
| 118544 | 12 | 4847562 | 4847577 | 2 | 8  | 16 | AC   | 20 | 5  |
| 118545 | 12 | 4847919 | 4847934 | 2 | 8  | 16 | TG   | 8  | 6  |
| 118546 | 12 | 4847936 | 4847949 | 2 | 7  | 14 | GT   | 12 | 8  |
| 118549 | 12 | 4851099 | 4851116 | 2 | 9  | 18 | CA   | 20 | 6  |
| 118553 | 12 | 4854509 | 4854530 | 2 | 11 | 22 | TG   | 17 | 8  |
| 118554 | 12 | 4854592 | 4854609 | 2 | 9  | 18 | TG   | 25 | 5  |
| 118556 | 12 | 4856899 | 4856920 | 2 | 11 | 22 | AT   | 13 | 7  |
| 118560 | 12 | 4861292 | 4861333 | 2 | 21 | 42 | CA   | 22 | 8  |
| 118563 | 12 | 4862940 | 4862953 | 2 | 7  | 14 | GT   | 30 | 4  |
| 118571 | 12 | 4874086 | 4874117 | 2 | 16 | 32 | CA   | 16 | 13 |
| 118573 | 12 | 4876017 | 4876030 | 2 | 7  | 14 | TG   | 22 | 9  |
| 118574 | 12 | 4876032 | 4876047 | 2 | 8  | 16 | GT   | 18 | 9  |
| 118577 | 12 | 4880356 | 4880367 | 2 | 6  | 12 | TG   | 23 | 4  |
| 118578 | 12 | 4880434 | 4880457 | 2 | 12 | 24 | AC   | 20 | 6  |
| 118579 | 12 | 4880637 | 4880672 | 2 | 18 | 36 | GT   | 9  | 11 |
| 118580 | 12 | 4880866 | 4880879 | 2 | 7  | 14 | GT   | 17 | 3  |
| 118581 | 12 | 4882874 | 4882893 | 2 | 10 | 20 | CA   | 6  | 3  |
| 118583 | 12 | 4883840 | 4883851 | 2 | 6  | 12 | AC   | 18 | 6  |
| 118585 | 12 | 4884831 | 4884844 | 2 | 7  | 14 | CA   | 26 | 3  |
| 118586 | 12 | 4884928 | 4884947 | 2 | 10 | 20 | CA   | 8  | 3  |
| 118610 | 12 | 4906134 | 4906163 | 2 | 15 | 30 | AC   | 11 | 11 |

|        |    |         |         |   |    |    |      |    |    |
|--------|----|---------|---------|---|----|----|------|----|----|
| 118613 | 12 | 4907249 | 4907268 | 2 | 10 | 20 | CA   | 11 | 6  |
| 118615 | 12 | 4907651 | 4907671 | 3 | 7  | 21 | GGA  | 24 | 3  |
| 118617 | 12 | 4911997 | 4912011 | 3 | 5  | 15 | TTA  | 20 | 9  |
| 118620 | 12 | 4917711 | 4917725 | 3 | 5  | 15 | GTG  | 26 | 6  |
| 118622 | 12 | 4922695 | 4922706 | 2 | 6  | 12 | AC   | 20 | 3  |
| 118623 | 12 | 4926263 | 4926286 | 4 | 6  | 24 | TTTC | 19 | 7  |
| 118629 | 12 | 4933266 | 4933286 | 3 | 7  | 21 | CAG  | 24 | 6  |
| 118637 | 12 | 4943839 | 4943852 | 2 | 7  | 14 | GT   | 26 | 8  |
| 118638 | 12 | 4944013 | 4944038 | 2 | 13 | 26 | TG   | 21 | 7  |
| 118639 | 12 | 4945254 | 4945279 | 2 | 13 | 26 | AC   | 10 | 9  |
| 118640 | 12 | 4946090 | 4946105 | 2 | 8  | 16 | AC   | 15 | 7  |
| 118643 | 12 | 4950058 | 4950073 | 2 | 8  | 16 | CA   | 13 | 10 |
| 118644 | 12 | 4950625 | 4950640 | 2 | 8  | 16 | TG   | 7  | 4  |
| 118645 | 12 | 4954902 | 4954923 | 2 | 11 | 22 | TG   | 19 | 7  |
| 118646 | 12 | 4956527 | 4956540 | 2 | 7  | 14 | AG   | 6  | 6  |
| 118647 | 12 | 4956938 | 4956953 | 2 | 8  | 16 | TG   | 16 | 9  |
| 118652 | 12 | 4964310 | 4964323 | 2 | 7  | 14 | GA   | 26 | 3  |
| 118653 | 12 | 4964324 | 4964337 | 2 | 7  | 14 | CA   | 28 | 5  |
| 118656 | 12 | 4970504 | 4970525 | 2 | 11 | 22 | GT   | 18 | 6  |
| 118657 | 12 | 4971748 | 4971759 | 2 | 6  | 12 | CA   | 27 | 3  |
| 118664 | 12 | 4977950 | 4977981 | 2 | 16 | 32 | TG   | 16 | 16 |
| 118665 | 12 | 4979057 | 4979074 | 2 | 9  | 18 | TG   | 28 | 4  |
| 118666 | 12 | 4979249 | 4979264 | 2 | 8  | 16 | GT   | 11 | 6  |
| 118667 | 12 | 4979605 | 4979618 | 2 | 7  | 14 | GT   | 20 | 6  |
| 118668 | 12 | 4980252 | 4980279 | 2 | 14 | 28 | GT   | 16 | 9  |
| 118670 | 12 | 4981703 | 4981714 | 2 | 6  | 12 | CA   | 17 | 5  |
| 118676 | 12 | 4984075 | 4984106 | 2 | 16 | 32 | AG   | 7  | 7  |
| 118680 | 12 | 4991720 | 4991745 | 2 | 13 | 26 | TG   | 19 | 7  |
| 118681 | 12 | 4991962 | 4991989 | 2 | 14 | 28 | TG   | 15 | 6  |
| 118682 | 12 | 4992123 | 4992136 | 2 | 7  | 14 | GT   | 21 | 3  |
| 118685 | 12 | 4997329 | 4997356 | 2 | 14 | 28 | CA   | 20 | 8  |
| 118686 | 12 | 4997730 | 4997767 | 2 | 19 | 38 | GT   | 9  | 13 |
| 118689 | 12 | 4998709 | 4998750 | 2 | 21 | 42 | AC   | 16 | 11 |
| 118695 | 12 | 5006637 | 5006692 | 4 | 14 | 56 | TCTT | 8  | 8  |
| 118696 | 12 | 5007113 | 5007142 | 2 | 15 | 30 | CA   | 12 | 18 |
| 118700 | 12 | 5013286 | 5013299 | 2 | 7  | 14 | GT   | 28 | 5  |
| 118704 | 12 | 5015075 | 5015092 | 2 | 9  | 18 | CA   | 21 | 7  |
| 118705 | 12 | 5015180 | 5015203 | 2 | 12 | 24 | GT   | 17 | 4  |
| 118706 | 12 | 5015676 | 5015701 | 2 | 13 | 26 | CA   | 18 | 8  |
| 118709 | 12 | 5015998 | 5016023 | 2 | 13 | 26 | AC   | 14 | 12 |
| 118711 | 12 | 5017695 | 5017722 | 2 | 14 | 28 | CA   | 11 | 10 |
| 118716 | 12 | 5019659 | 5019682 | 2 | 12 | 24 | GT   | 25 | 7  |
| 118719 | 12 | 5022899 | 5022922 | 2 | 12 | 24 | GT   | 13 | 5  |
| 118723 | 12 | 5024703 | 5024714 | 2 | 6  | 12 | AC   | 19 | 4  |
| 118728 | 12 | 5026029 | 5026050 | 2 | 11 | 22 | CA   | 14 | 9  |
| 118730 | 12 | 5026518 | 5026531 | 2 | 7  | 14 | TG   | 14 | 9  |
| 118733 | 12 | 5026801 | 5026820 | 2 | 10 | 20 | TG   | 12 | 11 |
| 118739 | 12 | 5031135 | 5031148 | 2 | 7  | 14 | CA   | 31 | 3  |
| 118741 | 12 | 5034588 | 5034603 | 2 | 8  | 16 | GT   | 9  | 4  |
| 118743 | 12 | 5035600 | 5035629 | 2 | 15 | 30 | TG   | 13 | 8  |
| 118744 | 12 | 5035762 | 5035773 | 2 | 6  | 12 | TG   | 9  | 7  |

|        |    |         |         |   |    |    |     |    |    |
|--------|----|---------|---------|---|----|----|-----|----|----|
| 118746 | 12 | 5035891 | 5035904 | 2 | 7  | 14 | TG  | 6  | 5  |
| 118757 | 12 | 5038562 | 5038581 | 2 | 10 | 20 | CA  | 27 | 3  |
| 118759 | 12 | 5038708 | 5038753 | 2 | 23 | 46 | CA  | 7  | 9  |
| 118761 | 12 | 5041180 | 5041195 | 2 | 8  | 16 | TG  | 23 | 5  |
| 118766 | 12 | 5045736 | 5045756 | 3 | 7  | 21 | TCC | 21 | 6  |
| 118772 | 12 | 5054170 | 5054185 | 2 | 8  | 16 | AC  | 26 | 3  |
| 118776 | 12 | 5056113 | 5056140 | 2 | 14 | 28 | TG  | 7  | 10 |
| 118778 | 12 | 5057263 | 5057284 | 2 | 11 | 22 | GT  | 26 | 8  |
| 118779 | 12 | 5057412 | 5057435 | 2 | 12 | 24 | GT  | 11 | 8  |
| 118780 | 12 | 5057493 | 5057516 | 2 | 12 | 24 | GT  | 14 | 14 |
| 118789 | 12 | 5070208 | 5070245 | 2 | 19 | 38 | CT  | 15 | 8  |
| 118790 | 12 | 5070368 | 5070385 | 2 | 9  | 18 | CA  | 21 | 6  |
| 118801 | 12 | 5086442 | 5086455 | 2 | 7  | 14 | GT  | 32 | 3  |
| 118805 | 12 | 5099871 | 5099898 | 2 | 14 | 28 | AC  | 16 | 11 |
| 118808 | 12 | 5106131 | 5106148 | 3 | 6  | 18 | GTT | 27 | 3  |
| 118820 | 12 | 5122308 | 5122329 | 2 | 11 | 22 | AG  | 23 | 5  |
| 118821 | 12 | 5133703 | 5133724 | 2 | 11 | 22 | TG  | 19 | 5  |
| 118828 | 12 | 5146787 | 5146804 | 2 | 9  | 18 | CA  | 16 | 7  |
| 118831 | 12 | 5147420 | 5147431 | 2 | 6  | 12 | TG  | 16 | 3  |
| 118852 | 12 | 5174953 | 5174966 | 2 | 7  | 14 | GT  | 19 | 3  |
| 118854 | 12 | 5176447 | 5176472 | 2 | 13 | 26 | AC  | 18 | 7  |
| 118857 | 12 | 5179762 | 5179785 | 2 | 12 | 24 | GT  | 25 | 13 |
| 118861 | 12 | 5185219 | 5185236 | 2 | 9  | 18 | CA  | 11 | 9  |
| 118871 | 12 | 5195499 | 5195538 | 2 | 20 | 40 | CA  | 12 | 10 |
| 118872 | 12 | 5196966 | 5196983 | 3 | 6  | 18 | GCT | 26 | 3  |
| 118873 | 12 | 5199734 | 5199757 | 3 | 8  | 24 | GAG | 26 | 5  |
| 118883 | 12 | 5202788 | 5202801 | 2 | 7  | 14 | AC  | 27 | 8  |
| 118886 | 12 | 5203815 | 5203828 | 2 | 7  | 14 | CA  | 10 | 8  |
| 118887 | 12 | 5205160 | 5205173 | 2 | 7  | 14 | TG  | 27 | 3  |
| 118892 | 12 | 5209901 | 5209920 | 2 | 10 | 20 | TG  | 22 | 7  |
| 118893 | 12 | 5211986 | 5212019 | 2 | 17 | 34 | AC  | 13 | 11 |
| 118899 | 12 | 5221875 | 5221888 | 2 | 7  | 14 | CA  | 15 | 8  |
| 118900 | 12 | 5221891 | 5221902 | 2 | 6  | 12 | CA  | 16 | 8  |
| 118901 | 12 | 5222003 | 5222030 | 2 | 14 | 28 | TG  | 23 | 6  |
| 118902 | 12 | 5222263 | 5222274 | 2 | 6  | 12 | CA  | 24 | 3  |
| 118903 | 12 | 5222547 | 5222564 | 2 | 9  | 18 | CA  | 11 | 6  |
| 118904 | 12 | 5222693 | 5222708 | 2 | 8  | 16 | GT  | 19 | 6  |
| 118906 | 12 | 5223797 | 5223812 | 2 | 8  | 16 | CA  | 22 | 3  |
| 118916 | 12 | 5227504 | 5227515 | 2 | 6  | 12 | GT  | 22 | 3  |
| 118919 | 12 | 5232494 | 5232521 | 2 | 14 | 28 | GT  | 7  | 7  |
| 118920 | 12 | 5232683 | 5232700 | 2 | 9  | 18 | AG  | 20 | 4  |
| 118924 | 12 | 5234516 | 5234527 | 2 | 6  | 12 | TG  | 7  | 3  |
| 118925 | 12 | 5234582 | 5234593 | 2 | 6  | 12 | AC  | 20 | 3  |
| 118929 | 12 | 5236266 | 5236291 | 2 | 13 | 26 | TG  | 21 | 12 |
| 118931 | 12 | 5237187 | 5237208 | 2 | 11 | 22 | CA  | 14 | 9  |
| 118939 | 12 | 5249145 | 5249188 | 2 | 22 | 44 | AC  | 11 | 13 |
| 118941 | 12 | 5250895 | 5250920 | 2 | 13 | 26 | CA  | 11 | 11 |
| 118943 | 12 | 5251035 | 5251058 | 2 | 12 | 24 | TG  | 21 | 9  |
| 118944 | 12 | 5251229 | 5251270 | 2 | 21 | 42 | AC  | 10 | 13 |
| 118946 | 12 | 5251897 | 5251916 | 2 | 10 | 20 | GT  | 22 | 6  |
| 118947 | 12 | 5252106 | 5252123 | 2 | 9  | 18 | TG  | 17 | 8  |

|        |    |         |         |   |    |    |      |    |    |
|--------|----|---------|---------|---|----|----|------|----|----|
| 118949 | 12 | 5255304 | 5255319 | 2 | 8  | 16 | AC   | 18 | 7  |
| 118950 | 12 | 5255604 | 5255615 | 2 | 6  | 12 | GT   | 32 | 3  |
| 118951 | 12 | 5255763 | 5255788 | 2 | 13 | 26 | CA   | 23 | 15 |
| 118955 | 12 | 5260084 | 5260111 | 2 | 14 | 28 | CA   | 13 | 10 |
| 118957 | 12 | 5261569 | 5261582 | 2 | 7  | 14 | AC   | 25 | 3  |
| 118958 | 12 | 5261662 | 5261683 | 2 | 11 | 22 | AC   | 19 | 8  |
| 118961 | 12 | 5266922 | 5266943 | 2 | 11 | 22 | GA   | 20 | 11 |
| 118962 | 12 | 5267034 | 5267047 | 2 | 7  | 14 | CA   | 24 | 7  |
| 118975 | 12 | 5274544 | 5274559 | 2 | 8  | 16 | GT   | 20 | 6  |
| 118976 | 12 | 5274658 | 5274669 | 2 | 6  | 12 | TG   | 14 | 4  |
| 118977 | 12 | 5275231 | 5275250 | 2 | 10 | 20 | CA   | 15 | 18 |
| 118978 | 12 | 5275473 | 5275486 | 2 | 7  | 14 | AC   | 20 | 11 |
| 118982 | 12 | 5280208 | 5280231 | 2 | 12 | 24 | CT   | 15 | 8  |
| 118983 | 12 | 5281773 | 5281804 | 2 | 16 | 32 | AC   | 11 | 8  |
| 118984 | 12 | 5283489 | 5283520 | 2 | 16 | 32 | AC   | 26 | 7  |
| 118985 | 12 | 5285613 | 5285640 | 2 | 14 | 28 | CA   | 18 | 11 |
| 118986 | 12 | 5286860 | 5286871 | 2 | 6  | 12 | AC   | 19 | 5  |
| 118989 | 12 | 5291290 | 5291331 | 2 | 21 | 42 | GT   | 11 | 10 |
| 118995 | 12 | 5295107 | 5295156 | 2 | 25 | 50 | TG   | 11 | 9  |
| 118997 | 12 | 5297540 | 5297569 | 2 | 15 | 30 | CA   | 19 | 9  |
| 119001 | 12 | 5299670 | 5299689 | 4 | 5  | 20 | CACG | 21 | 16 |
| 119002 | 12 | 5299690 | 5299707 | 2 | 9  | 18 | CA   | 10 | 11 |
| 119005 | 12 | 5301650 | 5301675 | 2 | 13 | 26 | GT   | 9  | 7  |
| 119007 | 12 | 5302005 | 5302018 | 2 | 7  | 14 | AC   | 12 | 3  |
| 119008 | 12 | 5302327 | 5302342 | 2 | 8  | 16 | GA   | 8  | 3  |
| 119011 | 12 | 5305284 | 5305295 | 2 | 6  | 12 | TG   | 31 | 5  |
| 119012 | 12 | 5305489 | 5305520 | 2 | 16 | 32 | TG   | 8  | 10 |
| 119016 | 12 | 5312404 | 5312417 | 2 | 7  | 14 | AG   | 17 | 6  |
| 119018 | 12 | 5313682 | 5313693 | 2 | 6  | 12 | GT   | 27 | 5  |
| 119019 | 12 | 5314144 | 5314159 | 2 | 8  | 16 | TC   | 26 | 3  |
| 119026 | 12 | 5321946 | 5321971 | 2 | 13 | 26 | AC   | 20 | 11 |
| 119027 | 12 | 5324561 | 5324574 | 2 | 7  | 14 | AC   | 28 | 5  |
| 119028 | 12 | 5326600 | 5326621 | 2 | 11 | 22 | TG   | 14 | 10 |
| 119032 | 12 | 5329717 | 5329738 | 2 | 11 | 22 | CA   | 18 | 10 |
| 119033 | 12 | 5330032 | 5330067 | 2 | 18 | 36 | TG   | 13 | 12 |
| 119038 | 12 | 5335571 | 5335600 | 2 | 15 | 30 | CA   | 11 | 10 |
| 119041 | 12 | 5337169 | 5337182 | 2 | 7  | 14 | AC   | 17 | 5  |
| 119042 | 12 | 5337288 | 5337311 | 2 | 12 | 24 | CA   | 21 | 9  |
| 119043 | 12 | 5337522 | 5337549 | 2 | 14 | 28 | TG   | 22 | 9  |
| 119046 | 12 | 5337745 | 5337766 | 2 | 11 | 22 | CA   | 23 | 6  |
| 119051 | 12 | 5338885 | 5338899 | 3 | 5  | 15 | GAG  | 21 | 9  |
| 119052 | 12 | 5339650 | 5339689 | 4 | 10 | 40 | TCTA | 20 | 12 |
| 119059 | 12 | 5343232 | 5343245 | 2 | 7  | 14 | TC   | 8  | 3  |
| 119061 | 12 | 5345432 | 5345455 | 2 | 12 | 24 | GT   | 15 | 10 |
| 119064 | 12 | 5346919 | 5346948 | 2 | 15 | 30 | TG   | 16 | 16 |
| 119065 | 12 | 5347020 | 5347035 | 2 | 8  | 16 | AC   | 23 | 4  |
| 119068 | 12 | 5350126 | 5350143 | 2 | 9  | 18 | CT   | 12 | 8  |
| 119070 | 12 | 5352200 | 5352213 | 2 | 7  | 14 | TC   | 16 | 5  |
| 119072 | 12 | 5353996 | 5354007 | 2 | 6  | 12 | GA   | 10 | 5  |
| 119075 | 12 | 5354502 | 5354521 | 2 | 10 | 20 | TG   | 16 | 3  |
| 119077 | 12 | 5355016 | 5355029 | 2 | 7  | 14 | CA   | 17 | 6  |

|        |    |         |         |   |    |    |      |    |    |
|--------|----|---------|---------|---|----|----|------|----|----|
| 119081 | 12 | 5360533 | 5360562 | 2 | 15 | 30 | AC   | 12 | 9  |
| 119084 | 12 | 5361472 | 5361491 | 2 | 10 | 20 | AC   | 10 | 5  |
| 119085 | 12 | 5364893 | 5364916 | 2 | 12 | 24 | AC   | 16 | 16 |
| 119086 | 12 | 5367365 | 5367380 | 2 | 8  | 16 | GT   | 22 | 6  |
| 119089 | 12 | 5369258 | 5369269 | 2 | 6  | 12 | TC   | 25 | 8  |
| 119090 | 12 | 5369270 | 5369287 | 2 | 9  | 18 | AC   | 23 | 7  |
| 119091 | 12 | 5371234 | 5371249 | 2 | 8  | 16 | GT   | 16 | 9  |
| 119092 | 12 | 5371539 | 5371554 | 2 | 8  | 16 | TG   | 23 | 7  |
| 119093 | 12 | 5373419 | 5373450 | 2 | 16 | 32 | AC   | 11 | 7  |
| 119094 | 12 | 5374885 | 5374908 | 2 | 12 | 24 | TG   | 17 | 4  |
| 119095 | 12 | 5380683 | 5380694 | 2 | 6  | 12 | GT   | 28 | 5  |
| 119102 | 12 | 5383961 | 5383972 | 2 | 6  | 12 | GT   | 25 | 6  |
| 119103 | 12 | 5384178 | 5384197 | 2 | 10 | 20 | CA   | 21 | 3  |
| 119106 | 12 | 5386339 | 5386350 | 2 | 6  | 12 | TG   | 21 | 4  |
| 119107 | 12 | 5386446 | 5386459 | 2 | 7  | 14 | GT   | 15 | 12 |
| 119108 | 12 | 5386844 | 5386859 | 2 | 8  | 16 | CA   | 12 | 3  |
| 119111 | 12 | 5387517 | 5387540 | 3 | 8  | 24 | GAG  | 17 | 8  |
| 119114 | 12 | 5389023 | 5389054 | 2 | 16 | 32 | AC   | 14 | 13 |
| 119115 | 12 | 5389216 | 5389243 | 2 | 14 | 28 | GT   | 17 | 11 |
| 119116 | 12 | 5389496 | 5389513 | 3 | 6  | 18 | CAG  | 21 | 4  |
| 119117 | 12 | 5389722 | 5389745 | 2 | 12 | 24 | TG   | 17 | 9  |
| 119121 | 12 | 5394041 | 5394052 | 2 | 6  | 12 | CA   | 26 | 3  |
| 119122 | 12 | 5394622 | 5394636 | 3 | 5  | 15 | GGA  | 36 | 3  |
| 119125 | 12 | 5397385 | 5397402 | 2 | 9  | 18 | TG   | 29 | 4  |
| 119126 | 12 | 5398397 | 5398416 | 2 | 10 | 20 | GT   | 19 | 7  |
| 119128 | 12 | 5399223 | 5399240 | 3 | 6  | 18 | ATT  | 18 | 11 |
| 119134 | 12 | 5404865 | 5404876 | 2 | 6  | 12 | TG   | 23 | 11 |
| 119137 | 12 | 5408742 | 5408785 | 2 | 22 | 44 | TG   | 10 | 12 |
| 119139 | 12 | 5408922 | 5408945 | 2 | 12 | 24 | AC   | 10 | 3  |
| 119141 | 12 | 5410344 | 5410361 | 2 | 9  | 18 | GT   | 23 | 7  |
| 119144 | 12 | 5415714 | 5415735 | 2 | 11 | 22 | GT   | 17 | 9  |
| 119147 | 12 | 5417466 | 5417485 | 2 | 10 | 20 | AC   | 15 | 6  |
| 119155 | 12 | 5421859 | 5421870 | 2 | 6  | 12 | GT   | 22 | 10 |
| 119156 | 12 | 5421987 | 5422028 | 2 | 21 | 42 | GT   | 10 | 11 |
| 119157 | 12 | 5422749 | 5422766 | 2 | 9  | 18 | TG   | 21 | 4  |
| 119162 | 12 | 5431960 | 5431971 | 2 | 6  | 12 | CA   | 20 | 12 |
| 119163 | 12 | 5431974 | 5431991 | 2 | 9  | 18 | CA   | 23 | 15 |
| 119165 | 12 | 5432787 | 5432804 | 2 | 9  | 18 | TG   | 13 | 3  |
| 119167 | 12 | 5441108 | 5441122 | 3 | 5  | 15 | AGC  | 29 | 3  |
| 119173 | 12 | 5464451 | 5464474 | 4 | 6  | 24 | GACT | 17 | 3  |
| 119175 | 12 | 5466886 | 5466901 | 4 | 4  | 16 | ATCC | 30 | 3  |
| 119184 | 12 | 5478171 | 5478188 | 2 | 9  | 18 | TC   | 15 | 3  |
| 119194 | 12 | 5498663 | 5498676 | 2 | 7  | 14 | GT   | 18 | 3  |
| 119195 | 12 | 5500147 | 5500158 | 2 | 6  | 12 | GT   | 30 | 4  |
| 119196 | 12 | 5503990 | 5504013 | 3 | 8  | 24 | TGA  | 21 | 6  |
| 119202 | 12 | 5523597 | 5523612 | 2 | 8  | 16 | GA   | 21 | 4  |
| 119204 | 12 | 5525672 | 5525711 | 4 | 10 | 40 | AAGA | 11 | 13 |
| 119209 | 12 | 5537355 | 5537384 | 3 | 10 | 30 | GTA  | 22 | 9  |
| 119211 | 12 | 5558990 | 5559009 | 4 | 5  | 20 | TTTG | 18 | 4  |
| 119212 | 12 | 5559601 | 5559618 | 2 | 9  | 18 | TG   | 19 | 9  |
| 119218 | 12 | 5567984 | 5568005 | 2 | 11 | 22 | AG   | 9  | 3  |

|        |    |         |         |   |    |    |      |    |    |
|--------|----|---------|---------|---|----|----|------|----|----|
| 119219 | 12 | 5570156 | 5570179 | 2 | 12 | 24 | GT   | 14 | 15 |
| 119221 | 12 | 5570314 | 5570327 | 2 | 7  | 14 | GT   | 22 | 3  |
| 119227 | 12 | 5577595 | 5577606 | 2 | 6  | 12 | CT   | 30 | 4  |
| 119232 | 12 | 5596230 | 5596241 | 2 | 6  | 12 | AC   | 24 | 4  |
| 119233 | 12 | 5596696 | 5596715 | 4 | 5  | 20 | TTGA | 27 | 5  |
| 119234 | 12 | 5598344 | 5598364 | 3 | 7  | 21 | CAT  | 23 | 3  |
| 119235 | 12 | 5601809 | 5601824 | 2 | 8  | 16 | TG   | 21 | 8  |
| 119237 | 12 | 5606828 | 5606841 | 2 | 7  | 14 | GT   | 33 | 6  |
| 119239 | 12 | 5612431 | 5612448 | 2 | 9  | 18 | GT   | 25 | 3  |
| 119240 | 12 | 5612675 | 5612694 | 2 | 10 | 20 | AC   | 15 | 7  |
| 119242 | 12 | 5614053 | 5614064 | 2 | 6  | 12 | AT   | 23 | 3  |
| 119247 | 12 | 5622806 | 5622821 | 2 | 8  | 16 | CA   | 15 | 3  |
| 119248 | 12 | 5626416 | 5626457 | 2 | 21 | 42 | GT   | 11 | 8  |
| 119250 | 12 | 5633944 | 5633955 | 2 | 6  | 12 | AC   | 12 | 10 |
| 119252 | 12 | 5635467 | 5635484 | 2 | 9  | 18 | TG   | 22 | 4  |
| 119253 | 12 | 5637030 | 5637053 | 2 | 12 | 24 | TG   | 28 | 13 |
| 119256 | 12 | 5639890 | 5639903 | 2 | 7  | 14 | GT   | 22 | 10 |
| 119258 | 12 | 5640860 | 5640881 | 2 | 11 | 22 | TG   | 14 | 8  |
| 119260 | 12 | 5642230 | 5642265 | 2 | 18 | 36 | AC   | 11 | 13 |
| 119262 | 12 | 5643244 | 5643271 | 2 | 14 | 28 | TG   | 10 | 12 |
| 119266 | 12 | 5651896 | 5651919 | 4 | 6  | 24 | TCTA | 17 | 7  |
| 119267 | 12 | 5652770 | 5652789 | 4 | 5  | 20 | TATC | 21 | 8  |
| 119271 | 12 | 5657952 | 5657971 | 2 | 10 | 20 | TG   | 16 | 13 |
| 119272 | 12 | 5659602 | 5659625 | 2 | 12 | 24 | GT   | 26 | 9  |
| 119275 | 12 | 5666108 | 5666119 | 2 | 6  | 12 | TG   | 21 | 3  |
| 119281 | 12 | 5681336 | 5681367 | 2 | 16 | 32 | TG   | 14 | 17 |
| 119288 | 12 | 5694243 | 5694266 | 2 | 12 | 24 | TG   | 24 | 11 |
| 119289 | 12 | 5699559 | 5699579 | 3 | 7  | 21 | CTG  | 18 | 6  |
| 119290 | 12 | 5699627 | 5699641 | 3 | 5  | 15 | CAT  | 15 | 3  |
| 119291 | 12 | 5699642 | 5699656 | 3 | 5  | 15 | CAC  | 19 | 5  |
| 119298 | 12 | 5708940 | 5708954 | 3 | 5  | 15 | TGG  | 13 | 3  |
| 119302 | 12 | 5717122 | 5717133 | 2 | 6  | 12 | GA   | 29 | 4  |
| 119303 | 12 | 5717978 | 5718019 | 2 | 21 | 42 | GT   | 10 | 11 |
| 119307 | 12 | 5719621 | 5719632 | 2 | 6  | 12 | AT   | 27 | 5  |
| 119308 | 12 | 5719986 | 5720001 | 2 | 8  | 16 | TA   | 8  | 4  |
| 119310 | 12 | 5721415 | 5721428 | 2 | 7  | 14 | CA   | 20 | 15 |
| 119315 | 12 | 5726856 | 5726870 | 3 | 5  | 15 | AAC  | 13 | 6  |
| 119316 | 12 | 5727195 | 5727230 | 4 | 9  | 36 | GAAA | 20 | 9  |
| 119320 | 12 | 5740367 | 5740382 | 2 | 8  | 16 | CT   | 28 | 3  |
| 119323 | 12 | 5753400 | 5753433 | 2 | 17 | 34 | GT   | 12 | 7  |
| 119324 | 12 | 5753804 | 5753819 | 2 | 8  | 16 | TG   | 24 | 6  |
| 119331 | 12 | 5760409 | 5760424 | 2 | 8  | 16 | TG   | 29 | 6  |
| 119334 | 12 | 5763512 | 5763531 | 2 | 10 | 20 | TA   | 17 | 5  |
| 119335 | 12 | 5764332 | 5764355 | 2 | 12 | 24 | CA   | 14 | 11 |
| 119338 | 12 | 5765008 | 5765023 | 2 | 8  | 16 | TG   | 17 | 4  |
| 119340 | 12 | 5767122 | 5767145 | 2 | 12 | 24 | AC   | 20 | 7  |
| 119346 | 12 | 5780918 | 5780941 | 3 | 8  | 24 | GAT  | 30 | 7  |
| 119348 | 12 | 5783322 | 5783337 | 2 | 8  | 16 | AT   | 12 | 7  |
| 119354 | 12 | 5797913 | 5797927 | 3 | 5  | 15 | CAG  | 23 | 6  |
| 119362 | 12 | 5829141 | 5829152 | 2 | 6  | 12 | AC   | 19 | 9  |
| 119367 | 12 | 5842798 | 5842811 | 2 | 7  | 14 | AC   | 30 | 3  |

|        |    |         |         |   |    |    |      |    |    |
|--------|----|---------|---------|---|----|----|------|----|----|
| 119371 | 12 | 5850591 | 5850622 | 2 | 16 | 32 | AC   | 17 | 9  |
| 119372 | 12 | 5852343 | 5852364 | 2 | 11 | 22 | CA   | 26 | 9  |
| 119379 | 12 | 5855581 | 5855602 | 2 | 11 | 22 | CA   | 13 | 19 |
| 119385 | 12 | 5860644 | 5860679 | 2 | 18 | 36 | CT   | 13 | 9  |
| 119388 | 12 | 5867264 | 5867281 | 2 | 9  | 18 | TG   | 14 | 6  |
| 119392 | 12 | 5870582 | 5870605 | 2 | 12 | 24 | AC   | 9  | 4  |
| 119393 | 12 | 5871490 | 5871501 | 2 | 6  | 12 | TG   | 20 | 6  |
| 119396 | 12 | 5875447 | 5875472 | 2 | 13 | 26 | CA   | 11 | 8  |
| 119404 | 12 | 5881374 | 5881393 | 2 | 10 | 20 | GT   | 20 | 7  |
| 119410 | 12 | 5886249 | 5886294 | 2 | 23 | 46 | GT   | 7  | 11 |
| 119411 | 12 | 5886605 | 5886632 | 2 | 14 | 28 | TC   | 13 | 8  |
| 119418 | 12 | 5901218 | 5901229 | 2 | 6  | 12 | GT   | 23 | 9  |
| 119419 | 12 | 5901567 | 5901586 | 2 | 10 | 20 | CT   | 10 | 8  |
| 119420 | 12 | 5901587 | 5901602 | 2 | 8  | 16 | CA   | 12 | 12 |
| 119426 | 12 | 5909886 | 5909899 | 2 | 7  | 14 | CA   | 26 | 7  |
| 119431 | 12 | 5910725 | 5910746 | 2 | 11 | 22 | TG   | 17 | 5  |
| 119432 | 12 | 5910948 | 5910961 | 2 | 7  | 14 | AC   | 27 | 9  |
| 119435 | 12 | 5912315 | 5912338 | 2 | 12 | 24 | TG   | 20 | 8  |
| 119438 | 12 | 5913273 | 5913286 | 2 | 7  | 14 | TC   | 16 | 3  |
| 119441 | 12 | 5916544 | 5916557 | 2 | 7  | 14 | GA   | 25 | 3  |
| 119443 | 12 | 5919646 | 5919667 | 2 | 11 | 22 | GT   | 19 | 5  |
| 119445 | 12 | 5921099 | 5921110 | 2 | 6  | 12 | AC   | 23 | 4  |
| 119448 | 12 | 5925804 | 5925823 | 2 | 10 | 20 | CA   | 18 | 12 |
| 119452 | 12 | 5927669 | 5927688 | 2 | 10 | 20 | TG   | 20 | 7  |
| 119454 | 12 | 5928167 | 5928184 | 3 | 6  | 18 | AGA  | 10 | 3  |
| 119456 | 12 | 5930741 | 5930755 | 3 | 5  | 15 | CCT  | 16 | 9  |
| 119457 | 12 | 5931573 | 5931596 | 4 | 6  | 24 | GACA | 22 | 6  |
| 119459 | 12 | 5932632 | 5932651 | 2 | 10 | 20 | AC   | 16 | 13 |
| 119466 | 12 | 5935965 | 5935982 | 3 | 6  | 18 | TGC  | 19 | 3  |
| 119467 | 12 | 5937060 | 5937073 | 2 | 7  | 14 | AC   | 17 | 4  |
| 119468 | 12 | 5937508 | 5937523 | 4 | 4  | 16 | TTTC | 10 | 3  |
| 119469 | 12 | 5938208 | 5938223 | 2 | 8  | 16 | GA   | 18 | 4  |
| 119471 | 12 | 5941181 | 5941192 | 2 | 6  | 12 | TG   | 25 | 5  |
| 119474 | 12 | 5943382 | 5943395 | 2 | 7  | 14 | CA   | 18 | 5  |
| 119477 | 12 | 5946191 | 5946218 | 2 | 14 | 28 | AC   | 7  | 8  |
| 119478 | 12 | 5951264 | 5951279 | 2 | 8  | 16 | GT   | 22 | 3  |
| 119479 | 12 | 5951771 | 5951788 | 2 | 9  | 18 | TG   | 16 | 12 |
| 119481 | 12 | 5953719 | 5953732 | 2 | 7  | 14 | AC   | 23 | 3  |
| 119491 | 12 | 5967992 | 5968015 | 4 | 6  | 24 | AAAC | 19 | 3  |
| 119493 | 12 | 5973780 | 5973793 | 2 | 7  | 14 | AC   | 23 | 5  |
| 119495 | 12 | 5979845 | 5979858 | 2 | 7  | 14 | AT   | 8  | 10 |
| 119502 | 12 | 5996950 | 5996969 | 2 | 10 | 20 | GT   | 15 | 3  |
| 119503 | 12 | 6005512 | 6005535 | 2 | 12 | 24 | TG   | 16 | 11 |
| 119508 | 12 | 6018698 | 6018733 | 3 | 12 | 36 | AAT  | 8  | 10 |
| 119510 | 12 | 6022060 | 6022075 | 2 | 8  | 16 | TC   | 16 | 3  |
| 119511 | 12 | 6022584 | 6022615 | 2 | 16 | 32 | AC   | 9  | 12 |
| 119512 | 12 | 6024613 | 6024630 | 3 | 6  | 18 | AAC  | 24 | 3  |
| 119514 | 12 | 6034212 | 6034243 | 2 | 16 | 32 | AC   | 6  | 7  |
| 119515 | 12 | 6035149 | 6035162 | 2 | 7  | 14 | AC   | 12 | 5  |
| 119516 | 12 | 6035186 | 6035225 | 2 | 20 | 40 | AC   | 10 | 10 |
| 119519 | 12 | 6039916 | 6039933 | 2 | 9  | 18 | TG   | 19 | 5  |

|        |    |         |         |   |    |    |      |    |    |
|--------|----|---------|---------|---|----|----|------|----|----|
| 119521 | 12 | 6048677 | 6048702 | 2 | 13 | 26 | CA   | 9  | 11 |
| 119522 | 12 | 6048893 | 6048916 | 2 | 12 | 24 | CA   | 21 | 11 |
| 119523 | 12 | 6049133 | 6049144 | 2 | 6  | 12 | TG   | 27 | 6  |
| 119524 | 12 | 6053545 | 6053574 | 2 | 15 | 30 | AC   | 11 | 10 |
| 119528 | 12 | 6058417 | 6058452 | 4 | 9  | 36 | TATC | 17 | 12 |
| 119529 | 12 | 6064141 | 6064164 | 4 | 6  | 24 | TTTC | 21 | 6  |
| 119537 | 12 | 6073347 | 6073360 | 2 | 7  | 14 | CT   | 20 | 4  |
| 119539 | 12 | 6082366 | 6082428 | 3 | 21 | 63 | AGA  | 9  | 14 |
| 119546 | 12 | 6090790 | 6090833 | 2 | 22 | 44 | TG   | 8  | 12 |
| 119548 | 12 | 6092619 | 6092646 | 4 | 7  | 28 | TTCT | 8  | 5  |
| 119549 | 12 | 6095131 | 6095172 | 2 | 21 | 42 | GA   | 6  | 5  |
| 119550 | 12 | 6096694 | 6096711 | 2 | 9  | 18 | AC   | 15 | 6  |
| 119559 | 12 | 6118600 | 6118633 | 2 | 17 | 34 | TG   | 9  | 10 |
| 119561 | 12 | 6122279 | 6122292 | 2 | 7  | 14 | CA   | 16 | 5  |
| 119562 | 12 | 6122295 | 6122308 | 2 | 7  | 14 | CA   | 22 | 6  |
| 119563 | 12 | 6122858 | 6122905 | 2 | 24 | 48 | GT   | 8  | 8  |
| 119566 | 12 | 6128038 | 6128053 | 4 | 4  | 16 | CCAT | 32 | 4  |
| 119575 | 12 | 6137388 | 6137421 | 2 | 17 | 34 | CA   | 16 | 12 |
| 119577 | 12 | 6141745 | 6141762 | 2 | 9  | 18 | GT   | 17 | 14 |
| 119587 | 12 | 6153121 | 6153136 | 4 | 4  | 16 | TTAA | 20 | 3  |
| 119589 | 12 | 6153835 | 6153862 | 2 | 14 | 28 | AC   | 6  | 7  |
| 119591 | 12 | 6153987 | 6154002 | 2 | 8  | 16 | GT   | 7  | 3  |
| 119593 | 12 | 6159050 | 6159061 | 2 | 6  | 12 | AG   | 24 | 3  |
| 119599 | 12 | 6164189 | 6164222 | 2 | 17 | 34 | AC   | 9  | 11 |
| 119600 | 12 | 6164307 | 6164322 | 2 | 8  | 16 | TG   | 19 | 5  |
| 119606 | 12 | 6167913 | 6167942 | 2 | 15 | 30 | CA   | 7  | 5  |
| 119607 | 12 | 6171243 | 6171256 | 2 | 7  | 14 | CA   | 14 | 3  |
| 119611 | 12 | 6179463 | 6179478 | 2 | 8  | 16 | GA   | 19 | 3  |
| 119620 | 12 | 6199151 | 6199166 | 2 | 8  | 16 | CA   | 23 | 6  |
| 119626 | 12 | 6204876 | 6204905 | 2 | 15 | 30 | CA   | 7  | 10 |
| 119630 | 12 | 6205278 | 6205297 | 2 | 10 | 20 | CT   | 15 | 10 |
| 119632 | 12 | 6208726 | 6208745 | 2 | 10 | 20 | CT   | 24 | 4  |
| 119633 | 12 | 6212316 | 6212341 | 2 | 13 | 26 | AC   | 16 | 14 |
| 119636 | 12 | 6213045 | 6213092 | 2 | 24 | 48 | TG   | 9  | 14 |
| 119641 | 12 | 6220367 | 6220384 | 2 | 9  | 18 | AC   | 13 | 10 |
| 119643 | 12 | 6224840 | 6224851 | 2 | 6  | 12 | TG   | 26 | 5  |
| 119648 | 12 | 6231629 | 6231650 | 2 | 11 | 22 | CA   | 15 | 13 |
| 119649 | 12 | 6232039 | 6232058 | 2 | 10 | 20 | GT   | 14 | 4  |
| 119652 | 12 | 6233753 | 6233786 | 2 | 17 | 34 | TG   | 16 | 10 |
| 119653 | 12 | 6237432 | 6237443 | 2 | 6  | 12 | GT   | 13 | 4  |
| 119654 | 12 | 6239253 | 6239272 | 2 | 10 | 20 | CA   | 26 | 9  |
| 119655 | 12 | 6239462 | 6239477 | 2 | 8  | 16 | CA   | 10 | 6  |
| 119659 | 12 | 6239693 | 6239710 | 2 | 9  | 18 | TG   | 13 | 3  |
| 119660 | 12 | 6242159 | 6242184 | 2 | 13 | 26 | TG   | 17 | 7  |
| 119667 | 12 | 6247824 | 6247843 | 2 | 10 | 20 | GT   | 22 | 5  |
| 119669 | 12 | 6252109 | 6252122 | 2 | 7  | 14 | AC   | 18 | 7  |
| 119670 | 12 | 6255840 | 6255867 | 4 | 7  | 28 | CAGG | 18 | 6  |
| 119671 | 12 | 6256016 | 6256027 | 2 | 6  | 12 | GT   | 20 | 5  |
| 119672 | 12 | 6256030 | 6256041 | 2 | 6  | 12 | GT   | 15 | 5  |
| 119673 | 12 | 6256179 | 6256202 | 2 | 12 | 24 | CA   | 9  | 8  |
| 119675 | 12 | 6258287 | 6258308 | 2 | 11 | 22 | GA   | 6  | 5  |



|        |    |         |         |   |    |    |      |    |    |
|--------|----|---------|---------|---|----|----|------|----|----|
| 119679 | 12 | 6261209 | 6261230 | 2 | 11 | 22 | CA   | 20 | 5  |
| 119680 | 12 | 6262237 | 6262252 | 2 | 8  | 16 | GA   | 22 | 3  |
| 119681 | 12 | 6267835 | 6267848 | 2 | 7  | 14 | TG   | 24 | 5  |
| 119682 | 12 | 6269388 | 6269421 | 2 | 17 | 34 | CA   | 12 | 8  |
| 119683 | 12 | 6270206 | 6270217 | 2 | 6  | 12 | TG   | 33 | 3  |
| 119684 | 12 | 6272429 | 6272454 | 2 | 13 | 26 | CA   | 23 | 15 |
| 119686 | 12 | 6276059 | 6276072 | 2 | 7  | 14 | GA   | 23 | 5  |
| 119687 | 12 | 6276860 | 6276899 | 2 | 20 | 40 | TG   | 7  | 7  |
| 119688 | 12 | 6276999 | 6277032 | 2 | 17 | 34 | GT   | 11 | 11 |
| 119693 | 12 | 6280158 | 6280187 | 2 | 15 | 30 | AC   | 20 | 13 |
| 119694 | 12 | 6281650 | 6281688 | 3 | 13 | 39 | AGC  | 20 | 7  |
| 119696 | 12 | 6282249 | 6282260 | 2 | 6  | 12 | GT   | 15 | 9  |
| 119698 | 12 | 6284608 | 6284619 | 2 | 6  | 12 | AG   | 25 | 3  |
| 119703 | 12 | 6288936 | 6288951 | 2 | 8  | 16 | AC   | 25 | 6  |
| 119715 | 12 | 6297569 | 6297588 | 2 | 10 | 20 | AC   | 34 | 3  |
| 119716 | 12 | 6298237 | 6298252 | 2 | 8  | 16 | TG   | 29 | 6  |
| 119720 | 12 | 6300362 | 6300387 | 2 | 13 | 26 | TG   | 7  | 10 |
| 119722 | 12 | 6302154 | 6302171 | 3 | 6  | 18 | TTG  | 32 | 4  |
| 119723 | 12 | 6303124 | 6303141 | 2 | 9  | 18 | AC   | 17 | 9  |
| 119728 | 12 | 6307345 | 6307374 | 2 | 15 | 30 | AC   | 13 | 13 |
| 119732 | 12 | 6313950 | 6313963 | 2 | 7  | 14 | TG   | 18 | 4  |
| 119733 | 12 | 6314554 | 6314581 | 2 | 14 | 28 | CA   | 13 | 8  |
| 119734 | 12 | 6314907 | 6314924 | 2 | 9  | 18 | TG   | 10 | 6  |
| 119736 | 12 | 6317429 | 6317452 | 4 | 6  | 24 | AAAT | 24 | 7  |
| 119740 | 12 | 6321963 | 6321986 | 2 | 12 | 24 | AC   | 15 | 6  |
| 119744 | 12 | 6326210 | 6326241 | 2 | 16 | 32 | AC   | 14 | 11 |
| 119747 | 12 | 6328462 | 6328473 | 2 | 6  | 12 | AC   | 19 | 3  |
| 119749 | 12 | 6332311 | 6332326 | 2 | 8  | 16 | AC   | 28 | 10 |
| 119757 | 12 | 6340267 | 6340278 | 2 | 6  | 12 | CA   | 20 | 6  |
| 119758 | 12 | 6340538 | 6340555 | 2 | 9  | 18 | TG   | 13 | 7  |
| 119778 | 12 | 6357999 | 6358022 | 2 | 12 | 24 | TG   | 19 | 6  |
| 119781 | 12 | 6360912 | 6360938 | 3 | 9  | 27 | GAG  | 22 | 3  |
| 119782 | 12 | 6361041 | 6361072 | 2 | 16 | 32 | CA   | 9  | 15 |
| 119784 | 12 | 6363372 | 6363393 | 2 | 11 | 22 | CT   | 23 | 6  |
| 119786 | 12 | 6368839 | 6368859 | 3 | 7  | 21 | TGT  | 29 | 3  |
| 119789 | 12 | 6370991 | 6371006 | 2 | 8  | 16 | AC   | 10 | 5  |
| 119791 | 12 | 6374518 | 6374547 | 2 | 15 | 30 | CA   | 16 | 11 |
| 119796 | 12 | 6379159 | 6379179 | 3 | 7  | 21 | CAG  | 25 | 7  |
| 119801 | 12 | 6381661 | 6381676 | 2 | 8  | 16 | AC   | 12 | 4  |
| 119803 | 12 | 6383343 | 6383360 | 2 | 9  | 18 | TG   | 22 | 4  |
| 119804 | 12 | 6385055 | 6385082 | 2 | 14 | 28 | TG   | 9  | 9  |
| 119805 | 12 | 6385268 | 6385311 | 4 | 11 | 44 | AGAA | 11 | 9  |
| 119806 | 12 | 6385948 | 6385967 | 4 | 5  | 20 | CATC | 22 | 4  |
| 119810 | 12 | 6387254 | 6387281 | 2 | 14 | 28 | CA   | 7  | 7  |
| 119811 | 12 | 6388821 | 6388832 | 2 | 6  | 12 | AC   | 24 | 3  |
| 119812 | 12 | 6389115 | 6389130 | 2 | 8  | 16 | AC   | 17 | 11 |
| 119813 | 12 | 6389349 | 6389388 | 2 | 20 | 40 | CA   | 10 | 10 |
| 119814 | 12 | 6389993 | 6390004 | 2 | 6  | 12 | AC   | 13 | 5  |
| 119817 | 12 | 6391035 | 6391046 | 2 | 6  | 12 | CA   | 18 | 7  |
| 119818 | 12 | 6391148 | 6391167 | 2 | 10 | 20 | GT   | 20 | 4  |
| 119821 | 12 | 6394658 | 6394711 | 2 | 27 | 54 | AC   | 10 | 11 |

|        |    |         |         |   |    |    |      |    |    |
|--------|----|---------|---------|---|----|----|------|----|----|
| 119825 | 12 | 6399293 | 6399310 | 2 | 9  | 18 | CA   | 16 | 4  |
| 119827 | 12 | 6399648 | 6399667 | 2 | 10 | 20 | AC   | 14 | 4  |
| 119828 | 12 | 6400336 | 6400351 | 2 | 8  | 16 | TG   | 16 | 9  |
| 119830 | 12 | 6400902 | 6400915 | 2 | 7  | 14 | CT   | 19 | 6  |
| 119834 | 12 | 6401789 | 6401818 | 2 | 15 | 30 | CA   | 6  | 4  |
| 119835 | 12 | 6402092 | 6402115 | 2 | 12 | 24 | AC   | 8  | 8  |
| 119840 | 12 | 6406374 | 6406385 | 2 | 6  | 12 | GT   | 21 | 3  |
| 119841 | 12 | 6406620 | 6406645 | 2 | 13 | 26 | TG   | 14 | 8  |
| 119842 | 12 | 6406785 | 6406804 | 2 | 10 | 20 | TG   | 21 | 8  |
| 119851 | 12 | 6412044 | 6412069 | 2 | 13 | 26 | TG   | 19 | 9  |
| 119856 | 12 | 6415841 | 6415858 | 2 | 9  | 18 | CA   | 28 | 24 |
| 119857 | 12 | 6416383 | 6416396 | 2 | 7  | 14 | TG   | 28 | 3  |
| 119858 | 12 | 6416540 | 6416555 | 2 | 8  | 16 | CA   | 18 | 13 |
| 119859 | 12 | 6416766 | 6416795 | 2 | 15 | 30 | TG   | 20 | 14 |
| 119862 | 12 | 6422271 | 6422286 | 4 | 4  | 16 | AGAA | 7  | 4  |
| 119863 | 12 | 6426053 | 6426076 | 2 | 12 | 24 | CT   | 19 | 10 |
| 119866 | 12 | 6427747 | 6427770 | 2 | 12 | 24 | TG   | 16 | 5  |
| 119867 | 12 | 6428625 | 6428652 | 2 | 14 | 28 | TG   | 15 | 9  |
| 119868 | 12 | 6429665 | 6429692 | 2 | 14 | 28 | CA   | 15 | 14 |
| 119869 | 12 | 6429777 | 6429798 | 2 | 11 | 22 | GT   | 21 | 6  |
| 119871 | 12 | 6429914 | 6429927 | 2 | 7  | 14 | GT   | 11 | 11 |
| 119875 | 12 | 6432855 | 6432876 | 2 | 11 | 22 | GT   | 19 | 15 |
| 119881 | 12 | 6435970 | 6435983 | 2 | 7  | 14 | GT   | 19 | 5  |
| 119884 | 12 | 6436375 | 6436410 | 2 | 18 | 36 | TC   | 16 | 13 |
| 119886 | 12 | 6436573 | 6436596 | 2 | 12 | 24 | GA   | 8  | 6  |
| 119887 | 12 | 6436661 | 6436690 | 2 | 15 | 30 | TC   | 8  | 6  |
| 119888 | 12 | 6436866 | 6436887 | 2 | 11 | 22 | AC   | 14 | 9  |
| 119889 | 12 | 6437069 | 6437082 | 2 | 7  | 14 | TG   | 15 | 11 |
| 119891 | 12 | 6437963 | 6437977 | 3 | 5  | 15 | GAA  | 20 | 4  |
| 119895 | 12 | 6441395 | 6441412 | 2 | 9  | 18 | GT   | 17 | 9  |
| 119896 | 12 | 6441546 | 6441567 | 2 | 11 | 22 | TG   | 13 | 7  |
| 119900 | 12 | 6446324 | 6446343 | 2 | 10 | 20 | GT   | 7  | 7  |
| 119901 | 12 | 6446455 | 6446468 | 2 | 7  | 14 | TC   | 19 | 3  |
| 119903 | 12 | 6446651 | 6446662 | 2 | 6  | 12 | CA   | 28 | 3  |
| 119904 | 12 | 6447052 | 6447072 | 3 | 7  | 21 | ATT  | 16 | 4  |
| 119905 | 12 | 6452617 | 6452632 | 4 | 4  | 16 | TTTA | 31 | 8  |
| 119910 | 12 | 6456915 | 6456948 | 2 | 17 | 34 | TG   | 10 | 9  |
| 119914 | 12 | 6458776 | 6458807 | 2 | 16 | 32 | TG   | 21 | 12 |
| 119916 | 12 | 6459932 | 6459963 | 4 | 8  | 32 | TCCA | 24 | 11 |
| 119917 | 12 | 6460450 | 6460463 | 2 | 7  | 14 | TG   | 21 | 7  |
| 119918 | 12 | 6460504 | 6460561 | 2 | 29 | 58 | TG   | 6  | 8  |
| 119920 | 12 | 6463098 | 6463109 | 2 | 6  | 12 | AC   | 9  | 5  |
| 119921 | 12 | 6463112 | 6463129 | 2 | 9  | 18 | AC   | 15 | 5  |
| 119925 | 12 | 6465803 | 6465814 | 2 | 6  | 12 | TA   | 23 | 4  |
| 119928 | 12 | 6468533 | 6468544 | 2 | 6  | 12 | GT   | 8  | 3  |
| 119929 | 12 | 6468602 | 6468613 | 2 | 6  | 12 | AC   | 20 | 5  |
| 119934 | 12 | 6471189 | 6471204 | 2 | 8  | 16 | AC   | 23 | 5  |
| 119935 | 12 | 6472257 | 6472278 | 2 | 11 | 22 | CA   | 18 | 18 |
| 119936 | 12 | 6475981 | 6476004 | 2 | 12 | 24 | GT   | 18 | 8  |
| 119937 | 12 | 6476321 | 6476332 | 2 | 6  | 12 | AC   | 30 | 3  |
| 119938 | 12 | 6476395 | 6476408 | 2 | 7  | 14 | TG   | 26 | 3  |

|        |    |         |         |   |    |    |      |    |    |
|--------|----|---------|---------|---|----|----|------|----|----|
| 119943 | 12 | 6481730 | 6481749 | 2 | 10 | 20 | GT   | 23 | 8  |
| 119944 | 12 | 6481901 | 6481922 | 2 | 11 | 22 | TG   | 16 | 7  |
| 119945 | 12 | 6482039 | 6482052 | 2 | 7  | 14 | CA   | 24 | 8  |
| 119946 | 12 | 6482212 | 6482233 | 2 | 11 | 22 | AC   | 12 | 6  |
| 119948 | 12 | 6483134 | 6483151 | 2 | 9  | 18 | GT   | 17 | 7  |
| 119949 | 12 | 6483310 | 6483321 | 2 | 6  | 12 | AC   | 21 | 4  |
| 119951 | 12 | 6484669 | 6484689 | 3 | 7  | 21 | GCA  | 25 | 8  |
| 119956 | 12 | 6490747 | 6490764 | 2 | 9  | 18 | GT   | 12 | 5  |
| 119957 | 12 | 6490767 | 6490780 | 2 | 7  | 14 | GT   | 21 | 16 |
| 119958 | 12 | 6491246 | 6491267 | 2 | 11 | 22 | AC   | 11 | 7  |
| 119963 | 12 | 6493031 | 6493046 | 2 | 8  | 16 | GA   | 19 | 5  |
| 119969 | 12 | 6499478 | 6499501 | 2 | 12 | 24 | CA   | 16 | 4  |
| 119970 | 12 | 6500391 | 6500420 | 2 | 15 | 30 | TG   | 9  | 7  |
| 119971 | 12 | 6501138 | 6501165 | 2 | 14 | 28 | CT   | 8  | 6  |
| 119972 | 12 | 6501309 | 6501320 | 2 | 6  | 12 | TG   | 11 | 6  |
| 119984 | 12 | 6512027 | 6512040 | 2 | 7  | 14 | CT   | 18 | 4  |
| 119985 | 12 | 6512490 | 6512513 | 2 | 12 | 24 | AC   | 15 | 7  |
| 119986 | 12 | 6512559 | 6512574 | 2 | 8  | 16 | CA   | 19 | 9  |
| 119987 | 12 | 6512783 | 6512800 | 2 | 9  | 18 | GA   | 14 | 7  |
| 119988 | 12 | 6514411 | 6514426 | 2 | 8  | 16 | TG   | 25 | 11 |
| 119991 | 12 | 6515425 | 6515448 | 2 | 12 | 24 | CA   | 14 | 10 |
| 119994 | 12 | 6517553 | 6517576 | 2 | 12 | 24 | AC   | 11 | 5  |
| 119995 | 12 | 6518652 | 6518671 | 2 | 10 | 20 | AC   | 17 | 4  |
| 120001 | 12 | 6521083 | 6521116 | 2 | 17 | 34 | TG   | 14 | 9  |
| 120003 | 12 | 6523178 | 6523205 | 2 | 14 | 28 | CA   | 21 | 18 |
| 120004 | 12 | 6523846 | 6523865 | 2 | 10 | 20 | CA   | 19 | 9  |
| 120012 | 12 | 6528698 | 6528709 | 2 | 6  | 12 | TG   | 25 | 3  |
| 120013 | 12 | 6529154 | 6529177 | 3 | 8  | 24 | AAT  | 28 | 5  |
| 120016 | 12 | 6530765 | 6530800 | 2 | 18 | 36 | AC   | 18 | 16 |
| 120018 | 12 | 6532012 | 6532041 | 2 | 15 | 30 | CA   | 14 | 9  |
| 120019 | 12 | 6533534 | 6533547 | 2 | 7  | 14 | TA   | 12 | 5  |
| 120028 | 12 | 6547035 | 6547058 | 2 | 12 | 24 | TC   | 16 | 8  |
| 120029 | 12 | 6548073 | 6548092 | 4 | 5  | 20 | TTTC | 21 | 3  |
| 120030 | 12 | 6550408 | 6550439 | 2 | 16 | 32 | GT   | 6  | 8  |
| 120036 | 12 | 6555110 | 6555133 | 3 | 8  | 24 | CTC  | 9  | 5  |
| 120037 | 12 | 6556778 | 6556791 | 2 | 7  | 14 | TC   | 31 | 3  |
| 120038 | 12 | 6559197 | 6559210 | 2 | 7  | 14 | AC   | 17 | 3  |
| 120041 | 12 | 6565844 | 6565881 | 2 | 19 | 38 | AC   | 16 | 14 |
| 120045 | 12 | 6568038 | 6568069 | 4 | 8  | 32 | ATCT | 14 | 7  |
| 120050 | 12 | 6573753 | 6573779 | 3 | 9  | 27 | TCA  | 21 | 10 |
| 120062 | 12 | 6587010 | 6587021 | 2 | 6  | 12 | TC   | 36 | 3  |
| 120064 | 12 | 6589216 | 6589227 | 2 | 6  | 12 | GT   | 24 | 3  |
| 120065 | 12 | 6589341 | 6589360 | 2 | 10 | 20 | GT   | 25 | 6  |
| 120066 | 12 | 6589468 | 6589481 | 2 | 7  | 14 | CA   | 25 | 5  |
| 120068 | 12 | 6589639 | 6589654 | 2 | 8  | 16 | GT   | 20 | 10 |
| 120070 | 12 | 6589904 | 6589917 | 2 | 7  | 14 | AC   | 24 | 4  |
| 120073 | 12 | 6592042 | 6592055 | 2 | 7  | 14 | CT   | 24 | 4  |
| 120075 | 12 | 6592224 | 6592249 | 2 | 13 | 26 | TG   | 25 | 7  |
| 120076 | 12 | 6594105 | 6594128 | 3 | 8  | 24 | AGC  | 26 | 3  |
| 120078 | 12 | 6594988 | 6595011 | 2 | 12 | 24 | TG   | 20 | 3  |
| 120084 | 12 | 6595637 | 6595668 | 2 | 16 | 32 | TG   | 9  | 13 |

|        |    |         |         |   |    |    |     |    |    |
|--------|----|---------|---------|---|----|----|-----|----|----|
| 120088 | 12 | 6601287 | 6601304 | 2 | 9  | 18 | AC  | 20 | 7  |
| 120089 | 12 | 6601383 | 6601402 | 2 | 10 | 20 | AC  | 17 | 3  |
| 120090 | 12 | 6604023 | 6604042 | 2 | 10 | 20 | AC  | 26 | 7  |
| 120091 | 12 | 6604114 | 6604129 | 2 | 8  | 16 | GT  | 22 | 4  |
| 120099 | 12 | 6608913 | 6608930 | 2 | 9  | 18 | GT  | 11 | 4  |
| 120100 | 12 | 6609022 | 6609043 | 2 | 11 | 22 | AC  | 6  | 8  |
| 120103 | 12 | 6609299 | 6609322 | 2 | 12 | 24 | CT  | 11 | 10 |
| 120104 | 12 | 6609656 | 6609685 | 2 | 15 | 30 | CA  | 22 | 17 |
| 120108 | 12 | 6612418 | 6612429 | 2 | 6  | 12 | CA  | 21 | 4  |
| 120109 | 12 | 6614517 | 6614534 | 2 | 9  | 18 | GT  | 17 | 6  |
| 120112 | 12 | 6614821 | 6614834 | 2 | 7  | 14 | TG  | 20 | 3  |
| 120113 | 12 | 6616696 | 6616719 | 2 | 12 | 24 | CA  | 14 | 6  |
| 120115 | 12 | 6619145 | 6619162 | 2 | 9  | 18 | AC  | 13 | 3  |
| 120116 | 12 | 6619292 | 6619313 | 2 | 11 | 22 | TG  | 20 | 7  |
| 120120 | 12 | 6620673 | 6620694 | 2 | 11 | 22 | CT  | 10 | 15 |
| 120126 | 12 | 6622695 | 6622708 | 2 | 7  | 14 | AG  | 26 | 4  |
| 120127 | 12 | 6622811 | 6622822 | 2 | 6  | 12 | CA  | 26 | 4  |
| 120128 | 12 | 6623941 | 6623960 | 2 | 10 | 20 | TG  | 17 | 11 |
| 120129 | 12 | 6624242 | 6624261 | 2 | 10 | 20 | CA  | 17 | 5  |
| 120130 | 12 | 6624370 | 6624387 | 2 | 9  | 18 | GT  | 7  | 6  |
| 120132 | 12 | 6624482 | 6624495 | 2 | 7  | 14 | CA  | 27 | 5  |
| 120134 | 12 | 6626022 | 6626073 | 2 | 26 | 52 | TG  | 6  | 7  |
| 120135 | 12 | 6626887 | 6626908 | 2 | 11 | 22 | TG  | 23 | 12 |
| 120136 | 12 | 6627104 | 6627123 | 2 | 10 | 20 | CA  | 6  | 4  |
| 120138 | 12 | 6628626 | 6628637 | 2 | 6  | 12 | AC  | 17 | 5  |
| 120143 | 12 | 6630722 | 6630735 | 2 | 7  | 14 | AT  | 7  | 3  |
| 120146 | 12 | 6635869 | 6635888 | 2 | 10 | 20 | TC  | 14 | 7  |
| 120148 | 12 | 6638280 | 6638294 | 3 | 5  | 15 | CCT | 23 | 3  |
| 120151 | 12 | 6642819 | 6642832 | 2 | 7  | 14 | CT  | 18 | 3  |
| 120157 | 12 | 6648687 | 6648700 | 2 | 7  | 14 | AG  | 25 | 5  |
| 120159 | 12 | 6649394 | 6649417 | 2 | 12 | 24 | GT  | 6  | 10 |
| 120160 | 12 | 6649641 | 6649656 | 2 | 8  | 16 | AG  | 25 | 4  |
| 120161 | 12 | 6650030 | 6650049 | 2 | 10 | 20 | GT  | 20 | 6  |
| 120166 | 12 | 6656942 | 6656953 | 2 | 6  | 12 | GC  | 16 | 11 |
| 120167 | 12 | 6657221 | 6657252 | 2 | 16 | 32 | AC  | 12 | 10 |
| 120168 | 12 | 6657459 | 6657484 | 2 | 13 | 26 | TG  | 12 | 6  |
| 120177 | 12 | 6660338 | 6660351 | 2 | 7  | 14 | CA  | 6  | 4  |
| 120179 | 12 | 6661221 | 6661242 | 2 | 11 | 22 | AC  | 11 | 7  |
| 120182 | 12 | 6662903 | 6662916 | 2 | 7  | 14 | AC  | 28 | 3  |
| 120187 | 12 | 6668320 | 6668339 | 2 | 10 | 20 | GT  | 19 | 6  |
| 120188 | 12 | 6669624 | 6669639 | 2 | 8  | 16 | TG  | 29 | 3  |
| 120189 | 12 | 6671329 | 6671342 | 2 | 7  | 14 | GT  | 19 | 4  |
| 120193 | 12 | 6672280 | 6672295 | 2 | 8  | 16 | CA  | 18 | 4  |
| 120194 | 12 | 6676149 | 6676184 | 2 | 18 | 36 | GT  | 22 | 9  |
| 120195 | 12 | 6676282 | 6676303 | 2 | 11 | 22 | CA  | 15 | 6  |
| 120196 | 12 | 6677402 | 6677415 | 2 | 7  | 14 | AC  | 20 | 6  |
| 120199 | 12 | 6678387 | 6678416 | 2 | 15 | 30 | AC  | 19 | 7  |
| 120202 | 12 | 6679160 | 6679173 | 2 | 7  | 14 | GT  | 26 | 3  |
| 120203 | 12 | 6680037 | 6680052 | 2 | 8  | 16 | AC  | 28 | 9  |
| 120207 | 12 | 6682377 | 6682400 | 2 | 12 | 24 | GT  | 10 | 11 |
| 120209 | 12 | 6683034 | 6683051 | 2 | 9  | 18 | AC  | 10 | 8  |

|        |    |         |         |   |    |    |     |    |    |
|--------|----|---------|---------|---|----|----|-----|----|----|
| 120214 | 12 | 6687296 | 6687313 | 2 | 9  | 18 | AC  | 10 | 7  |
| 120219 | 12 | 6690136 | 6690165 | 3 | 10 | 30 | TTC | 24 | 5  |
| 120220 | 12 | 6691220 | 6691247 | 2 | 14 | 28 | CA  | 19 | 13 |
| 120222 | 12 | 6692614 | 6692641 | 2 | 14 | 28 | TG  | 11 | 10 |
| 120223 | 12 | 6692793 | 6692808 | 2 | 8  | 16 | AC  | 24 | 5  |
| 120227 | 12 | 6699772 | 6699783 | 2 | 6  | 12 | CT  | 16 | 4  |
| 120237 | 12 | 6702229 | 6702252 | 2 | 12 | 24 | CT  | 7  | 7  |
| 120239 | 12 | 6702745 | 6702758 | 2 | 7  | 14 | CT  | 19 | 4  |
| 120241 | 12 | 6702869 | 6702886 | 3 | 6  | 18 | AAG | 16 | 9  |
| 120242 | 12 | 6703225 | 6703236 | 2 | 6  | 12 | TC  | 6  | 3  |
| 120254 | 12 | 6732825 | 6732836 | 2 | 6  | 12 | GA  | 26 | 3  |
| 120255 | 12 | 6733344 | 6733375 | 2 | 16 | 32 | AG  | 12 | 10 |
| 120257 | 12 | 6733718 | 6733743 | 2 | 13 | 26 | AC  | 13 | 9  |
| 120258 | 12 | 6735055 | 6735072 | 2 | 9  | 18 | TG  | 22 | 8  |
| 120261 | 12 | 6739625 | 6739650 | 2 | 13 | 26 | AC  | 8  | 6  |
| 120262 | 12 | 6739743 | 6739754 | 2 | 6  | 12 | GT  | 23 | 6  |
| 120263 | 12 | 6741594 | 6741605 | 2 | 6  | 12 | GT  | 12 | 5  |
| 120264 | 12 | 6741896 | 6741919 | 2 | 12 | 24 | AG  | 14 | 11 |
| 120266 | 12 | 6742144 | 6742155 | 2 | 6  | 12 | TG  | 15 | 4  |
| 120269 | 12 | 6744751 | 6744762 | 2 | 6  | 12 | GT  | 20 | 5  |
| 120273 | 12 | 6745060 | 6745071 | 2 | 6  | 12 | CT  | 26 | 4  |
| 120277 | 12 | 6748549 | 6748570 | 2 | 11 | 22 | CA  | 7  | 5  |
| 120278 | 12 | 6748700 | 6748729 | 2 | 15 | 30 | CA  | 11 | 7  |
| 120281 | 12 | 6749555 | 6749566 | 2 | 6  | 12 | TG  | 29 | 7  |
| 120282 | 12 | 6751839 | 6751852 | 2 | 7  | 14 | AC  | 12 | 12 |
| 120283 | 12 | 6751854 | 6751871 | 2 | 9  | 18 | CA  | 15 | 13 |
| 120284 | 12 | 6752768 | 6752789 | 2 | 11 | 22 | AC  | 18 | 4  |
| 120285 | 12 | 6752897 | 6752924 | 2 | 14 | 28 | GT  | 15 | 9  |
| 120289 | 12 | 6759869 | 6759890 | 2 | 11 | 22 | GA  | 14 | 9  |
| 120295 | 12 | 6764954 | 6764977 | 2 | 12 | 24 | CA  | 18 | 10 |
| 120299 | 12 | 6768886 | 6768917 | 2 | 16 | 32 | TG  | 18 | 9  |
| 120300 | 12 | 6770135 | 6770150 | 2 | 8  | 16 | GT  | 21 | 3  |
| 120305 | 12 | 6771390 | 6771409 | 2 | 10 | 20 | GT  | 12 | 6  |
| 120306 | 12 | 6771489 | 6771516 | 2 | 14 | 28 | GT  | 7  | 9  |
| 120314 | 12 | 6774463 | 6774476 | 2 | 7  | 14 | TA  | 13 | 3  |
| 120319 | 12 | 6779265 | 6779278 | 2 | 7  | 14 | GT  | 8  | 10 |
| 120320 | 12 | 6779660 | 6779683 | 3 | 8  | 24 | GAG | 23 | 5  |
| 120321 | 12 | 6779785 | 6779800 | 2 | 8  | 16 | CA  | 25 | 3  |
| 120322 | 12 | 6780730 | 6780750 | 3 | 7  | 21 | CTT | 10 | 6  |
| 120323 | 12 | 6780818 | 6780835 | 2 | 9  | 18 | TC  | 14 | 3  |
| 120325 | 12 | 6781590 | 6781605 | 2 | 8  | 16 | AC  | 11 | 11 |
| 120326 | 12 | 6781646 | 6781657 | 2 | 6  | 12 | CA  | 27 | 3  |
| 120333 | 12 | 6784157 | 6784172 | 2 | 8  | 16 | AT  | 10 | 3  |
| 120336 | 12 | 6785579 | 6785594 | 2 | 8  | 16 | GA  | 28 | 4  |
| 120343 | 12 | 6790355 | 6790370 | 2 | 8  | 16 | TC  | 26 | 3  |
| 120344 | 12 | 6790688 | 6790715 | 2 | 14 | 28 | AC  | 14 | 15 |
| 120345 | 12 | 6790828 | 6790847 | 2 | 10 | 20 | TG  | 14 | 12 |
| 120347 | 12 | 6790937 | 6790954 | 2 | 9  | 18 | GT  | 6  | 5  |
| 120348 | 12 | 6791035 | 6791054 | 2 | 10 | 20 | AC  | 14 | 8  |
| 120350 | 12 | 6793390 | 6793413 | 2 | 12 | 24 | TG  | 25 | 10 |
| 120353 | 12 | 6794022 | 6794043 | 2 | 11 | 22 | GT  | 14 | 6  |

|        |    |         |         |   |    |    |      |    |    |
|--------|----|---------|---------|---|----|----|------|----|----|
| 120356 | 12 | 6797336 | 6797351 | 2 | 8  | 16 | CA   | 15 | 4  |
| 120358 | 12 | 6797632 | 6797647 | 2 | 8  | 16 | TA   | 22 | 9  |
| 120361 | 12 | 6800369 | 6800386 | 2 | 9  | 18 | AC   | 12 | 8  |
| 120368 | 12 | 6803753 | 6803770 | 2 | 9  | 18 | TG   | 21 | 4  |
| 120369 | 12 | 6805619 | 6805646 | 2 | 14 | 28 | TG   | 22 | 12 |
| 120371 | 12 | 6805947 | 6805968 | 2 | 11 | 22 | TG   | 20 | 8  |
| 120373 | 12 | 6811795 | 6811822 | 2 | 14 | 28 | GT   | 9  | 8  |
| 120374 | 12 | 6811920 | 6811949 | 2 | 15 | 30 | AC   | 8  | 7  |
| 120375 | 12 | 6812033 | 6812066 | 2 | 17 | 34 | AC   | 7  | 9  |
| 120379 | 12 | 6814691 | 6814750 | 2 | 30 | 60 | TG   | 6  | 9  |
| 120381 | 12 | 6816353 | 6816364 | 2 | 6  | 12 | TG   | 17 | 3  |
| 120383 | 12 | 6817569 | 6817602 | 2 | 17 | 34 | CA   | 7  | 8  |
| 120387 | 12 | 6821630 | 6821649 | 2 | 10 | 20 | CA   | 22 | 5  |
| 120389 | 12 | 6821960 | 6821985 | 2 | 13 | 26 | AC   | 13 | 10 |
| 120390 | 12 | 6822123 | 6822134 | 2 | 6  | 12 | AC   | 19 | 4  |
| 120394 | 12 | 6828233 | 6828253 | 3 | 7  | 21 | TTC  | 12 | 3  |
| 120395 | 12 | 6829845 | 6829859 | 3 | 5  | 15 | CAG  | 23 | 5  |
| 120396 | 12 | 6832040 | 6832051 | 2 | 6  | 12 | GT   | 24 | 3  |
| 120398 | 12 | 6832312 | 6832339 | 2 | 14 | 28 | TG   | 19 | 8  |
| 120401 | 12 | 6837225 | 6837248 | 2 | 12 | 24 | AC   | 14 | 8  |
| 120402 | 12 | 6837662 | 6837683 | 2 | 11 | 22 | TG   | 14 | 8  |
| 120404 | 12 | 6840909 | 6840922 | 2 | 7  | 14 | AG   | 22 | 3  |
| 120408 | 12 | 6841555 | 6841578 | 2 | 12 | 24 | GT   | 12 | 9  |
| 120409 | 12 | 6841719 | 6841742 | 2 | 12 | 24 | GT   | 21 | 7  |
| 120411 | 12 | 6843074 | 6843085 | 2 | 6  | 12 | AC   | 17 | 3  |
| 120418 | 12 | 6853180 | 6853215 | 2 | 18 | 36 | TG   | 16 | 13 |
| 120419 | 12 | 6853570 | 6853602 | 3 | 11 | 33 | GCA  | 22 | 5  |
| 120420 | 12 | 6853788 | 6853801 | 2 | 7  | 14 | GT   | 19 | 3  |
| 120421 | 12 | 6853804 | 6853815 | 2 | 6  | 12 | GT   | 17 | 3  |
| 120422 | 12 | 6853939 | 6853968 | 2 | 15 | 30 | TG   | 7  | 6  |
| 120423 | 12 | 6854017 | 6854028 | 2 | 6  | 12 | TG   | 15 | 6  |
| 120424 | 12 | 6856878 | 6856901 | 2 | 12 | 24 | CA   | 16 | 8  |
| 120426 | 12 | 6857390 | 6857401 | 2 | 6  | 12 | GT   | 28 | 4  |
| 120428 | 12 | 6858436 | 6858467 | 2 | 16 | 32 | GT   | 9  | 8  |
| 120436 | 12 | 6864115 | 6864154 | 4 | 10 | 40 | AGAA | 6  | 8  |
| 120441 | 12 | 6867057 | 6867070 | 2 | 7  | 14 | GT   | 6  | 5  |
| 120442 | 12 | 6868182 | 6868229 | 2 | 24 | 48 | GT   | 8  | 11 |
| 120445 | 12 | 6868576 | 6868605 | 2 | 15 | 30 | CA   | 20 | 7  |
| 120453 | 12 | 6883930 | 6883943 | 2 | 7  | 14 | TG   | 14 | 7  |
| 120467 | 12 | 6905901 | 6905933 | 3 | 11 | 33 | TAA  | 7  | 5  |
| 120472 | 12 | 6922499 | 6922513 | 3 | 5  | 15 | CAT  | 30 | 4  |
| 120473 | 12 | 6923278 | 6923295 | 2 | 9  | 18 | TC   | 22 | 4  |
| 120475 | 12 | 6926617 | 6926640 | 4 | 6  | 24 | AATC | 25 | 4  |
| 120476 | 12 | 6926875 | 6926892 | 2 | 9  | 18 | TG   | 20 | 6  |
| 120477 | 12 | 6927534 | 6927545 | 2 | 6  | 12 | AC   | 23 | 3  |
| 120478 | 12 | 6928053 | 6928074 | 2 | 11 | 22 | TG   | 19 | 12 |
| 120483 | 12 | 6933829 | 6933842 | 2 | 7  | 14 | CA   | 11 | 8  |
| 120486 | 12 | 6934739 | 6934754 | 2 | 8  | 16 | AC   | 22 | 4  |
| 120487 | 12 | 6934937 | 6934952 | 2 | 8  | 16 | CT   | 20 | 4  |
| 120490 | 12 | 6937293 | 6937320 | 2 | 14 | 28 | GT   | 25 | 7  |
| 120495 | 12 | 6942735 | 6942748 | 2 | 7  | 14 | AC   | 21 | 5  |

|        |    |         |         |   |    |    |      |    |    |
|--------|----|---------|---------|---|----|----|------|----|----|
| 120496 | 12 | 6942898 | 6942911 | 2 | 7  | 14 | GT   | 24 | 4  |
| 120497 | 12 | 6944265 | 6944298 | 2 | 17 | 34 | GT   | 14 | 10 |
| 120498 | 12 | 6945321 | 6945332 | 2 | 6  | 12 | TG   | 23 | 3  |
| 120499 | 12 | 6946340 | 6946373 | 2 | 17 | 34 | GT   | 13 | 12 |
| 120501 | 12 | 6946827 | 6946842 | 4 | 4  | 16 | TGAA | 30 | 3  |
| 120503 | 12 | 6947376 | 6947393 | 2 | 9  | 18 | AC   | 21 | 10 |
| 120504 | 12 | 6947396 | 6947411 | 2 | 8  | 16 | AC   | 21 | 12 |
| 120506 | 12 | 6953757 | 6953772 | 4 | 4  | 16 | CGCA | 26 | 9  |
| 120508 | 12 | 6955691 | 6955722 | 2 | 16 | 32 | TG   | 11 | 8  |
| 120512 | 12 | 6955901 | 6955924 | 2 | 12 | 24 | CA   | 11 | 12 |
| 120513 | 12 | 6956098 | 6956111 | 2 | 7  | 14 | CA   | 14 | 3  |
| 120514 | 12 | 6956233 | 6956244 | 2 | 6  | 12 | TC   | 26 | 3  |
| 120516 | 12 | 6956268 | 6956287 | 4 | 5  | 20 | GTGC | 6  | 3  |
| 120517 | 12 | 6956441 | 6956464 | 2 | 12 | 24 | CA   | 18 | 7  |
| 120520 | 12 | 6959176 | 6959193 | 2 | 9  | 18 | TG   | 23 | 9  |
| 120522 | 12 | 6961668 | 6961685 | 2 | 9  | 18 | AC   | 22 | 4  |
| 120524 | 12 | 6963940 | 6963957 | 2 | 9  | 18 | GT   | 22 | 6  |
| 120525 | 12 | 6965361 | 6965386 | 2 | 13 | 26 | CA   | 13 | 12 |
| 120530 | 12 | 6969322 | 6969333 | 2 | 6  | 12 | CA   | 16 | 10 |
| 120531 | 12 | 6972021 | 6972042 | 2 | 11 | 22 | AC   | 17 | 7  |
| 120533 | 12 | 6973746 | 6973773 | 2 | 14 | 28 | TG   | 7  | 9  |
| 120535 | 12 | 6974063 | 6974088 | 2 | 13 | 26 | CA   | 9  | 11 |
| 120537 | 12 | 6974503 | 6974528 | 2 | 13 | 26 | CA   | 19 | 8  |
| 120538 | 12 | 6974885 | 6974898 | 2 | 7  | 14 | CA   | 16 | 8  |
| 120539 | 12 | 6977412 | 6977435 | 2 | 12 | 24 | AC   | 15 | 7  |
| 120541 | 12 | 6978147 | 6978164 | 2 | 9  | 18 | GA   | 7  | 4  |
| 120542 | 12 | 6984451 | 6984470 | 4 | 5  | 20 | TTTG | 25 | 7  |
| 120545 | 12 | 6995340 | 6995383 | 2 | 22 | 44 | CA   | 7  | 7  |
| 120547 | 12 | 6998485 | 6998502 | 2 | 9  | 18 | TG   | 25 | 9  |
| 120551 | 12 | 7002538 | 7002564 | 3 | 9  | 27 | ATG  | 20 | 8  |
| 120553 | 12 | 7002980 | 7003001 | 2 | 11 | 22 | CA   | 22 | 8  |
| 120557 | 12 | 7008773 | 7008790 | 2 | 9  | 18 | CA   | 33 | 5  |
| 120558 | 12 | 7010802 | 7010816 | 3 | 5  | 15 | CAA  | 29 | 3  |
| 120563 | 12 | 7014519 | 7014538 | 2 | 10 | 20 | TC   | 11 | 8  |
| 120565 | 12 | 7016546 | 7016563 | 2 | 9  | 18 | TC   | 14 | 7  |
| 120566 | 12 | 7017420 | 7017434 | 3 | 5  | 15 | GAG  | 12 | 7  |
| 120567 | 12 | 7017666 | 7017689 | 3 | 8  | 24 | GTT  | 19 | 8  |
| 120568 | 12 | 7017714 | 7017728 | 3 | 5  | 15 | AGA  | 19 | 4  |
| 120574 | 12 | 7028067 | 7028086 | 2 | 10 | 20 | TG   | 21 | 6  |
| 120578 | 12 | 7034109 | 7034134 | 2 | 13 | 26 | TG   | 17 | 4  |
| 120579 | 12 | 7035190 | 7035211 | 2 | 11 | 22 | GT   | 19 | 7  |
| 120583 | 12 | 7036037 | 7036068 | 2 | 16 | 32 | CA   | 19 | 13 |
| 120589 | 12 | 7041335 | 7041349 | 3 | 5  | 15 | GAG  | 27 | 4  |
| 120590 | 12 | 7043214 | 7043241 | 2 | 14 | 28 | GT   | 6  | 8  |
| 120591 | 12 | 7046228 | 7046255 | 2 | 14 | 28 | TG   | 12 | 8  |
| 120592 | 12 | 7046425 | 7046454 | 2 | 15 | 30 | GT   | 8  | 10 |
| 120595 | 12 | 7051322 | 7051351 | 2 | 15 | 30 | AC   | 8  | 7  |
| 120599 | 12 | 7051838 | 7051851 | 2 | 7  | 14 | TG   | 21 | 3  |
| 120602 | 12 | 7052042 | 7052073 | 2 | 16 | 32 | TG   | 8  | 7  |
| 120603 | 12 | 7052220 | 7052249 | 2 | 15 | 30 | TG   | 10 | 12 |
| 120606 | 12 | 7062903 | 7062942 | 2 | 20 | 40 | CA   | 7  | 10 |

|        |    |         |         |   |    |    |     |    |    |
|--------|----|---------|---------|---|----|----|-----|----|----|
| 120614 | 12 | 7072649 | 7072672 | 2 | 12 | 24 | GT  | 12 | 10 |
| 120619 | 12 | 7083356 | 7083376 | 3 | 7  | 21 | TTC | 19 | 14 |
| 120620 | 12 | 7084438 | 7084449 | 2 | 6  | 12 | GT  | 24 | 3  |
| 120622 | 12 | 7089533 | 7089556 | 2 | 12 | 24 | GT  | 18 | 12 |
| 120634 | 12 | 7099447 | 7099460 | 2 | 7  | 14 | CA  | 26 | 4  |
| 120638 | 12 | 7114251 | 7114276 | 2 | 13 | 26 | TG  | 7  | 8  |
| 120639 | 12 | 7115590 | 7115615 | 2 | 13 | 26 | TG  | 22 | 7  |
| 120641 | 12 | 7119658 | 7119675 | 3 | 6  | 18 | CCT | 29 | 3  |
| 120647 | 12 | 7124306 | 7124317 | 2 | 6  | 12 | TG  | 14 | 9  |
| 120649 | 12 | 7125006 | 7125029 | 2 | 12 | 24 | AC  | 6  | 6  |
| 120651 | 12 | 7128517 | 7128532 | 2 | 8  | 16 | CA  | 27 | 4  |
| 120653 | 12 | 7129019 | 7129040 | 2 | 11 | 22 | GT  | 17 | 4  |
| 120654 | 12 | 7130994 | 7131005 | 2 | 6  | 12 | GT  | 28 | 4  |
| 120655 | 12 | 7132469 | 7132498 | 2 | 15 | 30 | TG  | 20 | 16 |
| 120657 | 12 | 7134907 | 7134920 | 2 | 7  | 14 | GT  | 17 | 4  |
| 120658 | 12 | 7134944 | 7134973 | 2 | 15 | 30 | TG  | 10 | 12 |
| 120659 | 12 | 7135095 | 7135112 | 2 | 9  | 18 | CA  | 26 | 8  |
| 120668 | 12 | 7140648 | 7140687 | 2 | 20 | 40 | AC  | 8  | 9  |
| 120669 | 12 | 7142885 | 7142906 | 2 | 11 | 22 | CA  | 6  | 4  |
| 120673 | 12 | 7144522 | 7144545 | 2 | 12 | 24 | GT  | 7  | 9  |
| 120687 | 12 | 7148738 | 7148785 | 2 | 24 | 48 | TG  | 6  | 7  |
| 120688 | 12 | 7148907 | 7148940 | 2 | 17 | 34 | TG  | 11 | 11 |
| 120690 | 12 | 7149656 | 7149669 | 2 | 7  | 14 | CA  | 27 | 4  |
| 120697 | 12 | 7151662 | 7151687 | 2 | 13 | 26 | AC  | 12 | 12 |
| 120698 | 12 | 7151755 | 7151768 | 2 | 7  | 14 | AC  | 23 | 3  |
| 120699 | 12 | 7151830 | 7151843 | 2 | 7  | 14 | CA  | 29 | 5  |
| 120702 | 12 | 7153392 | 7153415 | 2 | 12 | 24 | AC  | 15 | 8  |
| 120703 | 12 | 7154511 | 7154548 | 2 | 19 | 38 | GT  | 10 | 9  |
| 120704 | 12 | 7155146 | 7155172 | 3 | 9  | 27 | AAG | 20 | 7  |
| 120705 | 12 | 7155244 | 7155269 | 2 | 13 | 26 | AC  | 17 | 10 |
| 120707 | 12 | 7162948 | 7162963 | 2 | 8  | 16 | TG  | 25 | 4  |
| 120708 | 12 | 7164200 | 7164221 | 2 | 11 | 22 | CA  | 14 | 6  |
| 120709 | 12 | 7164755 | 7164784 | 2 | 15 | 30 | GT  | 18 | 8  |
| 120712 | 12 | 7165443 | 7165458 | 2 | 8  | 16 | AC  | 31 | 4  |
| 120714 | 12 | 7166865 | 7166884 | 2 | 10 | 20 | GT  | 23 | 7  |
| 120715 | 12 | 7167060 | 7167071 | 2 | 6  | 12 | GT  | 13 | 13 |
| 120716 | 12 | 7167293 | 7167308 | 2 | 8  | 16 | CT  | 28 | 3  |
| 120717 | 12 | 7168469 | 7168484 | 2 | 8  | 16 | TG  | 21 | 9  |
| 120718 | 12 | 7168656 | 7168671 | 2 | 8  | 16 | GT  | 21 | 6  |
| 120720 | 12 | 7171110 | 7171145 | 2 | 18 | 36 | AC  | 15 | 8  |
| 120723 | 12 | 7173398 | 7173411 | 2 | 7  | 14 | CA  | 28 | 4  |
| 120726 | 12 | 7174896 | 7174928 | 3 | 11 | 33 | CAT | 9  | 5  |
| 120733 | 12 | 7183295 | 7183328 | 2 | 17 | 34 | TG  | 8  | 10 |
| 120734 | 12 | 7183521 | 7183541 | 3 | 7  | 21 | CTG | 26 | 8  |
| 120737 | 12 | 7185833 | 7185844 | 2 | 6  | 12 | GT  | 7  | 8  |
| 120746 | 12 | 7187976 | 7188007 | 2 | 16 | 32 | AG  | 7  | 9  |
| 120750 | 12 | 7189982 | 7190015 | 2 | 17 | 34 | CA  | 15 | 10 |
| 120751 | 12 | 7190196 | 7190221 | 2 | 13 | 26 | TG  | 20 | 7  |
| 120757 | 12 | 7204639 | 7204654 | 2 | 8  | 16 | CA  | 21 | 10 |
| 120759 | 12 | 7205129 | 7205142 | 2 | 7  | 14 | CT  | 15 | 6  |
| 120760 | 12 | 7205145 | 7205158 | 2 | 7  | 14 | CT  | 15 | 7  |



|        |    |         |         |   |    |    |      |    |    |
|--------|----|---------|---------|---|----|----|------|----|----|
| 120764 | 12 | 7212171 | 7212196 | 2 | 13 | 26 | AC   | 10 | 10 |
| 120770 | 12 | 7213793 | 7213820 | 2 | 14 | 28 | CA   | 12 | 12 |
| 120776 | 12 | 7218109 | 7218136 | 2 | 14 | 28 | AC   | 11 | 13 |
| 120777 | 12 | 7218373 | 7218410 | 2 | 19 | 38 | CA   | 14 | 11 |
| 120778 | 12 | 7218518 | 7218565 | 2 | 24 | 48 | GT   | 6  | 10 |
| 120779 | 12 | 7219882 | 7219905 | 2 | 12 | 24 | AC   | 19 | 6  |
| 120780 | 12 | 7220055 | 7220066 | 2 | 6  | 12 | AG   | 21 | 5  |
| 120781 | 12 | 7220474 | 7220511 | 2 | 19 | 38 | GT   | 8  | 11 |
| 120783 | 12 | 7220771 | 7220788 | 3 | 6  | 18 | AGA  | 27 | 5  |
| 120797 | 12 | 7233075 | 7233090 | 2 | 8  | 16 | AG   | 25 | 8  |
| 120798 | 12 | 7233178 | 7233193 | 2 | 8  | 16 | CT   | 19 | 6  |
| 120799 | 12 | 7233279 | 7233290 | 2 | 6  | 12 | AC   | 27 | 5  |
| 120801 | 12 | 7234996 | 7235041 | 2 | 23 | 46 | GT   | 14 | 15 |
| 120802 | 12 | 7235163 | 7235180 | 2 | 9  | 18 | TG   | 13 | 6  |
| 120808 | 12 | 7239686 | 7239703 | 3 | 6  | 18 | GCT  | 33 | 3  |
| 120809 | 12 | 7255317 | 7255336 | 2 | 10 | 20 | CA   | 20 | 9  |
| 120810 | 12 | 7255495 | 7255524 | 2 | 15 | 30 | TG   | 18 | 8  |
| 120815 | 12 | 7293725 | 7293768 | 4 | 11 | 44 | ATAG | 18 | 7  |
| 120823 | 12 | 7318590 | 7318625 | 3 | 12 | 36 | CAG  | 19 | 9  |
| 120827 | 12 | 7336079 | 7336118 | 2 | 20 | 40 | AG   | 8  | 8  |
| 120829 | 12 | 7350386 | 7350399 | 2 | 7  | 14 | TC   | 17 | 5  |
| 120830 | 12 | 7350402 | 7350417 | 2 | 8  | 16 | TC   | 20 | 6  |
| 120834 | 12 | 7363377 | 7363409 | 3 | 11 | 33 | GAG  | 22 | 7  |
| 120842 | 12 | 7385324 | 7385343 | 2 | 10 | 20 | AC   | 23 | 4  |
| 120843 | 12 | 7387384 | 7387397 | 2 | 7  | 14 | CT   | 24 | 3  |
| 120851 | 12 | 7409491 | 7409505 | 3 | 5  | 15 | GAA  | 14 | 7  |
| 120854 | 12 | 7416671 | 7416682 | 2 | 6  | 12 | TG   | 26 | 3  |
| 120855 | 12 | 7421021 | 7421036 | 2 | 8  | 16 | AC   | 25 | 6  |
| 120857 | 12 | 7426530 | 7426547 | 3 | 6  | 18 | CAT  | 31 | 15 |
| 120860 | 12 | 7430962 | 7430981 | 2 | 10 | 20 | CA   | 15 | 5  |
| 120865 | 12 | 7451844 | 7451879 | 2 | 18 | 36 | GT   | 10 | 11 |
| 120867 | 12 | 7458332 | 7458343 | 2 | 6  | 12 | AC   | 27 | 8  |
| 120868 | 12 | 7460141 | 7460152 | 2 | 6  | 12 | TG   | 29 | 3  |
| 120872 | 12 | 7465095 | 7465109 | 3 | 5  | 15 | AGA  | 25 | 5  |
| 120873 | 12 | 7466375 | 7466406 | 2 | 16 | 32 | GT   | 13 | 13 |
| 120876 | 12 | 7466669 | 7466692 | 3 | 8  | 24 | GCA  | 28 | 9  |
| 120877 | 12 | 7466985 | 7467014 | 2 | 15 | 30 | TG   | 13 | 8  |
| 120884 | 12 | 7470687 | 7470702 | 2 | 8  | 16 | AC   | 16 | 8  |
| 120887 | 12 | 7475280 | 7475293 | 2 | 7  | 14 | AC   | 12 | 5  |
| 120888 | 12 | 7475414 | 7475437 | 3 | 8  | 24 | GCT  | 26 | 8  |
| 120889 | 12 | 7475571 | 7475582 | 2 | 6  | 12 | AC   | 21 | 3  |
| 120890 | 12 | 7475682 | 7475705 | 2 | 12 | 24 | GT   | 18 | 7  |
| 120891 | 12 | 7476418 | 7476443 | 2 | 13 | 26 | GT   | 17 | 6  |
| 120900 | 12 | 7482760 | 7482777 | 2 | 9  | 18 | TG   | 21 | 23 |
| 120907 | 12 | 7515715 | 7515732 | 3 | 6  | 18 | CAG  | 17 | 6  |
| 120908 | 12 | 7520035 | 7520049 | 3 | 5  | 15 | GGC  | 22 | 3  |
| 120909 | 12 | 7520232 | 7520249 | 2 | 9  | 18 | AC   | 13 | 3  |
| 120910 | 12 | 7520252 | 7520263 | 2 | 6  | 12 | AC   | 16 | 5  |
| 120916 | 12 | 7532712 | 7532732 | 3 | 7  | 21 | TCT  | 24 | 5  |
| 120917 | 12 | 7533067 | 7533084 | 3 | 6  | 18 | CTT  | 15 | 9  |
| 120918 | 12 | 7533087 | 7533104 | 3 | 6  | 18 | TCT  | 15 | 10 |

|        |    |         |         |   |    |    |      |    |    |
|--------|----|---------|---------|---|----|----|------|----|----|
| 120924 | 12 | 7545032 | 7545045 | 2 | 7  | 14 | GA   | 15 | 3  |
| 120926 | 12 | 7547689 | 7547700 | 2 | 6  | 12 | AC   | 20 | 3  |
| 120927 | 12 | 7548132 | 7548159 | 2 | 14 | 28 | CA   | 8  | 8  |
| 120929 | 12 | 7548357 | 7548370 | 2 | 7  | 14 | CA   | 24 | 4  |
| 120931 | 12 | 7548753 | 7548774 | 2 | 11 | 22 | GT   | 7  | 4  |
| 120940 | 12 | 7570321 | 7570342 | 2 | 11 | 22 | TG   | 18 | 4  |
| 120941 | 12 | 7573565 | 7573600 | 2 | 18 | 36 | AC   | 22 | 9  |
| 120948 | 12 | 7575331 | 7575372 | 2 | 21 | 42 | CT   | 11 | 13 |
| 120960 | 12 | 7611318 | 7611337 | 2 | 10 | 20 | CA   | 15 | 12 |
| 120962 | 12 | 7616610 | 7616645 | 2 | 18 | 36 | TG   | 19 | 11 |
| 120965 | 12 | 7633968 | 7633983 | 2 | 8  | 16 | CA   | 32 | 3  |
| 120966 | 12 | 7639253 | 7639267 | 3 | 5  | 15 | TTA  | 15 | 4  |
| 120968 | 12 | 7642663 | 7642682 | 2 | 10 | 20 | AC   | 14 | 10 |
| 120976 | 12 | 7697072 | 7697095 | 4 | 6  | 24 | TATT | 10 | 6  |
| 120981 | 12 | 7703746 | 7703787 | 3 | 14 | 42 | AGA  | 15 | 13 |
| 120991 | 12 | 7730967 | 7730982 | 4 | 4  | 16 | AAAT | 33 | 4  |
| 120999 | 12 | 7747328 | 7747361 | 2 | 17 | 34 | TG   | 13 | 12 |
| 121002 | 12 | 7759566 | 7759577 | 2 | 6  | 12 | AC   | 28 | 4  |
| 121010 | 12 | 7777244 | 7777275 | 2 | 16 | 32 | CA   | 18 | 7  |
| 121014 | 12 | 7779769 | 7779794 | 2 | 13 | 26 | GT   | 12 | 6  |
| 121016 | 12 | 7780105 | 7780128 | 2 | 12 | 24 | AC   | 9  | 6  |
| 121017 | 12 | 7780548 | 7780562 | 3 | 5  | 15 | CCA  | 15 | 3  |
| 121018 | 12 | 7783819 | 7783845 | 3 | 9  | 27 | TAA  | 12 | 6  |
| 121020 | 12 | 7788912 | 7788935 | 2 | 12 | 24 | AC   | 18 | 15 |
| 121022 | 12 | 7792228 | 7792242 | 3 | 5  | 15 | CCT  | 18 | 3  |
| 121023 | 12 | 7792828 | 7792843 | 2 | 8  | 16 | GT   | 19 | 10 |
| 121025 | 12 | 7795245 | 7795274 | 2 | 15 | 30 | GT   | 18 | 6  |
| 121028 | 12 | 7801067 | 7801078 | 2 | 6  | 12 | TC   | 27 | 3  |
| 121031 | 12 | 7803394 | 7803408 | 3 | 5  | 15 | CCT  | 14 | 5  |
| 121034 | 12 | 7809810 | 7809835 | 2 | 13 | 26 | AC   | 18 | 10 |
| 121035 | 12 | 7811825 | 7811869 | 3 | 15 | 45 | GGA  | 14 | 11 |
| 121036 | 12 | 7814450 | 7814479 | 2 | 15 | 30 | TG   | 13 | 13 |
| 121039 | 12 | 7817563 | 7817576 | 2 | 7  | 14 | TG   | 19 | 6  |
| 121040 | 12 | 7817797 | 7817820 | 3 | 8  | 24 | CTT  | 29 | 9  |
| 121041 | 12 | 7817980 | 7818007 | 2 | 14 | 28 | AC   | 13 | 8  |
| 121049 | 12 | 7823371 | 7823392 | 2 | 11 | 22 | AC   | 19 | 6  |
| 121051 | 12 | 7823989 | 7824016 | 2 | 14 | 28 | AC   | 23 | 14 |
| 121056 | 12 | 7827566 | 7827591 | 2 | 13 | 26 | AC   | 22 | 10 |
| 121057 | 12 | 7828486 | 7828503 | 2 | 9  | 18 | TC   | 26 | 8  |
| 121058 | 12 | 7828967 | 7828980 | 2 | 7  | 14 | CA   | 25 | 5  |
| 121060 | 12 | 7830647 | 7830660 | 2 | 7  | 14 | GT   | 12 | 5  |
| 121061 | 12 | 7830663 | 7830674 | 2 | 6  | 12 | GT   | 11 | 7  |
| 121071 | 12 | 7839189 | 7839206 | 3 | 6  | 18 | GCT  | 17 | 3  |
| 121075 | 12 | 7849444 | 7849457 | 2 | 7  | 14 | CA   | 22 | 3  |
| 121077 | 12 | 7851125 | 7851139 | 3 | 5  | 15 | ATT  | 17 | 3  |
| 121081 | 12 | 7860283 | 7860300 | 2 | 9  | 18 | GA   | 17 | 10 |
| 121082 | 12 | 7865392 | 7865415 | 2 | 12 | 24 | GT   | 17 | 12 |
| 121083 | 12 | 7865791 | 7865814 | 3 | 8  | 24 | GTG  | 11 | 6  |
| 121084 | 12 | 7867000 | 7867017 | 2 | 9  | 18 | TG   | 12 | 12 |
| 121087 | 12 | 7870050 | 7870077 | 4 | 7  | 28 | AGAT | 10 | 10 |
| 121091 | 12 | 7873454 | 7873467 | 2 | 7  | 14 | GA   | 21 | 4  |

|        |    |         |         |   |    |    |      |    |    |
|--------|----|---------|---------|---|----|----|------|----|----|
| 121094 | 12 | 7878600 | 7878621 | 2 | 11 | 22 | CA   | 23 | 9  |
| 121101 | 12 | 7885279 | 7885300 | 2 | 11 | 22 | CA   | 13 | 7  |
| 121105 | 12 | 7887618 | 7887635 | 2 | 9  | 18 | GT   | 7  | 5  |
| 121106 | 12 | 7888878 | 7888893 | 2 | 8  | 16 | GT   | 15 | 6  |
| 121107 | 12 | 7889037 | 7889048 | 2 | 6  | 12 | CA   | 20 | 4  |
| 121108 | 12 | 7893105 | 7893122 | 2 | 9  | 18 | CT   | 15 | 3  |
| 121109 | 12 | 7895611 | 7895625 | 3 | 5  | 15 | ATT  | 19 | 3  |
| 121111 | 12 | 7902442 | 7902477 | 4 | 9  | 36 | TCTA | 18 | 17 |
| 121121 | 12 | 7911394 | 7911431 | 2 | 19 | 38 | GA   | 9  | 12 |
| 121134 | 12 | 7922439 | 7922452 | 2 | 7  | 14 | AC   | 17 | 6  |
| 121135 | 12 | 7924705 | 7924716 | 2 | 6  | 12 | TG   | 20 | 4  |
| 121136 | 12 | 7925126 | 7925139 | 2 | 7  | 14 | GT   | 19 | 3  |
| 121140 | 12 | 7925959 | 7926010 | 4 | 13 | 52 | CTAT | 23 | 15 |
| 121152 | 12 | 7934428 | 7934451 | 4 | 6  | 24 | ATAG | 19 | 8  |
| 121155 | 12 | 7939218 | 7939239 | 2 | 11 | 22 | AC   | 7  | 7  |
| 121156 | 12 | 7941493 | 7941506 | 2 | 7  | 14 | CA   | 28 | 4  |
| 121157 | 12 | 7942415 | 7942428 | 2 | 7  | 14 | CA   | 21 | 7  |
| 121161 | 12 | 7945700 | 7945727 | 2 | 14 | 28 | TG   | 10 | 9  |
| 121163 | 12 | 7947113 | 7947138 | 2 | 13 | 26 | CA   | 12 | 3  |
| 121164 | 12 | 7947370 | 7947387 | 3 | 6  | 18 | TCC  | 12 | 4  |
| 121166 | 12 | 7949984 | 7950016 | 3 | 11 | 33 | TTA  | 14 | 7  |
| 121169 | 12 | 7951170 | 7951187 | 2 | 9  | 18 | GT   | 13 | 5  |
| 121172 | 12 | 7952995 | 7953012 | 2 | 9  | 18 | TC   | 9  | 6  |
| 121173 | 12 | 7953245 | 7953256 | 2 | 6  | 12 | CT   | 15 | 5  |
| 121174 | 12 | 7953567 | 7953598 | 2 | 16 | 32 | CA   | 19 | 11 |
| 121175 | 12 | 7953938 | 7953958 | 3 | 7  | 21 | CTC  | 18 | 5  |
| 121176 | 12 | 7954757 | 7954776 | 2 | 10 | 20 | GT   | 13 | 6  |
| 121177 | 12 | 7954943 | 7954960 | 2 | 9  | 18 | TG   | 20 | 9  |
| 121184 | 12 | 7961956 | 7961969 | 2 | 7  | 14 | AC   | 19 | 4  |
| 121189 | 12 | 7969316 | 7969339 | 3 | 8  | 24 | CCT  | 17 | 6  |
| 121193 | 12 | 7971330 | 7971343 | 2 | 7  | 14 | GT   | 7  | 4  |
| 121194 | 12 | 7971345 | 7971356 | 2 | 6  | 12 | TG   | 7  | 4  |
| 121197 | 12 | 7971614 | 7971629 | 2 | 8  | 16 | GT   | 14 | 6  |
| 121200 | 12 | 7972123 | 7972136 | 2 | 7  | 14 | CA   | 19 | 8  |
| 121207 | 12 | 7978137 | 7978158 | 2 | 11 | 22 | CA   | 25 | 5  |
| 121210 | 12 | 7978662 | 7978687 | 2 | 13 | 26 | AG   | 14 | 10 |
| 121214 | 12 | 7983910 | 7983923 | 2 | 7  | 14 | GA   | 23 | 6  |
| 121219 | 12 | 7986369 | 7986382 | 2 | 7  | 14 | GT   | 14 | 5  |
| 121222 | 12 | 7988536 | 7988563 | 2 | 14 | 28 | TG   | 16 | 14 |
| 121223 | 12 | 7989508 | 7989525 | 3 | 6  | 18 | GAT  | 34 | 6  |
| 121231 | 12 | 8000141 | 8000154 | 2 | 7  | 14 | GT   | 20 | 9  |
| 121237 | 12 | 8008188 | 8008217 | 2 | 15 | 30 | GT   | 11 | 5  |
| 121239 | 12 | 8011566 | 8011577 | 2 | 6  | 12 | TA   | 18 | 9  |
| 121240 | 12 | 8011578 | 8011593 | 2 | 8  | 16 | CA   | 15 | 8  |
| 121244 | 12 | 8019201 | 8019226 | 2 | 13 | 26 | GT   | 19 | 7  |
| 121256 | 12 | 8031288 | 8031315 | 2 | 14 | 28 | GT   | 16 | 8  |
| 121264 | 12 | 8037302 | 8037322 | 3 | 7  | 21 | CAT  | 17 | 5  |
| 121265 | 12 | 8037965 | 8037980 | 2 | 8  | 16 | TG   | 7  | 4  |
| 121273 | 12 | 8058020 | 8058037 | 2 | 9  | 18 | GT   | 19 | 3  |
| 121277 | 12 | 8061164 | 8061183 | 2 | 10 | 20 | CT   | 13 | 6  |
| 121280 | 12 | 8063396 | 8063407 | 2 | 6  | 12 | TG   | 34 | 4  |

|        |    |         |         |   |    |    |      |    |    |
|--------|----|---------|---------|---|----|----|------|----|----|
| 121282 | 12 | 8064665 | 8064702 | 2 | 19 | 38 | GT   | 12 | 8  |
| 121283 | 12 | 8065177 | 8065198 | 2 | 11 | 22 | GT   | 23 | 15 |
| 121286 | 12 | 8068609 | 8068640 | 2 | 16 | 32 | CA   | 18 | 12 |
| 121289 | 12 | 8072279 | 8072302 | 4 | 6  | 24 | ATGA | 20 | 6  |
| 121292 | 12 | 8076429 | 8076444 | 2 | 8  | 16 | AC   | 26 | 5  |
| 121297 | 12 | 8086869 | 8086880 | 2 | 6  | 12 | TG   | 13 | 4  |
| 121299 | 12 | 8088140 | 8088154 | 3 | 5  | 15 | CCA  | 32 | 3  |
| 121302 | 12 | 8093420 | 8093443 | 2 | 12 | 24 | AC   | 17 | 11 |
| 121304 | 12 | 8094454 | 8094471 | 3 | 6  | 18 | GTG  | 28 | 3  |
| 121307 | 12 | 8097901 | 8097932 | 2 | 16 | 32 | TG   | 11 | 13 |
| 121309 | 12 | 8099755 | 8099802 | 4 | 12 | 48 | ATCT | 14 | 10 |
| 121311 | 12 | 8107984 | 8107997 | 2 | 7  | 14 | CA   | 22 | 4  |
| 121319 | 12 | 8126561 | 8126586 | 2 | 13 | 26 | GT   | 23 | 6  |
| 121320 | 12 | 8126991 | 8127002 | 2 | 6  | 12 | CA   | 25 | 4  |
| 121321 | 12 | 8128157 | 8128180 | 2 | 12 | 24 | CA   | 21 | 6  |
| 121323 | 12 | 8130668 | 8130679 | 2 | 6  | 12 | TC   | 27 | 4  |
| 121326 | 12 | 8140087 | 8140104 | 3 | 6  | 18 | AGC  | 23 | 6  |
| 121330 | 12 | 8147392 | 8147407 | 2 | 8  | 16 | AC   | 15 | 9  |
| 121338 | 12 | 8154488 | 8154499 | 2 | 6  | 12 | CA   | 38 | 3  |
| 121340 | 12 | 8161523 | 8161568 | 2 | 23 | 46 | GA   | 7  | 8  |
| 121342 | 12 | 8165432 | 8165483 | 4 | 13 | 52 | TAGA | 14 | 14 |
| 121344 | 12 | 8167388 | 8167403 | 4 | 4  | 16 | TTTA | 25 | 3  |
| 121345 | 12 | 8171218 | 8171231 | 2 | 7  | 14 | TG   | 28 | 6  |
| 121347 | 12 | 8175171 | 8175191 | 3 | 7  | 21 | AGG  | 22 | 5  |
| 121349 | 12 | 8175671 | 8175720 | 2 | 25 | 50 | TG   | 10 | 13 |
| 121350 | 12 | 8175855 | 8175878 | 2 | 12 | 24 | TG   | 11 | 9  |
| 121352 | 12 | 8179541 | 8179554 | 2 | 7  | 14 | AC   | 27 | 3  |
| 121355 | 12 | 8183192 | 8183211 | 4 | 5  | 20 | TTCT | 28 | 3  |
| 121356 | 12 | 8186012 | 8186023 | 2 | 6  | 12 | GT   | 23 | 4  |
| 121359 | 12 | 8193427 | 8193450 | 2 | 12 | 24 | CA   | 11 | 7  |
| 121370 | 12 | 8241296 | 8241311 | 4 | 4  | 16 | ACAA | 19 | 3  |
| 121371 | 12 | 8242156 | 8242170 | 3 | 5  | 15 | GTT  | 19 | 3  |
| 121378 | 12 | 8252007 | 8252030 | 4 | 6  | 24 | AAAG | 9  | 3  |
| 121382 | 12 | 8260199 | 8260216 | 2 | 9  | 18 | TC   | 10 | 12 |
| 121390 | 12 | 8275415 | 8275429 | 3 | 5  | 15 | TTG  | 15 | 3  |
| 121396 | 12 | 8295355 | 8295394 | 4 | 10 | 40 | TTTC | 11 | 12 |
| 121400 | 12 | 8295928 | 8295941 | 2 | 7  | 14 | GT   | 15 | 4  |
| 121403 | 12 | 8300236 | 8300271 | 3 | 12 | 36 | TTG  | 19 | 6  |
| 121408 | 12 | 8301212 | 8301231 | 2 | 10 | 20 | GT   | 9  | 7  |
| 121411 | 12 | 8304935 | 8304950 | 2 | 8  | 16 | TA   | 14 | 7  |
| 121417 | 12 | 8309900 | 8309925 | 2 | 13 | 26 | GT   | 15 | 7  |
| 121418 | 12 | 8310156 | 8310169 | 2 | 7  | 14 | GT   | 24 | 6  |
| 121419 | 12 | 8310170 | 8310185 | 2 | 8  | 16 | GA   | 25 | 4  |
| 121421 | 12 | 8311333 | 8311366 | 2 | 17 | 34 | AC   | 8  | 6  |
| 121431 | 12 | 8325180 | 8325194 | 3 | 5  | 15 | TCC  | 13 | 6  |
| 121432 | 12 | 8325196 | 8325209 | 2 | 7  | 14 | CA   | 14 | 7  |
| 121434 | 12 | 8325896 | 8325921 | 2 | 13 | 26 | GA   | 18 | 5  |
| 121436 | 12 | 8329790 | 8329811 | 2 | 11 | 22 | GT   | 21 | 9  |
| 121438 | 12 | 8329971 | 8330014 | 2 | 22 | 44 | CA   | 6  | 9  |
| 121442 | 12 | 8335607 | 8335627 | 3 | 7  | 21 | CTC  | 27 | 5  |
| 121450 | 12 | 8356473 | 8356492 | 2 | 10 | 20 | AC   | 19 | 6  |

|        |    |         |         |   |    |    |      |    |    |
|--------|----|---------|---------|---|----|----|------|----|----|
| 121453 | 12 | 8359407 | 8359424 | 2 | 9  | 18 | GT   | 26 | 12 |
| 121463 | 12 | 8367943 | 8367966 | 4 | 6  | 24 | ACAT | 19 | 8  |
| 121464 | 12 | 8371958 | 8371969 | 2 | 6  | 12 | TA   | 29 | 8  |
| 121467 | 12 | 8373550 | 8373567 | 3 | 6  | 18 | AAC  | 19 | 3  |
| 121479 | 12 | 8406580 | 8406591 | 2 | 6  | 12 | AT   | 23 | 4  |
| 121485 | 12 | 8426440 | 8426457 | 2 | 9  | 18 | GA   | 22 | 4  |
| 121486 | 12 | 8428290 | 8428309 | 2 | 10 | 20 | CT   | 11 | 3  |
| 121487 | 12 | 8428537 | 8428554 | 3 | 6  | 18 | GGA  | 17 | 6  |
| 121492 | 12 | 8429743 | 8429758 | 4 | 4  | 16 | AAAC | 18 | 5  |
| 121495 | 12 | 8431733 | 8431750 | 3 | 6  | 18 | AAC  | 23 | 6  |
| 121496 | 12 | 8432903 | 8432914 | 2 | 6  | 12 | TG   | 23 | 4  |
| 121517 | 12 | 8489496 | 8489535 | 4 | 10 | 40 | CCAA | 18 | 6  |
| 121531 | 12 | 8516573 | 8516628 | 4 | 14 | 56 | TATC | 14 | 12 |
| 121535 | 12 | 8525029 | 8525043 | 3 | 5  | 15 | TTG  | 31 | 4  |
| 121537 | 12 | 8532256 | 8532295 | 2 | 20 | 40 | CA   | 13 | 11 |
| 121540 | 12 | 8538123 | 8538136 | 2 | 7  | 14 | TG   | 22 | 4  |
| 121549 | 12 | 8567369 | 8567392 | 4 | 6  | 24 | ATAC | 11 | 3  |
| 121550 | 12 | 8569308 | 8569321 | 2 | 7  | 14 | CA   | 17 | 6  |
| 121553 | 12 | 8581716 | 8581737 | 2 | 11 | 22 | GT   | 12 | 9  |
| 121563 | 12 | 8611129 | 8611158 | 3 | 10 | 30 | AGA  | 15 | 9  |
| 121576 | 12 | 8625322 | 8625336 | 3 | 5  | 15 | TCT  | 15 | 6  |
| 121577 | 12 | 8626308 | 8626331 | 2 | 12 | 24 | CA   | 15 | 11 |
| 121580 | 12 | 8628638 | 8628663 | 2 | 13 | 26 | CA   | 18 | 4  |
| 121586 | 12 | 8634371 | 8634398 | 2 | 14 | 28 | GT   | 6  | 4  |
| 121591 | 12 | 8641149 | 8641164 | 2 | 8  | 16 | GT   | 18 | 7  |
| 121593 | 12 | 8645523 | 8645538 | 2 | 8  | 16 | AC   | 29 | 3  |
| 121599 | 12 | 8650499 | 8650536 | 2 | 19 | 38 | TC   | 8  | 7  |
| 121604 | 12 | 8656506 | 8656547 | 3 | 14 | 42 | CTC  | 12 | 5  |
| 121605 | 12 | 8659086 | 8659123 | 2 | 19 | 38 | TC   | 9  | 5  |
| 121606 | 12 | 8659439 | 8659459 | 3 | 7  | 21 | CCA  | 19 | 6  |
| 121607 | 12 | 8663210 | 8663223 | 2 | 7  | 14 | GT   | 22 | 6  |
| 121608 | 12 | 8663506 | 8663551 | 2 | 23 | 46 | TG   | 18 | 12 |
| 121614 | 12 | 8669957 | 8669972 | 2 | 8  | 16 | TG   | 8  | 9  |
| 121615 | 12 | 8669974 | 8669991 | 2 | 9  | 18 | GT   | 8  | 9  |
| 121620 | 12 | 8670502 | 8670521 | 2 | 10 | 20 | CA   | 13 | 3  |
| 121624 | 12 | 8678507 | 8678542 | 2 | 18 | 36 | GT   | 10 | 10 |
| 121640 | 12 | 8705157 | 8705171 | 3 | 5  | 15 | TTC  | 21 | 4  |
| 121642 | 12 | 8708030 | 8708049 | 2 | 10 | 20 | AC   | 18 | 7  |
| 121654 | 12 | 8725809 | 8725826 | 2 | 9  | 18 | TG   | 22 | 5  |
| 121658 | 12 | 8735265 | 8735285 | 3 | 7  | 21 | TAC  | 19 | 4  |
| 121660 | 12 | 8736830 | 8736865 | 2 | 18 | 36 | GT   | 6  | 8  |
| 121663 | 12 | 8742525 | 8742548 | 2 | 12 | 24 | TC   | 16 | 3  |
| 121664 | 12 | 8743763 | 8743800 | 2 | 19 | 38 | AC   | 9  | 12 |
| 121686 | 12 | 8794441 | 8794464 | 3 | 8  | 24 | CCA  | 18 | 3  |
| 121687 | 12 | 8803070 | 8803087 | 3 | 6  | 18 | CCT  | 17 | 3  |
| 121692 | 12 | 8808519 | 8808534 | 2 | 8  | 16 | GA   | 20 | 4  |
| 121694 | 12 | 8809569 | 8809600 | 2 | 16 | 32 | TG   | 7  | 6  |
| 121696 | 12 | 8815578 | 8815593 | 2 | 8  | 16 | TG   | 24 | 4  |
| 121699 | 12 | 8818098 | 8818113 | 4 | 4  | 16 | AGAC | 20 | 4  |
| 121701 | 12 | 8823977 | 8823996 | 2 | 10 | 20 | CA   | 24 | 9  |
| 121709 | 12 | 8838299 | 8838336 | 2 | 19 | 38 | AG   | 8  | 4  |

|        |    |         |         |   |    |    |      |    |    |
|--------|----|---------|---------|---|----|----|------|----|----|
| 121713 | 12 | 8848718 | 8848738 | 3 | 7  | 21 | AGG  | 15 | 4  |
| 121716 | 12 | 8850574 | 8850587 | 2 | 7  | 14 | TG   | 28 | 5  |
| 121717 | 12 | 8850833 | 8850850 | 2 | 9  | 18 | TG   | 23 | 4  |
| 121718 | 12 | 8854132 | 8854153 | 2 | 11 | 22 | AC   | 25 | 6  |
| 121723 | 12 | 8862892 | 8862903 | 2 | 6  | 12 | AC   | 21 | 3  |
| 121724 | 12 | 8862907 | 8862920 | 2 | 7  | 14 | AC   | 23 | 5  |
| 121726 | 12 | 8864976 | 8864987 | 2 | 6  | 12 | AC   | 24 | 4  |
| 121730 | 12 | 8871857 | 8871880 | 2 | 12 | 24 | AC   | 15 | 7  |
| 121732 | 12 | 8872329 | 8872343 | 3 | 5  | 15 | GGC  | 28 | 4  |
| 121736 | 12 | 8880409 | 8880424 | 2 | 8  | 16 | AC   | 25 | 5  |
| 121739 | 12 | 8887571 | 8887582 | 2 | 6  | 12 | TG   | 24 | 4  |
| 121740 | 12 | 8887900 | 8887917 | 2 | 9  | 18 | AC   | 13 | 6  |
| 121750 | 12 | 8906387 | 8906406 | 2 | 10 | 20 | TC   | 14 | 8  |
| 121752 | 12 | 8907910 | 8907939 | 2 | 15 | 30 | AC   | 16 | 7  |
| 121753 | 12 | 8909655 | 8909686 | 2 | 16 | 32 | CA   | 14 | 8  |
| 121755 | 12 | 8916768 | 8916803 | 4 | 9  | 36 | GATG | 26 | 8  |
| 121761 | 12 | 8933965 | 8933982 | 3 | 6  | 18 | CCA  | 19 | 7  |
| 121765 | 12 | 8941863 | 8941876 | 2 | 7  | 14 | CA   | 31 | 3  |
| 121766 | 12 | 8942231 | 8942262 | 2 | 16 | 32 | CA   | 25 | 11 |
| 121770 | 12 | 8947134 | 8947161 | 4 | 7  | 28 | ACAG | 22 | 7  |
| 121784 | 12 | 8961694 | 8961705 | 2 | 6  | 12 | AC   | 23 | 3  |
| 121793 | 12 | 8976751 | 8976796 | 2 | 23 | 46 | GT   | 8  | 8  |
| 121797 | 12 | 8980432 | 8980447 | 2 | 8  | 16 | GT   | 28 | 3  |
| 121798 | 12 | 8980646 | 8980657 | 2 | 6  | 12 | TG   | 32 | 3  |
| 121799 | 12 | 8981103 | 8981114 | 2 | 6  | 12 | GT   | 23 | 4  |
| 121800 | 12 | 8983011 | 8983040 | 2 | 15 | 30 | GA   | 14 | 8  |
| 121801 | 12 | 8983264 | 8983291 | 2 | 14 | 28 | AC   | 11 | 7  |
| 121812 | 12 | 8985668 | 8985687 | 2 | 10 | 20 | CA   | 17 | 8  |
| 121816 | 12 | 8990551 | 8990574 | 2 | 12 | 24 | GT   | 15 | 15 |
| 121823 | 12 | 9003322 | 9003335 | 2 | 7  | 14 | AC   | 25 | 3  |
| 121824 | 12 | 9005184 | 9005215 | 2 | 16 | 32 | CA   | 6  | 7  |
| 121825 | 12 | 9005429 | 9005458 | 2 | 15 | 30 | CA   | 18 | 5  |
| 121827 | 12 | 9008065 | 9008080 | 2 | 8  | 16 | CA   | 19 | 3  |
| 121829 | 12 | 9015518 | 9015535 | 2 | 9  | 18 | AC   | 25 | 6  |
| 121830 | 12 | 9015663 | 9015682 | 2 | 10 | 20 | CA   | 25 | 10 |
| 121835 | 12 | 9021049 | 9021064 | 2 | 8  | 16 | AC   | 15 | 3  |
| 121837 | 12 | 9024207 | 9024222 | 4 | 4  | 16 | AGAA | 25 | 3  |
| 121838 | 12 | 9025437 | 9025448 | 2 | 6  | 12 | AC   | 25 | 3  |
| 121841 | 12 | 9027499 | 9027530 | 2 | 16 | 32 | CA   | 18 | 7  |
| 121843 | 12 | 9028486 | 9028519 | 2 | 17 | 34 | AG   | 14 | 10 |
| 121844 | 12 | 9028808 | 9028831 | 3 | 8  | 24 | TTG  | 26 | 7  |
| 121845 | 12 | 9030986 | 9031019 | 2 | 17 | 34 | TG   | 7  | 6  |
| 121847 | 12 | 9034526 | 9034551 | 2 | 13 | 26 | TG   | 13 | 10 |
| 121848 | 12 | 9036226 | 9036241 | 2 | 8  | 16 | TG   | 21 | 5  |
| 121850 | 12 | 9038214 | 9038243 | 2 | 15 | 30 | CA   | 14 | 10 |
| 121857 | 12 | 9051424 | 9051462 | 3 | 13 | 39 | AGA  | 10 | 9  |
| 121863 | 12 | 9076972 | 9076986 | 3 | 5  | 15 | GTG  | 31 | 5  |
| 121864 | 12 | 9080368 | 9080385 | 2 | 9  | 18 | GT   | 9  | 10 |
| 121871 | 12 | 9091302 | 9091331 | 2 | 15 | 30 | GT   | 17 | 11 |
| 121878 | 12 | 9097423 | 9097458 | 2 | 18 | 36 | AC   | 11 | 12 |
| 121880 | 12 | 9099336 | 9099347 | 2 | 6  | 12 | CA   | 30 | 3  |

|        |    |         |         |   |    |    |      |    |    |
|--------|----|---------|---------|---|----|----|------|----|----|
| 121881 | 12 | 9102846 | 9102863 | 2 | 9  | 18 | GT   | 25 | 5  |
| 121891 | 12 | 9140835 | 9140866 | 2 | 16 | 32 | TG   | 8  | 5  |
| 121897 | 12 | 9157798 | 9157823 | 2 | 13 | 26 | TG   | 15 | 10 |
| 121898 | 12 | 9157936 | 9157949 | 2 | 7  | 14 | CA   | 27 | 5  |
| 121899 | 12 | 9159392 | 9159409 | 2 | 9  | 18 | CT   | 22 | 8  |
| 121911 | 12 | 9182462 | 9182481 | 2 | 10 | 20 | GT   | 13 | 13 |
| 121913 | 12 | 9187436 | 9187447 | 2 | 6  | 12 | AG   | 25 | 4  |
| 121914 | 12 | 9189101 | 9189114 | 2 | 7  | 14 | CT   | 27 | 3  |
| 121915 | 12 | 9190256 | 9190273 | 2 | 9  | 18 | TG   | 21 | 5  |
| 121922 | 12 | 9200053 | 9200070 | 3 | 6  | 18 | TCC  | 30 | 4  |
| 121926 | 12 | 9213705 | 9213722 | 2 | 9  | 18 | TC   | 22 | 3  |
| 121928 | 12 | 9222013 | 9222028 | 4 | 4  | 16 | ATAA | 17 | 3  |
| 121937 | 12 | 9225401 | 9225418 | 3 | 6  | 18 | CTG  | 28 | 5  |
| 121942 | 12 | 9238778 | 9238797 | 4 | 5  | 20 | AATG | 31 | 3  |
| 121943 | 12 | 9239977 | 9239996 | 2 | 10 | 20 | TG   | 15 | 10 |
| 121944 | 12 | 9248769 | 9248780 | 2 | 6  | 12 | CA   | 29 | 3  |
| 121946 | 12 | 9255927 | 9255944 | 2 | 9  | 18 | CA   | 12 | 5  |
| 121950 | 12 | 9260314 | 9260337 | 3 | 8  | 24 | AGC  | 18 | 4  |
| 121951 | 12 | 9262101 | 9262114 | 2 | 7  | 14 | AG   | 30 | 6  |
| 121952 | 12 | 9267505 | 9267522 | 2 | 9  | 18 | GT   | 22 | 4  |
| 121953 | 12 | 9269421 | 9269432 | 2 | 6  | 12 | CA   | 20 | 10 |
| 121961 | 12 | 9277661 | 9277676 | 2 | 8  | 16 | CA   | 23 | 4  |
| 121966 | 12 | 9287719 | 9287732 | 2 | 7  | 14 | GA   | 24 | 5  |
| 121971 | 12 | 9301267 | 9301282 | 2 | 8  | 16 | GA   | 13 | 4  |
| 121978 | 12 | 9319738 | 9319771 | 2 | 17 | 34 | CA   | 8  | 9  |
| 121980 | 12 | 9329489 | 9329521 | 3 | 11 | 33 | CCT  | 16 | 6  |
| 121986 | 12 | 9343826 | 9343837 | 2 | 6  | 12 | AT   | 11 | 3  |
| 121990 | 12 | 9347493 | 9347508 | 2 | 8  | 16 | CA   | 15 | 10 |
| 121992 | 12 | 9353255 | 9353274 | 2 | 10 | 20 | CA   | 23 | 4  |
| 121993 | 12 | 9354565 | 9354585 | 3 | 7  | 21 | TTC  | 27 | 4  |
| 121995 | 12 | 9358605 | 9358624 | 2 | 10 | 20 | GA   | 26 | 9  |
| 122000 | 12 | 9370916 | 9370939 | 4 | 6  | 24 | TTGA | 19 | 4  |
| 122001 | 12 | 9378426 | 9378437 | 2 | 6  | 12 | AC   | 22 | 10 |
| 122002 | 12 | 9378439 | 9378454 | 2 | 8  | 16 | CA   | 24 | 11 |
| 122009 | 12 | 9396251 | 9396272 | 2 | 11 | 22 | TG   | 19 | 7  |
| 122013 | 12 | 9402851 | 9402910 | 4 | 15 | 60 | ATAG | 14 | 7  |
| 122015 | 12 | 9406107 | 9406118 | 2 | 6  | 12 | GT   | 20 | 3  |
| 122020 | 12 | 9413254 | 9413277 | 3 | 8  | 24 | GAT  | 25 | 7  |
| 122021 | 12 | 9413684 | 9413701 | 3 | 6  | 18 | TTG  | 20 | 9  |
| 122028 | 12 | 9423049 | 9423072 | 3 | 8  | 24 | GTT  | 25 | 3  |
| 122030 | 12 | 9429320 | 9429349 | 3 | 10 | 30 | ACA  | 24 | 8  |
| 122033 | 12 | 9436617 | 9436640 | 4 | 6  | 24 | TTTA | 10 | 5  |
| 122035 | 12 | 9439653 | 9439680 | 2 | 14 | 28 | CA   | 24 | 6  |
| 122037 | 12 | 9444599 | 9444616 | 2 | 9  | 18 | AC   | 22 | 6  |
| 122038 | 12 | 9446991 | 9447020 | 2 | 15 | 30 | GT   | 8  | 8  |
| 122040 | 12 | 9452166 | 9452181 | 2 | 8  | 16 | TA   | 15 | 3  |
| 122048 | 12 | 9469641 | 9469652 | 2 | 6  | 12 | CA   | 11 | 5  |
| 122051 | 12 | 9474887 | 9474907 | 3 | 7  | 21 | GAG  | 7  | 6  |
| 122055 | 12 | 9481280 | 9481315 | 2 | 18 | 36 | AG   | 12 | 6  |
| 122056 | 12 | 9482150 | 9482169 | 4 | 5  | 20 | CAGG | 30 | 3  |
| 122058 | 12 | 9490325 | 9490345 | 3 | 7  | 21 | CAG  | 26 | 6  |

|        |    |         |         |   |    |    |      |    |    |
|--------|----|---------|---------|---|----|----|------|----|----|
| 122066 | 12 | 9500295 | 9500314 | 4 | 5  | 20 | GGTC | 11 | 3  |
| 122073 | 12 | 9523390 | 9523407 | 3 | 6  | 18 | CAT  | 21 | 4  |
| 122078 | 12 | 9538227 | 9538250 | 2 | 12 | 24 | GT   | 19 | 9  |
| 122079 | 12 | 9539129 | 9539143 | 3 | 5  | 15 | AGC  | 26 | 3  |
| 122085 | 12 | 9557398 | 9557413 | 2 | 8  | 16 | TG   | 26 | 3  |
| 122087 | 12 | 9568647 | 9568662 | 2 | 8  | 16 | AT   | 10 | 3  |
| 122088 | 12 | 9569037 | 9569048 | 2 | 6  | 12 | TA   | 18 | 3  |
| 122090 | 12 | 9569960 | 9569979 | 4 | 5  | 20 | GTCC | 13 | 4  |
| 122093 | 12 | 9575128 | 9575139 | 2 | 6  | 12 | TC   | 32 | 4  |
| 122103 | 12 | 9586508 | 9586522 | 3 | 5  | 15 | CTG  | 23 | 4  |
| 122104 | 12 | 9588747 | 9588760 | 2 | 7  | 14 | GA   | 14 | 3  |
| 122107 | 12 | 9593555 | 9593570 | 4 | 4  | 16 | AAAC | 27 | 3  |
| 122108 | 12 | 9595662 | 9595677 | 2 | 8  | 16 | CT   | 25 | 4  |
| 122116 | 12 | 9606450 | 9606465 | 2 | 8  | 16 | AC   | 11 | 3  |
| 122121 | 12 | 9619236 | 9619249 | 2 | 7  | 14 | AC   | 20 | 3  |
| 122133 | 12 | 9635845 | 9635868 | 4 | 6  | 24 | ACTA | 26 | 3  |
| 122134 | 12 | 9636064 | 9636078 | 3 | 5  | 15 | CAG  | 33 | 3  |
| 122138 | 12 | 9643106 | 9643127 | 2 | 11 | 22 | CA   | 9  | 9  |
| 122140 | 12 | 9652559 | 9652580 | 2 | 11 | 22 | AG   | 28 | 7  |
| 122143 | 12 | 9657616 | 9657639 | 3 | 8  | 24 | CCT  | 8  | 4  |
| 122160 | 12 | 9672247 | 9672284 | 2 | 19 | 38 | GT   | 10 | 9  |
| 122161 | 12 | 9672935 | 9672946 | 2 | 6  | 12 | GA   | 27 | 3  |
| 122163 | 12 | 9673009 | 9673028 | 2 | 10 | 20 | GA   | 16 | 6  |
| 122172 | 12 | 9678231 | 9678250 | 2 | 10 | 20 | CA   | 17 | 9  |
| 122175 | 12 | 9680451 | 9680462 | 2 | 6  | 12 | AC   | 18 | 3  |
| 122183 | 12 | 9691123 | 9691144 | 2 | 11 | 22 | AG   | 9  | 5  |
| 122184 | 12 | 9691415 | 9691428 | 2 | 7  | 14 | CA   | 23 | 7  |
| 122189 | 12 | 9696353 | 9696376 | 3 | 8  | 24 | AGG  | 21 | 7  |
| 122195 | 12 | 9698650 | 9698671 | 2 | 11 | 22 | CA   | 14 | 9  |
| 122196 | 12 | 9700791 | 9700810 | 2 | 10 | 20 | CA   | 22 | 6  |
| 122197 | 12 | 9701124 | 9701155 | 2 | 16 | 32 | AC   | 14 | 12 |
| 122198 | 12 | 9701286 | 9701297 | 2 | 6  | 12 | AC   | 16 | 10 |
| 122202 | 12 | 9707566 | 9707580 | 3 | 5  | 15 | GAA  | 12 | 4  |
| 122203 | 12 | 9708395 | 9708422 | 2 | 14 | 28 | AC   | 8  | 9  |
| 122207 | 12 | 9711830 | 9711841 | 2 | 6  | 12 | TG   | 29 | 6  |
| 122208 | 12 | 9712070 | 9712107 | 2 | 19 | 38 | AC   | 12 | 11 |
| 122214 | 12 | 9713700 | 9713723 | 2 | 12 | 24 | TG   | 12 | 12 |
| 122217 | 12 | 9716894 | 9716941 | 2 | 24 | 48 | TG   | 16 | 12 |
| 122218 | 12 | 9717130 | 9717159 | 2 | 15 | 30 | CA   | 16 | 6  |
| 122226 | 12 | 9721547 | 9721578 | 2 | 16 | 32 | TG   | 11 | 11 |
| 122229 | 12 | 9724377 | 9724392 | 2 | 8  | 16 | CT   | 7  | 3  |
| 122232 | 12 | 9725546 | 9725601 | 2 | 28 | 56 | AC   | 6  | 7  |
| 122233 | 12 | 9725724 | 9725743 | 2 | 10 | 20 | CA   | 17 | 9  |
| 122240 | 12 | 9729486 | 9729511 | 2 | 13 | 26 | TG   | 13 | 8  |
| 122243 | 12 | 9734244 | 9734269 | 2 | 13 | 26 | CA   | 13 | 12 |
| 122244 | 12 | 9735687 | 9735702 | 4 | 4  | 16 | TTTC | 25 | 4  |
| 122249 | 12 | 9739221 | 9739244 | 2 | 12 | 24 | AC   | 19 | 9  |
| 122255 | 12 | 9746012 | 9746023 | 2 | 6  | 12 | GT   | 15 | 4  |
| 122260 | 12 | 9748670 | 9748697 | 2 | 14 | 28 | GT   | 7  | 8  |
| 122262 | 12 | 9750498 | 9750523 | 2 | 13 | 26 | CA   | 15 | 7  |
| 122265 | 12 | 9754878 | 9754895 | 2 | 9  | 18 | TC   | 20 | 5  |



|        |    |         |         |   |    |    |      |    |    |
|--------|----|---------|---------|---|----|----|------|----|----|
| 122266 | 12 | 9754898 | 9754909 | 2 | 6  | 12 | TC   | 22 | 3  |
| 122267 | 12 | 9757288 | 9757305 | 2 | 9  | 18 | GT   | 19 | 6  |
| 122268 | 12 | 9757308 | 9757319 | 2 | 6  | 12 | GT   | 23 | 7  |
| 122270 | 12 | 9758716 | 9758739 | 3 | 8  | 24 | CAG  | 22 | 5  |
| 122271 | 12 | 9760925 | 9760948 | 2 | 12 | 24 | TG   | 22 | 10 |
| 122272 | 12 | 9761112 | 9761129 | 2 | 9  | 18 | TG   | 21 | 6  |
| 122274 | 12 | 9761615 | 9761636 | 2 | 11 | 22 | GT   | 17 | 6  |
| 122275 | 12 | 9761824 | 9761837 | 2 | 7  | 14 | TG   | 23 | 5  |
| 122277 | 12 | 9763003 | 9763023 | 3 | 7  | 21 | CTG  | 32 | 6  |
| 122278 | 12 | 9763369 | 9763390 | 2 | 11 | 22 | TG   | 20 | 5  |
| 122284 | 12 | 9767756 | 9767781 | 2 | 13 | 26 | CA   | 17 | 8  |
| 122285 | 12 | 9768005 | 9768026 | 2 | 11 | 22 | TG   | 16 | 10 |
| 122288 | 12 | 9768812 | 9768851 | 2 | 20 | 40 | AC   | 7  | 10 |
| 122289 | 12 | 9769009 | 9769026 | 2 | 9  | 18 | AC   | 6  | 5  |
| 122290 | 12 | 9769027 | 9769044 | 2 | 9  | 18 | AT   | 13 | 10 |
| 122292 | 12 | 9771307 | 9771334 | 2 | 14 | 28 | CA   | 22 | 16 |
| 122294 | 12 | 9773657 | 9773668 | 2 | 6  | 12 | GT   | 8  | 6  |
| 122295 | 12 | 9773670 | 9773681 | 2 | 6  | 12 | GT   | 8  | 5  |
| 122298 | 12 | 9777391 | 9777402 | 2 | 6  | 12 | CT   | 23 | 3  |
| 122299 | 12 | 9777620 | 9777643 | 4 | 6  | 24 | CTCC | 7  | 4  |
| 122302 | 12 | 9788113 | 9788132 | 2 | 10 | 20 | GT   | 9  | 5  |
| 122303 | 12 | 9788360 | 9788373 | 2 | 7  | 14 | AC   | 21 | 5  |
| 122304 | 12 | 9788726 | 9788737 | 2 | 6  | 12 | CA   | 12 | 3  |
| 122307 | 12 | 9791250 | 9791267 | 3 | 6  | 18 | CTC  | 12 | 6  |
| 122313 | 12 | 9795574 | 9795601 | 2 | 14 | 28 | CA   | 14 | 7  |
| 122314 | 12 | 9796889 | 9796900 | 2 | 6  | 12 | CA   | 28 | 6  |
| 122321 | 12 | 9800958 | 9800977 | 2 | 10 | 20 | TC   | 17 | 6  |
| 122323 | 12 | 9802276 | 9802305 | 2 | 15 | 30 | AC   | 16 | 23 |
| 122325 | 12 | 9803624 | 9803641 | 3 | 6  | 18 | TCT  | 24 | 3  |
| 122326 | 12 | 9803704 | 9803718 | 3 | 5  | 15 | AAG  | 20 | 6  |
| 122333 | 12 | 9805361 | 9805384 | 4 | 6  | 24 | TTCT | 16 | 3  |
| 122334 | 12 | 9805628 | 9805645 | 2 | 9  | 18 | AG   | 26 | 3  |
| 122335 | 12 | 9808108 | 9808129 | 2 | 11 | 22 | TC   | 17 | 3  |
| 122337 | 12 | 9810220 | 9810231 | 2 | 6  | 12 | GT   | 30 | 3  |
| 122338 | 12 | 9811736 | 9811768 | 3 | 11 | 33 | TGT  | 21 | 4  |
| 122339 | 12 | 9813390 | 9813404 | 3 | 5  | 15 | CTT  | 32 | 3  |
| 122341 | 12 | 9816836 | 9816855 | 2 | 10 | 20 | TC   | 12 | 3  |
| 122343 | 12 | 9816993 | 9817010 | 2 | 9  | 18 | AG   | 24 | 4  |
| 122344 | 12 | 9820144 | 9820167 | 2 | 12 | 24 | CA   | 15 | 4  |
| 122346 | 12 | 9822903 | 9822923 | 3 | 7  | 21 | CCT  | 19 | 11 |
| 122347 | 12 | 9825924 | 9825941 | 2 | 9  | 18 | TG   | 10 | 8  |
| 122348 | 12 | 9828908 | 9828921 | 2 | 7  | 14 | CA   | 21 | 5  |
| 122349 | 12 | 9832679 | 9832696 | 3 | 6  | 18 | GAG  | 22 | 7  |
| 122351 | 12 | 9837273 | 9837302 | 3 | 10 | 30 | GGA  | 12 | 9  |
| 122352 | 12 | 9837726 | 9837752 | 3 | 9  | 27 | TCC  | 17 | 3  |
| 122356 | 12 | 9843527 | 9843538 | 2 | 6  | 12 | AC   | 16 | 7  |
| 122357 | 12 | 9844202 | 9844216 | 3 | 5  | 15 | CTT  | 23 | 4  |
| 122359 | 12 | 9844890 | 9844907 | 2 | 9  | 18 | GA   | 23 | 4  |
| 122360 | 12 | 9845182 | 9845211 | 2 | 15 | 30 | CA   | 10 | 9  |
| 122361 | 12 | 9845234 | 9845247 | 2 | 7  | 14 | GA   | 27 | 3  |
| 122384 | 12 | 9862933 | 9862960 | 2 | 14 | 28 | CT   | 21 | 10 |

|        |    |          |          |   |    |    |      |    |    |
|--------|----|----------|----------|---|----|----|------|----|----|
| 122390 | 12 | 9868979  | 9868992  | 2 | 7  | 14 | GT   | 27 | 4  |
| 122397 | 12 | 9879601  | 9879614  | 2 | 7  | 14 | AC   | 14 | 7  |
| 122398 | 12 | 9880784  | 9880803  | 4 | 5  | 20 | TACA | 23 | 6  |
| 122399 | 12 | 9882401  | 9882432  | 2 | 16 | 32 | CA   | 8  | 9  |
| 122403 | 12 | 9890170  | 9890191  | 2 | 11 | 22 | TC   | 14 | 3  |
| 122404 | 12 | 9891765  | 9891780  | 4 | 4  | 16 | CCTC | 12 | 5  |
| 122407 | 12 | 9894992  | 9895007  | 2 | 8  | 16 | AC   | 24 | 8  |
| 122409 | 12 | 9897550  | 9897567  | 2 | 9  | 18 | TG   | 19 | 3  |
| 122411 | 12 | 9900500  | 9900513  | 2 | 7  | 14 | GA   | 18 | 4  |
| 122412 | 12 | 9900912  | 9900935  | 2 | 12 | 24 | AC   | 15 | 7  |
| 122413 | 12 | 9902515  | 9902536  | 2 | 11 | 22 | AC   | 12 | 6  |
| 122415 | 12 | 9906065  | 9906078  | 2 | 7  | 14 | CA   | 18 | 3  |
| 122421 | 12 | 9910220  | 9910240  | 3 | 7  | 21 | GGA  | 22 | 5  |
| 122424 | 12 | 9912388  | 9912405  | 2 | 9  | 18 | TC   | 28 | 7  |
| 122426 | 12 | 9915730  | 9915744  | 3 | 5  | 15 | TAA  | 26 | 3  |
| 122432 | 12 | 9922064  | 9922087  | 2 | 12 | 24 | CA   | 23 | 11 |
| 122434 | 12 | 9924691  | 9924706  | 4 | 4  | 16 | TTTG | 23 | 3  |
| 122441 | 12 | 9930130  | 9930145  | 2 | 8  | 16 | CA   | 16 | 14 |
| 122449 | 12 | 9936597  | 9936616  | 4 | 5  | 20 | AAAG | 19 | 3  |
| 122450 | 12 | 9939487  | 9939501  | 3 | 5  | 15 | GAG  | 10 | 7  |
| 122453 | 12 | 9942045  | 9942068  | 4 | 6  | 24 | CTGT | 17 | 4  |
| 122454 | 12 | 9948263  | 9948276  | 2 | 7  | 14 | TC   | 16 | 3  |
| 122457 | 12 | 9952401  | 9952412  | 2 | 6  | 12 | TA   | 24 | 4  |
| 122462 | 12 | 9956288  | 9956305  | 2 | 9  | 18 | CA   | 19 | 12 |
| 122463 | 12 | 9958123  | 9958156  | 2 | 17 | 34 | CT   | 13 | 9  |
| 122464 | 12 | 9959251  | 9959270  | 4 | 5  | 20 | AAAT | 20 | 4  |
| 122465 | 12 | 9963794  | 9963832  | 3 | 13 | 39 | AAG  | 19 | 9  |
| 122466 | 12 | 9965254  | 9965265  | 2 | 6  | 12 | CA   | 27 | 6  |
| 122467 | 12 | 9965495  | 9965520  | 2 | 13 | 26 | AC   | 11 | 5  |
| 122470 | 12 | 9980018  | 9980049  | 2 | 16 | 32 | AC   | 9  | 9  |
| 122473 | 12 | 9987114  | 9987125  | 2 | 6  | 12 | CA   | 28 | 6  |
| 122483 | 12 | 10005532 | 10005555 | 2 | 12 | 24 | AG   | 10 | 3  |
| 122486 | 12 | 10010198 | 10010211 | 2 | 7  | 14 | TC   | 22 | 3  |
| 122491 | 12 | 10016091 | 10016106 | 2 | 8  | 16 | GT   | 20 | 4  |
| 122496 | 12 | 10040797 | 10040824 | 2 | 14 | 28 | TG   | 11 | 11 |
| 122497 | 12 | 10050013 | 10050027 | 3 | 5  | 15 | CTG  | 28 | 3  |
| 122498 | 12 | 10050646 | 10050663 | 2 | 9  | 18 | GA   | 24 | 3  |
| 122499 | 12 | 10050756 | 10050779 | 2 | 12 | 24 | TG   | 17 | 12 |
| 122506 | 12 | 10073100 | 10073111 | 2 | 6  | 12 | GT   | 20 | 4  |
| 122508 | 12 | 10076973 | 10077000 | 2 | 14 | 28 | TG   | 22 | 11 |
| 122509 | 12 | 10077151 | 10077174 | 2 | 12 | 24 | GT   | 20 | 7  |
| 122510 | 12 | 10079374 | 10079387 | 2 | 7  | 14 | AC   | 10 | 6  |
| 122511 | 12 | 10079554 | 10079579 | 2 | 13 | 26 | AC   | 18 | 7  |
| 122512 | 12 | 10079756 | 10079767 | 2 | 6  | 12 | GT   | 20 | 9  |
| 122513 | 12 | 10079902 | 10079929 | 2 | 14 | 28 | TG   | 17 | 8  |
| 122518 | 12 | 10084321 | 10084332 | 2 | 6  | 12 | AC   | 6  | 7  |
| 122519 | 12 | 10089994 | 10090009 | 2 | 8  | 16 | AT   | 14 | 11 |
| 122520 | 12 | 10090333 | 10090356 | 2 | 12 | 24 | CA   | 8  | 5  |
| 122521 | 12 | 10092534 | 10092547 | 2 | 7  | 14 | CA   | 27 | 4  |
| 122527 | 12 | 10097769 | 10097786 | 3 | 6  | 18 | ACA  | 28 | 4  |
| 122532 | 12 | 10109238 | 10109251 | 2 | 7  | 14 | TG   | 31 | 3  |

|        |    |          |          |   |    |    |      |    |    |
|--------|----|----------|----------|---|----|----|------|----|----|
| 122534 | 12 | 10117527 | 10117540 | 2 | 7  | 14 | AC   | 24 | 8  |
| 122541 | 12 | 10125482 | 10125497 | 2 | 8  | 16 | TG   | 21 | 9  |
| 122545 | 12 | 10134951 | 10134972 | 2 | 11 | 22 | AC   | 15 | 10 |
| 122550 | 12 | 10144491 | 10144502 | 2 | 6  | 12 | GT   | 26 | 3  |
| 122551 | 12 | 10144634 | 10144665 | 2 | 16 | 32 | CA   | 12 | 15 |
| 122552 | 12 | 10144807 | 10144820 | 2 | 7  | 14 | AC   | 21 | 5  |
| 122555 | 12 | 10149226 | 10149245 | 2 | 10 | 20 | AC   | 13 | 10 |
| 122557 | 12 | 10151875 | 10151886 | 2 | 6  | 12 | GA   | 19 | 5  |
| 122558 | 12 | 10154284 | 10154297 | 2 | 7  | 14 | TG   | 21 | 6  |
| 122559 | 12 | 10154431 | 10154472 | 2 | 21 | 42 | TG   | 9  | 8  |
| 122560 | 12 | 10154648 | 10154675 | 2 | 14 | 28 | TG   | 12 | 12 |
| 122563 | 12 | 10161230 | 10161245 | 2 | 8  | 16 | CA   | 27 | 3  |
| 122579 | 12 | 10181048 | 10181067 | 2 | 10 | 20 | TG   | 16 | 5  |
| 122610 | 12 | 10224117 | 10224130 | 2 | 7  | 14 | GT   | 21 | 5  |
| 122614 | 12 | 10227797 | 10227810 | 2 | 7  | 14 | GT   | 26 | 5  |
| 122616 | 12 | 10240124 | 10240157 | 2 | 17 | 34 | AC   | 10 | 11 |
| 122620 | 12 | 10242836 | 10242851 | 2 | 8  | 16 | GT   | 20 | 3  |
| 122630 | 12 | 10256860 | 10256889 | 3 | 10 | 30 | AGG  | 14 | 6  |
| 122631 | 12 | 10257245 | 10257260 | 2 | 8  | 16 | AG   | 23 | 4  |
| 122633 | 12 | 10260030 | 10260041 | 2 | 6  | 12 | TG   | 20 | 3  |
| 122635 | 12 | 10261530 | 10261541 | 2 | 6  | 12 | TC   | 24 | 3  |
| 122636 | 12 | 10261610 | 10261627 | 2 | 9  | 18 | CT   | 18 | 5  |
| 122638 | 12 | 10264944 | 10264970 | 3 | 9  | 27 | CCT  | 18 | 5  |
| 122640 | 12 | 10265933 | 10265954 | 2 | 11 | 22 | AG   | 7  | 5  |
| 122643 | 12 | 10267906 | 10267919 | 2 | 7  | 14 | TA   | 10 | 12 |
| 122644 | 12 | 10276040 | 10276057 | 3 | 6  | 18 | CAG  | 26 | 4  |
| 122651 | 12 | 10280797 | 10280810 | 2 | 7  | 14 | TG   | 17 | 4  |
| 122652 | 12 | 10280880 | 10280899 | 2 | 10 | 20 | GT   | 13 | 5  |
| 122653 | 12 | 10281097 | 10281118 | 2 | 11 | 22 | GT   | 16 | 10 |
| 122657 | 12 | 10282300 | 10282323 | 3 | 8  | 24 | TTC  | 18 | 13 |
| 122658 | 12 | 10282651 | 10282678 | 2 | 14 | 28 | TG   | 14 | 5  |
| 122659 | 12 | 10284350 | 10284367 | 2 | 9  | 18 | TG   | 24 | 5  |
| 122661 | 12 | 10289537 | 10289570 | 2 | 17 | 34 | TG   | 15 | 12 |
| 122663 | 12 | 10292466 | 10292479 | 2 | 7  | 14 | CA   | 23 | 4  |
| 122664 | 12 | 10293698 | 10293715 | 2 | 9  | 18 | GA   | 14 | 3  |
| 122669 | 12 | 10298657 | 10298670 | 2 | 7  | 14 | TG   | 21 | 12 |
| 122670 | 12 | 10298673 | 10298686 | 2 | 7  | 14 | TG   | 14 | 9  |
| 122680 | 12 | 10301355 | 10301368 | 2 | 7  | 14 | GT   | 16 | 4  |
| 122681 | 12 | 10301464 | 10301485 | 2 | 11 | 22 | GT   | 12 | 5  |
| 122687 | 12 | 10312160 | 10312179 | 4 | 5  | 20 | CCTG | 32 | 5  |
| 122689 | 12 | 10317039 | 10317050 | 2 | 6  | 12 | GT   | 23 | 5  |
| 122690 | 12 | 10317351 | 10317364 | 2 | 7  | 14 | TG   | 22 | 3  |
| 122694 | 12 | 10322297 | 10322308 | 2 | 6  | 12 | GA   | 21 | 3  |
| 122696 | 12 | 10324339 | 10324368 | 2 | 15 | 30 | GT   | 14 | 13 |
| 122697 | 12 | 10324664 | 10324687 | 2 | 12 | 24 | TG   | 16 | 8  |
| 122698 | 12 | 10326206 | 10326217 | 2 | 6  | 12 | GT   | 22 | 7  |
| 122699 | 12 | 10326326 | 10326339 | 2 | 7  | 14 | AC   | 28 | 8  |
| 122706 | 12 | 10335469 | 10335484 | 2 | 8  | 16 | CA   | 18 | 3  |
| 122707 | 12 | 10336177 | 10336188 | 2 | 6  | 12 | GT   | 23 | 3  |
| 122708 | 12 | 10338486 | 10338521 | 2 | 18 | 36 | CA   | 15 | 13 |
| 122709 | 12 | 10338849 | 10338864 | 2 | 8  | 16 | GT   | 23 | 3  |

|        |    |          |          |   |    |    |      |    |    |
|--------|----|----------|----------|---|----|----|------|----|----|
| 122714 | 12 | 10342824 | 10342849 | 2 | 13 | 26 | AC   | 16 | 7  |
| 122715 | 12 | 10343088 | 10343109 | 2 | 11 | 22 | GT   | 18 | 9  |
| 122716 | 12 | 10343310 | 10343331 | 2 | 11 | 22 | CA   | 11 | 11 |
| 122719 | 12 | 10344780 | 10344793 | 2 | 7  | 14 | GT   | 22 | 4  |
| 122723 | 12 | 10349405 | 10349430 | 2 | 13 | 26 | AC   | 17 | 11 |
| 122725 | 12 | 10349729 | 10349748 | 2 | 10 | 20 | GT   | 13 | 10 |
| 122727 | 12 | 10349905 | 10349928 | 2 | 12 | 24 | TG   | 13 | 6  |
| 122728 | 12 | 10350070 | 10350107 | 2 | 19 | 38 | AC   | 19 | 10 |
| 122731 | 12 | 10355673 | 10355694 | 2 | 11 | 22 | AC   | 22 | 8  |
| 122735 | 12 | 10360727 | 10360746 | 2 | 10 | 20 | TG   | 15 | 9  |
| 122736 | 12 | 10360962 | 10360979 | 2 | 9  | 18 | TG   | 14 | 9  |
| 122742 | 12 | 10377395 | 10377416 | 2 | 11 | 22 | CA   | 24 | 8  |
| 122763 | 12 | 10413989 | 10414000 | 2 | 6  | 12 | TG   | 17 | 3  |
| 122764 | 12 | 10418329 | 10418352 | 2 | 12 | 24 | TG   | 10 | 4  |
| 122767 | 12 | 10427443 | 10427456 | 2 | 7  | 14 | CT   | 26 | 5  |
| 122773 | 12 | 10447416 | 10447435 | 2 | 10 | 20 | AC   | 15 | 11 |
| 122777 | 12 | 10455315 | 10455329 | 3 | 5  | 15 | CTG  | 18 | 5  |
| 122791 | 12 | 10479511 | 10479532 | 2 | 11 | 22 | AC   | 10 | 7  |
| 122792 | 12 | 10479771 | 10479812 | 2 | 21 | 42 | CA   | 24 | 5  |
| 122793 | 12 | 10481454 | 10481473 | 2 | 10 | 20 | GT   | 16 | 5  |
| 122801 | 12 | 10489572 | 10489583 | 2 | 6  | 12 | TG   | 23 | 3  |
| 122802 | 12 | 10489587 | 10489598 | 2 | 6  | 12 | GT   | 15 | 3  |
| 122808 | 12 | 10495526 | 10495541 | 4 | 4  | 16 | TAAA | 11 | 3  |
| 122809 | 12 | 10507280 | 10507297 | 2 | 9  | 18 | TG   | 28 | 4  |
| 122813 | 12 | 10514819 | 10514833 | 3 | 5  | 15 | TTC  | 15 | 3  |
| 122815 | 12 | 10518124 | 10518157 | 2 | 17 | 34 | TG   | 7  | 7  |
| 122816 | 12 | 10518559 | 10518574 | 2 | 8  | 16 | AC   | 29 | 3  |
| 122828 | 12 | 10529764 | 10529795 | 2 | 16 | 32 | TG   | 19 | 11 |
| 122833 | 12 | 10535339 | 10535364 | 2 | 13 | 26 | AC   | 18 | 5  |
| 122834 | 12 | 10536726 | 10536743 | 2 | 9  | 18 | CA   | 28 | 5  |
| 122835 | 12 | 10537638 | 10537659 | 2 | 11 | 22 | GT   | 26 | 6  |
| 122836 | 12 | 10537885 | 10537902 | 2 | 9  | 18 | CA   | 12 | 8  |
| 122837 | 12 | 10537904 | 10537919 | 2 | 8  | 16 | AC   | 11 | 10 |
| 122839 | 12 | 10538356 | 10538393 | 2 | 19 | 38 | TG   | 14 | 9  |
| 122848 | 12 | 10552770 | 10552815 | 2 | 23 | 46 | CA   | 9  | 8  |
| 122849 | 12 | 10552993 | 10553022 | 2 | 15 | 30 | GT   | 11 | 6  |
| 122851 | 12 | 10554113 | 10554128 | 2 | 8  | 16 | TG   | 17 | 4  |
| 122856 | 12 | 10559746 | 10559778 | 3 | 11 | 33 | GAA  | 10 | 5  |
| 122860 | 12 | 10563482 | 10563493 | 2 | 6  | 12 | TG   | 24 | 5  |
| 122863 | 12 | 10564516 | 10564559 | 2 | 22 | 44 | TG   | 7  | 8  |
| 122864 | 12 | 10564696 | 10564709 | 2 | 7  | 14 | TG   | 19 | 4  |
| 122865 | 12 | 10565967 | 10565988 | 2 | 11 | 22 | AC   | 21 | 12 |
| 122870 | 12 | 10570675 | 10570692 | 2 | 9  | 18 | GT   | 12 | 4  |
| 122874 | 12 | 10572697 | 10572716 | 2 | 10 | 20 | TG   | 19 | 14 |
| 122875 | 12 | 10572816 | 10572827 | 2 | 6  | 12 | CT   | 24 | 4  |
| 122876 | 12 | 10575183 | 10575206 | 2 | 12 | 24 | CA   | 11 | 9  |
| 122877 | 12 | 10575330 | 10575347 | 2 | 9  | 18 | CA   | 14 | 4  |
| 122883 | 12 | 10576392 | 10576411 | 2 | 10 | 20 | GT   | 14 | 9  |
| 122885 | 12 | 10577825 | 10577850 | 2 | 13 | 26 | AC   | 18 | 16 |
| 122887 | 12 | 10579581 | 10579596 | 2 | 8  | 16 | TG   | 16 | 6  |
| 122888 | 12 | 10580002 | 10580027 | 2 | 13 | 26 | TG   | 12 | 12 |

|        |    |          |          |   |    |    |      |    |    |
|--------|----|----------|----------|---|----|----|------|----|----|
| 122892 | 12 | 10582517 | 10582546 | 2 | 15 | 30 | AC   | 16 | 13 |
| 122899 | 12 | 10588464 | 10588489 | 2 | 13 | 26 | CA   | 13 | 4  |
| 122900 | 12 | 10588603 | 10588614 | 2 | 6  | 12 | GT   | 15 | 7  |
| 122901 | 12 | 10588617 | 10588630 | 2 | 7  | 14 | GT   | 19 | 6  |
| 122902 | 12 | 10588901 | 10588912 | 2 | 6  | 12 | CT   | 30 | 4  |
| 122903 | 12 | 10590274 | 10590299 | 2 | 13 | 26 | GT   | 17 | 16 |
| 122905 | 12 | 10592380 | 10592393 | 2 | 7  | 14 | CA   | 21 | 6  |
| 122906 | 12 | 10592772 | 10592791 | 2 | 10 | 20 | CA   | 24 | 4  |
| 122908 | 12 | 10595476 | 10595505 | 2 | 15 | 30 | AC   | 16 | 11 |
| 122910 | 12 | 10596864 | 10596877 | 2 | 7  | 14 | AC   | 23 | 4  |
| 122912 | 12 | 10598871 | 10598896 | 2 | 13 | 26 | AC   | 14 | 8  |
| 122916 | 12 | 10599565 | 10599578 | 2 | 7  | 14 | AC   | 19 | 7  |
| 122917 | 12 | 10600014 | 10600047 | 2 | 17 | 34 | TG   | 19 | 7  |
| 122919 | 12 | 10602907 | 10602922 | 4 | 4  | 16 | AAAC | 17 | 3  |
| 122920 | 12 | 10603364 | 10603389 | 2 | 13 | 26 | CA   | 13 | 7  |
| 122921 | 12 | 10603759 | 10603794 | 2 | 18 | 36 | AC   | 18 | 13 |
| 122922 | 12 | 10604978 | 10604989 | 2 | 6  | 12 | AT   | 26 | 13 |
| 122926 | 12 | 10608941 | 10608968 | 2 | 14 | 28 | CA   | 11 | 7  |
| 122930 | 12 | 10616065 | 10616082 | 2 | 9  | 18 | AC   | 13 | 10 |
| 122931 | 12 | 10616219 | 10616236 | 2 | 9  | 18 | GT   | 18 | 6  |
| 122933 | 12 | 10616415 | 10616426 | 2 | 6  | 12 | AC   | 30 | 4  |
| 122934 | 12 | 10616429 | 10616446 | 3 | 6  | 18 | AGC  | 28 | 5  |
| 122936 | 12 | 10618039 | 10618070 | 4 | 8  | 32 | GGAA | 18 | 5  |
| 122939 | 12 | 10622571 | 10622612 | 2 | 21 | 42 | TG   | 14 | 14 |
| 122942 | 12 | 10623767 | 10623788 | 2 | 11 | 22 | CA   | 13 | 12 |
| 122943 | 12 | 10623968 | 10623987 | 2 | 10 | 20 | GA   | 16 | 4  |
| 122948 | 12 | 10626453 | 10626494 | 2 | 21 | 42 | GT   | 9  | 9  |
| 122949 | 12 | 10626620 | 10626647 | 2 | 14 | 28 | CA   | 14 | 10 |
| 122959 | 12 | 10633382 | 10633401 | 2 | 10 | 20 | GT   | 14 | 6  |
| 122961 | 12 | 10633777 | 10633802 | 2 | 13 | 26 | GT   | 14 | 8  |
| 122962 | 12 | 10634160 | 10634191 | 2 | 16 | 32 | GT   | 14 | 10 |
| 122964 | 12 | 10636568 | 10636581 | 2 | 7  | 14 | CT   | 14 | 3  |
| 122965 | 12 | 10636753 | 10636776 | 2 | 12 | 24 | GT   | 17 | 9  |
| 122966 | 12 | 10637064 | 10637081 | 2 | 9  | 18 | TG   | 21 | 6  |
| 122971 | 12 | 10645063 | 10645084 | 2 | 11 | 22 | CA   | 6  | 9  |
| 122974 | 12 | 10646961 | 10646974 | 2 | 7  | 14 | GT   | 11 | 3  |
| 122978 | 12 | 10653675 | 10653696 | 2 | 11 | 22 | CA   | 17 | 6  |
| 122981 | 12 | 10656282 | 10656317 | 2 | 18 | 36 | AC   | 7  | 8  |
| 122987 | 12 | 10663688 | 10663711 | 2 | 12 | 24 | GA   | 16 | 7  |
| 122988 | 12 | 10664281 | 10664308 | 2 | 14 | 28 | GT   | 14 | 6  |
| 122989 | 12 | 10664430 | 10664449 | 4 | 5  | 20 | AAAT | 18 | 3  |
| 122992 | 12 | 10668018 | 10668031 | 2 | 7  | 14 | AC   | 16 | 4  |
| 122995 | 12 | 10675421 | 10675435 | 3 | 5  | 15 | CCT  | 13 | 3  |
| 122996 | 12 | 10675904 | 10675917 | 2 | 7  | 14 | CT   | 32 | 8  |
| 122997 | 12 | 10677301 | 10677318 | 2 | 9  | 18 | AC   | 12 | 5  |
| 123001 | 12 | 10681869 | 10681886 | 2 | 9  | 18 | CA   | 15 | 4  |
| 123003 | 12 | 10683329 | 10683384 | 2 | 28 | 56 | GT   | 18 | 9  |
| 123006 | 12 | 10685490 | 10685509 | 2 | 10 | 20 | CA   | 16 | 8  |
| 123008 | 12 | 10685879 | 10685900 | 2 | 11 | 22 | AG   | 14 | 4  |
| 123009 | 12 | 10687896 | 10687923 | 2 | 14 | 28 | GT   | 21 | 11 |
| 123011 | 12 | 10688956 | 10688987 | 2 | 16 | 32 | CA   | 9  | 9  |

|        |    |          |          |   |    |    |      |    |    |
|--------|----|----------|----------|---|----|----|------|----|----|
| 123013 | 12 | 10689494 | 10689535 | 2 | 21 | 42 | CA   | 10 | 15 |
| 123015 | 12 | 10690531 | 10690546 | 2 | 8  | 16 | CA   | 15 | 9  |
| 123016 | 12 | 10690717 | 10690746 | 2 | 15 | 30 | CA   | 12 | 9  |
| 123017 | 12 | 10692853 | 10692894 | 2 | 21 | 42 | CA   | 17 | 10 |
| 123019 | 12 | 10694876 | 10694891 | 2 | 8  | 16 | GT   | 18 | 10 |
| 123020 | 12 | 10695063 | 10695102 | 2 | 20 | 40 | CA   | 14 | 16 |
| 123022 | 12 | 10699021 | 10699034 | 2 | 7  | 14 | TG   | 28 | 4  |
| 123023 | 12 | 10699164 | 10699185 | 2 | 11 | 22 | CA   | 19 | 5  |
| 123024 | 12 | 10699862 | 10699875 | 2 | 7  | 14 | CA   | 16 | 6  |
| 123025 | 12 | 10699988 | 10700025 | 2 | 19 | 38 | CA   | 12 | 10 |
| 123026 | 12 | 10704175 | 10704198 | 2 | 12 | 24 | CA   | 15 | 14 |
| 123028 | 12 | 10705780 | 10705791 | 2 | 6  | 12 | AT   | 14 | 4  |
| 123032 | 12 | 10708509 | 10708536 | 2 | 14 | 28 | AC   | 27 | 16 |
| 123034 | 12 | 10712793 | 10712818 | 2 | 13 | 26 | TC   | 20 | 7  |
| 123035 | 12 | 10713090 | 10713109 | 4 | 5  | 20 | TGCG | 30 | 12 |
| 123041 | 12 | 10717916 | 10717935 | 2 | 10 | 20 | TG   | 21 | 5  |
| 123042 | 12 | 10718024 | 10718047 | 2 | 12 | 24 | AC   | 17 | 11 |
| 123045 | 12 | 10721698 | 10721711 | 2 | 7  | 14 | TC   | 25 | 3  |
| 123047 | 12 | 10724060 | 10724085 | 2 | 13 | 26 | AC   | 19 | 7  |
| 123050 | 12 | 10724458 | 10724483 | 2 | 13 | 26 | GT   | 14 | 8  |
| 123053 | 12 | 10730287 | 10730298 | 2 | 6  | 12 | TG   | 21 | 3  |
| 123056 | 12 | 10733433 | 10733448 | 2 | 8  | 16 | GA   | 20 | 5  |
| 123059 | 12 | 10735855 | 10735872 | 2 | 9  | 18 | CT   | 24 | 6  |
| 123060 | 12 | 10738723 | 10738752 | 2 | 15 | 30 | GT   | 16 | 7  |
| 123061 | 12 | 10741231 | 10741248 | 2 | 9  | 18 | CA   | 26 | 8  |
| 123063 | 12 | 10744823 | 10744848 | 2 | 13 | 26 | CA   | 11 | 9  |
| 123064 | 12 | 10744943 | 10744964 | 2 | 11 | 22 | TG   | 12 | 11 |
| 123067 | 12 | 10747661 | 10747672 | 2 | 6  | 12 | TC   | 23 | 4  |
| 123071 | 12 | 10750739 | 10750750 | 2 | 6  | 12 | GA   | 19 | 5  |
| 123072 | 12 | 10751647 | 10751672 | 2 | 13 | 26 | CA   | 9  | 8  |
| 123073 | 12 | 10752201 | 10752224 | 2 | 12 | 24 | AC   | 16 | 3  |
| 123074 | 12 | 10752280 | 10752307 | 2 | 14 | 28 | CA   | 9  | 9  |
| 123075 | 12 | 10754245 | 10754260 | 2 | 8  | 16 | CA   | 24 | 4  |
| 123076 | 12 | 10754426 | 10754467 | 2 | 21 | 42 | CA   | 9  | 8  |
| 123078 | 12 | 10761353 | 10761368 | 2 | 8  | 16 | GT   | 9  | 4  |
| 123081 | 12 | 10762892 | 10762907 | 2 | 8  | 16 | TC   | 21 | 3  |
| 123084 | 12 | 10763245 | 10763280 | 2 | 18 | 36 | AC   | 13 | 11 |
| 123087 | 12 | 10765156 | 10765171 | 4 | 4  | 16 | AAAG | 29 | 5  |
| 123089 | 12 | 10767079 | 10767090 | 2 | 6  | 12 | CA   | 24 | 3  |
| 123093 | 12 | 10774080 | 10774107 | 2 | 14 | 28 | AC   | 11 | 12 |
| 123098 | 12 | 10778850 | 10778861 | 2 | 6  | 12 | AC   | 13 | 7  |
| 123100 | 12 | 10784575 | 10784600 | 2 | 13 | 26 | CA   | 18 | 10 |
| 123102 | 12 | 10790696 | 10790727 | 2 | 16 | 32 | TG   | 16 | 5  |
| 123103 | 12 | 10790890 | 10790917 | 2 | 14 | 28 | AC   | 8  | 7  |
| 123105 | 12 | 10793143 | 10793178 | 2 | 18 | 36 | AC   | 13 | 11 |
| 123107 | 12 | 10793678 | 10793701 | 2 | 12 | 24 | AC   | 17 | 8  |
| 123111 | 12 | 10798562 | 10798579 | 2 | 9  | 18 | AC   | 16 | 12 |
| 123120 | 12 | 10805607 | 10805618 | 2 | 6  | 12 | CT   | 16 | 3  |
| 123121 | 12 | 10805939 | 10805962 | 2 | 12 | 24 | GT   | 11 | 6  |
| 123125 | 12 | 10808114 | 10808143 | 2 | 15 | 30 | AC   | 18 | 9  |
| 123128 | 12 | 10811751 | 10811786 | 2 | 18 | 36 | CA   | 19 | 11 |

|        |    |          |          |   |    |    |      |    |    |
|--------|----|----------|----------|---|----|----|------|----|----|
| 123130 | 12 | 10812112 | 10812131 | 2 | 10 | 20 | AC   | 14 | 10 |
| 123132 | 12 | 10812203 | 10812226 | 2 | 12 | 24 | TG   | 8  | 7  |
| 123136 | 12 | 10815076 | 10815095 | 2 | 10 | 20 | TC   | 11 | 3  |
| 123138 | 12 | 10816342 | 10816359 | 2 | 9  | 18 | TC   | 18 | 7  |
| 123142 | 12 | 10819544 | 10819559 | 2 | 8  | 16 | GT   | 9  | 13 |
| 123146 | 12 | 10834035 | 10834054 | 4 | 5  | 20 | ATAC | 24 | 7  |
| 123147 | 12 | 10834098 | 10834109 | 2 | 6  | 12 | AC   | 20 | 6  |
| 123148 | 12 | 10834112 | 10834123 | 2 | 6  | 12 | AC   | 20 | 5  |
| 123153 | 12 | 10835210 | 10835229 | 2 | 10 | 20 | GA   | 23 | 4  |
| 123155 | 12 | 10838409 | 10838430 | 2 | 11 | 22 | GT   | 15 | 8  |
| 123157 | 12 | 10845418 | 10845431 | 2 | 7  | 14 | AC   | 21 | 5  |
| 123159 | 12 | 10847790 | 10847817 | 2 | 14 | 28 | CA   | 16 | 16 |
| 123160 | 12 | 10849740 | 10849761 | 2 | 11 | 22 | CA   | 9  | 7  |
| 123161 | 12 | 10849862 | 10849881 | 2 | 10 | 20 | CA   | 16 | 5  |
| 123162 | 12 | 10851162 | 10851179 | 2 | 9  | 18 | CA   | 22 | 7  |
| 123163 | 12 | 10851306 | 10851335 | 3 | 10 | 30 | CCT  | 17 | 13 |
| 123164 | 12 | 10851813 | 10851842 | 2 | 15 | 30 | AG   | 13 | 6  |
| 123165 | 12 | 10852004 | 10852037 | 2 | 17 | 34 | AC   | 6  | 5  |
| 123169 | 12 | 10854975 | 10855004 | 3 | 10 | 30 | GCT  | 27 | 18 |
| 123176 | 12 | 10865715 | 10865736 | 2 | 11 | 22 | AC   | 12 | 3  |
| 123178 | 12 | 10867319 | 10867338 | 2 | 10 | 20 | GT   | 17 | 10 |
| 123179 | 12 | 10867466 | 10867481 | 2 | 8  | 16 | GT   | 27 | 14 |
| 123182 | 12 | 10871465 | 10871508 | 2 | 22 | 44 | TG   | 7  | 9  |
| 123183 | 12 | 10871691 | 10871722 | 2 | 16 | 32 | TG   | 8  | 7  |
| 123184 | 12 | 10871900 | 10871917 | 2 | 9  | 18 | AC   | 18 | 8  |
| 123185 | 12 | 10872077 | 10872092 | 2 | 8  | 16 | AC   | 13 | 10 |
| 123186 | 12 | 10872835 | 10872864 | 2 | 15 | 30 | CA   | 16 | 13 |
| 123187 | 12 | 10872959 | 10872988 | 2 | 15 | 30 | CA   | 11 | 13 |
| 123188 | 12 | 10876579 | 10876590 | 2 | 6  | 12 | CA   | 27 | 8  |
| 123189 | 12 | 10876592 | 10876603 | 2 | 6  | 12 | AC   | 26 | 8  |
| 123192 | 12 | 10882004 | 10882025 | 2 | 11 | 22 | AC   | 10 | 5  |
| 123197 | 12 | 10887066 | 10887079 | 2 | 7  | 14 | AC   | 24 | 3  |
| 123199 | 12 | 10888291 | 10888306 | 2 | 8  | 16 | AC   | 19 | 5  |
| 123202 | 12 | 10888810 | 10888843 | 2 | 17 | 34 | GT   | 20 | 12 |
| 123204 | 12 | 10891300 | 10891329 | 2 | 15 | 30 | AC   | 9  | 6  |
| 123206 | 12 | 10894485 | 10894496 | 2 | 6  | 12 | GA   | 28 | 4  |
| 123207 | 12 | 10896063 | 10896082 | 2 | 10 | 20 | CA   | 12 | 6  |
| 123208 | 12 | 10896735 | 10896762 | 2 | 14 | 28 | TG   | 20 | 9  |
| 123209 | 12 | 10897193 | 10897216 | 2 | 12 | 24 | GT   | 12 | 7  |
| 123210 | 12 | 10897353 | 10897366 | 2 | 7  | 14 | CA   | 13 | 8  |
| 123213 | 12 | 10897641 | 10897666 | 2 | 13 | 26 | CA   | 19 | 12 |
| 123214 | 12 | 10897783 | 10897800 | 2 | 9  | 18 | GT   | 24 | 16 |
| 123220 | 12 | 10913510 | 10913537 | 2 | 14 | 28 | GT   | 20 | 11 |
| 123223 | 12 | 10918344 | 10918367 | 4 | 6  | 24 | CTAT | 18 | 3  |
| 123226 | 12 | 10920720 | 10920743 | 2 | 12 | 24 | TG   | 20 | 12 |
| 123227 | 12 | 10923488 | 10923499 | 2 | 6  | 12 | GT   | 17 | 11 |
| 123231 | 12 | 10938926 | 10938940 | 3 | 5  | 15 | GCT  | 25 | 13 |
| 123237 | 12 | 10945296 | 10945310 | 3 | 5  | 15 | AAC  | 25 | 4  |
| 123238 | 12 | 10946174 | 10946187 | 2 | 7  | 14 | CA   | 19 | 4  |
| 123239 | 12 | 10946192 | 10946203 | 2 | 6  | 12 | CA   | 22 | 3  |
| 123244 | 12 | 10964803 | 10964829 | 3 | 9  | 27 | TCC  | 11 | 5  |

|        |    |          |          |   |    |    |      |    |    |
|--------|----|----------|----------|---|----|----|------|----|----|
| 123245 | 12 | 10965075 | 10965088 | 2 | 7  | 14 | TG   | 25 | 11 |
| 123247 | 12 | 10969925 | 10969936 | 2 | 6  | 12 | AC   | 30 | 6  |
| 123248 | 12 | 10969991 | 10970014 | 2 | 12 | 24 | CA   | 23 | 6  |
| 123251 | 12 | 10981080 | 10981094 | 3 | 5  | 15 | AAG  | 29 | 3  |
| 123255 | 12 | 10986039 | 10986050 | 2 | 6  | 12 | CA   | 26 | 3  |
| 123258 | 12 | 10988790 | 10988813 | 3 | 8  | 24 | GGT  | 8  | 4  |
| 123260 | 12 | 10989411 | 10989430 | 2 | 10 | 20 | CA   | 20 | 7  |
| 123264 | 12 | 10993969 | 10993982 | 2 | 7  | 14 | GT   | 29 | 5  |
| 123267 | 12 | 10997233 | 10997248 | 2 | 8  | 16 | TA   | 8  | 5  |
| 123280 | 12 | 11003653 | 11003668 | 2 | 8  | 16 | TG   | 12 | 4  |
| 123281 | 12 | 11004608 | 11004627 | 2 | 10 | 20 | GT   | 20 | 5  |
| 123288 | 12 | 11008818 | 11008847 | 2 | 15 | 30 | CA   | 7  | 6  |
| 123290 | 12 | 11015252 | 11015275 | 2 | 12 | 24 | AC   | 18 | 10 |
| 123292 | 12 | 11017755 | 11017769 | 3 | 5  | 15 | AGG  | 23 | 3  |
| 123295 | 12 | 11020077 | 11020092 | 2 | 8  | 16 | AG   | 9  | 7  |
| 123299 | 12 | 11022687 | 11022716 | 2 | 15 | 30 | GT   | 13 | 8  |
| 123303 | 12 | 11027771 | 11027796 | 2 | 13 | 26 | TG   | 17 | 8  |
| 123304 | 12 | 11027978 | 11027993 | 4 | 4  | 16 | GAGG | 8  | 6  |
| 123305 | 12 | 11028081 | 11028108 | 2 | 14 | 28 | GA   | 12 | 8  |
| 123307 | 12 | 11028302 | 11028323 | 2 | 11 | 22 | GT   | 12 | 13 |
| 123308 | 12 | 11030593 | 11030610 | 2 | 9  | 18 | GT   | 19 | 9  |
| 123313 | 12 | 11033593 | 11033624 | 2 | 16 | 32 | TG   | 17 | 11 |
| 123315 | 12 | 11033800 | 11033817 | 2 | 9  | 18 | TG   | 12 | 10 |
| 123329 | 12 | 11041514 | 11041527 | 2 | 7  | 14 | AC   | 19 | 3  |
| 123334 | 12 | 11045535 | 11045549 | 3 | 5  | 15 | GCT  | 29 | 3  |
| 123343 | 12 | 11072783 | 11072796 | 2 | 7  | 14 | TG   | 27 | 3  |
| 123347 | 12 | 11085691 | 11085702 | 2 | 6  | 12 | TG   | 11 | 7  |
| 123349 | 12 | 11088176 | 11088205 | 2 | 15 | 30 | AC   | 12 | 5  |
| 123350 | 12 | 11088402 | 11088433 | 2 | 16 | 32 | AG   | 17 | 10 |
| 123352 | 12 | 11093678 | 11093692 | 3 | 5  | 15 | AAT  | 19 | 5  |
| 123353 | 12 | 11094997 | 11095028 | 2 | 16 | 32 | TG   | 19 | 16 |
| 123356 | 12 | 11105839 | 11105852 | 2 | 7  | 14 | CA   | 7  | 7  |
| 123360 | 12 | 11115672 | 11115683 | 2 | 6  | 12 | AG   | 24 | 3  |
| 123362 | 12 | 11122174 | 11122193 | 2 | 10 | 20 | AG   | 23 | 4  |
| 123363 | 12 | 11123655 | 11123684 | 3 | 10 | 30 | GGA  | 19 | 5  |
| 123375 | 12 | 11155782 | 11155793 | 2 | 6  | 12 | CA   | 23 | 10 |
| 123378 | 12 | 11160958 | 11161001 | 2 | 22 | 44 | CA   | 6  | 7  |
| 123380 | 12 | 11165550 | 11165589 | 2 | 20 | 40 | AC   | 12 | 9  |
| 123385 | 12 | 11175668 | 11175713 | 2 | 23 | 46 | GA   | 21 | 9  |
| 123399 | 12 | 11191508 | 11191521 | 2 | 7  | 14 | CA   | 29 | 3  |
| 123401 | 12 | 11191566 | 11191587 | 2 | 11 | 22 | GT   | 22 | 6  |
| 123404 | 12 | 11196527 | 11196540 | 2 | 7  | 14 | GT   | 27 | 11 |
| 123407 | 12 | 11202201 | 11202216 | 4 | 4  | 16 | AAAC | 27 | 3  |
| 123408 | 12 | 11202575 | 11202592 | 2 | 9  | 18 | GT   | 18 | 3  |
| 123410 | 12 | 11215508 | 11215528 | 3 | 7  | 21 | GGT  | 6  | 5  |
| 123411 | 12 | 11217808 | 11217822 | 3 | 5  | 15 | AAT  | 24 | 4  |
| 123413 | 12 | 11222798 | 11222813 | 2 | 8  | 16 | TG   | 17 | 5  |
| 123416 | 12 | 11229400 | 11229419 | 2 | 10 | 20 | TG   | 18 | 6  |
| 123419 | 12 | 11233496 | 11233510 | 3 | 5  | 15 | GGA  | 19 | 8  |
| 123420 | 12 | 11233626 | 11233639 | 2 | 7  | 14 | TC   | 16 | 4  |
| 123423 | 12 | 11245977 | 11245990 | 2 | 7  | 14 | TC   | 25 | 3  |



|        |    |          |          |   |    |    |      |    |    |
|--------|----|----------|----------|---|----|----|------|----|----|
| 123427 | 12 | 11259145 | 11259166 | 2 | 11 | 22 | TG   | 18 | 8  |
| 123428 | 12 | 11260755 | 11260772 | 3 | 6  | 18 | AAC  | 28 | 4  |
| 123430 | 12 | 11273231 | 11273252 | 2 | 11 | 22 | CA   | 15 | 12 |
| 123431 | 12 | 11277439 | 11277470 | 2 | 16 | 32 | CA   | 16 | 8  |
| 123432 | 12 | 11283206 | 11283223 | 3 | 6  | 18 | TTC  | 17 | 3  |
| 123433 | 12 | 11284655 | 11284678 | 3 | 8  | 24 | TTC  | 29 | 9  |
| 123435 | 12 | 11286436 | 11286455 | 2 | 10 | 20 | AC   | 19 | 5  |
| 123438 | 12 | 11295910 | 11295930 | 3 | 7  | 21 | GAG  | 13 | 3  |
| 123442 | 12 | 11308329 | 11308342 | 2 | 7  | 14 | AG   | 26 | 3  |
| 123448 | 12 | 11317676 | 11317693 | 2 | 9  | 18 | CA   | 12 | 3  |
| 123450 | 12 | 11321730 | 11321745 | 2 | 8  | 16 | GA   | 16 | 13 |
| 123455 | 12 | 11329295 | 11329320 | 2 | 13 | 26 | GT   | 19 | 8  |
| 123457 | 12 | 11330772 | 11330783 | 2 | 6  | 12 | CA   | 11 | 7  |
| 123458 | 12 | 11332867 | 11332898 | 2 | 16 | 32 | CA   | 8  | 8  |
| 123461 | 12 | 11341658 | 11341671 | 2 | 7  | 14 | CA   | 16 | 6  |
| 123462 | 12 | 11343256 | 11343270 | 3 | 5  | 15 | AGC  | 29 | 3  |
| 123467 | 12 | 11352746 | 11352773 | 2 | 14 | 28 | CA   | 14 | 14 |
| 123468 | 12 | 11355309 | 11355320 | 2 | 6  | 12 | AC   | 28 | 4  |
| 123471 | 12 | 11359997 | 11360008 | 2 | 6  | 12 | AG   | 29 | 3  |
| 123474 | 12 | 11367260 | 11367273 | 2 | 7  | 14 | AG   | 23 | 3  |
| 123477 | 12 | 11370936 | 11370953 | 3 | 6  | 18 | GGC  | 19 | 3  |
| 123478 | 12 | 11371271 | 11371298 | 4 | 7  | 28 | CCAG | 16 | 5  |
| 123489 | 12 | 11391338 | 11391361 | 3 | 8  | 24 | TTA  | 15 | 8  |
| 123491 | 12 | 11399610 | 11399633 | 3 | 8  | 24 | AGA  | 22 | 4  |
| 123492 | 12 | 11401340 | 11401375 | 2 | 18 | 36 | CA   | 8  | 10 |
| 123497 | 12 | 11412438 | 11412465 | 2 | 14 | 28 | CA   | 18 | 11 |
| 123506 | 12 | 11418817 | 11418856 | 2 | 20 | 40 | CA   | 10 | 7  |
| 123508 | 12 | 11425075 | 11425112 | 2 | 19 | 38 | GT   | 19 | 9  |
| 123510 | 12 | 11427841 | 11427852 | 2 | 6  | 12 | AC   | 29 | 5  |
| 123514 | 12 | 11431650 | 11431663 | 2 | 7  | 14 | GT   | 22 | 3  |
| 123516 | 12 | 11432520 | 11432531 | 2 | 6  | 12 | TG   | 16 | 3  |
| 123521 | 12 | 11436741 | 11436768 | 2 | 14 | 28 | AC   | 14 | 8  |
| 123522 | 12 | 11438052 | 11438084 | 3 | 11 | 33 | GCA  | 16 | 10 |
| 123523 | 12 | 11438314 | 11438343 | 3 | 10 | 30 | GGA  | 11 | 6  |
| 123524 | 12 | 11438438 | 11438455 | 3 | 6  | 18 | GGA  | 13 | 4  |
| 123536 | 12 | 11449711 | 11449734 | 4 | 6  | 24 | AGAA | 27 | 5  |
| 123537 | 12 | 11452033 | 11452048 | 4 | 4  | 16 | GGAG | 9  | 5  |
| 123538 | 12 | 11452447 | 11452464 | 2 | 9  | 18 | AC   | 19 | 4  |
| 123539 | 12 | 11452628 | 11452655 | 2 | 14 | 28 | GT   | 16 | 8  |
| 123540 | 12 | 11462187 | 11462204 | 2 | 9  | 18 | GT   | 19 | 5  |
| 123541 | 12 | 11472554 | 11472567 | 2 | 7  | 14 | AG   | 21 | 6  |
| 123543 | 12 | 11481361 | 11481372 | 2 | 6  | 12 | TG   | 24 | 7  |
| 123549 | 12 | 11508076 | 11508099 | 4 | 6  | 24 | CATC | 33 | 4  |
| 123556 | 12 | 11529604 | 11529623 | 4 | 5  | 20 | TTTA | 19 | 3  |
| 123557 | 12 | 11531444 | 11531457 | 2 | 7  | 14 | GA   | 8  | 3  |
| 123560 | 12 | 11532047 | 11532062 | 2 | 8  | 16 | GT   | 12 | 7  |
| 123563 | 12 | 11537753 | 11537767 | 3 | 5  | 15 | GAT  | 27 | 5  |
| 123564 | 12 | 11537797 | 11537822 | 2 | 13 | 26 | TG   | 7  | 7  |
| 123565 | 12 | 11537853 | 11537878 | 2 | 13 | 26 | GT   | 9  | 9  |
| 123567 | 12 | 11540884 | 11540903 | 2 | 10 | 20 | TG   | 10 | 6  |
| 123569 | 12 | 11543321 | 11543336 | 2 | 8  | 16 | CT   | 12 | 3  |

|        |    |          |          |   |    |    |      |    |    |
|--------|----|----------|----------|---|----|----|------|----|----|
| 123571 | 12 | 11544740 | 11544754 | 3 | 5  | 15 | TGC  | 19 | 4  |
| 123574 | 12 | 11550934 | 11550949 | 2 | 8  | 16 | AC   | 26 | 3  |
| 123577 | 12 | 11562274 | 11562297 | 2 | 12 | 24 | CA   | 14 | 6  |
| 123578 | 12 | 11562324 | 11562351 | 2 | 14 | 28 | AC   | 13 | 12 |
| 123579 | 12 | 11564328 | 11564357 | 2 | 15 | 30 | TG   | 11 | 8  |
| 123582 | 12 | 11570607 | 11570634 | 2 | 14 | 28 | TG   | 12 | 8  |
| 123586 | 12 | 11579251 | 11579274 | 3 | 8  | 24 | CCT  | 24 | 8  |
| 123588 | 12 | 11582854 | 11582871 | 2 | 9  | 18 | CA   | 17 | 6  |
| 123592 | 12 | 11584898 | 11584933 | 3 | 12 | 36 | CCT  | 14 | 13 |
| 123595 | 12 | 11588123 | 11588152 | 2 | 15 | 30 | GT   | 15 | 17 |
| 123596 | 12 | 11590797 | 11590816 | 2 | 10 | 20 | AC   | 27 | 6  |
| 123600 | 12 | 11613465 | 11613478 | 2 | 7  | 14 | TG   | 25 | 9  |
| 123601 | 12 | 11613846 | 11613860 | 3 | 5  | 15 | CCT  | 27 | 4  |
| 123602 | 12 | 11615502 | 11615519 | 3 | 6  | 18 | AGC  | 25 | 3  |
| 123604 | 12 | 11622543 | 11622560 | 2 | 9  | 18 | GT   | 24 | 4  |
| 123605 | 12 | 11622585 | 11622602 | 2 | 9  | 18 | AC   | 20 | 9  |
| 123614 | 12 | 11638536 | 11638550 | 3 | 5  | 15 | TAT  | 24 | 4  |
| 123615 | 12 | 11639673 | 11639684 | 2 | 6  | 12 | AC   | 22 | 10 |
| 123616 | 12 | 11639685 | 11639696 | 2 | 6  | 12 | GC   | 25 | 12 |
| 123620 | 12 | 11645550 | 11645564 | 3 | 5  | 15 | TGC  | 32 | 4  |
| 123628 | 12 | 11655281 | 11655298 | 3 | 6  | 18 | CTC  | 22 | 3  |
| 123634 | 12 | 11668683 | 11668700 | 3 | 6  | 18 | ATA  | 19 | 6  |
| 123635 | 12 | 11675322 | 11675345 | 4 | 6  | 24 | TTTG | 27 | 6  |
| 123636 | 12 | 11687770 | 11687791 | 2 | 11 | 22 | TG   | 11 | 6  |
| 123637 | 12 | 11690751 | 11690765 | 3 | 5  | 15 | GGA  | 8  | 3  |
| 123644 | 12 | 11708100 | 11708123 | 4 | 6  | 24 | CTTT | 23 | 5  |
| 123646 | 12 | 11711993 | 11712010 | 3 | 6  | 18 | CTC  | 31 | 3  |
| 123652 | 12 | 11744158 | 11744175 | 2 | 9  | 18 | CT   | 19 | 7  |
| 123653 | 12 | 11744520 | 11744539 | 2 | 10 | 20 | GT   | 27 | 10 |
| 123656 | 12 | 11756268 | 11756303 | 2 | 18 | 36 | CA   | 15 | 5  |
| 123657 | 12 | 11758970 | 11759002 | 3 | 11 | 33 | GAT  | 23 | 9  |
| 123686 | 12 | 11811172 | 11811189 | 2 | 9  | 18 | GT   | 22 | 5  |
| 123690 | 12 | 11818077 | 11818104 | 4 | 7  | 28 | CAGT | 21 | 9  |
| 123696 | 12 | 11831519 | 11831532 | 2 | 7  | 14 | AC   | 21 | 4  |
| 123701 | 12 | 11841126 | 11841139 | 2 | 7  | 14 | CA   | 25 | 4  |
| 123702 | 12 | 11843055 | 11843080 | 2 | 13 | 26 | AG   | 16 | 7  |
| 123707 | 12 | 11863269 | 11863284 | 4 | 4  | 16 | GATG | 21 | 3  |
| 123712 | 12 | 11868437 | 11868466 | 3 | 10 | 30 | AAT  | 12 | 4  |
| 123715 | 12 | 11874940 | 11874963 | 2 | 12 | 24 | GA   | 33 | 7  |
| 123716 | 12 | 11875431 | 11875462 | 2 | 16 | 32 | TG   | 12 | 11 |
| 123718 | 12 | 11877561 | 11877584 | 3 | 8  | 24 | CTT  | 25 | 8  |
| 123720 | 12 | 11880522 | 11880547 | 2 | 13 | 26 | CA   | 25 | 3  |
| 123723 | 12 | 11893312 | 11893345 | 2 | 17 | 34 | GT   | 21 | 13 |
| 123724 | 12 | 11895553 | 11895576 | 3 | 8  | 24 | TCC  | 24 | 7  |
| 123725 | 12 | 11896089 | 11896102 | 2 | 7  | 14 | TC   | 17 | 8  |
| 123726 | 12 | 11896245 | 11896259 | 3 | 5  | 15 | AAT  | 17 | 10 |
| 123727 | 12 | 11897104 | 11897143 | 2 | 20 | 40 | AC   | 11 | 15 |
| 123733 | 12 | 11907920 | 11907934 | 3 | 5  | 15 | TGT  | 23 | 3  |
| 123735 | 12 | 11910629 | 11910652 | 4 | 6  | 24 | AACA | 8  | 4  |
| 123738 | 12 | 11913382 | 11913413 | 4 | 8  | 32 | TCTT | 8  | 5  |
| 123739 | 12 | 11914264 | 11914290 | 3 | 9  | 27 | TTC  | 23 | 6  |

|        |    |          |          |   |    |    |      |    |    |
|--------|----|----------|----------|---|----|----|------|----|----|
| 123740 | 12 | 11914792 | 11914803 | 2 | 6  | 12 | CT   | 22 | 3  |
| 123743 | 12 | 11917299 | 11917318 | 2 | 10 | 20 | TG   | 17 | 7  |
| 123753 | 12 | 11927578 | 11927598 | 3 | 7  | 21 | GGA  | 12 | 6  |
| 123759 | 12 | 11944120 | 11944143 | 2 | 12 | 24 | CA   | 12 | 6  |
| 123762 | 12 | 11946421 | 11946448 | 2 | 14 | 28 | TG   | 14 | 10 |
| 123763 | 12 | 11947889 | 11947912 | 4 | 6  | 24 | TTCT | 16 | 6  |
| 123768 | 12 | 11956790 | 11956813 | 4 | 6  | 24 | TTTG | 7  | 3  |
| 123769 | 12 | 11958441 | 11958467 | 3 | 9  | 27 | CTG  | 27 | 8  |
| 123770 | 12 | 11958511 | 11958534 | 4 | 6  | 24 | CATC | 26 | 3  |
| 123772 | 12 | 11961306 | 11961323 | 2 | 9  | 18 | TG   | 22 | 8  |
| 123773 | 12 | 11961431 | 11961442 | 2 | 6  | 12 | AC   | 29 | 3  |
| 123790 | 12 | 12001349 | 12001376 | 2 | 14 | 28 | CA   | 10 | 9  |
| 123800 | 12 | 12025661 | 12025675 | 3 | 5  | 15 | TTC  | 34 | 3  |
| 123803 | 12 | 12033968 | 12033994 | 3 | 9  | 27 | TAT  | 18 | 9  |
| 123809 | 12 | 12045482 | 12045507 | 2 | 13 | 26 | GT   | 6  | 4  |
| 123810 | 12 | 12045670 | 12045691 | 2 | 11 | 22 | GT   | 11 | 12 |
| 123814 | 12 | 12054754 | 12054775 | 2 | 11 | 22 | AC   | 27 | 7  |
| 123815 | 12 | 12054956 | 12054981 | 2 | 13 | 26 | AG   | 23 | 6  |
| 123817 | 12 | 12055146 | 12055157 | 2 | 6  | 12 | AC   | 19 | 4  |
| 123819 | 12 | 12055356 | 12055373 | 2 | 9  | 18 | CA   | 13 | 7  |
| 123824 | 12 | 12061394 | 12061413 | 4 | 5  | 20 | CACT | 28 | 3  |
| 123825 | 12 | 12062538 | 12062573 | 3 | 12 | 36 | CTT  | 22 | 15 |
| 123827 | 12 | 12064555 | 12064586 | 4 | 8  | 32 | TTGG | 17 | 11 |
| 123836 | 12 | 12084783 | 12084802 | 2 | 10 | 20 | TG   | 21 | 8  |
| 123850 | 12 | 12158861 | 12158887 | 3 | 9  | 27 | CCT  | 20 | 7  |
| 123851 | 12 | 12163126 | 12163153 | 2 | 14 | 28 | CA   | 13 | 11 |
| 123855 | 12 | 12180768 | 12180782 | 3 | 5  | 15 | GCT  | 34 | 3  |
| 123859 | 12 | 12194193 | 12194220 | 4 | 7  | 28 | AAGA | 24 | 20 |
| 123864 | 12 | 12196300 | 12196320 | 3 | 7  | 21 | TGC  | 30 | 5  |
| 123867 | 12 | 12201219 | 12201258 | 2 | 20 | 40 | TG   | 13 | 9  |
| 123870 | 12 | 12203101 | 12203112 | 2 | 6  | 12 | TG   | 25 | 8  |
| 123871 | 12 | 12207399 | 12207413 | 3 | 5  | 15 | CTT  | 19 | 5  |
| 123872 | 12 | 12209092 | 12209121 | 3 | 10 | 30 | CCT  | 18 | 5  |
| 123876 | 12 | 12212048 | 12212062 | 3 | 5  | 15 | TAT  | 7  | 4  |
| 123877 | 12 | 12213911 | 12213924 | 2 | 7  | 14 | AT   | 11 | 7  |
| 123879 | 12 | 12216537 | 12216552 | 2 | 8  | 16 | CA   | 23 | 6  |
| 123888 | 12 | 12238822 | 12238842 | 3 | 7  | 21 | TCC  | 25 | 5  |
| 123892 | 12 | 12260222 | 12260245 | 2 | 12 | 24 | AC   | 16 | 8  |
| 123893 | 12 | 12261956 | 12261967 | 2 | 6  | 12 | TG   | 10 | 5  |
| 123894 | 12 | 12263040 | 12263079 | 4 | 10 | 40 | AGAT | 15 | 13 |
| 123897 | 12 | 12273873 | 12273886 | 2 | 7  | 14 | CA   | 9  | 3  |
| 123898 | 12 | 12278463 | 12278490 | 4 | 7  | 28 | ACAA | 24 | 8  |
| 123918 | 12 | 12325099 | 12325118 | 4 | 5  | 20 | TGTT | 28 | 3  |
| 123919 | 12 | 12326921 | 12326956 | 2 | 18 | 36 | TG   | 16 | 16 |
| 123920 | 12 | 12329736 | 12329749 | 2 | 7  | 14 | AC   | 20 | 4  |
| 123923 | 12 | 12331742 | 12331757 | 2 | 8  | 16 | TG   | 18 | 8  |
| 123937 | 12 | 12377899 | 12377934 | 2 | 18 | 36 | AC   | 14 | 12 |
| 123945 | 12 | 12387538 | 12387564 | 3 | 9  | 27 | TGC  | 21 | 8  |
| 123950 | 12 | 12390806 | 12390821 | 2 | 8  | 16 | CT   | 19 | 3  |
| 123957 | 12 | 12394478 | 12394493 | 4 | 4  | 16 | TCTT | 23 | 12 |
| 123961 | 12 | 12403969 | 12403983 | 3 | 5  | 15 | TGC  | 35 | 4  |

|        |    |          |          |   |    |    |      |    |    |
|--------|----|----------|----------|---|----|----|------|----|----|
| 123962 | 12 | 12404364 | 12404387 | 2 | 12 | 24 | CA   | 15 | 7  |
| 123967 | 12 | 12407199 | 12407226 | 2 | 14 | 28 | AC   | 13 | 10 |
| 123970 | 12 | 12420723 | 12420736 | 2 | 7  | 14 | AC   | 23 | 9  |
| 123972 | 12 | 12430849 | 12430860 | 2 | 6  | 12 | GA   | 34 | 3  |
| 123973 | 12 | 12430999 | 12431012 | 2 | 7  | 14 | CA   | 27 | 3  |
| 123976 | 12 | 12450453 | 12450466 | 2 | 7  | 14 | TG   | 26 | 7  |
| 123978 | 12 | 12460314 | 12460351 | 2 | 19 | 38 | AC   | 11 | 8  |
| 123991 | 12 | 12489511 | 12489524 | 2 | 7  | 14 | GT   | 23 | 8  |
| 123997 | 12 | 12516709 | 12516722 | 2 | 7  | 14 | GT   | 8  | 5  |
| 123998 | 12 | 12517366 | 12517401 | 2 | 18 | 36 | AC   | 12 | 8  |
| 123999 | 12 | 12519309 | 12519328 | 2 | 10 | 20 | TG   | 17 | 8  |
| 124002 | 12 | 12520237 | 12520256 | 2 | 10 | 20 | TG   | 15 | 9  |
| 124010 | 12 | 12528420 | 12528449 | 3 | 10 | 30 | GAG  | 17 | 6  |
| 124012 | 12 | 12528546 | 12528560 | 3 | 5  | 15 | GAG  | 26 | 3  |
| 124014 | 12 | 12532041 | 12532058 | 2 | 9  | 18 | TG   | 14 | 9  |
| 124015 | 12 | 12532432 | 12532447 | 2 | 8  | 16 | AG   | 9  | 7  |
| 124016 | 12 | 12534231 | 12534256 | 2 | 13 | 26 | AC   | 13 | 9  |
| 124017 | 12 | 12534377 | 12534414 | 2 | 19 | 38 | AC   | 7  | 7  |
| 124018 | 12 | 12534435 | 12534446 | 2 | 6  | 12 | CA   | 7  | 5  |
| 124020 | 12 | 12536682 | 12536731 | 2 | 25 | 50 | TG   | 6  | 8  |
| 124023 | 12 | 12538983 | 12539022 | 2 | 20 | 40 | CA   | 14 | 7  |
| 124024 | 12 | 12540387 | 12540401 | 3 | 5  | 15 | CCA  | 12 | 6  |
| 124025 | 12 | 12541073 | 12541084 | 2 | 6  | 12 | TC   | 19 | 4  |
| 124026 | 12 | 12544029 | 12544042 | 2 | 7  | 14 | CA   | 26 | 6  |
| 124029 | 12 | 12547107 | 12547128 | 2 | 11 | 22 | TG   | 7  | 5  |
| 124034 | 12 | 12559166 | 12559195 | 2 | 15 | 30 | AC   | 8  | 12 |
| 124035 | 12 | 12559363 | 12559383 | 3 | 7  | 21 | TGC  | 25 | 4  |
| 124036 | 12 | 12566984 | 12567004 | 3 | 7  | 21 | GAG  | 22 | 13 |
| 124039 | 12 | 12574157 | 12574177 | 3 | 7  | 21 | ACT  | 27 | 4  |
| 124042 | 12 | 12579757 | 12579778 | 2 | 11 | 22 | TG   | 12 | 6  |
| 124043 | 12 | 12579863 | 12579880 | 2 | 9  | 18 | GT   | 17 | 4  |
| 124045 | 12 | 12582322 | 12582337 | 2 | 8  | 16 | GA   | 8  | 4  |
| 124046 | 12 | 12582811 | 12582846 | 2 | 18 | 36 | TG   | 8  | 8  |
| 124049 | 12 | 12586182 | 12586199 | 2 | 9  | 18 | AG   | 19 | 3  |
| 124052 | 12 | 12591203 | 12591220 | 3 | 6  | 18 | ATT  | 16 | 5  |
| 124053 | 12 | 12593804 | 12593825 | 2 | 11 | 22 | GT   | 14 | 15 |
| 124054 | 12 | 12596182 | 12596205 | 2 | 12 | 24 | TG   | 15 | 11 |
| 124056 | 12 | 12596887 | 12596908 | 2 | 11 | 22 | AG   | 20 | 7  |
| 124059 | 12 | 12606702 | 12606731 | 2 | 15 | 30 | CA   | 7  | 6  |
| 124060 | 12 | 12614547 | 12614567 | 3 | 7  | 21 | CTC  | 27 | 3  |
| 124065 | 12 | 12621044 | 12621061 | 2 | 9  | 18 | GT   | 20 | 12 |
| 124068 | 12 | 12627196 | 12627213 | 2 | 9  | 18 | GT   | 29 | 6  |
| 124075 | 12 | 12651568 | 12651591 | 3 | 8  | 24 | CAA  | 19 | 6  |
| 124079 | 12 | 12678181 | 12678207 | 3 | 9  | 27 | TGA  | 28 | 7  |
| 124087 | 12 | 12704381 | 12704440 | 4 | 15 | 60 | TAGA | 11 | 11 |
| 124089 | 12 | 12704904 | 12704918 | 3 | 5  | 15 | GCT  | 32 | 3  |
| 124097 | 12 | 12724415 | 12724426 | 2 | 6  | 12 | GT   | 29 | 3  |
| 124098 | 12 | 12726220 | 12726233 | 2 | 7  | 14 | AC   | 25 | 4  |
| 124102 | 12 | 12730142 | 12730165 | 2 | 12 | 24 | GT   | 12 | 8  |
| 124104 | 12 | 12731431 | 12731450 | 2 | 10 | 20 | AC   | 13 | 9  |
| 124107 | 12 | 12732382 | 12732395 | 2 | 7  | 14 | GT   | 18 | 8  |

|        |    |          |          |   |    |    |      |    |    |
|--------|----|----------|----------|---|----|----|------|----|----|
| 124108 | 12 | 12732398 | 12732409 | 2 | 6  | 12 | GT   | 18 | 6  |
| 124110 | 12 | 12735239 | 12735266 | 2 | 14 | 28 | GT   | 6  | 6  |
| 124111 | 12 | 12735390 | 12735431 | 2 | 21 | 42 | GT   | 9  | 11 |
| 124112 | 12 | 12735956 | 12735973 | 2 | 9  | 18 | CT   | 17 | 7  |
| 124117 | 12 | 12739409 | 12739432 | 2 | 12 | 24 | AC   | 16 | 12 |
| 124121 | 12 | 12739802 | 12739813 | 2 | 6  | 12 | CA   | 13 | 10 |
| 124122 | 12 | 12740342 | 12740363 | 2 | 11 | 22 | GT   | 17 | 11 |
| 124124 | 12 | 12740492 | 12740513 | 2 | 11 | 22 | GT   | 15 | 12 |
| 124125 | 12 | 12742494 | 12742543 | 2 | 25 | 50 | TG   | 12 | 13 |
| 124126 | 12 | 12742702 | 12742741 | 2 | 20 | 40 | GT   | 13 | 11 |
| 124127 | 12 | 12742823 | 12742836 | 2 | 7  | 14 | GT   | 16 | 4  |
| 124128 | 12 | 12742886 | 12742897 | 2 | 6  | 12 | GT   | 15 | 5  |
| 124129 | 12 | 12742934 | 12742961 | 2 | 14 | 28 | TG   | 8  | 5  |
| 124132 | 12 | 12743275 | 12743286 | 2 | 6  | 12 | AC   | 30 | 5  |
| 124136 | 12 | 12746326 | 12746347 | 2 | 11 | 22 | TG   | 16 | 7  |
| 124138 | 12 | 12748311 | 12748332 | 2 | 11 | 22 | AC   | 13 | 6  |
| 124139 | 12 | 12748461 | 12748482 | 2 | 11 | 22 | GT   | 12 | 9  |
| 124140 | 12 | 12748951 | 12748974 | 4 | 6  | 24 | ATTT | 16 | 9  |
| 124143 | 12 | 12750922 | 12750947 | 2 | 13 | 26 | TC   | 27 | 4  |
| 124144 | 12 | 12755567 | 12755580 | 2 | 7  | 14 | CA   | 26 | 3  |
| 124145 | 12 | 12757193 | 12757230 | 2 | 19 | 38 | AC   | 7  | 6  |
| 124153 | 12 | 12768958 | 12768975 | 2 | 9  | 18 | AC   | 25 | 9  |
| 124154 | 12 | 12769048 | 12769061 | 2 | 7  | 14 | GT   | 18 | 4  |
| 124157 | 12 | 12776894 | 12776917 | 2 | 12 | 24 | GA   | 17 | 5  |
| 124158 | 12 | 12776981 | 12776996 | 2 | 8  | 16 | CA   | 25 | 5  |
| 124160 | 12 | 12778843 | 12778860 | 2 | 9  | 18 | GT   | 22 | 6  |
| 124166 | 12 | 12780006 | 12780021 | 2 | 8  | 16 | TC   | 14 | 14 |
| 124167 | 12 | 12780096 | 12780115 | 4 | 5  | 20 | ACAG | 22 | 7  |
| 124168 | 12 | 12780175 | 12780204 | 2 | 15 | 30 | CA   | 27 | 17 |
| 124169 | 12 | 12780351 | 12780374 | 4 | 6  | 24 | TCTG | 23 | 7  |
| 124172 | 12 | 12783156 | 12783169 | 2 | 7  | 14 | CT   | 29 | 3  |
| 124173 | 12 | 12783877 | 12783910 | 2 | 17 | 34 | CA   | 12 | 9  |
| 124174 | 12 | 12784086 | 12784119 | 2 | 17 | 34 | GT   | 13 | 7  |
| 124176 | 12 | 12786994 | 12787015 | 2 | 11 | 22 | AC   | 16 | 8  |
| 124177 | 12 | 12787275 | 12787306 | 2 | 16 | 32 | TC   | 16 | 15 |
| 124182 | 12 | 12789981 | 12790004 | 4 | 6  | 24 | ATTG | 20 | 4  |
| 124186 | 12 | 12801934 | 12801953 | 4 | 5  | 20 | TTAT | 6  | 3  |
| 124187 | 12 | 12803178 | 12803189 | 2 | 6  | 12 | CA   | 15 | 5  |
| 124189 | 12 | 12805337 | 12805368 | 2 | 16 | 32 | CA   | 9  | 8  |
| 124192 | 12 | 12811052 | 12811069 | 2 | 9  | 18 | AC   | 19 | 6  |
| 124193 | 12 | 12811072 | 12811085 | 2 | 7  | 14 | AC   | 24 | 8  |
| 124196 | 12 | 12816303 | 12816330 | 2 | 14 | 28 | GT   | 7  | 5  |
| 124197 | 12 | 12817068 | 12817095 | 4 | 7  | 28 | GGAT | 22 | 8  |
| 124205 | 12 | 12841836 | 12841847 | 2 | 6  | 12 | TG   | 15 | 9  |
| 124206 | 12 | 12842709 | 12842744 | 2 | 18 | 36 | CA   | 9  | 11 |
| 124207 | 12 | 12847067 | 12847080 | 2 | 7  | 14 | GT   | 26 | 3  |
| 124211 | 12 | 12860546 | 12860569 | 4 | 6  | 24 | CTGT | 20 | 3  |
| 124217 | 12 | 12867086 | 12867103 | 2 | 9  | 18 | CA   | 27 | 4  |
| 124218 | 12 | 12872401 | 12872422 | 2 | 11 | 22 | AG   | 21 | 9  |
| 124219 | 12 | 12875669 | 12875680 | 2 | 6  | 12 | GT   | 30 | 3  |
| 124220 | 12 | 12877218 | 12877231 | 2 | 7  | 14 | AC   | 14 | 3  |

|        |    |          |          |   |    |    |      |    |    |
|--------|----|----------|----------|---|----|----|------|----|----|
| 124221 | 12 | 12881018 | 12881041 | 2 | 12 | 24 | TC   | 11 | 7  |
| 124226 | 12 | 12892831 | 12892842 | 2 | 6  | 12 | GT   | 30 | 3  |
| 124227 | 12 | 12904569 | 12904584 | 2 | 8  | 16 | TG   | 18 | 4  |
| 124228 | 12 | 12906862 | 12906883 | 2 | 11 | 22 | AC   | 20 | 7  |
| 124229 | 12 | 12907069 | 12907092 | 2 | 12 | 24 | GT   | 15 | 12 |
| 124233 | 12 | 12910164 | 12910187 | 2 | 12 | 24 | CA   | 16 | 13 |
| 124234 | 12 | 12910394 | 12910425 | 2 | 16 | 32 | TG   | 19 | 10 |
| 124241 | 12 | 12921327 | 12921364 | 2 | 19 | 38 | GT   | 13 | 9  |
| 124242 | 12 | 12930718 | 12930749 | 2 | 16 | 32 | TG   | 11 | 6  |
| 124244 | 12 | 12936858 | 12936869 | 2 | 6  | 12 | GT   | 25 | 3  |
| 124245 | 12 | 12940221 | 12940264 | 2 | 22 | 44 | AC   | 16 | 10 |
| 124247 | 12 | 12945486 | 12945503 | 2 | 9  | 18 | GT   | 10 | 12 |
| 124250 | 12 | 12945681 | 12945704 | 2 | 12 | 24 | TC   | 23 | 4  |
| 124255 | 12 | 12950934 | 12950973 | 2 | 20 | 40 | GT   | 16 | 13 |
| 124256 | 12 | 12951172 | 12951183 | 2 | 6  | 12 | AC   | 22 | 3  |
| 124257 | 12 | 12953386 | 12953401 | 2 | 8  | 16 | TG   | 17 | 4  |
| 124258 | 12 | 12955389 | 12955403 | 3 | 5  | 15 | GAA  | 28 | 5  |
| 124259 | 12 | 12955768 | 12955785 | 2 | 9  | 18 | GT   | 24 | 4  |
| 124261 | 12 | 12956571 | 12956588 | 2 | 9  | 18 | TC   | 24 | 8  |
| 124262 | 12 | 12956590 | 12956601 | 2 | 6  | 12 | CT   | 18 | 7  |
| 124265 | 12 | 12957250 | 12957265 | 4 | 4  | 16 | GCCT | 12 | 4  |
| 124275 | 12 | 12977436 | 12977463 | 2 | 14 | 28 | CA   | 13 | 14 |
| 124276 | 12 | 12983218 | 12983241 | 3 | 8  | 24 | TCC  | 10 | 3  |
| 124281 | 12 | 12994644 | 12994667 | 2 | 12 | 24 | AC   | 28 | 11 |
| 124282 | 12 | 12994701 | 12994716 | 2 | 8  | 16 | AC   | 20 | 3  |
| 124284 | 12 | 12996237 | 12996254 | 3 | 6  | 18 | CTT  | 18 | 3  |
| 124285 | 12 | 12996771 | 12996790 | 2 | 10 | 20 | TA   | 6  | 9  |
| 124286 | 12 | 12996931 | 12996946 | 4 | 4  | 16 | TTTA | 24 | 5  |
| 124287 | 12 | 12997570 | 12997603 | 2 | 17 | 34 | CT   | 7  | 7  |
| 124289 | 12 | 12999999 | 13000010 | 2 | 6  | 12 | TG   | 18 | 5  |
| 124293 | 12 | 13003233 | 13003244 | 2 | 6  | 12 | AC   | 13 | 3  |
| 124294 | 12 | 13003664 | 13003675 | 2 | 6  | 12 | AC   | 25 | 5  |
| 124295 | 12 | 13003676 | 13003687 | 2 | 6  | 12 | TC   | 23 | 5  |
| 124296 | 12 | 13003688 | 13003699 | 2 | 6  | 12 | AC   | 29 | 3  |
| 124297 | 12 | 13005479 | 13005505 | 3 | 9  | 27 | GAG  | 20 | 13 |
| 124298 | 12 | 13005664 | 13005699 | 2 | 18 | 36 | CA   | 16 | 10 |
| 124300 | 12 | 13008196 | 13008213 | 3 | 6  | 18 | GAA  | 25 | 5  |
| 124303 | 12 | 13012043 | 13012070 | 2 | 14 | 28 | CA   | 13 | 11 |
| 124304 | 12 | 13012153 | 13012170 | 2 | 9  | 18 | TG   | 20 | 9  |
| 124305 | 12 | 13012436 | 13012463 | 2 | 14 | 28 | TG   | 20 | 7  |
| 124306 | 12 | 13012519 | 13012536 | 2 | 9  | 18 | TG   | 18 | 12 |
| 124307 | 12 | 13012581 | 13012604 | 2 | 12 | 24 | AC   | 14 | 8  |
| 124308 | 12 | 13016522 | 13016533 | 2 | 6  | 12 | TC   | 15 | 10 |
| 124310 | 12 | 13017151 | 13017166 | 2 | 8  | 16 | AC   | 19 | 11 |
| 124313 | 12 | 13023906 | 13023923 | 2 | 9  | 18 | CA   | 16 | 14 |
| 124314 | 12 | 13023926 | 13023939 | 2 | 7  | 14 | CA   | 18 | 14 |
| 124319 | 12 | 13026356 | 13026377 | 2 | 11 | 22 | AC   | 20 | 11 |
| 124322 | 12 | 13028419 | 13028439 | 3 | 7  | 21 | AAT  | 24 | 4  |
| 124323 | 12 | 13029498 | 13029524 | 3 | 9  | 27 | AGC  | 23 | 4  |
| 124324 | 12 | 13029655 | 13029668 | 2 | 7  | 14 | GT   | 20 | 3  |
| 124327 | 12 | 13041149 | 13041160 | 2 | 6  | 12 | AC   | 24 | 3  |

|        |    |          |          |   |    |    |      |    |    |
|--------|----|----------|----------|---|----|----|------|----|----|
| 124336 | 12 | 13047344 | 13047359 | 2 | 8  | 16 | TG   | 23 | 5  |
| 124337 | 12 | 13047362 | 13047377 | 2 | 8  | 16 | TG   | 18 | 4  |
| 124340 | 12 | 13056718 | 13056732 | 3 | 5  | 15 | CCT  | 28 | 4  |
| 124341 | 12 | 13058742 | 13058759 | 2 | 9  | 18 | AC   | 25 | 3  |
| 124343 | 12 | 13059637 | 13059666 | 3 | 10 | 30 | GAG  | 8  | 6  |
| 124344 | 12 | 13061898 | 13061947 | 2 | 25 | 50 | GT   | 7  | 8  |
| 124351 | 12 | 13083962 | 13083973 | 2 | 6  | 12 | AG   | 18 | 3  |
| 124353 | 12 | 13085603 | 13085626 | 2 | 12 | 24 | CA   | 18 | 12 |
| 124355 | 12 | 13085801 | 13085850 | 2 | 25 | 50 | CA   | 8  | 9  |
| 124356 | 12 | 13086010 | 13086039 | 2 | 15 | 30 | CA   | 12 | 8  |
| 124357 | 12 | 13086198 | 13086225 | 2 | 14 | 28 | CA   | 12 | 6  |
| 124358 | 12 | 13086383 | 13086400 | 2 | 9  | 18 | AC   | 22 | 6  |
| 124359 | 12 | 13086725 | 13086740 | 2 | 8  | 16 | AG   | 23 | 4  |
| 124361 | 12 | 13088674 | 13088689 | 2 | 8  | 16 | GT   | 26 | 6  |
| 124363 | 12 | 13089291 | 13089306 | 4 | 4  | 16 | TTAT | 25 | 5  |
| 124368 | 12 | 13096809 | 13096822 | 2 | 7  | 14 | GT   | 30 | 4  |
| 124369 | 12 | 13096961 | 13096978 | 2 | 9  | 18 | TG   | 21 | 7  |
| 124372 | 12 | 13102523 | 13102540 | 2 | 9  | 18 | TG   | 6  | 6  |
| 124374 | 12 | 13103943 | 13103958 | 2 | 8  | 16 | TG   | 13 | 8  |
| 124375 | 12 | 13103960 | 13103975 | 2 | 8  | 16 | GT   | 19 | 10 |
| 124381 | 12 | 13109470 | 13109491 | 2 | 11 | 22 | GT   | 25 | 11 |
| 124384 | 12 | 13115417 | 13115434 | 2 | 9  | 18 | AC   | 26 | 5  |
| 124385 | 12 | 13115599 | 13115610 | 2 | 6  | 12 | TG   | 35 | 3  |
| 124390 | 12 | 13122983 | 13123004 | 2 | 11 | 22 | TG   | 17 | 6  |
| 124394 | 12 | 13130321 | 13130340 | 2 | 10 | 20 | CA   | 16 | 10 |
| 124398 | 12 | 13134972 | 13134987 | 2 | 8  | 16 | AC   | 23 | 5  |
| 124399 | 12 | 13135210 | 13135233 | 4 | 6  | 24 | TCTT | 22 | 5  |
| 124405 | 12 | 13138862 | 13138873 | 2 | 6  | 12 | CT   | 25 | 8  |
| 124406 | 12 | 13138874 | 13138885 | 2 | 6  | 12 | CA   | 24 | 8  |
| 124408 | 12 | 13139121 | 13139144 | 4 | 6  | 24 | TGTC | 32 | 3  |
| 124409 | 12 | 13141146 | 13141157 | 2 | 6  | 12 | CT   | 26 | 6  |
| 124410 | 12 | 13141309 | 13141323 | 3 | 5  | 15 | GGA  | 13 | 3  |
| 124414 | 12 | 13148927 | 13148966 | 4 | 10 | 40 | TCTA | 7  | 7  |
| 124415 | 12 | 13151634 | 13151675 | 2 | 21 | 42 | CA   | 6  | 9  |
| 124420 | 12 | 13156565 | 13156588 | 3 | 8  | 24 | TCA  | 27 | 4  |
| 124421 | 12 | 13157220 | 13157241 | 2 | 11 | 22 | GT   | 16 | 5  |
| 124427 | 12 | 13160769 | 13160786 | 2 | 9  | 18 | CA   | 16 | 11 |
| 124433 | 12 | 13170634 | 13170673 | 2 | 20 | 40 | CA   | 12 | 10 |
| 124435 | 12 | 13175345 | 13175362 | 3 | 6  | 18 | CTG  | 21 | 6  |
| 124436 | 12 | 13175534 | 13175551 | 3 | 6  | 18 | GAG  | 22 | 5  |
| 124437 | 12 | 13176376 | 13176409 | 2 | 17 | 34 | TG   | 15 | 16 |
| 124439 | 12 | 13178649 | 13178696 | 2 | 24 | 48 | CA   | 12 | 9  |
| 124440 | 12 | 13179363 | 13179382 | 2 | 10 | 20 | TG   | 17 | 7  |
| 124441 | 12 | 13181755 | 13181774 | 2 | 10 | 20 | TG   | 14 | 10 |
| 124442 | 12 | 13182167 | 13182186 | 2 | 10 | 20 | CA   | 17 | 6  |
| 124443 | 12 | 13183194 | 13183207 | 2 | 7  | 14 | CA   | 10 | 8  |
| 124446 | 12 | 13183869 | 13183906 | 2 | 19 | 38 | AC   | 12 | 13 |
| 124447 | 12 | 13187229 | 13187244 | 2 | 8  | 16 | TG   | 21 | 6  |
| 124449 | 12 | 13190801 | 13190821 | 3 | 7  | 21 | AAG  | 13 | 5  |
| 124452 | 12 | 13191535 | 13191550 | 2 | 8  | 16 | CA   | 24 | 10 |
| 124453 | 12 | 13192918 | 13192941 | 2 | 12 | 24 | AG   | 17 | 5  |

|        |    |          |          |   |    |    |     |    |    |
|--------|----|----------|----------|---|----|----|-----|----|----|
| 124454 | 12 | 13193780 | 13193799 | 2 | 10 | 20 | TG  | 11 | 8  |
| 124456 | 12 | 13193958 | 13193969 | 2 | 6  | 12 | GT  | 22 | 8  |
| 124457 | 12 | 13193971 | 13193988 | 2 | 9  | 18 | TG  | 12 | 4  |
| 124459 | 12 | 13194102 | 13194121 | 2 | 10 | 20 | AC  | 10 | 10 |
| 124462 | 12 | 13194799 | 13194814 | 2 | 8  | 16 | CT  | 26 | 3  |
| 124464 | 12 | 13198482 | 13198503 | 2 | 11 | 22 | TG  | 18 | 6  |
| 124466 | 12 | 13200291 | 13200306 | 2 | 8  | 16 | AC  | 18 | 8  |
| 124467 | 12 | 13200441 | 13200476 | 2 | 18 | 36 | CA  | 8  | 9  |
| 124469 | 12 | 13201130 | 13201147 | 2 | 9  | 18 | CT  | 16 | 4  |
| 124470 | 12 | 13204065 | 13204108 | 2 | 22 | 44 | TG  | 7  | 8  |
| 124477 | 12 | 13209115 | 13209126 | 2 | 6  | 12 | CA  | 18 | 5  |
| 124478 | 12 | 13209665 | 13209678 | 2 | 7  | 14 | TC  | 24 | 4  |
| 124479 | 12 | 13210258 | 13210281 | 2 | 12 | 24 | TG  | 14 | 12 |
| 124481 | 12 | 13210421 | 13210444 | 2 | 12 | 24 | TG  | 19 | 7  |
| 124482 | 12 | 13211255 | 13211270 | 2 | 8  | 16 | TG  | 24 | 4  |
| 124483 | 12 | 13211637 | 13211663 | 3 | 9  | 27 | GAG | 11 | 6  |
| 124485 | 12 | 13214206 | 13214227 | 2 | 11 | 22 | AC  | 15 | 5  |
| 124486 | 12 | 13214407 | 13214430 | 2 | 12 | 24 | CA  | 20 | 6  |
| 124487 | 12 | 13214732 | 13214753 | 2 | 11 | 22 | AC  | 19 | 5  |
| 124490 | 12 | 13217902 | 13217923 | 2 | 11 | 22 | TC  | 19 | 7  |
| 124495 | 12 | 13220496 | 13220517 | 2 | 11 | 22 | CA  | 18 | 13 |
| 124497 | 12 | 13221735 | 13221746 | 2 | 6  | 12 | AC  | 29 | 6  |
| 124499 | 12 | 13223766 | 13223781 | 2 | 8  | 16 | CA  | 20 | 4  |
| 124502 | 12 | 13225959 | 13225980 | 2 | 11 | 22 | CA  | 13 | 6  |
| 124503 | 12 | 13226458 | 13226479 | 2 | 11 | 22 | TG  | 14 | 10 |
| 124505 | 12 | 13229042 | 13229059 | 2 | 9  | 18 | TG  | 10 | 6  |
| 124506 | 12 | 13229239 | 13229258 | 2 | 10 | 20 | CA  | 13 | 8  |
| 124507 | 12 | 13229479 | 13229492 | 2 | 7  | 14 | AC  | 23 | 5  |
| 124508 | 12 | 13230145 | 13230174 | 2 | 15 | 30 | AC  | 13 | 7  |
| 124509 | 12 | 13230216 | 13230235 | 2 | 10 | 20 | AC  | 10 | 7  |
| 124510 | 12 | 13230384 | 13230419 | 2 | 18 | 36 | AC  | 7  | 7  |
| 124513 | 12 | 13231317 | 13231336 | 2 | 10 | 20 | GT  | 12 | 9  |
| 124516 | 12 | 13233701 | 13233720 | 2 | 10 | 20 | GT  | 18 | 4  |
| 124517 | 12 | 13233956 | 13233969 | 2 | 7  | 14 | AT  | 20 | 5  |
| 124519 | 12 | 13236612 | 13236629 | 3 | 6  | 18 | GAG | 21 | 3  |
| 124525 | 12 | 13243434 | 13243457 | 2 | 12 | 24 | GT  | 20 | 11 |
| 124531 | 12 | 13244272 | 13244289 | 2 | 9  | 18 | CA  | 10 | 11 |
| 124532 | 12 | 13244401 | 13244433 | 3 | 11 | 33 | GAG | 7  | 7  |
| 124537 | 12 | 13245771 | 13245784 | 2 | 7  | 14 | GA  | 7  | 4  |
| 124542 | 12 | 13246264 | 13246307 | 2 | 22 | 44 | TG  | 9  | 13 |
| 124544 | 12 | 13246439 | 13246450 | 2 | 6  | 12 | CA  | 14 | 6  |
| 124553 | 12 | 13253488 | 13253509 | 2 | 11 | 22 | TG  | 17 | 7  |
| 124554 | 12 | 13253739 | 13253754 | 2 | 8  | 16 | AG  | 17 | 5  |
| 124555 | 12 | 13253863 | 13253908 | 2 | 23 | 46 | AC  | 10 | 8  |
| 124558 | 12 | 13254308 | 13254321 | 2 | 7  | 14 | TG  | 12 | 3  |
| 124560 | 12 | 13254426 | 13254441 | 2 | 8  | 16 | GT  | 13 | 4  |
| 124561 | 12 | 13254509 | 13254534 | 2 | 13 | 26 | GT  | 13 | 10 |
| 124562 | 12 | 13254584 | 13254601 | 2 | 9  | 18 | GT  | 14 | 8  |
| 124563 | 12 | 13254695 | 13254712 | 2 | 9  | 18 | TG  | 18 | 6  |
| 124566 | 12 | 13258423 | 13258443 | 3 | 7  | 21 | GAT | 18 | 5  |
| 124567 | 12 | 13258980 | 13259009 | 2 | 15 | 30 | GT  | 12 | 12 |



|        |    |          |          |   |    |    |      |    |    |
|--------|----|----------|----------|---|----|----|------|----|----|
| 124568 | 12 | 13259119 | 13259138 | 2 | 10 | 20 | GT   | 18 | 10 |
| 124569 | 12 | 13259219 | 13259240 | 2 | 11 | 22 | TG   | 19 | 6  |
| 124570 | 12 | 13262281 | 13262304 | 3 | 8  | 24 | GAG  | 10 | 4  |
| 124571 | 12 | 13263659 | 13263686 | 4 | 7  | 28 | CCAT | 29 | 7  |
| 124572 | 12 | 13268431 | 13268442 | 2 | 6  | 12 | GA   | 25 | 3  |
| 124574 | 12 | 13269265 | 13269286 | 2 | 11 | 22 | GA   | 24 | 3  |
| 124575 | 12 | 13273244 | 13273265 | 2 | 11 | 22 | CA   | 30 | 8  |
| 124578 | 12 | 13285966 | 13285985 | 4 | 5  | 20 | TTAT | 20 | 4  |
| 124579 | 12 | 13286324 | 13286351 | 2 | 14 | 28 | CA   | 12 | 7  |
| 124582 | 12 | 13288637 | 13288658 | 2 | 11 | 22 | CA   | 16 | 5  |
| 124583 | 12 | 13288881 | 13288896 | 2 | 8  | 16 | TG   | 19 | 8  |
| 124585 | 12 | 13290002 | 13290017 | 2 | 8  | 16 | GA   | 18 | 4  |
| 124595 | 12 | 13291530 | 13291563 | 2 | 17 | 34 | AC   | 6  | 6  |
| 124596 | 12 | 13291690 | 13291701 | 2 | 6  | 12 | AC   | 21 | 3  |
| 124598 | 12 | 13295627 | 13295668 | 3 | 14 | 42 | AGG  | 12 | 10 |
| 124599 | 12 | 13296613 | 13296626 | 2 | 7  | 14 | AC   | 16 | 14 |
| 124600 | 12 | 13298664 | 13298678 | 3 | 5  | 15 | GCG  | 28 | 10 |
| 124603 | 12 | 13299205 | 13299220 | 2 | 8  | 16 | TC   | 20 | 8  |
| 124608 | 12 | 13302683 | 13302696 | 2 | 7  | 14 | GA   | 25 | 4  |
| 124609 | 12 | 13305441 | 13305467 | 3 | 9  | 27 | GAG  | 15 | 8  |
| 124610 | 12 | 13305491 | 13305516 | 2 | 13 | 26 | GT   | 14 | 6  |
| 124611 | 12 | 13305761 | 13305780 | 4 | 5  | 20 | TCCA | 30 | 3  |
| 124612 | 12 | 13309491 | 13309522 | 2 | 16 | 32 | AC   | 10 | 10 |
| 124614 | 12 | 13309829 | 13309842 | 2 | 7  | 14 | GT   | 6  | 3  |
| 124619 | 12 | 13310368 | 13310387 | 2 | 10 | 20 | GA   | 19 | 4  |
| 124622 | 12 | 13316562 | 13316585 | 4 | 6  | 24 | GAGC | 17 | 4  |
| 124627 | 12 | 13321985 | 13321998 | 2 | 7  | 14 | GT   | 8  | 4  |
| 124632 | 12 | 13323718 | 13323743 | 2 | 13 | 26 | GT   | 19 | 12 |
| 124635 | 12 | 13327066 | 13327089 | 2 | 12 | 24 | TG   | 19 | 7  |
| 124637 | 12 | 13329374 | 13329389 | 4 | 4  | 16 | CTTT | 25 | 3  |
| 124638 | 12 | 13330692 | 13330707 | 2 | 8  | 16 | CA   | 10 | 13 |
| 124641 | 12 | 13332664 | 13332703 | 4 | 10 | 40 | GGAT | 19 | 7  |
| 124643 | 12 | 13332820 | 13332841 | 2 | 11 | 22 | GT   | 14 | 7  |
| 124647 | 12 | 13340668 | 13340699 | 2 | 16 | 32 | TG   | 15 | 10 |
| 124651 | 12 | 13341869 | 13341892 | 2 | 12 | 24 | GT   | 11 | 5  |
| 124653 | 12 | 13344241 | 13344258 | 2 | 9  | 18 | CA   | 13 | 9  |
| 124655 | 12 | 13344469 | 13344490 | 2 | 11 | 22 | AC   | 12 | 8  |
| 124656 | 12 | 13344550 | 13344573 | 3 | 8  | 24 | GGT  | 22 | 3  |
| 124661 | 12 | 13349066 | 13349099 | 2 | 17 | 34 | GT   | 14 | 11 |
| 124662 | 12 | 13349141 | 13349156 | 2 | 8  | 16 | TG   | 26 | 3  |
| 124663 | 12 | 13349457 | 13349470 | 2 | 7  | 14 | AC   | 20 | 7  |
| 124664 | 12 | 13349679 | 13349704 | 2 | 13 | 26 | AC   | 9  | 10 |
| 124667 | 12 | 13350030 | 13350061 | 2 | 16 | 32 | TG   | 8  | 12 |
| 124669 | 12 | 13350188 | 13350227 | 2 | 20 | 40 | AC   | 11 | 11 |
| 124670 | 12 | 13350677 | 13350702 | 2 | 13 | 26 | TG   | 26 | 8  |
| 124671 | 12 | 13350756 | 13350771 | 2 | 8  | 16 | GT   | 28 | 6  |
| 124672 | 12 | 13350854 | 13350865 | 2 | 6  | 12 | GT   | 18 | 3  |
| 124683 | 12 | 13353585 | 13353630 | 2 | 23 | 46 | AC   | 6  | 9  |
| 124684 | 12 | 13355220 | 13355239 | 2 | 10 | 20 | AC   | 16 | 5  |
| 124685 | 12 | 13355271 | 13355286 | 2 | 8  | 16 | CA   | 12 | 13 |
| 124687 | 12 | 13357945 | 13357974 | 2 | 15 | 30 | TG   | 16 | 7  |

|        |    |          |          |   |    |    |     |    |    |
|--------|----|----------|----------|---|----|----|-----|----|----|
| 124692 | 12 | 13362829 | 13362860 | 2 | 16 | 32 | AC  | 17 | 6  |
| 124695 | 12 | 13366703 | 13366732 | 2 | 15 | 30 | GT  | 12 | 7  |
| 124696 | 12 | 13366905 | 13366930 | 2 | 13 | 26 | CA  | 7  | 7  |
| 124697 | 12 | 13368445 | 13368476 | 2 | 16 | 32 | AC  | 21 | 11 |
| 124698 | 12 | 13368611 | 13368644 | 2 | 17 | 34 | CA  | 10 | 6  |
| 124699 | 12 | 13368787 | 13368818 | 2 | 16 | 32 | GT  | 14 | 13 |
| 124702 | 12 | 13369083 | 13369112 | 2 | 15 | 30 | TG  | 18 | 7  |
| 124703 | 12 | 13369235 | 13369254 | 2 | 10 | 20 | AC  | 22 | 12 |
| 124704 | 12 | 13369484 | 13369507 | 2 | 12 | 24 | AC  | 24 | 10 |
| 124705 | 12 | 13369536 | 13369549 | 2 | 7  | 14 | AC  | 19 | 3  |
| 124706 | 12 | 13369678 | 13369703 | 2 | 13 | 26 | AC  | 9  | 11 |
| 124710 | 12 | 13372341 | 13372354 | 2 | 7  | 14 | GT  | 24 | 3  |
| 124711 | 12 | 13372497 | 13372508 | 2 | 6  | 12 | TG  | 26 | 5  |
| 124712 | 12 | 13372752 | 13372771 | 2 | 10 | 20 | TG  | 17 | 14 |
| 124713 | 12 | 13376016 | 13376033 | 3 | 6  | 18 | CCT | 19 | 7  |
| 124714 | 12 | 13376408 | 13376421 | 2 | 7  | 14 | AC  | 28 | 3  |
| 124717 | 12 | 13376771 | 13376792 | 2 | 11 | 22 | CA  | 8  | 6  |
| 124718 | 12 | 13376918 | 13376949 | 2 | 16 | 32 | CA  | 24 | 12 |
| 124719 | 12 | 13377319 | 13377342 | 2 | 12 | 24 | AC  | 15 | 8  |
| 124720 | 12 | 13377488 | 13377499 | 2 | 6  | 12 | AC  | 9  | 4  |
| 124722 | 12 | 13377656 | 13377679 | 2 | 12 | 24 | CA  | 14 | 11 |
| 124723 | 12 | 13377859 | 13377872 | 2 | 7  | 14 | TG  | 20 | 5  |
| 124725 | 12 | 13380359 | 13380388 | 3 | 10 | 30 | TGT | 28 | 4  |
| 124726 | 12 | 13381357 | 13381370 | 2 | 7  | 14 | TG  | 24 | 8  |
| 124728 | 12 | 13381928 | 13381941 | 2 | 7  | 14 | TG  | 24 | 4  |
| 124729 | 12 | 13381963 | 13381988 | 2 | 13 | 26 | CA  | 13 | 8  |
| 124730 | 12 | 13382111 | 13382124 | 2 | 7  | 14 | TG  | 14 | 4  |
| 124734 | 12 | 13382294 | 13382315 | 2 | 11 | 22 | TG  | 7  | 3  |
| 124735 | 12 | 13382442 | 13382455 | 2 | 7  | 14 | AG  | 18 | 5  |
| 124737 | 12 | 13382682 | 13382711 | 2 | 15 | 30 | AC  | 13 | 9  |
| 124740 | 12 | 13386439 | 13386456 | 3 | 6  | 18 | TGC | 24 | 4  |
| 124741 | 12 | 13388932 | 13388947 | 2 | 8  | 16 | GT  | 29 | 7  |
| 124742 | 12 | 13389268 | 13389293 | 2 | 13 | 26 | CA  | 15 | 14 |
| 124743 | 12 | 13389389 | 13389404 | 2 | 8  | 16 | AC  | 20 | 5  |
| 124744 | 12 | 13391846 | 13391877 | 2 | 16 | 32 | CA  | 14 | 8  |
| 124750 | 12 | 13395614 | 13395627 | 2 | 7  | 14 | TC  | 24 | 7  |
| 124752 | 12 | 13397673 | 13397698 | 2 | 13 | 26 | CA  | 10 | 12 |
| 124757 | 12 | 13398276 | 13398303 | 2 | 14 | 28 | CA  | 6  | 7  |
| 124759 | 12 | 13400434 | 13400465 | 2 | 16 | 32 | AC  | 15 | 14 |
| 124764 | 12 | 13405300 | 13405311 | 2 | 6  | 12 | AC  | 10 | 7  |
| 124766 | 12 | 13408248 | 13408262 | 3 | 5  | 15 | TTG | 26 | 5  |
| 124768 | 12 | 13409787 | 13409813 | 3 | 9  | 27 | GAG | 25 | 10 |
| 124769 | 12 | 13410131 | 13410156 | 2 | 13 | 26 | CA  | 20 | 15 |
| 124771 | 12 | 13412695 | 13412716 | 2 | 11 | 22 | TG  | 12 | 11 |
| 124772 | 12 | 13412869 | 13412907 | 3 | 13 | 39 | TCT | 19 | 14 |
| 124773 | 12 | 13414882 | 13414901 | 2 | 10 | 20 | AC  | 11 | 13 |
| 124777 | 12 | 13426113 | 13426126 | 2 | 7  | 14 | AG  | 22 | 5  |
| 124778 | 12 | 13428586 | 13428603 | 2 | 9  | 18 | AC  | 14 | 9  |
| 124779 | 12 | 13428787 | 13428808 | 2 | 11 | 22 | CA  | 17 | 13 |
| 124780 | 12 | 13429008 | 13429025 | 2 | 9  | 18 | AC  | 10 | 14 |
| 124781 | 12 | 13429027 | 13429044 | 2 | 9  | 18 | CA  | 11 | 15 |

|        |    |          |          |   |    |    |      |    |    |
|--------|----|----------|----------|---|----|----|------|----|----|
| 124787 | 12 | 13436296 | 13436325 | 2 | 15 | 30 | CA   | 19 | 9  |
| 124807 | 12 | 13475077 | 13475092 | 2 | 8  | 16 | AC   | 12 | 5  |
| 124810 | 12 | 13475381 | 13475410 | 2 | 15 | 30 | AC   | 7  | 9  |
| 124814 | 12 | 13476662 | 13476683 | 2 | 11 | 22 | AC   | 25 | 9  |
| 124817 | 12 | 13479379 | 13479402 | 2 | 12 | 24 | AC   | 7  | 9  |
| 124820 | 12 | 13483009 | 13483026 | 2 | 9  | 18 | AC   | 19 | 9  |
| 124828 | 12 | 13492184 | 13492203 | 2 | 10 | 20 | TG   | 23 | 10 |
| 124829 | 12 | 13492524 | 13492538 | 3 | 5  | 15 | CTG  | 24 | 4  |
| 124831 | 12 | 13493898 | 13493917 | 2 | 10 | 20 | AC   | 24 | 7  |
| 124832 | 12 | 13496077 | 13496092 | 2 | 8  | 16 | TG   | 20 | 6  |
| 124833 | 12 | 13496121 | 13496132 | 2 | 6  | 12 | GT   | 28 | 7  |
| 124836 | 12 | 13497489 | 13497524 | 2 | 18 | 36 | GT   | 12 | 6  |
| 124838 | 12 | 13497704 | 13497733 | 2 | 15 | 30 | GT   | 8  | 11 |
| 124840 | 12 | 13498372 | 13498389 | 2 | 9  | 18 | AG   | 12 | 3  |
| 124841 | 12 | 13501303 | 13501330 | 2 | 14 | 28 | GT   | 13 | 7  |
| 124842 | 12 | 13501740 | 13501771 | 2 | 16 | 32 | GT   | 13 | 13 |
| 124845 | 12 | 13503671 | 13503686 | 2 | 8  | 16 | CA   | 17 | 12 |
| 124847 | 12 | 13507161 | 13507176 | 2 | 8  | 16 | AG   | 21 | 4  |
| 124853 | 12 | 13521792 | 13521809 | 2 | 9  | 18 | GA   | 17 | 3  |
| 124854 | 12 | 13522133 | 13522152 | 4 | 5  | 20 | TTTA | 12 | 5  |
| 124855 | 12 | 13523364 | 13523381 | 3 | 6  | 18 | GCA  | 21 | 9  |
| 124859 | 12 | 13524631 | 13524650 | 2 | 10 | 20 | AC   | 22 | 9  |
| 124862 | 12 | 13526021 | 13526050 | 2 | 15 | 30 | CA   | 10 | 9  |
| 124872 | 12 | 13538334 | 13538363 | 2 | 15 | 30 | GT   | 10 | 6  |
| 124885 | 12 | 13542874 | 13542899 | 2 | 13 | 26 | TG   | 18 | 11 |
| 124890 | 12 | 13546241 | 13546261 | 3 | 7  | 21 | CTC  | 22 | 5  |
| 124891 | 12 | 13549638 | 13549653 | 2 | 8  | 16 | TG   | 19 | 9  |
| 124892 | 12 | 13549824 | 13549859 | 2 | 18 | 36 | TG   | 9  | 11 |
| 124893 | 12 | 13549901 | 13549926 | 2 | 13 | 26 | GA   | 11 | 13 |
| 124895 | 12 | 13550153 | 13550170 | 2 | 9  | 18 | CT   | 23 | 5  |
| 124897 | 12 | 13552673 | 13552702 | 2 | 15 | 30 | CA   | 13 | 12 |
| 124898 | 12 | 13552933 | 13552956 | 2 | 12 | 24 | AC   | 19 | 6  |
| 124900 | 12 | 13555247 | 13555260 | 2 | 7  | 14 | CA   | 24 | 3  |
| 124902 | 12 | 13559131 | 13559144 | 2 | 7  | 14 | GA   | 21 | 6  |
| 124904 | 12 | 13564665 | 13564688 | 2 | 12 | 24 | TG   | 15 | 7  |
| 124905 | 12 | 13564779 | 13564804 | 2 | 13 | 26 | CA   | 11 | 8  |
| 124909 | 12 | 13565577 | 13565590 | 2 | 7  | 14 | AC   | 20 | 3  |
| 124912 | 12 | 13568601 | 13568624 | 2 | 12 | 24 | CA   | 7  | 9  |
| 124915 | 12 | 13568890 | 13568903 | 2 | 7  | 14 | CA   | 23 | 6  |
| 124917 | 12 | 13569124 | 13569155 | 4 | 8  | 32 | ATGG | 16 | 7  |
| 124918 | 12 | 13569231 | 13569248 | 2 | 9  | 18 | AC   | 12 | 6  |
| 124919 | 12 | 13569514 | 13569545 | 2 | 16 | 32 | AC   | 7  | 7  |
| 124922 | 12 | 13572758 | 13572785 | 2 | 14 | 28 | TG   | 9  | 7  |
| 124923 | 12 | 13573026 | 13573049 | 2 | 12 | 24 | CA   | 10 | 7  |
| 124924 | 12 | 13573304 | 13573327 | 2 | 12 | 24 | CA   | 17 | 6  |
| 124925 | 12 | 13573645 | 13573670 | 2 | 13 | 26 | GT   | 14 | 10 |
| 124928 | 12 | 13576698 | 13576711 | 2 | 7  | 14 | CA   | 21 | 6  |
| 124930 | 12 | 13587009 | 13587046 | 2 | 19 | 38 | CA   | 11 | 10 |
| 124932 | 12 | 13592334 | 13592357 | 2 | 12 | 24 | GT   | 9  | 10 |
| 124940 | 12 | 13598037 | 13598064 | 2 | 14 | 28 | TG   | 14 | 6  |
| 124941 | 12 | 13599973 | 13599994 | 2 | 11 | 22 | AC   | 17 | 10 |

|        |    |          |          |   |    |    |      |    |    |
|--------|----|----------|----------|---|----|----|------|----|----|
| 124944 | 12 | 13604434 | 13604454 | 3 | 7  | 21 | CTC  | 22 | 4  |
| 124945 | 12 | 13604569 | 13604584 | 2 | 8  | 16 | AG   | 29 | 6  |
| 124950 | 12 | 13607248 | 13607262 | 3 | 5  | 15 | GGC  | 8  | 4  |
| 124951 | 12 | 13607380 | 13607395 | 4 | 4  | 16 | GGAG | 9  | 5  |
| 124957 | 12 | 13614364 | 13614378 | 3 | 5  | 15 | AAG  | 9  | 3  |
| 124960 | 12 | 13618052 | 13618075 | 3 | 8  | 24 | TGT  | 18 | 11 |
| 124966 | 12 | 13626671 | 13626692 | 2 | 11 | 22 | CA   | 16 | 12 |
| 124969 | 12 | 13627063 | 13627074 | 2 | 6  | 12 | CA   | 23 | 8  |
| 124970 | 12 | 13628716 | 13628733 | 2 | 9  | 18 | AG   | 22 | 5  |
| 124971 | 12 | 13629040 | 13629053 | 2 | 7  | 14 | AG   | 29 | 3  |
| 124977 | 12 | 13632865 | 13632886 | 2 | 11 | 22 | AG   | 13 | 6  |
| 124980 | 12 | 13635336 | 13635363 | 2 | 14 | 28 | AC   | 11 | 11 |
| 124981 | 12 | 13636264 | 13636281 | 2 | 9  | 18 | GT   | 31 | 5  |
| 124983 | 12 | 13637434 | 13637463 | 2 | 15 | 30 | GT   | 20 | 9  |
| 124984 | 12 | 13637997 | 13638026 | 2 | 15 | 30 | GT   | 22 | 11 |
| 124986 | 12 | 13639415 | 13639446 | 2 | 16 | 32 | GT   | 12 | 9  |
| 124987 | 12 | 13641195 | 13641208 | 2 | 7  | 14 | AC   | 27 | 8  |
| 124990 | 12 | 13643649 | 13643668 | 2 | 10 | 20 | GT   | 19 | 15 |
| 124991 | 12 | 13643761 | 13643772 | 2 | 6  | 12 | CA   | 17 | 10 |
| 124993 | 12 | 13647340 | 13647353 | 2 | 7  | 14 | CT   | 26 | 5  |
| 124997 | 12 | 13652087 | 13652098 | 2 | 6  | 12 | AC   | 23 | 3  |
| 125008 | 12 | 13668391 | 13668418 | 4 | 7  | 28 | TGGA | 14 | 3  |
| 125013 | 12 | 13678200 | 13678227 | 2 | 14 | 28 | CT   | 15 | 13 |
| 125021 | 12 | 13680009 | 13680034 | 2 | 13 | 26 | CA   | 15 | 12 |
| 125029 | 12 | 13680887 | 13680900 | 2 | 7  | 14 | AG   | 21 | 4  |
| 125031 | 12 | 13689286 | 13689315 | 2 | 15 | 30 | AC   | 18 | 11 |
| 125033 | 12 | 13689768 | 13689813 | 2 | 23 | 46 | CA   | 15 | 14 |
| 125034 | 12 | 13693236 | 13693259 | 2 | 12 | 24 | TG   | 10 | 12 |
| 125035 | 12 | 13693416 | 13693441 | 2 | 13 | 26 | GT   | 11 | 6  |
| 125042 | 12 | 13701114 | 13701125 | 2 | 6  | 12 | CA   | 12 | 3  |
| 125046 | 12 | 13703345 | 13703356 | 2 | 6  | 12 | TG   | 17 | 3  |
| 125047 | 12 | 13703456 | 13703467 | 2 | 6  | 12 | GT   | 10 | 6  |
| 125051 | 12 | 13703737 | 13703756 | 2 | 10 | 20 | AG   | 13 | 7  |
| 125053 | 12 | 13704459 | 13704484 | 2 | 13 | 26 | AC   | 14 | 12 |
| 125060 | 12 | 13707705 | 13707726 | 2 | 11 | 22 | CA   | 7  | 9  |
| 125068 | 12 | 13715182 | 13715197 | 4 | 4  | 16 | AGAA | 26 | 4  |
| 125071 | 12 | 13720187 | 13720212 | 2 | 13 | 26 | TG   | 9  | 10 |
| 125074 | 12 | 13721337 | 13721356 | 2 | 10 | 20 | TG   | 22 | 10 |
| 125082 | 12 | 13743024 | 13743049 | 2 | 13 | 26 | AC   | 22 | 9  |
| 125083 | 12 | 13744484 | 13744495 | 2 | 6  | 12 | CA   | 28 | 5  |
| 125086 | 12 | 13755763 | 13755776 | 2 | 7  | 14 | CT   | 29 | 3  |
| 125088 | 12 | 13757477 | 13757492 | 2 | 8  | 16 | CA   | 15 | 7  |
| 125096 | 12 | 13784497 | 13784512 | 4 | 4  | 16 | TGTC | 30 | 4  |
| 125098 | 12 | 13789478 | 13789495 | 3 | 6  | 18 | ATT  | 21 | 3  |
| 125099 | 12 | 13803943 | 13803958 | 2 | 8  | 16 | AG   | 31 | 3  |
| 125104 | 12 | 13837730 | 13837741 | 2 | 6  | 12 | TA   | 7  | 3  |
| 125111 | 12 | 13866977 | 13866988 | 2 | 6  | 12 | AC   | 8  | 3  |
| 125127 | 12 | 13947705 | 13947726 | 2 | 11 | 22 | GT   | 8  | 3  |
| 125134 | 12 | 13974703 | 13974736 | 2 | 17 | 34 | TG   | 7  | 9  |
| 125135 | 12 | 13974813 | 13974826 | 2 | 7  | 14 | GT   | 18 | 8  |
| 125136 | 12 | 13974860 | 13974887 | 2 | 14 | 28 | GT   | 7  | 10 |

|        |    |          |          |   |    |    |      |    |    |
|--------|----|----------|----------|---|----|----|------|----|----|
| 125138 | 12 | 13991711 | 13991744 | 2 | 17 | 34 | CA   | 14 | 18 |
| 125142 | 12 | 13998993 | 13999006 | 2 | 7  | 14 | AT   | 24 | 4  |
| 125154 | 13 | 27285    | 27300    | 2 | 8  | 16 | AC   | 19 | 4  |
| 125155 | 13 | 29270    | 29289    | 2 | 10 | 20 | CA   | 26 | 6  |
| 125156 | 13 | 30511    | 30524    | 2 | 7  | 14 | GT   | 27 | 3  |
| 125158 | 13 | 37130    | 37141    | 2 | 6  | 12 | AC   | 19 | 7  |
| 125159 | 13 | 37144    | 37161    | 2 | 9  | 18 | AC   | 25 | 11 |
| 125160 | 13 | 50015    | 50032    | 2 | 9  | 18 | CT   | 22 | 7  |
| 125163 | 13 | 51327    | 51346    | 2 | 10 | 20 | TG   | 10 | 11 |
| 125165 | 13 | 55548    | 55559    | 2 | 6  | 12 | CA   | 17 | 5  |
| 125167 | 13 | 60951    | 60968    | 2 | 9  | 18 | CA   | 21 | 8  |
| 125168 | 13 | 61205    | 61234    | 2 | 15 | 30 | AC   | 15 | 10 |
| 125170 | 13 | 67284    | 67298    | 3 | 5  | 15 | AAG  | 25 | 6  |
| 125171 | 13 | 70753    | 70764    | 2 | 6  | 12 | GT   | 7  | 5  |
| 125174 | 13 | 70907    | 70928    | 2 | 11 | 22 | CA   | 7  | 9  |
| 125175 | 13 | 71156    | 71169    | 2 | 7  | 14 | AC   | 13 | 4  |
| 125176 | 13 | 72772    | 72785    | 2 | 7  | 14 | GT   | 16 | 7  |
| 125178 | 13 | 73506    | 73521    | 2 | 8  | 16 | TG   | 10 | 7  |
| 125179 | 13 | 73834    | 73847    | 2 | 7  | 14 | AC   | 19 | 7  |
| 125183 | 13 | 78383    | 78394    | 2 | 6  | 12 | AC   | 30 | 5  |
| 125184 | 13 | 78470    | 78491    | 2 | 11 | 22 | CA   | 13 | 11 |
| 125185 | 13 | 78535    | 78550    | 2 | 8  | 16 | AC   | 16 | 4  |
| 125191 | 13 | 89116    | 89145    | 2 | 15 | 30 | CA   | 10 | 8  |
| 125192 | 13 | 91470    | 91485    | 2 | 8  | 16 | CA   | 11 | 6  |
| 125193 | 13 | 91743    | 91756    | 2 | 7  | 14 | AC   | 19 | 10 |
| 125195 | 13 | 93937    | 93964    | 2 | 14 | 28 | TG   | 13 | 10 |
| 125196 | 13 | 94190    | 94201    | 2 | 6  | 12 | CA   | 14 | 3  |
| 125197 | 13 | 99177    | 99192    | 4 | 4  | 16 | ATAA | 24 | 5  |
| 125205 | 13 | 119476   | 119503   | 2 | 14 | 28 | TG   | 20 | 11 |
| 125206 | 13 | 120856   | 120869   | 2 | 7  | 14 | AC   | 15 | 10 |
| 125208 | 13 | 121152   | 121175   | 3 | 8  | 24 | CAC  | 30 | 6  |
| 125209 | 13 | 121510   | 121541   | 2 | 16 | 32 | CA   | 12 | 13 |
| 125213 | 13 | 131391   | 131402   | 2 | 6  | 12 | GT   | 32 | 4  |
| 125215 | 13 | 133944   | 133967   | 4 | 6  | 24 | ATCA | 25 | 3  |
| 125221 | 13 | 156159   | 156176   | 3 | 6  | 18 | ATC  | 18 | 11 |
| 125222 | 13 | 157774   | 157789   | 2 | 8  | 16 | TG   | 18 | 4  |
| 125223 | 13 | 158014   | 158039   | 2 | 13 | 26 | AC   | 10 | 15 |
| 125229 | 13 | 168486   | 168509   | 2 | 12 | 24 | CA   | 19 | 13 |
| 125230 | 13 | 174029   | 174046   | 2 | 9  | 18 | TG   | 7  | 4  |
| 125237 | 13 | 187391   | 187405   | 3 | 5  | 15 | CTG  | 25 | 3  |
| 125239 | 13 | 194557   | 194583   | 3 | 9  | 27 | GCT  | 27 | 5  |
| 125243 | 13 | 202198   | 202237   | 4 | 10 | 40 | TAGA | 26 | 7  |
| 125244 | 13 | 205065   | 205112   | 4 | 12 | 48 | TGGA | 16 | 14 |
| 125246 | 13 | 211069   | 211104   | 2 | 18 | 36 | CA   | 7  | 9  |
| 125247 | 13 | 212364   | 212385   | 2 | 11 | 22 | CA   | 18 | 14 |
| 125253 | 13 | 219866   | 219879   | 2 | 7  | 14 | AT   | 16 | 3  |
| 125255 | 13 | 221916   | 221935   | 4 | 5  | 20 | AAAT | 12 | 3  |
| 125257 | 13 | 222541   | 222556   | 2 | 8  | 16 | AC   | 17 | 11 |
| 125258 | 13 | 224605   | 224620   | 4 | 4  | 16 | AAAT | 23 | 5  |
| 125261 | 13 | 233450   | 233465   | 2 | 8  | 16 | CA   | 9  | 5  |
| 125262 | 13 | 235697   | 235718   | 2 | 11 | 22 | AC   | 18 | 10 |

|        |    |        |        |   |    |    |      |    |    |
|--------|----|--------|--------|---|----|----|------|----|----|
| 125266 | 13 | 248232 | 248245 | 2 | 7  | 14 | CA   | 25 | 5  |
| 125267 | 13 | 248345 | 248364 | 2 | 10 | 20 | AC   | 16 | 5  |
| 125279 | 13 | 278024 | 278071 | 2 | 24 | 48 | AC   | 14 | 9  |
| 125283 | 13 | 290195 | 290210 | 2 | 8  | 16 | CA   | 12 | 8  |
| 125284 | 13 | 290879 | 290892 | 2 | 7  | 14 | AC   | 13 | 8  |
| 125288 | 13 | 295568 | 295585 | 2 | 9  | 18 | AC   | 21 | 20 |
| 125289 | 13 | 298986 | 299005 | 2 | 10 | 20 | GT   | 25 | 7  |
| 125292 | 13 | 306322 | 306333 | 2 | 6  | 12 | CA   | 23 | 5  |
| 125293 | 13 | 307189 | 307216 | 2 | 14 | 28 | AC   | 17 | 8  |
| 125296 | 13 | 314812 | 314823 | 2 | 6  | 12 | TG   | 23 | 4  |
| 125297 | 13 | 316792 | 316807 | 2 | 8  | 16 | GT   | 18 | 12 |
| 125298 | 13 | 320893 | 320928 | 2 | 18 | 36 | TG   | 11 | 10 |
| 125299 | 13 | 324578 | 324605 | 2 | 14 | 28 | CA   | 9  | 11 |
| 125300 | 13 | 326900 | 326929 | 2 | 15 | 30 | TG   | 17 | 9  |
| 125301 | 13 | 332032 | 332049 | 2 | 9  | 18 | CA   | 19 | 6  |
| 125306 | 13 | 342519 | 342532 | 2 | 7  | 14 | GT   | 23 | 8  |
| 125308 | 13 | 347328 | 347339 | 2 | 6  | 12 | CT   | 28 | 4  |
| 125309 | 13 | 348239 | 348262 | 2 | 12 | 24 | AC   | 15 | 8  |
| 125311 | 13 | 350354 | 350369 | 2 | 8  | 16 | CA   | 27 | 4  |
| 125312 | 13 | 352722 | 352761 | 2 | 20 | 40 | AC   | 8  | 12 |
| 125316 | 13 | 360181 | 360204 | 2 | 12 | 24 | AC   | 17 | 11 |
| 125317 | 13 | 365030 | 365049 | 2 | 10 | 20 | TG   | 15 | 7  |
| 125318 | 13 | 365590 | 365607 | 2 | 9  | 18 | AC   | 16 | 5  |
| 125319 | 13 | 366680 | 366693 | 2 | 7  | 14 | AC   | 26 | 4  |
| 125320 | 13 | 371518 | 371533 | 2 | 8  | 16 | AC   | 21 | 4  |
| 125324 | 13 | 389071 | 389086 | 4 | 4  | 16 | GTGC | 17 | 4  |
| 125325 | 13 | 392522 | 392535 | 2 | 7  | 14 | GT   | 19 | 6  |
| 125326 | 13 | 399624 | 399644 | 3 | 7  | 21 | CAT  | 20 | 3  |
| 125327 | 13 | 402757 | 402790 | 2 | 17 | 34 | GT   | 13 | 14 |
| 125329 | 13 | 404164 | 404191 | 4 | 7  | 28 | AAAG | 23 | 10 |
| 125330 | 13 | 410937 | 410952 | 2 | 8  | 16 | CA   | 19 | 12 |
| 125336 | 13 | 428047 | 428068 | 2 | 11 | 22 | TC   | 7  | 8  |
| 125337 | 13 | 429575 | 429594 | 2 | 10 | 20 | AC   | 8  | 5  |
| 125341 | 13 | 437442 | 437457 | 2 | 8  | 16 | TG   | 31 | 3  |
| 125349 | 13 | 454124 | 454143 | 2 | 10 | 20 | GT   | 10 | 11 |
| 125354 | 13 | 464693 | 464710 | 2 | 9  | 18 | CA   | 18 | 9  |
| 125356 | 13 | 467454 | 467471 | 2 | 9  | 18 | GT   | 15 | 8  |
| 125358 | 13 | 472234 | 472245 | 2 | 6  | 12 | TG   | 16 | 5  |
| 125359 | 13 | 474391 | 474414 | 2 | 12 | 24 | CA   | 14 | 4  |
| 125363 | 13 | 488058 | 488078 | 3 | 7  | 21 | AGA  | 21 | 3  |
| 125365 | 13 | 492962 | 492993 | 2 | 16 | 32 | TG   | 14 | 11 |
| 125366 | 13 | 495532 | 495551 | 2 | 10 | 20 | TG   | 10 | 5  |
| 125367 | 13 | 498520 | 498543 | 2 | 12 | 24 | AC   | 19 | 8  |
| 125372 | 13 | 510889 | 510900 | 2 | 6  | 12 | TG   | 24 | 3  |
| 125373 | 13 | 511250 | 511267 | 2 | 9  | 18 | TC   | 17 | 18 |
| 125377 | 13 | 523197 | 523224 | 2 | 14 | 28 | CA   | 11 | 12 |
| 125378 | 13 | 524062 | 524085 | 2 | 12 | 24 | TC   | 21 | 8  |
| 125379 | 13 | 529287 | 529310 | 2 | 12 | 24 | CA   | 22 | 9  |
| 125391 | 13 | 584704 | 584724 | 3 | 7  | 21 | TAG  | 28 | 5  |
| 125393 | 13 | 597190 | 597201 | 2 | 6  | 12 | AT   | 31 | 4  |
| 125394 | 13 | 602703 | 602718 | 2 | 8  | 16 | GT   | 26 | 6  |

|        |    |        |        |   |    |    |      |    |    |
|--------|----|--------|--------|---|----|----|------|----|----|
| 125396 | 13 | 607510 | 607533 | 4 | 6  | 24 | AGGA | 21 | 7  |
| 125399 | 13 | 608832 | 608849 | 2 | 9  | 18 | AC   | 13 | 12 |
| 125400 | 13 | 609157 | 609195 | 3 | 13 | 39 | TCC  | 14 | 10 |
| 125401 | 13 | 609455 | 609466 | 2 | 6  | 12 | CG   | 7  | 6  |
| 125402 | 13 | 609467 | 609484 | 2 | 9  | 18 | CA   | 19 | 24 |
| 125403 | 13 | 609571 | 609592 | 2 | 11 | 22 | AC   | 11 | 11 |
| 125404 | 13 | 610397 | 610426 | 2 | 15 | 30 | CA   | 12 | 13 |
| 125408 | 13 | 621937 | 621966 | 2 | 15 | 30 | CA   | 8  | 11 |
| 125421 | 13 | 629478 | 629493 | 4 | 4  | 16 | TATT | 8  | 4  |
| 125422 | 13 | 631318 | 631339 | 2 | 11 | 22 | GT   | 16 | 10 |
| 125423 | 13 | 631533 | 631559 | 3 | 9  | 27 | GGT  | 7  | 9  |
| 125424 | 13 | 634926 | 634939 | 2 | 7  | 14 | AT   | 15 | 5  |
| 125426 | 13 | 641440 | 641475 | 2 | 18 | 36 | TG   | 17 | 11 |
| 125427 | 13 | 641637 | 641662 | 2 | 13 | 26 | AC   | 18 | 12 |
| 125429 | 13 | 649485 | 649496 | 2 | 6  | 12 | AC   | 23 | 5  |
| 125431 | 13 | 652509 | 652542 | 2 | 17 | 34 | AC   | 13 | 11 |
| 125432 | 13 | 655855 | 655882 | 2 | 14 | 28 | AC   | 21 | 21 |
| 125433 | 13 | 658678 | 658693 | 2 | 8  | 16 | AC   | 22 | 7  |
| 125437 | 13 | 659802 | 659827 | 2 | 13 | 26 | CA   | 17 | 17 |
| 125440 | 13 | 663411 | 663424 | 2 | 7  | 14 | CA   | 31 | 4  |
| 125443 | 13 | 671965 | 671979 | 3 | 5  | 15 | CTG  | 29 | 8  |
| 125446 | 13 | 679964 | 679984 | 3 | 7  | 21 | CAG  | 31 | 6  |
| 125448 | 13 | 683890 | 683911 | 2 | 11 | 22 | GT   | 20 | 8  |
| 125452 | 13 | 687521 | 687536 | 4 | 4  | 16 | ATCT | 29 | 6  |
| 125453 | 13 | 687587 | 687606 | 2 | 10 | 20 | GT   | 12 | 11 |
| 125457 | 13 | 688426 | 688439 | 2 | 7  | 14 | CA   | 16 | 9  |
| 125465 | 13 | 707177 | 707194 | 2 | 9  | 18 | GT   | 27 | 6  |
| 125468 | 13 | 712767 | 712786 | 2 | 10 | 20 | CA   | 24 | 10 |
| 125469 | 13 | 716253 | 716274 | 2 | 11 | 22 | CA   | 15 | 8  |
| 125470 | 13 | 717189 | 717214 | 2 | 13 | 26 | GT   | 19 | 12 |
| 125471 | 13 | 719948 | 719973 | 2 | 13 | 26 | GT   | 16 | 9  |
| 125473 | 13 | 723319 | 723346 | 4 | 7  | 28 | AAAC | 10 | 3  |
| 125474 | 13 | 723378 | 723401 | 2 | 12 | 24 | CA   | 6  | 5  |
| 125481 | 13 | 747076 | 747101 | 2 | 13 | 26 | CT   | 13 | 3  |
| 125496 | 13 | 791820 | 791855 | 3 | 12 | 36 | ATG  | 23 | 7  |
| 125497 | 13 | 795177 | 795206 | 3 | 10 | 30 | TGT  | 27 | 14 |
| 125500 | 13 | 800056 | 800091 | 2 | 18 | 36 | CA   | 8  | 8  |
| 125511 | 13 | 826413 | 826432 | 2 | 10 | 20 | GT   | 27 | 9  |
| 125515 | 13 | 834726 | 834739 | 2 | 7  | 14 | CA   | 24 | 8  |
| 125517 | 13 | 836404 | 836417 | 2 | 7  | 14 | AG   | 21 | 4  |
| 125521 | 13 | 849150 | 849197 | 2 | 24 | 48 | TG   | 10 | 7  |
| 125525 | 13 | 854544 | 854561 | 2 | 9  | 18 | CA   | 28 | 4  |
| 125536 | 13 | 873348 | 873374 | 3 | 9  | 27 | CTC  | 10 | 3  |
| 125543 | 13 | 889991 | 890011 | 3 | 7  | 21 | AAC  | 22 | 17 |
| 125544 | 13 | 890093 | 890108 | 2 | 8  | 16 | CA   | 19 | 10 |
| 125547 | 13 | 915057 | 915072 | 2 | 8  | 16 | AG   | 21 | 4  |
| 125550 | 13 | 926713 | 926740 | 2 | 14 | 28 | GT   | 15 | 7  |
| 125556 | 13 | 948765 | 948786 | 2 | 11 | 22 | AC   | 14 | 6  |
| 125562 | 13 | 964731 | 964754 | 3 | 8  | 24 | TCA  | 22 | 13 |
| 125563 | 13 | 969308 | 969322 | 3 | 5  | 15 | TTC  | 11 | 5  |
| 125571 | 13 | 987197 | 987230 | 2 | 17 | 34 | TG   | 14 | 15 |

|        |    |         |         |   |    |    |      |    |    |
|--------|----|---------|---------|---|----|----|------|----|----|
| 125577 | 13 | 1005375 | 1005401 | 3 | 9  | 27 | ATA  | 13 | 9  |
| 125590 | 13 | 1031468 | 1031497 | 2 | 15 | 30 | AC   | 8  | 5  |
| 125591 | 13 | 1034026 | 1034053 | 4 | 7  | 28 | TATC | 12 | 3  |
| 125592 | 13 | 1040527 | 1040548 | 2 | 11 | 22 | GT   | 17 | 6  |
| 125597 | 13 | 1050165 | 1050176 | 2 | 6  | 12 | GT   | 21 | 3  |
| 125610 | 13 | 1085277 | 1085288 | 2 | 6  | 12 | AT   | 16 | 6  |
| 125614 | 13 | 1112313 | 1112328 | 4 | 4  | 16 | AAAT | 21 | 9  |
| 125618 | 13 | 1117941 | 1117952 | 2 | 6  | 12 | TG   | 23 | 4  |
| 125619 | 13 | 1119376 | 1119395 | 2 | 10 | 20 | GA   | 17 | 7  |
| 125622 | 13 | 1126729 | 1126770 | 2 | 21 | 42 | AG   | 10 | 8  |
| 125623 | 13 | 1127730 | 1127741 | 2 | 6  | 12 | TA   | 13 | 3  |
| 125630 | 13 | 1153110 | 1153121 | 2 | 6  | 12 | CA   | 21 | 4  |
| 125632 | 13 | 1153259 | 1153288 | 2 | 15 | 30 | AC   | 6  | 9  |
| 125642 | 13 | 1190673 | 1190696 | 2 | 12 | 24 | AG   | 18 | 8  |
| 125651 | 13 | 1211916 | 1211927 | 2 | 6  | 12 | AG   | 25 | 5  |
| 125662 | 13 | 1213672 | 1213687 | 2 | 8  | 16 | AC   | 20 | 8  |
| 125663 | 13 | 1213689 | 1213706 | 2 | 9  | 18 | CA   | 22 | 10 |
| 125664 | 13 | 1215517 | 1215532 | 2 | 8  | 16 | GT   | 30 | 4  |
| 125665 | 13 | 1215841 | 1215860 | 2 | 10 | 20 | CA   | 14 | 4  |
| 125666 | 13 | 1216114 | 1216129 | 2 | 8  | 16 | TG   | 15 | 6  |
| 125669 | 13 | 1219233 | 1219264 | 2 | 16 | 32 | CA   | 7  | 10 |
| 125680 | 13 | 1235283 | 1235296 | 2 | 7  | 14 | AC   | 21 | 6  |
| 125683 | 13 | 1240867 | 1240878 | 2 | 6  | 12 | CA   | 23 | 5  |
| 125692 | 13 | 1286739 | 1286765 | 3 | 9  | 27 | GAG  | 17 | 4  |
| 125694 | 13 | 1291787 | 1291798 | 2 | 6  | 12 | AG   | 16 | 4  |
| 125699 | 13 | 1295559 | 1295584 | 2 | 13 | 26 | CA   | 16 | 8  |
| 125700 | 13 | 1299113 | 1299146 | 2 | 17 | 34 | AC   | 14 | 11 |
| 125701 | 13 | 1312300 | 1312311 | 2 | 6  | 12 | TA   | 26 | 4  |
| 125703 | 13 | 1318345 | 1318356 | 2 | 6  | 12 | TG   | 26 | 3  |
| 125708 | 13 | 1322031 | 1322066 | 2 | 18 | 36 | GT   | 7  | 8  |
| 125712 | 13 | 1328644 | 1328661 | 2 | 9  | 18 | TG   | 26 | 3  |
| 125714 | 13 | 1334086 | 1334099 | 2 | 7  | 14 | CA   | 28 | 6  |
| 125715 | 13 | 1334523 | 1334544 | 2 | 11 | 22 | AC   | 15 | 9  |
| 125719 | 13 | 1341955 | 1341978 | 2 | 12 | 24 | GT   | 17 | 7  |
| 125725 | 13 | 1344767 | 1344784 | 2 | 9  | 18 | GT   | 16 | 10 |
| 125726 | 13 | 1344884 | 1344915 | 2 | 16 | 32 | CA   | 7  | 6  |
| 125728 | 13 | 1349332 | 1349347 | 2 | 8  | 16 | CA   | 23 | 6  |
| 125730 | 13 | 1350010 | 1350027 | 2 | 9  | 18 | CA   | 17 | 9  |
| 125731 | 13 | 1350822 | 1350837 | 4 | 4  | 16 | TTTA | 14 | 12 |
| 125740 | 13 | 1364763 | 1364777 | 3 | 5  | 15 | CCT  | 22 | 5  |
| 125747 | 13 | 1385930 | 1385943 | 2 | 7  | 14 | AG   | 10 | 4  |
| 125750 | 13 | 1391084 | 1391097 | 2 | 7  | 14 | CT   | 30 | 3  |
| 125751 | 13 | 1395158 | 1395209 | 4 | 13 | 52 | AAAG | 25 | 15 |
| 125752 | 13 | 1395435 | 1395466 | 2 | 16 | 32 | TG   | 11 | 9  |
| 125757 | 13 | 1399555 | 1399570 | 2 | 8  | 16 | AC   | 19 | 5  |
| 125758 | 13 | 1399596 | 1399615 | 2 | 10 | 20 | AC   | 13 | 4  |
| 125760 | 13 | 1400048 | 1400079 | 2 | 16 | 32 | CA   | 21 | 10 |
| 125761 | 13 | 1400187 | 1400206 | 2 | 10 | 20 | GT   | 22 | 7  |
| 125764 | 13 | 1403501 | 1403522 | 2 | 11 | 22 | TG   | 13 | 8  |
| 125767 | 13 | 1406874 | 1406899 | 2 | 13 | 26 | GA   | 14 | 5  |
| 125768 | 13 | 1410384 | 1410433 | 2 | 25 | 50 | TG   | 7  | 8  |



|        |    |         |         |   |    |    |      |    |    |
|--------|----|---------|---------|---|----|----|------|----|----|
| 125771 | 13 | 1420906 | 1420935 | 2 | 15 | 30 | AC   | 8  | 11 |
| 125776 | 13 | 1423362 | 1423395 | 2 | 17 | 34 | CA   | 8  | 8  |
| 125777 | 13 | 1426258 | 1426278 | 3 | 7  | 21 | TTC  | 26 | 8  |
| 125779 | 13 | 1427402 | 1427413 | 2 | 6  | 12 | GT   | 29 | 3  |
| 125780 | 13 | 1429997 | 1430046 | 2 | 25 | 50 | GT   | 12 | 10 |
| 125782 | 13 | 1436645 | 1436672 | 2 | 14 | 28 | GT   | 18 | 10 |
| 125785 | 13 | 1437483 | 1437497 | 3 | 5  | 15 | CTT  | 20 | 3  |
| 125787 | 13 | 1439124 | 1439137 | 2 | 7  | 14 | CA   | 21 | 10 |
| 125788 | 13 | 1439285 | 1439302 | 2 | 9  | 18 | CA   | 31 | 6  |
| 125796 | 13 | 1452820 | 1452847 | 4 | 7  | 28 | TTAT | 8  | 4  |
| 125797 | 13 | 1457210 | 1457221 | 2 | 6  | 12 | AC   | 17 | 10 |
| 125803 | 13 | 1463217 | 1463232 | 2 | 8  | 16 | GT   | 25 | 6  |
| 125804 | 13 | 1463233 | 1463244 | 2 | 6  | 12 | GA   | 21 | 6  |
| 125810 | 13 | 1470698 | 1470717 | 4 | 5  | 20 | AAAC | 24 | 3  |
| 125812 | 13 | 1472103 | 1472118 | 2 | 8  | 16 | CA   | 17 | 3  |
| 125817 | 13 | 1477204 | 1477219 | 2 | 8  | 16 | AC   | 22 | 3  |
| 125819 | 13 | 1477349 | 1477364 | 2 | 8  | 16 | AC   | 18 | 7  |
| 125820 | 13 | 1477496 | 1477515 | 4 | 5  | 20 | CACG | 7  | 12 |
| 125821 | 13 | 1477516 | 1477531 | 2 | 8  | 16 | CA   | 11 | 16 |
| 125823 | 13 | 1478006 | 1478029 | 2 | 12 | 24 | CA   | 15 | 8  |
| 125825 | 13 | 1482157 | 1482190 | 2 | 17 | 34 | CT   | 6  | 7  |
| 125829 | 13 | 1487478 | 1487491 | 2 | 7  | 14 | CA   | 21 | 8  |
| 125830 | 13 | 1487610 | 1487627 | 2 | 9  | 18 | GT   | 15 | 9  |
| 125832 | 13 | 1487948 | 1487969 | 2 | 11 | 22 | AC   | 26 | 11 |
| 125833 | 13 | 1488508 | 1488521 | 2 | 7  | 14 | AC   | 26 | 3  |
| 125834 | 13 | 1492817 | 1492848 | 2 | 16 | 32 | CA   | 13 | 6  |
| 125838 | 13 | 1500780 | 1500795 | 4 | 4  | 16 | AAAT | 24 | 5  |
| 125839 | 13 | 1500942 | 1500961 | 2 | 10 | 20 | AC   | 14 | 4  |
| 125849 | 13 | 1510197 | 1510228 | 2 | 16 | 32 | AG   | 6  | 5  |
| 125851 | 13 | 1510572 | 1510595 | 2 | 12 | 24 | AC   | 6  | 5  |
| 125852 | 13 | 1510713 | 1510724 | 2 | 6  | 12 | CA   | 18 | 3  |
| 125855 | 13 | 1511872 | 1511891 | 4 | 5  | 20 | TTTG | 12 | 7  |
| 125857 | 13 | 1516504 | 1516535 | 2 | 16 | 32 | CA   | 11 | 10 |
| 125858 | 13 | 1518204 | 1518237 | 2 | 17 | 34 | GA   | 9  | 8  |
| 125860 | 13 | 1524463 | 1524474 | 2 | 6  | 12 | TG   | 30 | 5  |
| 125861 | 13 | 1527403 | 1527424 | 2 | 11 | 22 | TG   | 18 | 6  |
| 125862 | 13 | 1527557 | 1527586 | 2 | 15 | 30 | TG   | 19 | 15 |
| 125864 | 13 | 1529156 | 1529207 | 2 | 26 | 52 | GT   | 8  | 10 |
| 125866 | 13 | 1530288 | 1530305 | 3 | 6  | 18 | CTT  | 31 | 3  |
| 125871 | 13 | 1535094 | 1535113 | 2 | 10 | 20 | CA   | 12 | 9  |
| 125872 | 13 | 1536988 | 1537003 | 2 | 8  | 16 | TG   | 16 | 6  |
| 125873 | 13 | 1537006 | 1537019 | 2 | 7  | 14 | TG   | 20 | 9  |
| 125875 | 13 | 1538968 | 1538985 | 2 | 9  | 18 | AC   | 26 | 5  |
| 125876 | 13 | 1539049 | 1539078 | 2 | 15 | 30 | AC   | 18 | 7  |
| 125877 | 13 | 1539227 | 1539244 | 2 | 9  | 18 | CA   | 20 | 10 |
| 125881 | 13 | 1541643 | 1541658 | 2 | 8  | 16 | CA   | 21 | 10 |
| 125884 | 13 | 1549691 | 1549728 | 2 | 19 | 38 | CT   | 8  | 10 |
| 125886 | 13 | 1550158 | 1550169 | 2 | 6  | 12 | AC   | 29 | 3  |
| 125887 | 13 | 1550272 | 1550285 | 2 | 7  | 14 | AC   | 33 | 3  |
| 125888 | 13 | 1550432 | 1550449 | 2 | 9  | 18 | AC   | 16 | 16 |
| 125889 | 13 | 1550452 | 1550467 | 2 | 8  | 16 | AC   | 13 | 14 |

|        |    |         |         |   |    |    |      |    |    |
|--------|----|---------|---------|---|----|----|------|----|----|
| 125890 | 13 | 1552714 | 1552741 | 2 | 14 | 28 | TG   | 10 | 8  |
| 125891 | 13 | 1552855 | 1552876 | 2 | 11 | 22 | AC   | 17 | 12 |
| 125892 | 13 | 1553846 | 1553857 | 2 | 6  | 12 | AC   | 27 | 4  |
| 125894 | 13 | 1554599 | 1554626 | 2 | 14 | 28 | GT   | 19 | 8  |
| 125895 | 13 | 1556109 | 1556142 | 2 | 17 | 34 | AC   | 7  | 7  |
| 125896 | 13 | 1556220 | 1556235 | 2 | 8  | 16 | AC   | 13 | 16 |
| 125900 | 13 | 1559275 | 1559296 | 2 | 11 | 22 | TC   | 20 | 7  |
| 125904 | 13 | 1561553 | 1561578 | 2 | 13 | 26 | CA   | 6  | 8  |
| 125908 | 13 | 1562151 | 1562170 | 2 | 10 | 20 | CA   | 9  | 4  |
| 125912 | 13 | 1566217 | 1566242 | 2 | 13 | 26 | CA   | 19 | 13 |
| 125913 | 13 | 1566667 | 1566702 | 2 | 18 | 36 | AC   | 14 | 9  |
| 125915 | 13 | 1569479 | 1569494 | 2 | 8  | 16 | CA   | 16 | 8  |
| 125917 | 13 | 1569630 | 1569645 | 2 | 8  | 16 | AC   | 10 | 4  |
| 125920 | 13 | 1574274 | 1574307 | 2 | 17 | 34 | AC   | 13 | 9  |
| 125924 | 13 | 1580033 | 1580044 | 2 | 6  | 12 | GT   | 21 | 13 |
| 125928 | 13 | 1591831 | 1591846 | 2 | 8  | 16 | CT   | 16 | 3  |
| 125931 | 13 | 1594744 | 1594763 | 2 | 10 | 20 | GT   | 20 | 10 |
| 125934 | 13 | 1596921 | 1596940 | 2 | 10 | 20 | TG   | 21 | 9  |
| 125936 | 13 | 1597389 | 1597412 | 2 | 12 | 24 | AC   | 17 | 10 |
| 125939 | 13 | 1606094 | 1606105 | 2 | 6  | 12 | TG   | 24 | 6  |
| 125944 | 13 | 1609569 | 1609582 | 2 | 7  | 14 | AC   | 13 | 5  |
| 125945 | 13 | 1609939 | 1609966 | 2 | 14 | 28 | TG   | 6  | 7  |
| 125946 | 13 | 1610117 | 1610128 | 2 | 6  | 12 | CT   | 25 | 3  |
| 125950 | 13 | 1612392 | 1612403 | 2 | 6  | 12 | GT   | 29 | 3  |
| 125951 | 13 | 1612411 | 1612422 | 2 | 6  | 12 | TG   | 14 | 3  |
| 125954 | 13 | 1614460 | 1614475 | 2 | 8  | 16 | TG   | 20 | 5  |
| 125956 | 13 | 1618054 | 1618065 | 2 | 6  | 12 | TG   | 27 | 6  |
| 125957 | 13 | 1618357 | 1618368 | 2 | 6  | 12 | AC   | 22 | 7  |
| 125958 | 13 | 1618370 | 1618381 | 2 | 6  | 12 | CA   | 20 | 4  |
| 125959 | 13 | 1618532 | 1618543 | 2 | 6  | 12 | CA   | 22 | 7  |
| 125960 | 13 | 1618958 | 1618981 | 2 | 12 | 24 | AC   | 14 | 10 |
| 125962 | 13 | 1619639 | 1619650 | 2 | 6  | 12 | AC   | 16 | 13 |
| 125963 | 13 | 1619908 | 1619919 | 2 | 6  | 12 | CA   | 10 | 3  |
| 125969 | 13 | 1630339 | 1630356 | 2 | 9  | 18 | AC   | 9  | 8  |
| 125970 | 13 | 1636866 | 1636893 | 2 | 14 | 28 | AC   | 7  | 7  |
| 125972 | 13 | 1663721 | 1663752 | 4 | 8  | 32 | AAAG | 22 | 8  |
| 125979 | 13 | 1685878 | 1685891 | 2 | 7  | 14 | AC   | 28 | 3  |
| 125986 | 13 | 1706094 | 1706107 | 2 | 7  | 14 | TG   | 27 | 3  |
| 125989 | 13 | 1713508 | 1713521 | 2 | 7  | 14 | CA   | 20 | 7  |
| 125992 | 13 | 1716644 | 1716659 | 2 | 8  | 16 | CA   | 13 | 8  |
| 125996 | 13 | 1732475 | 1732490 | 4 | 4  | 16 | AAAT | 21 | 5  |
| 126003 | 13 | 1744730 | 1744751 | 2 | 11 | 22 | CT   | 11 | 5  |
| 126017 | 13 | 1785459 | 1785472 | 2 | 7  | 14 | CA   | 15 | 10 |
| 126019 | 13 | 1785768 | 1785781 | 2 | 7  | 14 | AC   | 13 | 5  |
| 126026 | 13 | 1801138 | 1801149 | 2 | 6  | 12 | CT   | 32 | 5  |
| 126032 | 13 | 1826419 | 1826442 | 2 | 12 | 24 | GT   | 16 | 8  |
| 126033 | 13 | 1826573 | 1826588 | 2 | 8  | 16 | AG   | 18 | 4  |
| 126034 | 13 | 1826589 | 1826600 | 2 | 6  | 12 | AC   | 19 | 4  |
| 126038 | 13 | 1840279 | 1840290 | 2 | 6  | 12 | GT   | 18 | 5  |
| 126039 | 13 | 1840598 | 1840623 | 2 | 13 | 26 | GT   | 9  | 6  |
| 126042 | 13 | 1840837 | 1840850 | 2 | 7  | 14 | GT   | 15 | 5  |

|        |    |         |         |   |    |    |      |    |    |
|--------|----|---------|---------|---|----|----|------|----|----|
| 126046 | 13 | 1847598 | 1847617 | 2 | 10 | 20 | GT   | 20 | 7  |
| 126048 | 13 | 1855111 | 1855134 | 2 | 12 | 24 | GT   | 14 | 8  |
| 126057 | 13 | 1864586 | 1864599 | 2 | 7  | 14 | TC   | 18 | 3  |
| 126058 | 13 | 1864633 | 1864650 | 2 | 9  | 18 | CT   | 19 | 9  |
| 126059 | 13 | 1866050 | 1866069 | 2 | 10 | 20 | AC   | 10 | 9  |
| 126060 | 13 | 1866860 | 1866877 | 2 | 9  | 18 | CA   | 23 | 14 |
| 126062 | 13 | 1870280 | 1870297 | 2 | 9  | 18 | CT   | 21 | 5  |
| 126066 | 13 | 1877465 | 1877478 | 2 | 7  | 14 | GT   | 28 | 3  |
| 126067 | 13 | 1877604 | 1877629 | 2 | 13 | 26 | CT   | 25 | 7  |
| 126071 | 13 | 1886989 | 1887010 | 2 | 11 | 22 | GT   | 15 | 8  |
| 126075 | 13 | 1889812 | 1889839 | 2 | 14 | 28 | TG   | 14 | 10 |
| 126087 | 13 | 1897172 | 1897193 | 2 | 11 | 22 | AC   | 20 | 10 |
| 126088 | 13 | 1900106 | 1900121 | 2 | 8  | 16 | GT   | 10 | 5  |
| 126093 | 13 | 1906119 | 1906160 | 3 | 14 | 42 | ATA  | 10 | 9  |
| 126099 | 13 | 1911445 | 1911458 | 2 | 7  | 14 | AC   | 11 | 3  |
| 126100 | 13 | 1911813 | 1911830 | 2 | 9  | 18 | GT   | 23 | 9  |
| 126102 | 13 | 1914727 | 1914740 | 2 | 7  | 14 | CA   | 22 | 5  |
| 126103 | 13 | 1916402 | 1916428 | 3 | 9  | 27 | ACT  | 28 | 7  |
| 126104 | 13 | 1916515 | 1916540 | 2 | 13 | 26 | AC   | 15 | 10 |
| 126105 | 13 | 1917130 | 1917151 | 2 | 11 | 22 | AC   | 21 | 10 |
| 126110 | 13 | 1930880 | 1930891 | 2 | 6  | 12 | AC   | 26 | 6  |
| 126113 | 13 | 1933531 | 1933550 | 2 | 10 | 20 | TG   | 17 | 4  |
| 126114 | 13 | 1933686 | 1933701 | 2 | 8  | 16 | GT   | 28 | 6  |
| 126123 | 13 | 1940104 | 1940117 | 2 | 7  | 14 | GA   | 21 | 6  |
| 126124 | 13 | 1942627 | 1942642 | 2 | 8  | 16 | GT   | 26 | 8  |
| 126129 | 13 | 1951006 | 1951021 | 2 | 8  | 16 | AC   | 20 | 6  |
| 126130 | 13 | 1951466 | 1951481 | 2 | 8  | 16 | TG   | 26 | 8  |
| 126134 | 13 | 1958623 | 1958648 | 2 | 13 | 26 | AC   | 15 | 6  |
| 126137 | 13 | 1959630 | 1959649 | 2 | 10 | 20 | AC   | 13 | 8  |
| 126139 | 13 | 1963616 | 1963655 | 4 | 10 | 40 | AGAT | 9  | 12 |
| 126143 | 13 | 1967150 | 1967165 | 2 | 8  | 16 | AC   | 19 | 8  |
| 126144 | 13 | 1969122 | 1969133 | 2 | 6  | 12 | AT   | 12 | 5  |
| 126147 | 13 | 1975553 | 1975568 | 2 | 8  | 16 | CA   | 31 | 9  |
| 126149 | 13 | 1977417 | 1977436 | 2 | 10 | 20 | AT   | 9  | 7  |
| 126157 | 13 | 1987020 | 1987049 | 2 | 15 | 30 | GT   | 17 | 9  |
| 126158 | 13 | 1987117 | 1987130 | 2 | 7  | 14 | AG   | 16 | 8  |
| 126159 | 13 | 1987898 | 1987911 | 2 | 7  | 14 | CA   | 27 | 17 |
| 126161 | 13 | 1990449 | 1990472 | 2 | 12 | 24 | GA   | 24 | 7  |
| 126164 | 13 | 1991411 | 1991434 | 4 | 6  | 24 | AAAT | 18 | 8  |
| 126165 | 13 | 1991951 | 1991966 | 2 | 8  | 16 | TG   | 20 | 8  |
| 126166 | 13 | 1992123 | 1992144 | 2 | 11 | 22 | TG   | 15 | 7  |
| 126171 | 13 | 2003772 | 2003791 | 2 | 10 | 20 | GT   | 18 | 9  |
| 126173 | 13 | 2012868 | 2012885 | 2 | 9  | 18 | TG   | 18 | 5  |
| 126175 | 13 | 2015524 | 2015551 | 2 | 14 | 28 | CA   | 18 | 18 |
| 126178 | 13 | 2023478 | 2023495 | 3 | 6  | 18 | GAG  | 26 | 7  |
| 126179 | 13 | 2024893 | 2024920 | 2 | 14 | 28 | AC   | 16 | 6  |
| 126181 | 13 | 2038456 | 2038469 | 2 | 7  | 14 | AC   | 14 | 6  |
| 126191 | 13 | 2055288 | 2055302 | 3 | 5  | 15 | TCC  | 26 | 4  |
| 126192 | 13 | 2057384 | 2057395 | 2 | 6  | 12 | TC   | 29 | 3  |
| 126193 | 13 | 2057443 | 2057454 | 2 | 6  | 12 | TG   | 26 | 6  |
| 126194 | 13 | 2057457 | 2057470 | 2 | 7  | 14 | TG   | 25 | 6  |

|        |    |         |         |   |    |    |      |    |    |
|--------|----|---------|---------|---|----|----|------|----|----|
| 126196 | 13 | 2057910 | 2057933 | 2 | 12 | 24 | CA   | 13 | 9  |
| 126197 | 13 | 2058141 | 2058158 | 2 | 9  | 18 | TC   | 23 | 4  |
| 126201 | 13 | 2070985 | 2070998 | 2 | 7  | 14 | TC   | 21 | 4  |
| 126202 | 13 | 2078954 | 2078969 | 4 | 4  | 16 | TTTG | 17 | 5  |
| 126204 | 13 | 2079836 | 2079867 | 4 | 8  | 32 | TCTA | 24 | 3  |
| 126211 | 13 | 2092656 | 2092687 | 2 | 16 | 32 | TG   | 22 | 13 |
| 126213 | 13 | 2095187 | 2095198 | 2 | 6  | 12 | AC   | 10 | 11 |
| 126214 | 13 | 2095201 | 2095216 | 2 | 8  | 16 | AC   | 20 | 17 |
| 126217 | 13 | 2098835 | 2098852 | 3 | 6  | 18 | CTC  | 20 | 4  |
| 126220 | 13 | 2100526 | 2100543 | 3 | 6  | 18 | AAC  | 14 | 11 |
| 126221 | 13 | 2102068 | 2102087 | 2 | 10 | 20 | TG   | 15 | 12 |
| 126224 | 13 | 2106666 | 2106687 | 2 | 11 | 22 | TG   | 13 | 9  |
| 126227 | 13 | 2115166 | 2115177 | 2 | 6  | 12 | GT   | 13 | 3  |
| 126228 | 13 | 2115196 | 2115207 | 2 | 6  | 12 | GT   | 6  | 3  |
| 126230 | 13 | 2115338 | 2115351 | 2 | 7  | 14 | AC   | 16 | 3  |
| 126237 | 13 | 2123398 | 2123411 | 2 | 7  | 14 | GT   | 31 | 3  |
| 126240 | 13 | 2126435 | 2126450 | 2 | 8  | 16 | TG   | 22 | 7  |
| 126241 | 13 | 2126478 | 2126499 | 2 | 11 | 22 | TG   | 13 | 8  |
| 126245 | 13 | 2131089 | 2131136 | 2 | 24 | 48 | AC   | 13 | 10 |
| 126247 | 13 | 2132842 | 2132857 | 2 | 8  | 16 | CA   | 22 | 12 |
| 126248 | 13 | 2132941 | 2132984 | 2 | 22 | 44 | CA   | 9  | 11 |
| 126250 | 13 | 2140868 | 2140885 | 2 | 9  | 18 | TG   | 26 | 5  |
| 126251 | 13 | 2141525 | 2141538 | 2 | 7  | 14 | TG   | 9  | 5  |
| 126253 | 13 | 2146785 | 2146802 | 2 | 9  | 18 | AC   | 14 | 7  |
| 126256 | 13 | 2149971 | 2149992 | 2 | 11 | 22 | AC   | 21 | 4  |
| 126260 | 13 | 2163017 | 2163048 | 2 | 16 | 32 | CA   | 8  | 9  |
| 126261 | 13 | 2165495 | 2165512 | 2 | 9  | 18 | AC   | 23 | 5  |
| 126263 | 13 | 2170560 | 2170595 | 2 | 18 | 36 | GT   | 15 | 13 |
| 126265 | 13 | 2173791 | 2173804 | 2 | 7  | 14 | AC   | 21 | 4  |
| 126267 | 13 | 2178786 | 2178805 | 4 | 5  | 20 | AAAG | 16 | 6  |
| 126271 | 13 | 2183914 | 2183933 | 2 | 10 | 20 | AC   | 22 | 10 |
| 126272 | 13 | 2186945 | 2186956 | 2 | 6  | 12 | TG   | 22 | 3  |
| 126275 | 13 | 2190695 | 2190728 | 2 | 17 | 34 | AC   | 15 | 10 |
| 126287 | 13 | 2243639 | 2243664 | 2 | 13 | 26 | AC   | 12 | 9  |
| 126288 | 13 | 2248441 | 2248454 | 2 | 7  | 14 | AC   | 16 | 10 |
| 126291 | 13 | 2249287 | 2249302 | 4 | 4  | 16 | TTTA | 8  | 4  |
| 126294 | 13 | 2252198 | 2252221 | 2 | 12 | 24 | CA   | 7  | 9  |
| 126296 | 13 | 2253643 | 2253676 | 2 | 17 | 34 | AC   | 23 | 7  |
| 126299 | 13 | 2257409 | 2257420 | 2 | 6  | 12 | CA   | 27 | 10 |
| 126300 | 13 | 2257671 | 2257688 | 2 | 9  | 18 | CA   | 19 | 5  |
| 126303 | 13 | 2268761 | 2268775 | 3 | 5  | 15 | CAG  | 22 | 4  |
| 126307 | 13 | 2273727 | 2273760 | 2 | 17 | 34 | CA   | 10 | 11 |
| 126311 | 13 | 2280042 | 2280061 | 2 | 10 | 20 | CA   | 9  | 6  |
| 126312 | 13 | 2280129 | 2280168 | 2 | 20 | 40 | CA   | 8  | 9  |
| 126313 | 13 | 2280661 | 2280684 | 4 | 6  | 24 | AGAC | 20 | 4  |
| 126319 | 13 | 2288693 | 2288704 | 2 | 6  | 12 | TA   | 18 | 5  |
| 126334 | 13 | 2320259 | 2320288 | 2 | 15 | 30 | GA   | 11 | 10 |
| 126339 | 13 | 2323640 | 2323655 | 4 | 4  | 16 | ATGG | 16 | 3  |
| 126340 | 13 | 2323699 | 2323742 | 2 | 22 | 44 | GT   | 11 | 12 |
| 126341 | 13 | 2327086 | 2327125 | 2 | 20 | 40 | CA   | 15 | 13 |
| 126343 | 13 | 2329218 | 2329232 | 3 | 5  | 15 | CAG  | 36 | 4  |

|        |    |         |         |   |    |    |      |    |    |
|--------|----|---------|---------|---|----|----|------|----|----|
| 126349 | 13 | 2333041 | 2333058 | 2 | 9  | 18 | TG   | 25 | 9  |
| 126353 | 13 | 2336155 | 2336169 | 3 | 5  | 15 | TGT  | 32 | 3  |
| 126355 | 13 | 2339046 | 2339059 | 2 | 7  | 14 | CA   | 27 | 9  |
| 126359 | 13 | 2339995 | 2340020 | 2 | 13 | 26 | AC   | 20 | 10 |
| 126362 | 13 | 2342661 | 2342672 | 2 | 6  | 12 | CA   | 19 | 3  |
| 126367 | 13 | 2345124 | 2345173 | 2 | 25 | 50 | CA   | 6  | 8  |
| 126370 | 13 | 2349322 | 2349353 | 2 | 16 | 32 | GT   | 15 | 7  |
| 126371 | 13 | 2349585 | 2349596 | 2 | 6  | 12 | TG   | 30 | 3  |
| 126373 | 13 | 2351275 | 2351290 | 4 | 4  | 16 | CCTC | 25 | 3  |
| 126377 | 13 | 2353178 | 2353207 | 2 | 15 | 30 | TG   | 12 | 12 |
| 126382 | 13 | 2356638 | 2356661 | 2 | 12 | 24 | GT   | 19 | 6  |
| 126386 | 13 | 2359348 | 2359371 | 4 | 6  | 24 | TATT | 28 | 4  |
| 126389 | 13 | 2360803 | 2360820 | 2 | 9  | 18 | CA   | 17 | 20 |
| 126391 | 13 | 2362159 | 2362182 | 2 | 12 | 24 | CA   | 10 | 9  |
| 126395 | 13 | 2365850 | 2365879 | 3 | 10 | 30 | CTG  | 16 | 8  |
| 126396 | 13 | 2367468 | 2367493 | 2 | 13 | 26 | CA   | 11 | 5  |
| 126397 | 13 | 2367656 | 2367669 | 2 | 7  | 14 | CA   | 17 | 6  |
| 126401 | 13 | 2371524 | 2371545 | 2 | 11 | 22 | CA   | 14 | 12 |
| 126404 | 13 | 2374050 | 2374067 | 2 | 9  | 18 | CA   | 28 | 7  |
| 126410 | 13 | 2388048 | 2388071 | 4 | 6  | 24 | TTTG | 19 | 6  |
| 126413 | 13 | 2388705 | 2388742 | 2 | 19 | 38 | TG   | 9  | 8  |
| 126414 | 13 | 2389315 | 2389370 | 2 | 28 | 56 | CA   | 10 | 10 |
| 126415 | 13 | 2391052 | 2391079 | 2 | 14 | 28 | GT   | 12 | 11 |
| 126416 | 13 | 2391212 | 2391229 | 2 | 9  | 18 | TG   | 21 | 6  |
| 126417 | 13 | 2391630 | 2391653 | 2 | 12 | 24 | CA   | 23 | 14 |
| 126418 | 13 | 2392176 | 2392201 | 2 | 13 | 26 | GT   | 17 | 7  |
| 126420 | 13 | 2393367 | 2393392 | 2 | 13 | 26 | CA   | 13 | 10 |
| 126421 | 13 | 2393657 | 2393670 | 2 | 7  | 14 | GT   | 7  | 8  |
| 126424 | 13 | 2395193 | 2395206 | 2 | 7  | 14 | GA   | 27 | 5  |
| 126425 | 13 | 2396088 | 2396123 | 2 | 18 | 36 | TG   | 6  | 8  |
| 126426 | 13 | 2396182 | 2396203 | 2 | 11 | 22 | GA   | 7  | 7  |
| 126431 | 13 | 2397003 | 2397040 | 2 | 19 | 38 | AC   | 13 | 14 |
| 126432 | 13 | 2397265 | 2397285 | 3 | 7  | 21 | GAA  | 22 | 4  |
| 126435 | 13 | 2398125 | 2398144 | 2 | 10 | 20 | AC   | 9  | 10 |
| 126436 | 13 | 2398271 | 2398288 | 2 | 9  | 18 | AC   | 19 | 11 |
| 126443 | 13 | 2402641 | 2402656 | 2 | 8  | 16 | CA   | 16 | 11 |
| 126447 | 13 | 2406236 | 2406249 | 2 | 7  | 14 | TG   | 6  | 3  |
| 126450 | 13 | 2410680 | 2410705 | 2 | 13 | 26 | AC   | 14 | 13 |
| 126454 | 13 | 2416199 | 2416226 | 2 | 14 | 28 | CA   | 19 | 19 |
| 126457 | 13 | 2420337 | 2420356 | 4 | 5  | 20 | CATT | 23 | 3  |
| 126459 | 13 | 2428933 | 2428944 | 2 | 6  | 12 | AC   | 13 | 6  |
| 126460 | 13 | 2429045 | 2429060 | 2 | 8  | 16 | AC   | 10 | 10 |
| 126462 | 13 | 2429251 | 2429292 | 3 | 14 | 42 | TTC  | 19 | 17 |
| 126478 | 13 | 2439295 | 2439316 | 2 | 11 | 22 | GT   | 13 | 8  |
| 126479 | 13 | 2439504 | 2439529 | 2 | 13 | 26 | GT   | 10 | 10 |
| 126483 | 13 | 2449217 | 2449244 | 2 | 14 | 28 | AC   | 12 | 12 |
| 126484 | 13 | 2449734 | 2449769 | 3 | 12 | 36 | GAA  | 19 | 11 |
| 126489 | 13 | 2453255 | 2453302 | 4 | 12 | 48 | GATA | 22 | 19 |
| 126490 | 13 | 2454666 | 2454698 | 3 | 11 | 33 | GAT  | 23 | 4  |
| 126491 | 13 | 2458263 | 2458278 | 2 | 8  | 16 | AC   | 17 | 3  |
| 126492 | 13 | 2458484 | 2458521 | 2 | 19 | 38 | AC   | 15 | 10 |

|        |    |         |         |   |    |    |      |    |    |
|--------|----|---------|---------|---|----|----|------|----|----|
| 126496 | 13 | 2463962 | 2463985 | 2 | 12 | 24 | CA   | 11 | 6  |
| 126499 | 13 | 2467546 | 2467565 | 2 | 10 | 20 | AG   | 29 | 5  |
| 126507 | 13 | 2476100 | 2476131 | 2 | 16 | 32 | AC   | 10 | 8  |
| 126514 | 13 | 2481746 | 2481761 | 2 | 8  | 16 | AC   | 21 | 7  |
| 126516 | 13 | 2486114 | 2486137 | 2 | 12 | 24 | TG   | 20 | 11 |
| 126517 | 13 | 2486268 | 2486293 | 2 | 13 | 26 | GT   | 11 | 13 |
| 126520 | 13 | 2509786 | 2509803 | 2 | 9  | 18 | GT   | 25 | 8  |
| 126522 | 13 | 2511378 | 2511389 | 2 | 6  | 12 | AC   | 22 | 3  |
| 126525 | 13 | 2516294 | 2516307 | 2 | 7  | 14 | TG   | 8  | 5  |
| 126526 | 13 | 2516310 | 2516323 | 2 | 7  | 14 | TG   | 15 | 8  |
| 126529 | 13 | 2519824 | 2519841 | 3 | 6  | 18 | ATT  | 21 | 7  |
| 126530 | 13 | 2535767 | 2535802 | 2 | 18 | 36 | CA   | 10 | 10 |
| 126531 | 13 | 2536840 | 2536865 | 2 | 13 | 26 | AC   | 17 | 7  |
| 126533 | 13 | 2547969 | 2547980 | 2 | 6  | 12 | GT   | 22 | 4  |
| 126535 | 13 | 2548442 | 2548473 | 2 | 16 | 32 | TG   | 9  | 8  |
| 126536 | 13 | 2548662 | 2548675 | 2 | 7  | 14 | AC   | 26 | 4  |
| 126537 | 13 | 2551161 | 2551190 | 2 | 15 | 30 | CA   | 16 | 11 |
| 126538 | 13 | 2553143 | 2553163 | 3 | 7  | 21 | TTG  | 29 | 4  |
| 126540 | 13 | 2554202 | 2554239 | 2 | 19 | 38 | GT   | 9  | 8  |
| 126542 | 13 | 2558524 | 2558545 | 2 | 11 | 22 | CA   | 15 | 6  |
| 126547 | 13 | 2560815 | 2560834 | 4 | 5  | 20 | ATGG | 24 | 6  |
| 126548 | 13 | 2560998 | 2561019 | 2 | 11 | 22 | GT   | 13 | 9  |
| 126550 | 13 | 2561646 | 2561660 | 3 | 5  | 15 | CTC  | 17 | 5  |
| 126551 | 13 | 2561828 | 2561845 | 2 | 9  | 18 | TG   | 27 | 6  |
| 126552 | 13 | 2563189 | 2563212 | 2 | 12 | 24 | TG   | 19 | 6  |
| 126553 | 13 | 2563568 | 2563583 | 2 | 8  | 16 | CA   | 19 | 3  |
| 126554 | 13 | 2564405 | 2564424 | 2 | 10 | 20 | GT   | 25 | 3  |
| 126556 | 13 | 2568766 | 2568777 | 2 | 6  | 12 | TG   | 20 | 8  |
| 126557 | 13 | 2568780 | 2568793 | 2 | 7  | 14 | TG   | 10 | 5  |
| 126559 | 13 | 2574685 | 2574708 | 3 | 8  | 24 | GAT  | 26 | 5  |
| 126563 | 13 | 2578724 | 2578737 | 2 | 7  | 14 | CA   | 30 | 8  |
| 126564 | 13 | 2579834 | 2579877 | 2 | 22 | 44 | AC   | 14 | 9  |
| 126565 | 13 | 2579994 | 2580015 | 2 | 11 | 22 | CA   | 21 | 14 |
| 126570 | 13 | 2584353 | 2584367 | 3 | 5  | 15 | CTG  | 29 | 3  |
| 126573 | 13 | 2586516 | 2586543 | 2 | 14 | 28 | AC   | 7  | 8  |
| 126574 | 13 | 2586702 | 2586719 | 2 | 9  | 18 | CA   | 18 | 12 |
| 126575 | 13 | 2586722 | 2586735 | 2 | 7  | 14 | CA   | 23 | 12 |
| 126576 | 13 | 2586951 | 2586968 | 2 | 9  | 18 | TG   | 20 | 12 |
| 126577 | 13 | 2588432 | 2588452 | 3 | 7  | 21 | TCC  | 17 | 7  |
| 126578 | 13 | 2588577 | 2588600 | 2 | 12 | 24 | GT   | 10 | 7  |
| 126579 | 13 | 2588826 | 2588845 | 2 | 10 | 20 | TG   | 10 | 6  |
| 126580 | 13 | 2588971 | 2588998 | 2 | 14 | 28 | GT   | 12 | 9  |
| 126581 | 13 | 2589191 | 2589208 | 2 | 9  | 18 | GT   | 16 | 12 |
| 126582 | 13 | 2589479 | 2589494 | 2 | 8  | 16 | GT   | 13 | 10 |
| 126584 | 13 | 2589583 | 2589608 | 2 | 13 | 26 | GT   | 12 | 8  |
| 126587 | 13 | 2591548 | 2591573 | 2 | 13 | 26 | GA   | 10 | 7  |
| 126590 | 13 | 2592738 | 2592763 | 2 | 13 | 26 | CA   | 14 | 10 |
| 126593 | 13 | 2593075 | 2593089 | 3 | 5  | 15 | ACC  | 24 | 8  |
| 126594 | 13 | 2593090 | 2593104 | 3 | 5  | 15 | GCC  | 25 | 8  |
| 126595 | 13 | 2593637 | 2593648 | 2 | 6  | 12 | CA   | 25 | 3  |
| 126597 | 13 | 2594692 | 2594705 | 2 | 7  | 14 | AC   | 25 | 4  |

|        |    |         |         |   |    |    |      |    |    |
|--------|----|---------|---------|---|----|----|------|----|----|
| 126599 | 13 | 2603332 | 2603361 | 2 | 15 | 30 | TG   | 19 | 3  |
| 126600 | 13 | 2603599 | 2603620 | 2 | 11 | 22 | AC   | 31 | 4  |
| 126601 | 13 | 2603694 | 2603705 | 2 | 6  | 12 | CA   | 32 | 3  |
| 126602 | 13 | 2603755 | 2603766 | 2 | 6  | 12 | TG   | 28 | 3  |
| 126603 | 13 | 2603845 | 2603862 | 2 | 9  | 18 | AC   | 22 | 3  |
| 126604 | 13 | 2605339 | 2605368 | 2 | 15 | 30 | AC   | 17 | 12 |
| 126605 | 13 | 2605535 | 2605568 | 2 | 17 | 34 | AC   | 16 | 13 |
| 126607 | 13 | 2606493 | 2606510 | 2 | 9  | 18 | AG   | 15 | 3  |
| 126608 | 13 | 2607267 | 2607300 | 2 | 17 | 34 | CA   | 15 | 14 |
| 126609 | 13 | 2608750 | 2608767 | 2 | 9  | 18 | GT   | 25 | 9  |
| 126610 | 13 | 2609098 | 2609123 | 2 | 13 | 26 | TG   | 13 | 9  |
| 126612 | 13 | 2609313 | 2609332 | 2 | 10 | 20 | AC   | 13 | 5  |
| 126613 | 13 | 2610198 | 2610235 | 2 | 19 | 38 | TG   | 7  | 9  |
| 126615 | 13 | 2611063 | 2611086 | 4 | 6  | 24 | ATTT | 24 | 6  |
| 126616 | 13 | 2611447 | 2611478 | 2 | 16 | 32 | GT   | 17 | 8  |
| 126617 | 13 | 2611622 | 2611647 | 2 | 13 | 26 | AG   | 25 | 4  |
| 126618 | 13 | 2613821 | 2613838 | 3 | 6  | 18 | CTC  | 23 | 9  |
| 126619 | 13 | 2616042 | 2616059 | 3 | 6  | 18 | CTC  | 25 | 3  |
| 126620 | 13 | 2616248 | 2616275 | 2 | 14 | 28 | CA   | 20 | 8  |
| 126622 | 13 | 2617505 | 2617522 | 2 | 9  | 18 | AC   | 21 | 8  |
| 126627 | 13 | 2618332 | 2618345 | 2 | 7  | 14 | CA   | 16 | 9  |
| 126628 | 13 | 2621676 | 2621687 | 2 | 6  | 12 | AC   | 34 | 6  |
| 126629 | 13 | 2621802 | 2621813 | 2 | 6  | 12 | AC   | 18 | 6  |
| 126631 | 13 | 2625401 | 2625418 | 2 | 9  | 18 | AG   | 16 | 6  |
| 126635 | 13 | 2625882 | 2625905 | 2 | 12 | 24 | GT   | 19 | 7  |
| 126636 | 13 | 2625997 | 2626012 | 2 | 8  | 16 | GT   | 13 | 3  |
| 126640 | 13 | 2627978 | 2627991 | 2 | 7  | 14 | AG   | 16 | 3  |
| 126642 | 13 | 2629423 | 2629442 | 4 | 5  | 20 | TTTG | 10 | 7  |
| 126643 | 13 | 2630641 | 2630656 | 2 | 8  | 16 | TC   | 25 | 7  |
| 126644 | 13 | 2633513 | 2633526 | 2 | 7  | 14 | TC   | 28 | 6  |
| 126645 | 13 | 2639022 | 2639063 | 3 | 14 | 42 | AAT  | 20 | 5  |
| 126650 | 13 | 2643018 | 2643065 | 2 | 24 | 48 | CA   | 9  | 11 |
| 126652 | 13 | 2643488 | 2643545 | 2 | 29 | 58 | GT   | 13 | 13 |
| 126654 | 13 | 2645738 | 2645761 | 2 | 12 | 24 | TC   | 17 | 9  |
| 126655 | 13 | 2645809 | 2645822 | 2 | 7  | 14 | TC   | 14 | 4  |
| 126659 | 13 | 2647910 | 2647931 | 2 | 11 | 22 | CT   | 8  | 6  |
| 126660 | 13 | 2648068 | 2648083 | 2 | 8  | 16 | AC   | 7  | 4  |
| 126662 | 13 | 2648355 | 2648370 | 2 | 8  | 16 | TG   | 26 | 4  |
| 126666 | 13 | 2649289 | 2649300 | 2 | 6  | 12 | GT   | 9  | 3  |
| 126669 | 13 | 2651134 | 2651165 | 2 | 16 | 32 | GT   | 12 | 9  |
| 126670 | 13 | 2651276 | 2651301 | 2 | 13 | 26 | AC   | 9  | 7  |
| 126672 | 13 | 2653134 | 2653157 | 3 | 8  | 24 | CTG  | 27 | 4  |
| 126678 | 13 | 2657386 | 2657413 | 2 | 14 | 28 | TG   | 11 | 7  |
| 126680 | 13 | 2661045 | 2661062 | 2 | 9  | 18 | GA   | 23 | 4  |
| 126683 | 13 | 2662018 | 2662043 | 2 | 13 | 26 | CA   | 11 | 10 |
| 126684 | 13 | 2664523 | 2664562 | 2 | 20 | 40 | AC   | 9  | 10 |
| 126685 | 13 | 2665859 | 2665878 | 2 | 10 | 20 | CA   | 28 | 3  |
| 126686 | 13 | 2670910 | 2670921 | 2 | 6  | 12 | CA   | 15 | 11 |
| 126691 | 13 | 2674821 | 2674842 | 2 | 11 | 22 | GA   | 12 | 14 |
| 126693 | 13 | 2675706 | 2675721 | 2 | 8  | 16 | GT   | 18 | 8  |
| 126694 | 13 | 2675723 | 2675736 | 2 | 7  | 14 | TG   | 13 | 7  |

|        |    |         |         |   |    |    |      |    |    |
|--------|----|---------|---------|---|----|----|------|----|----|
| 126697 | 13 | 2683958 | 2683973 | 4 | 4  | 16 | TTTG | 30 | 3  |
| 126701 | 13 | 2696139 | 2696154 | 2 | 8  | 16 | CA   | 22 | 3  |
| 126702 | 13 | 2696261 | 2696272 | 2 | 6  | 12 | CA   | 21 | 4  |
| 126703 | 13 | 2710395 | 2710415 | 3 | 7  | 21 | ATC  | 23 | 5  |
| 126708 | 13 | 2730768 | 2730783 | 2 | 8  | 16 | CA   | 22 | 6  |
| 126709 | 13 | 2730919 | 2730946 | 2 | 14 | 28 | CA   | 16 | 5  |
| 126718 | 13 | 2738614 | 2738629 | 2 | 8  | 16 | CA   | 15 | 7  |
| 126719 | 13 | 2738632 | 2738645 | 2 | 7  | 14 | CA   | 17 | 7  |
| 126720 | 13 | 2740731 | 2740754 | 2 | 12 | 24 | GT   | 13 | 8  |
| 126723 | 13 | 2746189 | 2746202 | 2 | 7  | 14 | GA   | 29 | 6  |
| 126727 | 13 | 2750327 | 2750338 | 2 | 6  | 12 | AC   | 14 | 4  |
| 126729 | 13 | 2753516 | 2753533 | 2 | 9  | 18 | GA   | 13 | 4  |
| 126730 | 13 | 2755528 | 2755575 | 2 | 24 | 48 | TG   | 8  | 10 |
| 126732 | 13 | 2756052 | 2756065 | 2 | 7  | 14 | AG   | 16 | 5  |
| 126734 | 13 | 2760344 | 2760367 | 4 | 6  | 24 | ATCC | 26 | 3  |
| 126735 | 13 | 2766210 | 2766229 | 4 | 5  | 20 | AACC | 26 | 8  |
| 126737 | 13 | 2767334 | 2767363 | 2 | 15 | 30 | CA   | 7  | 7  |
| 126740 | 13 | 2769028 | 2769049 | 2 | 11 | 22 | GT   | 21 | 10 |
| 126742 | 13 | 2772806 | 2772823 | 3 | 6  | 18 | TCT  | 24 | 6  |
| 126743 | 13 | 2773319 | 2773360 | 2 | 21 | 42 | AC   | 7  | 8  |
| 126755 | 13 | 2787974 | 2787989 | 2 | 8  | 16 | AC   | 13 | 10 |
| 126756 | 13 | 2787992 | 2788003 | 2 | 6  | 12 | AC   | 6  | 7  |
| 126757 | 13 | 2788110 | 2788125 | 2 | 8  | 16 | AC   | 12 | 6  |
| 126758 | 13 | 2788128 | 2788139 | 2 | 6  | 12 | AC   | 14 | 8  |
| 126760 | 13 | 2792681 | 2792710 | 3 | 10 | 30 | TAT  | 18 | 5  |
| 126762 | 13 | 2802850 | 2802875 | 2 | 13 | 26 | CT   | 14 | 8  |
| 126768 | 13 | 2843218 | 2843231 | 2 | 7  | 14 | TG   | 24 | 7  |
| 126769 | 13 | 2847331 | 2847368 | 2 | 19 | 38 | TG   | 11 | 9  |
| 126770 | 13 | 2847396 | 2847407 | 2 | 6  | 12 | CA   | 26 | 3  |
| 126771 | 13 | 2847700 | 2847721 | 2 | 11 | 22 | AG   | 13 | 5  |
| 126772 | 13 | 2847754 | 2847765 | 2 | 6  | 12 | TG   | 18 | 10 |
| 126774 | 13 | 2847920 | 2847947 | 2 | 14 | 28 | GT   | 19 | 9  |
| 126777 | 13 | 2852746 | 2852779 | 2 | 17 | 34 | TG   | 8  | 9  |
| 126778 | 13 | 2852924 | 2852957 | 2 | 17 | 34 | AC   | 13 | 7  |
| 126781 | 13 | 2858048 | 2858065 | 2 | 9  | 18 | AG   | 11 | 11 |
| 126783 | 13 | 2858326 | 2858351 | 2 | 13 | 26 | CA   | 9  | 10 |
| 126788 | 13 | 2860624 | 2860637 | 2 | 7  | 14 | GT   | 25 | 4  |
| 126789 | 13 | 2860825 | 2860836 | 2 | 6  | 12 | CA   | 8  | 3  |
| 126794 | 13 | 2862187 | 2862212 | 2 | 13 | 26 | GT   | 10 | 12 |
| 126797 | 13 | 2863710 | 2863735 | 2 | 13 | 26 | TG   | 13 | 14 |
| 126799 | 13 | 2863898 | 2863909 | 2 | 6  | 12 | CA   | 16 | 15 |
| 126800 | 13 | 2863912 | 2863927 | 2 | 8  | 16 | CA   | 17 | 17 |
| 126802 | 13 | 2865397 | 2865412 | 2 | 8  | 16 | CA   | 22 | 9  |
| 126805 | 13 | 2868540 | 2868551 | 2 | 6  | 12 | TG   | 29 | 3  |
| 126806 | 13 | 2868598 | 2868635 | 2 | 19 | 38 | TG   | 19 | 12 |
| 126810 | 13 | 2869658 | 2869681 | 2 | 12 | 24 | AG   | 30 | 8  |
| 126812 | 13 | 2874608 | 2874640 | 3 | 11 | 33 | CCT  | 16 | 4  |
| 126815 | 13 | 2880747 | 2880760 | 2 | 7  | 14 | AC   | 20 | 6  |
| 126817 | 13 | 2883707 | 2883722 | 4 | 4  | 16 | TGGA | 8  | 5  |
| 126818 | 13 | 2884714 | 2884737 | 2 | 12 | 24 | GT   | 16 | 20 |
| 126819 | 13 | 2884868 | 2884885 | 3 | 6  | 18 | GAG  | 22 | 10 |



|        |    |         |         |   |    |    |      |    |    |
|--------|----|---------|---------|---|----|----|------|----|----|
| 126821 | 13 | 2886697 | 2886716 | 4 | 5  | 20 | TTAT | 14 | 3  |
| 126822 | 13 | 2891932 | 2891952 | 3 | 7  | 21 | GGA  | 29 | 5  |
| 126823 | 13 | 2892666 | 2892689 | 3 | 8  | 24 | TTG  | 16 | 9  |
| 126824 | 13 | 2897145 | 2897159 | 3 | 5  | 15 | TTA  | 28 | 5  |
| 126825 | 13 | 2897759 | 2897778 | 2 | 10 | 20 | GT   | 6  | 6  |
| 126826 | 13 | 2897935 | 2897962 | 2 | 14 | 28 | GT   | 8  | 8  |
| 126828 | 13 | 2898489 | 2898518 | 2 | 15 | 30 | TG   | 10 | 12 |
| 126829 | 13 | 2898916 | 2898939 | 2 | 12 | 24 | CA   | 12 | 16 |
| 126830 | 13 | 2899170 | 2899189 | 2 | 10 | 20 | GT   | 24 | 15 |
| 126833 | 13 | 2903300 | 2903321 | 2 | 11 | 22 | TG   | 15 | 6  |
| 126835 | 13 | 2907620 | 2907631 | 2 | 6  | 12 | AG   | 30 | 4  |
| 126836 | 13 | 2907698 | 2907719 | 2 | 11 | 22 | CA   | 10 | 11 |
| 126838 | 13 | 2909150 | 2909175 | 2 | 13 | 26 | GT   | 13 | 11 |
| 126840 | 13 | 2910747 | 2910762 | 2 | 8  | 16 | TG   | 14 | 10 |
| 126841 | 13 | 2911105 | 2911142 | 2 | 19 | 38 | GT   | 18 | 11 |
| 126842 | 13 | 2911250 | 2911271 | 2 | 11 | 22 | TG   | 14 | 8  |
| 126843 | 13 | 2911850 | 2911879 | 2 | 15 | 30 | TG   | 15 | 7  |
| 126844 | 13 | 2912422 | 2912451 | 3 | 10 | 30 | ATG  | 20 | 11 |
| 126852 | 13 | 2920042 | 2920077 | 2 | 18 | 36 | GT   | 7  | 7  |
| 126853 | 13 | 2920244 | 2920275 | 2 | 16 | 32 | CT   | 18 | 7  |
| 126854 | 13 | 2922168 | 2922201 | 2 | 17 | 34 | CA   | 8  | 9  |
| 126855 | 13 | 2922281 | 2922292 | 2 | 6  | 12 | CT   | 27 | 7  |
| 126856 | 13 | 2922532 | 2922555 | 2 | 12 | 24 | CA   | 6  | 6  |
| 126860 | 13 | 2936185 | 2936210 | 2 | 13 | 26 | AC   | 23 | 9  |
| 126863 | 13 | 2942734 | 2942749 | 2 | 8  | 16 | CA   | 28 | 7  |
| 126869 | 13 | 2953011 | 2953022 | 2 | 6  | 12 | AC   | 22 | 4  |
| 126873 | 13 | 2960971 | 2960986 | 2 | 8  | 16 | TG   | 26 | 12 |
| 126874 | 13 | 2963047 | 2963070 | 3 | 8  | 24 | AGA  | 29 | 5  |
| 126875 | 13 | 2964841 | 2964864 | 2 | 12 | 24 | CA   | 11 | 8  |
| 126883 | 13 | 2975482 | 2975511 | 2 | 15 | 30 | CA   | 8  | 12 |
| 126884 | 13 | 2975634 | 2975691 | 2 | 29 | 58 | AC   | 11 | 10 |
| 126885 | 13 | 2975814 | 2975825 | 2 | 6  | 12 | GT   | 17 | 5  |
| 126886 | 13 | 2975828 | 2975839 | 2 | 6  | 12 | GT   | 26 | 6  |
| 126887 | 13 | 2975904 | 2975923 | 2 | 10 | 20 | AC   | 26 | 6  |
| 126890 | 13 | 2979375 | 2979386 | 2 | 6  | 12 | CA   | 28 | 6  |
| 126891 | 13 | 2982089 | 2982108 | 2 | 10 | 20 | CT   | 19 | 9  |
| 126892 | 13 | 2982246 | 2982265 | 2 | 10 | 20 | GT   | 22 | 7  |
| 126893 | 13 | 2983511 | 2983532 | 2 | 11 | 22 | AC   | 20 | 7  |
| 126895 | 13 | 2984065 | 2984078 | 2 | 7  | 14 | CA   | 19 | 7  |
| 126897 | 13 | 2987713 | 2987746 | 2 | 17 | 34 | CA   | 10 | 9  |
| 126898 | 13 | 2987921 | 2987938 | 3 | 6  | 18 | AGG  | 23 | 5  |
| 126900 | 13 | 2988257 | 2988280 | 4 | 6  | 24 | ATCT | 24 | 11 |
| 126903 | 13 | 2995497 | 2995540 | 2 | 22 | 44 | GT   | 8  | 8  |
| 126904 | 13 | 2997288 | 2997307 | 2 | 10 | 20 | TG   | 20 | 7  |
| 126906 | 13 | 2997840 | 2997863 | 2 | 12 | 24 | TG   | 12 | 10 |
| 126909 | 13 | 3002760 | 3002777 | 2 | 9  | 18 | TG   | 24 | 5  |
| 126911 | 13 | 3002927 | 3002948 | 2 | 11 | 22 | TG   | 13 | 9  |
| 126914 | 13 | 3015633 | 3015658 | 2 | 13 | 26 | AC   | 11 | 4  |
| 126920 | 13 | 3023974 | 3023989 | 4 | 4  | 16 | AAAT | 28 | 4  |
| 126928 | 13 | 3036555 | 3036572 | 3 | 6  | 18 | TTG  | 8  | 5  |
| 126929 | 13 | 3037352 | 3037375 | 2 | 12 | 24 | AC   | 12 | 10 |

|        |    |         |         |   |    |    |      |    |    |
|--------|----|---------|---------|---|----|----|------|----|----|
| 126938 | 13 | 3044656 | 3044670 | 3 | 5  | 15 | ATG  | 33 | 3  |
| 126940 | 13 | 3046043 | 3046054 | 2 | 6  | 12 | CA   | 17 | 5  |
| 126941 | 13 | 3046056 | 3046067 | 2 | 6  | 12 | AC   | 8  | 4  |
| 126942 | 13 | 3046098 | 3046123 | 2 | 13 | 26 | CA   | 11 | 13 |
| 126945 | 13 | 3054700 | 3054723 | 3 | 8  | 24 | CTT  | 21 | 5  |
| 126947 | 13 | 3058752 | 3058771 | 2 | 10 | 20 | CA   | 14 | 6  |
| 126952 | 13 | 3060770 | 3060789 | 2 | 10 | 20 | AC   | 10 | 8  |
| 126955 | 13 | 3065978 | 3065998 | 3 | 7  | 21 | CCT  | 23 | 8  |
| 126956 | 13 | 3066258 | 3066279 | 2 | 11 | 22 | CT   | 21 | 4  |
| 126957 | 13 | 3066441 | 3066466 | 2 | 13 | 26 | GT   | 17 | 8  |
| 126961 | 13 | 3069084 | 3069109 | 2 | 13 | 26 | GT   | 19 | 16 |
| 126962 | 13 | 3069232 | 3069249 | 2 | 9  | 18 | GA   | 11 | 8  |
| 126963 | 13 | 3069443 | 3069457 | 3 | 5  | 15 | GAG  | 12 | 3  |
| 126964 | 13 | 3069971 | 3069998 | 4 | 7  | 28 | TTTC | 14 | 6  |
| 126970 | 13 | 3073965 | 3073996 | 2 | 16 | 32 | GT   | 6  | 10 |
| 126973 | 13 | 3088262 | 3088276 | 3 | 5  | 15 | CAG  | 27 | 3  |
| 126976 | 13 | 3096706 | 3096726 | 3 | 7  | 21 | GGA  | 22 | 9  |
| 126980 | 13 | 3109162 | 3109191 | 3 | 10 | 30 | TAT  | 18 | 6  |
| 126982 | 13 | 3117143 | 3117154 | 2 | 6  | 12 | TG   | 27 | 4  |
| 126985 | 13 | 3123248 | 3123263 | 2 | 8  | 16 | AC   | 15 | 3  |
| 126992 | 13 | 3125318 | 3125333 | 4 | 4  | 16 | AAAC | 16 | 3  |
| 127000 | 13 | 3131321 | 3131338 | 2 | 9  | 18 | AG   | 23 | 10 |
| 127001 | 13 | 3134716 | 3134775 | 3 | 20 | 60 | CTT  | 16 | 15 |
| 127005 | 13 | 3135708 | 3135735 | 2 | 14 | 28 | TG   | 16 | 14 |
| 127007 | 13 | 3137525 | 3137542 | 3 | 6  | 18 | GTT  | 24 | 5  |
| 127008 | 13 | 3137892 | 3137907 | 2 | 8  | 16 | TG   | 23 | 14 |
| 127009 | 13 | 3137979 | 3137999 | 3 | 7  | 21 | AGA  | 30 | 5  |
| 127010 | 13 | 3141226 | 3141241 | 4 | 4  | 16 | CTAT | 20 | 6  |
| 127011 | 13 | 3141569 | 3141608 | 2 | 20 | 40 | GT   | 9  | 13 |
| 127013 | 13 | 3142565 | 3142582 | 3 | 6  | 18 | CTG  | 22 | 3  |
| 127014 | 13 | 3144599 | 3144622 | 2 | 12 | 24 | AC   | 16 | 9  |
| 127016 | 13 | 3146925 | 3146940 | 2 | 8  | 16 | GT   | 19 | 10 |
| 127017 | 13 | 3147160 | 3147173 | 2 | 7  | 14 | TG   | 24 | 3  |
| 127018 | 13 | 3147344 | 3147361 | 2 | 9  | 18 | TG   | 10 | 11 |
| 127020 | 13 | 3150119 | 3150130 | 2 | 6  | 12 | TG   | 26 | 5  |
| 127021 | 13 | 3150292 | 3150309 | 2 | 9  | 18 | AC   | 25 | 4  |
| 127023 | 13 | 3150350 | 3150371 | 2 | 11 | 22 | TG   | 14 | 16 |
| 127024 | 13 | 3151388 | 3151408 | 3 | 7  | 21 | AAG  | 17 | 8  |
| 127025 | 13 | 3151726 | 3151745 | 2 | 10 | 20 | TG   | 21 | 5  |
| 127029 | 13 | 3155846 | 3155857 | 2 | 6  | 12 | AC   | 20 | 4  |
| 127030 | 13 | 3156668 | 3156691 | 4 | 6  | 24 | TCAT | 28 | 10 |
| 127031 | 13 | 3161620 | 3161643 | 3 | 8  | 24 | CCT  | 14 | 6  |
| 127033 | 13 | 3162014 | 3162037 | 3 | 8  | 24 | CCT  | 7  | 8  |
| 127035 | 13 | 3162363 | 3162378 | 4 | 4  | 16 | ACGC | 29 | 3  |
| 127037 | 13 | 3165997 | 3166018 | 2 | 11 | 22 | GT   | 21 | 7  |
| 127038 | 13 | 3166450 | 3166467 | 2 | 9  | 18 | GT   | 28 | 5  |
| 127040 | 13 | 3169559 | 3169573 | 3 | 5  | 15 | CCA  | 28 | 4  |
| 127041 | 13 | 3169864 | 3169902 | 3 | 13 | 39 | TGA  | 20 | 6  |
| 127049 | 13 | 3172590 | 3172610 | 3 | 7  | 21 | TGG  | 26 | 5  |
| 127050 | 13 | 3172911 | 3172952 | 2 | 21 | 42 | TG   | 13 | 11 |
| 127051 | 13 | 3173624 | 3173639 | 4 | 4  | 16 | TATT | 8  | 3  |

|        |    |         |         |   |    |    |      |    |    |
|--------|----|---------|---------|---|----|----|------|----|----|
| 127059 | 13 | 3207343 | 3207364 | 2 | 11 | 22 | TG   | 9  | 6  |
| 127062 | 13 | 3215981 | 3215994 | 2 | 7  | 14 | AC   | 10 | 3  |
| 127063 | 13 | 3216181 | 3216194 | 2 | 7  | 14 | AC   | 34 | 3  |
| 127065 | 13 | 3219003 | 3219023 | 3 | 7  | 21 | GGA  | 16 | 8  |
| 127067 | 13 | 3222536 | 3222549 | 2 | 7  | 14 | CA   | 22 | 3  |
| 127068 | 13 | 3222670 | 3222681 | 2 | 6  | 12 | AG   | 19 | 4  |
| 127069 | 13 | 3222684 | 3222699 | 2 | 8  | 16 | AG   | 18 | 4  |
| 127072 | 13 | 3225996 | 3226011 | 2 | 8  | 16 | AC   | 28 | 5  |
| 127073 | 13 | 3231349 | 3231394 | 2 | 23 | 46 | GT   | 16 | 14 |
| 127074 | 13 | 3233894 | 3233926 | 3 | 11 | 33 | GAG  | 17 | 12 |
| 127076 | 13 | 3240588 | 3240627 | 2 | 20 | 40 | CA   | 6  | 8  |
| 127078 | 13 | 3240808 | 3240821 | 2 | 7  | 14 | AC   | 18 | 3  |
| 127079 | 13 | 3240845 | 3240856 | 2 | 6  | 12 | CA   | 18 | 3  |
| 127080 | 13 | 3242809 | 3242835 | 3 | 9  | 27 | GAA  | 26 | 5  |
| 127081 | 13 | 3244011 | 3244022 | 2 | 6  | 12 | TA   | 22 | 3  |
| 127085 | 13 | 3257002 | 3257035 | 2 | 17 | 34 | TG   | 9  | 13 |
| 127087 | 13 | 3257524 | 3257541 | 2 | 9  | 18 | AG   | 18 | 3  |
| 127088 | 13 | 3259077 | 3259100 | 3 | 8  | 24 | CAT  | 26 | 6  |
| 127090 | 13 | 3260172 | 3260189 | 3 | 6  | 18 | CCT  | 17 | 3  |
| 127091 | 13 | 3260408 | 3260441 | 2 | 17 | 34 | AC   | 7  | 7  |
| 127092 | 13 | 3267913 | 3267928 | 4 | 4  | 16 | TTTC | 6  | 6  |
| 127097 | 13 | 3277116 | 3277135 | 2 | 10 | 20 | GT   | 18 | 7  |
| 127098 | 13 | 3277551 | 3277576 | 2 | 13 | 26 | CT   | 9  | 10 |
| 127099 | 13 | 3277833 | 3277853 | 3 | 7  | 21 | CCT  | 20 | 3  |
| 127101 | 13 | 3278835 | 3278848 | 2 | 7  | 14 | AC   | 15 | 6  |
| 127109 | 13 | 3286085 | 3286111 | 3 | 9  | 27 | GCT  | 16 | 6  |
| 127117 | 13 | 3289140 | 3289178 | 3 | 13 | 39 | TCT  | 15 | 8  |
| 127119 | 13 | 3289343 | 3289372 | 3 | 10 | 30 | CCT  | 16 | 5  |
| 127121 | 13 | 3290999 | 3291030 | 2 | 16 | 32 | GT   | 14 | 9  |
| 127124 | 13 | 3291658 | 3291687 | 2 | 15 | 30 | AC   | 16 | 11 |
| 127125 | 13 | 3295405 | 3295422 | 2 | 9  | 18 | GA   | 35 | 7  |
| 127127 | 13 | 3299682 | 3299707 | 2 | 13 | 26 | CA   | 11 | 8  |
| 127128 | 13 | 3300063 | 3300092 | 3 | 10 | 30 | TCC  | 24 | 5  |
| 127129 | 13 | 3302351 | 3302365 | 3 | 5  | 15 | TTA  | 25 | 4  |
| 127130 | 13 | 3304216 | 3304243 | 2 | 14 | 28 | TG   | 22 | 9  |
| 127131 | 13 | 3304353 | 3304380 | 2 | 14 | 28 | AC   | 15 | 11 |
| 127132 | 13 | 3308187 | 3308202 | 4 | 4  | 16 | CGCA | 19 | 8  |
| 127133 | 13 | 3308291 | 3308312 | 2 | 11 | 22 | CA   | 16 | 9  |
| 127135 | 13 | 3308759 | 3308774 | 2 | 8  | 16 | GT   | 14 | 5  |
| 127136 | 13 | 3308811 | 3308828 | 2 | 9  | 18 | TG   | 13 | 7  |
| 127139 | 13 | 3309265 | 3309298 | 2 | 17 | 34 | GT   | 17 | 9  |
| 127142 | 13 | 3311854 | 3311889 | 2 | 18 | 36 | TG   | 12 | 10 |
| 127143 | 13 | 3312026 | 3312061 | 2 | 18 | 36 | TG   | 16 | 11 |
| 127145 | 13 | 3313855 | 3313870 | 2 | 8  | 16 | AG   | 18 | 5  |
| 127149 | 13 | 3314322 | 3314336 | 3 | 5  | 15 | GTG  | 24 | 6  |
| 127154 | 13 | 3319690 | 3319717 | 2 | 14 | 28 | TG   | 15 | 7  |
| 127156 | 13 | 3319990 | 3320003 | 2 | 7  | 14 | CT   | 15 | 5  |
| 127157 | 13 | 3320259 | 3320290 | 2 | 16 | 32 | CA   | 13 | 11 |
| 127158 | 13 | 3320423 | 3320444 | 2 | 11 | 22 | AC   | 19 | 11 |
| 127161 | 13 | 3323609 | 3323620 | 2 | 6  | 12 | AG   | 18 | 3  |
| 127162 | 13 | 3324930 | 3324949 | 2 | 10 | 20 | GA   | 22 | 7  |

|        |    |         |         |   |    |    |     |    |    |
|--------|----|---------|---------|---|----|----|-----|----|----|
| 127163 | 13 | 3325835 | 3325862 | 2 | 14 | 28 | AC  | 9  | 8  |
| 127164 | 13 | 3326045 | 3326064 | 2 | 10 | 20 | GT  | 18 | 8  |
| 127166 | 13 | 3327705 | 3327732 | 2 | 14 | 28 | GT  | 10 | 6  |
| 127169 | 13 | 3328582 | 3328599 | 2 | 9  | 18 | AC  | 20 | 6  |
| 127170 | 13 | 3332454 | 3332469 | 2 | 8  | 16 | TG  | 9  | 11 |
| 127180 | 13 | 3335835 | 3335888 | 2 | 27 | 54 | CA  | 8  | 10 |
| 127183 | 13 | 3338781 | 3338802 | 2 | 11 | 22 | CA  | 7  | 6  |
| 127186 | 13 | 3339501 | 3339527 | 3 | 9  | 27 | GCA | 24 | 14 |
| 127187 | 13 | 3339914 | 3339925 | 2 | 6  | 12 | AT  | 8  | 4  |
| 127188 | 13 | 3340661 | 3340678 | 2 | 9  | 18 | CA  | 13 | 8  |
| 127189 | 13 | 3340681 | 3340696 | 2 | 8  | 16 | CA  | 15 | 9  |
| 127195 | 13 | 3345534 | 3345551 | 2 | 9  | 18 | CA  | 12 | 10 |
| 127196 | 13 | 3345644 | 3345663 | 2 | 10 | 20 | AC  | 8  | 3  |
| 127199 | 13 | 3345811 | 3345830 | 2 | 10 | 20 | AC  | 6  | 6  |
| 127205 | 13 | 3349381 | 3349404 | 2 | 12 | 24 | CA  | 7  | 7  |
| 127207 | 13 | 3350644 | 3350665 | 2 | 11 | 22 | AC  | 15 | 7  |
| 127210 | 13 | 3352570 | 3352609 | 2 | 20 | 40 | CA  | 12 | 12 |
| 127212 | 13 | 3356374 | 3356406 | 3 | 11 | 33 | CTC | 16 | 7  |
| 127213 | 13 | 3356564 | 3356593 | 2 | 15 | 30 | AC  | 12 | 11 |
| 127214 | 13 | 3356700 | 3356757 | 2 | 29 | 58 | AC  | 8  | 11 |
| 127216 | 13 | 3358027 | 3358040 | 2 | 7  | 14 | CA  | 26 | 7  |
| 127217 | 13 | 3358043 | 3358054 | 2 | 6  | 12 | CA  | 22 | 6  |
| 127218 | 13 | 3358221 | 3358248 | 2 | 14 | 28 | AC  | 14 | 10 |
| 127220 | 13 | 3359247 | 3359260 | 2 | 7  | 14 | TG  | 24 | 3  |
| 127221 | 13 | 3359338 | 3359355 | 3 | 6  | 18 | AGG | 12 | 6  |
| 127222 | 13 | 3359447 | 3359484 | 2 | 19 | 38 | AC  | 8  | 9  |
| 127223 | 13 | 3359719 | 3359734 | 2 | 8  | 16 | TG  | 7  | 9  |
| 127227 | 13 | 3360440 | 3360478 | 3 | 13 | 39 | TTG | 20 | 8  |
| 127239 | 13 | 3374393 | 3374414 | 2 | 11 | 22 | CA  | 16 | 8  |
| 127240 | 13 | 3374540 | 3374555 | 2 | 8  | 16 | TG  | 22 | 5  |
| 127243 | 13 | 3379942 | 3379965 | 2 | 12 | 24 | TG  | 9  | 4  |
| 127248 | 13 | 3380405 | 3380416 | 2 | 6  | 12 | TG  | 15 | 6  |
| 127250 | 13 | 3380517 | 3380528 | 2 | 6  | 12 | CA  | 27 | 4  |
| 127252 | 13 | 3380736 | 3380749 | 2 | 7  | 14 | TG  | 19 | 3  |
| 127253 | 13 | 3382679 | 3382694 | 2 | 8  | 16 | CA  | 23 | 3  |
| 127254 | 13 | 3383179 | 3383194 | 2 | 8  | 16 | GT  | 19 | 10 |
| 127255 | 13 | 3385406 | 3385427 | 2 | 11 | 22 | AC  | 17 | 6  |
| 127256 | 13 | 3385527 | 3385542 | 2 | 8  | 16 | CA  | 24 | 4  |
| 127257 | 13 | 3385831 | 3385878 | 2 | 24 | 48 | TG  | 12 | 10 |
| 127258 | 13 | 3388213 | 3388242 | 2 | 15 | 30 | AC  | 8  | 9  |
| 127259 | 13 | 3388365 | 3388396 | 2 | 16 | 32 | GT  | 12 | 14 |
| 127265 | 13 | 3400077 | 3400102 | 2 | 13 | 26 | GT  | 13 | 11 |
| 127266 | 13 | 3400215 | 3400254 | 2 | 20 | 40 | TG  | 15 | 14 |
| 127268 | 13 | 3402036 | 3402063 | 2 | 14 | 28 | CA  | 21 | 4  |
| 127269 | 13 | 3404264 | 3404295 | 2 | 16 | 32 | TG  | 18 | 9  |
| 127270 | 13 | 3404418 | 3404431 | 2 | 7  | 14 | AC  | 28 | 3  |
| 127276 | 13 | 3420424 | 3420443 | 2 | 10 | 20 | TG  | 23 | 18 |
| 127277 | 13 | 3421550 | 3421587 | 2 | 19 | 38 | TG  | 9  | 9  |
| 127279 | 13 | 3424126 | 3424139 | 2 | 7  | 14 | TG  | 14 | 7  |
| 127283 | 13 | 3429174 | 3429189 | 2 | 8  | 16 | TG  | 20 | 9  |
| 127284 | 13 | 3431011 | 3431028 | 2 | 9  | 18 | TG  | 21 | 5  |

|        |    |         |         |   |    |    |      |    |    |
|--------|----|---------|---------|---|----|----|------|----|----|
| 127285 | 13 | 3444410 | 3444451 | 3 | 14 | 42 | TAT  | 13 | 6  |
| 127292 | 13 | 3460875 | 3460895 | 3 | 7  | 21 | TTA  | 14 | 3  |
| 127293 | 13 | 3460970 | 3460984 | 3 | 5  | 15 | AGC  | 20 | 3  |
| 127316 | 13 | 3499324 | 3499353 | 2 | 15 | 30 | TG   | 12 | 8  |
| 127317 | 13 | 3505305 | 3505322 | 2 | 9  | 18 | AC   | 23 | 8  |
| 127320 | 13 | 3511114 | 3511129 | 4 | 4  | 16 | AATA | 16 | 4  |
| 127322 | 13 | 3521678 | 3521691 | 2 | 7  | 14 | GT   | 31 | 5  |
| 127323 | 13 | 3523296 | 3523313 | 2 | 9  | 18 | TG   | 22 | 7  |
| 127325 | 13 | 3530116 | 3530143 | 2 | 14 | 28 | CA   | 7  | 7  |
| 127328 | 13 | 3531917 | 3531934 | 2 | 9  | 18 | TC   | 18 | 3  |
| 127329 | 13 | 3532095 | 3532106 | 2 | 6  | 12 | GT   | 22 | 5  |
| 127331 | 13 | 3532524 | 3532535 | 2 | 6  | 12 | AC   | 22 | 5  |
| 127333 | 13 | 3541670 | 3541684 | 3 | 5  | 15 | GTT  | 25 | 3  |
| 127339 | 13 | 3554368 | 3554385 | 2 | 9  | 18 | AT   | 12 | 6  |
| 127341 | 13 | 3555616 | 3555627 | 2 | 6  | 12 | TG   | 27 | 4  |
| 127342 | 13 | 3555855 | 3555866 | 2 | 6  | 12 | GT   | 28 | 4  |
| 127345 | 13 | 3562565 | 3562578 | 2 | 7  | 14 | GT   | 17 | 8  |
| 127350 | 13 | 3564942 | 3564957 | 2 | 8  | 16 | AG   | 22 | 4  |
| 127351 | 13 | 3565046 | 3565059 | 2 | 7  | 14 | AC   | 8  | 7  |
| 127352 | 13 | 3565364 | 3565381 | 3 | 6  | 18 | CCT  | 7  | 5  |
| 127355 | 13 | 3567677 | 3567688 | 2 | 6  | 12 | GA   | 9  | 3  |
| 127362 | 13 | 3617373 | 3617404 | 2 | 16 | 32 | TG   | 11 | 8  |
| 127364 | 13 | 3626493 | 3626512 | 2 | 10 | 20 | GT   | 24 | 8  |
| 127365 | 13 | 3627866 | 3627883 | 2 | 9  | 18 | CA   | 21 | 7  |
| 127366 | 13 | 3628572 | 3628585 | 2 | 7  | 14 | TG   | 26 | 3  |
| 127367 | 13 | 3630588 | 3630608 | 3 | 7  | 21 | GCT  | 32 | 7  |
| 127370 | 13 | 3631357 | 3631374 | 3 | 6  | 18 | AGA  | 19 | 4  |
| 127373 | 13 | 3642052 | 3642075 | 4 | 6  | 24 | ACAA | 25 | 5  |
| 127384 | 13 | 3657286 | 3657317 | 2 | 16 | 32 | CA   | 6  | 7  |
| 127387 | 13 | 3660287 | 3660322 | 4 | 9  | 36 | CCAT | 29 | 7  |
| 127389 | 13 | 3661600 | 3661623 | 2 | 12 | 24 | CA   | 14 | 7  |
| 127392 | 13 | 3665068 | 3665099 | 2 | 16 | 32 | CA   | 12 | 9  |
| 127393 | 13 | 3667896 | 3667911 | 2 | 8  | 16 | GT   | 26 | 5  |
| 127395 | 13 | 3673287 | 3673310 | 2 | 12 | 24 | CT   | 9  | 9  |
| 127403 | 13 | 3703352 | 3703366 | 3 | 5  | 15 | CCT  | 23 | 5  |
| 127405 | 13 | 3709120 | 3709141 | 2 | 11 | 22 | AC   | 22 | 11 |
| 127407 | 13 | 3710768 | 3710823 | 4 | 14 | 56 | ATCT | 22 | 15 |
| 127416 | 13 | 3715129 | 3715146 | 2 | 9  | 18 | GA   | 9  | 3  |
| 127417 | 13 | 3715554 | 3715587 | 2 | 17 | 34 | AC   | 10 | 12 |
| 127419 | 13 | 3715727 | 3715748 | 2 | 11 | 22 | CA   | 19 | 12 |
| 127420 | 13 | 3716202 | 3716217 | 4 | 4  | 16 | AAAG | 29 | 7  |
| 127421 | 13 | 3716371 | 3716398 | 2 | 14 | 28 | AC   | 21 | 18 |
| 127423 | 13 | 3717648 | 3717663 | 2 | 8  | 16 | CA   | 22 | 18 |
| 127428 | 13 | 3722186 | 3722201 | 2 | 8  | 16 | TG   | 24 | 7  |
| 127430 | 13 | 3726237 | 3726268 | 2 | 16 | 32 | CA   | 12 | 15 |
| 127431 | 13 | 3726717 | 3726730 | 2 | 7  | 14 | AC   | 6  | 5  |
| 127432 | 13 | 3726867 | 3726886 | 2 | 10 | 20 | TG   | 15 | 8  |
| 127435 | 13 | 3731133 | 3731148 | 2 | 8  | 16 | AC   | 16 | 7  |
| 127436 | 13 | 3731150 | 3731163 | 2 | 7  | 14 | CA   | 22 | 9  |
| 127438 | 13 | 3732884 | 3732913 | 3 | 10 | 30 | AAC  | 21 | 6  |
| 127439 | 13 | 3735028 | 3735048 | 3 | 7  | 21 | CAA  | 30 | 6  |

|        |    |         |         |   |    |    |      |    |    |
|--------|----|---------|---------|---|----|----|------|----|----|
| 127443 | 13 | 3741102 | 3741139 | 2 | 19 | 38 | AC   | 10 | 10 |
| 127444 | 13 | 3741507 | 3741518 | 2 | 6  | 12 | CA   | 30 | 3  |
| 127447 | 13 | 3745999 | 3746020 | 2 | 11 | 22 | AC   | 19 | 7  |
| 127448 | 13 | 3746130 | 3746157 | 2 | 14 | 28 | CA   | 7  | 4  |
| 127450 | 13 | 3746525 | 3746540 | 2 | 8  | 16 | TG   | 18 | 7  |
| 127452 | 13 | 3747442 | 3747459 | 2 | 9  | 18 | AC   | 15 | 9  |
| 127453 | 13 | 3747562 | 3747585 | 2 | 12 | 24 | CA   | 11 | 9  |
| 127460 | 13 | 3755832 | 3755858 | 3 | 9  | 27 | AGC  | 28 | 5  |
| 127461 | 13 | 3758151 | 3758168 | 2 | 9  | 18 | CT   | 23 | 8  |
| 127466 | 13 | 3759157 | 3759171 | 3 | 5  | 15 | GCT  | 14 | 6  |
| 127472 | 13 | 3761109 | 3761128 | 2 | 10 | 20 | AG   | 26 | 4  |
| 127473 | 13 | 3762841 | 3762854 | 2 | 7  | 14 | CA   | 22 | 6  |
| 127474 | 13 | 3763045 | 3763062 | 2 | 9  | 18 | AC   | 21 | 6  |
| 127475 | 13 | 3763237 | 3763256 | 2 | 10 | 20 | AC   | 19 | 15 |
| 127476 | 13 | 3765470 | 3765521 | 2 | 26 | 52 | GT   | 7  | 9  |
| 127478 | 13 | 3766212 | 3766229 | 2 | 9  | 18 | TC   | 23 | 3  |
| 127479 | 13 | 3769835 | 3769846 | 2 | 6  | 12 | GT   | 12 | 6  |
| 127480 | 13 | 3769993 | 3770014 | 2 | 11 | 22 | TG   | 7  | 9  |
| 127483 | 13 | 3770211 | 3770238 | 2 | 14 | 28 | TG   | 13 | 10 |
| 127484 | 13 | 3772858 | 3772884 | 3 | 9  | 27 | AAC  | 6  | 5  |
| 127485 | 13 | 3773964 | 3773987 | 4 | 6  | 24 | ACAG | 33 | 6  |
| 127486 | 13 | 3774077 | 3774098 | 2 | 11 | 22 | AC   | 15 | 7  |
| 127487 | 13 | 3775111 | 3775122 | 2 | 6  | 12 | CA   | 12 | 8  |
| 127489 | 13 | 3775568 | 3775597 | 2 | 15 | 30 | AC   | 9  | 5  |
| 127493 | 13 | 3782895 | 3782914 | 2 | 10 | 20 | GA   | 24 | 6  |
| 127501 | 13 | 3789602 | 3789616 | 3 | 5  | 15 | AGG  | 25 | 3  |
| 127506 | 13 | 3796510 | 3796525 | 2 | 8  | 16 | TC   | 28 | 3  |
| 127508 | 13 | 3798815 | 3798828 | 2 | 7  | 14 | AC   | 21 | 13 |
| 127512 | 13 | 3803850 | 3803863 | 2 | 7  | 14 | AC   | 23 | 4  |
| 127513 | 13 | 3804028 | 3804061 | 2 | 17 | 34 | GT   | 9  | 13 |
| 127514 | 13 | 3804141 | 3804156 | 2 | 8  | 16 | CA   | 20 | 3  |
| 127515 | 13 | 3804304 | 3804323 | 2 | 10 | 20 | TG   | 14 | 6  |
| 127518 | 13 | 3806035 | 3806080 | 2 | 23 | 46 | AC   | 10 | 11 |
| 127519 | 13 | 3806202 | 3806215 | 2 | 7  | 14 | CA   | 17 | 4  |
| 127520 | 13 | 3806353 | 3806374 | 2 | 11 | 22 | AC   | 13 | 4  |
| 127523 | 13 | 3812236 | 3812249 | 2 | 7  | 14 | TG   | 18 | 7  |
| 127524 | 13 | 3812547 | 3812564 | 2 | 9  | 18 | GT   | 19 | 7  |
| 127525 | 13 | 3813683 | 3813703 | 3 | 7  | 21 | AAC  | 16 | 3  |
| 127529 | 13 | 3817093 | 3817108 | 2 | 8  | 16 | GT   | 22 | 7  |
| 127530 | 13 | 3817358 | 3817397 | 2 | 20 | 40 | TG   | 9  | 11 |
| 127535 | 13 | 3818208 | 3818221 | 2 | 7  | 14 | GT   | 18 | 3  |
| 127540 | 13 | 3821143 | 3821190 | 4 | 12 | 48 | GATA | 8  | 9  |
| 127541 | 13 | 3823601 | 3823616 | 4 | 4  | 16 | AAAT | 6  | 4  |
| 127543 | 13 | 3824136 | 3824159 | 2 | 12 | 24 | TC   | 8  | 4  |
| 127545 | 13 | 3827824 | 3827851 | 2 | 14 | 28 | TC   | 16 | 6  |
| 127549 | 13 | 3832841 | 3832874 | 2 | 17 | 34 | GT   | 24 | 16 |
| 127556 | 13 | 3844420 | 3844433 | 2 | 7  | 14 | GT   | 21 | 5  |
| 127558 | 13 | 3846659 | 3846676 | 2 | 9  | 18 | TG   | 12 | 7  |
| 127569 | 13 | 3857582 | 3857619 | 2 | 19 | 38 | GT   | 13 | 11 |
| 127570 | 13 | 3857869 | 3857880 | 2 | 6  | 12 | AC   | 23 | 5  |
| 127571 | 13 | 3857883 | 3857894 | 2 | 6  | 12 | AC   | 21 | 7  |

|        |    |         |         |   |    |    |     |    |    |
|--------|----|---------|---------|---|----|----|-----|----|----|
| 127572 | 13 | 3858265 | 3858294 | 2 | 15 | 30 | AC  | 12 | 6  |
| 127573 | 13 | 3858941 | 3858955 | 3 | 5  | 15 | ATT | 27 | 4  |
| 127574 | 13 | 3860418 | 3860445 | 2 | 14 | 28 | GT  | 19 | 10 |
| 127575 | 13 | 3860665 | 3860694 | 2 | 15 | 30 | GT  | 6  | 10 |
| 127578 | 13 | 3862827 | 3862840 | 2 | 7  | 14 | GT  | 15 | 7  |
| 127579 | 13 | 3863062 | 3863077 | 2 | 8  | 16 | TC  | 27 | 3  |
| 127582 | 13 | 3865625 | 3865638 | 2 | 7  | 14 | GT  | 15 | 7  |
| 127583 | 13 | 3865641 | 3865652 | 2 | 6  | 12 | GT  | 13 | 5  |
| 127584 | 13 | 3865723 | 3865752 | 2 | 15 | 30 | AG  | 10 | 7  |
| 127586 | 13 | 3865794 | 3865821 | 2 | 14 | 28 | TG  | 14 | 6  |
| 127594 | 13 | 3869659 | 3869690 | 2 | 16 | 32 | TG  | 15 | 5  |
| 127596 | 13 | 3875017 | 3875044 | 2 | 14 | 28 | GT  | 14 | 7  |
| 127597 | 13 | 3875613 | 3875624 | 2 | 6  | 12 | TG  | 20 | 3  |
| 127598 | 13 | 3879754 | 3879797 | 2 | 22 | 44 | CA  | 6  | 10 |
| 127599 | 13 | 3887200 | 3887235 | 2 | 18 | 36 | AC  | 12 | 8  |
| 127614 | 13 | 3904026 | 3904037 | 2 | 6  | 12 | AC  | 26 | 4  |
| 127615 | 13 | 3904639 | 3904658 | 2 | 10 | 20 | CA  | 26 | 8  |
| 127617 | 13 | 3908677 | 3908696 | 2 | 10 | 20 | CA  | 12 | 8  |
| 127618 | 13 | 3909687 | 3909710 | 2 | 12 | 24 | CA  | 18 | 11 |
| 127619 | 13 | 3913694 | 3913731 | 2 | 19 | 38 | CA  | 6  | 7  |
| 127620 | 13 | 3913830 | 3913847 | 2 | 9  | 18 | TG  | 24 | 7  |
| 127621 | 13 | 3915529 | 3915546 | 2 | 9  | 18 | TG  | 31 | 9  |
| 127624 | 13 | 3921725 | 3921738 | 2 | 7  | 14 | TA  | 8  | 4  |
| 127625 | 13 | 3922984 | 3923003 | 2 | 10 | 20 | AG  | 17 | 5  |
| 127626 | 13 | 3927950 | 3927963 | 2 | 7  | 14 | TG  | 27 | 6  |
| 127629 | 13 | 3931866 | 3931877 | 2 | 6  | 12 | CA  | 14 | 11 |
| 127638 | 13 | 3959105 | 3959120 | 2 | 8  | 16 | CA  | 19 | 4  |
| 127639 | 13 | 3959721 | 3959738 | 2 | 9  | 18 | CA  | 22 | 5  |
| 127641 | 13 | 3962279 | 3962290 | 2 | 6  | 12 | AC  | 26 | 10 |
| 127645 | 13 | 3966383 | 3966406 | 2 | 12 | 24 | TG  | 25 | 4  |
| 127647 | 13 | 3968792 | 3968845 | 2 | 27 | 54 | AC  | 8  | 10 |
| 127648 | 13 | 3971221 | 3971260 | 2 | 20 | 40 | AC  | 8  | 11 |
| 127651 | 13 | 3981545 | 3981568 | 2 | 12 | 24 | CA  | 14 | 12 |
| 127652 | 13 | 3982051 | 3982076 | 2 | 13 | 26 | GT  | 17 | 17 |
| 127653 | 13 | 3985299 | 3985310 | 2 | 6  | 12 | TG  | 20 | 5  |
| 127654 | 13 | 3991597 | 3991623 | 3 | 9  | 27 | TCT | 19 | 10 |
| 127656 | 13 | 3997556 | 3997567 | 2 | 6  | 12 | TG  | 20 | 8  |
| 127657 | 13 | 3997570 | 3997585 | 2 | 8  | 16 | TG  | 26 | 6  |
| 127663 | 13 | 4005253 | 4005264 | 2 | 6  | 12 | TG  | 25 | 3  |
| 127673 | 13 | 4015876 | 4015889 | 2 | 7  | 14 | AC  | 12 | 3  |
| 127676 | 13 | 4021704 | 4021721 | 3 | 6  | 18 | TTA | 16 | 4  |
| 127680 | 13 | 4028236 | 4028271 | 2 | 18 | 36 | TG  | 19 | 14 |
| 127681 | 13 | 4028419 | 4028444 | 2 | 13 | 26 | CA  | 16 | 9  |
| 127682 | 13 | 4031931 | 4031950 | 2 | 10 | 20 | GT  | 15 | 8  |
| 127685 | 13 | 4033964 | 4033981 | 3 | 6  | 18 | GGA | 7  | 5  |
| 127686 | 13 | 4036550 | 4036563 | 2 | 7  | 14 | TG  | 23 | 7  |
| 127687 | 13 | 4041763 | 4041806 | 2 | 22 | 44 | TG  | 13 | 11 |
| 127688 | 13 | 4042049 | 4042076 | 2 | 14 | 28 | TG  | 19 | 7  |
| 127689 | 13 | 4042243 | 4042260 | 2 | 9  | 18 | CA  | 27 | 5  |
| 127692 | 13 | 4045018 | 4045035 | 2 | 9  | 18 | CA  | 25 | 5  |
| 127693 | 13 | 4045218 | 4045232 | 3 | 5  | 15 | ATC | 26 | 4  |

|        |    |         |         |   |    |    |      |    |    |
|--------|----|---------|---------|---|----|----|------|----|----|
| 127695 | 13 | 4045424 | 4045451 | 2 | 14 | 28 | CA   | 10 | 11 |
| 127697 | 13 | 4045597 | 4045630 | 2 | 17 | 34 | CA   | 11 | 8  |
| 127699 | 13 | 4047866 | 4047877 | 2 | 6  | 12 | CA   | 30 | 4  |
| 127700 | 13 | 4051063 | 4051114 | 2 | 26 | 52 | TG   | 12 | 12 |
| 127702 | 13 | 4054248 | 4054273 | 2 | 13 | 26 | AC   | 6  | 6  |
| 127703 | 13 | 4056295 | 4056318 | 2 | 12 | 24 | GT   | 22 | 6  |
| 127704 | 13 | 4056843 | 4056866 | 2 | 12 | 24 | CT   | 17 | 10 |
| 127706 | 13 | 4058351 | 4058362 | 2 | 6  | 12 | GT   | 22 | 6  |
| 127708 | 13 | 4058608 | 4058631 | 2 | 12 | 24 | CA   | 16 | 6  |
| 127725 | 13 | 4073487 | 4073506 | 2 | 10 | 20 | GT   | 28 | 5  |
| 127727 | 13 | 4080844 | 4080905 | 2 | 31 | 62 | TG   | 6  | 10 |
| 127728 | 13 | 4084001 | 4084018 | 2 | 9  | 18 | CA   | 22 | 6  |
| 127730 | 13 | 4092386 | 4092409 | 2 | 12 | 24 | TG   | 19 | 12 |
| 127731 | 13 | 4092557 | 4092576 | 2 | 10 | 20 | GT   | 22 | 5  |
| 127741 | 13 | 4096694 | 4096713 | 2 | 10 | 20 | AC   | 15 | 13 |
| 127748 | 13 | 4100413 | 4100456 | 4 | 11 | 44 | ATAG | 15 | 14 |
| 127754 | 13 | 4122324 | 4122351 | 2 | 14 | 28 | AC   | 14 | 8  |
| 127755 | 13 | 4123369 | 4123404 | 2 | 18 | 36 | GT   | 16 | 15 |
| 127767 | 13 | 4138198 | 4138211 | 2 | 7  | 14 | TG   | 27 | 11 |
| 127768 | 13 | 4138214 | 4138225 | 2 | 6  | 12 | TG   | 14 | 5  |
| 127769 | 13 | 4138745 | 4138762 | 2 | 9  | 18 | TG   | 16 | 7  |
| 127772 | 13 | 4141843 | 4141857 | 3 | 5  | 15 | TGA  | 27 | 4  |
| 127774 | 13 | 4143517 | 4143528 | 2 | 6  | 12 | TG   | 24 | 3  |
| 127778 | 13 | 4144758 | 4144772 | 3 | 5  | 15 | TGC  | 22 | 4  |
| 127779 | 13 | 4146046 | 4146063 | 2 | 9  | 18 | AC   | 12 | 16 |
| 127785 | 13 | 4165519 | 4165538 | 2 | 10 | 20 | AC   | 7  | 4  |
| 127790 | 13 | 4178943 | 4178964 | 2 | 11 | 22 | AC   | 15 | 8  |
| 127791 | 13 | 4180385 | 4180412 | 2 | 14 | 28 | TG   | 11 | 12 |
| 127792 | 13 | 4180517 | 4180552 | 2 | 18 | 36 | TG   | 10 | 7  |
| 127793 | 13 | 4187190 | 4187203 | 2 | 7  | 14 | TC   | 22 | 3  |
| 127794 | 13 | 4187575 | 4187598 | 2 | 12 | 24 | TG   | 8  | 4  |
| 127796 | 13 | 4188019 | 4188046 | 2 | 14 | 28 | GT   | 16 | 7  |
| 127802 | 13 | 4191276 | 4191303 | 2 | 14 | 28 | TG   | 11 | 10 |
| 127804 | 13 | 4194453 | 4194466 | 2 | 7  | 14 | TG   | 26 | 8  |
| 127807 | 13 | 4211540 | 4211565 | 2 | 13 | 26 | CA   | 9  | 8  |
| 127809 | 13 | 4217184 | 4217198 | 3 | 5  | 15 | AAC  | 26 | 3  |
| 127818 | 13 | 4229169 | 4229182 | 2 | 7  | 14 | AC   | 20 | 4  |
| 127819 | 13 | 4229542 | 4229559 | 2 | 9  | 18 | AC   | 14 | 9  |
| 127827 | 13 | 4235944 | 4235963 | 2 | 10 | 20 | GT   | 25 | 7  |
| 127835 | 13 | 4242896 | 4242909 | 2 | 7  | 14 | TG   | 21 | 8  |
| 127838 | 13 | 4248781 | 4248794 | 2 | 7  | 14 | TG   | 20 | 8  |
| 127839 | 13 | 4248949 | 4248982 | 2 | 17 | 34 | AC   | 10 | 9  |
| 127842 | 13 | 4250921 | 4250948 | 2 | 14 | 28 | AC   | 12 | 11 |
| 127843 | 13 | 4251224 | 4251239 | 2 | 8  | 16 | AG   | 16 | 4  |
| 127845 | 13 | 4255070 | 4255081 | 2 | 6  | 12 | TG   | 26 | 3  |
| 127847 | 13 | 4257968 | 4257981 | 2 | 7  | 14 | AC   | 24 | 4  |
| 127853 | 13 | 4270643 | 4270666 | 2 | 12 | 24 | CA   | 20 | 10 |
| 127855 | 13 | 4270824 | 4270853 | 2 | 15 | 30 | GT   | 7  | 7  |
| 127857 | 13 | 4271449 | 4271472 | 2 | 12 | 24 | CA   | 15 | 10 |
| 127859 | 13 | 4271829 | 4271846 | 2 | 9  | 18 | GT   | 25 | 6  |
| 127860 | 13 | 4272011 | 4272030 | 2 | 10 | 20 | TC   | 24 | 5  |



|        |    |         |         |   |    |    |      |    |    |
|--------|----|---------|---------|---|----|----|------|----|----|
| 127872 | 13 | 4298741 | 4298758 | 3 | 6  | 18 | TTG  | 18 | 4  |
| 127874 | 13 | 4304983 | 4304998 | 2 | 8  | 16 | CT   | 25 | 4  |
| 127878 | 13 | 4309952 | 4309967 | 2 | 8  | 16 | AC   | 26 | 6  |
| 127879 | 13 | 4310205 | 4310234 | 2 | 15 | 30 | TG   | 9  | 8  |
| 127881 | 13 | 4310375 | 4310394 | 2 | 10 | 20 | TG   | 18 | 12 |
| 127884 | 13 | 4317064 | 4317083 | 2 | 10 | 20 | TG   | 16 | 13 |
| 127889 | 13 | 4322703 | 4322726 | 2 | 12 | 24 | GT   | 16 | 7  |
| 127890 | 13 | 4326201 | 4326226 | 2 | 13 | 26 | AC   | 22 | 5  |
| 127895 | 13 | 4336223 | 4336248 | 2 | 13 | 26 | CA   | 25 | 7  |
| 127896 | 13 | 4338879 | 4338894 | 2 | 8  | 16 | GT   | 19 | 12 |
| 127897 | 13 | 4341060 | 4341077 | 3 | 6  | 18 | TAT  | 17 | 3  |
| 127899 | 13 | 4344549 | 4344562 | 2 | 7  | 14 | CA   | 25 | 8  |
| 127900 | 13 | 4349783 | 4349797 | 3 | 5  | 15 | AGC  | 30 | 3  |
| 127901 | 13 | 4350769 | 4350782 | 2 | 7  | 14 | AC   | 26 | 3  |
| 127902 | 13 | 4350956 | 4350973 | 2 | 9  | 18 | AC   | 25 | 3  |
| 127903 | 13 | 4352118 | 4352131 | 2 | 7  | 14 | AC   | 22 | 5  |
| 127913 | 13 | 4360087 | 4360102 | 2 | 8  | 16 | AC   | 22 | 8  |
| 127914 | 13 | 4361201 | 4361220 | 2 | 10 | 20 | CT   | 20 | 5  |
| 127916 | 13 | 4362131 | 4362164 | 2 | 17 | 34 | TG   | 16 | 5  |
| 127917 | 13 | 4362289 | 4362322 | 2 | 17 | 34 | CA   | 17 | 15 |
| 127923 | 13 | 4379789 | 4379820 | 2 | 16 | 32 | CA   | 12 | 12 |
| 127929 | 13 | 4391412 | 4391456 | 3 | 15 | 45 | CAT  | 24 | 11 |
| 127934 | 13 | 4400091 | 4400108 | 2 | 9  | 18 | AC   | 20 | 7  |
| 127935 | 13 | 4401678 | 4401693 | 2 | 8  | 16 | AG   | 23 | 4  |
| 127936 | 13 | 4405184 | 4405205 | 2 | 11 | 22 | GT   | 22 | 7  |
| 127937 | 13 | 4405312 | 4405341 | 2 | 15 | 30 | TG   | 12 | 6  |
| 127938 | 13 | 4405908 | 4405921 | 2 | 7  | 14 | GT   | 20 | 3  |
| 127940 | 13 | 4421637 | 4421666 | 2 | 15 | 30 | TG   | 18 | 10 |
| 127943 | 13 | 4424444 | 4424461 | 2 | 9  | 18 | AT   | 6  | 6  |
| 127946 | 13 | 4430890 | 4430925 | 3 | 12 | 36 | TTC  | 22 | 22 |
| 127947 | 13 | 4431915 | 4431926 | 2 | 6  | 12 | TG   | 30 | 3  |
| 127948 | 13 | 4432677 | 4432714 | 2 | 19 | 38 | AC   | 7  | 7  |
| 127949 | 13 | 4432856 | 4432875 | 2 | 10 | 20 | AC   | 13 | 10 |
| 127950 | 13 | 4435612 | 4435633 | 2 | 11 | 22 | GT   | 25 | 9  |
| 127959 | 13 | 4470839 | 4470852 | 2 | 7  | 14 | TG   | 25 | 7  |
| 127965 | 13 | 4477537 | 4477558 | 2 | 11 | 22 | CA   | 16 | 12 |
| 127969 | 13 | 4479546 | 4479557 | 2 | 6  | 12 | TG   | 35 | 3  |
| 127971 | 13 | 4481940 | 4481967 | 2 | 14 | 28 | CA   | 20 | 13 |
| 127974 | 13 | 4485076 | 4485099 | 2 | 12 | 24 | TG   | 18 | 6  |
| 127975 | 13 | 4486092 | 4486124 | 3 | 11 | 33 | GAA  | 9  | 10 |
| 127976 | 13 | 4487333 | 4487346 | 2 | 7  | 14 | AC   | 29 | 5  |
| 127979 | 13 | 4490273 | 4490286 | 2 | 7  | 14 | TG   | 24 | 7  |
| 127981 | 13 | 4491914 | 4491933 | 2 | 10 | 20 | TG   | 14 | 7  |
| 127983 | 13 | 4493080 | 4493117 | 2 | 19 | 38 | AC   | 10 | 10 |
| 127984 | 13 | 4493263 | 4493276 | 2 | 7  | 14 | TG   | 31 | 5  |
| 127985 | 13 | 4493279 | 4493290 | 2 | 6  | 12 | TG   | 14 | 4  |
| 127986 | 13 | 4493430 | 4493453 | 2 | 12 | 24 | CA   | 18 | 7  |
| 127987 | 13 | 4493588 | 4493601 | 2 | 7  | 14 | GT   | 28 | 5  |
| 127990 | 13 | 4497389 | 4497406 | 2 | 9  | 18 | CA   | 26 | 4  |
| 127991 | 13 | 4498346 | 4498397 | 4 | 13 | 52 | AAAG | 20 | 11 |
| 127992 | 13 | 4501466 | 4501479 | 2 | 7  | 14 | TG   | 27 | 4  |

|        |    |         |         |   |    |    |      |    |    |
|--------|----|---------|---------|---|----|----|------|----|----|
| 127994 | 13 | 4503457 | 4503468 | 2 | 6  | 12 | TG   | 29 | 3  |
| 127995 | 13 | 4503577 | 4503588 | 2 | 6  | 12 | CA   | 22 | 5  |
| 127996 | 13 | 4503590 | 4503603 | 2 | 7  | 14 | AC   | 24 | 4  |
| 127997 | 13 | 4503738 | 4503753 | 2 | 8  | 16 | TG   | 25 | 6  |
| 128003 | 13 | 4522020 | 4522035 | 2 | 8  | 16 | AC   | 21 | 5  |
| 128004 | 13 | 4522037 | 4522050 | 2 | 7  | 14 | CA   | 25 | 6  |
| 128005 | 13 | 4522660 | 4522685 | 2 | 13 | 26 | AC   | 16 | 10 |
| 128007 | 13 | 4523753 | 4523768 | 4 | 4  | 16 | TTTA | 14 | 14 |
| 128009 | 13 | 4526620 | 4526671 | 4 | 13 | 52 | AGAT | 18 | 9  |
| 128010 | 13 | 4527101 | 4527122 | 2 | 11 | 22 | TG   | 11 | 11 |
| 128014 | 13 | 4540060 | 4540080 | 3 | 7  | 21 | GGA  | 16 | 4  |
| 128016 | 13 | 4540711 | 4540734 | 2 | 12 | 24 | CA   | 12 | 5  |
| 128019 | 13 | 4541130 | 4541144 | 3 | 5  | 15 | CCA  | 19 | 6  |
| 128031 | 13 | 4546822 | 4546839 | 2 | 9  | 18 | CA   | 16 | 15 |
| 128036 | 13 | 4576813 | 4576834 | 2 | 11 | 22 | CA   | 24 | 4  |
| 128038 | 13 | 4580750 | 4580765 | 2 | 8  | 16 | CA   | 18 | 10 |
| 128041 | 13 | 4584411 | 4584426 | 2 | 8  | 16 | AG   | 21 | 4  |
| 128042 | 13 | 4592301 | 4592318 | 2 | 9  | 18 | CA   | 30 | 10 |
| 128043 | 13 | 4592602 | 4592615 | 2 | 7  | 14 | TG   | 27 | 4  |
| 128045 | 13 | 4603038 | 4603053 | 2 | 8  | 16 | AG   | 17 | 3  |
| 128046 | 13 | 4603056 | 4603067 | 2 | 6  | 12 | AG   | 20 | 5  |
| 128047 | 13 | 4606579 | 4606598 | 2 | 10 | 20 | AG   | 24 | 6  |
| 128050 | 13 | 4607006 | 4607033 | 2 | 14 | 28 | TG   | 8  | 9  |
| 128055 | 13 | 4610325 | 4610338 | 2 | 7  | 14 | TG   | 19 | 4  |
| 128056 | 13 | 4610463 | 4610482 | 2 | 10 | 20 | GA   | 16 | 4  |
| 128057 | 13 | 4610513 | 4610530 | 2 | 9  | 18 | GT   | 16 | 7  |
| 128058 | 13 | 4610533 | 4610546 | 2 | 7  | 14 | GT   | 17 | 8  |
| 128065 | 13 | 4612349 | 4612374 | 2 | 13 | 26 | CA   | 7  | 7  |
| 128066 | 13 | 4612500 | 4612549 | 2 | 25 | 50 | TG   | 15 | 11 |
| 128067 | 13 | 4612700 | 4612737 | 2 | 19 | 38 | CA   | 14 | 10 |
| 128068 | 13 | 4612826 | 4612845 | 2 | 10 | 20 | GT   | 19 | 5  |
| 128069 | 13 | 4614172 | 4614189 | 2 | 9  | 18 | AC   | 24 | 6  |
| 128071 | 13 | 4622942 | 4622961 | 4 | 5  | 20 | TGTT | 23 | 4  |
| 128075 | 13 | 4624702 | 4624721 | 2 | 10 | 20 | CA   | 16 | 11 |
| 128077 | 13 | 4625106 | 4625145 | 2 | 20 | 40 | TG   | 12 | 11 |
| 128080 | 13 | 4632095 | 4632128 | 2 | 17 | 34 | AC   | 12 | 8  |
| 128083 | 13 | 4636930 | 4636951 | 2 | 11 | 22 | GT   | 11 | 10 |
| 128084 | 13 | 4636977 | 4637000 | 2 | 12 | 24 | TG   | 7  | 6  |
| 128085 | 13 | 4637155 | 4637174 | 2 | 10 | 20 | CT   | 26 | 6  |
| 128089 | 13 | 4642739 | 4642756 | 2 | 9  | 18 | TG   | 26 | 3  |
| 128090 | 13 | 4642893 | 4642928 | 2 | 18 | 36 | AC   | 7  | 10 |
| 128092 | 13 | 4643157 | 4643178 | 2 | 11 | 22 | CT   | 7  | 4  |
| 128094 | 13 | 4645755 | 4645770 | 2 | 8  | 16 | AC   | 27 | 3  |
| 128096 | 13 | 4645977 | 4645990 | 2 | 7  | 14 | GT   | 19 | 4  |
| 128098 | 13 | 4649204 | 4649247 | 2 | 22 | 44 | TG   | 10 | 9  |
| 128100 | 13 | 4652046 | 4652069 | 2 | 12 | 24 | CA   | 16 | 10 |
| 128101 | 13 | 4652216 | 4652239 | 2 | 12 | 24 | GT   | 18 | 4  |
| 128102 | 13 | 4652957 | 4652970 | 2 | 7  | 14 | TA   | 31 | 4  |
| 128104 | 13 | 4655536 | 4655547 | 2 | 6  | 12 | CA   | 16 | 3  |
| 128105 | 13 | 4655823 | 4655840 | 2 | 9  | 18 | CA   | 16 | 7  |
| 128106 | 13 | 4656957 | 4656984 | 2 | 14 | 28 | CA   | 18 | 7  |

|        |    |         |         |   |    |    |      |    |    |
|--------|----|---------|---------|---|----|----|------|----|----|
| 128108 | 13 | 4657165 | 4657182 | 2 | 9  | 18 | AC   | 11 | 6  |
| 128110 | 13 | 4657790 | 4657807 | 2 | 9  | 18 | GT   | 22 | 5  |
| 128111 | 13 | 4657873 | 4657888 | 2 | 8  | 16 | GT   | 19 | 6  |
| 128113 | 13 | 4657994 | 4658011 | 2 | 9  | 18 | AC   | 21 | 4  |
| 128120 | 13 | 4661275 | 4661288 | 2 | 7  | 14 | AC   | 10 | 5  |
| 128121 | 13 | 4661578 | 4661601 | 2 | 12 | 24 | AC   | 13 | 6  |
| 128122 | 13 | 4662150 | 4662163 | 2 | 7  | 14 | GT   | 19 | 6  |
| 128123 | 13 | 4662245 | 4662258 | 2 | 7  | 14 | GA   | 16 | 7  |
| 128124 | 13 | 4662427 | 4662440 | 2 | 7  | 14 | GA   | 16 | 4  |
| 128125 | 13 | 4662504 | 4662525 | 2 | 11 | 22 | AG   | 13 | 6  |
| 128127 | 13 | 4662626 | 4662651 | 2 | 13 | 26 | TG   | 12 | 13 |
| 128128 | 13 | 4662776 | 4662811 | 2 | 18 | 36 | TG   | 12 | 11 |
| 128129 | 13 | 4666381 | 4666410 | 2 | 15 | 30 | CA   | 25 | 8  |
| 128130 | 13 | 4666812 | 4666823 | 2 | 6  | 12 | GA   | 19 | 3  |
| 128134 | 13 | 4674028 | 4674051 | 2 | 12 | 24 | CA   | 21 | 6  |
| 128135 | 13 | 4676171 | 4676202 | 2 | 16 | 32 | CA   | 12 | 8  |
| 128136 | 13 | 4676333 | 4676360 | 2 | 14 | 28 | AC   | 15 | 16 |
| 128138 | 13 | 4677059 | 4677082 | 2 | 12 | 24 | GT   | 13 | 7  |
| 128139 | 13 | 4677174 | 4677187 | 2 | 7  | 14 | CA   | 14 | 3  |
| 128140 | 13 | 4677189 | 4677206 | 2 | 9  | 18 | AC   | 21 | 6  |
| 128142 | 13 | 4679435 | 4679458 | 3 | 8  | 24 | GGA  | 17 | 8  |
| 128143 | 13 | 4680795 | 4680814 | 2 | 10 | 20 | TG   | 18 | 8  |
| 128144 | 13 | 4680994 | 4681023 | 2 | 15 | 30 | GT   | 13 | 10 |
| 128146 | 13 | 4684403 | 4684414 | 2 | 6  | 12 | GA   | 23 | 4  |
| 128149 | 13 | 4689617 | 4689644 | 2 | 14 | 28 | CA   | 15 | 13 |
| 128151 | 13 | 4689825 | 4689839 | 3 | 5  | 15 | TCC  | 11 | 5  |
| 128152 | 13 | 4689871 | 4689884 | 2 | 7  | 14 | TC   | 12 | 3  |
| 128153 | 13 | 4689944 | 4689963 | 2 | 10 | 20 | AC   | 19 | 7  |
| 128159 | 13 | 4691186 | 4691197 | 2 | 6  | 12 | TG   | 22 | 6  |
| 128160 | 13 | 4691416 | 4691439 | 2 | 12 | 24 | TG   | 23 | 13 |
| 128161 | 13 | 4691535 | 4691556 | 2 | 11 | 22 | GT   | 14 | 7  |
| 128168 | 13 | 4692192 | 4692207 | 2 | 8  | 16 | GT   | 10 | 9  |
| 128172 | 13 | 4695195 | 4695208 | 2 | 7  | 14 | CA   | 25 | 7  |
| 128181 | 13 | 4707032 | 4707051 | 2 | 10 | 20 | AC   | 14 | 6  |
| 128183 | 13 | 4712374 | 4712393 | 2 | 10 | 20 | AC   | 18 | 7  |
| 128187 | 13 | 4719730 | 4719747 | 3 | 6  | 18 | TAT  | 15 | 7  |
| 128188 | 13 | 4720065 | 4720080 | 4 | 4  | 16 | TTTG | 20 | 4  |
| 128189 | 13 | 4720996 | 4721011 | 2 | 8  | 16 | AC   | 24 | 4  |
| 128190 | 13 | 4721031 | 4721046 | 2 | 8  | 16 | AC   | 27 | 3  |
| 128194 | 13 | 4725036 | 4725051 | 2 | 8  | 16 | GT   | 24 | 7  |
| 128198 | 13 | 4729378 | 4729409 | 4 | 8  | 32 | ACAA | 15 | 4  |
| 128200 | 13 | 4730437 | 4730448 | 2 | 6  | 12 | AG   | 18 | 7  |
| 128201 | 13 | 4730497 | 4730511 | 3 | 5  | 15 | CAG  | 18 | 6  |
| 128203 | 13 | 4731007 | 4731030 | 3 | 8  | 24 | ATG  | 22 | 21 |
| 128204 | 13 | 4731135 | 4731162 | 2 | 14 | 28 | CA   | 14 | 6  |
| 128210 | 13 | 4733025 | 4733058 | 2 | 17 | 34 | AC   | 21 | 6  |
| 128212 | 13 | 4733886 | 4733925 | 2 | 20 | 40 | TG   | 16 | 11 |
| 128218 | 13 | 4736383 | 4736406 | 2 | 12 | 24 | CA   | 22 | 7  |
| 128221 | 13 | 4738425 | 4738451 | 3 | 9  | 27 | ATA  | 18 | 6  |
| 128224 | 13 | 4741063 | 4741077 | 3 | 5  | 15 | CCT  | 19 | 3  |
| 128228 | 13 | 4744686 | 4744701 | 2 | 8  | 16 | GT   | 21 | 8  |

|        |    |         |         |   |    |    |     |    |    |
|--------|----|---------|---------|---|----|----|-----|----|----|
| 128229 | 13 | 4744789 | 4744804 | 2 | 8  | 16 | GT  | 17 | 4  |
| 128232 | 13 | 4748015 | 4748026 | 2 | 6  | 12 | AC  | 15 | 8  |
| 128233 | 13 | 4748029 | 4748042 | 2 | 7  | 14 | AC  | 20 | 12 |
| 128234 | 13 | 4749630 | 4749641 | 2 | 6  | 12 | AC  | 25 | 6  |
| 128235 | 13 | 4749736 | 4749759 | 2 | 12 | 24 | GT  | 7  | 6  |
| 128237 | 13 | 4749980 | 4749997 | 2 | 9  | 18 | CA  | 19 | 12 |
| 128238 | 13 | 4752717 | 4752732 | 2 | 8  | 16 | GT  | 32 | 3  |
| 128239 | 13 | 4754026 | 4754041 | 2 | 8  | 16 | TG  | 22 | 7  |
| 128241 | 13 | 4755906 | 4755932 | 3 | 9  | 27 | AGG | 6  | 4  |
| 128243 | 13 | 4757928 | 4757965 | 2 | 19 | 38 | TG  | 6  | 6  |
| 128244 | 13 | 4758121 | 4758144 | 2 | 12 | 24 | TG  | 21 | 14 |
| 128245 | 13 | 4758316 | 4758331 | 2 | 8  | 16 | AC  | 27 | 5  |
| 128247 | 13 | 4758867 | 4758900 | 2 | 17 | 34 | GT  | 13 | 15 |
| 128248 | 13 | 4760428 | 4760448 | 3 | 7  | 21 | TCC | 29 | 3  |
| 128250 | 13 | 4761300 | 4761325 | 2 | 13 | 26 | TG  | 14 | 8  |
| 128251 | 13 | 4761463 | 4761476 | 2 | 7  | 14 | TG  | 25 | 3  |
| 128252 | 13 | 4761510 | 4761525 | 2 | 8  | 16 | TG  | 11 | 10 |
| 128253 | 13 | 4762938 | 4762961 | 2 | 12 | 24 | TG  | 23 | 9  |
| 128254 | 13 | 4763152 | 4763191 | 2 | 20 | 40 | CA  | 15 | 10 |
| 128255 | 13 | 4764797 | 4764820 | 2 | 12 | 24 | AC  | 15 | 8  |
| 128257 | 13 | 4767139 | 4767154 | 2 | 8  | 16 | TG  | 15 | 3  |
| 128258 | 13 | 4768330 | 4768359 | 2 | 15 | 30 | AC  | 8  | 8  |
| 128262 | 13 | 4776951 | 4776976 | 2 | 13 | 26 | AC  | 15 | 5  |
| 128271 | 13 | 4790415 | 4790450 | 2 | 18 | 36 | AC  | 9  | 7  |
| 128274 | 13 | 4806653 | 4806686 | 2 | 17 | 34 | CA  | 13 | 8  |
| 128282 | 13 | 4834057 | 4834083 | 3 | 9  | 27 | AGA | 24 | 7  |
| 128284 | 13 | 4836143 | 4836154 | 2 | 6  | 12 | AT  | 21 | 4  |
| 128285 | 13 | 4837269 | 4837286 | 2 | 9  | 18 | AC  | 21 | 9  |
| 128286 | 13 | 4837951 | 4837970 | 2 | 10 | 20 | TG  | 21 | 6  |
| 128287 | 13 | 4838040 | 4838069 | 2 | 15 | 30 | AC  | 15 | 13 |
| 128288 | 13 | 4838237 | 4838250 | 2 | 7  | 14 | AC  | 27 | 8  |
| 128290 | 13 | 4839807 | 4839832 | 2 | 13 | 26 | AC  | 10 | 4  |
| 128291 | 13 | 4843009 | 4843026 | 2 | 9  | 18 | GT  | 18 | 10 |
| 128292 | 13 | 4850111 | 4850140 | 2 | 15 | 30 | TG  | 6  | 3  |
| 128293 | 13 | 4850553 | 4850574 | 2 | 11 | 22 | TG  | 18 | 6  |
| 128294 | 13 | 4850715 | 4850728 | 2 | 7  | 14 | AC  | 20 | 5  |
| 128295 | 13 | 4850849 | 4850876 | 2 | 14 | 28 | GA  | 8  | 6  |
| 128300 | 13 | 4855956 | 4855977 | 2 | 11 | 22 | GT  | 18 | 7  |
| 128304 | 13 | 4859771 | 4859786 | 2 | 8  | 16 | GT  | 20 | 3  |
| 128305 | 13 | 4860053 | 4860068 | 2 | 8  | 16 | CA  | 18 | 10 |
| 128308 | 13 | 4864719 | 4864746 | 2 | 14 | 28 | CA  | 12 | 9  |
| 128314 | 13 | 4872698 | 4872709 | 2 | 6  | 12 | GT  | 29 | 3  |
| 128315 | 13 | 4873456 | 4873475 | 2 | 10 | 20 | CA  | 23 | 6  |
| 128318 | 13 | 4877081 | 4877108 | 2 | 14 | 28 | CA  | 12 | 7  |
| 128320 | 13 | 4877284 | 4877305 | 2 | 11 | 22 | TG  | 12 | 5  |
| 128321 | 13 | 4877446 | 4877473 | 2 | 14 | 28 | CA  | 11 | 10 |
| 128325 | 13 | 4889578 | 4889601 | 2 | 12 | 24 | TG  | 20 | 5  |
| 128327 | 13 | 4891606 | 4891629 | 2 | 12 | 24 | AC  | 10 | 7  |
| 128328 | 13 | 4891737 | 4891758 | 2 | 11 | 22 | AC  | 18 | 6  |
| 128329 | 13 | 4891863 | 4891888 | 2 | 13 | 26 | GT  | 14 | 10 |
| 128334 | 13 | 4901180 | 4901193 | 2 | 7  | 14 | GT  | 26 | 3  |

|        |    |         |         |   |    |    |     |    |    |
|--------|----|---------|---------|---|----|----|-----|----|----|
| 128335 | 13 | 4903633 | 4903646 | 2 | 7  | 14 | AC  | 25 | 3  |
| 128340 | 13 | 4906941 | 4906956 | 2 | 8  | 16 | AC  | 28 | 4  |
| 128341 | 13 | 4907772 | 4907791 | 2 | 10 | 20 | CT  | 19 | 5  |
| 128342 | 13 | 4908645 | 4908668 | 2 | 12 | 24 | AC  | 18 | 7  |
| 128343 | 13 | 4912051 | 4912064 | 2 | 7  | 14 | TG  | 12 | 3  |
| 128344 | 13 | 4913238 | 4913259 | 2 | 11 | 22 | AC  | 15 | 10 |
| 128346 | 13 | 4917443 | 4917460 | 2 | 9  | 18 | CA  | 16 | 8  |
| 128351 | 13 | 4923110 | 4923125 | 2 | 8  | 16 | GT  | 7  | 3  |
| 128355 | 13 | 4931251 | 4931292 | 2 | 21 | 42 | TG  | 6  | 6  |
| 128361 | 13 | 4934269 | 4934312 | 2 | 22 | 44 | CA  | 6  | 7  |
| 128362 | 13 | 4935829 | 4935842 | 2 | 7  | 14 | AG  | 19 | 5  |
| 128364 | 13 | 4936109 | 4936130 | 2 | 11 | 22 | AC  | 19 | 13 |
| 128367 | 13 | 4942124 | 4942139 | 2 | 8  | 16 | GT  | 24 | 5  |
| 128368 | 13 | 4942858 | 4942881 | 2 | 12 | 24 | CA  | 10 | 14 |
| 128369 | 13 | 4942983 | 4942998 | 2 | 8  | 16 | AC  | 8  | 3  |
| 128370 | 13 | 4943012 | 4943027 | 2 | 8  | 16 | CA  | 15 | 3  |
| 128372 | 13 | 4946071 | 4946098 | 2 | 14 | 28 | TG  | 14 | 13 |
| 128374 | 13 | 4954194 | 4954225 | 2 | 16 | 32 | AC  | 6  | 8  |
| 128377 | 13 | 4957739 | 4957760 | 2 | 11 | 22 | CA  | 13 | 9  |
| 128378 | 13 | 4958091 | 4958124 | 2 | 17 | 34 | TG  | 9  | 10 |
| 128379 | 13 | 4959462 | 4959477 | 2 | 8  | 16 | TA  | 18 | 3  |
| 128380 | 13 | 4959670 | 4959683 | 2 | 7  | 14 | TG  | 7  | 3  |
| 128381 | 13 | 4959688 | 4959699 | 2 | 6  | 12 | AT  | 20 | 6  |
| 128382 | 13 | 4959700 | 4959711 | 2 | 6  | 12 | AG  | 23 | 5  |
| 128385 | 13 | 4960067 | 4960092 | 2 | 13 | 26 | AC  | 12 | 7  |
| 128386 | 13 | 4961619 | 4961636 | 2 | 9  | 18 | GT  | 17 | 10 |
| 128396 | 13 | 4975549 | 4975584 | 2 | 18 | 36 | CT  | 11 | 7  |
| 128398 | 13 | 4977118 | 4977139 | 2 | 11 | 22 | AG  | 16 | 8  |
| 128399 | 13 | 4979530 | 4979553 | 2 | 12 | 24 | AC  | 12 | 7  |
| 128400 | 13 | 4982172 | 4982192 | 3 | 7  | 21 | TCC | 9  | 7  |
| 128401 | 13 | 4988113 | 4988146 | 2 | 17 | 34 | AC  | 19 | 8  |
| 128402 | 13 | 4988811 | 4988826 | 2 | 8  | 16 | TG  | 19 | 4  |
| 128403 | 13 | 4989131 | 4989146 | 2 | 8  | 16 | CA  | 19 | 5  |
| 128404 | 13 | 4989259 | 4989280 | 2 | 11 | 22 | TG  | 14 | 13 |
| 128407 | 13 | 4995450 | 4995465 | 2 | 8  | 16 | GT  | 19 | 4  |
| 128408 | 13 | 4997837 | 4997860 | 2 | 12 | 24 | TC  | 24 | 6  |
| 128410 | 13 | 4998072 | 4998117 | 2 | 23 | 46 | CA  | 6  | 8  |
| 128433 | 13 | 5024217 | 5024232 | 2 | 8  | 16 | CA  | 22 | 3  |
| 128436 | 13 | 5024887 | 5024910 | 2 | 12 | 24 | AC  | 10 | 6  |
| 128438 | 13 | 5025278 | 5025289 | 2 | 6  | 12 | CA  | 18 | 5  |
| 128439 | 13 | 5027272 | 5027283 | 2 | 6  | 12 | AC  | 14 | 3  |
| 128440 | 13 | 5030628 | 5030657 | 2 | 15 | 30 | GT  | 10 | 10 |
| 128441 | 13 | 5030851 | 5030866 | 2 | 8  | 16 | GT  | 20 | 4  |
| 128442 | 13 | 5031010 | 5031047 | 2 | 19 | 38 | CA  | 21 | 12 |
| 128443 | 13 | 5034502 | 5034543 | 2 | 21 | 42 | CA  | 12 | 10 |
| 128445 | 13 | 5039864 | 5039879 | 2 | 8  | 16 | AC  | 19 | 5  |
| 128447 | 13 | 5040229 | 5040242 | 2 | 7  | 14 | GT  | 9  | 3  |
| 128448 | 13 | 5042123 | 5042136 | 2 | 7  | 14 | AC  | 23 | 6  |
| 128449 | 13 | 5042433 | 5042456 | 2 | 12 | 24 | CA  | 19 | 9  |
| 128451 | 13 | 5045848 | 5045861 | 2 | 7  | 14 | TA  | 14 | 4  |
| 128455 | 13 | 5049021 | 5049064 | 2 | 22 | 44 | CA  | 7  | 12 |

|        |    |         |         |   |    |    |      |    |    |
|--------|----|---------|---------|---|----|----|------|----|----|
| 128456 | 13 | 5050556 | 5050573 | 2 | 9  | 18 | GT   | 21 | 4  |
| 128460 | 13 | 5053380 | 5053397 | 2 | 9  | 18 | GT   | 13 | 6  |
| 128466 | 13 | 5058734 | 5058757 | 2 | 12 | 24 | CA   | 9  | 9  |
| 128467 | 13 | 5059037 | 5059080 | 4 | 11 | 44 | AGAC | 26 | 13 |
| 128470 | 13 | 5063741 | 5063752 | 2 | 6  | 12 | AC   | 20 | 7  |
| 128471 | 13 | 5063822 | 5063853 | 2 | 16 | 32 | AC   | 10 | 10 |
| 128472 | 13 | 5064194 | 5064225 | 2 | 16 | 32 | AC   | 13 | 10 |
| 128473 | 13 | 5064364 | 5064387 | 2 | 12 | 24 | CA   | 23 | 7  |
| 128478 | 13 | 5068947 | 5068982 | 2 | 18 | 36 | TC   | 12 | 7  |
| 128481 | 13 | 5071548 | 5071559 | 2 | 6  | 12 | TG   | 29 | 3  |
| 128482 | 13 | 5072152 | 5072177 | 2 | 13 | 26 | AC   | 12 | 6  |
| 128484 | 13 | 5074041 | 5074064 | 2 | 12 | 24 | AC   | 15 | 13 |
| 128517 | 13 | 5106335 | 5106352 | 2 | 9  | 18 | CT   | 21 | 5  |
| 128524 | 13 | 5112840 | 5112863 | 2 | 12 | 24 | AC   | 8  | 7  |
| 128529 | 13 | 5117753 | 5117788 | 2 | 18 | 36 | CA   | 15 | 12 |
| 128532 | 13 | 5119848 | 5119859 | 2 | 6  | 12 | GT   | 22 | 5  |
| 128534 | 13 | 5120973 | 5120986 | 2 | 7  | 14 | CA   | 24 | 8  |
| 128537 | 13 | 5126085 | 5126100 | 2 | 8  | 16 | TG   | 26 | 6  |
| 128538 | 13 | 5126107 | 5126122 | 2 | 8  | 16 | TG   | 9  | 3  |
| 128540 | 13 | 5126297 | 5126312 | 2 | 8  | 16 | AC   | 21 | 5  |
| 128542 | 13 | 5130739 | 5130752 | 2 | 7  | 14 | AT   | 11 | 4  |
| 128546 | 13 | 5132921 | 5132932 | 2 | 6  | 12 | CA   | 29 | 3  |
| 128547 | 13 | 5136816 | 5136857 | 2 | 21 | 42 | GT   | 9  | 12 |
| 128549 | 13 | 5137073 | 5137090 | 2 | 9  | 18 | TG   | 19 | 7  |
| 128550 | 13 | 5137295 | 5137326 | 2 | 16 | 32 | TG   | 14 | 10 |
| 128551 | 13 | 5141074 | 5141101 | 2 | 14 | 28 | AC   | 21 | 12 |
| 128553 | 13 | 5143650 | 5143669 | 2 | 10 | 20 | AC   | 16 | 3  |
| 128555 | 13 | 5143831 | 5143852 | 2 | 11 | 22 | CA   | 17 | 4  |
| 128559 | 13 | 5144377 | 5144392 | 2 | 8  | 16 | CA   | 20 | 6  |
| 128561 | 13 | 5147444 | 5147461 | 2 | 9  | 18 | TG   | 9  | 3  |
| 128565 | 13 | 5149273 | 5149292 | 2 | 10 | 20 | TG   | 11 | 12 |
| 128567 | 13 | 5150539 | 5150554 | 2 | 8  | 16 | AC   | 24 | 5  |
| 128568 | 13 | 5151542 | 5151585 | 2 | 22 | 44 | GT   | 7  | 10 |
| 128575 | 13 | 5155173 | 5155190 | 3 | 6  | 18 | ACA  | 26 | 5  |
| 128578 | 13 | 5156784 | 5156795 | 2 | 6  | 12 | CA   | 25 | 5  |
| 128579 | 13 | 5156798 | 5156811 | 2 | 7  | 14 | CA   | 13 | 4  |
| 128580 | 13 | 5157007 | 5157020 | 2 | 7  | 14 | GT   | 32 | 10 |
| 128585 | 13 | 5164738 | 5164767 | 2 | 15 | 30 | AC   | 16 | 12 |
| 128586 | 13 | 5165034 | 5165057 | 3 | 8  | 24 | GGA  | 20 | 8  |
| 128590 | 13 | 5165982 | 5166013 | 2 | 16 | 32 | GT   | 9  | 7  |
| 128594 | 13 | 5166371 | 5166398 | 2 | 14 | 28 | TG   | 13 | 10 |
| 128595 | 13 | 5166591 | 5166606 | 2 | 8  | 16 | GT   | 14 | 8  |
| 128597 | 13 | 5170247 | 5170273 | 3 | 9  | 27 | CAT  | 27 | 6  |
| 128598 | 13 | 5173032 | 5173053 | 2 | 11 | 22 | AC   | 8  | 10 |
| 128599 | 13 | 5173240 | 5173267 | 2 | 14 | 28 | GT   | 22 | 11 |
| 128600 | 13 | 5173482 | 5173495 | 2 | 7  | 14 | TG   | 27 | 6  |
| 128601 | 13 | 5173790 | 5173805 | 2 | 8  | 16 | AC   | 22 | 6  |
| 128602 | 13 | 5179837 | 5179848 | 2 | 6  | 12 | TG   | 23 | 9  |
| 128603 | 13 | 5180325 | 5180350 | 2 | 13 | 26 | CA   | 16 | 14 |
| 128605 | 13 | 5180435 | 5180484 | 2 | 25 | 50 | TG   | 19 | 19 |
| 128606 | 13 | 5180622 | 5180657 | 2 | 18 | 36 | AC   | 10 | 11 |

|        |    |         |         |   |    |    |      |    |    |
|--------|----|---------|---------|---|----|----|------|----|----|
| 128607 | 13 | 5181816 | 5181859 | 2 | 22 | 44 | CA   | 11 | 14 |
| 128609 | 13 | 5185722 | 5185735 | 2 | 7  | 14 | AC   | 17 | 8  |
| 128611 | 13 | 5186945 | 5186978 | 2 | 17 | 34 | GT   | 15 | 14 |
| 128616 | 13 | 5194864 | 5194879 | 2 | 8  | 16 | AC   | 23 | 6  |
| 128617 | 13 | 5195026 | 5195071 | 2 | 23 | 46 | GT   | 8  | 10 |
| 128618 | 13 | 5196406 | 5196429 | 4 | 6  | 24 | TATC | 21 | 8  |
| 128621 | 13 | 5197113 | 5197144 | 2 | 16 | 32 | CA   | 17 | 11 |
| 128622 | 13 | 5197300 | 5197313 | 2 | 7  | 14 | CA   | 22 | 9  |
| 128624 | 13 | 5197873 | 5197896 | 2 | 12 | 24 | GT   | 8  | 12 |
| 128626 | 13 | 5200555 | 5200590 | 2 | 18 | 36 | TG   | 23 | 14 |
| 128629 | 13 | 5202698 | 5202715 | 2 | 9  | 18 | AC   | 22 | 6  |
| 128631 | 13 | 5205226 | 5205253 | 2 | 14 | 28 | AC   | 14 | 12 |
| 128633 | 13 | 5205535 | 5205554 | 2 | 10 | 20 | CA   | 13 | 7  |
| 128634 | 13 | 5205706 | 5205741 | 2 | 18 | 36 | GT   | 12 | 9  |
| 128635 | 13 | 5206839 | 5206870 | 2 | 16 | 32 | TG   | 16 | 9  |
| 128636 | 13 | 5207020 | 5207039 | 2 | 10 | 20 | AC   | 24 | 5  |
| 128639 | 13 | 5210342 | 5210357 | 2 | 8  | 16 | AC   | 16 | 9  |
| 128644 | 13 | 5221817 | 5221840 | 2 | 12 | 24 | TG   | 17 | 7  |
| 128645 | 13 | 5222160 | 5222193 | 2 | 17 | 34 | TC   | 8  | 11 |
| 128648 | 13 | 5222233 | 5222246 | 2 | 7  | 14 | CA   | 11 | 4  |
| 128649 | 13 | 5222404 | 5222415 | 2 | 6  | 12 | AC   | 23 | 5  |
| 128651 | 13 | 5223590 | 5223607 | 2 | 9  | 18 | GA   | 26 | 8  |
| 128652 | 13 | 5223957 | 5223986 | 2 | 15 | 30 | CA   | 17 | 10 |
| 128653 | 13 | 5224147 | 5224162 | 2 | 8  | 16 | AC   | 10 | 5  |
| 128654 | 13 | 5228344 | 5228357 | 2 | 7  | 14 | AC   | 17 | 3  |
| 128658 | 13 | 5230390 | 5230403 | 2 | 7  | 14 | AC   | 37 | 7  |
| 128659 | 13 | 5233456 | 5233479 | 2 | 12 | 24 | AC   | 7  | 10 |
| 128660 | 13 | 5233921 | 5233948 | 4 | 7  | 28 | AAAT | 14 | 12 |
| 128661 | 13 | 5235090 | 5235107 | 2 | 9  | 18 | GT   | 25 | 9  |
| 128665 | 13 | 5240069 | 5240084 | 2 | 8  | 16 | AC   | 19 | 11 |
| 128670 | 13 | 5250007 | 5250032 | 2 | 13 | 26 | TG   | 19 | 13 |
| 128672 | 13 | 5252059 | 5252074 | 2 | 8  | 16 | AC   | 13 | 6  |
| 128673 | 13 | 5253205 | 5253226 | 2 | 11 | 22 | AC   | 15 | 12 |
| 128674 | 13 | 5255057 | 5255070 | 2 | 7  | 14 | GT   | 10 | 7  |
| 128679 | 13 | 5265658 | 5265669 | 2 | 6  | 12 | AC   | 25 | 4  |
| 128682 | 13 | 5266737 | 5266752 | 2 | 8  | 16 | AC   | 22 | 6  |
| 128685 | 13 | 5268792 | 5268819 | 2 | 14 | 28 | TG   | 17 | 10 |
| 128689 | 13 | 5281763 | 5281786 | 2 | 12 | 24 | TG   | 23 | 4  |
| 128690 | 13 | 5283211 | 5283240 | 2 | 15 | 30 | AC   | 18 | 4  |
| 128692 | 13 | 5283776 | 5283789 | 2 | 7  | 14 | AC   | 30 | 5  |
| 128693 | 13 | 5284035 | 5284050 | 2 | 8  | 16 | CA   | 21 | 3  |
| 128694 | 13 | 5288250 | 5288261 | 2 | 6  | 12 | TC   | 31 | 3  |
| 128695 | 13 | 5290212 | 5290223 | 2 | 6  | 12 | CA   | 35 | 4  |
| 128696 | 13 | 5292265 | 5292294 | 2 | 15 | 30 | AC   | 21 | 11 |
| 128700 | 13 | 5294573 | 5294588 | 2 | 8  | 16 | GT   | 29 | 4  |
| 128704 | 13 | 5297834 | 5297857 | 2 | 12 | 24 | CA   | 24 | 16 |
| 128706 | 13 | 5298134 | 5298153 | 2 | 10 | 20 | TG   | 12 | 6  |
| 128708 | 13 | 5298210 | 5298229 | 2 | 10 | 20 | TG   | 16 | 13 |
| 128710 | 13 | 5298441 | 5298452 | 2 | 6  | 12 | AC   | 15 | 4  |
| 128712 | 13 | 5298499 | 5298538 | 2 | 20 | 40 | GT   | 6  | 9  |
| 128715 | 13 | 5300241 | 5300261 | 3 | 7  | 21 | CTT  | 19 | 5  |

|        |    |         |         |   |    |    |      |    |    |
|--------|----|---------|---------|---|----|----|------|----|----|
| 128716 | 13 | 5300369 | 5300384 | 2 | 8  | 16 | GA   | 18 | 5  |
| 128717 | 13 | 5300458 | 5300481 | 3 | 8  | 24 | CCT  | 14 | 4  |
| 128718 | 13 | 5300732 | 5300761 | 2 | 15 | 30 | GT   | 15 | 10 |
| 128720 | 13 | 5300883 | 5300904 | 2 | 11 | 22 | CA   | 20 | 13 |
| 128721 | 13 | 5301069 | 5301086 | 3 | 6  | 18 | GAG  | 21 | 7  |
| 128722 | 13 | 5301355 | 5301380 | 2 | 13 | 26 | GT   | 17 | 8  |
| 128726 | 13 | 5306898 | 5306911 | 2 | 7  | 14 | TG   | 22 | 13 |
| 128727 | 13 | 5307016 | 5307029 | 2 | 7  | 14 | TG   | 39 | 11 |
| 128729 | 13 | 5307433 | 5307452 | 4 | 5  | 20 | TCTA | 19 | 5  |
| 128734 | 13 | 5310748 | 5310768 | 3 | 7  | 21 | CCT  | 21 | 3  |
| 128735 | 13 | 5312753 | 5312764 | 2 | 6  | 12 | TG   | 20 | 3  |
| 128736 | 13 | 5315701 | 5315722 | 2 | 11 | 22 | AC   | 24 | 5  |
| 128737 | 13 | 5316193 | 5316204 | 2 | 6  | 12 | AC   | 30 | 5  |
| 128741 | 13 | 5321742 | 5321755 | 2 | 7  | 14 | AC   | 22 | 4  |
| 128748 | 13 | 5324316 | 5324336 | 3 | 7  | 21 | AAC  | 18 | 3  |
| 128750 | 13 | 5324784 | 5324803 | 2 | 10 | 20 | AC   | 21 | 7  |
| 128755 | 13 | 5328669 | 5328686 | 2 | 9  | 18 | AC   | 15 | 12 |
| 128756 | 13 | 5328885 | 5328910 | 2 | 13 | 26 | AC   | 14 | 11 |
| 128758 | 13 | 5332577 | 5332594 | 3 | 6  | 18 | CTC  | 11 | 3  |
| 128761 | 13 | 5341506 | 5341533 | 2 | 14 | 28 | TC   | 18 | 4  |
| 128762 | 13 | 5341772 | 5341787 | 2 | 8  | 16 | AC   | 26 | 3  |
| 128763 | 13 | 5342604 | 5342647 | 2 | 22 | 44 | GT   | 10 | 8  |
| 128764 | 13 | 5342728 | 5342753 | 2 | 13 | 26 | CA   | 10 | 9  |
| 128770 | 13 | 5343983 | 5344008 | 2 | 13 | 26 | AC   | 15 | 8  |
| 128771 | 13 | 5344284 | 5344313 | 2 | 15 | 30 | GT   | 23 | 8  |
| 128772 | 13 | 5346275 | 5346302 | 2 | 14 | 28 | GT   | 14 | 9  |
| 128774 | 13 | 5349558 | 5349573 | 2 | 8  | 16 | AC   | 21 | 5  |
| 128776 | 13 | 5354388 | 5354402 | 3 | 5  | 15 | AAG  | 14 | 8  |
| 128779 | 13 | 5355019 | 5355030 | 2 | 6  | 12 | TG   | 20 | 5  |
| 128780 | 13 | 5355033 | 5355046 | 2 | 7  | 14 | TG   | 25 | 5  |
| 128781 | 13 | 5357385 | 5357406 | 2 | 11 | 22 | TG   | 23 | 6  |
| 128782 | 13 | 5357574 | 5357603 | 2 | 15 | 30 | CA   | 16 | 8  |
| 128783 | 13 | 5358112 | 5358127 | 2 | 8  | 16 | CA   | 15 | 8  |
| 128786 | 13 | 5362783 | 5362818 | 2 | 18 | 36 | CT   | 9  | 10 |
| 128791 | 13 | 5367295 | 5367318 | 2 | 12 | 24 | CA   | 25 | 6  |
| 128792 | 13 | 5367902 | 5367913 | 2 | 6  | 12 | TA   | 7  | 4  |
| 128795 | 13 | 5369129 | 5369155 | 3 | 9  | 27 | GAG  | 17 | 5  |
| 128796 | 13 | 5369425 | 5369436 | 2 | 6  | 12 | GC   | 19 | 3  |
| 128797 | 13 | 5369784 | 5369809 | 2 | 13 | 26 | TG   | 20 | 12 |
| 128798 | 13 | 5369860 | 5369871 | 2 | 6  | 12 | TG   | 30 | 3  |
| 128799 | 13 | 5370066 | 5370077 | 2 | 6  | 12 | GT   | 38 | 3  |
| 128804 | 13 | 5371524 | 5371543 | 2 | 10 | 20 | CA   | 12 | 6  |
| 128806 | 13 | 5374179 | 5374211 | 3 | 11 | 33 | TGA  | 23 | 7  |
| 128810 | 13 | 5380941 | 5380970 | 2 | 15 | 30 | CA   | 10 | 9  |
| 128815 | 13 | 5383551 | 5383572 | 2 | 11 | 22 | TG   | 22 | 13 |
| 128824 | 13 | 5395887 | 5395938 | 2 | 26 | 52 | CA   | 7  | 13 |
| 128827 | 13 | 5400083 | 5400110 | 2 | 14 | 28 | AC   | 9  | 5  |
| 128835 | 13 | 5413779 | 5413800 | 2 | 11 | 22 | TG   | 21 | 9  |
| 128841 | 13 | 5419384 | 5419409 | 2 | 13 | 26 | AC   | 17 | 8  |
| 128846 | 13 | 5426449 | 5426472 | 2 | 12 | 24 | GT   | 11 | 12 |
| 128847 | 13 | 5426939 | 5426978 | 2 | 20 | 40 | TG   | 10 | 9  |



|        |    |         |         |   |    |    |      |    |    |
|--------|----|---------|---------|---|----|----|------|----|----|
| 128849 | 13 | 5445967 | 5446018 | 4 | 13 | 52 | AGAT | 17 | 11 |
| 128850 | 13 | 5448590 | 5448605 | 2 | 8  | 16 | TG   | 23 | 4  |
| 128851 | 13 | 5448831 | 5448850 | 2 | 10 | 20 | GT   | 24 | 4  |
| 128852 | 13 | 5449023 | 5449038 | 2 | 8  | 16 | GT   | 34 | 3  |
| 128856 | 13 | 5455742 | 5455771 | 3 | 10 | 30 | GGA  | 10 | 3  |
| 128857 | 13 | 5456097 | 5456126 | 2 | 15 | 30 | GT   | 15 | 7  |
| 128861 | 13 | 5457701 | 5457714 | 2 | 7  | 14 | AC   | 24 | 7  |
| 128862 | 13 | 5457782 | 5457803 | 2 | 11 | 22 | CA   | 10 | 6  |
| 128871 | 13 | 5464468 | 5464495 | 2 | 14 | 28 | TG   | 15 | 7  |
| 128872 | 13 | 5464900 | 5464917 | 2 | 9  | 18 | TG   | 22 | 4  |
| 128874 | 13 | 5465829 | 5465840 | 2 | 6  | 12 | GT   | 22 | 3  |
| 128880 | 13 | 5472512 | 5472547 | 2 | 18 | 36 | AC   | 9  | 10 |
| 128882 | 13 | 5473361 | 5473376 | 2 | 8  | 16 | GT   | 16 | 7  |
| 128886 | 13 | 5479271 | 5479306 | 2 | 18 | 36 | AC   | 7  | 5  |
| 128887 | 13 | 5479441 | 5479458 | 2 | 9  | 18 | CT   | 9  | 3  |
| 128893 | 13 | 5484087 | 5484102 | 2 | 8  | 16 | CA   | 25 | 4  |
| 128896 | 13 | 5485498 | 5485541 | 2 | 22 | 44 | TG   | 13 | 10 |
| 128897 | 13 | 5485999 | 5486014 | 4 | 4  | 16 | TTAT | 23 | 14 |
| 128898 | 13 | 5488084 | 5488109 | 2 | 13 | 26 | AC   | 14 | 7  |
| 128900 | 13 | 5490167 | 5490190 | 2 | 12 | 24 | CA   | 9  | 8  |
| 128901 | 13 | 5490392 | 5490409 | 2 | 9  | 18 | AC   | 23 | 7  |
| 128903 | 13 | 5490982 | 5491015 | 2 | 17 | 34 | GT   | 11 | 9  |
| 128905 | 13 | 5494314 | 5494331 | 2 | 9  | 18 | TG   | 19 | 6  |
| 128907 | 13 | 5498992 | 5499009 | 3 | 6  | 18 | TTC  | 25 | 5  |
| 128910 | 13 | 5503788 | 5503803 | 2 | 8  | 16 | AC   | 20 | 4  |
| 128913 | 13 | 5509210 | 5509225 | 2 | 8  | 16 | CA   | 24 | 3  |
| 128914 | 13 | 5509438 | 5509455 | 3 | 6  | 18 | GCT  | 32 | 3  |
| 128918 | 13 | 5511451 | 5511488 | 2 | 19 | 38 | AC   | 11 | 10 |
| 128922 | 13 | 5517759 | 5517788 | 2 | 15 | 30 | CA   | 9  | 6  |
| 128923 | 13 | 5519662 | 5519673 | 2 | 6  | 12 | CA   | 11 | 7  |
| 128932 | 13 | 5530431 | 5530464 | 2 | 17 | 34 | TG   | 11 | 10 |
| 128933 | 13 | 5531569 | 5531589 | 3 | 7  | 21 | CTC  | 28 | 7  |
| 128936 | 13 | 5536102 | 5536113 | 2 | 6  | 12 | AC   | 25 | 3  |
| 128951 | 13 | 5588930 | 5588941 | 2 | 6  | 12 | TG   | 27 | 4  |
| 128954 | 13 | 5604021 | 5604036 | 2 | 8  | 16 | CA   | 17 | 3  |
| 128955 | 13 | 5604110 | 5604127 | 2 | 9  | 18 | CA   | 24 | 3  |
| 128956 | 13 | 5610599 | 5610654 | 2 | 28 | 56 | TG   | 9  | 9  |
| 128958 | 13 | 5615233 | 5615256 | 2 | 12 | 24 | CA   | 22 | 13 |
| 128959 | 13 | 5615486 | 5615497 | 2 | 6  | 12 | GT   | 16 | 5  |
| 128960 | 13 | 5615500 | 5615513 | 2 | 7  | 14 | GT   | 19 | 5  |
| 128962 | 13 | 5616258 | 5616291 | 2 | 17 | 34 | TG   | 19 | 13 |
| 128963 | 13 | 5617316 | 5617335 | 2 | 10 | 20 | TG   | 11 | 9  |
| 128968 | 13 | 5624692 | 5624709 | 2 | 9  | 18 | CA   | 7  | 4  |
| 128970 | 13 | 5630031 | 5630062 | 2 | 16 | 32 | CA   | 16 | 12 |
| 128971 | 13 | 5633011 | 5633024 | 2 | 7  | 14 | AT   | 13 | 6  |
| 128974 | 13 | 5633435 | 5633452 | 2 | 9  | 18 | TG   | 19 | 7  |
| 128975 | 13 | 5639011 | 5639025 | 3 | 5  | 15 | CAA  | 14 | 6  |
| 128982 | 13 | 5650667 | 5650690 | 2 | 12 | 24 | TG   | 24 | 8  |
| 128983 | 13 | 5653601 | 5653618 | 2 | 9  | 18 | AC   | 22 | 8  |
| 128985 | 13 | 5660930 | 5660941 | 2 | 6  | 12 | CT   | 20 | 3  |
| 129000 | 13 | 5710965 | 5710976 | 2 | 6  | 12 | GT   | 34 | 3  |

|        |    |         |         |   |    |    |      |    |    |
|--------|----|---------|---------|---|----|----|------|----|----|
| 129001 | 13 | 5711801 | 5711814 | 2 | 7  | 14 | AC   | 29 | 4  |
| 129014 | 13 | 5725435 | 5725450 | 2 | 8  | 16 | AC   | 26 | 5  |
| 129022 | 13 | 5738331 | 5738360 | 2 | 15 | 30 | AC   | 12 | 9  |
| 129024 | 13 | 5739884 | 5739909 | 2 | 13 | 26 | GT   | 13 | 7  |
| 129030 | 13 | 5775273 | 5775288 | 2 | 8  | 16 | GT   | 28 | 6  |
| 129036 | 13 | 5795545 | 5795572 | 4 | 7  | 28 | ACAG | 19 | 7  |
| 129040 | 13 | 5801983 | 5801998 | 2 | 8  | 16 | TG   | 21 | 10 |
| 129041 | 13 | 5803666 | 5803721 | 2 | 28 | 56 | GT   | 17 | 12 |
| 129045 | 13 | 5804227 | 5804244 | 2 | 9  | 18 | CA   | 17 | 9  |
| 129047 | 13 | 5805633 | 5805644 | 2 | 6  | 12 | GT   | 23 | 6  |
| 129048 | 13 | 5812621 | 5812656 | 4 | 9  | 36 | TTGA | 19 | 9  |
| 129049 | 13 | 5812691 | 5812710 | 4 | 5  | 20 | ATGA | 16 | 5  |
| 129051 | 13 | 5813779 | 5813796 | 3 | 6  | 18 | AAC  | 23 | 3  |
| 129052 | 13 | 5815474 | 5815507 | 2 | 17 | 34 | CA   | 10 | 8  |
| 129054 | 13 | 5816682 | 5816703 | 2 | 11 | 22 | TG   | 22 | 6  |
| 129055 | 13 | 5818599 | 5818620 | 2 | 11 | 22 | CT   | 9  | 3  |
| 129059 | 13 | 5818851 | 5818868 | 2 | 9  | 18 | CA   | 7  | 11 |
| 129060 | 13 | 5822378 | 5822417 | 2 | 20 | 40 | TG   | 7  | 7  |
| 129062 | 13 | 5824392 | 5824413 | 2 | 11 | 22 | TG   | 26 | 13 |
| 129063 | 13 | 5824839 | 5824852 | 2 | 7  | 14 | GT   | 22 | 4  |
| 129065 | 13 | 5825197 | 5825212 | 4 | 4  | 16 | CTGT | 17 | 10 |
| 129066 | 13 | 5825958 | 5825981 | 2 | 12 | 24 | TG   | 13 | 7  |
| 129067 | 13 | 5826880 | 5826907 | 2 | 14 | 28 | GT   | 14 | 5  |
| 129070 | 13 | 5827264 | 5827287 | 2 | 12 | 24 | CA   | 10 | 12 |
| 129074 | 13 | 5828953 | 5828980 | 2 | 14 | 28 | TG   | 20 | 11 |
| 129075 | 13 | 5829085 | 5829140 | 2 | 28 | 56 | TG   | 7  | 10 |
| 129076 | 13 | 5829994 | 5830009 | 2 | 8  | 16 | CA   | 24 | 8  |
| 129077 | 13 | 5832180 | 5832203 | 2 | 12 | 24 | TG   | 19 | 5  |
| 129079 | 13 | 5833801 | 5833818 | 2 | 9  | 18 | CT   | 29 | 3  |
| 129080 | 13 | 5834400 | 5834435 | 2 | 18 | 36 | AC   | 8  | 8  |
| 129081 | 13 | 5835496 | 5835511 | 2 | 8  | 16 | CA   | 29 | 3  |
| 129082 | 13 | 5835567 | 5835584 | 2 | 9  | 18 | GT   | 17 | 9  |
| 129083 | 13 | 5835899 | 5835910 | 2 | 6  | 12 | AG   | 25 | 3  |
| 129084 | 13 | 5836684 | 5836709 | 2 | 13 | 26 | GT   | 19 | 6  |
| 129087 | 13 | 5844147 | 5844170 | 2 | 12 | 24 | GT   | 15 | 6  |
| 129089 | 13 | 5846325 | 5846356 | 2 | 16 | 32 | GT   | 17 | 11 |
| 129092 | 13 | 5849924 | 5849953 | 2 | 15 | 30 | TG   | 11 | 12 |
| 129094 | 13 | 5851865 | 5851912 | 2 | 24 | 48 | TG   | 7  | 8  |
| 129096 | 13 | 5852867 | 5852878 | 2 | 6  | 12 | TG   | 20 | 6  |
| 129098 | 13 | 5855099 | 5855114 | 2 | 8  | 16 | GT   | 26 | 4  |
| 129104 | 13 | 5861873 | 5861892 | 2 | 10 | 20 | AC   | 15 | 4  |
| 129105 | 13 | 5862069 | 5862088 | 2 | 10 | 20 | TG   | 16 | 5  |
| 129107 | 13 | 5862937 | 5862960 | 2 | 12 | 24 | GT   | 16 | 9  |
| 129109 | 13 | 5866700 | 5866737 | 2 | 19 | 38 | TG   | 9  | 9  |
| 129110 | 13 | 5866859 | 5866882 | 2 | 12 | 24 | CA   | 17 | 6  |
| 129114 | 13 | 5888225 | 5888268 | 2 | 22 | 44 | TG   | 9  | 14 |
| 129118 | 13 | 5896794 | 5896820 | 3 | 9  | 27 | AGG  | 7  | 5  |
| 129132 | 13 | 5906823 | 5906866 | 2 | 22 | 44 | CA   | 11 | 9  |
| 129137 | 13 | 5921912 | 5921943 | 2 | 16 | 32 | AC   | 9  | 6  |
| 129138 | 13 | 5926567 | 5926582 | 2 | 8  | 16 | AC   | 22 | 4  |
| 129143 | 13 | 5945301 | 5945321 | 3 | 7  | 21 | AGC  | 36 | 7  |

|        |    |         |         |   |    |    |      |    |    |
|--------|----|---------|---------|---|----|----|------|----|----|
| 129156 | 13 | 5979426 | 5979449 | 2 | 12 | 24 | CA   | 26 | 13 |
| 129158 | 13 | 5980608 | 5980627 | 2 | 10 | 20 | GA   | 25 | 5  |
| 129166 | 13 | 6003400 | 6003417 | 2 | 9  | 18 | CT   | 17 | 8  |
| 129167 | 13 | 6003418 | 6003435 | 2 | 9  | 18 | CA   | 20 | 10 |
| 129169 | 13 | 6007122 | 6007137 | 2 | 8  | 16 | TG   | 24 | 3  |
| 129172 | 13 | 6012123 | 6012137 | 3 | 5  | 15 | GCA  | 18 | 4  |
| 129180 | 13 | 6020923 | 6020960 | 2 | 19 | 38 | CA   | 9  | 12 |
| 129181 | 13 | 6020992 | 6021005 | 2 | 7  | 14 | TG   | 20 | 4  |
| 129186 | 13 | 6029525 | 6029554 | 2 | 15 | 30 | TG   | 20 | 10 |
| 129187 | 13 | 6033215 | 6033230 | 2 | 8  | 16 | CA   | 15 | 8  |
| 129191 | 13 | 6046167 | 6046180 | 2 | 7  | 14 | TC   | 24 | 4  |
| 129200 | 13 | 6065553 | 6065584 | 2 | 16 | 32 | CA   | 7  | 7  |
| 129201 | 13 | 6069426 | 6069441 | 4 | 4  | 16 | TTAT | 26 | 3  |
| 129203 | 13 | 6071683 | 6071718 | 4 | 9  | 36 | TCTA | 19 | 10 |
| 129204 | 13 | 6073992 | 6074017 | 2 | 13 | 26 | CT   | 22 | 10 |
| 129207 | 13 | 6079784 | 6079810 | 3 | 9  | 27 | CAG  | 20 | 6  |
| 129208 | 13 | 6082767 | 6082778 | 2 | 6  | 12 | CA   | 35 | 7  |
| 129226 | 13 | 6122941 | 6122954 | 2 | 7  | 14 | TC   | 29 | 3  |
| 129233 | 13 | 6134439 | 6134458 | 4 | 5  | 20 | AGCT | 26 | 3  |
| 129235 | 13 | 6138960 | 6138975 | 2 | 8  | 16 | AC   | 22 | 5  |
| 129245 | 13 | 6174261 | 6174290 | 2 | 15 | 30 | TG   | 17 | 14 |
| 129248 | 13 | 6174969 | 6174996 | 2 | 14 | 28 | CA   | 20 | 8  |
| 129251 | 13 | 6178408 | 6178419 | 2 | 6  | 12 | CA   | 19 | 5  |
| 129252 | 13 | 6178565 | 6178592 | 2 | 14 | 28 | CA   | 22 | 9  |
| 129256 | 13 | 6184671 | 6184690 | 2 | 10 | 20 | CA   | 30 | 15 |
| 129262 | 13 | 6197947 | 6197970 | 2 | 12 | 24 | CA   | 20 | 8  |
| 129263 | 13 | 6198003 | 6198022 | 2 | 10 | 20 | TG   | 18 | 5  |
| 129265 | 13 | 6201453 | 6201468 | 2 | 8  | 16 | CA   | 25 | 7  |
| 129269 | 13 | 6211468 | 6211479 | 2 | 6  | 12 | CA   | 13 | 9  |
| 129270 | 13 | 6212304 | 6212327 | 2 | 12 | 24 | GT   | 11 | 9  |
| 129271 | 13 | 6212684 | 6212719 | 2 | 18 | 36 | GT   | 16 | 8  |
| 129275 | 13 | 6229598 | 6229609 | 2 | 6  | 12 | CA   | 28 | 6  |
| 129279 | 13 | 6234519 | 6234534 | 4 | 4  | 16 | TCTG | 28 | 3  |
| 129280 | 13 | 6246651 | 6246678 | 2 | 14 | 28 | CA   | 15 | 10 |
| 129282 | 13 | 6247095 | 6247118 | 3 | 8  | 24 | GAG  | 25 | 4  |
| 129287 | 13 | 6258855 | 6258868 | 2 | 7  | 14 | AC   | 23 | 4  |
| 129290 | 13 | 6261255 | 6261272 | 2 | 9  | 18 | TC   | 25 | 3  |
| 129292 | 13 | 6261800 | 6261811 | 2 | 6  | 12 | TG   | 26 | 4  |
| 129293 | 13 | 6262528 | 6262543 | 2 | 8  | 16 | TG   | 24 | 7  |
| 129294 | 13 | 6263707 | 6263726 | 4 | 5  | 20 | ATCT | 15 | 4  |
| 129305 | 13 | 6285864 | 6285877 | 2 | 7  | 14 | AC   | 14 | 5  |
| 129308 | 13 | 6291237 | 6291258 | 2 | 11 | 22 | CA   | 13 | 12 |
| 129315 | 13 | 6296659 | 6296672 | 2 | 7  | 14 | GA   | 25 | 4  |
| 129318 | 13 | 6297307 | 6297332 | 2 | 13 | 26 | AC   | 15 | 11 |
| 129320 | 13 | 6298400 | 6298415 | 2 | 8  | 16 | AG   | 19 | 4  |
| 129329 | 13 | 6323380 | 6323411 | 2 | 16 | 32 | AC   | 7  | 9  |
| 129330 | 13 | 6326431 | 6326450 | 2 | 10 | 20 | GT   | 16 | 7  |
| 129331 | 13 | 6331926 | 6331951 | 2 | 13 | 26 | AG   | 16 | 10 |
| 129334 | 13 | 6343363 | 6343386 | 2 | 12 | 24 | CT   | 9  | 6  |
| 129335 | 13 | 6344916 | 6344937 | 2 | 11 | 22 | TG   | 20 | 7  |
| 129337 | 13 | 6346245 | 6346260 | 2 | 8  | 16 | GT   | 20 | 3  |

|        |    |         |         |   |    |    |      |    |    |
|--------|----|---------|---------|---|----|----|------|----|----|
| 129341 | 13 | 6363802 | 6363813 | 2 | 6  | 12 | CT   | 20 | 4  |
| 129347 | 13 | 6379657 | 6379672 | 4 | 4  | 16 | TTTG | 21 | 3  |
| 129351 | 13 | 6384379 | 6384406 | 2 | 14 | 28 | TG   | 11 | 10 |
| 129353 | 13 | 6384873 | 6384890 | 3 | 6  | 18 | GAA  | 16 | 4  |
| 129354 | 13 | 6388814 | 6388837 | 3 | 8  | 24 | AAG  | 18 | 13 |
| 129356 | 13 | 6391377 | 6391396 | 2 | 10 | 20 | TG   | 20 | 6  |
| 129368 | 13 | 6410780 | 6410797 | 2 | 9  | 18 | AC   | 15 | 8  |
| 129369 | 13 | 6412132 | 6412157 | 2 | 13 | 26 | GT   | 18 | 6  |
| 129370 | 13 | 6412229 | 6412248 | 4 | 5  | 20 | AAAT | 29 | 3  |
| 129372 | 13 | 6413633 | 6413652 | 2 | 10 | 20 | CA   | 24 | 13 |
| 129374 | 13 | 6425192 | 6425205 | 2 | 7  | 14 | CA   | 14 | 5  |
| 129382 | 13 | 6437126 | 6437157 | 2 | 16 | 32 | TG   | 18 | 10 |
| 129385 | 13 | 6443345 | 6443358 | 2 | 7  | 14 | GA   | 24 | 3  |
| 129396 | 13 | 6494022 | 6494037 | 2 | 8  | 16 | GT   | 16 | 5  |
| 129400 | 13 | 6508695 | 6508756 | 2 | 31 | 62 | GT   | 10 | 11 |
| 129401 | 13 | 6518886 | 6518909 | 2 | 12 | 24 | AC   | 9  | 5  |
| 129404 | 13 | 6521682 | 6521695 | 2 | 7  | 14 | AT   | 26 | 3  |
| 129411 | 13 | 6551454 | 6551473 | 2 | 10 | 20 | TG   | 16 | 8  |
| 129414 | 13 | 6558829 | 6558856 | 2 | 14 | 28 | GT   | 20 | 14 |
| 129426 | 13 | 6579434 | 6579453 | 2 | 10 | 20 | GT   | 25 | 4  |
| 129432 | 13 | 6611929 | 6611952 | 2 | 12 | 24 | AC   | 14 | 7  |
| 129435 | 13 | 6628671 | 6628686 | 2 | 8  | 16 | AC   | 25 | 7  |
| 129436 | 13 | 6631129 | 6631148 | 4 | 5  | 20 | AAAG | 7  | 4  |
| 129438 | 13 | 6634647 | 6634662 | 2 | 8  | 16 | AC   | 29 | 7  |
| 129440 | 13 | 6645555 | 6645590 | 2 | 18 | 36 | GT   | 14 | 12 |
| 129442 | 13 | 6647408 | 6647423 | 2 | 8  | 16 | GA   | 25 | 3  |
| 129446 | 13 | 6651989 | 6652015 | 3 | 9  | 27 | TTC  | 23 | 5  |
| 129455 | 13 | 6690541 | 6690558 | 3 | 6  | 18 | CCT  | 10 | 4  |
| 129461 | 13 | 6699833 | 6699859 | 3 | 9  | 27 | CAT  | 16 | 4  |
| 129462 | 13 | 6700599 | 6700614 | 2 | 8  | 16 | AG   | 16 | 10 |
| 129466 | 13 | 6710134 | 6710147 | 2 | 7  | 14 | AT   | 9  | 3  |
| 129468 | 13 | 6714172 | 6714195 | 2 | 12 | 24 | GA   | 18 | 8  |
| 129471 | 13 | 6720983 | 6720998 | 4 | 4  | 16 | TGTT | 24 | 4  |
| 129474 | 13 | 6739329 | 6739350 | 2 | 11 | 22 | GT   | 21 | 6  |
| 129475 | 13 | 6741103 | 6741134 | 2 | 16 | 32 | GT   | 16 | 8  |
| 129477 | 13 | 6747185 | 6747206 | 2 | 11 | 22 | AC   | 12 | 13 |
| 129479 | 13 | 6750756 | 6750775 | 2 | 10 | 20 | AC   | 16 | 6  |
| 129481 | 13 | 6753305 | 6753326 | 2 | 11 | 22 | TC   | 25 | 5  |
| 129483 | 13 | 6757846 | 6757861 | 4 | 4  | 16 | ACAG | 28 | 3  |
| 129496 | 13 | 6766501 | 6766514 | 2 | 7  | 14 | CA   | 11 | 11 |
| 129498 | 13 | 6770492 | 6770513 | 2 | 11 | 22 | AC   | 14 | 9  |
| 129500 | 13 | 6770582 | 6770597 | 2 | 8  | 16 | GA   | 16 | 11 |
| 129503 | 13 | 6770927 | 6770948 | 2 | 11 | 22 | AC   | 21 | 8  |
| 129507 | 13 | 6775941 | 6775994 | 2 | 27 | 54 | AC   | 6  | 11 |
| 129511 | 13 | 6784752 | 6784766 | 3 | 5  | 15 | TAA  | 27 | 3  |
| 129513 | 13 | 6792566 | 6792583 | 3 | 6  | 18 | GCT  | 26 | 3  |
| 129514 | 13 | 6794761 | 6794786 | 2 | 13 | 26 | GT   | 6  | 5  |
| 129516 | 13 | 6797920 | 6797931 | 2 | 6  | 12 | TA   | 20 | 4  |
| 129519 | 13 | 6801383 | 6801398 | 4 | 4  | 16 | TATT | 30 | 3  |
| 129523 | 13 | 6803818 | 6803845 | 2 | 14 | 28 | CA   | 20 | 7  |
| 129524 | 13 | 6804914 | 6804957 | 2 | 22 | 44 | AG   | 7  | 9  |

|        |    |         |         |   |    |    |      |    |    |
|--------|----|---------|---------|---|----|----|------|----|----|
| 129525 | 13 | 6809389 | 6809406 | 2 | 9  | 18 | CA   | 24 | 12 |
| 129527 | 13 | 6813121 | 6813140 | 2 | 10 | 20 | GT   | 10 | 11 |
| 129529 | 13 | 6813396 | 6813409 | 2 | 7  | 14 | AT   | 12 | 3  |
| 129530 | 13 | 6814189 | 6814216 | 2 | 14 | 28 | TG   | 14 | 13 |
| 129533 | 13 | 6817556 | 6817585 | 2 | 15 | 30 | CA   | 16 | 11 |
| 129535 | 13 | 6822914 | 6822940 | 3 | 9  | 27 | GTT  | 20 | 8  |
| 129537 | 13 | 6824773 | 6824792 | 2 | 10 | 20 | AC   | 24 | 9  |
| 129540 | 13 | 6833303 | 6833330 | 2 | 14 | 28 | AC   | 12 | 8  |
| 129547 | 13 | 6844212 | 6844235 | 2 | 12 | 24 | TG   | 7  | 5  |
| 129548 | 13 | 6845579 | 6845608 | 2 | 15 | 30 | GT   | 19 | 7  |
| 129561 | 13 | 6860008 | 6860063 | 2 | 28 | 56 | AC   | 13 | 11 |
| 129563 | 13 | 6860600 | 6860613 | 2 | 7  | 14 | GA   | 23 | 3  |
| 129564 | 13 | 6860902 | 6860917 | 2 | 8  | 16 | AG   | 24 | 6  |
| 129571 | 13 | 6876834 | 6876849 | 2 | 8  | 16 | TC   | 6  | 9  |
| 129574 | 13 | 6879862 | 6879883 | 2 | 11 | 22 | CA   | 16 | 12 |
| 129575 | 13 | 6880345 | 6880370 | 2 | 13 | 26 | TG   | 17 | 5  |
| 129576 | 13 | 6880439 | 6880460 | 2 | 11 | 22 | GA   | 21 | 9  |
| 129578 | 13 | 6883124 | 6883143 | 2 | 10 | 20 | CA   | 18 | 8  |
| 129580 | 13 | 6883301 | 6883312 | 2 | 6  | 12 | TG   | 16 | 3  |
| 129582 | 13 | 6883436 | 6883461 | 2 | 13 | 26 | TG   | 22 | 14 |
| 129584 | 13 | 6888627 | 6888650 | 2 | 12 | 24 | CA   | 24 | 6  |
| 129589 | 13 | 6902086 | 6902097 | 2 | 6  | 12 | GT   | 30 | 4  |
| 129590 | 13 | 6903111 | 6903124 | 2 | 7  | 14 | TG   | 13 | 7  |
| 129591 | 13 | 6903127 | 6903138 | 2 | 6  | 12 | TG   | 17 | 7  |
| 129596 | 13 | 6908875 | 6908886 | 2 | 6  | 12 | AC   | 19 | 7  |
| 129599 | 13 | 6911243 | 6911264 | 2 | 11 | 22 | AC   | 15 | 11 |
| 129602 | 13 | 6912945 | 6912960 | 2 | 8  | 16 | GT   | 15 | 14 |
| 129604 | 13 | 6914319 | 6914346 | 4 | 7  | 28 | TCCA | 20 | 4  |
| 129606 | 13 | 6915406 | 6915421 | 2 | 8  | 16 | CA   | 6  | 7  |
| 129607 | 13 | 6915645 | 6915666 | 2 | 11 | 22 | CA   | 19 | 8  |
| 129608 | 13 | 6916053 | 6916064 | 2 | 6  | 12 | TG   | 30 | 3  |
| 129610 | 13 | 6921735 | 6921766 | 2 | 16 | 32 | AC   | 24 | 12 |
| 129611 | 13 | 6921920 | 6921941 | 2 | 11 | 22 | GT   | 12 | 10 |
| 129617 | 13 | 6935925 | 6935952 | 2 | 14 | 28 | TG   | 11 | 9  |
| 129619 | 13 | 6938184 | 6938211 | 2 | 14 | 28 | CA   | 15 | 5  |
| 129639 | 13 | 6957857 | 6957870 | 2 | 7  | 14 | TC   | 33 | 3  |
| 129640 | 13 | 6958336 | 6958353 | 2 | 9  | 18 | CA   | 16 | 9  |
| 129644 | 13 | 6959865 | 6959884 | 2 | 10 | 20 | GT   | 22 | 5  |
| 129646 | 13 | 6964581 | 6964604 | 2 | 12 | 24 | TG   | 15 | 8  |
| 129647 | 13 | 6965608 | 6965621 | 2 | 7  | 14 | TG   | 19 | 3  |
| 129654 | 13 | 6979412 | 6979427 | 4 | 4  | 16 | AAAT | 21 | 11 |
| 129656 | 13 | 6980871 | 6980886 | 2 | 8  | 16 | TG   | 29 | 8  |
| 129659 | 13 | 6984859 | 6984879 | 3 | 7  | 21 | TGA  | 22 | 3  |
| 129661 | 13 | 6988008 | 6988025 | 3 | 6  | 18 | GTG  | 32 | 3  |
| 129664 | 13 | 6991437 | 6991454 | 3 | 6  | 18 | CTG  | 19 | 7  |
| 129665 | 13 | 6991456 | 6991476 | 3 | 7  | 21 | TGC  | 24 | 7  |
| 129668 | 13 | 6998621 | 6998634 | 2 | 7  | 14 | TG   | 16 | 5  |
| 129670 | 13 | 7007153 | 7007188 | 2 | 18 | 36 | GT   | 6  | 7  |
| 129677 | 13 | 7028966 | 7028981 | 4 | 4  | 16 | TTAT | 34 | 7  |
| 129679 | 13 | 7033044 | 7033059 | 2 | 8  | 16 | TG   | 17 | 14 |
| 129683 | 13 | 7036398 | 7036417 | 2 | 10 | 20 | TG   | 13 | 7  |

|        |    |         |         |   |    |    |      |    |    |
|--------|----|---------|---------|---|----|----|------|----|----|
| 129686 | 13 | 7043024 | 7043039 | 2 | 8  | 16 | GT   | 22 | 19 |
| 129692 | 13 | 7074473 | 7074486 | 2 | 7  | 14 | GT   | 16 | 3  |
| 129693 | 13 | 7075380 | 7075393 | 2 | 7  | 14 | CA   | 26 | 3  |
| 129698 | 13 | 7098532 | 7098547 | 2 | 8  | 16 | AC   | 16 | 3  |
| 129717 | 13 | 7127961 | 7127976 | 2 | 8  | 16 | GT   | 22 | 6  |
| 129721 | 13 | 7130370 | 7130385 | 4 | 4  | 16 | TTTA | 6  | 3  |
| 129724 | 13 | 7133843 | 7133866 | 2 | 12 | 24 | TC   | 12 | 11 |
| 129731 | 13 | 7153352 | 7153367 | 2 | 8  | 16 | GA   | 17 | 5  |
| 129733 | 13 | 7153934 | 7153965 | 2 | 16 | 32 | AG   | 10 | 8  |
| 129740 | 13 | 7163489 | 7163508 | 2 | 10 | 20 | TA   | 10 | 12 |
| 129746 | 13 | 7172487 | 7172510 | 2 | 12 | 24 | TG   | 16 | 14 |
| 129747 | 13 | 7175010 | 7175021 | 2 | 6  | 12 | AT   | 24 | 8  |
| 129748 | 13 | 7177004 | 7177021 | 2 | 9  | 18 | CA   | 20 | 3  |
| 129749 | 13 | 7179616 | 7179635 | 4 | 5  | 20 | GACA | 23 | 4  |
| 129751 | 13 | 7180685 | 7180712 | 4 | 7  | 28 | ATCT | 15 | 13 |
| 129753 | 13 | 7182042 | 7182077 | 2 | 18 | 36 | AC   | 7  | 8  |
| 129755 | 13 | 7186175 | 7186202 | 2 | 14 | 28 | GA   | 20 | 10 |
| 129757 | 13 | 7188698 | 7188731 | 2 | 17 | 34 | AC   | 9  | 10 |
| 129759 | 13 | 7198913 | 7198924 | 2 | 6  | 12 | AC   | 29 | 3  |
| 129760 | 13 | 7199686 | 7199707 | 2 | 11 | 22 | AC   | 15 | 10 |
| 129762 | 13 | 7204823 | 7204840 | 2 | 9  | 18 | GA   | 15 | 9  |
| 129769 | 13 | 7216468 | 7216491 | 2 | 12 | 24 | TC   | 19 | 5  |
| 129775 | 13 | 7240093 | 7240110 | 2 | 9  | 18 | AG   | 20 | 3  |
| 129779 | 13 | 7245357 | 7245372 | 4 | 4  | 16 | AAAT | 21 | 4  |
| 129787 | 13 | 7269282 | 7269295 | 2 | 7  | 14 | GA   | 17 | 3  |
| 129789 | 13 | 7277058 | 7277072 | 3 | 5  | 15 | AGC  | 34 | 3  |
| 129791 | 13 | 7278879 | 7278890 | 2 | 6  | 12 | TG   | 25 | 4  |
| 129792 | 13 | 7279007 | 7279036 | 2 | 15 | 30 | TG   | 15 | 8  |
| 129809 | 13 | 7329511 | 7329528 | 2 | 9  | 18 | TG   | 13 | 3  |
| 129813 | 13 | 7335755 | 7335786 | 2 | 16 | 32 | AC   | 12 | 9  |
| 129818 | 13 | 7341794 | 7341808 | 3 | 5  | 15 | CAT  | 28 | 3  |
| 129820 | 13 | 7342408 | 7342431 | 2 | 12 | 24 | CA   | 7  | 8  |
| 129826 | 13 | 7347719 | 7347736 | 2 | 9  | 18 | CA   | 14 | 6  |
| 129830 | 13 | 7382440 | 7382459 | 2 | 10 | 20 | GT   | 18 | 10 |
| 129831 | 13 | 7383044 | 7383067 | 2 | 12 | 24 | AG   | 17 | 7  |
| 129832 | 13 | 7383683 | 7383703 | 3 | 7  | 21 | TTG  | 30 | 7  |
| 129838 | 13 | 7385589 | 7385606 | 3 | 6  | 18 | GTT  | 29 | 3  |
| 129840 | 13 | 7392049 | 7392066 | 2 | 9  | 18 | AC   | 12 | 8  |
| 129842 | 13 | 7394386 | 7394399 | 2 | 7  | 14 | GT   | 28 | 4  |
| 129847 | 13 | 7406085 | 7406100 | 4 | 4  | 16 | AATG | 23 | 5  |
| 129852 | 13 | 7413392 | 7413403 | 2 | 6  | 12 | GT   | 22 | 4  |
| 129859 | 13 | 7427270 | 7427287 | 2 | 9  | 18 | AC   | 22 | 4  |
| 129860 | 13 | 7434916 | 7434939 | 3 | 8  | 24 | CCA  | 19 | 10 |
| 129862 | 13 | 7445548 | 7445563 | 2 | 8  | 16 | GT   | 26 | 3  |
| 129864 | 13 | 7447227 | 7447250 | 2 | 12 | 24 | CA   | 13 | 13 |
| 129865 | 13 | 7448281 | 7448294 | 2 | 7  | 14 | GT   | 13 | 5  |
| 129875 | 13 | 7458268 | 7458313 | 2 | 23 | 46 | CA   | 19 | 25 |
| 129879 | 13 | 7470971 | 7470988 | 3 | 6  | 18 | AGG  | 8  | 4  |
| 129882 | 13 | 7477569 | 7477582 | 2 | 7  | 14 | TC   | 26 | 4  |
| 129885 | 13 | 7483822 | 7483865 | 2 | 22 | 44 | AC   | 8  | 11 |
| 129895 | 13 | 7493976 | 7494003 | 2 | 14 | 28 | AC   | 7  | 11 |

|        |    |         |         |   |    |    |      |    |    |
|--------|----|---------|---------|---|----|----|------|----|----|
| 129896 | 13 | 7495185 | 7495196 | 2 | 6  | 12 | GA   | 11 | 5  |
| 129897 | 13 | 7496156 | 7496177 | 2 | 11 | 22 | CA   | 8  | 9  |
| 129902 | 13 | 7498221 | 7498232 | 2 | 6  | 12 | AT   | 18 | 3  |
| 129912 | 13 | 7516226 | 7516249 | 3 | 8  | 24 | GAG  | 19 | 9  |
| 129921 | 13 | 7529189 | 7529206 | 2 | 9  | 18 | TG   | 23 | 6  |
| 129924 | 13 | 7537459 | 7537480 | 2 | 11 | 22 | GT   | 18 | 9  |
| 129928 | 13 | 7548881 | 7548894 | 2 | 7  | 14 | AC   | 16 | 6  |
| 129929 | 13 | 7548897 | 7548914 | 2 | 9  | 18 | AC   | 14 | 7  |
| 129930 | 13 | 7553489 | 7553532 | 2 | 22 | 44 | GT   | 9  | 10 |
| 129931 | 13 | 7553687 | 7553698 | 2 | 6  | 12 | AC   | 17 | 4  |
| 129932 | 13 | 7553700 | 7553711 | 2 | 6  | 12 | CA   | 15 | 6  |
| 129939 | 13 | 7557270 | 7557285 | 2 | 8  | 16 | GT   | 30 | 6  |
| 129941 | 13 | 7564803 | 7564816 | 2 | 7  | 14 | CA   | 18 | 4  |
| 129942 | 13 | 7566903 | 7566930 | 2 | 14 | 28 | AC   | 20 | 13 |
| 129943 | 13 | 7567143 | 7567154 | 2 | 6  | 12 | GT   | 23 | 3  |
| 129945 | 13 | 7568241 | 7568254 | 2 | 7  | 14 | AC   | 28 | 10 |
| 129946 | 13 | 7568356 | 7568375 | 2 | 10 | 20 | AC   | 23 | 6  |
| 129950 | 13 | 7574906 | 7574923 | 2 | 9  | 18 | TG   | 13 | 3  |
| 129952 | 13 | 7576657 | 7576674 | 3 | 6  | 18 | GCA  | 23 | 3  |
| 129961 | 13 | 7587253 | 7587268 | 2 | 8  | 16 | GT   | 22 | 4  |
| 129965 | 13 | 7590960 | 7590980 | 3 | 7  | 21 | TCA  | 17 | 5  |
| 129971 | 13 | 7598041 | 7598058 | 2 | 9  | 18 | AC   | 15 | 16 |
| 129973 | 13 | 7599525 | 7599552 | 2 | 14 | 28 | CA   | 14 | 7  |
| 129975 | 13 | 7599691 | 7599722 | 2 | 16 | 32 | CA   | 17 | 11 |
| 129976 | 13 | 7599819 | 7599860 | 2 | 21 | 42 | GT   | 7  | 9  |
| 129977 | 13 | 7602639 | 7602654 | 4 | 4  | 16 | GCTC | 32 | 4  |
| 129978 | 13 | 7605522 | 7605537 | 4 | 4  | 16 | ATGG | 24 | 3  |
| 129981 | 13 | 7606590 | 7606607 | 2 | 9  | 18 | GT   | 6  | 3  |
| 129990 | 13 | 7611673 | 7611690 | 2 | 9  | 18 | TG   | 13 | 7  |
| 130006 | 13 | 7639319 | 7639340 | 2 | 11 | 22 | TG   | 16 | 8  |
| 130008 | 13 | 7643191 | 7643208 | 2 | 9  | 18 | CT   | 8  | 4  |
| 130011 | 13 | 7651625 | 7651646 | 2 | 11 | 22 | CA   | 24 | 9  |
| 130012 | 13 | 7651932 | 7651949 | 2 | 9  | 18 | TG   | 17 | 10 |
| 130024 | 13 | 7666112 | 7666135 | 2 | 12 | 24 | CA   | 13 | 9  |
| 130032 | 13 | 7679152 | 7679169 | 2 | 9  | 18 | TG   | 26 | 5  |
| 130034 | 13 | 7679870 | 7679884 | 3 | 5  | 15 | GCT  | 22 | 5  |
| 130035 | 13 | 7680498 | 7680519 | 2 | 11 | 22 | TG   | 22 | 6  |
| 130040 | 13 | 7687474 | 7687485 | 2 | 6  | 12 | GT   | 27 | 4  |
| 130041 | 13 | 7687508 | 7687521 | 2 | 7  | 14 | CA   | 23 | 3  |
| 130042 | 13 | 7687550 | 7687571 | 2 | 11 | 22 | CA   | 23 | 5  |
| 130048 | 13 | 7696512 | 7696527 | 2 | 8  | 16 | TG   | 19 | 4  |
| 130050 | 13 | 7697489 | 7697500 | 2 | 6  | 12 | AC   | 27 | 8  |
| 130053 | 13 | 7707951 | 7707962 | 2 | 6  | 12 | TG   | 13 | 3  |
| 130054 | 13 | 7709327 | 7709346 | 2 | 10 | 20 | CT   | 25 | 5  |
| 130055 | 13 | 7710341 | 7710356 | 2 | 8  | 16 | GT   | 23 | 4  |
| 130059 | 13 | 7715049 | 7715078 | 2 | 15 | 30 | GT   | 15 | 7  |
| 130070 | 13 | 7728420 | 7728443 | 2 | 12 | 24 | CA   | 12 | 9  |
| 130071 | 13 | 7728628 | 7728643 | 2 | 8  | 16 | TG   | 14 | 4  |
| 130073 | 13 | 7729321 | 7729334 | 2 | 7  | 14 | TG   | 20 | 3  |
| 130074 | 13 | 7730315 | 7730338 | 2 | 12 | 24 | TG   | 17 | 9  |
| 130077 | 13 | 7737620 | 7737657 | 2 | 19 | 38 | TG   | 17 | 16 |

|        |    |         |         |   |    |    |      |    |    |
|--------|----|---------|---------|---|----|----|------|----|----|
| 130087 | 13 | 7747678 | 7747699 | 2 | 11 | 22 | GA   | 11 | 8  |
| 130102 | 13 | 7761802 | 7761817 | 2 | 8  | 16 | GT   | 23 | 4  |
| 130119 | 13 | 7783726 | 7783743 | 2 | 9  | 18 | AC   | 13 | 8  |
| 130121 | 13 | 7789985 | 7789998 | 2 | 7  | 14 | GA   | 19 | 3  |
| 130127 | 13 | 7815997 | 7816017 | 3 | 7  | 21 | GTA  | 22 | 7  |
| 130128 | 13 | 7816992 | 7817017 | 2 | 13 | 26 | CA   | 19 | 11 |
| 130141 | 13 | 7851557 | 7851580 | 3 | 8  | 24 | TCC  | 17 | 5  |
| 130148 | 13 | 7861229 | 7861248 | 2 | 10 | 20 | GT   | 23 | 7  |
| 130170 | 13 | 7892876 | 7892890 | 3 | 5  | 15 | AGA  | 15 | 3  |
| 130171 | 13 | 7892894 | 7892908 | 3 | 5  | 15 | AGC  | 24 | 6  |
| 130178 | 13 | 7927214 | 7927237 | 2 | 12 | 24 | GA   | 14 | 10 |
| 130180 | 13 | 7928143 | 7928156 | 2 | 7  | 14 | AC   | 34 | 3  |
| 130184 | 13 | 7937013 | 7937026 | 2 | 7  | 14 | GT   | 26 | 3  |
| 130185 | 13 | 7937095 | 7937112 | 2 | 9  | 18 | TG   | 20 | 4  |
| 130190 | 13 | 7951803 | 7951828 | 2 | 13 | 26 | GA   | 9  | 3  |
| 130193 | 13 | 7954821 | 7954838 | 2 | 9  | 18 | CA   | 13 | 7  |
| 130197 | 13 | 7955427 | 7955441 | 3 | 5  | 15 | TCT  | 22 | 3  |
| 130199 | 13 | 7955813 | 7955827 | 3 | 5  | 15 | GCA  | 24 | 5  |
| 130201 | 13 | 7956668 | 7956683 | 4 | 4  | 16 | CAGC | 21 | 4  |
| 130207 | 13 | 7959040 | 7959057 | 2 | 9  | 18 | CT   | 9  | 12 |
| 130208 | 13 | 7959059 | 7959072 | 2 | 7  | 14 | TC   | 10 | 9  |
| 130221 | 13 | 7961927 | 7961954 | 2 | 14 | 28 | CA   | 7  | 12 |
| 130222 | 13 | 7962237 | 7962251 | 3 | 5  | 15 | TGC  | 20 | 3  |
| 130223 | 13 | 7962772 | 7962785 | 2 | 7  | 14 | CG   | 28 | 9  |
| 130225 | 13 | 7962994 | 7963019 | 2 | 13 | 26 | AC   | 10 | 10 |
| 130226 | 13 | 7963298 | 7963321 | 2 | 12 | 24 | AG   | 19 | 8  |
| 130227 | 13 | 7963537 | 7963550 | 2 | 7  | 14 | AC   | 12 | 6  |
| 130237 | 13 | 7978574 | 7978603 | 2 | 15 | 30 | AG   | 20 | 7  |
| 130241 | 13 | 7993654 | 7993665 | 2 | 6  | 12 | TG   | 16 | 4  |
| 130268 | 13 | 8022522 | 8022535 | 2 | 7  | 14 | TG   | 25 | 5  |
| 130269 | 13 | 8022537 | 8022548 | 2 | 6  | 12 | GT   | 24 | 4  |
| 130272 | 13 | 8026949 | 8026976 | 4 | 7  | 28 | ATAG | 9  | 5  |
| 130274 | 13 | 8027991 | 8028024 | 2 | 17 | 34 | GT   | 10 | 7  |
| 130278 | 13 | 8030818 | 8030829 | 2 | 6  | 12 | GA   | 27 | 3  |
| 130283 | 13 | 8038308 | 8038323 | 2 | 8  | 16 | AC   | 8  | 6  |
| 130284 | 13 | 8039053 | 8039074 | 2 | 11 | 22 | AC   | 9  | 6  |
| 130286 | 13 | 8042794 | 8042813 | 2 | 10 | 20 | GT   | 21 | 5  |
| 130287 | 13 | 8042926 | 8042937 | 2 | 6  | 12 | GT   | 13 | 4  |
| 130288 | 13 | 8044654 | 8044677 | 2 | 12 | 24 | AG   | 9  | 3  |
| 130289 | 13 | 8050370 | 8050399 | 3 | 10 | 30 | TCT  | 32 | 3  |
| 130292 | 13 | 8060041 | 8060058 | 2 | 9  | 18 | GT   | 16 | 6  |
| 130294 | 13 | 8064271 | 8064288 | 2 | 9  | 18 | TG   | 19 | 7  |
| 130301 | 13 | 8071789 | 8071804 | 2 | 8  | 16 | TG   | 18 | 3  |
| 130315 | 13 | 8084331 | 8084354 | 3 | 8  | 24 | GTG  | 27 | 5  |
| 130319 | 13 | 8087932 | 8087947 | 2 | 8  | 16 | CA   | 16 | 8  |
| 130321 | 13 | 8091264 | 8091293 | 3 | 10 | 30 | TCT  | 15 | 8  |
| 130322 | 13 | 8093413 | 8093430 | 2 | 9  | 18 | AG   | 17 | 4  |
| 130323 | 13 | 8094631 | 8094642 | 2 | 6  | 12 | GT   | 27 | 3  |
| 130324 | 13 | 8094804 | 8094821 | 2 | 9  | 18 | TC   | 21 | 3  |
| 130327 | 13 | 8101941 | 8101978 | 2 | 19 | 38 | TG   | 6  | 7  |
| 130329 | 13 | 8106240 | 8106273 | 2 | 17 | 34 | AC   | 11 | 11 |



|        |    |         |         |   |    |    |      |    |    |
|--------|----|---------|---------|---|----|----|------|----|----|
| 130330 | 13 | 8107907 | 8107944 | 2 | 19 | 38 | TG   | 13 | 8  |
| 130331 | 13 | 8108199 | 8108216 | 2 | 9  | 18 | CA   | 14 | 12 |
| 130333 | 13 | 8108386 | 8108399 | 2 | 7  | 14 | TG   | 22 | 7  |
| 130334 | 13 | 8108401 | 8108412 | 2 | 6  | 12 | GT   | 20 | 6  |
| 130336 | 13 | 8110577 | 8110588 | 2 | 6  | 12 | TA   | 11 | 3  |
| 130339 | 13 | 8116499 | 8116513 | 3 | 5  | 15 | GGT  | 7  | 3  |
| 130342 | 13 | 8128114 | 8128131 | 2 | 9  | 18 | GT   | 26 | 8  |
| 130357 | 13 | 8153598 | 8153619 | 2 | 11 | 22 | TG   | 14 | 7  |
| 130359 | 13 | 8154991 | 8155020 | 2 | 15 | 30 | GT   | 13 | 7  |
| 130363 | 13 | 8157330 | 8157349 | 2 | 10 | 20 | GT   | 13 | 5  |
| 130364 | 13 | 8157378 | 8157391 | 2 | 7  | 14 | GT   | 11 | 8  |
| 130365 | 13 | 8157420 | 8157435 | 2 | 8  | 16 | GA   | 11 | 3  |
| 130366 | 13 | 8157468 | 8157481 | 2 | 7  | 14 | GA   | 11 | 3  |
| 130368 | 13 | 8159433 | 8159446 | 2 | 7  | 14 | TG   | 23 | 3  |
| 130372 | 13 | 8172613 | 8172628 | 2 | 8  | 16 | TG   | 28 | 10 |
| 130374 | 13 | 8178751 | 8178768 | 2 | 9  | 18 | TG   | 28 | 5  |
| 130375 | 13 | 8178960 | 8179001 | 2 | 21 | 42 | CA   | 11 | 9  |
| 130387 | 13 | 8208599 | 8208640 | 2 | 21 | 42 | AC   | 9  | 8  |
| 130388 | 13 | 8210907 | 8210930 | 4 | 6  | 24 | TTTG | 28 | 3  |
| 130395 | 13 | 8222910 | 8222927 | 2 | 9  | 18 | CA   | 6  | 5  |
| 130396 | 13 | 8223334 | 8223363 | 2 | 15 | 30 | AC   | 8  | 9  |
| 130397 | 13 | 8223511 | 8223528 | 2 | 9  | 18 | GT   | 25 | 6  |
| 130405 | 13 | 8237598 | 8237615 | 2 | 9  | 18 | AC   | 13 | 6  |
| 130414 | 13 | 8241906 | 8241920 | 3 | 5  | 15 | GGA  | 17 | 9  |
| 130417 | 13 | 8243335 | 8243348 | 2 | 7  | 14 | AC   | 22 | 4  |
| 130425 | 13 | 8251259 | 8251284 | 2 | 13 | 26 | TG   | 13 | 11 |
| 130426 | 13 | 8252920 | 8252931 | 2 | 6  | 12 | CT   | 15 | 11 |
| 130427 | 13 | 8252932 | 8252945 | 2 | 7  | 14 | CA   | 13 | 9  |
| 130433 | 13 | 8273202 | 8273228 | 3 | 9  | 27 | CAT  | 16 | 3  |
| 130434 | 13 | 8273421 | 8273436 | 2 | 8  | 16 | CA   | 12 | 4  |
| 130436 | 13 | 8280927 | 8280938 | 2 | 6  | 12 | AC   | 26 | 3  |
| 130437 | 13 | 8281043 | 8281062 | 2 | 10 | 20 | CA   | 17 | 8  |
| 130438 | 13 | 8285730 | 8285741 | 2 | 6  | 12 | GT   | 29 | 3  |
| 130439 | 13 | 8287833 | 8287854 | 2 | 11 | 22 | TG   | 12 | 7  |
| 130440 | 13 | 8288026 | 8288053 | 2 | 14 | 28 | AC   | 18 | 10 |
| 130442 | 13 | 8290825 | 8290874 | 2 | 25 | 50 | GT   | 7  | 10 |
| 130443 | 13 | 8291050 | 8291067 | 2 | 9  | 18 | TG   | 18 | 4  |
| 130447 | 13 | 8298069 | 8298098 | 2 | 15 | 30 | CT   | 12 | 7  |
| 130448 | 13 | 8298868 | 8298883 | 2 | 8  | 16 | CA   | 21 | 11 |
| 130449 | 13 | 8299634 | 8299654 | 3 | 7  | 21 | GAT  | 15 | 4  |
| 130450 | 13 | 8299748 | 8299775 | 2 | 14 | 28 | CA   | 20 | 6  |
| 130453 | 13 | 8314854 | 8314867 | 2 | 7  | 14 | TG   | 18 | 3  |
| 130454 | 13 | 8314959 | 8314972 | 2 | 7  | 14 | CA   | 19 | 9  |
| 130457 | 13 | 8317385 | 8317408 | 2 | 12 | 24 | TG   | 17 | 5  |
| 130459 | 13 | 8325755 | 8325793 | 3 | 13 | 39 | AAG  | 16 | 12 |
| 130464 | 13 | 8335019 | 8335040 | 2 | 11 | 22 | CA   | 19 | 11 |
| 130465 | 13 | 8335439 | 8335476 | 2 | 19 | 38 | CA   | 13 | 12 |
| 130468 | 13 | 8337474 | 8337500 | 3 | 9  | 27 | GCA  | 29 | 6  |
| 130471 | 13 | 8345271 | 8345282 | 2 | 6  | 12 | TG   | 23 | 10 |
| 130484 | 13 | 8368850 | 8368877 | 2 | 14 | 28 | AC   | 18 | 9  |
| 130486 | 13 | 8376305 | 8376318 | 2 | 7  | 14 | AG   | 19 | 3  |

|        |    |         |         |   |    |    |      |    |    |
|--------|----|---------|---------|---|----|----|------|----|----|
| 130488 | 13 | 8378213 | 8378224 | 2 | 6  | 12 | CA   | 28 | 5  |
| 130497 | 13 | 8386370 | 8386384 | 3 | 5  | 15 | CCA  | 28 | 3  |
| 130498 | 13 | 8386590 | 8386627 | 2 | 19 | 38 | CA   | 8  | 9  |
| 130507 | 13 | 8397278 | 8397289 | 2 | 6  | 12 | GT   | 25 | 3  |
| 130509 | 13 | 8399592 | 8399605 | 2 | 7  | 14 | CA   | 19 | 5  |
| 130511 | 13 | 8403349 | 8403378 | 2 | 15 | 30 | TG   | 12 | 7  |
| 130516 | 13 | 8409967 | 8409988 | 2 | 11 | 22 | CA   | 11 | 8  |
| 130518 | 13 | 8413612 | 8413623 | 2 | 6  | 12 | AC   | 22 | 5  |
| 130519 | 13 | 8414593 | 8414612 | 2 | 10 | 20 | TG   | 20 | 8  |
| 130522 | 13 | 8418087 | 8418104 | 2 | 9  | 18 | AC   | 23 | 6  |
| 130525 | 13 | 8421005 | 8421016 | 2 | 6  | 12 | CA   | 20 | 3  |
| 130541 | 13 | 8450712 | 8450735 | 2 | 12 | 24 | CA   | 19 | 8  |
| 130544 | 13 | 8469676 | 8469687 | 2 | 6  | 12 | AG   | 31 | 3  |
| 130547 | 13 | 8475831 | 8475854 | 4 | 6  | 24 | TGGA | 28 | 4  |
| 130549 | 13 | 8477287 | 8477312 | 2 | 13 | 26 | GT   | 17 | 11 |
| 130560 | 13 | 8507581 | 8507594 | 2 | 7  | 14 | TG   | 23 | 3  |
| 130562 | 13 | 8509519 | 8509542 | 2 | 12 | 24 | CA   | 25 | 10 |
| 130563 | 13 | 8511834 | 8511877 | 2 | 22 | 44 | TG   | 20 | 12 |
| 130564 | 13 | 8511952 | 8511965 | 2 | 7  | 14 | CT   | 15 | 3  |
| 130576 | 13 | 8530659 | 8530674 | 4 | 4  | 16 | TTTA | 19 | 8  |
| 130584 | 13 | 8559255 | 8559266 | 2 | 6  | 12 | CT   | 25 | 3  |
| 130594 | 13 | 8601598 | 8601609 | 2 | 6  | 12 | TG   | 33 | 3  |
| 130595 | 13 | 8605190 | 8605203 | 2 | 7  | 14 | TC   | 22 | 3  |
| 130601 | 13 | 8612702 | 8612719 | 2 | 9  | 18 | AG   | 21 | 7  |
| 130605 | 13 | 8621668 | 8621699 | 2 | 16 | 32 | CA   | 7  | 7  |
| 130628 | 13 | 8667244 | 8667273 | 2 | 15 | 30 | AG   | 14 | 7  |
| 130630 | 13 | 8667818 | 8667835 | 2 | 9  | 18 | GT   | 15 | 8  |
| 130631 | 13 | 8668252 | 8668265 | 2 | 7  | 14 | CA   | 23 | 3  |
| 130632 | 13 | 8670036 | 8670075 | 4 | 10 | 40 | GCCT | 23 | 7  |
| 130633 | 13 | 8671139 | 8671158 | 2 | 10 | 20 | GT   | 17 | 8  |
| 130639 | 13 | 8685790 | 8685807 | 2 | 9  | 18 | TG   | 27 | 6  |
| 130640 | 13 | 8686628 | 8686667 | 2 | 20 | 40 | TG   | 7  | 8  |
| 130642 | 13 | 8689578 | 8689607 | 2 | 15 | 30 | TG   | 8  | 11 |
| 130643 | 13 | 8690993 | 8691012 | 4 | 5  | 20 | ATTT | 24 | 9  |
| 130646 | 13 | 8696262 | 8696281 | 4 | 5  | 20 | TTTA | 16 | 4  |
| 130647 | 13 | 8697150 | 8697161 | 2 | 6  | 12 | TG   | 25 | 5  |
| 130654 | 13 | 8707046 | 8707073 | 2 | 14 | 28 | GA   | 12 | 5  |
| 130659 | 13 | 8713350 | 8713383 | 2 | 17 | 34 | GT   | 10 | 6  |
| 130661 | 13 | 8713684 | 8713725 | 2 | 21 | 42 | TG   | 14 | 10 |
| 130662 | 13 | 8714155 | 8714172 | 2 | 9  | 18 | GT   | 25 | 6  |
| 130674 | 13 | 8736762 | 8736775 | 2 | 7  | 14 | GT   | 16 | 4  |
| 130678 | 13 | 8741493 | 8741522 | 2 | 15 | 30 | GT   | 9  | 10 |
| 130679 | 13 | 8742149 | 8742160 | 2 | 6  | 12 | TG   | 22 | 3  |
| 130683 | 13 | 8751511 | 8751524 | 2 | 7  | 14 | GT   | 23 | 4  |
| 130697 | 13 | 8793315 | 8793338 | 4 | 6  | 24 | TTGT | 18 | 4  |
| 130713 | 13 | 8819189 | 8819208 | 2 | 10 | 20 | TG   | 10 | 12 |
| 130715 | 13 | 8819366 | 8819387 | 2 | 11 | 22 | GT   | 18 | 7  |
| 130716 | 13 | 8819502 | 8819521 | 4 | 5  | 20 | TTGT | 25 | 6  |
| 130727 | 13 | 8864778 | 8864795 | 3 | 6  | 18 | GAG  | 24 | 6  |
| 130729 | 13 | 8866110 | 8866127 | 3 | 6  | 18 | AGG  | 22 | 4  |
| 130736 | 13 | 8884994 | 8885007 | 2 | 7  | 14 | TG   | 28 | 3  |

|        |    |         |         |   |    |    |      |    |    |
|--------|----|---------|---------|---|----|----|------|----|----|
| 130739 | 13 | 8888960 | 8888975 | 4 | 4  | 16 | TTAT | 15 | 4  |
| 130745 | 13 | 8894430 | 8894459 | 2 | 15 | 30 | AC   | 11 | 7  |
| 130749 | 13 | 8903819 | 8903834 | 2 | 8  | 16 | TC   | 19 | 5  |
| 130756 | 13 | 8906998 | 8907029 | 2 | 16 | 32 | AC   | 19 | 7  |
| 130761 | 13 | 8920369 | 8920402 | 2 | 17 | 34 | TC   | 11 | 8  |
| 130762 | 13 | 8920527 | 8920538 | 2 | 6  | 12 | CA   | 32 | 4  |
| 130764 | 13 | 8940812 | 8940837 | 2 | 13 | 26 | AC   | 21 | 11 |
| 130767 | 13 | 8944460 | 8944475 | 2 | 8  | 16 | CA   | 22 | 3  |
| 130769 | 13 | 8949258 | 8949287 | 2 | 15 | 30 | GT   | 7  | 8  |
| 130770 | 13 | 8950924 | 8950955 | 2 | 16 | 32 | GT   | 10 | 12 |
| 130771 | 13 | 8956225 | 8956240 | 2 | 8  | 16 | GA   | 26 | 7  |
| 130772 | 13 | 8956242 | 8956253 | 2 | 6  | 12 | AG   | 25 | 7  |
| 130773 | 13 | 8957498 | 8957525 | 2 | 14 | 28 | CA   | 15 | 7  |
| 130782 | 13 | 8978249 | 8978270 | 2 | 11 | 22 | CA   | 20 | 7  |
| 130793 | 13 | 8992084 | 8992095 | 2 | 6  | 12 | TG   | 22 | 7  |
| 130794 | 13 | 8992098 | 8992111 | 2 | 7  | 14 | TG   | 21 | 7  |
| 130797 | 13 | 8992358 | 8992377 | 2 | 10 | 20 | AC   | 16 | 5  |
| 130798 | 13 | 8992539 | 8992558 | 2 | 10 | 20 | GT   | 17 | 8  |
| 130802 | 13 | 8996235 | 8996249 | 3 | 5  | 15 | TGT  | 27 | 7  |
| 130803 | 13 | 8996304 | 8996317 | 2 | 7  | 14 | CA   | 25 | 3  |
| 130804 | 13 | 8996330 | 8996344 | 3 | 5  | 15 | CCT  | 20 | 4  |
| 130805 | 13 | 8996404 | 8996424 | 3 | 7  | 21 | TCC  | 28 | 8  |
| 130817 | 13 | 9002643 | 9002668 | 2 | 13 | 26 | TG   | 19 | 12 |
| 130818 | 13 | 9003129 | 9003152 | 3 | 8  | 24 | TCC  | 23 | 8  |
| 130822 | 13 | 9013057 | 9013078 | 2 | 11 | 22 | CA   | 19 | 6  |
| 130828 | 13 | 9024119 | 9024133 | 3 | 5  | 15 | AAG  | 30 | 3  |
| 130830 | 13 | 9045266 | 9045283 | 2 | 9  | 18 | TG   | 26 | 5  |
| 130844 | 13 | 9108608 | 9108621 | 2 | 7  | 14 | TG   | 26 | 6  |
| 130845 | 13 | 9111741 | 9111758 | 3 | 6  | 18 | GAG  | 28 | 5  |
| 130847 | 13 | 9114595 | 9114612 | 2 | 9  | 18 | TC   | 21 | 16 |
| 130848 | 13 | 9114613 | 9114630 | 2 | 9  | 18 | AC   | 20 | 14 |
| 130851 | 13 | 9116598 | 9116615 | 3 | 6  | 18 | CAG  | 25 | 6  |
| 130852 | 13 | 9116944 | 9116971 | 2 | 14 | 28 | TG   | 15 | 11 |
| 130853 | 13 | 9124047 | 9124060 | 2 | 7  | 14 | GA   | 29 | 3  |
| 130854 | 13 | 9124062 | 9124075 | 2 | 7  | 14 | AG   | 23 | 4  |
| 130858 | 13 | 9126607 | 9126634 | 2 | 14 | 28 | TG   | 22 | 8  |
| 130861 | 13 | 9131031 | 9131068 | 2 | 19 | 38 | CA   | 7  | 7  |
| 130866 | 13 | 9134403 | 9134424 | 2 | 11 | 22 | GT   | 16 | 4  |
| 130868 | 13 | 9134674 | 9134693 | 2 | 10 | 20 | CA   | 19 | 5  |
| 130873 | 13 | 9142399 | 9142416 | 2 | 9  | 18 | CA   | 30 | 3  |
| 130875 | 13 | 9145897 | 9145908 | 2 | 6  | 12 | AC   | 20 | 6  |
| 130876 | 13 | 9146114 | 9146155 | 2 | 21 | 42 | TG   | 9  | 8  |
| 130880 | 13 | 9151289 | 9151302 | 2 | 7  | 14 | TG   | 23 | 5  |
| 130890 | 13 | 9169069 | 9169088 | 2 | 10 | 20 | AT   | 11 | 5  |
| 130904 | 13 | 9208239 | 9208258 | 2 | 10 | 20 | TG   | 10 | 7  |
| 130907 | 13 | 9211967 | 9211984 | 2 | 9  | 18 | TG   | 12 | 6  |
| 130909 | 13 | 9217618 | 9217643 | 2 | 13 | 26 | AG   | 14 | 9  |
| 130915 | 13 | 9223272 | 9223303 | 2 | 16 | 32 | GT   | 10 | 8  |
| 130916 | 13 | 9225132 | 9225149 | 3 | 6  | 18 | CAG  | 34 | 4  |
| 130917 | 13 | 9225740 | 9225765 | 2 | 13 | 26 | TG   | 20 | 8  |
| 130922 | 13 | 9235898 | 9235925 | 4 | 7  | 28 | TTGT | 30 | 5  |

|        |    |         |         |   |    |    |      |    |    |
|--------|----|---------|---------|---|----|----|------|----|----|
| 130926 | 13 | 9238094 | 9238107 | 2 | 7  | 14 | AC   | 13 | 7  |
| 130928 | 13 | 9238244 | 9238263 | 4 | 5  | 20 | CACG | 12 | 6  |
| 130930 | 13 | 9238666 | 9238679 | 2 | 7  | 14 | AC   | 10 | 4  |
| 130941 | 13 | 9262870 | 9262907 | 2 | 19 | 38 | AC   | 15 | 11 |
| 130942 | 13 | 9263752 | 9263767 | 2 | 8  | 16 | AC   | 7  | 4  |
| 130950 | 13 | 9271637 | 9271680 | 2 | 22 | 44 | GT   | 13 | 14 |
| 130953 | 13 | 9277935 | 9277962 | 4 | 7  | 28 | CACT | 24 | 3  |
| 130963 | 13 | 9284233 | 9284272 | 4 | 10 | 40 | AGAA | 11 | 6  |
| 130966 | 13 | 9292126 | 9292145 | 2 | 10 | 20 | CA   | 16 | 7  |
| 130969 | 13 | 9300090 | 9300101 | 2 | 6  | 12 | GT   | 23 | 3  |
| 130970 | 13 | 9300105 | 9300116 | 2 | 6  | 12 | TG   | 23 | 5  |
| 130977 | 13 | 9306739 | 9306750 | 2 | 6  | 12 | GT   | 30 | 3  |
| 130978 | 13 | 9308276 | 9308287 | 2 | 6  | 12 | TG   | 24 | 3  |
| 130989 | 13 | 9315411 | 9315434 | 2 | 12 | 24 | AC   | 15 | 9  |
| 131006 | 13 | 9338318 | 9338329 | 2 | 6  | 12 | TG   | 19 | 3  |
| 131016 | 13 | 9362379 | 9362414 | 2 | 18 | 36 | TG   | 8  | 8  |
| 131018 | 13 | 9369681 | 9369702 | 2 | 11 | 22 | AC   | 23 | 3  |
| 131020 | 13 | 9371709 | 9371736 | 2 | 14 | 28 | TG   | 16 | 12 |
| 131030 | 13 | 9384911 | 9384932 | 2 | 11 | 22 | GT   | 8  | 11 |
| 131036 | 13 | 9394179 | 9394214 | 2 | 18 | 36 | CA   | 12 | 8  |
| 131040 | 13 | 9396515 | 9396548 | 2 | 17 | 34 | AC   | 14 | 13 |
| 131043 | 13 | 9397944 | 9397955 | 2 | 6  | 12 | AC   | 16 | 6  |
| 131048 | 13 | 9398711 | 9398724 | 2 | 7  | 14 | CA   | 19 | 8  |
| 131051 | 13 | 9399487 | 9399502 | 4 | 4  | 16 | TTTC | 18 | 8  |
| 131056 | 13 | 9411193 | 9411204 | 2 | 6  | 12 | CA   | 9  | 3  |
| 131059 | 13 | 9412909 | 9412922 | 2 | 7  | 14 | TC   | 29 | 4  |
| 131072 | 13 | 9419712 | 9419727 | 2 | 8  | 16 | GT   | 15 | 9  |
| 131078 | 13 | 9424186 | 9424199 | 2 | 7  | 14 | CA   | 11 | 9  |
| 131080 | 13 | 9424539 | 9424580 | 2 | 21 | 42 | AC   | 9  | 11 |
| 131081 | 13 | 9425373 | 9425418 | 2 | 23 | 46 | TG   | 9  | 8  |
| 131083 | 13 | 9425582 | 9425601 | 2 | 10 | 20 | AC   | 26 | 7  |
| 131086 | 13 | 9426384 | 9426419 | 2 | 18 | 36 | TG   | 6  | 4  |
| 131087 | 13 | 9426597 | 9426628 | 2 | 16 | 32 | CA   | 15 | 12 |
| 131088 | 13 | 9426816 | 9426841 | 2 | 13 | 26 | CA   | 15 | 3  |
| 131091 | 13 | 9427872 | 9427891 | 2 | 10 | 20 | GT   | 23 | 7  |
| 131092 | 13 | 9428006 | 9428019 | 2 | 7  | 14 | TG   | 18 | 4  |
| 131093 | 13 | 9428689 | 9428708 | 4 | 5  | 20 | CAAG | 26 | 7  |
| 131097 | 13 | 9431060 | 9431077 | 2 | 9  | 18 | GT   | 23 | 7  |
| 131100 | 13 | 9435052 | 9435067 | 2 | 8  | 16 | TG   | 16 | 3  |
| 131101 | 13 | 9436754 | 9436773 | 2 | 10 | 20 | TG   | 25 | 7  |
| 131104 | 13 | 9436982 | 9437005 | 2 | 12 | 24 | GA   | 8  | 7  |
| 131105 | 13 | 9437060 | 9437091 | 4 | 8  | 32 | AGAA | 12 | 5  |
| 131106 | 13 | 9437325 | 9437356 | 2 | 16 | 32 | GT   | 14 | 9  |
| 131108 | 13 | 9439203 | 9439218 | 4 | 4  | 16 | TTCT | 10 | 3  |
| 131109 | 13 | 9439594 | 9439621 | 2 | 14 | 28 | CA   | 10 | 11 |
| 131110 | 13 | 9439896 | 9439911 | 2 | 8  | 16 | GA   | 26 | 4  |
| 131111 | 13 | 9440042 | 9440065 | 2 | 12 | 24 | GT   | 15 | 8  |
| 131113 | 13 | 9441092 | 9441119 | 2 | 14 | 28 | AC   | 17 | 6  |
| 131117 | 13 | 9444245 | 9444258 | 2 | 7  | 14 | AC   | 27 | 3  |
| 131118 | 13 | 9444963 | 9444978 | 2 | 8  | 16 | TG   | 27 | 4  |
| 131120 | 13 | 9446291 | 9446314 | 4 | 6  | 24 | CAAC | 17 | 3  |

|        |    |         |         |   |    |    |      |    |    |
|--------|----|---------|---------|---|----|----|------|----|----|
| 131122 | 13 | 9446859 | 9446878 | 4 | 5  | 20 | AAAC | 28 | 3  |
| 131124 | 13 | 9447468 | 9447485 | 2 | 9  | 18 | GT   | 9  | 7  |
| 131125 | 13 | 9447489 | 9447500 | 2 | 6  | 12 | TG   | 23 | 11 |
| 131127 | 13 | 9447686 | 9447707 | 2 | 11 | 22 | CA   | 25 | 6  |
| 131134 | 13 | 9450625 | 9450660 | 2 | 18 | 36 | AC   | 7  | 11 |
| 131144 | 13 | 9460534 | 9460549 | 2 | 8  | 16 | GT   | 27 | 4  |
| 131152 | 13 | 9467235 | 9467272 | 2 | 19 | 38 | GT   | 16 | 10 |
| 131153 | 13 | 9467408 | 9467431 | 2 | 12 | 24 | GT   | 14 | 9  |
| 131154 | 13 | 9467980 | 9468009 | 2 | 15 | 30 | TG   | 21 | 13 |
| 131159 | 13 | 9482136 | 9482157 | 2 | 11 | 22 | TG   | 14 | 7  |
| 131161 | 13 | 9482332 | 9482343 | 2 | 6  | 12 | GT   | 21 | 3  |
| 131162 | 13 | 9482457 | 9482474 | 2 | 9  | 18 | AC   | 21 | 9  |
| 131164 | 13 | 9482558 | 9482569 | 2 | 6  | 12 | CA   | 17 | 4  |
| 131166 | 13 | 9482645 | 9482664 | 2 | 10 | 20 | GA   | 11 | 3  |
| 131168 | 13 | 9482771 | 9482802 | 2 | 16 | 32 | AG   | 13 | 5  |
| 131175 | 13 | 9484752 | 9484779 | 2 | 14 | 28 | TG   | 16 | 6  |
| 131177 | 13 | 9485389 | 9485404 | 2 | 8  | 16 | TG   | 14 | 10 |
| 131188 | 13 | 9490150 | 9490169 | 4 | 5  | 20 | AAAT | 16 | 3  |
| 131192 | 13 | 9491539 | 9491554 | 2 | 8  | 16 | TG   | 25 | 5  |
| 131193 | 13 | 9491693 | 9491710 | 2 | 9  | 18 | GT   | 20 | 5  |
| 131195 | 13 | 9492037 | 9492058 | 2 | 11 | 22 | GT   | 14 | 6  |
| 131196 | 13 | 9492243 | 9492263 | 3 | 7  | 21 | CTT  | 27 | 4  |
| 131197 | 13 | 9492942 | 9492979 | 2 | 19 | 38 | TG   | 10 | 9  |
| 131199 | 13 | 9493467 | 9493490 | 4 | 6  | 24 | ATAA | 22 | 4  |
| 131200 | 13 | 9493820 | 9493845 | 2 | 13 | 26 | GT   | 16 | 9  |
| 131202 | 13 | 9494617 | 9494648 | 2 | 16 | 32 | AC   | 13 | 11 |
| 131203 | 13 | 9494727 | 9494758 | 2 | 16 | 32 | TG   | 14 | 11 |
| 131205 | 13 | 9495472 | 9495495 | 2 | 12 | 24 | GT   | 7  | 5  |
| 131207 | 13 | 9495670 | 9495690 | 3 | 7  | 21 | AGG  | 21 | 4  |
| 131208 | 13 | 9495903 | 9495918 | 2 | 8  | 16 | AC   | 19 | 12 |
| 131209 | 13 | 9495920 | 9495933 | 2 | 7  | 14 | CA   | 17 | 9  |
| 131210 | 13 | 9496259 | 9496284 | 2 | 13 | 26 | TG   | 12 | 8  |
| 131211 | 13 | 9496389 | 9496416 | 2 | 14 | 28 | AC   | 9  | 9  |
| 131213 | 13 | 9496803 | 9496842 | 2 | 20 | 40 | CA   | 13 | 17 |
| 131214 | 13 | 9498067 | 9498080 | 2 | 7  | 14 | AC   | 8  | 9  |
| 131215 | 13 | 9498169 | 9498190 | 2 | 11 | 22 | CA   | 22 | 5  |
| 131217 | 13 | 9498680 | 9498699 | 2 | 10 | 20 | AG   | 11 | 5  |
| 131218 | 13 | 9502551 | 9502570 | 2 | 10 | 20 | TG   | 13 | 8  |
| 131220 | 13 | 9502717 | 9502732 | 2 | 8  | 16 | AC   | 23 | 5  |
| 131221 | 13 | 9503003 | 9503024 | 2 | 11 | 22 | AC   | 20 | 14 |
| 131222 | 13 | 9503564 | 9503581 | 2 | 9  | 18 | CA   | 22 | 13 |
| 131226 | 13 | 9506518 | 9506551 | 2 | 17 | 34 | TG   | 16 | 5  |
| 131230 | 13 | 9510986 | 9510999 | 2 | 7  | 14 | AC   | 21 | 5  |
| 131231 | 13 | 9511156 | 9511175 | 2 | 10 | 20 | AC   | 16 | 10 |
| 131232 | 13 | 9511349 | 9511364 | 2 | 8  | 16 | CA   | 23 | 5  |
| 131233 | 13 | 9512306 | 9512329 | 2 | 12 | 24 | TG   | 7  | 6  |
| 131235 | 13 | 9513903 | 9513920 | 2 | 9  | 18 | CA   | 19 | 6  |
| 131240 | 13 | 9518516 | 9518535 | 2 | 10 | 20 | CA   | 24 | 9  |
| 131244 | 13 | 9520409 | 9520441 | 3 | 11 | 33 | GCA  | 25 | 8  |
| 131246 | 13 | 9522976 | 9522991 | 2 | 8  | 16 | TG   | 24 | 8  |
| 131248 | 13 | 9528219 | 9528242 | 2 | 12 | 24 | AC   | 22 | 6  |

|        |    |         |         |   |    |    |      |    |    |
|--------|----|---------|---------|---|----|----|------|----|----|
| 131252 | 13 | 9528680 | 9528705 | 2 | 13 | 26 | GT   | 14 | 8  |
| 131253 | 13 | 9530290 | 9530305 | 2 | 8  | 16 | TG   | 18 | 5  |
| 131254 | 13 | 9530491 | 9530506 | 2 | 8  | 16 | TG   | 27 | 5  |
| 131259 | 13 | 9542278 | 9542297 | 2 | 10 | 20 | GT   | 18 | 3  |
| 131260 | 13 | 9542423 | 9542474 | 2 | 26 | 52 | CA   | 8  | 7  |
| 131265 | 13 | 9546263 | 9546282 | 2 | 10 | 20 | AG   | 24 | 5  |
| 131271 | 13 | 9549339 | 9549350 | 2 | 6  | 12 | TG   | 27 | 4  |
| 131272 | 13 | 9549683 | 9549720 | 2 | 19 | 38 | CA   | 11 | 7  |
| 131274 | 13 | 9551652 | 9551677 | 2 | 13 | 26 | CA   | 9  | 3  |
| 131276 | 13 | 9552517 | 9552536 | 4 | 5  | 20 | TTTG | 13 | 3  |
| 131277 | 13 | 9553480 | 9553513 | 2 | 17 | 34 | TG   | 7  | 9  |
| 131279 | 13 | 9555648 | 9555663 | 2 | 8  | 16 | TG   | 23 | 3  |
| 131282 | 13 | 9558518 | 9558545 | 2 | 14 | 28 | CA   | 11 | 11 |
| 131283 | 13 | 9558797 | 9558818 | 2 | 11 | 22 | AC   | 27 | 5  |
| 131285 | 13 | 9559325 | 9559342 | 2 | 9  | 18 | CA   | 8  | 5  |
| 131287 | 13 | 9559934 | 9559957 | 2 | 12 | 24 | AC   | 15 | 4  |
| 131289 | 13 | 9560995 | 9561016 | 2 | 11 | 22 | AC   | 19 | 9  |
| 131290 | 13 | 9561144 | 9561155 | 2 | 6  | 12 | TG   | 8  | 3  |
| 131291 | 13 | 9564086 | 9564099 | 2 | 7  | 14 | CA   | 23 | 5  |
| 131298 | 13 | 9591170 | 9591191 | 2 | 11 | 22 | AC   | 16 | 4  |
| 131302 | 13 | 9593336 | 9593349 | 2 | 7  | 14 | CA   | 15 | 4  |
| 131313 | 13 | 9605676 | 9605693 | 2 | 9  | 18 | CT   | 9  | 3  |
| 131319 | 13 | 9614061 | 9614076 | 2 | 8  | 16 | TC   | 20 | 3  |
| 131320 | 13 | 9615135 | 9615150 | 2 | 8  | 16 | CA   | 26 | 4  |
| 131324 | 13 | 9617504 | 9617515 | 2 | 6  | 12 | TG   | 25 | 5  |
| 131325 | 13 | 9617744 | 9617761 | 2 | 9  | 18 | AC   | 25 | 6  |
| 131336 | 13 | 9643087 | 9643102 | 2 | 8  | 16 | GT   | 31 | 4  |
| 131337 | 13 | 9644436 | 9644463 | 2 | 14 | 28 | AC   | 8  | 9  |
| 131341 | 13 | 9649740 | 9649759 | 2 | 10 | 20 | AG   | 28 | 3  |
| 131342 | 13 | 9651636 | 9651653 | 2 | 9  | 18 | AC   | 20 | 8  |
| 131346 | 13 | 9664474 | 9664505 | 2 | 16 | 32 | CT   | 6  | 10 |
| 131362 | 13 | 9687558 | 9687579 | 2 | 11 | 22 | AC   | 18 | 7  |
| 131363 | 13 | 9688402 | 9688417 | 2 | 8  | 16 | AG   | 24 | 3  |
| 131366 | 13 | 9692045 | 9692056 | 2 | 6  | 12 | CT   | 32 | 3  |
| 131368 | 13 | 9701552 | 9701577 | 2 | 13 | 26 | AC   | 20 | 12 |
| 131369 | 13 | 9702606 | 9702625 | 2 | 10 | 20 | TG   | 20 | 7  |
| 131372 | 13 | 9716561 | 9716590 | 3 | 10 | 30 | GAG  | 16 | 5  |
| 131373 | 13 | 9717896 | 9717907 | 2 | 6  | 12 | GT   | 24 | 9  |
| 131385 | 13 | 9758149 | 9758174 | 2 | 13 | 26 | AC   | 18 | 11 |
| 131394 | 13 | 9784176 | 9784191 | 4 | 4  | 16 | GTTG | 23 | 3  |
| 131397 | 13 | 9799346 | 9799361 | 2 | 8  | 16 | AC   | 10 | 7  |
| 131398 | 13 | 9802405 | 9802426 | 2 | 11 | 22 | CT   | 15 | 5  |
| 131400 | 13 | 9805877 | 9805904 | 2 | 14 | 28 | TG   | 14 | 7  |
| 131407 | 13 | 9814942 | 9814955 | 2 | 7  | 14 | AC   | 17 | 4  |
| 131414 | 13 | 9824905 | 9824924 | 2 | 10 | 20 | CA   | 16 | 5  |
| 131415 | 13 | 9825248 | 9825283 | 2 | 18 | 36 | CA   | 17 | 9  |
| 131417 | 13 | 9826167 | 9826180 | 2 | 7  | 14 | TG   | 18 | 3  |
| 131426 | 13 | 9834525 | 9834552 | 2 | 14 | 28 | AC   | 10 | 11 |
| 131429 | 13 | 9836060 | 9836086 | 3 | 9  | 27 | CTG  | 24 | 10 |
| 131435 | 13 | 9843183 | 9843222 | 2 | 20 | 40 | AC   | 9  | 9  |
| 131436 | 13 | 9843315 | 9843358 | 2 | 22 | 44 | AC   | 6  | 12 |

|        |    |          |          |   |    |    |      |    |    |
|--------|----|----------|----------|---|----|----|------|----|----|
| 131443 | 13 | 9851711  | 9851748  | 2 | 19 | 38 | AC   | 19 | 15 |
| 131444 | 13 | 9852499  | 9852524  | 2 | 13 | 26 | AC   | 17 | 11 |
| 131450 | 13 | 9856421  | 9856440  | 2 | 10 | 20 | AC   | 26 | 5  |
| 131460 | 13 | 9861645  | 9861682  | 2 | 19 | 38 | CT   | 10 | 10 |
| 131462 | 13 | 9861885  | 9861898  | 2 | 7  | 14 | CT   | 19 | 5  |
| 131466 | 13 | 9862600  | 9862625  | 2 | 13 | 26 | CA   | 12 | 13 |
| 131467 | 13 | 9863136  | 9863161  | 2 | 13 | 26 | GT   | 19 | 10 |
| 131470 | 13 | 9864986  | 9865007  | 2 | 11 | 22 | GT   | 11 | 8  |
| 131472 | 13 | 9865075  | 9865090  | 2 | 8  | 16 | GT   | 24 | 5  |
| 131474 | 13 | 9867383  | 9867400  | 3 | 6  | 18 | GAT  | 24 | 5  |
| 131475 | 13 | 9868576  | 9868587  | 2 | 6  | 12 | TC   | 17 | 3  |
| 131482 | 13 | 9879447  | 9879474  | 2 | 14 | 28 | CA   | 7  | 10 |
| 131483 | 13 | 9881065  | 9881078  | 2 | 7  | 14 | TG   | 15 | 4  |
| 131484 | 13 | 9882211  | 9882230  | 4 | 5  | 20 | TTAT | 22 | 9  |
| 131486 | 13 | 9884478  | 9884505  | 2 | 14 | 28 | TG   | 12 | 10 |
| 131490 | 13 | 9888102  | 9888119  | 3 | 6  | 18 | GTG  | 14 | 4  |
| 131491 | 13 | 9888547  | 9888560  | 2 | 7  | 14 | TG   | 17 | 3  |
| 131497 | 13 | 9894960  | 9894983  | 2 | 12 | 24 | AC   | 17 | 11 |
| 131501 | 13 | 9897061  | 9897074  | 2 | 7  | 14 | TG   | 22 | 6  |
| 131521 | 13 | 9908593  | 9908604  | 2 | 6  | 12 | AC   | 13 | 14 |
| 131522 | 13 | 9908607  | 9908618  | 2 | 6  | 12 | AC   | 12 | 9  |
| 131523 | 13 | 9914556  | 9914571  | 4 | 4  | 16 | TACA | 29 | 5  |
| 131530 | 13 | 9932658  | 9932669  | 2 | 6  | 12 | CA   | 28 | 5  |
| 131532 | 13 | 9933487  | 9933510  | 3 | 8  | 24 | CCT  | 9  | 5  |
| 131535 | 13 | 9935961  | 9935978  | 3 | 6  | 18 | TCA  | 21 | 5  |
| 131557 | 13 | 9992988  | 9993003  | 4 | 4  | 16 | TTTA | 19 | 4  |
| 131561 | 13 | 9998469  | 9998492  | 4 | 6  | 24 | TAGA | 16 | 4  |
| 131578 | 13 | 10021262 | 10021283 | 2 | 11 | 22 | AC   | 9  | 5  |
| 131582 | 13 | 10027583 | 10027598 | 2 | 8  | 16 | AC   | 12 | 7  |
| 131590 | 13 | 10061013 | 10061032 | 2 | 10 | 20 | CT   | 26 | 5  |
| 131591 | 13 | 10066644 | 10066655 | 2 | 6  | 12 | CT   | 32 | 3  |
| 131592 | 13 | 10070910 | 10070955 | 2 | 23 | 46 | AC   | 8  | 8  |
| 131594 | 13 | 10075732 | 10075755 | 2 | 12 | 24 | AC   | 17 | 6  |
| 131595 | 13 | 10078318 | 10078335 | 2 | 9  | 18 | TG   | 26 | 3  |
| 131597 | 13 | 10081273 | 10081296 | 3 | 8  | 24 | TAT  | 23 | 3  |
| 131598 | 13 | 10081623 | 10081638 | 2 | 8  | 16 | CA   | 20 | 8  |
| 131599 | 13 | 10084866 | 10084881 | 2 | 8  | 16 | GT   | 8  | 3  |
| 131606 | 13 | 10111848 | 10111859 | 2 | 6  | 12 | TG   | 19 | 3  |
| 131628 | 13 | 10149653 | 10149678 | 2 | 13 | 26 | TG   | 17 | 6  |
| 131633 | 13 | 10163359 | 10163382 | 2 | 12 | 24 | CA   | 16 | 4  |
| 131637 | 13 | 10170596 | 10170639 | 2 | 22 | 44 | TC   | 6  | 10 |
| 131638 | 13 | 10171611 | 10171632 | 2 | 11 | 22 | GT   | 14 | 8  |
| 131639 | 13 | 10171873 | 10171894 | 2 | 11 | 22 | GT   | 22 | 10 |
| 131644 | 13 | 10178277 | 10178288 | 2 | 6  | 12 | CT   | 23 | 4  |
| 131645 | 13 | 10178627 | 10178640 | 2 | 7  | 14 | CT   | 29 | 3  |
| 131646 | 13 | 10178874 | 10178893 | 4 | 5  | 20 | AATA | 23 | 7  |
| 131649 | 13 | 10181996 | 10182015 | 2 | 10 | 20 | TG   | 23 | 12 |
| 131650 | 13 | 10182113 | 10182130 | 3 | 6  | 18 | CAG  | 31 | 3  |
| 131656 | 13 | 10186640 | 10186665 | 2 | 13 | 26 | AC   | 17 | 11 |
| 131658 | 13 | 10188370 | 10188397 | 2 | 14 | 28 | AC   | 23 | 7  |
| 131660 | 13 | 10192346 | 10192360 | 3 | 5  | 15 | GCT  | 27 | 4  |

|        |    |          |          |   |    |    |      |    |    |
|--------|----|----------|----------|---|----|----|------|----|----|
| 131661 | 13 | 10192537 | 10192550 | 2 | 7  | 14 | CT   | 16 | 5  |
| 131662 | 13 | 10192635 | 10192658 | 2 | 12 | 24 | AG   | 12 | 6  |
| 131664 | 13 | 10193997 | 10194014 | 2 | 9  | 18 | TG   | 24 | 6  |
| 131668 | 13 | 10202939 | 10202956 | 2 | 9  | 18 | TC   | 27 | 5  |
| 131669 | 13 | 10204847 | 10204858 | 2 | 6  | 12 | TC   | 20 | 3  |
| 131679 | 13 | 10222934 | 10222951 | 3 | 6  | 18 | GCT  | 21 | 5  |
| 131697 | 13 | 10260680 | 10260707 | 2 | 14 | 28 | TG   | 15 | 7  |
| 131706 | 13 | 10265883 | 10265906 | 2 | 12 | 24 | CA   | 14 | 13 |
| 131708 | 13 | 10266329 | 10266348 | 2 | 10 | 20 | AT   | 7  | 6  |
| 131718 | 13 | 10278256 | 10278267 | 2 | 6  | 12 | GT   | 22 | 5  |
| 131730 | 13 | 10310011 | 10310024 | 2 | 7  | 14 | AC   | 25 | 4  |
| 131731 | 13 | 10311073 | 10311088 | 2 | 8  | 16 | AG   | 27 | 3  |
| 131744 | 13 | 10340366 | 10340379 | 2 | 7  | 14 | TC   | 9  | 8  |
| 131748 | 13 | 10343654 | 10343667 | 2 | 7  | 14 | TG   | 21 | 5  |
| 131749 | 13 | 10344511 | 10344524 | 2 | 7  | 14 | AG   | 23 | 3  |
| 131750 | 13 | 10348453 | 10348464 | 2 | 6  | 12 | CT   | 26 | 3  |
| 131763 | 13 | 10359607 | 10359622 | 2 | 8  | 16 | GT   | 20 | 11 |
| 131792 | 13 | 10404031 | 10404060 | 2 | 15 | 30 | TC   | 11 | 9  |
| 131793 | 13 | 10413823 | 10413840 | 2 | 9  | 18 | CA   | 14 | 5  |
| 131794 | 13 | 10414638 | 10414659 | 2 | 11 | 22 | CT   | 19 | 7  |
| 131795 | 13 | 10420258 | 10420281 | 2 | 12 | 24 | TG   | 17 | 10 |
| 131796 | 13 | 10420363 | 10420374 | 2 | 6  | 12 | TG   | 26 | 4  |
| 131800 | 13 | 10428267 | 10428299 | 3 | 11 | 33 | GCT  | 13 | 5  |
| 131806 | 13 | 10435400 | 10435421 | 2 | 11 | 22 | TG   | 13 | 5  |
| 131809 | 13 | 10435934 | 10435961 | 2 | 14 | 28 | CA   | 14 | 7  |
| 131813 | 13 | 10445964 | 10445983 | 2 | 10 | 20 | GT   | 21 | 11 |
| 131819 | 13 | 10452636 | 10452649 | 2 | 7  | 14 | CA   | 30 | 4  |
| 131824 | 13 | 10457024 | 10457045 | 2 | 11 | 22 | TG   | 11 | 4  |
| 131825 | 13 | 10457395 | 10457420 | 2 | 13 | 26 | TG   | 20 | 5  |
| 131826 | 13 | 10457640 | 10457669 | 2 | 15 | 30 | GA   | 7  | 10 |
| 131839 | 13 | 10465557 | 10465574 | 2 | 9  | 18 | GT   | 15 | 5  |
| 131844 | 13 | 10468166 | 10468179 | 2 | 7  | 14 | AT   | 16 | 8  |
| 131847 | 13 | 10474248 | 10474283 | 2 | 18 | 36 | TG   | 12 | 12 |
| 131853 | 13 | 10493059 | 10493076 | 2 | 9  | 18 | AC   | 33 | 4  |
| 131854 | 13 | 10495217 | 10495230 | 2 | 7  | 14 | CA   | 28 | 4  |
| 131880 | 13 | 10544771 | 10544784 | 2 | 7  | 14 | CT   | 13 | 3  |
| 131884 | 13 | 10551697 | 10551730 | 2 | 17 | 34 | CA   | 7  | 7  |
| 131885 | 13 | 10554651 | 10554666 | 2 | 8  | 16 | CA   | 24 | 4  |
| 131886 | 13 | 10555729 | 10555750 | 2 | 11 | 22 | AC   | 12 | 7  |
| 131890 | 13 | 10559690 | 10559715 | 2 | 13 | 26 | AC   | 20 | 5  |
| 131896 | 13 | 10565700 | 10565711 | 2 | 6  | 12 | CA   | 17 | 3  |
| 131897 | 13 | 10566639 | 10566654 | 2 | 8  | 16 | AC   | 22 | 7  |
| 131898 | 13 | 10566809 | 10566820 | 2 | 6  | 12 | GA   | 24 | 3  |
| 131899 | 13 | 10566823 | 10566836 | 2 | 7  | 14 | GA   | 24 | 3  |
| 131901 | 13 | 10566998 | 10567029 | 2 | 16 | 32 | GT   | 9  | 7  |
| 131902 | 13 | 10571482 | 10571505 | 4 | 6  | 24 | ATTT | 21 | 3  |
| 131907 | 13 | 10582297 | 10582308 | 2 | 6  | 12 | GA   | 16 | 3  |
| 131908 | 13 | 10584610 | 10584621 | 2 | 6  | 12 | GT   | 6  | 6  |
| 131912 | 13 | 10587450 | 10587471 | 2 | 11 | 22 | CA   | 15 | 13 |
| 131914 | 13 | 10589904 | 10589919 | 2 | 8  | 16 | AC   | 20 | 3  |
| 131917 | 13 | 10591444 | 10591469 | 2 | 13 | 26 | GT   | 20 | 14 |



|        |    |          |          |   |    |    |      |    |    |
|--------|----|----------|----------|---|----|----|------|----|----|
| 131922 | 13 | 10595055 | 10595076 | 2 | 11 | 22 | GT   | 18 | 9  |
| 131923 | 13 | 10595414 | 10595431 | 2 | 9  | 18 | TG   | 20 | 4  |
| 131925 | 13 | 10599160 | 10599174 | 3 | 5  | 15 | CCA  | 24 | 4  |
| 131927 | 13 | 10600933 | 10600952 | 2 | 10 | 20 | AC   | 6  | 10 |
| 131928 | 13 | 10600954 | 10600965 | 2 | 6  | 12 | CA   | 6  | 9  |
| 131929 | 13 | 10601533 | 10601550 | 2 | 9  | 18 | AT   | 9  | 4  |
| 131934 | 13 | 10608402 | 10608413 | 2 | 6  | 12 | GT   | 28 | 3  |
| 131937 | 13 | 10608603 | 10608616 | 2 | 7  | 14 | GA   | 14 | 3  |
| 131938 | 13 | 10608870 | 10608887 | 2 | 9  | 18 | AC   | 16 | 14 |
| 131939 | 13 | 10609082 | 10609099 | 2 | 9  | 18 | TG   | 21 | 13 |
| 131941 | 13 | 10609853 | 10609866 | 2 | 7  | 14 | CA   | 27 | 4  |
| 131945 | 13 | 10619701 | 10619720 | 4 | 5  | 20 | TGGA | 29 | 3  |
| 131946 | 13 | 10620904 | 10620919 | 4 | 4  | 16 | CATG | 33 | 5  |
| 131950 | 13 | 10625768 | 10625794 | 3 | 9  | 27 | ATT  | 18 | 6  |
| 131954 | 13 | 10636698 | 10636713 | 2 | 8  | 16 | GT   | 16 | 6  |
| 131957 | 13 | 10638863 | 10638882 | 4 | 5  | 20 | TTCT | 13 | 6  |
| 131963 | 13 | 10658375 | 10658392 | 2 | 9  | 18 | TG   | 20 | 3  |
| 131964 | 13 | 10658699 | 10658710 | 2 | 6  | 12 | CT   | 25 | 4  |
| 131969 | 13 | 10663739 | 10663756 | 2 | 9  | 18 | GT   | 19 | 3  |
| 131974 | 13 | 10670207 | 10670222 | 4 | 4  | 16 | ATTT | 32 | 4  |
| 131977 | 13 | 10675367 | 10675387 | 3 | 7  | 21 | TCC  | 16 | 4  |
| 131978 | 13 | 10675607 | 10675622 | 2 | 8  | 16 | GT   | 23 | 3  |
| 131982 | 13 | 10678627 | 10678666 | 2 | 20 | 40 | GT   | 8  | 10 |
| 131983 | 13 | 10679416 | 10679455 | 2 | 20 | 40 | TG   | 6  | 7  |
| 131990 | 13 | 10697253 | 10697276 | 2 | 12 | 24 | AC   | 10 | 10 |
| 131995 | 13 | 10704996 | 10705027 | 2 | 16 | 32 | GT   | 11 | 11 |
| 131997 | 13 | 10714665 | 10714682 | 2 | 9  | 18 | AC   | 17 | 3  |
| 131999 | 13 | 10718250 | 10718271 | 2 | 11 | 22 | CA   | 17 | 4  |
| 132003 | 13 | 10726566 | 10726601 | 2 | 18 | 36 | CA   | 10 | 11 |
| 132010 | 13 | 10737603 | 10737658 | 2 | 28 | 56 | TG   | 15 | 16 |
| 132021 | 13 | 10751519 | 10751542 | 2 | 12 | 24 | CA   | 19 | 14 |
| 132026 | 13 | 10762591 | 10762626 | 4 | 9  | 36 | AGAA | 20 | 8  |
| 132031 | 13 | 10771079 | 10771098 | 2 | 10 | 20 | TG   | 20 | 6  |
| 132032 | 13 | 10774560 | 10774575 | 2 | 8  | 16 | GT   | 19 | 3  |
| 132036 | 13 | 10792931 | 10792944 | 2 | 7  | 14 | AC   | 33 | 4  |
| 132043 | 13 | 10805904 | 10805923 | 2 | 10 | 20 | AC   | 14 | 10 |
| 132049 | 13 | 10831380 | 10831407 | 2 | 14 | 28 | GT   | 7  | 5  |
| 132051 | 13 | 10834792 | 10834817 | 2 | 13 | 26 | TG   | 13 | 6  |
| 132067 | 13 | 10887673 | 10887694 | 2 | 11 | 22 | TC   | 14 | 8  |
| 132069 | 13 | 10896799 | 10896814 | 4 | 4  | 16 | ATTT | 32 | 3  |
| 132075 | 13 | 10902845 | 10902870 | 2 | 13 | 26 | AC   | 22 | 7  |
| 132076 | 13 | 10905135 | 10905150 | 4 | 4  | 16 | TTTG | 25 | 4  |
| 132077 | 13 | 10905350 | 10905367 | 2 | 9  | 18 | CT   | 19 | 8  |
| 132080 | 13 | 10912467 | 10912487 | 3 | 7  | 21 | CAA  | 29 | 4  |
| 132086 | 14 | 17402    | 17413    | 2 | 6  | 12 | TG   | 16 | 4  |
| 132092 | 14 | 23824    | 23835    | 2 | 6  | 12 | TC   | 23 | 3  |
| 132095 | 14 | 45846    | 45863    | 3 | 6  | 18 | TAG  | 25 | 4  |
| 132096 | 14 | 46426    | 46437    | 2 | 6  | 12 | TG   | 28 | 4  |
| 132100 | 14 | 60770    | 60793    | 2 | 12 | 24 | AC   | 12 | 10 |
| 132101 | 14 | 62030    | 62045    | 2 | 8  | 16 | AC   | 22 | 4  |
| 132105 | 14 | 73418    | 73441    | 2 | 12 | 24 | GT   | 7  | 8  |

|        |    |        |        |   |    |    |      |    |    |
|--------|----|--------|--------|---|----|----|------|----|----|
| 132108 | 14 | 86547  | 86592  | 2 | 23 | 46 | TG   | 6  | 8  |
| 132112 | 14 | 109879 | 109896 | 2 | 9  | 18 | TG   | 30 | 5  |
| 132113 | 14 | 111393 | 111407 | 3 | 5  | 15 | TAA  | 25 | 4  |
| 132127 | 14 | 144455 | 144469 | 3 | 5  | 15 | TAT  | 25 | 8  |
| 132141 | 14 | 183216 | 183227 | 2 | 6  | 12 | AC   | 13 | 3  |
| 132150 | 14 | 203038 | 203055 | 2 | 9  | 18 | GT   | 19 | 10 |
| 132152 | 14 | 205570 | 205587 | 2 | 9  | 18 | CA   | 18 | 4  |
| 132165 | 14 | 256195 | 256254 | 4 | 15 | 60 | TTTG | 16 | 7  |
| 132176 | 14 | 261885 | 261904 | 2 | 10 | 20 | AC   | 19 | 13 |
| 132180 | 14 | 273760 | 273777 | 2 | 9  | 18 | AC   | 30 | 5  |
| 132183 | 14 | 282953 | 282974 | 2 | 11 | 22 | GT   | 10 | 7  |
| 132185 | 14 | 287670 | 287697 | 4 | 7  | 28 | TTTC | 24 | 5  |
| 132190 | 14 | 291817 | 291834 | 3 | 6  | 18 | CCT  | 17 | 8  |
| 132191 | 14 | 292114 | 292129 | 2 | 8  | 16 | TG   | 11 | 8  |
| 132193 | 14 | 292290 | 292315 | 2 | 13 | 26 | CT   | 26 | 15 |
| 132197 | 14 | 300420 | 300447 | 2 | 14 | 28 | GT   | 20 | 11 |
| 132202 | 14 | 310973 | 310988 | 4 | 4  | 16 | ATTC | 17 | 3  |
| 132226 | 14 | 357658 | 357693 | 2 | 18 | 36 | AC   | 9  | 8  |
| 132227 | 14 | 359925 | 359940 | 2 | 8  | 16 | CA   | 12 | 4  |
| 132228 | 14 | 359943 | 359954 | 2 | 6  | 12 | CA   | 23 | 8  |
| 132229 | 14 | 364073 | 364094 | 2 | 11 | 22 | TG   | 15 | 12 |
| 132258 | 14 | 435404 | 435427 | 2 | 12 | 24 | CA   | 18 | 16 |
| 132263 | 14 | 452159 | 452202 | 2 | 22 | 44 | TG   | 17 | 11 |
| 132268 | 14 | 465990 | 466007 | 2 | 9  | 18 | CA   | 21 | 10 |
| 132269 | 14 | 469118 | 469131 | 2 | 7  | 14 | AC   | 6  | 6  |
| 132274 | 14 | 478262 | 478281 | 2 | 10 | 20 | AG   | 18 | 8  |
| 132279 | 14 | 490898 | 490911 | 2 | 7  | 14 | TG   | 12 | 14 |
| 132287 | 14 | 514480 | 514503 | 2 | 12 | 24 | GT   | 18 | 6  |
| 132290 | 14 | 519200 | 519225 | 2 | 13 | 26 | AC   | 10 | 5  |
| 132292 | 14 | 522888 | 522921 | 2 | 17 | 34 | GT   | 20 | 13 |
| 132293 | 14 | 523402 | 523419 | 3 | 6  | 18 | ATA  | 17 | 8  |
| 132296 | 14 | 529245 | 529259 | 3 | 5  | 15 | CAT  | 23 | 4  |
| 132297 | 14 | 537410 | 537427 | 2 | 9  | 18 | AC   | 29 | 6  |
| 132301 | 14 | 543494 | 543505 | 2 | 6  | 12 | CT   | 17 | 5  |
| 132302 | 14 | 545869 | 545888 | 2 | 10 | 20 | TG   | 19 | 6  |
| 132318 | 14 | 581466 | 581495 | 2 | 15 | 30 | CA   | 15 | 9  |
| 132319 | 14 | 581717 | 581738 | 2 | 11 | 22 | CA   | 14 | 7  |
| 132323 | 14 | 591037 | 591062 | 2 | 13 | 26 | AC   | 20 | 5  |
| 132325 | 14 | 592273 | 592308 | 2 | 18 | 36 | AC   | 14 | 11 |
| 132330 | 14 | 600729 | 600760 | 4 | 8  | 32 | AGAT | 7  | 11 |
| 132331 | 14 | 601485 | 601510 | 2 | 13 | 26 | GT   | 18 | 6  |
| 132332 | 14 | 602405 | 602426 | 2 | 11 | 22 | TG   | 18 | 9  |
| 132336 | 14 | 620298 | 620309 | 2 | 6  | 12 | CA   | 28 | 4  |
| 132342 | 14 | 634881 | 634912 | 2 | 16 | 32 | TG   | 8  | 5  |
| 132345 | 14 | 645379 | 645398 | 2 | 10 | 20 | GT   | 13 | 8  |
| 132347 | 14 | 646928 | 646975 | 4 | 12 | 48 | ATAG | 10 | 8  |
| 132348 | 14 | 647703 | 647720 | 2 | 9  | 18 | GT   | 18 | 11 |
| 132349 | 14 | 647944 | 647958 | 3 | 5  | 15 | GGA  | 22 | 4  |
| 132354 | 14 | 654927 | 654948 | 2 | 11 | 22 | AC   | 12 | 5  |
| 132357 | 14 | 658758 | 658777 | 2 | 10 | 20 | GT   | 12 | 5  |
| 132362 | 14 | 662605 | 662624 | 2 | 10 | 20 | AC   | 22 | 9  |

|        |    |        |        |   |    |    |      |    |    |
|--------|----|--------|--------|---|----|----|------|----|----|
| 132363 | 14 | 662762 | 662783 | 2 | 11 | 22 | AC   | 27 | 6  |
| 132372 | 14 | 687582 | 687599 | 3 | 6  | 18 | CTT  | 31 | 5  |
| 132376 | 14 | 701308 | 701333 | 2 | 13 | 26 | TG   | 12 | 10 |
| 132378 | 14 | 715704 | 715715 | 2 | 6  | 12 | TG   | 24 | 3  |
| 132380 | 14 | 717136 | 717175 | 2 | 20 | 40 | AC   | 11 | 10 |
| 132382 | 14 | 730419 | 730446 | 4 | 7  | 28 | AGAC | 25 | 4  |
| 132383 | 14 | 732209 | 732228 | 2 | 10 | 20 | GT   | 19 | 20 |
| 132384 | 14 | 735648 | 735689 | 2 | 21 | 42 | GT   | 6  | 8  |
| 132386 | 14 | 737373 | 737402 | 2 | 15 | 30 | TG   | 17 | 7  |
| 132389 | 14 | 741883 | 741896 | 2 | 7  | 14 | TG   | 26 | 6  |
| 132394 | 14 | 744209 | 744223 | 3 | 5  | 15 | GAA  | 28 | 3  |
| 132395 | 14 | 744604 | 744639 | 2 | 18 | 36 | CA   | 13 | 10 |
| 132398 | 14 | 751041 | 751060 | 2 | 10 | 20 | AC   | 15 | 8  |
| 132399 | 14 | 751831 | 751846 | 4 | 4  | 16 | TTTA | 35 | 4  |
| 132401 | 14 | 753693 | 753710 | 2 | 9  | 18 | CA   | 21 | 5  |
| 132405 | 14 | 759109 | 759150 | 2 | 21 | 42 | CA   | 7  | 14 |
| 132413 | 14 | 782139 | 782158 | 2 | 10 | 20 | AC   | 14 | 4  |
| 132417 | 14 | 790095 | 790110 | 2 | 8  | 16 | CA   | 18 | 3  |
| 132419 | 14 | 793357 | 793382 | 2 | 13 | 26 | TG   | 22 | 8  |
| 132422 | 14 | 801965 | 801982 | 2 | 9  | 18 | CA   | 17 | 6  |
| 132423 | 14 | 802051 | 802062 | 2 | 6  | 12 | AG   | 22 | 3  |
| 132425 | 14 | 808626 | 808647 | 2 | 11 | 22 | CA   | 8  | 6  |
| 132427 | 14 | 808766 | 808781 | 2 | 8  | 16 | CA   | 11 | 8  |
| 132442 | 14 | 828977 | 829000 | 2 | 12 | 24 | CT   | 7  | 7  |
| 132445 | 14 | 835173 | 835193 | 3 | 7  | 21 | CTG  | 29 | 5  |
| 132446 | 14 | 836976 | 836987 | 2 | 6  | 12 | TC   | 23 | 3  |
| 132447 | 14 | 837304 | 837324 | 3 | 7  | 21 | AAG  | 24 | 6  |
| 132459 | 14 | 850874 | 850885 | 2 | 6  | 12 | AT   | 21 | 10 |
| 132462 | 14 | 853958 | 853983 | 2 | 13 | 26 | TG   | 15 | 11 |
| 132464 | 14 | 856028 | 856047 | 2 | 10 | 20 | AT   | 6  | 3  |
| 132466 | 14 | 857854 | 857865 | 2 | 6  | 12 | AC   | 24 | 6  |
| 132471 | 14 | 864885 | 864908 | 2 | 12 | 24 | AC   | 9  | 6  |
| 132474 | 14 | 873471 | 873514 | 2 | 22 | 44 | CA   | 16 | 9  |
| 132484 | 14 | 886933 | 886947 | 3 | 5  | 15 | TCC  | 29 | 5  |
| 132485 | 14 | 893212 | 893235 | 2 | 12 | 24 | TG   | 21 | 10 |
| 132496 | 14 | 909878 | 909889 | 2 | 6  | 12 | AG   | 22 | 4  |
| 132498 | 14 | 914915 | 914934 | 2 | 10 | 20 | AC   | 12 | 5  |
| 132500 | 14 | 915066 | 915093 | 2 | 14 | 28 | TG   | 18 | 19 |
| 132502 | 14 | 917212 | 917233 | 2 | 11 | 22 | CA   | 13 | 10 |
| 132503 | 14 | 917476 | 917487 | 2 | 6  | 12 | AT   | 23 | 4  |
| 132513 | 14 | 935709 | 935728 | 2 | 10 | 20 | TG   | 19 | 9  |
| 132514 | 14 | 939551 | 939586 | 3 | 12 | 36 | ATC  | 30 | 6  |
| 132517 | 14 | 949360 | 949371 | 2 | 6  | 12 | CT   | 28 | 3  |
| 132521 | 14 | 952217 | 952236 | 2 | 10 | 20 | GT   | 9  | 9  |
| 132525 | 14 | 960682 | 960693 | 2 | 6  | 12 | AC   | 22 | 7  |
| 132532 | 14 | 971747 | 971778 | 4 | 8  | 32 | AAAG | 27 | 9  |
| 132533 | 14 | 972833 | 972848 | 4 | 4  | 16 | TGAT | 29 | 5  |
| 132535 | 14 | 980617 | 980632 | 2 | 8  | 16 | AG   | 10 | 8  |
| 132536 | 14 | 981194 | 981209 | 2 | 8  | 16 | GT   | 22 | 8  |
| 132537 | 14 | 983739 | 983766 | 2 | 14 | 28 | CA   | 7  | 7  |
| 132538 | 14 | 983889 | 983918 | 2 | 15 | 30 | TG   | 18 | 13 |

|        |    |         |         |   |    |    |      |    |    |
|--------|----|---------|---------|---|----|----|------|----|----|
| 132539 | 14 | 984031  | 984044  | 2 | 7  | 14 | GT   | 23 | 8  |
| 132540 | 14 | 984291  | 984310  | 2 | 10 | 20 | GT   | 16 | 16 |
| 132543 | 14 | 994558  | 994573  | 4 | 4  | 16 | CTGA | 25 | 3  |
| 132547 | 14 | 996139  | 996150  | 2 | 6  | 12 | GT   | 13 | 3  |
| 132548 | 14 | 996203  | 996220  | 2 | 9  | 18 | GT   | 13 | 7  |
| 132550 | 14 | 1008664 | 1008679 | 2 | 8  | 16 | GT   | 17 | 3  |
| 132553 | 14 | 1016183 | 1016196 | 2 | 7  | 14 | AC   | 11 | 5  |
| 132561 | 14 | 1045028 | 1045045 | 2 | 9  | 18 | TG   | 20 | 6  |
| 132563 | 14 | 1046729 | 1046742 | 2 | 7  | 14 | TG   | 26 | 3  |
| 132564 | 14 | 1046945 | 1046962 | 2 | 9  | 18 | TG   | 19 | 4  |
| 132579 | 14 | 1098464 | 1098477 | 2 | 7  | 14 | TC   | 35 | 3  |
| 132580 | 14 | 1104789 | 1104806 | 3 | 6  | 18 | GAA  | 23 | 4  |
| 132590 | 14 | 1128145 | 1128158 | 2 | 7  | 14 | AC   | 17 | 9  |
| 132596 | 14 | 1137067 | 1137084 | 2 | 9  | 18 | GT   | 20 | 6  |
| 132598 | 14 | 1137209 | 1137220 | 2 | 6  | 12 | CT   | 8  | 4  |
| 132600 | 14 | 1139634 | 1139657 | 4 | 6  | 24 | TTGA | 33 | 10 |
| 132605 | 14 | 1155734 | 1155777 | 2 | 22 | 44 | GT   | 16 | 12 |
| 132607 | 14 | 1157656 | 1157679 | 2 | 12 | 24 | TG   | 15 | 6  |
| 132608 | 14 | 1157748 | 1157771 | 2 | 12 | 24 | TG   | 21 | 8  |
| 132611 | 14 | 1161057 | 1161088 | 2 | 16 | 32 | TG   | 13 | 12 |
| 132613 | 14 | 1167689 | 1167712 | 2 | 12 | 24 | AC   | 19 | 6  |
| 132616 | 14 | 1173768 | 1173791 | 2 | 12 | 24 | AG   | 16 | 5  |
| 132620 | 14 | 1182092 | 1182109 | 2 | 9  | 18 | AC   | 23 | 4  |
| 132622 | 14 | 1183037 | 1183064 | 4 | 7  | 28 | TGAA | 19 | 3  |
| 132625 | 14 | 1188081 | 1188096 | 2 | 8  | 16 | GT   | 22 | 10 |
| 132626 | 14 | 1188729 | 1188754 | 2 | 13 | 26 | AC   | 17 | 13 |
| 132629 | 14 | 1198198 | 1198227 | 2 | 15 | 30 | AC   | 11 | 10 |
| 132630 | 14 | 1204663 | 1204676 | 2 | 7  | 14 | TC   | 17 | 5  |
| 132631 | 14 | 1204678 | 1204693 | 2 | 8  | 16 | CT   | 18 | 4  |
| 132632 | 14 | 1204854 | 1204871 | 2 | 9  | 18 | TG   | 18 | 6  |
| 132633 | 14 | 1204934 | 1204947 | 2 | 7  | 14 | AG   | 24 | 4  |
| 132634 | 14 | 1206728 | 1206745 | 3 | 6  | 18 | ATG  | 29 | 4  |
| 132635 | 14 | 1209354 | 1209368 | 3 | 5  | 15 | CTG  | 32 | 4  |
| 132636 | 14 | 1210938 | 1210961 | 2 | 12 | 24 | CA   | 19 | 7  |
| 132638 | 14 | 1211612 | 1211625 | 2 | 7  | 14 | TG   | 17 | 4  |
| 132639 | 14 | 1211673 | 1211700 | 2 | 14 | 28 | CA   | 20 | 6  |
| 132640 | 14 | 1212762 | 1212777 | 2 | 8  | 16 | GT   | 22 | 6  |
| 132641 | 14 | 1213309 | 1213330 | 2 | 11 | 22 | GT   | 25 | 6  |
| 132643 | 14 | 1221936 | 1221950 | 3 | 5  | 15 | TCC  | 29 | 3  |
| 132644 | 14 | 1226778 | 1226795 | 2 | 9  | 18 | AC   | 27 | 7  |
| 132645 | 14 | 1231773 | 1231808 | 2 | 18 | 36 | TG   | 20 | 6  |
| 132648 | 14 | 1237231 | 1237250 | 2 | 10 | 20 | AC   | 27 | 4  |
| 132649 | 14 | 1237400 | 1237419 | 2 | 10 | 20 | AC   | 11 | 6  |
| 132650 | 14 | 1239232 | 1239243 | 2 | 6  | 12 | CA   | 27 | 4  |
| 132657 | 14 | 1244652 | 1244681 | 2 | 15 | 30 | GA   | 15 | 5  |
| 132661 | 14 | 1250812 | 1250825 | 2 | 7  | 14 | CA   | 25 | 3  |
| 132663 | 14 | 1254160 | 1254205 | 2 | 23 | 46 | CA   | 8  | 9  |
| 132668 | 14 | 1261250 | 1261263 | 2 | 7  | 14 | TG   | 20 | 6  |
| 132670 | 14 | 1264457 | 1264482 | 2 | 13 | 26 | CA   | 14 | 6  |
| 132672 | 14 | 1265599 | 1265630 | 2 | 16 | 32 | CA   | 20 | 10 |
| 132673 | 14 | 1267142 | 1267171 | 2 | 15 | 30 | TG   | 18 | 12 |

|        |    |         |         |   |    |    |      |    |    |
|--------|----|---------|---------|---|----|----|------|----|----|
| 132677 | 14 | 1276123 | 1276144 | 2 | 11 | 22 | GT   | 26 | 5  |
| 132679 | 14 | 1278589 | 1278622 | 2 | 17 | 34 | TG   | 9  | 9  |
| 132683 | 14 | 1283557 | 1283584 | 2 | 14 | 28 | TC   | 10 | 9  |
| 132687 | 14 | 1287421 | 1287446 | 2 | 13 | 26 | GT   | 9  | 8  |
| 132689 | 14 | 1291248 | 1291267 | 2 | 10 | 20 | AC   | 17 | 12 |
| 132690 | 14 | 1291335 | 1291348 | 2 | 7  | 14 | TG   | 24 | 6  |
| 132691 | 14 | 1291454 | 1291473 | 2 | 10 | 20 | GT   | 14 | 6  |
| 132692 | 14 | 1291574 | 1291593 | 2 | 10 | 20 | AC   | 22 | 4  |
| 132693 | 14 | 1291738 | 1291753 | 2 | 8  | 16 | GT   | 18 | 8  |
| 132694 | 14 | 1291892 | 1291903 | 2 | 6  | 12 | AC   | 22 | 9  |
| 132695 | 14 | 1291973 | 1291994 | 2 | 11 | 22 | TG   | 18 | 10 |
| 132698 | 14 | 1296328 | 1296345 | 2 | 9  | 18 | GT   | 16 | 11 |
| 132699 | 14 | 1298860 | 1298889 | 2 | 15 | 30 | GT   | 12 | 8  |
| 132700 | 14 | 1298930 | 1298947 | 2 | 9  | 18 | TG   | 28 | 5  |
| 132704 | 14 | 1309353 | 1309370 | 2 | 9  | 18 | GT   | 18 | 7  |
| 132706 | 14 | 1309583 | 1309616 | 2 | 17 | 34 | TG   | 12 | 6  |
| 132745 | 14 | 1336744 | 1336779 | 2 | 18 | 36 | AC   | 7  | 9  |
| 132765 | 14 | 1361094 | 1361115 | 2 | 11 | 22 | GT   | 9  | 7  |
| 132766 | 14 | 1362155 | 1362174 | 2 | 10 | 20 | AG   | 14 | 6  |
| 132773 | 14 | 1368291 | 1368304 | 2 | 7  | 14 | TG   | 27 | 4  |
| 132797 | 14 | 1391261 | 1391298 | 2 | 19 | 38 | AC   | 9  | 9  |
| 132801 | 14 | 1393702 | 1393719 | 2 | 9  | 18 | AC   | 29 | 7  |
| 132803 | 14 | 1399391 | 1399423 | 3 | 11 | 33 | AGG  | 25 | 5  |
| 132836 | 14 | 1431309 | 1431320 | 2 | 6  | 12 | TG   | 20 | 3  |
| 132839 | 14 | 1431602 | 1431637 | 2 | 18 | 36 | GT   | 15 | 9  |
| 132841 | 14 | 1439180 | 1439194 | 3 | 5  | 15 | GGA  | 26 | 6  |
| 132846 | 14 | 1457136 | 1457163 | 2 | 14 | 28 | AC   | 24 | 9  |
| 132849 | 14 | 1471905 | 1471916 | 2 | 6  | 12 | TG   | 16 | 3  |
| 132853 | 14 | 1477311 | 1477334 | 2 | 12 | 24 | GT   | 23 | 13 |
| 132854 | 14 | 1478477 | 1478488 | 2 | 6  | 12 | AT   | 22 | 4  |
| 132864 | 14 | 1519326 | 1519355 | 2 | 15 | 30 | AC   | 18 | 12 |
| 132866 | 14 | 1521317 | 1521338 | 2 | 11 | 22 | CA   | 10 | 7  |
| 132867 | 14 | 1522981 | 1523020 | 4 | 10 | 40 | TCTT | 31 | 9  |
| 132869 | 14 | 1532303 | 1532314 | 2 | 6  | 12 | TG   | 29 | 4  |
| 132870 | 14 | 1535784 | 1535805 | 2 | 11 | 22 | AG   | 16 | 4  |
| 132877 | 14 | 1561278 | 1561298 | 3 | 7  | 21 | CTG  | 33 | 8  |
| 132880 | 14 | 1564210 | 1564227 | 2 | 9  | 18 | TG   | 15 | 8  |
| 132881 | 14 | 1564697 | 1564708 | 2 | 6  | 12 | AT   | 20 | 4  |
| 132883 | 14 | 1567752 | 1567766 | 3 | 5  | 15 | AAC  | 31 | 4  |
| 132884 | 14 | 1569022 | 1569041 | 2 | 10 | 20 | GT   | 20 | 18 |
| 132891 | 14 | 1590437 | 1590450 | 2 | 7  | 14 | GT   | 15 | 7  |
| 132893 | 14 | 1590915 | 1590960 | 2 | 23 | 46 | GT   | 6  | 8  |
| 132894 | 14 | 1591988 | 1592008 | 3 | 7  | 21 | CCT  | 20 | 5  |
| 132896 | 14 | 1593760 | 1593775 | 2 | 8  | 16 | TG   | 23 | 6  |
| 132901 | 14 | 1598584 | 1598595 | 2 | 6  | 12 | TG   | 27 | 5  |
| 132904 | 14 | 1600267 | 1600287 | 3 | 7  | 21 | CTT  | 29 | 7  |
| 132907 | 14 | 1603809 | 1603840 | 2 | 16 | 32 | GA   | 11 | 11 |
| 132910 | 14 | 1607412 | 1607427 | 4 | 4  | 16 | CCCT | 13 | 4  |
| 132913 | 14 | 1612613 | 1612624 | 2 | 6  | 12 | TC   | 9  | 4  |
| 132924 | 14 | 1640118 | 1640141 | 2 | 12 | 24 | AC   | 12 | 12 |
| 132926 | 14 | 1654598 | 1654615 | 2 | 9  | 18 | AC   | 21 | 6  |

|        |    |         |         |   |    |    |      |    |    |
|--------|----|---------|---------|---|----|----|------|----|----|
| 132931 | 14 | 1666962 | 1666973 | 2 | 6  | 12 | AC   | 29 | 3  |
| 132932 | 14 | 1667178 | 1667205 | 4 | 7  | 28 | AAAT | 19 | 4  |
| 132936 | 14 | 1669803 | 1669818 | 4 | 4  | 16 | AAAC | 12 | 5  |
| 132945 | 14 | 1690727 | 1690740 | 2 | 7  | 14 | CA   | 24 | 4  |
| 132946 | 14 | 1690787 | 1690808 | 2 | 11 | 22 | CA   | 14 | 7  |
| 132954 | 14 | 1713671 | 1713702 | 4 | 8  | 32 | TCAA | 33 | 8  |
| 132955 | 14 | 1714745 | 1714756 | 2 | 6  | 12 | TG   | 25 | 4  |
| 132956 | 14 | 1715829 | 1715846 | 3 | 6  | 18 | TGC  | 25 | 3  |
| 132957 | 14 | 1723089 | 1723106 | 3 | 6  | 18 | CTC  | 16 | 4  |
| 132959 | 14 | 1723624 | 1723647 | 2 | 12 | 24 | AC   | 14 | 6  |
| 132961 | 14 | 1726370 | 1726385 | 2 | 8  | 16 | AC   | 25 | 4  |
| 132965 | 14 | 1731496 | 1731507 | 2 | 6  | 12 | TG   | 20 | 3  |
| 132966 | 14 | 1732754 | 1732773 | 4 | 5  | 20 | AAAG | 11 | 3  |
| 132971 | 14 | 1741315 | 1741326 | 2 | 6  | 12 | TC   | 21 | 3  |
| 132976 | 14 | 1760220 | 1760237 | 3 | 6  | 18 | CTG  | 22 | 6  |
| 132977 | 14 | 1760344 | 1760357 | 2 | 7  | 14 | CG   | 26 | 5  |
| 132979 | 14 | 1761578 | 1761589 | 2 | 6  | 12 | TG   | 26 | 5  |
| 132984 | 14 | 1769603 | 1769618 | 4 | 4  | 16 | CTTT | 26 | 3  |
| 132986 | 14 | 1770641 | 1770664 | 3 | 8  | 24 | AAC  | 14 | 3  |
| 132991 | 14 | 1788942 | 1788953 | 2 | 6  | 12 | AC   | 10 | 3  |
| 132992 | 14 | 1789623 | 1789636 | 2 | 7  | 14 | AC   | 23 | 5  |
| 132995 | 14 | 1800187 | 1800202 | 2 | 8  | 16 | AC   | 23 | 6  |
| 133001 | 14 | 1813510 | 1813525 | 2 | 8  | 16 | AC   | 16 | 8  |
| 133003 | 14 | 1822136 | 1822157 | 2 | 11 | 22 | GT   | 17 | 6  |
| 133005 | 14 | 1824151 | 1824162 | 2 | 6  | 12 | TG   | 18 | 7  |
| 133006 | 14 | 1825031 | 1825046 | 2 | 8  | 16 | AC   | 10 | 4  |
| 133009 | 14 | 1826880 | 1826899 | 2 | 10 | 20 | TG   | 18 | 12 |
| 133011 | 14 | 1829448 | 1829475 | 2 | 14 | 28 | GT   | 21 | 4  |
| 133012 | 14 | 1832472 | 1832487 | 4 | 4  | 16 | CAAC | 21 | 8  |
| 133013 | 14 | 1833079 | 1833112 | 2 | 17 | 34 | CA   | 11 | 9  |
| 133015 | 14 | 1837732 | 1837753 | 2 | 11 | 22 | CA   | 18 | 11 |
| 133017 | 14 | 1843686 | 1843717 | 2 | 16 | 32 | TG   | 13 | 11 |
| 133018 | 14 | 1843880 | 1843895 | 2 | 8  | 16 | AC   | 12 | 10 |
| 133019 | 14 | 1844023 | 1844058 | 2 | 18 | 36 | GT   | 16 | 10 |
| 133021 | 14 | 1844582 | 1844603 | 2 | 11 | 22 | TG   | 13 | 5  |
| 133028 | 14 | 1856661 | 1856684 | 2 | 12 | 24 | AC   | 17 | 6  |
| 133029 | 14 | 1857881 | 1857918 | 2 | 19 | 38 | TG   | 16 | 9  |
| 133030 | 14 | 1862243 | 1862274 | 4 | 8  | 32 | TGGA | 19 | 4  |
| 133035 | 14 | 1872718 | 1872741 | 2 | 12 | 24 | CA   | 22 | 8  |
| 133038 | 14 | 1883004 | 1883023 | 2 | 10 | 20 | AC   | 27 | 9  |
| 133040 | 14 | 1884458 | 1884473 | 4 | 4  | 16 | ATGG | 10 | 3  |
| 133042 | 14 | 1891142 | 1891155 | 2 | 7  | 14 | AC   | 9  | 8  |
| 133048 | 14 | 1895285 | 1895296 | 2 | 6  | 12 | TG   | 31 | 6  |
| 133051 | 14 | 1896516 | 1896535 | 2 | 10 | 20 | AC   | 19 | 5  |
| 133059 | 14 | 1898790 | 1898829 | 2 | 20 | 40 | AC   | 7  | 10 |
| 133060 | 14 | 1901109 | 1901134 | 2 | 13 | 26 | TG   | 17 | 13 |
| 133063 | 14 | 1902993 | 1903012 | 2 | 10 | 20 | TG   | 12 | 7  |
| 133067 | 14 | 1911677 | 1911704 | 2 | 14 | 28 | CA   | 9  | 10 |
| 133078 | 14 | 1918431 | 1918454 | 3 | 8  | 24 | AGG  | 25 | 6  |
| 133079 | 14 | 1920875 | 1920894 | 2 | 10 | 20 | TC   | 26 | 3  |
| 133081 | 14 | 1921553 | 1921578 | 2 | 13 | 26 | TG   | 20 | 9  |

|        |    |         |         |   |    |    |      |    |    |
|--------|----|---------|---------|---|----|----|------|----|----|
| 133085 | 14 | 1929145 | 1929166 | 2 | 11 | 22 | TG   | 13 | 5  |
| 133086 | 14 | 1929986 | 1930017 | 2 | 16 | 32 | GT   | 11 | 9  |
| 133087 | 14 | 1931363 | 1931376 | 2 | 7  | 14 | TG   | 24 | 8  |
| 133089 | 14 | 1932968 | 1932991 | 2 | 12 | 24 | AG   | 9  | 9  |
| 133092 | 14 | 1936227 | 1936268 | 2 | 21 | 42 | AC   | 9  | 10 |
| 133093 | 14 | 1936380 | 1936393 | 2 | 7  | 14 | GT   | 15 | 5  |
| 133094 | 14 | 1937373 | 1937392 | 2 | 10 | 20 | TG   | 15 | 10 |
| 133097 | 14 | 1938840 | 1938861 | 2 | 11 | 22 | TG   | 13 | 13 |
| 133098 | 14 | 1940296 | 1940315 | 2 | 10 | 20 | TG   | 15 | 8  |
| 133099 | 14 | 1940469 | 1940504 | 2 | 18 | 36 | TG   | 7  | 6  |
| 133108 | 14 | 1945189 | 1945215 | 3 | 9  | 27 | GGA  | 13 | 4  |
| 133111 | 14 | 1946761 | 1946772 | 2 | 6  | 12 | CT   | 8  | 5  |
| 133116 | 14 | 1950170 | 1950183 | 2 | 7  | 14 | TG   | 18 | 4  |
| 133125 | 14 | 1953715 | 1953732 | 3 | 6  | 18 | GCT  | 20 | 5  |
| 133126 | 14 | 1953733 | 1953747 | 3 | 5  | 15 | GGT  | 24 | 7  |
| 133129 | 14 | 1958396 | 1958435 | 4 | 10 | 40 | GAAA | 12 | 6  |
| 133132 | 14 | 1959226 | 1959237 | 2 | 6  | 12 | GT   | 31 | 3  |
| 133135 | 14 | 1959588 | 1959605 | 2 | 9  | 18 | GT   | 23 | 9  |
| 133142 | 14 | 1965272 | 1965289 | 2 | 9  | 18 | TC   | 18 | 3  |
| 133143 | 14 | 1965410 | 1965421 | 2 | 6  | 12 | TG   | 16 | 12 |
| 133145 | 14 | 1965558 | 1965593 | 2 | 18 | 36 | AC   | 14 | 10 |
| 133146 | 14 | 1965994 | 1966005 | 2 | 6  | 12 | AG   | 20 | 3  |
| 133149 | 14 | 1967632 | 1967643 | 2 | 6  | 12 | TG   | 29 | 5  |
| 133152 | 14 | 1972310 | 1972339 | 2 | 15 | 30 | GT   | 10 | 8  |
| 133153 | 14 | 1972423 | 1972448 | 2 | 13 | 26 | GT   | 21 | 11 |
| 133154 | 14 | 1973437 | 1973452 | 2 | 8  | 16 | GA   | 6  | 3  |
| 133155 | 14 | 1973616 | 1973637 | 2 | 11 | 22 | GT   | 19 | 7  |
| 133157 | 14 | 1974547 | 1974588 | 2 | 21 | 42 | TG   | 12 | 12 |
| 133158 | 14 | 1974743 | 1974768 | 2 | 13 | 26 | CA   | 13 | 9  |
| 133159 | 14 | 1976372 | 1976389 | 2 | 9  | 18 | AC   | 19 | 9  |
| 133161 | 14 | 1978706 | 1978727 | 2 | 11 | 22 | GT   | 13 | 5  |
| 133163 | 14 | 1983081 | 1983116 | 4 | 9  | 36 | AAGA | 18 | 9  |
| 133165 | 14 | 1985391 | 1985408 | 3 | 6  | 18 | CAG  | 35 | 3  |
| 133166 | 14 | 1987458 | 1987471 | 2 | 7  | 14 | CA   | 14 | 4  |
| 133171 | 14 | 1996473 | 1996486 | 2 | 7  | 14 | AC   | 19 | 7  |
| 133172 | 14 | 1998847 | 1998858 | 2 | 6  | 12 | TG   | 22 | 4  |
| 133173 | 14 | 1998979 | 1999010 | 2 | 16 | 32 | CA   | 23 | 5  |
| 133175 | 14 | 2001536 | 2001579 | 4 | 11 | 44 | ATAC | 13 | 6  |
| 133178 | 14 | 2010466 | 2010483 | 2 | 9  | 18 | CA   | 27 | 12 |
| 133179 | 14 | 2010655 | 2010678 | 2 | 12 | 24 | GT   | 17 | 13 |
| 133187 | 14 | 2023723 | 2023746 | 2 | 12 | 24 | TC   | 21 | 5  |
| 133188 | 14 | 2025016 | 2025035 | 2 | 10 | 20 | TG   | 20 | 10 |
| 133189 | 14 | 2025682 | 2025701 | 2 | 10 | 20 | AC   | 15 | 12 |
| 133190 | 14 | 2026654 | 2026665 | 2 | 6  | 12 | AC   | 10 | 5  |
| 133192 | 14 | 2030944 | 2030957 | 2 | 7  | 14 | CT   | 21 | 5  |
| 133197 | 14 | 2032327 | 2032354 | 4 | 7  | 28 | AGAA | 25 | 8  |
| 133199 | 14 | 2035075 | 2035088 | 2 | 7  | 14 | CA   | 19 | 7  |
| 133200 | 14 | 2037443 | 2037466 | 3 | 8  | 24 | CAT  | 22 | 4  |
| 133206 | 14 | 2044150 | 2044171 | 2 | 11 | 22 | GT   | 14 | 6  |
| 133209 | 14 | 2046111 | 2046138 | 2 | 14 | 28 | AC   | 19 | 8  |
| 133211 | 14 | 2053465 | 2053478 | 2 | 7  | 14 | TA   | 15 | 5  |

|        |    |         |         |   |    |    |      |    |    |
|--------|----|---------|---------|---|----|----|------|----|----|
| 133217 | 14 | 2061304 | 2061339 | 4 | 9  | 36 | TCCA | 21 | 6  |
| 133218 | 14 | 2066548 | 2066561 | 2 | 7  | 14 | GT   | 23 | 6  |
| 133219 | 14 | 2066672 | 2066705 | 2 | 17 | 34 | GT   | 10 | 10 |
| 133220 | 14 | 2068434 | 2068445 | 2 | 6  | 12 | GT   | 19 | 7  |
| 133221 | 14 | 2070349 | 2070364 | 2 | 8  | 16 | TG   | 27 | 4  |
| 133222 | 14 | 2072396 | 2072411 | 2 | 8  | 16 | TG   | 20 | 5  |
| 133226 | 14 | 2082963 | 2082974 | 2 | 6  | 12 | AT   | 8  | 5  |
| 133227 | 14 | 2083448 | 2083461 | 2 | 7  | 14 | AC   | 16 | 9  |
| 133228 | 14 | 2083464 | 2083475 | 2 | 6  | 12 | AC   | 14 | 7  |
| 133229 | 14 | 2083731 | 2083746 | 2 | 8  | 16 | AC   | 19 | 7  |
| 133231 | 14 | 2084354 | 2084367 | 2 | 7  | 14 | TC   | 28 | 4  |
| 133232 | 14 | 2087116 | 2087139 | 2 | 12 | 24 | GT   | 22 | 15 |
| 133233 | 14 | 2087302 | 2087317 | 2 | 8  | 16 | AC   | 20 | 4  |
| 133234 | 14 | 2091505 | 2091526 | 2 | 11 | 22 | TG   | 25 | 8  |
| 133235 | 14 | 2092957 | 2092970 | 2 | 7  | 14 | GT   | 19 | 3  |
| 133236 | 14 | 2093112 | 2093125 | 2 | 7  | 14 | GT   | 32 | 4  |
| 133238 | 14 | 2099966 | 2099981 | 2 | 8  | 16 | GA   | 23 | 4  |
| 133239 | 14 | 2104009 | 2104028 | 2 | 10 | 20 | AC   | 15 | 6  |
| 133240 | 14 | 2107090 | 2107103 | 2 | 7  | 14 | AC   | 23 | 3  |
| 133245 | 14 | 2109249 | 2109260 | 2 | 6  | 12 | GC   | 20 | 4  |
| 133252 | 14 | 2117654 | 2117673 | 2 | 10 | 20 | CA   | 22 | 6  |
| 133258 | 14 | 2123252 | 2123265 | 2 | 7  | 14 | AG   | 13 | 5  |
| 133259 | 14 | 2124697 | 2124712 | 4 | 4  | 16 | AAAG | 16 | 3  |
| 133260 | 14 | 2124917 | 2124928 | 2 | 6  | 12 | GT   | 21 | 6  |
| 133262 | 14 | 2126300 | 2126311 | 2 | 6  | 12 | TG   | 29 | 3  |
| 133263 | 14 | 2127500 | 2127513 | 2 | 7  | 14 | CA   | 14 | 4  |
| 133267 | 14 | 2130381 | 2130410 | 2 | 15 | 30 | TG   | 20 | 12 |
| 133269 | 14 | 2130786 | 2130801 | 2 | 8  | 16 | GT   | 23 | 5  |
| 133270 | 14 | 2131204 | 2131233 | 2 | 15 | 30 | AC   | 22 | 11 |
| 133271 | 14 | 2136850 | 2136867 | 2 | 9  | 18 | CA   | 13 | 6  |
| 133273 | 14 | 2137361 | 2137372 | 2 | 6  | 12 | AC   | 16 | 5  |
| 133276 | 14 | 2138234 | 2138255 | 2 | 11 | 22 | AC   | 8  | 5  |
| 133277 | 14 | 2138290 | 2138307 | 2 | 9  | 18 | CA   | 20 | 5  |
| 133282 | 14 | 2139810 | 2139829 | 4 | 5  | 20 | CTCC | 15 | 3  |
| 133285 | 14 | 2148603 | 2148620 | 2 | 9  | 18 | GT   | 22 | 7  |
| 133286 | 14 | 2153291 | 2153302 | 2 | 6  | 12 | AC   | 22 | 4  |
| 133292 | 14 | 2164072 | 2164093 | 2 | 11 | 22 | TG   | 15 | 7  |
| 133294 | 14 | 2166405 | 2166422 | 3 | 6  | 18 | TGA  | 21 | 8  |
| 133295 | 14 | 2166680 | 2166693 | 2 | 7  | 14 | CA   | 9  | 4  |
| 133297 | 14 | 2170864 | 2170877 | 2 | 7  | 14 | TA   | 9  | 4  |
| 133299 | 14 | 2174846 | 2174883 | 2 | 19 | 38 | TG   | 6  | 11 |
| 133300 | 14 | 2175587 | 2175608 | 2 | 11 | 22 | GT   | 8  | 6  |
| 133301 | 14 | 2175641 | 2175658 | 2 | 9  | 18 | GA   | 14 | 10 |
| 133303 | 14 | 2175796 | 2175811 | 2 | 8  | 16 | CA   | 24 | 4  |
| 133309 | 14 | 2190697 | 2190716 | 2 | 10 | 20 | CA   | 18 | 7  |
| 133311 | 14 | 2191172 | 2191185 | 2 | 7  | 14 | CA   | 21 | 7  |
| 133313 | 14 | 2195637 | 2195652 | 4 | 4  | 16 | CTGA | 27 | 3  |
| 133314 | 14 | 2197676 | 2197693 | 2 | 9  | 18 | GT   | 24 | 6  |
| 133317 | 14 | 2200220 | 2200237 | 2 | 9  | 18 | TG   | 24 | 14 |
| 133323 | 14 | 2206534 | 2206545 | 2 | 6  | 12 | TG   | 29 | 3  |
| 133324 | 14 | 2206703 | 2206732 | 2 | 15 | 30 | AC   | 14 | 13 |



|        |    |         |         |   |    |    |      |    |    |
|--------|----|---------|---------|---|----|----|------|----|----|
| 133325 | 14 | 2207423 | 2207444 | 2 | 11 | 22 | AC   | 6  | 9  |
| 133327 | 14 | 2208098 | 2208133 | 2 | 18 | 36 | GT   | 6  | 9  |
| 133328 | 14 | 2209201 | 2209216 | 2 | 8  | 16 | AC   | 23 | 3  |
| 133329 | 14 | 2212623 | 2212656 | 2 | 17 | 34 | AC   | 18 | 11 |
| 133330 | 14 | 2213219 | 2213254 | 2 | 18 | 36 | GT   | 10 | 9  |
| 133332 | 14 | 2214715 | 2214732 | 3 | 6  | 18 | GGA  | 27 | 5  |
| 133333 | 14 | 2215911 | 2215928 | 3 | 6  | 18 | CCT  | 21 | 4  |
| 133334 | 14 | 2216062 | 2216095 | 2 | 17 | 34 | CA   | 15 | 12 |
| 133335 | 14 | 2218205 | 2218220 | 2 | 8  | 16 | TG   | 24 | 5  |
| 133338 | 14 | 2218594 | 2218625 | 2 | 16 | 32 | TG   | 11 | 7  |
| 133339 | 14 | 2221558 | 2221579 | 2 | 11 | 22 | TG   | 24 | 7  |
| 133340 | 14 | 2221654 | 2221669 | 2 | 8  | 16 | CA   | 19 | 13 |
| 133341 | 14 | 2223516 | 2223537 | 2 | 11 | 22 | CA   | 7  | 8  |
| 133350 | 14 | 2230781 | 2230796 | 4 | 4  | 16 | ATTT | 27 | 6  |
| 133353 | 14 | 2235079 | 2235093 | 3 | 5  | 15 | TCC  | 18 | 7  |
| 133358 | 14 | 2241454 | 2241473 | 2 | 10 | 20 | GT   | 10 | 6  |
| 133367 | 14 | 2261233 | 2261272 | 2 | 20 | 40 | AC   | 16 | 10 |
| 133373 | 14 | 2276976 | 2276995 | 4 | 5  | 20 | AAAT | 20 | 4  |
| 133377 | 14 | 2284345 | 2284359 | 3 | 5  | 15 | ATT  | 12 | 8  |
| 133378 | 14 | 2284360 | 2284377 | 3 | 6  | 18 | ACT  | 8  | 5  |
| 133379 | 14 | 2287488 | 2287503 | 4 | 4  | 16 | AGAT | 21 | 4  |
| 133381 | 14 | 2293634 | 2293653 | 2 | 10 | 20 | CA   | 29 | 7  |
| 133383 | 14 | 2295852 | 2295871 | 2 | 10 | 20 | CA   | 18 | 15 |
| 133384 | 14 | 2295980 | 2295999 | 2 | 10 | 20 | CA   | 25 | 8  |
| 133393 | 14 | 2326138 | 2326157 | 2 | 10 | 20 | AG   | 23 | 3  |
| 133397 | 14 | 2335553 | 2335576 | 2 | 12 | 24 | GT   | 17 | 7  |
| 133398 | 14 | 2338173 | 2338188 | 4 | 4  | 16 | AAAT | 21 | 7  |
| 133403 | 14 | 2344779 | 2344844 | 3 | 22 | 66 | GAA  | 15 | 14 |
| 133404 | 14 | 2351595 | 2351614 | 2 | 10 | 20 | AC   | 24 | 15 |
| 133410 | 14 | 2359389 | 2359412 | 3 | 8  | 24 | TAC  | 32 | 3  |
| 133420 | 14 | 2369677 | 2369708 | 2 | 16 | 32 | CA   | 7  | 10 |
| 133421 | 14 | 2370274 | 2370285 | 2 | 6  | 12 | AC   | 27 | 4  |
| 133424 | 14 | 2379046 | 2379059 | 2 | 7  | 14 | GT   | 28 | 4  |
| 133430 | 14 | 2385751 | 2385774 | 3 | 8  | 24 | GGA  | 22 | 4  |
| 133436 | 14 | 2403225 | 2403260 | 2 | 18 | 36 | AC   | 10 | 8  |
| 133438 | 14 | 2406397 | 2406442 | 2 | 23 | 46 | GT   | 8  | 9  |
| 133440 | 14 | 2410057 | 2410068 | 2 | 6  | 12 | CA   | 21 | 8  |
| 133446 | 14 | 2425698 | 2425725 | 2 | 14 | 28 | AC   | 23 | 10 |
| 133447 | 14 | 2427150 | 2427171 | 2 | 11 | 22 | TC   | 27 | 6  |
| 133457 | 14 | 2450338 | 2450351 | 2 | 7  | 14 | CA   | 30 | 4  |
| 133460 | 14 | 2458109 | 2458138 | 2 | 15 | 30 | AC   | 15 | 11 |
| 133464 | 14 | 2471556 | 2471571 | 4 | 4  | 16 | CTGT | 20 | 5  |
| 133471 | 14 | 2489278 | 2489295 | 2 | 9  | 18 | AC   | 14 | 11 |
| 133472 | 14 | 2489426 | 2489459 | 2 | 17 | 34 | TG   | 18 | 14 |
| 133473 | 14 | 2490226 | 2490249 | 2 | 12 | 24 | GT   | 8  | 4  |
| 133475 | 14 | 2490437 | 2490448 | 2 | 6  | 12 | CA   | 23 | 16 |
| 133477 | 14 | 2494117 | 2494144 | 2 | 14 | 28 | CA   | 11 | 6  |
| 133478 | 14 | 2495654 | 2495677 | 2 | 12 | 24 | GT   | 14 | 9  |
| 133479 | 14 | 2495854 | 2495867 | 2 | 7  | 14 | GT   | 20 | 4  |
| 133483 | 14 | 2496453 | 2496470 | 2 | 9  | 18 | TG   | 9  | 9  |
| 133484 | 14 | 2496472 | 2496483 | 2 | 6  | 12 | GT   | 11 | 9  |

|        |    |         |         |   |    |    |      |    |    |
|--------|----|---------|---------|---|----|----|------|----|----|
| 133490 | 14 | 2497732 | 2497749 | 3 | 6  | 18 | AAG  | 17 | 5  |
| 133493 | 14 | 2500020 | 2500037 | 2 | 9  | 18 | TG   | 14 | 7  |
| 133501 | 14 | 2510815 | 2510854 | 2 | 20 | 40 | GT   | 8  | 7  |
| 133502 | 14 | 2511296 | 2511317 | 2 | 11 | 22 | CA   | 14 | 13 |
| 133510 | 14 | 2515509 | 2515524 | 2 | 8  | 16 | TG   | 24 | 5  |
| 133511 | 14 | 2515646 | 2515669 | 2 | 12 | 24 | TG   | 21 | 8  |
| 133521 | 14 | 2522740 | 2522765 | 2 | 13 | 26 | AC   | 9  | 12 |
| 133522 | 14 | 2522920 | 2522949 | 2 | 15 | 30 | CA   | 6  | 4  |
| 133523 | 14 | 2523378 | 2523411 | 2 | 17 | 34 | CA   | 16 | 11 |
| 133526 | 14 | 2523730 | 2523741 | 2 | 6  | 12 | CA   | 15 | 3  |
| 133527 | 14 | 2523764 | 2523785 | 2 | 11 | 22 | TG   | 12 | 5  |
| 133531 | 14 | 2527098 | 2527123 | 2 | 13 | 26 | GT   | 17 | 6  |
| 133532 | 14 | 2527184 | 2527213 | 2 | 15 | 30 | TG   | 16 | 7  |
| 133534 | 14 | 2528510 | 2528529 | 4 | 5  | 20 | AAAG | 21 | 4  |
| 133535 | 14 | 2528823 | 2528856 | 2 | 17 | 34 | CA   | 19 | 9  |
| 133536 | 14 | 2529684 | 2529719 | 2 | 18 | 36 | CA   | 8  | 9  |
| 133537 | 14 | 2530485 | 2530518 | 2 | 17 | 34 | CA   | 15 | 8  |
| 133538 | 14 | 2531655 | 2531678 | 2 | 12 | 24 | AC   | 19 | 8  |
| 133540 | 14 | 2532460 | 2532479 | 2 | 10 | 20 | GT   | 10 | 11 |
| 133541 | 14 | 2532658 | 2532683 | 2 | 13 | 26 | TG   | 15 | 7  |
| 133542 | 14 | 2532865 | 2532878 | 2 | 7  | 14 | TG   | 25 | 3  |
| 133543 | 14 | 2533046 | 2533061 | 2 | 8  | 16 | CA   | 18 | 8  |
| 133544 | 14 | 2533204 | 2533223 | 2 | 10 | 20 | CT   | 25 | 9  |
| 133545 | 14 | 2535092 | 2535109 | 2 | 9  | 18 | TG   | 21 | 8  |
| 133546 | 14 | 2535982 | 2536001 | 2 | 10 | 20 | TG   | 19 | 3  |
| 133547 | 14 | 2536139 | 2536168 | 2 | 15 | 30 | GT   | 12 | 15 |
| 133548 | 14 | 2536268 | 2536283 | 2 | 8  | 16 | GT   | 23 | 3  |
| 133549 | 14 | 2537461 | 2537476 | 2 | 8  | 16 | CA   | 17 | 13 |
| 133550 | 14 | 2538071 | 2538092 | 2 | 11 | 22 | AC   | 17 | 4  |
| 133551 | 14 | 2538982 | 2539001 | 2 | 10 | 20 | GT   | 12 | 9  |
| 133552 | 14 | 2539074 | 2539091 | 2 | 9  | 18 | GT   | 24 | 12 |
| 133555 | 14 | 2540299 | 2540322 | 2 | 12 | 24 | AC   | 14 | 7  |
| 133558 | 14 | 2542000 | 2542027 | 2 | 14 | 28 | AC   | 13 | 12 |
| 133560 | 14 | 2542745 | 2542760 | 2 | 8  | 16 | AC   | 19 | 3  |
| 133561 | 14 | 2543010 | 2543036 | 3 | 9  | 27 | CCT  | 18 | 5  |
| 133562 | 14 | 2544586 | 2544639 | 2 | 27 | 54 | AC   | 6  | 10 |
| 133571 | 14 | 2545792 | 2545809 | 2 | 9  | 18 | GT   | 19 | 3  |
| 133572 | 14 | 2546216 | 2546235 | 2 | 10 | 20 | CA   | 16 | 8  |
| 133578 | 14 | 2551774 | 2551805 | 2 | 16 | 32 | AC   | 9  | 7  |
| 133580 | 14 | 2554551 | 2554570 | 2 | 10 | 20 | TG   | 14 | 11 |
| 133581 | 14 | 2554714 | 2554733 | 2 | 10 | 20 | GT   | 18 | 8  |
| 133584 | 14 | 2555409 | 2555444 | 2 | 18 | 36 | GT   | 10 | 8  |
| 133585 | 14 | 2555568 | 2555581 | 2 | 7  | 14 | TA   | 13 | 8  |
| 133588 | 14 | 2559072 | 2559087 | 2 | 8  | 16 | CA   | 27 | 4  |
| 133589 | 14 | 2559089 | 2559100 | 2 | 6  | 12 | AC   | 26 | 3  |
| 133590 | 14 | 2559506 | 2559531 | 2 | 13 | 26 | CA   | 16 | 6  |
| 133594 | 14 | 2560553 | 2560574 | 2 | 11 | 22 | AC   | 22 | 10 |
| 133595 | 14 | 2560648 | 2560673 | 2 | 13 | 26 | CA   | 15 | 7  |
| 133598 | 14 | 2561593 | 2561612 | 2 | 10 | 20 | AC   | 10 | 10 |
| 133599 | 14 | 2561768 | 2561797 | 2 | 15 | 30 | GT   | 14 | 11 |
| 133600 | 14 | 2561958 | 2561987 | 2 | 15 | 30 | GT   | 14 | 8  |

|        |    |         |         |   |    |    |      |    |    |
|--------|----|---------|---------|---|----|----|------|----|----|
| 133601 | 14 | 2562137 | 2562158 | 2 | 11 | 22 | CA   | 20 | 12 |
| 133603 | 14 | 2562370 | 2562419 | 2 | 25 | 50 | TG   | 19 | 13 |
| 133605 | 14 | 2565360 | 2565386 | 3 | 9  | 27 | CTC  | 15 | 8  |
| 133609 | 14 | 2567129 | 2567168 | 4 | 10 | 40 | ATCT | 16 | 14 |
| 133610 | 14 | 2567601 | 2567614 | 2 | 7  | 14 | TA   | 11 | 3  |
| 133616 | 14 | 2568881 | 2568894 | 2 | 7  | 14 | CT   | 9  | 5  |
| 133626 | 14 | 2573942 | 2573963 | 2 | 11 | 22 | GT   | 10 | 8  |
| 133627 | 14 | 2574113 | 2574164 | 2 | 26 | 52 | CA   | 9  | 9  |
| 133628 | 14 | 2574372 | 2574385 | 2 | 7  | 14 | CA   | 13 | 5  |
| 133629 | 14 | 2574573 | 2574602 | 2 | 15 | 30 | AC   | 17 | 10 |
| 133634 | 14 | 2577869 | 2577890 | 2 | 11 | 22 | CA   | 19 | 12 |
| 133635 | 14 | 2578038 | 2578049 | 2 | 6  | 12 | CA   | 21 | 3  |
| 133637 | 14 | 2584462 | 2584473 | 2 | 6  | 12 | AG   | 9  | 5  |
| 133638 | 14 | 2586031 | 2586045 | 3 | 5  | 15 | AGA  | 27 | 3  |
| 133639 | 14 | 2586109 | 2586141 | 3 | 11 | 33 | TCT  | 29 | 10 |
| 133640 | 14 | 2586905 | 2586926 | 2 | 11 | 22 | GT   | 11 | 6  |
| 133641 | 14 | 2587080 | 2587097 | 2 | 9  | 18 | GT   | 14 | 9  |
| 133642 | 14 | 2589406 | 2589417 | 2 | 6  | 12 | AG   | 25 | 4  |
| 133647 | 14 | 2593107 | 2593134 | 2 | 14 | 28 | AC   | 11 | 8  |
| 133648 | 14 | 2593481 | 2593498 | 2 | 9  | 18 | TG   | 17 | 12 |
| 133649 | 14 | 2594438 | 2594467 | 2 | 15 | 30 | GT   | 15 | 14 |
| 133654 | 14 | 2595343 | 2595369 | 3 | 9  | 27 | GAG  | 23 | 9  |
| 133658 | 14 | 2596989 | 2597018 | 2 | 15 | 30 | AC   | 14 | 9  |
| 133662 | 14 | 2599283 | 2599306 | 2 | 12 | 24 | AC   | 9  | 8  |
| 133663 | 14 | 2599440 | 2599453 | 2 | 7  | 14 | GA   | 17 | 9  |
| 133664 | 14 | 2599454 | 2599471 | 2 | 9  | 18 | GT   | 22 | 10 |
| 133666 | 14 | 2602738 | 2602765 | 2 | 14 | 28 | GT   | 16 | 10 |
| 133667 | 14 | 2604175 | 2604188 | 2 | 7  | 14 | AC   | 27 | 3  |
| 133668 | 14 | 2606248 | 2606259 | 2 | 6  | 12 | AG   | 20 | 4  |
| 133669 | 14 | 2606948 | 2606973 | 2 | 13 | 26 | AC   | 7  | 6  |
| 133672 | 14 | 2608487 | 2608508 | 2 | 11 | 22 | TG   | 14 | 9  |
| 133673 | 14 | 2609956 | 2609981 | 2 | 13 | 26 | TG   | 8  | 7  |
| 133674 | 14 | 2610047 | 2610068 | 2 | 11 | 22 | GT   | 11 | 10 |
| 133675 | 14 | 2611833 | 2611856 | 2 | 12 | 24 | TG   | 15 | 5  |
| 133677 | 14 | 2613488 | 2613511 | 2 | 12 | 24 | GT   | 28 | 6  |
| 133679 | 14 | 2617524 | 2617543 | 4 | 5  | 20 | GGGA | 14 | 5  |
| 133683 | 14 | 2621407 | 2621422 | 2 | 8  | 16 | AC   | 8  | 9  |
| 133685 | 14 | 2621775 | 2621789 | 3 | 5  | 15 | CTC  | 17 | 5  |
| 133689 | 14 | 2624798 | 2624813 | 2 | 8  | 16 | CA   | 29 | 5  |
| 133690 | 14 | 2625167 | 2625180 | 2 | 7  | 14 | GT   | 21 | 6  |
| 133692 | 14 | 2627271 | 2627282 | 2 | 6  | 12 | TG   | 29 | 4  |
| 133693 | 14 | 2627585 | 2627604 | 2 | 10 | 20 | CA   | 15 | 7  |
| 133695 | 14 | 2627998 | 2628021 | 2 | 12 | 24 | AC   | 12 | 6  |
| 133699 | 14 | 2630207 | 2630218 | 2 | 6  | 12 | AC   | 21 | 3  |
| 133702 | 14 | 2631244 | 2631295 | 2 | 26 | 52 | TG   | 9  | 9  |
| 133704 | 14 | 2634897 | 2634910 | 2 | 7  | 14 | GT   | 27 | 5  |
| 133705 | 14 | 2635202 | 2635213 | 2 | 6  | 12 | AC   | 25 | 5  |
| 133707 | 14 | 2637467 | 2637488 | 2 | 11 | 22 | TG   | 21 | 8  |
| 133708 | 14 | 2637920 | 2637933 | 2 | 7  | 14 | GT   | 24 | 8  |
| 133710 | 14 | 2639899 | 2639912 | 2 | 7  | 14 | CA   | 26 | 4  |
| 133711 | 14 | 2639941 | 2639980 | 2 | 20 | 40 | AC   | 8  | 7  |

|        |    |         |         |   |    |    |      |    |    |
|--------|----|---------|---------|---|----|----|------|----|----|
| 133713 | 14 | 2643591 | 2643612 | 2 | 11 | 22 | AC   | 13 | 7  |
| 133714 | 14 | 2644730 | 2644757 | 4 | 7  | 28 | ACAA | 9  | 3  |
| 133715 | 14 | 2645770 | 2645785 | 4 | 4  | 16 | GGAG | 7  | 4  |
| 133724 | 14 | 2662745 | 2662762 | 2 | 9  | 18 | GT   | 15 | 4  |
| 133729 | 14 | 2668131 | 2668154 | 2 | 12 | 24 | AC   | 7  | 10 |
| 133731 | 14 | 2668668 | 2668687 | 2 | 10 | 20 | AC   | 6  | 4  |
| 133732 | 14 | 2668689 | 2668704 | 2 | 8  | 16 | CA   | 8  | 7  |
| 133733 | 14 | 2670006 | 2670031 | 2 | 13 | 26 | TG   | 17 | 12 |
| 133734 | 14 | 2670164 | 2670177 | 2 | 7  | 14 | CA   | 18 | 13 |
| 133741 | 14 | 2689371 | 2689388 | 3 | 6  | 18 | GGA  | 15 | 8  |
| 133746 | 14 | 2696168 | 2696191 | 2 | 12 | 24 | AG   | 13 | 11 |
| 133747 | 14 | 2696589 | 2696602 | 2 | 7  | 14 | TG   | 14 | 6  |
| 133748 | 14 | 2696763 | 2696784 | 2 | 11 | 22 | AC   | 13 | 11 |
| 133750 | 14 | 2696932 | 2696963 | 2 | 16 | 32 | GA   | 11 | 8  |
| 133751 | 14 | 2697305 | 2697322 | 2 | 9  | 18 | AG   | 9  | 4  |
| 133752 | 14 | 2700426 | 2700441 | 2 | 8  | 16 | GT   | 27 | 4  |
| 133755 | 14 | 2703589 | 2703610 | 2 | 11 | 22 | GT   | 21 | 4  |
| 133756 | 14 | 2704074 | 2704101 | 2 | 14 | 28 | AC   | 12 | 10 |
| 133758 | 14 | 2705968 | 2705983 | 2 | 8  | 16 | TG   | 29 | 3  |
| 133760 | 14 | 2710929 | 2710942 | 2 | 7  | 14 | CA   | 14 | 4  |
| 133761 | 14 | 2710944 | 2710959 | 2 | 8  | 16 | AC   | 26 | 9  |
| 133762 | 14 | 2711247 | 2711266 | 4 | 5  | 20 | ATCC | 32 | 11 |
| 133763 | 14 | 2713033 | 2713048 | 4 | 4  | 16 | CAGA | 18 | 5  |
| 133766 | 14 | 2714758 | 2714771 | 2 | 7  | 14 | AC   | 22 | 5  |
| 133768 | 14 | 2718240 | 2718261 | 2 | 11 | 22 | TG   | 8  | 8  |
| 133770 | 14 | 2718758 | 2718777 | 2 | 10 | 20 | GT   | 12 | 9  |
| 133777 | 14 | 2722200 | 2722211 | 2 | 6  | 12 | AC   | 28 | 7  |
| 133779 | 14 | 2725636 | 2725647 | 2 | 6  | 12 | AC   | 15 | 4  |
| 133780 | 14 | 2728150 | 2728161 | 2 | 6  | 12 | GT   | 25 | 3  |
| 133782 | 14 | 2728703 | 2728732 | 2 | 15 | 30 | GT   | 21 | 6  |
| 133784 | 14 | 2730395 | 2730412 | 3 | 6  | 18 | CCT  | 19 | 5  |
| 133790 | 14 | 2735167 | 2735178 | 2 | 6  | 12 | CT   | 18 | 7  |
| 133791 | 14 | 2735179 | 2735192 | 2 | 7  | 14 | CA   | 19 | 8  |
| 133792 | 14 | 2735340 | 2735351 | 2 | 6  | 12 | GT   | 30 | 6  |
| 133797 | 14 | 2740485 | 2740522 | 2 | 19 | 38 | AC   | 18 | 11 |
| 133802 | 14 | 2757132 | 2757151 | 2 | 10 | 20 | TG   | 12 | 7  |
| 133803 | 14 | 2757153 | 2757164 | 2 | 6  | 12 | GT   | 18 | 7  |
| 133805 | 14 | 2762579 | 2762604 | 2 | 13 | 26 | AC   | 22 | 9  |
| 133807 | 14 | 2764147 | 2764160 | 2 | 7  | 14 | TG   | 28 | 4  |
| 133808 | 14 | 2764442 | 2764467 | 2 | 13 | 26 | AC   | 17 | 14 |
| 133809 | 14 | 2766324 | 2766383 | 2 | 30 | 60 | TG   | 12 | 13 |
| 133811 | 14 | 2768226 | 2768243 | 2 | 9  | 18 | AC   | 11 | 5  |
| 133812 | 14 | 2768356 | 2768373 | 2 | 9  | 18 | CA   | 16 | 3  |
| 133813 | 14 | 2768375 | 2768388 | 2 | 7  | 14 | AC   | 18 | 5  |
| 133814 | 14 | 2768598 | 2768639 | 2 | 21 | 42 | TG   | 14 | 9  |
| 133815 | 14 | 2768812 | 2768823 | 2 | 6  | 12 | CA   | 17 | 4  |
| 133817 | 14 | 2770311 | 2770326 | 2 | 8  | 16 | AC   | 20 | 6  |
| 133818 | 14 | 2770527 | 2770542 | 2 | 8  | 16 | CA   | 21 | 3  |
| 133819 | 14 | 2772458 | 2772475 | 2 | 9  | 18 | AC   | 21 | 9  |
| 133820 | 14 | 2772611 | 2772631 | 3 | 7  | 21 | GAG  | 21 | 5  |
| 133821 | 14 | 2773220 | 2773237 | 3 | 6  | 18 | CCT  | 27 | 3  |

|        |    |         |         |   |    |    |      |    |    |
|--------|----|---------|---------|---|----|----|------|----|----|
| 133823 | 14 | 2773949 | 2773970 | 2 | 11 | 22 | CA   | 19 | 6  |
| 133824 | 14 | 2776342 | 2776355 | 2 | 7  | 14 | TG   | 23 | 3  |
| 133827 | 14 | 2791722 | 2791749 | 2 | 14 | 28 | AC   | 17 | 9  |
| 133828 | 14 | 2792197 | 2792210 | 2 | 7  | 14 | GT   | 23 | 4  |
| 133833 | 14 | 2795264 | 2795277 | 2 | 7  | 14 | TG   | 20 | 9  |
| 133834 | 14 | 2795280 | 2795293 | 2 | 7  | 14 | TG   | 15 | 9  |
| 133841 | 14 | 2799951 | 2799974 | 2 | 12 | 24 | TG   | 17 | 7  |
| 133848 | 14 | 2807721 | 2807738 | 2 | 9  | 18 | CT   | 17 | 3  |
| 133849 | 14 | 2808066 | 2808079 | 2 | 7  | 14 | TC   | 19 | 3  |
| 133850 | 14 | 2808483 | 2808500 | 2 | 9  | 18 | CA   | 20 | 7  |
| 133852 | 14 | 2810703 | 2810730 | 2 | 14 | 28 | AC   | 9  | 5  |
| 133853 | 14 | 2810970 | 2811003 | 2 | 17 | 34 | TG   | 11 | 11 |
| 133857 | 14 | 2811978 | 2812003 | 2 | 13 | 26 | CA   | 14 | 9  |
| 133858 | 14 | 2813131 | 2813146 | 2 | 8  | 16 | GA   | 15 | 8  |
| 133863 | 14 | 2820450 | 2820463 | 2 | 7  | 14 | GT   | 28 | 9  |
| 133864 | 14 | 2822182 | 2822207 | 2 | 13 | 26 | GT   | 17 | 10 |
| 133865 | 14 | 2822367 | 2822390 | 2 | 12 | 24 | AC   | 24 | 15 |
| 133866 | 14 | 2823320 | 2823341 | 2 | 11 | 22 | CA   | 18 | 12 |
| 133868 | 14 | 2824982 | 2824995 | 2 | 7  | 14 | TC   | 17 | 5  |
| 133872 | 14 | 2828276 | 2828291 | 2 | 8  | 16 | TG   | 18 | 4  |
| 133879 | 14 | 2833149 | 2833178 | 3 | 10 | 30 | TCA  | 23 | 4  |
| 133882 | 14 | 2841345 | 2841366 | 2 | 11 | 22 | TG   | 22 | 7  |
| 133886 | 14 | 2843454 | 2843469 | 2 | 8  | 16 | TG   | 18 | 3  |
| 133887 | 14 | 2845563 | 2845578 | 2 | 8  | 16 | AC   | 21 | 4  |
| 133888 | 14 | 2845787 | 2845814 | 2 | 14 | 28 | GT   | 10 | 7  |
| 133889 | 14 | 2846085 | 2846096 | 2 | 6  | 12 | AC   | 26 | 3  |
| 133890 | 14 | 2846552 | 2846563 | 2 | 6  | 12 | AT   | 19 | 4  |
| 133892 | 14 | 2848024 | 2848047 | 4 | 6  | 24 | GACA | 29 | 4  |
| 133896 | 14 | 2852327 | 2852346 | 2 | 10 | 20 | AG   | 31 | 4  |
| 133897 | 14 | 2867485 | 2867504 | 2 | 10 | 20 | TG   | 29 | 3  |
| 133900 | 14 | 2881475 | 2881486 | 2 | 6  | 12 | CA   | 29 | 3  |
| 133930 | 14 | 2920030 | 2920043 | 2 | 7  | 14 | CA   | 23 | 4  |
| 133931 | 14 | 2920192 | 2920203 | 2 | 6  | 12 | TC   | 34 | 3  |
| 133932 | 14 | 2920479 | 2920498 | 4 | 5  | 20 | GATG | 22 | 5  |
| 133938 | 14 | 2929628 | 2929647 | 4 | 5  | 20 | TTCT | 28 | 8  |
| 133939 | 14 | 2930676 | 2930691 | 2 | 8  | 16 | GT   | 15 | 13 |
| 133941 | 14 | 2931253 | 2931270 | 2 | 9  | 18 | CT   | 26 | 6  |
| 133946 | 14 | 2936421 | 2936444 | 2 | 12 | 24 | CA   | 10 | 8  |
| 133947 | 14 | 2936522 | 2936541 | 2 | 10 | 20 | AC   | 13 | 8  |
| 133948 | 14 | 2936924 | 2936937 | 2 | 7  | 14 | TG   | 18 | 7  |
| 133949 | 14 | 2938775 | 2938800 | 2 | 13 | 26 | TG   | 10 | 12 |
| 133951 | 14 | 2940408 | 2940419 | 2 | 6  | 12 | TG   | 28 | 4  |
| 133953 | 14 | 2944188 | 2944209 | 2 | 11 | 22 | TG   | 17 | 13 |
| 133960 | 14 | 2957968 | 2957994 | 3 | 9  | 27 | GGA  | 20 | 6  |
| 133961 | 14 | 2958501 | 2958512 | 2 | 6  | 12 | CA   | 30 | 8  |
| 133962 | 14 | 2961549 | 2961578 | 2 | 15 | 30 | TG   | 6  | 6  |
| 133964 | 14 | 2961735 | 2961748 | 2 | 7  | 14 | TG   | 22 | 11 |
| 133965 | 14 | 2961926 | 2961939 | 2 | 7  | 14 | CA   | 18 | 3  |
| 133967 | 14 | 2964130 | 2964149 | 2 | 10 | 20 | TG   | 16 | 3  |
| 133968 | 14 | 2969461 | 2969474 | 2 | 7  | 14 | GT   | 26 | 4  |
| 133970 | 14 | 2969707 | 2969734 | 2 | 14 | 28 | AC   | 15 | 10 |

|        |    |         |         |   |    |    |      |    |    |
|--------|----|---------|---------|---|----|----|------|----|----|
| 133976 | 14 | 2972220 | 2972234 | 3 | 5  | 15 | GGT  | 25 | 3  |
| 133977 | 14 | 2972329 | 2972355 | 3 | 9  | 27 | TCC  | 15 | 7  |
| 133978 | 14 | 2972833 | 2972854 | 2 | 11 | 22 | TG   | 11 | 7  |
| 133981 | 14 | 2977217 | 2977230 | 2 | 7  | 14 | GT   | 14 | 4  |
| 133984 | 14 | 2980528 | 2980542 | 3 | 5  | 15 | AGG  | 26 | 4  |
| 133985 | 14 | 2983956 | 2983983 | 2 | 14 | 28 | CA   | 21 | 10 |
| 133989 | 14 | 2984747 | 2984766 | 2 | 10 | 20 | CA   | 17 | 10 |
| 133990 | 14 | 2984875 | 2984896 | 2 | 11 | 22 | TG   | 10 | 11 |
| 133992 | 14 | 2987422 | 2987433 | 2 | 6  | 12 | CA   | 26 | 3  |
| 133993 | 14 | 2987613 | 2987624 | 2 | 6  | 12 | AC   | 22 | 5  |
| 133994 | 14 | 2989757 | 2989770 | 2 | 7  | 14 | CA   | 17 | 6  |
| 133997 | 14 | 2994302 | 2994316 | 3 | 5  | 15 | AGA  | 12 | 5  |
| 134001 | 14 | 3000022 | 3000057 | 2 | 18 | 36 | AC   | 17 | 10 |
| 134002 | 14 | 3000224 | 3000239 | 4 | 4  | 16 | GCGT | 29 | 3  |
| 134003 | 14 | 3000726 | 3000749 | 4 | 6  | 24 | CAAA | 21 | 11 |
| 134005 | 14 | 3001131 | 3001152 | 2 | 11 | 22 | AC   | 22 | 11 |
| 134013 | 14 | 3004857 | 3004868 | 2 | 6  | 12 | AG   | 13 | 5  |
| 134014 | 14 | 3004905 | 3004916 | 2 | 6  | 12 | GA   | 16 | 4  |
| 134023 | 14 | 3009164 | 3009181 | 2 | 9  | 18 | AT   | 7  | 6  |
| 134024 | 14 | 3009437 | 3009460 | 2 | 12 | 24 | CA   | 8  | 9  |
| 134028 | 14 | 3015632 | 3015657 | 2 | 13 | 26 | AC   | 15 | 14 |
| 134029 | 14 | 3018133 | 3018152 | 2 | 10 | 20 | TG   | 23 | 5  |
| 134030 | 14 | 3019521 | 3019536 | 2 | 8  | 16 | CA   | 21 | 4  |
| 134031 | 14 | 3019706 | 3019721 | 2 | 8  | 16 | AC   | 10 | 5  |
| 134032 | 14 | 3020800 | 3020811 | 2 | 6  | 12 | AC   | 27 | 3  |
| 134038 | 14 | 3027561 | 3027586 | 2 | 13 | 26 | AC   | 13 | 11 |
| 134039 | 14 | 3027657 | 3027668 | 2 | 6  | 12 | AC   | 32 | 3  |
| 134040 | 14 | 3028237 | 3028252 | 4 | 4  | 16 | GAGG | 27 | 4  |
| 134042 | 14 | 3028419 | 3028446 | 2 | 14 | 28 | GT   | 14 | 6  |
| 134045 | 14 | 3032675 | 3032701 | 3 | 9  | 27 | AGG  | 25 | 4  |
| 134046 | 14 | 3033013 | 3033028 | 2 | 8  | 16 | CA   | 22 | 12 |
| 134053 | 14 | 3035488 | 3035507 | 2 | 10 | 20 | GT   | 14 | 3  |
| 134054 | 14 | 3035631 | 3035668 | 2 | 19 | 38 | CA   | 21 | 21 |
| 134057 | 14 | 3036886 | 3036901 | 2 | 8  | 16 | CA   | 19 | 4  |
| 134058 | 14 | 3036971 | 3036982 | 2 | 6  | 12 | TG   | 24 | 6  |
| 134059 | 14 | 3037383 | 3037424 | 2 | 21 | 42 | GT   | 7  | 11 |
| 134060 | 14 | 3037604 | 3037615 | 2 | 6  | 12 | CA   | 24 | 4  |
| 134062 | 14 | 3044709 | 3044734 | 2 | 13 | 26 | CA   | 13 | 7  |
| 134072 | 14 | 3070407 | 3070418 | 2 | 6  | 12 | GT   | 28 | 4  |
| 134075 | 14 | 3074124 | 3074139 | 2 | 8  | 16 | AC   | 22 | 4  |
| 134076 | 14 | 3074771 | 3074796 | 2 | 13 | 26 | CA   | 14 | 7  |
| 134077 | 14 | 3078490 | 3078511 | 2 | 11 | 22 | GT   | 15 | 8  |
| 134083 | 14 | 3081797 | 3081816 | 2 | 10 | 20 | AC   | 23 | 4  |
| 134084 | 14 | 3082245 | 3082260 | 2 | 8  | 16 | CA   | 21 | 4  |
| 134089 | 14 | 3087447 | 3087464 | 2 | 9  | 18 | GT   | 17 | 3  |
| 134091 | 14 | 3089396 | 3089415 | 2 | 10 | 20 | CA   | 9  | 8  |
| 134092 | 14 | 3089951 | 3089978 | 2 | 14 | 28 | CA   | 14 | 6  |
| 134094 | 14 | 3093094 | 3093107 | 2 | 7  | 14 | CA   | 26 | 5  |
| 134095 | 14 | 3094738 | 3094749 | 2 | 6  | 12 | GT   | 29 | 6  |
| 134096 | 14 | 3094951 | 3094964 | 2 | 7  | 14 | TG   | 32 | 6  |
| 134097 | 14 | 3100022 | 3100041 | 2 | 10 | 20 | GT   | 26 | 9  |

|        |    |         |         |   |    |    |      |    |    |
|--------|----|---------|---------|---|----|----|------|----|----|
| 134102 | 14 | 3111989 | 3112009 | 3 | 7  | 21 | TCT  | 18 | 4  |
| 134107 | 14 | 3116892 | 3116939 | 2 | 24 | 48 | GT   | 13 | 12 |
| 134110 | 14 | 3119934 | 3119945 | 2 | 6  | 12 | CA   | 28 | 13 |
| 134113 | 14 | 3121988 | 3122003 | 2 | 8  | 16 | CA   | 22 | 7  |
| 134114 | 14 | 3122628 | 3122647 | 2 | 10 | 20 | AC   | 20 | 8  |
| 134117 | 14 | 3125367 | 3125386 | 4 | 5  | 20 | ACTG | 29 | 3  |
| 134118 | 14 | 3125525 | 3125544 | 2 | 10 | 20 | AC   | 22 | 10 |
| 134119 | 14 | 3127228 | 3127241 | 2 | 7  | 14 | AT   | 27 | 6  |
| 134120 | 14 | 3128906 | 3128926 | 3 | 7  | 21 | AGG  | 26 | 4  |
| 134122 | 14 | 3129672 | 3129699 | 2 | 14 | 28 | AC   | 16 | 8  |
| 134124 | 14 | 3130080 | 3130095 | 2 | 8  | 16 | TG   | 22 | 5  |
| 134126 | 14 | 3132009 | 3132023 | 3 | 5  | 15 | CTT  | 28 | 4  |
| 134128 | 14 | 3132991 | 3133006 | 4 | 4  | 16 | AAGG | 23 | 3  |
| 134130 | 14 | 3134745 | 3134768 | 2 | 12 | 24 | CA   | 11 | 8  |
| 134133 | 14 | 3136679 | 3136694 | 2 | 8  | 16 | AC   | 11 | 3  |
| 134136 | 14 | 3140529 | 3140560 | 2 | 16 | 32 | AC   | 11 | 10 |
| 134137 | 14 | 3142106 | 3142127 | 2 | 11 | 22 | AC   | 14 | 5  |
| 134138 | 14 | 3143255 | 3143272 | 3 | 6  | 18 | TAA  | 24 | 3  |
| 134141 | 14 | 3154219 | 3154246 | 2 | 14 | 28 | AC   | 17 | 13 |
| 134152 | 14 | 3182838 | 3182851 | 2 | 7  | 14 | CA   | 22 | 5  |
| 134154 | 14 | 3185800 | 3185811 | 2 | 6  | 12 | TG   | 23 | 3  |
| 134158 | 14 | 3189410 | 3189423 | 2 | 7  | 14 | TA   | 8  | 4  |
| 134159 | 14 | 3195470 | 3195493 | 4 | 6  | 24 | TCCA | 23 | 16 |
| 134160 | 14 | 3198236 | 3198253 | 3 | 6  | 18 | GCT  | 13 | 3  |
| 134165 | 14 | 3209829 | 3209850 | 2 | 11 | 22 | CT   | 17 | 6  |
| 134166 | 14 | 3214661 | 3214674 | 2 | 7  | 14 | CA   | 22 | 6  |
| 134167 | 14 | 3216972 | 3216989 | 2 | 9  | 18 | AC   | 14 | 5  |
| 134173 | 14 | 3221318 | 3221331 | 2 | 7  | 14 | AT   | 24 | 10 |
| 134176 | 14 | 3225100 | 3225135 | 2 | 18 | 36 | AC   | 16 | 12 |
| 134179 | 14 | 3228017 | 3228034 | 2 | 9  | 18 | CA   | 15 | 9  |
| 134183 | 14 | 3238536 | 3238549 | 2 | 7  | 14 | CA   | 30 | 9  |
| 134190 | 14 | 3243641 | 3243668 | 2 | 14 | 28 | TG   | 11 | 8  |
| 134191 | 14 | 3243722 | 3243741 | 2 | 10 | 20 | AG   | 19 | 5  |
| 134193 | 14 | 3247016 | 3247033 | 2 | 9  | 18 | AC   | 24 | 8  |
| 134196 | 14 | 3249673 | 3249686 | 2 | 7  | 14 | AC   | 23 | 10 |
| 134197 | 14 | 3250975 | 3250996 | 2 | 11 | 22 | CA   | 14 | 11 |
| 134198 | 14 | 3252007 | 3252024 | 2 | 9  | 18 | TG   | 15 | 11 |
| 134202 | 14 | 3256282 | 3256307 | 2 | 13 | 26 | CA   | 23 | 6  |
| 134203 | 14 | 3258246 | 3258266 | 3 | 7  | 21 | GTG  | 17 | 3  |
| 134207 | 14 | 3267600 | 3267614 | 3 | 5  | 15 | TCT  | 25 | 6  |
| 134210 | 14 | 3268347 | 3268364 | 2 | 9  | 18 | GT   | 22 | 12 |
| 134211 | 14 | 3268638 | 3268665 | 2 | 14 | 28 | TG   | 8  | 9  |
| 134212 | 14 | 3268803 | 3268818 | 2 | 8  | 16 | AG   | 23 | 5  |
| 134214 | 14 | 3269144 | 3269159 | 2 | 8  | 16 | CA   | 18 | 5  |
| 134215 | 14 | 3269211 | 3269230 | 2 | 10 | 20 | CA   | 31 | 8  |
| 134216 | 14 | 3270903 | 3270926 | 3 | 8  | 24 | CCT  | 18 | 3  |
| 134217 | 14 | 3271931 | 3271944 | 2 | 7  | 14 | TG   | 32 | 3  |
| 134218 | 14 | 3272563 | 3272580 | 2 | 9  | 18 | CA   | 21 | 9  |
| 134220 | 14 | 3276733 | 3276758 | 2 | 13 | 26 | TG   | 9  | 9  |
| 134223 | 14 | 3278565 | 3278600 | 2 | 18 | 36 | CT   | 11 | 12 |
| 134224 | 14 | 3279327 | 3279350 | 4 | 6  | 24 | ATAA | 24 | 18 |

|        |    |         |         |   |    |    |      |    |    |
|--------|----|---------|---------|---|----|----|------|----|----|
| 134229 | 14 | 3284176 | 3284209 | 2 | 17 | 34 | AC   | 12 | 8  |
| 134230 | 14 | 3284666 | 3284679 | 2 | 7  | 14 | GA   | 17 | 4  |
| 134232 | 14 | 3284875 | 3284900 | 2 | 13 | 26 | TG   | 15 | 9  |
| 134235 | 14 | 3286198 | 3286211 | 2 | 7  | 14 | AC   | 13 | 8  |
| 134237 | 14 | 3286421 | 3286432 | 2 | 6  | 12 | CT   | 8  | 3  |
| 134238 | 14 | 3286832 | 3286859 | 2 | 14 | 28 | GT   | 16 | 9  |
| 134239 | 14 | 3286933 | 3286960 | 2 | 14 | 28 | CA   | 19 | 9  |
| 134240 | 14 | 3287925 | 3287942 | 3 | 6  | 18 | AGG  | 24 | 5  |
| 134241 | 14 | 3288216 | 3288271 | 4 | 14 | 56 | ATCT | 17 | 11 |
| 134245 | 14 | 3290512 | 3290537 | 2 | 13 | 26 | CA   | 8  | 5  |
| 134246 | 14 | 3292376 | 3292395 | 2 | 10 | 20 | GT   | 18 | 7  |
| 134247 | 14 | 3292416 | 3292427 | 2 | 6  | 12 | GT   | 19 | 3  |
| 134249 | 14 | 3295641 | 3295656 | 2 | 8  | 16 | GA   | 21 | 7  |
| 134257 | 14 | 3314122 | 3314145 | 2 | 12 | 24 | GA   | 9  | 4  |
| 134258 | 14 | 3314197 | 3314214 | 2 | 9  | 18 | TG   | 14 | 3  |
| 134262 | 14 | 3329444 | 3329479 | 4 | 9  | 36 | AGAT | 15 | 10 |
| 134263 | 14 | 3331978 | 3331995 | 2 | 9  | 18 | TG   | 8  | 8  |
| 134275 | 14 | 3344679 | 3344714 | 4 | 9  | 36 | AGAT | 20 | 7  |
| 134277 | 14 | 3355145 | 3355176 | 2 | 16 | 32 | TG   | 21 | 10 |
| 134286 | 14 | 3367570 | 3367581 | 2 | 6  | 12 | CA   | 23 | 4  |
| 134287 | 14 | 3367905 | 3367936 | 2 | 16 | 32 | GT   | 10 | 12 |
| 134288 | 14 | 3371015 | 3371026 | 2 | 6  | 12 | GT   | 31 | 3  |
| 134292 | 14 | 3384721 | 3384738 | 3 | 6  | 18 | TGC  | 29 | 4  |
| 134297 | 14 | 3401208 | 3401222 | 3 | 5  | 15 | TGT  | 31 | 5  |
| 134298 | 14 | 3402406 | 3402425 | 2 | 10 | 20 | CA   | 19 | 3  |
| 134299 | 14 | 3402529 | 3402542 | 2 | 7  | 14 | CA   | 25 | 4  |
| 134300 | 14 | 3402713 | 3402734 | 2 | 11 | 22 | GT   | 21 | 7  |
| 134307 | 14 | 3426663 | 3426684 | 2 | 11 | 22 | TG   | 9  | 4  |
| 134311 | 14 | 3438618 | 3438631 | 2 | 7  | 14 | TG   | 30 | 3  |
| 134313 | 14 | 3442150 | 3442169 | 2 | 10 | 20 | TC   | 25 | 3  |
| 134315 | 14 | 3449261 | 3449274 | 2 | 7  | 14 | TG   | 22 | 7  |
| 134320 | 14 | 3452754 | 3452765 | 2 | 6  | 12 | TG   | 30 | 3  |
| 134323 | 14 | 3456061 | 3456088 | 2 | 14 | 28 | TG   | 21 | 8  |
| 134327 | 14 | 3468561 | 3468576 | 2 | 8  | 16 | CA   | 19 | 6  |
| 134333 | 14 | 3483665 | 3483700 | 2 | 18 | 36 | AC   | 7  | 9  |
| 134340 | 14 | 3488063 | 3488094 | 2 | 16 | 32 | GT   | 22 | 10 |
| 134344 | 14 | 3489548 | 3489565 | 2 | 9  | 18 | TG   | 27 | 6  |
| 134347 | 14 | 3493872 | 3493889 | 2 | 9  | 18 | TG   | 25 | 8  |
| 134355 | 14 | 3510478 | 3510491 | 2 | 7  | 14 | AC   | 20 | 3  |
| 134363 | 14 | 3525544 | 3525573 | 2 | 15 | 30 | CT   | 13 | 12 |
| 134373 | 14 | 3548767 | 3548780 | 2 | 7  | 14 | GA   | 28 | 4  |
| 134379 | 14 | 3556246 | 3556257 | 2 | 6  | 12 | GT   | 25 | 3  |
| 134380 | 14 | 3559757 | 3559768 | 2 | 6  | 12 | CA   | 27 | 4  |
| 134390 | 14 | 3581778 | 3581792 | 3 | 5  | 15 | GGT  | 31 | 3  |
| 134400 | 14 | 3610286 | 3610303 | 2 | 9  | 18 | AC   | 17 | 5  |
| 134402 | 14 | 3639040 | 3639053 | 2 | 7  | 14 | AC   | 11 | 3  |
| 134406 | 14 | 3648596 | 3648635 | 2 | 20 | 40 | TC   | 7  | 7  |
| 134412 | 14 | 3667810 | 3667829 | 4 | 5  | 20 | AAGG | 28 | 4  |
| 134424 | 14 | 3696933 | 3696954 | 2 | 11 | 22 | AC   | 24 | 10 |
| 134426 | 14 | 3700237 | 3700251 | 3 | 5  | 15 | TTA  | 14 | 5  |
| 134433 | 14 | 3706508 | 3706521 | 2 | 7  | 14 | AC   | 6  | 3  |



|        |    |         |         |   |    |    |     |    |    |
|--------|----|---------|---------|---|----|----|-----|----|----|
| 134436 | 14 | 3708746 | 3708759 | 2 | 7  | 14 | GA  | 14 | 3  |
| 134437 | 14 | 3708787 | 3708806 | 2 | 10 | 20 | AG  | 9  | 6  |
| 134440 | 14 | 3711402 | 3711417 | 2 | 8  | 16 | TC  | 19 | 3  |
| 134442 | 14 | 3715707 | 3715718 | 2 | 6  | 12 | TC  | 14 | 3  |
| 134448 | 14 | 3736919 | 3736936 | 2 | 9  | 18 | GT  | 28 | 9  |
| 134450 | 14 | 3740203 | 3740224 | 2 | 11 | 22 | TG  | 19 | 7  |
| 134452 | 14 | 3742504 | 3742515 | 2 | 6  | 12 | GT  | 31 | 8  |
| 134460 | 14 | 3755565 | 3755580 | 2 | 8  | 16 | TG  | 18 | 5  |
| 134462 | 14 | 3755702 | 3755719 | 2 | 9  | 18 | TG  | 20 | 7  |
| 134471 | 14 | 3775761 | 3775796 | 2 | 18 | 36 | GT  | 10 | 8  |
| 134472 | 14 | 3776700 | 3776713 | 2 | 7  | 14 | AT  | 10 | 8  |
| 134473 | 14 | 3776750 | 3776763 | 2 | 7  | 14 | AC  | 22 | 4  |
| 134474 | 14 | 3777995 | 3778016 | 2 | 11 | 22 | CA  | 22 | 12 |
| 134480 | 14 | 3787380 | 3787401 | 2 | 11 | 22 | TG  | 19 | 7  |
| 134481 | 14 | 3787456 | 3787493 | 2 | 19 | 38 | TC  | 12 | 17 |
| 134485 | 14 | 3791843 | 3791857 | 3 | 5  | 15 | AGA | 23 | 3  |
| 134491 | 14 | 3796494 | 3796511 | 2 | 9  | 18 | AC  | 19 | 5  |
| 134492 | 14 | 3796710 | 3796723 | 2 | 7  | 14 | TG  | 27 | 3  |
| 134493 | 14 | 3799220 | 3799237 | 2 | 9  | 18 | GT  | 21 | 4  |
| 134496 | 14 | 3811131 | 3811150 | 2 | 10 | 20 | GA  | 13 | 3  |
| 134499 | 14 | 3817083 | 3817104 | 2 | 11 | 22 | AC  | 21 | 7  |
| 134501 | 14 | 3820693 | 3820710 | 2 | 9  | 18 | CT  | 17 | 3  |
| 134502 | 14 | 3820822 | 3820833 | 2 | 6  | 12 | GT  | 10 | 8  |
| 134504 | 14 | 3821117 | 3821132 | 2 | 8  | 16 | GT  | 21 | 9  |
| 134510 | 14 | 3823693 | 3823714 | 2 | 11 | 22 | TG  | 21 | 11 |
| 134511 | 14 | 3823893 | 3823930 | 2 | 19 | 38 | AC  | 13 | 11 |
| 134512 | 14 | 3824946 | 3824963 | 2 | 9  | 18 | GT  | 14 | 16 |
| 134514 | 14 | 3831410 | 3831421 | 2 | 6  | 12 | GT  | 26 | 4  |
| 134515 | 14 | 3834033 | 3834044 | 2 | 6  | 12 | AC  | 16 | 4  |
| 134516 | 14 | 3834852 | 3834881 | 2 | 15 | 30 | GT  | 10 | 7  |
| 134518 | 14 | 3836851 | 3836886 | 2 | 18 | 36 | CA  | 13 | 10 |
| 134522 | 14 | 3837469 | 3837483 | 3 | 5  | 15 | AGA | 29 | 4  |
| 134525 | 14 | 3838154 | 3838169 | 2 | 8  | 16 | AC  | 16 | 4  |
| 134526 | 14 | 3839723 | 3839740 | 2 | 9  | 18 | CT  | 21 | 3  |
| 134527 | 14 | 3841189 | 3841218 | 2 | 15 | 30 | TG  | 7  | 7  |
| 134530 | 14 | 3843275 | 3843292 | 3 | 6  | 18 | AGG | 25 | 3  |
| 134532 | 14 | 3846866 | 3846883 | 2 | 9  | 18 | GT  | 11 | 8  |
| 134533 | 14 | 3847650 | 3847663 | 2 | 7  | 14 | CA  | 17 | 9  |
| 134537 | 14 | 3849740 | 3849751 | 2 | 6  | 12 | CA  | 25 | 4  |
| 134541 | 14 | 3851910 | 3851931 | 2 | 11 | 22 | TG  | 18 | 9  |
| 134543 | 14 | 3853176 | 3853193 | 2 | 9  | 18 | AC  | 19 | 7  |
| 134544 | 14 | 3854937 | 3854962 | 2 | 13 | 26 | AC  | 21 | 7  |
| 134546 | 14 | 3856290 | 3856311 | 2 | 11 | 22 | GT  | 12 | 16 |
| 134548 | 14 | 3856762 | 3856783 | 2 | 11 | 22 | CT  | 18 | 8  |
| 134549 | 14 | 3857068 | 3857089 | 2 | 11 | 22 | CT  | 18 | 8  |
| 134552 | 14 | 3861951 | 3861968 | 2 | 9  | 18 | TG  | 16 | 9  |
| 134553 | 14 | 3865741 | 3865758 | 2 | 9  | 18 | AC  | 16 | 7  |
| 134555 | 14 | 3866247 | 3866260 | 2 | 7  | 14 | GT  | 22 | 4  |
| 134560 | 14 | 3870924 | 3870957 | 2 | 17 | 34 | TG  | 20 | 9  |
| 134562 | 14 | 3872633 | 3872672 | 2 | 20 | 40 | AC  | 14 | 10 |
| 134566 | 14 | 3873023 | 3873064 | 2 | 21 | 42 | TG  | 13 | 10 |

|        |    |         |         |   |    |    |      |    |    |
|--------|----|---------|---------|---|----|----|------|----|----|
| 134567 | 14 | 3874068 | 3874081 | 2 | 7  | 14 | CA   | 21 | 7  |
| 134568 | 14 | 3874309 | 3874324 | 2 | 8  | 16 | CA   | 11 | 5  |
| 134570 | 14 | 3876322 | 3876345 | 2 | 12 | 24 | AC   | 19 | 11 |
| 134572 | 14 | 3879111 | 3879140 | 2 | 15 | 30 | TG   | 16 | 12 |
| 134574 | 14 | 3883946 | 3883971 | 2 | 13 | 26 | CT   | 18 | 7  |
| 134576 | 14 | 3887089 | 3887104 | 2 | 8  | 16 | TG   | 25 | 6  |
| 134578 | 14 | 3889234 | 3889251 | 3 | 6  | 18 | TTA  | 13 | 9  |
| 134579 | 14 | 3893323 | 3893334 | 2 | 6  | 12 | CA   | 21 | 4  |
| 134580 | 14 | 3898383 | 3898414 | 2 | 16 | 32 | GT   | 18 | 11 |
| 134581 | 14 | 3898467 | 3898484 | 2 | 9  | 18 | TG   | 17 | 6  |
| 134582 | 14 | 3901376 | 3901391 | 4 | 4  | 16 | GTTT | 27 | 7  |
| 134587 | 14 | 3907194 | 3907233 | 2 | 20 | 40 | GT   | 15 | 12 |
| 134593 | 14 | 3911601 | 3911652 | 4 | 13 | 52 | TTTC | 20 | 10 |
| 134594 | 14 | 3912041 | 3912064 | 2 | 12 | 24 | AC   | 11 | 8  |
| 134599 | 14 | 3922530 | 3922549 | 2 | 10 | 20 | TG   | 12 | 8  |
| 134602 | 14 | 3924728 | 3924745 | 2 | 9  | 18 | TG   | 11 | 12 |
| 134603 | 14 | 3924747 | 3924760 | 2 | 7  | 14 | GT   | 14 | 14 |
| 134618 | 14 | 3948473 | 3948498 | 2 | 13 | 26 | TG   | 14 | 8  |
| 134624 | 14 | 3955761 | 3955781 | 3 | 7  | 21 | GGA  | 10 | 3  |
| 134625 | 14 | 3956129 | 3956140 | 2 | 6  | 12 | TG   | 18 | 4  |
| 134627 | 14 | 3956603 | 3956624 | 2 | 11 | 22 | GT   | 24 | 5  |
| 134628 | 14 | 3956782 | 3956796 | 3 | 5  | 15 | GCC  | 27 | 5  |
| 134629 | 14 | 3956859 | 3956885 | 3 | 9  | 27 | CCG  | 24 | 11 |
| 134632 | 14 | 3961751 | 3961770 | 2 | 10 | 20 | AC   | 18 | 9  |
| 134633 | 14 | 3962211 | 3962246 | 2 | 18 | 36 | TG   | 12 | 11 |
| 134642 | 14 | 3970361 | 3970386 | 2 | 13 | 26 | TG   | 13 | 7  |
| 134645 | 14 | 3980246 | 3980257 | 2 | 6  | 12 | AT   | 14 | 8  |
| 134646 | 14 | 3981335 | 3981370 | 2 | 18 | 36 | TG   | 15 | 11 |
| 134653 | 14 | 3987132 | 3987143 | 2 | 6  | 12 | CT   | 25 | 3  |
| 134657 | 14 | 3999357 | 3999368 | 2 | 6  | 12 | AC   | 17 | 5  |
| 134658 | 14 | 4002055 | 4002074 | 2 | 10 | 20 | AC   | 23 | 9  |
| 134666 | 14 | 4013526 | 4013543 | 2 | 9  | 18 | TG   | 14 | 9  |
| 134668 | 14 | 4014158 | 4014179 | 2 | 11 | 22 | TG   | 20 | 9  |
| 134678 | 14 | 4029358 | 4029387 | 3 | 10 | 30 | TCC  | 26 | 8  |
| 134686 | 14 | 4047071 | 4047088 | 2 | 9  | 18 | GA   | 14 | 7  |
| 134692 | 14 | 4055629 | 4055646 | 2 | 9  | 18 | TC   | 8  | 4  |
| 134694 | 14 | 4055678 | 4055701 | 2 | 12 | 24 | TC   | 9  | 4  |
| 134699 | 14 | 4061924 | 4061937 | 2 | 7  | 14 | AC   | 26 | 3  |
| 134701 | 14 | 4064881 | 4064910 | 2 | 15 | 30 | AC   | 18 | 9  |
| 134705 | 14 | 4068717 | 4068744 | 2 | 14 | 28 | TG   | 11 | 11 |
| 134706 | 14 | 4074156 | 4074167 | 2 | 6  | 12 | CA   | 11 | 3  |
| 134712 | 14 | 4075442 | 4075453 | 2 | 6  | 12 | CA   | 16 | 4  |
| 134713 | 14 | 4079293 | 4079316 | 3 | 8  | 24 | GAT  | 26 | 7  |
| 134714 | 14 | 4080119 | 4080132 | 2 | 7  | 14 | GT   | 28 | 4  |
| 134715 | 14 | 4080135 | 4080146 | 2 | 6  | 12 | GT   | 6  | 3  |
| 134721 | 14 | 4088504 | 4088515 | 2 | 6  | 12 | TG   | 26 | 4  |
| 134722 | 14 | 4088714 | 4088735 | 2 | 11 | 22 | TG   | 20 | 5  |
| 134725 | 14 | 4091314 | 4091329 | 2 | 8  | 16 | AC   | 21 | 8  |
| 134727 | 14 | 4092373 | 4092400 | 2 | 14 | 28 | AC   | 9  | 8  |
| 134733 | 14 | 4098730 | 4098741 | 2 | 6  | 12 | CA   | 20 | 3  |
| 134741 | 14 | 4116446 | 4116463 | 3 | 6  | 18 | GCG  | 27 | 5  |

|        |    |         |         |   |    |    |      |    |    |
|--------|----|---------|---------|---|----|----|------|----|----|
| 134748 | 14 | 4125694 | 4125709 | 2 | 8  | 16 | GT   | 21 | 6  |
| 134749 | 14 | 4126378 | 4126389 | 2 | 6  | 12 | TA   | 28 | 4  |
| 134757 | 14 | 4136036 | 4136061 | 2 | 13 | 26 | TG   | 20 | 8  |
| 134763 | 14 | 4144360 | 4144383 | 2 | 12 | 24 | TG   | 9  | 5  |
| 134768 | 14 | 4146471 | 4146508 | 2 | 19 | 38 | AC   | 11 | 12 |
| 134775 | 14 | 4181006 | 4181019 | 2 | 7  | 14 | TG   | 24 | 15 |
| 134776 | 14 | 4181169 | 4181200 | 2 | 16 | 32 | TG   | 23 | 12 |
| 134777 | 14 | 4184040 | 4184053 | 2 | 7  | 14 | GT   | 17 | 5  |
| 134778 | 14 | 4184277 | 4184300 | 2 | 12 | 24 | TG   | 18 | 12 |
| 134780 | 14 | 4186665 | 4186676 | 2 | 6  | 12 | AC   | 24 | 3  |
| 134782 | 14 | 4190617 | 4190636 | 2 | 10 | 20 | AC   | 13 | 5  |
| 134785 | 14 | 4192643 | 4192658 | 2 | 8  | 16 | TG   | 24 | 4  |
| 134786 | 14 | 4193344 | 4193357 | 2 | 7  | 14 | TC   | 26 | 10 |
| 134789 | 14 | 4195890 | 4195909 | 2 | 10 | 20 | TG   | 14 | 10 |
| 134798 | 14 | 4203713 | 4203732 | 2 | 10 | 20 | CA   | 17 | 8  |
| 134800 | 14 | 4204124 | 4204141 | 2 | 9  | 18 | GT   | 14 | 11 |
| 134803 | 14 | 4207017 | 4207028 | 2 | 6  | 12 | TG   | 30 | 8  |
| 134807 | 14 | 4208054 | 4208077 | 4 | 6  | 24 | AACC | 24 | 4  |
| 134809 | 14 | 4212795 | 4212810 | 2 | 8  | 16 | GT   | 16 | 8  |
| 134819 | 14 | 4224625 | 4224640 | 4 | 4  | 16 | TTTA | 18 | 5  |
| 134821 | 14 | 4226675 | 4226692 | 3 | 6  | 18 | TTG  | 22 | 8  |
| 134822 | 14 | 4233487 | 4233516 | 3 | 10 | 30 | TCC  | 16 | 6  |
| 134828 | 14 | 4243789 | 4243802 | 2 | 7  | 14 | GT   | 14 | 5  |
| 134829 | 14 | 4243805 | 4243818 | 2 | 7  | 14 | GT   | 14 | 7  |
| 134830 | 14 | 4244955 | 4244974 | 4 | 5  | 20 | TTTA | 16 | 9  |
| 134843 | 14 | 4252822 | 4252845 | 3 | 8  | 24 | CTC  | 15 | 6  |
| 134847 | 14 | 4256777 | 4256788 | 2 | 6  | 12 | CA   | 24 | 5  |
| 134848 | 14 | 4256790 | 4256803 | 2 | 7  | 14 | AC   | 21 | 4  |
| 134856 | 14 | 4276974 | 4276991 | 2 | 9  | 18 | AG   | 21 | 3  |
| 134859 | 14 | 4279176 | 4279187 | 2 | 6  | 12 | TC   | 12 | 3  |
| 134860 | 14 | 4281209 | 4281220 | 2 | 6  | 12 | GT   | 20 | 6  |
| 134861 | 14 | 4281253 | 4281274 | 2 | 11 | 22 | GT   | 14 | 7  |
| 134869 | 14 | 4296551 | 4296562 | 2 | 6  | 12 | GA   | 20 | 5  |
| 134878 | 14 | 4321205 | 4321225 | 3 | 7  | 21 | AAT  | 10 | 3  |
| 134879 | 14 | 4325039 | 4325050 | 2 | 6  | 12 | AC   | 22 | 6  |
| 134890 | 14 | 4334217 | 4334252 | 2 | 18 | 36 | AC   | 23 | 10 |
| 134892 | 14 | 4334820 | 4334835 | 2 | 8  | 16 | AC   | 24 | 9  |
| 134900 | 14 | 4355032 | 4355045 | 2 | 7  | 14 | TG   | 23 | 3  |
| 134902 | 14 | 4357212 | 4357237 | 2 | 13 | 26 | CA   | 17 | 6  |
| 134919 | 14 | 4382319 | 4382334 | 4 | 4  | 16 | TTTA | 21 | 4  |
| 134939 | 14 | 4416679 | 4416693 | 3 | 5  | 15 | ATT  | 15 | 7  |
| 134949 | 14 | 4428919 | 4428944 | 2 | 13 | 26 | CA   | 13 | 6  |
| 134951 | 14 | 4431661 | 4431672 | 2 | 6  | 12 | AG   | 28 | 3  |
| 134952 | 14 | 4431714 | 4431733 | 2 | 10 | 20 | AC   | 14 | 13 |
| 134955 | 14 | 4436824 | 4436853 | 2 | 15 | 30 | AC   | 24 | 8  |
| 134967 | 14 | 4447724 | 4447744 | 3 | 7  | 21 | CTT  | 14 | 5  |
| 135012 | 14 | 4519937 | 4519956 | 4 | 5  | 20 | AAAT | 18 | 4  |
| 135034 | 14 | 4547973 | 4547993 | 3 | 7  | 21 | GAG  | 17 | 5  |
| 135041 | 14 | 4556622 | 4556645 | 4 | 6  | 24 | TTTC | 11 | 7  |
| 135043 | 14 | 4559342 | 4559367 | 2 | 13 | 26 | TG   | 14 | 7  |
| 135044 | 14 | 4561234 | 4561249 | 2 | 8  | 16 | GT   | 23 | 7  |

|        |    |         |         |   |    |    |      |    |    |
|--------|----|---------|---------|---|----|----|------|----|----|
| 135055 | 14 | 4578994 | 4579019 | 2 | 13 | 26 | AC   | 14 | 12 |
| 135056 | 14 | 4579622 | 4579657 | 2 | 18 | 36 | GA   | 6  | 8  |
| 135060 | 14 | 4586604 | 4586627 | 2 | 12 | 24 | CA   | 13 | 8  |
| 135068 | 14 | 4593739 | 4593750 | 2 | 6  | 12 | AC   | 16 | 7  |
| 135069 | 14 | 4593752 | 4593765 | 2 | 7  | 14 | CA   | 18 | 9  |
| 135096 | 14 | 4616501 | 4616526 | 2 | 13 | 26 | TG   | 22 | 7  |
| 135109 | 14 | 4638045 | 4638072 | 2 | 14 | 28 | AG   | 16 | 11 |
| 135114 | 14 | 4640362 | 4640393 | 2 | 16 | 32 | AC   | 16 | 9  |
| 135119 | 14 | 4657771 | 4657800 | 2 | 15 | 30 | TG   | 6  | 9  |
| 135121 | 14 | 4660658 | 4660685 | 2 | 14 | 28 | GT   | 22 | 12 |
| 135122 | 14 | 4662044 | 4662069 | 2 | 13 | 26 | AC   | 13 | 13 |
| 135123 | 14 | 4662192 | 4662205 | 2 | 7  | 14 | GT   | 18 | 3  |
| 135129 | 14 | 4663870 | 4663884 | 3 | 5  | 15 | TAA  | 18 | 3  |
| 135134 | 14 | 4670418 | 4670433 | 2 | 8  | 16 | AT   | 20 | 11 |
| 135136 | 14 | 4671793 | 4671816 | 2 | 12 | 24 | TG   | 18 | 12 |
| 135138 | 14 | 4674491 | 4674508 | 3 | 6  | 18 | ATT  | 10 | 8  |
| 135139 | 14 | 4676185 | 4676220 | 2 | 18 | 36 | GT   | 18 | 15 |
| 135141 | 14 | 4679824 | 4679835 | 2 | 6  | 12 | CA   | 28 | 5  |
| 135142 | 14 | 4679995 | 4680006 | 2 | 6  | 12 | GT   | 20 | 6  |
| 135143 | 14 | 4683030 | 4683051 | 2 | 11 | 22 | CA   | 17 | 6  |
| 135145 | 14 | 4687330 | 4687345 | 2 | 8  | 16 | TG   | 16 | 4  |
| 135147 | 14 | 4689156 | 4689173 | 3 | 6  | 18 | AGG  | 24 | 5  |
| 135149 | 14 | 4696637 | 4696657 | 3 | 7  | 21 | TGA  | 24 | 6  |
| 135150 | 14 | 4698412 | 4698423 | 2 | 6  | 12 | CA   | 16 | 3  |
| 135151 | 14 | 4698425 | 4698436 | 2 | 6  | 12 | AC   | 11 | 3  |
| 135157 | 14 | 4704621 | 4704650 | 2 | 15 | 30 | CA   | 12 | 10 |
| 135159 | 14 | 4714577 | 4714591 | 3 | 5  | 15 | AAT  | 12 | 3  |
| 135162 | 14 | 4716880 | 4716895 | 2 | 8  | 16 | TA   | 17 | 5  |
| 135170 | 14 | 4734587 | 4734610 | 2 | 12 | 24 | CA   | 12 | 5  |
| 135173 | 14 | 4735617 | 4735630 | 2 | 7  | 14 | GT   | 25 | 6  |
| 135174 | 14 | 4738778 | 4738795 | 3 | 6  | 18 | GGT  | 9  | 4  |
| 135175 | 14 | 4740753 | 4740766 | 2 | 7  | 14 | GT   | 28 | 6  |
| 135193 | 14 | 4773174 | 4773215 | 2 | 21 | 42 | AC   | 9  | 11 |
| 135195 | 14 | 4773987 | 4774010 | 4 | 6  | 24 | ATCC | 29 | 3  |
| 135211 | 14 | 4799351 | 4799366 | 2 | 8  | 16 | GT   | 20 | 4  |
| 135213 | 14 | 4802550 | 4802581 | 2 | 16 | 32 | TG   | 13 | 12 |
| 135214 | 14 | 4802975 | 4802990 | 2 | 8  | 16 | TC   | 15 | 6  |
| 135221 | 14 | 4810790 | 4810813 | 2 | 12 | 24 | CA   | 19 | 7  |
| 135222 | 14 | 4811935 | 4811952 | 3 | 6  | 18 | CCA  | 16 | 5  |
| 135232 | 14 | 4840271 | 4840294 | 4 | 6  | 24 | GAAA | 17 | 3  |
| 135234 | 14 | 4842322 | 4842343 | 2 | 11 | 22 | AG   | 13 | 5  |
| 135236 | 14 | 4843760 | 4843774 | 3 | 5  | 15 | TTG  | 15 | 4  |
| 135243 | 14 | 4851828 | 4851841 | 2 | 7  | 14 | GT   | 12 | 3  |
| 135250 | 14 | 4863804 | 4863818 | 3 | 5  | 15 | TGC  | 34 | 8  |
| 135253 | 14 | 4870051 | 4870068 | 2 | 9  | 18 | CA   | 14 | 7  |
| 135257 | 14 | 4876737 | 4876748 | 2 | 6  | 12 | AT   | 11 | 9  |
| 135259 | 14 | 4877320 | 4877337 | 2 | 9  | 18 | AC   | 17 | 3  |
| 135261 | 14 | 4879573 | 4879596 | 2 | 12 | 24 | GT   | 13 | 9  |
| 135267 | 14 | 4883189 | 4883208 | 4 | 5  | 20 | TTAT | 19 | 5  |
| 135268 | 14 | 4889626 | 4889640 | 3 | 5  | 15 | TTA  | 21 | 13 |
| 135289 | 14 | 4918893 | 4918914 | 2 | 11 | 22 | GT   | 19 | 10 |

|        |    |         |         |   |    |    |      |    |    |
|--------|----|---------|---------|---|----|----|------|----|----|
| 135293 | 14 | 4924356 | 4924391 | 2 | 18 | 36 | CA   | 11 | 8  |
| 135299 | 14 | 4936020 | 4936031 | 2 | 6  | 12 | GT   | 20 | 5  |
| 135301 | 14 | 4941021 | 4941038 | 3 | 6  | 18 | TGG  | 23 | 6  |
| 135304 | 14 | 4952831 | 4952862 | 2 | 16 | 32 | CA   | 9  | 9  |
| 135330 | 14 | 4998116 | 4998127 | 2 | 6  | 12 | AT   | 21 | 3  |
| 135341 | 14 | 5033230 | 5033265 | 3 | 12 | 36 | GTT  | 6  | 4  |
| 135345 | 14 | 5036666 | 5036683 | 3 | 6  | 18 | TGT  | 24 | 4  |
| 135350 | 14 | 5044320 | 5044333 | 2 | 7  | 14 | GA   | 23 | 3  |
| 135353 | 14 | 5049926 | 5049943 | 3 | 6  | 18 | AAC  | 11 | 6  |
| 135361 | 14 | 5090626 | 5090641 | 2 | 8  | 16 | TG   | 13 | 5  |
| 135362 | 14 | 5090645 | 5090656 | 2 | 6  | 12 | GT   | 19 | 4  |
| 135364 | 14 | 5091357 | 5091376 | 2 | 10 | 20 | CA   | 7  | 10 |
| 135365 | 14 | 5092628 | 5092645 | 2 | 9  | 18 | TG   | 12 | 12 |
| 135374 | 14 | 5111752 | 5111765 | 2 | 7  | 14 | AT   | 18 | 3  |
| 135380 | 14 | 5123224 | 5123235 | 2 | 6  | 12 | GC   | 27 | 8  |
| 135390 | 14 | 5136339 | 5136370 | 2 | 16 | 32 | AC   | 9  | 10 |
| 135397 | 14 | 5145822 | 5145837 | 2 | 8  | 16 | GT   | 24 | 6  |
| 135409 | 14 | 5180233 | 5180248 | 4 | 4  | 16 | TTGT | 32 | 4  |
| 135415 | 14 | 5186515 | 5186526 | 2 | 6  | 12 | CA   | 20 | 5  |
| 135416 | 14 | 5186657 | 5186670 | 2 | 7  | 14 | TG   | 24 | 3  |
| 135427 | 14 | 5194724 | 5194737 | 2 | 7  | 14 | AC   | 23 | 9  |
| 135429 | 14 | 5210518 | 5210533 | 4 | 4  | 16 | TTGT | 25 | 3  |
| 135430 | 14 | 5211328 | 5211339 | 2 | 6  | 12 | TG   | 26 | 3  |
| 135436 | 14 | 5234448 | 5234483 | 2 | 18 | 36 | GT   | 9  | 6  |
| 135446 | 14 | 5257150 | 5257165 | 4 | 4  | 16 | GATG | 22 | 3  |
| 135447 | 14 | 5263590 | 5263601 | 2 | 6  | 12 | GT   | 22 | 3  |
| 135448 | 14 | 5273334 | 5273345 | 2 | 6  | 12 | TG   | 24 | 3  |
| 135449 | 14 | 5273501 | 5273534 | 2 | 17 | 34 | CA   | 16 | 8  |
| 135451 | 14 | 5273747 | 5273784 | 2 | 19 | 38 | TC   | 9  | 5  |
| 135454 | 14 | 5275686 | 5275701 | 2 | 8  | 16 | AT   | 16 | 6  |
| 135456 | 14 | 5281626 | 5281641 | 4 | 4  | 16 | CTTA | 25 | 3  |
| 135459 | 14 | 5289971 | 5289982 | 2 | 6  | 12 | GT   | 27 | 3  |
| 135464 | 14 | 5304950 | 5304963 | 2 | 7  | 14 | CA   | 27 | 5  |
| 135471 | 14 | 5329034 | 5329051 | 3 | 6  | 18 | GCA  | 16 | 5  |
| 135472 | 14 | 5329440 | 5329453 | 2 | 7  | 14 | CA   | 24 | 7  |
| 135473 | 14 | 5329455 | 5329468 | 2 | 7  | 14 | AC   | 24 | 6  |
| 135476 | 14 | 5333556 | 5333571 | 2 | 8  | 16 | GT   | 17 | 4  |
| 135477 | 14 | 5333602 | 5333617 | 2 | 8  | 16 | GT   | 17 | 3  |
| 135484 | 14 | 5347135 | 5347162 | 4 | 7  | 28 | AAAC | 30 | 3  |
| 135490 | 14 | 5348836 | 5348847 | 2 | 6  | 12 | TA   | 12 | 5  |
| 135493 | 14 | 5349247 | 5349268 | 2 | 11 | 22 | CT   | 12 | 9  |
| 135495 | 14 | 5349431 | 5349460 | 3 | 10 | 30 | GAG  | 12 | 5  |
| 135498 | 14 | 5353568 | 5353583 | 2 | 8  | 16 | AC   | 19 | 4  |
| 135501 | 14 | 5354213 | 5354233 | 3 | 7  | 21 | CCT  | 20 | 4  |
| 135502 | 14 | 5354337 | 5354350 | 2 | 7  | 14 | AC   | 15 | 3  |
| 135503 | 14 | 5354520 | 5354547 | 4 | 7  | 28 | CTGT | 22 | 8  |
| 135506 | 14 | 5362244 | 5362257 | 2 | 7  | 14 | TG   | 12 | 8  |
| 135510 | 14 | 5368415 | 5368432 | 2 | 9  | 18 | AC   | 21 | 5  |
| 135513 | 14 | 5373299 | 5373316 | 2 | 9  | 18 | CA   | 10 | 7  |
| 135515 | 14 | 5383773 | 5383800 | 2 | 14 | 28 | GT   | 8  | 5  |
| 135516 | 14 | 5384181 | 5384194 | 2 | 7  | 14 | CT   | 27 | 5  |

|        |    |         |         |   |    |    |      |    |    |
|--------|----|---------|---------|---|----|----|------|----|----|
| 135534 | 14 | 5421613 | 5421624 | 2 | 6  | 12 | AC   | 29 | 3  |
| 135539 | 14 | 5438160 | 5438173 | 2 | 7  | 14 | CT   | 16 | 4  |
| 135540 | 14 | 5438174 | 5438187 | 2 | 7  | 14 | CA   | 17 | 4  |
| 135541 | 14 | 5440184 | 5440211 | 2 | 14 | 28 | CA   | 18 | 9  |
| 135542 | 14 | 5440245 | 5440258 | 2 | 7  | 14 | CA   | 21 | 3  |
| 135544 | 14 | 5440873 | 5440890 | 2 | 9  | 18 | GT   | 9  | 4  |
| 135545 | 14 | 5441098 | 5441111 | 2 | 7  | 14 | TG   | 17 | 3  |
| 135546 | 14 | 5441221 | 5441250 | 2 | 15 | 30 | CA   | 10 | 11 |
| 135550 | 14 | 5441791 | 5441808 | 2 | 9  | 18 | CA   | 18 | 7  |
| 135552 | 14 | 5443532 | 5443558 | 3 | 9  | 27 | CAT  | 19 | 11 |
| 135558 | 14 | 5449975 | 5450006 | 4 | 8  | 32 | TCAA | 29 | 7  |
| 135561 | 14 | 5452081 | 5452106 | 2 | 13 | 26 | GT   | 12 | 13 |
| 135564 | 14 | 5458321 | 5458338 | 2 | 9  | 18 | GT   | 12 | 6  |
| 135566 | 14 | 5464767 | 5464794 | 2 | 14 | 28 | GT   | 26 | 11 |
| 135572 | 14 | 5475138 | 5475169 | 2 | 16 | 32 | CA   | 10 | 6  |
| 135575 | 14 | 5478037 | 5478058 | 2 | 11 | 22 | CA   | 18 | 4  |
| 135577 | 14 | 5481397 | 5481414 | 3 | 6  | 18 | CAC  | 24 | 6  |
| 135582 | 14 | 5485125 | 5485140 | 2 | 8  | 16 | AC   | 21 | 4  |
| 135588 | 14 | 5491366 | 5491397 | 2 | 16 | 32 | AC   | 18 | 9  |
| 135598 | 14 | 5510194 | 5510220 | 3 | 9  | 27 | AGG  | 6  | 4  |
| 135599 | 14 | 5510483 | 5510504 | 2 | 11 | 22 | GA   | 19 | 5  |
| 135609 | 14 | 5519590 | 5519609 | 2 | 10 | 20 | CA   | 17 | 8  |
| 135610 | 14 | 5519720 | 5519735 | 2 | 8  | 16 | GA   | 13 | 5  |
| 135611 | 14 | 5521932 | 5521945 | 2 | 7  | 14 | TG   | 17 | 4  |
| 135612 | 14 | 5521947 | 5521958 | 2 | 6  | 12 | GT   | 19 | 4  |
| 135613 | 14 | 5522067 | 5522088 | 2 | 11 | 22 | CA   | 13 | 10 |
| 135618 | 14 | 5529576 | 5529589 | 2 | 7  | 14 | AC   | 19 | 3  |
| 135620 | 14 | 5530772 | 5530801 | 2 | 15 | 30 | GT   | 18 | 9  |
| 135636 | 14 | 5565972 | 5565998 | 3 | 9  | 27 | TTC  | 11 | 4  |
| 135640 | 14 | 5572843 | 5572864 | 2 | 11 | 22 | GT   | 13 | 6  |
| 135641 | 14 | 5572982 | 5572999 | 2 | 9  | 18 | TG   | 28 | 9  |
| 135642 | 14 | 5573699 | 5573712 | 2 | 7  | 14 | TG   | 19 | 6  |
| 135643 | 14 | 5574227 | 5574240 | 2 | 7  | 14 | CA   | 25 | 3  |
| 135648 | 14 | 5581748 | 5581762 | 3 | 5  | 15 | CCG  | 29 | 5  |
| 135653 | 14 | 5594446 | 5594457 | 2 | 6  | 12 | CT   | 25 | 3  |
| 135657 | 14 | 5604890 | 5604911 | 2 | 11 | 22 | CA   | 27 | 5  |
| 135662 | 14 | 5607274 | 5607288 | 3 | 5  | 15 | GCT  | 30 | 3  |
| 135663 | 14 | 5607469 | 5607488 | 2 | 10 | 20 | GA   | 8  | 7  |
| 135665 | 14 | 5607910 | 5607931 | 2 | 11 | 22 | GT   | 7  | 6  |
| 135666 | 14 | 5608168 | 5608191 | 2 | 12 | 24 | TC   | 19 | 6  |
| 135668 | 14 | 5629093 | 5629130 | 2 | 19 | 38 | TG   | 7  | 9  |
| 135669 | 14 | 5631034 | 5631045 | 2 | 6  | 12 | CA   | 26 | 3  |
| 135670 | 14 | 5631047 | 5631058 | 2 | 6  | 12 | AC   | 27 | 4  |
| 135672 | 14 | 5635076 | 5635087 | 2 | 6  | 12 | TG   | 23 | 3  |
| 135681 | 14 | 5646950 | 5646970 | 3 | 7  | 21 | CAG  | 17 | 6  |
| 135682 | 14 | 5647689 | 5647700 | 2 | 6  | 12 | CA   | 17 | 9  |
| 135684 | 14 | 5647732 | 5647757 | 2 | 13 | 26 | CA   | 11 | 7  |
| 135685 | 14 | 5649364 | 5649377 | 2 | 7  | 14 | GT   | 15 | 3  |
| 135686 | 14 | 5651177 | 5651188 | 2 | 6  | 12 | AC   | 22 | 3  |
| 135687 | 14 | 5651320 | 5651345 | 2 | 13 | 26 | CA   | 15 | 9  |
| 135688 | 14 | 5651462 | 5651473 | 2 | 6  | 12 | AC   | 6  | 4  |

|        |    |         |         |   |    |    |      |    |    |
|--------|----|---------|---------|---|----|----|------|----|----|
| 135690 | 14 | 5653685 | 5653708 | 2 | 12 | 24 | TG   | 14 | 17 |
| 135691 | 14 | 5654158 | 5654187 | 2 | 15 | 30 | GT   | 12 | 14 |
| 135694 | 14 | 5661033 | 5661044 | 2 | 6  | 12 | CT   | 16 | 8  |
| 135695 | 14 | 5661045 | 5661062 | 2 | 9  | 18 | CA   | 21 | 10 |
| 135699 | 14 | 5670670 | 5670687 | 2 | 9  | 18 | GT   | 21 | 8  |
| 135700 | 14 | 5674978 | 5675015 | 2 | 19 | 38 | TG   | 18 | 9  |
| 135703 | 14 | 5679604 | 5679627 | 2 | 12 | 24 | CA   | 26 | 6  |
| 135704 | 14 | 5680162 | 5680189 | 2 | 14 | 28 | TG   | 6  | 5  |
| 135706 | 14 | 5684430 | 5684451 | 2 | 11 | 22 | TG   | 24 | 3  |
| 135709 | 14 | 5709312 | 5709327 | 2 | 8  | 16 | CT   | 26 | 3  |
| 135713 | 14 | 5726151 | 5726180 | 2 | 15 | 30 | AC   | 8  | 9  |
| 135720 | 14 | 5736368 | 5736389 | 2 | 11 | 22 | TG   | 16 | 13 |
| 135721 | 14 | 5738510 | 5738523 | 2 | 7  | 14 | TG   | 27 | 3  |
| 135724 | 14 | 5745299 | 5745313 | 3 | 5  | 15 | TTC  | 13 | 4  |
| 135727 | 14 | 5746068 | 5746083 | 2 | 8  | 16 | GT   | 25 | 7  |
| 135728 | 14 | 5747780 | 5747795 | 2 | 8  | 16 | GT   | 28 | 4  |
| 135737 | 14 | 5791630 | 5791651 | 2 | 11 | 22 | AC   | 24 | 12 |
| 135740 | 14 | 5806941 | 5806960 | 2 | 10 | 20 | TC   | 8  | 7  |
| 135741 | 14 | 5807077 | 5807098 | 2 | 11 | 22 | TC   | 13 | 10 |
| 135744 | 14 | 5808964 | 5808984 | 3 | 7  | 21 | TTA  | 16 | 4  |
| 135747 | 14 | 5831775 | 5831790 | 4 | 4  | 16 | TCTT | 34 | 3  |
| 135750 | 14 | 5835050 | 5835067 | 2 | 9  | 18 | CA   | 18 | 10 |
| 135752 | 14 | 5835214 | 5835225 | 2 | 6  | 12 | TC   | 22 | 6  |
| 135753 | 14 | 5835226 | 5835241 | 2 | 8  | 16 | AC   | 19 | 6  |
| 135755 | 14 | 5841416 | 5841435 | 4 | 5  | 20 | AGAC | 31 | 5  |
| 135761 | 14 | 5855464 | 5855479 | 2 | 8  | 16 | AC   | 10 | 9  |
| 135762 | 14 | 5855481 | 5855496 | 2 | 8  | 16 | CA   | 13 | 10 |
| 135764 | 14 | 5859434 | 5859455 | 2 | 11 | 22 | AC   | 19 | 11 |
| 135767 | 14 | 5862247 | 5862258 | 2 | 6  | 12 | CA   | 30 | 6  |
| 135768 | 14 | 5862425 | 5862460 | 2 | 18 | 36 | GT   | 16 | 13 |
| 135775 | 14 | 5867179 | 5867206 | 2 | 14 | 28 | AC   | 7  | 5  |
| 135776 | 14 | 5868330 | 5868365 | 2 | 18 | 36 | TG   | 9  | 7  |
| 135780 | 14 | 5888995 | 5889009 | 3 | 5  | 15 | GGA  | 22 | 4  |
| 135781 | 14 | 5893388 | 5893415 | 2 | 14 | 28 | CA   | 6  | 7  |
| 135782 | 14 | 5894643 | 5894660 | 2 | 9  | 18 | AC   | 28 | 5  |
| 135788 | 14 | 5905626 | 5905655 | 2 | 15 | 30 | CA   | 13 | 13 |
| 135791 | 14 | 5907685 | 5907714 | 2 | 15 | 30 | AC   | 13 | 6  |
| 135794 | 14 | 5909524 | 5909535 | 2 | 6  | 12 | CA   | 11 | 3  |
| 135797 | 14 | 5911136 | 5911153 | 2 | 9  | 18 | CA   | 18 | 6  |
| 135799 | 14 | 5912285 | 5912308 | 3 | 8  | 24 | CTC  | 18 | 3  |
| 135805 | 14 | 5923426 | 5923467 | 2 | 21 | 42 | CA   | 10 | 9  |
| 135807 | 14 | 5925512 | 5925527 | 2 | 8  | 16 | CA   | 18 | 4  |
| 135808 | 14 | 5927341 | 5927372 | 2 | 16 | 32 | CA   | 10 | 9  |
| 135810 | 14 | 5927490 | 5927515 | 2 | 13 | 26 | GT   | 16 | 19 |
| 135817 | 14 | 5933621 | 5933632 | 2 | 6  | 12 | CA   | 24 | 7  |
| 135819 | 14 | 5938310 | 5938325 | 2 | 8  | 16 | AG   | 19 | 4  |
| 135820 | 14 | 5939568 | 5939581 | 2 | 7  | 14 | CA   | 29 | 3  |
| 135824 | 14 | 5947717 | 5947738 | 2 | 11 | 22 | TG   | 15 | 3  |
| 135829 | 14 | 5951421 | 5951456 | 2 | 18 | 36 | CA   | 7  | 7  |
| 135833 | 14 | 5953618 | 5953643 | 2 | 13 | 26 | GT   | 15 | 9  |
| 135835 | 14 | 5956954 | 5956983 | 2 | 15 | 30 | CA   | 13 | 5  |

|        |    |         |         |   |    |    |      |    |    |
|--------|----|---------|---------|---|----|----|------|----|----|
| 135837 | 14 | 5963770 | 5963781 | 2 | 6  | 12 | AC   | 18 | 7  |
| 135845 | 14 | 5966619 | 5966657 | 3 | 13 | 39 | AGA  | 14 | 7  |
| 135852 | 14 | 5985987 | 5986004 | 2 | 9  | 18 | CA   | 28 | 4  |
| 135855 | 14 | 5989167 | 5989198 | 2 | 16 | 32 | TG   | 11 | 8  |
| 135857 | 14 | 5990813 | 5990838 | 2 | 13 | 26 | AC   | 8  | 6  |
| 135859 | 14 | 5991108 | 5991141 | 2 | 17 | 34 | AC   | 10 | 16 |
| 135868 | 14 | 6007799 | 6007840 | 2 | 21 | 42 | TG   | 14 | 11 |
| 135871 | 14 | 6010125 | 6010142 | 2 | 9  | 18 | TG   | 14 | 4  |
| 135875 | 14 | 6011443 | 6011468 | 2 | 13 | 26 | AC   | 23 | 13 |
| 135877 | 14 | 6013775 | 6013788 | 2 | 7  | 14 | AC   | 17 | 4  |
| 135886 | 14 | 6020970 | 6021008 | 3 | 13 | 39 | CTT  | 14 | 13 |
| 135890 | 14 | 6021421 | 6021460 | 2 | 20 | 40 | CA   | 10 | 13 |
| 135891 | 14 | 6021665 | 6021688 | 4 | 6  | 24 | GGAT | 24 | 8  |
| 135892 | 14 | 6021865 | 6021876 | 2 | 6  | 12 | GA   | 20 | 4  |
| 135894 | 14 | 6022098 | 6022125 | 2 | 14 | 28 | CA   | 13 | 14 |
| 135896 | 14 | 6024078 | 6024097 | 2 | 10 | 20 | CT   | 10 | 6  |
| 135901 | 14 | 6024473 | 6024484 | 2 | 6  | 12 | GT   | 18 | 8  |
| 135904 | 14 | 6030043 | 6030054 | 2 | 6  | 12 | CA   | 10 | 5  |
| 135905 | 14 | 6030055 | 6030070 | 2 | 8  | 16 | CG   | 33 | 8  |
| 135908 | 14 | 6034836 | 6034853 | 2 | 9  | 18 | CA   | 26 | 6  |
| 135912 | 14 | 6036658 | 6036695 | 2 | 19 | 38 | TG   | 6  | 6  |
| 135914 | 14 | 6048640 | 6048659 | 2 | 10 | 20 | CA   | 16 | 6  |
| 135915 | 14 | 6048884 | 6048907 | 2 | 12 | 24 | TG   | 17 | 7  |
| 135916 | 14 | 6048930 | 6048941 | 2 | 6  | 12 | TG   | 25 | 3  |
| 135917 | 14 | 6049039 | 6049078 | 4 | 10 | 40 | ATCT | 24 | 5  |
| 135920 | 14 | 6051127 | 6051162 | 2 | 18 | 36 | CA   | 8  | 7  |
| 135921 | 14 | 6051301 | 6051320 | 2 | 10 | 20 | GT   | 24 | 4  |
| 135922 | 14 | 6051469 | 6051484 | 2 | 8  | 16 | TG   | 29 | 4  |
| 135926 | 14 | 6053267 | 6053292 | 2 | 13 | 26 | TG   | 14 | 9  |
| 135928 | 14 | 6057191 | 6057204 | 2 | 7  | 14 | CT   | 25 | 3  |
| 135931 | 14 | 6062190 | 6062201 | 2 | 6  | 12 | AC   | 26 | 3  |
| 135936 | 14 | 6096534 | 6096557 | 2 | 12 | 24 | TA   | 11 | 9  |
| 135937 | 14 | 6102006 | 6102044 | 3 | 13 | 39 | TGA  | 20 | 10 |
| 135946 | 14 | 6135757 | 6135784 | 2 | 14 | 28 | CA   | 16 | 8  |
| 135948 | 14 | 6136427 | 6136446 | 2 | 10 | 20 | TG   | 20 | 7  |
| 135949 | 14 | 6136606 | 6136653 | 2 | 24 | 48 | AC   | 7  | 9  |
| 135953 | 14 | 6136979 | 6136994 | 2 | 8  | 16 | TG   | 19 | 9  |
| 135957 | 14 | 6150382 | 6150393 | 2 | 6  | 12 | AC   | 12 | 6  |
| 135958 | 14 | 6153463 | 6153482 | 2 | 10 | 20 | GT   | 22 | 11 |
| 135959 | 14 | 6156859 | 6156882 | 2 | 12 | 24 | TG   | 12 | 9  |
| 135961 | 14 | 6160586 | 6160603 | 2 | 9  | 18 | AC   | 17 | 6  |
| 135962 | 14 | 6165925 | 6165956 | 2 | 16 | 32 | AC   | 19 | 11 |
| 135964 | 14 | 6167423 | 6167450 | 2 | 14 | 28 | TG   | 18 | 15 |
| 135965 | 14 | 6167767 | 6167782 | 2 | 8  | 16 | AC   | 24 | 3  |
| 135974 | 14 | 6177740 | 6177757 | 3 | 6  | 18 | GCT  | 22 | 4  |
| 135975 | 14 | 6178835 | 6178862 | 2 | 14 | 28 | TG   | 17 | 13 |
| 135983 | 14 | 6193348 | 6193367 | 2 | 10 | 20 | AC   | 11 | 5  |
| 135987 | 14 | 6196528 | 6196557 | 2 | 15 | 30 | TG   | 7  | 6  |
| 135988 | 14 | 6196685 | 6196716 | 2 | 16 | 32 | GT   | 15 | 8  |
| 135991 | 14 | 6203737 | 6203754 | 2 | 9  | 18 | AC   | 8  | 6  |
| 135992 | 14 | 6203880 | 6203893 | 2 | 7  | 14 | CA   | 29 | 3  |



|        |    |         |         |   |    |    |      |    |    |
|--------|----|---------|---------|---|----|----|------|----|----|
| 135993 | 14 | 6206814 | 6206837 | 2 | 12 | 24 | AC   | 15 | 5  |
| 135999 | 14 | 6221886 | 6221909 | 2 | 12 | 24 | TG   | 19 | 4  |
| 136006 | 14 | 6236262 | 6236287 | 2 | 13 | 26 | TG   | 16 | 6  |
| 136007 | 14 | 6237227 | 6237241 | 3 | 5  | 15 | TCC  | 23 | 3  |
| 136010 | 14 | 6245247 | 6245272 | 2 | 13 | 26 | CT   | 12 | 4  |
| 136014 | 14 | 6254041 | 6254076 | 2 | 18 | 36 | CA   | 9  | 8  |
| 136015 | 14 | 6261073 | 6261086 | 2 | 7  | 14 | TG   | 22 | 3  |
| 136016 | 14 | 6262691 | 6262704 | 2 | 7  | 14 | CA   | 16 | 6  |
| 136018 | 14 | 6265678 | 6265689 | 2 | 6  | 12 | GT   | 26 | 5  |
| 136023 | 14 | 6270698 | 6270711 | 2 | 7  | 14 | AT   | 14 | 6  |
| 136024 | 14 | 6270854 | 6270893 | 2 | 20 | 40 | GT   | 10 | 9  |
| 136026 | 14 | 6273395 | 6273410 | 2 | 8  | 16 | AC   | 28 | 4  |
| 136031 | 14 | 6279168 | 6279185 | 2 | 9  | 18 | CA   | 16 | 6  |
| 136042 | 14 | 6308009 | 6308024 | 2 | 8  | 16 | TG   | 21 | 6  |
| 136046 | 14 | 6316801 | 6316816 | 4 | 4  | 16 | GAGG | 23 | 3  |
| 136048 | 14 | 6317642 | 6317679 | 2 | 19 | 38 | GT   | 15 | 10 |
| 136049 | 14 | 6318680 | 6318701 | 2 | 11 | 22 | TG   | 14 | 7  |
| 136052 | 14 | 6321513 | 6321532 | 2 | 10 | 20 | CA   | 26 | 5  |
| 136060 | 14 | 6329929 | 6329952 | 3 | 8  | 24 | AGC  | 25 | 5  |
| 136061 | 14 | 6334358 | 6334378 | 3 | 7  | 21 | ACC  | 25 | 7  |
| 136062 | 14 | 6334885 | 6334914 | 3 | 10 | 30 | CAG  | 20 | 4  |
| 136063 | 14 | 6335925 | 6335944 | 2 | 10 | 20 | AT   | 15 | 8  |
| 136065 | 14 | 6346472 | 6346483 | 2 | 6  | 12 | AC   | 27 | 3  |
| 136068 | 14 | 6353890 | 6353905 | 2 | 8  | 16 | AC   | 7  | 5  |
| 136070 | 14 | 6355481 | 6355500 | 2 | 10 | 20 | GT   | 7  | 8  |
| 136072 | 14 | 6363459 | 6363480 | 2 | 11 | 22 | CA   | 17 | 5  |
| 136076 | 14 | 6367719 | 6367748 | 2 | 15 | 30 | CA   | 12 | 10 |
| 136077 | 14 | 6372228 | 6372249 | 2 | 11 | 22 | TG   | 20 | 7  |
| 136078 | 14 | 6372389 | 6372410 | 2 | 11 | 22 | TG   | 15 | 11 |
| 136081 | 14 | 6377374 | 6377387 | 2 | 7  | 14 | GT   | 19 | 6  |
| 136085 | 14 | 6383689 | 6383720 | 2 | 16 | 32 | AC   | 14 | 14 |
| 136089 | 14 | 6395839 | 6395854 | 2 | 8  | 16 | TG   | 16 | 6  |
| 136092 | 14 | 6399048 | 6399067 | 2 | 10 | 20 | GT   | 6  | 7  |
| 136094 | 14 | 6401516 | 6401529 | 2 | 7  | 14 | AC   | 17 | 11 |
| 136095 | 14 | 6401531 | 6401550 | 2 | 10 | 20 | CA   | 18 | 12 |
| 136096 | 14 | 6401709 | 6401736 | 2 | 14 | 28 | TG   | 22 | 12 |
| 136097 | 14 | 6404883 | 6404914 | 2 | 16 | 32 | AC   | 10 | 11 |
| 136102 | 14 | 6412109 | 6412132 | 2 | 12 | 24 | CA   | 11 | 11 |
| 136103 | 14 | 6412197 | 6412246 | 2 | 25 | 50 | TG   | 14 | 8  |
| 136107 | 14 | 6422919 | 6422934 | 2 | 8  | 16 | TG   | 14 | 9  |
| 136111 | 14 | 6434534 | 6434559 | 2 | 13 | 26 | CA   | 23 | 10 |
| 136114 | 14 | 6439125 | 6439160 | 2 | 18 | 36 | CA   | 10 | 11 |
| 136120 | 14 | 6447689 | 6447700 | 2 | 6  | 12 | AC   | 35 | 3  |
| 136124 | 14 | 6469104 | 6469117 | 2 | 7  | 14 | TG   | 24 | 4  |
| 136125 | 14 | 6470504 | 6470521 | 2 | 9  | 18 | AC   | 29 | 6  |
| 136126 | 14 | 6470687 | 6470716 | 2 | 15 | 30 | TG   | 14 | 13 |
| 136127 | 14 | 6483389 | 6483428 | 2 | 20 | 40 | GT   | 10 | 9  |
| 136134 | 14 | 6507376 | 6507401 | 2 | 13 | 26 | AC   | 25 | 9  |
| 136139 | 14 | 6516591 | 6516604 | 2 | 7  | 14 | AC   | 14 | 3  |
| 136143 | 14 | 6534430 | 6534443 | 2 | 7  | 14 | AC   | 31 | 3  |
| 136144 | 14 | 6534674 | 6534693 | 2 | 10 | 20 | AG   | 18 | 3  |

|        |    |         |         |   |    |    |      |    |    |
|--------|----|---------|---------|---|----|----|------|----|----|
| 136148 | 14 | 6540980 | 6540991 | 2 | 6  | 12 | GT   | 28 | 4  |
| 136149 | 14 | 6545442 | 6545461 | 2 | 10 | 20 | CT   | 17 | 4  |
| 136155 | 14 | 6554914 | 6554946 | 3 | 11 | 33 | AAC  | 24 | 6  |
| 136157 | 14 | 6556486 | 6556506 | 3 | 7  | 21 | GAG  | 17 | 11 |
| 136158 | 14 | 6557140 | 6557154 | 3 | 5  | 15 | CAG  | 23 | 4  |
| 136163 | 14 | 6561950 | 6561983 | 2 | 17 | 34 | AC   | 11 | 8  |
| 136167 | 14 | 6562817 | 6562840 | 2 | 12 | 24 | GA   | 6  | 4  |
| 136171 | 14 | 6568798 | 6568809 | 2 | 6  | 12 | GT   | 28 | 3  |
| 136181 | 14 | 6611433 | 6611454 | 2 | 11 | 22 | GA   | 15 | 9  |
| 136188 | 14 | 6632551 | 6632570 | 2 | 10 | 20 | TG   | 28 | 7  |
| 136195 | 14 | 6648387 | 6648408 | 2 | 11 | 22 | TC   | 21 | 5  |
| 136198 | 14 | 6650550 | 6650565 | 4 | 4  | 16 | CCAC | 9  | 3  |
| 136201 | 14 | 6660186 | 6660209 | 2 | 12 | 24 | GT   | 16 | 11 |
| 136204 | 14 | 6668330 | 6668345 | 4 | 4  | 16 | ATTT | 26 | 8  |
| 136205 | 14 | 6668978 | 6669011 | 2 | 17 | 34 | GT   | 14 | 7  |
| 136209 | 14 | 6671874 | 6671897 | 3 | 8  | 24 | TTG  | 28 | 4  |
| 136211 | 14 | 6677678 | 6677692 | 3 | 5  | 15 | GGT  | 10 | 4  |
| 136215 | 14 | 6683026 | 6683046 | 3 | 7  | 21 | GCT  | 14 | 4  |
| 136217 | 14 | 6686786 | 6686813 | 2 | 14 | 28 | GT   | 19 | 13 |
| 136218 | 14 | 6690180 | 6690191 | 2 | 6  | 12 | TG   | 24 | 4  |
| 136219 | 14 | 6695209 | 6695234 | 2 | 13 | 26 | AC   | 15 | 4  |
| 136220 | 14 | 6698155 | 6698166 | 2 | 6  | 12 | CA   | 22 | 3  |
| 136221 | 14 | 6705146 | 6705175 | 3 | 10 | 30 | AGG  | 16 | 3  |
| 136223 | 14 | 6706772 | 6706783 | 2 | 6  | 12 | AC   | 12 | 3  |
| 136225 | 14 | 6716675 | 6716694 | 2 | 10 | 20 | TG   | 19 | 6  |
| 136231 | 14 | 6726883 | 6726904 | 2 | 11 | 22 | GT   | 14 | 5  |
| 136232 | 14 | 6727139 | 6727182 | 2 | 22 | 44 | GT   | 10 | 10 |
| 136233 | 14 | 6732505 | 6732524 | 2 | 10 | 20 | AC   | 10 | 3  |
| 136234 | 14 | 6735578 | 6735595 | 2 | 9  | 18 | TG   | 12 | 4  |
| 136237 | 14 | 6736914 | 6736929 | 2 | 8  | 16 | GT   | 23 | 7  |
| 136242 | 14 | 6742222 | 6742237 | 2 | 8  | 16 | GT   | 17 | 3  |
| 136243 | 14 | 6743201 | 6743222 | 2 | 11 | 22 | AC   | 11 | 7  |
| 136244 | 14 | 6743420 | 6743435 | 2 | 8  | 16 | TG   | 20 | 14 |
| 136246 | 14 | 6744491 | 6744508 | 2 | 9  | 18 | AC   | 22 | 7  |
| 136247 | 14 | 6744719 | 6744748 | 2 | 15 | 30 | CA   | 14 | 11 |
| 136258 | 14 | 6771404 | 6771418 | 3 | 5  | 15 | TGT  | 25 | 5  |
| 136260 | 14 | 6776156 | 6776167 | 2 | 6  | 12 | AC   | 32 | 3  |
| 136263 | 14 | 6782712 | 6782741 | 2 | 15 | 30 | AC   | 15 | 13 |
| 136264 | 14 | 6788336 | 6788351 | 2 | 8  | 16 | GT   | 17 | 6  |
| 136272 | 14 | 6804906 | 6804959 | 2 | 27 | 54 | GT   | 6  | 10 |
| 136274 | 14 | 6809910 | 6809921 | 2 | 6  | 12 | AC   | 27 | 5  |
| 136275 | 14 | 6810079 | 6810090 | 2 | 6  | 12 | GT   | 12 | 5  |
| 136277 | 14 | 6810394 | 6810429 | 2 | 18 | 36 | CA   | 8  | 9  |
| 136281 | 14 | 6818887 | 6818898 | 2 | 6  | 12 | TG   | 18 | 4  |
| 136285 | 14 | 6827734 | 6827749 | 2 | 8  | 16 | AC   | 15 | 3  |
| 136286 | 14 | 6827792 | 6827815 | 2 | 12 | 24 | CA   | 19 | 8  |
| 136300 | 14 | 6854785 | 6854798 | 2 | 7  | 14 | TG   | 26 | 4  |
| 136304 | 14 | 6857773 | 6857805 | 3 | 11 | 33 | AGG  | 6  | 7  |
| 136305 | 14 | 6858350 | 6858369 | 2 | 10 | 20 | GT   | 24 | 5  |
| 136307 | 14 | 6861009 | 6861032 | 2 | 12 | 24 | GT   | 8  | 9  |
| 136308 | 14 | 6861080 | 6861119 | 2 | 20 | 40 | TG   | 13 | 11 |

|        |    |         |         |   |    |    |      |    |    |
|--------|----|---------|---------|---|----|----|------|----|----|
| 136310 | 14 | 6863103 | 6863126 | 2 | 12 | 24 | TG   | 7  | 7  |
| 136312 | 14 | 6865655 | 6865668 | 2 | 7  | 14 | AG   | 34 | 3  |
| 136318 | 14 | 6867350 | 6867371 | 2 | 11 | 22 | CT   | 9  | 4  |
| 136320 | 14 | 6867530 | 6867557 | 2 | 14 | 28 | TG   | 12 | 7  |
| 136323 | 14 | 6879258 | 6879269 | 2 | 6  | 12 | AC   | 26 | 4  |
| 136326 | 14 | 6881155 | 6881188 | 2 | 17 | 34 | TG   | 11 | 10 |
| 136330 | 14 | 6884828 | 6884849 | 2 | 11 | 22 | TG   | 21 | 9  |
| 136336 | 14 | 6894623 | 6894638 | 2 | 8  | 16 | TG   | 19 | 5  |
| 136337 | 14 | 6894902 | 6894925 | 2 | 12 | 24 | GT   | 29 | 7  |
| 136338 | 14 | 6895194 | 6895207 | 2 | 7  | 14 | GT   | 20 | 9  |
| 136340 | 14 | 6896297 | 6896318 | 2 | 11 | 22 | AC   | 16 | 9  |
| 136346 | 14 | 6898663 | 6898680 | 3 | 6  | 18 | GAA  | 15 | 3  |
| 136347 | 14 | 6900795 | 6900810 | 2 | 8  | 16 | GT   | 25 | 4  |
| 136348 | 14 | 6902795 | 6902809 | 3 | 5  | 15 | GGA  | 29 | 6  |
| 136349 | 14 | 6904154 | 6904167 | 2 | 7  | 14 | AC   | 22 | 3  |
| 136353 | 14 | 6905316 | 6905343 | 2 | 14 | 28 | TG   | 25 | 7  |
| 136356 | 14 | 6909188 | 6909203 | 2 | 8  | 16 | TG   | 17 | 3  |
| 136358 | 14 | 6916269 | 6916284 | 2 | 8  | 16 | GT   | 23 | 3  |
| 136360 | 14 | 6924696 | 6924713 | 2 | 9  | 18 | CA   | 13 | 6  |
| 136364 | 14 | 6929078 | 6929099 | 2 | 11 | 22 | AC   | 9  | 5  |
| 136366 | 14 | 6930596 | 6930615 | 4 | 5  | 20 | CAGA | 26 | 4  |
| 136367 | 14 | 6934660 | 6934677 | 2 | 9  | 18 | TG   | 19 | 4  |
| 136370 | 14 | 6939786 | 6939818 | 3 | 11 | 33 | CTT  | 11 | 5  |
| 136371 | 14 | 6943567 | 6943580 | 2 | 7  | 14 | GT   | 21 | 4  |
| 136373 | 14 | 6944916 | 6944931 | 2 | 8  | 16 | AC   | 23 | 5  |
| 136374 | 14 | 6945418 | 6945437 | 2 | 10 | 20 | TG   | 21 | 11 |
| 136376 | 14 | 6947541 | 6947558 | 2 | 9  | 18 | CA   | 23 | 7  |
| 136377 | 14 | 6947723 | 6947746 | 2 | 12 | 24 | AG   | 9  | 4  |
| 136379 | 14 | 6948197 | 6948220 | 2 | 12 | 24 | CA   | 10 | 8  |
| 136380 | 14 | 6949736 | 6949777 | 2 | 21 | 42 | GT   | 10 | 9  |
| 136381 | 14 | 6950162 | 6950179 | 2 | 9  | 18 | GT   | 21 | 6  |
| 136382 | 14 | 6952727 | 6952744 | 2 | 9  | 18 | GT   | 21 | 8  |
| 136384 | 14 | 6952922 | 6952955 | 2 | 17 | 34 | CT   | 11 | 6  |
| 136393 | 14 | 6958553 | 6958570 | 3 | 6  | 18 | AAT  | 29 | 3  |
| 136398 | 14 | 6959225 | 6959248 | 2 | 12 | 24 | AC   | 16 | 3  |
| 136402 | 14 | 6960011 | 6960026 | 4 | 4  | 16 | CTTT | 22 | 3  |
| 136405 | 14 | 6962399 | 6962434 | 2 | 18 | 36 | CA   | 7  | 6  |
| 136406 | 14 | 6962691 | 6962702 | 2 | 6  | 12 | GT   | 18 | 3  |
| 136421 | 14 | 6990280 | 6990311 | 2 | 16 | 32 | GA   | 11 | 9  |
| 136427 | 14 | 6998711 | 6998724 | 2 | 7  | 14 | AC   | 24 | 3  |
| 136429 | 14 | 7004658 | 7004685 | 2 | 14 | 28 | TG   | 15 | 14 |
| 136430 | 14 | 7006394 | 7006414 | 3 | 7  | 21 | TCC  | 25 | 3  |
| 136432 | 14 | 7012772 | 7012813 | 2 | 21 | 42 | AC   | 13 | 14 |
| 136434 | 14 | 7021457 | 7021496 | 2 | 20 | 40 | TG   | 7  | 7  |
| 136435 | 14 | 7024209 | 7024222 | 2 | 7  | 14 | TG   | 19 | 7  |
| 136439 | 14 | 7028302 | 7028313 | 2 | 6  | 12 | TA   | 15 | 11 |
| 136440 | 14 | 7030342 | 7030377 | 2 | 18 | 36 | GA   | 14 | 6  |
| 136445 | 14 | 7043095 | 7043118 | 3 | 8  | 24 | TCC  | 15 | 7  |
| 136447 | 14 | 7045316 | 7045331 | 2 | 8  | 16 | TG   | 17 | 3  |
| 136448 | 14 | 7047213 | 7047240 | 2 | 14 | 28 | GT   | 13 | 6  |
| 136451 | 14 | 7055457 | 7055474 | 2 | 9  | 18 | AC   | 16 | 7  |

|        |    |         |         |   |    |    |      |    |    |
|--------|----|---------|---------|---|----|----|------|----|----|
| 136456 | 14 | 7057208 | 7057219 | 2 | 6  | 12 | AC   | 28 | 4  |
| 136460 | 14 | 7073059 | 7073080 | 2 | 11 | 22 | AG   | 17 | 5  |
| 136464 | 14 | 7097465 | 7097486 | 2 | 11 | 22 | TG   | 18 | 17 |
| 136470 | 14 | 7110035 | 7110062 | 2 | 14 | 28 | AC   | 15 | 9  |
| 136473 | 14 | 7111522 | 7111537 | 2 | 8  | 16 | TC   | 29 | 5  |
| 136480 | 14 | 7131451 | 7131464 | 2 | 7  | 14 | AC   | 24 | 8  |
| 136483 | 14 | 7146120 | 7146141 | 2 | 11 | 22 | TG   | 25 | 13 |
| 136486 | 14 | 7148474 | 7148501 | 4 | 7  | 28 | TCAT | 17 | 7  |
| 136489 | 14 | 7161081 | 7161102 | 2 | 11 | 22 | GA   | 25 | 3  |
| 136491 | 14 | 7163326 | 7163339 | 2 | 7  | 14 | AT   | 6  | 8  |
| 136494 | 14 | 7167188 | 7167202 | 3 | 5  | 15 | AGG  | 24 | 6  |
| 136503 | 14 | 7176532 | 7176545 | 2 | 7  | 14 | CT   | 25 | 5  |
| 136504 | 14 | 7176797 | 7176828 | 2 | 16 | 32 | CA   | 24 | 7  |
| 136505 | 14 | 7188061 | 7188086 | 2 | 13 | 26 | CA   | 18 | 11 |
| 136510 | 14 | 7214782 | 7214795 | 2 | 7  | 14 | AC   | 20 | 4  |
| 136514 | 14 | 7234998 | 7235012 | 3 | 5  | 15 | CTC  | 28 | 5  |
| 136525 | 14 | 7268281 | 7268304 | 3 | 8  | 24 | TGC  | 12 | 4  |
| 136528 | 14 | 7272805 | 7272825 | 3 | 7  | 21 | GAG  | 19 | 7  |
| 136530 | 14 | 7276169 | 7276195 | 3 | 9  | 27 | GGA  | 20 | 7  |
| 136536 | 14 | 7284992 | 7285003 | 2 | 6  | 12 | CA   | 20 | 5  |
| 136537 | 14 | 7285006 | 7285019 | 2 | 7  | 14 | CA   | 19 | 6  |
| 136538 | 14 | 7285163 | 7285176 | 2 | 7  | 14 | CA   | 21 | 8  |
| 136545 | 14 | 7295832 | 7295881 | 2 | 25 | 50 | AC   | 7  | 7  |
| 136547 | 14 | 7305043 | 7305062 | 2 | 10 | 20 | AC   | 11 | 5  |
| 136550 | 14 | 7314814 | 7314871 | 2 | 29 | 58 | GT   | 12 | 15 |
| 136552 | 14 | 7319624 | 7319641 | 3 | 6  | 18 | GGT  | 12 | 4  |
| 136556 | 14 | 7336201 | 7336230 | 2 | 15 | 30 | CA   | 11 | 10 |
| 136557 | 14 | 7337570 | 7337591 | 2 | 11 | 22 | TG   | 15 | 5  |
| 136558 | 14 | 7337728 | 7337754 | 3 | 9  | 27 | GAA  | 19 | 5  |
| 136563 | 14 | 7371402 | 7371419 | 2 | 9  | 18 | GA   | 18 | 5  |
| 136567 | 14 | 7391937 | 7391960 | 4 | 6  | 24 | TTGG | 19 | 3  |
| 136568 | 14 | 7395020 | 7395049 | 3 | 10 | 30 | AGG  | 11 | 5  |
| 136570 | 14 | 7395269 | 7395300 | 2 | 16 | 32 | TG   | 15 | 7  |
| 136574 | 14 | 7403095 | 7403112 | 2 | 9  | 18 | GT   | 13 | 7  |
| 136582 | 14 | 7412925 | 7412944 | 2 | 10 | 20 | AC   | 17 | 9  |
| 136583 | 14 | 7413102 | 7413115 | 2 | 7  | 14 | CA   | 27 | 6  |
| 136589 | 14 | 7437002 | 7437025 | 2 | 12 | 24 | AC   | 20 | 5  |
| 136595 | 14 | 7443748 | 7443761 | 2 | 7  | 14 | CA   | 17 | 6  |
| 136596 | 14 | 7446747 | 7446764 | 3 | 6  | 18 | TGT  | 22 | 4  |
| 136598 | 14 | 7448685 | 7448702 | 2 | 9  | 18 | GA   | 16 | 5  |
| 136599 | 14 | 7448865 | 7448876 | 2 | 6  | 12 | AG   | 20 | 3  |
| 136603 | 14 | 7452895 | 7452909 | 3 | 5  | 15 | AGC  | 20 | 3  |
| 136604 | 14 | 7452934 | 7452954 | 3 | 7  | 21 | AGC  | 17 | 3  |
| 136611 | 14 | 7460369 | 7460386 | 2 | 9  | 18 | CA   | 20 | 7  |
| 136612 | 14 | 7460695 | 7460715 | 3 | 7  | 21 | GGA  | 22 | 4  |
| 136613 | 14 | 7465272 | 7465289 | 2 | 9  | 18 | AC   | 27 | 3  |
| 136616 | 14 | 7479090 | 7479107 | 3 | 6  | 18 | AGC  | 30 | 3  |
| 136620 | 14 | 7494759 | 7494773 | 3 | 5  | 15 | CAG  | 21 | 3  |
| 136621 | 14 | 7495304 | 7495317 | 2 | 7  | 14 | TG   | 26 | 5  |
| 136628 | 14 | 7502448 | 7502465 | 3 | 6  | 18 | GAG  | 30 | 4  |
| 136629 | 14 | 7506777 | 7506791 | 3 | 5  | 15 | CTG  | 18 | 4  |

|        |    |         |         |   |    |    |      |    |    |
|--------|----|---------|---------|---|----|----|------|----|----|
| 136630 | 14 | 7508972 | 7509001 | 3 | 10 | 30 | GAA  | 16 | 4  |
| 136633 | 14 | 7520684 | 7520695 | 2 | 6  | 12 | CT   | 14 | 4  |
| 136634 | 14 | 7520724 | 7520739 | 2 | 8  | 16 | GA   | 18 | 4  |
| 136636 | 14 | 7522073 | 7522084 | 2 | 6  | 12 | AT   | 14 | 3  |
| 136639 | 14 | 7525890 | 7525915 | 2 | 13 | 26 | AG   | 6  | 5  |
| 136640 | 14 | 7529433 | 7529464 | 2 | 16 | 32 | TG   | 13 | 14 |
| 136642 | 14 | 7533488 | 7533502 | 3 | 5  | 15 | TAT  | 13 | 9  |
| 136649 | 14 | 7539072 | 7539085 | 2 | 7  | 14 | CA   | 18 | 6  |
| 136650 | 14 | 7539288 | 7539299 | 2 | 6  | 12 | TG   | 10 | 7  |
| 136651 | 14 | 7539302 | 7539317 | 2 | 8  | 16 | TG   | 16 | 9  |
| 136652 | 14 | 7539431 | 7539450 | 2 | 10 | 20 | CA   | 12 | 5  |
| 136653 | 14 | 7541192 | 7541213 | 2 | 11 | 22 | AC   | 10 | 6  |
| 136654 | 14 | 7541873 | 7541896 | 3 | 8  | 24 | CCT  | 8  | 3  |
| 136658 | 14 | 7546012 | 7546025 | 2 | 7  | 14 | AC   | 18 | 5  |
| 136661 | 14 | 7551311 | 7551324 | 2 | 7  | 14 | TG   | 20 | 4  |
| 136663 | 14 | 7551544 | 7551561 | 2 | 9  | 18 | GT   | 27 | 6  |
| 136664 | 14 | 7552039 | 7552062 | 2 | 12 | 24 | GT   | 9  | 7  |
| 136665 | 14 | 7552476 | 7552495 | 2 | 10 | 20 | CA   | 22 | 11 |
| 136666 | 14 | 7553730 | 7553753 | 2 | 12 | 24 | CA   | 23 | 8  |
| 136669 | 14 | 7557215 | 7557228 | 2 | 7  | 14 | CT   | 11 | 5  |
| 136671 | 14 | 7558370 | 7558393 | 2 | 12 | 24 | CA   | 15 | 6  |
| 136674 | 14 | 7562298 | 7562313 | 2 | 8  | 16 | TG   | 24 | 4  |
| 136675 | 14 | 7562422 | 7562437 | 2 | 8  | 16 | TG   | 17 | 5  |
| 136680 | 14 | 7563766 | 7563779 | 2 | 7  | 14 | CA   | 12 | 3  |
| 136683 | 14 | 7564280 | 7564297 | 2 | 9  | 18 | GA   | 15 | 5  |
| 136696 | 14 | 7567850 | 7567863 | 2 | 7  | 14 | CA   | 8  | 4  |
| 136697 | 14 | 7568280 | 7568291 | 2 | 6  | 12 | TG   | 15 | 3  |
| 136699 | 14 | 7568910 | 7568931 | 2 | 11 | 22 | AC   | 12 | 9  |
| 136705 | 14 | 7569822 | 7569837 | 2 | 8  | 16 | AC   | 16 | 3  |
| 136710 | 14 | 7571299 | 7571322 | 2 | 12 | 24 | TG   | 12 | 13 |
| 136712 | 14 | 7572638 | 7572697 | 4 | 15 | 60 | TATC | 11 | 9  |
| 136713 | 14 | 7572852 | 7572915 | 2 | 32 | 64 | GT   | 8  | 9  |
| 136718 | 14 | 7580399 | 7580414 | 2 | 8  | 16 | GT   | 15 | 13 |
| 136719 | 14 | 7580580 | 7580593 | 2 | 7  | 14 | CT   | 15 | 3  |
| 136724 | 14 | 7584258 | 7584269 | 2 | 6  | 12 | GT   | 18 | 6  |
| 136725 | 14 | 7584304 | 7584321 | 2 | 9  | 18 | GT   | 20 | 3  |
| 136726 | 14 | 7584388 | 7584415 | 2 | 14 | 28 | GT   | 21 | 8  |
| 136727 | 14 | 7585622 | 7585647 | 2 | 13 | 26 | TG   | 20 | 13 |
| 136729 | 14 | 7587139 | 7587156 | 2 | 9  | 18 | AC   | 14 | 6  |
| 136730 | 14 | 7590610 | 7590665 | 2 | 28 | 56 | TG   | 12 | 13 |
| 136733 | 14 | 7591746 | 7591769 | 2 | 12 | 24 | TG   | 16 | 5  |
| 136735 | 14 | 7592161 | 7592181 | 3 | 7  | 21 | CTC  | 25 | 4  |
| 136737 | 14 | 7592330 | 7592347 | 2 | 9  | 18 | TG   | 24 | 4  |
| 136739 | 14 | 7592521 | 7592534 | 2 | 7  | 14 | CA   | 19 | 8  |
| 136740 | 14 | 7592836 | 7592853 | 2 | 9  | 18 | CA   | 21 | 5  |
| 136745 | 14 | 7606591 | 7606612 | 2 | 11 | 22 | TG   | 18 | 4  |
| 136752 | 14 | 7609136 | 7609153 | 3 | 6  | 18 | TGC  | 13 | 3  |
| 136757 | 14 | 7615538 | 7615559 | 2 | 11 | 22 | AC   | 16 | 4  |
| 136760 | 14 | 7617665 | 7617676 | 2 | 6  | 12 | TC   | 22 | 12 |
| 136761 | 14 | 7617906 | 7617925 | 2 | 10 | 20 | CA   | 21 | 4  |
| 136762 | 14 | 7621385 | 7621404 | 2 | 10 | 20 | GT   | 15 | 4  |

|        |    |         |         |   |    |    |      |    |    |
|--------|----|---------|---------|---|----|----|------|----|----|
| 136763 | 14 | 7621602 | 7621615 | 2 | 7  | 14 | CA   | 18 | 4  |
| 136765 | 14 | 7623853 | 7623866 | 2 | 7  | 14 | CA   | 20 | 11 |
| 136768 | 14 | 7626496 | 7626516 | 3 | 7  | 21 | GGA  | 7  | 5  |
| 136769 | 14 | 7626697 | 7626716 | 2 | 10 | 20 | CA   | 17 | 8  |
| 136770 | 14 | 7627259 | 7627284 | 2 | 13 | 26 | CA   | 9  | 6  |
| 136772 | 14 | 7629815 | 7629826 | 2 | 6  | 12 | AT   | 29 | 4  |
| 136773 | 14 | 7631388 | 7631419 | 2 | 16 | 32 | TG   | 15 | 14 |
| 136778 | 14 | 7635011 | 7635024 | 2 | 7  | 14 | CA   | 20 | 3  |
| 136781 | 14 | 7639377 | 7639390 | 2 | 7  | 14 | AG   | 21 | 3  |
| 136783 | 14 | 7639804 | 7639823 | 2 | 10 | 20 | AC   | 21 | 7  |
| 136787 | 14 | 7645208 | 7645219 | 2 | 6  | 12 | TG   | 22 | 11 |
| 136790 | 14 | 7656856 | 7656879 | 2 | 12 | 24 | TG   | 13 | 8  |
| 136791 | 14 | 7659315 | 7659340 | 2 | 13 | 26 | CA   | 6  | 4  |
| 136793 | 14 | 7662080 | 7662091 | 2 | 6  | 12 | CA   | 25 | 6  |
| 136803 | 14 | 7690679 | 7690693 | 3 | 5  | 15 | TGA  | 15 | 3  |
| 136806 | 14 | 7699422 | 7699433 | 2 | 6  | 12 | GT   | 20 | 3  |
| 136809 | 14 | 7704509 | 7704520 | 2 | 6  | 12 | CA   | 20 | 4  |
| 136810 | 14 | 7705646 | 7705663 | 3 | 6  | 18 | CAG  | 27 | 4  |
| 136811 | 14 | 7711576 | 7711611 | 2 | 18 | 36 | AC   | 12 | 8  |
| 136814 | 14 | 7736067 | 7736096 | 2 | 15 | 30 | CA   | 14 | 8  |
| 136818 | 14 | 7744686 | 7744705 | 2 | 10 | 20 | CA   | 27 | 7  |
| 136819 | 14 | 7745107 | 7745120 | 2 | 7  | 14 | TG   | 25 | 7  |
| 136822 | 14 | 7754848 | 7754861 | 2 | 7  | 14 | TG   | 25 | 5  |
| 136827 | 14 | 7770560 | 7770583 | 3 | 8  | 24 | ATT  | 16 | 6  |
| 136838 | 14 | 7801988 | 7801999 | 2 | 6  | 12 | AC   | 33 | 3  |
| 136841 | 14 | 7812124 | 7812137 | 2 | 7  | 14 | CA   | 32 | 4  |
| 136844 | 14 | 7824989 | 7825003 | 3 | 5  | 15 | CCT  | 26 | 3  |
| 136848 | 14 | 7829550 | 7829565 | 2 | 8  | 16 | AC   | 27 | 11 |
| 136851 | 14 | 7840696 | 7840709 | 2 | 7  | 14 | AT   | 14 | 3  |
| 136852 | 14 | 7846330 | 7846344 | 3 | 5  | 15 | GGA  | 29 | 4  |
| 136853 | 14 | 7848211 | 7848226 | 2 | 8  | 16 | GT   | 31 | 4  |
| 136854 | 14 | 7852034 | 7852053 | 4 | 5  | 20 | ATTT | 32 | 3  |
| 136856 | 14 | 7856303 | 7856330 | 2 | 14 | 28 | AC   | 15 | 8  |
| 136857 | 14 | 7856651 | 7856662 | 2 | 6  | 12 | CA   | 33 | 3  |
| 136867 | 14 | 7888209 | 7888240 | 2 | 16 | 32 | TG   | 12 | 14 |
| 136868 | 14 | 7888374 | 7888397 | 2 | 12 | 24 | GT   | 16 | 9  |
| 136871 | 14 | 7891524 | 7891541 | 2 | 9  | 18 | TG   | 16 | 4  |
| 136873 | 14 | 7891719 | 7891730 | 2 | 6  | 12 | CA   | 20 | 6  |
| 136874 | 14 | 7891900 | 7891931 | 2 | 16 | 32 | CA   | 7  | 8  |
| 136896 | 14 | 7918444 | 7918465 | 2 | 11 | 22 | TG   | 12 | 11 |
| 136898 | 14 | 7919035 | 7919049 | 3 | 5  | 15 | TGT  | 21 | 3  |
| 136904 | 14 | 7937738 | 7937765 | 2 | 14 | 28 | TG   | 9  | 12 |
| 136905 | 14 | 7938475 | 7938500 | 2 | 13 | 26 | CA   | 22 | 11 |
| 136906 | 14 | 7938659 | 7938692 | 2 | 17 | 34 | GT   | 15 | 8  |
| 136910 | 14 | 7944899 | 7944916 | 2 | 9  | 18 | AC   | 19 | 7  |
| 136916 | 14 | 7948786 | 7948806 | 3 | 7  | 21 | CTC  | 19 | 8  |
| 136919 | 14 | 7951614 | 7951635 | 2 | 11 | 22 | AC   | 15 | 10 |
| 136920 | 14 | 7951850 | 7951869 | 4 | 5  | 20 | AAAT | 28 | 3  |
| 136921 | 14 | 7952867 | 7952892 | 2 | 13 | 26 | AC   | 20 | 6  |
| 136925 | 14 | 7955044 | 7955059 | 2 | 8  | 16 | CA   | 22 | 6  |
| 136929 | 14 | 7960278 | 7960298 | 3 | 7  | 21 | CCT  | 27 | 5  |

|        |    |         |         |   |    |    |      |    |    |
|--------|----|---------|---------|---|----|----|------|----|----|
| 136933 | 14 | 7966139 | 7966166 | 2 | 14 | 28 | AC   | 15 | 6  |
| 136939 | 14 | 7969134 | 7969145 | 2 | 6  | 12 | GT   | 11 | 8  |
| 136940 | 14 | 7969147 | 7969158 | 2 | 6  | 12 | TG   | 11 | 7  |
| 136941 | 14 | 7972970 | 7972987 | 2 | 9  | 18 | TC   | 17 | 5  |
| 136943 | 14 | 7982689 | 7982703 | 3 | 5  | 15 | TCC  | 36 | 3  |
| 136944 | 14 | 7993156 | 7993173 | 3 | 6  | 18 | TTC  | 20 | 3  |
| 136946 | 14 | 8002471 | 8002494 | 2 | 12 | 24 | GT   | 10 | 6  |
| 136947 | 14 | 8006980 | 8007007 | 2 | 14 | 28 | AC   | 19 | 11 |
| 136957 | 14 | 8017794 | 8017827 | 2 | 17 | 34 | TG   | 21 | 7  |
| 136961 | 14 | 8027977 | 8028000 | 2 | 12 | 24 | GT   | 9  | 9  |
| 136962 | 14 | 8030830 | 8030851 | 2 | 11 | 22 | CT   | 22 | 5  |
| 136967 | 14 | 8038000 | 8038015 | 2 | 8  | 16 | TG   | 19 | 4  |
| 136968 | 14 | 8040331 | 8040366 | 2 | 18 | 36 | GT   | 11 | 12 |
| 136970 | 14 | 8042079 | 8042104 | 2 | 13 | 26 | TG   | 26 | 8  |
| 136976 | 14 | 8055533 | 8055554 | 2 | 11 | 22 | AC   | 22 | 11 |
| 136978 | 14 | 8056003 | 8056026 | 3 | 8  | 24 | GAT  | 24 | 5  |
| 136979 | 14 | 8058416 | 8058433 | 2 | 9  | 18 | AC   | 22 | 11 |
| 136980 | 14 | 8058562 | 8058591 | 2 | 15 | 30 | TG   | 15 | 9  |
| 136982 | 14 | 8063710 | 8063735 | 2 | 13 | 26 | AC   | 14 | 6  |
| 136983 | 14 | 8063848 | 8063865 | 3 | 6  | 18 | CAG  | 27 | 3  |
| 136985 | 14 | 8067693 | 8067724 | 2 | 16 | 32 | GA   | 15 | 8  |
| 136987 | 14 | 8068933 | 8068952 | 2 | 10 | 20 | TG   | 19 | 14 |
| 136990 | 14 | 8071789 | 8071808 | 2 | 10 | 20 | CA   | 15 | 3  |
| 136992 | 14 | 8081084 | 8081103 | 4 | 5  | 20 | TATG | 17 | 5  |
| 136996 | 14 | 8086219 | 8086244 | 2 | 13 | 26 | GT   | 14 | 9  |
| 137000 | 14 | 8089733 | 8089762 | 2 | 15 | 30 | GT   | 17 | 14 |
| 137001 | 14 | 8092805 | 8092820 | 2 | 8  | 16 | AC   | 21 | 4  |
| 137002 | 14 | 8093443 | 8093464 | 2 | 11 | 22 | CA   | 28 | 5  |
| 137004 | 14 | 8096451 | 8096464 | 2 | 7  | 14 | GT   | 15 | 5  |
| 137008 | 14 | 8100744 | 8100761 | 2 | 9  | 18 | TG   | 14 | 4  |
| 137009 | 14 | 8101931 | 8101942 | 2 | 6  | 12 | TC   | 17 | 3  |
| 137010 | 14 | 8103979 | 8103993 | 3 | 5  | 15 | AAT  | 38 | 3  |
| 137019 | 14 | 8120078 | 8120089 | 2 | 6  | 12 | AC   | 15 | 7  |
| 137025 | 14 | 8127852 | 8127879 | 2 | 14 | 28 | GT   | 14 | 8  |
| 137026 | 14 | 8128027 | 8128046 | 2 | 10 | 20 | TG   | 13 | 4  |
| 137027 | 14 | 8128192 | 8128209 | 2 | 9  | 18 | TG   | 15 | 4  |
| 137028 | 14 | 8128252 | 8128263 | 2 | 6  | 12 | TG   | 29 | 3  |
| 137030 | 14 | 8135142 | 8135177 | 2 | 18 | 36 | GT   | 12 | 8  |
| 137032 | 14 | 8135782 | 8135801 | 2 | 10 | 20 | AC   | 7  | 5  |
| 137036 | 14 | 8143082 | 8143117 | 2 | 18 | 36 | AC   | 11 | 9  |
| 137038 | 14 | 8144617 | 8144658 | 2 | 21 | 42 | GT   | 14 | 7  |
| 137039 | 14 | 8144826 | 8144839 | 2 | 7  | 14 | CA   | 27 | 7  |
| 137040 | 14 | 8145108 | 8145119 | 2 | 6  | 12 | GT   | 20 | 5  |
| 137041 | 14 | 8145288 | 8145309 | 2 | 11 | 22 | GT   | 9  | 10 |
| 137042 | 14 | 8145797 | 8145810 | 2 | 7  | 14 | TG   | 30 | 3  |
| 137043 | 14 | 8147347 | 8147367 | 3 | 7  | 21 | AGG  | 20 | 6  |
| 137047 | 14 | 8158063 | 8158080 | 2 | 9  | 18 | GT   | 14 | 3  |
| 137052 | 14 | 8163184 | 8163195 | 2 | 6  | 12 | AC   | 15 | 3  |
| 137058 | 14 | 8171604 | 8171625 | 2 | 11 | 22 | CT   | 9  | 6  |
| 137060 | 14 | 8173306 | 8173323 | 2 | 9  | 18 | AC   | 23 | 8  |
| 137061 | 14 | 8173483 | 8173500 | 2 | 9  | 18 | TG   | 21 | 5  |

|        |    |         |         |   |    |    |     |    |    |
|--------|----|---------|---------|---|----|----|-----|----|----|
| 137063 | 14 | 8173624 | 8173641 | 2 | 9  | 18 | CA  | 22 | 4  |
| 137065 | 14 | 8175346 | 8175387 | 2 | 21 | 42 | GT  | 16 | 11 |
| 137068 | 14 | 8177595 | 8177608 | 2 | 7  | 14 | GT  | 21 | 3  |
| 137069 | 14 | 8177731 | 8177750 | 2 | 10 | 20 | TG  | 19 | 7  |
| 137080 | 14 | 8192368 | 8192387 | 2 | 10 | 20 | GA  | 14 | 7  |
| 137082 | 14 | 8195341 | 8195358 | 2 | 9  | 18 | CA  | 23 | 5  |
| 137083 | 14 | 8197214 | 8197249 | 2 | 18 | 36 | GT  | 10 | 12 |
| 137084 | 14 | 8199458 | 8199485 | 2 | 14 | 28 | TG  | 9  | 10 |
| 137093 | 14 | 8201256 | 8201281 | 2 | 13 | 26 | TG  | 10 | 11 |
| 137094 | 14 | 8204705 | 8204738 | 2 | 17 | 34 | GT  | 11 | 10 |
| 137095 | 14 | 8206573 | 8206592 | 2 | 10 | 20 | AC  | 8  | 6  |
| 137098 | 14 | 8209615 | 8209628 | 2 | 7  | 14 | AC  | 34 | 5  |
| 137100 | 14 | 8213832 | 8213849 | 2 | 9  | 18 | CA  | 28 | 7  |
| 137105 | 14 | 8224470 | 8224487 | 2 | 9  | 18 | GA  | 11 | 4  |
| 137119 | 14 | 8242572 | 8242583 | 2 | 6  | 12 | CA  | 25 | 13 |
| 137120 | 14 | 8242586 | 8242603 | 2 | 9  | 18 | CA  | 25 | 15 |
| 137121 | 14 | 8242787 | 8242802 | 2 | 8  | 16 | AC  | 20 | 3  |
| 137122 | 14 | 8242934 | 8242951 | 2 | 9  | 18 | GT  | 23 | 5  |
| 137123 | 14 | 8243075 | 8243086 | 2 | 6  | 12 | TG  | 24 | 6  |
| 137124 | 14 | 8245329 | 8245340 | 2 | 6  | 12 | GT  | 25 | 4  |
| 137127 | 14 | 8251532 | 8251543 | 2 | 6  | 12 | TG  | 30 | 4  |
| 137132 | 14 | 8262823 | 8262844 | 2 | 11 | 22 | TG  | 18 | 10 |
| 137133 | 14 | 8263021 | 8263032 | 2 | 6  | 12 | AC  | 15 | 4  |
| 137134 | 14 | 8263202 | 8263217 | 2 | 8  | 16 | TG  | 17 | 7  |
| 137142 | 14 | 8279432 | 8279455 | 2 | 12 | 24 | AC  | 24 | 7  |
| 137143 | 14 | 8279563 | 8279574 | 2 | 6  | 12 | AG  | 26 | 3  |
| 137144 | 14 | 8279575 | 8279586 | 2 | 6  | 12 | TG  | 25 | 3  |
| 137147 | 14 | 8282114 | 8282131 | 2 | 9  | 18 | GT  | 16 | 6  |
| 137148 | 14 | 8282487 | 8282508 | 2 | 11 | 22 | GT  | 15 | 4  |
| 137151 | 14 | 8285286 | 8285297 | 2 | 6  | 12 | TG  | 20 | 4  |
| 137152 | 14 | 8286299 | 8286328 | 2 | 15 | 30 | GT  | 14 | 9  |
| 137157 | 14 | 8288702 | 8288719 | 3 | 6  | 18 | CAT | 23 | 4  |
| 137160 | 14 | 8294317 | 8294332 | 2 | 8  | 16 | TG  | 22 | 3  |
| 137162 | 14 | 8300784 | 8300817 | 2 | 17 | 34 | AC  | 9  | 8  |
| 137163 | 14 | 8302248 | 8302271 | 2 | 12 | 24 | AC  | 25 | 12 |
| 137170 | 14 | 8303985 | 8304006 | 2 | 11 | 22 | GT  | 24 | 5  |
| 137171 | 14 | 8304799 | 8304812 | 2 | 7  | 14 | GT  | 23 | 4  |
| 137176 | 14 | 8312342 | 8312379 | 2 | 19 | 38 | CA  | 6  | 8  |
| 137180 | 14 | 8315989 | 8316010 | 2 | 11 | 22 | AC  | 23 | 4  |
| 137182 | 14 | 8320290 | 8320311 | 2 | 11 | 22 | GT  | 22 | 6  |
| 137183 | 14 | 8320466 | 8320517 | 2 | 26 | 52 | AC  | 12 | 14 |
| 137184 | 14 | 8320964 | 8320983 | 2 | 10 | 20 | CA  | 20 | 9  |
| 137185 | 14 | 8321236 | 8321247 | 2 | 6  | 12 | AC  | 18 | 5  |
| 137186 | 14 | 8321250 | 8321261 | 2 | 6  | 12 | AC  | 22 | 3  |
| 137187 | 14 | 8322087 | 8322102 | 2 | 8  | 16 | TG  | 15 | 11 |
| 137188 | 14 | 8322105 | 8322116 | 2 | 6  | 12 | TG  | 18 | 8  |
| 137189 | 14 | 8322181 | 8322208 | 2 | 14 | 28 | GT  | 14 | 16 |
| 137190 | 14 | 8324768 | 8324811 | 2 | 22 | 44 | GT  | 10 | 10 |
| 137192 | 14 | 8327624 | 8327650 | 3 | 9  | 27 | TGA | 24 | 4  |
| 137194 | 14 | 8332020 | 8332039 | 2 | 10 | 20 | CA  | 20 | 5  |
| 137195 | 14 | 8333184 | 8333199 | 2 | 8  | 16 | CA  | 24 | 6  |



|        |    |         |         |   |    |    |      |    |    |
|--------|----|---------|---------|---|----|----|------|----|----|
| 137197 | 14 | 8333354 | 8333379 | 2 | 13 | 26 | TC   | 18 | 10 |
| 137201 | 14 | 8334852 | 8334878 | 3 | 9  | 27 | TCT  | 13 | 5  |
| 137202 | 14 | 8334936 | 8334951 | 4 | 4  | 16 | AAAT | 16 | 5  |
| 137209 | 14 | 8337070 | 8337089 | 2 | 10 | 20 | GT   | 15 | 8  |
| 137212 | 14 | 8343443 | 8343454 | 2 | 6  | 12 | CA   | 20 | 3  |
| 137213 | 14 | 8344918 | 8344941 | 2 | 12 | 24 | TG   | 14 | 12 |
| 137219 | 14 | 8359400 | 8359415 | 2 | 8  | 16 | GT   | 23 | 7  |
| 137220 | 14 | 8359632 | 8359645 | 2 | 7  | 14 | AC   | 24 | 5  |
| 137223 | 14 | 8360839 | 8360872 | 2 | 17 | 34 | CA   | 8  | 7  |
| 137225 | 14 | 8364404 | 8364431 | 2 | 14 | 28 | CA   | 16 | 11 |
| 137226 | 14 | 8365968 | 8365985 | 3 | 6  | 18 | CAA  | 23 | 3  |
| 137228 | 14 | 8368751 | 8368774 | 2 | 12 | 24 | TG   | 15 | 6  |
| 137229 | 14 | 8371135 | 8371154 | 2 | 10 | 20 | AC   | 19 | 4  |
| 137230 | 14 | 8371221 | 8371244 | 2 | 12 | 24 | TG   | 9  | 12 |
| 137235 | 14 | 8372735 | 8372748 | 2 | 7  | 14 | TG   | 24 | 5  |
| 137244 | 14 | 8385062 | 8385079 | 3 | 6  | 18 | CTT  | 27 | 5  |
| 137245 | 14 | 8388131 | 8388152 | 2 | 11 | 22 | GT   | 15 | 8  |
| 137247 | 14 | 8389612 | 8389623 | 2 | 6  | 12 | CA   | 25 | 5  |
| 137248 | 14 | 8389733 | 8389750 | 2 | 9  | 18 | TG   | 16 | 7  |
| 137249 | 14 | 8389916 | 8389933 | 2 | 9  | 18 | TA   | 6  | 3  |
| 137252 | 14 | 8395146 | 8395163 | 2 | 9  | 18 | CA   | 28 | 6  |
| 137255 | 14 | 8397116 | 8397127 | 2 | 6  | 12 | TG   | 7  | 5  |
| 137257 | 14 | 8398763 | 8398784 | 2 | 11 | 22 | CA   | 10 | 7  |
| 137259 | 14 | 8400753 | 8400766 | 2 | 7  | 14 | TG   | 11 | 4  |
| 137260 | 14 | 8400863 | 8400898 | 2 | 18 | 36 | TG   | 7  | 9  |
| 137264 | 14 | 8402252 | 8402267 | 2 | 8  | 16 | TC   | 18 | 3  |
| 137268 | 14 | 8405372 | 8405383 | 2 | 6  | 12 | TG   | 21 | 3  |
| 137269 | 14 | 8405434 | 8405463 | 2 | 15 | 30 | GT   | 12 | 9  |
| 137270 | 14 | 8405563 | 8405598 | 2 | 18 | 36 | TG   | 18 | 15 |
| 137274 | 14 | 8411077 | 8411108 | 2 | 16 | 32 | TG   | 15 | 10 |
| 137275 | 14 | 8411226 | 8411261 | 2 | 18 | 36 | GT   | 6  | 9  |
| 137276 | 14 | 8411528 | 8411541 | 2 | 7  | 14 | TG   | 26 | 4  |
| 137278 | 14 | 8415343 | 8415362 | 2 | 10 | 20 | CT   | 19 | 6  |
| 137279 | 14 | 8419420 | 8419433 | 2 | 7  | 14 | TG   | 27 | 5  |
| 137286 | 14 | 8429782 | 8429801 | 4 | 5  | 20 | ATTT | 23 | 3  |
| 137287 | 14 | 8435137 | 8435162 | 2 | 13 | 26 | AG   | 20 | 4  |
| 137289 | 14 | 8435419 | 8435440 | 2 | 11 | 22 | GA   | 11 | 11 |
| 137294 | 14 | 8438009 | 8438056 | 4 | 12 | 48 | GACA | 24 | 11 |
| 137298 | 14 | 8445037 | 8445066 | 2 | 15 | 30 | TG   | 9  | 10 |
| 137306 | 14 | 8449547 | 8449562 | 2 | 8  | 16 | TG   | 28 | 4  |
| 137311 | 14 | 8460661 | 8460678 | 2 | 9  | 18 | AC   | 24 | 6  |
| 137314 | 14 | 8470624 | 8470641 | 2 | 9  | 18 | CA   | 18 | 4  |
| 137315 | 14 | 8470694 | 8470711 | 2 | 9  | 18 | AC   | 15 | 5  |
| 137319 | 14 | 8471315 | 8471329 | 3 | 5  | 15 | CTT  | 23 | 4  |
| 137322 | 14 | 8475383 | 8475394 | 2 | 6  | 12 | TG   | 9  | 8  |
| 137323 | 14 | 8475396 | 8475411 | 2 | 8  | 16 | GA   | 11 | 10 |
| 137324 | 14 | 8475460 | 8475483 | 2 | 12 | 24 | GT   | 11 | 7  |
| 137325 | 14 | 8475605 | 8475630 | 2 | 13 | 26 | TG   | 11 | 6  |
| 137326 | 14 | 8476392 | 8476411 | 2 | 10 | 20 | AG   | 33 | 9  |
| 137327 | 14 | 8481126 | 8481155 | 2 | 15 | 30 | CA   | 9  | 11 |
| 137334 | 14 | 8482353 | 8482400 | 2 | 24 | 48 | AC   | 9  | 8  |

|        |    |         |         |   |    |    |      |    |    |
|--------|----|---------|---------|---|----|----|------|----|----|
| 137340 | 14 | 8482877 | 8482892 | 2 | 8  | 16 | TG   | 12 | 3  |
| 137343 | 14 | 8484495 | 8484506 | 2 | 6  | 12 | AC   | 20 | 3  |
| 137345 | 14 | 8486415 | 8486428 | 2 | 7  | 14 | AC   | 34 | 3  |
| 137349 | 14 | 8489577 | 8489594 | 2 | 9  | 18 | AC   | 14 | 7  |
| 137350 | 14 | 8489687 | 8489708 | 2 | 11 | 22 | GT   | 17 | 7  |
| 137352 | 14 | 8490774 | 8490797 | 4 | 6  | 24 | AGAC | 27 | 4  |
| 137354 | 14 | 8491756 | 8491775 | 2 | 10 | 20 | CA   | 19 | 5  |
| 137360 | 14 | 8497826 | 8497841 | 2 | 8  | 16 | AC   | 25 | 7  |
| 137361 | 14 | 8498009 | 8498023 | 3 | 5  | 15 | GAG  | 33 | 3  |
| 137363 | 14 | 8500242 | 8500271 | 2 | 15 | 30 | AC   | 15 | 10 |
| 137365 | 14 | 8502205 | 8502226 | 2 | 11 | 22 | TG   | 23 | 6  |
| 137366 | 14 | 8503688 | 8503717 | 2 | 15 | 30 | GT   | 25 | 8  |
| 137367 | 14 | 8503815 | 8503832 | 2 | 9  | 18 | CA   | 20 | 3  |
| 137368 | 14 | 8504988 | 8505021 | 2 | 17 | 34 | GT   | 9  | 8  |
| 137372 | 14 | 8509348 | 8509363 | 2 | 8  | 16 | TG   | 13 | 9  |
| 137373 | 14 | 8509500 | 8509527 | 2 | 14 | 28 | GT   | 8  | 7  |
| 137374 | 14 | 8509718 | 8509733 | 2 | 8  | 16 | GT   | 24 | 4  |
| 137375 | 14 | 8509855 | 8509880 | 2 | 13 | 26 | CA   | 19 | 10 |
| 137377 | 14 | 8511574 | 8511585 | 2 | 6  | 12 | GT   | 29 | 8  |
| 137381 | 14 | 8514040 | 8514055 | 2 | 8  | 16 | GT   | 18 | 5  |
| 137383 | 14 | 8514216 | 8514233 | 2 | 9  | 18 | GT   | 20 | 7  |
| 137384 | 14 | 8515059 | 8515074 | 2 | 8  | 16 | TG   | 12 | 4  |
| 137387 | 14 | 8515474 | 8515485 | 2 | 6  | 12 | AC   | 25 | 3  |
| 137391 | 14 | 8517515 | 8517532 | 2 | 9  | 18 | CA   | 9  | 8  |
| 137392 | 14 | 8517615 | 8517626 | 2 | 6  | 12 | AG   | 27 | 3  |
| 137393 | 14 | 8519032 | 8519053 | 2 | 11 | 22 | GT   | 20 | 6  |
| 137394 | 14 | 8519122 | 8519153 | 2 | 16 | 32 | GT   | 15 | 6  |
| 137395 | 14 | 8519260 | 8519279 | 2 | 10 | 20 | AC   | 13 | 4  |
| 137396 | 14 | 8519383 | 8519396 | 2 | 7  | 14 | CA   | 17 | 3  |
| 137397 | 14 | 8519734 | 8519755 | 2 | 11 | 22 | AC   | 22 | 5  |
| 137398 | 14 | 8519923 | 8519938 | 2 | 8  | 16 | AC   | 28 | 5  |
| 137399 | 14 | 8521939 | 8521960 | 2 | 11 | 22 | CA   | 19 | 6  |
| 137400 | 14 | 8522016 | 8522042 | 3 | 9  | 27 | GAG  | 15 | 5  |
| 137401 | 14 | 8523031 | 8523050 | 2 | 10 | 20 | GT   | 17 | 9  |
| 137402 | 14 | 8523136 | 8523161 | 2 | 13 | 26 | CA   | 14 | 7  |
| 137403 | 14 | 8524658 | 8524693 | 2 | 18 | 36 | CA   | 7  | 8  |
| 137405 | 14 | 8524937 | 8524954 | 2 | 9  | 18 | AC   | 21 | 3  |
| 137407 | 14 | 8525146 | 8525163 | 2 | 9  | 18 | AG   | 23 | 3  |
| 137408 | 14 | 8526621 | 8526634 | 2 | 7  | 14 | CA   | 26 | 4  |
| 137409 | 14 | 8529132 | 8529145 | 2 | 7  | 14 | GT   | 23 | 9  |
| 137410 | 14 | 8529259 | 8529282 | 2 | 12 | 24 | GT   | 11 | 5  |
| 137412 | 14 | 8530995 | 8531014 | 2 | 10 | 20 | GT   | 20 | 6  |
| 137413 | 14 | 8531748 | 8531763 | 2 | 8  | 16 | TG   | 17 | 5  |
| 137414 | 14 | 8531766 | 8531779 | 2 | 7  | 14 | TG   | 16 | 5  |
| 137421 | 14 | 8535782 | 8535795 | 2 | 7  | 14 | TG   | 16 | 15 |
| 137422 | 14 | 8535801 | 8535816 | 2 | 8  | 16 | GT   | 16 | 14 |
| 137424 | 14 | 8538681 | 8538700 | 2 | 10 | 20 | CA   | 16 | 6  |
| 137426 | 14 | 8540622 | 8540653 | 2 | 16 | 32 | AC   | 9  | 9  |
| 137428 | 14 | 8542401 | 8542436 | 2 | 18 | 36 | TG   | 9  | 8  |
| 137430 | 14 | 8544072 | 8544087 | 2 | 8  | 16 | AC   | 29 | 3  |
| 137431 | 14 | 8544174 | 8544189 | 2 | 8  | 16 | AC   | 23 | 4  |

|        |    |         |         |   |    |    |      |    |    |
|--------|----|---------|---------|---|----|----|------|----|----|
| 137432 | 14 | 8544257 | 8544274 | 2 | 9  | 18 | AC   | 26 | 6  |
| 137433 | 14 | 8544352 | 8544371 | 2 | 10 | 20 | GT   | 26 | 5  |
| 137435 | 14 | 8545505 | 8545522 | 3 | 6  | 18 | CTT  | 33 | 3  |
| 137439 | 14 | 8550625 | 8550638 | 2 | 7  | 14 | TG   | 29 | 3  |
| 137441 | 14 | 8552150 | 8552183 | 2 | 17 | 34 | AC   | 14 | 11 |
| 137442 | 14 | 8554367 | 8554382 | 2 | 8  | 16 | TG   | 18 | 5  |
| 137447 | 14 | 8554979 | 8555014 | 2 | 18 | 36 | GT   | 10 | 6  |
| 137451 | 14 | 8559302 | 8559321 | 2 | 10 | 20 | TG   | 18 | 8  |
| 137454 | 14 | 8559502 | 8559513 | 2 | 6  | 12 | AC   | 23 | 4  |
| 137455 | 14 | 8559617 | 8559644 | 2 | 14 | 28 | CA   | 14 | 8  |
| 137458 | 14 | 8561070 | 8561089 | 2 | 10 | 20 | GT   | 24 | 3  |
| 137459 | 14 | 8561152 | 8561177 | 2 | 13 | 26 | CA   | 28 | 6  |
| 137461 | 14 | 8563018 | 8563043 | 2 | 13 | 26 | CA   | 6  | 4  |
| 137462 | 14 | 8563157 | 8563190 | 2 | 17 | 34 | CA   | 11 | 9  |
| 137468 | 14 | 8568354 | 8568373 | 2 | 10 | 20 | CA   | 14 | 4  |
| 137471 | 14 | 8568595 | 8568606 | 2 | 6  | 12 | CA   | 31 | 3  |
| 137473 | 14 | 8571065 | 8571088 | 2 | 12 | 24 | CA   | 15 | 7  |
| 137474 | 14 | 8571807 | 8571844 | 2 | 19 | 38 | AC   | 8  | 10 |
| 137475 | 14 | 8573670 | 8573693 | 2 | 12 | 24 | GT   | 18 | 10 |
| 137477 | 14 | 8578176 | 8578187 | 2 | 6  | 12 | GT   | 23 | 5  |
| 137481 | 14 | 8586466 | 8586492 | 3 | 9  | 27 | TCC  | 11 | 10 |
| 137482 | 14 | 8592144 | 8592157 | 2 | 7  | 14 | GT   | 16 | 5  |
| 137484 | 14 | 8606454 | 8606471 | 3 | 6  | 18 | GCT  | 30 | 4  |
| 137495 | 14 | 8629185 | 8629202 | 3 | 6  | 18 | GAG  | 13 | 9  |
| 137496 | 14 | 8635220 | 8635233 | 2 | 7  | 14 | CA   | 25 | 5  |
| 137500 | 14 | 8638632 | 8638652 | 3 | 7  | 21 | TCC  | 26 | 5  |
| 137503 | 14 | 8643079 | 8643105 | 3 | 9  | 27 | AGG  | 12 | 4  |
| 137505 | 14 | 8645210 | 8645225 | 4 | 4  | 16 | AAAG | 13 | 5  |
| 137506 | 14 | 8645459 | 8645482 | 2 | 12 | 24 | CT   | 10 | 12 |
| 137517 | 14 | 8661865 | 8661898 | 2 | 17 | 34 | AC   | 8  | 6  |
| 137518 | 14 | 8662145 | 8662162 | 2 | 9  | 18 | CA   | 18 | 5  |
| 137522 | 14 | 8668958 | 8669033 | 2 | 38 | 76 | TG   | 8  | 8  |
| 137523 | 14 | 8671324 | 8671337 | 2 | 7  | 14 | CA   | 24 | 3  |
| 137524 | 14 | 8671340 | 8671351 | 2 | 6  | 12 | CA   | 30 | 4  |
| 137528 | 14 | 8677261 | 8677284 | 4 | 6  | 24 | AGAA | 18 | 3  |
| 137530 | 14 | 8678499 | 8678522 | 2 | 12 | 24 | GT   | 9  | 7  |
| 137532 | 14 | 8679782 | 8679805 | 2 | 12 | 24 | TG   | 20 | 12 |
| 137535 | 14 | 8684860 | 8684883 | 2 | 12 | 24 | GA   | 17 | 10 |
| 137536 | 14 | 8686753 | 8686766 | 2 | 7  | 14 | TG   | 11 | 4  |
| 137541 | 14 | 8691418 | 8691437 | 2 | 10 | 20 | CA   | 19 | 15 |
| 137551 | 14 | 8718620 | 8718649 | 2 | 15 | 30 | TG   | 6  | 5  |
| 137562 | 14 | 8737625 | 8737644 | 2 | 10 | 20 | AC   | 19 | 10 |
| 137564 | 14 | 8742071 | 8742084 | 2 | 7  | 14 | GT   | 18 | 8  |
| 137566 | 14 | 8742328 | 8742359 | 2 | 16 | 32 | GT   | 15 | 8  |
| 137567 | 14 | 8743327 | 8743341 | 3 | 5  | 15 | ATT  | 25 | 4  |
| 137572 | 14 | 8746667 | 8746681 | 3 | 5  | 15 | GAG  | 22 | 7  |
| 137577 | 14 | 8754570 | 8754593 | 2 | 12 | 24 | AC   | 15 | 9  |
| 137581 | 14 | 8757805 | 8757819 | 3 | 5  | 15 | ACA  | 17 | 4  |
| 137582 | 14 | 8761339 | 8761364 | 2 | 13 | 26 | GT   | 7  | 9  |
| 137583 | 14 | 8761402 | 8761421 | 4 | 5  | 20 | GACA | 18 | 3  |
| 137585 | 14 | 8764704 | 8764735 | 2 | 16 | 32 | AC   | 7  | 7  |

|        |    |         |         |   |    |    |      |    |    |
|--------|----|---------|---------|---|----|----|------|----|----|
| 137588 | 14 | 8767092 | 8767107 | 2 | 8  | 16 | AC   | 21 | 3  |
| 137589 | 14 | 8767329 | 8767370 | 3 | 14 | 42 | TCT  | 28 | 8  |
| 137592 | 14 | 8772242 | 8772259 | 2 | 9  | 18 | TG   | 14 | 9  |
| 137593 | 14 | 8773525 | 8773540 | 2 | 8  | 16 | GT   | 25 | 5  |
| 137594 | 14 | 8773685 | 8773714 | 2 | 15 | 30 | GT   | 13 | 7  |
| 137596 | 14 | 8775259 | 8775272 | 2 | 7  | 14 | GT   | 18 | 8  |
| 137600 | 14 | 8778271 | 8778300 | 2 | 15 | 30 | AC   | 9  | 6  |
| 137603 | 14 | 8791319 | 8791333 | 3 | 5  | 15 | GAG  | 16 | 5  |
| 137604 | 14 | 8792625 | 8792638 | 2 | 7  | 14 | GT   | 13 | 9  |
| 137610 | 14 | 8802117 | 8802136 | 2 | 10 | 20 | GT   | 18 | 4  |
| 137612 | 14 | 8807662 | 8807677 | 2 | 8  | 16 | CA   | 13 | 7  |
| 137613 | 14 | 8807679 | 8807694 | 2 | 8  | 16 | AC   | 19 | 11 |
| 137614 | 14 | 8814743 | 8814768 | 2 | 13 | 26 | AC   | 19 | 6  |
| 137615 | 14 | 8814921 | 8814936 | 2 | 8  | 16 | GT   | 25 | 4  |
| 137618 | 14 | 8817995 | 8818008 | 2 | 7  | 14 | CA   | 14 | 4  |
| 137619 | 14 | 8818326 | 8818346 | 3 | 7  | 21 | CAC  | 30 | 9  |
| 137621 | 14 | 8821782 | 8821805 | 2 | 12 | 24 | CA   | 16 | 15 |
| 137625 | 14 | 8823924 | 8823937 | 2 | 7  | 14 | AC   | 31 | 3  |
| 137629 | 14 | 8830442 | 8830455 | 2 | 7  | 14 | TG   | 14 | 4  |
| 137630 | 14 | 8830955 | 8830970 | 2 | 8  | 16 | AC   | 12 | 7  |
| 137632 | 14 | 8831283 | 8831300 | 2 | 9  | 18 | CA   | 8  | 5  |
| 137634 | 14 | 8831603 | 8831614 | 2 | 6  | 12 | TG   | 19 | 5  |
| 137636 | 14 | 8833598 | 8833619 | 2 | 11 | 22 | AG   | 20 | 5  |
| 137643 | 14 | 8876768 | 8876811 | 4 | 11 | 44 | TGGA | 27 | 16 |
| 137644 | 14 | 8876962 | 8877001 | 2 | 20 | 40 | AC   | 14 | 8  |
| 137652 | 14 | 8896160 | 8896177 | 3 | 6  | 18 | GAT  | 8  | 3  |
| 137657 | 14 | 8909021 | 8909036 | 2 | 8  | 16 | GT   | 20 | 3  |
| 137659 | 14 | 8911823 | 8911864 | 2 | 21 | 42 | GT   | 11 | 8  |
| 137662 | 14 | 8915762 | 8915779 | 2 | 9  | 18 | TC   | 22 | 4  |
| 137663 | 14 | 8916113 | 8916134 | 2 | 11 | 22 | GT   | 20 | 4  |
| 137664 | 14 | 8920663 | 8920676 | 2 | 7  | 14 | CA   | 12 | 7  |
| 137665 | 14 | 8920683 | 8920694 | 2 | 6  | 12 | CA   | 7  | 5  |
| 137683 | 14 | 8980272 | 8980289 | 2 | 9  | 18 | AC   | 28 | 6  |
| 137684 | 14 | 8982552 | 8982572 | 3 | 7  | 21 | GGA  | 17 | 3  |
| 137685 | 14 | 8983050 | 8983067 | 2 | 9  | 18 | TC   | 15 | 5  |
| 137688 | 14 | 8984374 | 8984388 | 3 | 5  | 15 | GAG  | 22 | 3  |
| 137689 | 14 | 8984536 | 8984550 | 3 | 5  | 15 | AAG  | 29 | 3  |
| 137698 | 14 | 9011137 | 9011151 | 3 | 5  | 15 | CAT  | 23 | 5  |
| 137699 | 14 | 9011152 | 9011166 | 3 | 5  | 15 | CAC  | 19 | 5  |
| 137702 | 14 | 9019262 | 9019273 | 2 | 6  | 12 | CA   | 16 | 4  |
| 137703 | 14 | 9019277 | 9019290 | 2 | 7  | 14 | AC   | 16 | 3  |
| 137704 | 14 | 9021821 | 9021834 | 2 | 7  | 14 | AG   | 10 | 4  |
| 137705 | 14 | 9022981 | 9022998 | 3 | 6  | 18 | CTC  | 25 | 7  |
| 137707 | 14 | 9033425 | 9033438 | 2 | 7  | 14 | CA   | 31 | 3  |
| 137715 | 14 | 9066340 | 9066355 | 2 | 8  | 16 | GT   | 17 | 4  |
| 137717 | 14 | 9069609 | 9069620 | 2 | 6  | 12 | AT   | 24 | 3  |
| 137720 | 14 | 9074562 | 9074579 | 2 | 9  | 18 | CA   | 17 | 7  |
| 137727 | 14 | 9101206 | 9101217 | 2 | 6  | 12 | AG   | 22 | 5  |
| 137730 | 14 | 9104113 | 9104124 | 2 | 6  | 12 | CA   | 29 | 4  |
| 137731 | 14 | 9104237 | 9104248 | 2 | 6  | 12 | AC   | 30 | 5  |
| 137742 | 14 | 9122003 | 9122017 | 3 | 5  | 15 | AAT  | 18 | 4  |

|        |    |         |         |   |    |    |      |    |    |
|--------|----|---------|---------|---|----|----|------|----|----|
| 137746 | 14 | 9135405 | 9135428 | 4 | 6  | 24 | CCTT | 25 | 4  |
| 137747 | 14 | 9136038 | 9136053 | 2 | 8  | 16 | GT   | 26 | 12 |
| 137751 | 14 | 9150143 | 9150158 | 2 | 8  | 16 | GT   | 23 | 4  |
| 137752 | 14 | 9156198 | 9156209 | 2 | 6  | 12 | AC   | 29 | 6  |
| 137764 | 14 | 9185402 | 9185413 | 2 | 6  | 12 | TC   | 14 | 3  |
| 137766 | 14 | 9188775 | 9188800 | 2 | 13 | 26 | TC   | 7  | 7  |
| 137767 | 14 | 9190279 | 9190322 | 2 | 22 | 44 | TG   | 8  | 8  |
| 137777 | 14 | 9202365 | 9202390 | 2 | 13 | 26 | AC   | 13 | 9  |
| 137778 | 14 | 9212761 | 9212806 | 2 | 23 | 46 | CA   | 11 | 11 |
| 137783 | 14 | 9228469 | 9228486 | 2 | 9  | 18 | TG   | 25 | 7  |
| 137790 | 14 | 9236993 | 9237006 | 2 | 7  | 14 | CA   | 23 | 7  |
| 137800 | 14 | 9272235 | 9272262 | 2 | 14 | 28 | CA   | 17 | 10 |
| 137801 | 14 | 9272920 | 9272935 | 2 | 8  | 16 | CA   | 27 | 5  |
| 137804 | 14 | 9282858 | 9282881 | 2 | 12 | 24 | AC   | 14 | 8  |
| 137808 | 14 | 9293951 | 9293966 | 4 | 4  | 16 | TTTA | 14 | 3  |
| 137813 | 14 | 9311149 | 9311192 | 2 | 22 | 44 | CA   | 11 | 7  |
| 137814 | 14 | 9312442 | 9312463 | 2 | 11 | 22 | AC   | 23 | 5  |
| 137815 | 14 | 9312557 | 9312576 | 2 | 10 | 20 | GT   | 19 | 8  |
| 137821 | 14 | 9343421 | 9343440 | 4 | 5  | 20 | AACC | 29 | 6  |
| 137822 | 14 | 9346873 | 9346898 | 2 | 13 | 26 | CA   | 13 | 6  |
| 137823 | 14 | 9353152 | 9353185 | 2 | 17 | 34 | CA   | 18 | 13 |
| 137827 | 14 | 9360176 | 9360197 | 2 | 11 | 22 | GT   | 27 | 6  |
| 137839 | 14 | 9380848 | 9380871 | 2 | 12 | 24 | TG   | 23 | 7  |
| 137844 | 14 | 9383431 | 9383448 | 2 | 9  | 18 | GT   | 28 | 4  |
| 137846 | 14 | 9385484 | 9385519 | 2 | 18 | 36 | CA   | 10 | 9  |
| 137847 | 14 | 9388608 | 9388637 | 2 | 15 | 30 | GT   | 10 | 4  |
| 137848 | 14 | 9388825 | 9388836 | 2 | 6  | 12 | AC   | 16 | 5  |
| 137849 | 14 | 9388839 | 9388850 | 2 | 6  | 12 | AC   | 15 | 6  |
| 137858 | 14 | 9403870 | 9403891 | 2 | 11 | 22 | AG   | 14 | 13 |
| 137859 | 14 | 9404117 | 9404130 | 2 | 7  | 14 | CT   | 21 | 6  |
| 137870 | 14 | 9449434 | 9449448 | 3 | 5  | 15 | CTT  | 15 | 3  |
| 137874 | 14 | 9461273 | 9461332 | 2 | 30 | 60 | GT   | 10 | 10 |
| 137883 | 14 | 9485649 | 9485680 | 4 | 8  | 32 | AATA | 19 | 9  |
| 137887 | 14 | 9510929 | 9510952 | 4 | 6  | 24 | CTTT | 19 | 8  |
| 137896 | 14 | 9542918 | 9542949 | 2 | 16 | 32 | TG   | 17 | 13 |
| 137909 | 14 | 9570100 | 9570123 | 4 | 6  | 24 | TTTA | 18 | 3  |
| 137911 | 14 | 9570669 | 9570684 | 2 | 8  | 16 | CA   | 27 | 4  |
| 137922 | 14 | 9595894 | 9595909 | 2 | 8  | 16 | TG   | 20 | 7  |
| 137932 | 14 | 9613746 | 9613769 | 2 | 12 | 24 | TG   | 25 | 13 |
| 137934 | 14 | 9619099 | 9619142 | 2 | 22 | 44 | GT   | 10 | 10 |
| 137935 | 14 | 9619228 | 9619257 | 2 | 15 | 30 | TG   | 10 | 8  |
| 137936 | 14 | 9622345 | 9622370 | 2 | 13 | 26 | GT   | 11 | 13 |
| 137938 | 14 | 9627856 | 9627893 | 2 | 19 | 38 | GT   | 10 | 10 |
| 137940 | 14 | 9637148 | 9637175 | 2 | 14 | 28 | GT   | 9  | 7  |
| 137944 | 14 | 9640692 | 9640717 | 2 | 13 | 26 | AC   | 23 | 8  |
| 137950 | 14 | 9650479 | 9650492 | 2 | 7  | 14 | CA   | 26 | 3  |
| 137957 | 14 | 9665410 | 9665421 | 2 | 6  | 12 | AC   | 33 | 4  |
| 137958 | 14 | 9667062 | 9667083 | 2 | 11 | 22 | TG   | 20 | 9  |
| 137960 | 14 | 9668022 | 9668035 | 2 | 7  | 14 | AC   | 28 | 3  |
| 137963 | 14 | 9671428 | 9671451 | 3 | 8  | 24 | GAG  | 23 | 3  |
| 137970 | 14 | 9686689 | 9686704 | 4 | 4  | 16 | TTTC | 13 | 10 |

|        |    |         |         |   |    |    |      |    |    |
|--------|----|---------|---------|---|----|----|------|----|----|
| 137977 | 14 | 9700490 | 9700507 | 2 | 9  | 18 | AC   | 21 | 5  |
| 137980 | 14 | 9709704 | 9709724 | 3 | 7  | 21 | TCC  | 26 | 10 |
| 137984 | 14 | 9738060 | 9738101 | 2 | 21 | 42 | GT   | 6  | 7  |
| 137985 | 14 | 9738915 | 9738959 | 3 | 15 | 45 | ATC  | 25 | 11 |
| 137986 | 14 | 9745441 | 9745458 | 2 | 9  | 18 | CA   | 21 | 5  |
| 137987 | 14 | 9745677 | 9745696 | 2 | 10 | 20 | GT   | 23 | 9  |
| 137989 | 14 | 9752334 | 9752351 | 3 | 6  | 18 | TCC  | 34 | 5  |
| 137991 | 14 | 9755676 | 9755690 | 3 | 5  | 15 | AAC  | 12 | 6  |
| 137992 | 14 | 9755814 | 9755828 | 3 | 5  | 15 | AAC  | 9  | 3  |
| 138007 | 14 | 9782811 | 9782838 | 2 | 14 | 28 | TG   | 16 | 6  |
| 138008 | 14 | 9782975 | 9783010 | 2 | 18 | 36 | AC   | 13 | 9  |
| 138009 | 14 | 9791042 | 9791081 | 2 | 20 | 40 | AC   | 19 | 8  |
| 138010 | 14 | 9800880 | 9800907 | 2 | 14 | 28 | TG   | 8  | 6  |
| 138015 | 14 | 9805653 | 9805668 | 2 | 8  | 16 | CT   | 10 | 4  |
| 138017 | 14 | 9805884 | 9805901 | 3 | 6  | 18 | ACA  | 27 | 3  |
| 138019 | 14 | 9806128 | 9806143 | 2 | 8  | 16 | AC   | 19 | 10 |
| 138020 | 14 | 9807204 | 9807218 | 3 | 5  | 15 | GCT  | 29 | 3  |
| 138021 | 14 | 9807258 | 9807289 | 2 | 16 | 32 | CA   | 13 | 11 |
| 138023 | 14 | 9809477 | 9809506 | 2 | 15 | 30 | AC   | 12 | 8  |
| 138024 | 14 | 9809613 | 9809628 | 2 | 8  | 16 | GT   | 6  | 5  |
| 138029 | 14 | 9819942 | 9819956 | 3 | 5  | 15 | GTG  | 30 | 3  |
| 138034 | 14 | 9837368 | 9837381 | 2 | 7  | 14 | GA   | 17 | 3  |
| 138043 | 14 | 9849751 | 9849768 | 2 | 9  | 18 | AC   | 11 | 8  |
| 138044 | 14 | 9849770 | 9849785 | 2 | 8  | 16 | CA   | 11 | 8  |
| 138046 | 14 | 9851904 | 9851919 | 2 | 8  | 16 | GT   | 18 | 8  |
| 138047 | 14 | 9860927 | 9860938 | 2 | 6  | 12 | TC   | 24 | 4  |
| 138048 | 14 | 9861625 | 9861640 | 2 | 8  | 16 | GC   | 31 | 13 |
| 138050 | 14 | 9867641 | 9867652 | 2 | 6  | 12 | TG   | 31 | 4  |
| 138052 | 14 | 9875015 | 9875038 | 2 | 12 | 24 | TG   | 17 | 15 |
| 138053 | 14 | 9876426 | 9876449 | 4 | 6  | 24 | TTAT | 18 | 3  |
| 138055 | 14 | 9878970 | 9878995 | 2 | 13 | 26 | TG   | 15 | 12 |
| 138056 | 14 | 9882967 | 9883014 | 3 | 16 | 48 | GAA  | 24 | 13 |
| 138057 | 14 | 9883250 | 9883279 | 3 | 10 | 30 | TCC  | 18 | 9  |
| 138059 | 14 | 9884474 | 9884489 | 2 | 8  | 16 | GT   | 16 | 11 |
| 138060 | 14 | 9884680 | 9884709 | 3 | 10 | 30 | GCT  | 22 | 5  |
| 138065 | 14 | 9900642 | 9900671 | 2 | 15 | 30 | GT   | 7  | 8  |
| 138069 | 14 | 9912497 | 9912514 | 3 | 6  | 18 | CAT  | 27 | 4  |
| 138072 | 14 | 9922370 | 9922383 | 2 | 7  | 14 | TG   | 14 | 6  |
| 138076 | 14 | 9930714 | 9930725 | 2 | 6  | 12 | CA   | 18 | 3  |
| 138079 | 14 | 9935463 | 9935486 | 2 | 12 | 24 | TG   | 16 | 8  |
| 138080 | 14 | 9935633 | 9935677 | 3 | 15 | 45 | GAA  | 13 | 15 |
| 138081 | 14 | 9935946 | 9935963 | 2 | 9  | 18 | CA   | 23 | 11 |
| 138083 | 14 | 9939210 | 9939221 | 2 | 6  | 12 | AC   | 16 | 9  |
| 138084 | 14 | 9939351 | 9939389 | 3 | 13 | 39 | AAG  | 16 | 11 |
| 138085 | 14 | 9944041 | 9944060 | 2 | 10 | 20 | CA   | 14 | 4  |
| 138087 | 14 | 9944234 | 9944267 | 2 | 17 | 34 | AC   | 7  | 8  |
| 138090 | 14 | 9948948 | 9948967 | 2 | 10 | 20 | CA   | 11 | 11 |
| 138097 | 14 | 9950848 | 9950865 | 3 | 6  | 18 | CAA  | 21 | 5  |
| 138098 | 14 | 9953520 | 9953534 | 3 | 5  | 15 | GCA  | 30 | 3  |
| 138099 | 14 | 9955475 | 9955492 | 3 | 6  | 18 | CAG  | 28 | 3  |
| 138100 | 14 | 9956276 | 9956302 | 3 | 9  | 27 | GGA  | 18 | 5  |

|        |    |          |          |   |    |    |      |    |    |
|--------|----|----------|----------|---|----|----|------|----|----|
| 138109 | 14 | 9968561  | 9968584  | 3 | 8  | 24 | ATC  | 25 | 7  |
| 138110 | 14 | 9971716  | 9971735  | 4 | 5  | 20 | ATCC | 23 | 5  |
| 138112 | 14 | 9973645  | 9973682  | 2 | 19 | 38 | AC   | 12 | 9  |
| 138115 | 14 | 9991499  | 9991516  | 2 | 9  | 18 | TG   | 20 | 3  |
| 138116 | 14 | 9992158  | 9992185  | 2 | 14 | 28 | CT   | 18 | 9  |
| 138128 | 14 | 10019768 | 10019781 | 2 | 7  | 14 | AG   | 16 | 4  |
| 138134 | 14 | 10033401 | 10033432 | 2 | 16 | 32 | AC   | 6  | 10 |
| 138137 | 14 | 10046399 | 10046419 | 3 | 7  | 21 | AAC  | 23 | 5  |
| 138145 | 14 | 10087620 | 10087633 | 2 | 7  | 14 | AG   | 23 | 4  |
| 138146 | 14 | 10088186 | 10088205 | 2 | 10 | 20 | CA   | 18 | 7  |
| 138152 | 14 | 10103020 | 10103031 | 2 | 6  | 12 | GT   | 32 | 3  |
| 138153 | 14 | 10112156 | 10112170 | 3 | 5  | 15 | AAG  | 28 | 3  |
| 138154 | 14 | 10114844 | 10114865 | 2 | 11 | 22 | GT   | 22 | 5  |
| 138164 | 14 | 10150408 | 10150419 | 2 | 6  | 12 | AC   | 29 | 3  |
| 138167 | 14 | 10154143 | 10154154 | 2 | 6  | 12 | AC   | 20 | 8  |
| 138168 | 14 | 10154157 | 10154168 | 2 | 6  | 12 | AC   | 18 | 7  |
| 138171 | 14 | 10160985 | 10160999 | 3 | 5  | 15 | CCG  | 22 | 4  |
| 138175 | 14 | 10163180 | 10163191 | 2 | 6  | 12 | TC   | 30 | 3  |
| 138176 | 14 | 10163638 | 10163651 | 2 | 7  | 14 | AG   | 17 | 4  |
| 138178 | 14 | 10163854 | 10163871 | 2 | 9  | 18 | TG   | 15 | 12 |
| 138179 | 14 | 10163873 | 10163884 | 2 | 6  | 12 | GT   | 16 | 10 |
| 138180 | 14 | 10164030 | 10164043 | 2 | 7  | 14 | CA   | 24 | 9  |
| 138182 | 14 | 10166332 | 10166353 | 2 | 11 | 22 | TG   | 14 | 8  |
| 138185 | 14 | 10168938 | 10168969 | 2 | 16 | 32 | TG   | 15 | 11 |
| 138187 | 14 | 10169339 | 10169356 | 2 | 9  | 18 | GT   | 17 | 8  |
| 138188 | 14 | 10170014 | 10170046 | 3 | 11 | 33 | TGA  | 20 | 6  |
| 138191 | 14 | 10183591 | 10183620 | 2 | 15 | 30 | TG   | 13 | 6  |
| 138199 | 14 | 10192546 | 10192569 | 3 | 8  | 24 | CCT  | 8  | 4  |
| 138204 | 14 | 10194212 | 10194245 | 2 | 17 | 34 | CA   | 14 | 8  |
| 138207 | 14 | 10195263 | 10195286 | 4 | 6  | 24 | AAAT | 25 | 10 |
| 138209 | 14 | 10196632 | 10196655 | 4 | 6  | 24 | CTTT | 13 | 6  |
| 138210 | 14 | 10196789 | 10196803 | 3 | 5  | 15 | GTT  | 19 | 4  |
| 138222 | 14 | 10204549 | 10204572 | 2 | 12 | 24 | CA   | 19 | 10 |
| 138223 | 14 | 10204617 | 10204634 | 3 | 6  | 18 | ACT  | 29 | 12 |
| 138224 | 14 | 10204635 | 10204649 | 3 | 5  | 15 | AAT  | 24 | 7  |
| 138232 | 14 | 10207999 | 10208030 | 2 | 16 | 32 | TG   | 11 | 12 |
| 138233 | 14 | 10209323 | 10209376 | 2 | 27 | 54 | CA   | 8  | 12 |
| 138243 | 14 | 10215937 | 10215962 | 2 | 13 | 26 | GA   | 14 | 4  |
| 138244 | 14 | 10216082 | 10216101 | 4 | 5  | 20 | TCCA | 22 | 5  |
| 138246 | 14 | 10216218 | 10216251 | 2 | 17 | 34 | AC   | 6  | 10 |
| 138252 | 14 | 10222791 | 10222818 | 2 | 14 | 28 | TG   | 18 | 10 |
| 138253 | 14 | 10223014 | 10223046 | 3 | 11 | 33 | AGG  | 13 | 5  |
| 138259 | 14 | 10226790 | 10226811 | 2 | 11 | 22 | CA   | 18 | 13 |
| 138263 | 14 | 10229128 | 10229155 | 2 | 14 | 28 | CA   | 7  | 7  |
| 138266 | 14 | 10231799 | 10231828 | 3 | 10 | 30 | GAG  | 15 | 7  |
| 138267 | 14 | 10232007 | 10232030 | 3 | 8  | 24 | CCT  | 19 | 3  |
| 138272 | 14 | 10234009 | 10234042 | 2 | 17 | 34 | GT   | 12 | 6  |
| 138273 | 14 | 10234162 | 10234185 | 2 | 12 | 24 | AC   | 10 | 6  |
| 138275 | 14 | 10235745 | 10235764 | 2 | 10 | 20 | TG   | 17 | 8  |
| 138277 | 14 | 10236878 | 10236897 | 2 | 10 | 20 | CA   | 20 | 7  |
| 138279 | 14 | 10237289 | 10237322 | 2 | 17 | 34 | GT   | 13 | 13 |

|        |    |          |          |   |    |    |      |    |    |
|--------|----|----------|----------|---|----|----|------|----|----|
| 138280 | 14 | 10239113 | 10239142 | 2 | 15 | 30 | GT   | 9  | 11 |
| 138286 | 14 | 10244731 | 10244744 | 2 | 7  | 14 | GT   | 20 | 5  |
| 138292 | 14 | 10254978 | 10254995 | 2 | 9  | 18 | GT   | 15 | 5  |
| 138294 | 14 | 10255037 | 10255058 | 2 | 11 | 22 | TG   | 9  | 7  |
| 138295 | 14 | 10255209 | 10255222 | 2 | 7  | 14 | GT   | 27 | 6  |
| 138300 | 14 | 10261672 | 10261707 | 2 | 18 | 36 | CA   | 10 | 10 |
| 138305 | 14 | 10265158 | 10265193 | 3 | 12 | 36 | CCT  | 12 | 8  |
| 138306 | 14 | 10267670 | 10267681 | 2 | 6  | 12 | GT   | 11 | 4  |
| 138307 | 14 | 10267684 | 10267701 | 2 | 9  | 18 | TG   | 15 | 4  |
| 138310 | 14 | 10274673 | 10274687 | 3 | 5  | 15 | CTC  | 16 | 6  |
| 138311 | 14 | 10274755 | 10274780 | 2 | 13 | 26 | TG   | 17 | 6  |
| 138312 | 14 | 10274827 | 10274854 | 2 | 14 | 28 | GT   | 10 | 8  |
| 138315 | 14 | 10276204 | 10276225 | 2 | 11 | 22 | AC   | 16 | 11 |
| 138316 | 14 | 10276385 | 10276414 | 2 | 15 | 30 | GT   | 10 | 8  |
| 138317 | 14 | 10276456 | 10276483 | 2 | 14 | 28 | TG   | 15 | 9  |
| 138323 | 14 | 10282111 | 10282134 | 2 | 12 | 24 | TG   | 6  | 8  |
| 138326 | 14 | 10282745 | 10282762 | 3 | 6  | 18 | GCA  | 18 | 3  |
| 138329 | 14 | 10286275 | 10286308 | 2 | 17 | 34 | TG   | 10 | 9  |
| 138330 | 14 | 10287683 | 10287696 | 2 | 7  | 14 | GT   | 27 | 6  |
| 138333 | 14 | 10288209 | 10288260 | 2 | 26 | 52 | AC   | 10 | 12 |
| 138339 | 14 | 10294433 | 10294460 | 2 | 14 | 28 | GT   | 18 | 7  |
| 138340 | 14 | 10294642 | 10294663 | 2 | 11 | 22 | CA   | 12 | 6  |
| 138341 | 14 | 10295671 | 10295712 | 3 | 14 | 42 | AAC  | 23 | 9  |
| 138343 | 14 | 10297498 | 10297521 | 2 | 12 | 24 | GT   | 14 | 6  |
| 138345 | 14 | 10299546 | 10299565 | 2 | 10 | 20 | GT   | 10 | 9  |
| 138347 | 14 | 10301563 | 10301576 | 2 | 7  | 14 | CA   | 30 | 5  |
| 138349 | 14 | 10305861 | 10305884 | 2 | 12 | 24 | GA   | 23 | 5  |
| 138350 | 14 | 10306141 | 10306160 | 2 | 10 | 20 | GT   | 17 | 7  |
| 138351 | 14 | 10306296 | 10306313 | 2 | 9  | 18 | CA   | 14 | 6  |
| 138352 | 14 | 10306692 | 10306721 | 3 | 10 | 30 | CTC  | 18 | 4  |
| 138355 | 14 | 10307898 | 10307913 | 2 | 8  | 16 | CA   | 19 | 7  |
| 138358 | 14 | 10310211 | 10310226 | 2 | 8  | 16 | AC   | 23 | 7  |
| 138365 | 14 | 10319095 | 10319112 | 2 | 9  | 18 | CA   | 26 | 6  |
| 138366 | 14 | 10319292 | 10319311 | 2 | 10 | 20 | GT   | 19 | 9  |
| 138367 | 14 | 10320411 | 10320428 | 3 | 6  | 18 | CCA  | 22 | 4  |
| 138369 | 14 | 10322035 | 10322062 | 2 | 14 | 28 | AG   | 16 | 8  |
| 138370 | 14 | 10322359 | 10322370 | 2 | 6  | 12 | TG   | 19 | 3  |
| 138371 | 14 | 10322741 | 10322752 | 2 | 6  | 12 | TG   | 25 | 3  |
| 138373 | 14 | 10326198 | 10326211 | 2 | 7  | 14 | CA   | 30 | 7  |
| 138374 | 14 | 10326615 | 10326640 | 2 | 13 | 26 | GT   | 27 | 8  |
| 138376 | 14 | 10327313 | 10327334 | 2 | 11 | 22 | CA   | 21 | 12 |
| 138377 | 14 | 10327578 | 10327591 | 2 | 7  | 14 | CA   | 6  | 6  |
| 138378 | 14 | 10327594 | 10327609 | 2 | 8  | 16 | CA   | 8  | 9  |
| 138379 | 14 | 10329016 | 10329036 | 3 | 7  | 21 | CTC  | 9  | 9  |
| 138383 | 14 | 10333608 | 10333651 | 2 | 22 | 44 | AC   | 7  | 6  |
| 138386 | 14 | 10336169 | 10336188 | 4 | 5  | 20 | AAAC | 17 | 4  |
| 138387 | 14 | 10336642 | 10336661 | 2 | 10 | 20 | AG   | 23 | 7  |
| 138388 | 14 | 10336762 | 10336783 | 2 | 11 | 22 | CT   | 15 | 4  |
| 138392 | 14 | 10338408 | 10338435 | 2 | 14 | 28 | AG   | 17 | 11 |
| 138393 | 14 | 10340340 | 10340355 | 2 | 8  | 16 | AG   | 15 | 3  |
| 138395 | 14 | 10341485 | 10341502 | 2 | 9  | 18 | CA   | 9  | 5  |



|        |    |          |          |   |    |    |     |    |    |
|--------|----|----------|----------|---|----|----|-----|----|----|
| 138396 | 14 | 10343805 | 10343820 | 2 | 8  | 16 | CT  | 19 | 5  |
| 138399 | 14 | 10354336 | 10354355 | 2 | 10 | 20 | AG  | 19 | 7  |
| 138401 | 14 | 10361091 | 10361110 | 2 | 10 | 20 | CA  | 6  | 7  |
| 138405 | 14 | 10364975 | 10364992 | 2 | 9  | 18 | TG  | 21 | 7  |
| 138406 | 14 | 10365017 | 10365037 | 3 | 7  | 21 | CCA | 33 | 4  |
| 138407 | 14 | 10365137 | 10365150 | 2 | 7  | 14 | CA  | 26 | 4  |
| 138413 | 14 | 10374976 | 10374996 | 3 | 7  | 21 | GGA | 22 | 8  |
| 138423 | 14 | 10382084 | 10382098 | 3 | 5  | 15 | GCG | 24 | 5  |
| 138424 | 14 | 10382205 | 10382220 | 2 | 8  | 16 | TG  | 14 | 3  |
| 138425 | 14 | 10382492 | 10382503 | 2 | 6  | 12 | AG  | 15 | 3  |
| 138429 | 14 | 10383985 | 10384044 | 2 | 30 | 60 | CA  | 6  | 8  |
| 138430 | 14 | 10385908 | 10385937 | 3 | 10 | 30 | CCT | 15 | 7  |
| 138431 | 14 | 10386613 | 10386636 | 2 | 12 | 24 | CA  | 16 | 5  |
| 138432 | 14 | 10387483 | 10387514 | 2 | 16 | 32 | CA  | 11 | 14 |
| 138435 | 14 | 10388643 | 10388656 | 2 | 7  | 14 | CA  | 18 | 9  |
| 138436 | 14 | 10388662 | 10388675 | 2 | 7  | 14 | AC  | 15 | 6  |
| 138437 | 14 | 10389235 | 10389250 | 2 | 8  | 16 | TG  | 15 | 10 |
| 138438 | 14 | 10390015 | 10390032 | 3 | 6  | 18 | GAG | 20 | 3  |
| 138439 | 14 | 10394703 | 10394723 | 3 | 7  | 21 | TCT | 15 | 4  |
| 138445 | 14 | 10406179 | 10406211 | 3 | 11 | 33 | CAT | 31 | 13 |
| 138453 | 14 | 10412376 | 10412393 | 3 | 6  | 18 | GAG | 6  | 3  |
| 138454 | 14 | 10413002 | 10413017 | 2 | 8  | 16 | CA  | 15 | 10 |
| 138455 | 14 | 10413641 | 10413661 | 3 | 7  | 21 | TCC | 20 | 4  |
| 138457 | 14 | 10417438 | 10417467 | 2 | 15 | 30 | TG  | 13 | 9  |
| 138459 | 14 | 10420868 | 10420893 | 2 | 13 | 26 | TG  | 15 | 8  |
| 138460 | 14 | 10421390 | 10421407 | 2 | 9  | 18 | AC  | 21 | 7  |
| 138469 | 14 | 10442957 | 10442983 | 3 | 9  | 27 | GAG | 9  | 9  |
| 138470 | 14 | 10443360 | 10443387 | 2 | 14 | 28 | CA  | 13 | 11 |
| 138472 | 14 | 10445960 | 10445989 | 2 | 15 | 30 | AC  | 18 | 14 |
| 138473 | 14 | 10448212 | 10448237 | 2 | 13 | 26 | AG  | 10 | 6  |
| 138475 | 14 | 10449384 | 10449401 | 2 | 9  | 18 | AC  | 16 | 8  |
| 138479 | 14 | 10453759 | 10453770 | 2 | 6  | 12 | AC  | 21 | 4  |
| 138481 | 14 | 10455461 | 10455472 | 2 | 6  | 12 | AT  | 20 | 6  |
| 138498 | 14 | 10463970 | 10463993 | 3 | 8  | 24 | TTC | 22 | 10 |
| 138500 | 14 | 10465278 | 10465293 | 2 | 8  | 16 | AC  | 17 | 3  |
| 138501 | 14 | 10465374 | 10465387 | 2 | 7  | 14 | GA  | 11 | 4  |
| 138503 | 14 | 10466973 | 10466990 | 3 | 6  | 18 | AAC | 28 | 4  |
| 138505 | 14 | 10468281 | 10468302 | 2 | 11 | 22 | CA  | 21 | 8  |
| 138510 | 14 | 10471020 | 10471034 | 3 | 5  | 15 | AGA | 24 | 5  |
| 138511 | 14 | 10472490 | 10472504 | 3 | 5  | 15 | ATA | 17 | 3  |
| 138515 | 14 | 10473598 | 10473625 | 2 | 14 | 28 | TG  | 9  | 5  |
| 138516 | 14 | 10473654 | 10473677 | 2 | 12 | 24 | AC  | 18 | 12 |
| 138518 | 14 | 10478021 | 10478032 | 2 | 6  | 12 | GT  | 22 | 3  |
| 138519 | 14 | 10478066 | 10478099 | 2 | 17 | 34 | GT  | 8  | 8  |
| 138523 | 14 | 10478470 | 10478499 | 2 | 15 | 30 | TG  | 13 | 7  |
| 138526 | 14 | 10490089 | 10490124 | 2 | 18 | 36 | CA  | 16 | 15 |
| 138527 | 14 | 10491456 | 10491475 | 2 | 10 | 20 | AC  | 22 | 6  |
| 138533 | 14 | 10501165 | 10501179 | 3 | 5  | 15 | CAA | 28 | 3  |
| 138548 | 15 | 26589    | 26612    | 2 | 12 | 24 | GT  | 7  | 7  |
| 138567 | 15 | 56925    | 56942    | 2 | 9  | 18 | TG  | 16 | 7  |
| 138570 | 15 | 60726    | 60747    | 2 | 11 | 22 | CA  | 15 | 8  |

|        |    |        |        |   |    |    |      |    |    |
|--------|----|--------|--------|---|----|----|------|----|----|
| 138571 | 15 | 61648  | 61661  | 2 | 7  | 14 | CA   | 20 | 6  |
| 138572 | 15 | 62163  | 62176  | 2 | 7  | 14 | CA   | 24 | 6  |
| 138577 | 15 | 70584  | 70611  | 4 | 7  | 28 | ATCC | 30 | 6  |
| 138581 | 15 | 80868  | 80885  | 2 | 9  | 18 | CA   | 23 | 3  |
| 138582 | 15 | 82147  | 82164  | 2 | 9  | 18 | AT   | 9  | 3  |
| 138583 | 15 | 82255  | 82269  | 3 | 5  | 15 | TTG  | 23 | 8  |
| 138592 | 15 | 107303 | 107324 | 2 | 11 | 22 | AC   | 17 | 5  |
| 138596 | 15 | 115885 | 115899 | 3 | 5  | 15 | TTG  | 30 | 3  |
| 138600 | 15 | 131331 | 131350 | 2 | 10 | 20 | GT   | 28 | 10 |
| 138603 | 15 | 134124 | 134135 | 2 | 6  | 12 | GT   | 13 | 8  |
| 138605 | 15 | 137749 | 137793 | 3 | 15 | 45 | TCT  | 20 | 10 |
| 138612 | 15 | 157358 | 157396 | 3 | 13 | 39 | CTG  | 29 | 8  |
| 138613 | 15 | 157470 | 157491 | 2 | 11 | 22 | TG   | 15 | 11 |
| 138628 | 15 | 195347 | 195370 | 2 | 12 | 24 | AC   | 17 | 9  |
| 138629 | 15 | 195603 | 195632 | 2 | 15 | 30 | CA   | 11 | 12 |
| 138631 | 15 | 201474 | 201487 | 2 | 7  | 14 | AC   | 31 | 6  |
| 138632 | 15 | 201489 | 201500 | 2 | 6  | 12 | CA   | 32 | 6  |
| 138633 | 15 | 201604 | 201615 | 2 | 6  | 12 | AC   | 33 | 3  |
| 138634 | 15 | 205061 | 205076 | 2 | 8  | 16 | TC   | 28 | 8  |
| 138636 | 15 | 209580 | 209593 | 2 | 7  | 14 | GT   | 29 | 10 |
| 138638 | 15 | 210894 | 210905 | 2 | 6  | 12 | CA   | 18 | 6  |
| 138641 | 15 | 211677 | 211700 | 3 | 8  | 24 | CCA  | 25 | 10 |
| 138647 | 15 | 213497 | 213512 | 2 | 8  | 16 | AC   | 19 | 6  |
| 138649 | 15 | 214115 | 214144 | 2 | 15 | 30 | TG   | 20 | 5  |
| 138658 | 15 | 221070 | 221105 | 2 | 18 | 36 | CA   | 14 | 6  |
| 138664 | 15 | 229652 | 229667 | 2 | 8  | 16 | GT   | 24 | 5  |
| 138665 | 15 | 229737 | 229756 | 4 | 5  | 20 | TCAA | 30 | 3  |
| 138669 | 15 | 241276 | 241287 | 2 | 6  | 12 | AC   | 13 | 6  |
| 138670 | 15 | 241904 | 241955 | 2 | 26 | 52 | TG   | 20 | 9  |
| 138672 | 15 | 245582 | 245597 | 2 | 8  | 16 | CA   | 25 | 15 |
| 138683 | 15 | 266295 | 266324 | 3 | 10 | 30 | GCA  | 33 | 7  |
| 138684 | 15 | 268439 | 268494 | 2 | 28 | 56 | CA   | 7  | 10 |
| 138689 | 15 | 273564 | 273583 | 2 | 10 | 20 | AC   | 20 | 10 |
| 138691 | 15 | 276502 | 276531 | 2 | 15 | 30 | TG   | 13 | 7  |
| 138698 | 15 | 283961 | 283976 | 2 | 8  | 16 | AC   | 26 | 5  |
| 138699 | 15 | 284300 | 284313 | 2 | 7  | 14 | CA   | 19 | 3  |
| 138712 | 15 | 303747 | 303768 | 2 | 11 | 22 | AG   | 15 | 7  |
| 138720 | 15 | 314877 | 314892 | 2 | 8  | 16 | TG   | 17 | 5  |
| 138728 | 15 | 333591 | 333617 | 3 | 9  | 27 | GAG  | 17 | 6  |
| 138732 | 15 | 337380 | 337397 | 2 | 9  | 18 | TG   | 21 | 4  |
| 138736 | 15 | 348535 | 348568 | 2 | 17 | 34 | CA   | 10 | 13 |
| 138741 | 15 | 349978 | 349991 | 2 | 7  | 14 | CA   | 21 | 6  |
| 138744 | 15 | 359035 | 359046 | 2 | 6  | 12 | CA   | 16 | 3  |
| 138745 | 15 | 359099 | 359112 | 2 | 7  | 14 | TC   | 13 | 4  |
| 138751 | 15 | 364010 | 364023 | 2 | 7  | 14 | CT   | 21 | 4  |
| 138752 | 15 | 364409 | 364420 | 2 | 6  | 12 | CT   | 27 | 3  |
| 138764 | 15 | 373670 | 373683 | 2 | 7  | 14 | TG   | 24 | 3  |
| 138765 | 15 | 374712 | 374727 | 2 | 8  | 16 | TC   | 13 | 4  |
| 138767 | 15 | 374871 | 374884 | 2 | 7  | 14 | TG   | 6  | 4  |
| 138768 | 15 | 374887 | 374902 | 2 | 8  | 16 | TG   | 24 | 7  |
| 138773 | 15 | 387575 | 387586 | 2 | 6  | 12 | CT   | 8  | 4  |

|        |    |        |        |   |    |    |      |    |    |
|--------|----|--------|--------|---|----|----|------|----|----|
| 138774 | 15 | 395158 | 395173 | 2 | 8  | 16 | TG   | 14 | 5  |
| 138775 | 15 | 396492 | 396515 | 2 | 12 | 24 | GA   | 24 | 10 |
| 138776 | 15 | 399103 | 399118 | 4 | 4  | 16 | TCTG | 15 | 3  |
| 138777 | 15 | 399119 | 399130 | 2 | 6  | 12 | TC   | 14 | 3  |
| 138789 | 15 | 414301 | 414316 | 2 | 8  | 16 | GA   | 20 | 4  |
| 138791 | 15 | 414709 | 414726 | 2 | 9  | 18 | TG   | 27 | 4  |
| 138804 | 15 | 436207 | 436220 | 2 | 7  | 14 | AC   | 11 | 3  |
| 138815 | 15 | 447686 | 447705 | 2 | 10 | 20 | GA   | 22 | 4  |
| 138822 | 15 | 463127 | 463148 | 2 | 11 | 22 | CA   | 9  | 5  |
| 138832 | 15 | 475783 | 475802 | 2 | 10 | 20 | TC   | 12 | 5  |
| 138833 | 15 | 480312 | 480351 | 2 | 20 | 40 | GT   | 7  | 10 |
| 138841 | 15 | 494573 | 494584 | 2 | 6  | 12 | AC   | 21 | 3  |
| 138848 | 15 | 502589 | 502603 | 3 | 5  | 15 | GTT  | 25 | 3  |
| 138853 | 15 | 512727 | 512738 | 2 | 6  | 12 | AT   | 7  | 3  |
| 138869 | 15 | 532501 | 532524 | 2 | 12 | 24 | TC   | 11 | 3  |
| 138891 | 15 | 595875 | 595889 | 3 | 5  | 15 | CAG  | 23 | 3  |
| 138897 | 15 | 621556 | 621573 | 3 | 6  | 18 | AGC  | 22 | 5  |
| 138901 | 15 | 640680 | 640691 | 2 | 6  | 12 | CA   | 28 | 3  |
| 138906 | 15 | 648005 | 648020 | 2 | 8  | 16 | TG   | 16 | 4  |
| 138910 | 15 | 656968 | 656979 | 2 | 6  | 12 | CA   | 20 | 9  |
| 138913 | 15 | 659576 | 659597 | 2 | 11 | 22 | AC   | 28 | 5  |
| 138914 | 15 | 660263 | 660280 | 2 | 9  | 18 | TG   | 13 | 7  |
| 138915 | 15 | 661246 | 661263 | 2 | 9  | 18 | TG   | 16 | 7  |
| 138916 | 15 | 664087 | 664102 | 4 | 4  | 16 | TAGA | 36 | 4  |
| 138919 | 15 | 665558 | 665572 | 3 | 5  | 15 | CAC  | 15 | 3  |
| 138920 | 15 | 665819 | 665832 | 2 | 7  | 14 | CA   | 21 | 4  |
| 138923 | 15 | 669191 | 669220 | 3 | 10 | 30 | CTC  | 7  | 5  |
| 138925 | 15 | 675522 | 675555 | 2 | 17 | 34 | CT   | 13 | 5  |
| 138929 | 15 | 680057 | 680070 | 2 | 7  | 14 | TG   | 30 | 3  |
| 138930 | 15 | 680354 | 680381 | 2 | 14 | 28 | GT   | 13 | 5  |
| 138931 | 15 | 681903 | 681914 | 2 | 6  | 12 | TG   | 27 | 3  |
| 138940 | 15 | 693598 | 693631 | 2 | 17 | 34 | TG   | 17 | 11 |
| 138955 | 15 | 730782 | 730805 | 2 | 12 | 24 | AC   | 17 | 8  |
| 138962 | 15 | 758031 | 758046 | 4 | 4  | 16 | AAAC | 19 | 4  |
| 138966 | 15 | 772172 | 772210 | 3 | 13 | 39 | AAT  | 7  | 5  |
| 138990 | 15 | 842372 | 842391 | 4 | 5  | 20 | TTTA | 18 | 3  |
| 138995 | 15 | 850857 | 850878 | 2 | 11 | 22 | AG   | 18 | 9  |
| 139000 | 15 | 875612 | 875643 | 2 | 16 | 32 | TG   | 11 | 9  |
| 139004 | 15 | 879120 | 879141 | 2 | 11 | 22 | CT   | 11 | 4  |
| 139007 | 15 | 882752 | 882767 | 2 | 8  | 16 | CA   | 22 | 4  |
| 139016 | 15 | 899423 | 899442 | 2 | 10 | 20 | TG   | 20 | 9  |
| 139020 | 15 | 910879 | 910912 | 2 | 17 | 34 | TG   | 20 | 8  |
| 139021 | 15 | 911210 | 911237 | 2 | 14 | 28 | TG   | 11 | 8  |
| 139024 | 15 | 926649 | 926702 | 2 | 27 | 54 | TG   | 10 | 14 |
| 139030 | 15 | 931783 | 931816 | 2 | 17 | 34 | GT   | 12 | 8  |
| 139031 | 15 | 932614 | 932643 | 2 | 15 | 30 | CA   | 13 | 19 |
| 139032 | 15 | 936771 | 936784 | 2 | 7  | 14 | GT   | 27 | 5  |
| 139033 | 15 | 945513 | 945524 | 2 | 6  | 12 | TC   | 24 | 3  |
| 139035 | 15 | 948338 | 948375 | 2 | 19 | 38 | AC   | 7  | 9  |
| 139040 | 15 | 954751 | 954764 | 2 | 7  | 14 | TG   | 20 | 5  |
| 139044 | 15 | 961798 | 961813 | 2 | 8  | 16 | TC   | 16 | 3  |

|        |    |         |         |   |    |    |      |    |    |
|--------|----|---------|---------|---|----|----|------|----|----|
| 139051 | 15 | 985754  | 985771  | 2 | 9  | 18 | TG   | 23 | 5  |
| 139056 | 15 | 999189  | 999212  | 2 | 12 | 24 | AC   | 24 | 10 |
| 139057 | 15 | 999359  | 999370  | 2 | 6  | 12 | TG   | 27 | 3  |
| 139058 | 15 | 1001371 | 1001384 | 2 | 7  | 14 | AC   | 23 | 4  |
| 139067 | 15 | 1024081 | 1024092 | 2 | 6  | 12 | GT   | 25 | 5  |
| 139078 | 15 | 1043191 | 1043211 | 3 | 7  | 21 | TCA  | 19 | 3  |
| 139083 | 15 | 1062335 | 1062350 | 2 | 8  | 16 | TG   | 15 | 6  |
| 139092 | 15 | 1075431 | 1075454 | 2 | 12 | 24 | AG   | 14 | 7  |
| 139093 | 15 | 1078590 | 1078603 | 2 | 7  | 14 | AC   | 26 | 3  |
| 139116 | 15 | 1115488 | 1115505 | 3 | 6  | 18 | TCT  | 17 | 4  |
| 139122 | 15 | 1123694 | 1123711 | 2 | 9  | 18 | TG   | 16 | 12 |
| 139123 | 15 | 1123714 | 1123729 | 2 | 8  | 16 | TG   | 17 | 12 |
| 139124 | 15 | 1124156 | 1124177 | 2 | 11 | 22 | AC   | 20 | 8  |
| 139127 | 15 | 1126351 | 1126364 | 2 | 7  | 14 | GT   | 21 | 6  |
| 139128 | 15 | 1126681 | 1126698 | 2 | 9  | 18 | TG   | 24 | 5  |
| 139130 | 15 | 1127749 | 1127766 | 3 | 6  | 18 | ATT  | 24 | 4  |
| 139136 | 15 | 1130798 | 1130819 | 2 | 11 | 22 | GT   | 11 | 10 |
| 139137 | 15 | 1130889 | 1130904 | 2 | 8  | 16 | TG   | 22 | 4  |
| 139138 | 15 | 1132869 | 1132886 | 2 | 9  | 18 | TG   | 23 | 4  |
| 139141 | 15 | 1134132 | 1134157 | 2 | 13 | 26 | GT   | 16 | 5  |
| 139146 | 15 | 1137291 | 1137332 | 2 | 21 | 42 | GT   | 9  | 10 |
| 139147 | 15 | 1137500 | 1137517 | 2 | 9  | 18 | GT   | 7  | 8  |
| 139150 | 15 | 1140738 | 1140763 | 2 | 13 | 26 | GT   | 17 | 5  |
| 139153 | 15 | 1149118 | 1149165 | 2 | 24 | 48 | CA   | 11 | 13 |
| 139154 | 15 | 1149279 | 1149300 | 2 | 11 | 22 | TG   | 22 | 5  |
| 139157 | 15 | 1152609 | 1152632 | 2 | 12 | 24 | TC   | 20 | 5  |
| 139159 | 15 | 1162171 | 1162182 | 2 | 6  | 12 | TG   | 27 | 3  |
| 139164 | 15 | 1166772 | 1166801 | 2 | 15 | 30 | TG   | 20 | 8  |
| 139166 | 15 | 1168167 | 1168198 | 2 | 16 | 32 | TG   | 10 | 14 |
| 139169 | 15 | 1176774 | 1176803 | 2 | 15 | 30 | GA   | 10 | 6  |
| 139170 | 15 | 1177478 | 1177499 | 2 | 11 | 22 | TG   | 15 | 7  |
| 139172 | 15 | 1180811 | 1180822 | 2 | 6  | 12 | AG   | 27 | 3  |
| 139173 | 15 | 1180943 | 1180964 | 2 | 11 | 22 | GT   | 22 | 6  |
| 139174 | 15 | 1181096 | 1181111 | 2 | 8  | 16 | GT   | 24 | 4  |
| 139175 | 15 | 1185510 | 1185521 | 2 | 6  | 12 | TG   | 24 | 3  |
| 139187 | 15 | 1217905 | 1217920 | 4 | 4  | 16 | TTAT | 6  | 3  |
| 139188 | 15 | 1221549 | 1221570 | 2 | 11 | 22 | TG   | 16 | 9  |
| 139189 | 15 | 1224923 | 1224944 | 2 | 11 | 22 | AC   | 23 | 6  |
| 139197 | 15 | 1250429 | 1250448 | 2 | 10 | 20 | AC   | 20 | 4  |
| 139207 | 15 | 1277859 | 1277874 | 4 | 4  | 16 | AAAT | 29 | 5  |
| 139208 | 15 | 1279373 | 1279388 | 4 | 4  | 16 | TATT | 23 | 4  |
| 139209 | 15 | 1280957 | 1280980 | 2 | 12 | 24 | GT   | 16 | 6  |
| 139212 | 15 | 1281901 | 1281914 | 2 | 7  | 14 | GT   | 27 | 6  |
| 139213 | 15 | 1289287 | 1289346 | 4 | 15 | 60 | GATA | 19 | 10 |
| 139216 | 15 | 1298789 | 1298812 | 2 | 12 | 24 | TG   | 13 | 7  |
| 139217 | 15 | 1299711 | 1299726 | 2 | 8  | 16 | GT   | 30 | 5  |
| 139222 | 15 | 1307404 | 1307415 | 2 | 6  | 12 | GA   | 16 | 3  |
| 139231 | 15 | 1325229 | 1325246 | 2 | 9  | 18 | CA   | 10 | 3  |
| 139232 | 15 | 1325442 | 1325465 | 2 | 12 | 24 | AC   | 13 | 6  |
| 139235 | 15 | 1327256 | 1327287 | 2 | 16 | 32 | TG   | 9  | 6  |
| 139250 | 15 | 1329391 | 1329406 | 2 | 8  | 16 | CA   | 21 | 9  |

|        |    |         |         |   |    |    |      |    |    |
|--------|----|---------|---------|---|----|----|------|----|----|
| 139251 | 15 | 1329557 | 1329584 | 2 | 14 | 28 | AC   | 10 | 9  |
| 139252 | 15 | 1329739 | 1329752 | 2 | 7  | 14 | TC   | 21 | 7  |
| 139263 | 15 | 1346282 | 1346293 | 2 | 6  | 12 | CA   | 22 | 4  |
| 139274 | 15 | 1362253 | 1362276 | 2 | 12 | 24 | AC   | 22 | 17 |
| 139281 | 15 | 1371124 | 1371144 | 3 | 7  | 21 | CCT  | 13 | 5  |
| 139282 | 15 | 1371315 | 1371326 | 2 | 6  | 12 | CA   | 23 | 3  |
| 139283 | 15 | 1375435 | 1375452 | 2 | 9  | 18 | GT   | 18 | 6  |
| 139286 | 15 | 1376958 | 1376973 | 2 | 8  | 16 | CT   | 20 | 4  |
| 139288 | 15 | 1381257 | 1381292 | 4 | 9  | 36 | TTAG | 23 | 5  |
| 139290 | 15 | 1386406 | 1386417 | 2 | 6  | 12 | TG   | 30 | 3  |
| 139291 | 15 | 1389902 | 1389921 | 2 | 10 | 20 | CA   | 20 | 7  |
| 139292 | 15 | 1390183 | 1390200 | 3 | 6  | 18 | CTC  | 8  | 3  |
| 139293 | 15 | 1391328 | 1391345 | 3 | 6  | 18 | AAG  | 25 | 8  |
| 139295 | 15 | 1394009 | 1394030 | 2 | 11 | 22 | AC   | 25 | 6  |
| 139302 | 15 | 1406044 | 1406063 | 2 | 10 | 20 | AC   | 19 | 7  |
| 139307 | 15 | 1414858 | 1414879 | 2 | 11 | 22 | AC   | 19 | 10 |
| 139308 | 15 | 1418372 | 1418387 | 2 | 8  | 16 | AG   | 30 | 3  |
| 139312 | 15 | 1426826 | 1426859 | 2 | 17 | 34 | CA   | 10 | 7  |
| 139315 | 15 | 1427535 | 1427554 | 2 | 10 | 20 | GA   | 8  | 6  |
| 139316 | 15 | 1427858 | 1427869 | 2 | 6  | 12 | GT   | 26 | 8  |
| 139317 | 15 | 1428047 | 1428088 | 3 | 14 | 42 | CTT  | 10 | 14 |
| 139320 | 15 | 1429265 | 1429290 | 2 | 13 | 26 | AC   | 15 | 7  |
| 139325 | 15 | 1430704 | 1430751 | 2 | 24 | 48 | GT   | 9  | 12 |
| 139326 | 15 | 1430837 | 1430850 | 2 | 7  | 14 | GT   | 11 | 7  |
| 139328 | 15 | 1433613 | 1433624 | 2 | 6  | 12 | TC   | 13 | 4  |
| 139331 | 15 | 1433695 | 1433718 | 2 | 12 | 24 | TC   | 18 | 8  |
| 139335 | 15 | 1440453 | 1440474 | 2 | 11 | 22 | CA   | 7  | 7  |
| 139336 | 15 | 1440499 | 1440510 | 2 | 6  | 12 | CA   | 9  | 3  |
| 139337 | 15 | 1440665 | 1440698 | 2 | 17 | 34 | AC   | 12 | 8  |
| 139338 | 15 | 1440827 | 1440850 | 2 | 12 | 24 | AC   | 15 | 5  |
| 139343 | 15 | 1443952 | 1443967 | 2 | 8  | 16 | TG   | 19 | 7  |
| 139344 | 15 | 1443970 | 1443983 | 2 | 7  | 14 | TG   | 19 | 6  |
| 139345 | 15 | 1444088 | 1444099 | 2 | 6  | 12 | TG   | 23 | 12 |
| 139346 | 15 | 1444214 | 1444231 | 2 | 9  | 18 | AC   | 23 | 7  |
| 139354 | 15 | 1450014 | 1450037 | 2 | 12 | 24 | AC   | 10 | 8  |
| 139359 | 15 | 1457990 | 1458021 | 2 | 16 | 32 | GT   | 10 | 13 |
| 139360 | 15 | 1458166 | 1458185 | 2 | 10 | 20 | TG   | 14 | 9  |
| 139361 | 15 | 1458397 | 1458424 | 2 | 14 | 28 | AC   | 12 | 8  |
| 139362 | 15 | 1459005 | 1459036 | 2 | 16 | 32 | TG   | 9  | 4  |
| 139363 | 15 | 1460298 | 1460309 | 2 | 6  | 12 | TC   | 21 | 14 |
| 139368 | 15 | 1461406 | 1461443 | 2 | 19 | 38 | GT   | 8  | 7  |
| 139370 | 15 | 1462423 | 1462440 | 2 | 9  | 18 | TC   | 19 | 3  |
| 139372 | 15 | 1464023 | 1464038 | 2 | 8  | 16 | CA   | 14 | 11 |
| 139374 | 15 | 1466857 | 1466886 | 2 | 15 | 30 | GT   | 17 | 8  |
| 139376 | 15 | 1470580 | 1470605 | 2 | 13 | 26 | GT   | 14 | 7  |
| 139377 | 15 | 1471534 | 1471551 | 2 | 9  | 18 | CA   | 21 | 4  |
| 139378 | 15 | 1471764 | 1471775 | 2 | 6  | 12 | GT   | 24 | 4  |
| 139381 | 15 | 1474243 | 1474266 | 4 | 6  | 24 | AGGA | 11 | 3  |
| 139382 | 15 | 1474359 | 1474404 | 2 | 23 | 46 | GT   | 11 | 10 |
| 139384 | 15 | 1474872 | 1474893 | 2 | 11 | 22 | AC   | 18 | 5  |
| 139386 | 15 | 1479791 | 1479804 | 2 | 7  | 14 | AC   | 20 | 3  |

|        |    |         |         |   |    |    |      |    |    |
|--------|----|---------|---------|---|----|----|------|----|----|
| 139387 | 15 | 1482314 | 1482331 | 2 | 9  | 18 | AC   | 16 | 7  |
| 139388 | 15 | 1482428 | 1482451 | 2 | 12 | 24 | GT   | 28 | 14 |
| 139390 | 15 | 1482602 | 1482637 | 2 | 18 | 36 | TG   | 7  | 8  |
| 139392 | 15 | 1482871 | 1482896 | 2 | 13 | 26 | CA   | 6  | 4  |
| 139395 | 15 | 1488168 | 1488200 | 3 | 11 | 33 | ATC  | 15 | 6  |
| 139399 | 15 | 1490920 | 1490935 | 2 | 8  | 16 | GT   | 18 | 4  |
| 139402 | 15 | 1491386 | 1491423 | 2 | 19 | 38 | CA   | 17 | 14 |
| 139403 | 15 | 1491843 | 1491858 | 2 | 8  | 16 | TA   | 24 | 6  |
| 139411 | 15 | 1496997 | 1497008 | 2 | 6  | 12 | AC   | 20 | 3  |
| 139412 | 15 | 1497534 | 1497549 | 2 | 8  | 16 | AC   | 19 | 4  |
| 139414 | 15 | 1506261 | 1506274 | 2 | 7  | 14 | GT   | 29 | 5  |
| 139418 | 15 | 1519377 | 1519392 | 2 | 8  | 16 | GT   | 28 | 5  |
| 139420 | 15 | 1520789 | 1520800 | 2 | 6  | 12 | GT   | 20 | 3  |
| 139423 | 15 | 1527321 | 1527340 | 2 | 10 | 20 | AC   | 18 | 6  |
| 139424 | 15 | 1527762 | 1527785 | 4 | 6  | 24 | AATA | 13 | 3  |
| 139426 | 15 | 1532520 | 1532579 | 4 | 15 | 60 | TCTA | 24 | 12 |
| 139434 | 15 | 1551507 | 1551518 | 2 | 6  | 12 | GT   | 24 | 4  |
| 139436 | 15 | 1560118 | 1560137 | 2 | 10 | 20 | GT   | 16 | 7  |
| 139437 | 15 | 1560139 | 1560152 | 2 | 7  | 14 | TG   | 13 | 7  |
| 139438 | 15 | 1560943 | 1560966 | 3 | 8  | 24 | CCA  | 14 | 4  |
| 139454 | 15 | 1581208 | 1581222 | 3 | 5  | 15 | GTG  | 19 | 6  |
| 139461 | 15 | 1595815 | 1595836 | 2 | 11 | 22 | TC   | 22 | 3  |
| 139468 | 15 | 1605818 | 1605839 | 2 | 11 | 22 | CA   | 10 | 4  |
| 139477 | 15 | 1621288 | 1621303 | 4 | 4  | 16 | CTTA | 29 | 4  |
| 139478 | 15 | 1621797 | 1621836 | 2 | 20 | 40 | CT   | 7  | 8  |
| 139481 | 15 | 1630112 | 1630171 | 4 | 15 | 60 | ATAG | 16 | 10 |
| 139482 | 15 | 1632553 | 1632568 | 4 | 4  | 16 | TTTC | 17 | 5  |
| 139487 | 15 | 1633938 | 1633953 | 2 | 8  | 16 | GA   | 25 | 3  |
| 139496 | 15 | 1654035 | 1654062 | 2 | 14 | 28 | GT   | 22 | 8  |
| 139505 | 15 | 1673866 | 1673897 | 2 | 16 | 32 | AG   | 6  | 4  |
| 139507 | 15 | 1683427 | 1683470 | 4 | 11 | 44 | TTTC | 23 | 8  |
| 139536 | 15 | 1764571 | 1764582 | 2 | 6  | 12 | AC   | 31 | 3  |
| 139537 | 15 | 1764632 | 1764645 | 2 | 7  | 14 | TG   | 30 | 7  |
| 139539 | 15 | 1773219 | 1773254 | 2 | 18 | 36 | CA   | 12 | 12 |
| 139540 | 15 | 1776049 | 1776060 | 2 | 6  | 12 | CA   | 25 | 11 |
| 139541 | 15 | 1776298 | 1776313 | 2 | 8  | 16 | TG   | 25 | 9  |
| 139542 | 15 | 1779799 | 1779816 | 2 | 9  | 18 | AG   | 19 | 4  |
| 139544 | 15 | 1781145 | 1781156 | 2 | 6  | 12 | AC   | 29 | 4  |
| 139549 | 15 | 1788932 | 1788973 | 2 | 21 | 42 | TG   | 19 | 14 |
| 139550 | 15 | 1791334 | 1791349 | 2 | 8  | 16 | AC   | 33 | 3  |
| 139551 | 15 | 1791636 | 1791667 | 2 | 16 | 32 | CA   | 12 | 12 |
| 139553 | 15 | 1798199 | 1798212 | 2 | 7  | 14 | GT   | 27 | 5  |
| 139563 | 15 | 1822403 | 1822417 | 3 | 5  | 15 | ATT  | 15 | 3  |
| 139567 | 15 | 1833952 | 1833983 | 2 | 16 | 32 | CA   | 7  | 8  |
| 139572 | 15 | 1841291 | 1841326 | 3 | 12 | 36 | TTC  | 19 | 7  |
| 139579 | 15 | 1853651 | 1853662 | 2 | 6  | 12 | TG   | 19 | 6  |
| 139580 | 15 | 1859051 | 1859062 | 2 | 6  | 12 | GA   | 22 | 6  |
| 139582 | 15 | 1861868 | 1861879 | 2 | 6  | 12 | TG   | 20 | 8  |
| 139588 | 15 | 1874173 | 1874196 | 4 | 6  | 24 | TTTC | 24 | 8  |
| 139589 | 15 | 1874392 | 1874415 | 2 | 12 | 24 | GT   | 15 | 7  |
| 139590 | 15 | 1874693 | 1874704 | 2 | 6  | 12 | CA   | 26 | 3  |

|        |    |         |         |   |    |    |      |    |    |
|--------|----|---------|---------|---|----|----|------|----|----|
| 139591 | 15 | 1874714 | 1874725 | 2 | 6  | 12 | AC   | 25 | 3  |
| 139592 | 15 | 1875902 | 1875917 | 2 | 8  | 16 | TG   | 27 | 6  |
| 139595 | 15 | 1879917 | 1879928 | 2 | 6  | 12 | CT   | 8  | 6  |
| 139597 | 15 | 1880875 | 1880886 | 2 | 6  | 12 | CT   | 20 | 9  |
| 139598 | 15 | 1880887 | 1880900 | 2 | 7  | 14 | CA   | 24 | 8  |
| 139599 | 15 | 1880957 | 1880970 | 2 | 7  | 14 | TC   | 22 | 3  |
| 139600 | 15 | 1881767 | 1881796 | 2 | 15 | 30 | AC   | 12 | 8  |
| 139603 | 15 | 1885051 | 1885102 | 2 | 26 | 52 | TG   | 8  | 7  |
| 139604 | 15 | 1886301 | 1886318 | 3 | 6  | 18 | GAG  | 19 | 5  |
| 139607 | 15 | 1891033 | 1891054 | 2 | 11 | 22 | TG   | 17 | 4  |
| 139609 | 15 | 1894850 | 1894881 | 2 | 16 | 32 | AC   | 7  | 9  |
| 139611 | 15 | 1903755 | 1903774 | 2 | 10 | 20 | TG   | 21 | 9  |
| 139613 | 15 | 1904412 | 1904429 | 2 | 9  | 18 | CA   | 28 | 5  |
| 139616 | 15 | 1915572 | 1915583 | 2 | 6  | 12 | GT   | 11 | 7  |
| 139617 | 15 | 1915586 | 1915599 | 2 | 7  | 14 | GT   | 9  | 5  |
| 139626 | 15 | 1949459 | 1949470 | 2 | 6  | 12 | GT   | 31 | 3  |
| 139628 | 15 | 1957472 | 1957483 | 2 | 6  | 12 | AC   | 26 | 3  |
| 139629 | 15 | 1959026 | 1959039 | 2 | 7  | 14 | AC   | 24 | 4  |
| 139630 | 15 | 1959297 | 1959308 | 2 | 6  | 12 | TA   | 16 | 3  |
| 139636 | 15 | 1968750 | 1968767 | 2 | 9  | 18 | GT   | 22 | 3  |
| 139645 | 15 | 1978993 | 1979052 | 2 | 30 | 60 | AC   | 9  | 10 |
| 139657 | 15 | 2004195 | 2004216 | 2 | 11 | 22 | TG   | 14 | 6  |
| 139664 | 15 | 2016772 | 2016803 | 2 | 16 | 32 | GT   | 16 | 8  |
| 139665 | 15 | 2016933 | 2016960 | 2 | 14 | 28 | GT   | 22 | 9  |
| 139675 | 15 | 2024159 | 2024194 | 4 | 9  | 36 | AGAC | 19 | 6  |
| 139677 | 15 | 2025899 | 2025932 | 2 | 17 | 34 | GT   | 6  | 7  |
| 139682 | 15 | 2028057 | 2028068 | 2 | 6  | 12 | TA   | 26 | 4  |
| 139684 | 15 | 2030949 | 2030984 | 2 | 18 | 36 | CA   | 10 | 10 |
| 139691 | 15 | 2031784 | 2031811 | 2 | 14 | 28 | TG   | 7  | 4  |
| 139698 | 15 | 2037743 | 2037762 | 2 | 10 | 20 | AC   | 20 | 4  |
| 139699 | 15 | 2039378 | 2039391 | 2 | 7  | 14 | TG   | 32 | 3  |
| 139711 | 15 | 2050999 | 2051010 | 2 | 6  | 12 | TG   | 21 | 4  |
| 139715 | 15 | 2051342 | 2051365 | 3 | 8  | 24 | AGG  | 20 | 6  |
| 139716 | 15 | 2056708 | 2056745 | 2 | 19 | 38 | TG   | 7  | 5  |
| 139721 | 15 | 2061811 | 2061828 | 2 | 9  | 18 | CA   | 23 | 8  |
| 139724 | 15 | 2063958 | 2063977 | 2 | 10 | 20 | CA   | 12 | 3  |
| 139730 | 15 | 2073754 | 2073775 | 2 | 11 | 22 | TG   | 21 | 15 |
| 139734 | 15 | 2074125 | 2074138 | 2 | 7  | 14 | TG   | 18 | 11 |
| 139735 | 15 | 2074141 | 2074158 | 2 | 9  | 18 | TG   | 21 | 11 |
| 139736 | 15 | 2076418 | 2076431 | 2 | 7  | 14 | AG   | 25 | 4  |
| 139738 | 15 | 2077490 | 2077505 | 2 | 8  | 16 | GT   | 24 | 4  |
| 139739 | 15 | 2077911 | 2077942 | 4 | 8  | 32 | CTGT | 24 | 9  |
| 139742 | 15 | 2082362 | 2082376 | 3 | 5  | 15 | GAG  | 15 | 4  |
| 139745 | 15 | 2083173 | 2083188 | 2 | 8  | 16 | CA   | 21 | 8  |
| 139746 | 15 | 2083191 | 2083202 | 2 | 6  | 12 | CA   | 15 | 4  |
| 139747 | 15 | 2083304 | 2083319 | 2 | 8  | 16 | TG   | 23 | 6  |
| 139748 | 15 | 2083493 | 2083508 | 2 | 8  | 16 | AC   | 23 | 4  |
| 139753 | 15 | 2089177 | 2089188 | 2 | 6  | 12 | TG   | 11 | 4  |
| 139756 | 15 | 2090669 | 2090683 | 3 | 5  | 15 | TTC  | 24 | 3  |
| 139758 | 15 | 2093991 | 2094022 | 2 | 16 | 32 | GT   | 10 | 10 |
| 139761 | 15 | 2094314 | 2094341 | 2 | 14 | 28 | GT   | 11 | 13 |

|        |    |         |         |   |    |    |      |    |    |
|--------|----|---------|---------|---|----|----|------|----|----|
| 139766 | 15 | 2097664 | 2097681 | 2 | 9  | 18 | TC   | 19 | 6  |
| 139767 | 15 | 2097719 | 2097739 | 3 | 7  | 21 | CTC  | 28 | 4  |
| 139769 | 15 | 2097943 | 2097963 | 3 | 7  | 21 | GAG  | 27 | 3  |
| 139770 | 15 | 2098394 | 2098409 | 2 | 8  | 16 | AC   | 24 | 6  |
| 139772 | 15 | 2101081 | 2101110 | 2 | 15 | 30 | TG   | 15 | 7  |
| 139774 | 15 | 2103409 | 2103434 | 2 | 13 | 26 | CT   | 11 | 11 |
| 139779 | 15 | 2104523 | 2104542 | 4 | 5  | 20 | CACG | 21 | 5  |
| 139780 | 15 | 2104543 | 2104554 | 2 | 6  | 12 | CA   | 19 | 4  |
| 139781 | 15 | 2106284 | 2106301 | 2 | 9  | 18 | AC   | 24 | 4  |
| 139782 | 15 | 2109449 | 2109466 | 2 | 9  | 18 | TC   | 23 | 4  |
| 139785 | 15 | 2112572 | 2112591 | 2 | 10 | 20 | AG   | 9  | 5  |
| 139787 | 15 | 2121028 | 2121041 | 2 | 7  | 14 | CA   | 21 | 6  |
| 139802 | 15 | 2154827 | 2154838 | 2 | 6  | 12 | AC   | 22 | 4  |
| 139803 | 15 | 2154885 | 2154908 | 2 | 12 | 24 | AC   | 15 | 10 |
| 139811 | 15 | 2162124 | 2162139 | 2 | 8  | 16 | CA   | 25 | 4  |
| 139812 | 15 | 2166803 | 2166814 | 2 | 6  | 12 | GT   | 35 | 3  |
| 139818 | 15 | 2186185 | 2186202 | 3 | 6  | 18 | AGG  | 23 | 5  |
| 139821 | 15 | 2206625 | 2206640 | 2 | 8  | 16 | TG   | 20 | 9  |
| 139825 | 15 | 2218454 | 2218471 | 3 | 6  | 18 | TGC  | 28 | 3  |
| 139826 | 15 | 2222460 | 2222495 | 2 | 18 | 36 | CT   | 9  | 14 |
| 139828 | 15 | 2222609 | 2222628 | 2 | 10 | 20 | CA   | 19 | 7  |
| 139830 | 15 | 2225156 | 2225167 | 2 | 6  | 12 | AC   | 22 | 6  |
| 139835 | 15 | 2247570 | 2247585 | 2 | 8  | 16 | TG   | 20 | 13 |
| 139836 | 15 | 2247588 | 2247599 | 2 | 6  | 12 | TG   | 24 | 14 |
| 139839 | 15 | 2257307 | 2257358 | 4 | 13 | 52 | ATAG | 13 | 10 |
| 139846 | 15 | 2283312 | 2283327 | 4 | 4  | 16 | TGTT | 19 | 15 |
| 139847 | 15 | 2292085 | 2292108 | 2 | 12 | 24 | AC   | 14 | 10 |
| 139849 | 15 | 2301026 | 2301040 | 3 | 5  | 15 | ATT  | 22 | 6  |
| 139853 | 15 | 2310050 | 2310061 | 2 | 6  | 12 | TG   | 24 | 4  |
| 139855 | 15 | 2319603 | 2319616 | 2 | 7  | 14 | CA   | 30 | 7  |
| 139859 | 15 | 2336361 | 2336374 | 2 | 7  | 14 | CA   | 15 | 5  |
| 139865 | 15 | 2353793 | 2353812 | 2 | 10 | 20 | AC   | 17 | 10 |
| 139868 | 15 | 2364132 | 2364149 | 3 | 6  | 18 | GGA  | 29 | 4  |
| 139870 | 15 | 2374873 | 2374886 | 2 | 7  | 14 | GT   | 23 | 5  |
| 139878 | 15 | 2405484 | 2405509 | 2 | 13 | 26 | CA   | 16 | 11 |
| 139879 | 15 | 2407320 | 2407337 | 2 | 9  | 18 | TG   | 12 | 4  |
| 139882 | 15 | 2409720 | 2409735 | 2 | 8  | 16 | TG   | 25 | 3  |
| 139883 | 15 | 2410355 | 2410380 | 2 | 13 | 26 | TG   | 11 | 5  |
| 139885 | 15 | 2411232 | 2411245 | 2 | 7  | 14 | TG   | 25 | 3  |
| 139886 | 15 | 2411424 | 2411435 | 2 | 6  | 12 | AC   | 9  | 6  |
| 139887 | 15 | 2412984 | 2413027 | 2 | 22 | 44 | AC   | 9  | 10 |
| 139888 | 15 | 2413736 | 2413751 | 4 | 4  | 16 | ATTT | 10 | 8  |
| 139889 | 15 | 2416195 | 2416216 | 2 | 11 | 22 | CA   | 14 | 13 |
| 139890 | 15 | 2417853 | 2417868 | 2 | 8  | 16 | TA   | 8  | 6  |
| 139894 | 15 | 2420520 | 2420555 | 2 | 18 | 36 | CA   | 15 | 11 |
| 139895 | 15 | 2421114 | 2421127 | 2 | 7  | 14 | TG   | 30 | 3  |
| 139898 | 15 | 2430068 | 2430101 | 2 | 17 | 34 | AC   | 12 | 10 |
| 139899 | 15 | 2431898 | 2431913 | 2 | 8  | 16 | CA   | 15 | 6  |
| 139909 | 15 | 2460643 | 2460696 | 2 | 27 | 54 | GT   | 8  | 10 |
| 139915 | 15 | 2465071 | 2465082 | 2 | 6  | 12 | TG   | 12 | 3  |
| 139918 | 15 | 2467234 | 2467257 | 2 | 12 | 24 | CA   | 23 | 4  |



|        |    |         |         |   |    |    |     |    |    |
|--------|----|---------|---------|---|----|----|-----|----|----|
| 139919 | 15 | 2468259 | 2468276 | 2 | 9  | 18 | CA  | 27 | 11 |
| 139926 | 15 | 2470457 | 2470474 | 2 | 9  | 18 | TG  | 10 | 9  |
| 139927 | 15 | 2470655 | 2470676 | 2 | 11 | 22 | AC  | 17 | 8  |
| 139936 | 15 | 2474721 | 2474735 | 3 | 5  | 15 | AGG | 32 | 3  |
| 139945 | 15 | 2481270 | 2481289 | 2 | 10 | 20 | GT  | 28 | 3  |
| 139949 | 15 | 2483993 | 2484006 | 2 | 7  | 14 | TG  | 24 | 4  |
| 139951 | 15 | 2484364 | 2484377 | 2 | 7  | 14 | TG  | 23 | 4  |
| 139953 | 15 | 2484644 | 2484657 | 2 | 7  | 14 | GT  | 29 | 6  |
| 139958 | 15 | 2485792 | 2485819 | 2 | 14 | 28 | GT  | 11 | 11 |
| 139960 | 15 | 2485961 | 2485992 | 2 | 16 | 32 | AC  | 11 | 7  |
| 139965 | 15 | 2488683 | 2488700 | 2 | 9  | 18 | TG  | 24 | 8  |
| 139967 | 15 | 2490537 | 2490558 | 2 | 11 | 22 | TG  | 21 | 4  |
| 139972 | 15 | 2495106 | 2495123 | 2 | 9  | 18 | CA  | 19 | 5  |
| 139975 | 15 | 2496695 | 2496754 | 2 | 30 | 60 | CA  | 13 | 12 |
| 139976 | 15 | 2497345 | 2497364 | 2 | 10 | 20 | AG  | 21 | 6  |
| 139977 | 15 | 2498647 | 2498678 | 2 | 16 | 32 | AC  | 18 | 8  |
| 139980 | 15 | 2499417 | 2499466 | 2 | 25 | 50 | TG  | 7  | 8  |
| 139988 | 15 | 2503761 | 2503792 | 2 | 16 | 32 | GT  | 10 | 9  |
| 139989 | 15 | 2505491 | 2505502 | 2 | 6  | 12 | AC  | 24 | 9  |
| 139990 | 15 | 2505505 | 2505520 | 2 | 8  | 16 | AC  | 20 | 9  |
| 139998 | 15 | 2508725 | 2508742 | 3 | 6  | 18 | GAG | 9  | 4  |
| 139999 | 15 | 2509085 | 2509099 | 3 | 5  | 15 | AGA | 20 | 3  |
| 140004 | 15 | 2512151 | 2512168 | 2 | 9  | 18 | TG  | 12 | 3  |
| 140020 | 15 | 2520978 | 2520991 | 2 | 7  | 14 | GT  | 23 | 3  |
| 140021 | 15 | 2521127 | 2521152 | 2 | 13 | 26 | AC  | 13 | 5  |
| 140023 | 15 | 2521414 | 2521447 | 2 | 17 | 34 | AC  | 7  | 9  |
| 140034 | 15 | 2562282 | 2562311 | 2 | 15 | 30 | TG  | 13 | 8  |
| 140035 | 15 | 2564624 | 2564635 | 2 | 6  | 12 | TG  | 27 | 3  |
| 140036 | 15 | 2565137 | 2565158 | 2 | 11 | 22 | TC  | 21 | 10 |
| 140041 | 15 | 2570125 | 2570152 | 2 | 14 | 28 | CA  | 15 | 7  |
| 140043 | 15 | 2573215 | 2573234 | 2 | 10 | 20 | GA  | 18 | 4  |
| 140048 | 15 | 2574041 | 2574058 | 2 | 9  | 18 | AC  | 23 | 8  |
| 140049 | 15 | 2574177 | 2574192 | 2 | 8  | 16 | TC  | 23 | 4  |
| 140051 | 15 | 2578214 | 2578233 | 2 | 10 | 20 | GT  | 7  | 10 |
| 140055 | 15 | 2585814 | 2585843 | 2 | 15 | 30 | CA  | 23 | 6  |
| 140060 | 15 | 2596535 | 2596550 | 2 | 8  | 16 | CA  | 6  | 6  |
| 140064 | 15 | 2597317 | 2597338 | 2 | 11 | 22 | CA  | 13 | 4  |
| 140066 | 15 | 2599215 | 2599232 | 2 | 9  | 18 | AC  | 27 | 5  |
| 140068 | 15 | 2601287 | 2601308 | 2 | 11 | 22 | AG  | 10 | 5  |
| 140070 | 15 | 2601444 | 2601471 | 2 | 14 | 28 | GT  | 8  | 11 |
| 140071 | 15 | 2602003 | 2602020 | 2 | 9  | 18 | CA  | 16 | 5  |
| 140075 | 15 | 2603469 | 2603510 | 2 | 21 | 42 | GT  | 6  | 5  |
| 140077 | 15 | 2603919 | 2603940 | 2 | 11 | 22 | CA  | 15 | 8  |
| 140079 | 15 | 2604595 | 2604610 | 2 | 8  | 16 | AC  | 13 | 6  |
| 140080 | 15 | 2604650 | 2604683 | 2 | 17 | 34 | AC  | 10 | 7  |
| 140087 | 15 | 2606480 | 2606511 | 2 | 16 | 32 | AC  | 8  | 7  |
| 140091 | 15 | 2608396 | 2608409 | 2 | 7  | 14 | GA  | 19 | 5  |
| 140094 | 15 | 2610464 | 2610483 | 2 | 10 | 20 | TG  | 22 | 7  |
| 140095 | 15 | 2612330 | 2612357 | 2 | 14 | 28 | CT  | 24 | 6  |
| 140097 | 15 | 2615504 | 2615517 | 2 | 7  | 14 | AG  | 15 | 8  |
| 140099 | 15 | 2615794 | 2615808 | 3 | 5  | 15 | GGA | 9  | 7  |

|        |    |         |         |   |    |    |      |    |    |
|--------|----|---------|---------|---|----|----|------|----|----|
| 140100 | 15 | 2616016 | 2616027 | 2 | 6  | 12 | CT   | 14 | 7  |
| 140101 | 15 | 2616030 | 2616045 | 2 | 8  | 16 | CT   | 9  | 7  |
| 140106 | 15 | 2617735 | 2617748 | 2 | 7  | 14 | TG   | 23 | 7  |
| 140107 | 15 | 2618022 | 2618059 | 2 | 19 | 38 | TG   | 9  | 11 |
| 140108 | 15 | 2619109 | 2619146 | 2 | 19 | 38 | CA   | 12 | 14 |
| 140111 | 15 | 2620591 | 2620604 | 2 | 7  | 14 | TG   | 17 | 5  |
| 140112 | 15 | 2620607 | 2620620 | 2 | 7  | 14 | TG   | 17 | 8  |
| 140114 | 15 | 2621204 | 2621215 | 2 | 6  | 12 | AC   | 31 | 3  |
| 140115 | 15 | 2622096 | 2622127 | 2 | 16 | 32 | TG   | 19 | 8  |
| 140125 | 15 | 2632143 | 2632160 | 2 | 9  | 18 | AC   | 16 | 12 |
| 140126 | 15 | 2634239 | 2634268 | 2 | 15 | 30 | GT   | 16 | 12 |
| 140127 | 15 | 2635442 | 2635465 | 2 | 12 | 24 | GT   | 19 | 11 |
| 140132 | 15 | 2652851 | 2652868 | 2 | 9  | 18 | AC   | 12 | 7  |
| 140139 | 15 | 2665959 | 2665996 | 2 | 19 | 38 | GT   | 11 | 9  |
| 140140 | 15 | 2668284 | 2668299 | 2 | 8  | 16 | AC   | 31 | 5  |
| 140142 | 15 | 2682486 | 2682515 | 3 | 10 | 30 | CTC  | 11 | 5  |
| 140144 | 15 | 2699850 | 2699861 | 2 | 6  | 12 | GT   | 20 | 15 |
| 140145 | 15 | 2699934 | 2699955 | 2 | 11 | 22 | GA   | 13 | 9  |
| 140146 | 15 | 2700377 | 2700392 | 4 | 4  | 16 | TTTG | 12 | 5  |
| 140147 | 15 | 2702439 | 2702458 | 2 | 10 | 20 | TG   | 7  | 7  |
| 140149 | 15 | 2708089 | 2708112 | 2 | 12 | 24 | AC   | 13 | 5  |
| 140151 | 15 | 2709195 | 2709210 | 2 | 8  | 16 | AT   | 16 | 5  |
| 140154 | 15 | 2716832 | 2716851 | 2 | 10 | 20 | TG   | 20 | 7  |
| 140156 | 15 | 2717803 | 2717846 | 4 | 11 | 44 | ATGG | 12 | 5  |
| 140160 | 15 | 2725413 | 2725442 | 2 | 15 | 30 | AC   | 10 | 9  |
| 140164 | 15 | 2727553 | 2727567 | 3 | 5  | 15 | TTC  | 23 | 4  |
| 140165 | 15 | 2729758 | 2729773 | 2 | 8  | 16 | CA   | 19 | 8  |
| 140166 | 15 | 2730235 | 2730270 | 2 | 18 | 36 | TG   | 11 | 7  |
| 140170 | 15 | 2742172 | 2742215 | 2 | 22 | 44 | TG   | 15 | 13 |
| 140172 | 15 | 2753452 | 2753463 | 2 | 6  | 12 | TG   | 27 | 3  |
| 140174 | 15 | 2754778 | 2754789 | 2 | 6  | 12 | AC   | 7  | 3  |
| 140175 | 15 | 2756626 | 2756669 | 2 | 22 | 44 | AC   | 12 | 10 |
| 140177 | 15 | 2760978 | 2760991 | 2 | 7  | 14 | TG   | 14 | 11 |
| 140178 | 15 | 2760993 | 2761004 | 2 | 6  | 12 | GT   | 15 | 10 |
| 140181 | 15 | 2767541 | 2767564 | 4 | 6  | 24 | AATA | 21 | 5  |
| 140190 | 15 | 2795727 | 2795752 | 2 | 13 | 26 | TG   | 22 | 8  |
| 140196 | 15 | 2808568 | 2808593 | 2 | 13 | 26 | GT   | 20 | 5  |
| 140197 | 15 | 2815335 | 2815350 | 4 | 4  | 16 | CCTC | 29 | 5  |
| 140203 | 15 | 2828450 | 2828489 | 2 | 20 | 40 | CA   | 7  | 11 |
| 140205 | 15 | 2837467 | 2837486 | 2 | 10 | 20 | AC   | 17 | 7  |
| 140215 | 15 | 2871593 | 2871606 | 2 | 7  | 14 | AC   | 14 | 5  |
| 140220 | 15 | 2891126 | 2891157 | 2 | 16 | 32 | TG   | 20 | 11 |
| 140225 | 15 | 2896186 | 2896201 | 2 | 8  | 16 | TG   | 31 | 6  |
| 140228 | 15 | 2900120 | 2900139 | 2 | 10 | 20 | GT   | 16 | 18 |
| 140242 | 15 | 2917766 | 2917797 | 2 | 16 | 32 | TG   | 8  | 8  |
| 140244 | 15 | 2926098 | 2926127 | 2 | 15 | 30 | TG   | 11 | 10 |
| 140245 | 15 | 2926319 | 2926334 | 2 | 8  | 16 | TG   | 28 | 3  |
| 140248 | 15 | 2932328 | 2932345 | 2 | 9  | 18 | TC   | 25 | 3  |
| 140249 | 15 | 2934020 | 2934041 | 2 | 11 | 22 | AC   | 12 | 12 |
| 140256 | 15 | 2967243 | 2967258 | 2 | 8  | 16 | TG   | 19 | 5  |
| 140263 | 15 | 2975672 | 2975697 | 2 | 13 | 26 | CA   | 11 | 7  |

|        |    |         |         |   |    |    |      |    |    |
|--------|----|---------|---------|---|----|----|------|----|----|
| 140264 | 15 | 2975723 | 2975744 | 2 | 11 | 22 | AC   | 20 | 7  |
| 140276 | 15 | 2987879 | 2987898 | 2 | 10 | 20 | GA   | 24 | 4  |
| 140278 | 15 | 2989947 | 2989986 | 2 | 20 | 40 | CA   | 6  | 9  |
| 140281 | 15 | 2994594 | 2994629 | 2 | 18 | 36 | AC   | 19 | 12 |
| 140291 | 15 | 3004667 | 3004696 | 2 | 15 | 30 | CT   | 10 | 6  |
| 140293 | 15 | 3006155 | 3006208 | 3 | 18 | 54 | AGA  | 9  | 10 |
| 140305 | 15 | 3023589 | 3023602 | 2 | 7  | 14 | GT   | 20 | 5  |
| 140307 | 15 | 3026468 | 3026511 | 2 | 22 | 44 | CA   | 17 | 8  |
| 140309 | 15 | 3028820 | 3028841 | 2 | 11 | 22 | TG   | 16 | 12 |
| 140323 | 15 | 3045622 | 3045633 | 2 | 6  | 12 | TG   | 10 | 3  |
| 140324 | 15 | 3045932 | 3045949 | 2 | 9  | 18 | GT   | 14 | 10 |
| 140325 | 15 | 3048584 | 3048604 | 3 | 7  | 21 | AAT  | 22 | 11 |
| 140326 | 15 | 3049256 | 3049275 | 2 | 10 | 20 | AC   | 17 | 14 |
| 140330 | 15 | 3051024 | 3051067 | 2 | 22 | 44 | AC   | 17 | 19 |
| 140331 | 15 | 3051713 | 3051734 | 2 | 11 | 22 | TG   | 23 | 8  |
| 140332 | 15 | 3051981 | 3051992 | 2 | 6  | 12 | GT   | 28 | 4  |
| 140334 | 15 | 3052123 | 3052144 | 2 | 11 | 22 | TC   | 8  | 7  |
| 140335 | 15 | 3052304 | 3052330 | 3 | 9  | 27 | GGA  | 13 | 3  |
| 140340 | 15 | 3056146 | 3056167 | 2 | 11 | 22 | AC   | 6  | 3  |
| 140342 | 15 | 3056876 | 3056889 | 2 | 7  | 14 | CA   | 24 | 12 |
| 140344 | 15 | 3059245 | 3059256 | 2 | 6  | 12 | TG   | 22 | 5  |
| 140351 | 15 | 3066933 | 3066970 | 2 | 19 | 38 | AC   | 18 | 8  |
| 140357 | 15 | 3080510 | 3080539 | 2 | 15 | 30 | AC   | 18 | 14 |
| 140358 | 15 | 3082115 | 3082138 | 2 | 12 | 24 | AC   | 26 | 8  |
| 140364 | 15 | 3107502 | 3107519 | 3 | 6  | 18 | AGG  | 16 | 3  |
| 140366 | 15 | 3110939 | 3110966 | 2 | 14 | 28 | CA   | 11 | 6  |
| 140368 | 15 | 3111264 | 3111281 | 2 | 9  | 18 | GT   | 16 | 7  |
| 140369 | 15 | 3111322 | 3111341 | 2 | 10 | 20 | GA   | 15 | 7  |
| 140370 | 15 | 3111384 | 3111401 | 2 | 9  | 18 | AG   | 19 | 4  |
| 140374 | 15 | 3114399 | 3114416 | 3 | 6  | 18 | TCC  | 20 | 5  |
| 140375 | 15 | 3115006 | 3115021 | 4 | 4  | 16 | AAAT | 20 | 5  |
| 140378 | 15 | 3116561 | 3116586 | 2 | 13 | 26 | GT   | 10 | 6  |
| 140379 | 15 | 3116606 | 3116627 | 2 | 11 | 22 | TG   | 17 | 7  |
| 140384 | 15 | 3116796 | 3116831 | 2 | 18 | 36 | GT   | 8  | 7  |
| 140385 | 15 | 3116924 | 3116939 | 2 | 8  | 16 | TG   | 15 | 4  |
| 140392 | 15 | 3153218 | 3153231 | 2 | 7  | 14 | CA   | 25 | 4  |
| 140394 | 15 | 3159412 | 3159439 | 2 | 14 | 28 | GT   | 13 | 7  |
| 140399 | 15 | 3171603 | 3171630 | 4 | 7  | 28 | AATC | 12 | 7  |
| 140402 | 15 | 3174463 | 3174484 | 2 | 11 | 22 | CA   | 20 | 9  |
| 140410 | 15 | 3197873 | 3197910 | 2 | 19 | 38 | AG   | 6  | 7  |
| 140411 | 15 | 3218610 | 3218625 | 2 | 8  | 16 | GT   | 19 | 7  |
| 140431 | 15 | 3254110 | 3254129 | 2 | 10 | 20 | GT   | 23 | 3  |
| 140433 | 15 | 3259762 | 3259789 | 4 | 7  | 28 | TTCT | 26 | 3  |
| 140436 | 15 | 3277105 | 3277120 | 2 | 8  | 16 | CT   | 12 | 3  |
| 140442 | 15 | 3283082 | 3283096 | 3 | 5  | 15 | CAG  | 31 | 3  |
| 140452 | 15 | 3320879 | 3320902 | 3 | 8  | 24 | ATT  | 12 | 6  |
| 140453 | 15 | 3323505 | 3323520 | 2 | 8  | 16 | TG   | 28 | 4  |
| 140462 | 15 | 3353631 | 3353648 | 2 | 9  | 18 | AC   | 16 | 8  |
| 140464 | 15 | 3367015 | 3367030 | 4 | 4  | 16 | AAAC | 24 | 5  |
| 140465 | 15 | 3371604 | 3371619 | 2 | 8  | 16 | AG   | 24 | 10 |
| 140466 | 15 | 3372411 | 3372437 | 3 | 9  | 27 | AAC  | 29 | 6  |

|        |    |         |         |   |    |    |      |    |    |
|--------|----|---------|---------|---|----|----|------|----|----|
| 140470 | 15 | 3385278 | 3385297 | 2 | 10 | 20 | TG   | 22 | 7  |
| 140478 | 15 | 3402880 | 3402897 | 2 | 9  | 18 | CA   | 21 | 6  |
| 140480 | 15 | 3409396 | 3409423 | 2 | 14 | 28 | CA   | 19 | 8  |
| 140486 | 15 | 3425112 | 3425145 | 2 | 17 | 34 | CA   | 9  | 8  |
| 140488 | 15 | 3432403 | 3432429 | 3 | 9  | 27 | GAG  | 25 | 6  |
| 140498 | 15 | 3443602 | 3443627 | 2 | 13 | 26 | TG   | 12 | 6  |
| 140503 | 15 | 3455953 | 3455968 | 2 | 8  | 16 | AT   | 7  | 4  |
| 140505 | 15 | 3459234 | 3459249 | 2 | 8  | 16 | AT   | 6  | 6  |
| 140507 | 15 | 3463232 | 3463246 | 3 | 5  | 15 | AAT  | 14 | 9  |
| 140511 | 15 | 3471749 | 3471764 | 2 | 8  | 16 | CA   | 19 | 5  |
| 140516 | 15 | 3483855 | 3483866 | 2 | 6  | 12 | AC   | 11 | 9  |
| 140523 | 15 | 3498868 | 3498879 | 2 | 6  | 12 | CT   | 21 | 3  |
| 140525 | 15 | 3513299 | 3513314 | 4 | 4  | 16 | GACA | 27 | 4  |
| 140538 | 15 | 3552307 | 3552318 | 2 | 6  | 12 | TG   | 28 | 3  |
| 140541 | 15 | 3557555 | 3557568 | 2 | 7  | 14 | TC   | 28 | 3  |
| 140542 | 15 | 3557892 | 3557921 | 2 | 15 | 30 | AC   | 18 | 9  |
| 140549 | 15 | 3564928 | 3564947 | 4 | 5  | 20 | TTTG | 16 | 5  |
| 140550 | 15 | 3567458 | 3567471 | 2 | 7  | 14 | AT   | 12 | 4  |
| 140551 | 15 | 3569706 | 3569733 | 2 | 14 | 28 | CA   | 9  | 8  |
| 140563 | 15 | 3593569 | 3593592 | 2 | 12 | 24 | AC   | 26 | 5  |
| 140567 | 15 | 3599015 | 3599048 | 2 | 17 | 34 | AC   | 16 | 12 |
| 140613 | 15 | 3711683 | 3711696 | 2 | 7  | 14 | CA   | 23 | 3  |
| 140614 | 15 | 3713406 | 3713437 | 2 | 16 | 32 | GT   | 9  | 9  |
| 140616 | 15 | 3715167 | 3715214 | 2 | 24 | 48 | TC   | 13 | 11 |
| 140618 | 15 | 3717488 | 3717503 | 4 | 4  | 16 | GAGG | 11 | 3  |
| 140619 | 15 | 3717815 | 3717842 | 2 | 14 | 28 | TG   | 9  | 7  |
| 140620 | 15 | 3719813 | 3719824 | 2 | 6  | 12 | AC   | 7  | 4  |
| 140625 | 15 | 3721685 | 3721708 | 2 | 12 | 24 | GA   | 12 | 7  |
| 140628 | 15 | 3723036 | 3723055 | 2 | 10 | 20 | TG   | 18 | 14 |
| 140631 | 15 | 3729968 | 3729987 | 2 | 10 | 20 | TG   | 13 | 8  |
| 140633 | 15 | 3731207 | 3731234 | 2 | 14 | 28 | AC   | 9  | 7  |
| 140634 | 15 | 3732059 | 3732078 | 2 | 10 | 20 | GT   | 20 | 7  |
| 140638 | 15 | 3760148 | 3760159 | 2 | 6  | 12 | CT   | 26 | 3  |
| 140647 | 15 | 3776472 | 3776489 | 3 | 6  | 18 | GGA  | 14 | 5  |
| 140653 | 15 | 3778596 | 3778609 | 2 | 7  | 14 | AC   | 24 | 6  |
| 140654 | 15 | 3778612 | 3778623 | 2 | 6  | 12 | AC   | 10 | 4  |
| 140657 | 15 | 3781119 | 3781140 | 2 | 11 | 22 | CA   | 21 | 6  |
| 140658 | 15 | 3781471 | 3781496 | 2 | 13 | 26 | GT   | 7  | 4  |
| 140660 | 15 | 3782425 | 3782440 | 4 | 4  | 16 | CTTC | 24 | 4  |
| 140661 | 15 | 3783015 | 3783042 | 2 | 14 | 28 | GT   | 15 | 4  |
| 140674 | 15 | 3794454 | 3794469 | 2 | 8  | 16 | CA   | 23 | 4  |
| 140677 | 15 | 3796610 | 3796625 | 2 | 8  | 16 | CA   | 19 | 6  |
| 140678 | 15 | 3800284 | 3800303 | 2 | 10 | 20 | TG   | 21 | 10 |
| 140683 | 15 | 3809318 | 3809347 | 2 | 15 | 30 | AC   | 8  | 9  |
| 140686 | 15 | 3810940 | 3810963 | 2 | 12 | 24 | AC   | 27 | 7  |
| 140687 | 15 | 3811257 | 3811272 | 2 | 8  | 16 | GT   | 24 | 3  |
| 140690 | 15 | 3812591 | 3812604 | 2 | 7  | 14 | AC   | 10 | 4  |
| 140702 | 15 | 3839636 | 3839649 | 2 | 7  | 14 | GT   | 11 | 6  |
| 140703 | 15 | 3840271 | 3840294 | 2 | 12 | 24 | AG   | 11 | 7  |
| 140717 | 15 | 3864961 | 3864974 | 2 | 7  | 14 | TG   | 25 | 3  |
| 140718 | 15 | 3865623 | 3865634 | 2 | 6  | 12 | GT   | 27 | 5  |

|        |    |         |         |   |    |    |      |    |    |
|--------|----|---------|---------|---|----|----|------|----|----|
| 140719 | 15 | 3865636 | 3865647 | 2 | 6  | 12 | TG   | 8  | 3  |
| 140722 | 15 | 3868136 | 3868163 | 2 | 14 | 28 | TG   | 19 | 6  |
| 140723 | 15 | 3869453 | 3869478 | 2 | 13 | 26 | CA   | 15 | 8  |
| 140724 | 15 | 3869709 | 3869734 | 2 | 13 | 26 | CT   | 9  | 6  |
| 140734 | 15 | 3886834 | 3886851 | 2 | 9  | 18 | CA   | 18 | 9  |
| 140735 | 15 | 3887021 | 3887046 | 2 | 13 | 26 | CA   | 12 | 6  |
| 140742 | 15 | 3894083 | 3894094 | 2 | 6  | 12 | GT   | 25 | 4  |
| 140743 | 15 | 3895189 | 3895204 | 2 | 8  | 16 | GT   | 10 | 4  |
| 140744 | 15 | 3895375 | 3895404 | 2 | 15 | 30 | GT   | 17 | 11 |
| 140745 | 15 | 3895459 | 3895482 | 2 | 12 | 24 | GT   | 11 | 6  |
| 140746 | 15 | 3898877 | 3898890 | 2 | 7  | 14 | AC   | 27 | 6  |
| 140747 | 15 | 3899028 | 3899039 | 2 | 6  | 12 | GT   | 21 | 7  |
| 140748 | 15 | 3899706 | 3899725 | 2 | 10 | 20 | AC   | 27 | 6  |
| 140754 | 15 | 3902174 | 3902201 | 2 | 14 | 28 | CA   | 21 | 11 |
| 140759 | 15 | 3903179 | 3903196 | 2 | 9  | 18 | GA   | 16 | 13 |
| 140768 | 15 | 3905265 | 3905282 | 2 | 9  | 18 | GT   | 24 | 8  |
| 140781 | 15 | 3912314 | 3912329 | 4 | 4  | 16 | TTTC | 11 | 4  |
| 140782 | 15 | 3912714 | 3912740 | 3 | 9  | 27 | ACA  | 21 | 11 |
| 140783 | 15 | 3912973 | 3912992 | 4 | 5  | 20 | TTTC | 12 | 6  |
| 140788 | 15 | 3914619 | 3914654 | 2 | 18 | 36 | AC   | 15 | 14 |
| 140805 | 15 | 3928055 | 3928068 | 2 | 7  | 14 | TG   | 19 | 3  |
| 140807 | 15 | 3928321 | 3928332 | 2 | 6  | 12 | GT   | 25 | 5  |
| 140808 | 15 | 3929221 | 3929246 | 2 | 13 | 26 | GA   | 19 | 13 |
| 140810 | 15 | 3934258 | 3934297 | 2 | 20 | 40 | GA   | 8  | 9  |
| 140812 | 15 | 3934801 | 3934816 | 2 | 8  | 16 | TC   | 11 | 4  |
| 140813 | 15 | 3934868 | 3934883 | 2 | 8  | 16 | GT   | 18 | 10 |
| 140815 | 15 | 3937073 | 3937093 | 3 | 7  | 21 | AAG  | 14 | 5  |
| 140820 | 15 | 3941908 | 3941939 | 2 | 16 | 32 | AG   | 10 | 6  |
| 140822 | 15 | 3949207 | 3949236 | 2 | 15 | 30 | TG   | 22 | 6  |
| 140825 | 15 | 3950854 | 3950867 | 2 | 7  | 14 | TC   | 21 | 3  |
| 140829 | 15 | 3952483 | 3952504 | 2 | 11 | 22 | CA   | 18 | 6  |
| 140830 | 15 | 3952854 | 3952879 | 2 | 13 | 26 | AC   | 19 | 8  |
| 140831 | 15 | 3953699 | 3953712 | 2 | 7  | 14 | CA   | 26 | 10 |
| 140834 | 15 | 3956825 | 3956838 | 2 | 7  | 14 | AC   | 25 | 4  |
| 140835 | 15 | 3957071 | 3957108 | 2 | 19 | 38 | AC   | 7  | 5  |
| 140850 | 15 | 3968538 | 3968581 | 2 | 22 | 44 | TC   | 15 | 10 |
| 140853 | 15 | 3972380 | 3972397 | 2 | 9  | 18 | TC   | 20 | 11 |
| 140854 | 15 | 3972543 | 3972556 | 2 | 7  | 14 | AC   | 32 | 3  |
| 140855 | 15 | 3973379 | 3973398 | 2 | 10 | 20 | TG   | 10 | 11 |
| 140858 | 15 | 3974374 | 3974393 | 2 | 10 | 20 | AC   | 18 | 7  |
| 140860 | 15 | 3976066 | 3976095 | 3 | 10 | 30 | TAT  | 13 | 5  |
| 140868 | 15 | 3979695 | 3979710 | 2 | 8  | 16 | GT   | 10 | 3  |
| 140873 | 15 | 3983593 | 3983626 | 2 | 17 | 34 | GT   | 7  | 8  |
| 140875 | 15 | 3983740 | 3983779 | 2 | 20 | 40 | TG   | 15 | 9  |
| 140878 | 15 | 3986188 | 3986225 | 2 | 19 | 38 | CT   | 6  | 9  |
| 140879 | 15 | 3986352 | 3986366 | 3 | 5  | 15 | TGG  | 17 | 3  |
| 140880 | 15 | 3987962 | 3987985 | 4 | 6  | 24 | CAGT | 35 | 4  |
| 140882 | 15 | 3990206 | 3990219 | 2 | 7  | 14 | CA   | 16 | 6  |
| 140883 | 15 | 3990740 | 3990751 | 2 | 6  | 12 | TG   | 24 | 4  |
| 140893 | 15 | 4009132 | 4009147 | 2 | 8  | 16 | AC   | 15 | 15 |
| 140901 | 15 | 4016220 | 4016265 | 2 | 23 | 46 | CA   | 6  | 8  |

|        |    |         |         |   |    |    |     |    |    |
|--------|----|---------|---------|---|----|----|-----|----|----|
| 140907 | 15 | 4025714 | 4025729 | 2 | 8  | 16 | GT  | 17 | 3  |
| 140911 | 15 | 4026070 | 4026081 | 2 | 6  | 12 | AC  | 24 | 3  |
| 140913 | 15 | 4027058 | 4027069 | 2 | 6  | 12 | TG  | 21 | 3  |
| 140917 | 15 | 4028134 | 4028165 | 2 | 16 | 32 | GT  | 16 | 7  |
| 140921 | 15 | 4032074 | 4032097 | 2 | 12 | 24 | TC  | 11 | 6  |
| 140922 | 15 | 4035388 | 4035407 | 2 | 10 | 20 | CA  | 12 | 6  |
| 140924 | 15 | 4035910 | 4035942 | 3 | 11 | 33 | GAA | 23 | 8  |
| 140927 | 15 | 4036484 | 4036507 | 2 | 12 | 24 | TG  | 17 | 11 |
| 140940 | 15 | 4045282 | 4045313 | 2 | 16 | 32 | GT  | 9  | 8  |
| 140941 | 15 | 4045744 | 4045773 | 2 | 15 | 30 | CA  | 19 | 10 |
| 140942 | 15 | 4045856 | 4045875 | 2 | 10 | 20 | AC  | 24 | 9  |
| 140945 | 15 | 4049598 | 4049611 | 2 | 7  | 14 | TG  | 22 | 4  |
| 140949 | 15 | 4052493 | 4052520 | 2 | 14 | 28 | CT  | 11 | 5  |
| 140959 | 15 | 4074346 | 4074363 | 3 | 6  | 18 | GCT | 16 | 3  |
| 140968 | 15 | 4077614 | 4077625 | 2 | 6  | 12 | GC  | 14 | 10 |
| 140969 | 15 | 4077626 | 4077641 | 2 | 8  | 16 | AC  | 15 | 9  |
| 140971 | 15 | 4078143 | 4078170 | 2 | 14 | 28 | CT  | 13 | 8  |
| 140973 | 15 | 4081657 | 4081668 | 2 | 6  | 12 | AC  | 25 | 6  |
| 140982 | 15 | 4096547 | 4096566 | 2 | 10 | 20 | TG  | 21 | 7  |
| 140983 | 15 | 4096903 | 4096922 | 2 | 10 | 20 | TG  | 16 | 10 |
| 140987 | 15 | 4108491 | 4108526 | 2 | 18 | 36 | GT  | 7  | 7  |
| 140989 | 15 | 4108620 | 4108639 | 2 | 10 | 20 | CA  | 16 | 4  |
| 140990 | 15 | 4108739 | 4108754 | 2 | 8  | 16 | TG  | 22 | 3  |
| 141001 | 15 | 4125575 | 4125588 | 2 | 7  | 14 | CA  | 32 | 4  |
| 141003 | 15 | 4130778 | 4130793 | 2 | 8  | 16 | CT  | 9  | 3  |
| 141004 | 15 | 4130795 | 4130808 | 2 | 7  | 14 | TC  | 13 | 5  |
| 141009 | 15 | 4137096 | 4137127 | 2 | 16 | 32 | GT  | 6  | 7  |
| 141010 | 15 | 4137304 | 4137319 | 2 | 8  | 16 | AC  | 17 | 8  |
| 141013 | 15 | 4139692 | 4139711 | 2 | 10 | 20 | CA  | 24 | 10 |
| 141017 | 15 | 4156101 | 4156140 | 2 | 20 | 40 | AC  | 10 | 13 |
| 141020 | 15 | 4161309 | 4161332 | 2 | 12 | 24 | GA  | 6  | 5  |
| 141022 | 15 | 4163028 | 4163051 | 2 | 12 | 24 | TG  | 6  | 6  |
| 141024 | 15 | 4168516 | 4168537 | 2 | 11 | 22 | CA  | 22 | 13 |
| 141027 | 15 | 4172461 | 4172480 | 2 | 10 | 20 | GT  | 24 | 10 |
| 141030 | 15 | 4175473 | 4175496 | 2 | 12 | 24 | GT  | 12 | 4  |
| 141031 | 15 | 4177030 | 4177041 | 2 | 6  | 12 | TA  | 18 | 8  |
| 141034 | 15 | 4180855 | 4180874 | 2 | 10 | 20 | CA  | 22 | 5  |
| 141036 | 15 | 4183973 | 4184006 | 2 | 17 | 34 | AC  | 8  | 4  |
| 141039 | 15 | 4188088 | 4188102 | 3 | 5  | 15 | ACC | 20 | 6  |
| 141048 | 15 | 4201240 | 4201257 | 2 | 9  | 18 | AC  | 9  | 10 |
| 141058 | 15 | 4212352 | 4212379 | 2 | 14 | 28 | CA  | 18 | 10 |
| 141059 | 15 | 4213723 | 4213752 | 2 | 15 | 30 | TG  | 15 | 12 |
| 141061 | 15 | 4216024 | 4216045 | 2 | 11 | 22 | TG  | 20 | 9  |
| 141074 | 15 | 4237576 | 4237599 | 2 | 12 | 24 | TC  | 10 | 10 |
| 141077 | 15 | 4241412 | 4241425 | 2 | 7  | 14 | TG  | 29 | 5  |
| 141079 | 15 | 4241792 | 4241843 | 2 | 26 | 52 | TG  | 6  | 8  |
| 141080 | 15 | 4242924 | 4242945 | 2 | 11 | 22 | CA  | 29 | 7  |
| 141083 | 15 | 4245784 | 4245805 | 2 | 11 | 22 | AC  | 22 | 5  |
| 141086 | 15 | 4247459 | 4247476 | 3 | 6  | 18 | CCT | 26 | 3  |
| 141088 | 15 | 4248995 | 4249032 | 2 | 19 | 38 | TG  | 18 | 17 |
| 141090 | 15 | 4253078 | 4253095 | 2 | 9  | 18 | AC  | 17 | 7  |

|        |    |         |         |   |    |    |      |    |    |
|--------|----|---------|---------|---|----|----|------|----|----|
| 141095 | 15 | 4259096 | 4259111 | 2 | 8  | 16 | CA   | 24 | 4  |
| 141103 | 15 | 4264197 | 4264224 | 2 | 14 | 28 | AC   | 12 | 10 |
| 141105 | 15 | 4265240 | 4265291 | 2 | 26 | 52 | TC   | 13 | 12 |
| 141106 | 15 | 4265423 | 4265442 | 2 | 10 | 20 | GT   | 18 | 13 |
| 141107 | 15 | 4265613 | 4265642 | 2 | 15 | 30 | TG   | 19 | 7  |
| 141109 | 15 | 4265792 | 4265813 | 2 | 11 | 22 | CA   | 13 | 14 |
| 141114 | 15 | 4278134 | 4278153 | 4 | 5  | 20 | TTCT | 21 | 3  |
| 141116 | 15 | 4280630 | 4280653 | 2 | 12 | 24 | AC   | 15 | 5  |
| 141117 | 15 | 4280972 | 4280985 | 2 | 7  | 14 | GT   | 26 | 5  |
| 141119 | 15 | 4281894 | 4281923 | 2 | 15 | 30 | GT   | 16 | 12 |
| 141123 | 15 | 4288840 | 4288859 | 2 | 10 | 20 | GA   | 19 | 3  |
| 141124 | 15 | 4294861 | 4294880 | 4 | 5  | 20 | ATTT | 26 | 5  |
| 141125 | 15 | 4295727 | 4295741 | 3 | 5  | 15 | CAA  | 27 | 3  |
| 141132 | 15 | 4321743 | 4321763 | 3 | 7  | 21 | GCA  | 25 | 3  |
| 141147 | 15 | 4379940 | 4379959 | 2 | 10 | 20 | TG   | 15 | 7  |
| 141150 | 15 | 4384086 | 4384101 | 4 | 4  | 16 | CCTG | 16 | 6  |
| 141165 | 15 | 4406821 | 4406856 | 2 | 18 | 36 | AC   | 10 | 11 |
| 141166 | 15 | 4412672 | 4412695 | 2 | 12 | 24 | GT   | 9  | 4  |
| 141167 | 15 | 4413301 | 4413326 | 2 | 13 | 26 | GT   | 10 | 7  |
| 141168 | 15 | 4413651 | 4413688 | 2 | 19 | 38 | AC   | 11 | 12 |
| 141176 | 15 | 4421815 | 4421826 | 2 | 6  | 12 | GA   | 12 | 3  |
| 141180 | 15 | 4441161 | 4441178 | 2 | 9  | 18 | TG   | 18 | 4  |
| 141183 | 15 | 4448095 | 4448110 | 4 | 4  | 16 | TTTA | 20 | 3  |
| 141184 | 15 | 4448518 | 4448529 | 2 | 6  | 12 | CT   | 22 | 3  |
| 141187 | 15 | 4465068 | 4465083 | 2 | 8  | 16 | AG   | 23 | 4  |
| 141189 | 15 | 4469479 | 4469506 | 2 | 14 | 28 | CA   | 15 | 10 |
| 141190 | 15 | 4470607 | 4470622 | 2 | 8  | 16 | AC   | 20 | 6  |
| 141191 | 15 | 4470786 | 4470815 | 2 | 15 | 30 | GT   | 17 | 8  |
| 141194 | 15 | 4475860 | 4475891 | 2 | 16 | 32 | CA   | 7  | 8  |
| 141200 | 15 | 4491748 | 4491775 | 2 | 14 | 28 | GA   | 23 | 5  |
| 141201 | 15 | 4493495 | 4493518 | 2 | 12 | 24 | TG   | 19 | 8  |
| 141202 | 15 | 4493896 | 4493911 | 2 | 8  | 16 | TC   | 23 | 5  |
| 141209 | 15 | 4503793 | 4503807 | 3 | 5  | 15 | GCA  | 26 | 4  |
| 141213 | 15 | 4510095 | 4510126 | 2 | 16 | 32 | TG   | 8  | 10 |
| 141225 | 15 | 4525130 | 4525145 | 2 | 8  | 16 | CA   | 28 | 6  |
| 141231 | 15 | 4536197 | 4536242 | 2 | 23 | 46 | GA   | 6  | 7  |
| 141232 | 15 | 4536299 | 4536316 | 2 | 9  | 18 | AC   | 12 | 3  |
| 141249 | 15 | 4563561 | 4563588 | 2 | 14 | 28 | AG   | 22 | 7  |
| 141257 | 15 | 4575961 | 4575992 | 2 | 16 | 32 | GT   | 11 | 9  |
| 141258 | 15 | 4576423 | 4576454 | 2 | 16 | 32 | GA   | 15 | 5  |
| 141269 | 15 | 4586924 | 4586949 | 2 | 13 | 26 | AG   | 20 | 5  |
| 141273 | 15 | 4594258 | 4594283 | 2 | 13 | 26 | CA   | 12 | 7  |
| 141276 | 15 | 4596223 | 4596236 | 2 | 7  | 14 | GT   | 26 | 4  |
| 141278 | 15 | 4596461 | 4596504 | 2 | 22 | 44 | AC   | 6  | 8  |
| 141284 | 15 | 4600649 | 4600674 | 2 | 13 | 26 | TC   | 10 | 8  |
| 141288 | 15 | 4604387 | 4604406 | 2 | 10 | 20 | TG   | 17 | 6  |
| 141291 | 15 | 4611279 | 4611292 | 2 | 7  | 14 | AC   | 33 | 4  |
| 141295 | 15 | 4614764 | 4614785 | 2 | 11 | 22 | TG   | 17 | 10 |
| 141297 | 15 | 4615019 | 4615030 | 2 | 6  | 12 | AC   | 16 | 4  |
| 141298 | 15 | 4615032 | 4615045 | 2 | 7  | 14 | CA   | 15 | 3  |
| 141299 | 15 | 4615868 | 4615889 | 2 | 11 | 22 | GA   | 26 | 6  |

|        |    |         |         |   |    |    |      |    |    |
|--------|----|---------|---------|---|----|----|------|----|----|
| 141303 | 15 | 4618710 | 4618737 | 2 | 14 | 28 | AC   | 25 | 7  |
| 141306 | 15 | 4626799 | 4626810 | 2 | 6  | 12 | GT   | 30 | 3  |
| 141316 | 15 | 4634168 | 4634206 | 3 | 13 | 39 | GCA  | 22 | 13 |
| 141319 | 15 | 4636480 | 4636509 | 2 | 15 | 30 | GT   | 16 | 11 |
| 141321 | 15 | 4636893 | 4636910 | 2 | 9  | 18 | AC   | 15 | 7  |
| 141322 | 15 | 4637061 | 4637074 | 2 | 7  | 14 | TC   | 23 | 3  |
| 141323 | 15 | 4637300 | 4637311 | 2 | 6  | 12 | GT   | 29 | 4  |
| 141324 | 15 | 4639063 | 4639076 | 2 | 7  | 14 | TG   | 26 | 3  |
| 141325 | 15 | 4641398 | 4641423 | 2 | 13 | 26 | AC   | 15 | 7  |
| 141326 | 15 | 4642098 | 4642115 | 2 | 9  | 18 | TG   | 21 | 5  |
| 141328 | 15 | 4643202 | 4643217 | 2 | 8  | 16 | AC   | 24 | 3  |
| 141332 | 15 | 4646680 | 4646697 | 2 | 9  | 18 | TG   | 23 | 11 |
| 141340 | 15 | 4650648 | 4650661 | 2 | 7  | 14 | TG   | 17 | 5  |
| 141342 | 15 | 4652027 | 4652066 | 2 | 20 | 40 | TC   | 8  | 5  |
| 141343 | 15 | 4653319 | 4653354 | 2 | 18 | 36 | AC   | 9  | 9  |
| 141344 | 15 | 4653553 | 4653578 | 2 | 13 | 26 | AC   | 8  | 8  |
| 141346 | 15 | 4654338 | 4654353 | 2 | 8  | 16 | CT   | 24 | 3  |
| 141348 | 15 | 4657675 | 4657696 | 2 | 11 | 22 | GA   | 17 | 5  |
| 141349 | 15 | 4659954 | 4659965 | 2 | 6  | 12 | TG   | 11 | 3  |
| 141351 | 15 | 4660140 | 4660161 | 2 | 11 | 22 | CT   | 6  | 5  |
| 141356 | 15 | 4669500 | 4669517 | 2 | 9  | 18 | CA   | 15 | 3  |
| 141360 | 15 | 4677628 | 4677645 | 2 | 9  | 18 | TG   | 22 | 4  |
| 141366 | 15 | 4684000 | 4684027 | 2 | 14 | 28 | TC   | 19 | 6  |
| 141370 | 15 | 4687651 | 4687678 | 2 | 14 | 28 | GA   | 10 | 4  |
| 141374 | 15 | 4689674 | 4689687 | 2 | 7  | 14 | GT   | 28 | 3  |
| 141375 | 15 | 4693987 | 4693998 | 2 | 6  | 12 | CA   | 21 | 3  |
| 141379 | 15 | 4697221 | 4697260 | 2 | 20 | 40 | TG   | 10 | 11 |
| 141385 | 15 | 4704031 | 4704056 | 2 | 13 | 26 | CA   | 13 | 6  |
| 141388 | 15 | 4705191 | 4705212 | 2 | 11 | 22 | CA   | 22 | 5  |
| 141389 | 15 | 4705324 | 4705353 | 2 | 15 | 30 | CA   | 21 | 7  |
| 141403 | 15 | 4719209 | 4719222 | 2 | 7  | 14 | CA   | 21 | 7  |
| 141413 | 15 | 4721941 | 4721952 | 2 | 6  | 12 | GT   | 10 | 4  |
| 141416 | 15 | 4723201 | 4723216 | 2 | 8  | 16 | AG   | 10 | 7  |
| 141430 | 15 | 4736972 | 4736991 | 2 | 10 | 20 | AC   | 15 | 9  |
| 141438 | 15 | 4740395 | 4740418 | 2 | 12 | 24 | GT   | 21 | 9  |
| 141443 | 15 | 4741525 | 4741556 | 4 | 8  | 32 | AGAA | 16 | 9  |
| 141449 | 15 | 4744061 | 4744074 | 2 | 7  | 14 | CT   | 17 | 3  |
| 141450 | 15 | 4744792 | 4744819 | 2 | 14 | 28 | CT   | 13 | 7  |
| 141451 | 15 | 4744938 | 4744955 | 3 | 6  | 18 | GTG  | 7  | 4  |
| 141454 | 15 | 4746991 | 4747002 | 2 | 6  | 12 | CA   | 21 | 4  |
| 141455 | 15 | 4747004 | 4747021 | 2 | 9  | 18 | AC   | 17 | 6  |
| 141459 | 15 | 4748064 | 4748083 | 2 | 10 | 20 | AC   | 14 | 5  |
| 141460 | 15 | 4748169 | 4748182 | 2 | 7  | 14 | TA   | 21 | 3  |
| 141461 | 15 | 4748251 | 4748264 | 2 | 7  | 14 | CA   | 16 | 5  |
| 141473 | 15 | 4751704 | 4751725 | 2 | 11 | 22 | AC   | 12 | 7  |
| 141481 | 15 | 4754083 | 4754106 | 3 | 8  | 24 | ATA  | 13 | 7  |
| 141486 | 15 | 4756108 | 4756131 | 2 | 12 | 24 | CA   | 19 | 8  |
| 141491 | 15 | 4758631 | 4758656 | 2 | 13 | 26 | AC   | 13 | 15 |
| 141494 | 15 | 4759927 | 4759958 | 2 | 16 | 32 | AC   | 6  | 7  |
| 141495 | 15 | 4760324 | 4760339 | 2 | 8  | 16 | TC   | 17 | 3  |
| 141500 | 15 | 4761665 | 4761684 | 2 | 10 | 20 | CA   | 12 | 8  |



|        |    |         |         |   |    |    |     |    |    |
|--------|----|---------|---------|---|----|----|-----|----|----|
| 141501 | 15 | 4761772 | 4761789 | 2 | 9  | 18 | AG  | 24 | 12 |
| 141502 | 15 | 4762060 | 4762077 | 2 | 9  | 18 | GT  | 22 | 13 |
| 141512 | 15 | 4768345 | 4768362 | 2 | 9  | 18 | AG  | 25 | 6  |
| 141513 | 15 | 4769511 | 4769532 | 2 | 11 | 22 | CA  | 8  | 7  |
| 141515 | 15 | 4772656 | 4772669 | 2 | 7  | 14 | AC  | 28 | 5  |
| 141516 | 15 | 4772673 | 4772684 | 2 | 6  | 12 | CA  | 28 | 5  |
| 141521 | 15 | 4774900 | 4774921 | 2 | 11 | 22 | AC  | 28 | 3  |
| 141522 | 15 | 4775231 | 4775260 | 2 | 15 | 30 | TG  | 13 | 5  |
| 141523 | 15 | 4775480 | 4775501 | 2 | 11 | 22 | GT  | 11 | 12 |
| 141529 | 15 | 4782819 | 4782830 | 2 | 6  | 12 | AC  | 27 | 3  |
| 141533 | 15 | 4784703 | 4784714 | 2 | 6  | 12 | TC  | 27 | 3  |
| 141534 | 15 | 4787531 | 4787582 | 2 | 26 | 52 | TG  | 11 | 6  |
| 141536 | 15 | 4788023 | 4788034 | 2 | 6  | 12 | CT  | 34 | 4  |
| 141538 | 15 | 4790184 | 4790209 | 2 | 13 | 26 | CA  | 13 | 11 |
| 141539 | 15 | 4791511 | 4791532 | 2 | 11 | 22 | AC  | 23 | 4  |
| 141541 | 15 | 4794337 | 4794352 | 2 | 8  | 16 | AC  | 7  | 4  |
| 141543 | 15 | 4800201 | 4800212 | 2 | 6  | 12 | GC  | 20 | 12 |
| 141544 | 15 | 4800213 | 4800230 | 2 | 9  | 18 | AC  | 11 | 9  |
| 141546 | 15 | 4800369 | 4800386 | 2 | 9  | 18 | AC  | 8  | 7  |
| 141557 | 15 | 4810951 | 4810976 | 2 | 13 | 26 | AC  | 7  | 8  |
| 141559 | 15 | 4811887 | 4811908 | 2 | 11 | 22 | AC  | 23 | 9  |
| 141561 | 15 | 4812459 | 4812476 | 2 | 9  | 18 | GT  | 23 | 6  |
| 141562 | 15 | 4813210 | 4813235 | 2 | 13 | 26 | GT  | 18 | 8  |
| 141564 | 15 | 4814004 | 4814029 | 2 | 13 | 26 | GT  | 20 | 9  |
| 141566 | 15 | 4815468 | 4815489 | 2 | 11 | 22 | GT  | 17 | 7  |
| 141571 | 15 | 4823152 | 4823167 | 2 | 8  | 16 | CA  | 15 | 17 |
| 141573 | 15 | 4825295 | 4825322 | 2 | 14 | 28 | CA  | 7  | 8  |
| 141575 | 15 | 4825474 | 4825499 | 2 | 13 | 26 | CA  | 6  | 9  |
| 141576 | 15 | 4825982 | 4826011 | 2 | 15 | 30 | GT  | 10 | 6  |
| 141577 | 15 | 4827308 | 4827321 | 2 | 7  | 14 | CA  | 21 | 5  |
| 141581 | 15 | 4832687 | 4832713 | 3 | 9  | 27 | AGG | 16 | 3  |
| 141590 | 15 | 4843252 | 4843265 | 2 | 7  | 14 | GT  | 20 | 5  |
| 141592 | 15 | 4846383 | 4846394 | 2 | 6  | 12 | CA  | 29 | 3  |
| 141595 | 15 | 4848072 | 4848113 | 2 | 21 | 42 | GT  | 6  | 9  |
| 141598 | 15 | 4850993 | 4851004 | 2 | 6  | 12 | TG  | 10 | 4  |
| 141599 | 15 | 4851140 | 4851151 | 2 | 6  | 12 | AC  | 26 | 3  |
| 141604 | 15 | 4859879 | 4859890 | 2 | 6  | 12 | AC  | 28 | 3  |
| 141607 | 15 | 4865651 | 4865662 | 2 | 6  | 12 | CT  | 23 | 4  |
| 141609 | 15 | 4866291 | 4866338 | 2 | 24 | 48 | GT  | 18 | 11 |
| 141612 | 15 | 4868360 | 4868401 | 2 | 21 | 42 | GT  | 8  | 9  |
| 141613 | 15 | 4870056 | 4870079 | 2 | 12 | 24 | AC  | 15 | 7  |
| 141615 | 15 | 4875010 | 4875025 | 2 | 8  | 16 | AC  | 24 | 5  |
| 141616 | 15 | 4875592 | 4875605 | 2 | 7  | 14 | AC  | 21 | 4  |
| 141620 | 15 | 4880144 | 4880171 | 2 | 14 | 28 | AG  | 7  | 5  |
| 141623 | 15 | 4883201 | 4883222 | 2 | 11 | 22 | AC  | 19 | 4  |
| 141624 | 15 | 4883542 | 4883581 | 2 | 20 | 40 | TC  | 7  | 5  |
| 141625 | 15 | 4883760 | 4883773 | 2 | 7  | 14 | GA  | 31 | 3  |
| 141626 | 15 | 4887494 | 4887507 | 2 | 7  | 14 | GT  | 24 | 4  |
| 141627 | 15 | 4887673 | 4887684 | 2 | 6  | 12 | GT  | 21 | 4  |
| 141628 | 15 | 4889435 | 4889446 | 2 | 6  | 12 | CA  | 29 | 5  |
| 141629 | 15 | 4889967 | 4890014 | 2 | 24 | 48 | TG  | 12 | 13 |

|        |    |         |         |   |    |    |      |    |    |
|--------|----|---------|---------|---|----|----|------|----|----|
| 141631 | 15 | 4890224 | 4890259 | 2 | 18 | 36 | CA   | 7  | 8  |
| 141635 | 15 | 4891473 | 4891490 | 2 | 9  | 18 | CT   | 20 | 8  |
| 141636 | 15 | 4891708 | 4891743 | 2 | 18 | 36 | TC   | 10 | 10 |
| 141639 | 15 | 4892581 | 4892592 | 2 | 6  | 12 | AC   | 16 | 3  |
| 141640 | 15 | 4892613 | 4892626 | 2 | 7  | 14 | AC   | 14 | 8  |
| 141641 | 15 | 4892628 | 4892641 | 2 | 7  | 14 | CA   | 23 | 7  |
| 141642 | 15 | 4897010 | 4897029 | 2 | 10 | 20 | AC   | 24 | 6  |
| 141647 | 15 | 4903121 | 4903140 | 2 | 10 | 20 | AC   | 28 | 5  |
| 141662 | 15 | 4912426 | 4912439 | 2 | 7  | 14 | GT   | 24 | 10 |
| 141663 | 15 | 4912577 | 4912608 | 2 | 16 | 32 | AC   | 10 | 10 |
| 141668 | 15 | 4923020 | 4923035 | 2 | 8  | 16 | CA   | 22 | 5  |
| 141671 | 15 | 4928883 | 4928910 | 2 | 14 | 28 | TG   | 16 | 12 |
| 141675 | 15 | 4929288 | 4929299 | 2 | 6  | 12 | CA   | 16 | 12 |
| 141676 | 15 | 4929349 | 4929370 | 2 | 11 | 22 | GA   | 23 | 5  |
| 141680 | 15 | 4936028 | 4936041 | 2 | 7  | 14 | TG   | 27 | 3  |
| 141681 | 15 | 4936479 | 4936506 | 2 | 14 | 28 | CA   | 16 | 9  |
| 141683 | 15 | 4938972 | 4939035 | 2 | 32 | 64 | GT   | 6  | 7  |
| 141684 | 15 | 4940281 | 4940296 | 2 | 8  | 16 | AC   | 26 | 6  |
| 141685 | 15 | 4940345 | 4940370 | 2 | 13 | 26 | AC   | 8  | 6  |
| 141688 | 15 | 4941095 | 4941108 | 2 | 7  | 14 | CA   | 22 | 4  |
| 141691 | 15 | 4944606 | 4944619 | 2 | 7  | 14 | GA   | 17 | 3  |
| 141697 | 15 | 4953419 | 4953440 | 2 | 11 | 22 | GT   | 15 | 5  |
| 141698 | 15 | 4953588 | 4953603 | 2 | 8  | 16 | AC   | 24 | 5  |
| 141703 | 15 | 4956170 | 4956227 | 2 | 29 | 58 | AC   | 14 | 13 |
| 141705 | 15 | 4956355 | 4956382 | 2 | 14 | 28 | AC   | 14 | 11 |
| 141709 | 15 | 4958038 | 4958073 | 2 | 18 | 36 | TG   | 6  | 9  |
| 141712 | 15 | 4959118 | 4959133 | 2 | 8  | 16 | AC   | 21 | 4  |
| 141713 | 15 | 4959535 | 4959546 | 2 | 6  | 12 | TG   | 22 | 3  |
| 141714 | 15 | 4959555 | 4959566 | 2 | 6  | 12 | TG   | 18 | 3  |
| 141718 | 15 | 4960148 | 4960165 | 3 | 6  | 18 | AAG  | 19 | 3  |
| 141720 | 15 | 4960730 | 4960753 | 2 | 12 | 24 | CT   | 12 | 3  |
| 141725 | 15 | 4964403 | 4964422 | 2 | 10 | 20 | CA   | 14 | 4  |
| 141727 | 15 | 4968645 | 4968672 | 2 | 14 | 28 | CA   | 6  | 8  |
| 141735 | 15 | 4979381 | 4979400 | 2 | 10 | 20 | CA   | 25 | 5  |
| 141737 | 15 | 4979682 | 4979709 | 2 | 14 | 28 | CT   | 8  | 5  |
| 141739 | 15 | 4980065 | 4980080 | 2 | 8  | 16 | AC   | 16 | 8  |
| 141746 | 15 | 4984858 | 4984881 | 2 | 12 | 24 | AC   | 14 | 7  |
| 141747 | 15 | 4985997 | 4986020 | 2 | 12 | 24 | AC   | 20 | 11 |
| 141751 | 15 | 4989133 | 4989144 | 2 | 6  | 12 | GT   | 26 | 4  |
| 141755 | 15 | 4995474 | 4995497 | 2 | 12 | 24 | GT   | 21 | 8  |
| 141759 | 15 | 4998368 | 4998395 | 2 | 14 | 28 | GT   | 7  | 5  |
| 141760 | 15 | 4998536 | 4998551 | 2 | 8  | 16 | GT   | 17 | 6  |
| 141764 | 15 | 5002006 | 5002025 | 2 | 10 | 20 | CA   | 27 | 11 |
| 141765 | 15 | 5004539 | 5004550 | 2 | 6  | 12 | AG   | 23 | 3  |
| 141773 | 15 | 5016788 | 5016835 | 4 | 12 | 48 | AAAG | 9  | 7  |
| 141775 | 15 | 5018279 | 5018298 | 4 | 5  | 20 | AAAG | 15 | 4  |
| 141777 | 15 | 5025930 | 5025969 | 2 | 20 | 40 | TG   | 8  | 11 |
| 141780 | 15 | 5027195 | 5027206 | 2 | 6  | 12 | AC   | 24 | 4  |
| 141783 | 15 | 5030869 | 5030882 | 2 | 7  | 14 | TG   | 24 | 4  |
| 141785 | 15 | 5035943 | 5035964 | 2 | 11 | 22 | AC   | 8  | 10 |
| 141790 | 15 | 5050921 | 5050940 | 2 | 10 | 20 | CA   | 12 | 6  |

|        |    |         |         |   |    |    |     |    |    |
|--------|----|---------|---------|---|----|----|-----|----|----|
| 141801 | 15 | 5057520 | 5057545 | 2 | 13 | 26 | GT  | 16 | 5  |
| 141802 | 15 | 5060393 | 5060404 | 2 | 6  | 12 | AC  | 19 | 6  |
| 141803 | 15 | 5061665 | 5061688 | 2 | 12 | 24 | TG  | 19 | 3  |
| 141807 | 15 | 5066043 | 5066056 | 2 | 7  | 14 | TA  | 22 | 5  |
| 141810 | 15 | 5071836 | 5071857 | 2 | 11 | 22 | GT  | 24 | 7  |
| 141813 | 15 | 5076787 | 5076808 | 2 | 11 | 22 | CA  | 17 | 6  |
| 141814 | 15 | 5076972 | 5076987 | 2 | 8  | 16 | CA  | 25 | 3  |
| 141815 | 15 | 5078790 | 5078821 | 2 | 16 | 32 | AC  | 16 | 8  |
| 141816 | 15 | 5079483 | 5079502 | 2 | 10 | 20 | AC  | 24 | 4  |
| 141817 | 15 | 5079644 | 5079659 | 2 | 8  | 16 | CA  | 21 | 5  |
| 141823 | 15 | 5089438 | 5089453 | 2 | 8  | 16 | AC  | 7  | 5  |
| 141831 | 15 | 5091693 | 5091704 | 2 | 6  | 12 | CA  | 27 | 3  |
| 141832 | 15 | 5091875 | 5091888 | 2 | 7  | 14 | CA  | 25 | 7  |
| 141833 | 15 | 5092089 | 5092102 | 2 | 7  | 14 | CA  | 28 | 5  |
| 141838 | 15 | 5097103 | 5097116 | 2 | 7  | 14 | AC  | 16 | 5  |
| 141839 | 15 | 5097119 | 5097132 | 2 | 7  | 14 | AC  | 12 | 5  |
| 141841 | 15 | 5097325 | 5097342 | 2 | 9  | 18 | TG  | 22 | 5  |
| 141845 | 15 | 5100110 | 5100121 | 2 | 6  | 12 | AG  | 29 | 4  |
| 141846 | 15 | 5100379 | 5100394 | 2 | 8  | 16 | GT  | 24 | 5  |
| 141849 | 15 | 5105708 | 5105721 | 2 | 7  | 14 | CA  | 26 | 5  |
| 141851 | 15 | 5106146 | 5106185 | 2 | 20 | 40 | GT  | 6  | 5  |
| 141853 | 15 | 5107752 | 5107765 | 2 | 7  | 14 | CA  | 14 | 5  |
| 141857 | 15 | 5110682 | 5110707 | 2 | 13 | 26 | TG  | 7  | 9  |
| 141871 | 15 | 5129701 | 5129732 | 2 | 16 | 32 | CA  | 14 | 6  |
| 141877 | 15 | 5132213 | 5132226 | 2 | 7  | 14 | TG  | 19 | 3  |
| 141882 | 15 | 5137211 | 5137238 | 2 | 14 | 28 | TC  | 12 | 4  |
| 141884 | 15 | 5140077 | 5140088 | 2 | 6  | 12 | TG  | 25 | 3  |
| 141886 | 15 | 5142299 | 5142318 | 2 | 10 | 20 | AC  | 19 | 3  |
| 141887 | 15 | 5143484 | 5143497 | 2 | 7  | 14 | GT  | 25 | 3  |
| 141894 | 15 | 5149198 | 5149211 | 2 | 7  | 14 | CA  | 21 | 6  |
| 141896 | 15 | 5149818 | 5149831 | 2 | 7  | 14 | AC  | 16 | 4  |
| 141900 | 15 | 5153314 | 5153327 | 2 | 7  | 14 | GA  | 24 | 4  |
| 141901 | 15 | 5154252 | 5154289 | 2 | 19 | 38 | GT  | 6  | 8  |
| 141902 | 15 | 5154621 | 5154650 | 2 | 15 | 30 | AC  | 10 | 7  |
| 141903 | 15 | 5154982 | 5155007 | 2 | 13 | 26 | GA  | 13 | 9  |
| 141907 | 15 | 5163873 | 5163902 | 2 | 15 | 30 | TG  | 10 | 6  |
| 141913 | 15 | 5165646 | 5165665 | 2 | 10 | 20 | CA  | 19 | 6  |
| 141918 | 15 | 5169909 | 5169929 | 3 | 7  | 21 | AGT | 21 | 5  |
| 141920 | 15 | 5171676 | 5171687 | 2 | 6  | 12 | GT  | 21 | 4  |
| 141922 | 15 | 5172112 | 5172153 | 2 | 21 | 42 | CA  | 6  | 8  |
| 141925 | 15 | 5172862 | 5172879 | 2 | 9  | 18 | CA  | 33 | 6  |
| 141926 | 15 | 5173384 | 5173413 | 2 | 15 | 30 | AC  | 19 | 8  |
| 141928 | 15 | 5176810 | 5176827 | 2 | 9  | 18 | AC  | 15 | 3  |
| 141935 | 15 | 5190740 | 5190771 | 2 | 16 | 32 | GT  | 15 | 10 |
| 141936 | 15 | 5194369 | 5194384 | 2 | 8  | 16 | CA  | 29 | 6  |
| 141937 | 15 | 5194832 | 5194845 | 2 | 7  | 14 | AC  | 19 | 7  |
| 141938 | 15 | 5199296 | 5199309 | 2 | 7  | 14 | TC  | 25 | 5  |
| 141940 | 15 | 5200225 | 5200258 | 2 | 17 | 34 | AG  | 7  | 6  |
| 141942 | 15 | 5202958 | 5202975 | 2 | 9  | 18 | TG  | 18 | 6  |
| 141950 | 15 | 5215710 | 5215733 | 2 | 12 | 24 | TG  | 17 | 6  |
| 141956 | 15 | 5223804 | 5223815 | 2 | 6  | 12 | CA  | 21 | 6  |

|        |    |         |         |   |    |    |      |    |    |
|--------|----|---------|---------|---|----|----|------|----|----|
| 141957 | 15 | 5224205 | 5224224 | 4 | 5  | 20 | AGAC | 25 | 4  |
| 141963 | 15 | 5224531 | 5224554 | 2 | 12 | 24 | TC   | 7  | 7  |
| 141964 | 15 | 5227628 | 5227651 | 2 | 12 | 24 | GT   | 17 | 7  |
| 141968 | 15 | 5229303 | 5229340 | 2 | 19 | 38 | GT   | 8  | 10 |
| 141973 | 15 | 5244810 | 5244857 | 2 | 24 | 48 | AC   | 8  | 11 |
| 141978 | 15 | 5255284 | 5255315 | 2 | 16 | 32 | CA   | 14 | 9  |
| 141981 | 15 | 5259290 | 5259319 | 2 | 15 | 30 | CA   | 11 | 9  |
| 141982 | 15 | 5262939 | 5262964 | 2 | 13 | 26 | AC   | 11 | 9  |
| 141986 | 15 | 5269095 | 5269114 | 2 | 10 | 20 | AC   | 14 | 4  |
| 141993 | 15 | 5284899 | 5284912 | 2 | 7  | 14 | TG   | 20 | 4  |
| 141997 | 15 | 5294940 | 5294954 | 3 | 5  | 15 | AAC  | 26 | 4  |
| 142000 | 15 | 5332460 | 5332471 | 2 | 6  | 12 | GT   | 19 | 6  |
| 142001 | 15 | 5332641 | 5332658 | 3 | 6  | 18 | CTG  | 22 | 6  |
| 142003 | 15 | 5336643 | 5336666 | 2 | 12 | 24 | GT   | 12 | 13 |
| 142011 | 15 | 5343784 | 5343815 | 2 | 16 | 32 | CA   | 15 | 7  |
| 142013 | 15 | 5344780 | 5344815 | 2 | 18 | 36 | CA   | 8  | 9  |
| 142017 | 15 | 5352704 | 5352718 | 3 | 5  | 15 | TGC  | 31 | 5  |
| 142024 | 15 | 5362274 | 5362303 | 2 | 15 | 30 | TG   | 7  | 8  |
| 142032 | 15 | 5384458 | 5384469 | 2 | 6  | 12 | CA   | 27 | 3  |
| 142051 | 15 | 5407730 | 5407743 | 2 | 7  | 14 | TG   | 26 | 3  |
| 142053 | 15 | 5420462 | 5420489 | 2 | 14 | 28 | TG   | 15 | 3  |
| 142064 | 15 | 5480127 | 5480144 | 2 | 9  | 18 | AC   | 21 | 6  |
| 142066 | 15 | 5497134 | 5497155 | 2 | 11 | 22 | AC   | 23 | 9  |
| 142070 | 15 | 5508788 | 5508801 | 2 | 7  | 14 | CA   | 23 | 3  |
| 142071 | 15 | 5513091 | 5513106 | 2 | 8  | 16 | AG   | 27 | 3  |
| 142072 | 15 | 5513854 | 5513879 | 2 | 13 | 26 | AC   | 21 | 13 |
| 142073 | 15 | 5514131 | 5514160 | 2 | 15 | 30 | AC   | 23 | 10 |
| 142074 | 15 | 5514540 | 5514555 | 2 | 8  | 16 | GT   | 25 | 5  |
| 142075 | 15 | 5517171 | 5517192 | 2 | 11 | 22 | CA   | 16 | 9  |
| 142080 | 15 | 5518612 | 5518633 | 2 | 11 | 22 | TG   | 9  | 7  |
| 142082 | 15 | 5519991 | 5520002 | 2 | 6  | 12 | GA   | 30 | 3  |
| 142085 | 15 | 5523685 | 5523714 | 2 | 15 | 30 | AC   | 14 | 11 |
| 142087 | 15 | 5528334 | 5528365 | 2 | 16 | 32 | GT   | 15 | 16 |
| 142088 | 15 | 5530510 | 5530525 | 2 | 8  | 16 | TG   | 18 | 3  |
| 142089 | 15 | 5530804 | 5530821 | 2 | 9  | 18 | CA   | 18 | 9  |
| 142091 | 15 | 5531829 | 5531864 | 2 | 18 | 36 | AC   | 12 | 11 |
| 142093 | 15 | 5534405 | 5534432 | 2 | 14 | 28 | CT   | 10 | 12 |
| 142099 | 15 | 5540390 | 5540413 | 4 | 6  | 24 | TCAG | 30 | 3  |
| 142100 | 15 | 5541869 | 5541880 | 2 | 6  | 12 | AG   | 21 | 3  |
| 142104 | 15 | 5543944 | 5543957 | 2 | 7  | 14 | CA   | 20 | 4  |
| 142105 | 15 | 5544170 | 5544203 | 2 | 17 | 34 | CA   | 10 | 13 |
| 142106 | 15 | 5550548 | 5550567 | 2 | 10 | 20 | TG   | 18 | 11 |
| 142107 | 15 | 5552736 | 5552763 | 4 | 7  | 28 | GGCA | 28 | 8  |
| 142109 | 15 | 5554627 | 5554674 | 2 | 24 | 48 | GT   | 15 | 9  |
| 142112 | 15 | 5557805 | 5557831 | 3 | 9  | 27 | GCT  | 25 | 6  |
| 142114 | 15 | 5561277 | 5561296 | 2 | 10 | 20 | CA   | 26 | 5  |
| 142115 | 15 | 5563119 | 5563136 | 2 | 9  | 18 | TG   | 22 | 7  |
| 142121 | 15 | 5571284 | 5571305 | 2 | 11 | 22 | TG   | 8  | 3  |
| 142124 | 15 | 5573271 | 5573288 | 3 | 6  | 18 | TTG  | 26 | 6  |
| 142127 | 15 | 5573856 | 5573867 | 2 | 6  | 12 | GA   | 19 | 3  |
| 142128 | 15 | 5574670 | 5574683 | 2 | 7  | 14 | GT   | 11 | 9  |

|        |    |         |         |   |    |    |      |    |    |
|--------|----|---------|---------|---|----|----|------|----|----|
| 142132 | 15 | 5578154 | 5578165 | 2 | 6  | 12 | CA   | 21 | 3  |
| 142140 | 15 | 5601427 | 5601478 | 2 | 26 | 52 | GT   | 10 | 6  |
| 142141 | 15 | 5602030 | 5602067 | 2 | 19 | 38 | AC   | 7  | 7  |
| 142144 | 15 | 5602991 | 5603004 | 2 | 7  | 14 | TG   | 25 | 5  |
| 142149 | 15 | 5605775 | 5605798 | 2 | 12 | 24 | CA   | 9  | 11 |
| 142152 | 15 | 5606227 | 5606256 | 2 | 15 | 30 | AG   | 14 | 3  |
| 142156 | 15 | 5611061 | 5611086 | 2 | 13 | 26 | TG   | 9  | 5  |
| 142165 | 15 | 5622295 | 5622324 | 2 | 15 | 30 | AC   | 8  | 8  |
| 142170 | 15 | 5635389 | 5635420 | 2 | 16 | 32 | AC   | 20 | 9  |
| 142171 | 15 | 5636060 | 5636079 | 2 | 10 | 20 | TC   | 16 | 6  |
| 142172 | 15 | 5636423 | 5636437 | 3 | 5  | 15 | TTC  | 9  | 5  |
| 142176 | 15 | 5638448 | 5638459 | 2 | 6  | 12 | CG   | 26 | 3  |
| 142180 | 15 | 5646575 | 5646596 | 2 | 11 | 22 | GT   | 14 | 7  |
| 142181 | 15 | 5648018 | 5648041 | 2 | 12 | 24 | CT   | 9  | 8  |
| 142186 | 15 | 5649879 | 5649890 | 2 | 6  | 12 | AT   | 16 | 3  |
| 142188 | 15 | 5655546 | 5655573 | 2 | 14 | 28 | GT   | 18 | 9  |
| 142190 | 15 | 5658582 | 5658617 | 4 | 9  | 36 | TTTG | 27 | 6  |
| 142191 | 15 | 5664252 | 5664277 | 2 | 13 | 26 | CA   | 14 | 5  |
| 142192 | 15 | 5665077 | 5665120 | 2 | 22 | 44 | GT   | 9  | 8  |
| 142193 | 15 | 5667545 | 5667564 | 2 | 10 | 20 | CA   | 23 | 6  |
| 142197 | 15 | 5695263 | 5695280 | 2 | 9  | 18 | CA   | 7  | 6  |
| 142199 | 15 | 5697260 | 5697277 | 2 | 9  | 18 | AC   | 11 | 7  |
| 142210 | 15 | 5714697 | 5714708 | 2 | 6  | 12 | GT   | 31 | 3  |
| 142215 | 15 | 5723381 | 5723394 | 2 | 7  | 14 | CA   | 28 | 3  |
| 142217 | 15 | 5727045 | 5727076 | 2 | 16 | 32 | CA   | 13 | 6  |
| 142219 | 15 | 5727721 | 5727746 | 2 | 13 | 26 | CA   | 8  | 5  |
| 142220 | 15 | 5733073 | 5733100 | 2 | 14 | 28 | GT   | 6  | 7  |
| 142223 | 15 | 5733434 | 5733445 | 2 | 6  | 12 | TG   | 20 | 4  |
| 142227 | 15 | 5742667 | 5742686 | 2 | 10 | 20 | GT   | 20 | 4  |
| 142228 | 15 | 5744438 | 5744465 | 2 | 14 | 28 | TG   | 17 | 8  |
| 142229 | 15 | 5749929 | 5749940 | 2 | 6  | 12 | AC   | 32 | 5  |
| 142231 | 15 | 5752065 | 5752082 | 3 | 6  | 18 | GCA  | 9  | 3  |
| 142234 | 15 | 5755630 | 5755643 | 2 | 7  | 14 | GT   | 24 | 6  |
| 142240 | 15 | 5773646 | 5773665 | 2 | 10 | 20 | AC   | 10 | 7  |
| 142241 | 15 | 5775685 | 5775698 | 2 | 7  | 14 | AC   | 14 | 8  |
| 142248 | 15 | 5791734 | 5791745 | 2 | 6  | 12 | TG   | 28 | 3  |
| 142250 | 15 | 5804498 | 5804529 | 2 | 16 | 32 | TG   | 9  | 7  |
| 142252 | 15 | 5808229 | 5808254 | 2 | 13 | 26 | AC   | 17 | 3  |
| 142265 | 15 | 5837442 | 5837461 | 2 | 10 | 20 | TG   | 18 | 3  |
| 142269 | 15 | 5848362 | 5848377 | 2 | 8  | 16 | TG   | 18 | 4  |
| 142270 | 15 | 5848689 | 5848706 | 2 | 9  | 18 | TG   | 16 | 14 |
| 142275 | 15 | 5860549 | 5860570 | 2 | 11 | 22 | CA   | 14 | 8  |
| 142282 | 15 | 5872231 | 5872256 | 2 | 13 | 26 | AC   | 14 | 18 |
| 142287 | 15 | 5874596 | 5874607 | 2 | 6  | 12 | GC   | 26 | 8  |
| 142288 | 15 | 5874608 | 5874619 | 2 | 6  | 12 | AC   | 27 | 5  |
| 142289 | 15 | 5877724 | 5877743 | 2 | 10 | 20 | GT   | 13 | 10 |
| 142294 | 15 | 5883941 | 5883970 | 2 | 15 | 30 | TG   | 9  | 11 |
| 142295 | 15 | 5886872 | 5886905 | 2 | 17 | 34 | CA   | 16 | 12 |
| 142309 | 15 | 5905911 | 5905922 | 2 | 6  | 12 | GT   | 33 | 4  |
| 142323 | 15 | 5917274 | 5917315 | 2 | 21 | 42 | TC   | 8  | 5  |
| 142337 | 15 | 5940169 | 5940184 | 4 | 4  | 16 | GAGG | 7  | 3  |

|        |    |         |         |   |    |    |      |    |    |
|--------|----|---------|---------|---|----|----|------|----|----|
| 142340 | 15 | 5944072 | 5944093 | 2 | 11 | 22 | AC   | 21 | 8  |
| 142343 | 15 | 5945495 | 5945510 | 2 | 8  | 16 | GA   | 26 | 7  |
| 142345 | 15 | 5949758 | 5949769 | 2 | 6  | 12 | GT   | 27 | 7  |
| 142346 | 15 | 5949771 | 5949782 | 2 | 6  | 12 | TG   | 26 | 7  |
| 142350 | 15 | 5953686 | 5953705 | 2 | 10 | 20 | GT   | 11 | 9  |
| 142351 | 15 | 5957718 | 5957735 | 2 | 9  | 18 | CA   | 19 | 5  |
| 142354 | 15 | 5967366 | 5967377 | 2 | 6  | 12 | GT   | 20 | 3  |
| 142355 | 15 | 5969178 | 5969197 | 2 | 10 | 20 | AC   | 17 | 10 |
| 142358 | 15 | 5974948 | 5974961 | 2 | 7  | 14 | CA   | 26 | 9  |
| 142360 | 15 | 5983667 | 5983694 | 2 | 14 | 28 | AC   | 9  | 7  |
| 142362 | 15 | 5984050 | 5984063 | 2 | 7  | 14 | AC   | 23 | 3  |
| 142368 | 15 | 5996897 | 5996912 | 2 | 8  | 16 | CA   | 15 | 15 |
| 142377 | 15 | 6017569 | 6017614 | 2 | 23 | 46 | TG   | 6  | 10 |
| 142380 | 15 | 6024015 | 6024034 | 4 | 5  | 20 | TTTG | 17 | 3  |
| 142386 | 15 | 6056162 | 6056179 | 2 | 9  | 18 | CT   | 17 | 9  |
| 142387 | 15 | 6056180 | 6056191 | 2 | 6  | 12 | CA   | 18 | 9  |
| 142389 | 15 | 6065735 | 6065778 | 2 | 22 | 44 | TC   | 8  | 9  |
| 142391 | 15 | 6070048 | 6070071 | 4 | 6  | 24 | AATA | 14 | 9  |
| 142407 | 15 | 6102173 | 6102196 | 2 | 12 | 24 | CA   | 20 | 10 |
| 142412 | 15 | 6106842 | 6106871 | 2 | 15 | 30 | TG   | 17 | 8  |
| 142416 | 15 | 6116452 | 6116467 | 2 | 8  | 16 | GT   | 19 | 9  |
| 142417 | 15 | 6124106 | 6124129 | 4 | 6  | 24 | TTTA | 19 | 4  |
| 142420 | 15 | 6131668 | 6131701 | 2 | 17 | 34 | AC   | 11 | 9  |
| 142421 | 15 | 6131848 | 6131871 | 2 | 12 | 24 | TG   | 14 | 12 |
| 142424 | 15 | 6145685 | 6145710 | 2 | 13 | 26 | AC   | 15 | 11 |
| 142427 | 15 | 6156519 | 6156562 | 2 | 22 | 44 | TG   | 13 | 8  |
| 142429 | 15 | 6159100 | 6159127 | 2 | 14 | 28 | GT   | 11 | 15 |
| 142449 | 15 | 6229306 | 6229325 | 2 | 10 | 20 | AC   | 14 | 9  |
| 142454 | 15 | 6239797 | 6239816 | 4 | 5  | 20 | AAAT | 21 | 5  |
| 142459 | 15 | 6266743 | 6266762 | 2 | 10 | 20 | GT   | 9  | 4  |
| 142461 | 15 | 6270381 | 6270406 | 2 | 13 | 26 | AC   | 19 | 5  |
| 142463 | 15 | 6271965 | 6271992 | 2 | 14 | 28 | CA   | 9  | 10 |
| 142472 | 15 | 6291553 | 6291567 | 3 | 5  | 15 | ATC  | 27 | 3  |
| 142478 | 15 | 6297860 | 6297874 | 3 | 5  | 15 | CAC  | 11 | 3  |
| 142480 | 15 | 6299177 | 6299194 | 2 | 9  | 18 | TG   | 22 | 10 |
| 142483 | 15 | 6314255 | 6314290 | 2 | 18 | 36 | CA   | 10 | 12 |
| 142484 | 15 | 6314361 | 6314381 | 3 | 7  | 21 | GCA  | 22 | 7  |
| 142486 | 15 | 6318069 | 6318083 | 3 | 5  | 15 | CAG  | 25 | 3  |
| 142487 | 15 | 6324856 | 6324885 | 2 | 15 | 30 | GT   | 13 | 8  |
| 142488 | 15 | 6326498 | 6326525 | 2 | 14 | 28 | GT   | 20 | 14 |
| 142489 | 15 | 6328221 | 6328246 | 2 | 13 | 26 | AC   | 9  | 10 |
| 142491 | 15 | 6329442 | 6329469 | 2 | 14 | 28 | TG   | 13 | 11 |
| 142493 | 15 | 6330323 | 6330338 | 2 | 8  | 16 | TG   | 10 | 5  |
| 142494 | 15 | 6330341 | 6330356 | 2 | 8  | 16 | TG   | 17 | 8  |
| 142496 | 15 | 6333743 | 6333760 | 3 | 6  | 18 | GAG  | 21 | 3  |
| 142497 | 15 | 6346365 | 6346382 | 2 | 9  | 18 | TG   | 18 | 9  |
| 142498 | 15 | 6360372 | 6360389 | 2 | 9  | 18 | AC   | 14 | 5  |
| 142500 | 15 | 6366548 | 6366571 | 4 | 6  | 24 | CTGC | 28 | 7  |
| 142504 | 15 | 6379303 | 6379316 | 2 | 7  | 14 | AC   | 29 | 3  |
| 142508 | 15 | 6387482 | 6387503 | 2 | 11 | 22 | AC   | 18 | 12 |
| 142513 | 15 | 6389389 | 6389416 | 4 | 7  | 28 | ACAA | 24 | 4  |

|        |    |         |         |   |    |    |      |    |    |
|--------|----|---------|---------|---|----|----|------|----|----|
| 142514 | 15 | 6390369 | 6390395 | 3 | 9  | 27 | ATT  | 7  | 4  |
| 142524 | 15 | 6407316 | 6407329 | 2 | 7  | 14 | CA   | 17 | 4  |
| 142530 | 15 | 6414909 | 6414942 | 2 | 17 | 34 | AG   | 6  | 10 |
| 142532 | 15 | 6415131 | 6415150 | 2 | 10 | 20 | CT   | 22 | 5  |
| 142536 | 15 | 6424291 | 6424308 | 2 | 9  | 18 | TC   | 23 | 7  |
| 142539 | 15 | 6437723 | 6437744 | 2 | 11 | 22 | TG   | 9  | 4  |
| 142542 | 15 | 6440860 | 6440871 | 2 | 6  | 12 | GT   | 30 | 4  |
| 142543 | 15 | 6441946 | 6441973 | 4 | 7  | 28 | TATC | 15 | 9  |
| 142544 | 15 | 6445228 | 6445242 | 3 | 5  | 15 | TTC  | 22 | 3  |
| 142546 | 15 | 6445930 | 6445941 | 2 | 6  | 12 | AC   | 23 | 9  |
| 142549 | 15 | 6458914 | 6458928 | 3 | 5  | 15 | TGT  | 22 | 3  |
| 142550 | 15 | 6465103 | 6465118 | 4 | 4  | 16 | CAAA | 29 | 3  |
| 142569 | 15 | 6532548 | 6532567 | 4 | 5  | 20 | TTAT | 24 | 3  |
| 142571 | 15 | 6542593 | 6542614 | 2 | 11 | 22 | TG   | 9  | 5  |
| 142574 | 15 | 6549054 | 6549069 | 2 | 8  | 16 | AT   | 15 | 3  |
| 142588 | 15 | 6580797 | 6580822 | 2 | 13 | 26 | TG   | 13 | 13 |
| 142589 | 15 | 6585210 | 6585247 | 2 | 19 | 38 | TG   | 12 | 13 |
| 142590 | 15 | 6589420 | 6589437 | 2 | 9  | 18 | AT   | 13 | 15 |
| 142593 | 15 | 6604129 | 6604149 | 3 | 7  | 21 | AGA  | 19 | 11 |
| 142595 | 15 | 6610515 | 6610536 | 2 | 11 | 22 | CA   | 21 | 6  |
| 142597 | 15 | 6626432 | 6626455 | 2 | 12 | 24 | GT   | 16 | 3  |
| 142600 | 15 | 6628950 | 6628969 | 4 | 5  | 20 | AAAT | 27 | 7  |
| 142602 | 15 | 6638422 | 6638457 | 2 | 18 | 36 | AC   | 6  | 8  |
| 142603 | 15 | 6638559 | 6638578 | 2 | 10 | 20 | TG   | 13 | 3  |
| 142605 | 15 | 6643409 | 6643442 | 2 | 17 | 34 | TG   | 10 | 7  |
| 142608 | 15 | 6653605 | 6653628 | 4 | 6  | 24 | CAGA | 26 | 10 |
| 142614 | 15 | 6671374 | 6671393 | 2 | 10 | 20 | CA   | 19 | 7  |
| 142617 | 15 | 6699480 | 6699509 | 2 | 15 | 30 | GT   | 11 | 7  |
| 142620 | 15 | 6704875 | 6704890 | 2 | 8  | 16 | AC   | 24 | 4  |
| 142622 | 15 | 6710940 | 6710951 | 2 | 6  | 12 | CT   | 29 | 4  |
| 142625 | 15 | 6712645 | 6712662 | 2 | 9  | 18 | AC   | 22 | 3  |
| 142626 | 15 | 6712898 | 6712957 | 4 | 15 | 60 | TGTA | 13 | 10 |
| 142635 | 15 | 6729909 | 6729926 | 2 | 9  | 18 | AC   | 19 | 6  |
| 142643 | 15 | 6746260 | 6746283 | 2 | 12 | 24 | TG   | 17 | 10 |
| 142651 | 15 | 6751122 | 6751153 | 2 | 16 | 32 | TG   | 8  | 5  |
| 142659 | 15 | 6770265 | 6770280 | 4 | 4  | 16 | CGCA | 29 | 6  |
| 142662 | 15 | 6780271 | 6780285 | 3 | 5  | 15 | AAC  | 27 | 6  |
| 142664 | 15 | 6781621 | 6781646 | 2 | 13 | 26 | AC   | 12 | 8  |
| 142666 | 15 | 6792625 | 6792639 | 3 | 5  | 15 | TAA  | 16 | 3  |
| 142667 | 15 | 6795353 | 6795373 | 3 | 7  | 21 | TTA  | 23 | 8  |
| 142668 | 15 | 6798989 | 6799003 | 3 | 5  | 15 | ATA  | 29 | 4  |
| 142671 | 15 | 6816024 | 6816041 | 3 | 6  | 18 | TAA  | 8  | 3  |
| 142673 | 15 | 6823149 | 6823172 | 4 | 6  | 24 | AAAT | 18 | 3  |
| 142688 | 15 | 6857720 | 6857755 | 3 | 12 | 36 | GCT  | 19 | 7  |
| 142698 | 15 | 6881983 | 6881998 | 2 | 8  | 16 | CA   | 19 | 12 |
| 142699 | 15 | 6882629 | 6882648 | 2 | 10 | 20 | AC   | 16 | 3  |
| 142702 | 15 | 6888093 | 6888132 | 2 | 20 | 40 | CA   | 12 | 10 |
| 142709 | 15 | 6897994 | 6898015 | 2 | 11 | 22 | AC   | 13 | 8  |
| 142724 | 15 | 6917789 | 6917808 | 2 | 10 | 20 | CA   | 23 | 11 |
| 142733 | 15 | 6930824 | 6930853 | 2 | 15 | 30 | AC   | 12 | 8  |
| 142734 | 15 | 6932897 | 6932918 | 2 | 11 | 22 | TG   | 19 | 6  |

|        |    |         |         |   |    |    |      |    |    |
|--------|----|---------|---------|---|----|----|------|----|----|
| 142735 | 15 | 6933338 | 6933353 | 4 | 4  | 16 | TTAT | 24 | 11 |
| 142736 | 15 | 6934094 | 6934108 | 3 | 5  | 15 | TCC  | 19 | 3  |
| 142739 | 15 | 6937849 | 6937876 | 2 | 14 | 28 | CA   | 11 | 9  |
| 142743 | 15 | 6946162 | 6946177 | 2 | 8  | 16 | TG   | 22 | 8  |
| 142744 | 15 | 6948501 | 6948528 | 2 | 14 | 28 | GT   | 14 | 11 |
| 142746 | 15 | 6952112 | 6952129 | 2 | 9  | 18 | GT   | 19 | 11 |
| 142749 | 15 | 6953709 | 6953720 | 2 | 6  | 12 | GT   | 23 | 9  |
| 142752 | 15 | 6956385 | 6956402 | 2 | 9  | 18 | GT   | 14 | 9  |
| 142753 | 15 | 6957007 | 6957018 | 2 | 6  | 12 | GT   | 22 | 5  |
| 142762 | 15 | 6979315 | 6979356 | 2 | 21 | 42 | TG   | 15 | 11 |
| 142763 | 15 | 6980018 | 6980031 | 2 | 7  | 14 | GT   | 8  | 6  |
| 142771 | 15 | 6985552 | 6985575 | 2 | 12 | 24 | CA   | 6  | 3  |
| 142772 | 15 | 6991566 | 6991593 | 2 | 14 | 28 | GA   | 11 | 7  |
| 142776 | 15 | 6997655 | 6997672 | 2 | 9  | 18 | CA   | 14 | 10 |
| 142783 | 15 | 7003966 | 7003995 | 2 | 15 | 30 | CA   | 12 | 15 |
| 142788 | 15 | 7016925 | 7016938 | 2 | 7  | 14 | AC   | 21 | 4  |
| 142789 | 15 | 7017077 | 7017096 | 2 | 10 | 20 | AG   | 17 | 3  |
| 142793 | 15 | 7023968 | 7024023 | 4 | 14 | 56 | AAAG | 14 | 7  |
| 142796 | 15 | 7026147 | 7026173 | 3 | 9  | 27 | TCC  | 18 | 5  |
| 142797 | 15 | 7026291 | 7026322 | 2 | 16 | 32 | TG   | 15 | 7  |
| 142803 | 15 | 7029551 | 7029562 | 2 | 6  | 12 | GT   | 20 | 3  |
| 142808 | 15 | 7030722 | 7030733 | 2 | 6  | 12 | TG   | 19 | 4  |
| 142809 | 15 | 7030736 | 7030749 | 2 | 7  | 14 | TG   | 22 | 6  |
| 142811 | 15 | 7031575 | 7031592 | 2 | 9  | 18 | TG   | 20 | 4  |
| 142814 | 15 | 7035854 | 7035879 | 2 | 13 | 26 | CA   | 24 | 9  |
| 142815 | 15 | 7038332 | 7038373 | 2 | 21 | 42 | CA   | 17 | 14 |
| 142817 | 15 | 7039770 | 7039797 | 2 | 14 | 28 | GT   | 12 | 5  |
| 142823 | 15 | 7045302 | 7045321 | 2 | 10 | 20 | CA   | 17 | 10 |
| 142825 | 15 | 7051291 | 7051310 | 2 | 10 | 20 | AC   | 9  | 7  |
| 142841 | 15 | 7071413 | 7071426 | 2 | 7  | 14 | TG   | 6  | 3  |
| 142851 | 15 | 7096922 | 7096951 | 2 | 15 | 30 | AC   | 15 | 5  |
| 142855 | 15 | 7103861 | 7103878 | 2 | 9  | 18 | AC   | 20 | 3  |
| 142856 | 15 | 7104638 | 7104673 | 2 | 18 | 36 | TC   | 11 | 10 |
| 142857 | 15 | 7104842 | 7104873 | 2 | 16 | 32 | AG   | 10 | 11 |
| 142859 | 15 | 7105743 | 7105766 | 2 | 12 | 24 | CA   | 17 | 9  |
| 142864 | 15 | 7110385 | 7110402 | 3 | 6  | 18 | GAG  | 32 | 3  |
| 142865 | 15 | 7111629 | 7111642 | 2 | 7  | 14 | GT   | 20 | 3  |
| 142866 | 15 | 7112292 | 7112313 | 2 | 11 | 22 | AC   | 19 | 9  |
| 142867 | 15 | 7113448 | 7113467 | 2 | 10 | 20 | GT   | 8  | 7  |
| 142869 | 15 | 7117314 | 7117337 | 2 | 12 | 24 | AC   | 13 | 13 |
| 142871 | 15 | 7117492 | 7117507 | 2 | 8  | 16 | GT   | 27 | 8  |
| 142872 | 15 | 7117727 | 7117750 | 2 | 12 | 24 | TG   | 10 | 5  |
| 142878 | 15 | 7129234 | 7129260 | 3 | 9  | 27 | TGC  | 23 | 6  |
| 142883 | 15 | 7132156 | 7132191 | 2 | 18 | 36 | AC   | 10 | 13 |
| 142886 | 15 | 7143476 | 7143487 | 2 | 6  | 12 | CA   | 23 | 5  |
| 142887 | 15 | 7143533 | 7143550 | 2 | 9  | 18 | AC   | 19 | 4  |
| 142893 | 15 | 7147890 | 7147915 | 2 | 13 | 26 | GA   | 8  | 6  |
| 142896 | 15 | 7151135 | 7151160 | 2 | 13 | 26 | GT   | 16 | 9  |
| 142897 | 15 | 7151336 | 7151350 | 3 | 5  | 15 | ATG  | 26 | 3  |
| 142900 | 15 | 7163527 | 7163538 | 2 | 6  | 12 | TG   | 25 | 4  |
| 142905 | 15 | 7169480 | 7169491 | 2 | 6  | 12 | GT   | 30 | 3  |



|        |    |         |         |   |    |    |      |    |    |
|--------|----|---------|---------|---|----|----|------|----|----|
| 142906 | 15 | 7172533 | 7172568 | 2 | 18 | 36 | CA   | 16 | 16 |
| 142909 | 15 | 7177245 | 7177260 | 2 | 8  | 16 | AC   | 25 | 4  |
| 142910 | 15 | 7178328 | 7178349 | 2 | 11 | 22 | AC   | 12 | 8  |
| 142914 | 15 | 7181602 | 7181621 | 4 | 5  | 20 | TGGT | 24 | 4  |
| 142920 | 15 | 7185383 | 7185400 | 2 | 9  | 18 | CA   | 15 | 3  |
| 142922 | 15 | 7189424 | 7189445 | 2 | 11 | 22 | CA   | 21 | 17 |
| 142925 | 15 | 7194911 | 7194928 | 3 | 6  | 18 | CCA  | 12 | 6  |
| 142926 | 15 | 7195114 | 7195141 | 2 | 14 | 28 | CA   | 12 | 6  |
| 142927 | 15 | 7195235 | 7195260 | 2 | 13 | 26 | CT   | 12 | 9  |
| 142929 | 15 | 7197482 | 7197511 | 2 | 15 | 30 | GT   | 19 | 8  |
| 142934 | 15 | 7201481 | 7201498 | 2 | 9  | 18 | TG   | 14 | 8  |
| 142935 | 15 | 7201924 | 7201937 | 2 | 7  | 14 | GT   | 16 | 4  |
| 142936 | 15 | 7201940 | 7201953 | 2 | 7  | 14 | GT   | 16 | 6  |
| 142937 | 15 | 7204862 | 7204883 | 2 | 11 | 22 | CA   | 11 | 8  |
| 142938 | 15 | 7208348 | 7208375 | 2 | 14 | 28 | TG   | 13 | 6  |
| 142939 | 15 | 7208503 | 7208518 | 2 | 8  | 16 | GT   | 25 | 5  |
| 142942 | 15 | 7210530 | 7210547 | 2 | 9  | 18 | CA   | 20 | 5  |
| 142944 | 15 | 7211706 | 7211739 | 2 | 17 | 34 | AC   | 13 | 11 |
| 142945 | 15 | 7212550 | 7212569 | 2 | 10 | 20 | TG   | 9  | 3  |
| 142951 | 15 | 7215279 | 7215290 | 2 | 6  | 12 | CT   | 8  | 5  |
| 142952 | 15 | 7215291 | 7215306 | 2 | 8  | 16 | CA   | 8  | 7  |
| 142957 | 15 | 7218502 | 7218521 | 2 | 10 | 20 | AC   | 13 | 10 |
| 142962 | 15 | 7223813 | 7223826 | 2 | 7  | 14 | CA   | 7  | 4  |
| 142963 | 15 | 7226427 | 7226446 | 2 | 10 | 20 | GT   | 13 | 18 |
| 142964 | 15 | 7228459 | 7228480 | 2 | 11 | 22 | AC   | 20 | 6  |
| 142965 | 15 | 7229148 | 7229165 | 2 | 9  | 18 | GT   | 12 | 6  |
| 142966 | 15 | 7229255 | 7229270 | 2 | 8  | 16 | GT   | 21 | 7  |
| 142973 | 15 | 7236377 | 7236398 | 2 | 11 | 22 | TG   | 19 | 4  |
| 142975 | 15 | 7236967 | 7236984 | 3 | 6  | 18 | CAG  | 20 | 4  |
| 142978 | 15 | 7244193 | 7244219 | 3 | 9  | 27 | GGA  | 11 | 4  |
| 142979 | 15 | 7244356 | 7244377 | 2 | 11 | 22 | GT   | 25 | 7  |
| 142981 | 15 | 7247332 | 7247363 | 2 | 16 | 32 | TG   | 10 | 12 |
| 142984 | 15 | 7250729 | 7250742 | 2 | 7  | 14 | CA   | 19 | 5  |
| 142985 | 15 | 7251444 | 7251465 | 2 | 11 | 22 | CA   | 13 | 7  |
| 142986 | 15 | 7251654 | 7251669 | 4 | 4  | 16 | GGAG | 8  | 3  |
| 142987 | 15 | 7251822 | 7251848 | 3 | 9  | 27 | CCT  | 6  | 4  |
| 142988 | 15 | 7252072 | 7252097 | 2 | 13 | 26 | CA   | 14 | 7  |
| 142992 | 15 | 7253553 | 7253578 | 2 | 13 | 26 | CA   | 13 | 5  |
| 142993 | 15 | 7253809 | 7253842 | 2 | 17 | 34 | AC   | 9  | 12 |
| 142994 | 15 | 7262342 | 7262362 | 3 | 7  | 21 | GCT  | 25 | 5  |
| 142997 | 15 | 7264407 | 7264420 | 2 | 7  | 14 | CA   | 26 | 6  |
| 143000 | 15 | 7264992 | 7265003 | 2 | 6  | 12 | GT   | 10 | 6  |
| 143004 | 15 | 7268279 | 7268290 | 2 | 6  | 12 | TC   | 13 | 5  |
| 143005 | 15 | 7268292 | 7268305 | 2 | 7  | 14 | CT   | 16 | 7  |
| 143007 | 15 | 7270101 | 7270132 | 2 | 16 | 32 | GT   | 13 | 10 |
| 143013 | 15 | 7271919 | 7271952 | 2 | 17 | 34 | TG   | 11 | 11 |
| 143015 | 15 | 7273790 | 7273805 | 4 | 4  | 16 | AGGC | 26 | 4  |
| 143016 | 15 | 7274417 | 7274434 | 2 | 9  | 18 | CA   | 26 | 13 |
| 143017 | 15 | 7275370 | 7275381 | 2 | 6  | 12 | CA   | 31 | 11 |
| 143018 | 15 | 7275569 | 7275620 | 2 | 26 | 52 | CA   | 10 | 11 |
| 143020 | 15 | 7276760 | 7276779 | 2 | 10 | 20 | CA   | 18 | 6  |

|        |    |         |         |   |    |    |      |    |    |
|--------|----|---------|---------|---|----|----|------|----|----|
| 143021 | 15 | 7277653 | 7277678 | 2 | 13 | 26 | AC   | 22 | 10 |
| 143023 | 15 | 7278465 | 7278478 | 2 | 7  | 14 | CA   | 23 | 6  |
| 143028 | 15 | 7287440 | 7287457 | 3 | 6  | 18 | GCT  | 28 | 3  |
| 143030 | 15 | 7289507 | 7289550 | 2 | 22 | 44 | GA   | 6  | 6  |
| 143031 | 15 | 7290558 | 7290577 | 2 | 10 | 20 | GT   | 25 | 11 |
| 143032 | 15 | 7291611 | 7291626 | 4 | 4  | 16 | AAAT | 8  | 3  |
| 143034 | 15 | 7295608 | 7295634 | 3 | 9  | 27 | CAA  | 23 | 12 |
| 143044 | 15 | 7316150 | 7316171 | 2 | 11 | 22 | AC   | 11 | 11 |
| 143051 | 15 | 7335967 | 7335981 | 3 | 5  | 15 | CCA  | 27 | 9  |
| 143054 | 15 | 7338481 | 7338500 | 2 | 10 | 20 | GT   | 11 | 10 |
| 143056 | 15 | 7338611 | 7338632 | 2 | 11 | 22 | GT   | 21 | 10 |
| 143057 | 15 | 7340288 | 7340303 | 2 | 8  | 16 | TA   | 22 | 7  |
| 143067 | 15 | 7354956 | 7354973 | 2 | 9  | 18 | AC   | 20 | 4  |
| 143068 | 15 | 7361816 | 7361851 | 3 | 12 | 36 | AAC  | 9  | 3  |
| 143069 | 15 | 7363863 | 7363877 | 3 | 5  | 15 | AAG  | 22 | 4  |
| 143073 | 15 | 7370293 | 7370324 | 2 | 16 | 32 | CA   | 11 | 10 |
| 143078 | 15 | 7372448 | 7372462 | 3 | 5  | 15 | TGA  | 27 | 3  |
| 143084 | 15 | 7377940 | 7377979 | 2 | 20 | 40 | TG   | 11 | 11 |
| 143090 | 15 | 7389991 | 7390011 | 3 | 7  | 21 | AGT  | 10 | 4  |
| 143093 | 15 | 7390986 | 7391003 | 2 | 9  | 18 | AC   | 19 | 7  |
| 143096 | 15 | 7419687 | 7419698 | 2 | 6  | 12 | AC   | 25 | 3  |
| 143097 | 15 | 7421172 | 7421203 | 2 | 16 | 32 | CA   | 18 | 11 |
| 143098 | 15 | 7421320 | 7421375 | 2 | 28 | 56 | AC   | 8  | 8  |
| 143108 | 15 | 7439595 | 7439630 | 2 | 18 | 36 | AC   | 15 | 16 |
| 143109 | 15 | 7446463 | 7446498 | 2 | 18 | 36 | AC   | 14 | 14 |
| 143124 | 15 | 7470886 | 7470901 | 2 | 8  | 16 | CA   | 13 | 8  |
| 143125 | 15 | 7471723 | 7471734 | 2 | 6  | 12 | AC   | 26 | 4  |
| 143126 | 15 | 7473748 | 7473765 | 2 | 9  | 18 | GT   | 16 | 6  |
| 143127 | 15 | 7473767 | 7473780 | 2 | 7  | 14 | TG   | 17 | 6  |
| 143128 | 15 | 7474923 | 7474962 | 4 | 10 | 40 | TTCA | 19 | 13 |
| 143130 | 15 | 7482885 | 7482905 | 3 | 7  | 21 | AGC  | 31 | 3  |
| 143141 | 15 | 7532319 | 7532340 | 2 | 11 | 22 | CA   | 15 | 5  |
| 143148 | 15 | 7540807 | 7540830 | 4 | 6  | 24 | AAAT | 25 | 4  |
| 143165 | 15 | 7612761 | 7612778 | 2 | 9  | 18 | GT   | 21 | 3  |
| 143171 | 15 | 7638124 | 7638165 | 2 | 21 | 42 | GT   | 8  | 9  |
| 143184 | 15 | 7661885 | 7661898 | 2 | 7  | 14 | GA   | 15 | 3  |
| 143188 | 15 | 7673290 | 7673311 | 2 | 11 | 22 | AC   | 11 | 6  |
| 143194 | 15 | 7693406 | 7693425 | 2 | 10 | 20 | CA   | 8  | 7  |
| 143195 | 15 | 7693427 | 7693444 | 2 | 9  | 18 | AC   | 8  | 8  |
| 143200 | 15 | 7706299 | 7706314 | 2 | 8  | 16 | CT   | 15 | 5  |
| 143207 | 15 | 7710166 | 7710180 | 3 | 5  | 15 | TTG  | 12 | 5  |
| 143212 | 15 | 7722339 | 7722350 | 2 | 6  | 12 | AC   | 28 | 3  |
| 143215 | 15 | 7730572 | 7730589 | 3 | 6  | 18 | GAG  | 23 | 4  |
| 143221 | 15 | 7755366 | 7755385 | 2 | 10 | 20 | GT   | 22 | 7  |
| 143228 | 15 | 7782134 | 7782147 | 2 | 7  | 14 | TG   | 28 | 6  |
| 143230 | 15 | 7784708 | 7784737 | 2 | 15 | 30 | CA   | 22 | 9  |
| 143234 | 15 | 7793234 | 7793247 | 2 | 7  | 14 | AC   | 21 | 6  |
| 143235 | 15 | 7793250 | 7793263 | 2 | 7  | 14 | AC   | 23 | 6  |
| 143236 | 15 | 7795543 | 7795574 | 2 | 16 | 32 | TG   | 13 | 8  |
| 143238 | 15 | 7799237 | 7799254 | 2 | 9  | 18 | GT   | 17 | 4  |
| 143240 | 15 | 7799408 | 7799421 | 2 | 7  | 14 | TG   | 19 | 5  |

|        |    |         |         |   |    |    |      |    |    |
|--------|----|---------|---------|---|----|----|------|----|----|
| 143242 | 15 | 7801694 | 7801705 | 2 | 6  | 12 | TG   | 26 | 4  |
| 143243 | 15 | 7801892 | 7801907 | 2 | 8  | 16 | TG   | 29 | 5  |
| 143246 | 15 | 7802200 | 7802223 | 2 | 12 | 24 | CT   | 16 | 8  |
| 143247 | 15 | 7806315 | 7806328 | 2 | 7  | 14 | CA   | 15 | 4  |
| 143257 | 15 | 7833105 | 7833122 | 2 | 9  | 18 | AC   | 19 | 5  |
| 143265 | 15 | 7859456 | 7859475 | 4 | 5  | 20 | TTTG | 20 | 5  |
| 143268 | 15 | 7869478 | 7869499 | 2 | 11 | 22 | CA   | 13 | 6  |
| 143271 | 15 | 7877022 | 7877047 | 2 | 13 | 26 | TC   | 23 | 6  |
| 143272 | 15 | 7878436 | 7878475 | 2 | 20 | 40 | AC   | 19 | 9  |
| 143275 | 15 | 7885538 | 7885549 | 2 | 6  | 12 | TG   | 19 | 5  |
| 143280 | 15 | 7900759 | 7900790 | 2 | 16 | 32 | TG   | 14 | 10 |
| 143282 | 15 | 7906125 | 7906136 | 2 | 6  | 12 | CA   | 27 | 3  |
| 143284 | 15 | 7907479 | 7907500 | 2 | 11 | 22 | AC   | 11 | 8  |
| 143286 | 15 | 7909221 | 7909236 | 2 | 8  | 16 | GT   | 24 | 3  |
| 143289 | 15 | 7920746 | 7920763 | 2 | 9  | 18 | CT   | 19 | 8  |
| 143294 | 15 | 7928185 | 7928196 | 2 | 6  | 12 | GT   | 16 | 4  |
| 143297 | 15 | 7929164 | 7929183 | 2 | 10 | 20 | GA   | 23 | 7  |
| 143298 | 15 | 7929401 | 7929452 | 2 | 26 | 52 | GT   | 8  | 9  |
| 143301 | 15 | 7932739 | 7932764 | 2 | 13 | 26 | CA   | 24 | 14 |
| 143304 | 15 | 7938095 | 7938126 | 2 | 16 | 32 | TG   | 10 | 14 |
| 143309 | 15 | 7938920 | 7938945 | 2 | 13 | 26 | AC   | 8  | 10 |
| 143311 | 15 | 7939857 | 7939886 | 2 | 15 | 30 | GT   | 16 | 9  |
| 143314 | 15 | 7940250 | 7940265 | 4 | 4  | 16 | GTTT | 30 | 3  |
| 143317 | 15 | 7946950 | 7946969 | 2 | 10 | 20 | GT   | 20 | 7  |
| 143318 | 15 | 7949012 | 7949027 | 2 | 8  | 16 | TG   | 18 | 3  |
| 143319 | 15 | 7949182 | 7949197 | 2 | 8  | 16 | CT   | 12 | 5  |
| 143329 | 15 | 7949860 | 7949897 | 2 | 19 | 38 | GT   | 9  | 12 |
| 143332 | 15 | 7952731 | 7952742 | 2 | 6  | 12 | AT   | 15 | 4  |
| 143333 | 15 | 7954101 | 7954112 | 2 | 6  | 12 | AC   | 20 | 8  |
| 143334 | 15 | 7954588 | 7954602 | 3 | 5  | 15 | GAA  | 22 | 3  |
| 143335 | 15 | 7956369 | 7956386 | 2 | 9  | 18 | AG   | 14 | 4  |
| 143336 | 15 | 7959560 | 7959581 | 2 | 11 | 22 | GT   | 8  | 10 |
| 143338 | 15 | 7961120 | 7961135 | 4 | 4  | 16 | TCTT | 29 | 3  |
| 143340 | 15 | 7961913 | 7961948 | 4 | 9  | 36 | ATGG | 23 | 9  |
| 143347 | 15 | 7963542 | 7963565 | 2 | 12 | 24 | CT   | 10 | 4  |
| 143353 | 15 | 7969785 | 7969800 | 2 | 8  | 16 | CA   | 23 | 6  |
| 143354 | 15 | 7969930 | 7969943 | 2 | 7  | 14 | CA   | 26 | 3  |
| 143355 | 15 | 7970202 | 7970213 | 2 | 6  | 12 | AG   | 18 | 3  |
| 143358 | 15 | 7972366 | 7972391 | 2 | 13 | 26 | TG   | 15 | 7  |
| 143360 | 15 | 7972567 | 7972594 | 2 | 14 | 28 | TG   | 10 | 7  |
| 143362 | 15 | 7984449 | 7984470 | 2 | 11 | 22 | AG   | 18 | 3  |
| 143363 | 15 | 7984878 | 7984905 | 2 | 14 | 28 | GT   | 12 | 11 |
| 143364 | 15 | 7987350 | 7987375 | 2 | 13 | 26 | AC   | 14 | 12 |
| 143365 | 15 | 7989104 | 7989119 | 4 | 4  | 16 | AACC | 29 | 3  |
| 143366 | 15 | 7990830 | 7990850 | 3 | 7  | 21 | CTC  | 22 | 4  |
| 143368 | 15 | 7991034 | 7991055 | 2 | 11 | 22 | CA   | 24 | 10 |
| 143369 | 15 | 7992122 | 7992157 | 2 | 18 | 36 | AC   | 9  | 12 |
| 143371 | 15 | 7993424 | 7993435 | 2 | 6  | 12 | AT   | 27 | 4  |
| 143373 | 15 | 7999923 | 7999934 | 2 | 6  | 12 | GC   | 32 | 4  |
| 143375 | 15 | 8000482 | 8000503 | 2 | 11 | 22 | CA   | 26 | 15 |
| 143376 | 15 | 8000743 | 8000762 | 4 | 5  | 20 | TTTA | 23 | 3  |

|        |    |         |         |   |    |    |      |    |    |
|--------|----|---------|---------|---|----|----|------|----|----|
| 143377 | 15 | 8001473 | 8001494 | 2 | 11 | 22 | AG   | 22 | 4  |
| 143381 | 15 | 8004513 | 8004540 | 2 | 14 | 28 | AC   | 22 | 10 |
| 143383 | 15 | 8005716 | 8005735 | 2 | 10 | 20 | AC   | 19 | 4  |
| 143384 | 15 | 8006477 | 8006502 | 2 | 13 | 26 | TG   | 13 | 8  |
| 143385 | 15 | 8006657 | 8006698 | 2 | 21 | 42 | GA   | 7  | 9  |
| 143387 | 15 | 8006888 | 8006899 | 2 | 6  | 12 | CA   | 25 | 3  |
| 143390 | 15 | 8008741 | 8008770 | 2 | 15 | 30 | TG   | 6  | 7  |
| 143391 | 15 | 8008972 | 8008997 | 2 | 13 | 26 | TG   | 18 | 10 |
| 143392 | 15 | 8009047 | 8009058 | 2 | 6  | 12 | TG   | 24 | 6  |
| 143394 | 15 | 8009327 | 8009340 | 2 | 7  | 14 | GT   | 19 | 6  |
| 143395 | 15 | 8009593 | 8009614 | 2 | 11 | 22 | GT   | 18 | 9  |
| 143397 | 15 | 8012923 | 8012940 | 2 | 9  | 18 | CA   | 22 | 3  |
| 143398 | 15 | 8013260 | 8013289 | 3 | 10 | 30 | CAG  | 26 | 5  |
| 143400 | 15 | 8016164 | 8016181 | 2 | 9  | 18 | GT   | 18 | 4  |
| 143405 | 15 | 8027507 | 8027518 | 2 | 6  | 12 | TC   | 7  | 3  |
| 143408 | 15 | 8028763 | 8028784 | 2 | 11 | 22 | CA   | 21 | 5  |
| 143411 | 15 | 8040899 | 8040922 | 2 | 12 | 24 | CA   | 6  | 7  |
| 143416 | 15 | 8047323 | 8047350 | 2 | 14 | 28 | CA   | 16 | 5  |
| 143424 | 15 | 8064929 | 8064960 | 2 | 16 | 32 | TG   | 14 | 6  |
| 143428 | 15 | 8082438 | 8082457 | 2 | 10 | 20 | TG   | 20 | 10 |
| 143430 | 15 | 8092755 | 8092772 | 3 | 6  | 18 | CAG  | 26 | 4  |
| 143431 | 15 | 8092958 | 8092981 | 2 | 12 | 24 | TG   | 20 | 6  |
| 143435 | 15 | 8103306 | 8103321 | 4 | 4  | 16 | CTGC | 24 | 3  |
| 143436 | 15 | 8105022 | 8105037 | 2 | 8  | 16 | TG   | 19 | 4  |
| 143438 | 15 | 8110030 | 8110051 | 2 | 11 | 22 | TG   | 12 | 11 |
| 143445 | 15 | 8112333 | 8112360 | 2 | 14 | 28 | TG   | 8  | 9  |
| 143452 | 15 | 8121074 | 8121088 | 3 | 5  | 15 | AGG  | 26 | 4  |
| 143457 | 15 | 8122984 | 8122999 | 2 | 8  | 16 | AC   | 23 | 6  |
| 143458 | 15 | 8123002 | 8123013 | 2 | 6  | 12 | AC   | 23 | 7  |
| 143466 | 15 | 8129604 | 8129623 | 2 | 10 | 20 | TG   | 18 | 4  |
| 143477 | 15 | 8154953 | 8154968 | 2 | 8  | 16 | GA   | 23 | 3  |
| 143478 | 15 | 8160572 | 8160587 | 2 | 8  | 16 | AC   | 23 | 4  |
| 143481 | 15 | 8172573 | 8172590 | 2 | 9  | 18 | TG   | 21 | 6  |
| 143482 | 15 | 8182978 | 8183013 | 2 | 18 | 36 | TG   | 6  | 3  |
| 143486 | 15 | 8198824 | 8198847 | 3 | 8  | 24 | TCC  | 17 | 5  |
| 143488 | 15 | 8201197 | 8201240 | 4 | 11 | 44 | ATGA | 19 | 5  |
| 143492 | 15 | 8220430 | 8220443 | 2 | 7  | 14 | AC   | 23 | 6  |
| 143503 | 15 | 8254561 | 8254581 | 3 | 7  | 21 | ATC  | 25 | 4  |
| 143505 | 15 | 8259114 | 8259128 | 3 | 5  | 15 | CTG  | 25 | 3  |
| 143516 | 15 | 8282234 | 8282248 | 3 | 5  | 15 | GAT  | 24 | 4  |
| 143517 | 15 | 8287852 | 8287869 | 2 | 9  | 18 | CA   | 17 | 3  |
| 143523 | 15 | 8301237 | 8301262 | 2 | 13 | 26 | TG   | 7  | 8  |
| 143524 | 15 | 8301364 | 8301403 | 2 | 20 | 40 | AC   | 14 | 7  |
| 143526 | 15 | 8311806 | 8311817 | 2 | 6  | 12 | AC   | 23 | 6  |
| 143528 | 15 | 8314734 | 8314765 | 2 | 16 | 32 | TG   | 16 | 8  |
| 143538 | 15 | 8335829 | 8335867 | 3 | 13 | 39 | AAC  | 8  | 5  |
| 143541 | 15 | 8348560 | 8348577 | 2 | 9  | 18 | CA   | 19 | 4  |
| 143544 | 15 | 8355220 | 8355243 | 2 | 12 | 24 | TA   | 10 | 6  |
| 143545 | 15 | 8357529 | 8357552 | 4 | 6  | 24 | ATTT | 25 | 3  |
| 143554 | 15 | 8411577 | 8411594 | 3 | 6  | 18 | CTG  | 24 | 4  |
| 143559 | 15 | 8429390 | 8429415 | 2 | 13 | 26 | CA   | 12 | 8  |

|        |    |         |         |   |    |    |      |    |    |
|--------|----|---------|---------|---|----|----|------|----|----|
| 143565 | 15 | 8438214 | 8438227 | 2 | 7  | 14 | GT   | 25 | 4  |
| 143566 | 15 | 8438993 | 8439010 | 2 | 9  | 18 | AC   | 8  | 8  |
| 143574 | 15 | 8449251 | 8449266 | 2 | 8  | 16 | TG   | 16 | 5  |
| 143575 | 15 | 8450153 | 8450192 | 2 | 20 | 40 | CA   | 7  | 8  |
| 143576 | 15 | 8451280 | 8451299 | 2 | 10 | 20 | TG   | 24 | 4  |
| 143579 | 15 | 8452990 | 8453001 | 2 | 6  | 12 | GA   | 29 | 4  |
| 143584 | 15 | 8456288 | 8456303 | 2 | 8  | 16 | GA   | 20 | 3  |
| 143587 | 15 | 8465036 | 8465071 | 2 | 18 | 36 | CA   | 6  | 7  |
| 143590 | 15 | 8468385 | 8468435 | 3 | 17 | 51 | AGA  | 14 | 12 |
| 143591 | 15 | 8469807 | 8469827 | 3 | 7  | 21 | TGA  | 23 | 5  |
| 143592 | 15 | 8470211 | 8470234 | 2 | 12 | 24 | CA   | 15 | 7  |
| 143593 | 15 | 8470581 | 8470601 | 3 | 7  | 21 | TCC  | 19 | 4  |
| 143599 | 15 | 8487456 | 8487473 | 2 | 9  | 18 | TC   | 26 | 3  |
| 143603 | 15 | 8495497 | 8495508 | 2 | 6  | 12 | TG   | 11 | 3  |
| 143608 | 15 | 8508770 | 8508791 | 2 | 11 | 22 | TC   | 19 | 5  |
| 143609 | 15 | 8514526 | 8514549 | 2 | 12 | 24 | AG   | 17 | 9  |
| 143623 | 15 | 8575606 | 8575623 | 2 | 9  | 18 | AC   | 18 | 9  |
| 143626 | 15 | 8578212 | 8578227 | 2 | 8  | 16 | CA   | 15 | 3  |
| 143629 | 15 | 8579603 | 8579614 | 2 | 6  | 12 | CA   | 16 | 3  |
| 143632 | 15 | 8583084 | 8583111 | 2 | 14 | 28 | TG   | 28 | 7  |
| 143635 | 15 | 8587933 | 8587948 | 4 | 4  | 16 | CCAG | 20 | 4  |
| 143641 | 15 | 8598760 | 8598771 | 2 | 6  | 12 | TA   | 22 | 4  |
| 143647 | 15 | 8606062 | 8606075 | 2 | 7  | 14 | TG   | 26 | 5  |
| 143648 | 15 | 8610877 | 8610890 | 2 | 7  | 14 | AC   | 27 | 3  |
| 143656 | 15 | 8630494 | 8630517 | 2 | 12 | 24 | GT   | 24 | 5  |
| 143678 | 15 | 8687254 | 8687267 | 2 | 7  | 14 | AG   | 20 | 5  |
| 143686 | 15 | 8690621 | 8690636 | 2 | 8  | 16 | TG   | 21 | 6  |
| 143688 | 15 | 8691034 | 8691065 | 2 | 16 | 32 | GT   | 15 | 13 |
| 143695 | 15 | 8696507 | 8696520 | 2 | 7  | 14 | CA   | 17 | 7  |
| 143698 | 15 | 8697571 | 8697590 | 2 | 10 | 20 | TG   | 20 | 4  |
| 143700 | 15 | 8698072 | 8698093 | 2 | 11 | 22 | TG   | 18 | 5  |
| 143701 | 15 | 8698908 | 8698925 | 2 | 9  | 18 | CA   | 25 | 8  |
| 143702 | 15 | 8699475 | 8699488 | 2 | 7  | 14 | GT   | 27 | 6  |
| 143706 | 15 | 8701956 | 8701993 | 2 | 19 | 38 | CA   | 7  | 8  |
| 143708 | 15 | 8704079 | 8704106 | 2 | 14 | 28 | CT   | 7  | 7  |
| 143716 | 15 | 8722367 | 8722394 | 2 | 14 | 28 | AC   | 17 | 7  |
| 143722 | 15 | 8728332 | 8728346 | 3 | 5  | 15 | ACA  | 17 | 4  |
| 143723 | 15 | 8729216 | 8729251 | 2 | 18 | 36 | AC   | 13 | 10 |
| 143727 | 15 | 8734314 | 8734343 | 3 | 10 | 30 | TCC  | 25 | 3  |
| 143729 | 15 | 8740680 | 8740703 | 2 | 12 | 24 | TG   | 19 | 7  |
| 143731 | 15 | 8745530 | 8745549 | 2 | 10 | 20 | AC   | 9  | 8  |
| 143732 | 15 | 8745584 | 8745599 | 2 | 8  | 16 | CA   | 12 | 5  |
| 143737 | 15 | 8750335 | 8750346 | 2 | 6  | 12 | AT   | 16 | 5  |
| 143738 | 15 | 8750592 | 8750605 | 2 | 7  | 14 | GA   | 22 | 4  |
| 143740 | 15 | 8757763 | 8757778 | 4 | 4  | 16 | ATTT | 25 | 4  |
| 143746 | 15 | 8768177 | 8768196 | 4 | 5  | 20 | AAAT | 19 | 5  |
| 143750 | 15 | 8777550 | 8777561 | 2 | 6  | 12 | AG   | 19 | 3  |
| 143758 | 15 | 8781434 | 8781447 | 2 | 7  | 14 | CA   | 14 | 3  |
| 143768 | 15 | 8793012 | 8793025 | 2 | 7  | 14 | AG   | 12 | 3  |
| 143778 | 15 | 8824521 | 8824534 | 2 | 7  | 14 | GT   | 28 | 4  |
| 143784 | 15 | 8842208 | 8842222 | 3 | 5  | 15 | AAG  | 6  | 5  |

|        |    |         |         |   |    |    |      |    |    |
|--------|----|---------|---------|---|----|----|------|----|----|
| 143794 | 15 | 8867965 | 8867984 | 2 | 10 | 20 | GT   | 15 | 6  |
| 143796 | 15 | 8880415 | 8880426 | 2 | 6  | 12 | TC   | 24 | 4  |
| 143800 | 15 | 8884317 | 8884331 | 3 | 5  | 15 | TTG  | 9  | 7  |
| 143801 | 15 | 8886272 | 8886291 | 2 | 10 | 20 | GT   | 25 | 9  |
| 143808 | 15 | 8895308 | 8895329 | 2 | 11 | 22 | GT   | 13 | 10 |
| 143809 | 15 | 8895366 | 8895395 | 2 | 15 | 30 | GT   | 13 | 7  |
| 143811 | 15 | 8897479 | 8897510 | 2 | 16 | 32 | CA   | 10 | 6  |
| 143812 | 15 | 8902739 | 8902756 | 2 | 9  | 18 | TG   | 19 | 5  |
| 143813 | 15 | 8903072 | 8903101 | 3 | 10 | 30 | CAT  | 26 | 4  |
| 143820 | 15 | 8908579 | 8908602 | 2 | 12 | 24 | GT   | 13 | 10 |
| 143826 | 15 | 8910190 | 8910217 | 2 | 14 | 28 | GT   | 17 | 9  |
| 143827 | 15 | 8910283 | 8910300 | 2 | 9  | 18 | TG   | 19 | 7  |
| 143828 | 15 | 8910600 | 8910613 | 2 | 7  | 14 | CA   | 17 | 3  |
| 143829 | 15 | 8910615 | 8910628 | 2 | 7  | 14 | AC   | 23 | 3  |
| 143830 | 15 | 8913942 | 8913953 | 2 | 6  | 12 | AC   | 29 | 3  |
| 143832 | 15 | 8915845 | 8915858 | 2 | 7  | 14 | TC   | 17 | 8  |
| 143847 | 15 | 8928996 | 8929011 | 4 | 4  | 16 | AAAT | 23 | 3  |
| 143849 | 15 | 8930011 | 8930034 | 4 | 6  | 24 | CACG | 28 | 5  |
| 143863 | 15 | 8942916 | 8942929 | 2 | 7  | 14 | GT   | 28 | 10 |
| 143864 | 15 | 8942931 | 8942944 | 2 | 7  | 14 | TG   | 23 | 3  |
| 143867 | 15 | 8944372 | 8944387 | 4 | 4  | 16 | TTTC | 14 | 11 |
| 143870 | 15 | 8945854 | 8945879 | 2 | 13 | 26 | GT   | 12 | 7  |
| 143874 | 15 | 8947663 | 8947698 | 2 | 18 | 36 | GT   | 11 | 12 |
| 143878 | 15 | 8949953 | 8949978 | 2 | 13 | 26 | TG   | 14 | 7  |
| 143879 | 15 | 8950171 | 8950188 | 3 | 6  | 18 | TTC  | 9  | 5  |
| 143880 | 15 | 8953520 | 8953534 | 3 | 5  | 15 | CCA  | 27 | 7  |
| 143882 | 15 | 8956000 | 8956015 | 2 | 8  | 16 | AC   | 17 | 6  |
| 143885 | 15 | 8959868 | 8959897 | 3 | 10 | 30 | GAG  | 15 | 9  |
| 143887 | 15 | 8966770 | 8966793 | 2 | 12 | 24 | AC   | 10 | 3  |
| 143892 | 15 | 8972702 | 8972717 | 2 | 8  | 16 | AC   | 15 | 5  |
| 143894 | 15 | 8973259 | 8973280 | 2 | 11 | 22 | GT   | 14 | 8  |
| 143897 | 15 | 8973934 | 8973957 | 2 | 12 | 24 | GT   | 20 | 14 |
| 143900 | 15 | 8978803 | 8978823 | 3 | 7  | 21 | AAC  | 29 | 5  |
| 143904 | 15 | 8986020 | 8986037 | 2 | 9  | 18 | AC   | 15 | 5  |
| 143908 | 15 | 8993829 | 8993850 | 2 | 11 | 22 | AC   | 15 | 8  |
| 143915 | 15 | 9017227 | 9017240 | 2 | 7  | 14 | TG   | 26 | 4  |
| 143920 | 15 | 9022351 | 9022362 | 2 | 6  | 12 | CA   | 19 | 5  |
| 143926 | 15 | 9033180 | 9033195 | 2 | 8  | 16 | AC   | 20 | 3  |
| 143929 | 15 | 9034698 | 9034709 | 2 | 6  | 12 | GT   | 7  | 3  |
| 143930 | 15 | 9034712 | 9034725 | 2 | 7  | 14 | GT   | 11 | 8  |
| 143953 | 15 | 9126770 | 9126785 | 2 | 8  | 16 | CA   | 18 | 5  |
| 143955 | 15 | 9133746 | 9133759 | 2 | 7  | 14 | CA   | 22 | 4  |
| 143956 | 15 | 9135679 | 9135714 | 3 | 12 | 36 | TCT  | 23 | 3  |
| 143959 | 15 | 9139541 | 9139576 | 4 | 9  | 36 | CTGC | 19 | 14 |
| 143962 | 15 | 9157614 | 9157639 | 2 | 13 | 26 | TG   | 19 | 6  |
| 143965 | 15 | 9170040 | 9170059 | 2 | 10 | 20 | TG   | 17 | 12 |
| 143966 | 15 | 9190002 | 9190025 | 2 | 12 | 24 | AG   | 20 | 8  |
| 143968 | 15 | 9203327 | 9203359 | 3 | 11 | 33 | TTA  | 13 | 3  |
| 143969 | 15 | 9203963 | 9203980 | 3 | 6  | 18 | ATA  | 15 | 4  |
| 143970 | 15 | 9205607 | 9205620 | 2 | 7  | 14 | TG   | 12 | 9  |
| 143972 | 15 | 9222878 | 9222901 | 3 | 8  | 24 | AAT  | 15 | 4  |

|        |    |         |         |   |    |    |      |    |    |
|--------|----|---------|---------|---|----|----|------|----|----|
| 143997 | 15 | 9247987 | 9248002 | 2 | 8  | 16 | TG   | 25 | 9  |
| 144005 | 15 | 9265339 | 9265358 | 2 | 10 | 20 | AC   | 7  | 7  |
| 144022 | 15 | 9297632 | 9297647 | 4 | 4  | 16 | CAGC | 24 | 4  |
| 144040 | 15 | 9343745 | 9343764 | 4 | 5  | 20 | CTGC | 17 | 5  |
| 144044 | 15 | 9353003 | 9353024 | 2 | 11 | 22 | CA   | 6  | 8  |
| 144046 | 15 | 9358635 | 9358660 | 2 | 13 | 26 | CA   | 19 | 6  |
| 144054 | 15 | 9381097 | 9381114 | 2 | 9  | 18 | GT   | 21 | 4  |
| 144068 | 15 | 9401690 | 9401713 | 4 | 6  | 24 | GACT | 19 | 5  |
| 144070 | 15 | 9406727 | 9406756 | 2 | 15 | 30 | AC   | 20 | 12 |
| 144072 | 15 | 9412925 | 9412960 | 2 | 18 | 36 | GT   | 7  | 6  |
| 144089 | 15 | 9462219 | 9462254 | 2 | 18 | 36 | AC   | 13 | 8  |
| 144092 | 15 | 9466987 | 9467008 | 2 | 11 | 22 | GT   | 11 | 5  |
| 144098 | 15 | 9478270 | 9478283 | 2 | 7  | 14 | AC   | 31 | 9  |
| 144118 | 15 | 9559190 | 9559213 | 2 | 12 | 24 | CA   | 13 | 11 |
| 144121 | 15 | 9571313 | 9571340 | 2 | 14 | 28 | GA   | 16 | 13 |
| 144123 | 15 | 9576561 | 9576582 | 2 | 11 | 22 | CA   | 32 | 10 |
| 144128 | 15 | 9587259 | 9587276 | 2 | 9  | 18 | TG   | 8  | 3  |
| 144129 | 15 | 9588762 | 9588793 | 2 | 16 | 32 | TG   | 15 | 10 |
| 144137 | 15 | 9605698 | 9605713 | 2 | 8  | 16 | CA   | 26 | 6  |
| 144140 | 15 | 9616944 | 9616961 | 2 | 9  | 18 | GT   | 14 | 4  |
| 144143 | 15 | 9621389 | 9621409 | 3 | 7  | 21 | TCC  | 14 | 3  |
| 144145 | 15 | 9623081 | 9623116 | 2 | 18 | 36 | GT   | 8  | 11 |
| 144146 | 15 | 9626344 | 9626359 | 2 | 8  | 16 | AT   | 16 | 4  |
| 144148 | 15 | 9633451 | 9633470 | 2 | 10 | 20 | TG   | 9  | 6  |
| 144151 | 15 | 9638951 | 9638962 | 2 | 6  | 12 | TC   | 30 | 4  |
| 144160 | 15 | 9655382 | 9655405 | 4 | 6  | 24 | GATG | 21 | 11 |
| 144161 | 15 | 9657350 | 9657367 | 3 | 6  | 18 | AGG  | 13 | 4  |
| 144162 | 15 | 9657370 | 9657387 | 3 | 6  | 18 | GAG  | 18 | 6  |
| 144176 | 15 | 9673902 | 9673931 | 3 | 10 | 30 | TAC  | 15 | 8  |
| 144177 | 15 | 9681329 | 9681342 | 2 | 7  | 14 | AT   | 11 | 5  |
| 144179 | 15 | 9682496 | 9682513 | 3 | 6  | 18 | GTG  | 20 | 4  |
| 144190 | 15 | 9727008 | 9727027 | 2 | 10 | 20 | CA   | 17 | 8  |
| 144195 | 15 | 9740896 | 9740911 | 4 | 4  | 16 | CCAA | 22 | 5  |
| 144199 | 15 | 9742785 | 9742822 | 2 | 19 | 38 | AC   | 10 | 12 |
| 144202 | 15 | 9751334 | 9751345 | 2 | 6  | 12 | TG   | 24 | 3  |
| 144204 | 15 | 9754684 | 9754698 | 3 | 5  | 15 | TTA  | 13 | 3  |
| 144213 | 15 | 9764157 | 9764168 | 2 | 6  | 12 | AC   | 27 | 3  |
| 144215 | 15 | 9766647 | 9766670 | 3 | 8  | 24 | GAA  | 23 | 7  |
| 144216 | 15 | 9767283 | 9767296 | 2 | 7  | 14 | CA   | 29 | 6  |
| 144217 | 15 | 9773936 | 9773963 | 2 | 14 | 28 | CA   | 16 | 9  |
| 144221 | 15 | 9784533 | 9784550 | 2 | 9  | 18 | AC   | 26 | 10 |
| 144222 | 15 | 9788042 | 9788063 | 2 | 11 | 22 | AC   | 19 | 5  |
| 144223 | 15 | 9788934 | 9788948 | 3 | 5  | 15 | CAG  | 27 | 5  |
| 144225 | 15 | 9789240 | 9789259 | 2 | 10 | 20 | GA   | 19 | 9  |
| 144227 | 15 | 9789354 | 9789377 | 2 | 12 | 24 | TC   | 6  | 6  |
| 144236 | 15 | 9826745 | 9826766 | 2 | 11 | 22 | AC   | 18 | 7  |
| 144242 | 15 | 9851507 | 9851532 | 2 | 13 | 26 | CA   | 11 | 10 |
| 144253 | 15 | 9873599 | 9873622 | 3 | 8  | 24 | CTG  | 28 | 4  |
| 144254 | 15 | 9873964 | 9873977 | 2 | 7  | 14 | AC   | 28 | 6  |
| 144256 | 15 | 9874728 | 9874743 | 2 | 8  | 16 | CA   | 21 | 3  |
| 144257 | 15 | 9878245 | 9878264 | 2 | 10 | 20 | TG   | 8  | 5  |

|        |    |          |          |   |    |    |      |    |    |
|--------|----|----------|----------|---|----|----|------|----|----|
| 144258 | 15 | 9878265  | 9878276  | 2 | 6  | 12 | TA   | 7  | 5  |
| 144264 | 15 | 9901913  | 9901944  | 2 | 16 | 32 | AC   | 9  | 10 |
| 144274 | 15 | 9922020  | 9922052  | 3 | 11 | 33 | GCA  | 23 | 4  |
| 144285 | 15 | 9949252  | 9949283  | 2 | 16 | 32 | CA   | 13 | 11 |
| 144287 | 15 | 9955228  | 9955293  | 2 | 33 | 66 | CA   | 6  | 8  |
| 144295 | 15 | 9987727  | 9987746  | 4 | 5  | 20 | TATT | 19 | 4  |
| 144299 | 15 | 10005096 | 10005111 | 2 | 8  | 16 | AC   | 18 | 7  |
| 144301 | 15 | 10006677 | 10006688 | 2 | 6  | 12 | AC   | 18 | 5  |
| 144303 | 15 | 10014282 | 10014293 | 2 | 6  | 12 | GT   | 21 | 4  |
| 144311 | 15 | 10030482 | 10030493 | 2 | 6  | 12 | GT   | 21 | 4  |
| 144318 | 15 | 10032560 | 10032573 | 2 | 7  | 14 | AG   | 11 | 7  |
| 144323 | 15 | 10037953 | 10037972 | 2 | 10 | 20 | TG   | 25 | 6  |
| 144327 | 15 | 10046336 | 10046374 | 3 | 13 | 39 | GAT  | 13 | 8  |
| 144329 | 15 | 10054839 | 10054854 | 4 | 4  | 16 | AAAT | 20 | 3  |
| 144330 | 15 | 10055591 | 10055604 | 2 | 7  | 14 | CA   | 32 | 8  |
| 144331 | 15 | 10066847 | 10066876 | 2 | 15 | 30 | TG   | 14 | 16 |
| 144337 | 15 | 10079144 | 10079161 | 2 | 9  | 18 | CA   | 28 | 12 |
| 144344 | 15 | 10088789 | 10088818 | 2 | 15 | 30 | CA   | 7  | 9  |
| 144346 | 15 | 10088943 | 10088954 | 2 | 6  | 12 | GT   | 19 | 4  |
| 144349 | 15 | 10094266 | 10094287 | 2 | 11 | 22 | CA   | 16 | 14 |
| 144351 | 15 | 10094724 | 10094737 | 2 | 7  | 14 | CA   | 13 | 14 |
| 144355 | 15 | 10108227 | 10108250 | 2 | 12 | 24 | GT   | 19 | 6  |
| 144359 | 15 | 10126709 | 10126730 | 2 | 11 | 22 | GT   | 20 | 5  |
| 144363 | 15 | 10135432 | 10135461 | 2 | 15 | 30 | AC   | 9  | 6  |
| 144365 | 15 | 10137268 | 10137285 | 2 | 9  | 18 | TG   | 19 | 7  |
| 144366 | 15 | 10138994 | 10139021 | 2 | 14 | 28 | CA   | 13 | 11 |
| 144368 | 15 | 10146579 | 10146594 | 4 | 4  | 16 | CTCA | 30 | 3  |
| 144370 | 15 | 10160417 | 10160431 | 3 | 5  | 15 | AAC  | 7  | 3  |
| 144378 | 15 | 10197632 | 10197691 | 4 | 15 | 60 | TTTC | 21 | 10 |
| 144380 | 15 | 10208503 | 10208518 | 2 | 8  | 16 | AC   | 11 | 12 |
| 144383 | 15 | 10215259 | 10215286 | 2 | 14 | 28 | GT   | 17 | 7  |
| 144384 | 15 | 10218746 | 10218761 | 2 | 8  | 16 | CA   | 21 | 9  |
| 144387 | 15 | 10231747 | 10231772 | 2 | 13 | 26 | TG   | 9  | 9  |
| 144396 | 15 | 10272564 | 10272579 | 4 | 4  | 16 | CAAT | 20 | 4  |
| 144410 | 15 | 10299654 | 10299673 | 2 | 10 | 20 | CA   | 14 | 7  |
| 144421 | 15 | 10326597 | 10326612 | 2 | 8  | 16 | TG   | 13 | 6  |
| 144426 | 15 | 10347491 | 10347520 | 2 | 15 | 30 | AC   | 16 | 7  |
| 144427 | 15 | 10348429 | 10348444 | 2 | 8  | 16 | AC   | 16 | 8  |
| 144428 | 15 | 10350928 | 10350971 | 4 | 11 | 44 | TTCT | 18 | 7  |
| 144429 | 15 | 10352017 | 10352050 | 2 | 17 | 34 | AC   | 18 | 17 |
| 144431 | 15 | 10355081 | 10355101 | 3 | 7  | 21 | ATT  | 8  | 3  |
| 144450 | 15 | 10413944 | 10413967 | 2 | 12 | 24 | CA   | 16 | 8  |
| 144455 | 15 | 10425432 | 10425447 | 2 | 8  | 16 | TG   | 24 | 4  |
| 144457 | 15 | 10438409 | 10438432 | 4 | 6  | 24 | TTGG | 21 | 5  |
| 144460 | 15 | 10441636 | 10441647 | 2 | 6  | 12 | AT   | 20 | 4  |
| 144461 | 15 | 10444802 | 10444819 | 3 | 6  | 18 | CAT  | 26 | 6  |
| 144462 | 15 | 10448121 | 10448138 | 2 | 9  | 18 | TG   | 29 | 4  |
| 144465 | 15 | 10451790 | 10451805 | 4 | 4  | 16 | ATTT | 21 | 12 |
| 144470 | 15 | 10460167 | 10460178 | 2 | 6  | 12 | AT   | 20 | 6  |
| 144473 | 15 | 10467358 | 10467369 | 2 | 6  | 12 | GT   | 21 | 3  |
| 144476 | 15 | 10474685 | 10474698 | 2 | 7  | 14 | AG   | 30 | 5  |



|        |    |          |          |   |    |    |      |    |    |
|--------|----|----------|----------|---|----|----|------|----|----|
| 144478 | 15 | 10476330 | 10476349 | 2 | 10 | 20 | GT   | 12 | 5  |
| 144479 | 15 | 10476483 | 10476503 | 3 | 7  | 21 | CAG  | 26 | 8  |
| 144480 | 15 | 10479200 | 10479217 | 3 | 6  | 18 | TTA  | 6  | 5  |
| 144482 | 15 | 10480101 | 10480120 | 4 | 5  | 20 | ACAG | 18 | 3  |
| 144485 | 15 | 10485411 | 10485425 | 3 | 5  | 15 | TCC  | 30 | 5  |
| 144495 | 15 | 10497875 | 10497888 | 2 | 7  | 14 | TG   | 25 | 4  |
| 144497 | 15 | 10504461 | 10504488 | 2 | 14 | 28 | AC   | 6  | 9  |
| 144502 | 15 | 10512263 | 10512292 | 2 | 15 | 30 | AC   | 6  | 7  |
| 144504 | 15 | 10514794 | 10514807 | 2 | 7  | 14 | TG   | 18 | 5  |
| 144510 | 15 | 10535119 | 10535160 | 3 | 14 | 42 | GAT  | 16 | 10 |
| 144512 | 15 | 10537190 | 10537203 | 2 | 7  | 14 | GT   | 27 | 4  |
| 144513 | 15 | 10552070 | 10552081 | 2 | 6  | 12 | AG   | 26 | 3  |
| 144514 | 15 | 10553124 | 10553143 | 2 | 10 | 20 | CA   | 7  | 7  |
| 144515 | 15 | 10553144 | 10553155 | 2 | 6  | 12 | CG   | 11 | 11 |
| 144517 | 15 | 10567762 | 10567781 | 4 | 5  | 20 | ATTT | 9  | 5  |
| 144527 | 15 | 10599434 | 10599453 | 4 | 5  | 20 | TTTG | 29 | 4  |
| 144529 | 15 | 10600254 | 10600315 | 2 | 31 | 62 | CA   | 6  | 9  |
| 144541 | 15 | 10630701 | 10630724 | 2 | 12 | 24 | AC   | 17 | 9  |
| 144542 | 15 | 10630773 | 10630788 | 2 | 8  | 16 | GT   | 27 | 4  |
| 144545 | 15 | 10631057 | 10631080 | 2 | 12 | 24 | TG   | 11 | 5  |
| 144549 | 15 | 10652970 | 10652993 | 2 | 12 | 24 | AC   | 19 | 12 |
| 144550 | 15 | 10654379 | 10654390 | 2 | 6  | 12 | GT   | 25 | 8  |
| 144551 | 15 | 10654656 | 10654671 | 2 | 8  | 16 | GT   | 22 | 11 |
| 144574 | 15 | 10731771 | 10731788 | 2 | 9  | 18 | GT   | 12 | 13 |
| 144599 | 15 | 10820888 | 10820899 | 2 | 6  | 12 | TG   | 24 | 3  |
| 144600 | 15 | 10822220 | 10822233 | 2 | 7  | 14 | AG   | 16 | 3  |
| 144604 | 15 | 10829533 | 10829546 | 2 | 7  | 14 | TG   | 23 | 3  |
| 144611 | 15 | 10832820 | 10832839 | 2 | 10 | 20 | AG   | 17 | 7  |
| 144612 | 15 | 10836618 | 10836655 | 2 | 19 | 38 | AC   | 14 | 9  |
| 144614 | 15 | 10845009 | 10845054 | 2 | 23 | 46 | GT   | 13 | 12 |
| 144616 | 15 | 10850533 | 10850556 | 3 | 8  | 24 | ATC  | 22 | 5  |
| 144618 | 15 | 10855278 | 10855289 | 2 | 6  | 12 | TC   | 24 | 3  |
| 144621 | 15 | 10859528 | 10859539 | 2 | 6  | 12 | AC   | 14 | 4  |
| 144624 | 15 | 10867002 | 10867013 | 2 | 6  | 12 | AT   | 14 | 9  |
| 144631 | 15 | 10887202 | 10887213 | 2 | 6  | 12 | TG   | 24 | 6  |
| 144635 | 15 | 10894796 | 10894816 | 3 | 7  | 21 | ATC  | 33 | 3  |
| 144640 | 15 | 10904518 | 10904531 | 2 | 7  | 14 | CT   | 24 | 4  |
| 144642 | 15 | 10909141 | 10909152 | 2 | 6  | 12 | AC   | 17 | 10 |
| 144643 | 15 | 10909154 | 10909167 | 2 | 7  | 14 | CA   | 12 | 7  |
| 144648 | 15 | 10913172 | 10913204 | 3 | 11 | 33 | ACT  | 15 | 6  |
| 144655 | 15 | 10940947 | 10940964 | 2 | 9  | 18 | AC   | 12 | 7  |
| 144659 | 15 | 10942197 | 10942208 | 2 | 6  | 12 | CA   | 20 | 3  |
| 144660 | 15 | 10942210 | 10942223 | 2 | 7  | 14 | AC   | 24 | 3  |
| 144661 | 15 | 10943792 | 10943829 | 2 | 19 | 38 | AC   | 7  | 6  |
| 144671 | 15 | 10965865 | 10965890 | 2 | 13 | 26 | AC   | 22 | 9  |
| 144680 | 15 | 11007411 | 11007426 | 4 | 4  | 16 | TCTG | 31 | 4  |
| 144683 | 15 | 11015051 | 11015064 | 2 | 7  | 14 | CA   | 10 | 7  |
| 144685 | 15 | 11016795 | 11016806 | 2 | 6  | 12 | GT   | 22 | 4  |
| 144696 | 15 | 11047581 | 11047604 | 2 | 12 | 24 | TG   | 22 | 6  |
| 144698 | 15 | 11063680 | 11063695 | 2 | 8  | 16 | GT   | 16 | 3  |
| 144700 | 15 | 11067165 | 11067186 | 2 | 11 | 22 | TG   | 18 | 8  |

|        |    |          |          |   |    |    |      |    |    |
|--------|----|----------|----------|---|----|----|------|----|----|
| 144701 | 15 | 11067441 | 11067466 | 2 | 13 | 26 | AC   | 22 | 8  |
| 144704 | 15 | 11076271 | 11076282 | 2 | 6  | 12 | CT   | 23 | 3  |
| 144705 | 15 | 11076535 | 11076556 | 2 | 11 | 22 | GT   | 18 | 16 |
| 144708 | 15 | 11093257 | 11093272 | 4 | 4  | 16 | TGGA | 30 | 3  |
| 144709 | 15 | 11095049 | 11095063 | 3 | 5  | 15 | CAG  | 30 | 3  |
| 144710 | 15 | 11096393 | 11096404 | 2 | 6  | 12 | TG   | 22 | 4  |
| 144712 | 15 | 11104804 | 11104835 | 2 | 16 | 32 | CA   | 12 | 9  |
| 144716 | 15 | 11133187 | 11133206 | 2 | 10 | 20 | AC   | 12 | 7  |
| 144719 | 15 | 11141033 | 11141072 | 2 | 20 | 40 | GT   | 13 | 18 |
| 144728 | 15 | 11158111 | 11158128 | 3 | 6  | 18 | AAC  | 24 | 6  |
| 144731 | 15 | 11167001 | 11167016 | 2 | 8  | 16 | GT   | 28 | 6  |
| 144733 | 15 | 11173013 | 11173024 | 2 | 6  | 12 | CG   | 28 | 3  |
| 144735 | 15 | 11189013 | 11189028 | 2 | 8  | 16 | AC   | 11 | 5  |
| 144737 | 15 | 11199768 | 11199782 | 3 | 5  | 15 | CTT  | 10 | 9  |
| 144739 | 15 | 11200202 | 11200241 | 2 | 20 | 40 | TG   | 9  | 6  |
| 144748 | 15 | 11218521 | 11218532 | 2 | 6  | 12 | CA   | 21 | 4  |
| 144750 | 15 | 11219692 | 11219721 | 2 | 15 | 30 | TG   | 13 | 10 |
| 144751 | 15 | 11222318 | 11222341 | 2 | 12 | 24 | GT   | 8  | 6  |
| 144763 | 15 | 11262911 | 11262937 | 3 | 9  | 27 | TCC  | 11 | 5  |
| 144770 | 15 | 11278848 | 11278875 | 2 | 14 | 28 | AC   | 6  | 5  |
| 144771 | 15 | 11280647 | 11280664 | 2 | 9  | 18 | TG   | 22 | 8  |
| 144772 | 15 | 11281191 | 11281208 | 2 | 9  | 18 | AC   | 17 | 3  |
| 144773 | 15 | 11284405 | 11284418 | 2 | 7  | 14 | GT   | 22 | 4  |
| 144777 | 15 | 11288187 | 11288202 | 2 | 8  | 16 | GT   | 14 | 6  |
| 144782 | 15 | 11292571 | 11292586 | 2 | 8  | 16 | GT   | 13 | 3  |
| 144783 | 15 | 11293263 | 11293282 | 2 | 10 | 20 | TG   | 19 | 10 |
| 144784 | 15 | 11293850 | 11293865 | 2 | 8  | 16 | GT   | 21 | 4  |
| 144785 | 15 | 11302406 | 11302443 | 2 | 19 | 38 | AG   | 9  | 7  |
| 144787 | 15 | 11303719 | 11303733 | 3 | 5  | 15 | CCT  | 29 | 5  |
| 144789 | 15 | 11303932 | 11303953 | 2 | 11 | 22 | TC   | 21 | 9  |
| 144791 | 15 | 11312749 | 11312762 | 2 | 7  | 14 | AC   | 11 | 9  |
| 144792 | 15 | 11312765 | 11312782 | 2 | 9  | 18 | AC   | 12 | 8  |
| 144798 | 15 | 11338075 | 11338113 | 3 | 13 | 39 | TGA  | 18 | 11 |
| 144800 | 15 | 11340572 | 11340583 | 2 | 6  | 12 | CA   | 30 | 3  |
| 144802 | 15 | 11341193 | 11341216 | 4 | 6  | 24 | TATT | 18 | 4  |
| 144803 | 15 | 11342507 | 11342520 | 2 | 7  | 14 | GT   | 18 | 13 |
| 144806 | 15 | 11346834 | 11346861 | 2 | 14 | 28 | TG   | 9  | 6  |
| 144810 | 15 | 11350978 | 11350991 | 2 | 7  | 14 | GT   | 13 | 3  |
| 144811 | 15 | 11351383 | 11351404 | 2 | 11 | 22 | AC   | 10 | 10 |
| 144812 | 15 | 11351574 | 11351593 | 2 | 10 | 20 | CA   | 24 | 6  |
| 144813 | 15 | 11353010 | 11353039 | 2 | 15 | 30 | GT   | 13 | 11 |
| 144820 | 15 | 11357599 | 11357632 | 2 | 17 | 34 | CA   | 7  | 8  |
| 144821 | 15 | 11357675 | 11357694 | 2 | 10 | 20 | AC   | 10 | 7  |
| 144822 | 15 | 11360859 | 11360874 | 2 | 8  | 16 | TG   | 23 | 3  |
| 144824 | 15 | 11363663 | 11363676 | 2 | 7  | 14 | CA   | 24 | 4  |
| 144825 | 15 | 11365110 | 11365123 | 2 | 7  | 14 | GT   | 14 | 9  |
| 144831 | 15 | 11379599 | 11379620 | 2 | 11 | 22 | AC   | 15 | 6  |
| 144834 | 15 | 11395453 | 11395468 | 4 | 4  | 16 | TTTA | 25 | 4  |
| 144835 | 15 | 11396328 | 11396369 | 2 | 21 | 42 | AC   | 10 | 11 |
| 144840 | 15 | 11400132 | 11400145 | 2 | 7  | 14 | AC   | 16 | 3  |
| 144841 | 15 | 11400351 | 11400366 | 4 | 4  | 16 | ACAG | 28 | 3  |

|        |    |          |          |   |    |    |      |    |    |
|--------|----|----------|----------|---|----|----|------|----|----|
| 144846 | 15 | 11402765 | 11402776 | 2 | 6  | 12 | TG   | 21 | 4  |
| 144849 | 15 | 11404004 | 11404023 | 4 | 5  | 20 | AAAG | 27 | 8  |
| 144850 | 15 | 11404818 | 11404829 | 2 | 6  | 12 | AG   | 20 | 9  |
| 144851 | 15 | 11405034 | 11405045 | 2 | 6  | 12 | TC   | 13 | 4  |
| 144859 | 15 | 11408608 | 11408623 | 4 | 4  | 16 | TTCT | 12 | 3  |
| 144864 | 15 | 11414822 | 11414837 | 2 | 8  | 16 | TG   | 28 | 6  |
| 144865 | 15 | 11415502 | 11415529 | 2 | 14 | 28 | AC   | 23 | 10 |
| 144868 | 15 | 11416238 | 11416273 | 2 | 18 | 36 | GT   | 6  | 6  |
| 144869 | 15 | 11419849 | 11419868 | 2 | 10 | 20 | TC   | 21 | 3  |
| 144871 | 15 | 11419910 | 11419943 | 2 | 17 | 34 | CA   | 9  | 8  |
| 144878 | 15 | 11429227 | 11429256 | 2 | 15 | 30 | AC   | 10 | 9  |
| 144879 | 15 | 11429464 | 11429501 | 2 | 19 | 38 | TG   | 10 | 9  |
| 144881 | 15 | 11433421 | 11433446 | 2 | 13 | 26 | CA   | 17 | 6  |
| 144882 | 15 | 11435002 | 11435015 | 2 | 7  | 14 | AC   | 8  | 4  |
| 144897 | 15 | 11459229 | 11459262 | 2 | 17 | 34 | CA   | 21 | 13 |
| 144910 | 15 | 11496710 | 11496743 | 2 | 17 | 34 | AC   | 9  | 8  |
| 144926 | 15 | 11540640 | 11540651 | 2 | 6  | 12 | AC   | 10 | 4  |
| 144928 | 15 | 11543994 | 11544005 | 2 | 6  | 12 | CA   | 18 | 4  |
| 144938 | 15 | 11557490 | 11557513 | 2 | 12 | 24 | CA   | 18 | 9  |
| 144944 | 15 | 11575961 | 11575992 | 2 | 16 | 32 | CA   | 18 | 7  |
| 144946 | 15 | 11580013 | 11580038 | 2 | 13 | 26 | TG   | 10 | 9  |
| 144957 | 15 | 11598533 | 11598544 | 2 | 6  | 12 | TG   | 26 | 3  |
| 144958 | 15 | 11598619 | 11598648 | 2 | 15 | 30 | TG   | 12 | 6  |
| 144963 | 15 | 11611569 | 11611602 | 2 | 17 | 34 | GA   | 12 | 5  |
| 144964 | 15 | 11616200 | 11616211 | 2 | 6  | 12 | TC   | 26 | 3  |
| 144967 | 15 | 11619394 | 11619405 | 2 | 6  | 12 | GT   | 24 | 5  |
| 144971 | 15 | 11639270 | 11639293 | 4 | 6  | 24 | TTTG | 16 | 4  |
| 144980 | 15 | 11652645 | 11652682 | 2 | 19 | 38 | TG   | 7  | 6  |
| 144981 | 15 | 11657387 | 11657404 | 2 | 9  | 18 | GT   | 20 | 6  |
| 144987 | 15 | 11665263 | 11665286 | 2 | 12 | 24 | TC   | 14 | 4  |
| 144989 | 15 | 11680120 | 11680143 | 2 | 12 | 24 | GT   | 17 | 10 |
| 144996 | 15 | 11690202 | 11690221 | 2 | 10 | 20 | AC   | 19 | 7  |
| 145001 | 15 | 11699673 | 11699690 | 2 | 9  | 18 | GT   | 10 | 3  |
| 145005 | 15 | 11702456 | 11702471 | 2 | 8  | 16 | AC   | 13 | 5  |
| 145015 | 15 | 11705537 | 11705554 | 2 | 9  | 18 | CA   | 9  | 5  |
| 145016 | 15 | 11706667 | 11706678 | 2 | 6  | 12 | AT   | 15 | 5  |
| 145029 | 15 | 11717125 | 11717144 | 2 | 10 | 20 | GT   | 18 | 4  |
| 145033 | 15 | 11726243 | 11726254 | 2 | 6  | 12 | AG   | 14 | 3  |
| 145035 | 15 | 11726871 | 11726910 | 2 | 20 | 40 | AC   | 14 | 8  |
| 145038 | 15 | 11747799 | 11747810 | 2 | 6  | 12 | TG   | 27 | 3  |
| 145056 | 15 | 11800144 | 11800155 | 2 | 6  | 12 | AC   | 35 | 3  |
| 145059 | 15 | 11811664 | 11811677 | 2 | 7  | 14 | GT   | 16 | 3  |
| 145060 | 15 | 11813195 | 11813214 | 2 | 10 | 20 | CA   | 18 | 9  |
| 145063 | 15 | 11822298 | 11822313 | 4 | 4  | 16 | GACA | 30 | 4  |
| 145066 | 15 | 11824391 | 11824402 | 2 | 6  | 12 | AC   | 23 | 4  |
| 145067 | 15 | 11829333 | 11829356 | 4 | 6  | 24 | TCAA | 16 | 7  |
| 145073 | 15 | 11841118 | 11841165 | 2 | 24 | 48 | GT   | 10 | 12 |
| 145074 | 15 | 11842830 | 11842841 | 2 | 6  | 12 | CG   | 21 | 10 |
| 145075 | 15 | 11842842 | 11842859 | 2 | 9  | 18 | CA   | 26 | 12 |
| 145076 | 15 | 11843260 | 11843285 | 2 | 13 | 26 | TG   | 15 | 11 |
| 145077 | 15 | 11843478 | 11843504 | 3 | 9  | 27 | TGC  | 25 | 10 |

|        |    |          |          |   |    |    |      |    |    |
|--------|----|----------|----------|---|----|----|------|----|----|
| 145080 | 15 | 11846060 | 11846075 | 4 | 4  | 16 | AAAT | 27 | 7  |
| 145084 | 15 | 11847151 | 11847166 | 2 | 8  | 16 | CA   | 12 | 5  |
| 145085 | 15 | 11847956 | 11847969 | 2 | 7  | 14 | CA   | 20 | 7  |
| 145086 | 15 | 11848897 | 11848932 | 3 | 12 | 36 | GAT  | 22 | 12 |
| 145094 | 15 | 11889555 | 11889566 | 2 | 6  | 12 | CA   | 22 | 3  |
| 145115 | 15 | 11933442 | 11933453 | 2 | 6  | 12 | CT   | 21 | 4  |
| 145116 | 15 | 11938539 | 11938554 | 4 | 4  | 16 | TGTC | 30 | 4  |
| 145119 | 15 | 11947178 | 11947213 | 4 | 9  | 36 | GATG | 17 | 9  |
| 145121 | 15 | 11959537 | 11959552 | 2 | 8  | 16 | AC   | 23 | 4  |
| 145124 | 15 | 11977313 | 11977330 | 3 | 6  | 18 | ACC  | 18 | 4  |
| 145125 | 15 | 11977705 | 11977722 | 2 | 9  | 18 | GT   | 19 | 7  |
| 145128 | 15 | 11988997 | 11989014 | 2 | 9  | 18 | TG   | 11 | 3  |
| 145129 | 15 | 11995158 | 11995181 | 2 | 12 | 24 | GT   | 13 | 6  |
| 145141 | 15 | 12036123 | 12036170 | 2 | 24 | 48 | CA   | 6  | 6  |
| 145149 | 15 | 12056500 | 12056527 | 4 | 7  | 28 | CACG | 18 | 10 |
| 145152 | 15 | 12065452 | 12065463 | 2 | 6  | 12 | CA   | 38 | 3  |
| 145154 | 15 | 12070942 | 12070959 | 2 | 9  | 18 | CA   | 7  | 3  |
| 145158 | 15 | 12083531 | 12083550 | 2 | 10 | 20 | AT   | 14 | 5  |
| 145159 | 15 | 12088089 | 12088116 | 2 | 14 | 28 | AC   | 8  | 5  |
| 145163 | 15 | 12103206 | 12103217 | 2 | 6  | 12 | AC   | 26 | 4  |
| 145165 | 15 | 12104613 | 12104624 | 2 | 6  | 12 | CT   | 25 | 3  |
| 145173 | 15 | 12132873 | 12132888 | 4 | 4  | 16 | AAAG | 21 | 3  |
| 145174 | 15 | 12135324 | 12135351 | 2 | 14 | 28 | GT   | 23 | 20 |
| 145177 | 15 | 12136609 | 12136624 | 4 | 4  | 16 | TATC | 30 | 5  |
| 145193 | 15 | 12169688 | 12169711 | 4 | 6  | 24 | TAGA | 24 | 12 |
| 145194 | 15 | 12171336 | 12171351 | 4 | 4  | 16 | AAAC | 27 | 3  |
| 145200 | 15 | 12184687 | 12184718 | 2 | 16 | 32 | TG   | 16 | 10 |
| 145211 | 15 | 12206884 | 12206895 | 2 | 6  | 12 | GT   | 28 | 3  |
| 145213 | 15 | 12208964 | 12208993 | 2 | 15 | 30 | TG   | 19 | 13 |
| 145216 | 15 | 12215195 | 12215206 | 2 | 6  | 12 | TG   | 27 | 3  |
| 145217 | 15 | 12217295 | 12217326 | 4 | 8  | 32 | ATAG | 24 | 4  |
| 145220 | 15 | 12236307 | 12236320 | 2 | 7  | 14 | AC   | 24 | 3  |
| 145228 | 15 | 12264448 | 12264477 | 2 | 15 | 30 | GT   | 21 | 10 |
| 145230 | 15 | 12269253 | 12269266 | 2 | 7  | 14 | CT   | 18 | 8  |
| 145231 | 15 | 12269267 | 12269284 | 2 | 9  | 18 | CA   | 18 | 7  |
| 145240 | 15 | 12295284 | 12295295 | 2 | 6  | 12 | GT   | 25 | 3  |
| 145246 | 15 | 12305058 | 12305085 | 2 | 14 | 28 | TG   | 18 | 8  |
| 145249 | 15 | 12309165 | 12309190 | 2 | 13 | 26 | GT   | 14 | 13 |
| 145257 | 15 | 12331583 | 12331597 | 3 | 5  | 15 | AGT  | 32 | 4  |
| 145259 | 15 | 12336551 | 12336600 | 2 | 25 | 50 | TG   | 6  | 6  |
| 145260 | 15 | 12336708 | 12336727 | 2 | 10 | 20 | TG   | 18 | 4  |
| 145261 | 15 | 12341718 | 12341735 | 3 | 6  | 18 | AAC  | 17 | 4  |
| 145270 | 15 | 12358945 | 12358962 | 3 | 6  | 18 | TAG  | 28 | 3  |
| 145275 | 15 | 12367544 | 12367563 | 4 | 5  | 20 | GCCT | 18 | 4  |
| 145278 | 15 | 12397491 | 12397510 | 2 | 10 | 20 | TG   | 16 | 5  |
| 145281 | 15 | 12405732 | 12405743 | 2 | 6  | 12 | TG   | 12 | 10 |
| 145282 | 15 | 12405745 | 12405762 | 2 | 9  | 18 | GT   | 16 | 10 |
| 145285 | 15 | 12434668 | 12434693 | 2 | 13 | 26 | CA   | 25 | 12 |
| 145290 | 15 | 12437636 | 12437647 | 2 | 6  | 12 | TG   | 9  | 3  |
| 145291 | 15 | 12442589 | 12442602 | 2 | 7  | 14 | TC   | 10 | 6  |
| 145292 | 15 | 12442605 | 12442616 | 2 | 6  | 12 | TC   | 8  | 4  |

|        |    |          |          |   |    |    |      |    |    |
|--------|----|----------|----------|---|----|----|------|----|----|
| 145299 | 15 | 12453482 | 12453517 | 2 | 18 | 36 | CA   | 12 | 11 |
| 145303 | 15 | 12467750 | 12467779 | 2 | 15 | 30 | AC   | 7  | 11 |
| 145307 | 15 | 12473095 | 12473108 | 2 | 7  | 14 | TG   | 17 | 7  |
| 145308 | 15 | 12473110 | 12473123 | 2 | 7  | 14 | GT   | 15 | 7  |
| 145311 | 15 | 12475836 | 12475849 | 2 | 7  | 14 | GT   | 14 | 9  |
| 145312 | 15 | 12481445 | 12481468 | 2 | 12 | 24 | CA   | 10 | 11 |
| 145314 | 15 | 12481542 | 12481569 | 2 | 14 | 28 | AC   | 6  | 8  |
| 145317 | 15 | 12495106 | 12495120 | 3 | 5  | 15 | GTT  | 24 | 4  |
| 145319 | 15 | 12510482 | 12510493 | 2 | 6  | 12 | GT   | 16 | 6  |
| 145337 | 15 | 12553924 | 12553938 | 3 | 5  | 15 | CAG  | 9  | 4  |
| 145341 | 16 | 9605     | 9636     | 4 | 8  | 32 | AAAT | 12 | 4  |
| 145342 | 16 | 11808    | 11823    | 4 | 4  | 16 | TATT | 23 | 10 |
| 145343 | 16 | 15502    | 15517    | 2 | 8  | 16 | AT   | 11 | 5  |
| 145352 | 16 | 43540    | 43579    | 2 | 20 | 40 | GT   | 8  | 7  |
| 145354 | 16 | 45425    | 45442    | 2 | 9  | 18 | CA   | 19 | 8  |
| 145358 | 16 | 53942    | 53971    | 2 | 15 | 30 | AC   | 11 | 11 |
| 145360 | 16 | 55001    | 55028    | 2 | 14 | 28 | TG   | 13 | 16 |
| 145361 | 16 | 56702    | 56721    | 4 | 5  | 20 | CATC | 31 | 3  |
| 145362 | 16 | 60064    | 60083    | 2 | 10 | 20 | CA   | 23 | 11 |
| 145363 | 16 | 62382    | 62395    | 2 | 7  | 14 | GT   | 19 | 3  |
| 145367 | 16 | 69339    | 69364    | 2 | 13 | 26 | GT   | 9  | 8  |
| 145368 | 16 | 69473    | 69500    | 2 | 14 | 28 | AC   | 13 | 10 |
| 145373 | 16 | 82917    | 82932    | 2 | 8  | 16 | TC   | 26 | 4  |
| 145374 | 16 | 84396    | 84410    | 3 | 5  | 15 | CAG  | 28 | 3  |
| 145377 | 16 | 89459    | 89474    | 2 | 8  | 16 | GT   | 8  | 9  |
| 145381 | 16 | 94500    | 94511    | 2 | 6  | 12 | AT   | 13 | 3  |
| 145392 | 16 | 113985   | 114006   | 2 | 11 | 22 | TG   | 18 | 13 |
| 145395 | 16 | 123060   | 123081   | 2 | 11 | 22 | CA   | 11 | 9  |
| 145396 | 16 | 125660   | 125681   | 2 | 11 | 22 | CA   | 20 | 9  |
| 145397 | 16 | 128206   | 128251   | 2 | 23 | 46 | CA   | 9  | 12 |
| 145398 | 16 | 132026   | 132040   | 3 | 5  | 15 | TGT  | 14 | 6  |
| 145400 | 16 | 135427   | 135464   | 2 | 19 | 38 | GT   | 9  | 10 |
| 145403 | 16 | 139045   | 139064   | 2 | 10 | 20 | CA   | 22 | 14 |
| 145405 | 16 | 139493   | 139524   | 2 | 16 | 32 | CA   | 15 | 13 |
| 145438 | 16 | 216804   | 216821   | 2 | 9  | 18 | TG   | 19 | 9  |
| 145457 | 16 | 243290   | 243317   | 2 | 14 | 28 | GT   | 15 | 11 |
| 145458 | 16 | 249376   | 249389   | 2 | 7  | 14 | CA   | 14 | 10 |
| 145460 | 16 | 255507   | 255562   | 4 | 14 | 56 | CTTT | 7  | 7  |
| 145462 | 16 | 258380   | 258397   | 2 | 9  | 18 | AC   | 11 | 6  |
| 145463 | 16 | 258637   | 258666   | 2 | 15 | 30 | AC   | 8  | 10 |
| 145464 | 16 | 259169   | 259204   | 2 | 18 | 36 | CA   | 17 | 15 |
| 145465 | 16 | 266238   | 266271   | 2 | 17 | 34 | TG   | 12 | 12 |
| 145468 | 16 | 270133   | 270148   | 2 | 8  | 16 | TG   | 30 | 4  |
| 145470 | 16 | 272306   | 272335   | 2 | 15 | 30 | GT   | 11 | 10 |
| 145473 | 16 | 276438   | 276457   | 2 | 10 | 20 | GT   | 20 | 7  |
| 145474 | 16 | 280780   | 280797   | 2 | 9  | 18 | TC   | 22 | 9  |
| 145480 | 16 | 285999   | 286030   | 2 | 16 | 32 | AG   | 25 | 3  |
| 145482 | 16 | 291231   | 291246   | 2 | 8  | 16 | AC   | 28 | 3  |
| 145487 | 16 | 294733   | 294762   | 3 | 10 | 30 | GAG  | 20 | 6  |
| 145494 | 16 | 302887   | 302920   | 2 | 17 | 34 | CA   | 11 | 5  |
| 145506 | 16 | 319674   | 319725   | 4 | 13 | 52 | CAAT | 27 | 8  |

|        |    |        |        |   |    |    |      |    |    |
|--------|----|--------|--------|---|----|----|------|----|----|
| 145514 | 16 | 329002 | 329022 | 3 | 7  | 21 | TTG  | 28 | 3  |
| 145519 | 16 | 338236 | 338256 | 3 | 7  | 21 | TGC  | 26 | 4  |
| 145521 | 16 | 340314 | 340327 | 2 | 7  | 14 | TC   | 17 | 5  |
| 145522 | 16 | 340328 | 340341 | 2 | 7  | 14 | AC   | 17 | 5  |
| 145524 | 16 | 340786 | 340812 | 3 | 9  | 27 | AGG  | 18 | 11 |
| 145525 | 16 | 342696 | 342713 | 2 | 9  | 18 | AG   | 26 | 8  |
| 145528 | 16 | 345949 | 345972 | 2 | 12 | 24 | TG   | 11 | 3  |
| 145532 | 16 | 351493 | 351508 | 2 | 8  | 16 | AT   | 6  | 4  |
| 145539 | 16 | 361416 | 361429 | 2 | 7  | 14 | GT   | 20 | 8  |
| 145543 | 16 | 365821 | 365836 | 2 | 8  | 16 | GT   | 21 | 6  |
| 145546 | 16 | 369009 | 369026 | 3 | 6  | 18 | TTC  | 23 | 3  |
| 145550 | 16 | 377849 | 377864 | 2 | 8  | 16 | CA   | 19 | 10 |
| 145551 | 16 | 377867 | 377880 | 2 | 7  | 14 | CA   | 26 | 11 |
| 145560 | 16 | 385308 | 385339 | 2 | 16 | 32 | GT   | 8  | 11 |
| 145561 | 16 | 385508 | 385527 | 2 | 10 | 20 | AC   | 19 | 8  |
| 145564 | 16 | 386981 | 387004 | 2 | 12 | 24 | GT   | 26 | 6  |
| 145565 | 16 | 387227 | 387246 | 2 | 10 | 20 | TG   | 14 | 8  |
| 145569 | 16 | 391396 | 391411 | 2 | 8  | 16 | TG   | 11 | 9  |
| 145571 | 16 | 392013 | 392024 | 2 | 6  | 12 | TG   | 12 | 3  |
| 145572 | 16 | 392567 | 392582 | 2 | 8  | 16 | TG   | 12 | 7  |
| 145574 | 16 | 396988 | 397005 | 2 | 9  | 18 | AC   | 24 | 5  |
| 145576 | 16 | 398725 | 398742 | 2 | 9  | 18 | TG   | 18 | 6  |
| 145579 | 16 | 404176 | 404205 | 2 | 15 | 30 | GT   | 19 | 11 |
| 145580 | 16 | 406479 | 406504 | 2 | 13 | 26 | CA   | 8  | 7  |
| 145582 | 16 | 408968 | 408982 | 3 | 5  | 15 | ATT  | 20 | 9  |
| 145583 | 16 | 410237 | 410248 | 2 | 6  | 12 | CA   | 13 | 4  |
| 145588 | 16 | 420019 | 420038 | 4 | 5  | 20 | TTTC | 26 | 3  |
| 145589 | 16 | 422409 | 422422 | 2 | 7  | 14 | CA   | 29 | 3  |
| 145590 | 16 | 422608 | 422621 | 2 | 7  | 14 | AC   | 30 | 3  |
| 145591 | 16 | 423092 | 423119 | 2 | 14 | 28 | AC   | 14 | 12 |
| 145596 | 16 | 433011 | 433034 | 2 | 12 | 24 | AC   | 18 | 11 |
| 145597 | 16 | 433253 | 433276 | 2 | 12 | 24 | AC   | 8  | 13 |
| 145601 | 16 | 438713 | 438742 | 2 | 15 | 30 | TG   | 9  | 6  |
| 145602 | 16 | 439420 | 439435 | 4 | 4  | 16 | AAAT | 25 | 6  |
| 145604 | 16 | 446316 | 446333 | 2 | 9  | 18 | TC   | 23 | 3  |
| 145605 | 16 | 449673 | 449696 | 2 | 12 | 24 | AC   | 10 | 15 |
| 145610 | 16 | 456680 | 456723 | 2 | 22 | 44 | GT   | 11 | 13 |
| 145613 | 16 | 459665 | 459702 | 2 | 19 | 38 | AC   | 14 | 10 |
| 145618 | 16 | 462496 | 462513 | 2 | 9  | 18 | GT   | 21 | 12 |
| 145619 | 16 | 462657 | 462682 | 2 | 13 | 26 | CA   | 8  | 6  |
| 145622 | 16 | 470189 | 470216 | 2 | 14 | 28 | TG   | 7  | 9  |
| 145625 | 16 | 470794 | 470817 | 2 | 12 | 24 | TG   | 13 | 13 |
| 145628 | 16 | 476365 | 476380 | 2 | 8  | 16 | TG   | 22 | 3  |
| 145629 | 16 | 477574 | 477588 | 3 | 5  | 15 | CAT  | 23 | 5  |
| 145638 | 16 | 506919 | 506934 | 2 | 8  | 16 | CA   | 20 | 5  |
| 145646 | 16 | 516552 | 516577 | 2 | 13 | 26 | CA   | 10 | 10 |
| 145647 | 16 | 516680 | 516699 | 2 | 10 | 20 | GT   | 16 | 11 |
| 145658 | 16 | 547265 | 547290 | 2 | 13 | 26 | GT   | 15 | 13 |
| 145659 | 16 | 548519 | 548542 | 2 | 12 | 24 | AC   | 21 | 14 |
| 145660 | 16 | 549253 | 549278 | 2 | 13 | 26 | TG   | 25 | 9  |
| 145663 | 16 | 552885 | 552917 | 3 | 11 | 33 | TCA  | 26 | 5  |

|        |    |        |        |   |    |    |      |    |    |
|--------|----|--------|--------|---|----|----|------|----|----|
| 145665 | 16 | 560351 | 560380 | 3 | 10 | 30 | GCT  | 19 | 8  |
| 145666 | 16 | 560456 | 560481 | 2 | 13 | 26 | AC   | 16 | 9  |
| 145668 | 16 | 563235 | 563254 | 2 | 10 | 20 | CA   | 22 | 9  |
| 145669 | 16 | 563745 | 563758 | 2 | 7  | 14 | TG   | 15 | 9  |
| 145674 | 16 | 566941 | 566954 | 2 | 7  | 14 | TG   | 29 | 6  |
| 145675 | 16 | 567116 | 567147 | 2 | 16 | 32 | GT   | 13 | 12 |
| 145677 | 16 | 569489 | 569542 | 2 | 27 | 54 | GT   | 10 | 9  |
| 145678 | 16 | 569981 | 570018 | 2 | 19 | 38 | AC   | 7  | 10 |
| 145679 | 16 | 570780 | 570799 | 2 | 10 | 20 | AC   | 20 | 4  |
| 145681 | 16 | 574095 | 574110 | 4 | 4  | 16 | TCTG | 31 | 4  |
| 145682 | 16 | 574181 | 574198 | 2 | 9  | 18 | TG   | 30 | 6  |
| 145683 | 16 | 576039 | 576056 | 2 | 9  | 18 | AC   | 20 | 14 |
| 145684 | 16 | 576126 | 576141 | 2 | 8  | 16 | AC   | 22 | 4  |
| 145687 | 16 | 584259 | 584270 | 2 | 6  | 12 | CA   | 22 | 6  |
| 145688 | 16 | 584447 | 584470 | 2 | 12 | 24 | CA   | 15 | 7  |
| 145689 | 16 | 584730 | 584745 | 4 | 4  | 16 | TTTA | 24 | 6  |
| 145690 | 16 | 585977 | 585994 | 2 | 9  | 18 | GT   | 16 | 4  |
| 145698 | 16 | 598463 | 598480 | 2 | 9  | 18 | GT   | 17 | 7  |
| 145699 | 16 | 598689 | 598706 | 2 | 9  | 18 | GT   | 17 | 5  |
| 145701 | 16 | 600927 | 600940 | 2 | 7  | 14 | GT   | 14 | 5  |
| 145702 | 16 | 602586 | 602605 | 2 | 10 | 20 | TG   | 18 | 5  |
| 145703 | 16 | 604870 | 604883 | 2 | 7  | 14 | TG   | 30 | 4  |
| 145706 | 16 | 611015 | 611034 | 2 | 10 | 20 | AC   | 19 | 8  |
| 145707 | 16 | 611367 | 611392 | 2 | 13 | 26 | CA   | 11 | 10 |
| 145710 | 16 | 628049 | 628066 | 2 | 9  | 18 | TG   | 25 | 10 |
| 145711 | 16 | 632402 | 632421 | 2 | 10 | 20 | GT   | 23 | 7  |
| 145718 | 16 | 649350 | 649391 | 3 | 14 | 42 | TCT  | 17 | 13 |
| 145723 | 16 | 681981 | 682002 | 2 | 11 | 22 | CA   | 19 | 8  |
| 145728 | 16 | 705351 | 705370 | 2 | 10 | 20 | TG   | 27 | 4  |
| 145729 | 16 | 711363 | 711378 | 2 | 8  | 16 | GT   | 18 | 3  |
| 145731 | 16 | 711575 | 711596 | 2 | 11 | 22 | GT   | 12 | 5  |
| 145735 | 16 | 721689 | 721708 | 4 | 5  | 20 | GTCA | 24 | 3  |
| 145736 | 16 | 721889 | 721902 | 2 | 7  | 14 | GT   | 24 | 5  |
| 145739 | 16 | 733443 | 733474 | 2 | 16 | 32 | CA   | 19 | 7  |
| 145742 | 16 | 738170 | 738181 | 2 | 6  | 12 | CT   | 11 | 5  |
| 145747 | 16 | 753752 | 753775 | 2 | 12 | 24 | GT   | 13 | 9  |
| 145751 | 16 | 758822 | 758861 | 2 | 20 | 40 | TG   | 10 | 7  |
| 145752 | 16 | 761177 | 761198 | 2 | 11 | 22 | AC   | 15 | 8  |
| 145753 | 16 | 761574 | 761601 | 2 | 14 | 28 | GT   | 18 | 16 |
| 145755 | 16 | 764649 | 764664 | 2 | 8  | 16 | CA   | 24 | 5  |
| 145760 | 16 | 768557 | 768574 | 2 | 9  | 18 | TG   | 24 | 6  |
| 145761 | 16 | 770637 | 770674 | 2 | 19 | 38 | CA   | 6  | 9  |
| 145763 | 16 | 771196 | 771219 | 2 | 12 | 24 | AC   | 14 | 9  |
| 145766 | 16 | 778116 | 778135 | 2 | 10 | 20 | GT   | 19 | 9  |
| 145768 | 16 | 781123 | 781156 | 2 | 17 | 34 | AG   | 24 | 11 |
| 145777 | 16 | 804061 | 804081 | 3 | 7  | 21 | GCG  | 14 | 9  |
| 145780 | 16 | 816270 | 816295 | 2 | 13 | 26 | GT   | 26 | 7  |
| 145781 | 16 | 818801 | 818822 | 2 | 11 | 22 | AC   | 15 | 9  |
| 145789 | 16 | 845341 | 845356 | 2 | 8  | 16 | GT   | 15 | 13 |
| 145793 | 16 | 856962 | 856991 | 2 | 15 | 30 | AC   | 25 | 8  |
| 145794 | 16 | 860096 | 860115 | 2 | 10 | 20 | CA   | 22 | 9  |

|        |    |         |         |   |    |    |      |    |    |
|--------|----|---------|---------|---|----|----|------|----|----|
| 145796 | 16 | 870066  | 870077  | 2 | 6  | 12 | AT   | 20 | 3  |
| 145797 | 16 | 871818  | 871853  | 2 | 18 | 36 | GT   | 10 | 9  |
| 145798 | 16 | 872919  | 872962  | 2 | 22 | 44 | TG   | 10 | 12 |
| 145799 | 16 | 873472  | 873489  | 2 | 9  | 18 | TG   | 14 | 4  |
| 145800 | 16 | 873490  | 873503  | 2 | 7  | 14 | AG   | 24 | 8  |
| 145802 | 16 | 877810  | 877835  | 2 | 13 | 26 | CA   | 13 | 10 |
| 145806 | 16 | 880951  | 880974  | 2 | 12 | 24 | GT   | 21 | 9  |
| 145810 | 16 | 883486  | 883503  | 2 | 9  | 18 | GT   | 11 | 9  |
| 145812 | 16 | 885298  | 885317  | 2 | 10 | 20 | GT   | 17 | 10 |
| 145814 | 16 | 887384  | 887405  | 2 | 11 | 22 | AC   | 17 | 5  |
| 145815 | 16 | 887578  | 887597  | 2 | 10 | 20 | TG   | 15 | 13 |
| 145821 | 16 | 894983  | 895012  | 2 | 15 | 30 | CA   | 17 | 6  |
| 145825 | 16 | 903520  | 903549  | 3 | 10 | 30 | AGA  | 20 | 12 |
| 145826 | 16 | 906503  | 906534  | 2 | 16 | 32 | GT   | 9  | 15 |
| 145827 | 16 | 906604  | 906615  | 2 | 6  | 12 | CA   | 28 | 4  |
| 145828 | 16 | 907203  | 907217  | 3 | 5  | 15 | ATG  | 14 | 3  |
| 145832 | 16 | 918220  | 918231  | 2 | 6  | 12 | AT   | 21 | 4  |
| 145835 | 16 | 928396  | 928411  | 4 | 4  | 16 | AAAC | 12 | 5  |
| 145837 | 16 | 949948  | 949961  | 2 | 7  | 14 | TG   | 24 | 4  |
| 145847 | 16 | 985741  | 985762  | 2 | 11 | 22 | CA   | 19 | 8  |
| 145848 | 16 | 987909  | 987936  | 2 | 14 | 28 | AC   | 19 | 8  |
| 145855 | 16 | 1000423 | 1000458 | 2 | 18 | 36 | AC   | 12 | 9  |
| 145857 | 16 | 1004081 | 1004104 | 4 | 6  | 24 | AAAT | 20 | 3  |
| 145858 | 16 | 1004227 | 1004256 | 2 | 15 | 30 | CA   | 17 | 6  |
| 145859 | 16 | 1004758 | 1004779 | 2 | 11 | 22 | CA   | 9  | 12 |
| 145863 | 16 | 1010275 | 1010296 | 2 | 11 | 22 | TG   | 14 | 9  |
| 145864 | 16 | 1011318 | 1011331 | 2 | 7  | 14 | CA   | 20 | 7  |
| 145865 | 16 | 1011593 | 1011618 | 2 | 13 | 26 | AC   | 10 | 5  |
| 145867 | 16 | 1013570 | 1013593 | 2 | 12 | 24 | AC   | 22 | 7  |
| 145868 | 16 | 1014611 | 1014632 | 2 | 11 | 22 | GT   | 7  | 7  |
| 145874 | 16 | 1023398 | 1023423 | 2 | 13 | 26 | CA   | 18 | 14 |
| 145875 | 16 | 1030545 | 1030574 | 2 | 15 | 30 | AC   | 8  | 5  |
| 145877 | 16 | 1048497 | 1048520 | 2 | 12 | 24 | CA   | 11 | 11 |
| 145886 | 16 | 1060142 | 1060159 | 3 | 6  | 18 | TCT  | 25 | 3  |
| 145888 | 16 | 1070438 | 1070451 | 2 | 7  | 14 | CA   | 28 | 12 |
| 145890 | 16 | 1074838 | 1074861 | 2 | 12 | 24 | AG   | 19 | 11 |
| 145895 | 16 | 1093363 | 1093380 | 3 | 6  | 18 | GCA  | 28 | 7  |
| 145896 | 16 | 1099479 | 1099493 | 3 | 5  | 15 | GCA  | 23 | 6  |
| 145904 | 16 | 1118810 | 1118837 | 2 | 14 | 28 | CA   | 21 | 12 |
| 145906 | 16 | 1136442 | 1136465 | 2 | 12 | 24 | TC   | 25 | 8  |
| 145907 | 16 | 1138142 | 1138159 | 2 | 9  | 18 | GT   | 11 | 3  |
| 145913 | 16 | 1140136 | 1140161 | 2 | 13 | 26 | CT   | 11 | 13 |
| 145916 | 16 | 1144001 | 1144012 | 2 | 6  | 12 | AC   | 27 | 6  |
| 145917 | 16 | 1144182 | 1144195 | 2 | 7  | 14 | GT   | 29 | 5  |
| 145919 | 16 | 1147062 | 1147079 | 2 | 9  | 18 | AC   | 8  | 8  |
| 145920 | 16 | 1147082 | 1147097 | 2 | 8  | 16 | AC   | 10 | 8  |
| 145921 | 16 | 1151663 | 1151692 | 2 | 15 | 30 | CA   | 14 | 12 |
| 145924 | 16 | 1154122 | 1154143 | 2 | 11 | 22 | TG   | 16 | 12 |
| 145926 | 16 | 1159970 | 1159987 | 2 | 9  | 18 | CA   | 17 | 3  |
| 145928 | 16 | 1160378 | 1160407 | 2 | 15 | 30 | CA   | 20 | 13 |
| 145930 | 16 | 1161205 | 1161218 | 2 | 7  | 14 | AT   | 13 | 3  |



|        |    |         |         |   |    |    |      |    |    |
|--------|----|---------|---------|---|----|----|------|----|----|
| 145954 | 16 | 1164991 | 1165022 | 2 | 16 | 32 | CA   | 9  | 10 |
| 145955 | 16 | 1166637 | 1166656 | 2 | 10 | 20 | GT   | 12 | 4  |
| 145956 | 16 | 1166738 | 1166755 | 2 | 9  | 18 | GT   | 15 | 7  |
| 145957 | 16 | 1167629 | 1167652 | 4 | 6  | 24 | CCAT | 24 | 4  |
| 145961 | 16 | 1168971 | 1168982 | 2 | 6  | 12 | CA   | 25 | 7  |
| 145962 | 16 | 1169194 | 1169219 | 2 | 13 | 26 | GT   | 18 | 10 |
| 145963 | 16 | 1169889 | 1169912 | 2 | 12 | 24 | GT   | 10 | 6  |
| 145964 | 16 | 1170101 | 1170118 | 2 | 9  | 18 | CT   | 26 | 6  |
| 145966 | 16 | 1178525 | 1178550 | 2 | 13 | 26 | TG   | 16 | 11 |
| 145968 | 16 | 1180896 | 1180907 | 2 | 6  | 12 | CA   | 31 | 4  |
| 145972 | 16 | 1187598 | 1187615 | 2 | 9  | 18 | TG   | 28 | 6  |
| 145975 | 16 | 1190586 | 1190605 | 2 | 10 | 20 | TG   | 31 | 5  |
| 145976 | 16 | 1190727 | 1190754 | 2 | 14 | 28 | AC   | 11 | 13 |
| 145977 | 16 | 1190862 | 1190883 | 2 | 11 | 22 | CA   | 19 | 11 |
| 145980 | 16 | 1198485 | 1198499 | 3 | 5  | 15 | CCT  | 26 | 4  |
| 145985 | 16 | 1226736 | 1226753 | 3 | 6  | 18 | CAG  | 19 | 3  |
| 145986 | 16 | 1233403 | 1233426 | 3 | 8  | 24 | TCT  | 26 | 8  |
| 145990 | 16 | 1247251 | 1247282 | 2 | 16 | 32 | AC   | 18 | 10 |
| 145993 | 16 | 1252549 | 1252563 | 3 | 5  | 15 | TGT  | 12 | 6  |
| 145999 | 16 | 1271228 | 1271245 | 2 | 9  | 18 | TG   | 29 | 7  |
| 146004 | 16 | 1289158 | 1289171 | 2 | 7  | 14 | TG   | 8  | 6  |
| 146006 | 16 | 1297901 | 1297922 | 2 | 11 | 22 | GT   | 17 | 6  |
| 146007 | 16 | 1301967 | 1301980 | 2 | 7  | 14 | GT   | 23 | 10 |
| 146008 | 16 | 1301983 | 1302000 | 2 | 9  | 18 | GT   | 25 | 13 |
| 146010 | 16 | 1305144 | 1305161 | 3 | 6  | 18 | CAT  | 30 | 4  |
| 146011 | 16 | 1305311 | 1305328 | 2 | 9  | 18 | AC   | 23 | 4  |
| 146023 | 16 | 1351470 | 1351485 | 4 | 4  | 16 | AAAT | 11 | 11 |
| 146024 | 16 | 1358217 | 1358234 | 2 | 9  | 18 | CT   | 23 | 5  |
| 146029 | 16 | 1363359 | 1363382 | 4 | 6  | 24 | AATA | 16 | 8  |
| 146030 | 16 | 1363660 | 1363675 | 4 | 4  | 16 | AAAC | 22 | 3  |
| 146031 | 16 | 1364115 | 1364132 | 2 | 9  | 18 | TG   | 27 | 9  |
| 146032 | 16 | 1364177 | 1364200 | 2 | 12 | 24 | TG   | 16 | 9  |
| 146033 | 16 | 1366749 | 1366772 | 2 | 12 | 24 | AC   | 22 | 13 |
| 146034 | 16 | 1368675 | 1368690 | 2 | 8  | 16 | TC   | 25 | 3  |
| 146037 | 16 | 1372720 | 1372734 | 3 | 5  | 15 | GAA  | 28 | 4  |
| 146041 | 16 | 1376868 | 1376901 | 2 | 17 | 34 | AC   | 9  | 8  |
| 146042 | 16 | 1376981 | 1377010 | 2 | 15 | 30 | TG   | 17 | 9  |
| 146044 | 16 | 1378927 | 1378941 | 3 | 5  | 15 | GGT  | 25 | 3  |
| 146048 | 16 | 1389419 | 1389439 | 3 | 7  | 21 | CCT  | 24 | 4  |
| 146053 | 16 | 1401456 | 1401476 | 3 | 7  | 21 | CCT  | 9  | 3  |
| 146057 | 16 | 1409179 | 1409194 | 4 | 4  | 16 | AAAT | 28 | 5  |
| 146058 | 16 | 1411396 | 1411409 | 2 | 7  | 14 | CA   | 25 | 9  |
| 146059 | 16 | 1411796 | 1411809 | 2 | 7  | 14 | AC   | 31 | 3  |
| 146062 | 16 | 1415415 | 1415426 | 2 | 6  | 12 | AG   | 18 | 4  |
| 146064 | 16 | 1417279 | 1417302 | 2 | 12 | 24 | AC   | 11 | 5  |
| 146065 | 16 | 1423316 | 1423336 | 3 | 7  | 21 | GGA  | 24 | 3  |
| 146070 | 16 | 1432430 | 1432451 | 2 | 11 | 22 | CA   | 20 | 8  |
| 146077 | 16 | 1444448 | 1444487 | 4 | 10 | 40 | TCCA | 14 | 9  |
| 146078 | 16 | 1446449 | 1446492 | 4 | 11 | 44 | ATTC | 13 | 6  |
| 146084 | 16 | 1457177 | 1457200 | 2 | 12 | 24 | CA   | 27 | 9  |
| 146085 | 16 | 1463222 | 1463257 | 2 | 18 | 36 | GT   | 11 | 10 |

|        |    |         |         |   |    |    |      |    |    |
|--------|----|---------|---------|---|----|----|------|----|----|
| 146086 | 16 | 1463658 | 1463687 | 3 | 10 | 30 | TCT  | 22 | 8  |
| 146088 | 16 | 1466863 | 1466890 | 2 | 14 | 28 | CA   | 12 | 7  |
| 146090 | 16 | 1469584 | 1469603 | 2 | 10 | 20 | AC   | 16 | 8  |
| 146092 | 16 | 1473757 | 1473768 | 2 | 6  | 12 | TG   | 31 | 4  |
| 146097 | 16 | 1480138 | 1480153 | 2 | 8  | 16 | TG   | 19 | 4  |
| 146101 | 16 | 1480469 | 1480488 | 2 | 10 | 20 | AC   | 22 | 10 |
| 146103 | 16 | 1482716 | 1482739 | 2 | 12 | 24 | GT   | 13 | 7  |
| 146104 | 16 | 1482805 | 1482832 | 2 | 14 | 28 | GT   | 12 | 9  |
| 146111 | 16 | 1492777 | 1492788 | 2 | 6  | 12 | TA   | 25 | 4  |
| 146112 | 16 | 1493497 | 1493508 | 2 | 6  | 12 | AC   | 24 | 4  |
| 146127 | 16 | 1514562 | 1514579 | 3 | 6  | 18 | GCA  | 11 | 4  |
| 146128 | 16 | 1514740 | 1514761 | 2 | 11 | 22 | GA   | 12 | 6  |
| 146129 | 16 | 1515070 | 1515093 | 3 | 8  | 24 | GAG  | 11 | 5  |
| 146133 | 16 | 1516443 | 1516456 | 2 | 7  | 14 | TG   | 10 | 9  |
| 146135 | 16 | 1522649 | 1522662 | 2 | 7  | 14 | GT   | 27 | 4  |
| 146138 | 16 | 1530348 | 1530381 | 2 | 17 | 34 | GT   | 15 | 9  |
| 146139 | 16 | 1530461 | 1530484 | 2 | 12 | 24 | TG   | 18 | 9  |
| 146142 | 16 | 1535803 | 1535822 | 2 | 10 | 20 | GT   | 25 | 9  |
| 146143 | 16 | 1544754 | 1544765 | 2 | 6  | 12 | CA   | 19 | 5  |
| 146146 | 16 | 1550527 | 1550538 | 2 | 6  | 12 | TA   | 14 | 3  |
| 146153 | 16 | 1570514 | 1570525 | 2 | 6  | 12 | AC   | 30 | 4  |
| 146154 | 16 | 1572576 | 1572599 | 2 | 12 | 24 | GT   | 18 | 11 |
| 146164 | 16 | 1593414 | 1593431 | 2 | 9  | 18 | TG   | 16 | 4  |
| 146165 | 16 | 1593739 | 1593754 | 4 | 4  | 16 | TTTA | 16 | 13 |
| 146168 | 16 | 1600576 | 1600589 | 2 | 7  | 14 | GA   | 27 | 5  |
| 146171 | 16 | 1609857 | 1609877 | 3 | 7  | 21 | CTT  | 25 | 10 |
| 146173 | 16 | 1613146 | 1613161 | 2 | 8  | 16 | AC   | 14 | 6  |
| 146180 | 16 | 1629334 | 1629365 | 2 | 16 | 32 | TG   | 12 | 11 |
| 146181 | 16 | 1629481 | 1629516 | 2 | 18 | 36 | TG   | 17 | 14 |
| 146184 | 16 | 1632880 | 1632893 | 2 | 7  | 14 | GT   | 28 | 8  |
| 146187 | 16 | 1654235 | 1654256 | 2 | 11 | 22 | TG   | 22 | 9  |
| 146189 | 16 | 1662300 | 1662313 | 2 | 7  | 14 | GT   | 16 | 7  |
| 146190 | 16 | 1662468 | 1662523 | 2 | 28 | 56 | CA   | 7  | 10 |
| 146191 | 16 | 1662625 | 1662640 | 2 | 8  | 16 | CA   | 20 | 7  |
| 146193 | 16 | 1663016 | 1663027 | 2 | 6  | 12 | TG   | 17 | 6  |
| 146196 | 16 | 1664500 | 1664527 | 2 | 14 | 28 | TG   | 14 | 10 |
| 146201 | 16 | 1678865 | 1678876 | 2 | 6  | 12 | AC   | 25 | 6  |
| 146203 | 16 | 1682149 | 1682172 | 2 | 12 | 24 | CA   | 20 | 15 |
| 146211 | 16 | 1686898 | 1686909 | 2 | 6  | 12 | AC   | 22 | 4  |
| 146212 | 16 | 1686986 | 1687009 | 2 | 12 | 24 | CA   | 8  | 6  |
| 146213 | 16 | 1689278 | 1689331 | 2 | 27 | 54 | AC   | 9  | 10 |
| 146216 | 16 | 1697000 | 1697017 | 3 | 6  | 18 | GGA  | 31 | 4  |
| 146217 | 16 | 1698696 | 1698715 | 4 | 5  | 20 | CAGA | 28 | 5  |
| 146219 | 16 | 1706159 | 1706174 | 2 | 8  | 16 | CA   | 22 | 8  |
| 146220 | 16 | 1706889 | 1706915 | 3 | 9  | 27 | GAG  | 26 | 11 |
| 146221 | 16 | 1708887 | 1708900 | 2 | 7  | 14 | AC   | 26 | 6  |
| 146223 | 16 | 1710804 | 1710831 | 2 | 14 | 28 | GT   | 10 | 12 |
| 146225 | 16 | 1713736 | 1713759 | 2 | 12 | 24 | TG   | 24 | 10 |
| 146226 | 16 | 1714554 | 1714565 | 2 | 6  | 12 | AC   | 26 | 3  |
| 146227 | 16 | 1714717 | 1714742 | 2 | 13 | 26 | CA   | 23 | 8  |
| 146233 | 16 | 1728812 | 1728839 | 2 | 14 | 28 | GA   | 16 | 9  |

|        |    |         |         |   |    |    |      |    |    |
|--------|----|---------|---------|---|----|----|------|----|----|
| 146238 | 16 | 1736516 | 1736537 | 2 | 11 | 22 | CA   | 21 | 4  |
| 146249 | 16 | 1756351 | 1756378 | 2 | 14 | 28 | AC   | 9  | 9  |
| 146250 | 16 | 1756480 | 1756505 | 2 | 13 | 26 | TG   | 8  | 11 |
| 146251 | 16 | 1756595 | 1756614 | 2 | 10 | 20 | TG   | 21 | 8  |
| 146252 | 16 | 1757034 | 1757057 | 2 | 12 | 24 | TG   | 22 | 7  |
| 146256 | 16 | 1759329 | 1759346 | 2 | 9  | 18 | TG   | 14 | 4  |
| 146261 | 16 | 1761683 | 1761698 | 2 | 8  | 16 | AC   | 13 | 15 |
| 146262 | 16 | 1761700 | 1761713 | 2 | 7  | 14 | CA   | 16 | 17 |
| 146263 | 16 | 1761877 | 1761916 | 2 | 20 | 40 | AG   | 8  | 10 |
| 146265 | 16 | 1762807 | 1762820 | 2 | 7  | 14 | TG   | 31 | 4  |
| 146266 | 16 | 1762872 | 1762895 | 2 | 12 | 24 | GT   | 18 | 6  |
| 146268 | 16 | 1763432 | 1763445 | 2 | 7  | 14 | GT   | 17 | 6  |
| 146269 | 16 | 1763674 | 1763685 | 2 | 6  | 12 | AC   | 17 | 7  |
| 146271 | 16 | 1770848 | 1770859 | 2 | 6  | 12 | GT   | 19 | 8  |
| 146272 | 16 | 1771366 | 1771377 | 2 | 6  | 12 | TC   | 23 | 4  |
| 146277 | 16 | 1775325 | 1775358 | 2 | 17 | 34 | AC   | 15 | 12 |
| 146278 | 16 | 1775590 | 1775605 | 4 | 4  | 16 | TTTG | 15 | 6  |
| 146281 | 16 | 1776678 | 1776699 | 2 | 11 | 22 | TG   | 25 | 6  |
| 146282 | 16 | 1784080 | 1784103 | 3 | 8  | 24 | TTG  | 14 | 3  |
| 146283 | 16 | 1786615 | 1786634 | 2 | 10 | 20 | TG   | 23 | 6  |
| 146285 | 16 | 1787811 | 1787828 | 2 | 9  | 18 | TG   | 20 | 6  |
| 146293 | 16 | 1797367 | 1797382 | 2 | 8  | 16 | GC   | 13 | 17 |
| 146294 | 16 | 1797383 | 1797398 | 2 | 8  | 16 | GT   | 14 | 19 |
| 146299 | 16 | 1800046 | 1800060 | 3 | 5  | 15 | GCT  | 33 | 7  |
| 146303 | 16 | 1813366 | 1813383 | 2 | 9  | 18 | TG   | 19 | 4  |
| 146304 | 16 | 1813526 | 1813547 | 2 | 11 | 22 | TG   | 12 | 8  |
| 146305 | 16 | 1813979 | 1813996 | 2 | 9  | 18 | GT   | 20 | 8  |
| 146307 | 16 | 1818244 | 1818281 | 2 | 19 | 38 | GT   | 10 | 15 |
| 146308 | 16 | 1819269 | 1819284 | 2 | 8  | 16 | GT   | 19 | 5  |
| 146322 | 16 | 1831032 | 1831047 | 4 | 4  | 16 | TTTC | 11 | 8  |
| 146324 | 16 | 1831732 | 1831747 | 2 | 8  | 16 | GA   | 19 | 4  |
| 146325 | 16 | 1835002 | 1835023 | 2 | 11 | 22 | CA   | 19 | 6  |
| 146327 | 16 | 1837829 | 1837840 | 2 | 6  | 12 | TG   | 18 | 3  |
| 146328 | 16 | 1837888 | 1837923 | 2 | 18 | 36 | GT   | 10 | 10 |
| 146330 | 16 | 1841523 | 1841548 | 2 | 13 | 26 | AC   | 15 | 11 |
| 146331 | 16 | 1841608 | 1841641 | 2 | 17 | 34 | TG   | 14 | 15 |
| 146334 | 16 | 1850873 | 1850887 | 3 | 5  | 15 | CTG  | 28 | 3  |
| 146335 | 16 | 1850889 | 1850906 | 3 | 6  | 18 | TGC  | 19 | 3  |
| 146339 | 16 | 1872582 | 1872595 | 2 | 7  | 14 | AT   | 21 | 4  |
| 146341 | 16 | 1874896 | 1874907 | 2 | 6  | 12 | CA   | 32 | 4  |
| 146342 | 16 | 1882033 | 1882044 | 2 | 6  | 12 | GA   | 20 | 3  |
| 146343 | 16 | 1882047 | 1882060 | 2 | 7  | 14 | GA   | 20 | 3  |
| 146344 | 16 | 1888703 | 1888742 | 2 | 20 | 40 | CA   | 8  | 10 |
| 146346 | 16 | 1888979 | 1888998 | 2 | 10 | 20 | TG   | 14 | 17 |
| 146348 | 16 | 1893132 | 1893147 | 2 | 8  | 16 | GT   | 15 | 3  |
| 146351 | 16 | 1893747 | 1893760 | 2 | 7  | 14 | CA   | 30 | 8  |
| 146357 | 16 | 1895989 | 1896020 | 4 | 8  | 32 | TTTG | 22 | 7  |
| 146360 | 16 | 1897512 | 1897535 | 2 | 12 | 24 | CA   | 19 | 18 |
| 146366 | 16 | 1922669 | 1922701 | 3 | 11 | 33 | CCT  | 12 | 6  |
| 146370 | 16 | 1927376 | 1927391 | 2 | 8  | 16 | GT   | 20 | 8  |
| 146373 | 16 | 1933711 | 1933736 | 2 | 13 | 26 | CA   | 18 | 19 |

|        |    |         |         |   |    |    |      |    |    |
|--------|----|---------|---------|---|----|----|------|----|----|
| 146374 | 16 | 1934023 | 1934042 | 2 | 10 | 20 | AC   | 14 | 14 |
| 146375 | 16 | 1934171 | 1934202 | 2 | 16 | 32 | GT   | 13 | 8  |
| 146376 | 16 | 1934490 | 1934505 | 2 | 8  | 16 | TG   | 20 | 12 |
| 146380 | 16 | 1945390 | 1945409 | 2 | 10 | 20 | CA   | 18 | 5  |
| 146381 | 16 | 1948576 | 1948593 | 2 | 9  | 18 | AC   | 23 | 8  |
| 146382 | 16 | 1950059 | 1950084 | 2 | 13 | 26 | TG   | 24 | 11 |
| 146383 | 16 | 1956008 | 1956043 | 4 | 9  | 36 | ATTA | 16 | 6  |
| 146392 | 16 | 1969657 | 1969677 | 3 | 7  | 21 | GAG  | 23 | 5  |
| 146396 | 16 | 1993051 | 1993068 | 2 | 9  | 18 | TG   | 15 | 12 |
| 146407 | 16 | 2003214 | 2003237 | 4 | 6  | 24 | TCCA | 25 | 3  |
| 146408 | 16 | 2003384 | 2003397 | 2 | 7  | 14 | GT   | 23 | 10 |
| 146410 | 16 | 2004728 | 2004741 | 2 | 7  | 14 | GT   | 12 | 7  |
| 146412 | 16 | 2008236 | 2008271 | 2 | 18 | 36 | CA   | 14 | 8  |
| 146413 | 16 | 2008409 | 2008442 | 2 | 17 | 34 | AC   | 17 | 10 |
| 146414 | 16 | 2008487 | 2008518 | 2 | 16 | 32 | GT   | 14 | 11 |
| 146424 | 16 | 2017066 | 2017083 | 2 | 9  | 18 | GT   | 8  | 5  |
| 146425 | 16 | 2019366 | 2019403 | 2 | 19 | 38 | AC   | 14 | 8  |
| 146426 | 16 | 2022462 | 2022477 | 2 | 8  | 16 | AC   | 19 | 8  |
| 146428 | 16 | 2029674 | 2029685 | 2 | 6  | 12 | TG   | 25 | 3  |
| 146429 | 16 | 2029843 | 2029872 | 2 | 15 | 30 | GT   | 24 | 10 |
| 146430 | 16 | 2030333 | 2030344 | 2 | 6  | 12 | TA   | 6  | 3  |
| 146434 | 16 | 2034114 | 2034137 | 2 | 12 | 24 | AC   | 13 | 11 |
| 146441 | 16 | 2037194 | 2037219 | 2 | 13 | 26 | GT   | 25 | 10 |
| 146444 | 16 | 2042687 | 2042702 | 2 | 8  | 16 | AG   | 8  | 8  |
| 146448 | 16 | 2045046 | 2045075 | 3 | 10 | 30 | CCT  | 12 | 6  |
| 146449 | 16 | 2045187 | 2045200 | 2 | 7  | 14 | TC   | 21 | 7  |
| 146450 | 16 | 2045378 | 2045395 | 3 | 6  | 18 | CAG  | 29 | 4  |
| 146453 | 16 | 2048085 | 2048098 | 2 | 7  | 14 | TG   | 16 | 11 |
| 146455 | 16 | 2054110 | 2054123 | 2 | 7  | 14 | TG   | 26 | 10 |
| 146456 | 16 | 2054297 | 2054316 | 2 | 10 | 20 | CA   | 16 | 9  |
| 146457 | 16 | 2055735 | 2055760 | 2 | 13 | 26 | TG   | 9  | 11 |
| 146458 | 16 | 2055914 | 2055941 | 2 | 14 | 28 | AC   | 19 | 3  |
| 146459 | 16 | 2058479 | 2058504 | 2 | 13 | 26 | GT   | 22 | 15 |
| 146460 | 16 | 2058765 | 2058780 | 2 | 8  | 16 | AC   | 27 | 4  |
| 146461 | 16 | 2059232 | 2059251 | 2 | 10 | 20 | GT   | 15 | 8  |
| 146462 | 16 | 2059336 | 2059357 | 2 | 11 | 22 | CA   | 7  | 9  |
| 146465 | 16 | 2065904 | 2065921 | 2 | 9  | 18 | GT   | 9  | 5  |
| 146470 | 16 | 2070612 | 2070627 | 4 | 4  | 16 | AGTT | 33 | 3  |
| 146473 | 16 | 2071897 | 2071912 | 2 | 8  | 16 | GT   | 20 | 5  |
| 146475 | 16 | 2075530 | 2075549 | 2 | 10 | 20 | GT   | 6  | 6  |
| 146476 | 16 | 2076895 | 2076924 | 2 | 15 | 30 | AC   | 19 | 10 |
| 146477 | 16 | 2077178 | 2077209 | 2 | 16 | 32 | GT   | 13 | 5  |
| 146479 | 16 | 2079453 | 2079480 | 2 | 14 | 28 | TG   | 18 | 9  |
| 146481 | 16 | 2084227 | 2084250 | 4 | 6  | 24 | ATGG | 16 | 3  |
| 146484 | 16 | 2094069 | 2094098 | 2 | 15 | 30 | AC   | 6  | 8  |
| 146485 | 16 | 2094878 | 2094911 | 2 | 17 | 34 | GT   | 11 | 11 |
| 146488 | 16 | 2105357 | 2105370 | 2 | 7  | 14 | CA   | 30 | 3  |
| 146498 | 16 | 2127565 | 2127598 | 2 | 17 | 34 | GT   | 12 | 13 |
| 146500 | 16 | 2129522 | 2129549 | 2 | 14 | 28 | GT   | 8  | 8  |
| 146501 | 16 | 2129764 | 2129775 | 2 | 6  | 12 | GT   | 20 | 6  |
| 146502 | 16 | 2129933 | 2129946 | 2 | 7  | 14 | CA   | 16 | 4  |

|        |    |         |         |   |    |    |      |    |    |
|--------|----|---------|---------|---|----|----|------|----|----|
| 146506 | 16 | 2130733 | 2130747 | 3 | 5  | 15 | CCG  | 25 | 6  |
| 146507 | 16 | 2130748 | 2130765 | 3 | 6  | 18 | CTG  | 24 | 7  |
| 146510 | 16 | 2134184 | 2134201 | 3 | 6  | 18 | AAT  | 16 | 13 |
| 146515 | 16 | 2152742 | 2152753 | 2 | 6  | 12 | GT   | 16 | 3  |
| 146516 | 16 | 2154164 | 2154187 | 3 | 8  | 24 | CAA  | 16 | 6  |
| 146518 | 16 | 2156507 | 2156530 | 4 | 6  | 24 | CAAT | 29 | 12 |
| 146522 | 16 | 2185677 | 2185690 | 2 | 7  | 14 | TG   | 22 | 5  |
| 146523 | 16 | 2185798 | 2185818 | 3 | 7  | 21 | CTC  | 7  | 3  |
| 146528 | 16 | 2207285 | 2207296 | 2 | 6  | 12 | GT   | 27 | 5  |
| 146530 | 16 | 2208811 | 2208824 | 2 | 7  | 14 | CA   | 15 | 4  |
| 146531 | 16 | 2210854 | 2210869 | 2 | 8  | 16 | TG   | 23 | 6  |
| 146534 | 16 | 2218671 | 2218685 | 3 | 5  | 15 | CCT  | 27 | 3  |
| 146542 | 16 | 2247083 | 2247106 | 2 | 12 | 24 | GT   | 12 | 9  |
| 146548 | 16 | 2252881 | 2252898 | 2 | 9  | 18 | GA   | 27 | 8  |
| 146549 | 16 | 2257837 | 2257868 | 2 | 16 | 32 | AC   | 14 | 13 |
| 146550 | 16 | 2258684 | 2258715 | 2 | 16 | 32 | AG   | 6  | 4  |
| 146557 | 16 | 2285801 | 2285821 | 3 | 7  | 21 | CCT  | 29 | 6  |
| 146569 | 16 | 2320994 | 2321023 | 2 | 15 | 30 | TG   | 11 | 12 |
| 146572 | 16 | 2328161 | 2328175 | 3 | 5  | 15 | TTG  | 23 | 3  |
| 146574 | 16 | 2335546 | 2335571 | 2 | 13 | 26 | TC   | 15 | 9  |
| 146576 | 16 | 2339622 | 2339653 | 4 | 8  | 32 | AGAT | 25 | 5  |
| 146579 | 16 | 2347526 | 2347541 | 2 | 8  | 16 | CA   | 23 | 4  |
| 146580 | 16 | 2347630 | 2347643 | 2 | 7  | 14 | TC   | 15 | 4  |
| 146586 | 16 | 2356100 | 2356111 | 2 | 6  | 12 | AT   | 25 | 3  |
| 146592 | 16 | 2362322 | 2362341 | 2 | 10 | 20 | CA   | 22 | 12 |
| 146600 | 16 | 2376166 | 2376201 | 2 | 18 | 36 | TG   | 9  | 10 |
| 146604 | 16 | 2379715 | 2379740 | 2 | 13 | 26 | GA   | 16 | 12 |
| 146608 | 16 | 2382464 | 2382489 | 2 | 13 | 26 | CA   | 15 | 14 |
| 146615 | 16 | 2397862 | 2397879 | 2 | 9  | 18 | TA   | 11 | 5  |
| 146616 | 16 | 2398432 | 2398453 | 2 | 11 | 22 | GT   | 17 | 13 |
| 146622 | 16 | 2408983 | 2408997 | 3 | 5  | 15 | CAT  | 28 | 5  |
| 146624 | 16 | 2411999 | 2412010 | 2 | 6  | 12 | AC   | 24 | 4  |
| 146627 | 16 | 2417726 | 2417737 | 2 | 6  | 12 | CA   | 26 | 3  |
| 146628 | 16 | 2419338 | 2419365 | 2 | 14 | 28 | AC   | 15 | 12 |
| 146629 | 16 | 2419508 | 2419531 | 4 | 6  | 24 | TCTT | 27 | 6  |
| 146631 | 16 | 2422423 | 2422458 | 4 | 9  | 36 | TTTC | 7  | 8  |
| 146636 | 16 | 2424135 | 2424149 | 3 | 5  | 15 | ATA  | 20 | 3  |
| 146637 | 16 | 2424335 | 2424348 | 2 | 7  | 14 | AC   | 24 | 4  |
| 146638 | 16 | 2426858 | 2426875 | 3 | 6  | 18 | CTC  | 28 | 7  |
| 146639 | 16 | 2427766 | 2427793 | 2 | 14 | 28 | GT   | 15 | 6  |
| 146641 | 16 | 2437469 | 2437490 | 2 | 11 | 22 | GT   | 12 | 6  |
| 146643 | 16 | 2445770 | 2445787 | 2 | 9  | 18 | TC   | 24 | 8  |
| 146644 | 16 | 2447604 | 2447621 | 3 | 6  | 18 | CTT  | 24 | 4  |
| 146645 | 16 | 2450045 | 2450062 | 2 | 9  | 18 | GT   | 21 | 4  |
| 146647 | 16 | 2453950 | 2453965 | 2 | 8  | 16 | AC   | 14 | 8  |
| 146651 | 16 | 2455755 | 2455774 | 4 | 5  | 20 | TTTC | 14 | 9  |
| 146652 | 16 | 2458444 | 2458491 | 2 | 24 | 48 | AC   | 7  | 11 |
| 146655 | 16 | 2464207 | 2464232 | 2 | 13 | 26 | GT   | 16 | 3  |
| 146656 | 16 | 2465434 | 2465460 | 3 | 9  | 27 | GAG  | 22 | 6  |
| 146657 | 16 | 2465668 | 2465689 | 2 | 11 | 22 | TG   | 21 | 10 |
| 146662 | 16 | 2475230 | 2475259 | 2 | 15 | 30 | GT   | 17 | 9  |

|        |    |         |         |   |    |    |      |    |    |
|--------|----|---------|---------|---|----|----|------|----|----|
| 146666 | 16 | 2479936 | 2479959 | 2 | 12 | 24 | TC   | 15 | 8  |
| 146670 | 16 | 2485835 | 2485848 | 2 | 7  | 14 | AC   | 8  | 9  |
| 146671 | 16 | 2486376 | 2486399 | 4 | 6  | 24 | GAAA | 15 | 6  |
| 146672 | 16 | 2486900 | 2486921 | 2 | 11 | 22 | GT   | 15 | 10 |
| 146675 | 16 | 2487287 | 2487306 | 2 | 10 | 20 | AC   | 14 | 4  |
| 146677 | 16 | 2487854 | 2487874 | 3 | 7  | 21 | GGA  | 24 | 14 |
| 146681 | 16 | 2491358 | 2491373 | 2 | 8  | 16 | AC   | 29 | 3  |
| 146683 | 16 | 2496463 | 2496498 | 2 | 18 | 36 | AC   | 11 | 9  |
| 146685 | 16 | 2497335 | 2497372 | 2 | 19 | 38 | AC   | 15 | 10 |
| 146693 | 16 | 2507959 | 2507985 | 3 | 9  | 27 | CTC  | 14 | 6  |
| 146694 | 16 | 2511809 | 2511836 | 2 | 14 | 28 | GT   | 21 | 6  |
| 146695 | 16 | 2512303 | 2512316 | 2 | 7  | 14 | TG   | 9  | 7  |
| 146700 | 16 | 2519988 | 2520003 | 4 | 4  | 16 | GCCT | 22 | 8  |
| 146701 | 16 | 2524424 | 2524435 | 2 | 6  | 12 | CG   | 32 | 7  |
| 146708 | 16 | 2530044 | 2530058 | 3 | 5  | 15 | TTC  | 17 | 4  |
| 146709 | 16 | 2530596 | 2530607 | 2 | 6  | 12 | AG   | 23 | 3  |
| 146712 | 16 | 2534422 | 2534436 | 3 | 5  | 15 | CCT  | 23 | 4  |
| 146713 | 16 | 2537636 | 2537661 | 2 | 13 | 26 | GT   | 15 | 11 |
| 146717 | 16 | 2540681 | 2540706 | 2 | 13 | 26 | TG   | 22 | 10 |
| 146718 | 16 | 2545729 | 2545766 | 2 | 19 | 38 | AC   | 12 | 15 |
| 146719 | 16 | 2550388 | 2550413 | 2 | 13 | 26 | CT   | 8  | 10 |
| 146720 | 16 | 2554503 | 2554524 | 2 | 11 | 22 | CA   | 17 | 4  |
| 146731 | 16 | 2564011 | 2564038 | 2 | 14 | 28 | GT   | 12 | 6  |
| 146742 | 16 | 2584777 | 2584804 | 2 | 14 | 28 | AC   | 10 | 6  |
| 146745 | 16 | 2591890 | 2591907 | 2 | 9  | 18 | TG   | 10 | 7  |
| 146750 | 16 | 2601520 | 2601539 | 4 | 5  | 20 | GAGG | 23 | 3  |
| 146751 | 16 | 2601736 | 2601755 | 2 | 10 | 20 | GT   | 26 | 10 |
| 146754 | 16 | 2609014 | 2609029 | 2 | 8  | 16 | CT   | 24 | 5  |
| 146755 | 16 | 2613345 | 2613358 | 2 | 7  | 14 | CA   | 25 | 5  |
| 146759 | 16 | 2619658 | 2619671 | 2 | 7  | 14 | AG   | 28 | 3  |
| 146762 | 16 | 2629914 | 2629931 | 2 | 9  | 18 | GA   | 25 | 6  |
| 146763 | 16 | 2633018 | 2633029 | 2 | 6  | 12 | CA   | 12 | 13 |
| 146764 | 16 | 2634419 | 2634434 | 4 | 4  | 16 | AAAT | 10 | 3  |
| 146770 | 16 | 2659761 | 2659782 | 2 | 11 | 22 | AC   | 21 | 10 |
| 146771 | 16 | 2661383 | 2661396 | 2 | 7  | 14 | GA   | 20 | 9  |
| 146776 | 16 | 2673653 | 2673664 | 2 | 6  | 12 | CT   | 8  | 6  |
| 146777 | 16 | 2673665 | 2673684 | 2 | 10 | 20 | CA   | 12 | 9  |
| 146778 | 16 | 2679478 | 2679489 | 2 | 6  | 12 | AC   | 30 | 4  |
| 146779 | 16 | 2687158 | 2687205 | 4 | 12 | 48 | TTCT | 13 | 8  |
| 146788 | 16 | 2708025 | 2708052 | 2 | 14 | 28 | AC   | 16 | 6  |
| 146801 | 16 | 2727725 | 2727746 | 2 | 11 | 22 | AG   | 18 | 6  |
| 146804 | 16 | 2731066 | 2731097 | 4 | 8  | 32 | ACAG | 16 | 6  |
| 146805 | 16 | 2731263 | 2731296 | 2 | 17 | 34 | CA   | 18 | 13 |
| 146817 | 16 | 2761097 | 2761108 | 2 | 6  | 12 | TA   | 13 | 4  |
| 146821 | 16 | 2771364 | 2771379 | 2 | 8  | 16 | AC   | 18 | 5  |
| 146829 | 16 | 2778711 | 2778724 | 2 | 7  | 14 | AC   | 16 | 9  |
| 146830 | 16 | 2786352 | 2786381 | 2 | 15 | 30 | GT   | 10 | 10 |
| 146831 | 16 | 2790186 | 2790206 | 3 | 7  | 21 | GGT  | 26 | 7  |
| 146835 | 16 | 2793583 | 2793594 | 2 | 6  | 12 | AC   | 26 | 7  |
| 146838 | 16 | 2797780 | 2797799 | 4 | 5  | 20 | AAAG | 32 | 4  |
| 146840 | 16 | 2802645 | 2802664 | 2 | 10 | 20 | TC   | 19 | 3  |

|        |    |         |         |   |    |    |      |    |    |
|--------|----|---------|---------|---|----|----|------|----|----|
| 146842 | 16 | 2805463 | 2805482 | 2 | 10 | 20 | TG   | 16 | 13 |
| 146843 | 16 | 2806048 | 2806061 | 2 | 7  | 14 | AT   | 22 | 9  |
| 146844 | 16 | 2807358 | 2807371 | 2 | 7  | 14 | CA   | 28 | 7  |
| 146845 | 16 | 2807956 | 2807967 | 2 | 6  | 12 | TG   | 11 | 8  |
| 146846 | 16 | 2808310 | 2808321 | 2 | 6  | 12 | GT   | 7  | 7  |
| 146847 | 16 | 2808324 | 2808341 | 2 | 9  | 18 | GT   | 9  | 7  |
| 146848 | 16 | 2814986 | 2815009 | 2 | 12 | 24 | TG   | 23 | 8  |
| 146850 | 16 | 2826262 | 2826276 | 3 | 5  | 15 | TGA  | 6  | 3  |
| 146852 | 16 | 2838053 | 2838064 | 2 | 6  | 12 | AT   | 16 | 3  |
| 146856 | 16 | 2852125 | 2852142 | 2 | 9  | 18 | GT   | 21 | 7  |
| 146858 | 16 | 2857113 | 2857130 | 3 | 6  | 18 | TTG  | 28 | 5  |
| 146862 | 16 | 2865216 | 2865233 | 2 | 9  | 18 | AC   | 21 | 4  |
| 146864 | 16 | 2867889 | 2867902 | 2 | 7  | 14 | GT   | 18 | 3  |
| 146865 | 16 | 2868023 | 2868054 | 2 | 16 | 32 | GT   | 18 | 12 |
| 146866 | 16 | 2869488 | 2869511 | 2 | 12 | 24 | TG   | 11 | 10 |
| 146870 | 16 | 2875083 | 2875094 | 2 | 6  | 12 | TG   | 32 | 3  |
| 146871 | 16 | 2875333 | 2875352 | 2 | 10 | 20 | CA   | 18 | 8  |
| 146875 | 16 | 2889930 | 2889951 | 2 | 11 | 22 | CA   | 20 | 7  |
| 146879 | 16 | 2897738 | 2897752 | 3 | 5  | 15 | TTA  | 20 | 12 |
| 146882 | 16 | 2906633 | 2906652 | 2 | 10 | 20 | TG   | 20 | 5  |
| 146887 | 16 | 2935594 | 2935637 | 4 | 11 | 44 | CCAT | 6  | 8  |
| 146889 | 16 | 2945275 | 2945308 | 2 | 17 | 34 | AC   | 11 | 16 |
| 146891 | 16 | 2946765 | 2946784 | 4 | 5  | 20 | AATA | 20 | 5  |
| 146894 | 16 | 2950453 | 2950467 | 3 | 5  | 15 | TCT  | 25 | 4  |
| 146898 | 16 | 2967925 | 2967970 | 2 | 23 | 46 | AC   | 16 | 13 |
| 146902 | 16 | 2975659 | 2975704 | 2 | 23 | 46 | TG   | 11 | 8  |
| 146903 | 16 | 2975847 | 2975858 | 2 | 6  | 12 | AC   | 27 | 4  |
| 146904 | 16 | 2975948 | 2975969 | 2 | 11 | 22 | AC   | 8  | 12 |
| 146910 | 16 | 2978946 | 2978966 | 3 | 7  | 21 | CTC  | 15 | 3  |
| 146911 | 16 | 2979845 | 2979860 | 2 | 8  | 16 | AG   | 18 | 4  |
| 146912 | 16 | 2981038 | 2981063 | 2 | 13 | 26 | AC   | 20 | 11 |
| 146913 | 16 | 2981199 | 2981258 | 4 | 15 | 60 | CTAT | 14 | 12 |
| 146915 | 16 | 2983806 | 2983835 | 2 | 15 | 30 | CA   | 13 | 8  |
| 146917 | 16 | 2983964 | 2983985 | 2 | 11 | 22 | AC   | 8  | 11 |
| 146919 | 16 | 2986695 | 2986706 | 2 | 6  | 12 | CA   | 17 | 6  |
| 146920 | 16 | 2986738 | 2986755 | 2 | 9  | 18 | AC   | 19 | 10 |
| 146921 | 16 | 2986887 | 2986904 | 2 | 9  | 18 | TG   | 25 | 6  |
| 146924 | 16 | 2995170 | 2995181 | 2 | 6  | 12 | GT   | 32 | 3  |
| 146925 | 16 | 2995210 | 2995221 | 2 | 6  | 12 | TG   | 31 | 4  |
| 146928 | 16 | 2996999 | 2997022 | 2 | 12 | 24 | CA   | 18 | 10 |
| 146929 | 16 | 2997230 | 2997243 | 2 | 7  | 14 | TG   | 25 | 10 |
| 146930 | 16 | 2997372 | 2997393 | 2 | 11 | 22 | TG   | 19 | 8  |
| 146931 | 16 | 2997772 | 2997797 | 2 | 13 | 26 | GT   | 16 | 5  |
| 146932 | 16 | 3002079 | 3002100 | 2 | 11 | 22 | TG   | 13 | 15 |
| 146934 | 16 | 3002221 | 3002246 | 2 | 13 | 26 | GT   | 14 | 11 |
| 146936 | 16 | 3002824 | 3002845 | 2 | 11 | 22 | AC   | 14 | 10 |
| 146938 | 16 | 3006541 | 3006564 | 2 | 12 | 24 | TG   | 9  | 4  |
| 146940 | 16 | 3006695 | 3006718 | 2 | 12 | 24 | CA   | 16 | 18 |
| 146949 | 16 | 3015443 | 3015460 | 2 | 9  | 18 | GT   | 16 | 7  |
| 146950 | 16 | 3015580 | 3015595 | 2 | 8  | 16 | TG   | 20 | 11 |
| 146954 | 16 | 3016510 | 3016537 | 4 | 7  | 28 | GACA | 20 | 7  |

|        |    |         |         |   |    |    |      |    |    |
|--------|----|---------|---------|---|----|----|------|----|----|
| 146957 | 16 | 3016874 | 3016889 | 2 | 8  | 16 | CA   | 18 | 12 |
| 146958 | 16 | 3017071 | 3017086 | 2 | 8  | 16 | CA   | 20 | 3  |
| 146961 | 16 | 3019890 | 3019927 | 2 | 19 | 38 | TG   | 12 | 10 |
| 146962 | 16 | 3021666 | 3021697 | 2 | 16 | 32 | CA   | 7  | 7  |
| 146963 | 16 | 3021802 | 3021821 | 2 | 10 | 20 | AC   | 15 | 8  |
| 146967 | 16 | 3022327 | 3022354 | 2 | 14 | 28 | CA   | 14 | 11 |
| 146968 | 16 | 3022620 | 3022637 | 2 | 9  | 18 | GT   | 21 | 14 |
| 146969 | 16 | 3023215 | 3023232 | 2 | 9  | 18 | AC   | 28 | 4  |
| 146974 | 16 | 3030544 | 3030579 | 4 | 9  | 36 | TCTG | 20 | 11 |
| 146977 | 16 | 3032588 | 3032615 | 2 | 14 | 28 | TG   | 12 | 16 |
| 146980 | 16 | 3035979 | 3036000 | 2 | 11 | 22 | AC   | 15 | 7  |
| 146985 | 16 | 3038731 | 3038752 | 2 | 11 | 22 | TG   | 22 | 8  |
| 146988 | 16 | 3039829 | 3039872 | 2 | 22 | 44 | TG   | 9  | 9  |
| 146989 | 16 | 3040027 | 3040072 | 2 | 23 | 46 | AC   | 10 | 11 |
| 146992 | 16 | 3041808 | 3041823 | 2 | 8  | 16 | GT   | 14 | 6  |
| 147001 | 16 | 3042584 | 3042613 | 2 | 15 | 30 | CA   | 15 | 5  |
| 147002 | 16 | 3043194 | 3043207 | 2 | 7  | 14 | AC   | 16 | 5  |
| 147004 | 16 | 3043494 | 3043513 | 2 | 10 | 20 | AC   | 15 | 5  |
| 147005 | 16 | 3043550 | 3043573 | 2 | 12 | 24 | AC   | 12 | 10 |
| 147006 | 16 | 3043720 | 3043753 | 2 | 17 | 34 | GT   | 10 | 8  |
| 147007 | 16 | 3043811 | 3043842 | 2 | 16 | 32 | AC   | 8  | 9  |
| 147008 | 16 | 3044619 | 3044636 | 3 | 6  | 18 | CCT  | 30 | 3  |
| 147009 | 16 | 3045515 | 3045552 | 2 | 19 | 38 | TG   | 9  | 8  |
| 147011 | 16 | 3047428 | 3047448 | 3 | 7  | 21 | GCT  | 27 | 5  |
| 147013 | 16 | 3047815 | 3047830 | 2 | 8  | 16 | CA   | 16 | 3  |
| 147016 | 16 | 3050385 | 3050399 | 3 | 5  | 15 | TCA  | 30 | 3  |
| 147018 | 16 | 3054949 | 3054980 | 2 | 16 | 32 | TG   | 7  | 6  |
| 147024 | 16 | 3056260 | 3056275 | 2 | 8  | 16 | GT   | 17 | 6  |
| 147025 | 16 | 3056504 | 3056519 | 2 | 8  | 16 | CA   | 23 | 3  |
| 147026 | 16 | 3058414 | 3058435 | 2 | 11 | 22 | AC   | 9  | 5  |
| 147027 | 16 | 3058556 | 3058577 | 2 | 11 | 22 | TG   | 11 | 8  |
| 147057 | 16 | 3079420 | 3079431 | 2 | 6  | 12 | CA   | 23 | 3  |
| 147059 | 16 | 3079636 | 3079649 | 2 | 7  | 14 | GT   | 16 | 3  |
| 147060 | 16 | 3079652 | 3079667 | 2 | 8  | 16 | GT   | 16 | 3  |
| 147073 | 16 | 3082210 | 3082239 | 2 | 15 | 30 | AC   | 8  | 5  |
| 147075 | 16 | 3084885 | 3084910 | 2 | 13 | 26 | GT   | 14 | 10 |
| 147080 | 16 | 3087194 | 3087211 | 2 | 9  | 18 | CA   | 8  | 4  |
| 147081 | 16 | 3088113 | 3088136 | 2 | 12 | 24 | AC   | 8  | 10 |
| 147082 | 16 | 3088227 | 3088250 | 2 | 12 | 24 | AC   | 21 | 6  |
| 147086 | 16 | 3090892 | 3090911 | 2 | 10 | 20 | CA   | 11 | 4  |
| 147087 | 16 | 3091089 | 3091112 | 3 | 8  | 24 | CTC  | 20 | 5  |
| 147088 | 16 | 3091225 | 3091242 | 2 | 9  | 18 | AC   | 24 | 6  |
| 147090 | 16 | 3091316 | 3091343 | 2 | 14 | 28 | CA   | 16 | 11 |
| 147091 | 16 | 3091546 | 3091563 | 2 | 9  | 18 | CA   | 21 | 9  |
| 147093 | 16 | 3092073 | 3092108 | 2 | 18 | 36 | CA   | 14 | 10 |
| 147094 | 16 | 3092159 | 3092178 | 2 | 10 | 20 | AG   | 13 | 10 |
| 147098 | 16 | 3094131 | 3094156 | 2 | 13 | 26 | CA   | 9  | 8  |
| 147107 | 16 | 3099210 | 3099229 | 2 | 10 | 20 | AC   | 13 | 8  |
| 147110 | 16 | 3099843 | 3099864 | 2 | 11 | 22 | TG   | 11 | 6  |
| 147111 | 16 | 3099914 | 3099947 | 2 | 17 | 34 | AC   | 8  | 8  |
| 147112 | 16 | 3100027 | 3100056 | 2 | 15 | 30 | CA   | 14 | 7  |



|        |    |         |         |   |    |    |      |    |    |
|--------|----|---------|---------|---|----|----|------|----|----|
| 147113 | 16 | 3100675 | 3100708 | 2 | 17 | 34 | AC   | 10 | 11 |
| 147114 | 16 | 3100887 | 3100924 | 2 | 19 | 38 | GT   | 15 | 9  |
| 147116 | 16 | 3101317 | 3101331 | 3 | 5  | 15 | TGC  | 12 | 3  |
| 147124 | 16 | 3102690 | 3102701 | 2 | 6  | 12 | AC   | 28 | 3  |
| 147126 | 16 | 3104240 | 3104261 | 2 | 11 | 22 | CA   | 16 | 11 |
| 147129 | 16 | 3104983 | 3104994 | 2 | 6  | 12 | AC   | 11 | 9  |
| 147131 | 16 | 3106358 | 3106372 | 3 | 5  | 15 | CAG  | 26 | 8  |
| 147132 | 16 | 3106373 | 3106390 | 3 | 6  | 18 | AAG  | 28 | 10 |
| 147138 | 16 | 3109740 | 3109751 | 2 | 6  | 12 | GT   | 11 | 3  |
| 147139 | 16 | 3109868 | 3109895 | 2 | 14 | 28 | CA   | 18 | 10 |
| 147142 | 16 | 3110375 | 3110400 | 2 | 13 | 26 | CA   | 16 | 8  |
| 147145 | 16 | 3111522 | 3111545 | 3 | 8  | 24 | ACA  | 25 | 6  |
| 147146 | 16 | 3113686 | 3113701 | 2 | 8  | 16 | GT   | 21 | 11 |
| 147147 | 16 | 3118376 | 3118387 | 2 | 6  | 12 | GT   | 15 | 7  |
| 147149 | 16 | 3118541 | 3118556 | 2 | 8  | 16 | TG   | 15 | 6  |
| 147150 | 16 | 3118557 | 3118572 | 2 | 8  | 16 | AG   | 15 | 6  |
| 147154 | 16 | 3119050 | 3119061 | 2 | 6  | 12 | CA   | 15 | 4  |
| 147156 | 16 | 3119294 | 3119333 | 4 | 10 | 40 | CTGC | 10 | 3  |
| 147164 | 16 | 3122642 | 3122677 | 3 | 12 | 36 | AAC  | 10 | 6  |
| 147166 | 16 | 3123593 | 3123612 | 4 | 5  | 20 | TTTG | 27 | 3  |
| 147167 | 16 | 3123814 | 3123827 | 2 | 7  | 14 | GT   | 26 | 8  |
| 147168 | 16 | 3123928 | 3123951 | 4 | 6  | 24 | TAAA | 16 | 6  |
| 147177 | 16 | 3128081 | 3128096 | 2 | 8  | 16 | CA   | 30 | 8  |
| 147180 | 16 | 3128380 | 3128415 | 2 | 18 | 36 | GT   | 20 | 10 |
| 147181 | 16 | 3128561 | 3128586 | 2 | 13 | 26 | TG   | 9  | 5  |
| 147182 | 16 | 3128665 | 3128692 | 2 | 14 | 28 | GT   | 10 | 4  |
| 147183 | 16 | 3128920 | 3128939 | 2 | 10 | 20 | TG   | 18 | 9  |
| 147185 | 16 | 3129864 | 3129877 | 2 | 7  | 14 | TG   | 19 | 3  |
| 147186 | 16 | 3129986 | 3130015 | 2 | 15 | 30 | TG   | 17 | 9  |
| 147192 | 16 | 3133408 | 3133431 | 2 | 12 | 24 | TG   | 9  | 6  |
| 147193 | 16 | 3133602 | 3133623 | 2 | 11 | 22 | AC   | 20 | 6  |
| 147196 | 16 | 3136248 | 3136281 | 2 | 17 | 34 | TG   | 10 | 10 |
| 147203 | 16 | 3144890 | 3144933 | 2 | 22 | 44 | GT   | 6  | 7  |
| 147208 | 16 | 3164507 | 3164528 | 2 | 11 | 22 | CA   | 16 | 10 |
| 147213 | 16 | 3169692 | 3169703 | 2 | 6  | 12 | TG   | 21 | 5  |
| 147216 | 16 | 3180371 | 3180384 | 2 | 7  | 14 | AC   | 27 | 5  |
| 147217 | 16 | 3181037 | 3181050 | 2 | 7  | 14 | CA   | 18 | 4  |
| 147221 | 16 | 3208893 | 3208918 | 2 | 13 | 26 | GT   | 15 | 9  |
| 147225 | 16 | 3216655 | 3216666 | 2 | 6  | 12 | TG   | 28 | 4  |
| 147227 | 16 | 3219971 | 3219990 | 4 | 5  | 20 | TTTG | 17 | 3  |
| 147230 | 16 | 3222269 | 3222283 | 3 | 5  | 15 | TTA  | 10 | 9  |
| 147231 | 16 | 3223691 | 3223704 | 2 | 7  | 14 | TC   | 15 | 3  |
| 147234 | 16 | 3225355 | 3225375 | 3 | 7  | 21 | TCT  | 20 | 3  |
| 147235 | 16 | 3226931 | 3226942 | 2 | 6  | 12 | TG   | 13 | 7  |
| 147236 | 16 | 3226943 | 3226954 | 2 | 6  | 12 | TA   | 15 | 9  |
| 147237 | 16 | 3227566 | 3227583 | 2 | 9  | 18 | AT   | 12 | 6  |
| 147238 | 16 | 3227749 | 3227762 | 2 | 7  | 14 | CT   | 23 | 14 |
| 147241 | 16 | 3237008 | 3237031 | 4 | 6  | 24 | TTTC | 18 | 3  |
| 147242 | 16 | 3237401 | 3237424 | 2 | 12 | 24 | GT   | 17 | 7  |
| 147243 | 16 | 3238179 | 3238194 | 2 | 8  | 16 | TC   | 33 | 5  |
| 147244 | 16 | 3238234 | 3238248 | 3 | 5  | 15 | CTC  | 20 | 5  |

|        |    |         |         |   |    |    |      |    |    |
|--------|----|---------|---------|---|----|----|------|----|----|
| 147245 | 16 | 3238250 | 3238267 | 3 | 6  | 18 | TCC  | 19 | 4  |
| 147247 | 16 | 3238417 | 3238442 | 2 | 13 | 26 | GT   | 10 | 8  |
| 147250 | 16 | 3239173 | 3239200 | 2 | 14 | 28 | TG   | 13 | 16 |
| 147251 | 16 | 3239971 | 3239988 | 2 | 9  | 18 | CA   | 11 | 4  |
| 147252 | 16 | 3243022 | 3243039 | 2 | 9  | 18 | AC   | 16 | 5  |
| 147253 | 16 | 3243242 | 3243263 | 2 | 11 | 22 | GT   | 24 | 7  |
| 147254 | 16 | 3243675 | 3243686 | 2 | 6  | 12 | AC   | 24 | 7  |
| 147255 | 16 | 3243785 | 3243798 | 2 | 7  | 14 | TG   | 28 | 6  |
| 147256 | 16 | 3244255 | 3244276 | 2 | 11 | 22 | TG   | 12 | 6  |
| 147259 | 16 | 3254794 | 3254813 | 2 | 10 | 20 | TG   | 19 | 6  |
| 147261 | 16 | 3255997 | 3256008 | 2 | 6  | 12 | CT   | 26 | 3  |
| 147263 | 16 | 3261719 | 3261734 | 2 | 8  | 16 | AC   | 21 | 7  |
| 147264 | 16 | 3263002 | 3263021 | 2 | 10 | 20 | CT   | 18 | 7  |
| 147265 | 16 | 3268803 | 3268816 | 2 | 7  | 14 | AT   | 18 | 4  |
| 147273 | 16 | 3307429 | 3307444 | 4 | 4  | 16 | TTAT | 25 | 5  |
| 147278 | 16 | 3313739 | 3313759 | 3 | 7  | 21 | CCT  | 19 | 4  |
| 147285 | 16 | 3321224 | 3321235 | 2 | 6  | 12 | CA   | 27 | 6  |
| 147287 | 16 | 3324310 | 3324333 | 2 | 12 | 24 | GT   | 13 | 4  |
| 147288 | 16 | 3333409 | 3333430 | 2 | 11 | 22 | TG   | 8  | 5  |
| 147293 | 16 | 3343280 | 3343294 | 3 | 5  | 15 | TTG  | 27 | 5  |
| 147297 | 16 | 3348620 | 3348633 | 2 | 7  | 14 | TG   | 18 | 3  |
| 147298 | 16 | 3348636 | 3348647 | 2 | 6  | 12 | TG   | 8  | 3  |
| 147300 | 16 | 3349592 | 3349605 | 2 | 7  | 14 | TG   | 22 | 6  |
| 147303 | 16 | 3372571 | 3372592 | 2 | 11 | 22 | TG   | 13 | 13 |
| 147304 | 16 | 3373012 | 3373050 | 3 | 13 | 39 | TTA  | 6  | 7  |
| 147305 | 16 | 3375715 | 3375746 | 2 | 16 | 32 | TG   | 14 | 12 |
| 147308 | 16 | 3376093 | 3376120 | 2 | 14 | 28 | AC   | 11 | 10 |
| 147313 | 16 | 3381107 | 3381122 | 2 | 8  | 16 | TG   | 18 | 13 |
| 147323 | 16 | 3387917 | 3387944 | 2 | 14 | 28 | AC   | 19 | 14 |
| 147324 | 16 | 3388210 | 3388253 | 2 | 22 | 44 | AC   | 6  | 7  |
| 147325 | 16 | 3388698 | 3388715 | 3 | 6  | 18 | AGG  | 24 | 3  |
| 147326 | 16 | 3388872 | 3388907 | 2 | 18 | 36 | CA   | 9  | 7  |
| 147328 | 16 | 3389875 | 3389888 | 2 | 7  | 14 | TG   | 9  | 3  |
| 147340 | 16 | 3395673 | 3395692 | 2 | 10 | 20 | CA   | 23 | 4  |
| 147343 | 16 | 3398573 | 3398602 | 2 | 15 | 30 | CT   | 13 | 10 |
| 147344 | 16 | 3398930 | 3398965 | 3 | 12 | 36 | AGA  | 16 | 15 |
| 147345 | 16 | 3402051 | 3402068 | 2 | 9  | 18 | GT   | 22 | 13 |
| 147348 | 16 | 3406787 | 3406820 | 2 | 17 | 34 | CA   | 13 | 9  |
| 147350 | 16 | 3411065 | 3411104 | 2 | 20 | 40 | CA   | 15 | 13 |
| 147354 | 16 | 3424595 | 3424626 | 2 | 16 | 32 | GT   | 15 | 8  |
| 147356 | 16 | 3431812 | 3431831 | 2 | 10 | 20 | TG   | 16 | 7  |
| 147360 | 16 | 3445479 | 3445500 | 2 | 11 | 22 | AC   | 10 | 5  |
| 147363 | 16 | 3457791 | 3457822 | 4 | 8  | 32 | TGGA | 25 | 4  |
| 147364 | 16 | 3463118 | 3463131 | 2 | 7  | 14 | GT   | 26 | 3  |
| 147365 | 16 | 3466428 | 3466445 | 2 | 9  | 18 | GT   | 21 | 5  |
| 147371 | 16 | 3477056 | 3477070 | 3 | 5  | 15 | TCA  | 28 | 10 |
| 147372 | 16 | 3479434 | 3479451 | 3 | 6  | 18 | GAA  | 21 | 6  |
| 147387 | 16 | 3515977 | 3515990 | 2 | 7  | 14 | GT   | 20 | 6  |
| 147388 | 16 | 3516173 | 3516218 | 2 | 23 | 46 | AC   | 14 | 8  |
| 147391 | 16 | 3526617 | 3526631 | 3 | 5  | 15 | AAC  | 14 | 6  |
| 147395 | 16 | 3533907 | 3533920 | 2 | 7  | 14 | GA   | 8  | 3  |

|        |    |         |         |   |    |    |     |    |    |
|--------|----|---------|---------|---|----|----|-----|----|----|
| 147402 | 16 | 3542111 | 3542132 | 2 | 11 | 22 | TG  | 16 | 14 |
| 147403 | 16 | 3544053 | 3544072 | 2 | 10 | 20 | AC  | 8  | 7  |
| 147404 | 16 | 3545410 | 3545435 | 2 | 13 | 26 | GT  | 27 | 8  |
| 147418 | 16 | 3569689 | 3569700 | 2 | 6  | 12 | TG  | 18 | 8  |
| 147419 | 16 | 3569703 | 3569718 | 2 | 8  | 16 | TG  | 16 | 11 |
| 147420 | 16 | 3572494 | 3572505 | 2 | 6  | 12 | GT  | 23 | 3  |
| 147424 | 16 | 3574742 | 3574763 | 2 | 11 | 22 | CA  | 16 | 10 |
| 147428 | 16 | 3576492 | 3576523 | 2 | 16 | 32 | GT  | 13 | 10 |
| 147429 | 16 | 3576977 | 3576994 | 2 | 9  | 18 | TG  | 12 | 5  |
| 147431 | 16 | 3589525 | 3589536 | 2 | 6  | 12 | AC  | 14 | 9  |
| 147432 | 16 | 3589538 | 3589557 | 2 | 10 | 20 | CA  | 26 | 12 |
| 147433 | 16 | 3591576 | 3591607 | 2 | 16 | 32 | AC  | 14 | 13 |
| 147434 | 16 | 3592005 | 3592038 | 2 | 17 | 34 | AC  | 10 | 12 |
| 147435 | 16 | 3592406 | 3592435 | 2 | 15 | 30 | AC  | 17 | 12 |
| 147436 | 16 | 3597737 | 3597762 | 2 | 13 | 26 | CA  | 18 | 7  |
| 147437 | 16 | 3600602 | 3600613 | 2 | 6  | 12 | TG  | 22 | 4  |
| 147441 | 16 | 3603915 | 3603932 | 2 | 9  | 18 | TC  | 18 | 4  |
| 147448 | 16 | 3610466 | 3610481 | 2 | 8  | 16 | GA  | 22 | 6  |
| 147452 | 16 | 3615500 | 3615520 | 3 | 7  | 21 | GTT | 12 | 3  |
| 147454 | 16 | 3617733 | 3617762 | 2 | 15 | 30 | AC  | 20 | 14 |
| 147458 | 16 | 3619477 | 3619494 | 2 | 9  | 18 | GT  | 12 | 5  |
| 147459 | 16 | 3622292 | 3622325 | 2 | 17 | 34 | TG  | 6  | 10 |
| 147460 | 16 | 3623943 | 3623964 | 2 | 11 | 22 | AC  | 15 | 9  |
| 147462 | 16 | 3626912 | 3626949 | 2 | 19 | 38 | AC  | 14 | 10 |
| 147463 | 16 | 3627224 | 3627253 | 2 | 15 | 30 | AC  | 26 | 7  |
| 147465 | 16 | 3630467 | 3630484 | 3 | 6  | 18 | CTC | 22 | 6  |
| 147466 | 16 | 3630640 | 3630651 | 2 | 6  | 12 | GA  | 17 | 3  |
| 147467 | 16 | 3631846 | 3631893 | 2 | 24 | 48 | AC  | 10 | 13 |
| 147468 | 16 | 3631985 | 3632014 | 2 | 15 | 30 | GT  | 25 | 11 |
| 147469 | 16 | 3632159 | 3632170 | 2 | 6  | 12 | AC  | 31 | 4  |
| 147470 | 16 | 3632176 | 3632187 | 2 | 6  | 12 | CA  | 24 | 3  |
| 147471 | 16 | 3632409 | 3632422 | 2 | 7  | 14 | TG  | 25 | 3  |
| 147473 | 16 | 3633747 | 3633776 | 2 | 15 | 30 | GT  | 19 | 10 |
| 147475 | 16 | 3633917 | 3633930 | 2 | 7  | 14 | CA  | 17 | 13 |
| 147477 | 16 | 3638543 | 3638564 | 2 | 11 | 22 | TG  | 14 | 8  |
| 147483 | 16 | 3645723 | 3645752 | 2 | 15 | 30 | TG  | 20 | 9  |
| 147484 | 16 | 3646508 | 3646527 | 2 | 10 | 20 | GT  | 20 | 7  |
| 147485 | 16 | 3647832 | 3647849 | 2 | 9  | 18 | TG  | 8  | 10 |
| 147487 | 16 | 3648126 | 3648151 | 2 | 13 | 26 | CA  | 12 | 12 |
| 147488 | 16 | 3648228 | 3648241 | 2 | 7  | 14 | AC  | 26 | 5  |
| 147489 | 16 | 3648930 | 3648945 | 2 | 8  | 16 | GT  | 19 | 11 |
| 147490 | 16 | 3649967 | 3649982 | 2 | 8  | 16 | GT  | 19 | 6  |
| 147491 | 16 | 3650141 | 3650154 | 2 | 7  | 14 | GT  | 15 | 3  |
| 147493 | 16 | 3650313 | 3650332 | 2 | 10 | 20 | AC  | 25 | 4  |
| 147494 | 16 | 3652077 | 3652092 | 2 | 8  | 16 | GT  | 15 | 13 |
| 147498 | 16 | 3654007 | 3654024 | 2 | 9  | 18 | AC  | 23 | 6  |
| 147499 | 16 | 3655244 | 3655259 | 2 | 8  | 16 | TG  | 20 | 3  |
| 147504 | 16 | 3665225 | 3665258 | 2 | 17 | 34 | GT  | 20 | 8  |
| 147505 | 16 | 3665559 | 3665578 | 2 | 10 | 20 | TG  | 21 | 9  |
| 147507 | 16 | 3668292 | 3668307 | 2 | 8  | 16 | GT  | 19 | 3  |
| 147510 | 16 | 3670500 | 3670517 | 2 | 9  | 18 | GT  | 25 | 3  |

|        |    |         |         |   |    |    |      |    |    |
|--------|----|---------|---------|---|----|----|------|----|----|
| 147513 | 16 | 3676824 | 3676844 | 3 | 7  | 21 | GAG  | 20 | 6  |
| 147515 | 16 | 3677129 | 3677150 | 2 | 11 | 22 | AC   | 20 | 12 |
| 147516 | 16 | 3679568 | 3679581 | 2 | 7  | 14 | GA   | 24 | 4  |
| 147518 | 16 | 3681941 | 3681964 | 2 | 12 | 24 | TG   | 8  | 4  |
| 147519 | 16 | 3682626 | 3682637 | 2 | 6  | 12 | TG   | 25 | 4  |
| 147520 | 16 | 3682797 | 3682812 | 2 | 8  | 16 | GT   | 24 | 17 |
| 147522 | 16 | 3683148 | 3683183 | 2 | 18 | 36 | TG   | 10 | 12 |
| 147525 | 16 | 3683631 | 3683648 | 2 | 9  | 18 | GT   | 9  | 4  |
| 147526 | 16 | 3684459 | 3684478 | 2 | 10 | 20 | AC   | 12 | 11 |
| 147527 | 16 | 3684949 | 3684966 | 2 | 9  | 18 | AC   | 6  | 9  |
| 147529 | 16 | 3685088 | 3685127 | 2 | 20 | 40 | CA   | 8  | 6  |
| 147530 | 16 | 3685186 | 3685201 | 2 | 8  | 16 | AC   | 15 | 5  |
| 147531 | 16 | 3687628 | 3687639 | 2 | 6  | 12 | GT   | 27 | 9  |
| 147535 | 16 | 3689456 | 3689487 | 2 | 16 | 32 | GA   | 10 | 8  |
| 147536 | 16 | 3689953 | 3689964 | 2 | 6  | 12 | AC   | 20 | 3  |
| 147537 | 16 | 3691492 | 3691503 | 2 | 6  | 12 | GT   | 16 | 3  |
| 147539 | 16 | 3692864 | 3692875 | 2 | 6  | 12 | CA   | 18 | 3  |
| 147542 | 16 | 3696130 | 3696147 | 2 | 9  | 18 | AC   | 22 | 6  |
| 147544 | 16 | 3697564 | 3697585 | 2 | 11 | 22 | AC   | 18 | 6  |
| 147545 | 16 | 3697818 | 3697829 | 2 | 6  | 12 | GT   | 9  | 6  |
| 147546 | 16 | 3697996 | 3698007 | 2 | 6  | 12 | CA   | 25 | 5  |
| 147550 | 16 | 3700171 | 3700196 | 2 | 13 | 26 | CA   | 15 | 10 |
| 147554 | 16 | 3707244 | 3707255 | 2 | 6  | 12 | GT   | 18 | 3  |
| 147555 | 16 | 3707258 | 3707271 | 2 | 7  | 14 | GT   | 20 | 4  |
| 147556 | 16 | 3707390 | 3707405 | 2 | 8  | 16 | TC   | 21 | 5  |
| 147560 | 16 | 3721103 | 3721122 | 2 | 10 | 20 | GT   | 16 | 8  |
| 147564 | 16 | 3723338 | 3723352 | 3 | 5  | 15 | TGC  | 18 | 5  |
| 147569 | 16 | 3731383 | 3731404 | 2 | 11 | 22 | CT   | 20 | 4  |
| 147580 | 16 | 3749359 | 3749376 | 2 | 9  | 18 | TC   | 13 | 3  |
| 147581 | 16 | 3749706 | 3749727 | 2 | 11 | 22 | TG   | 16 | 5  |
| 147584 | 16 | 3752137 | 3752150 | 2 | 7  | 14 | TG   | 31 | 3  |
| 147585 | 16 | 3752638 | 3752665 | 2 | 14 | 28 | GA   | 16 | 12 |
| 147586 | 16 | 3752799 | 3752849 | 3 | 17 | 51 | AGA  | 19 | 11 |
| 147587 | 16 | 3752941 | 3752962 | 2 | 11 | 22 | CA   | 12 | 3  |
| 147589 | 16 | 3755778 | 3755811 | 2 | 17 | 34 | AC   | 17 | 13 |
| 147590 | 16 | 3755925 | 3755936 | 2 | 6  | 12 | TG   | 29 | 3  |
| 147591 | 16 | 3758272 | 3758292 | 3 | 7  | 21 | GGA  | 22 | 3  |
| 147593 | 16 | 3758982 | 3758997 | 2 | 8  | 16 | AC   | 24 | 6  |
| 147594 | 16 | 3759189 | 3759208 | 2 | 10 | 20 | TG   | 23 | 4  |
| 147599 | 16 | 3762222 | 3762245 | 2 | 12 | 24 | CA   | 19 | 13 |
| 147605 | 16 | 3765955 | 3765976 | 2 | 11 | 22 | GT   | 17 | 12 |
| 147606 | 16 | 3766111 | 3766140 | 2 | 15 | 30 | CA   | 14 | 8  |
| 147617 | 16 | 3807923 | 3807934 | 2 | 6  | 12 | AG   | 15 | 17 |
| 147618 | 16 | 3807935 | 3807948 | 2 | 7  | 14 | TG   | 18 | 21 |
| 147619 | 16 | 3808437 | 3808458 | 2 | 11 | 22 | GA   | 12 | 9  |
| 147621 | 16 | 3810291 | 3810302 | 2 | 6  | 12 | TA   | 22 | 4  |
| 147624 | 16 | 3816517 | 3816554 | 2 | 19 | 38 | AC   | 9  | 7  |
| 147626 | 16 | 3822242 | 3822257 | 4 | 4  | 16 | CTTT | 24 | 5  |
| 147628 | 16 | 3823177 | 3823194 | 2 | 9  | 18 | AG   | 21 | 8  |
| 147632 | 16 | 3827896 | 3827915 | 2 | 10 | 20 | AC   | 20 | 7  |
| 147638 | 16 | 3850371 | 3850394 | 2 | 12 | 24 | GT   | 9  | 4  |

|        |    |         |         |   |    |    |      |    |    |
|--------|----|---------|---------|---|----|----|------|----|----|
| 147639 | 16 | 3851915 | 3851930 | 4 | 4  | 16 | AAAC | 31 | 4  |
| 147640 | 16 | 3854319 | 3854390 | 4 | 18 | 72 | TATC | 9  | 7  |
| 147644 | 16 | 3865685 | 3865708 | 4 | 6  | 24 | TATT | 26 | 4  |
| 147652 | 16 | 3870929 | 3870950 | 2 | 11 | 22 | GA   | 13 | 5  |
| 147655 | 16 | 3888613 | 3888664 | 2 | 26 | 52 | CA   | 8  | 8  |
| 147657 | 16 | 3894033 | 3894054 | 2 | 11 | 22 | GT   | 12 | 10 |
| 147659 | 16 | 3897197 | 3897216 | 4 | 5  | 20 | TGAC | 32 | 4  |
| 147673 | 16 | 3938150 | 3938161 | 2 | 6  | 12 | TC   | 26 | 3  |
| 147676 | 16 | 3938437 | 3938448 | 2 | 6  | 12 | GT   | 11 | 3  |
| 147677 | 16 | 3938461 | 3938472 | 2 | 6  | 12 | GA   | 23 | 8  |
| 147693 | 16 | 3971738 | 3971755 | 2 | 9  | 18 | GT   | 16 | 8  |
| 147694 | 16 | 3971967 | 3971990 | 2 | 12 | 24 | TG   | 10 | 12 |
| 147697 | 16 | 3990957 | 3990978 | 2 | 11 | 22 | TG   | 6  | 8  |
| 147698 | 16 | 3994883 | 3994894 | 2 | 6  | 12 | GT   | 27 | 3  |
| 147700 | 16 | 3995711 | 3995730 | 2 | 10 | 20 | GT   | 16 | 9  |
| 147706 | 16 | 4020634 | 4020651 | 2 | 9  | 18 | GA   | 14 | 7  |
| 147711 | 16 | 4036538 | 4036561 | 2 | 12 | 24 | AC   | 13 | 6  |
| 147726 | 16 | 4067578 | 4067595 | 2 | 9  | 18 | AC   | 17 | 8  |
| 147728 | 16 | 4072036 | 4072049 | 2 | 7  | 14 | TG   | 27 | 3  |
| 147729 | 16 | 4072198 | 4072217 | 2 | 10 | 20 | AG   | 17 | 8  |
| 147731 | 16 | 4074277 | 4074290 | 2 | 7  | 14 | GT   | 24 | 3  |
| 147736 | 16 | 4088922 | 4088953 | 2 | 16 | 32 | AC   | 17 | 11 |
| 147739 | 16 | 4094384 | 4094398 | 3 | 5  | 15 | TGT  | 13 | 3  |
| 147740 | 16 | 4096353 | 4096366 | 2 | 7  | 14 | AG   | 24 | 4  |
| 147745 | 16 | 4112646 | 4112661 | 2 | 8  | 16 | TC   | 32 | 5  |
| 147750 | 16 | 4117989 | 4118006 | 2 | 9  | 18 | GT   | 13 | 6  |
| 147759 | 16 | 4133060 | 4133074 | 3 | 5  | 15 | TTG  | 20 | 9  |
| 147761 | 16 | 4138812 | 4138829 | 2 | 9  | 18 | AT   | 17 | 9  |
| 147765 | 16 | 4150464 | 4150479 | 2 | 8  | 16 | TG   | 17 | 3  |
| 147767 | 16 | 4158158 | 4158185 | 2 | 14 | 28 | TG   | 15 | 9  |
| 147778 | 16 | 4212626 | 4212640 | 3 | 5  | 15 | AAC  | 29 | 4  |
| 147785 | 16 | 4234233 | 4234258 | 2 | 13 | 26 | GT   | 14 | 11 |
| 147792 | 16 | 4248527 | 4248556 | 2 | 15 | 30 | GT   | 12 | 11 |
| 147798 | 16 | 4258271 | 4258284 | 2 | 7  | 14 | AG   | 25 | 4  |
| 147799 | 16 | 4258339 | 4258372 | 2 | 17 | 34 | GT   | 11 | 12 |
| 147803 | 16 | 4267278 | 4267297 | 4 | 5  | 20 | TGAT | 18 | 6  |
| 147809 | 16 | 4280295 | 4280352 | 2 | 29 | 58 | TG   | 10 | 10 |
| 147812 | 16 | 4285935 | 4285950 | 2 | 8  | 16 | CA   | 15 | 16 |
| 147813 | 16 | 4286550 | 4286573 | 3 | 8  | 24 | GAG  | 26 | 10 |
| 147821 | 16 | 4294741 | 4294756 | 2 | 8  | 16 | CA   | 31 | 5  |
| 147826 | 16 | 4296136 | 4296155 | 2 | 10 | 20 | CT   | 20 | 6  |
| 147827 | 16 | 4296362 | 4296383 | 2 | 11 | 22 | AC   | 6  | 5  |
| 147828 | 16 | 4296411 | 4296440 | 2 | 15 | 30 | AC   | 8  | 9  |
| 147829 | 16 | 4305249 | 4305264 | 4 | 4  | 16 | TCAC | 19 | 3  |
| 147830 | 16 | 4305378 | 4305395 | 2 | 9  | 18 | AG   | 12 | 8  |
| 147831 | 16 | 4305493 | 4305508 | 2 | 8  | 16 | AC   | 20 | 10 |
| 147832 | 16 | 4307205 | 4307224 | 2 | 10 | 20 | TG   | 26 | 7  |
| 147833 | 16 | 4316791 | 4316808 | 2 | 9  | 18 | CA   | 13 | 13 |
| 147836 | 16 | 4350793 | 4350812 | 2 | 10 | 20 | CA   | 27 | 10 |
| 147837 | 16 | 4355325 | 4355338 | 2 | 7  | 14 | TG   | 25 | 8  |
| 147845 | 16 | 4375636 | 4375679 | 4 | 11 | 44 | TATC | 18 | 12 |

|        |    |         |         |   |    |    |      |    |    |
|--------|----|---------|---------|---|----|----|------|----|----|
| 147846 | 16 | 4376980 | 4376995 | 4 | 4  | 16 | TTTC | 12 | 5  |
| 147854 | 16 | 4379862 | 4379873 | 2 | 6  | 12 | TG   | 10 | 9  |
| 147860 | 16 | 4384473 | 4384494 | 2 | 11 | 22 | AC   | 11 | 6  |
| 147863 | 16 | 4399052 | 4399063 | 2 | 6  | 12 | CT   | 23 | 3  |
| 147864 | 16 | 4399065 | 4399080 | 2 | 8  | 16 | TC   | 18 | 5  |
| 147866 | 16 | 4400434 | 4400454 | 3 | 7  | 21 | AGA  | 17 | 3  |
| 147873 | 16 | 4405257 | 4405268 | 2 | 6  | 12 | GT   | 27 | 3  |
| 147874 | 16 | 4409209 | 4409230 | 2 | 11 | 22 | AC   | 15 | 8  |
| 147876 | 16 | 4412702 | 4412723 | 2 | 11 | 22 | TG   | 15 | 6  |
| 147878 | 16 | 4429191 | 4429222 | 2 | 16 | 32 | AC   | 16 | 8  |
| 147879 | 16 | 4429946 | 4429957 | 2 | 6  | 12 | TG   | 13 | 3  |
| 147881 | 16 | 4431777 | 4431792 | 2 | 8  | 16 | AC   | 19 | 6  |
| 147884 | 16 | 4433078 | 4433123 | 2 | 23 | 46 | GT   | 6  | 10 |
| 147888 | 16 | 4434809 | 4434862 | 2 | 27 | 54 | AC   | 10 | 13 |
| 147889 | 16 | 4435067 | 4435084 | 2 | 9  | 18 | AC   | 10 | 13 |
| 147890 | 16 | 4435085 | 4435100 | 2 | 8  | 16 | GC   | 17 | 18 |
| 147894 | 16 | 4439622 | 4439633 | 2 | 6  | 12 | AC   | 27 | 5  |
| 147895 | 16 | 4439711 | 4439722 | 2 | 6  | 12 | CA   | 35 | 6  |
| 147897 | 16 | 4442895 | 4442924 | 2 | 15 | 30 | TG   | 23 | 9  |
| 147898 | 16 | 4443330 | 4443345 | 2 | 8  | 16 | CA   | 15 | 4  |
| 147900 | 16 | 4443664 | 4443689 | 2 | 13 | 26 | CA   | 21 | 12 |
| 147903 | 16 | 4447608 | 4447651 | 4 | 11 | 44 | ATTG | 26 | 11 |
| 147904 | 16 | 4448866 | 4448909 | 2 | 22 | 44 | TG   | 8  | 10 |
| 147906 | 16 | 4449329 | 4449358 | 2 | 15 | 30 | AC   | 22 | 7  |
| 147909 | 16 | 4451869 | 4451882 | 2 | 7  | 14 | TG   | 21 | 4  |
| 147913 | 16 | 4453885 | 4453932 | 4 | 12 | 48 | TTTG | 18 | 8  |
| 147917 | 16 | 4460464 | 4460495 | 2 | 16 | 32 | AC   | 7  | 7  |
| 147918 | 16 | 4462439 | 4462462 | 2 | 12 | 24 | TG   | 11 | 10 |
| 147919 | 16 | 4464108 | 4464119 | 2 | 6  | 12 | GT   | 26 | 3  |
| 147925 | 16 | 4469878 | 4469897 | 4 | 5  | 20 | GACA | 21 | 4  |
| 147927 | 16 | 4474294 | 4474313 | 2 | 10 | 20 | GT   | 18 | 9  |
| 147935 | 16 | 4484287 | 4484298 | 2 | 6  | 12 | AC   | 31 | 4  |
| 147940 | 16 | 4489140 | 4489171 | 2 | 16 | 32 | TG   | 12 | 11 |
| 147947 | 16 | 4493367 | 4493380 | 2 | 7  | 14 | GT   | 27 | 3  |
| 147953 | 16 | 4504346 | 4504369 | 3 | 8  | 24 | ATC  | 20 | 4  |
| 147960 | 16 | 4518367 | 4518384 | 3 | 6  | 18 | GGA  | 32 | 4  |
| 147961 | 16 | 4522429 | 4522446 | 2 | 9  | 18 | CA   | 14 | 10 |
| 147962 | 16 | 4522543 | 4522572 | 2 | 15 | 30 | CA   | 12 | 11 |
| 147963 | 16 | 4522748 | 4522775 | 2 | 14 | 28 | GT   | 24 | 10 |
| 147969 | 16 | 4536890 | 4536925 | 2 | 18 | 36 | TG   | 10 | 4  |
| 147970 | 16 | 4538050 | 4538079 | 2 | 15 | 30 | AC   | 6  | 5  |
| 147976 | 16 | 4548918 | 4548947 | 2 | 15 | 30 | CA   | 16 | 8  |
| 147979 | 16 | 4550769 | 4550784 | 2 | 8  | 16 | AC   | 10 | 6  |
| 147980 | 16 | 4550787 | 4550800 | 2 | 7  | 14 | AC   | 15 | 7  |
| 147983 | 16 | 4555801 | 4555814 | 2 | 7  | 14 | AC   | 24 | 3  |
| 147989 | 16 | 4572906 | 4572923 | 3 | 6  | 18 | TCT  | 29 | 5  |
| 147999 | 16 | 4583928 | 4583948 | 3 | 7  | 21 | TAA  | 14 | 3  |
| 148004 | 16 | 4600280 | 4600299 | 2 | 10 | 20 | GT   | 16 | 8  |
| 148006 | 16 | 4602397 | 4602420 | 2 | 12 | 24 | TG   | 17 | 13 |
| 148008 | 16 | 4609118 | 4609135 | 3 | 6  | 18 | CAG  | 28 | 3  |
| 148014 | 16 | 4618518 | 4618553 | 2 | 18 | 36 | TG   | 9  | 8  |

|        |    |         |         |   |    |    |      |    |    |
|--------|----|---------|---------|---|----|----|------|----|----|
| 148017 | 16 | 4625414 | 4625428 | 3 | 5  | 15 | AAC  | 12 | 4  |
| 148019 | 16 | 4627320 | 4627353 | 2 | 17 | 34 | CA   | 7  | 6  |
| 148020 | 16 | 4630090 | 4630107 | 2 | 9  | 18 | CA   | 10 | 6  |
| 148025 | 16 | 4636028 | 4636041 | 2 | 7  | 14 | GA   | 24 | 3  |
| 148027 | 16 | 4643519 | 4643536 | 2 | 9  | 18 | AC   | 13 | 3  |
| 148032 | 16 | 4654162 | 4654194 | 3 | 11 | 33 | TTA  | 9  | 8  |
| 148034 | 16 | 4656722 | 4656733 | 2 | 6  | 12 | TG   | 26 | 3  |
| 148036 | 16 | 4659147 | 4659174 | 2 | 14 | 28 | AC   | 18 | 11 |
| 148037 | 16 | 4661044 | 4661063 | 2 | 10 | 20 | AC   | 17 | 4  |
| 148038 | 16 | 4661239 | 4661266 | 2 | 14 | 28 | TG   | 17 | 11 |
| 148041 | 16 | 4663132 | 4663145 | 2 | 7  | 14 | TG   | 22 | 9  |
| 148042 | 16 | 4664483 | 4664508 | 2 | 13 | 26 | CA   | 10 | 7  |
| 148045 | 16 | 4668859 | 4668878 | 2 | 10 | 20 | GT   | 13 | 8  |
| 148046 | 16 | 4668999 | 4669020 | 2 | 11 | 22 | GT   | 27 | 7  |
| 148047 | 16 | 4669055 | 4669068 | 2 | 7  | 14 | TG   | 27 | 3  |
| 148048 | 16 | 4669174 | 4669197 | 2 | 12 | 24 | CA   | 15 | 7  |
| 148049 | 16 | 4669279 | 4669308 | 2 | 15 | 30 | CA   | 13 | 6  |
| 148050 | 16 | 4669431 | 4669462 | 2 | 16 | 32 | CT   | 17 | 11 |
| 148051 | 16 | 4669575 | 4669612 | 2 | 19 | 38 | CA   | 13 | 7  |
| 148052 | 16 | 4669715 | 4669732 | 2 | 9  | 18 | CA   | 20 | 6  |
| 148053 | 16 | 4669735 | 4669748 | 2 | 7  | 14 | CA   | 17 | 3  |
| 148064 | 16 | 4674336 | 4674359 | 4 | 6  | 24 | AGAA | 20 | 5  |
| 148065 | 16 | 4674979 | 4675012 | 2 | 17 | 34 | AC   | 16 | 10 |
| 148068 | 16 | 4688608 | 4688643 | 2 | 18 | 36 | TG   | 9  | 6  |
| 148069 | 16 | 4690300 | 4690311 | 2 | 6  | 12 | GT   | 24 | 7  |
| 148071 | 16 | 4698249 | 4698264 | 2 | 8  | 16 | TG   | 23 | 8  |
| 148075 | 16 | 4698615 | 4698628 | 2 | 7  | 14 | AC   | 14 | 3  |
| 148076 | 16 | 4698631 | 4698642 | 2 | 6  | 12 | AC   | 22 | 3  |
| 148077 | 16 | 4700650 | 4700685 | 2 | 18 | 36 | CA   | 8  | 8  |
| 148078 | 16 | 4701417 | 4701430 | 2 | 7  | 14 | CA   | 19 | 5  |
| 148081 | 16 | 4711933 | 4711982 | 2 | 25 | 50 | CT   | 9  | 6  |
| 148084 | 16 | 4716720 | 4716739 | 2 | 10 | 20 | AC   | 16 | 5  |
| 148087 | 16 | 4720280 | 4720311 | 2 | 16 | 32 | CA   | 12 | 11 |
| 148089 | 16 | 4724535 | 4724558 | 2 | 12 | 24 | AC   | 19 | 10 |
| 148091 | 16 | 4726528 | 4726539 | 2 | 6  | 12 | GT   | 32 | 5  |
| 148096 | 16 | 4731452 | 4731487 | 4 | 9  | 36 | ATGT | 6  | 4  |
| 148102 | 16 | 4754056 | 4754069 | 2 | 7  | 14 | TG   | 30 | 8  |
| 148104 | 16 | 4755496 | 4755513 | 2 | 9  | 18 | GT   | 31 | 5  |
| 148109 | 16 | 4762324 | 4762350 | 3 | 9  | 27 | TTG  | 21 | 8  |
| 148111 | 16 | 4766682 | 4766702 | 3 | 7  | 21 | TTG  | 24 | 6  |
| 148113 | 16 | 4775957 | 4775970 | 2 | 7  | 14 | AC   | 16 | 3  |
| 148114 | 16 | 4776601 | 4776638 | 2 | 19 | 38 | AC   | 9  | 11 |
| 148115 | 16 | 4778482 | 4778507 | 2 | 13 | 26 | CA   | 13 | 12 |
| 148116 | 16 | 4783691 | 4783702 | 2 | 6  | 12 | CA   | 14 | 3  |
| 148117 | 16 | 4787626 | 4787641 | 2 | 8  | 16 | CA   | 28 | 4  |
| 148120 | 16 | 4796092 | 4796103 | 2 | 6  | 12 | AC   | 22 | 8  |
| 148121 | 16 | 4809799 | 4809814 | 2 | 8  | 16 | TG   | 22 | 9  |
| 148122 | 16 | 4810079 | 4810093 | 3 | 5  | 15 | GGA  | 26 | 3  |
| 148123 | 16 | 4810459 | 4810472 | 2 | 7  | 14 | CA   | 21 | 4  |
| 148130 | 16 | 4820471 | 4820491 | 3 | 7  | 21 | CCT  | 26 | 3  |
| 148132 | 16 | 4823868 | 4823883 | 2 | 8  | 16 | AC   | 23 | 3  |

|        |    |         |         |   |    |    |      |    |    |
|--------|----|---------|---------|---|----|----|------|----|----|
| 148133 | 16 | 4826823 | 4826840 | 3 | 6  | 18 | CCA  | 14 | 4  |
| 148136 | 16 | 4828894 | 4828937 | 4 | 11 | 44 | CAAA | 18 | 15 |
| 148137 | 16 | 4830868 | 4830885 | 3 | 6  | 18 | ACA  | 26 | 14 |
| 148138 | 16 | 4832160 | 4832183 | 3 | 8  | 24 | ACA  | 11 | 8  |
| 148141 | 16 | 4839523 | 4839566 | 2 | 22 | 44 | AC   | 13 | 13 |
| 148144 | 16 | 4841721 | 4841742 | 2 | 11 | 22 | TG   | 14 | 11 |
| 148146 | 16 | 4848514 | 4848528 | 3 | 5  | 15 | TTC  | 15 | 7  |
| 148151 | 16 | 4860275 | 4860286 | 2 | 6  | 12 | AC   | 23 | 13 |
| 148152 | 16 | 4861128 | 4861141 | 2 | 7  | 14 | CA   | 15 | 12 |
| 148153 | 16 | 4861142 | 4861155 | 2 | 7  | 14 | CT   | 12 | 6  |
| 148162 | 16 | 4881828 | 4881845 | 3 | 6  | 18 | CTT  | 22 | 3  |
| 148166 | 16 | 4893490 | 4893511 | 2 | 11 | 22 | CA   | 13 | 10 |
| 148174 | 16 | 4918081 | 4918095 | 3 | 5  | 15 | TAC  | 31 | 3  |
| 148185 | 16 | 4927552 | 4927589 | 2 | 19 | 38 | CA   | 7  | 10 |
| 148186 | 16 | 4933079 | 4933104 | 2 | 13 | 26 | CA   | 14 | 10 |
| 148188 | 16 | 4935206 | 4935231 | 2 | 13 | 26 | GT   | 11 | 8  |
| 148189 | 16 | 4935408 | 4935427 | 2 | 10 | 20 | TG   | 24 | 7  |
| 148190 | 16 | 4938719 | 4938730 | 2 | 6  | 12 | AC   | 30 | 3  |
| 148192 | 16 | 4942346 | 4942363 | 2 | 9  | 18 | CA   | 13 | 7  |
| 148193 | 16 | 4942677 | 4942700 | 2 | 12 | 24 | TG   | 15 | 9  |
| 148196 | 16 | 4946671 | 4946712 | 2 | 21 | 42 | CA   | 7  | 8  |
| 148197 | 16 | 4949224 | 4949241 | 2 | 9  | 18 | CA   | 24 | 5  |
| 148198 | 16 | 4949911 | 4949940 | 2 | 15 | 30 | GT   | 11 | 9  |
| 148201 | 16 | 4951088 | 4951099 | 2 | 6  | 12 | TG   | 24 | 4  |
| 148205 | 16 | 4955270 | 4955289 | 2 | 10 | 20 | AC   | 21 | 6  |
| 148211 | 16 | 4956539 | 4956584 | 2 | 23 | 46 | TG   | 10 | 13 |
| 148212 | 16 | 4957065 | 4957080 | 2 | 8  | 16 | CA   | 20 | 4  |
| 148213 | 16 | 4957590 | 4957601 | 2 | 6  | 12 | TC   | 14 | 7  |
| 148214 | 16 | 4957602 | 4957619 | 2 | 9  | 18 | AC   | 21 | 9  |
| 148215 | 16 | 4958766 | 4958811 | 2 | 23 | 46 | GT   | 13 | 12 |
| 148222 | 16 | 4974461 | 4974486 | 2 | 13 | 26 | GT   | 6  | 7  |
| 148226 | 16 | 4977137 | 4977154 | 3 | 6  | 18 | CAT  | 33 | 7  |
| 148228 | 16 | 4982981 | 4983004 | 2 | 12 | 24 | AC   | 17 | 6  |
| 148231 | 16 | 4984044 | 4984070 | 3 | 9  | 27 | GAG  | 9  | 6  |
| 148232 | 16 | 4984587 | 4984602 | 2 | 8  | 16 | CA   | 26 | 7  |
| 148233 | 16 | 4984800 | 4984817 | 2 | 9  | 18 | GT   | 13 | 8  |
| 148234 | 16 | 4987795 | 4987836 | 3 | 14 | 42 | ATC  | 25 | 8  |
| 148236 | 16 | 4994263 | 4994282 | 4 | 5  | 20 | CTTT | 11 | 4  |
| 148239 | 16 | 4998906 | 4998917 | 2 | 6  | 12 | AC   | 26 | 3  |
| 148240 | 16 | 4999302 | 4999319 | 2 | 9  | 18 | CT   | 19 | 4  |
| 148242 | 16 | 5001278 | 5001293 | 2 | 8  | 16 | CA   | 12 | 5  |
| 148243 | 16 | 5002451 | 5002474 | 2 | 12 | 24 | TG   | 19 | 8  |
| 148244 | 16 | 5002775 | 5002790 | 2 | 8  | 16 | AC   | 20 | 3  |
| 148249 | 16 | 5003435 | 5003460 | 2 | 13 | 26 | TC   | 9  | 4  |
| 148250 | 16 | 5003486 | 5003527 | 2 | 21 | 42 | CA   | 9  | 7  |
| 148251 | 16 | 5003702 | 5003713 | 2 | 6  | 12 | GT   | 24 | 5  |
| 148254 | 16 | 5003887 | 5003906 | 2 | 10 | 20 | AC   | 6  | 6  |
| 148257 | 16 | 5004815 | 5004832 | 2 | 9  | 18 | TG   | 23 | 3  |
| 148258 | 16 | 5005425 | 5005464 | 2 | 20 | 40 | AC   | 16 | 6  |
| 148259 | 16 | 5006762 | 5006785 | 2 | 12 | 24 | TG   | 6  | 4  |
| 148269 | 16 | 5008343 | 5008364 | 2 | 11 | 22 | AC   | 10 | 9  |



|        |    |         |         |   |    |    |      |    |    |
|--------|----|---------|---------|---|----|----|------|----|----|
| 148272 | 16 | 5010415 | 5010436 | 2 | 11 | 22 | CA   | 18 | 8  |
| 148274 | 16 | 5010675 | 5010692 | 2 | 9  | 18 | AC   | 9  | 9  |
| 148275 | 16 | 5010777 | 5010796 | 2 | 10 | 20 | CA   | 14 | 11 |
| 148280 | 16 | 5013447 | 5013466 | 4 | 5  | 20 | CGGT | 20 | 3  |
| 148283 | 16 | 5023120 | 5023135 | 4 | 4  | 16 | GCAC | 24 | 9  |
| 148284 | 16 | 5023139 | 5023150 | 2 | 6  | 12 | CA   | 17 | 6  |
| 148287 | 16 | 5032128 | 5032155 | 2 | 14 | 28 | GT   | 15 | 5  |
| 148290 | 16 | 5043142 | 5043165 | 2 | 12 | 24 | TG   | 20 | 10 |
| 148291 | 16 | 5043332 | 5043353 | 2 | 11 | 22 | GT   | 16 | 13 |
| 148293 | 16 | 5045495 | 5045520 | 2 | 13 | 26 | GT   | 8  | 10 |
| 148294 | 16 | 5046029 | 5046048 | 2 | 10 | 20 | GT   | 19 | 5  |
| 148297 | 16 | 5051252 | 5051265 | 2 | 7  | 14 | GA   | 15 | 4  |
| 148298 | 16 | 5051394 | 5051417 | 2 | 12 | 24 | TG   | 8  | 7  |
| 148299 | 16 | 5051570 | 5051593 | 2 | 12 | 24 | GT   | 15 | 11 |
| 148300 | 16 | 5051945 | 5051958 | 2 | 7  | 14 | AC   | 16 | 5  |
| 148310 | 16 | 5062372 | 5062423 | 2 | 26 | 52 | GT   | 8  | 10 |
| 148314 | 16 | 5064188 | 5064201 | 2 | 7  | 14 | TC   | 16 | 8  |
| 148315 | 16 | 5064202 | 5064213 | 2 | 6  | 12 | AC   | 21 | 12 |
| 148325 | 16 | 5078654 | 5078673 | 2 | 10 | 20 | GT   | 18 | 11 |
| 148329 | 16 | 5091400 | 5091411 | 2 | 6  | 12 | AG   | 28 | 4  |
| 148335 | 16 | 5104753 | 5104786 | 2 | 17 | 34 | TG   | 11 | 10 |
| 148340 | 16 | 5119224 | 5119247 | 3 | 8  | 24 | TGT  | 27 | 3  |
| 148341 | 16 | 5119610 | 5119627 | 2 | 9  | 18 | GT   | 13 | 7  |
| 148344 | 16 | 5127284 | 5127303 | 2 | 10 | 20 | CA   | 15 | 12 |
| 148347 | 16 | 5146372 | 5146389 | 2 | 9  | 18 | GT   | 19 | 7  |
| 148348 | 16 | 5151221 | 5151235 | 3 | 5  | 15 | TCC  | 30 | 4  |
| 148349 | 16 | 5162713 | 5162736 | 4 | 6  | 24 | AATG | 20 | 7  |
| 148355 | 16 | 5183173 | 5183199 | 3 | 9  | 27 | AGG  | 10 | 6  |
| 148358 | 16 | 5185560 | 5185599 | 2 | 20 | 40 | TG   | 10 | 12 |
| 148378 | 16 | 5192795 | 5192812 | 2 | 9  | 18 | TG   | 12 | 6  |
| 148380 | 16 | 5193160 | 5193179 | 4 | 5  | 20 | CTGG | 16 | 3  |
| 148383 | 16 | 5193872 | 5193891 | 2 | 10 | 20 | AC   | 14 | 13 |
| 148385 | 16 | 5197949 | 5197964 | 2 | 8  | 16 | AC   | 18 | 5  |
| 148390 | 16 | 5201150 | 5201171 | 2 | 11 | 22 | GT   | 10 | 5  |
| 148391 | 16 | 5201524 | 5201545 | 2 | 11 | 22 | CA   | 24 | 8  |
| 148395 | 16 | 5203851 | 5203872 | 2 | 11 | 22 | TG   | 16 | 12 |
| 148398 | 16 | 5206936 | 5206951 | 2 | 8  | 16 | CA   | 20 | 5  |
| 148399 | 16 | 5212521 | 5212544 | 2 | 12 | 24 | AC   | 20 | 6  |
| 148401 | 16 | 5217285 | 5217300 | 4 | 4  | 16 | TTTG | 25 | 3  |
| 148406 | 16 | 5231989 | 5232003 | 3 | 5  | 15 | TTA  | 22 | 7  |
| 148408 | 16 | 5236717 | 5236731 | 3 | 5  | 15 | TTA  | 10 | 3  |
| 148412 | 16 | 5247260 | 5247293 | 2 | 17 | 34 | AC   | 10 | 5  |
| 148413 | 16 | 5250973 | 5250994 | 2 | 11 | 22 | TG   | 15 | 7  |
| 148414 | 16 | 5251142 | 5251167 | 2 | 13 | 26 | GT   | 10 | 12 |
| 148419 | 16 | 5255272 | 5255301 | 2 | 15 | 30 | GT   | 12 | 8  |
| 148422 | 16 | 5257629 | 5257652 | 4 | 6  | 24 | CTGA | 25 | 5  |
| 148425 | 16 | 5261731 | 5261748 | 2 | 9  | 18 | GT   | 15 | 10 |
| 148429 | 16 | 5269495 | 5269508 | 2 | 7  | 14 | TC   | 24 | 6  |
| 148430 | 16 | 5269934 | 5269978 | 3 | 15 | 45 | TAA  | 12 | 7  |
| 148431 | 16 | 5271289 | 5271306 | 2 | 9  | 18 | CA   | 19 | 9  |
| 148440 | 16 | 5291730 | 5291747 | 2 | 9  | 18 | GA   | 18 | 4  |

|        |    |         |         |   |    |    |      |    |    |
|--------|----|---------|---------|---|----|----|------|----|----|
| 148441 | 16 | 5293103 | 5293114 | 2 | 6  | 12 | CT   | 29 | 6  |
| 148451 | 16 | 5307408 | 5307449 | 2 | 21 | 42 | TG   | 9  | 9  |
| 148452 | 16 | 5307606 | 5307621 | 2 | 8  | 16 | GA   | 33 | 3  |
| 148458 | 16 | 5328461 | 5328486 | 2 | 13 | 26 | TG   | 7  | 7  |
| 148461 | 16 | 5334767 | 5334787 | 3 | 7  | 21 | TGA  | 20 | 5  |
| 148472 | 16 | 5337075 | 5337094 | 2 | 10 | 20 | TG   | 18 | 7  |
| 148473 | 16 | 5338060 | 5338085 | 2 | 13 | 26 | TG   | 13 | 7  |
| 148475 | 16 | 5346952 | 5346963 | 2 | 6  | 12 | GT   | 27 | 4  |
| 148480 | 16 | 5360500 | 5360517 | 2 | 9  | 18 | CA   | 6  | 6  |
| 148486 | 16 | 5373331 | 5373350 | 2 | 10 | 20 | AC   | 19 | 8  |
| 148489 | 16 | 5374208 | 5374225 | 2 | 9  | 18 | GA   | 22 | 4  |
| 148490 | 16 | 5374575 | 5374588 | 2 | 7  | 14 | AG   | 18 | 3  |
| 148495 | 16 | 5394868 | 5394901 | 2 | 17 | 34 | CA   | 19 | 22 |
| 148497 | 16 | 5396250 | 5396277 | 2 | 14 | 28 | CA   | 12 | 9  |
| 148509 | 16 | 5403748 | 5403765 | 2 | 9  | 18 | GT   | 17 | 4  |
| 148510 | 16 | 5403802 | 5403821 | 2 | 10 | 20 | GT   | 18 | 7  |
| 148511 | 16 | 5405583 | 5405598 | 2 | 8  | 16 | AT   | 14 | 10 |
| 148512 | 16 | 5406085 | 5406104 | 2 | 10 | 20 | GA   | 6  | 4  |
| 148521 | 16 | 5423527 | 5423548 | 2 | 11 | 22 | AC   | 20 | 9  |
| 148523 | 16 | 5427227 | 5427254 | 2 | 14 | 28 | CT   | 10 | 8  |
| 148524 | 16 | 5428121 | 5428140 | 2 | 10 | 20 | AC   | 21 | 5  |
| 148525 | 16 | 5428278 | 5428329 | 2 | 26 | 52 | TG   | 10 | 9  |
| 148531 | 16 | 5428575 | 5428602 | 2 | 14 | 28 | AG   | 6  | 5  |
| 148532 | 16 | 5428806 | 5428833 | 2 | 14 | 28 | GT   | 8  | 8  |
| 148535 | 16 | 5454724 | 5454755 | 2 | 16 | 32 | TG   | 8  | 7  |
| 148536 | 16 | 5456358 | 5456371 | 2 | 7  | 14 | TG   | 15 | 7  |
| 148537 | 16 | 5456374 | 5456391 | 2 | 9  | 18 | TG   | 12 | 8  |
| 148540 | 16 | 5461097 | 5461108 | 2 | 6  | 12 | GA   | 26 | 4  |
| 148544 | 16 | 5465659 | 5465684 | 2 | 13 | 26 | CA   | 11 | 5  |
| 148546 | 16 | 5466683 | 5466718 | 2 | 18 | 36 | GT   | 6  | 7  |
| 148547 | 16 | 5466743 | 5466760 | 3 | 6  | 18 | GGT  | 14 | 7  |
| 148548 | 16 | 5467648 | 5467663 | 2 | 8  | 16 | TG   | 23 | 3  |
| 148549 | 16 | 5468165 | 5468188 | 2 | 12 | 24 | CA   | 19 | 10 |
| 148551 | 16 | 5470368 | 5470391 | 3 | 8  | 24 | GCT  | 25 | 4  |
| 148552 | 16 | 5471433 | 5471488 | 2 | 28 | 56 | GT   | 10 | 13 |
| 148554 | 16 | 5472455 | 5472486 | 2 | 16 | 32 | CA   | 22 | 8  |
| 148566 | 16 | 5498034 | 5498049 | 2 | 8  | 16 | GA   | 22 | 10 |
| 148568 | 16 | 5498636 | 5498651 | 2 | 8  | 16 | TG   | 17 | 9  |
| 148569 | 16 | 5498682 | 5498695 | 2 | 7  | 14 | AC   | 11 | 6  |
| 148570 | 16 | 5499101 | 5499112 | 2 | 6  | 12 | GA   | 10 | 3  |
| 148571 | 16 | 5499316 | 5499330 | 3 | 5  | 15 | TCC  | 13 | 7  |
| 148572 | 16 | 5501097 | 5501112 | 4 | 4  | 16 | GAGG | 12 | 6  |
| 148579 | 16 | 5513294 | 5513311 | 2 | 9  | 18 | GA   | 15 | 4  |
| 148580 | 16 | 5513736 | 5513750 | 3 | 5  | 15 | CCA  | 15 | 5  |
| 148583 | 16 | 5515876 | 5515891 | 2 | 8  | 16 | CA   | 19 | 6  |
| 148584 | 16 | 5523216 | 5523227 | 2 | 6  | 12 | AC   | 16 | 8  |
| 148586 | 16 | 5539940 | 5539953 | 2 | 7  | 14 | AC   | 29 | 5  |
| 148588 | 16 | 5540558 | 5540583 | 2 | 13 | 26 | CA   | 6  | 8  |
| 148591 | 16 | 5543236 | 5543255 | 2 | 10 | 20 | GA   | 6  | 3  |
| 148599 | 16 | 5557859 | 5557906 | 4 | 12 | 48 | ATAG | 18 | 9  |
| 148601 | 16 | 5565496 | 5565516 | 3 | 7  | 21 | GGA  | 27 | 4  |

|        |    |         |         |   |    |    |      |    |    |
|--------|----|---------|---------|---|----|----|------|----|----|
| 148610 | 16 | 5590237 | 5590268 | 2 | 16 | 32 | GT   | 19 | 10 |
| 148617 | 16 | 5608464 | 5608485 | 2 | 11 | 22 | AC   | 23 | 6  |
| 148618 | 16 | 5608584 | 5608597 | 2 | 7  | 14 | CA   | 21 | 5  |
| 148619 | 16 | 5608636 | 5608653 | 2 | 9  | 18 | CA   | 14 | 6  |
| 148627 | 16 | 5617293 | 5617320 | 2 | 14 | 28 | AC   | 18 | 8  |
| 148629 | 16 | 5625259 | 5625280 | 2 | 11 | 22 | AC   | 18 | 12 |
| 148634 | 16 | 5632753 | 5632774 | 2 | 11 | 22 | AC   | 19 | 8  |
| 148635 | 16 | 5634162 | 5634173 | 2 | 6  | 12 | CT   | 25 | 3  |
| 148637 | 16 | 5643338 | 5643353 | 4 | 4  | 16 | TTTG | 30 | 6  |
| 148641 | 16 | 5646701 | 5646721 | 3 | 7  | 21 | CAG  | 23 | 3  |
| 148643 | 16 | 5649040 | 5649054 | 3 | 5  | 15 | CTG  | 31 | 3  |
| 148645 | 16 | 5649890 | 5649921 | 2 | 16 | 32 | AC   | 14 | 8  |
| 148646 | 16 | 5653427 | 5653442 | 2 | 8  | 16 | AC   | 14 | 13 |
| 148647 | 16 | 5655667 | 5655686 | 4 | 5  | 20 | AAAT | 25 | 7  |
| 148650 | 16 | 5667982 | 5668011 | 2 | 15 | 30 | CA   | 8  | 9  |
| 148651 | 16 | 5669483 | 5669508 | 2 | 13 | 26 | AC   | 21 | 9  |
| 148653 | 16 | 5670560 | 5670583 | 2 | 12 | 24 | CA   | 20 | 9  |
| 148661 | 16 | 5708802 | 5708819 | 2 | 9  | 18 | GT   | 21 | 3  |
| 148674 | 16 | 5739315 | 5739326 | 2 | 6  | 12 | TA   | 13 | 4  |
| 148675 | 16 | 5739335 | 5739346 | 2 | 6  | 12 | TA   | 16 | 4  |
| 148676 | 16 | 5741852 | 5741865 | 2 | 7  | 14 | TG   | 24 | 5  |
| 148679 | 16 | 5752895 | 5752936 | 2 | 21 | 42 | GT   | 18 | 9  |
| 148686 | 16 | 5772495 | 5772510 | 2 | 8  | 16 | TG   | 19 | 3  |
| 148687 | 16 | 5772566 | 5772585 | 2 | 10 | 20 | GT   | 20 | 4  |
| 148692 | 16 | 5776726 | 5776757 | 2 | 16 | 32 | AC   | 15 | 10 |
| 148694 | 16 | 5779096 | 5779137 | 2 | 21 | 42 | CA   | 15 | 17 |
| 148695 | 16 | 5779299 | 5779316 | 2 | 9  | 18 | GT   | 19 | 3  |
| 148696 | 16 | 5779505 | 5779526 | 2 | 11 | 22 | CA   | 19 | 8  |
| 148697 | 16 | 5779684 | 5779713 | 2 | 15 | 30 | CA   | 9  | 4  |
| 148702 | 16 | 5801377 | 5801406 | 2 | 15 | 30 | AC   | 12 | 9  |
| 148703 | 16 | 5801819 | 5801832 | 2 | 7  | 14 | TC   | 16 | 8  |
| 148704 | 16 | 5801834 | 5801851 | 2 | 9  | 18 | CT   | 20 | 9  |
| 148705 | 16 | 5802462 | 5802501 | 4 | 10 | 40 | AAAG | 19 | 12 |
| 148710 | 16 | 5807434 | 5807451 | 3 | 6  | 18 | AAC  | 14 | 6  |
| 148711 | 16 | 5807614 | 5807633 | 2 | 10 | 20 | GT   | 21 | 17 |
| 148732 | 16 | 5823388 | 5823421 | 2 | 17 | 34 | TG   | 8  | 9  |
| 148733 | 16 | 5823527 | 5823554 | 2 | 14 | 28 | CA   | 15 | 13 |
| 148734 | 16 | 5823683 | 5823696 | 2 | 7  | 14 | AC   | 21 | 4  |
| 148735 | 16 | 5824083 | 5824102 | 2 | 10 | 20 | AC   | 20 | 6  |
| 148736 | 16 | 5825014 | 5825031 | 2 | 9  | 18 | GT   | 15 | 10 |
| 148741 | 16 | 5828230 | 5828253 | 3 | 8  | 24 | AGG  | 8  | 4  |
| 148742 | 16 | 5828529 | 5828540 | 2 | 6  | 12 | CA   | 14 | 8  |
| 148746 | 16 | 5830966 | 5830997 | 2 | 16 | 32 | TG   | 13 | 12 |
| 148747 | 16 | 5831136 | 5831153 | 2 | 9  | 18 | GT   | 15 | 4  |
| 148748 | 16 | 5831245 | 5831272 | 2 | 14 | 28 | GT   | 10 | 6  |
| 148749 | 16 | 5831425 | 5831452 | 2 | 14 | 28 | TA   | 7  | 6  |
| 148754 | 16 | 5837118 | 5837141 | 4 | 6  | 24 | CAGT | 33 | 4  |
| 148756 | 16 | 5840150 | 5840161 | 2 | 6  | 12 | TG   | 17 | 3  |
| 148759 | 16 | 5841519 | 5841530 | 2 | 6  | 12 | GT   | 18 | 3  |
| 148760 | 16 | 5842679 | 5842694 | 4 | 4  | 16 | GACG | 29 | 6  |
| 148761 | 16 | 5842846 | 5842877 | 2 | 16 | 32 | CA   | 13 | 8  |

|        |    |         |         |   |    |    |      |    |    |
|--------|----|---------|---------|---|----|----|------|----|----|
| 148762 | 16 | 5842943 | 5842958 | 2 | 8  | 16 | CA   | 23 | 4  |
| 148774 | 16 | 5855780 | 5855793 | 2 | 7  | 14 | CT   | 17 | 4  |
| 148777 | 16 | 5856452 | 5856472 | 3 | 7  | 21 | TCC  | 19 | 3  |
| 148778 | 16 | 5856595 | 5856608 | 2 | 7  | 14 | TG   | 17 | 6  |
| 148779 | 16 | 5856959 | 5856980 | 2 | 11 | 22 | TG   | 16 | 5  |
| 148780 | 16 | 5857336 | 5857357 | 2 | 11 | 22 | TG   | 13 | 6  |
| 148781 | 16 | 5857892 | 5857919 | 4 | 7  | 28 | AACC | 23 | 5  |
| 148784 | 16 | 5860762 | 5860811 | 2 | 25 | 50 | TG   | 6  | 8  |
| 148793 | 16 | 5864576 | 5864603 | 2 | 14 | 28 | TG   | 13 | 11 |
| 148800 | 16 | 5868386 | 5868421 | 2 | 18 | 36 | CA   | 8  | 6  |
| 148801 | 16 | 5868539 | 5868568 | 2 | 15 | 30 | CA   | 7  | 6  |
| 148804 | 16 | 5874739 | 5874754 | 2 | 8  | 16 | TG   | 21 | 7  |
| 148807 | 16 | 5876173 | 5876186 | 2 | 7  | 14 | CA   | 22 | 3  |
| 148808 | 16 | 5876413 | 5876424 | 2 | 6  | 12 | CA   | 16 | 5  |
| 148811 | 16 | 5876924 | 5876963 | 2 | 20 | 40 | AG   | 6  | 6  |
| 148812 | 16 | 5877071 | 5877094 | 2 | 12 | 24 | GT   | 12 | 9  |
| 148814 | 16 | 5879077 | 5879102 | 2 | 13 | 26 | CT   | 10 | 6  |
| 148824 | 16 | 5885420 | 5885441 | 2 | 11 | 22 | GA   | 18 | 13 |
| 148825 | 16 | 5885747 | 5885784 | 2 | 19 | 38 | TG   | 13 | 13 |
| 148833 | 16 | 5895290 | 5895301 | 2 | 6  | 12 | TG   | 27 | 4  |
| 148838 | 16 | 5898442 | 5898456 | 3 | 5  | 15 | AAT  | 23 | 5  |
| 148841 | 16 | 5907985 | 5908020 | 2 | 18 | 36 | CA   | 9  | 11 |
| 148846 | 16 | 5918265 | 5918288 | 4 | 6  | 24 | AGGC | 21 | 7  |
| 148847 | 16 | 5918678 | 5918701 | 2 | 12 | 24 | TG   | 22 | 4  |
| 148851 | 16 | 5920850 | 5920865 | 2 | 8  | 16 | AC   | 15 | 3  |
| 148856 | 16 | 5921792 | 5921807 | 2 | 8  | 16 | CA   | 16 | 8  |
| 148857 | 16 | 5922300 | 5922321 | 2 | 11 | 22 | AC   | 18 | 6  |
| 148858 | 16 | 5925327 | 5925348 | 2 | 11 | 22 | AC   | 22 | 9  |
| 148859 | 16 | 5926079 | 5926098 | 2 | 10 | 20 | AC   | 24 | 6  |
| 148862 | 16 | 5929209 | 5929246 | 2 | 19 | 38 | AG   | 8  | 9  |
| 148863 | 16 | 5931222 | 5931241 | 2 | 10 | 20 | AC   | 19 | 6  |
| 148866 | 16 | 5935154 | 5935205 | 2 | 26 | 52 | GT   | 15 | 11 |
| 148870 | 16 | 5940162 | 5940209 | 4 | 12 | 48 | AAAG | 20 | 11 |
| 148871 | 16 | 5943071 | 5943088 | 2 | 9  | 18 | CA   | 21 | 8  |
| 148873 | 16 | 5943957 | 5943968 | 2 | 6  | 12 | CA   | 11 | 3  |
| 148877 | 16 | 5946711 | 5946734 | 2 | 12 | 24 | CA   | 18 | 8  |
| 148879 | 16 | 5949255 | 5949266 | 2 | 6  | 12 | AC   | 29 | 3  |
| 148880 | 16 | 5949882 | 5949893 | 2 | 6  | 12 | CA   | 8  | 4  |
| 148881 | 16 | 5950444 | 5950473 | 2 | 15 | 30 | CA   | 7  | 7  |
| 148882 | 16 | 5951010 | 5951043 | 2 | 17 | 34 | GT   | 6  | 6  |
| 148884 | 16 | 5957499 | 5957518 | 2 | 10 | 20 | TG   | 15 | 4  |
| 148889 | 16 | 5962455 | 5962468 | 2 | 7  | 14 | CA   | 25 | 5  |
| 148890 | 16 | 5962812 | 5962827 | 2 | 8  | 16 | TC   | 24 | 3  |
| 148893 | 16 | 5965712 | 5965732 | 3 | 7  | 21 | CCT  | 12 | 5  |
| 148896 | 16 | 5966180 | 5966209 | 2 | 15 | 30 | CT   | 7  | 7  |
| 148899 | 16 | 5971320 | 5971345 | 2 | 13 | 26 | GT   | 18 | 6  |
| 148900 | 16 | 5979297 | 5979318 | 2 | 11 | 22 | CA   | 28 | 6  |
| 148904 | 16 | 5987117 | 5987134 | 3 | 6  | 18 | CAG  | 23 | 5  |
| 148907 | 16 | 5995144 | 5995171 | 2 | 14 | 28 | AC   | 14 | 8  |
| 148912 | 16 | 6008151 | 6008198 | 3 | 16 | 48 | GCT  | 25 | 9  |
| 148913 | 16 | 6009026 | 6009043 | 2 | 9  | 18 | AC   | 15 | 11 |

|        |    |         |         |   |    |    |      |    |    |
|--------|----|---------|---------|---|----|----|------|----|----|
| 148914 | 16 | 6009045 | 6009062 | 2 | 9  | 18 | CA   | 14 | 9  |
| 148916 | 16 | 6011121 | 6011132 | 2 | 6  | 12 | AC   | 31 | 6  |
| 148919 | 16 | 6024252 | 6024269 | 2 | 9  | 18 | GT   | 24 | 6  |
| 148922 | 16 | 6029197 | 6029222 | 2 | 13 | 26 | AC   | 14 | 10 |
| 148928 | 16 | 6038331 | 6038346 | 2 | 8  | 16 | TC   | 21 | 8  |
| 148929 | 16 | 6038347 | 6038364 | 2 | 9  | 18 | AC   | 21 | 9  |
| 148930 | 16 | 6040990 | 6041011 | 2 | 11 | 22 | TG   | 19 | 9  |
| 148931 | 16 | 6041600 | 6041627 | 2 | 14 | 28 | TG   | 11 | 10 |
| 148933 | 16 | 6044114 | 6044137 | 2 | 12 | 24 | TG   | 13 | 13 |
| 148935 | 16 | 6050647 | 6050666 | 2 | 10 | 20 | AC   | 19 | 10 |
| 148938 | 16 | 6053787 | 6053798 | 2 | 6  | 12 | TG   | 11 | 4  |
| 148939 | 16 | 6056557 | 6056588 | 2 | 16 | 32 | GA   | 6  | 9  |
| 148940 | 16 | 6057690 | 6057709 | 2 | 10 | 20 | CT   | 18 | 12 |
| 148943 | 16 | 6065034 | 6065048 | 3 | 5  | 15 | CAG  | 29 | 3  |
| 148944 | 16 | 6067886 | 6067901 | 2 | 8  | 16 | TG   | 21 | 7  |
| 148945 | 16 | 6069125 | 6069138 | 2 | 7  | 14 | TA   | 29 | 3  |
| 148946 | 16 | 6072250 | 6072265 | 2 | 8  | 16 | TG   | 26 | 6  |
| 148949 | 16 | 6074328 | 6074363 | 2 | 18 | 36 | TG   | 7  | 7  |
| 148952 | 16 | 6076093 | 6076104 | 2 | 6  | 12 | TG   | 21 | 5  |
| 148953 | 16 | 6078098 | 6078112 | 3 | 5  | 15 | CAG  | 26 | 4  |
| 148954 | 16 | 6080088 | 6080111 | 3 | 8  | 24 | ATC  | 29 | 7  |
| 148955 | 16 | 6080584 | 6080604 | 3 | 7  | 21 | CCT  | 15 | 5  |
| 148956 | 16 | 6080973 | 6081002 | 2 | 15 | 30 | GT   | 15 | 13 |
| 148957 | 16 | 6081882 | 6081895 | 2 | 7  | 14 | TG   | 21 | 3  |
| 148971 | 16 | 6138433 | 6138448 | 4 | 4  | 16 | TCTG | 27 | 3  |
| 148972 | 16 | 6140531 | 6140558 | 2 | 14 | 28 | TG   | 12 | 11 |
| 148974 | 16 | 6144645 | 6144656 | 2 | 6  | 12 | TG   | 25 | 9  |
| 148975 | 16 | 6144658 | 6144671 | 2 | 7  | 14 | GT   | 25 | 9  |
| 148977 | 16 | 6147852 | 6147867 | 2 | 8  | 16 | AC   | 26 | 10 |
| 148978 | 16 | 6153083 | 6153132 | 2 | 25 | 50 | TG   | 12 | 8  |
| 148980 | 16 | 6158483 | 6158498 | 4 | 4  | 16 | AAAT | 23 | 6  |
| 148982 | 16 | 6161374 | 6161417 | 2 | 22 | 44 | CA   | 16 | 4  |
| 148987 | 16 | 6169139 | 6169150 | 2 | 6  | 12 | CA   | 23 | 4  |
| 148988 | 16 | 6171479 | 6171490 | 2 | 6  | 12 | TG   | 25 | 6  |
| 148989 | 16 | 6171492 | 6171505 | 2 | 7  | 14 | GT   | 24 | 3  |
| 148998 | 16 | 6188500 | 6188521 | 2 | 11 | 22 | GT   | 18 | 13 |
| 149001 | 16 | 6199625 | 6199636 | 2 | 6  | 12 | TG   | 26 | 3  |
| 149004 | 16 | 6201074 | 6201105 | 2 | 16 | 32 | GT   | 7  | 7  |
| 149006 | 16 | 6205734 | 6205745 | 2 | 6  | 12 | CA   | 27 | 6  |
| 149007 | 16 | 6207536 | 6207567 | 2 | 16 | 32 | TG   | 8  | 9  |
| 149008 | 16 | 6207961 | 6207990 | 2 | 15 | 30 | CA   | 6  | 5  |
| 149009 | 16 | 6208232 | 6208264 | 3 | 11 | 33 | GGA  | 18 | 9  |
| 149013 | 16 | 6211177 | 6211210 | 2 | 17 | 34 | CA   | 18 | 13 |
| 149024 | 16 | 6230279 | 6230296 | 3 | 6  | 18 | CAC  | 7  | 4  |
| 149025 | 16 | 6230297 | 6230314 | 3 | 6  | 18 | CTC  | 10 | 5  |
| 149031 | 16 | 6237658 | 6237685 | 2 | 14 | 28 | TG   | 11 | 9  |
| 149036 | 16 | 6238262 | 6238283 | 2 | 11 | 22 | AC   | 21 | 7  |
| 149037 | 16 | 6240148 | 6240180 | 3 | 11 | 33 | TCT  | 21 | 6  |
| 149043 | 16 | 6242850 | 6242877 | 2 | 14 | 28 | CA   | 7  | 7  |
| 149045 | 16 | 6243795 | 6243836 | 2 | 21 | 42 | GT   | 9  | 7  |
| 149049 | 16 | 6244780 | 6244793 | 2 | 7  | 14 | CT   | 7  | 3  |

|        |    |         |         |   |    |    |      |    |    |
|--------|----|---------|---------|---|----|----|------|----|----|
| 149051 | 16 | 6246742 | 6246753 | 2 | 6  | 12 | AC   | 26 | 3  |
| 149052 | 16 | 6248029 | 6248062 | 2 | 17 | 34 | GT   | 9  | 11 |
| 149053 | 16 | 6248229 | 6248270 | 2 | 21 | 42 | GT   | 12 | 10 |
| 149057 | 16 | 6250004 | 6250017 | 2 | 7  | 14 | AC   | 16 | 4  |
| 149059 | 16 | 6250813 | 6250830 | 2 | 9  | 18 | TG   | 11 | 5  |
| 149062 | 16 | 6257466 | 6257487 | 2 | 11 | 22 | TG   | 22 | 10 |
| 149063 | 16 | 6257630 | 6257649 | 2 | 10 | 20 | CA   | 17 | 5  |
| 149064 | 16 | 6258234 | 6258255 | 2 | 11 | 22 | AC   | 18 | 8  |
| 149066 | 16 | 6263841 | 6263864 | 2 | 12 | 24 | AC   | 19 | 8  |
| 149068 | 16 | 6264570 | 6264591 | 2 | 11 | 22 | AC   | 15 | 3  |
| 149069 | 16 | 6267086 | 6267111 | 2 | 13 | 26 | AC   | 14 | 7  |
| 149070 | 16 | 6267152 | 6267165 | 2 | 7  | 14 | TG   | 16 | 3  |
| 149073 | 16 | 6267946 | 6267959 | 2 | 7  | 14 | GT   | 15 | 6  |
| 149079 | 16 | 6280307 | 6280318 | 2 | 6  | 12 | AC   | 28 | 5  |
| 149080 | 16 | 6280447 | 6280468 | 2 | 11 | 22 | CA   | 13 | 4  |
| 149082 | 16 | 6283576 | 6283603 | 2 | 14 | 28 | CA   | 13 | 9  |
| 149087 | 16 | 6289197 | 6289208 | 2 | 6  | 12 | TG   | 20 | 5  |
| 149088 | 16 | 6289210 | 6289223 | 2 | 7  | 14 | GT   | 16 | 4  |
| 149089 | 16 | 6289439 | 6289466 | 2 | 14 | 28 | TG   | 11 | 6  |
| 149090 | 16 | 6291534 | 6291549 | 4 | 4  | 16 | CTCC | 8  | 5  |
| 149093 | 16 | 6306840 | 6306853 | 2 | 7  | 14 | TC   | 7  | 4  |
| 149095 | 16 | 6311467 | 6311486 | 2 | 10 | 20 | GT   | 14 | 11 |
| 149096 | 16 | 6312015 | 6312050 | 2 | 18 | 36 | AC   | 6  | 9  |
| 149098 | 16 | 6312296 | 6312313 | 2 | 9  | 18 | CT   | 14 | 4  |
| 149101 | 16 | 6315506 | 6315517 | 2 | 6  | 12 | CA   | 11 | 4  |
| 149105 | 16 | 6322895 | 6322909 | 3 | 5  | 15 | CAA  | 26 | 3  |
| 149106 | 16 | 6324243 | 6324258 | 2 | 8  | 16 | TG   | 16 | 7  |
| 149109 | 16 | 6333319 | 6333340 | 2 | 11 | 22 | AG   | 23 | 5  |
| 149113 | 16 | 6337988 | 6338041 | 2 | 27 | 54 | CA   | 9  | 10 |
| 149128 | 16 | 6367071 | 6367092 | 2 | 11 | 22 | CA   | 19 | 9  |
| 149131 | 16 | 6388074 | 6388087 | 2 | 7  | 14 | TG   | 27 | 3  |
| 149133 | 16 | 6390610 | 6390625 | 2 | 8  | 16 | TG   | 22 | 5  |
| 149137 | 16 | 6398770 | 6398799 | 2 | 15 | 30 | CT   | 19 | 9  |
| 149138 | 16 | 6402237 | 6402262 | 2 | 13 | 26 | GA   | 12 | 7  |
| 149139 | 16 | 6405022 | 6405036 | 3 | 5  | 15 | AGC  | 21 | 5  |
| 149140 | 16 | 6405131 | 6405170 | 2 | 20 | 40 | CT   | 14 | 14 |
| 149146 | 16 | 6439958 | 6439975 | 3 | 6  | 18 | CTC  | 25 | 3  |
| 149150 | 16 | 6441516 | 6441530 | 3 | 5  | 15 | GCT  | 28 | 4  |
| 149163 | 16 | 6484843 | 6484860 | 3 | 6  | 18 | CAG  | 30 | 4  |
| 149168 | 16 | 6497623 | 6497634 | 2 | 6  | 12 | AC   | 27 | 5  |
| 149169 | 16 | 6502615 | 6502630 | 2 | 8  | 16 | GT   | 34 | 4  |
| 149171 | 16 | 6504582 | 6504601 | 2 | 10 | 20 | CA   | 19 | 7  |
| 149174 | 16 | 6506294 | 6506351 | 2 | 29 | 58 | TG   | 8  | 11 |
| 149176 | 16 | 6508004 | 6508031 | 2 | 14 | 28 | CT   | 17 | 8  |
| 149178 | 16 | 6508301 | 6508322 | 2 | 11 | 22 | TG   | 11 | 5  |
| 149179 | 16 | 6512951 | 6512968 | 3 | 6  | 18 | TGC  | 26 | 4  |
| 149180 | 16 | 6513194 | 6513205 | 2 | 6  | 12 | GA   | 31 | 3  |
| 149186 | 16 | 6542423 | 6542440 | 2 | 9  | 18 | AC   | 13 | 11 |
| 149187 | 16 | 6542443 | 6542456 | 2 | 7  | 14 | AC   | 15 | 7  |
| 149188 | 16 | 6544373 | 6544390 | 3 | 6  | 18 | CTA  | 15 | 4  |
| 149190 | 16 | 6548534 | 6548551 | 3 | 6  | 18 | CTT  | 34 | 3  |

|        |    |         |         |   |    |    |      |    |    |
|--------|----|---------|---------|---|----|----|------|----|----|
| 149194 | 16 | 6566073 | 6566087 | 3 | 5  | 15 | CAG  | 32 | 3  |
| 149198 | 16 | 6582353 | 6582366 | 2 | 7  | 14 | TA   | 24 | 3  |
| 149199 | 16 | 6590509 | 6590526 | 2 | 9  | 18 | AC   | 21 | 6  |
| 149202 | 16 | 6593368 | 6593383 | 2 | 8  | 16 | CA   | 21 | 9  |
| 149204 | 16 | 6594099 | 6594126 | 2 | 14 | 28 | CT   | 7  | 4  |
| 149207 | 16 | 6596022 | 6596035 | 2 | 7  | 14 | TG   | 18 | 4  |
| 149210 | 16 | 6604861 | 6604874 | 2 | 7  | 14 | TA   | 20 | 5  |
| 149211 | 16 | 6605729 | 6605758 | 2 | 15 | 30 | AG   | 7  | 8  |
| 149213 | 16 | 6611498 | 6611509 | 2 | 6  | 12 | CT   | 16 | 7  |
| 149217 | 16 | 6618996 | 6619021 | 2 | 13 | 26 | CA   | 16 | 8  |
| 149223 | 16 | 6621979 | 6621996 | 2 | 9  | 18 | GT   | 22 | 4  |
| 149224 | 16 | 6625955 | 6625966 | 2 | 6  | 12 | AC   | 21 | 9  |
| 149226 | 16 | 6626357 | 6626384 | 2 | 14 | 28 | AC   | 11 | 9  |
| 149243 | 16 | 6647616 | 6647629 | 2 | 7  | 14 | TG   | 25 | 7  |
| 149244 | 16 | 6648575 | 6648586 | 2 | 6  | 12 | CA   | 21 | 4  |
| 149245 | 16 | 6648925 | 6648952 | 2 | 14 | 28 | TG   | 21 | 13 |
| 149251 | 16 | 6674336 | 6674351 | 4 | 4  | 16 | TGTC | 15 | 3  |
| 149252 | 16 | 6679496 | 6679507 | 2 | 6  | 12 | GT   | 34 | 3  |
| 149253 | 16 | 6685856 | 6685867 | 2 | 6  | 12 | AT   | 28 | 11 |
| 149254 | 16 | 6687051 | 6687084 | 2 | 17 | 34 | TG   | 11 | 11 |
| 149257 | 16 | 6690572 | 6690595 | 2 | 12 | 24 | AC   | 17 | 9  |
| 149262 | 16 | 6715672 | 6715689 | 2 | 9  | 18 | CA   | 22 | 4  |
| 149263 | 16 | 6718634 | 6718651 | 2 | 9  | 18 | GT   | 17 | 3  |
| 149270 | 16 | 6732006 | 6732031 | 2 | 13 | 26 | CA   | 26 | 12 |
| 149272 | 16 | 6739309 | 6739320 | 2 | 6  | 12 | GT   | 28 | 3  |
| 149276 | 16 | 6745394 | 6745405 | 2 | 6  | 12 | TG   | 25 | 5  |
| 149280 | 16 | 6762177 | 6762192 | 2 | 8  | 16 | TC   | 11 | 7  |
| 149285 | 16 | 6775347 | 6775358 | 2 | 6  | 12 | CA   | 29 | 3  |
| 149293 | 16 | 6782388 | 6782399 | 2 | 6  | 12 | GT   | 27 | 4  |
| 149294 | 16 | 6782460 | 6782477 | 2 | 9  | 18 | TG   | 13 | 3  |
| 149295 | 16 | 6784990 | 6785007 | 2 | 9  | 18 | AG   | 20 | 5  |
| 149300 | 16 | 6787373 | 6787392 | 4 | 5  | 20 | CTGT | 25 | 5  |
| 149301 | 16 | 6787539 | 6787554 | 2 | 8  | 16 | GA   | 27 | 6  |
| 149304 | 16 | 6788281 | 6788300 | 2 | 10 | 20 | CT   | 9  | 4  |
| 149305 | 16 | 6789343 | 6789360 | 2 | 9  | 18 | AG   | 16 | 6  |
| 149306 | 16 | 6789392 | 6789405 | 2 | 7  | 14 | GT   | 19 | 6  |
| 149307 | 16 | 6793279 | 6793314 | 2 | 18 | 36 | AC   | 15 | 13 |
| 149308 | 16 | 6793492 | 6793507 | 2 | 8  | 16 | TG   | 22 | 3  |
| 149310 | 16 | 6804984 | 6805015 | 2 | 16 | 32 | GT   | 10 | 7  |
| 149316 | 16 | 6824933 | 6824976 | 2 | 22 | 44 | TG   | 17 | 15 |
| 149317 | 16 | 6826325 | 6826339 | 3 | 5  | 15 | CTC  | 26 | 4  |
| 149319 | 16 | 6836812 | 6836827 | 4 | 4  | 16 | ATGT | 26 | 3  |
| 149320 | 16 | 6837967 | 6837982 | 2 | 8  | 16 | AC   | 22 | 11 |
| 149325 | 16 | 6839560 | 6839575 | 2 | 8  | 16 | TC   | 24 | 3  |
| 149330 | 16 | 6851983 | 6852000 | 2 | 9  | 18 | TG   | 24 | 8  |
| 149334 | 16 | 6852993 | 6853006 | 2 | 7  | 14 | GT   | 27 | 4  |
| 149335 | 16 | 6853262 | 6853289 | 2 | 14 | 28 | GT   | 12 | 14 |
| 149336 | 16 | 6853813 | 6853840 | 2 | 14 | 28 | GT   | 17 | 8  |
| 149337 | 16 | 6854020 | 6854055 | 2 | 18 | 36 | CA   | 16 | 9  |
| 149341 | 16 | 6861008 | 6861023 | 2 | 8  | 16 | CA   | 17 | 11 |
| 149345 | 16 | 6866090 | 6866115 | 2 | 13 | 26 | AC   | 13 | 9  |

|        |    |         |         |   |    |    |      |    |    |
|--------|----|---------|---------|---|----|----|------|----|----|
| 149349 | 16 | 6870618 | 6870651 | 2 | 17 | 34 | AC   | 6  | 8  |
| 149350 | 16 | 6870758 | 6870805 | 2 | 24 | 48 | GT   | 9  | 8  |
| 149352 | 16 | 6872780 | 6872794 | 3 | 5  | 15 | TCC  | 25 | 3  |
| 149354 | 16 | 6877381 | 6877396 | 2 | 8  | 16 | CA   | 24 | 5  |
| 149357 | 16 | 6886636 | 6886653 | 2 | 9  | 18 | TG   | 21 | 4  |
| 149358 | 16 | 6886808 | 6886825 | 3 | 6  | 18 | AAT  | 20 | 5  |
| 149359 | 16 | 6898682 | 6898695 | 2 | 7  | 14 | TG   | 30 | 3  |
| 149362 | 16 | 6911061 | 6911084 | 4 | 6  | 24 | TTTC | 25 | 6  |
| 149371 | 16 | 6926915 | 6926946 | 2 | 16 | 32 | GT   | 9  | 5  |
| 149373 | 16 | 6927230 | 6927247 | 2 | 9  | 18 | CA   | 12 | 3  |
| 149375 | 16 | 6931683 | 6931694 | 2 | 6  | 12 | GA   | 9  | 3  |
| 149380 | 16 | 6936124 | 6936137 | 2 | 7  | 14 | TG   | 25 | 3  |
| 149383 | 16 | 6937792 | 6937833 | 2 | 21 | 42 | AC   | 8  | 7  |
| 149384 | 16 | 6941016 | 6941051 | 2 | 18 | 36 | TG   | 10 | 9  |
| 149385 | 16 | 6941190 | 6941205 | 2 | 8  | 16 | AC   | 16 | 6  |
| 149387 | 16 | 6942894 | 6942915 | 2 | 11 | 22 | GT   | 20 | 8  |
| 149389 | 16 | 6943375 | 6943390 | 2 | 8  | 16 | GT   | 14 | 3  |
| 149404 | 16 | 6964703 | 6964722 | 2 | 10 | 20 | TG   | 16 | 10 |
| 149405 | 16 | 6964763 | 6964784 | 2 | 11 | 22 | TG   | 15 | 8  |
| 149406 | 16 | 6968413 | 6968428 | 2 | 8  | 16 | TG   | 26 | 10 |
| 149409 | 16 | 6970796 | 6970819 | 2 | 12 | 24 | TG   | 10 | 14 |
| 149410 | 16 | 6971316 | 6971339 | 3 | 8  | 24 | CTC  | 24 | 7  |
| 149411 | 16 | 6973710 | 6973729 | 2 | 10 | 20 | CT   | 7  | 11 |
| 149412 | 16 | 6973779 | 6973796 | 2 | 9  | 18 | CA   | 15 | 5  |
| 149414 | 16 | 6979229 | 6979250 | 2 | 11 | 22 | TG   | 16 | 4  |
| 149415 | 16 | 6979491 | 6979518 | 2 | 14 | 28 | GT   | 21 | 13 |
| 149419 | 16 | 6983941 | 6983952 | 2 | 6  | 12 | AC   | 22 | 5  |
| 149423 | 16 | 7004962 | 7004981 | 4 | 5  | 20 | ATTC | 22 | 3  |
| 149425 | 16 | 7007751 | 7007780 | 2 | 15 | 30 | TG   | 14 | 15 |
| 149432 | 16 | 7021665 | 7021680 | 2 | 8  | 16 | TG   | 19 | 5  |
| 149435 | 16 | 7030514 | 7030527 | 2 | 7  | 14 | TG   | 28 | 3  |
| 149438 | 16 | 7037560 | 7037593 | 2 | 17 | 34 | AC   | 16 | 14 |
| 149439 | 16 | 7037678 | 7037689 | 2 | 6  | 12 | GT   | 25 | 3  |
| 149440 | 16 | 7040207 | 7040224 | 2 | 9  | 18 | GT   | 20 | 3  |
| 149443 | 16 | 7050452 | 7050465 | 2 | 7  | 14 | CA   | 18 | 3  |
| 149449 | 16 | 7054250 | 7054265 | 2 | 8  | 16 | AT   | 13 | 5  |
| 149454 | 16 | 7057847 | 7057874 | 2 | 14 | 28 | TG   | 14 | 7  |
| 149456 | 16 | 7066489 | 7066506 | 2 | 9  | 18 | GT   | 23 | 7  |
| 149458 | 16 | 7072856 | 7072871 | 4 | 4  | 16 | ACGC | 26 | 6  |
| 149468 | 16 | 7084083 | 7084110 | 2 | 14 | 28 | AC   | 14 | 11 |
| 149471 | 16 | 7084649 | 7084668 | 2 | 10 | 20 | TG   | 23 | 6  |
| 149473 | 16 | 7085861 | 7085886 | 2 | 13 | 26 | CA   | 12 | 8  |
| 149479 | 16 | 7093680 | 7093703 | 2 | 12 | 24 | AC   | 11 | 10 |
| 149484 | 16 | 7106797 | 7106824 | 2 | 14 | 28 | AC   | 18 | 10 |
| 149489 | 16 | 7109666 | 7109687 | 2 | 11 | 22 | TG   | 15 | 6  |
| 149491 | 16 | 7109795 | 7109824 | 2 | 15 | 30 | TG   | 11 | 10 |
| 149493 | 16 | 7115230 | 7115285 | 2 | 28 | 56 | AC   | 8  | 10 |
| 149494 | 16 | 7121009 | 7121022 | 2 | 7  | 14 | CA   | 23 | 5  |
| 149495 | 16 | 7121132 | 7121153 | 2 | 11 | 22 | TG   | 13 | 13 |
| 149496 | 16 | 7122563 | 7122594 | 2 | 16 | 32 | TG   | 12 | 6  |
| 149499 | 16 | 7126093 | 7126110 | 3 | 6  | 18 | ATT  | 22 | 6  |



|        |    |         |         |   |    |    |      |    |    |
|--------|----|---------|---------|---|----|----|------|----|----|
| 149503 | 16 | 7129276 | 7129291 | 2 | 8  | 16 | TC   | 19 | 7  |
| 149516 | 16 | 7152326 | 7152343 | 2 | 9  | 18 | TG   | 21 | 10 |
| 149518 | 16 | 7152412 | 7152449 | 2 | 19 | 38 | TG   | 7  | 11 |
| 149519 | 16 | 7154311 | 7154322 | 2 | 6  | 12 | CT   | 24 | 3  |
| 149529 | 16 | 7169613 | 7169640 | 2 | 14 | 28 | CA   | 18 | 10 |
| 149530 | 16 | 7169890 | 7169909 | 2 | 10 | 20 | CA   | 16 | 11 |
| 149539 | 16 | 7184876 | 7184913 | 2 | 19 | 38 | GT   | 6  | 7  |
| 149541 | 16 | 7185942 | 7185953 | 2 | 6  | 12 | TG   | 23 | 7  |
| 149545 | 16 | 7192241 | 7192254 | 2 | 7  | 14 | AC   | 24 | 3  |
| 149547 | 16 | 7196202 | 7196213 | 2 | 6  | 12 | CA   | 20 | 3  |
| 149549 | 16 | 7197846 | 7197866 | 3 | 7  | 21 | GTT  | 24 | 4  |
| 149552 | 16 | 7200997 | 7201010 | 2 | 7  | 14 | AC   | 18 | 6  |
| 149557 | 16 | 7215828 | 7215859 | 2 | 16 | 32 | AG   | 11 | 6  |
| 149560 | 16 | 7220641 | 7220654 | 2 | 7  | 14 | CA   | 23 | 9  |
| 149565 | 16 | 7234698 | 7234718 | 3 | 7  | 21 | TCA  | 17 | 8  |
| 149566 | 16 | 7235903 | 7235920 | 2 | 9  | 18 | GA   | 22 | 6  |
| 149567 | 16 | 7236388 | 7236409 | 2 | 11 | 22 | GT   | 25 | 16 |
| 149569 | 16 | 7236615 | 7236628 | 2 | 7  | 14 | CA   | 10 | 7  |
| 149570 | 16 | 7238734 | 7238753 | 2 | 10 | 20 | AG   | 25 | 8  |
| 149572 | 16 | 7241732 | 7241749 | 3 | 6  | 18 | CAC  | 32 | 3  |
| 149573 | 16 | 7242116 | 7242127 | 2 | 6  | 12 | CA   | 19 | 4  |
| 149576 | 16 | 7246461 | 7246476 | 2 | 8  | 16 | TG   | 19 | 10 |
| 149577 | 16 | 7246478 | 7246491 | 2 | 7  | 14 | GT   | 19 | 7  |
| 149578 | 16 | 7247315 | 7247330 | 2 | 8  | 16 | CA   | 25 | 8  |
| 149580 | 16 | 7248837 | 7248852 | 2 | 8  | 16 | AC   | 18 | 11 |
| 149584 | 16 | 7251172 | 7251195 | 2 | 12 | 24 | TG   | 12 | 5  |
| 149587 | 16 | 7253939 | 7253952 | 2 | 7  | 14 | GA   | 16 | 4  |
| 149588 | 16 | 7254825 | 7254840 | 2 | 8  | 16 | AC   | 20 | 5  |
| 149589 | 16 | 7255002 | 7255021 | 2 | 10 | 20 | AC   | 20 | 8  |
| 149590 | 16 | 7258034 | 7258047 | 2 | 7  | 14 | GT   | 22 | 8  |
| 149596 | 16 | 7275085 | 7275122 | 2 | 19 | 38 | GT   | 9  | 8  |
| 149601 | 16 | 7278780 | 7278791 | 2 | 6  | 12 | AC   | 22 | 7  |
| 149602 | 16 | 7278899 | 7278916 | 2 | 9  | 18 | GT   | 15 | 11 |
| 149605 | 16 | 7279888 | 7279905 | 2 | 9  | 18 | AC   | 16 | 13 |
| 149607 | 16 | 7280797 | 7280820 | 2 | 12 | 24 | TG   | 17 | 5  |
| 149610 | 16 | 7283563 | 7283576 | 2 | 7  | 14 | AC   | 22 | 10 |
| 149612 | 16 | 7285143 | 7285154 | 2 | 6  | 12 | GA   | 28 | 3  |
| 149613 | 16 | 7285610 | 7285641 | 2 | 16 | 32 | AC   | 16 | 7  |
| 149615 | 16 | 7289542 | 7289555 | 2 | 7  | 14 | TG   | 32 | 7  |
| 149624 | 16 | 7304644 | 7304665 | 2 | 11 | 22 | GT   | 18 | 6  |
| 149637 | 16 | 7309862 | 7309873 | 2 | 6  | 12 | CA   | 21 | 3  |
| 149638 | 16 | 7315155 | 7315170 | 2 | 8  | 16 | TG   | 20 | 4  |
| 149640 | 16 | 7319521 | 7319544 | 2 | 12 | 24 | GT   | 14 | 9  |
| 149644 | 16 | 7324628 | 7324641 | 2 | 7  | 14 | TG   | 29 | 3  |
| 149649 | 16 | 7336465 | 7336476 | 2 | 6  | 12 | CA   | 16 | 16 |
| 149652 | 16 | 7337936 | 7337956 | 3 | 7  | 21 | ATT  | 11 | 10 |
| 149657 | 16 | 7353163 | 7353204 | 3 | 14 | 42 | CAT  | 22 | 6  |
| 149658 | 16 | 7353653 | 7353664 | 2 | 6  | 12 | TG   | 15 | 3  |
| 149667 | 16 | 7368051 | 7368070 | 2 | 10 | 20 | AC   | 18 | 17 |
| 149669 | 16 | 7368116 | 7368143 | 2 | 14 | 28 | TG   | 22 | 9  |
| 149670 | 16 | 7368163 | 7368178 | 4 | 4  | 16 | TCAG | 25 | 5  |

|        |    |         |         |   |    |    |      |    |    |
|--------|----|---------|---------|---|----|----|------|----|----|
| 149673 | 16 | 7370664 | 7370691 | 4 | 7  | 28 | AGGA | 15 | 7  |
| 149675 | 16 | 7372968 | 7372987 | 2 | 10 | 20 | GT   | 24 | 8  |
| 149678 | 16 | 7373949 | 7373960 | 2 | 6  | 12 | CT   | 28 | 3  |
| 149681 | 16 | 7376908 | 7376923 | 2 | 8  | 16 | GT   | 6  | 6  |
| 149687 | 16 | 7381257 | 7381268 | 2 | 6  | 12 | CA   | 24 | 3  |
| 149689 | 16 | 7382276 | 7382309 | 2 | 17 | 34 | AC   | 6  | 8  |
| 149690 | 16 | 7382476 | 7382491 | 2 | 8  | 16 | GT   | 26 | 9  |
| 149693 | 16 | 7393555 | 7393572 | 2 | 9  | 18 | CA   | 18 | 6  |
| 149694 | 16 | 7395656 | 7395673 | 2 | 9  | 18 | AG   | 26 | 5  |
| 149696 | 16 | 7398281 | 7398300 | 2 | 10 | 20 | AC   | 11 | 10 |
| 149697 | 16 | 7399198 | 7399213 | 2 | 8  | 16 | GT   | 24 | 6  |
| 149702 | 16 | 7403916 | 7403927 | 2 | 6  | 12 | TA   | 16 | 4  |
| 149704 | 16 | 7404940 | 7404967 | 2 | 14 | 28 | TG   | 15 | 8  |
| 149705 | 16 | 7405504 | 7405531 | 2 | 14 | 28 | GT   | 19 | 10 |
| 149711 | 16 | 7410995 | 7411030 | 4 | 9  | 36 | AAGA | 14 | 13 |
| 149712 | 16 | 7411388 | 7411409 | 2 | 11 | 22 | GT   | 16 | 10 |
| 149713 | 16 | 7413301 | 7413328 | 4 | 7  | 28 | TCCA | 32 | 10 |
| 149716 | 16 | 7414669 | 7414716 | 4 | 12 | 48 | TCTA | 13 | 9  |
| 149717 | 16 | 7414841 | 7414868 | 2 | 14 | 28 | AC   | 12 | 7  |
| 149718 | 16 | 7415585 | 7415612 | 4 | 7  | 28 | TGAG | 24 | 7  |
| 149719 | 16 | 7415747 | 7415776 | 2 | 15 | 30 | GT   | 16 | 11 |
| 149720 | 16 | 7415876 | 7415893 | 2 | 9  | 18 | TG   | 15 | 10 |
| 149721 | 16 | 7417286 | 7417305 | 2 | 10 | 20 | AC   | 24 | 9  |
| 149722 | 16 | 7419908 | 7419927 | 2 | 10 | 20 | TG   | 24 | 9  |
| 149724 | 16 | 7422149 | 7422174 | 2 | 13 | 26 | AC   | 14 | 5  |
| 149725 | 16 | 7430183 | 7430208 | 2 | 13 | 26 | GT   | 8  | 6  |
| 149728 | 16 | 7435170 | 7435187 | 2 | 9  | 18 | AC   | 18 | 6  |
| 149731 | 16 | 7437474 | 7437489 | 2 | 8  | 16 | GA   | 6  | 4  |
| 149734 | 16 | 7438634 | 7438663 | 2 | 15 | 30 | AC   | 19 | 14 |
| 149735 | 16 | 7444686 | 7444705 | 4 | 5  | 20 | CTTT | 22 | 4  |
| 149738 | 16 | 7450991 | 7451020 | 2 | 15 | 30 | CA   | 6  | 10 |
| 149739 | 16 | 7451684 | 7451697 | 2 | 7  | 14 | AT   | 7  | 3  |
| 149740 | 16 | 7451820 | 7451865 | 2 | 23 | 46 | TG   | 7  | 10 |
| 149741 | 16 | 7459521 | 7459538 | 2 | 9  | 18 | CA   | 22 | 6  |
| 149742 | 16 | 7461001 | 7461022 | 2 | 11 | 22 | CT   | 24 | 4  |
| 149744 | 16 | 7465457 | 7465474 | 2 | 9  | 18 | AT   | 9  | 4  |
| 149745 | 16 | 7470468 | 7470497 | 2 | 15 | 30 | CA   | 23 | 11 |
| 149746 | 16 | 7470644 | 7470667 | 2 | 12 | 24 | TG   | 7  | 8  |
| 149756 | 16 | 7495907 | 7495926 | 2 | 10 | 20 | CA   | 20 | 4  |
| 149757 | 16 | 7498154 | 7498165 | 2 | 6  | 12 | GT   | 18 | 5  |
| 149758 | 16 | 7499985 | 7499998 | 2 | 7  | 14 | GT   | 25 | 4  |
| 149761 | 16 | 7503140 | 7503163 | 2 | 12 | 24 | TG   | 13 | 13 |
| 149762 | 16 | 7503328 | 7503339 | 2 | 6  | 12 | AG   | 21 | 3  |
| 149763 | 16 | 7503462 | 7503483 | 2 | 11 | 22 | AC   | 10 | 6  |
| 149764 | 16 | 7503698 | 7503709 | 2 | 6  | 12 | GT   | 19 | 3  |
| 149765 | 16 | 7503712 | 7503723 | 2 | 6  | 12 | GT   | 28 | 4  |
| 149778 | 16 | 7529360 | 7529375 | 2 | 8  | 16 | CA   | 27 | 4  |
| 149784 | 16 | 7558179 | 7558236 | 2 | 29 | 58 | AC   | 9  | 8  |
| 149786 | 16 | 7567994 | 7568031 | 2 | 19 | 38 | GA   | 7  | 8  |
| 149788 | 16 | 7574108 | 7574122 | 3 | 5  | 15 | CTA  | 20 | 3  |
| 149789 | 16 | 7574188 | 7574211 | 4 | 6  | 24 | AATC | 27 | 5  |

|        |    |         |         |   |    |    |      |    |    |
|--------|----|---------|---------|---|----|----|------|----|----|
| 149795 | 16 | 7583243 | 7583264 | 2 | 11 | 22 | AC   | 7  | 9  |
| 149796 | 16 | 7584363 | 7584377 | 3 | 5  | 15 | TTG  | 20 | 4  |
| 149797 | 16 | 7584978 | 7585011 | 2 | 17 | 34 | AC   | 13 | 10 |
| 149798 | 16 | 7585379 | 7585398 | 2 | 10 | 20 | CA   | 21 | 6  |
| 149799 | 16 | 7586559 | 7586572 | 2 | 7  | 14 | GT   | 23 | 7  |
| 149805 | 16 | 7596694 | 7596715 | 2 | 11 | 22 | CA   | 15 | 3  |
| 149811 | 16 | 7602400 | 7602425 | 2 | 13 | 26 | GT   | 16 | 6  |
| 149817 | 16 | 7616196 | 7616207 | 2 | 6  | 12 | TG   | 19 | 4  |
| 149819 | 16 | 7621073 | 7621108 | 4 | 9  | 36 | TCTT | 19 | 11 |
| 149820 | 16 | 7621869 | 7621882 | 2 | 7  | 14 | GT   | 27 | 4  |
| 149822 | 16 | 7622966 | 7622981 | 4 | 4  | 16 | GAGG | 18 | 3  |
| 149825 | 16 | 7624842 | 7624857 | 2 | 8  | 16 | TG   | 12 | 3  |
| 149829 | 16 | 7633239 | 7633256 | 2 | 9  | 18 | CA   | 16 | 9  |
| 149830 | 16 | 7637015 | 7637029 | 3 | 5  | 15 | CTG  | 22 | 3  |
| 149836 | 16 | 7642708 | 7642725 | 2 | 9  | 18 | CA   | 18 | 7  |
| 149837 | 16 | 7643784 | 7643807 | 4 | 6  | 24 | ATTC | 28 | 6  |
| 149845 | 16 | 7653596 | 7653607 | 2 | 6  | 12 | CA   | 6  | 6  |
| 149846 | 16 | 7654588 | 7654599 | 2 | 6  | 12 | GT   | 21 | 6  |
| 149847 | 16 | 7658035 | 7658058 | 4 | 6  | 24 | TGGA | 26 | 12 |
| 149849 | 16 | 7662501 | 7662516 | 4 | 4  | 16 | GAGG | 14 | 3  |
| 149853 | 16 | 7666143 | 7666170 | 4 | 7  | 28 | AAAC | 17 | 9  |
| 149855 | 16 | 7674642 | 7674657 | 2 | 8  | 16 | CA   | 25 | 5  |
| 149856 | 16 | 7674812 | 7674843 | 2 | 16 | 32 | AC   | 7  | 8  |
| 149857 | 16 | 7674963 | 7674996 | 2 | 17 | 34 | TG   | 12 | 13 |
| 149860 | 16 | 7683802 | 7683825 | 3 | 8  | 24 | TGT  | 25 | 5  |
| 149861 | 16 | 7684951 | 7684964 | 2 | 7  | 14 | CA   | 21 | 11 |
| 149865 | 16 | 7694867 | 7694878 | 2 | 6  | 12 | GT   | 19 | 5  |
| 149867 | 16 | 7695027 | 7695054 | 2 | 14 | 28 | AC   | 19 | 12 |
| 149868 | 16 | 7695114 | 7695125 | 2 | 6  | 12 | CA   | 27 | 6  |
| 149869 | 16 | 7695288 | 7695301 | 2 | 7  | 14 | CA   | 30 | 4  |
| 149872 | 16 | 7695804 | 7695821 | 2 | 9  | 18 | CA   | 10 | 3  |
| 149873 | 16 | 7695823 | 7695836 | 2 | 7  | 14 | AC   | 10 | 6  |
| 149880 | 16 | 7716508 | 7716533 | 2 | 13 | 26 | AC   | 15 | 10 |
| 149881 | 16 | 7717488 | 7717505 | 2 | 9  | 18 | GT   | 21 | 3  |
| 149883 | 16 | 7718120 | 7718133 | 2 | 7  | 14 | GT   | 11 | 4  |
| 149884 | 16 | 7718135 | 7718146 | 2 | 6  | 12 | TG   | 13 | 4  |
| 149885 | 16 | 7721885 | 7721898 | 2 | 7  | 14 | GA   | 23 | 4  |
| 149886 | 16 | 7721995 | 7722018 | 2 | 12 | 24 | GT   | 11 | 13 |
| 149887 | 16 | 7723327 | 7723360 | 2 | 17 | 34 | CA   | 21 | 10 |
| 149889 | 16 | 7727284 | 7727317 | 2 | 17 | 34 | CA   | 11 | 8  |
| 149892 | 16 | 7730306 | 7730339 | 2 | 17 | 34 | TG   | 10 | 7  |
| 149895 | 16 | 7736092 | 7736111 | 4 | 5  | 20 | TTTA | 19 | 6  |
| 149902 | 16 | 7743537 | 7743566 | 2 | 15 | 30 | GA   | 14 | 8  |
| 149906 | 16 | 7744379 | 7744393 | 3 | 5  | 15 | TTA  | 12 | 4  |
| 149911 | 16 | 7755916 | 7755961 | 2 | 23 | 46 | AC   | 6  | 6  |
| 149919 | 16 | 7762905 | 7762925 | 3 | 7  | 21 | ATG  | 15 | 14 |
| 149921 | 16 | 7763730 | 7763749 | 4 | 5  | 20 | TTAT | 11 | 3  |
| 149929 | 16 | 7787110 | 7787127 | 2 | 9  | 18 | CA   | 19 | 10 |
| 149930 | 16 | 7787364 | 7787377 | 2 | 7  | 14 | TG   | 23 | 6  |
| 149951 | 16 | 7800974 | 7800989 | 2 | 8  | 16 | GT   | 19 | 10 |
| 149954 | 16 | 7806905 | 7806920 | 2 | 8  | 16 | TC   | 27 | 5  |

|        |    |         |         |   |    |    |      |    |    |
|--------|----|---------|---------|---|----|----|------|----|----|
| 149959 | 16 | 7814300 | 7814323 | 4 | 6  | 24 | AAAT | 14 | 4  |
| 149960 | 16 | 7815258 | 7815271 | 2 | 7  | 14 | CA   | 18 | 10 |
| 149965 | 16 | 7835730 | 7835751 | 2 | 11 | 22 | TG   | 18 | 10 |
| 149966 | 16 | 7835867 | 7835882 | 2 | 8  | 16 | GT   | 15 | 4  |
| 149969 | 16 | 7836145 | 7836160 | 2 | 8  | 16 | AC   | 14 | 5  |
| 149974 | 16 | 7837842 | 7837857 | 2 | 8  | 16 | CA   | 7  | 7  |
| 149978 | 16 | 7840655 | 7840680 | 2 | 13 | 26 | GT   | 8  | 5  |
| 149982 | 16 | 7842602 | 7842641 | 2 | 20 | 40 | TG   | 12 | 11 |
| 149985 | 16 | 7843338 | 7843357 | 4 | 5  | 20 | GGAG | 9  | 5  |
| 149986 | 16 | 7845903 | 7845918 | 2 | 8  | 16 | CA   | 25 | 3  |
| 149992 | 16 | 7854780 | 7854821 | 3 | 14 | 42 | TCT  | 16 | 5  |
| 149998 | 16 | 7864706 | 7864717 | 2 | 6  | 12 | GT   | 20 | 5  |
| 150002 | 16 | 7871885 | 7871906 | 2 | 11 | 22 | CT   | 15 | 7  |
| 150014 | 16 | 7897472 | 7897522 | 3 | 17 | 51 | GAA  | 14 | 15 |
| 150016 | 16 | 7898199 | 7898226 | 2 | 14 | 28 | TG   | 23 | 9  |
| 150019 | 16 | 7911225 | 7911252 | 2 | 14 | 28 | AC   | 14 | 9  |
| 150022 | 16 | 7919687 | 7919718 | 2 | 16 | 32 | TG   | 13 | 9  |
| 150024 | 16 | 7921075 | 7921122 | 2 | 24 | 48 | GA   | 14 | 11 |
| 150025 | 16 | 7921798 | 7921821 | 2 | 12 | 24 | TC   | 13 | 8  |
| 150026 | 16 | 7921851 | 7921870 | 2 | 10 | 20 | GA   | 18 | 7  |
| 150028 | 16 | 7922106 | 7922125 | 4 | 5  | 20 | AAAT | 19 | 7  |
| 150032 | 16 | 7926943 | 7926957 | 3 | 5  | 15 | ATT  | 21 | 5  |
| 150034 | 16 | 7927576 | 7927591 | 2 | 8  | 16 | CA   | 21 | 20 |
| 150035 | 16 | 7927738 | 7927753 | 4 | 4  | 16 | GCTG | 18 | 4  |
| 150036 | 16 | 7928783 | 7928822 | 2 | 20 | 40 | AG   | 19 | 13 |
| 150037 | 16 | 7929535 | 7929552 | 2 | 9  | 18 | TC   | 20 | 4  |
| 150038 | 16 | 7929839 | 7929870 | 2 | 16 | 32 | GT   | 21 | 21 |
| 150041 | 16 | 7934674 | 7934689 | 2 | 8  | 16 | GA   | 22 | 3  |
| 150043 | 16 | 7935116 | 7935147 | 2 | 16 | 32 | TG   | 9  | 10 |
| 150047 | 16 | 7944972 | 7944985 | 2 | 7  | 14 | GT   | 12 | 7  |
| 150048 | 16 | 7945126 | 7945141 | 2 | 8  | 16 | AC   | 17 | 3  |
| 150056 | 16 | 7949863 | 7949878 | 2 | 8  | 16 | CA   | 30 | 8  |
| 150059 | 16 | 7952705 | 7952725 | 3 | 7  | 21 | AGA  | 20 | 3  |
| 150062 | 16 | 7956270 | 7956285 | 2 | 8  | 16 | CA   | 10 | 6  |
| 150068 | 16 | 7966099 | 7966126 | 2 | 14 | 28 | TG   | 12 | 13 |
| 150069 | 16 | 7966253 | 7966266 | 2 | 7  | 14 | CA   | 23 | 12 |
| 150071 | 16 | 7966484 | 7966511 | 2 | 14 | 28 | GT   | 22 | 9  |
| 150072 | 16 | 7969017 | 7969032 | 2 | 8  | 16 | AC   | 25 | 7  |
| 150073 | 16 | 7969596 | 7969619 | 2 | 12 | 24 | TG   | 12 | 6  |
| 150074 | 16 | 7970115 | 7970126 | 2 | 6  | 12 | AC   | 29 | 3  |
| 150079 | 16 | 7974894 | 7974909 | 2 | 8  | 16 | TG   | 22 | 4  |
| 150085 | 16 | 7982802 | 7982827 | 2 | 13 | 26 | TC   | 20 | 8  |
| 150086 | 16 | 7983481 | 7983496 | 2 | 8  | 16 | CA   | 31 | 5  |
| 150090 | 16 | 7989587 | 7989616 | 2 | 15 | 30 | GT   | 10 | 13 |
| 150091 | 16 | 7991805 | 7991819 | 3 | 5  | 15 | CCA  | 22 | 3  |
| 150093 | 16 | 7992473 | 7992498 | 2 | 13 | 26 | CA   | 11 | 11 |
| 150094 | 16 | 7992680 | 7992691 | 2 | 6  | 12 | GT   | 19 | 5  |
| 150095 | 16 | 7992801 | 7992820 | 2 | 10 | 20 | TG   | 19 | 5  |
| 150104 | 16 | 8009647 | 8009676 | 2 | 15 | 30 | CT   | 13 | 4  |
| 150107 | 16 | 8016553 | 8016566 | 2 | 7  | 14 | TC   | 17 | 4  |
| 150119 | 16 | 8028802 | 8028813 | 2 | 6  | 12 | AT   | 23 | 8  |

|        |    |         |         |   |    |    |      |    |    |
|--------|----|---------|---------|---|----|----|------|----|----|
| 150122 | 16 | 8030603 | 8030622 | 4 | 5  | 20 | AAAT | 28 | 4  |
| 150127 | 16 | 8035355 | 8035368 | 2 | 7  | 14 | AC   | 6  | 3  |
| 150129 | 16 | 8035985 | 8035998 | 2 | 7  | 14 | TG   | 22 | 3  |
| 150134 | 16 | 8044625 | 8044636 | 2 | 6  | 12 | TG   | 24 | 5  |
| 150137 | 16 | 8050350 | 8050371 | 2 | 11 | 22 | TC   | 18 | 6  |
| 150143 | 16 | 8059053 | 8059064 | 2 | 6  | 12 | AC   | 8  | 4  |
| 150146 | 16 | 8059967 | 8059992 | 2 | 13 | 26 | CA   | 18 | 9  |
| 150150 | 16 | 8070707 | 8070730 | 2 | 12 | 24 | CA   | 13 | 9  |
| 150163 | 16 | 8080109 | 8080120 | 2 | 6  | 12 | TG   | 25 | 3  |
| 150164 | 16 | 8080122 | 8080135 | 2 | 7  | 14 | GT   | 22 | 3  |
| 150169 | 16 | 8082930 | 8082947 | 3 | 6  | 18 | CCA  | 24 | 5  |
| 150171 | 16 | 8084470 | 8084489 | 2 | 10 | 20 | CA   | 20 | 8  |
| 150172 | 16 | 8084684 | 8084697 | 2 | 7  | 14 | GT   | 25 | 3  |
| 150175 | 16 | 8087845 | 8087872 | 2 | 14 | 28 | GT   | 14 | 6  |
| 150181 | 16 | 8091083 | 8091106 | 2 | 12 | 24 | TG   | 12 | 10 |
| 150192 | 16 | 8097164 | 8097177 | 2 | 7  | 14 | GT   | 24 | 6  |
| 150194 | 16 | 8100006 | 8100021 | 4 | 4  | 16 | TTTA | 10 | 3  |
| 150200 | 16 | 8103606 | 8103619 | 2 | 7  | 14 | GA   | 22 | 3  |
| 150201 | 16 | 8108585 | 8108600 | 2 | 8  | 16 | GT   | 26 | 3  |
| 150203 | 16 | 8111196 | 8111211 | 4 | 4  | 16 | AATA | 16 | 8  |
| 150204 | 16 | 8111788 | 8111811 | 2 | 12 | 24 | GT   | 12 | 7  |
| 150206 | 16 | 8112283 | 8112300 | 2 | 9  | 18 | GT   | 22 | 4  |
| 150208 | 16 | 8115706 | 8115729 | 4 | 6  | 24 | AAAT | 15 | 4  |
| 150228 | 16 | 8140649 | 8140672 | 3 | 8  | 24 | CAA  | 24 | 7  |
| 150229 | 16 | 8140862 | 8140887 | 2 | 13 | 26 | TG   | 15 | 10 |
| 150230 | 16 | 8141254 | 8141273 | 2 | 10 | 20 | CA   | 17 | 13 |
| 150231 | 16 | 8141695 | 8141730 | 2 | 18 | 36 | CA   | 11 | 13 |
| 150233 | 16 | 8142701 | 8142716 | 2 | 8  | 16 | TG   | 28 | 5  |
| 150237 | 16 | 8143566 | 8143589 | 2 | 12 | 24 | AC   | 13 | 10 |
| 150241 | 16 | 8151580 | 8151591 | 2 | 6  | 12 | AT   | 23 | 3  |
| 150244 | 16 | 8155558 | 8155569 | 2 | 6  | 12 | TG   | 34 | 4  |
| 150249 | 16 | 8157944 | 8157955 | 2 | 6  | 12 | AC   | 16 | 5  |
| 150251 | 16 | 8159124 | 8159153 | 2 | 15 | 30 | AC   | 18 | 9  |
| 150256 | 16 | 8165466 | 8165477 | 2 | 6  | 12 | CA   | 24 | 4  |
| 150257 | 16 | 8165949 | 8165970 | 2 | 11 | 22 | GT   | 10 | 8  |
| 150262 | 16 | 8172233 | 8172252 | 2 | 10 | 20 | CA   | 12 | 11 |
| 150264 | 16 | 8173203 | 8173220 | 2 | 9  | 18 | AC   | 17 | 6  |
| 150265 | 16 | 8174617 | 8174660 | 2 | 22 | 44 | GT   | 8  | 12 |
| 150269 | 16 | 8184150 | 8184171 | 2 | 11 | 22 | AC   | 10 | 6  |
| 150274 | 16 | 8188003 | 8188022 | 2 | 10 | 20 | AC   | 6  | 7  |
| 150277 | 16 | 8192744 | 8192767 | 3 | 8  | 24 | GGC  | 30 | 11 |
| 150278 | 16 | 8193600 | 8193615 | 4 | 4  | 16 | TTTG | 17 | 3  |
| 150281 | 16 | 8194579 | 8194606 | 2 | 14 | 28 | AC   | 12 | 8  |
| 150284 | 16 | 8196722 | 8196757 | 2 | 18 | 36 | CA   | 14 | 10 |
| 150286 | 16 | 8198744 | 8198761 | 2 | 9  | 18 | CA   | 17 | 8  |
| 150290 | 16 | 8205031 | 8205062 | 2 | 16 | 32 | TC   | 6  | 9  |
| 150293 | 16 | 8206443 | 8206466 | 2 | 12 | 24 | GT   | 25 | 9  |
| 150294 | 16 | 8208113 | 8208136 | 2 | 12 | 24 | CA   | 7  | 9  |
| 150296 | 16 | 8208641 | 8208654 | 2 | 7  | 14 | TG   | 21 | 7  |
| 150298 | 16 | 8209059 | 8209074 | 4 | 4  | 16 | GAGG | 13 | 4  |
| 150299 | 16 | 8209291 | 8209312 | 2 | 11 | 22 | GT   | 14 | 4  |

|        |    |         |         |   |    |    |      |    |    |
|--------|----|---------|---------|---|----|----|------|----|----|
| 150307 | 16 | 8213396 | 8213413 | 2 | 9  | 18 | CA   | 25 | 14 |
| 150311 | 16 | 8214173 | 8214190 | 2 | 9  | 18 | AC   | 17 | 8  |
| 150312 | 16 | 8214192 | 8214207 | 2 | 8  | 16 | AC   | 18 | 9  |
| 150313 | 16 | 8214769 | 8214790 | 2 | 11 | 22 | AC   | 21 | 6  |
| 150316 | 16 | 8218651 | 8218670 | 4 | 5  | 20 | ATTT | 11 | 8  |
| 150317 | 16 | 8220177 | 8220222 | 2 | 23 | 46 | GT   | 9  | 13 |
| 150319 | 16 | 8220710 | 8220721 | 2 | 6  | 12 | GT   | 8  | 4  |
| 150321 | 16 | 8221031 | 8221042 | 2 | 6  | 12 | GT   | 21 | 5  |
| 150326 | 16 | 8223597 | 8223612 | 4 | 4  | 16 | TTTG | 18 | 4  |
| 150327 | 16 | 8224473 | 8224500 | 4 | 7  | 28 | TTTA | 10 | 3  |
| 150329 | 16 | 8225108 | 8225139 | 4 | 8  | 32 | CAAT | 14 | 6  |
| 150330 | 16 | 8225857 | 8225876 | 2 | 10 | 20 | AG   | 17 | 5  |
| 150332 | 16 | 8226064 | 8226091 | 2 | 14 | 28 | GT   | 15 | 12 |
| 150339 | 16 | 8229803 | 8229826 | 2 | 12 | 24 | GT   | 15 | 8  |
| 150341 | 16 | 8230258 | 8230307 | 2 | 25 | 50 | CA   | 7  | 9  |
| 150344 | 16 | 8232521 | 8232540 | 2 | 10 | 20 | CA   | 21 | 8  |
| 150350 | 16 | 8234989 | 8235006 | 2 | 9  | 18 | CA   | 11 | 7  |
| 150355 | 16 | 8237746 | 8237771 | 2 | 13 | 26 | TG   | 19 | 6  |
| 150357 | 16 | 8239502 | 8239521 | 2 | 10 | 20 | GT   | 19 | 7  |
| 150358 | 16 | 8239619 | 8239640 | 2 | 11 | 22 | TG   | 22 | 9  |
| 150364 | 16 | 8243557 | 8243576 | 2 | 10 | 20 | CA   | 15 | 9  |
| 150369 | 16 | 8251085 | 8251114 | 2 | 15 | 30 | TG   | 18 | 11 |
| 150370 | 16 | 8251278 | 8251305 | 2 | 14 | 28 | CA   | 21 | 12 |
| 150371 | 16 | 8251442 | 8251459 | 2 | 9  | 18 | TG   | 13 | 8  |
| 150372 | 16 | 8252200 | 8252229 | 2 | 15 | 30 | AC   | 9  | 7  |
| 150375 | 16 | 8254833 | 8254852 | 2 | 10 | 20 | GT   | 25 | 3  |
| 150376 | 16 | 8257619 | 8257630 | 2 | 6  | 12 | GT   | 23 | 4  |
| 150377 | 16 | 8257860 | 8257887 | 2 | 14 | 28 | TC   | 14 | 5  |
| 150380 | 16 | 8260540 | 8260551 | 2 | 6  | 12 | CT   | 14 | 4  |
| 150383 | 16 | 8261322 | 8261345 | 2 | 12 | 24 | CT   | 20 | 6  |
| 150395 | 16 | 8277318 | 8277339 | 2 | 11 | 22 | AC   | 9  | 9  |
| 150396 | 16 | 8277525 | 8277538 | 2 | 7  | 14 | AC   | 31 | 4  |
| 150397 | 16 | 8284476 | 8284491 | 4 | 4  | 16 | TTTG | 14 | 8  |
| 150399 | 16 | 8287091 | 8287124 | 2 | 17 | 34 | AC   | 16 | 11 |
| 150401 | 16 | 8290999 | 8291022 | 2 | 12 | 24 | TG   | 11 | 6  |
| 150402 | 16 | 8291168 | 8291195 | 2 | 14 | 28 | GT   | 17 | 11 |
| 150410 | 16 | 8301433 | 8301456 | 2 | 12 | 24 | GT   | 11 | 10 |
| 150419 | 16 | 8304980 | 8305005 | 2 | 13 | 26 | CA   | 20 | 12 |
| 150434 | 16 | 8319980 | 8319991 | 2 | 6  | 12 | CA   | 30 | 4  |
| 150435 | 16 | 8320117 | 8320138 | 2 | 11 | 22 | AC   | 25 | 8  |
| 150443 | 16 | 8322885 | 8322900 | 4 | 4  | 16 | TTTA | 20 | 3  |
| 150454 | 16 | 8334187 | 8334200 | 2 | 7  | 14 | AC   | 21 | 5  |
| 150457 | 16 | 8339204 | 8339217 | 2 | 7  | 14 | CA   | 18 | 9  |
| 150458 | 16 | 8339307 | 8339330 | 2 | 12 | 24 | AC   | 14 | 7  |
| 150459 | 16 | 8339600 | 8339613 | 2 | 7  | 14 | TG   | 18 | 6  |
| 150469 | 16 | 8348287 | 8348318 | 2 | 16 | 32 | TG   | 10 | 9  |
| 150470 | 16 | 8348489 | 8348514 | 2 | 13 | 26 | GT   | 16 | 7  |
| 150478 | 16 | 8357640 | 8357671 | 2 | 16 | 32 | GT   | 17 | 7  |
| 150481 | 16 | 8363094 | 8363121 | 2 | 14 | 28 | AC   | 8  | 10 |
| 150487 | 16 | 8364425 | 8364436 | 2 | 6  | 12 | GT   | 12 | 3  |
| 150488 | 16 | 8364438 | 8364451 | 2 | 7  | 14 | TG   | 17 | 5  |

|        |    |         |         |   |    |    |      |    |    |
|--------|----|---------|---------|---|----|----|------|----|----|
| 150490 | 16 | 8364852 | 8364883 | 2 | 16 | 32 | GT   | 12 | 7  |
| 150495 | 16 | 8366175 | 8366194 | 4 | 5  | 20 | TTTA | 19 | 8  |
| 150496 | 16 | 8366715 | 8366738 | 2 | 12 | 24 | TG   | 25 | 9  |
| 150497 | 16 | 8367753 | 8367776 | 3 | 8  | 24 | GAT  | 26 | 9  |
| 150501 | 16 | 8379834 | 8379857 | 2 | 12 | 24 | GT   | 15 | 7  |
| 150511 | 16 | 8396695 | 8396714 | 2 | 10 | 20 | TG   | 22 | 9  |
| 150513 | 16 | 8399208 | 8399237 | 3 | 10 | 30 | AAC  | 18 | 4  |
| 150522 | 16 | 8412725 | 8412740 | 2 | 8  | 16 | TG   | 28 | 4  |
| 150526 | 16 | 8417926 | 8417941 | 2 | 8  | 16 | AG   | 21 | 6  |
| 150527 | 16 | 8418168 | 8418179 | 2 | 6  | 12 | GT   | 25 | 5  |
| 150528 | 16 | 8418804 | 8418827 | 2 | 12 | 24 | AG   | 18 | 7  |
| 150531 | 16 | 8420093 | 8420106 | 2 | 7  | 14 | CA   | 22 | 4  |
| 150532 | 16 | 8421039 | 8421058 | 4 | 5  | 20 | CATA | 21 | 3  |
| 150535 | 16 | 8430605 | 8430650 | 2 | 23 | 46 | AC   | 12 | 14 |
| 150536 | 16 | 8431162 | 8431173 | 2 | 6  | 12 | AG   | 32 | 3  |
| 150537 | 16 | 8432459 | 8432478 | 2 | 10 | 20 | GT   | 19 | 9  |
| 150538 | 16 | 8432635 | 8432678 | 2 | 22 | 44 | GT   | 7  | 7  |
| 150542 | 16 | 8438171 | 8438188 | 2 | 9  | 18 | CA   | 14 | 8  |
| 150543 | 16 | 8438318 | 8438341 | 2 | 12 | 24 | CA   | 15 | 6  |
| 150544 | 16 | 8438541 | 8438574 | 2 | 17 | 34 | AC   | 24 | 10 |
| 150548 | 16 | 8443981 | 8444028 | 2 | 24 | 48 | CT   | 20 | 12 |
| 150552 | 16 | 8450751 | 8450766 | 2 | 8  | 16 | TG   | 19 | 12 |
| 150558 | 16 | 8458456 | 8458471 | 2 | 8  | 16 | CA   | 22 | 5  |
| 150559 | 16 | 8458474 | 8458489 | 2 | 8  | 16 | CA   | 10 | 3  |
| 150561 | 16 | 8459101 | 8459118 | 2 | 9  | 18 | AG   | 11 | 3  |
| 150563 | 16 | 8459627 | 8459658 | 2 | 16 | 32 | GA   | 8  | 7  |
| 150573 | 16 | 8462166 | 8462195 | 2 | 15 | 30 | CA   | 15 | 12 |
| 150575 | 16 | 8466937 | 8466952 | 2 | 8  | 16 | CA   | 26 | 5  |
| 150576 | 16 | 8467154 | 8467169 | 4 | 4  | 16 | CTTT | 12 | 3  |
| 150582 | 16 | 8468621 | 8468641 | 3 | 7  | 21 | GAG  | 19 | 5  |
| 150583 | 16 | 8468888 | 8468911 | 2 | 12 | 24 | CA   | 21 | 6  |
| 150584 | 16 | 8469034 | 8469063 | 2 | 15 | 30 | TG   | 13 | 7  |
| 150585 | 16 | 8469242 | 8469265 | 2 | 12 | 24 | TG   | 20 | 7  |
| 150589 | 16 | 8471260 | 8471285 | 2 | 13 | 26 | AC   | 11 | 3  |
| 150594 | 16 | 8474560 | 8474587 | 2 | 14 | 28 | GT   | 15 | 9  |
| 150597 | 16 | 8475923 | 8475940 | 2 | 9  | 18 | AC   | 9  | 3  |
| 150598 | 16 | 8476068 | 8476089 | 2 | 11 | 22 | TG   | 15 | 8  |
| 150599 | 16 | 8477483 | 8477496 | 2 | 7  | 14 | AG   | 14 | 7  |
| 150602 | 16 | 8482718 | 8482729 | 2 | 6  | 12 | TA   | 24 | 3  |
| 150607 | 16 | 8488142 | 8488157 | 2 | 8  | 16 | TG   | 19 | 5  |
| 150613 | 16 | 8492282 | 8492329 | 2 | 24 | 48 | CA   | 10 | 8  |
| 150614 | 16 | 8492664 | 8492685 | 2 | 11 | 22 | CA   | 8  | 3  |
| 150622 | 16 | 8506900 | 8506927 | 2 | 14 | 28 | GT   | 15 | 14 |
| 150624 | 16 | 8507621 | 8507640 | 2 | 10 | 20 | TG   | 19 | 13 |
| 150630 | 16 | 8508758 | 8508778 | 3 | 7  | 21 | GTG  | 26 | 3  |
| 150633 | 16 | 8512237 | 8512250 | 2 | 7  | 14 | CA   | 29 | 4  |
| 150634 | 16 | 8512495 | 8512522 | 2 | 14 | 28 | AC   | 9  | 5  |
| 150635 | 16 | 8512710 | 8512745 | 2 | 18 | 36 | AC   | 7  | 7  |
| 150637 | 16 | 8519121 | 8519154 | 2 | 17 | 34 | CA   | 10 | 10 |
| 150639 | 16 | 8521793 | 8521822 | 2 | 15 | 30 | GT   | 16 | 8  |
| 150640 | 16 | 8522068 | 8522085 | 2 | 9  | 18 | TG   | 19 | 12 |

|        |    |         |         |   |    |    |      |    |    |
|--------|----|---------|---------|---|----|----|------|----|----|
| 150649 | 16 | 8538543 | 8538558 | 2 | 8  | 16 | CA   | 17 | 9  |
| 150653 | 16 | 8544975 | 8544994 | 2 | 10 | 20 | CA   | 16 | 5  |
| 150654 | 16 | 8545048 | 8545073 | 2 | 13 | 26 | CA   | 19 | 7  |
| 150656 | 16 | 8545939 | 8545960 | 2 | 11 | 22 | GT   | 7  | 4  |
| 150657 | 16 | 8545987 | 8546002 | 2 | 8  | 16 | GT   | 14 | 3  |
| 150668 | 16 | 8563727 | 8563770 | 2 | 22 | 44 | AC   | 7  | 8  |
| 150669 | 16 | 8564423 | 8564438 | 2 | 8  | 16 | TG   | 20 | 4  |
| 150670 | 16 | 8564441 | 8564452 | 2 | 6  | 12 | TG   | 20 | 4  |
| 150673 | 16 | 8564909 | 8564946 | 2 | 19 | 38 | GA   | 10 | 10 |
| 150681 | 16 | 8580214 | 8580241 | 4 | 7  | 28 | ATCC | 28 | 3  |
| 150683 | 16 | 8583302 | 8583325 | 2 | 12 | 24 | CT   | 15 | 7  |
| 150685 | 16 | 8583434 | 8583465 | 4 | 8  | 32 | AGAC | 24 | 9  |
| 150687 | 16 | 8590892 | 8590913 | 2 | 11 | 22 | GT   | 18 | 8  |
| 150692 | 16 | 8595825 | 8595852 | 2 | 14 | 28 | CA   | 21 | 7  |
| 150693 | 16 | 8597942 | 8597991 | 2 | 25 | 50 | GT   | 6  | 7  |
| 150696 | 16 | 8600313 | 8600340 | 2 | 14 | 28 | TG   | 16 | 9  |
| 150697 | 16 | 8602523 | 8602568 | 2 | 23 | 46 | TG   | 7  | 10 |
| 150700 | 16 | 8611378 | 8611427 | 2 | 25 | 50 | TG   | 18 | 15 |
| 150703 | 16 | 8614541 | 8614580 | 2 | 20 | 40 | GT   | 7  | 8  |
| 150704 | 16 | 8614937 | 8614952 | 4 | 4  | 16 | GCTC | 19 | 7  |
| 150709 | 16 | 8616036 | 8616071 | 2 | 18 | 36 | TC   | 13 | 6  |
| 150710 | 16 | 8618918 | 8618949 | 2 | 16 | 32 | GT   | 13 | 8  |
| 150711 | 16 | 8619132 | 8619151 | 4 | 5  | 20 | AAGA | 15 | 7  |
| 150715 | 16 | 8629407 | 8629446 | 2 | 20 | 40 | TC   | 14 | 10 |
| 150719 | 16 | 8637283 | 8637310 | 2 | 14 | 28 | CA   | 16 | 12 |
| 150721 | 16 | 8639272 | 8639293 | 2 | 11 | 22 | GT   | 11 | 3  |
| 150722 | 16 | 8639486 | 8639507 | 2 | 11 | 22 | AC   | 18 | 8  |
| 150723 | 16 | 8642935 | 8642946 | 2 | 6  | 12 | AC   | 22 | 3  |
| 150725 | 16 | 8645527 | 8645538 | 2 | 6  | 12 | TG   | 22 | 3  |
| 150729 | 16 | 8648618 | 8648631 | 2 | 7  | 14 | TG   | 22 | 5  |
| 150730 | 16 | 8648635 | 8648646 | 2 | 6  | 12 | GT   | 21 | 4  |
| 150738 | 16 | 8656011 | 8656038 | 2 | 14 | 28 | GT   | 18 | 12 |
| 150747 | 16 | 8665488 | 8665531 | 2 | 22 | 44 | CA   | 16 | 9  |
| 150748 | 16 | 8669051 | 8669070 | 2 | 10 | 20 | TG   | 11 | 7  |
| 150749 | 16 | 8669916 | 8669939 | 2 | 12 | 24 | AC   | 20 | 7  |
| 150753 | 16 | 8671776 | 8671809 | 2 | 17 | 34 | AC   | 7  | 7  |
| 150755 | 16 | 8676791 | 8676816 | 2 | 13 | 26 | CA   | 15 | 11 |
| 150761 | 16 | 8686135 | 8686150 | 2 | 8  | 16 | CA   | 30 | 4  |
| 150762 | 16 | 8686247 | 8686270 | 2 | 12 | 24 | GT   | 18 | 5  |
| 150766 | 16 | 8698090 | 8698104 | 3 | 5  | 15 | GGA  | 23 | 4  |
| 150776 | 16 | 8705458 | 8705491 | 2 | 17 | 34 | AG   | 10 | 7  |
| 150778 | 16 | 8707231 | 8707260 | 2 | 15 | 30 | GT   | 9  | 6  |
| 150783 | 16 | 8712509 | 8712522 | 2 | 7  | 14 | AC   | 21 | 8  |
| 150787 | 16 | 8718054 | 8718067 | 2 | 7  | 14 | CA   | 27 | 3  |
| 150788 | 16 | 8718231 | 8718246 | 2 | 8  | 16 | AC   | 25 | 8  |
| 150794 | 16 | 8737858 | 8737869 | 2 | 6  | 12 | TG   | 12 | 3  |
| 150798 | 16 | 8749797 | 8749840 | 4 | 11 | 44 | ATCT | 15 | 6  |
| 150802 | 16 | 8780310 | 8780321 | 2 | 6  | 12 | AC   | 32 | 3  |
| 150804 | 16 | 8792153 | 8792164 | 2 | 6  | 12 | TG   | 17 | 8  |
| 150809 | 16 | 8815965 | 8815994 | 2 | 15 | 30 | CT   | 10 | 7  |
| 150814 | 16 | 8826043 | 8826058 | 4 | 4  | 16 | AATG | 24 | 8  |



|        |    |         |         |   |    |    |      |    |    |
|--------|----|---------|---------|---|----|----|------|----|----|
| 150818 | 16 | 8849830 | 8849843 | 2 | 7  | 14 | GT   | 24 | 6  |
| 150824 | 16 | 8873007 | 8873018 | 2 | 6  | 12 | AC   | 17 | 5  |
| 150825 | 16 | 8873392 | 8873415 | 2 | 12 | 24 | TG   | 12 | 5  |
| 150828 | 16 | 8894507 | 8894522 | 2 | 8  | 16 | GT   | 24 | 5  |
| 150830 | 16 | 8897677 | 8897694 | 2 | 9  | 18 | AC   | 28 | 4  |
| 150831 | 16 | 8898906 | 8898921 | 2 | 8  | 16 | GT   | 18 | 6  |
| 150832 | 16 | 8900307 | 8900330 | 2 | 12 | 24 | GT   | 27 | 8  |
| 150837 | 16 | 8908282 | 8908309 | 2 | 14 | 28 | AC   | 23 | 7  |
| 150839 | 16 | 8913264 | 8913297 | 2 | 17 | 34 | CA   | 7  | 7  |
| 150843 | 16 | 8922662 | 8922689 | 2 | 14 | 28 | TG   | 9  | 8  |
| 150844 | 16 | 8927473 | 8927494 | 2 | 11 | 22 | GA   | 14 | 6  |
| 150845 | 16 | 8928031 | 8928044 | 2 | 7  | 14 | AG   | 30 | 3  |
| 150846 | 16 | 8930091 | 8930114 | 2 | 12 | 24 | TG   | 19 | 5  |
| 150848 | 16 | 8932163 | 8932182 | 2 | 10 | 20 | GA   | 12 | 5  |
| 150850 | 16 | 8933518 | 8933531 | 2 | 7  | 14 | CT   | 29 | 3  |
| 150851 | 16 | 8935464 | 8935477 | 2 | 7  | 14 | AG   | 10 | 4  |
| 150853 | 16 | 8935501 | 8935522 | 2 | 11 | 22 | AG   | 10 | 9  |
| 150856 | 16 | 8939091 | 8939111 | 3 | 7  | 21 | CTC  | 26 | 3  |
| 150859 | 16 | 8947897 | 8947912 | 2 | 8  | 16 | CA   | 23 | 4  |
| 150866 | 16 | 8961155 | 8961174 | 2 | 10 | 20 | GT   | 22 | 8  |
| 150867 | 16 | 8975348 | 8975365 | 2 | 9  | 18 | TA   | 14 | 7  |
| 150868 | 16 | 8978105 | 8978130 | 2 | 13 | 26 | TG   | 16 | 8  |
| 150870 | 16 | 8981670 | 8981687 | 2 | 9  | 18 | TC   | 26 | 3  |
| 150872 | 16 | 8990809 | 8990826 | 2 | 9  | 18 | AC   | 7  | 4  |
| 150875 | 16 | 8998879 | 8998890 | 2 | 6  | 12 | TG   | 24 | 3  |
| 150877 | 16 | 9004576 | 9004591 | 2 | 8  | 16 | TC   | 16 | 7  |
| 150880 | 16 | 9014292 | 9014329 | 2 | 19 | 38 | GT   | 6  | 6  |
| 150884 | 16 | 9029040 | 9029071 | 2 | 16 | 32 | AC   | 7  | 9  |
| 150896 | 16 | 9074068 | 9074085 | 2 | 9  | 18 | CA   | 11 | 11 |
| 150898 | 16 | 9077201 | 9077230 | 2 | 15 | 30 | TC   | 9  | 7  |
| 150901 | 16 | 9084695 | 9084724 | 3 | 10 | 30 | AAT  | 16 | 7  |
| 150903 | 16 | 9089355 | 9089370 | 2 | 8  | 16 | AC   | 19 | 7  |
| 150910 | 16 | 9101035 | 9101092 | 2 | 29 | 58 | AC   | 12 | 9  |
| 150911 | 16 | 9109005 | 9109019 | 3 | 5  | 15 | CCT  | 20 | 3  |
| 150914 | 16 | 9114616 | 9114627 | 2 | 6  | 12 | AT   | 24 | 3  |
| 150915 | 16 | 9116555 | 9116566 | 2 | 6  | 12 | CA   | 26 | 4  |
| 150919 | 16 | 9122972 | 9122987 | 2 | 8  | 16 | CA   | 28 | 3  |
| 150923 | 16 | 9146332 | 9146347 | 2 | 8  | 16 | GT   | 21 | 7  |
| 150924 | 16 | 9146492 | 9146515 | 2 | 12 | 24 | TG   | 18 | 13 |
| 150926 | 16 | 9146659 | 9146682 | 2 | 12 | 24 | CA   | 18 | 6  |
| 150931 | 16 | 9152864 | 9152875 | 2 | 6  | 12 | GT   | 25 | 3  |
| 150935 | 16 | 9156624 | 9156663 | 2 | 20 | 40 | CA   | 11 | 13 |
| 150937 | 16 | 9158180 | 9158194 | 3 | 5  | 15 | GCT  | 26 | 3  |
| 150942 | 16 | 9161940 | 9161955 | 2 | 8  | 16 | TG   | 23 | 3  |
| 150945 | 16 | 9164743 | 9164756 | 2 | 7  | 14 | CA   | 24 | 7  |
| 150958 | 16 | 9179524 | 9179544 | 3 | 7  | 21 | CTG  | 27 | 3  |
| 150959 | 16 | 9182455 | 9182474 | 2 | 10 | 20 | GT   | 7  | 4  |
| 150966 | 16 | 9183861 | 9183882 | 2 | 11 | 22 | AC   | 21 | 11 |
| 150969 | 16 | 9185855 | 9185878 | 2 | 12 | 24 | CA   | 17 | 10 |
| 150970 | 16 | 9186035 | 9186054 | 4 | 5  | 20 | CACG | 20 | 13 |
| 150972 | 16 | 9186189 | 9186212 | 2 | 12 | 24 | AC   | 23 | 5  |

|        |    |         |         |   |    |    |      |    |    |
|--------|----|---------|---------|---|----|----|------|----|----|
| 150973 | 16 | 9186841 | 9186858 | 2 | 9  | 18 | GT   | 19 | 4  |
| 150974 | 16 | 9187016 | 9187029 | 2 | 7  | 14 | TG   | 19 | 4  |
| 150982 | 16 | 9191126 | 9191149 | 2 | 12 | 24 | TG   | 12 | 7  |
| 150986 | 16 | 9192768 | 9192807 | 2 | 20 | 40 | TG   | 6  | 6  |
| 150993 | 16 | 9195921 | 9195934 | 2 | 7  | 14 | TG   | 25 | 4  |
| 150997 | 16 | 9196678 | 9196723 | 2 | 23 | 46 | TG   | 6  | 10 |
| 151003 | 16 | 9200074 | 9200103 | 2 | 15 | 30 | TG   | 11 | 7  |
| 151004 | 16 | 9200217 | 9200234 | 2 | 9  | 18 | GA   | 17 | 6  |
| 151005 | 16 | 9200318 | 9200331 | 2 | 7  | 14 | GT   | 23 | 3  |
| 151006 | 16 | 9200676 | 9200687 | 2 | 6  | 12 | CT   | 26 | 6  |
| 151007 | 16 | 9200959 | 9200982 | 2 | 12 | 24 | AC   | 11 | 8  |
| 151009 | 16 | 9204146 | 9204169 | 3 | 8  | 24 | AGG  | 14 | 3  |
| 151013 | 16 | 9210364 | 9210379 | 2 | 8  | 16 | CA   | 26 | 19 |
| 151018 | 16 | 9211670 | 9211687 | 2 | 9  | 18 | CA   | 10 | 5  |
| 151021 | 16 | 9214921 | 9214954 | 2 | 17 | 34 | GT   | 20 | 14 |
| 151022 | 16 | 9215478 | 9215509 | 2 | 16 | 32 | TG   | 13 | 5  |
| 151027 | 16 | 9215987 | 9216012 | 2 | 13 | 26 | AG   | 7  | 4  |
| 151032 | 16 | 9219771 | 9219786 | 2 | 8  | 16 | TG   | 7  | 3  |
| 151035 | 16 | 9220741 | 9220764 | 2 | 12 | 24 | TG   | 11 | 9  |
| 151037 | 16 | 9221586 | 9221601 | 2 | 8  | 16 | GT   | 16 | 6  |
| 151039 | 16 | 9223663 | 9223684 | 2 | 11 | 22 | TG   | 19 | 12 |
| 151040 | 16 | 9223841 | 9223854 | 2 | 7  | 14 | AC   | 21 | 3  |
| 151041 | 16 | 9223995 | 9224006 | 2 | 6  | 12 | CA   | 28 | 3  |
| 151042 | 16 | 9224135 | 9224170 | 2 | 18 | 36 | AC   | 16 | 10 |
| 151044 | 16 | 9226587 | 9226600 | 2 | 7  | 14 | TC   | 20 | 3  |
| 151046 | 16 | 9227029 | 9227060 | 2 | 16 | 32 | TG   | 15 | 9  |
| 151048 | 16 | 9228526 | 9228552 | 3 | 9  | 27 | TAT  | 15 | 8  |
| 151049 | 16 | 9229130 | 9229145 | 2 | 8  | 16 | AC   | 15 | 8  |
| 151050 | 16 | 9229250 | 9229283 | 2 | 17 | 34 | CA   | 12 | 8  |
| 151057 | 16 | 9233621 | 9233638 | 2 | 9  | 18 | GT   | 7  | 4  |
| 151059 | 16 | 9235474 | 9235515 | 2 | 21 | 42 | AC   | 6  | 6  |
| 151060 | 16 | 9235722 | 9235751 | 2 | 15 | 30 | TG   | 18 | 18 |
| 151063 | 16 | 9236691 | 9236714 | 2 | 12 | 24 | AC   | 15 | 15 |
| 151064 | 16 | 9236883 | 9236898 | 2 | 8  | 16 | TG   | 26 | 4  |
| 151066 | 16 | 9242545 | 9242560 | 2 | 8  | 16 | AC   | 14 | 4  |
| 151067 | 16 | 9242975 | 9242994 | 2 | 10 | 20 | CA   | 20 | 6  |
| 151068 | 16 | 9248897 | 9248936 | 2 | 20 | 40 | TG   | 6  | 8  |
| 151069 | 16 | 9249409 | 9249432 | 4 | 6  | 24 | TGAC | 23 | 3  |
| 151070 | 16 | 9250951 | 9251000 | 2 | 25 | 50 | TG   | 9  | 10 |
| 151071 | 16 | 9251193 | 9251212 | 2 | 10 | 20 | AC   | 24 | 10 |
| 151080 | 16 | 9261559 | 9261598 | 2 | 20 | 40 | TC   | 7  | 9  |
| 151087 | 16 | 9268607 | 9268636 | 2 | 15 | 30 | CA   | 10 | 9  |
| 151088 | 16 | 9269101 | 9269122 | 2 | 11 | 22 | TC   | 23 | 7  |
| 151089 | 16 | 9271775 | 9271790 | 2 | 8  | 16 | GT   | 33 | 10 |
| 151090 | 16 | 9272497 | 9272512 | 2 | 8  | 16 | AC   | 23 | 4  |
| 151093 | 16 | 9273187 | 9273224 | 2 | 19 | 38 | CA   | 11 | 7  |
| 151095 | 16 | 9276523 | 9276542 | 2 | 10 | 20 | GT   | 11 | 13 |
| 151098 | 16 | 9277309 | 9277328 | 4 | 5  | 20 | CTTT | 10 | 7  |
| 151104 | 16 | 9280583 | 9280602 | 2 | 10 | 20 | CA   | 14 | 11 |
| 151112 | 16 | 9299621 | 9299654 | 2 | 17 | 34 | AC   | 20 | 4  |
| 151118 | 16 | 9307464 | 9307499 | 2 | 18 | 36 | AC   | 11 | 11 |

|        |    |         |         |   |    |    |      |    |    |
|--------|----|---------|---------|---|----|----|------|----|----|
| 151119 | 16 | 9307543 | 9307566 | 2 | 12 | 24 | GT   | 6  | 9  |
| 151122 | 16 | 9317008 | 9317035 | 2 | 14 | 28 | CA   | 9  | 7  |
| 151124 | 16 | 9337228 | 9337275 | 2 | 24 | 48 | AC   | 14 | 13 |
| 151125 | 16 | 9338021 | 9338046 | 2 | 13 | 26 | AC   | 17 | 16 |
| 151126 | 16 | 9338130 | 9338159 | 2 | 15 | 30 | CA   | 12 | 8  |
| 151127 | 16 | 9339914 | 9339927 | 2 | 7  | 14 | AT   | 28 | 3  |
| 151128 | 16 | 9341536 | 9341547 | 2 | 6  | 12 | TA   | 17 | 6  |
| 151132 | 16 | 9350890 | 9350939 | 2 | 25 | 50 | GT   | 9  | 6  |
| 151136 | 16 | 9363914 | 9363925 | 2 | 6  | 12 | GA   | 26 | 3  |
| 151138 | 16 | 9366601 | 9366615 | 3 | 5  | 15 | AAG  | 26 | 9  |
| 151140 | 16 | 9371270 | 9371283 | 2 | 7  | 14 | AT   | 11 | 5  |
| 151148 | 16 | 9387718 | 9387735 | 2 | 9  | 18 | AT   | 14 | 6  |
| 151156 | 16 | 9401041 | 9401058 | 2 | 9  | 18 | TG   | 10 | 4  |
| 151160 | 16 | 9411765 | 9411784 | 2 | 10 | 20 | TG   | 21 | 9  |
| 151162 | 16 | 9414173 | 9414188 | 4 | 4  | 16 | TATT | 23 | 4  |
| 151169 | 16 | 9440522 | 9440541 | 2 | 10 | 20 | GT   | 22 | 10 |
| 151170 | 16 | 9442414 | 9442459 | 2 | 23 | 46 | AG   | 7  | 8  |
| 151171 | 16 | 9443170 | 9443208 | 3 | 13 | 39 | AAC  | 21 | 12 |
| 151174 | 16 | 9446559 | 9446574 | 2 | 8  | 16 | GT   | 21 | 7  |
| 151188 | 16 | 9466931 | 9466946 | 2 | 8  | 16 | AC   | 22 | 3  |
| 151192 | 16 | 9472112 | 9472149 | 2 | 19 | 38 | AC   | 12 | 10 |
| 151198 | 16 | 9479598 | 9479645 | 4 | 12 | 48 | AGAT | 11 | 12 |
| 151206 | 16 | 9499407 | 9499454 | 2 | 24 | 48 | TG   | 7  | 7  |
| 151208 | 16 | 9500465 | 9500480 | 2 | 8  | 16 | AC   | 33 | 3  |
| 151209 | 16 | 9500657 | 9500677 | 3 | 7  | 21 | GAG  | 22 | 6  |
| 151210 | 16 | 9500734 | 9500745 | 2 | 6  | 12 | TG   | 26 | 3  |
| 151211 | 16 | 9500871 | 9500882 | 2 | 6  | 12 | TG   | 32 | 3  |
| 151212 | 16 | 9501186 | 9501209 | 4 | 6  | 24 | AGAC | 22 | 3  |
| 151216 | 16 | 9506107 | 9506136 | 3 | 10 | 30 | CAG  | 23 | 5  |
| 151222 | 16 | 9515601 | 9515624 | 2 | 12 | 24 | TG   | 14 | 11 |
| 151224 | 16 | 9523657 | 9523674 | 2 | 9  | 18 | AG   | 26 | 3  |
| 151225 | 16 | 9524560 | 9524595 | 2 | 18 | 36 | AC   | 23 | 12 |
| 151231 | 16 | 9542234 | 9542293 | 2 | 30 | 60 | AC   | 9  | 13 |
| 151232 | 16 | 9543646 | 9543669 | 2 | 12 | 24 | AC   | 14 | 10 |
| 151241 | 16 | 9556979 | 9556994 | 2 | 8  | 16 | CT   | 21 | 10 |
| 151243 | 16 | 9560607 | 9560636 | 2 | 15 | 30 | CA   | 19 | 19 |
| 151251 | 16 | 9574881 | 9574904 | 2 | 12 | 24 | GT   | 20 | 11 |
| 151254 | 16 | 9575422 | 9575449 | 2 | 14 | 28 | TC   | 15 | 16 |
| 151256 | 16 | 9576003 | 9576050 | 2 | 24 | 48 | TG   | 22 | 12 |
| 151257 | 16 | 9577326 | 9577353 | 2 | 14 | 28 | AC   | 16 | 10 |
| 151259 | 16 | 9580942 | 9580957 | 2 | 8  | 16 | TG   | 8  | 7  |
| 151260 | 16 | 9580987 | 9581008 | 2 | 11 | 22 | AG   | 17 | 4  |
| 151263 | 16 | 9585055 | 9585074 | 2 | 10 | 20 | AG   | 14 | 10 |
| 151268 | 16 | 9591100 | 9591129 | 2 | 15 | 30 | GA   | 21 | 8  |
| 151270 | 16 | 9591873 | 9591918 | 2 | 23 | 46 | TG   | 10 | 13 |
| 151271 | 16 | 9591977 | 9592010 | 2 | 17 | 34 | TG   | 17 | 13 |
| 151273 | 16 | 9594940 | 9594975 | 2 | 18 | 36 | TG   | 22 | 10 |
| 151274 | 16 | 9597006 | 9597031 | 2 | 13 | 26 | CA   | 16 | 9  |
| 151277 | 16 | 9602640 | 9602657 | 2 | 9  | 18 | CA   | 14 | 4  |
| 151280 | 16 | 9602949 | 9602966 | 2 | 9  | 18 | CA   | 19 | 8  |
| 151281 | 16 | 9607660 | 9607677 | 3 | 6  | 18 | GTG  | 22 | 8  |

|        |    |         |         |   |    |    |      |    |    |
|--------|----|---------|---------|---|----|----|------|----|----|
| 151284 | 16 | 9615466 | 9615477 | 2 | 6  | 12 | TC   | 18 | 4  |
| 151285 | 16 | 9616138 | 9616157 | 4 | 5  | 20 | AAGA | 25 | 6  |
| 151286 | 16 | 9619425 | 9619448 | 2 | 12 | 24 | TG   | 17 | 11 |
| 151290 | 16 | 9620452 | 9620469 | 2 | 9  | 18 | TG   | 16 | 10 |
| 151295 | 16 | 9628076 | 9628089 | 2 | 7  | 14 | TG   | 17 | 7  |
| 151301 | 16 | 9634400 | 9634423 | 2 | 12 | 24 | AC   | 17 | 7  |
| 151302 | 16 | 9635000 | 9635015 | 4 | 4  | 16 | AACC | 30 | 3  |
| 151303 | 16 | 9635320 | 9635352 | 3 | 11 | 33 | GAT  | 19 | 8  |
| 151304 | 16 | 9636427 | 9636448 | 2 | 11 | 22 | AC   | 20 | 7  |
| 151309 | 16 | 9657656 | 9657671 | 2 | 8  | 16 | CT   | 25 | 4  |
| 151315 | 16 | 9666774 | 9666801 | 2 | 14 | 28 | GT   | 15 | 15 |
| 151323 | 16 | 9676089 | 9676134 | 2 | 23 | 46 | TG   | 8  | 5  |
| 151324 | 16 | 9679860 | 9679885 | 2 | 13 | 26 | GT   | 15 | 8  |
| 151325 | 16 | 9680448 | 9680475 | 2 | 14 | 28 | CA   | 18 | 11 |
| 151326 | 16 | 9680594 | 9680617 | 2 | 12 | 24 | CA   | 20 | 10 |
| 151327 | 16 | 9681883 | 9681914 | 4 | 8  | 32 | TCAA | 23 | 10 |
| 151330 | 16 | 9691842 | 9691859 | 2 | 9  | 18 | GT   | 17 | 7  |
| 151332 | 16 | 9695482 | 9695507 | 2 | 13 | 26 | TG   | 8  | 7  |
| 151338 | 16 | 9731170 | 9731197 | 4 | 7  | 28 | ATGG | 12 | 6  |
| 151339 | 16 | 9731660 | 9731679 | 2 | 10 | 20 | AC   | 17 | 9  |
| 151348 | 16 | 9742099 | 9742122 | 4 | 6  | 24 | TCTG | 17 | 3  |
| 151355 | 16 | 9752766 | 9752799 | 2 | 17 | 34 | TG   | 6  | 9  |
| 151357 | 16 | 9761892 | 9761907 | 2 | 8  | 16 | AC   | 18 | 5  |
| 151358 | 16 | 9764755 | 9764772 | 2 | 9  | 18 | TG   | 26 | 4  |
| 151359 | 16 | 9772671 | 9772724 | 2 | 27 | 54 | AC   | 7  | 7  |
| 151361 | 16 | 9779919 | 9779936 | 2 | 9  | 18 | AC   | 18 | 10 |
| 151369 | 16 | 9805392 | 9805431 | 2 | 20 | 40 | TG   | 14 | 15 |
| 151371 | 16 | 9806036 | 9806047 | 2 | 6  | 12 | AC   | 28 | 3  |
| 151374 | 16 | 9825730 | 9825759 | 3 | 10 | 30 | AAT  | 17 | 8  |
| 151378 | 16 | 9837124 | 9837147 | 2 | 12 | 24 | AC   | 16 | 7  |
| 151380 | 16 | 9838012 | 9838025 | 2 | 7  | 14 | GT   | 26 | 4  |
| 151389 | 16 | 9847028 | 9847041 | 2 | 7  | 14 | GT   | 8  | 3  |
| 151390 | 16 | 9847710 | 9847727 | 2 | 9  | 18 | AC   | 13 | 8  |
| 151392 | 16 | 9847765 | 9847778 | 2 | 7  | 14 | AC   | 20 | 6  |
| 151393 | 16 | 9848757 | 9848786 | 2 | 15 | 30 | GT   | 7  | 8  |
| 151396 | 16 | 9850025 | 9850036 | 2 | 6  | 12 | GA   | 20 | 3  |
| 151400 | 16 | 9854754 | 9854791 | 2 | 19 | 38 | GT   | 20 | 14 |
| 151402 | 16 | 9855361 | 9855406 | 2 | 23 | 46 | CA   | 9  | 8  |
| 151405 | 16 | 9858604 | 9858635 | 2 | 16 | 32 | TG   | 16 | 12 |
| 151407 | 16 | 9859252 | 9859265 | 2 | 7  | 14 | TG   | 23 | 4  |
| 151409 | 16 | 9859347 | 9859366 | 2 | 10 | 20 | GT   | 10 | 8  |
| 151415 | 16 | 9866317 | 9866334 | 2 | 9  | 18 | CA   | 13 | 7  |
| 151416 | 16 | 9866450 | 9866473 | 2 | 12 | 24 | AC   | 12 | 7  |
| 151419 | 16 | 9868205 | 9868230 | 2 | 13 | 26 | GT   | 14 | 7  |
| 151421 | 16 | 9869176 | 9869199 | 2 | 12 | 24 | GT   | 19 | 9  |
| 151426 | 16 | 9869873 | 9869892 | 2 | 10 | 20 | GT   | 17 | 7  |
| 151435 | 16 | 9882712 | 9882723 | 2 | 6  | 12 | GT   | 19 | 4  |
| 151437 | 16 | 9882903 | 9882922 | 2 | 10 | 20 | TG   | 14 | 12 |
| 151438 | 16 | 9883052 | 9883095 | 2 | 22 | 44 | TG   | 7  | 8  |
| 151439 | 16 | 9883312 | 9883341 | 2 | 15 | 30 | CA   | 7  | 7  |
| 151447 | 16 | 9888262 | 9888279 | 2 | 9  | 18 | AC   | 22 | 7  |

|        |    |          |          |   |    |    |      |    |    |
|--------|----|----------|----------|---|----|----|------|----|----|
| 151448 | 16 | 9888388  | 9888405  | 2 | 9  | 18 | CA   | 23 | 9  |
| 151449 | 16 | 9888687  | 9888700  | 2 | 7  | 14 | AC   | 25 | 5  |
| 151450 | 16 | 9889847  | 9889862  | 2 | 8  | 16 | AT   | 13 | 5  |
| 151451 | 16 | 9890481  | 9890506  | 2 | 13 | 26 | CA   | 15 | 9  |
| 151452 | 16 | 9891507  | 9891528  | 2 | 11 | 22 | GT   | 17 | 7  |
| 151453 | 16 | 9891872  | 9891883  | 2 | 6  | 12 | AT   | 28 | 7  |
| 151456 | 16 | 9894933  | 9894950  | 2 | 9  | 18 | GT   | 15 | 7  |
| 151463 | 16 | 9898065  | 9898080  | 2 | 8  | 16 | CT   | 22 | 4  |
| 151466 | 16 | 9898222  | 9898245  | 2 | 12 | 24 | CA   | 10 | 10 |
| 151467 | 16 | 9898375  | 9898394  | 2 | 10 | 20 | TG   | 27 | 7  |
| 151470 | 16 | 9898562  | 9898573  | 2 | 6  | 12 | TG   | 30 | 3  |
| 151482 | 16 | 9904633  | 9904656  | 3 | 8  | 24 | CTG  | 30 | 9  |
| 151486 | 16 | 9908800  | 9908835  | 2 | 18 | 36 | GT   | 14 | 10 |
| 151488 | 16 | 9909556  | 9909589  | 2 | 17 | 34 | CA   | 10 | 7  |
| 151489 | 16 | 9911697  | 9911732  | 2 | 18 | 36 | TG   | 19 | 14 |
| 151491 | 16 | 9917101  | 9917114  | 2 | 7  | 14 | GT   | 8  | 6  |
| 151495 | 16 | 9924241  | 9924260  | 2 | 10 | 20 | GT   | 12 | 11 |
| 151497 | 16 | 9925858  | 9925869  | 2 | 6  | 12 | TA   | 15 | 4  |
| 151511 | 16 | 9937890  | 9937941  | 4 | 13 | 52 | GAAA | 18 | 7  |
| 151514 | 16 | 9940926  | 9940964  | 3 | 13 | 39 | GCT  | 15 | 11 |
| 151517 | 16 | 9945641  | 9945662  | 2 | 11 | 22 | GT   | 9  | 5  |
| 151518 | 16 | 9945998  | 9946018  | 3 | 7  | 21 | TGT  | 15 | 9  |
| 151519 | 16 | 9946306  | 9946321  | 2 | 8  | 16 | TG   | 20 | 3  |
| 151521 | 16 | 9948923  | 9948948  | 2 | 13 | 26 | GT   | 8  | 8  |
| 151522 | 16 | 9949390  | 9949423  | 2 | 17 | 34 | CA   | 6  | 8  |
| 151523 | 16 | 9951555  | 9951568  | 2 | 7  | 14 | GA   | 26 | 8  |
| 151531 | 16 | 9980449  | 9980470  | 2 | 11 | 22 | AC   | 19 | 5  |
| 151537 | 16 | 9999703  | 9999736  | 2 | 17 | 34 | AC   | 15 | 11 |
| 151539 | 16 | 10004767 | 10004780 | 2 | 7  | 14 | TG   | 26 | 3  |
| 151542 | 16 | 10008772 | 10008795 | 2 | 12 | 24 | TG   | 13 | 7  |
| 151549 | 16 | 10041009 | 10041046 | 2 | 19 | 38 | AC   | 12 | 14 |
| 151550 | 16 | 10042544 | 10042559 | 2 | 8  | 16 | GT   | 21 | 4  |
| 151551 | 16 | 10046190 | 10046213 | 2 | 12 | 24 | GT   | 18 | 12 |
| 151552 | 16 | 10046462 | 10046473 | 2 | 6  | 12 | TG   | 9  | 5  |
| 151553 | 16 | 10046616 | 10046639 | 2 | 12 | 24 | GT   | 19 | 17 |
| 151561 | 16 | 10065338 | 10065351 | 2 | 7  | 14 | GT   | 22 | 7  |
| 151562 | 16 | 10068195 | 10068216 | 2 | 11 | 22 | AC   | 20 | 3  |
| 151563 | 16 | 10068965 | 10068976 | 2 | 6  | 12 | AT   | 12 | 3  |
| 151564 | 16 | 10070220 | 10070243 | 2 | 12 | 24 | AG   | 18 | 4  |
| 151565 | 16 | 10073855 | 10073878 | 2 | 12 | 24 | CT   | 8  | 3  |
| 151573 | 16 | 10087173 | 10087208 | 2 | 18 | 36 | TC   | 7  | 7  |
| 151576 | 16 | 10102766 | 10102777 | 2 | 6  | 12 | AC   | 30 | 6  |
| 151577 | 16 | 10103438 | 10103463 | 2 | 13 | 26 | TG   | 11 | 5  |
| 151580 | 16 | 10113539 | 10113558 | 2 | 10 | 20 | TG   | 14 | 6  |
| 151586 | 16 | 10124113 | 10124162 | 2 | 25 | 50 | CA   | 9  | 6  |
| 151587 | 16 | 10124286 | 10124315 | 3 | 10 | 30 | TAC  | 6  | 4  |
| 151592 | 16 | 10130044 | 10130071 | 2 | 14 | 28 | AC   | 8  | 8  |
| 151596 | 16 | 10143076 | 10143097 | 2 | 11 | 22 | TG   | 14 | 9  |
| 151600 | 16 | 10144079 | 10144102 | 4 | 6  | 24 | CTGC | 19 | 9  |
| 151602 | 16 | 10144211 | 10144238 | 2 | 14 | 28 | AG   | 14 | 8  |
| 151606 | 16 | 10155357 | 10155386 | 2 | 15 | 30 | TG   | 15 | 13 |

|        |    |          |          |   |    |    |      |    |    |
|--------|----|----------|----------|---|----|----|------|----|----|
| 151610 | 16 | 10161095 | 10161136 | 2 | 21 | 42 | TG   | 12 | 17 |
| 151612 | 16 | 10164671 | 10164686 | 2 | 8  | 16 | AT   | 11 | 5  |
| 151615 | 16 | 10171389 | 10171402 | 2 | 7  | 14 | TG   | 15 | 3  |
| 151619 | 16 | 10191574 | 10191593 | 2 | 10 | 20 | TG   | 28 | 10 |
| 151622 | 16 | 10204822 | 10204845 | 2 | 12 | 24 | CA   | 21 | 11 |
| 151628 | 16 | 10233177 | 10233220 | 2 | 22 | 44 | CA   | 12 | 13 |
| 151640 | 17 | 11883    | 11912    | 3 | 10 | 30 | CTG  | 26 | 6  |
| 151642 | 17 | 12231    | 12264    | 2 | 17 | 34 | CA   | 8  | 10 |
| 151647 | 17 | 27038    | 27077    | 4 | 10 | 40 | AAAG | 13 | 10 |
| 151649 | 17 | 33941    | 33973    | 3 | 11 | 33 | AAC  | 23 | 12 |
| 151650 | 17 | 35391    | 35405    | 3 | 5  | 15 | TGC  | 12 | 3  |
| 151656 | 17 | 43312    | 43341    | 3 | 10 | 30 | TCA  | 20 | 11 |
| 151659 | 17 | 48360    | 48374    | 3 | 5  | 15 | ATG  | 23 | 3  |
| 151661 | 17 | 53320    | 53339    | 4 | 5  | 20 | GACA | 28 | 4  |
| 151664 | 17 | 56159    | 56184    | 2 | 13 | 26 | AC   | 11 | 8  |
| 151677 | 17 | 79450    | 79467    | 2 | 9  | 18 | GT   | 25 | 4  |
| 151682 | 17 | 85780    | 85805    | 2 | 13 | 26 | TG   | 22 | 8  |
| 151689 | 17 | 97614    | 97641    | 2 | 14 | 28 | GT   | 15 | 10 |
| 151690 | 17 | 97877    | 97891    | 3 | 5  | 15 | TGA  | 25 | 3  |
| 151691 | 17 | 98634    | 98651    | 2 | 9  | 18 | GT   | 26 | 6  |
| 151692 | 17 | 98810    | 98827    | 2 | 9  | 18 | AG   | 26 | 5  |
| 151699 | 17 | 109276   | 109333   | 2 | 29 | 58 | CA   | 7  | 10 |
| 151704 | 17 | 118528   | 118548   | 3 | 7  | 21 | CCT  | 11 | 3  |
| 151706 | 17 | 119272   | 119293   | 2 | 11 | 22 | GT   | 21 | 12 |
| 151707 | 17 | 119731   | 119790   | 3 | 20 | 60 | TAA  | 9  | 10 |
| 151709 | 17 | 124142   | 124169   | 2 | 14 | 28 | TG   | 21 | 15 |
| 151714 | 17 | 134236   | 134251   | 2 | 8  | 16 | TG   | 7  | 7  |
| 151716 | 17 | 136433   | 136460   | 2 | 14 | 28 | GT   | 17 | 6  |
| 151717 | 17 | 139413   | 139424   | 2 | 6  | 12 | CT   | 23 | 4  |
| 151728 | 17 | 150214   | 150245   | 2 | 16 | 32 | CA   | 6  | 5  |
| 151730 | 17 | 152808   | 152827   | 2 | 10 | 20 | GT   | 25 | 5  |
| 151735 | 17 | 158459   | 158474   | 2 | 8  | 16 | GT   | 22 | 7  |
| 151743 | 17 | 161376   | 161409   | 2 | 17 | 34 | GT   | 22 | 11 |
| 151748 | 17 | 167450   | 167488   | 3 | 13 | 39 | TTA  | 6  | 4  |
| 151758 | 17 | 176177   | 176188   | 2 | 6  | 12 | TG   | 27 | 3  |
| 151759 | 17 | 178461   | 178480   | 2 | 10 | 20 | TG   | 20 | 6  |
| 151767 | 17 | 193866   | 193897   | 2 | 16 | 32 | CA   | 11 | 15 |
| 151770 | 17 | 195127   | 195150   | 2 | 12 | 24 | GT   | 19 | 17 |
| 151776 | 17 | 203903   | 203914   | 2 | 6  | 12 | AG   | 27 | 3  |
| 151782 | 17 | 224940   | 224963   | 2 | 12 | 24 | GT   | 20 | 9  |
| 151784 | 17 | 225221   | 225248   | 2 | 14 | 28 | TG   | 13 | 13 |
| 151787 | 17 | 232652   | 232665   | 2 | 7  | 14 | CT   | 19 | 7  |
| 151792 | 17 | 247805   | 247816   | 2 | 6  | 12 | CA   | 30 | 3  |
| 151793 | 17 | 248396   | 248419   | 4 | 6  | 24 | TCTT | 20 | 5  |
| 151794 | 17 | 248501   | 248515   | 3 | 5  | 15 | TTC  | 19 | 6  |
| 151795 | 17 | 248636   | 248663   | 2 | 14 | 28 | TC   | 7  | 4  |
| 151800 | 17 | 280606   | 280619   | 2 | 7  | 14 | TC   | 23 | 3  |
| 151809 | 17 | 298939   | 298954   | 4 | 4  | 16 | AATC | 20 | 4  |
| 151813 | 17 | 308122   | 308142   | 3 | 7  | 21 | CTG  | 28 | 7  |
| 151826 | 17 | 363175   | 363188   | 2 | 7  | 14 | TG   | 23 | 5  |
| 151830 | 17 | 369247   | 369282   | 2 | 18 | 36 | TG   | 9  | 5  |

|        |    |        |        |   |    |    |      |    |    |
|--------|----|--------|--------|---|----|----|------|----|----|
| 151832 | 17 | 369887 | 369904 | 2 | 9  | 18 | TG   | 18 | 3  |
| 151841 | 17 | 411699 | 411714 | 4 | 4  | 16 | AAAC | 30 | 3  |
| 151862 | 17 | 446346 | 446369 | 3 | 8  | 24 | TAT  | 17 | 4  |
| 151863 | 17 | 455702 | 455721 | 4 | 5  | 20 | TTTG | 19 | 6  |
| 151865 | 17 | 456917 | 456942 | 2 | 13 | 26 | GT   | 9  | 4  |
| 151866 | 17 | 458185 | 458206 | 2 | 11 | 22 | AC   | 20 | 11 |
| 151867 | 17 | 458364 | 458393 | 2 | 15 | 30 | TG   | 21 | 8  |
| 151872 | 17 | 465571 | 465588 | 2 | 9  | 18 | GT   | 13 | 12 |
| 151873 | 17 | 471393 | 471408 | 4 | 4  | 16 | CAAA | 29 | 4  |
| 151880 | 17 | 493099 | 493126 | 2 | 14 | 28 | AC   | 10 | 7  |
| 151886 | 17 | 499952 | 499963 | 2 | 6  | 12 | GT   | 26 | 4  |
| 151891 | 17 | 520490 | 520505 | 4 | 4  | 16 | TTTG | 14 | 3  |
| 151897 | 17 | 530530 | 530553 | 2 | 12 | 24 | CA   | 13 | 7  |
| 151898 | 17 | 532203 | 532218 | 2 | 8  | 16 | GT   | 22 | 3  |
| 151900 | 17 | 538507 | 538538 | 2 | 16 | 32 | CA   | 11 | 5  |
| 151903 | 17 | 541028 | 541061 | 2 | 17 | 34 | GT   | 12 | 11 |
| 151904 | 17 | 541217 | 541228 | 2 | 6  | 12 | CA   | 25 | 3  |
| 151908 | 17 | 543632 | 543653 | 2 | 11 | 22 | CT   | 8  | 4  |
| 151916 | 17 | 554740 | 554765 | 2 | 13 | 26 | AC   | 13 | 6  |
| 151926 | 17 | 566193 | 566210 | 3 | 6  | 18 | GAT  | 28 | 5  |
| 151927 | 17 | 569021 | 569040 | 2 | 10 | 20 | CA   | 16 | 7  |
| 151928 | 17 | 573584 | 573635 | 2 | 26 | 52 | AC   | 8  | 9  |
| 151932 | 17 | 580400 | 580431 | 4 | 8  | 32 | TAAA | 20 | 9  |
| 151933 | 17 | 581191 | 581206 | 4 | 4  | 16 | TTTG | 23 | 4  |
| 151936 | 17 | 592794 | 592833 | 2 | 20 | 40 | GT   | 9  | 9  |
| 151946 | 17 | 622552 | 622566 | 3 | 5  | 15 | CAG  | 24 | 3  |
| 151949 | 17 | 625856 | 625867 | 2 | 6  | 12 | TG   | 28 | 10 |
| 151951 | 17 | 632676 | 632691 | 4 | 4  | 16 | CAAA | 25 | 3  |
| 151952 | 17 | 635572 | 635593 | 2 | 11 | 22 | CA   | 25 | 11 |
| 151955 | 17 | 642965 | 642982 | 2 | 9  | 18 | AC   | 25 | 4  |
| 151961 | 17 | 658759 | 658770 | 2 | 6  | 12 | TC   | 28 | 6  |
| 151963 | 17 | 661674 | 661687 | 2 | 7  | 14 | GT   | 25 | 6  |
| 151969 | 17 | 674503 | 674548 | 2 | 23 | 46 | TG   | 8  | 12 |
| 151979 | 17 | 682263 | 682276 | 2 | 7  | 14 | CA   | 19 | 11 |
| 151982 | 17 | 693002 | 693019 | 3 | 6  | 18 | TGA  | 26 | 7  |
| 151984 | 17 | 698417 | 698431 | 3 | 5  | 15 | GGA  | 28 | 3  |
| 151985 | 17 | 698830 | 698845 | 2 | 8  | 16 | CT   | 22 | 9  |
| 151986 | 17 | 702787 | 702800 | 2 | 7  | 14 | CA   | 27 | 4  |
| 151990 | 17 | 705854 | 705867 | 2 | 7  | 14 | AC   | 24 | 4  |
| 152002 | 17 | 713472 | 713507 | 3 | 12 | 36 | CAG  | 23 | 20 |
| 152003 | 17 | 713539 | 713586 | 3 | 16 | 48 | TCA  | 13 | 9  |
| 152007 | 17 | 723442 | 723465 | 2 | 12 | 24 | CA   | 14 | 7  |
| 152009 | 17 | 730707 | 730730 | 2 | 12 | 24 | GT   | 6  | 5  |
| 152010 | 17 | 733607 | 733638 | 2 | 16 | 32 | AG   | 13 | 5  |
| 152022 | 17 | 748011 | 748024 | 2 | 7  | 14 | TG   | 25 | 3  |
| 152025 | 17 | 752722 | 752747 | 2 | 13 | 26 | TG   | 17 | 3  |
| 152029 | 17 | 759449 | 759464 | 4 | 4  | 16 | AAAC | 25 | 3  |
| 152030 | 17 | 760458 | 760501 | 2 | 22 | 44 | CA   | 15 | 11 |
| 152031 | 17 | 762600 | 762615 | 2 | 8  | 16 | TA   | 11 | 6  |
| 152035 | 17 | 766618 | 766635 | 2 | 9  | 18 | GT   | 13 | 5  |
| 152037 | 17 | 766808 | 766839 | 2 | 16 | 32 | CA   | 7  | 7  |

|        |    |         |         |   |    |    |      |    |    |
|--------|----|---------|---------|---|----|----|------|----|----|
| 152039 | 17 | 769505  | 769516  | 2 | 6  | 12 | TG   | 29 | 4  |
| 152040 | 17 | 770086  | 770099  | 2 | 7  | 14 | AG   | 18 | 4  |
| 152041 | 17 | 770523  | 770552  | 2 | 15 | 30 | AC   | 16 | 10 |
| 152047 | 17 | 778206  | 778239  | 2 | 17 | 34 | CA   | 16 | 12 |
| 152053 | 17 | 806892  | 806911  | 2 | 10 | 20 | GA   | 21 | 6  |
| 152055 | 17 | 809497  | 809532  | 2 | 18 | 36 | TC   | 27 | 8  |
| 152059 | 17 | 823589  | 823606  | 2 | 9  | 18 | CA   | 13 | 11 |
| 152065 | 17 | 833707  | 833736  | 2 | 15 | 30 | AC   | 9  | 9  |
| 152066 | 17 | 833858  | 833881  | 2 | 12 | 24 | GT   | 14 | 6  |
| 152068 | 17 | 835086  | 835097  | 2 | 6  | 12 | CA   | 17 | 3  |
| 152087 | 17 | 853353  | 853373  | 3 | 7  | 21 | TTA  | 24 | 3  |
| 152089 | 17 | 853793  | 853804  | 2 | 6  | 12 | AC   | 18 | 3  |
| 152091 | 17 | 854378  | 854393  | 2 | 8  | 16 | GT   | 19 | 4  |
| 152092 | 17 | 861319  | 861382  | 2 | 32 | 64 | CA   | 8  | 10 |
| 152097 | 17 | 879265  | 879276  | 2 | 6  | 12 | TG   | 24 | 11 |
| 152100 | 17 | 883013  | 883028  | 2 | 8  | 16 | AC   | 28 | 3  |
| 152104 | 17 | 885192  | 885205  | 2 | 7  | 14 | AC   | 10 | 6  |
| 152111 | 17 | 907001  | 907015  | 3 | 5  | 15 | AGC  | 35 | 3  |
| 152114 | 17 | 924859  | 924876  | 2 | 9  | 18 | CA   | 21 | 3  |
| 152116 | 17 | 925465  | 925480  | 4 | 4  | 16 | ATTT | 25 | 3  |
| 152118 | 17 | 927746  | 927759  | 2 | 7  | 14 | CA   | 33 | 5  |
| 152120 | 17 | 931975  | 932000  | 2 | 13 | 26 | AC   | 21 | 13 |
| 152122 | 17 | 936526  | 936541  | 4 | 4  | 16 | AGCC | 19 | 3  |
| 152123 | 17 | 940299  | 940362  | 2 | 32 | 64 | GT   | 6  | 7  |
| 152125 | 17 | 942329  | 942358  | 3 | 10 | 30 | CCT  | 19 | 6  |
| 152135 | 17 | 963653  | 963668  | 4 | 4  | 16 | TGTC | 26 | 4  |
| 152139 | 17 | 980733  | 980746  | 2 | 7  | 14 | TG   | 28 | 4  |
| 152163 | 17 | 997608  | 997639  | 2 | 16 | 32 | TG   | 20 | 9  |
| 152165 | 17 | 998775  | 998792  | 2 | 9  | 18 | AC   | 20 | 4  |
| 152171 | 17 | 1004860 | 1004873 | 2 | 7  | 14 | GT   | 19 | 8  |
| 152172 | 17 | 1004947 | 1004968 | 2 | 11 | 22 | GT   | 15 | 6  |
| 152173 | 17 | 1005292 | 1005321 | 2 | 15 | 30 | GT   | 17 | 8  |
| 152179 | 17 | 1006996 | 1007007 | 2 | 6  | 12 | AC   | 6  | 3  |
| 152180 | 17 | 1007010 | 1007023 | 2 | 7  | 14 | AC   | 23 | 4  |
| 152185 | 17 | 1012865 | 1012884 | 2 | 10 | 20 | TG   | 21 | 12 |
| 152187 | 17 | 1014796 | 1014816 | 3 | 7  | 21 | GGA  | 20 | 8  |
| 152189 | 17 | 1017361 | 1017384 | 4 | 6  | 24 | GAAA | 23 | 6  |
| 152205 | 17 | 1049414 | 1049429 | 2 | 8  | 16 | CA   | 18 | 4  |
| 152207 | 17 | 1050562 | 1050599 | 2 | 19 | 38 | AC   | 16 | 12 |
| 152208 | 17 | 1052124 | 1052149 | 2 | 13 | 26 | CA   | 17 | 7  |
| 152209 | 17 | 1053950 | 1053967 | 2 | 9  | 18 | TG   | 23 | 6  |
| 152211 | 17 | 1061103 | 1061116 | 2 | 7  | 14 | CA   | 18 | 4  |
| 152223 | 17 | 1083059 | 1083076 | 2 | 9  | 18 | GT   | 8  | 11 |
| 152234 | 17 | 1096805 | 1096819 | 3 | 5  | 15 | GCG  | 27 | 5  |
| 152237 | 17 | 1101263 | 1101278 | 2 | 8  | 16 | AT   | 17 | 3  |
| 152238 | 17 | 1108258 | 1108275 | 3 | 6  | 18 | GTT  | 24 | 5  |
| 152241 | 17 | 1115217 | 1115231 | 3 | 5  | 15 | CCT  | 32 | 3  |
| 152246 | 17 | 1147833 | 1147847 | 3 | 5  | 15 | ACC  | 30 | 6  |
| 152254 | 17 | 1162200 | 1162217 | 3 | 6  | 18 | GAT  | 26 | 5  |
| 152258 | 17 | 1168155 | 1168175 | 3 | 7  | 21 | ATG  | 25 | 9  |
| 152261 | 17 | 1175365 | 1175384 | 2 | 10 | 20 | TG   | 8  | 4  |



|        |    |         |         |   |    |    |      |    |    |
|--------|----|---------|---------|---|----|----|------|----|----|
| 152272 | 17 | 1224584 | 1224599 | 4 | 4  | 16 | ATTT | 26 | 3  |
| 152276 | 17 | 1228110 | 1228137 | 2 | 14 | 28 | CA   | 26 | 8  |
| 152277 | 17 | 1230748 | 1230763 | 2 | 8  | 16 | TG   | 21 | 3  |
| 152282 | 17 | 1243134 | 1243154 | 3 | 7  | 21 | GGA  | 23 | 3  |
| 152283 | 17 | 1247197 | 1247217 | 3 | 7  | 21 | CCT  | 23 | 4  |
| 152285 | 17 | 1248845 | 1248866 | 2 | 11 | 22 | CA   | 11 | 11 |
| 152286 | 17 | 1248990 | 1249013 | 2 | 12 | 24 | TG   | 19 | 6  |
| 152292 | 17 | 1259344 | 1259355 | 2 | 6  | 12 | AG   | 31 | 3  |
| 152293 | 17 | 1261524 | 1261549 | 2 | 13 | 26 | CA   | 16 | 11 |
| 152295 | 17 | 1262523 | 1262540 | 2 | 9  | 18 | AC   | 22 | 8  |
| 152296 | 17 | 1262542 | 1262553 | 2 | 6  | 12 | CA   | 22 | 5  |
| 152298 | 17 | 1265515 | 1265558 | 4 | 11 | 44 | TACA | 20 | 5  |
| 152300 | 17 | 1265944 | 1265957 | 2 | 7  | 14 | TG   | 18 | 5  |
| 152301 | 17 | 1267202 | 1267221 | 2 | 10 | 20 | GT   | 11 | 9  |
| 152303 | 17 | 1267369 | 1267386 | 2 | 9  | 18 | AC   | 8  | 6  |
| 152305 | 17 | 1271390 | 1271423 | 2 | 17 | 34 | AC   | 7  | 6  |
| 152306 | 17 | 1272690 | 1272701 | 2 | 6  | 12 | CA   | 7  | 6  |
| 152310 | 17 | 1272963 | 1272992 | 2 | 15 | 30 | GT   | 13 | 13 |
| 152312 | 17 | 1278324 | 1278335 | 2 | 6  | 12 | AC   | 23 | 5  |
| 152314 | 17 | 1281041 | 1281056 | 2 | 8  | 16 | AG   | 18 | 4  |
| 152315 | 17 | 1281058 | 1281069 | 2 | 6  | 12 | GA   | 18 | 4  |
| 152322 | 17 | 1307465 | 1307480 | 2 | 8  | 16 | CA   | 17 | 4  |
| 152325 | 17 | 1315026 | 1315039 | 2 | 7  | 14 | TG   | 20 | 8  |
| 152329 | 17 | 1324689 | 1324702 | 2 | 7  | 14 | AC   | 24 | 4  |
| 152333 | 17 | 1333017 | 1333028 | 2 | 6  | 12 | TG   | 21 | 3  |
| 152334 | 17 | 1333118 | 1333135 | 2 | 9  | 18 | CT   | 19 | 5  |
| 152337 | 17 | 1344767 | 1344790 | 2 | 12 | 24 | CA   | 24 | 5  |
| 152342 | 17 | 1358818 | 1358841 | 4 | 6  | 24 | TACA | 24 | 6  |
| 152346 | 17 | 1370535 | 1370556 | 2 | 11 | 22 | AC   | 16 | 4  |
| 152349 | 17 | 1373697 | 1373744 | 2 | 24 | 48 | GT   | 10 | 10 |
| 152350 | 17 | 1379849 | 1379866 | 2 | 9  | 18 | TG   | 21 | 10 |
| 152360 | 17 | 1405097 | 1405124 | 2 | 14 | 28 | GA   | 13 | 6  |
| 152368 | 17 | 1438857 | 1438884 | 2 | 14 | 28 | CA   | 11 | 4  |
| 152370 | 17 | 1441608 | 1441633 | 2 | 13 | 26 | AC   | 6  | 6  |
| 152372 | 17 | 1442017 | 1442042 | 2 | 13 | 26 | TG   | 7  | 4  |
| 152378 | 17 | 1444866 | 1444877 | 2 | 6  | 12 | GT   | 7  | 4  |
| 152384 | 17 | 1449935 | 1449960 | 2 | 13 | 26 | AC   | 10 | 6  |
| 152386 | 17 | 1451085 | 1451098 | 2 | 7  | 14 | TG   | 25 | 3  |
| 152387 | 17 | 1452084 | 1452099 | 4 | 4  | 16 | TGCG | 17 | 5  |
| 152388 | 17 | 1452716 | 1452735 | 2 | 10 | 20 | GT   | 17 | 8  |
| 152391 | 17 | 1453568 | 1453599 | 4 | 8  | 32 | TGTC | 8  | 6  |
| 152392 | 17 | 1455439 | 1455476 | 2 | 19 | 38 | AC   | 8  | 9  |
| 152396 | 17 | 1460414 | 1460433 | 2 | 10 | 20 | AC   | 21 | 5  |
| 152400 | 17 | 1463659 | 1463698 | 4 | 10 | 40 | GAAA | 16 | 8  |
| 152405 | 17 | 1469369 | 1469384 | 4 | 4  | 16 | CAAC | 25 | 4  |
| 152422 | 17 | 1511570 | 1511593 | 3 | 8  | 24 | AGC  | 18 | 7  |
| 152426 | 17 | 1514765 | 1514778 | 2 | 7  | 14 | GT   | 11 | 6  |
| 152432 | 17 | 1519302 | 1519327 | 2 | 13 | 26 | TG   | 12 | 8  |
| 152433 | 17 | 1522181 | 1522192 | 2 | 6  | 12 | TG   | 27 | 3  |
| 152437 | 17 | 1524071 | 1524132 | 2 | 31 | 62 | AC   | 7  | 8  |
| 152441 | 17 | 1528136 | 1528161 | 2 | 13 | 26 | GT   | 8  | 8  |

|        |    |         |         |   |    |    |      |    |    |
|--------|----|---------|---------|---|----|----|------|----|----|
| 152445 | 17 | 1529950 | 1529965 | 2 | 8  | 16 | TG   | 19 | 3  |
| 152450 | 17 | 1531680 | 1531691 | 2 | 6  | 12 | TG   | 25 | 8  |
| 152452 | 17 | 1533076 | 1533127 | 2 | 26 | 52 | TG   | 9  | 10 |
| 152453 | 17 | 1533178 | 1533193 | 2 | 8  | 16 | TG   | 25 | 4  |
| 152478 | 17 | 1565235 | 1565252 | 2 | 9  | 18 | GT   | 21 | 7  |
| 152480 | 17 | 1567943 | 1567957 | 3 | 5  | 15 | TTC  | 27 | 3  |
| 152481 | 17 | 1570005 | 1570020 | 2 | 8  | 16 | CT   | 19 | 3  |
| 152482 | 17 | 1570166 | 1570185 | 2 | 10 | 20 | GA   | 20 | 7  |
| 152483 | 17 | 1571343 | 1571358 | 2 | 8  | 16 | GA   | 26 | 5  |
| 152484 | 17 | 1571413 | 1571428 | 4 | 4  | 16 | AAAC | 7  | 4  |
| 152490 | 17 | 1577777 | 1577796 | 2 | 10 | 20 | AC   | 25 | 5  |
| 152491 | 17 | 1578308 | 1578319 | 2 | 6  | 12 | TG   | 28 | 3  |
| 152493 | 17 | 1579178 | 1579213 | 2 | 18 | 36 | GT   | 11 | 8  |
| 152494 | 17 | 1580995 | 1581016 | 2 | 11 | 22 | AG   | 22 | 4  |
| 152503 | 17 | 1589680 | 1589691 | 2 | 6  | 12 | TG   | 26 | 5  |
| 152504 | 17 | 1589694 | 1589709 | 2 | 8  | 16 | TG   | 24 | 6  |
| 152509 | 17 | 1594080 | 1594111 | 2 | 16 | 32 | AC   | 10 | 10 |
| 152511 | 17 | 1597191 | 1597218 | 2 | 14 | 28 | TG   | 11 | 5  |
| 152513 | 17 | 1598862 | 1598873 | 2 | 6  | 12 | TG   | 28 | 3  |
| 152515 | 17 | 1605030 | 1605056 | 3 | 9  | 27 | CAT  | 19 | 5  |
| 152519 | 17 | 1607808 | 1607819 | 2 | 6  | 12 | AC   | 7  | 4  |
| 152530 | 17 | 1628275 | 1628324 | 2 | 25 | 50 | AC   | 11 | 10 |
| 152532 | 17 | 1639345 | 1639358 | 2 | 7  | 14 | GT   | 19 | 9  |
| 152534 | 17 | 1642939 | 1642962 | 2 | 12 | 24 | TG   | 15 | 7  |
| 152535 | 17 | 1643142 | 1643159 | 2 | 9  | 18 | AC   | 23 | 3  |
| 152536 | 17 | 1646843 | 1646854 | 2 | 6  | 12 | CA   | 22 | 7  |
| 152537 | 17 | 1647782 | 1647797 | 4 | 4  | 16 | CAGA | 18 | 5  |
| 152542 | 17 | 1659043 | 1659064 | 2 | 11 | 22 | GT   | 21 | 5  |
| 152543 | 17 | 1659642 | 1659663 | 2 | 11 | 22 | GT   | 13 | 7  |
| 152548 | 17 | 1662339 | 1662372 | 2 | 17 | 34 | AC   | 6  | 8  |
| 152549 | 17 | 1663876 | 1663891 | 2 | 8  | 16 | AC   | 11 | 8  |
| 152555 | 17 | 1668186 | 1668215 | 3 | 10 | 30 | GCT  | 29 | 5  |
| 152557 | 17 | 1669064 | 1669078 | 3 | 5  | 15 | CTT  | 14 | 4  |
| 152558 | 17 | 1669384 | 1669403 | 4 | 5  | 20 | TTTA | 16 | 4  |
| 152559 | 17 | 1669616 | 1669635 | 4 | 5  | 20 | TCTT | 12 | 9  |
| 152560 | 17 | 1670397 | 1670426 | 3 | 10 | 30 | CAG  | 18 | 13 |
| 152563 | 17 | 1671568 | 1671583 | 2 | 8  | 16 | CA   | 17 | 4  |
| 152564 | 17 | 1674269 | 1674308 | 2 | 20 | 40 | AC   | 8  | 10 |
| 152572 | 17 | 1679730 | 1679741 | 2 | 6  | 12 | GA   | 11 | 3  |
| 152575 | 17 | 1680939 | 1680956 | 2 | 9  | 18 | GT   | 29 | 5  |
| 152582 | 17 | 1684792 | 1684829 | 2 | 19 | 38 | AC   | 8  | 10 |
| 152583 | 17 | 1685648 | 1685671 | 2 | 12 | 24 | TG   | 14 | 5  |
| 152585 | 17 | 1685769 | 1685782 | 2 | 7  | 14 | CA   | 20 | 3  |
| 152591 | 17 | 1688153 | 1688164 | 2 | 6  | 12 | CA   | 29 | 3  |
| 152592 | 17 | 1689230 | 1689241 | 2 | 6  | 12 | AC   | 29 | 3  |
| 152597 | 17 | 1694444 | 1694459 | 2 | 8  | 16 | CA   | 8  | 5  |
| 152598 | 17 | 1695219 | 1695232 | 2 | 7  | 14 | AC   | 23 | 4  |
| 152609 | 17 | 1703600 | 1703611 | 2 | 6  | 12 | GA   | 19 | 4  |
| 152611 | 17 | 1704019 | 1704044 | 2 | 13 | 26 | AC   | 11 | 9  |
| 152629 | 17 | 1729221 | 1729264 | 4 | 11 | 44 | ATAC | 8  | 6  |
| 152631 | 17 | 1730168 | 1730197 | 2 | 15 | 30 | AC   | 18 | 11 |

|        |    |         |         |   |    |    |      |    |    |
|--------|----|---------|---------|---|----|----|------|----|----|
| 152636 | 17 | 1734456 | 1734511 | 2 | 28 | 56 | TG   | 7  | 11 |
| 152640 | 17 | 1737372 | 1737395 | 2 | 12 | 24 | CA   | 16 | 9  |
| 152642 | 17 | 1737658 | 1737707 | 2 | 25 | 50 | TG   | 7  | 8  |
| 152643 | 17 | 1740152 | 1740171 | 4 | 5  | 20 | TAGC | 22 | 4  |
| 152645 | 17 | 1749720 | 1749747 | 2 | 14 | 28 | AC   | 6  | 6  |
| 152653 | 17 | 1764432 | 1764449 | 3 | 6  | 18 | AAG  | 32 | 4  |
| 152654 | 17 | 1764886 | 1764906 | 3 | 7  | 21 | CCT  | 19 | 6  |
| 152656 | 17 | 1773322 | 1773337 | 2 | 8  | 16 | TC   | 27 | 3  |
| 152659 | 17 | 1780060 | 1780087 | 2 | 14 | 28 | CT   | 22 | 9  |
| 152663 | 17 | 1794951 | 1794962 | 2 | 6  | 12 | AG   | 15 | 3  |
| 152665 | 17 | 1804875 | 1804886 | 2 | 6  | 12 | CA   | 25 | 4  |
| 152666 | 17 | 1804888 | 1804903 | 2 | 8  | 16 | AC   | 24 | 3  |
| 152685 | 17 | 1855895 | 1855910 | 4 | 4  | 16 | ACAT | 23 | 3  |
| 152694 | 17 | 1876742 | 1876763 | 2 | 11 | 22 | TG   | 16 | 12 |
| 152701 | 17 | 1894431 | 1894466 | 2 | 18 | 36 | CA   | 10 | 9  |
| 152709 | 17 | 1911815 | 1911828 | 2 | 7  | 14 | AC   | 21 | 3  |
| 152713 | 17 | 1915794 | 1915827 | 2 | 17 | 34 | TG   | 12 | 10 |
| 152715 | 17 | 1918151 | 1918176 | 2 | 13 | 26 | AC   | 14 | 8  |
| 152716 | 17 | 1918306 | 1918325 | 2 | 10 | 20 | AC   | 15 | 5  |
| 152723 | 17 | 1937293 | 1937306 | 2 | 7  | 14 | TG   | 23 | 3  |
| 152726 | 17 | 1946823 | 1946836 | 2 | 7  | 14 | TG   | 24 | 3  |
| 152729 | 17 | 1950060 | 1950079 | 2 | 10 | 20 | TG   | 25 | 8  |
| 152730 | 17 | 1950270 | 1950283 | 2 | 7  | 14 | TG   | 16 | 5  |
| 152734 | 17 | 1951240 | 1951251 | 2 | 6  | 12 | TG   | 28 | 3  |
| 152740 | 17 | 1963774 | 1963789 | 4 | 4  | 16 | TACT | 27 | 3  |
| 152742 | 17 | 1967045 | 1967084 | 4 | 10 | 40 | TCCA | 19 | 8  |
| 152743 | 17 | 1968179 | 1968208 | 3 | 10 | 30 | GAG  | 18 | 7  |
| 152748 | 17 | 1973166 | 1973177 | 2 | 6  | 12 | CA   | 19 | 6  |
| 152749 | 17 | 1974211 | 1974234 | 2 | 12 | 24 | CA   | 17 | 6  |
| 152753 | 17 | 1977527 | 1977558 | 2 | 16 | 32 | GT   | 6  | 7  |
| 152756 | 17 | 1982662 | 1982693 | 2 | 16 | 32 | GT   | 13 | 12 |
| 152761 | 17 | 1983323 | 1983334 | 2 | 6  | 12 | CA   | 24 | 4  |
| 152762 | 17 | 1986034 | 1986047 | 2 | 7  | 14 | TG   | 36 | 3  |
| 152763 | 17 | 1986210 | 1986221 | 2 | 6  | 12 | AC   | 29 | 3  |
| 152768 | 17 | 1988283 | 1988306 | 2 | 12 | 24 | GT   | 19 | 3  |
| 152769 | 17 | 1988864 | 1988889 | 2 | 13 | 26 | AC   | 14 | 8  |
| 152771 | 17 | 1989624 | 1989647 | 2 | 12 | 24 | GT   | 8  | 8  |
| 152774 | 17 | 1993033 | 1993046 | 2 | 7  | 14 | AG   | 29 | 3  |
| 152781 | 17 | 1998867 | 1998884 | 2 | 9  | 18 | GT   | 16 | 4  |
| 152783 | 17 | 2002496 | 2002523 | 2 | 14 | 28 | CA   | 14 | 11 |
| 152784 | 17 | 2002712 | 2002743 | 2 | 16 | 32 | TG   | 16 | 6  |
| 152787 | 17 | 2010422 | 2010449 | 2 | 14 | 28 | GT   | 12 | 11 |
| 152789 | 17 | 2012882 | 2012896 | 3 | 5  | 15 | CTG  | 22 | 9  |
| 152790 | 17 | 2013626 | 2013651 | 2 | 13 | 26 | AC   | 26 | 10 |
| 152793 | 17 | 2021464 | 2021490 | 3 | 9  | 27 | GAG  | 8  | 4  |
| 152797 | 17 | 2025338 | 2025371 | 2 | 17 | 34 | TG   | 15 | 11 |
| 152799 | 17 | 2026854 | 2026871 | 3 | 6  | 18 | TCC  | 20 | 6  |
| 152803 | 17 | 2027590 | 2027611 | 2 | 11 | 22 | GA   | 20 | 8  |
| 152805 | 17 | 2031202 | 2031219 | 2 | 9  | 18 | GA   | 14 | 4  |
| 152807 | 17 | 2035789 | 2035808 | 2 | 10 | 20 | AC   | 22 | 5  |
| 152809 | 17 | 2037180 | 2037211 | 2 | 16 | 32 | CA   | 15 | 13 |

|        |    |         |         |   |    |    |      |    |    |
|--------|----|---------|---------|---|----|----|------|----|----|
| 152812 | 17 | 2043087 | 2043132 | 2 | 23 | 46 | CA   | 17 | 12 |
| 152813 | 17 | 2043666 | 2043693 | 2 | 14 | 28 | TG   | 10 | 4  |
| 152815 | 17 | 2047702 | 2047713 | 2 | 6  | 12 | TC   | 28 | 3  |
| 152816 | 17 | 2048660 | 2048689 | 2 | 15 | 30 | AC   | 19 | 6  |
| 152817 | 17 | 2048886 | 2048901 | 2 | 8  | 16 | CA   | 23 | 4  |
| 152818 | 17 | 2050975 | 2050990 | 2 | 8  | 16 | AC   | 20 | 7  |
| 152819 | 17 | 2053911 | 2053937 | 3 | 9  | 27 | GCA  | 9  | 6  |
| 152820 | 17 | 2054460 | 2054475 | 4 | 4  | 16 | GCTC | 26 | 3  |
| 152821 | 17 | 2054513 | 2054528 | 4 | 4  | 16 | AAAT | 21 | 6  |
| 152823 | 17 | 2056662 | 2056675 | 2 | 7  | 14 | AC   | 22 | 6  |
| 152824 | 17 | 2059119 | 2059130 | 2 | 6  | 12 | TG   | 22 | 5  |
| 152825 | 17 | 2059259 | 2059306 | 2 | 24 | 48 | TG   | 12 | 12 |
| 152827 | 17 | 2061535 | 2061549 | 3 | 5  | 15 | CCT  | 27 | 4  |
| 152828 | 17 | 2061942 | 2061953 | 2 | 6  | 12 | AG   | 26 | 3  |
| 152835 | 17 | 2071439 | 2071450 | 2 | 6  | 12 | AC   | 25 | 5  |
| 152837 | 17 | 2073537 | 2073558 | 2 | 11 | 22 | CA   | 13 | 9  |
| 152840 | 17 | 2074068 | 2074087 | 2 | 10 | 20 | CT   | 11 | 8  |
| 152843 | 17 | 2077422 | 2077435 | 2 | 7  | 14 | TC   | 28 | 4  |
| 152844 | 17 | 2078123 | 2078156 | 2 | 17 | 34 | TC   | 8  | 11 |
| 152848 | 17 | 2079639 | 2079654 | 2 | 8  | 16 | GT   | 30 | 6  |
| 152850 | 17 | 2079990 | 2080005 | 2 | 8  | 16 | TG   | 31 | 4  |
| 152856 | 17 | 2088710 | 2088721 | 2 | 6  | 12 | TC   | 28 | 3  |
| 152858 | 17 | 2089101 | 2089118 | 3 | 6  | 18 | GCT  | 20 | 4  |
| 152859 | 17 | 2091335 | 2091350 | 2 | 8  | 16 | TA   | 16 | 4  |
| 152861 | 17 | 2094806 | 2094825 | 2 | 10 | 20 | GT   | 15 | 11 |
| 152862 | 17 | 2096140 | 2096151 | 2 | 6  | 12 | TA   | 11 | 4  |
| 152863 | 17 | 2097028 | 2097045 | 3 | 6  | 18 | TAG  | 27 | 3  |
| 152866 | 17 | 2100607 | 2100620 | 2 | 7  | 14 | TC   | 23 | 4  |
| 152867 | 17 | 2101082 | 2101103 | 2 | 11 | 22 | CA   | 16 | 11 |
| 152868 | 17 | 2101232 | 2101249 | 2 | 9  | 18 | GT   | 20 | 14 |
| 152869 | 17 | 2101335 | 2101368 | 2 | 17 | 34 | CA   | 9  | 4  |
| 152875 | 17 | 2104885 | 2104906 | 2 | 11 | 22 | TG   | 14 | 8  |
| 152876 | 17 | 2108144 | 2108157 | 2 | 7  | 14 | TG   | 22 | 4  |
| 152877 | 17 | 2108289 | 2108310 | 2 | 11 | 22 | AC   | 24 | 12 |
| 152879 | 17 | 2115097 | 2115124 | 2 | 14 | 28 | TG   | 21 | 6  |
| 152880 | 17 | 2115346 | 2115377 | 2 | 16 | 32 | CA   | 16 | 4  |
| 152881 | 17 | 2115633 | 2115656 | 3 | 8  | 24 | GGA  | 20 | 7  |
| 152882 | 17 | 2118543 | 2118576 | 2 | 17 | 34 | TG   | 7  | 7  |
| 152883 | 17 | 2118698 | 2118709 | 2 | 6  | 12 | GT   | 26 | 3  |
| 152884 | 17 | 2118776 | 2118787 | 2 | 6  | 12 | GT   | 12 | 4  |
| 152885 | 17 | 2118900 | 2118911 | 2 | 6  | 12 | AC   | 29 | 3  |
| 152886 | 17 | 2119724 | 2119739 | 2 | 8  | 16 | AC   | 15 | 4  |
| 152888 | 17 | 2120971 | 2120994 | 2 | 12 | 24 | GT   | 7  | 5  |
| 152892 | 17 | 2122580 | 2122599 | 2 | 10 | 20 | TG   | 22 | 3  |
| 152895 | 17 | 2126058 | 2126081 | 4 | 6  | 24 | TTTG | 15 | 12 |
| 152896 | 17 | 2126366 | 2126399 | 2 | 17 | 34 | AC   | 8  | 8  |
| 152899 | 17 | 2127394 | 2127411 | 2 | 9  | 18 | GT   | 17 | 8  |
| 152901 | 17 | 2130647 | 2130661 | 3 | 5  | 15 | CTG  | 32 | 3  |
| 152905 | 17 | 2133635 | 2133658 | 2 | 12 | 24 | GT   | 11 | 6  |
| 152906 | 17 | 2134053 | 2134074 | 2 | 11 | 22 | TG   | 16 | 3  |
| 152907 | 17 | 2134155 | 2134176 | 2 | 11 | 22 | CA   | 26 | 7  |

|        |    |         |         |   |    |    |      |    |    |
|--------|----|---------|---------|---|----|----|------|----|----|
| 152908 | 17 | 2134354 | 2134371 | 2 | 9  | 18 | TG   | 20 | 5  |
| 152909 | 17 | 2134373 | 2134384 | 2 | 6  | 12 | GT   | 19 | 5  |
| 152912 | 17 | 2136681 | 2136700 | 4 | 5  | 20 | CTGT | 30 | 4  |
| 152914 | 17 | 2139265 | 2139290 | 2 | 13 | 26 | AC   | 16 | 7  |
| 152917 | 17 | 2141927 | 2141966 | 2 | 20 | 40 | GT   | 14 | 13 |
| 152922 | 17 | 2157656 | 2157675 | 4 | 5  | 20 | AAAC | 16 | 3  |
| 152926 | 17 | 2182368 | 2182407 | 4 | 10 | 40 | TCTA | 13 | 6  |
| 152928 | 17 | 2183031 | 2183060 | 2 | 15 | 30 | TG   | 14 | 9  |
| 152934 | 17 | 2197688 | 2197709 | 2 | 11 | 22 | GT   | 23 | 8  |
| 152937 | 17 | 2202196 | 2202210 | 3 | 5  | 15 | CAA  | 29 | 3  |
| 152945 | 17 | 2209550 | 2209561 | 2 | 6  | 12 | AC   | 13 | 6  |
| 152946 | 17 | 2209564 | 2209575 | 2 | 6  | 12 | AC   | 14 | 6  |
| 152950 | 17 | 2219782 | 2219795 | 2 | 7  | 14 | CA   | 29 | 3  |
| 152952 | 17 | 2224042 | 2224053 | 2 | 6  | 12 | AT   | 21 | 6  |
| 152960 | 17 | 2238491 | 2238520 | 3 | 10 | 30 | TTC  | 15 | 7  |
| 152961 | 17 | 2239303 | 2239328 | 2 | 13 | 26 | CA   | 14 | 9  |
| 152964 | 17 | 2244887 | 2244901 | 3 | 5  | 15 | CCA  | 31 | 3  |
| 152966 | 17 | 2247205 | 2247250 | 2 | 23 | 46 | AG   | 16 | 8  |
| 152968 | 17 | 2249693 | 2249724 | 2 | 16 | 32 | CT   | 12 | 6  |
| 152971 | 17 | 2257494 | 2257511 | 3 | 6  | 18 | AAG  | 31 | 3  |
| 152978 | 17 | 2265276 | 2265289 | 2 | 7  | 14 | GT   | 15 | 6  |
| 152982 | 17 | 2268300 | 2268313 | 2 | 7  | 14 | TG   | 16 | 3  |
| 152986 | 17 | 2276734 | 2276753 | 2 | 10 | 20 | TG   | 21 | 9  |
| 152987 | 17 | 2276809 | 2276823 | 3 | 5  | 15 | GAG  | 23 | 5  |
| 152992 | 17 | 2285823 | 2285852 | 2 | 15 | 30 | GT   | 14 | 7  |
| 152993 | 17 | 2285972 | 2285983 | 2 | 6  | 12 | TG   | 23 | 3  |
| 152996 | 17 | 2293848 | 2293859 | 2 | 6  | 12 | GT   | 17 | 6  |
| 153001 | 17 | 2299034 | 2299071 | 2 | 19 | 38 | GT   | 7  | 7  |
| 153004 | 17 | 2301896 | 2301919 | 2 | 12 | 24 | TG   | 15 | 9  |
| 153010 | 17 | 2311181 | 2311192 | 2 | 6  | 12 | TG   | 15 | 3  |
| 153014 | 17 | 2313552 | 2313589 | 2 | 19 | 38 | CA   | 17 | 11 |
| 153015 | 17 | 2313739 | 2313778 | 2 | 20 | 40 | TG   | 8  | 7  |
| 153017 | 17 | 2313933 | 2313946 | 2 | 7  | 14 | CA   | 25 | 3  |
| 153020 | 17 | 2322776 | 2322791 | 2 | 8  | 16 | GT   | 24 | 11 |
| 153022 | 17 | 2326283 | 2326298 | 4 | 4  | 16 | ACAG | 27 | 3  |
| 153026 | 17 | 2335057 | 2335070 | 2 | 7  | 14 | CA   | 20 | 4  |
| 153031 | 17 | 2361910 | 2361929 | 2 | 10 | 20 | TG   | 18 | 7  |
| 153035 | 17 | 2381012 | 2381025 | 2 | 7  | 14 | CA   | 25 | 3  |
| 153036 | 17 | 2387891 | 2387908 | 3 | 6  | 18 | ACA  | 32 | 4  |
| 153038 | 17 | 2390859 | 2390874 | 4 | 4  | 16 | GCAG | 21 | 4  |
| 153041 | 17 | 2392775 | 2392806 | 4 | 8  | 32 | TCCA | 27 | 5  |
| 153045 | 17 | 2400128 | 2400149 | 2 | 11 | 22 | GT   | 11 | 4  |
| 153048 | 17 | 2406386 | 2406419 | 2 | 17 | 34 | CA   | 14 | 11 |
| 153049 | 17 | 2409384 | 2409397 | 2 | 7  | 14 | TG   | 22 | 8  |
| 153059 | 17 | 2416779 | 2416798 | 2 | 10 | 20 | GT   | 11 | 3  |
| 153070 | 17 | 2439685 | 2439699 | 3 | 5  | 15 | CAG  | 25 | 4  |
| 153071 | 17 | 2451508 | 2451525 | 3 | 6  | 18 | TCC  | 26 | 3  |
| 153072 | 17 | 2453697 | 2453712 | 4 | 4  | 16 | GATT | 33 | 3  |
| 153075 | 17 | 2475212 | 2475229 | 2 | 9  | 18 | GT   | 15 | 7  |
| 153081 | 17 | 2490749 | 2490768 | 2 | 10 | 20 | CT   | 20 | 5  |
| 153082 | 17 | 2491041 | 2491064 | 2 | 12 | 24 | AG   | 18 | 5  |

|        |    |         |         |   |    |    |      |    |    |
|--------|----|---------|---------|---|----|----|------|----|----|
| 153094 | 17 | 2521556 | 2521570 | 3 | 5  | 15 | TTG  | 31 | 6  |
| 153098 | 17 | 2530373 | 2530390 | 3 | 6  | 18 | CTG  | 27 | 5  |
| 153101 | 17 | 2542742 | 2542779 | 2 | 19 | 38 | AC   | 8  | 8  |
| 153102 | 17 | 2547024 | 2547039 | 2 | 8  | 16 | CA   | 24 | 3  |
| 153106 | 17 | 2554856 | 2554879 | 4 | 6  | 24 | ATTT | 9  | 4  |
| 153108 | 17 | 2555790 | 2555825 | 4 | 9  | 36 | TCTA | 15 | 12 |
| 153110 | 17 | 2559697 | 2559717 | 3 | 7  | 21 | ATT  | 23 | 3  |
| 153114 | 17 | 2567322 | 2567341 | 2 | 10 | 20 | GA   | 16 | 6  |
| 153129 | 17 | 2607365 | 2607379 | 3 | 5  | 15 | AGC  | 27 | 3  |
| 153130 | 17 | 2608682 | 2608697 | 4 | 4  | 16 | TGTT | 32 | 3  |
| 153138 | 17 | 2627724 | 2627743 | 4 | 5  | 20 | AAAT | 11 | 3  |
| 153143 | 17 | 2631957 | 2631986 | 2 | 15 | 30 | AC   | 20 | 10 |
| 153146 | 17 | 2633521 | 2633535 | 3 | 5  | 15 | AGC  | 29 | 6  |
| 153150 | 17 | 2643716 | 2643739 | 2 | 12 | 24 | GT   | 15 | 11 |
| 153151 | 17 | 2645928 | 2645941 | 2 | 7  | 14 | TG   | 26 | 3  |
| 153155 | 17 | 2653500 | 2653517 | 2 | 9  | 18 | GT   | 20 | 7  |
| 153161 | 17 | 2658495 | 2658506 | 2 | 6  | 12 | TG   | 24 | 4  |
| 153163 | 17 | 2660831 | 2660848 | 2 | 9  | 18 | AC   | 26 | 5  |
| 153165 | 17 | 2663385 | 2663405 | 3 | 7  | 21 | CTG  | 29 | 4  |
| 153169 | 17 | 2671376 | 2671395 | 2 | 10 | 20 | CA   | 10 | 7  |
| 153170 | 17 | 2671397 | 2671410 | 2 | 7  | 14 | AC   | 12 | 9  |
| 153171 | 17 | 2671439 | 2671454 | 2 | 8  | 16 | AC   | 25 | 9  |
| 153178 | 17 | 2684368 | 2684383 | 4 | 4  | 16 | TATG | 17 | 4  |
| 153181 | 17 | 2685759 | 2685778 | 2 | 10 | 20 | TG   | 19 | 5  |
| 153186 | 17 | 2696249 | 2696268 | 4 | 5  | 20 | CAAA | 29 | 5  |
| 153187 | 17 | 2697026 | 2697037 | 2 | 6  | 12 | CA   | 26 | 7  |
| 153188 | 17 | 2698917 | 2698936 | 2 | 10 | 20 | AC   | 20 | 9  |
| 153194 | 17 | 2700165 | 2700179 | 3 | 5  | 15 | CCT  | 11 | 5  |
| 153197 | 17 | 2701446 | 2701463 | 2 | 9  | 18 | GT   | 24 | 5  |
| 153198 | 17 | 2701464 | 2701475 | 2 | 6  | 12 | GA   | 19 | 7  |
| 153206 | 17 | 2712974 | 2712993 | 2 | 10 | 20 | TG   | 23 | 6  |
| 153208 | 17 | 2714614 | 2714635 | 2 | 11 | 22 | AG   | 18 | 8  |
| 153212 | 17 | 2714928 | 2714939 | 2 | 6  | 12 | TG   | 20 | 3  |
| 153213 | 17 | 2714976 | 2714995 | 2 | 10 | 20 | GT   | 18 | 7  |
| 153215 | 17 | 2717574 | 2717615 | 2 | 21 | 42 | TG   | 11 | 10 |
| 153216 | 17 | 2718663 | 2718694 | 2 | 16 | 32 | TG   | 12 | 10 |
| 153218 | 17 | 2719753 | 2719796 | 2 | 22 | 44 | GT   | 11 | 11 |
| 153221 | 17 | 2721733 | 2721762 | 2 | 15 | 30 | GT   | 17 | 8  |
| 153223 | 17 | 2722107 | 2722120 | 2 | 7  | 14 | GT   | 21 | 4  |
| 153225 | 17 | 2722378 | 2722393 | 2 | 8  | 16 | TG   | 18 | 4  |
| 153226 | 17 | 2722395 | 2722408 | 2 | 7  | 14 | GT   | 21 | 5  |
| 153228 | 17 | 2726380 | 2726419 | 2 | 20 | 40 | TG   | 11 | 11 |
| 153232 | 17 | 2732391 | 2732404 | 2 | 7  | 14 | GT   | 17 | 4  |
| 153233 | 17 | 2732629 | 2732644 | 4 | 4  | 16 | AAAC | 27 | 7  |
| 153235 | 17 | 2737895 | 2737918 | 2 | 12 | 24 | GA   | 9  | 5  |
| 153248 | 17 | 2753000 | 2753027 | 2 | 14 | 28 | GT   | 19 | 7  |
| 153250 | 17 | 2753790 | 2753803 | 2 | 7  | 14 | TG   | 22 | 3  |
| 153256 | 17 | 2757180 | 2757191 | 2 | 6  | 12 | GT   | 21 | 5  |
| 153261 | 17 | 2765158 | 2765177 | 2 | 10 | 20 | GA   | 6  | 7  |
| 153264 | 17 | 2766394 | 2766411 | 3 | 6  | 18 | TCC  | 24 | 4  |
| 153268 | 17 | 2771008 | 2771027 | 4 | 5  | 20 | GATG | 14 | 3  |

|        |    |         |         |   |    |    |      |    |    |
|--------|----|---------|---------|---|----|----|------|----|----|
| 153270 | 17 | 2771992 | 2772009 | 3 | 6  | 18 | GCA  | 27 | 6  |
| 153271 | 17 | 2772174 | 2772205 | 2 | 16 | 32 | TG   | 8  | 4  |
| 153276 | 17 | 2779035 | 2779048 | 2 | 7  | 14 | AC   | 28 | 4  |
| 153288 | 17 | 2794416 | 2794437 | 2 | 11 | 22 | TG   | 21 | 9  |
| 153292 | 17 | 2794824 | 2794839 | 2 | 8  | 16 | TG   | 15 | 11 |
| 153297 | 17 | 2804782 | 2804797 | 2 | 8  | 16 | TG   | 23 | 9  |
| 153303 | 17 | 2814730 | 2814751 | 2 | 11 | 22 | TG   | 13 | 5  |
| 153305 | 17 | 2814945 | 2814962 | 2 | 9  | 18 | GT   | 24 | 8  |
| 153312 | 17 | 2828559 | 2828578 | 4 | 5  | 20 | AAAT | 19 | 8  |
| 153313 | 17 | 2829599 | 2829616 | 2 | 9  | 18 | CA   | 19 | 16 |
| 153317 | 17 | 2835102 | 2835115 | 2 | 7  | 14 | AG   | 14 | 7  |
| 153318 | 17 | 2835125 | 2835138 | 2 | 7  | 14 | GA   | 15 | 4  |
| 153319 | 17 | 2835256 | 2835271 | 2 | 8  | 16 | TG   | 18 | 11 |
| 153320 | 17 | 2836914 | 2836941 | 2 | 14 | 28 | GT   | 18 | 14 |
| 153321 | 17 | 2837337 | 2837354 | 2 | 9  | 18 | TC   | 14 | 10 |
| 153326 | 17 | 2842018 | 2842031 | 2 | 7  | 14 | CA   | 23 | 3  |
| 153328 | 17 | 2843032 | 2843071 | 2 | 20 | 40 | TG   | 11 | 13 |
| 153330 | 17 | 2843930 | 2843943 | 2 | 7  | 14 | GT   | 33 | 5  |
| 153331 | 17 | 2844065 | 2844110 | 2 | 23 | 46 | CA   | 12 | 17 |
| 153332 | 17 | 2844451 | 2844470 | 4 | 5  | 20 | CTCC | 8  | 4  |
| 153338 | 17 | 2856647 | 2856688 | 2 | 21 | 42 | GT   | 10 | 12 |
| 153339 | 17 | 2857807 | 2857818 | 2 | 6  | 12 | GT   | 28 | 4  |
| 153341 | 17 | 2859255 | 2859282 | 2 | 14 | 28 | CA   | 24 | 5  |
| 153346 | 17 | 2864332 | 2864357 | 2 | 13 | 26 | TG   | 18 | 9  |
| 153347 | 17 | 2866412 | 2866441 | 2 | 15 | 30 | AC   | 18 | 11 |
| 153350 | 17 | 2870766 | 2870799 | 2 | 17 | 34 | TC   | 10 | 9  |
| 153356 | 17 | 2881723 | 2881746 | 4 | 6  | 24 | TTTC | 23 | 4  |
| 153361 | 17 | 2887620 | 2887635 | 2 | 8  | 16 | TG   | 9  | 3  |
| 153366 | 17 | 2893611 | 2893656 | 2 | 23 | 46 | TG   | 9  | 10 |
| 153368 | 17 | 2894132 | 2894171 | 2 | 20 | 40 | CA   | 6  | 6  |
| 153369 | 17 | 2897951 | 2897964 | 2 | 7  | 14 | TG   | 18 | 7  |
| 153370 | 17 | 2898107 | 2898118 | 2 | 6  | 12 | CA   | 25 | 3  |
| 153372 | 17 | 2898987 | 2899032 | 2 | 23 | 46 | CA   | 9  | 8  |
| 153373 | 17 | 2901153 | 2901176 | 2 | 12 | 24 | AC   | 18 | 10 |
| 153376 | 17 | 2904679 | 2904714 | 4 | 9  | 36 | AGAA | 20 | 11 |
| 153377 | 17 | 2904825 | 2904846 | 2 | 11 | 22 | TG   | 19 | 8  |
| 153378 | 17 | 2906391 | 2906404 | 2 | 7  | 14 | AC   | 30 | 4  |
| 153381 | 17 | 2909711 | 2909728 | 2 | 9  | 18 | TG   | 19 | 7  |
| 153382 | 17 | 2909938 | 2909953 | 2 | 8  | 16 | AC   | 18 | 4  |
| 153383 | 17 | 2913711 | 2913728 | 2 | 9  | 18 | TG   | 19 | 6  |
| 153391 | 17 | 2918323 | 2918338 | 2 | 8  | 16 | GA   | 20 | 6  |
| 153394 | 17 | 2918917 | 2918948 | 2 | 16 | 32 | GT   | 7  | 4  |
| 153400 | 17 | 2923206 | 2923221 | 2 | 8  | 16 | TC   | 18 | 8  |
| 153401 | 17 | 2923412 | 2923453 | 2 | 21 | 42 | AG   | 19 | 8  |
| 153406 | 17 | 2928786 | 2928806 | 3 | 7  | 21 | AGA  | 23 | 3  |
| 153407 | 17 | 2929048 | 2929061 | 2 | 7  | 14 | TG   | 19 | 4  |
| 153408 | 17 | 2931989 | 2932004 | 2 | 8  | 16 | AG   | 23 | 3  |
| 153412 | 17 | 2934565 | 2934594 | 2 | 15 | 30 | TG   | 7  | 7  |
| 153413 | 17 | 2934774 | 2934795 | 2 | 11 | 22 | CA   | 19 | 5  |
| 153419 | 17 | 2939139 | 2939152 | 2 | 7  | 14 | TG   | 18 | 6  |
| 153428 | 17 | 2943755 | 2943766 | 2 | 6  | 12 | AG   | 19 | 4  |

|        |    |         |         |   |    |    |      |    |    |
|--------|----|---------|---------|---|----|----|------|----|----|
| 153437 | 17 | 2953838 | 2953879 | 2 | 21 | 42 | CA   | 6  | 6  |
| 153444 | 17 | 2963832 | 2963859 | 2 | 14 | 28 | CA   | 10 | 10 |
| 153448 | 17 | 2968836 | 2968853 | 3 | 6  | 18 | CCT  | 30 | 5  |
| 153452 | 17 | 2971984 | 2972013 | 2 | 15 | 30 | GT   | 10 | 9  |
| 153453 | 17 | 2972164 | 2972197 | 2 | 17 | 34 | CA   | 6  | 5  |
| 153455 | 17 | 2972736 | 2972755 | 2 | 10 | 20 | TG   | 10 | 4  |
| 153457 | 17 | 2973979 | 2974002 | 2 | 12 | 24 | TG   | 20 | 5  |
| 153459 | 17 | 2975585 | 2975618 | 2 | 17 | 34 | GT   | 16 | 7  |
| 153460 | 17 | 2977307 | 2977320 | 2 | 7  | 14 | TG   | 9  | 3  |
| 153461 | 17 | 2977338 | 2977349 | 2 | 6  | 12 | GT   | 10 | 3  |
| 153463 | 17 | 2977787 | 2977820 | 2 | 17 | 34 | CA   | 8  | 5  |
| 153465 | 17 | 2980006 | 2980021 | 2 | 8  | 16 | AG   | 16 | 3  |
| 153470 | 17 | 2982102 | 2982121 | 2 | 10 | 20 | GT   | 21 | 3  |
| 153472 | 17 | 2984375 | 2984408 | 2 | 17 | 34 | CA   | 16 | 9  |
| 153475 | 17 | 2985999 | 2986022 | 2 | 12 | 24 | TG   | 12 | 7  |
| 153476 | 17 | 2986142 | 2986159 | 2 | 9  | 18 | AC   | 17 | 6  |
| 153478 | 17 | 2987598 | 2987617 | 2 | 10 | 20 | CA   | 14 | 9  |
| 153480 | 17 | 2988381 | 2988404 | 2 | 12 | 24 | GA   | 21 | 4  |
| 153484 | 17 | 2993902 | 2993913 | 2 | 6  | 12 | TG   | 26 | 3  |
| 153489 | 17 | 2995440 | 2995453 | 2 | 7  | 14 | TG   | 15 | 4  |
| 153490 | 17 | 2995456 | 2995467 | 2 | 6  | 12 | TG   | 18 | 6  |
| 153494 | 17 | 2996603 | 2996618 | 2 | 8  | 16 | CT   | 16 | 3  |
| 153495 | 17 | 2996822 | 2996839 | 2 | 9  | 18 | CA   | 15 | 9  |
| 153496 | 17 | 2997325 | 2997342 | 2 | 9  | 18 | CT   | 21 | 3  |
| 153497 | 17 | 2997485 | 2997514 | 2 | 15 | 30 | TG   | 19 | 10 |
| 153498 | 17 | 2999167 | 2999180 | 2 | 7  | 14 | CA   | 26 | 8  |
| 153499 | 17 | 2999467 | 2999496 | 2 | 15 | 30 | TG   | 15 | 7  |
| 153501 | 17 | 3001631 | 3001660 | 2 | 15 | 30 | GT   | 20 | 7  |
| 153503 | 17 | 3002390 | 3002401 | 2 | 6  | 12 | TG   | 25 | 4  |
| 153505 | 17 | 3004958 | 3004969 | 2 | 6  | 12 | TC   | 33 | 3  |
| 153507 | 17 | 3008770 | 3008793 | 2 | 12 | 24 | AC   | 16 | 14 |
| 153511 | 17 | 3010224 | 3010235 | 2 | 6  | 12 | CA   | 31 | 5  |
| 153515 | 17 | 3018012 | 3018027 | 4 | 4  | 16 | AAAC | 28 | 3  |
| 153517 | 17 | 3018835 | 3018858 | 2 | 12 | 24 | CA   | 9  | 7  |
| 153518 | 17 | 3020201 | 3020214 | 2 | 7  | 14 | GT   | 28 | 4  |
| 153520 | 17 | 3020340 | 3020353 | 2 | 7  | 14 | CA   | 23 | 6  |
| 153522 | 17 | 3022308 | 3022323 | 2 | 8  | 16 | TC   | 16 | 3  |
| 153524 | 17 | 3022907 | 3022918 | 2 | 6  | 12 | AT   | 16 | 6  |
| 153528 | 17 | 3025055 | 3025080 | 2 | 13 | 26 | GT   | 9  | 9  |
| 153529 | 17 | 3026688 | 3026701 | 2 | 7  | 14 | CA   | 21 | 7  |
| 153530 | 17 | 3027072 | 3027099 | 2 | 14 | 28 | CA   | 8  | 5  |
| 153532 | 17 | 3028854 | 3028877 | 3 | 8  | 24 | CAT  | 28 | 3  |
| 153533 | 17 | 3032602 | 3032625 | 3 | 8  | 24 | GCA  | 27 | 12 |
| 153534 | 17 | 3035598 | 3035645 | 2 | 24 | 48 | AC   | 12 | 12 |
| 153539 | 17 | 3047157 | 3047172 | 2 | 8  | 16 | TC   | 23 | 3  |
| 153543 | 17 | 3051646 | 3051665 | 4 | 5  | 20 | AAAT | 22 | 3  |
| 153545 | 17 | 3052018 | 3052041 | 2 | 12 | 24 | CA   | 14 | 7  |
| 153546 | 17 | 3052967 | 3052984 | 2 | 9  | 18 | CA   | 7  | 4  |
| 153547 | 17 | 3054769 | 3054782 | 2 | 7  | 14 | CA   | 19 | 4  |
| 153556 | 17 | 3064991 | 3065010 | 2 | 10 | 20 | GA   | 8  | 5  |
| 153559 | 17 | 3067634 | 3067649 | 4 | 4  | 16 | CATA | 29 | 3  |



|        |    |         |         |   |    |    |      |    |    |
|--------|----|---------|---------|---|----|----|------|----|----|
| 153560 | 17 | 3069318 | 3069331 | 2 | 7  | 14 | TG   | 27 | 3  |
| 153565 | 17 | 3075700 | 3075711 | 2 | 6  | 12 | GT   | 9  | 3  |
| 153569 | 17 | 3077456 | 3077475 | 2 | 10 | 20 | AC   | 19 | 6  |
| 153574 | 17 | 3082761 | 3082780 | 4 | 5  | 20 | GGCA | 29 | 7  |
| 153579 | 17 | 3086948 | 3086963 | 2 | 8  | 16 | GT   | 23 | 3  |
| 153580 | 17 | 3088244 | 3088265 | 2 | 11 | 22 | TG   | 18 | 12 |
| 153587 | 17 | 3102258 | 3102281 | 4 | 6  | 24 | ATTC | 22 | 4  |
| 153591 | 17 | 3104860 | 3104880 | 3 | 7  | 21 | GAG  | 25 | 5  |
| 153603 | 17 | 3121770 | 3121805 | 2 | 18 | 36 | CA   | 9  | 9  |
| 153607 | 17 | 3129510 | 3129542 | 3 | 11 | 33 | CTG  | 30 | 11 |
| 153608 | 17 | 3136132 | 3136161 | 2 | 15 | 30 | TG   | 16 | 7  |
| 153609 | 17 | 3144421 | 3144448 | 2 | 14 | 28 | CA   | 12 | 17 |
| 153610 | 17 | 3144512 | 3144531 | 2 | 10 | 20 | TC   | 10 | 5  |
| 153617 | 17 | 3151835 | 3151888 | 2 | 27 | 54 | GT   | 8  | 9  |
| 153619 | 17 | 3153321 | 3153348 | 4 | 7  | 28 | AGAA | 15 | 13 |
| 153620 | 17 | 3159304 | 3159315 | 2 | 6  | 12 | GT   | 29 | 3  |
| 153622 | 17 | 3164263 | 3164280 | 3 | 6  | 18 | GAT  | 32 | 3  |
| 153631 | 17 | 3181648 | 3181731 | 4 | 21 | 84 | TAGA | 12 | 9  |
| 153634 | 17 | 3185608 | 3185623 | 2 | 8  | 16 | CA   | 23 | 4  |
| 153637 | 17 | 3188872 | 3188886 | 3 | 5  | 15 | GCT  | 19 | 4  |
| 153639 | 17 | 3191375 | 3191394 | 2 | 10 | 20 | CA   | 19 | 5  |
| 153646 | 17 | 3203976 | 3204003 | 2 | 14 | 28 | CA   | 16 | 7  |
| 153648 | 17 | 3206166 | 3206177 | 2 | 6  | 12 | TA   | 23 | 3  |
| 153652 | 17 | 3210155 | 3210174 | 2 | 10 | 20 | AC   | 18 | 7  |
| 153653 | 17 | 3210371 | 3210388 | 2 | 9  | 18 | CA   | 21 | 10 |
| 153654 | 17 | 3210390 | 3210401 | 2 | 6  | 12 | AC   | 22 | 11 |
| 153659 | 17 | 3215007 | 3215027 | 3 | 7  | 21 | CCA  | 22 | 5  |
| 153661 | 17 | 3217016 | 3217043 | 4 | 7  | 28 | TCTA | 9  | 10 |
| 153662 | 17 | 3226696 | 3226717 | 2 | 11 | 22 | TC   | 10 | 6  |
| 153663 | 17 | 3227040 | 3227065 | 2 | 13 | 26 | AC   | 19 | 7  |
| 153664 | 17 | 3228414 | 3228425 | 2 | 6  | 12 | AC   | 26 | 4  |
| 153665 | 17 | 3229514 | 3229545 | 2 | 16 | 32 | GT   | 7  | 5  |
| 153667 | 17 | 3232059 | 3232088 | 3 | 10 | 30 | GGA  | 20 | 8  |
| 153669 | 17 | 3233281 | 3233308 | 2 | 14 | 28 | AC   | 6  | 7  |
| 153670 | 17 | 3233404 | 3233415 | 2 | 6  | 12 | CA   | 17 | 11 |
| 153676 | 17 | 3236286 | 3236300 | 3 | 5  | 15 | AAG  | 23 | 3  |
| 153677 | 17 | 3236646 | 3236661 | 2 | 8  | 16 | CA   | 28 | 8  |
| 153684 | 17 | 3242394 | 3242419 | 2 | 13 | 26 | TG   | 18 | 4  |
| 153685 | 17 | 3242589 | 3242616 | 2 | 14 | 28 | GT   | 11 | 6  |
| 153686 | 17 | 3243073 | 3243088 | 2 | 8  | 16 | GA   | 19 | 3  |
| 153687 | 17 | 3243378 | 3243389 | 2 | 6  | 12 | GT   | 32 | 5  |
| 153689 | 17 | 3243855 | 3243874 | 2 | 10 | 20 | CA   | 12 | 8  |
| 153691 | 17 | 3245910 | 3245931 | 2 | 11 | 22 | AC   | 21 | 5  |
| 153692 | 17 | 3246161 | 3246176 | 2 | 8  | 16 | AT   | 13 | 3  |
| 153695 | 17 | 3249667 | 3249682 | 2 | 8  | 16 | TG   | 23 | 6  |
| 153697 | 17 | 3260273 | 3260314 | 3 | 14 | 42 | TAA  | 12 | 11 |
| 153699 | 17 | 3271862 | 3271879 | 2 | 9  | 18 | AC   | 11 | 4  |
| 153707 | 17 | 3289183 | 3289228 | 2 | 23 | 46 | AC   | 10 | 10 |
| 153717 | 17 | 3296012 | 3296023 | 2 | 6  | 12 | GT   | 18 | 11 |
| 153724 | 17 | 3306980 | 3307007 | 2 | 14 | 28 | GT   | 13 | 7  |
| 153725 | 17 | 3307126 | 3307147 | 2 | 11 | 22 | CA   | 18 | 3  |

|        |    |         |         |   |    |    |      |    |    |
|--------|----|---------|---------|---|----|----|------|----|----|
| 153727 | 17 | 3314094 | 3314108 | 3 | 5  | 15 | GGA  | 27 | 4  |
| 153732 | 17 | 3318129 | 3318148 | 2 | 10 | 20 | AC   | 11 | 7  |
| 153733 | 17 | 3318150 | 3318167 | 2 | 9  | 18 | CA   | 14 | 7  |
| 153734 | 17 | 3318408 | 3318457 | 2 | 25 | 50 | CA   | 19 | 11 |
| 153736 | 17 | 3321061 | 3321076 | 2 | 8  | 16 | GT   | 27 | 3  |
| 153739 | 17 | 3325029 | 3325050 | 2 | 11 | 22 | TG   | 16 | 5  |
| 153741 | 17 | 3325693 | 3325704 | 2 | 6  | 12 | AT   | 13 | 11 |
| 153746 | 17 | 3341379 | 3341400 | 2 | 11 | 22 | GT   | 17 | 10 |
| 153748 | 17 | 3355024 | 3355035 | 2 | 6  | 12 | TG   | 21 | 3  |
| 153750 | 17 | 3359651 | 3359686 | 2 | 18 | 36 | GT   | 7  | 8  |
| 153760 | 17 | 3390363 | 3390380 | 2 | 9  | 18 | GA   | 7  | 8  |
| 153762 | 17 | 3390457 | 3390474 | 2 | 9  | 18 | GA   | 9  | 10 |
| 153769 | 17 | 3399862 | 3399905 | 2 | 22 | 44 | TG   | 10 | 7  |
| 153770 | 17 | 3402508 | 3402521 | 2 | 7  | 14 | TG   | 23 | 3  |
| 153771 | 17 | 3402785 | 3402796 | 2 | 6  | 12 | TG   | 23 | 7  |
| 153775 | 17 | 3409403 | 3409414 | 2 | 6  | 12 | AC   | 16 | 3  |
| 153776 | 17 | 3411186 | 3411209 | 2 | 12 | 24 | TG   | 21 | 10 |
| 153781 | 17 | 3413570 | 3413581 | 2 | 6  | 12 | CA   | 22 | 4  |
| 153787 | 17 | 3431530 | 3431557 | 2 | 14 | 28 | CA   | 22 | 8  |
| 153788 | 17 | 3431837 | 3431854 | 3 | 6  | 18 | CCT  | 15 | 4  |
| 153790 | 17 | 3432799 | 3432820 | 2 | 11 | 22 | TG   | 8  | 6  |
| 153792 | 17 | 3433077 | 3433088 | 2 | 6  | 12 | TC   | 17 | 4  |
| 153798 | 17 | 3435341 | 3435356 | 2 | 8  | 16 | AC   | 13 | 5  |
| 153799 | 17 | 3435358 | 3435371 | 2 | 7  | 14 | CA   | 12 | 4  |
| 153802 | 17 | 3448755 | 3448778 | 3 | 8  | 24 | TCT  | 15 | 3  |
| 153805 | 17 | 3454158 | 3454175 | 2 | 9  | 18 | TC   | 16 | 16 |
| 153806 | 17 | 3454176 | 3454187 | 2 | 6  | 12 | AC   | 14 | 15 |
| 153807 | 17 | 3456301 | 3456318 | 3 | 6  | 18 | ATG  | 19 | 4  |
| 153808 | 17 | 3456515 | 3456550 | 2 | 18 | 36 | TG   | 11 | 13 |
| 153810 | 17 | 3456730 | 3456751 | 2 | 11 | 22 | AC   | 18 | 15 |
| 153817 | 17 | 3465942 | 3465953 | 2 | 6  | 12 | TG   | 6  | 3  |
| 153818 | 17 | 3466147 | 3466162 | 2 | 8  | 16 | GA   | 19 | 3  |
| 153822 | 17 | 3488257 | 3488290 | 2 | 17 | 34 | AC   | 12 | 10 |
| 153823 | 17 | 3491213 | 3491224 | 2 | 6  | 12 | GT   | 28 | 5  |
| 153824 | 17 | 3491512 | 3491543 | 2 | 16 | 32 | AG   | 7  | 5  |
| 153825 | 17 | 3491713 | 3491746 | 2 | 17 | 34 | TG   | 10 | 9  |
| 153827 | 17 | 3502725 | 3502742 | 2 | 9  | 18 | CA   | 12 | 5  |
| 153833 | 17 | 3506202 | 3506233 | 2 | 16 | 32 | GT   | 12 | 8  |
| 153834 | 17 | 3506401 | 3506434 | 2 | 17 | 34 | AC   | 9  | 7  |
| 153837 | 17 | 3511568 | 3511594 | 3 | 9  | 27 | CAG  | 30 | 5  |
| 153842 | 17 | 3517986 | 3517997 | 2 | 6  | 12 | CT   | 23 | 5  |
| 153845 | 17 | 3522604 | 3522653 | 2 | 25 | 50 | GT   | 13 | 11 |
| 153855 | 17 | 3543235 | 3543260 | 2 | 13 | 26 | CA   | 12 | 9  |
| 153856 | 17 | 3567851 | 3567862 | 2 | 6  | 12 | AT   | 29 | 3  |
| 153864 | 17 | 3601086 | 3601099 | 2 | 7  | 14 | TG   | 19 | 7  |
| 153865 | 17 | 3621325 | 3621338 | 2 | 7  | 14 | GT   | 21 | 4  |
| 153870 | 17 | 3639646 | 3639705 | 4 | 15 | 60 | TGAT | 6  | 8  |
| 153873 | 17 | 3642095 | 3642118 | 2 | 12 | 24 | TG   | 7  | 3  |
| 153874 | 17 | 3647632 | 3647659 | 2 | 14 | 28 | GT   | 7  | 10 |
| 153877 | 17 | 3649991 | 3650004 | 2 | 7  | 14 | TG   | 19 | 6  |
| 153878 | 17 | 3650005 | 3650016 | 2 | 6  | 12 | CG   | 28 | 10 |

|        |    |         |         |   |    |    |      |    |    |
|--------|----|---------|---------|---|----|----|------|----|----|
| 153879 | 17 | 3650160 | 3650175 | 2 | 8  | 16 | AC   | 20 | 5  |
| 153880 | 17 | 3651557 | 3651588 | 2 | 16 | 32 | AC   | 12 | 14 |
| 153881 | 17 | 3651729 | 3651750 | 2 | 11 | 22 | AC   | 24 | 12 |
| 153882 | 17 | 3652400 | 3652415 | 2 | 8  | 16 | TG   | 8  | 7  |
| 153883 | 17 | 3653081 | 3653096 | 2 | 8  | 16 | TG   | 21 | 4  |
| 153884 | 17 | 3653908 | 3653921 | 2 | 7  | 14 | AG   | 13 | 6  |
| 153887 | 17 | 3654445 | 3654464 | 4 | 5  | 20 | TCAC | 29 | 3  |
| 153888 | 17 | 3654642 | 3654655 | 2 | 7  | 14 | GT   | 22 | 5  |
| 153890 | 17 | 3661460 | 3661495 | 2 | 18 | 36 | AC   | 11 | 7  |
| 153893 | 17 | 3672314 | 3672331 | 3 | 6  | 18 | CTG  | 16 | 3  |
| 153902 | 17 | 3686054 | 3686075 | 2 | 11 | 22 | AC   | 16 | 6  |
| 153908 | 17 | 3699333 | 3699352 | 2 | 10 | 20 | GA   | 12 | 11 |
| 153909 | 17 | 3702351 | 3702374 | 2 | 12 | 24 | GT   | 9  | 4  |
| 153914 | 17 | 3708303 | 3708320 | 2 | 9  | 18 | TG   | 21 | 6  |
| 153915 | 17 | 3709310 | 3709325 | 2 | 8  | 16 | GT   | 17 | 5  |
| 153916 | 17 | 3713097 | 3713132 | 2 | 18 | 36 | CA   | 8  | 6  |
| 153925 | 17 | 3730300 | 3730314 | 3 | 5  | 15 | CTT  | 29 | 3  |
| 153927 | 17 | 3732732 | 3732759 | 2 | 14 | 28 | AC   | 22 | 8  |
| 153929 | 17 | 3735246 | 3735257 | 2 | 6  | 12 | GT   | 12 | 3  |
| 153930 | 17 | 3735528 | 3735553 | 2 | 13 | 26 | TG   | 19 | 6  |
| 153932 | 17 | 3737157 | 3737180 | 2 | 12 | 24 | CA   | 25 | 9  |
| 153933 | 17 | 3737724 | 3737743 | 2 | 10 | 20 | TG   | 20 | 5  |
| 153935 | 17 | 3739829 | 3739848 | 2 | 10 | 20 | AG   | 17 | 4  |
| 153937 | 17 | 3740338 | 3740355 | 2 | 9  | 18 | TG   | 9  | 5  |
| 153939 | 17 | 3740620 | 3740631 | 2 | 6  | 12 | GT   | 32 | 3  |
| 153942 | 17 | 3743673 | 3743686 | 2 | 7  | 14 | TG   | 29 | 4  |
| 153943 | 17 | 3743881 | 3743896 | 2 | 8  | 16 | CA   | 23 | 3  |
| 153945 | 17 | 3744473 | 3744492 | 2 | 10 | 20 | TG   | 9  | 10 |
| 153946 | 17 | 3744624 | 3744649 | 2 | 13 | 26 | TG   | 12 | 13 |
| 153948 | 17 | 3744672 | 3744685 | 2 | 7  | 14 | AG   | 13 | 3  |
| 153949 | 17 | 3744823 | 3744838 | 2 | 8  | 16 | GT   | 14 | 10 |
| 153950 | 17 | 3746684 | 3746703 | 2 | 10 | 20 | TC   | 18 | 10 |
| 153953 | 17 | 3746913 | 3746926 | 2 | 7  | 14 | CA   | 26 | 4  |
| 153954 | 17 | 3746928 | 3746943 | 2 | 8  | 16 | CA   | 25 | 4  |
| 153955 | 17 | 3747536 | 3747583 | 2 | 24 | 48 | GT   | 8  | 10 |
| 153956 | 17 | 3747788 | 3747799 | 2 | 6  | 12 | GT   | 27 | 3  |
| 153957 | 17 | 3747942 | 3747975 | 2 | 17 | 34 | AC   | 12 | 10 |
| 153958 | 17 | 3751696 | 3751717 | 2 | 11 | 22 | GA   | 18 | 6  |
| 153966 | 17 | 3758196 | 3758207 | 2 | 6  | 12 | AC   | 25 | 3  |
| 153974 | 17 | 3763661 | 3763688 | 2 | 14 | 28 | TG   | 11 | 6  |
| 153975 | 17 | 3764764 | 3764791 | 2 | 14 | 28 | CA   | 16 | 11 |
| 153976 | 17 | 3767601 | 3767612 | 2 | 6  | 12 | TG   | 8  | 3  |
| 153977 | 17 | 3767620 | 3767635 | 2 | 8  | 16 | GT   | 15 | 7  |
| 153978 | 17 | 3768467 | 3768492 | 2 | 13 | 26 | TG   | 14 | 4  |
| 153982 | 17 | 3773654 | 3773683 | 2 | 15 | 30 | TG   | 13 | 9  |
| 153985 | 17 | 3778713 | 3778736 | 2 | 12 | 24 | CA   | 17 | 8  |
| 153989 | 17 | 3781398 | 3781415 | 2 | 9  | 18 | TC   | 26 | 5  |
| 153993 | 17 | 3784407 | 3784458 | 2 | 26 | 52 | AC   | 7  | 8  |
| 153994 | 17 | 3784611 | 3784648 | 2 | 19 | 38 | AC   | 12 | 7  |
| 153996 | 17 | 3785721 | 3785732 | 2 | 6  | 12 | TG   | 21 | 5  |
| 153997 | 17 | 3785809 | 3785824 | 2 | 8  | 16 | AC   | 25 | 10 |

|        |    |         |         |   |    |    |      |    |    |
|--------|----|---------|---------|---|----|----|------|----|----|
| 153998 | 17 | 3786053 | 3786066 | 2 | 7  | 14 | AC   | 18 | 3  |
| 154006 | 17 | 3809376 | 3809403 | 2 | 14 | 28 | TG   | 21 | 6  |
| 154012 | 17 | 3816032 | 3816049 | 2 | 9  | 18 | TG   | 27 | 5  |
| 154016 | 17 | 3823958 | 3823987 | 2 | 15 | 30 | GT   | 8  | 8  |
| 154017 | 17 | 3825638 | 3825679 | 2 | 21 | 42 | AC   | 10 | 9  |
| 154018 | 17 | 3825893 | 3825928 | 2 | 18 | 36 | CA   | 14 | 7  |
| 154023 | 17 | 3830206 | 3830219 | 2 | 7  | 14 | AC   | 21 | 4  |
| 154024 | 17 | 3832270 | 3832287 | 2 | 9  | 18 | GT   | 18 | 6  |
| 154026 | 17 | 3834763 | 3834774 | 2 | 6  | 12 | GT   | 17 | 5  |
| 154027 | 17 | 3834933 | 3834948 | 2 | 8  | 16 | AC   | 15 | 8  |
| 154028 | 17 | 3835235 | 3835252 | 2 | 9  | 18 | CA   | 22 | 4  |
| 154031 | 17 | 3835631 | 3835644 | 2 | 7  | 14 | TG   | 6  | 4  |
| 154035 | 17 | 3835940 | 3835951 | 2 | 6  | 12 | AC   | 24 | 3  |
| 154037 | 17 | 3836947 | 3836964 | 2 | 9  | 18 | GT   | 22 | 4  |
| 154038 | 17 | 3840509 | 3840523 | 3 | 5  | 15 | TCC  | 34 | 3  |
| 154040 | 17 | 3844815 | 3844826 | 2 | 6  | 12 | TG   | 36 | 3  |
| 154041 | 17 | 3845301 | 3845330 | 2 | 15 | 30 | CT   | 21 | 7  |
| 154051 | 17 | 3859442 | 3859465 | 2 | 12 | 24 | AG   | 7  | 4  |
| 154053 | 17 | 3859669 | 3859686 | 2 | 9  | 18 | AG   | 14 | 3  |
| 154056 | 17 | 3860568 | 3860585 | 2 | 9  | 18 | CT   | 18 | 6  |
| 154064 | 17 | 3869405 | 3869431 | 3 | 9  | 27 | GAG  | 16 | 4  |
| 154065 | 17 | 3870028 | 3870041 | 2 | 7  | 14 | TG   | 22 | 4  |
| 154066 | 17 | 3870542 | 3870571 | 2 | 15 | 30 | AC   | 33 | 5  |
| 154068 | 17 | 3880338 | 3880375 | 2 | 19 | 38 | TG   | 6  | 5  |
| 154081 | 17 | 3905393 | 3905430 | 2 | 19 | 38 | CT   | 13 | 8  |
| 154088 | 17 | 3920067 | 3920082 | 2 | 8  | 16 | GT   | 20 | 10 |
| 154089 | 17 | 3920387 | 3920402 | 2 | 8  | 16 | AC   | 17 | 13 |
| 154090 | 17 | 3920538 | 3920569 | 2 | 16 | 32 | AC   | 6  | 9  |
| 154094 | 17 | 3923589 | 3923600 | 2 | 6  | 12 | GT   | 17 | 5  |
| 154107 | 17 | 3940703 | 3940722 | 2 | 10 | 20 | GT   | 20 | 7  |
| 154117 | 17 | 3955698 | 3955711 | 2 | 7  | 14 | AC   | 27 | 3  |
| 154123 | 17 | 3967225 | 3967251 | 3 | 9  | 27 | TGT  | 7  | 4  |
| 154124 | 17 | 3973720 | 3973769 | 2 | 25 | 50 | TG   | 10 | 10 |
| 154125 | 17 | 3977909 | 3977924 | 2 | 8  | 16 | GT   | 23 | 7  |
| 154126 | 17 | 3978186 | 3978205 | 2 | 10 | 20 | AC   | 19 | 5  |
| 154127 | 17 | 3979365 | 3979380 | 4 | 4  | 16 | GTTT | 31 | 4  |
| 154132 | 17 | 3992668 | 3992705 | 2 | 19 | 38 | AC   | 8  | 11 |
| 154134 | 17 | 3994704 | 3994723 | 2 | 10 | 20 | AC   | 20 | 5  |
| 154135 | 17 | 3994725 | 3994736 | 2 | 6  | 12 | CA   | 13 | 5  |
| 154136 | 17 | 3997044 | 3997061 | 2 | 9  | 18 | GT   | 15 | 5  |
| 154138 | 17 | 3999030 | 3999045 | 2 | 8  | 16 | GT   | 19 | 6  |
| 154140 | 17 | 4001450 | 4001463 | 2 | 7  | 14 | TG   | 12 | 4  |
| 154142 | 17 | 4002928 | 4002945 | 3 | 6  | 18 | GAA  | 22 | 4  |
| 154143 | 17 | 4003538 | 4003555 | 2 | 9  | 18 | GA   | 27 | 5  |
| 154148 | 17 | 4012699 | 4012744 | 2 | 23 | 46 | CA   | 10 | 11 |
| 154149 | 17 | 4012942 | 4012955 | 2 | 7  | 14 | CA   | 18 | 6  |
| 154150 | 17 | 4013353 | 4013364 | 2 | 6  | 12 | AC   | 22 | 6  |
| 154153 | 17 | 4016400 | 4016423 | 2 | 12 | 24 | TG   | 14 | 9  |
| 154158 | 17 | 4024949 | 4024972 | 4 | 6  | 24 | AAAC | 19 | 6  |
| 154159 | 17 | 4025840 | 4025869 | 2 | 15 | 30 | AC   | 23 | 18 |
| 154163 | 17 | 4027548 | 4027563 | 2 | 8  | 16 | TG   | 7  | 8  |

|        |    |         |         |   |    |    |      |    |    |
|--------|----|---------|---------|---|----|----|------|----|----|
| 154165 | 17 | 4031738 | 4031755 | 2 | 9  | 18 | TG   | 21 | 16 |
| 154166 | 17 | 4033124 | 4033159 | 4 | 9  | 36 | CTTT | 23 | 8  |
| 154167 | 17 | 4033355 | 4033366 | 2 | 6  | 12 | AC   | 26 | 3  |
| 154169 | 17 | 4033431 | 4033456 | 2 | 13 | 26 | CA   | 18 | 9  |
| 154173 | 17 | 4034736 | 4034777 | 2 | 21 | 42 | GA   | 11 | 8  |
| 154174 | 17 | 4034883 | 4034897 | 3 | 5  | 15 | AGA  | 10 | 3  |
| 154177 | 17 | 4038302 | 4038328 | 3 | 9  | 27 | AAT  | 13 | 6  |
| 154178 | 17 | 4038647 | 4038658 | 2 | 6  | 12 | GT   | 24 | 4  |
| 154180 | 17 | 4039131 | 4039142 | 2 | 6  | 12 | AC   | 23 | 3  |
| 154181 | 17 | 4039360 | 4039389 | 2 | 15 | 30 | AC   | 12 | 14 |
| 154185 | 17 | 4041609 | 4041620 | 2 | 6  | 12 | GT   | 19 | 5  |
| 154187 | 17 | 4042112 | 4042132 | 3 | 7  | 21 | TGC  | 21 | 10 |
| 154191 | 17 | 4047255 | 4047272 | 3 | 6  | 18 | CAC  | 22 | 6  |
| 154196 | 17 | 4050642 | 4050655 | 2 | 7  | 14 | AT   | 11 | 4  |
| 154198 | 17 | 4051007 | 4051020 | 2 | 7  | 14 | AC   | 29 | 3  |
| 154199 | 17 | 4051186 | 4051203 | 2 | 9  | 18 | GT   | 16 | 7  |
| 154200 | 17 | 4051916 | 4051927 | 2 | 6  | 12 | GT   | 27 | 4  |
| 154201 | 17 | 4052566 | 4052579 | 2 | 7  | 14 | CA   | 25 | 4  |
| 154203 | 17 | 4053287 | 4053310 | 3 | 8  | 24 | TCC  | 24 | 6  |
| 154205 | 17 | 4055425 | 4055450 | 2 | 13 | 26 | AC   | 17 | 11 |
| 154206 | 17 | 4055649 | 4055663 | 3 | 5  | 15 | GGA  | 11 | 5  |
| 154207 | 17 | 4056839 | 4056882 | 2 | 22 | 44 | AC   | 18 | 9  |
| 154208 | 17 | 4057604 | 4057627 | 2 | 12 | 24 | GA   | 17 | 5  |
| 154209 | 17 | 4058521 | 4058538 | 2 | 9  | 18 | GT   | 17 | 6  |
| 154210 | 17 | 4058724 | 4058751 | 2 | 14 | 28 | TG   | 17 | 10 |
| 154212 | 17 | 4060853 | 4060868 | 2 | 8  | 16 | GT   | 18 | 3  |
| 154223 | 17 | 4068238 | 4068259 | 2 | 11 | 22 | GT   | 15 | 4  |
| 154224 | 17 | 4068393 | 4068416 | 2 | 12 | 24 | CA   | 8  | 5  |
| 154226 | 17 | 4068804 | 4068837 | 2 | 17 | 34 | AC   | 7  | 8  |
| 154227 | 17 | 4069779 | 4069790 | 2 | 6  | 12 | GT   | 26 | 12 |
| 154228 | 17 | 4070519 | 4070534 | 2 | 8  | 16 | TG   | 15 | 7  |
| 154229 | 17 | 4070837 | 4070852 | 2 | 8  | 16 | GT   | 20 | 4  |
| 154233 | 17 | 4073041 | 4073062 | 2 | 11 | 22 | CA   | 14 | 10 |
| 154237 | 17 | 4073364 | 4073393 | 2 | 15 | 30 | CA   | 18 | 10 |
| 154239 | 17 | 4074297 | 4074308 | 2 | 6  | 12 | AC   | 21 | 3  |
| 154241 | 17 | 4075717 | 4075748 | 2 | 16 | 32 | GT   | 22 | 4  |
| 154242 | 17 | 4076898 | 4076917 | 2 | 10 | 20 | AC   | 17 | 4  |
| 154246 | 17 | 4078571 | 4078590 | 2 | 10 | 20 | AG   | 6  | 4  |
| 154252 | 17 | 4080612 | 4080637 | 2 | 13 | 26 | GA   | 10 | 6  |
| 154254 | 17 | 4083103 | 4083117 | 3 | 5  | 15 | CCT  | 27 | 3  |
| 154255 | 17 | 4083545 | 4083558 | 2 | 7  | 14 | TG   | 13 | 8  |
| 154256 | 17 | 4084205 | 4084228 | 2 | 12 | 24 | CA   | 14 | 7  |
| 154258 | 17 | 4085984 | 4086007 | 2 | 12 | 24 | CT   | 21 | 4  |
| 154261 | 17 | 4087759 | 4087780 | 2 | 11 | 22 | AC   | 15 | 7  |
| 154263 | 17 | 4088339 | 4088365 | 3 | 9  | 27 | GGA  | 20 | 5  |
| 154266 | 17 | 4089952 | 4089966 | 3 | 5  | 15 | AGA  | 17 | 3  |
| 154273 | 17 | 4097607 | 4097620 | 2 | 7  | 14 | GT   | 29 | 10 |
| 154277 | 17 | 4103484 | 4103498 | 3 | 5  | 15 | TCT  | 15 | 6  |
| 154283 | 17 | 4106441 | 4106455 | 3 | 5  | 15 | GGT  | 13 | 6  |
| 154284 | 17 | 4108264 | 4108275 | 2 | 6  | 12 | CA   | 26 | 4  |
| 154285 | 17 | 4108694 | 4108731 | 2 | 19 | 38 | AC   | 21 | 15 |

|        |    |         |         |   |    |    |      |    |    |
|--------|----|---------|---------|---|----|----|------|----|----|
| 154287 | 17 | 4112265 | 4112280 | 2 | 8  | 16 | CA   | 26 | 4  |
| 154288 | 17 | 4114026 | 4114045 | 2 | 10 | 20 | GT   | 25 | 12 |
| 154290 | 17 | 4119989 | 4120026 | 2 | 19 | 38 | AC   | 17 | 9  |
| 154291 | 17 | 4120140 | 4120171 | 2 | 16 | 32 | TG   | 18 | 7  |
| 154305 | 17 | 4136400 | 4136415 | 2 | 8  | 16 | CA   | 20 | 8  |
| 154324 | 17 | 4166278 | 4166297 | 2 | 10 | 20 | TG   | 18 | 9  |
| 154328 | 17 | 4172466 | 4172483 | 2 | 9  | 18 | AC   | 24 | 4  |
| 154330 | 17 | 4173094 | 4173133 | 2 | 20 | 40 | CA   | 14 | 11 |
| 154338 | 17 | 4177315 | 4177334 | 4 | 5  | 20 | ATGG | 18 | 3  |
| 154341 | 17 | 4184260 | 4184289 | 2 | 15 | 30 | AC   | 16 | 8  |
| 154342 | 17 | 4187209 | 4187236 | 2 | 14 | 28 | AC   | 14 | 6  |
| 154343 | 17 | 4191962 | 4191981 | 4 | 5  | 20 | TTTA | 25 | 3  |
| 154347 | 17 | 4198560 | 4198579 | 2 | 10 | 20 | CA   | 14 | 6  |
| 154350 | 17 | 4199929 | 4199944 | 2 | 8  | 16 | GA   | 18 | 11 |
| 154353 | 17 | 4205183 | 4205196 | 2 | 7  | 14 | GT   | 15 | 8  |
| 154355 | 17 | 4215426 | 4215441 | 2 | 8  | 16 | TG   | 25 | 4  |
| 154357 | 17 | 4222170 | 4222201 | 2 | 16 | 32 | TG   | 18 | 15 |
| 154360 | 17 | 4229449 | 4229462 | 2 | 7  | 14 | TC   | 26 | 3  |
| 154365 | 17 | 4243634 | 4243671 | 2 | 19 | 38 | TG   | 7  | 10 |
| 154379 | 17 | 4262345 | 4262356 | 2 | 6  | 12 | CA   | 20 | 3  |
| 154385 | 17 | 4270943 | 4270974 | 2 | 16 | 32 | GT   | 12 | 6  |
| 154386 | 17 | 4271442 | 4271468 | 3 | 9  | 27 | GCA  | 34 | 7  |
| 154387 | 17 | 4271776 | 4271805 | 2 | 15 | 30 | TG   | 13 | 8  |
| 154388 | 17 | 4273472 | 4273501 | 2 | 15 | 30 | GT   | 8  | 9  |
| 154394 | 17 | 4289387 | 4289402 | 2 | 8  | 16 | TC   | 24 | 3  |
| 154396 | 17 | 4297727 | 4297742 | 2 | 8  | 16 | GT   | 30 | 6  |
| 154397 | 17 | 4300118 | 4300133 | 2 | 8  | 16 | TG   | 27 | 10 |
| 154401 | 17 | 4303061 | 4303084 | 2 | 12 | 24 | TG   | 18 | 9  |
| 154410 | 17 | 4317931 | 4317944 | 2 | 7  | 14 | CA   | 31 | 3  |
| 154413 | 17 | 4323405 | 4323432 | 2 | 14 | 28 | TG   | 6  | 7  |
| 154415 | 17 | 4327082 | 4327101 | 2 | 10 | 20 | AC   | 14 | 9  |
| 154417 | 17 | 4328301 | 4328346 | 2 | 23 | 46 | GT   | 17 | 10 |
| 154419 | 17 | 4329908 | 4329923 | 4 | 4  | 16 | ATTT | 32 | 3  |
| 154421 | 17 | 4332605 | 4332632 | 2 | 14 | 28 | GT   | 19 | 5  |
| 154422 | 17 | 4333624 | 4333671 | 2 | 24 | 48 | AC   | 11 | 13 |
| 154423 | 17 | 4334399 | 4334410 | 2 | 6  | 12 | TG   | 23 | 6  |
| 154424 | 17 | 4335611 | 4335631 | 3 | 7  | 21 | TTG  | 14 | 4  |
| 154426 | 17 | 4335798 | 4335809 | 2 | 6  | 12 | AG   | 28 | 3  |
| 154429 | 17 | 4337307 | 4337326 | 2 | 10 | 20 | AC   | 20 | 5  |
| 154430 | 17 | 4337452 | 4337466 | 3 | 5  | 15 | CCT  | 17 | 3  |
| 154434 | 17 | 4341821 | 4341844 | 3 | 8  | 24 | GGA  | 21 | 3  |
| 154441 | 17 | 4348399 | 4348432 | 2 | 17 | 34 | CA   | 8  | 9  |
| 154444 | 17 | 4355459 | 4355470 | 2 | 6  | 12 | CA   | 30 | 3  |
| 154447 | 17 | 4360044 | 4360063 | 2 | 10 | 20 | CT   | 16 | 7  |
| 154448 | 17 | 4360577 | 4360592 | 2 | 8  | 16 | CT   | 15 | 5  |
| 154450 | 17 | 4360867 | 4360880 | 2 | 7  | 14 | TG   | 8  | 5  |
| 154460 | 17 | 4376857 | 4376880 | 2 | 12 | 24 | GT   | 14 | 4  |
| 154466 | 17 | 4386413 | 4386438 | 2 | 13 | 26 | TG   | 15 | 7  |
| 154469 | 17 | 4392941 | 4393000 | 2 | 30 | 60 | CA   | 12 | 7  |
| 154471 | 17 | 4397281 | 4397310 | 2 | 15 | 30 | AG   | 12 | 6  |
| 154474 | 17 | 4402218 | 4402229 | 2 | 6  | 12 | CA   | 29 | 5  |

|        |    |         |         |   |    |    |      |    |    |
|--------|----|---------|---------|---|----|----|------|----|----|
| 154481 | 17 | 4421005 | 4421032 | 2 | 14 | 28 | TG   | 25 | 9  |
| 154497 | 17 | 4466756 | 4466767 | 2 | 6  | 12 | AT   | 9  | 4  |
| 154498 | 17 | 4466770 | 4466781 | 2 | 6  | 12 | TA   | 7  | 4  |
| 154502 | 17 | 4468055 | 4468066 | 2 | 6  | 12 | CA   | 29 | 4  |
| 154504 | 17 | 4468813 | 4468828 | 2 | 8  | 16 | AC   | 17 | 6  |
| 154506 | 17 | 4469497 | 4469514 | 3 | 6  | 18 | CCT  | 12 | 3  |
| 154508 | 17 | 4469666 | 4469689 | 2 | 12 | 24 | CA   | 13 | 13 |
| 154511 | 17 | 4473786 | 4473821 | 3 | 12 | 36 | CTG  | 20 | 8  |
| 154513 | 17 | 4475169 | 4475182 | 2 | 7  | 14 | AG   | 20 | 5  |
| 154514 | 17 | 4475603 | 4475648 | 2 | 23 | 46 | TC   | 11 | 12 |
| 154515 | 17 | 4475763 | 4475776 | 2 | 7  | 14 | GT   | 19 | 6  |
| 154520 | 17 | 4480138 | 4480152 | 3 | 5  | 15 | CTG  | 27 | 3  |
| 154524 | 17 | 4482720 | 4482749 | 2 | 15 | 30 | CA   | 18 | 10 |
| 154525 | 17 | 4484052 | 4484063 | 2 | 6  | 12 | AC   | 27 | 3  |
| 154533 | 17 | 4507722 | 4507753 | 2 | 16 | 32 | CA   | 11 | 7  |
| 154539 | 17 | 4527588 | 4527603 | 4 | 4  | 16 | AAAG | 16 | 3  |
| 154540 | 17 | 4528349 | 4528370 | 2 | 11 | 22 | TG   | 22 | 6  |
| 154542 | 17 | 4528625 | 4528638 | 2 | 7  | 14 | AC   | 26 | 4  |
| 154543 | 17 | 4528743 | 4528764 | 2 | 11 | 22 | CA   | 12 | 9  |
| 154544 | 17 | 4528955 | 4528970 | 2 | 8  | 16 | CA   | 17 | 5  |
| 154547 | 17 | 4532553 | 4532574 | 2 | 11 | 22 | TG   | 22 | 6  |
| 154551 | 17 | 4537277 | 4537290 | 2 | 7  | 14 | AC   | 19 | 3  |
| 154555 | 17 | 4538003 | 4538018 | 2 | 8  | 16 | CA   | 18 | 3  |
| 154556 | 17 | 4540644 | 4540659 | 2 | 8  | 16 | CA   | 13 | 5  |
| 154557 | 17 | 4540826 | 4540845 | 2 | 10 | 20 | GT   | 18 | 9  |
| 154560 | 17 | 4545339 | 4545352 | 2 | 7  | 14 | TG   | 26 | 3  |
| 154561 | 17 | 4546242 | 4546280 | 3 | 13 | 39 | TCT  | 26 | 9  |
| 154564 | 17 | 4548895 | 4548908 | 2 | 7  | 14 | GT   | 30 | 3  |
| 154565 | 17 | 4550458 | 4550513 | 4 | 14 | 56 | TCTA | 6  | 5  |
| 154566 | 17 | 4550624 | 4550641 | 2 | 9  | 18 | CT   | 18 | 3  |
| 154569 | 17 | 4552586 | 4552613 | 2 | 14 | 28 | GT   | 21 | 8  |
| 154570 | 17 | 4552835 | 4552858 | 4 | 6  | 24 | AAAG | 11 | 7  |
| 154589 | 17 | 4581125 | 4581138 | 2 | 7  | 14 | GT   | 11 | 5  |
| 154595 | 17 | 4590106 | 4590117 | 2 | 6  | 12 | TG   | 29 | 3  |
| 154596 | 17 | 4590397 | 4590412 | 2 | 8  | 16 | TG   | 16 | 8  |
| 154601 | 17 | 4595279 | 4595310 | 2 | 16 | 32 | AC   | 7  | 11 |
| 154605 | 17 | 4599641 | 4599652 | 2 | 6  | 12 | CA   | 18 | 5  |
| 154608 | 17 | 4607911 | 4607924 | 2 | 7  | 14 | TG   | 16 | 4  |
| 154616 | 17 | 4619952 | 4619971 | 2 | 10 | 20 | GT   | 9  | 12 |
| 154619 | 17 | 4622621 | 4622636 | 2 | 8  | 16 | AC   | 7  | 3  |
| 154626 | 17 | 4629989 | 4630034 | 2 | 23 | 46 | TC   | 10 | 10 |
| 154627 | 17 | 4634176 | 4634203 | 2 | 14 | 28 | AC   | 10 | 7  |
| 154629 | 17 | 4634462 | 4634481 | 2 | 10 | 20 | AC   | 22 | 11 |
| 154630 | 17 | 4634961 | 4634980 | 4 | 5  | 20 | TCCA | 25 | 4  |
| 154637 | 17 | 4645873 | 4645914 | 2 | 21 | 42 | CA   | 7  | 6  |
| 154641 | 17 | 4648132 | 4648153 | 2 | 11 | 22 | TC   | 13 | 8  |
| 154643 | 17 | 4649384 | 4649413 | 2 | 15 | 30 | TC   | 19 | 8  |
| 154647 | 17 | 4652160 | 4652171 | 2 | 6  | 12 | TG   | 27 | 3  |
| 154652 | 17 | 4661211 | 4661230 | 4 | 5  | 20 | TATT | 25 | 5  |
| 154679 | 17 | 4699269 | 4699300 | 2 | 16 | 32 | GA   | 15 | 9  |
| 154680 | 17 | 4699827 | 4699840 | 2 | 7  | 14 | CA   | 12 | 11 |

|        |    |         |         |   |    |    |      |    |    |
|--------|----|---------|---------|---|----|----|------|----|----|
| 154682 | 17 | 4703638 | 4703655 | 2 | 9  | 18 | GT   | 20 | 5  |
| 154683 | 17 | 4705516 | 4705533 | 2 | 9  | 18 | CA   | 12 | 6  |
| 154684 | 17 | 4705720 | 4705734 | 3 | 5  | 15 | ATC  | 23 | 3  |
| 154689 | 17 | 4710076 | 4710087 | 2 | 6  | 12 | GT   | 15 | 6  |
| 154690 | 17 | 4710091 | 4710102 | 2 | 6  | 12 | TG   | 9  | 5  |
| 154737 | 17 | 4778179 | 4778198 | 2 | 10 | 20 | AC   | 21 | 13 |
| 154739 | 17 | 4782798 | 4782817 | 4 | 5  | 20 | AAAT | 18 | 8  |
| 154744 | 17 | 4790807 | 4790850 | 4 | 11 | 44 | GAAG | 24 | 13 |
| 154750 | 17 | 4794141 | 4794184 | 2 | 22 | 44 | CA   | 13 | 9  |
| 154751 | 17 | 4794308 | 4794323 | 2 | 8  | 16 | TG   | 21 | 8  |
| 154757 | 17 | 4800658 | 4800669 | 2 | 6  | 12 | TG   | 30 | 3  |
| 154758 | 17 | 4800794 | 4800811 | 2 | 9  | 18 | TC   | 11 | 8  |
| 154759 | 17 | 4800966 | 4800977 | 2 | 6  | 12 | CA   | 23 | 3  |
| 154761 | 17 | 4804120 | 4804133 | 2 | 7  | 14 | GT   | 26 | 4  |
| 154769 | 17 | 4809162 | 4809185 | 3 | 8  | 24 | CAG  | 26 | 5  |
| 154771 | 17 | 4811152 | 4811175 | 2 | 12 | 24 | GT   | 14 | 5  |
| 154774 | 17 | 4812448 | 4812481 | 2 | 17 | 34 | CA   | 10 | 8  |
| 154780 | 17 | 4820616 | 4820631 | 2 | 8  | 16 | TC   | 19 | 8  |
| 154781 | 17 | 4820635 | 4820650 | 2 | 8  | 16 | CA   | 12 | 3  |
| 154784 | 17 | 4825627 | 4825660 | 2 | 17 | 34 | TG   | 18 | 9  |
| 154785 | 17 | 4827773 | 4827788 | 2 | 8  | 16 | TG   | 10 | 11 |
| 154786 | 17 | 4827952 | 4827983 | 2 | 16 | 32 | GT   | 14 | 11 |
| 154789 | 17 | 4828386 | 4828401 | 2 | 8  | 16 | CA   | 23 | 5  |
| 154791 | 17 | 4834283 | 4834298 | 2 | 8  | 16 | TG   | 24 | 3  |
| 154794 | 17 | 4836466 | 4836481 | 2 | 8  | 16 | TC   | 27 | 6  |
| 154795 | 17 | 4836646 | 4836671 | 2 | 13 | 26 | GA   | 13 | 11 |
| 154800 | 17 | 4841937 | 4841950 | 2 | 7  | 14 | AC   | 22 | 5  |
| 154807 | 17 | 4858677 | 4858698 | 2 | 11 | 22 | GT   | 16 | 9  |
| 154810 | 17 | 4859489 | 4859504 | 2 | 8  | 16 | GT   | 14 | 5  |
| 154811 | 17 | 4860938 | 4860957 | 4 | 5  | 20 | ACAT | 22 | 5  |
| 154813 | 17 | 4862918 | 4862929 | 2 | 6  | 12 | TG   | 24 | 3  |
| 154814 | 17 | 4863038 | 4863049 | 2 | 6  | 12 | AG   | 32 | 4  |
| 154815 | 17 | 4865796 | 4865821 | 2 | 13 | 26 | GT   | 16 | 12 |
| 154819 | 17 | 4874032 | 4874043 | 2 | 6  | 12 | GT   | 30 | 4  |
| 154822 | 17 | 4877113 | 4877130 | 2 | 9  | 18 | CA   | 16 | 5  |
| 154825 | 17 | 4878333 | 4878372 | 2 | 20 | 40 | GT   | 10 | 8  |
| 154826 | 17 | 4880191 | 4880206 | 2 | 8  | 16 | TG   | 16 | 10 |
| 154827 | 17 | 4885011 | 4885026 | 2 | 8  | 16 | TC   | 23 | 6  |
| 154829 | 17 | 4886050 | 4886085 | 2 | 18 | 36 | TG   | 8  | 9  |
| 154830 | 17 | 4886330 | 4886363 | 2 | 17 | 34 | CA   | 15 | 7  |
| 154831 | 17 | 4888455 | 4888470 | 4 | 4  | 16 | TCTT | 12 | 7  |
| 154832 | 17 | 4888810 | 4888827 | 2 | 9  | 18 | TG   | 28 | 9  |
| 154834 | 17 | 4893457 | 4893470 | 2 | 7  | 14 | CA   | 25 | 3  |
| 154836 | 17 | 4895796 | 4895813 | 2 | 9  | 18 | AC   | 18 | 3  |
| 154837 | 17 | 4896137 | 4896158 | 2 | 11 | 22 | GT   | 16 | 8  |
| 154839 | 17 | 4897403 | 4897414 | 2 | 6  | 12 | TC   | 19 | 5  |
| 154842 | 17 | 4903363 | 4903376 | 2 | 7  | 14 | GA   | 22 | 4  |
| 154869 | 17 | 4930764 | 4930787 | 2 | 12 | 24 | CA   | 29 | 14 |
| 154876 | 17 | 4933273 | 4933290 | 2 | 9  | 18 | CA   | 16 | 14 |
| 154877 | 17 | 4934978 | 4934993 | 2 | 8  | 16 | GT   | 17 | 9  |
| 154882 | 17 | 4941541 | 4941568 | 2 | 14 | 28 | GT   | 11 | 8  |



|        |    |         |         |   |    |    |      |    |    |
|--------|----|---------|---------|---|----|----|------|----|----|
| 154884 | 17 | 4943069 | 4943086 | 2 | 9  | 18 | CA   | 22 | 5  |
| 154888 | 17 | 4946550 | 4946569 | 4 | 5  | 20 | ATTT | 16 | 6  |
| 154890 | 17 | 4952299 | 4952334 | 2 | 18 | 36 | CA   | 7  | 9  |
| 154891 | 17 | 4952711 | 4952724 | 2 | 7  | 14 | GT   | 20 | 5  |
| 154892 | 17 | 4952727 | 4952738 | 2 | 6  | 12 | GT   | 7  | 3  |
| 154893 | 17 | 4953053 | 4953064 | 2 | 6  | 12 | TG   | 20 | 3  |
| 154898 | 17 | 4956261 | 4956296 | 2 | 18 | 36 | TG   | 12 | 9  |
| 154901 | 17 | 4957014 | 4957031 | 2 | 9  | 18 | CT   | 26 | 6  |
| 154910 | 17 | 4969936 | 4969959 | 3 | 8  | 24 | GTG  | 12 | 3  |
| 154918 | 17 | 4974876 | 4974919 | 2 | 22 | 44 | GT   | 12 | 11 |
| 154919 | 17 | 4975000 | 4975037 | 2 | 19 | 38 | TC   | 9  | 5  |
| 154920 | 17 | 4975064 | 4975087 | 2 | 12 | 24 | CA   | 6  | 6  |
| 154921 | 17 | 4978074 | 4978103 | 2 | 15 | 30 | CA   | 11 | 7  |
| 154923 | 17 | 4978455 | 4978468 | 2 | 7  | 14 | AC   | 16 | 10 |
| 154924 | 17 | 4978471 | 4978482 | 2 | 6  | 12 | AC   | 9  | 5  |
| 154929 | 17 | 4979870 | 4979893 | 4 | 6  | 24 | CTTT | 31 | 5  |
| 154930 | 17 | 4980330 | 4980357 | 2 | 14 | 28 | AC   | 15 | 9  |
| 154931 | 17 | 4980853 | 4980880 | 2 | 14 | 28 | AG   | 19 | 7  |
| 154939 | 17 | 4985874 | 4985897 | 4 | 6  | 24 | TCCA | 25 | 4  |
| 154943 | 17 | 4988481 | 4988510 | 2 | 15 | 30 | TG   | 14 | 8  |
| 154944 | 17 | 4988886 | 4988907 | 2 | 11 | 22 | AC   | 29 | 8  |
| 154947 | 17 | 4992082 | 4992095 | 2 | 7  | 14 | CA   | 18 | 5  |
| 154953 | 17 | 5004812 | 5004833 | 2 | 11 | 22 | CA   | 18 | 7  |
| 154954 | 17 | 5004936 | 5004967 | 2 | 16 | 32 | GT   | 11 | 9  |
| 154956 | 17 | 5005826 | 5005837 | 2 | 6  | 12 | GT   | 23 | 4  |
| 154959 | 17 | 5010094 | 5010119 | 2 | 13 | 26 | GT   | 11 | 11 |
| 154960 | 17 | 5010297 | 5010324 | 2 | 14 | 28 | GT   | 14 | 10 |
| 154967 | 17 | 5012600 | 5012623 | 2 | 12 | 24 | TG   | 6  | 6  |
| 154969 | 17 | 5013008 | 5013023 | 2 | 8  | 16 | CA   | 24 | 6  |
| 154970 | 17 | 5015883 | 5015908 | 2 | 13 | 26 | CA   | 13 | 9  |
| 154978 | 17 | 5020404 | 5020439 | 2 | 18 | 36 | CT   | 9  | 8  |
| 154981 | 17 | 5024827 | 5024838 | 2 | 6  | 12 | AC   | 29 | 4  |
| 154982 | 17 | 5025080 | 5025093 | 2 | 7  | 14 | AG   | 21 | 6  |
| 154983 | 17 | 5026084 | 5026113 | 3 | 10 | 30 | TGC  | 26 | 7  |
| 154984 | 17 | 5029647 | 5029660 | 2 | 7  | 14 | TC   | 25 | 3  |
| 154985 | 17 | 5030286 | 5030303 | 2 | 9  | 18 | CA   | 15 | 14 |
| 154989 | 17 | 5035609 | 5035630 | 2 | 11 | 22 | TC   | 17 | 4  |
| 154990 | 17 | 5037630 | 5037653 | 2 | 12 | 24 | TC   | 22 | 4  |
| 154993 | 17 | 5038708 | 5038723 | 2 | 8  | 16 | CA   | 17 | 3  |
| 154995 | 17 | 5039371 | 5039404 | 2 | 17 | 34 | GT   | 11 | 6  |
| 154997 | 17 | 5040109 | 5040122 | 2 | 7  | 14 | GA   | 22 | 4  |
| 154998 | 17 | 5040282 | 5040311 | 2 | 15 | 30 | CA   | 8  | 9  |
| 155015 | 17 | 5056545 | 5056562 | 2 | 9  | 18 | CA   | 20 | 11 |
| 155022 | 17 | 5061543 | 5061560 | 2 | 9  | 18 | TC   | 19 | 4  |
| 155031 | 17 | 5073172 | 5073187 | 2 | 8  | 16 | TG   | 13 | 5  |
| 155043 | 17 | 5090511 | 5090546 | 2 | 18 | 36 | AC   | 6  | 6  |
| 155045 | 17 | 5092882 | 5092899 | 2 | 9  | 18 | CT   | 16 | 3  |
| 155046 | 17 | 5092901 | 5092912 | 2 | 6  | 12 | TC   | 16 | 3  |
| 155050 | 17 | 5096312 | 5096331 | 2 | 10 | 20 | CA   | 6  | 3  |
| 155051 | 17 | 5097318 | 5097332 | 3 | 5  | 15 | TTG  | 7  | 8  |
| 155053 | 17 | 5098640 | 5098681 | 3 | 14 | 42 | GCT  | 21 | 8  |

|        |    |         |         |   |    |    |      |    |    |
|--------|----|---------|---------|---|----|----|------|----|----|
| 155054 | 17 | 5103846 | 5103859 | 2 | 7  | 14 | CA   | 25 | 7  |
| 155056 | 17 | 5104059 | 5104084 | 2 | 13 | 26 | AC   | 17 | 9  |
| 155057 | 17 | 5104544 | 5104561 | 3 | 6  | 18 | CAA  | 26 | 4  |
| 155066 | 17 | 5112902 | 5112917 | 4 | 4  | 16 | ATTC | 33 | 3  |
| 155067 | 17 | 5119874 | 5119923 | 2 | 25 | 50 | TG   | 6  | 10 |
| 155073 | 17 | 5128380 | 5128397 | 2 | 9  | 18 | CA   | 17 | 9  |
| 155074 | 17 | 5129317 | 5129340 | 2 | 12 | 24 | TG   | 20 | 7  |
| 155075 | 17 | 5130422 | 5130439 | 2 | 9  | 18 | AC   | 13 | 3  |
| 155077 | 17 | 5132291 | 5132306 | 2 | 8  | 16 | AC   | 27 | 3  |
| 155078 | 17 | 5132343 | 5132358 | 2 | 8  | 16 | GT   | 23 | 7  |
| 155079 | 17 | 5132793 | 5132806 | 2 | 7  | 14 | CT   | 21 | 3  |
| 155080 | 17 | 5132987 | 5133002 | 2 | 8  | 16 | CA   | 26 | 3  |
| 155081 | 17 | 5135150 | 5135171 | 2 | 11 | 22 | GT   | 23 | 7  |
| 155082 | 17 | 5135258 | 5135271 | 2 | 7  | 14 | GT   | 22 | 8  |
| 155084 | 17 | 5135338 | 5135363 | 2 | 13 | 26 | TC   | 15 | 15 |
| 155086 | 17 | 5135717 | 5135740 | 2 | 12 | 24 | CT   | 7  | 7  |
| 155090 | 17 | 5137010 | 5137023 | 2 | 7  | 14 | GA   | 21 | 8  |
| 155091 | 17 | 5137137 | 5137151 | 3 | 5  | 15 | CAG  | 22 | 5  |
| 155092 | 17 | 5137730 | 5137743 | 2 | 7  | 14 | AG   | 11 | 4  |
| 155095 | 17 | 5143436 | 5143455 | 2 | 10 | 20 | CT   | 21 | 3  |
| 155099 | 17 | 5149193 | 5149206 | 2 | 7  | 14 | AT   | 27 | 4  |
| 155104 | 17 | 5159813 | 5159854 | 2 | 21 | 42 | GT   | 16 | 13 |
| 155114 | 17 | 5174035 | 5174062 | 4 | 7  | 28 | CAGA | 30 | 7  |
| 155116 | 17 | 5175926 | 5175949 | 2 | 12 | 24 | CA   | 6  | 4  |
| 155121 | 17 | 5184125 | 5184136 | 2 | 6  | 12 | CA   | 11 | 13 |
| 155123 | 17 | 5184290 | 5184319 | 2 | 15 | 30 | AC   | 13 | 10 |
| 155127 | 17 | 5189547 | 5189568 | 2 | 11 | 22 | AC   | 19 | 18 |
| 155129 | 17 | 5190964 | 5190984 | 3 | 7  | 21 | ATT  | 27 | 3  |
| 155130 | 17 | 5192136 | 5192149 | 2 | 7  | 14 | AC   | 25 | 6  |
| 155133 | 17 | 5193829 | 5193842 | 2 | 7  | 14 | TG   | 23 | 3  |
| 155138 | 17 | 5195489 | 5195534 | 2 | 23 | 46 | CA   | 7  | 9  |
| 155139 | 17 | 5195640 | 5195653 | 2 | 7  | 14 | TC   | 22 | 3  |
| 155141 | 17 | 5195700 | 5195715 | 2 | 8  | 16 | AC   | 11 | 4  |
| 155143 | 17 | 5197949 | 5197972 | 2 | 12 | 24 | GA   | 14 | 7  |
| 155148 | 17 | 5203100 | 5203125 | 2 | 13 | 26 | CA   | 20 | 6  |
| 155149 | 17 | 5203317 | 5203352 | 2 | 18 | 36 | CA   | 15 | 8  |
| 155150 | 17 | 5208017 | 5208030 | 2 | 7  | 14 | GT   | 22 | 4  |
| 155151 | 17 | 5208250 | 5208275 | 2 | 13 | 26 | GT   | 11 | 9  |
| 155155 | 17 | 5213193 | 5213222 | 2 | 15 | 30 | GT   | 12 | 14 |
| 155157 | 17 | 5213545 | 5213560 | 2 | 8  | 16 | GT   | 24 | 6  |
| 155160 | 17 | 5214076 | 5214101 | 2 | 13 | 26 | TG   | 19 | 7  |
| 155163 | 17 | 5216908 | 5216937 | 2 | 15 | 30 | TG   | 15 | 14 |
| 155165 | 17 | 5222565 | 5222596 | 4 | 8  | 32 | CATC | 26 | 4  |
| 155171 | 17 | 5233084 | 5233137 | 2 | 27 | 54 | CA   | 13 | 11 |
| 155172 | 17 | 5233499 | 5233510 | 2 | 6  | 12 | AC   | 20 | 3  |
| 155177 | 17 | 5235318 | 5235351 | 2 | 17 | 34 | AC   | 18 | 12 |
| 155184 | 17 | 5248623 | 5248644 | 2 | 11 | 22 | AG   | 22 | 6  |
| 155190 | 17 | 5260557 | 5260568 | 2 | 6  | 12 | TA   | 9  | 6  |
| 155191 | 17 | 5261532 | 5261543 | 2 | 6  | 12 | AC   | 18 | 3  |
| 155192 | 17 | 5261645 | 5261674 | 2 | 15 | 30 | CT   | 18 | 7  |
| 155197 | 17 | 5277277 | 5277296 | 2 | 10 | 20 | CA   | 22 | 11 |

|        |    |         |         |   |    |    |      |    |    |
|--------|----|---------|---------|---|----|----|------|----|----|
| 155199 | 17 | 5277520 | 5277533 | 2 | 7  | 14 | AC   | 17 | 4  |
| 155203 | 17 | 5285246 | 5285257 | 2 | 6  | 12 | TC   | 23 | 5  |
| 155206 | 17 | 5285618 | 5285639 | 2 | 11 | 22 | GT   | 12 | 7  |
| 155207 | 17 | 5285667 | 5285692 | 2 | 13 | 26 | TG   | 10 | 8  |
| 155209 | 17 | 5287132 | 5287165 | 2 | 17 | 34 | TG   | 12 | 8  |
| 155212 | 17 | 5299943 | 5299994 | 2 | 26 | 52 | GT   | 11 | 9  |
| 155213 | 17 | 5308748 | 5308771 | 2 | 12 | 24 | AC   | 23 | 13 |
| 155215 | 17 | 5315808 | 5315822 | 3 | 5  | 15 | GAA  | 16 | 9  |
| 155217 | 17 | 5316316 | 5316331 | 2 | 8  | 16 | TG   | 21 | 5  |
| 155219 | 17 | 5318091 | 5318105 | 3 | 5  | 15 | ATC  | 31 | 11 |
| 155223 | 17 | 5330814 | 5330835 | 2 | 11 | 22 | AC   | 15 | 13 |
| 155224 | 17 | 5334136 | 5334163 | 2 | 14 | 28 | AC   | 14 | 13 |
| 155232 | 17 | 5342166 | 5342195 | 2 | 15 | 30 | GT   | 8  | 8  |
| 155243 | 17 | 5373438 | 5373453 | 2 | 8  | 16 | AC   | 13 | 3  |
| 155244 | 17 | 5375814 | 5375833 | 2 | 10 | 20 | TG   | 15 | 10 |
| 155245 | 17 | 5376158 | 5376209 | 2 | 26 | 52 | TG   | 16 | 7  |
| 155246 | 17 | 5379993 | 5380016 | 2 | 12 | 24 | GT   | 19 | 9  |
| 155247 | 17 | 5380136 | 5380161 | 2 | 13 | 26 | GT   | 18 | 11 |
| 155249 | 17 | 5385510 | 5385521 | 2 | 6  | 12 | TC   | 24 | 4  |
| 155250 | 17 | 5385560 | 5385593 | 2 | 17 | 34 | TG   | 17 | 14 |
| 155256 | 17 | 5393628 | 5393645 | 2 | 9  | 18 | TG   | 19 | 4  |
| 155257 | 17 | 5400765 | 5400776 | 2 | 6  | 12 | AC   | 17 | 3  |
| 155259 | 17 | 5411986 | 5412003 | 3 | 6  | 18 | ATT  | 19 | 3  |
| 155262 | 17 | 5415381 | 5415404 | 3 | 8  | 24 | GCA  | 19 | 6  |
| 155265 | 17 | 5434925 | 5434956 | 2 | 16 | 32 | CA   | 14 | 10 |
| 155266 | 17 | 5439147 | 5439166 | 4 | 5  | 20 | GGAT | 14 | 3  |
| 155267 | 17 | 5439959 | 5439990 | 2 | 16 | 32 | AC   | 6  | 3  |
| 155269 | 17 | 5440319 | 5440342 | 2 | 12 | 24 | GT   | 10 | 6  |
| 155272 | 17 | 5440715 | 5440734 | 2 | 10 | 20 | CA   | 14 | 6  |
| 155273 | 17 | 5440786 | 5440801 | 2 | 8  | 16 | AC   | 28 | 3  |
| 155274 | 17 | 5442533 | 5442564 | 2 | 16 | 32 | GT   | 13 | 11 |
| 155276 | 17 | 5442757 | 5442782 | 2 | 13 | 26 | GT   | 16 | 7  |
| 155285 | 17 | 5449561 | 5449572 | 2 | 6  | 12 | AC   | 20 | 10 |
| 155286 | 17 | 5449575 | 5449588 | 2 | 7  | 14 | AC   | 19 | 10 |
| 155288 | 17 | 5451501 | 5451528 | 2 | 14 | 28 | AC   | 19 | 10 |
| 155291 | 17 | 5451665 | 5451684 | 2 | 10 | 20 | CA   | 8  | 8  |
| 155292 | 17 | 5455084 | 5455115 | 4 | 8  | 32 | TAGA | 16 | 11 |
| 155295 | 17 | 5457531 | 5457546 | 2 | 8  | 16 | TG   | 30 | 10 |
| 155296 | 17 | 5458591 | 5458618 | 2 | 14 | 28 | TG   | 18 | 4  |
| 155297 | 17 | 5458799 | 5458812 | 2 | 7  | 14 | AC   | 16 | 12 |
| 155298 | 17 | 5459223 | 5459238 | 2 | 8  | 16 | AC   | 23 | 3  |
| 155299 | 17 | 5462250 | 5462261 | 2 | 6  | 12 | TG   | 26 | 9  |
| 155303 | 17 | 5466324 | 5466339 | 2 | 8  | 16 | AC   | 23 | 7  |
| 155304 | 17 | 5466389 | 5466416 | 2 | 14 | 28 | CA   | 15 | 11 |
| 155305 | 17 | 5466585 | 5466610 | 2 | 13 | 26 | CT   | 8  | 4  |
| 155307 | 17 | 5468564 | 5468583 | 2 | 10 | 20 | CA   | 14 | 10 |
| 155309 | 17 | 5470355 | 5470380 | 2 | 13 | 26 | TG   | 20 | 11 |
| 155310 | 17 | 5470851 | 5470868 | 3 | 6  | 18 | TTG  | 27 | 5  |
| 155311 | 17 | 5471262 | 5471273 | 2 | 6  | 12 | CT   | 13 | 4  |
| 155312 | 17 | 5472361 | 5472386 | 2 | 13 | 26 | TG   | 14 | 9  |
| 155313 | 17 | 5474380 | 5474397 | 2 | 9  | 18 | TG   | 16 | 4  |

|        |    |         |         |   |    |    |     |    |    |
|--------|----|---------|---------|---|----|----|-----|----|----|
| 155317 | 17 | 5478332 | 5478357 | 2 | 13 | 26 | GT  | 8  | 7  |
| 155318 | 17 | 5478497 | 5478508 | 2 | 6  | 12 | GT  | 26 | 4  |
| 155320 | 17 | 5480232 | 5480251 | 2 | 10 | 20 | GT  | 14 | 8  |
| 155321 | 17 | 5480468 | 5480505 | 2 | 19 | 38 | GT  | 10 | 12 |
| 155323 | 17 | 5482709 | 5482742 | 2 | 17 | 34 | GT  | 8  | 8  |
| 155326 | 17 | 5483114 | 5483137 | 2 | 12 | 24 | TG  | 10 | 10 |
| 155327 | 17 | 5483438 | 5483455 | 3 | 6  | 18 | CCT | 16 | 3  |
| 155328 | 17 | 5483732 | 5483757 | 2 | 13 | 26 | AC  | 17 | 12 |
| 155332 | 17 | 5484340 | 5484354 | 3 | 5  | 15 | CTC | 20 | 3  |
| 155333 | 17 | 5487583 | 5487598 | 2 | 8  | 16 | GT  | 22 | 3  |
| 155335 | 17 | 5491549 | 5491566 | 3 | 6  | 18 | GGA | 17 | 8  |
| 155337 | 17 | 5496644 | 5496663 | 2 | 10 | 20 | CT  | 10 | 7  |
| 155341 | 17 | 5499029 | 5499046 | 2 | 9  | 18 | CA  | 15 | 9  |
| 155342 | 17 | 5499160 | 5499171 | 2 | 6  | 12 | TC  | 16 | 8  |
| 155343 | 17 | 5499172 | 5499189 | 2 | 9  | 18 | AC  | 20 | 8  |
| 155344 | 17 | 5499340 | 5499365 | 2 | 13 | 26 | GT  | 13 | 10 |
| 155345 | 17 | 5499473 | 5499505 | 3 | 11 | 33 | TCC | 14 | 3  |
| 155346 | 17 | 5500397 | 5500410 | 2 | 7  | 14 | AC  | 8  | 11 |
| 155348 | 17 | 5500790 | 5500803 | 2 | 7  | 14 | CA  | 26 | 3  |
| 155350 | 17 | 5502225 | 5502248 | 3 | 8  | 24 | GGA | 8  | 5  |
| 155352 | 17 | 5502501 | 5502524 | 2 | 12 | 24 | GT  | 15 | 15 |
| 155357 | 17 | 5502885 | 5502918 | 2 | 17 | 34 | CT  | 15 | 8  |
| 155360 | 17 | 5505311 | 5505330 | 2 | 10 | 20 | CT  | 18 | 10 |
| 155363 | 17 | 5505638 | 5505655 | 2 | 9  | 18 | AC  | 25 | 7  |
| 155364 | 17 | 5505775 | 5505802 | 2 | 14 | 28 | TG  | 11 | 9  |
| 155368 | 17 | 5506007 | 5506022 | 2 | 8  | 16 | AC  | 18 | 5  |
| 155369 | 17 | 5506211 | 5506244 | 2 | 17 | 34 | TG  | 20 | 12 |
| 155373 | 17 | 5507356 | 5507375 | 2 | 10 | 20 | GT  | 21 | 7  |
| 155374 | 17 | 5507621 | 5507640 | 2 | 10 | 20 | TG  | 14 | 5  |
| 155380 | 17 | 5511108 | 5511137 | 2 | 15 | 30 | CA  | 11 | 11 |
| 155381 | 17 | 5511245 | 5511262 | 2 | 9  | 18 | GT  | 15 | 13 |
| 155382 | 17 | 5511264 | 5511279 | 2 | 8  | 16 | TG  | 6  | 8  |
| 155388 | 17 | 5514369 | 5514406 | 2 | 19 | 38 | CA  | 8  | 9  |
| 155390 | 17 | 5514750 | 5514769 | 2 | 10 | 20 | TG  | 6  | 7  |
| 155391 | 17 | 5515152 | 5515181 | 2 | 15 | 30 | CA  | 18 | 10 |
| 155392 | 17 | 5515351 | 5515376 | 2 | 13 | 26 | AC  | 16 | 5  |
| 155400 | 17 | 5531514 | 5531541 | 2 | 14 | 28 | GT  | 8  | 10 |
| 155404 | 17 | 5538887 | 5538916 | 2 | 15 | 30 | GT  | 18 | 15 |
| 155410 | 17 | 5547072 | 5547091 | 2 | 10 | 20 | GT  | 24 | 6  |
| 155411 | 17 | 5548921 | 5548942 | 2 | 11 | 22 | TG  | 13 | 12 |
| 155416 | 17 | 5559987 | 5560022 | 2 | 18 | 36 | GT  | 7  | 7  |
| 155418 | 17 | 5560384 | 5560401 | 2 | 9  | 18 | AC  | 19 | 4  |
| 155421 | 17 | 5565619 | 5565640 | 2 | 11 | 22 | TG  | 14 | 13 |
| 155422 | 17 | 5569484 | 5569499 | 2 | 8  | 16 | AC  | 21 | 6  |
| 155424 | 17 | 5574571 | 5574602 | 2 | 16 | 32 | GT  | 14 | 9  |
| 155425 | 17 | 5574937 | 5574957 | 3 | 7  | 21 | GGA | 32 | 4  |
| 155427 | 17 | 5575345 | 5575358 | 2 | 7  | 14 | TG  | 21 | 6  |
| 155429 | 17 | 5576283 | 5576302 | 2 | 10 | 20 | CA  | 17 | 4  |
| 155431 | 17 | 5587345 | 5587382 | 2 | 19 | 38 | GT  | 8  | 8  |
| 155440 | 17 | 5595936 | 5595967 | 2 | 16 | 32 | AC  | 9  | 8  |
| 155442 | 17 | 5598870 | 5598893 | 2 | 12 | 24 | TG  | 9  | 4  |

|        |    |         |         |   |    |    |      |    |    |
|--------|----|---------|---------|---|----|----|------|----|----|
| 155445 | 17 | 5601724 | 5601747 | 2 | 12 | 24 | CA   | 21 | 8  |
| 155447 | 17 | 5605682 | 5605701 | 2 | 10 | 20 | AC   | 19 | 4  |
| 155449 | 17 | 5612244 | 5612265 | 2 | 11 | 22 | CA   | 16 | 8  |
| 155450 | 17 | 5612561 | 5612588 | 2 | 14 | 28 | AC   | 13 | 9  |
| 155451 | 17 | 5612834 | 5612851 | 3 | 6  | 18 | GGA  | 21 | 8  |
| 155453 | 17 | 5613010 | 5613041 | 2 | 16 | 32 | CA   | 8  | 10 |
| 155459 | 17 | 5620302 | 5620321 | 2 | 10 | 20 | AC   | 11 | 5  |
| 155461 | 17 | 5620483 | 5620508 | 2 | 13 | 26 | TG   | 11 | 11 |
| 155462 | 17 | 5621566 | 5621581 | 4 | 4  | 16 | GGAT | 32 | 7  |
| 155464 | 17 | 5625696 | 5625709 | 2 | 7  | 14 | CA   | 25 | 5  |
| 155465 | 17 | 5625934 | 5625963 | 2 | 15 | 30 | CA   | 25 | 25 |
| 155466 | 17 | 5626173 | 5626192 | 2 | 10 | 20 | GT   | 26 | 8  |
| 155469 | 17 | 5628177 | 5628190 | 2 | 7  | 14 | TG   | 29 | 3  |
| 155471 | 17 | 5630346 | 5630360 | 3 | 5  | 15 | CTG  | 23 | 3  |
| 155472 | 17 | 5630576 | 5630611 | 2 | 18 | 36 | TG   | 19 | 14 |
| 155476 | 17 | 5636041 | 5636067 | 3 | 9  | 27 | AAC  | 23 | 8  |
| 155477 | 17 | 5637398 | 5637409 | 2 | 6  | 12 | AG   | 32 | 3  |
| 155486 | 17 | 5668510 | 5668523 | 2 | 7  | 14 | AC   | 23 | 5  |
| 155487 | 17 | 5685186 | 5685201 | 2 | 8  | 16 | CA   | 16 | 4  |
| 155488 | 17 | 5686892 | 5686911 | 2 | 10 | 20 | TC   | 10 | 8  |
| 155495 | 17 | 5692801 | 5692820 | 2 | 10 | 20 | TC   | 14 | 4  |
| 155498 | 17 | 5694418 | 5694437 | 4 | 5  | 20 | GAAA | 22 | 3  |
| 155499 | 17 | 5694562 | 5694573 | 2 | 6  | 12 | GT   | 17 | 3  |
| 155500 | 17 | 5698701 | 5698718 | 2 | 9  | 18 | AC   | 25 | 4  |
| 155505 | 17 | 5704923 | 5704950 | 2 | 14 | 28 | AC   | 19 | 13 |
| 155511 | 17 | 5715312 | 5715327 | 2 | 8  | 16 | GT   | 17 | 5  |
| 155514 | 17 | 5716287 | 5716304 | 2 | 9  | 18 | AC   | 13 | 15 |
| 155515 | 17 | 5717050 | 5717077 | 4 | 7  | 28 | TTTC | 12 | 6  |
| 155516 | 17 | 5717179 | 5717204 | 2 | 13 | 26 | CA   | 11 | 10 |
| 155519 | 17 | 5720876 | 5720887 | 2 | 6  | 12 | AG   | 18 | 5  |
| 155520 | 17 | 5720947 | 5720970 | 3 | 8  | 24 | CTG  | 22 | 12 |
| 155522 | 17 | 5721156 | 5721176 | 3 | 7  | 21 | CCT  | 19 | 9  |
| 155524 | 17 | 5722328 | 5722341 | 2 | 7  | 14 | TG   | 22 | 3  |
| 155529 | 17 | 5729136 | 5729163 | 2 | 14 | 28 | TG   | 16 | 11 |
| 155530 | 17 | 5729322 | 5729337 | 2 | 8  | 16 | AC   | 20 | 14 |
| 155531 | 17 | 5729526 | 5729539 | 2 | 7  | 14 | TG   | 17 | 6  |
| 155532 | 17 | 5729542 | 5729557 | 2 | 8  | 16 | TG   | 22 | 5  |
| 155538 | 17 | 5735954 | 5735983 | 2 | 15 | 30 | TG   | 9  | 7  |
| 155540 | 17 | 5737159 | 5737184 | 2 | 13 | 26 | AC   | 10 | 11 |
| 155547 | 17 | 5739159 | 5739176 | 3 | 6  | 18 | CAC  | 26 | 5  |
| 155550 | 17 | 5746730 | 5746743 | 2 | 7  | 14 | CT   | 26 | 12 |
| 155551 | 17 | 5746744 | 5746755 | 2 | 6  | 12 | CA   | 29 | 13 |
| 155552 | 17 | 5746854 | 5746880 | 3 | 9  | 27 | CTC  | 25 | 6  |
| 155554 | 17 | 5749278 | 5749291 | 2 | 7  | 14 | AC   | 17 | 3  |
| 155555 | 17 | 5750378 | 5750397 | 2 | 10 | 20 | TC   | 14 | 10 |
| 155557 | 17 | 5756279 | 5756290 | 2 | 6  | 12 | TC   | 29 | 5  |
| 155558 | 17 | 5756329 | 5756354 | 2 | 13 | 26 | TG   | 15 | 8  |
| 155561 | 17 | 5761101 | 5761115 | 3 | 5  | 15 | ATT  | 22 | 6  |
| 155566 | 17 | 5762836 | 5762871 | 2 | 18 | 36 | CA   | 13 | 9  |
| 155567 | 17 | 5763109 | 5763134 | 2 | 13 | 26 | CA   | 16 | 11 |
| 155568 | 17 | 5763192 | 5763215 | 2 | 12 | 24 | CA   | 16 | 5  |

|        |    |         |         |   |    |    |      |    |    |
|--------|----|---------|---------|---|----|----|------|----|----|
| 155569 | 17 | 5764596 | 5764611 | 2 | 8  | 16 | AC   | 21 | 8  |
| 155573 | 17 | 5770475 | 5770492 | 3 | 6  | 18 | AAC  | 12 | 5  |
| 155574 | 17 | 5771037 | 5771072 | 4 | 9  | 36 | CTTT | 16 | 12 |
| 155575 | 17 | 5771844 | 5771857 | 2 | 7  | 14 | TG   | 25 | 5  |
| 155577 | 17 | 5775974 | 5776011 | 2 | 19 | 38 | AC   | 10 | 10 |
| 155579 | 17 | 5778097 | 5778112 | 2 | 8  | 16 | AC   | 14 | 11 |
| 155580 | 17 | 5778379 | 5778398 | 2 | 10 | 20 | TG   | 26 | 10 |
| 155583 | 17 | 5783289 | 5783336 | 2 | 24 | 48 | TG   | 7  | 7  |
| 155586 | 17 | 5787485 | 5787496 | 2 | 6  | 12 | AC   | 24 | 4  |
| 155590 | 17 | 5792021 | 5792042 | 2 | 11 | 22 | AC   | 16 | 8  |
| 155591 | 17 | 5792932 | 5792943 | 2 | 6  | 12 | AC   | 26 | 3  |
| 155594 | 17 | 5793342 | 5793353 | 2 | 6  | 12 | TG   | 21 | 3  |
| 155595 | 17 | 5793355 | 5793368 | 2 | 7  | 14 | GT   | 25 | 3  |
| 155596 | 17 | 5793545 | 5793588 | 2 | 22 | 44 | TG   | 16 | 9  |
| 155597 | 17 | 5795603 | 5795618 | 2 | 8  | 16 | AT   | 9  | 7  |
| 155599 | 17 | 5798565 | 5798592 | 2 | 14 | 28 | TG   | 14 | 6  |
| 155600 | 17 | 5798689 | 5798726 | 2 | 19 | 38 | GT   | 11 | 12 |
| 155605 | 17 | 5802152 | 5802185 | 2 | 17 | 34 | AC   | 15 | 12 |
| 155606 | 17 | 5802576 | 5802589 | 2 | 7  | 14 | AG   | 30 | 3  |
| 155609 | 17 | 5804558 | 5804569 | 2 | 6  | 12 | GA   | 25 | 3  |
| 155610 | 17 | 5806620 | 5806631 | 2 | 6  | 12 | TC   | 27 | 3  |
| 155612 | 17 | 5808288 | 5808307 | 2 | 10 | 20 | AT   | 22 | 8  |
| 155616 | 17 | 5811175 | 5811202 | 2 | 14 | 28 | CA   | 9  | 6  |
| 155619 | 17 | 5811607 | 5811658 | 2 | 26 | 52 | CA   | 15 | 8  |
| 155620 | 17 | 5812198 | 5812229 | 2 | 16 | 32 | CA   | 12 | 10 |
| 155621 | 17 | 5812378 | 5812399 | 2 | 11 | 22 | AC   | 17 | 9  |
| 155623 | 17 | 5813448 | 5813462 | 3 | 5  | 15 | AAC  | 34 | 4  |
| 155624 | 17 | 5813937 | 5813956 | 2 | 10 | 20 | TG   | 19 | 6  |
| 155625 | 17 | 5815141 | 5815160 | 2 | 10 | 20 | GT   | 19 | 9  |
| 155626 | 17 | 5815663 | 5815690 | 2 | 14 | 28 | GT   | 11 | 12 |
| 155637 | 17 | 5831611 | 5831628 | 3 | 6  | 18 | TCC  | 22 | 3  |
| 155642 | 17 | 5836831 | 5836848 | 2 | 9  | 18 | GT   | 13 | 4  |
| 155645 | 17 | 5837487 | 5837506 | 2 | 10 | 20 | TG   | 11 | 3  |
| 155648 | 17 | 5839404 | 5839417 | 2 | 7  | 14 | CA   | 28 | 5  |
| 155649 | 17 | 5842693 | 5842718 | 2 | 13 | 26 | CA   | 10 | 10 |
| 155655 | 17 | 5847037 | 5847056 | 2 | 10 | 20 | GA   | 22 | 6  |
| 155656 | 17 | 5850134 | 5850151 | 2 | 9  | 18 | AC   | 22 | 8  |
| 155665 | 17 | 5866672 | 5866683 | 2 | 6  | 12 | CA   | 32 | 3  |
| 155668 | 17 | 5868622 | 5868633 | 2 | 6  | 12 | TA   | 16 | 6  |
| 155677 | 17 | 5892475 | 5892490 | 2 | 8  | 16 | GT   | 26 | 10 |
| 155679 | 17 | 5895920 | 5895943 | 2 | 12 | 24 | AC   | 12 | 14 |
| 155680 | 17 | 5899302 | 5899325 | 2 | 12 | 24 | CA   | 15 | 7  |
| 155682 | 17 | 5907708 | 5907723 | 2 | 8  | 16 | TA   | 6  | 3  |
| 155684 | 17 | 5914004 | 5914025 | 2 | 11 | 22 | CA   | 7  | 8  |
| 155688 | 17 | 5919422 | 5919463 | 2 | 21 | 42 | CA   | 18 | 11 |
| 155689 | 17 | 5922054 | 5922075 | 2 | 11 | 22 | AC   | 11 | 11 |
| 155694 | 17 | 5936049 | 5936062 | 2 | 7  | 14 | TC   | 29 | 4  |
| 155698 | 17 | 5950518 | 5950531 | 2 | 7  | 14 | CT   | 28 | 3  |
| 155703 | 17 | 5972705 | 5972728 | 2 | 12 | 24 | TG   | 12 | 6  |
| 155704 | 17 | 5972876 | 5972891 | 2 | 8  | 16 | TG   | 26 | 12 |
| 155705 | 17 | 5973092 | 5973109 | 2 | 9  | 18 | GT   | 14 | 5  |

|        |    |         |         |   |    |    |      |    |    |
|--------|----|---------|---------|---|----|----|------|----|----|
| 155706 | 17 | 5973285 | 5973308 | 2 | 12 | 24 | TG   | 19 | 10 |
| 155708 | 17 | 5976205 | 5976240 | 2 | 18 | 36 | GT   | 12 | 11 |
| 155710 | 17 | 5980209 | 5980232 | 2 | 12 | 24 | CA   | 17 | 13 |
| 155711 | 17 | 5981740 | 5981753 | 2 | 7  | 14 | AC   | 25 | 5  |
| 155713 | 17 | 5987852 | 5987899 | 3 | 16 | 48 | AAG  | 25 | 8  |
| 155716 | 17 | 5996332 | 5996355 | 2 | 12 | 24 | CA   | 9  | 9  |
| 155719 | 17 | 5999279 | 5999308 | 2 | 15 | 30 | CA   | 17 | 11 |
| 155722 | 17 | 6000503 | 6000550 | 4 | 12 | 48 | GAAA | 22 | 12 |
| 155728 | 17 | 6013302 | 6013327 | 2 | 13 | 26 | CA   | 7  | 7  |
| 155729 | 17 | 6013423 | 6013446 | 2 | 12 | 24 | GT   | 13 | 6  |
| 155732 | 17 | 6023764 | 6023777 | 2 | 7  | 14 | CA   | 32 | 4  |
| 155736 | 17 | 6029589 | 6029600 | 2 | 6  | 12 | AC   | 26 | 3  |
| 155738 | 17 | 6035832 | 6035847 | 2 | 8  | 16 | CA   | 17 | 5  |
| 155739 | 17 | 6037140 | 6037163 | 2 | 12 | 24 | AG   | 9  | 5  |
| 155741 | 17 | 6037247 | 6037274 | 2 | 14 | 28 | AG   | 7  | 7  |
| 155742 | 17 | 6040912 | 6040927 | 2 | 8  | 16 | AC   | 32 | 4  |
| 155744 | 17 | 6052093 | 6052104 | 2 | 6  | 12 | AT   | 20 | 4  |
| 155755 | 17 | 6058395 | 6058422 | 2 | 14 | 28 | TG   | 16 | 6  |
| 155756 | 17 | 6058747 | 6058770 | 2 | 12 | 24 | TG   | 16 | 10 |
| 155758 | 17 | 6063827 | 6063846 | 2 | 10 | 20 | AC   | 19 | 6  |
| 155760 | 17 | 6069321 | 6069332 | 2 | 6  | 12 | TG   | 30 | 5  |
| 155764 | 17 | 6076015 | 6076042 | 2 | 14 | 28 | GT   | 21 | 10 |
| 155766 | 17 | 6078881 | 6078894 | 2 | 7  | 14 | TG   | 19 | 3  |
| 155767 | 17 | 6083437 | 6083450 | 2 | 7  | 14 | GT   | 27 | 3  |
| 155768 | 17 | 6083945 | 6083974 | 2 | 15 | 30 | CA   | 12 | 9  |
| 155770 | 17 | 6085273 | 6085294 | 2 | 11 | 22 | AC   | 14 | 5  |
| 155771 | 17 | 6085355 | 6085369 | 3 | 5  | 15 | GAA  | 24 | 3  |
| 155773 | 17 | 6088774 | 6088811 | 2 | 19 | 38 | GT   | 12 | 11 |
| 155776 | 17 | 6091041 | 6091052 | 2 | 6  | 12 | AT   | 20 | 4  |
| 155779 | 17 | 6094994 | 6095005 | 2 | 6  | 12 | GT   | 17 | 7  |
| 155780 | 17 | 6095008 | 6095019 | 2 | 6  | 12 | GT   | 16 | 5  |
| 155781 | 17 | 6095265 | 6095296 | 2 | 16 | 32 | GT   | 12 | 12 |
| 155782 | 17 | 6095344 | 6095355 | 2 | 6  | 12 | GT   | 18 | 3  |
| 155786 | 17 | 6101690 | 6101705 | 4 | 4  | 16 | AAAT | 23 | 4  |
| 155787 | 17 | 6102362 | 6102385 | 3 | 8  | 24 | CCT  | 17 | 4  |
| 155788 | 17 | 6103554 | 6103571 | 3 | 6  | 18 | ACA  | 17 | 3  |
| 155794 | 17 | 6112770 | 6112787 | 2 | 9  | 18 | TG   | 21 | 6  |
| 155797 | 17 | 6117131 | 6117158 | 2 | 14 | 28 | TG   | 12 | 13 |
| 155799 | 17 | 6119031 | 6119062 | 2 | 16 | 32 | AC   | 9  | 10 |
| 155801 | 17 | 6120850 | 6120867 | 2 | 9  | 18 | CA   | 19 | 13 |
| 155802 | 17 | 6122297 | 6122316 | 2 | 10 | 20 | GT   | 16 | 8  |
| 155803 | 17 | 6124241 | 6124274 | 2 | 17 | 34 | AG   | 6  | 10 |
| 155804 | 17 | 6124471 | 6124504 | 2 | 17 | 34 | CA   | 17 | 7  |
| 155805 | 17 | 6125514 | 6125541 | 2 | 14 | 28 | TG   | 9  | 6  |
| 155811 | 17 | 6128794 | 6128815 | 2 | 11 | 22 | GT   | 25 | 8  |
| 155813 | 17 | 6130148 | 6130165 | 2 | 9  | 18 | AC   | 14 | 7  |
| 155814 | 17 | 6130424 | 6130437 | 2 | 7  | 14 | TG   | 6  | 7  |
| 155815 | 17 | 6130440 | 6130451 | 2 | 6  | 12 | TG   | 8  | 7  |
| 155816 | 17 | 6130486 | 6130507 | 2 | 11 | 22 | GT   | 17 | 5  |
| 155820 | 17 | 6133374 | 6133399 | 2 | 13 | 26 | GT   | 19 | 12 |
| 155824 | 17 | 6134288 | 6134325 | 2 | 19 | 38 | TG   | 18 | 11 |

|        |    |         |         |   |    |    |      |    |    |
|--------|----|---------|---------|---|----|----|------|----|----|
| 155825 | 17 | 6134968 | 6135001 | 2 | 17 | 34 | GT   | 11 | 12 |
| 155829 | 17 | 6141226 | 6141243 | 2 | 9  | 18 | TG   | 20 | 5  |
| 155831 | 17 | 6141995 | 6142015 | 3 | 7  | 21 | GGA  | 9  | 4  |
| 155834 | 17 | 6148147 | 6148162 | 2 | 8  | 16 | GT   | 27 | 3  |
| 155835 | 17 | 6148270 | 6148283 | 2 | 7  | 14 | TG   | 10 | 3  |
| 155836 | 17 | 6148288 | 6148299 | 2 | 6  | 12 | TG   | 11 | 3  |
| 155840 | 17 | 6149308 | 6149321 | 2 | 7  | 14 | TG   | 24 | 5  |
| 155842 | 17 | 6151789 | 6151806 | 2 | 9  | 18 | TG   | 32 | 7  |
| 155851 | 17 | 6161794 | 6161811 | 2 | 9  | 18 | TG   | 22 | 3  |
| 155852 | 17 | 6161962 | 6161977 | 2 | 8  | 16 | TG   | 18 | 5  |
| 155853 | 17 | 6162423 | 6162446 | 2 | 12 | 24 | CA   | 12 | 11 |
| 155854 | 17 | 6163427 | 6163442 | 2 | 8  | 16 | AC   | 17 | 10 |
| 155857 | 17 | 6165050 | 6165077 | 2 | 14 | 28 | CA   | 14 | 13 |
| 155859 | 17 | 6165554 | 6165569 | 2 | 8  | 16 | GT   | 12 | 5  |
| 155860 | 17 | 6165836 | 6165867 | 2 | 16 | 32 | TG   | 9  | 7  |
| 155862 | 17 | 6166140 | 6166167 | 2 | 14 | 28 | TG   | 21 | 8  |
| 155863 | 17 | 6167366 | 6167381 | 2 | 8  | 16 | GT   | 29 | 3  |
| 155865 | 17 | 6168318 | 6168333 | 2 | 8  | 16 | TG   | 15 | 3  |
| 155869 | 17 | 6175745 | 6175760 | 2 | 8  | 16 | TC   | 25 | 6  |
| 155870 | 17 | 6178028 | 6178063 | 2 | 18 | 36 | CA   | 12 | 12 |
| 155871 | 17 | 6179234 | 6179267 | 2 | 17 | 34 | GT   | 11 | 12 |
| 155872 | 17 | 6180794 | 6180817 | 2 | 12 | 24 | AC   | 17 | 9  |
| 155875 | 17 | 6183641 | 6183662 | 2 | 11 | 22 | CA   | 18 | 4  |
| 155878 | 17 | 6186759 | 6186798 | 2 | 20 | 40 | GT   | 6  | 8  |
| 155880 | 17 | 6187108 | 6187131 | 2 | 12 | 24 | CA   | 13 | 10 |
| 155882 | 17 | 6187311 | 6187324 | 2 | 7  | 14 | CA   | 25 | 3  |
| 155884 | 17 | 6187693 | 6187706 | 2 | 7  | 14 | GT   | 21 | 5  |
| 155885 | 17 | 6189275 | 6189288 | 2 | 7  | 14 | GT   | 28 | 3  |
| 155886 | 17 | 6191202 | 6191219 | 2 | 9  | 18 | AC   | 10 | 6  |
| 155888 | 17 | 6192236 | 6192263 | 2 | 14 | 28 | AG   | 8  | 6  |
| 155889 | 17 | 6192390 | 6192410 | 3 | 7  | 21 | GAA  | 30 | 3  |
| 155890 | 17 | 6192450 | 6192485 | 2 | 18 | 36 | GA   | 30 | 9  |
| 155891 | 17 | 6193441 | 6193461 | 3 | 7  | 21 | TAT  | 19 | 4  |
| 155892 | 17 | 6194719 | 6194730 | 2 | 6  | 12 | GA   | 16 | 3  |
| 155893 | 17 | 6195606 | 6195649 | 2 | 22 | 44 | GT   | 9  | 9  |
| 155906 | 17 | 6228227 | 6228250 | 2 | 12 | 24 | CA   | 23 | 6  |
| 155909 | 17 | 6230850 | 6230877 | 2 | 14 | 28 | CA   | 18 | 7  |
| 155911 | 17 | 6231222 | 6231241 | 2 | 10 | 20 | AC   | 12 | 5  |
| 155912 | 17 | 6231411 | 6231430 | 2 | 10 | 20 | AC   | 11 | 6  |
| 155914 | 17 | 6236049 | 6236064 | 2 | 8  | 16 | CA   | 10 | 4  |
| 155922 | 17 | 6243638 | 6243667 | 2 | 15 | 30 | AC   | 9  | 8  |
| 155925 | 17 | 6247911 | 6247962 | 2 | 26 | 52 | AC   | 9  | 14 |
| 155927 | 17 | 6249418 | 6249441 | 4 | 6  | 24 | AAAT | 24 | 3  |
| 155929 | 17 | 6250199 | 6250218 | 2 | 10 | 20 | GT   | 17 | 10 |
| 155931 | 17 | 6252196 | 6252211 | 4 | 4  | 16 | AAAT | 24 | 3  |
| 155932 | 17 | 6252247 | 6252264 | 2 | 9  | 18 | GT   | 26 | 3  |
| 155933 | 17 | 6252677 | 6252690 | 2 | 7  | 14 | GA   | 21 | 4  |
| 155935 | 17 | 6254619 | 6254634 | 4 | 4  | 16 | GAAA | 9  | 3  |
| 155940 | 17 | 6256298 | 6256313 | 2 | 8  | 16 | CA   | 28 | 3  |
| 155943 | 17 | 6257934 | 6257963 | 2 | 15 | 30 | CA   | 15 | 11 |
| 155948 | 17 | 6258876 | 6258887 | 2 | 6  | 12 | CA   | 22 | 4  |



|        |    |         |         |   |    |    |      |    |    |
|--------|----|---------|---------|---|----|----|------|----|----|
| 155950 | 17 | 6261030 | 6261045 | 2 | 8  | 16 | GT   | 27 | 7  |
| 155954 | 17 | 6264490 | 6264523 | 2 | 17 | 34 | CA   | 24 | 12 |
| 155960 | 17 | 6265729 | 6265742 | 2 | 7  | 14 | TG   | 17 | 12 |
| 155961 | 17 | 6265745 | 6265758 | 2 | 7  | 14 | TG   | 22 | 10 |
| 155964 | 17 | 6271294 | 6271309 | 2 | 8  | 16 | GT   | 16 | 6  |
| 155969 | 17 | 6273886 | 6273899 | 2 | 7  | 14 | AC   | 25 | 5  |
| 155970 | 17 | 6274060 | 6274083 | 2 | 12 | 24 | CA   | 16 | 10 |
| 155971 | 17 | 6274431 | 6274448 | 2 | 9  | 18 | GA   | 21 | 3  |
| 155974 | 17 | 6274794 | 6274825 | 2 | 16 | 32 | TG   | 6  | 10 |
| 155979 | 17 | 6277552 | 6277575 | 2 | 12 | 24 | GT   | 23 | 6  |
| 155981 | 17 | 6278382 | 6278401 | 2 | 10 | 20 | AT   | 6  | 5  |
| 155985 | 17 | 6283126 | 6283149 | 2 | 12 | 24 | TG   | 16 | 7  |
| 155986 | 17 | 6283296 | 6283311 | 2 | 8  | 16 | GA   | 13 | 3  |
| 155989 | 17 | 6290297 | 6290314 | 2 | 9  | 18 | GT   | 13 | 7  |
| 155990 | 17 | 6290317 | 6290328 | 2 | 6  | 12 | GT   | 19 | 8  |
| 155991 | 17 | 6290729 | 6290748 | 2 | 10 | 20 | GT   | 26 | 7  |
| 155995 | 17 | 6298904 | 6298915 | 2 | 6  | 12 | AC   | 25 | 7  |
| 155996 | 17 | 6300965 | 6300980 | 4 | 4  | 16 | TTTA | 25 | 6  |
| 156004 | 17 | 6307162 | 6307181 | 2 | 10 | 20 | CA   | 23 | 8  |
| 156005 | 17 | 6308030 | 6308047 | 2 | 9  | 18 | TG   | 18 | 4  |
| 156006 | 17 | 6308095 | 6308142 | 2 | 24 | 48 | TG   | 6  | 9  |
| 156007 | 17 | 6312717 | 6312737 | 3 | 7  | 21 | CTG  | 27 | 8  |
| 156015 | 17 | 6320091 | 6320112 | 2 | 11 | 22 | TG   | 21 | 5  |
| 156016 | 17 | 6320194 | 6320205 | 2 | 6  | 12 | GT   | 25 | 3  |
| 156018 | 17 | 6320425 | 6320440 | 2 | 8  | 16 | AC   | 7  | 3  |
| 156019 | 17 | 6320482 | 6320513 | 2 | 16 | 32 | AC   | 9  | 11 |
| 156020 | 17 | 6320915 | 6320926 | 2 | 6  | 12 | GT   | 33 | 3  |
| 156021 | 17 | 6323658 | 6323691 | 2 | 17 | 34 | CA   | 20 | 11 |
| 156023 | 17 | 6325080 | 6325093 | 2 | 7  | 14 | TC   | 25 | 3  |
| 156024 | 17 | 6325932 | 6325945 | 2 | 7  | 14 | CA   | 11 | 8  |
| 156027 | 17 | 6328690 | 6328719 | 3 | 10 | 30 | GGA  | 26 | 6  |
| 156033 | 17 | 6331656 | 6331707 | 2 | 26 | 52 | GT   | 7  | 10 |
| 156034 | 17 | 6331853 | 6331868 | 2 | 8  | 16 | CT   | 18 | 5  |
| 156035 | 17 | 6331869 | 6331884 | 2 | 8  | 16 | CA   | 15 | 4  |
| 156037 | 17 | 6332440 | 6332453 | 2 | 7  | 14 | AC   | 28 | 4  |
| 156039 | 17 | 6334701 | 6334720 | 2 | 10 | 20 | AC   | 10 | 6  |
| 156040 | 17 | 6334817 | 6334858 | 2 | 21 | 42 | GT   | 7  | 8  |
| 156041 | 17 | 6335742 | 6335759 | 2 | 9  | 18 | CA   | 16 | 6  |
| 156042 | 17 | 6337442 | 6337456 | 3 | 5  | 15 | TCT  | 27 | 4  |
| 156043 | 17 | 6338057 | 6338098 | 2 | 21 | 42 | AC   | 13 | 11 |
| 156045 | 17 | 6338811 | 6338828 | 2 | 9  | 18 | TC   | 21 | 4  |
| 156047 | 17 | 6342899 | 6342924 | 2 | 13 | 26 | GT   | 17 | 4  |
| 156050 | 17 | 6347300 | 6347315 | 2 | 8  | 16 | TG   | 16 | 5  |
| 156053 | 17 | 6352960 | 6352983 | 2 | 12 | 24 | GT   | 14 | 13 |
| 156063 | 17 | 6359356 | 6359371 | 2 | 8  | 16 | AG   | 24 | 3  |
| 156067 | 17 | 6361215 | 6361264 | 2 | 25 | 50 | AC   | 8  | 8  |
| 156068 | 17 | 6361383 | 6361406 | 2 | 12 | 24 | AC   | 10 | 7  |
| 156069 | 17 | 6361506 | 6361519 | 2 | 7  | 14 | CT   | 11 | 3  |
| 156070 | 17 | 6361524 | 6361539 | 2 | 8  | 16 | CA   | 16 | 5  |
| 156071 | 17 | 6361542 | 6361553 | 2 | 6  | 12 | CA   | 15 | 3  |
| 156076 | 17 | 6365777 | 6365798 | 2 | 11 | 22 | CA   | 17 | 3  |

|        |    |         |         |   |    |    |     |    |    |
|--------|----|---------|---------|---|----|----|-----|----|----|
| 156079 | 17 | 6367018 | 6367029 | 2 | 6  | 12 | TG  | 26 | 5  |
| 156080 | 17 | 6367128 | 6367155 | 2 | 14 | 28 | AC  | 15 | 9  |
| 156081 | 17 | 6367648 | 6367669 | 2 | 11 | 22 | GT  | 19 | 9  |
| 156083 | 17 | 6369111 | 6369134 | 2 | 12 | 24 | AC  | 12 | 12 |
| 156084 | 17 | 6369528 | 6369549 | 2 | 11 | 22 | CA  | 22 | 9  |
| 156085 | 17 | 6369845 | 6369856 | 2 | 6  | 12 | CA  | 19 | 4  |
| 156088 | 17 | 6370599 | 6370612 | 2 | 7  | 14 | CA  | 21 | 3  |
| 156091 | 17 | 6372446 | 6372457 | 2 | 6  | 12 | TG  | 34 | 3  |
| 156093 | 17 | 6373773 | 6373812 | 2 | 20 | 40 | CA  | 10 | 13 |
| 156094 | 17 | 6373909 | 6373926 | 2 | 9  | 18 | TG  | 22 | 5  |
| 156096 | 17 | 6377486 | 6377501 | 2 | 8  | 16 | CA  | 16 | 8  |
| 156102 | 17 | 6382801 | 6382840 | 2 | 20 | 40 | CA  | 14 | 12 |
| 156103 | 17 | 6382927 | 6382942 | 2 | 8  | 16 | AC  | 21 | 8  |
| 156104 | 17 | 6383205 | 6383218 | 2 | 7  | 14 | GT  | 24 | 3  |
| 156111 | 17 | 6387495 | 6387530 | 2 | 18 | 36 | GT  | 17 | 13 |
| 156113 | 17 | 6390423 | 6390434 | 2 | 6  | 12 | AC  | 22 | 3  |
| 156115 | 17 | 6391492 | 6391509 | 2 | 9  | 18 | GA  | 21 | 7  |
| 156119 | 17 | 6392887 | 6392912 | 2 | 13 | 26 | AG  | 12 | 8  |
| 156121 | 17 | 6393442 | 6393463 | 2 | 11 | 22 | AC  | 8  | 10 |
| 156123 | 17 | 6393845 | 6393860 | 2 | 8  | 16 | AC  | 28 | 6  |
| 156124 | 17 | 6396669 | 6396702 | 2 | 17 | 34 | GT  | 19 | 8  |
| 156125 | 17 | 6397054 | 6397079 | 2 | 13 | 26 | TG  | 12 | 7  |
| 156128 | 17 | 6399478 | 6399499 | 2 | 11 | 22 | GT  | 24 | 9  |
| 156131 | 17 | 6402803 | 6402817 | 3 | 5  | 15 | GCC | 17 | 8  |
| 156133 | 17 | 6404858 | 6404891 | 2 | 17 | 34 | AC  | 16 | 11 |
| 156135 | 17 | 6405023 | 6405038 | 2 | 8  | 16 | AC  | 22 | 4  |
| 156137 | 17 | 6407083 | 6407100 | 3 | 6  | 18 | TCC | 20 | 5  |
| 156138 | 17 | 6407469 | 6407500 | 2 | 16 | 32 | CA  | 17 | 12 |
| 156140 | 17 | 6407793 | 6407808 | 2 | 8  | 16 | GT  | 11 | 5  |
| 156152 | 17 | 6417301 | 6417316 | 2 | 8  | 16 | CA  | 29 | 9  |
| 156153 | 17 | 6417512 | 6417525 | 2 | 7  | 14 | TG  | 17 | 4  |
| 156155 | 17 | 6417851 | 6417862 | 2 | 6  | 12 | GT  | 17 | 11 |
| 156158 | 17 | 6418892 | 6418907 | 2 | 8  | 16 | AC  | 20 | 3  |
| 156159 | 17 | 6419441 | 6419458 | 2 | 9  | 18 | AC  | 17 | 4  |
| 156160 | 17 | 6420705 | 6420716 | 2 | 6  | 12 | CA  | 17 | 8  |
| 156161 | 17 | 6421021 | 6421034 | 2 | 7  | 14 | GA  | 25 | 4  |
| 156162 | 17 | 6421658 | 6421683 | 2 | 13 | 26 | CA  | 15 | 10 |
| 156163 | 17 | 6421782 | 6421809 | 2 | 14 | 28 | GT  | 17 | 15 |
| 156164 | 17 | 6422169 | 6422184 | 2 | 8  | 16 | CA  | 17 | 9  |
| 156165 | 17 | 6422186 | 6422197 | 2 | 6  | 12 | AC  | 20 | 10 |
| 156166 | 17 | 6422321 | 6422374 | 2 | 27 | 54 | CA  | 6  | 11 |
| 156170 | 17 | 6424431 | 6424446 | 2 | 8  | 16 | TG  | 27 | 6  |
| 156172 | 17 | 6427547 | 6427578 | 2 | 16 | 32 | AC  | 12 | 10 |
| 156173 | 17 | 6429219 | 6429244 | 2 | 13 | 26 | TG  | 7  | 8  |
| 156176 | 17 | 6433472 | 6433485 | 2 | 7  | 14 | AT  | 16 | 7  |
| 156185 | 17 | 6447262 | 6447287 | 2 | 13 | 26 | AC  | 10 | 8  |
| 156188 | 17 | 6449072 | 6449091 | 2 | 10 | 20 | CT  | 13 | 4  |
| 156189 | 17 | 6449128 | 6449139 | 2 | 6  | 12 | TC  | 22 | 4  |
| 156192 | 17 | 6455093 | 6455112 | 2 | 10 | 20 | AG  | 21 | 3  |
| 156194 | 17 | 6457057 | 6457070 | 2 | 7  | 14 | CA  | 13 | 9  |
| 156195 | 17 | 6457109 | 6457124 | 2 | 8  | 16 | AC  | 12 | 3  |

|        |    |         |         |   |    |    |      |    |    |
|--------|----|---------|---------|---|----|----|------|----|----|
| 156200 | 17 | 6457353 | 6457392 | 2 | 20 | 40 | GT   | 9  | 13 |
| 156203 | 17 | 6459938 | 6459995 | 2 | 29 | 58 | CA   | 12 | 11 |
| 156204 | 17 | 6461143 | 6461157 | 3 | 5  | 15 | AGG  | 16 | 3  |
| 156210 | 17 | 6468847 | 6468864 | 2 | 9  | 18 | AC   | 15 | 10 |
| 156211 | 17 | 6470001 | 6470020 | 4 | 5  | 20 | TTTA | 19 | 5  |
| 156212 | 17 | 6470126 | 6470145 | 4 | 5  | 20 | AATC | 24 | 6  |
| 156214 | 17 | 6475518 | 6475541 | 2 | 12 | 24 | AC   | 16 | 10 |
| 156215 | 17 | 6475626 | 6475639 | 2 | 7  | 14 | TG   | 19 | 4  |
| 156216 | 17 | 6475691 | 6475712 | 2 | 11 | 22 | TG   | 16 | 9  |
| 156220 | 17 | 6479530 | 6479545 | 2 | 8  | 16 | GA   | 25 | 3  |
| 156221 | 17 | 6480659 | 6480678 | 2 | 10 | 20 | TC   | 19 | 6  |
| 156222 | 17 | 6482541 | 6482560 | 2 | 10 | 20 | TG   | 6  | 4  |
| 156223 | 17 | 6482713 | 6482738 | 2 | 13 | 26 | TG   | 8  | 11 |
| 156226 | 17 | 6487362 | 6487377 | 2 | 8  | 16 | GA   | 14 | 4  |
| 156227 | 17 | 6490760 | 6490779 | 2 | 10 | 20 | AT   | 14 | 16 |
| 156231 | 17 | 6502529 | 6502544 | 2 | 8  | 16 | AC   | 22 | 9  |
| 156232 | 17 | 6502883 | 6502918 | 2 | 18 | 36 | CA   | 10 | 10 |
| 156242 | 17 | 6507584 | 6507607 | 2 | 12 | 24 | GT   | 9  | 7  |
| 156249 | 17 | 6526121 | 6526132 | 2 | 6  | 12 | TG   | 31 | 4  |
| 156257 | 17 | 6541889 | 6541912 | 4 | 6  | 24 | AAAG | 32 | 4  |
| 156261 | 17 | 6548436 | 6548455 | 2 | 10 | 20 | AC   | 16 | 7  |
| 156263 | 17 | 6552731 | 6552770 | 2 | 20 | 40 | GT   | 12 | 13 |
| 156265 | 17 | 6553014 | 6553035 | 2 | 11 | 22 | GT   | 11 | 7  |
| 156266 | 17 | 6555781 | 6555808 | 2 | 14 | 28 | GT   | 7  | 4  |
| 156267 | 17 | 6562224 | 6562243 | 2 | 10 | 20 | CT   | 20 | 6  |
| 156268 | 17 | 6562430 | 6562451 | 2 | 11 | 22 | AC   | 24 | 6  |
| 156271 | 17 | 6567849 | 6567862 | 2 | 7  | 14 | AC   | 35 | 3  |
| 156273 | 17 | 6568873 | 6568884 | 2 | 6  | 12 | TG   | 27 | 3  |
| 156274 | 17 | 6569090 | 6569113 | 2 | 12 | 24 | AC   | 22 | 8  |
| 156275 | 17 | 6569319 | 6569346 | 2 | 14 | 28 | AC   | 10 | 9  |
| 156277 | 17 | 6570645 | 6570656 | 2 | 6  | 12 | GT   | 15 | 3  |
| 156278 | 17 | 6570753 | 6570772 | 2 | 10 | 20 | AC   | 14 | 16 |
| 156282 | 17 | 6574489 | 6574502 | 2 | 7  | 14 | AC   | 23 | 5  |
| 156283 | 17 | 6574640 | 6574677 | 2 | 19 | 38 | CA   | 9  | 14 |
| 156286 | 17 | 6579528 | 6579539 | 2 | 6  | 12 | GT   | 14 | 7  |
| 156287 | 17 | 6579546 | 6579557 | 2 | 6  | 12 | GT   | 18 | 8  |
| 156292 | 17 | 6582905 | 6582932 | 2 | 14 | 28 | CA   | 15 | 10 |
| 156293 | 17 | 6583237 | 6583266 | 2 | 15 | 30 | CA   | 8  | 10 |
| 156297 | 17 | 6590132 | 6590145 | 2 | 7  | 14 | GT   | 21 | 4  |
| 156300 | 17 | 6601439 | 6601466 | 2 | 14 | 28 | CA   | 6  | 7  |
| 156301 | 17 | 6601719 | 6601730 | 2 | 6  | 12 | GT   | 23 | 6  |
| 156302 | 17 | 6607160 | 6607191 | 2 | 16 | 32 | TG   | 10 | 6  |
| 156303 | 17 | 6607411 | 6607431 | 3 | 7  | 21 | TCT  | 17 | 6  |
| 156307 | 17 | 6611260 | 6611283 | 2 | 12 | 24 | AC   | 11 | 11 |
| 156308 | 17 | 6612181 | 6612208 | 4 | 7  | 28 | AATG | 25 | 6  |
| 156309 | 17 | 6613582 | 6613603 | 2 | 11 | 22 | TC   | 16 | 7  |
| 156314 | 17 | 6614717 | 6614744 | 2 | 14 | 28 | CA   | 18 | 8  |
| 156316 | 17 | 6617951 | 6617962 | 2 | 6  | 12 | AC   | 34 | 3  |
| 156318 | 17 | 6618714 | 6618731 | 2 | 9  | 18 | AC   | 14 | 3  |
| 156322 | 17 | 6622899 | 6622954 | 4 | 14 | 56 | GATG | 22 | 10 |
| 156324 | 17 | 6627278 | 6627299 | 2 | 11 | 22 | TG   | 28 | 8  |

|        |    |         |         |   |    |    |      |    |    |
|--------|----|---------|---------|---|----|----|------|----|----|
| 156325 | 17 | 6629023 | 6629058 | 2 | 18 | 36 | CA   | 25 | 7  |
| 156330 | 17 | 6646866 | 6646897 | 4 | 8  | 32 | GTTG | 28 | 4  |
| 156331 | 17 | 6647644 | 6647657 | 2 | 7  | 14 | CA   | 33 | 4  |
| 156332 | 17 | 6647756 | 6647769 | 2 | 7  | 14 | AC   | 25 | 5  |
| 156334 | 17 | 6648010 | 6648021 | 2 | 6  | 12 | CG   | 31 | 12 |
| 156337 | 17 | 6654257 | 6654278 | 2 | 11 | 22 | AC   | 12 | 7  |
| 156338 | 17 | 6659590 | 6659601 | 2 | 6  | 12 | TG   | 20 | 3  |
| 156343 | 17 | 6677670 | 6677683 | 2 | 7  | 14 | AC   | 24 | 10 |
| 156345 | 17 | 6684618 | 6684633 | 2 | 8  | 16 | GT   | 16 | 3  |
| 156346 | 17 | 6684874 | 6684888 | 3 | 5  | 15 | GCG  | 18 | 4  |
| 156353 | 17 | 6693977 | 6693994 | 2 | 9  | 18 | GT   | 28 | 9  |
| 156354 | 17 | 6695087 | 6695108 | 2 | 11 | 22 | AC   | 12 | 6  |
| 156356 | 17 | 6701350 | 6701367 | 2 | 9  | 18 | AC   | 14 | 10 |
| 156361 | 17 | 6704936 | 6704953 | 2 | 9  | 18 | AC   | 27 | 7  |
| 156364 | 17 | 6712083 | 6712094 | 2 | 6  | 12 | TG   | 20 | 3  |
| 156369 | 17 | 6717832 | 6717847 | 2 | 8  | 16 | GA   | 24 | 3  |
| 156379 | 17 | 6760225 | 6760272 | 4 | 12 | 48 | TTTC | 14 | 9  |
| 156386 | 17 | 6767208 | 6767227 | 2 | 10 | 20 | CA   | 11 | 6  |
| 156387 | 17 | 6767251 | 6767294 | 2 | 22 | 44 | AG   | 6  | 7  |
| 156388 | 17 | 6768315 | 6768326 | 2 | 6  | 12 | TG   | 14 | 4  |
| 156390 | 17 | 6770508 | 6770534 | 3 | 9  | 27 | GAG  | 13 | 11 |
| 156394 | 17 | 6771704 | 6771721 | 2 | 9  | 18 | AC   | 13 | 12 |
| 156399 | 17 | 6776374 | 6776389 | 4 | 4  | 16 | TCAC | 21 | 3  |
| 156400 | 17 | 6776504 | 6776519 | 2 | 8  | 16 | TC   | 20 | 6  |
| 156402 | 17 | 6778558 | 6778571 | 2 | 7  | 14 | CA   | 12 | 7  |
| 156404 | 17 | 6782661 | 6782674 | 2 | 7  | 14 | CA   | 26 | 3  |
| 156405 | 17 | 6782842 | 6782863 | 2 | 11 | 22 | CA   | 28 | 9  |
| 156412 | 17 | 6786987 | 6787000 | 2 | 7  | 14 | TG   | 7  | 7  |
| 156417 | 17 | 6788963 | 6788995 | 3 | 11 | 33 | AAT  | 13 | 12 |
| 156427 | 17 | 6800498 | 6800525 | 2 | 14 | 28 | TG   | 12 | 11 |
| 156428 | 17 | 6800614 | 6800633 | 2 | 10 | 20 | TG   | 14 | 8  |
| 156429 | 17 | 6800707 | 6800728 | 2 | 11 | 22 | TG   | 18 | 14 |
| 156430 | 17 | 6803273 | 6803288 | 2 | 8  | 16 | TG   | 21 | 5  |
| 156433 | 17 | 6813351 | 6813370 | 4 | 5  | 20 | TCCA | 27 | 3  |
| 156442 | 17 | 6845625 | 6845654 | 3 | 10 | 30 | TGT  | 27 | 9  |
| 156445 | 17 | 6850137 | 6850158 | 2 | 11 | 22 | GT   | 14 | 6  |
| 156448 | 17 | 6855226 | 6855239 | 2 | 7  | 14 | AC   | 20 | 12 |
| 156450 | 17 | 6861390 | 6861409 | 2 | 10 | 20 | AG   | 15 | 11 |
| 156451 | 17 | 6861617 | 6861634 | 2 | 9  | 18 | AG   | 18 | 4  |
| 156454 | 17 | 6862999 | 6863020 | 2 | 11 | 22 | CA   | 16 | 8  |
| 156457 | 17 | 6866904 | 6866945 | 2 | 21 | 42 | TG   | 9  | 7  |
| 156463 | 17 | 6871394 | 6871413 | 2 | 10 | 20 | GT   | 15 | 4  |
| 156465 | 17 | 6871638 | 6871663 | 2 | 13 | 26 | AC   | 28 | 10 |
| 156472 | 17 | 6876812 | 6876827 | 2 | 8  | 16 | AG   | 14 | 4  |
| 156474 | 17 | 6880766 | 6880781 | 2 | 8  | 16 | GT   | 23 | 10 |
| 156475 | 17 | 6880806 | 6880819 | 2 | 7  | 14 | GA   | 22 | 5  |
| 156476 | 17 | 6884869 | 6884894 | 2 | 13 | 26 | AC   | 10 | 6  |
| 156480 | 17 | 6889372 | 6889389 | 2 | 9  | 18 | AG   | 23 | 6  |
| 156481 | 17 | 6890763 | 6890780 | 2 | 9  | 18 | GT   | 15 | 4  |
| 156482 | 17 | 6891922 | 6891943 | 2 | 11 | 22 | AC   | 22 | 7  |
| 156499 | 17 | 6904318 | 6904335 | 2 | 9  | 18 | CA   | 22 | 11 |

|        |    |         |         |   |    |    |      |    |    |
|--------|----|---------|---------|---|----|----|------|----|----|
| 156501 | 17 | 6905952 | 6905973 | 2 | 11 | 22 | AC   | 24 | 8  |
| 156504 | 17 | 6907877 | 6907892 | 2 | 8  | 16 | CA   | 24 | 5  |
| 156505 | 17 | 6908570 | 6908587 | 2 | 9  | 18 | CA   | 21 | 4  |
| 156508 | 17 | 6910580 | 6910593 | 2 | 7  | 14 | AC   | 15 | 4  |
| 156509 | 17 | 6910656 | 6910685 | 2 | 15 | 30 | AC   | 11 | 8  |
| 156513 | 17 | 6921594 | 6921607 | 2 | 7  | 14 | CT   | 20 | 8  |
| 156514 | 17 | 6921739 | 6921758 | 2 | 10 | 20 | TC   | 22 | 6  |
| 156537 | 17 | 6967509 | 6967522 | 2 | 7  | 14 | GT   | 7  | 7  |
| 156540 | 17 | 6969742 | 6969753 | 2 | 6  | 12 | AC   | 30 | 3  |
| 156541 | 17 | 6971919 | 6971936 | 2 | 9  | 18 | CT   | 23 | 5  |
| 156542 | 17 | 6973019 | 6973046 | 4 | 7  | 28 | AATC | 6  | 3  |
| 156548 | 17 | 7003776 | 7003790 | 3 | 5  | 15 | GAG  | 31 | 3  |
| 156551 | 17 | 7006583 | 7006594 | 2 | 6  | 12 | AT   | 18 | 4  |
| 156552 | 17 | 7011303 | 7011316 | 2 | 7  | 14 | AT   | 11 | 8  |
| 156553 | 17 | 7012675 | 7012704 | 3 | 10 | 30 | GTG  | 30 | 8  |
| 156554 | 17 | 7014229 | 7014243 | 3 | 5  | 15 | TGG  | 29 | 6  |
| 156560 | 17 | 7022682 | 7022703 | 2 | 11 | 22 | AC   | 16 | 9  |
| 156561 | 17 | 7022728 | 7022743 | 2 | 8  | 16 | AC   | 24 | 4  |
| 156562 | 17 | 7023244 | 7023273 | 3 | 10 | 30 | GCA  | 18 | 6  |
| 156563 | 17 | 7023316 | 7023330 | 3 | 5  | 15 | GAG  | 31 | 3  |
| 156564 | 17 | 7024290 | 7024335 | 2 | 23 | 46 | TG   | 11 | 13 |
| 156565 | 17 | 7024426 | 7024452 | 3 | 9  | 27 | GAT  | 21 | 9  |
| 156585 | 17 | 7108917 | 7108932 | 2 | 8  | 16 | AT   | 16 | 12 |
| 156586 | 17 | 7109132 | 7109152 | 3 | 7  | 21 | TGA  | 22 | 5  |
| 156587 | 17 | 7109630 | 7109641 | 2 | 6  | 12 | GT   | 32 | 6  |
| 156588 | 17 | 7109866 | 7109907 | 3 | 14 | 42 | CAT  | 29 | 17 |
| 156589 | 17 | 7110565 | 7110580 | 2 | 8  | 16 | GT   | 11 | 5  |
| 156592 | 17 | 7111891 | 7111912 | 2 | 11 | 22 | TG   | 16 | 13 |
| 156602 | 17 | 7165397 | 7165436 | 2 | 20 | 40 | TG   | 18 | 16 |
| 156603 | 17 | 7168522 | 7168535 | 2 | 7  | 14 | GT   | 24 | 4  |
| 156605 | 17 | 7172008 | 7172033 | 2 | 13 | 26 | AC   | 14 | 8  |
| 156610 | 17 | 7177876 | 7177911 | 2 | 18 | 36 | AC   | 11 | 12 |
| 156616 | 17 | 7189096 | 7189115 | 2 | 10 | 20 | TG   | 23 | 7  |
| 156618 | 17 | 7191850 | 7191865 | 2 | 8  | 16 | TG   | 28 | 5  |
| 156622 | 17 | 7201775 | 7201788 | 2 | 7  | 14 | AC   | 31 | 3  |
| 156625 | 17 | 7205025 | 7205036 | 2 | 6  | 12 | TA   | 25 | 9  |
| 156626 | 17 | 7205037 | 7205050 | 2 | 7  | 14 | CA   | 21 | 7  |
| 156628 | 17 | 7207343 | 7207357 | 3 | 5  | 15 | GAA  | 27 | 5  |
| 156634 | 17 | 7220557 | 7220572 | 4 | 4  | 16 | AAAG | 8  | 3  |
| 156638 | 17 | 7235098 | 7235117 | 2 | 10 | 20 | GT   | 14 | 8  |
| 156639 | 17 | 7235119 | 7235130 | 2 | 6  | 12 | TG   | 11 | 6  |
| 156642 | 17 | 7242243 | 7242258 | 2 | 8  | 16 | GT   | 23 | 4  |
| 156644 | 17 | 7243351 | 7243364 | 2 | 7  | 14 | GT   | 30 | 3  |
| 156648 | 17 | 7248816 | 7248835 | 2 | 10 | 20 | TG   | 20 | 10 |
| 156649 | 17 | 7249630 | 7249641 | 2 | 6  | 12 | TG   | 21 | 8  |
| 156651 | 17 | 7250485 | 7250500 | 2 | 8  | 16 | CA   | 12 | 4  |
| 156655 | 17 | 7251515 | 7251538 | 4 | 6  | 24 | GACA | 20 | 4  |
| 156658 | 17 | 7252319 | 7252352 | 2 | 17 | 34 | GT   | 10 | 9  |
| 156661 | 17 | 7253137 | 7253154 | 2 | 9  | 18 | GT   | 20 | 5  |
| 156663 | 17 | 7253433 | 7253462 | 2 | 15 | 30 | GT   | 12 | 11 |
| 156668 | 17 | 7256629 | 7256648 | 2 | 10 | 20 | GT   | 24 | 6  |

|        |    |         |         |   |    |    |      |    |    |
|--------|----|---------|---------|---|----|----|------|----|----|
| 156674 | 17 | 7273821 | 7273838 | 2 | 9  | 18 | GT   | 26 | 11 |
| 156675 | 17 | 7275260 | 7275274 | 3 | 5  | 15 | TCC  | 19 | 3  |
| 156676 | 17 | 7275333 | 7275356 | 3 | 8  | 24 | TCC  | 18 | 10 |
| 156678 | 17 | 7277454 | 7277477 | 2 | 12 | 24 | TC   | 15 | 5  |
| 156679 | 17 | 7277526 | 7277547 | 2 | 11 | 22 | TG   | 15 | 7  |
| 156680 | 17 | 7278602 | 7278623 | 2 | 11 | 22 | GT   | 8  | 12 |
| 156682 | 17 | 7278797 | 7278840 | 2 | 22 | 44 | TG   | 6  | 6  |
| 156684 | 17 | 7281258 | 7281269 | 2 | 6  | 12 | TG   | 24 | 4  |
| 156689 | 17 | 7288638 | 7288655 | 3 | 6  | 18 | GCT  | 30 | 7  |
| 156690 | 17 | 7288758 | 7288772 | 3 | 5  | 15 | GCT  | 10 | 4  |
| 156699 | 17 | 7299823 | 7299836 | 2 | 7  | 14 | TG   | 34 | 3  |
| 156701 | 17 | 7301390 | 7301415 | 2 | 13 | 26 | TC   | 25 | 7  |
| 156702 | 17 | 7301573 | 7301604 | 2 | 16 | 32 | CA   | 7  | 8  |
| 156703 | 17 | 7303613 | 7303626 | 2 | 7  | 14 | CA   | 24 | 5  |
| 156705 | 17 | 7308345 | 7308360 | 2 | 8  | 16 | TG   | 13 | 3  |
| 156706 | 17 | 7308386 | 7308417 | 2 | 16 | 32 | GT   | 20 | 9  |
| 156709 | 17 | 7322111 | 7322126 | 2 | 8  | 16 | TG   | 7  | 9  |
| 156710 | 17 | 7322559 | 7322580 | 2 | 11 | 22 | GA   | 15 | 12 |
| 156721 | 17 | 7348120 | 7348153 | 2 | 17 | 34 | AC   | 11 | 11 |
| 156723 | 17 | 7352677 | 7352688 | 2 | 6  | 12 | AC   | 9  | 3  |
| 156726 | 17 | 7359306 | 7359329 | 2 | 12 | 24 | AC   | 7  | 7  |
| 156727 | 17 | 7360178 | 7360195 | 2 | 9  | 18 | TG   | 23 | 12 |
| 156728 | 17 | 7361236 | 7361292 | 3 | 19 | 57 | GAA  | 14 | 18 |
| 156730 | 17 | 7364664 | 7364675 | 2 | 6  | 12 | AC   | 12 | 3  |
| 156732 | 17 | 7369727 | 7369740 | 2 | 7  | 14 | TA   | 6  | 4  |
| 156734 | 17 | 7370447 | 7370470 | 3 | 8  | 24 | GAG  | 20 | 7  |
| 156739 | 17 | 7371717 | 7371746 | 2 | 15 | 30 | GT   | 9  | 9  |
| 156740 | 17 | 7372107 | 7372122 | 4 | 4  | 16 | TTTC | 6  | 3  |
| 156745 | 17 | 7376480 | 7376491 | 2 | 6  | 12 | TC   | 7  | 3  |
| 156750 | 17 | 7379014 | 7379049 | 2 | 18 | 36 | AC   | 8  | 12 |
| 156754 | 17 | 7382791 | 7382832 | 2 | 21 | 42 | TG   | 6  | 7  |
| 156755 | 17 | 7382989 | 7383006 | 2 | 9  | 18 | TC   | 11 | 6  |
| 156756 | 17 | 7383144 | 7383167 | 3 | 8  | 24 | TCT  | 16 | 5  |
| 156759 | 17 | 7387149 | 7387169 | 3 | 7  | 21 | TGC  | 28 | 6  |
| 156767 | 17 | 7389622 | 7389647 | 2 | 13 | 26 | TC   | 16 | 6  |
| 156772 | 17 | 7394266 | 7394286 | 3 | 7  | 21 | GAG  | 18 | 10 |
| 156773 | 17 | 7394899 | 7394916 | 2 | 9  | 18 | TG   | 14 | 15 |
| 156774 | 17 | 7397094 | 7397123 | 2 | 15 | 30 | TG   | 13 | 5  |
| 156776 | 17 | 7398551 | 7398570 | 2 | 10 | 20 | CT   | 15 | 4  |
| 156787 | 17 | 7407159 | 7407174 | 4 | 4  | 16 | TGTC | 12 | 3  |
| 156788 | 17 | 7407935 | 7407946 | 2 | 6  | 12 | TG   | 30 | 4  |
| 156789 | 17 | 7408265 | 7408279 | 3 | 5  | 15 | ACC  | 12 | 3  |
| 156790 | 17 | 7408307 | 7408318 | 2 | 6  | 12 | AC   | 12 | 4  |
| 156792 | 17 | 7408583 | 7408604 | 2 | 11 | 22 | TG   | 22 | 9  |
| 156793 | 17 | 7410326 | 7410341 | 4 | 4  | 16 | CTGT | 29 | 4  |
| 156797 | 17 | 7413169 | 7413183 | 3 | 5  | 15 | CTT  | 15 | 6  |
| 156800 | 17 | 7413667 | 7413687 | 3 | 7  | 21 | GAG  | 13 | 6  |
| 156801 | 17 | 7413863 | 7413880 | 3 | 6  | 18 | CCT  | 16 | 9  |
| 156802 | 17 | 7413985 | 7414000 | 2 | 8  | 16 | CA   | 26 | 6  |
| 156803 | 17 | 7416947 | 7416960 | 2 | 7  | 14 | AG   | 15 | 8  |
| 156806 | 17 | 7422531 | 7422558 | 2 | 14 | 28 | TG   | 17 | 10 |

|        |    |         |         |   |    |    |      |    |    |
|--------|----|---------|---------|---|----|----|------|----|----|
| 156807 | 17 | 7422773 | 7422788 | 2 | 8  | 16 | TG   | 22 | 6  |
| 156810 | 17 | 7424875 | 7424895 | 3 | 7  | 21 | AAG  | 23 | 3  |
| 156813 | 17 | 7425671 | 7425682 | 2 | 6  | 12 | AG   | 13 | 6  |
| 156817 | 17 | 7427477 | 7427488 | 2 | 6  | 12 | TG   | 19 | 11 |
| 156820 | 17 | 7431421 | 7431438 | 2 | 9  | 18 | TG   | 20 | 4  |
| 156821 | 17 | 7432813 | 7432827 | 3 | 5  | 15 | CTT  | 24 | 11 |
| 156822 | 17 | 7432869 | 7432884 | 4 | 4  | 16 | ACCA | 20 | 4  |
| 156829 | 17 | 7438351 | 7438368 | 2 | 9  | 18 | TG   | 21 | 9  |
| 156830 | 17 | 7438563 | 7438578 | 4 | 4  | 16 | TCCC | 8  | 4  |
| 156843 | 17 | 7459036 | 7459049 | 2 | 7  | 14 | TG   | 15 | 16 |
| 156844 | 17 | 7459051 | 7459064 | 2 | 7  | 14 | GT   | 17 | 15 |
| 156847 | 17 | 7469581 | 7469598 | 3 | 6  | 18 | CCT  | 12 | 8  |
| 156848 | 17 | 7469720 | 7469753 | 2 | 17 | 34 | AC   | 15 | 8  |
| 156855 | 17 | 7475657 | 7475671 | 3 | 5  | 15 | TTC  | 21 | 3  |
| 156856 | 17 | 7477334 | 7477349 | 2 | 8  | 16 | AG   | 25 | 4  |
| 156857 | 17 | 7478274 | 7478301 | 2 | 14 | 28 | GT   | 15 | 17 |
| 156858 | 17 | 7480841 | 7480856 | 2 | 8  | 16 | GT   | 27 | 7  |
| 156861 | 17 | 7484214 | 7484225 | 2 | 6  | 12 | GT   | 10 | 3  |
| 156862 | 17 | 7484228 | 7484241 | 2 | 7  | 14 | GT   | 12 | 3  |
| 156863 | 17 | 7488100 | 7488113 | 2 | 7  | 14 | TG   | 10 | 7  |
| 156867 | 17 | 7490934 | 7490965 | 2 | 16 | 32 | GT   | 12 | 11 |
| 156868 | 17 | 7491285 | 7491306 | 2 | 11 | 22 | TG   | 13 | 14 |
| 156870 | 17 | 7491500 | 7491520 | 3 | 7  | 21 | GAA  | 30 | 5  |
| 156878 | 17 | 7494813 | 7494836 | 4 | 6  | 24 | ATGT | 17 | 3  |
| 156882 | 17 | 7499203 | 7499217 | 3 | 5  | 15 | GTT  | 28 | 6  |
| 156884 | 17 | 7501791 | 7501804 | 2 | 7  | 14 | TC   | 26 | 5  |
| 156886 | 17 | 7510098 | 7510111 | 2 | 7  | 14 | CT   | 15 | 5  |
| 156890 | 17 | 7515394 | 7515409 | 2 | 8  | 16 | CT   | 17 | 3  |
| 156894 | 17 | 7520719 | 7520732 | 2 | 7  | 14 | AG   | 25 | 3  |
| 156896 | 17 | 7525392 | 7525419 | 2 | 14 | 28 | TG   | 18 | 9  |
| 156900 | 17 | 7527305 | 7527322 | 3 | 6  | 18 | CAC  | 31 | 5  |
| 156901 | 17 | 7527718 | 7527737 | 2 | 10 | 20 | TG   | 21 | 9  |
| 156904 | 17 | 7528604 | 7528619 | 2 | 8  | 16 | AG   | 19 | 4  |
| 156905 | 17 | 7529120 | 7529131 | 2 | 6  | 12 | GA   | 17 | 3  |
| 156908 | 17 | 7536214 | 7536240 | 3 | 9  | 27 | CCA  | 23 | 8  |
| 156911 | 17 | 7542528 | 7542545 | 3 | 6  | 18 | TTG  | 27 | 6  |
| 156922 | 17 | 7572503 | 7572556 | 2 | 27 | 54 | GT   | 7  | 11 |
| 156924 | 17 | 7578769 | 7578796 | 2 | 14 | 28 | TG   | 7  | 8  |
| 156932 | 17 | 7604592 | 7604615 | 2 | 12 | 24 | GT   | 10 | 8  |
| 156940 | 17 | 7622022 | 7622042 | 3 | 7  | 21 | CTT  | 31 | 4  |
| 156941 | 17 | 7622580 | 7622591 | 2 | 6  | 12 | TG   | 27 | 3  |
| 156942 | 17 | 7622679 | 7622694 | 4 | 4  | 16 | GCAC | 32 | 6  |
| 156946 | 17 | 7630724 | 7630745 | 2 | 11 | 22 | GT   | 19 | 8  |
| 156948 | 17 | 7632393 | 7632404 | 2 | 6  | 12 | AC   | 25 | 4  |
| 156950 | 17 | 7634803 | 7634834 | 2 | 16 | 32 | TG   | 15 | 12 |
| 156951 | 17 | 7636928 | 7636957 | 2 | 15 | 30 | TG   | 15 | 8  |
| 156956 | 17 | 7641714 | 7641727 | 2 | 7  | 14 | AT   | 12 | 3  |
| 156959 | 17 | 7642770 | 7642797 | 2 | 14 | 28 | AC   | 16 | 20 |
| 156960 | 17 | 7643128 | 7643142 | 3 | 5  | 15 | CCG  | 25 | 4  |
| 156966 | 17 | 7644055 | 7644076 | 2 | 11 | 22 | CA   | 16 | 11 |
| 156967 | 17 | 7644221 | 7644244 | 3 | 8  | 24 | GCA  | 22 | 8  |

|        |    |         |         |   |    |    |      |    |    |
|--------|----|---------|---------|---|----|----|------|----|----|
| 156972 | 17 | 7655859 | 7655892 | 2 | 17 | 34 | CA   | 17 | 11 |
| 156977 | 17 | 7672325 | 7672354 | 3 | 10 | 30 | AAG  | 26 | 9  |
| 156978 | 17 | 7674582 | 7674599 | 2 | 9  | 18 | CT   | 8  | 3  |
| 156980 | 17 | 7676914 | 7676934 | 3 | 7  | 21 | CCT  | 25 | 6  |
| 156983 | 17 | 7680437 | 7680451 | 3 | 5  | 15 | GAA  | 33 | 3  |
| 156984 | 17 | 7680772 | 7680793 | 2 | 11 | 22 | TC   | 23 | 5  |
| 156989 | 17 | 7686366 | 7686380 | 3 | 5  | 15 | GGA  | 24 | 7  |
| 156990 | 17 | 7686519 | 7686548 | 2 | 15 | 30 | GT   | 17 | 13 |
| 156991 | 17 | 7687255 | 7687268 | 2 | 7  | 14 | GA   | 13 | 4  |
| 156992 | 17 | 7690209 | 7690242 | 2 | 17 | 34 | AC   | 9  | 12 |
| 156993 | 17 | 7690394 | 7690429 | 3 | 12 | 36 | GGA  | 15 | 7  |
| 156994 | 17 | 7693706 | 7693741 | 3 | 12 | 36 | TCC  | 17 | 7  |
| 156995 | 17 | 7693876 | 7693891 | 2 | 8  | 16 | CT   | 22 | 4  |
| 157007 | 17 | 7719357 | 7719370 | 2 | 7  | 14 | TG   | 27 | 5  |
| 157012 | 17 | 7725550 | 7725573 | 3 | 8  | 24 | AGG  | 17 | 7  |
| 157013 | 17 | 7725720 | 7725743 | 3 | 8  | 24 | CCT  | 17 | 5  |
| 157014 | 17 | 7727055 | 7727066 | 2 | 6  | 12 | GA   | 27 | 3  |
| 157033 | 17 | 7743860 | 7743873 | 2 | 7  | 14 | CA   | 25 | 3  |
| 157034 | 17 | 7744071 | 7744086 | 4 | 4  | 16 | CAGA | 31 | 6  |
| 157035 | 17 | 7745070 | 7745085 | 2 | 8  | 16 | CA   | 10 | 4  |
| 157036 | 17 | 7745282 | 7745307 | 2 | 13 | 26 | CA   | 11 | 7  |
| 157038 | 17 | 7747125 | 7747144 | 4 | 5  | 20 | CTCA | 16 | 3  |
| 157042 | 17 | 7748628 | 7748648 | 3 | 7  | 21 | GCA  | 25 | 4  |
| 157043 | 17 | 7752535 | 7752546 | 2 | 6  | 12 | AC   | 17 | 8  |
| 157051 | 17 | 7758894 | 7758923 | 2 | 15 | 30 | GT   | 17 | 6  |
| 157052 | 17 | 7758956 | 7758981 | 2 | 13 | 26 | GT   | 20 | 10 |
| 157053 | 17 | 7762649 | 7762660 | 2 | 6  | 12 | AG   | 31 | 3  |
| 157057 | 17 | 7773647 | 7773678 | 2 | 16 | 32 | GT   | 20 | 9  |
| 157060 | 17 | 7774828 | 7774843 | 2 | 8  | 16 | CA   | 22 | 6  |
| 157062 | 17 | 7776228 | 7776243 | 2 | 8  | 16 | GA   | 22 | 4  |
| 157063 | 17 | 7777331 | 7777344 | 2 | 7  | 14 | TG   | 23 | 8  |
| 157064 | 17 | 7777434 | 7777459 | 2 | 13 | 26 | CA   | 7  | 4  |
| 157066 | 17 | 7782614 | 7782631 | 2 | 9  | 18 | CA   | 16 | 8  |
| 157067 | 17 | 7783648 | 7783663 | 2 | 8  | 16 | TC   | 22 | 3  |
| 157068 | 17 | 7783771 | 7783788 | 2 | 9  | 18 | TC   | 14 | 13 |
| 157070 | 17 | 7790832 | 7790857 | 2 | 13 | 26 | CA   | 23 | 5  |
| 157071 | 17 | 7793745 | 7793756 | 2 | 6  | 12 | AC   | 23 | 7  |
| 157072 | 17 | 7795376 | 7795387 | 2 | 6  | 12 | AG   | 18 | 5  |
| 157074 | 17 | 7798854 | 7798865 | 2 | 6  | 12 | CA   | 24 | 7  |
| 157075 | 17 | 7800105 | 7800122 | 3 | 6  | 18 | AAC  | 27 | 9  |
| 157076 | 17 | 7800354 | 7800379 | 2 | 13 | 26 | AG   | 18 | 4  |
| 157078 | 17 | 7809323 | 7809346 | 2 | 12 | 24 | GT   | 19 | 14 |
| 157079 | 17 | 7815696 | 7815715 | 2 | 10 | 20 | GT   | 19 | 10 |
| 157080 | 17 | 7819261 | 7819278 | 3 | 6  | 18 | GAG  | 29 | 8  |
| 157086 | 17 | 7824413 | 7824436 | 3 | 8  | 24 | CTC  | 22 | 8  |
| 157087 | 17 | 7825004 | 7825015 | 2 | 6  | 12 | CA   | 34 | 3  |
| 157088 | 17 | 7825236 | 7825255 | 4 | 5  | 20 | ACAG | 27 | 10 |
| 157089 | 17 | 7825630 | 7825644 | 3 | 5  | 15 | ATT  | 32 | 3  |
| 157090 | 17 | 7831550 | 7831563 | 2 | 7  | 14 | AT   | 19 | 15 |
| 157091 | 17 | 7838236 | 7838250 | 3 | 5  | 15 | GGA  | 29 | 4  |
| 157096 | 17 | 7854654 | 7854669 | 2 | 8  | 16 | CA   | 20 | 11 |



|        |    |         |         |   |    |    |      |    |    |
|--------|----|---------|---------|---|----|----|------|----|----|
| 157105 | 17 | 7872842 | 7872857 | 4 | 4  | 16 | TTAA | 33 | 4  |
| 157110 | 17 | 7895468 | 7895495 | 2 | 14 | 28 | GT   | 19 | 13 |
| 157118 | 17 | 7906498 | 7906521 | 2 | 12 | 24 | CA   | 20 | 11 |
| 157119 | 17 | 7910904 | 7910917 | 2 | 7  | 14 | TG   | 19 | 6  |
| 157122 | 17 | 7913624 | 7913649 | 2 | 13 | 26 | CA   | 12 | 6  |
| 157123 | 17 | 7913807 | 7913824 | 2 | 9  | 18 | TG   | 18 | 9  |
| 157126 | 17 | 7921687 | 7921707 | 3 | 7  | 21 | CAG  | 29 | 5  |
| 157127 | 17 | 7922141 | 7922155 | 3 | 5  | 15 | GCT  | 21 | 4  |
| 157128 | 17 | 7925220 | 7925237 | 3 | 6  | 18 | CCG  | 15 | 7  |
| 157133 | 17 | 7926667 | 7926678 | 2 | 6  | 12 | GT   | 23 | 4  |
| 157136 | 17 | 7927979 | 7928008 | 2 | 15 | 30 | GT   | 12 | 13 |
| 157138 | 17 | 7929308 | 7929339 | 2 | 16 | 32 | CA   | 16 | 8  |
| 157139 | 17 | 7932104 | 7932118 | 3 | 5  | 15 | CAA  | 28 | 5  |
| 157140 | 17 | 7932296 | 7932333 | 2 | 19 | 38 | CA   | 13 | 12 |
| 157146 | 17 | 7942273 | 7942296 | 2 | 12 | 24 | GA   | 24 | 6  |
| 157147 | 17 | 7942491 | 7942508 | 2 | 9  | 18 | CA   | 15 | 10 |
| 157150 | 17 | 7950874 | 7950887 | 2 | 7  | 14 | GT   | 35 | 4  |
| 157151 | 17 | 7951878 | 7951891 | 2 | 7  | 14 | TG   | 23 | 9  |
| 157152 | 17 | 7952411 | 7952428 | 2 | 9  | 18 | TG   | 22 | 4  |
| 157153 | 17 | 7952569 | 7952592 | 2 | 12 | 24 | TG   | 22 | 11 |
| 157154 | 17 | 7954523 | 7954540 | 3 | 6  | 18 | TGT  | 26 | 5  |
| 157155 | 17 | 7958392 | 7958418 | 3 | 9  | 27 | AAC  | 10 | 3  |
| 157159 | 17 | 7961313 | 7961342 | 3 | 10 | 30 | AAC  | 21 | 11 |
| 157162 | 17 | 7968131 | 7968145 | 3 | 5  | 15 | TTG  | 24 | 5  |
| 157163 | 17 | 7971055 | 7971075 | 3 | 7  | 21 | ATC  | 27 | 4  |
| 157167 | 17 | 7980200 | 7980219 | 4 | 5  | 20 | TTTC | 27 | 5  |
| 157168 | 17 | 7981077 | 7981103 | 3 | 9  | 27 | ACA  | 24 | 4  |
| 157170 | 17 | 7986957 | 7986980 | 2 | 12 | 24 | AC   | 10 | 6  |
| 157174 | 17 | 7996150 | 7996170 | 3 | 7  | 21 | GGA  | 26 | 6  |
| 157175 | 17 | 8001656 | 8001682 | 3 | 9  | 27 | GCT  | 30 | 3  |
| 157182 | 17 | 8018888 | 8018899 | 2 | 6  | 12 | TG   | 23 | 8  |
| 157189 | 17 | 8041002 | 8041017 | 2 | 8  | 16 | AC   | 19 | 4  |
| 157194 | 17 | 8046011 | 8046022 | 2 | 6  | 12 | AT   | 16 | 7  |
| 157215 | 17 | 8101115 | 8101129 | 3 | 5  | 15 | ATG  | 22 | 7  |
| 157218 | 17 | 8105186 | 8105215 | 2 | 15 | 30 | TG   | 13 | 12 |
| 157220 | 17 | 8114985 | 8115000 | 4 | 4  | 16 | AAAT | 28 | 15 |
| 157228 | 17 | 8136198 | 8136219 | 2 | 11 | 22 | TG   | 19 | 11 |
| 157233 | 17 | 8141510 | 8141521 | 2 | 6  | 12 | AT   | 18 | 3  |
| 157234 | 17 | 8142105 | 8142122 | 2 | 9  | 18 | GT   | 28 | 7  |
| 157238 | 17 | 8150825 | 8150850 | 2 | 13 | 26 | AC   | 12 | 10 |
| 157239 | 17 | 8151053 | 8151076 | 2 | 12 | 24 | TC   | 17 | 7  |
| 157241 | 17 | 8155915 | 8155965 | 3 | 17 | 51 | AGA  | 18 | 11 |
| 157242 | 17 | 8156610 | 8156621 | 2 | 6  | 12 | AG   | 23 | 6  |
| 157243 | 17 | 8156677 | 8156690 | 2 | 7  | 14 | AT   | 18 | 5  |
| 157246 | 17 | 8157309 | 8157340 | 2 | 16 | 32 | AC   | 13 | 8  |
| 157252 | 17 | 8161346 | 8161365 | 2 | 10 | 20 | CT   | 17 | 4  |
| 157253 | 17 | 8163217 | 8163250 | 2 | 17 | 34 | AC   | 14 | 11 |
| 157254 | 17 | 8163604 | 8163627 | 4 | 6  | 24 | CAGT | 26 | 4  |
| 157258 | 17 | 8167563 | 8167586 | 3 | 8  | 24 | GGA  | 27 | 6  |
| 157263 | 17 | 8173638 | 8173659 | 2 | 11 | 22 | GT   | 17 | 7  |
| 157264 | 17 | 8173686 | 8173701 | 2 | 8  | 16 | GT   | 14 | 6  |

|        |    |         |         |   |    |    |      |    |    |
|--------|----|---------|---------|---|----|----|------|----|----|
| 157265 | 17 | 8173783 | 8173796 | 2 | 7  | 14 | AT   | 24 | 20 |
| 157267 | 17 | 8179656 | 8179689 | 2 | 17 | 34 | CA   | 18 | 12 |
| 157274 | 17 | 8184953 | 8184973 | 3 | 7  | 21 | TCA  | 18 | 9  |
| 157283 | 17 | 8212267 | 8212281 | 3 | 5  | 15 | TCC  | 18 | 3  |
| 157284 | 17 | 8214576 | 8214591 | 2 | 8  | 16 | AG   | 34 | 5  |
| 157286 | 17 | 8217509 | 8217520 | 2 | 6  | 12 | GT   | 26 | 7  |
| 157287 | 17 | 8217652 | 8217667 | 2 | 8  | 16 | TG   | 17 | 9  |
| 157288 | 17 | 8217669 | 8217686 | 2 | 9  | 18 | GT   | 18 | 12 |
| 157290 | 17 | 8227887 | 8227924 | 2 | 19 | 38 | CA   | 8  | 6  |
| 157294 | 17 | 8238043 | 8238054 | 2 | 6  | 12 | TA   | 15 | 8  |
| 157298 | 17 | 8242993 | 8243010 | 2 | 9  | 18 | AC   | 6  | 3  |
| 157304 | 17 | 8248773 | 8248798 | 2 | 13 | 26 | TC   | 26 | 7  |
| 157312 | 17 | 8251426 | 8251443 | 3 | 6  | 18 | TGT  | 29 | 4  |
| 157313 | 17 | 8252330 | 8252350 | 3 | 7  | 21 | CAA  | 26 | 7  |
| 157317 | 17 | 8257474 | 8257513 | 2 | 20 | 40 | TG   | 12 | 13 |
| 157318 | 17 | 8260273 | 8260312 | 2 | 20 | 40 | AG   | 12 | 10 |
| 157332 | 17 | 8267476 | 8267527 | 2 | 26 | 52 | TG   | 8  | 9  |
| 157334 | 17 | 8268931 | 8268962 | 2 | 16 | 32 | CA   | 25 | 16 |
| 157336 | 17 | 8271704 | 8271727 | 2 | 12 | 24 | GT   | 14 | 5  |
| 157346 | 17 | 8280123 | 8280134 | 2 | 6  | 12 | GA   | 10 | 11 |
| 157347 | 17 | 8281944 | 8281965 | 2 | 11 | 22 | AC   | 14 | 6  |
| 157348 | 17 | 8282523 | 8282550 | 2 | 14 | 28 | GA   | 8  | 6  |
| 157351 | 17 | 8286573 | 8286604 | 2 | 16 | 32 | GT   | 17 | 9  |
| 157359 | 17 | 8296442 | 8296455 | 2 | 7  | 14 | CA   | 7  | 10 |
| 157360 | 17 | 8296786 | 8296803 | 2 | 9  | 18 | CT   | 19 | 7  |
| 157361 | 17 | 8296960 | 8296979 | 2 | 10 | 20 | GT   | 22 | 10 |
| 157365 | 17 | 8300677 | 8300694 | 3 | 6  | 18 | CTG  | 32 | 4  |
| 157371 | 17 | 8301866 | 8301879 | 2 | 7  | 14 | AG   | 26 | 3  |
| 157372 | 17 | 8303170 | 8303185 | 4 | 4  | 16 | ATTT | 16 | 7  |
| 157375 | 17 | 8305908 | 8305935 | 2 | 14 | 28 | AC   | 21 | 11 |
| 157380 | 17 | 8315196 | 8315211 | 4 | 4  | 16 | CTTT | 24 | 3  |
| 157383 | 17 | 8318571 | 8318594 | 2 | 12 | 24 | CA   | 16 | 9  |
| 157388 | 17 | 8323765 | 8323782 | 2 | 9  | 18 | TG   | 21 | 14 |
| 157392 | 17 | 8327815 | 8327854 | 2 | 20 | 40 | CA   | 8  | 10 |
| 157394 | 17 | 8329434 | 8329448 | 3 | 5  | 15 | TAA  | 21 | 4  |
| 157404 | 17 | 8353645 | 8353660 | 2 | 8  | 16 | TC   | 25 | 4  |
| 157408 | 17 | 8360832 | 8360851 | 2 | 10 | 20 | GT   | 24 | 12 |
| 157417 | 17 | 8394585 | 8394596 | 2 | 6  | 12 | AC   | 31 | 5  |
| 157419 | 17 | 8400936 | 8400950 | 3 | 5  | 15 | TGA  | 19 | 4  |
| 157424 | 17 | 8408185 | 8408210 | 2 | 13 | 26 | CA   | 10 | 11 |
| 157427 | 17 | 8413145 | 8413192 | 3 | 16 | 48 | TCA  | 32 | 9  |
| 157430 | 17 | 8414420 | 8414434 | 3 | 5  | 15 | TTC  | 16 | 6  |
| 157435 | 17 | 8417480 | 8417505 | 2 | 13 | 26 | GT   | 11 | 8  |
| 157442 | 17 | 8456406 | 8456420 | 3 | 5  | 15 | CAG  | 31 | 3  |
| 157444 | 17 | 8459788 | 8459809 | 2 | 11 | 22 | GT   | 19 | 10 |
| 157446 | 17 | 8471281 | 8471310 | 2 | 15 | 30 | GT   | 15 | 16 |
| 157450 | 17 | 8492821 | 8492847 | 3 | 9  | 27 | TAT  | 8  | 8  |
| 157451 | 17 | 8492959 | 8492997 | 3 | 13 | 39 | AGA  | 17 | 9  |
| 157452 | 17 | 8493248 | 8493267 | 4 | 5  | 20 | AGCT | 25 | 6  |
| 157453 | 17 | 8496314 | 8496325 | 2 | 6  | 12 | TA   | 25 | 3  |
| 157459 | 17 | 8506829 | 8506843 | 3 | 5  | 15 | TCT  | 21 | 5  |

|        |    |         |         |   |    |    |      |    |    |
|--------|----|---------|---------|---|----|----|------|----|----|
| 157461 | 17 | 8507203 | 8507214 | 2 | 6  | 12 | TG   | 17 | 4  |
| 157468 | 17 | 8524886 | 8524909 | 2 | 12 | 24 | AC   | 13 | 11 |
| 157474 | 17 | 8526491 | 8526508 | 3 | 6  | 18 | TAA  | 25 | 4  |
| 157477 | 17 | 8531342 | 8531371 | 2 | 15 | 30 | AC   | 8  | 8  |
| 157479 | 17 | 8534030 | 8534051 | 2 | 11 | 22 | TG   | 9  | 5  |
| 157500 | 17 | 8547059 | 8547074 | 2 | 8  | 16 | TC   | 29 | 4  |
| 157501 | 17 | 8549290 | 8549310 | 3 | 7  | 21 | AGA  | 22 | 5  |
| 157503 | 17 | 8554274 | 8554306 | 3 | 11 | 33 | GGA  | 18 | 8  |
| 157504 | 17 | 8558154 | 8558169 | 4 | 4  | 16 | TCAC | 37 | 4  |
| 157512 | 17 | 8584737 | 8584752 | 4 | 4  | 16 | TAGC | 23 | 3  |
| 157513 | 17 | 8586830 | 8586847 | 2 | 9  | 18 | GT   | 26 | 7  |
| 157516 | 17 | 8595382 | 8595395 | 2 | 7  | 14 | AC   | 20 | 5  |
| 157517 | 17 | 8596727 | 8596744 | 2 | 9  | 18 | GT   | 25 | 5  |
| 157521 | 17 | 8610359 | 8610384 | 2 | 13 | 26 | CA   | 17 | 11 |
| 157528 | 17 | 8631825 | 8631850 | 2 | 13 | 26 | CA   | 19 | 12 |
| 157531 | 17 | 8634987 | 8635000 | 2 | 7  | 14 | CA   | 16 | 7  |
| 157532 | 17 | 8635003 | 8635014 | 2 | 6  | 12 | CA   | 7  | 5  |
| 157537 | 17 | 8638798 | 8638819 | 2 | 11 | 22 | AC   | 9  | 6  |
| 157538 | 17 | 8639242 | 8639256 | 3 | 5  | 15 | AAT  | 26 | 12 |
| 157549 | 17 | 8651449 | 8651464 | 2 | 8  | 16 | CA   | 23 | 8  |
| 157554 | 17 | 8653031 | 8653048 | 2 | 9  | 18 | TG   | 25 | 14 |
| 157555 | 17 | 8655427 | 8655464 | 2 | 19 | 38 | TG   | 15 | 12 |
| 157556 | 17 | 8655626 | 8655653 | 2 | 14 | 28 | TG   | 19 | 11 |
| 157561 | 17 | 8658984 | 8659015 | 2 | 16 | 32 | AC   | 11 | 11 |
| 157562 | 17 | 8659830 | 8659850 | 3 | 7  | 21 | GCA  | 28 | 11 |
| 157564 | 17 | 8661014 | 8661043 | 3 | 10 | 30 | CTG  | 23 | 8  |
| 157566 | 17 | 8661623 | 8661640 | 3 | 6  | 18 | TTG  | 10 | 9  |
| 157568 | 17 | 8662432 | 8662453 | 2 | 11 | 22 | CA   | 18 | 4  |
| 157569 | 17 | 8662950 | 8662975 | 2 | 13 | 26 | AC   | 14 | 7  |
| 157571 | 17 | 8663717 | 8663740 | 2 | 12 | 24 | GT   | 15 | 8  |
| 157573 | 17 | 8665693 | 8665714 | 2 | 11 | 22 | TG   | 17 | 10 |
| 157580 | 17 | 8677220 | 8677249 | 2 | 15 | 30 | AC   | 9  | 10 |
| 157581 | 17 | 8678880 | 8678909 | 3 | 10 | 30 | AGA  | 14 | 5  |
| 157584 | 17 | 8681659 | 8681670 | 2 | 6  | 12 | GT   | 30 | 5  |
| 157585 | 17 | 8681955 | 8681970 | 2 | 8  | 16 | AC   | 26 | 7  |
| 157587 | 17 | 8682186 | 8682211 | 2 | 13 | 26 | GA   | 15 | 9  |
| 157588 | 17 | 8683056 | 8683069 | 2 | 7  | 14 | CA   | 27 | 7  |
| 157590 | 17 | 8685484 | 8685507 | 2 | 12 | 24 | CA   | 6  | 5  |
| 157592 | 17 | 8685877 | 8685897 | 3 | 7  | 21 | TCC  | 10 | 11 |
| 157593 | 17 | 8686053 | 8686068 | 2 | 8  | 16 | AC   | 21 | 11 |
| 157597 | 17 | 8688818 | 8688841 | 2 | 12 | 24 | CA   | 22 | 9  |
| 157598 | 17 | 8688930 | 8688941 | 2 | 6  | 12 | CA   | 27 | 3  |
| 157599 | 17 | 8689135 | 8689154 | 2 | 10 | 20 | TG   | 15 | 8  |
| 157600 | 17 | 8689357 | 8689374 | 2 | 9  | 18 | AC   | 24 | 4  |
| 157605 | 17 | 8705594 | 8705613 | 2 | 10 | 20 | AC   | 14 | 10 |
| 157606 | 17 | 8705724 | 8705751 | 2 | 14 | 28 | TG   | 6  | 7  |
| 157607 | 17 | 8705981 | 8706004 | 2 | 12 | 24 | AC   | 15 | 13 |
| 157608 | 17 | 8706176 | 8706197 | 2 | 11 | 22 | CA   | 23 | 8  |
| 157609 | 17 | 8707984 | 8708003 | 2 | 10 | 20 | TC   | 28 | 5  |
| 157613 | 17 | 8722059 | 8722070 | 2 | 6  | 12 | CT   | 10 | 6  |
| 157614 | 17 | 8722071 | 8722090 | 2 | 10 | 20 | CA   | 20 | 10 |

|        |    |         |         |   |    |    |      |    |    |
|--------|----|---------|---------|---|----|----|------|----|----|
| 157615 | 17 | 8722169 | 8722186 | 2 | 9  | 18 | GT   | 23 | 3  |
| 157624 | 17 | 8738955 | 8738978 | 3 | 8  | 24 | GTT  | 21 | 9  |
| 157630 | 17 | 8760032 | 8760047 | 2 | 8  | 16 | AC   | 18 | 13 |
| 157631 | 17 | 8760392 | 8760407 | 2 | 8  | 16 | TA   | 10 | 7  |
| 157633 | 17 | 8771134 | 8771145 | 2 | 6  | 12 | AC   | 26 | 5  |
| 157634 | 17 | 8771525 | 8771536 | 2 | 6  | 12 | AC   | 14 | 5  |
| 157635 | 17 | 8771538 | 8771549 | 2 | 6  | 12 | CA   | 13 | 6  |
| 157647 | 17 | 8786940 | 8786963 | 3 | 8  | 24 | CAG  | 22 | 9  |
| 157649 | 17 | 8788594 | 8788605 | 2 | 6  | 12 | AT   | 17 | 5  |
| 157651 | 17 | 8791709 | 8791724 | 4 | 4  | 16 | TCAG | 30 | 6  |
| 157652 | 17 | 8793717 | 8793730 | 2 | 7  | 14 | TC   | 23 | 4  |
| 157654 | 17 | 8793963 | 8793986 | 3 | 8  | 24 | CAT  | 18 | 12 |
| 157656 | 17 | 8794715 | 8794729 | 3 | 5  | 15 | TCT  | 19 | 7  |
| 157660 | 17 | 8795272 | 8795295 | 2 | 12 | 24 | TG   | 15 | 7  |
| 157663 | 17 | 8795890 | 8795907 | 3 | 6  | 18 | GGA  | 8  | 5  |
| 157664 | 17 | 8796142 | 8796157 | 4 | 4  | 16 | ATTT | 23 | 5  |
| 157665 | 17 | 8797448 | 8797479 | 2 | 16 | 32 | AG   | 8  | 10 |
| 157667 | 17 | 8798047 | 8798072 | 2 | 13 | 26 | CA   | 10 | 5  |
| 157672 | 17 | 8802010 | 8802043 | 2 | 17 | 34 | CT   | 9  | 7  |
| 157676 | 17 | 8804424 | 8804438 | 3 | 5  | 15 | GCT  | 23 | 4  |
| 157677 | 17 | 8810177 | 8810194 | 2 | 9  | 18 | AC   | 17 | 6  |
| 157681 | 17 | 8814078 | 8814101 | 3 | 8  | 24 | GAG  | 26 | 10 |
| 157685 | 17 | 8817701 | 8817716 | 4 | 4  | 16 | CTTT | 7  | 8  |
| 157686 | 17 | 8820741 | 8820761 | 3 | 7  | 21 | CAC  | 20 | 9  |
| 157689 | 17 | 8822288 | 8822302 | 3 | 5  | 15 | GCC  | 27 | 4  |
| 157693 | 17 | 8824906 | 8824937 | 2 | 16 | 32 | CA   | 11 | 8  |
| 157694 | 17 | 8826557 | 8826572 | 2 | 8  | 16 | GT   | 20 | 4  |
| 157705 | 17 | 8834137 | 8834152 | 2 | 8  | 16 | TC   | 21 | 5  |
| 157707 | 17 | 8834377 | 8834400 | 3 | 8  | 24 | TCC  | 8  | 6  |
| 157712 | 17 | 8840380 | 8840403 | 2 | 12 | 24 | GT   | 16 | 7  |
| 157713 | 17 | 8840456 | 8840479 | 3 | 8  | 24 | CCT  | 17 | 14 |
| 157716 | 17 | 8845636 | 8845661 | 2 | 13 | 26 | AG   | 18 | 5  |
| 157722 | 17 | 8850103 | 8850114 | 2 | 6  | 12 | AC   | 23 | 7  |
| 157723 | 17 | 8850117 | 8850134 | 2 | 9  | 18 | AC   | 16 | 5  |
| 157728 | 17 | 8853928 | 8853955 | 2 | 14 | 28 | CA   | 18 | 6  |
| 157730 | 17 | 8857573 | 8857586 | 2 | 7  | 14 | GT   | 15 | 6  |
| 157733 | 17 | 8862865 | 8862890 | 2 | 13 | 26 | AC   | 18 | 7  |
| 157735 | 17 | 8865403 | 8865418 | 2 | 8  | 16 | CT   | 28 | 8  |
| 157736 | 17 | 8865562 | 8865582 | 3 | 7  | 21 | GCA  | 19 | 11 |
| 157737 | 17 | 8866130 | 8866159 | 3 | 10 | 30 | TCT  | 18 | 9  |
| 157738 | 17 | 8866457 | 8866480 | 2 | 12 | 24 | GT   | 12 | 12 |
| 157740 | 17 | 8866642 | 8866659 | 2 | 9  | 18 | TC   | 20 | 4  |
| 157756 | 17 | 8892396 | 8892407 | 2 | 6  | 12 | AC   | 32 | 9  |
| 157762 | 17 | 8903754 | 8903771 | 3 | 6  | 18 | TTC  | 11 | 9  |
| 157764 | 17 | 8906248 | 8906267 | 2 | 10 | 20 | GT   | 22 | 6  |
| 157765 | 17 | 8913138 | 8913163 | 2 | 13 | 26 | TG   | 17 | 5  |
| 157766 | 17 | 8913278 | 8913289 | 2 | 6  | 12 | TG   | 22 | 5  |
| 157768 | 17 | 8915936 | 8915957 | 2 | 11 | 22 | CA   | 17 | 8  |
| 157772 | 17 | 8917320 | 8917337 | 2 | 9  | 18 | GT   | 25 | 8  |
| 157773 | 17 | 8917651 | 8917668 | 2 | 9  | 18 | AC   | 27 | 7  |
| 157774 | 17 | 8918714 | 8918749 | 2 | 18 | 36 | GT   | 14 | 10 |

|        |    |         |         |   |    |    |      |    |    |
|--------|----|---------|---------|---|----|----|------|----|----|
| 157775 | 17 | 8918816 | 8918827 | 2 | 6  | 12 | TG   | 16 | 4  |
| 157776 | 17 | 8918829 | 8918844 | 2 | 8  | 16 | TG   | 18 | 5  |
| 157781 | 17 | 8927285 | 8927298 | 2 | 7  | 14 | GT   | 19 | 16 |
| 157783 | 17 | 8929944 | 8929965 | 2 | 11 | 22 | CA   | 21 | 13 |
| 157784 | 17 | 8934417 | 8934442 | 2 | 13 | 26 | GT   | 13 | 3  |
| 157789 | 17 | 8948819 | 8948832 | 2 | 7  | 14 | TC   | 25 | 3  |
| 157791 | 17 | 8950772 | 8950793 | 2 | 11 | 22 | AG   | 19 | 3  |
| 157794 | 17 | 8957225 | 8957268 | 2 | 22 | 44 | AC   | 6  | 6  |
| 157800 | 17 | 8968053 | 8968084 | 2 | 16 | 32 | AC   | 8  | 6  |
| 157810 | 17 | 8991387 | 8991422 | 2 | 18 | 36 | AC   | 16 | 12 |
| 157814 | 17 | 8993309 | 8993320 | 2 | 6  | 12 | TC   | 24 | 4  |
| 157817 | 17 | 8999919 | 8999940 | 2 | 11 | 22 | GT   | 16 | 13 |
| 157819 | 17 | 9002578 | 9002613 | 3 | 12 | 36 | ATC  | 24 | 6  |
| 157822 | 17 | 9005930 | 9005955 | 2 | 13 | 26 | TG   | 6  | 5  |
| 157823 | 17 | 9006048 | 9006071 | 2 | 12 | 24 | TG   | 9  | 9  |
| 157825 | 17 | 9007657 | 9007680 | 3 | 8  | 24 | TAG  | 16 | 10 |
| 157830 | 17 | 9031693 | 9031706 | 2 | 7  | 14 | AC   | 23 | 6  |
| 157831 | 17 | 9033577 | 9033600 | 3 | 8  | 24 | AAC  | 20 | 9  |
| 157832 | 17 | 9033745 | 9033762 | 3 | 6  | 18 | ATA  | 21 | 5  |
| 157833 | 17 | 9034692 | 9034707 | 2 | 8  | 16 | GT   | 24 | 5  |
| 157834 | 17 | 9038433 | 9038454 | 2 | 11 | 22 | AG   | 27 | 5  |
| 157836 | 17 | 9045529 | 9045554 | 2 | 13 | 26 | CA   | 12 | 11 |
| 157838 | 17 | 9057991 | 9058020 | 3 | 10 | 30 | GTT  | 23 | 10 |
| 157840 | 17 | 9061144 | 9061164 | 3 | 7  | 21 | CAG  | 25 | 8  |
| 157843 | 17 | 9071871 | 9071888 | 3 | 6  | 18 | TTG  | 31 | 3  |
| 157845 | 17 | 9072701 | 9072716 | 4 | 4  | 16 | TTTA | 23 | 5  |
| 157849 | 17 | 9081846 | 9081897 | 2 | 26 | 52 | TG   | 7  | 10 |
| 157850 | 17 | 9082360 | 9082393 | 2 | 17 | 34 | AC   | 7  | 7  |
| 157856 | 17 | 9098619 | 9098638 | 2 | 10 | 20 | GT   | 19 | 13 |
| 157860 | 17 | 9107792 | 9107809 | 2 | 9  | 18 | AT   | 16 | 8  |
| 157864 | 17 | 9125834 | 9125883 | 2 | 25 | 50 | TG   | 15 | 11 |
| 157869 | 17 | 9136302 | 9136316 | 3 | 5  | 15 | TGT  | 21 | 3  |
| 157870 | 17 | 9139460 | 9139473 | 2 | 7  | 14 | AG   | 24 | 4  |
| 157872 | 17 | 9141472 | 9141491 | 2 | 10 | 20 | CA   | 15 | 7  |
| 157873 | 17 | 9142222 | 9142247 | 2 | 13 | 26 | CA   | 15 | 8  |
| 157875 | 17 | 9143808 | 9143829 | 2 | 11 | 22 | CA   | 20 | 7  |
| 157877 | 17 | 9149137 | 9149152 | 2 | 8  | 16 | GT   | 26 | 5  |
| 157879 | 17 | 9160997 | 9161008 | 2 | 6  | 12 | AC   | 24 | 3  |
| 157886 | 17 | 9176272 | 9176331 | 4 | 15 | 60 | AGAT | 18 | 9  |
| 157887 | 17 | 9182946 | 9182963 | 3 | 6  | 18 | CTT  | 16 | 5  |
| 157888 | 17 | 9183886 | 9183909 | 2 | 12 | 24 | TG   | 14 | 13 |
| 157893 | 17 | 9189964 | 9189987 | 4 | 6  | 24 | TGTC | 22 | 5  |
| 157894 | 17 | 9199907 | 9199932 | 2 | 13 | 26 | AC   | 20 | 10 |
| 157898 | 17 | 9212487 | 9212498 | 2 | 6  | 12 | AC   | 25 | 6  |
| 157903 | 17 | 9233482 | 9233496 | 3 | 5  | 15 | CCA  | 22 | 5  |
| 157913 | 17 | 9263135 | 9263148 | 2 | 7  | 14 | AC   | 9  | 4  |
| 157914 | 17 | 9264440 | 9264459 | 2 | 10 | 20 | TG   | 20 | 6  |
| 157915 | 17 | 9264653 | 9264686 | 2 | 17 | 34 | GT   | 13 | 14 |
| 157916 | 17 | 9267511 | 9267524 | 2 | 7  | 14 | AG   | 19 | 4  |
| 157923 | 17 | 9276807 | 9276826 | 2 | 10 | 20 | TG   | 28 | 9  |
| 157927 | 17 | 9295888 | 9295911 | 2 | 12 | 24 | GA   | 19 | 3  |

|        |    |         |         |   |    |    |      |    |    |
|--------|----|---------|---------|---|----|----|------|----|----|
| 157928 | 17 | 9302491 | 9302502 | 2 | 6  | 12 | AT   | 32 | 3  |
| 157932 | 17 | 9310724 | 9310769 | 2 | 23 | 46 | CA   | 8  | 11 |
| 157933 | 17 | 9310911 | 9310936 | 2 | 13 | 26 | AC   | 20 | 14 |
| 157936 | 17 | 9319011 | 9319034 | 2 | 12 | 24 | CA   | 16 | 11 |
| 157939 | 17 | 9325858 | 9325890 | 3 | 11 | 33 | GAG  | 7  | 5  |
| 157941 | 17 | 9331439 | 9331468 | 3 | 10 | 30 | GAG  | 14 | 5  |
| 157942 | 17 | 9333526 | 9333557 | 2 | 16 | 32 | GT   | 12 | 10 |
| 157944 | 17 | 9337015 | 9337026 | 2 | 6  | 12 | AC   | 13 | 3  |
| 157951 | 17 | 9344287 | 9344322 | 2 | 18 | 36 | TG   | 8  | 12 |
| 157961 | 17 | 9360452 | 9360471 | 2 | 10 | 20 | CT   | 19 | 4  |
| 157963 | 17 | 9362843 | 9362854 | 2 | 6  | 12 | CA   | 12 | 3  |
| 157965 | 17 | 9375460 | 9375475 | 2 | 8  | 16 | GT   | 6  | 6  |
| 157966 | 17 | 9375480 | 9375495 | 2 | 8  | 16 | GT   | 20 | 11 |
| 157967 | 17 | 9376318 | 9376347 | 3 | 10 | 30 | GCA  | 30 | 9  |
| 157970 | 17 | 9387066 | 9387080 | 3 | 5  | 15 | CAC  | 13 | 3  |
| 157978 | 17 | 9419065 | 9419079 | 3 | 5  | 15 | AGG  | 27 | 4  |
| 157979 | 17 | 9419449 | 9419466 | 2 | 9  | 18 | AC   | 18 | 8  |
| 157981 | 17 | 9427854 | 9427867 | 2 | 7  | 14 | TG   | 27 | 5  |
| 157991 | 17 | 9445051 | 9445062 | 2 | 6  | 12 | GA   | 23 | 3  |
| 157992 | 17 | 9447326 | 9447351 | 2 | 13 | 26 | CA   | 18 | 5  |
| 157993 | 17 | 9453512 | 9453539 | 2 | 14 | 28 | AC   | 20 | 10 |
| 157998 | 17 | 9455939 | 9455968 | 3 | 10 | 30 | TCT  | 20 | 4  |
| 157999 | 17 | 9459450 | 9459461 | 2 | 6  | 12 | AG   | 27 | 4  |
| 158003 | 17 | 9464174 | 9464193 | 4 | 5  | 20 | TTTC | 27 | 5  |
| 158004 | 17 | 9467551 | 9467568 | 3 | 6  | 18 | CTC  | 29 | 9  |
| 158017 | 17 | 9498834 | 9498851 | 2 | 9  | 18 | CA   | 25 | 9  |
| 158019 | 17 | 9500697 | 9500722 | 2 | 13 | 26 | TG   | 6  | 7  |
| 158020 | 17 | 9501131 | 9501151 | 3 | 7  | 21 | CAG  | 26 | 4  |
| 158021 | 17 | 9503956 | 9503983 | 2 | 14 | 28 | GT   | 15 | 10 |
| 158024 | 17 | 9511110 | 9511127 | 3 | 6  | 18 | TCT  | 24 | 6  |
| 158029 | 17 | 9516508 | 9516522 | 3 | 5  | 15 | GCT  | 31 | 4  |
| 158031 | 17 | 9520293 | 9520316 | 3 | 8  | 24 | TCA  | 7  | 4  |
| 158033 | 17 | 9524079 | 9524090 | 2 | 6  | 12 | GT   | 18 | 5  |
| 158035 | 17 | 9543879 | 9543899 | 3 | 7  | 21 | ATC  | 23 | 9  |
| 158036 | 17 | 9544607 | 9544633 | 3 | 9  | 27 | CCT  | 11 | 6  |
| 158038 | 17 | 9554768 | 9554787 | 4 | 5  | 20 | TCTT | 32 | 4  |
| 158040 | 17 | 9555852 | 9555872 | 3 | 7  | 21 | TCC  | 17 | 6  |
| 158043 | 17 | 9564402 | 9564431 | 2 | 15 | 30 | AC   | 21 | 10 |
| 158044 | 17 | 9571788 | 9571811 | 3 | 8  | 24 | AGC  | 22 | 5  |
| 158047 | 17 | 9573281 | 9573334 | 2 | 27 | 54 | AC   | 7  | 6  |
| 158049 | 17 | 9578710 | 9578735 | 2 | 13 | 26 | CA   | 24 | 14 |
| 158056 | 17 | 9592860 | 9592873 | 2 | 7  | 14 | AT   | 24 | 8  |
| 158058 | 17 | 9594117 | 9594132 | 4 | 4  | 16 | AAAT | 20 | 14 |
| 158060 | 17 | 9601306 | 9601327 | 2 | 11 | 22 | AC   | 16 | 13 |
| 158062 | 17 | 9602629 | 9602660 | 2 | 16 | 32 | AC   | 11 | 11 |
| 158066 | 17 | 9609418 | 9609431 | 2 | 7  | 14 | AC   | 20 | 9  |
| 158067 | 17 | 9609937 | 9609958 | 2 | 11 | 22 | GT   | 23 | 10 |
| 158069 | 17 | 9615330 | 9615351 | 2 | 11 | 22 | TC   | 25 | 11 |
| 158070 | 17 | 9615518 | 9615539 | 2 | 11 | 22 | TC   | 19 | 7  |
| 158074 | 17 | 9618390 | 9618417 | 2 | 14 | 28 | AC   | 15 | 5  |
| 158076 | 17 | 9622342 | 9622355 | 2 | 7  | 14 | AT   | 11 | 7  |

|        |    |         |         |   |    |    |      |    |    |
|--------|----|---------|---------|---|----|----|------|----|----|
| 158080 | 17 | 9626445 | 9626459 | 3 | 5  | 15 | AAC  | 9  | 8  |
| 158081 | 17 | 9627207 | 9627228 | 2 | 11 | 22 | TG   | 8  | 11 |
| 158083 | 17 | 9627911 | 9627932 | 2 | 11 | 22 | AG   | 23 | 3  |
| 158085 | 17 | 9633545 | 9633556 | 2 | 6  | 12 | AC   | 23 | 16 |
| 158088 | 17 | 9643945 | 9643960 | 4 | 4  | 16 | AAAG | 26 | 4  |
| 158089 | 17 | 9646971 | 9646986 | 2 | 8  | 16 | AG   | 13 | 3  |
| 158090 | 17 | 9648294 | 9648307 | 2 | 7  | 14 | AT   | 15 | 4  |
| 158091 | 17 | 9654364 | 9654379 | 2 | 8  | 16 | TG   | 12 | 8  |
| 158094 | 17 | 9657717 | 9657730 | 2 | 7  | 14 | TA   | 25 | 5  |
| 158095 | 17 | 9659183 | 9659200 | 2 | 9  | 18 | TC   | 11 | 9  |
| 158097 | 17 | 9660994 | 9661008 | 3 | 5  | 15 | CCT  | 26 | 6  |
| 158102 | 17 | 9665821 | 9665832 | 2 | 6  | 12 | AT   | 24 | 3  |
| 158103 | 17 | 9669932 | 9669958 | 3 | 9  | 27 | TGA  | 28 | 8  |
| 158104 | 17 | 9672297 | 9672318 | 2 | 11 | 22 | CA   | 24 | 11 |
| 158105 | 17 | 9672373 | 9672400 | 2 | 14 | 28 | CA   | 16 | 12 |
| 158107 | 17 | 9674653 | 9674673 | 3 | 7  | 21 | AGC  | 22 | 3  |
| 158111 | 17 | 9679142 | 9679177 | 2 | 18 | 36 | TG   | 11 | 11 |
| 158112 | 17 | 9679420 | 9679439 | 4 | 5  | 20 | ACAA | 23 | 5  |
| 158115 | 17 | 9681167 | 9681187 | 3 | 7  | 21 | GAA  | 25 | 5  |
| 158116 | 17 | 9681603 | 9681617 | 3 | 5  | 15 | CCA  | 22 | 8  |
| 158118 | 17 | 9684062 | 9684105 | 2 | 22 | 44 | TG   | 14 | 13 |
| 158119 | 17 | 9684480 | 9684512 | 3 | 11 | 33 | CCT  | 13 | 7  |
| 158120 | 17 | 9684685 | 9684708 | 2 | 12 | 24 | AC   | 18 | 11 |
| 158124 | 17 | 9695503 | 9695526 | 2 | 12 | 24 | CA   | 19 | 9  |
| 158126 | 17 | 9701664 | 9701687 | 2 | 12 | 24 | GT   | 11 | 6  |
| 158127 | 17 | 9704950 | 9704967 | 3 | 6  | 18 | ATT  | 17 | 4  |
| 158128 | 17 | 9707223 | 9707240 | 3 | 6  | 18 | AAG  | 23 | 4  |
| 158129 | 17 | 9707485 | 9707502 | 3 | 6  | 18 | TAA  | 14 | 9  |
| 158130 | 17 | 9707886 | 9707903 | 3 | 6  | 18 | AAT  | 15 | 4  |
| 158137 | 17 | 9719159 | 9719190 | 2 | 16 | 32 | TG   | 11 | 10 |
| 158138 | 17 | 9721064 | 9721075 | 2 | 6  | 12 | CA   | 12 | 8  |
| 158140 | 17 | 9722086 | 9722097 | 2 | 6  | 12 | AC   | 22 | 3  |
| 158143 | 17 | 9729235 | 9729252 | 2 | 9  | 18 | GT   | 22 | 6  |
| 158144 | 17 | 9729446 | 9729465 | 2 | 10 | 20 | AC   | 14 | 5  |
| 158145 | 17 | 9730540 | 9730565 | 2 | 13 | 26 | CT   | 18 | 14 |
| 158148 | 17 | 9731892 | 9731909 | 2 | 9  | 18 | AG   | 29 | 4  |
| 158149 | 17 | 9732049 | 9732066 | 2 | 9  | 18 | AG   | 24 | 10 |
| 158152 | 17 | 9743390 | 9743413 | 2 | 12 | 24 | TC   | 10 | 7  |
| 158156 | 17 | 9748616 | 9748633 | 2 | 9  | 18 | GT   | 25 | 5  |
| 158157 | 17 | 9752634 | 9752653 | 2 | 10 | 20 | AC   | 11 | 13 |
| 158165 | 17 | 9766668 | 9766681 | 2 | 7  | 14 | GT   | 26 | 9  |
| 158169 | 17 | 9773742 | 9773765 | 2 | 12 | 24 | GT   | 17 | 16 |
| 158170 | 17 | 9773942 | 9773973 | 2 | 16 | 32 | AC   | 15 | 11 |
| 158171 | 17 | 9775255 | 9775266 | 2 | 6  | 12 | AC   | 14 | 11 |
| 158175 | 17 | 9786790 | 9786809 | 2 | 10 | 20 | AC   | 23 | 3  |
| 158178 | 17 | 9794289 | 9794302 | 2 | 7  | 14 | AC   | 21 | 13 |
| 158179 | 17 | 9794529 | 9794552 | 2 | 12 | 24 | CA   | 23 | 11 |
| 158180 | 17 | 9794679 | 9794692 | 2 | 7  | 14 | TG   | 29 | 9  |
| 158182 | 17 | 9795303 | 9795318 | 4 | 4  | 16 | TCCG | 19 | 10 |
| 158183 | 17 | 9798777 | 9798804 | 4 | 7  | 28 | CAGA | 23 | 4  |
| 158185 | 17 | 9804115 | 9804134 | 2 | 10 | 20 | TG   | 14 | 13 |

|        |    |         |         |   |    |    |      |    |    |
|--------|----|---------|---------|---|----|----|------|----|----|
| 158186 | 17 | 9804460 | 9804473 | 2 | 7  | 14 | GT   | 18 | 5  |
| 158187 | 17 | 9805903 | 9805917 | 3 | 5  | 15 | GTT  | 12 | 10 |
| 158188 | 17 | 9807525 | 9807544 | 4 | 5  | 20 | AACA | 24 | 10 |
| 158191 | 17 | 9813632 | 9813652 | 3 | 7  | 21 | CTC  | 25 | 4  |
| 158199 | 17 | 9830449 | 9830494 | 2 | 23 | 46 | AC   | 10 | 10 |
| 158200 | 17 | 9830707 | 9830732 | 2 | 13 | 26 | AC   | 20 | 17 |
| 158202 | 17 | 9833063 | 9833090 | 2 | 14 | 28 | TG   | 11 | 9  |
| 158205 | 17 | 9839670 | 9839687 | 3 | 6  | 18 | CTT  | 29 | 3  |
| 158206 | 17 | 9839820 | 9839843 | 2 | 12 | 24 | AC   | 10 | 10 |
| 158210 | 17 | 9843115 | 9843128 | 2 | 7  | 14 | GT   | 23 | 5  |
| 158212 | 17 | 9846534 | 9846551 | 3 | 6  | 18 | CGC  | 25 | 6  |
| 158213 | 17 | 9846951 | 9846994 | 2 | 22 | 44 | AC   | 10 | 9  |
| 158215 | 17 | 9847492 | 9847503 | 2 | 6  | 12 | AT   | 12 | 5  |
| 158216 | 17 | 9848332 | 9848357 | 2 | 13 | 26 | AC   | 10 | 11 |
| 158217 | 17 | 9848525 | 9848560 | 2 | 18 | 36 | CA   | 16 | 16 |
| 158219 | 17 | 9853347 | 9853388 | 2 | 21 | 42 | TG   | 9  | 6  |
| 158220 | 17 | 9853942 | 9853957 | 4 | 4  | 16 | CTTT | 26 | 3  |
| 158221 | 17 | 9854273 | 9854292 | 2 | 10 | 20 | GT   | 21 | 9  |
| 158222 | 17 | 9854527 | 9854554 | 2 | 14 | 28 | CA   | 17 | 8  |
| 158224 | 17 | 9857199 | 9857213 | 3 | 5  | 15 | GAG  | 28 | 3  |
| 158225 | 17 | 9858093 | 9858124 | 2 | 16 | 32 | AC   | 6  | 10 |
| 158226 | 17 | 9858753 | 9858772 | 2 | 10 | 20 | TC   | 26 | 6  |
| 158230 | 17 | 9861445 | 9861464 | 4 | 5  | 20 | ACAA | 18 | 13 |
| 158232 | 17 | 9862064 | 9862079 | 2 | 8  | 16 | TG   | 19 | 7  |
| 158233 | 17 | 9865105 | 9865130 | 2 | 13 | 26 | AC   | 13 | 10 |
| 158234 | 17 | 9865350 | 9865365 | 2 | 8  | 16 | CA   | 18 | 4  |
| 158235 | 17 | 9865400 | 9865413 | 2 | 7  | 14 | TG   | 22 | 7  |
| 158238 | 17 | 9867984 | 9867995 | 2 | 6  | 12 | AT   | 17 | 10 |
| 158240 | 17 | 9870229 | 9870248 | 2 | 10 | 20 | AG   | 11 | 10 |
| 158241 | 17 | 9871416 | 9871431 | 2 | 8  | 16 | GT   | 14 | 3  |
| 158242 | 17 | 9871577 | 9871604 | 2 | 14 | 28 | CA   | 13 | 12 |
| 158243 | 17 | 9878484 | 9878499 | 2 | 8  | 16 | AC   | 15 | 11 |
| 158245 | 18 | 3336    | 3359    | 4 | 6  | 24 | TTTG | 16 | 5  |
| 158247 | 18 | 3864    | 3891    | 4 | 7  | 28 | AAAT | 10 | 9  |
| 158255 | 18 | 20571   | 20586   | 4 | 4  | 16 | AGCT | 30 | 3  |
| 158265 | 18 | 23021   | 23072   | 4 | 13 | 52 | ATTG | 12 | 11 |
| 158269 | 18 | 24863   | 24894   | 2 | 16 | 32 | AC   | 8  | 8  |
| 158272 | 18 | 32400   | 32425   | 2 | 13 | 26 | GT   | 7  | 6  |
| 158276 | 18 | 37865   | 37892   | 2 | 14 | 28 | AC   | 20 | 6  |
| 158277 | 18 | 38060   | 38077   | 2 | 9  | 18 | CA   | 24 | 6  |
| 158278 | 18 | 38324   | 38353   | 2 | 15 | 30 | GT   | 10 | 14 |
| 158280 | 18 | 41937   | 41952   | 2 | 8  | 16 | GT   | 14 | 12 |
| 158281 | 18 | 42153   | 42170   | 2 | 9  | 18 | TC   | 11 | 6  |
| 158284 | 18 | 52517   | 52542   | 2 | 13 | 26 | GA   | 8  | 7  |
| 158290 | 18 | 64562   | 64577   | 2 | 8  | 16 | AC   | 23 | 4  |
| 158291 | 18 | 66008   | 66067   | 4 | 15 | 60 | ATGG | 11 | 11 |
| 158293 | 18 | 67072   | 67089   | 2 | 9  | 18 | TG   | 17 | 11 |
| 158294 | 18 | 67090   | 67105   | 2 | 8  | 16 | AG   | 20 | 12 |
| 158296 | 18 | 73358   | 73371   | 2 | 7  | 14 | AC   | 25 | 6  |
| 158299 | 18 | 79364   | 79377   | 2 | 7  | 14 | CA   | 20 | 4  |
| 158300 | 18 | 81190   | 81205   | 2 | 8  | 16 | AC   | 18 | 3  |



|        |    |        |        |   |    |    |      |    |    |
|--------|----|--------|--------|---|----|----|------|----|----|
| 158301 | 18 | 81378  | 81405  | 2 | 14 | 28 | TG   | 20 | 12 |
| 158303 | 18 | 82799  | 82824  | 2 | 13 | 26 | CA   | 17 | 11 |
| 158307 | 18 | 83765  | 83779  | 3 | 5  | 15 | TGC  | 23 | 3  |
| 158308 | 18 | 86567  | 86594  | 2 | 14 | 28 | GT   | 9  | 9  |
| 158309 | 18 | 86987  | 87036  | 2 | 25 | 50 | GT   | 10 | 11 |
| 158310 | 18 | 88257  | 88268  | 2 | 6  | 12 | CA   | 31 | 4  |
| 158311 | 18 | 89911  | 89940  | 2 | 15 | 30 | CA   | 18 | 8  |
| 158318 | 18 | 96867  | 96884  | 2 | 9  | 18 | CA   | 12 | 8  |
| 158320 | 18 | 98767  | 98778  | 2 | 6  | 12 | AC   | 32 | 3  |
| 158322 | 18 | 106383 | 106400 | 2 | 9  | 18 | AC   | 16 | 8  |
| 158323 | 18 | 107467 | 107496 | 2 | 15 | 30 | AC   | 10 | 8  |
| 158324 | 18 | 109285 | 109320 | 2 | 18 | 36 | CA   | 6  | 7  |
| 158325 | 18 | 109979 | 110000 | 2 | 11 | 22 | CA   | 15 | 6  |
| 158333 | 18 | 112466 | 112507 | 2 | 21 | 42 | AC   | 13 | 11 |
| 158335 | 18 | 114435 | 114468 | 2 | 17 | 34 | AC   | 6  | 9  |
| 158336 | 18 | 114581 | 114596 | 2 | 8  | 16 | TC   | 9  | 8  |
| 158337 | 18 | 115731 | 115750 | 4 | 5  | 20 | TTTA | 18 | 6  |
| 158339 | 18 | 116345 | 116364 | 4 | 5  | 20 | GTCA | 20 | 4  |
| 158347 | 18 | 123014 | 123035 | 2 | 11 | 22 | AC   | 19 | 7  |
| 158348 | 18 | 123218 | 123233 | 2 | 8  | 16 | TG   | 9  | 8  |
| 158349 | 18 | 123381 | 123396 | 2 | 8  | 16 | AC   | 13 | 5  |
| 158351 | 18 | 124328 | 124343 | 2 | 8  | 16 | GT   | 27 | 7  |
| 158355 | 18 | 132527 | 132540 | 2 | 7  | 14 | AC   | 23 | 3  |
| 158356 | 18 | 133279 | 133296 | 2 | 9  | 18 | TG   | 22 | 6  |
| 158362 | 18 | 142654 | 142673 | 2 | 10 | 20 | AC   | 20 | 5  |
| 158367 | 18 | 154601 | 154612 | 2 | 6  | 12 | AG   | 24 | 3  |
| 158384 | 18 | 216645 | 216666 | 2 | 11 | 22 | GA   | 17 | 9  |
| 158388 | 18 | 228347 | 228360 | 2 | 7  | 14 | CA   | 27 | 4  |
| 158397 | 18 | 232406 | 232425 | 2 | 10 | 20 | GA   | 20 | 6  |
| 158399 | 18 | 232668 | 232685 | 2 | 9  | 18 | AC   | 8  | 3  |
| 158401 | 18 | 235385 | 235410 | 2 | 13 | 26 | CA   | 22 | 7  |
| 158409 | 18 | 242777 | 242792 | 2 | 8  | 16 | AC   | 12 | 4  |
| 158411 | 18 | 247576 | 247589 | 2 | 7  | 14 | AC   | 23 | 3  |
| 158416 | 18 | 251700 | 251715 | 4 | 4  | 16 | CGCA | 21 | 6  |
| 158423 | 18 | 253612 | 253623 | 2 | 6  | 12 | GT   | 28 | 3  |
| 158424 | 18 | 257644 | 257687 | 2 | 22 | 44 | GT   | 8  | 12 |
| 158431 | 18 | 271973 | 271992 | 2 | 10 | 20 | GT   | 10 | 4  |
| 158435 | 18 | 276228 | 276243 | 4 | 4  | 16 | TCAG | 27 | 4  |
| 158437 | 18 | 277416 | 277445 | 2 | 15 | 30 | GT   | 7  | 8  |
| 158458 | 18 | 327202 | 327219 | 3 | 6  | 18 | CAG  | 29 | 3  |
| 158460 | 18 | 335047 | 335066 | 2 | 10 | 20 | AC   | 9  | 4  |
| 158462 | 18 | 337167 | 337184 | 2 | 9  | 18 | CA   | 25 | 5  |
| 158464 | 18 | 342733 | 342754 | 2 | 11 | 22 | TG   | 19 | 4  |
| 158477 | 18 | 358551 | 358566 | 2 | 8  | 16 | TG   | 24 | 4  |
| 158478 | 18 | 358787 | 358800 | 2 | 7  | 14 | GA   | 34 | 8  |
| 158479 | 18 | 359147 | 359166 | 2 | 10 | 20 | CA   | 13 | 10 |
| 158480 | 18 | 359213 | 359246 | 2 | 17 | 34 | AC   | 13 | 9  |
| 158482 | 18 | 359655 | 359676 | 2 | 11 | 22 | CA   | 10 | 5  |
| 158483 | 18 | 359820 | 359833 | 2 | 7  | 14 | GA   | 30 | 3  |
| 158484 | 18 | 359944 | 359971 | 2 | 14 | 28 | TG   | 23 | 9  |
| 158488 | 18 | 361155 | 361176 | 2 | 11 | 22 | CT   | 14 | 6  |

|        |    |        |        |   |    |    |      |    |    |
|--------|----|--------|--------|---|----|----|------|----|----|
| 158490 | 18 | 362423 | 362456 | 2 | 17 | 34 | TG   | 13 | 14 |
| 158493 | 18 | 363722 | 363737 | 2 | 8  | 16 | CA   | 26 | 6  |
| 158495 | 18 | 364037 | 364056 | 2 | 10 | 20 | AG   | 18 | 11 |
| 158498 | 18 | 364557 | 364576 | 2 | 10 | 20 | CA   | 23 | 9  |
| 158505 | 18 | 377833 | 377846 | 2 | 7  | 14 | GT   | 25 | 4  |
| 158506 | 18 | 377975 | 378000 | 2 | 13 | 26 | TG   | 19 | 14 |
| 158507 | 18 | 378257 | 378271 | 3 | 5  | 15 | TGC  | 27 | 4  |
| 158511 | 18 | 383811 | 383838 | 2 | 14 | 28 | GT   | 13 | 8  |
| 158513 | 18 | 384135 | 384162 | 2 | 14 | 28 | TG   | 9  | 14 |
| 158516 | 18 | 387615 | 387652 | 2 | 19 | 38 | TG   | 13 | 11 |
| 158518 | 18 | 387824 | 387851 | 2 | 14 | 28 | AC   | 15 | 3  |
| 158519 | 18 | 388021 | 388046 | 2 | 13 | 26 | TG   | 14 | 6  |
| 158522 | 18 | 392257 | 392271 | 3 | 5  | 15 | AAT  | 16 | 3  |
| 158524 | 18 | 395580 | 395591 | 2 | 6  | 12 | TC   | 28 | 3  |
| 158525 | 18 | 395757 | 395770 | 2 | 7  | 14 | GA   | 20 | 4  |
| 158526 | 18 | 396026 | 396055 | 2 | 15 | 30 | AC   | 16 | 11 |
| 158529 | 18 | 398932 | 398947 | 2 | 8  | 16 | CT   | 13 | 5  |
| 158530 | 18 | 399256 | 399277 | 2 | 11 | 22 | TG   | 12 | 5  |
| 158532 | 18 | 403149 | 403164 | 2 | 8  | 16 | GT   | 19 | 10 |
| 158533 | 18 | 404143 | 404164 | 2 | 11 | 22 | TG   | 13 | 8  |
| 158535 | 18 | 405581 | 405598 | 2 | 9  | 18 | GT   | 20 | 8  |
| 158536 | 18 | 406172 | 406185 | 2 | 7  | 14 | CA   | 20 | 3  |
| 158540 | 18 | 416581 | 416596 | 2 | 8  | 16 | TA   | 6  | 3  |
| 158541 | 18 | 417241 | 417268 | 2 | 14 | 28 | AC   | 6  | 8  |
| 158547 | 18 | 424600 | 424611 | 2 | 6  | 12 | TG   | 25 | 4  |
| 158556 | 18 | 435159 | 435186 | 2 | 14 | 28 | GT   | 9  | 7  |
| 158557 | 18 | 438255 | 438280 | 2 | 13 | 26 | GT   | 16 | 11 |
| 158563 | 18 | 457865 | 457892 | 2 | 14 | 28 | GT   | 18 | 6  |
| 158565 | 18 | 462041 | 462064 | 2 | 12 | 24 | AC   | 12 | 4  |
| 158566 | 18 | 462458 | 462485 | 2 | 14 | 28 | AG   | 20 | 8  |
| 158567 | 18 | 464915 | 464946 | 2 | 16 | 32 | CA   | 9  | 7  |
| 158569 | 18 | 469762 | 469789 | 2 | 14 | 28 | GA   | 8  | 6  |
| 158571 | 18 | 473212 | 473223 | 2 | 6  | 12 | GA   | 25 | 4  |
| 158573 | 18 | 474666 | 474679 | 2 | 7  | 14 | TG   | 21 | 5  |
| 158584 | 18 | 489546 | 489581 | 2 | 18 | 36 | CT   | 7  | 9  |
| 158587 | 18 | 494497 | 494516 | 2 | 10 | 20 | GT   | 12 | 6  |
| 158591 | 18 | 497182 | 497195 | 2 | 7  | 14 | AC   | 22 | 5  |
| 158592 | 18 | 497527 | 497560 | 2 | 17 | 34 | AG   | 7  | 9  |
| 158593 | 18 | 497861 | 497896 | 4 | 9  | 36 | ATGG | 23 | 7  |
| 158594 | 18 | 499362 | 499381 | 2 | 10 | 20 | GT   | 28 | 5  |
| 158595 | 18 | 499958 | 500009 | 2 | 26 | 52 | AC   | 8  | 8  |
| 158611 | 18 | 508305 | 508344 | 2 | 20 | 40 | AC   | 13 | 9  |
| 158615 | 18 | 519600 | 519617 | 2 | 9  | 18 | CA   | 20 | 7  |
| 158620 | 18 | 530459 | 530476 | 2 | 9  | 18 | GT   | 18 | 4  |
| 158633 | 18 | 561064 | 561089 | 2 | 13 | 26 | GA   | 17 | 7  |
| 158638 | 18 | 566635 | 566646 | 2 | 6  | 12 | TA   | 15 | 6  |
| 158641 | 18 | 567090 | 567111 | 2 | 11 | 22 | GT   | 14 | 9  |
| 158647 | 18 | 576543 | 576554 | 2 | 6  | 12 | TA   | 27 | 4  |
| 158652 | 18 | 584693 | 584726 | 2 | 17 | 34 | AC   | 9  | 7  |
| 158664 | 18 | 595604 | 595625 | 2 | 11 | 22 | AC   | 11 | 7  |
| 158669 | 18 | 597524 | 597541 | 2 | 9  | 18 | CA   | 20 | 5  |

|        |    |        |        |   |    |    |      |    |    |
|--------|----|--------|--------|---|----|----|------|----|----|
| 158671 | 18 | 600922 | 600942 | 3 | 7  | 21 | TTG  | 15 | 5  |
| 158675 | 18 | 604010 | 604023 | 2 | 7  | 14 | TG   | 19 | 3  |
| 158676 | 18 | 604259 | 604292 | 2 | 17 | 34 | CA   | 12 | 7  |
| 158681 | 18 | 605260 | 605285 | 2 | 13 | 26 | AC   | 14 | 10 |
| 158682 | 18 | 605344 | 605357 | 2 | 7  | 14 | CA   | 16 | 3  |
| 158685 | 18 | 611848 | 611877 | 2 | 15 | 30 | AC   | 6  | 5  |
| 158689 | 18 | 616636 | 616675 | 2 | 20 | 40 | AC   | 8  | 11 |
| 158690 | 18 | 618552 | 618567 | 4 | 4  | 16 | AAAC | 14 | 8  |
| 158691 | 18 | 623296 | 623319 | 4 | 6  | 24 | ATTC | 17 | 4  |
| 158699 | 18 | 651042 | 651053 | 2 | 6  | 12 | TA   | 25 | 3  |
| 158704 | 18 | 660774 | 660785 | 2 | 6  | 12 | CA   | 27 | 3  |
| 158707 | 18 | 674884 | 674899 | 2 | 8  | 16 | TC   | 15 | 4  |
| 158723 | 18 | 701760 | 701785 | 2 | 13 | 26 | CA   | 10 | 7  |
| 158725 | 18 | 706766 | 706787 | 2 | 11 | 22 | TG   | 20 | 16 |
| 158726 | 18 | 708896 | 708909 | 2 | 7  | 14 | GC   | 17 | 20 |
| 158727 | 18 | 708910 | 708929 | 2 | 10 | 20 | AC   | 20 | 19 |
| 158728 | 18 | 712211 | 712226 | 2 | 8  | 16 | TG   | 23 | 6  |
| 158729 | 18 | 712229 | 712240 | 2 | 6  | 12 | TG   | 16 | 5  |
| 158730 | 18 | 712828 | 712847 | 2 | 10 | 20 | TG   | 23 | 5  |
| 158731 | 18 | 713742 | 713761 | 2 | 10 | 20 | GA   | 14 | 4  |
| 158732 | 18 | 715574 | 715591 | 2 | 9  | 18 | AC   | 27 | 7  |
| 158733 | 18 | 717266 | 717279 | 2 | 7  | 14 | TC   | 20 | 3  |
| 158734 | 18 | 717490 | 717505 | 2 | 8  | 16 | GA   | 14 | 7  |
| 158736 | 18 | 719686 | 719711 | 2 | 13 | 26 | CT   | 8  | 8  |
| 158737 | 18 | 719760 | 719773 | 2 | 7  | 14 | CA   | 9  | 3  |
| 158738 | 18 | 719824 | 719837 | 2 | 7  | 14 | CA   | 19 | 5  |
| 158739 | 18 | 720848 | 720863 | 2 | 8  | 16 | TG   | 20 | 3  |
| 158740 | 18 | 721038 | 721055 | 2 | 9  | 18 | AC   | 23 | 6  |
| 158746 | 18 | 729959 | 729974 | 2 | 8  | 16 | TG   | 20 | 3  |
| 158750 | 18 | 736744 | 736773 | 2 | 15 | 30 | CT   | 18 | 11 |
| 158756 | 18 | 743578 | 743604 | 3 | 9  | 27 | TGC  | 24 | 6  |
| 158770 | 18 | 753352 | 753363 | 2 | 6  | 12 | AG   | 31 | 3  |
| 158771 | 18 | 753364 | 753375 | 2 | 6  | 12 | AC   | 28 | 3  |
| 158772 | 18 | 754990 | 755013 | 2 | 12 | 24 | GT   | 20 | 13 |
| 158775 | 18 | 764166 | 764189 | 3 | 8  | 24 | CCT  | 24 | 4  |
| 158783 | 18 | 771478 | 771507 | 3 | 10 | 30 | AGG  | 13 | 8  |
| 158786 | 18 | 773805 | 773832 | 2 | 14 | 28 | CA   | 7  | 10 |
| 158787 | 18 | 774213 | 774227 | 3 | 5  | 15 | TTG  | 19 | 3  |
| 158790 | 18 | 774506 | 774519 | 2 | 7  | 14 | CA   | 11 | 5  |
| 158798 | 18 | 780573 | 780594 | 2 | 11 | 22 | AC   | 25 | 8  |
| 158807 | 18 | 787114 | 787127 | 2 | 7  | 14 | AC   | 15 | 9  |
| 158809 | 18 | 787394 | 787405 | 2 | 6  | 12 | GT   | 21 | 5  |
| 158810 | 18 | 787702 | 787715 | 2 | 7  | 14 | AT   | 24 | 16 |
| 158813 | 18 | 789353 | 789376 | 2 | 12 | 24 | TG   | 9  | 6  |
| 158816 | 18 | 791672 | 791683 | 2 | 6  | 12 | TG   | 30 | 6  |
| 158817 | 18 | 791686 | 791697 | 2 | 6  | 12 | TG   | 31 | 4  |
| 158820 | 18 | 794181 | 794196 | 2 | 8  | 16 | TG   | 10 | 5  |
| 158823 | 18 | 794995 | 795014 | 4 | 5  | 20 | TTTC | 14 | 8  |
| 158827 | 18 | 797789 | 797814 | 2 | 13 | 26 | AC   | 13 | 14 |
| 158831 | 18 | 798871 | 798886 | 2 | 8  | 16 | TG   | 11 | 10 |
| 158833 | 18 | 798911 | 798930 | 2 | 10 | 20 | AG   | 14 | 3  |

|        |    |         |         |   |    |    |      |    |    |
|--------|----|---------|---------|---|----|----|------|----|----|
| 158834 | 18 | 799296  | 799309  | 2 | 7  | 14 | CT   | 25 | 3  |
| 158840 | 18 | 801166  | 801179  | 2 | 7  | 14 | CA   | 24 | 4  |
| 158842 | 18 | 802175  | 802192  | 3 | 6  | 18 | GAG  | 22 | 4  |
| 158846 | 18 | 804336  | 804355  | 2 | 10 | 20 | AC   | 18 | 6  |
| 158847 | 18 | 804601  | 804624  | 3 | 8  | 24 | AAT  | 15 | 8  |
| 158850 | 18 | 805776  | 805793  | 2 | 9  | 18 | CA   | 19 | 11 |
| 158851 | 18 | 806122  | 806153  | 2 | 16 | 32 | TG   | 15 | 6  |
| 158852 | 18 | 806448  | 806463  | 2 | 8  | 16 | AC   | 19 | 6  |
| 158855 | 18 | 808049  | 808066  | 2 | 9  | 18 | TC   | 19 | 5  |
| 158857 | 18 | 811437  | 811454  | 3 | 6  | 18 | GAG  | 24 | 4  |
| 158860 | 18 | 814405  | 814425  | 3 | 7  | 21 | CAG  | 24 | 7  |
| 158862 | 18 | 815575  | 815604  | 2 | 15 | 30 | GT   | 19 | 11 |
| 158865 | 18 | 816101  | 816130  | 3 | 10 | 30 | TCT  | 16 | 4  |
| 158866 | 18 | 816848  | 816880  | 3 | 11 | 33 | TGT  | 22 | 7  |
| 158867 | 18 | 817678  | 817697  | 2 | 10 | 20 | CA   | 20 | 14 |
| 158870 | 18 | 820969  | 820983  | 3 | 5  | 15 | TCT  | 22 | 9  |
| 158873 | 18 | 821811  | 821828  | 2 | 9  | 18 | GT   | 22 | 15 |
| 158874 | 18 | 822876  | 822889  | 2 | 7  | 14 | AC   | 21 | 6  |
| 158875 | 18 | 822892  | 822903  | 2 | 6  | 12 | AC   | 8  | 4  |
| 158878 | 18 | 823780  | 823801  | 2 | 11 | 22 | GT   | 15 | 10 |
| 158879 | 18 | 824062  | 824081  | 2 | 10 | 20 | TG   | 19 | 12 |
| 158885 | 18 | 828959  | 828973  | 3 | 5  | 15 | AAT  | 19 | 3  |
| 158886 | 18 | 829154  | 829169  | 2 | 8  | 16 | CA   | 23 | 8  |
| 158896 | 18 | 845028  | 845048  | 3 | 7  | 21 | GCT  | 19 | 4  |
| 158912 | 18 | 860139  | 860150  | 2 | 6  | 12 | CA   | 21 | 9  |
| 158913 | 18 | 860153  | 860164  | 2 | 6  | 12 | CA   | 18 | 7  |
| 158923 | 18 | 878835  | 878854  | 2 | 10 | 20 | TG   | 16 | 14 |
| 158924 | 18 | 879126  | 879141  | 2 | 8  | 16 | GT   | 16 | 5  |
| 158926 | 18 | 883083  | 883112  | 2 | 15 | 30 | GT   | 11 | 10 |
| 158928 | 18 | 886814  | 886829  | 4 | 4  | 16 | TTTC | 25 | 4  |
| 158949 | 18 | 943446  | 943460  | 3 | 5  | 15 | TGA  | 29 | 3  |
| 158950 | 18 | 944015  | 944036  | 2 | 11 | 22 | TG   | 19 | 9  |
| 158952 | 18 | 947173  | 947186  | 2 | 7  | 14 | AC   | 25 | 9  |
| 158956 | 18 | 953246  | 953263  | 2 | 9  | 18 | TG   | 28 | 3  |
| 158958 | 18 | 955225  | 955240  | 4 | 4  | 16 | AGGC | 23 | 3  |
| 158964 | 18 | 962604  | 962631  | 2 | 14 | 28 | AG   | 9  | 8  |
| 158965 | 18 | 963021  | 963054  | 2 | 17 | 34 | CT   | 14 | 7  |
| 158970 | 18 | 966286  | 966341  | 2 | 28 | 56 | AC   | 7  | 7  |
| 158972 | 18 | 972234  | 972245  | 2 | 6  | 12 | AG   | 28 | 5  |
| 158973 | 18 | 972366  | 972387  | 2 | 11 | 22 | CT   | 16 | 6  |
| 158975 | 18 | 973314  | 973341  | 2 | 14 | 28 | AC   | 9  | 5  |
| 158979 | 18 | 985388  | 985427  | 2 | 20 | 40 | CA   | 8  | 12 |
| 158983 | 18 | 989272  | 989289  | 2 | 9  | 18 | CA   | 25 | 7  |
| 158986 | 18 | 990846  | 990871  | 2 | 13 | 26 | GT   | 19 | 10 |
| 159003 | 18 | 1013163 | 1013182 | 2 | 10 | 20 | CA   | 22 | 4  |
| 159014 | 18 | 1044099 | 1044122 | 4 | 6  | 24 | AAAC | 15 | 4  |
| 159019 | 18 | 1050600 | 1050614 | 3 | 5  | 15 | CCT  | 20 | 6  |
| 159020 | 18 | 1050941 | 1050974 | 2 | 17 | 34 | GT   | 12 | 9  |
| 159023 | 18 | 1055705 | 1055716 | 2 | 6  | 12 | CT   | 14 | 6  |
| 159025 | 18 | 1063985 | 1064016 | 2 | 16 | 32 | TG   | 11 | 9  |
| 159027 | 18 | 1064656 | 1064671 | 4 | 4  | 16 | TTTG | 19 | 3  |

|        |    |         |         |   |    |    |      |    |    |
|--------|----|---------|---------|---|----|----|------|----|----|
| 159033 | 18 | 1071345 | 1071366 | 2 | 11 | 22 | AG   | 23 | 10 |
| 159044 | 18 | 1093061 | 1093078 | 3 | 6  | 18 | GTG  | 11 | 5  |
| 159050 | 18 | 1103515 | 1103528 | 2 | 7  | 14 | AC   | 30 | 3  |
| 159051 | 18 | 1106225 | 1106240 | 4 | 4  | 16 | GATG | 27 | 5  |
| 159053 | 18 | 1108984 | 1109007 | 2 | 12 | 24 | CA   | 25 | 8  |
| 159054 | 18 | 1112051 | 1112070 | 2 | 10 | 20 | GT   | 15 | 7  |
| 159055 | 18 | 1112216 | 1112227 | 2 | 6  | 12 | CA   | 10 | 5  |
| 159056 | 18 | 1112229 | 1112248 | 2 | 10 | 20 | AC   | 20 | 4  |
| 159058 | 18 | 1118960 | 1118983 | 3 | 8  | 24 | ATG  | 19 | 8  |
| 159061 | 18 | 1125089 | 1125142 | 2 | 27 | 54 | TG   | 14 | 15 |
| 159062 | 18 | 1128106 | 1128137 | 2 | 16 | 32 | AC   | 23 | 8  |
| 159063 | 18 | 1130499 | 1130524 | 2 | 13 | 26 | AG   | 20 | 6  |
| 159066 | 18 | 1137162 | 1137177 | 2 | 8  | 16 | CA   | 20 | 8  |
| 159069 | 18 | 1150757 | 1150780 | 4 | 6  | 24 | AAAC | 31 | 3  |
| 159070 | 18 | 1151018 | 1151029 | 2 | 6  | 12 | TA   | 20 | 5  |
| 159072 | 18 | 1158171 | 1158184 | 2 | 7  | 14 | TG   | 10 | 9  |
| 159074 | 18 | 1160036 | 1160055 | 2 | 10 | 20 | AC   | 13 | 12 |
| 159080 | 18 | 1165337 | 1165352 | 4 | 4  | 16 | AAAC | 29 | 3  |
| 159082 | 18 | 1169252 | 1169269 | 3 | 6  | 18 | GAT  | 32 | 3  |
| 159085 | 18 | 1188799 | 1188824 | 2 | 13 | 26 | AC   | 15 | 6  |
| 159091 | 18 | 1205309 | 1205338 | 2 | 15 | 30 | AC   | 19 | 11 |
| 159095 | 18 | 1222034 | 1222055 | 2 | 11 | 22 | CA   | 22 | 5  |
| 159098 | 18 | 1230572 | 1230587 | 2 | 8  | 16 | TG   | 19 | 7  |
| 159100 | 18 | 1241165 | 1241184 | 4 | 5  | 20 | TTTC | 17 | 3  |
| 159103 | 18 | 1244112 | 1244141 | 2 | 15 | 30 | CA   | 11 | 9  |
| 159104 | 18 | 1244278 | 1244291 | 2 | 7  | 14 | GT   | 18 | 3  |
| 159107 | 18 | 1246530 | 1246549 | 2 | 10 | 20 | CA   | 19 | 7  |
| 159108 | 18 | 1247790 | 1247819 | 2 | 15 | 30 | GT   | 15 | 13 |
| 159120 | 18 | 1271119 | 1271142 | 3 | 8  | 24 | GCT  | 29 | 7  |
| 159122 | 18 | 1272866 | 1272898 | 3 | 11 | 33 | GCA  | 27 | 7  |
| 159128 | 18 | 1285190 | 1285203 | 2 | 7  | 14 | TG   | 27 | 5  |
| 159129 | 18 | 1285436 | 1285459 | 2 | 12 | 24 | CT   | 16 | 8  |
| 159138 | 18 | 1303113 | 1303133 | 3 | 7  | 21 | AGG  | 12 | 4  |
| 159140 | 18 | 1303822 | 1303841 | 4 | 5  | 20 | TTTC | 8  | 5  |
| 159143 | 18 | 1309085 | 1309102 | 2 | 9  | 18 | TC   | 15 | 11 |
| 159158 | 18 | 1390633 | 1390646 | 2 | 7  | 14 | TG   | 26 | 3  |
| 159160 | 18 | 1390958 | 1390971 | 2 | 7  | 14 | CA   | 23 | 3  |
| 159162 | 18 | 1396307 | 1396330 | 4 | 6  | 24 | AGCC | 23 | 7  |
| 159169 | 18 | 1403772 | 1403797 | 2 | 13 | 26 | GT   | 13 | 8  |
| 159180 | 18 | 1428629 | 1428654 | 2 | 13 | 26 | CA   | 12 | 14 |
| 159185 | 18 | 1434847 | 1434860 | 2 | 7  | 14 | CA   | 25 | 3  |
| 159186 | 18 | 1436170 | 1436203 | 2 | 17 | 34 | TG   | 12 | 10 |
| 159189 | 18 | 1439660 | 1439681 | 2 | 11 | 22 | TG   | 24 | 4  |
| 159190 | 18 | 1439913 | 1439936 | 4 | 6  | 24 | AGAA | 23 | 3  |
| 159191 | 18 | 1442446 | 1442477 | 2 | 16 | 32 | TG   | 12 | 11 |
| 159195 | 18 | 1444320 | 1444343 | 2 | 12 | 24 | TC   | 21 | 8  |
| 159198 | 18 | 1445624 | 1445663 | 2 | 20 | 40 | TG   | 13 | 10 |
| 159208 | 18 | 1453754 | 1453777 | 3 | 8  | 24 | CTC  | 14 | 3  |
| 159210 | 18 | 1457112 | 1457127 | 2 | 8  | 16 | AC   | 18 | 5  |
| 159212 | 18 | 1459525 | 1459542 | 2 | 9  | 18 | GT   | 24 | 3  |
| 159213 | 18 | 1468563 | 1468612 | 2 | 25 | 50 | TG   | 10 | 9  |

|        |    |         |         |   |    |    |      |    |    |
|--------|----|---------|---------|---|----|----|------|----|----|
| 159214 | 18 | 1469001 | 1469021 | 3 | 7  | 21 | CTG  | 30 | 3  |
| 159215 | 18 | 1469669 | 1469684 | 2 | 8  | 16 | GA   | 28 | 4  |
| 159217 | 18 | 1471822 | 1471861 | 4 | 10 | 40 | GTCT | 25 | 4  |
| 159233 | 18 | 1486783 | 1486824 | 2 | 21 | 42 | GT   | 6  | 8  |
| 159236 | 18 | 1494240 | 1494257 | 2 | 9  | 18 | CA   | 15 | 9  |
| 159237 | 18 | 1494259 | 1494278 | 2 | 10 | 20 | AC   | 11 | 8  |
| 159252 | 18 | 1518092 | 1518105 | 2 | 7  | 14 | GT   | 19 | 4  |
| 159259 | 18 | 1534406 | 1534447 | 3 | 14 | 42 | TAT  | 8  | 9  |
| 159260 | 18 | 1534867 | 1534884 | 2 | 9  | 18 | CT   | 23 | 4  |
| 159262 | 18 | 1539806 | 1539819 | 2 | 7  | 14 | AT   | 22 | 6  |
| 159263 | 18 | 1540477 | 1540494 | 2 | 9  | 18 | TG   | 14 | 11 |
| 159269 | 18 | 1545246 | 1545271 | 2 | 13 | 26 | AC   | 16 | 12 |
| 159272 | 18 | 1550106 | 1550135 | 2 | 15 | 30 | TG   | 16 | 11 |
| 159274 | 18 | 1552859 | 1552874 | 4 | 4  | 16 | TTTA | 19 | 4  |
| 159275 | 18 | 1553041 | 1553072 | 4 | 8  | 32 | AAAC | 17 | 5  |
| 159279 | 18 | 1560684 | 1560695 | 2 | 6  | 12 | GT   | 26 | 3  |
| 159280 | 18 | 1562271 | 1562298 | 2 | 14 | 28 | AC   | 17 | 11 |
| 159283 | 18 | 1570409 | 1570430 | 2 | 11 | 22 | TG   | 17 | 8  |
| 159292 | 18 | 1581200 | 1581241 | 2 | 21 | 42 | AC   | 7  | 8  |
| 159296 | 18 | 1588703 | 1588714 | 2 | 6  | 12 | CA   | 26 | 3  |
| 159297 | 18 | 1588969 | 1589004 | 2 | 18 | 36 | GT   | 14 | 10 |
| 159298 | 18 | 1589860 | 1589871 | 2 | 6  | 12 | AC   | 15 | 3  |
| 159302 | 18 | 1599505 | 1599518 | 2 | 7  | 14 | AG   | 23 | 3  |
| 159307 | 18 | 1603082 | 1603105 | 2 | 12 | 24 | TG   | 20 | 10 |
| 159310 | 18 | 1608613 | 1608628 | 2 | 8  | 16 | GT   | 22 | 6  |
| 159313 | 18 | 1610555 | 1610568 | 2 | 7  | 14 | CA   | 20 | 8  |
| 159316 | 18 | 1613525 | 1613548 | 2 | 12 | 24 | TG   | 14 | 9  |
| 159317 | 18 | 1613740 | 1613751 | 2 | 6  | 12 | AC   | 21 | 3  |
| 159318 | 18 | 1613754 | 1613767 | 2 | 7  | 14 | AC   | 21 | 3  |
| 159319 | 18 | 1614243 | 1614254 | 2 | 6  | 12 | AC   | 16 | 5  |
| 159325 | 18 | 1626262 | 1626283 | 2 | 11 | 22 | GA   | 13 | 10 |
| 159327 | 18 | 1628866 | 1628877 | 2 | 6  | 12 | GT   | 25 | 5  |
| 159329 | 18 | 1630706 | 1630723 | 3 | 6  | 18 | TCC  | 18 | 3  |
| 159330 | 18 | 1630922 | 1630941 | 2 | 10 | 20 | TC   | 13 | 7  |
| 159336 | 18 | 1635912 | 1635951 | 2 | 20 | 40 | AC   | 7  | 11 |
| 159337 | 18 | 1636036 | 1636067 | 2 | 16 | 32 | AC   | 11 | 9  |
| 159339 | 18 | 1637029 | 1637043 | 3 | 5  | 15 | TGC  | 11 | 7  |
| 159340 | 18 | 1637102 | 1637117 | 2 | 8  | 16 | TG   | 13 | 7  |
| 159341 | 18 | 1637118 | 1637131 | 2 | 7  | 14 | AG   | 13 | 7  |
| 159343 | 18 | 1639692 | 1639705 | 2 | 7  | 14 | TG   | 25 | 4  |
| 159345 | 18 | 1641651 | 1641666 | 2 | 8  | 16 | AC   | 26 | 4  |
| 159350 | 18 | 1648324 | 1648361 | 2 | 19 | 38 | AC   | 9  | 12 |
| 159352 | 18 | 1652164 | 1652227 | 4 | 16 | 64 | GATA | 25 | 25 |
| 159358 | 18 | 1666242 | 1666269 | 2 | 14 | 28 | GT   | 19 | 6  |
| 159374 | 18 | 1717338 | 1717349 | 2 | 6  | 12 | AG   | 27 | 3  |
| 159375 | 18 | 1717988 | 1718015 | 2 | 14 | 28 | CA   | 19 | 9  |
| 159381 | 18 | 1735657 | 1735700 | 2 | 22 | 44 | AC   | 8  | 12 |
| 159386 | 18 | 1763105 | 1763132 | 4 | 7  | 28 | TCAA | 29 | 6  |
| 159390 | 18 | 1778917 | 1778928 | 2 | 6  | 12 | AT   | 16 | 4  |
| 159391 | 18 | 1780100 | 1780119 | 2 | 10 | 20 | GT   | 25 | 9  |
| 159395 | 18 | 1794664 | 1794677 | 2 | 7  | 14 | AC   | 26 | 3  |

|        |    |         |         |   |    |    |      |    |    |
|--------|----|---------|---------|---|----|----|------|----|----|
| 159398 | 18 | 1798881 | 1798908 | 2 | 14 | 28 | TG   | 15 | 7  |
| 159401 | 18 | 1805690 | 1805707 | 2 | 9  | 18 | AC   | 27 | 8  |
| 159402 | 18 | 1806672 | 1806721 | 2 | 25 | 50 | GT   | 7  | 8  |
| 159404 | 18 | 1809421 | 1809448 | 4 | 7  | 28 | GTCA | 29 | 3  |
| 159405 | 18 | 1809943 | 1809966 | 4 | 6  | 24 | AATG | 14 | 8  |
| 159408 | 18 | 1811520 | 1811543 | 3 | 8  | 24 | AGG  | 11 | 6  |
| 159410 | 18 | 1813398 | 1813411 | 2 | 7  | 14 | CA   | 27 | 6  |
| 159414 | 18 | 1822747 | 1822770 | 2 | 12 | 24 | GT   | 15 | 10 |
| 159425 | 18 | 1833428 | 1833439 | 2 | 6  | 12 | TG   | 32 | 4  |
| 159426 | 18 | 1841094 | 1841111 | 2 | 9  | 18 | TG   | 20 | 7  |
| 159436 | 18 | 1880938 | 1880953 | 2 | 8  | 16 | TG   | 23 | 5  |
| 159443 | 18 | 1904952 | 1904966 | 3 | 5  | 15 | AGC  | 26 | 3  |
| 159444 | 18 | 1909383 | 1909397 | 3 | 5  | 15 | TGC  | 25 | 3  |
| 159445 | 18 | 1918995 | 1919016 | 2 | 11 | 22 | CA   | 19 | 10 |
| 159449 | 18 | 1927832 | 1927849 | 3 | 6  | 18 | CCT  | 26 | 3  |
| 159450 | 18 | 1928073 | 1928090 | 3 | 6  | 18 | CCT  | 25 | 4  |
| 159451 | 18 | 1932871 | 1932892 | 2 | 11 | 22 | AC   | 16 | 3  |
| 159455 | 18 | 1937849 | 1937860 | 2 | 6  | 12 | AC   | 29 | 6  |
| 159456 | 18 | 1938383 | 1938394 | 2 | 6  | 12 | AT   | 21 | 9  |
| 159460 | 18 | 1947599 | 1947632 | 2 | 17 | 34 | CA   | 25 | 18 |
| 159463 | 18 | 1965037 | 1965050 | 2 | 7  | 14 | GA   | 20 | 6  |
| 159469 | 18 | 1968086 | 1968109 | 2 | 12 | 24 | TG   | 23 | 8  |
| 159483 | 18 | 1986846 | 1986859 | 2 | 7  | 14 | CA   | 18 | 5  |
| 159485 | 18 | 1987163 | 1987174 | 2 | 6  | 12 | CA   | 23 | 7  |
| 159486 | 18 | 1989354 | 1989399 | 2 | 23 | 46 | TG   | 9  | 11 |
| 159489 | 18 | 2003294 | 2003319 | 2 | 13 | 26 | CA   | 18 | 9  |
| 159491 | 18 | 2010057 | 2010070 | 2 | 7  | 14 | CA   | 21 | 3  |
| 159493 | 18 | 2024473 | 2024484 | 2 | 6  | 12 | CA   | 24 | 3  |
| 159499 | 18 | 2029880 | 2029895 | 2 | 8  | 16 | TC   | 13 | 6  |
| 159503 | 18 | 2047421 | 2047472 | 2 | 26 | 52 | TG   | 10 | 10 |
| 159510 | 18 | 2060717 | 2060730 | 2 | 7  | 14 | AC   | 7  | 5  |
| 159516 | 18 | 2071466 | 2071501 | 3 | 12 | 36 | ATT  | 6  | 7  |
| 159517 | 18 | 2073848 | 2073871 | 2 | 12 | 24 | GT   | 13 | 6  |
| 159518 | 18 | 2074093 | 2074116 | 3 | 8  | 24 | GGA  | 27 | 4  |
| 159519 | 18 | 2080482 | 2080493 | 2 | 6  | 12 | CA   | 8  | 3  |
| 159520 | 18 | 2082832 | 2082855 | 2 | 12 | 24 | AG   | 9  | 6  |
| 159521 | 18 | 2083174 | 2083193 | 2 | 10 | 20 | TG   | 20 | 5  |
| 159524 | 18 | 2094111 | 2094126 | 2 | 8  | 16 | GT   | 29 | 8  |
| 159525 | 18 | 2104056 | 2104070 | 3 | 5  | 15 | AAG  | 13 | 4  |
| 159529 | 18 | 2108367 | 2108384 | 3 | 6  | 18 | CCT  | 22 | 3  |
| 159531 | 18 | 2108986 | 2109013 | 4 | 7  | 28 | AAAC | 17 | 13 |
| 159532 | 18 | 2109328 | 2109347 | 4 | 5  | 20 | TGGA | 22 | 7  |
| 159533 | 18 | 2111159 | 2111206 | 3 | 16 | 48 | CAG  | 25 | 19 |
| 159538 | 18 | 2114276 | 2114299 | 2 | 12 | 24 | TG   | 13 | 8  |
| 159545 | 18 | 2118701 | 2118724 | 3 | 8  | 24 | GGA  | 23 | 5  |
| 159551 | 18 | 2125171 | 2125192 | 2 | 11 | 22 | TG   | 22 | 3  |
| 159560 | 18 | 2143233 | 2143254 | 2 | 11 | 22 | TG   | 17 | 13 |
| 159565 | 18 | 2148325 | 2148348 | 3 | 8  | 24 | CAG  | 33 | 7  |
| 159566 | 18 | 2149537 | 2149584 | 2 | 24 | 48 | CA   | 9  | 6  |
| 159573 | 18 | 2160097 | 2160130 | 2 | 17 | 34 | TC   | 12 | 7  |
| 159574 | 18 | 2160572 | 2160595 | 3 | 8  | 24 | CAC  | 25 | 4  |

|        |    |         |         |   |    |    |      |    |    |
|--------|----|---------|---------|---|----|----|------|----|----|
| 159578 | 18 | 2162108 | 2162123 | 2 | 8  | 16 | TC   | 21 | 7  |
| 159579 | 18 | 2164879 | 2164893 | 3 | 5  | 15 | AAT  | 12 | 3  |
| 159581 | 18 | 2168938 | 2168957 | 4 | 5  | 20 | AGGC | 22 | 5  |
| 159585 | 18 | 2184359 | 2184380 | 2 | 11 | 22 | AC   | 16 | 8  |
| 159586 | 18 | 2184687 | 2184701 | 3 | 5  | 15 | CAA  | 25 | 3  |
| 159595 | 18 | 2204951 | 2204968 | 2 | 9  | 18 | CT   | 19 | 5  |
| 159597 | 18 | 2205523 | 2205536 | 2 | 7  | 14 | CA   | 22 | 5  |
| 159602 | 18 | 2215963 | 2215974 | 2 | 6  | 12 | TG   | 24 | 3  |
| 159606 | 18 | 2226428 | 2226443 | 4 | 4  | 16 | TTTG | 31 | 3  |
| 159609 | 18 | 2230604 | 2230625 | 2 | 11 | 22 | CA   | 27 | 15 |
| 159611 | 18 | 2231108 | 2231129 | 2 | 11 | 22 | TG   | 25 | 7  |
| 159617 | 18 | 2251213 | 2251232 | 2 | 10 | 20 | AC   | 11 | 10 |
| 159618 | 18 | 2251624 | 2251637 | 2 | 7  | 14 | AC   | 22 | 3  |
| 159619 | 18 | 2252030 | 2252055 | 2 | 13 | 26 | TG   | 12 | 6  |
| 159621 | 18 | 2255309 | 2255326 | 2 | 9  | 18 | AG   | 24 | 5  |
| 159624 | 18 | 2256482 | 2256511 | 2 | 15 | 30 | AG   | 18 | 7  |
| 159625 | 18 | 2256860 | 2256889 | 2 | 15 | 30 | CT   | 11 | 6  |
| 159626 | 18 | 2257026 | 2257045 | 2 | 10 | 20 | AG   | 21 | 5  |
| 159631 | 18 | 2266054 | 2266071 | 2 | 9  | 18 | CA   | 17 | 3  |
| 159634 | 18 | 2285753 | 2285768 | 2 | 8  | 16 | GA   | 19 | 4  |
| 159635 | 18 | 2285770 | 2285783 | 2 | 7  | 14 | AG   | 17 | 4  |
| 159655 | 18 | 2333436 | 2333447 | 2 | 6  | 12 | TG   | 27 | 4  |
| 159657 | 18 | 2334017 | 2334028 | 2 | 6  | 12 | GT   | 19 | 3  |
| 159658 | 18 | 2334192 | 2334213 | 2 | 11 | 22 | CA   | 9  | 4  |
| 159660 | 18 | 2342075 | 2342086 | 2 | 6  | 12 | AG   | 27 | 3  |
| 159661 | 18 | 2344243 | 2344266 | 4 | 6  | 24 | TTTA | 11 | 3  |
| 159668 | 18 | 2351005 | 2351054 | 2 | 25 | 50 | AC   | 13 | 11 |
| 159669 | 18 | 2352131 | 2352150 | 2 | 10 | 20 | TG   | 20 | 9  |
| 159670 | 18 | 2352341 | 2352354 | 2 | 7  | 14 | CT   | 23 | 5  |
| 159671 | 18 | 2352355 | 2352368 | 2 | 7  | 14 | CA   | 24 | 4  |
| 159672 | 18 | 2354148 | 2354163 | 4 | 4  | 16 | AATA | 25 | 3  |
| 159674 | 18 | 2357460 | 2357480 | 3 | 7  | 21 | GGA  | 17 | 4  |
| 159675 | 18 | 2357544 | 2357561 | 3 | 6  | 18 | CTG  | 21 | 3  |
| 159676 | 18 | 2358413 | 2358426 | 2 | 7  | 14 | AC   | 28 | 4  |
| 159686 | 18 | 2415476 | 2415497 | 2 | 11 | 22 | AC   | 14 | 5  |
| 159690 | 18 | 2431264 | 2431287 | 3 | 8  | 24 | TGT  | 19 | 3  |
| 159705 | 18 | 2468556 | 2468583 | 2 | 14 | 28 | TC   | 19 | 6  |
| 159712 | 18 | 2486990 | 2487001 | 2 | 6  | 12 | GT   | 29 | 3  |
| 159713 | 18 | 2488761 | 2488776 | 4 | 4  | 16 | GACA | 24 | 4  |
| 159719 | 18 | 2502406 | 2502421 | 2 | 8  | 16 | GA   | 25 | 7  |
| 159720 | 18 | 2502765 | 2502788 | 3 | 8  | 24 | CAT  | 17 | 3  |
| 159729 | 18 | 2522712 | 2522739 | 2 | 14 | 28 | CA   | 12 | 12 |
| 159734 | 18 | 2539424 | 2539459 | 4 | 9  | 36 | AAAC | 12 | 4  |
| 159751 | 18 | 2606047 | 2606064 | 3 | 6  | 18 | TCC  | 22 | 4  |
| 159752 | 18 | 2606589 | 2606608 | 2 | 10 | 20 | CA   | 18 | 6  |
| 159756 | 18 | 2611630 | 2611644 | 3 | 5  | 15 | TGT  | 11 | 8  |
| 159758 | 18 | 2614458 | 2614472 | 3 | 5  | 15 | TAT  | 14 | 3  |
| 159759 | 18 | 2614474 | 2614488 | 3 | 5  | 15 | ATT  | 15 | 4  |
| 159764 | 18 | 2628594 | 2628607 | 2 | 7  | 14 | CA   | 22 | 4  |
| 159773 | 18 | 2643936 | 2643955 | 2 | 10 | 20 | TC   | 19 | 4  |
| 159774 | 18 | 2648928 | 2648947 | 2 | 10 | 20 | TG   | 22 | 5  |



|        |    |         |         |   |    |    |      |    |    |
|--------|----|---------|---------|---|----|----|------|----|----|
| 159777 | 18 | 2651897 | 2651917 | 3 | 7  | 21 | TCC  | 16 | 4  |
| 159782 | 18 | 2673125 | 2673176 | 2 | 26 | 52 | CA   | 8  | 11 |
| 159790 | 18 | 2686393 | 2686412 | 4 | 5  | 20 | AAAT | 23 | 3  |
| 159793 | 18 | 2690716 | 2690735 | 2 | 10 | 20 | GT   | 12 | 3  |
| 159800 | 18 | 2727433 | 2727450 | 3 | 6  | 18 | CAG  | 25 | 3  |
| 159803 | 18 | 2736118 | 2736139 | 2 | 11 | 22 | TG   | 18 | 8  |
| 159805 | 18 | 2745592 | 2745619 | 2 | 14 | 28 | TG   | 18 | 7  |
| 159817 | 18 | 2768508 | 2768519 | 2 | 6  | 12 | AT   | 12 | 4  |
| 159822 | 18 | 2777170 | 2777201 | 2 | 16 | 32 | AG   | 8  | 4  |
| 159825 | 18 | 2781254 | 2781281 | 2 | 14 | 28 | TG   | 13 | 10 |
| 159833 | 18 | 2797490 | 2797509 | 2 | 10 | 20 | CA   | 11 | 7  |
| 159841 | 18 | 2815176 | 2815223 | 4 | 12 | 48 | AGAA | 9  | 9  |
| 159849 | 18 | 2848803 | 2848826 | 2 | 12 | 24 | TG   | 13 | 15 |
| 159858 | 18 | 2863985 | 2863998 | 2 | 7  | 14 | GT   | 27 | 3  |
| 159862 | 18 | 2873452 | 2873475 | 2 | 12 | 24 | GT   | 6  | 5  |
| 159863 | 18 | 2874083 | 2874108 | 2 | 13 | 26 | TG   | 17 | 13 |
| 159876 | 18 | 2898259 | 2898284 | 2 | 13 | 26 | AC   | 15 | 8  |
| 159878 | 18 | 2899914 | 2899940 | 3 | 9  | 27 | CAG  | 22 | 7  |
| 159879 | 18 | 2900104 | 2900125 | 2 | 11 | 22 | AG   | 15 | 6  |
| 159886 | 18 | 2907284 | 2907299 | 2 | 8  | 16 | GT   | 19 | 14 |
| 159890 | 18 | 2931785 | 2931796 | 2 | 6  | 12 | TG   | 17 | 5  |
| 159897 | 18 | 2948626 | 2948645 | 4 | 5  | 20 | TGTT | 27 | 3  |
| 159899 | 18 | 2955373 | 2955405 | 3 | 11 | 33 | ATA  | 13 | 6  |
| 159907 | 18 | 2972153 | 2972164 | 2 | 6  | 12 | CA   | 20 | 3  |
| 159908 | 18 | 2972557 | 2972580 | 3 | 8  | 24 | CTC  | 20 | 5  |
| 159916 | 18 | 2987637 | 2987664 | 2 | 14 | 28 | AC   | 16 | 7  |
| 159919 | 18 | 3013368 | 3013379 | 2 | 6  | 12 | AC   | 26 | 4  |
| 159922 | 18 | 3019984 | 3020017 | 2 | 17 | 34 | CT   | 11 | 7  |
| 159925 | 18 | 3029684 | 3029697 | 2 | 7  | 14 | AG   | 28 | 3  |
| 159929 | 18 | 3040717 | 3040738 | 2 | 11 | 22 | GT   | 25 | 4  |
| 159930 | 18 | 3049039 | 3049070 | 2 | 16 | 32 | CA   | 24 | 10 |
| 159934 | 18 | 3058685 | 3058712 | 2 | 14 | 28 | GT   | 14 | 8  |
| 159936 | 18 | 3068735 | 3068750 | 2 | 8  | 16 | TG   | 28 | 4  |
| 159941 | 18 | 3077540 | 3077563 | 4 | 6  | 24 | TAGA | 28 | 5  |
| 159943 | 18 | 3078273 | 3078292 | 2 | 10 | 20 | CA   | 19 | 13 |
| 159944 | 18 | 3078349 | 3078372 | 2 | 12 | 24 | AC   | 17 | 10 |
| 159945 | 18 | 3079235 | 3079252 | 3 | 6  | 18 | TGC  | 23 | 4  |
| 159949 | 18 | 3083776 | 3083789 | 2 | 7  | 14 | AT   | 23 | 9  |
| 159953 | 18 | 3086727 | 3086758 | 4 | 8  | 32 | CAGA | 32 | 7  |
| 159956 | 18 | 3098596 | 3098615 | 2 | 10 | 20 | GT   | 22 | 6  |
| 159957 | 18 | 3099349 | 3099364 | 2 | 8  | 16 | TG   | 23 | 6  |
| 159960 | 18 | 3099719 | 3099740 | 2 | 11 | 22 | CA   | 16 | 9  |
| 159962 | 18 | 3103217 | 3103243 | 3 | 9  | 27 | GAG  | 20 | 5  |
| 159964 | 18 | 3103417 | 3103440 | 2 | 12 | 24 | AG   | 17 | 6  |
| 159967 | 18 | 3111985 | 3111999 | 3 | 5  | 15 | TCT  | 24 | 5  |
| 159970 | 18 | 3127346 | 3127363 | 3 | 6  | 18 | CAC  | 29 | 3  |
| 159974 | 18 | 3152781 | 3152804 | 2 | 12 | 24 | GT   | 10 | 10 |
| 159975 | 18 | 3152938 | 3152953 | 2 | 8  | 16 | CA   | 16 | 5  |
| 159976 | 18 | 3153017 | 3153034 | 3 | 6  | 18 | CTC  | 24 | 4  |
| 159980 | 18 | 3174279 | 3174290 | 2 | 6  | 12 | GT   | 29 | 3  |
| 159983 | 18 | 3184533 | 3184556 | 2 | 12 | 24 | AC   | 26 | 9  |

|        |    |         |         |   |    |    |      |    |    |
|--------|----|---------|---------|---|----|----|------|----|----|
| 159985 | 18 | 3199119 | 3199132 | 2 | 7  | 14 | TG   | 15 | 5  |
| 159986 | 18 | 3199275 | 3199290 | 2 | 8  | 16 | TG   | 17 | 7  |
| 159988 | 18 | 3206820 | 3206840 | 3 | 7  | 21 | GAG  | 27 | 4  |
| 159993 | 18 | 3224428 | 3224447 | 2 | 10 | 20 | AC   | 26 | 10 |
| 159994 | 18 | 3235813 | 3235840 | 2 | 14 | 28 | GT   | 14 | 13 |
| 159997 | 18 | 3239384 | 3239397 | 2 | 7  | 14 | AG   | 15 | 4  |
| 160001 | 18 | 3256664 | 3256684 | 3 | 7  | 21 | CTG  | 29 | 4  |
| 160002 | 18 | 3260975 | 3261001 | 3 | 9  | 27 | AGG  | 9  | 3  |
| 160003 | 18 | 3261397 | 3261412 | 4 | 4  | 16 | CAGC | 18 | 3  |
| 160008 | 18 | 3263165 | 3263182 | 2 | 9  | 18 | AC   | 17 | 7  |
| 160009 | 18 | 3263185 | 3263198 | 2 | 7  | 14 | AC   | 19 | 8  |
| 160012 | 18 | 3264589 | 3264603 | 3 | 5  | 15 | TGC  | 30 | 4  |
| 160013 | 18 | 3265038 | 3265051 | 2 | 7  | 14 | AG   | 27 | 3  |
| 160030 | 18 | 3291480 | 3291499 | 4 | 5  | 20 | ACAG | 32 | 7  |
| 160035 | 18 | 3301760 | 3301783 | 2 | 12 | 24 | GT   | 29 | 10 |
| 160039 | 18 | 3310660 | 3310677 | 2 | 9  | 18 | AT   | 22 | 8  |
| 160045 | 18 | 3320406 | 3320429 | 3 | 8  | 24 | GCT  | 28 | 4  |
| 160048 | 18 | 3325537 | 3325594 | 2 | 29 | 58 | TG   | 11 | 10 |
| 160052 | 18 | 3329356 | 3329373 | 2 | 9  | 18 | TG   | 17 | 12 |
| 160053 | 18 | 3329683 | 3329718 | 2 | 18 | 36 | TC   | 12 | 10 |
| 160055 | 18 | 3329963 | 3329982 | 2 | 10 | 20 | AG   | 24 | 8  |
| 160056 | 18 | 3330561 | 3330575 | 3 | 5  | 15 | CCA  | 13 | 3  |
| 160057 | 18 | 3332580 | 3332607 | 2 | 14 | 28 | TG   | 11 | 12 |
| 160058 | 18 | 3333310 | 3333325 | 2 | 8  | 16 | CA   | 18 | 4  |
| 160066 | 18 | 3334035 | 3334050 | 2 | 8  | 16 | CA   | 16 | 8  |
| 160070 | 18 | 3340333 | 3340348 | 2 | 8  | 16 | GT   | 14 | 9  |
| 160071 | 18 | 3340350 | 3340361 | 2 | 6  | 12 | TG   | 20 | 11 |
| 160072 | 18 | 3343001 | 3343016 | 2 | 8  | 16 | CA   | 22 | 4  |
| 160075 | 18 | 3348820 | 3348851 | 2 | 16 | 32 | TG   | 21 | 14 |
| 160077 | 18 | 3350766 | 3350779 | 2 | 7  | 14 | GT   | 24 | 5  |
| 160079 | 18 | 3352428 | 3352445 | 2 | 9  | 18 | AC   | 26 | 7  |
| 160081 | 18 | 3354237 | 3354256 | 2 | 10 | 20 | TC   | 20 | 3  |
| 160086 | 18 | 3358803 | 3358836 | 2 | 17 | 34 | GT   | 19 | 11 |
| 160091 | 18 | 3360458 | 3360475 | 3 | 6  | 18 | CCA  | 7  | 4  |
| 160092 | 18 | 3360549 | 3360564 | 2 | 8  | 16 | TC   | 8  | 4  |
| 160098 | 18 | 3361383 | 3361403 | 3 | 7  | 21 | GAG  | 14 | 4  |
| 160099 | 18 | 3361838 | 3361853 | 2 | 8  | 16 | TG   | 15 | 9  |
| 160109 | 18 | 3373702 | 3373719 | 2 | 9  | 18 | TG   | 21 | 6  |
| 160111 | 18 | 3376057 | 3376071 | 3 | 5  | 15 | TCC  | 31 | 3  |
| 160114 | 18 | 3379662 | 3379681 | 2 | 10 | 20 | TG   | 23 | 7  |
| 160122 | 18 | 3392899 | 3392934 | 2 | 18 | 36 | TG   | 16 | 9  |
| 160125 | 18 | 3393729 | 3393750 | 2 | 11 | 22 | TC   | 18 | 9  |
| 160130 | 18 | 3396111 | 3396128 | 3 | 6  | 18 | TTG  | 23 | 3  |
| 160132 | 18 | 3396524 | 3396569 | 2 | 23 | 46 | AC   | 6  | 8  |
| 160133 | 18 | 3397054 | 3397065 | 2 | 6  | 12 | TG   | 14 | 5  |
| 160137 | 18 | 3399169 | 3399184 | 2 | 8  | 16 | TG   | 26 | 9  |
| 160138 | 18 | 3400034 | 3400063 | 2 | 15 | 30 | TG   | 12 | 8  |
| 160139 | 18 | 3402687 | 3402706 | 2 | 10 | 20 | GT   | 20 | 14 |
| 160140 | 18 | 3402827 | 3402842 | 2 | 8  | 16 | TG   | 18 | 9  |
| 160141 | 18 | 3404040 | 3404073 | 2 | 17 | 34 | GT   | 9  | 13 |
| 160143 | 18 | 3409657 | 3409668 | 2 | 6  | 12 | TG   | 24 | 3  |

|        |    |         |         |   |    |    |      |    |    |
|--------|----|---------|---------|---|----|----|------|----|----|
| 160144 | 18 | 3411127 | 3411144 | 3 | 6  | 18 | TGC  | 28 | 7  |
| 160146 | 18 | 3412551 | 3412588 | 2 | 19 | 38 | GT   | 17 | 14 |
| 160147 | 18 | 3413173 | 3413206 | 2 | 17 | 34 | CT   | 18 | 8  |
| 160148 | 18 | 3413543 | 3413562 | 2 | 10 | 20 | CA   | 25 | 5  |
| 160150 | 18 | 3414203 | 3414216 | 2 | 7  | 14 | CA   | 23 | 5  |
| 160151 | 18 | 3415782 | 3415805 | 3 | 8  | 24 | CTG  | 21 | 6  |
| 160152 | 18 | 3415928 | 3415961 | 2 | 17 | 34 | TG   | 9  | 11 |
| 160156 | 18 | 3419438 | 3419455 | 2 | 9  | 18 | AC   | 24 | 9  |
| 160158 | 18 | 3424558 | 3424575 | 3 | 6  | 18 | TGT  | 25 | 3  |
| 160159 | 18 | 3427495 | 3427512 | 3 | 6  | 18 | CCT  | 21 | 6  |
| 160160 | 18 | 3428684 | 3428701 | 2 | 9  | 18 | TG   | 17 | 7  |
| 160161 | 18 | 3429732 | 3429746 | 3 | 5  | 15 | GAG  | 32 | 3  |
| 160167 | 18 | 3438994 | 3439015 | 2 | 11 | 22 | AC   | 10 | 8  |
| 160169 | 18 | 3442099 | 3442122 | 3 | 8  | 24 | CCT  | 19 | 3  |
| 160170 | 18 | 3442316 | 3442331 | 4 | 4  | 16 | GGAG | 12 | 5  |
| 160178 | 18 | 3455410 | 3455425 | 4 | 4  | 16 | GGGA | 21 | 4  |
| 160186 | 18 | 3467488 | 3467503 | 4 | 4  | 16 | GCCT | 23 | 6  |
| 160187 | 18 | 3470724 | 3470745 | 2 | 11 | 22 | CA   | 24 | 9  |
| 160189 | 18 | 3471286 | 3471301 | 2 | 8  | 16 | GT   | 29 | 9  |
| 160190 | 18 | 3471551 | 3471574 | 2 | 12 | 24 | CA   | 19 | 6  |
| 160195 | 18 | 3482241 | 3482266 | 2 | 13 | 26 | GT   | 14 | 11 |
| 160200 | 18 | 3495927 | 3495958 | 2 | 16 | 32 | GT   | 7  | 7  |
| 160202 | 18 | 3496099 | 3496116 | 2 | 9  | 18 | AC   | 22 | 5  |
| 160204 | 18 | 3502696 | 3502729 | 2 | 17 | 34 | AC   | 17 | 12 |
| 160210 | 18 | 3510732 | 3510763 | 2 | 16 | 32 | TG   | 11 | 9  |
| 160211 | 18 | 3514642 | 3514665 | 2 | 12 | 24 | TG   | 23 | 15 |
| 160220 | 18 | 3525336 | 3525363 | 2 | 14 | 28 | GT   | 6  | 8  |
| 160222 | 18 | 3527706 | 3527725 | 2 | 10 | 20 | TG   | 13 | 6  |
| 160224 | 18 | 3528310 | 3528325 | 2 | 8  | 16 | CA   | 19 | 6  |
| 160229 | 18 | 3529280 | 3529297 | 2 | 9  | 18 | CA   | 18 | 7  |
| 160230 | 18 | 3530047 | 3530060 | 2 | 7  | 14 | TG   | 26 | 4  |
| 160231 | 18 | 3530347 | 3530362 | 2 | 8  | 16 | AT   | 11 | 4  |
| 160236 | 18 | 3533467 | 3533488 | 2 | 11 | 22 | CA   | 13 | 4  |
| 160237 | 18 | 3533616 | 3533637 | 2 | 11 | 22 | TG   | 17 | 7  |
| 160243 | 18 | 3545960 | 3545997 | 2 | 19 | 38 | TG   | 9  | 11 |
| 160249 | 18 | 3555847 | 3555876 | 2 | 15 | 30 | GT   | 17 | 6  |
| 160259 | 18 | 3558194 | 3558211 | 2 | 9  | 18 | CA   | 20 | 5  |
| 160260 | 18 | 3559695 | 3559708 | 2 | 7  | 14 | GA   | 30 | 3  |
| 160262 | 18 | 3560072 | 3560103 | 2 | 16 | 32 | CA   | 15 | 13 |
| 160263 | 18 | 3560295 | 3560312 | 3 | 6  | 18 | CCT  | 30 | 3  |
| 160264 | 18 | 3562893 | 3562904 | 2 | 6  | 12 | TG   | 19 | 5  |
| 160266 | 18 | 3563838 | 3563870 | 3 | 11 | 33 | ATC  | 16 | 6  |
| 160267 | 18 | 3564379 | 3564398 | 2 | 10 | 20 | AC   | 11 | 8  |
| 160268 | 18 | 3564400 | 3564417 | 2 | 9  | 18 | CA   | 10 | 8  |
| 160269 | 18 | 3565296 | 3565311 | 2 | 8  | 16 | TG   | 25 | 5  |
| 160270 | 18 | 3565375 | 3565396 | 2 | 11 | 22 | AC   | 7  | 7  |
| 160277 | 18 | 3567894 | 3567913 | 2 | 10 | 20 | TG   | 9  | 5  |
| 160281 | 18 | 3569959 | 3569978 | 2 | 10 | 20 | TC   | 17 | 6  |
| 160285 | 18 | 3571656 | 3571681 | 2 | 13 | 26 | TG   | 17 | 8  |
| 160286 | 18 | 3573942 | 3573969 | 2 | 14 | 28 | AC   | 12 | 8  |
| 160287 | 18 | 3574648 | 3574661 | 2 | 7  | 14 | GA   | 15 | 6  |

|        |    |         |         |   |    |    |      |    |    |
|--------|----|---------|---------|---|----|----|------|----|----|
| 160288 | 18 | 3574667 | 3574680 | 2 | 7  | 14 | AG   | 13 | 5  |
| 160290 | 18 | 3574952 | 3574963 | 2 | 6  | 12 | AC   | 13 | 3  |
| 160292 | 18 | 3577026 | 3577037 | 2 | 6  | 12 | CT   | 19 | 3  |
| 160293 | 18 | 3578139 | 3578154 | 2 | 8  | 16 | GT   | 19 | 4  |
| 160294 | 18 | 3578277 | 3578304 | 2 | 14 | 28 | CA   | 15 | 14 |
| 160296 | 18 | 3581030 | 3581059 | 3 | 10 | 30 | TCA  | 26 | 8  |
| 160297 | 18 | 3581449 | 3581482 | 2 | 17 | 34 | TG   | 18 | 7  |
| 160298 | 18 | 3581610 | 3581621 | 2 | 6  | 12 | CA   | 18 | 4  |
| 160299 | 18 | 3581768 | 3581783 | 2 | 8  | 16 | CA   | 20 | 11 |
| 160304 | 18 | 3586608 | 3586651 | 2 | 22 | 44 | CA   | 13 | 11 |
| 160306 | 18 | 3592463 | 3592478 | 2 | 8  | 16 | TG   | 31 | 3  |
| 160313 | 18 | 3619171 | 3619194 | 2 | 12 | 24 | GT   | 18 | 7  |
| 160319 | 18 | 3639448 | 3639468 | 3 | 7  | 21 | ATC  | 7  | 4  |
| 160326 | 18 | 3668217 | 3668232 | 2 | 8  | 16 | AC   | 11 | 5  |
| 160327 | 18 | 3673873 | 3673914 | 2 | 21 | 42 | TG   | 6  | 6  |
| 160328 | 18 | 3673937 | 3673948 | 2 | 6  | 12 | TG   | 16 | 4  |
| 160330 | 18 | 3674076 | 3674093 | 2 | 9  | 18 | GT   | 9  | 3  |
| 160331 | 18 | 3675883 | 3675900 | 2 | 9  | 18 | AC   | 21 | 4  |
| 160334 | 18 | 3679855 | 3679876 | 2 | 11 | 22 | TG   | 14 | 11 |
| 160335 | 18 | 3694105 | 3694122 | 2 | 9  | 18 | CA   | 20 | 7  |
| 160341 | 18 | 3705052 | 3705073 | 2 | 11 | 22 | CA   | 14 | 6  |
| 160343 | 18 | 3708991 | 3709006 | 4 | 4  | 16 | TTTG | 27 | 4  |
| 160344 | 18 | 3709309 | 3709322 | 2 | 7  | 14 | GT   | 12 | 3  |
| 160348 | 18 | 3713389 | 3713410 | 2 | 11 | 22 | GT   | 21 | 6  |
| 160352 | 18 | 3740903 | 3740918 | 2 | 8  | 16 | AG   | 19 | 3  |
| 160371 | 18 | 3772970 | 3772983 | 2 | 7  | 14 | GT   | 25 | 5  |
| 160372 | 18 | 3781568 | 3781579 | 2 | 6  | 12 | TG   | 21 | 4  |
| 160375 | 18 | 3787238 | 3787271 | 2 | 17 | 34 | AG   | 9  | 7  |
| 160376 | 18 | 3788828 | 3788839 | 2 | 6  | 12 | TG   | 18 | 12 |
| 160378 | 18 | 3796068 | 3796111 | 2 | 22 | 44 | TG   | 9  | 9  |
| 160379 | 18 | 3797886 | 3797899 | 2 | 7  | 14 | TA   | 12 | 3  |
| 160380 | 18 | 3800971 | 3800984 | 2 | 7  | 14 | CA   | 22 | 3  |
| 160382 | 18 | 3807852 | 3807887 | 2 | 18 | 36 | TG   | 10 | 11 |
| 160385 | 18 | 3821788 | 3821809 | 2 | 11 | 22 | CA   | 24 | 5  |
| 160388 | 18 | 3832963 | 3832994 | 2 | 16 | 32 | GT   | 13 | 14 |
| 160391 | 18 | 3837072 | 3837089 | 2 | 9  | 18 | TG   | 16 | 9  |
| 160392 | 18 | 3839491 | 3839505 | 3 | 5  | 15 | CAG  | 24 | 3  |
| 160394 | 18 | 3847998 | 3848015 | 2 | 9  | 18 | AC   | 24 | 7  |
| 160398 | 18 | 3850473 | 3850494 | 2 | 11 | 22 | AG   | 19 | 7  |
| 160399 | 18 | 3853607 | 3853618 | 2 | 6  | 12 | TG   | 25 | 3  |
| 160406 | 18 | 3861559 | 3861582 | 2 | 12 | 24 | CA   | 26 | 8  |
| 160411 | 18 | 3890355 | 3890378 | 2 | 12 | 24 | CA   | 21 | 9  |
| 160417 | 18 | 3912060 | 3912081 | 2 | 11 | 22 | GT   | 24 | 16 |
| 160425 | 18 | 3932135 | 3932160 | 2 | 13 | 26 | AC   | 27 | 7  |
| 160433 | 18 | 3963876 | 3963915 | 2 | 20 | 40 | TG   | 13 | 7  |
| 160434 | 18 | 3964416 | 3964439 | 4 | 6  | 24 | CATA | 16 | 4  |
| 160439 | 18 | 3978984 | 3978995 | 2 | 6  | 12 | GT   | 30 | 5  |
| 160443 | 18 | 3986569 | 3986583 | 3 | 5  | 15 | AGT  | 25 | 3  |
| 160449 | 18 | 3999158 | 3999175 | 2 | 9  | 18 | CA   | 27 | 10 |
| 160456 | 18 | 4018698 | 4018713 | 4 | 4  | 16 | AAAC | 29 | 4  |
| 160465 | 18 | 4039992 | 4040017 | 2 | 13 | 26 | AC   | 14 | 7  |

|        |    |         |         |   |    |    |      |    |    |
|--------|----|---------|---------|---|----|----|------|----|----|
| 160495 | 18 | 4090000 | 4090045 | 2 | 23 | 46 | AC   | 15 | 12 |
| 160505 | 18 | 4111285 | 4111304 | 4 | 5  | 20 | ATTT | 21 | 5  |
| 160514 | 18 | 4142010 | 4142025 | 4 | 4  | 16 | CTCA | 24 | 3  |
| 160515 | 18 | 4145217 | 4145248 | 2 | 16 | 32 | TG   | 10 | 8  |
| 160516 | 18 | 4146190 | 4146205 | 4 | 4  | 16 | AAAC | 18 | 5  |
| 160523 | 18 | 4185938 | 4185969 | 2 | 16 | 32 | GT   | 8  | 7  |
| 160524 | 18 | 4187748 | 4187777 | 2 | 15 | 30 | GT   | 14 | 10 |
| 160530 | 18 | 4193177 | 4193194 | 2 | 9  | 18 | AC   | 18 | 7  |
| 160542 | 18 | 4207317 | 4207336 | 2 | 10 | 20 | GT   | 10 | 7  |
| 160546 | 18 | 4213632 | 4213659 | 2 | 14 | 28 | AC   | 10 | 7  |
| 160548 | 18 | 4215458 | 4215484 | 3 | 9  | 27 | CAG  | 26 | 8  |
| 160563 | 18 | 4226509 | 4226528 | 2 | 10 | 20 | GA   | 8  | 4  |
| 160570 | 18 | 4230108 | 4230139 | 2 | 16 | 32 | GT   | 10 | 5  |
| 160578 | 18 | 4242274 | 4242315 | 2 | 21 | 42 | GT   | 8  | 4  |
| 160580 | 18 | 4246001 | 4246012 | 2 | 6  | 12 | GT   | 21 | 4  |
| 160594 | 18 | 4266807 | 4266822 | 4 | 4  | 16 | TTGT | 20 | 4  |
| 160597 | 18 | 4284682 | 4284703 | 2 | 11 | 22 | TG   | 15 | 4  |
| 160598 | 18 | 4286979 | 4287005 | 3 | 9  | 27 | GAG  | 13 | 3  |
| 160601 | 18 | 4289608 | 4289629 | 2 | 11 | 22 | TG   | 13 | 9  |
| 160603 | 18 | 4289861 | 4289878 | 2 | 9  | 18 | GT   | 11 | 9  |
| 160614 | 18 | 4306194 | 4306221 | 2 | 14 | 28 | GT   | 11 | 8  |
| 160622 | 18 | 4315253 | 4315276 | 2 | 12 | 24 | TG   | 6  | 7  |
| 160624 | 18 | 4319475 | 4319490 | 2 | 8  | 16 | GT   | 24 | 6  |
| 160625 | 18 | 4321707 | 4321718 | 2 | 6  | 12 | TC   | 35 | 3  |
| 160626 | 18 | 4326979 | 4326994 | 2 | 8  | 16 | GT   | 25 | 4  |
| 160632 | 18 | 4346244 | 4346255 | 2 | 6  | 12 | AC   | 35 | 3  |
| 160634 | 18 | 4356171 | 4356186 | 2 | 8  | 16 | TC   | 21 | 5  |
| 160643 | 18 | 4374343 | 4374362 | 4 | 5  | 20 | TAGA | 15 | 12 |
| 160651 | 18 | 4410611 | 4410634 | 2 | 12 | 24 | GA   | 13 | 8  |
| 160652 | 18 | 4418814 | 4418837 | 4 | 6  | 24 | AGAT | 20 | 3  |
| 160661 | 18 | 4456214 | 4456235 | 2 | 11 | 22 | AG   | 18 | 4  |
| 160662 | 18 | 4456258 | 4456273 | 2 | 8  | 16 | AG   | 15 | 6  |
| 160665 | 18 | 4468274 | 4468297 | 2 | 12 | 24 | CA   | 14 | 8  |
| 160666 | 18 | 4468659 | 4468670 | 2 | 6  | 12 | TG   | 21 | 8  |
| 160667 | 18 | 4469323 | 4469338 | 2 | 8  | 16 | GT   | 9  | 5  |
| 160669 | 18 | 4469659 | 4469670 | 2 | 6  | 12 | CA   | 14 | 4  |
| 160675 | 18 | 4474160 | 4474175 | 2 | 8  | 16 | GT   | 10 | 9  |
| 160678 | 18 | 4477027 | 4477050 | 2 | 12 | 24 | GT   | 18 | 9  |
| 160688 | 18 | 4497969 | 4497984 | 2 | 8  | 16 | GT   | 26 | 3  |
| 160690 | 18 | 4503418 | 4503461 | 2 | 22 | 44 | GT   | 13 | 13 |
| 160702 | 18 | 4545212 | 4545226 | 3 | 5  | 15 | GAA  | 32 | 3  |
| 160704 | 18 | 4547722 | 4547745 | 2 | 12 | 24 | CA   | 6  | 5  |
| 160713 | 18 | 4552525 | 4552540 | 2 | 8  | 16 | AC   | 11 | 3  |
| 160714 | 18 | 4553310 | 4553339 | 2 | 15 | 30 | TG   | 12 | 5  |
| 160718 | 18 | 4556517 | 4556546 | 2 | 15 | 30 | AC   | 21 | 7  |
| 160724 | 18 | 4562153 | 4562166 | 2 | 7  | 14 | GA   | 20 | 3  |
| 160727 | 18 | 4562757 | 4562780 | 2 | 12 | 24 | TG   | 26 | 7  |
| 160730 | 18 | 4563591 | 4563614 | 2 | 12 | 24 | TG   | 24 | 7  |
| 160732 | 18 | 4567559 | 4567572 | 2 | 7  | 14 | TA   | 8  | 5  |
| 160733 | 18 | 4570108 | 4570119 | 2 | 6  | 12 | AT   | 17 | 5  |
| 160738 | 18 | 4572866 | 4572893 | 2 | 14 | 28 | CA   | 23 | 8  |

|        |    |         |         |   |    |    |      |    |    |
|--------|----|---------|---------|---|----|----|------|----|----|
| 160740 | 18 | 4576350 | 4576379 | 2 | 15 | 30 | GT   | 8  | 8  |
| 160742 | 18 | 4579001 | 4579024 | 3 | 8  | 24 | CAC  | 30 | 4  |
| 160746 | 18 | 4584346 | 4584375 | 2 | 15 | 30 | TG   | 13 | 9  |
| 160747 | 18 | 4586666 | 4586679 | 2 | 7  | 14 | AC   | 22 | 9  |
| 160748 | 18 | 4589333 | 4589359 | 3 | 9  | 27 | CAC  | 19 | 4  |
| 160750 | 18 | 4593562 | 4593599 | 2 | 19 | 38 | TG   | 6  | 7  |
| 160753 | 18 | 4598524 | 4598551 | 2 | 14 | 28 | AC   | 11 | 8  |
| 160761 | 18 | 4622924 | 4622943 | 4 | 5  | 20 | ATTT | 19 | 4  |
| 160779 | 18 | 4693720 | 4693743 | 3 | 8  | 24 | GAG  | 22 | 3  |
| 160784 | 18 | 4695932 | 4695947 | 2 | 8  | 16 | CA   | 15 | 5  |
| 160791 | 18 | 4710950 | 4710976 | 3 | 9  | 27 | GGA  | 24 | 4  |
| 160796 | 18 | 4717290 | 4717307 | 2 | 9  | 18 | AC   | 22 | 7  |
| 160801 | 18 | 4725933 | 4725946 | 2 | 7  | 14 | AG   | 22 | 3  |
| 160802 | 18 | 4726214 | 4726233 | 2 | 10 | 20 | CA   | 17 | 8  |
| 160811 | 18 | 4746209 | 4746226 | 2 | 9  | 18 | GT   | 17 | 10 |
| 160812 | 18 | 4746329 | 4746348 | 4 | 5  | 20 | AACA | 19 | 4  |
| 160821 | 18 | 4770622 | 4770637 | 2 | 8  | 16 | CA   | 9  | 5  |
| 160826 | 18 | 4778523 | 4778538 | 4 | 4  | 16 | TTTG | 30 | 8  |
| 160827 | 18 | 4779041 | 4779054 | 2 | 7  | 14 | AC   | 23 | 3  |
| 160828 | 18 | 4779195 | 4779212 | 2 | 9  | 18 | CA   | 25 | 3  |
| 160830 | 18 | 4781926 | 4781945 | 2 | 10 | 20 | TG   | 24 | 8  |
| 160834 | 18 | 4803475 | 4803498 | 4 | 6  | 24 | TATG | 12 | 4  |
| 160836 | 18 | 4818866 | 4818895 | 2 | 15 | 30 | TG   | 18 | 7  |
| 160842 | 18 | 4838625 | 4838638 | 2 | 7  | 14 | CA   | 15 | 7  |
| 160846 | 18 | 4848463 | 4848488 | 2 | 13 | 26 | TC   | 6  | 9  |
| 160849 | 18 | 4855144 | 4855185 | 2 | 21 | 42 | TG   | 6  | 9  |
| 160850 | 18 | 4855838 | 4855853 | 2 | 8  | 16 | GT   | 26 | 3  |
| 160859 | 18 | 4875290 | 4875313 | 3 | 8  | 24 | GGT  | 22 | 4  |
| 160864 | 18 | 4882840 | 4882857 | 2 | 9  | 18 | TG   | 22 | 4  |
| 160866 | 18 | 4883975 | 4884006 | 4 | 8  | 32 | GATA | 21 | 9  |
| 160870 | 18 | 4893413 | 4893432 | 2 | 10 | 20 | AC   | 21 | 9  |
| 160878 | 18 | 4900418 | 4900435 | 2 | 9  | 18 | TC   | 18 | 3  |
| 160880 | 18 | 4906477 | 4906496 | 2 | 10 | 20 | CA   | 20 | 8  |
| 160882 | 18 | 4908874 | 4908885 | 2 | 6  | 12 | AG   | 26 | 3  |
| 160884 | 18 | 4909603 | 4909626 | 2 | 12 | 24 | CA   | 15 | 9  |
| 160886 | 18 | 4909914 | 4909945 | 2 | 16 | 32 | GT   | 14 | 8  |
| 160899 | 18 | 4914177 | 4914206 | 2 | 15 | 30 | TG   | 14 | 8  |
| 160902 | 18 | 4915194 | 4915245 | 4 | 13 | 52 | ATCT | 15 | 7  |
| 160903 | 18 | 4921313 | 4921344 | 2 | 16 | 32 | CA   | 7  | 5  |
| 160907 | 18 | 4923728 | 4923741 | 2 | 7  | 14 | GT   | 14 | 5  |
| 160908 | 18 | 4925539 | 4925564 | 2 | 13 | 26 | GA   | 11 | 7  |
| 160909 | 18 | 4927799 | 4927832 | 2 | 17 | 34 | AC   | 11 | 11 |
| 160911 | 18 | 4934908 | 4934923 | 2 | 8  | 16 | TG   | 15 | 3  |
| 160912 | 18 | 4935083 | 4935108 | 2 | 13 | 26 | AC   | 12 | 4  |
| 160915 | 18 | 4936062 | 4936079 | 2 | 9  | 18 | CA   | 20 | 6  |
| 160918 | 18 | 4938180 | 4938193 | 2 | 7  | 14 | GT   | 17 | 9  |
| 160924 | 18 | 4950107 | 4950136 | 2 | 15 | 30 | TG   | 17 | 7  |
| 160926 | 18 | 4950506 | 4950537 | 2 | 16 | 32 | TG   | 11 | 6  |
| 160929 | 18 | 4952693 | 4952726 | 2 | 17 | 34 | CT   | 10 | 8  |
| 160930 | 18 | 4953039 | 4953064 | 2 | 13 | 26 | CT   | 20 | 6  |
| 160931 | 18 | 4953473 | 4953492 | 2 | 10 | 20 | GA   | 20 | 4  |

|        |    |         |         |   |    |    |      |    |    |
|--------|----|---------|---------|---|----|----|------|----|----|
| 160934 | 18 | 4958225 | 4958240 | 2 | 8  | 16 | CA   | 23 | 6  |
| 160959 | 18 | 4989725 | 4989736 | 2 | 6  | 12 | TA   | 26 | 3  |
| 160971 | 18 | 4999729 | 4999743 | 3 | 5  | 15 | CAG  | 40 | 3  |
| 160972 | 18 | 4999920 | 4999937 | 2 | 9  | 18 | GA   | 24 | 5  |
| 160973 | 18 | 5000099 | 5000116 | 2 | 9  | 18 | TG   | 17 | 3  |
| 160974 | 18 | 5000164 | 5000191 | 2 | 14 | 28 | GT   | 8  | 6  |
| 160976 | 18 | 5001101 | 5001120 | 2 | 10 | 20 | TG   | 15 | 7  |
| 160981 | 18 | 5008711 | 5008732 | 2 | 11 | 22 | CT   | 12 | 9  |
| 160993 | 18 | 5027671 | 5027694 | 3 | 8  | 24 | TCC  | 8  | 3  |
| 160997 | 18 | 5052471 | 5052486 | 2 | 8  | 16 | AG   | 19 | 11 |
| 160998 | 18 | 5052488 | 5052499 | 2 | 6  | 12 | GA   | 22 | 9  |
| 160999 | 18 | 5052989 | 5053014 | 2 | 13 | 26 | GT   | 23 | 11 |
| 161001 | 18 | 5053323 | 5053342 | 4 | 5  | 20 | CAGA | 22 | 3  |
| 161002 | 18 | 5055424 | 5055447 | 2 | 12 | 24 | CA   | 13 | 5  |
| 161006 | 18 | 5085201 | 5085226 | 2 | 13 | 26 | CA   | 17 | 5  |
| 161023 | 18 | 5117781 | 5117794 | 2 | 7  | 14 | AT   | 13 | 8  |
| 161024 | 18 | 5118157 | 5118176 | 4 | 5  | 20 | AAAC | 16 | 5  |
| 161027 | 18 | 5123654 | 5123691 | 2 | 19 | 38 | CA   | 9  | 12 |
| 161030 | 18 | 5136817 | 5136840 | 4 | 6  | 24 | TTCT | 18 | 5  |
| 161032 | 18 | 5150059 | 5150076 | 2 | 9  | 18 | TG   | 20 | 12 |
| 161035 | 18 | 5156491 | 5156510 | 2 | 10 | 20 | GT   | 11 | 11 |
| 161039 | 18 | 5169479 | 5169496 | 3 | 6  | 18 | CAC  | 26 | 4  |
| 161044 | 18 | 5173164 | 5173178 | 3 | 5  | 15 | GGT  | 17 | 3  |
| 161045 | 18 | 5173347 | 5173374 | 2 | 14 | 28 | CA   | 11 | 11 |
| 161049 | 18 | 5176345 | 5176360 | 2 | 8  | 16 | TG   | 20 | 3  |
| 161063 | 18 | 5193779 | 5193805 | 3 | 9  | 27 | AGC  | 27 | 8  |
| 161070 | 18 | 5202128 | 5202141 | 2 | 7  | 14 | CT   | 19 | 5  |
| 161071 | 18 | 5202142 | 5202159 | 2 | 9  | 18 | CA   | 18 | 4  |
| 161076 | 18 | 5209610 | 5209627 | 3 | 6  | 18 | TCC  | 22 | 3  |
| 161092 | 18 | 5231075 | 5231086 | 2 | 6  | 12 | AT   | 7  | 3  |
| 161094 | 18 | 5232449 | 5232466 | 2 | 9  | 18 | GT   | 15 | 12 |
| 161095 | 18 | 5232469 | 5232482 | 2 | 7  | 14 | GT   | 11 | 7  |
| 161099 | 18 | 5235689 | 5235734 | 2 | 23 | 46 | TG   | 10 | 12 |
| 161104 | 18 | 5241849 | 5241866 | 2 | 9  | 18 | CA   | 15 | 6  |
| 161105 | 18 | 5242639 | 5242660 | 2 | 11 | 22 | TG   | 22 | 6  |
| 161106 | 18 | 5243681 | 5243696 | 4 | 4  | 16 | GCCT | 24 | 4  |
| 161107 | 18 | 5244384 | 5244397 | 2 | 7  | 14 | AC   | 27 | 3  |
| 161114 | 18 | 5251900 | 5251911 | 2 | 6  | 12 | AC   | 21 | 4  |
| 161118 | 18 | 5254345 | 5254360 | 2 | 8  | 16 | GT   | 20 | 4  |
| 161119 | 18 | 5254443 | 5254460 | 2 | 9  | 18 | TG   | 21 | 6  |
| 161121 | 18 | 5258604 | 5258627 | 3 | 8  | 24 | CTT  | 14 | 4  |
| 161123 | 18 | 5274959 | 5274978 | 2 | 10 | 20 | TG   | 25 | 6  |
| 161125 | 18 | 5275948 | 5275961 | 2 | 7  | 14 | CT   | 24 | 3  |
| 161126 | 18 | 5277020 | 5277041 | 2 | 11 | 22 | TG   | 12 | 4  |
| 161134 | 18 | 5285261 | 5285278 | 2 | 9  | 18 | GA   | 23 | 3  |
| 161140 | 18 | 5300013 | 5300042 | 2 | 15 | 30 | GT   | 11 | 6  |
| 161142 | 18 | 5300341 | 5300358 | 2 | 9  | 18 | TG   | 16 | 6  |
| 161143 | 18 | 5300361 | 5300372 | 2 | 6  | 12 | TG   | 8  | 6  |
| 161150 | 18 | 5318909 | 5318922 | 2 | 7  | 14 | AC   | 25 | 6  |
| 161156 | 18 | 5336731 | 5336752 | 2 | 11 | 22 | TG   | 15 | 8  |
| 161157 | 18 | 5336896 | 5336917 | 2 | 11 | 22 | TG   | 10 | 6  |

|        |    |         |         |   |    |    |      |    |    |
|--------|----|---------|---------|---|----|----|------|----|----|
| 161162 | 18 | 5342421 | 5342444 | 2 | 12 | 24 | TG   | 6  | 5  |
| 161165 | 18 | 5365286 | 5365303 | 3 | 6  | 18 | GTA  | 21 | 6  |
| 161167 | 18 | 5366507 | 5366522 | 2 | 8  | 16 | CT   | 16 | 4  |
| 161169 | 18 | 5368192 | 5368205 | 2 | 7  | 14 | TG   | 27 | 4  |
| 161170 | 18 | 5368286 | 5368303 | 2 | 9  | 18 | AC   | 22 | 7  |
| 161174 | 18 | 5373504 | 5373549 | 2 | 23 | 46 | TG   | 14 | 10 |
| 161177 | 18 | 5389674 | 5389703 | 3 | 10 | 30 | CTG  | 21 | 8  |
| 161183 | 18 | 5398177 | 5398188 | 2 | 6  | 12 | AC   | 32 | 4  |
| 161187 | 18 | 5404141 | 5404166 | 2 | 13 | 26 | CA   | 17 | 12 |
| 161196 | 18 | 5418677 | 5418694 | 2 | 9  | 18 | GT   | 22 | 13 |
| 161198 | 18 | 5421446 | 5421487 | 2 | 21 | 42 | TG   | 10 | 11 |
| 161199 | 18 | 5424113 | 5424140 | 2 | 14 | 28 | TG   | 14 | 9  |
| 161203 | 18 | 5432231 | 5432244 | 2 | 7  | 14 | TA   | 15 | 3  |
| 161213 | 18 | 5457653 | 5457670 | 2 | 9  | 18 | AC   | 17 | 18 |
| 161214 | 18 | 5457673 | 5457684 | 2 | 6  | 12 | AC   | 15 | 14 |
| 161217 | 18 | 5461075 | 5461086 | 2 | 6  | 12 | TG   | 20 | 3  |
| 161224 | 18 | 5475484 | 5475503 | 2 | 10 | 20 | GT   | 18 | 8  |
| 161228 | 18 | 5492562 | 5492575 | 2 | 7  | 14 | AC   | 25 | 6  |
| 161233 | 18 | 5498904 | 5498919 | 4 | 4  | 16 | AAAC | 21 | 3  |
| 161236 | 18 | 5505440 | 5505479 | 2 | 20 | 40 | GT   | 7  | 7  |
| 161239 | 18 | 5518768 | 5518787 | 2 | 10 | 20 | TG   | 17 | 5  |
| 161241 | 18 | 5523985 | 5524002 | 2 | 9  | 18 | CT   | 23 | 4  |
| 161247 | 18 | 5527235 | 5527288 | 2 | 27 | 54 | TC   | 7  | 9  |
| 161252 | 18 | 5533943 | 5533962 | 2 | 10 | 20 | CA   | 21 | 5  |
| 161253 | 18 | 5536051 | 5536062 | 2 | 6  | 12 | GT   | 27 | 3  |
| 161258 | 18 | 5546723 | 5546738 | 2 | 8  | 16 | AC   | 24 | 3  |
| 161262 | 18 | 5550203 | 5550222 | 2 | 10 | 20 | CA   | 9  | 5  |
| 161264 | 18 | 5554905 | 5554918 | 2 | 7  | 14 | CA   | 15 | 6  |
| 161265 | 18 | 5556842 | 5556893 | 2 | 26 | 52 | AC   | 8  | 9  |
| 161268 | 18 | 5557597 | 5557622 | 2 | 13 | 26 | CA   | 17 | 11 |
| 161271 | 18 | 5559088 | 5559103 | 2 | 8  | 16 | CA   | 16 | 7  |
| 161272 | 18 | 5561099 | 5561112 | 2 | 7  | 14 | CT   | 17 | 4  |
| 161273 | 18 | 5561113 | 5561124 | 2 | 6  | 12 | CA   | 16 | 4  |
| 161278 | 18 | 5564037 | 5564050 | 2 | 7  | 14 | AC   | 20 | 6  |
| 161285 | 18 | 5570641 | 5570652 | 2 | 6  | 12 | GT   | 23 | 4  |
| 161291 | 18 | 5575417 | 5575458 | 3 | 14 | 42 | GCA  | 6  | 4  |
| 161300 | 18 | 5577705 | 5577718 | 2 | 7  | 14 | AC   | 13 | 4  |
| 161302 | 18 | 5577877 | 5577900 | 2 | 12 | 24 | CA   | 16 | 7  |
| 161334 | 18 | 5601896 | 5601919 | 2 | 12 | 24 | TG   | 24 | 7  |
| 161337 | 18 | 5602495 | 5602506 | 2 | 6  | 12 | TC   | 24 | 4  |
| 161338 | 18 | 5602509 | 5602520 | 2 | 6  | 12 | TC   | 27 | 4  |
| 161345 | 18 | 5605849 | 5605870 | 2 | 11 | 22 | CA   | 22 | 4  |
| 161346 | 18 | 5608395 | 5608416 | 2 | 11 | 22 | CA   | 20 | 9  |
| 161349 | 18 | 5611046 | 5611061 | 2 | 8  | 16 | TC   | 22 | 4  |
| 161352 | 18 | 5614072 | 5614095 | 2 | 12 | 24 | CA   | 6  | 9  |
| 161353 | 18 | 5615451 | 5615470 | 2 | 10 | 20 | TG   | 24 | 7  |
| 161354 | 18 | 5615640 | 5615655 | 2 | 8  | 16 | AC   | 24 | 3  |
| 161356 | 18 | 5617595 | 5617642 | 2 | 24 | 48 | GT   | 12 | 10 |
| 161357 | 18 | 5617778 | 5617815 | 2 | 19 | 38 | CA   | 10 | 7  |
| 161358 | 18 | 5620119 | 5620132 | 2 | 7  | 14 | AC   | 24 | 3  |
| 161363 | 18 | 5623822 | 5623833 | 2 | 6  | 12 | AC   | 29 | 4  |



|        |    |         |         |   |    |    |      |    |    |
|--------|----|---------|---------|---|----|----|------|----|----|
| 161364 | 18 | 5623962 | 5623983 | 2 | 11 | 22 | TG   | 18 | 6  |
| 161366 | 18 | 5624612 | 5624633 | 2 | 11 | 22 | AC   | 11 | 8  |
| 161368 | 18 | 5624944 | 5624957 | 2 | 7  | 14 | TG   | 22 | 13 |
| 161374 | 18 | 5633856 | 5633869 | 2 | 7  | 14 | GT   | 14 | 5  |
| 161375 | 18 | 5633872 | 5633887 | 2 | 8  | 16 | GT   | 17 | 6  |
| 161379 | 18 | 5636018 | 5636035 | 2 | 9  | 18 | TG   | 19 | 6  |
| 161380 | 18 | 5636149 | 5636182 | 2 | 17 | 34 | AC   | 7  | 6  |
| 161385 | 18 | 5639241 | 5639284 | 2 | 22 | 44 | CT   | 7  | 8  |
| 161388 | 18 | 5644003 | 5644028 | 2 | 13 | 26 | AC   | 8  | 3  |
| 161389 | 18 | 5644330 | 5644355 | 2 | 13 | 26 | TG   | 13 | 9  |
| 161396 | 18 | 5648562 | 5648579 | 2 | 9  | 18 | CA   | 14 | 7  |
| 161397 | 18 | 5648582 | 5648599 | 2 | 9  | 18 | CA   | 13 | 10 |
| 161400 | 18 | 5652800 | 5652839 | 2 | 20 | 40 | GA   | 12 | 8  |
| 161404 | 18 | 5654476 | 5654503 | 2 | 14 | 28 | CA   | 9  | 7  |
| 161405 | 18 | 5654604 | 5654615 | 2 | 6  | 12 | TG   | 19 | 4  |
| 161409 | 18 | 5655267 | 5655304 | 2 | 19 | 38 | GT   | 13 | 13 |
| 161410 | 18 | 5656607 | 5656618 | 2 | 6  | 12 | GT   | 17 | 7  |
| 161412 | 18 | 5658317 | 5658331 | 3 | 5  | 15 | TCG  | 18 | 3  |
| 161419 | 18 | 5660562 | 5660583 | 2 | 11 | 22 | CA   | 18 | 6  |
| 161420 | 18 | 5660652 | 5660671 | 2 | 10 | 20 | CA   | 11 | 5  |
| 161422 | 18 | 5661485 | 5661548 | 4 | 16 | 64 | TTCT | 7  | 7  |
| 161423 | 18 | 5663912 | 5663927 | 2 | 8  | 16 | AG   | 17 | 4  |
| 161424 | 18 | 5665329 | 5665342 | 2 | 7  | 14 | CA   | 19 | 3  |
| 161429 | 18 | 5671362 | 5671397 | 2 | 18 | 36 | TC   | 7  | 4  |
| 161431 | 18 | 5684752 | 5684775 | 2 | 12 | 24 | CA   | 24 | 8  |
| 161432 | 18 | 5684920 | 5684949 | 2 | 15 | 30 | CA   | 8  | 10 |
| 161433 | 18 | 5685094 | 5685109 | 2 | 8  | 16 | AC   | 18 | 4  |
| 161434 | 18 | 5687232 | 5687251 | 2 | 10 | 20 | CA   | 24 | 6  |
| 161435 | 18 | 5687426 | 5687439 | 2 | 7  | 14 | TC   | 23 | 3  |
| 161438 | 18 | 5689969 | 5689989 | 3 | 7  | 21 | CCT  | 17 | 5  |
| 161443 | 18 | 5696523 | 5696534 | 2 | 6  | 12 | AT   | 17 | 9  |
| 161444 | 18 | 5697051 | 5697077 | 3 | 9  | 27 | CAT  | 28 | 4  |
| 161449 | 18 | 5701009 | 5701046 | 2 | 19 | 38 | AC   | 22 | 10 |
| 161450 | 18 | 5701537 | 5701570 | 2 | 17 | 34 | GT   | 9  | 10 |
| 161451 | 18 | 5704371 | 5704388 | 2 | 9  | 18 | AC   | 24 | 5  |
| 161453 | 18 | 5704516 | 5704551 | 2 | 18 | 36 | GT   | 10 | 9  |
| 161454 | 18 | 5705079 | 5705106 | 2 | 14 | 28 | TG   | 13 | 6  |
| 161455 | 18 | 5705643 | 5705670 | 2 | 14 | 28 | AC   | 9  | 8  |
| 161458 | 18 | 5706976 | 5706991 | 2 | 8  | 16 | AC   | 17 | 4  |
| 161459 | 18 | 5707288 | 5707321 | 2 | 17 | 34 | GT   | 13 | 6  |
| 161461 | 18 | 5708850 | 5708877 | 2 | 14 | 28 | CT   | 15 | 12 |
| 161463 | 18 | 5709213 | 5709230 | 2 | 9  | 18 | TG   | 15 | 5  |
| 161464 | 18 | 5709878 | 5709889 | 2 | 6  | 12 | GT   | 24 | 3  |
| 161465 | 18 | 5709929 | 5709946 | 2 | 9  | 18 | GT   | 23 | 5  |
| 161468 | 18 | 5710484 | 5710505 | 2 | 11 | 22 | CA   | 15 | 5  |
| 161470 | 18 | 5711345 | 5711364 | 2 | 10 | 20 | TG   | 19 | 9  |
| 161475 | 18 | 5715122 | 5715151 | 2 | 15 | 30 | TG   | 12 | 9  |
| 161477 | 18 | 5721144 | 5721159 | 2 | 8  | 16 | GT   | 19 | 6  |
| 161478 | 18 | 5721609 | 5721656 | 2 | 24 | 48 | CA   | 10 | 5  |
| 161480 | 18 | 5724083 | 5724104 | 2 | 11 | 22 | CA   | 18 | 10 |
| 161483 | 18 | 5724483 | 5724506 | 2 | 12 | 24 | GT   | 16 | 7  |

|        |    |         |         |   |    |    |      |    |    |
|--------|----|---------|---------|---|----|----|------|----|----|
| 161484 | 18 | 5724677 | 5724690 | 2 | 7  | 14 | AC   | 20 | 4  |
| 161487 | 18 | 5724883 | 5724914 | 2 | 16 | 32 | AC   | 10 | 7  |
| 161488 | 18 | 5727167 | 5727182 | 2 | 8  | 16 | GT   | 27 | 4  |
| 161489 | 18 | 5727482 | 5727495 | 2 | 7  | 14 | CA   | 18 | 11 |
| 161490 | 18 | 5728733 | 5728748 | 2 | 8  | 16 | AG   | 15 | 6  |
| 161495 | 18 | 5730689 | 5730706 | 2 | 9  | 18 | GT   | 15 | 4  |
| 161496 | 18 | 5730877 | 5730900 | 2 | 12 | 24 | GT   | 18 | 9  |
| 161500 | 18 | 5733757 | 5733788 | 2 | 16 | 32 | AC   | 13 | 7  |
| 161505 | 18 | 5737367 | 5737386 | 2 | 10 | 20 | TG   | 14 | 8  |
| 161513 | 18 | 5742806 | 5742829 | 2 | 12 | 24 | CA   | 7  | 7  |
| 161526 | 18 | 5751479 | 5751490 | 2 | 6  | 12 | AC   | 6  | 7  |
| 161529 | 18 | 5751812 | 5751823 | 2 | 6  | 12 | AC   | 27 | 5  |
| 161534 | 18 | 5758874 | 5758885 | 2 | 6  | 12 | CA   | 29 | 7  |
| 161535 | 18 | 5758887 | 5758898 | 2 | 6  | 12 | AC   | 20 | 3  |
| 161540 | 18 | 5764976 | 5764997 | 2 | 11 | 22 | AC   | 14 | 7  |
| 161542 | 18 | 5768784 | 5768799 | 2 | 8  | 16 | CA   | 21 | 6  |
| 161543 | 18 | 5768913 | 5768926 | 2 | 7  | 14 | CA   | 24 | 3  |
| 161544 | 18 | 5770288 | 5770311 | 2 | 12 | 24 | GT   | 18 | 13 |
| 161545 | 18 | 5771686 | 5771703 | 2 | 9  | 18 | CA   | 14 | 9  |
| 161550 | 18 | 5772400 | 5772427 | 2 | 14 | 28 | GT   | 12 | 6  |
| 161554 | 18 | 5774635 | 5774660 | 2 | 13 | 26 | AC   | 17 | 5  |
| 161557 | 18 | 5776221 | 5776235 | 3 | 5  | 15 | CTC  | 22 | 4  |
| 161559 | 18 | 5776932 | 5776955 | 2 | 12 | 24 | TG   | 21 | 5  |
| 161563 | 18 | 5778536 | 5778549 | 2 | 7  | 14 | CA   | 26 | 5  |
| 161567 | 18 | 5779327 | 5779348 | 2 | 11 | 22 | GT   | 10 | 3  |
| 161569 | 18 | 5780370 | 5780381 | 2 | 6  | 12 | GT   | 24 | 8  |
| 161572 | 18 | 5780669 | 5780702 | 2 | 17 | 34 | AG   | 9  | 10 |
| 161575 | 18 | 5781273 | 5781308 | 2 | 18 | 36 | TG   | 15 | 7  |
| 161593 | 18 | 5802314 | 5802327 | 2 | 7  | 14 | GA   | 14 | 5  |
| 161604 | 18 | 5822561 | 5822588 | 4 | 7  | 28 | TTCT | 9  | 4  |
| 161605 | 18 | 5822611 | 5822628 | 3 | 6  | 18 | CTT  | 10 | 3  |
| 161607 | 18 | 5822781 | 5822801 | 3 | 7  | 21 | TCT  | 13 | 9  |
| 161609 | 18 | 5823791 | 5823816 | 2 | 13 | 26 | TG   | 16 | 6  |
| 161612 | 18 | 5833410 | 5833424 | 3 | 5  | 15 | TTG  | 27 | 4  |
| 161613 | 18 | 5835745 | 5835764 | 2 | 10 | 20 | CA   | 9  | 9  |
| 161614 | 18 | 5835929 | 5835948 | 4 | 5  | 20 | TTCT | 12 | 7  |
| 161615 | 18 | 5835979 | 5836008 | 3 | 10 | 30 | TTC  | 9  | 4  |
| 161617 | 18 | 5838472 | 5838493 | 2 | 11 | 22 | AC   | 15 | 7  |
| 161620 | 18 | 5842450 | 5842461 | 2 | 6  | 12 | TC   | 21 | 3  |
| 161621 | 18 | 5844933 | 5844962 | 2 | 15 | 30 | AC   | 20 | 7  |
| 161622 | 18 | 5845688 | 5845711 | 2 | 12 | 24 | CA   | 11 | 10 |
| 161623 | 18 | 5845900 | 5845939 | 2 | 20 | 40 | AG   | 8  | 7  |
| 161624 | 18 | 5847348 | 5847361 | 2 | 7  | 14 | AC   | 24 | 8  |
| 161625 | 18 | 5847748 | 5847805 | 2 | 29 | 58 | TG   | 7  | 8  |
| 161636 | 18 | 5872666 | 5872685 | 4 | 5  | 20 | ATTT | 12 | 8  |
| 161639 | 18 | 5879589 | 5879608 | 2 | 10 | 20 | GT   | 24 | 18 |
| 161642 | 18 | 5882801 | 5882812 | 2 | 6  | 12 | AC   | 30 | 4  |
| 161647 | 18 | 5885400 | 5885415 | 4 | 4  | 16 | CCTC | 24 | 3  |
| 161648 | 18 | 5885738 | 5885755 | 2 | 9  | 18 | TG   | 21 | 7  |
| 161659 | 18 | 5891219 | 5891244 | 2 | 13 | 26 | TG   | 6  | 5  |
| 161673 | 18 | 5937164 | 5937183 | 4 | 5  | 20 | AAAC | 11 | 9  |

|        |    |         |         |   |    |    |      |    |    |
|--------|----|---------|---------|---|----|----|------|----|----|
| 161683 | 18 | 5994806 | 5994825 | 4 | 5  | 20 | AGAC | 35 | 3  |
| 161687 | 18 | 6009827 | 6009850 | 4 | 6  | 24 | TCAA | 27 | 6  |
| 161688 | 18 | 6021946 | 6021961 | 4 | 4  | 16 | AACC | 29 | 3  |
| 161689 | 18 | 6026740 | 6026763 | 2 | 12 | 24 | GT   | 25 | 6  |
| 161691 | 18 | 6030969 | 6030996 | 2 | 14 | 28 | CA   | 18 | 10 |
| 161693 | 18 | 6033902 | 6033935 | 2 | 17 | 34 | CA   | 10 | 11 |
| 161701 | 18 | 6047639 | 6047658 | 4 | 5  | 20 | GAAA | 25 | 5  |
| 161704 | 18 | 6060570 | 6060590 | 3 | 7  | 21 | CAG  | 25 | 4  |
| 161706 | 18 | 6063796 | 6063827 | 4 | 8  | 32 | ATGA | 26 | 7  |
| 161708 | 18 | 6064863 | 6064888 | 2 | 13 | 26 | CA   | 15 | 5  |
| 161709 | 18 | 6066253 | 6066264 | 2 | 6  | 12 | GA   | 23 | 4  |
| 161725 | 18 | 6103303 | 6103358 | 2 | 28 | 56 | GT   | 6  | 10 |
| 161726 | 18 | 6109915 | 6109934 | 4 | 5  | 20 | TTTG | 29 | 4  |
| 161727 | 18 | 6111284 | 6111298 | 3 | 5  | 15 | ATT  | 16 | 3  |
| 161728 | 18 | 6114852 | 6114867 | 2 | 8  | 16 | CT   | 20 | 3  |
| 161731 | 18 | 6118513 | 6118536 | 4 | 6  | 24 | AGAA | 22 | 7  |
| 161734 | 18 | 6120747 | 6120764 | 3 | 6  | 18 | CCT  | 17 | 6  |
| 161736 | 18 | 6121659 | 6121674 | 4 | 4  | 16 | ATTT | 16 | 11 |
| 161742 | 18 | 6131594 | 6131605 | 2 | 6  | 12 | GT   | 24 | 4  |
| 161745 | 18 | 6136179 | 6136210 | 4 | 8  | 32 | TATT | 18 | 3  |
| 161747 | 18 | 6141102 | 6141135 | 2 | 17 | 34 | AC   | 19 | 12 |
| 161748 | 18 | 6141542 | 6141556 | 3 | 5  | 15 | CTG  | 30 | 4  |
| 161753 | 18 | 6151929 | 6151952 | 2 | 12 | 24 | GT   | 12 | 13 |
| 161754 | 18 | 6152098 | 6152113 | 2 | 8  | 16 | GA   | 13 | 9  |
| 161755 | 18 | 6152116 | 6152133 | 2 | 9  | 18 | GA   | 12 | 11 |
| 161758 | 18 | 6167071 | 6167086 | 2 | 8  | 16 | TA   | 12 | 3  |
| 161759 | 18 | 6168989 | 6169008 | 2 | 10 | 20 | GT   | 23 | 7  |
| 161761 | 18 | 6173944 | 6173963 | 4 | 5  | 20 | GTAT | 16 | 11 |
| 161763 | 18 | 6179918 | 6179973 | 2 | 28 | 56 | GT   | 11 | 10 |
| 161764 | 18 | 6186791 | 6186810 | 2 | 10 | 20 | CA   | 21 | 7  |
| 161772 | 18 | 6202545 | 6202574 | 2 | 15 | 30 | CA   | 20 | 11 |
| 161776 | 18 | 6212307 | 6212324 | 3 | 6  | 18 | AGT  | 19 | 6  |
| 161783 | 18 | 6238383 | 6238398 | 2 | 8  | 16 | TA   | 23 | 3  |
| 161807 | 18 | 6343472 | 6343495 | 4 | 6  | 24 | CTAT | 9  | 5  |
| 161816 | 18 | 6349452 | 6349477 | 2 | 13 | 26 | GT   | 9  | 6  |
| 161824 | 18 | 6395939 | 6395970 | 2 | 16 | 32 | AC   | 14 | 10 |
| 161829 | 18 | 6407720 | 6407731 | 2 | 6  | 12 | GT   | 31 | 11 |
| 161830 | 18 | 6407732 | 6407743 | 2 | 6  | 12 | GA   | 32 | 8  |
| 161833 | 18 | 6419562 | 6419587 | 2 | 13 | 26 | CA   | 24 | 13 |
| 161835 | 18 | 6422440 | 6422461 | 2 | 11 | 22 | AG   | 17 | 9  |
| 161848 | 18 | 6455857 | 6455868 | 2 | 6  | 12 | AC   | 27 | 3  |
| 161855 | 18 | 6477883 | 6477912 | 2 | 15 | 30 | AC   | 6  | 6  |
| 161872 | 18 | 6515381 | 6515392 | 2 | 6  | 12 | CA   | 22 | 3  |
| 161875 | 18 | 6522871 | 6522890 | 2 | 10 | 20 | AC   | 18 | 8  |
| 161876 | 18 | 6523064 | 6523091 | 2 | 14 | 28 | GT   | 16 | 7  |
| 161877 | 18 | 6523244 | 6523259 | 4 | 4  | 16 | CCTG | 33 | 3  |
| 161882 | 18 | 6530705 | 6530718 | 2 | 7  | 14 | TG   | 29 | 4  |
| 161883 | 18 | 6530721 | 6530732 | 2 | 6  | 12 | TG   | 18 | 3  |
| 161884 | 18 | 6536179 | 6536212 | 2 | 17 | 34 | CA   | 19 | 10 |
| 161886 | 18 | 6536913 | 6536930 | 2 | 9  | 18 | GA   | 13 | 5  |
| 161888 | 18 | 6537653 | 6537667 | 3 | 5  | 15 | AAC  | 33 | 4  |

|        |    |         |         |   |    |    |      |    |    |
|--------|----|---------|---------|---|----|----|------|----|----|
| 161891 | 18 | 6538879 | 6538892 | 2 | 7  | 14 | TG   | 12 | 4  |
| 161892 | 18 | 6538981 | 6539014 | 2 | 17 | 34 | GA   | 8  | 10 |
| 161900 | 18 | 6550623 | 6550658 | 3 | 12 | 36 | CAA  | 23 | 13 |
| 161907 | 18 | 6583317 | 6583332 | 2 | 8  | 16 | GT   | 23 | 9  |
| 161908 | 18 | 6587404 | 6587417 | 2 | 7  | 14 | AC   | 23 | 3  |
| 161909 | 18 | 6599756 | 6599777 | 2 | 11 | 22 | TG   | 12 | 5  |
| 161915 | 18 | 6602980 | 6602993 | 2 | 7  | 14 | CA   | 23 | 3  |
| 161919 | 18 | 6607352 | 6607363 | 2 | 6  | 12 | TG   | 27 | 3  |
| 161920 | 18 | 6607829 | 6607846 | 3 | 6  | 18 | CCT  | 25 | 4  |
| 161926 | 18 | 6621302 | 6621333 | 2 | 16 | 32 | GT   | 10 | 9  |
| 161927 | 18 | 6622305 | 6622322 | 2 | 9  | 18 | AG   | 24 | 6  |
| 161928 | 18 | 6622479 | 6622502 | 2 | 12 | 24 | AG   | 22 | 8  |
| 161929 | 18 | 6627088 | 6627111 | 3 | 8  | 24 | AAC  | 23 | 5  |
| 161940 | 18 | 6648115 | 6648158 | 2 | 22 | 44 | TG   | 6  | 8  |
| 161951 | 18 | 6673293 | 6673322 | 2 | 15 | 30 | GT   | 18 | 15 |
| 161952 | 18 | 6674565 | 6674590 | 2 | 13 | 26 | GT   | 19 | 10 |
| 161957 | 18 | 6690512 | 6690525 | 2 | 7  | 14 | AC   | 22 | 4  |
| 161970 | 18 | 6721248 | 6721271 | 2 | 12 | 24 | AC   | 23 | 5  |
| 161985 | 18 | 6752187 | 6752206 | 2 | 10 | 20 | GT   | 17 | 4  |
| 161988 | 18 | 6757503 | 6757520 | 3 | 6  | 18 | GGA  | 17 | 7  |
| 161989 | 18 | 6761361 | 6761384 | 3 | 8  | 24 | GAA  | 28 | 5  |
| 161990 | 18 | 6762064 | 6762081 | 3 | 6  | 18 | CAA  | 28 | 8  |
| 161991 | 18 | 6763945 | 6763958 | 2 | 7  | 14 | TG   | 27 | 3  |
| 161992 | 18 | 6764537 | 6764560 | 2 | 12 | 24 | GT   | 18 | 7  |
| 161995 | 18 | 6778613 | 6778632 | 2 | 10 | 20 | CA   | 12 | 10 |
| 162003 | 18 | 6786221 | 6786240 | 2 | 10 | 20 | GT   | 16 | 5  |
| 162014 | 18 | 6788036 | 6788051 | 2 | 8  | 16 | CA   | 8  | 10 |
| 162015 | 18 | 6788213 | 6788228 | 2 | 8  | 16 | GT   | 20 | 8  |
| 162016 | 18 | 6788779 | 6788796 | 2 | 9  | 18 | AC   | 23 | 5  |
| 162025 | 18 | 6802605 | 6802643 | 3 | 13 | 39 | GAT  | 26 | 9  |
| 162026 | 18 | 6808532 | 6808543 | 2 | 6  | 12 | TA   | 28 | 3  |
| 162027 | 18 | 6809430 | 6809447 | 3 | 6  | 18 | CAT  | 22 | 3  |
| 162033 | 18 | 6816917 | 6816932 | 2 | 8  | 16 | GT   | 17 | 5  |
| 162039 | 18 | 6822785 | 6822800 | 2 | 8  | 16 | GT   | 18 | 7  |
| 162042 | 18 | 6833754 | 6833781 | 2 | 14 | 28 | CA   | 17 | 10 |
| 162055 | 18 | 6848057 | 6848074 | 3 | 6  | 18 | TCA  | 26 | 5  |
| 162059 | 18 | 6861083 | 6861138 | 4 | 14 | 56 | ATGT | 12 | 11 |
| 162061 | 18 | 6862286 | 6862309 | 3 | 8  | 24 | TTC  | 7  | 3  |
| 162065 | 18 | 6874825 | 6874836 | 2 | 6  | 12 | AC   | 31 | 5  |
| 162066 | 18 | 6875975 | 6875996 | 2 | 11 | 22 | GT   | 23 | 4  |
| 162068 | 18 | 6883644 | 6883681 | 2 | 19 | 38 | TG   | 6  | 7  |
| 162072 | 18 | 6912180 | 6912219 | 2 | 20 | 40 | TG   | 13 | 18 |
| 162079 | 18 | 6936375 | 6936394 | 2 | 10 | 20 | GT   | 15 | 6  |
| 162083 | 18 | 6942252 | 6942267 | 2 | 8  | 16 | TG   | 8  | 5  |
| 162084 | 18 | 6950783 | 6950796 | 2 | 7  | 14 | GT   | 20 | 9  |
| 162085 | 18 | 6952882 | 6952897 | 2 | 8  | 16 | TG   | 19 | 7  |
| 162086 | 18 | 6953301 | 6953314 | 2 | 7  | 14 | CA   | 14 | 3  |
| 162089 | 18 | 6957605 | 6957616 | 2 | 6  | 12 | TG   | 29 | 4  |
| 162098 | 18 | 6970478 | 6970491 | 2 | 7  | 14 | TG   | 21 | 3  |
| 162100 | 18 | 6971572 | 6971609 | 2 | 19 | 38 | GT   | 12 | 16 |
| 162107 | 18 | 6974793 | 6974812 | 4 | 5  | 20 | GGCT | 18 | 6  |

|        |    |         |         |   |    |    |      |    |    |
|--------|----|---------|---------|---|----|----|------|----|----|
| 162108 | 18 | 6975485 | 6975508 | 2 | 12 | 24 | AC   | 10 | 3  |
| 162109 | 18 | 6976841 | 6976856 | 2 | 8  | 16 | CA   | 25 | 9  |
| 162110 | 18 | 6976962 | 6976979 | 3 | 6  | 18 | CTA  | 24 | 3  |
| 162126 | 18 | 6987310 | 6987323 | 2 | 7  | 14 | CA   | 22 | 3  |
| 162128 | 18 | 6987806 | 6987821 | 4 | 4  | 16 | TTCT | 27 | 4  |
| 162138 | 18 | 6994352 | 6994367 | 2 | 8  | 16 | CA   | 24 | 6  |
| 162142 | 18 | 6996324 | 6996345 | 2 | 11 | 22 | GA   | 10 | 8  |
| 162143 | 18 | 6996862 | 6996877 | 2 | 8  | 16 | TG   | 19 | 8  |
| 162144 | 18 | 6996879 | 6996890 | 2 | 6  | 12 | GT   | 15 | 7  |
| 162147 | 18 | 6997946 | 6997961 | 2 | 8  | 16 | AC   | 17 | 7  |
| 162149 | 18 | 7000042 | 7000059 | 2 | 9  | 18 | GT   | 19 | 5  |
| 162152 | 18 | 7001054 | 7001071 | 2 | 9  | 18 | GA   | 12 | 5  |
| 162153 | 18 | 7002390 | 7002407 | 3 | 6  | 18 | CAG  | 26 | 4  |
| 162154 | 18 | 7002828 | 7002855 | 2 | 14 | 28 | TG   | 21 | 7  |
| 162157 | 18 | 7004364 | 7004385 | 2 | 11 | 22 | GT   | 10 | 3  |
| 162158 | 18 | 7006204 | 7006231 | 2 | 14 | 28 | GT   | 14 | 8  |
| 162159 | 18 | 7008167 | 7008182 | 2 | 8  | 16 | TG   | 22 | 5  |
| 162160 | 18 | 7012378 | 7012392 | 3 | 5  | 15 | TTC  | 16 | 6  |
| 162161 | 18 | 7016234 | 7016261 | 2 | 14 | 28 | TG   | 11 | 16 |
| 162169 | 18 | 7028870 | 7028887 | 2 | 9  | 18 | CT   | 22 | 7  |
| 162172 | 18 | 7031964 | 7031983 | 2 | 10 | 20 | GT   | 14 | 6  |
| 162173 | 18 | 7032663 | 7032683 | 3 | 7  | 21 | AGG  | 14 | 5  |
| 162177 | 18 | 7036631 | 7036654 | 2 | 12 | 24 | CA   | 6  | 5  |
| 162181 | 18 | 7039435 | 7039446 | 2 | 6  | 12 | TG   | 30 | 3  |
| 162194 | 18 | 7050520 | 7050534 | 3 | 5  | 15 | CCT  | 20 | 3  |
| 162198 | 18 | 7055059 | 7055082 | 2 | 12 | 24 | TG   | 15 | 8  |
| 162200 | 18 | 7064850 | 7064861 | 2 | 6  | 12 | GA   | 19 | 3  |
| 162201 | 18 | 7065070 | 7065093 | 3 | 8  | 24 | GCA  | 15 | 6  |
| 162209 | 18 | 7085926 | 7085946 | 3 | 7  | 21 | TGC  | 12 | 4  |
| 162213 | 18 | 7098734 | 7098749 | 2 | 8  | 16 | CT   | 13 | 4  |
| 162214 | 18 | 7098752 | 7098763 | 2 | 6  | 12 | CT   | 22 | 12 |
| 162217 | 18 | 7098943 | 7098962 | 4 | 5  | 20 | TTTA | 31 | 3  |
| 162219 | 18 | 7103142 | 7103161 | 2 | 10 | 20 | CT   | 24 | 3  |
| 162225 | 18 | 7114454 | 7114477 | 2 | 12 | 24 | TG   | 11 | 8  |
| 162238 | 18 | 7128777 | 7128800 | 3 | 8  | 24 | TTG  | 18 | 7  |
| 162241 | 18 | 7130536 | 7130547 | 2 | 6  | 12 | GT   | 6  | 4  |
| 162246 | 18 | 7141625 | 7141639 | 3 | 5  | 15 | ACA  | 27 | 3  |
| 162247 | 18 | 7141719 | 7141742 | 4 | 6  | 24 | ATTC | 27 | 3  |
| 162252 | 18 | 7153187 | 7153202 | 4 | 4  | 16 | AAAT | 18 | 6  |
| 162253 | 18 | 7153447 | 7153466 | 2 | 10 | 20 | AC   | 17 | 9  |
| 162254 | 18 | 7153541 | 7153556 | 4 | 4  | 16 | TTGT | 29 | 3  |
| 162256 | 18 | 7158309 | 7158334 | 2 | 13 | 26 | CA   | 10 | 5  |
| 162257 | 18 | 7161210 | 7161223 | 2 | 7  | 14 | AC   | 8  | 6  |
| 162258 | 18 | 7166864 | 7166879 | 2 | 8  | 16 | TG   | 7  | 4  |
| 162259 | 18 | 7168220 | 7168239 | 2 | 10 | 20 | CA   | 13 | 6  |
| 162263 | 18 | 7190018 | 7190043 | 2 | 13 | 26 | TG   | 21 | 10 |
| 162264 | 18 | 7192660 | 7192693 | 2 | 17 | 34 | TG   | 15 | 11 |
| 162267 | 18 | 7203196 | 7203222 | 3 | 9  | 27 | AGC  | 26 | 3  |
| 162268 | 18 | 7204335 | 7204358 | 2 | 12 | 24 | CT   | 13 | 7  |
| 162272 | 18 | 7213659 | 7213684 | 2 | 13 | 26 | GT   | 23 | 14 |
| 162282 | 18 | 7224375 | 7224390 | 4 | 4  | 16 | GGTT | 30 | 4  |

|        |    |         |         |   |    |    |      |    |    |
|--------|----|---------|---------|---|----|----|------|----|----|
| 162283 | 18 | 7234913 | 7234924 | 2 | 6  | 12 | GT   | 26 | 6  |
| 162284 | 18 | 7237150 | 7237167 | 2 | 9  | 18 | AC   | 22 | 9  |
| 162288 | 18 | 7243354 | 7243367 | 2 | 7  | 14 | AC   | 20 | 5  |
| 162289 | 18 | 7243741 | 7243762 | 2 | 11 | 22 | CA   | 13 | 14 |
| 162304 | 18 | 7306406 | 7306429 | 3 | 8  | 24 | GCA  | 28 | 10 |
| 162308 | 18 | 7313860 | 7313873 | 2 | 7  | 14 | AG   | 23 | 3  |
| 162309 | 18 | 7316632 | 7316647 | 4 | 4  | 16 | TTTC | 15 | 7  |
| 162312 | 18 | 7317720 | 7317743 | 3 | 8  | 24 | GAA  | 13 | 4  |
| 162313 | 18 | 7324590 | 7324625 | 2 | 18 | 36 | TG   | 9  | 8  |
| 162318 | 18 | 7350574 | 7350605 | 2 | 16 | 32 | AC   | 12 | 13 |
| 162319 | 18 | 7356147 | 7356158 | 2 | 6  | 12 | TG   | 29 | 5  |
| 162322 | 18 | 7370697 | 7370740 | 4 | 11 | 44 | CTTC | 37 | 7  |
| 162323 | 18 | 7372761 | 7372774 | 2 | 7  | 14 | AC   | 11 | 9  |
| 162326 | 18 | 7384607 | 7384630 | 2 | 12 | 24 | TG   | 11 | 7  |
| 162332 | 18 | 7391451 | 7391468 | 2 | 9  | 18 | AC   | 25 | 4  |
| 162339 | 18 | 7414285 | 7414344 | 4 | 15 | 60 | TCTG | 23 | 7  |
| 162347 | 18 | 7433335 | 7433358 | 2 | 12 | 24 | CT   | 26 | 4  |
| 162352 | 18 | 7439466 | 7439487 | 2 | 11 | 22 | TG   | 9  | 4  |
| 162354 | 18 | 7444082 | 7444117 | 2 | 18 | 36 | TG   | 14 | 12 |
| 162365 | 18 | 7469136 | 7469151 | 2 | 8  | 16 | GT   | 21 | 7  |
| 162370 | 18 | 7480779 | 7480796 | 3 | 6  | 18 | GTG  | 29 | 4  |
| 162371 | 18 | 7482409 | 7482428 | 4 | 5  | 20 | AAAG | 16 | 3  |
| 162376 | 18 | 7486932 | 7486964 | 3 | 11 | 33 | CAT  | 26 | 8  |
| 162383 | 18 | 7497553 | 7497592 | 2 | 20 | 40 | AG   | 6  | 6  |
| 162384 | 18 | 7498969 | 7499010 | 2 | 21 | 42 | CT   | 6  | 8  |
| 162389 | 18 | 7509267 | 7509302 | 2 | 18 | 36 | GT   | 7  | 10 |
| 162391 | 18 | 7509414 | 7509431 | 2 | 9  | 18 | TG   | 13 | 4  |
| 162392 | 18 | 7509549 | 7509574 | 2 | 13 | 26 | TG   | 20 | 7  |
| 162393 | 18 | 7510382 | 7510405 | 4 | 6  | 24 | TTTA | 21 | 7  |
| 162410 | 18 | 7557991 | 7558004 | 2 | 7  | 14 | TG   | 30 | 3  |
| 162412 | 18 | 7561452 | 7561465 | 2 | 7  | 14 | CT   | 32 | 3  |
| 162415 | 18 | 7568552 | 7568563 | 2 | 6  | 12 | AC   | 24 | 4  |
| 162417 | 18 | 7575482 | 7575499 | 2 | 9  | 18 | GT   | 29 | 3  |
| 162431 | 18 | 7595787 | 7595816 | 2 | 15 | 30 | CA   | 11 | 4  |
| 162432 | 18 | 7595868 | 7595883 | 2 | 8  | 16 | AC   | 18 | 4  |
| 162434 | 18 | 7600749 | 7600762 | 2 | 7  | 14 | AC   | 27 | 4  |
| 162437 | 18 | 7608732 | 7608747 | 2 | 8  | 16 | TG   | 20 | 3  |
| 162442 | 18 | 7622610 | 7622621 | 2 | 6  | 12 | CA   | 27 | 3  |
| 162443 | 18 | 7622834 | 7622849 | 2 | 8  | 16 | CA   | 20 | 5  |
| 162444 | 18 | 7627697 | 7627717 | 3 | 7  | 21 | CTG  | 20 | 3  |
| 162448 | 18 | 7632074 | 7632101 | 2 | 14 | 28 | TC   | 12 | 4  |
| 162449 | 18 | 7632173 | 7632192 | 2 | 10 | 20 | TG   | 7  | 7  |
| 162457 | 18 | 7647219 | 7647244 | 2 | 13 | 26 | CA   | 18 | 8  |
| 162458 | 18 | 7648885 | 7648906 | 2 | 11 | 22 | TG   | 8  | 7  |
| 162461 | 18 | 7650468 | 7650493 | 2 | 13 | 26 | CA   | 22 | 11 |
| 162466 | 18 | 7654865 | 7654876 | 2 | 6  | 12 | AC   | 26 | 4  |
| 162468 | 18 | 7655288 | 7655313 | 2 | 13 | 26 | CA   | 18 | 9  |
| 162469 | 18 | 7658378 | 7658423 | 2 | 23 | 46 | GT   | 14 | 10 |
| 162478 | 18 | 7691925 | 7691942 | 2 | 9  | 18 | TG   | 15 | 6  |
| 162482 | 18 | 7693385 | 7693396 | 2 | 6  | 12 | GT   | 20 | 5  |
| 162490 | 18 | 7719403 | 7719420 | 3 | 6  | 18 | CAG  | 27 | 7  |

|        |    |         |         |   |    |    |      |    |    |
|--------|----|---------|---------|---|----|----|------|----|----|
| 162493 | 18 | 7730275 | 7730288 | 2 | 7  | 14 | AT   | 24 | 3  |
| 162497 | 18 | 7747010 | 7747030 | 3 | 7  | 21 | CCT  | 23 | 6  |
| 162502 | 18 | 7757721 | 7757748 | 4 | 7  | 28 | TTTC | 23 | 5  |
| 162503 | 18 | 7758728 | 7758749 | 2 | 11 | 22 | GT   | 21 | 11 |
| 162504 | 18 | 7760108 | 7760129 | 2 | 11 | 22 | TG   | 18 | 7  |
| 162506 | 18 | 7764393 | 7764412 | 2 | 10 | 20 | TC   | 20 | 4  |
| 162511 | 18 | 7779818 | 7779841 | 2 | 12 | 24 | TG   | 24 | 7  |
| 162521 | 18 | 7804723 | 7804738 | 4 | 4  | 16 | TTTA | 31 | 5  |
| 162524 | 18 | 7810431 | 7810444 | 2 | 7  | 14 | CA   | 18 | 6  |
| 162525 | 18 | 7810446 | 7810461 | 2 | 8  | 16 | AC   | 25 | 7  |
| 162532 | 18 | 7827453 | 7827476 | 4 | 6  | 24 | AATA | 16 | 3  |
| 162534 | 18 | 7828291 | 7828314 | 2 | 12 | 24 | AG   | 14 | 7  |
| 162539 | 18 | 7833030 | 7833065 | 3 | 12 | 36 | CAG  | 20 | 7  |
| 162542 | 18 | 7835394 | 7835405 | 2 | 6  | 12 | AT   | 13 | 3  |
| 162548 | 18 | 7846544 | 7846555 | 2 | 6  | 12 | GT   | 21 | 4  |
| 162549 | 18 | 7846557 | 7846570 | 2 | 7  | 14 | TG   | 25 | 7  |
| 162553 | 18 | 7854263 | 7854288 | 2 | 13 | 26 | TG   | 17 | 5  |
| 162554 | 18 | 7855496 | 7855513 | 2 | 9  | 18 | CA   | 21 | 4  |
| 162556 | 18 | 7858945 | 7858958 | 2 | 7  | 14 | AC   | 19 | 9  |
| 162562 | 18 | 7867520 | 7867537 | 2 | 9  | 18 | GT   | 16 | 5  |
| 162566 | 18 | 7870222 | 7870237 | 2 | 8  | 16 | CA   | 7  | 7  |
| 162569 | 18 | 7876236 | 7876249 | 2 | 7  | 14 | AC   | 9  | 6  |
| 162570 | 18 | 7876828 | 7876842 | 3 | 5  | 15 | CAA  | 26 | 8  |
| 162571 | 18 | 7878354 | 7878377 | 3 | 8  | 24 | CAG  | 26 | 7  |
| 162572 | 18 | 7881171 | 7881188 | 3 | 6  | 18 | ACA  | 26 | 7  |
| 162573 | 18 | 7882675 | 7882690 | 2 | 8  | 16 | CT   | 21 | 5  |
| 162579 | 18 | 7891703 | 7891720 | 2 | 9  | 18 | TG   | 18 | 4  |
| 162581 | 18 | 7894301 | 7894322 | 2 | 11 | 22 | TG   | 15 | 10 |
| 162583 | 18 | 7900138 | 7900149 | 2 | 6  | 12 | GT   | 24 | 6  |
| 162584 | 18 | 7903135 | 7903146 | 2 | 6  | 12 | GA   | 29 | 4  |
| 162585 | 18 | 7903818 | 7903829 | 2 | 6  | 12 | CA   | 24 | 4  |
| 162586 | 18 | 7905031 | 7905042 | 2 | 6  | 12 | CA   | 18 | 5  |
| 162588 | 18 | 7910897 | 7910944 | 4 | 12 | 48 | AAAG | 11 | 6  |
| 162589 | 18 | 7911720 | 7911745 | 2 | 13 | 26 | CA   | 7  | 8  |
| 162591 | 18 | 7918741 | 7918770 | 2 | 15 | 30 | GT   | 13 | 8  |
| 162598 | 18 | 7936377 | 7936392 | 4 | 4  | 16 | GGGA | 7  | 3  |
| 162604 | 18 | 7960036 | 7960053 | 2 | 9  | 18 | AC   | 16 | 9  |
| 162605 | 18 | 7964423 | 7964438 | 4 | 4  | 16 | ATAA | 16 | 3  |
| 162607 | 18 | 7964951 | 7964966 | 2 | 8  | 16 | TG   | 27 | 6  |
| 162610 | 18 | 7975767 | 7975778 | 2 | 6  | 12 | CA   | 28 | 4  |
| 162611 | 18 | 7976019 | 7976030 | 2 | 6  | 12 | TG   | 28 | 5  |
| 162613 | 18 | 7979507 | 7979522 | 4 | 4  | 16 | AATA | 22 | 3  |
| 162616 | 18 | 7983019 | 7983036 | 3 | 6  | 18 | AGC  | 23 | 4  |
| 162617 | 18 | 7983279 | 7983329 | 3 | 17 | 51 | GAA  | 22 | 16 |
| 162622 | 18 | 7996670 | 7996683 | 2 | 7  | 14 | GT   | 19 | 9  |
| 162624 | 18 | 7996951 | 7996962 | 2 | 6  | 12 | CT   | 27 | 3  |
| 162630 | 18 | 8003053 | 8003064 | 2 | 6  | 12 | CA   | 22 | 3  |
| 162637 | 18 | 8026152 | 8026163 | 2 | 6  | 12 | TC   | 32 | 3  |
| 162638 | 18 | 8027483 | 8027526 | 2 | 22 | 44 | TG   | 6  | 7  |
| 162640 | 18 | 8029215 | 8029238 | 2 | 12 | 24 | GT   | 16 | 8  |
| 162643 | 18 | 8033722 | 8033773 | 2 | 26 | 52 | CA   | 6  | 8  |

|        |    |         |         |   |    |    |      |    |    |
|--------|----|---------|---------|---|----|----|------|----|----|
| 162646 | 18 | 8035429 | 8035462 | 2 | 17 | 34 | TG   | 8  | 6  |
| 162647 | 18 | 8038481 | 8038504 | 2 | 12 | 24 | TG   | 18 | 9  |
| 162648 | 18 | 8043855 | 8043888 | 2 | 17 | 34 | GT   | 13 | 13 |
| 162649 | 18 | 8045019 | 8045030 | 2 | 6  | 12 | TG   | 13 | 3  |
| 162650 | 18 | 8045071 | 8045094 | 2 | 12 | 24 | TG   | 13 | 8  |
| 162654 | 18 | 8057077 | 8057096 | 4 | 5  | 20 | AAAC | 23 | 3  |
| 162658 | 18 | 8057955 | 8057972 | 2 | 9  | 18 | TG   | 14 | 6  |
| 162663 | 18 | 8067392 | 8067425 | 2 | 17 | 34 | GT   | 11 | 9  |
| 162665 | 18 | 8077415 | 8077430 | 2 | 8  | 16 | CA   | 24 | 7  |
| 162668 | 18 | 8083538 | 8083555 | 3 | 6  | 18 | GCT  | 22 | 4  |
| 162671 | 18 | 8089768 | 8089787 | 2 | 10 | 20 | TG   | 14 | 6  |
| 162674 | 18 | 8092557 | 8092570 | 2 | 7  | 14 | GA   | 24 | 5  |
| 162676 | 18 | 8095524 | 8095538 | 3 | 5  | 15 | GTG  | 28 | 3  |
| 162682 | 18 | 8116893 | 8116924 | 4 | 8  | 32 | CTAT | 21 | 4  |
| 162684 | 18 | 8123858 | 8123873 | 2 | 8  | 16 | CA   | 21 | 9  |
| 162685 | 18 | 8126116 | 8126151 | 2 | 18 | 36 | GT   | 15 | 15 |
| 162696 | 18 | 8138443 | 8138458 | 2 | 8  | 16 | CT   | 7  | 5  |
| 162705 | 18 | 8145393 | 8145408 | 2 | 8  | 16 | TA   | 26 | 4  |
| 162706 | 18 | 8145584 | 8145607 | 2 | 12 | 24 | GT   | 20 | 7  |
| 162719 | 18 | 8171161 | 8171178 | 3 | 6  | 18 | CCT  | 16 | 7  |
| 162722 | 18 | 8173226 | 8173241 | 4 | 4  | 16 | AAAT | 18 | 10 |
| 162723 | 18 | 8173378 | 8173401 | 2 | 12 | 24 | GA   | 12 | 11 |
| 162731 | 18 | 8188530 | 8188547 | 3 | 6  | 18 | ATG  | 15 | 3  |
| 162742 | 18 | 8215961 | 8215972 | 2 | 6  | 12 | CT   | 29 | 4  |
| 162743 | 18 | 8216388 | 8216403 | 2 | 8  | 16 | CT   | 21 | 3  |
| 162753 | 18 | 8236892 | 8236907 | 2 | 8  | 16 | AC   | 6  | 7  |
| 162754 | 18 | 8237143 | 8237162 | 4 | 5  | 20 | CAGG | 23 | 4  |
| 162755 | 18 | 8240897 | 8240914 | 3 | 6  | 18 | TGC  | 29 | 3  |
| 162759 | 18 | 8244960 | 8244973 | 2 | 7  | 14 | GA   | 27 | 4  |
| 162764 | 18 | 8261963 | 8262008 | 2 | 23 | 46 | CA   | 7  | 12 |
| 162765 | 18 | 8268202 | 8268231 | 2 | 15 | 30 | AC   | 8  | 9  |
| 162766 | 18 | 8277087 | 8277102 | 4 | 4  | 16 | GGGA | 7  | 3  |
| 162770 | 18 | 8297553 | 8297568 | 4 | 4  | 16 | AAAT | 27 | 5  |
| 162771 | 18 | 8303037 | 8303066 | 2 | 15 | 30 | GA   | 9  | 7  |
| 162772 | 18 | 8303513 | 8303524 | 2 | 6  | 12 | TA   | 7  | 3  |
| 162774 | 18 | 8310457 | 8310480 | 2 | 12 | 24 | TG   | 8  | 9  |
| 162788 | 18 | 8347664 | 8347675 | 2 | 6  | 12 | AC   | 20 | 3  |
| 162790 | 18 | 8354208 | 8354219 | 2 | 6  | 12 | TG   | 30 | 6  |
| 162799 | 18 | 8367572 | 8367585 | 2 | 7  | 14 | AG   | 19 | 7  |
| 162801 | 18 | 8374555 | 8374582 | 2 | 14 | 28 | GT   | 18 | 5  |
| 162803 | 18 | 8376005 | 8376032 | 2 | 14 | 28 | GT   | 17 | 9  |
| 162806 | 18 | 8383063 | 8383100 | 2 | 19 | 38 | CA   | 11 | 8  |
| 162807 | 18 | 8383442 | 8383453 | 2 | 6  | 12 | GT   | 21 | 5  |
| 162808 | 18 | 8383665 | 8383686 | 2 | 11 | 22 | CA   | 15 | 9  |
| 162812 | 18 | 8396551 | 8396576 | 2 | 13 | 26 | AG   | 12 | 8  |
| 162813 | 18 | 8397103 | 8397140 | 2 | 19 | 38 | CT   | 19 | 11 |
| 162820 | 18 | 8401526 | 8401549 | 3 | 8  | 24 | TCC  | 16 | 8  |
| 162835 | 18 | 8409943 | 8409974 | 2 | 16 | 32 | TG   | 16 | 10 |
| 162836 | 18 | 8412068 | 8412089 | 2 | 11 | 22 | AC   | 27 | 5  |
| 162837 | 18 | 8413799 | 8413846 | 2 | 24 | 48 | TC   | 11 | 8  |
| 162838 | 18 | 8414107 | 8414140 | 2 | 17 | 34 | GT   | 10 | 9  |



|        |    |         |         |   |    |    |      |    |    |
|--------|----|---------|---------|---|----|----|------|----|----|
| 162839 | 18 | 8415755 | 8415784 | 2 | 15 | 30 | GT   | 11 | 14 |
| 162843 | 18 | 8430093 | 8430108 | 2 | 8  | 16 | TG   | 20 | 9  |
| 162844 | 18 | 8433214 | 8433229 | 4 | 4  | 16 | TTTA | 11 | 3  |
| 162850 | 18 | 8437775 | 8437798 | 4 | 6  | 24 | TTTA | 15 | 5  |
| 162855 | 18 | 8445660 | 8445693 | 2 | 17 | 34 | TG   | 12 | 10 |
| 162857 | 18 | 8445809 | 8445826 | 2 | 9  | 18 | CA   | 19 | 9  |
| 162858 | 18 | 8445828 | 8445843 | 2 | 8  | 16 | AC   | 25 | 11 |
| 162859 | 18 | 8445893 | 8445908 | 2 | 8  | 16 | TG   | 22 | 6  |
| 162861 | 18 | 8448987 | 8449000 | 2 | 7  | 14 | TG   | 15 | 9  |
| 162862 | 18 | 8450980 | 8451001 | 2 | 11 | 22 | TG   | 15 | 10 |
| 162866 | 18 | 8455385 | 8455408 | 2 | 12 | 24 | CA   | 22 | 8  |
| 162869 | 18 | 8458450 | 8458463 | 2 | 7  | 14 | TG   | 21 | 3  |
| 162870 | 18 | 8458909 | 8458926 | 2 | 9  | 18 | TG   | 23 | 8  |
| 162872 | 18 | 8459795 | 8459808 | 2 | 7  | 14 | TG   | 28 | 3  |
| 162874 | 18 | 8461634 | 8461649 | 2 | 8  | 16 | AC   | 20 | 5  |
| 162877 | 18 | 8471330 | 8471345 | 4 | 4  | 16 | AATG | 6  | 3  |
| 162884 | 18 | 8475567 | 8475588 | 2 | 11 | 22 | TG   | 30 | 9  |
| 162891 | 18 | 8481617 | 8481632 | 2 | 8  | 16 | TG   | 19 | 5  |
| 162892 | 18 | 8482441 | 8482474 | 2 | 17 | 34 | AG   | 17 | 9  |
| 162894 | 18 | 8489939 | 8489958 | 2 | 10 | 20 | TC   | 20 | 5  |
| 162895 | 18 | 8490060 | 8490073 | 2 | 7  | 14 | TC   | 12 | 3  |
| 162899 | 18 | 8493470 | 8493481 | 2 | 6  | 12 | AC   | 30 | 6  |
| 162902 | 18 | 8496781 | 8496806 | 2 | 13 | 26 | GT   | 17 | 7  |
| 162904 | 18 | 8501197 | 8501212 | 2 | 8  | 16 | TG   | 8  | 10 |
| 162913 | 18 | 8507517 | 8507528 | 2 | 6  | 12 | TG   | 35 | 5  |
| 162917 | 18 | 8510356 | 8510373 | 2 | 9  | 18 | TG   | 21 | 9  |
| 162918 | 18 | 8510375 | 8510386 | 2 | 6  | 12 | GT   | 18 | 9  |
| 162930 | 18 | 8523493 | 8523516 | 2 | 12 | 24 | AC   | 14 | 8  |
| 162936 | 18 | 8531344 | 8531363 | 4 | 5  | 20 | ATTT | 15 | 7  |
| 162937 | 18 | 8534542 | 8534563 | 2 | 11 | 22 | GT   | 15 | 10 |
| 162946 | 18 | 8545413 | 8545424 | 2 | 6  | 12 | AG   | 16 | 8  |
| 162948 | 18 | 8546280 | 8546291 | 2 | 6  | 12 | CG   | 19 | 9  |
| 162951 | 18 | 8548179 | 8548200 | 2 | 11 | 22 | TC   | 12 | 7  |
| 162953 | 18 | 8548230 | 8548261 | 2 | 16 | 32 | TG   | 13 | 11 |
| 162954 | 18 | 8548350 | 8548365 | 4 | 4  | 16 | CAGT | 31 | 3  |
| 162959 | 18 | 8558195 | 8558228 | 2 | 17 | 34 | GT   | 12 | 13 |
| 162966 | 18 | 8564269 | 8564296 | 2 | 14 | 28 | AC   | 15 | 12 |
| 162967 | 18 | 8564376 | 8564389 | 2 | 7  | 14 | GA   | 24 | 3  |
| 162968 | 18 | 8564522 | 8564533 | 2 | 6  | 12 | TG   | 22 | 8  |
| 162970 | 18 | 8568760 | 8568771 | 2 | 6  | 12 | TA   | 19 | 8  |
| 162972 | 18 | 8583916 | 8583935 | 2 | 10 | 20 | TG   | 22 | 3  |
| 162976 | 18 | 8587012 | 8587035 | 2 | 12 | 24 | TG   | 18 | 9  |
| 162979 | 18 | 8590439 | 8590464 | 2 | 13 | 26 | CA   | 9  | 11 |
| 162980 | 18 | 8590622 | 8590641 | 2 | 10 | 20 | GT   | 14 | 11 |
| 162983 | 18 | 8596947 | 8596974 | 4 | 7  | 28 | GTCT | 30 | 8  |
| 162988 | 18 | 8610874 | 8610893 | 2 | 10 | 20 | TG   | 17 | 5  |
| 162990 | 18 | 8616555 | 8616582 | 2 | 14 | 28 | CA   | 13 | 7  |
| 162991 | 18 | 8616705 | 8616730 | 2 | 13 | 26 | TG   | 15 | 5  |
| 162995 | 18 | 8623157 | 8623171 | 3 | 5  | 15 | CCT  | 28 | 7  |
| 162996 | 18 | 8623946 | 8623983 | 2 | 19 | 38 | AC   | 17 | 14 |
| 162998 | 18 | 8629129 | 8629154 | 2 | 13 | 26 | CA   | 20 | 10 |

|        |    |         |         |   |    |    |      |    |    |
|--------|----|---------|---------|---|----|----|------|----|----|
| 162999 | 18 | 8629404 | 8629421 | 2 | 9  | 18 | CT   | 13 | 9  |
| 163002 | 18 | 8631034 | 8631055 | 2 | 11 | 22 | TG   | 23 | 9  |
| 163004 | 18 | 8634235 | 8634268 | 2 | 17 | 34 | CA   | 8  | 8  |
| 163007 | 18 | 8637468 | 8637497 | 2 | 15 | 30 | AC   | 15 | 12 |
| 163009 | 18 | 8639321 | 8639336 | 2 | 8  | 16 | TG   | 21 | 5  |
| 163012 | 18 | 8640931 | 8640956 | 2 | 13 | 26 | AC   | 20 | 10 |
| 163016 | 18 | 8643048 | 8643065 | 2 | 9  | 18 | CA   | 15 | 10 |
| 163020 | 18 | 8646104 | 8646149 | 2 | 23 | 46 | AC   | 8  | 8  |
| 163023 | 18 | 8648936 | 8648983 | 4 | 12 | 48 | TTTC | 7  | 6  |
| 163025 | 18 | 8651347 | 8651364 | 2 | 9  | 18 | TG   | 19 | 7  |
| 163027 | 18 | 8653738 | 8653761 | 2 | 12 | 24 | TG   | 17 | 5  |
| 163028 | 18 | 8653979 | 8654006 | 2 | 14 | 28 | AC   | 8  | 8  |
| 163031 | 18 | 8654749 | 8654768 | 2 | 10 | 20 | CA   | 19 | 9  |
| 163036 | 18 | 8659258 | 8659283 | 2 | 13 | 26 | CA   | 14 | 12 |
| 163039 | 18 | 8659827 | 8659846 | 2 | 10 | 20 | TC   | 14 | 5  |
| 163040 | 18 | 8659880 | 8659909 | 2 | 15 | 30 | TC   | 15 | 5  |
| 163048 | 18 | 8662681 | 8662702 | 2 | 11 | 22 | AG   | 9  | 6  |
| 163050 | 18 | 8672205 | 8672230 | 2 | 13 | 26 | TG   | 20 | 8  |
| 163051 | 18 | 8672466 | 8672479 | 2 | 7  | 14 | AC   | 32 | 3  |
| 163054 | 18 | 8681521 | 8681542 | 2 | 11 | 22 | AC   | 13 | 7  |
| 163056 | 18 | 8684118 | 8684151 | 2 | 17 | 34 | CA   | 6  | 8  |
| 163058 | 18 | 8689127 | 8689140 | 2 | 7  | 14 | GT   | 26 | 4  |
| 163062 | 18 | 8693812 | 8693847 | 2 | 18 | 36 | CA   | 12 | 8  |
| 163063 | 18 | 8698567 | 8698582 | 2 | 8  | 16 | GA   | 11 | 4  |
| 163064 | 18 | 8698752 | 8698775 | 2 | 12 | 24 | TG   | 17 | 9  |
| 163081 | 18 | 8708315 | 8708326 | 2 | 6  | 12 | TG   | 29 | 5  |
| 163082 | 18 | 8708364 | 8708379 | 2 | 8  | 16 | TG   | 19 | 4  |
| 163095 | 18 | 8715578 | 8715595 | 2 | 9  | 18 | AC   | 12 | 11 |
| 163098 | 18 | 8716615 | 8716632 | 3 | 6  | 18 | AAT  | 30 | 3  |
| 163101 | 18 | 8724891 | 8724911 | 3 | 7  | 21 | TCA  | 29 | 8  |
| 163103 | 18 | 8738205 | 8738220 | 2 | 8  | 16 | CT   | 11 | 8  |
| 163114 | 18 | 8750547 | 8750560 | 2 | 7  | 14 | CT   | 21 | 3  |
| 163122 | 18 | 8752701 | 8752716 | 2 | 8  | 16 | TC   | 14 | 3  |
| 163130 | 18 | 8762072 | 8762103 | 2 | 16 | 32 | GT   | 15 | 13 |
| 163131 | 18 | 8763170 | 8763189 | 2 | 10 | 20 | TG   | 11 | 9  |
| 163133 | 18 | 8765693 | 8765722 | 3 | 10 | 30 | GCA  | 21 | 6  |
| 163134 | 18 | 8766736 | 8766749 | 2 | 7  | 14 | AC   | 29 | 15 |
| 163136 | 18 | 8768544 | 8768567 | 2 | 12 | 24 | CA   | 10 | 8  |
| 163139 | 18 | 8771720 | 8771745 | 2 | 13 | 26 | GT   | 9  | 8  |
| 163140 | 18 | 8771826 | 8771851 | 2 | 13 | 26 | TG   | 13 | 5  |
| 163141 | 18 | 8771980 | 8772003 | 2 | 12 | 24 | GA   | 21 | 8  |
| 163146 | 18 | 8779199 | 8779232 | 2 | 17 | 34 | GA   | 11 | 6  |
| 163147 | 18 | 8779501 | 8779516 | 2 | 8  | 16 | AC   | 25 | 6  |
| 163148 | 18 | 8779676 | 8779699 | 2 | 12 | 24 | TG   | 10 | 4  |
| 163150 | 18 | 8782631 | 8782658 | 2 | 14 | 28 | TG   | 17 | 7  |
| 163153 | 18 | 8787900 | 8787917 | 2 | 9  | 18 | CA   | 20 | 7  |
| 163154 | 18 | 8790533 | 8790546 | 2 | 7  | 14 | CA   | 27 | 3  |
| 163157 | 18 | 8793488 | 8793515 | 2 | 14 | 28 | GA   | 12 | 11 |
| 163165 | 18 | 8806360 | 8806393 | 2 | 17 | 34 | CA   | 15 | 7  |
| 163166 | 18 | 8808077 | 8808088 | 2 | 6  | 12 | TG   | 20 | 5  |
| 163170 | 18 | 8813614 | 8813645 | 2 | 16 | 32 | TC   | 16 | 6  |

|        |    |         |         |   |    |    |      |    |    |
|--------|----|---------|---------|---|----|----|------|----|----|
| 163172 | 18 | 8818981 | 8818995 | 3 | 5  | 15 | CTG  | 32 | 4  |
| 163175 | 18 | 8821263 | 8821278 | 2 | 8  | 16 | GT   | 11 | 5  |
| 163176 | 18 | 8821281 | 8821296 | 2 | 8  | 16 | GT   | 8  | 4  |
| 163179 | 18 | 8825979 | 8826006 | 2 | 14 | 28 | TG   | 10 | 7  |
| 163183 | 18 | 8830108 | 8830123 | 2 | 8  | 16 | TG   | 20 | 9  |
| 163184 | 18 | 8830125 | 8830136 | 2 | 6  | 12 | GT   | 18 | 8  |
| 163185 | 18 | 8833156 | 8833169 | 2 | 7  | 14 | GT   | 7  | 7  |
| 163187 | 18 | 8834116 | 8834131 | 2 | 8  | 16 | AG   | 19 | 12 |
| 163188 | 18 | 8834172 | 8834203 | 2 | 16 | 32 | AG   | 17 | 10 |
| 163190 | 18 | 8838048 | 8838065 | 2 | 9  | 18 | GT   | 7  | 5  |
| 163197 | 18 | 8839304 | 8839335 | 2 | 16 | 32 | CA   | 13 | 12 |
| 163199 | 18 | 8839708 | 8839719 | 2 | 6  | 12 | GT   | 24 | 6  |
| 163200 | 18 | 8839728 | 8839739 | 2 | 6  | 12 | GT   | 19 | 3  |
| 163203 | 18 | 8841216 | 8841247 | 2 | 16 | 32 | AC   | 14 | 5  |
| 163204 | 18 | 8842398 | 8842409 | 2 | 6  | 12 | CA   | 14 | 7  |
| 163205 | 18 | 8842412 | 8842429 | 2 | 9  | 18 | CA   | 15 | 8  |
| 163207 | 18 | 8842583 | 8842596 | 2 | 7  | 14 | CA   | 14 | 6  |
| 163208 | 18 | 8842841 | 8842861 | 3 | 7  | 21 | GCA  | 24 | 10 |
| 163217 | 18 | 8848004 | 8848025 | 2 | 11 | 22 | TG   | 19 | 6  |
| 163227 | 18 | 8857332 | 8857347 | 2 | 8  | 16 | CT   | 22 | 3  |
| 163229 | 18 | 8858997 | 8859010 | 2 | 7  | 14 | TC   | 13 | 5  |
| 163232 | 18 | 8867419 | 8867434 | 2 | 8  | 16 | AG   | 25 | 3  |
| 163233 | 18 | 8870767 | 8870790 | 2 | 12 | 24 | TG   | 20 | 7  |
| 163234 | 18 | 8870897 | 8870908 | 2 | 6  | 12 | GT   | 23 | 3  |
| 163240 | 18 | 8876563 | 8876580 | 2 | 9  | 18 | GT   | 18 | 3  |
| 163246 | 18 | 8887093 | 8887104 | 2 | 6  | 12 | AC   | 28 | 3  |
| 163250 | 18 | 8896259 | 8896294 | 2 | 18 | 36 | CA   | 12 | 11 |
| 163251 | 18 | 8901072 | 8901111 | 2 | 20 | 40 | CA   | 10 | 8  |
| 163252 | 18 | 8903398 | 8903413 | 2 | 8  | 16 | GT   | 33 | 7  |
| 163266 | 18 | 8925459 | 8925486 | 2 | 14 | 28 | AG   | 8  | 3  |
| 163267 | 18 | 8928708 | 8928719 | 2 | 6  | 12 | AT   | 20 | 6  |
| 163273 | 18 | 8934269 | 8934286 | 2 | 9  | 18 | AG   | 17 | 3  |
| 163274 | 18 | 8934330 | 8934345 | 2 | 8  | 16 | GT   | 22 | 5  |
| 163281 | 18 | 8946210 | 8946221 | 2 | 6  | 12 | GT   | 17 | 4  |
| 163283 | 18 | 8947377 | 8947388 | 2 | 6  | 12 | GT   | 24 | 5  |
| 163284 | 18 | 8949388 | 8949423 | 4 | 9  | 36 | ACAG | 25 | 4  |
| 163287 | 18 | 8950642 | 8950675 | 2 | 17 | 34 | AC   | 9  | 9  |
| 163288 | 18 | 8950783 | 8950812 | 2 | 15 | 30 | CA   | 10 | 4  |
| 163289 | 18 | 8952224 | 8952247 | 2 | 12 | 24 | CT   | 15 | 5  |
| 163295 | 18 | 8955712 | 8955725 | 2 | 7  | 14 | TG   | 25 | 5  |
| 163296 | 18 | 8956879 | 8956900 | 2 | 11 | 22 | AC   | 20 | 6  |
| 163298 | 18 | 8960987 | 8961006 | 2 | 10 | 20 | AC   | 20 | 9  |
| 163299 | 18 | 8961106 | 8961121 | 2 | 8  | 16 | AC   | 8  | 7  |
| 163302 | 18 | 8963447 | 8963486 | 2 | 20 | 40 | GT   | 8  | 11 |
| 163306 | 18 | 8966526 | 8966547 | 2 | 11 | 22 | TG   | 19 | 4  |
| 163308 | 18 | 8968004 | 8968019 | 2 | 8  | 16 | AC   | 23 | 5  |
| 163310 | 18 | 8976396 | 8976409 | 2 | 7  | 14 | CA   | 29 | 3  |
| 163311 | 18 | 8976565 | 8976582 | 2 | 9  | 18 | AC   | 18 | 3  |
| 163314 | 18 | 8979943 | 8979954 | 2 | 6  | 12 | AG   | 17 | 3  |
| 163315 | 18 | 8981240 | 8981257 | 2 | 9  | 18 | GT   | 17 | 7  |
| 163320 | 18 | 8986808 | 8986841 | 2 | 17 | 34 | GT   | 8  | 8  |

|        |    |         |         |   |    |    |     |    |    |
|--------|----|---------|---------|---|----|----|-----|----|----|
| 163321 | 18 | 8989137 | 8989170 | 2 | 17 | 34 | TG  | 9  | 11 |
| 163326 | 18 | 8994859 | 8994910 | 2 | 26 | 52 | TG  | 9  | 9  |
| 163331 | 18 | 9003344 | 9003357 | 2 | 7  | 14 | TG  | 21 | 5  |
| 163332 | 18 | 9003374 | 9003387 | 2 | 7  | 14 | GT  | 18 | 3  |
| 163333 | 18 | 9003505 | 9003542 | 2 | 19 | 38 | GT  | 10 | 11 |
| 163336 | 18 | 9005355 | 9005378 | 2 | 12 | 24 | AC  | 12 | 5  |
| 163337 | 18 | 9012753 | 9012776 | 2 | 12 | 24 | TG  | 21 | 6  |
| 163338 | 18 | 9013014 | 9013025 | 2 | 6  | 12 | GT  | 22 | 3  |
| 163340 | 18 | 9014708 | 9014727 | 2 | 10 | 20 | CA  | 26 | 5  |
| 163341 | 18 | 9015324 | 9015343 | 2 | 10 | 20 | AC  | 14 | 3  |
| 163343 | 18 | 9017824 | 9017835 | 2 | 6  | 12 | TG  | 22 | 4  |
| 163344 | 18 | 9020513 | 9020544 | 2 | 16 | 32 | CT  | 16 | 10 |
| 163346 | 18 | 9023594 | 9023614 | 3 | 7  | 21 | AGC | 28 | 3  |
| 163347 | 18 | 9026281 | 9026292 | 2 | 6  | 12 | CA  | 20 | 4  |
| 163348 | 18 | 9026578 | 9026605 | 2 | 14 | 28 | GT  | 21 | 14 |
| 163349 | 18 | 9026871 | 9026891 | 3 | 7  | 21 | TGG | 31 | 4  |
| 163350 | 18 | 9027369 | 9027390 | 2 | 11 | 22 | CA  | 14 | 9  |
| 163360 | 18 | 9047721 | 9047738 | 2 | 9  | 18 | CA  | 14 | 7  |
| 163366 | 18 | 9058654 | 9058667 | 2 | 7  | 14 | TC  | 29 | 4  |
| 163369 | 18 | 9070701 | 9070718 | 2 | 9  | 18 | CA  | 21 | 10 |
| 163373 | 18 | 9088456 | 9088467 | 2 | 6  | 12 | TG  | 28 | 5  |
| 163375 | 18 | 9090038 | 9090065 | 2 | 14 | 28 | TC  | 12 | 5  |
| 163382 | 18 | 9097749 | 9097768 | 2 | 10 | 20 | GT  | 18 | 13 |
| 163384 | 18 | 9099798 | 9099831 | 2 | 17 | 34 | CA  | 17 | 12 |
| 163387 | 18 | 9108423 | 9108462 | 2 | 20 | 40 | CA  | 6  | 7  |
| 163389 | 18 | 9108735 | 9108764 | 2 | 15 | 30 | TG  | 12 | 5  |
| 163395 | 18 | 9115280 | 9115295 | 2 | 8  | 16 | GA  | 17 | 5  |
| 163398 | 18 | 9120102 | 9120115 | 2 | 7  | 14 | CA  | 27 | 6  |
| 163399 | 18 | 9120404 | 9120417 | 2 | 7  | 14 | CA  | 29 | 8  |
| 163400 | 18 | 9120419 | 9120436 | 2 | 9  | 18 | AC  | 26 | 4  |
| 163402 | 18 | 9123787 | 9123804 | 2 | 9  | 18 | CA  | 20 | 5  |
| 163403 | 18 | 9123888 | 9123913 | 2 | 13 | 26 | AC  | 16 | 8  |
| 163404 | 18 | 9126930 | 9126947 | 2 | 9  | 18 | GT  | 21 | 10 |
| 163406 | 18 | 9128121 | 9128142 | 2 | 11 | 22 | TG  | 14 | 8  |
| 163407 | 18 | 9128589 | 9128612 | 2 | 12 | 24 | GT  | 8  | 5  |
| 163408 | 18 | 9128738 | 9128751 | 2 | 7  | 14 | AC  | 18 | 3  |
| 163409 | 18 | 9128754 | 9128765 | 2 | 6  | 12 | AC  | 23 | 3  |
| 163410 | 18 | 9133484 | 9133513 | 2 | 15 | 30 | TG  | 13 | 14 |
| 163412 | 18 | 9135686 | 9135701 | 2 | 8  | 16 | AC  | 19 | 7  |
| 163415 | 18 | 9136333 | 9136346 | 2 | 7  | 14 | GA  | 24 | 3  |
| 163418 | 18 | 9138940 | 9138965 | 2 | 13 | 26 | TG  | 25 | 13 |
| 163419 | 18 | 9138998 | 9139017 | 2 | 10 | 20 | GT  | 23 | 6  |
| 163420 | 18 | 9139164 | 9139181 | 2 | 9  | 18 | AC  | 24 | 5  |
| 163421 | 18 | 9139351 | 9139366 | 2 | 8  | 16 | CT  | 26 | 4  |
| 163422 | 18 | 9144030 | 9144053 | 2 | 12 | 24 | TA  | 13 | 5  |
| 163424 | 18 | 9147836 | 9147849 | 2 | 7  | 14 | GT  | 29 | 5  |
| 163425 | 18 | 9147985 | 9148008 | 3 | 8  | 24 | CTT | 21 | 3  |
| 163426 | 18 | 9148266 | 9148281 | 2 | 8  | 16 | AC  | 18 | 9  |
| 163427 | 18 | 9148985 | 9149010 | 2 | 13 | 26 | CA  | 22 | 7  |
| 163428 | 18 | 9149200 | 9149215 | 2 | 8  | 16 | GT  | 20 | 12 |
| 163432 | 18 | 9151520 | 9151531 | 2 | 6  | 12 | CA  | 31 | 3  |

|        |    |         |         |   |    |    |      |    |    |
|--------|----|---------|---------|---|----|----|------|----|----|
| 163435 | 18 | 9153918 | 9153937 | 2 | 10 | 20 | AC   | 28 | 6  |
| 163443 | 18 | 9177202 | 9177231 | 2 | 15 | 30 | GT   | 6  | 6  |
| 163444 | 18 | 9178507 | 9178532 | 2 | 13 | 26 | TG   | 19 | 11 |
| 163452 | 18 | 9186237 | 9186256 | 4 | 5  | 20 | GGAG | 7  | 4  |
| 163456 | 18 | 9192367 | 9192398 | 2 | 16 | 32 | TC   | 12 | 6  |
| 163458 | 18 | 9194553 | 9194580 | 2 | 14 | 28 | CA   | 9  | 8  |
| 163461 | 18 | 9195978 | 9195995 | 2 | 9  | 18 | TG   | 10 | 4  |
| 163478 | 18 | 9209826 | 9209845 | 2 | 10 | 20 | GT   | 22 | 5  |
| 163479 | 18 | 9215922 | 9215935 | 2 | 7  | 14 | AG   | 17 | 3  |
| 163481 | 18 | 9227135 | 9227146 | 2 | 6  | 12 | GT   | 20 | 4  |
| 163485 | 18 | 9230496 | 9230519 | 2 | 12 | 24 | GT   | 19 | 11 |
| 163489 | 18 | 9244361 | 9244384 | 3 | 8  | 24 | AAC  | 20 | 7  |
| 163503 | 18 | 9311563 | 9311577 | 3 | 5  | 15 | GAG  | 26 | 3  |
| 163504 | 18 | 9315689 | 9315712 | 3 | 8  | 24 | GTT  | 27 | 4  |
| 163510 | 18 | 9331691 | 9331716 | 2 | 13 | 26 | CA   | 15 | 7  |
| 163511 | 18 | 9332604 | 9332619 | 2 | 8  | 16 | GA   | 18 | 3  |
| 163513 | 18 | 9332854 | 9332865 | 2 | 6  | 12 | TG   | 27 | 4  |
| 163514 | 18 | 9332960 | 9332993 | 2 | 17 | 34 | GA   | 14 | 8  |
| 163518 | 18 | 9341951 | 9341976 | 2 | 13 | 26 | AG   | 14 | 8  |
| 163524 | 18 | 9345506 | 9345529 | 2 | 12 | 24 | AC   | 11 | 5  |
| 163536 | 18 | 9363840 | 9363859 | 4 | 5  | 20 | ATGA | 26 | 4  |
| 163539 | 18 | 9369887 | 9369904 | 2 | 9  | 18 | AG   | 21 | 3  |
| 163544 | 18 | 9375125 | 9375156 | 2 | 16 | 32 | AC   | 9  | 12 |
| 163545 | 18 | 9376642 | 9376653 | 2 | 6  | 12 | CA   | 17 | 7  |
| 163546 | 18 | 9376656 | 9376667 | 2 | 6  | 12 | CA   | 14 | 6  |
| 163547 | 18 | 9376702 | 9376745 | 2 | 22 | 44 | AC   | 11 | 11 |
| 163549 | 18 | 9377008 | 9377033 | 2 | 13 | 26 | CT   | 23 | 10 |
| 163550 | 18 | 9378664 | 9378687 | 2 | 12 | 24 | TG   | 28 | 6  |
| 163551 | 18 | 9378711 | 9378726 | 2 | 8  | 16 | TG   | 16 | 5  |
| 163554 | 18 | 9379102 | 9379129 | 2 | 14 | 28 | AG   | 12 | 13 |
| 163556 | 18 | 9391361 | 9391386 | 2 | 13 | 26 | CA   | 22 | 12 |
| 163558 | 18 | 9394674 | 9394694 | 3 | 7  | 21 | AGC  | 31 | 5  |
| 163564 | 18 | 9403931 | 9403972 | 2 | 21 | 42 | AC   | 10 | 17 |
| 163578 | 19 | 11357   | 11380   | 2 | 12 | 24 | GT   | 11 | 13 |
| 163580 | 19 | 14516   | 14547   | 2 | 16 | 32 | TG   | 19 | 9  |
| 163582 | 19 | 20077   | 20094   | 3 | 6  | 18 | TCC  | 6  | 7  |
| 163583 | 19 | 22780   | 22795   | 2 | 8  | 16 | AG   | 13 | 5  |
| 163584 | 19 | 28760   | 28803   | 2 | 22 | 44 | GT   | 7  | 13 |
| 163586 | 19 | 30908   | 30921   | 2 | 7  | 14 | AC   | 14 | 8  |
| 163588 | 19 | 33640   | 33683   | 4 | 11 | 44 | CAGG | 30 | 16 |
| 163589 | 19 | 33977   | 33994   | 2 | 9  | 18 | CA   | 24 | 7  |
| 163591 | 19 | 42245   | 42262   | 2 | 9  | 18 | GT   | 22 | 5  |
| 163592 | 19 | 42759   | 42774   | 2 | 8  | 16 | CA   | 14 | 6  |
| 163603 | 19 | 62202   | 62215   | 2 | 7  | 14 | GT   | 21 | 13 |
| 163614 | 19 | 79569   | 79594   | 2 | 13 | 26 | TG   | 8  | 7  |
| 163626 | 19 | 96335   | 96350   | 4 | 4  | 16 | CTGC | 26 | 3  |
| 163628 | 19 | 98978   | 98999   | 2 | 11 | 22 | CA   | 7  | 5  |
| 163629 | 19 | 99429   | 99443   | 3 | 5  | 15 | CAG  | 28 | 3  |
| 163634 | 19 | 105466  | 105489  | 4 | 6  | 24 | AATA | 20 | 4  |
| 163637 | 19 | 107183  | 107196  | 2 | 7  | 14 | TG   | 16 | 16 |
| 163638 | 19 | 107198  | 107215  | 2 | 9  | 18 | GT   | 19 | 15 |

|        |    |        |        |   |    |    |      |    |    |
|--------|----|--------|--------|---|----|----|------|----|----|
| 163639 | 19 | 109342 | 109363 | 2 | 11 | 22 | TG   | 19 | 5  |
| 163640 | 19 | 109505 | 109528 | 3 | 8  | 24 | AGA  | 25 | 3  |
| 163641 | 19 | 110188 | 110207 | 2 | 10 | 20 | TG   | 12 | 6  |
| 163643 | 19 | 111915 | 111928 | 2 | 7  | 14 | GT   | 22 | 3  |
| 163664 | 19 | 145890 | 145907 | 2 | 9  | 18 | GA   | 18 | 5  |
| 163666 | 19 | 151319 | 151350 | 2 | 16 | 32 | AC   | 18 | 18 |
| 163671 | 19 | 158968 | 158985 | 2 | 9  | 18 | AG   | 16 | 4  |
| 163673 | 19 | 161822 | 161845 | 2 | 12 | 24 | AG   | 23 | 4  |
| 163677 | 19 | 171022 | 171043 | 2 | 11 | 22 | TG   | 21 | 9  |
| 163678 | 19 | 171237 | 171248 | 2 | 6  | 12 | AC   | 25 | 3  |
| 163680 | 19 | 171799 | 171848 | 2 | 25 | 50 | CA   | 13 | 13 |
| 163690 | 19 | 200683 | 200706 | 2 | 12 | 24 | GA   | 15 | 6  |
| 163692 | 19 | 204697 | 204711 | 3 | 5  | 15 | TCC  | 21 | 8  |
| 163695 | 19 | 216454 | 216485 | 2 | 16 | 32 | AC   | 13 | 9  |
| 163701 | 19 | 233340 | 233383 | 2 | 22 | 44 | TG   | 6  | 8  |
| 163702 | 19 | 234667 | 234686 | 4 | 5  | 20 | GGTC | 20 | 7  |
| 163712 | 19 | 247136 | 247147 | 2 | 6  | 12 | TC   | 34 | 3  |
| 163714 | 19 | 250047 | 250070 | 2 | 12 | 24 | AC   | 11 | 8  |
| 163715 | 19 | 250248 | 250271 | 2 | 12 | 24 | AC   | 25 | 11 |
| 163719 | 19 | 255051 | 255064 | 2 | 7  | 14 | GA   | 7  | 3  |
| 163720 | 19 | 255068 | 255085 | 2 | 9  | 18 | AG   | 16 | 6  |
| 163722 | 19 | 258904 | 258941 | 2 | 19 | 38 | GT   | 8  | 11 |
| 163723 | 19 | 260288 | 260299 | 2 | 6  | 12 | TG   | 29 | 5  |
| 163724 | 19 | 260492 | 260503 | 2 | 6  | 12 | GA   | 23 | 7  |
| 163726 | 19 | 261710 | 261723 | 2 | 7  | 14 | CT   | 25 | 9  |
| 163728 | 19 | 266045 | 266060 | 2 | 8  | 16 | AG   | 32 | 3  |
| 163736 | 19 | 279834 | 279853 | 2 | 10 | 20 | CA   | 6  | 8  |
| 163738 | 19 | 281200 | 281221 | 2 | 11 | 22 | GT   | 10 | 9  |
| 163747 | 19 | 286546 | 286561 | 2 | 8  | 16 | CA   | 26 | 3  |
| 163749 | 19 | 288386 | 288400 | 3 | 5  | 15 | CTG  | 33 | 3  |
| 163750 | 19 | 289186 | 289199 | 2 | 7  | 14 | GT   | 26 | 4  |
| 163761 | 19 | 304953 | 304976 | 2 | 12 | 24 | AC   | 20 | 9  |
| 163762 | 19 | 305256 | 305267 | 2 | 6  | 12 | GA   | 23 | 3  |
| 163763 | 19 | 307556 | 307581 | 2 | 13 | 26 | CA   | 20 | 9  |
| 163764 | 19 | 308872 | 308897 | 2 | 13 | 26 | TG   | 14 | 9  |
| 163767 | 19 | 310562 | 310579 | 3 | 6  | 18 | AGG  | 29 | 3  |
| 163776 | 19 | 318543 | 318558 | 2 | 8  | 16 | GT   | 10 | 8  |
| 163778 | 19 | 319346 | 319367 | 2 | 11 | 22 | CA   | 22 | 6  |
| 163779 | 19 | 322329 | 322348 | 2 | 10 | 20 | CA   | 15 | 6  |
| 163781 | 19 | 324571 | 324604 | 2 | 17 | 34 | CA   | 15 | 15 |
| 163782 | 19 | 325910 | 325921 | 2 | 6  | 12 | GT   | 26 | 3  |
| 163783 | 19 | 326448 | 326487 | 2 | 20 | 40 | AC   | 7  | 9  |
| 163784 | 19 | 326679 | 326694 | 2 | 8  | 16 | AC   | 20 | 5  |
| 163785 | 19 | 327957 | 327976 | 2 | 10 | 20 | AC   | 16 | 9  |
| 163786 | 19 | 330669 | 330700 | 2 | 16 | 32 | CA   | 13 | 9  |
| 163791 | 19 | 336819 | 336870 | 2 | 26 | 52 | CA   | 12 | 12 |
| 163797 | 19 | 348130 | 348151 | 2 | 11 | 22 | CA   | 14 | 5  |
| 163799 | 19 | 350737 | 350750 | 2 | 7  | 14 | GT   | 24 | 4  |
| 163801 | 19 | 351996 | 352019 | 2 | 12 | 24 | GA   | 12 | 9  |
| 163804 | 19 | 357754 | 357779 | 2 | 13 | 26 | CA   | 16 | 8  |
| 163806 | 19 | 361948 | 361989 | 2 | 21 | 42 | AC   | 16 | 16 |

|        |    |        |        |   |    |    |      |    |    |
|--------|----|--------|--------|---|----|----|------|----|----|
| 163817 | 19 | 370476 | 370499 | 2 | 12 | 24 | GT   | 17 | 19 |
| 163819 | 19 | 374020 | 374033 | 2 | 7  | 14 | CA   | 19 | 3  |
| 163820 | 19 | 377028 | 377065 | 2 | 19 | 38 | GT   | 12 | 9  |
| 163822 | 19 | 378271 | 378288 | 2 | 9  | 18 | GT   | 22 | 6  |
| 163830 | 19 | 400129 | 400161 | 3 | 11 | 33 | GGA  | 24 | 5  |
| 163832 | 19 | 404106 | 404119 | 2 | 7  | 14 | CT   | 9  | 9  |
| 163834 | 19 | 404242 | 404273 | 2 | 16 | 32 | AC   | 15 | 8  |
| 163835 | 19 | 407197 | 407214 | 2 | 9  | 18 | AC   | 14 | 6  |
| 163840 | 19 | 413972 | 413983 | 2 | 6  | 12 | AC   | 25 | 4  |
| 163841 | 19 | 416500 | 416531 | 2 | 16 | 32 | GT   | 8  | 6  |
| 163846 | 19 | 424145 | 424158 | 2 | 7  | 14 | CT   | 20 | 4  |
| 163848 | 19 | 431211 | 431222 | 2 | 6  | 12 | AG   | 28 | 3  |
| 163850 | 19 | 432702 | 432743 | 2 | 21 | 42 | CA   | 14 | 11 |
| 163854 | 19 | 447001 | 447018 | 2 | 9  | 18 | AG   | 14 | 7  |
| 163864 | 19 | 485015 | 485048 | 2 | 17 | 34 | AC   | 21 | 14 |
| 163866 | 19 | 496803 | 496818 | 2 | 8  | 16 | TG   | 26 | 4  |
| 163867 | 19 | 497108 | 497139 | 4 | 8  | 32 | AATA | 19 | 7  |
| 163879 | 19 | 524897 | 524924 | 2 | 14 | 28 | GT   | 6  | 7  |
| 163880 | 19 | 525109 | 525128 | 4 | 5  | 20 | TTTA | 24 | 4  |
| 163883 | 19 | 528291 | 528310 | 2 | 10 | 20 | GT   | 17 | 7  |
| 163885 | 19 | 528521 | 528556 | 2 | 18 | 36 | GA   | 11 | 6  |
| 163887 | 19 | 532433 | 532452 | 2 | 10 | 20 | AC   | 14 | 4  |
| 163889 | 19 | 533284 | 533295 | 2 | 6  | 12 | CA   | 17 | 4  |
| 163891 | 19 | 547176 | 547207 | 2 | 16 | 32 | TG   | 15 | 7  |
| 163892 | 19 | 551435 | 551448 | 2 | 7  | 14 | TC   | 19 | 3  |
| 163894 | 19 | 555910 | 555927 | 2 | 9  | 18 | AT   | 8  | 6  |
| 163895 | 19 | 561461 | 561476 | 4 | 4  | 16 | CCCT | 8  | 3  |
| 163898 | 19 | 578068 | 578123 | 2 | 28 | 56 | TG   | 11 | 7  |
| 163902 | 19 | 584392 | 584407 | 2 | 8  | 16 | TC   | 25 | 5  |
| 163906 | 19 | 605400 | 605435 | 3 | 12 | 36 | CTG  | 28 | 10 |
| 163910 | 19 | 609023 | 609043 | 3 | 7  | 21 | GCT  | 27 | 7  |
| 163911 | 19 | 614648 | 614668 | 3 | 7  | 21 | GCT  | 30 | 4  |
| 163919 | 19 | 668161 | 668178 | 3 | 6  | 18 | ATC  | 20 | 9  |
| 163923 | 19 | 686035 | 686070 | 2 | 18 | 36 | TG   | 15 | 12 |
| 163925 | 19 | 694406 | 694444 | 3 | 13 | 39 | AAT  | 7  | 4  |
| 163943 | 19 | 764703 | 764723 | 3 | 7  | 21 | TTG  | 28 | 3  |
| 163969 | 19 | 853560 | 853589 | 3 | 10 | 30 | TCA  | 26 | 5  |
| 163975 | 19 | 872935 | 872962 | 2 | 14 | 28 | CA   | 8  | 6  |
| 163977 | 19 | 876026 | 876043 | 2 | 9  | 18 | CA   | 21 | 3  |
| 163979 | 19 | 893906 | 893929 | 2 | 12 | 24 | TC   | 20 | 4  |
| 163989 | 19 | 910814 | 910835 | 2 | 11 | 22 | CA   | 13 | 3  |
| 163994 | 19 | 918817 | 918828 | 2 | 6  | 12 | TG   | 29 | 3  |
| 163995 | 19 | 918910 | 918923 | 2 | 7  | 14 | AC   | 21 | 4  |
| 163997 | 19 | 920484 | 920497 | 2 | 7  | 14 | AG   | 17 | 4  |
| 164001 | 19 | 929637 | 929660 | 2 | 12 | 24 | AC   | 24 | 3  |
| 164002 | 19 | 929792 | 929815 | 2 | 12 | 24 | GT   | 18 | 5  |
| 164004 | 19 | 935368 | 935389 | 2 | 11 | 22 | CT   | 18 | 6  |
| 164005 | 19 | 938533 | 938580 | 4 | 12 | 48 | TTTC | 21 | 10 |
| 164013 | 19 | 951077 | 951116 | 2 | 20 | 40 | TC   | 8  | 8  |
| 164014 | 19 | 953033 | 953048 | 2 | 8  | 16 | TG   | 26 | 5  |
| 164021 | 19 | 983650 | 983667 | 2 | 9  | 18 | AC   | 12 | 3  |

|        |    |         |         |   |    |    |      |    |    |
|--------|----|---------|---------|---|----|----|------|----|----|
| 164022 | 19 | 985169  | 985200  | 2 | 16 | 32 | TC   | 21 | 13 |
| 164023 | 19 | 985303  | 985326  | 2 | 12 | 24 | CT   | 14 | 9  |
| 164024 | 19 | 985697  | 985720  | 2 | 12 | 24 | GT   | 14 | 7  |
| 164025 | 19 | 986090  | 986107  | 2 | 9  | 18 | AC   | 18 | 3  |
| 164033 | 19 | 999904  | 999923  | 2 | 10 | 20 | CT   | 22 | 7  |
| 164037 | 19 | 1000655 | 1000666 | 2 | 6  | 12 | TG   | 10 | 11 |
| 164038 | 19 | 1000667 | 1000684 | 2 | 9  | 18 | GT   | 14 | 18 |
| 164041 | 19 | 1005819 | 1005838 | 4 | 5  | 20 | GGAC | 21 | 4  |
| 164046 | 19 | 1009253 | 1009280 | 2 | 14 | 28 | TG   | 23 | 7  |
| 164048 | 19 | 1017377 | 1017392 | 2 | 8  | 16 | AC   | 24 | 7  |
| 164055 | 19 | 1033683 | 1033694 | 2 | 6  | 12 | AC   | 16 | 5  |
| 164056 | 19 | 1033928 | 1033947 | 2 | 10 | 20 | TG   | 16 | 5  |
| 164070 | 19 | 1044782 | 1044803 | 2 | 11 | 22 | AC   | 18 | 8  |
| 164084 | 19 | 1066547 | 1066564 | 3 | 6  | 18 | AAT  | 22 | 4  |
| 164085 | 19 | 1066765 | 1066780 | 2 | 8  | 16 | AC   | 16 | 5  |
| 164087 | 19 | 1071885 | 1071908 | 4 | 6  | 24 | GACA | 20 | 8  |
| 164088 | 19 | 1076134 | 1076165 | 2 | 16 | 32 | CA   | 8  | 9  |
| 164091 | 19 | 1079775 | 1079824 | 2 | 25 | 50 | GA   | 8  | 9  |
| 164093 | 19 | 1080633 | 1080656 | 2 | 12 | 24 | TG   | 9  | 5  |
| 164108 | 19 | 1102343 | 1102366 | 2 | 12 | 24 | GT   | 11 | 10 |
| 164112 | 19 | 1110120 | 1110153 | 2 | 17 | 34 | GT   | 12 | 10 |
| 164113 | 19 | 1124017 | 1124049 | 3 | 11 | 33 | TCT  | 20 | 9  |
| 164114 | 19 | 1127057 | 1127076 | 2 | 10 | 20 | AC   | 20 | 6  |
| 164130 | 19 | 1171848 | 1171887 | 2 | 20 | 40 | TG   | 14 | 11 |
| 164133 | 19 | 1187067 | 1187082 | 2 | 8  | 16 | CA   | 24 | 9  |
| 164135 | 19 | 1198480 | 1198503 | 3 | 8  | 24 | TGT  | 23 | 5  |
| 164140 | 19 | 1204852 | 1204863 | 2 | 6  | 12 | AC   | 28 | 3  |
| 164141 | 19 | 1205461 | 1205478 | 2 | 9  | 18 | CA   | 26 | 4  |
| 164149 | 19 | 1220151 | 1220180 | 2 | 15 | 30 | AC   | 9  | 9  |
| 164150 | 19 | 1221043 | 1221060 | 2 | 9  | 18 | AC   | 7  | 6  |
| 164151 | 19 | 1221084 | 1221105 | 2 | 11 | 22 | AG   | 9  | 10 |
| 164154 | 19 | 1228086 | 1228097 | 2 | 6  | 12 | TG   | 23 | 4  |
| 164157 | 19 | 1229728 | 1229759 | 2 | 16 | 32 | AC   | 11 | 10 |
| 164162 | 19 | 1236726 | 1236749 | 2 | 12 | 24 | CA   | 19 | 3  |
| 164165 | 19 | 1248539 | 1248564 | 2 | 13 | 26 | TG   | 7  | 7  |
| 164175 | 19 | 1265535 | 1265558 | 2 | 12 | 24 | TG   | 10 | 5  |
| 164177 | 19 | 1266704 | 1266727 | 2 | 12 | 24 | TG   | 7  | 9  |
| 164178 | 19 | 1269040 | 1269065 | 2 | 13 | 26 | TG   | 17 | 7  |
| 164181 | 19 | 1284550 | 1284571 | 2 | 11 | 22 | GT   | 18 | 7  |
| 164182 | 19 | 1284850 | 1284865 | 2 | 8  | 16 | TG   | 23 | 6  |
| 164187 | 19 | 1305003 | 1305022 | 2 | 10 | 20 | GT   | 18 | 11 |
| 164197 | 19 | 1318020 | 1318034 | 3 | 5  | 15 | TGC  | 28 | 3  |
| 164208 | 19 | 1324809 | 1324834 | 2 | 13 | 26 | CA   | 23 | 12 |
| 164213 | 19 | 1331765 | 1331782 | 2 | 9  | 18 | CA   | 26 | 5  |
| 164216 | 19 | 1339786 | 1339807 | 2 | 11 | 22 | TC   | 14 | 10 |
| 164219 | 19 | 1347412 | 1347445 | 2 | 17 | 34 | GT   | 12 | 10 |
| 164220 | 19 | 1347510 | 1347529 | 2 | 10 | 20 | TG   | 22 | 3  |
| 164221 | 19 | 1347580 | 1347607 | 2 | 14 | 28 | GT   | 19 | 9  |
| 164224 | 19 | 1354256 | 1354267 | 2 | 6  | 12 | CA   | 23 | 4  |
| 164225 | 19 | 1356065 | 1356076 | 2 | 6  | 12 | TA   | 10 | 4  |
| 164227 | 19 | 1357689 | 1357726 | 2 | 19 | 38 | TG   | 9  | 12 |



|        |    |         |         |   |    |    |      |    |    |
|--------|----|---------|---------|---|----|----|------|----|----|
| 164229 | 19 | 1358191 | 1358228 | 2 | 19 | 38 | TG   | 23 | 9  |
| 164231 | 19 | 1358926 | 1358951 | 2 | 13 | 26 | TC   | 17 | 8  |
| 164235 | 19 | 1363956 | 1363971 | 4 | 4  | 16 | ATGT | 15 | 3  |
| 164237 | 19 | 1367435 | 1367452 | 3 | 6  | 18 | GGA  | 24 | 3  |
| 164242 | 19 | 1378962 | 1378997 | 3 | 12 | 36 | GTA  | 19 | 9  |
| 164244 | 19 | 1388563 | 1388578 | 4 | 4  | 16 | AAAT | 33 | 6  |
| 164252 | 19 | 1403077 | 1403100 | 2 | 12 | 24 | AC   | 15 | 10 |
| 164255 | 19 | 1406140 | 1406154 | 3 | 5  | 15 | TGG  | 23 | 3  |
| 164258 | 19 | 1424487 | 1424504 | 2 | 9  | 18 | TC   | 11 | 3  |
| 164265 | 19 | 1438124 | 1438149 | 2 | 13 | 26 | TG   | 17 | 12 |
| 164267 | 19 | 1443034 | 1443051 | 2 | 9  | 18 | AC   | 18 | 6  |
| 164268 | 19 | 1443192 | 1443205 | 2 | 7  | 14 | GT   | 23 | 3  |
| 164271 | 19 | 1456310 | 1456325 | 4 | 4  | 16 | TCTT | 26 | 4  |
| 164285 | 19 | 1479509 | 1479540 | 4 | 8  | 32 | ATTG | 27 | 4  |
| 164288 | 19 | 1480494 | 1480526 | 3 | 11 | 33 | TGT  | 20 | 6  |
| 164289 | 19 | 1482310 | 1482324 | 3 | 5  | 15 | TAG  | 29 | 4  |
| 164296 | 19 | 1527135 | 1527148 | 2 | 7  | 14 | AT   | 14 | 3  |
| 164300 | 19 | 1531687 | 1531706 | 4 | 5  | 20 | AGGG | 6  | 5  |
| 164301 | 19 | 1536609 | 1536642 | 2 | 17 | 34 | AC   | 20 | 13 |
| 164302 | 19 | 1536964 | 1536978 | 3 | 5  | 15 | TTC  | 18 | 8  |
| 164303 | 19 | 1537935 | 1537946 | 2 | 6  | 12 | TG   | 27 | 4  |
| 164304 | 19 | 1556958 | 1556989 | 2 | 16 | 32 | TG   | 6  | 5  |
| 164308 | 19 | 1558900 | 1558913 | 2 | 7  | 14 | TG   | 27 | 3  |
| 164316 | 19 | 1590623 | 1590643 | 3 | 7  | 21 | AGG  | 23 | 5  |
| 164317 | 19 | 1591363 | 1591374 | 2 | 6  | 12 | AC   | 9  | 4  |
| 164321 | 19 | 1601219 | 1601233 | 3 | 5  | 15 | CTG  | 26 | 3  |
| 164329 | 19 | 1624452 | 1624483 | 2 | 16 | 32 | TG   | 10 | 8  |
| 164333 | 19 | 1635336 | 1635391 | 2 | 28 | 56 | AC   | 6  | 7  |
| 164339 | 19 | 1644212 | 1644231 | 4 | 5  | 20 | CATC | 25 | 4  |
| 164340 | 19 | 1647196 | 1647209 | 2 | 7  | 14 | TG   | 22 | 6  |
| 164341 | 19 | 1659271 | 1659284 | 2 | 7  | 14 | TG   | 26 | 3  |
| 164344 | 19 | 1667085 | 1667100 | 4 | 4  | 16 | TAGC | 24 | 3  |
| 164352 | 19 | 1694938 | 1694958 | 3 | 7  | 21 | GGA  | 16 | 5  |
| 164358 | 19 | 1708668 | 1708701 | 2 | 17 | 34 | CA   | 16 | 10 |
| 164359 | 19 | 1709108 | 1709134 | 3 | 9  | 27 | CCT  | 20 | 3  |
| 164364 | 19 | 1720143 | 1720163 | 3 | 7  | 21 | CTG  | 23 | 4  |
| 164365 | 19 | 1720250 | 1720273 | 2 | 12 | 24 | AC   | 16 | 10 |
| 164368 | 19 | 1725459 | 1725474 | 2 | 8  | 16 | TG   | 17 | 5  |
| 164371 | 19 | 1742023 | 1742052 | 2 | 15 | 30 | TG   | 27 | 11 |
| 164372 | 19 | 1742933 | 1742954 | 2 | 11 | 22 | CT   | 22 | 4  |
| 164379 | 19 | 1772162 | 1772225 | 4 | 16 | 64 | TAGA | 26 | 12 |
| 164383 | 19 | 1786477 | 1786498 | 2 | 11 | 22 | GT   | 23 | 9  |
| 164385 | 19 | 1788188 | 1788201 | 2 | 7  | 14 | GT   | 23 | 4  |
| 164396 | 19 | 1816895 | 1816920 | 2 | 13 | 26 | GT   | 10 | 8  |
| 164399 | 19 | 1821098 | 1821121 | 2 | 12 | 24 | TG   | 13 | 10 |
| 164403 | 19 | 1830450 | 1830463 | 2 | 7  | 14 | AC   | 26 | 4  |
| 164404 | 19 | 1832811 | 1832862 | 2 | 26 | 52 | TG   | 8  | 12 |
| 164420 | 19 | 1861571 | 1861590 | 2 | 10 | 20 | AG   | 23 | 5  |
| 164421 | 19 | 1861729 | 1861744 | 4 | 4  | 16 | AAAT | 33 | 6  |
| 164423 | 19 | 1868224 | 1868238 | 3 | 5  | 15 | TTG  | 8  | 5  |
| 164425 | 19 | 1868716 | 1868741 | 2 | 13 | 26 | TG   | 15 | 10 |

|        |    |         |         |   |    |    |      |    |    |
|--------|----|---------|---------|---|----|----|------|----|----|
| 164426 | 19 | 1871146 | 1871160 | 3 | 5  | 15 | TGG  | 31 | 4  |
| 164438 | 19 | 1903466 | 1903491 | 2 | 13 | 26 | GT   | 9  | 3  |
| 164444 | 19 | 1909381 | 1909410 | 2 | 15 | 30 | AG   | 10 | 14 |
| 164454 | 19 | 1929318 | 1929361 | 2 | 22 | 44 | TG   | 10 | 13 |
| 164455 | 19 | 1931876 | 1931887 | 2 | 6  | 12 | TC   | 33 | 3  |
| 164458 | 19 | 1934977 | 1934991 | 3 | 5  | 15 | CAA  | 21 | 12 |
| 164459 | 19 | 1935865 | 1935882 | 2 | 9  | 18 | TG   | 21 | 12 |
| 164463 | 19 | 1940742 | 1940759 | 2 | 9  | 18 | AG   | 7  | 5  |
| 164468 | 19 | 1943100 | 1943137 | 2 | 19 | 38 | AC   | 13 | 12 |
| 164469 | 19 | 1943501 | 1943514 | 2 | 7  | 14 | TG   | 9  | 3  |
| 164475 | 19 | 1948867 | 1948894 | 2 | 14 | 28 | GT   | 11 | 12 |
| 164476 | 19 | 1949713 | 1949730 | 2 | 9  | 18 | CA   | 8  | 3  |
| 164479 | 19 | 1954524 | 1954541 | 2 | 9  | 18 | CA   | 19 | 3  |
| 164482 | 19 | 1965310 | 1965331 | 2 | 11 | 22 | GT   | 14 | 7  |
| 164491 | 19 | 1980958 | 1980990 | 3 | 11 | 33 | TGA  | 26 | 4  |
| 164494 | 19 | 1982996 | 1983023 | 2 | 14 | 28 | GT   | 9  | 9  |
| 164497 | 19 | 1987917 | 1987932 | 4 | 4  | 16 | TGTT | 28 | 3  |
| 164501 | 19 | 2002732 | 2002747 | 2 | 8  | 16 | GA   | 23 | 5  |
| 164508 | 19 | 2013408 | 2013421 | 2 | 7  | 14 | AT   | 14 | 8  |
| 164509 | 19 | 2013567 | 2013584 | 2 | 9  | 18 | GT   | 22 | 4  |
| 164514 | 19 | 2029041 | 2029052 | 2 | 6  | 12 | TC   | 26 | 4  |
| 164520 | 19 | 2039020 | 2039039 | 4 | 5  | 20 | ACAA | 18 | 4  |
| 164525 | 19 | 2047045 | 2047060 | 2 | 8  | 16 | TG   | 24 | 6  |
| 164547 | 19 | 2068394 | 2068405 | 2 | 6  | 12 | AC   | 19 | 3  |
| 164557 | 19 | 2094837 | 2094852 | 2 | 8  | 16 | AT   | 8  | 5  |
| 164561 | 19 | 2108196 | 2108215 | 2 | 10 | 20 | CA   | 10 | 9  |
| 164585 | 19 | 2127842 | 2127861 | 2 | 10 | 20 | AC   | 20 | 7  |
| 164589 | 19 | 2133509 | 2133522 | 2 | 7  | 14 | GT   | 17 | 6  |
| 164593 | 19 | 2147700 | 2147715 | 4 | 4  | 16 | AAAT | 25 | 4  |
| 164603 | 19 | 2169403 | 2169416 | 2 | 7  | 14 | CT   | 23 | 4  |
| 164615 | 19 | 2194614 | 2194628 | 3 | 5  | 15 | ATT  | 19 | 8  |
| 164617 | 19 | 2196045 | 2196070 | 2 | 13 | 26 | AC   | 14 | 8  |
| 164626 | 19 | 2231658 | 2231675 | 3 | 6  | 18 | TTC  | 11 | 3  |
| 164641 | 19 | 2252749 | 2252776 | 2 | 14 | 28 | CA   | 12 | 10 |
| 164652 | 19 | 2276656 | 2276669 | 2 | 7  | 14 | TG   | 8  | 5  |
| 164654 | 19 | 2277221 | 2277236 | 4 | 4  | 16 | ATTT | 18 | 3  |
| 164661 | 19 | 2295710 | 2295725 | 4 | 4  | 16 | TTGT | 31 | 4  |
| 164662 | 19 | 2299157 | 2299171 | 3 | 5  | 15 | AGA  | 23 | 3  |
| 164665 | 19 | 2312453 | 2312472 | 2 | 10 | 20 | GT   | 19 | 13 |
| 164670 | 19 | 2330951 | 2330980 | 2 | 15 | 30 | AC   | 25 | 5  |
| 164673 | 19 | 2339808 | 2339819 | 2 | 6  | 12 | TG   | 19 | 6  |
| 164674 | 19 | 2341314 | 2341343 | 2 | 15 | 30 | TG   | 14 | 10 |
| 164683 | 19 | 2353166 | 2353187 | 2 | 11 | 22 | GT   | 10 | 14 |
| 164684 | 19 | 2353355 | 2353387 | 3 | 11 | 33 | CAT  | 24 | 8  |
| 164685 | 19 | 2353520 | 2353551 | 2 | 16 | 32 | TG   | 9  | 6  |
| 164688 | 19 | 2354196 | 2354225 | 3 | 10 | 30 | GGA  | 13 | 4  |
| 164689 | 19 | 2354655 | 2354688 | 2 | 17 | 34 | AC   | 11 | 13 |
| 164690 | 19 | 2356221 | 2356250 | 2 | 15 | 30 | CA   | 7  | 5  |
| 164694 | 19 | 2358127 | 2358150 | 3 | 8  | 24 | CAG  | 25 | 5  |
| 164695 | 19 | 2358369 | 2358383 | 3 | 5  | 15 | CGG  | 7  | 7  |
| 164702 | 19 | 2359788 | 2359805 | 3 | 6  | 18 | TCT  | 17 | 3  |

|        |    |         |         |   |    |    |      |    |    |
|--------|----|---------|---------|---|----|----|------|----|----|
| 164703 | 19 | 2360089 | 2360108 | 2 | 10 | 20 | TG   | 20 | 5  |
| 164715 | 19 | 2374750 | 2374765 | 4 | 4  | 16 | AAAT | 16 | 11 |
| 164718 | 19 | 2381659 | 2381685 | 3 | 9  | 27 | TCT  | 21 | 8  |
| 164738 | 19 | 2429359 | 2429416 | 2 | 29 | 58 | AC   | 6  | 8  |
| 164742 | 19 | 2436938 | 2436949 | 2 | 6  | 12 | GT   | 16 | 4  |
| 164744 | 19 | 2446081 | 2446094 | 2 | 7  | 14 | CA   | 17 | 4  |
| 164747 | 19 | 2451762 | 2451797 | 2 | 18 | 36 | AC   | 9  | 8  |
| 164755 | 19 | 2484237 | 2484280 | 2 | 22 | 44 | AC   | 11 | 9  |
| 164791 | 19 | 2558532 | 2558563 | 2 | 16 | 32 | GT   | 11 | 7  |
| 164792 | 19 | 2560648 | 2560663 | 4 | 4  | 16 | TTTA | 24 | 5  |
| 164794 | 19 | 2563920 | 2563935 | 2 | 8  | 16 | TG   | 19 | 3  |
| 164807 | 19 | 2581085 | 2581096 | 2 | 6  | 12 | CA   | 21 | 8  |
| 164809 | 19 | 2583989 | 2584000 | 2 | 6  | 12 | AC   | 28 | 5  |
| 164813 | 19 | 2595886 | 2595930 | 3 | 15 | 45 | AAT  | 12 | 5  |
| 164814 | 19 | 2596329 | 2596344 | 2 | 8  | 16 | AG   | 16 | 11 |
| 164815 | 19 | 2596346 | 2596357 | 2 | 6  | 12 | GA   | 13 | 8  |
| 164818 | 19 | 2598043 | 2598060 | 3 | 6  | 18 | GAG  | 16 | 7  |
| 164820 | 19 | 2598654 | 2598667 | 2 | 7  | 14 | GA   | 13 | 6  |
| 164822 | 19 | 2599228 | 2599269 | 3 | 14 | 42 | ATC  | 20 | 9  |
| 164829 | 19 | 2610915 | 2610938 | 2 | 12 | 24 | CA   | 12 | 11 |
| 164833 | 19 | 2627588 | 2627643 | 2 | 28 | 56 | AC   | 15 | 10 |
| 164835 | 19 | 2632547 | 2632558 | 2 | 6  | 12 | TG   | 32 | 3  |
| 164839 | 19 | 2641507 | 2641528 | 2 | 11 | 22 | GT   | 9  | 6  |
| 164842 | 19 | 2651545 | 2651558 | 2 | 7  | 14 | TG   | 18 | 3  |
| 164844 | 19 | 2653956 | 2653989 | 2 | 17 | 34 | AC   | 13 | 8  |
| 164856 | 19 | 2687368 | 2687391 | 3 | 8  | 24 | CTT  | 20 | 4  |
| 164866 | 19 | 2715292 | 2715317 | 2 | 13 | 26 | CA   | 20 | 7  |
| 164867 | 19 | 2716646 | 2716657 | 2 | 6  | 12 | TA   | 17 | 3  |
| 164879 | 19 | 2760057 | 2760086 | 2 | 15 | 30 | AC   | 11 | 12 |
| 164887 | 19 | 2771645 | 2771665 | 3 | 7  | 21 | AGA  | 18 | 7  |
| 164907 | 19 | 2826462 | 2826477 | 2 | 8  | 16 | CA   | 15 | 6  |
| 164917 | 19 | 2844423 | 2844437 | 3 | 5  | 15 | GAG  | 16 | 3  |
| 164930 | 19 | 2855200 | 2855211 | 2 | 6  | 12 | TC   | 10 | 6  |
| 164939 | 19 | 2866366 | 2866380 | 3 | 5  | 15 | ATC  | 14 | 3  |
| 164945 | 19 | 2898306 | 2898320 | 3 | 5  | 15 | TCC  | 30 | 3  |
| 164949 | 19 | 2903860 | 2903873 | 2 | 7  | 14 | AT   | 24 | 4  |
| 164965 | 19 | 2934654 | 2934699 | 2 | 23 | 46 | GT   | 15 | 9  |
| 164967 | 19 | 2938742 | 2938768 | 3 | 9  | 27 | AAT  | 13 | 4  |
| 164973 | 19 | 2959655 | 2959672 | 3 | 6  | 18 | CTG  | 34 | 4  |
| 164974 | 19 | 2960626 | 2960659 | 2 | 17 | 34 | CA   | 8  | 9  |
| 164976 | 19 | 2962766 | 2962781 | 2 | 8  | 16 | GT   | 21 | 5  |
| 164983 | 19 | 2983649 | 2983662 | 2 | 7  | 14 | TG   | 19 | 3  |
| 164985 | 19 | 2985942 | 2985957 | 2 | 8  | 16 | TG   | 17 | 5  |
| 164987 | 19 | 2995232 | 2995263 | 2 | 16 | 32 | AG   | 15 | 8  |
| 164988 | 19 | 2995440 | 2995451 | 2 | 6  | 12 | CT   | 33 | 3  |
| 164989 | 19 | 2995503 | 2995516 | 2 | 7  | 14 | AC   | 35 | 3  |
| 164990 | 19 | 2996203 | 2996216 | 2 | 7  | 14 | GT   | 25 | 3  |
| 164993 | 19 | 3009132 | 3009145 | 2 | 7  | 14 | AG   | 23 | 3  |
| 165003 | 19 | 3037050 | 3037071 | 2 | 11 | 22 | GT   | 13 | 7  |
| 165004 | 19 | 3037441 | 3037472 | 2 | 16 | 32 | CA   | 7  | 8  |
| 165006 | 19 | 3037737 | 3037754 | 2 | 9  | 18 | CT   | 19 | 4  |

|        |    |         |         |   |    |    |      |    |    |
|--------|----|---------|---------|---|----|----|------|----|----|
| 165014 | 19 | 3062088 | 3062107 | 2 | 10 | 20 | GA   | 25 | 9  |
| 165016 | 19 | 3069116 | 3069129 | 2 | 7  | 14 | TG   | 26 | 3  |
| 165022 | 19 | 3110515 | 3110530 | 4 | 4  | 16 | TTTG | 24 | 3  |
| 165027 | 19 | 3117988 | 3118007 | 2 | 10 | 20 | TG   | 24 | 4  |
| 165032 | 19 | 3125866 | 3125877 | 2 | 6  | 12 | CA   | 31 | 3  |
| 165034 | 19 | 3128483 | 3128512 | 3 | 10 | 30 | ATG  | 19 | 6  |
| 165036 | 19 | 3134625 | 3134640 | 4 | 4  | 16 | TATT | 29 | 5  |
| 165037 | 19 | 3139188 | 3139207 | 2 | 10 | 20 | AC   | 21 | 9  |
| 165041 | 19 | 3154017 | 3154028 | 2 | 6  | 12 | TG   | 16 | 4  |
| 165043 | 19 | 3159503 | 3159520 | 2 | 9  | 18 | AC   | 23 | 4  |
| 165044 | 19 | 3159729 | 3159752 | 2 | 12 | 24 | GT   | 10 | 4  |
| 165045 | 19 | 3159901 | 3159914 | 2 | 7  | 14 | GA   | 12 | 9  |
| 165046 | 19 | 3160609 | 3160626 | 2 | 9  | 18 | GA   | 21 | 3  |
| 165049 | 19 | 3165421 | 3165450 | 2 | 15 | 30 | TG   | 12 | 15 |
| 165051 | 19 | 3165874 | 3165894 | 3 | 7  | 21 | CCT  | 27 | 5  |
| 165052 | 19 | 3170427 | 3170444 | 2 | 9  | 18 | GA   | 27 | 3  |
| 165053 | 19 | 3178746 | 3178766 | 3 | 7  | 21 | TCC  | 26 | 4  |
| 165058 | 19 | 3194349 | 3194362 | 2 | 7  | 14 | CA   | 29 | 5  |
| 165064 | 19 | 3202847 | 3202858 | 2 | 6  | 12 | CA   | 15 | 9  |
| 165069 | 19 | 3208902 | 3208915 | 2 | 7  | 14 | GT   | 7  | 7  |
| 165076 | 19 | 3216294 | 3216311 | 3 | 6  | 18 | TGC  | 26 | 7  |
| 165081 | 19 | 3255847 | 3255862 | 2 | 8  | 16 | CA   | 23 | 4  |
| 165084 | 19 | 3260248 | 3260279 | 2 | 16 | 32 | AC   | 12 | 12 |
| 165106 | 19 | 3306843 | 3306856 | 2 | 7  | 14 | AC   | 21 | 3  |
| 165107 | 19 | 3307573 | 3307588 | 2 | 8  | 16 | TC   | 24 | 8  |
| 165108 | 19 | 3311890 | 3311903 | 2 | 7  | 14 | GT   | 27 | 4  |
| 165114 | 19 | 3321653 | 3321696 | 4 | 11 | 44 | AACA | 11 | 7  |
| 165122 | 19 | 3337148 | 3337159 | 2 | 6  | 12 | CT   | 19 | 6  |
| 165129 | 19 | 3341749 | 3341774 | 2 | 13 | 26 | GT   | 15 | 7  |
| 165130 | 19 | 3341991 | 3342006 | 2 | 8  | 16 | AC   | 17 | 3  |
| 165133 | 19 | 3346397 | 3346424 | 2 | 14 | 28 | AC   | 6  | 5  |
| 165139 | 19 | 3351752 | 3351791 | 2 | 20 | 40 | CA   | 10 | 8  |
| 165142 | 19 | 3359087 | 3359102 | 2 | 8  | 16 | AG   | 21 | 4  |
| 165151 | 19 | 3366800 | 3366815 | 2 | 8  | 16 | CA   | 21 | 3  |
| 165154 | 19 | 3371818 | 3371837 | 2 | 10 | 20 | AC   | 12 | 11 |
| 165162 | 19 | 3382083 | 3382110 | 2 | 14 | 28 | CT   | 6  | 3  |
| 165163 | 19 | 3383013 | 3383026 | 2 | 7  | 14 | CA   | 25 | 3  |
| 165164 | 19 | 3384438 | 3384453 | 2 | 8  | 16 | CA   | 25 | 7  |
| 165165 | 19 | 3388167 | 3388188 | 2 | 11 | 22 | AC   | 15 | 8  |
| 165166 | 19 | 3390819 | 3390840 | 2 | 11 | 22 | GA   | 33 | 4  |
| 165167 | 19 | 3392445 | 3392477 | 3 | 11 | 33 | CCT  | 25 | 6  |
| 165168 | 19 | 3393182 | 3393203 | 2 | 11 | 22 | GT   | 10 | 10 |
| 165169 | 19 | 3398808 | 3398819 | 2 | 6  | 12 | AC   | 29 | 4  |
| 165172 | 19 | 3409597 | 3409644 | 2 | 24 | 48 | AC   | 8  | 6  |
| 165177 | 19 | 3425312 | 3425323 | 2 | 6  | 12 | AC   | 17 | 3  |
| 165184 | 19 | 3443915 | 3443930 | 2 | 8  | 16 | GT   | 19 | 4  |
| 165185 | 19 | 3446801 | 3446814 | 2 | 7  | 14 | TG   | 33 | 3  |
| 165198 | 19 | 3504264 | 3504287 | 3 | 8  | 24 | CTC  | 22 | 3  |
| 165200 | 19 | 3509523 | 3509548 | 2 | 13 | 26 | GT   | 17 | 4  |
| 165208 | 19 | 3523945 | 3523970 | 2 | 13 | 26 | AC   | 10 | 13 |
| 165221 | 19 | 3558696 | 3558743 | 3 | 16 | 48 | ATG  | 25 | 12 |

|        |    |         |         |   |    |    |      |    |    |
|--------|----|---------|---------|---|----|----|------|----|----|
| 165222 | 19 | 3564973 | 3565002 | 2 | 15 | 30 | GT   | 8  | 12 |
| 165225 | 19 | 3570458 | 3570469 | 2 | 6  | 12 | AG   | 19 | 5  |
| 165226 | 19 | 3575438 | 3575449 | 2 | 6  | 12 | GT   | 29 | 3  |
| 165227 | 19 | 3582573 | 3582586 | 2 | 7  | 14 | AC   | 21 | 5  |
| 165234 | 19 | 3608397 | 3608416 | 2 | 10 | 20 | TG   | 14 | 7  |
| 165235 | 19 | 3609822 | 3609837 | 2 | 8  | 16 | GT   | 15 | 9  |
| 165240 | 19 | 3613286 | 3613305 | 2 | 10 | 20 | GT   | 19 | 14 |
| 165242 | 19 | 3619950 | 3619970 | 3 | 7  | 21 | GCT  | 22 | 7  |
| 165244 | 19 | 3628672 | 3628692 | 3 | 7  | 21 | TGT  | 17 | 6  |
| 165245 | 19 | 3634999 | 3635010 | 2 | 6  | 12 | TG   | 27 | 3  |
| 165246 | 19 | 3635947 | 3635966 | 2 | 10 | 20 | CA   | 26 | 7  |
| 165257 | 19 | 3651958 | 3651983 | 2 | 13 | 26 | TG   | 8  | 10 |
| 165259 | 19 | 3660391 | 3660404 | 2 | 7  | 14 | TG   | 24 | 4  |
| 165262 | 19 | 3662865 | 3662890 | 2 | 13 | 26 | TG   | 11 | 12 |
| 165263 | 19 | 3662998 | 3663015 | 2 | 9  | 18 | GT   | 20 | 6  |
| 165289 | 19 | 3689690 | 3689707 | 2 | 9  | 18 | TG   | 16 | 11 |
| 165295 | 19 | 3695308 | 3695331 | 2 | 12 | 24 | GA   | 13 | 6  |
| 165296 | 19 | 3698254 | 3698299 | 2 | 23 | 46 | TG   | 15 | 11 |
| 165297 | 19 | 3698656 | 3698669 | 2 | 7  | 14 | GT   | 24 | 3  |
| 165302 | 19 | 3705367 | 3705394 | 2 | 14 | 28 | TG   | 19 | 6  |
| 165305 | 19 | 3708026 | 3708049 | 2 | 12 | 24 | TG   | 21 | 3  |
| 165307 | 19 | 3708550 | 3708577 | 4 | 7  | 28 | GGAA | 16 | 4  |
| 165308 | 19 | 3713071 | 3713082 | 2 | 6  | 12 | CT   | 30 | 3  |
| 165309 | 19 | 3719130 | 3719141 | 2 | 6  | 12 | CA   | 19 | 11 |
| 165311 | 19 | 3732719 | 3732730 | 2 | 6  | 12 | CA   | 25 | 5  |
| 165319 | 19 | 3760287 | 3760308 | 2 | 11 | 22 | TG   | 21 | 6  |
| 165320 | 19 | 3761661 | 3761675 | 3 | 5  | 15 | TCT  | 28 | 4  |
| 165322 | 19 | 3766029 | 3766040 | 2 | 6  | 12 | GT   | 22 | 4  |
| 165330 | 19 | 3794302 | 3794317 | 2 | 8  | 16 | TG   | 29 | 3  |
| 165332 | 19 | 3800481 | 3800516 | 2 | 18 | 36 | AC   | 13 | 9  |
| 165333 | 19 | 3811379 | 3811390 | 2 | 6  | 12 | TG   | 20 | 5  |
| 165334 | 19 | 3811711 | 3811731 | 3 | 7  | 21 | GTT  | 26 | 3  |
| 165347 | 19 | 3835765 | 3835798 | 2 | 17 | 34 | TG   | 17 | 8  |
| 165350 | 19 | 3838715 | 3838742 | 2 | 14 | 28 | CA   | 19 | 7  |
| 165357 | 19 | 3867092 | 3867103 | 2 | 6  | 12 | TG   | 22 | 3  |
| 165367 | 19 | 3876046 | 3876061 | 2 | 8  | 16 | AC   | 15 | 5  |
| 165369 | 19 | 3878727 | 3878752 | 2 | 13 | 26 | GT   | 22 | 8  |
| 165372 | 19 | 3880585 | 3880598 | 2 | 7  | 14 | TG   | 21 | 7  |
| 165373 | 19 | 3880779 | 3880808 | 2 | 15 | 30 | AC   | 22 | 9  |
| 165374 | 19 | 3881296 | 3881313 | 2 | 9  | 18 | CA   | 21 | 4  |
| 165379 | 19 | 3884855 | 3884868 | 2 | 7  | 14 | TG   | 24 | 3  |
| 165382 | 19 | 3886813 | 3886854 | 2 | 21 | 42 | CA   | 25 | 14 |
| 165385 | 19 | 3890076 | 3890111 | 2 | 18 | 36 | TG   | 19 | 5  |
| 165386 | 19 | 3890258 | 3890273 | 2 | 8  | 16 | TG   | 16 | 8  |
| 165390 | 19 | 3892826 | 3892869 | 2 | 22 | 44 | TG   | 9  | 8  |
| 165391 | 19 | 3892979 | 3892990 | 2 | 6  | 12 | GA   | 20 | 9  |
| 165392 | 19 | 3893052 | 3893075 | 2 | 12 | 24 | TG   | 12 | 5  |
| 165397 | 19 | 3897693 | 3897708 | 2 | 8  | 16 | AC   | 12 | 8  |
| 165398 | 19 | 3897928 | 3897943 | 2 | 8  | 16 | AG   | 26 | 5  |
| 165399 | 19 | 3900088 | 3900127 | 2 | 20 | 40 | CA   | 7  | 8  |
| 165402 | 19 | 3902317 | 3902355 | 3 | 13 | 39 | CTG  | 19 | 15 |

|        |    |         |         |   |    |    |      |    |    |
|--------|----|---------|---------|---|----|----|------|----|----|
| 165403 | 19 | 3902534 | 3902555 | 2 | 11 | 22 | TG   | 9  | 4  |
| 165405 | 19 | 3903029 | 3903040 | 2 | 6  | 12 | AC   | 24 | 3  |
| 165406 | 19 | 3903993 | 3904007 | 3 | 5  | 15 | GGA  | 27 | 3  |
| 165409 | 19 | 3906345 | 3906368 | 2 | 12 | 24 | AC   | 14 | 4  |
| 165410 | 19 | 3906508 | 3906543 | 2 | 18 | 36 | CA   | 10 | 6  |
| 165413 | 19 | 3912571 | 3912584 | 2 | 7  | 14 | CT   | 20 | 7  |
| 165414 | 19 | 3912587 | 3912602 | 2 | 8  | 16 | CA   | 24 | 5  |
| 165416 | 19 | 3912752 | 3912763 | 2 | 6  | 12 | CA   | 6  | 7  |
| 165423 | 19 | 3916095 | 3916106 | 2 | 6  | 12 | GA   | 16 | 3  |
| 165424 | 19 | 3917153 | 3917168 | 2 | 8  | 16 | CA   | 25 | 3  |
| 165425 | 19 | 3917730 | 3917765 | 2 | 18 | 36 | GT   | 20 | 14 |
| 165427 | 19 | 3921367 | 3921384 | 2 | 9  | 18 | CA   | 20 | 3  |
| 165428 | 19 | 3921716 | 3921736 | 3 | 7  | 21 | GCT  | 28 | 4  |
| 165429 | 19 | 3922574 | 3922597 | 3 | 8  | 24 | TGA  | 17 | 4  |
| 165430 | 19 | 3925302 | 3925319 | 2 | 9  | 18 | TG   | 16 | 16 |
| 165432 | 19 | 3925517 | 3925560 | 2 | 22 | 44 | CA   | 8  | 11 |
| 165434 | 19 | 3928020 | 3928047 | 2 | 14 | 28 | TG   | 23 | 6  |
| 165436 | 19 | 3930634 | 3930653 | 2 | 10 | 20 | AC   | 17 | 3  |
| 165443 | 19 | 3936614 | 3936639 | 2 | 13 | 26 | CA   | 20 | 7  |
| 165444 | 19 | 3937080 | 3937095 | 2 | 8  | 16 | GA   | 17 | 3  |
| 165445 | 19 | 3937348 | 3937393 | 2 | 23 | 46 | TG   | 7  | 9  |
| 165447 | 19 | 3939479 | 3939506 | 2 | 14 | 28 | CA   | 18 | 9  |
| 165451 | 19 | 3946160 | 3946181 | 2 | 11 | 22 | CT   | 21 | 5  |
| 165458 | 19 | 3960262 | 3960275 | 2 | 7  | 14 | TG   | 26 | 8  |
| 165459 | 19 | 3960278 | 3960291 | 2 | 7  | 14 | TG   | 22 | 5  |
| 165460 | 19 | 3960444 | 3960479 | 2 | 18 | 36 | TG   | 10 | 9  |
| 165461 | 19 | 3960631 | 3960642 | 2 | 6  | 12 | CA   | 19 | 11 |
| 165462 | 19 | 3960687 | 3960700 | 2 | 7  | 14 | AC   | 17 | 3  |
| 165468 | 19 | 3968611 | 3968634 | 4 | 6  | 24 | AGTG | 22 | 5  |
| 165469 | 19 | 3973812 | 3973829 | 2 | 9  | 18 | CA   | 24 | 13 |
| 165471 | 19 | 3974472 | 3974487 | 4 | 4  | 16 | TTAT | 27 | 3  |
| 165479 | 19 | 3981444 | 3981469 | 2 | 13 | 26 | GT   | 11 | 9  |
| 165485 | 19 | 4008757 | 4008770 | 2 | 7  | 14 | GT   | 26 | 9  |
| 165488 | 19 | 4030609 | 4030628 | 2 | 10 | 20 | GT   | 17 | 5  |
| 165489 | 19 | 4032439 | 4032452 | 2 | 7  | 14 | TG   | 23 | 11 |
| 165509 | 19 | 4078070 | 4078087 | 2 | 9  | 18 | AC   | 7  | 6  |
| 165510 | 19 | 4081572 | 4081586 | 3 | 5  | 15 | CCT  | 19 | 6  |
| 165518 | 19 | 4100864 | 4100875 | 2 | 6  | 12 | TA   | 9  | 3  |
| 165519 | 19 | 4106823 | 4106838 | 2 | 8  | 16 | GT   | 20 | 4  |
| 165520 | 19 | 4106926 | 4106941 | 2 | 8  | 16 | GA   | 17 | 6  |
| 165521 | 19 | 4109467 | 4109480 | 2 | 7  | 14 | TG   | 24 | 4  |
| 165530 | 19 | 4123385 | 4123398 | 2 | 7  | 14 | CA   | 18 | 4  |
| 165532 | 19 | 4126325 | 4126348 | 2 | 12 | 24 | TG   | 20 | 5  |
| 165533 | 19 | 4127091 | 4127122 | 4 | 8  | 32 | CCAA | 32 | 4  |
| 165536 | 19 | 4128416 | 4128433 | 2 | 9  | 18 | AC   | 19 | 5  |
| 165538 | 19 | 4130740 | 4130763 | 4 | 6  | 24 | TATC | 17 | 3  |
| 165543 | 19 | 4139265 | 4139282 | 2 | 9  | 18 | TG   | 15 | 8  |
| 165544 | 19 | 4141518 | 4141549 | 2 | 16 | 32 | GT   | 17 | 6  |
| 165545 | 19 | 4142026 | 4142043 | 2 | 9  | 18 | TG   | 7  | 4  |
| 165557 | 19 | 4155944 | 4155957 | 2 | 7  | 14 | CA   | 27 | 4  |
| 165559 | 19 | 4157423 | 4157434 | 2 | 6  | 12 | AC   | 26 | 4  |

|        |    |         |         |   |    |    |      |    |    |
|--------|----|---------|---------|---|----|----|------|----|----|
| 165563 | 19 | 4161886 | 4161900 | 3 | 5  | 15 | CCT  | 13 | 8  |
| 165564 | 19 | 4172933 | 4172950 | 2 | 9  | 18 | TG   | 31 | 3  |
| 165568 | 19 | 4187178 | 4187205 | 2 | 14 | 28 | TG   | 9  | 5  |
| 165570 | 19 | 4188645 | 4188676 | 2 | 16 | 32 | TG   | 7  | 4  |
| 165573 | 19 | 4190110 | 4190129 | 2 | 10 | 20 | TG   | 14 | 6  |
| 165575 | 19 | 4190989 | 4191006 | 2 | 9  | 18 | TC   | 26 | 5  |
| 165576 | 19 | 4195202 | 4195229 | 2 | 14 | 28 | CA   | 18 | 5  |
| 165581 | 19 | 4196011 | 4196022 | 2 | 6  | 12 | GT   | 19 | 5  |
| 165583 | 19 | 4197892 | 4197917 | 2 | 13 | 26 | TG   | 18 | 5  |
| 165590 | 19 | 4204645 | 4204658 | 2 | 7  | 14 | AC   | 21 | 3  |
| 165592 | 19 | 4206365 | 4206384 | 2 | 10 | 20 | TG   | 23 | 7  |
| 165599 | 19 | 4209880 | 4209909 | 2 | 15 | 30 | GT   | 9  | 5  |
| 165602 | 19 | 4211176 | 4211207 | 2 | 16 | 32 | TG   | 12 | 10 |
| 165612 | 19 | 4217761 | 4217780 | 2 | 10 | 20 | TG   | 16 | 6  |
| 165622 | 19 | 4220159 | 4220182 | 2 | 12 | 24 | GT   | 13 | 7  |
| 165627 | 19 | 4221716 | 4221727 | 2 | 6  | 12 | TG   | 27 | 3  |
| 165628 | 19 | 4221921 | 4221938 | 2 | 9  | 18 | TG   | 19 | 6  |
| 165631 | 19 | 4225440 | 4225477 | 2 | 19 | 38 | GT   | 7  | 8  |
| 165633 | 19 | 4229957 | 4229977 | 3 | 7  | 21 | CCT  | 20 | 3  |
| 165635 | 19 | 4245146 | 4245157 | 2 | 6  | 12 | TG   | 30 | 3  |
| 165636 | 19 | 4245986 | 4246021 | 2 | 18 | 36 | AC   | 12 | 12 |
| 165642 | 19 | 4254649 | 4254674 | 2 | 13 | 26 | TG   | 17 | 7  |
| 165647 | 19 | 4259046 | 4259065 | 4 | 5  | 20 | TAAA | 11 | 4  |
| 165649 | 19 | 4259967 | 4259984 | 2 | 9  | 18 | GT   | 24 | 3  |
| 165650 | 19 | 4261006 | 4261025 | 2 | 10 | 20 | AC   | 23 | 8  |
| 165651 | 19 | 4263346 | 4263361 | 2 | 8  | 16 | AC   | 24 | 3  |
| 165652 | 19 | 4264157 | 4264170 | 2 | 7  | 14 | TG   | 16 | 7  |
| 165660 | 19 | 4276130 | 4276141 | 2 | 6  | 12 | GT   | 24 | 5  |
| 165661 | 19 | 4276255 | 4276266 | 2 | 6  | 12 | TG   | 31 | 6  |
| 165663 | 19 | 4281800 | 4281817 | 2 | 9  | 18 | TG   | 23 | 5  |
| 165667 | 19 | 4288888 | 4288905 | 2 | 9  | 18 | AC   | 12 | 6  |
| 165673 | 19 | 4293106 | 4293127 | 2 | 11 | 22 | AC   | 14 | 7  |
| 165674 | 19 | 4293498 | 4293531 | 2 | 17 | 34 | CA   | 10 | 7  |
| 165678 | 19 | 4305756 | 4305771 | 2 | 8  | 16 | GT   | 26 | 3  |
| 165679 | 19 | 4306588 | 4306599 | 2 | 6  | 12 | TC   | 14 | 9  |
| 165688 | 19 | 4323881 | 4323904 | 4 | 6  | 24 | TTTG | 25 | 6  |
| 165689 | 19 | 4325407 | 4325422 | 4 | 4  | 16 | TTTA | 11 | 4  |
| 165691 | 19 | 4338877 | 4338892 | 2 | 8  | 16 | AC   | 24 | 5  |
| 165695 | 19 | 4345394 | 4345433 | 4 | 10 | 40 | TTTC | 21 | 9  |
| 165698 | 19 | 4357649 | 4357662 | 2 | 7  | 14 | TC   | 23 | 3  |
| 165700 | 19 | 4364244 | 4364263 | 2 | 10 | 20 | GT   | 16 | 7  |
| 165701 | 19 | 4368682 | 4368709 | 2 | 14 | 28 | TG   | 17 | 7  |
| 165704 | 19 | 4371815 | 4371836 | 2 | 11 | 22 | GT   | 8  | 5  |
| 165705 | 19 | 4372188 | 4372207 | 2 | 10 | 20 | GT   | 17 | 10 |
| 165706 | 19 | 4372209 | 4372222 | 2 | 7  | 14 | TG   | 16 | 8  |
| 165713 | 19 | 4389954 | 4389989 | 2 | 18 | 36 | GT   | 10 | 9  |
| 165715 | 19 | 4395121 | 4395136 | 2 | 8  | 16 | TG   | 28 | 7  |
| 165717 | 19 | 4396392 | 4396403 | 2 | 6  | 12 | TG   | 23 | 5  |
| 165718 | 19 | 4398012 | 4398031 | 2 | 10 | 20 | GT   | 24 | 5  |
| 165721 | 19 | 4400328 | 4400343 | 2 | 8  | 16 | CA   | 11 | 6  |
| 165723 | 19 | 4402300 | 4402327 | 2 | 14 | 28 | AC   | 12 | 7  |

|        |    |         |         |   |    |    |      |    |    |
|--------|----|---------|---------|---|----|----|------|----|----|
| 165729 | 19 | 4410117 | 4410136 | 2 | 10 | 20 | GT   | 12 | 15 |
| 165730 | 19 | 4410138 | 4410151 | 2 | 7  | 14 | TG   | 18 | 15 |
| 165733 | 19 | 4410881 | 4410916 | 2 | 18 | 36 | CA   | 6  | 10 |
| 165734 | 19 | 4413804 | 4413824 | 3 | 7  | 21 | AAC  | 32 | 7  |
| 165740 | 19 | 4420928 | 4420955 | 2 | 14 | 28 | AC   | 16 | 9  |
| 165742 | 19 | 4425270 | 4425295 | 2 | 13 | 26 | AC   | 21 | 12 |
| 165743 | 19 | 4427261 | 4427272 | 2 | 6  | 12 | CA   | 29 | 6  |
| 165745 | 19 | 4429120 | 4429135 | 2 | 8  | 16 | CA   | 12 | 3  |
| 165748 | 19 | 4430569 | 4430594 | 2 | 13 | 26 | GT   | 20 | 6  |
| 165749 | 19 | 4432002 | 4432023 | 2 | 11 | 22 | TG   | 11 | 12 |
| 165756 | 19 | 4437893 | 4437916 | 2 | 12 | 24 | AC   | 13 | 12 |
| 165762 | 19 | 4449244 | 4449270 | 3 | 9  | 27 | TTG  | 12 | 5  |
| 165763 | 19 | 4449532 | 4449567 | 2 | 18 | 36 | GT   | 9  | 5  |
| 165765 | 19 | 4451095 | 4451109 | 3 | 5  | 15 | CAG  | 27 | 3  |
| 165766 | 19 | 4452208 | 4452225 | 3 | 6  | 18 | GCA  | 24 | 7  |
| 165770 | 19 | 4454489 | 4454502 | 2 | 7  | 14 | GT   | 22 | 4  |
| 165772 | 19 | 4459368 | 4459387 | 2 | 10 | 20 | AG   | 20 | 4  |
| 165775 | 19 | 4466403 | 4466414 | 2 | 6  | 12 | GT   | 15 | 3  |
| 165781 | 19 | 4477232 | 4477246 | 3 | 5  | 15 | AGA  | 34 | 4  |
| 165782 | 19 | 4483186 | 4483217 | 2 | 16 | 32 | CA   | 14 | 8  |
| 165784 | 19 | 4484427 | 4484454 | 2 | 14 | 28 | CA   | 13 | 9  |
| 165791 | 19 | 4502141 | 4502192 | 4 | 13 | 52 | TATC | 13 | 10 |
| 165795 | 19 | 4514988 | 4515005 | 3 | 6  | 18 | GAG  | 25 | 3  |
| 165796 | 19 | 4520994 | 4521005 | 2 | 6  | 12 | TA   | 14 | 4  |
| 165798 | 19 | 4525186 | 4525205 | 2 | 10 | 20 | CA   | 15 | 5  |
| 165804 | 19 | 4530522 | 4530542 | 3 | 7  | 21 | TTG  | 18 | 16 |
| 165805 | 19 | 4530889 | 4530902 | 2 | 7  | 14 | TG   | 15 | 8  |
| 165807 | 19 | 4541643 | 4541670 | 2 | 14 | 28 | TG   | 6  | 5  |
| 165810 | 19 | 4553032 | 4553049 | 3 | 6  | 18 | TAC  | 25 | 4  |
| 165811 | 19 | 4554266 | 4554289 | 3 | 8  | 24 | AAG  | 17 | 10 |
| 165815 | 19 | 4562493 | 4562518 | 2 | 13 | 26 | CA   | 15 | 11 |
| 165816 | 19 | 4564586 | 4564619 | 2 | 17 | 34 | AC   | 6  | 7  |
| 165820 | 19 | 4574706 | 4574717 | 2 | 6  | 12 | TG   | 29 | 3  |
| 165822 | 19 | 4577992 | 4578007 | 2 | 8  | 16 | TG   | 12 | 5  |
| 165824 | 19 | 4581051 | 4581066 | 2 | 8  | 16 | AC   | 21 | 6  |
| 165826 | 19 | 4585217 | 4585230 | 2 | 7  | 14 | CA   | 21 | 3  |
| 165829 | 19 | 4592351 | 4592364 | 2 | 7  | 14 | CT   | 29 | 3  |
| 165833 | 19 | 4596268 | 4596281 | 2 | 7  | 14 | GT   | 23 | 11 |
| 165834 | 19 | 4596284 | 4596301 | 2 | 9  | 18 | GT   | 8  | 6  |
| 165840 | 19 | 4606325 | 4606340 | 4 | 4  | 16 | TTTA | 15 | 3  |
| 165852 | 19 | 4618861 | 4618878 | 2 | 9  | 18 | TC   | 10 | 5  |
| 165853 | 19 | 4618881 | 4618898 | 2 | 9  | 18 | TC   | 16 | 4  |
| 165855 | 19 | 4623165 | 4623184 | 2 | 10 | 20 | AT   | 7  | 6  |
| 165856 | 19 | 4624599 | 4624618 | 2 | 10 | 20 | TG   | 25 | 3  |
| 165861 | 19 | 4636826 | 4636839 | 2 | 7  | 14 | AG   | 28 | 4  |
| 165865 | 19 | 4647210 | 4647229 | 2 | 10 | 20 | CA   | 8  | 7  |
| 165867 | 19 | 4647408 | 4647427 | 2 | 10 | 20 | GT   | 18 | 9  |
| 165870 | 19 | 4649583 | 4649604 | 2 | 11 | 22 | GT   | 15 | 3  |
| 165872 | 19 | 4649722 | 4649747 | 2 | 13 | 26 | AC   | 6  | 7  |
| 165878 | 19 | 4653650 | 4653681 | 2 | 16 | 32 | AC   | 12 | 8  |
| 165882 | 19 | 4659788 | 4659799 | 2 | 6  | 12 | GT   | 29 | 3  |



|        |    |         |         |   |    |    |      |    |    |
|--------|----|---------|---------|---|----|----|------|----|----|
| 165892 | 19 | 4672441 | 4672473 | 3 | 11 | 33 | CAG  | 23 | 7  |
| 165897 | 19 | 4685932 | 4685951 | 4 | 5  | 20 | TATT | 13 | 6  |
| 165898 | 19 | 4686820 | 4686839 | 2 | 10 | 20 | TG   | 14 | 11 |
| 165904 | 19 | 4704194 | 4704207 | 2 | 7  | 14 | AC   | 19 | 5  |
| 165908 | 19 | 4716630 | 4716647 | 2 | 9  | 18 | GT   | 21 | 8  |
| 165909 | 19 | 4720559 | 4720578 | 2 | 10 | 20 | TG   | 25 | 8  |
| 165916 | 19 | 4728784 | 4728801 | 3 | 6  | 18 | GGA  | 21 | 3  |
| 165917 | 19 | 4729512 | 4729535 | 3 | 8  | 24 | GAG  | 24 | 4  |
| 165918 | 19 | 4729846 | 4729857 | 2 | 6  | 12 | CA   | 27 | 7  |
| 165919 | 19 | 4731711 | 4731730 | 2 | 10 | 20 | GA   | 28 | 7  |
| 165920 | 19 | 4732556 | 4732570 | 3 | 5  | 15 | AGC  | 33 | 5  |
| 165924 | 19 | 4737066 | 4737080 | 3 | 5  | 15 | AGG  | 20 | 4  |
| 165927 | 19 | 4741167 | 4741186 | 4 | 5  | 20 | TTTG | 12 | 3  |
| 165930 | 19 | 4745828 | 4745843 | 2 | 8  | 16 | CA   | 16 | 5  |
| 165931 | 19 | 4745846 | 4745857 | 2 | 6  | 12 | CA   | 13 | 3  |
| 165935 | 19 | 4749492 | 4749515 | 2 | 12 | 24 | TG   | 12 | 9  |
| 165936 | 19 | 4749643 | 4749672 | 2 | 15 | 30 | AC   | 8  | 6  |
| 165943 | 19 | 4765664 | 4765681 | 3 | 6  | 18 | AGA  | 20 | 3  |
| 165944 | 19 | 4767733 | 4767772 | 2 | 20 | 40 | TG   | 14 | 11 |
| 165950 | 19 | 4786754 | 4786771 | 2 | 9  | 18 | GT   | 12 | 8  |
| 165951 | 19 | 4787548 | 4787565 | 2 | 9  | 18 | GA   | 12 | 4  |
| 165952 | 19 | 4789057 | 4789078 | 2 | 11 | 22 | CA   | 9  | 7  |
| 165962 | 19 | 4815605 | 4815618 | 2 | 7  | 14 | GT   | 16 | 5  |
| 165963 | 19 | 4815620 | 4815637 | 2 | 9  | 18 | TG   | 17 | 7  |
| 165964 | 19 | 4816013 | 4816026 | 2 | 7  | 14 | CA   | 9  | 4  |
| 165967 | 19 | 4818019 | 4818038 | 2 | 10 | 20 | TG   | 21 | 7  |
| 165977 | 19 | 4825780 | 4825797 | 2 | 9  | 18 | TG   | 17 | 3  |
| 165982 | 19 | 4834181 | 4834226 | 2 | 23 | 46 | GT   | 10 | 12 |
| 165985 | 19 | 4837513 | 4837536 | 3 | 8  | 24 | TTA  | 12 | 5  |
| 165988 | 19 | 4845582 | 4845613 | 2 | 16 | 32 | AC   | 19 | 10 |
| 166000 | 19 | 4880268 | 4880307 | 2 | 20 | 40 | TG   | 9  | 15 |
| 166001 | 19 | 4880332 | 4880351 | 4 | 5  | 20 | TTAT | 19 | 3  |
| 166004 | 19 | 4885042 | 4885061 | 4 | 5  | 20 | ATAG | 22 | 9  |
| 166005 | 19 | 4885612 | 4885623 | 2 | 6  | 12 | AT   | 14 | 3  |
| 166007 | 19 | 4892243 | 4892254 | 2 | 6  | 12 | TG   | 21 | 3  |
| 166008 | 19 | 4895304 | 4895343 | 2 | 20 | 40 | TG   | 9  | 8  |
| 166020 | 19 | 4935856 | 4935871 | 2 | 8  | 16 | AC   | 23 | 6  |
| 166027 | 19 | 4947237 | 4947252 | 2 | 8  | 16 | AG   | 15 | 5  |
| 166030 | 19 | 4947507 | 4947532 | 2 | 13 | 26 | TG   | 15 | 10 |
| 166032 | 19 | 4950230 | 4950261 | 2 | 16 | 32 | TG   | 7  | 11 |
| 166043 | 19 | 4978332 | 4978343 | 2 | 6  | 12 | AC   | 24 | 6  |
| 166044 | 19 | 4980161 | 4980188 | 2 | 14 | 28 | TG   | 22 | 6  |
| 166047 | 19 | 4986647 | 4986690 | 2 | 22 | 44 | GT   | 8  | 8  |
| 166058 | 19 | 5007126 | 5007143 | 3 | 6  | 18 | TGA  | 28 | 3  |
| 166066 | 19 | 5024575 | 5024590 | 2 | 8  | 16 | AT   | 15 | 11 |
| 166067 | 19 | 5024919 | 5024930 | 2 | 6  | 12 | AG   | 20 | 7  |
| 166079 | 19 | 5046890 | 5046909 | 2 | 10 | 20 | AC   | 9  | 8  |
| 166082 | 19 | 5058308 | 5058325 | 2 | 9  | 18 | CA   | 14 | 9  |
| 166084 | 19 | 5072228 | 5072241 | 2 | 7  | 14 | TG   | 29 | 4  |
| 166085 | 19 | 5073740 | 5073785 | 2 | 23 | 46 | CA   | 7  | 9  |
| 166089 | 19 | 5082978 | 5083011 | 2 | 17 | 34 | TG   | 6  | 10 |

|        |    |         |         |   |    |    |      |    |    |
|--------|----|---------|---------|---|----|----|------|----|----|
| 166090 | 19 | 5083391 | 5083434 | 2 | 22 | 44 | TG   | 15 | 12 |
| 166091 | 19 | 5089980 | 5089994 | 3 | 5  | 15 | CCT  | 35 | 4  |
| 166092 | 19 | 5092922 | 5092937 | 2 | 8  | 16 | CA   | 23 | 7  |
| 166093 | 19 | 5092939 | 5092950 | 2 | 6  | 12 | AC   | 22 | 6  |
| 166094 | 19 | 5093263 | 5093288 | 2 | 13 | 26 | TG   | 17 | 7  |
| 166098 | 19 | 5096537 | 5096564 | 2 | 14 | 28 | TG   | 11 | 8  |
| 166100 | 19 | 5099333 | 5099346 | 2 | 7  | 14 | AG   | 34 | 3  |
| 166102 | 19 | 5100202 | 5100227 | 2 | 13 | 26 | GT   | 9  | 12 |
| 166105 | 19 | 5102211 | 5102222 | 2 | 6  | 12 | AC   | 23 | 4  |
| 166108 | 19 | 5111764 | 5111797 | 2 | 17 | 34 | AC   | 7  | 8  |
| 166111 | 19 | 5118334 | 5118355 | 2 | 11 | 22 | AC   | 16 | 11 |
| 166113 | 19 | 5125232 | 5125259 | 2 | 14 | 28 | TG   | 18 | 13 |
| 166117 | 19 | 5140780 | 5140797 | 2 | 9  | 18 | GT   | 22 | 6  |
| 166124 | 19 | 5148176 | 5148215 | 2 | 20 | 40 | AC   | 16 | 14 |
| 166125 | 19 | 5148432 | 5148459 | 2 | 14 | 28 | CA   | 12 | 9  |
| 166133 | 19 | 5173699 | 5173719 | 3 | 7  | 21 | GCA  | 25 | 8  |
| 166140 | 19 | 5194322 | 5194339 | 2 | 9  | 18 | TG   | 9  | 4  |
| 166147 | 19 | 5203700 | 5203715 | 2 | 8  | 16 | TG   | 7  | 9  |
| 166150 | 19 | 5210581 | 5210592 | 2 | 6  | 12 | TA   | 9  | 4  |
| 166152 | 19 | 5212673 | 5212692 | 2 | 10 | 20 | GT   | 20 | 7  |
| 166153 | 19 | 5212937 | 5212970 | 2 | 17 | 34 | TG   | 8  | 9  |
| 166157 | 19 | 5215885 | 5215904 | 4 | 5  | 20 | AAAT | 24 | 6  |
| 166161 | 19 | 5238926 | 5238947 | 2 | 11 | 22 | CT   | 18 | 6  |
| 166163 | 19 | 5241247 | 5241276 | 2 | 15 | 30 | AC   | 11 | 9  |
| 166169 | 19 | 5279101 | 5279118 | 2 | 9  | 18 | CT   | 31 | 5  |
| 166175 | 19 | 5296230 | 5296265 | 4 | 9  | 36 | CAAT | 27 | 19 |
| 166179 | 19 | 5300171 | 5300184 | 2 | 7  | 14 | TG   | 17 | 3  |
| 166181 | 19 | 5317608 | 5317634 | 3 | 9  | 27 | AGG  | 22 | 5  |
| 166183 | 19 | 5324307 | 5324330 | 2 | 12 | 24 | AC   | 14 | 8  |
| 166191 | 19 | 5343397 | 5343412 | 2 | 8  | 16 | CA   | 15 | 3  |
| 166192 | 19 | 5343585 | 5343604 | 2 | 10 | 20 | AC   | 14 | 8  |
| 166197 | 19 | 5349666 | 5349681 | 2 | 8  | 16 | CA   | 20 | 4  |
| 166199 | 19 | 5355525 | 5355550 | 2 | 13 | 26 | AC   | 15 | 12 |
| 166203 | 19 | 5370141 | 5370156 | 2 | 8  | 16 | AG   | 26 | 5  |
| 166215 | 19 | 5400145 | 5400160 | 2 | 8  | 16 | GT   | 19 | 6  |
| 166226 | 19 | 5416148 | 5416171 | 2 | 12 | 24 | GT   | 7  | 7  |
| 166232 | 19 | 5432843 | 5432854 | 2 | 6  | 12 | AC   | 18 | 11 |
| 166235 | 19 | 5441401 | 5441430 | 2 | 15 | 30 | TG   | 16 | 10 |
| 166238 | 19 | 5449306 | 5449329 | 2 | 12 | 24 | AC   | 16 | 4  |
| 166239 | 19 | 5461339 | 5461374 | 2 | 18 | 36 | CA   | 16 | 11 |
| 166246 | 19 | 5484361 | 5484384 | 4 | 6  | 24 | TATT | 15 | 5  |
| 166247 | 19 | 5486142 | 5486159 | 3 | 6  | 18 | GGA  | 17 | 4  |
| 166251 | 19 | 5494067 | 5494078 | 2 | 6  | 12 | CG   | 27 | 5  |
| 166253 | 19 | 5494462 | 5494491 | 2 | 15 | 30 | AG   | 9  | 5  |
| 166254 | 19 | 5494601 | 5494621 | 3 | 7  | 21 | CCT  | 20 | 4  |
| 166256 | 19 | 5498294 | 5498307 | 2 | 7  | 14 | CA   | 27 | 11 |
| 166257 | 19 | 5502448 | 5502459 | 2 | 6  | 12 | CA   | 17 | 3  |
| 166259 | 19 | 5504301 | 5504334 | 2 | 17 | 34 | CA   | 14 | 12 |
| 166261 | 19 | 5506893 | 5506910 | 2 | 9  | 18 | TG   | 10 | 9  |
| 166263 | 19 | 5518826 | 5518843 | 3 | 6  | 18 | GAG  | 25 | 5  |
| 166264 | 19 | 5518847 | 5518861 | 3 | 5  | 15 | GAG  | 26 | 6  |

|        |    |         |         |   |    |    |      |    |    |
|--------|----|---------|---------|---|----|----|------|----|----|
| 166265 | 19 | 5519099 | 5519140 | 2 | 21 | 42 | AC   | 10 | 10 |
| 166267 | 19 | 5529582 | 5529602 | 3 | 7  | 21 | GAT  | 26 | 3  |
| 166268 | 19 | 5529670 | 5529684 | 3 | 5  | 15 | CCA  | 23 | 4  |
| 166269 | 19 | 5531391 | 5531414 | 2 | 12 | 24 | GT   | 14 | 13 |
| 166270 | 19 | 5531537 | 5531548 | 2 | 6  | 12 | TC   | 31 | 3  |
| 166271 | 19 | 5533564 | 5533575 | 2 | 6  | 12 | AC   | 18 | 5  |
| 166275 | 19 | 5539392 | 5539419 | 4 | 7  | 28 | TAGA | 17 | 5  |
| 166277 | 19 | 5545257 | 5545271 | 3 | 5  | 15 | TCG  | 28 | 7  |
| 166279 | 19 | 5560553 | 5560567 | 3 | 5  | 15 | CTC  | 31 | 3  |
| 166280 | 19 | 5560645 | 5560662 | 2 | 9  | 18 | TC   | 30 | 7  |
| 166282 | 19 | 5567679 | 5567692 | 2 | 7  | 14 | AC   | 25 | 12 |
| 166284 | 19 | 5569911 | 5569922 | 2 | 6  | 12 | AC   | 26 | 6  |
| 166286 | 19 | 5572198 | 5572217 | 2 | 10 | 20 | TG   | 28 | 6  |
| 166290 | 19 | 5581684 | 5581711 | 2 | 14 | 28 | CA   | 27 | 16 |
| 166302 | 19 | 5596072 | 5596085 | 2 | 7  | 14 | GT   | 14 | 3  |
| 166306 | 19 | 5597631 | 5597670 | 2 | 20 | 40 | GT   | 18 | 10 |
| 166307 | 19 | 5598012 | 5598029 | 2 | 9  | 18 | TG   | 18 | 8  |
| 166309 | 19 | 5599629 | 5599697 | 3 | 23 | 69 | AGA  | 20 | 10 |
| 166314 | 19 | 5603165 | 5603184 | 2 | 10 | 20 | AC   | 22 | 4  |
| 166315 | 19 | 5604453 | 5604470 | 2 | 9  | 18 | CA   | 14 | 13 |
| 166318 | 19 | 5616253 | 5616279 | 3 | 9  | 27 | AGC  | 25 | 7  |
| 166320 | 19 | 5622993 | 5623006 | 2 | 7  | 14 | TC   | 25 | 5  |
| 166323 | 19 | 5625439 | 5625456 | 2 | 9  | 18 | CA   | 23 | 4  |
| 166324 | 19 | 5625713 | 5625734 | 2 | 11 | 22 | AC   | 16 | 7  |
| 166364 | 19 | 5719570 | 5719611 | 2 | 21 | 42 | CA   | 15 | 15 |
| 166366 | 19 | 5722998 | 5723021 | 2 | 12 | 24 | TG   | 18 | 10 |
| 166368 | 19 | 5726441 | 5726452 | 2 | 6  | 12 | GA   | 23 | 3  |
| 166375 | 19 | 5739808 | 5739822 | 3 | 5  | 15 | CCA  | 16 | 5  |
| 166392 | 19 | 5780851 | 5780868 | 2 | 9  | 18 | CA   | 24 | 9  |
| 166399 | 19 | 5794443 | 5794463 | 3 | 7  | 21 | GAA  | 26 | 3  |
| 166408 | 19 | 5800897 | 5800918 | 2 | 11 | 22 | TG   | 20 | 8  |
| 166410 | 19 | 5801653 | 5801668 | 2 | 8  | 16 | CA   | 22 | 8  |
| 166411 | 19 | 5801939 | 5801962 | 2 | 12 | 24 | AG   | 10 | 5  |
| 166416 | 19 | 5810324 | 5810351 | 2 | 14 | 28 | TG   | 22 | 12 |
| 166417 | 19 | 5813338 | 5813349 | 2 | 6  | 12 | AG   | 20 | 5  |
| 166420 | 19 | 5818285 | 5818310 | 2 | 13 | 26 | AC   | 16 | 4  |
| 166421 | 19 | 5819309 | 5819326 | 2 | 9  | 18 | TG   | 18 | 4  |
| 166429 | 19 | 5826383 | 5826396 | 2 | 7  | 14 | GT   | 26 | 4  |
| 166431 | 19 | 5826600 | 5826639 | 2 | 20 | 40 | TG   | 8  | 10 |
| 166432 | 19 | 5829758 | 5829793 | 2 | 18 | 36 | AC   | 15 | 10 |
| 166434 | 19 | 5831914 | 5831927 | 2 | 7  | 14 | GT   | 31 | 3  |
| 166438 | 19 | 5848106 | 5848137 | 2 | 16 | 32 | AC   | 7  | 6  |
| 166444 | 19 | 5853742 | 5853759 | 2 | 9  | 18 | CA   | 25 | 3  |
| 166447 | 19 | 5860809 | 5860820 | 2 | 6  | 12 | CA   | 15 | 5  |
| 166448 | 19 | 5862803 | 5862820 | 2 | 9  | 18 | CA   | 16 | 7  |
| 166450 | 19 | 5863345 | 5863358 | 2 | 7  | 14 | GT   | 23 | 8  |
| 166455 | 19 | 5868672 | 5868687 | 2 | 8  | 16 | TA   | 23 | 5  |
| 166460 | 19 | 5870609 | 5870626 | 3 | 6  | 18 | GCT  | 30 | 7  |
| 166463 | 19 | 5874362 | 5874375 | 2 | 7  | 14 | TC   | 20 | 3  |
| 166475 | 19 | 5893890 | 5893901 | 2 | 6  | 12 | AG   | 17 | 4  |
| 166479 | 19 | 5898111 | 5898126 | 2 | 8  | 16 | GT   | 13 | 4  |

|        |    |         |         |   |    |    |      |    |    |
|--------|----|---------|---------|---|----|----|------|----|----|
| 166481 | 19 | 5899486 | 5899509 | 2 | 12 | 24 | AC   | 25 | 8  |
| 166484 | 19 | 5901200 | 5901219 | 2 | 10 | 20 | TG   | 22 | 6  |
| 166485 | 19 | 5901332 | 5901365 | 2 | 17 | 34 | CA   | 17 | 8  |
| 166486 | 19 | 5901602 | 5901625 | 3 | 8  | 24 | AGG  | 22 | 3  |
| 166491 | 19 | 5907469 | 5907488 | 2 | 10 | 20 | TG   | 13 | 4  |
| 166493 | 19 | 5910859 | 5910876 | 2 | 9  | 18 | CA   | 14 | 6  |
| 166498 | 19 | 5922895 | 5922908 | 2 | 7  | 14 | TG   | 21 | 3  |
| 166503 | 19 | 5937176 | 5937193 | 2 | 9  | 18 | CA   | 14 | 4  |
| 166506 | 19 | 5946105 | 5946134 | 2 | 15 | 30 | AC   | 15 | 7  |
| 166511 | 19 | 5969205 | 5969216 | 2 | 6  | 12 | AC   | 30 | 3  |
| 166513 | 19 | 5977771 | 5977786 | 2 | 8  | 16 | TG   | 28 | 3  |
| 166522 | 19 | 5994580 | 5994615 | 2 | 18 | 36 | CT   | 11 | 6  |
| 166525 | 19 | 6014319 | 6014344 | 2 | 13 | 26 | CA   | 11 | 5  |
| 166528 | 19 | 6017474 | 6017497 | 2 | 12 | 24 | AC   | 10 | 10 |
| 166533 | 19 | 6018890 | 6018909 | 2 | 10 | 20 | AG   | 14 | 8  |
| 166534 | 19 | 6023099 | 6023114 | 2 | 8  | 16 | GT   | 23 | 3  |
| 166541 | 19 | 6067645 | 6067670 | 2 | 13 | 26 | TG   | 14 | 9  |
| 166547 | 19 | 6077681 | 6077694 | 2 | 7  | 14 | GT   | 11 | 6  |
| 166549 | 19 | 6085352 | 6085363 | 2 | 6  | 12 | AC   | 31 | 4  |
| 166553 | 19 | 6093384 | 6093403 | 2 | 10 | 20 | GT   | 14 | 7  |
| 166556 | 19 | 6095557 | 6095572 | 2 | 8  | 16 | AC   | 17 | 8  |
| 166565 | 19 | 6107836 | 6107847 | 2 | 6  | 12 | TG   | 23 | 3  |
| 166572 | 19 | 6119182 | 6119197 | 2 | 8  | 16 | TG   | 17 | 6  |
| 166573 | 19 | 6119200 | 6119215 | 2 | 8  | 16 | TG   | 13 | 5  |
| 166577 | 19 | 6124008 | 6124023 | 2 | 8  | 16 | GT   | 28 | 5  |
| 166584 | 19 | 6131722 | 6131741 | 4 | 5  | 20 | AGAC | 30 | 3  |
| 166601 | 19 | 6169119 | 6169134 | 4 | 4  | 16 | ATAC | 26 | 3  |
| 166611 | 19 | 6202987 | 6203004 | 3 | 6  | 18 | AAC  | 33 | 3  |
| 166615 | 19 | 6208176 | 6208197 | 2 | 11 | 22 | CA   | 14 | 4  |
| 166617 | 19 | 6210088 | 6210103 | 2 | 8  | 16 | AG   | 14 | 3  |
| 166618 | 19 | 6210110 | 6210125 | 2 | 8  | 16 | AG   | 20 | 4  |
| 166625 | 19 | 6229337 | 6229369 | 3 | 11 | 33 | ATG  | 26 | 5  |
| 166627 | 19 | 6238504 | 6238524 | 3 | 7  | 21 | GAT  | 17 | 9  |
| 166631 | 19 | 6245604 | 6245618 | 3 | 5  | 15 | AAC  | 31 | 3  |
| 166643 | 19 | 6284587 | 6284604 | 2 | 9  | 18 | CA   | 19 | 9  |
| 166644 | 19 | 6291287 | 6291298 | 2 | 6  | 12 | TG   | 26 | 5  |
| 166645 | 19 | 6299930 | 6299955 | 2 | 13 | 26 | TG   | 27 | 7  |
| 166646 | 19 | 6315011 | 6315037 | 3 | 9  | 27 | ATG  | 26 | 6  |
| 166647 | 19 | 6316236 | 6316259 | 4 | 6  | 24 | TTTA | 30 | 5  |
| 166648 | 19 | 6316934 | 6316947 | 2 | 7  | 14 | TG   | 30 | 3  |
| 166650 | 19 | 6317909 | 6317932 | 3 | 8  | 24 | AGA  | 21 | 10 |
| 166655 | 19 | 6346669 | 6346702 | 2 | 17 | 34 | TG   | 17 | 16 |
| 166656 | 19 | 6348460 | 6348477 | 3 | 6  | 18 | TTA  | 6  | 4  |
| 166661 | 19 | 6362075 | 6362102 | 4 | 7  | 28 | AACA | 21 | 5  |
| 166663 | 19 | 6369819 | 6369838 | 2 | 10 | 20 | AC   | 17 | 9  |
| 166667 | 19 | 6389210 | 6389227 | 3 | 6  | 18 | CAG  | 28 | 3  |
| 166673 | 19 | 6392097 | 6392120 | 2 | 12 | 24 | GA   | 9  | 4  |
| 166690 | 19 | 6414401 | 6414428 | 2 | 14 | 28 | CA   | 9  | 7  |
| 166697 | 19 | 6417761 | 6417781 | 3 | 7  | 21 | CAG  | 31 | 3  |
| 166698 | 19 | 6418453 | 6418468 | 2 | 8  | 16 | AG   | 20 | 3  |
| 166701 | 19 | 6419684 | 6419699 | 2 | 8  | 16 | TG   | 25 | 3  |

|        |    |         |         |   |    |    |      |    |    |
|--------|----|---------|---------|---|----|----|------|----|----|
| 166702 | 19 | 6419818 | 6419829 | 2 | 6  | 12 | TG   | 19 | 6  |
| 166703 | 19 | 6421523 | 6421536 | 2 | 7  | 14 | CT   | 32 | 3  |
| 166704 | 19 | 6421659 | 6421679 | 3 | 7  | 21 | TCC  | 23 | 5  |
| 166706 | 19 | 6424942 | 6424977 | 2 | 18 | 36 | GT   | 7  | 8  |
| 166707 | 19 | 6425098 | 6425113 | 2 | 8  | 16 | AG   | 27 | 3  |
| 166709 | 19 | 6427909 | 6427924 | 2 | 8  | 16 | GT   | 24 | 3  |
| 166710 | 19 | 6427947 | 6427964 | 2 | 9  | 18 | GT   | 15 | 4  |
| 166712 | 19 | 6428106 | 6428121 | 4 | 4  | 16 | CACG | 18 | 9  |
| 166714 | 19 | 6428628 | 6428639 | 2 | 6  | 12 | AG   | 20 | 3  |
| 166715 | 19 | 6428642 | 6428657 | 2 | 8  | 16 | AG   | 18 | 3  |
| 166717 | 19 | 6435233 | 6435266 | 2 | 17 | 34 | TG   | 20 | 9  |
| 166718 | 19 | 6440582 | 6440607 | 2 | 13 | 26 | GT   | 17 | 7  |
| 166720 | 19 | 6445437 | 6445452 | 2 | 8  | 16 | TG   | 27 | 5  |
| 166721 | 19 | 6445523 | 6445538 | 2 | 8  | 16 | TG   | 16 | 3  |
| 166724 | 19 | 6450845 | 6450866 | 2 | 11 | 22 | CA   | 15 | 5  |
| 166725 | 19 | 6450949 | 6450962 | 2 | 7  | 14 | TC   | 27 | 4  |
| 166727 | 19 | 6450994 | 6451023 | 2 | 15 | 30 | CA   | 11 | 10 |
| 166728 | 19 | 6451277 | 6451296 | 2 | 10 | 20 | CT   | 13 | 5  |
| 166729 | 19 | 6451917 | 6451938 | 2 | 11 | 22 | TG   | 16 | 9  |
| 166731 | 19 | 6452084 | 6452101 | 2 | 9  | 18 | CT   | 8  | 3  |
| 166736 | 19 | 6452713 | 6452736 | 2 | 12 | 24 | GT   | 8  | 6  |
| 166740 | 19 | 6453128 | 6453147 | 2 | 10 | 20 | GT   | 9  | 4  |
| 166749 | 19 | 6483584 | 6483617 | 2 | 17 | 34 | AG   | 7  | 9  |
| 166754 | 19 | 6484184 | 6484215 | 2 | 16 | 32 | GT   | 9  | 8  |
| 166765 | 19 | 6503396 | 6503407 | 2 | 6  | 12 | GT   | 14 | 6  |
| 166766 | 19 | 6503551 | 6503586 | 2 | 18 | 36 | AC   | 12 | 11 |
| 166768 | 19 | 6507017 | 6507052 | 2 | 18 | 36 | AC   | 16 | 11 |
| 166770 | 19 | 6508203 | 6508230 | 2 | 14 | 28 | CA   | 12 | 15 |
| 166777 | 19 | 6513407 | 6513421 | 3 | 5  | 15 | TGC  | 31 | 3  |
| 166785 | 19 | 6520748 | 6520767 | 2 | 10 | 20 | TG   | 12 | 6  |
| 166802 | 19 | 6565841 | 6565854 | 2 | 7  | 14 | TG   | 30 | 3  |
| 166803 | 19 | 6565901 | 6565926 | 2 | 13 | 26 | TG   | 20 | 8  |
| 166804 | 19 | 6566067 | 6566084 | 2 | 9  | 18 | AC   | 14 | 6  |
| 166806 | 19 | 6568561 | 6568598 | 2 | 19 | 38 | CT   | 6  | 6  |
| 166809 | 19 | 6572658 | 6572679 | 2 | 11 | 22 | TG   | 13 | 3  |
| 166811 | 19 | 6572870 | 6572881 | 2 | 6  | 12 | TG   | 21 | 5  |
| 166820 | 19 | 6574210 | 6574225 | 2 | 8  | 16 | TC   | 17 | 9  |
| 166821 | 19 | 6574228 | 6574243 | 2 | 8  | 16 | TC   | 16 | 10 |
| 166827 | 19 | 6575509 | 6575534 | 2 | 13 | 26 | CA   | 17 | 13 |
| 166832 | 19 | 6577389 | 6577408 | 2 | 10 | 20 | CA   | 17 | 4  |
| 166833 | 19 | 6577772 | 6577801 | 2 | 15 | 30 | CA   | 10 | 11 |
| 166839 | 19 | 6598934 | 6598945 | 2 | 6  | 12 | CT   | 29 | 3  |
| 166851 | 19 | 6609042 | 6609059 | 3 | 6  | 18 | TGC  | 16 | 7  |
| 166854 | 19 | 6609318 | 6609347 | 2 | 15 | 30 | AC   | 17 | 9  |
| 166855 | 19 | 6609823 | 6609837 | 3 | 5  | 15 | CAC  | 26 | 3  |
| 166856 | 19 | 6610180 | 6610201 | 2 | 11 | 22 | GA   | 15 | 8  |
| 166858 | 19 | 6610730 | 6610743 | 2 | 7  | 14 | GT   | 11 | 4  |
| 166863 | 19 | 6614109 | 6614128 | 2 | 10 | 20 | AG   | 22 | 6  |
| 166864 | 19 | 6615285 | 6615296 | 2 | 6  | 12 | CT   | 15 | 3  |
| 166867 | 19 | 6619744 | 6619775 | 2 | 16 | 32 | TG   | 6  | 7  |
| 166869 | 19 | 6620952 | 6620987 | 4 | 9  | 36 | GATG | 6  | 6  |

|        |    |         |         |   |    |    |      |    |    |
|--------|----|---------|---------|---|----|----|------|----|----|
| 166874 | 19 | 6625749 | 6625762 | 2 | 7  | 14 | AC   | 16 | 4  |
| 166877 | 19 | 6627058 | 6627073 | 4 | 4  | 16 | GCCT | 24 | 4  |
| 166879 | 19 | 6629234 | 6629249 | 4 | 4  | 16 | CCGG | 10 | 6  |
| 166881 | 19 | 6633797 | 6633826 | 2 | 15 | 30 | AG   | 11 | 9  |
| 166882 | 19 | 6634070 | 6634093 | 4 | 6  | 24 | AAGG | 13 | 5  |
| 166885 | 19 | 6635564 | 6635599 | 2 | 18 | 36 | GA   | 23 | 12 |
| 166888 | 19 | 6637559 | 6637576 | 2 | 9  | 18 | CT   | 20 | 3  |
| 166890 | 19 | 6647296 | 6647310 | 3 | 5  | 15 | CAA  | 34 | 3  |
| 166894 | 19 | 6652330 | 6652349 | 2 | 10 | 20 | TG   | 10 | 6  |
| 166896 | 19 | 6652747 | 6652764 | 2 | 9  | 18 | TG   | 10 | 4  |
| 166898 | 19 | 6652898 | 6652917 | 2 | 10 | 20 | GT   | 22 | 11 |
| 166900 | 19 | 6655363 | 6655384 | 2 | 11 | 22 | CA   | 11 | 10 |
| 166916 | 19 | 6660509 | 6660522 | 2 | 7  | 14 | GT   | 17 | 11 |
| 166917 | 19 | 6660527 | 6660542 | 4 | 4  | 16 | GTGC | 14 | 12 |
| 166919 | 19 | 6661240 | 6661263 | 4 | 6  | 24 | TTAT | 21 | 8  |
| 166921 | 19 | 6662398 | 6662417 | 2 | 10 | 20 | TG   | 24 | 5  |
| 166922 | 19 | 6662880 | 6662895 | 2 | 8  | 16 | GT   | 10 | 5  |
| 166923 | 19 | 6663178 | 6663207 | 2 | 15 | 30 | GT   | 15 | 6  |
| 166928 | 19 | 6679333 | 6679348 | 2 | 8  | 16 | AG   | 7  | 3  |
| 166942 | 19 | 6699377 | 6699400 | 2 | 12 | 24 | CA   | 20 | 9  |
| 166944 | 19 | 6700690 | 6700727 | 2 | 19 | 38 | GT   | 18 | 11 |
| 166947 | 19 | 6702658 | 6702669 | 2 | 6  | 12 | AC   | 25 | 5  |
| 166949 | 19 | 6706623 | 6706640 | 2 | 9  | 18 | CT   | 16 | 5  |
| 166951 | 19 | 6711932 | 6711969 | 2 | 19 | 38 | GT   | 6  | 10 |
| 166955 | 19 | 6716278 | 6716310 | 3 | 11 | 33 | GGA  | 18 | 8  |
| 166956 | 19 | 6719848 | 6719865 | 2 | 9  | 18 | AG   | 25 | 4  |
| 166957 | 19 | 6720009 | 6720034 | 2 | 13 | 26 | AC   | 12 | 7  |
| 166960 | 19 | 6726000 | 6726023 | 2 | 12 | 24 | GT   | 29 | 11 |
| 166962 | 19 | 6726552 | 6726566 | 3 | 5  | 15 | GTG  | 29 | 5  |
| 166964 | 19 | 6728780 | 6728791 | 2 | 6  | 12 | CT   | 24 | 4  |
| 166968 | 19 | 6732386 | 6732407 | 2 | 11 | 22 | CT   | 17 | 7  |
| 166971 | 19 | 6735245 | 6735282 | 2 | 19 | 38 | AC   | 24 | 11 |
| 166972 | 19 | 6739709 | 6739742 | 2 | 17 | 34 | GT   | 19 | 6  |
| 166974 | 19 | 6745297 | 6745326 | 2 | 15 | 30 | TC   | 8  | 10 |
| 166978 | 19 | 6754137 | 6754154 | 2 | 9  | 18 | CA   | 28 | 4  |
| 166979 | 19 | 6754257 | 6754277 | 3 | 7  | 21 | GAG  | 25 | 3  |
| 166983 | 19 | 6762671 | 6762710 | 4 | 10 | 40 | CATT | 28 | 11 |
| 166989 | 19 | 6788425 | 6788452 | 2 | 14 | 28 | AC   | 14 | 10 |
| 166991 | 19 | 6802272 | 6802315 | 2 | 22 | 44 | GT   | 12 | 12 |
| 166996 | 19 | 6812808 | 6812835 | 2 | 14 | 28 | CA   | 17 | 8  |
| 166997 | 19 | 6813726 | 6813746 | 3 | 7  | 21 | CCT  | 25 | 5  |
| 166998 | 19 | 6815291 | 6815322 | 4 | 8  | 32 | TCTT | 21 | 10 |
| 166999 | 19 | 6816047 | 6816068 | 2 | 11 | 22 | GT   | 15 | 12 |
| 167000 | 19 | 6817319 | 6817348 | 3 | 10 | 30 | TTG  | 14 | 10 |
| 167002 | 19 | 6818088 | 6818101 | 2 | 7  | 14 | AG   | 9  | 5  |
| 167003 | 19 | 6818297 | 6818323 | 3 | 9  | 27 | TCT  | 20 | 10 |
| 167008 | 19 | 6822354 | 6822367 | 2 | 7  | 14 | AC   | 27 | 6  |
| 167013 | 19 | 6825743 | 6825756 | 2 | 7  | 14 | GA   | 21 | 5  |
| 167015 | 19 | 6829996 | 6830009 | 2 | 7  | 14 | GT   | 17 | 4  |
| 167016 | 19 | 6830211 | 6830222 | 2 | 6  | 12 | GT   | 18 | 6  |
| 167020 | 19 | 6832786 | 6832805 | 2 | 10 | 20 | AC   | 21 | 3  |

|        |    |         |         |   |    |    |      |    |    |
|--------|----|---------|---------|---|----|----|------|----|----|
| 167021 | 19 | 6833964 | 6833977 | 2 | 7  | 14 | TG   | 27 | 3  |
| 167026 | 19 | 6838921 | 6838936 | 2 | 8  | 16 | TC   | 14 | 4  |
| 167027 | 19 | 6838939 | 6838954 | 2 | 8  | 16 | TC   | 16 | 5  |
| 167032 | 19 | 6846165 | 6846196 | 2 | 16 | 32 | TC   | 14 | 5  |
| 167035 | 19 | 6854118 | 6854135 | 3 | 6  | 18 | CAG  | 24 | 5  |
| 167043 | 19 | 6861462 | 6861475 | 2 | 7  | 14 | CA   | 26 | 6  |
| 167046 | 19 | 6862854 | 6862893 | 2 | 20 | 40 | CA   | 13 | 10 |
| 167057 | 19 | 6870652 | 6870681 | 2 | 15 | 30 | CA   | 10 | 11 |
| 167059 | 19 | 6875451 | 6875472 | 2 | 11 | 22 | TG   | 17 | 15 |
| 167060 | 19 | 6879008 | 6879019 | 2 | 6  | 12 | CA   | 25 | 12 |
| 167062 | 19 | 6883918 | 6883949 | 2 | 16 | 32 | TG   | 7  | 7  |
| 167064 | 19 | 6889440 | 6889455 | 2 | 8  | 16 | AG   | 22 | 3  |
| 167067 | 19 | 6892602 | 6892637 | 2 | 18 | 36 | TG   | 13 | 13 |
| 167070 | 19 | 6904615 | 6904630 | 4 | 4  | 16 | AAAT | 20 | 3  |
| 167071 | 19 | 6905830 | 6905883 | 2 | 27 | 54 | GT   | 6  | 8  |
| 167076 | 19 | 6923526 | 6923557 | 2 | 16 | 32 | CT   | 12 | 8  |
| 167077 | 19 | 6924758 | 6924775 | 2 | 9  | 18 | AC   | 22 | 5  |
| 167081 | 19 | 6928939 | 6928962 | 3 | 8  | 24 | ATT  | 13 | 6  |
| 167086 | 19 | 6943813 | 6943834 | 2 | 11 | 22 | AC   | 16 | 10 |
| 167088 | 19 | 6945280 | 6945291 | 2 | 6  | 12 | CA   | 21 | 3  |
| 167092 | 19 | 6953322 | 6953337 | 2 | 8  | 16 | CA   | 23 | 7  |
| 167094 | 19 | 6954738 | 6954753 | 2 | 8  | 16 | TG   | 26 | 6  |
| 167099 | 19 | 6958167 | 6958192 | 2 | 13 | 26 | GT   | 14 | 10 |
| 167103 | 19 | 6968616 | 6968633 | 2 | 9  | 18 | TG   | 31 | 4  |
| 167105 | 19 | 6970738 | 6970757 | 2 | 10 | 20 | TC   | 15 | 6  |
| 167106 | 19 | 6971126 | 6971143 | 2 | 9  | 18 | CA   | 18 | 12 |
| 167107 | 19 | 6971214 | 6971229 | 4 | 4  | 16 | AAAT | 25 | 3  |
| 167109 | 19 | 6973051 | 6973074 | 3 | 8  | 24 | GAG  | 28 | 6  |
| 167115 | 19 | 6983424 | 6983437 | 2 | 7  | 14 | TA   | 12 | 3  |
| 167116 | 19 | 6983700 | 6983715 | 2 | 8  | 16 | TG   | 22 | 7  |
| 167118 | 19 | 6989191 | 6989202 | 2 | 6  | 12 | AT   | 27 | 10 |
| 167122 | 19 | 6998696 | 6998715 | 2 | 10 | 20 | CT   | 18 | 3  |
| 167123 | 19 | 6999148 | 6999161 | 2 | 7  | 14 | CA   | 25 | 5  |
| 167127 | 19 | 7002581 | 7002595 | 3 | 5  | 15 | CTG  | 18 | 6  |
| 167133 | 19 | 7008729 | 7008762 | 2 | 17 | 34 | CA   | 9  | 11 |
| 167134 | 19 | 7015181 | 7015194 | 2 | 7  | 14 | AC   | 12 | 7  |
| 167136 | 19 | 7017812 | 7017823 | 2 | 6  | 12 | TG   | 20 | 6  |
| 167137 | 19 | 7017825 | 7017836 | 2 | 6  | 12 | GT   | 19 | 6  |
| 167139 | 19 | 7019488 | 7019505 | 2 | 9  | 18 | CT   | 24 | 3  |
| 167140 | 19 | 7021395 | 7021418 | 2 | 12 | 24 | GT   | 12 | 7  |
| 167143 | 19 | 7021839 | 7021852 | 2 | 7  | 14 | CT   | 18 | 5  |
| 167148 | 19 | 7025061 | 7025084 | 2 | 12 | 24 | AC   | 23 | 8  |
| 167149 | 19 | 7025196 | 7025225 | 2 | 15 | 30 | TG   | 12 | 8  |
| 167150 | 19 | 7025421 | 7025444 | 2 | 12 | 24 | AC   | 6  | 7  |
| 167151 | 19 | 7025911 | 7025926 | 4 | 4  | 16 | AAAC | 31 | 3  |
| 167153 | 19 | 7029399 | 7029416 | 3 | 6  | 18 | CAG  | 31 | 6  |
| 167154 | 19 | 7029575 | 7029594 | 2 | 10 | 20 | CA   | 21 | 5  |
| 167155 | 19 | 7031809 | 7031826 | 2 | 9  | 18 | AC   | 11 | 10 |
| 167157 | 19 | 7035478 | 7035489 | 2 | 6  | 12 | CG   | 25 | 3  |
| 167167 | 19 | 7042347 | 7042361 | 3 | 5  | 15 | TGA  | 21 | 4  |
| 167170 | 19 | 7045968 | 7045991 | 2 | 12 | 24 | AC   | 9  | 5  |

|        |    |         |         |   |    |    |      |    |    |
|--------|----|---------|---------|---|----|----|------|----|----|
| 167177 | 19 | 7068048 | 7068062 | 3 | 5  | 15 | GAG  | 24 | 3  |
| 167185 | 19 | 7091869 | 7091882 | 2 | 7  | 14 | AC   | 21 | 3  |
| 167193 | 19 | 7104922 | 7104939 | 3 | 6  | 18 | GCA  | 30 | 6  |
| 167194 | 19 | 7106606 | 7106625 | 2 | 10 | 20 | TG   | 17 | 6  |
| 167197 | 19 | 7108675 | 7108696 | 2 | 11 | 22 | TG   | 18 | 6  |
| 167200 | 19 | 7115596 | 7115615 | 2 | 10 | 20 | TG   | 15 | 10 |
| 167206 | 19 | 7124429 | 7124460 | 4 | 8  | 32 | CCAG | 27 | 9  |
| 167207 | 19 | 7132226 | 7132237 | 2 | 6  | 12 | TG   | 17 | 4  |
| 167212 | 19 | 7148769 | 7148784 | 2 | 8  | 16 | CA   | 18 | 6  |
| 167213 | 19 | 7150231 | 7150248 | 2 | 9  | 18 | TC   | 15 | 5  |
| 167217 | 19 | 7154679 | 7154708 | 2 | 15 | 30 | AC   | 15 | 6  |
| 167221 | 19 | 7168528 | 7168541 | 2 | 7  | 14 | GT   | 24 | 4  |
| 167222 | 19 | 7169830 | 7169841 | 2 | 6  | 12 | CA   | 31 | 7  |
| 167223 | 19 | 7172003 | 7172022 | 2 | 10 | 20 | GT   | 6  | 7  |
| 167224 | 19 | 7172084 | 7172127 | 4 | 11 | 44 | TTCT | 19 | 13 |
| 167226 | 19 | 7180964 | 7180989 | 2 | 13 | 26 | TG   | 9  | 15 |
| 167230 | 19 | 7186414 | 7186429 | 2 | 8  | 16 | TG   | 13 | 10 |
| 167232 | 19 | 7189012 | 7189031 | 2 | 10 | 20 | CA   | 21 | 12 |
| 167234 | 19 | 7189668 | 7189683 | 2 | 8  | 16 | GT   | 18 | 7  |
| 167235 | 19 | 7191062 | 7191081 | 2 | 10 | 20 | GT   | 15 | 9  |
| 167239 | 19 | 7203637 | 7203663 | 3 | 9  | 27 | CCT  | 15 | 6  |
| 167247 | 19 | 7209451 | 7209476 | 2 | 13 | 26 | AC   | 10 | 7  |
| 167261 | 19 | 7220152 | 7220169 | 2 | 9  | 18 | AG   | 21 | 5  |
| 167277 | 19 | 7243570 | 7243597 | 2 | 14 | 28 | CA   | 14 | 10 |
| 167279 | 19 | 7243696 | 7243717 | 2 | 11 | 22 | TC   | 12 | 12 |
| 167282 | 19 | 7244842 | 7244853 | 2 | 6  | 12 | TA   | 18 | 3  |
| 167290 | 19 | 7251575 | 7251588 | 2 | 7  | 14 | AC   | 21 | 3  |
| 167292 | 19 | 7253848 | 7253877 | 2 | 15 | 30 | CT   | 24 | 21 |
| 167295 | 19 | 7255222 | 7255239 | 2 | 9  | 18 | GT   | 12 | 7  |
| 167300 | 19 | 7263630 | 7263655 | 2 | 13 | 26 | GT   | 10 | 13 |
| 167307 | 19 | 7282207 | 7282228 | 2 | 11 | 22 | AC   | 19 | 9  |
| 167310 | 19 | 7290982 | 7291002 | 3 | 7  | 21 | CCT  | 25 | 5  |
| 167311 | 19 | 7291239 | 7291258 | 2 | 10 | 20 | GT   | 11 | 7  |
| 167321 | 19 | 7299678 | 7299701 | 2 | 12 | 24 | GT   | 15 | 8  |
| 167322 | 19 | 7302292 | 7302309 | 2 | 9  | 18 | GT   | 8  | 7  |
| 167325 | 19 | 7310946 | 7310961 | 2 | 8  | 16 | AG   | 16 | 3  |
| 167328 | 19 | 7316644 | 7316673 | 2 | 15 | 30 | AC   | 9  | 8  |
| 167331 | 19 | 7324442 | 7324461 | 4 | 5  | 20 | GCTA | 22 | 4  |
| 167332 | 19 | 7331593 | 7331614 | 2 | 11 | 22 | TG   | 15 | 13 |
| 167334 | 19 | 7334791 | 7334811 | 3 | 7  | 21 | AGG  | 8  | 5  |
| 167335 | 19 | 7335559 | 7335574 | 4 | 4  | 16 | TTTA | 22 | 8  |
| 167336 | 19 | 7339034 | 7339045 | 2 | 6  | 12 | CA   | 31 | 3  |
| 167337 | 19 | 7340437 | 7340452 | 2 | 8  | 16 | GT   | 27 | 5  |
| 167339 | 19 | 7343263 | 7343280 | 2 | 9  | 18 | CA   | 14 | 10 |
| 167340 | 19 | 7345840 | 7345851 | 2 | 6  | 12 | TC   | 25 | 5  |
| 167345 | 19 | 7349561 | 7349602 | 3 | 14 | 42 | TTA  | 9  | 10 |
| 167346 | 19 | 7351155 | 7351168 | 2 | 7  | 14 | AG   | 22 | 4  |
| 167347 | 19 | 7351303 | 7351330 | 2 | 14 | 28 | AC   | 7  | 8  |
| 167356 | 19 | 7354178 | 7354210 | 3 | 11 | 33 | ACA  | 7  | 6  |
| 167358 | 19 | 7354876 | 7354909 | 2 | 17 | 34 | GT   | 10 | 6  |
| 167365 | 19 | 7370162 | 7370203 | 2 | 21 | 42 | TG   | 14 | 16 |



|        |    |         |         |   |    |    |     |    |    |
|--------|----|---------|---------|---|----|----|-----|----|----|
| 167366 | 19 | 7372884 | 7372897 | 2 | 7  | 14 | AC  | 28 | 4  |
| 167368 | 19 | 7389675 | 7389700 | 2 | 13 | 26 | GT  | 22 | 11 |
| 167376 | 19 | 7403817 | 7403834 | 2 | 9  | 18 | CA  | 18 | 6  |
| 167382 | 19 | 7407992 | 7408017 | 2 | 13 | 26 | AC  | 11 | 9  |
| 167386 | 19 | 7415241 | 7415266 | 2 | 13 | 26 | CA  | 20 | 12 |
| 167392 | 19 | 7425647 | 7425674 | 2 | 14 | 28 | GT  | 11 | 9  |
| 167400 | 19 | 7427670 | 7427697 | 2 | 14 | 28 | AG  | 10 | 9  |
| 167401 | 19 | 7427906 | 7427925 | 2 | 10 | 20 | CA  | 16 | 3  |
| 167404 | 19 | 7433385 | 7433399 | 3 | 5  | 15 | CTT | 21 | 5  |
| 167416 | 19 | 7436266 | 7436283 | 2 | 9  | 18 | AC  | 15 | 14 |
| 167417 | 19 | 7436754 | 7436768 | 3 | 5  | 15 | CCA | 23 | 4  |
| 167422 | 19 | 7439468 | 7439485 | 2 | 9  | 18 | GT  | 7  | 9  |
| 167423 | 19 | 7439532 | 7439553 | 2 | 11 | 22 | AC  | 14 | 3  |
| 167427 | 19 | 7444155 | 7444182 | 2 | 14 | 28 | CA  | 20 | 9  |
| 167429 | 19 | 7445563 | 7445586 | 2 | 12 | 24 | CA  | 19 | 6  |
| 167430 | 19 | 7446421 | 7446447 | 3 | 9  | 27 | CCT | 15 | 7  |
| 167431 | 19 | 7446643 | 7446668 | 2 | 13 | 26 | TG  | 23 | 13 |
| 167436 | 19 | 7452233 | 7452250 | 2 | 9  | 18 | CA  | 28 | 4  |
| 167438 | 19 | 7458420 | 7458447 | 2 | 14 | 28 | AC  | 6  | 9  |
| 167440 | 19 | 7461010 | 7461043 | 2 | 17 | 34 | AC  | 9  | 11 |
| 167441 | 19 | 7462157 | 7462178 | 2 | 11 | 22 | AC  | 20 | 8  |
| 167444 | 19 | 7468253 | 7468270 | 2 | 9  | 18 | TG  | 19 | 7  |
| 167445 | 19 | 7469754 | 7469779 | 2 | 13 | 26 | AG  | 17 | 6  |
| 167453 | 19 | 7471940 | 7471951 | 2 | 6  | 12 | CT  | 13 | 6  |
| 167454 | 19 | 7471953 | 7471970 | 2 | 9  | 18 | TC  | 16 | 8  |
| 167459 | 19 | 7476756 | 7476770 | 3 | 5  | 15 | GGA | 24 | 3  |
| 167462 | 19 | 7482555 | 7482566 | 2 | 6  | 12 | GT  | 31 | 3  |
| 167467 | 19 | 7484739 | 7484772 | 2 | 17 | 34 | GT  | 7  | 11 |
| 167468 | 19 | 7484925 | 7484946 | 2 | 11 | 22 | GT  | 18 | 12 |
| 167471 | 19 | 7489144 | 7489161 | 3 | 6  | 18 | GAT | 24 | 3  |
| 167481 | 19 | 7505191 | 7505220 | 2 | 15 | 30 | TG  | 11 | 6  |
| 167482 | 19 | 7514518 | 7514535 | 2 | 9  | 18 | CA  | 17 | 6  |
| 167484 | 19 | 7523176 | 7523203 | 2 | 14 | 28 | GT  | 14 | 5  |
| 167485 | 19 | 7523957 | 7523982 | 2 | 13 | 26 | CA  | 26 | 4  |
| 167488 | 19 | 7526554 | 7526575 | 2 | 11 | 22 | GT  | 28 | 11 |
| 167500 | 19 | 7545295 | 7545315 | 3 | 7  | 21 | TGC | 23 | 6  |
| 167526 | 19 | 7585109 | 7585130 | 2 | 11 | 22 | AC  | 18 | 6  |
| 167537 | 19 | 7611194 | 7611205 | 2 | 6  | 12 | AC  | 16 | 3  |
| 167548 | 19 | 7652618 | 7652635 | 2 | 9  | 18 | TG  | 26 | 7  |
| 167554 | 19 | 7665996 | 7666007 | 2 | 6  | 12 | TG  | 35 | 4  |
| 167556 | 19 | 7672202 | 7672225 | 2 | 12 | 24 | CA  | 12 | 6  |
| 167559 | 19 | 7676403 | 7676418 | 2 | 8  | 16 | TG  | 19 | 3  |
| 167563 | 19 | 7681264 | 7681279 | 2 | 8  | 16 | AC  | 13 | 3  |
| 167568 | 19 | 7697836 | 7697891 | 2 | 28 | 56 | TG  | 7  | 10 |
| 167570 | 19 | 7718976 | 7718999 | 2 | 12 | 24 | AC  | 8  | 7  |
| 167572 | 19 | 7720310 | 7720327 | 3 | 6  | 18 | AAC | 31 | 4  |
| 167585 | 19 | 7766934 | 7766961 | 2 | 14 | 28 | GT  | 25 | 9  |
| 167587 | 19 | 7769322 | 7769335 | 2 | 7  | 14 | AG  | 16 | 5  |
| 167590 | 19 | 7777306 | 7777325 | 2 | 10 | 20 | CA  | 30 | 8  |
| 167591 | 19 | 7779141 | 7779158 | 3 | 6  | 18 | TTA | 21 | 3  |
| 167593 | 19 | 7780194 | 7780211 | 2 | 9  | 18 | CA  | 18 | 20 |

|        |    |         |         |   |    |    |      |    |    |
|--------|----|---------|---------|---|----|----|------|----|----|
| 167598 | 19 | 7794183 | 7794200 | 2 | 9  | 18 | TC   | 28 | 4  |
| 167603 | 19 | 7795966 | 7795983 | 2 | 9  | 18 | AC   | 20 | 8  |
| 167606 | 19 | 7797355 | 7797369 | 3 | 5  | 15 | TTA  | 29 | 3  |
| 167619 | 19 | 7815806 | 7815835 | 3 | 10 | 30 | TGA  | 34 | 11 |
| 167635 | 19 | 7859496 | 7859507 | 2 | 6  | 12 | CT   | 35 | 3  |
| 167642 | 19 | 7868807 | 7868842 | 2 | 18 | 36 | GA   | 8  | 9  |
| 167649 | 19 | 7879170 | 7879187 | 2 | 9  | 18 | TG   | 22 | 3  |
| 167652 | 19 | 7884158 | 7884175 | 2 | 9  | 18 | CA   | 26 | 11 |
| 167657 | 19 | 7899055 | 7899066 | 2 | 6  | 12 | TC   | 20 | 5  |
| 167658 | 19 | 7899069 | 7899080 | 2 | 6  | 12 | TC   | 25 | 7  |
| 167659 | 19 | 7900271 | 7900288 | 3 | 6  | 18 | TTC  | 18 | 3  |
| 167661 | 19 | 7901217 | 7901230 | 2 | 7  | 14 | TG   | 10 | 8  |
| 167671 | 19 | 7926999 | 7927026 | 2 | 14 | 28 | GT   | 16 | 11 |
| 167673 | 19 | 7930281 | 7930300 | 2 | 10 | 20 | CA   | 21 | 10 |
| 167674 | 19 | 7931345 | 7931362 | 3 | 6  | 18 | AGA  | 27 | 5  |
| 167677 | 19 | 7932376 | 7932413 | 2 | 19 | 38 | AG   | 11 | 10 |
| 167687 | 19 | 7956844 | 7956867 | 2 | 12 | 24 | CA   | 20 | 10 |
| 167690 | 19 | 7963199 | 7963228 | 2 | 15 | 30 | GT   | 12 | 9  |
| 167698 | 19 | 7973256 | 7973279 | 2 | 12 | 24 | TG   | 13 | 7  |
| 167699 | 19 | 7973366 | 7973391 | 2 | 13 | 26 | TG   | 18 | 14 |
| 167707 | 19 | 7994487 | 7994520 | 2 | 17 | 34 | AC   | 11 | 9  |
| 167708 | 19 | 7995309 | 7995330 | 2 | 11 | 22 | GT   | 29 | 4  |
| 167712 | 19 | 8006043 | 8006064 | 2 | 11 | 22 | GA   | 23 | 5  |
| 167713 | 19 | 8006103 | 8006123 | 3 | 7  | 21 | GCA  | 20 | 5  |
| 167720 | 19 | 8024121 | 8024134 | 2 | 7  | 14 | CA   | 26 | 3  |
| 167722 | 19 | 8028176 | 8028189 | 2 | 7  | 14 | GA   | 15 | 3  |
| 167726 | 19 | 8038206 | 8038219 | 2 | 7  | 14 | GT   | 20 | 10 |
| 167728 | 19 | 8040452 | 8040463 | 2 | 6  | 12 | GT   | 24 | 4  |
| 167737 | 19 | 8054158 | 8054175 | 2 | 9  | 18 | AC   | 20 | 5  |
| 167742 | 19 | 8057486 | 8057515 | 2 | 15 | 30 | TG   | 9  | 7  |
| 167743 | 19 | 8060305 | 8060324 | 4 | 5  | 20 | AAGA | 20 | 7  |
| 167744 | 19 | 8061972 | 8061989 | 2 | 9  | 18 | AC   | 24 | 4  |
| 167751 | 19 | 8073483 | 8073514 | 4 | 8  | 32 | TAAA | 21 | 4  |
| 167762 | 19 | 8106289 | 8106328 | 2 | 20 | 40 | CA   | 19 | 10 |
| 167763 | 19 | 8110201 | 8110228 | 2 | 14 | 28 | TG   | 14 | 10 |
| 167777 | 19 | 8144961 | 8144975 | 3 | 5  | 15 | GCT  | 26 | 4  |
| 167778 | 19 | 8145027 | 8145047 | 3 | 7  | 21 | GCT  | 22 | 9  |
| 167779 | 19 | 8145737 | 8145757 | 3 | 7  | 21 | TGC  | 28 | 6  |
| 167781 | 19 | 8149212 | 8149232 | 3 | 7  | 21 | TGC  | 21 | 5  |
| 167783 | 19 | 8149607 | 8149624 | 2 | 9  | 18 | CT   | 20 | 4  |
| 167784 | 19 | 8149974 | 8150001 | 2 | 14 | 28 | GA   | 17 | 6  |
| 167787 | 19 | 8154636 | 8154647 | 2 | 6  | 12 | GT   | 21 | 5  |
| 167790 | 19 | 8156835 | 8156884 | 2 | 25 | 50 | TG   | 20 | 12 |
| 167793 | 19 | 8159704 | 8159715 | 2 | 6  | 12 | CA   | 26 | 4  |
| 167794 | 19 | 8160369 | 8160386 | 3 | 6  | 18 | AGA  | 27 | 4  |
| 167803 | 19 | 8178454 | 8178467 | 2 | 7  | 14 | GT   | 18 | 6  |
| 167804 | 19 | 8178470 | 8178483 | 2 | 7  | 14 | GT   | 18 | 9  |
| 167805 | 19 | 8179261 | 8179282 | 2 | 11 | 22 | CA   | 13 | 9  |
| 167806 | 19 | 8179742 | 8179777 | 2 | 18 | 36 | AG   | 10 | 13 |
| 167807 | 19 | 8180776 | 8180791 | 2 | 8  | 16 | GT   | 21 | 4  |
| 167810 | 19 | 8182805 | 8182830 | 2 | 13 | 26 | AC   | 18 | 11 |

|        |    |         |         |   |    |    |      |    |    |
|--------|----|---------|---------|---|----|----|------|----|----|
| 167814 | 19 | 8186952 | 8186973 | 2 | 11 | 22 | CA   | 24 | 12 |
| 167818 | 19 | 8189916 | 8189960 | 3 | 15 | 45 | AAG  | 22 | 6  |
| 167825 | 19 | 8194888 | 8194917 | 3 | 10 | 30 | TTC  | 13 | 9  |
| 167826 | 19 | 8195347 | 8195367 | 3 | 7  | 21 | TGA  | 19 | 6  |
| 167827 | 19 | 8195632 | 8195651 | 4 | 5  | 20 | GCAC | 6  | 5  |
| 167832 | 19 | 8196279 | 8196302 | 4 | 6  | 24 | AAAT | 11 | 4  |
| 167846 | 19 | 8202244 | 8202281 | 2 | 19 | 38 | TG   | 11 | 9  |
| 167855 | 19 | 8207764 | 8207801 | 2 | 19 | 38 | GT   | 13 | 12 |
| 167856 | 19 | 8208304 | 8208321 | 2 | 9  | 18 | GT   | 23 | 9  |
| 167863 | 19 | 8217020 | 8217033 | 2 | 7  | 14 | GT   | 25 | 9  |
| 167865 | 19 | 8219754 | 8219771 | 2 | 9  | 18 | TG   | 18 | 4  |
| 167874 | 19 | 8230050 | 8230064 | 3 | 5  | 15 | ATC  | 28 | 6  |
| 167876 | 19 | 8233783 | 8233802 | 2 | 10 | 20 | AG   | 22 | 8  |
| 167877 | 19 | 8233969 | 8233986 | 3 | 6  | 18 | GCA  | 20 | 4  |
| 167883 | 19 | 8243415 | 8243426 | 2 | 6  | 12 | TG   | 36 | 8  |
| 167891 | 19 | 8271741 | 8271764 | 4 | 6  | 24 | AATA | 11 | 7  |
| 167894 | 19 | 8280897 | 8280911 | 3 | 5  | 15 | AGA  | 26 | 3  |
| 167904 | 19 | 8315315 | 8315344 | 2 | 15 | 30 | AC   | 24 | 7  |
| 167905 | 19 | 8319610 | 8319629 | 2 | 10 | 20 | AC   | 25 | 6  |
| 167909 | 19 | 8322908 | 8322921 | 2 | 7  | 14 | TG   | 26 | 7  |
| 167913 | 19 | 8327375 | 8327401 | 3 | 9  | 27 | CAT  | 21 | 8  |
| 167915 | 19 | 8332577 | 8332592 | 2 | 8  | 16 | TG   | 28 | 6  |
| 167918 | 19 | 8338005 | 8338028 | 3 | 8  | 24 | CAT  | 28 | 10 |
| 167919 | 19 | 8338151 | 8338170 | 4 | 5  | 20 | CTGT | 11 | 6  |
| 167976 | 19 | 8466146 | 8466163 | 2 | 9  | 18 | AC   | 19 | 5  |
| 167986 | 19 | 8500258 | 8500289 | 4 | 8  | 32 | CAGT | 17 | 7  |
| 167994 | 19 | 8520032 | 8520045 | 2 | 7  | 14 | AG   | 23 | 5  |
| 167997 | 19 | 8529971 | 8529990 | 2 | 10 | 20 | TG   | 24 | 3  |
| 168003 | 19 | 8546309 | 8546326 | 2 | 9  | 18 | GT   | 19 | 6  |
| 168004 | 19 | 8546416 | 8546443 | 2 | 14 | 28 | TG   | 13 | 8  |
| 168008 | 19 | 8550641 | 8550652 | 2 | 6  | 12 | AC   | 17 | 3  |
| 168009 | 19 | 8556572 | 8556583 | 2 | 6  | 12 | GT   | 26 | 3  |
| 168013 | 19 | 8566079 | 8566096 | 2 | 9  | 18 | TG   | 25 | 4  |
| 168020 | 19 | 8576886 | 8576905 | 2 | 10 | 20 | TG   | 20 | 5  |
| 168022 | 19 | 8578855 | 8578902 | 3 | 16 | 48 | TCT  | 8  | 7  |
| 168026 | 19 | 8589628 | 8589643 | 2 | 8  | 16 | TG   | 21 | 3  |
| 168032 | 19 | 8601869 | 8601908 | 2 | 20 | 40 | AC   | 10 | 8  |
| 168033 | 19 | 8602461 | 8602490 | 2 | 15 | 30 | CA   | 12 | 11 |
| 168038 | 19 | 8609236 | 8609251 | 2 | 8  | 16 | TG   | 19 | 4  |
| 168040 | 19 | 8611791 | 8611806 | 2 | 8  | 16 | TG   | 24 | 3  |
| 168041 | 19 | 8612300 | 8612317 | 2 | 9  | 18 | GT   | 22 | 4  |
| 168047 | 19 | 8617611 | 8617628 | 2 | 9  | 18 | TC   | 24 | 3  |
| 168048 | 19 | 8617847 | 8617870 | 2 | 12 | 24 | CA   | 9  | 8  |
| 168060 | 19 | 8650897 | 8650920 | 3 | 8  | 24 | AGG  | 30 | 4  |
| 168065 | 19 | 8656232 | 8656246 | 3 | 5  | 15 | TAA  | 27 | 4  |
| 168069 | 19 | 8657762 | 8657795 | 2 | 17 | 34 | CA   | 13 | 8  |
| 168070 | 19 | 8658007 | 8658028 | 2 | 11 | 22 | GT   | 25 | 6  |
| 168071 | 19 | 8659516 | 8659541 | 2 | 13 | 26 | AC   | 13 | 7  |
| 168073 | 19 | 8660220 | 8660235 | 2 | 8  | 16 | AC   | 27 | 5  |
| 168074 | 19 | 8660265 | 8660288 | 2 | 12 | 24 | CA   | 22 | 6  |
| 168077 | 19 | 8660708 | 8660729 | 2 | 11 | 22 | CA   | 19 | 8  |

|        |    |         |         |   |    |    |      |    |    |
|--------|----|---------|---------|---|----|----|------|----|----|
| 168079 | 19 | 8663273 | 8663296 | 2 | 12 | 24 | CT   | 22 | 5  |
| 168081 | 19 | 8663839 | 8663850 | 2 | 6  | 12 | GT   | 18 | 7  |
| 168082 | 19 | 8665557 | 8665586 | 2 | 15 | 30 | AC   | 13 | 11 |
| 168085 | 19 | 8665780 | 8665791 | 2 | 6  | 12 | TC   | 13 | 3  |
| 168091 | 19 | 8669003 | 8669026 | 2 | 12 | 24 | AC   | 10 | 3  |
| 168092 | 19 | 8669964 | 8669987 | 4 | 6  | 24 | TTCT | 27 | 3  |
| 168093 | 19 | 8670992 | 8671009 | 2 | 9  | 18 | TG   | 11 | 11 |
| 168094 | 19 | 8671012 | 8671027 | 2 | 8  | 16 | TG   | 8  | 7  |
| 168096 | 19 | 8672576 | 8672599 | 3 | 8  | 24 | AGG  | 19 | 4  |
| 168099 | 19 | 8676556 | 8676579 | 2 | 12 | 24 | AC   | 23 | 9  |
| 168102 | 19 | 8677924 | 8677941 | 2 | 9  | 18 | CT   | 20 | 5  |
| 168103 | 19 | 8678057 | 8678112 | 2 | 28 | 56 | GA   | 9  | 11 |
| 168107 | 19 | 8679928 | 8679957 | 3 | 10 | 30 | AGA  | 27 | 8  |
| 168111 | 19 | 8685988 | 8686017 | 2 | 15 | 30 | CA   | 11 | 10 |
| 168114 | 19 | 8687003 | 8687026 | 2 | 12 | 24 | CA   | 6  | 6  |
| 168116 | 19 | 8687507 | 8687520 | 2 | 7  | 14 | TG   | 16 | 5  |
| 168118 | 19 | 8689950 | 8689999 | 2 | 25 | 50 | GT   | 8  | 10 |
| 168120 | 19 | 8695008 | 8695019 | 2 | 6  | 12 | GT   | 21 | 3  |
| 168134 | 19 | 8718430 | 8718447 | 3 | 6  | 18 | GCA  | 16 | 4  |
| 168137 | 19 | 8728060 | 8728071 | 2 | 6  | 12 | GT   | 22 | 9  |
| 168139 | 19 | 8731604 | 8731617 | 2 | 7  | 14 | AC   | 29 | 3  |
| 168140 | 19 | 8732371 | 8732396 | 2 | 13 | 26 | GT   | 13 | 5  |
| 168144 | 19 | 8736512 | 8736527 | 2 | 8  | 16 | GT   | 17 | 5  |
| 168148 | 19 | 8743202 | 8743217 | 2 | 8  | 16 | GT   | 24 | 4  |
| 168149 | 19 | 8743674 | 8743711 | 2 | 19 | 38 | GT   | 20 | 9  |
| 168151 | 19 | 8749807 | 8749818 | 2 | 6  | 12 | TG   | 25 | 3  |
| 168152 | 19 | 8750179 | 8750200 | 2 | 11 | 22 | CT   | 18 | 9  |
| 168157 | 19 | 8767711 | 8767725 | 3 | 5  | 15 | TAT  | 23 | 3  |
| 168161 | 19 | 8784619 | 8784634 | 2 | 8  | 16 | TG   | 17 | 3  |
| 168162 | 19 | 8790251 | 8790268 | 3 | 6  | 18 | CAA  | 23 | 4  |
| 168164 | 19 | 8790543 | 8790572 | 3 | 10 | 30 | AGC  | 21 | 3  |
| 168165 | 19 | 8791357 | 8791377 | 3 | 7  | 21 | GCA  | 23 | 4  |
| 168167 | 19 | 8805240 | 8805255 | 2 | 8  | 16 | TG   | 16 | 9  |
| 168169 | 19 | 8820865 | 8820879 | 3 | 5  | 15 | AGC  | 21 | 5  |
| 168171 | 19 | 8822373 | 8822393 | 3 | 7  | 21 | AGA  | 19 | 4  |
| 168179 | 19 | 8832141 | 8832164 | 2 | 12 | 24 | TG   | 21 | 12 |
| 168181 | 19 | 8833788 | 8833835 | 2 | 24 | 48 | AC   | 8  | 7  |
| 168183 | 19 | 8835400 | 8835429 | 2 | 15 | 30 | CA   | 7  | 7  |
| 168189 | 19 | 8840153 | 8840170 | 2 | 9  | 18 | GT   | 23 | 7  |
| 168198 | 19 | 8860911 | 8860924 | 2 | 7  | 14 | TG   | 16 | 7  |
| 168199 | 19 | 8861726 | 8861743 | 3 | 6  | 18 | GCT  | 23 | 4  |
| 168200 | 19 | 8862357 | 8862370 | 2 | 7  | 14 | AG   | 24 | 4  |
| 168209 | 19 | 8872095 | 8872110 | 4 | 4  | 16 | CTGG | 33 | 3  |
| 168211 | 19 | 8872865 | 8872904 | 2 | 20 | 40 | TG   | 9  | 8  |
| 168217 | 19 | 8879615 | 8879642 | 2 | 14 | 28 | TG   | 17 | 10 |
| 168218 | 19 | 8882716 | 8882733 | 2 | 9  | 18 | AC   | 21 | 7  |
| 168221 | 19 | 8885176 | 8885199 | 4 | 6  | 24 | GTGC | 23 | 15 |
| 168224 | 19 | 8900685 | 8900696 | 2 | 6  | 12 | TG   | 34 | 3  |
| 168225 | 19 | 8903535 | 8903566 | 2 | 16 | 32 | TG   | 12 | 10 |
| 168227 | 19 | 8904058 | 8904091 | 2 | 17 | 34 | GT   | 9  | 10 |
| 168233 | 19 | 8908661 | 8908712 | 2 | 26 | 52 | AC   | 6  | 8  |

|        |    |         |         |   |    |    |      |    |    |
|--------|----|---------|---------|---|----|----|------|----|----|
| 168241 | 19 | 8918862 | 8918893 | 2 | 16 | 32 | TG   | 14 | 9  |
| 168246 | 19 | 8932131 | 8932154 | 2 | 12 | 24 | TG   | 10 | 4  |
| 168247 | 19 | 8933145 | 8933172 | 2 | 14 | 28 | TG   | 13 | 9  |
| 168248 | 19 | 8933330 | 8933343 | 2 | 7  | 14 | GT   | 26 | 4  |
| 168252 | 19 | 8939581 | 8939608 | 4 | 7  | 28 | AAAC | 11 | 8  |
| 168259 | 19 | 8949750 | 8949781 | 2 | 16 | 32 | TG   | 9  | 7  |
| 168269 | 19 | 8962127 | 8962148 | 2 | 11 | 22 | AC   | 16 | 10 |
| 168270 | 19 | 8962294 | 8962305 | 2 | 6  | 12 | TG   | 30 | 3  |
| 168271 | 19 | 8964191 | 8964216 | 2 | 13 | 26 | CA   | 14 | 6  |
| 168277 | 19 | 8980454 | 8980473 | 4 | 5  | 20 | TCCC | 7  | 3  |
| 168278 | 19 | 8980759 | 8980772 | 2 | 7  | 14 | TA   | 17 | 5  |
| 168282 | 19 | 8985727 | 8985741 | 3 | 5  | 15 | CTT  | 23 | 3  |
| 168301 | 20 | 5045    | 5056    | 2 | 6  | 12 | AC   | 7  | 5  |
| 168302 | 20 | 6853    | 6866    | 2 | 7  | 14 | TA   | 8  | 3  |
| 168303 | 20 | 7694    | 7717    | 3 | 8  | 24 | TAA  | 15 | 5  |
| 168305 | 20 | 8524    | 8549    | 2 | 13 | 26 | TG   | 13 | 9  |
| 168319 | 20 | 68242   | 68255   | 2 | 7  | 14 | TG   | 17 | 5  |
| 168320 | 20 | 70103   | 70154   | 2 | 26 | 52 | TG   | 7  | 9  |
| 168322 | 20 | 71066   | 71089   | 2 | 12 | 24 | CA   | 14 | 7  |
| 168324 | 20 | 72856   | 72879   | 4 | 6  | 24 | TCTT | 17 | 8  |
| 168328 | 20 | 74405   | 74438   | 2 | 17 | 34 | TC   | 8  | 7  |
| 168329 | 20 | 76897   | 76914   | 2 | 9  | 18 | CA   | 12 | 8  |
| 168332 | 20 | 88551   | 88576   | 2 | 13 | 26 | CA   | 17 | 7  |
| 168338 | 20 | 95817   | 95830   | 2 | 7  | 14 | TG   | 25 | 4  |
| 168339 | 20 | 96015   | 96030   | 2 | 8  | 16 | TG   | 13 | 10 |
| 168340 | 20 | 96033   | 96044   | 2 | 6  | 12 | TG   | 18 | 12 |
| 168341 | 20 | 97646   | 97667   | 2 | 11 | 22 | GT   | 17 | 9  |
| 168342 | 20 | 99015   | 99035   | 3 | 7  | 21 | TCC  | 19 | 3  |
| 168343 | 20 | 99245   | 99274   | 2 | 15 | 30 | GT   | 15 | 15 |
| 168347 | 20 | 113425  | 113438  | 2 | 7  | 14 | CA   | 17 | 5  |
| 168348 | 20 | 115354  | 115383  | 2 | 15 | 30 | GT   | 19 | 7  |
| 168359 | 20 | 133106  | 133117  | 2 | 6  | 12 | AC   | 21 | 8  |
| 168360 | 20 | 133120  | 133131  | 2 | 6  | 12 | AC   | 23 | 5  |
| 168362 | 20 | 134329  | 134356  | 4 | 7  | 28 | TTTC | 24 | 9  |
| 168363 | 20 | 137473  | 137488  | 2 | 8  | 16 | TG   | 21 | 3  |
| 168365 | 20 | 144018  | 144029  | 2 | 6  | 12 | AC   | 20 | 6  |
| 168373 | 20 | 159007  | 159028  | 2 | 11 | 22 | CA   | 20 | 8  |
| 168375 | 20 | 159144  | 159173  | 2 | 15 | 30 | AC   | 13 | 11 |
| 168377 | 20 | 161474  | 161494  | 3 | 7  | 21 | CTC  | 10 | 4  |
| 168378 | 20 | 161551  | 161576  | 2 | 13 | 26 | TC   | 10 | 8  |
| 168384 | 20 | 177454  | 177487  | 2 | 17 | 34 | AC   | 8  | 9  |
| 168386 | 20 | 177989  | 178016  | 2 | 14 | 28 | CT   | 19 | 6  |
| 168387 | 20 | 178045  | 178064  | 2 | 10 | 20 | AC   | 21 | 9  |
| 168392 | 20 | 181725  | 181764  | 2 | 20 | 40 | AC   | 7  | 11 |
| 168395 | 20 | 192042  | 192061  | 2 | 10 | 20 | TG   | 21 | 18 |
| 168398 | 20 | 196357  | 196380  | 2 | 12 | 24 | CA   | 19 | 18 |
| 168414 | 20 | 211562  | 211577  | 2 | 8  | 16 | TG   | 20 | 4  |
| 168419 | 20 | 215612  | 215667  | 2 | 28 | 56 | AG   | 6  | 9  |
| 168420 | 20 | 220392  | 220431  | 4 | 10 | 40 | GCAC | 26 | 11 |
| 168422 | 20 | 221019  | 221036  | 3 | 6  | 18 | GGA  | 17 | 3  |
| 168426 | 20 | 228418  | 228437  | 2 | 10 | 20 | AT   | 9  | 7  |

|        |    |        |        |   |    |    |      |    |    |
|--------|----|--------|--------|---|----|----|------|----|----|
| 168432 | 20 | 239209 | 239232 | 2 | 12 | 24 | TG   | 13 | 11 |
| 168433 | 20 | 239477 | 239494 | 2 | 9  | 18 | TG   | 20 | 9  |
| 168442 | 20 | 245419 | 245438 | 2 | 10 | 20 | GT   | 8  | 6  |
| 168444 | 20 | 250946 | 250965 | 2 | 10 | 20 | CA   | 23 | 6  |
| 168447 | 20 | 255361 | 255376 | 2 | 8  | 16 | AC   | 20 | 4  |
| 168450 | 20 | 258800 | 258817 | 2 | 9  | 18 | AG   | 10 | 3  |
| 168451 | 20 | 259342 | 259367 | 2 | 13 | 26 | AC   | 18 | 8  |
| 168452 | 20 | 261684 | 261707 | 2 | 12 | 24 | GA   | 19 | 8  |
| 168453 | 20 | 261847 | 261867 | 3 | 7  | 21 | CTC  | 20 | 4  |
| 168456 | 20 | 264736 | 264753 | 2 | 9  | 18 | GT   | 29 | 7  |
| 168459 | 20 | 267057 | 267076 | 2 | 10 | 20 | AC   | 11 | 11 |
| 168463 | 20 | 270418 | 270449 | 2 | 16 | 32 | AC   | 14 | 10 |
| 168466 | 20 | 275016 | 275037 | 2 | 11 | 22 | CA   | 16 | 11 |
| 168473 | 20 | 281415 | 281434 | 2 | 10 | 20 | AG   | 19 | 3  |
| 168475 | 20 | 284344 | 284363 | 2 | 10 | 20 | GT   | 23 | 6  |
| 168477 | 20 | 287068 | 287109 | 2 | 21 | 42 | CA   | 9  | 11 |
| 168478 | 20 | 289937 | 289948 | 2 | 6  | 12 | CA   | 22 | 3  |
| 168488 | 20 | 303525 | 303544 | 2 | 10 | 20 | CA   | 19 | 7  |
| 168489 | 20 | 304356 | 304369 | 2 | 7  | 14 | AC   | 18 | 8  |
| 168490 | 20 | 304803 | 304818 | 2 | 8  | 16 | GT   | 27 | 6  |
| 168491 | 20 | 305388 | 305403 | 2 | 8  | 16 | GT   | 24 | 4  |
| 168493 | 20 | 305993 | 306004 | 2 | 6  | 12 | TC   | 20 | 3  |
| 168494 | 20 | 306359 | 306394 | 2 | 18 | 36 | CA   | 11 | 11 |
| 168495 | 20 | 308105 | 308122 | 2 | 9  | 18 | TG   | 18 | 14 |
| 168496 | 20 | 308123 | 308136 | 2 | 7  | 14 | AG   | 19 | 17 |
| 168498 | 20 | 308543 | 308574 | 2 | 16 | 32 | AC   | 10 | 11 |
| 168505 | 20 | 313133 | 313160 | 2 | 14 | 28 | CA   | 20 | 9  |
| 168507 | 20 | 315519 | 315554 | 3 | 12 | 36 | ATG  | 14 | 8  |
| 168510 | 20 | 317136 | 317149 | 2 | 7  | 14 | CA   | 8  | 4  |
| 168525 | 20 | 345923 | 345940 | 2 | 9  | 18 | AC   | 14 | 8  |
| 168527 | 20 | 350634 | 350669 | 2 | 18 | 36 | CA   | 20 | 23 |
| 168528 | 20 | 355102 | 355119 | 2 | 9  | 18 | CA   | 25 | 12 |
| 168529 | 20 | 355347 | 355376 | 3 | 10 | 30 | TCA  | 23 | 7  |
| 168530 | 20 | 358049 | 358064 | 4 | 4  | 16 | AAAT | 7  | 5  |
| 168532 | 20 | 361817 | 361848 | 2 | 16 | 32 | TG   | 11 | 6  |
| 168534 | 20 | 366096 | 366119 | 2 | 12 | 24 | TG   | 19 | 10 |
| 168539 | 20 | 368370 | 368385 | 4 | 4  | 16 | ATTT | 28 | 3  |
| 168542 | 20 | 371148 | 371159 | 2 | 6  | 12 | GT   | 20 | 3  |
| 168548 | 20 | 383740 | 383769 | 2 | 15 | 30 | TG   | 10 | 7  |
| 168554 | 20 | 396462 | 396473 | 2 | 6  | 12 | AC   | 22 | 4  |
| 168556 | 20 | 397853 | 397864 | 2 | 6  | 12 | GT   | 27 | 4  |
| 168560 | 20 | 405118 | 405137 | 2 | 10 | 20 | AC   | 23 | 6  |
| 168564 | 20 | 410846 | 410857 | 2 | 6  | 12 | GT   | 22 | 3  |
| 168567 | 20 | 416245 | 416260 | 2 | 8  | 16 | CA   | 22 | 5  |
| 168571 | 20 | 427722 | 427747 | 2 | 13 | 26 | CA   | 15 | 4  |
| 168573 | 20 | 431646 | 431659 | 2 | 7  | 14 | CA   | 27 | 9  |
| 168581 | 20 | 437612 | 437639 | 2 | 14 | 28 | CA   | 18 | 11 |
| 168596 | 20 | 485795 | 485810 | 2 | 8  | 16 | AG   | 21 | 6  |
| 168599 | 20 | 491307 | 491322 | 2 | 8  | 16 | AC   | 20 | 4  |
| 168601 | 20 | 492132 | 492157 | 2 | 13 | 26 | GT   | 27 | 7  |
| 168603 | 20 | 495089 | 495104 | 2 | 8  | 16 | TG   | 19 | 3  |

|        |    |        |        |   |    |    |      |    |    |
|--------|----|--------|--------|---|----|----|------|----|----|
| 168610 | 20 | 510332 | 510349 | 2 | 9  | 18 | CA   | 23 | 8  |
| 168612 | 20 | 510757 | 510770 | 2 | 7  | 14 | GT   | 26 | 5  |
| 168614 | 20 | 516511 | 516526 | 2 | 8  | 16 | GT   | 17 | 5  |
| 168617 | 20 | 519884 | 519895 | 2 | 6  | 12 | TG   | 28 | 4  |
| 168618 | 20 | 519898 | 519911 | 2 | 7  | 14 | TG   | 23 | 5  |
| 168621 | 20 | 527794 | 527807 | 2 | 7  | 14 | TG   | 15 | 9  |
| 168622 | 20 | 528149 | 528166 | 2 | 9  | 18 | CA   | 32 | 9  |
| 168624 | 20 | 528921 | 528936 | 2 | 8  | 16 | TG   | 20 | 3  |
| 168625 | 20 | 529150 | 529161 | 2 | 6  | 12 | GA   | 20 | 3  |
| 168626 | 20 | 531736 | 531775 | 4 | 10 | 40 | TTTC | 18 | 11 |
| 168627 | 20 | 532386 | 532415 | 2 | 15 | 30 | TG   | 19 | 8  |
| 168629 | 20 | 533661 | 533688 | 2 | 14 | 28 | TG   | 16 | 5  |
| 168630 | 20 | 537747 | 537760 | 2 | 7  | 14 | CT   | 26 | 3  |
| 168634 | 20 | 543808 | 543845 | 2 | 19 | 38 | TG   | 12 | 9  |
| 168636 | 20 | 544359 | 544388 | 2 | 15 | 30 | TG   | 14 | 8  |
| 168666 | 20 | 588555 | 588566 | 2 | 6  | 12 | TG   | 23 | 4  |
| 168675 | 20 | 595115 | 595148 | 2 | 17 | 34 | CA   | 7  | 9  |
| 168680 | 20 | 600476 | 600503 | 2 | 14 | 28 | TG   | 13 | 12 |
| 168681 | 20 | 600679 | 600724 | 2 | 23 | 46 | GT   | 9  | 11 |
| 168682 | 20 | 602083 | 602094 | 2 | 6  | 12 | CT   | 22 | 4  |
| 168692 | 20 | 611174 | 611185 | 2 | 6  | 12 | TG   | 11 | 3  |
| 168695 | 20 | 615417 | 615450 | 2 | 17 | 34 | TG   | 7  | 11 |
| 168696 | 20 | 615542 | 615567 | 2 | 13 | 26 | TG   | 10 | 10 |
| 168708 | 20 | 624834 | 624849 | 2 | 8  | 16 | GT   | 20 | 4  |
| 168711 | 20 | 627611 | 627624 | 2 | 7  | 14 | CA   | 27 | 5  |
| 168712 | 20 | 628278 | 628289 | 2 | 6  | 12 | CA   | 31 | 3  |
| 168715 | 20 | 635810 | 635823 | 2 | 7  | 14 | TG   | 26 | 4  |
| 168717 | 20 | 636263 | 636274 | 2 | 6  | 12 | GT   | 25 | 3  |
| 168720 | 20 | 637964 | 637981 | 2 | 9  | 18 | TG   | 21 | 8  |
| 168721 | 20 | 638133 | 638144 | 2 | 6  | 12 | TG   | 27 | 3  |
| 168730 | 20 | 650928 | 650943 | 2 | 8  | 16 | CA   | 20 | 5  |
| 168738 | 20 | 655556 | 655597 | 2 | 21 | 42 | CA   | 8  | 8  |
| 168739 | 20 | 655707 | 655726 | 2 | 10 | 20 | AC   | 13 | 8  |
| 168742 | 20 | 660480 | 660497 | 2 | 9  | 18 | GT   | 25 | 5  |
| 168743 | 20 | 660889 | 660910 | 2 | 11 | 22 | CA   | 27 | 9  |
| 168744 | 20 | 661010 | 661021 | 2 | 6  | 12 | AC   | 28 | 3  |
| 168747 | 20 | 661809 | 661830 | 2 | 11 | 22 | TG   | 24 | 8  |
| 168749 | 20 | 663417 | 663436 | 2 | 10 | 20 | CA   | 12 | 13 |
| 168751 | 20 | 664217 | 664230 | 2 | 7  | 14 | TG   | 24 | 7  |
| 168756 | 20 | 664807 | 664818 | 2 | 6  | 12 | TG   | 16 | 4  |
| 168757 | 20 | 665212 | 665229 | 2 | 9  | 18 | AC   | 19 | 3  |
| 168763 | 20 | 668191 | 668238 | 2 | 24 | 48 | AC   | 9  | 8  |
| 168767 | 20 | 669800 | 669813 | 2 | 7  | 14 | GT   | 32 | 5  |
| 168775 | 20 | 684085 | 684122 | 2 | 19 | 38 | CA   | 18 | 9  |
| 168776 | 20 | 685971 | 685988 | 3 | 6  | 18 | TCT  | 15 | 7  |
| 168778 | 20 | 686614 | 686641 | 2 | 14 | 28 | TC   | 15 | 10 |
| 168780 | 20 | 687010 | 687023 | 2 | 7  | 14 | CA   | 16 | 9  |
| 168788 | 20 | 692386 | 692400 | 3 | 5  | 15 | AAG  | 20 | 7  |
| 168794 | 20 | 694239 | 694264 | 2 | 13 | 26 | CA   | 18 | 13 |
| 168795 | 20 | 694635 | 694660 | 2 | 13 | 26 | GT   | 16 | 8  |
| 168797 | 20 | 695120 | 695141 | 2 | 11 | 22 | TG   | 16 | 5  |

|        |    |        |        |   |    |    |      |    |    |
|--------|----|--------|--------|---|----|----|------|----|----|
| 168799 | 20 | 695889 | 695902 | 2 | 7  | 14 | TC   | 25 | 3  |
| 168800 | 20 | 697379 | 697394 | 2 | 8  | 16 | TG   | 15 | 12 |
| 168808 | 20 | 705889 | 705904 | 2 | 8  | 16 | TG   | 31 | 10 |
| 168809 | 20 | 706381 | 706407 | 3 | 9  | 27 | GAG  | 28 | 6  |
| 168811 | 20 | 706641 | 706660 | 2 | 10 | 20 | CA   | 15 | 5  |
| 168813 | 20 | 708144 | 708173 | 2 | 15 | 30 | GT   | 19 | 12 |
| 168817 | 20 | 713393 | 713408 | 2 | 8  | 16 | CA   | 21 | 11 |
| 168818 | 20 | 714350 | 714361 | 2 | 6  | 12 | GT   | 29 | 3  |
| 168820 | 20 | 717980 | 718005 | 2 | 13 | 26 | GA   | 20 | 7  |
| 168821 | 20 | 721285 | 721300 | 2 | 8  | 16 | TG   | 30 | 4  |
| 168822 | 20 | 721925 | 721938 | 2 | 7  | 14 | CA   | 17 | 6  |
| 168823 | 20 | 722249 | 722276 | 2 | 14 | 28 | AC   | 14 | 6  |
| 168824 | 20 | 723566 | 723593 | 2 | 14 | 28 | AC   | 16 | 11 |
| 168825 | 20 | 723707 | 723734 | 2 | 14 | 28 | AC   | 9  | 7  |
| 168827 | 20 | 727733 | 727746 | 2 | 7  | 14 | AC   | 26 | 4  |
| 168829 | 20 | 732213 | 732224 | 2 | 6  | 12 | GT   | 18 | 4  |
| 168834 | 20 | 734908 | 734955 | 4 | 12 | 48 | AAAG | 10 | 8  |
| 168835 | 20 | 736036 | 736047 | 2 | 6  | 12 | AG   | 30 | 4  |
| 168840 | 20 | 740914 | 740949 | 2 | 18 | 36 | CA   | 11 | 9  |
| 168846 | 20 | 750234 | 750259 | 2 | 13 | 26 | AC   | 19 | 5  |
| 168847 | 20 | 751424 | 751437 | 2 | 7  | 14 | AT   | 23 | 4  |
| 168853 | 20 | 757578 | 757589 | 2 | 6  | 12 | GT   | 10 | 3  |
| 168855 | 20 | 760020 | 760037 | 2 | 9  | 18 | AC   | 23 | 3  |
| 168859 | 20 | 762973 | 763002 | 2 | 15 | 30 | GT   | 16 | 13 |
| 168860 | 20 | 763639 | 763660 | 2 | 11 | 22 | AC   | 13 | 5  |
| 168862 | 20 | 766166 | 766193 | 2 | 14 | 28 | AC   | 13 | 11 |
| 168869 | 20 | 769533 | 769548 | 2 | 8  | 16 | TA   | 11 | 4  |
| 168870 | 20 | 770730 | 770755 | 2 | 13 | 26 | AC   | 23 | 10 |
| 168878 | 20 | 792595 | 792626 | 2 | 16 | 32 | CA   | 13 | 5  |
| 168879 | 20 | 793042 | 793055 | 2 | 7  | 14 | CA   | 21 | 3  |
| 168883 | 20 | 796311 | 796322 | 2 | 6  | 12 | CA   | 25 | 5  |
| 168884 | 20 | 796328 | 796343 | 2 | 8  | 16 | AC   | 25 | 3  |
| 168891 | 20 | 800240 | 800253 | 2 | 7  | 14 | GT   | 24 | 4  |
| 168893 | 20 | 803166 | 803195 | 3 | 10 | 30 | GCA  | 30 | 9  |
| 168894 | 20 | 807217 | 807228 | 2 | 6  | 12 | GT   | 23 | 6  |
| 168895 | 20 | 810514 | 810539 | 2 | 13 | 26 | GT   | 9  | 8  |
| 168896 | 20 | 811257 | 811282 | 2 | 13 | 26 | AC   | 13 | 7  |
| 168897 | 20 | 811517 | 811538 | 2 | 11 | 22 | AC   | 14 | 7  |
| 168904 | 20 | 817821 | 817854 | 2 | 17 | 34 | CA   | 7  | 10 |
| 168909 | 20 | 820310 | 820329 | 2 | 10 | 20 | GT   | 28 | 9  |
| 168910 | 20 | 821930 | 821953 | 2 | 12 | 24 | AC   | 18 | 8  |
| 168912 | 20 | 824170 | 824211 | 2 | 21 | 42 | AC   | 17 | 14 |
| 168914 | 20 | 826568 | 826589 | 2 | 11 | 22 | CA   | 28 | 3  |
| 168916 | 20 | 828294 | 828311 | 2 | 9  | 18 | AC   | 9  | 10 |
| 168918 | 20 | 831513 | 831542 | 2 | 15 | 30 | CA   | 10 | 9  |
| 168922 | 20 | 833566 | 833586 | 3 | 7  | 21 | GCT  | 30 | 8  |
| 168924 | 20 | 837687 | 837700 | 2 | 7  | 14 | TC   | 17 | 4  |
| 168925 | 20 | 837702 | 837717 | 2 | 8  | 16 | CA   | 19 | 3  |
| 168926 | 20 | 838231 | 838266 | 2 | 18 | 36 | GT   | 10 | 12 |
| 168928 | 20 | 839873 | 839899 | 3 | 9  | 27 | GGA  | 20 | 4  |
| 168930 | 20 | 843295 | 843306 | 2 | 6  | 12 | GC   | 28 | 5  |



|        |    |         |         |   |    |    |      |    |    |
|--------|----|---------|---------|---|----|----|------|----|----|
| 168935 | 20 | 849092  | 849135  | 2 | 22 | 44 | GT   | 12 | 15 |
| 168936 | 20 | 849303  | 849320  | 2 | 9  | 18 | AC   | 12 | 3  |
| 168944 | 20 | 852699  | 852718  | 2 | 10 | 20 | CA   | 13 | 5  |
| 168946 | 20 | 852933  | 852952  | 2 | 10 | 20 | AC   | 7  | 6  |
| 168949 | 20 | 854573  | 854590  | 2 | 9  | 18 | TG   | 11 | 8  |
| 168950 | 20 | 854711  | 854764  | 2 | 27 | 54 | AC   | 8  | 13 |
| 168952 | 20 | 857372  | 857383  | 2 | 6  | 12 | TC   | 25 | 4  |
| 168953 | 20 | 857505  | 857524  | 2 | 10 | 20 | AG   | 11 | 7  |
| 168960 | 20 | 875336  | 875349  | 2 | 7  | 14 | TG   | 28 | 3  |
| 168964 | 20 | 878558  | 878577  | 2 | 10 | 20 | AC   | 16 | 8  |
| 168972 | 20 | 884426  | 884439  | 2 | 7  | 14 | TG   | 25 | 3  |
| 168973 | 20 | 887942  | 887975  | 2 | 17 | 34 | TC   | 13 | 7  |
| 168975 | 20 | 890100  | 890115  | 2 | 8  | 16 | CA   | 18 | 8  |
| 168979 | 20 | 893495  | 893508  | 2 | 7  | 14 | CA   | 10 | 5  |
| 168980 | 20 | 894888  | 894905  | 2 | 9  | 18 | AT   | 18 | 5  |
| 168981 | 20 | 895427  | 895444  | 2 | 9  | 18 | GA   | 21 | 10 |
| 168988 | 20 | 913880  | 913897  | 3 | 6  | 18 | CCT  | 14 | 3  |
| 168992 | 20 | 921020  | 921039  | 2 | 10 | 20 | AC   | 13 | 5  |
| 168995 | 20 | 924774  | 924791  | 2 | 9  | 18 | CA   | 23 | 6  |
| 168997 | 20 | 925439  | 925454  | 2 | 8  | 16 | CA   | 19 | 11 |
| 168998 | 20 | 926126  | 926147  | 2 | 11 | 22 | AC   | 25 | 8  |
| 169000 | 20 | 927936  | 927969  | 2 | 17 | 34 | GT   | 14 | 12 |
| 169002 | 20 | 928813  | 928846  | 2 | 17 | 34 | CA   | 8  | 12 |
| 169003 | 20 | 930218  | 930247  | 2 | 15 | 30 | CA   | 17 | 8  |
| 169006 | 20 | 931932  | 931949  | 2 | 9  | 18 | TC   | 19 | 8  |
| 169011 | 20 | 935462  | 935485  | 2 | 12 | 24 | GT   | 19 | 19 |
| 169013 | 20 | 936401  | 936412  | 2 | 6  | 12 | TG   | 24 | 5  |
| 169019 | 20 | 947865  | 947880  | 2 | 8  | 16 | CA   | 22 | 5  |
| 169022 | 20 | 948206  | 948221  | 2 | 8  | 16 | TG   | 18 | 8  |
| 169023 | 20 | 952824  | 952863  | 2 | 20 | 40 | AC   | 16 | 13 |
| 169029 | 20 | 965462  | 965489  | 2 | 14 | 28 | AC   | 17 | 12 |
| 169030 | 20 | 970198  | 970213  | 4 | 4  | 16 | AAAG | 17 | 3  |
| 169031 | 20 | 970288  | 970308  | 3 | 7  | 21 | TTA  | 7  | 5  |
| 169032 | 20 | 978598  | 978611  | 2 | 7  | 14 | AC   | 23 | 3  |
| 169040 | 20 | 989518  | 989577  | 4 | 15 | 60 | AAGA | 15 | 10 |
| 169041 | 20 | 990630  | 990665  | 2 | 18 | 36 | AC   | 10 | 7  |
| 169043 | 20 | 992444  | 992481  | 2 | 19 | 38 | GT   | 8  | 6  |
| 169046 | 20 | 1000889 | 1000902 | 2 | 7  | 14 | AC   | 23 | 5  |
| 169048 | 20 | 1002980 | 1002995 | 2 | 8  | 16 | AC   | 27 | 6  |
| 169056 | 20 | 1021178 | 1021239 | 2 | 31 | 62 | GT   | 6  | 10 |
| 169057 | 20 | 1028079 | 1028096 | 2 | 9  | 18 | AG   | 23 | 3  |
| 169060 | 20 | 1032334 | 1032359 | 2 | 13 | 26 | GT   | 11 | 7  |
| 169062 | 20 | 1034455 | 1034500 | 2 | 23 | 46 | TC   | 8  | 7  |
| 169064 | 20 | 1039204 | 1039235 | 2 | 16 | 32 | AC   | 16 | 13 |
| 169065 | 20 | 1041151 | 1041170 | 2 | 10 | 20 | GT   | 13 | 4  |
| 169067 | 20 | 1041602 | 1041619 | 2 | 9  | 18 | TG   | 8  | 4  |
| 169070 | 20 | 1041810 | 1041833 | 2 | 12 | 24 | TG   | 12 | 8  |
| 169071 | 20 | 1041935 | 1041950 | 2 | 8  | 16 | GA   | 17 | 7  |
| 169075 | 20 | 1045132 | 1045171 | 2 | 20 | 40 | TG   | 8  | 12 |
| 169078 | 20 | 1051178 | 1051189 | 2 | 6  | 12 | TG   | 26 | 3  |
| 169080 | 20 | 1053825 | 1053836 | 2 | 6  | 12 | CA   | 29 | 4  |

|        |    |         |         |   |    |    |      |    |    |
|--------|----|---------|---------|---|----|----|------|----|----|
| 169083 | 20 | 1060469 | 1060480 | 2 | 6  | 12 | AT   | 28 | 3  |
| 169087 | 20 | 1061888 | 1061907 | 4 | 5  | 20 | AGAA | 14 | 6  |
| 169089 | 20 | 1062330 | 1062344 | 3 | 5  | 15 | TGT  | 17 | 9  |
| 169091 | 20 | 1062616 | 1062641 | 2 | 13 | 26 | GA   | 11 | 6  |
| 169092 | 20 | 1062684 | 1062707 | 2 | 12 | 24 | GA   | 14 | 10 |
| 169093 | 20 | 1062891 | 1062920 | 2 | 15 | 30 | GT   | 13 | 6  |
| 169094 | 20 | 1063032 | 1063049 | 2 | 9  | 18 | TG   | 14 | 4  |
| 169099 | 20 | 1063382 | 1063413 | 2 | 16 | 32 | GT   | 15 | 15 |
| 169100 | 20 | 1065433 | 1065478 | 2 | 23 | 46 | CA   | 22 | 9  |
| 169102 | 20 | 1072977 | 1072994 | 3 | 6  | 18 | TTA  | 12 | 6  |
| 169103 | 20 | 1072997 | 1073011 | 3 | 5  | 15 | ATT  | 14 | 6  |
| 169109 | 20 | 1085541 | 1085558 | 2 | 9  | 18 | CT   | 20 | 6  |
| 169110 | 20 | 1086849 | 1086864 | 2 | 8  | 16 | GT   | 19 | 8  |
| 169116 | 20 | 1098965 | 1098982 | 2 | 9  | 18 | CA   | 20 | 8  |
| 169118 | 20 | 1099628 | 1099655 | 2 | 14 | 28 | TC   | 16 | 12 |
| 169119 | 20 | 1099701 | 1099722 | 2 | 11 | 22 | CA   | 16 | 9  |
| 169122 | 20 | 1100647 | 1100664 | 2 | 9  | 18 | CT   | 18 | 10 |
| 169124 | 20 | 1107077 | 1107110 | 2 | 17 | 34 | TG   | 17 | 12 |
| 169125 | 20 | 1107263 | 1107274 | 2 | 6  | 12 | AC   | 35 | 3  |
| 169126 | 20 | 1109189 | 1109206 | 2 | 9  | 18 | AC   | 10 | 8  |
| 169129 | 20 | 1121208 | 1121249 | 2 | 21 | 42 | GT   | 16 | 14 |
| 169130 | 20 | 1121599 | 1121610 | 2 | 6  | 12 | AC   | 26 | 3  |
| 169145 | 20 | 1141452 | 1141469 | 2 | 9  | 18 | AC   | 26 | 5  |
| 169149 | 20 | 1147427 | 1147440 | 2 | 7  | 14 | CT   | 19 | 7  |
| 169156 | 20 | 1152924 | 1152955 | 2 | 16 | 32 | TG   | 11 | 8  |
| 169157 | 20 | 1154338 | 1154367 | 2 | 15 | 30 | TG   | 16 | 6  |
| 169158 | 20 | 1154510 | 1154527 | 2 | 9  | 18 | TG   | 28 | 3  |
| 169160 | 20 | 1157538 | 1157549 | 2 | 6  | 12 | CA   | 19 | 6  |
| 169162 | 20 | 1159103 | 1159124 | 2 | 11 | 22 | CA   | 21 | 4  |
| 169171 | 20 | 1175370 | 1175389 | 2 | 10 | 20 | CT   | 19 | 8  |
| 169174 | 20 | 1180314 | 1180341 | 2 | 14 | 28 | CA   | 26 | 7  |
| 169175 | 20 | 1183064 | 1183089 | 2 | 13 | 26 | TG   | 7  | 7  |
| 169178 | 20 | 1186598 | 1186619 | 2 | 11 | 22 | GT   | 18 | 5  |
| 169179 | 20 | 1188909 | 1188956 | 2 | 24 | 48 | GT   | 14 | 8  |
| 169182 | 20 | 1196782 | 1196799 | 2 | 9  | 18 | AC   | 19 | 7  |
| 169184 | 20 | 1199543 | 1199566 | 2 | 12 | 24 | GT   | 19 | 8  |
| 169187 | 20 | 1202047 | 1202062 | 2 | 8  | 16 | TG   | 24 | 3  |
| 169188 | 20 | 1202227 | 1202256 | 2 | 15 | 30 | CA   | 8  | 6  |
| 169189 | 20 | 1202331 | 1202344 | 2 | 7  | 14 | CA   | 9  | 12 |
| 169190 | 20 | 1202345 | 1202356 | 2 | 6  | 12 | CG   | 10 | 14 |
| 169191 | 20 | 1202667 | 1202706 | 4 | 10 | 40 | AAAG | 13 | 8  |
| 169194 | 20 | 1204827 | 1204850 | 3 | 8  | 24 | CTC  | 15 | 5  |
| 169201 | 20 | 1222053 | 1222068 | 2 | 8  | 16 | AG   | 22 | 3  |
| 169203 | 20 | 1223650 | 1223671 | 2 | 11 | 22 | TG   | 20 | 5  |
| 169206 | 20 | 1227602 | 1227617 | 2 | 8  | 16 | TG   | 32 | 6  |
| 169208 | 20 | 1237712 | 1237735 | 2 | 12 | 24 | AC   | 20 | 10 |
| 169209 | 20 | 1238160 | 1238195 | 2 | 18 | 36 | AC   | 18 | 15 |
| 169212 | 20 | 1244229 | 1244258 | 2 | 15 | 30 | TG   | 10 | 8  |
| 169217 | 20 | 1251955 | 1251976 | 2 | 11 | 22 | TG   | 12 | 9  |
| 169220 | 20 | 1257473 | 1257492 | 2 | 10 | 20 | TG   | 22 | 8  |
| 169227 | 20 | 1261561 | 1261584 | 2 | 12 | 24 | GT   | 17 | 11 |

|        |    |         |         |   |    |    |      |    |    |
|--------|----|---------|---------|---|----|----|------|----|----|
| 169230 | 20 | 1265726 | 1265740 | 3 | 5  | 15 | GGA  | 27 | 3  |
| 169231 | 20 | 1265816 | 1265843 | 2 | 14 | 28 | AC   | 8  | 9  |
| 169247 | 20 | 1301474 | 1301485 | 2 | 6  | 12 | TG   | 28 | 4  |
| 169248 | 20 | 1301834 | 1301879 | 2 | 23 | 46 | TG   | 6  | 7  |
| 169254 | 20 | 1308499 | 1308510 | 2 | 6  | 12 | GT   | 27 | 8  |
| 169255 | 20 | 1308554 | 1308571 | 2 | 9  | 18 | CA   | 25 | 6  |
| 169262 | 20 | 1313450 | 1313463 | 2 | 7  | 14 | AC   | 19 | 7  |
| 169264 | 20 | 1319296 | 1319313 | 2 | 9  | 18 | CA   | 24 | 8  |
| 169265 | 20 | 1320881 | 1320892 | 2 | 6  | 12 | CA   | 22 | 5  |
| 169269 | 20 | 1323998 | 1324017 | 2 | 10 | 20 | TG   | 21 | 4  |
| 169274 | 20 | 1326253 | 1326272 | 2 | 10 | 20 | GT   | 15 | 5  |
| 169275 | 20 | 1326299 | 1326310 | 2 | 6  | 12 | GA   | 11 | 3  |
| 169276 | 20 | 1326432 | 1326449 | 2 | 9  | 18 | AC   | 19 | 6  |
| 169278 | 20 | 1329791 | 1329804 | 2 | 7  | 14 | CA   | 18 | 6  |
| 169279 | 20 | 1329806 | 1329821 | 2 | 8  | 16 | AC   | 23 | 4  |
| 169280 | 20 | 1330664 | 1330685 | 2 | 11 | 22 | AC   | 17 | 5  |
| 169281 | 20 | 1330853 | 1330882 | 2 | 15 | 30 | AC   | 10 | 5  |
| 169285 | 20 | 1331331 | 1331348 | 2 | 9  | 18 | TG   | 11 | 7  |
| 169286 | 20 | 1332470 | 1332499 | 2 | 15 | 30 | AC   | 13 | 9  |
| 169287 | 20 | 1333117 | 1333138 | 2 | 11 | 22 | TG   | 19 | 9  |
| 169290 | 20 | 1334553 | 1334568 | 2 | 8  | 16 | CA   | 17 | 7  |
| 169295 | 20 | 1337494 | 1337513 | 2 | 10 | 20 | CT   | 7  | 6  |
| 169296 | 20 | 1337741 | 1337758 | 2 | 9  | 18 | CA   | 24 | 10 |
| 169303 | 20 | 1350401 | 1350428 | 2 | 14 | 28 | AC   | 12 | 4  |
| 169310 | 20 | 1367468 | 1367513 | 2 | 23 | 46 | TC   | 14 | 11 |
| 169311 | 20 | 1369979 | 1369992 | 2 | 7  | 14 | CA   | 26 | 4  |
| 169313 | 20 | 1372377 | 1372404 | 2 | 14 | 28 | AC   | 17 | 6  |
| 169314 | 20 | 1372858 | 1372887 | 2 | 15 | 30 | GA   | 9  | 8  |
| 169319 | 20 | 1379708 | 1379722 | 3 | 5  | 15 | CAG  | 20 | 4  |
| 169328 | 20 | 1403618 | 1403650 | 3 | 11 | 33 | TAT  | 8  | 7  |
| 169329 | 20 | 1403783 | 1403800 | 3 | 6  | 18 | GCT  | 16 | 3  |
| 169330 | 20 | 1403867 | 1403896 | 2 | 15 | 30 | TC   | 7  | 10 |
| 169334 | 20 | 1420457 | 1420476 | 2 | 10 | 20 | TG   | 25 | 6  |
| 169337 | 20 | 1421543 | 1421568 | 2 | 13 | 26 | GT   | 10 | 9  |
| 169340 | 20 | 1423757 | 1423770 | 2 | 7  | 14 | TC   | 30 | 3  |
| 169341 | 20 | 1424152 | 1424175 | 2 | 12 | 24 | TG   | 13 | 11 |
| 169349 | 20 | 1433657 | 1433668 | 2 | 6  | 12 | AC   | 32 | 4  |
| 169352 | 20 | 1436075 | 1436114 | 2 | 20 | 40 | AC   | 10 | 10 |
| 169353 | 20 | 1440070 | 1440093 | 2 | 12 | 24 | TG   | 10 | 7  |
| 169354 | 20 | 1440480 | 1440491 | 2 | 6  | 12 | GT   | 12 | 8  |
| 169360 | 20 | 1447577 | 1447590 | 2 | 7  | 14 | AC   | 25 | 4  |
| 169372 | 20 | 1477013 | 1477030 | 3 | 6  | 18 | CAT  | 23 | 3  |
| 169373 | 20 | 1478030 | 1478045 | 2 | 8  | 16 | CA   | 25 | 6  |
| 169377 | 20 | 1481102 | 1481116 | 3 | 5  | 15 | AAG  | 20 | 8  |
| 169380 | 20 | 1497829 | 1497842 | 2 | 7  | 14 | AC   | 20 | 6  |
| 169386 | 20 | 1515251 | 1515274 | 2 | 12 | 24 | GA   | 13 | 6  |
| 169387 | 20 | 1520125 | 1520138 | 2 | 7  | 14 | AG   | 19 | 3  |
| 169389 | 20 | 1523288 | 1523309 | 2 | 11 | 22 | TG   | 14 | 18 |
| 169397 | 20 | 1549985 | 1549998 | 2 | 7  | 14 | TG   | 22 | 9  |
| 169400 | 20 | 1554452 | 1554467 | 4 | 4  | 16 | CATA | 26 | 3  |
| 169408 | 20 | 1568199 | 1568216 | 2 | 9  | 18 | GT   | 20 | 7  |

|        |    |         |         |   |    |    |      |    |    |
|--------|----|---------|---------|---|----|----|------|----|----|
| 169409 | 20 | 1568280 | 1568297 | 2 | 9  | 18 | CA   | 23 | 4  |
| 169411 | 20 | 1572500 | 1572515 | 2 | 8  | 16 | GT   | 21 | 6  |
| 169414 | 20 | 1576197 | 1576218 | 2 | 11 | 22 | GT   | 17 | 7  |
| 169415 | 20 | 1577021 | 1577044 | 3 | 8  | 24 | AGG  | 23 | 6  |
| 169419 | 20 | 1581528 | 1581547 | 2 | 10 | 20 | CT   | 19 | 7  |
| 169420 | 20 | 1581606 | 1581643 | 2 | 19 | 38 | CA   | 8  | 8  |
| 169424 | 20 | 1583521 | 1583538 | 2 | 9  | 18 | CA   | 21 | 6  |
| 169428 | 20 | 1597589 | 1597612 | 2 | 12 | 24 | CA   | 19 | 10 |
| 169429 | 20 | 1598239 | 1598250 | 2 | 6  | 12 | TC   | 28 | 3  |
| 169431 | 20 | 1602248 | 1602265 | 3 | 6  | 18 | TAC  | 19 | 6  |
| 169434 | 20 | 1615350 | 1615365 | 2 | 8  | 16 | TC   | 22 | 10 |
| 169443 | 20 | 1621481 | 1621498 | 2 | 9  | 18 | TG   | 14 | 6  |
| 169445 | 20 | 1621841 | 1621882 | 2 | 21 | 42 | CA   | 6  | 9  |
| 169449 | 20 | 1626280 | 1626297 | 2 | 9  | 18 | AC   | 26 | 6  |
| 169450 | 20 | 1627407 | 1627430 | 2 | 12 | 24 | TC   | 16 | 8  |
| 169453 | 20 | 1643134 | 1643145 | 2 | 6  | 12 | CA   | 31 | 4  |
| 169457 | 20 | 1663706 | 1663720 | 3 | 5  | 15 | TTC  | 13 | 3  |
| 169462 | 20 | 1669427 | 1669448 | 2 | 11 | 22 | AC   | 13 | 13 |
| 169464 | 20 | 1673461 | 1673476 | 2 | 8  | 16 | TC   | 15 | 3  |
| 169467 | 20 | 1674893 | 1674910 | 2 | 9  | 18 | TG   | 15 | 6  |
| 169470 | 20 | 1675998 | 1676027 | 2 | 15 | 30 | GT   | 9  | 6  |
| 169471 | 20 | 1676487 | 1676506 | 4 | 5  | 20 | AGAA | 16 | 8  |
| 169472 | 20 | 1676966 | 1676985 | 2 | 10 | 20 | CA   | 10 | 6  |
| 169477 | 20 | 1705598 | 1705609 | 2 | 6  | 12 | GA   | 23 | 7  |
| 169480 | 20 | 1710706 | 1710741 | 2 | 18 | 36 | GT   | 15 | 14 |
| 169488 | 20 | 1719945 | 1719960 | 2 | 8  | 16 | AC   | 19 | 4  |
| 169497 | 20 | 1731067 | 1731078 | 2 | 6  | 12 | AC   | 16 | 4  |
| 169499 | 20 | 1731553 | 1731567 | 3 | 5  | 15 | TTA  | 14 | 6  |
| 169502 | 20 | 1736392 | 1736403 | 2 | 6  | 12 | GT   | 21 | 5  |
| 169506 | 20 | 1744129 | 1744149 | 3 | 7  | 21 | GAA  | 19 | 5  |
| 169516 | 20 | 1756681 | 1756696 | 4 | 4  | 16 | TTTC | 14 | 5  |
| 169528 | 20 | 1775594 | 1775605 | 2 | 6  | 12 | TG   | 19 | 6  |
| 169529 | 20 | 1776739 | 1776753 | 3 | 5  | 15 | TTG  | 26 | 4  |
| 169530 | 20 | 1777213 | 1777246 | 2 | 17 | 34 | CA   | 15 | 12 |
| 169531 | 20 | 1777768 | 1777783 | 4 | 4  | 16 | AAAT | 23 | 3  |
| 169535 | 20 | 1779046 | 1779061 | 2 | 8  | 16 | AC   | 14 | 5  |
| 169538 | 20 | 1781283 | 1781300 | 2 | 9  | 18 | AC   | 17 | 11 |
| 169539 | 20 | 1782371 | 1782384 | 2 | 7  | 14 | CT   | 25 | 5  |
| 169542 | 20 | 1784198 | 1784219 | 2 | 11 | 22 | TG   | 17 | 6  |
| 169543 | 20 | 1785332 | 1785349 | 2 | 9  | 18 | CA   | 22 | 6  |
| 169546 | 20 | 1794891 | 1794920 | 2 | 15 | 30 | TG   | 11 | 14 |
| 169557 | 20 | 1809446 | 1809460 | 3 | 5  | 15 | ATC  | 32 | 3  |
| 169571 | 20 | 1844812 | 1844825 | 2 | 7  | 14 | AC   | 17 | 8  |
| 169576 | 20 | 1855056 | 1855077 | 2 | 11 | 22 | GT   | 25 | 8  |
| 169578 | 20 | 1855669 | 1855680 | 2 | 6  | 12 | CA   | 18 | 8  |
| 169583 | 20 | 1858028 | 1858048 | 3 | 7  | 21 | TCT  | 23 | 5  |
| 169586 | 20 | 1858427 | 1858462 | 2 | 18 | 36 | AC   | 8  | 9  |
| 169590 | 20 | 1876016 | 1876045 | 2 | 15 | 30 | GT   | 8  | 6  |
| 169595 | 20 | 1891101 | 1891140 | 2 | 20 | 40 | AC   | 9  | 8  |
| 169601 | 20 | 1918170 | 1918189 | 2 | 10 | 20 | CT   | 22 | 9  |
| 169605 | 20 | 1927549 | 1927566 | 2 | 9  | 18 | CA   | 8  | 3  |

|        |    |         |         |   |    |    |      |    |    |
|--------|----|---------|---------|---|----|----|------|----|----|
| 169607 | 20 | 1932485 | 1932496 | 2 | 6  | 12 | TA   | 11 | 3  |
| 169610 | 20 | 1952509 | 1952544 | 2 | 18 | 36 | CA   | 16 | 13 |
| 169614 | 20 | 1960881 | 1960895 | 3 | 5  | 15 | GCT  | 26 | 7  |
| 169617 | 20 | 1961918 | 1961937 | 4 | 5  | 20 | TGTT | 17 | 8  |
| 169620 | 20 | 1965749 | 1965762 | 2 | 7  | 14 | GT   | 22 | 6  |
| 169621 | 20 | 1970250 | 1970269 | 2 | 10 | 20 | TG   | 21 | 5  |
| 169622 | 20 | 1971387 | 1971401 | 3 | 5  | 15 | ATT  | 16 | 3  |
| 169627 | 20 | 1975202 | 1975221 | 2 | 10 | 20 | CA   | 20 | 5  |
| 169628 | 20 | 1977609 | 1977624 | 2 | 8  | 16 | AC   | 19 | 6  |
| 169629 | 20 | 1978635 | 1978648 | 2 | 7  | 14 | GT   | 26 | 4  |
| 169630 | 20 | 1978875 | 1978892 | 2 | 9  | 18 | CA   | 18 | 6  |
| 169633 | 20 | 1981535 | 1981550 | 2 | 8  | 16 | CA   | 28 | 5  |
| 169637 | 20 | 1983009 | 1983022 | 2 | 7  | 14 | GT   | 15 | 3  |
| 169640 | 20 | 1986258 | 1986273 | 2 | 8  | 16 | TG   | 15 | 5  |
| 169642 | 20 | 1986975 | 1986988 | 2 | 7  | 14 | CA   | 20 | 10 |
| 169643 | 20 | 1987415 | 1987426 | 2 | 6  | 12 | AC   | 24 | 18 |
| 169644 | 20 | 1987428 | 1987443 | 2 | 8  | 16 | CA   | 18 | 12 |
| 169649 | 20 | 1990284 | 1990317 | 2 | 17 | 34 | CA   | 12 | 11 |
| 169656 | 20 | 1993790 | 1993803 | 2 | 7  | 14 | GT   | 16 | 7  |
| 169657 | 20 | 1993965 | 1993984 | 2 | 10 | 20 | AC   | 17 | 5  |
| 169659 | 20 | 1995330 | 1995347 | 2 | 9  | 18 | CT   | 23 | 3  |
| 169662 | 20 | 1997628 | 1997655 | 2 | 14 | 28 | TG   | 13 | 10 |
| 169664 | 20 | 1998765 | 1998788 | 2 | 12 | 24 | AC   | 24 | 3  |
| 169665 | 20 | 1999051 | 1999072 | 2 | 11 | 22 | TG   | 9  | 4  |
| 169667 | 20 | 2000312 | 2000333 | 2 | 11 | 22 | TG   | 14 | 9  |
| 169682 | 20 | 2019688 | 2019717 | 2 | 15 | 30 | AC   | 15 | 8  |
| 169683 | 20 | 2019884 | 2019897 | 2 | 7  | 14 | CA   | 23 | 3  |
| 169684 | 20 | 2020486 | 2020497 | 2 | 6  | 12 | TG   | 22 | 3  |
| 169685 | 20 | 2020629 | 2020644 | 2 | 8  | 16 | GA   | 12 | 9  |
| 169687 | 20 | 2020815 | 2020842 | 2 | 14 | 28 | CA   | 17 | 8  |
| 169691 | 20 | 2026712 | 2026725 | 2 | 7  | 14 | AG   | 27 | 5  |
| 169692 | 20 | 2028207 | 2028240 | 2 | 17 | 34 | GT   | 16 | 8  |
| 169693 | 20 | 2028432 | 2028451 | 2 | 10 | 20 | AC   | 18 | 4  |
| 169695 | 20 | 2029744 | 2029763 | 2 | 10 | 20 | GT   | 16 | 13 |
| 169696 | 20 | 2029804 | 2029835 | 2 | 16 | 32 | AC   | 12 | 9  |
| 169698 | 20 | 2035390 | 2035403 | 2 | 7  | 14 | TG   | 21 | 8  |
| 169699 | 20 | 2035405 | 2035422 | 2 | 9  | 18 | GT   | 17 | 6  |
| 169702 | 20 | 2036016 | 2036033 | 2 | 9  | 18 | CA   | 13 | 8  |
| 169704 | 20 | 2039777 | 2039848 | 4 | 18 | 72 | GATA | 11 | 9  |
| 169706 | 20 | 2040816 | 2040845 | 2 | 15 | 30 | TG   | 9  | 6  |
| 169710 | 20 | 2049027 | 2049038 | 2 | 6  | 12 | AC   | 20 | 4  |
| 169712 | 20 | 2051758 | 2051781 | 2 | 12 | 24 | TG   | 18 | 8  |
| 169713 | 20 | 2052446 | 2052478 | 3 | 11 | 33 | AAT  | 12 | 7  |
| 169714 | 20 | 2053192 | 2053221 | 2 | 15 | 30 | AC   | 12 | 7  |
| 169715 | 20 | 2053444 | 2053477 | 2 | 17 | 34 | TG   | 18 | 7  |
| 169716 | 20 | 2054230 | 2054247 | 2 | 9  | 18 | AC   | 16 | 7  |
| 169718 | 20 | 2055947 | 2055960 | 2 | 7  | 14 | GT   | 13 | 6  |
| 169720 | 20 | 2057425 | 2057450 | 2 | 13 | 26 | AC   | 8  | 9  |
| 169729 | 20 | 2060972 | 2060987 | 4 | 4  | 16 | TCCT | 11 | 9  |
| 169736 | 20 | 2063119 | 2063132 | 2 | 7  | 14 | CT   | 11 | 3  |
| 169738 | 20 | 2064394 | 2064407 | 2 | 7  | 14 | GT   | 7  | 3  |

|        |    |         |         |   |    |    |      |    |    |
|--------|----|---------|---------|---|----|----|------|----|----|
| 169739 | 20 | 2064408 | 2064423 | 2 | 8  | 16 | GA   | 25 | 10 |
| 169757 | 20 | 2087208 | 2087237 | 2 | 15 | 30 | CA   | 10 | 11 |
| 169764 | 20 | 2094423 | 2094438 | 2 | 8  | 16 | CA   | 30 | 4  |
| 169766 | 20 | 2095269 | 2095292 | 2 | 12 | 24 | GT   | 16 | 5  |
| 169768 | 20 | 2097036 | 2097057 | 2 | 11 | 22 | GT   | 17 | 10 |
| 169774 | 20 | 2101302 | 2101335 | 2 | 17 | 34 | GT   | 8  | 8  |
| 169775 | 20 | 2103260 | 2103273 | 2 | 7  | 14 | CA   | 31 | 5  |
| 169777 | 20 | 2105463 | 2105486 | 4 | 6  | 24 | TGCC | 28 | 10 |
| 169779 | 20 | 2113003 | 2113030 | 2 | 14 | 28 | AC   | 19 | 8  |
| 169788 | 20 | 2120063 | 2120092 | 2 | 15 | 30 | AC   | 17 | 11 |
| 169801 | 20 | 2137049 | 2137060 | 2 | 6  | 12 | CA   | 21 | 3  |
| 169802 | 20 | 2138163 | 2138180 | 2 | 9  | 18 | CA   | 19 | 12 |
| 169803 | 20 | 2138768 | 2138785 | 3 | 6  | 18 | CTG  | 15 | 4  |
| 169804 | 20 | 2138838 | 2138853 | 4 | 4  | 16 | TGAC | 14 | 4  |
| 169805 | 20 | 2138896 | 2138910 | 3 | 5  | 15 | AGG  | 8  | 3  |
| 169806 | 20 | 2139578 | 2139610 | 3 | 11 | 33 | TTC  | 18 | 9  |
| 169807 | 20 | 2139771 | 2139791 | 3 | 7  | 21 | CTC  | 18 | 6  |
| 169808 | 20 | 2139835 | 2139864 | 2 | 15 | 30 | CT   | 8  | 4  |
| 169809 | 20 | 2139971 | 2139982 | 2 | 6  | 12 | AC   | 16 | 6  |
| 169810 | 20 | 2140076 | 2140099 | 3 | 8  | 24 | CTC  | 13 | 3  |
| 169814 | 20 | 2143383 | 2143422 | 2 | 20 | 40 | TG   | 17 | 10 |
| 169819 | 20 | 2146556 | 2146570 | 3 | 5  | 15 | CCT  | 15 | 5  |
| 169820 | 20 | 2146571 | 2146585 | 3 | 5  | 15 | CTT  | 10 | 4  |
| 169821 | 20 | 2146978 | 2146989 | 2 | 6  | 12 | CA   | 25 | 10 |
| 169823 | 20 | 2147345 | 2147358 | 2 | 7  | 14 | GT   | 7  | 6  |
| 169824 | 20 | 2148029 | 2148048 | 4 | 5  | 20 | CCCT | 6  | 3  |
| 169828 | 20 | 2150574 | 2150591 | 2 | 9  | 18 | AC   | 19 | 5  |
| 169829 | 20 | 2150618 | 2150631 | 2 | 7  | 14 | CA   | 22 | 5  |
| 169837 | 20 | 2161579 | 2161590 | 2 | 6  | 12 | TG   | 7  | 6  |
| 169840 | 20 | 2165338 | 2165359 | 2 | 11 | 22 | GT   | 6  | 7  |
| 169841 | 20 | 2165520 | 2165533 | 2 | 7  | 14 | GA   | 27 | 4  |
| 169845 | 20 | 2168322 | 2168347 | 2 | 13 | 26 | CA   | 12 | 5  |
| 169849 | 20 | 2172590 | 2172615 | 2 | 13 | 26 | CA   | 11 | 4  |
| 169851 | 20 | 2173360 | 2173373 | 2 | 7  | 14 | GT   | 7  | 4  |
| 169853 | 20 | 2173630 | 2173644 | 3 | 5  | 15 | CCT  | 9  | 4  |
| 169855 | 20 | 2174004 | 2174019 | 4 | 4  | 16 | CTGC | 20 | 4  |
| 169857 | 20 | 2174141 | 2174164 | 3 | 8  | 24 | GGA  | 11 | 8  |
| 169858 | 20 | 2174450 | 2174477 | 2 | 14 | 28 | TG   | 19 | 8  |
| 169860 | 20 | 2175411 | 2175436 | 2 | 13 | 26 | GT   | 6  | 3  |
| 169862 | 20 | 2176751 | 2176768 | 3 | 6  | 18 | TTC  | 22 | 7  |
| 169866 | 20 | 2178166 | 2178189 | 2 | 12 | 24 | TC   | 20 | 8  |
| 169871 | 20 | 2181764 | 2181799 | 2 | 18 | 36 | GT   | 12 | 11 |
| 169873 | 20 | 2181991 | 2182016 | 2 | 13 | 26 | TG   | 14 | 7  |
| 169877 | 20 | 2183059 | 2183076 | 2 | 9  | 18 | CT   | 23 | 5  |
| 169880 | 20 | 2183973 | 2183990 | 2 | 9  | 18 | AC   | 10 | 4  |
| 169883 | 20 | 2184855 | 2184878 | 2 | 12 | 24 | CA   | 20 | 7  |
| 169884 | 20 | 2187521 | 2187540 | 2 | 10 | 20 | AC   | 14 | 7  |
| 169888 | 20 | 2189967 | 2189986 | 2 | 10 | 20 | CA   | 8  | 6  |
| 169889 | 20 | 2198811 | 2198824 | 2 | 7  | 14 | TG   | 22 | 6  |
| 169891 | 20 | 2200760 | 2200785 | 2 | 13 | 26 | AC   | 11 | 9  |
| 169892 | 20 | 2201643 | 2201698 | 2 | 28 | 56 | GT   | 7  | 8  |

|        |    |         |         |   |    |    |     |    |    |
|--------|----|---------|---------|---|----|----|-----|----|----|
| 169893 | 20 | 2204792 | 2204823 | 2 | 16 | 32 | TG  | 7  | 7  |
| 169896 | 20 | 2213240 | 2213251 | 2 | 6  | 12 | AC  | 31 | 4  |
| 169899 | 20 | 2214451 | 2214470 | 2 | 10 | 20 | CA  | 16 | 8  |
| 169901 | 20 | 2215260 | 2215279 | 2 | 10 | 20 | TG  | 14 | 5  |
| 169910 | 20 | 2233806 | 2233865 | 2 | 30 | 60 | AC  | 8  | 9  |
| 169919 | 20 | 2245506 | 2245559 | 2 | 27 | 54 | TG  | 13 | 15 |
| 169921 | 20 | 2248557 | 2248568 | 2 | 6  | 12 | GT  | 28 | 4  |
| 169922 | 20 | 2249724 | 2249747 | 2 | 12 | 24 | AC  | 7  | 3  |
| 169926 | 20 | 2252673 | 2252694 | 2 | 11 | 22 | CA  | 14 | 10 |
| 169928 | 20 | 2254307 | 2254324 | 2 | 9  | 18 | GT  | 21 | 5  |
| 169933 | 20 | 2258281 | 2258308 | 2 | 14 | 28 | TG  | 19 | 5  |
| 169935 | 20 | 2260003 | 2260036 | 2 | 17 | 34 | CA  | 14 | 8  |
| 169942 | 20 | 2262203 | 2262230 | 2 | 14 | 28 | GT  | 12 | 10 |
| 169945 | 20 | 2262948 | 2262961 | 2 | 7  | 14 | GT  | 30 | 3  |
| 169947 | 20 | 2263417 | 2263452 | 2 | 18 | 36 | GA  | 10 | 5  |
| 169949 | 20 | 2265732 | 2265745 | 2 | 7  | 14 | AG  | 11 | 3  |
| 169953 | 20 | 2270489 | 2270502 | 2 | 7  | 14 | AC  | 19 | 4  |
| 169957 | 20 | 2273252 | 2273281 | 2 | 15 | 30 | AC  | 12 | 12 |
| 169959 | 20 | 2273945 | 2273956 | 2 | 6  | 12 | TG  | 27 | 3  |
| 169960 | 20 | 2274636 | 2274653 | 3 | 6  | 18 | GAG | 23 | 3  |
| 169962 | 20 | 2278303 | 2278326 | 2 | 12 | 24 | TG  | 17 | 6  |
| 169963 | 20 | 2278545 | 2278558 | 2 | 7  | 14 | CA  | 22 | 7  |
| 169965 | 20 | 2278763 | 2278776 | 2 | 7  | 14 | AG  | 23 | 4  |
| 169980 | 20 | 2292213 | 2292240 | 2 | 14 | 28 | AC  | 14 | 9  |
| 169981 | 20 | 2292290 | 2292307 | 2 | 9  | 18 | AC  | 20 | 4  |
| 169983 | 20 | 2295329 | 2295348 | 2 | 10 | 20 | AC  | 8  | 4  |
| 169984 | 20 | 2300742 | 2300761 | 2 | 10 | 20 | AC  | 20 | 3  |
| 169987 | 20 | 2301010 | 2301033 | 2 | 12 | 24 | TG  | 13 | 6  |
| 169990 | 20 | 2303599 | 2303619 | 3 | 7  | 21 | GAG | 11 | 5  |
| 169993 | 20 | 2304017 | 2304032 | 2 | 8  | 16 | TG  | 11 | 8  |
| 169995 | 20 | 2304488 | 2304505 | 2 | 9  | 18 | CA  | 18 | 5  |
| 169998 | 20 | 2307040 | 2307067 | 2 | 14 | 28 | CA  | 18 | 12 |
| 169999 | 20 | 2307119 | 2307136 | 2 | 9  | 18 | GT  | 18 | 3  |
| 170000 | 20 | 2307264 | 2307275 | 2 | 6  | 12 | CA  | 18 | 3  |
| 170001 | 20 | 2307845 | 2307860 | 2 | 8  | 16 | AC  | 19 | 7  |
| 170002 | 20 | 2307971 | 2307996 | 2 | 13 | 26 | AC  | 8  | 5  |
| 170003 | 20 | 2308209 | 2308232 | 3 | 8  | 24 | AGA | 22 | 5  |
| 170004 | 20 | 2308493 | 2308512 | 2 | 10 | 20 | AC  | 20 | 4  |
| 170006 | 20 | 2309759 | 2309774 | 2 | 8  | 16 | AC  | 15 | 8  |
| 170008 | 20 | 2310271 | 2310286 | 2 | 8  | 16 | CA  | 16 | 3  |
| 170012 | 20 | 2311936 | 2311959 | 2 | 12 | 24 | CA  | 16 | 6  |
| 170017 | 20 | 2313897 | 2313916 | 2 | 10 | 20 | TG  | 14 | 9  |
| 170029 | 20 | 2320553 | 2320566 | 2 | 7  | 14 | GT  | 25 | 4  |
| 170030 | 20 | 2320772 | 2320783 | 2 | 6  | 12 | CA  | 33 | 3  |
| 170033 | 20 | 2321109 | 2321130 | 2 | 11 | 22 | AG  | 18 | 6  |
| 170040 | 20 | 2327935 | 2327964 | 2 | 15 | 30 | AC  | 14 | 13 |
| 170048 | 20 | 2334825 | 2334838 | 2 | 7  | 14 | GA  | 24 | 4  |
| 170049 | 20 | 2334840 | 2334853 | 2 | 7  | 14 | AG  | 22 | 3  |
| 170061 | 20 | 2352992 | 2353009 | 2 | 9  | 18 | CA  | 17 | 5  |
| 170062 | 20 | 2353383 | 2353396 | 2 | 7  | 14 | AC  | 17 | 11 |
| 170063 | 20 | 2353399 | 2353414 | 2 | 8  | 16 | AC  | 16 | 9  |

|        |    |         |         |   |    |    |      |    |    |
|--------|----|---------|---------|---|----|----|------|----|----|
| 170065 | 20 | 2357561 | 2357576 | 2 | 8  | 16 | CA   | 24 | 4  |
| 170067 | 20 | 2361189 | 2361224 | 2 | 18 | 36 | AC   | 14 | 8  |
| 170068 | 20 | 2364197 | 2364212 | 2 | 8  | 16 | GA   | 26 | 3  |
| 170072 | 20 | 2370143 | 2370170 | 2 | 14 | 28 | GA   | 15 | 9  |
| 170075 | 20 | 2370375 | 2370404 | 2 | 15 | 30 | AG   | 7  | 8  |
| 170085 | 20 | 2376803 | 2376818 | 2 | 8  | 16 | CT   | 21 | 5  |
| 170087 | 20 | 2377083 | 2377104 | 2 | 11 | 22 | TC   | 16 | 3  |
| 170088 | 20 | 2380170 | 2380201 | 2 | 16 | 32 | AC   | 6  | 6  |
| 170090 | 20 | 2382866 | 2382879 | 2 | 7  | 14 | TG   | 23 | 5  |
| 170096 | 20 | 2387412 | 2387432 | 3 | 7  | 21 | GAA  | 22 | 5  |
| 170099 | 20 | 2390050 | 2390065 | 4 | 4  | 16 | TTTC | 27 | 4  |
| 170101 | 20 | 2393561 | 2393580 | 2 | 10 | 20 | AG   | 23 | 4  |
| 170103 | 20 | 2404447 | 2404472 | 2 | 13 | 26 | TC   | 21 | 10 |
| 170107 | 20 | 2409178 | 2409197 | 2 | 10 | 20 | TG   | 22 | 7  |
| 170108 | 20 | 2410460 | 2410485 | 2 | 13 | 26 | GT   | 16 | 7  |
| 170115 | 20 | 2422002 | 2422023 | 2 | 11 | 22 | GA   | 26 | 6  |
| 170118 | 20 | 2425558 | 2425571 | 2 | 7  | 14 | TG   | 25 | 4  |
| 170120 | 20 | 2430018 | 2430032 | 3 | 5  | 15 | GCA  | 24 | 3  |
| 170122 | 20 | 2432086 | 2432117 | 2 | 16 | 32 | GT   | 19 | 9  |
| 170123 | 20 | 2432245 | 2432256 | 2 | 6  | 12 | CA   | 25 | 3  |
| 170124 | 20 | 2432360 | 2432381 | 2 | 11 | 22 | AC   | 18 | 12 |
| 170128 | 20 | 2439048 | 2439093 | 2 | 23 | 46 | AC   | 10 | 9  |
| 170135 | 20 | 2447121 | 2447138 | 2 | 9  | 18 | GT   | 25 | 8  |
| 170136 | 20 | 2447180 | 2447193 | 2 | 7  | 14 | TG   | 29 | 3  |
| 170137 | 20 | 2447392 | 2447423 | 4 | 8  | 32 | ATCT | 15 | 12 |
| 170140 | 20 | 2449873 | 2449896 | 2 | 12 | 24 | CT   | 20 | 11 |
| 170141 | 20 | 2451829 | 2451870 | 2 | 21 | 42 | TC   | 12 | 9  |
| 170143 | 20 | 2460054 | 2460079 | 2 | 13 | 26 | CA   | 10 | 11 |
| 170147 | 20 | 2469147 | 2469172 | 2 | 13 | 26 | AC   | 15 | 10 |
| 170154 | 20 | 2476202 | 2476233 | 2 | 16 | 32 | TG   | 16 | 8  |
| 170156 | 20 | 2478632 | 2478651 | 2 | 10 | 20 | TG   | 14 | 3  |
| 170157 | 20 | 2479029 | 2479040 | 2 | 6  | 12 | GT   | 18 | 8  |
| 170158 | 20 | 2479399 | 2479412 | 2 | 7  | 14 | GT   | 23 | 3  |
| 170159 | 20 | 2479898 | 2479915 | 2 | 9  | 18 | CT   | 13 | 4  |
| 170163 | 20 | 2483350 | 2483363 | 2 | 7  | 14 | CA   | 18 | 7  |
| 170164 | 20 | 2484407 | 2484430 | 4 | 6  | 24 | GTAT | 11 | 7  |
| 170169 | 20 | 2488439 | 2488492 | 2 | 27 | 54 | CA   | 8  | 12 |
| 170171 | 20 | 2501774 | 2501794 | 3 | 7  | 21 | ATT  | 10 | 9  |
| 170174 | 20 | 2506231 | 2506260 | 2 | 15 | 30 | CA   | 18 | 6  |
| 170175 | 20 | 2506406 | 2506425 | 2 | 10 | 20 | GA   | 8  | 4  |
| 170176 | 20 | 2506976 | 2506987 | 2 | 6  | 12 | CA   | 22 | 18 |
| 170177 | 20 | 2510264 | 2510279 | 2 | 8  | 16 | CA   | 23 | 7  |
| 170186 | 20 | 2536282 | 2536295 | 2 | 7  | 14 | GT   | 25 | 3  |
| 170187 | 20 | 2537303 | 2537318 | 2 | 8  | 16 | GT   | 15 | 5  |
| 170188 | 20 | 2541452 | 2541479 | 4 | 7  | 28 | ATGG | 23 | 4  |
| 170195 | 20 | 2551250 | 2551279 | 2 | 15 | 30 | TG   | 20 | 13 |
| 170197 | 20 | 2558512 | 2558537 | 2 | 13 | 26 | GT   | 22 | 7  |
| 170205 | 20 | 2565812 | 2565849 | 2 | 19 | 38 | CA   | 15 | 12 |
| 170206 | 20 | 2566757 | 2566780 | 2 | 12 | 24 | GT   | 10 | 10 |
| 170212 | 20 | 2575539 | 2575552 | 2 | 7  | 14 | AC   | 26 | 9  |
| 170214 | 20 | 2580580 | 2580599 | 2 | 10 | 20 | GT   | 12 | 4  |



|        |    |         |         |   |    |    |      |    |    |
|--------|----|---------|---------|---|----|----|------|----|----|
| 170215 | 20 | 2582707 | 2582722 | 2 | 8  | 16 | AC   | 20 | 4  |
| 170217 | 20 | 2589201 | 2589216 | 2 | 8  | 16 | CA   | 10 | 4  |
| 170218 | 20 | 2589669 | 2589700 | 2 | 16 | 32 | AC   | 8  | 8  |
| 170219 | 20 | 2591194 | 2591211 | 2 | 9  | 18 | AG   | 15 | 6  |
| 170223 | 20 | 2602132 | 2602147 | 2 | 8  | 16 | AG   | 25 | 5  |
| 170224 | 20 | 2605624 | 2605643 | 2 | 10 | 20 | AC   | 19 | 4  |
| 170226 | 20 | 2605857 | 2605876 | 2 | 10 | 20 | GA   | 16 | 6  |
| 170228 | 20 | 2611021 | 2611064 | 2 | 22 | 44 | TG   | 10 | 9  |
| 170229 | 20 | 2621060 | 2621077 | 2 | 9  | 18 | CA   | 12 | 4  |
| 170233 | 20 | 2627995 | 2628030 | 2 | 18 | 36 | AC   | 16 | 9  |
| 170234 | 20 | 2635005 | 2635020 | 4 | 4  | 16 | ATGG | 24 | 3  |
| 170238 | 20 | 2648511 | 2648524 | 2 | 7  | 14 | TG   | 9  | 5  |
| 170240 | 20 | 2651644 | 2651659 | 2 | 8  | 16 | CA   | 23 | 5  |
| 170243 | 20 | 2658413 | 2658452 | 2 | 20 | 40 | AC   | 7  | 6  |
| 170249 | 20 | 2683340 | 2683357 | 2 | 9  | 18 | CA   | 20 | 3  |
| 170252 | 20 | 2684006 | 2684033 | 2 | 14 | 28 | GA   | 9  | 9  |
| 170253 | 20 | 2687222 | 2687251 | 2 | 15 | 30 | CA   | 17 | 6  |
| 170254 | 20 | 2694577 | 2694612 | 2 | 18 | 36 | GT   | 18 | 13 |
| 170258 | 20 | 2702366 | 2702383 | 3 | 6  | 18 | AAT  | 22 | 7  |
| 170267 | 20 | 2730565 | 2730600 | 4 | 9  | 36 | TAGA | 13 | 4  |
| 170268 | 20 | 2730933 | 2730952 | 2 | 10 | 20 | GT   | 11 | 7  |
| 170279 | 20 | 2765085 | 2765096 | 2 | 6  | 12 | GT   | 21 | 3  |
| 170284 | 20 | 2786606 | 2786625 | 2 | 10 | 20 | GT   | 21 | 3  |
| 170285 | 20 | 2791646 | 2791663 | 2 | 9  | 18 | AC   | 27 | 8  |
| 170295 | 20 | 2818920 | 2818951 | 2 | 16 | 32 | GT   | 10 | 10 |
| 170296 | 20 | 2820402 | 2820419 | 2 | 9  | 18 | TC   | 18 | 5  |
| 170299 | 20 | 2821326 | 2821343 | 2 | 9  | 18 | TG   | 16 | 5  |
| 170306 | 20 | 2847240 | 2847263 | 2 | 12 | 24 | GT   | 12 | 8  |
| 170312 | 20 | 2849500 | 2849533 | 2 | 17 | 34 | CA   | 10 | 6  |
| 170314 | 20 | 2852884 | 2852895 | 2 | 6  | 12 | GT   | 33 | 3  |
| 170315 | 20 | 2854233 | 2854250 | 2 | 9  | 18 | CT   | 22 | 4  |
| 170317 | 20 | 2856366 | 2856395 | 2 | 15 | 30 | GA   | 13 | 7  |
| 170318 | 20 | 2856579 | 2856620 | 2 | 21 | 42 | CA   | 13 | 12 |
| 170320 | 20 | 2856867 | 2856888 | 2 | 11 | 22 | TG   | 13 | 9  |
| 170322 | 20 | 2857305 | 2857320 | 4 | 4  | 16 | AACA | 30 | 3  |
| 170323 | 20 | 2858969 | 2859008 | 2 | 20 | 40 | TG   | 8  | 8  |
| 170328 | 20 | 2861949 | 2861966 | 2 | 9  | 18 | AC   | 17 | 7  |
| 170330 | 20 | 2864801 | 2864816 | 4 | 4  | 16 | AAAG | 6  | 4  |
| 170334 | 20 | 2869037 | 2869054 | 2 | 9  | 18 | AC   | 18 | 6  |
| 170335 | 20 | 2869408 | 2869429 | 2 | 11 | 22 | TC   | 17 | 8  |
| 170339 | 20 | 2871205 | 2871218 | 2 | 7  | 14 | CA   | 16 | 3  |
| 170341 | 20 | 2872097 | 2872114 | 3 | 6  | 18 | GAA  | 16 | 3  |
| 170343 | 20 | 2872341 | 2872386 | 2 | 23 | 46 | TC   | 11 | 8  |
| 170344 | 20 | 2872436 | 2872457 | 2 | 11 | 22 | AG   | 12 | 6  |
| 170345 | 20 | 2872574 | 2872593 | 2 | 10 | 20 | TG   | 8  | 5  |
| 170347 | 20 | 2873625 | 2873654 | 2 | 15 | 30 | TG   | 22 | 7  |
| 170348 | 20 | 2873804 | 2873817 | 2 | 7  | 14 | CA   | 23 | 5  |
| 170349 | 20 | 2873872 | 2873889 | 2 | 9  | 18 | CA   | 19 | 15 |
| 170350 | 20 | 2874198 | 2874229 | 2 | 16 | 32 | GT   | 21 | 8  |
| 170352 | 20 | 2876516 | 2876529 | 2 | 7  | 14 | CT   | 22 | 3  |
| 170353 | 20 | 2884594 | 2884623 | 2 | 15 | 30 | GT   | 12 | 13 |

|        |    |         |         |   |    |    |      |    |    |
|--------|----|---------|---------|---|----|----|------|----|----|
| 170355 | 20 | 2888356 | 2888367 | 2 | 6  | 12 | CA   | 22 | 8  |
| 170357 | 20 | 2889002 | 2889035 | 2 | 17 | 34 | AG   | 17 | 9  |
| 170358 | 20 | 2891846 | 2891857 | 2 | 6  | 12 | AC   | 27 | 3  |
| 170362 | 20 | 2893118 | 2893129 | 2 | 6  | 12 | CA   | 12 | 7  |
| 170363 | 20 | 2893241 | 2893274 | 2 | 17 | 34 | CA   | 6  | 7  |
| 170365 | 20 | 2893475 | 2893500 | 2 | 13 | 26 | GA   | 8  | 7  |
| 170367 | 20 | 2895815 | 2895826 | 2 | 6  | 12 | AG   | 27 | 4  |
| 170369 | 20 | 2899341 | 2899354 | 2 | 7  | 14 | CA   | 25 | 6  |
| 170370 | 20 | 2899422 | 2899437 | 2 | 8  | 16 | CA   | 14 | 8  |
| 170380 | 20 | 2907229 | 2907278 | 2 | 25 | 50 | GT   | 8  | 12 |
| 170381 | 20 | 2907413 | 2907426 | 2 | 7  | 14 | GT   | 21 | 6  |
| 170382 | 20 | 2909547 | 2909586 | 4 | 10 | 40 | AGAC | 26 | 8  |
| 170383 | 20 | 2910222 | 2910249 | 2 | 14 | 28 | AC   | 13 | 10 |
| 170388 | 20 | 2918530 | 2918547 | 2 | 9  | 18 | TG   | 15 | 7  |
| 170389 | 20 | 2924057 | 2924070 | 2 | 7  | 14 | CT   | 27 | 3  |
| 170391 | 20 | 2926030 | 2926043 | 2 | 7  | 14 | CA   | 22 | 5  |
| 170400 | 20 | 2931740 | 2931763 | 2 | 12 | 24 | CA   | 18 | 11 |
| 170405 | 20 | 2941336 | 2941365 | 2 | 15 | 30 | CA   | 13 | 13 |
| 170408 | 20 | 2946640 | 2946655 | 2 | 8  | 16 | CA   | 26 | 6  |
| 170412 | 20 | 2952339 | 2952356 | 2 | 9  | 18 | AC   | 22 | 11 |
| 170421 | 20 | 2964285 | 2964320 | 2 | 18 | 36 | AC   | 12 | 13 |
| 170422 | 20 | 2965687 | 2965700 | 2 | 7  | 14 | AC   | 23 | 5  |
| 170450 | 20 | 3022465 | 3022479 | 3 | 5  | 15 | GCT  | 27 | 3  |
| 170452 | 20 | 3023011 | 3023024 | 2 | 7  | 14 | CA   | 23 | 4  |
| 170453 | 20 | 3024133 | 3024150 | 2 | 9  | 18 | GT   | 6  | 5  |
| 170456 | 20 | 3025266 | 3025299 | 2 | 17 | 34 | AC   | 8  | 10 |
| 170458 | 20 | 3031060 | 3031083 | 3 | 8  | 24 | CTC  | 11 | 4  |
| 170460 | 20 | 3032217 | 3032228 | 2 | 6  | 12 | TG   | 18 | 3  |
| 170461 | 20 | 3032277 | 3032316 | 2 | 20 | 40 | TG   | 15 | 8  |
| 170463 | 20 | 3038836 | 3038851 | 2 | 8  | 16 | GA   | 10 | 3  |
| 170465 | 20 | 3043070 | 3043091 | 2 | 11 | 22 | CA   | 19 | 11 |
| 170466 | 20 | 3044031 | 3044048 | 2 | 9  | 18 | GT   | 25 | 3  |
| 170468 | 20 | 3046349 | 3046372 | 3 | 8  | 24 | AAG  | 30 | 3  |
| 170474 | 20 | 3055611 | 3055632 | 2 | 11 | 22 | GT   | 18 | 17 |
| 170476 | 20 | 3056045 | 3056086 | 2 | 21 | 42 | CA   | 13 | 10 |
| 170478 | 20 | 3058474 | 3058503 | 3 | 10 | 30 | GGA  | 21 | 6  |
| 170482 | 20 | 3062769 | 3062806 | 2 | 19 | 38 | GT   | 9  | 9  |
| 170483 | 20 | 3064737 | 3064758 | 2 | 11 | 22 | CT   | 11 | 12 |
| 170485 | 20 | 3067246 | 3067257 | 2 | 6  | 12 | AC   | 28 | 5  |
| 170493 | 20 | 3072990 | 3073009 | 2 | 10 | 20 | CA   | 15 | 4  |
| 170494 | 20 | 3075033 | 3075054 | 2 | 11 | 22 | GT   | 14 | 4  |
| 170498 | 20 | 3078389 | 3078410 | 2 | 11 | 22 | AC   | 13 | 7  |
| 170505 | 20 | 3109475 | 3109504 | 2 | 15 | 30 | GT   | 17 | 17 |
| 170507 | 20 | 3110232 | 3110258 | 3 | 9  | 27 | CAG  | 31 | 4  |
| 170508 | 20 | 3111097 | 3111112 | 2 | 8  | 16 | TG   | 8  | 4  |
| 170509 | 20 | 3111139 | 3111150 | 2 | 6  | 12 | TG   | 19 | 3  |
| 170510 | 20 | 3111536 | 3111567 | 2 | 16 | 32 | TG   | 19 | 12 |
| 170515 | 20 | 3116218 | 3116244 | 3 | 9  | 27 | AGT  | 16 | 8  |
| 170528 | 20 | 3141506 | 3141519 | 2 | 7  | 14 | CA   | 22 | 5  |
| 170529 | 20 | 3142039 | 3142052 | 2 | 7  | 14 | GT   | 8  | 4  |
| 170530 | 20 | 3142270 | 3142287 | 2 | 9  | 18 | AC   | 21 | 10 |

|        |    |         |         |   |    |    |      |    |    |
|--------|----|---------|---------|---|----|----|------|----|----|
| 170531 | 20 | 3144646 | 3144679 | 2 | 17 | 34 | TG   | 14 | 12 |
| 170532 | 20 | 3144893 | 3144932 | 2 | 20 | 40 | TG   | 11 | 8  |
| 170539 | 20 | 3165428 | 3165448 | 3 | 7  | 21 | GCT  | 21 | 6  |
| 170552 | 20 | 3190590 | 3190610 | 3 | 7  | 21 | CTG  | 16 | 8  |
| 170553 | 20 | 3191231 | 3191246 | 4 | 4  | 16 | ACAT | 25 | 3  |
| 170554 | 20 | 3209297 | 3209314 | 3 | 6  | 18 | TTG  | 26 | 4  |
| 170556 | 20 | 3215371 | 3215392 | 2 | 11 | 22 | AG   | 18 | 4  |
| 170558 | 20 | 3218805 | 3218816 | 2 | 6  | 12 | AT   | 15 | 3  |
| 170559 | 20 | 3221200 | 3221221 | 2 | 11 | 22 | TG   | 32 | 8  |
| 170563 | 20 | 3227037 | 3227076 | 2 | 20 | 40 | AC   | 10 | 15 |
| 170569 | 20 | 3232574 | 3232593 | 2 | 10 | 20 | GT   | 25 | 6  |
| 170573 | 20 | 3238803 | 3238823 | 3 | 7  | 21 | CAG  | 31 | 8  |
| 170574 | 20 | 3239875 | 3239886 | 2 | 6  | 12 | TG   | 24 | 3  |
| 170576 | 20 | 3242185 | 3242202 | 2 | 9  | 18 | GT   | 12 | 7  |
| 170587 | 20 | 3253562 | 3253601 | 2 | 20 | 40 | TG   | 8  | 7  |
| 170588 | 20 | 3253806 | 3253827 | 2 | 11 | 22 | AC   | 23 | 13 |
| 170594 | 20 | 3258015 | 3258044 | 2 | 15 | 30 | GT   | 12 | 14 |
| 170596 | 20 | 3267403 | 3267426 | 2 | 12 | 24 | AG   | 19 | 9  |
| 170599 | 20 | 3294099 | 3294112 | 2 | 7  | 14 | AC   | 27 | 3  |
| 170604 | 20 | 3304060 | 3304071 | 2 | 6  | 12 | TA   | 26 | 3  |
| 170605 | 20 | 3312441 | 3312468 | 4 | 7  | 28 | TCTT | 25 | 6  |
| 170606 | 20 | 3312710 | 3312724 | 3 | 5  | 15 | GCA  | 20 | 3  |
| 170608 | 20 | 3320051 | 3320100 | 2 | 25 | 50 | CA   | 14 | 12 |
| 170615 | 20 | 3342068 | 3342091 | 4 | 6  | 24 | GGCA | 27 | 6  |
| 170623 | 20 | 3356898 | 3356911 | 2 | 7  | 14 | CA   | 12 | 3  |
| 170625 | 20 | 3356943 | 3356962 | 2 | 10 | 20 | AC   | 17 | 7  |
| 170632 | 20 | 3375875 | 3375886 | 2 | 6  | 12 | GA   | 24 | 3  |
| 170641 | 20 | 3387521 | 3387550 | 2 | 15 | 30 | CA   | 10 | 11 |
| 170642 | 20 | 3387656 | 3387670 | 3 | 5  | 15 | CTG  | 28 | 4  |
| 170645 | 20 | 3416090 | 3416104 | 3 | 5  | 15 | AAT  | 26 | 4  |
| 170646 | 20 | 3420900 | 3420931 | 4 | 8  | 32 | TGAA | 19 | 4  |
| 170653 | 20 | 3442369 | 3442386 | 2 | 9  | 18 | TG   | 24 | 5  |
| 170659 | 20 | 3469188 | 3469203 | 2 | 8  | 16 | AC   | 24 | 3  |
| 170673 | 20 | 3488859 | 3488876 | 2 | 9  | 18 | AC   | 13 | 6  |
| 170675 | 20 | 3490312 | 3490323 | 2 | 6  | 12 | GT   | 29 | 6  |
| 170676 | 20 | 3497917 | 3497936 | 4 | 5  | 20 | GATG | 24 | 4  |
| 170680 | 20 | 3510070 | 3510089 | 2 | 10 | 20 | TC   | 18 | 4  |
| 170684 | 20 | 3515949 | 3515992 | 2 | 22 | 44 | TG   | 10 | 13 |
| 170687 | 20 | 3522020 | 3522039 | 4 | 5  | 20 | TTTG | 26 | 6  |
| 170690 | 20 | 3535857 | 3535874 | 3 | 6  | 18 | ATC  | 20 | 5  |
| 170706 | 20 | 3567872 | 3567885 | 2 | 7  | 14 | GA   | 15 | 5  |
| 170707 | 20 | 3570315 | 3570335 | 3 | 7  | 21 | AGA  | 22 | 6  |
| 170713 | 20 | 3575852 | 3575863 | 2 | 6  | 12 | GT   | 23 | 5  |
| 170714 | 20 | 3575865 | 3575880 | 2 | 8  | 16 | TG   | 17 | 5  |
| 170715 | 20 | 3576045 | 3576090 | 2 | 23 | 46 | GT   | 10 | 8  |
| 170717 | 20 | 3577453 | 3577466 | 2 | 7  | 14 | GT   | 22 | 3  |
| 170721 | 20 | 3585376 | 3585399 | 4 | 6  | 24 | CAGG | 26 | 3  |
| 170722 | 20 | 3585645 | 3585660 | 2 | 8  | 16 | AC   | 18 | 7  |
| 170723 | 20 | 3585947 | 3585980 | 2 | 17 | 34 | AC   | 15 | 11 |
| 170726 | 20 | 3593023 | 3593040 | 2 | 9  | 18 | CA   | 16 | 7  |
| 170732 | 20 | 3602005 | 3602016 | 2 | 6  | 12 | AC   | 30 | 3  |

|        |    |         |         |   |    |    |      |    |    |
|--------|----|---------|---------|---|----|----|------|----|----|
| 170742 | 20 | 3622848 | 3622863 | 2 | 8  | 16 | GT   | 24 | 5  |
| 170745 | 20 | 3625260 | 3625277 | 2 | 9  | 18 | TG   | 8  | 3  |
| 170748 | 20 | 3626880 | 3626891 | 2 | 6  | 12 | TA   | 21 | 3  |
| 170749 | 20 | 3627208 | 3627237 | 2 | 15 | 30 | GT   | 11 | 9  |
| 170754 | 20 | 3631920 | 3631941 | 2 | 11 | 22 | TG   | 15 | 11 |
| 170764 | 20 | 3648806 | 3648841 | 4 | 9  | 36 | ATAG | 9  | 8  |
| 170768 | 20 | 3667919 | 3667936 | 3 | 6  | 18 | ATT  | 17 | 5  |
| 170775 | 20 | 3695924 | 3695935 | 2 | 6  | 12 | TC   | 35 | 5  |
| 170776 | 20 | 3696492 | 3696509 | 2 | 9  | 18 | CA   | 19 | 6  |
| 170777 | 20 | 3696613 | 3696628 | 4 | 4  | 16 | GTCA | 29 | 3  |
| 170778 | 20 | 3700316 | 3700335 | 2 | 10 | 20 | GT   | 7  | 3  |
| 170785 | 20 | 3709282 | 3709293 | 2 | 6  | 12 | AC   | 15 | 4  |
| 170788 | 20 | 3713021 | 3713034 | 2 | 7  | 14 | TG   | 21 | 6  |
| 170789 | 20 | 3715674 | 3715711 | 2 | 19 | 38 | CA   | 7  | 13 |
| 170792 | 20 | 3719809 | 3719826 | 3 | 6  | 18 | GCT  | 22 | 7  |
| 170796 | 20 | 3721990 | 3722009 | 4 | 5  | 20 | GCCT | 23 | 10 |
| 170797 | 20 | 3722217 | 3722240 | 2 | 12 | 24 | TG   | 20 | 7  |
| 170798 | 20 | 3724800 | 3724814 | 3 | 5  | 15 | CCA  | 12 | 4  |
| 170801 | 20 | 3727735 | 3727766 | 2 | 16 | 32 | GT   | 18 | 6  |
| 170802 | 20 | 3728197 | 3728224 | 2 | 14 | 28 | CA   | 25 | 9  |
| 170803 | 20 | 3730582 | 3730599 | 2 | 9  | 18 | GA   | 23 | 5  |
| 170804 | 20 | 3731432 | 3731447 | 2 | 8  | 16 | GT   | 18 | 7  |
| 170805 | 20 | 3731449 | 3731460 | 2 | 6  | 12 | TG   | 22 | 6  |
| 170808 | 20 | 3735338 | 3735351 | 2 | 7  | 14 | AC   | 11 | 5  |
| 170809 | 20 | 3735489 | 3735518 | 2 | 15 | 30 | AG   | 6  | 5  |
| 170810 | 20 | 3735629 | 3735644 | 2 | 8  | 16 | CT   | 25 | 6  |
| 170811 | 20 | 3735896 | 3735923 | 2 | 14 | 28 | GT   | 15 | 10 |
| 170812 | 20 | 3736953 | 3736982 | 3 | 10 | 30 | AGG  | 14 | 6  |
| 170823 | 20 | 3755774 | 3755791 | 2 | 9  | 18 | CA   | 18 | 12 |
| 170827 | 20 | 3757028 | 3757045 | 2 | 9  | 18 | GT   | 12 | 12 |
| 170828 | 20 | 3757274 | 3757295 | 2 | 11 | 22 | TG   | 16 | 9  |
| 170829 | 20 | 3757715 | 3757732 | 2 | 9  | 18 | CA   | 10 | 7  |
| 170834 | 20 | 3759401 | 3759412 | 2 | 6  | 12 | GT   | 26 | 7  |
| 170836 | 20 | 3761441 | 3761452 | 2 | 6  | 12 | CA   | 14 | 4  |
| 170837 | 20 | 3761624 | 3761647 | 3 | 8  | 24 | GAG  | 19 | 3  |
| 170838 | 20 | 3761965 | 3761996 | 2 | 16 | 32 | GA   | 9  | 7  |
| 170839 | 20 | 3762337 | 3762372 | 3 | 12 | 36 | CAT  | 21 | 11 |
| 170843 | 20 | 3769667 | 3769682 | 2 | 8  | 16 | GT   | 18 | 9  |
| 170844 | 20 | 3769986 | 3770001 | 2 | 8  | 16 | AC   | 27 | 4  |
| 170846 | 20 | 3770533 | 3770558 | 2 | 13 | 26 | AC   | 12 | 11 |
| 170847 | 20 | 3770871 | 3770918 | 2 | 24 | 48 | TG   | 7  | 8  |
| 170848 | 20 | 3771096 | 3771109 | 2 | 7  | 14 | GT   | 25 | 4  |
| 170849 | 20 | 3771211 | 3771226 | 2 | 8  | 16 | TG   | 19 | 5  |
| 170850 | 20 | 3771265 | 3771280 | 2 | 8  | 16 | TG   | 14 | 4  |
| 170852 | 20 | 3778649 | 3778669 | 3 | 7  | 21 | GAG  | 17 | 3  |
| 170858 | 20 | 3782823 | 3782852 | 2 | 15 | 30 | CA   | 16 | 9  |
| 170861 | 20 | 3784269 | 3784280 | 2 | 6  | 12 | GT   | 23 | 3  |
| 170863 | 20 | 3784429 | 3784450 | 2 | 11 | 22 | GT   | 19 | 7  |
| 170867 | 20 | 3793499 | 3793516 | 2 | 9  | 18 | GT   | 19 | 4  |
| 170870 | 20 | 3796389 | 3796436 | 2 | 24 | 48 | TG   | 7  | 7  |
| 170874 | 20 | 3798796 | 3798825 | 2 | 15 | 30 | CA   | 14 | 8  |

|        |    |         |         |   |    |    |      |    |    |
|--------|----|---------|---------|---|----|----|------|----|----|
| 170880 | 20 | 3804513 | 3804538 | 2 | 13 | 26 | CA   | 15 | 11 |
| 170881 | 20 | 3804655 | 3804672 | 2 | 9  | 18 | AC   | 6  | 9  |
| 170884 | 20 | 3805927 | 3805941 | 3 | 5  | 15 | GCA  | 28 | 6  |
| 170886 | 20 | 3810475 | 3810492 | 2 | 9  | 18 | AC   | 24 | 3  |
| 170887 | 20 | 3810773 | 3810788 | 2 | 8  | 16 | CA   | 11 | 6  |
| 170889 | 20 | 3812213 | 3812228 | 2 | 8  | 16 | GT   | 19 | 7  |
| 170894 | 20 | 3814282 | 3814305 | 2 | 12 | 24 | CA   | 12 | 5  |
| 170895 | 20 | 3815054 | 3815091 | 2 | 19 | 38 | TG   | 15 | 11 |
| 170899 | 20 | 3817803 | 3817816 | 2 | 7  | 14 | CA   | 24 | 12 |
| 170901 | 20 | 3818214 | 3818225 | 2 | 6  | 12 | GT   | 21 | 5  |
| 170914 | 20 | 3836547 | 3836588 | 2 | 21 | 42 | GT   | 11 | 9  |
| 170917 | 20 | 3865919 | 3865936 | 2 | 9  | 18 | CA   | 11 | 9  |
| 170922 | 20 | 3897389 | 3897422 | 2 | 17 | 34 | GT   | 21 | 13 |
| 170923 | 20 | 3900347 | 3900370 | 4 | 6  | 24 | CCAA | 22 | 4  |
| 170933 | 20 | 3922253 | 3922267 | 3 | 5  | 15 | ATT  | 25 | 3  |
| 170934 | 20 | 3922395 | 3922409 | 3 | 5  | 15 | AGC  | 25 | 8  |
| 170935 | 20 | 3922410 | 3922427 | 3 | 6  | 18 | ACC  | 24 | 5  |
| 170941 | 20 | 3939959 | 3939974 | 2 | 8  | 16 | CA   | 19 | 8  |
| 170942 | 20 | 3940309 | 3940322 | 2 | 7  | 14 | TG   | 17 | 7  |
| 170946 | 20 | 3940888 | 3940901 | 2 | 7  | 14 | CA   | 23 | 6  |
| 170951 | 20 | 3950503 | 3950522 | 4 | 5  | 20 | AAAT | 22 | 4  |
| 170955 | 20 | 3962104 | 3962135 | 2 | 16 | 32 | TG   | 7  | 9  |
| 170956 | 20 | 3962579 | 3962598 | 2 | 10 | 20 | AC   | 23 | 8  |
| 170963 | 20 | 3978396 | 3978413 | 2 | 9  | 18 | AC   | 6  | 4  |
| 170964 | 20 | 3982833 | 3982853 | 3 | 7  | 21 | CTT  | 9  | 5  |
| 170966 | 20 | 3985326 | 3985349 | 2 | 12 | 24 | TG   | 11 | 7  |
| 170967 | 20 | 3985677 | 3985724 | 2 | 24 | 48 | TG   | 10 | 12 |
| 170970 | 20 | 3989068 | 3989103 | 2 | 18 | 36 | GT   | 10 | 11 |
| 170987 | 20 | 4026832 | 4026863 | 4 | 8  | 32 | ATAG | 20 | 3  |
| 170988 | 20 | 4033064 | 4033081 | 2 | 9  | 18 | CA   | 16 | 6  |
| 170989 | 20 | 4033227 | 4033252 | 2 | 13 | 26 | CA   | 17 | 7  |
| 170991 | 20 | 4036161 | 4036176 | 4 | 4  | 16 | CATA | 16 | 4  |
| 170997 | 20 | 4042298 | 4042313 | 2 | 8  | 16 | TG   | 31 | 5  |
| 171000 | 20 | 4043805 | 4043816 | 2 | 6  | 12 | TG   | 24 | 3  |
| 171001 | 20 | 4044298 | 4044315 | 2 | 9  | 18 | GT   | 20 | 7  |
| 171009 | 20 | 4060129 | 4060144 | 2 | 8  | 16 | GT   | 19 | 7  |
| 171010 | 20 | 4064168 | 4064191 | 2 | 12 | 24 | AG   | 13 | 5  |
| 171012 | 20 | 4072993 | 4073008 | 2 | 8  | 16 | GT   | 17 | 4  |
| 171018 | 20 | 4079395 | 4079408 | 2 | 7  | 14 | AC   | 14 | 4  |
| 171019 | 20 | 4079410 | 4079425 | 2 | 8  | 16 | AC   | 11 | 3  |
| 171020 | 20 | 4095145 | 4095160 | 4 | 4  | 16 | CCTC | 9  | 4  |
| 171029 | 20 | 4111608 | 4111631 | 2 | 12 | 24 | TG   | 25 | 13 |
| 171043 | 20 | 4139037 | 4139090 | 3 | 18 | 54 | TCA  | 24 | 10 |
| 171045 | 20 | 4144695 | 4144706 | 2 | 6  | 12 | TC   | 22 | 4  |
| 171047 | 20 | 4144964 | 4144989 | 2 | 13 | 26 | TG   | 10 | 4  |
| 171076 | 20 | 4189312 | 4189333 | 2 | 11 | 22 | GT   | 30 | 5  |
| 171078 | 20 | 4192387 | 4192416 | 2 | 15 | 30 | TG   | 6  | 3  |
| 171096 | 20 | 4227996 | 4228013 | 2 | 9  | 18 | AC   | 23 | 6  |
| 171100 | 20 | 4243594 | 4243607 | 2 | 7  | 14 | TC   | 17 | 3  |
| 171101 | 20 | 4245899 | 4245914 | 2 | 8  | 16 | CA   | 24 | 9  |
| 171102 | 20 | 4248535 | 4248552 | 2 | 9  | 18 | TG   | 16 | 5  |

|        |    |         |         |   |    |    |      |    |    |
|--------|----|---------|---------|---|----|----|------|----|----|
| 171103 | 20 | 4248554 | 4248567 | 2 | 7  | 14 | GT   | 14 | 5  |
| 171112 | 20 | 4270690 | 4270701 | 2 | 6  | 12 | TG   | 22 | 3  |
| 171115 | 20 | 4286936 | 4286953 | 2 | 9  | 18 | TG   | 22 | 5  |
| 171118 | 20 | 4299680 | 4299691 | 2 | 6  | 12 | CA   | 11 | 3  |
| 171119 | 20 | 4299736 | 4299755 | 2 | 10 | 20 | AC   | 8  | 4  |
| 171131 | 20 | 4320933 | 4320956 | 2 | 12 | 24 | CA   | 11 | 4  |
| 171141 | 20 | 4331426 | 4331463 | 2 | 19 | 38 | TG   | 7  | 7  |
| 171143 | 20 | 4336805 | 4336864 | 3 | 20 | 60 | TCT  | 20 | 10 |
| 171150 | 20 | 4356335 | 4356368 | 2 | 17 | 34 | AC   | 14 | 7  |
| 171154 | 20 | 4366688 | 4366707 | 2 | 10 | 20 | TC   | 9  | 5  |
| 171155 | 20 | 4366709 | 4366724 | 2 | 8  | 16 | CT   | 13 | 4  |
| 171167 | 20 | 4383094 | 4383111 | 2 | 9  | 18 | AC   | 27 | 3  |
| 171177 | 20 | 4395521 | 4395562 | 2 | 21 | 42 | AC   | 7  | 8  |
| 171181 | 20 | 4408955 | 4408984 | 2 | 15 | 30 | AC   | 11 | 8  |
| 171183 | 20 | 4409119 | 4409148 | 2 | 15 | 30 | CA   | 13 | 9  |
| 171188 | 20 | 4411171 | 4411188 | 3 | 6  | 18 | AGA  | 25 | 6  |
| 171199 | 20 | 4431686 | 4431697 | 2 | 6  | 12 | TG   | 24 | 3  |
| 171205 | 20 | 4451982 | 4452013 | 4 | 8  | 32 | TTTA | 8  | 10 |
| 171212 | 20 | 4454097 | 4454108 | 2 | 6  | 12 | TG   | 12 | 4  |
| 171213 | 20 | 4455502 | 4455516 | 3 | 5  | 15 | CCG  | 30 | 3  |
| 171218 | 20 | 4465747 | 4465794 | 2 | 24 | 48 | GT   | 16 | 13 |
| 171238 | 20 | 4506581 | 4506598 | 3 | 6  | 18 | TCC  | 30 | 3  |
| 171247 | 20 | 4522676 | 4522687 | 2 | 6  | 12 | TG   | 6  | 5  |
| 171248 | 20 | 4524379 | 4524410 | 2 | 16 | 32 | TG   | 26 | 12 |
| 171249 | 20 | 4524924 | 4524937 | 2 | 7  | 14 | GA   | 24 | 4  |
| 171252 | 20 | 4525430 | 4525450 | 3 | 7  | 21 | CCA  | 12 | 5  |
| 171254 | 20 | 4526250 | 4526283 | 2 | 17 | 34 | GA   | 6  | 3  |
| 171271 | 20 | 4534318 | 4534345 | 4 | 7  | 28 | CTGC | 16 | 3  |
| 171272 | 20 | 4534367 | 4534388 | 2 | 11 | 22 | TG   | 9  | 11 |
| 171273 | 20 | 4534640 | 4534657 | 2 | 9  | 18 | GT   | 10 | 9  |
| 171274 | 20 | 4534920 | 4534935 | 2 | 8  | 16 | TG   | 22 | 3  |
| 171275 | 20 | 4535754 | 4535775 | 2 | 11 | 22 | AC   | 9  | 7  |
| 171277 | 20 | 4537897 | 4537918 | 2 | 11 | 22 | AG   | 17 | 5  |
| 171278 | 20 | 4538125 | 4538138 | 2 | 7  | 14 | AG   | 17 | 4  |
| 171287 | 20 | 4540826 | 4540847 | 2 | 11 | 22 | AC   | 14 | 11 |
| 171289 | 20 | 4542585 | 4542624 | 2 | 20 | 40 | TG   | 15 | 6  |
| 171292 | 20 | 4545668 | 4545685 | 2 | 9  | 18 | AG   | 24 | 4  |
| 171293 | 20 | 4547580 | 4547597 | 2 | 9  | 18 | TG   | 12 | 3  |
| 171298 | 20 | 4562850 | 4562870 | 3 | 7  | 21 | TCC  | 11 | 3  |
| 171299 | 20 | 4564475 | 4564510 | 2 | 18 | 36 | CA   | 12 | 5  |
| 171301 | 20 | 4565117 | 4565140 | 2 | 12 | 24 | TG   | 12 | 5  |
| 171303 | 20 | 4565567 | 4565586 | 2 | 10 | 20 | GT   | 18 | 9  |
| 171304 | 20 | 4565695 | 4565714 | 2 | 10 | 20 | TG   | 16 | 6  |
| 171307 | 20 | 4575969 | 4575989 | 3 | 7  | 21 | TCC  | 18 | 3  |
| 171309 | 20 | 4576482 | 4576501 | 2 | 10 | 20 | AC   | 13 | 9  |
| 171311 | 20 | 4582503 | 4582524 | 2 | 11 | 22 | GT   | 12 | 6  |
| 171312 | 20 | 4582602 | 4582615 | 2 | 7  | 14 | TG   | 14 | 6  |
| 171314 | 20 | 4583125 | 4583144 | 2 | 10 | 20 | GA   | 25 | 12 |
| 171315 | 20 | 4585872 | 4585893 | 2 | 11 | 22 | CA   | 8  | 10 |
| 171320 | 20 | 4589318 | 4589333 | 2 | 8  | 16 | AG   | 6  | 5  |
| 171323 | 20 | 4596811 | 4596831 | 3 | 7  | 21 | GAA  | 26 | 4  |

|        |    |         |         |   |    |    |      |    |    |
|--------|----|---------|---------|---|----|----|------|----|----|
| 171330 | 20 | 4612942 | 4612967 | 2 | 13 | 26 | GT   | 7  | 8  |
| 171337 | 20 | 4626548 | 4626579 | 2 | 16 | 32 | GT   | 20 | 11 |
| 171338 | 20 | 4626645 | 4626656 | 2 | 6  | 12 | CA   | 32 | 3  |
| 171339 | 20 | 4632968 | 4632987 | 2 | 10 | 20 | TG   | 27 | 4  |
| 171341 | 20 | 4634423 | 4634440 | 2 | 9  | 18 | CA   | 8  | 8  |
| 171342 | 20 | 4634541 | 4634560 | 2 | 10 | 20 | AG   | 17 | 5  |
| 171345 | 20 | 4641418 | 4641439 | 2 | 11 | 22 | AC   | 24 | 5  |
| 171350 | 20 | 4652059 | 4652072 | 2 | 7  | 14 | AG   | 20 | 3  |
| 171351 | 20 | 4652444 | 4652483 | 2 | 20 | 40 | AC   | 6  | 7  |
| 171357 | 20 | 4656324 | 4656362 | 3 | 13 | 39 | TTC  | 13 | 7  |
| 171358 | 20 | 4656423 | 4656449 | 3 | 9  | 27 | CAT  | 12 | 4  |
| 171359 | 20 | 4657250 | 4657276 | 3 | 9  | 27 | CCT  | 22 | 5  |
| 171362 | 20 | 4660111 | 4660124 | 2 | 7  | 14 | TG   | 16 | 7  |
| 171363 | 20 | 4660139 | 4660150 | 2 | 6  | 12 | TG   | 14 | 4  |
| 171381 | 20 | 4682176 | 4682195 | 2 | 10 | 20 | TG   | 11 | 10 |
| 171382 | 20 | 4682745 | 4682756 | 2 | 6  | 12 | GT   | 27 | 8  |
| 171383 | 20 | 4683769 | 4683788 | 4 | 5  | 20 | CTGC | 31 | 3  |
| 171391 | 20 | 4692162 | 4692177 | 2 | 8  | 16 | CA   | 17 | 4  |
| 171394 | 20 | 4709415 | 4709430 | 4 | 4  | 16 | TTAT | 25 | 6  |
| 171402 | 20 | 4720196 | 4720213 | 3 | 6  | 18 | GAG  | 29 | 4  |
| 171404 | 20 | 4721967 | 4721994 | 2 | 14 | 28 | AC   | 15 | 10 |
| 171407 | 20 | 4729688 | 4729711 | 2 | 12 | 24 | AC   | 14 | 13 |
| 171408 | 20 | 4731387 | 4731406 | 2 | 10 | 20 | GT   | 16 | 8  |
| 171412 | 20 | 4733973 | 4733992 | 4 | 5  | 20 | ATAG | 21 | 7  |
| 171413 | 20 | 4736123 | 4736148 | 2 | 13 | 26 | GT   | 17 | 13 |
| 171416 | 20 | 4740203 | 4740216 | 2 | 7  | 14 | AC   | 14 | 5  |
| 171447 | 20 | 4783239 | 4783260 | 2 | 11 | 22 | AC   | 16 | 8  |
| 171448 | 20 | 4783728 | 4783743 | 2 | 8  | 16 | GT   | 8  | 3  |
| 171453 | 20 | 4785200 | 4785221 | 2 | 11 | 22 | AG   | 8  | 9  |
| 171455 | 20 | 4785910 | 4785927 | 2 | 9  | 18 | TC   | 25 | 5  |
| 171457 | 20 | 4789796 | 4789813 | 2 | 9  | 18 | TG   | 15 | 14 |
| 171461 | 20 | 4797130 | 4797153 | 3 | 8  | 24 | GCG  | 28 | 6  |
| 171463 | 20 | 4798400 | 4798413 | 2 | 7  | 14 | CT   | 28 | 4  |
| 171470 | 20 | 4809174 | 4809189 | 4 | 4  | 16 | AAAT | 28 | 3  |
| 171472 | 20 | 4811290 | 4811325 | 2 | 18 | 36 | AC   | 9  | 7  |
| 171474 | 20 | 4812265 | 4812278 | 2 | 7  | 14 | TG   | 32 | 3  |
| 171476 | 20 | 4818560 | 4818601 | 2 | 21 | 42 | AC   | 14 | 15 |
| 171478 | 20 | 4822075 | 4822102 | 2 | 14 | 28 | CA   | 9  | 9  |
| 171482 | 20 | 4828144 | 4828159 | 4 | 4  | 16 | ATCA | 24 | 4  |
| 171488 | 20 | 4835756 | 4835773 | 2 | 9  | 18 | AG   | 18 | 5  |
| 171493 | 20 | 4842170 | 4842193 | 3 | 8  | 24 | ATT  | 8  | 4  |
| 171494 | 20 | 4844470 | 4844483 | 2 | 7  | 14 | CA   | 11 | 5  |
| 171495 | 20 | 4847640 | 4847657 | 3 | 6  | 18 | CTC  | 22 | 7  |
| 171499 | 20 | 4860197 | 4860212 | 4 | 4  | 16 | AAAT | 15 | 6  |
| 171502 | 20 | 4867616 | 4867643 | 2 | 14 | 28 | TG   | 13 | 8  |
| 171508 | 20 | 4886136 | 4886147 | 2 | 6  | 12 | CT   | 32 | 3  |
| 171524 | 20 | 4937995 | 4938010 | 2 | 8  | 16 | CA   | 32 | 5  |
| 171525 | 20 | 4939372 | 4939392 | 3 | 7  | 21 | TTC  | 28 | 3  |
| 171528 | 20 | 4944209 | 4944234 | 2 | 13 | 26 | TG   | 28 | 7  |
| 171536 | 20 | 4956360 | 4956379 | 2 | 10 | 20 | CA   | 28 | 8  |
| 171538 | 20 | 4964497 | 4964512 | 2 | 8  | 16 | CA   | 15 | 4  |

|        |    |         |         |   |    |    |      |    |    |
|--------|----|---------|---------|---|----|----|------|----|----|
| 171539 | 20 | 4970471 | 4970488 | 3 | 6  | 18 | CTC  | 25 | 3  |
| 171543 | 20 | 4975768 | 4975787 | 2 | 10 | 20 | TG   | 22 | 7  |
| 171545 | 20 | 4976478 | 4976499 | 2 | 11 | 22 | TG   | 11 | 12 |
| 171553 | 20 | 4982568 | 4982579 | 2 | 6  | 12 | AC   | 23 | 3  |
| 171554 | 20 | 4982589 | 4982600 | 2 | 6  | 12 | AC   | 20 | 3  |
| 171555 | 20 | 4982942 | 4982997 | 4 | 14 | 56 | TTGT | 8  | 7  |
| 171562 | 20 | 4992702 | 4992717 | 2 | 8  | 16 | TC   | 27 | 4  |
| 171577 | 20 | 5029877 | 5029898 | 2 | 11 | 22 | CA   | 11 | 9  |
| 171581 | 20 | 5035603 | 5035620 | 2 | 9  | 18 | GT   | 22 | 7  |
| 171582 | 20 | 5037211 | 5037246 | 2 | 18 | 36 | TG   | 6  | 6  |
| 171585 | 20 | 5044281 | 5044298 | 3 | 6  | 18 | TGC  | 24 | 3  |
| 171587 | 20 | 5046937 | 5046948 | 2 | 6  | 12 | TG   | 15 | 3  |
| 171589 | 20 | 5049024 | 5049047 | 2 | 12 | 24 | TG   | 20 | 3  |
| 171590 | 20 | 5049189 | 5049218 | 2 | 15 | 30 | CA   | 11 | 12 |
| 171591 | 20 | 5051836 | 5051855 | 2 | 10 | 20 | AC   | 19 | 11 |
| 171594 | 20 | 5053317 | 5053334 | 2 | 9  | 18 | TG   | 22 | 12 |
| 171601 | 20 | 5056921 | 5056948 | 2 | 14 | 28 | TG   | 14 | 9  |
| 171603 | 20 | 5058635 | 5058658 | 2 | 12 | 24 | AC   | 15 | 6  |
| 171607 | 20 | 5059232 | 5059261 | 2 | 15 | 30 | GT   | 11 | 11 |
| 171609 | 20 | 5063385 | 5063404 | 2 | 10 | 20 | GT   | 14 | 10 |
| 171612 | 20 | 5063613 | 5063630 | 2 | 9  | 18 | AC   | 22 | 6  |
| 171615 | 20 | 5065718 | 5065745 | 2 | 14 | 28 | AC   | 10 | 12 |
| 171616 | 20 | 5065855 | 5065872 | 2 | 9  | 18 | TG   | 20 | 8  |
| 171630 | 20 | 5075679 | 5075700 | 2 | 11 | 22 | AC   | 11 | 10 |
| 171631 | 20 | 5076111 | 5076134 | 2 | 12 | 24 | TG   | 12 | 8  |
| 171632 | 20 | 5078991 | 5079040 | 2 | 25 | 50 | TG   | 6  | 8  |
| 171636 | 20 | 5084188 | 5084217 | 2 | 15 | 30 | GT   | 12 | 7  |
| 171637 | 20 | 5084352 | 5084371 | 2 | 10 | 20 | CT   | 29 | 4  |
| 171646 | 20 | 5105609 | 5105634 | 2 | 13 | 26 | TG   | 13 | 11 |
| 171648 | 20 | 5117513 | 5117542 | 3 | 10 | 30 | CCT  | 28 | 8  |
| 171649 | 20 | 5118485 | 5118504 | 2 | 10 | 20 | TC   | 13 | 5  |
| 171651 | 20 | 5122486 | 5122497 | 2 | 6  | 12 | TG   | 20 | 4  |
| 171656 | 20 | 5132647 | 5132658 | 2 | 6  | 12 | GA   | 12 | 4  |
| 171657 | 20 | 5132892 | 5132907 | 4 | 4  | 16 | CCGT | 29 | 7  |
| 171659 | 20 | 5133715 | 5133738 | 4 | 6  | 24 | TCTT | 27 | 3  |
| 171664 | 20 | 5139823 | 5139846 | 2 | 12 | 24 | GT   | 18 | 7  |
| 171673 | 20 | 5158277 | 5158306 | 2 | 15 | 30 | TG   | 14 | 8  |
| 171677 | 20 | 5161214 | 5161231 | 3 | 6  | 18 | CAG  | 22 | 4  |
| 171678 | 20 | 5161513 | 5161536 | 3 | 8  | 24 | GAA  | 28 | 3  |
| 171686 | 20 | 5179386 | 5179397 | 2 | 6  | 12 | AC   | 25 | 3  |
| 171689 | 20 | 5184403 | 5184426 | 3 | 8  | 24 | TAT  | 6  | 4  |
| 171692 | 20 | 5192486 | 5192506 | 3 | 7  | 21 | TCT  | 21 | 9  |
| 171694 | 20 | 5201035 | 5201058 | 4 | 6  | 24 | TTAG | 25 | 9  |
| 171696 | 20 | 5222244 | 5222259 | 2 | 8  | 16 | AC   | 14 | 5  |
| 171701 | 20 | 5231873 | 5231887 | 3 | 5  | 15 | CGT  | 31 | 6  |
| 171709 | 20 | 5247278 | 5247295 | 3 | 6  | 18 | GCT  | 25 | 4  |
| 171710 | 20 | 5247574 | 5247587 | 2 | 7  | 14 | GA   | 30 | 3  |
| 171711 | 20 | 5247800 | 5247819 | 2 | 10 | 20 | TG   | 14 | 12 |
| 171716 | 20 | 5255235 | 5255250 | 2 | 8  | 16 | TG   | 19 | 6  |
| 171719 | 20 | 5262291 | 5262305 | 3 | 5  | 15 | AAT  | 27 | 3  |
| 171720 | 20 | 5263221 | 5263252 | 2 | 16 | 32 | CA   | 10 | 7  |



|        |    |         |         |   |    |    |      |    |    |
|--------|----|---------|---------|---|----|----|------|----|----|
| 171725 | 20 | 5291773 | 5291790 | 2 | 9  | 18 | GA   | 22 | 8  |
| 171726 | 20 | 5292173 | 5292212 | 2 | 20 | 40 | TG   | 9  | 12 |
| 171729 | 20 | 5296205 | 5296219 | 3 | 5  | 15 | GCC  | 23 | 5  |
| 171731 | 20 | 5300510 | 5300521 | 2 | 6  | 12 | CA   | 29 | 3  |
| 171732 | 20 | 5300984 | 5300995 | 2 | 6  | 12 | CA   | 25 | 4  |
| 171735 | 20 | 5305966 | 5305981 | 2 | 8  | 16 | AC   | 19 | 12 |
| 171737 | 20 | 5314147 | 5314162 | 2 | 8  | 16 | AC   | 8  | 3  |
| 171744 | 20 | 5321738 | 5321777 | 2 | 20 | 40 | TG   | 13 | 6  |
| 171759 | 20 | 5349584 | 5349609 | 2 | 13 | 26 | TG   | 22 | 13 |
| 171760 | 20 | 5354077 | 5354092 | 4 | 4  | 16 | GTGC | 19 | 7  |
| 171761 | 20 | 5354093 | 5354110 | 2 | 9  | 18 | GT   | 15 | 7  |
| 171762 | 20 | 5354312 | 5354339 | 2 | 14 | 28 | GT   | 16 | 9  |
| 171764 | 20 | 5354564 | 5354575 | 2 | 6  | 12 | AC   | 25 | 3  |
| 171765 | 20 | 5356393 | 5356406 | 2 | 7  | 14 | AC   | 17 | 4  |
| 171768 | 20 | 5363658 | 5363669 | 2 | 6  | 12 | CA   | 22 | 5  |
| 171771 | 20 | 5364503 | 5364526 | 2 | 12 | 24 | AC   | 11 | 7  |
| 171778 | 20 | 5366190 | 5366233 | 2 | 22 | 44 | CA   | 20 | 9  |
| 171781 | 20 | 5369882 | 5369901 | 2 | 10 | 20 | TG   | 13 | 6  |
| 171788 | 20 | 5377483 | 5377504 | 2 | 11 | 22 | TG   | 15 | 5  |
| 171790 | 20 | 5378317 | 5378340 | 2 | 12 | 24 | TC   | 29 | 7  |
| 171791 | 20 | 5381005 | 5381016 | 2 | 6  | 12 | AC   | 16 | 10 |
| 171792 | 20 | 5381018 | 5381037 | 2 | 10 | 20 | CA   | 18 | 7  |
| 171805 | 20 | 5398834 | 5398849 | 2 | 8  | 16 | TC   | 11 | 3  |
| 171811 | 20 | 5405058 | 5405079 | 2 | 11 | 22 | CA   | 8  | 6  |
| 171812 | 20 | 5405207 | 5405222 | 2 | 8  | 16 | GT   | 25 | 4  |
| 171813 | 20 | 5405402 | 5405433 | 2 | 16 | 32 | AC   | 6  | 5  |
| 171815 | 20 | 5411609 | 5411626 | 2 | 9  | 18 | CA   | 21 | 10 |
| 171817 | 20 | 5412168 | 5412185 | 3 | 6  | 18 | GAG  | 16 | 5  |
| 171822 | 20 | 5420835 | 5420850 | 2 | 8  | 16 | TG   | 34 | 3  |
| 171823 | 20 | 5425684 | 5425704 | 3 | 7  | 21 | GAG  | 9  | 6  |
| 171825 | 20 | 5442736 | 5442747 | 2 | 6  | 12 | CA   | 33 | 3  |
| 171827 | 20 | 5443152 | 5443165 | 2 | 7  | 14 | GT   | 28 | 7  |
| 171828 | 20 | 5448797 | 5448828 | 2 | 16 | 32 | GT   | 17 | 8  |
| 171834 | 20 | 5464410 | 5464424 | 3 | 5  | 15 | GCT  | 27 | 5  |
| 171841 | 20 | 5488580 | 5488591 | 2 | 6  | 12 | AC   | 26 | 3  |
| 171843 | 20 | 5490764 | 5490787 | 3 | 8  | 24 | CAT  | 21 | 5  |
| 171847 | 20 | 5501024 | 5501041 | 3 | 6  | 18 | AAT  | 13 | 3  |
| 171855 | 20 | 5532758 | 5532809 | 2 | 26 | 52 | AG   | 8  | 11 |
| 171857 | 20 | 5551009 | 5551036 | 4 | 7  | 28 | GTTT | 22 | 4  |
| 171859 | 20 | 5563729 | 5563740 | 2 | 6  | 12 | TG   | 27 | 3  |
| 171869 | 20 | 5592537 | 5592552 | 2 | 8  | 16 | GT   | 8  | 7  |
| 171872 | 20 | 5599349 | 5599364 | 2 | 8  | 16 | GA   | 16 | 6  |
| 171873 | 20 | 5599489 | 5599510 | 2 | 11 | 22 | GA   | 17 | 5  |
| 171879 | 20 | 5615243 | 5615268 | 2 | 13 | 26 | AG   | 13 | 9  |
| 171888 | 20 | 5628557 | 5628568 | 2 | 6  | 12 | AT   | 29 | 10 |
| 171891 | 20 | 5631566 | 5631577 | 2 | 6  | 12 | AG   | 32 | 6  |
| 171896 | 20 | 5640623 | 5640634 | 2 | 6  | 12 | AC   | 23 | 5  |
| 171900 | 20 | 5644814 | 5644834 | 3 | 7  | 21 | CAG  | 14 | 5  |
| 171906 | 20 | 5650045 | 5650056 | 2 | 6  | 12 | GT   | 12 | 11 |
| 171907 | 20 | 5650059 | 5650074 | 2 | 8  | 16 | GT   | 14 | 12 |
| 171917 | 20 | 5678795 | 5678808 | 2 | 7  | 14 | AT   | 26 | 4  |

|        |    |         |         |   |    |    |      |    |    |
|--------|----|---------|---------|---|----|----|------|----|----|
| 171921 | 20 | 5688124 | 5688139 | 4 | 4  | 16 | ATGG | 32 | 3  |
| 171924 | 20 | 5707466 | 5707489 | 2 | 12 | 24 | AC   | 15 | 4  |
| 171931 | 20 | 5716061 | 5716078 | 2 | 9  | 18 | AG   | 17 | 3  |
| 171939 | 20 | 5728269 | 5728286 | 2 | 9  | 18 | AG   | 21 | 3  |
| 171942 | 20 | 5734305 | 5734336 | 2 | 16 | 32 | GA   | 14 | 7  |
| 171944 | 20 | 5736416 | 5736433 | 3 | 6  | 18 | CCT  | 25 | 5  |
| 171947 | 20 | 5751389 | 5751404 | 2 | 8  | 16 | AG   | 31 | 4  |
| 171950 | 20 | 5754084 | 5754117 | 2 | 17 | 34 | CT   | 9  | 4  |
| 171957 | 20 | 5759977 | 5759994 | 2 | 9  | 18 | TG   | 11 | 3  |
| 171958 | 20 | 5759996 | 5760007 | 2 | 6  | 12 | GT   | 18 | 5  |
| 171969 | 20 | 5772568 | 5772589 | 2 | 11 | 22 | TG   | 24 | 5  |
| 171973 | 20 | 5779932 | 5779959 | 2 | 14 | 28 | CA   | 11 | 10 |
| 171979 | 20 | 5786411 | 5786426 | 2 | 8  | 16 | AC   | 29 | 3  |
| 171982 | 20 | 5787641 | 5787680 | 2 | 20 | 40 | AC   | 9  | 9  |
| 171983 | 20 | 5788861 | 5788878 | 3 | 6  | 18 | ATA  | 28 | 5  |
| 171997 | 20 | 5808339 | 5808350 | 2 | 6  | 12 | GT   | 25 | 4  |
| 172017 | 20 | 5845533 | 5845552 | 2 | 10 | 20 | TC   | 22 | 3  |
| 172020 | 20 | 5847236 | 5847255 | 2 | 10 | 20 | AC   | 15 | 3  |
| 172021 | 20 | 5847488 | 5847499 | 2 | 6  | 12 | CA   | 30 | 3  |
| 172023 | 20 | 5852937 | 5852952 | 2 | 8  | 16 | AG   | 25 | 4  |
| 172030 | 20 | 5867161 | 5867184 | 2 | 12 | 24 | GA   | 17 | 5  |
| 172035 | 20 | 5871669 | 5871686 | 2 | 9  | 18 | GT   | 21 | 4  |
| 172037 | 20 | 5872486 | 5872519 | 2 | 17 | 34 | TG   | 7  | 9  |
| 172042 | 20 | 5877436 | 5877447 | 2 | 6  | 12 | CT   | 18 | 4  |
| 172045 | 20 | 5888962 | 5888979 | 2 | 9  | 18 | TG   | 24 | 5  |
| 172051 | 20 | 5894669 | 5894684 | 2 | 8  | 16 | AC   | 20 | 4  |
| 172056 | 20 | 5906442 | 5906463 | 2 | 11 | 22 | CT   | 19 | 4  |
| 172057 | 20 | 5908600 | 5908611 | 2 | 6  | 12 | AC   | 26 | 3  |
| 172060 | 20 | 5916196 | 5916209 | 2 | 7  | 14 | CA   | 13 | 5  |
| 172061 | 20 | 5916211 | 5916226 | 2 | 8  | 16 | AC   | 11 | 6  |
| 172062 | 20 | 5920338 | 5920349 | 2 | 6  | 12 | AG   | 20 | 4  |
| 172066 | 20 | 5934107 | 5934128 | 2 | 11 | 22 | TC   | 6  | 7  |
| 172070 | 20 | 5946698 | 5946721 | 2 | 12 | 24 | AC   | 8  | 5  |
| 172071 | 20 | 5949615 | 5949636 | 2 | 11 | 22 | TG   | 18 | 6  |
| 172081 | 20 | 5970666 | 5970695 | 2 | 15 | 30 | AC   | 7  | 8  |
| 172084 | 20 | 5988625 | 5988660 | 2 | 18 | 36 | CA   | 11 | 8  |
| 172090 | 20 | 6017784 | 6017798 | 3 | 5  | 15 | CTC  | 29 | 3  |
| 172093 | 20 | 6019254 | 6019265 | 2 | 6  | 12 | GA   | 18 | 3  |
| 172120 | 20 | 6077285 | 6077299 | 3 | 5  | 15 | GCA  | 28 | 3  |
| 172127 | 20 | 6086774 | 6086791 | 2 | 9  | 18 | CA   | 7  | 7  |
| 172133 | 20 | 6098883 | 6098904 | 2 | 11 | 22 | TG   | 23 | 6  |
| 172138 | 20 | 6113356 | 6113373 | 2 | 9  | 18 | AC   | 13 | 3  |
| 172139 | 20 | 6117081 | 6117092 | 2 | 6  | 12 | AC   | 24 | 4  |
| 172142 | 20 | 6119781 | 6119798 | 3 | 6  | 18 | GAT  | 23 | 3  |
| 172145 | 20 | 6127302 | 6127325 | 2 | 12 | 24 | TG   | 18 | 6  |
| 172154 | 20 | 6147199 | 6147226 | 2 | 14 | 28 | AG   | 11 | 11 |
| 172161 | 20 | 6166418 | 6166433 | 4 | 4  | 16 | AAAG | 20 | 5  |
| 172171 | 20 | 6184773 | 6184804 | 4 | 8  | 32 | ATGT | 13 | 4  |
| 172185 | 20 | 6206188 | 6206199 | 2 | 6  | 12 | CA   | 23 | 3  |
| 172238 | 20 | 6281141 | 6281152 | 2 | 6  | 12 | GA   | 20 | 7  |
| 172243 | 20 | 6290457 | 6290482 | 2 | 13 | 26 | CA   | 9  | 11 |

|        |    |         |         |   |    |    |      |    |    |
|--------|----|---------|---------|---|----|----|------|----|----|
| 172244 | 20 | 6290570 | 6290587 | 2 | 9  | 18 | AC   | 16 | 6  |
| 172258 | 20 | 6314314 | 6314334 | 3 | 7  | 21 | TGG  | 23 | 4  |
| 172273 | 20 | 6345073 | 6345093 | 3 | 7  | 21 | AGC  | 31 | 3  |
| 172278 | 20 | 6355146 | 6355157 | 2 | 6  | 12 | GT   | 16 | 4  |
| 172279 | 20 | 6355314 | 6355329 | 2 | 8  | 16 | GT   | 20 | 4  |
| 172289 | 20 | 6376070 | 6376113 | 4 | 11 | 44 | TCTG | 15 | 6  |
| 172290 | 20 | 6381451 | 6381465 | 3 | 5  | 15 | CCA  | 24 | 5  |
| 172291 | 20 | 6385983 | 6386006 | 2 | 12 | 24 | TC   | 18 | 4  |
| 172296 | 20 | 6391916 | 6391931 | 2 | 8  | 16 | AG   | 29 | 3  |
| 172299 | 20 | 6393956 | 6393971 | 2 | 8  | 16 | TC   | 19 | 11 |
| 172303 | 20 | 6399050 | 6399079 | 2 | 15 | 30 | AC   | 15 | 6  |
| 172316 | 20 | 6416512 | 6416543 | 2 | 16 | 32 | CA   | 11 | 9  |
| 172324 | 20 | 6431048 | 6431077 | 2 | 15 | 30 | TG   | 20 | 7  |
| 172326 | 20 | 6434329 | 6434348 | 2 | 10 | 20 | CT   | 20 | 7  |
| 172327 | 20 | 6434928 | 6434943 | 2 | 8  | 16 | TA   | 7  | 3  |
| 172336 | 20 | 6454392 | 6454403 | 2 | 6  | 12 | GT   | 24 | 5  |
| 172356 | 20 | 6509774 | 6509803 | 3 | 10 | 30 | CTT  | 23 | 10 |
| 172358 | 20 | 6510178 | 6510192 | 3 | 5  | 15 | TCT  | 20 | 3  |
| 172390 | 20 | 6591964 | 6591995 | 2 | 16 | 32 | TG   | 17 | 12 |
| 172424 | 20 | 6664205 | 6664216 | 2 | 6  | 12 | GT   | 19 | 4  |
| 172430 | 20 | 6675715 | 6675748 | 2 | 17 | 34 | AC   | 14 | 13 |
| 172433 | 20 | 6680897 | 6680920 | 3 | 8  | 24 | CTC  | 17 | 4  |
| 172435 | 20 | 6684514 | 6684547 | 2 | 17 | 34 | CA   | 13 | 10 |
| 172440 | 20 | 6700131 | 6700148 | 2 | 9  | 18 | CT   | 11 | 8  |
| 172452 | 20 | 6722791 | 6722834 | 2 | 22 | 44 | GT   | 6  | 7  |
| 172457 | 20 | 6729133 | 6729146 | 2 | 7  | 14 | CA   | 23 | 4  |
| 172495 | 20 | 6792173 | 6792184 | 2 | 6  | 12 | TG   | 28 | 3  |
| 172496 | 20 | 6794293 | 6794310 | 2 | 9  | 18 | GT   | 16 | 7  |
| 172497 | 20 | 6794312 | 6794327 | 2 | 8  | 16 | TG   | 7  | 3  |
| 172499 | 20 | 6797821 | 6797832 | 2 | 6  | 12 | TC   | 30 | 3  |
| 172502 | 20 | 6807041 | 6807056 | 2 | 8  | 16 | CT   | 22 | 5  |
| 172504 | 20 | 6810250 | 6810279 | 2 | 15 | 30 | AG   | 14 | 8  |
| 172507 | 20 | 6825213 | 6825238 | 2 | 13 | 26 | AC   | 7  | 7  |
| 172509 | 20 | 6826182 | 6826221 | 2 | 20 | 40 | GT   | 9  | 9  |
| 172513 | 20 | 6832070 | 6832093 | 4 | 6  | 24 | GTCT | 18 | 5  |
| 172515 | 20 | 6843166 | 6843191 | 2 | 13 | 26 | GT   | 12 | 7  |
| 172520 | 20 | 6847606 | 6847629 | 3 | 8  | 24 | AGG  | 17 | 3  |
| 172521 | 20 | 6848946 | 6848963 | 2 | 9  | 18 | CA   | 16 | 5  |
| 172523 | 20 | 6850829 | 6850840 | 2 | 6  | 12 | AT   | 22 | 4  |
| 172526 | 20 | 6853545 | 6853559 | 3 | 5  | 15 | GCT  | 22 | 7  |
| 172527 | 20 | 6853647 | 6853658 | 2 | 6  | 12 | TG   | 17 | 11 |
| 172528 | 20 | 6853660 | 6853671 | 2 | 6  | 12 | GT   | 16 | 10 |
| 172537 | 20 | 6862459 | 6862473 | 3 | 5  | 15 | TAC  | 28 | 3  |
| 172539 | 20 | 6867165 | 6867180 | 2 | 8  | 16 | AC   | 18 | 4  |
| 172541 | 20 | 6868362 | 6868385 | 3 | 8  | 24 | TGT  | 17 | 7  |
| 172544 | 20 | 6868996 | 6869055 | 4 | 15 | 60 | ATCT | 16 | 14 |
| 172547 | 20 | 6870044 | 6870067 | 2 | 12 | 24 | TG   | 13 | 6  |
| 172549 | 20 | 6872456 | 6872473 | 3 | 6  | 18 | GCA  | 12 | 4  |
| 172556 | 20 | 6879551 | 6879568 | 3 | 6  | 18 | GCC  | 15 | 6  |
| 172558 | 20 | 6879916 | 6879933 | 2 | 9  | 18 | CT   | 15 | 6  |
| 172559 | 20 | 6881262 | 6881277 | 2 | 8  | 16 | GA   | 30 | 7  |

|        |    |         |         |   |    |    |      |    |    |
|--------|----|---------|---------|---|----|----|------|----|----|
| 172563 | 20 | 6890623 | 6890640 | 2 | 9  | 18 | TG   | 22 | 8  |
| 172567 | 20 | 6893741 | 6893752 | 2 | 6  | 12 | GT   | 27 | 5  |
| 172568 | 20 | 6893754 | 6893769 | 2 | 8  | 16 | TG   | 25 | 4  |
| 172569 | 20 | 6893901 | 6893916 | 2 | 8  | 16 | AC   | 13 | 11 |
| 172571 | 20 | 6898946 | 6898960 | 3 | 5  | 15 | CCT  | 17 | 4  |
| 172580 | 20 | 6913804 | 6913819 | 2 | 8  | 16 | TC   | 19 | 3  |
| 172582 | 20 | 6916744 | 6916757 | 2 | 7  | 14 | GA   | 24 | 6  |
| 172590 | 20 | 6947390 | 6947410 | 3 | 7  | 21 | AAC  | 26 | 7  |
| 172594 | 20 | 6949896 | 6949910 | 3 | 5  | 15 | TCT  | 32 | 4  |
| 172595 | 20 | 6953800 | 6953814 | 3 | 5  | 15 | AAC  | 21 | 3  |
| 172597 | 20 | 6962146 | 6962165 | 2 | 10 | 20 | GT   | 19 | 8  |
| 172598 | 20 | 6965871 | 6965882 | 2 | 6  | 12 | TG   | 27 | 3  |
| 172603 | 20 | 6984734 | 6984751 | 2 | 9  | 18 | CA   | 16 | 8  |
| 172604 | 20 | 6984754 | 6984765 | 2 | 6  | 12 | CA   | 22 | 11 |
| 172606 | 20 | 6985181 | 6985198 | 2 | 9  | 18 | AC   | 24 | 4  |
| 172608 | 20 | 6987836 | 6987851 | 2 | 8  | 16 | GA   | 30 | 9  |
| 172612 | 20 | 6992668 | 6992688 | 3 | 7  | 21 | CCT  | 24 | 3  |
| 172613 | 20 | 6992793 | 6992812 | 2 | 10 | 20 | TG   | 17 | 6  |
| 172620 | 20 | 7010102 | 7010115 | 2 | 7  | 14 | GT   | 10 | 3  |
| 172624 | 20 | 7024903 | 7024914 | 2 | 6  | 12 | CA   | 23 | 4  |
| 172625 | 20 | 7026187 | 7026225 | 3 | 13 | 39 | TCT  | 15 | 10 |
| 172626 | 20 | 7028270 | 7028302 | 3 | 11 | 33 | TCT  | 16 | 4  |
| 172627 | 20 | 7030911 | 7030925 | 3 | 5  | 15 | TAA  | 18 | 3  |
| 172629 | 20 | 7034279 | 7034310 | 4 | 8  | 32 | TTTG | 29 | 8  |
| 172630 | 20 | 7035221 | 7035236 | 2 | 8  | 16 | TG   | 19 | 12 |
| 172635 | 20 | 7054427 | 7054446 | 4 | 5  | 20 | TTTC | 11 | 7  |
| 172638 | 20 | 7054789 | 7054824 | 2 | 18 | 36 | TC   | 9  | 8  |
| 172641 | 20 | 7055054 | 7055079 | 2 | 13 | 26 | CA   | 19 | 8  |
| 172642 | 20 | 7055286 | 7055309 | 3 | 8  | 24 | CTT  | 28 | 5  |
| 172644 | 20 | 7055812 | 7055837 | 2 | 13 | 26 | AC   | 18 | 10 |
| 172649 | 20 | 7087574 | 7087589 | 2 | 8  | 16 | AT   | 22 | 3  |
| 172652 | 20 | 7092615 | 7092626 | 2 | 6  | 12 | GT   | 17 | 4  |
| 172663 | 20 | 7116337 | 7116348 | 2 | 6  | 12 | AC   | 13 | 4  |
| 172664 | 20 | 7116351 | 7116366 | 2 | 8  | 16 | AC   | 16 | 6  |
| 172665 | 20 | 7117283 | 7117302 | 2 | 10 | 20 | CA   | 20 | 5  |
| 172673 | 20 | 7147634 | 7147645 | 2 | 6  | 12 | AC   | 21 | 12 |
| 172678 | 20 | 7156838 | 7156849 | 2 | 6  | 12 | AC   | 8  | 4  |
| 172681 | 20 | 7160268 | 7160285 | 2 | 9  | 18 | AC   | 26 | 12 |
| 172685 | 20 | 7160644 | 7160661 | 3 | 6  | 18 | AAC  | 11 | 9  |
| 172690 | 20 | 7168481 | 7168498 | 2 | 9  | 18 | CA   | 32 | 3  |
| 172707 | 20 | 7217271 | 7217286 | 2 | 8  | 16 | CA   | 22 | 11 |
| 172710 | 20 | 7236078 | 7236105 | 4 | 7  | 28 | GGTT | 21 | 9  |
| 172711 | 20 | 7237091 | 7237150 | 3 | 20 | 60 | AGA  | 18 | 16 |
| 172713 | 20 | 7239285 | 7239306 | 2 | 11 | 22 | TG   | 30 | 6  |
| 172714 | 20 | 7245110 | 7245145 | 3 | 12 | 36 | TAA  | 12 | 5  |
| 172727 | 20 | 7263389 | 7263404 | 2 | 8  | 16 | CA   | 18 | 7  |
| 172734 | 20 | 7289047 | 7289064 | 2 | 9  | 18 | AC   | 26 | 4  |
| 172735 | 20 | 7289488 | 7289507 | 2 | 10 | 20 | TG   | 7  | 3  |
| 172738 | 20 | 7293081 | 7293102 | 2 | 11 | 22 | TG   | 11 | 9  |
| 172743 | 20 | 7299440 | 7299483 | 2 | 22 | 44 | AC   | 11 | 14 |
| 172746 | 20 | 7316280 | 7316305 | 2 | 13 | 26 | CA   | 19 | 13 |

|        |    |         |         |   |    |    |      |    |    |
|--------|----|---------|---------|---|----|----|------|----|----|
| 172747 | 20 | 7317804 | 7317831 | 2 | 14 | 28 | AC   | 14 | 11 |
| 172751 | 20 | 7325820 | 7325831 | 2 | 6  | 12 | TC   | 27 | 3  |
| 172754 | 20 | 7341523 | 7341538 | 2 | 8  | 16 | AT   | 6  | 4  |
| 172758 | 20 | 7348788 | 7348805 | 2 | 9  | 18 | GT   | 19 | 5  |
| 172759 | 20 | 7350147 | 7350168 | 2 | 11 | 22 | GT   | 24 | 19 |
| 172762 | 20 | 7355539 | 7355560 | 2 | 11 | 22 | AC   | 22 | 11 |
| 172764 | 20 | 7357245 | 7357264 | 2 | 10 | 20 | CA   | 18 | 8  |
| 172769 | 20 | 7365783 | 7365800 | 2 | 9  | 18 | TG   | 22 | 12 |
| 172770 | 20 | 7365906 | 7365929 | 3 | 8  | 24 | TGC  | 22 | 4  |
| 172771 | 20 | 7367722 | 7367743 | 2 | 11 | 22 | CA   | 21 | 9  |
| 172772 | 20 | 7368434 | 7368453 | 2 | 10 | 20 | TG   | 20 | 9  |
| 172786 | 20 | 7380045 | 7380058 | 2 | 7  | 14 | AG   | 20 | 3  |
| 172788 | 20 | 7384028 | 7384042 | 3 | 5  | 15 | TTG  | 24 | 5  |
| 172791 | 20 | 7388675 | 7388692 | 2 | 9  | 18 | GT   | 18 | 3  |
| 172796 | 20 | 7396196 | 7396237 | 2 | 21 | 42 | TG   | 12 | 12 |
| 172797 | 20 | 7396523 | 7396550 | 2 | 14 | 28 | CA   | 17 | 10 |
| 172798 | 20 | 7396696 | 7396717 | 2 | 11 | 22 | GT   | 15 | 5  |
| 172799 | 20 | 7396929 | 7396950 | 2 | 11 | 22 | TG   | 17 | 9  |
| 172802 | 20 | 7404737 | 7404756 | 2 | 10 | 20 | CT   | 20 | 9  |
| 172810 | 20 | 7406642 | 7406667 | 2 | 13 | 26 | TG   | 15 | 7  |
| 172814 | 20 | 7410690 | 7410711 | 2 | 11 | 22 | CA   | 14 | 8  |
| 172817 | 20 | 7413529 | 7413550 | 2 | 11 | 22 | GT   | 16 | 8  |
| 172818 | 20 | 7417395 | 7417406 | 2 | 6  | 12 | CA   | 21 | 5  |
| 172819 | 20 | 7420677 | 7420696 | 2 | 10 | 20 | AG   | 26 | 6  |
| 172823 | 20 | 7423595 | 7423609 | 3 | 5  | 15 | GCT  | 27 | 4  |
| 172824 | 20 | 7426460 | 7426481 | 2 | 11 | 22 | GT   | 22 | 7  |
| 172826 | 20 | 7427118 | 7427135 | 2 | 9  | 18 | TG   | 15 | 5  |
| 172827 | 20 | 7428955 | 7428966 | 2 | 6  | 12 | TC   | 32 | 3  |
| 172832 | 20 | 7439689 | 7439720 | 2 | 16 | 32 | AC   | 6  | 6  |
| 172836 | 20 | 7446576 | 7446605 | 3 | 10 | 30 | GAG  | 12 | 4  |
| 172838 | 20 | 7449790 | 7449805 | 2 | 8  | 16 | AG   | 22 | 4  |
| 172847 | 20 | 7469660 | 7469674 | 3 | 5  | 15 | AAG  | 15 | 6  |
| 172856 | 20 | 7486081 | 7486092 | 2 | 6  | 12 | AT   | 14 | 3  |
| 172858 | 20 | 7490316 | 7490342 | 3 | 9  | 27 | GTT  | 18 | 5  |
| 172860 | 20 | 7495561 | 7495574 | 2 | 7  | 14 | AG   | 27 | 4  |
| 172862 | 20 | 7497288 | 7497311 | 4 | 6  | 24 | TCAA | 31 | 3  |
| 172864 | 20 | 7502193 | 7502204 | 2 | 6  | 12 | GA   | 12 | 4  |
| 172865 | 20 | 7502206 | 7502223 | 2 | 9  | 18 | AG   | 11 | 4  |
| 172870 | 20 | 7503002 | 7503023 | 2 | 11 | 22 | AG   | 15 | 8  |
| 172881 | 20 | 7522869 | 7522884 | 2 | 8  | 16 | CA   | 26 | 5  |
| 172882 | 20 | 7523033 | 7523050 | 2 | 9  | 18 | CA   | 25 | 3  |
| 172887 | 20 | 7544422 | 7544435 | 2 | 7  | 14 | GA   | 16 | 5  |
| 172888 | 20 | 7544573 | 7544586 | 2 | 7  | 14 | GT   | 20 | 9  |
| 172893 | 20 | 7551994 | 7552017 | 2 | 12 | 24 | GT   | 18 | 11 |
| 172896 | 20 | 7552221 | 7552232 | 2 | 6  | 12 | TC   | 18 | 4  |
| 172901 | 20 | 7558837 | 7558862 | 2 | 13 | 26 | TG   | 14 | 8  |
| 172902 | 20 | 7559070 | 7559085 | 2 | 8  | 16 | TG   | 27 | 6  |
| 172908 | 20 | 7596097 | 7596126 | 2 | 15 | 30 | AG   | 22 | 13 |
| 172911 | 20 | 7599055 | 7599068 | 2 | 7  | 14 | GA   | 11 | 4  |
| 172912 | 20 | 7602443 | 7602454 | 2 | 6  | 12 | TG   | 25 | 4  |
| 172915 | 20 | 7609632 | 7609643 | 2 | 6  | 12 | TG   | 21 | 5  |

|        |    |         |         |   |    |    |      |    |    |
|--------|----|---------|---------|---|----|----|------|----|----|
| 172916 | 20 | 7610356 | 7610373 | 2 | 9  | 18 | AG   | 23 | 3  |
| 172918 | 20 | 7613817 | 7613834 | 2 | 9  | 18 | AC   | 26 | 3  |
| 172921 | 20 | 7617175 | 7617189 | 3 | 5  | 15 | AAC  | 19 | 3  |
| 172924 | 20 | 7623597 | 7623614 | 2 | 9  | 18 | TG   | 29 | 6  |
| 172932 | 20 | 7647897 | 7647914 | 2 | 9  | 18 | GT   | 23 | 7  |
| 172933 | 20 | 7648063 | 7648104 | 2 | 21 | 42 | TG   | 6  | 6  |
| 172937 | 20 | 7651052 | 7651075 | 4 | 6  | 24 | GTAA | 15 | 5  |
| 172944 | 20 | 7673615 | 7673632 | 2 | 9  | 18 | CA   | 15 | 14 |
| 172946 | 20 | 7676106 | 7676117 | 2 | 6  | 12 | GT   | 23 | 6  |
| 172952 | 20 | 7679182 | 7679211 | 2 | 15 | 30 | AC   | 22 | 14 |
| 172954 | 20 | 7680097 | 7680110 | 2 | 7  | 14 | GT   | 26 | 3  |
| 172957 | 20 | 7681280 | 7681307 | 2 | 14 | 28 | GT   | 15 | 11 |
| 172961 | 20 | 7686612 | 7686627 | 4 | 4  | 16 | GACT | 25 | 6  |
| 172962 | 20 | 7692328 | 7692348 | 3 | 7  | 21 | CAC  | 12 | 4  |
| 172968 | 20 | 7702914 | 7702929 | 2 | 8  | 16 | TC   | 22 | 5  |
| 172970 | 20 | 7706396 | 7706416 | 3 | 7  | 21 | TTG  | 23 | 4  |
| 172977 | 20 | 7711763 | 7711778 | 4 | 4  | 16 | TTTA | 20 | 4  |
| 172983 | 20 | 7712519 | 7712539 | 3 | 7  | 21 | TCC  | 14 | 4  |
| 172986 | 20 | 7712922 | 7712955 | 2 | 17 | 34 | CA   | 17 | 12 |
| 173000 | 20 | 7734618 | 7734647 | 3 | 10 | 30 | GGA  | 12 | 4  |
| 173003 | 20 | 7743891 | 7743911 | 3 | 7  | 21 | CAG  | 24 | 6  |
| 173007 | 20 | 7754919 | 7754936 | 3 | 6  | 18 | CTT  | 19 | 8  |
| 173008 | 20 | 7754938 | 7754955 | 3 | 6  | 18 | TTC  | 18 | 7  |
| 173012 | 20 | 7758929 | 7758952 | 2 | 12 | 24 | TG   | 11 | 5  |
| 173014 | 20 | 7772967 | 7772984 | 2 | 9  | 18 | CA   | 26 | 8  |
| 173016 | 20 | 7774198 | 7774231 | 2 | 17 | 34 | TG   | 12 | 8  |
| 173019 | 20 | 7777996 | 7778015 | 2 | 10 | 20 | AG   | 13 | 5  |
| 173022 | 20 | 7778777 | 7778804 | 2 | 14 | 28 | GA   | 6  | 6  |
| 173023 | 20 | 7779603 | 7779630 | 2 | 14 | 28 | TG   | 20 | 6  |
| 173024 | 20 | 7782557 | 7782574 | 2 | 9  | 18 | AG   | 17 | 7  |
| 173025 | 20 | 7786216 | 7786237 | 2 | 11 | 22 | GT   | 19 | 4  |
| 173030 | 20 | 7787637 | 7787650 | 2 | 7  | 14 | AT   | 19 | 3  |
| 173031 | 20 | 7793775 | 7793794 | 2 | 10 | 20 | AC   | 15 | 16 |
| 173041 | 20 | 7823307 | 7823330 | 2 | 12 | 24 | TG   | 14 | 11 |
| 173043 | 20 | 7830699 | 7830744 | 2 | 23 | 46 | AC   | 6  | 7  |
| 173050 | 20 | 7841329 | 7841368 | 2 | 20 | 40 | AC   | 15 | 10 |
| 173055 | 20 | 7844132 | 7844143 | 2 | 6  | 12 | GT   | 16 | 6  |
| 173058 | 20 | 7845106 | 7845117 | 2 | 6  | 12 | GA   | 15 | 5  |
| 173061 | 20 | 7850038 | 7850061 | 3 | 8  | 24 | TCC  | 22 | 7  |
| 173065 | 20 | 7850813 | 7850834 | 2 | 11 | 22 | TC   | 24 | 3  |
| 173066 | 20 | 7851055 | 7851076 | 2 | 11 | 22 | AC   | 9  | 5  |
| 173070 | 20 | 7855163 | 7855218 | 2 | 28 | 56 | GA   | 13 | 12 |
| 173071 | 20 | 7855678 | 7855717 | 2 | 20 | 40 | CA   | 12 | 12 |
| 173073 | 20 | 7855884 | 7855895 | 2 | 6  | 12 | AC   | 17 | 4  |
| 173074 | 20 | 7856414 | 7856427 | 2 | 7  | 14 | CT   | 16 | 4  |
| 173075 | 20 | 7856428 | 7856441 | 2 | 7  | 14 | CA   | 13 | 5  |
| 173076 | 20 | 7860603 | 7860629 | 3 | 9  | 27 | AAC  | 22 | 9  |
| 173080 | 20 | 7862362 | 7862379 | 3 | 6  | 18 | ATT  | 16 | 5  |
| 173081 | 20 | 7862450 | 7862461 | 2 | 6  | 12 | TC   | 23 | 5  |
| 173084 | 20 | 7868755 | 7868768 | 2 | 7  | 14 | TG   | 26 | 4  |
| 173085 | 20 | 7870546 | 7870575 | 2 | 15 | 30 | CA   | 14 | 7  |

|        |    |         |         |   |    |    |      |    |    |
|--------|----|---------|---------|---|----|----|------|----|----|
| 173086 | 20 | 7870631 | 7870650 | 2 | 10 | 20 | AC   | 20 | 6  |
| 173088 | 20 | 7870973 | 7870984 | 2 | 6  | 12 | TG   | 16 | 5  |
| 173090 | 20 | 7871765 | 7871778 | 2 | 7  | 14 | GA   | 14 | 5  |
| 173091 | 20 | 7871849 | 7871862 | 2 | 7  | 14 | GA   | 21 | 4  |
| 173093 | 20 | 7874471 | 7874490 | 4 | 5  | 20 | TTTA | 12 | 3  |
| 173099 | 20 | 7894156 | 7894177 | 2 | 11 | 22 | AC   | 7  | 5  |
| 173100 | 20 | 7898602 | 7898631 | 2 | 15 | 30 | GA   | 14 | 8  |
| 173101 | 20 | 7905154 | 7905173 | 4 | 5  | 20 | AGCC | 29 | 3  |
| 173102 | 20 | 7910906 | 7910929 | 3 | 8  | 24 | TGC  | 27 | 8  |
| 173107 | 20 | 7912591 | 7912612 | 2 | 11 | 22 | CA   | 9  | 8  |
| 173108 | 20 | 7913171 | 7913182 | 2 | 6  | 12 | AC   | 21 | 5  |
| 173114 | 20 | 7914086 | 7914097 | 2 | 6  | 12 | GA   | 22 | 5  |
| 173117 | 20 | 7914372 | 7914383 | 2 | 6  | 12 | CT   | 23 | 3  |
| 173125 | 20 | 7935907 | 7935926 | 2 | 10 | 20 | TG   | 14 | 5  |
| 173130 | 20 | 7946702 | 7946725 | 3 | 8  | 24 | TTC  | 21 | 3  |
| 173132 | 20 | 7957337 | 7957348 | 2 | 6  | 12 | CA   | 23 | 3  |
| 173139 | 20 | 7966248 | 7966267 | 2 | 10 | 20 | CA   | 26 | 11 |
| 173146 | 20 | 7973522 | 7973537 | 2 | 8  | 16 | TG   | 18 | 5  |
| 173165 | 20 | 8021295 | 8021308 | 2 | 7  | 14 | CA   | 19 | 12 |
| 173166 | 20 | 8022824 | 8022844 | 3 | 7  | 21 | GAG  | 31 | 7  |
| 173171 | 20 | 8040388 | 8040411 | 3 | 8  | 24 | CAT  | 22 | 5  |
| 173172 | 20 | 8040924 | 8040938 | 3 | 5  | 15 | GCT  | 27 | 6  |
| 173178 | 20 | 8049257 | 8049270 | 2 | 7  | 14 | AC   | 29 | 3  |
| 173179 | 20 | 8053024 | 8053039 | 4 | 4  | 16 | AGAA | 20 | 3  |
| 173180 | 20 | 8053241 | 8053276 | 2 | 18 | 36 | AC   | 10 | 9  |
| 173181 | 20 | 8053393 | 8053407 | 3 | 5  | 15 | TGC  | 24 | 7  |
| 173182 | 20 | 8053660 | 8053695 | 3 | 12 | 36 | AGG  | 19 | 8  |
| 173184 | 20 | 8056239 | 8056254 | 2 | 8  | 16 | GT   | 23 | 9  |
| 173185 | 20 | 8056256 | 8056273 | 2 | 9  | 18 | TG   | 19 | 8  |
| 173186 | 20 | 8063857 | 8063880 | 4 | 6  | 24 | TCTT | 26 | 12 |
| 173189 | 20 | 8071773 | 8071784 | 2 | 6  | 12 | CA   | 28 | 3  |
| 173192 | 20 | 8075440 | 8075453 | 2 | 7  | 14 | GT   | 24 | 3  |
| 173197 | 20 | 8080901 | 8080918 | 2 | 9  | 18 | TG   | 18 | 10 |
| 173205 | 20 | 8101966 | 8102007 | 2 | 21 | 42 | AC   | 10 | 11 |
| 173208 | 20 | 8108840 | 8108851 | 2 | 6  | 12 | AC   | 18 | 3  |
| 173209 | 20 | 8108902 | 8108925 | 4 | 6  | 24 | CAGT | 18 | 3  |
| 173212 | 20 | 8109777 | 8109857 | 3 | 27 | 81 | CTT  | 23 | 20 |
| 173217 | 20 | 8120217 | 8120232 | 2 | 8  | 16 | TC   | 9  | 11 |
| 173220 | 20 | 8122927 | 8122942 | 2 | 8  | 16 | GT   | 19 | 6  |
| 173221 | 20 | 8125291 | 8125306 | 2 | 8  | 16 | CA   | 7  | 3  |
| 173222 | 20 | 8134394 | 8134411 | 3 | 6  | 18 | CAG  | 30 | 5  |
| 173223 | 20 | 8134450 | 8134473 | 4 | 6  | 24 | TTTG | 22 | 5  |
| 173225 | 20 | 8134871 | 8134896 | 2 | 13 | 26 | CA   | 20 | 7  |
| 173227 | 20 | 8135754 | 8135773 | 2 | 10 | 20 | GT   | 18 | 7  |
| 173230 | 20 | 8144520 | 8144535 | 2 | 8  | 16 | AC   | 19 | 5  |
| 173231 | 20 | 8144855 | 8144874 | 2 | 10 | 20 | GT   | 23 | 8  |
| 173233 | 20 | 8148614 | 8148633 | 4 | 5  | 20 | TTTA | 22 | 3  |
| 173240 | 20 | 8154333 | 8154354 | 2 | 11 | 22 | GT   | 19 | 11 |
| 173245 | 20 | 8174332 | 8174361 | 3 | 10 | 30 | TAT  | 10 | 4  |
| 173249 | 20 | 8176524 | 8176544 | 3 | 7  | 21 | CTT  | 18 | 5  |
| 173255 | 20 | 8206375 | 8206394 | 2 | 10 | 20 | GT   | 18 | 13 |

|        |    |         |         |   |    |    |      |    |    |
|--------|----|---------|---------|---|----|----|------|----|----|
| 173257 | 20 | 8206928 | 8206951 | 4 | 6  | 24 | TCTG | 20 | 4  |
| 173259 | 20 | 8212149 | 8212168 | 4 | 5  | 20 | AAAC | 24 | 4  |
| 173260 | 20 | 8212859 | 8212873 | 3 | 5  | 15 | GCA  | 25 | 5  |
| 173273 | 20 | 8227148 | 8227163 | 2 | 8  | 16 | CA   | 20 | 5  |
| 173280 | 20 | 8241392 | 8241409 | 3 | 6  | 18 | CAC  | 19 | 5  |
| 173283 | 20 | 8243509 | 8243546 | 2 | 19 | 38 | CA   | 8  | 10 |
| 173284 | 20 | 8243626 | 8243640 | 3 | 5  | 15 | GGA  | 10 | 4  |
| 173285 | 20 | 8243860 | 8243871 | 2 | 6  | 12 | TG   | 20 | 6  |
| 173286 | 20 | 8244045 | 8244064 | 2 | 10 | 20 | GT   | 17 | 8  |
| 173288 | 20 | 8244551 | 8244564 | 2 | 7  | 14 | TG   | 22 | 5  |
| 173291 | 20 | 8247355 | 8247368 | 2 | 7  | 14 | GT   | 34 | 3  |
| 173292 | 20 | 8247621 | 8247634 | 2 | 7  | 14 | TG   | 20 | 4  |
| 173295 | 20 | 8250404 | 8250429 | 2 | 13 | 26 | CA   | 16 | 8  |
| 173297 | 20 | 8251258 | 8251269 | 2 | 6  | 12 | CA   | 24 | 7  |
| 173299 | 20 | 8252955 | 8252980 | 2 | 13 | 26 | TG   | 12 | 8  |
| 173322 | 20 | 8319733 | 8319748 | 4 | 4  | 16 | TTTG | 14 | 3  |
| 173325 | 20 | 8326050 | 8326065 | 2 | 8  | 16 | TG   | 22 | 10 |
| 173329 | 20 | 8334295 | 8334316 | 2 | 11 | 22 | GA   | 18 | 6  |
| 173331 | 20 | 8336430 | 8336483 | 2 | 27 | 54 | CA   | 6  | 7  |
| 173333 | 20 | 8340380 | 8340409 | 3 | 10 | 30 | CAT  | 22 | 6  |
| 173336 | 20 | 8346393 | 8346413 | 3 | 7  | 21 | TCA  | 15 | 3  |
| 173343 | 20 | 8370018 | 8370073 | 4 | 14 | 56 | CTAT | 23 | 12 |
| 173346 | 20 | 8377319 | 8377350 | 2 | 16 | 32 | CA   | 12 | 9  |
| 173347 | 20 | 8377692 | 8377718 | 3 | 9  | 27 | AGC  | 6  | 5  |
| 173351 | 20 | 8378902 | 8378913 | 2 | 6  | 12 | AC   | 12 | 5  |
| 173352 | 20 | 8383038 | 8383049 | 2 | 6  | 12 | CT   | 25 | 5  |
| 173353 | 20 | 8385987 | 8386002 | 4 | 4  | 16 | CATT | 30 | 3  |
| 173363 | 20 | 8421177 | 8421190 | 2 | 7  | 14 | AC   | 16 | 4  |
| 173364 | 20 | 8421210 | 8421221 | 2 | 6  | 12 | CA   | 13 | 3  |
| 173366 | 20 | 8425533 | 8425556 | 4 | 6  | 24 | ACAG | 26 | 4  |
| 173371 | 20 | 8431117 | 8431132 | 2 | 8  | 16 | CA   | 23 | 7  |
| 173374 | 20 | 8442213 | 8442224 | 2 | 6  | 12 | AG   | 24 | 3  |
| 173384 | 20 | 8456410 | 8456433 | 2 | 12 | 24 | CA   | 14 | 10 |
| 173392 | 20 | 8468767 | 8468786 | 4 | 5  | 20 | AAAC | 19 | 6  |
| 173399 | 20 | 8500192 | 8500231 | 2 | 20 | 40 | GT   | 16 | 8  |
| 173401 | 20 | 8509830 | 8509867 | 2 | 19 | 38 | GT   | 13 | 9  |
| 173402 | 20 | 8513041 | 8513076 | 2 | 18 | 36 | AC   | 10 | 4  |
| 173403 | 20 | 8513316 | 8513349 | 2 | 17 | 34 | CA   | 9  | 5  |
| 173405 | 20 | 8524033 | 8524050 | 3 | 6  | 18 | GCT  | 27 | 5  |
| 173406 | 20 | 8527396 | 8527419 | 3 | 8  | 24 | GAG  | 19 | 8  |
| 173418 | 20 | 8553184 | 8553199 | 4 | 4  | 16 | CAAA | 37 | 3  |
| 173430 | 20 | 8591191 | 8591208 | 2 | 9  | 18 | TA   | 8  | 5  |
| 173433 | 20 | 8602930 | 8602943 | 2 | 7  | 14 | TG   | 20 | 6  |
| 173434 | 20 | 8603712 | 8603735 | 2 | 12 | 24 | TG   | 11 | 14 |
| 173443 | 20 | 8615628 | 8615642 | 3 | 5  | 15 | TTG  | 26 | 4  |
| 173444 | 20 | 8616851 | 8616864 | 2 | 7  | 14 | GT   | 22 | 6  |
| 173455 | 20 | 8657638 | 8657659 | 2 | 11 | 22 | GT   | 17 | 8  |
| 173457 | 20 | 8660615 | 8660634 | 2 | 10 | 20 | TC   | 29 | 5  |
| 173458 | 20 | 8663566 | 8663583 | 3 | 6  | 18 | AAT  | 29 | 3  |
| 173461 | 20 | 8675524 | 8675544 | 3 | 7  | 21 | TCT  | 26 | 4  |
| 173472 | 20 | 8709800 | 8709811 | 2 | 6  | 12 | TG   | 16 | 9  |



|        |    |         |         |   |    |    |      |    |    |
|--------|----|---------|---------|---|----|----|------|----|----|
| 173473 | 20 | 8710002 | 8710019 | 3 | 6  | 18 | TGC  | 30 | 6  |
| 173480 | 20 | 8733353 | 8733368 | 2 | 8  | 16 | CA   | 17 | 4  |
| 173483 | 20 | 8737624 | 8737635 | 2 | 6  | 12 | CA   | 15 | 3  |
| 173491 | 20 | 8749425 | 8749436 | 2 | 6  | 12 | CT   | 21 | 8  |
| 173492 | 20 | 8749440 | 8749455 | 2 | 8  | 16 | TC   | 11 | 4  |
| 173496 | 20 | 8751304 | 8751317 | 2 | 7  | 14 | AC   | 19 | 7  |
| 173497 | 20 | 8756485 | 8756504 | 2 | 10 | 20 | AC   | 19 | 7  |
| 173501 | 20 | 8765886 | 8765905 | 2 | 10 | 20 | TC   | 28 | 5  |
| 173504 | 20 | 8774264 | 8774293 | 2 | 15 | 30 | CA   | 12 | 10 |
| 173506 | 20 | 8777766 | 8777783 | 3 | 6  | 18 | GAA  | 26 | 5  |
| 173508 | 20 | 8778425 | 8778462 | 2 | 19 | 38 | TC   | 11 | 9  |
| 173509 | 20 | 8789301 | 8789314 | 2 | 7  | 14 | GT   | 19 | 3  |
| 173514 | 20 | 8806442 | 8806457 | 4 | 4  | 16 | GCAA | 26 | 3  |
| 173536 | 20 | 8835978 | 8835995 | 2 | 9  | 18 | TG   | 27 | 6  |
| 173542 | 20 | 8853080 | 8853097 | 3 | 6  | 18 | GAG  | 23 | 5  |
| 173545 | 20 | 8855612 | 8855625 | 2 | 7  | 14 | GA   | 20 | 3  |
| 173556 | 21 | 9112    | 9153    | 2 | 21 | 42 | CA   | 12 | 9  |
| 173559 | 21 | 17598   | 17617   | 4 | 5  | 20 | GATG | 18 | 4  |
| 173561 | 21 | 20820   | 20833   | 2 | 7  | 14 | AC   | 16 | 4  |
| 173563 | 21 | 24112   | 24125   | 2 | 7  | 14 | AC   | 23 | 5  |
| 173582 | 21 | 62022   | 62033   | 2 | 6  | 12 | GT   | 11 | 7  |
| 173583 | 21 | 62214   | 62233   | 2 | 10 | 20 | CA   | 15 | 11 |
| 173586 | 21 | 64004   | 64043   | 2 | 20 | 40 | TG   | 7  | 11 |
| 173587 | 21 | 67169   | 67195   | 3 | 9  | 27 | CCT  | 14 | 8  |
| 173590 | 21 | 67588   | 67599   | 2 | 6  | 12 | TG   | 21 | 4  |
| 173593 | 21 | 77914   | 77927   | 2 | 7  | 14 | GT   | 16 | 9  |
| 173594 | 21 | 77929   | 77942   | 2 | 7  | 14 | TG   | 14 | 10 |
| 173595 | 21 | 78013   | 78030   | 2 | 9  | 18 | CA   | 21 | 4  |
| 173603 | 21 | 93962   | 93983   | 2 | 11 | 22 | TG   | 19 | 8  |
| 173604 | 21 | 94053   | 94070   | 2 | 9  | 18 | CA   | 28 | 5  |
| 173605 | 21 | 94160   | 94175   | 2 | 8  | 16 | GT   | 21 | 8  |
| 173609 | 21 | 96527   | 96550   | 2 | 12 | 24 | AC   | 12 | 10 |
| 173610 | 21 | 96837   | 96872   | 2 | 18 | 36 | TG   | 6  | 9  |
| 173611 | 21 | 97006   | 97019   | 2 | 7  | 14 | AC   | 24 | 3  |
| 173613 | 21 | 98255   | 98272   | 3 | 6  | 18 | AGC  | 27 | 5  |
| 173614 | 21 | 100586  | 100599  | 2 | 7  | 14 | GT   | 30 | 4  |
| 173617 | 21 | 100775  | 100786  | 2 | 6  | 12 | CA   | 10 | 4  |
| 173625 | 21 | 108774  | 108825  | 2 | 26 | 52 | TG   | 7  | 10 |
| 173630 | 21 | 111027  | 111042  | 2 | 8  | 16 | TG   | 23 | 3  |
| 173631 | 21 | 111228  | 111239  | 2 | 6  | 12 | TG   | 25 | 5  |
| 173632 | 21 | 111363  | 111389  | 3 | 9  | 27 | CTC  | 26 | 9  |
| 173647 | 21 | 127805  | 127828  | 2 | 12 | 24 | TG   | 9  | 12 |
| 173648 | 21 | 128678  | 128693  | 2 | 8  | 16 | AG   | 22 | 4  |
| 173652 | 21 | 135599  | 135614  | 2 | 8  | 16 | TG   | 23 | 4  |
| 173653 | 21 | 135646  | 135669  | 2 | 12 | 24 | TG   | 17 | 12 |
| 173654 | 21 | 145889  | 145906  | 3 | 6  | 18 | AAC  | 32 | 3  |
| 173660 | 21 | 155059  | 155072  | 2 | 7  | 14 | TC   | 28 | 5  |
| 173661 | 21 | 155312  | 155327  | 2 | 8  | 16 | AC   | 14 | 4  |
| 173663 | 21 | 159803  | 159818  | 2 | 8  | 16 | TG   | 23 | 4  |
| 173665 | 21 | 160206  | 160221  | 2 | 8  | 16 | CT   | 13 | 3  |
| 173666 | 21 | 160392  | 160423  | 4 | 8  | 32 | TCTT | 19 | 7  |

|        |    |        |        |   |    |    |      |    |    |
|--------|----|--------|--------|---|----|----|------|----|----|
| 173667 | 21 | 160856 | 160879 | 2 | 12 | 24 | CA   | 18 | 9  |
| 173668 | 21 | 161255 | 161270 | 2 | 8  | 16 | GT   | 18 | 8  |
| 173673 | 21 | 165225 | 165262 | 2 | 19 | 38 | GT   | 7  | 8  |
| 173676 | 21 | 167180 | 167199 | 2 | 10 | 20 | GT   | 6  | 6  |
| 173678 | 21 | 167397 | 167414 | 2 | 9  | 18 | CA   | 11 | 4  |
| 173679 | 21 | 170553 | 170578 | 2 | 13 | 26 | TG   | 12 | 11 |
| 173682 | 21 | 171040 | 171057 | 2 | 9  | 18 | TG   | 20 | 11 |
| 173683 | 21 | 171059 | 171078 | 2 | 10 | 20 | GT   | 26 | 10 |
| 173684 | 21 | 171232 | 171245 | 2 | 7  | 14 | AC   | 20 | 5  |
| 173695 | 21 | 177405 | 177418 | 2 | 7  | 14 | AT   | 22 | 4  |
| 173696 | 21 | 178800 | 178819 | 2 | 10 | 20 | TG   | 19 | 4  |
| 173697 | 21 | 178928 | 178939 | 2 | 6  | 12 | GT   | 26 | 3  |
| 173698 | 21 | 178988 | 179005 | 2 | 9  | 18 | GT   | 22 | 7  |
| 173700 | 21 | 179706 | 179733 | 2 | 14 | 28 | TG   | 20 | 6  |
| 173704 | 21 | 181277 | 181304 | 2 | 14 | 28 | TG   | 14 | 9  |
| 173705 | 21 | 182259 | 182282 | 2 | 12 | 24 | TG   | 20 | 7  |
| 173708 | 21 | 186778 | 186801 | 2 | 12 | 24 | AC   | 16 | 4  |
| 173709 | 21 | 187212 | 187231 | 4 | 5  | 20 | TGGA | 24 | 3  |
| 173714 | 21 | 191192 | 191203 | 2 | 6  | 12 | AC   | 26 | 4  |
| 173717 | 21 | 191852 | 191877 | 2 | 13 | 26 | TG   | 22 | 5  |
| 173720 | 21 | 193361 | 193376 | 2 | 8  | 16 | TG   | 18 | 7  |
| 173727 | 21 | 197920 | 197941 | 2 | 11 | 22 | TG   | 14 | 5  |
| 173729 | 21 | 202711 | 202728 | 2 | 9  | 18 | AC   | 21 | 9  |
| 173731 | 21 | 203710 | 203725 | 2 | 8  | 16 | AC   | 17 | 3  |
| 173732 | 21 | 203868 | 203905 | 2 | 19 | 38 | CA   | 13 | 10 |
| 173735 | 21 | 206560 | 206575 | 2 | 8  | 16 | TG   | 18 | 6  |
| 173736 | 21 | 206809 | 206836 | 2 | 14 | 28 | CT   | 13 | 11 |
| 173737 | 21 | 208633 | 208652 | 2 | 10 | 20 | TG   | 17 | 6  |
| 173738 | 21 | 208781 | 208792 | 2 | 6  | 12 | AC   | 19 | 4  |
| 173739 | 21 | 208795 | 208808 | 2 | 7  | 14 | AC   | 19 | 4  |
| 173744 | 21 | 211597 | 211646 | 2 | 25 | 50 | GT   | 8  | 7  |
| 173745 | 21 | 212042 | 212065 | 2 | 12 | 24 | AC   | 21 | 3  |
| 173746 | 21 | 215117 | 215128 | 2 | 6  | 12 | AC   | 24 | 4  |
| 173747 | 21 | 216319 | 216340 | 2 | 11 | 22 | TG   | 23 | 8  |
| 173748 | 21 | 216475 | 216486 | 2 | 6  | 12 | GT   | 26 | 4  |
| 173749 | 21 | 217655 | 217674 | 2 | 10 | 20 | AC   | 12 | 3  |
| 173750 | 21 | 217756 | 217771 | 2 | 8  | 16 | CA   | 9  | 7  |
| 173751 | 21 | 217899 | 217910 | 2 | 6  | 12 | AC   | 18 | 5  |
| 173753 | 21 | 219167 | 219190 | 2 | 12 | 24 | CA   | 9  | 8  |
| 173761 | 21 | 239216 | 239233 | 3 | 6  | 18 | AAT  | 31 | 3  |
| 173769 | 21 | 243995 | 244010 | 2 | 8  | 16 | AC   | 22 | 4  |
| 173771 | 21 | 245932 | 245943 | 2 | 6  | 12 | AC   | 30 | 5  |
| 173775 | 21 | 248448 | 248461 | 2 | 7  | 14 | AG   | 27 | 3  |
| 173776 | 21 | 248498 | 248517 | 4 | 5  | 20 | CGCA | 27 | 5  |
| 173778 | 21 | 250075 | 250092 | 2 | 9  | 18 | AC   | 18 | 8  |
| 173783 | 21 | 257553 | 257572 | 2 | 10 | 20 | AC   | 20 | 11 |
| 173793 | 21 | 269961 | 269976 | 2 | 8  | 16 | TG   | 15 | 5  |
| 173796 | 21 | 276554 | 276585 | 2 | 16 | 32 | TG   | 7  | 5  |
| 173797 | 21 | 277082 | 277101 | 2 | 10 | 20 | CA   | 9  | 12 |
| 173799 | 21 | 280622 | 280637 | 4 | 4  | 16 | AAAC | 18 | 7  |
| 173807 | 21 | 291118 | 291135 | 2 | 9  | 18 | CA   | 20 | 4  |

|        |    |        |        |   |    |    |      |    |    |
|--------|----|--------|--------|---|----|----|------|----|----|
| 173809 | 21 | 301798 | 301831 | 2 | 17 | 34 | TG   | 9  | 9  |
| 173811 | 21 | 303570 | 303605 | 2 | 18 | 36 | GT   | 21 | 11 |
| 173812 | 21 | 303639 | 303654 | 2 | 8  | 16 | TG   | 23 | 6  |
| 173819 | 21 | 320245 | 320274 | 2 | 15 | 30 | TG   | 16 | 12 |
| 173830 | 21 | 332058 | 332073 | 2 | 8  | 16 | CT   | 22 | 4  |
| 173836 | 21 | 341945 | 341964 | 2 | 10 | 20 | TG   | 19 | 6  |
| 173838 | 21 | 342199 | 342222 | 2 | 12 | 24 | CA   | 16 | 10 |
| 173839 | 21 | 343036 | 343047 | 2 | 6  | 12 | GT   | 19 | 3  |
| 173840 | 21 | 343201 | 343220 | 2 | 10 | 20 | GT   | 19 | 8  |
| 173844 | 21 | 348154 | 348177 | 4 | 6  | 24 | GACA | 17 | 5  |
| 173851 | 21 | 359415 | 359442 | 2 | 14 | 28 | CA   | 13 | 6  |
| 173852 | 21 | 359845 | 359856 | 2 | 6  | 12 | GT   | 21 | 5  |
| 173856 | 21 | 364666 | 364681 | 4 | 4  | 16 | ATAG | 27 | 3  |
| 173857 | 21 | 365053 | 365070 | 2 | 9  | 18 | CT   | 22 | 3  |
| 173861 | 21 | 369417 | 369464 | 2 | 24 | 48 | AC   | 14 | 11 |
| 173866 | 21 | 379283 | 379334 | 4 | 13 | 52 | AGAT | 7  | 9  |
| 173870 | 21 | 384618 | 384635 | 2 | 9  | 18 | GT   | 27 | 6  |
| 173879 | 21 | 395503 | 395518 | 2 | 8  | 16 | GA   | 17 | 10 |
| 173880 | 21 | 398644 | 398670 | 3 | 9  | 27 | CAA  | 19 | 5  |
| 173884 | 21 | 399287 | 399332 | 2 | 23 | 46 | CA   | 13 | 10 |
| 173889 | 21 | 406621 | 406654 | 2 | 17 | 34 | CA   | 13 | 8  |
| 173893 | 21 | 417272 | 417295 | 2 | 12 | 24 | CA   | 12 | 9  |
| 173899 | 21 | 433047 | 433058 | 2 | 6  | 12 | GT   | 24 | 9  |
| 173900 | 21 | 433167 | 433180 | 2 | 7  | 14 | CA   | 26 | 4  |
| 173901 | 21 | 434626 | 434641 | 4 | 4  | 16 | TGTA | 28 | 3  |
| 173902 | 21 | 434932 | 434957 | 2 | 13 | 26 | AC   | 9  | 10 |
| 173912 | 21 | 449303 | 449316 | 2 | 7  | 14 | AG   | 24 | 6  |
| 173915 | 21 | 459219 | 459270 | 2 | 26 | 52 | TG   | 17 | 19 |
| 173916 | 21 | 459307 | 459318 | 2 | 6  | 12 | TG   | 15 | 3  |
| 173919 | 21 | 460081 | 460108 | 2 | 14 | 28 | TG   | 10 | 8  |
| 173921 | 21 | 463762 | 463787 | 2 | 13 | 26 | CA   | 8  | 8  |
| 173928 | 21 | 470626 | 470640 | 3 | 5  | 15 | GGA  | 24 | 3  |
| 173930 | 21 | 475099 | 475122 | 2 | 12 | 24 | AC   | 12 | 11 |
| 173932 | 21 | 478429 | 478454 | 2 | 13 | 26 | TG   | 21 | 17 |
| 173933 | 21 | 478672 | 478723 | 4 | 13 | 52 | CTAT | 19 | 10 |
| 173935 | 21 | 482251 | 482278 | 2 | 14 | 28 | AC   | 17 | 8  |
| 173938 | 21 | 486305 | 486360 | 4 | 14 | 56 | ATAG | 6  | 5  |
| 173946 | 21 | 502082 | 502109 | 2 | 14 | 28 | GT   | 16 | 11 |
| 173949 | 21 | 504919 | 504936 | 2 | 9  | 18 | TG   | 24 | 6  |
| 173954 | 21 | 517455 | 517484 | 2 | 15 | 30 | AC   | 14 | 12 |
| 173955 | 21 | 518256 | 518279 | 2 | 12 | 24 | TG   | 23 | 5  |
| 173964 | 21 | 535202 | 535223 | 2 | 11 | 22 | CA   | 18 | 12 |
| 173966 | 21 | 535733 | 535784 | 2 | 26 | 52 | GT   | 8  | 10 |
| 173967 | 21 | 536009 | 536044 | 2 | 18 | 36 | GT   | 8  | 10 |
| 173968 | 21 | 536176 | 536209 | 2 | 17 | 34 | TG   | 6  | 11 |
| 173969 | 21 | 536380 | 536393 | 2 | 7  | 14 | AC   | 25 | 3  |
| 173970 | 21 | 538379 | 538398 | 2 | 10 | 20 | AC   | 19 | 4  |
| 173971 | 21 | 538577 | 538598 | 2 | 11 | 22 | CA   | 15 | 6  |
| 173972 | 21 | 546199 | 546220 | 2 | 11 | 22 | GT   | 12 | 5  |
| 173974 | 21 | 546339 | 546362 | 2 | 12 | 24 | TC   | 17 | 9  |
| 173977 | 21 | 555464 | 555477 | 2 | 7  | 14 | TG   | 22 | 4  |

|        |    |        |        |   |    |    |      |    |    |
|--------|----|--------|--------|---|----|----|------|----|----|
| 173978 | 21 | 562072 | 562099 | 2 | 14 | 28 | AC   | 17 | 7  |
| 173980 | 21 | 563843 | 563854 | 2 | 6  | 12 | TA   | 30 | 3  |
| 173981 | 21 | 566170 | 566187 | 3 | 6  | 18 | CTA  | 28 | 3  |
| 173985 | 21 | 573211 | 573242 | 2 | 16 | 32 | CA   | 17 | 7  |
| 173986 | 21 | 573513 | 573528 | 2 | 8  | 16 | CT   | 25 | 4  |
| 173987 | 21 | 573530 | 573543 | 2 | 7  | 14 | AC   | 25 | 7  |
| 173991 | 21 | 581038 | 581055 | 2 | 9  | 18 | GT   | 21 | 6  |
| 173994 | 21 | 586125 | 586145 | 3 | 7  | 21 | ATT  | 21 | 5  |
| 173995 | 21 | 587792 | 587805 | 2 | 7  | 14 | CA   | 25 | 9  |
| 173998 | 21 | 592700 | 592733 | 2 | 17 | 34 | TG   | 19 | 11 |
| 173999 | 21 | 592838 | 592857 | 2 | 10 | 20 | TG   | 21 | 9  |
| 174001 | 21 | 595493 | 595556 | 4 | 16 | 64 | TCTA | 17 | 11 |
| 174003 | 21 | 600052 | 600087 | 2 | 18 | 36 | AC   | 10 | 9  |
| 174008 | 21 | 606899 | 606928 | 2 | 15 | 30 | GT   | 9  | 10 |
| 174031 | 21 | 630698 | 630718 | 3 | 7  | 21 | TGG  | 24 | 4  |
| 174039 | 21 | 648468 | 648527 | 4 | 15 | 60 | TGGA | 27 | 8  |
| 174041 | 21 | 657484 | 657513 | 3 | 10 | 30 | GAA  | 29 | 9  |
| 174042 | 21 | 658678 | 658701 | 3 | 8  | 24 | CCT  | 11 | 5  |
| 174045 | 21 | 662599 | 662616 | 2 | 9  | 18 | AC   | 13 | 10 |
| 174047 | 21 | 664950 | 664967 | 2 | 9  | 18 | AC   | 17 | 8  |
| 174048 | 21 | 665402 | 665427 | 2 | 13 | 26 | CA   | 17 | 12 |
| 174053 | 21 | 674179 | 674242 | 4 | 16 | 64 | GATT | 27 | 12 |
| 174054 | 21 | 674769 | 674780 | 2 | 6  | 12 | CA   | 17 | 3  |
| 174063 | 21 | 688328 | 688349 | 2 | 11 | 22 | TG   | 17 | 10 |
| 174066 | 21 | 688476 | 688493 | 2 | 9  | 18 | GT   | 9  | 8  |
| 174074 | 21 | 704199 | 704222 | 2 | 12 | 24 | TG   | 13 | 12 |
| 174075 | 21 | 705559 | 705574 | 2 | 8  | 16 | AC   | 27 | 6  |
| 174080 | 21 | 715117 | 715136 | 4 | 5  | 20 | AATA | 9  | 3  |
| 174083 | 21 | 716917 | 716948 | 2 | 16 | 32 | CA   | 22 | 10 |
| 174085 | 21 | 718373 | 718402 | 2 | 15 | 30 | TG   | 9  | 10 |
| 174086 | 21 | 729197 | 729242 | 2 | 23 | 46 | TC   | 6  | 5  |
| 174090 | 21 | 732205 | 732218 | 2 | 7  | 14 | TG   | 32 | 3  |
| 174091 | 21 | 732326 | 732381 | 2 | 28 | 56 | TG   | 7  | 11 |
| 174099 | 21 | 741629 | 741646 | 2 | 9  | 18 | CA   | 24 | 8  |
| 174100 | 21 | 741648 | 741663 | 2 | 8  | 16 | AC   | 13 | 8  |
| 174101 | 21 | 741939 | 741954 | 2 | 8  | 16 | TG   | 17 | 12 |
| 174102 | 21 | 741956 | 741971 | 2 | 8  | 16 | GT   | 19 | 9  |
| 174103 | 21 | 741995 | 742018 | 2 | 12 | 24 | GT   | 18 | 11 |
| 174105 | 21 | 748656 | 748679 | 4 | 6  | 24 | TCCA | 23 | 5  |
| 174115 | 21 | 769828 | 769861 | 2 | 17 | 34 | TG   | 20 | 10 |
| 174116 | 21 | 773082 | 773093 | 2 | 6  | 12 | GT   | 19 | 8  |
| 174117 | 21 | 773206 | 773227 | 2 | 11 | 22 | AC   | 18 | 6  |
| 174118 | 21 | 773357 | 773376 | 2 | 10 | 20 | CA   | 20 | 13 |
| 174119 | 21 | 776913 | 776940 | 2 | 14 | 28 | CA   | 11 | 8  |
| 174121 | 21 | 777181 | 777196 | 4 | 4  | 16 | GGAT | 22 | 3  |
| 174124 | 21 | 779485 | 779546 | 2 | 31 | 62 | CA   | 7  | 11 |
| 174127 | 21 | 783025 | 783042 | 2 | 9  | 18 | GT   | 24 | 4  |
| 174133 | 21 | 791397 | 791414 | 2 | 9  | 18 | AC   | 13 | 9  |
| 174135 | 21 | 795334 | 795351 | 2 | 9  | 18 | TG   | 12 | 12 |
| 174136 | 21 | 798373 | 798406 | 2 | 17 | 34 | AC   | 8  | 6  |
| 174139 | 21 | 802086 | 802131 | 2 | 23 | 46 | CA   | 10 | 13 |

|        |    |         |         |   |    |    |      |    |    |
|--------|----|---------|---------|---|----|----|------|----|----|
| 174141 | 21 | 802331  | 802344  | 2 | 7  | 14 | AC   | 31 | 3  |
| 174142 | 21 | 802894  | 802917  | 2 | 12 | 24 | TG   | 16 | 13 |
| 174144 | 21 | 803738  | 803749  | 2 | 6  | 12 | TG   | 11 | 5  |
| 174145 | 21 | 803750  | 803763  | 2 | 7  | 14 | AG   | 23 | 10 |
| 174148 | 21 | 809718  | 809731  | 2 | 7  | 14 | CA   | 24 | 4  |
| 174149 | 21 | 809849  | 809870  | 2 | 11 | 22 | CA   | 15 | 8  |
| 174153 | 21 | 819185  | 819214  | 2 | 15 | 30 | TG   | 8  | 7  |
| 174157 | 21 | 832478  | 832515  | 2 | 19 | 38 | GT   | 10 | 10 |
| 174158 | 21 | 835188  | 835233  | 2 | 23 | 46 | AC   | 6  | 10 |
| 174159 | 21 | 835416  | 835449  | 2 | 17 | 34 | CA   | 10 | 12 |
| 174163 | 21 | 839122  | 839161  | 2 | 20 | 40 | TG   | 12 | 8  |
| 174173 | 21 | 848729  | 848748  | 4 | 5  | 20 | AAAT | 23 | 3  |
| 174179 | 21 | 856363  | 856374  | 2 | 6  | 12 | TG   | 28 | 3  |
| 174180 | 21 | 858434  | 858449  | 2 | 8  | 16 | AC   | 21 | 6  |
| 174188 | 21 | 880127  | 880174  | 2 | 24 | 48 | GT   | 8  | 9  |
| 174200 | 21 | 891246  | 891263  | 2 | 9  | 18 | CA   | 28 | 5  |
| 174202 | 21 | 891413  | 891426  | 2 | 7  | 14 | AC   | 15 | 8  |
| 174205 | 21 | 893112  | 893123  | 2 | 6  | 12 | CA   | 14 | 12 |
| 174215 | 21 | 902256  | 902297  | 2 | 21 | 42 | AC   | 14 | 12 |
| 174220 | 21 | 910290  | 910334  | 3 | 15 | 45 | ATG  | 28 | 14 |
| 174224 | 21 | 920113  | 920126  | 2 | 7  | 14 | CA   | 19 | 9  |
| 174225 | 21 | 924768  | 924787  | 2 | 10 | 20 | GT   | 26 | 6  |
| 174226 | 21 | 925386  | 925403  | 2 | 9  | 18 | AC   | 22 | 4  |
| 174227 | 21 | 925976  | 926001  | 2 | 13 | 26 | GT   | 9  | 8  |
| 174231 | 21 | 928223  | 928236  | 2 | 7  | 14 | TG   | 19 | 8  |
| 174232 | 21 | 928311  | 928340  | 2 | 15 | 30 | CA   | 14 | 6  |
| 174233 | 21 | 929160  | 929185  | 2 | 13 | 26 | TG   | 9  | 8  |
| 174241 | 21 | 933665  | 933686  | 2 | 11 | 22 | CA   | 22 | 3  |
| 174243 | 21 | 938106  | 938125  | 2 | 10 | 20 | CA   | 16 | 16 |
| 174244 | 21 | 938127  | 938140  | 2 | 7  | 14 | AC   | 18 | 17 |
| 174255 | 21 | 948579  | 948608  | 2 | 15 | 30 | GT   | 15 | 10 |
| 174259 | 21 | 958247  | 958264  | 3 | 6  | 18 | ATT  | 16 | 3  |
| 174262 | 21 | 964290  | 964317  | 4 | 7  | 28 | TCAA | 25 | 7  |
| 174266 | 21 | 968715  | 968728  | 2 | 7  | 14 | GT   | 31 | 4  |
| 174267 | 21 | 969291  | 969314  | 2 | 12 | 24 | AC   | 10 | 9  |
| 174272 | 21 | 980798  | 980821  | 3 | 8  | 24 | ATC  | 25 | 3  |
| 174275 | 21 | 988947  | 988964  | 2 | 9  | 18 | CA   | 15 | 6  |
| 174277 | 21 | 992266  | 992283  | 2 | 9  | 18 | TG   | 19 | 4  |
| 174280 | 21 | 998228  | 998245  | 2 | 9  | 18 | AC   | 16 | 7  |
| 174283 | 21 | 1000687 | 1000716 | 2 | 15 | 30 | CA   | 15 | 7  |
| 174284 | 21 | 1008400 | 1008421 | 2 | 11 | 22 | CA   | 8  | 10 |
| 174287 | 21 | 1011670 | 1011689 | 4 | 5  | 20 | CTGT | 26 | 4  |
| 174289 | 21 | 1013004 | 1013027 | 3 | 8  | 24 | AGG  | 27 | 4  |
| 174293 | 21 | 1019175 | 1019190 | 2 | 8  | 16 | CA   | 25 | 13 |
| 174303 | 21 | 1044335 | 1044352 | 2 | 9  | 18 | AG   | 23 | 5  |
| 174306 | 21 | 1044951 | 1044974 | 2 | 12 | 24 | CT   | 13 | 6  |
| 174315 | 21 | 1061326 | 1061355 | 2 | 15 | 30 | TG   | 12 | 9  |
| 174317 | 21 | 1066169 | 1066182 | 2 | 7  | 14 | CA   | 7  | 3  |
| 174320 | 21 | 1070052 | 1070077 | 2 | 13 | 26 | AC   | 13 | 8  |
| 174322 | 21 | 1077731 | 1077768 | 2 | 19 | 38 | GT   | 6  | 9  |
| 174331 | 21 | 1088387 | 1088398 | 2 | 6  | 12 | CA   | 15 | 6  |

|        |    |         |         |   |    |    |     |    |    |
|--------|----|---------|---------|---|----|----|-----|----|----|
| 174332 | 21 | 1088431 | 1088446 | 2 | 8  | 16 | CA  | 10 | 4  |
| 174333 | 21 | 1088551 | 1088584 | 2 | 17 | 34 | AC  | 13 | 13 |
| 174335 | 21 | 1096329 | 1096352 | 3 | 8  | 24 | TGG | 22 | 3  |
| 174339 | 21 | 1101605 | 1101662 | 2 | 29 | 58 | AC  | 8  | 7  |
| 174350 | 21 | 1112737 | 1112754 | 2 | 9  | 18 | GT  | 18 | 10 |
| 174352 | 21 | 1113092 | 1113113 | 2 | 11 | 22 | AC  | 19 | 12 |
| 174353 | 21 | 1115989 | 1116020 | 2 | 16 | 32 | TG  | 9  | 6  |
| 174357 | 21 | 1116958 | 1116977 | 2 | 10 | 20 | TA  | 7  | 4  |
| 174360 | 21 | 1118901 | 1118920 | 2 | 10 | 20 | TC  | 6  | 8  |
| 174376 | 21 | 1142936 | 1142955 | 2 | 10 | 20 | TG  | 22 | 7  |
| 174378 | 21 | 1149960 | 1149981 | 2 | 11 | 22 | AG  | 12 | 10 |
| 174392 | 21 | 1162751 | 1162776 | 2 | 13 | 26 | GT  | 19 | 6  |
| 174393 | 21 | 1164115 | 1164132 | 2 | 9  | 18 | CA  | 21 | 3  |
| 174399 | 21 | 1175135 | 1175146 | 2 | 6  | 12 | AC  | 14 | 4  |
| 174400 | 21 | 1175190 | 1175204 | 3 | 5  | 15 | GCA | 11 | 3  |
| 174401 | 21 | 1177329 | 1177342 | 2 | 7  | 14 | GT  | 18 | 4  |
| 174404 | 21 | 1189457 | 1189468 | 2 | 6  | 12 | GT  | 19 | 8  |
| 174409 | 21 | 1208501 | 1208515 | 3 | 5  | 15 | GCA | 24 | 8  |
| 174412 | 21 | 1222131 | 1222150 | 2 | 10 | 20 | GT  | 9  | 4  |
| 174416 | 21 | 1249246 | 1249275 | 3 | 10 | 30 | TAA | 13 | 4  |
| 174417 | 21 | 1249395 | 1249410 | 2 | 8  | 16 | TA  | 10 | 4  |
| 174419 | 21 | 1251617 | 1251632 | 2 | 8  | 16 | GA  | 23 | 5  |
| 174423 | 21 | 1268014 | 1268029 | 2 | 8  | 16 | AT  | 12 | 3  |
| 174432 | 21 | 1299073 | 1299087 | 3 | 5  | 15 | TTA | 27 | 3  |
| 174435 | 21 | 1309066 | 1309097 | 2 | 16 | 32 | CA  | 14 | 13 |
| 174441 | 21 | 1314612 | 1314627 | 2 | 8  | 16 | CT  | 27 | 4  |
| 174443 | 21 | 1319452 | 1319495 | 2 | 22 | 44 | AC  | 6  | 9  |
| 174460 | 21 | 1343467 | 1343481 | 3 | 5  | 15 | CCA | 24 | 6  |
| 174500 | 21 | 1454177 | 1454220 | 2 | 22 | 44 | GT  | 18 | 13 |
| 174502 | 21 | 1456652 | 1456669 | 2 | 9  | 18 | GA  | 13 | 4  |
| 174504 | 21 | 1457921 | 1457944 | 3 | 8  | 24 | AAC | 15 | 9  |
| 174509 | 21 | 1461961 | 1462016 | 2 | 28 | 56 | AC  | 13 | 11 |
| 174522 | 21 | 1471170 | 1471185 | 2 | 8  | 16 | AC  | 12 | 7  |
| 174529 | 21 | 1488233 | 1488248 | 2 | 8  | 16 | GT  | 13 | 5  |
| 174530 | 21 | 1488276 | 1488291 | 2 | 8  | 16 | TG  | 21 | 5  |
| 174532 | 21 | 1489733 | 1489747 | 3 | 5  | 15 | TAT | 22 | 5  |
| 174535 | 21 | 1491971 | 1492002 | 2 | 16 | 32 | TG  | 22 | 9  |
| 174537 | 21 | 1492545 | 1492558 | 2 | 7  | 14 | CA  | 26 | 3  |
| 174539 | 21 | 1504010 | 1504037 | 2 | 14 | 28 | CA  | 18 | 13 |
| 174540 | 21 | 1504283 | 1504298 | 2 | 8  | 16 | GT  | 24 | 3  |
| 174543 | 21 | 1509202 | 1509217 | 2 | 8  | 16 | AG  | 6  | 7  |
| 174545 | 21 | 1510660 | 1510671 | 2 | 6  | 12 | AG  | 8  | 5  |
| 174550 | 21 | 1516866 | 1516885 | 2 | 10 | 20 | AG  | 27 | 4  |
| 174551 | 21 | 1517087 | 1517104 | 2 | 9  | 18 | AC  | 15 | 9  |
| 174559 | 21 | 1539083 | 1539104 | 2 | 11 | 22 | TG  | 14 | 13 |
| 174563 | 21 | 1543002 | 1543031 | 2 | 15 | 30 | CA  | 12 | 7  |
| 174566 | 21 | 1546178 | 1546195 | 3 | 6  | 18 | AAG | 7  | 3  |
| 174586 | 21 | 1580685 | 1580714 | 2 | 15 | 30 | CT  | 13 | 8  |
| 174597 | 21 | 1589631 | 1589644 | 2 | 7  | 14 | TG  | 28 | 3  |
| 174603 | 21 | 1595298 | 1595309 | 2 | 6  | 12 | GT  | 22 | 3  |
| 174604 | 21 | 1595864 | 1595887 | 2 | 12 | 24 | AC  | 18 | 7  |

|        |    |         |         |   |    |    |      |    |    |
|--------|----|---------|---------|---|----|----|------|----|----|
| 174605 | 21 | 1596152 | 1596189 | 2 | 19 | 38 | CA   | 23 | 6  |
| 174619 | 21 | 1616136 | 1616149 | 2 | 7  | 14 | AC   | 25 | 3  |
| 174620 | 21 | 1616582 | 1616605 | 3 | 8  | 24 | AAG  | 25 | 6  |
| 174626 | 21 | 1622722 | 1622757 | 2 | 18 | 36 | CA   | 10 | 8  |
| 174632 | 21 | 1627853 | 1627880 | 4 | 7  | 28 | TCAA | 24 | 7  |
| 174633 | 21 | 1629781 | 1629810 | 2 | 15 | 30 | TG   | 12 | 9  |
| 174636 | 21 | 1632279 | 1632298 | 2 | 10 | 20 | GA   | 17 | 5  |
| 174638 | 21 | 1635916 | 1635941 | 2 | 13 | 26 | AC   | 17 | 11 |
| 174640 | 21 | 1637107 | 1637118 | 2 | 6  | 12 | CA   | 12 | 12 |
| 174645 | 21 | 1642149 | 1642170 | 2 | 11 | 22 | AG   | 24 | 3  |
| 174649 | 21 | 1643950 | 1643967 | 2 | 9  | 18 | TG   | 26 | 6  |
| 174650 | 21 | 1644481 | 1644504 | 2 | 12 | 24 | TG   | 21 | 6  |
| 174661 | 21 | 1653613 | 1653668 | 4 | 14 | 56 | TCTA | 8  | 8  |
| 174672 | 21 | 1663837 | 1663856 | 2 | 10 | 20 | GT   | 15 | 10 |
| 174686 | 21 | 1673415 | 1673434 | 2 | 10 | 20 | GA   | 15 | 3  |
| 174688 | 21 | 1675725 | 1675748 | 3 | 8  | 24 | CAT  | 23 | 4  |
| 174705 | 21 | 1695122 | 1695148 | 3 | 9  | 27 | CTC  | 24 | 5  |
| 174706 | 21 | 1695658 | 1695679 | 2 | 11 | 22 | TG   | 21 | 7  |
| 174708 | 21 | 1701089 | 1701102 | 2 | 7  | 14 | TG   | 16 | 6  |
| 174709 | 21 | 1701749 | 1701764 | 2 | 8  | 16 | AG   | 24 | 8  |
| 174710 | 21 | 1701888 | 1701902 | 3 | 5  | 15 | AGA  | 17 | 6  |
| 174721 | 21 | 1717564 | 1717579 | 2 | 8  | 16 | AG   | 23 | 4  |
| 174722 | 21 | 1718036 | 1718063 | 2 | 14 | 28 | GT   | 24 | 14 |
| 174723 | 21 | 1718182 | 1718211 | 2 | 15 | 30 | GT   | 16 | 12 |
| 174730 | 21 | 1727109 | 1727124 | 4 | 4  | 16 | CCAT | 25 | 4  |
| 174732 | 21 | 1728517 | 1728574 | 2 | 29 | 58 | CA   | 19 | 11 |
| 174735 | 21 | 1729081 | 1729124 | 2 | 22 | 44 | TG   | 11 | 7  |
| 174736 | 21 | 1731205 | 1731216 | 2 | 6  | 12 | AC   | 24 | 4  |
| 174753 | 21 | 1748679 | 1748698 | 2 | 10 | 20 | GT   | 16 | 11 |
| 174765 | 21 | 1788924 | 1788939 | 4 | 4  | 16 | GTTT | 14 | 4  |
| 174779 | 21 | 1814469 | 1814480 | 2 | 6  | 12 | GT   | 14 | 8  |
| 174785 | 21 | 1822498 | 1822509 | 2 | 6  | 12 | CA   | 24 | 4  |
| 174790 | 21 | 1832527 | 1832544 | 3 | 6  | 18 | ATT  | 15 | 9  |
| 174796 | 21 | 1846813 | 1846824 | 2 | 6  | 12 | AT   | 19 | 5  |
| 174816 | 21 | 1873811 | 1873838 | 2 | 14 | 28 | GT   | 17 | 10 |
| 174824 | 21 | 1900363 | 1900389 | 3 | 9  | 27 | ATT  | 9  | 9  |
| 174829 | 21 | 1912008 | 1912067 | 4 | 15 | 60 | ATAG | 16 | 10 |
| 174831 | 21 | 1926960 | 1926973 | 2 | 7  | 14 | TG   | 16 | 8  |
| 174839 | 21 | 1955589 | 1955620 | 2 | 16 | 32 | TG   | 7  | 8  |
| 174849 | 21 | 1968906 | 1968925 | 2 | 10 | 20 | AT   | 6  | 5  |
| 174867 | 21 | 2011764 | 2011775 | 2 | 6  | 12 | AC   | 11 | 7  |
| 174870 | 21 | 2018491 | 2018506 | 2 | 8  | 16 | CA   | 23 | 8  |
| 174872 | 21 | 2021606 | 2021617 | 2 | 6  | 12 | AC   | 23 | 6  |
| 174878 | 21 | 2030782 | 2030803 | 2 | 11 | 22 | CA   | 21 | 7  |
| 174880 | 21 | 2032073 | 2032092 | 4 | 5  | 20 | TTTG | 8  | 5  |
| 174881 | 21 | 2032214 | 2032249 | 4 | 9  | 36 | TCTA | 23 | 11 |
| 174890 | 21 | 2039320 | 2039337 | 2 | 9  | 18 | GT   | 25 | 6  |
| 174893 | 21 | 2042997 | 2043036 | 4 | 10 | 40 | TATC | 20 | 7  |
| 174898 | 21 | 2062678 | 2062689 | 2 | 6  | 12 | CT   | 12 | 4  |
| 174912 | 21 | 2085492 | 2085521 | 2 | 15 | 30 | AC   | 13 | 10 |
| 174915 | 21 | 2086735 | 2086750 | 2 | 8  | 16 | TG   | 25 | 8  |

|        |    |         |         |   |    |    |      |    |    |
|--------|----|---------|---------|---|----|----|------|----|----|
| 174922 | 21 | 2102570 | 2102597 | 4 | 7  | 28 | GTTT | 26 | 5  |
| 174927 | 21 | 2115439 | 2115466 | 2 | 14 | 28 | AC   | 8  | 7  |
| 174929 | 21 | 2119342 | 2119362 | 3 | 7  | 21 | AAT  | 17 | 7  |
| 174930 | 21 | 2121676 | 2121689 | 2 | 7  | 14 | GA   | 22 | 4  |
| 174936 | 21 | 2136047 | 2136062 | 2 | 8  | 16 | TG   | 23 | 4  |
| 174959 | 21 | 2172927 | 2172962 | 2 | 18 | 36 | AG   | 9  | 10 |
| 174963 | 21 | 2176467 | 2176484 | 3 | 6  | 18 | TGC  | 30 | 3  |
| 174976 | 21 | 2208494 | 2208517 | 3 | 8  | 24 | AGA  | 15 | 5  |
| 174977 | 21 | 2209446 | 2209473 | 2 | 14 | 28 | CA   | 19 | 11 |
| 174979 | 21 | 2212690 | 2212715 | 2 | 13 | 26 | TG   | 15 | 12 |
| 174980 | 21 | 2212747 | 2212770 | 2 | 12 | 24 | TG   | 9  | 5  |
| 174982 | 21 | 2213476 | 2213487 | 2 | 6  | 12 | GT   | 19 | 6  |
| 174987 | 21 | 2215597 | 2215622 | 2 | 13 | 26 | CA   | 13 | 5  |
| 174993 | 21 | 2222839 | 2222854 | 4 | 4  | 16 | TTTC | 9  | 9  |
| 174997 | 21 | 2224744 | 2224763 | 4 | 5  | 20 | TTTC | 24 | 9  |
| 175003 | 21 | 2229619 | 2229634 | 2 | 8  | 16 | CA   | 28 | 3  |
| 175004 | 21 | 2232936 | 2232947 | 2 | 6  | 12 | GA   | 27 | 3  |
| 175005 | 21 | 2233456 | 2233467 | 2 | 6  | 12 | TG   | 24 | 4  |
| 175008 | 21 | 2235981 | 2235998 | 2 | 9  | 18 | TG   | 12 | 8  |
| 175009 | 21 | 2236031 | 2236048 | 2 | 9  | 18 | TG   | 12 | 10 |
| 175016 | 21 | 2251261 | 2251274 | 2 | 7  | 14 | AT   | 21 | 7  |
| 175026 | 21 | 2279759 | 2279796 | 2 | 19 | 38 | CA   | 11 | 9  |
| 175028 | 21 | 2286307 | 2286321 | 3 | 5  | 15 | GCA  | 29 | 6  |
| 175031 | 21 | 2289859 | 2289878 | 2 | 10 | 20 | CA   | 21 | 3  |
| 175036 | 21 | 2296710 | 2296723 | 2 | 7  | 14 | AG   | 18 | 6  |
| 175040 | 21 | 2300043 | 2300058 | 2 | 8  | 16 | AC   | 14 | 3  |
| 175043 | 21 | 2303569 | 2303614 | 2 | 23 | 46 | CA   | 8  | 8  |
| 175045 | 21 | 2304889 | 2304910 | 2 | 11 | 22 | AC   | 19 | 7  |
| 175048 | 21 | 2309703 | 2309726 | 4 | 6  | 24 | GAGG | 8  | 5  |
| 175053 | 21 | 2317916 | 2317941 | 2 | 13 | 26 | GT   | 17 | 9  |
| 175055 | 21 | 2328775 | 2328788 | 2 | 7  | 14 | GT   | 8  | 7  |
| 175057 | 21 | 2331200 | 2331213 | 2 | 7  | 14 | CA   | 23 | 4  |
| 175058 | 21 | 2331215 | 2331226 | 2 | 6  | 12 | AC   | 22 | 3  |
| 175068 | 21 | 2342317 | 2342342 | 2 | 13 | 26 | TG   | 10 | 6  |
| 175083 | 21 | 2380938 | 2380951 | 2 | 7  | 14 | TC   | 23 | 10 |
| 175084 | 21 | 2381219 | 2381236 | 3 | 6  | 18 | TGT  | 23 | 5  |
| 175085 | 21 | 2383121 | 2383138 | 2 | 9  | 18 | GT   | 23 | 6  |
| 175098 | 21 | 2396123 | 2396143 | 3 | 7  | 21 | GCA  | 34 | 7  |
| 175106 | 21 | 2410705 | 2410718 | 2 | 7  | 14 | AC   | 24 | 5  |
| 175108 | 21 | 2411363 | 2411383 | 3 | 7  | 21 | GAG  | 23 | 5  |
| 175109 | 21 | 2411540 | 2411563 | 2 | 12 | 24 | GT   | 24 | 5  |
| 175110 | 21 | 2412127 | 2412150 | 3 | 8  | 24 | TTC  | 19 | 5  |
| 175113 | 21 | 2420511 | 2420556 | 2 | 23 | 46 | TG   | 13 | 8  |
| 175122 | 21 | 2434686 | 2434711 | 2 | 13 | 26 | TG   | 16 | 11 |
| 175124 | 21 | 2438433 | 2438444 | 2 | 6  | 12 | AC   | 18 | 4  |
| 175129 | 21 | 2443407 | 2443428 | 2 | 11 | 22 | TG   | 16 | 8  |
| 175130 | 21 | 2453290 | 2453307 | 2 | 9  | 18 | AC   | 17 | 5  |
| 175132 | 21 | 2456836 | 2456851 | 2 | 8  | 16 | AG   | 14 | 4  |
| 175134 | 21 | 2460735 | 2460755 | 3 | 7  | 21 | CCT  | 22 | 3  |
| 175135 | 21 | 2461267 | 2461302 | 2 | 18 | 36 | GT   | 15 | 7  |
| 175143 | 21 | 2485642 | 2485677 | 4 | 9  | 36 | TTCT | 12 | 14 |



|        |    |         |         |   |    |    |      |    |    |
|--------|----|---------|---------|---|----|----|------|----|----|
| 175150 | 21 | 2498187 | 2498220 | 2 | 17 | 34 | GT   | 18 | 9  |
| 175151 | 21 | 2498398 | 2498437 | 2 | 20 | 40 | TG   | 8  | 11 |
| 175154 | 21 | 2509350 | 2509369 | 2 | 10 | 20 | TG   | 20 | 10 |
| 175155 | 21 | 2510407 | 2510442 | 4 | 9  | 36 | ATGG | 27 | 6  |
| 175159 | 21 | 2516093 | 2516112 | 2 | 10 | 20 | AC   | 20 | 6  |
| 175162 | 21 | 2520130 | 2520149 | 2 | 10 | 20 | TC   | 18 | 14 |
| 175164 | 21 | 2524396 | 2524415 | 4 | 5  | 20 | TTGA | 30 | 5  |
| 175165 | 21 | 2528106 | 2528127 | 2 | 11 | 22 | CA   | 18 | 11 |
| 175167 | 21 | 2536267 | 2536304 | 2 | 19 | 38 | CA   | 17 | 9  |
| 175175 | 21 | 2556276 | 2556289 | 2 | 7  | 14 | AC   | 26 | 4  |
| 175183 | 21 | 2566303 | 2566314 | 2 | 6  | 12 | TA   | 23 | 3  |
| 175197 | 21 | 2589946 | 2589960 | 3 | 5  | 15 | GAG  | 25 | 5  |
| 175198 | 21 | 2592713 | 2592740 | 2 | 14 | 28 | GT   | 14 | 13 |
| 175204 | 21 | 2600541 | 2600556 | 2 | 8  | 16 | TG   | 16 | 8  |
| 175206 | 21 | 2601744 | 2601758 | 3 | 5  | 15 | ATC  | 21 | 3  |
| 175208 | 21 | 2603649 | 2603678 | 3 | 10 | 30 | GTT  | 16 | 3  |
| 175211 | 21 | 2608169 | 2608182 | 2 | 7  | 14 | GA   | 24 | 3  |
| 175220 | 21 | 2621220 | 2621249 | 2 | 15 | 30 | GT   | 22 | 8  |
| 175228 | 21 | 2631231 | 2631275 | 3 | 15 | 45 | ACA  | 21 | 9  |
| 175230 | 21 | 2632404 | 2632431 | 2 | 14 | 28 | CA   | 16 | 12 |
| 175244 | 21 | 2660161 | 2660182 | 2 | 11 | 22 | AG   | 17 | 6  |
| 175245 | 21 | 2664715 | 2664740 | 2 | 13 | 26 | CA   | 15 | 8  |
| 175249 | 21 | 2671465 | 2671486 | 2 | 11 | 22 | TG   | 18 | 6  |
| 175253 | 21 | 2690967 | 2690982 | 2 | 8  | 16 | GT   | 18 | 5  |
| 175256 | 21 | 2702028 | 2702045 | 2 | 9  | 18 | TG   | 23 | 5  |
| 175266 | 21 | 2732160 | 2732175 | 2 | 8  | 16 | AC   | 8  | 8  |
| 175269 | 21 | 2737132 | 2737143 | 2 | 6  | 12 | AC   | 32 | 4  |
| 175273 | 21 | 2743738 | 2743753 | 2 | 8  | 16 | TG   | 22 | 3  |
| 175286 | 21 | 2764226 | 2764240 | 3 | 5  | 15 | CAT  | 36 | 3  |
| 175297 | 21 | 2779837 | 2779868 | 2 | 16 | 32 | AC   | 10 | 8  |
| 175303 | 21 | 2792300 | 2792319 | 4 | 5  | 20 | AGTT | 23 | 4  |
| 175304 | 21 | 2795682 | 2795695 | 2 | 7  | 14 | AC   | 34 | 9  |
| 175310 | 21 | 2801573 | 2801602 | 2 | 15 | 30 | CA   | 18 | 16 |
| 175317 | 21 | 2802682 | 2802707 | 2 | 13 | 26 | TG   | 9  | 5  |
| 175318 | 21 | 2803530 | 2803555 | 2 | 13 | 26 | GA   | 13 | 9  |
| 175322 | 21 | 2806240 | 2806263 | 3 | 8  | 24 | AGG  | 16 | 4  |
| 175326 | 21 | 2822576 | 2822601 | 2 | 13 | 26 | AC   | 19 | 8  |
| 175330 | 21 | 2829754 | 2829765 | 2 | 6  | 12 | AC   | 11 | 7  |
| 175333 | 21 | 2833546 | 2833589 | 2 | 22 | 44 | AC   | 7  | 8  |
| 175336 | 21 | 2837476 | 2837490 | 3 | 5  | 15 | TTG  | 31 | 3  |
| 175338 | 21 | 2845662 | 2845689 | 2 | 14 | 28 | TG   | 15 | 8  |
| 175339 | 21 | 2850317 | 2850342 | 2 | 13 | 26 | CA   | 15 | 10 |
| 175342 | 21 | 2852943 | 2852954 | 2 | 6  | 12 | CA   | 19 | 6  |
| 175347 | 21 | 2860232 | 2860246 | 3 | 5  | 15 | GAA  | 26 | 5  |
| 175355 | 21 | 2874469 | 2874480 | 2 | 6  | 12 | TG   | 29 | 3  |
| 175364 | 21 | 2903120 | 2903135 | 4 | 4  | 16 | ATTT | 21 | 6  |
| 175365 | 21 | 2904296 | 2904316 | 3 | 7  | 21 | TAG  | 9  | 4  |
| 175368 | 21 | 2912281 | 2912304 | 4 | 6  | 24 | ATGG | 15 | 7  |
| 175369 | 21 | 2918230 | 2918243 | 2 | 7  | 14 | TG   | 21 | 4  |
| 175374 | 21 | 2924930 | 2924945 | 4 | 4  | 16 | TTTG | 15 | 4  |
| 175377 | 21 | 2932066 | 2932087 | 2 | 11 | 22 | GT   | 12 | 10 |

|        |    |         |         |   |    |    |      |    |    |
|--------|----|---------|---------|---|----|----|------|----|----|
| 175379 | 21 | 2934348 | 2934365 | 2 | 9  | 18 | TG   | 16 | 5  |
| 175391 | 21 | 2950902 | 2950919 | 2 | 9  | 18 | CA   | 22 | 7  |
| 175393 | 21 | 2957869 | 2957886 | 2 | 9  | 18 | CA   | 16 | 15 |
| 175405 | 21 | 2976172 | 2976187 | 2 | 8  | 16 | TC   | 25 | 3  |
| 175411 | 21 | 2985208 | 2985231 | 2 | 12 | 24 | AC   | 17 | 8  |
| 175417 | 21 | 2990817 | 2990864 | 2 | 24 | 48 | AC   | 13 | 13 |
| 175420 | 21 | 2996548 | 2996559 | 2 | 6  | 12 | CA   | 20 | 3  |
| 175423 | 21 | 3014040 | 3014065 | 2 | 13 | 26 | TG   | 13 | 11 |
| 175426 | 21 | 3014536 | 3014551 | 4 | 4  | 16 | CTGT | 23 | 9  |
| 175427 | 21 | 3014552 | 3014571 | 4 | 5  | 20 | CTGA | 20 | 9  |
| 175432 | 21 | 3022069 | 3022083 | 3 | 5  | 15 | AAT  | 28 | 3  |
| 175446 | 21 | 3045553 | 3045570 | 3 | 6  | 18 | GGA  | 23 | 5  |
| 175448 | 21 | 3046460 | 3046503 | 4 | 11 | 44 | ATCT | 20 | 12 |
| 175450 | 21 | 3058530 | 3058577 | 3 | 16 | 48 | TCT  | 12 | 7  |
| 175452 | 21 | 3063377 | 3063390 | 2 | 7  | 14 | TG   | 22 | 4  |
| 175453 | 21 | 3064172 | 3064187 | 2 | 8  | 16 | GT   | 26 | 6  |
| 175454 | 21 | 3066978 | 3066995 | 2 | 9  | 18 | TG   | 21 | 11 |
| 175455 | 21 | 3067466 | 3067479 | 2 | 7  | 14 | CT   | 7  | 5  |
| 175462 | 21 | 3075439 | 3075462 | 2 | 12 | 24 | GT   | 14 | 12 |
| 175463 | 21 | 3075599 | 3075634 | 2 | 18 | 36 | GT   | 22 | 17 |
| 175469 | 21 | 3083079 | 3083110 | 2 | 16 | 32 | AC   | 16 | 13 |
| 175472 | 21 | 3094318 | 3094339 | 2 | 11 | 22 | AC   | 22 | 9  |
| 175474 | 21 | 3096875 | 3096888 | 2 | 7  | 14 | AC   | 26 | 4  |
| 175475 | 21 | 3097925 | 3097939 | 3 | 5  | 15 | ATG  | 25 | 3  |
| 175483 | 21 | 3104776 | 3104789 | 2 | 7  | 14 | AC   | 15 | 3  |
| 175484 | 21 | 3104792 | 3104803 | 2 | 6  | 12 | AC   | 13 | 4  |
| 175493 | 21 | 3109988 | 3110014 | 3 | 9  | 27 | TCC  | 17 | 8  |
| 175494 | 21 | 3110204 | 3110224 | 3 | 7  | 21 | CTG  | 16 | 7  |
| 175495 | 21 | 3110343 | 3110392 | 2 | 25 | 50 | TG   | 6  | 9  |
| 175496 | 21 | 3110525 | 3110554 | 2 | 15 | 30 | CA   | 9  | 3  |
| 175497 | 21 | 3114086 | 3114121 | 2 | 18 | 36 | TG   | 17 | 13 |
| 175507 | 21 | 3129277 | 3129288 | 2 | 6  | 12 | TG   | 19 | 3  |
| 175511 | 21 | 3152968 | 3152988 | 3 | 7  | 21 | GCA  | 27 | 11 |
| 175514 | 21 | 3159771 | 3159798 | 4 | 7  | 28 | TAAA | 17 | 7  |
| 175515 | 21 | 3161279 | 3161314 | 4 | 9  | 36 | ATAG | 24 | 15 |
| 175516 | 21 | 3162242 | 3162253 | 2 | 6  | 12 | GT   | 19 | 6  |
| 175520 | 21 | 3173387 | 3173414 | 2 | 14 | 28 | AC   | 12 | 10 |
| 175524 | 21 | 3182060 | 3182073 | 2 | 7  | 14 | GT   | 34 | 4  |
| 175529 | 21 | 3201380 | 3201397 | 3 | 6  | 18 | GCT  | 30 | 5  |
| 175541 | 21 | 3216169 | 3216198 | 2 | 15 | 30 | AC   | 15 | 8  |
| 175546 | 21 | 3220834 | 3220853 | 2 | 10 | 20 | GT   | 20 | 6  |
| 175549 | 21 | 3221838 | 3221863 | 2 | 13 | 26 | TG   | 11 | 5  |
| 175552 | 21 | 3224673 | 3224702 | 2 | 15 | 30 | CA   | 16 | 9  |
| 175557 | 21 | 3230061 | 3230081 | 3 | 7  | 21 | AGA  | 28 | 3  |
| 175558 | 21 | 3230338 | 3230389 | 2 | 26 | 52 | GT   | 13 | 13 |
| 175560 | 21 | 3230871 | 3230900 | 2 | 15 | 30 | AC   | 15 | 5  |
| 175569 | 21 | 3237006 | 3237019 | 2 | 7  | 14 | TG   | 22 | 4  |
| 175571 | 21 | 3237064 | 3237099 | 2 | 18 | 36 | TG   | 12 | 9  |
| 175574 | 21 | 3237271 | 3237292 | 2 | 11 | 22 | AC   | 18 | 10 |
| 175576 | 21 | 3239704 | 3239731 | 2 | 14 | 28 | CT   | 17 | 18 |
| 175580 | 21 | 3251359 | 3251370 | 2 | 6  | 12 | CG   | 21 | 5  |

|        |    |         |         |   |    |    |      |    |    |
|--------|----|---------|---------|---|----|----|------|----|----|
| 175581 | 21 | 3252882 | 3252905 | 4 | 6  | 24 | GGAG | 11 | 3  |
| 175597 | 21 | 3266129 | 3266146 | 2 | 9  | 18 | CA   | 13 | 6  |
| 175610 | 21 | 3278905 | 3278920 | 2 | 8  | 16 | TG   | 17 | 4  |
| 175613 | 21 | 3285814 | 3285849 | 3 | 12 | 36 | AGG  | 9  | 5  |
| 175614 | 21 | 3293544 | 3293555 | 2 | 6  | 12 | TC   | 30 | 3  |
| 175619 | 21 | 3304798 | 3304817 | 2 | 10 | 20 | TG   | 20 | 5  |
| 175624 | 21 | 3315576 | 3315593 | 3 | 6  | 18 | GGA  | 21 | 4  |
| 175626 | 21 | 3320921 | 3320946 | 2 | 13 | 26 | AC   | 15 | 10 |
| 175632 | 21 | 3325754 | 3325771 | 2 | 9  | 18 | AC   | 23 | 7  |
| 175635 | 21 | 3327132 | 3327147 | 2 | 8  | 16 | CA   | 9  | 6  |
| 175636 | 21 | 3327150 | 3327161 | 2 | 6  | 12 | CA   | 12 | 8  |
| 175638 | 21 | 3329242 | 3329263 | 2 | 11 | 22 | TG   | 15 | 8  |
| 175646 | 21 | 3339733 | 3339765 | 3 | 11 | 33 | CAT  | 25 | 8  |
| 175648 | 21 | 3344651 | 3344668 | 2 | 9  | 18 | CA   | 20 | 5  |
| 175650 | 21 | 3347307 | 3347318 | 2 | 6  | 12 | CT   | 23 | 3  |
| 175652 | 21 | 3348881 | 3348900 | 4 | 5  | 20 | GCAG | 25 | 3  |
| 175655 | 21 | 3352361 | 3352386 | 2 | 13 | 26 | AC   | 11 | 8  |
| 175659 | 21 | 3359681 | 3359712 | 2 | 16 | 32 | CA   | 15 | 15 |
| 175660 | 21 | 3361219 | 3361230 | 2 | 6  | 12 | CA   | 14 | 7  |
| 175663 | 21 | 3365955 | 3365972 | 2 | 9  | 18 | TG   | 20 | 4  |
| 175664 | 21 | 3366817 | 3366843 | 3 | 9  | 27 | CTC  | 19 | 5  |
| 175666 | 21 | 3369915 | 3369935 | 3 | 7  | 21 | CAT  | 27 | 7  |
| 175677 | 21 | 3390910 | 3390924 | 3 | 5  | 15 | TCC  | 8  | 9  |
| 175686 | 21 | 3400028 | 3400047 | 2 | 10 | 20 | AC   | 14 | 5  |
| 175693 | 21 | 3448759 | 3448782 | 2 | 12 | 24 | CA   | 12 | 8  |
| 175694 | 21 | 3449067 | 3449082 | 4 | 4  | 16 | AGCG | 15 | 4  |
| 175699 | 21 | 3453438 | 3453451 | 2 | 7  | 14 | TA   | 16 | 8  |
| 175700 | 21 | 3454389 | 3454406 | 3 | 6  | 18 | CAG  | 21 | 3  |
| 175704 | 21 | 3455892 | 3455921 | 2 | 15 | 30 | GT   | 20 | 10 |
| 175719 | 21 | 3495413 | 3495434 | 2 | 11 | 22 | AC   | 20 | 5  |
| 175723 | 21 | 3517555 | 3517569 | 3 | 5  | 15 | TTG  | 19 | 3  |
| 175725 | 21 | 3528928 | 3528943 | 4 | 4  | 16 | AAAC | 23 | 3  |
| 175726 | 21 | 3530108 | 3530135 | 2 | 14 | 28 | CA   | 7  | 8  |
| 175729 | 21 | 3535565 | 3535585 | 3 | 7  | 21 | CAT  | 19 | 4  |
| 175730 | 21 | 3536453 | 3536466 | 2 | 7  | 14 | CA   | 25 | 7  |
| 175732 | 21 | 3538931 | 3538956 | 2 | 13 | 26 | GT   | 17 | 11 |
| 175749 | 21 | 3590762 | 3590773 | 2 | 6  | 12 | TA   | 27 | 3  |
| 175763 | 21 | 3614722 | 3614733 | 2 | 6  | 12 | CT   | 23 | 3  |
| 175765 | 21 | 3617452 | 3617469 | 2 | 9  | 18 | GT   | 23 | 4  |
| 175766 | 21 | 3621696 | 3621711 | 2 | 8  | 16 | CA   | 17 | 3  |
| 175767 | 21 | 3622450 | 3622507 | 2 | 29 | 58 | TG   | 6  | 11 |
| 175769 | 21 | 3632213 | 3632254 | 2 | 21 | 42 | AC   | 10 | 10 |
| 175771 | 21 | 3639079 | 3639093 | 3 | 5  | 15 | AAC  | 25 | 3  |
| 175772 | 21 | 3641403 | 3641423 | 3 | 7  | 21 | GCT  | 24 | 4  |
| 175773 | 21 | 3641622 | 3641645 | 2 | 12 | 24 | TG   | 17 | 18 |
| 175778 | 21 | 3643466 | 3643479 | 2 | 7  | 14 | GT   | 17 | 5  |
| 175779 | 21 | 3644128 | 3644147 | 4 | 5  | 20 | AAAG | 15 | 7  |
| 175780 | 21 | 3644400 | 3644429 | 2 | 15 | 30 | GT   | 12 | 6  |
| 175790 | 21 | 3664414 | 3664427 | 2 | 7  | 14 | TG   | 6  | 6  |
| 175791 | 21 | 3666207 | 3666236 | 2 | 15 | 30 | TG   | 19 | 7  |
| 175792 | 21 | 3666335 | 3666376 | 2 | 21 | 42 | TC   | 7  | 5  |

|        |    |         |         |   |    |    |      |    |    |
|--------|----|---------|---------|---|----|----|------|----|----|
| 175794 | 21 | 3666569 | 3666586 | 2 | 9  | 18 | CT   | 16 | 3  |
| 175797 | 21 | 3676329 | 3676346 | 2 | 9  | 18 | GT   | 20 | 4  |
| 175798 | 21 | 3676921 | 3676936 | 2 | 8  | 16 | GT   | 25 | 3  |
| 175799 | 21 | 3677062 | 3677079 | 2 | 9  | 18 | CA   | 20 | 6  |
| 175800 | 21 | 3678140 | 3678154 | 3 | 5  | 15 | TTA  | 19 | 6  |
| 175801 | 21 | 3679798 | 3679825 | 2 | 14 | 28 | TG   | 14 | 6  |
| 175804 | 21 | 3685681 | 3685692 | 2 | 6  | 12 | TG   | 24 | 3  |
| 175809 | 21 | 3692623 | 3692637 | 3 | 5  | 15 | AAT  | 12 | 4  |
| 175816 | 21 | 3716916 | 3716939 | 2 | 12 | 24 | TC   | 21 | 4  |
| 175817 | 21 | 3720949 | 3720966 | 2 | 9  | 18 | AT   | 8  | 3  |
| 175827 | 21 | 3748147 | 3748160 | 2 | 7  | 14 | GT   | 26 | 3  |
| 175828 | 21 | 3748544 | 3748565 | 2 | 11 | 22 | TG   | 16 | 9  |
| 175835 | 21 | 3756586 | 3756611 | 2 | 13 | 26 | AC   | 9  | 3  |
| 175840 | 21 | 3763330 | 3763359 | 3 | 10 | 30 | CTA  | 12 | 7  |
| 175842 | 21 | 3764477 | 3764488 | 2 | 6  | 12 | GT   | 16 | 10 |
| 175847 | 21 | 3779866 | 3779883 | 2 | 9  | 18 | CA   | 25 | 3  |
| 175849 | 21 | 3791792 | 3791811 | 2 | 10 | 20 | GT   | 27 | 5  |
| 175850 | 21 | 3794545 | 3794564 | 2 | 10 | 20 | AC   | 25 | 9  |
| 175854 | 21 | 3804854 | 3804871 | 3 | 6  | 18 | AAT  | 24 | 8  |
| 175855 | 21 | 3809631 | 3809654 | 2 | 12 | 24 | CA   | 9  | 5  |
| 175857 | 21 | 3814479 | 3814494 | 2 | 8  | 16 | CA   | 9  | 3  |
| 175864 | 21 | 3827627 | 3827666 | 2 | 20 | 40 | AC   | 11 | 9  |
| 175865 | 21 | 3835459 | 3835492 | 2 | 17 | 34 | CA   | 13 | 12 |
| 175866 | 21 | 3835542 | 3835559 | 3 | 6  | 18 | TCC  | 27 | 5  |
| 175869 | 21 | 3841621 | 3841634 | 2 | 7  | 14 | AC   | 26 | 3  |
| 175870 | 21 | 3844057 | 3844080 | 4 | 6  | 24 | ATTT | 27 | 4  |
| 175875 | 21 | 3851410 | 3851421 | 2 | 6  | 12 | GT   | 14 | 3  |
| 175877 | 21 | 3851700 | 3851715 | 2 | 8  | 16 | TG   | 19 | 3  |
| 175878 | 21 | 3854653 | 3854664 | 2 | 6  | 12 | CA   | 28 | 4  |
| 175883 | 21 | 3862851 | 3862882 | 4 | 8  | 32 | GTAT | 15 | 8  |
| 175884 | 21 | 3863782 | 3863793 | 2 | 6  | 12 | GA   | 13 | 5  |
| 175885 | 21 | 3867528 | 3867559 | 4 | 8  | 32 | GATA | 18 | 8  |
| 175897 | 21 | 3899294 | 3899339 | 2 | 23 | 46 | AC   | 8  | 11 |
| 175914 | 21 | 3970565 | 3970624 | 2 | 30 | 60 | AC   | 20 | 13 |
| 175918 | 21 | 3987304 | 3987327 | 3 | 8  | 24 | GAA  | 15 | 6  |
| 175919 | 21 | 3988012 | 3988033 | 2 | 11 | 22 | TC   | 23 | 14 |
| 175934 | 21 | 4024165 | 4024204 | 2 | 20 | 40 | GT   | 24 | 15 |
| 175935 | 21 | 4028800 | 4028817 | 3 | 6  | 18 | CTC  | 26 | 6  |
| 175939 | 21 | 4038196 | 4038215 | 2 | 10 | 20 | GT   | 15 | 5  |
| 175949 | 21 | 4069838 | 4069871 | 2 | 17 | 34 | AC   | 9  | 7  |
| 175954 | 21 | 4081875 | 4081898 | 2 | 12 | 24 | GT   | 18 | 10 |
| 175963 | 21 | 4100119 | 4100139 | 3 | 7  | 21 | TAA  | 21 | 7  |
| 175964 | 21 | 4102246 | 4102260 | 3 | 5  | 15 | ATA  | 19 | 3  |
| 175966 | 21 | 4106163 | 4106178 | 2 | 8  | 16 | CT   | 23 | 3  |
| 175974 | 21 | 4114305 | 4114344 | 4 | 10 | 40 | ACAG | 13 | 9  |
| 175976 | 21 | 4117181 | 4117194 | 2 | 7  | 14 | TG   | 23 | 3  |
| 175981 | 21 | 4131588 | 4131603 | 2 | 8  | 16 | AC   | 25 | 3  |
| 175983 | 21 | 4135162 | 4135177 | 2 | 8  | 16 | GA   | 19 | 4  |
| 175990 | 21 | 4143390 | 4143401 | 2 | 6  | 12 | CA   | 24 | 3  |
| 175993 | 21 | 4146981 | 4147002 | 2 | 11 | 22 | CA   | 13 | 6  |
| 175994 | 21 | 4148218 | 4148232 | 3 | 5  | 15 | GTG  | 31 | 3  |

|        |    |         |         |   |    |    |      |    |    |
|--------|----|---------|---------|---|----|----|------|----|----|
| 175995 | 21 | 4156264 | 4156275 | 2 | 6  | 12 | TG   | 9  | 3  |
| 175996 | 21 | 4156280 | 4156293 | 2 | 7  | 14 | TG   | 11 | 7  |
| 176003 | 21 | 4177275 | 4177288 | 2 | 7  | 14 | AT   | 11 | 3  |
| 176009 | 21 | 4203144 | 4203163 | 4 | 5  | 20 | TTTG | 26 | 6  |
| 176027 | 21 | 4263662 | 4263675 | 2 | 7  | 14 | GT   | 29 | 4  |
| 176029 | 21 | 4264331 | 4264360 | 2 | 15 | 30 | AC   | 14 | 9  |
| 176030 | 21 | 4264520 | 4264553 | 2 | 17 | 34 | GT   | 12 | 11 |
| 176035 | 21 | 4284375 | 4284394 | 2 | 10 | 20 | GT   | 17 | 12 |
| 176037 | 21 | 4289768 | 4289783 | 4 | 4  | 16 | AATT | 19 | 5  |
| 176038 | 21 | 4290025 | 4290044 | 4 | 5  | 20 | AAAT | 20 | 4  |
| 176039 | 21 | 4290275 | 4290292 | 3 | 6  | 18 | CTG  | 27 | 5  |
| 176040 | 21 | 4290333 | 4290346 | 2 | 7  | 14 | AG   | 27 | 3  |
| 176041 | 21 | 4290903 | 4290918 | 2 | 8  | 16 | GT   | 26 | 14 |
| 176050 | 21 | 4301381 | 4301392 | 2 | 6  | 12 | CA   | 14 | 8  |
| 176051 | 21 | 4301394 | 4301407 | 2 | 7  | 14 | AC   | 18 | 9  |
| 176061 | 21 | 4326877 | 4326900 | 4 | 6  | 24 | TAGA | 18 | 13 |
| 176062 | 21 | 4328664 | 4328681 | 3 | 6  | 18 | TTC  | 7  | 3  |
| 176069 | 21 | 4341765 | 4341816 | 2 | 26 | 52 | AC   | 8  | 11 |
| 176071 | 21 | 4347147 | 4347168 | 2 | 11 | 22 | TG   | 19 | 5  |
| 176072 | 21 | 4349949 | 4349964 | 2 | 8  | 16 | CT   | 12 | 6  |
| 176085 | 21 | 4380065 | 4380112 | 2 | 24 | 48 | CT   | 11 | 7  |
| 176091 | 21 | 4417564 | 4417575 | 2 | 6  | 12 | GC   | 20 | 3  |
| 176095 | 21 | 4429069 | 4429088 | 2 | 10 | 20 | TG   | 14 | 9  |
| 176097 | 21 | 4429302 | 4429316 | 3 | 5  | 15 | AAT  | 32 | 3  |
| 176098 | 21 | 4431413 | 4431430 | 3 | 6  | 18 | AAG  | 21 | 5  |
| 176103 | 21 | 4436644 | 4436677 | 2 | 17 | 34 | GT   | 7  | 8  |
| 176104 | 21 | 4439163 | 4439188 | 2 | 13 | 26 | GT   | 15 | 10 |
| 176106 | 21 | 4440058 | 4440093 | 2 | 18 | 36 | AC   | 7  | 9  |
| 176107 | 21 | 4440261 | 4440290 | 2 | 15 | 30 | AC   | 13 | 6  |
| 176127 | 21 | 4473748 | 4473765 | 2 | 9  | 18 | TG   | 20 | 9  |
| 176134 | 21 | 4487188 | 4487205 | 3 | 6  | 18 | TTA  | 26 | 9  |
| 176135 | 21 | 4487627 | 4487662 | 2 | 18 | 36 | TG   | 10 | 9  |
| 176136 | 21 | 4490385 | 4490405 | 3 | 7  | 21 | CCT  | 14 | 3  |
| 176143 | 21 | 4503199 | 4503228 | 2 | 15 | 30 | TG   | 11 | 12 |
| 176152 | 21 | 4530617 | 4530634 | 3 | 6  | 18 | CAA  | 27 | 5  |
| 176154 | 21 | 4542112 | 4542138 | 3 | 9  | 27 | GCT  | 10 | 11 |
| 176161 | 21 | 4568048 | 4568059 | 2 | 6  | 12 | CT   | 27 | 4  |
| 176162 | 21 | 4568061 | 4568072 | 2 | 6  | 12 | TC   | 26 | 3  |
| 176173 | 21 | 4600994 | 4601027 | 2 | 17 | 34 | CA   | 13 | 9  |
| 176175 | 21 | 4608496 | 4608509 | 2 | 7  | 14 | TC   | 28 | 3  |
| 176177 | 21 | 4614041 | 4614064 | 4 | 6  | 24 | CTTT | 22 | 4  |
| 176184 | 21 | 4617594 | 4617627 | 2 | 17 | 34 | AC   | 6  | 4  |
| 176186 | 21 | 4618201 | 4618226 | 2 | 13 | 26 | TG   | 14 | 3  |
| 176187 | 21 | 4618390 | 4618405 | 2 | 8  | 16 | TG   | 21 | 9  |
| 176189 | 21 | 4626084 | 4626103 | 2 | 10 | 20 | CA   | 22 | 4  |
| 176191 | 21 | 4628589 | 4628612 | 3 | 8  | 24 | TAT  | 16 | 4  |
| 176192 | 21 | 4629336 | 4629367 | 4 | 8  | 32 | TGAT | 21 | 3  |
| 176193 | 21 | 4637952 | 4637967 | 2 | 8  | 16 | TG   | 19 | 5  |
| 176196 | 21 | 4642269 | 4642288 | 2 | 10 | 20 | AC   | 18 | 15 |
| 176197 | 21 | 4642631 | 4642658 | 4 | 7  | 28 | AGAA | 14 | 11 |
| 176199 | 21 | 4646638 | 4646653 | 2 | 8  | 16 | TG   | 19 | 4  |

|        |    |         |         |   |    |    |      |    |    |
|--------|----|---------|---------|---|----|----|------|----|----|
| 176203 | 21 | 4651873 | 4651886 | 2 | 7  | 14 | AT   | 20 | 8  |
| 176206 | 21 | 4660615 | 4660646 | 4 | 8  | 32 | TAGA | 22 | 5  |
| 176207 | 21 | 4663825 | 4663838 | 2 | 7  | 14 | AC   | 23 | 3  |
| 176208 | 21 | 4664740 | 4664751 | 2 | 6  | 12 | CA   | 20 | 5  |
| 176211 | 21 | 4667893 | 4667920 | 2 | 14 | 28 | AC   | 11 | 10 |
| 176215 | 21 | 4689550 | 4689573 | 2 | 12 | 24 | TG   | 9  | 5  |
| 176218 | 21 | 4692002 | 4692029 | 2 | 14 | 28 | TG   | 17 | 5  |
| 176221 | 21 | 4701822 | 4701836 | 3 | 5  | 15 | AAC  | 22 | 3  |
| 176223 | 21 | 4720032 | 4720065 | 2 | 17 | 34 | GT   | 7  | 5  |
| 176224 | 21 | 4720174 | 4720203 | 2 | 15 | 30 | CA   | 12 | 8  |
| 176228 | 21 | 4722938 | 4722955 | 2 | 9  | 18 | AC   | 8  | 4  |
| 176232 | 21 | 4726566 | 4726577 | 2 | 6  | 12 | TC   | 22 | 4  |
| 176233 | 21 | 4728630 | 4728645 | 2 | 8  | 16 | TG   | 29 | 3  |
| 176240 | 21 | 4743264 | 4743285 | 2 | 11 | 22 | AC   | 27 | 4  |
| 176241 | 21 | 4744289 | 4744310 | 2 | 11 | 22 | CA   | 9  | 6  |
| 176242 | 21 | 4745352 | 4745367 | 2 | 8  | 16 | CA   | 19 | 11 |
| 176245 | 21 | 4750588 | 4750621 | 2 | 17 | 34 | GT   | 17 | 10 |
| 176249 | 21 | 4753579 | 4753590 | 2 | 6  | 12 | CT   | 20 | 3  |
| 176250 | 21 | 4753676 | 4753711 | 2 | 18 | 36 | CA   | 9  | 11 |
| 176251 | 21 | 4753930 | 4753947 | 2 | 9  | 18 | TG   | 26 | 9  |
| 176262 | 21 | 4772564 | 4772581 | 2 | 9  | 18 | TG   | 21 | 8  |
| 176263 | 21 | 4773412 | 4773435 | 4 | 6  | 24 | ATAC | 20 | 4  |
| 176267 | 21 | 4775128 | 4775151 | 2 | 12 | 24 | AC   | 23 | 10 |
| 176268 | 21 | 4779083 | 4779104 | 2 | 11 | 22 | AC   | 19 | 4  |
| 176269 | 21 | 4781555 | 4781582 | 2 | 14 | 28 | TG   | 18 | 7  |
| 176271 | 21 | 4782871 | 4782884 | 2 | 7  | 14 | TA   | 25 | 3  |
| 176272 | 21 | 4783744 | 4783787 | 2 | 22 | 44 | GT   | 13 | 11 |
| 176273 | 21 | 4783809 | 4783822 | 2 | 7  | 14 | TG   | 13 | 3  |
| 176274 | 21 | 4783914 | 4783929 | 2 | 8  | 16 | GT   | 15 | 10 |
| 176277 | 21 | 4786334 | 4786357 | 2 | 12 | 24 | TG   | 18 | 9  |
| 176278 | 21 | 4786893 | 4786952 | 2 | 30 | 60 | TG   | 6  | 8  |
| 176279 | 21 | 4787225 | 4787244 | 2 | 10 | 20 | CA   | 20 | 7  |
| 176283 | 21 | 4793724 | 4793745 | 2 | 11 | 22 | GT   | 13 | 6  |
| 176284 | 21 | 4798192 | 4798217 | 2 | 13 | 26 | TG   | 9  | 7  |
| 176287 | 21 | 4799830 | 4799855 | 2 | 13 | 26 | TG   | 16 | 10 |
| 176288 | 21 | 4800098 | 4800115 | 2 | 9  | 18 | TG   | 25 | 5  |
| 176291 | 21 | 4802947 | 4802972 | 2 | 13 | 26 | TG   | 16 | 9  |
| 176292 | 21 | 4803109 | 4803126 | 3 | 6  | 18 | CTC  | 14 | 7  |
| 176300 | 21 | 4809184 | 4809207 | 2 | 12 | 24 | AC   | 18 | 11 |
| 176303 | 21 | 4816108 | 4816131 | 2 | 12 | 24 | TG   | 22 | 8  |
| 176305 | 21 | 4816698 | 4816713 | 4 | 4  | 16 | TTTA | 16 | 7  |
| 176306 | 21 | 4818624 | 4818641 | 2 | 9  | 18 | TG   | 24 | 4  |
| 176307 | 21 | 4820561 | 4820590 | 2 | 15 | 30 | TG   | 11 | 12 |
| 176309 | 21 | 4821948 | 4821981 | 2 | 17 | 34 | AC   | 6  | 7  |
| 176314 | 21 | 4827170 | 4827187 | 2 | 9  | 18 | TC   | 23 | 8  |
| 176317 | 21 | 4832945 | 4832968 | 4 | 6  | 24 | ATTT | 29 | 6  |
| 176321 | 21 | 4843941 | 4843958 | 2 | 9  | 18 | AC   | 14 | 8  |
| 176322 | 21 | 4844921 | 4844934 | 2 | 7  | 14 | TA   | 13 | 4  |
| 176323 | 21 | 4845117 | 4845132 | 2 | 8  | 16 | GT   | 25 | 7  |
| 176334 | 21 | 4865452 | 4865469 | 2 | 9  | 18 | CA   | 18 | 3  |
| 176337 | 21 | 4867371 | 4867391 | 3 | 7  | 21 | CAA  | 15 | 4  |

|        |    |         |         |   |    |    |      |    |    |
|--------|----|---------|---------|---|----|----|------|----|----|
| 176342 | 21 | 4874700 | 4874717 | 2 | 9  | 18 | TG   | 10 | 6  |
| 176346 | 21 | 4880473 | 4880488 | 2 | 8  | 16 | AC   | 28 | 6  |
| 176353 | 21 | 4890415 | 4890450 | 4 | 9  | 36 | TCTA | 18 | 15 |
| 176356 | 21 | 4891269 | 4891280 | 2 | 6  | 12 | GT   | 12 | 11 |
| 176357 | 21 | 4891648 | 4891669 | 2 | 11 | 22 | CA   | 21 | 9  |
| 176360 | 21 | 4895283 | 4895310 | 2 | 14 | 28 | GT   | 6  | 10 |
| 176361 | 21 | 4895740 | 4895757 | 2 | 9  | 18 | GT   | 21 | 7  |
| 176362 | 21 | 4896180 | 4896207 | 2 | 14 | 28 | TG   | 13 | 9  |
| 176363 | 21 | 4896238 | 4896249 | 2 | 6  | 12 | GT   | 22 | 4  |
| 176366 | 21 | 4898113 | 4898160 | 2 | 24 | 48 | TG   | 6  | 10 |
| 176367 | 21 | 4898298 | 4898341 | 2 | 22 | 44 | GT   | 8  | 8  |
| 176368 | 21 | 4906348 | 4906367 | 4 | 5  | 20 | AATA | 15 | 5  |
| 176369 | 21 | 4909469 | 4909483 | 3 | 5  | 15 | GCA  | 20 | 3  |
| 176370 | 21 | 4919310 | 4919327 | 2 | 9  | 18 | AC   | 25 | 3  |
| 176371 | 21 | 4920113 | 4920144 | 4 | 8  | 32 | TATC | 15 | 13 |
| 176378 | 21 | 4944949 | 4944964 | 2 | 8  | 16 | AC   | 25 | 12 |
| 176379 | 21 | 4944966 | 4944977 | 2 | 6  | 12 | CA   | 19 | 7  |
| 176387 | 21 | 4962498 | 4962509 | 2 | 6  | 12 | AC   | 22 | 5  |
| 176388 | 21 | 4965545 | 4965572 | 2 | 14 | 28 | TC   | 7  | 8  |
| 176401 | 21 | 4980436 | 4980455 | 4 | 5  | 20 | TCTT | 15 | 6  |
| 176402 | 21 | 4980865 | 4980885 | 3 | 7  | 21 | AGC  | 26 | 6  |
| 176403 | 21 | 4981128 | 4981143 | 2 | 8  | 16 | CA   | 20 | 12 |
| 176404 | 21 | 4981174 | 4981201 | 2 | 14 | 28 | AG   | 24 | 10 |
| 176405 | 21 | 4981760 | 4981779 | 4 | 5  | 20 | AAAG | 11 | 10 |
| 176406 | 21 | 4983915 | 4983932 | 3 | 6  | 18 | GAG  | 24 | 4  |
| 176408 | 21 | 4996544 | 4996563 | 4 | 5  | 20 | ATTT | 13 | 3  |
| 176412 | 21 | 5000853 | 5000867 | 3 | 5  | 15 | TCT  | 24 | 8  |
| 176422 | 21 | 5023907 | 5023924 | 3 | 6  | 18 | ATG  | 25 | 3  |
| 176424 | 21 | 5034531 | 5034554 | 2 | 12 | 24 | TG   | 10 | 9  |
| 176425 | 21 | 5044313 | 5044338 | 2 | 13 | 26 | TG   | 14 | 4  |
| 176429 | 21 | 5051631 | 5051670 | 2 | 20 | 40 | GT   | 6  | 6  |
| 176434 | 21 | 5074145 | 5074164 | 2 | 10 | 20 | TC   | 25 | 4  |
| 176436 | 21 | 5079423 | 5079438 | 4 | 4  | 16 | CAGA | 30 | 3  |
| 176437 | 21 | 5079443 | 5079458 | 4 | 4  | 16 | CAGA | 26 | 8  |
| 176446 | 21 | 5109696 | 5109710 | 3 | 5  | 15 | TCA  | 28 | 4  |
| 176447 | 21 | 5110610 | 5110637 | 2 | 14 | 28 | CT   | 17 | 10 |
| 176448 | 21 | 5110667 | 5110682 | 2 | 8  | 16 | TC   | 22 | 3  |
| 176450 | 21 | 5113269 | 5113290 | 2 | 11 | 22 | TG   | 27 | 6  |
| 176452 | 21 | 5115041 | 5115054 | 2 | 7  | 14 | AC   | 23 | 5  |
| 176457 | 21 | 5120685 | 5120700 | 2 | 8  | 16 | GT   | 8  | 3  |
| 176459 | 21 | 5122539 | 5122566 | 2 | 14 | 28 | GT   | 9  | 10 |
| 176460 | 21 | 5123801 | 5123848 | 3 | 16 | 48 | AGA  | 29 | 10 |
| 176462 | 21 | 5125117 | 5125136 | 2 | 10 | 20 | AC   | 25 | 5  |
| 176463 | 21 | 5127771 | 5127788 | 2 | 9  | 18 | CA   | 16 | 8  |
| 176469 | 21 | 5146424 | 5146437 | 2 | 7  | 14 | GT   | 6  | 4  |
| 176471 | 21 | 5146648 | 5146661 | 2 | 7  | 14 | GT   | 19 | 6  |
| 176472 | 21 | 5147256 | 5147269 | 2 | 7  | 14 | AC   | 26 | 7  |
| 176475 | 21 | 5148924 | 5148957 | 2 | 17 | 34 | CA   | 12 | 10 |
| 176480 | 21 | 5157979 | 5157999 | 3 | 7  | 21 | CTC  | 23 | 5  |
| 176484 | 21 | 5166093 | 5166124 | 4 | 8  | 32 | CATA | 16 | 10 |
| 176485 | 21 | 5166340 | 5166354 | 3 | 5  | 15 | GTA  | 26 | 3  |

|        |    |         |         |   |    |    |      |    |    |
|--------|----|---------|---------|---|----|----|------|----|----|
| 176499 | 21 | 5171790 | 5171809 | 2 | 10 | 20 | AC   | 17 | 4  |
| 176504 | 21 | 5198412 | 5198425 | 2 | 7  | 14 | GT   | 27 | 6  |
| 176507 | 21 | 5204962 | 5204979 | 2 | 9  | 18 | GT   | 17 | 7  |
| 176511 | 21 | 5208571 | 5208588 | 2 | 9  | 18 | CA   | 20 | 6  |
| 176513 | 21 | 5213328 | 5213348 | 3 | 7  | 21 | TTG  | 24 | 5  |
| 176514 | 21 | 5213610 | 5213645 | 2 | 18 | 36 | CA   | 16 | 15 |
| 176527 | 21 | 5234882 | 5234899 | 2 | 9  | 18 | AC   | 24 | 8  |
| 176528 | 21 | 5234900 | 5234911 | 2 | 6  | 12 | TC   | 21 | 5  |
| 176532 | 21 | 5241979 | 5241992 | 2 | 7  | 14 | GT   | 28 | 6  |
| 176533 | 21 | 5245419 | 5245448 | 2 | 15 | 30 | GT   | 16 | 15 |
| 176536 | 21 | 5249695 | 5249714 | 4 | 5  | 20 | TTTC | 23 | 4  |
| 176543 | 21 | 5289041 | 5289052 | 2 | 6  | 12 | CA   | 19 | 6  |
| 176544 | 21 | 5290275 | 5290286 | 2 | 6  | 12 | GT   | 28 | 5  |
| 176545 | 21 | 5290288 | 5290299 | 2 | 6  | 12 | TG   | 24 | 3  |
| 176546 | 21 | 5290376 | 5290395 | 2 | 10 | 20 | TG   | 8  | 9  |
| 176547 | 21 | 5291738 | 5291763 | 2 | 13 | 26 | TG   | 22 | 8  |
| 176549 | 21 | 5294355 | 5294368 | 2 | 7  | 14 | GT   | 20 | 15 |
| 176550 | 21 | 5294370 | 5294385 | 2 | 8  | 16 | TG   | 16 | 11 |
| 176551 | 21 | 5295882 | 5295911 | 3 | 10 | 30 | TGA  | 30 | 5  |
| 176552 | 21 | 5296248 | 5296271 | 2 | 12 | 24 | TG   | 23 | 8  |
| 176553 | 21 | 5298727 | 5298741 | 3 | 5  | 15 | AGA  | 18 | 9  |
| 176554 | 21 | 5300223 | 5300236 | 2 | 7  | 14 | GT   | 16 | 3  |
| 176555 | 21 | 5301851 | 5301862 | 2 | 6  | 12 | TG   | 23 | 12 |
| 176557 | 21 | 5303653 | 5303668 | 4 | 4  | 16 | AATG | 6  | 3  |
| 176571 | 21 | 5332470 | 5332487 | 2 | 9  | 18 | TG   | 23 | 10 |
| 176572 | 21 | 5332712 | 5332723 | 2 | 6  | 12 | TG   | 31 | 11 |
| 176573 | 21 | 5332725 | 5332740 | 2 | 8  | 16 | GT   | 28 | 10 |
| 176577 | 21 | 5343801 | 5343814 | 2 | 7  | 14 | CA   | 16 | 10 |
| 176578 | 21 | 5343817 | 5343828 | 2 | 6  | 12 | CA   | 7  | 5  |
| 176591 | 21 | 5350665 | 5350694 | 2 | 15 | 30 | CA   | 28 | 11 |
| 176592 | 21 | 5350980 | 5351003 | 3 | 8  | 24 | TAT  | 34 | 3  |
| 176598 | 21 | 5364222 | 5364239 | 3 | 6  | 18 | GAG  | 22 | 6  |
| 176601 | 21 | 5367904 | 5367925 | 2 | 11 | 22 | CA   | 11 | 9  |
| 176603 | 21 | 5368084 | 5368097 | 2 | 7  | 14 | CA   | 22 | 13 |
| 176606 | 21 | 5371923 | 5371934 | 2 | 6  | 12 | AC   | 28 | 6  |
| 176610 | 21 | 5375401 | 5375448 | 2 | 24 | 48 | CA   | 7  | 8  |
| 176612 | 21 | 5379103 | 5379132 | 2 | 15 | 30 | CA   | 7  | 6  |
| 176621 | 21 | 5388278 | 5388301 | 4 | 6  | 24 | CTTC | 25 | 5  |
| 176625 | 21 | 5400862 | 5400875 | 2 | 7  | 14 | TG   | 19 | 5  |
| 176631 | 21 | 5408605 | 5408642 | 2 | 19 | 38 | GT   | 11 | 6  |
| 176633 | 21 | 5410846 | 5410857 | 2 | 6  | 12 | TG   | 34 | 3  |
| 176637 | 21 | 5413783 | 5413794 | 2 | 6  | 12 | GT   | 18 | 3  |
| 176638 | 21 | 5414196 | 5414215 | 2 | 10 | 20 | AC   | 31 | 4  |
| 176639 | 21 | 5414606 | 5414629 | 2 | 12 | 24 | CA   | 10 | 6  |
| 176641 | 21 | 5415146 | 5415159 | 2 | 7  | 14 | CA   | 25 | 4  |
| 176643 | 21 | 5416901 | 5416916 | 2 | 8  | 16 | CA   | 19 | 7  |
| 176658 | 21 | 5437887 | 5437902 | 2 | 8  | 16 | TG   | 20 | 4  |
| 176659 | 21 | 5437925 | 5437944 | 2 | 10 | 20 | AC   | 9  | 6  |
| 176660 | 21 | 5440053 | 5440092 | 2 | 20 | 40 | TG   | 14 | 10 |
| 176662 | 21 | 5443166 | 5443195 | 2 | 15 | 30 | CA   | 17 | 12 |
| 176664 | 21 | 5445562 | 5445601 | 4 | 10 | 40 | GTCT | 26 | 4  |



|        |    |         |         |   |    |    |      |    |    |
|--------|----|---------|---------|---|----|----|------|----|----|
| 176666 | 21 | 5446876 | 5446889 | 2 | 7  | 14 | AG   | 25 | 5  |
| 176669 | 21 | 5450001 | 5450028 | 2 | 14 | 28 | GT   | 16 | 8  |
| 176671 | 21 | 5450239 | 5450268 | 2 | 15 | 30 | AC   | 8  | 8  |
| 176674 | 21 | 5450996 | 5451017 | 2 | 11 | 22 | CA   | 25 | 14 |
| 176675 | 21 | 5454657 | 5454688 | 4 | 8  | 32 | CAGA | 26 | 9  |
| 176677 | 21 | 5457554 | 5457585 | 2 | 16 | 32 | AC   | 10 | 12 |
| 176679 | 21 | 5460218 | 5460247 | 2 | 15 | 30 | AC   | 10 | 11 |
| 176680 | 21 | 5461439 | 5461464 | 2 | 13 | 26 | GT   | 13 | 6  |
| 176688 | 21 | 5469367 | 5469384 | 2 | 9  | 18 | TG   | 17 | 3  |
| 176701 | 21 | 5483570 | 5483585 | 4 | 4  | 16 | TGTT | 23 | 3  |
| 176715 | 21 | 5499216 | 5499227 | 2 | 6  | 12 | TC   | 19 | 5  |
| 176716 | 21 | 5499376 | 5499401 | 2 | 13 | 26 | TG   | 9  | 7  |
| 176719 | 21 | 5499634 | 5499653 | 2 | 10 | 20 | AC   | 18 | 9  |
| 176720 | 21 | 5499789 | 5499810 | 2 | 11 | 22 | TG   | 22 | 7  |
| 176727 | 21 | 5506340 | 5506355 | 2 | 8  | 16 | GT   | 21 | 4  |
| 176735 | 21 | 5509833 | 5509860 | 2 | 14 | 28 | AC   | 9  | 5  |
| 176736 | 21 | 5510113 | 5510138 | 2 | 13 | 26 | AG   | 16 | 6  |
| 176738 | 21 | 5510333 | 5510368 | 2 | 18 | 36 | CT   | 8  | 11 |
| 176739 | 21 | 5512268 | 5512289 | 2 | 11 | 22 | GT   | 24 | 5  |
| 176740 | 21 | 5515298 | 5515345 | 2 | 24 | 48 | GT   | 8  | 8  |
| 176741 | 21 | 5515455 | 5515488 | 2 | 17 | 34 | AC   | 13 | 9  |
| 176742 | 21 | 5515904 | 5515929 | 2 | 13 | 26 | TG   | 19 | 7  |
| 176745 | 21 | 5516290 | 5516301 | 2 | 6  | 12 | GA   | 24 | 3  |
| 176747 | 21 | 5516436 | 5516459 | 2 | 12 | 24 | CA   | 11 | 14 |
| 176750 | 21 | 5518215 | 5518226 | 2 | 6  | 12 | GT   | 12 | 13 |
| 176759 | 21 | 5525127 | 5525140 | 2 | 7  | 14 | TG   | 22 | 5  |
| 176764 | 21 | 5527556 | 5527605 | 2 | 25 | 50 | GT   | 12 | 12 |
| 176765 | 21 | 5527730 | 5527759 | 2 | 15 | 30 | AC   | 17 | 10 |
| 176767 | 21 | 5529518 | 5529539 | 2 | 11 | 22 | AC   | 19 | 11 |
| 176770 | 21 | 5531765 | 5531798 | 2 | 17 | 34 | AC   | 16 | 10 |
| 176772 | 21 | 5533137 | 5533156 | 2 | 10 | 20 | AC   | 15 | 9  |
| 176775 | 21 | 5533516 | 5533545 | 2 | 15 | 30 | AG   | 6  | 10 |
| 176777 | 21 | 5533660 | 5533677 | 2 | 9  | 18 | GT   | 8  | 6  |
| 176779 | 21 | 5534569 | 5534586 | 2 | 9  | 18 | AG   | 22 | 7  |
| 176786 | 21 | 5538177 | 5538208 | 2 | 16 | 32 | GT   | 6  | 5  |
| 176787 | 21 | 5538299 | 5538312 | 2 | 7  | 14 | AC   | 20 | 5  |
| 176791 | 21 | 5539723 | 5539734 | 2 | 6  | 12 | AC   | 26 | 3  |
| 176793 | 21 | 5540394 | 5540419 | 2 | 13 | 26 | CA   | 18 | 14 |
| 176794 | 21 | 5541142 | 5541153 | 2 | 6  | 12 | TG   | 24 | 5  |
| 176795 | 21 | 5541762 | 5541789 | 2 | 14 | 28 | TG   | 12 | 12 |
| 176797 | 21 | 5546066 | 5546079 | 2 | 7  | 14 | TG   | 23 | 4  |
| 176802 | 21 | 5548309 | 5548348 | 2 | 20 | 40 | TG   | 11 | 12 |
| 176803 | 21 | 5548414 | 5548437 | 2 | 12 | 24 | AC   | 12 | 10 |
| 176805 | 21 | 5549439 | 5549484 | 2 | 23 | 46 | CA   | 14 | 12 |
| 176806 | 21 | 5549518 | 5549541 | 2 | 12 | 24 | GT   | 21 | 7  |
| 176807 | 21 | 5551897 | 5551912 | 4 | 4  | 16 | AAAT | 23 | 3  |
| 176808 | 21 | 5552079 | 5552104 | 2 | 13 | 26 | GT   | 9  | 10 |
| 176809 | 21 | 5552792 | 5552819 | 2 | 14 | 28 | AC   | 20 | 9  |
| 176810 | 21 | 5552933 | 5552952 | 2 | 10 | 20 | AC   | 10 | 3  |
| 176811 | 21 | 5553055 | 5553086 | 2 | 16 | 32 | CA   | 8  | 8  |
| 176813 | 21 | 5555886 | 5555909 | 4 | 6  | 24 | AGAC | 19 | 4  |

|        |    |         |         |   |    |    |     |    |    |
|--------|----|---------|---------|---|----|----|-----|----|----|
| 176843 | 21 | 5564196 | 5564235 | 2 | 20 | 40 | AG  | 7  | 9  |
| 176853 | 21 | 5568675 | 5568690 | 2 | 8  | 16 | AC  | 15 | 4  |
| 176854 | 21 | 5568759 | 5568816 | 2 | 29 | 58 | GT  | 7  | 8  |
| 176866 | 21 | 5574872 | 5574893 | 2 | 11 | 22 | AC  | 9  | 10 |
| 176900 | 21 | 5597429 | 5597440 | 2 | 6  | 12 | CA  | 23 | 4  |
| 176901 | 21 | 5597489 | 5597506 | 2 | 9  | 18 | GT  | 17 | 7  |
| 176905 | 21 | 5599118 | 5599131 | 2 | 7  | 14 | GA  | 19 | 3  |
| 176907 | 21 | 5599755 | 5599772 | 2 | 9  | 18 | GA  | 23 | 6  |
| 176909 | 21 | 5599908 | 5599925 | 2 | 9  | 18 | AC  | 23 | 6  |
| 176911 | 21 | 5601979 | 5601990 | 2 | 6  | 12 | TG  | 6  | 3  |
| 176912 | 21 | 5602050 | 5602065 | 2 | 8  | 16 | AC  | 15 | 6  |
| 176917 | 21 | 5604397 | 5604418 | 2 | 11 | 22 | TG  | 18 | 11 |
| 176920 | 21 | 5605466 | 5605493 | 2 | 14 | 28 | AC  | 11 | 7  |
| 176921 | 21 | 5605667 | 5605724 | 2 | 29 | 58 | TG  | 9  | 12 |
| 176922 | 21 | 5607441 | 5607466 | 2 | 13 | 26 | AC  | 15 | 5  |
| 176925 | 21 | 5609048 | 5609061 | 2 | 7  | 14 | GT  | 7  | 3  |
| 176929 | 21 | 5609770 | 5609803 | 2 | 17 | 34 | GT  | 10 | 8  |
| 176944 | 21 | 5623614 | 5623629 | 2 | 8  | 16 | AC  | 15 | 5  |
| 176947 | 21 | 5625451 | 5625476 | 2 | 13 | 26 | CA  | 14 | 7  |
| 176948 | 21 | 5625884 | 5625897 | 2 | 7  | 14 | CA  | 8  | 7  |
| 176949 | 21 | 5625899 | 5625914 | 2 | 8  | 16 | AC  | 6  | 5  |
| 176973 | 21 | 5644721 | 5644740 | 2 | 10 | 20 | GT  | 12 | 6  |
| 176976 | 21 | 5648382 | 5648405 | 2 | 12 | 24 | GT  | 20 | 7  |
| 176977 | 21 | 5648496 | 5648511 | 2 | 8  | 16 | AC  | 13 | 3  |
| 176980 | 21 | 5650190 | 5650219 | 2 | 15 | 30 | AC  | 9  | 10 |
| 176981 | 21 | 5651273 | 5651300 | 2 | 14 | 28 | AC  | 11 | 10 |
| 176987 | 21 | 5653829 | 5653850 | 2 | 11 | 22 | AC  | 10 | 8  |
| 176988 | 21 | 5653929 | 5653940 | 2 | 6  | 12 | TC  | 29 | 5  |
| 176995 | 21 | 5660176 | 5660193 | 2 | 9  | 18 | AC  | 14 | 5  |
| 176997 | 21 | 5660330 | 5660343 | 2 | 7  | 14 | CA  | 6  | 3  |
| 177005 | 21 | 5665369 | 5665426 | 2 | 29 | 58 | AC  | 12 | 9  |
| 177006 | 21 | 5665855 | 5665872 | 2 | 9  | 18 | TG  | 23 | 13 |
| 177007 | 21 | 5666035 | 5666046 | 2 | 6  | 12 | AG  | 23 | 4  |
| 177010 | 21 | 5670045 | 5670058 | 2 | 7  | 14 | GT  | 23 | 6  |
| 177011 | 21 | 5670127 | 5670142 | 2 | 8  | 16 | GT  | 25 | 3  |
| 177014 | 21 | 5670401 | 5670428 | 2 | 14 | 28 | AC  | 11 | 5  |
| 177015 | 21 | 5670526 | 5670549 | 2 | 12 | 24 | AC  | 10 | 7  |
| 177016 | 21 | 5673372 | 5673383 | 2 | 6  | 12 | CA  | 23 | 3  |
| 177028 | 21 | 5676478 | 5676491 | 2 | 7  | 14 | TG  | 21 | 3  |
| 177031 | 21 | 5678826 | 5678871 | 2 | 23 | 46 | GT  | 14 | 15 |
| 177033 | 21 | 5682283 | 5682296 | 2 | 7  | 14 | CA  | 29 | 7  |
| 177034 | 21 | 5682437 | 5682452 | 2 | 8  | 16 | AC  | 15 | 11 |
| 177035 | 21 | 5682454 | 5682469 | 2 | 8  | 16 | CA  | 15 | 13 |
| 177044 | 21 | 5690592 | 5690623 | 2 | 16 | 32 | AC  | 9  | 8  |
| 177045 | 21 | 5692221 | 5692250 | 2 | 15 | 30 | CA  | 17 | 13 |
| 177046 | 21 | 5692310 | 5692324 | 3 | 5  | 15 | AGA | 23 | 4  |
| 177050 | 21 | 5694276 | 5694303 | 2 | 14 | 28 | GA  | 12 | 11 |
| 177052 | 21 | 5696254 | 5696271 | 2 | 9  | 18 | CA  | 14 | 4  |
| 177053 | 21 | 5696392 | 5696427 | 2 | 18 | 36 | TG  | 15 | 12 |
| 177054 | 21 | 5697433 | 5697450 | 2 | 9  | 18 | TG  | 14 | 9  |
| 177055 | 21 | 5697557 | 5697606 | 2 | 25 | 50 | CA  | 9  | 11 |

|        |    |         |         |   |    |    |      |    |    |
|--------|----|---------|---------|---|----|----|------|----|----|
| 177057 | 21 | 5699995 | 5700012 | 2 | 9  | 18 | AC   | 20 | 5  |
| 177059 | 21 | 5701055 | 5701086 | 2 | 16 | 32 | AC   | 10 | 11 |
| 177067 | 21 | 5706168 | 5706195 | 2 | 14 | 28 | TG   | 11 | 3  |
| 177068 | 21 | 5706230 | 5706255 | 2 | 13 | 26 | AC   | 19 | 7  |
| 177070 | 21 | 5707713 | 5707733 | 3 | 7  | 21 | GGA  | 13 | 5  |
| 177071 | 21 | 5708422 | 5708447 | 2 | 13 | 26 | AC   | 10 | 7  |
| 177072 | 21 | 5714526 | 5714537 | 2 | 6  | 12 | AC   | 15 | 4  |
| 177073 | 21 | 5714541 | 5714554 | 2 | 7  | 14 | CA   | 12 | 4  |
| 177074 | 21 | 5714644 | 5714665 | 2 | 11 | 22 | CA   | 11 | 7  |
| 177077 | 21 | 5718526 | 5718545 | 4 | 5  | 20 | AATG | 33 | 3  |
| 177079 | 21 | 5719514 | 5719547 | 2 | 17 | 34 | CA   | 17 | 10 |
| 177086 | 21 | 5725622 | 5725639 | 2 | 9  | 18 | CA   | 15 | 5  |
| 177087 | 21 | 5725716 | 5725735 | 4 | 5  | 20 | TTTC | 13 | 3  |
| 177092 | 21 | 5726828 | 5726854 | 3 | 9  | 27 | GCT  | 26 | 7  |
| 177093 | 21 | 5727845 | 5727880 | 2 | 18 | 36 | AC   | 7  | 11 |
| 177103 | 21 | 5734385 | 5734408 | 2 | 12 | 24 | GT   | 15 | 8  |
| 177111 | 21 | 5739759 | 5739812 | 2 | 27 | 54 | TG   | 6  | 5  |
| 177113 | 21 | 5739937 | 5739962 | 2 | 13 | 26 | CA   | 17 | 14 |
| 177114 | 21 | 5740559 | 5740572 | 2 | 7  | 14 | TG   | 21 | 5  |
| 177115 | 21 | 5740604 | 5740615 | 2 | 6  | 12 | GT   | 22 | 9  |
| 177116 | 21 | 5741377 | 5741396 | 2 | 10 | 20 | CA   | 12 | 3  |
| 177117 | 21 | 5741603 | 5741624 | 2 | 11 | 22 | AC   | 21 | 5  |
| 177119 | 21 | 5744575 | 5744588 | 2 | 7  | 14 | CA   | 24 | 9  |
| 177120 | 21 | 5744753 | 5744770 | 2 | 9  | 18 | AC   | 20 | 10 |
| 177121 | 21 | 5744946 | 5744971 | 2 | 13 | 26 | CA   | 9  | 4  |
| 177128 | 21 | 5755350 | 5755363 | 2 | 7  | 14 | CA   | 15 | 3  |
| 177129 | 21 | 5755473 | 5755484 | 2 | 6  | 12 | CA   | 14 | 5  |
| 177130 | 21 | 5757274 | 5757294 | 3 | 7  | 21 | AGA  | 25 | 6  |
| 177139 | 21 | 5759208 | 5759219 | 2 | 6  | 12 | AC   | 11 | 5  |
| 177141 | 21 | 5760540 | 5760551 | 2 | 6  | 12 | AT   | 13 | 4  |
| 177143 | 21 | 5761913 | 5761928 | 2 | 8  | 16 | AC   | 13 | 6  |
| 177153 | 21 | 5767828 | 5767857 | 2 | 15 | 30 | TG   | 8  | 8  |
| 177154 | 21 | 5769138 | 5769153 | 2 | 8  | 16 | AC   | 23 | 3  |
| 177157 | 21 | 5773147 | 5773182 | 2 | 18 | 36 | AC   | 10 | 14 |
| 177159 | 21 | 5775372 | 5775399 | 2 | 14 | 28 | CA   | 13 | 7  |
| 177160 | 21 | 5777520 | 5777541 | 2 | 11 | 22 | GA   | 12 | 3  |
| 177161 | 21 | 5777706 | 5777741 | 2 | 18 | 36 | AC   | 20 | 10 |
| 177166 | 21 | 5779812 | 5779839 | 2 | 14 | 28 | TG   | 10 | 10 |
| 177167 | 21 | 5782696 | 5782719 | 2 | 12 | 24 | TG   | 21 | 7  |
| 177169 | 21 | 5782958 | 5783003 | 2 | 23 | 46 | AC   | 6  | 11 |
| 177170 | 21 | 5783033 | 5783044 | 2 | 6  | 12 | TG   | 21 | 3  |
| 177177 | 21 | 5787408 | 5787421 | 2 | 7  | 14 | CT   | 27 | 3  |
| 177178 | 21 | 5792085 | 5792098 | 2 | 7  | 14 | AC   | 16 | 3  |
| 177179 | 21 | 5792129 | 5792142 | 2 | 7  | 14 | AC   | 11 | 3  |
| 177184 | 21 | 5796012 | 5796047 | 2 | 18 | 36 | AC   | 13 | 14 |
| 177190 | 21 | 5801811 | 5801832 | 2 | 11 | 22 | AC   | 27 | 5  |
| 177193 | 21 | 5808896 | 5808911 | 2 | 8  | 16 | GT   | 21 | 4  |
| 177194 | 21 | 5809037 | 5809058 | 2 | 11 | 22 | GT   | 19 | 6  |
| 177195 | 21 | 5809153 | 5809174 | 2 | 11 | 22 | CA   | 13 | 9  |
| 177196 | 21 | 5809287 | 5809304 | 2 | 9  | 18 | AC   | 20 | 4  |
| 177197 | 21 | 5812812 | 5812839 | 2 | 14 | 28 | TG   | 18 | 8  |

|        |    |         |         |   |    |    |      |    |    |
|--------|----|---------|---------|---|----|----|------|----|----|
| 177199 | 21 | 5815512 | 5815539 | 4 | 7  | 28 | CCTT | 10 | 7  |
| 177200 | 21 | 5815620 | 5815639 | 4 | 5  | 20 | CCTT | 18 | 4  |
| 177208 | 21 | 5822024 | 5822059 | 2 | 18 | 36 | AC   | 7  | 6  |
| 177210 | 21 | 5822262 | 5822289 | 2 | 14 | 28 | CA   | 11 | 6  |
| 177211 | 21 | 5822460 | 5822485 | 2 | 13 | 26 | CA   | 25 | 7  |
| 177214 | 21 | 5823539 | 5823554 | 2 | 8  | 16 | GT   | 7  | 3  |
| 177220 | 21 | 5828656 | 5828669 | 2 | 7  | 14 | AC   | 16 | 3  |
| 177221 | 21 | 5828799 | 5828822 | 2 | 12 | 24 | CT   | 11 | 7  |
| 177222 | 21 | 5829144 | 5829159 | 2 | 8  | 16 | GA   | 17 | 7  |
| 177223 | 21 | 5829161 | 5829174 | 2 | 7  | 14 | AG   | 14 | 8  |
| 177224 | 21 | 5829330 | 5829357 | 4 | 7  | 28 | TGGA | 19 | 7  |
| 177228 | 21 | 5834126 | 5834157 | 2 | 16 | 32 | TC   | 10 | 9  |
| 177229 | 21 | 5834233 | 5834256 | 2 | 12 | 24 | GT   | 13 | 8  |
| 177230 | 21 | 5834395 | 5834414 | 2 | 10 | 20 | TC   | 15 | 12 |
| 177233 | 21 | 5845210 | 5845237 | 2 | 14 | 28 | AC   | 9  | 5  |
| 177237 | 21 | 5854441 | 5854452 | 2 | 6  | 12 | TG   | 19 | 5  |
| 177238 | 21 | 5855837 | 5855866 | 2 | 15 | 30 | TC   | 8  | 4  |
| 177239 | 21 | 5870387 | 5870402 | 2 | 8  | 16 | CA   | 22 | 5  |
| 177242 | 21 | 5877474 | 5877489 | 2 | 8  | 16 | CA   | 19 | 3  |
| 177244 | 21 | 5880691 | 5880704 | 2 | 7  | 14 | CA   | 21 | 6  |
| 177245 | 21 | 5880938 | 5880977 | 2 | 20 | 40 | AG   | 7  | 8  |
| 177251 | 21 | 5891621 | 5891640 | 2 | 10 | 20 | TG   | 24 | 5  |
| 177255 | 21 | 5899130 | 5899165 | 2 | 18 | 36 | AC   | 6  | 6  |
| 177263 | 21 | 5918860 | 5918873 | 2 | 7  | 14 | TC   | 19 | 3  |
| 177279 | 21 | 5946756 | 5946771 | 2 | 8  | 16 | TG   | 29 | 3  |
| 177284 | 21 | 5960156 | 5960191 | 2 | 18 | 36 | AC   | 6  | 6  |
| 177285 | 21 | 5960923 | 5960942 | 2 | 10 | 20 | TG   | 18 | 4  |
| 177287 | 21 | 5963170 | 5963193 | 2 | 12 | 24 | TG   | 16 | 10 |
| 177288 | 21 | 5967142 | 5967155 | 2 | 7  | 14 | GT   | 16 | 9  |
| 177289 | 21 | 5967230 | 5967243 | 2 | 7  | 14 | AC   | 28 | 13 |
| 177292 | 21 | 5968456 | 5968475 | 2 | 10 | 20 | GT   | 16 | 10 |
| 177293 | 21 | 5969187 | 5969202 | 2 | 8  | 16 | AC   | 11 | 3  |
| 177299 | 21 | 5978298 | 5978315 | 2 | 9  | 18 | GT   | 15 | 8  |
| 177300 | 21 | 5978318 | 5978329 | 2 | 6  | 12 | GT   | 18 | 9  |
| 177301 | 21 | 5978582 | 5978602 | 3 | 7  | 21 | ACA  | 18 | 3  |
| 177304 | 21 | 5979820 | 5979840 | 3 | 7  | 21 | GAG  | 20 | 4  |
| 177313 | 21 | 5995047 | 5995072 | 2 | 13 | 26 | TG   | 14 | 7  |
| 177316 | 21 | 5997071 | 5997090 | 4 | 5  | 20 | CTGT | 25 | 6  |
| 177319 | 21 | 5998300 | 5998323 | 2 | 12 | 24 | AC   | 12 | 6  |
| 177323 | 21 | 6004626 | 6004645 | 2 | 10 | 20 | AG   | 19 | 5  |
| 177327 | 21 | 6008592 | 6008619 | 2 | 14 | 28 | TG   | 8  | 6  |
| 177330 | 21 | 6010465 | 6010482 | 2 | 9  | 18 | GT   | 19 | 4  |
| 177333 | 21 | 6012785 | 6012796 | 2 | 6  | 12 | AT   | 20 | 3  |
| 177337 | 21 | 6018359 | 6018386 | 2 | 14 | 28 | TG   | 13 | 10 |
| 177338 | 21 | 6019116 | 6019147 | 2 | 16 | 32 | AC   | 14 | 8  |
| 177347 | 21 | 6034669 | 6034688 | 4 | 5  | 20 | CTGT | 31 | 5  |
| 177348 | 21 | 6035316 | 6035331 | 2 | 8  | 16 | AC   | 29 | 7  |
| 177353 | 21 | 6036746 | 6036766 | 3 | 7  | 21 | TCC  | 21 | 6  |
| 177355 | 21 | 6038435 | 6038468 | 2 | 17 | 34 | CA   | 8  | 7  |
| 177357 | 21 | 6039845 | 6039874 | 2 | 15 | 30 | TG   | 15 | 8  |
| 177358 | 21 | 6040292 | 6040337 | 2 | 23 | 46 | CA   | 7  | 11 |

|        |    |         |         |   |    |    |      |    |    |
|--------|----|---------|---------|---|----|----|------|----|----|
| 177359 | 21 | 6040520 | 6040539 | 2 | 10 | 20 | GT   | 20 | 5  |
| 177362 | 21 | 6044605 | 6044630 | 2 | 13 | 26 | GA   | 18 | 9  |
| 177363 | 21 | 6044903 | 6044934 | 2 | 16 | 32 | CA   | 9  | 10 |
| 177364 | 21 | 6045797 | 6045842 | 2 | 23 | 46 | AC   | 14 | 10 |
| 177365 | 21 | 6047010 | 6047021 | 2 | 6  | 12 | AT   | 11 | 3  |
| 177374 | 21 | 6068426 | 6068446 | 3 | 7  | 21 | CAG  | 26 | 4  |
| 177379 | 21 | 6075443 | 6075480 | 2 | 19 | 38 | AC   | 10 | 10 |
| 177383 | 21 | 6076941 | 6076966 | 2 | 13 | 26 | GT   | 26 | 7  |
| 177385 | 21 | 6078567 | 6078581 | 3 | 5  | 15 | GGA  | 21 | 3  |
| 177386 | 21 | 6078712 | 6078751 | 2 | 20 | 40 | CA   | 13 | 13 |
| 177391 | 21 | 6088819 | 6088832 | 2 | 7  | 14 | CA   | 27 | 4  |
| 177394 | 21 | 6090363 | 6090390 | 2 | 14 | 28 | GT   | 21 | 8  |
| 177395 | 21 | 6092920 | 6092945 | 2 | 13 | 26 | CA   | 18 | 7  |
| 177398 | 21 | 6096377 | 6096412 | 2 | 18 | 36 | GT   | 14 | 9  |
| 177399 | 21 | 6098768 | 6098799 | 2 | 16 | 32 | TG   | 13 | 8  |
| 177401 | 21 | 6100156 | 6100197 | 2 | 21 | 42 | TG   | 10 | 11 |
| 177408 | 21 | 6102677 | 6102724 | 2 | 24 | 48 | TC   | 7  | 8  |
| 177415 | 21 | 6110945 | 6110960 | 4 | 4  | 16 | TTGT | 19 | 4  |
| 177425 | 21 | 6115552 | 6115569 | 2 | 9  | 18 | TG   | 15 | 8  |
| 177426 | 21 | 6115633 | 6115644 | 2 | 6  | 12 | AC   | 30 | 4  |
| 177427 | 21 | 6115735 | 6115748 | 2 | 7  | 14 | AG   | 24 | 5  |
| 177429 | 21 | 6121652 | 6121667 | 2 | 8  | 16 | AC   | 25 | 7  |
| 177431 | 21 | 6124327 | 6124344 | 2 | 9  | 18 | CA   | 18 | 5  |
| 177432 | 21 | 6124347 | 6124358 | 2 | 6  | 12 | CA   | 26 | 12 |
| 177433 | 21 | 6124462 | 6124475 | 2 | 7  | 14 | TG   | 22 | 5  |
| 177438 | 21 | 6132534 | 6132549 | 2 | 8  | 16 | AC   | 17 | 8  |
| 177443 | 21 | 6141416 | 6141431 | 4 | 4  | 16 | AAAG | 29 | 4  |
| 177444 | 21 | 6143932 | 6143943 | 2 | 6  | 12 | AC   | 22 | 9  |
| 177445 | 21 | 6144084 | 6144107 | 2 | 12 | 24 | CA   | 10 | 7  |
| 177446 | 21 | 6144817 | 6144846 | 2 | 15 | 30 | GT   | 16 | 9  |
| 177449 | 21 | 6147026 | 6147039 | 2 | 7  | 14 | CA   | 29 | 3  |
| 177451 | 21 | 6148729 | 6148756 | 2 | 14 | 28 | GT   | 16 | 18 |
| 177453 | 21 | 6148982 | 6149011 | 2 | 15 | 30 | GT   | 14 | 8  |
| 177475 | 21 | 6161213 | 6161236 | 2 | 12 | 24 | CA   | 12 | 10 |
| 177479 | 21 | 6171390 | 6171401 | 2 | 6  | 12 | CA   | 28 | 3  |
| 177480 | 21 | 6173263 | 6173300 | 2 | 19 | 38 | CA   | 6  | 5  |
| 177482 | 21 | 6175722 | 6175749 | 2 | 14 | 28 | CA   | 11 | 9  |
| 177486 | 21 | 6183294 | 6183305 | 2 | 6  | 12 | TG   | 27 | 3  |
| 177492 | 21 | 6186360 | 6186377 | 2 | 9  | 18 | GT   | 21 | 5  |
| 177493 | 21 | 6186515 | 6186528 | 2 | 7  | 14 | GT   | 17 | 5  |
| 177498 | 21 | 6190645 | 6190672 | 4 | 7  | 28 | AAGG | 15 | 9  |
| 177504 | 21 | 6199126 | 6199141 | 2 | 8  | 16 | TG   | 27 | 9  |
| 177512 | 21 | 6200337 | 6200368 | 2 | 16 | 32 | GT   | 7  | 10 |
| 177516 | 21 | 6203935 | 6203952 | 2 | 9  | 18 | TG   | 24 | 5  |
| 177517 | 21 | 6204199 | 6204216 | 2 | 9  | 18 | TG   | 16 | 12 |
| 177518 | 21 | 6204332 | 6204361 | 2 | 15 | 30 | AC   | 8  | 8  |
| 177524 | 21 | 6207881 | 6207896 | 2 | 8  | 16 | GA   | 25 | 6  |
| 177527 | 21 | 6211786 | 6211797 | 2 | 6  | 12 | TG   | 18 | 3  |
| 177529 | 21 | 6215741 | 6215754 | 2 | 7  | 14 | AC   | 11 | 5  |
| 177530 | 21 | 6215757 | 6215768 | 2 | 6  | 12 | AC   | 12 | 3  |
| 177534 | 21 | 6223009 | 6223022 | 2 | 7  | 14 | TG   | 19 | 3  |

|        |    |         |         |   |    |    |      |    |    |
|--------|----|---------|---------|---|----|----|------|----|----|
| 177551 | 21 | 6237833 | 6237864 | 2 | 16 | 32 | CA   | 21 | 13 |
| 177552 | 21 | 6237961 | 6237972 | 2 | 6  | 12 | GT   | 24 | 8  |
| 177558 | 21 | 6251546 | 6251557 | 2 | 6  | 12 | AC   | 17 | 7  |
| 177559 | 21 | 6251561 | 6251574 | 2 | 7  | 14 | CA   | 21 | 8  |
| 177560 | 21 | 6257413 | 6257444 | 4 | 8  | 32 | AGAC | 20 | 15 |
| 177561 | 21 | 6261261 | 6261300 | 4 | 10 | 40 | GATT | 20 | 9  |
| 177565 | 21 | 6266688 | 6266699 | 2 | 6  | 12 | GT   | 26 | 3  |
| 177568 | 21 | 6268874 | 6268885 | 2 | 6  | 12 | TG   | 21 | 3  |
| 177570 | 21 | 6271453 | 6271470 | 3 | 6  | 18 | TTG  | 30 | 8  |
| 177571 | 21 | 6271471 | 6271482 | 2 | 6  | 12 | GT   | 22 | 5  |
| 177584 | 21 | 6300375 | 6300396 | 2 | 11 | 22 | GT   | 13 | 14 |
| 177585 | 21 | 6300875 | 6300910 | 2 | 18 | 36 | AC   | 10 | 10 |
| 177586 | 21 | 6304318 | 6304331 | 2 | 7  | 14 | GT   | 30 | 6  |
| 177590 | 21 | 6308940 | 6308951 | 2 | 6  | 12 | CA   | 28 | 4  |
| 177594 | 21 | 6323562 | 6323585 | 2 | 12 | 24 | AC   | 12 | 12 |
| 177597 | 21 | 6327416 | 6327435 | 4 | 5  | 20 | TCTG | 28 | 3  |
| 177600 | 21 | 6331361 | 6331380 | 4 | 5  | 20 | AAAG | 26 | 3  |
| 177602 | 21 | 6342538 | 6342573 | 2 | 18 | 36 | CA   | 14 | 12 |
| 177605 | 21 | 6360557 | 6360570 | 2 | 7  | 14 | TG   | 26 | 6  |
| 177606 | 21 | 6361217 | 6361240 | 4 | 6  | 24 | AAAT | 24 | 4  |
| 177607 | 21 | 6366539 | 6366552 | 2 | 7  | 14 | AC   | 21 | 5  |
| 177608 | 21 | 6367861 | 6367872 | 2 | 6  | 12 | TG   | 26 | 4  |
| 177612 | 21 | 6370094 | 6370111 | 2 | 9  | 18 | CA   | 18 | 8  |
| 177617 | 21 | 6374457 | 6374490 | 2 | 17 | 34 | AC   | 7  | 8  |
| 177620 | 21 | 6378409 | 6378428 | 4 | 5  | 20 | TTCA | 29 | 5  |
| 177621 | 21 | 6378807 | 6378827 | 3 | 7  | 21 | ATA  | 10 | 4  |
| 177623 | 21 | 6382900 | 6382933 | 2 | 17 | 34 | AC   | 10 | 11 |
| 177626 | 21 | 6389564 | 6389577 | 2 | 7  | 14 | GT   | 13 | 9  |
| 177627 | 21 | 6392251 | 6392276 | 2 | 13 | 26 | TG   | 8  | 7  |
| 177629 | 21 | 6394905 | 6394924 | 2 | 10 | 20 | CA   | 23 | 5  |
| 177635 | 21 | 6432463 | 6432478 | 2 | 8  | 16 | GT   | 28 | 8  |
| 177637 | 21 | 6446102 | 6446129 | 2 | 14 | 28 | CA   | 18 | 15 |
| 177645 | 21 | 6460704 | 6460719 | 4 | 4  | 16 | AAAT | 20 | 4  |
| 177647 | 21 | 6462696 | 6462713 | 2 | 9  | 18 | CA   | 16 | 5  |
| 177671 | 21 | 6488388 | 6488403 | 4 | 4  | 16 | GTCT | 14 | 4  |
| 177681 | 21 | 6525218 | 6525249 | 2 | 16 | 32 | CA   | 11 | 7  |
| 177682 | 21 | 6526067 | 6526084 | 2 | 9  | 18 | AC   | 21 | 6  |
| 177685 | 21 | 6547196 | 6547231 | 3 | 12 | 36 | CTA  | 6  | 5  |
| 177690 | 21 | 6561398 | 6561413 | 2 | 8  | 16 | GT   | 21 | 4  |
| 177691 | 21 | 6570813 | 6570852 | 2 | 20 | 40 | GT   | 15 | 12 |
| 177695 | 21 | 6578691 | 6578734 | 4 | 11 | 44 | ATAC | 10 | 7  |
| 177698 | 21 | 6581175 | 6581218 | 2 | 22 | 44 | CA   | 14 | 10 |
| 177700 | 21 | 6581622 | 6581641 | 4 | 5  | 20 | TCCA | 27 | 3  |
| 177702 | 21 | 6583776 | 6583809 | 2 | 17 | 34 | CA   | 7  | 6  |
| 177708 | 21 | 6605912 | 6605925 | 2 | 7  | 14 | AC   | 21 | 5  |
| 177709 | 21 | 6605928 | 6605941 | 2 | 7  | 14 | AC   | 22 | 7  |
| 177712 | 21 | 6621302 | 6621325 | 4 | 6  | 24 | ATGG | 28 | 6  |
| 177716 | 21 | 6631830 | 6631857 | 2 | 14 | 28 | CA   | 10 | 6  |
| 177722 | 21 | 6634540 | 6634561 | 2 | 11 | 22 | GA   | 12 | 3  |
| 177728 | 21 | 6642190 | 6642221 | 2 | 16 | 32 | CA   | 7  | 8  |
| 177743 | 21 | 6688964 | 6688995 | 2 | 16 | 32 | TG   | 9  | 8  |

|        |    |         |         |   |    |    |      |    |    |
|--------|----|---------|---------|---|----|----|------|----|----|
| 177748 | 21 | 6693742 | 6693773 | 4 | 8  | 32 | AGAC | 22 | 9  |
| 177750 | 21 | 6696357 | 6696376 | 2 | 10 | 20 | AC   | 22 | 3  |
| 177751 | 21 | 6697543 | 6697560 | 2 | 9  | 18 | CA   | 29 | 9  |
| 177753 | 21 | 6701590 | 6701613 | 2 | 12 | 24 | AC   | 18 | 10 |
| 177760 | 21 | 6721135 | 6721152 | 2 | 9  | 18 | GT   | 13 | 8  |
| 177772 | 21 | 6804815 | 6804850 | 4 | 9  | 36 | ATGA | 8  | 6  |
| 177773 | 21 | 6807014 | 6807031 | 3 | 6  | 18 | AAC  | 29 | 5  |
| 177780 | 21 | 6823647 | 6823674 | 2 | 14 | 28 | TG   | 13 | 10 |
| 177781 | 21 | 6824627 | 6824650 | 4 | 6  | 24 | TCCA | 27 | 5  |
| 177784 | 21 | 6830189 | 6830206 | 2 | 9  | 18 | CA   | 14 | 6  |
| 177786 | 21 | 6833387 | 6833406 | 2 | 10 | 20 | CA   | 24 | 8  |
| 177788 | 21 | 6848612 | 6848631 | 2 | 10 | 20 | CA   | 8  | 4  |
| 177790 | 21 | 6854196 | 6854209 | 2 | 7  | 14 | AC   | 8  | 4  |
| 177791 | 21 | 6855785 | 6855824 | 4 | 10 | 40 | CTAT | 20 | 6  |
| 177794 | 21 | 6865618 | 6865632 | 3 | 5  | 15 | ATA  | 26 | 3  |
| 177805 | 21 | 6892057 | 6892072 | 4 | 4  | 16 | AAAC | 20 | 10 |
| 177812 | 21 | 6907262 | 6907281 | 4 | 5  | 20 | GTCT | 25 | 4  |
| 177814 | 21 | 6910293 | 6910306 | 2 | 7  | 14 | TG   | 31 | 3  |
| 177832 | 21 | 6978569 | 6978616 | 4 | 12 | 48 | TCAT | 19 | 9  |
| 177833 | 21 | 6979393 | 6979412 | 4 | 5  | 20 | CTGT | 29 | 10 |
| 177836 | 21 | 6983915 | 6983970 | 4 | 14 | 56 | ATAG | 11 | 7  |
| 177837 | 21 | 6984236 | 6984255 | 2 | 10 | 20 | CA   | 21 | 7  |
| 177838 | 21 | 6985576 | 6985597 | 2 | 11 | 22 | GT   | 15 | 6  |
| 177840 | 21 | 7003475 | 7003500 | 2 | 13 | 26 | AC   | 17 | 10 |
| 177841 | 21 | 7005629 | 7005642 | 2 | 7  | 14 | AC   | 23 | 5  |
| 177851 | 21 | 7028192 | 7028205 | 2 | 7  | 14 | CT   | 25 | 3  |
| 177853 | 21 | 7040481 | 7040498 | 3 | 6  | 18 | GAT  | 18 | 4  |
| 177854 | 21 | 7040687 | 7040698 | 2 | 6  | 12 | TG   | 21 | 4  |
| 177862 | 21 | 7072027 | 7072046 | 4 | 5  | 20 | GGCA | 26 | 7  |
| 177874 | 21 | 7121306 | 7121347 | 2 | 21 | 42 | CA   | 7  | 10 |
| 177882 | 21 | 7172946 | 7172991 | 2 | 23 | 46 | TG   | 7  | 11 |
| 177888 | 21 | 7184228 | 7184249 | 2 | 11 | 22 | TG   | 11 | 12 |
| 177894 | 21 | 7207437 | 7207494 | 2 | 29 | 58 | AC   | 6  | 10 |
| 177896 | 21 | 7217558 | 7217578 | 3 | 7  | 21 | TTG  | 30 | 3  |
| 177897 | 21 | 7217892 | 7217915 | 2 | 12 | 24 | GT   | 15 | 4  |
| 177899 | 21 | 7219908 | 7219933 | 2 | 13 | 26 | TG   | 15 | 10 |
| 177900 | 21 | 7224560 | 7224573 | 2 | 7  | 14 | GT   | 23 | 5  |
| 177921 | 21 | 7286886 | 7286917 | 2 | 16 | 32 | CA   | 12 | 16 |
| 177922 | 21 | 7289387 | 7289404 | 2 | 9  | 18 | AC   | 8  | 9  |
| 177936 | 21 | 7328540 | 7328559 | 2 | 10 | 20 | TG   | 11 | 9  |
| 177939 | 21 | 7330301 | 7330326 | 2 | 13 | 26 | TG   | 8  | 9  |
| 177941 | 21 | 7330485 | 7330526 | 2 | 21 | 42 | CA   | 7  | 12 |
| 177951 | 21 | 7349863 | 7349874 | 2 | 6  | 12 | AT   | 8  | 4  |
| 177954 | 21 | 7354558 | 7354579 | 2 | 11 | 22 | GT   | 14 | 6  |
| 177962 | 21 | 7360856 | 7360879 | 2 | 12 | 24 | GT   | 15 | 7  |
| 177966 | 21 | 7362182 | 7362205 | 2 | 12 | 24 | CA   | 10 | 12 |
| 177974 | 21 | 7382615 | 7382629 | 3 | 5  | 15 | ATT  | 16 | 3  |
| 177975 | 21 | 7383250 | 7383270 | 3 | 7  | 21 | TTA  | 17 | 4  |
| 177978 | 21 | 7398652 | 7398683 | 2 | 16 | 32 | AC   | 14 | 8  |
| 177990 | 21 | 7434042 | 7434077 | 2 | 18 | 36 | GA   | 6  | 7  |
| 177994 | 21 | 7447170 | 7447187 | 3 | 6  | 18 | CTG  | 21 | 3  |

|        |    |         |         |   |    |    |      |    |    |
|--------|----|---------|---------|---|----|----|------|----|----|
| 177999 | 21 | 7451686 | 7451706 | 3 | 7  | 21 | ATC  | 20 | 16 |
| 178005 | 21 | 7481643 | 7481662 | 2 | 10 | 20 | CA   | 11 | 12 |
| 178006 | 21 | 7481664 | 7481681 | 2 | 9  | 18 | AC   | 8  | 7  |
| 178007 | 21 | 7481776 | 7481787 | 2 | 6  | 12 | TG   | 27 | 3  |
| 178013 | 21 | 7484483 | 7484512 | 2 | 15 | 30 | CA   | 13 | 11 |
| 178016 | 21 | 7512284 | 7512299 | 2 | 8  | 16 | CA   | 11 | 8  |
| 178025 | 21 | 7550157 | 7550174 | 3 | 6  | 18 | ATT  | 10 | 7  |
| 178027 | 21 | 7560423 | 7560454 | 4 | 8  | 32 | ATGG | 15 | 10 |
| 178031 | 21 | 7569603 | 7569618 | 4 | 4  | 16 | TATT | 21 | 4  |
| 178034 | 21 | 7587311 | 7587328 | 2 | 9  | 18 | CA   | 17 | 4  |
| 178039 | 21 | 7597641 | 7597670 | 3 | 10 | 30 | AGT  | 25 | 7  |
| 178040 | 21 | 7606083 | 7606096 | 2 | 7  | 14 | GT   | 28 | 5  |
| 178043 | 21 | 7611712 | 7611723 | 2 | 6  | 12 | AT   | 24 | 4  |
| 178055 | 21 | 7628435 | 7628452 | 2 | 9  | 18 | GT   | 21 | 15 |
| 178061 | 21 | 7645365 | 7645379 | 3 | 5  | 15 | TAC  | 25 | 3  |
| 178062 | 21 | 7649145 | 7649174 | 2 | 15 | 30 | TG   | 7  | 7  |
| 178068 | 21 | 7662550 | 7662573 | 4 | 6  | 24 | CCTG | 21 | 5  |
| 178072 | 21 | 7682481 | 7682498 | 3 | 6  | 18 | AAC  | 8  | 6  |
| 178078 | 21 | 7702682 | 7702696 | 3 | 5  | 15 | TCA  | 18 | 5  |
| 178081 | 21 | 7715209 | 7715222 | 2 | 7  | 14 | AC   | 17 | 3  |
| 178084 | 21 | 7723646 | 7723665 | 4 | 5  | 20 | TTTA | 17 | 5  |
| 178088 | 21 | 7731373 | 7731410 | 2 | 19 | 38 | AG   | 20 | 10 |
| 178090 | 21 | 7737133 | 7737150 | 2 | 9  | 18 | CA   | 11 | 7  |
| 178091 | 21 | 7737152 | 7737163 | 2 | 6  | 12 | AC   | 8  | 5  |
| 178101 | 21 | 7756424 | 7756443 | 2 | 10 | 20 | CA   | 10 | 8  |
| 178102 | 21 | 7756663 | 7756676 | 2 | 7  | 14 | GT   | 22 | 4  |
| 178108 | 21 | 7763657 | 7763690 | 2 | 17 | 34 | TG   | 8  | 7  |
| 178112 | 21 | 7772312 | 7772339 | 2 | 14 | 28 | TC   | 16 | 8  |
| 178114 | 21 | 7778199 | 7778216 | 2 | 9  | 18 | TA   | 25 | 6  |
| 178117 | 21 | 7791472 | 7791483 | 2 | 6  | 12 | CA   | 28 | 4  |
| 178123 | 21 | 7813102 | 7813117 | 2 | 8  | 16 | CT   | 19 | 3  |
| 178128 | 21 | 7815658 | 7815681 | 3 | 8  | 24 | TGA  | 18 | 3  |
| 178130 | 21 | 7822641 | 7822656 | 2 | 8  | 16 | AC   | 21 | 4  |
| 178131 | 21 | 7822661 | 7822676 | 4 | 4  | 16 | ACAG | 19 | 3  |
| 178136 | 21 | 7839254 | 7839271 | 2 | 9  | 18 | GT   | 25 | 4  |
| 178153 | 21 | 7878757 | 7878780 | 2 | 12 | 24 | AC   | 16 | 7  |
| 178156 | 21 | 7887032 | 7887045 | 2 | 7  | 14 | CA   | 26 | 4  |
| 178158 | 21 | 7891037 | 7891070 | 2 | 17 | 34 | TG   | 17 | 10 |
| 178186 | 21 | 7937252 | 7937267 | 4 | 4  | 16 | TATC | 15 | 3  |
| 178191 | 21 | 7946495 | 7946512 | 2 | 9  | 18 | AT   | 7  | 5  |
| 178192 | 21 | 7954893 | 7954906 | 2 | 7  | 14 | TG   | 14 | 5  |
| 178193 | 21 | 7954907 | 7954918 | 2 | 6  | 12 | TA   | 14 | 4  |
| 178204 | 21 | 7971004 | 7971043 | 2 | 20 | 40 | CT   | 11 | 10 |
| 178215 | 21 | 8019134 | 8019145 | 2 | 6  | 12 | CT   | 22 | 4  |
| 178229 | 21 | 8052651 | 8052666 | 4 | 4  | 16 | ATTT | 19 | 4  |
| 178231 | 21 | 8059510 | 8059521 | 2 | 6  | 12 | GA   | 23 | 7  |
| 178233 | 21 | 8063759 | 8063786 | 2 | 14 | 28 | GT   | 14 | 6  |
| 178237 | 21 | 8066899 | 8066930 | 2 | 16 | 32 | AC   | 11 | 11 |
| 178246 | 21 | 8071909 | 8071935 | 3 | 9  | 27 | TTA  | 14 | 5  |
| 178251 | 21 | 8087382 | 8087413 | 4 | 8  | 32 | TGTC | 28 | 3  |
| 178257 | 21 | 8109656 | 8109669 | 2 | 7  | 14 | GT   | 15 | 4  |



|        |    |         |         |   |    |    |      |    |    |
|--------|----|---------|---------|---|----|----|------|----|----|
| 178259 | 21 | 8112551 | 8112566 | 2 | 8  | 16 | TG   | 22 | 6  |
| 178261 | 21 | 8119963 | 8119994 | 2 | 16 | 32 | AC   | 9  | 7  |
| 178262 | 21 | 8124437 | 8124450 | 2 | 7  | 14 | AG   | 13 | 5  |
| 178263 | 21 | 8127986 | 8128015 | 2 | 15 | 30 | TG   | 16 | 12 |
| 178268 | 21 | 8148657 | 8148676 | 2 | 10 | 20 | TG   | 23 | 3  |
| 178270 | 21 | 8179735 | 8179754 | 2 | 10 | 20 | TG   | 15 | 12 |
| 178274 | 21 | 8187165 | 8187184 | 4 | 5  | 20 | GTGC | 26 | 4  |
| 178275 | 21 | 8188576 | 8188619 | 4 | 11 | 44 | TATC | 13 | 8  |
| 178282 | 21 | 8200937 | 8200954 | 2 | 9  | 18 | GT   | 27 | 3  |
| 178292 | 21 | 8237240 | 8237263 | 2 | 12 | 24 | CA   | 12 | 7  |
| 178294 | 21 | 8239400 | 8239419 | 2 | 10 | 20 | GT   | 18 | 10 |
| 178299 | 21 | 8247483 | 8247506 | 2 | 12 | 24 | CA   | 24 | 9  |
| 178301 | 21 | 8257308 | 8257334 | 3 | 9  | 27 | TAT  | 14 | 5  |
| 178305 | 21 | 8261398 | 8261409 | 2 | 6  | 12 | AT   | 16 | 3  |
| 178312 | 21 | 8282302 | 8282317 | 2 | 8  | 16 | AC   | 22 | 11 |
| 178315 | 21 | 8287215 | 8287229 | 3 | 5  | 15 | TTG  | 10 | 4  |
| 178317 | 21 | 8302314 | 8302365 | 4 | 13 | 52 | TTTC | 18 | 9  |
| 178321 | 21 | 8313528 | 8313567 | 4 | 10 | 40 | AAAG | 17 | 11 |
| 178322 | 21 | 8313831 | 8313854 | 2 | 12 | 24 | TG   | 10 | 7  |
| 178326 | 21 | 8322353 | 8322376 | 2 | 12 | 24 | GT   | 15 | 8  |
| 178330 | 21 | 8329764 | 8329789 | 2 | 13 | 26 | GT   | 15 | 10 |
| 178331 | 21 | 8329936 | 8329957 | 2 | 11 | 22 | TG   | 21 | 5  |
| 178332 | 21 | 8330747 | 8330774 | 2 | 14 | 28 | AC   | 25 | 11 |
| 178340 | 21 | 8340362 | 8340375 | 2 | 7  | 14 | AC   | 20 | 3  |
| 178341 | 21 | 8340406 | 8340421 | 2 | 8  | 16 | CA   | 25 | 4  |
| 178344 | 21 | 8343200 | 8343217 | 3 | 6  | 18 | CTC  | 20 | 4  |
| 178345 | 21 | 8343475 | 8343530 | 2 | 28 | 56 | CT   | 6  | 9  |
| 178348 | 21 | 8348383 | 8348406 | 2 | 12 | 24 | TG   | 15 | 6  |
| 178349 | 21 | 8350723 | 8350746 | 2 | 12 | 24 | CA   | 20 | 8  |
| 178356 | 21 | 8372811 | 8372840 | 3 | 10 | 30 | ATT  | 14 | 6  |
| 178363 | 21 | 8388385 | 8388396 | 2 | 6  | 12 | TG   | 20 | 7  |
| 178369 | 21 | 8397394 | 8397409 | 2 | 8  | 16 | TC   | 20 | 3  |
| 178377 | 21 | 8403474 | 8403497 | 4 | 6  | 24 | ATCA | 16 | 3  |
| 178378 | 21 | 8413156 | 8413183 | 2 | 14 | 28 | GT   | 15 | 9  |
| 178384 | 21 | 8422544 | 8422577 | 2 | 17 | 34 | TG   | 16 | 9  |
| 178385 | 21 | 8423038 | 8423052 | 3 | 5  | 15 | TGC  | 20 | 4  |
| 178388 | 21 | 8424934 | 8424948 | 3 | 5  | 15 | AAT  | 30 | 5  |
| 178389 | 21 | 8425261 | 8425281 | 3 | 7  | 21 | AAC  | 13 | 4  |
| 178399 | 21 | 8452582 | 8452619 | 2 | 19 | 38 | GA   | 6  | 7  |
| 178403 | 21 | 8456816 | 8456833 | 2 | 9  | 18 | AC   | 15 | 6  |
| 178407 | 21 | 8471941 | 8471954 | 2 | 7  | 14 | TA   | 28 | 4  |
| 178412 | 21 | 8483897 | 8483916 | 2 | 10 | 20 | AC   | 23 | 10 |
| 178418 | 21 | 8495990 | 8496031 | 2 | 21 | 42 | TG   | 17 | 12 |
| 178424 | 21 | 8510685 | 8510716 | 2 | 16 | 32 | GT   | 16 | 7  |
| 178430 | 21 | 8526140 | 8526167 | 2 | 14 | 28 | TG   | 8  | 12 |
| 178435 | 21 | 8542281 | 8542292 | 2 | 6  | 12 | CA   | 20 | 9  |
| 178439 | 21 | 8550735 | 8550749 | 3 | 5  | 15 | ATC  | 27 | 3  |
| 178441 | 21 | 8558460 | 8558474 | 3 | 5  | 15 | TTA  | 30 | 3  |
| 178443 | 21 | 8564089 | 8564114 | 2 | 13 | 26 | CA   | 16 | 8  |
| 178447 | 21 | 8567904 | 8567927 | 4 | 6  | 24 | TATC | 13 | 5  |
| 178457 | 21 | 8597827 | 8597842 | 4 | 4  | 16 | AAAC | 23 | 4  |

|        |    |         |         |   |    |    |      |    |    |
|--------|----|---------|---------|---|----|----|------|----|----|
| 178460 | 21 | 8612026 | 8612051 | 2 | 13 | 26 | TG   | 9  | 5  |
| 178469 | 21 | 8639443 | 8639468 | 2 | 13 | 26 | CT   | 18 | 7  |
| 178473 | 21 | 8640753 | 8640770 | 3 | 6  | 18 | TGA  | 25 | 4  |
| 178474 | 21 | 8642197 | 8642223 | 3 | 9  | 27 | GAG  | 26 | 4  |
| 178487 | 21 | 8663355 | 8663369 | 3 | 5  | 15 | ATG  | 11 | 3  |
| 178492 | 21 | 8670925 | 8670942 | 2 | 9  | 18 | AC   | 18 | 6  |
| 178501 | 21 | 8681833 | 8681870 | 2 | 19 | 38 | AC   | 8  | 9  |
| 178502 | 21 | 8681893 | 8681908 | 2 | 8  | 16 | AC   | 7  | 3  |
| 178506 | 21 | 8698896 | 8698917 | 2 | 11 | 22 | GT   | 11 | 5  |
| 178509 | 21 | 8703631 | 8703650 | 2 | 10 | 20 | GT   | 19 | 7  |
| 178513 | 21 | 8725214 | 8725235 | 2 | 11 | 22 | AC   | 18 | 3  |
| 178516 | 21 | 8738422 | 8738477 | 4 | 14 | 56 | TATC | 16 | 12 |
| 178520 | 21 | 8739877 | 8739890 | 2 | 7  | 14 | TC   | 16 | 5  |
| 178530 | 21 | 8792537 | 8792552 | 2 | 8  | 16 | AC   | 18 | 5  |
| 178531 | 21 | 8792554 | 8792569 | 2 | 8  | 16 | CA   | 21 | 4  |
| 178533 | 21 | 8792618 | 8792633 | 2 | 8  | 16 | CA   | 22 | 3  |
| 178541 | 21 | 8816501 | 8816524 | 2 | 12 | 24 | AC   | 13 | 6  |
| 178549 | 21 | 8833932 | 8833967 | 3 | 12 | 36 | GTA  | 22 | 11 |
| 178553 | 21 | 8850036 | 8850049 | 2 | 7  | 14 | AC   | 12 | 3  |
| 178554 | 21 | 8852706 | 8852749 | 2 | 22 | 44 | AC   | 7  | 9  |
| 178565 | 21 | 8876090 | 8876113 | 2 | 12 | 24 | AC   | 10 | 10 |
| 178582 | 22 | 32338   | 32363   | 2 | 13 | 26 | CA   | 7  | 5  |
| 178604 | 22 | 109655  | 109686  | 2 | 16 | 32 | CA   | 19 | 10 |
| 178609 | 22 | 118752  | 118767  | 4 | 4  | 16 | TTTA | 8  | 6  |
| 178612 | 22 | 124694  | 124713  | 4 | 5  | 20 | TTTA | 18 | 3  |
| 178618 | 22 | 133629  | 133644  | 2 | 8  | 16 | AC   | 13 | 6  |
| 178625 | 22 | 141741  | 141762  | 2 | 11 | 22 | GT   | 13 | 9  |
| 178632 | 22 | 145775  | 145804  | 2 | 15 | 30 | TG   | 12 | 7  |
| 178650 | 22 | 156634  | 156651  | 3 | 6  | 18 | ATT  | 12 | 9  |
| 178651 | 22 | 157551  | 157566  | 4 | 4  | 16 | AAAC | 20 | 6  |
| 178655 | 22 | 160085  | 160116  | 4 | 8  | 32 | GTCA | 18 | 7  |
| 178658 | 22 | 161470  | 161483  | 2 | 7  | 14 | CT   | 15 | 3  |
| 178663 | 22 | 167998  | 168011  | 2 | 7  | 14 | CT   | 24 | 5  |
| 178669 | 22 | 172740  | 172773  | 2 | 17 | 34 | TG   | 7  | 5  |
| 178670 | 22 | 172848  | 172885  | 2 | 19 | 38 | CA   | 8  | 9  |
| 178681 | 22 | 185164  | 185189  | 2 | 13 | 26 | AC   | 14 | 6  |
| 178688 | 22 | 193121  | 193146  | 2 | 13 | 26 | AC   | 16 | 8  |
| 178689 | 22 | 194247  | 194262  | 4 | 4  | 16 | TTTA | 18 | 5  |
| 178691 | 22 | 194915  | 194928  | 2 | 7  | 14 | GT   | 17 | 13 |
| 178697 | 22 | 198090  | 198113  | 2 | 12 | 24 | CA   | 17 | 16 |
| 178698 | 22 | 201766  | 201792  | 3 | 9  | 27 | TTC  | 19 | 12 |
| 178730 | 22 | 254073  | 254084  | 2 | 6  | 12 | CA   | 21 | 9  |
| 178732 | 22 | 255287  | 255308  | 2 | 11 | 22 | CA   | 14 | 6  |
| 178748 | 22 | 274074  | 274093  | 4 | 5  | 20 | AAAC | 20 | 3  |
| 178749 | 22 | 275802  | 275845  | 4 | 11 | 44 | CTTT | 34 | 7  |
| 178764 | 22 | 297708  | 297721  | 2 | 7  | 14 | AC   | 14 | 11 |
| 178766 | 22 | 302146  | 302185  | 2 | 20 | 40 | AC   | 16 | 13 |
| 178771 | 22 | 311247  | 311276  | 2 | 15 | 30 | TG   | 17 | 7  |
| 178773 | 22 | 314676  | 314689  | 2 | 7  | 14 | TG   | 16 | 5  |
| 178774 | 22 | 316276  | 316293  | 3 | 6  | 18 | ACA  | 16 | 3  |
| 178779 | 22 | 318984  | 319023  | 2 | 20 | 40 | TG   | 16 | 17 |

|        |    |        |        |   |    |    |      |    |    |
|--------|----|--------|--------|---|----|----|------|----|----|
| 178782 | 22 | 321364 | 321383 | 4 | 5  | 20 | TATT | 13 | 6  |
| 178785 | 22 | 321886 | 321909 | 2 | 12 | 24 | CA   | 17 | 17 |
| 178786 | 22 | 323016 | 323045 | 2 | 15 | 30 | GT   | 18 | 7  |
| 178795 | 22 | 331719 | 331736 | 3 | 6  | 18 | GGT  | 9  | 3  |
| 178796 | 22 | 331784 | 331807 | 2 | 12 | 24 | CA   | 11 | 7  |
| 178806 | 22 | 346474 | 346489 | 2 | 8  | 16 | GT   | 12 | 3  |
| 178809 | 22 | 352216 | 352239 | 2 | 12 | 24 | GA   | 17 | 7  |
| 178810 | 22 | 352822 | 352837 | 2 | 8  | 16 | GT   | 22 | 9  |
| 178811 | 22 | 352881 | 352906 | 2 | 13 | 26 | TG   | 15 | 7  |
| 178812 | 22 | 356938 | 356951 | 2 | 7  | 14 | CA   | 21 | 5  |
| 178814 | 22 | 357066 | 357091 | 2 | 13 | 26 | GT   | 24 | 8  |
| 178826 | 22 | 368032 | 368049 | 2 | 9  | 18 | CT   | 26 | 5  |
| 178832 | 22 | 376127 | 376138 | 2 | 6  | 12 | TC   | 8  | 3  |
| 178834 | 22 | 377456 | 377487 | 4 | 8  | 32 | GGCT | 28 | 5  |
| 178836 | 22 | 379661 | 379672 | 2 | 6  | 12 | CA   | 11 | 5  |
| 178838 | 22 | 379851 | 379862 | 2 | 6  | 12 | TG   | 13 | 6  |
| 178840 | 22 | 382865 | 382876 | 2 | 6  | 12 | CA   | 25 | 3  |
| 178842 | 22 | 384316 | 384347 | 2 | 16 | 32 | AC   | 14 | 11 |
| 178843 | 22 | 384694 | 384731 | 2 | 19 | 38 | AC   | 11 | 12 |
| 178845 | 22 | 387232 | 387247 | 2 | 8  | 16 | TG   | 21 | 6  |
| 178848 | 22 | 388128 | 388141 | 2 | 7  | 14 | AC   | 16 | 3  |
| 178850 | 22 | 394389 | 394404 | 2 | 8  | 16 | GT   | 23 | 5  |
| 178851 | 22 | 394633 | 394650 | 3 | 6  | 18 | CAG  | 26 | 6  |
| 178867 | 22 | 412670 | 412687 | 2 | 9  | 18 | CA   | 17 | 4  |
| 178869 | 22 | 415930 | 415943 | 2 | 7  | 14 | AC   | 21 | 4  |
| 178874 | 22 | 423188 | 423205 | 2 | 9  | 18 | TG   | 24 | 10 |
| 178888 | 22 | 438804 | 438815 | 2 | 6  | 12 | GT   | 19 | 4  |
| 178889 | 22 | 440677 | 440694 | 2 | 9  | 18 | TG   | 19 | 8  |
| 178894 | 22 | 450620 | 450633 | 2 | 7  | 14 | CA   | 27 | 3  |
| 178897 | 22 | 452669 | 452682 | 2 | 7  | 14 | CA   | 28 | 4  |
| 178907 | 22 | 472624 | 472635 | 2 | 6  | 12 | TG   | 14 | 5  |
| 178909 | 22 | 474133 | 474148 | 2 | 8  | 16 | TG   | 19 | 11 |
| 178912 | 22 | 476917 | 476934 | 2 | 9  | 18 | GT   | 20 | 6  |
| 178915 | 22 | 485604 | 485645 | 2 | 21 | 42 | TG   | 9  | 8  |
| 178917 | 22 | 490190 | 490211 | 2 | 11 | 22 | GT   | 19 | 7  |
| 178924 | 22 | 495008 | 495021 | 2 | 7  | 14 | AG   | 29 | 5  |
| 178926 | 22 | 499942 | 499961 | 4 | 5  | 20 | TTTA | 18 | 3  |
| 178930 | 22 | 509652 | 509677 | 2 | 13 | 26 | GA   | 13 | 7  |
| 178939 | 22 | 514127 | 514150 | 2 | 12 | 24 | GT   | 14 | 7  |
| 178941 | 22 | 517809 | 517826 | 2 | 9  | 18 | TC   | 22 | 5  |
| 178942 | 22 | 519682 | 519695 | 2 | 7  | 14 | TC   | 20 | 3  |
| 178944 | 22 | 521928 | 521942 | 3 | 5  | 15 | AGG  | 34 | 3  |
| 178952 | 22 | 532981 | 533006 | 2 | 13 | 26 | GA   | 14 | 8  |
| 178954 | 22 | 534638 | 534653 | 2 | 8  | 16 | CT   | 17 | 4  |
| 178957 | 22 | 537780 | 537803 | 3 | 8  | 24 | CTC  | 19 | 4  |
| 178958 | 22 | 537908 | 537922 | 3 | 5  | 15 | ACC  | 14 | 6  |
| 178963 | 22 | 545173 | 545205 | 3 | 11 | 33 | CAT  | 26 | 6  |
| 178964 | 22 | 545242 | 545271 | 3 | 10 | 30 | TCA  | 23 | 5  |
| 178965 | 22 | 546586 | 546599 | 2 | 7  | 14 | AG   | 20 | 4  |
| 178966 | 22 | 546641 | 546654 | 2 | 7  | 14 | GT   | 20 | 5  |
| 178969 | 22 | 552340 | 552359 | 2 | 10 | 20 | AG   | 17 | 9  |

|        |    |        |        |   |    |    |      |    |    |
|--------|----|--------|--------|---|----|----|------|----|----|
| 178973 | 22 | 553592 | 553623 | 2 | 16 | 32 | CA   | 9  | 6  |
| 178976 | 22 | 556076 | 556091 | 2 | 8  | 16 | TC   | 25 | 3  |
| 178977 | 22 | 556234 | 556259 | 2 | 13 | 26 | CA   | 13 | 5  |
| 178992 | 22 | 559002 | 559015 | 2 | 7  | 14 | AG   | 22 | 3  |
| 178997 | 22 | 567718 | 567749 | 2 | 16 | 32 | AC   | 7  | 9  |
| 178999 | 22 | 568523 | 568546 | 4 | 6  | 24 | TTGT | 25 | 11 |
| 179000 | 22 | 583900 | 583911 | 2 | 6  | 12 | TG   | 27 | 4  |
| 179001 | 22 | 583914 | 583925 | 2 | 6  | 12 | TG   | 25 | 4  |
| 179004 | 22 | 587319 | 587338 | 2 | 10 | 20 | CA   | 16 | 12 |
| 179006 | 22 | 590439 | 590478 | 2 | 20 | 40 | CA   | 7  | 7  |
| 179007 | 22 | 590624 | 590647 | 2 | 12 | 24 | AC   | 20 | 6  |
| 179010 | 22 | 595596 | 595613 | 2 | 9  | 18 | TG   | 11 | 8  |
| 179014 | 22 | 602861 | 602884 | 2 | 12 | 24 | GT   | 22 | 10 |
| 179019 | 22 | 607219 | 607232 | 2 | 7  | 14 | CA   | 13 | 9  |
| 179023 | 22 | 611456 | 611481 | 2 | 13 | 26 | AG   | 7  | 6  |
| 179026 | 22 | 616489 | 616518 | 2 | 15 | 30 | TG   | 20 | 10 |
| 179031 | 22 | 619959 | 619982 | 4 | 6  | 24 | TAGA | 12 | 6  |
| 179032 | 22 | 620137 | 620148 | 2 | 6  | 12 | AC   | 27 | 5  |
| 179033 | 22 | 621300 | 621317 | 2 | 9  | 18 | TG   | 20 | 7  |
| 179035 | 22 | 622986 | 623011 | 2 | 13 | 26 | CA   | 17 | 8  |
| 179036 | 22 | 624060 | 624077 | 3 | 6  | 18 | CCA  | 7  | 5  |
| 179037 | 22 | 629844 | 629867 | 2 | 12 | 24 | CA   | 22 | 7  |
| 179043 | 22 | 640574 | 640595 | 2 | 11 | 22 | GT   | 15 | 9  |
| 179044 | 22 | 645898 | 645909 | 2 | 6  | 12 | CA   | 28 | 3  |
| 179047 | 22 | 653661 | 653674 | 2 | 7  | 14 | AC   | 31 | 3  |
| 179048 | 22 | 656286 | 656297 | 2 | 6  | 12 | AC   | 30 | 3  |
| 179049 | 22 | 656649 | 656664 | 2 | 8  | 16 | CA   | 25 | 3  |
| 179052 | 22 | 660348 | 660359 | 2 | 6  | 12 | CA   | 25 | 3  |
| 179053 | 22 | 660476 | 660495 | 2 | 10 | 20 | CA   | 9  | 9  |
| 179055 | 22 | 665779 | 665790 | 2 | 6  | 12 | CA   | 21 | 8  |
| 179057 | 22 | 672479 | 672496 | 2 | 9  | 18 | GT   | 22 | 8  |
| 179058 | 22 | 676634 | 676647 | 2 | 7  | 14 | GT   | 28 | 4  |
| 179060 | 22 | 683701 | 683716 | 2 | 8  | 16 | TG   | 13 | 7  |
| 179063 | 22 | 686987 | 687012 | 2 | 13 | 26 | AC   | 6  | 7  |
| 179064 | 22 | 690904 | 690929 | 2 | 13 | 26 | AC   | 11 | 12 |
| 179069 | 22 | 695526 | 695555 | 3 | 10 | 30 | CTC  | 8  | 5  |
| 179070 | 22 | 696491 | 696504 | 2 | 7  | 14 | AC   | 27 | 3  |
| 179075 | 22 | 710525 | 710556 | 2 | 16 | 32 | TG   | 11 | 8  |
| 179077 | 22 | 714253 | 714270 | 2 | 9  | 18 | TG   | 25 | 8  |
| 179079 | 22 | 716412 | 716443 | 2 | 16 | 32 | TG   | 17 | 11 |
| 179083 | 22 | 720301 | 720318 | 2 | 9  | 18 | TG   | 15 | 8  |
| 179084 | 22 | 720319 | 720334 | 2 | 8  | 16 | AG   | 13 | 9  |
| 179092 | 22 | 734002 | 734019 | 2 | 9  | 18 | CA   | 15 | 6  |
| 179093 | 22 | 737259 | 737292 | 2 | 17 | 34 | CA   | 12 | 9  |
| 179099 | 22 | 751776 | 751791 | 2 | 8  | 16 | TC   | 30 | 5  |
| 179108 | 22 | 769191 | 769206 | 2 | 8  | 16 | GT   | 16 | 11 |
| 179110 | 22 | 772586 | 772605 | 2 | 10 | 20 | GT   | 17 | 11 |
| 179116 | 22 | 776934 | 776949 | 2 | 8  | 16 | TG   | 20 | 3  |
| 179117 | 22 | 778170 | 778209 | 4 | 10 | 40 | ATAG | 18 | 8  |
| 179118 | 22 | 779738 | 779757 | 2 | 10 | 20 | TG   | 27 | 4  |
| 179121 | 22 | 782349 | 782374 | 2 | 13 | 26 | CA   | 11 | 10 |

|        |    |        |        |   |    |    |      |    |    |
|--------|----|--------|--------|---|----|----|------|----|----|
| 179123 | 22 | 795293 | 795310 | 2 | 9  | 18 | CA   | 26 | 5  |
| 179124 | 22 | 799807 | 799836 | 3 | 10 | 30 | CTG  | 26 | 8  |
| 179128 | 22 | 808684 | 808705 | 2 | 11 | 22 | AC   | 25 | 11 |
| 179141 | 22 | 870231 | 870266 | 4 | 9  | 36 | GTGC | 13 | 13 |
| 179146 | 22 | 882287 | 882302 | 2 | 8  | 16 | CA   | 11 | 9  |
| 179147 | 22 | 882305 | 882318 | 2 | 7  | 14 | CA   | 16 | 8  |
| 179148 | 22 | 882472 | 882493 | 2 | 11 | 22 | AC   | 16 | 9  |
| 179149 | 22 | 882651 | 882678 | 2 | 14 | 28 | TG   | 16 | 11 |
| 179150 | 22 | 883666 | 883679 | 2 | 7  | 14 | CA   | 19 | 8  |
| 179152 | 22 | 884830 | 884843 | 2 | 7  | 14 | AC   | 17 | 4  |
| 179153 | 22 | 888931 | 888962 | 2 | 16 | 32 | AC   | 13 | 12 |
| 179155 | 22 | 890879 | 890902 | 2 | 12 | 24 | AC   | 13 | 8  |
| 179158 | 22 | 894925 | 894938 | 2 | 7  | 14 | TC   | 27 | 5  |
| 179161 | 22 | 895972 | 895991 | 4 | 5  | 20 | GACA | 16 | 3  |
| 179162 | 22 | 898652 | 898695 | 2 | 22 | 44 | TG   | 22 | 12 |
| 179166 | 22 | 903837 | 903864 | 2 | 14 | 28 | CA   | 10 | 9  |
| 179167 | 22 | 903917 | 903940 | 2 | 12 | 24 | CA   | 11 | 9  |
| 179168 | 22 | 904684 | 904711 | 2 | 14 | 28 | AC   | 9  | 7  |
| 179169 | 22 | 904787 | 904800 | 2 | 7  | 14 | TG   | 20 | 12 |
| 179170 | 22 | 904803 | 904818 | 2 | 8  | 16 | TG   | 16 | 11 |
| 179171 | 22 | 904955 | 904982 | 2 | 14 | 28 | CA   | 19 | 15 |
| 179173 | 22 | 906106 | 906126 | 3 | 7  | 21 | TTC  | 23 | 3  |
| 179174 | 22 | 906286 | 906297 | 2 | 6  | 12 | TC   | 15 | 6  |
| 179175 | 22 | 906370 | 906381 | 2 | 6  | 12 | CT   | 22 | 3  |
| 179191 | 22 | 913534 | 913561 | 2 | 14 | 28 | CA   | 12 | 10 |
| 179194 | 22 | 917405 | 917438 | 2 | 17 | 34 | AC   | 9  | 12 |
| 179195 | 22 | 917827 | 917872 | 2 | 23 | 46 | AC   | 7  | 7  |
| 179196 | 22 | 918051 | 918080 | 3 | 10 | 30 | GGA  | 16 | 5  |
| 179198 | 22 | 918366 | 918393 | 2 | 14 | 28 | GT   | 14 | 13 |
| 179199 | 22 | 918481 | 918508 | 2 | 14 | 28 | CA   | 15 | 12 |
| 179205 | 22 | 923887 | 923904 | 2 | 9  | 18 | AC   | 15 | 11 |
| 179206 | 22 | 924256 | 924287 | 2 | 16 | 32 | TG   | 8  | 7  |
| 179207 | 22 | 924414 | 924425 | 2 | 6  | 12 | AC   | 22 | 7  |
| 179208 | 22 | 924427 | 924444 | 2 | 9  | 18 | CA   | 18 | 4  |
| 179211 | 22 | 924851 | 924866 | 2 | 8  | 16 | CA   | 18 | 7  |
| 179212 | 22 | 924956 | 924969 | 2 | 7  | 14 | CA   | 22 | 7  |
| 179213 | 22 | 925027 | 925060 | 2 | 17 | 34 | TG   | 16 | 13 |
| 179214 | 22 | 925260 | 925293 | 2 | 17 | 34 | TG   | 9  | 11 |
| 179216 | 22 | 925913 | 925928 | 2 | 8  | 16 | GT   | 26 | 6  |
| 179218 | 22 | 926600 | 926611 | 2 | 6  | 12 | GT   | 6  | 11 |
| 179221 | 22 | 927659 | 927686 | 2 | 14 | 28 | GA   | 13 | 5  |
| 179223 | 22 | 928347 | 928376 | 2 | 15 | 30 | TG   | 6  | 5  |
| 179228 | 22 | 929369 | 929384 | 4 | 4  | 16 | GACA | 7  | 3  |
| 179229 | 22 | 930893 | 930912 | 4 | 5  | 20 | AAAG | 6  | 3  |
| 179231 | 22 | 941874 | 941885 | 2 | 6  | 12 | TG   | 27 | 4  |
| 179232 | 22 | 950737 | 950770 | 2 | 17 | 34 | TG   | 16 | 7  |
| 179233 | 22 | 950894 | 950909 | 2 | 8  | 16 | AC   | 22 | 5  |
| 179238 | 22 | 951415 | 951432 | 2 | 9  | 18 | GT   | 7  | 7  |
| 179241 | 22 | 951657 | 951672 | 2 | 8  | 16 | AC   | 28 | 3  |
| 179243 | 22 | 952885 | 952906 | 2 | 11 | 22 | TG   | 13 | 8  |
| 179248 | 22 | 959821 | 959840 | 2 | 10 | 20 | GT   | 20 | 10 |

|        |    |         |         |   |    |    |      |    |    |
|--------|----|---------|---------|---|----|----|------|----|----|
| 179252 | 22 | 964736  | 964749  | 2 | 7  | 14 | AC   | 20 | 5  |
| 179253 | 22 | 966005  | 966024  | 2 | 10 | 20 | GT   | 21 | 6  |
| 179255 | 22 | 966923  | 966940  | 2 | 9  | 18 | GT   | 21 | 8  |
| 179257 | 22 | 967552  | 967563  | 2 | 6  | 12 | GT   | 28 | 4  |
| 179258 | 22 | 967645  | 967670  | 2 | 13 | 26 | GT   | 14 | 11 |
| 179259 | 22 | 967870  | 967899  | 2 | 15 | 30 | TG   | 12 | 8  |
| 179260 | 22 | 968229  | 968242  | 2 | 7  | 14 | TC   | 28 | 4  |
| 179265 | 22 | 973520  | 973541  | 2 | 11 | 22 | AC   | 11 | 5  |
| 179267 | 22 | 976471  | 976500  | 3 | 10 | 30 | GGA  | 20 | 8  |
| 179270 | 22 | 978411  | 978424  | 2 | 7  | 14 | TG   | 23 | 5  |
| 179271 | 22 | 978584  | 978607  | 2 | 12 | 24 | AG   | 28 | 6  |
| 179272 | 22 | 979931  | 979962  | 2 | 16 | 32 | AC   | 8  | 8  |
| 179273 | 22 | 980521  | 980536  | 2 | 8  | 16 | GT   | 21 | 7  |
| 179276 | 22 | 982611  | 982622  | 2 | 6  | 12 | CA   | 21 | 4  |
| 179277 | 22 | 982780  | 982807  | 2 | 14 | 28 | TG   | 14 | 12 |
| 179279 | 22 | 982975  | 982986  | 2 | 6  | 12 | GT   | 26 | 4  |
| 179287 | 22 | 994896  | 994925  | 2 | 15 | 30 | GT   | 14 | 10 |
| 179288 | 22 | 995324  | 995349  | 2 | 13 | 26 | AC   | 11 | 9  |
| 179289 | 22 | 995386  | 995399  | 2 | 7  | 14 | GA   | 23 | 3  |
| 179293 | 22 | 998969  | 998980  | 2 | 6  | 12 | GT   | 26 | 3  |
| 179297 | 22 | 1000450 | 1000467 | 3 | 6  | 18 | GTA  | 26 | 5  |
| 179298 | 22 | 1001405 | 1001416 | 2 | 6  | 12 | AG   | 12 | 6  |
| 179301 | 22 | 1002156 | 1002170 | 3 | 5  | 15 | AAC  | 29 | 3  |
| 179303 | 22 | 1004906 | 1004939 | 2 | 17 | 34 | CA   | 8  | 10 |
| 179304 | 22 | 1005373 | 1005396 | 4 | 6  | 24 | AATA | 23 | 3  |
| 179312 | 22 | 1010152 | 1010177 | 2 | 13 | 26 | GA   | 16 | 4  |
| 179314 | 22 | 1011794 | 1011823 | 2 | 15 | 30 | AC   | 8  | 7  |
| 179321 | 22 | 1017501 | 1017538 | 2 | 19 | 38 | GT   | 12 | 12 |
| 179322 | 22 | 1018868 | 1018895 | 2 | 14 | 28 | AC   | 23 | 17 |
| 179325 | 22 | 1023866 | 1023897 | 2 | 16 | 32 | AC   | 10 | 5  |
| 179330 | 22 | 1040932 | 1040946 | 3 | 5  | 15 | GGA  | 30 | 4  |
| 179332 | 22 | 1049988 | 1049999 | 2 | 6  | 12 | CT   | 27 | 3  |
| 179342 | 22 | 1073196 | 1073219 | 2 | 12 | 24 | GT   | 29 | 6  |
| 179343 | 22 | 1073351 | 1073364 | 2 | 7  | 14 | AC   | 33 | 3  |
| 179344 | 22 | 1074292 | 1074303 | 2 | 6  | 12 | TA   | 27 | 8  |
| 179345 | 22 | 1076534 | 1076545 | 2 | 6  | 12 | GT   | 26 | 8  |
| 179346 | 22 | 1076704 | 1076719 | 2 | 8  | 16 | TG   | 19 | 6  |
| 179347 | 22 | 1078232 | 1078249 | 3 | 6  | 18 | GAT  | 29 | 4  |
| 179348 | 22 | 1078701 | 1078720 | 2 | 10 | 20 | AG   | 10 | 9  |
| 179349 | 22 | 1081910 | 1081929 | 2 | 10 | 20 | CA   | 18 | 11 |
| 179356 | 22 | 1089829 | 1089840 | 2 | 6  | 12 | TC   | 23 | 10 |
| 179357 | 22 | 1089841 | 1089852 | 2 | 6  | 12 | AC   | 23 | 10 |
| 179358 | 22 | 1097380 | 1097391 | 2 | 6  | 12 | AC   | 24 | 4  |
| 179360 | 22 | 1098776 | 1098791 | 2 | 8  | 16 | TG   | 21 | 7  |
| 179361 | 22 | 1098994 | 1099005 | 2 | 6  | 12 | AC   | 10 | 5  |
| 179364 | 22 | 1100323 | 1100334 | 2 | 6  | 12 | TG   | 23 | 3  |
| 179365 | 22 | 1100376 | 1100395 | 2 | 10 | 20 | GT   | 12 | 8  |
| 179367 | 22 | 1100836 | 1100853 | 2 | 9  | 18 | GT   | 7  | 5  |
| 179369 | 22 | 1101333 | 1101348 | 2 | 8  | 16 | CA   | 16 | 4  |
| 179370 | 22 | 1101424 | 1101451 | 2 | 14 | 28 | AC   | 19 | 11 |
| 179372 | 22 | 1102131 | 1102152 | 2 | 11 | 22 | AC   | 19 | 3  |

|        |    |         |         |   |    |    |      |    |    |
|--------|----|---------|---------|---|----|----|------|----|----|
| 179373 | 22 | 1103327 | 1103348 | 2 | 11 | 22 | CA   | 17 | 6  |
| 179374 | 22 | 1104004 | 1104017 | 2 | 7  | 14 | AC   | 12 | 6  |
| 179375 | 22 | 1104331 | 1104360 | 2 | 15 | 30 | AC   | 13 | 11 |
| 179376 | 22 | 1104469 | 1104486 | 2 | 9  | 18 | GT   | 22 | 5  |
| 179378 | 22 | 1105273 | 1105284 | 2 | 6  | 12 | TG   | 23 | 3  |
| 179379 | 22 | 1106940 | 1106957 | 2 | 9  | 18 | CA   | 27 | 11 |
| 179380 | 22 | 1107140 | 1107153 | 2 | 7  | 14 | TG   | 6  | 3  |
| 179382 | 22 | 1108604 | 1108631 | 2 | 14 | 28 | GT   | 10 | 10 |
| 179412 | 22 | 1135295 | 1135310 | 2 | 8  | 16 | CA   | 25 | 4  |
| 179414 | 22 | 1140136 | 1140163 | 2 | 14 | 28 | AC   | 11 | 13 |
| 179420 | 22 | 1140514 | 1140525 | 2 | 6  | 12 | AC   | 17 | 6  |
| 179428 | 22 | 1159808 | 1159819 | 2 | 6  | 12 | AC   | 23 | 4  |
| 179430 | 22 | 1163071 | 1163088 | 2 | 9  | 18 | TG   | 15 | 8  |
| 179432 | 22 | 1163172 | 1163183 | 2 | 6  | 12 | AC   | 24 | 5  |
| 179433 | 22 | 1163213 | 1163228 | 2 | 8  | 16 | GT   | 21 | 4  |
| 179436 | 22 | 1163749 | 1163769 | 3 | 7  | 21 | GGA  | 25 | 4  |
| 179437 | 22 | 1164145 | 1164162 | 2 | 9  | 18 | GT   | 25 | 4  |
| 179445 | 22 | 1183708 | 1183721 | 2 | 7  | 14 | CA   | 26 | 7  |
| 179446 | 22 | 1183846 | 1183859 | 2 | 7  | 14 | CA   | 25 | 7  |
| 179449 | 22 | 1186663 | 1186682 | 2 | 10 | 20 | GT   | 7  | 4  |
| 179457 | 22 | 1209555 | 1209576 | 2 | 11 | 22 | AC   | 10 | 7  |
| 179464 | 22 | 1215020 | 1215035 | 2 | 8  | 16 | AC   | 20 | 6  |
| 179468 | 22 | 1220202 | 1220219 | 2 | 9  | 18 | CA   | 22 | 8  |
| 179469 | 22 | 1224615 | 1224634 | 4 | 5  | 20 | TGAA | 32 | 4  |
| 179470 | 22 | 1224777 | 1224802 | 2 | 13 | 26 | GT   | 21 | 12 |
| 179473 | 22 | 1234239 | 1234256 | 2 | 9  | 18 | AC   | 22 | 5  |
| 179475 | 22 | 1234381 | 1234398 | 2 | 9  | 18 | TG   | 20 | 4  |
| 179477 | 22 | 1236612 | 1236625 | 2 | 7  | 14 | AC   | 20 | 4  |
| 179479 | 22 | 1238270 | 1238305 | 2 | 18 | 36 | GT   | 13 | 10 |
| 179480 | 22 | 1238768 | 1238781 | 2 | 7  | 14 | AG   | 26 | 3  |
| 179481 | 22 | 1241423 | 1241440 | 2 | 9  | 18 | CA   | 24 | 8  |
| 179482 | 22 | 1242276 | 1242305 | 2 | 15 | 30 | GT   | 26 | 13 |
| 179484 | 22 | 1248407 | 1248426 | 2 | 10 | 20 | TG   | 24 | 5  |
| 179490 | 22 | 1253922 | 1253939 | 2 | 9  | 18 | AC   | 14 | 12 |
| 179492 | 22 | 1259837 | 1259858 | 2 | 11 | 22 | TG   | 16 | 12 |
| 179494 | 22 | 1266866 | 1266915 | 2 | 25 | 50 | CA   | 6  | 10 |
| 179495 | 22 | 1267031 | 1267052 | 2 | 11 | 22 | CA   | 16 | 6  |
| 179497 | 22 | 1270192 | 1270203 | 2 | 6  | 12 | TG   | 14 | 3  |
| 179499 | 22 | 1273202 | 1273233 | 2 | 16 | 32 | TG   | 13 | 8  |
| 179501 | 22 | 1273768 | 1273781 | 2 | 7  | 14 | GT   | 27 | 3  |
| 179503 | 22 | 1274433 | 1274450 | 2 | 9  | 18 | TA   | 13 | 7  |
| 179507 | 22 | 1276695 | 1276712 | 2 | 9  | 18 | CA   | 24 | 4  |
| 179508 | 22 | 1279001 | 1279042 | 2 | 21 | 42 | CA   | 6  | 8  |
| 179509 | 22 | 1279701 | 1279720 | 2 | 10 | 20 | TG   | 9  | 9  |
| 179511 | 22 | 1280232 | 1280243 | 2 | 6  | 12 | TG   | 22 | 3  |
| 179512 | 22 | 1280313 | 1280332 | 4 | 5  | 20 | AAAC | 25 | 5  |
| 179513 | 22 | 1280657 | 1280678 | 2 | 11 | 22 | CA   | 20 | 8  |
| 179514 | 22 | 1280727 | 1280748 | 2 | 11 | 22 | AC   | 16 | 13 |
| 179520 | 22 | 1283646 | 1283669 | 2 | 12 | 24 | CA   | 20 | 12 |
| 179527 | 22 | 1287347 | 1287364 | 2 | 9  | 18 | GT   | 22 | 6  |
| 179530 | 22 | 1293145 | 1293156 | 2 | 6  | 12 | AC   | 22 | 4  |

|        |    |         |         |   |    |    |      |    |    |
|--------|----|---------|---------|---|----|----|------|----|----|
| 179531 | 22 | 1293380 | 1293406 | 3 | 9  | 27 | TCC  | 15 | 3  |
| 179532 | 22 | 1294343 | 1294372 | 3 | 10 | 30 | GGA  | 19 | 5  |
| 179534 | 22 | 1294720 | 1294755 | 2 | 18 | 36 | TG   | 9  | 9  |
| 179535 | 22 | 1294933 | 1294952 | 2 | 10 | 20 | TG   | 24 | 8  |
| 179537 | 22 | 1295703 | 1295741 | 3 | 13 | 39 | GAT  | 19 | 9  |
| 179538 | 22 | 1296603 | 1296616 | 2 | 7  | 14 | AC   | 22 | 4  |
| 179539 | 22 | 1296680 | 1296695 | 2 | 8  | 16 | GT   | 6  | 3  |
| 179541 | 22 | 1300096 | 1300143 | 2 | 24 | 48 | CA   | 14 | 10 |
| 179542 | 22 | 1301287 | 1301298 | 2 | 6  | 12 | AG   | 13 | 3  |
| 179545 | 22 | 1305003 | 1305028 | 2 | 13 | 26 | TG   | 13 | 10 |
| 179547 | 22 | 1306219 | 1306260 | 2 | 21 | 42 | AC   | 7  | 8  |
| 179554 | 22 | 1310698 | 1310727 | 2 | 15 | 30 | TG   | 15 | 11 |
| 179563 | 22 | 1321358 | 1321381 | 4 | 6  | 24 | CTGT | 26 | 13 |
| 179571 | 22 | 1346834 | 1346857 | 3 | 8  | 24 | TCC  | 21 | 5  |
| 179573 | 22 | 1347176 | 1347189 | 2 | 7  | 14 | GT   | 24 | 3  |
| 179582 | 22 | 1356318 | 1356349 | 2 | 16 | 32 | AC   | 6  | 6  |
| 179583 | 22 | 1358506 | 1358533 | 4 | 7  | 28 | CATT | 23 | 9  |
| 179584 | 22 | 1367142 | 1367167 | 2 | 13 | 26 | GT   | 13 | 8  |
| 179585 | 22 | 1374065 | 1374110 | 2 | 23 | 46 | AC   | 12 | 11 |
| 179586 | 22 | 1380779 | 1380816 | 2 | 19 | 38 | AC   | 20 | 15 |
| 179589 | 22 | 1404584 | 1404595 | 2 | 6  | 12 | TG   | 25 | 4  |
| 179590 | 22 | 1408684 | 1408703 | 2 | 10 | 20 | TG   | 24 | 7  |
| 179591 | 22 | 1413017 | 1413028 | 2 | 6  | 12 | GT   | 28 | 4  |
| 179592 | 22 | 1413646 | 1413663 | 2 | 9  | 18 | GT   | 22 | 4  |
| 179595 | 22 | 1415237 | 1415274 | 2 | 19 | 38 | GT   | 19 | 13 |
| 179599 | 22 | 1417743 | 1417756 | 2 | 7  | 14 | AC   | 9  | 3  |
| 179605 | 22 | 1425710 | 1425725 | 2 | 8  | 16 | GT   | 24 | 9  |
| 179606 | 22 | 1425986 | 1426001 | 2 | 8  | 16 | GT   | 32 | 4  |
| 179607 | 22 | 1430703 | 1430728 | 2 | 13 | 26 | AC   | 15 | 7  |
| 179613 | 22 | 1441797 | 1441816 | 2 | 10 | 20 | TG   | 10 | 13 |
| 179623 | 22 | 1448471 | 1448510 | 4 | 10 | 40 | AAAG | 17 | 7  |
| 179627 | 22 | 1458169 | 1458198 | 2 | 15 | 30 | AC   | 10 | 11 |
| 179630 | 22 | 1462257 | 1462271 | 3 | 5  | 15 | TTC  | 21 | 3  |
| 179635 | 22 | 1467807 | 1467824 | 2 | 9  | 18 | CA   | 21 | 7  |
| 179636 | 22 | 1468611 | 1468628 | 2 | 9  | 18 | GT   | 18 | 7  |
| 179640 | 22 | 1471115 | 1471138 | 2 | 12 | 24 | CA   | 11 | 10 |
| 179641 | 22 | 1471214 | 1471237 | 2 | 12 | 24 | TG   | 19 | 9  |
| 179646 | 22 | 1476810 | 1476847 | 2 | 19 | 38 | AC   | 12 | 9  |
| 179653 | 22 | 1485114 | 1485141 | 2 | 14 | 28 | CA   | 9  | 9  |
| 179656 | 22 | 1486826 | 1486861 | 2 | 18 | 36 | TG   | 10 | 8  |
| 179663 | 22 | 1491351 | 1491386 | 2 | 18 | 36 | TG   | 9  | 6  |
| 179665 | 22 | 1493128 | 1493155 | 4 | 7  | 28 | CTGT | 33 | 6  |
| 179666 | 22 | 1493535 | 1493556 | 2 | 11 | 22 | TG   | 14 | 4  |
| 179667 | 22 | 1495194 | 1495227 | 2 | 17 | 34 | AC   | 21 | 17 |
| 179668 | 22 | 1495545 | 1495580 | 2 | 18 | 36 | AC   | 8  | 8  |
| 179669 | 22 | 1495712 | 1495729 | 2 | 9  | 18 | GT   | 14 | 8  |
| 179670 | 22 | 1495813 | 1495826 | 2 | 7  | 14 | TG   | 14 | 11 |
| 179672 | 22 | 1497121 | 1497140 | 2 | 10 | 20 | CA   | 9  | 7  |
| 179675 | 22 | 1500823 | 1500856 | 2 | 17 | 34 | AC   | 11 | 9  |
| 179677 | 22 | 1510758 | 1510803 | 2 | 23 | 46 | TG   | 12 | 10 |
| 179681 | 22 | 1516423 | 1516448 | 2 | 13 | 26 | CA   | 12 | 10 |



|        |    |         |         |   |    |    |      |    |    |
|--------|----|---------|---------|---|----|----|------|----|----|
| 179682 | 22 | 1519017 | 1519034 | 2 | 9  | 18 | TG   | 19 | 5  |
| 179683 | 22 | 1519773 | 1519796 | 2 | 12 | 24 | GT   | 12 | 8  |
| 179684 | 22 | 1521329 | 1521368 | 2 | 20 | 40 | TG   | 9  | 12 |
| 179691 | 22 | 1526857 | 1526876 | 4 | 5  | 20 | TTTA | 13 | 4  |
| 179694 | 22 | 1535565 | 1535588 | 3 | 8  | 24 | CTG  | 31 | 8  |
| 179695 | 22 | 1538774 | 1538793 | 2 | 10 | 20 | TA   | 16 | 10 |
| 179696 | 22 | 1543026 | 1543045 | 2 | 10 | 20 | GT   | 8  | 5  |
| 179697 | 22 | 1543209 | 1543236 | 2 | 14 | 28 | CA   | 17 | 9  |
| 179698 | 22 | 1544884 | 1544897 | 2 | 7  | 14 | AC   | 25 | 7  |
| 179704 | 22 | 1549766 | 1549797 | 2 | 16 | 32 | CT   | 17 | 4  |
| 179707 | 22 | 1550526 | 1550571 | 2 | 23 | 46 | TG   | 7  | 5  |
| 179708 | 22 | 1554062 | 1554081 | 2 | 10 | 20 | CA   | 14 | 4  |
| 179710 | 22 | 1559050 | 1559067 | 2 | 9  | 18 | CA   | 20 | 10 |
| 179715 | 22 | 1566311 | 1566340 | 2 | 15 | 30 | AC   | 13 | 11 |
| 179722 | 22 | 1574616 | 1574631 | 2 | 8  | 16 | GT   | 25 | 4  |
| 179723 | 22 | 1575270 | 1575297 | 2 | 14 | 28 | TG   | 17 | 10 |
| 179724 | 22 | 1576329 | 1576356 | 2 | 14 | 28 | AC   | 19 | 11 |
| 179728 | 22 | 1585238 | 1585258 | 3 | 7  | 21 | TAT  | 9  | 7  |
| 179734 | 22 | 1593491 | 1593504 | 2 | 7  | 14 | CA   | 25 | 4  |
| 179739 | 22 | 1599104 | 1599121 | 2 | 9  | 18 | GT   | 22 | 6  |
| 179744 | 22 | 1603372 | 1603399 | 2 | 14 | 28 | CT   | 19 | 7  |
| 179754 | 22 | 1608011 | 1608042 | 2 | 16 | 32 | TG   | 16 | 9  |
| 179755 | 22 | 1609372 | 1609387 | 4 | 4  | 16 | GCTG | 30 | 3  |
| 179756 | 22 | 1610258 | 1610291 | 2 | 17 | 34 | GT   | 9  | 11 |
| 179763 | 22 | 1617488 | 1617505 | 2 | 9  | 18 | AC   | 23 | 13 |
| 179764 | 22 | 1619579 | 1619594 | 2 | 8  | 16 | AC   | 22 | 7  |
| 179767 | 22 | 1622760 | 1622773 | 2 | 7  | 14 | CA   | 27 | 3  |
| 179769 | 22 | 1622879 | 1622890 | 2 | 6  | 12 | TG   | 25 | 3  |
| 179772 | 22 | 1630294 | 1630309 | 4 | 4  | 16 | AAAC | 20 | 3  |
| 179773 | 22 | 1633083 | 1633106 | 2 | 12 | 24 | GT   | 13 | 7  |
| 179777 | 22 | 1640929 | 1640954 | 2 | 13 | 26 | GT   | 16 | 10 |
| 179778 | 22 | 1644719 | 1644742 | 2 | 12 | 24 | GT   | 16 | 8  |
| 179779 | 22 | 1644836 | 1644849 | 2 | 7  | 14 | GT   | 16 | 4  |
| 179785 | 22 | 1652919 | 1652934 | 2 | 8  | 16 | TA   | 10 | 4  |
| 179790 | 22 | 1656959 | 1656973 | 3 | 5  | 15 | GCA  | 24 | 3  |
| 179791 | 22 | 1657040 | 1657063 | 2 | 12 | 24 | GT   | 13 | 9  |
| 179792 | 22 | 1661651 | 1661674 | 4 | 6  | 24 | GGAG | 10 | 3  |
| 179794 | 22 | 1662982 | 1662997 | 2 | 8  | 16 | CA   | 24 | 3  |
| 179795 | 22 | 1665625 | 1665646 | 2 | 11 | 22 | AC   | 12 | 11 |
| 179801 | 22 | 1670261 | 1670282 | 2 | 11 | 22 | CA   | 19 | 9  |
| 179802 | 22 | 1671029 | 1671054 | 2 | 13 | 26 | TG   | 9  | 9  |
| 179803 | 22 | 1674964 | 1675007 | 2 | 22 | 44 | GT   | 28 | 10 |
| 179805 | 22 | 1675207 | 1675222 | 2 | 8  | 16 | AC   | 24 | 10 |
| 179806 | 22 | 1680332 | 1680347 | 2 | 8  | 16 | GA   | 6  | 3  |
| 179809 | 22 | 1685792 | 1685809 | 3 | 6  | 18 | TCT  | 17 | 6  |
| 179810 | 22 | 1686007 | 1686022 | 2 | 8  | 16 | CA   | 25 | 5  |
| 179812 | 22 | 1687874 | 1687899 | 2 | 13 | 26 | TG   | 21 | 8  |
| 179813 | 22 | 1689925 | 1689944 | 2 | 10 | 20 | GT   | 17 | 9  |
| 179817 | 22 | 1692253 | 1692276 | 2 | 12 | 24 | GT   | 12 | 4  |
| 179818 | 22 | 1692315 | 1692332 | 2 | 9  | 18 | TC   | 14 | 6  |
| 179819 | 22 | 1695780 | 1695831 | 2 | 26 | 52 | GT   | 7  | 7  |

|        |    |         |         |   |    |    |      |    |    |
|--------|----|---------|---------|---|----|----|------|----|----|
| 179823 | 22 | 1699664 | 1699691 | 4 | 7  | 28 | GGTT | 26 | 4  |
| 179825 | 22 | 1703169 | 1703186 | 2 | 9  | 18 | CA   | 23 | 6  |
| 179830 | 22 | 1707524 | 1707563 | 2 | 20 | 40 | TG   | 8  | 13 |
| 179831 | 22 | 1707714 | 1707745 | 2 | 16 | 32 | CA   | 11 | 6  |
| 179844 | 22 | 1721398 | 1721421 | 4 | 6  | 24 | ATTT | 27 | 5  |
| 179847 | 22 | 1724976 | 1724991 | 2 | 8  | 16 | TC   | 26 | 5  |
| 179849 | 22 | 1736177 | 1736194 | 2 | 9  | 18 | TC   | 18 | 5  |
| 179851 | 22 | 1740658 | 1740681 | 2 | 12 | 24 | GT   | 17 | 9  |
| 179853 | 22 | 1742776 | 1742799 | 2 | 12 | 24 | AC   | 17 | 5  |
| 179863 | 22 | 1759350 | 1759361 | 2 | 6  | 12 | CA   | 24 | 3  |
| 179868 | 22 | 1768771 | 1768790 | 2 | 10 | 20 | AC   | 12 | 9  |
| 179870 | 22 | 1769472 | 1769515 | 2 | 22 | 44 | GT   | 11 | 11 |
| 179877 | 22 | 1782059 | 1782078 | 4 | 5  | 20 | AAGA | 21 | 6  |
| 179890 | 22 | 1799087 | 1799104 | 2 | 9  | 18 | GT   | 18 | 7  |
| 179892 | 22 | 1799735 | 1799748 | 2 | 7  | 14 | AC   | 22 | 4  |
| 179894 | 22 | 1799904 | 1799915 | 2 | 6  | 12 | CA   | 20 | 6  |
| 179896 | 22 | 1801962 | 1801985 | 2 | 12 | 24 | AC   | 15 | 10 |
| 179898 | 22 | 1803890 | 1803905 | 2 | 8  | 16 | GT   | 14 | 3  |
| 179900 | 22 | 1806025 | 1806078 | 2 | 27 | 54 | GT   | 6  | 9  |
| 179908 | 22 | 1824402 | 1824419 | 2 | 9  | 18 | CA   | 27 | 4  |
| 179909 | 22 | 1824535 | 1824555 | 3 | 7  | 21 | CAG  | 28 | 3  |
| 179910 | 22 | 1826564 | 1826577 | 2 | 7  | 14 | CA   | 22 | 5  |
| 179911 | 22 | 1828627 | 1828654 | 2 | 14 | 28 | CA   | 7  | 11 |
| 179914 | 22 | 1831345 | 1831356 | 2 | 6  | 12 | GA   | 22 | 8  |
| 179917 | 22 | 1832857 | 1832886 | 2 | 15 | 30 | AC   | 12 | 11 |
| 179919 | 22 | 1833127 | 1833140 | 2 | 7  | 14 | CA   | 18 | 3  |
| 179921 | 22 | 1834630 | 1834657 | 2 | 14 | 28 | AC   | 14 | 16 |
| 179926 | 22 | 1842978 | 1843037 | 2 | 30 | 60 | CA   | 20 | 7  |
| 179929 | 22 | 1844672 | 1844687 | 2 | 8  | 16 | CT   | 28 | 9  |
| 179930 | 22 | 1845219 | 1845232 | 2 | 7  | 14 | GT   | 20 | 4  |
| 179932 | 22 | 1846897 | 1846910 | 2 | 7  | 14 | AC   | 22 | 4  |
| 179933 | 22 | 1847564 | 1847587 | 4 | 6  | 24 | TTTA | 10 | 8  |
| 179942 | 22 | 1859235 | 1859290 | 2 | 28 | 56 | AC   | 6  | 7  |
| 179943 | 22 | 1859412 | 1859469 | 2 | 29 | 58 | CA   | 16 | 8  |
| 179944 | 22 | 1859607 | 1859630 | 2 | 12 | 24 | CA   | 14 | 10 |
| 179947 | 22 | 1860010 | 1860021 | 2 | 6  | 12 | CA   | 19 | 10 |
| 179950 | 22 | 1860855 | 1860886 | 2 | 16 | 32 | CA   | 11 | 13 |
| 179951 | 22 | 1861059 | 1861086 | 2 | 14 | 28 | CA   | 9  | 12 |
| 179952 | 22 | 1861158 | 1861191 | 2 | 17 | 34 | AC   | 8  | 6  |
| 179956 | 22 | 1865705 | 1865730 | 2 | 13 | 26 | AC   | 9  | 8  |
| 179958 | 22 | 1868217 | 1868237 | 3 | 7  | 21 | AAG  | 22 | 6  |
| 179961 | 22 | 1869838 | 1869873 | 2 | 18 | 36 | TC   | 14 | 12 |
| 179965 | 22 | 1875594 | 1875625 | 2 | 16 | 32 | GA   | 7  | 10 |
| 179971 | 22 | 1880840 | 1880851 | 2 | 6  | 12 | GT   | 6  | 6  |
| 179972 | 22 | 1887245 | 1887272 | 2 | 14 | 28 | TG   | 19 | 11 |
| 179973 | 22 | 1887458 | 1887511 | 2 | 27 | 54 | AC   | 14 | 8  |
| 179974 | 22 | 1887664 | 1887677 | 2 | 7  | 14 | CA   | 27 | 10 |
| 179975 | 22 | 1887810 | 1887821 | 2 | 6  | 12 | CA   | 6  | 9  |
| 179976 | 22 | 1889473 | 1889500 | 2 | 14 | 28 | CA   | 8  | 11 |
| 179978 | 22 | 1893465 | 1893478 | 2 | 7  | 14 | CA   | 25 | 5  |
| 179979 | 22 | 1894487 | 1894508 | 2 | 11 | 22 | TG   | 19 | 11 |

|        |    |         |         |   |    |    |      |    |    |
|--------|----|---------|---------|---|----|----|------|----|----|
| 179980 | 22 | 1894659 | 1894690 | 2 | 16 | 32 | GT   | 10 | 4  |
| 179981 | 22 | 1894845 | 1894860 | 2 | 8  | 16 | GT   | 24 | 12 |
| 179982 | 22 | 1897199 | 1897213 | 3 | 5  | 15 | TGT  | 30 | 3  |
| 179983 | 22 | 1899404 | 1899433 | 3 | 10 | 30 | TTG  | 33 | 5  |
| 179984 | 22 | 1900429 | 1900450 | 2 | 11 | 22 | AC   | 13 | 10 |
| 179988 | 22 | 1901097 | 1901110 | 2 | 7  | 14 | TA   | 18 | 3  |
| 179992 | 22 | 1907295 | 1907314 | 2 | 10 | 20 | CT   | 18 | 5  |
| 179993 | 22 | 1907554 | 1907571 | 2 | 9  | 18 | GA   | 16 | 6  |
| 179995 | 22 | 1913061 | 1913074 | 2 | 7  | 14 | TC   | 18 | 3  |
| 179998 | 22 | 1918201 | 1918222 | 2 | 11 | 22 | GT   | 18 | 10 |
| 180004 | 22 | 1926441 | 1926460 | 2 | 10 | 20 | AC   | 19 | 10 |
| 180006 | 22 | 1930571 | 1930586 | 2 | 8  | 16 | GT   | 17 | 9  |
| 180009 | 22 | 1937959 | 1937988 | 2 | 15 | 30 | AC   | 12 | 14 |
| 180010 | 22 | 1938134 | 1938151 | 2 | 9  | 18 | GT   | 12 | 6  |
| 180012 | 22 | 1938314 | 1938341 | 2 | 14 | 28 | TG   | 21 | 17 |
| 180015 | 22 | 1943407 | 1943422 | 4 | 4  | 16 | CTGT | 20 | 6  |
| 180016 | 22 | 1943769 | 1943788 | 2 | 10 | 20 | TG   | 18 | 8  |
| 180021 | 22 | 1949612 | 1949631 | 2 | 10 | 20 | AC   | 9  | 5  |
| 180023 | 22 | 1951317 | 1951340 | 2 | 12 | 24 | CA   | 8  | 8  |
| 180025 | 22 | 1951477 | 1951488 | 2 | 6  | 12 | AC   | 31 | 3  |
| 180029 | 22 | 1957332 | 1957351 | 2 | 10 | 20 | CA   | 18 | 6  |
| 180041 | 22 | 1979346 | 1979365 | 2 | 10 | 20 | GT   | 10 | 9  |
| 180047 | 22 | 1988306 | 1988325 | 2 | 10 | 20 | GT   | 8  | 7  |
| 180056 | 22 | 2004115 | 2004134 | 2 | 10 | 20 | CA   | 18 | 5  |
| 180064 | 22 | 2018435 | 2018480 | 2 | 23 | 46 | GT   | 9  | 11 |
| 180065 | 22 | 2018800 | 2018813 | 2 | 7  | 14 | GT   | 24 | 6  |
| 180067 | 22 | 2019932 | 2019947 | 4 | 4  | 16 | CCTG | 29 | 3  |
| 180068 | 22 | 2020958 | 2020977 | 2 | 10 | 20 | GT   | 14 | 15 |
| 180074 | 22 | 2029568 | 2029583 | 2 | 8  | 16 | AC   | 15 | 7  |
| 180078 | 22 | 2031563 | 2031588 | 2 | 13 | 26 | CA   | 25 | 6  |
| 180080 | 22 | 2035376 | 2035407 | 2 | 16 | 32 | TG   | 22 | 7  |
| 180081 | 22 | 2037110 | 2037125 | 4 | 4  | 16 | TTTA | 19 | 3  |
| 180082 | 22 | 2050809 | 2050860 | 2 | 26 | 52 | GT   | 11 | 9  |
| 180083 | 22 | 2051861 | 2051872 | 2 | 6  | 12 | AG   | 24 | 4  |
| 180084 | 22 | 2052171 | 2052182 | 2 | 6  | 12 | GT   | 33 | 3  |
| 180085 | 22 | 2052343 | 2052360 | 2 | 9  | 18 | TG   | 16 | 6  |
| 180088 | 22 | 2053933 | 2053962 | 2 | 15 | 30 | AC   | 11 | 7  |
| 180090 | 22 | 2060264 | 2060275 | 2 | 6  | 12 | GA   | 31 | 3  |
| 180091 | 22 | 2063820 | 2063839 | 2 | 10 | 20 | AC   | 16 | 8  |
| 180092 | 22 | 2063943 | 2063968 | 2 | 13 | 26 | AC   | 17 | 11 |
| 180093 | 22 | 2068228 | 2068245 | 2 | 9  | 18 | AG   | 21 | 13 |
| 180094 | 22 | 2068423 | 2068456 | 2 | 17 | 34 | TG   | 11 | 9  |
| 180095 | 22 | 2070076 | 2070095 | 2 | 10 | 20 | AG   | 18 | 4  |
| 180096 | 22 | 2070129 | 2070142 | 2 | 7  | 14 | TC   | 33 | 3  |
| 180098 | 22 | 2071824 | 2071849 | 2 | 13 | 26 | GT   | 15 | 11 |
| 180101 | 22 | 2073864 | 2073877 | 2 | 7  | 14 | CA   | 22 | 5  |
| 180102 | 22 | 2073962 | 2073981 | 2 | 10 | 20 | AG   | 20 | 5  |
| 180103 | 22 | 2074299 | 2074336 | 2 | 19 | 38 | TG   | 12 | 11 |
| 180105 | 22 | 2075471 | 2075486 | 4 | 4  | 16 | AATG | 34 | 4  |
| 180106 | 22 | 2075775 | 2075796 | 2 | 11 | 22 | CA   | 14 | 10 |
| 180109 | 22 | 2076416 | 2076431 | 2 | 8  | 16 | TG   | 25 | 10 |

|        |    |         |         |   |    |    |     |    |    |
|--------|----|---------|---------|---|----|----|-----|----|----|
| 180110 | 22 | 2076517 | 2076528 | 2 | 6  | 12 | AC  | 23 | 3  |
| 180111 | 22 | 2080256 | 2080267 | 2 | 6  | 12 | GT  | 22 | 3  |
| 180112 | 22 | 2081010 | 2081023 | 2 | 7  | 14 | GT  | 22 | 9  |
| 180113 | 22 | 2081027 | 2081040 | 2 | 7  | 14 | TG  | 14 | 8  |
| 180114 | 22 | 2081139 | 2081152 | 2 | 7  | 14 | CA  | 28 | 6  |
| 180115 | 22 | 2081215 | 2081238 | 2 | 12 | 24 | CA  | 12 | 12 |
| 180118 | 22 | 2084480 | 2084509 | 2 | 15 | 30 | TG  | 13 | 5  |
| 180119 | 22 | 2084639 | 2084654 | 2 | 8  | 16 | TG  | 23 | 3  |
| 180123 | 22 | 2086183 | 2086212 | 2 | 15 | 30 | TG  | 9  | 8  |
| 180124 | 22 | 2086313 | 2086326 | 2 | 7  | 14 | AC  | 25 | 9  |
| 180128 | 22 | 2091523 | 2091544 | 2 | 11 | 22 | TG  | 12 | 12 |
| 180129 | 22 | 2091649 | 2091684 | 2 | 18 | 36 | TG  | 18 | 13 |
| 180131 | 22 | 2094725 | 2094745 | 3 | 7  | 21 | CCT | 17 | 6  |
| 180132 | 22 | 2094805 | 2094844 | 2 | 20 | 40 | TC  | 10 | 10 |
| 180133 | 22 | 2095021 | 2095038 | 2 | 9  | 18 | TG  | 13 | 9  |
| 180145 | 22 | 2104845 | 2104864 | 2 | 10 | 20 | AC  | 8  | 6  |
| 180155 | 22 | 2111415 | 2111440 | 2 | 13 | 26 | TG  | 14 | 6  |
| 180156 | 22 | 2114314 | 2114349 | 2 | 18 | 36 | CA  | 12 | 11 |
| 180157 | 22 | 2116103 | 2116120 | 2 | 9  | 18 | GT  | 17 | 10 |
| 180158 | 22 | 2117880 | 2117899 | 2 | 10 | 20 | CA  | 22 | 5  |
| 180159 | 22 | 2118021 | 2118042 | 2 | 11 | 22 | CA  | 19 | 5  |
| 180168 | 22 | 2123447 | 2123464 | 2 | 9  | 18 | GA  | 25 | 5  |
| 180170 | 22 | 2126294 | 2126311 | 2 | 9  | 18 | CA  | 21 | 9  |
| 180174 | 22 | 2128227 | 2128242 | 2 | 8  | 16 | AC  | 13 | 9  |
| 180175 | 22 | 2128589 | 2128620 | 2 | 16 | 32 | CA  | 11 | 10 |
| 180176 | 22 | 2130160 | 2130179 | 2 | 10 | 20 | CA  | 22 | 5  |
| 180177 | 22 | 2130427 | 2130454 | 2 | 14 | 28 | CA  | 23 | 8  |
| 180181 | 22 | 2132555 | 2132578 | 2 | 12 | 24 | TG  | 14 | 10 |
| 180182 | 22 | 2132697 | 2132722 | 2 | 13 | 26 | TG  | 20 | 13 |
| 180183 | 22 | 2133503 | 2133516 | 2 | 7  | 14 | CT  | 21 | 3  |
| 180184 | 22 | 2133538 | 2133563 | 2 | 13 | 26 | AC  | 23 | 6  |
| 180187 | 22 | 2135505 | 2135530 | 2 | 13 | 26 | TG  | 21 | 9  |
| 180188 | 22 | 2135697 | 2135728 | 2 | 16 | 32 | AC  | 17 | 14 |
| 180189 | 22 | 2137128 | 2137145 | 3 | 6  | 18 | TCC | 27 | 3  |
| 180192 | 22 | 2140696 | 2140717 | 2 | 11 | 22 | GT  | 23 | 11 |
| 180193 | 22 | 2141133 | 2141160 | 2 | 14 | 28 | AC  | 21 | 9  |
| 180194 | 22 | 2141328 | 2141341 | 2 | 7  | 14 | CA  | 23 | 10 |
| 180198 | 22 | 2149739 | 2149776 | 2 | 19 | 38 | CA  | 18 | 13 |
| 180199 | 22 | 2149904 | 2149923 | 2 | 10 | 20 | GT  | 21 | 14 |
| 180200 | 22 | 2151588 | 2151629 | 2 | 21 | 42 | TG  | 7  | 6  |
| 180202 | 22 | 2153196 | 2153221 | 2 | 13 | 26 | TG  | 10 | 5  |
| 180203 | 22 | 2153356 | 2153391 | 2 | 18 | 36 | TG  | 18 | 7  |
| 180208 | 22 | 2158228 | 2158245 | 2 | 9  | 18 | AC  | 17 | 12 |
| 180211 | 22 | 2160325 | 2160336 | 2 | 6  | 12 | CA  | 32 | 7  |
| 180213 | 22 | 2160647 | 2160667 | 3 | 7  | 21 | CTT | 16 | 4  |
| 180214 | 22 | 2161072 | 2161097 | 2 | 13 | 26 | GT  | 24 | 9  |
| 180215 | 22 | 2164823 | 2164874 | 2 | 26 | 52 | TG  | 14 | 10 |
| 180216 | 22 | 2165015 | 2165026 | 2 | 6  | 12 | GT  | 29 | 3  |
| 180217 | 22 | 2165265 | 2165280 | 2 | 8  | 16 | TG  | 22 | 3  |
| 180219 | 22 | 2170237 | 2170250 | 2 | 7  | 14 | AC  | 24 | 4  |
| 180220 | 22 | 2170376 | 2170407 | 2 | 16 | 32 | CA  | 26 | 10 |

|        |    |         |         |   |    |    |      |    |    |
|--------|----|---------|---------|---|----|----|------|----|----|
| 180222 | 22 | 2170817 | 2170844 | 2 | 14 | 28 | CA   | 14 | 6  |
| 180223 | 22 | 2170953 | 2170986 | 2 | 17 | 34 | AC   | 7  | 7  |
| 180228 | 22 | 2180946 | 2180965 | 2 | 10 | 20 | GT   | 12 | 8  |
| 180236 | 22 | 2187406 | 2187441 | 2 | 18 | 36 | TG   | 15 | 11 |
| 180240 | 22 | 2189363 | 2189374 | 2 | 6  | 12 | AC   | 30 | 3  |
| 180241 | 22 | 2190823 | 2190834 | 2 | 6  | 12 | AC   | 24 | 3  |
| 180242 | 22 | 2191002 | 2191023 | 2 | 11 | 22 | CA   | 16 | 3  |
| 180245 | 22 | 2198502 | 2198541 | 2 | 20 | 40 | GT   | 6  | 7  |
| 180249 | 22 | 2198974 | 2198987 | 2 | 7  | 14 | CA   | 7  | 4  |
| 180257 | 22 | 2214577 | 2214592 | 2 | 8  | 16 | TG   | 18 | 3  |
| 180260 | 22 | 2214803 | 2214818 | 2 | 8  | 16 | GT   | 22 | 6  |
| 180261 | 22 | 2225218 | 2225241 | 2 | 12 | 24 | AC   | 19 | 10 |
| 180264 | 22 | 2233086 | 2233117 | 2 | 16 | 32 | TC   | 14 | 8  |
| 180265 | 22 | 2236278 | 2236291 | 2 | 7  | 14 | AC   | 7  | 9  |
| 180266 | 22 | 2236830 | 2236849 | 4 | 5  | 20 | CAGT | 28 | 6  |
| 180269 | 22 | 2242960 | 2242977 | 2 | 9  | 18 | TG   | 16 | 11 |
| 180270 | 22 | 2245380 | 2245397 | 2 | 9  | 18 | GT   | 23 | 4  |
| 180271 | 22 | 2246573 | 2246592 | 2 | 10 | 20 | AC   | 23 | 5  |
| 180281 | 22 | 2263593 | 2263612 | 2 | 10 | 20 | CA   | 27 | 7  |
| 180282 | 22 | 2264496 | 2264519 | 2 | 12 | 24 | CT   | 24 | 6  |
| 180283 | 22 | 2265019 | 2265070 | 4 | 13 | 52 | TATC | 14 | 10 |
| 180285 | 22 | 2272230 | 2272247 | 3 | 6  | 18 | TGT  | 20 | 3  |
| 180286 | 22 | 2280619 | 2280630 | 2 | 6  | 12 | TA   | 18 | 5  |
| 180291 | 22 | 2300699 | 2300734 | 4 | 9  | 36 | ATCT | 19 | 10 |
| 180292 | 22 | 2300990 | 2301013 | 3 | 8  | 24 | CCA  | 11 | 6  |
| 180294 | 22 | 2306606 | 2306617 | 2 | 6  | 12 | GT   | 17 | 6  |
| 180295 | 22 | 2308020 | 2308035 | 2 | 8  | 16 | AC   | 19 | 5  |
| 180302 | 22 | 2322407 | 2322422 | 2 | 8  | 16 | GT   | 17 | 5  |
| 180303 | 22 | 2322717 | 2322728 | 2 | 6  | 12 | GT   | 14 | 4  |
| 180305 | 22 | 2330120 | 2330133 | 2 | 7  | 14 | AC   | 9  | 5  |
| 180307 | 22 | 2330174 | 2330201 | 2 | 14 | 28 | AC   | 7  | 7  |
| 180309 | 22 | 2330809 | 2330824 | 2 | 8  | 16 | GT   | 15 | 4  |
| 180310 | 22 | 2331608 | 2331625 | 2 | 9  | 18 | GT   | 19 | 7  |
| 180311 | 22 | 2333284 | 2333301 | 3 | 6  | 18 | TGC  | 26 | 5  |
| 180312 | 22 | 2333651 | 2333662 | 2 | 6  | 12 | CA   | 21 | 4  |
| 180314 | 22 | 2335968 | 2336015 | 2 | 24 | 48 | AC   | 11 | 12 |
| 180319 | 22 | 2339386 | 2339425 | 2 | 20 | 40 | GT   | 14 | 14 |
| 180324 | 22 | 2346159 | 2346178 | 2 | 10 | 20 | GT   | 18 | 4  |
| 180326 | 22 | 2348074 | 2348107 | 2 | 17 | 34 | TG   | 8  | 10 |
| 180327 | 22 | 2348216 | 2348253 | 2 | 19 | 38 | CA   | 13 | 16 |
| 180331 | 22 | 2356546 | 2356587 | 2 | 21 | 42 | GT   | 9  | 12 |
| 180332 | 22 | 2356972 | 2356991 | 2 | 10 | 20 | CA   | 20 | 10 |
| 180334 | 22 | 2357393 | 2357424 | 2 | 16 | 32 | AC   | 9  | 7  |
| 180335 | 22 | 2357804 | 2357827 | 2 | 12 | 24 | TG   | 8  | 7  |
| 180336 | 22 | 2359837 | 2359866 | 2 | 15 | 30 | TG   | 9  | 10 |
| 180338 | 22 | 2359991 | 2360010 | 2 | 10 | 20 | TG   | 8  | 11 |
| 180339 | 22 | 2360053 | 2360070 | 2 | 9  | 18 | TG   | 12 | 6  |
| 180340 | 22 | 2360186 | 2360201 | 2 | 8  | 16 | CA   | 20 | 14 |
| 180342 | 22 | 2363415 | 2363432 | 2 | 9  | 18 | AC   | 8  | 8  |
| 180343 | 22 | 2363542 | 2363557 | 2 | 8  | 16 | AC   | 24 | 8  |
| 180344 | 22 | 2365821 | 2365834 | 2 | 7  | 14 | AC   | 29 | 5  |

|        |    |         |         |   |    |    |      |    |    |
|--------|----|---------|---------|---|----|----|------|----|----|
| 180345 | 22 | 2371862 | 2371877 | 2 | 8  | 16 | AC   | 12 | 4  |
| 180347 | 22 | 2374814 | 2374837 | 4 | 6  | 24 | TCCA | 27 | 3  |
| 180348 | 22 | 2375637 | 2375690 | 2 | 27 | 54 | GT   | 13 | 8  |
| 180351 | 22 | 2403211 | 2403226 | 2 | 8  | 16 | CA   | 22 | 12 |
| 180353 | 22 | 2403394 | 2403441 | 2 | 24 | 48 | AC   | 8  | 10 |
| 180355 | 22 | 2403802 | 2403815 | 2 | 7  | 14 | CA   | 19 | 3  |
| 180363 | 22 | 2412772 | 2412783 | 2 | 6  | 12 | TG   | 32 | 3  |
| 180364 | 22 | 2413071 | 2413090 | 2 | 10 | 20 | AC   | 20 | 10 |
| 180365 | 22 | 2414490 | 2414533 | 2 | 22 | 44 | AC   | 14 | 12 |
| 180367 | 22 | 2415992 | 2416009 | 2 | 9  | 18 | AC   | 6  | 5  |
| 180369 | 22 | 2416477 | 2416510 | 2 | 17 | 34 | CA   | 9  | 7  |
| 180373 | 22 | 2421674 | 2421689 | 2 | 8  | 16 | GT   | 22 | 7  |
| 180374 | 22 | 2422997 | 2423030 | 2 | 17 | 34 | CA   | 8  | 8  |
| 180380 | 22 | 2426468 | 2426499 | 2 | 16 | 32 | TG   | 14 | 9  |
| 180385 | 22 | 2432154 | 2432168 | 3 | 5  | 15 | CAG  | 28 | 4  |
| 180386 | 22 | 2432327 | 2432344 | 2 | 9  | 18 | TC   | 21 | 4  |
| 180387 | 22 | 2432544 | 2432555 | 2 | 6  | 12 | GT   | 26 | 10 |
| 180389 | 22 | 2435147 | 2435180 | 2 | 17 | 34 | AC   | 15 | 15 |
| 180391 | 22 | 2440207 | 2440222 | 2 | 8  | 16 | TC   | 20 | 4  |
| 180393 | 22 | 2445265 | 2445294 | 3 | 10 | 30 | TGA  | 24 | 7  |
| 180394 | 22 | 2445412 | 2445441 | 3 | 10 | 30 | GCT  | 29 | 12 |
| 180395 | 22 | 2446736 | 2446761 | 2 | 13 | 26 | TC   | 16 | 7  |
| 180396 | 22 | 2447273 | 2447296 | 2 | 12 | 24 | CA   | 14 | 5  |
| 180397 | 22 | 2447717 | 2447746 | 2 | 15 | 30 | TG   | 15 | 6  |
| 180398 | 22 | 2449676 | 2449697 | 2 | 11 | 22 | TG   | 17 | 7  |
| 180399 | 22 | 2449782 | 2449797 | 2 | 8  | 16 | GT   | 16 | 5  |
| 180402 | 22 | 2474486 | 2474511 | 2 | 13 | 26 | CA   | 16 | 8  |
| 180404 | 22 | 2482909 | 2482929 | 3 | 7  | 21 | AGA  | 24 | 6  |
| 180406 | 22 | 2489512 | 2489529 | 2 | 9  | 18 | AC   | 16 | 4  |
| 180408 | 22 | 2490618 | 2490685 | 2 | 34 | 68 | GT   | 11 | 7  |
| 180411 | 22 | 2493956 | 2493977 | 2 | 11 | 22 | GT   | 26 | 4  |
| 180415 | 22 | 2501585 | 2501608 | 2 | 12 | 24 | AC   | 15 | 9  |
| 180420 | 22 | 2507594 | 2507625 | 2 | 16 | 32 | TG   | 11 | 12 |
| 180422 | 22 | 2507943 | 2507960 | 2 | 9  | 18 | TG   | 8  | 8  |
| 180424 | 22 | 2509260 | 2509273 | 2 | 7  | 14 | GA   | 20 | 7  |
| 180427 | 22 | 2512731 | 2512760 | 2 | 15 | 30 | AC   | 12 | 7  |
| 180429 | 22 | 2516761 | 2516776 | 2 | 8  | 16 | GT   | 19 | 4  |
| 180433 | 22 | 2528528 | 2528563 | 2 | 18 | 36 | GT   | 15 | 8  |
| 180434 | 22 | 2528687 | 2528712 | 2 | 13 | 26 | GT   | 12 | 9  |
| 180435 | 22 | 2528890 | 2528933 | 2 | 22 | 44 | CA   | 11 | 8  |
| 180442 | 22 | 2536243 | 2536274 | 2 | 16 | 32 | AC   | 16 | 10 |
| 180447 | 22 | 2545092 | 2545105 | 2 | 7  | 14 | GA   | 31 | 5  |
| 180448 | 22 | 2548409 | 2548432 | 3 | 8  | 24 | CTC  | 19 | 4  |
| 180449 | 22 | 2548546 | 2548577 | 2 | 16 | 32 | GT   | 7  | 7  |
| 180450 | 22 | 2550180 | 2550195 | 2 | 8  | 16 | AG   | 28 | 5  |
| 180454 | 22 | 2553612 | 2553629 | 2 | 9  | 18 | TG   | 8  | 8  |
| 180457 | 22 | 2554420 | 2554479 | 4 | 15 | 60 | GATA | 17 | 15 |
| 180459 | 22 | 2556972 | 2556995 | 2 | 12 | 24 | TG   | 15 | 14 |
| 180463 | 22 | 2559213 | 2559246 | 2 | 17 | 34 | TG   | 9  | 12 |
| 180466 | 22 | 2562422 | 2562435 | 2 | 7  | 14 | AC   | 15 | 4  |
| 180468 | 22 | 2562688 | 2562713 | 2 | 13 | 26 | TG   | 22 | 8  |

|        |    |         |         |   |    |    |      |    |    |
|--------|----|---------|---------|---|----|----|------|----|----|
| 180469 | 22 | 2563875 | 2563898 | 2 | 12 | 24 | GT   | 14 | 6  |
| 180470 | 22 | 2564939 | 2564982 | 2 | 22 | 44 | AC   | 13 | 10 |
| 180475 | 22 | 2570153 | 2570164 | 2 | 6  | 12 | GT   | 28 | 3  |
| 180476 | 22 | 2570333 | 2570344 | 2 | 6  | 12 | TG   | 26 | 3  |
| 180479 | 22 | 2574802 | 2574821 | 2 | 10 | 20 | TG   | 15 | 10 |
| 180480 | 22 | 2574925 | 2574948 | 2 | 12 | 24 | TG   | 13 | 12 |
| 180481 | 22 | 2576978 | 2577007 | 2 | 15 | 30 | GT   | 17 | 8  |
| 180483 | 22 | 2580037 | 2580058 | 2 | 11 | 22 | CA   | 18 | 8  |
| 180486 | 22 | 2592271 | 2592310 | 2 | 20 | 40 | TG   | 6  | 9  |
| 180490 | 22 | 2596267 | 2596284 | 3 | 6  | 18 | GAG  | 19 | 7  |
| 180491 | 22 | 2600534 | 2600561 | 4 | 7  | 28 | CCAT | 27 | 3  |
| 180493 | 22 | 2604145 | 2604182 | 2 | 19 | 38 | CA   | 9  | 10 |
| 180507 | 22 | 2637869 | 2637884 | 2 | 8  | 16 | CA   | 14 | 3  |
| 180509 | 22 | 2638677 | 2638716 | 2 | 20 | 40 | GT   | 7  | 7  |
| 180510 | 22 | 2642274 | 2642300 | 3 | 9  | 27 | TCT  | 10 | 11 |
| 180512 | 22 | 2644262 | 2644275 | 2 | 7  | 14 | CA   | 23 | 9  |
| 180513 | 22 | 2646734 | 2646745 | 2 | 6  | 12 | AC   | 16 | 3  |
| 180514 | 22 | 2646784 | 2646809 | 2 | 13 | 26 | CA   | 7  | 7  |
| 180516 | 22 | 2649065 | 2649098 | 2 | 17 | 34 | GT   | 10 | 6  |
| 180518 | 22 | 2651026 | 2651043 | 2 | 9  | 18 | CA   | 17 | 3  |
| 180519 | 22 | 2651193 | 2651212 | 2 | 10 | 20 | GT   | 21 | 6  |
| 180521 | 22 | 2651956 | 2651997 | 2 | 21 | 42 | CA   | 14 | 11 |
| 180523 | 22 | 2657953 | 2657992 | 4 | 10 | 40 | ATAG | 20 | 13 |
| 180527 | 22 | 2675968 | 2675989 | 2 | 11 | 22 | CA   | 21 | 10 |
| 180531 | 22 | 2681553 | 2681604 | 2 | 26 | 52 | TG   | 11 | 8  |
| 180533 | 22 | 2682207 | 2682264 | 2 | 29 | 58 | CA   | 8  | 11 |
| 180540 | 22 | 2686237 | 2686264 | 2 | 14 | 28 | GT   | 9  | 8  |
| 180545 | 22 | 2703936 | 2703980 | 3 | 15 | 45 | TGA  | 26 | 17 |
| 180547 | 22 | 2705259 | 2705272 | 2 | 7  | 14 | CT   | 14 | 5  |
| 180553 | 22 | 2706809 | 2706826 | 3 | 6  | 18 | CTC  | 20 | 8  |
| 180557 | 22 | 2707116 | 2707131 | 2 | 8  | 16 | AC   | 20 | 8  |
| 180559 | 22 | 2707956 | 2707983 | 2 | 14 | 28 | AC   | 9  | 9  |
| 180563 | 22 | 2710728 | 2710748 | 3 | 7  | 21 | ATT  | 15 | 10 |
| 180565 | 22 | 2711062 | 2711083 | 2 | 11 | 22 | CA   | 9  | 9  |
| 180566 | 22 | 2711311 | 2711331 | 3 | 7  | 21 | GAG  | 21 | 6  |
| 180567 | 22 | 2712177 | 2712194 | 2 | 9  | 18 | AT   | 18 | 4  |
| 180569 | 22 | 2713288 | 2713305 | 3 | 6  | 18 | CTC  | 16 | 6  |
| 180570 | 22 | 2713618 | 2713631 | 2 | 7  | 14 | AG   | 25 | 4  |
| 180574 | 22 | 2718347 | 2718358 | 2 | 6  | 12 | CT   | 24 | 3  |
| 180576 | 22 | 2727351 | 2727362 | 2 | 6  | 12 | TG   | 13 | 6  |
| 180581 | 22 | 2733129 | 2733144 | 2 | 8  | 16 | AC   | 7  | 6  |
| 180583 | 22 | 2735774 | 2735805 | 2 | 16 | 32 | GT   | 11 | 11 |
| 180585 | 22 | 2736107 | 2736130 | 3 | 8  | 24 | CTC  | 15 | 12 |
| 180586 | 22 | 2736421 | 2736441 | 3 | 7  | 21 | CCT  | 23 | 3  |
| 180588 | 22 | 2737565 | 2737576 | 2 | 6  | 12 | AC   | 25 | 4  |
| 180589 | 22 | 2737884 | 2737927 | 2 | 22 | 44 | GT   | 11 | 15 |
| 180593 | 22 | 2739814 | 2739843 | 2 | 15 | 30 | CA   | 14 | 9  |
| 180594 | 22 | 2740118 | 2740153 | 2 | 18 | 36 | AC   | 13 | 11 |
| 180599 | 22 | 2747146 | 2747161 | 2 | 8  | 16 | AC   | 20 | 4  |
| 180602 | 22 | 2752237 | 2752250 | 2 | 7  | 14 | CA   | 25 | 3  |
| 180603 | 22 | 2752305 | 2752328 | 2 | 12 | 24 | CA   | 10 | 4  |

|        |    |         |         |   |    |    |      |    |    |
|--------|----|---------|---------|---|----|----|------|----|----|
| 180610 | 22 | 2756009 | 2756032 | 2 | 12 | 24 | AC   | 11 | 4  |
| 180611 | 22 | 2757261 | 2757296 | 2 | 18 | 36 | AC   | 12 | 8  |
| 180612 | 22 | 2757482 | 2757497 | 2 | 8  | 16 | CA   | 17 | 10 |
| 180613 | 22 | 2757499 | 2757512 | 2 | 7  | 14 | AC   | 16 | 8  |
| 180614 | 22 | 2757612 | 2757637 | 2 | 13 | 26 | CA   | 13 | 16 |
| 180616 | 22 | 2758170 | 2758189 | 2 | 10 | 20 | TG   | 13 | 8  |
| 180620 | 22 | 2759156 | 2759179 | 2 | 12 | 24 | GA   | 16 | 8  |
| 180624 | 22 | 2759738 | 2759759 | 2 | 11 | 22 | AC   | 13 | 10 |
| 180626 | 22 | 2761901 | 2761914 | 2 | 7  | 14 | TG   | 27 | 3  |
| 180627 | 22 | 2762356 | 2762373 | 2 | 9  | 18 | CA   | 29 | 6  |
| 180628 | 22 | 2762561 | 2762580 | 2 | 10 | 20 | GA   | 23 | 7  |
| 180629 | 22 | 2762581 | 2762592 | 2 | 6  | 12 | GT   | 24 | 10 |
| 180630 | 22 | 2762695 | 2762712 | 2 | 9  | 18 | GT   | 20 | 6  |
| 180632 | 22 | 2763034 | 2763055 | 2 | 11 | 22 | GT   | 18 | 12 |
| 180637 | 22 | 2763624 | 2763639 | 2 | 8  | 16 | AC   | 15 | 3  |
| 180638 | 22 | 2763732 | 2763749 | 2 | 9  | 18 | CA   | 24 | 7  |
| 180639 | 22 | 2763863 | 2763884 | 2 | 11 | 22 | AC   | 23 | 9  |
| 180640 | 22 | 2764021 | 2764038 | 2 | 9  | 18 | GT   | 24 | 7  |
| 180641 | 22 | 2765327 | 2765338 | 2 | 6  | 12 | GT   | 24 | 3  |
| 180644 | 22 | 2767034 | 2767048 | 3 | 5  | 15 | GGA  | 10 | 6  |
| 180646 | 22 | 2768029 | 2768046 | 2 | 9  | 18 | TG   | 12 | 8  |
| 180647 | 22 | 2768256 | 2768275 | 2 | 10 | 20 | CA   | 20 | 8  |
| 180650 | 22 | 2769446 | 2769479 | 2 | 17 | 34 | GT   | 12 | 8  |
| 180651 | 22 | 2769540 | 2769555 | 2 | 8  | 16 | GT   | 18 | 3  |
| 180653 | 22 | 2769693 | 2769714 | 2 | 11 | 22 | TG   | 21 | 6  |
| 180655 | 22 | 2771551 | 2771582 | 2 | 16 | 32 | AC   | 19 | 11 |
| 180656 | 22 | 2771835 | 2771850 | 2 | 8  | 16 | TG   | 16 | 10 |
| 180659 | 22 | 2774924 | 2774939 | 2 | 8  | 16 | TG   | 7  | 6  |
| 180660 | 22 | 2775654 | 2775681 | 2 | 14 | 28 | CA   | 10 | 8  |
| 180662 | 22 | 2776186 | 2776215 | 2 | 15 | 30 | TG   | 15 | 9  |
| 180664 | 22 | 2776837 | 2776854 | 2 | 9  | 18 | GT   | 28 | 4  |
| 180666 | 22 | 2777948 | 2777965 | 2 | 9  | 18 | AC   | 18 | 9  |
| 180669 | 22 | 2780027 | 2780042 | 2 | 8  | 16 | CT   | 18 | 3  |
| 180672 | 22 | 2781663 | 2781692 | 2 | 15 | 30 | TG   | 15 | 15 |
| 180681 | 22 | 2789277 | 2789298 | 2 | 11 | 22 | AG   | 14 | 6  |
| 180686 | 22 | 2791933 | 2791950 | 2 | 9  | 18 | AC   | 16 | 3  |
| 180688 | 22 | 2794435 | 2794472 | 2 | 19 | 38 | AC   | 12 | 7  |
| 180689 | 22 | 2794757 | 2794778 | 2 | 11 | 22 | AC   | 18 | 5  |
| 180691 | 22 | 2796601 | 2796628 | 2 | 14 | 28 | GT   | 18 | 9  |
| 180697 | 22 | 2802614 | 2802641 | 2 | 14 | 28 | AC   | 8  | 8  |
| 180698 | 22 | 2805505 | 2805520 | 2 | 8  | 16 | GA   | 16 | 3  |
| 180701 | 22 | 2806815 | 2806846 | 4 | 8  | 32 | ATAC | 18 | 9  |
| 180702 | 22 | 2806950 | 2806975 | 2 | 13 | 26 | AC   | 10 | 12 |
| 180703 | 22 | 2807314 | 2807331 | 2 | 9  | 18 | AC   | 21 | 15 |
| 180711 | 22 | 2810458 | 2810489 | 2 | 16 | 32 | AC   | 7  | 10 |
| 180712 | 22 | 2810653 | 2810674 | 2 | 11 | 22 | CA   | 9  | 7  |
| 180713 | 22 | 2810709 | 2810720 | 2 | 6  | 12 | AC   | 20 | 5  |
| 180714 | 22 | 2811940 | 2811955 | 2 | 8  | 16 | AC   | 16 | 5  |
| 180722 | 22 | 2815120 | 2815145 | 2 | 13 | 26 | GT   | 6  | 7  |
| 180724 | 22 | 2816341 | 2816354 | 2 | 7  | 14 | AC   | 16 | 5  |
| 180726 | 22 | 2817127 | 2817144 | 3 | 6  | 18 | CTG  | 19 | 3  |



|        |    |         |         |   |    |    |      |    |    |
|--------|----|---------|---------|---|----|----|------|----|----|
| 180730 | 22 | 2819001 | 2819020 | 2 | 10 | 20 | CA   | 23 | 8  |
| 180737 | 22 | 2821238 | 2821252 | 3 | 5  | 15 | AAG  | 21 | 3  |
| 180740 | 22 | 2823112 | 2823126 | 3 | 5  | 15 | AAT  | 12 | 3  |
| 180741 | 22 | 2823308 | 2823331 | 3 | 8  | 24 | ATA  | 19 | 10 |
| 180743 | 22 | 2823977 | 2823992 | 2 | 8  | 16 | GT   | 12 | 5  |
| 180748 | 22 | 2826498 | 2826525 | 2 | 14 | 28 | AC   | 16 | 9  |
| 180751 | 22 | 2828022 | 2828051 | 3 | 10 | 30 | GAG  | 20 | 7  |
| 180752 | 22 | 2828229 | 2828256 | 2 | 14 | 28 | AC   | 19 | 11 |
| 180753 | 22 | 2828448 | 2828471 | 3 | 8  | 24 | ATA  | 19 | 6  |
| 180754 | 22 | 2829310 | 2829336 | 3 | 9  | 27 | GCT  | 22 | 6  |
| 180755 | 22 | 2829682 | 2829693 | 2 | 6  | 12 | GT   | 14 | 6  |
| 180756 | 22 | 2830731 | 2830772 | 2 | 21 | 42 | TG   | 15 | 11 |
| 180757 | 22 | 2830880 | 2830909 | 2 | 15 | 30 | AC   | 15 | 10 |
| 180762 | 22 | 2834388 | 2834419 | 2 | 16 | 32 | CA   | 18 | 6  |
| 180765 | 22 | 2836779 | 2836792 | 2 | 7  | 14 | AC   | 18 | 4  |
| 180769 | 22 | 2839082 | 2839103 | 2 | 11 | 22 | CA   | 8  | 9  |
| 180774 | 22 | 2841658 | 2841678 | 3 | 7  | 21 | GAG  | 8  | 5  |
| 180780 | 22 | 2848224 | 2848251 | 2 | 14 | 28 | AC   | 21 | 8  |
| 180781 | 22 | 2848296 | 2848329 | 2 | 17 | 34 | CA   | 18 | 10 |
| 180783 | 22 | 2849743 | 2849772 | 3 | 10 | 30 | AGA  | 19 | 9  |
| 180784 | 22 | 2852323 | 2852358 | 2 | 18 | 36 | CA   | 14 | 13 |
| 180786 | 22 | 2857330 | 2857345 | 2 | 8  | 16 | TG   | 16 | 5  |
| 180787 | 22 | 2857611 | 2857640 | 2 | 15 | 30 | TG   | 19 | 10 |
| 180792 | 22 | 2870690 | 2870713 | 3 | 8  | 24 | CTC  | 13 | 6  |
| 180793 | 22 | 2870949 | 2870964 | 2 | 8  | 16 | AC   | 27 | 3  |
| 180794 | 22 | 2871139 | 2871156 | 2 | 9  | 18 | CA   | 20 | 6  |
| 180798 | 22 | 2873731 | 2873754 | 4 | 6  | 24 | TTCT | 32 | 3  |
| 180803 | 22 | 2875709 | 2875732 | 2 | 12 | 24 | AC   | 14 | 10 |
| 180810 | 22 | 2887412 | 2887426 | 3 | 5  | 15 | GAG  | 26 | 7  |
| 180812 | 22 | 2889100 | 2889121 | 2 | 11 | 22 | TG   | 11 | 13 |
| 180817 | 22 | 2896288 | 2896311 | 2 | 12 | 24 | GT   | 10 | 11 |
| 180819 | 22 | 2898031 | 2898054 | 2 | 12 | 24 | TG   | 21 | 9  |
| 180821 | 22 | 2903480 | 2903503 | 2 | 12 | 24 | AC   | 20 | 6  |
| 180829 | 22 | 2905230 | 2905275 | 2 | 23 | 46 | AC   | 7  | 9  |
| 180831 | 22 | 2907369 | 2907388 | 2 | 10 | 20 | AC   | 13 | 4  |
| 180834 | 22 | 2911177 | 2911196 | 2 | 10 | 20 | AG   | 15 | 8  |
| 180836 | 22 | 2912530 | 2912559 | 2 | 15 | 30 | TG   | 7  | 9  |
| 180838 | 22 | 2915451 | 2915462 | 2 | 6  | 12 | AG   | 16 | 4  |
| 180839 | 22 | 2921875 | 2921892 | 3 | 6  | 18 | TGT  | 23 | 5  |
| 180842 | 22 | 2926280 | 2926307 | 2 | 14 | 28 | AC   | 13 | 9  |
| 180845 | 22 | 2932645 | 2932660 | 2 | 8  | 16 | CA   | 24 | 3  |
| 180847 | 22 | 2936682 | 2936721 | 2 | 20 | 40 | CA   | 8  | 11 |
| 180849 | 22 | 2948462 | 2948473 | 2 | 6  | 12 | TG   | 20 | 3  |
| 180853 | 22 | 2953687 | 2953704 | 2 | 9  | 18 | AC   | 19 | 6  |
| 180860 | 22 | 2958587 | 2958604 | 2 | 9  | 18 | GT   | 26 | 8  |
| 180861 | 22 | 2959252 | 2959287 | 2 | 18 | 36 | CA   | 6  | 10 |
| 180867 | 22 | 2965745 | 2965760 | 4 | 4  | 16 | ATTG | 14 | 6  |
| 180870 | 22 | 2967739 | 2967764 | 2 | 13 | 26 | GA   | 19 | 11 |
| 180872 | 22 | 2967979 | 2967990 | 2 | 6  | 12 | AG   | 24 | 3  |
| 180875 | 22 | 2972022 | 2972037 | 2 | 8  | 16 | CA   | 18 | 3  |
| 180878 | 22 | 2974586 | 2974621 | 2 | 18 | 36 | GT   | 9  | 7  |

|        |    |         |         |   |    |    |      |    |    |
|--------|----|---------|---------|---|----|----|------|----|----|
| 180880 | 22 | 2978485 | 2978510 | 2 | 13 | 26 | GT   | 21 | 16 |
| 180881 | 22 | 2978658 | 2978683 | 2 | 13 | 26 | TG   | 9  | 6  |
| 180883 | 22 | 2978813 | 2978836 | 2 | 12 | 24 | CA   | 12 | 6  |
| 180884 | 22 | 2980369 | 2980402 | 2 | 17 | 34 | CA   | 18 | 14 |
| 180887 | 22 | 2985143 | 2985160 | 3 | 6  | 18 | CCT  | 19 | 3  |
| 180888 | 22 | 2985325 | 2985340 | 2 | 8  | 16 | AC   | 16 | 6  |
| 180900 | 22 | 2994067 | 2994090 | 2 | 12 | 24 | GT   | 18 | 8  |
| 180903 | 22 | 2996376 | 2996409 | 2 | 17 | 34 | GT   | 14 | 10 |
| 180906 | 22 | 2998827 | 2998840 | 2 | 7  | 14 | GA   | 24 | 5  |
| 180907 | 22 | 2999400 | 2999417 | 2 | 9  | 18 | AT   | 16 | 7  |
| 180914 | 22 | 3007808 | 3007829 | 2 | 11 | 22 | TG   | 23 | 10 |
| 180918 | 22 | 3017358 | 3017371 | 2 | 7  | 14 | CA   | 21 | 6  |
| 180919 | 22 | 3019975 | 3019988 | 2 | 7  | 14 | CA   | 22 | 3  |
| 180921 | 22 | 3025202 | 3025225 | 3 | 8  | 24 | TCC  | 26 | 4  |
| 180928 | 22 | 3034920 | 3034951 | 2 | 16 | 32 | AC   | 16 | 15 |
| 180929 | 22 | 3035160 | 3035175 | 2 | 8  | 16 | AT   | 10 | 3  |
| 180930 | 22 | 3039246 | 3039263 | 3 | 6  | 18 | CTT  | 24 | 4  |
| 180931 | 22 | 3039470 | 3039493 | 3 | 8  | 24 | TCT  | 26 | 6  |
| 180933 | 22 | 3039622 | 3039675 | 3 | 18 | 54 | CTT  | 16 | 9  |
| 180934 | 22 | 3041808 | 3041837 | 2 | 15 | 30 | CA   | 6  | 9  |
| 180937 | 22 | 3048067 | 3048086 | 2 | 10 | 20 | CA   | 17 | 12 |
| 180939 | 22 | 3050633 | 3050646 | 2 | 7  | 14 | AG   | 26 | 4  |
| 180943 | 22 | 3055956 | 3055971 | 4 | 4  | 16 | GCGT | 30 | 7  |
| 180945 | 22 | 3057443 | 3057468 | 2 | 13 | 26 | GT   | 15 | 6  |
| 180954 | 22 | 3070102 | 3070121 | 2 | 10 | 20 | TC   | 21 | 9  |
| 180955 | 22 | 3070430 | 3070451 | 2 | 11 | 22 | CA   | 14 | 11 |
| 180957 | 22 | 3077394 | 3077447 | 2 | 27 | 54 | TG   | 9  | 12 |
| 180960 | 22 | 3082083 | 3082124 | 2 | 21 | 42 | AC   | 10 | 11 |
| 180962 | 22 | 3085092 | 3085111 | 2 | 10 | 20 | CA   | 17 | 9  |
| 180963 | 22 | 3089832 | 3089843 | 2 | 6  | 12 | TG   | 29 | 5  |
| 180964 | 22 | 3094322 | 3094351 | 2 | 15 | 30 | AC   | 14 | 10 |
| 180965 | 22 | 3094404 | 3094415 | 2 | 6  | 12 | AC   | 21 | 4  |
| 180966 | 22 | 3094417 | 3094428 | 2 | 6  | 12 | CA   | 22 | 4  |
| 180968 | 22 | 3096912 | 3096937 | 2 | 13 | 26 | TG   | 21 | 8  |
| 180971 | 22 | 3100378 | 3100395 | 3 | 6  | 18 | GCA  | 24 | 3  |
| 180972 | 22 | 3100686 | 3100707 | 2 | 11 | 22 | CA   | 12 | 10 |
| 180973 | 22 | 3100805 | 3100824 | 2 | 10 | 20 | TG   | 21 | 9  |
| 180980 | 22 | 3111023 | 3111040 | 2 | 9  | 18 | CA   | 29 | 3  |
| 180983 | 22 | 3119797 | 3119814 | 2 | 9  | 18 | GT   | 24 | 7  |
| 180988 | 22 | 3127016 | 3127051 | 2 | 18 | 36 | CA   | 10 | 6  |
| 180990 | 22 | 3130705 | 3130724 | 2 | 10 | 20 | CA   | 21 | 8  |
| 180991 | 22 | 3131143 | 3131170 | 2 | 14 | 28 | AC   | 22 | 11 |
| 180993 | 22 | 3132935 | 3132948 | 2 | 7  | 14 | TG   | 22 | 4  |
| 180995 | 22 | 3133709 | 3133730 | 2 | 11 | 22 | GT   | 18 | 10 |
| 180998 | 22 | 3138381 | 3138398 | 2 | 9  | 18 | CA   | 21 | 8  |
| 181001 | 22 | 3138564 | 3138581 | 2 | 9  | 18 | TG   | 23 | 8  |
| 181004 | 22 | 3141719 | 3141742 | 2 | 12 | 24 | AC   | 16 | 8  |
| 181005 | 22 | 3142255 | 3142282 | 2 | 14 | 28 | TG   | 18 | 10 |
| 181009 | 22 | 3144918 | 3144931 | 2 | 7  | 14 | GT   | 20 | 9  |
| 181018 | 22 | 3155209 | 3155234 | 2 | 13 | 26 | GT   | 18 | 8  |
| 181023 | 22 | 3170814 | 3170855 | 2 | 21 | 42 | TG   | 7  | 8  |

|        |    |         |         |   |    |    |     |    |    |
|--------|----|---------|---------|---|----|----|-----|----|----|
| 181024 | 22 | 3172022 | 3172037 | 2 | 8  | 16 | GT  | 16 | 3  |
| 181025 | 22 | 3172981 | 3173018 | 2 | 19 | 38 | CA  | 10 | 11 |
| 181028 | 22 | 3179205 | 3179232 | 2 | 14 | 28 | GT  | 23 | 9  |
| 181032 | 22 | 3185196 | 3185215 | 2 | 10 | 20 | AC  | 12 | 8  |
| 181036 | 22 | 3204956 | 3204967 | 2 | 6  | 12 | AG  | 29 | 3  |
| 181037 | 22 | 3205183 | 3205222 | 2 | 20 | 40 | GT  | 9  | 13 |
| 181041 | 22 | 3208536 | 3208547 | 2 | 6  | 12 | CA  | 24 | 3  |
| 181044 | 22 | 3210783 | 3210794 | 2 | 6  | 12 | GT  | 22 | 3  |
| 181046 | 22 | 3212666 | 3212679 | 2 | 7  | 14 | GT  | 24 | 4  |
| 181048 | 22 | 3218392 | 3218409 | 3 | 6  | 18 | AGC | 29 | 8  |
| 181049 | 22 | 3218521 | 3218540 | 2 | 10 | 20 | TG  | 22 | 7  |
| 181051 | 22 | 3219000 | 3219025 | 2 | 13 | 26 | CT  | 13 | 9  |
| 181052 | 22 | 3219347 | 3219372 | 2 | 13 | 26 | CA  | 17 | 13 |
| 181056 | 22 | 3225702 | 3225723 | 2 | 11 | 22 | AC  | 16 | 3  |
| 181057 | 22 | 3226215 | 3226238 | 2 | 12 | 24 | CA  | 10 | 8  |
| 181058 | 22 | 3227659 | 3227680 | 2 | 11 | 22 | CA  | 12 | 12 |
| 181059 | 22 | 3227827 | 3227852 | 2 | 13 | 26 | AC  | 7  | 8  |
| 181060 | 22 | 3228377 | 3228400 | 2 | 12 | 24 | CA  | 19 | 6  |
| 181062 | 22 | 3229789 | 3229804 | 2 | 8  | 16 | TG  | 14 | 3  |
| 181064 | 22 | 3232439 | 3232459 | 3 | 7  | 21 | CAC | 25 | 4  |
| 181066 | 22 | 3233020 | 3233041 | 2 | 11 | 22 | TG  | 18 | 9  |
| 181069 | 22 | 3233320 | 3233331 | 2 | 6  | 12 | GT  | 33 | 4  |
| 181071 | 22 | 3233612 | 3233627 | 2 | 8  | 16 | AC  | 20 | 5  |
| 181072 | 22 | 3234105 | 3234122 | 2 | 9  | 18 | CA  | 21 | 5  |
| 181077 | 22 | 3242155 | 3242178 | 3 | 8  | 24 | CAT | 24 | 4  |
| 181079 | 22 | 3242885 | 3242916 | 2 | 16 | 32 | AC  | 20 | 9  |
| 181080 | 22 | 3244016 | 3244055 | 2 | 20 | 40 | CA  | 6  | 8  |
| 181082 | 22 | 3244504 | 3244539 | 2 | 18 | 36 | AC  | 11 | 12 |
| 181083 | 22 | 3245766 | 3245791 | 2 | 13 | 26 | GT  | 13 | 12 |
| 181100 | 22 | 3257687 | 3257698 | 2 | 6  | 12 | AC  | 14 | 10 |
| 181101 | 22 | 3257831 | 3257842 | 2 | 6  | 12 | TG  | 22 | 5  |
| 181102 | 22 | 3258912 | 3258939 | 2 | 14 | 28 | GT  | 15 | 5  |
| 181103 | 22 | 3259274 | 3259303 | 2 | 15 | 30 | GT  | 16 | 12 |
| 181104 | 22 | 3259426 | 3259447 | 2 | 11 | 22 | AC  | 9  | 5  |
| 181105 | 22 | 3260411 | 3260434 | 2 | 12 | 24 | CA  | 23 | 5  |
| 181114 | 22 | 3264684 | 3264697 | 2 | 7  | 14 | CA  | 19 | 3  |
| 181115 | 22 | 3264921 | 3264935 | 3 | 5  | 15 | CCA | 25 | 3  |
| 181116 | 22 | 3265024 | 3265047 | 2 | 12 | 24 | AG  | 14 | 5  |
| 181127 | 22 | 3275299 | 3275310 | 2 | 6  | 12 | CA  | 23 | 3  |
| 181129 | 22 | 3278277 | 3278291 | 3 | 5  | 15 | CTT | 29 | 4  |
| 181130 | 22 | 3278344 | 3278381 | 2 | 19 | 38 | AC  | 9  | 8  |
| 181139 | 22 | 3283975 | 3283995 | 3 | 7  | 21 | GGA | 20 | 5  |
| 181143 | 22 | 3285784 | 3285817 | 2 | 17 | 34 | TG  | 8  | 8  |
| 181144 | 22 | 3287147 | 3287170 | 3 | 8  | 24 | AAG | 20 | 10 |
| 181163 | 22 | 3290482 | 3290505 | 2 | 12 | 24 | AC  | 10 | 8  |
| 181166 | 22 | 3291358 | 3291373 | 2 | 8  | 16 | GT  | 23 | 15 |
| 181171 | 22 | 3292128 | 3292142 | 3 | 5  | 15 | TCA | 27 | 4  |
| 181174 | 22 | 3292737 | 3292751 | 3 | 5  | 15 | GAG | 25 | 3  |
| 181176 | 22 | 3293510 | 3293521 | 2 | 6  | 12 | TG  | 25 | 6  |
| 181181 | 22 | 3302984 | 3303009 | 2 | 13 | 26 | GT  | 22 | 8  |
| 181182 | 22 | 3303069 | 3303084 | 2 | 8  | 16 | TC  | 25 | 3  |

|        |    |         |         |   |    |    |      |    |    |
|--------|----|---------|---------|---|----|----|------|----|----|
| 181183 | 22 | 3303187 | 3303202 | 2 | 8  | 16 | AC   | 22 | 5  |
| 181184 | 22 | 3303293 | 3303312 | 2 | 10 | 20 | CA   | 13 | 12 |
| 181188 | 22 | 3305236 | 3305249 | 2 | 7  | 14 | GT   | 27 | 3  |
| 181189 | 22 | 3305511 | 3305558 | 2 | 24 | 48 | TG   | 9  | 12 |
| 181191 | 22 | 3306718 | 3306735 | 2 | 9  | 18 | CA   | 12 | 8  |
| 181192 | 22 | 3306829 | 3306846 | 2 | 9  | 18 | TG   | 25 | 5  |
| 181193 | 22 | 3307256 | 3307273 | 2 | 9  | 18 | TG   | 12 | 9  |
| 181195 | 22 | 3307402 | 3307425 | 4 | 6  | 24 | TTCA | 18 | 4  |
| 181200 | 22 | 3311460 | 3311475 | 2 | 8  | 16 | CA   | 31 | 3  |
| 181201 | 22 | 3312634 | 3312660 | 3 | 9  | 27 | GGA  | 24 | 3  |
| 181202 | 22 | 3312792 | 3312815 | 2 | 12 | 24 | CT   | 16 | 7  |
| 181205 | 22 | 3314998 | 3315021 | 2 | 12 | 24 | CA   | 24 | 13 |
| 181206 | 22 | 3315974 | 3315987 | 2 | 7  | 14 | AC   | 21 | 4  |
| 181210 | 22 | 3318899 | 3318914 | 2 | 8  | 16 | AC   | 21 | 3  |
| 181211 | 22 | 3319141 | 3319164 | 2 | 12 | 24 | CA   | 15 | 10 |
| 181212 | 22 | 3319306 | 3319323 | 2 | 9  | 18 | GT   | 22 | 5  |
| 181213 | 22 | 3319352 | 3319369 | 2 | 9  | 18 | GT   | 17 | 3  |
| 181214 | 22 | 3321766 | 3321799 | 2 | 17 | 34 | GT   | 12 | 5  |
| 181218 | 22 | 3323912 | 3323933 | 2 | 11 | 22 | CA   | 26 | 11 |
| 181227 | 22 | 3333864 | 3333875 | 2 | 6  | 12 | GA   | 24 | 5  |
| 181228 | 22 | 3334605 | 3334622 | 3 | 6  | 18 | TAT  | 15 | 4  |
| 181230 | 22 | 3335355 | 3335388 | 2 | 17 | 34 | CA   | 8  | 9  |
| 181235 | 22 | 3336139 | 3336152 | 2 | 7  | 14 | CA   | 25 | 4  |
| 181236 | 22 | 3336233 | 3336246 | 2 | 7  | 14 | GT   | 27 | 8  |
| 181237 | 22 | 3338010 | 3338021 | 2 | 6  | 12 | CA   | 6  | 3  |
| 181238 | 22 | 3338026 | 3338039 | 2 | 7  | 14 | CA   | 19 | 4  |
| 181240 | 22 | 3341565 | 3341582 | 2 | 9  | 18 | AC   | 18 | 6  |
| 181243 | 22 | 3341919 | 3341948 | 2 | 15 | 30 | CA   | 7  | 8  |
| 181246 | 22 | 3343252 | 3343277 | 2 | 13 | 26 | TC   | 25 | 6  |
| 181247 | 22 | 3345033 | 3345056 | 3 | 8  | 24 | ATC  | 8  | 7  |
| 181250 | 22 | 3348091 | 3348102 | 2 | 6  | 12 | AC   | 31 | 3  |
| 181251 | 22 | 3349045 | 3349066 | 2 | 11 | 22 | GA   | 24 | 9  |
| 181253 | 22 | 3351799 | 3351820 | 2 | 11 | 22 | AC   | 18 | 8  |
| 181258 | 22 | 3352740 | 3352757 | 2 | 9  | 18 | AG   | 6  | 4  |
| 181259 | 22 | 3352944 | 3352969 | 2 | 13 | 26 | TG   | 10 | 5  |
| 181260 | 22 | 3353489 | 3353504 | 2 | 8  | 16 | GT   | 26 | 10 |
| 181262 | 22 | 3353695 | 3353734 | 2 | 20 | 40 | AC   | 10 | 11 |
| 181263 | 22 | 3353813 | 3353830 | 2 | 9  | 18 | GA   | 11 | 3  |
| 181268 | 22 | 3356353 | 3356374 | 2 | 11 | 22 | AC   | 16 | 8  |
| 181271 | 22 | 3357680 | 3357703 | 3 | 8  | 24 | AGG  | 6  | 5  |
| 181274 | 22 | 3358053 | 3358074 | 2 | 11 | 22 | CA   | 9  | 9  |
| 181279 | 22 | 3360048 | 3360067 | 2 | 10 | 20 | AC   | 20 | 7  |
| 181281 | 22 | 3361702 | 3361715 | 2 | 7  | 14 | AC   | 28 | 5  |
| 181291 | 22 | 3373665 | 3373678 | 2 | 7  | 14 | AC   | 25 | 3  |
| 181294 | 22 | 3377053 | 3377070 | 2 | 9  | 18 | TG   | 26 | 10 |
| 181296 | 22 | 3377905 | 3377930 | 2 | 13 | 26 | TG   | 20 | 10 |
| 181308 | 22 | 3390329 | 3390342 | 2 | 7  | 14 | TC   | 18 | 4  |
| 181309 | 22 | 3390759 | 3390784 | 2 | 13 | 26 | TG   | 14 | 7  |
| 181313 | 22 | 3398190 | 3398207 | 2 | 9  | 18 | AC   | 15 | 8  |
| 181314 | 22 | 3398895 | 3398910 | 4 | 4  | 16 | ACAT | 30 | 3  |
| 181315 | 22 | 3400238 | 3400251 | 2 | 7  | 14 | AC   | 25 | 3  |

|        |    |         |         |   |    |    |     |    |    |
|--------|----|---------|---------|---|----|----|-----|----|----|
| 181316 | 22 | 3400750 | 3400763 | 2 | 7  | 14 | TG  | 22 | 4  |
| 181317 | 22 | 3400890 | 3400909 | 2 | 10 | 20 | TG  | 24 | 9  |
| 181318 | 22 | 3402201 | 3402242 | 2 | 21 | 42 | TG  | 12 | 9  |
| 181320 | 22 | 3404882 | 3404893 | 2 | 6  | 12 | TG  | 29 | 3  |
| 181326 | 22 | 3407252 | 3407267 | 2 | 8  | 16 | AC  | 26 | 5  |
| 181330 | 22 | 3412926 | 3412939 | 2 | 7  | 14 | CA  | 21 | 5  |
| 181331 | 22 | 3414938 | 3414949 | 2 | 6  | 12 | TG  | 23 | 3  |
| 181332 | 22 | 3415125 | 3415166 | 2 | 21 | 42 | CA  | 10 | 9  |
| 181333 | 22 | 3415315 | 3415326 | 2 | 6  | 12 | AG  | 20 | 4  |
| 181334 | 22 | 3416040 | 3416073 | 2 | 17 | 34 | CA  | 10 | 11 |
| 181336 | 22 | 3416512 | 3416529 | 2 | 9  | 18 | AC  | 26 | 4  |
| 181342 | 22 | 3427143 | 3427154 | 2 | 6  | 12 | CA  | 32 | 3  |
| 181348 | 22 | 3439651 | 3439664 | 2 | 7  | 14 | CA  | 22 | 13 |
| 181351 | 22 | 3458942 | 3458965 | 3 | 8  | 24 | CAT | 25 | 6  |
| 181352 | 22 | 3464571 | 3464594 | 2 | 12 | 24 | TG  | 23 | 4  |
| 181369 | 22 | 3478318 | 3478332 | 3 | 5  | 15 | AAC | 12 | 5  |
| 181370 | 22 | 3483911 | 3483970 | 2 | 30 | 60 | TG  | 8  | 11 |
| 181377 | 22 | 3504732 | 3504747 | 2 | 8  | 16 | CA  | 17 | 5  |
| 181379 | 22 | 3505770 | 3505803 | 2 | 17 | 34 | CA  | 17 | 10 |
| 181382 | 22 | 3517083 | 3517096 | 2 | 7  | 14 | TG  | 28 | 8  |
| 181384 | 22 | 3521198 | 3521218 | 3 | 7  | 21 | AGC | 33 | 4  |
| 181385 | 22 | 3521568 | 3521611 | 2 | 22 | 44 | AC  | 8  | 6  |
| 181388 | 22 | 3527095 | 3527114 | 2 | 10 | 20 | GT  | 17 | 4  |
| 181389 | 22 | 3528660 | 3528685 | 2 | 13 | 26 | AC  | 18 | 6  |
| 181394 | 22 | 3533857 | 3533880 | 3 | 8  | 24 | AAG | 14 | 15 |
| 181395 | 22 | 3536715 | 3536732 | 2 | 9  | 18 | GT  | 22 | 7  |
| 181399 | 22 | 3545462 | 3545473 | 2 | 6  | 12 | CT  | 27 | 7  |
| 181403 | 22 | 3552754 | 3552771 | 2 | 9  | 18 | CA  | 9  | 7  |
| 181404 | 22 | 3552862 | 3552879 | 2 | 9  | 18 | TC  | 13 | 7  |
| 181410 | 22 | 3558401 | 3558422 | 2 | 11 | 22 | TG  | 23 | 9  |
| 181419 | 22 | 3572776 | 3572793 | 2 | 9  | 18 | AC  | 19 | 5  |
| 181420 | 22 | 3577568 | 3577583 | 2 | 8  | 16 | GA  | 23 | 3  |
| 181422 | 22 | 3578344 | 3578359 | 2 | 8  | 16 | AG  | 27 | 7  |
| 181424 | 22 | 3584837 | 3584872 | 2 | 18 | 36 | TG  | 19 | 15 |
| 181425 | 22 | 3596148 | 3596193 | 2 | 23 | 46 | TG  | 9  | 9  |
| 181426 | 22 | 3599867 | 3599894 | 2 | 14 | 28 | CA  | 13 | 11 |
| 181429 | 22 | 3603612 | 3603645 | 2 | 17 | 34 | CA  | 11 | 6  |
| 181430 | 22 | 3606077 | 3606100 | 2 | 12 | 24 | TG  | 7  | 6  |
| 181431 | 22 | 3606288 | 3606308 | 3 | 7  | 21 | CAT | 24 | 13 |
| 181435 | 22 | 3610460 | 3610485 | 2 | 13 | 26 | TG  | 10 | 13 |
| 181436 | 22 | 3610608 | 3610625 | 2 | 9  | 18 | AG  | 17 | 7  |
| 181438 | 22 | 3614874 | 3614891 | 2 | 9  | 18 | TC  | 24 | 3  |
| 181444 | 22 | 3649212 | 3649233 | 2 | 11 | 22 | CA  | 14 | 6  |
| 181445 | 22 | 3649284 | 3649295 | 2 | 6  | 12 | CA  | 24 | 3  |
| 181446 | 22 | 3649807 | 3649826 | 2 | 10 | 20 | CA  | 24 | 7  |
| 181449 | 22 | 3653849 | 3653862 | 2 | 7  | 14 | GA  | 24 | 5  |
| 181450 | 22 | 3653895 | 3653914 | 2 | 10 | 20 | GA  | 19 | 5  |
| 181451 | 22 | 3654790 | 3654801 | 2 | 6  | 12 | AT  | 19 | 11 |
| 181464 | 22 | 3681179 | 3681216 | 2 | 19 | 38 | TG  | 7  | 10 |
| 181466 | 22 | 3689020 | 3689047 | 2 | 14 | 28 | GT  | 17 | 9  |
| 181472 | 22 | 3693790 | 3693821 | 2 | 16 | 32 | AC  | 10 | 16 |

|        |    |         |         |   |    |    |      |    |    |
|--------|----|---------|---------|---|----|----|------|----|----|
| 181473 | 22 | 3695514 | 3695541 | 2 | 14 | 28 | AC   | 16 | 17 |
| 181474 | 22 | 3696262 | 3696277 | 2 | 8  | 16 | AC   | 17 | 9  |
| 181475 | 22 | 3702585 | 3702628 | 2 | 22 | 44 | TG   | 17 | 12 |
| 181479 | 22 | 3704154 | 3704197 | 4 | 11 | 44 | AGAT | 9  | 9  |
| 181483 | 22 | 3710731 | 3710746 | 4 | 4  | 16 | GAAT | 16 | 3  |
| 181485 | 22 | 3710779 | 3710792 | 2 | 7  | 14 | GT   | 21 | 6  |
| 181489 | 22 | 3719886 | 3719901 | 4 | 4  | 16 | AAGA | 24 | 9  |
| 181490 | 22 | 3720100 | 3720135 | 2 | 18 | 36 | CA   | 12 | 12 |
| 181495 | 22 | 3720825 | 3720864 | 2 | 20 | 40 | AC   | 7  | 7  |
| 181496 | 22 | 3720936 | 3720961 | 2 | 13 | 26 | GT   | 13 | 8  |
| 181497 | 22 | 3731905 | 3731928 | 2 | 12 | 24 | AC   | 21 | 6  |
| 181498 | 22 | 3733211 | 3733250 | 2 | 20 | 40 | TG   | 16 | 12 |
| 181502 | 22 | 3737455 | 3737488 | 2 | 17 | 34 | TG   | 9  | 8  |
| 181516 | 22 | 3771853 | 3771888 | 2 | 18 | 36 | GT   | 6  | 8  |
| 181518 | 22 | 3772008 | 3772035 | 2 | 14 | 28 | CA   | 7  | 7  |
| 181519 | 22 | 3772277 | 3772304 | 2 | 14 | 28 | AC   | 19 | 8  |
| 181521 | 22 | 3773368 | 3773403 | 2 | 18 | 36 | AC   | 15 | 13 |
| 181523 | 22 | 3773529 | 3773542 | 2 | 7  | 14 | CA   | 9  | 7  |
| 181528 | 22 | 3790181 | 3790202 | 2 | 11 | 22 | GT   | 13 | 9  |
| 181529 | 22 | 3792304 | 3792331 | 2 | 14 | 28 | GT   | 16 | 8  |
| 181531 | 22 | 3793949 | 3793996 | 2 | 24 | 48 | GT   | 9  | 8  |
| 181533 | 22 | 3794769 | 3794804 | 3 | 12 | 36 | AGA  | 9  | 6  |
| 181537 | 22 | 3795639 | 3795658 | 2 | 10 | 20 | TG   | 19 | 7  |
| 181539 | 22 | 3796915 | 3796954 | 2 | 20 | 40 | CA   | 10 | 12 |
| 181546 | 22 | 3800278 | 3800305 | 2 | 14 | 28 | TC   | 13 | 10 |
| 181547 | 22 | 3802298 | 3802311 | 2 | 7  | 14 | CA   | 10 | 3  |
| 181548 | 22 | 3802973 | 3802986 | 2 | 7  | 14 | AG   | 15 | 13 |
| 181549 | 22 | 3803103 | 3803118 | 2 | 8  | 16 | GT   | 11 | 9  |
| 181552 | 22 | 3806010 | 3806033 | 2 | 12 | 24 | CA   | 16 | 6  |
| 181554 | 22 | 3812601 | 3812622 | 2 | 11 | 22 | TC   | 28 | 10 |
| 181558 | 22 | 3816843 | 3816866 | 2 | 12 | 24 | AC   | 19 | 7  |
| 181559 | 22 | 3817162 | 3817185 | 4 | 6  | 24 | TTTC | 20 | 12 |
| 181560 | 22 | 3817319 | 3817338 | 2 | 10 | 20 | CA   | 7  | 6  |
| 181561 | 22 | 3817340 | 3817357 | 2 | 9  | 18 | AC   | 9  | 10 |
| 181562 | 22 | 3818778 | 3818829 | 4 | 13 | 52 | CATC | 22 | 10 |
| 181565 | 22 | 3819877 | 3819932 | 2 | 28 | 56 | AC   | 16 | 13 |
| 181566 | 22 | 3821323 | 3821348 | 2 | 13 | 26 | AC   | 17 | 8  |
| 181567 | 22 | 3822135 | 3822158 | 4 | 6  | 24 | CATC | 23 | 3  |
| 181568 | 22 | 3824090 | 3824125 | 3 | 12 | 36 | AGA  | 23 | 9  |
| 181569 | 22 | 3824272 | 3824289 | 2 | 9  | 18 | GA   | 16 | 4  |
| 181570 | 22 | 3824452 | 3824493 | 3 | 14 | 42 | GAG  | 13 | 12 |
| 181572 | 22 | 3824762 | 3824791 | 2 | 15 | 30 | AC   | 7  | 7  |
| 181573 | 22 | 3826638 | 3826671 | 2 | 17 | 34 | GT   | 13 | 5  |
| 181574 | 22 | 3826788 | 3826815 | 2 | 14 | 28 | CA   | 10 | 8  |
| 181576 | 22 | 3826865 | 3826880 | 2 | 8  | 16 | GA   | 12 | 11 |
| 181583 | 22 | 3833094 | 3833119 | 2 | 13 | 26 | CT   | 8  | 5  |
| 181585 | 22 | 3833270 | 3833299 | 3 | 10 | 30 | GAA  | 15 | 11 |
| 181586 | 22 | 3833376 | 3833396 | 3 | 7  | 21 | CAT  | 16 | 4  |
| 181591 | 22 | 3841464 | 3841495 | 2 | 16 | 32 | GT   | 19 | 12 |
| 181592 | 22 | 3841552 | 3841579 | 2 | 14 | 28 | CT   | 15 | 7  |
| 181596 | 22 | 3843289 | 3843312 | 2 | 12 | 24 | TG   | 13 | 9  |

|        |    |         |         |   |    |    |      |    |    |
|--------|----|---------|---------|---|----|----|------|----|----|
| 181600 | 22 | 3852187 | 3852212 | 2 | 13 | 26 | AC   | 18 | 10 |
| 181604 | 22 | 3855416 | 3855447 | 2 | 16 | 32 | AC   | 11 | 7  |
| 181605 | 22 | 3855987 | 3855998 | 2 | 6  | 12 | CT   | 22 | 5  |
| 181607 | 22 | 3857938 | 3857965 | 2 | 14 | 28 | GT   | 26 | 9  |
| 181608 | 22 | 3858239 | 3858253 | 3 | 5  | 15 | CTC  | 12 | 3  |
| 181610 | 22 | 3858537 | 3858552 | 2 | 8  | 16 | TG   | 14 | 6  |
| 181612 | 22 | 3858937 | 3858958 | 2 | 11 | 22 | CT   | 6  | 6  |
| 181617 | 22 | 3867384 | 3867397 | 2 | 7  | 14 | TA   | 18 | 4  |
| 181618 | 22 | 3868902 | 3868913 | 2 | 6  | 12 | GA   | 31 | 3  |
| 181622 | 22 | 3875900 | 3875923 | 2 | 12 | 24 | GT   | 10 | 5  |
| 181623 | 22 | 3877609 | 3877628 | 2 | 10 | 20 | GT   | 9  | 4  |
| 181624 | 22 | 3877743 | 3877776 | 2 | 17 | 34 | AC   | 9  | 10 |
| 181626 | 22 | 3879007 | 3879026 | 2 | 10 | 20 | TG   | 8  | 8  |
| 181627 | 22 | 3879973 | 3879984 | 2 | 6  | 12 | GA   | 25 | 5  |
| 181629 | 22 | 3881216 | 3881235 | 2 | 10 | 20 | GA   | 23 | 7  |
| 181630 | 22 | 3881369 | 3881390 | 2 | 11 | 22 | GT   | 12 | 4  |
| 181631 | 22 | 3881454 | 3881477 | 2 | 12 | 24 | CA   | 8  | 7  |
| 181633 | 22 | 3883246 | 3883263 | 2 | 9  | 18 | TG   | 21 | 4  |
| 181637 | 22 | 3889997 | 3890014 | 2 | 9  | 18 | TG   | 17 | 8  |
| 181638 | 22 | 3890168 | 3890197 | 2 | 15 | 30 | TG   | 17 | 16 |
| 181639 | 22 | 3890251 | 3890272 | 2 | 11 | 22 | TG   | 20 | 4  |
| 181641 | 22 | 3892447 | 3892464 | 2 | 9  | 18 | AC   | 17 | 5  |
| 181644 | 22 | 3892940 | 3892955 | 2 | 8  | 16 | GT   | 11 | 7  |
| 181647 | 22 | 3895843 | 3895864 | 2 | 11 | 22 | CA   | 15 | 6  |
| 181652 | 22 | 3897998 | 3898033 | 2 | 18 | 36 | GT   | 6  | 7  |
| 181653 | 22 | 3898169 | 3898186 | 2 | 9  | 18 | GT   | 21 | 11 |
| 181655 | 22 | 3903855 | 3903870 | 2 | 8  | 16 | GT   | 18 | 7  |
| 181656 | 22 | 3904182 | 3904195 | 2 | 7  | 14 | AC   | 22 | 7  |
| 181658 | 22 | 3905878 | 3905901 | 2 | 12 | 24 | CA   | 9  | 7  |
| 181659 | 22 | 3906109 | 3906124 | 2 | 8  | 16 | TG   | 22 | 5  |
| 181660 | 22 | 3906513 | 3906542 | 2 | 15 | 30 | TG   | 11 | 13 |
| 181663 | 22 | 3908826 | 3908843 | 2 | 9  | 18 | AC   | 23 | 9  |
| 181664 | 22 | 3909283 | 3909306 | 2 | 12 | 24 | GT   | 13 | 11 |
| 181665 | 22 | 3909408 | 3909423 | 2 | 8  | 16 | AC   | 18 | 4  |
| 181667 | 22 | 3909595 | 3909658 | 2 | 32 | 64 | CA   | 8  | 10 |
| 181668 | 22 | 3909778 | 3909789 | 2 | 6  | 12 | CT   | 16 | 3  |
| 181670 | 22 | 3912799 | 3912828 | 2 | 15 | 30 | TG   | 15 | 9  |
| 181671 | 22 | 3913463 | 3913490 | 2 | 14 | 28 | TG   | 18 | 10 |
| 181673 | 22 | 3913713 | 3913750 | 2 | 19 | 38 | AC   | 8  | 10 |
| 181674 | 22 | 3916067 | 3916086 | 2 | 10 | 20 | CT   | 16 | 3  |
| 181681 | 22 | 3920618 | 3920633 | 4 | 4  | 16 | GACA | 30 | 3  |
| 181682 | 22 | 3922131 | 3922158 | 4 | 7  | 28 | AAAC | 21 | 7  |
| 181683 | 22 | 3925564 | 3925577 | 2 | 7  | 14 | TG   | 16 | 5  |
| 181684 | 22 | 3925734 | 3925757 | 2 | 12 | 24 | GT   | 13 | 9  |
| 181692 | 22 | 3927079 | 3927108 | 3 | 10 | 30 | TTG  | 15 | 16 |
| 181694 | 22 | 3927732 | 3927757 | 2 | 13 | 26 | CA   | 14 | 9  |
| 181697 | 22 | 3929104 | 3929117 | 2 | 7  | 14 | AG   | 19 | 3  |
| 181701 | 22 | 3933951 | 3933990 | 2 | 20 | 40 | TC   | 8  | 9  |
| 181709 | 22 | 3940000 | 3940039 | 2 | 20 | 40 | CA   | 11 | 9  |
| 181722 | 22 | 3950624 | 3950649 | 2 | 13 | 26 | GT   | 12 | 12 |
| 181728 | 22 | 3954424 | 3954455 | 4 | 8  | 32 | GACA | 16 | 15 |

|        |    |         |         |   |    |    |      |    |    |
|--------|----|---------|---------|---|----|----|------|----|----|
| 181731 | 22 | 3955525 | 3955542 | 2 | 9  | 18 | AC   | 17 | 8  |
| 181732 | 22 | 3956666 | 3956693 | 2 | 14 | 28 | GT   | 7  | 7  |
| 181735 | 22 | 3959417 | 3959440 | 2 | 12 | 24 | AC   | 17 | 13 |
| 181736 | 22 | 3959638 | 3959667 | 2 | 15 | 30 | CA   | 9  | 11 |
| 181747 | 22 | 3971492 | 3971521 | 2 | 15 | 30 | GT   | 10 | 7  |
| 181763 | 22 | 4022981 | 4022992 | 2 | 6  | 12 | TG   | 25 | 8  |
| 181765 | 22 | 4023546 | 4023561 | 4 | 4  | 16 | TAAA | 22 | 7  |
| 181766 | 22 | 4025602 | 4025615 | 2 | 7  | 14 | AG   | 15 | 3  |
| 181770 | 22 | 4029788 | 4029801 | 2 | 7  | 14 | CT   | 21 | 3  |
| 181771 | 22 | 4032403 | 4032423 | 3 | 7  | 21 | CAG  | 28 | 4  |
| 181772 | 22 | 4032822 | 4032843 | 2 | 11 | 22 | GT   | 10 | 8  |
| 181773 | 22 | 4032948 | 4032977 | 2 | 15 | 30 | GT   | 17 | 7  |
| 181775 | 22 | 4040628 | 4040663 | 3 | 12 | 36 | CAA  | 24 | 5  |
| 181776 | 22 | 4040867 | 4040880 | 2 | 7  | 14 | CA   | 25 | 5  |
| 181780 | 22 | 4044260 | 4044275 | 2 | 8  | 16 | AC   | 8  | 6  |
| 181782 | 22 | 4046854 | 4046881 | 2 | 14 | 28 | GT   | 25 | 16 |
| 181783 | 22 | 4054114 | 4054125 | 2 | 6  | 12 | CA   | 28 | 3  |
| 181784 | 22 | 4054423 | 4054434 | 2 | 6  | 12 | TG   | 23 | 4  |
| 181790 | 22 | 4061738 | 4061751 | 2 | 7  | 14 | AG   | 22 | 3  |
| 181791 | 22 | 4061895 | 4061916 | 2 | 11 | 22 | GT   | 19 | 12 |
| 181793 | 22 | 4068014 | 4068046 | 3 | 11 | 33 | GAG  | 17 | 7  |
| 181794 | 22 | 4068446 | 4068496 | 3 | 17 | 51 | ATC  | 11 | 7  |
| 181799 | 22 | 4083621 | 4083636 | 4 | 4  | 16 | AAAC | 21 | 3  |
| 181802 | 22 | 4084047 | 4084066 | 2 | 10 | 20 | TG   | 16 | 11 |
| 181808 | 22 | 4092482 | 4092503 | 2 | 11 | 22 | CA   | 8  | 8  |
| 181813 | 22 | 4099817 | 4099838 | 2 | 11 | 22 | GT   | 26 | 7  |
| 181814 | 22 | 4100085 | 4100098 | 2 | 7  | 14 | CA   | 29 | 3  |
| 181815 | 22 | 4101394 | 4101413 | 4 | 5  | 20 | AACA | 34 | 3  |
| 181816 | 22 | 4102040 | 4102077 | 2 | 19 | 38 | AC   | 14 | 7  |
| 181817 | 22 | 4103149 | 4103170 | 2 | 11 | 22 | GT   | 14 | 11 |
| 181818 | 22 | 4103259 | 4103274 | 2 | 8  | 16 | GT   | 21 | 10 |
| 181819 | 22 | 4104881 | 4104896 | 2 | 8  | 16 | GT   | 28 | 3  |
| 181820 | 22 | 4105466 | 4105483 | 2 | 9  | 18 | CT   | 11 | 4  |
| 181821 | 22 | 4109160 | 4109183 | 2 | 12 | 24 | CA   | 17 | 17 |
| 181822 | 22 | 4109495 | 4109534 | 4 | 10 | 40 | TGGA | 15 | 9  |
| 181824 | 22 | 4110195 | 4110232 | 2 | 19 | 38 | TG   | 7  | 9  |
| 181826 | 22 | 4110952 | 4110971 | 4 | 5  | 20 | AATG | 34 | 3  |
| 181830 | 22 | 4119927 | 4119982 | 2 | 28 | 56 | TG   | 11 | 14 |
| 181831 | 22 | 4121168 | 4121179 | 2 | 6  | 12 | TG   | 21 | 3  |
| 181832 | 22 | 4123464 | 4123481 | 2 | 9  | 18 | GT   | 22 | 5  |
| 181833 | 22 | 4126459 | 4126470 | 2 | 6  | 12 | TC   | 25 | 3  |
| 181835 | 22 | 4126955 | 4126972 | 2 | 9  | 18 | TG   | 8  | 4  |
| 181836 | 22 | 4127155 | 4127178 | 2 | 12 | 24 | AG   | 17 | 7  |
| 181837 | 22 | 4128331 | 4128351 | 3 | 7  | 21 | GAA  | 25 | 7  |
| 181838 | 22 | 4129313 | 4129330 | 2 | 9  | 18 | AG   | 15 | 5  |
| 181842 | 22 | 4133541 | 4133556 | 2 | 8  | 16 | AC   | 6  | 8  |
| 181844 | 22 | 4133641 | 4133654 | 2 | 7  | 14 | AG   | 14 | 3  |
| 181846 | 22 | 4135590 | 4135609 | 2 | 10 | 20 | AC   | 16 | 8  |
| 181851 | 22 | 4140980 | 4140997 | 2 | 9  | 18 | AC   | 29 | 3  |
| 181852 | 22 | 4141630 | 4141650 | 3 | 7  | 21 | CCT  | 19 | 3  |
| 181853 | 22 | 4144937 | 4144952 | 2 | 8  | 16 | AC   | 23 | 5  |



|        |    |         |         |   |    |    |      |    |    |
|--------|----|---------|---------|---|----|----|------|----|----|
| 181856 | 22 | 4147464 | 4147485 | 2 | 11 | 22 | CA   | 22 | 5  |
| 181858 | 22 | 4150021 | 4150032 | 2 | 6  | 12 | CA   | 20 | 9  |
| 181859 | 22 | 4150035 | 4150050 | 2 | 8  | 16 | CA   | 18 | 10 |
| 181860 | 22 | 4150882 | 4150895 | 2 | 7  | 14 | TC   | 22 | 11 |
| 181861 | 22 | 4151152 | 4151171 | 2 | 10 | 20 | TG   | 15 | 10 |
| 181862 | 22 | 4151278 | 4151297 | 2 | 10 | 20 | AC   | 23 | 5  |
| 181864 | 22 | 4153589 | 4153600 | 2 | 6  | 12 | AC   | 8  | 3  |
| 181867 | 22 | 4154127 | 4154162 | 2 | 18 | 36 | TG   | 10 | 11 |
| 181868 | 22 | 4155622 | 4155635 | 2 | 7  | 14 | GA   | 25 | 4  |
| 181871 | 22 | 4157646 | 4157675 | 2 | 15 | 30 | TG   | 9  | 9  |
| 181872 | 22 | 4160608 | 4160651 | 2 | 22 | 44 | AC   | 13 | 10 |
| 181873 | 22 | 4160717 | 4160758 | 2 | 21 | 42 | AC   | 8  | 9  |
| 181880 | 22 | 4174239 | 4174264 | 2 | 13 | 26 | GT   | 14 | 9  |
| 181885 | 22 | 4174984 | 4175009 | 2 | 13 | 26 | CA   | 7  | 4  |
| 181887 | 22 | 4175526 | 4175543 | 2 | 9  | 18 | AC   | 10 | 4  |
| 181888 | 22 | 4175624 | 4175653 | 2 | 15 | 30 | AC   | 6  | 7  |
| 181889 | 22 | 4177389 | 4177400 | 2 | 6  | 12 | AG   | 20 | 5  |
| 181890 | 22 | 4177506 | 4177523 | 2 | 9  | 18 | CT   | 14 | 4  |
| 181895 | 22 | 4179637 | 4179656 | 2 | 10 | 20 | GA   | 20 | 5  |
| 181896 | 22 | 4179713 | 4179734 | 2 | 11 | 22 | GA   | 21 | 7  |
| 181898 | 22 | 4180491 | 4180506 | 2 | 8  | 16 | GA   | 22 | 8  |
| 181899 | 22 | 4180596 | 4180633 | 2 | 19 | 38 | AC   | 18 | 18 |
| 181900 | 22 | 4180822 | 4180839 | 2 | 9  | 18 | AC   | 16 | 10 |
| 181906 | 22 | 4182457 | 4182472 | 4 | 4  | 16 | TATT | 8  | 4  |
| 181908 | 22 | 4186028 | 4186049 | 2 | 11 | 22 | GT   | 21 | 4  |
| 181910 | 22 | 4191251 | 4191274 | 2 | 12 | 24 | AC   | 16 | 8  |
| 181913 | 22 | 4193716 | 4193737 | 2 | 11 | 22 | GT   | 17 | 13 |
| 181916 | 22 | 4197035 | 4197076 | 2 | 21 | 42 | CA   | 14 | 10 |
| 181917 | 22 | 4201824 | 4201841 | 2 | 9  | 18 | CT   | 19 | 5  |
| 181918 | 22 | 4201864 | 4201901 | 2 | 19 | 38 | AC   | 11 | 10 |
| 181921 | 22 | 4203647 | 4203682 | 2 | 18 | 36 | AC   | 9  | 10 |
| 181924 | 22 | 4205738 | 4205755 | 2 | 9  | 18 | GA   | 19 | 8  |
| 181927 | 22 | 4210015 | 4210030 | 2 | 8  | 16 | TG   | 6  | 8  |
| 181932 | 22 | 4210536 | 4210559 | 2 | 12 | 24 | CA   | 14 | 10 |
| 181934 | 22 | 4210706 | 4210725 | 2 | 10 | 20 | AC   | 19 | 8  |
| 181935 | 22 | 4210926 | 4210969 | 2 | 22 | 44 | TG   | 18 | 19 |
| 181937 | 22 | 4213317 | 4213346 | 2 | 15 | 30 | GT   | 16 | 10 |
| 181938 | 22 | 4214075 | 4214106 | 2 | 16 | 32 | CA   | 16 | 13 |
| 181942 | 22 | 4219567 | 4219582 | 2 | 8  | 16 | CT   | 21 | 3  |
| 181947 | 22 | 4225700 | 4225715 | 4 | 4  | 16 | TAAA | 9  | 3  |
| 181948 | 22 | 4226062 | 4226083 | 2 | 11 | 22 | GA   | 13 | 3  |
| 181951 | 22 | 4226417 | 4226456 | 2 | 20 | 40 | AC   | 6  | 7  |
| 181953 | 22 | 4233417 | 4233444 | 4 | 7  | 28 | GGAT | 21 | 5  |
| 181960 | 22 | 4238973 | 4238986 | 2 | 7  | 14 | TC   | 20 | 5  |
| 181962 | 22 | 4240199 | 4240228 | 2 | 15 | 30 | TG   | 18 | 11 |
| 181964 | 22 | 4242784 | 4242799 | 2 | 8  | 16 | CA   | 24 | 4  |
| 181965 | 22 | 4243514 | 4243527 | 2 | 7  | 14 | TG   | 12 | 5  |
| 181975 | 22 | 4267544 | 4267561 | 2 | 9  | 18 | CA   | 15 | 8  |
| 181976 | 22 | 4269175 | 4269196 | 2 | 11 | 22 | GA   | 16 | 4  |
| 181978 | 22 | 4271758 | 4271778 | 3 | 7  | 21 | GAG  | 18 | 5  |
| 181980 | 22 | 4276013 | 4276030 | 2 | 9  | 18 | AG   | 22 | 6  |

|        |    |         |         |   |    |    |      |    |    |
|--------|----|---------|---------|---|----|----|------|----|----|
| 181981 | 22 | 4277472 | 4277485 | 2 | 7  | 14 | TG   | 10 | 5  |
| 181982 | 22 | 4277491 | 4277502 | 2 | 6  | 12 | GT   | 15 | 3  |
| 181994 | 22 | 4303535 | 4303546 | 2 | 6  | 12 | GT   | 26 | 9  |
| 181996 | 22 | 4303876 | 4303907 | 2 | 16 | 32 | TG   | 7  | 6  |
| 181997 | 22 | 4304090 | 4304145 | 2 | 28 | 56 | AC   | 17 | 15 |
| 181998 | 22 | 4305165 | 4305190 | 2 | 13 | 26 | GT   | 20 | 9  |
| 181999 | 22 | 4305268 | 4305315 | 2 | 24 | 48 | CA   | 15 | 9  |
| 182000 | 22 | 4305347 | 4305362 | 2 | 8  | 16 | AC   | 19 | 6  |
| 182001 | 22 | 4305519 | 4305530 | 2 | 6  | 12 | TG   | 30 | 3  |
| 182009 | 22 | 4312313 | 4312360 | 2 | 24 | 48 | TG   | 9  | 11 |
| 182011 | 22 | 4312939 | 4312958 | 4 | 5  | 20 | TCCT | 6  | 3  |
| 182014 | 22 | 4316143 | 4316158 | 4 | 4  | 16 | TTTG | 13 | 7  |
| 182017 | 22 | 4317986 | 4318021 | 2 | 18 | 36 | CA   | 8  | 11 |
| 182021 | 22 | 4318435 | 4318452 | 2 | 9  | 18 | GT   | 24 | 8  |
| 182022 | 22 | 4318671 | 4318710 | 2 | 20 | 40 | CT   | 15 | 4  |
| 182023 | 22 | 4321060 | 4321093 | 2 | 17 | 34 | GT   | 8  | 12 |
| 182026 | 22 | 4325858 | 4325897 | 2 | 20 | 40 | CA   | 11 | 12 |
| 182032 | 22 | 4328534 | 4328581 | 2 | 24 | 48 | CA   | 6  | 9  |
| 182045 | 22 | 4342380 | 4342403 | 3 | 8  | 24 | GCT  | 24 | 6  |
| 182052 | 22 | 4345892 | 4345909 | 2 | 9  | 18 | AC   | 15 | 11 |
| 182053 | 22 | 4346034 | 4346069 | 2 | 18 | 36 | AC   | 12 | 15 |
| 182058 | 22 | 4350238 | 4350251 | 2 | 7  | 14 | AC   | 16 | 8  |
| 182067 | 22 | 4364430 | 4364461 | 2 | 16 | 32 | AC   | 10 | 8  |
| 182070 | 22 | 4364799 | 4364822 | 2 | 12 | 24 | AC   | 13 | 7  |
| 182071 | 22 | 4367891 | 4367926 | 4 | 9  | 36 | CATC | 19 | 11 |
| 182078 | 22 | 4370637 | 4370672 | 2 | 18 | 36 | CA   | 13 | 13 |
| 182080 | 22 | 4372617 | 4372644 | 2 | 14 | 28 | CA   | 12 | 8  |
| 182082 | 22 | 4376566 | 4376587 | 2 | 11 | 22 | AC   | 14 | 5  |
| 182089 | 22 | 4379770 | 4379784 | 3 | 5  | 15 | GCT  | 33 | 3  |
| 182091 | 22 | 4383843 | 4383880 | 2 | 19 | 38 | AC   | 7  | 8  |
| 182102 | 22 | 4391029 | 4391062 | 2 | 17 | 34 | AC   | 15 | 8  |
| 182108 | 22 | 4394797 | 4394812 | 2 | 8  | 16 | AT   | 12 | 7  |
| 182110 | 22 | 4398612 | 4398629 | 2 | 9  | 18 | GT   | 30 | 4  |
| 182111 | 22 | 4398740 | 4398757 | 2 | 9  | 18 | TG   | 22 | 3  |
| 182112 | 22 | 4398962 | 4398983 | 2 | 11 | 22 | AC   | 22 | 6  |
| 182113 | 22 | 4401026 | 4401037 | 2 | 6  | 12 | AC   | 19 | 13 |
| 182114 | 22 | 4401039 | 4401052 | 2 | 7  | 14 | CA   | 18 | 11 |
| 182115 | 22 | 4402916 | 4402945 | 2 | 15 | 30 | AC   | 18 | 7  |
| 182119 | 22 | 4409210 | 4409255 | 2 | 23 | 46 | GT   | 16 | 17 |
| 182125 | 22 | 4413747 | 4413762 | 4 | 4  | 16 | GAGG | 9  | 3  |
| 182126 | 22 | 4414303 | 4414314 | 2 | 6  | 12 | GT   | 23 | 5  |
| 182128 | 22 | 4414504 | 4414533 | 2 | 15 | 30 | TG   | 15 | 13 |
| 182129 | 22 | 4415557 | 4415596 | 2 | 20 | 40 | TG   | 9  | 9  |
| 182130 | 22 | 4415725 | 4415762 | 2 | 19 | 38 | AC   | 8  | 10 |
| 182131 | 22 | 4417158 | 4417183 | 2 | 13 | 26 | TG   | 13 | 10 |
| 182133 | 22 | 4421336 | 4421361 | 2 | 13 | 26 | CA   | 16 | 7  |
| 182134 | 22 | 4422373 | 4422394 | 2 | 11 | 22 | GT   | 17 | 12 |
| 182135 | 22 | 4424409 | 4424436 | 2 | 14 | 28 | TG   | 16 | 7  |
| 182136 | 22 | 4424582 | 4424613 | 2 | 16 | 32 | AC   | 13 | 18 |
| 182138 | 22 | 4426821 | 4426840 | 2 | 10 | 20 | AC   | 17 | 10 |
| 182139 | 22 | 4427099 | 4427134 | 2 | 18 | 36 | GT   | 6  | 8  |

|        |    |         |         |   |    |    |      |    |    |
|--------|----|---------|---------|---|----|----|------|----|----|
| 182140 | 22 | 4427175 | 4427190 | 2 | 8  | 16 | GT   | 14 | 7  |
| 182148 | 22 | 4442104 | 4442149 | 2 | 23 | 46 | AC   | 19 | 12 |
| 182149 | 22 | 4442510 | 4442527 | 3 | 6  | 18 | GAG  | 14 | 5  |
| 182151 | 22 | 4445573 | 4445584 | 2 | 6  | 12 | TG   | 24 | 7  |
| 182153 | 22 | 4447458 | 4447481 | 2 | 12 | 24 | AC   | 6  | 5  |
| 182154 | 22 | 4448860 | 4448881 | 2 | 11 | 22 | CA   | 21 | 5  |
| 182155 | 22 | 4449065 | 4449096 | 2 | 16 | 32 | GT   | 17 | 13 |
| 182160 | 22 | 4454025 | 4454038 | 2 | 7  | 14 | GT   | 32 | 7  |
| 182161 | 22 | 4454243 | 4454270 | 2 | 14 | 28 | AC   | 24 | 16 |
| 182162 | 22 | 4454864 | 4454897 | 2 | 17 | 34 | GT   | 16 | 13 |
| 182163 | 22 | 4457213 | 4457246 | 2 | 17 | 34 | TG   | 8  | 5  |
| 182165 | 22 | 4459493 | 4459520 | 2 | 14 | 28 | GT   | 9  | 11 |
| 182175 | 22 | 4470066 | 4470095 | 2 | 15 | 30 | TG   | 11 | 15 |
| 182177 | 22 | 4471705 | 4471732 | 2 | 14 | 28 | TG   | 24 | 11 |
| 182182 | 22 | 4477947 | 4477968 | 2 | 11 | 22 | GT   | 9  | 5  |
| 182187 | 22 | 4482054 | 4482085 | 2 | 16 | 32 | AC   | 11 | 8  |
| 182190 | 22 | 4482594 | 4482607 | 2 | 7  | 14 | GT   | 24 | 6  |
| 182192 | 22 | 4487278 | 4487293 | 4 | 4  | 16 | AAAT | 24 | 6  |
| 182193 | 22 | 4488382 | 4488405 | 3 | 8  | 24 | TGA  | 25 | 9  |
| 182195 | 22 | 4492006 | 4492031 | 2 | 13 | 26 | TG   | 10 | 11 |
| 182201 | 22 | 4500534 | 4500567 | 2 | 17 | 34 | CA   | 6  | 7  |
| 182206 | 22 | 4500792 | 4500823 | 2 | 16 | 32 | TG   | 11 | 12 |
| 182207 | 22 | 4500907 | 4500932 | 2 | 13 | 26 | GT   | 8  | 11 |
| 182208 | 22 | 4501031 | 4501046 | 2 | 8  | 16 | GA   | 20 | 4  |
| 182212 | 22 | 4502974 | 4502991 | 2 | 9  | 18 | GT   | 21 | 8  |
| 182216 | 22 | 4506053 | 4506064 | 2 | 6  | 12 | GT   | 26 | 10 |
| 182217 | 22 | 4506646 | 4506673 | 2 | 14 | 28 | AC   | 15 | 7  |
| 182224 | 22 | 4514946 | 4514967 | 2 | 11 | 22 | CA   | 20 | 6  |
| 182228 | 22 | 4518811 | 4518848 | 2 | 19 | 38 | TG   | 9  | 11 |
| 182230 | 22 | 4522188 | 4522219 | 2 | 16 | 32 | AC   | 20 | 10 |
| 182233 | 22 | 4527918 | 4527947 | 2 | 15 | 30 | CA   | 18 | 14 |
| 182235 | 22 | 4531238 | 4531271 | 2 | 17 | 34 | AC   | 13 | 8  |
| 182236 | 22 | 4531370 | 4531397 | 2 | 14 | 28 | GT   | 21 | 9  |
| 182245 | 22 | 4544627 | 4544640 | 2 | 7  | 14 | AC   | 30 | 3  |
| 182246 | 22 | 4544724 | 4544749 | 2 | 13 | 26 | CA   | 17 | 12 |
| 182247 | 22 | 4545271 | 4545294 | 2 | 12 | 24 | GT   | 17 | 7  |
| 182249 | 22 | 4547625 | 4547654 | 2 | 15 | 30 | TG   | 9  | 8  |
| 182252 | 22 | 4549964 | 4550007 | 4 | 11 | 44 | GATA | 10 | 11 |
| 182254 | 22 | 4552191 | 4552206 | 2 | 8  | 16 | TC   | 9  | 7  |
| 182255 | 22 | 4552208 | 4552223 | 2 | 8  | 16 | CT   | 12 | 11 |
| 182256 | 22 | 4552375 | 4552410 | 2 | 18 | 36 | CA   | 11 | 11 |
| 182258 | 22 | 4553690 | 4553701 | 2 | 6  | 12 | TG   | 8  | 4  |
| 182260 | 22 | 4555925 | 4555964 | 2 | 20 | 40 | AC   | 8  | 10 |
| 182261 | 22 | 4556288 | 4556319 | 2 | 16 | 32 | CA   | 13 | 11 |
| 182262 | 22 | 4556446 | 4556469 | 2 | 12 | 24 | CA   | 18 | 11 |
| 182265 | 22 | 4556845 | 4556902 | 2 | 29 | 58 | CA   | 13 | 18 |
| 182268 | 22 | 4567300 | 4567313 | 2 | 7  | 14 | TG   | 22 | 4  |
| 182270 | 22 | 4567507 | 4567526 | 2 | 10 | 20 | GT   | 19 | 14 |
| 182271 | 22 | 4567676 | 4567707 | 2 | 16 | 32 | GT   | 24 | 12 |
| 182272 | 22 | 4572167 | 4572186 | 2 | 10 | 20 | TG   | 11 | 12 |
| 182279 | 22 | 4573997 | 4574059 | 3 | 21 | 63 | TCT  | 15 | 12 |

|        |    |         |         |   |    |    |      |    |    |
|--------|----|---------|---------|---|----|----|------|----|----|
| 182284 | 22 | 4575605 | 4575620 | 2 | 8  | 16 | CA   | 18 | 8  |
| 182285 | 22 | 4575764 | 4575783 | 2 | 10 | 20 | CA   | 22 | 11 |
| 182286 | 22 | 4575837 | 4575852 | 2 | 8  | 16 | AC   | 24 | 5  |
| 182289 | 22 | 4577295 | 4577332 | 2 | 19 | 38 | GT   | 8  | 7  |
| 182292 | 22 | 4580294 | 4580308 | 3 | 5  | 15 | AGA  | 27 | 3  |
| 182293 | 22 | 4580383 | 4580406 | 2 | 12 | 24 | GT   | 20 | 8  |
| 182296 | 22 | 4584815 | 4584844 | 2 | 15 | 30 | GT   | 14 | 9  |
| 182297 | 22 | 4585178 | 4585193 | 2 | 8  | 16 | TC   | 24 | 5  |
| 182299 | 22 | 4588085 | 4588104 | 2 | 10 | 20 | TA   | 14 | 9  |
| 182301 | 22 | 4589688 | 4589717 | 3 | 10 | 30 | GCT  | 14 | 11 |
| 182303 | 22 | 4595108 | 4595125 | 2 | 9  | 18 | AC   | 18 | 6  |
| 182304 | 22 | 4595300 | 4595321 | 2 | 11 | 22 | CA   | 20 | 14 |
| 182305 | 22 | 4596926 | 4596945 | 2 | 10 | 20 | AC   | 18 | 4  |
| 182306 | 22 | 4597019 | 4597042 | 2 | 12 | 24 | AC   | 17 | 8  |
| 182307 | 22 | 4600358 | 4600377 | 2 | 10 | 20 | TG   | 24 | 6  |
| 182308 | 22 | 4601274 | 4601305 | 2 | 16 | 32 | TG   | 9  | 12 |
| 182310 | 22 | 4604576 | 4604590 | 3 | 5  | 15 | ACA  | 24 | 3  |
| 182311 | 22 | 4605847 | 4605880 | 2 | 17 | 34 | TG   | 12 | 15 |
| 182312 | 22 | 4609625 | 4609650 | 2 | 13 | 26 | CA   | 17 | 7  |
| 182315 | 22 | 4611198 | 4611237 | 2 | 20 | 40 | TG   | 9  | 13 |
| 182316 | 22 | 4615044 | 4615061 | 3 | 6  | 18 | CTC  | 12 | 6  |
| 182317 | 22 | 4615419 | 4615436 | 2 | 9  | 18 | AC   | 20 | 5  |
| 182319 | 22 | 4617375 | 4617386 | 2 | 6  | 12 | TG   | 22 | 5  |
| 182321 | 22 | 4618429 | 4618442 | 2 | 7  | 14 | TC   | 18 | 4  |
| 182323 | 22 | 4619944 | 4619963 | 2 | 10 | 20 | AC   | 13 | 14 |
| 182325 | 22 | 4620024 | 4620035 | 2 | 6  | 12 | AC   | 17 | 5  |
| 182326 | 22 | 4620103 | 4620128 | 2 | 13 | 26 | AC   | 16 | 10 |
| 182327 | 22 | 4620255 | 4620274 | 2 | 10 | 20 | GT   | 24 | 14 |
| 182328 | 22 | 4620411 | 4620454 | 2 | 22 | 44 | TG   | 9  | 11 |
| 182332 | 22 | 4624585 | 4624610 | 2 | 13 | 26 | AC   | 12 | 8  |
| 182336 | 22 | 4631160 | 4631185 | 2 | 13 | 26 | GT   | 10 | 11 |
| 182338 | 22 | 4632902 | 4632929 | 2 | 14 | 28 | TG   | 9  | 9  |
| 182340 | 22 | 4642615 | 4642630 | 4 | 4  | 16 | ATAC | 24 | 3  |
| 182341 | 22 | 4643435 | 4643460 | 2 | 13 | 26 | CA   | 14 | 9  |
| 182342 | 22 | 4643578 | 4643595 | 2 | 9  | 18 | CA   | 14 | 3  |
| 182344 | 22 | 4646311 | 4646332 | 2 | 11 | 22 | TC   | 15 | 3  |
| 182347 | 22 | 4649327 | 4649356 | 2 | 15 | 30 | CA   | 18 | 9  |
| 182351 | 22 | 4652993 | 4653012 | 2 | 10 | 20 | GA   | 20 | 6  |
| 182352 | 22 | 4653183 | 4653208 | 2 | 13 | 26 | CA   | 18 | 9  |
| 182354 | 22 | 4656254 | 4656271 | 2 | 9  | 18 | TG   | 17 | 9  |
| 182355 | 22 | 4656635 | 4656652 | 2 | 9  | 18 | TG   | 18 | 9  |
| 182360 | 22 | 4663413 | 4663446 | 2 | 17 | 34 | GT   | 9  | 9  |
| 182364 | 22 | 4664988 | 4665007 | 2 | 10 | 20 | TG   | 14 | 11 |
| 182365 | 22 | 4665188 | 4665207 | 2 | 10 | 20 | CA   | 13 | 12 |
| 182368 | 22 | 4669314 | 4669325 | 2 | 6  | 12 | AC   | 30 | 7  |
| 182369 | 22 | 4669393 | 4669428 | 2 | 18 | 36 | TG   | 10 | 9  |
| 182374 | 22 | 4673856 | 4673893 | 2 | 19 | 38 | AC   | 16 | 11 |
| 182376 | 22 | 4679342 | 4679357 | 4 | 4  | 16 | CTTT | 24 | 7  |
| 182377 | 22 | 4680964 | 4680975 | 2 | 6  | 12 | GT   | 15 | 11 |
| 182378 | 22 | 4680978 | 4680991 | 2 | 7  | 14 | GT   | 20 | 9  |
| 182386 | 22 | 4684438 | 4684451 | 2 | 7  | 14 | TG   | 11 | 9  |

|        |    |         |         |   |    |    |      |    |    |
|--------|----|---------|---------|---|----|----|------|----|----|
| 182387 | 22 | 4684453 | 4684466 | 2 | 7  | 14 | GT   | 11 | 8  |
| 182388 | 22 | 4687793 | 4687818 | 2 | 13 | 26 | GT   | 15 | 14 |
| 182389 | 22 | 4688162 | 4688175 | 2 | 7  | 14 | AC   | 27 | 3  |
| 182393 | 22 | 4688521 | 4688554 | 2 | 17 | 34 | TG   | 11 | 10 |
| 182395 | 22 | 4688916 | 4688927 | 2 | 6  | 12 | AC   | 24 | 3  |
| 182396 | 22 | 4689042 | 4689067 | 2 | 13 | 26 | CA   | 15 | 9  |
| 182398 | 22 | 4692622 | 4692635 | 2 | 7  | 14 | CA   | 22 | 3  |
| 182400 | 22 | 4698753 | 4698772 | 4 | 5  | 20 | GACA | 18 | 7  |
| 182408 | 22 | 4707535 | 4707564 | 2 | 15 | 30 | TG   | 13 | 11 |
| 182414 | 22 | 4714505 | 4714552 | 2 | 24 | 48 | CA   | 7  | 8  |
| 182415 | 22 | 4716965 | 4716980 | 2 | 8  | 16 | TA   | 15 | 3  |
| 182416 | 22 | 4718765 | 4718788 | 2 | 12 | 24 | AC   | 9  | 9  |
| 182422 | 22 | 4731196 | 4731211 | 2 | 8  | 16 | AC   | 19 | 15 |
| 182423 | 22 | 4733857 | 4733871 | 3 | 5  | 15 | TGA  | 17 | 4  |
| 182424 | 22 | 4733872 | 4733889 | 3 | 6  | 18 | GGA  | 24 | 5  |
| 182429 | 22 | 4742879 | 4742908 | 3 | 10 | 30 | TTC  | 20 | 9  |
| 182430 | 22 | 4743447 | 4743474 | 4 | 7  | 28 | TTGT | 20 | 4  |
| 182431 | 22 | 4743646 | 4743685 | 2 | 20 | 40 | GT   | 16 | 10 |
| 182433 | 22 | 4745818 | 4745831 | 2 | 7  | 14 | CA   | 11 | 9  |
| 182437 | 22 | 4749374 | 4749429 | 2 | 28 | 56 | GT   | 14 | 7  |
| 182439 | 22 | 4751955 | 4751970 | 2 | 8  | 16 | CA   | 29 | 4  |
| 182440 | 22 | 4752091 | 4752118 | 2 | 14 | 28 | TG   | 7  | 5  |
| 182441 | 22 | 4753531 | 4753554 | 2 | 12 | 24 | TG   | 25 | 5  |
| 182443 | 22 | 4755429 | 4755444 | 2 | 8  | 16 | CA   | 24 | 4  |
| 182444 | 22 | 4755773 | 4755784 | 2 | 6  | 12 | TG   | 29 | 3  |
| 182446 | 22 | 4757418 | 4757429 | 2 | 6  | 12 | CA   | 31 | 5  |
| 182447 | 22 | 4757630 | 4757663 | 2 | 17 | 34 | AC   | 17 | 5  |
| 182448 | 22 | 4757699 | 4757710 | 2 | 6  | 12 | AC   | 18 | 3  |
| 182449 | 22 | 4757796 | 4757829 | 2 | 17 | 34 | CA   | 14 | 11 |
| 182450 | 22 | 4757921 | 4757932 | 2 | 6  | 12 | CA   | 15 | 3  |
| 182451 | 22 | 4758020 | 4758053 | 2 | 17 | 34 | CA   | 11 | 12 |
| 182452 | 22 | 4758159 | 4758180 | 2 | 11 | 22 | AC   | 18 | 12 |
| 182453 | 22 | 4758670 | 4758685 | 2 | 8  | 16 | GA   | 14 | 6  |
| 182456 | 22 | 4761343 | 4761364 | 2 | 11 | 22 | AC   | 15 | 14 |
| 182461 | 22 | 4769392 | 4769413 | 2 | 11 | 22 | TG   | 14 | 6  |
| 182463 | 22 | 4770906 | 4770931 | 2 | 13 | 26 | GT   | 10 | 13 |
| 182464 | 22 | 4771307 | 4771358 | 2 | 26 | 52 | GT   | 17 | 8  |
| 182465 | 22 | 4771591 | 4771614 | 3 | 8  | 24 | CCA  | 17 | 4  |
| 182468 | 22 | 4784182 | 4784207 | 2 | 13 | 26 | CA   | 13 | 12 |
| 182469 | 22 | 4787326 | 4787337 | 2 | 6  | 12 | GA   | 15 | 3  |
| 182470 | 22 | 4787490 | 4787553 | 4 | 16 | 64 | AGAA | 14 | 8  |
| 182471 | 22 | 4792495 | 4792508 | 2 | 7  | 14 | AC   | 15 | 3  |
| 182473 | 22 | 4797113 | 4797134 | 2 | 11 | 22 | AC   | 22 | 5  |
| 182476 | 22 | 4797285 | 4797308 | 2 | 12 | 24 | CA   | 9  | 10 |
| 182480 | 22 | 4799830 | 4799863 | 2 | 17 | 34 | CA   | 12 | 15 |
| 182481 | 22 | 4800273 | 4800292 | 2 | 10 | 20 | AC   | 16 | 7  |
| 182485 | 22 | 4801144 | 4801159 | 4 | 4  | 16 | AGAC | 21 | 5  |
| 182492 | 22 | 4809088 | 4809103 | 2 | 8  | 16 | TG   | 19 | 8  |
| 182493 | 22 | 4813158 | 4813169 | 2 | 6  | 12 | CA   | 23 | 9  |
| 182494 | 22 | 4815523 | 4815544 | 2 | 11 | 22 | CA   | 11 | 10 |
| 182496 | 22 | 4815755 | 4815770 | 4 | 4  | 16 | TTGT | 19 | 4  |

|        |    |         |         |   |    |    |      |    |    |
|--------|----|---------|---------|---|----|----|------|----|----|
| 182499 | 22 | 4820424 | 4820447 | 2 | 12 | 24 | CA   | 18 | 12 |
| 182501 | 22 | 4820698 | 4820723 | 2 | 13 | 26 | GT   | 7  | 9  |
| 182504 | 22 | 4825848 | 4825865 | 2 | 9  | 18 | CA   | 17 | 11 |
| 182509 | 22 | 4826235 | 4826258 | 2 | 12 | 24 | TG   | 28 | 9  |
| 182511 | 22 | 4826707 | 4826726 | 2 | 10 | 20 | GT   | 20 | 7  |
| 182512 | 22 | 4826845 | 4826858 | 2 | 7  | 14 | CA   | 26 | 6  |
| 182515 | 22 | 4827055 | 4827098 | 2 | 22 | 44 | GT   | 7  | 7  |
| 182520 | 22 | 4832660 | 4832689 | 3 | 10 | 30 | TGA  | 19 | 8  |
| 182524 | 22 | 4839201 | 4839212 | 2 | 6  | 12 | TG   | 23 | 7  |
| 182528 | 22 | 4846916 | 4846941 | 2 | 13 | 26 | CA   | 12 | 7  |
| 182530 | 22 | 4847912 | 4847927 | 2 | 8  | 16 | AC   | 31 | 4  |
| 182533 | 22 | 4850326 | 4850353 | 4 | 7  | 28 | TTAT | 12 | 5  |
| 182536 | 22 | 4852794 | 4852823 | 3 | 10 | 30 | ACA  | 20 | 13 |
| 182537 | 22 | 4853290 | 4853310 | 3 | 7  | 21 | ATG  | 25 | 3  |
| 182540 | 22 | 4855220 | 4855231 | 2 | 6  | 12 | AT   | 17 | 3  |
| 182541 | 22 | 4855318 | 4855341 | 3 | 8  | 24 | GAG  | 16 | 7  |
| 182542 | 22 | 4855517 | 4855540 | 4 | 6  | 24 | AGAT | 23 | 17 |
| 182543 | 22 | 4856038 | 4856052 | 3 | 5  | 15 | AGA  | 22 | 3  |
| 182545 | 22 | 4858469 | 4858486 | 2 | 9  | 18 | AC   | 19 | 6  |
| 182547 | 22 | 4858550 | 4858575 | 2 | 13 | 26 | AC   | 13 | 9  |
| 182548 | 22 | 4858912 | 4858967 | 2 | 28 | 56 | TG   | 7  | 10 |
| 182549 | 22 | 4860659 | 4860680 | 2 | 11 | 22 | GT   | 14 | 11 |
| 182550 | 22 | 4863483 | 4863496 | 2 | 7  | 14 | GT   | 21 | 7  |
| 182554 | 22 | 4871992 | 4872015 | 2 | 12 | 24 | GT   | 8  | 6  |
| 182557 | 22 | 4875393 | 4875408 | 2 | 8  | 16 | AC   | 14 | 5  |
| 182561 | 22 | 4882225 | 4882244 | 2 | 10 | 20 | AC   | 25 | 8  |
| 182562 | 22 | 4882949 | 4882974 | 2 | 13 | 26 | GT   | 14 | 15 |
| 182563 | 22 | 4883941 | 4883996 | 2 | 28 | 56 | CA   | 6  | 9  |
| 182564 | 22 | 4884684 | 4884733 | 2 | 25 | 50 | CA   | 9  | 13 |
| 182565 | 22 | 4884811 | 4884846 | 2 | 18 | 36 | AC   | 6  | 8  |
| 182579 | 22 | 4887322 | 4887351 | 3 | 10 | 30 | CCT  | 19 | 8  |
| 182580 | 22 | 4889376 | 4889395 | 2 | 10 | 20 | TC   | 21 | 7  |
| 182586 | 22 | 4896137 | 4896170 | 2 | 17 | 34 | AC   | 15 | 16 |
| 182587 | 22 | 4896356 | 4896371 | 2 | 8  | 16 | CA   | 8  | 5  |
| 182588 | 22 | 4896373 | 4896386 | 2 | 7  | 14 | AC   | 21 | 11 |
| 182589 | 22 | 4896576 | 4896611 | 4 | 9  | 36 | TATC | 14 | 7  |
| 182592 | 22 | 4902091 | 4902112 | 2 | 11 | 22 | TG   | 16 | 4  |
| 182599 | 22 | 4915941 | 4915954 | 2 | 7  | 14 | TC   | 19 | 4  |
| 182600 | 22 | 4918321 | 4918342 | 2 | 11 | 22 | AC   | 21 | 9  |
| 182602 | 22 | 4926673 | 4926712 | 2 | 20 | 40 | CA   | 6  | 10 |
| 182605 | 22 | 4938323 | 4938334 | 2 | 6  | 12 | TC   | 32 | 5  |
| 182606 | 22 | 4940167 | 4940178 | 2 | 6  | 12 | AC   | 21 | 5  |
| 182609 | 22 | 4944991 | 4945014 | 2 | 12 | 24 | TG   | 15 | 9  |
| 182610 | 22 | 4945266 | 4945283 | 2 | 9  | 18 | GT   | 20 | 6  |
| 182611 | 22 | 4945660 | 4945687 | 2 | 14 | 28 | CA   | 10 | 8  |
| 182612 | 22 | 4946006 | 4946017 | 2 | 6  | 12 | AG   | 21 | 3  |
| 182617 | 22 | 4951422 | 4951437 | 2 | 8  | 16 | CA   | 8  | 10 |
| 182618 | 22 | 4951440 | 4951453 | 2 | 7  | 14 | CA   | 11 | 11 |
| 182619 | 22 | 4951511 | 4951534 | 2 | 12 | 24 | AC   | 12 | 8  |
| 182625 | 22 | 4952102 | 4952127 | 2 | 13 | 26 | GT   | 10 | 5  |
| 182631 | 22 | 4956296 | 4956313 | 3 | 6  | 18 | ACA  | 10 | 5  |

|        |    |         |         |   |    |    |      |    |    |
|--------|----|---------|---------|---|----|----|------|----|----|
| 182632 | 22 | 4957266 | 4957283 | 3 | 6  | 18 | AAT  | 25 | 9  |
| 182634 | 22 | 4960904 | 4960931 | 2 | 14 | 28 | TG   | 15 | 15 |
| 182635 | 22 | 4961116 | 4961143 | 2 | 14 | 28 | CA   | 12 | 9  |
| 182637 | 22 | 4961309 | 4961340 | 2 | 16 | 32 | AC   | 8  | 8  |
| 182641 | 22 | 4965942 | 4965971 | 2 | 15 | 30 | CA   | 18 | 7  |
| 182642 | 22 | 4966436 | 4966461 | 2 | 13 | 26 | CA   | 7  | 6  |
| 182643 | 22 | 4967716 | 4967742 | 3 | 9  | 27 | TCC  | 23 | 11 |
| 182644 | 22 | 4968109 | 4968124 | 2 | 8  | 16 | GT   | 26 | 5  |
| 182651 | 22 | 4968682 | 4968697 | 2 | 8  | 16 | GT   | 14 | 7  |
| 182653 | 22 | 4972832 | 4972859 | 2 | 14 | 28 | CA   | 20 | 13 |
| 182654 | 22 | 4973006 | 4973029 | 2 | 12 | 24 | TG   | 16 | 6  |
| 182655 | 22 | 4973080 | 4973109 | 2 | 15 | 30 | TG   | 6  | 5  |
| 182658 | 22 | 4977236 | 4977255 | 2 | 10 | 20 | TG   | 9  | 8  |
| 182659 | 22 | 4977464 | 4977483 | 2 | 10 | 20 | GT   | 21 | 15 |
| 182660 | 22 | 4977582 | 4977597 | 2 | 8  | 16 | CA   | 21 | 7  |
| 182662 | 22 | 4979647 | 4979664 | 2 | 9  | 18 | AC   | 17 | 12 |
| 182664 | 22 | 4979832 | 4979857 | 2 | 13 | 26 | GT   | 13 | 9  |
| 182665 | 22 | 4980409 | 4980432 | 3 | 8  | 24 | GGA  | 19 | 10 |
| 182670 | 22 | 4984060 | 4984077 | 2 | 9  | 18 | AC   | 26 | 10 |
| 182680 | 22 | 4994729 | 4994749 | 3 | 7  | 21 | GCT  | 17 | 9  |
| 182687 | 22 | 4995347 | 4995364 | 2 | 9  | 18 | TG   | 13 | 4  |
| 182690 | 22 | 4995761 | 4995796 | 3 | 12 | 36 | CTC  | 12 | 9  |
| 182691 | 22 | 4995955 | 4995968 | 2 | 7  | 14 | TC   | 19 | 6  |
| 182694 | 22 | 4998398 | 4998415 | 3 | 6  | 18 | GAG  | 23 | 15 |
| 182702 | 22 | 5005591 | 5005620 | 3 | 10 | 30 | CCT  | 28 | 13 |
| 182704 | 22 | 5007807 | 5007821 | 3 | 5  | 15 | CGC  | 21 | 5  |
| 182705 | 22 | 5007999 | 5008022 | 2 | 12 | 24 | CA   | 12 | 9  |
| 182707 | 22 | 5008152 | 5008177 | 2 | 13 | 26 | AC   | 10 | 8  |
| 182708 | 22 | 5008200 | 5008213 | 2 | 7  | 14 | AC   | 14 | 3  |
| 182709 | 22 | 5008340 | 5008365 | 2 | 13 | 26 | AC   | 15 | 7  |
| 182716 | 22 | 5019585 | 5019602 | 3 | 6  | 18 | GGC  | 8  | 4  |
| 182722 | 22 | 5026413 | 5026426 | 2 | 7  | 14 | TG   | 30 | 3  |
| 182725 | 22 | 5026650 | 5026673 | 2 | 12 | 24 | TG   | 18 | 13 |
| 182729 | 22 | 5035138 | 5035155 | 2 | 9  | 18 | GT   | 10 | 10 |
| 182730 | 22 | 5035300 | 5035331 | 2 | 16 | 32 | CA   | 19 | 12 |
| 182731 | 22 | 5035493 | 5035522 | 2 | 15 | 30 | AC   | 14 | 12 |
| 182732 | 22 | 5035623 | 5035640 | 2 | 9  | 18 | TG   | 19 | 8  |
| 182733 | 22 | 5036239 | 5036258 | 4 | 5  | 20 | AAAG | 15 | 4  |
| 182735 | 22 | 5039531 | 5039544 | 2 | 7  | 14 | GT   | 17 | 4  |
| 182738 | 22 | 5041795 | 5041820 | 2 | 13 | 26 | GT   | 17 | 6  |
| 182740 | 22 | 5043791 | 5043818 | 2 | 14 | 28 | TG   | 17 | 13 |
| 182742 | 22 | 5045524 | 5045555 | 2 | 16 | 32 | CA   | 11 | 8  |
| 182744 | 22 | 5047669 | 5047695 | 3 | 9  | 27 | TCC  | 14 | 5  |
| 182746 | 22 | 5051698 | 5051729 | 2 | 16 | 32 | AC   | 15 | 6  |
| 182748 | 22 | 5052177 | 5052226 | 2 | 25 | 50 | GT   | 6  | 11 |
| 182749 | 22 | 5052346 | 5052363 | 2 | 9  | 18 | AC   | 17 | 6  |
| 182750 | 22 | 5052388 | 5052403 | 2 | 8  | 16 | CA   | 9  | 3  |
| 182751 | 22 | 5054076 | 5054111 | 2 | 18 | 36 | TG   | 8  | 7  |
| 182753 | 22 | 5055444 | 5055481 | 2 | 19 | 38 | AC   | 9  | 8  |
| 182760 | 22 | 5056273 | 5056287 | 3 | 5  | 15 | GGA  | 15 | 8  |
| 182762 | 22 | 5060071 | 5060085 | 3 | 5  | 15 | CCT  | 18 | 6  |

|        |    |         |         |   |    |    |      |    |    |
|--------|----|---------|---------|---|----|----|------|----|----|
| 182763 | 22 | 5060265 | 5060282 | 2 | 9  | 18 | CA   | 20 | 8  |
| 182765 | 22 | 5060630 | 5060649 | 2 | 10 | 20 | CA   | 12 | 9  |
| 182783 | 22 | 5074213 | 5074236 | 2 | 12 | 24 | CA   | 15 | 6  |
| 182784 | 22 | 5074978 | 5074992 | 3 | 5  | 15 | GGC  | 26 | 7  |
| 182785 | 22 | 5075143 | 5075158 | 2 | 8  | 16 | AC   | 19 | 11 |
| 182786 | 22 | 5075230 | 5075253 | 2 | 12 | 24 | GT   | 10 | 6  |
| 182790 | 22 | 5076666 | 5076677 | 2 | 6  | 12 | TA   | 27 | 7  |
| 182791 | 22 | 5077138 | 5077151 | 2 | 7  | 14 | CT   | 19 | 3  |
| 182792 | 22 | 5077559 | 5077574 | 2 | 8  | 16 | GA   | 16 | 6  |
| 182794 | 22 | 5080492 | 5080521 | 2 | 15 | 30 | CA   | 15 | 7  |
| 182795 | 22 | 5080654 | 5080685 | 2 | 16 | 32 | AC   | 9  | 10 |
| 182796 | 22 | 5080889 | 5080900 | 2 | 6  | 12 | CA   | 23 | 3  |
| 182798 | 22 | 5082950 | 5082969 | 2 | 10 | 20 | AG   | 25 | 9  |
| 182802 | 22 | 5086450 | 5086483 | 2 | 17 | 34 | CA   | 16 | 9  |
| 182803 | 22 | 5086876 | 5086907 | 2 | 16 | 32 | AC   | 7  | 10 |
| 182804 | 22 | 5088078 | 5088105 | 4 | 7  | 28 | TCAA | 23 | 4  |
| 182807 | 22 | 5092585 | 5092602 | 3 | 6  | 18 | AGA  | 22 | 6  |
| 182813 | 22 | 5108283 | 5108316 | 2 | 17 | 34 | GT   | 11 | 6  |
| 182814 | 22 | 5109084 | 5109117 | 2 | 17 | 34 | CA   | 16 | 6  |
| 182816 | 22 | 5110475 | 5110488 | 2 | 7  | 14 | TG   | 16 | 5  |
| 182828 | 22 | 5134025 | 5134036 | 2 | 6  | 12 | TG   | 12 | 4  |
| 182829 | 22 | 5134067 | 5134092 | 2 | 13 | 26 | GT   | 7  | 9  |
| 182836 | 22 | 5149119 | 5149144 | 2 | 13 | 26 | CA   | 18 | 12 |
| 182837 | 22 | 5151139 | 5151150 | 2 | 6  | 12 | AC   | 21 | 4  |
| 182843 | 22 | 5156755 | 5156792 | 2 | 19 | 38 | AC   | 15 | 13 |
| 182847 | 22 | 5164418 | 5164453 | 2 | 18 | 36 | AC   | 9  | 12 |
| 182849 | 22 | 5165395 | 5165408 | 2 | 7  | 14 | AC   | 26 | 5  |
| 182850 | 22 | 5166714 | 5166733 | 2 | 10 | 20 | AC   | 14 | 11 |
| 182851 | 22 | 5166879 | 5166922 | 2 | 22 | 44 | CA   | 11 | 11 |
| 182857 | 22 | 5171626 | 5171643 | 3 | 6  | 18 | GAG  | 26 | 4  |
| 182860 | 22 | 5174005 | 5174022 | 2 | 9  | 18 | AC   | 15 | 4  |
| 182864 | 22 | 5175463 | 5175482 | 2 | 10 | 20 | CA   | 16 | 9  |
| 182865 | 22 | 5177786 | 5177809 | 2 | 12 | 24 | AC   | 15 | 7  |
| 182868 | 22 | 5184513 | 5184524 | 2 | 6  | 12 | AT   | 10 | 3  |
| 182869 | 22 | 5184693 | 5184712 | 2 | 10 | 20 | TG   | 16 | 13 |
| 182881 | 22 | 5219974 | 5219993 | 2 | 10 | 20 | CA   | 20 | 10 |
| 182882 | 22 | 5220047 | 5220060 | 2 | 7  | 14 | CA   | 26 | 6  |
| 182884 | 22 | 5227005 | 5227018 | 2 | 7  | 14 | AC   | 27 | 9  |
| 182885 | 22 | 5227120 | 5227135 | 2 | 8  | 16 | AC   | 21 | 10 |
| 182890 | 22 | 5230631 | 5230666 | 2 | 18 | 36 | AC   | 8  | 9  |
| 182891 | 22 | 5230791 | 5230822 | 2 | 16 | 32 | GT   | 16 | 9  |
| 182896 | 22 | 5238741 | 5238761 | 3 | 7  | 21 | CAT  | 24 | 7  |
| 182898 | 22 | 5243185 | 5243208 | 2 | 12 | 24 | TG   | 13 | 6  |
| 182899 | 22 | 5243252 | 5243277 | 2 | 13 | 26 | GA   | 17 | 15 |
| 182900 | 22 | 5243440 | 5243451 | 2 | 6  | 12 | AC   | 22 | 7  |
| 182901 | 22 | 5243453 | 5243464 | 2 | 6  | 12 | CA   | 26 | 7  |
| 182902 | 22 | 5249561 | 5249575 | 3 | 5  | 15 | GGT  | 27 | 4  |
| 182909 | 22 | 5262654 | 5262683 | 2 | 15 | 30 | AC   | 7  | 4  |
| 182910 | 22 | 5262722 | 5262745 | 4 | 6  | 24 | ACAA | 10 | 6  |
| 182911 | 22 | 5265168 | 5265183 | 2 | 8  | 16 | TG   | 31 | 4  |
| 182915 | 22 | 5265966 | 5265999 | 2 | 17 | 34 | TG   | 13 | 10 |



|        |    |         |         |   |    |    |      |    |    |
|--------|----|---------|---------|---|----|----|------|----|----|
| 182917 | 22 | 5267270 | 5267291 | 2 | 11 | 22 | AC   | 19 | 7  |
| 182918 | 22 | 5268533 | 5268560 | 2 | 14 | 28 | TG   | 19 | 7  |
| 182920 | 22 | 5268802 | 5268825 | 4 | 6  | 24 | TTCA | 30 | 4  |
| 182921 | 22 | 5271254 | 5271265 | 2 | 6  | 12 | GT   | 26 | 3  |
| 182923 | 22 | 5271940 | 5271963 | 2 | 12 | 24 | GT   | 13 | 6  |
| 182926 | 22 | 5272068 | 5272085 | 3 | 6  | 18 | CCT  | 23 | 3  |
| 182927 | 22 | 5272120 | 5272152 | 3 | 11 | 33 | AGA  | 19 | 12 |
| 182929 | 22 | 5272539 | 5272571 | 3 | 11 | 33 | AAC  | 22 | 4  |
| 182930 | 22 | 5273853 | 5273867 | 3 | 5  | 15 | TTA  | 27 | 3  |
| 182931 | 22 | 5274183 | 5274196 | 2 | 7  | 14 | AC   | 19 | 3  |
| 182932 | 22 | 5274370 | 5274389 | 2 | 10 | 20 | GT   | 18 | 3  |
| 182933 | 22 | 5278398 | 5278421 | 2 | 12 | 24 | AC   | 15 | 12 |
| 182937 | 22 | 5281673 | 5281696 | 2 | 12 | 24 | AC   | 19 | 8  |
| 182942 | 22 | 5291925 | 5291946 | 2 | 11 | 22 | AC   | 24 | 7  |
| 182943 | 22 | 5295161 | 5295184 | 2 | 12 | 24 | GT   | 18 | 10 |
| 182944 | 22 | 5296478 | 5296489 | 2 | 6  | 12 | AC   | 23 | 8  |
| 182951 | 22 | 5309877 | 5309894 | 2 | 9  | 18 | TG   | 21 | 9  |
| 182953 | 22 | 5310830 | 5310847 | 2 | 9  | 18 | GT   | 19 | 10 |
| 182954 | 22 | 5313445 | 5313456 | 2 | 6  | 12 | CA   | 32 | 5  |
| 182955 | 22 | 5313632 | 5313649 | 2 | 9  | 18 | GT   | 24 | 12 |
| 182958 | 22 | 5317430 | 5317463 | 2 | 17 | 34 | CA   | 20 | 14 |
| 182959 | 22 | 5317555 | 5317580 | 2 | 13 | 26 | AC   | 12 | 10 |
| 182960 | 22 | 5322360 | 5322393 | 2 | 17 | 34 | CA   | 11 | 6  |
| 182972 | 22 | 5333787 | 5333828 | 2 | 21 | 42 | AC   | 9  | 11 |
| 182979 | 22 | 5336145 | 5336159 | 3 | 5  | 15 | GGA  | 17 | 5  |
| 182980 | 22 | 5337439 | 5337470 | 4 | 8  | 32 | AGAA | 22 | 5  |
| 182981 | 22 | 5337519 | 5337532 | 2 | 7  | 14 | AC   | 25 | 3  |
| 182983 | 22 | 5337636 | 5337665 | 2 | 15 | 30 | TG   | 12 | 11 |
| 182985 | 22 | 5338780 | 5338811 | 2 | 16 | 32 | GT   | 21 | 14 |
| 182986 | 22 | 5338836 | 5338847 | 2 | 6  | 12 | TG   | 12 | 5  |
| 182989 | 22 | 5341692 | 5341725 | 2 | 17 | 34 | TG   | 14 | 14 |
| 182991 | 22 | 5344121 | 5344150 | 2 | 15 | 30 | GT   | 19 | 8  |
| 182992 | 22 | 5344457 | 5344498 | 2 | 21 | 42 | GT   | 8  | 8  |
| 182993 | 22 | 5346167 | 5346184 | 3 | 6  | 18 | CCT  | 22 | 3  |
| 182995 | 22 | 5348158 | 5348169 | 2 | 6  | 12 | AC   | 28 | 3  |
| 182996 | 22 | 5352461 | 5352476 | 2 | 8  | 16 | TG   | 20 | 11 |
| 182997 | 22 | 5353831 | 5353846 | 4 | 4  | 16 | GAGG | 32 | 3  |
| 182998 | 22 | 5354860 | 5354887 | 2 | 14 | 28 | CA   | 12 | 9  |
| 182999 | 22 | 5355006 | 5355041 | 2 | 18 | 36 | CA   | 10 | 8  |
| 183001 | 22 | 5357305 | 5357320 | 2 | 8  | 16 | CA   | 20 | 7  |
| 183004 | 22 | 5360311 | 5360322 | 2 | 6  | 12 | AC   | 18 | 5  |
| 183005 | 22 | 5360353 | 5360364 | 2 | 6  | 12 | AC   | 12 | 7  |
| 183006 | 22 | 5360367 | 5360382 | 2 | 8  | 16 | AC   | 19 | 12 |
| 183007 | 22 | 5360507 | 5360550 | 2 | 22 | 44 | AC   | 6  | 8  |
| 183009 | 22 | 5360673 | 5360698 | 2 | 13 | 26 | AC   | 7  | 7  |
| 183011 | 22 | 5362782 | 5362805 | 3 | 8  | 24 | ACA  | 16 | 7  |
| 183012 | 22 | 5362910 | 5362945 | 3 | 12 | 36 | AGG  | 13 | 6  |
| 183013 | 22 | 5365045 | 5365072 | 2 | 14 | 28 | TC   | 20 | 8  |
| 183014 | 22 | 5365486 | 5365542 | 3 | 19 | 57 | AGA  | 24 | 9  |
| 183016 | 22 | 5368243 | 5368260 | 2 | 9  | 18 | CA   | 10 | 4  |
| 183017 | 22 | 5368291 | 5368308 | 2 | 9  | 18 | TC   | 24 | 5  |

|        |    |         |         |   |    |    |      |    |    |
|--------|----|---------|---------|---|----|----|------|----|----|
| 183020 | 22 | 5370021 | 5370035 | 3 | 5  | 15 | GGA  | 6  | 7  |
| 183028 | 22 | 5376697 | 5376734 | 2 | 19 | 38 | AC   | 11 | 12 |
| 183029 | 22 | 5377484 | 5377499 | 2 | 8  | 16 | GT   | 9  | 7  |
| 183030 | 22 | 5378736 | 5378753 | 2 | 9  | 18 | AC   | 8  | 7  |
| 183031 | 22 | 5379360 | 5379383 | 2 | 12 | 24 | GT   | 21 | 12 |
| 183039 | 22 | 5389597 | 5389612 | 2 | 8  | 16 | AT   | 16 | 12 |
| 183043 | 22 | 5391049 | 5391092 | 2 | 22 | 44 | AC   | 7  | 6  |
| 183044 | 22 | 5391303 | 5391320 | 2 | 9  | 18 | AC   | 19 | 9  |
| 183045 | 22 | 5392169 | 5392210 | 2 | 21 | 42 | AC   | 6  | 6  |
| 183046 | 22 | 5392800 | 5392819 | 2 | 10 | 20 | TG   | 21 | 7  |
| 183047 | 22 | 5393806 | 5393837 | 2 | 16 | 32 | TC   | 15 | 14 |
| 183057 | 22 | 5394978 | 5394991 | 2 | 7  | 14 | GA   | 21 | 3  |
| 183058 | 22 | 5396265 | 5396280 | 4 | 4  | 16 | TTTC | 15 | 3  |
| 183061 | 22 | 5398452 | 5398489 | 2 | 19 | 38 | TG   | 10 | 8  |
| 183064 | 22 | 5399572 | 5399593 | 2 | 11 | 22 | TG   | 16 | 6  |
| 183070 | 22 | 5401905 | 5401920 | 2 | 8  | 16 | TC   | 19 | 3  |
| 183074 | 22 | 5404907 | 5404940 | 2 | 17 | 34 | TG   | 15 | 14 |
| 183076 | 22 | 5406036 | 5406049 | 2 | 7  | 14 | AC   | 26 | 3  |
| 183077 | 22 | 5408119 | 5408130 | 2 | 6  | 12 | CA   | 29 | 4  |
| 183080 | 22 | 5409879 | 5409905 | 3 | 9  | 27 | GAA  | 14 | 16 |
| 183082 | 22 | 5410577 | 5410596 | 2 | 10 | 20 | GT   | 6  | 7  |
| 183084 | 22 | 5410707 | 5410736 | 2 | 15 | 30 | CA   | 13 | 8  |
| 183089 | 22 | 5414011 | 5414022 | 2 | 6  | 12 | AG   | 31 | 3  |
| 183090 | 22 | 5414136 | 5414175 | 2 | 20 | 40 | AC   | 9  | 11 |
| 183094 | 22 | 5416883 | 5416900 | 3 | 6  | 18 | AGG  | 17 | 4  |
| 183095 | 22 | 5418010 | 5418027 | 2 | 9  | 18 | AC   | 18 | 11 |
| 183096 | 22 | 5418165 | 5418180 | 2 | 8  | 16 | GT   | 8  | 8  |
| 183097 | 22 | 5418312 | 5418325 | 2 | 7  | 14 | GA   | 28 | 6  |
| 183098 | 22 | 5418575 | 5418600 | 2 | 13 | 26 | GT   | 26 | 17 |
| 183099 | 22 | 5418697 | 5418720 | 2 | 12 | 24 | AC   | 18 | 7  |
| 183100 | 22 | 5418806 | 5418829 | 2 | 12 | 24 | TG   | 18 | 10 |
| 183102 | 22 | 5420057 | 5420092 | 2 | 18 | 36 | TG   | 14 | 9  |
| 183103 | 22 | 5420224 | 5420265 | 2 | 21 | 42 | AC   | 7  | 7  |
| 183104 | 22 | 5421310 | 5421335 | 2 | 13 | 26 | AG   | 14 | 4  |
| 183108 | 22 | 5421671 | 5421686 | 4 | 4  | 16 | AAAT | 15 | 3  |
| 183116 | 22 | 5422579 | 5422594 | 2 | 8  | 16 | AG   | 19 | 5  |
| 183117 | 22 | 5423804 | 5423835 | 2 | 16 | 32 | AC   | 7  | 10 |
| 183121 | 22 | 5424350 | 5424377 | 2 | 14 | 28 | AC   | 10 | 8  |
| 183122 | 22 | 5425544 | 5425567 | 2 | 12 | 24 | CA   | 10 | 9  |
| 183126 | 22 | 5427669 | 5427682 | 2 | 7  | 14 | CA   | 12 | 7  |
| 183127 | 22 | 5427685 | 5427698 | 2 | 7  | 14 | CA   | 22 | 15 |
| 183128 | 22 | 5430865 | 5430892 | 2 | 14 | 28 | TG   | 11 | 10 |
| 183134 | 22 | 5433548 | 5433562 | 3 | 5  | 15 | TTG  | 27 | 3  |
| 183135 | 22 | 5434693 | 5434724 | 2 | 16 | 32 | TG   | 14 | 15 |
| 183137 | 22 | 5435925 | 5435948 | 3 | 8  | 24 | GGA  | 19 | 4  |
| 183144 | 22 | 5441731 | 5441751 | 3 | 7  | 21 | CAG  | 28 | 6  |
| 183148 | 22 | 5445882 | 5445913 | 2 | 16 | 32 | GT   | 14 | 10 |
| 183153 | 22 | 5454004 | 5454021 | 2 | 9  | 18 | TG   | 19 | 4  |
| 183155 | 22 | 5455731 | 5455750 | 2 | 10 | 20 | GT   | 15 | 7  |
| 183156 | 22 | 5455850 | 5455867 | 2 | 9  | 18 | GT   | 19 | 8  |
| 183157 | 22 | 5455962 | 5456001 | 2 | 20 | 40 | CA   | 15 | 19 |

|        |    |         |         |   |    |    |      |    |    |
|--------|----|---------|---------|---|----|----|------|----|----|
| 183158 | 22 | 5457534 | 5457557 | 2 | 12 | 24 | TG   | 10 | 7  |
| 183161 | 22 | 5458279 | 5458310 | 2 | 16 | 32 | TG   | 9  | 15 |
| 183162 | 22 | 5458510 | 5458521 | 2 | 6  | 12 | AC   | 24 | 4  |
| 183163 | 22 | 5458695 | 5458718 | 2 | 12 | 24 | TG   | 16 | 8  |
| 183164 | 22 | 5458901 | 5458920 | 2 | 10 | 20 | GT   | 16 | 9  |
| 183167 | 22 | 5461691 | 5461702 | 2 | 6  | 12 | CA   | 18 | 6  |
| 183176 | 22 | 5466558 | 5466571 | 2 | 7  | 14 | GT   | 25 | 6  |
| 183177 | 22 | 5468818 | 5468861 | 2 | 22 | 44 | TG   | 12 | 10 |
| 183178 | 22 | 5468942 | 5468977 | 2 | 18 | 36 | TG   | 14 | 11 |
| 183180 | 22 | 5472219 | 5472272 | 2 | 27 | 54 | CA   | 7  | 9  |
| 183181 | 22 | 5472367 | 5472382 | 2 | 8  | 16 | TG   | 26 | 3  |
| 183182 | 22 | 5472457 | 5472488 | 2 | 16 | 32 | CA   | 13 | 11 |
| 183183 | 22 | 5479187 | 5479244 | 2 | 29 | 58 | CA   | 12 | 13 |
| 183186 | 22 | 5483829 | 5483846 | 3 | 6  | 18 | AGC  | 24 | 4  |
| 183188 | 22 | 5488426 | 5488443 | 2 | 9  | 18 | AC   | 20 | 8  |
| 183189 | 22 | 5488478 | 5488503 | 2 | 13 | 26 | AC   | 9  | 6  |
| 183192 | 22 | 5492722 | 5492751 | 2 | 15 | 30 | TG   | 15 | 10 |
| 183193 | 22 | 5492841 | 5492856 | 2 | 8  | 16 | CA   | 17 | 13 |
| 183194 | 22 | 5492911 | 5492928 | 2 | 9  | 18 | TG   | 16 | 11 |
| 183199 | 22 | 5497477 | 5497497 | 3 | 7  | 21 | CTC  | 17 | 12 |
| 183200 | 22 | 5497666 | 5497691 | 2 | 13 | 26 | TG   | 12 | 6  |
| 183201 | 22 | 5497773 | 5497796 | 2 | 12 | 24 | GT   | 7  | 10 |
| 183203 | 22 | 5499637 | 5499650 | 2 | 7  | 14 | GA   | 10 | 7  |
| 183205 | 22 | 5503755 | 5503776 | 2 | 11 | 22 | TG   | 18 | 16 |
| 183206 | 22 | 5511074 | 5511088 | 3 | 5  | 15 | GGA  | 26 | 3  |
| 183207 | 22 | 5513218 | 5513231 | 2 | 7  | 14 | AG   | 29 | 3  |
| 183212 | 22 | 5521261 | 5521308 | 2 | 24 | 48 | AC   | 8  | 8  |
| 183216 | 22 | 5523395 | 5523430 | 4 | 9  | 36 | CATA | 13 | 8  |
| 183221 | 22 | 5525250 | 5525267 | 3 | 6  | 18 | GGA  | 26 | 3  |
| 183226 | 22 | 5526062 | 5526101 | 2 | 20 | 40 | GT   | 11 | 12 |
| 183229 | 22 | 5530043 | 5530057 | 3 | 5  | 15 | TGA  | 31 | 3  |
| 183233 | 22 | 5532205 | 5532230 | 2 | 13 | 26 | CA   | 9  | 13 |
| 183242 | 22 | 5538969 | 5538988 | 2 | 10 | 20 | GT   | 20 | 13 |
| 183245 | 22 | 5540694 | 5540709 | 2 | 8  | 16 | TG   | 14 | 3  |
| 183246 | 22 | 5540710 | 5540723 | 2 | 7  | 14 | AG   | 15 | 6  |
| 183247 | 22 | 5542814 | 5542833 | 4 | 5  | 20 | TTCT | 22 | 8  |
| 183256 | 22 | 5546205 | 5546219 | 3 | 5  | 15 | TCT  | 20 | 5  |
| 183257 | 22 | 5547661 | 5547676 | 2 | 8  | 16 | CA   | 27 | 12 |
| 183261 | 22 | 5553247 | 5553260 | 2 | 7  | 14 | AC   | 12 | 4  |
| 183274 | 22 | 5582592 | 5582621 | 2 | 15 | 30 | TG   | 17 | 9  |
| 183280 | 22 | 5592881 | 5592898 | 2 | 9  | 18 | GT   | 20 | 6  |
| 183281 | 22 | 5592927 | 5592944 | 2 | 9  | 18 | CA   | 9  | 11 |
| 183283 | 22 | 5593132 | 5593158 | 3 | 9  | 27 | CCT  | 18 | 8  |
| 183285 | 22 | 5594067 | 5594078 | 2 | 6  | 12 | AC   | 22 | 9  |
| 183286 | 22 | 5594082 | 5594097 | 2 | 8  | 16 | CA   | 22 | 7  |
| 183287 | 22 | 5594283 | 5594312 | 2 | 15 | 30 | TG   | 11 | 13 |
| 183291 | 22 | 5598854 | 5598880 | 3 | 9  | 27 | GCT  | 22 | 10 |
| 183293 | 22 | 5600658 | 5600693 | 2 | 18 | 36 | AC   | 8  | 9  |
| 183294 | 22 | 5602448 | 5602481 | 2 | 17 | 34 | TG   | 10 | 10 |
| 183305 | 22 | 5607641 | 5607652 | 2 | 6  | 12 | TC   | 20 | 3  |
| 183306 | 22 | 5611740 | 5611793 | 2 | 27 | 54 | AC   | 8  | 8  |

|        |    |         |         |   |    |    |      |    |    |
|--------|----|---------|---------|---|----|----|------|----|----|
| 183308 | 22 | 5611961 | 5611978 | 2 | 9  | 18 | TG   | 10 | 7  |
| 183310 | 22 | 5615518 | 5615529 | 2 | 6  | 12 | GT   | 12 | 4  |
| 183311 | 22 | 5615675 | 5615686 | 2 | 6  | 12 | GT   | 19 | 9  |
| 183313 | 22 | 5617475 | 5617494 | 2 | 10 | 20 | CT   | 23 | 6  |
| 183314 | 22 | 5618650 | 5618663 | 2 | 7  | 14 | TA   | 23 | 3  |
| 183315 | 22 | 5618934 | 5618949 | 2 | 8  | 16 | AC   | 17 | 7  |
| 183317 | 22 | 5624137 | 5624158 | 2 | 11 | 22 | GT   | 20 | 8  |
| 183321 | 22 | 5627255 | 5627266 | 2 | 6  | 12 | CA   | 22 | 3  |
| 183322 | 22 | 5627268 | 5627281 | 2 | 7  | 14 | AC   | 22 | 4  |
| 183323 | 22 | 5628119 | 5628140 | 2 | 11 | 22 | CA   | 15 | 11 |
| 183330 | 22 | 5631650 | 5631673 | 2 | 12 | 24 | TG   | 17 | 12 |
| 183331 | 22 | 5631758 | 5631773 | 2 | 8  | 16 | TG   | 20 | 4  |
| 183332 | 22 | 5631899 | 5631922 | 2 | 12 | 24 | AC   | 15 | 12 |
| 183333 | 22 | 5632356 | 5632389 | 2 | 17 | 34 | CA   | 10 | 15 |
| 183335 | 22 | 5632697 | 5632712 | 2 | 8  | 16 | CT   | 17 | 5  |
| 183336 | 22 | 5635920 | 5635947 | 2 | 14 | 28 | GT   | 11 | 10 |
| 183337 | 22 | 5640934 | 5640948 | 3 | 5  | 15 | GCC  | 27 | 7  |
| 183340 | 22 | 5642294 | 5642311 | 3 | 6  | 18 | CCT  | 8  | 4  |
| 183341 | 22 | 5643131 | 5643148 | 2 | 9  | 18 | GT   | 7  | 9  |
| 183354 | 22 | 5656621 | 5656646 | 2 | 13 | 26 | TG   | 21 | 6  |
| 183355 | 22 | 5656955 | 5656968 | 2 | 7  | 14 | CA   | 24 | 8  |
| 183356 | 22 | 5657128 | 5657151 | 2 | 12 | 24 | AG   | 11 | 9  |
| 183364 | 22 | 5668255 | 5668290 | 3 | 12 | 36 | CCT  | 7  | 10 |
| 183365 | 22 | 5672487 | 5672498 | 2 | 6  | 12 | AG   | 19 | 4  |
| 183388 | 22 | 5676528 | 5676555 | 4 | 7  | 28 | AAAT | 11 | 3  |
| 183390 | 22 | 5676960 | 5677011 | 2 | 26 | 52 | CT   | 6  | 6  |
| 183391 | 22 | 5677091 | 5677142 | 2 | 26 | 52 | CA   | 6  | 6  |
| 183392 | 22 | 5677286 | 5677337 | 2 | 26 | 52 | TG   | 7  | 8  |
| 183396 | 22 | 5678762 | 5678785 | 2 | 12 | 24 | TG   | 8  | 10 |
| 183397 | 22 | 5678928 | 5678969 | 2 | 21 | 42 | TG   | 6  | 4  |
| 183398 | 22 | 5680392 | 5680423 | 2 | 16 | 32 | TG   | 13 | 12 |
| 183399 | 22 | 5681286 | 5681333 | 2 | 24 | 48 | GT   | 7  | 9  |
| 183402 | 22 | 5689423 | 5689434 | 2 | 6  | 12 | CT   | 24 | 3  |
| 183405 | 22 | 5694942 | 5694957 | 2 | 8  | 16 | AC   | 23 | 3  |
| 183406 | 22 | 5698996 | 5699007 | 2 | 6  | 12 | TA   | 18 | 6  |
| 183407 | 22 | 5700622 | 5700654 | 3 | 11 | 33 | CCT  | 14 | 9  |
| 183408 | 22 | 5700846 | 5700865 | 2 | 10 | 20 | CA   | 16 | 5  |
| 183411 | 22 | 5709370 | 5709401 | 2 | 16 | 32 | GT   | 7  | 7  |
| 183421 | 22 | 5726533 | 5726562 | 2 | 15 | 30 | TG   | 14 | 12 |
| 183423 | 22 | 5726738 | 5726767 | 2 | 15 | 30 | AC   | 13 | 12 |
| 183424 | 22 | 5726886 | 5726901 | 2 | 8  | 16 | TG   | 27 | 3  |
| 183428 | 22 | 5733335 | 5733348 | 2 | 7  | 14 | AC   | 16 | 6  |
| 183430 | 22 | 5735247 | 5735270 | 3 | 8  | 24 | CAG  | 31 | 11 |
| 183431 | 22 | 5736738 | 5736757 | 2 | 10 | 20 | GT   | 19 | 5  |
| 183435 | 22 | 5740834 | 5740847 | 2 | 7  | 14 | CA   | 19 | 8  |
| 183436 | 22 | 5740899 | 5740928 | 2 | 15 | 30 | GT   | 10 | 9  |
| 183439 | 22 | 5744623 | 5744638 | 2 | 8  | 16 | TG   | 24 | 10 |
| 183440 | 22 | 5744680 | 5744703 | 2 | 12 | 24 | TG   | 18 | 7  |
| 183441 | 22 | 5744836 | 5744863 | 2 | 14 | 28 | GT   | 6  | 10 |
| 183442 | 22 | 5745033 | 5745046 | 2 | 7  | 14 | TC   | 23 | 4  |
| 183445 | 22 | 5747628 | 5747651 | 2 | 12 | 24 | AC   | 14 | 11 |

|        |    |         |         |   |    |    |      |    |    |
|--------|----|---------|---------|---|----|----|------|----|----|
| 183447 | 22 | 5750063 | 5750074 | 2 | 6  | 12 | TC   | 22 | 4  |
| 183449 | 22 | 5756232 | 5756255 | 2 | 12 | 24 | GT   | 13 | 7  |
| 183453 | 22 | 5759688 | 5759711 | 2 | 12 | 24 | GT   | 8  | 9  |
| 183454 | 22 | 5759851 | 5759886 | 2 | 18 | 36 | AC   | 9  | 8  |
| 183457 | 22 | 5765806 | 5765833 | 2 | 14 | 28 | CA   | 12 | 7  |
| 183459 | 22 | 5770037 | 5770048 | 2 | 6  | 12 | AG   | 21 | 3  |
| 183460 | 22 | 5770260 | 5770275 | 4 | 4  | 16 | CCGC | 21 | 3  |
| 183462 | 22 | 5770584 | 5770607 | 2 | 12 | 24 | TG   | 17 | 9  |
| 183463 | 22 | 5772867 | 5772890 | 2 | 12 | 24 | AC   | 20 | 10 |
| 183465 | 22 | 5773547 | 5773561 | 3 | 5  | 15 | GGT  | 14 | 4  |
| 183477 | 22 | 5802235 | 5802250 | 2 | 8  | 16 | AC   | 19 | 7  |
| 183481 | 22 | 5808704 | 5808717 | 2 | 7  | 14 | CA   | 17 | 3  |
| 183488 | 22 | 5818577 | 5818598 | 2 | 11 | 22 | GT   | 15 | 7  |
| 183489 | 22 | 5818768 | 5818787 | 2 | 10 | 20 | TG   | 18 | 13 |
| 183490 | 22 | 5819209 | 5819222 | 2 | 7  | 14 | CA   | 11 | 9  |
| 183491 | 22 | 5819326 | 5819345 | 2 | 10 | 20 | AC   | 16 | 15 |
| 183495 | 22 | 5838870 | 5838893 | 2 | 12 | 24 | AC   | 19 | 10 |
| 183496 | 22 | 5842704 | 5842718 | 3 | 5  | 15 | TCC  | 29 | 9  |
| 183499 | 22 | 5846247 | 5846260 | 2 | 7  | 14 | CT   | 9  | 6  |
| 183501 | 22 | 5852291 | 5852318 | 2 | 14 | 28 | CA   | 17 | 10 |
| 183502 | 22 | 5856045 | 5856068 | 2 | 12 | 24 | CA   | 17 | 13 |
| 183503 | 22 | 5856532 | 5856559 | 2 | 14 | 28 | GT   | 6  | 9  |
| 183512 | 22 | 5872463 | 5872476 | 2 | 7  | 14 | GT   | 22 | 12 |
| 183513 | 22 | 5874661 | 5874684 | 2 | 12 | 24 | CA   | 8  | 9  |
| 183514 | 22 | 5875420 | 5875431 | 2 | 6  | 12 | AT   | 19 | 6  |
| 183515 | 22 | 5876892 | 5876915 | 2 | 12 | 24 | AC   | 17 | 14 |
| 183516 | 22 | 5876942 | 5876969 | 2 | 14 | 28 | AC   | 20 | 10 |
| 183517 | 22 | 5876991 | 5877008 | 2 | 9  | 18 | CA   | 19 | 5  |
| 183518 | 22 | 5877104 | 5877121 | 2 | 9  | 18 | AC   | 12 | 11 |
| 183523 | 22 | 5885995 | 5886009 | 3 | 5  | 15 | GAT  | 27 | 3  |
| 183524 | 22 | 5889824 | 5889841 | 2 | 9  | 18 | CA   | 14 | 15 |
| 183526 | 22 | 5894271 | 5894290 | 2 | 10 | 20 | TG   | 22 | 6  |
| 183529 | 22 | 5894702 | 5894717 | 2 | 8  | 16 | CT   | 20 | 9  |
| 183530 | 22 | 5896856 | 5896881 | 2 | 13 | 26 | CA   | 17 | 9  |
| 183531 | 22 | 5896977 | 5897000 | 2 | 12 | 24 | AC   | 10 | 12 |
| 183538 | 22 | 5914562 | 5914573 | 2 | 6  | 12 | AC   | 20 | 5  |
| 183540 | 22 | 5916838 | 5916853 | 2 | 8  | 16 | GT   | 28 | 8  |
| 183541 | 22 | 5916986 | 5917033 | 2 | 24 | 48 | CA   | 7  | 10 |
| 183544 | 22 | 5930004 | 5930015 | 2 | 6  | 12 | AT   | 20 | 8  |
| 183546 | 22 | 5936636 | 5936665 | 2 | 15 | 30 | TG   | 9  | 12 |
| 183550 | 22 | 5944003 | 5944020 | 2 | 9  | 18 | CA   | 21 | 6  |
| 183551 | 22 | 5946908 | 5946931 | 2 | 12 | 24 | GT   | 11 | 16 |
| 183552 | 22 | 5947041 | 5947058 | 2 | 9  | 18 | GT   | 15 | 6  |
| 183553 | 22 | 5948008 | 5948031 | 3 | 8  | 24 | GCT  | 26 | 11 |
| 183560 | 22 | 5963320 | 5963341 | 2 | 11 | 22 | CA   | 19 | 15 |
| 183562 | 22 | 5966893 | 5966907 | 3 | 5  | 15 | CAA  | 15 | 3  |
| 183569 | 22 | 5976507 | 5976520 | 2 | 7  | 14 | GA   | 24 | 3  |
| 183575 | 22 | 6003088 | 6003109 | 2 | 11 | 22 | AC   | 8  | 5  |
| 183581 | 22 | 6007366 | 6007377 | 2 | 6  | 12 | CA   | 17 | 4  |
| 183582 | 22 | 6009783 | 6009794 | 2 | 6  | 12 | CA   | 22 | 4  |
| 183583 | 22 | 6024957 | 6024971 | 3 | 5  | 15 | AGC  | 7  | 4  |

|        |    |         |         |   |    |    |      |    |    |
|--------|----|---------|---------|---|----|----|------|----|----|
| 183594 | 22 | 6049202 | 6049215 | 2 | 7  | 14 | CT   | 28 | 5  |
| 183595 | 22 | 6049670 | 6049683 | 2 | 7  | 14 | CA   | 25 | 10 |
| 183597 | 22 | 6051998 | 6052025 | 2 | 14 | 28 | GA   | 21 | 5  |
| 183598 | 22 | 6054497 | 6054520 | 2 | 12 | 24 | CA   | 7  | 8  |
| 183600 | 22 | 6059420 | 6059451 | 2 | 16 | 32 | CA   | 21 | 7  |
| 183604 | 22 | 6075014 | 6075029 | 2 | 8  | 16 | GT   | 24 | 4  |
| 183605 | 22 | 6075121 | 6075140 | 4 | 5  | 20 | ATGA | 17 | 5  |
| 183611 | 22 | 6083958 | 6083979 | 2 | 11 | 22 | AC   | 15 | 10 |
| 183612 | 22 | 6085549 | 6085569 | 3 | 7  | 21 | AAT  | 23 | 6  |
| 183618 | 22 | 6092192 | 6092217 | 2 | 13 | 26 | GT   | 6  | 10 |
| 183619 | 22 | 6092332 | 6092363 | 2 | 16 | 32 | AC   | 17 | 15 |
| 183626 | 22 | 6104041 | 6104080 | 4 | 10 | 40 | ACAA | 17 | 4  |
| 183630 | 22 | 6108989 | 6109004 | 2 | 8  | 16 | AG   | 25 | 4  |
| 183634 | 22 | 6114039 | 6114070 | 2 | 16 | 32 | CA   | 8  | 10 |
| 183638 | 22 | 6127666 | 6127677 | 2 | 6  | 12 | GT   | 22 | 6  |
| 183640 | 22 | 6128272 | 6128287 | 2 | 8  | 16 | CA   | 15 | 3  |
| 183643 | 22 | 6134976 | 6134991 | 2 | 8  | 16 | CA   | 28 | 6  |
| 183644 | 22 | 6137942 | 6137961 | 2 | 10 | 20 | GT   | 13 | 9  |
| 183646 | 22 | 6139487 | 6139532 | 2 | 23 | 46 | AC   | 10 | 12 |
| 183648 | 22 | 6148416 | 6148431 | 2 | 8  | 16 | CT   | 23 | 5  |
| 183649 | 22 | 6148433 | 6148446 | 2 | 7  | 14 | TC   | 23 | 5  |
| 183651 | 22 | 6149443 | 6149470 | 2 | 14 | 28 | AC   | 18 | 10 |
| 183655 | 22 | 6152434 | 6152461 | 2 | 14 | 28 | CA   | 15 | 11 |
| 183658 | 22 | 6154098 | 6154117 | 2 | 10 | 20 | AC   | 6  | 4  |
| 183659 | 22 | 6155067 | 6155080 | 2 | 7  | 14 | TC   | 33 | 3  |
| 183661 | 22 | 6157478 | 6157497 | 2 | 10 | 20 | TC   | 24 | 6  |
| 183662 | 22 | 6158777 | 6158790 | 2 | 7  | 14 | AC   | 23 | 11 |
| 183663 | 22 | 6159595 | 6159606 | 2 | 6  | 12 | CA   | 19 | 7  |
| 183667 | 22 | 6169325 | 6169336 | 2 | 6  | 12 | CA   | 14 | 3  |
| 183673 | 22 | 6177859 | 6177870 | 2 | 6  | 12 | AC   | 24 | 5  |
| 183674 | 22 | 6179108 | 6179127 | 2 | 10 | 20 | CA   | 16 | 8  |
| 183678 | 22 | 6188436 | 6188450 | 3 | 5  | 15 | CTC  | 27 | 12 |
| 183680 | 22 | 6191760 | 6191781 | 2 | 11 | 22 | GT   | 12 | 5  |
| 183681 | 22 | 6192199 | 6192214 | 4 | 4  | 16 | AAAT | 27 | 7  |
| 183686 | 22 | 6202733 | 6202754 | 2 | 11 | 22 | TG   | 11 | 6  |
| 183687 | 22 | 6204476 | 6204490 | 3 | 5  | 15 | TGC  | 25 | 4  |
| 183688 | 22 | 6204707 | 6204732 | 2 | 13 | 26 | CA   | 21 | 8  |
| 183690 | 22 | 6207651 | 6207664 | 2 | 7  | 14 | GT   | 25 | 6  |
| 183693 | 22 | 6213950 | 6213973 | 2 | 12 | 24 | CA   | 7  | 5  |
| 183698 | 22 | 6227666 | 6227679 | 2 | 7  | 14 | GT   | 14 | 4  |
| 183701 | 22 | 6228419 | 6228450 | 2 | 16 | 32 | AC   | 9  | 9  |
| 183712 | 22 | 6242738 | 6242751 | 2 | 7  | 14 | GT   | 28 | 8  |
| 183721 | 22 | 6248130 | 6248149 | 2 | 10 | 20 | TC   | 19 | 3  |
| 183725 | 22 | 6253429 | 6253450 | 2 | 11 | 22 | CA   | 11 | 7  |
| 183726 | 22 | 6254691 | 6254716 | 2 | 13 | 26 | TG   | 11 | 9  |
| 183727 | 22 | 6255662 | 6255719 | 2 | 29 | 58 | TG   | 14 | 8  |
| 183730 | 22 | 6259966 | 6259981 | 2 | 8  | 16 | TG   | 10 | 6  |
| 183733 | 22 | 6263804 | 6263831 | 2 | 14 | 28 | TG   | 15 | 16 |
| 183739 | 22 | 6270463 | 6270496 | 2 | 17 | 34 | GT   | 17 | 13 |
| 183742 | 22 | 6271914 | 6271947 | 2 | 17 | 34 | TG   | 8  | 7  |
| 183743 | 22 | 6273262 | 6273277 | 2 | 8  | 16 | AT   | 12 | 15 |

|        |    |         |         |   |    |    |      |    |    |
|--------|----|---------|---------|---|----|----|------|----|----|
| 183745 | 22 | 6273850 | 6273867 | 2 | 9  | 18 | TG   | 23 | 4  |
| 183748 | 22 | 6276145 | 6276158 | 2 | 7  | 14 | CA   | 12 | 4  |
| 183750 | 22 | 6279284 | 6279303 | 2 | 10 | 20 | AC   | 14 | 7  |
| 183757 | 22 | 6288239 | 6288254 | 2 | 8  | 16 | AT   | 9  | 8  |
| 183759 | 22 | 6290148 | 6290167 | 4 | 5  | 20 | AAAG | 24 | 4  |
| 183763 | 22 | 6292064 | 6292083 | 2 | 10 | 20 | GT   | 21 | 10 |
| 183765 | 22 | 6295517 | 6295532 | 2 | 8  | 16 | CT   | 23 | 5  |
| 183770 | 22 | 6306861 | 6306876 | 2 | 8  | 16 | CA   | 20 | 5  |
| 183772 | 22 | 6307130 | 6307149 | 2 | 10 | 20 | TC   | 18 | 5  |
| 183773 | 22 | 6307417 | 6307466 | 2 | 25 | 50 | CA   | 12 | 11 |
| 183775 | 22 | 6309949 | 6309964 | 2 | 8  | 16 | GT   | 9  | 7  |
| 183780 | 22 | 6313832 | 6313861 | 2 | 15 | 30 | GT   | 9  | 7  |
| 183784 | 22 | 6327982 | 6328031 | 2 | 25 | 50 | GT   | 9  | 9  |
| 183786 | 22 | 6328945 | 6328974 | 2 | 15 | 30 | GT   | 7  | 8  |
| 183789 | 22 | 6337253 | 6337264 | 2 | 6  | 12 | TG   | 27 | 3  |
| 183792 | 22 | 6341374 | 6341387 | 2 | 7  | 14 | GT   | 28 | 4  |
| 183794 | 22 | 6341500 | 6341521 | 2 | 11 | 22 | AG   | 10 | 6  |
| 183796 | 22 | 6343008 | 6343021 | 2 | 7  | 14 | TG   | 34 | 5  |
| 183797 | 22 | 6343298 | 6343312 | 3 | 5  | 15 | TTA  | 17 | 3  |
| 183802 | 22 | 6352703 | 6352726 | 4 | 6  | 24 | GTAT | 11 | 8  |
| 183805 | 22 | 6358766 | 6358777 | 2 | 6  | 12 | AG   | 11 | 6  |
| 183809 | 22 | 6363205 | 6363248 | 4 | 11 | 44 | TATC | 15 | 11 |
| 183836 | 22 | 6400982 | 6401021 | 2 | 20 | 40 | GT   | 7  | 11 |
| 183841 | 22 | 6411084 | 6411103 | 2 | 10 | 20 | GA   | 9  | 6  |
| 183847 | 22 | 6411802 | 6411821 | 4 | 5  | 20 | ACAG | 17 | 9  |
| 183850 | 22 | 6412583 | 6412600 | 2 | 9  | 18 | CA   | 13 | 3  |
| 183851 | 22 | 6412770 | 6412801 | 2 | 16 | 32 | AC   | 7  | 9  |
| 183854 | 22 | 6422513 | 6422528 | 4 | 4  | 16 | TTTA | 17 | 3  |
| 183855 | 22 | 6424481 | 6424500 | 4 | 5  | 20 | CCTT | 18 | 7  |
| 183857 | 22 | 6426560 | 6426583 | 2 | 12 | 24 | AC   | 15 | 9  |
| 183859 | 22 | 6429220 | 6429267 | 3 | 16 | 48 | CAG  | 19 | 9  |
| 183865 | 22 | 6442131 | 6442148 | 2 | 9  | 18 | TG   | 18 | 7  |
| 183872 | 22 | 6447525 | 6447542 | 2 | 9  | 18 | TG   | 12 | 12 |
| 183873 | 22 | 6447730 | 6447741 | 2 | 6  | 12 | TG   | 22 | 4  |
| 183875 | 22 | 6450833 | 6450850 | 2 | 9  | 18 | CA   | 8  | 3  |
| 183878 | 22 | 6453670 | 6453685 | 2 | 8  | 16 | AC   | 7  | 7  |
| 183884 | 22 | 6469924 | 6469935 | 2 | 6  | 12 | TA   | 18 | 4  |
| 183885 | 22 | 6470806 | 6470841 | 2 | 18 | 36 | TG   | 11 | 12 |
| 183887 | 22 | 6474460 | 6474481 | 2 | 11 | 22 | CA   | 20 | 11 |
| 183888 | 22 | 6476317 | 6476340 | 2 | 12 | 24 | CA   | 22 | 12 |
| 183891 | 22 | 6481218 | 6481233 | 2 | 8  | 16 | AC   | 24 | 8  |
| 183893 | 22 | 6484193 | 6484204 | 2 | 6  | 12 | TG   | 20 | 13 |
| 183894 | 22 | 6484418 | 6484439 | 2 | 11 | 22 | TG   | 27 | 10 |
| 183895 | 22 | 6489373 | 6489392 | 2 | 10 | 20 | GA   | 25 | 3  |
| 183896 | 22 | 6496387 | 6496410 | 2 | 12 | 24 | GT   | 15 | 9  |
| 183901 | 22 | 6525396 | 6525411 | 4 | 4  | 16 | TACT | 13 | 4  |
| 183902 | 22 | 6541330 | 6541368 | 3 | 13 | 39 | GTT  | 19 | 13 |
| 183904 | 22 | 6547215 | 6547246 | 2 | 16 | 32 | GT   | 14 | 11 |
| 183908 | 22 | 6553303 | 6553317 | 3 | 5  | 15 | GCA  | 30 | 3  |
| 183909 | 22 | 6554366 | 6554379 | 2 | 7  | 14 | TG   | 28 | 14 |
| 183913 | 22 | 6567349 | 6567376 | 2 | 14 | 28 | CA   | 24 | 13 |

|        |    |         |         |   |    |    |      |    |    |
|--------|----|---------|---------|---|----|----|------|----|----|
| 183915 | 22 | 6573726 | 6573741 | 4 | 4  | 16 | CAAA | 19 | 3  |
| 183920 | 22 | 6590624 | 6590637 | 2 | 7  | 14 | CT   | 16 | 4  |
| 183921 | 22 | 6591747 | 6591761 | 3 | 5  | 15 | AAC  | 9  | 5  |
| 183928 | 22 | 6613207 | 6613234 | 4 | 7  | 28 | GAAT | 9  | 4  |
| 183935 | 22 | 6632127 | 6632160 | 2 | 17 | 34 | CA   | 7  | 9  |
| 183941 | 22 | 6635690 | 6635709 | 2 | 10 | 20 | GT   | 21 | 5  |
| 183942 | 22 | 6637624 | 6637649 | 2 | 13 | 26 | GT   | 18 | 11 |
| 183943 | 22 | 6637823 | 6637860 | 2 | 19 | 38 | AC   | 7  | 8  |
| 183945 | 22 | 6638408 | 6638433 | 2 | 13 | 26 | GT   | 12 | 6  |
| 183951 | 22 | 6647025 | 6647056 | 2 | 16 | 32 | AC   | 6  | 5  |
| 183954 | 22 | 6650345 | 6650370 | 2 | 13 | 26 | AC   | 8  | 6  |
| 183955 | 22 | 6652177 | 6652192 | 2 | 8  | 16 | TG   | 17 | 8  |
| 183959 | 22 | 6652900 | 6652913 | 2 | 7  | 14 | AC   | 17 | 6  |
| 183960 | 22 | 6654309 | 6654335 | 3 | 9  | 27 | GCT  | 26 | 4  |
| 183961 | 22 | 6655544 | 6655579 | 2 | 18 | 36 | TG   | 11 | 7  |
| 183963 | 22 | 6663896 | 6663943 | 3 | 16 | 48 | ATT  | 6  | 5  |
| 183967 | 22 | 6666371 | 6666394 | 2 | 12 | 24 | GT   | 18 | 8  |
| 183968 | 22 | 6667783 | 6667806 | 2 | 12 | 24 | CA   | 23 | 14 |
| 183969 | 22 | 6669064 | 6669093 | 2 | 15 | 30 | CT   | 9  | 10 |
| 183972 | 22 | 6674198 | 6674219 | 2 | 11 | 22 | GT   | 16 | 12 |
| 183974 | 22 | 6676503 | 6676528 | 2 | 13 | 26 | TG   | 14 | 18 |
| 183976 | 22 | 6677228 | 6677241 | 2 | 7  | 14 | TC   | 34 | 3  |
| 183980 | 22 | 6686460 | 6686495 | 4 | 9  | 36 | TTTA | 19 | 11 |
| 183981 | 22 | 6692306 | 6692321 | 2 | 8  | 16 | CA   | 28 | 13 |
| 183982 | 22 | 6693570 | 6693584 | 3 | 5  | 15 | TTG  | 20 | 6  |
| 183984 | 22 | 6695795 | 6695806 | 2 | 6  | 12 | AC   | 25 | 3  |
| 183985 | 22 | 6695982 | 6696009 | 2 | 14 | 28 | TG   | 12 | 8  |
| 183987 | 22 | 6696170 | 6696191 | 2 | 11 | 22 | GT   | 16 | 9  |
| 183989 | 22 | 6702846 | 6702875 | 2 | 15 | 30 | TG   | 20 | 7  |
| 183991 | 22 | 6709568 | 6709599 | 2 | 16 | 32 | GT   | 9  | 10 |
| 183992 | 22 | 6711221 | 6711232 | 2 | 6  | 12 | TG   | 8  | 4  |
| 183993 | 22 | 6712937 | 6712976 | 2 | 20 | 40 | GT   | 12 | 7  |
| 184010 | 22 | 6735945 | 6735960 | 2 | 8  | 16 | GT   | 18 | 7  |
| 184011 | 22 | 6745749 | 6745770 | 2 | 11 | 22 | TG   | 17 | 8  |
| 184016 | 22 | 6759949 | 6759963 | 3 | 5  | 15 | AAT  | 25 | 4  |
| 184017 | 22 | 6762779 | 6762818 | 2 | 20 | 40 | CA   | 11 | 14 |
| 184018 | 22 | 6762912 | 6762939 | 2 | 14 | 28 | AC   | 16 | 11 |
| 184019 | 22 | 6764354 | 6764365 | 2 | 6  | 12 | GT   | 24 | 7  |
| 184020 | 22 | 6767670 | 6767687 | 2 | 9  | 18 | GT   | 24 | 14 |
| 184021 | 22 | 6767728 | 6767751 | 3 | 8  | 24 | CCT  | 20 | 7  |
| 184022 | 22 | 6768521 | 6768534 | 2 | 7  | 14 | CT   | 27 | 3  |
| 184025 | 22 | 6771855 | 6771900 | 2 | 23 | 46 | GT   | 11 | 11 |
| 184026 | 22 | 6772040 | 6772087 | 2 | 24 | 48 | GT   | 11 | 12 |
| 184029 | 22 | 6779315 | 6779348 | 2 | 17 | 34 | GT   | 13 | 6  |
| 184030 | 22 | 6779481 | 6779502 | 2 | 11 | 22 | TG   | 15 | 11 |
| 184032 | 22 | 6782287 | 6782300 | 2 | 7  | 14 | AG   | 33 | 3  |
| 184033 | 22 | 6783725 | 6783736 | 2 | 6  | 12 | TA   | 26 | 3  |
| 184034 | 22 | 6785304 | 6785325 | 2 | 11 | 22 | CA   | 15 | 14 |
| 184035 | 22 | 6788818 | 6788829 | 2 | 6  | 12 | TA   | 26 | 5  |
| 184038 | 22 | 6799468 | 6799488 | 3 | 7  | 21 | GAG  | 22 | 6  |
| 184039 | 22 | 6804228 | 6804245 | 2 | 9  | 18 | AC   | 19 | 8  |



|        |    |         |         |   |    |    |      |    |    |
|--------|----|---------|---------|---|----|----|------|----|----|
| 184041 | 22 | 6809769 | 6809786 | 3 | 6  | 18 | ATC  | 19 | 6  |
| 184044 | 22 | 6837216 | 6837235 | 2 | 10 | 20 | TG   | 16 | 6  |
| 184045 | 22 | 6845119 | 6845160 | 2 | 21 | 42 | AC   | 9  | 5  |
| 184047 | 22 | 6851116 | 6851127 | 2 | 6  | 12 | TG   | 17 | 4  |
| 184048 | 22 | 6851490 | 6851503 | 2 | 7  | 14 | GT   | 16 | 11 |
| 184049 | 22 | 6851608 | 6851645 | 2 | 19 | 38 | AC   | 15 | 11 |
| 184052 | 22 | 6855708 | 6855725 | 2 | 9  | 18 | CA   | 17 | 5  |
| 184054 | 22 | 6859225 | 6859239 | 3 | 5  | 15 | ATG  | 32 | 7  |
| 184055 | 22 | 6859431 | 6859458 | 2 | 14 | 28 | GT   | 9  | 7  |
| 184057 | 22 | 6860068 | 6860079 | 2 | 6  | 12 | GT   | 22 | 6  |
| 184060 | 22 | 6860404 | 6860437 | 2 | 17 | 34 | GT   | 13 | 10 |
| 184062 | 22 | 6864298 | 6864321 | 3 | 8  | 24 | GAT  | 23 | 5  |
| 184063 | 22 | 6867731 | 6867754 | 2 | 12 | 24 | GT   | 15 | 7  |
| 184064 | 22 | 6871198 | 6871243 | 2 | 23 | 46 | TG   | 13 | 8  |
| 184065 | 22 | 6872559 | 6872598 | 2 | 20 | 40 | TG   | 16 | 12 |
| 184066 | 22 | 6872650 | 6872667 | 2 | 9  | 18 | TG   | 11 | 5  |
| 184071 | 22 | 6879320 | 6879345 | 2 | 13 | 26 | CA   | 16 | 13 |
| 184073 | 22 | 6882770 | 6882787 | 2 | 9  | 18 | GT   | 13 | 14 |
| 184075 | 22 | 6882885 | 6882906 | 2 | 11 | 22 | GT   | 13 | 7  |
| 184076 | 22 | 6884314 | 6884331 | 3 | 6  | 18 | GAT  | 32 | 8  |
| 184077 | 22 | 6885452 | 6885465 | 2 | 7  | 14 | CA   | 23 | 5  |
| 184078 | 22 | 6887308 | 6887339 | 2 | 16 | 32 | GT   | 13 | 6  |
| 184079 | 22 | 6887413 | 6887444 | 2 | 16 | 32 | GT   | 16 | 8  |
| 184080 | 22 | 6887554 | 6887587 | 2 | 17 | 34 | GT   | 9  | 8  |
| 184083 | 22 | 6887845 | 6887859 | 3 | 5  | 15 | TTC  | 24 | 4  |
| 184084 | 22 | 6888785 | 6888820 | 2 | 18 | 36 | TG   | 11 | 10 |
| 184089 | 22 | 6894771 | 6894790 | 2 | 10 | 20 | CA   | 13 | 10 |
| 184090 | 22 | 6897191 | 6897224 | 2 | 17 | 34 | CA   | 17 | 11 |
| 184091 | 22 | 6898188 | 6898219 | 2 | 16 | 32 | TG   | 21 | 8  |
| 184092 | 22 | 6898247 | 6898267 | 3 | 7  | 21 | CCT  | 27 | 3  |
| 184094 | 22 | 6898694 | 6898711 | 3 | 6  | 18 | AAG  | 25 | 7  |
| 184103 | 22 | 6914532 | 6914547 | 2 | 8  | 16 | AC   | 19 | 4  |
| 184105 | 22 | 6917199 | 6917226 | 2 | 14 | 28 | AC   | 9  | 10 |
| 184110 | 22 | 6920052 | 6920085 | 2 | 17 | 34 | CA   | 7  | 12 |
| 184111 | 22 | 6920165 | 6920208 | 2 | 22 | 44 | CA   | 11 | 11 |
| 184114 | 22 | 6922580 | 6922617 | 2 | 19 | 38 | TG   | 6  | 7  |
| 184117 | 22 | 6925217 | 6925234 | 2 | 9  | 18 | AC   | 8  | 10 |
| 184118 | 22 | 6925236 | 6925253 | 2 | 9  | 18 | CA   | 10 | 12 |
| 184119 | 22 | 6928169 | 6928200 | 2 | 16 | 32 | TC   | 11 | 14 |
| 184120 | 22 | 6928355 | 6928394 | 2 | 20 | 40 | CA   | 14 | 14 |
| 184121 | 22 | 6928420 | 6928457 | 2 | 19 | 38 | AC   | 15 | 8  |
| 184130 | 22 | 6933073 | 6933092 | 4 | 5  | 20 | TGTT | 12 | 3  |
| 184133 | 22 | 6934397 | 6934444 | 2 | 24 | 48 | CA   | 15 | 17 |
| 184134 | 22 | 6937564 | 6937611 | 2 | 24 | 48 | AC   | 9  | 9  |
| 184135 | 22 | 6938357 | 6938372 | 2 | 8  | 16 | CA   | 10 | 6  |
| 184136 | 22 | 6938375 | 6938392 | 2 | 9  | 18 | CA   | 14 | 10 |
| 184137 | 22 | 6940429 | 6940464 | 2 | 18 | 36 | CA   | 16 | 13 |
| 184138 | 22 | 6941004 | 6941033 | 2 | 15 | 30 | GT   | 18 | 15 |
| 184139 | 22 | 6942878 | 6942901 | 2 | 12 | 24 | CA   | 6  | 3  |
| 184141 | 22 | 6944938 | 6944971 | 2 | 17 | 34 | CA   | 12 | 10 |
| 184143 | 22 | 6946854 | 6946885 | 2 | 16 | 32 | AC   | 10 | 4  |

|        |    |         |         |   |    |    |     |    |    |
|--------|----|---------|---------|---|----|----|-----|----|----|
| 184144 | 22 | 6947173 | 6947200 | 2 | 14 | 28 | CA  | 15 | 9  |
| 184146 | 22 | 6951272 | 6951283 | 2 | 6  | 12 | GT  | 20 | 4  |
| 184147 | 22 | 6951324 | 6951339 | 2 | 8  | 16 | CA  | 21 | 10 |
| 184148 | 22 | 6952934 | 6952948 | 3 | 5  | 15 | TGA | 23 | 13 |
| 184149 | 22 | 6953260 | 6953298 | 3 | 13 | 39 | TGA | 21 | 8  |
| 184152 | 22 | 6955000 | 6955021 | 2 | 11 | 22 | AC  | 13 | 15 |
| 184153 | 22 | 6955820 | 6955849 | 2 | 15 | 30 | GA  | 20 | 10 |
| 184157 | 22 | 6963111 | 6963142 | 2 | 16 | 32 | TG  | 14 | 14 |
| 184159 | 22 | 6967747 | 6967770 | 2 | 12 | 24 | TG  | 12 | 9  |
| 184160 | 22 | 6967887 | 6967902 | 2 | 8  | 16 | GT  | 22 | 13 |
| 184161 | 22 | 6968137 | 6968148 | 2 | 6  | 12 | TG  | 35 | 3  |
| 184162 | 22 | 6968202 | 6968241 | 2 | 20 | 40 | TG  | 15 | 15 |
| 184163 | 22 | 6972601 | 6972626 | 2 | 13 | 26 | GT  | 19 | 9  |
| 184176 | 22 | 6992314 | 6992339 | 2 | 13 | 26 | CA  | 17 | 9  |
| 184177 | 22 | 6994698 | 6994717 | 2 | 10 | 20 | TG  | 19 | 3  |
| 184178 | 22 | 6995091 | 6995114 | 3 | 8  | 24 | TGT | 26 | 10 |
| 184181 | 22 | 6995451 | 6995464 | 2 | 7  | 14 | AC  | 13 | 11 |
| 184183 | 22 | 6998191 | 6998205 | 3 | 5  | 15 | GAG | 21 | 4  |
| 184184 | 22 | 7001994 | 7002023 | 3 | 10 | 30 | AGG | 12 | 5  |
| 184185 | 22 | 7005724 | 7005761 | 2 | 19 | 38 | GT  | 11 | 12 |
| 184186 | 22 | 7005899 | 7005928 | 2 | 15 | 30 | TG  | 14 | 15 |
| 184189 | 22 | 7012453 | 7012467 | 3 | 5  | 15 | TCC | 20 | 4  |
| 184190 | 22 | 7013105 | 7013125 | 3 | 7  | 21 | AGC | 28 | 6  |
| 184191 | 22 | 7017674 | 7017701 | 2 | 14 | 28 | TG  | 8  | 9  |
| 184192 | 22 | 7017799 | 7017850 | 2 | 26 | 52 | TG  | 9  | 12 |
| 184193 | 22 | 7018021 | 7018042 | 2 | 11 | 22 | GT  | 17 | 9  |
| 184195 | 22 | 7018821 | 7018834 | 2 | 7  | 14 | TG  | 26 | 3  |
| 184196 | 22 | 7019425 | 7019460 | 2 | 18 | 36 | GT  | 19 | 11 |
| 184197 | 22 | 7019848 | 7019877 | 2 | 15 | 30 | AC  | 15 | 7  |
| 184198 | 22 | 7023481 | 7023506 | 2 | 13 | 26 | GT  | 12 | 8  |
| 184199 | 22 | 7023776 | 7023803 | 2 | 14 | 28 | TG  | 13 | 9  |
| 184200 | 22 | 7023915 | 7023936 | 2 | 11 | 22 | CA  | 16 | 6  |
| 184201 | 22 | 7027065 | 7027080 | 2 | 8  | 16 | AC  | 16 | 6  |
| 184202 | 22 | 7032793 | 7032812 | 2 | 10 | 20 | AC  | 16 | 13 |
| 184203 | 22 | 7040047 | 7040079 | 3 | 11 | 33 | ATA | 14 | 4  |
| 184204 | 22 | 7040317 | 7040332 | 2 | 8  | 16 | AT  | 15 | 4  |
| 184205 | 22 | 7044563 | 7044577 | 3 | 5  | 15 | AGC | 29 | 5  |
| 184206 | 22 | 7045872 | 7045883 | 2 | 6  | 12 | AG  | 9  | 6  |
| 184207 | 22 | 7045885 | 7045896 | 2 | 6  | 12 | GA  | 19 | 9  |
| 184210 | 22 | 7046707 | 7046727 | 3 | 7  | 21 | TCT | 27 | 5  |
| 184211 | 22 | 7047444 | 7047458 | 3 | 5  | 15 | CTC | 21 | 3  |
| 184212 | 22 | 7047625 | 7047654 | 2 | 15 | 30 | GT  | 7  | 7  |
| 184216 | 22 | 7049957 | 7049980 | 2 | 12 | 24 | CA  | 17 | 4  |
| 184217 | 22 | 7050920 | 7050957 | 2 | 19 | 38 | AC  | 7  | 12 |
| 184218 | 22 | 7051049 | 7051070 | 2 | 11 | 22 | AC  | 17 | 11 |
| 184219 | 22 | 7051297 | 7051334 | 2 | 19 | 38 | TG  | 13 | 12 |
| 184220 | 22 | 7051455 | 7051486 | 2 | 16 | 32 | TG  | 10 | 10 |
| 184223 | 22 | 7051769 | 7051796 | 2 | 14 | 28 | AC  | 10 | 10 |
| 184224 | 22 | 7053391 | 7053422 | 2 | 16 | 32 | TG  | 6  | 5  |
| 184225 | 22 | 7054543 | 7054560 | 2 | 9  | 18 | GT  | 15 | 12 |
| 184226 | 22 | 7054680 | 7054705 | 2 | 13 | 26 | AC  | 21 | 13 |

|        |    |         |         |   |    |    |      |    |    |
|--------|----|---------|---------|---|----|----|------|----|----|
| 184227 | 22 | 7054743 | 7054766 | 2 | 12 | 24 | GT   | 14 | 7  |
| 184235 | 22 | 7059214 | 7059255 | 2 | 21 | 42 | GT   | 9  | 12 |
| 184236 | 22 | 7059383 | 7059400 | 2 | 9  | 18 | AC   | 14 | 5  |
| 184238 | 22 | 7060436 | 7060461 | 2 | 13 | 26 | GT   | 12 | 12 |
| 184239 | 22 | 7061627 | 7061656 | 2 | 15 | 30 | AC   | 23 | 8  |
| 184241 | 22 | 7063112 | 7063135 | 2 | 12 | 24 | GT   | 11 | 13 |
| 184246 | 22 | 7063462 | 7063517 | 2 | 28 | 56 | CA   | 6  | 7  |
| 184248 | 22 | 7066719 | 7066736 | 2 | 9  | 18 | AC   | 18 | 3  |
| 184249 | 22 | 7066766 | 7066795 | 2 | 15 | 30 | AC   | 11 | 9  |
| 184260 | 22 | 7080150 | 7080177 | 2 | 14 | 28 | AC   | 10 | 9  |
| 184261 | 22 | 7080257 | 7080274 | 2 | 9  | 18 | AC   | 14 | 4  |
| 184262 | 22 | 7080324 | 7080337 | 2 | 7  | 14 | AC   | 14 | 4  |
| 184263 | 22 | 7083413 | 7083444 | 2 | 16 | 32 | CA   | 15 | 13 |
| 184264 | 22 | 7084396 | 7084409 | 2 | 7  | 14 | TC   | 21 | 14 |
| 184265 | 22 | 7084410 | 7084425 | 2 | 8  | 16 | AC   | 20 | 13 |
| 184266 | 22 | 7084536 | 7084569 | 2 | 17 | 34 | CA   | 14 | 15 |
| 184267 | 22 | 7084698 | 7084717 | 2 | 10 | 20 | CA   | 18 | 10 |
| 184268 | 22 | 7087975 | 7087996 | 2 | 11 | 22 | TG   | 19 | 10 |
| 184270 | 22 | 7088440 | 7088469 | 2 | 15 | 30 | GT   | 13 | 10 |
| 184271 | 22 | 7089812 | 7089871 | 2 | 30 | 60 | GT   | 6  | 9  |
| 184276 | 22 | 7091714 | 7091745 | 2 | 16 | 32 | AC   | 14 | 12 |
| 184278 | 22 | 7096150 | 7096170 | 3 | 7  | 21 | CCT  | 23 | 4  |
| 184280 | 22 | 7096871 | 7096886 | 4 | 4  | 16 | GGAT | 20 | 5  |
| 184282 | 22 | 7099599 | 7099619 | 3 | 7  | 21 | CTC  | 23 | 4  |
| 184285 | 22 | 7106450 | 7106475 | 2 | 13 | 26 | GT   | 9  | 10 |
| 184287 | 22 | 7110206 | 7110229 | 4 | 6  | 24 | CTAT | 7  | 8  |
| 184288 | 22 | 7112525 | 7112536 | 2 | 6  | 12 | AC   | 26 | 3  |
| 184290 | 22 | 7112829 | 7112843 | 3 | 5  | 15 | AGA  | 21 | 9  |
| 184291 | 22 | 7112972 | 7112997 | 2 | 13 | 26 | TG   | 13 | 13 |
| 184292 | 22 | 7113442 | 7113468 | 3 | 9  | 27 | CTC  | 18 | 4  |
| 184293 | 22 | 7114289 | 7114324 | 2 | 18 | 36 | AC   | 9  | 7  |
| 184297 | 22 | 7115950 | 7115983 | 2 | 17 | 34 | TG   | 9  | 9  |
| 184299 | 22 | 7116064 | 7116103 | 2 | 20 | 40 | CA   | 11 | 19 |
| 184300 | 22 | 7118474 | 7118505 | 2 | 16 | 32 | AC   | 13 | 12 |
| 184302 | 22 | 7120116 | 7120157 | 2 | 21 | 42 | GT   | 8  | 9  |
| 184303 | 22 | 7124077 | 7124094 | 2 | 9  | 18 | GT   | 24 | 3  |
| 184305 | 22 | 7125122 | 7125142 | 3 | 7  | 21 | CCT  | 15 | 8  |
| 184306 | 22 | 7125442 | 7125459 | 3 | 6  | 18 | TCC  | 16 | 3  |
| 184307 | 22 | 7125607 | 7125621 | 3 | 5  | 15 | GCA  | 31 | 3  |
| 184310 | 22 | 7128938 | 7128963 | 2 | 13 | 26 | GT   | 25 | 10 |
| 184311 | 22 | 7130649 | 7130670 | 2 | 11 | 22 | GT   | 9  | 7  |
| 184313 | 22 | 7133761 | 7133782 | 2 | 11 | 22 | GT   | 17 | 7  |
| 184314 | 22 | 7142819 | 7142836 | 2 | 9  | 18 | AC   | 18 | 11 |
| 184316 | 22 | 7147171 | 7147198 | 2 | 14 | 28 | AC   | 13 | 8  |
| 184318 | 22 | 7150392 | 7150427 | 2 | 18 | 36 | TG   | 9  | 11 |
| 184322 | 22 | 7169441 | 7169474 | 2 | 17 | 34 | AC   | 8  | 12 |
| 184323 | 22 | 7171596 | 7171616 | 3 | 7  | 21 | ATC  | 25 | 9  |
| 184324 | 22 | 7171788 | 7171799 | 2 | 6  | 12 | CT   | 28 | 3  |
| 184327 | 22 | 7176687 | 7176724 | 2 | 19 | 38 | TG   | 7  | 8  |
| 184330 | 22 | 7179103 | 7179153 | 3 | 17 | 51 | ATG  | 22 | 7  |
| 184332 | 22 | 7180146 | 7180172 | 3 | 9  | 27 | AGG  | 22 | 4  |

|        |    |         |         |   |    |    |      |    |    |
|--------|----|---------|---------|---|----|----|------|----|----|
| 184333 | 22 | 7184659 | 7184688 | 3 | 10 | 30 | GAA  | 17 | 13 |
| 184334 | 22 | 7184826 | 7184859 | 2 | 17 | 34 | CA   | 15 | 14 |
| 184336 | 22 | 7196901 | 7196924 | 2 | 12 | 24 | CA   | 9  | 7  |
| 184337 | 22 | 7197807 | 7197818 | 2 | 6  | 12 | AC   | 24 | 3  |
| 184338 | 22 | 7197861 | 7197888 | 2 | 14 | 28 | TG   | 9  | 11 |
| 184342 | 22 | 7200899 | 7200940 | 2 | 21 | 42 | GT   | 8  | 9  |
| 184343 | 22 | 7202621 | 7202638 | 2 | 9  | 18 | CA   | 18 | 11 |
| 184345 | 22 | 7213014 | 7213035 | 2 | 11 | 22 | CA   | 9  | 8  |
| 184352 | 22 | 7220342 | 7220371 | 2 | 15 | 30 | TG   | 13 | 7  |
| 184356 | 22 | 7224885 | 7224922 | 2 | 19 | 38 | AC   | 16 | 11 |
| 184357 | 22 | 7225029 | 7225058 | 2 | 15 | 30 | AC   | 9  | 11 |
| 184359 | 22 | 7229199 | 7229210 | 2 | 6  | 12 | CT   | 20 | 4  |
| 184365 | 22 | 7236927 | 7236954 | 2 | 14 | 28 | CA   | 15 | 10 |
| 184366 | 22 | 7237110 | 7237123 | 2 | 7  | 14 | CA   | 12 | 8  |
| 184367 | 22 | 7237126 | 7237141 | 2 | 8  | 16 | CA   | 17 | 15 |
| 184374 | 22 | 7240289 | 7240318 | 2 | 15 | 30 | GT   | 11 | 9  |
| 184376 | 22 | 7241457 | 7241472 | 2 | 8  | 16 | AC   | 13 | 7  |
| 184381 | 22 | 7243533 | 7243550 | 2 | 9  | 18 | CA   | 20 | 6  |
| 184385 | 22 | 7245512 | 7245525 | 2 | 7  | 14 | AC   | 7  | 4  |
| 184386 | 22 | 7245556 | 7245603 | 2 | 24 | 48 | TC   | 9  | 11 |
| 184387 | 22 | 7245683 | 7245702 | 4 | 5  | 20 | GACG | 17 | 3  |
| 184392 | 22 | 7248310 | 7248329 | 4 | 5  | 20 | ATTT | 25 | 4  |
| 184393 | 22 | 7248991 | 7249004 | 2 | 7  | 14 | CT   | 22 | 5  |
| 184394 | 22 | 7249533 | 7249552 | 2 | 10 | 20 | GT   | 17 | 9  |
| 184397 | 22 | 7249723 | 7249740 | 3 | 6  | 18 | CCT  | 17 | 8  |
| 184400 | 22 | 7250146 | 7250159 | 2 | 7  | 14 | TG   | 24 | 3  |
| 184403 | 22 | 7250955 | 7250994 | 2 | 20 | 40 | GT   | 10 | 11 |
| 184405 | 22 | 7251142 | 7251157 | 4 | 4  | 16 | CCTT | 15 | 7  |
| 184411 | 22 | 7251944 | 7251983 | 2 | 20 | 40 | TG   | 9  | 14 |
| 184414 | 22 | 7252709 | 7252730 | 2 | 11 | 22 | AC   | 13 | 6  |
| 184415 | 22 | 7252876 | 7252891 | 2 | 8  | 16 | TC   | 25 | 3  |
| 184419 | 22 | 7255912 | 7255937 | 2 | 13 | 26 | TG   | 14 | 11 |
| 184420 | 22 | 7256144 | 7256159 | 2 | 8  | 16 | TG   | 17 | 11 |
| 184421 | 22 | 7256891 | 7256905 | 3 | 5  | 15 | TGA  | 6  | 7  |
| 184424 | 22 | 7258201 | 7258218 | 2 | 9  | 18 | AC   | 17 | 8  |
| 184425 | 22 | 7259291 | 7259310 | 2 | 10 | 20 | AC   | 19 | 7  |
| 184426 | 22 | 7259348 | 7259367 | 2 | 10 | 20 | TG   | 10 | 11 |
| 184427 | 22 | 7259416 | 7259443 | 2 | 14 | 28 | AC   | 20 | 13 |
| 184428 | 22 | 7259580 | 7259609 | 2 | 15 | 30 | GT   | 19 | 15 |
| 184429 | 22 | 7260670 | 7260719 | 2 | 25 | 50 | AC   | 6  | 9  |
| 184430 | 22 | 7260758 | 7260781 | 2 | 12 | 24 | TG   | 19 | 8  |
| 184437 | 22 | 7261100 | 7261121 | 2 | 11 | 22 | CA   | 12 | 9  |
| 184444 | 22 | 7262573 | 7262598 | 2 | 13 | 26 | GT   | 7  | 8  |
| 184447 | 22 | 7265337 | 7265350 | 2 | 7  | 14 | AC   | 25 | 3  |
| 184448 | 22 | 7265462 | 7265477 | 4 | 4  | 16 | GGAA | 21 | 12 |
| 184453 | 22 | 7266423 | 7266476 | 2 | 27 | 54 | CA   | 8  | 12 |
| 184456 | 22 | 7266780 | 7266817 | 2 | 19 | 38 | CA   | 7  | 8  |
| 184461 | 22 | 7268369 | 7268394 | 2 | 13 | 26 | AC   | 10 | 14 |
| 184463 | 22 | 7269513 | 7269554 | 2 | 21 | 42 | AC   | 11 | 8  |
| 184468 | 22 | 7270018 | 7270045 | 2 | 14 | 28 | TG   | 8  | 8  |
| 184470 | 22 | 7273599 | 7273616 | 2 | 9  | 18 | TC   | 23 | 8  |

|        |    |         |         |   |    |    |      |    |    |
|--------|----|---------|---------|---|----|----|------|----|----|
| 184473 | 22 | 7275668 | 7275699 | 2 | 16 | 32 | TG   | 12 | 10 |
| 184474 | 22 | 7276357 | 7276386 | 3 | 10 | 30 | TGA  | 20 | 5  |
| 184477 | 22 | 7279396 | 7279451 | 2 | 28 | 56 | TG   | 9  | 9  |
| 184478 | 22 | 7279649 | 7279678 | 2 | 15 | 30 | GT   | 10 | 14 |
| 184480 | 22 | 7284794 | 7284805 | 2 | 6  | 12 | CA   | 29 | 3  |
| 184481 | 22 | 7286453 | 7286470 | 2 | 9  | 18 | TG   | 11 | 11 |
| 184482 | 22 | 7286583 | 7286602 | 2 | 10 | 20 | CA   | 15 | 16 |
| 184484 | 22 | 7287593 | 7287622 | 2 | 15 | 30 | TG   | 9  | 5  |
| 184485 | 22 | 7287757 | 7287771 | 3 | 5  | 15 | TAT  | 13 | 3  |
| 184488 | 22 | 7288801 | 7288818 | 2 | 9  | 18 | GT   | 7  | 7  |
| 184489 | 22 | 7288875 | 7288890 | 4 | 4  | 16 | GACA | 22 | 3  |
| 184519 | 22 | 7292185 | 7292216 | 2 | 16 | 32 | TG   | 7  | 7  |
| 184537 | 22 | 7303279 | 7303318 | 2 | 20 | 40 | GT   | 7  | 10 |
| 184539 | 22 | 7303677 | 7303724 | 2 | 24 | 48 | TG   | 7  | 8  |
| 184540 | 22 | 7303845 | 7303894 | 2 | 25 | 50 | GT   | 7  | 10 |
| 184543 | 22 | 7305898 | 7305911 | 2 | 7  | 14 | TG   | 21 | 10 |
| 184544 | 22 | 7305914 | 7305925 | 2 | 6  | 12 | TG   | 21 | 9  |
| 184549 | 22 | 7312384 | 7312398 | 3 | 5  | 15 | GCC  | 10 | 10 |
| 184552 | 22 | 7316498 | 7316535 | 2 | 19 | 38 | GT   | 15 | 12 |
| 184569 | 22 | 7336464 | 7336490 | 3 | 9  | 27 | CCT  | 17 | 8  |
| 184572 | 22 | 7341160 | 7341183 | 2 | 12 | 24 | TG   | 7  | 5  |
| 184595 | 22 | 7350875 | 7350889 | 3 | 5  | 15 | AAT  | 23 | 4  |
| 184597 | 22 | 7351248 | 7351271 | 2 | 12 | 24 | GT   | 16 | 8  |
| 184598 | 22 | 7352018 | 7352045 | 4 | 7  | 28 | ATGA | 21 | 6  |
| 184605 | 22 | 7352618 | 7352647 | 2 | 15 | 30 | TG   | 10 | 14 |
| 184610 | 22 | 7359243 | 7359272 | 3 | 10 | 30 | GAG  | 14 | 4  |
| 184612 | 22 | 7359831 | 7359850 | 2 | 10 | 20 | AC   | 12 | 8  |
| 184613 | 22 | 7359932 | 7359955 | 3 | 8  | 24 | GAG  | 18 | 7  |
| 184614 | 22 | 7360069 | 7360092 | 3 | 8  | 24 | CTC  | 20 | 4  |
| 184615 | 22 | 7360174 | 7360193 | 2 | 10 | 20 | TG   | 10 | 5  |
| 184619 | 22 | 7365474 | 7365503 | 2 | 15 | 30 | TG   | 12 | 8  |
| 184620 | 22 | 7365593 | 7365612 | 2 | 10 | 20 | AC   | 16 | 4  |
| 184621 | 22 | 7366591 | 7366614 | 2 | 12 | 24 | TG   | 22 | 4  |
| 184623 | 22 | 7366678 | 7366699 | 2 | 11 | 22 | TG   | 7  | 5  |
| 184631 | 22 | 7369014 | 7369029 | 2 | 8  | 16 | AC   | 18 | 4  |
| 184632 | 22 | 7369069 | 7369108 | 2 | 20 | 40 | GT   | 14 | 10 |
| 184633 | 22 | 7369245 | 7369276 | 2 | 16 | 32 | GT   | 18 | 9  |
| 184634 | 22 | 7369377 | 7369406 | 2 | 15 | 30 | TG   | 14 | 8  |
| 184637 | 22 | 7371081 | 7371108 | 2 | 14 | 28 | TG   | 10 | 9  |
| 184640 | 22 | 7371272 | 7371291 | 2 | 10 | 20 | AC   | 12 | 3  |
| 184641 | 22 | 7371391 | 7371406 | 2 | 8  | 16 | GT   | 17 | 15 |
| 184643 | 22 | 7372549 | 7372566 | 3 | 6  | 18 | TTC  | 26 | 12 |
| 184644 | 22 | 7374051 | 7374070 | 2 | 10 | 20 | AC   | 20 | 10 |
| 184653 | 22 | 7385420 | 7385431 | 2 | 6  | 12 | GT   | 23 | 6  |
| 184657 | 22 | 7390940 | 7390979 | 2 | 20 | 40 | CA   | 12 | 10 |
| 184659 | 22 | 7394499 | 7394561 | 3 | 21 | 63 | CTT  | 18 | 19 |
| 184680 | 22 | 7398963 | 7398988 | 2 | 13 | 26 | CA   | 12 | 14 |
| 184684 | 22 | 7402272 | 7402301 | 3 | 10 | 30 | GAG  | 14 | 8  |
| 184686 | 22 | 7402553 | 7402580 | 2 | 14 | 28 | GT   | 11 | 4  |
| 184687 | 22 | 7402723 | 7402752 | 2 | 15 | 30 | GT   | 14 | 6  |
| 184690 | 22 | 7402869 | 7402883 | 3 | 5  | 15 | TGA  | 28 | 11 |

|        |    |         |         |   |    |    |      |    |    |
|--------|----|---------|---------|---|----|----|------|----|----|
| 184691 | 22 | 7403263 | 7403283 | 3 | 7  | 21 | CTC  | 11 | 8  |
| 184692 | 22 | 7403364 | 7403384 | 3 | 7  | 21 | TCC  | 12 | 10 |
| 184693 | 22 | 7403605 | 7403622 | 3 | 6  | 18 | GGA  | 20 | 4  |
| 184694 | 22 | 7403904 | 7403945 | 3 | 14 | 42 | CTT  | 22 | 20 |
| 184697 | 22 | 7405364 | 7405390 | 3 | 9  | 27 | GAT  | 17 | 10 |
| 184704 | 22 | 7407445 | 7407462 | 3 | 6  | 18 | TCC  | 6  | 5  |
| 184705 | 22 | 7407737 | 7407754 | 3 | 6  | 18 | CTC  | 20 | 3  |
| 184706 | 22 | 7408857 | 7408874 | 3 | 6  | 18 | TCT  | 28 | 6  |
| 184710 | 22 | 7410860 | 7410879 | 2 | 10 | 20 | TG   | 19 | 14 |
| 184714 | 22 | 7411538 | 7411577 | 2 | 20 | 40 | AC   | 8  | 9  |
| 184715 | 22 | 7411606 | 7411629 | 2 | 12 | 24 | AC   | 23 | 10 |
| 184719 | 22 | 7413313 | 7413336 | 2 | 12 | 24 | GT   | 10 | 10 |
| 184722 | 22 | 7413697 | 7413750 | 2 | 27 | 54 | AC   | 12 | 12 |
| 184723 | 22 | 7413917 | 7413952 | 3 | 12 | 36 | TTC  | 21 | 14 |
| 184724 | 22 | 7414127 | 7414141 | 3 | 5  | 15 | GCA  | 26 | 4  |
| 184736 | 22 | 7417687 | 7417712 | 2 | 13 | 26 | GT   | 21 | 14 |
| 184738 | 22 | 7417972 | 7418003 | 2 | 16 | 32 | TG   | 7  | 6  |
| 184739 | 22 | 7418046 | 7418065 | 2 | 10 | 20 | CA   | 17 | 10 |
| 184740 | 22 | 7418141 | 7418170 | 2 | 15 | 30 | CA   | 15 | 13 |
| 184742 | 22 | 7419978 | 7420027 | 2 | 25 | 50 | TG   | 8  | 11 |
| 184766 | 22 | 7427417 | 7427436 | 2 | 10 | 20 | AC   | 14 | 7  |
| 184769 | 22 | 7428002 | 7428019 | 3 | 6  | 18 | AGA  | 31 | 4  |
| 184770 | 22 | 7428058 | 7428069 | 2 | 6  | 12 | TC   | 23 | 6  |
| 184773 | 22 | 7429594 | 7429609 | 2 | 8  | 16 | CT   | 20 | 5  |
| 184775 | 22 | 7430520 | 7430546 | 3 | 9  | 27 | AGA  | 15 | 7  |
| 184778 | 22 | 7430760 | 7430785 | 2 | 13 | 26 | GT   | 10 | 11 |
| 184780 | 22 | 7431333 | 7431372 | 2 | 20 | 40 | GT   | 8  | 9  |
| 184793 | 22 | 7442438 | 7442469 | 2 | 16 | 32 | AC   | 19 | 9  |
| 184795 | 22 | 7442916 | 7442957 | 3 | 14 | 42 | CCT  | 14 | 16 |
| 184797 | 22 | 7444008 | 7444025 | 2 | 9  | 18 | GT   | 15 | 8  |
| 184798 | 22 | 7444807 | 7444840 | 2 | 17 | 34 | AC   | 11 | 15 |
| 184810 | 22 | 7450356 | 7450391 | 2 | 18 | 36 | GT   | 6  | 7  |
| 184825 | 22 | 7454820 | 7454853 | 2 | 17 | 34 | AC   | 13 | 11 |
| 184827 | 22 | 7455163 | 7455198 | 2 | 18 | 36 | GT   | 10 | 10 |
| 184828 | 22 | 7455259 | 7455282 | 2 | 12 | 24 | TG   | 6  | 11 |
| 184830 | 22 | 7455429 | 7455474 | 2 | 23 | 46 | TG   | 8  | 8  |
| 184831 | 22 | 7455572 | 7455601 | 2 | 15 | 30 | TG   | 13 | 15 |
| 184832 | 22 | 7455629 | 7455646 | 3 | 6  | 18 | AGA  | 20 | 6  |
| 184837 | 22 | 7456544 | 7456557 | 2 | 7  | 14 | TC   | 23 | 8  |
| 184859 | 22 | 7466326 | 7466353 | 2 | 14 | 28 | AC   | 19 | 14 |
| 184860 | 22 | 7466706 | 7466735 | 3 | 10 | 30 | CCT  | 14 | 9  |
| 184861 | 22 | 7468544 | 7468567 | 4 | 6  | 24 | CCTT | 29 | 4  |
| 184872 | 22 | 7476112 | 7476143 | 2 | 16 | 32 | GT   | 9  | 10 |
| 184873 | 22 | 7476224 | 7476244 | 3 | 7  | 21 | CTC  | 20 | 3  |
| 184876 | 22 | 7484123 | 7484136 | 2 | 7  | 14 | TG   | 30 | 7  |
| 184878 | 22 | 7485156 | 7485177 | 2 | 11 | 22 | TG   | 18 | 6  |
| 184879 | 22 | 7485339 | 7485376 | 2 | 19 | 38 | AC   | 16 | 11 |
| 184880 | 22 | 7487728 | 7487765 | 2 | 19 | 38 | TG   | 21 | 15 |
| 184881 | 22 | 7490608 | 7490628 | 3 | 7  | 21 | ATC  | 29 | 10 |
| 184885 | 22 | 7493194 | 7493208 | 3 | 5  | 15 | CCT  | 28 | 6  |
| 184887 | 22 | 7493879 | 7493902 | 3 | 8  | 24 | TTC  | 19 | 16 |

|        |    |         |         |   |    |    |      |    |    |
|--------|----|---------|---------|---|----|----|------|----|----|
| 184888 | 22 | 7496006 | 7496033 | 2 | 14 | 28 | GT   | 14 | 12 |
| 184889 | 22 | 7497539 | 7497580 | 2 | 21 | 42 | GT   | 14 | 14 |
| 184891 | 22 | 7498565 | 7498584 | 4 | 5  | 20 | CTGT | 11 | 12 |
| 184896 | 22 | 7503750 | 7503773 | 2 | 12 | 24 | GT   | 13 | 12 |
| 184899 | 22 | 7508878 | 7508913 | 2 | 18 | 36 | AC   | 8  | 7  |
| 184900 | 22 | 7509302 | 7509335 | 2 | 17 | 34 | CA   | 13 | 11 |
| 184901 | 22 | 7509546 | 7509575 | 3 | 10 | 30 | CAT  | 27 | 14 |
| 184902 | 22 | 7509626 | 7509651 | 2 | 13 | 26 | GT   | 14 | 10 |
| 184914 | 22 | 7519106 | 7519127 | 2 | 11 | 22 | AC   | 14 | 10 |
| 184945 | 22 | 7525588 | 7525629 | 2 | 21 | 42 | CA   | 6  | 10 |
| 184957 | 22 | 7531027 | 7531050 | 3 | 8  | 24 | CTT  | 22 | 11 |
| 184958 | 22 | 7531963 | 7531994 | 2 | 16 | 32 | AC   | 13 | 13 |
| 184988 | 22 | 7542883 | 7542914 | 2 | 16 | 32 | CA   | 14 | 10 |
| 184989 | 22 | 7544860 | 7544875 | 2 | 8  | 16 | TG   | 17 | 10 |
| 184990 | 22 | 7544989 | 7545016 | 2 | 14 | 28 | TG   | 16 | 10 |
| 184993 | 22 | 7545283 | 7545300 | 2 | 9  | 18 | TC   | 14 | 3  |
| 184998 | 22 | 7547345 | 7547368 | 2 | 12 | 24 | TG   | 13 | 5  |
| 185000 | 22 | 7547774 | 7547799 | 2 | 13 | 26 | AC   | 14 | 11 |
| 185001 | 22 | 7548784 | 7548821 | 2 | 19 | 38 | AC   | 14 | 10 |
| 185002 | 22 | 7549497 | 7549522 | 2 | 13 | 26 | GT   | 14 | 10 |
| 185003 | 22 | 7550713 | 7550746 | 2 | 17 | 34 | GT   | 8  | 12 |
| 185015 | 22 | 7553187 | 7553218 | 2 | 16 | 32 | GT   | 6  | 7  |
| 185021 | 22 | 7554655 | 7554686 | 2 | 16 | 32 | TG   | 13 | 10 |
| 185022 | 22 | 7557999 | 7558032 | 2 | 17 | 34 | TG   | 25 | 11 |
| 185036 | 22 | 7569896 | 7569913 | 3 | 6  | 18 | GCA  | 18 | 3  |
| 185039 | 22 | 7577894 | 7577921 | 4 | 7  | 28 | TTAT | 7  | 4  |
| 185042 | 22 | 7580729 | 7580772 | 4 | 11 | 44 | ATAG | 23 | 12 |
| 185043 | 22 | 7599606 | 7599629 | 3 | 8  | 24 | CTC  | 31 | 5  |
| 185051 | 22 | 7615658 | 7615678 | 3 | 7  | 21 | CAT  | 30 | 3  |
| 185068 | 22 | 7636049 | 7636075 | 3 | 9  | 27 | GAT  | 22 | 9  |
| 185069 | 22 | 7636158 | 7636193 | 4 | 9  | 36 | TCAA | 21 | 8  |
| 185077 | 22 | 7639146 | 7639201 | 2 | 28 | 56 | CA   | 9  | 8  |
| 185078 | 22 | 7639634 | 7639665 | 4 | 8  | 32 | ATCA | 17 | 9  |
| 185080 | 22 | 7640626 | 7640647 | 2 | 11 | 22 | CA   | 20 | 17 |
| 185081 | 22 | 7640710 | 7640737 | 2 | 14 | 28 | CA   | 14 | 10 |
| 185083 | 22 | 7642828 | 7642860 | 3 | 11 | 33 | TGA  | 28 | 8  |
| 185084 | 22 | 7643226 | 7643246 | 3 | 7  | 21 | AAG  | 28 | 3  |
| 185086 | 22 | 7645065 | 7645082 | 2 | 9  | 18 | CA   | 18 | 6  |
| 185087 | 22 | 7645562 | 7645587 | 2 | 13 | 26 | AC   | 17 | 15 |
| 185088 | 22 | 7647605 | 7647618 | 2 | 7  | 14 | TG   | 14 | 4  |
| 185091 | 22 | 7649818 | 7649841 | 2 | 12 | 24 | AC   | 19 | 8  |
| 185094 | 22 | 7656348 | 7656377 | 3 | 10 | 30 | TCC  | 18 | 8  |
| 185099 | 22 | 7661733 | 7661760 | 2 | 14 | 28 | GT   | 20 | 7  |
| 185100 | 22 | 7662188 | 7662202 | 3 | 5  | 15 | GAG  | 19 | 8  |
| 185101 | 22 | 7662516 | 7662527 | 2 | 6  | 12 | AT   | 18 | 5  |
| 185102 | 22 | 7663115 | 7663138 | 3 | 8  | 24 | AAG  | 27 | 6  |
| 185106 | 22 | 7663607 | 7663618 | 2 | 6  | 12 | AC   | 30 | 4  |
| 185107 | 22 | 7663785 | 7663814 | 2 | 15 | 30 | AC   | 15 | 10 |
| 185108 | 22 | 7664145 | 7664176 | 2 | 16 | 32 | AC   | 13 | 8  |
| 185111 | 22 | 7665962 | 7665985 | 2 | 12 | 24 | CA   | 16 | 11 |
| 185116 | 22 | 7668934 | 7668960 | 3 | 9  | 27 | CTC  | 12 | 4  |

|        |    |         |         |   |    |    |      |    |    |
|--------|----|---------|---------|---|----|----|------|----|----|
| 185117 | 22 | 7669114 | 7669134 | 3 | 7  | 21 | GGA  | 9  | 6  |
| 185118 | 22 | 7669254 | 7669279 | 2 | 13 | 26 | CA   | 15 | 7  |
| 185121 | 22 | 7673605 | 7673640 | 3 | 12 | 36 | TGA  | 20 | 5  |
| 185123 | 22 | 7673829 | 7673860 | 2 | 16 | 32 | TG   | 8  | 10 |
| 185131 | 22 | 7687304 | 7687315 | 2 | 6  | 12 | TG   | 28 | 5  |
| 185132 | 22 | 7687396 | 7687417 | 2 | 11 | 22 | AC   | 18 | 4  |
| 185133 | 22 | 7687504 | 7687519 | 2 | 8  | 16 | TG   | 19 | 9  |
| 185134 | 22 | 7687720 | 7687739 | 2 | 10 | 20 | CA   | 17 | 9  |
| 185136 | 22 | 7688006 | 7688039 | 2 | 17 | 34 | TG   | 15 | 5  |
| 185137 | 22 | 7688702 | 7688717 | 2 | 8  | 16 | GT   | 13 | 10 |
| 185139 | 22 | 7689017 | 7689042 | 2 | 13 | 26 | TG   | 11 | 11 |
| 185141 | 22 | 7692007 | 7692024 | 3 | 6  | 18 | CTC  | 27 | 3  |
| 185142 | 22 | 7692319 | 7692336 | 2 | 9  | 18 | AC   | 18 | 4  |
| 185143 | 22 | 7692394 | 7692427 | 2 | 17 | 34 | TG   | 11 | 12 |
| 185144 | 22 | 7692516 | 7692549 | 2 | 17 | 34 | AC   | 14 | 9  |
| 185145 | 22 | 7692711 | 7692722 | 2 | 6  | 12 | CA   | 29 | 3  |
| 185146 | 22 | 7692870 | 7692885 | 2 | 8  | 16 | TG   | 24 | 7  |
| 185147 | 22 | 7693330 | 7693353 | 2 | 12 | 24 | TG   | 10 | 8  |
| 185150 | 22 | 7694423 | 7694446 | 2 | 12 | 24 | AC   | 16 | 5  |
| 185151 | 22 | 7694776 | 7694827 | 2 | 26 | 52 | TG   | 6  | 8  |
| 185155 | 22 | 7696415 | 7696430 | 2 | 8  | 16 | TG   | 20 | 10 |
| 185156 | 22 | 7696608 | 7696623 | 4 | 4  | 16 | TGTC | 26 | 3  |
| 185164 | 22 | 7698032 | 7698058 | 3 | 9  | 27 | GAT  | 22 | 8  |
| 185167 | 22 | 7701996 | 7702007 | 2 | 6  | 12 | TG   | 15 | 4  |
| 185169 | 22 | 7703532 | 7703581 | 2 | 25 | 50 | GT   | 10 | 12 |
| 185174 | 22 | 7705298 | 7705313 | 2 | 8  | 16 | TG   | 26 | 10 |
| 185175 | 22 | 7705809 | 7705822 | 2 | 7  | 14 | CA   | 26 | 3  |
| 185176 | 22 | 7705902 | 7705935 | 2 | 17 | 34 | TG   | 13 | 9  |
| 185179 | 22 | 7707646 | 7707663 | 2 | 9  | 18 | AC   | 22 | 3  |
| 185180 | 22 | 7707798 | 7707819 | 2 | 11 | 22 | TG   | 29 | 13 |
| 185181 | 22 | 7707968 | 7707981 | 2 | 7  | 14 | AC   | 21 | 4  |
| 185182 | 22 | 7708442 | 7708461 | 2 | 10 | 20 | AC   | 12 | 9  |
| 185187 | 22 | 7715920 | 7715943 | 2 | 12 | 24 | TG   | 9  | 8  |
| 185191 | 22 | 7720317 | 7720354 | 2 | 19 | 38 | TG   | 9  | 8  |
| 185200 | 22 | 7731332 | 7731351 | 4 | 5  | 20 | TCTG | 24 | 3  |
| 185202 | 22 | 7731804 | 7731827 | 3 | 8  | 24 | GGA  | 32 | 12 |
| 185203 | 22 | 7731987 | 7732004 | 2 | 9  | 18 | CA   | 16 | 13 |
| 185204 | 22 | 7732006 | 7732017 | 2 | 6  | 12 | AC   | 17 | 16 |
| 185207 | 22 | 7736239 | 7736254 | 2 | 8  | 16 | TG   | 7  | 9  |
| 185208 | 22 | 7736419 | 7736452 | 2 | 17 | 34 | GT   | 7  | 11 |
| 185209 | 22 | 7740116 | 7740142 | 3 | 9  | 27 | AGG  | 22 | 9  |
| 185210 | 22 | 7741513 | 7741534 | 2 | 11 | 22 | GT   | 18 | 14 |
| 185212 | 22 | 7743613 | 7743638 | 2 | 13 | 26 | CA   | 18 | 13 |
| 185213 | 22 | 7743800 | 7743829 | 2 | 15 | 30 | CA   | 12 | 11 |
| 185214 | 22 | 7743874 | 7743903 | 2 | 15 | 30 | AC   | 12 | 12 |
| 185215 | 22 | 7744162 | 7744185 | 3 | 8  | 24 | GAT  | 17 | 4  |
| 185217 | 22 | 7751709 | 7751738 | 2 | 15 | 30 | AC   | 11 | 11 |
| 185218 | 22 | 7752177 | 7752194 | 2 | 9  | 18 | TG   | 20 | 11 |
| 185222 | 22 | 7753931 | 7753960 | 2 | 15 | 30 | CA   | 7  | 8  |
| 185223 | 22 | 7754254 | 7754273 | 2 | 10 | 20 | TG   | 8  | 8  |
| 185224 | 22 | 7754396 | 7754419 | 4 | 6  | 24 | CCTT | 14 | 10 |



|        |    |         |         |   |    |    |      |    |    |
|--------|----|---------|---------|---|----|----|------|----|----|
| 185228 | 22 | 7758739 | 7758762 | 2 | 12 | 24 | AC   | 15 | 11 |
| 185229 | 22 | 7758861 | 7758900 | 2 | 20 | 40 | CA   | 17 | 12 |
| 185230 | 22 | 7759027 | 7759042 | 2 | 8  | 16 | GT   | 15 | 6  |
| 185231 | 22 | 7759170 | 7759181 | 2 | 6  | 12 | TC   | 22 | 7  |
| 185232 | 22 | 7759182 | 7759195 | 2 | 7  | 14 | AC   | 27 | 7  |
| 185237 | 22 | 7761917 | 7761928 | 2 | 6  | 12 | CA   | 21 | 4  |
| 185238 | 22 | 7762246 | 7762266 | 3 | 7  | 21 | TCC  | 22 | 3  |
| 185243 | 22 | 7766653 | 7766684 | 2 | 16 | 32 | CA   | 10 | 12 |
| 185244 | 22 | 7767439 | 7767464 | 2 | 13 | 26 | CA   | 18 | 7  |
| 185247 | 22 | 7772819 | 7772840 | 2 | 11 | 22 | CT   | 23 | 14 |
| 185267 | 22 | 7786970 | 7786997 | 2 | 14 | 28 | AC   | 9  | 8  |
| 185268 | 22 | 7787657 | 7787678 | 2 | 11 | 22 | GT   | 18 | 11 |
| 185271 | 22 | 7789465 | 7789490 | 2 | 13 | 26 | AC   | 11 | 6  |
| 185272 | 22 | 7789675 | 7789686 | 2 | 6  | 12 | AC   | 30 | 6  |
| 185281 | 22 | 7795440 | 7795467 | 2 | 14 | 28 | TG   | 15 | 7  |
| 185282 | 22 | 7795512 | 7795535 | 2 | 12 | 24 | CA   | 22 | 7  |
| 185283 | 22 | 7795590 | 7795601 | 2 | 6  | 12 | GT   | 19 | 6  |
| 185284 | 22 | 7795634 | 7795661 | 2 | 14 | 28 | CA   | 7  | 9  |
| 185287 | 22 | 7795868 | 7795885 | 3 | 6  | 18 | AAG  | 13 | 3  |
| 185289 | 22 | 7796163 | 7796177 | 3 | 5  | 15 | TGT  | 30 | 6  |
| 185290 | 22 | 7796650 | 7796691 | 3 | 14 | 42 | TGA  | 22 | 9  |
| 185291 | 22 | 7797000 | 7797043 | 2 | 22 | 44 | TG   | 9  | 12 |
| 185296 | 22 | 7799015 | 7799046 | 4 | 8  | 32 | CAAT | 7  | 4  |
| 185307 | 22 | 7812743 | 7812799 | 3 | 19 | 57 | AGA  | 18 | 15 |
| 185309 | 22 | 7817013 | 7817027 | 3 | 5  | 15 | AGA  | 23 | 9  |
| 185311 | 22 | 7820013 | 7820034 | 2 | 11 | 22 | GT   | 13 | 12 |
| 185313 | 22 | 7825476 | 7825509 | 2 | 17 | 34 | TG   | 19 | 12 |
| 185315 | 22 | 7826010 | 7826033 | 2 | 12 | 24 | AC   | 12 | 8  |
| 185325 | 22 | 7828059 | 7828080 | 2 | 11 | 22 | TG   | 7  | 5  |
| 185331 | 22 | 7830348 | 7830383 | 2 | 18 | 36 | CA   | 7  | 9  |
| 185333 | 22 | 7831150 | 7831167 | 2 | 9  | 18 | AC   | 17 | 4  |
| 185341 | 22 | 7848719 | 7848733 | 3 | 5  | 15 | ATG  | 33 | 4  |
| 185343 | 22 | 7866388 | 7866405 | 3 | 6  | 18 | TTC  | 20 | 9  |
| 185346 | 22 | 7883326 | 7883355 | 2 | 15 | 30 | CA   | 20 | 14 |
| 185347 | 22 | 7883612 | 7883627 | 2 | 8  | 16 | GT   | 18 | 4  |
| 185349 | 22 | 7884262 | 7884287 | 2 | 13 | 26 | TG   | 10 | 9  |
| 185352 | 22 | 7885433 | 7885480 | 2 | 24 | 48 | CT   | 14 | 10 |
| 185354 | 22 | 7886199 | 7886246 | 4 | 12 | 48 | ATGG | 18 | 11 |
| 185370 | 22 | 7912342 | 7912391 | 2 | 25 | 50 | TG   | 6  | 9  |
| 185371 | 22 | 7912824 | 7912843 | 4 | 5  | 20 | GACA | 28 | 4  |
| 185372 | 22 | 7912892 | 7912925 | 2 | 17 | 34 | GT   | 7  | 7  |
| 185374 | 22 | 7913895 | 7913909 | 3 | 5  | 15 | GGA  | 26 | 3  |
| 185376 | 22 | 7915956 | 7915975 | 2 | 10 | 20 | AC   | 26 | 6  |
| 185378 | 22 | 7917490 | 7917503 | 2 | 7  | 14 | TG   | 27 | 4  |
| 185382 | 22 | 7920710 | 7920723 | 2 | 7  | 14 | CA   | 11 | 11 |
| 185383 | 22 | 7920728 | 7920739 | 2 | 6  | 12 | CT   | 16 | 13 |
| 185384 | 22 | 7921434 | 7921448 | 3 | 5  | 15 | CCG  | 24 | 4  |
| 185385 | 22 | 7923343 | 7923354 | 2 | 6  | 12 | TG   | 18 | 10 |
| 185386 | 22 | 7923471 | 7923482 | 2 | 6  | 12 | GT   | 18 | 9  |
| 185389 | 22 | 7927318 | 7927341 | 2 | 12 | 24 | GT   | 20 | 11 |
| 185390 | 22 | 7927542 | 7927565 | 2 | 12 | 24 | TG   | 8  | 5  |

|        |    |         |         |   |    |    |      |    |    |
|--------|----|---------|---------|---|----|----|------|----|----|
| 185393 | 22 | 7928191 | 7928222 | 2 | 16 | 32 | CA   | 13 | 6  |
| 185394 | 22 | 7933694 | 7933731 | 2 | 19 | 38 | AC   | 6  | 9  |
| 185399 | 22 | 7934882 | 7934897 | 2 | 8  | 16 | AC   | 29 | 6  |
| 185400 | 22 | 7935156 | 7935193 | 2 | 19 | 38 | TG   | 7  | 6  |
| 185401 | 22 | 7935290 | 7935325 | 3 | 12 | 36 | TCT  | 11 | 11 |
| 185407 | 22 | 7940426 | 7940459 | 2 | 17 | 34 | CA   | 11 | 5  |
| 185408 | 22 | 7940528 | 7940551 | 3 | 8  | 24 | TCA  | 23 | 3  |
| 185409 | 22 | 7940934 | 7940951 | 3 | 6  | 18 | TCT  | 31 | 6  |
| 185418 | 22 | 7943978 | 7943999 | 2 | 11 | 22 | TG   | 25 | 4  |
| 185419 | 22 | 7945145 | 7945168 | 4 | 6  | 24 | GATT | 18 | 5  |
| 185425 | 22 | 7950444 | 7950479 | 2 | 18 | 36 | GT   | 10 | 10 |
| 185426 | 22 | 7951509 | 7951526 | 3 | 6  | 18 | GGA  | 15 | 5  |
| 185433 | 22 | 7959022 | 7959045 | 3 | 8  | 24 | TAT  | 14 | 6  |
| 185434 | 22 | 7960161 | 7960196 | 2 | 18 | 36 | CA   | 11 | 11 |
| 185440 | 22 | 7962865 | 7962906 | 3 | 14 | 42 | GAA  | 15 | 10 |
| 185442 | 22 | 7963798 | 7963819 | 2 | 11 | 22 | GT   | 12 | 8  |
| 185443 | 22 | 7963942 | 7963965 | 2 | 12 | 24 | AC   | 10 | 9  |
| 185444 | 22 | 7963985 | 7964004 | 2 | 10 | 20 | TG   | 15 | 10 |
| 185452 | 22 | 7966733 | 7966746 | 2 | 7  | 14 | TG   | 26 | 9  |
| 185453 | 22 | 7966860 | 7966877 | 3 | 6  | 18 | CTT  | 28 | 3  |
| 185455 | 22 | 7967373 | 7967390 | 3 | 6  | 18 | CTT  | 21 | 5  |
| 185457 | 22 | 7967940 | 7967965 | 2 | 13 | 26 | AC   | 8  | 6  |
| 185462 | 22 | 7970764 | 7970789 | 2 | 13 | 26 | CA   | 15 | 7  |
| 185468 | 22 | 7972366 | 7972377 | 2 | 6  | 12 | CT   | 22 | 3  |
| 185469 | 22 | 7973019 | 7973044 | 2 | 13 | 26 | AC   | 9  | 4  |
| 185471 | 22 | 7976717 | 7976748 | 2 | 16 | 32 | CA   | 11 | 11 |
| 185479 | 22 | 7982489 | 7982512 | 2 | 12 | 24 | AC   | 13 | 15 |
| 185480 | 22 | 7982724 | 7982763 | 2 | 20 | 40 | GT   | 7  | 9  |
| 185483 | 22 | 7985095 | 7985115 | 3 | 7  | 21 | TCC  | 27 | 3  |
| 185489 | 22 | 8008409 | 8008442 | 2 | 17 | 34 | GT   | 17 | 9  |
| 185491 | 22 | 8009051 | 8009070 | 2 | 10 | 20 | TG   | 13 | 10 |
| 185492 | 22 | 8010234 | 8010255 | 2 | 11 | 22 | TG   | 13 | 10 |
| 185493 | 22 | 8010361 | 8010384 | 3 | 8  | 24 | TCT  | 29 | 7  |
| 185495 | 22 | 8014365 | 8014394 | 2 | 15 | 30 | AC   | 16 | 11 |
| 185497 | 22 | 8015671 | 8015684 | 2 | 7  | 14 | TG   | 21 | 8  |
| 185498 | 22 | 8017004 | 8017024 | 3 | 7  | 21 | TGA  | 15 | 8  |
| 185500 | 22 | 8020669 | 8020694 | 2 | 13 | 26 | GT   | 18 | 8  |
| 185501 | 22 | 8020895 | 8020916 | 2 | 11 | 22 | GT   | 22 | 9  |
| 185504 | 22 | 8021901 | 8021940 | 2 | 20 | 40 | AC   | 12 | 11 |
| 185506 | 22 | 8023051 | 8023072 | 2 | 11 | 22 | AC   | 15 | 8  |
| 185507 | 22 | 8023601 | 8023618 | 2 | 9  | 18 | AC   | 21 | 6  |
| 185508 | 22 | 8026033 | 8026050 | 3 | 6  | 18 | GAG  | 16 | 4  |
| 185523 | 22 | 8030046 | 8030081 | 2 | 18 | 36 | AC   | 9  | 10 |
| 185524 | 22 | 8030431 | 8030444 | 2 | 7  | 14 | GT   | 27 | 9  |
| 185525 | 22 | 8033605 | 8033631 | 3 | 9  | 27 | TCA  | 22 | 6  |
| 185526 | 22 | 8034231 | 8034270 | 2 | 20 | 40 | AC   | 16 | 11 |
| 185527 | 22 | 8035055 | 8035116 | 2 | 31 | 62 | GT   | 16 | 17 |
| 185530 | 22 | 8035572 | 8035613 | 2 | 21 | 42 | AC   | 11 | 12 |
| 185537 | 22 | 8045919 | 8045942 | 2 | 12 | 24 | TG   | 15 | 12 |
| 185540 | 22 | 8046841 | 8046876 | 2 | 18 | 36 | AC   | 14 | 13 |
| 185541 | 22 | 8047802 | 8047821 | 2 | 10 | 20 | AC   | 24 | 15 |

|        |    |         |         |   |    |    |      |    |    |
|--------|----|---------|---------|---|----|----|------|----|----|
| 185545 | 22 | 8054635 | 8054664 | 2 | 15 | 30 | GT   | 19 | 12 |
| 185546 | 22 | 8055583 | 8055602 | 2 | 10 | 20 | CA   | 15 | 14 |
| 185547 | 22 | 8055794 | 8055815 | 2 | 11 | 22 | AC   | 23 | 12 |
| 185548 | 22 | 8057576 | 8057599 | 2 | 12 | 24 | CA   | 16 | 11 |
| 185554 | 22 | 8065979 | 8066010 | 2 | 16 | 32 | CA   | 22 | 15 |
| 185555 | 22 | 8067304 | 8067329 | 2 | 13 | 26 | TG   | 27 | 16 |
| 185557 | 22 | 8068228 | 8068249 | 2 | 11 | 22 | AC   | 23 | 8  |
| 185562 | 22 | 8069094 | 8069133 | 2 | 20 | 40 | CA   | 9  | 8  |
| 185578 | 22 | 8081100 | 8081115 | 2 | 8  | 16 | CA   | 17 | 10 |
| 185579 | 22 | 8083082 | 8083099 | 3 | 6  | 18 | ATG  | 26 | 4  |
| 185580 | 22 | 8083500 | 8083523 | 2 | 12 | 24 | GT   | 15 | 10 |
| 185584 | 22 | 8087606 | 8087633 | 4 | 7  | 28 | TGTT | 29 | 8  |
| 185595 | 22 | 8094294 | 8094315 | 2 | 11 | 22 | CT   | 9  | 10 |
| 185601 | 22 | 8096801 | 8096820 | 4 | 5  | 20 | GAGC | 10 | 3  |
| 185604 | 22 | 8106772 | 8106819 | 2 | 24 | 48 | TG   | 11 | 12 |
| 185605 | 22 | 8106954 | 8106979 | 2 | 13 | 26 | GT   | 8  | 9  |
| 185607 | 22 | 8107486 | 8107500 | 3 | 5  | 15 | CTC  | 23 | 4  |
| 185608 | 22 | 8107879 | 8107905 | 3 | 9  | 27 | ATC  | 24 | 12 |
| 185610 | 22 | 8115183 | 8115203 | 3 | 7  | 21 | TGA  | 27 | 7  |
| 185613 | 22 | 8116502 | 8116533 | 2 | 16 | 32 | AC   | 6  | 6  |
| 185625 | 22 | 8123029 | 8123055 | 3 | 9  | 27 | TCC  | 16 | 8  |
| 185646 | 22 | 8144031 | 8144050 | 4 | 5  | 20 | TCTT | 11 | 6  |
| 185660 | 22 | 8149480 | 8149501 | 2 | 11 | 22 | GT   | 7  | 4  |
| 185662 | 22 | 8152230 | 8152262 | 3 | 11 | 33 | GAG  | 16 | 7  |
| 185676 | 22 | 8164767 | 8164786 | 2 | 10 | 20 | GA   | 30 | 9  |
| 185681 | 22 | 8166323 | 8166346 | 2 | 12 | 24 | AC   | 13 | 12 |
| 185682 | 22 | 8168513 | 8168540 | 2 | 14 | 28 | GT   | 9  | 10 |
| 185688 | 22 | 8173187 | 8173202 | 2 | 8  | 16 | GT   | 17 | 11 |
| 185689 | 22 | 8175135 | 8175168 | 2 | 17 | 34 | TG   | 6  | 8  |
| 185690 | 22 | 8175882 | 8175911 | 2 | 15 | 30 | TG   | 18 | 7  |
| 185694 | 22 | 8190003 | 8190030 | 2 | 14 | 28 | AC   | 15 | 8  |
| 185695 | 22 | 8200057 | 8200070 | 2 | 7  | 14 | GT   | 21 | 4  |
| 185703 | 22 | 8203781 | 8203794 | 2 | 7  | 14 | AC   | 26 | 5  |
| 185704 | 22 | 8203872 | 8203891 | 2 | 10 | 20 | GT   | 19 | 9  |
| 185719 | 22 | 8223134 | 8223169 | 2 | 18 | 36 | CA   | 7  | 9  |
| 185720 | 22 | 8224016 | 8224061 | 2 | 23 | 46 | TG   | 14 | 10 |
| 185722 | 22 | 8224515 | 8224550 | 3 | 12 | 36 | ATG  | 24 | 10 |
| 185723 | 22 | 8225840 | 8225855 | 2 | 8  | 16 | TG   | 28 | 9  |
| 185728 | 22 | 8229771 | 8229788 | 2 | 9  | 18 | CA   | 10 | 11 |
| 185729 | 22 | 8230712 | 8230735 | 2 | 12 | 24 | GT   | 13 | 12 |
| 185734 | 22 | 8232732 | 8232775 | 2 | 22 | 44 | TG   | 6  | 8  |
| 185737 | 22 | 8237022 | 8237063 | 2 | 21 | 42 | CA   | 6  | 9  |
| 185742 | 22 | 8245773 | 8245790 | 3 | 6  | 18 | TCC  | 20 | 11 |
| 185744 | 22 | 8246162 | 8246176 | 3 | 5  | 15 | AGG  | 19 | 7  |
| 185745 | 22 | 8247016 | 8247051 | 3 | 12 | 36 | AAG  | 14 | 7  |
| 185776 | 22 | 8258089 | 8258138 | 2 | 25 | 50 | AC   | 6  | 5  |
| 185785 | 22 | 8271871 | 8271896 | 2 | 13 | 26 | TG   | 17 | 7  |
| 185786 | 22 | 8272666 | 8272699 | 2 | 17 | 34 | TG   | 7  | 8  |
| 185787 | 22 | 8275031 | 8275050 | 2 | 10 | 20 | GT   | 29 | 6  |
| 185789 | 22 | 8278243 | 8278262 | 2 | 10 | 20 | AC   | 16 | 11 |
| 185790 | 22 | 8279697 | 8279708 | 2 | 6  | 12 | AT   | 24 | 3  |

|        |    |         |         |   |    |    |      |    |    |
|--------|----|---------|---------|---|----|----|------|----|----|
| 185794 | 22 | 8294744 | 8294781 | 2 | 19 | 38 | GT   | 11 | 14 |
| 185795 | 22 | 8295015 | 8295030 | 4 | 4  | 16 | CAGA | 16 | 3  |
| 185798 | 22 | 8296635 | 8296650 | 2 | 8  | 16 | GT   | 6  | 3  |
| 185804 | 22 | 8299844 | 8299873 | 2 | 15 | 30 | AC   | 13 | 14 |
| 185809 | 22 | 8300348 | 8300395 | 2 | 24 | 48 | CA   | 6  | 6  |
| 185810 | 22 | 8300536 | 8300565 | 2 | 15 | 30 | AC   | 15 | 7  |
| 185812 | 22 | 8305578 | 8305605 | 2 | 14 | 28 | TG   | 9  | 7  |
| 185814 | 22 | 8308264 | 8308303 | 2 | 20 | 40 | AC   | 18 | 8  |
| 185816 | 22 | 8308467 | 8308490 | 2 | 12 | 24 | TG   | 20 | 8  |
| 185817 | 22 | 8310048 | 8310081 | 2 | 17 | 34 | TG   | 9  | 5  |
| 185818 | 22 | 8310198 | 8310211 | 2 | 7  | 14 | GT   | 16 | 4  |
| 185819 | 22 | 8312886 | 8312917 | 2 | 16 | 32 | GT   | 19 | 9  |
| 185822 | 22 | 8315625 | 8315640 | 2 | 8  | 16 | GT   | 23 | 7  |
| 185826 | 22 | 8318424 | 8318451 | 2 | 14 | 28 | TG   | 8  | 9  |
| 185827 | 22 | 8318549 | 8318564 | 2 | 8  | 16 | GT   | 6  | 6  |
| 185829 | 22 | 8318659 | 8318670 | 2 | 6  | 12 | GT   | 15 | 3  |
| 185834 | 22 | 8328850 | 8328887 | 2 | 19 | 38 | TG   | 10 | 11 |
| 185839 | 22 | 8330267 | 8330292 | 2 | 13 | 26 | AC   | 18 | 9  |
| 185843 | 22 | 8332553 | 8332576 | 3 | 8  | 24 | CCT  | 12 | 6  |
| 185849 | 22 | 8342036 | 8342073 | 2 | 19 | 38 | AC   | 9  | 11 |
| 185856 | 22 | 8346167 | 8346180 | 2 | 7  | 14 | CA   | 20 | 7  |
| 185859 | 22 | 8349574 | 8349599 | 2 | 13 | 26 | TG   | 8  | 5  |
| 185862 | 22 | 8355989 | 8356010 | 2 | 11 | 22 | GT   | 16 | 5  |
| 185883 | 22 | 8363789 | 8363800 | 2 | 6  | 12 | GT   | 26 | 4  |
| 185884 | 22 | 8366633 | 8366659 | 3 | 9  | 27 | TCA  | 21 | 8  |
| 185886 | 22 | 8368917 | 8368944 | 2 | 14 | 28 | CA   | 20 | 8  |
| 185888 | 22 | 8370071 | 8370086 | 2 | 8  | 16 | TG   | 17 | 4  |
| 185890 | 22 | 8373678 | 8373701 | 2 | 12 | 24 | CA   | 17 | 6  |
| 185906 | 22 | 8378432 | 8378445 | 2 | 7  | 14 | AC   | 9  | 3  |
| 185908 | 22 | 8379779 | 8379796 | 2 | 9  | 18 | TG   | 8  | 4  |
| 185911 | 22 | 8380261 | 8380274 | 2 | 7  | 14 | GT   | 27 | 9  |
| 185915 | 22 | 8388765 | 8388788 | 2 | 12 | 24 | CA   | 19 | 7  |
| 185918 | 22 | 8390731 | 8390750 | 2 | 10 | 20 | AC   | 20 | 6  |
| 185922 | 22 | 8392948 | 8392973 | 2 | 13 | 26 | CA   | 13 | 5  |
| 185923 | 22 | 8393074 | 8393101 | 2 | 14 | 28 | AC   | 18 | 7  |
| 185925 | 22 | 8394903 | 8394936 | 2 | 17 | 34 | TG   | 8  | 9  |
| 185932 | 22 | 8402324 | 8402363 | 4 | 10 | 40 | GTTT | 23 | 7  |
| 185933 | 22 | 8403334 | 8403359 | 2 | 13 | 26 | GT   | 6  | 5  |
| 185938 | 22 | 8410782 | 8410805 | 3 | 8  | 24 | GCT  | 26 | 6  |
| 185945 | 22 | 8419108 | 8419134 | 3 | 9  | 27 | CCT  | 9  | 7  |
| 185946 | 22 | 8419417 | 8419431 | 3 | 5  | 15 | GTG  | 24 | 4  |
| 185951 | 22 | 8422994 | 8423011 | 2 | 9  | 18 | TG   | 21 | 4  |
| 185954 | 22 | 8426355 | 8426410 | 2 | 28 | 56 | CA   | 9  | 16 |
| 185955 | 22 | 8426738 | 8426791 | 2 | 27 | 54 | GT   | 8  | 10 |
| 185957 | 22 | 8428049 | 8428062 | 2 | 7  | 14 | CA   | 6  | 4  |
| 185958 | 22 | 8428065 | 8428078 | 2 | 7  | 14 | CA   | 8  | 5  |
| 185961 | 22 | 8431374 | 8431397 | 2 | 12 | 24 | CA   | 18 | 6  |
| 185966 | 22 | 8441619 | 8441646 | 2 | 14 | 28 | AC   | 15 | 8  |
| 185967 | 22 | 8448411 | 8448431 | 3 | 7  | 21 | GCT  | 26 | 11 |
| 185968 | 22 | 8448570 | 8448583 | 2 | 7  | 14 | AC   | 22 | 5  |
| 185969 | 22 | 8448712 | 8448731 | 2 | 10 | 20 | AC   | 9  | 4  |

|        |    |         |         |   |    |    |      |    |    |
|--------|----|---------|---------|---|----|----|------|----|----|
| 185971 | 22 | 8450667 | 8450698 | 2 | 16 | 32 | TG   | 7  | 11 |
| 185974 | 22 | 8451826 | 8451843 | 2 | 9  | 18 | TG   | 13 | 12 |
| 185975 | 22 | 8452007 | 8452020 | 2 | 7  | 14 | CA   | 13 | 13 |
| 185976 | 22 | 8453427 | 8453456 | 2 | 15 | 30 | TG   | 18 | 8  |
| 185977 | 22 | 8454239 | 8454254 | 2 | 8  | 16 | CA   | 16 | 8  |
| 185978 | 22 | 8456032 | 8456063 | 4 | 8  | 32 | CTGT | 21 | 8  |
| 185980 | 22 | 8457105 | 8457126 | 2 | 11 | 22 | TG   | 19 | 8  |
| 185984 | 22 | 8466450 | 8466465 | 4 | 4  | 16 | AAAC | 23 | 3  |
| 185988 | 22 | 8468882 | 8468909 | 2 | 14 | 28 | TG   | 16 | 6  |
| 185989 | 22 | 8469569 | 8469596 | 2 | 14 | 28 | GT   | 16 | 11 |
| 185991 | 22 | 8470534 | 8470557 | 2 | 12 | 24 | GT   | 17 | 7  |
| 185997 | 22 | 8475233 | 8475258 | 2 | 13 | 26 | CA   | 16 | 10 |
| 186004 | 22 | 8485893 | 8485914 | 2 | 11 | 22 | TG   | 17 | 11 |
| 186007 | 22 | 8495466 | 8495477 | 2 | 6  | 12 | AC   | 24 | 4  |
| 186008 | 22 | 8495494 | 8495505 | 2 | 6  | 12 | AC   | 21 | 4  |
| 186009 | 22 | 8495510 | 8495521 | 2 | 6  | 12 | AC   | 22 | 3  |
| 186010 | 22 | 8497788 | 8497831 | 4 | 11 | 44 | ATAC | 19 | 16 |
| 186011 | 22 | 8498218 | 8498243 | 2 | 13 | 26 | AC   | 21 | 8  |
| 186012 | 22 | 8500269 | 8500312 | 2 | 22 | 44 | GT   | 14 | 10 |
| 186013 | 22 | 8500466 | 8500481 | 2 | 8  | 16 | TG   | 27 | 3  |
| 186015 | 22 | 8503311 | 8503334 | 3 | 8  | 24 | CCT  | 22 | 4  |
| 186020 | 23 | 6880    | 6895    | 4 | 4  | 16 | AAAT | 23 | 5  |
| 186023 | 23 | 18518   | 18539   | 2 | 11 | 22 | GT   | 12 | 8  |
| 186025 | 23 | 19074   | 19088   | 3 | 5  | 15 | TCT  | 31 | 4  |
| 186027 | 23 | 29148   | 29159   | 2 | 6  | 12 | TG   | 30 | 6  |
| 186028 | 23 | 33658   | 33689   | 4 | 8  | 32 | ATTT | 25 | 11 |
| 186029 | 23 | 39088   | 39099   | 2 | 6  | 12 | CT   | 28 | 4  |
| 186030 | 23 | 46714   | 46731   | 2 | 9  | 18 | AC   | 26 | 9  |
| 186035 | 23 | 72739   | 72758   | 2 | 10 | 20 | GT   | 15 | 10 |
| 186036 | 23 | 75032   | 75051   | 2 | 10 | 20 | CT   | 25 | 4  |
| 186038 | 23 | 89882   | 89897   | 4 | 4  | 16 | TTTG | 26 | 9  |
| 186040 | 23 | 95018   | 95031   | 2 | 7  | 14 | TG   | 23 | 9  |
| 186042 | 23 | 98645   | 98656   | 2 | 6  | 12 | GT   | 27 | 5  |
| 186043 | 23 | 99672   | 99699   | 2 | 14 | 28 | CA   | 19 | 10 |
| 186044 | 23 | 100649  | 100660  | 2 | 6  | 12 | CA   | 28 | 3  |
| 186049 | 23 | 124994  | 125007  | 2 | 7  | 14 | AC   | 37 | 3  |
| 186065 | 23 | 168669  | 168682  | 2 | 7  | 14 | TC   | 19 | 3  |
| 186067 | 23 | 173341  | 173362  | 2 | 11 | 22 | CA   | 14 | 5  |
| 186069 | 23 | 174287  | 174304  | 2 | 9  | 18 | AC   | 26 | 8  |
| 186110 | 23 | 241481  | 241500  | 2 | 10 | 20 | GT   | 14 | 5  |
| 186116 | 23 | 249471  | 249494  | 3 | 8  | 24 | GCA  | 25 | 8  |
| 186122 | 23 | 253494  | 253508  | 3 | 5  | 15 | CAG  | 24 | 4  |
| 186124 | 23 | 254838  | 254853  | 2 | 8  | 16 | GT   | 7  | 4  |
| 186126 | 23 | 255039  | 255060  | 2 | 11 | 22 | CT   | 19 | 6  |
| 186127 | 23 | 255461  | 255478  | 3 | 6  | 18 | ACA  | 23 | 5  |
| 186128 | 23 | 256552  | 256585  | 2 | 17 | 34 | CA   | 20 | 8  |
| 186131 | 23 | 259808  | 259821  | 2 | 7  | 14 | CA   | 18 | 7  |
| 186134 | 23 | 260716  | 260741  | 2 | 13 | 26 | TG   | 20 | 8  |
| 186146 | 23 | 275840  | 275871  | 2 | 16 | 32 | TG   | 17 | 19 |
| 186149 | 23 | 277997  | 278014  | 2 | 9  | 18 | TC   | 17 | 10 |
| 186154 | 23 | 285329  | 285390  | 2 | 31 | 62 | GT   | 8  | 13 |

|        |    |        |        |   |    |    |      |    |    |
|--------|----|--------|--------|---|----|----|------|----|----|
| 186221 | 23 | 370105 | 370122 | 2 | 9  | 18 | TG   | 19 | 12 |
| 186223 | 23 | 371847 | 371878 | 2 | 16 | 32 | TG   | 7  | 6  |
| 186231 | 23 | 381090 | 381117 | 2 | 14 | 28 | GA   | 12 | 8  |
| 186233 | 23 | 382006 | 382019 | 2 | 7  | 14 | GT   | 19 | 3  |
| 186236 | 23 | 383894 | 383911 | 2 | 9  | 18 | CT   | 27 | 6  |
| 186237 | 23 | 387118 | 387139 | 2 | 11 | 22 | TG   | 9  | 9  |
| 186238 | 23 | 392668 | 392688 | 3 | 7  | 21 | GCA  | 33 | 6  |
| 186239 | 23 | 392865 | 392878 | 2 | 7  | 14 | AC   | 23 | 8  |
| 186240 | 23 | 394797 | 394808 | 2 | 6  | 12 | CA   | 21 | 5  |
| 186242 | 23 | 399043 | 399060 | 2 | 9  | 18 | TG   | 26 | 8  |
| 186252 | 23 | 409204 | 409215 | 2 | 6  | 12 | TG   | 15 | 4  |
| 186261 | 23 | 437758 | 437773 | 2 | 8  | 16 | CA   | 19 | 3  |
| 186262 | 23 | 438721 | 438735 | 3 | 5  | 15 | CAA  | 26 | 5  |
| 186265 | 23 | 442953 | 442973 | 3 | 7  | 21 | GAA  | 12 | 6  |
| 186267 | 23 | 451045 | 451058 | 2 | 7  | 14 | AC   | 19 | 5  |
| 186268 | 23 | 452044 | 452059 | 2 | 8  | 16 | TG   | 23 | 3  |
| 186270 | 23 | 457160 | 457173 | 2 | 7  | 14 | CT   | 22 | 14 |
| 186271 | 23 | 457175 | 457190 | 2 | 8  | 16 | TC   | 25 | 15 |
| 186274 | 23 | 458421 | 458450 | 2 | 15 | 30 | AG   | 14 | 10 |
| 186275 | 23 | 460575 | 460595 | 3 | 7  | 21 | CAG  | 31 | 4  |
| 186280 | 23 | 471910 | 471925 | 2 | 8  | 16 | TG   | 11 | 12 |
| 186281 | 23 | 474185 | 474212 | 2 | 14 | 28 | GA   | 11 | 6  |
| 186282 | 23 | 476617 | 476632 | 2 | 8  | 16 | CA   | 12 | 6  |
| 186284 | 23 | 478128 | 478143 | 2 | 8  | 16 | GT   | 25 | 11 |
| 186293 | 23 | 499429 | 499456 | 2 | 14 | 28 | CT   | 14 | 6  |
| 186295 | 23 | 500388 | 500407 | 2 | 10 | 20 | GT   | 20 | 3  |
| 186298 | 23 | 506021 | 506056 | 2 | 18 | 36 | TG   | 13 | 7  |
| 186299 | 23 | 507346 | 507377 | 2 | 16 | 32 | TG   | 18 | 12 |
| 186300 | 23 | 508206 | 508226 | 3 | 7  | 21 | CAG  | 31 | 4  |
| 186301 | 23 | 510501 | 510524 | 2 | 12 | 24 | CA   | 6  | 8  |
| 186310 | 23 | 527559 | 527586 | 2 | 14 | 28 | AC   | 17 | 6  |
| 186316 | 23 | 537125 | 537144 | 4 | 5  | 20 | TATT | 19 | 5  |
| 186319 | 23 | 544499 | 544514 | 2 | 8  | 16 | TG   | 25 | 5  |
| 186324 | 23 | 548827 | 548860 | 2 | 17 | 34 | TG   | 19 | 10 |
| 186328 | 23 | 555459 | 555480 | 2 | 11 | 22 | TG   | 21 | 8  |
| 186330 | 23 | 563811 | 563838 | 4 | 7  | 28 | GATG | 11 | 3  |
| 186343 | 23 | 584687 | 584710 | 2 | 12 | 24 | GT   | 13 | 12 |
| 186352 | 23 | 595459 | 595478 | 2 | 10 | 20 | CT   | 20 | 5  |
| 186354 | 23 | 596406 | 596421 | 2 | 8  | 16 | GT   | 16 | 9  |
| 186357 | 23 | 600805 | 600822 | 2 | 9  | 18 | CA   | 12 | 13 |
| 186363 | 23 | 614632 | 614651 | 2 | 10 | 20 | AC   | 24 | 9  |
| 186364 | 23 | 619532 | 619555 | 2 | 12 | 24 | GT   | 16 | 8  |
| 186365 | 23 | 623747 | 623764 | 3 | 6  | 18 | GAG  | 21 | 3  |
| 186367 | 23 | 639089 | 639128 | 2 | 20 | 40 | GT   | 8  | 13 |
| 186368 | 23 | 640051 | 640076 | 2 | 13 | 26 | TG   | 10 | 6  |
| 186375 | 23 | 644648 | 644669 | 2 | 11 | 22 | AC   | 15 | 6  |
| 186377 | 23 | 647697 | 647732 | 2 | 18 | 36 | GT   | 13 | 14 |
| 186380 | 23 | 665125 | 665163 | 3 | 13 | 39 | AAG  | 22 | 8  |
| 186383 | 23 | 670978 | 670995 | 2 | 9  | 18 | CT   | 16 | 8  |
| 186384 | 23 | 671295 | 671324 | 2 | 15 | 30 | TG   | 9  | 8  |
| 186385 | 23 | 674153 | 674168 | 4 | 4  | 16 | ATCC | 27 | 3  |

|        |    |         |         |   |    |    |      |    |    |
|--------|----|---------|---------|---|----|----|------|----|----|
| 186387 | 23 | 683897  | 683936  | 2 | 20 | 40 | GT   | 8  | 5  |
| 186388 | 23 | 684792  | 684825  | 2 | 17 | 34 | AC   | 10 | 6  |
| 186389 | 23 | 686062  | 686093  | 2 | 16 | 32 | AC   | 24 | 14 |
| 186390 | 23 | 686264  | 686285  | 2 | 11 | 22 | AC   | 6  | 5  |
| 186393 | 23 | 694249  | 694262  | 2 | 7  | 14 | GA   | 23 | 3  |
| 186395 | 23 | 706822  | 706835  | 2 | 7  | 14 | AC   | 25 | 7  |
| 186396 | 23 | 712132  | 712159  | 2 | 14 | 28 | TG   | 24 | 9  |
| 186398 | 23 | 714506  | 714539  | 2 | 17 | 34 | AC   | 6  | 7  |
| 186402 | 23 | 719620  | 719635  | 4 | 4  | 16 | GCAC | 16 | 14 |
| 186403 | 23 | 719885  | 719896  | 2 | 6  | 12 | CA   | 28 | 3  |
| 186408 | 23 | 739552  | 739579  | 2 | 14 | 28 | TG   | 12 | 6  |
| 186417 | 23 | 771463  | 771484  | 2 | 11 | 22 | AC   | 10 | 9  |
| 186427 | 23 | 826808  | 826839  | 2 | 16 | 32 | GT   | 20 | 13 |
| 186432 | 23 | 836685  | 836702  | 2 | 9  | 18 | TG   | 26 | 6  |
| 186433 | 23 | 838607  | 838622  | 4 | 4  | 16 | ATGG | 26 | 3  |
| 186435 | 23 | 844394  | 844405  | 2 | 6  | 12 | AC   | 20 | 4  |
| 186436 | 23 | 844932  | 844945  | 2 | 7  | 14 | AC   | 21 | 7  |
| 186441 | 23 | 848509  | 848524  | 4 | 4  | 16 | GACC | 32 | 4  |
| 186449 | 23 | 859927  | 859944  | 2 | 9  | 18 | TG   | 24 | 6  |
| 186455 | 23 | 863787  | 863807  | 3 | 7  | 21 | AGG  | 24 | 4  |
| 186456 | 23 | 864580  | 864609  | 2 | 15 | 30 | CA   | 13 | 6  |
| 186468 | 23 | 881165  | 881196  | 4 | 8  | 32 | TAGA | 27 | 6  |
| 186473 | 23 | 888834  | 888853  | 2 | 10 | 20 | AG   | 13 | 5  |
| 186474 | 23 | 889306  | 889323  | 2 | 9  | 18 | GT   | 22 | 4  |
| 186482 | 23 | 906144  | 906163  | 4 | 5  | 20 | ATTT | 10 | 8  |
| 186485 | 23 | 906643  | 906658  | 4 | 4  | 16 | TAAA | 27 | 4  |
| 186488 | 23 | 907835  | 907849  | 3 | 5  | 15 | TGT  | 13 | 3  |
| 186490 | 23 | 908966  | 908989  | 4 | 6  | 24 | TGAA | 22 | 5  |
| 186491 | 23 | 909147  | 909162  | 4 | 4  | 16 | TTTG | 11 | 4  |
| 186502 | 23 | 939882  | 939896  | 3 | 5  | 15 | TTC  | 27 | 3  |
| 186503 | 23 | 941617  | 941636  | 4 | 5  | 20 | GAAA | 22 | 6  |
| 186508 | 23 | 950777  | 950800  | 2 | 12 | 24 | CA   | 22 | 7  |
| 186509 | 23 | 952452  | 952479  | 2 | 14 | 28 | GA   | 17 | 9  |
| 186510 | 23 | 955294  | 955315  | 2 | 11 | 22 | CA   | 30 | 9  |
| 186519 | 23 | 963213  | 963233  | 3 | 7  | 21 | GCT  | 28 | 10 |
| 186522 | 23 | 967087  | 967102  | 2 | 8  | 16 | AC   | 12 | 8  |
| 186533 | 23 | 989415  | 989446  | 2 | 16 | 32 | GT   | 8  | 9  |
| 186538 | 23 | 1000285 | 1000326 | 2 | 21 | 42 | AG   | 7  | 7  |
| 186542 | 23 | 1010279 | 1010292 | 2 | 7  | 14 | AT   | 15 | 10 |
| 186543 | 23 | 1016465 | 1016486 | 2 | 11 | 22 | GT   | 16 | 5  |
| 186544 | 23 | 1020315 | 1020326 | 2 | 6  | 12 | GT   | 13 | 9  |
| 186545 | 23 | 1020666 | 1020704 | 3 | 13 | 39 | TGC  | 24 | 12 |
| 186549 | 23 | 1026510 | 1026523 | 2 | 7  | 14 | GT   | 22 | 5  |
| 186551 | 23 | 1028405 | 1028432 | 4 | 7  | 28 | TCCA | 25 | 3  |
| 186556 | 23 | 1052888 | 1052903 | 2 | 8  | 16 | CT   | 25 | 4  |
| 186561 | 23 | 1073561 | 1073576 | 2 | 8  | 16 | AC   | 25 | 3  |
| 186570 | 23 | 1104003 | 1104032 | 2 | 15 | 30 | CA   | 11 | 6  |
| 186594 | 23 | 1188431 | 1188442 | 2 | 6  | 12 | AT   | 19 | 3  |
| 186616 | 23 | 1215848 | 1215859 | 2 | 6  | 12 | AC   | 20 | 4  |
| 186617 | 23 | 1215861 | 1215874 | 2 | 7  | 14 | CA   | 23 | 3  |
| 186622 | 23 | 1231045 | 1231056 | 2 | 6  | 12 | AT   | 22 | 3  |

|        |    |         |         |   |    |    |      |    |    |
|--------|----|---------|---------|---|----|----|------|----|----|
| 186623 | 23 | 1236239 | 1236302 | 4 | 16 | 64 | CTAT | 18 | 11 |
| 186624 | 23 | 1240656 | 1240675 | 2 | 10 | 20 | GT   | 21 | 8  |
| 186626 | 23 | 1244653 | 1244672 | 2 | 10 | 20 | TG   | 25 | 7  |
| 186631 | 23 | 1251469 | 1251484 | 2 | 8  | 16 | GT   | 23 | 6  |
| 186636 | 23 | 1257505 | 1257528 | 4 | 6  | 24 | TAGA | 21 | 3  |
| 186637 | 23 | 1258783 | 1258797 | 3 | 5  | 15 | GCA  | 22 | 4  |
| 186641 | 23 | 1259505 | 1259524 | 2 | 10 | 20 | CA   | 10 | 6  |
| 186642 | 23 | 1259658 | 1259669 | 2 | 6  | 12 | TG   | 20 | 3  |
| 186643 | 23 | 1260308 | 1260347 | 4 | 10 | 40 | GCAG | 32 | 9  |
| 186650 | 23 | 1266165 | 1266182 | 2 | 9  | 18 | AT   | 9  | 5  |
| 186655 | 23 | 1270645 | 1270670 | 2 | 13 | 26 | GT   | 22 | 4  |
| 186657 | 23 | 1271986 | 1271999 | 2 | 7  | 14 | GT   | 10 | 4  |
| 186658 | 23 | 1272549 | 1272574 | 2 | 13 | 26 | CA   | 17 | 11 |
| 186660 | 23 | 1275720 | 1275731 | 2 | 6  | 12 | TG   | 25 | 8  |
| 186661 | 23 | 1276616 | 1276649 | 2 | 17 | 34 | CA   | 22 | 9  |
| 186662 | 23 | 1278126 | 1278159 | 2 | 17 | 34 | GT   | 8  | 9  |
| 186663 | 23 | 1278424 | 1278435 | 2 | 6  | 12 | CA   | 18 | 3  |
| 186664 | 23 | 1281277 | 1281304 | 2 | 14 | 28 | GT   | 13 | 14 |
| 186667 | 23 | 1283679 | 1283696 | 2 | 9  | 18 | GT   | 19 | 4  |
| 186668 | 23 | 1284732 | 1284743 | 2 | 6  | 12 | AG   | 27 | 3  |
| 186670 | 23 | 1285515 | 1285536 | 2 | 11 | 22 | GT   | 13 | 6  |
| 186682 | 23 | 1319748 | 1319779 | 2 | 16 | 32 | CA   | 6  | 6  |
| 186683 | 23 | 1322190 | 1322201 | 2 | 6  | 12 | AT   | 11 | 7  |
| 186684 | 23 | 1322203 | 1322216 | 2 | 7  | 14 | TA   | 13 | 8  |
| 186685 | 23 | 1323559 | 1323580 | 2 | 11 | 22 | CA   | 21 | 7  |
| 186690 | 23 | 1349351 | 1349380 | 3 | 10 | 30 | CAT  | 24 | 10 |
| 186691 | 23 | 1351197 | 1351238 | 2 | 21 | 42 | AC   | 12 | 13 |
| 186692 | 23 | 1362231 | 1362246 | 2 | 8  | 16 | TG   | 28 | 5  |
| 186695 | 23 | 1376321 | 1376344 | 2 | 12 | 24 | CA   | 7  | 10 |
| 186697 | 23 | 1381615 | 1381640 | 2 | 13 | 26 | GT   | 15 | 12 |
| 186700 | 23 | 1387003 | 1387020 | 3 | 6  | 18 | GTG  | 14 | 3  |
| 186701 | 23 | 1387088 | 1387113 | 2 | 13 | 26 | CA   | 12 | 13 |
| 186705 | 23 | 1397235 | 1397248 | 2 | 7  | 14 | CA   | 26 | 6  |
| 186707 | 23 | 1401088 | 1401123 | 2 | 18 | 36 | AC   | 6  | 8  |
| 186714 | 23 | 1418122 | 1418137 | 2 | 8  | 16 | TG   | 23 | 10 |
| 186715 | 23 | 1418229 | 1418252 | 2 | 12 | 24 | CA   | 16 | 10 |
| 186727 | 23 | 1443233 | 1443244 | 2 | 6  | 12 | GT   | 27 | 3  |
| 186731 | 23 | 1451634 | 1451651 | 2 | 9  | 18 | GT   | 18 | 12 |
| 186732 | 23 | 1452725 | 1452745 | 3 | 7  | 21 | AGA  | 19 | 7  |
| 186734 | 23 | 1453721 | 1453736 | 4 | 4  | 16 | TTTA | 17 | 11 |
| 186736 | 23 | 1454268 | 1454303 | 2 | 18 | 36 | AG   | 6  | 7  |
| 186737 | 23 | 1454331 | 1454356 | 2 | 13 | 26 | GA   | 14 | 11 |
| 186739 | 23 | 1464860 | 1464879 | 2 | 10 | 20 | GT   | 17 | 17 |
| 186740 | 23 | 1465022 | 1465036 | 3 | 5  | 15 | CAC  | 23 | 7  |
| 186744 | 23 | 1472173 | 1472190 | 2 | 9  | 18 | TG   | 17 | 6  |
| 186746 | 23 | 1474332 | 1474346 | 3 | 5  | 15 | GCA  | 31 | 9  |
| 186749 | 23 | 1480903 | 1480932 | 3 | 10 | 30 | CAT  | 18 | 7  |
| 186755 | 23 | 1486689 | 1486718 | 2 | 15 | 30 | CA   | 18 | 9  |
| 186756 | 23 | 1487153 | 1487164 | 2 | 6  | 12 | CT   | 20 | 4  |
| 186759 | 23 | 1490154 | 1490169 | 4 | 4  | 16 | CACG | 27 | 13 |
| 186760 | 23 | 1490170 | 1490185 | 2 | 8  | 16 | CA   | 24 | 11 |



|        |    |         |         |   |    |    |      |    |    |
|--------|----|---------|---------|---|----|----|------|----|----|
| 186763 | 23 | 1492358 | 1492375 | 2 | 9  | 18 | CA   | 8  | 6  |
| 186768 | 23 | 1497651 | 1497664 | 2 | 7  | 14 | GA   | 22 | 3  |
| 186772 | 23 | 1502933 | 1502948 | 2 | 8  | 16 | GA   | 14 | 5  |
| 186775 | 23 | 1505100 | 1505141 | 2 | 21 | 42 | TG   | 10 | 12 |
| 186780 | 23 | 1511859 | 1511874 | 2 | 8  | 16 | CT   | 12 | 9  |
| 186786 | 23 | 1513915 | 1513930 | 4 | 4  | 16 | AAAT | 28 | 6  |
| 186788 | 23 | 1518273 | 1518284 | 2 | 6  | 12 | AC   | 29 | 3  |
| 186792 | 23 | 1530151 | 1530162 | 2 | 6  | 12 | CT   | 28 | 3  |
| 186794 | 23 | 1532661 | 1532678 | 2 | 9  | 18 | GA   | 14 | 5  |
| 186795 | 23 | 1534968 | 1534997 | 2 | 15 | 30 | GT   | 19 | 11 |
| 186797 | 23 | 1536684 | 1536695 | 2 | 6  | 12 | AC   | 18 | 13 |
| 186799 | 23 | 1538086 | 1538111 | 2 | 13 | 26 | TG   | 15 | 9  |
| 186800 | 23 | 1538248 | 1538263 | 2 | 8  | 16 | TG   | 22 | 4  |
| 186809 | 23 | 1550361 | 1550378 | 2 | 9  | 18 | TG   | 25 | 3  |
| 186815 | 23 | 1563287 | 1563306 | 2 | 10 | 20 | TC   | 16 | 5  |
| 186823 | 23 | 1579781 | 1579807 | 3 | 9  | 27 | GAA  | 15 | 13 |
| 186834 | 23 | 1598075 | 1598094 | 2 | 10 | 20 | TC   | 20 | 3  |
| 186835 | 23 | 1598277 | 1598298 | 2 | 11 | 22 | TG   | 7  | 4  |
| 186838 | 23 | 1602954 | 1602977 | 2 | 12 | 24 | GT   | 22 | 6  |
| 186839 | 23 | 1603486 | 1603503 | 2 | 9  | 18 | GT   | 22 | 3  |
| 186845 | 23 | 1617964 | 1617997 | 2 | 17 | 34 | CA   | 10 | 7  |
| 186847 | 23 | 1619746 | 1619769 | 2 | 12 | 24 | AC   | 14 | 5  |
| 186863 | 23 | 1642590 | 1642607 | 2 | 9  | 18 | AC   | 18 | 8  |
| 186864 | 23 | 1642862 | 1642879 | 2 | 9  | 18 | AG   | 14 | 5  |
| 186866 | 23 | 1643489 | 1643516 | 2 | 14 | 28 | TG   | 13 | 9  |
| 186867 | 23 | 1646126 | 1646183 | 2 | 29 | 58 | AC   | 6  | 7  |
| 186868 | 23 | 1647443 | 1647494 | 2 | 26 | 52 | AG   | 7  | 8  |
| 186870 | 23 | 1654641 | 1654654 | 2 | 7  | 14 | TG   | 19 | 7  |
| 186872 | 23 | 1656457 | 1656501 | 3 | 15 | 45 | CCT  | 12 | 9  |
| 186876 | 23 | 1662412 | 1662427 | 2 | 8  | 16 | CA   | 15 | 7  |
| 186881 | 23 | 1673766 | 1673817 | 2 | 26 | 52 | TG   | 11 | 10 |
| 186897 | 23 | 1718225 | 1718238 | 2 | 7  | 14 | AC   | 8  | 6  |
| 186898 | 23 | 1718719 | 1718730 | 2 | 6  | 12 | GT   | 18 | 3  |
| 186906 | 23 | 1727984 | 1728001 | 2 | 9  | 18 | TG   | 20 | 7  |
| 186907 | 23 | 1728543 | 1728572 | 3 | 10 | 30 | ATC  | 26 | 7  |
| 186917 | 23 | 1754970 | 1755005 | 2 | 18 | 36 | GA   | 11 | 11 |
| 186918 | 23 | 1755457 | 1755492 | 3 | 12 | 36 | AAG  | 25 | 7  |
| 186919 | 23 | 1755623 | 1755643 | 3 | 7  | 21 | CCT  | 11 | 3  |
| 186923 | 23 | 1756159 | 1756182 | 2 | 12 | 24 | GA   | 11 | 11 |
| 186925 | 23 | 1756495 | 1756518 | 2 | 12 | 24 | AG   | 13 | 11 |
| 186926 | 23 | 1756727 | 1756748 | 2 | 11 | 22 | TG   | 19 | 10 |
| 186931 | 23 | 1759530 | 1759547 | 3 | 6  | 18 | CAG  | 11 | 3  |
| 186934 | 23 | 1763384 | 1763403 | 2 | 10 | 20 | AC   | 14 | 5  |
| 186935 | 23 | 1763744 | 1763758 | 3 | 5  | 15 | TCC  | 21 | 4  |
| 186943 | 23 | 1773516 | 1773529 | 2 | 7  | 14 | TC   | 31 | 3  |
| 186958 | 23 | 1793598 | 1793627 | 2 | 15 | 30 | TG   | 17 | 9  |
| 186959 | 23 | 1802218 | 1802229 | 2 | 6  | 12 | CA   | 23 | 3  |
| 186960 | 23 | 1806069 | 1806100 | 4 | 8  | 32 | CAGG | 18 | 12 |
| 186962 | 23 | 1807677 | 1807720 | 2 | 22 | 44 | GT   | 6  | 8  |
| 186968 | 23 | 1827772 | 1827791 | 2 | 10 | 20 | TG   | 19 | 4  |
| 186970 | 23 | 1841155 | 1841184 | 2 | 15 | 30 | GT   | 6  | 10 |

|        |    |         |         |   |    |    |      |    |    |
|--------|----|---------|---------|---|----|----|------|----|----|
| 186972 | 23 | 1844302 | 1844325 | 4 | 6  | 24 | CAGA | 12 | 4  |
| 186981 | 23 | 1865272 | 1865287 | 2 | 8  | 16 | AC   | 28 | 6  |
| 186984 | 23 | 1877000 | 1877019 | 4 | 5  | 20 | ATTT | 7  | 10 |
| 186997 | 23 | 1912638 | 1912653 | 4 | 4  | 16 | GTGC | 20 | 3  |
| 186999 | 23 | 1915732 | 1915755 | 2 | 12 | 24 | AC   | 15 | 6  |
| 187003 | 23 | 1921126 | 1921167 | 2 | 21 | 42 | TG   | 6  | 6  |
| 187005 | 23 | 1925360 | 1925401 | 2 | 21 | 42 | AC   | 9  | 10 |
| 187007 | 23 | 1929170 | 1929193 | 2 | 12 | 24 | AC   | 11 | 8  |
| 187008 | 23 | 1931594 | 1931605 | 2 | 6  | 12 | TG   | 27 | 3  |
| 187014 | 23 | 1954797 | 1954816 | 2 | 10 | 20 | GT   | 21 | 6  |
| 187025 | 23 | 1973419 | 1973454 | 2 | 18 | 36 | AC   | 11 | 14 |
| 187027 | 23 | 1978336 | 1978347 | 2 | 6  | 12 | CA   | 27 | 3  |
| 187030 | 23 | 1984944 | 1984973 | 2 | 15 | 30 | GT   | 22 | 14 |
| 187032 | 23 | 1991670 | 1991709 | 2 | 20 | 40 | GA   | 12 | 11 |
| 187047 | 23 | 2015209 | 2015220 | 2 | 6  | 12 | CA   | 20 | 5  |
| 187064 | 23 | 2044565 | 2044588 | 2 | 12 | 24 | GT   | 10 | 6  |
| 187077 | 23 | 2051142 | 2051181 | 2 | 20 | 40 | GT   | 24 | 14 |
| 187085 | 23 | 2068251 | 2068270 | 4 | 5  | 20 | TATC | 10 | 3  |
| 187086 | 23 | 2068338 | 2068359 | 2 | 11 | 22 | GT   | 19 | 5  |
| 187089 | 23 | 2078027 | 2078042 | 2 | 8  | 16 | GT   | 24 | 7  |
| 187090 | 23 | 2091578 | 2091601 | 4 | 6  | 24 | TTTA | 14 | 4  |
| 187096 | 23 | 2101003 | 2101016 | 2 | 7  | 14 | AT   | 22 | 5  |
| 187098 | 23 | 2106168 | 2106187 | 2 | 10 | 20 | TG   | 15 | 9  |
| 187100 | 23 | 2109126 | 2109139 | 2 | 7  | 14 | AC   | 32 | 3  |
| 187103 | 23 | 2115585 | 2115620 | 2 | 18 | 36 | TG   | 14 | 12 |
| 187106 | 23 | 2119581 | 2119595 | 3 | 5  | 15 | TGT  | 30 | 3  |
| 187134 | 23 | 2187075 | 2187102 | 2 | 14 | 28 | GT   | 14 | 8  |
| 187142 | 23 | 2197658 | 2197679 | 2 | 11 | 22 | AC   | 22 | 11 |
| 187146 | 23 | 2200536 | 2200551 | 4 | 4  | 16 | AAAT | 21 | 10 |
| 187163 | 23 | 2232251 | 2232268 | 2 | 9  | 18 | GT   | 13 | 4  |
| 187166 | 23 | 2236776 | 2236801 | 2 | 13 | 26 | AC   | 7  | 8  |
| 187167 | 23 | 2239986 | 2239999 | 2 | 7  | 14 | AG   | 10 | 3  |
| 187173 | 23 | 2248844 | 2248867 | 2 | 12 | 24 | GT   | 20 | 7  |
| 187174 | 23 | 2255770 | 2255790 | 3 | 7  | 21 | TCC  | 21 | 6  |
| 187176 | 23 | 2258507 | 2258522 | 2 | 8  | 16 | TG   | 21 | 9  |
| 187177 | 23 | 2258741 | 2258766 | 2 | 13 | 26 | AC   | 14 | 11 |
| 187179 | 23 | 2260309 | 2260320 | 2 | 6  | 12 | GT   | 31 | 3  |
| 187182 | 23 | 2265456 | 2265471 | 2 | 8  | 16 | TG   | 26 | 5  |
| 187183 | 23 | 2266145 | 2266166 | 2 | 11 | 22 | AC   | 21 | 4  |
| 187191 | 23 | 2289101 | 2289120 | 2 | 10 | 20 | CA   | 25 | 7  |
| 187194 | 23 | 2292010 | 2292027 | 2 | 9  | 18 | GT   | 16 | 12 |
| 187197 | 23 | 2301232 | 2301251 | 4 | 5  | 20 | TTTG | 10 | 3  |
| 187204 | 23 | 2312544 | 2312559 | 2 | 8  | 16 | GT   | 19 | 5  |
| 187210 | 23 | 2318179 | 2318198 | 2 | 10 | 20 | AC   | 18 | 7  |
| 187211 | 23 | 2318335 | 2318366 | 2 | 16 | 32 | CA   | 20 | 10 |
| 187212 | 23 | 2318737 | 2318748 | 2 | 6  | 12 | GT   | 26 | 5  |
| 187216 | 23 | 2321994 | 2322023 | 2 | 15 | 30 | CA   | 13 | 7  |
| 187220 | 23 | 2326438 | 2326453 | 2 | 8  | 16 | GT   | 34 | 3  |
| 187225 | 23 | 2336835 | 2336850 | 2 | 8  | 16 | GT   | 17 | 13 |
| 187226 | 23 | 2336853 | 2336866 | 2 | 7  | 14 | GT   | 12 | 8  |
| 187229 | 23 | 2339735 | 2339758 | 3 | 8  | 24 | TCC  | 10 | 3  |

|        |    |         |         |   |    |    |      |    |    |
|--------|----|---------|---------|---|----|----|------|----|----|
| 187232 | 23 | 2342634 | 2342653 | 2 | 10 | 20 | TC   | 6  | 3  |
| 187233 | 23 | 2344938 | 2344967 | 2 | 15 | 30 | CA   | 20 | 10 |
| 187238 | 23 | 2351510 | 2351525 | 2 | 8  | 16 | GT   | 24 | 5  |
| 187241 | 23 | 2355712 | 2355727 | 2 | 8  | 16 | TG   | 18 | 7  |
| 187242 | 23 | 2355885 | 2355902 | 2 | 9  | 18 | GT   | 17 | 17 |
| 187245 | 23 | 2358322 | 2358345 | 2 | 12 | 24 | TG   | 17 | 8  |
| 187251 | 23 | 2363890 | 2363925 | 4 | 9  | 36 | ATGG | 24 | 11 |
| 187252 | 23 | 2372224 | 2372269 | 2 | 23 | 46 | TC   | 9  | 6  |
| 187255 | 23 | 2381506 | 2381517 | 2 | 6  | 12 | TG   | 24 | 3  |
| 187261 | 23 | 2393717 | 2393731 | 3 | 5  | 15 | CAG  | 21 | 6  |
| 187264 | 23 | 2401417 | 2401438 | 2 | 11 | 22 | AC   | 16 | 4  |
| 187267 | 23 | 2404580 | 2404603 | 2 | 12 | 24 | CA   | 14 | 5  |
| 187268 | 23 | 2406675 | 2406686 | 2 | 6  | 12 | GT   | 21 | 7  |
| 187269 | 23 | 2406688 | 2406699 | 2 | 6  | 12 | TG   | 22 | 10 |
| 187273 | 23 | 2412374 | 2412399 | 2 | 13 | 26 | CA   | 20 | 7  |
| 187277 | 23 | 2414404 | 2414435 | 2 | 16 | 32 | CA   | 9  | 10 |
| 187282 | 23 | 2451355 | 2451366 | 2 | 6  | 12 | CA   | 22 | 3  |
| 187284 | 23 | 2459783 | 2459798 | 4 | 4  | 16 | AAAG | 20 | 3  |
| 187288 | 23 | 2468961 | 2468976 | 4 | 4  | 16 | TTAT | 32 | 4  |
| 187291 | 23 | 2476902 | 2476917 | 2 | 8  | 16 | AG   | 22 | 4  |
| 187300 | 23 | 2497549 | 2497564 | 2 | 8  | 16 | AG   | 15 | 8  |
| 187306 | 23 | 2530870 | 2530885 | 4 | 4  | 16 | AGAA | 35 | 3  |
| 187308 | 23 | 2533862 | 2533879 | 2 | 9  | 18 | CA   | 22 | 3  |
| 187312 | 23 | 2551604 | 2551635 | 2 | 16 | 32 | AC   | 12 | 9  |
| 187315 | 23 | 2565488 | 2565507 | 4 | 5  | 20 | AATG | 19 | 3  |
| 187317 | 23 | 2574105 | 2574120 | 2 | 8  | 16 | CA   | 24 | 5  |
| 187321 | 23 | 2582792 | 2582847 | 2 | 28 | 56 | TG   | 7  | 11 |
| 187322 | 23 | 2583969 | 2583990 | 2 | 11 | 22 | CA   | 13 | 7  |
| 187323 | 23 | 2587288 | 2587302 | 3 | 5  | 15 | AAC  | 21 | 4  |
| 187327 | 23 | 2600555 | 2600575 | 3 | 7  | 21 | GCT  | 22 | 4  |
| 187332 | 23 | 2620619 | 2620632 | 2 | 7  | 14 | AC   | 9  | 4  |
| 187333 | 23 | 2623007 | 2623022 | 4 | 4  | 16 | CAAA | 26 | 4  |
| 187336 | 23 | 2635210 | 2635265 | 2 | 28 | 56 | GT   | 6  | 6  |
| 187337 | 23 | 2636847 | 2636858 | 2 | 6  | 12 | TG   | 21 | 4  |
| 187338 | 23 | 2640060 | 2640071 | 2 | 6  | 12 | TA   | 27 | 4  |
| 187339 | 23 | 2649696 | 2649716 | 3 | 7  | 21 | TTA  | 11 | 6  |
| 187342 | 23 | 2661008 | 2661019 | 2 | 6  | 12 | GT   | 29 | 7  |
| 187344 | 23 | 2671011 | 2671030 | 2 | 10 | 20 | AC   | 9  | 3  |
| 187345 | 23 | 2671869 | 2671884 | 2 | 8  | 16 | CA   | 25 | 6  |
| 187347 | 23 | 2675304 | 2675327 | 2 | 12 | 24 | CA   | 6  | 4  |
| 187349 | 23 | 2675438 | 2675455 | 2 | 9  | 18 | GT   | 15 | 9  |
| 187352 | 23 | 2676709 | 2676723 | 3 | 5  | 15 | GAT  | 31 | 3  |
| 187353 | 23 | 2676868 | 2676883 | 2 | 8  | 16 | CA   | 24 | 4  |
| 187358 | 23 | 2699125 | 2699138 | 2 | 7  | 14 | TA   | 9  | 5  |
| 187361 | 23 | 2705943 | 2705957 | 3 | 5  | 15 | CAG  | 26 | 6  |
| 187362 | 23 | 2706615 | 2706629 | 3 | 5  | 15 | TTG  | 30 | 3  |
| 187365 | 23 | 2714337 | 2714354 | 2 | 9  | 18 | TG   | 17 | 8  |
| 187366 | 23 | 2719806 | 2719817 | 2 | 6  | 12 | GA   | 28 | 3  |
| 187371 | 23 | 2729548 | 2729579 | 2 | 16 | 32 | AC   | 6  | 6  |
| 187372 | 23 | 2729867 | 2729898 | 2 | 16 | 32 | GT   | 14 | 13 |
| 187373 | 23 | 2731917 | 2731932 | 2 | 8  | 16 | AC   | 12 | 4  |

|        |    |         |         |   |    |    |      |    |    |
|--------|----|---------|---------|---|----|----|------|----|----|
| 187386 | 23 | 2744236 | 2744261 | 2 | 13 | 26 | AC   | 9  | 5  |
| 187393 | 23 | 2753162 | 2753193 | 2 | 16 | 32 | CA   | 11 | 8  |
| 187394 | 23 | 2753904 | 2753921 | 2 | 9  | 18 | AC   | 18 | 6  |
| 187395 | 23 | 2755834 | 2755875 | 3 | 14 | 42 | ATC  | 23 | 8  |
| 187397 | 23 | 2757107 | 2757130 | 2 | 12 | 24 | CA   | 16 | 7  |
| 187398 | 23 | 2760141 | 2760164 | 2 | 12 | 24 | TG   | 15 | 7  |
| 187400 | 23 | 2760307 | 2760326 | 2 | 10 | 20 | AC   | 27 | 4  |
| 187402 | 23 | 2762647 | 2762710 | 4 | 16 | 64 | AGAT | 12 | 13 |
| 187409 | 23 | 2767101 | 2767118 | 2 | 9  | 18 | AC   | 22 | 4  |
| 187418 | 23 | 2789926 | 2789947 | 2 | 11 | 22 | AC   | 29 | 7  |
| 187423 | 23 | 2797862 | 2797875 | 2 | 7  | 14 | GT   | 27 | 4  |
| 187424 | 23 | 2797978 | 2797999 | 2 | 11 | 22 | TG   | 21 | 8  |
| 187427 | 23 | 2803113 | 2803148 | 2 | 18 | 36 | GT   | 11 | 6  |
| 187429 | 23 | 2805677 | 2805691 | 3 | 5  | 15 | CCT  | 24 | 3  |
| 187433 | 23 | 2814537 | 2814554 | 2 | 9  | 18 | CA   | 16 | 6  |
| 187435 | 23 | 2815000 | 2815023 | 3 | 8  | 24 | GGA  | 14 | 4  |
| 187436 | 23 | 2815948 | 2815967 | 2 | 10 | 20 | GT   | 14 | 7  |
| 187437 | 23 | 2816282 | 2816293 | 2 | 6  | 12 | AC   | 26 | 4  |
| 187438 | 23 | 2816343 | 2816360 | 2 | 9  | 18 | GT   | 29 | 6  |
| 187449 | 23 | 2841813 | 2841840 | 2 | 14 | 28 | AC   | 17 | 5  |
| 187450 | 23 | 2844927 | 2844954 | 4 | 7  | 28 | CATT | 27 | 5  |
| 187455 | 23 | 2850953 | 2850966 | 2 | 7  | 14 | TG   | 27 | 4  |
| 187458 | 23 | 2857984 | 2858013 | 3 | 10 | 30 | GGA  | 15 | 8  |
| 187459 | 23 | 2858184 | 2858204 | 3 | 7  | 21 | GCT  | 10 | 3  |
| 187462 | 23 | 2862918 | 2862935 | 2 | 9  | 18 | TG   | 30 | 3  |
| 187463 | 23 | 2865531 | 2865560 | 2 | 15 | 30 | AC   | 11 | 10 |
| 187473 | 23 | 2909849 | 2909864 | 4 | 4  | 16 | CTGG | 34 | 3  |
| 187512 | 23 | 2937817 | 2937838 | 2 | 11 | 22 | TG   | 19 | 9  |
| 187521 | 23 | 2963575 | 2963595 | 3 | 7  | 21 | TCA  | 21 | 5  |
| 187525 | 23 | 2973640 | 2973669 | 2 | 15 | 30 | GT   | 10 | 10 |
| 187533 | 23 | 2984987 | 2984998 | 2 | 6  | 12 | TG   | 33 | 3  |
| 187534 | 23 | 2986300 | 2986313 | 2 | 7  | 14 | TG   | 27 | 3  |
| 187535 | 23 | 2986932 | 2986946 | 3 | 5  | 15 | TTC  | 23 | 3  |
| 187548 | 23 | 3003867 | 3003898 | 2 | 16 | 32 | GT   | 7  | 8  |
| 187551 | 23 | 3008971 | 3008986 | 4 | 4  | 16 | AAAT | 20 | 3  |
| 187553 | 23 | 3014405 | 3014424 | 2 | 10 | 20 | CA   | 9  | 13 |
| 187561 | 23 | 3031342 | 3031383 | 3 | 14 | 42 | ATC  | 26 | 13 |
| 187564 | 23 | 3041052 | 3041072 | 3 | 7  | 21 | GAT  | 17 | 3  |
| 187565 | 23 | 3041633 | 3041652 | 4 | 5  | 20 | AGCT | 26 | 4  |
| 187567 | 23 | 3045427 | 3045468 | 2 | 21 | 42 | AG   | 7  | 8  |
| 187575 | 23 | 3049999 | 3050038 | 4 | 10 | 40 | AAGA | 17 | 8  |
| 187584 | 23 | 3078951 | 3078965 | 3 | 5  | 15 | GAC  | 32 | 5  |
| 187588 | 23 | 3086143 | 3086163 | 3 | 7  | 21 | ATA  | 6  | 4  |
| 187620 | 23 | 3120484 | 3120511 | 2 | 14 | 28 | CA   | 19 | 7  |
| 187621 | 23 | 3122384 | 3122399 | 2 | 8  | 16 | GT   | 26 | 4  |
| 187622 | 23 | 3122455 | 3122468 | 2 | 7  | 14 | GT   | 20 | 4  |
| 187623 | 23 | 3123600 | 3123626 | 3 | 9  | 27 | GAT  | 24 | 7  |
| 187627 | 23 | 3126158 | 3126181 | 2 | 12 | 24 | CA   | 15 | 11 |
| 187629 | 23 | 3132110 | 3132127 | 2 | 9  | 18 | AT   | 7  | 6  |
| 187631 | 23 | 3133224 | 3133243 | 2 | 10 | 20 | GA   | 22 | 4  |
| 187632 | 23 | 3133408 | 3133423 | 2 | 8  | 16 | GT   | 19 | 3  |

|        |    |         |         |   |    |    |      |    |    |
|--------|----|---------|---------|---|----|----|------|----|----|
| 187633 | 23 | 3133537 | 3133568 | 2 | 16 | 32 | TG   | 11 | 7  |
| 187635 | 23 | 3133630 | 3133641 | 2 | 6  | 12 | TG   | 16 | 3  |
| 187643 | 23 | 3144626 | 3144659 | 2 | 17 | 34 | GT   | 17 | 8  |
| 187652 | 23 | 3150220 | 3150247 | 2 | 14 | 28 | TG   | 21 | 8  |
| 187653 | 23 | 3150365 | 3150380 | 2 | 8  | 16 | GT   | 18 | 4  |
| 187658 | 23 | 3155825 | 3155844 | 2 | 10 | 20 | AC   | 17 | 12 |
| 187660 | 23 | 3156848 | 3156861 | 2 | 7  | 14 | AC   | 25 | 5  |
| 187662 | 23 | 3161295 | 3161309 | 3 | 5  | 15 | TCT  | 17 | 3  |
| 187670 | 23 | 3174918 | 3174959 | 2 | 21 | 42 | AC   | 6  | 6  |
| 187672 | 23 | 3175345 | 3175376 | 2 | 16 | 32 | GA   | 8  | 6  |
| 187676 | 23 | 3177098 | 3177127 | 2 | 15 | 30 | CA   | 9  | 7  |
| 187677 | 23 | 3177445 | 3177476 | 2 | 16 | 32 | AC   | 8  | 7  |
| 187685 | 23 | 3187471 | 3187488 | 2 | 9  | 18 | GT   | 17 | 5  |
| 187686 | 23 | 3188015 | 3188026 | 2 | 6  | 12 | AC   | 35 | 3  |
| 187687 | 23 | 3188413 | 3188432 | 2 | 10 | 20 | GT   | 10 | 5  |
| 187690 | 23 | 3196939 | 3196970 | 2 | 16 | 32 | AC   | 18 | 20 |
| 187691 | 23 | 3197826 | 3197849 | 2 | 12 | 24 | GT   | 16 | 17 |
| 187692 | 23 | 3197935 | 3197956 | 2 | 11 | 22 | GT   | 15 | 5  |
| 187694 | 23 | 3201973 | 3202000 | 4 | 7  | 28 | CTTT | 20 | 9  |
| 187697 | 23 | 3205080 | 3205107 | 2 | 14 | 28 | CA   | 10 | 12 |
| 187699 | 23 | 3207824 | 3207847 | 2 | 12 | 24 | GT   | 13 | 5  |
| 187701 | 23 | 3209862 | 3209895 | 2 | 17 | 34 | AC   | 10 | 12 |
| 187704 | 23 | 3210234 | 3210257 | 2 | 12 | 24 | CT   | 11 | 5  |
| 187706 | 23 | 3213031 | 3213056 | 2 | 13 | 26 | GT   | 13 | 9  |
| 187710 | 23 | 3215826 | 3215845 | 2 | 10 | 20 | AC   | 16 | 3  |
| 187712 | 23 | 3219690 | 3219705 | 2 | 8  | 16 | AG   | 14 | 4  |
| 187713 | 23 | 3219897 | 3219910 | 2 | 7  | 14 | AC   | 14 | 9  |
| 187716 | 23 | 3228894 | 3228905 | 2 | 6  | 12 | AG   | 27 | 3  |
| 187717 | 23 | 3229338 | 3229373 | 2 | 18 | 36 | TG   | 6  | 8  |
| 187718 | 23 | 3229536 | 3229549 | 2 | 7  | 14 | AC   | 18 | 3  |
| 187719 | 23 | 3229579 | 3229600 | 2 | 11 | 22 | CA   | 17 | 5  |
| 187724 | 23 | 3236010 | 3236051 | 2 | 21 | 42 | TG   | 8  | 11 |
| 187728 | 23 | 3242071 | 3242088 | 2 | 9  | 18 | TG   | 11 | 8  |
| 187730 | 23 | 3245021 | 3245044 | 2 | 12 | 24 | GT   | 15 | 7  |
| 187737 | 23 | 3248866 | 3248881 | 2 | 8  | 16 | AC   | 24 | 3  |
| 187738 | 23 | 3250346 | 3250381 | 2 | 18 | 36 | AC   | 17 | 8  |
| 187739 | 23 | 3250539 | 3250562 | 2 | 12 | 24 | AC   | 17 | 7  |
| 187744 | 23 | 3251847 | 3251864 | 2 | 9  | 18 | AC   | 20 | 3  |
| 187746 | 23 | 3254742 | 3254757 | 2 | 8  | 16 | TA   | 24 | 4  |
| 187748 | 23 | 3260390 | 3260405 | 4 | 4  | 16 | TTAT | 25 | 4  |
| 187752 | 23 | 3264087 | 3264098 | 2 | 6  | 12 | AC   | 29 | 4  |
| 187754 | 23 | 3267683 | 3267702 | 2 | 10 | 20 | GT   | 25 | 7  |
| 187755 | 23 | 3267793 | 3267824 | 2 | 16 | 32 | CA   | 13 | 7  |
| 187756 | 23 | 3271839 | 3271850 | 2 | 6  | 12 | TG   | 30 | 3  |
| 187757 | 23 | 3271879 | 3271890 | 2 | 6  | 12 | GT   | 16 | 8  |
| 187758 | 23 | 3271892 | 3271903 | 2 | 6  | 12 | TG   | 24 | 8  |
| 187761 | 23 | 3272411 | 3272442 | 2 | 16 | 32 | TG   | 8  | 8  |
| 187763 | 23 | 3274716 | 3274729 | 2 | 7  | 14 | AC   | 21 | 4  |
| 187764 | 23 | 3279240 | 3279259 | 2 | 10 | 20 | CA   | 17 | 7  |
| 187766 | 23 | 3280597 | 3280608 | 2 | 6  | 12 | CA   | 17 | 4  |
| 187767 | 23 | 3280688 | 3280701 | 2 | 7  | 14 | AC   | 20 | 3  |

|        |    |         |         |   |    |    |      |    |    |
|--------|----|---------|---------|---|----|----|------|----|----|
| 187768 | 23 | 3280970 | 3280987 | 2 | 9  | 18 | AG   | 25 | 3  |
| 187769 | 23 | 3281355 | 3281374 | 4 | 5  | 20 | CTGT | 29 | 8  |
| 187770 | 23 | 3281710 | 3281725 | 2 | 8  | 16 | AC   | 11 | 4  |
| 187771 | 23 | 3281728 | 3281743 | 2 | 8  | 16 | AC   | 19 | 11 |
| 187772 | 23 | 3281913 | 3281928 | 2 | 8  | 16 | CA   | 25 | 4  |
| 187773 | 23 | 3282016 | 3282035 | 2 | 10 | 20 | TG   | 15 | 9  |
| 187774 | 23 | 3283095 | 3283118 | 2 | 12 | 24 | GT   | 18 | 14 |
| 187779 | 23 | 3297090 | 3297121 | 2 | 16 | 32 | CA   | 14 | 10 |
| 187784 | 23 | 3301566 | 3301581 | 2 | 8  | 16 | AG   | 17 | 3  |
| 187786 | 23 | 3301771 | 3301814 | 2 | 22 | 44 | GT   | 14 | 10 |
| 187789 | 23 | 3312188 | 3312207 | 2 | 10 | 20 | TG   | 22 | 6  |
| 187791 | 23 | 3316295 | 3316318 | 2 | 12 | 24 | CA   | 20 | 8  |
| 187792 | 23 | 3316719 | 3316740 | 2 | 11 | 22 | AG   | 20 | 5  |
| 187794 | 23 | 3317535 | 3317556 | 2 | 11 | 22 | GT   | 17 | 11 |
| 187797 | 23 | 3317878 | 3317895 | 2 | 9  | 18 | AC   | 16 | 4  |
| 187799 | 23 | 3320601 | 3320614 | 2 | 7  | 14 | AC   | 21 | 3  |
| 187800 | 23 | 3322552 | 3322569 | 2 | 9  | 18 | CT   | 25 | 5  |
| 187806 | 23 | 3334581 | 3334604 | 4 | 6  | 24 | TTAT | 14 | 4  |
| 187810 | 23 | 3337125 | 3337154 | 2 | 15 | 30 | AC   | 11 | 11 |
| 187811 | 23 | 3337269 | 3337282 | 2 | 7  | 14 | AC   | 25 | 7  |
| 187819 | 23 | 3356146 | 3356167 | 2 | 11 | 22 | AC   | 17 | 7  |
| 187830 | 23 | 3370058 | 3370073 | 4 | 4  | 16 | AGGA | 21 | 4  |
| 187831 | 23 | 3370408 | 3370423 | 2 | 8  | 16 | TC   | 14 | 3  |
| 187836 | 23 | 3372779 | 3372796 | 2 | 9  | 18 | TG   | 23 | 8  |
| 187837 | 23 | 3375632 | 3375649 | 2 | 9  | 18 | AC   | 18 | 4  |
| 187839 | 23 | 3375759 | 3375772 | 2 | 7  | 14 | TG   | 23 | 4  |
| 187840 | 23 | 3375914 | 3375937 | 2 | 12 | 24 | TG   | 9  | 8  |
| 187841 | 23 | 3379387 | 3379416 | 2 | 15 | 30 | CA   | 12 | 8  |
| 187842 | 23 | 3379517 | 3379538 | 2 | 11 | 22 | AC   | 9  | 9  |
| 187843 | 23 | 3379609 | 3379644 | 2 | 18 | 36 | CA   | 8  | 6  |
| 187848 | 23 | 3389685 | 3389700 | 2 | 8  | 16 | TG   | 10 | 3  |
| 187851 | 23 | 3389842 | 3389867 | 2 | 13 | 26 | GT   | 9  | 9  |
| 187856 | 23 | 3393856 | 3393879 | 2 | 12 | 24 | CA   | 24 | 7  |
| 187861 | 23 | 3399748 | 3399771 | 2 | 12 | 24 | TG   | 12 | 11 |
| 187863 | 23 | 3406550 | 3406565 | 2 | 8  | 16 | GT   | 21 | 7  |
| 187866 | 23 | 3412653 | 3412692 | 2 | 20 | 40 | TG   | 13 | 12 |
| 187871 | 23 | 3412878 | 3412889 | 2 | 6  | 12 | GT   | 30 | 3  |
| 187872 | 23 | 3412931 | 3412954 | 2 | 12 | 24 | AC   | 22 | 4  |
| 187873 | 23 | 3413094 | 3413105 | 2 | 6  | 12 | AC   | 23 | 3  |
| 187876 | 23 | 3413853 | 3413864 | 2 | 6  | 12 | CA   | 18 | 4  |
| 187877 | 23 | 3414147 | 3414180 | 2 | 17 | 34 | AC   | 8  | 6  |
| 187878 | 23 | 3414263 | 3414300 | 2 | 19 | 38 | GT   | 7  | 7  |
| 187879 | 23 | 3414428 | 3414445 | 2 | 9  | 18 | TG   | 27 | 5  |
| 187880 | 23 | 3414559 | 3414576 | 2 | 9  | 18 | CT   | 18 | 5  |
| 187881 | 23 | 3415248 | 3415271 | 4 | 6  | 24 | GATG | 28 | 4  |
| 187884 | 23 | 3423620 | 3423635 | 2 | 8  | 16 | GA   | 19 | 11 |
| 187888 | 23 | 3425921 | 3425944 | 4 | 6  | 24 | TGTC | 15 | 4  |
| 187889 | 23 | 3427023 | 3427034 | 2 | 6  | 12 | GT   | 19 | 3  |
| 187896 | 23 | 3430236 | 3430255 | 2 | 10 | 20 | TG   | 18 | 9  |
| 187900 | 23 | 3432725 | 3432736 | 2 | 6  | 12 | AC   | 12 | 5  |
| 187901 | 23 | 3432942 | 3432959 | 2 | 9  | 18 | CA   | 23 | 4  |

|        |    |         |         |   |    |    |      |    |    |
|--------|----|---------|---------|---|----|----|------|----|----|
| 187903 | 23 | 3433216 | 3433241 | 2 | 13 | 26 | CA   | 10 | 5  |
| 187907 | 23 | 3434195 | 3434210 | 4 | 4  | 16 | CAGA | 28 | 8  |
| 187909 | 23 | 3441653 | 3441668 | 2 | 8  | 16 | AC   | 23 | 3  |
| 187910 | 23 | 3441826 | 3441843 | 2 | 9  | 18 | AC   | 19 | 5  |
| 187913 | 23 | 3447019 | 3447054 | 3 | 12 | 36 | TAG  | 20 | 10 |
| 187914 | 23 | 3449093 | 3449120 | 2 | 14 | 28 | AC   | 6  | 6  |
| 187921 | 23 | 3452332 | 3452369 | 2 | 19 | 38 | TG   | 18 | 10 |
| 187922 | 23 | 3452498 | 3452515 | 2 | 9  | 18 | CA   | 25 | 8  |
| 187923 | 23 | 3456081 | 3456118 | 2 | 19 | 38 | CA   | 8  | 9  |
| 187928 | 23 | 3456569 | 3456580 | 2 | 6  | 12 | CT   | 17 | 4  |
| 187930 | 23 | 3456845 | 3456864 | 2 | 10 | 20 | CA   | 14 | 4  |
| 187932 | 23 | 3460888 | 3460907 | 2 | 10 | 20 | CT   | 23 | 7  |
| 187933 | 23 | 3461248 | 3461285 | 2 | 19 | 38 | AC   | 11 | 13 |
| 187935 | 23 | 3461487 | 3461498 | 2 | 6  | 12 | CA   | 27 | 8  |
| 187936 | 23 | 3461500 | 3461515 | 2 | 8  | 16 | AC   | 18 | 6  |
| 187938 | 23 | 3461679 | 3461714 | 2 | 18 | 36 | CA   | 16 | 16 |
| 187939 | 23 | 3461911 | 3461932 | 2 | 11 | 22 | AC   | 20 | 6  |
| 187940 | 23 | 3462068 | 3462085 | 2 | 9  | 18 | GT   | 23 | 6  |
| 187942 | 23 | 3463699 | 3463730 | 2 | 16 | 32 | AC   | 11 | 10 |
| 187943 | 23 | 3463957 | 3463968 | 2 | 6  | 12 | GT   | 13 | 8  |
| 187947 | 23 | 3467974 | 3467997 | 3 | 8  | 24 | AAT  | 21 | 14 |
| 187949 | 23 | 3470213 | 3470238 | 2 | 13 | 26 | AC   | 20 | 11 |
| 187950 | 23 | 3472637 | 3472663 | 3 | 9  | 27 | CAT  | 23 | 7  |
| 187951 | 23 | 3474144 | 3474185 | 2 | 21 | 42 | AC   | 10 | 12 |
| 187953 | 23 | 3480036 | 3480057 | 2 | 11 | 22 | CA   | 17 | 9  |
| 187954 | 23 | 3480205 | 3480216 | 2 | 6  | 12 | TG   | 19 | 3  |
| 187956 | 23 | 3480404 | 3480435 | 2 | 16 | 32 | CT   | 10 | 7  |
| 187958 | 23 | 3480496 | 3480511 | 2 | 8  | 16 | CA   | 13 | 5  |
| 187961 | 23 | 3481035 | 3481054 | 2 | 10 | 20 | CA   | 9  | 9  |
| 187962 | 23 | 3481056 | 3481067 | 2 | 6  | 12 | AC   | 8  | 8  |
| 187965 | 23 | 3482958 | 3482987 | 2 | 15 | 30 | CA   | 14 | 6  |
| 187970 | 23 | 3483529 | 3483540 | 2 | 6  | 12 | TG   | 23 | 3  |
| 187972 | 23 | 3484244 | 3484259 | 2 | 8  | 16 | CA   | 23 | 3  |
| 187973 | 23 | 3484477 | 3484494 | 2 | 9  | 18 | CA   | 20 | 3  |
| 187974 | 23 | 3484659 | 3484688 | 2 | 15 | 30 | AC   | 10 | 12 |
| 187976 | 23 | 3487058 | 3487069 | 2 | 6  | 12 | GT   | 26 | 3  |
| 187977 | 23 | 3487284 | 3487333 | 2 | 25 | 50 | AC   | 6  | 7  |
| 187980 | 23 | 3489237 | 3489282 | 2 | 23 | 46 | AC   | 9  | 11 |
| 187983 | 23 | 3493013 | 3493036 | 2 | 12 | 24 | CA   | 15 | 8  |
| 187985 | 23 | 3493475 | 3493498 | 2 | 12 | 24 | AG   | 13 | 5  |
| 187986 | 23 | 3494103 | 3494114 | 2 | 6  | 12 | AG   | 29 | 5  |
| 187987 | 23 | 3496062 | 3496081 | 2 | 10 | 20 | CA   | 27 | 10 |
| 187993 | 23 | 3498134 | 3498157 | 2 | 12 | 24 | TG   | 13 | 4  |
| 187994 | 23 | 3498266 | 3498279 | 2 | 7  | 14 | TG   | 20 | 4  |
| 187995 | 23 | 3498396 | 3498407 | 2 | 6  | 12 | CA   | 27 | 4  |
| 187998 | 23 | 3499534 | 3499565 | 2 | 16 | 32 | CA   | 12 | 9  |
| 188004 | 23 | 3500597 | 3500620 | 2 | 12 | 24 | CA   | 7  | 9  |
| 188007 | 23 | 3504344 | 3504359 | 2 | 8  | 16 | TG   | 18 | 5  |
| 188008 | 23 | 3504552 | 3504575 | 2 | 12 | 24 | GT   | 8  | 4  |
| 188011 | 23 | 3506303 | 3506324 | 2 | 11 | 22 | AC   | 14 | 6  |
| 188024 | 23 | 3517186 | 3517199 | 2 | 7  | 14 | CA   | 25 | 5  |

|        |    |         |         |   |    |    |      |    |    |
|--------|----|---------|---------|---|----|----|------|----|----|
| 188025 | 23 | 3517611 | 3517642 | 2 | 16 | 32 | TG   | 9  | 8  |
| 188032 | 23 | 3522555 | 3522572 | 2 | 9  | 18 | AC   | 24 | 3  |
| 188037 | 23 | 3524821 | 3524832 | 2 | 6  | 12 | CA   | 23 | 6  |
| 188038 | 23 | 3525117 | 3525138 | 2 | 11 | 22 | GA   | 20 | 3  |
| 188039 | 23 | 3525459 | 3525490 | 2 | 16 | 32 | CA   | 18 | 7  |
| 188040 | 23 | 3527026 | 3527039 | 2 | 7  | 14 | AC   | 25 | 3  |
| 188043 | 23 | 3528919 | 3528942 | 4 | 6  | 24 | GACA | 30 | 5  |
| 188044 | 23 | 3531636 | 3531657 | 2 | 11 | 22 | CA   | 16 | 3  |
| 188045 | 23 | 3532835 | 3532864 | 3 | 10 | 30 | GAG  | 8  | 4  |
| 188046 | 23 | 3533113 | 3533150 | 2 | 19 | 38 | GT   | 7  | 11 |
| 188054 | 23 | 3543084 | 3543113 | 2 | 15 | 30 | CA   | 6  | 4  |
| 188058 | 23 | 3546436 | 3546463 | 2 | 14 | 28 | AC   | 7  | 3  |
| 188062 | 23 | 3550716 | 3550731 | 2 | 8  | 16 | CA   | 22 | 4  |
| 188064 | 23 | 3552794 | 3552823 | 2 | 15 | 30 | AC   | 7  | 8  |
| 188070 | 23 | 3565879 | 3565890 | 2 | 6  | 12 | CA   | 26 | 3  |
| 188071 | 23 | 3566881 | 3566906 | 2 | 13 | 26 | AC   | 10 | 4  |
| 188073 | 23 | 3568696 | 3568715 | 2 | 10 | 20 | AC   | 14 | 11 |
| 188074 | 23 | 3568835 | 3568862 | 2 | 14 | 28 | CA   | 11 | 7  |
| 188094 | 23 | 3581646 | 3581691 | 2 | 23 | 46 | AC   | 8  | 10 |
| 188096 | 23 | 3582929 | 3582960 | 2 | 16 | 32 | AC   | 8  | 7  |
| 188102 | 23 | 3587380 | 3587397 | 2 | 9  | 18 | GT   | 13 | 6  |
| 188103 | 23 | 3587399 | 3587412 | 2 | 7  | 14 | TG   | 18 | 4  |
| 188110 | 23 | 3596121 | 3596152 | 2 | 16 | 32 | AC   | 13 | 10 |
| 188112 | 23 | 3597630 | 3597641 | 2 | 6  | 12 | AC   | 25 | 4  |
| 188119 | 23 | 3598772 | 3598813 | 2 | 21 | 42 | CA   | 7  | 9  |
| 188122 | 23 | 3600375 | 3600386 | 2 | 6  | 12 | GA   | 24 | 4  |
| 188127 | 23 | 3606095 | 3606106 | 2 | 6  | 12 | AC   | 24 | 3  |
| 188136 | 23 | 3610680 | 3610699 | 4 | 5  | 20 | CACG | 14 | 7  |
| 188144 | 23 | 3618053 | 3618076 | 2 | 12 | 24 | GT   | 12 | 12 |
| 188147 | 23 | 3618944 | 3618961 | 3 | 6  | 18 | AAT  | 7  | 5  |
| 188152 | 23 | 3627426 | 3627443 | 3 | 6  | 18 | TCC  | 21 | 4  |
| 188155 | 23 | 3630663 | 3630684 | 2 | 11 | 22 | GT   | 17 | 6  |
| 188156 | 23 | 3633508 | 3633529 | 2 | 11 | 22 | TC   | 9  | 5  |
| 188161 | 23 | 3637788 | 3637820 | 3 | 11 | 33 | CTT  | 16 | 9  |
| 188163 | 23 | 3638738 | 3638763 | 2 | 13 | 26 | CA   | 21 | 6  |
| 188166 | 23 | 3642040 | 3642057 | 2 | 9  | 18 | AG   | 22 | 5  |
| 188176 | 23 | 3664429 | 3664452 | 4 | 6  | 24 | TATC | 15 | 8  |
| 188182 | 23 | 3690405 | 3690418 | 2 | 7  | 14 | AC   | 22 | 3  |
| 188185 | 23 | 3693230 | 3693243 | 2 | 7  | 14 | AC   | 25 | 3  |
| 188192 | 23 | 3707161 | 3707178 | 2 | 9  | 18 | AC   | 22 | 8  |
| 188193 | 23 | 3707746 | 3707793 | 3 | 16 | 48 | ATT  | 9  | 5  |
| 188201 | 23 | 3717641 | 3717652 | 2 | 6  | 12 | GT   | 22 | 4  |
| 188204 | 23 | 3722026 | 3722039 | 2 | 7  | 14 | AG   | 27 | 4  |
| 188206 | 23 | 3722731 | 3722748 | 2 | 9  | 18 | GT   | 22 | 11 |
| 188213 | 23 | 3744697 | 3744726 | 2 | 15 | 30 | AC   | 18 | 9  |
| 188215 | 23 | 3746805 | 3746832 | 2 | 14 | 28 | TG   | 10 | 7  |
| 188216 | 23 | 3746967 | 3747010 | 2 | 22 | 44 | GT   | 10 | 11 |
| 188218 | 23 | 3750800 | 3750813 | 2 | 7  | 14 | CA   | 26 | 6  |
| 188220 | 23 | 3754266 | 3754283 | 2 | 9  | 18 | CA   | 21 | 6  |
| 188224 | 23 | 3757131 | 3757160 | 2 | 15 | 30 | GT   | 11 | 13 |
| 188230 | 23 | 3759581 | 3759598 | 2 | 9  | 18 | CA   | 24 | 4  |



|        |    |         |         |   |    |    |      |    |    |
|--------|----|---------|---------|---|----|----|------|----|----|
| 188231 | 23 | 3759749 | 3759762 | 2 | 7  | 14 | AC   | 24 | 4  |
| 188232 | 23 | 3759860 | 3759891 | 2 | 16 | 32 | GT   | 18 | 7  |
| 188233 | 23 | 3760092 | 3760119 | 4 | 7  | 28 | TTCT | 21 | 11 |
| 188234 | 23 | 3760300 | 3760313 | 2 | 7  | 14 | AC   | 24 | 4  |
| 188235 | 23 | 3760487 | 3760520 | 2 | 17 | 34 | AC   | 6  | 9  |
| 188236 | 23 | 3761391 | 3761416 | 2 | 13 | 26 | TG   | 14 | 6  |
| 188238 | 23 | 3761656 | 3761667 | 2 | 6  | 12 | AC   | 13 | 5  |
| 188239 | 23 | 3763589 | 3763608 | 2 | 10 | 20 | AC   | 18 | 5  |
| 188240 | 23 | 3763839 | 3763850 | 2 | 6  | 12 | TG   | 21 | 7  |
| 188241 | 23 | 3763852 | 3763869 | 2 | 9  | 18 | GT   | 22 | 6  |
| 188253 | 23 | 3769719 | 3769734 | 2 | 8  | 16 | GT   | 14 | 5  |
| 188261 | 23 | 3773472 | 3773485 | 2 | 7  | 14 | TG   | 22 | 3  |
| 188263 | 23 | 3774059 | 3774092 | 2 | 17 | 34 | AG   | 13 | 6  |
| 188266 | 23 | 3778147 | 3778168 | 2 | 11 | 22 | CA   | 25 | 6  |
| 188267 | 23 | 3778748 | 3778777 | 2 | 15 | 30 | GT   | 7  | 4  |
| 188275 | 23 | 3783097 | 3783124 | 2 | 14 | 28 | CA   | 12 | 6  |
| 188276 | 23 | 3783284 | 3783301 | 2 | 9  | 18 | AC   | 10 | 8  |
| 188279 | 23 | 3783613 | 3783640 | 2 | 14 | 28 | CA   | 19 | 12 |
| 188285 | 23 | 3788330 | 3788383 | 2 | 27 | 54 | TG   | 13 | 16 |
| 188286 | 23 | 3790191 | 3790230 | 4 | 10 | 40 | GAAA | 13 | 8  |
| 188298 | 23 | 3805932 | 3805951 | 2 | 10 | 20 | TC   | 22 | 5  |
| 188302 | 23 | 3808852 | 3808869 | 3 | 6  | 18 | AGA  | 26 | 3  |
| 188306 | 23 | 3816653 | 3816668 | 2 | 8  | 16 | AC   | 17 | 3  |
| 188311 | 23 | 3819530 | 3819543 | 2 | 7  | 14 | AC   | 20 | 4  |
| 188312 | 23 | 3819664 | 3819681 | 2 | 9  | 18 | AC   | 7  | 4  |
| 188314 | 23 | 3819710 | 3819721 | 2 | 6  | 12 | AC   | 9  | 4  |
| 188316 | 23 | 3822753 | 3822768 | 2 | 8  | 16 | AC   | 17 | 3  |
| 188319 | 23 | 3835500 | 3835517 | 2 | 9  | 18 | AC   | 16 | 5  |
| 188328 | 23 | 3843666 | 3843677 | 2 | 6  | 12 | CA   | 18 | 9  |
| 188330 | 23 | 3852065 | 3852082 | 2 | 9  | 18 | TG   | 7  | 4  |
| 188332 | 23 | 3854416 | 3854427 | 2 | 6  | 12 | CA   | 26 | 4  |
| 188333 | 23 | 3855644 | 3855667 | 4 | 6  | 24 | ATAC | 17 | 4  |
| 188335 | 23 | 3855930 | 3855955 | 2 | 13 | 26 | GT   | 16 | 6  |
| 188338 | 23 | 3858117 | 3858142 | 2 | 13 | 26 | TG   | 20 | 5  |
| 188340 | 23 | 3858676 | 3858689 | 2 | 7  | 14 | CT   | 26 | 5  |
| 188341 | 23 | 3862278 | 3862289 | 2 | 6  | 12 | AC   | 21 | 4  |
| 188342 | 23 | 3863881 | 3863904 | 2 | 12 | 24 | TG   | 16 | 9  |
| 188343 | 23 | 3863995 | 3864018 | 2 | 12 | 24 | GT   | 10 | 12 |
| 188344 | 23 | 3865772 | 3865789 | 2 | 9  | 18 | AC   | 11 | 3  |
| 188348 | 23 | 3867306 | 3867332 | 3 | 9  | 27 | CCA  | 8  | 4  |
| 188359 | 23 | 3879107 | 3879118 | 2 | 6  | 12 | TG   | 34 | 3  |
| 188361 | 23 | 3879785 | 3879814 | 2 | 15 | 30 | AC   | 18 | 9  |
| 188364 | 23 | 3884214 | 3884225 | 2 | 6  | 12 | AC   | 19 | 3  |
| 188365 | 23 | 3884358 | 3884389 | 2 | 16 | 32 | AC   | 7  | 8  |
| 188366 | 23 | 3884514 | 3884541 | 2 | 14 | 28 | TG   | 11 | 8  |
| 188376 | 23 | 3897250 | 3897265 | 2 | 8  | 16 | CA   | 7  | 6  |
| 188390 | 23 | 3908351 | 3908378 | 2 | 14 | 28 | TC   | 19 | 8  |
| 188394 | 23 | 3911611 | 3911648 | 2 | 19 | 38 | AC   | 15 | 11 |
| 188396 | 23 | 3916510 | 3916527 | 2 | 9  | 18 | AC   | 7  | 8  |
| 188397 | 23 | 3917108 | 3917127 | 4 | 5  | 20 | CGTC | 22 | 6  |
| 188398 | 23 | 3920028 | 3920055 | 2 | 14 | 28 | AC   | 9  | 6  |

|        |    |         |         |   |    |    |      |    |    |
|--------|----|---------|---------|---|----|----|------|----|----|
| 188399 | 23 | 3920764 | 3920827 | 4 | 16 | 64 | TCTA | 9  | 7  |
| 188400 | 23 | 3922421 | 3922442 | 2 | 11 | 22 | AC   | 21 | 7  |
| 188404 | 23 | 3930206 | 3930237 | 2 | 16 | 32 | CA   | 6  | 11 |
| 188405 | 23 | 3930752 | 3930807 | 2 | 28 | 56 | GT   | 9  | 5  |
| 188406 | 23 | 3931532 | 3931571 | 4 | 10 | 40 | CATT | 22 | 8  |
| 188407 | 23 | 3932071 | 3932086 | 2 | 8  | 16 | TG   | 27 | 3  |
| 188409 | 23 | 3934395 | 3934426 | 2 | 16 | 32 | AC   | 15 | 9  |
| 188411 | 23 | 3935008 | 3935025 | 2 | 9  | 18 | GT   | 27 | 4  |
| 188418 | 23 | 3950639 | 3950656 | 2 | 9  | 18 | AG   | 20 | 6  |
| 188420 | 23 | 3951008 | 3951025 | 2 | 9  | 18 | CA   | 28 | 5  |
| 188422 | 23 | 3953087 | 3953104 | 3 | 6  | 18 | TAA  | 10 | 7  |
| 188423 | 23 | 3954141 | 3954152 | 2 | 6  | 12 | GT   | 14 | 3  |
| 188425 | 23 | 3954182 | 3954203 | 2 | 11 | 22 | TG   | 9  | 6  |
| 188426 | 23 | 3954508 | 3954537 | 2 | 15 | 30 | AC   | 16 | 10 |
| 188430 | 23 | 3958642 | 3958675 | 2 | 17 | 34 | CA   | 18 | 10 |
| 188431 | 23 | 3958839 | 3958852 | 2 | 7  | 14 | AC   | 17 | 3  |
| 188435 | 23 | 3963931 | 3963944 | 2 | 7  | 14 | GT   | 19 | 6  |
| 188440 | 23 | 3978977 | 3978996 | 2 | 10 | 20 | TC   | 16 | 4  |
| 188442 | 23 | 3991267 | 3991280 | 2 | 7  | 14 | CA   | 22 | 3  |
| 188443 | 23 | 3991355 | 3991398 | 2 | 22 | 44 | CA   | 8  | 8  |
| 188444 | 23 | 3992168 | 3992197 | 2 | 15 | 30 | TG   | 9  | 11 |
| 188447 | 23 | 4002307 | 4002324 | 2 | 9  | 18 | AC   | 26 | 7  |
| 188448 | 23 | 4002459 | 4002472 | 2 | 7  | 14 | TG   | 29 | 4  |
| 188455 | 23 | 4020180 | 4020223 | 2 | 22 | 44 | TG   | 14 | 16 |
| 188456 | 23 | 4020648 | 4020663 | 2 | 8  | 16 | GT   | 30 | 3  |
| 188459 | 23 | 4026482 | 4026499 | 2 | 9  | 18 | TG   | 21 | 4  |
| 188460 | 23 | 4027653 | 4027676 | 2 | 12 | 24 | TG   | 12 | 10 |
| 188463 | 23 | 4029042 | 4029057 | 4 | 4  | 16 | ATCC | 25 | 3  |
| 188466 | 23 | 4033662 | 4033693 | 2 | 16 | 32 | TG   | 13 | 7  |
| 188474 | 23 | 4055206 | 4055233 | 2 | 14 | 28 | AC   | 8  | 6  |
| 188475 | 23 | 4055448 | 4055463 | 2 | 8  | 16 | GT   | 22 | 7  |
| 188478 | 23 | 4062286 | 4062313 | 2 | 14 | 28 | GT   | 20 | 10 |
| 188479 | 23 | 4064314 | 4064359 | 2 | 23 | 46 | GT   | 16 | 13 |
| 188483 | 23 | 4068470 | 4068493 | 2 | 12 | 24 | AC   | 17 | 7  |
| 188484 | 23 | 4077690 | 4077719 | 3 | 10 | 30 | ATC  | 12 | 3  |
| 188489 | 23 | 4096784 | 4096797 | 2 | 7  | 14 | TA   | 21 | 4  |
| 188496 | 23 | 4129584 | 4129625 | 2 | 21 | 42 | TG   | 13 | 10 |
| 188502 | 23 | 4144561 | 4144592 | 2 | 16 | 32 | AG   | 10 | 3  |
| 188512 | 23 | 4160884 | 4160895 | 2 | 6  | 12 | TG   | 17 | 4  |
| 188519 | 23 | 4173439 | 4173480 | 2 | 21 | 42 | TG   | 12 | 7  |
| 188527 | 23 | 4183363 | 4183394 | 4 | 8  | 32 | GTCA | 15 | 5  |
| 188530 | 23 | 4191894 | 4191911 | 3 | 6  | 18 | CAA  | 16 | 3  |
| 188533 | 23 | 4195747 | 4195776 | 3 | 10 | 30 | ATT  | 9  | 12 |
| 188534 | 23 | 4196106 | 4196129 | 3 | 8  | 24 | AGT  | 17 | 8  |
| 188542 | 23 | 4217266 | 4217281 | 2 | 8  | 16 | AC   | 18 | 12 |
| 188544 | 23 | 4222802 | 4222834 | 3 | 11 | 33 | AGC  | 22 | 14 |
| 188545 | 23 | 4222923 | 4222940 | 2 | 9  | 18 | TG   | 21 | 7  |
| 188546 | 23 | 4224695 | 4224714 | 2 | 10 | 20 | AC   | 20 | 6  |
| 188547 | 23 | 4224878 | 4224893 | 2 | 8  | 16 | TG   | 22 | 6  |
| 188557 | 23 | 4239503 | 4239542 | 4 | 10 | 40 | AATC | 32 | 13 |
| 188558 | 23 | 4241592 | 4241615 | 2 | 12 | 24 | AC   | 11 | 12 |

|        |    |         |         |   |    |    |      |    |    |
|--------|----|---------|---------|---|----|----|------|----|----|
| 188559 | 23 | 4251575 | 4251596 | 2 | 11 | 22 | CA   | 17 | 10 |
| 188560 | 23 | 4256654 | 4256669 | 2 | 8  | 16 | CA   | 17 | 5  |
| 188562 | 23 | 4260216 | 4260229 | 2 | 7  | 14 | CT   | 30 | 3  |
| 188563 | 23 | 4262982 | 4263003 | 2 | 11 | 22 | TG   | 19 | 8  |
| 188566 | 23 | 4264133 | 4264148 | 2 | 8  | 16 | CA   | 8  | 4  |
| 188567 | 23 | 4264150 | 4264161 | 2 | 6  | 12 | AC   | 6  | 4  |
| 188568 | 23 | 4264305 | 4264319 | 3 | 5  | 15 | ATT  | 25 | 3  |
| 188569 | 23 | 4264663 | 4264690 | 2 | 14 | 28 | TG   | 16 | 12 |
| 188570 | 23 | 4266519 | 4266542 | 2 | 12 | 24 | GT   | 12 | 11 |
| 188575 | 23 | 4278158 | 4278171 | 2 | 7  | 14 | TC   | 22 | 4  |
| 188578 | 23 | 4281187 | 4281198 | 2 | 6  | 12 | GT   | 11 | 10 |
| 188579 | 23 | 4281202 | 4281219 | 2 | 9  | 18 | TG   | 8  | 8  |
| 188580 | 23 | 4282071 | 4282088 | 2 | 9  | 18 | CA   | 22 | 4  |
| 188581 | 23 | 4282162 | 4282175 | 2 | 7  | 14 | AG   | 26 | 3  |
| 188582 | 23 | 4284169 | 4284196 | 2 | 14 | 28 | CA   | 7  | 6  |
| 188584 | 23 | 4285859 | 4285890 | 2 | 16 | 32 | TG   | 6  | 10 |
| 188587 | 23 | 4291150 | 4291179 | 2 | 15 | 30 | GT   | 11 | 9  |
| 188590 | 23 | 4299325 | 4299350 | 2 | 13 | 26 | TG   | 6  | 6  |
| 188591 | 23 | 4299438 | 4299463 | 2 | 13 | 26 | GT   | 12 | 15 |
| 188593 | 23 | 4299718 | 4299732 | 3 | 5  | 15 | TTC  | 13 | 4  |
| 188595 | 23 | 4302312 | 4302335 | 2 | 12 | 24 | GT   | 16 | 10 |
| 188597 | 23 | 4304047 | 4304070 | 2 | 12 | 24 | AG   | 16 | 7  |
| 188599 | 23 | 4304702 | 4304753 | 4 | 13 | 52 | GAAA | 17 | 8  |
| 188604 | 23 | 4312908 | 4312941 | 2 | 17 | 34 | AC   | 17 | 8  |
| 188607 | 23 | 4313916 | 4313955 | 2 | 20 | 40 | GT   | 9  | 10 |
| 188609 | 23 | 4315219 | 4315234 | 2 | 8  | 16 | CA   | 14 | 6  |
| 188611 | 23 | 4316316 | 4316357 | 2 | 21 | 42 | TG   | 8  | 8  |
| 188613 | 23 | 4322387 | 4322402 | 2 | 8  | 16 | TG   | 23 | 9  |
| 188614 | 23 | 4322407 | 4322422 | 2 | 8  | 16 | TG   | 6  | 6  |
| 188619 | 23 | 4323508 | 4323539 | 2 | 16 | 32 | GT   | 11 | 8  |
| 188620 | 23 | 4328205 | 4328262 | 2 | 29 | 58 | CA   | 14 | 12 |
| 188622 | 23 | 4330840 | 4330851 | 2 | 6  | 12 | TC   | 27 | 4  |
| 188629 | 23 | 4355509 | 4355524 | 2 | 8  | 16 | AG   | 23 | 5  |
| 188632 | 23 | 4368925 | 4368958 | 2 | 17 | 34 | CA   | 15 | 10 |
| 188633 | 23 | 4373306 | 4373321 | 2 | 8  | 16 | CA   | 23 | 10 |
| 188634 | 23 | 4373997 | 4374017 | 3 | 7  | 21 | CTG  | 23 | 5  |
| 188635 | 23 | 4379256 | 4379267 | 2 | 6  | 12 | CA   | 16 | 3  |
| 188642 | 23 | 4389037 | 4389066 | 2 | 15 | 30 | CA   | 19 | 10 |
| 188645 | 23 | 4393324 | 4393339 | 4 | 4  | 16 | AGCT | 25 | 4  |
| 188649 | 23 | 4396116 | 4396139 | 2 | 12 | 24 | AC   | 14 | 8  |
| 188653 | 23 | 4402168 | 4402193 | 2 | 13 | 26 | CA   | 8  | 4  |
| 188656 | 23 | 4414062 | 4414089 | 2 | 14 | 28 | GA   | 7  | 5  |
| 188658 | 23 | 4418274 | 4418293 | 2 | 10 | 20 | TG   | 22 | 3  |
| 188659 | 23 | 4419921 | 4419956 | 4 | 9  | 36 | ATTT | 22 | 6  |
| 188660 | 23 | 4421919 | 4421934 | 2 | 8  | 16 | TG   | 16 | 6  |
| 188663 | 23 | 4432339 | 4432358 | 2 | 10 | 20 | TG   | 21 | 10 |
| 188670 | 23 | 4444392 | 4444405 | 2 | 7  | 14 | AC   | 32 | 6  |
| 188674 | 23 | 4448644 | 4448655 | 2 | 6  | 12 | GT   | 14 | 3  |
| 188675 | 23 | 4448859 | 4448870 | 2 | 6  | 12 | TG   | 21 | 5  |
| 188676 | 23 | 4448873 | 4448886 | 2 | 7  | 14 | TG   | 23 | 7  |
| 188681 | 23 | 4451752 | 4451767 | 2 | 8  | 16 | CA   | 23 | 5  |

|        |    |         |         |   |    |    |      |    |    |
|--------|----|---------|---------|---|----|----|------|----|----|
| 188685 | 23 | 4462132 | 4462146 | 3 | 5  | 15 | TTG  | 11 | 3  |
| 188689 | 23 | 4470109 | 4470128 | 2 | 10 | 20 | TA   | 6  | 6  |
| 188692 | 23 | 4472975 | 4472992 | 3 | 6  | 18 | AAC  | 28 | 3  |
| 188694 | 23 | 4482155 | 4482166 | 2 | 6  | 12 | AC   | 28 | 4  |
| 188700 | 23 | 4494527 | 4494550 | 2 | 12 | 24 | TG   | 15 | 13 |
| 188707 | 23 | 4500347 | 4500378 | 2 | 16 | 32 | TG   | 8  | 10 |
| 188708 | 23 | 4502772 | 4502815 | 2 | 22 | 44 | CA   | 9  | 9  |
| 188712 | 23 | 4513472 | 4513491 | 2 | 10 | 20 | AC   | 10 | 6  |
| 188713 | 23 | 4513493 | 4513510 | 2 | 9  | 18 | CA   | 10 | 6  |
| 188717 | 23 | 4522323 | 4522342 | 2 | 10 | 20 | TG   | 21 | 9  |
| 188718 | 23 | 4522438 | 4522461 | 2 | 12 | 24 | AC   | 10 | 6  |
| 188726 | 23 | 4535033 | 4535052 | 2 | 10 | 20 | CT   | 7  | 7  |
| 188736 | 23 | 4548847 | 4548862 | 2 | 8  | 16 | TC   | 12 | 11 |
| 188743 | 23 | 4568186 | 4568233 | 3 | 16 | 48 | AAG  | 12 | 16 |
| 188746 | 23 | 4571702 | 4571725 | 2 | 12 | 24 | AG   | 18 | 7  |
| 188748 | 23 | 4572006 | 4572043 | 2 | 19 | 38 | TG   | 14 | 12 |
| 188749 | 23 | 4572215 | 4572252 | 2 | 19 | 38 | CA   | 14 | 10 |
| 188753 | 23 | 4574162 | 4574175 | 2 | 7  | 14 | GT   | 20 | 6  |
| 188754 | 23 | 4574178 | 4574191 | 2 | 7  | 14 | GT   | 19 | 6  |
| 188757 | 23 | 4582619 | 4582660 | 2 | 21 | 42 | AC   | 18 | 11 |
| 188759 | 23 | 4586900 | 4586919 | 2 | 10 | 20 | TG   | 24 | 3  |
| 188760 | 23 | 4591703 | 4591728 | 2 | 13 | 26 | AC   | 18 | 6  |
| 188761 | 23 | 4592290 | 4592303 | 2 | 7  | 14 | TC   | 8  | 7  |
| 188762 | 23 | 4592304 | 4592319 | 2 | 8  | 16 | AC   | 8  | 9  |
| 188764 | 23 | 4594076 | 4594107 | 2 | 16 | 32 | TG   | 19 | 10 |
| 188765 | 23 | 4596364 | 4596383 | 2 | 10 | 20 | AC   | 22 | 5  |
| 188766 | 23 | 4596553 | 4596582 | 2 | 15 | 30 | CA   | 7  | 4  |
| 188768 | 23 | 4598368 | 4598389 | 2 | 11 | 22 | GT   | 14 | 13 |
| 188771 | 23 | 4600832 | 4600883 | 2 | 26 | 52 | TG   | 11 | 11 |
| 188792 | 23 | 4672778 | 4672801 | 2 | 12 | 24 | TG   | 23 | 12 |
| 188796 | 23 | 4686066 | 4686091 | 2 | 13 | 26 | GT   | 14 | 8  |
| 188799 | 23 | 4691789 | 4691804 | 4 | 4  | 16 | AAAT | 25 | 5  |
| 188808 | 23 | 4708413 | 4708432 | 2 | 10 | 20 | TG   | 6  | 4  |
| 188811 | 23 | 4710866 | 4710877 | 2 | 6  | 12 | AC   | 31 | 4  |
| 188812 | 23 | 4711740 | 4711765 | 2 | 13 | 26 | AG   | 15 | 9  |
| 188816 | 23 | 4728598 | 4728617 | 2 | 10 | 20 | GT   | 15 | 14 |
| 188819 | 23 | 4733163 | 4733208 | 2 | 23 | 46 | GT   | 25 | 7  |
| 188820 | 23 | 4735389 | 4735412 | 4 | 6  | 24 | TTTA | 21 | 5  |
| 188822 | 23 | 4741098 | 4741111 | 2 | 7  | 14 | TG   | 22 | 6  |
| 188823 | 23 | 4746079 | 4746112 | 2 | 17 | 34 | GT   | 7  | 8  |
| 188826 | 23 | 4750753 | 4750768 | 4 | 4  | 16 | GTTG | 23 | 3  |
| 188832 | 23 | 4781734 | 4781765 | 2 | 16 | 32 | AG   | 7  | 6  |
| 188838 | 23 | 4814180 | 4814201 | 2 | 11 | 22 | CA   | 18 | 7  |
| 188841 | 23 | 4815998 | 4816023 | 2 | 13 | 26 | AC   | 9  | 8  |
| 188847 | 23 | 4824535 | 4824546 | 2 | 6  | 12 | AC   | 15 | 7  |
| 188854 | 23 | 4847068 | 4847089 | 2 | 11 | 22 | CA   | 11 | 9  |
| 188857 | 23 | 4847418 | 4847438 | 3 | 7  | 21 | GCA  | 8  | 3  |
| 188861 | 23 | 4848647 | 4848666 | 2 | 10 | 20 | CA   | 22 | 8  |
| 188862 | 23 | 4849149 | 4849166 | 2 | 9  | 18 | CA   | 13 | 10 |
| 188865 | 23 | 4859966 | 4859980 | 3 | 5  | 15 | TGC  | 27 | 4  |
| 188868 | 23 | 4872023 | 4872046 | 3 | 8  | 24 | GAA  | 29 | 3  |

|        |    |         |         |   |    |    |      |    |    |
|--------|----|---------|---------|---|----|----|------|----|----|
| 188872 | 23 | 4886876 | 4886897 | 2 | 11 | 22 | CA   | 20 | 6  |
| 188873 | 23 | 4888596 | 4888615 | 2 | 10 | 20 | AC   | 17 | 6  |
| 188877 | 23 | 4910159 | 4910174 | 2 | 8  | 16 | CA   | 21 | 10 |
| 188878 | 23 | 4912128 | 4912147 | 4 | 5  | 20 | TCAA | 28 | 4  |
| 188885 | 23 | 4914560 | 4914574 | 3 | 5  | 15 | TCT  | 21 | 3  |
| 188888 | 23 | 4918657 | 4918676 | 4 | 5  | 20 | ATTT | 11 | 11 |
| 188899 | 23 | 4948530 | 4948557 | 2 | 14 | 28 | CA   | 11 | 4  |
| 188903 | 23 | 4971650 | 4971683 | 2 | 17 | 34 | TG   | 8  | 10 |
| 188905 | 23 | 4976559 | 4976594 | 2 | 18 | 36 | GT   | 15 | 7  |
| 188910 | 23 | 4982298 | 4982324 | 3 | 9  | 27 | CCT  | 18 | 5  |
| 188923 | 23 | 5004804 | 5004815 | 2 | 6  | 12 | GT   | 17 | 8  |
| 188924 | 23 | 5005396 | 5005411 | 2 | 8  | 16 | CT   | 13 | 4  |
| 188927 | 23 | 5014270 | 5014291 | 2 | 11 | 22 | TG   | 18 | 13 |
| 188928 | 23 | 5014465 | 5014476 | 2 | 6  | 12 | GT   | 21 | 4  |
| 188931 | 23 | 5019437 | 5019452 | 2 | 8  | 16 | CA   | 28 | 3  |
| 188937 | 23 | 5026825 | 5026848 | 2 | 12 | 24 | CA   | 6  | 3  |
| 188939 | 23 | 5028350 | 5028367 | 2 | 9  | 18 | GT   | 14 | 3  |
| 188949 | 23 | 5033782 | 5033799 | 3 | 6  | 18 | CTT  | 29 | 3  |
| 188950 | 23 | 5035485 | 5035526 | 2 | 21 | 42 | TG   | 11 | 14 |
| 188951 | 23 | 5035847 | 5035868 | 2 | 11 | 22 | TG   | 9  | 6  |
| 188956 | 23 | 5039864 | 5039899 | 2 | 18 | 36 | TG   | 6  | 7  |
| 188957 | 23 | 5040016 | 5040047 | 2 | 16 | 32 | AC   | 12 | 9  |
| 188959 | 23 | 5042391 | 5042402 | 2 | 6  | 12 | TG   | 27 | 4  |
| 188960 | 23 | 5042443 | 5042454 | 2 | 6  | 12 | AC   | 23 | 9  |
| 188961 | 23 | 5042456 | 5042469 | 2 | 7  | 14 | CA   | 19 | 7  |
| 188962 | 23 | 5042592 | 5042605 | 2 | 7  | 14 | TG   | 26 | 5  |
| 188966 | 23 | 5049504 | 5049523 | 2 | 10 | 20 | TG   | 7  | 4  |
| 188977 | 23 | 5051754 | 5051779 | 2 | 13 | 26 | GT   | 15 | 6  |
| 188978 | 23 | 5051950 | 5051967 | 2 | 9  | 18 | GT   | 14 | 8  |
| 188986 | 23 | 5057685 | 5057716 | 2 | 16 | 32 | CA   | 6  | 8  |
| 188995 | 23 | 5074411 | 5074422 | 2 | 6  | 12 | GT   | 16 | 3  |
| 188996 | 23 | 5075730 | 5075741 | 2 | 6  | 12 | GT   | 22 | 3  |
| 188997 | 23 | 5075943 | 5075956 | 2 | 7  | 14 | TG   | 26 | 3  |
| 188999 | 23 | 5084323 | 5084340 | 2 | 9  | 18 | AC   | 18 | 5  |
| 189000 | 23 | 5086880 | 5086899 | 2 | 10 | 20 | GT   | 11 | 4  |
| 189002 | 23 | 5087000 | 5087019 | 2 | 10 | 20 | CA   | 6  | 4  |
| 189006 | 23 | 5096235 | 5096252 | 2 | 9  | 18 | TG   | 33 | 8  |
| 189009 | 23 | 5098138 | 5098157 | 2 | 10 | 20 | TG   | 24 | 10 |
| 189011 | 23 | 5098606 | 5098631 | 2 | 13 | 26 | GT   | 11 | 9  |
| 189014 | 23 | 5107588 | 5107603 | 2 | 8  | 16 | AC   | 22 | 7  |
| 189015 | 23 | 5109090 | 5109105 | 2 | 8  | 16 | GT   | 19 | 11 |
| 189016 | 23 | 5109106 | 5109121 | 2 | 8  | 16 | GA   | 17 | 11 |
| 189017 | 23 | 5110561 | 5110580 | 2 | 10 | 20 | AC   | 20 | 11 |
| 189021 | 23 | 5119719 | 5119752 | 2 | 17 | 34 | AC   | 15 | 13 |
| 189024 | 23 | 5123942 | 5123971 | 2 | 15 | 30 | CA   | 8  | 8  |
| 189025 | 23 | 5126798 | 5126809 | 2 | 6  | 12 | CA   | 33 | 4  |
| 189028 | 23 | 5130206 | 5130225 | 2 | 10 | 20 | AC   | 15 | 6  |
| 189036 | 23 | 5154458 | 5154473 | 2 | 8  | 16 | AG   | 22 | 4  |
| 189037 | 23 | 5155101 | 5155114 | 2 | 7  | 14 | GT   | 20 | 3  |
| 189039 | 23 | 5155929 | 5155952 | 2 | 12 | 24 | CA   | 20 | 6  |
| 189045 | 23 | 5161911 | 5161944 | 2 | 17 | 34 | CA   | 6  | 10 |

|        |    |         |         |   |    |    |      |    |    |
|--------|----|---------|---------|---|----|----|------|----|----|
| 189047 | 23 | 5162122 | 5162155 | 2 | 17 | 34 | CA   | 6  | 10 |
| 189058 | 23 | 5190316 | 5190330 | 3 | 5  | 15 | TGC  | 24 | 3  |
| 189059 | 23 | 5192413 | 5192438 | 2 | 13 | 26 | TG   | 19 | 6  |
| 189065 | 23 | 5215690 | 5215721 | 2 | 16 | 32 | GT   | 18 | 11 |
| 189066 | 23 | 5216302 | 5216331 | 2 | 15 | 30 | TG   | 6  | 6  |
| 189071 | 23 | 5222853 | 5222870 | 2 | 9  | 18 | GT   | 26 | 7  |
| 189073 | 23 | 5223365 | 5223390 | 2 | 13 | 26 | CA   | 8  | 7  |
| 189074 | 23 | 5223526 | 5223543 | 2 | 9  | 18 | GT   | 21 | 5  |
| 189076 | 23 | 5223757 | 5223768 | 2 | 6  | 12 | AC   | 11 | 5  |
| 189078 | 23 | 5235005 | 5235020 | 4 | 4  | 16 | AAAT | 19 | 5  |
| 189079 | 23 | 5236166 | 5236179 | 2 | 7  | 14 | TC   | 22 | 4  |
| 189085 | 23 | 5249919 | 5249946 | 2 | 14 | 28 | TG   | 18 | 8  |
| 189086 | 23 | 5251703 | 5251722 | 2 | 10 | 20 | GT   | 17 | 8  |
| 189087 | 23 | 5252415 | 5252436 | 2 | 11 | 22 | GT   | 19 | 7  |
| 189089 | 23 | 5253730 | 5253745 | 2 | 8  | 16 | TG   | 18 | 3  |
| 189092 | 23 | 5260779 | 5260820 | 2 | 21 | 42 | AC   | 16 | 8  |
| 189093 | 23 | 5264692 | 5264715 | 2 | 12 | 24 | CA   | 23 | 6  |
| 189094 | 23 | 5267729 | 5267744 | 2 | 8  | 16 | AC   | 30 | 3  |
| 189096 | 23 | 5276422 | 5276451 | 2 | 15 | 30 | GT   | 8  | 5  |
| 189097 | 23 | 5276629 | 5276654 | 2 | 13 | 26 | CA   | 15 | 10 |
| 189102 | 23 | 5293993 | 5294016 | 3 | 8  | 24 | ATT  | 9  | 7  |
| 189103 | 23 | 5296517 | 5296554 | 2 | 19 | 38 | GT   | 12 | 13 |
| 189107 | 23 | 5304832 | 5304851 | 2 | 10 | 20 | GT   | 26 | 5  |
| 189110 | 23 | 5310941 | 5310954 | 2 | 7  | 14 | TG   | 26 | 5  |
| 189111 | 23 | 5311078 | 5311129 | 2 | 26 | 52 | GT   | 6  | 6  |
| 189112 | 23 | 5311439 | 5311471 | 3 | 11 | 33 | AAC  | 8  | 5  |
| 189114 | 23 | 5318678 | 5318699 | 2 | 11 | 22 | AC   | 8  | 9  |
| 189115 | 23 | 5319638 | 5319673 | 2 | 18 | 36 | AC   | 9  | 11 |
| 189116 | 23 | 5320966 | 5320977 | 2 | 6  | 12 | TG   | 20 | 12 |
| 189118 | 23 | 5322232 | 5322255 | 3 | 8  | 24 | AAG  | 18 | 7  |
| 189120 | 23 | 5328568 | 5328589 | 2 | 11 | 22 | CA   | 6  | 8  |
| 189121 | 23 | 5330176 | 5330189 | 2 | 7  | 14 | AC   | 6  | 3  |
| 189125 | 23 | 5335851 | 5335865 | 3 | 5  | 15 | GCG  | 26 | 3  |
| 189126 | 23 | 5336074 | 5336093 | 2 | 10 | 20 | TG   | 25 | 5  |
| 189129 | 23 | 5344229 | 5344252 | 2 | 12 | 24 | AC   | 17 | 14 |
| 189130 | 23 | 5344615 | 5344654 | 2 | 20 | 40 | TG   | 11 | 13 |
| 189131 | 23 | 5345953 | 5345984 | 2 | 16 | 32 | AC   | 6  | 7  |
| 189134 | 23 | 5350858 | 5350877 | 2 | 10 | 20 | TG   | 17 | 3  |
| 189137 | 23 | 5354715 | 5354734 | 2 | 10 | 20 | CA   | 17 | 5  |
| 189149 | 23 | 5369410 | 5369427 | 2 | 9  | 18 | CA   | 21 | 4  |
| 189152 | 23 | 5370991 | 5371042 | 2 | 26 | 52 | GT   | 7  | 11 |
| 189155 | 23 | 5373205 | 5373238 | 2 | 17 | 34 | AC   | 16 | 11 |
| 189158 | 23 | 5381211 | 5381226 | 2 | 8  | 16 | GT   | 18 | 5  |
| 189161 | 23 | 5383323 | 5383340 | 2 | 9  | 18 | GT   | 17 | 8  |
| 189163 | 23 | 5385912 | 5385943 | 2 | 16 | 32 | GT   | 23 | 10 |
| 189165 | 23 | 5393066 | 5393079 | 2 | 7  | 14 | TA   | 8  | 6  |
| 189166 | 23 | 5397735 | 5397748 | 2 | 7  | 14 | GT   | 20 | 3  |
| 189167 | 23 | 5398110 | 5398139 | 2 | 15 | 30 | AC   | 10 | 7  |
| 189173 | 23 | 5406028 | 5406045 | 2 | 9  | 18 | CA   | 21 | 3  |
| 189175 | 23 | 5410072 | 5410085 | 2 | 7  | 14 | TG   | 26 | 9  |
| 189178 | 23 | 5417957 | 5417972 | 2 | 8  | 16 | CA   | 21 | 3  |

|        |    |         |         |   |    |    |      |    |    |
|--------|----|---------|---------|---|----|----|------|----|----|
| 189181 | 23 | 5423852 | 5423865 | 2 | 7  | 14 | AC   | 23 | 3  |
| 189182 | 23 | 5428658 | 5428675 | 2 | 9  | 18 | CA   | 24 | 4  |
| 189189 | 23 | 5440703 | 5440720 | 2 | 9  | 18 | CA   | 28 | 13 |
| 189191 | 23 | 5446836 | 5446847 | 2 | 6  | 12 | TC   | 23 | 3  |
| 189194 | 23 | 5450363 | 5450384 | 2 | 11 | 22 | TG   | 23 | 6  |
| 189195 | 23 | 5450447 | 5450496 | 2 | 25 | 50 | GT   | 7  | 7  |
| 189199 | 23 | 5456077 | 5456094 | 2 | 9  | 18 | GT   | 24 | 8  |
| 189202 | 23 | 5458619 | 5458642 | 2 | 12 | 24 | AC   | 20 | 5  |
| 189203 | 23 | 5458761 | 5458788 | 2 | 14 | 28 | CA   | 18 | 12 |
| 189210 | 23 | 5480774 | 5480793 | 2 | 10 | 20 | CA   | 10 | 6  |
| 189217 | 23 | 5505037 | 5505050 | 2 | 7  | 14 | CA   | 20 | 3  |
| 189218 | 23 | 5505145 | 5505156 | 2 | 6  | 12 | CA   | 29 | 4  |
| 189224 | 23 | 5523421 | 5523486 | 3 | 22 | 66 | TGA  | 16 | 11 |
| 189226 | 23 | 5524868 | 5524891 | 2 | 12 | 24 | CA   | 28 | 6  |
| 189228 | 23 | 5526707 | 5526742 | 4 | 9  | 36 | TTAT | 12 | 5  |
| 189232 | 23 | 5532054 | 5532077 | 2 | 12 | 24 | TG   | 18 | 5  |
| 189233 | 23 | 5536755 | 5536770 | 2 | 8  | 16 | AC   | 18 | 5  |
| 189234 | 23 | 5537001 | 5537032 | 2 | 16 | 32 | AC   | 13 | 10 |
| 189236 | 23 | 5546280 | 5546305 | 2 | 13 | 26 | CA   | 12 | 6  |
| 189237 | 23 | 5546497 | 5546520 | 2 | 12 | 24 | AC   | 17 | 5  |
| 189238 | 23 | 5547943 | 5547962 | 4 | 5  | 20 | GGAT | 28 | 5  |
| 189240 | 23 | 5548083 | 5548104 | 2 | 11 | 22 | AC   | 11 | 12 |
| 189241 | 23 | 5548352 | 5548365 | 2 | 7  | 14 | TG   | 7  | 5  |
| 189242 | 23 | 5548371 | 5548386 | 2 | 8  | 16 | GT   | 24 | 13 |
| 189243 | 23 | 5548557 | 5548602 | 2 | 23 | 46 | TG   | 6  | 10 |
| 189247 | 23 | 5558234 | 5558271 | 2 | 19 | 38 | AC   | 9  | 10 |
| 189257 | 23 | 5589182 | 5589193 | 2 | 6  | 12 | TG   | 15 | 5  |
| 189258 | 23 | 5602798 | 5602815 | 2 | 9  | 18 | GT   | 10 | 7  |
| 189259 | 23 | 5603457 | 5603471 | 3 | 5  | 15 | GCT  | 25 | 4  |
| 189261 | 23 | 5603785 | 5603806 | 2 | 11 | 22 | AG   | 10 | 12 |
| 189263 | 23 | 5614440 | 5614455 | 4 | 4  | 16 | TTTC | 17 | 7  |
| 189271 | 23 | 5645373 | 5645390 | 2 | 9  | 18 | GT   | 18 | 6  |
| 189276 | 23 | 5657311 | 5657328 | 2 | 9  | 18 | AC   | 25 | 6  |
| 189277 | 23 | 5663105 | 5663132 | 2 | 14 | 28 | CA   | 18 | 9  |
| 189278 | 23 | 5663402 | 5663439 | 2 | 19 | 38 | CA   | 16 | 9  |
| 189279 | 23 | 5665205 | 5665220 | 2 | 8  | 16 | AT   | 16 | 4  |
| 189283 | 23 | 5671239 | 5671254 | 2 | 8  | 16 | TG   | 12 | 7  |
| 189285 | 23 | 5673303 | 5673326 | 2 | 12 | 24 | AC   | 17 | 12 |
| 189287 | 23 | 5676738 | 5676775 | 2 | 19 | 38 | GT   | 15 | 14 |
| 189289 | 23 | 5679416 | 5679431 | 4 | 4  | 16 | TTAT | 12 | 3  |
| 189296 | 23 | 5681307 | 5681336 | 2 | 15 | 30 | TG   | 11 | 10 |
| 189297 | 23 | 5681418 | 5681437 | 2 | 10 | 20 | AC   | 13 | 13 |
| 189298 | 23 | 5681570 | 5681587 | 2 | 9  | 18 | CT   | 21 | 3  |
| 189299 | 23 | 5681660 | 5681677 | 3 | 6  | 18 | TGC  | 27 | 6  |
| 189301 | 23 | 5684838 | 5684855 | 2 | 9  | 18 | CA   | 22 | 6  |
| 189305 | 23 | 5687758 | 5687797 | 2 | 20 | 40 | GT   | 13 | 11 |
| 189306 | 23 | 5687922 | 5687945 | 2 | 12 | 24 | AC   | 19 | 6  |
| 189307 | 23 | 5688100 | 5688121 | 2 | 11 | 22 | TC   | 25 | 3  |
| 189312 | 23 | 5689677 | 5689698 | 2 | 11 | 22 | CA   | 12 | 3  |
| 189319 | 23 | 5696636 | 5696649 | 2 | 7  | 14 | AC   | 11 | 3  |
| 189320 | 23 | 5696789 | 5696804 | 2 | 8  | 16 | AC   | 26 | 5  |

|        |    |         |         |   |    |    |      |    |    |
|--------|----|---------|---------|---|----|----|------|----|----|
| 189323 | 23 | 5700513 | 5700530 | 2 | 9  | 18 | TG   | 17 | 5  |
| 189324 | 23 | 5700558 | 5700573 | 2 | 8  | 16 | TG   | 11 | 4  |
| 189328 | 23 | 5703637 | 5703658 | 2 | 11 | 22 | AC   | 11 | 8  |
| 189331 | 23 | 5704341 | 5704364 | 2 | 12 | 24 | GT   | 11 | 13 |
| 189333 | 23 | 5706707 | 5706728 | 2 | 11 | 22 | CA   | 15 | 7  |
| 189339 | 23 | 5723716 | 5723742 | 3 | 9  | 27 | TGA  | 20 | 5  |
| 189340 | 23 | 5725420 | 5725431 | 2 | 6  | 12 | GT   | 13 | 8  |
| 189346 | 23 | 5735347 | 5735370 | 4 | 6  | 24 | AAAG | 24 | 6  |
| 189360 | 23 | 5746748 | 5746769 | 2 | 11 | 22 | GT   | 22 | 7  |
| 189364 | 23 | 5754105 | 5754144 | 2 | 20 | 40 | CA   | 11 | 13 |
| 189366 | 23 | 5755729 | 5755743 | 3 | 5  | 15 | CAA  | 30 | 3  |
| 189367 | 23 | 5756263 | 5756294 | 2 | 16 | 32 | AC   | 23 | 9  |
| 189369 | 23 | 5760436 | 5760459 | 2 | 12 | 24 | TG   | 7  | 4  |
| 189370 | 23 | 5760716 | 5760731 | 2 | 8  | 16 | AC   | 20 | 3  |
| 189371 | 23 | 5761288 | 5761319 | 2 | 16 | 32 | AC   | 11 | 9  |
| 189373 | 23 | 5766541 | 5766560 | 2 | 10 | 20 | GT   | 23 | 10 |
| 189374 | 23 | 5766729 | 5766752 | 2 | 12 | 24 | AC   | 19 | 12 |
| 189379 | 23 | 5777968 | 5777997 | 2 | 15 | 30 | AC   | 23 | 7  |
| 189380 | 23 | 5778153 | 5778180 | 2 | 14 | 28 | CA   | 16 | 9  |
| 189383 | 23 | 5779524 | 5779545 | 2 | 11 | 22 | CA   | 6  | 3  |
| 189384 | 23 | 5780271 | 5780328 | 2 | 29 | 58 | AC   | 6  | 9  |
| 189388 | 23 | 5789503 | 5789524 | 2 | 11 | 22 | CA   | 17 | 9  |
| 189389 | 23 | 5790439 | 5790458 | 2 | 10 | 20 | TG   | 21 | 9  |
| 189391 | 23 | 5791840 | 5791881 | 2 | 21 | 42 | GT   | 14 | 10 |
| 189402 | 23 | 5804947 | 5804960 | 2 | 7  | 14 | GT   | 26 | 3  |
| 189403 | 23 | 5805186 | 5805201 | 2 | 8  | 16 | TG   | 24 | 5  |
| 189405 | 23 | 5805770 | 5805815 | 2 | 23 | 46 | TG   | 6  | 5  |
| 189407 | 23 | 5812019 | 5812040 | 2 | 11 | 22 | TG   | 17 | 10 |
| 189409 | 23 | 5814669 | 5814683 | 3 | 5  | 15 | TAT  | 16 | 5  |
| 189410 | 23 | 5815162 | 5815173 | 2 | 6  | 12 | GT   | 23 | 3  |
| 189411 | 23 | 5815347 | 5815364 | 3 | 6  | 18 | GAG  | 27 | 3  |
| 189414 | 23 | 5823288 | 5823311 | 4 | 6  | 24 | GACA | 26 | 3  |
| 189425 | 23 | 5846353 | 5846374 | 2 | 11 | 22 | TG   | 12 | 9  |
| 189426 | 23 | 5846838 | 5846849 | 2 | 6  | 12 | CA   | 29 | 3  |
| 189444 | 23 | 5880199 | 5880214 | 2 | 8  | 16 | GT   | 25 | 11 |
| 189445 | 23 | 5880215 | 5880226 | 2 | 6  | 12 | GA   | 21 | 9  |
| 189448 | 23 | 5889574 | 5889593 | 2 | 10 | 20 | CA   | 7  | 4  |
| 189450 | 23 | 5891641 | 5891660 | 2 | 10 | 20 | AG   | 20 | 5  |
| 189456 | 23 | 5905475 | 5905504 | 2 | 15 | 30 | TG   | 8  | 10 |
| 189457 | 23 | 5905603 | 5905616 | 2 | 7  | 14 | CA   | 26 | 3  |
| 189458 | 23 | 5905844 | 5905879 | 2 | 18 | 36 | GT   | 13 | 11 |
| 189459 | 23 | 5906058 | 5906071 | 2 | 7  | 14 | TG   | 18 | 5  |
| 189466 | 23 | 5911298 | 5911327 | 2 | 15 | 30 | GT   | 23 | 12 |
| 189467 | 23 | 5912915 | 5912936 | 2 | 11 | 22 | GT   | 12 | 7  |
| 189470 | 23 | 5919450 | 5919477 | 2 | 14 | 28 | GT   | 13 | 8  |
| 189473 | 23 | 5921195 | 5921218 | 2 | 12 | 24 | GT   | 17 | 9  |
| 189475 | 23 | 5925521 | 5925535 | 3 | 5  | 15 | TGC  | 19 | 4  |
| 189477 | 23 | 5929333 | 5929347 | 3 | 5  | 15 | CTG  | 38 | 3  |
| 189478 | 23 | 5929461 | 5929488 | 2 | 14 | 28 | CA   | 19 | 12 |
| 189482 | 23 | 5931698 | 5931719 | 2 | 11 | 22 | TG   | 25 | 6  |
| 189483 | 23 | 5931959 | 5931980 | 2 | 11 | 22 | GT   | 19 | 6  |



|        |    |         |         |   |    |    |      |    |    |
|--------|----|---------|---------|---|----|----|------|----|----|
| 189490 | 23 | 5936082 | 5936099 | 2 | 9  | 18 | GT   | 8  | 8  |
| 189494 | 23 | 5940769 | 5940784 | 2 | 8  | 16 | GT   | 31 | 9  |
| 189498 | 23 | 5946949 | 5946970 | 2 | 11 | 22 | TG   | 14 | 18 |
| 189500 | 23 | 5950833 | 5950860 | 2 | 14 | 28 | TC   | 11 | 6  |
| 189505 | 23 | 5954493 | 5954506 | 2 | 7  | 14 | GA   | 15 | 9  |
| 189506 | 23 | 5954508 | 5954519 | 2 | 6  | 12 | AG   | 20 | 11 |
| 189508 | 23 | 5954963 | 5954989 | 3 | 9  | 27 | TCT  | 20 | 5  |
| 189509 | 23 | 5958269 | 5958298 | 2 | 15 | 30 | AC   | 18 | 8  |
| 189510 | 23 | 5960988 | 5960999 | 2 | 6  | 12 | CA   | 27 | 6  |
| 189514 | 23 | 5970866 | 5970881 | 2 | 8  | 16 | TG   | 28 | 6  |
| 189515 | 23 | 5970921 | 5970952 | 2 | 16 | 32 | AC   | 18 | 10 |
| 189524 | 23 | 5988355 | 5988374 | 2 | 10 | 20 | CA   | 28 | 3  |
| 189525 | 23 | 5988783 | 5988804 | 2 | 11 | 22 | TG   | 15 | 4  |
| 189528 | 23 | 5992873 | 5992890 | 2 | 9  | 18 | TG   | 25 | 5  |
| 189537 | 23 | 6003165 | 6003188 | 2 | 12 | 24 | AC   | 13 | 9  |
| 189539 | 23 | 6003423 | 6003452 | 2 | 15 | 30 | TG   | 6  | 7  |
| 189546 | 23 | 6011046 | 6011075 | 2 | 15 | 30 | TG   | 20 | 10 |
| 189547 | 23 | 6011217 | 6011232 | 2 | 8  | 16 | TG   | 16 | 11 |
| 189548 | 23 | 6011235 | 6011250 | 2 | 8  | 16 | TG   | 16 | 10 |
| 189552 | 23 | 6012669 | 6012720 | 4 | 13 | 52 | TTCT | 15 | 6  |
| 189553 | 23 | 6014273 | 6014293 | 3 | 7  | 21 | GCA  | 20 | 3  |
| 189555 | 23 | 6020240 | 6020263 | 2 | 12 | 24 | GT   | 25 | 6  |
| 189558 | 23 | 6026795 | 6026826 | 2 | 16 | 32 | TG   | 8  | 4  |
| 189559 | 23 | 6027809 | 6027828 | 2 | 10 | 20 | AC   | 26 | 7  |
| 189563 | 23 | 6037512 | 6037535 | 2 | 12 | 24 | CA   | 19 | 13 |
| 189564 | 23 | 6039598 | 6039612 | 3 | 5  | 15 | CTC  | 23 | 4  |
| 189567 | 23 | 6049467 | 6049488 | 2 | 11 | 22 | TG   | 19 | 6  |
| 189568 | 23 | 6050116 | 6050155 | 4 | 10 | 40 | GGAT | 21 | 11 |
| 189569 | 23 | 6050680 | 6050711 | 2 | 16 | 32 | AC   | 19 | 10 |
| 189571 | 23 | 6055666 | 6055681 | 4 | 4  | 16 | AAAT | 21 | 6  |
| 189573 | 23 | 6061284 | 6061303 | 2 | 10 | 20 | GT   | 20 | 6  |
| 189577 | 23 | 6061697 | 6061708 | 2 | 6  | 12 | TG   | 27 | 3  |
| 189578 | 23 | 6062065 | 6062094 | 2 | 15 | 30 | TG   | 8  | 7  |
| 189581 | 23 | 6067932 | 6067943 | 2 | 6  | 12 | TG   | 33 | 4  |
| 189595 | 23 | 6088378 | 6088399 | 2 | 11 | 22 | TG   | 18 | 4  |
| 189598 | 23 | 6092129 | 6092146 | 2 | 9  | 18 | TG   | 24 | 3  |
| 189600 | 23 | 6095172 | 6095183 | 2 | 6  | 12 | TA   | 12 | 4  |
| 189602 | 23 | 6097166 | 6097201 | 2 | 18 | 36 | TG   | 6  | 9  |
| 189603 | 23 | 6097551 | 6097580 | 3 | 10 | 30 | GCT  | 22 | 4  |
| 189604 | 23 | 6099261 | 6099276 | 4 | 4  | 16 | TGAA | 24 | 3  |
| 189608 | 23 | 6102021 | 6102038 | 2 | 9  | 18 | AC   | 15 | 6  |
| 189611 | 23 | 6104203 | 6104218 | 2 | 8  | 16 | TG   | 19 | 6  |
| 189615 | 23 | 6110046 | 6110061 | 2 | 8  | 16 | GT   | 7  | 5  |
| 189616 | 23 | 6110376 | 6110401 | 2 | 13 | 26 | GT   | 16 | 6  |
| 189618 | 23 | 6111134 | 6111153 | 4 | 5  | 20 | CTCC | 12 | 6  |
| 189619 | 23 | 6111275 | 6111298 | 2 | 12 | 24 | CA   | 11 | 6  |
| 189622 | 23 | 6113961 | 6113988 | 2 | 14 | 28 | CA   | 13 | 4  |
| 189632 | 23 | 6119980 | 6119997 | 2 | 9  | 18 | TG   | 18 | 5  |
| 189634 | 23 | 6120154 | 6120197 | 2 | 22 | 44 | GT   | 11 | 7  |
| 189639 | 23 | 6121748 | 6121775 | 2 | 14 | 28 | GT   | 10 | 7  |
| 189642 | 23 | 6125496 | 6125510 | 3 | 5  | 15 | AAC  | 29 | 4  |

|        |    |         |         |   |    |    |      |    |    |
|--------|----|---------|---------|---|----|----|------|----|----|
| 189649 | 23 | 6135230 | 6135257 | 4 | 7  | 28 | ACAG | 21 | 7  |
| 189653 | 23 | 6148590 | 6148605 | 2 | 8  | 16 | AC   | 27 | 4  |
| 189656 | 23 | 6155074 | 6155089 | 2 | 8  | 16 | AC   | 26 | 9  |
| 189658 | 23 | 6155527 | 6155552 | 2 | 13 | 26 | TG   | 22 | 7  |
| 189661 | 23 | 6166398 | 6166413 | 2 | 8  | 16 | GT   | 23 | 6  |
| 189662 | 23 | 6166520 | 6166547 | 2 | 14 | 28 | GT   | 11 | 7  |
| 189663 | 23 | 6166921 | 6166940 | 2 | 10 | 20 | GT   | 24 | 9  |
| 189666 | 23 | 6178156 | 6178175 | 2 | 10 | 20 | TG   | 25 | 6  |
| 189667 | 23 | 6179965 | 6179996 | 2 | 16 | 32 | TG   | 12 | 16 |
| 189670 | 23 | 6190637 | 6190652 | 4 | 4  | 16 | TTTA | 29 | 3  |
| 189675 | 23 | 6200708 | 6200723 | 4 | 4  | 16 | GCTA | 19 | 6  |
| 189678 | 23 | 6209706 | 6209745 | 2 | 20 | 40 | CA   | 6  | 8  |
| 189684 | 23 | 6231549 | 6231560 | 2 | 6  | 12 | GA   | 25 | 5  |
| 189694 | 23 | 6237527 | 6237550 | 2 | 12 | 24 | GT   | 15 | 4  |
| 189695 | 23 | 6237662 | 6237683 | 2 | 11 | 22 | CA   | 23 | 6  |
| 189696 | 23 | 6238019 | 6238030 | 2 | 6  | 12 | AC   | 18 | 4  |
| 189697 | 23 | 6238760 | 6238777 | 2 | 9  | 18 | AC   | 14 | 11 |
| 189698 | 23 | 6238780 | 6238791 | 2 | 6  | 12 | AC   | 13 | 9  |
| 189699 | 23 | 6239870 | 6239893 | 2 | 12 | 24 | GT   | 25 | 8  |
| 189701 | 23 | 6241678 | 6241703 | 2 | 13 | 26 | CA   | 15 | 8  |
| 189702 | 23 | 6244182 | 6244197 | 4 | 4  | 16 | ATTT | 22 | 3  |
| 189703 | 23 | 6245505 | 6245530 | 2 | 13 | 26 | GT   | 18 | 7  |
| 189704 | 23 | 6245768 | 6245791 | 2 | 12 | 24 | GT   | 14 | 7  |
| 189706 | 23 | 6247329 | 6247340 | 2 | 6  | 12 | CA   | 14 | 7  |
| 189707 | 23 | 6248202 | 6248215 | 2 | 7  | 14 | GT   | 23 | 5  |
| 189710 | 23 | 6254933 | 6254960 | 2 | 14 | 28 | TG   | 8  | 8  |
| 189711 | 23 | 6255046 | 6255063 | 2 | 9  | 18 | CA   | 19 | 6  |
| 189712 | 23 | 6255208 | 6255231 | 2 | 12 | 24 | GT   | 18 | 6  |
| 189714 | 23 | 6262334 | 6262355 | 2 | 11 | 22 | AC   | 15 | 8  |
| 189717 | 23 | 6268157 | 6268174 | 2 | 9  | 18 | AC   | 22 | 12 |
| 189718 | 23 | 6268508 | 6268523 | 2 | 8  | 16 | TG   | 24 | 6  |
| 189722 | 23 | 6270570 | 6270589 | 4 | 5  | 20 | CAGT | 18 | 4  |
| 189724 | 23 | 6271406 | 6271426 | 3 | 7  | 21 | TCT  | 17 | 6  |
| 189727 | 23 | 6287365 | 6287388 | 2 | 12 | 24 | TG   | 25 | 4  |
| 189728 | 23 | 6290385 | 6290402 | 2 | 9  | 18 | TG   | 25 | 3  |
| 189731 | 23 | 6297680 | 6297705 | 2 | 13 | 26 | AC   | 14 | 6  |
| 189733 | 23 | 6298002 | 6298021 | 2 | 10 | 20 | CA   | 21 | 11 |
| 189734 | 23 | 6308461 | 6308484 | 2 | 12 | 24 | AC   | 17 | 9  |
| 189735 | 23 | 6308641 | 6308672 | 2 | 16 | 32 | AC   | 15 | 8  |
| 189740 | 23 | 6318486 | 6318505 | 4 | 5  | 20 | AAAT | 24 | 4  |
| 189743 | 23 | 6324323 | 6324336 | 2 | 7  | 14 | AG   | 26 | 4  |
| 189745 | 23 | 6325301 | 6325312 | 2 | 6  | 12 | GT   | 31 | 3  |
| 189746 | 23 | 6326093 | 6326104 | 2 | 6  | 12 | TG   | 20 | 7  |
| 189750 | 23 | 6336697 | 6336714 | 2 | 9  | 18 | TG   | 19 | 6  |
| 189751 | 23 | 6336781 | 6336806 | 2 | 13 | 26 | AC   | 7  | 11 |
| 189752 | 23 | 6336927 | 6336946 | 2 | 10 | 20 | TG   | 29 | 6  |
| 189753 | 23 | 6337034 | 6337045 | 2 | 6  | 12 | TG   | 29 | 4  |
| 189755 | 23 | 6340120 | 6340131 | 2 | 6  | 12 | CA   | 24 | 3  |
| 189756 | 23 | 6340278 | 6340301 | 2 | 12 | 24 | CA   | 8  | 10 |
| 189757 | 23 | 6340415 | 6340441 | 3 | 9  | 27 | CTT  | 20 | 6  |
| 189759 | 23 | 6341142 | 6341169 | 2 | 14 | 28 | GT   | 9  | 10 |

|        |    |         |         |   |    |    |      |    |    |
|--------|----|---------|---------|---|----|----|------|----|----|
| 189763 | 23 | 6343596 | 6343616 | 3 | 7  | 21 | ATT  | 22 | 7  |
| 189764 | 23 | 6349505 | 6349520 | 4 | 4  | 16 | AAAC | 27 | 5  |
| 189765 | 23 | 6353255 | 6353290 | 2 | 18 | 36 | AC   | 17 | 11 |
| 189766 | 23 | 6353395 | 6353414 | 2 | 10 | 20 | AC   | 14 | 7  |
| 189768 | 23 | 6360903 | 6360936 | 2 | 17 | 34 | CA   | 7  | 11 |
| 189769 | 23 | 6361864 | 6361878 | 3 | 5  | 15 | TAG  | 13 | 3  |
| 189770 | 23 | 6363287 | 6363312 | 2 | 13 | 26 | TG   | 11 | 12 |
| 189776 | 23 | 6373300 | 6373327 | 2 | 14 | 28 | TG   | 9  | 11 |
| 189780 | 23 | 6381380 | 6381397 | 2 | 9  | 18 | GT   | 9  | 10 |
| 189791 | 23 | 6401061 | 6401096 | 3 | 12 | 36 | CAG  | 24 | 7  |
| 189792 | 23 | 6401530 | 6401569 | 2 | 20 | 40 | AC   | 14 | 8  |
| 189794 | 23 | 6408714 | 6408733 | 2 | 10 | 20 | TG   | 17 | 10 |
| 189799 | 23 | 6417478 | 6417489 | 2 | 6  | 12 | GT   | 23 | 4  |
| 189802 | 23 | 6421227 | 6421260 | 2 | 17 | 34 | TG   | 16 | 12 |
| 189804 | 23 | 6426704 | 6426721 | 3 | 6  | 18 | GAG  | 19 | 5  |
| 189807 | 23 | 6433000 | 6433017 | 2 | 9  | 18 | GA   | 8  | 3  |
| 189812 | 23 | 6441899 | 6441910 | 2 | 6  | 12 | AG   | 21 | 10 |
| 189814 | 23 | 6448323 | 6448354 | 2 | 16 | 32 | GT   | 12 | 8  |
| 189815 | 23 | 6452473 | 6452506 | 2 | 17 | 34 | TG   | 17 | 12 |
| 189816 | 23 | 6454331 | 6454374 | 2 | 22 | 44 | TG   | 19 | 12 |
| 189817 | 23 | 6455142 | 6455163 | 2 | 11 | 22 | CA   | 20 | 8  |
| 189819 | 23 | 6455909 | 6455938 | 2 | 15 | 30 | AC   | 13 | 12 |
| 189822 | 23 | 6462188 | 6462201 | 2 | 7  | 14 | GT   | 10 | 3  |
| 189824 | 23 | 6462691 | 6462718 | 4 | 7  | 28 | AAAG | 7  | 4  |
| 189831 | 23 | 6483521 | 6483554 | 2 | 17 | 34 | AC   | 8  | 8  |
| 189833 | 23 | 6486858 | 6486873 | 4 | 4  | 16 | TTTG | 20 | 4  |
| 189834 | 23 | 6491394 | 6491415 | 2 | 11 | 22 | TG   | 23 | 10 |
| 189848 | 23 | 6509279 | 6509298 | 2 | 10 | 20 | GT   | 23 | 7  |
| 189851 | 23 | 6512202 | 6512215 | 2 | 7  | 14 | TG   | 30 | 5  |
| 189852 | 23 | 6512490 | 6512521 | 2 | 16 | 32 | GT   | 17 | 15 |
| 189853 | 23 | 6512655 | 6512672 | 2 | 9  | 18 | CA   | 23 | 7  |
| 189856 | 23 | 6518351 | 6518365 | 3 | 5  | 15 | CTG  | 16 | 3  |
| 189863 | 23 | 6524359 | 6524392 | 2 | 17 | 34 | CA   | 28 | 10 |
| 189865 | 23 | 6524703 | 6524728 | 2 | 13 | 26 | CA   | 11 | 12 |
| 189873 | 23 | 6532000 | 6532011 | 2 | 6  | 12 | GT   | 25 | 3  |
| 189874 | 23 | 6532174 | 6532203 | 2 | 15 | 30 | CA   | 18 | 9  |
| 189876 | 23 | 6534091 | 6534122 | 4 | 8  | 32 | GATT | 16 | 7  |
| 189883 | 23 | 6537169 | 6537192 | 2 | 12 | 24 | GT   | 11 | 11 |
| 189885 | 23 | 6537323 | 6537344 | 2 | 11 | 22 | AC   | 17 | 7  |
| 189886 | 23 | 6537468 | 6537523 | 2 | 28 | 56 | AC   | 7  | 8  |
| 189887 | 23 | 6538408 | 6538453 | 2 | 23 | 46 | AC   | 10 | 13 |
| 189888 | 23 | 6538654 | 6538687 | 2 | 17 | 34 | TG   | 8  | 8  |
| 189889 | 23 | 6538791 | 6538814 | 4 | 6  | 24 | AGGA | 16 | 3  |
| 189892 | 23 | 6542987 | 6543010 | 2 | 12 | 24 | CA   | 10 | 13 |
| 189893 | 23 | 6543348 | 6543369 | 2 | 11 | 22 | AC   | 23 | 6  |
| 189894 | 23 | 6544839 | 6544850 | 2 | 6  | 12 | GA   | 28 | 3  |
| 189896 | 23 | 6545821 | 6545840 | 4 | 5  | 20 | CTGT | 12 | 3  |
| 189900 | 23 | 6550437 | 6550472 | 2 | 18 | 36 | AC   | 11 | 13 |
| 189901 | 23 | 6552003 | 6552022 | 4 | 5  | 20 | CCAA | 22 | 6  |
| 189902 | 23 | 6552127 | 6552146 | 4 | 5  | 20 | CCAA | 28 | 4  |
| 189907 | 23 | 6554567 | 6554586 | 2 | 10 | 20 | CA   | 14 | 3  |

|        |    |         |         |   |    |    |      |    |    |
|--------|----|---------|---------|---|----|----|------|----|----|
| 189909 | 23 | 6555233 | 6555258 | 2 | 13 | 26 | AC   | 14 | 7  |
| 189917 | 23 | 6560172 | 6560191 | 2 | 10 | 20 | TC   | 18 | 10 |
| 189918 | 23 | 6560385 | 6560404 | 2 | 10 | 20 | AC   | 15 | 5  |
| 189921 | 23 | 6563984 | 6564009 | 2 | 13 | 26 | AC   | 17 | 9  |
| 189923 | 23 | 6566232 | 6566249 | 2 | 9  | 18 | CA   | 19 | 4  |
| 189925 | 23 | 6567411 | 6567452 | 2 | 21 | 42 | GT   | 12 | 11 |
| 189928 | 23 | 6577930 | 6577945 | 2 | 8  | 16 | AC   | 19 | 7  |
| 189929 | 23 | 6578236 | 6578247 | 2 | 6  | 12 | CT   | 21 | 4  |
| 189930 | 23 | 6579070 | 6579111 | 2 | 21 | 42 | AC   | 12 | 8  |
| 189933 | 23 | 6583153 | 6583168 | 2 | 8  | 16 | GT   | 17 | 9  |
| 189934 | 23 | 6583505 | 6583532 | 2 | 14 | 28 | CA   | 10 | 12 |
| 189943 | 23 | 6594630 | 6594655 | 2 | 13 | 26 | TG   | 19 | 7  |
| 189945 | 23 | 6601237 | 6601260 | 4 | 6  | 24 | GATT | 23 | 7  |
| 189949 | 23 | 6610018 | 6610037 | 2 | 10 | 20 | GA   | 16 | 4  |
| 189953 | 23 | 6626060 | 6626091 | 2 | 16 | 32 | TG   | 11 | 10 |
| 189955 | 23 | 6627963 | 6627977 | 3 | 5  | 15 | ATG  | 30 | 3  |
| 189961 | 23 | 6652118 | 6652141 | 4 | 6  | 24 | ATGA | 24 | 3  |
| 189962 | 23 | 6652711 | 6652738 | 2 | 14 | 28 | GT   | 25 | 8  |
| 189964 | 23 | 6653688 | 6653711 | 2 | 12 | 24 | TG   | 16 | 11 |
| 189972 | 23 | 6674770 | 6674787 | 2 | 9  | 18 | TG   | 17 | 6  |
| 189974 | 23 | 6685757 | 6685778 | 2 | 11 | 22 | AC   | 17 | 6  |
| 189977 | 23 | 6693251 | 6693268 | 2 | 9  | 18 | TG   | 25 | 4  |
| 189980 | 23 | 6698185 | 6698196 | 2 | 6  | 12 | TG   | 29 | 3  |
| 189983 | 23 | 6712186 | 6712205 | 2 | 10 | 20 | TG   | 13 | 7  |
| 189984 | 23 | 6712400 | 6712419 | 2 | 10 | 20 | CA   | 19 | 12 |
| 189985 | 23 | 6712546 | 6712557 | 2 | 6  | 12 | TG   | 21 | 6  |
| 189986 | 23 | 6713611 | 6713640 | 2 | 15 | 30 | GT   | 15 | 10 |
| 189989 | 23 | 6714886 | 6714947 | 2 | 31 | 62 | CA   | 8  | 12 |
| 189990 | 23 | 6715470 | 6715483 | 2 | 7  | 14 | TG   | 13 | 5  |
| 190000 | 23 | 6721828 | 6721841 | 2 | 7  | 14 | CA   | 7  | 7  |
| 190004 | 23 | 6726230 | 6726245 | 2 | 8  | 16 | CA   | 13 | 4  |
| 190006 | 23 | 6728488 | 6728503 | 4 | 4  | 16 | AAAT | 19 | 3  |
| 190007 | 23 | 6728548 | 6728567 | 2 | 10 | 20 | CA   | 18 | 4  |
| 190011 | 23 | 6728980 | 6728999 | 4 | 5  | 20 | GGAA | 13 | 6  |
| 190012 | 23 | 6729105 | 6729134 | 2 | 15 | 30 | CA   | 13 | 10 |
| 190014 | 23 | 6730386 | 6730411 | 2 | 13 | 26 | CA   | 15 | 10 |
| 190033 | 23 | 6754487 | 6754504 | 2 | 9  | 18 | TC   | 15 | 4  |
| 190040 | 23 | 6763773 | 6763812 | 2 | 20 | 40 | TC   | 7  | 7  |
| 190045 | 23 | 6771712 | 6771745 | 2 | 17 | 34 | TG   | 12 | 13 |
| 190046 | 23 | 6771907 | 6771924 | 2 | 9  | 18 | AC   | 14 | 5  |
| 190069 | 23 | 6823877 | 6823898 | 2 | 11 | 22 | AC   | 30 | 6  |
| 190083 | 23 | 6856829 | 6856856 | 2 | 14 | 28 | GT   | 15 | 12 |
| 190086 | 23 | 6858701 | 6858720 | 2 | 10 | 20 | TG   | 20 | 11 |
| 190093 | 23 | 6868538 | 6868553 | 2 | 8  | 16 | TC   | 23 | 7  |
| 190105 | 23 | 6884312 | 6884337 | 2 | 13 | 26 | TG   | 9  | 9  |
| 190108 | 23 | 6890071 | 6890084 | 2 | 7  | 14 | CA   | 26 | 4  |
| 190111 | 23 | 6895117 | 6895134 | 2 | 9  | 18 | AT   | 12 | 3  |
| 190115 | 23 | 6904640 | 6904663 | 2 | 12 | 24 | GT   | 16 | 5  |
| 190117 | 23 | 6906536 | 6906563 | 2 | 14 | 28 | AC   | 13 | 7  |
| 190120 | 23 | 6914976 | 6914989 | 2 | 7  | 14 | GT   | 21 | 3  |
| 190121 | 23 | 6916213 | 6916260 | 2 | 24 | 48 | AC   | 20 | 20 |

|        |    |         |         |   |    |    |      |    |    |
|--------|----|---------|---------|---|----|----|------|----|----|
| 190124 | 23 | 6922507 | 6922532 | 2 | 13 | 26 | GT   | 9  | 5  |
| 190129 | 23 | 6933335 | 6933362 | 4 | 7  | 28 | GTGC | 18 | 21 |
| 190134 | 23 | 6938400 | 6938427 | 2 | 14 | 28 | TG   | 9  | 8  |
| 190136 | 23 | 6938778 | 6938813 | 2 | 18 | 36 | AG   | 11 | 13 |
| 190139 | 23 | 6949735 | 6949746 | 2 | 6  | 12 | AT   | 25 | 6  |
| 190140 | 23 | 6950811 | 6950840 | 2 | 15 | 30 | GT   | 12 | 11 |
| 190141 | 23 | 6954687 | 6954702 | 2 | 8  | 16 | TG   | 10 | 7  |
| 190149 | 23 | 6978751 | 6978772 | 2 | 11 | 22 | GT   | 24 | 6  |
| 190152 | 23 | 6981041 | 6981056 | 2 | 8  | 16 | CA   | 16 | 12 |
| 190155 | 23 | 6982753 | 6982766 | 2 | 7  | 14 | GT   | 18 | 6  |
| 190156 | 23 | 6983238 | 6983261 | 2 | 12 | 24 | TG   | 6  | 5  |
| 190158 | 23 | 6986212 | 6986239 | 4 | 7  | 28 | AGTG | 23 | 4  |
| 190159 | 23 | 6988408 | 6988434 | 3 | 9  | 27 | TAA  | 15 | 3  |
| 190165 | 23 | 6993799 | 6993819 | 3 | 7  | 21 | ATT  | 10 | 6  |
| 190170 | 23 | 7002082 | 7002105 | 4 | 6  | 24 | TTTA | 19 | 3  |
| 190174 | 23 | 7023563 | 7023592 | 3 | 10 | 30 | TCC  | 18 | 5  |
| 190175 | 23 | 7028318 | 7028375 | 2 | 29 | 58 | TG   | 8  | 9  |
| 190177 | 23 | 7031924 | 7031939 | 4 | 4  | 16 | TTTA | 16 | 3  |
| 190178 | 23 | 7034069 | 7034086 | 2 | 9  | 18 | AC   | 20 | 10 |
| 190182 | 23 | 7041295 | 7041318 | 2 | 12 | 24 | CA   | 11 | 4  |
| 190184 | 23 | 7042504 | 7042517 | 2 | 7  | 14 | AC   | 20 | 7  |
| 190187 | 23 | 7050228 | 7050242 | 3 | 5  | 15 | GCC  | 15 | 4  |
| 190188 | 23 | 7055408 | 7055423 | 4 | 4  | 16 | CAAA | 28 | 3  |
| 190190 | 23 | 7059516 | 7059561 | 2 | 23 | 46 | CA   | 9  | 12 |
| 190192 | 23 | 7062029 | 7062056 | 2 | 14 | 28 | CA   | 24 | 9  |
| 190193 | 23 | 7065047 | 7065062 | 4 | 4  | 16 | GCAG | 30 | 4  |
| 190194 | 23 | 7066396 | 7066407 | 2 | 6  | 12 | AC   | 26 | 4  |
| 190198 | 23 | 7077346 | 7077413 | 2 | 34 | 68 | TG   | 9  | 10 |
| 190203 | 23 | 7087961 | 7087993 | 3 | 11 | 33 | TCA  | 9  | 10 |
| 190204 | 23 | 7091518 | 7091538 | 3 | 7  | 21 | TGC  | 26 | 5  |
| 190205 | 23 | 7091948 | 7091965 | 3 | 6  | 18 | TAG  | 18 | 11 |
| 190206 | 23 | 7093335 | 7093360 | 2 | 13 | 26 | AC   | 11 | 7  |
| 190212 | 23 | 7098291 | 7098322 | 2 | 16 | 32 | GT   | 11 | 7  |
| 190213 | 23 | 7100001 | 7100022 | 2 | 11 | 22 | CA   | 14 | 10 |
| 190214 | 23 | 7106222 | 7106267 | 2 | 23 | 46 | CA   | 6  | 8  |
| 190231 | 23 | 7161405 | 7161438 | 2 | 17 | 34 | TG   | 9  | 11 |
| 190232 | 23 | 7166772 | 7166786 | 3 | 5  | 15 | TCA  | 21 | 3  |
| 190233 | 23 | 7169507 | 7169520 | 2 | 7  | 14 | GT   | 19 | 4  |
| 190237 | 23 | 7184902 | 7184922 | 3 | 7  | 21 | GTT  | 17 | 9  |
| 190267 | 23 | 7244152 | 7244185 | 2 | 17 | 34 | AC   | 11 | 9  |
| 190281 | 23 | 7249721 | 7249732 | 2 | 6  | 12 | CA   | 20 | 3  |
| 190284 | 23 | 7252459 | 7252514 | 2 | 28 | 56 | TG   | 7  | 9  |
| 190301 | 23 | 7300449 | 7300474 | 2 | 13 | 26 | CA   | 23 | 6  |
| 190302 | 23 | 7300610 | 7300645 | 2 | 18 | 36 | TG   | 22 | 9  |
| 190304 | 23 | 7310245 | 7310262 | 2 | 9  | 18 | AC   | 24 | 4  |
| 190309 | 23 | 7316274 | 7316295 | 2 | 11 | 22 | TG   | 14 | 5  |
| 190311 | 23 | 7326868 | 7326888 | 3 | 7  | 21 | GAT  | 11 | 4  |
| 190314 | 23 | 7327478 | 7327489 | 2 | 6  | 12 | TC   | 24 | 3  |
| 190315 | 23 | 7327709 | 7327726 | 2 | 9  | 18 | CT   | 20 | 11 |
| 190321 | 23 | 7338776 | 7338811 | 2 | 18 | 36 | AC   | 12 | 9  |
| 190323 | 23 | 7344761 | 7344774 | 2 | 7  | 14 | TA   | 12 | 4  |

|        |    |         |         |   |    |    |      |    |    |
|--------|----|---------|---------|---|----|----|------|----|----|
| 190328 | 23 | 7357170 | 7357191 | 2 | 11 | 22 | TG   | 12 | 11 |
| 190330 | 23 | 7357770 | 7357790 | 3 | 7  | 21 | CAA  | 15 | 3  |
| 190332 | 23 | 7373964 | 7373991 | 4 | 7  | 28 | TTTA | 17 | 6  |
| 190334 | 23 | 7375833 | 7375852 | 2 | 10 | 20 | AC   | 10 | 4  |
| 190335 | 23 | 7376301 | 7376328 | 2 | 14 | 28 | TG   | 18 | 14 |
| 190337 | 23 | 7388344 | 7388419 | 4 | 19 | 76 | ATTC | 25 | 10 |
| 190346 | 23 | 7409969 | 7409982 | 2 | 7  | 14 | AC   | 30 | 5  |
| 190347 | 23 | 7410892 | 7410925 | 2 | 17 | 34 | CA   | 17 | 13 |
| 190350 | 23 | 7418039 | 7418053 | 3 | 5  | 15 | TTG  | 18 | 10 |
| 190352 | 23 | 7422936 | 7422981 | 2 | 23 | 46 | AC   | 12 | 12 |
| 190353 | 23 | 7434792 | 7434807 | 2 | 8  | 16 | AC   | 26 | 5  |
| 190358 | 23 | 7446670 | 7446689 | 4 | 5  | 20 | AAAC | 15 | 3  |
| 190359 | 23 | 7452839 | 7452858 | 4 | 5  | 20 | GATT | 26 | 6  |
| 190364 | 23 | 7467278 | 7467297 | 2 | 10 | 20 | CA   | 16 | 8  |
| 190366 | 23 | 7470411 | 7470426 | 4 | 4  | 16 | TATG | 25 | 3  |
| 190367 | 23 | 7471706 | 7471723 | 3 | 6  | 18 | ATG  | 25 | 4  |
| 190369 | 23 | 7475279 | 7475292 | 2 | 7  | 14 | TG   | 16 | 5  |
| 190372 | 23 | 7480369 | 7480383 | 3 | 5  | 15 | CTG  | 27 | 5  |
| 190382 | 23 | 7526089 | 7526104 | 2 | 8  | 16 | TG   | 16 | 9  |
| 190384 | 23 | 7531254 | 7531271 | 2 | 9  | 18 | CT   | 18 | 7  |
| 190385 | 23 | 7532152 | 7532171 | 4 | 5  | 20 | GATG | 24 | 15 |
| 190388 | 23 | 7539513 | 7539538 | 2 | 13 | 26 | CA   | 17 | 10 |
| 190389 | 23 | 7540174 | 7540197 | 4 | 6  | 24 | AAAC | 29 | 3  |
| 190391 | 23 | 7543340 | 7543354 | 3 | 5  | 15 | TTA  | 24 | 4  |
| 190394 | 23 | 7549053 | 7549094 | 2 | 21 | 42 | CA   | 12 | 13 |
| 190396 | 23 | 7550174 | 7550193 | 2 | 10 | 20 | CA   | 14 | 15 |
| 190401 | 23 | 7554314 | 7554337 | 2 | 12 | 24 | AT   | 6  | 6  |
| 190407 | 23 | 7564215 | 7564226 | 2 | 6  | 12 | AT   | 17 | 4  |
| 190411 | 23 | 7585951 | 7585966 | 4 | 4  | 16 | CACG | 7  | 6  |
| 190415 | 23 | 7588295 | 7588308 | 2 | 7  | 14 | TA   | 12 | 4  |
| 190417 | 23 | 7593256 | 7593279 | 4 | 6  | 24 | ATCC | 17 | 4  |
| 190422 | 23 | 7607277 | 7607308 | 2 | 16 | 32 | GT   | 24 | 14 |
| 190423 | 23 | 7616025 | 7616048 | 2 | 12 | 24 | CA   | 18 | 15 |
| 190428 | 23 | 7625227 | 7625262 | 2 | 18 | 36 | TG   | 10 | 13 |
| 190429 | 23 | 7636100 | 7636129 | 2 | 15 | 30 | GT   | 16 | 10 |
| 190431 | 23 | 7638692 | 7638718 | 3 | 9  | 27 | CTC  | 29 | 3  |
| 190440 | 23 | 7646620 | 7646641 | 2 | 11 | 22 | TG   | 15 | 4  |
| 190457 | 23 | 7685081 | 7685114 | 2 | 17 | 34 | TG   | 10 | 6  |
| 190469 | 23 | 7705970 | 7706005 | 3 | 12 | 36 | AAC  | 15 | 8  |
| 190471 | 23 | 7708816 | 7708833 | 2 | 9  | 18 | CA   | 8  | 8  |
| 190476 | 23 | 7713462 | 7713477 | 2 | 8  | 16 | CA   | 12 | 3  |
| 190484 | 23 | 7739278 | 7739298 | 3 | 7  | 21 | TGT  | 30 | 3  |
| 190491 | 23 | 7755047 | 7755078 | 2 | 16 | 32 | GT   | 6  | 7  |
| 190498 | 23 | 7780471 | 7780484 | 2 | 7  | 14 | GA   | 29 | 3  |
| 190499 | 23 | 7782418 | 7782457 | 2 | 20 | 40 | GT   | 19 | 19 |
| 190500 | 23 | 7783669 | 7783708 | 4 | 10 | 40 | CACG | 24 | 20 |
| 190501 | 23 | 7784497 | 7784538 | 2 | 21 | 42 | TG   | 11 | 11 |
| 190514 | 23 | 7805999 | 7806010 | 2 | 6  | 12 | GA   | 29 | 4  |
| 190516 | 23 | 7811509 | 7811540 | 2 | 16 | 32 | CA   | 16 | 12 |
| 190518 | 23 | 7813417 | 7813434 | 3 | 6  | 18 | CTT  | 29 | 5  |
| 190521 | 23 | 7817618 | 7817631 | 2 | 7  | 14 | TA   | 17 | 3  |

|        |    |         |         |   |    |    |      |    |    |
|--------|----|---------|---------|---|----|----|------|----|----|
| 190522 | 23 | 7820229 | 7820242 | 2 | 7  | 14 | GT   | 24 | 3  |
| 190533 | 23 | 7847885 | 7847904 | 2 | 10 | 20 | AG   | 29 | 9  |
| 190534 | 23 | 7849898 | 7849913 | 2 | 8  | 16 | TG   | 24 | 14 |
| 190551 | 23 | 7873127 | 7873144 | 3 | 6  | 18 | TGA  | 26 | 9  |
| 190555 | 23 | 7877690 | 7877705 | 2 | 8  | 16 | TG   | 9  | 4  |
| 190556 | 23 | 7878635 | 7878662 | 2 | 14 | 28 | AC   | 9  | 6  |
| 190569 | 23 | 7893804 | 7893833 | 2 | 15 | 30 | GA   | 21 | 12 |
| 190571 | 23 | 7895965 | 7895978 | 2 | 7  | 14 | CT   | 25 | 4  |
| 190576 | 24 | 3962    | 3981    | 2 | 10 | 20 | CA   | 20 | 4  |
| 190581 | 24 | 29141   | 29161   | 3 | 7  | 21 | ATC  | 21 | 4  |
| 190583 | 24 | 32249   | 32281   | 3 | 11 | 33 | CTT  | 9  | 5  |
| 190596 | 24 | 89597   | 89629   | 3 | 11 | 33 | ATA  | 7  | 4  |
| 190598 | 24 | 93824   | 93853   | 2 | 15 | 30 | TG   | 11 | 10 |
| 190600 | 24 | 94965   | 94982   | 2 | 9  | 18 | AC   | 15 | 5  |
| 190601 | 24 | 94985   | 95000   | 2 | 8  | 16 | AC   | 17 | 4  |
| 190603 | 24 | 95641   | 95660   | 2 | 10 | 20 | CA   | 27 | 4  |
| 190604 | 24 | 101050  | 101067  | 2 | 9  | 18 | AC   | 28 | 6  |
| 190605 | 24 | 102229  | 102256  | 2 | 14 | 28 | TG   | 18 | 13 |
| 190609 | 24 | 108340  | 108357  | 2 | 9  | 18 | TG   | 25 | 4  |
| 190612 | 24 | 113787  | 113810  | 2 | 12 | 24 | GT   | 18 | 11 |
| 190613 | 24 | 115096  | 115109  | 2 | 7  | 14 | CA   | 21 | 5  |
| 190619 | 24 | 127358  | 127393  | 3 | 12 | 36 | TTA  | 14 | 7  |
| 190620 | 24 | 129344  | 129389  | 2 | 23 | 46 | GT   | 13 | 12 |
| 190622 | 24 | 132283  | 132348  | 3 | 22 | 66 | TAG  | 15 | 14 |
| 190629 | 24 | 147600  | 147619  | 2 | 10 | 20 | TG   | 15 | 7  |
| 190630 | 24 | 149295  | 149310  | 2 | 8  | 16 | AC   | 33 | 3  |
| 190631 | 24 | 150756  | 150770  | 3 | 5  | 15 | GGA  | 23 | 3  |
| 190639 | 24 | 168322  | 168339  | 2 | 9  | 18 | AC   | 18 | 6  |
| 190646 | 24 | 189139  | 189162  | 4 | 6  | 24 | GCAC | 21 | 18 |
| 190667 | 24 | 240251  | 240278  | 2 | 14 | 28 | CA   | 6  | 7  |
| 190669 | 24 | 244675  | 244692  | 2 | 9  | 18 | GT   | 23 | 5  |
| 190676 | 24 | 259660  | 259687  | 2 | 14 | 28 | AC   | 10 | 6  |
| 190681 | 24 | 269784  | 269799  | 2 | 8  | 16 | TG   | 21 | 4  |
| 190687 | 24 | 293378  | 293391  | 2 | 7  | 14 | GT   | 24 | 3  |
| 190688 | 24 | 294175  | 294204  | 2 | 15 | 30 | TG   | 15 | 4  |
| 190689 | 24 | 294366  | 294379  | 2 | 7  | 14 | GT   | 26 | 8  |
| 190690 | 24 | 294517  | 294544  | 2 | 14 | 28 | CA   | 10 | 9  |
| 190691 | 24 | 297184  | 297197  | 2 | 7  | 14 | GT   | 23 | 7  |
| 190692 | 24 | 300774  | 300788  | 3 | 5  | 15 | TTA  | 15 | 5  |
| 190709 | 24 | 325820  | 325847  | 2 | 14 | 28 | GT   | 12 | 3  |
| 190712 | 24 | 330876  | 330899  | 2 | 12 | 24 | GT   | 16 | 7  |
| 190715 | 24 | 349785  | 349808  | 2 | 12 | 24 | TG   | 17 | 9  |
| 190719 | 24 | 361053  | 361082  | 3 | 10 | 30 | ATC  | 28 | 5  |
| 190724 | 24 | 361579  | 361608  | 2 | 15 | 30 | CA   | 7  | 11 |
| 190725 | 24 | 366339  | 366354  | 2 | 8  | 16 | TC   | 17 | 5  |
| 190726 | 24 | 366355  | 366372  | 2 | 9  | 18 | AC   | 17 | 6  |
| 190728 | 24 | 367362  | 367395  | 2 | 17 | 34 | TG   | 7  | 8  |
| 190730 | 24 | 367538  | 367559  | 2 | 11 | 22 | GT   | 13 | 9  |
| 190732 | 24 | 368539  | 368594  | 2 | 28 | 56 | CA   | 8  | 10 |
| 190734 | 24 | 373775  | 373790  | 2 | 8  | 16 | CA   | 19 | 7  |
| 190737 | 24 | 378529  | 378554  | 2 | 13 | 26 | TG   | 12 | 7  |

|        |    |        |        |   |    |    |     |    |    |
|--------|----|--------|--------|---|----|----|-----|----|----|
| 190741 | 24 | 385317 | 385332 | 2 | 8  | 16 | GT  | 25 | 5  |
| 190743 | 24 | 385712 | 385723 | 2 | 6  | 12 | AC  | 18 | 4  |
| 190750 | 24 | 399345 | 399370 | 2 | 13 | 26 | TG  | 7  | 6  |
| 190756 | 24 | 403059 | 403072 | 2 | 7  | 14 | TC  | 14 | 6  |
| 190757 | 24 | 403313 | 403336 | 2 | 12 | 24 | CA  | 6  | 8  |
| 190758 | 24 | 404256 | 404291 | 2 | 18 | 36 | AC  | 11 | 5  |
| 190760 | 24 | 405878 | 405901 | 2 | 12 | 24 | CA  | 21 | 6  |
| 190763 | 24 | 413341 | 413370 | 2 | 15 | 30 | TG  | 16 | 5  |
| 190765 | 24 | 417802 | 417817 | 2 | 8  | 16 | TC  | 24 | 7  |
| 190768 | 24 | 421420 | 421441 | 2 | 11 | 22 | GT  | 21 | 5  |
| 190773 | 24 | 428925 | 428948 | 2 | 12 | 24 | TG  | 14 | 6  |
| 190776 | 24 | 433411 | 433428 | 3 | 6  | 18 | CAA | 15 | 5  |
| 190778 | 24 | 437634 | 437663 | 2 | 15 | 30 | GT  | 17 | 14 |
| 190782 | 24 | 441395 | 441420 | 2 | 13 | 26 | AC  | 9  | 8  |
| 190784 | 24 | 441590 | 441607 | 2 | 9  | 18 | AC  | 23 | 8  |
| 190792 | 24 | 458635 | 458650 | 2 | 8  | 16 | TC  | 23 | 10 |
| 190793 | 24 | 458869 | 458884 | 2 | 8  | 16 | AT  | 16 | 6  |
| 190796 | 24 | 463623 | 463642 | 2 | 10 | 20 | AC  | 13 | 7  |
| 190797 | 24 | 463779 | 463794 | 2 | 8  | 16 | TG  | 16 | 6  |
| 190799 | 24 | 466116 | 466141 | 2 | 13 | 26 | AC  | 18 | 6  |
| 190801 | 24 | 470067 | 470106 | 2 | 20 | 40 | GT  | 15 | 13 |
| 190802 | 24 | 473606 | 473617 | 2 | 6  | 12 | CT  | 21 | 5  |
| 190803 | 24 | 479017 | 479028 | 2 | 6  | 12 | GT  | 25 | 3  |
| 190805 | 24 | 481053 | 481076 | 2 | 12 | 24 | TG  | 17 | 7  |
| 190809 | 24 | 484041 | 484054 | 2 | 7  | 14 | TG  | 18 | 4  |
| 190815 | 24 | 495576 | 495607 | 2 | 16 | 32 | CT  | 12 | 11 |
| 190817 | 24 | 498557 | 498574 | 2 | 9  | 18 | CA  | 9  | 8  |
| 190821 | 24 | 500381 | 500398 | 2 | 9  | 18 | AC  | 9  | 8  |
| 190828 | 24 | 516332 | 516353 | 2 | 11 | 22 | GA  | 11 | 9  |
| 190831 | 24 | 518208 | 518235 | 2 | 14 | 28 | TG  | 10 | 7  |
| 190839 | 24 | 533589 | 533610 | 2 | 11 | 22 | CA  | 17 | 12 |
| 190841 | 24 | 535819 | 535838 | 2 | 10 | 20 | TC  | 12 | 11 |
| 190842 | 24 | 536037 | 536050 | 2 | 7  | 14 | GT  | 19 | 9  |
| 190844 | 24 | 540033 | 540060 | 2 | 14 | 28 | AC  | 10 | 11 |
| 190845 | 24 | 540361 | 540394 | 2 | 17 | 34 | CA  | 16 | 18 |
| 190846 | 24 | 542176 | 542189 | 2 | 7  | 14 | TG  | 19 | 5  |
| 190847 | 24 | 542271 | 542282 | 2 | 6  | 12 | AC  | 26 | 6  |
| 190849 | 24 | 544637 | 544668 | 2 | 16 | 32 | AC  | 26 | 14 |
| 190850 | 24 | 545562 | 545579 | 2 | 9  | 18 | TG  | 20 | 5  |
| 190856 | 24 | 548579 | 548608 | 2 | 15 | 30 | GT  | 21 | 10 |
| 190860 | 24 | 549239 | 549262 | 2 | 12 | 24 | GT  | 18 | 6  |
| 190863 | 24 | 550530 | 550567 | 2 | 19 | 38 | TG  | 15 | 11 |
| 190866 | 24 | 550884 | 550897 | 2 | 7  | 14 | CA  | 11 | 10 |
| 190867 | 24 | 550977 | 550992 | 2 | 8  | 16 | TG  | 20 | 3  |
| 190868 | 24 | 551618 | 551649 | 2 | 16 | 32 | AG  | 12 | 11 |
| 190869 | 24 | 551809 | 551828 | 2 | 10 | 20 | CA  | 22 | 9  |
| 190870 | 24 | 552114 | 552125 | 2 | 6  | 12 | CA  | 26 | 4  |
| 190880 | 24 | 567053 | 567080 | 2 | 14 | 28 | GT  | 15 | 9  |
| 190888 | 24 | 587606 | 587635 | 2 | 15 | 30 | CA  | 8  | 9  |
| 190891 | 24 | 588828 | 588849 | 2 | 11 | 22 | CA  | 15 | 11 |
| 190892 | 24 | 588906 | 588927 | 2 | 11 | 22 | TG  | 16 | 4  |



|        |    |        |        |   |    |    |      |    |    |
|--------|----|--------|--------|---|----|----|------|----|----|
| 190894 | 24 | 589384 | 589403 | 2 | 10 | 20 | TG   | 22 | 10 |
| 190895 | 24 | 590809 | 590840 | 2 | 16 | 32 | CA   | 21 | 10 |
| 190897 | 24 | 592608 | 592635 | 2 | 14 | 28 | GT   | 13 | 9  |
| 190902 | 24 | 595460 | 595475 | 4 | 4  | 16 | AAAT | 13 | 10 |
| 190911 | 24 | 612814 | 612837 | 2 | 12 | 24 | CA   | 14 | 12 |
| 190913 | 24 | 613929 | 613942 | 2 | 7  | 14 | GA   | 29 | 4  |
| 190914 | 24 | 616904 | 616915 | 2 | 6  | 12 | TG   | 11 | 3  |
| 190917 | 24 | 644753 | 644764 | 2 | 6  | 12 | GT   | 22 | 5  |
| 190918 | 24 | 644882 | 644925 | 2 | 22 | 44 | GT   | 12 | 13 |
| 190937 | 24 | 694925 | 694968 | 2 | 22 | 44 | CA   | 10 | 7  |
| 190941 | 24 | 703549 | 703562 | 2 | 7  | 14 | GT   | 16 | 7  |
| 190950 | 24 | 714134 | 714169 | 2 | 18 | 36 | CA   | 14 | 7  |
| 190952 | 24 | 725515 | 725530 | 2 | 8  | 16 | TG   | 16 | 5  |
| 190953 | 24 | 729550 | 729579 | 2 | 15 | 30 | GT   | 14 | 10 |
| 190956 | 24 | 733858 | 733893 | 2 | 18 | 36 | CA   | 20 | 11 |
| 190959 | 24 | 734612 | 734625 | 2 | 7  | 14 | CA   | 12 | 6  |
| 190960 | 24 | 734628 | 734641 | 2 | 7  | 14 | CA   | 7  | 4  |
| 190963 | 24 | 742289 | 742312 | 4 | 6  | 24 | ATTT | 16 | 4  |
| 190964 | 24 | 747003 | 747026 | 2 | 12 | 24 | GT   | 9  | 6  |
| 190966 | 24 | 748890 | 748901 | 2 | 6  | 12 | TG   | 13 | 14 |
| 190970 | 24 | 758692 | 758707 | 4 | 4  | 16 | TTTA | 21 | 8  |
| 190973 | 24 | 763847 | 763868 | 2 | 11 | 22 | GT   | 24 | 8  |
| 190991 | 24 | 812164 | 812175 | 2 | 6  | 12 | GA   | 28 | 3  |
| 190993 | 24 | 814511 | 814530 | 4 | 5  | 20 | TTTC | 13 | 6  |
| 190999 | 24 | 835627 | 835642 | 4 | 4  | 16 | AAAC | 19 | 4  |
| 191000 | 24 | 836045 | 836058 | 2 | 7  | 14 | AT   | 6  | 5  |
| 191001 | 24 | 838304 | 838359 | 2 | 28 | 56 | TG   | 7  | 7  |
| 191004 | 24 | 845739 | 845754 | 2 | 8  | 16 | GT   | 18 | 8  |
| 191005 | 24 | 849888 | 849903 | 4 | 4  | 16 | TTTC | 21 | 6  |
| 191006 | 24 | 852303 | 852358 | 4 | 14 | 56 | TATC | 16 | 15 |
| 191007 | 24 | 854585 | 854606 | 2 | 11 | 22 | CA   | 13 | 9  |
| 191008 | 24 | 855518 | 855535 | 2 | 9  | 18 | CA   | 17 | 7  |
| 191023 | 24 | 880901 | 880932 | 4 | 8  | 32 | GAAA | 12 | 8  |
| 191024 | 24 | 881180 | 881203 | 2 | 12 | 24 | GT   | 11 | 8  |
| 191025 | 24 | 881320 | 881339 | 2 | 10 | 20 | GT   | 9  | 8  |
| 191040 | 24 | 912050 | 912077 | 4 | 7  | 28 | CAGA | 28 | 5  |
| 191062 | 24 | 933633 | 933670 | 2 | 19 | 38 | TG   | 6  | 9  |
| 191063 | 24 | 934163 | 934194 | 2 | 16 | 32 | CA   | 8  | 9  |
| 191073 | 24 | 942912 | 942931 | 2 | 10 | 20 | AG   | 11 | 4  |
| 191074 | 24 | 942960 | 942987 | 2 | 14 | 28 | GT   | 10 | 9  |
| 191077 | 24 | 948092 | 948111 | 2 | 10 | 20 | GT   | 20 | 5  |
| 191079 | 24 | 948847 | 948876 | 2 | 15 | 30 | CA   | 22 | 9  |
| 191090 | 24 | 965827 | 965838 | 2 | 6  | 12 | AC   | 14 | 9  |
| 191093 | 24 | 967146 | 967177 | 2 | 16 | 32 | TG   | 13 | 10 |
| 191094 | 24 | 967502 | 967513 | 2 | 6  | 12 | TG   | 11 | 8  |
| 191098 | 24 | 972840 | 972877 | 2 | 19 | 38 | GT   | 18 | 16 |
| 191100 | 24 | 975574 | 975591 | 3 | 6  | 18 | GAG  | 18 | 4  |
| 191104 | 24 | 980533 | 980560 | 2 | 14 | 28 | AC   | 20 | 7  |
| 191108 | 24 | 989419 | 989440 | 2 | 11 | 22 | GA   | 6  | 5  |
| 191109 | 24 | 990008 | 990029 | 2 | 11 | 22 | TG   | 24 | 8  |
| 191110 | 24 | 990598 | 990627 | 2 | 15 | 30 | TG   | 16 | 6  |

|        |    |         |         |   |    |    |      |    |    |
|--------|----|---------|---------|---|----|----|------|----|----|
| 191113 | 24 | 998831  | 998866  | 2 | 18 | 36 | CA   | 8  | 7  |
| 191123 | 24 | 1015498 | 1015539 | 2 | 21 | 42 | AC   | 9  | 7  |
| 191127 | 24 | 1020012 | 1020035 | 2 | 12 | 24 | CA   | 20 | 5  |
| 191133 | 24 | 1030987 | 1031000 | 2 | 7  | 14 | TG   | 15 | 3  |
| 191140 | 24 | 1035820 | 1035837 | 2 | 9  | 18 | GA   | 12 | 4  |
| 191141 | 24 | 1035908 | 1035941 | 2 | 17 | 34 | GT   | 6  | 6  |
| 191144 | 24 | 1050938 | 1050971 | 2 | 17 | 34 | CA   | 12 | 12 |
| 191148 | 24 | 1065720 | 1065734 | 3 | 5  | 15 | TTG  | 21 | 4  |
| 191165 | 24 | 1115176 | 1115197 | 2 | 11 | 22 | GT   | 19 | 6  |
| 191169 | 24 | 1127023 | 1127054 | 2 | 16 | 32 | TG   | 6  | 11 |
| 191179 | 24 | 1149298 | 1149312 | 3 | 5  | 15 | ATA  | 21 | 3  |
| 191180 | 24 | 1150977 | 1151000 | 2 | 12 | 24 | GT   | 21 | 10 |
| 191181 | 24 | 1155567 | 1155580 | 2 | 7  | 14 | TG   | 21 | 6  |
| 191183 | 24 | 1156781 | 1156796 | 4 | 4  | 16 | CCAT | 30 | 3  |
| 191191 | 24 | 1162563 | 1162576 | 2 | 7  | 14 | AC   | 26 | 3  |
| 191192 | 24 | 1162731 | 1162788 | 2 | 29 | 58 | GT   | 13 | 14 |
| 191197 | 24 | 1166786 | 1166797 | 2 | 6  | 12 | CA   | 19 | 3  |
| 191202 | 24 | 1169619 | 1169632 | 2 | 7  | 14 | CA   | 11 | 7  |
| 191205 | 24 | 1172973 | 1172990 | 2 | 9  | 18 | CA   | 12 | 7  |
| 191207 | 24 | 1173534 | 1173547 | 2 | 7  | 14 | GA   | 23 | 3  |
| 191232 | 24 | 1217724 | 1217741 | 2 | 9  | 18 | TG   | 23 | 4  |
| 191237 | 24 | 1223752 | 1223767 | 4 | 4  | 16 | ATGG | 29 | 3  |
| 191239 | 24 | 1225804 | 1225817 | 2 | 7  | 14 | AT   | 11 | 7  |
| 191240 | 24 | 1226503 | 1226514 | 2 | 6  | 12 | TG   | 24 | 18 |
| 191241 | 24 | 1226516 | 1226533 | 2 | 9  | 18 | GT   | 15 | 11 |
| 191242 | 24 | 1226993 | 1227046 | 2 | 27 | 54 | GT   | 12 | 8  |
| 191243 | 24 | 1227322 | 1227337 | 2 | 8  | 16 | CA   | 19 | 3  |
| 191257 | 24 | 1253403 | 1253423 | 3 | 7  | 21 | GAG  | 25 | 6  |
| 191258 | 24 | 1254507 | 1254524 | 2 | 9  | 18 | AC   | 16 | 4  |
| 191265 | 24 | 1268300 | 1268311 | 2 | 6  | 12 | TC   | 28 | 3  |
| 191269 | 24 | 1277269 | 1277302 | 2 | 17 | 34 | AC   | 8  | 12 |
| 191271 | 24 | 1278362 | 1278373 | 2 | 6  | 12 | AC   | 27 | 3  |
| 191284 | 24 | 1308532 | 1308546 | 3 | 5  | 15 | AAC  | 14 | 4  |
| 191285 | 24 | 1308547 | 1308564 | 3 | 6  | 18 | AAT  | 6  | 3  |
| 191290 | 24 | 1314477 | 1314496 | 4 | 5  | 20 | TTTG | 17 | 6  |
| 191296 | 24 | 1320011 | 1320042 | 2 | 16 | 32 | TG   | 15 | 10 |
| 191297 | 24 | 1320972 | 1320985 | 2 | 7  | 14 | CT   | 25 | 3  |
| 191301 | 24 | 1321490 | 1321521 | 2 | 16 | 32 | AC   | 12 | 7  |
| 191307 | 24 | 1325946 | 1325965 | 4 | 5  | 20 | AGAC | 21 | 4  |
| 191314 | 24 | 1334469 | 1334504 | 2 | 18 | 36 | CA   | 14 | 17 |
| 191317 | 24 | 1355742 | 1355777 | 2 | 18 | 36 | GT   | 7  | 9  |
| 191321 | 24 | 1362007 | 1362038 | 2 | 16 | 32 | AC   | 15 | 10 |
| 191323 | 24 | 1365115 | 1365146 | 2 | 16 | 32 | AC   | 11 | 12 |
| 191325 | 24 | 1365436 | 1365475 | 2 | 20 | 40 | TC   | 16 | 4  |
| 191326 | 24 | 1365512 | 1365543 | 2 | 16 | 32 | TG   | 18 | 8  |
| 191329 | 24 | 1367684 | 1367697 | 2 | 7  | 14 | AT   | 27 | 3  |
| 191330 | 24 | 1369319 | 1369360 | 3 | 14 | 42 | GAA  | 9  | 9  |
| 191331 | 24 | 1371756 | 1371767 | 2 | 6  | 12 | GT   | 26 | 4  |
| 191333 | 24 | 1374898 | 1374917 | 4 | 5  | 20 | AAAT | 24 | 6  |
| 191335 | 24 | 1378786 | 1378797 | 2 | 6  | 12 | CA   | 25 | 3  |
| 191336 | 24 | 1378898 | 1378913 | 2 | 8  | 16 | GT   | 20 | 5  |

|        |    |         |         |   |    |    |      |    |    |
|--------|----|---------|---------|---|----|----|------|----|----|
| 191340 | 24 | 1384294 | 1384307 | 2 | 7  | 14 | GT   | 32 | 4  |
| 191347 | 24 | 1391599 | 1391618 | 4 | 5  | 20 | AAAC | 25 | 4  |
| 191348 | 24 | 1391846 | 1391883 | 2 | 19 | 38 | GA   | 8  | 5  |
| 191350 | 24 | 1395553 | 1395567 | 3 | 5  | 15 | AGC  | 29 | 4  |
| 191352 | 24 | 1396886 | 1396933 | 2 | 24 | 48 | CA   | 8  | 11 |
| 191356 | 24 | 1405327 | 1405342 | 4 | 4  | 16 | GATG | 32 | 5  |
| 191359 | 24 | 1414641 | 1414656 | 2 | 8  | 16 | CA   | 16 | 5  |
| 191360 | 24 | 1415372 | 1415391 | 2 | 10 | 20 | CT   | 27 | 3  |
| 191361 | 24 | 1415568 | 1415587 | 2 | 10 | 20 | TG   | 23 | 5  |
| 191365 | 24 | 1423784 | 1423799 | 2 | 8  | 16 | TG   | 13 | 4  |
| 191381 | 24 | 1446568 | 1446591 | 2 | 12 | 24 | TG   | 16 | 13 |
| 191382 | 24 | 1446833 | 1446848 | 4 | 4  | 16 | TTTG | 18 | 5  |
| 191385 | 24 | 1453672 | 1453693 | 2 | 11 | 22 | TG   | 19 | 6  |
| 191387 | 24 | 1456274 | 1456295 | 2 | 11 | 22 | CA   | 19 | 6  |
| 191388 | 24 | 1460251 | 1460264 | 2 | 7  | 14 | TA   | 18 | 5  |
| 191389 | 24 | 1460410 | 1460430 | 3 | 7  | 21 | AAT  | 17 | 8  |
| 191394 | 24 | 1462726 | 1462749 | 2 | 12 | 24 | CT   | 13 | 3  |
| 191395 | 24 | 1463158 | 1463172 | 3 | 5  | 15 | TAA  | 11 | 5  |
| 191399 | 24 | 1465922 | 1465945 | 3 | 8  | 24 | GGT  | 21 | 5  |
| 191400 | 24 | 1466426 | 1466483 | 2 | 29 | 58 | AC   | 8  | 10 |
| 191404 | 24 | 1469229 | 1469240 | 2 | 6  | 12 | GT   | 9  | 6  |
| 191405 | 24 | 1469856 | 1469871 | 4 | 4  | 16 | GTGC | 13 | 9  |
| 191411 | 24 | 1476231 | 1476266 | 2 | 18 | 36 | GT   | 11 | 11 |
| 191412 | 24 | 1476402 | 1476421 | 2 | 10 | 20 | GT   | 17 | 6  |
| 191413 | 24 | 1476451 | 1476474 | 2 | 12 | 24 | GT   | 16 | 9  |
| 191416 | 24 | 1476941 | 1476956 | 4 | 4  | 16 | AAAG | 20 | 3  |
| 191421 | 24 | 1492703 | 1492728 | 2 | 13 | 26 | CA   | 17 | 10 |
| 191433 | 24 | 1532471 | 1532488 | 3 | 6  | 18 | GAA  | 18 | 6  |
| 191434 | 24 | 1535418 | 1535429 | 2 | 6  | 12 | CA   | 21 | 8  |
| 191435 | 24 | 1535431 | 1535446 | 2 | 8  | 16 | AC   | 20 | 6  |
| 191443 | 24 | 1546392 | 1546407 | 2 | 8  | 16 | CA   | 19 | 5  |
| 191445 | 24 | 1550659 | 1550686 | 2 | 14 | 28 | CA   | 11 | 6  |
| 191450 | 24 | 1556681 | 1556732 | 2 | 26 | 52 | TG   | 10 | 11 |
| 191455 | 24 | 1565439 | 1565468 | 2 | 15 | 30 | TG   | 14 | 13 |
| 191470 | 24 | 1584804 | 1584831 | 4 | 7  | 28 | TATC | 20 | 3  |
| 191472 | 24 | 1586257 | 1586274 | 2 | 9  | 18 | CA   | 20 | 8  |
| 191473 | 24 | 1588081 | 1588092 | 2 | 6  | 12 | TA   | 12 | 4  |
| 191475 | 24 | 1599885 | 1599902 | 3 | 6  | 18 | GAT  | 25 | 4  |
| 191476 | 24 | 1600016 | 1600027 | 2 | 6  | 12 | TG   | 22 | 4  |
| 191478 | 24 | 1603965 | 1603988 | 3 | 8  | 24 | ATG  | 18 | 6  |
| 191485 | 24 | 1619473 | 1619524 | 4 | 13 | 52 | CTAT | 15 | 8  |
| 191495 | 24 | 1644063 | 1644092 | 2 | 15 | 30 | AC   | 24 | 10 |
| 191504 | 24 | 1659444 | 1659467 | 4 | 6  | 24 | TCTG | 10 | 5  |
| 191512 | 24 | 1695086 | 1695097 | 2 | 6  | 12 | GT   | 22 | 4  |
| 191513 | 24 | 1696256 | 1696276 | 3 | 7  | 21 | CTG  | 26 | 5  |
| 191514 | 24 | 1696320 | 1696337 | 3 | 6  | 18 | AAG  | 23 | 3  |
| 191517 | 24 | 1699964 | 1700003 | 4 | 10 | 40 | GATA | 10 | 9  |
| 191521 | 24 | 1702121 | 1702180 | 2 | 30 | 60 | GT   | 9  | 12 |
| 191522 | 24 | 1709442 | 1709465 | 2 | 12 | 24 | TG   | 14 | 9  |
| 191524 | 24 | 1712975 | 1712989 | 3 | 5  | 15 | ACC  | 28 | 3  |
| 191528 | 24 | 1719353 | 1719376 | 2 | 12 | 24 | CA   | 10 | 7  |

|        |    |         |         |   |    |    |      |    |    |
|--------|----|---------|---------|---|----|----|------|----|----|
| 191532 | 24 | 1728815 | 1728829 | 3 | 5  | 15 | AGC  | 31 | 5  |
| 191539 | 24 | 1747044 | 1747061 | 2 | 9  | 18 | AC   | 25 | 4  |
| 191540 | 24 | 1750741 | 1750755 | 3 | 5  | 15 | TTG  | 6  | 4  |
| 191542 | 24 | 1751233 | 1751250 | 2 | 9  | 18 | CA   | 11 | 10 |
| 191548 | 24 | 1761692 | 1761703 | 2 | 6  | 12 | AC   | 23 | 4  |
| 191549 | 24 | 1763902 | 1763913 | 2 | 6  | 12 | TG   | 16 | 9  |
| 191550 | 24 | 1769486 | 1769501 | 2 | 8  | 16 | AC   | 27 | 5  |
| 191551 | 24 | 1777586 | 1777605 | 2 | 10 | 20 | GT   | 18 | 8  |
| 191553 | 24 | 1796893 | 1796904 | 2 | 6  | 12 | AG   | 17 | 5  |
| 191559 | 24 | 1821784 | 1821803 | 2 | 10 | 20 | AC   | 8  | 10 |
| 191561 | 24 | 1827341 | 1827364 | 3 | 8  | 24 | CTC  | 21 | 5  |
| 191572 | 24 | 1836381 | 1836418 | 2 | 19 | 38 | GT   | 7  | 9  |
| 191573 | 24 | 1836550 | 1836561 | 2 | 6  | 12 | CA   | 14 | 6  |
| 191574 | 24 | 1836562 | 1836577 | 2 | 8  | 16 | CT   | 9  | 4  |
| 191575 | 24 | 1836606 | 1836617 | 2 | 6  | 12 | CA   | 26 | 4  |
| 191582 | 24 | 1876582 | 1876597 | 2 | 8  | 16 | AG   | 18 | 4  |
| 191594 | 24 | 1908147 | 1908162 | 4 | 4  | 16 | TACA | 21 | 4  |
| 191596 | 24 | 1912443 | 1912456 | 2 | 7  | 14 | TG   | 15 | 5  |
| 191602 | 24 | 1922436 | 1922457 | 2 | 11 | 22 | TG   | 21 | 4  |
| 191606 | 24 | 1922911 | 1922924 | 2 | 7  | 14 | CA   | 18 | 6  |
| 191607 | 24 | 1924026 | 1924045 | 2 | 10 | 20 | TG   | 24 | 7  |
| 191614 | 24 | 1932524 | 1932537 | 2 | 7  | 14 | GT   | 27 | 4  |
| 191616 | 24 | 1934100 | 1934125 | 2 | 13 | 26 | TG   | 17 | 12 |
| 191618 | 24 | 1939563 | 1939580 | 3 | 6  | 18 | AAT  | 21 | 3  |
| 191626 | 24 | 1949983 | 1949994 | 2 | 6  | 12 | AT   | 13 | 3  |
| 191628 | 24 | 1954575 | 1954586 | 2 | 6  | 12 | AT   | 22 | 3  |
| 191632 | 24 | 1959228 | 1959249 | 2 | 11 | 22 | CA   | 13 | 9  |
| 191637 | 24 | 1983860 | 1983873 | 2 | 7  | 14 | GT   | 14 | 6  |
| 191638 | 24 | 1985854 | 1985874 | 3 | 7  | 21 | GGA  | 18 | 5  |
| 191640 | 24 | 1993341 | 1993352 | 2 | 6  | 12 | CA   | 28 | 3  |
| 191647 | 24 | 2047227 | 2047250 | 3 | 8  | 24 | AAC  | 24 | 12 |
| 191650 | 24 | 2047790 | 2047805 | 2 | 8  | 16 | TG   | 26 | 4  |
| 191651 | 24 | 2048658 | 2048685 | 2 | 14 | 28 | AG   | 24 | 5  |
| 191657 | 24 | 2062614 | 2062629 | 2 | 8  | 16 | GT   | 23 | 4  |
| 191658 | 24 | 2062712 | 2062737 | 2 | 13 | 26 | CA   | 20 | 9  |
| 191659 | 24 | 2065164 | 2065179 | 2 | 8  | 16 | CA   | 19 | 8  |
| 191662 | 24 | 2070656 | 2070673 | 2 | 9  | 18 | AC   | 9  | 5  |
| 191668 | 24 | 2096253 | 2096280 | 2 | 14 | 28 | AC   | 13 | 7  |
| 191677 | 24 | 2115360 | 2115391 | 2 | 16 | 32 | CA   | 16 | 12 |
| 191679 | 24 | 2123101 | 2123116 | 4 | 4  | 16 | GCAC | 26 | 5  |
| 191681 | 24 | 2124311 | 2124324 | 2 | 7  | 14 | GT   | 31 | 3  |
| 191685 | 24 | 2129401 | 2129416 | 2 | 8  | 16 | AC   | 35 | 3  |
| 191689 | 24 | 2137938 | 2137975 | 2 | 19 | 38 | TG   | 12 | 12 |
| 191690 | 24 | 2138122 | 2138133 | 2 | 6  | 12 | AC   | 22 | 6  |
| 191695 | 24 | 2147319 | 2147360 | 2 | 21 | 42 | TC   | 7  | 9  |
| 191696 | 24 | 2149717 | 2149736 | 2 | 10 | 20 | TG   | 11 | 11 |
| 191703 | 24 | 2190072 | 2190105 | 2 | 17 | 34 | AG   | 13 | 9  |
| 191707 | 24 | 2191775 | 2191796 | 2 | 11 | 22 | AG   | 21 | 5  |
| 191709 | 24 | 2196180 | 2196215 | 2 | 18 | 36 | TG   | 11 | 6  |
| 191713 | 24 | 2205194 | 2205237 | 2 | 22 | 44 | AC   | 6  | 8  |
| 191719 | 24 | 2236049 | 2236060 | 2 | 6  | 12 | CA   | 30 | 3  |

|        |    |         |         |   |    |    |      |    |    |
|--------|----|---------|---------|---|----|----|------|----|----|
| 191721 | 24 | 2241358 | 2241372 | 3 | 5  | 15 | ACA  | 22 | 4  |
| 191723 | 24 | 2258295 | 2258322 | 2 | 14 | 28 | AC   | 21 | 10 |
| 191724 | 24 | 2259922 | 2259937 | 2 | 8  | 16 | TG   | 22 | 4  |
| 191726 | 24 | 2265206 | 2265221 | 2 | 8  | 16 | TG   | 28 | 3  |
| 191729 | 24 | 2273826 | 2273837 | 2 | 6  | 12 | TG   | 27 | 7  |
| 191738 | 24 | 2289427 | 2289442 | 4 | 4  | 16 | GAAT | 27 | 3  |
| 191741 | 24 | 2296641 | 2296654 | 2 | 7  | 14 | CA   | 10 | 6  |
| 191742 | 24 | 2296657 | 2296668 | 2 | 6  | 12 | CA   | 6  | 5  |
| 191746 | 24 | 2300163 | 2300182 | 2 | 10 | 20 | AC   | 6  | 3  |
| 191748 | 24 | 2302851 | 2302864 | 2 | 7  | 14 | TG   | 18 | 4  |
| 191750 | 24 | 2313085 | 2313096 | 2 | 6  | 12 | CA   | 29 | 4  |
| 191758 | 24 | 2325992 | 2326017 | 2 | 13 | 26 | GT   | 7  | 7  |
| 191759 | 24 | 2327952 | 2327967 | 2 | 8  | 16 | TG   | 21 | 3  |
| 191761 | 24 | 2328117 | 2328160 | 4 | 11 | 44 | TTCT | 17 | 8  |
| 191771 | 24 | 2347819 | 2347846 | 2 | 14 | 28 | CA   | 17 | 5  |
| 191772 | 24 | 2348157 | 2348168 | 2 | 6  | 12 | CG   | 32 | 5  |
| 191783 | 24 | 2359462 | 2359475 | 2 | 7  | 14 | AC   | 25 | 11 |
| 191784 | 24 | 2359477 | 2359488 | 2 | 6  | 12 | CA   | 24 | 10 |
| 191786 | 24 | 2361228 | 2361249 | 2 | 11 | 22 | TG   | 6  | 9  |
| 191787 | 24 | 2361334 | 2361363 | 2 | 15 | 30 | TG   | 14 | 5  |
| 191791 | 24 | 2367405 | 2367454 | 2 | 25 | 50 | CA   | 9  | 8  |
| 191800 | 24 | 2379792 | 2379803 | 2 | 6  | 12 | GT   | 26 | 3  |
| 191801 | 24 | 2379999 | 2380014 | 2 | 8  | 16 | AC   | 19 | 6  |
| 191804 | 24 | 2384584 | 2384607 | 2 | 12 | 24 | TG   | 17 | 8  |
| 191805 | 24 | 2384893 | 2384908 | 2 | 8  | 16 | AC   | 21 | 5  |
| 191806 | 24 | 2389310 | 2389323 | 2 | 7  | 14 | TG   | 18 | 4  |
| 191811 | 24 | 2413715 | 2413735 | 3 | 7  | 21 | AAG  | 27 | 4  |
| 191815 | 24 | 2428449 | 2428474 | 2 | 13 | 26 | CA   | 10 | 12 |
| 191834 | 24 | 2447766 | 2447781 | 2 | 8  | 16 | TG   | 22 | 4  |
| 191836 | 24 | 2448154 | 2448167 | 2 | 7  | 14 | GA   | 13 | 4  |
| 191838 | 24 | 2471756 | 2471767 | 2 | 6  | 12 | TG   | 22 | 6  |
| 191846 | 24 | 2474290 | 2474303 | 2 | 7  | 14 | CA   | 18 | 3  |
| 191847 | 24 | 2474563 | 2474576 | 2 | 7  | 14 | TG   | 21 | 4  |
| 191848 | 24 | 2474692 | 2474721 | 2 | 15 | 30 | CA   | 15 | 10 |
| 191852 | 24 | 2478953 | 2478964 | 2 | 6  | 12 | TG   | 25 | 4  |
| 191853 | 24 | 2483028 | 2483049 | 2 | 11 | 22 | TG   | 11 | 4  |
| 191855 | 24 | 2485638 | 2485655 | 2 | 9  | 18 | CA   | 22 | 7  |
| 191856 | 24 | 2485690 | 2485701 | 2 | 6  | 12 | CA   | 22 | 3  |
| 191859 | 24 | 2486366 | 2486381 | 2 | 8  | 16 | CA   | 28 | 5  |
| 191864 | 24 | 2498178 | 2498215 | 2 | 19 | 38 | TG   | 14 | 7  |
| 191868 | 24 | 2505900 | 2505913 | 2 | 7  | 14 | AC   | 18 | 9  |
| 191870 | 24 | 2507726 | 2507739 | 2 | 7  | 14 | AC   | 23 | 8  |
| 191872 | 24 | 2508040 | 2508061 | 2 | 11 | 22 | GT   | 21 | 8  |
| 191873 | 24 | 2508241 | 2508274 | 2 | 17 | 34 | AG   | 12 | 9  |
| 191876 | 24 | 2510779 | 2510828 | 2 | 25 | 50 | TG   | 8  | 10 |
| 191877 | 24 | 2513417 | 2513450 | 2 | 17 | 34 | AC   | 6  | 7  |
| 191878 | 24 | 2513632 | 2513643 | 2 | 6  | 12 | AC   | 22 | 7  |
| 191883 | 24 | 2520407 | 2520430 | 2 | 12 | 24 | TG   | 12 | 4  |
| 191892 | 24 | 2527670 | 2527709 | 2 | 20 | 40 | AC   | 8  | 10 |
| 191893 | 24 | 2527786 | 2527797 | 2 | 6  | 12 | GT   | 19 | 4  |
| 191895 | 24 | 2530319 | 2530330 | 2 | 6  | 12 | AC   | 17 | 3  |

|        |    |         |         |   |    |    |      |    |    |
|--------|----|---------|---------|---|----|----|------|----|----|
| 191925 | 24 | 2609700 | 2609723 | 3 | 8  | 24 | AGG  | 24 | 4  |
| 191930 | 24 | 2621591 | 2621617 | 3 | 9  | 27 | TAC  | 13 | 10 |
| 191932 | 24 | 2628380 | 2628409 | 3 | 10 | 30 | ATC  | 27 | 5  |
| 191937 | 24 | 2637714 | 2637751 | 2 | 19 | 38 | TG   | 9  | 10 |
| 191938 | 24 | 2637832 | 2637843 | 2 | 6  | 12 | GT   | 15 | 8  |
| 191940 | 24 | 2641338 | 2641365 | 4 | 7  | 28 | TCTG | 20 | 3  |
| 191946 | 24 | 2649024 | 2649035 | 2 | 6  | 12 | GA   | 20 | 4  |
| 191950 | 24 | 2659038 | 2659057 | 2 | 10 | 20 | TG   | 28 | 9  |
| 191955 | 24 | 2663607 | 2663636 | 2 | 15 | 30 | TG   | 21 | 17 |
| 191962 | 24 | 2669030 | 2669041 | 2 | 6  | 12 | TG   | 17 | 3  |
| 191963 | 24 | 2669043 | 2669060 | 2 | 9  | 18 | GT   | 14 | 4  |
| 191964 | 24 | 2670423 | 2670442 | 4 | 5  | 20 | TTGA | 28 | 3  |
| 191966 | 24 | 2677632 | 2677651 | 2 | 10 | 20 | CA   | 20 | 9  |
| 191975 | 24 | 2688160 | 2688171 | 2 | 6  | 12 | TA   | 15 | 7  |
| 191976 | 24 | 2689981 | 2690008 | 2 | 14 | 28 | CA   | 8  | 8  |
| 191980 | 24 | 2694070 | 2694083 | 2 | 7  | 14 | AC   | 24 | 5  |
| 191990 | 24 | 2704528 | 2704547 | 2 | 10 | 20 | TG   | 9  | 8  |
| 191994 | 24 | 2706147 | 2706164 | 3 | 6  | 18 | ATG  | 10 | 7  |
| 191996 | 24 | 2708819 | 2708830 | 2 | 6  | 12 | AC   | 28 | 3  |
| 191997 | 24 | 2708937 | 2708948 | 2 | 6  | 12 | AC   | 28 | 4  |
| 191998 | 24 | 2709641 | 2709656 | 2 | 8  | 16 | TC   | 15 | 8  |
| 191999 | 24 | 2709657 | 2709668 | 2 | 6  | 12 | AC   | 9  | 5  |
| 192000 | 24 | 2709670 | 2709683 | 2 | 7  | 14 | CA   | 13 | 5  |
| 192002 | 24 | 2711208 | 2711219 | 2 | 6  | 12 | TC   | 18 | 10 |
| 192003 | 24 | 2711225 | 2711236 | 2 | 6  | 12 | CT   | 19 | 6  |
| 192006 | 24 | 2722901 | 2722926 | 2 | 13 | 26 | TC   | 18 | 12 |
| 192007 | 24 | 2724750 | 2724783 | 2 | 17 | 34 | TG   | 13 | 10 |
| 192011 | 24 | 2727166 | 2727187 | 2 | 11 | 22 | AC   | 18 | 8  |
| 192015 | 24 | 2730091 | 2730104 | 2 | 7  | 14 | CT   | 13 | 6  |
| 192023 | 24 | 2735750 | 2735761 | 2 | 6  | 12 | CT   | 17 | 3  |
| 192024 | 24 | 2736514 | 2736537 | 2 | 12 | 24 | TG   | 14 | 6  |
| 192027 | 24 | 2743167 | 2743184 | 2 | 9  | 18 | GT   | 30 | 5  |
| 192029 | 24 | 2744677 | 2744692 | 2 | 8  | 16 | TG   | 19 | 4  |
| 192033 | 24 | 2749529 | 2749546 | 3 | 6  | 18 | CCT  | 29 | 3  |
| 192036 | 24 | 2752790 | 2752817 | 2 | 14 | 28 | CA   | 14 | 7  |
| 192037 | 24 | 2755774 | 2755787 | 2 | 7  | 14 | TG   | 14 | 13 |
| 192040 | 24 | 2760647 | 2760670 | 3 | 8  | 24 | AGG  | 15 | 3  |
| 192042 | 24 | 2763998 | 2764012 | 3 | 5  | 15 | CCT  | 17 | 3  |
| 192054 | 24 | 2779555 | 2779590 | 2 | 18 | 36 | TG   | 14 | 11 |
| 192055 | 24 | 2780151 | 2780184 | 2 | 17 | 34 | GT   | 20 | 10 |
| 192058 | 24 | 2796188 | 2796202 | 3 | 5  | 15 | AAG  | 15 | 4  |
| 192063 | 24 | 2802183 | 2802198 | 2 | 8  | 16 | AC   | 18 | 9  |
| 192081 | 24 | 2836910 | 2836921 | 2 | 6  | 12 | TC   | 22 | 3  |
| 192082 | 24 | 2838338 | 2838357 | 2 | 10 | 20 | GT   | 22 | 6  |
| 192086 | 24 | 2843846 | 2843859 | 2 | 7  | 14 | CA   | 23 | 6  |
| 192088 | 24 | 2847177 | 2847198 | 2 | 11 | 22 | TG   | 17 | 8  |
| 192092 | 24 | 2854002 | 2854043 | 2 | 21 | 42 | GT   | 17 | 10 |
| 192093 | 24 | 2856003 | 2856026 | 3 | 8  | 24 | AAT  | 8  | 4  |
| 192094 | 24 | 2859096 | 2859147 | 2 | 26 | 52 | AC   | 6  | 9  |
| 192095 | 24 | 2859466 | 2859493 | 2 | 14 | 28 | AC   | 11 | 7  |
| 192102 | 24 | 2889631 | 2889648 | 2 | 9  | 18 | CA   | 10 | 6  |

|        |    |         |         |   |    |    |      |    |    |
|--------|----|---------|---------|---|----|----|------|----|----|
| 192104 | 24 | 2895262 | 2895289 | 4 | 7  | 28 | ATGG | 21 | 8  |
| 192105 | 24 | 2898114 | 2898133 | 2 | 10 | 20 | TG   | 18 | 12 |
| 192106 | 24 | 2899933 | 2899958 | 2 | 13 | 26 | TG   | 11 | 6  |
| 192107 | 24 | 2900648 | 2900665 | 2 | 9  | 18 | GT   | 19 | 4  |
| 192108 | 24 | 2903690 | 2903705 | 4 | 4  | 16 | AAAC | 10 | 4  |
| 192112 | 24 | 2907746 | 2907769 | 2 | 12 | 24 | GT   | 13 | 5  |
| 192127 | 24 | 2965671 | 2965686 | 2 | 8  | 16 | CA   | 24 | 5  |
| 192128 | 24 | 2967786 | 2967806 | 3 | 7  | 21 | CTA  | 14 | 7  |
| 192129 | 24 | 2968798 | 2968833 | 3 | 12 | 36 | ACT  | 13 | 9  |
| 192133 | 24 | 2973887 | 2973908 | 2 | 11 | 22 | CA   | 24 | 12 |
| 192136 | 24 | 2977518 | 2977533 | 4 | 4  | 16 | AGGC | 32 | 5  |
| 192139 | 24 | 2985578 | 2985601 | 2 | 12 | 24 | AC   | 9  | 3  |
| 192140 | 24 | 2988536 | 2988555 | 2 | 10 | 20 | GT   | 18 | 10 |
| 192142 | 24 | 3008670 | 3008689 | 4 | 5  | 20 | GACA | 21 | 5  |
| 192153 | 24 | 3070981 | 3071000 | 2 | 10 | 20 | CA   | 13 | 4  |
| 192157 | 24 | 3075573 | 3075584 | 2 | 6  | 12 | AC   | 19 | 3  |
| 192172 | 24 | 3111787 | 3111818 | 2 | 16 | 32 | AC   | 9  | 8  |
| 192180 | 24 | 3114645 | 3114676 | 2 | 16 | 32 | CA   | 13 | 6  |
| 192181 | 24 | 3116961 | 3116972 | 2 | 6  | 12 | TG   | 23 | 3  |
| 192201 | 24 | 3145965 | 3145980 | 4 | 4  | 16 | AAAG | 14 | 4  |
| 192203 | 24 | 3146332 | 3146349 | 2 | 9  | 18 | GT   | 25 | 7  |
| 192204 | 24 | 3148880 | 3148921 | 2 | 21 | 42 | GT   | 15 | 10 |
| 192208 | 24 | 3156871 | 3156892 | 2 | 11 | 22 | AC   | 14 | 10 |
| 192215 | 24 | 3168780 | 3168793 | 2 | 7  | 14 | CA   | 19 | 5  |
| 192232 | 24 | 3211457 | 3211472 | 2 | 8  | 16 | TG   | 7  | 6  |
| 192233 | 24 | 3212902 | 3212917 | 2 | 8  | 16 | CA   | 22 | 7  |
| 192234 | 24 | 3214241 | 3214260 | 2 | 10 | 20 | TG   | 22 | 5  |
| 192236 | 24 | 3214513 | 3214536 | 2 | 12 | 24 | TG   | 9  | 6  |
| 192238 | 24 | 3231056 | 3231087 | 2 | 16 | 32 | TG   | 6  | 5  |
| 192240 | 24 | 3234547 | 3234564 | 2 | 9  | 18 | AC   | 18 | 9  |
| 192241 | 24 | 3235082 | 3235095 | 2 | 7  | 14 | GT   | 10 | 3  |
| 192243 | 24 | 3236104 | 3236118 | 3 | 5  | 15 | GTT  | 16 | 6  |
| 192245 | 24 | 3238680 | 3238705 | 2 | 13 | 26 | AC   | 20 | 7  |
| 192250 | 24 | 3251640 | 3251667 | 2 | 14 | 28 | TG   | 16 | 3  |
| 192269 | 24 | 3289934 | 3289957 | 4 | 6  | 24 | TCCA | 27 | 6  |
| 192277 | 24 | 3308528 | 3308547 | 2 | 10 | 20 | AG   | 14 | 6  |
| 192284 | 24 | 3333720 | 3333739 | 4 | 5  | 20 | ACTC | 25 | 4  |
| 192286 | 24 | 3344733 | 3344762 | 3 | 10 | 30 | GCA  | 23 | 9  |
| 192303 | 24 | 3419642 | 3419681 | 2 | 20 | 40 | TC   | 10 | 11 |
| 192311 | 24 | 3450895 | 3450914 | 4 | 5  | 20 | TTGA | 22 | 5  |
| 192319 | 24 | 3481180 | 3481201 | 2 | 11 | 22 | CT   | 10 | 11 |
| 192325 | 24 | 3504076 | 3504095 | 4 | 5  | 20 | AAAT | 16 | 3  |
| 192327 | 24 | 3506204 | 3506223 | 2 | 10 | 20 | TG   | 26 | 4  |
| 192335 | 24 | 3553227 | 3553244 | 2 | 9  | 18 | CA   | 22 | 4  |
| 192336 | 24 | 3553989 | 3554004 | 4 | 4  | 16 | CCCT | 6  | 3  |
| 192337 | 24 | 3571376 | 3571393 | 3 | 6  | 18 | GAA  | 20 | 8  |
| 192338 | 24 | 3571472 | 3571486 | 3 | 5  | 15 | AAG  | 20 | 4  |
| 192340 | 24 | 3574325 | 3574344 | 2 | 10 | 20 | GT   | 15 | 15 |
| 192345 | 24 | 3583167 | 3583208 | 2 | 21 | 42 | TG   | 8  | 9  |
| 192347 | 24 | 3594977 | 3594996 | 2 | 10 | 20 | GT   | 17 | 10 |
| 192348 | 24 | 3600757 | 3600777 | 3 | 7  | 21 | TCA  | 16 | 3  |

|        |    |         |         |   |    |    |      |    |    |
|--------|----|---------|---------|---|----|----|------|----|----|
| 192349 | 24 | 3602410 | 3602433 | 4 | 6  | 24 | TACA | 12 | 7  |
| 192350 | 24 | 3602729 | 3602752 | 2 | 12 | 24 | AC   | 19 | 12 |
| 192351 | 24 | 3603607 | 3603621 | 3 | 5  | 15 | TGC  | 28 | 4  |
| 192357 | 24 | 3618980 | 3618997 | 2 | 9  | 18 | CA   | 14 | 14 |
| 192360 | 24 | 3627354 | 3627371 | 2 | 9  | 18 | CA   | 19 | 13 |
| 192365 | 24 | 3639272 | 3639287 | 4 | 4  | 16 | AAAC | 24 | 3  |
| 192368 | 24 | 3642439 | 3642456 | 3 | 6  | 18 | CTG  | 17 | 3  |
| 192375 | 24 | 3657091 | 3657114 | 2 | 12 | 24 | GT   | 17 | 14 |
| 192376 | 24 | 3661905 | 3661940 | 2 | 18 | 36 | TG   | 15 | 11 |
| 192379 | 24 | 3665676 | 3665690 | 3 | 5  | 15 | TCT  | 26 | 6  |
| 192380 | 24 | 3668809 | 3668822 | 2 | 7  | 14 | TG   | 21 | 8  |
| 192384 | 24 | 3676655 | 3676672 | 3 | 6  | 18 | TAT  | 8  | 4  |
| 192398 | 24 | 3704763 | 3704774 | 2 | 6  | 12 | TA   | 17 | 6  |
| 192400 | 24 | 3710394 | 3710409 | 2 | 8  | 16 | TG   | 21 | 8  |
| 192402 | 24 | 3718660 | 3718701 | 2 | 21 | 42 | AC   | 11 | 12 |
| 192404 | 24 | 3723603 | 3723626 | 2 | 12 | 24 | CA   | 20 | 12 |
| 192405 | 24 | 3725197 | 3725214 | 2 | 9  | 18 | GT   | 17 | 5  |
| 192407 | 24 | 3735282 | 3735297 | 2 | 8  | 16 | TG   | 6  | 3  |
| 192411 | 24 | 3743945 | 3743964 | 4 | 5  | 20 | ATAC | 23 | 5  |
| 192412 | 24 | 3745968 | 3745985 | 2 | 9  | 18 | AC   | 14 | 10 |
| 192420 | 24 | 3776111 | 3776122 | 2 | 6  | 12 | CA   | 18 | 4  |
| 192424 | 24 | 3780343 | 3780356 | 2 | 7  | 14 | AC   | 14 | 4  |
| 192425 | 24 | 3784579 | 3784594 | 4 | 4  | 16 | ATTT | 25 | 7  |
| 192427 | 24 | 3787961 | 3787990 | 2 | 15 | 30 | TG   | 12 | 8  |
| 192433 | 24 | 3804207 | 3804254 | 2 | 24 | 48 | GA   | 8  | 9  |
| 192434 | 24 | 3804523 | 3804537 | 3 | 5  | 15 | TGC  | 18 | 3  |
| 192441 | 24 | 3825646 | 3825657 | 2 | 6  | 12 | AT   | 22 | 11 |
| 192446 | 24 | 3847127 | 3847158 | 2 | 16 | 32 | GT   | 14 | 16 |
| 192453 | 24 | 3850222 | 3850243 | 2 | 11 | 22 | CA   | 13 | 6  |
| 192459 | 24 | 3865648 | 3865659 | 2 | 6  | 12 | AG   | 34 | 4  |
| 192461 | 24 | 3866683 | 3866697 | 3 | 5  | 15 | TTG  | 22 | 4  |
| 192463 | 24 | 3872011 | 3872038 | 2 | 14 | 28 | GT   | 6  | 5  |
| 192464 | 24 | 3873279 | 3873298 | 2 | 10 | 20 | TG   | 21 | 6  |
| 192465 | 24 | 3875445 | 3875470 | 2 | 13 | 26 | CA   | 15 | 7  |
| 192467 | 24 | 3882096 | 3882109 | 2 | 7  | 14 | TG   | 28 | 6  |
| 192468 | 24 | 3882281 | 3882296 | 2 | 8  | 16 | AC   | 9  | 6  |
| 192471 | 24 | 3883015 | 3883038 | 3 | 8  | 24 | GGA  | 21 | 4  |
| 192474 | 24 | 3884389 | 3884402 | 2 | 7  | 14 | GA   | 20 | 4  |
| 192478 | 24 | 3886287 | 3886304 | 2 | 9  | 18 | TG   | 22 | 6  |
| 192480 | 24 | 3889567 | 3889580 | 2 | 7  | 14 | CA   | 15 | 7  |
| 192481 | 24 | 3890540 | 3890554 | 3 | 5  | 15 | GGT  | 16 | 3  |
| 192486 | 24 | 3895442 | 3895455 | 2 | 7  | 14 | AT   | 7  | 3  |
| 192493 | 24 | 3905903 | 3905918 | 2 | 8  | 16 | AG   | 26 | 6  |
| 192495 | 24 | 3910724 | 3910738 | 3 | 5  | 15 | CTG  | 11 | 3  |
| 192509 | 24 | 3957551 | 3957568 | 2 | 9  | 18 | GT   | 14 | 11 |
| 192525 | 24 | 4019425 | 4019439 | 3 | 5  | 15 | TGC  | 28 | 3  |
| 192526 | 24 | 4020786 | 4020806 | 3 | 7  | 21 | CTG  | 30 | 4  |
| 192531 | 24 | 4038723 | 4038754 | 2 | 16 | 32 | TG   | 10 | 10 |
| 192532 | 24 | 4038987 | 4038998 | 2 | 6  | 12 | GT   | 21 | 3  |
| 192534 | 24 | 4053637 | 4053648 | 2 | 6  | 12 | GT   | 14 | 5  |
| 192535 | 24 | 4053795 | 4053822 | 2 | 14 | 28 | TG   | 10 | 11 |



|        |    |         |         |   |    |    |      |    |    |
|--------|----|---------|---------|---|----|----|------|----|----|
| 192536 | 24 | 4053971 | 4053988 | 2 | 9  | 18 | GT   | 15 | 8  |
| 192538 | 24 | 4055479 | 4055494 | 2 | 8  | 16 | GT   | 17 | 9  |
| 192541 | 24 | 4060996 | 4061007 | 2 | 6  | 12 | GT   | 15 | 8  |
| 192542 | 24 | 4061127 | 4061168 | 2 | 21 | 42 | GT   | 18 | 10 |
| 192544 | 24 | 4063405 | 4063422 | 2 | 9  | 18 | AC   | 19 | 7  |
| 192545 | 24 | 4064973 | 4065002 | 2 | 15 | 30 | GT   | 16 | 19 |
| 192546 | 24 | 4065344 | 4065359 | 2 | 8  | 16 | GT   | 19 | 11 |
| 192547 | 24 | 4067584 | 4067611 | 2 | 14 | 28 | TG   | 12 | 4  |
| 192548 | 24 | 4067715 | 4067776 | 2 | 31 | 62 | TG   | 9  | 13 |
| 192549 | 24 | 4067895 | 4067912 | 2 | 9  | 18 | CA   | 19 | 8  |
| 192550 | 24 | 4068079 | 4068090 | 2 | 6  | 12 | AC   | 13 | 3  |
| 192552 | 24 | 4070058 | 4070099 | 2 | 21 | 42 | AC   | 14 | 12 |
| 192553 | 24 | 4070549 | 4070574 | 2 | 13 | 26 | TG   | 28 | 6  |
| 192559 | 24 | 4076467 | 4076496 | 2 | 15 | 30 | GT   | 14 | 14 |
| 192560 | 24 | 4076604 | 4076625 | 2 | 11 | 22 | CA   | 13 | 11 |
| 192562 | 24 | 4076976 | 4077017 | 2 | 21 | 42 | CT   | 6  | 6  |
| 192567 | 24 | 4084199 | 4084226 | 4 | 7  | 28 | TCTA | 20 | 9  |
| 192568 | 24 | 4084487 | 4084508 | 2 | 11 | 22 | AC   | 15 | 8  |
| 192571 | 24 | 4085523 | 4085546 | 2 | 12 | 24 | TG   | 18 | 8  |
| 192573 | 24 | 4087994 | 4088009 | 2 | 8  | 16 | GT   | 19 | 6  |
| 192574 | 24 | 4088301 | 4088326 | 2 | 13 | 26 | TG   | 13 | 7  |
| 192575 | 24 | 4090013 | 4090033 | 3 | 7  | 21 | GTA  | 28 | 5  |
| 192583 | 24 | 4090828 | 4090843 | 2 | 8  | 16 | CA   | 26 | 11 |
| 192587 | 24 | 4097485 | 4097496 | 2 | 6  | 12 | GT   | 25 | 5  |
| 192591 | 24 | 4099516 | 4099533 | 2 | 9  | 18 | CA   | 23 | 4  |
| 192592 | 24 | 4101254 | 4101271 | 2 | 9  | 18 | TG   | 14 | 6  |
| 192593 | 24 | 4101381 | 4101404 | 2 | 12 | 24 | CA   | 11 | 10 |
| 192594 | 24 | 4101563 | 4101576 | 2 | 7  | 14 | AC   | 21 | 7  |
| 192595 | 24 | 4102772 | 4102791 | 2 | 10 | 20 | TG   | 13 | 7  |
| 192596 | 24 | 4103391 | 4103410 | 2 | 10 | 20 | GT   | 16 | 8  |
| 192597 | 24 | 4103598 | 4103612 | 3 | 5  | 15 | GGA  | 31 | 3  |
| 192612 | 24 | 4113141 | 4113188 | 2 | 24 | 48 | TG   | 13 | 11 |
| 192613 | 24 | 4113285 | 4113300 | 2 | 8  | 16 | GA   | 21 | 3  |
| 192614 | 24 | 4120265 | 4120296 | 2 | 16 | 32 | CT   | 13 | 10 |
| 192615 | 24 | 4120359 | 4120372 | 2 | 7  | 14 | GT   | 21 | 6  |
| 192616 | 24 | 4120522 | 4120533 | 2 | 6  | 12 | GT   | 24 | 3  |
| 192621 | 24 | 4123821 | 4123832 | 2 | 6  | 12 | GA   | 20 | 5  |
| 192625 | 24 | 4124103 | 4124120 | 2 | 9  | 18 | CA   | 17 | 6  |
| 192626 | 24 | 4124268 | 4124283 | 2 | 8  | 16 | TG   | 22 | 5  |
| 192628 | 24 | 4127065 | 4127088 | 2 | 12 | 24 | CA   | 15 | 11 |
| 192629 | 24 | 4127312 | 4127341 | 2 | 15 | 30 | CA   | 14 | 5  |
| 192635 | 24 | 4134683 | 4134696 | 2 | 7  | 14 | CT   | 12 | 4  |
| 192640 | 24 | 4136936 | 4136949 | 2 | 7  | 14 | GT   | 28 | 3  |
| 192641 | 24 | 4137126 | 4137147 | 2 | 11 | 22 | GT   | 17 | 7  |
| 192642 | 24 | 4137288 | 4137321 | 2 | 17 | 34 | TG   | 11 | 15 |
| 192644 | 24 | 4141653 | 4141666 | 2 | 7  | 14 | TG   | 25 | 7  |
| 192646 | 24 | 4144701 | 4144714 | 2 | 7  | 14 | AG   | 26 | 3  |
| 192648 | 24 | 4147675 | 4147690 | 2 | 8  | 16 | CA   | 21 | 7  |
| 192658 | 24 | 4156554 | 4156569 | 2 | 8  | 16 | AC   | 21 | 4  |
| 192660 | 24 | 4159370 | 4159407 | 2 | 19 | 38 | AC   | 19 | 9  |
| 192664 | 24 | 4165148 | 4165181 | 2 | 17 | 34 | GT   | 13 | 16 |

|        |    |         |         |   |    |    |      |    |    |
|--------|----|---------|---------|---|----|----|------|----|----|
| 192667 | 24 | 4168633 | 4168648 | 2 | 8  | 16 | AC   | 28 | 5  |
| 192669 | 24 | 4171830 | 4171853 | 2 | 12 | 24 | GT   | 24 | 7  |
| 192670 | 24 | 4171984 | 4172001 | 2 | 9  | 18 | CA   | 22 | 8  |
| 192672 | 24 | 4172190 | 4172203 | 2 | 7  | 14 | TC   | 18 | 4  |
| 192674 | 24 | 4174093 | 4174108 | 2 | 8  | 16 | GT   | 22 | 6  |
| 192675 | 24 | 4174205 | 4174220 | 2 | 8  | 16 | CA   | 19 | 6  |
| 192681 | 24 | 4174848 | 4174875 | 2 | 14 | 28 | AG   | 15 | 10 |
| 192682 | 24 | 4176243 | 4176260 | 2 | 9  | 18 | TG   | 24 | 3  |
| 192684 | 24 | 4178147 | 4178172 | 2 | 13 | 26 | GT   | 13 | 7  |
| 192685 | 24 | 4178303 | 4178320 | 2 | 9  | 18 | TG   | 18 | 11 |
| 192688 | 24 | 4179313 | 4179342 | 2 | 15 | 30 | GT   | 18 | 5  |
| 192689 | 24 | 4179402 | 4179427 | 2 | 13 | 26 | TG   | 10 | 13 |
| 192691 | 24 | 4179816 | 4179831 | 2 | 8  | 16 | CA   | 17 | 5  |
| 192693 | 24 | 4180766 | 4180781 | 2 | 8  | 16 | TG   | 19 | 8  |
| 192694 | 24 | 4180832 | 4180853 | 2 | 11 | 22 | GT   | 15 | 4  |
| 192695 | 24 | 4180949 | 4180964 | 2 | 8  | 16 | TG   | 23 | 6  |
| 192697 | 24 | 4181347 | 4181360 | 2 | 7  | 14 | GT   | 30 | 3  |
| 192699 | 24 | 4183339 | 4183354 | 2 | 8  | 16 | TG   | 25 | 5  |
| 192703 | 24 | 4184049 | 4184064 | 2 | 8  | 16 | GT   | 17 | 11 |
| 192708 | 24 | 4188773 | 4188794 | 2 | 11 | 22 | TG   | 15 | 8  |
| 192709 | 24 | 4189117 | 4189134 | 2 | 9  | 18 | GT   | 20 | 4  |
| 192711 | 24 | 4190776 | 4190797 | 2 | 11 | 22 | TG   | 10 | 4  |
| 192715 | 24 | 4192871 | 4192896 | 2 | 13 | 26 | TG   | 20 | 11 |
| 192719 | 24 | 4194901 | 4194918 | 3 | 6  | 18 | CTG  | 25 | 3  |
| 192727 | 24 | 4198071 | 4198084 | 2 | 7  | 14 | CT   | 25 | 7  |
| 192728 | 24 | 4199503 | 4199518 | 2 | 8  | 16 | AC   | 27 | 7  |
| 192729 | 24 | 4199985 | 4200004 | 2 | 10 | 20 | GT   | 15 | 12 |
| 192731 | 24 | 4200241 | 4200254 | 2 | 7  | 14 | TG   | 28 | 3  |
| 192732 | 24 | 4201337 | 4201362 | 2 | 13 | 26 | TG   | 16 | 6  |
| 192737 | 24 | 4202241 | 4202268 | 4 | 7  | 28 | ATTG | 18 | 4  |
| 192738 | 24 | 4203760 | 4203791 | 2 | 16 | 32 | AC   | 10 | 10 |
| 192740 | 24 | 4208798 | 4208815 | 2 | 9  | 18 | TG   | 23 | 4  |
| 192741 | 24 | 4208859 | 4208882 | 2 | 12 | 24 | GT   | 18 | 4  |
| 192746 | 24 | 4211298 | 4211311 | 2 | 7  | 14 | GT   | 26 | 9  |
| 192754 | 24 | 4219619 | 4219636 | 2 | 9  | 18 | GT   | 12 | 10 |
| 192755 | 24 | 4219758 | 4219775 | 2 | 9  | 18 | TG   | 8  | 8  |
| 192756 | 24 | 4220661 | 4220700 | 2 | 20 | 40 | AC   | 7  | 9  |
| 192761 | 24 | 4238654 | 4238667 | 2 | 7  | 14 | TG   | 22 | 3  |
| 192762 | 24 | 4238721 | 4238736 | 2 | 8  | 16 | GT   | 24 | 6  |
| 192768 | 24 | 4247438 | 4247465 | 2 | 14 | 28 | TC   | 6  | 6  |
| 192769 | 24 | 4249107 | 4249118 | 2 | 6  | 12 | GA   | 25 | 3  |
| 192771 | 24 | 4249995 | 4250016 | 2 | 11 | 22 | CT   | 23 | 5  |
| 192772 | 24 | 4251904 | 4251925 | 2 | 11 | 22 | TG   | 17 | 10 |
| 192775 | 24 | 4254367 | 4254418 | 2 | 26 | 52 | TC   | 6  | 7  |
| 192777 | 24 | 4260501 | 4260524 | 3 | 8  | 24 | ATA  | 12 | 6  |
| 192793 | 24 | 4287203 | 4287223 | 3 | 7  | 21 | TCC  | 14 | 5  |
| 192798 | 24 | 4292005 | 4292020 | 4 | 4  | 16 | TTTA | 20 | 9  |
| 192807 | 24 | 4318526 | 4318539 | 2 | 7  | 14 | AC   | 24 | 11 |
| 192815 | 24 | 4371038 | 4371059 | 2 | 11 | 22 | AC   | 23 | 11 |
| 192821 | 24 | 4388199 | 4388226 | 2 | 14 | 28 | AC   | 9  | 5  |
| 192823 | 24 | 4396188 | 4396199 | 2 | 6  | 12 | CT   | 30 | 5  |

|        |    |         |         |   |    |    |      |    |    |
|--------|----|---------|---------|---|----|----|------|----|----|
| 192825 | 24 | 4400806 | 4400817 | 2 | 6  | 12 | GT   | 15 | 9  |
| 192826 | 24 | 4400819 | 4400834 | 2 | 8  | 16 | TG   | 15 | 7  |
| 192829 | 24 | 4401188 | 4401201 | 2 | 7  | 14 | GT   | 26 | 9  |
| 192835 | 24 | 4414418 | 4414437 | 2 | 10 | 20 | GT   | 28 | 9  |
| 192836 | 24 | 4414590 | 4414619 | 3 | 10 | 30 | AGG  | 8  | 7  |
| 192837 | 24 | 4415062 | 4415103 | 2 | 21 | 42 | GT   | 10 | 13 |
| 192840 | 24 | 4416662 | 4416681 | 2 | 10 | 20 | CA   | 14 | 8  |
| 192841 | 24 | 4416722 | 4416733 | 2 | 6  | 12 | GT   | 15 | 4  |
| 192842 | 24 | 4418742 | 4418781 | 2 | 20 | 40 | AG   | 11 | 8  |
| 192846 | 24 | 4422541 | 4422560 | 2 | 10 | 20 | CA   | 9  | 7  |
| 192848 | 24 | 4429813 | 4429836 | 2 | 12 | 24 | TG   | 26 | 9  |
| 192852 | 24 | 4436963 | 4437006 | 2 | 22 | 44 | CT   | 11 | 10 |
| 192853 | 24 | 4438106 | 4438141 | 2 | 18 | 36 | AC   | 19 | 10 |
| 192856 | 24 | 4439528 | 4439561 | 2 | 17 | 34 | GT   | 11 | 10 |
| 192860 | 24 | 4441753 | 4441786 | 2 | 17 | 34 | CA   | 6  | 7  |
| 192865 | 24 | 4446821 | 4446836 | 4 | 4  | 16 | AAAT | 16 | 13 |
| 192873 | 24 | 4462404 | 4462417 | 2 | 7  | 14 | TG   | 23 | 6  |
| 192874 | 24 | 4463676 | 4463691 | 2 | 8  | 16 | TG   | 28 | 3  |
| 192881 | 24 | 4476951 | 4476970 | 4 | 5  | 20 | TTTA | 16 | 6  |
| 192888 | 24 | 4488712 | 4488729 | 2 | 9  | 18 | TA   | 14 | 3  |
| 192891 | 24 | 4491239 | 4491282 | 2 | 22 | 44 | AC   | 7  | 5  |
| 192906 | 24 | 4516877 | 4516898 | 2 | 11 | 22 | TC   | 9  | 5  |
| 192910 | 24 | 4531202 | 4531237 | 4 | 9  | 36 | TTGA | 9  | 10 |
| 192915 | 24 | 4547731 | 4547758 | 4 | 7  | 28 | TGTC | 28 | 4  |
| 192916 | 24 | 4547906 | 4547927 | 2 | 11 | 22 | AC   | 18 | 8  |
| 192918 | 24 | 4551240 | 4551253 | 2 | 7  | 14 | TG   | 20 | 8  |
| 192920 | 24 | 4565963 | 4565998 | 2 | 18 | 36 | AC   | 20 | 13 |
| 192921 | 24 | 4569266 | 4569299 | 2 | 17 | 34 | GT   | 9  | 15 |
| 192922 | 24 | 4569444 | 4569471 | 2 | 14 | 28 | CA   | 11 | 10 |
| 192925 | 24 | 4577168 | 4577205 | 2 | 19 | 38 | CA   | 10 | 10 |
| 192930 | 24 | 4579317 | 4579328 | 2 | 6  | 12 | AG   | 23 | 6  |
| 192931 | 24 | 4579330 | 4579343 | 2 | 7  | 14 | GA   | 24 | 6  |
| 192940 | 24 | 4595609 | 4595628 | 4 | 5  | 20 | TTAC | 24 | 6  |
| 192941 | 24 | 4599888 | 4599903 | 4 | 4  | 16 | GGCA | 30 | 3  |
| 192945 | 24 | 4611928 | 4611957 | 2 | 15 | 30 | CA   | 19 | 11 |
| 192946 | 24 | 4612117 | 4612142 | 2 | 13 | 26 | CA   | 15 | 12 |
| 192951 | 24 | 4616854 | 4616879 | 2 | 13 | 26 | AC   | 10 | 13 |
| 192963 | 24 | 4639388 | 4639399 | 2 | 6  | 12 | CT   | 25 | 3  |
| 192965 | 24 | 4645803 | 4645832 | 2 | 15 | 30 | GT   | 16 | 9  |
| 192966 | 24 | 4657121 | 4657144 | 4 | 6  | 24 | AAAC | 28 | 10 |
| 192972 | 24 | 4667420 | 4667435 | 4 | 4  | 16 | GCAC | 19 | 5  |
| 192974 | 24 | 4674328 | 4674343 | 2 | 8  | 16 | CA   | 9  | 4  |
| 192975 | 24 | 4674345 | 4674362 | 2 | 9  | 18 | AC   | 10 | 5  |
| 192976 | 24 | 4676594 | 4676627 | 2 | 17 | 34 | TG   | 6  | 7  |
| 192978 | 24 | 4679828 | 4679861 | 2 | 17 | 34 | GT   | 11 | 8  |
| 192983 | 24 | 4691704 | 4691721 | 2 | 9  | 18 | TC   | 19 | 6  |
| 192987 | 24 | 4702257 | 4702302 | 2 | 23 | 46 | AC   | 6  | 6  |
| 192988 | 24 | 4702417 | 4702430 | 2 | 7  | 14 | GT   | 14 | 8  |
| 192991 | 24 | 4704435 | 4704480 | 2 | 23 | 46 | TG   | 16 | 9  |
| 192996 | 24 | 4711991 | 4712006 | 4 | 4  | 16 | ATTT | 23 | 3  |
| 192998 | 24 | 4716515 | 4716534 | 4 | 5  | 20 | TATC | 23 | 3  |

|        |    |         |         |   |    |    |      |    |    |
|--------|----|---------|---------|---|----|----|------|----|----|
| 193000 | 24 | 4731515 | 4731556 | 2 | 21 | 42 | AC   | 9  | 13 |
| 193007 | 24 | 4744407 | 4744422 | 2 | 8  | 16 | GA   | 22 | 3  |
| 193011 | 24 | 4762100 | 4762113 | 2 | 7  | 14 | AC   | 22 | 9  |
| 193013 | 24 | 4767361 | 4767390 | 2 | 15 | 30 | AC   | 7  | 6  |
| 193021 | 24 | 4798019 | 4798038 | 4 | 5  | 20 | ATAC | 19 | 3  |
| 193030 | 24 | 4818874 | 4818885 | 2 | 6  | 12 | GT   | 15 | 9  |
| 193033 | 24 | 4823638 | 4823658 | 3 | 7  | 21 | AAG  | 29 | 4  |
| 193036 | 24 | 4830706 | 4830735 | 2 | 15 | 30 | TG   | 8  | 6  |
| 193037 | 24 | 4831296 | 4831313 | 2 | 9  | 18 | GT   | 12 | 12 |
| 193040 | 24 | 4832335 | 4832358 | 2 | 12 | 24 | TG   | 18 | 8  |
| 193042 | 24 | 4835176 | 4835191 | 4 | 4  | 16 | AAAC | 23 | 3  |
| 193045 | 24 | 4840169 | 4840208 | 2 | 20 | 40 | AG   | 12 | 8  |
| 193060 | 24 | 4865916 | 4865933 | 3 | 6  | 18 | ATT  | 10 | 3  |
| 193064 | 24 | 4878702 | 4878715 | 2 | 7  | 14 | TA   | 19 | 4  |
| 193065 | 24 | 4881348 | 4881386 | 3 | 13 | 39 | CAT  | 22 | 11 |
| 193074 | 24 | 4915239 | 4915250 | 2 | 6  | 12 | AC   | 18 | 3  |
| 193084 | 24 | 4951623 | 4951656 | 2 | 17 | 34 | TG   | 7  | 8  |
| 193086 | 24 | 4955416 | 4955443 | 4 | 7  | 28 | AAAC | 24 | 6  |
| 193101 | 24 | 4979294 | 4979305 | 2 | 6  | 12 | CA   | 25 | 5  |
| 193103 | 24 | 4982721 | 4982738 | 3 | 6  | 18 | CAG  | 13 | 3  |
| 193108 | 24 | 4988530 | 4988545 | 4 | 4  | 16 | TATT | 22 | 4  |
| 193110 | 24 | 5000225 | 5000242 | 2 | 9  | 18 | GT   | 26 | 7  |
| 193111 | 24 | 5000857 | 5000896 | 2 | 20 | 40 | CA   | 6  | 6  |
| 193116 | 24 | 5009792 | 5009806 | 3 | 5  | 15 | CCT  | 22 | 6  |
| 193120 | 24 | 5011624 | 5011641 | 2 | 9  | 18 | CA   | 26 | 8  |
| 193121 | 24 | 5012518 | 5012545 | 2 | 14 | 28 | TG   | 17 | 7  |
| 193123 | 24 | 5013234 | 5013245 | 2 | 6  | 12 | TG   | 31 | 3  |
| 193124 | 24 | 5013816 | 5013843 | 4 | 7  | 28 | GGAT | 20 | 4  |
| 193126 | 24 | 5017143 | 5017168 | 2 | 13 | 26 | TG   | 18 | 11 |
| 193127 | 24 | 5020089 | 5020104 | 2 | 8  | 16 | CT   | 21 | 3  |
| 193129 | 24 | 5022257 | 5022272 | 4 | 4  | 16 | GAGC | 25 | 4  |
| 193131 | 24 | 5027540 | 5027551 | 2 | 6  | 12 | AG   | 33 | 5  |
| 193132 | 24 | 5028872 | 5028883 | 2 | 6  | 12 | CA   | 27 | 6  |
| 193133 | 24 | 5028899 | 5028910 | 2 | 6  | 12 | TG   | 22 | 3  |
| 193134 | 24 | 5029044 | 5029075 | 2 | 16 | 32 | TG   | 24 | 12 |
| 193136 | 24 | 5029646 | 5029659 | 2 | 7  | 14 | CA   | 19 | 7  |
| 193137 | 24 | 5030275 | 5030308 | 2 | 17 | 34 | GT   | 20 | 11 |
| 193140 | 24 | 5034565 | 5034588 | 2 | 12 | 24 | TG   | 15 | 7  |
| 193148 | 24 | 5036292 | 5036319 | 4 | 7  | 28 | ACCA | 21 | 5  |
| 193150 | 24 | 5036865 | 5036880 | 2 | 8  | 16 | TG   | 11 | 5  |
| 193151 | 24 | 5036882 | 5036895 | 2 | 7  | 14 | GT   | 10 | 6  |
| 193154 | 24 | 5037135 | 5037156 | 2 | 11 | 22 | CA   | 9  | 8  |
| 193155 | 24 | 5039178 | 5039191 | 2 | 7  | 14 | TC   | 30 | 3  |
| 193156 | 24 | 5039648 | 5039665 | 3 | 6  | 18 | GCT  | 19 | 10 |
| 193157 | 24 | 5041966 | 5042007 | 2 | 21 | 42 | GT   | 7  | 7  |
| 193160 | 24 | 5046118 | 5046141 | 3 | 8  | 24 | GAG  | 22 | 5  |
| 193168 | 24 | 5057251 | 5057286 | 2 | 18 | 36 | GT   | 9  | 8  |
| 193171 | 24 | 5057506 | 5057553 | 2 | 24 | 48 | TG   | 6  | 9  |
| 193175 | 24 | 5059216 | 5059241 | 2 | 13 | 26 | AC   | 18 | 12 |
| 193176 | 24 | 5061659 | 5061673 | 3 | 5  | 15 | GGA  | 23 | 5  |
| 193178 | 24 | 5062960 | 5063005 | 2 | 23 | 46 | CA   | 6  | 7  |

|        |    |         |         |   |    |    |      |    |    |
|--------|----|---------|---------|---|----|----|------|----|----|
| 193179 | 24 | 5063187 | 5063242 | 2 | 28 | 56 | CA   | 11 | 10 |
| 193184 | 24 | 5066439 | 5066452 | 2 | 7  | 14 | AC   | 21 | 4  |
| 193185 | 24 | 5066566 | 5066599 | 2 | 17 | 34 | AC   | 9  | 8  |
| 193190 | 24 | 5072849 | 5072870 | 2 | 11 | 22 | GT   | 9  | 4  |
| 193191 | 24 | 5073016 | 5073031 | 2 | 8  | 16 | TG   | 14 | 7  |
| 193195 | 24 | 5075122 | 5075173 | 2 | 26 | 52 | CA   | 6  | 8  |
| 193204 | 24 | 5097520 | 5097533 | 2 | 7  | 14 | AC   | 22 | 9  |
| 193205 | 24 | 5097535 | 5097550 | 2 | 8  | 16 | CA   | 22 | 10 |
| 193208 | 24 | 5101806 | 5101823 | 2 | 9  | 18 | CA   | 17 | 7  |
| 193212 | 24 | 5105392 | 5105411 | 2 | 10 | 20 | AC   | 16 | 10 |
| 193215 | 24 | 5108763 | 5108798 | 2 | 18 | 36 | AC   | 9  | 10 |
| 193218 | 24 | 5121283 | 5121308 | 2 | 13 | 26 | TG   | 14 | 4  |
| 193225 | 24 | 5129587 | 5129602 | 2 | 8  | 16 | CA   | 17 | 5  |
| 193226 | 24 | 5131184 | 5131198 | 3 | 5  | 15 | CAG  | 28 | 8  |
| 193227 | 24 | 5132532 | 5132563 | 2 | 16 | 32 | CA   | 15 | 6  |
| 193232 | 24 | 5144147 | 5144182 | 2 | 18 | 36 | CA   | 7  | 7  |
| 193233 | 24 | 5147998 | 5148027 | 2 | 15 | 30 | TG   | 16 | 9  |
| 193235 | 24 | 5150239 | 5150252 | 2 | 7  | 14 | CA   | 13 | 3  |
| 193239 | 24 | 5151979 | 5151990 | 2 | 6  | 12 | AC   | 17 | 6  |
| 193241 | 24 | 5152150 | 5152179 | 2 | 15 | 30 | CA   | 8  | 5  |
| 193246 | 24 | 5159038 | 5159061 | 4 | 6  | 24 | GAAA | 16 | 8  |
| 193250 | 24 | 5164674 | 5164689 | 2 | 8  | 16 | AC   | 22 | 7  |
| 193251 | 24 | 5165197 | 5165228 | 2 | 16 | 32 | AC   | 8  | 10 |
| 193252 | 24 | 5178694 | 5178721 | 2 | 14 | 28 | GT   | 15 | 11 |
| 193262 | 24 | 5195339 | 5195370 | 2 | 16 | 32 | TG   | 8  | 7  |
| 193263 | 24 | 5195739 | 5195760 | 2 | 11 | 22 | CA   | 6  | 8  |
| 193264 | 24 | 5199688 | 5199711 | 2 | 12 | 24 | TG   | 15 | 7  |
| 193265 | 24 | 5199861 | 5199894 | 2 | 17 | 34 | GT   | 15 | 11 |
| 193268 | 24 | 5200226 | 5200239 | 2 | 7  | 14 | CA   | 24 | 4  |
| 193269 | 24 | 5206564 | 5206577 | 2 | 7  | 14 | GT   | 23 | 5  |
| 193270 | 24 | 5206748 | 5206761 | 2 | 7  | 14 | CA   | 17 | 3  |
| 193271 | 24 | 5207092 | 5207103 | 2 | 6  | 12 | CA   | 25 | 3  |
| 193286 | 24 | 5240708 | 5240719 | 2 | 6  | 12 | CT   | 30 | 3  |
| 193294 | 24 | 5251451 | 5251462 | 2 | 6  | 12 | AC   | 27 | 5  |
| 193295 | 24 | 5251546 | 5251587 | 2 | 21 | 42 | AC   | 13 | 11 |
| 193301 | 24 | 5255727 | 5255748 | 2 | 11 | 22 | CA   | 25 | 12 |
| 193309 | 24 | 5273739 | 5273752 | 2 | 7  | 14 | TG   | 21 | 4  |
| 193311 | 24 | 5277585 | 5277626 | 2 | 21 | 42 | AC   | 11 | 8  |
| 193312 | 24 | 5277671 | 5277682 | 2 | 6  | 12 | AC   | 25 | 5  |
| 193317 | 24 | 5283010 | 5283039 | 2 | 15 | 30 | GT   | 11 | 5  |
| 193319 | 24 | 5286547 | 5286618 | 4 | 18 | 72 | AAAG | 9  | 9  |
| 193325 | 24 | 5299452 | 5299496 | 3 | 15 | 45 | CCT  | 19 | 11 |
| 193338 | 24 | 5319764 | 5319777 | 2 | 7  | 14 | CA   | 25 | 5  |
| 193342 | 24 | 5322611 | 5322624 | 2 | 7  | 14 | TG   | 19 | 3  |
| 193343 | 24 | 5322626 | 5322637 | 2 | 6  | 12 | GT   | 25 | 3  |
| 193346 | 24 | 5333650 | 5333673 | 2 | 12 | 24 | CA   | 17 | 13 |
| 193352 | 24 | 5344274 | 5344291 | 3 | 6  | 18 | AAC  | 27 | 4  |
| 193354 | 24 | 5346559 | 5346582 | 2 | 12 | 24 | AC   | 15 | 6  |
| 193355 | 24 | 5346706 | 5346739 | 2 | 17 | 34 | CA   | 13 | 10 |
| 193358 | 24 | 5351282 | 5351296 | 3 | 5  | 15 | TAT  | 19 | 13 |
| 193362 | 24 | 5354335 | 5354348 | 2 | 7  | 14 | CA   | 13 | 11 |

|        |    |         |         |   |    |    |      |    |    |
|--------|----|---------|---------|---|----|----|------|----|----|
| 193363 | 24 | 5354568 | 5354599 | 2 | 16 | 32 | AC   | 14 | 5  |
| 193365 | 24 | 5357275 | 5357296 | 2 | 11 | 22 | CA   | 7  | 4  |
| 193368 | 24 | 5357674 | 5357691 | 2 | 9  | 18 | CA   | 21 | 11 |
| 193369 | 24 | 5361913 | 5361936 | 2 | 12 | 24 | AC   | 13 | 11 |
| 193371 | 24 | 5363398 | 5363417 | 2 | 10 | 20 | AC   | 18 | 12 |
| 193377 | 24 | 5373271 | 5373284 | 2 | 7  | 14 | TA   | 16 | 12 |
| 193380 | 24 | 5387818 | 5387833 | 4 | 4  | 16 | AAAC | 24 | 5  |
| 193391 | 24 | 5416470 | 5416483 | 2 | 7  | 14 | AC   | 16 | 5  |
| 193393 | 24 | 5424167 | 5424194 | 2 | 14 | 28 | GT   | 13 | 9  |
| 193394 | 24 | 5424820 | 5424853 | 2 | 17 | 34 | TG   | 8  | 12 |
| 193397 | 24 | 5429597 | 5429610 | 2 | 7  | 14 | AC   | 24 | 4  |
| 193398 | 24 | 5430459 | 5430494 | 2 | 18 | 36 | TG   | 6  | 9  |
| 193399 | 24 | 5430625 | 5430640 | 2 | 8  | 16 | AC   | 25 | 5  |
| 193402 | 24 | 5434945 | 5434974 | 2 | 15 | 30 | CA   | 7  | 5  |
| 193404 | 24 | 5443571 | 5443630 | 2 | 30 | 60 | CA   | 10 | 6  |
| 193412 | 24 | 5459515 | 5459530 | 2 | 8  | 16 | CA   | 17 | 7  |
| 193413 | 24 | 5459812 | 5459832 | 3 | 7  | 21 | CCT  | 28 | 7  |
| 193414 | 24 | 5460083 | 5460102 | 2 | 10 | 20 | CA   | 22 | 9  |
| 193416 | 24 | 5460431 | 5460446 | 2 | 8  | 16 | TC   | 10 | 5  |
| 193419 | 24 | 5464233 | 5464248 | 2 | 8  | 16 | AC   | 25 | 4  |
| 193420 | 24 | 5467991 | 5468026 | 2 | 18 | 36 | GT   | 12 | 7  |
| 193422 | 24 | 5471876 | 5471903 | 2 | 14 | 28 | CA   | 21 | 8  |
| 193423 | 24 | 5474863 | 5474900 | 2 | 19 | 38 | AC   | 7  | 7  |
| 193436 | 24 | 5492588 | 5492633 | 2 | 23 | 46 | TG   | 12 | 10 |
| 193437 | 24 | 5492830 | 5492841 | 2 | 6  | 12 | CA   | 18 | 4  |
| 193440 | 24 | 5493675 | 5493688 | 2 | 7  | 14 | TA   | 6  | 6  |
| 193448 | 24 | 5504595 | 5504608 | 2 | 7  | 14 | GT   | 17 | 5  |
| 193454 | 24 | 5509203 | 5509230 | 2 | 14 | 28 | CT   | 20 | 10 |
| 193467 | 24 | 5525146 | 5525160 | 3 | 5  | 15 | GCT  | 33 | 3  |
| 193470 | 24 | 5525911 | 5525942 | 2 | 16 | 32 | TG   | 8  | 8  |
| 193474 | 24 | 5529177 | 5529192 | 4 | 4  | 16 | AAAC | 26 | 6  |
| 193485 | 24 | 5554133 | 5554178 | 2 | 23 | 46 | CA   | 12 | 18 |
| 193487 | 24 | 5554797 | 5554810 | 2 | 7  | 14 | AC   | 22 | 7  |
| 193488 | 24 | 5555290 | 5555327 | 2 | 19 | 38 | CT   | 18 | 9  |
| 193494 | 24 | 5567603 | 5567614 | 2 | 6  | 12 | CA   | 17 | 4  |
| 193497 | 24 | 5571319 | 5571340 | 2 | 11 | 22 | TG   | 24 | 6  |
| 193501 | 24 | 5573171 | 5573204 | 2 | 17 | 34 | TG   | 8  | 6  |
| 193510 | 24 | 5592423 | 5592440 | 3 | 6  | 18 | TTA  | 22 | 3  |
| 193517 | 24 | 5597498 | 5597517 | 2 | 10 | 20 | CA   | 19 | 7  |
| 193520 | 24 | 5606176 | 5606193 | 3 | 6  | 18 | CAA  | 22 | 6  |
| 193531 | 24 | 5631745 | 5631760 | 2 | 8  | 16 | GT   | 23 | 4  |
| 193537 | 24 | 5637895 | 5637924 | 2 | 15 | 30 | CA   | 14 | 11 |
| 193544 | 24 | 5648601 | 5648624 | 4 | 6  | 24 | AAAT | 16 | 5  |
| 193545 | 24 | 5649300 | 5649321 | 2 | 11 | 22 | CA   | 21 | 8  |
| 193547 | 24 | 5655625 | 5655648 | 4 | 6  | 24 | TGTT | 20 | 6  |
| 193556 | 24 | 5667132 | 5667143 | 2 | 6  | 12 | CT   | 20 | 3  |
| 193557 | 24 | 5667613 | 5667630 | 2 | 9  | 18 | AC   | 9  | 6  |
| 193558 | 24 | 5667632 | 5667649 | 2 | 9  | 18 | CA   | 16 | 13 |
| 193560 | 24 | 5676348 | 5676391 | 2 | 22 | 44 | TG   | 7  | 10 |
| 193562 | 24 | 5676670 | 5676691 | 2 | 11 | 22 | TG   | 11 | 6  |
| 193569 | 24 | 5694422 | 5694436 | 3 | 5  | 15 | GAG  | 8  | 3  |

|        |    |         |         |   |    |    |      |    |    |
|--------|----|---------|---------|---|----|----|------|----|----|
| 193570 | 24 | 5697645 | 5697658 | 2 | 7  | 14 | AC   | 17 | 8  |
| 193571 | 24 | 5697660 | 5697671 | 2 | 6  | 12 | CA   | 21 | 6  |
| 193576 | 24 | 5704715 | 5704744 | 2 | 15 | 30 | GA   | 10 | 7  |
| 193577 | 24 | 5705809 | 5705832 | 2 | 12 | 24 | GT   | 7  | 6  |
| 193579 | 24 | 5707173 | 5707192 | 4 | 5  | 20 | ACAA | 22 | 3  |
| 193580 | 24 | 5715888 | 5715937 | 2 | 25 | 50 | CA   | 8  | 10 |
| 193583 | 24 | 5716773 | 5716784 | 2 | 6  | 12 | TG   | 19 | 3  |
| 193584 | 24 | 5717779 | 5717808 | 2 | 15 | 30 | CA   | 13 | 8  |
| 193586 | 24 | 5721527 | 5721548 | 2 | 11 | 22 | GT   | 26 | 6  |
| 193587 | 24 | 5721696 | 5721727 | 2 | 16 | 32 | AC   | 14 | 6  |
| 193589 | 24 | 5727891 | 5727910 | 4 | 5  | 20 | CAGA | 30 | 4  |
| 193590 | 24 | 5728937 | 5728966 | 2 | 15 | 30 | AC   | 13 | 14 |
| 193592 | 24 | 5731541 | 5731576 | 3 | 12 | 36 | CAG  | 23 | 7  |
| 193597 | 24 | 5744655 | 5744678 | 3 | 8  | 24 | TCC  | 25 | 4  |
| 193600 | 24 | 5745859 | 5745879 | 3 | 7  | 21 | CAA  | 27 | 3  |
| 193603 | 24 | 5751311 | 5751332 | 2 | 11 | 22 | AC   | 16 | 13 |
| 193608 | 24 | 5755681 | 5755714 | 2 | 17 | 34 | GT   | 7  | 10 |
| 193609 | 24 | 5755867 | 5755898 | 2 | 16 | 32 | AC   | 19 | 12 |
| 193620 | 24 | 5764160 | 5764174 | 3 | 5  | 15 | CTT  | 25 | 3  |
| 193624 | 24 | 5770559 | 5770590 | 2 | 16 | 32 | CA   | 6  | 7  |
| 193628 | 24 | 5774391 | 5774402 | 2 | 6  | 12 | CA   | 20 | 10 |
| 193629 | 24 | 5774405 | 5774418 | 2 | 7  | 14 | CA   | 24 | 11 |
| 193635 | 24 | 5785833 | 5785844 | 2 | 6  | 12 | CA   | 25 | 5  |
| 193637 | 24 | 5787533 | 5787550 | 2 | 9  | 18 | CA   | 19 | 10 |
| 193641 | 24 | 5800046 | 5800069 | 4 | 6  | 24 | AAAC | 13 | 7  |
| 193643 | 24 | 5806825 | 5806864 | 2 | 20 | 40 | TG   | 8  | 8  |
| 193645 | 24 | 5807449 | 5807472 | 3 | 8  | 24 | TCC  | 20 | 6  |
| 193648 | 24 | 5813894 | 5813911 | 2 | 9  | 18 | GT   | 13 | 8  |
| 193656 | 24 | 5837023 | 5837037 | 3 | 5  | 15 | TAA  | 22 | 3  |
| 193672 | 24 | 5854989 | 5855000 | 2 | 6  | 12 | TG   | 8  | 4  |
| 193673 | 24 | 5855003 | 5855018 | 2 | 8  | 16 | TG   | 13 | 4  |
| 193682 | 24 | 5888064 | 5888095 | 2 | 16 | 32 | CT   | 16 | 7  |
| 193691 | 24 | 5906979 | 5906990 | 2 | 6  | 12 | TG   | 30 | 3  |
| 193698 | 24 | 5933682 | 5933711 | 2 | 15 | 30 | GT   | 10 | 12 |
| 193699 | 24 | 5934237 | 5934264 | 2 | 14 | 28 | GT   | 9  | 6  |
| 193704 | 24 | 5945802 | 5945821 | 4 | 5  | 20 | AAAT | 9  | 3  |
| 193706 | 24 | 5956604 | 5956617 | 2 | 7  | 14 | AT   | 8  | 8  |
| 193713 | 24 | 5964253 | 5964274 | 2 | 11 | 22 | AC   | 22 | 7  |
| 193714 | 24 | 5964630 | 5964649 | 2 | 10 | 20 | CA   | 17 | 14 |
| 193716 | 24 | 5966598 | 5966615 | 2 | 9  | 18 | TG   | 18 | 12 |
| 193717 | 24 | 5966662 | 5966673 | 2 | 6  | 12 | TG   | 19 | 4  |
| 193718 | 24 | 5969394 | 5969427 | 2 | 17 | 34 | AC   | 13 | 14 |
| 193719 | 24 | 5977667 | 5977696 | 2 | 15 | 30 | TG   | 14 | 9  |
| 193723 | 24 | 5984515 | 5984534 | 4 | 5  | 20 | AAAT | 20 | 9  |
| 193724 | 24 | 5984808 | 5984819 | 2 | 6  | 12 | GT   | 26 | 3  |
| 193726 | 24 | 5991316 | 5991339 | 3 | 8  | 24 | CAT  | 17 | 6  |
| 193751 | 24 | 6044301 | 6044334 | 2 | 17 | 34 | CA   | 8  | 9  |
| 193757 | 24 | 6047628 | 6047647 | 2 | 10 | 20 | AC   | 12 | 6  |
| 193758 | 24 | 6048543 | 6048566 | 4 | 6  | 24 | TTAT | 32 | 3  |
| 193760 | 24 | 6052243 | 6052256 | 2 | 7  | 14 | CT   | 11 | 3  |
| 193766 | 24 | 6056707 | 6056728 | 2 | 11 | 22 | TC   | 15 | 5  |

|        |    |         |         |   |    |    |      |    |    |
|--------|----|---------|---------|---|----|----|------|----|----|
| 193770 | 24 | 6059420 | 6059445 | 2 | 13 | 26 | TG   | 13 | 7  |
| 193774 | 24 | 6076931 | 6076960 | 2 | 15 | 30 | TG   | 7  | 8  |
| 193783 | 24 | 6101780 | 6101827 | 4 | 12 | 48 | CTAT | 11 | 12 |
| 193786 | 24 | 6110918 | 6110945 | 2 | 14 | 28 | CA   | 18 | 8  |
| 193787 | 24 | 6114459 | 6114480 | 2 | 11 | 22 | TG   | 18 | 3  |
| 193788 | 24 | 6114538 | 6114567 | 2 | 15 | 30 | GT   | 11 | 8  |
| 193789 | 24 | 6115243 | 6115264 | 2 | 11 | 22 | TG   | 15 | 4  |
| 193790 | 24 | 6119544 | 6119575 | 2 | 16 | 32 | CA   | 15 | 9  |
| 193793 | 24 | 6128744 | 6128767 | 2 | 12 | 24 | CA   | 8  | 9  |
| 193794 | 24 | 6128885 | 6128902 | 2 | 9  | 18 | AC   | 15 | 3  |
| 193800 | 24 | 6135428 | 6135457 | 2 | 15 | 30 | TG   | 15 | 5  |
| 193801 | 24 | 6135500 | 6135511 | 2 | 6  | 12 | AC   | 29 | 3  |
| 193807 | 24 | 6143488 | 6143517 | 2 | 15 | 30 | CA   | 8  | 8  |
| 193808 | 24 | 6143549 | 6143574 | 2 | 13 | 26 | TG   | 7  | 7  |
| 193816 | 24 | 6154626 | 6154645 | 2 | 10 | 20 | GA   | 16 | 6  |
| 193825 | 24 | 6162655 | 6162668 | 2 | 7  | 14 | GT   | 14 | 5  |
| 193826 | 24 | 6162769 | 6162790 | 2 | 11 | 22 | AC   | 15 | 6  |
| 193830 | 24 | 6164656 | 6164689 | 2 | 17 | 34 | AC   | 17 | 12 |
| 193832 | 24 | 6164830 | 6164851 | 2 | 11 | 22 | CA   | 13 | 4  |
| 193834 | 24 | 6167849 | 6167874 | 2 | 13 | 26 | CA   | 14 | 5  |
| 193835 | 24 | 6167977 | 6168012 | 2 | 18 | 36 | GT   | 6  | 7  |
| 193847 | 24 | 6184256 | 6184291 | 2 | 18 | 36 | CA   | 21 | 9  |
| 193848 | 24 | 6184551 | 6184570 | 2 | 10 | 20 | GT   | 10 | 6  |
| 193849 | 24 | 6184675 | 6184696 | 2 | 11 | 22 | GT   | 13 | 4  |
| 193852 | 24 | 6187937 | 6187966 | 2 | 15 | 30 | AC   | 19 | 8  |
| 193855 | 24 | 6189319 | 6189376 | 2 | 29 | 58 | CA   | 10 | 6  |
| 193858 | 24 | 6189640 | 6189651 | 2 | 6  | 12 | CA   | 17 | 7  |
| 193862 | 24 | 6194064 | 6194089 | 2 | 13 | 26 | CA   | 14 | 9  |
| 193865 | 24 | 6194929 | 6194942 | 2 | 7  | 14 | GA   | 16 | 4  |
| 193866 | 24 | 6195037 | 6195072 | 2 | 18 | 36 | TC   | 13 | 13 |
| 193867 | 24 | 6196610 | 6196633 | 2 | 12 | 24 | TG   | 12 | 10 |
| 193869 | 24 | 6198725 | 6198744 | 2 | 10 | 20 | GT   | 16 | 7  |
| 193871 | 24 | 6199042 | 6199065 | 2 | 12 | 24 | AC   | 16 | 9  |
| 193872 | 24 | 6200765 | 6200778 | 2 | 7  | 14 | TG   | 20 | 4  |
| 193873 | 24 | 6200884 | 6200897 | 2 | 7  | 14 | TG   | 23 | 3  |
| 193874 | 24 | 6200899 | 6200914 | 2 | 8  | 16 | GT   | 19 | 5  |
| 193875 | 24 | 6201050 | 6201083 | 2 | 17 | 34 | TG   | 18 | 8  |
| 193876 | 24 | 6201208 | 6201237 | 2 | 15 | 30 | GT   | 16 | 9  |
| 193878 | 24 | 6203827 | 6203858 | 2 | 16 | 32 | GT   | 17 | 6  |
| 193879 | 24 | 6204562 | 6204577 | 4 | 4  | 16 | CAGA | 27 | 3  |
| 193880 | 24 | 6204644 | 6204657 | 2 | 7  | 14 | GT   | 11 | 10 |
| 193882 | 24 | 6205660 | 6205677 | 2 | 9  | 18 | CA   | 25 | 8  |
| 193884 | 24 | 6205884 | 6205897 | 2 | 7  | 14 | CA   | 11 | 3  |
| 193885 | 24 | 6206047 | 6206062 | 2 | 8  | 16 | GT   | 23 | 6  |
| 193886 | 24 | 6207578 | 6207593 | 2 | 8  | 16 | CA   | 27 | 3  |
| 193888 | 24 | 6210574 | 6210597 | 4 | 6  | 24 | CGTG | 16 | 16 |
| 193889 | 24 | 6210760 | 6210779 | 2 | 10 | 20 | TG   | 22 | 6  |
| 193890 | 24 | 6211202 | 6211225 | 2 | 12 | 24 | CA   | 17 | 7  |
| 193892 | 24 | 6212147 | 6212158 | 2 | 6  | 12 | CT   | 18 | 3  |
| 193893 | 24 | 6212367 | 6212426 | 3 | 20 | 60 | TTC  | 16 | 13 |
| 193895 | 24 | 6214598 | 6214619 | 2 | 11 | 22 | AC   | 15 | 4  |



|        |    |         |         |   |    |    |      |    |    |
|--------|----|---------|---------|---|----|----|------|----|----|
| 193896 | 24 | 6214816 | 6214830 | 3 | 5  | 15 | TCC  | 22 | 3  |
| 193897 | 24 | 6217831 | 6217860 | 2 | 15 | 30 | CA   | 13 | 8  |
| 193898 | 24 | 6217969 | 6217980 | 2 | 6  | 12 | GT   | 11 | 3  |
| 193901 | 24 | 6218126 | 6218149 | 2 | 12 | 24 | TG   | 19 | 7  |
| 193906 | 24 | 6223694 | 6223721 | 2 | 14 | 28 | TG   | 18 | 7  |
| 193908 | 24 | 6223940 | 6223957 | 2 | 9  | 18 | TG   | 14 | 9  |
| 193909 | 24 | 6224805 | 6224824 | 2 | 10 | 20 | CT   | 11 | 7  |
| 193910 | 24 | 6225384 | 6225409 | 2 | 13 | 26 | TG   | 13 | 13 |
| 193914 | 24 | 6228333 | 6228362 | 2 | 15 | 30 | AC   | 8  | 7  |
| 193917 | 24 | 6228887 | 6228908 | 2 | 11 | 22 | TG   | 11 | 5  |
| 193920 | 24 | 6231686 | 6231703 | 2 | 9  | 18 | GT   | 19 | 7  |
| 193921 | 24 | 6231837 | 6231850 | 2 | 7  | 14 | TG   | 10 | 7  |
| 193922 | 24 | 6231977 | 6231992 | 2 | 8  | 16 | TG   | 22 | 6  |
| 193927 | 24 | 6235465 | 6235480 | 2 | 8  | 16 | TG   | 16 | 7  |
| 193928 | 24 | 6235482 | 6235493 | 2 | 6  | 12 | GT   | 17 | 5  |
| 193929 | 24 | 6235889 | 6235900 | 2 | 6  | 12 | CA   | 18 | 4  |
| 193931 | 24 | 6238808 | 6238825 | 3 | 6  | 18 | AGG  | 14 | 4  |
| 193933 | 24 | 6238989 | 6239012 | 3 | 8  | 24 | GGA  | 8  | 5  |
| 193935 | 24 | 6239177 | 6239192 | 2 | 8  | 16 | GT   | 16 | 7  |
| 193937 | 24 | 6239962 | 6239995 | 2 | 17 | 34 | CA   | 14 | 11 |
| 193938 | 24 | 6242970 | 6242989 | 2 | 10 | 20 | TG   | 9  | 7  |
| 193940 | 24 | 6246278 | 6246291 | 2 | 7  | 14 | CA   | 33 | 8  |
| 193943 | 24 | 6246683 | 6246700 | 2 | 9  | 18 | TG   | 22 | 8  |
| 193944 | 24 | 6247526 | 6247545 | 2 | 10 | 20 | CA   | 22 | 11 |
| 193949 | 24 | 6250057 | 6250077 | 3 | 7  | 21 | GAG  | 21 | 3  |
| 193952 | 24 | 6251425 | 6251452 | 2 | 14 | 28 | TG   | 11 | 10 |
| 193962 | 24 | 6252113 | 6252132 | 2 | 10 | 20 | GT   | 21 | 5  |
| 193963 | 24 | 6253408 | 6253435 | 2 | 14 | 28 | CA   | 12 | 13 |
| 193965 | 24 | 6256122 | 6256157 | 2 | 18 | 36 | GT   | 12 | 11 |
| 193966 | 24 | 6256275 | 6256300 | 2 | 13 | 26 | AC   | 8  | 7  |
| 193967 | 24 | 6256521 | 6256554 | 2 | 17 | 34 | TG   | 10 | 10 |
| 193968 | 24 | 6256680 | 6256707 | 2 | 14 | 28 | GT   | 8  | 10 |
| 193969 | 24 | 6257497 | 6257510 | 2 | 7  | 14 | AC   | 23 | 3  |
| 193970 | 24 | 6259778 | 6259797 | 2 | 10 | 20 | TG   | 14 | 6  |
| 193971 | 24 | 6259924 | 6259953 | 2 | 15 | 30 | GT   | 14 | 12 |
| 193975 | 24 | 6264452 | 6264479 | 2 | 14 | 28 | TG   | 19 | 10 |
| 193978 | 24 | 6264684 | 6264705 | 2 | 11 | 22 | TG   | 16 | 13 |
| 193980 | 24 | 6265095 | 6265114 | 4 | 5  | 20 | TTTC | 6  | 4  |
| 193983 | 24 | 6268256 | 6268297 | 2 | 21 | 42 | GA   | 7  | 8  |
| 193986 | 24 | 6268552 | 6268569 | 2 | 9  | 18 | AC   | 22 | 9  |
| 193987 | 24 | 6269522 | 6269541 | 4 | 5  | 20 | AAAC | 11 | 5  |
| 193991 | 24 | 6272544 | 6272579 | 2 | 18 | 36 | GT   | 6  | 6  |
| 193992 | 24 | 6272761 | 6272786 | 2 | 13 | 26 | TG   | 12 | 8  |
| 193993 | 24 | 6272868 | 6272883 | 2 | 8  | 16 | CA   | 14 | 6  |
| 193994 | 24 | 6275896 | 6275955 | 2 | 30 | 60 | CA   | 9  | 13 |
| 193996 | 24 | 6276117 | 6276144 | 2 | 14 | 28 | AC   | 17 | 9  |
| 193997 | 24 | 6284287 | 6284302 | 2 | 8  | 16 | GT   | 18 | 5  |
| 193999 | 24 | 6285870 | 6285895 | 2 | 13 | 26 | AC   | 18 | 10 |
| 194001 | 24 | 6289019 | 6289050 | 2 | 16 | 32 | CA   | 10 | 11 |
| 194002 | 24 | 6290121 | 6290140 | 2 | 10 | 20 | AC   | 23 | 13 |
| 194003 | 24 | 6290289 | 6290326 | 2 | 19 | 38 | AC   | 12 | 12 |

|        |    |         |         |   |    |    |      |    |    |
|--------|----|---------|---------|---|----|----|------|----|----|
| 194004 | 24 | 6292749 | 6292766 | 2 | 9  | 18 | TG   | 10 | 5  |
| 194005 | 24 | 6292969 | 6292992 | 2 | 12 | 24 | GT   | 13 | 11 |
| 194006 | 24 | 6293477 | 6293502 | 2 | 13 | 26 | TG   | 21 | 8  |
| 194007 | 24 | 6293694 | 6293727 | 2 | 17 | 34 | GT   | 8  | 8  |
| 194008 | 24 | 6293903 | 6293914 | 2 | 6  | 12 | CA   | 18 | 7  |
| 194009 | 24 | 6295918 | 6295933 | 2 | 8  | 16 | CA   | 14 | 6  |
| 194010 | 24 | 6296398 | 6296413 | 2 | 8  | 16 | TG   | 14 | 6  |
| 194015 | 24 | 6304756 | 6304771 | 4 | 4  | 16 | AAAT | 19 | 3  |
| 194019 | 24 | 6306597 | 6306628 | 2 | 16 | 32 | TG   | 11 | 11 |
| 194026 | 24 | 6310111 | 6310174 | 4 | 16 | 64 | ATCT | 21 | 11 |
| 194027 | 24 | 6311830 | 6311843 | 2 | 7  | 14 | GT   | 19 | 7  |
| 194028 | 24 | 6311942 | 6311963 | 2 | 11 | 22 | CA   | 16 | 4  |
| 194029 | 24 | 6311984 | 6311999 | 2 | 8  | 16 | TA   | 17 | 7  |
| 194035 | 24 | 6316546 | 6316559 | 2 | 7  | 14 | TG   | 25 | 3  |
| 194036 | 24 | 6316584 | 6316601 | 2 | 9  | 18 | TG   | 10 | 9  |
| 194038 | 24 | 6316663 | 6316692 | 2 | 15 | 30 | TG   | 13 | 15 |
| 194041 | 24 | 6316821 | 6316854 | 2 | 17 | 34 | CA   | 11 | 9  |
| 194042 | 24 | 6318433 | 6318444 | 2 | 6  | 12 | CA   | 28 | 7  |
| 194043 | 24 | 6318588 | 6318605 | 2 | 9  | 18 | AC   | 20 | 8  |
| 194044 | 24 | 6318890 | 6318923 | 2 | 17 | 34 | AC   | 12 | 10 |
| 194046 | 24 | 6319283 | 6319294 | 2 | 6  | 12 | TG   | 22 | 6  |
| 194047 | 24 | 6319429 | 6319456 | 2 | 14 | 28 | GT   | 9  | 6  |
| 194048 | 24 | 6319645 | 6319684 | 2 | 20 | 40 | TG   | 12 | 15 |
| 194050 | 24 | 6320487 | 6320516 | 2 | 15 | 30 | AG   | 11 | 8  |
| 194051 | 24 | 6321154 | 6321169 | 4 | 4  | 16 | TTTA | 13 | 8  |
| 194057 | 24 | 6330141 | 6330166 | 2 | 13 | 26 | GT   | 15 | 5  |
| 194059 | 24 | 6331807 | 6331827 | 3 | 7  | 21 | GCT  | 26 | 9  |
| 194060 | 24 | 6331891 | 6331914 | 2 | 12 | 24 | AC   | 22 | 9  |
| 194061 | 24 | 6332371 | 6332408 | 2 | 19 | 38 | TG   | 18 | 13 |
| 194062 | 24 | 6332552 | 6332583 | 2 | 16 | 32 | GT   | 13 | 11 |
| 194063 | 24 | 6334449 | 6334476 | 4 | 7  | 28 | CAGT | 17 | 4  |
| 194064 | 24 | 6336555 | 6336580 | 2 | 13 | 26 | GT   | 9  | 8  |
| 194066 | 24 | 6336680 | 6336723 | 2 | 22 | 44 | AC   | 8  | 9  |
| 194067 | 24 | 6336955 | 6336970 | 2 | 8  | 16 | CA   | 21 | 9  |
| 194068 | 24 | 6337474 | 6337511 | 2 | 19 | 38 | GT   | 9  | 8  |
| 194069 | 24 | 6338274 | 6338293 | 4 | 5  | 20 | ATTT | 15 | 8  |
| 194074 | 24 | 6342765 | 6342784 | 2 | 10 | 20 | CA   | 8  | 4  |
| 194075 | 24 | 6343003 | 6343030 | 2 | 14 | 28 | GT   | 12 | 7  |
| 194080 | 24 | 6349016 | 6349051 | 2 | 18 | 36 | GT   | 14 | 15 |
| 194082 | 24 | 6349140 | 6349179 | 2 | 20 | 40 | GT   | 8  | 11 |
| 194085 | 24 | 6350684 | 6350707 | 2 | 12 | 24 | CA   | 16 | 12 |
| 194086 | 24 | 6350893 | 6350910 | 3 | 6  | 18 | GAG  | 22 | 4  |
| 194088 | 24 | 6354985 | 6355004 | 2 | 10 | 20 | TG   | 16 | 7  |
| 194091 | 24 | 6361208 | 6361229 | 2 | 11 | 22 | TG   | 10 | 6  |
| 194092 | 24 | 6361855 | 6361880 | 2 | 13 | 26 | TG   | 15 | 5  |
| 194093 | 24 | 6362056 | 6362071 | 2 | 8  | 16 | TG   | 14 | 8  |
| 194094 | 24 | 6362073 | 6362086 | 2 | 7  | 14 | GT   | 13 | 3  |
| 194102 | 24 | 6371602 | 6371615 | 2 | 7  | 14 | TG   | 8  | 3  |
| 194103 | 24 | 6376515 | 6376526 | 2 | 6  | 12 | TG   | 32 | 4  |
| 194109 | 24 | 6382653 | 6382670 | 3 | 6  | 18 | CCT  | 17 | 3  |
| 194111 | 24 | 6384503 | 6384520 | 2 | 9  | 18 | TC   | 18 | 12 |

|        |    |         |         |   |    |    |      |    |    |
|--------|----|---------|---------|---|----|----|------|----|----|
| 194115 | 24 | 6391416 | 6391454 | 3 | 13 | 39 | TCA  | 27 | 5  |
| 194119 | 24 | 6395186 | 6395213 | 2 | 14 | 28 | GT   | 7  | 6  |
| 194120 | 24 | 6396823 | 6396834 | 2 | 6  | 12 | AC   | 22 | 3  |
| 194121 | 24 | 6399042 | 6399067 | 2 | 13 | 26 | GT   | 17 | 6  |
| 194123 | 24 | 6399199 | 6399224 | 2 | 13 | 26 | GT   | 9  | 8  |
| 194132 | 24 | 6412705 | 6412730 | 2 | 13 | 26 | GT   | 15 | 9  |
| 194133 | 24 | 6413882 | 6413895 | 2 | 7  | 14 | GT   | 8  | 5  |
| 194136 | 24 | 6414090 | 6414121 | 2 | 16 | 32 | CA   | 10 | 3  |
| 194141 | 24 | 6431903 | 6431946 | 2 | 22 | 44 | CA   | 7  | 7  |
| 194146 | 24 | 6435692 | 6435703 | 2 | 6  | 12 | GT   | 32 | 4  |
| 194155 | 24 | 6442408 | 6442419 | 2 | 6  | 12 | GT   | 19 | 5  |
| 194164 | 24 | 6450884 | 6450919 | 2 | 18 | 36 | GT   | 12 | 7  |
| 194166 | 24 | 6462511 | 6462534 | 3 | 8  | 24 | AGG  | 15 | 5  |
| 194174 | 24 | 6474015 | 6474026 | 2 | 6  | 12 | GT   | 25 | 4  |
| 194175 | 24 | 6474028 | 6474041 | 2 | 7  | 14 | TG   | 23 | 3  |
| 194177 | 24 | 6478720 | 6478739 | 4 | 5  | 20 | ATTC | 16 | 6  |
| 194195 | 24 | 6499513 | 6499546 | 2 | 17 | 34 | CA   | 10 | 10 |
| 194196 | 24 | 6502206 | 6502217 | 2 | 6  | 12 | CT   | 32 | 4  |
| 194198 | 24 | 6504406 | 6504435 | 3 | 10 | 30 | AGG  | 9  | 3  |
| 194204 | 24 | 6512707 | 6512718 | 2 | 6  | 12 | AG   | 25 | 4  |
| 194208 | 24 | 6513143 | 6513176 | 2 | 17 | 34 | TG   | 12 | 6  |
| 194213 | 24 | 6520248 | 6520263 | 2 | 8  | 16 | GA   | 10 | 3  |
| 194215 | 24 | 6520303 | 6520322 | 2 | 10 | 20 | AG   | 12 | 8  |
| 194230 | 24 | 6538833 | 6538847 | 3 | 5  | 15 | GGA  | 12 | 5  |
| 194234 | 24 | 6543268 | 6543291 | 2 | 12 | 24 | AC   | 6  | 4  |
| 194236 | 24 | 6549961 | 6549996 | 2 | 18 | 36 | TG   | 13 | 9  |
| 194254 | 24 | 6597738 | 6597759 | 2 | 11 | 22 | TA   | 11 | 9  |
| 194258 | 24 | 6604990 | 6605021 | 4 | 8  | 32 | AATA | 6  | 4  |
| 194265 | 24 | 6611987 | 6612006 | 2 | 10 | 20 | CA   | 13 | 10 |
| 194267 | 24 | 6615801 | 6615828 | 2 | 14 | 28 | TG   | 10 | 7  |
| 194268 | 24 | 6615943 | 6615982 | 2 | 20 | 40 | TC   | 18 | 13 |
| 194270 | 24 | 6618852 | 6618867 | 4 | 4  | 16 | AAAT | 28 | 4  |
| 194273 | 24 | 6621465 | 6621484 | 2 | 10 | 20 | AG   | 26 | 5  |
| 194275 | 24 | 6630629 | 6630646 | 2 | 9  | 18 | CA   | 21 | 5  |
| 194278 | 24 | 6633360 | 6633377 | 2 | 9  | 18 | AC   | 18 | 12 |
| 194287 | 24 | 6636282 | 6636313 | 2 | 16 | 32 | GT   | 11 | 10 |
| 194288 | 24 | 6637982 | 6638001 | 2 | 10 | 20 | AC   | 17 | 8  |
| 194289 | 24 | 6638234 | 6638259 | 2 | 13 | 26 | CT   | 18 | 8  |
| 194294 | 24 | 6644821 | 6644836 | 2 | 8  | 16 | AC   | 7  | 4  |
| 194295 | 24 | 6644839 | 6644852 | 2 | 7  | 14 | AC   | 11 | 5  |
| 194299 | 24 | 6651008 | 6651023 | 4 | 4  | 16 | AAAC | 7  | 4  |
| 194300 | 24 | 6654485 | 6654498 | 2 | 7  | 14 | GT   | 25 | 4  |
| 194301 | 24 | 6660870 | 6660891 | 2 | 11 | 22 | TC   | 14 | 3  |
| 194303 | 24 | 6663131 | 6663144 | 2 | 7  | 14 | GT   | 22 | 12 |
| 194309 | 24 | 6668571 | 6668586 | 2 | 8  | 16 | AC   | 23 | 8  |
| 194310 | 24 | 6668767 | 6668798 | 2 | 16 | 32 | CA   | 17 | 9  |
| 194312 | 24 | 6670787 | 6670807 | 3 | 7  | 21 | GCA  | 27 | 4  |
| 194313 | 24 | 6671485 | 6671500 | 2 | 8  | 16 | GT   | 18 | 5  |
| 194318 | 24 | 6675427 | 6675440 | 2 | 7  | 14 | GA   | 18 | 3  |
| 194319 | 24 | 6678764 | 6678787 | 2 | 12 | 24 | AC   | 14 | 6  |
| 194325 | 24 | 6695672 | 6695699 | 2 | 14 | 28 | TG   | 16 | 10 |

|        |    |         |         |   |    |    |      |    |    |
|--------|----|---------|---------|---|----|----|------|----|----|
| 194326 | 24 | 6695828 | 6695841 | 2 | 7  | 14 | TG   | 23 | 5  |
| 194327 | 24 | 6697487 | 6697520 | 2 | 17 | 34 | TG   | 9  | 13 |
| 194328 | 24 | 6697573 | 6697598 | 2 | 13 | 26 | GT   | 7  | 7  |
| 194330 | 24 | 6697650 | 6697673 | 2 | 12 | 24 | GT   | 9  | 7  |
| 194333 | 24 | 6700725 | 6700742 | 3 | 6  | 18 | CTC  | 28 | 3  |
| 194335 | 24 | 6700849 | 6700872 | 2 | 12 | 24 | AC   | 8  | 5  |
| 194336 | 24 | 6700984 | 6701001 | 2 | 9  | 18 | TG   | 19 | 12 |
| 194337 | 24 | 6701151 | 6701172 | 2 | 11 | 22 | CA   | 20 | 8  |
| 194338 | 24 | 6701291 | 6701304 | 2 | 7  | 14 | GT   | 19 | 3  |
| 194340 | 24 | 6704550 | 6704579 | 2 | 15 | 30 | TG   | 19 | 12 |
| 194343 | 24 | 6706773 | 6706802 | 2 | 15 | 30 | TG   | 9  | 10 |
| 194344 | 24 | 6708567 | 6708594 | 2 | 14 | 28 | GT   | 19 | 12 |
| 194348 | 24 | 6712382 | 6712405 | 2 | 12 | 24 | CA   | 21 | 6  |
| 194350 | 24 | 6713850 | 6713865 | 2 | 8  | 16 | CA   | 24 | 4  |
| 194353 | 24 | 6718796 | 6718823 | 2 | 14 | 28 | TG   | 10 | 9  |
| 194358 | 24 | 6722594 | 6722617 | 2 | 12 | 24 | TC   | 16 | 8  |
| 194360 | 24 | 6726256 | 6726269 | 2 | 7  | 14 | TG   | 24 | 4  |
| 194361 | 24 | 6726329 | 6726368 | 2 | 20 | 40 | TG   | 10 | 13 |
| 194370 | 24 | 6732520 | 6732537 | 3 | 6  | 18 | GAG  | 23 | 5  |
| 194374 | 24 | 6739444 | 6739488 | 3 | 15 | 45 | AAG  | 10 | 13 |
| 194378 | 24 | 6746099 | 6746110 | 2 | 6  | 12 | AC   | 10 | 7  |
| 194379 | 24 | 6746193 | 6746218 | 2 | 13 | 26 | AC   | 22 | 9  |
| 194393 | 24 | 6754254 | 6754275 | 2 | 11 | 22 | AC   | 6  | 5  |
| 194394 | 24 | 6754504 | 6754527 | 3 | 8  | 24 | CAT  | 8  | 4  |
| 194395 | 24 | 6754906 | 6754925 | 2 | 10 | 20 | CA   | 18 | 8  |
| 194396 | 24 | 6755818 | 6755859 | 2 | 21 | 42 | AC   | 13 | 11 |
| 194397 | 24 | 6755929 | 6755940 | 2 | 6  | 12 | TG   | 19 | 14 |
| 194398 | 24 | 6755942 | 6755955 | 2 | 7  | 14 | GT   | 14 | 9  |
| 194401 | 24 | 6760007 | 6760064 | 2 | 29 | 58 | AC   | 11 | 10 |
| 194407 | 24 | 6779275 | 6779306 | 2 | 16 | 32 | CA   | 16 | 10 |
| 194408 | 24 | 6780648 | 6780665 | 2 | 9  | 18 | AC   | 13 | 5  |
| 194413 | 24 | 6788372 | 6788387 | 2 | 8  | 16 | TG   | 7  | 3  |
| 194414 | 24 | 6788389 | 6788402 | 2 | 7  | 14 | GT   | 14 | 4  |
| 194418 | 24 | 6793211 | 6793228 | 3 | 6  | 18 | TTG  | 12 | 4  |
| 194420 | 24 | 6797007 | 6797034 | 2 | 14 | 28 | GT   | 14 | 7  |
| 194425 | 24 | 6802423 | 6802478 | 2 | 28 | 56 | CA   | 8  | 10 |
| 194431 | 24 | 6812578 | 6812637 | 2 | 30 | 60 | TG   | 6  | 8  |
| 194433 | 24 | 6815519 | 6815540 | 2 | 11 | 22 | AC   | 16 | 5  |
| 194434 | 24 | 6815634 | 6815655 | 2 | 11 | 22 | AC   | 23 | 7  |
| 194436 | 24 | 6822112 | 6822126 | 3 | 5  | 15 | AGG  | 33 | 3  |
| 194437 | 24 | 6822238 | 6822261 | 2 | 12 | 24 | CA   | 17 | 9  |
| 194438 | 24 | 6823523 | 6823543 | 3 | 7  | 21 | GAA  | 21 | 6  |
| 194442 | 24 | 6824203 | 6824218 | 4 | 4  | 16 | ATTT | 17 | 11 |
| 194444 | 24 | 6847639 | 6847656 | 2 | 9  | 18 | AC   | 23 | 5  |
| 194445 | 24 | 6853464 | 6853475 | 2 | 6  | 12 | CA   | 21 | 6  |
| 194450 | 24 | 6862059 | 6862074 | 2 | 8  | 16 | AC   | 17 | 7  |
| 194452 | 24 | 6862179 | 6862202 | 2 | 12 | 24 | AC   | 11 | 8  |
| 194455 | 24 | 6863964 | 6863985 | 2 | 11 | 22 | AC   | 20 | 6  |
| 194467 | 24 | 6868929 | 6868952 | 2 | 12 | 24 | AC   | 16 | 7  |
| 194469 | 24 | 6873173 | 6873190 | 2 | 9  | 18 | GT   | 21 | 6  |
| 194472 | 24 | 6880653 | 6880682 | 3 | 10 | 30 | CCT  | 9  | 3  |

|        |    |         |         |   |    |    |      |    |    |
|--------|----|---------|---------|---|----|----|------|----|----|
| 194473 | 24 | 6881092 | 6881115 | 2 | 12 | 24 | CA   | 11 | 11 |
| 194474 | 24 | 6881265 | 6881294 | 2 | 15 | 30 | GT   | 12 | 11 |
| 194476 | 24 | 6883367 | 6883387 | 3 | 7  | 21 | TCC  | 24 | 10 |
| 194479 | 24 | 6890620 | 6890653 | 2 | 17 | 34 | AC   | 15 | 9  |
| 194482 | 24 | 6896115 | 6896129 | 3 | 5  | 15 | TAT  | 27 | 3  |
| 194487 | 24 | 6902530 | 6902553 | 2 | 12 | 24 | AC   | 21 | 7  |
| 194488 | 24 | 6903245 | 6903276 | 2 | 16 | 32 | CA   | 10 | 6  |
| 194492 | 24 | 6910354 | 6910365 | 2 | 6  | 12 | CT   | 28 | 3  |
| 194493 | 24 | 6910435 | 6910458 | 3 | 8  | 24 | GAG  | 20 | 5  |
| 194494 | 24 | 6910714 | 6910741 | 4 | 7  | 28 | GTGC | 23 | 16 |
| 194510 | 24 | 6943881 | 6943910 | 2 | 15 | 30 | TG   | 11 | 8  |
| 194512 | 24 | 6947338 | 6947355 | 3 | 6  | 18 | GAG  | 22 | 3  |
| 194517 | 24 | 6958419 | 6958445 | 3 | 9  | 27 | CTC  | 14 | 4  |
| 194519 | 24 | 6958767 | 6958796 | 2 | 15 | 30 | GT   | 7  | 6  |
| 194522 | 24 | 6958953 | 6958970 | 2 | 9  | 18 | AC   | 22 | 3  |
| 194523 | 24 | 6961843 | 6961876 | 2 | 17 | 34 | CA   | 17 | 15 |
| 194524 | 24 | 6967171 | 6967188 | 2 | 9  | 18 | AC   | 18 | 7  |
| 194526 | 24 | 6968352 | 6968373 | 2 | 11 | 22 | GT   | 16 | 6  |
| 194532 | 24 | 6992552 | 6992575 | 4 | 6  | 24 | AGGA | 17 | 4  |
| 194533 | 24 | 6999867 | 6999880 | 2 | 7  | 14 | CT   | 28 | 5  |
| 194534 | 24 | 7002442 | 7002457 | 4 | 4  | 16 | CAGA | 17 | 5  |
| 194535 | 24 | 7007979 | 7008026 | 4 | 12 | 48 | TCTA | 8  | 8  |
| 194537 | 24 | 7027175 | 7027200 | 2 | 13 | 26 | AG   | 12 | 6  |
| 194538 | 24 | 7034536 | 7034549 | 2 | 7  | 14 | AG   | 19 | 3  |
| 194539 | 24 | 7034838 | 7034861 | 2 | 12 | 24 | GT   | 14 | 7  |
| 194540 | 24 | 7034980 | 7035023 | 2 | 22 | 44 | TC   | 6  | 8  |
| 194552 | 24 | 7056486 | 7056512 | 3 | 9  | 27 | CTC  | 12 | 3  |
| 194554 | 24 | 7065211 | 7065236 | 2 | 13 | 26 | GT   | 19 | 9  |
| 194556 | 24 | 7071204 | 7071221 | 3 | 6  | 18 | ACT  | 22 | 5  |
| 194559 | 24 | 7074007 | 7074026 | 2 | 10 | 20 | TG   | 19 | 5  |
| 194566 | 24 | 7088801 | 7088830 | 2 | 15 | 30 | TG   | 11 | 12 |
| 194568 | 24 | 7094736 | 7094785 | 2 | 25 | 50 | GT   | 13 | 8  |
| 194575 | 24 | 7104180 | 7104215 | 2 | 18 | 36 | AC   | 14 | 5  |
| 194577 | 24 | 7107599 | 7107610 | 2 | 6  | 12 | AT   | 11 | 7  |
| 194578 | 24 | 7110075 | 7110098 | 4 | 6  | 24 | TGTC | 24 | 7  |
| 194580 | 24 | 7111787 | 7111812 | 2 | 13 | 26 | GA   | 11 | 5  |
| 194582 | 24 | 7111932 | 7111955 | 2 | 12 | 24 | GA   | 6  | 8  |
| 194584 | 24 | 7112155 | 7112188 | 2 | 17 | 34 | AC   | 11 | 5  |
| 194602 | 24 | 7130937 | 7130956 | 2 | 10 | 20 | TG   | 8  | 9  |
| 194603 | 24 | 7131121 | 7131136 | 2 | 8  | 16 | GT   | 20 | 4  |
| 194604 | 24 | 7131166 | 7131195 | 2 | 15 | 30 | TG   | 6  | 5  |
| 194618 | 24 | 7156153 | 7156170 | 2 | 9  | 18 | AC   | 18 | 8  |
| 194626 | 24 | 7163144 | 7163169 | 2 | 13 | 26 | TG   | 7  | 7  |
| 194627 | 24 | 7165871 | 7165885 | 3 | 5  | 15 | GAG  | 22 | 6  |
| 194631 | 24 | 7181996 | 7182023 | 2 | 14 | 28 | CA   | 10 | 8  |
| 194632 | 24 | 7182137 | 7182158 | 2 | 11 | 22 | CA   | 19 | 6  |
| 194635 | 24 | 7186429 | 7186443 | 3 | 5  | 15 | AAG  | 18 | 3  |
| 194639 | 24 | 7190907 | 7190926 | 2 | 10 | 20 | TG   | 27 | 9  |
| 194640 | 24 | 7194688 | 7194703 | 4 | 4  | 16 | TCAT | 17 | 3  |
| 194641 | 24 | 7196367 | 7196394 | 2 | 14 | 28 | GT   | 8  | 5  |
| 194644 | 24 | 7200276 | 7200296 | 3 | 7  | 21 | GGA  | 11 | 6  |

|        |    |         |         |   |    |    |      |    |    |
|--------|----|---------|---------|---|----|----|------|----|----|
| 194654 | 24 | 7204695 | 7204715 | 3 | 7  | 21 | TTA  | 13 | 4  |
| 194659 | 24 | 7209910 | 7209924 | 3 | 5  | 15 | ATG  | 11 | 3  |
| 194662 | 24 | 7212395 | 7212406 | 2 | 6  | 12 | TG   | 22 | 3  |
| 194664 | 24 | 7215691 | 7215706 | 2 | 8  | 16 | AC   | 25 | 3  |
| 194665 | 24 | 7215794 | 7215807 | 2 | 7  | 14 | CT   | 24 | 7  |
| 194666 | 24 | 7215808 | 7215823 | 2 | 8  | 16 | CA   | 27 | 11 |
| 194667 | 24 | 7215883 | 7215894 | 2 | 6  | 12 | CA   | 23 | 4  |
| 194675 | 24 | 7225764 | 7225807 | 4 | 11 | 44 | TATC | 25 | 19 |
| 194678 | 24 | 7228449 | 7228462 | 2 | 7  | 14 | TC   | 19 | 4  |
| 194679 | 24 | 7240812 | 7240823 | 2 | 6  | 12 | AC   | 23 | 4  |
| 194680 | 24 | 7240908 | 7240931 | 2 | 12 | 24 | AC   | 19 | 5  |
| 194682 | 24 | 7242792 | 7242831 | 2 | 20 | 40 | AC   | 19 | 8  |
| 194683 | 24 | 7245980 | 7246007 | 2 | 14 | 28 | TG   | 17 | 6  |
| 194690 | 24 | 7260924 | 7260939 | 2 | 8  | 16 | TG   | 29 | 3  |
| 194692 | 24 | 7262825 | 7262848 | 2 | 12 | 24 | CA   | 11 | 9  |
| 194697 | 24 | 7264005 | 7264016 | 2 | 6  | 12 | TG   | 13 | 3  |
| 194705 | 24 | 7284139 | 7284160 | 2 | 11 | 22 | AC   | 19 | 10 |
| 194709 | 24 | 7289546 | 7289561 | 4 | 4  | 16 | CGTC | 26 | 8  |
| 194716 | 24 | 7312988 | 7313003 | 2 | 8  | 16 | AC   | 25 | 5  |
| 194717 | 24 | 7315501 | 7315512 | 2 | 6  | 12 | AC   | 32 | 5  |
| 194719 | 24 | 7319730 | 7319744 | 3 | 5  | 15 | CAG  | 28 | 4  |
| 194720 | 24 | 7319969 | 7319983 | 3 | 5  | 15 | GCC  | 23 | 6  |
| 194724 | 24 | 7323861 | 7323880 | 2 | 10 | 20 | CT   | 13 | 6  |
| 194725 | 24 | 7323927 | 7323938 | 2 | 6  | 12 | AT   | 16 | 4  |
| 194727 | 24 | 7325893 | 7325907 | 3 | 5  | 15 | GCT  | 34 | 3  |
| 194728 | 24 | 7329480 | 7329497 | 3 | 6  | 18 | TTG  | 18 | 7  |
| 194729 | 24 | 7329561 | 7329578 | 3 | 6  | 18 | ATC  | 15 | 4  |
| 194736 | 24 | 7336730 | 7336753 | 3 | 8  | 24 | TCA  | 33 | 9  |
| 194737 | 24 | 7342340 | 7342353 | 2 | 7  | 14 | TG   | 35 | 6  |
| 194739 | 24 | 7352455 | 7352474 | 4 | 5  | 20 | TGAG | 29 | 3  |
| 194745 | 24 | 7365600 | 7365617 | 2 | 9  | 18 | TG   | 20 | 3  |
| 194747 | 24 | 7367944 | 7367991 | 4 | 12 | 48 | AGAA | 15 | 7  |
| 194749 | 24 | 7379752 | 7379765 | 2 | 7  | 14 | CA   | 25 | 3  |
| 194755 | 24 | 7388585 | 7388608 | 2 | 12 | 24 | TG   | 16 | 9  |
| 194759 | 24 | 7396753 | 7396798 | 2 | 23 | 46 | CA   | 8  | 6  |
| 194764 | 24 | 7408604 | 7408621 | 2 | 9  | 18 | AC   | 22 | 8  |
| 194767 | 24 | 7408752 | 7408789 | 2 | 19 | 38 | TG   | 8  | 9  |
| 194768 | 24 | 7410660 | 7410675 | 2 | 8  | 16 | TG   | 23 | 6  |
| 194769 | 24 | 7410732 | 7410747 | 2 | 8  | 16 | AC   | 25 | 4  |
| 194770 | 24 | 7410806 | 7410823 | 2 | 9  | 18 | AC   | 16 | 7  |
| 194774 | 24 | 7418182 | 7418197 | 4 | 4  | 16 | AAAG | 22 | 4  |
| 194775 | 24 | 7418824 | 7418841 | 2 | 9  | 18 | TG   | 24 | 4  |
| 194777 | 24 | 7418961 | 7418976 | 2 | 8  | 16 | CA   | 20 | 3  |
| 194780 | 24 | 7420387 | 7420416 | 2 | 15 | 30 | CA   | 10 | 3  |
| 194786 | 24 | 7423656 | 7423671 | 2 | 8  | 16 | CA   | 21 | 3  |
| 194791 | 24 | 7425398 | 7425411 | 2 | 7  | 14 | TG   | 17 | 6  |
| 194794 | 24 | 7425730 | 7425753 | 2 | 12 | 24 | AC   | 11 | 5  |
| 194795 | 24 | 7425808 | 7425827 | 2 | 10 | 20 | GT   | 11 | 9  |
| 194796 | 24 | 7425852 | 7425867 | 2 | 8  | 16 | GT   | 7  | 4  |
| 194803 | 24 | 7430298 | 7430325 | 2 | 14 | 28 | AC   | 7  | 8  |
| 194807 | 24 | 7433241 | 7433258 | 2 | 9  | 18 | TG   | 23 | 8  |

|        |    |         |         |   |    |    |      |    |    |
|--------|----|---------|---------|---|----|----|------|----|----|
| 194808 | 24 | 7433447 | 7433488 | 2 | 21 | 42 | CA   | 8  | 13 |
| 194812 | 24 | 7435123 | 7435173 | 3 | 17 | 51 | GAA  | 20 | 7  |
| 194817 | 24 | 7444154 | 7444177 | 2 | 12 | 24 | GT   | 12 | 6  |
| 194823 | 24 | 7447068 | 7447083 | 2 | 8  | 16 | TG   | 19 | 9  |
| 194828 | 24 | 7450062 | 7450079 | 3 | 6  | 18 | CCT  | 23 | 3  |
| 194829 | 24 | 7450273 | 7450292 | 2 | 10 | 20 | GT   | 18 | 3  |
| 194831 | 24 | 7451380 | 7451411 | 2 | 16 | 32 | TG   | 11 | 10 |
| 194836 | 24 | 7453351 | 7453392 | 2 | 21 | 42 | AC   | 6  | 8  |
| 194837 | 24 | 7453457 | 7453490 | 2 | 17 | 34 | CA   | 12 | 4  |
| 194838 | 24 | 7453563 | 7453583 | 3 | 7  | 21 | CCT  | 22 | 3  |
| 194840 | 24 | 7455755 | 7455784 | 2 | 15 | 30 | AC   | 12 | 7  |
| 194841 | 24 | 7455924 | 7455935 | 2 | 6  | 12 | AC   | 24 | 4  |
| 194843 | 24 | 7457227 | 7457254 | 2 | 14 | 28 | AC   | 7  | 7  |
| 194844 | 24 | 7458530 | 7458547 | 2 | 9  | 18 | GT   | 18 | 3  |
| 194847 | 24 | 7460506 | 7460551 | 2 | 23 | 46 | CA   | 7  | 10 |
| 194848 | 24 | 7460679 | 7460690 | 2 | 6  | 12 | GT   | 20 | 3  |
| 194853 | 24 | 7462569 | 7462586 | 2 | 9  | 18 | AC   | 20 | 9  |
| 194860 | 24 | 7471036 | 7471047 | 2 | 6  | 12 | AC   | 21 | 3  |
| 194862 | 24 | 7477379 | 7477394 | 2 | 8  | 16 | GT   | 12 | 3  |
| 194867 | 24 | 7487710 | 7487721 | 2 | 6  | 12 | GT   | 27 | 5  |
| 194868 | 24 | 7487724 | 7487737 | 2 | 7  | 14 | GT   | 20 | 3  |
| 194874 | 24 | 7495642 | 7495661 | 4 | 5  | 20 | TTGA | 22 | 5  |
| 194875 | 24 | 7496608 | 7496619 | 2 | 6  | 12 | AC   | 23 | 4  |
| 194879 | 24 | 7497105 | 7497120 | 2 | 8  | 16 | TG   | 13 | 4  |
| 194881 | 24 | 7500799 | 7500832 | 2 | 17 | 34 | GT   | 20 | 12 |
| 194888 | 24 | 7526700 | 7526721 | 2 | 11 | 22 | GT   | 18 | 5  |
| 194891 | 24 | 7532528 | 7532557 | 3 | 10 | 30 | AGG  | 24 | 5  |
| 194893 | 24 | 7537041 | 7537070 | 2 | 15 | 30 | CA   | 16 | 8  |
| 194898 | 24 | 7555089 | 7555110 | 2 | 11 | 22 | TG   | 14 | 8  |
| 194903 | 24 | 7565256 | 7565285 | 2 | 15 | 30 | GT   | 17 | 10 |
| 194907 | 24 | 7571081 | 7571100 | 2 | 10 | 20 | TG   | 22 | 4  |
| 194908 | 24 | 7572417 | 7572434 | 3 | 6  | 18 | TTC  | 16 | 3  |
| 194909 | 24 | 7573705 | 7573722 | 3 | 6  | 18 | GAG  | 27 | 3  |
| 194914 | 24 | 7583312 | 7583333 | 2 | 11 | 22 | GT   | 8  | 6  |
| 194917 | 24 | 7584591 | 7584620 | 3 | 10 | 30 | CCT  | 14 | 5  |
| 194919 | 24 | 7590276 | 7590301 | 2 | 13 | 26 | TG   | 16 | 5  |
| 194920 | 24 | 7592489 | 7592502 | 2 | 7  | 14 | GT   | 18 | 3  |
| 194922 | 24 | 7595076 | 7595095 | 2 | 10 | 20 | CA   | 11 | 6  |
| 194927 | 24 | 7596720 | 7596733 | 2 | 7  | 14 | GT   | 27 | 3  |
| 194928 | 24 | 7596828 | 7596861 | 2 | 17 | 34 | TG   | 10 | 5  |
| 194930 | 24 | 7596890 | 7596901 | 2 | 6  | 12 | TG   | 23 | 4  |
| 194931 | 24 | 7597018 | 7597051 | 2 | 17 | 34 | GT   | 6  | 6  |
| 194932 | 24 | 7598883 | 7598896 | 2 | 7  | 14 | GT   | 15 | 3  |
| 194933 | 24 | 7599054 | 7599085 | 2 | 16 | 32 | TC   | 15 | 8  |
| 194935 | 24 | 7602480 | 7602495 | 2 | 8  | 16 | CA   | 20 | 9  |
| 194939 | 24 | 7606357 | 7606370 | 2 | 7  | 14 | AC   | 19 | 3  |
| 194944 | 24 | 7612143 | 7612166 | 3 | 8  | 24 | CTC  | 8  | 3  |
| 194948 | 24 | 7615973 | 7615986 | 2 | 7  | 14 | GT   | 26 | 3  |
| 194949 | 24 | 7616062 | 7616073 | 2 | 6  | 12 | AC   | 23 | 3  |
| 194961 | 24 | 7626513 | 7626536 | 2 | 12 | 24 | GT   | 12 | 4  |
| 194967 | 24 | 7628956 | 7628971 | 2 | 8  | 16 | AC   | 25 | 3  |

|        |    |         |         |   |    |    |      |    |    |
|--------|----|---------|---------|---|----|----|------|----|----|
| 194968 | 24 | 7628998 | 7629011 | 2 | 7  | 14 | CA   | 24 | 5  |
| 194971 | 24 | 7631191 | 7631220 | 2 | 15 | 30 | AC   | 8  | 8  |
| 194973 | 24 | 7631386 | 7631401 | 2 | 8  | 16 | CA   | 20 | 4  |
| 194974 | 24 | 7632323 | 7632338 | 2 | 8  | 16 | GT   | 22 | 6  |
| 194975 | 24 | 7632667 | 7632700 | 2 | 17 | 34 | AC   | 14 | 10 |
| 194976 | 24 | 7634141 | 7634184 | 2 | 22 | 44 | TG   | 6  | 6  |
| 194995 | 24 | 7649774 | 7649795 | 2 | 11 | 22 | TG   | 18 | 11 |
| 194996 | 24 | 7652081 | 7652112 | 2 | 16 | 32 | CA   | 13 | 12 |
| 195000 | 24 | 7653717 | 7653740 | 2 | 12 | 24 | TC   | 13 | 5  |
| 195002 | 24 | 7653993 | 7654036 | 2 | 22 | 44 | GT   | 9  | 7  |
| 195003 | 24 | 7654105 | 7654136 | 2 | 16 | 32 | AC   | 10 | 10 |
| 195004 | 24 | 7657595 | 7657612 | 3 | 6  | 18 | CCT  | 24 | 3  |
| 195006 | 24 | 7658879 | 7658904 | 2 | 13 | 26 | GT   | 20 | 4  |
| 195007 | 24 | 7659327 | 7659350 | 2 | 12 | 24 | TG   | 18 | 10 |
| 195008 | 24 | 7659498 | 7659531 | 2 | 17 | 34 | CA   | 18 | 7  |
| 195055 | 24 | 7676124 | 7676165 | 2 | 21 | 42 | GT   | 12 | 8  |
| 195058 | 24 | 7679342 | 7679359 | 2 | 9  | 18 | TG   | 20 | 4  |
| 195062 | 24 | 7681286 | 7681305 | 2 | 10 | 20 | GT   | 13 | 4  |
| 195063 | 24 | 7682272 | 7682297 | 2 | 13 | 26 | TG   | 6  | 4  |
| 195066 | 24 | 7685839 | 7685866 | 2 | 14 | 28 | TG   | 15 | 4  |
| 195068 | 24 | 7686278 | 7686305 | 4 | 7  | 28 | TAGA | 27 | 9  |
| 195073 | 24 | 7687875 | 7687918 | 2 | 22 | 44 | AC   | 9  | 7  |
| 195076 | 24 | 7690158 | 7690183 | 2 | 13 | 26 | GT   | 14 | 7  |
| 195077 | 24 | 7690351 | 7690368 | 2 | 9  | 18 | AC   | 13 | 8  |
| 195079 | 24 | 7691113 | 7691126 | 2 | 7  | 14 | GT   | 13 | 7  |
| 195083 | 24 | 7692813 | 7692863 | 3 | 17 | 51 | CCT  | 8  | 7  |
| 195088 | 24 | 7696793 | 7696820 | 2 | 14 | 28 | TG   | 13 | 4  |
| 195089 | 24 | 7697010 | 7697023 | 2 | 7  | 14 | TG   | 26 | 3  |
| 195090 | 24 | 7702638 | 7702658 | 3 | 7  | 21 | CTG  | 24 | 8  |
| 195093 | 24 | 7704615 | 7704656 | 2 | 21 | 42 | CA   | 7  | 4  |
| 195094 | 24 | 7705102 | 7705141 | 2 | 20 | 40 | TG   | 10 | 6  |
| 195104 | 24 | 7720958 | 7720984 | 3 | 9  | 27 | AGG  | 26 | 5  |
| 195115 | 24 | 7741630 | 7741651 | 2 | 11 | 22 | TC   | 21 | 6  |
| 195121 | 24 | 7754520 | 7754539 | 2 | 10 | 20 | CA   | 16 | 5  |
| 195171 | 24 | 7783121 | 7783156 | 2 | 18 | 36 | CA   | 8  | 4  |
| 195175 | 24 | 7792608 | 7792639 | 2 | 16 | 32 | TG   | 12 | 6  |
| 195178 | 24 | 7794939 | 7794970 | 2 | 16 | 32 | AC   | 8  | 6  |
| 195186 | 24 | 7809732 | 7809759 | 2 | 14 | 28 | GT   | 7  | 5  |
| 195189 | 24 | 7813605 | 7813620 | 2 | 8  | 16 | GT   | 19 | 3  |
| 195191 | 24 | 7813805 | 7813834 | 2 | 15 | 30 | TG   | 6  | 6  |
| 195192 | 24 | 7816043 | 7816076 | 2 | 17 | 34 | CA   | 9  | 5  |
| 195194 | 24 | 7817636 | 7817669 | 2 | 17 | 34 | GT   | 7  | 7  |
| 195200 | 24 | 7842192 | 7842227 | 2 | 18 | 36 | CA   | 10 | 8  |
| 195203 | 24 | 7842779 | 7842802 | 3 | 8  | 24 | GCA  | 26 | 6  |
| 195204 | 24 | 7843119 | 7843150 | 2 | 16 | 32 | TG   | 8  | 10 |
| 195206 | 24 | 7844224 | 7844255 | 4 | 8  | 32 | TTGA | 23 | 5  |
| 195208 | 24 | 7845799 | 7845816 | 2 | 9  | 18 | TG   | 24 | 4  |
| 195215 | 24 | 7861732 | 7861747 | 2 | 8  | 16 | GT   | 28 | 4  |
| 195217 | 24 | 7864928 | 7864945 | 2 | 9  | 18 | TG   | 13 | 4  |
| 195218 | 24 | 7865525 | 7865558 | 2 | 17 | 34 | GT   | 7  | 9  |
| 195220 | 24 | 7869794 | 7869819 | 2 | 13 | 26 | GT   | 14 | 10 |



|        |    |         |         |   |    |    |     |    |    |
|--------|----|---------|---------|---|----|----|-----|----|----|
| 195221 | 24 | 7870301 | 7870315 | 3 | 5  | 15 | GGT | 26 | 3  |
| 195230 | 24 | 7893150 | 7893177 | 2 | 14 | 28 | TG  | 9  | 4  |
| 195231 | 24 | 7894734 | 7894749 | 2 | 8  | 16 | AC  | 20 | 6  |
| 195234 | 24 | 7898020 | 7898031 | 2 | 6  | 12 | CA  | 22 | 3  |
| 195235 | 24 | 7898318 | 7898349 | 2 | 16 | 32 | CA  | 16 | 10 |
| 195238 | 24 | 7903674 | 7903689 | 2 | 8  | 16 | TG  | 29 | 3  |
| 195244 | 24 | 7908463 | 7908492 | 3 | 10 | 30 | GGA | 11 | 4  |
| 195253 | 25 | 7201    | 7216    | 2 | 8  | 16 | TG  | 18 | 4  |
| 195258 | 25 | 11800   | 11811   | 2 | 6  | 12 | GT  | 12 | 5  |
| 195260 | 25 | 12037   | 12060   | 2 | 12 | 24 | CA  | 9  | 5  |
| 195261 | 25 | 12147   | 12170   | 2 | 12 | 24 | TG  | 20 | 6  |
| 195262 | 25 | 12294   | 12311   | 2 | 9  | 18 | GT  | 18 | 7  |
| 195263 | 25 | 12643   | 12672   | 2 | 15 | 30 | TG  | 10 | 9  |
| 195264 | 25 | 18524   | 18545   | 2 | 11 | 22 | AC  | 18 | 5  |
| 195266 | 25 | 24503   | 24532   | 3 | 10 | 30 | ATC | 20 | 4  |
| 195269 | 25 | 25286   | 25301   | 2 | 8  | 16 | CA  | 17 | 4  |
| 195273 | 25 | 31133   | 31156   | 2 | 12 | 24 | CA  | 15 | 17 |
| 195274 | 25 | 31379   | 31396   | 2 | 9  | 18 | CA  | 29 | 7  |
| 195275 | 25 | 31520   | 31535   | 2 | 8  | 16 | TC  | 24 | 3  |
| 195276 | 25 | 31692   | 31703   | 2 | 6  | 12 | TG  | 17 | 5  |
| 195277 | 25 | 32750   | 32789   | 2 | 20 | 40 | TG  | 10 | 9  |
| 195279 | 25 | 37359   | 37384   | 2 | 13 | 26 | AC  | 21 | 11 |
| 195281 | 25 | 42084   | 42105   | 2 | 11 | 22 | TG  | 20 | 6  |
| 195282 | 25 | 42357   | 42404   | 2 | 24 | 48 | AC  | 7  | 9  |
| 195283 | 25 | 44550   | 44571   | 2 | 11 | 22 | TG  | 24 | 7  |
| 195285 | 25 | 46348   | 46375   | 2 | 14 | 28 | AC  | 17 | 8  |
| 195288 | 25 | 49615   | 49628   | 2 | 7  | 14 | GT  | 25 | 7  |
| 195291 | 25 | 67623   | 67640   | 2 | 9  | 18 | TG  | 25 | 7  |
| 195298 | 25 | 77657   | 77670   | 2 | 7  | 14 | AC  | 27 | 7  |
| 195303 | 25 | 85112   | 85129   | 2 | 9  | 18 | TC  | 32 | 3  |
| 195305 | 25 | 87166   | 87191   | 2 | 13 | 26 | GA  | 13 | 6  |
| 195307 | 25 | 89928   | 89963   | 2 | 18 | 36 | GT  | 10 | 7  |
| 195310 | 25 | 90163   | 90182   | 2 | 10 | 20 | TG  | 13 | 6  |
| 195311 | 25 | 95627   | 95654   | 2 | 14 | 28 | GT  | 8  | 10 |
| 195313 | 25 | 96818   | 96829   | 2 | 6  | 12 | GT  | 33 | 3  |
| 195314 | 25 | 97376   | 97407   | 2 | 16 | 32 | AC  | 18 | 9  |
| 195315 | 25 | 99303   | 99314   | 2 | 6  | 12 | TG  | 18 | 3  |
| 195316 | 25 | 99450   | 99469   | 2 | 10 | 20 | TG  | 6  | 4  |
| 195318 | 25 | 99643   | 99654   | 2 | 6  | 12 | CA  | 29 | 3  |
| 195319 | 25 | 99709   | 99722   | 2 | 7  | 14 | TG  | 26 | 7  |
| 195320 | 25 | 100507  | 100562  | 2 | 28 | 56 | AG  | 6  | 7  |
| 195322 | 25 | 106857  | 106884  | 2 | 14 | 28 | GA  | 30 | 11 |
| 195323 | 25 | 107067  | 107094  | 2 | 14 | 28 | AC  | 12 | 8  |
| 195324 | 25 | 107408  | 107421  | 2 | 7  | 14 | GT  | 29 | 5  |
| 195325 | 25 | 107592  | 107613  | 2 | 11 | 22 | CA  | 20 | 8  |
| 195326 | 25 | 107778  | 107815  | 2 | 19 | 38 | AC  | 13 | 11 |
| 195329 | 25 | 114786  | 114799  | 2 | 7  | 14 | GA  | 12 | 3  |
| 195330 | 25 | 115275  | 115298  | 2 | 12 | 24 | GA  | 15 | 9  |
| 195333 | 25 | 129535  | 129552  | 2 | 9  | 18 | AC  | 26 | 8  |
| 195334 | 25 | 130667  | 130680  | 2 | 7  | 14 | AC  | 23 | 4  |
| 195335 | 25 | 130708  | 130723  | 2 | 8  | 16 | CA  | 18 | 3  |

|        |    |        |        |   |    |    |      |    |    |
|--------|----|--------|--------|---|----|----|------|----|----|
| 195337 | 25 | 135278 | 135297 | 2 | 10 | 20 | CA   | 20 | 6  |
| 195338 | 25 | 135401 | 135430 | 2 | 15 | 30 | CA   | 6  | 6  |
| 195341 | 25 | 138081 | 138100 | 2 | 10 | 20 | TG   | 13 | 7  |
| 195343 | 25 | 138215 | 138234 | 2 | 10 | 20 | AC   | 16 | 5  |
| 195344 | 25 | 138277 | 138288 | 2 | 6  | 12 | GT   | 30 | 4  |
| 195346 | 25 | 138606 | 138653 | 2 | 24 | 48 | CA   | 6  | 8  |
| 195350 | 25 | 143302 | 143322 | 3 | 7  | 21 | TCC  | 12 | 5  |
| 195351 | 25 | 143638 | 143663 | 2 | 13 | 26 | TG   | 6  | 5  |
| 195352 | 25 | 143991 | 144023 | 3 | 11 | 33 | CTC  | 13 | 7  |
| 195353 | 25 | 144133 | 144168 | 2 | 18 | 36 | CA   | 12 | 10 |
| 195356 | 25 | 151693 | 151726 | 2 | 17 | 34 | GT   | 9  | 7  |
| 195359 | 25 | 152715 | 152730 | 4 | 4  | 16 | TTTG | 20 | 5  |
| 195360 | 25 | 155636 | 155655 | 2 | 10 | 20 | TG   | 9  | 7  |
| 195361 | 25 | 156584 | 156617 | 2 | 17 | 34 | GT   | 6  | 10 |
| 195364 | 25 | 157664 | 157701 | 2 | 19 | 38 | TG   | 7  | 9  |
| 195368 | 25 | 164075 | 164114 | 2 | 20 | 40 | TG   | 14 | 9  |
| 195376 | 25 | 172981 | 173014 | 2 | 17 | 34 | CA   | 12 | 5  |
| 195378 | 25 | 173181 | 173202 | 2 | 11 | 22 | TG   | 22 | 6  |
| 195384 | 25 | 186882 | 186911 | 2 | 15 | 30 | AC   | 13 | 8  |
| 195385 | 25 | 187332 | 187359 | 4 | 7  | 28 | AGTA | 21 | 3  |
| 195387 | 25 | 190067 | 190084 | 3 | 6  | 18 | GAG  | 25 | 3  |
| 195390 | 25 | 193403 | 193418 | 2 | 8  | 16 | GT   | 18 | 8  |
| 195392 | 25 | 197480 | 197493 | 2 | 7  | 14 | AC   | 20 | 5  |
| 195393 | 25 | 197501 | 197512 | 2 | 6  | 12 | CA   | 16 | 4  |
| 195394 | 25 | 197693 | 197706 | 2 | 7  | 14 | CA   | 20 | 3  |
| 195395 | 25 | 197708 | 197721 | 2 | 7  | 14 | TG   | 20 | 3  |
| 195397 | 25 | 199679 | 199696 | 2 | 9  | 18 | TG   | 19 | 10 |
| 195401 | 25 | 203794 | 203811 | 2 | 9  | 18 | GT   | 15 | 9  |
| 195402 | 25 | 203982 | 204001 | 2 | 10 | 20 | CA   | 7  | 9  |
| 195403 | 25 | 204104 | 204131 | 2 | 14 | 28 | CA   | 8  | 5  |
| 195404 | 25 | 204241 | 204258 | 2 | 9  | 18 | CA   | 19 | 12 |
| 195405 | 25 | 205008 | 205023 | 4 | 4  | 16 | AAAC | 22 | 4  |
| 195406 | 25 | 205623 | 205634 | 2 | 6  | 12 | AC   | 30 | 3  |
| 195407 | 25 | 205912 | 205927 | 2 | 8  | 16 | AC   | 21 | 11 |
| 195408 | 25 | 206321 | 206332 | 2 | 6  | 12 | AC   | 26 | 5  |
| 195409 | 25 | 206733 | 206744 | 2 | 6  | 12 | GT   | 22 | 5  |
| 195411 | 25 | 207291 | 207308 | 2 | 9  | 18 | TA   | 15 | 8  |
| 195416 | 25 | 216917 | 216934 | 2 | 9  | 18 | AT   | 21 | 5  |
| 195418 | 25 | 219251 | 219266 | 2 | 8  | 16 | GT   | 19 | 3  |
| 195428 | 25 | 233536 | 233549 | 2 | 7  | 14 | GT   | 19 | 6  |
| 195429 | 25 | 233656 | 233695 | 2 | 20 | 40 | AC   | 17 | 13 |
| 195431 | 25 | 236349 | 236360 | 2 | 6  | 12 | AC   | 24 | 4  |
| 195435 | 25 | 246098 | 246129 | 2 | 16 | 32 | AG   | 15 | 14 |
| 195439 | 25 | 255919 | 255942 | 2 | 12 | 24 | TG   | 9  | 5  |
| 195440 | 25 | 264847 | 264862 | 2 | 8  | 16 | TG   | 8  | 5  |
| 195445 | 25 | 270551 | 270574 | 2 | 12 | 24 | GT   | 23 | 5  |
| 195446 | 25 | 271564 | 271575 | 2 | 6  | 12 | CA   | 21 | 3  |
| 195448 | 25 | 273555 | 273588 | 2 | 17 | 34 | AC   | 14 | 11 |
| 195449 | 25 | 274696 | 274713 | 2 | 9  | 18 | AC   | 21 | 4  |
| 195450 | 25 | 276149 | 276174 | 2 | 13 | 26 | GT   | 15 | 16 |
| 195451 | 25 | 277429 | 277452 | 2 | 12 | 24 | TC   | 16 | 5  |

|        |    |        |        |   |    |    |      |    |    |
|--------|----|--------|--------|---|----|----|------|----|----|
| 195453 | 25 | 291670 | 291689 | 2 | 10 | 20 | GA   | 16 | 4  |
| 195455 | 25 | 293434 | 293463 | 3 | 10 | 30 | CTT  | 17 | 8  |
| 195456 | 25 | 299488 | 299501 | 2 | 7  | 14 | AT   | 19 | 4  |
| 195460 | 25 | 306439 | 306456 | 3 | 6  | 18 | TCC  | 25 | 3  |
| 195463 | 25 | 318264 | 318281 | 3 | 6  | 18 | TAA  | 19 | 3  |
| 195474 | 25 | 338034 | 338071 | 2 | 19 | 38 | GA   | 6  | 7  |
| 195479 | 25 | 346725 | 346744 | 2 | 10 | 20 | GT   | 22 | 4  |
| 195496 | 25 | 409360 | 409373 | 2 | 7  | 14 | AC   | 11 | 9  |
| 195497 | 25 | 409375 | 409394 | 2 | 10 | 20 | CA   | 15 | 10 |
| 195498 | 25 | 411722 | 411737 | 2 | 8  | 16 | CT   | 24 | 4  |
| 195502 | 25 | 414426 | 414457 | 2 | 16 | 32 | GT   | 16 | 6  |
| 195504 | 25 | 427468 | 427511 | 2 | 22 | 44 | CA   | 6  | 8  |
| 195506 | 25 | 435224 | 435247 | 3 | 8  | 24 | TTG  | 27 | 7  |
| 195516 | 25 | 454231 | 454250 | 2 | 10 | 20 | AC   | 21 | 8  |
| 195520 | 25 | 459911 | 459944 | 2 | 17 | 34 | CA   | 14 | 14 |
| 195530 | 25 | 481810 | 481843 | 2 | 17 | 34 | TG   | 14 | 9  |
| 195531 | 25 | 482016 | 482031 | 2 | 8  | 16 | CT   | 16 | 14 |
| 195536 | 25 | 493013 | 493026 | 2 | 7  | 14 | GT   | 22 | 4  |
| 195539 | 25 | 499824 | 499839 | 2 | 8  | 16 | CT   | 20 | 3  |
| 195544 | 25 | 504507 | 504528 | 2 | 11 | 22 | AC   | 19 | 7  |
| 195547 | 25 | 508515 | 508530 | 2 | 8  | 16 | GT   | 26 | 4  |
| 195553 | 25 | 519007 | 519038 | 4 | 8  | 32 | TATC | 23 | 4  |
| 195564 | 25 | 530540 | 530571 | 2 | 16 | 32 | TC   | 7  | 6  |
| 195565 | 25 | 533203 | 533218 | 2 | 8  | 16 | AC   | 14 | 3  |
| 195566 | 25 | 535917 | 535930 | 2 | 7  | 14 | TG   | 12 | 5  |
| 195571 | 25 | 543424 | 543439 | 2 | 8  | 16 | GT   | 26 | 6  |
| 195575 | 25 | 562996 | 563009 | 2 | 7  | 14 | GT   | 24 | 5  |
| 195579 | 25 | 567927 | 567952 | 2 | 13 | 26 | AC   | 17 | 15 |
| 195583 | 25 | 569876 | 569890 | 3 | 5  | 15 | GGA  | 23 | 3  |
| 195585 | 25 | 572742 | 572761 | 2 | 10 | 20 | TG   | 15 | 5  |
| 195586 | 25 | 577676 | 577691 | 4 | 4  | 16 | ATTG | 21 | 3  |
| 195589 | 25 | 587388 | 587427 | 2 | 20 | 40 | TC   | 9  | 12 |
| 195590 | 25 | 587683 | 587712 | 2 | 15 | 30 | GT   | 22 | 9  |
| 195591 | 25 | 591200 | 591229 | 2 | 15 | 30 | AC   | 6  | 8  |
| 195592 | 25 | 592985 | 593012 | 2 | 14 | 28 | GT   | 15 | 11 |
| 195595 | 25 | 603885 | 603898 | 2 | 7  | 14 | TG   | 31 | 7  |
| 195599 | 25 | 609755 | 609782 | 2 | 14 | 28 | AG   | 16 | 5  |
| 195613 | 25 | 622762 | 622781 | 2 | 10 | 20 | AG   | 11 | 3  |
| 195615 | 25 | 623174 | 623189 | 2 | 8  | 16 | CA   | 20 | 8  |
| 195616 | 25 | 623323 | 623342 | 2 | 10 | 20 | CA   | 16 | 5  |
| 195618 | 25 | 626471 | 626484 | 2 | 7  | 14 | CA   | 23 | 4  |
| 195633 | 25 | 645649 | 645672 | 2 | 12 | 24 | CA   | 21 | 7  |
| 195642 | 25 | 657321 | 657342 | 2 | 11 | 22 | TG   | 17 | 4  |
| 195644 | 25 | 664783 | 664798 | 4 | 4  | 16 | TTTA | 9  | 8  |
| 195646 | 25 | 674257 | 674274 | 2 | 9  | 18 | AC   | 21 | 3  |
| 195648 | 25 | 676254 | 676289 | 4 | 9  | 36 | AAGA | 15 | 10 |
| 195649 | 25 | 676957 | 676968 | 2 | 6  | 12 | TG   | 25 | 3  |
| 195650 | 25 | 678414 | 678445 | 2 | 16 | 32 | GT   | 10 | 7  |
| 195656 | 25 | 686420 | 686433 | 2 | 7  | 14 | AT   | 12 | 8  |
| 195660 | 25 | 698115 | 698138 | 2 | 12 | 24 | CA   | 9  | 5  |
| 195663 | 25 | 703875 | 703900 | 2 | 13 | 26 | CA   | 27 | 9  |

|        |    |        |        |   |    |    |      |    |    |
|--------|----|--------|--------|---|----|----|------|----|----|
| 195674 | 25 | 724575 | 724602 | 2 | 14 | 28 | GT   | 18 | 11 |
| 195683 | 25 | 742314 | 742325 | 2 | 6  | 12 | TC   | 27 | 3  |
| 195684 | 25 | 742764 | 742785 | 2 | 11 | 22 | AT   | 18 | 13 |
| 195685 | 25 | 743041 | 743054 | 2 | 7  | 14 | GA   | 32 | 4  |
| 195686 | 25 | 743156 | 743173 | 2 | 9  | 18 | AC   | 29 | 3  |
| 195688 | 25 | 747588 | 747603 | 2 | 8  | 16 | GT   | 26 | 6  |
| 195707 | 25 | 787781 | 787792 | 2 | 6  | 12 | TG   | 35 | 4  |
| 195714 | 25 | 794749 | 794762 | 2 | 7  | 14 | AG   | 22 | 3  |
| 195715 | 25 | 794772 | 794783 | 2 | 6  | 12 | AG   | 23 | 4  |
| 195716 | 25 | 794999 | 795032 | 2 | 17 | 34 | AC   | 13 | 10 |
| 195719 | 25 | 798386 | 798405 | 4 | 5  | 20 | TATC | 22 | 4  |
| 195724 | 25 | 805261 | 805278 | 2 | 9  | 18 | AG   | 20 | 6  |
| 195728 | 25 | 806975 | 806990 | 2 | 8  | 16 | AC   | 28 | 5  |
| 195729 | 25 | 810689 | 810756 | 4 | 17 | 68 | ATCT | 14 | 13 |
| 195731 | 25 | 813027 | 813040 | 2 | 7  | 14 | CA   | 24 | 9  |
| 195735 | 25 | 821603 | 821658 | 2 | 28 | 56 | GT   | 9  | 11 |
| 195736 | 25 | 822198 | 822209 | 2 | 6  | 12 | TC   | 14 | 4  |
| 195740 | 25 | 828130 | 828143 | 2 | 7  | 14 | GT   | 22 | 5  |
| 195743 | 25 | 828820 | 828863 | 2 | 22 | 44 | CA   | 13 | 16 |
| 195745 | 25 | 835492 | 835507 | 4 | 4  | 16 | TTTG | 29 | 3  |
| 195748 | 25 | 846742 | 846753 | 2 | 6  | 12 | AC   | 24 | 3  |
| 195754 | 25 | 850608 | 850623 | 2 | 8  | 16 | AC   | 21 | 4  |
| 195759 | 25 | 851015 | 851038 | 2 | 12 | 24 | AG   | 14 | 4  |
| 195762 | 25 | 854615 | 854630 | 2 | 8  | 16 | AG   | 24 | 5  |
| 195764 | 25 | 864337 | 864364 | 2 | 14 | 28 | TG   | 14 | 6  |
| 195765 | 25 | 864432 | 864461 | 2 | 15 | 30 | TG   | 9  | 8  |
| 195766 | 25 | 868517 | 868540 | 2 | 12 | 24 | CA   | 19 | 8  |
| 195767 | 25 | 873355 | 873366 | 2 | 6  | 12 | CA   | 24 | 3  |
| 195771 | 25 | 892386 | 892401 | 2 | 8  | 16 | TC   | 20 | 6  |
| 195772 | 25 | 892936 | 892949 | 2 | 7  | 14 | TC   | 13 | 6  |
| 195774 | 25 | 898296 | 898309 | 2 | 7  | 14 | TG   | 20 | 5  |
| 195775 | 25 | 898591 | 898604 | 2 | 7  | 14 | GT   | 8  | 6  |
| 195781 | 25 | 905162 | 905189 | 2 | 14 | 28 | GT   | 13 | 8  |
| 195788 | 25 | 910460 | 910479 | 2 | 10 | 20 | CA   | 15 | 6  |
| 195790 | 25 | 913856 | 913873 | 2 | 9  | 18 | CA   | 27 | 12 |
| 195794 | 25 | 916624 | 916637 | 2 | 7  | 14 | AC   | 23 | 3  |
| 195800 | 25 | 923184 | 923199 | 2 | 8  | 16 | CA   | 25 | 4  |
| 195806 | 25 | 929092 | 929117 | 2 | 13 | 26 | CA   | 21 | 9  |
| 195813 | 25 | 932947 | 932968 | 2 | 11 | 22 | CA   | 19 | 15 |
| 195816 | 25 | 933571 | 933586 | 2 | 8  | 16 | CT   | 19 | 5  |
| 195828 | 25 | 942850 | 942891 | 2 | 21 | 42 | GT   | 6  | 6  |
| 195829 | 25 | 947563 | 947586 | 2 | 12 | 24 | TC   | 22 | 7  |
| 195831 | 25 | 949208 | 949225 | 2 | 9  | 18 | GA   | 18 | 3  |
| 195836 | 25 | 952405 | 952430 | 2 | 13 | 26 | AC   | 11 | 6  |
| 195841 | 25 | 956123 | 956144 | 2 | 11 | 22 | GT   | 17 | 14 |
| 195849 | 25 | 965541 | 965568 | 2 | 14 | 28 | CA   | 21 | 9  |
| 195852 | 25 | 968716 | 968739 | 4 | 6  | 24 | AAAG | 22 | 3  |
| 195858 | 25 | 970478 | 970495 | 2 | 9  | 18 | AC   | 20 | 7  |
| 195859 | 25 | 970577 | 970597 | 3 | 7  | 21 | GGA  | 12 | 4  |
| 195860 | 25 | 971533 | 971547 | 3 | 5  | 15 | AGC  | 18 | 5  |
| 195872 | 25 | 995373 | 995390 | 2 | 9  | 18 | TG   | 17 | 4  |

|        |    |         |         |   |    |    |      |    |    |
|--------|----|---------|---------|---|----|----|------|----|----|
| 195881 | 25 | 1021267 | 1021284 | 3 | 6  | 18 | TGT  | 29 | 3  |
| 195882 | 25 | 1021399 | 1021422 | 4 | 6  | 24 | CCTG | 29 | 4  |
| 195884 | 25 | 1029289 | 1029304 | 2 | 8  | 16 | TA   | 9  | 7  |
| 195885 | 25 | 1038305 | 1038320 | 2 | 8  | 16 | AT   | 25 | 3  |
| 195900 | 25 | 1064692 | 1064723 | 2 | 16 | 32 | TC   | 17 | 9  |
| 195906 | 25 | 1077727 | 1077740 | 2 | 7  | 14 | CT   | 21 | 7  |
| 195907 | 25 | 1079601 | 1079630 | 2 | 15 | 30 | TG   | 9  | 11 |
| 195909 | 25 | 1083792 | 1083803 | 2 | 6  | 12 | TG   | 19 | 10 |
| 195910 | 25 | 1083806 | 1083821 | 2 | 8  | 16 | TG   | 16 | 10 |
| 195913 | 25 | 1094633 | 1094650 | 2 | 9  | 18 | GT   | 10 | 12 |
| 195914 | 25 | 1094652 | 1094663 | 2 | 6  | 12 | TG   | 10 | 10 |
| 195916 | 25 | 1099459 | 1099488 | 2 | 15 | 30 | TG   | 14 | 8  |
| 195918 | 25 | 1106134 | 1106157 | 2 | 12 | 24 | TG   | 8  | 8  |
| 195940 | 25 | 1159779 | 1159800 | 2 | 11 | 22 | AG   | 15 | 8  |
| 195948 | 25 | 1196403 | 1196414 | 2 | 6  | 12 | AT   | 23 | 4  |
| 195956 | 25 | 1216277 | 1216292 | 2 | 8  | 16 | CT   | 14 | 6  |
| 195957 | 25 | 1216692 | 1216712 | 3 | 7  | 21 | CTG  | 27 | 3  |
| 195958 | 25 | 1216795 | 1216806 | 2 | 6  | 12 | TC   | 21 | 3  |
| 195963 | 25 | 1217730 | 1217753 | 4 | 6  | 24 | ATAA | 14 | 6  |
| 195972 | 25 | 1234079 | 1234108 | 3 | 10 | 30 | GCA  | 22 | 11 |
| 195975 | 25 | 1241077 | 1241092 | 2 | 8  | 16 | TC   | 19 | 7  |
| 195978 | 25 | 1247223 | 1247240 | 3 | 6  | 18 | AAC  | 27 | 8  |
| 195980 | 25 | 1248867 | 1248892 | 2 | 13 | 26 | CA   | 15 | 12 |
| 195981 | 25 | 1249185 | 1249196 | 2 | 6  | 12 | AG   | 26 | 6  |
| 195982 | 25 | 1249198 | 1249213 | 2 | 8  | 16 | GA   | 22 | 6  |
| 195989 | 25 | 1258156 | 1258171 | 2 | 8  | 16 | AC   | 24 | 4  |
| 195992 | 25 | 1267065 | 1267090 | 2 | 13 | 26 | TG   | 24 | 9  |
| 195995 | 25 | 1276184 | 1276207 | 3 | 8  | 24 | TTC  | 29 | 6  |
| 195999 | 25 | 1284870 | 1284884 | 3 | 5  | 15 | GCG  | 23 | 7  |
| 196001 | 25 | 1289543 | 1289574 | 2 | 16 | 32 | TC   | 11 | 7  |
| 196003 | 25 | 1289890 | 1289907 | 3 | 6  | 18 | GGA  | 20 | 4  |
| 196013 | 25 | 1301847 | 1301876 | 2 | 15 | 30 | CA   | 8  | 7  |
| 196017 | 25 | 1304347 | 1304382 | 4 | 9  | 36 | TGGA | 17 | 10 |
| 196019 | 25 | 1308174 | 1308197 | 2 | 12 | 24 | AC   | 22 | 6  |
| 196022 | 25 | 1324855 | 1324872 | 2 | 9  | 18 | TG   | 21 | 4  |
| 196023 | 25 | 1324874 | 1324885 | 2 | 6  | 12 | GT   | 27 | 6  |
| 196026 | 25 | 1337261 | 1337274 | 2 | 7  | 14 | CA   | 27 | 3  |
| 196044 | 25 | 1398877 | 1398888 | 2 | 6  | 12 | AT   | 8  | 3  |
| 196045 | 25 | 1399170 | 1399184 | 3 | 5  | 15 | AAC  | 22 | 3  |
| 196052 | 25 | 1427150 | 1427173 | 2 | 12 | 24 | GT   | 20 | 12 |
| 196056 | 25 | 1428627 | 1428646 | 4 | 5  | 20 | TTTA | 9  | 3  |
| 196060 | 25 | 1446630 | 1446657 | 2 | 14 | 28 | GT   | 8  | 9  |
| 196061 | 25 | 1448546 | 1448563 | 2 | 9  | 18 | AC   | 17 | 11 |
| 196065 | 25 | 1450723 | 1450744 | 2 | 11 | 22 | AG   | 17 | 8  |
| 196066 | 25 | 1453140 | 1453173 | 2 | 17 | 34 | AC   | 17 | 9  |
| 196068 | 25 | 1453803 | 1453846 | 2 | 22 | 44 | GT   | 11 | 8  |
| 196070 | 25 | 1454713 | 1454724 | 2 | 6  | 12 | GA   | 31 | 3  |
| 196072 | 25 | 1461122 | 1461135 | 2 | 7  | 14 | CA   | 24 | 6  |
| 196073 | 25 | 1462020 | 1462055 | 2 | 18 | 36 | TG   | 10 | 4  |
| 196074 | 25 | 1462258 | 1462297 | 2 | 20 | 40 | GT   | 9  | 10 |
| 196083 | 25 | 1470724 | 1470737 | 2 | 7  | 14 | CA   | 28 | 3  |

|        |    |         |         |   |    |    |      |    |    |
|--------|----|---------|---------|---|----|----|------|----|----|
| 196084 | 25 | 1473321 | 1473341 | 3 | 7  | 21 | GCA  | 27 | 4  |
| 196086 | 25 | 1474083 | 1474096 | 2 | 7  | 14 | TG   | 20 | 3  |
| 196088 | 25 | 1478730 | 1478775 | 2 | 23 | 46 | AC   | 7  | 6  |
| 196092 | 25 | 1479227 | 1479250 | 2 | 12 | 24 | GT   | 12 | 10 |
| 196093 | 25 | 1481638 | 1481657 | 2 | 10 | 20 | CA   | 16 | 13 |
| 196094 | 25 | 1484408 | 1484433 | 2 | 13 | 26 | CA   | 18 | 10 |
| 196096 | 25 | 1485675 | 1485692 | 2 | 9  | 18 | TG   | 16 | 8  |
| 196097 | 25 | 1486018 | 1486045 | 2 | 14 | 28 | CT   | 17 | 9  |
| 196098 | 25 | 1486299 | 1486324 | 2 | 13 | 26 | TG   | 12 | 6  |
| 196099 | 25 | 1487230 | 1487249 | 2 | 10 | 20 | CA   | 18 | 7  |
| 196100 | 25 | 1487455 | 1487470 | 4 | 4  | 16 | CTTT | 24 | 3  |
| 196101 | 25 | 1488621 | 1488638 | 2 | 9  | 18 | GT   | 25 | 5  |
| 196104 | 25 | 1491213 | 1491232 | 2 | 10 | 20 | TG   | 17 | 9  |
| 196107 | 25 | 1491762 | 1491777 | 2 | 8  | 16 | AG   | 15 | 6  |
| 196110 | 25 | 1498780 | 1498797 | 2 | 9  | 18 | TG   | 21 | 3  |
| 196111 | 25 | 1499476 | 1499505 | 3 | 10 | 30 | AGA  | 21 | 7  |
| 196112 | 25 | 1501527 | 1501538 | 2 | 6  | 12 | GT   | 26 | 4  |
| 196117 | 25 | 1526039 | 1526052 | 2 | 7  | 14 | GT   | 24 | 6  |
| 196118 | 25 | 1527632 | 1527645 | 2 | 7  | 14 | CA   | 27 | 3  |
| 196119 | 25 | 1529239 | 1529256 | 2 | 9  | 18 | AC   | 25 | 6  |
| 196120 | 25 | 1529352 | 1529381 | 2 | 15 | 30 | AC   | 12 | 11 |
| 196124 | 25 | 1532352 | 1532363 | 2 | 6  | 12 | GA   | 30 | 3  |
| 196128 | 25 | 1533347 | 1533397 | 3 | 17 | 51 | AGA  | 16 | 14 |
| 196130 | 25 | 1537145 | 1537160 | 4 | 4  | 16 | AAAT | 19 | 13 |
| 196133 | 25 | 1542101 | 1542132 | 2 | 16 | 32 | CA   | 6  | 10 |
| 196138 | 25 | 1547649 | 1547666 | 2 | 9  | 18 | AC   | 25 | 4  |
| 196145 | 25 | 1553763 | 1553804 | 3 | 14 | 42 | CAG  | 14 | 9  |
| 196146 | 25 | 1555314 | 1555355 | 2 | 21 | 42 | TG   | 11 | 10 |
| 196150 | 25 | 1564460 | 1564485 | 2 | 13 | 26 | TG   | 12 | 7  |
| 196151 | 25 | 1570024 | 1570043 | 2 | 10 | 20 | CT   | 17 | 8  |
| 196153 | 25 | 1570239 | 1570270 | 4 | 8  | 32 | TCTG | 24 | 6  |
| 196155 | 25 | 1570737 | 1570762 | 2 | 13 | 26 | CA   | 16 | 10 |
| 196182 | 25 | 1599213 | 1599230 | 2 | 9  | 18 | CA   | 25 | 8  |
| 196185 | 25 | 1600224 | 1600237 | 2 | 7  | 14 | AT   | 20 | 5  |
| 196186 | 25 | 1600695 | 1600706 | 2 | 6  | 12 | CA   | 20 | 4  |
| 196187 | 25 | 1600999 | 1601046 | 4 | 12 | 48 | CATC | 29 | 9  |
| 196189 | 25 | 1602920 | 1602934 | 3 | 5  | 15 | CAG  | 11 | 4  |
| 196190 | 25 | 1607452 | 1607471 | 2 | 10 | 20 | AC   | 23 | 6  |
| 196193 | 25 | 1614935 | 1614950 | 4 | 4  | 16 | AAAG | 18 | 7  |
| 196194 | 25 | 1614989 | 1615008 | 4 | 5  | 20 | CCTG | 22 | 5  |
| 196196 | 25 | 1615583 | 1615606 | 2 | 12 | 24 | TG   | 26 | 9  |
| 196199 | 25 | 1616340 | 1616384 | 3 | 15 | 45 | CTT  | 12 | 9  |
| 196201 | 25 | 1616591 | 1616610 | 2 | 10 | 20 | GT   | 20 | 9  |
| 196203 | 25 | 1616973 | 1617006 | 2 | 17 | 34 | AC   | 10 | 6  |
| 196207 | 25 | 1621005 | 1621022 | 2 | 9  | 18 | TG   | 8  | 4  |
| 196208 | 25 | 1621125 | 1621140 | 2 | 8  | 16 | GA   | 23 | 5  |
| 196209 | 25 | 1621168 | 1621201 | 2 | 17 | 34 | AC   | 15 | 10 |
| 196214 | 25 | 1635709 | 1635730 | 2 | 11 | 22 | CA   | 17 | 8  |
| 196215 | 25 | 1637274 | 1637295 | 2 | 11 | 22 | TG   | 14 | 10 |
| 196217 | 25 | 1638325 | 1638354 | 2 | 15 | 30 | GT   | 7  | 8  |
| 196219 | 25 | 1640951 | 1640965 | 3 | 5  | 15 | AAC  | 27 | 8  |

|        |    |         |         |   |    |    |      |    |    |
|--------|----|---------|---------|---|----|----|------|----|----|
| 196220 | 25 | 1641940 | 1641965 | 2 | 13 | 26 | CA   | 17 | 10 |
| 196221 | 25 | 1643689 | 1643716 | 4 | 7  | 28 | ATAG | 17 | 10 |
| 196226 | 25 | 1647759 | 1647780 | 2 | 11 | 22 | CA   | 19 | 12 |
| 196229 | 25 | 1659161 | 1659184 | 3 | 8  | 24 | TCC  | 9  | 3  |
| 196230 | 25 | 1660009 | 1660020 | 2 | 6  | 12 | AC   | 23 | 3  |
| 196231 | 25 | 1661697 | 1661712 | 2 | 8  | 16 | GT   | 20 | 9  |
| 196232 | 25 | 1661952 | 1661981 | 2 | 15 | 30 | AC   | 21 | 11 |
| 196236 | 25 | 1668654 | 1668667 | 2 | 7  | 14 | AT   | 19 | 17 |
| 196243 | 25 | 1673642 | 1673671 | 2 | 15 | 30 | CA   | 14 | 9  |
| 196244 | 25 | 1673820 | 1673831 | 2 | 6  | 12 | CA   | 10 | 5  |
| 196246 | 25 | 1673991 | 1674018 | 2 | 14 | 28 | AC   | 21 | 12 |
| 196248 | 25 | 1680050 | 1680063 | 2 | 7  | 14 | CT   | 27 | 5  |
| 196252 | 25 | 1681148 | 1681159 | 2 | 6  | 12 | GT   | 19 | 7  |
| 196256 | 25 | 1683597 | 1683616 | 2 | 10 | 20 | AC   | 16 | 4  |
| 196260 | 25 | 1696091 | 1696114 | 3 | 8  | 24 | TTG  | 13 | 6  |
| 196261 | 25 | 1698610 | 1698647 | 2 | 19 | 38 | AG   | 19 | 7  |
| 196262 | 25 | 1700014 | 1700025 | 2 | 6  | 12 | TG   | 20 | 4  |
| 196266 | 25 | 1710121 | 1710134 | 2 | 7  | 14 | AG   | 33 | 3  |
| 196267 | 25 | 1710479 | 1710494 | 2 | 8  | 16 | TC   | 19 | 4  |
| 196269 | 25 | 1711082 | 1711095 | 2 | 7  | 14 | GT   | 22 | 11 |
| 196270 | 25 | 1712658 | 1712675 | 2 | 9  | 18 | CT   | 25 | 3  |
| 196271 | 25 | 1719822 | 1719837 | 2 | 8  | 16 | CA   | 14 | 5  |
| 196273 | 25 | 1719916 | 1719933 | 2 | 9  | 18 | TC   | 12 | 5  |
| 196285 | 25 | 1737704 | 1737725 | 2 | 11 | 22 | CA   | 17 | 5  |
| 196287 | 25 | 1739385 | 1739400 | 2 | 8  | 16 | AC   | 11 | 4  |
| 196288 | 25 | 1739522 | 1739547 | 2 | 13 | 26 | AC   | 12 | 12 |
| 196291 | 25 | 1745041 | 1745058 | 2 | 9  | 18 | AC   | 25 | 7  |
| 196300 | 25 | 1750256 | 1750277 | 2 | 11 | 22 | CA   | 15 | 4  |
| 196302 | 25 | 1752368 | 1752401 | 2 | 17 | 34 | CA   | 15 | 13 |
| 196304 | 25 | 1753083 | 1753110 | 2 | 14 | 28 | GT   | 15 | 7  |
| 196306 | 25 | 1753888 | 1753917 | 2 | 15 | 30 | GT   | 17 | 10 |
| 196311 | 25 | 1762298 | 1762309 | 2 | 6  | 12 | AC   | 38 | 3  |
| 196322 | 25 | 1776880 | 1776919 | 2 | 20 | 40 | TG   | 9  | 8  |
| 196323 | 25 | 1777122 | 1777141 | 2 | 10 | 20 | CA   | 19 | 6  |
| 196324 | 25 | 1777319 | 1777340 | 2 | 11 | 22 | TG   | 19 | 16 |
| 196326 | 25 | 1777660 | 1777675 | 2 | 8  | 16 | CA   | 19 | 3  |
| 196327 | 25 | 1777697 | 1777722 | 2 | 13 | 26 | CT   | 14 | 10 |
| 196329 | 25 | 1778138 | 1778173 | 2 | 18 | 36 | GT   | 15 | 12 |
| 196330 | 25 | 1778226 | 1778247 | 2 | 11 | 22 | CA   | 9  | 3  |
| 196335 | 25 | 1778839 | 1778862 | 2 | 12 | 24 | CT   | 14 | 7  |
| 196339 | 25 | 1779105 | 1779130 | 2 | 13 | 26 | CA   | 15 | 8  |
| 196342 | 25 | 1779649 | 1779670 | 2 | 11 | 22 | TC   | 15 | 5  |
| 196343 | 25 | 1783597 | 1783610 | 2 | 7  | 14 | CA   | 27 | 3  |
| 196349 | 25 | 1796608 | 1796651 | 2 | 22 | 44 | AC   | 18 | 8  |
| 196350 | 25 | 1796932 | 1796969 | 2 | 19 | 38 | AC   | 16 | 11 |
| 196351 | 25 | 1797121 | 1797142 | 2 | 11 | 22 | CA   | 18 | 6  |
| 196355 | 25 | 1799598 | 1799611 | 2 | 7  | 14 | AC   | 18 | 3  |
| 196358 | 25 | 1805659 | 1805688 | 2 | 15 | 30 | CA   | 8  | 8  |
| 196359 | 25 | 1811998 | 1812012 | 3 | 5  | 15 | TTC  | 22 | 3  |
| 196362 | 25 | 1816712 | 1816731 | 4 | 5  | 20 | CTAA | 17 | 3  |
| 196363 | 25 | 1817407 | 1817468 | 2 | 31 | 62 | CA   | 6  | 9  |

|        |    |         |         |   |    |    |      |    |    |
|--------|----|---------|---------|---|----|----|------|----|----|
| 196367 | 25 | 1859855 | 1859874 | 2 | 10 | 20 | AC   | 19 | 8  |
| 196368 | 25 | 1861764 | 1861779 | 2 | 8  | 16 | TA   | 11 | 6  |
| 196371 | 25 | 1871909 | 1871956 | 2 | 24 | 48 | AC   | 12 | 6  |
| 196373 | 25 | 1873918 | 1873969 | 4 | 13 | 52 | CTTT | 20 | 7  |
| 196374 | 25 | 1885725 | 1885752 | 2 | 14 | 28 | GT   | 16 | 7  |
| 196376 | 25 | 1886897 | 1886922 | 2 | 13 | 26 | CA   | 11 | 6  |
| 196381 | 25 | 1897973 | 1898002 | 2 | 15 | 30 | TG   | 9  | 3  |
| 196383 | 25 | 1904310 | 1904333 | 2 | 12 | 24 | CA   | 6  | 3  |
| 196384 | 25 | 1904368 | 1904379 | 2 | 6  | 12 | CA   | 21 | 4  |
| 196385 | 25 | 1905057 | 1905080 | 2 | 12 | 24 | AC   | 12 | 11 |
| 196387 | 25 | 1905533 | 1905550 | 2 | 9  | 18 | AC   | 20 | 3  |
| 196395 | 25 | 1912310 | 1912331 | 2 | 11 | 22 | CA   | 13 | 3  |
| 196398 | 25 | 1918173 | 1918194 | 2 | 11 | 22 | CA   | 28 | 4  |
| 196401 | 25 | 1921260 | 1921277 | 2 | 9  | 18 | TG   | 20 | 6  |
| 196402 | 25 | 1922357 | 1922374 | 2 | 9  | 18 | AC   | 26 | 8  |
| 196404 | 25 | 1923399 | 1923426 | 2 | 14 | 28 | CA   | 6  | 7  |
| 196406 | 25 | 1930708 | 1930729 | 2 | 11 | 22 | CA   | 22 | 16 |
| 196407 | 25 | 1933653 | 1933664 | 2 | 6  | 12 | TG   | 16 | 3  |
| 196409 | 25 | 1934691 | 1934710 | 4 | 5  | 20 | AGAA | 30 | 4  |
| 196412 | 25 | 1939590 | 1939629 | 2 | 20 | 40 | GT   | 9  | 11 |
| 196414 | 25 | 1945123 | 1945146 | 2 | 12 | 24 | AC   | 12 | 9  |
| 196416 | 25 | 1956753 | 1956770 | 2 | 9  | 18 | TG   | 20 | 5  |
| 196418 | 25 | 1971876 | 1971891 | 2 | 8  | 16 | TG   | 29 | 3  |
| 196419 | 25 | 1972034 | 1972065 | 2 | 16 | 32 | GT   | 17 | 10 |
| 196426 | 25 | 1984430 | 1984441 | 2 | 6  | 12 | GT   | 18 | 4  |
| 196436 | 25 | 1999807 | 1999824 | 2 | 9  | 18 | GA   | 17 | 3  |
| 196439 | 25 | 2005224 | 2005238 | 3 | 5  | 15 | CAG  | 22 | 3  |
| 196459 | 25 | 2032856 | 2032867 | 2 | 6  | 12 | GT   | 15 | 11 |
| 196460 | 25 | 2032870 | 2032887 | 2 | 9  | 18 | GT   | 25 | 16 |
| 196465 | 25 | 2041280 | 2041325 | 2 | 23 | 46 | TG   | 11 | 12 |
| 196466 | 25 | 2043947 | 2043958 | 2 | 6  | 12 | CA   | 25 | 3  |
| 196467 | 25 | 2044866 | 2044895 | 2 | 15 | 30 | GT   | 18 | 11 |
| 196468 | 25 | 2046847 | 2046858 | 2 | 6  | 12 | CT   | 27 | 4  |
| 196469 | 25 | 2046861 | 2046878 | 2 | 9  | 18 | CT   | 14 | 4  |
| 196470 | 25 | 2047535 | 2047558 | 4 | 6  | 24 | ACAG | 25 | 3  |
| 196471 | 25 | 2047752 | 2047769 | 2 | 9  | 18 | TG   | 23 | 3  |
| 196472 | 25 | 2048890 | 2048907 | 3 | 6  | 18 | CCT  | 25 | 3  |
| 196474 | 25 | 2050473 | 2050484 | 2 | 6  | 12 | TG   | 25 | 3  |
| 196478 | 25 | 2054302 | 2054331 | 2 | 15 | 30 | TC   | 15 | 8  |
| 196486 | 25 | 2075355 | 2075368 | 2 | 7  | 14 | CA   | 29 | 5  |
| 196489 | 25 | 2093549 | 2093584 | 4 | 9  | 36 | TTTC | 23 | 7  |
| 196492 | 25 | 2098573 | 2098588 | 2 | 8  | 16 | GT   | 17 | 5  |
| 196495 | 25 | 2103421 | 2103434 | 2 | 7  | 14 | CA   | 25 | 5  |
| 196499 | 25 | 2118059 | 2118086 | 4 | 7  | 28 | ACAG | 27 | 8  |
| 196500 | 25 | 2121456 | 2121471 | 2 | 8  | 16 | TG   | 16 | 7  |
| 196516 | 25 | 2170433 | 2170444 | 2 | 6  | 12 | GT   | 25 | 4  |
| 196517 | 25 | 2172196 | 2172210 | 3 | 5  | 15 | AAC  | 20 | 3  |
| 196519 | 25 | 2177544 | 2177559 | 2 | 8  | 16 | AC   | 15 | 5  |
| 196520 | 25 | 2177561 | 2177574 | 2 | 7  | 14 | CA   | 24 | 9  |
| 196521 | 25 | 2178117 | 2178132 | 4 | 4  | 16 | ACAG | 27 | 4  |
| 196528 | 25 | 2200247 | 2200272 | 2 | 13 | 26 | AC   | 19 | 8  |



|        |    |         |         |   |    |    |      |    |    |
|--------|----|---------|---------|---|----|----|------|----|----|
| 196532 | 25 | 2205878 | 2205897 | 2 | 10 | 20 | TG   | 23 | 6  |
| 196533 | 25 | 2212823 | 2212838 | 2 | 8  | 16 | AC   | 15 | 11 |
| 196534 | 25 | 2215957 | 2215970 | 2 | 7  | 14 | TG   | 23 | 4  |
| 196536 | 25 | 2219675 | 2219701 | 3 | 9  | 27 | CTC  | 27 | 8  |
| 196544 | 25 | 2227386 | 2227409 | 2 | 12 | 24 | TG   | 13 | 9  |
| 196547 | 25 | 2230948 | 2230959 | 2 | 6  | 12 | TA   | 12 | 3  |
| 196553 | 25 | 2247790 | 2247813 | 2 | 12 | 24 | AC   | 21 | 9  |
| 196556 | 25 | 2252264 | 2252289 | 2 | 13 | 26 | TG   | 12 | 8  |
| 196557 | 25 | 2257045 | 2257086 | 3 | 14 | 42 | TAC  | 15 | 8  |
| 196564 | 25 | 2266953 | 2266964 | 2 | 6  | 12 | TA   | 11 | 3  |
| 196565 | 25 | 2266965 | 2266976 | 2 | 6  | 12 | CA   | 10 | 4  |
| 196566 | 25 | 2267242 | 2267253 | 2 | 6  | 12 | AG   | 25 | 3  |
| 196567 | 25 | 2269923 | 2269952 | 3 | 10 | 30 | ATA  | 14 | 5  |
| 196569 | 25 | 2270850 | 2270881 | 2 | 16 | 32 | AC   | 7  | 8  |
| 196571 | 25 | 2277480 | 2277499 | 2 | 10 | 20 | AC   | 13 | 6  |
| 196574 | 25 | 2282122 | 2282136 | 3 | 5  | 15 | CTC  | 26 | 3  |
| 196579 | 25 | 2289763 | 2289774 | 2 | 6  | 12 | TG   | 27 | 3  |
| 196581 | 25 | 2291918 | 2291941 | 3 | 8  | 24 | CAG  | 19 | 6  |
| 196582 | 25 | 2293099 | 2293126 | 2 | 14 | 28 | CA   | 10 | 9  |
| 196586 | 25 | 2294785 | 2294804 | 2 | 10 | 20 | AC   | 18 | 4  |
| 196596 | 25 | 2307586 | 2307621 | 4 | 9  | 36 | CAGG | 23 | 3  |
| 196601 | 25 | 2310720 | 2310747 | 2 | 14 | 28 | TC   | 8  | 6  |
| 196606 | 25 | 2315953 | 2315974 | 2 | 11 | 22 | TG   | 23 | 3  |
| 196608 | 25 | 2317664 | 2317711 | 4 | 12 | 48 | CTTT | 21 | 5  |
| 196609 | 25 | 2319772 | 2319795 | 2 | 12 | 24 | CA   | 16 | 6  |
| 196613 | 25 | 2328647 | 2328658 | 2 | 6  | 12 | AC   | 17 | 8  |
| 196614 | 25 | 2328661 | 2328678 | 2 | 9  | 18 | AC   | 19 | 9  |
| 196616 | 25 | 2328997 | 2329010 | 2 | 7  | 14 | GT   | 29 | 3  |
| 196617 | 25 | 2329215 | 2329232 | 3 | 6  | 18 | CAA  | 26 | 4  |
| 196618 | 25 | 2329348 | 2329379 | 2 | 16 | 32 | TG   | 10 | 10 |
| 196621 | 25 | 2329689 | 2329730 | 3 | 14 | 42 | AGA  | 18 | 9  |
| 196624 | 25 | 2330777 | 2330806 | 2 | 15 | 30 | AC   | 12 | 11 |
| 196627 | 25 | 2334196 | 2334219 | 2 | 12 | 24 | GT   | 22 | 8  |
| 196629 | 25 | 2339892 | 2339911 | 2 | 10 | 20 | AC   | 23 | 5  |
| 196630 | 25 | 2344120 | 2344134 | 3 | 5  | 15 | GCA  | 19 | 3  |
| 196634 | 25 | 2356483 | 2356518 | 4 | 9  | 36 | AGAT | 6  | 9  |
| 196635 | 25 | 2357021 | 2357034 | 2 | 7  | 14 | AG   | 23 | 5  |
| 196636 | 25 | 2357426 | 2357449 | 3 | 8  | 24 | GAA  | 28 | 3  |
| 196642 | 25 | 2371992 | 2372007 | 2 | 8  | 16 | AG   | 25 | 5  |
| 196644 | 25 | 2382288 | 2382321 | 2 | 17 | 34 | CA   | 11 | 9  |
| 196649 | 25 | 2384555 | 2384570 | 2 | 8  | 16 | TC   | 17 | 4  |
| 196653 | 25 | 2389787 | 2389798 | 2 | 6  | 12 | GT   | 29 | 4  |
| 196654 | 25 | 2390713 | 2390754 | 2 | 21 | 42 | CA   | 7  | 9  |
| 196657 | 25 | 2399956 | 2399973 | 2 | 9  | 18 | GA   | 25 | 5  |
| 196660 | 25 | 2401735 | 2401752 | 2 | 9  | 18 | TG   | 26 | 3  |
| 196661 | 25 | 2402120 | 2402133 | 2 | 7  | 14 | GT   | 27 | 10 |
| 196666 | 25 | 2411909 | 2411924 | 2 | 8  | 16 | TG   | 17 | 4  |
| 196667 | 25 | 2413508 | 2413519 | 2 | 6  | 12 | GT   | 33 | 3  |
| 196671 | 25 | 2421060 | 2421073 | 2 | 7  | 14 | AC   | 24 | 3  |
| 196673 | 25 | 2426407 | 2426418 | 2 | 6  | 12 | AG   | 23 | 3  |
| 196674 | 25 | 2426739 | 2426764 | 2 | 13 | 26 | AC   | 16 | 7  |

|        |    |         |         |   |    |    |      |    |    |
|--------|----|---------|---------|---|----|----|------|----|----|
| 196675 | 25 | 2428537 | 2428564 | 2 | 14 | 28 | CA   | 11 | 9  |
| 196676 | 25 | 2431151 | 2431166 | 4 | 4  | 16 | ATAA | 27 | 3  |
| 196677 | 25 | 2431916 | 2431941 | 2 | 13 | 26 | GT   | 21 | 6  |
| 196678 | 25 | 2432057 | 2432070 | 2 | 7  | 14 | AC   | 18 | 11 |
| 196679 | 25 | 2432073 | 2432084 | 2 | 6  | 12 | AC   | 14 | 7  |
| 196680 | 25 | 2432498 | 2432539 | 3 | 14 | 42 | GCA  | 13 | 10 |
| 196689 | 25 | 2448472 | 2448495 | 2 | 12 | 24 | CA   | 17 | 11 |
| 196692 | 25 | 2455855 | 2455886 | 4 | 8  | 32 | TTTA | 18 | 5  |
| 196697 | 25 | 2462126 | 2462152 | 3 | 9  | 27 | GAG  | 26 | 5  |
| 196700 | 25 | 2464433 | 2464450 | 3 | 6  | 18 | AGA  | 25 | 8  |
| 196701 | 25 | 2464745 | 2464762 | 3 | 6  | 18 | GAA  | 28 | 3  |
| 196704 | 25 | 2465347 | 2465368 | 2 | 11 | 22 | TG   | 24 | 8  |
| 196705 | 25 | 2465711 | 2465737 | 3 | 9  | 27 | TTC  | 18 | 5  |
| 196713 | 25 | 2494581 | 2494613 | 3 | 11 | 33 | GGA  | 16 | 7  |
| 196716 | 25 | 2496009 | 2496038 | 2 | 15 | 30 | TG   | 6  | 11 |
| 196717 | 25 | 2498341 | 2498356 | 2 | 8  | 16 | AC   | 20 | 3  |
| 196721 | 25 | 2504063 | 2504078 | 2 | 8  | 16 | AC   | 27 | 3  |
| 196723 | 25 | 2509554 | 2509571 | 2 | 9  | 18 | AC   | 19 | 3  |
| 196724 | 25 | 2510830 | 2510841 | 2 | 6  | 12 | CA   | 24 | 9  |
| 196725 | 25 | 2512310 | 2512329 | 4 | 5  | 20 | ATAA | 13 | 8  |
| 196726 | 25 | 2514083 | 2514108 | 2 | 13 | 26 | AC   | 11 | 7  |
| 196730 | 25 | 2523733 | 2523762 | 2 | 15 | 30 | AC   | 9  | 10 |
| 196734 | 25 | 2526801 | 2526816 | 4 | 4  | 16 | ATGC | 29 | 4  |
| 196738 | 25 | 2528866 | 2528881 | 2 | 8  | 16 | AG   | 12 | 3  |
| 196746 | 25 | 2553254 | 2553269 | 4 | 4  | 16 | AACC | 21 | 3  |
| 196748 | 25 | 2554928 | 2554965 | 2 | 19 | 38 | CA   | 6  | 7  |
| 196749 | 25 | 2555389 | 2555404 | 2 | 8  | 16 | TG   | 25 | 3  |
| 196756 | 25 | 2573934 | 2573949 | 2 | 8  | 16 | CA   | 29 | 5  |
| 196761 | 25 | 2580950 | 2580967 | 3 | 6  | 18 | TAA  | 8  | 3  |
| 196763 | 25 | 2583265 | 2583278 | 2 | 7  | 14 | GA   | 28 | 3  |
| 196764 | 25 | 2585842 | 2585863 | 2 | 11 | 22 | AC   | 18 | 8  |
| 196766 | 25 | 2586289 | 2586309 | 3 | 7  | 21 | CAT  | 17 | 5  |
| 196767 | 25 | 2586708 | 2586727 | 4 | 5  | 20 | AGAA | 28 | 3  |
| 196768 | 25 | 2587140 | 2587153 | 2 | 7  | 14 | GT   | 26 | 5  |
| 196770 | 25 | 2589903 | 2589914 | 2 | 6  | 12 | TA   | 9  | 4  |
| 196773 | 25 | 2595874 | 2595893 | 4 | 5  | 20 | ACAG | 22 | 5  |
| 196786 | 25 | 2620986 | 2621019 | 2 | 17 | 34 | GT   | 10 | 8  |
| 196788 | 25 | 2632961 | 2632978 | 3 | 6  | 18 | GCA  | 22 | 7  |
| 196794 | 25 | 2647965 | 2647979 | 3 | 5  | 15 | TCC  | 24 | 5  |
| 196796 | 25 | 2648958 | 2648989 | 4 | 8  | 32 | TTTC | 16 | 5  |
| 196799 | 25 | 2652985 | 2652998 | 2 | 7  | 14 | GT   | 15 | 4  |
| 196810 | 25 | 2668586 | 2668603 | 2 | 9  | 18 | GT   | 8  | 7  |
| 196816 | 25 | 2685786 | 2685811 | 2 | 13 | 26 | AC   | 17 | 6  |
| 196819 | 25 | 2695833 | 2695856 | 2 | 12 | 24 | CA   | 19 | 11 |
| 196822 | 25 | 2700006 | 2700023 | 3 | 6  | 18 | TTG  | 22 | 4  |
| 196848 | 25 | 2791534 | 2791547 | 2 | 7  | 14 | CA   | 20 | 3  |
| 196849 | 25 | 2791580 | 2791609 | 2 | 15 | 30 | AC   | 13 | 7  |
| 196851 | 25 | 2793824 | 2793843 | 2 | 10 | 20 | AC   | 22 | 5  |
| 196855 | 25 | 2799224 | 2799243 | 2 | 10 | 20 | GT   | 18 | 6  |
| 196861 | 25 | 2805915 | 2805932 | 2 | 9  | 18 | GA   | 25 | 7  |
| 196877 | 25 | 2842580 | 2842594 | 3 | 5  | 15 | GGT  | 11 | 3  |

|        |    |         |         |   |    |    |      |    |    |
|--------|----|---------|---------|---|----|----|------|----|----|
| 196903 | 25 | 2906833 | 2906847 | 3 | 5  | 15 | AAT  | 17 | 6  |
| 196913 | 25 | 2926838 | 2926849 | 2 | 6  | 12 | TG   | 7  | 5  |
| 196915 | 25 | 2934061 | 2934080 | 2 | 10 | 20 | TG   | 11 | 7  |
| 196919 | 25 | 2937453 | 2937466 | 2 | 7  | 14 | CA   | 26 | 4  |
| 196922 | 25 | 2947941 | 2947966 | 2 | 13 | 26 | AC   | 16 | 6  |
| 196926 | 25 | 2957641 | 2957672 | 2 | 16 | 32 | CT   | 11 | 11 |
| 196929 | 25 | 2959309 | 2959328 | 4 | 5  | 20 | AAAT | 21 | 8  |
| 196932 | 25 | 2970098 | 2970121 | 4 | 6  | 24 | ATAG | 16 | 7  |
| 196933 | 25 | 2971566 | 2971587 | 2 | 11 | 22 | AC   | 14 | 10 |
| 196936 | 25 | 2975230 | 2975265 | 2 | 18 | 36 | CA   | 7  | 8  |
| 196937 | 25 | 2980892 | 2980921 | 2 | 15 | 30 | GT   | 12 | 9  |
| 196939 | 25 | 2981011 | 2981031 | 3 | 7  | 21 | AGG  | 9  | 3  |
| 196940 | 25 | 2982617 | 2982632 | 2 | 8  | 16 | GT   | 27 | 6  |
| 196944 | 25 | 2990165 | 2990184 | 2 | 10 | 20 | CA   | 17 | 8  |
| 196945 | 25 | 2994020 | 2994043 | 3 | 8  | 24 | TTC  | 22 | 7  |
| 196947 | 25 | 3003716 | 3003727 | 2 | 6  | 12 | TA   | 6  | 3  |
| 196956 | 25 | 3038999 | 3039016 | 2 | 9  | 18 | GT   | 10 | 5  |
| 196968 | 25 | 3082592 | 3082603 | 2 | 6  | 12 | AC   | 27 | 3  |
| 196969 | 25 | 3084285 | 3084298 | 2 | 7  | 14 | TG   | 15 | 3  |
| 196971 | 25 | 3084348 | 3084365 | 2 | 9  | 18 | GT   | 10 | 9  |
| 196972 | 25 | 3090559 | 3090570 | 2 | 6  | 12 | GT   | 16 | 3  |
| 196973 | 25 | 3091089 | 3091103 | 3 | 5  | 15 | CAA  | 29 | 3  |
| 196974 | 25 | 3091663 | 3091682 | 4 | 5  | 20 | GGAT | 28 | 3  |
| 196975 | 25 | 3099229 | 3099250 | 2 | 11 | 22 | GT   | 23 | 6  |
| 196980 | 25 | 3121078 | 3121103 | 2 | 13 | 26 | AC   | 12 | 7  |
| 196994 | 25 | 3148503 | 3148514 | 2 | 6  | 12 | AC   | 15 | 3  |
| 196998 | 25 | 3161135 | 3161149 | 3 | 5  | 15 | GGA  | 22 | 3  |
| 197000 | 25 | 3165904 | 3165921 | 2 | 9  | 18 | AG   | 23 | 8  |
| 197004 | 25 | 3185058 | 3185093 | 2 | 18 | 36 | AC   | 6  | 8  |
| 197011 | 25 | 3217699 | 3217712 | 2 | 7  | 14 | AG   | 20 | 3  |
| 197016 | 25 | 3231384 | 3231395 | 2 | 6  | 12 | TG   | 28 | 4  |
| 197022 | 25 | 3261585 | 3261600 | 4 | 4  | 16 | TTTA | 16 | 5  |
| 197026 | 25 | 3291511 | 3291526 | 2 | 8  | 16 | GT   | 26 | 5  |
| 197027 | 25 | 3294624 | 3294647 | 3 | 8  | 24 | GAG  | 30 | 3  |
| 197030 | 25 | 3299160 | 3299175 | 2 | 8  | 16 | AG   | 21 | 12 |
| 197032 | 25 | 3301889 | 3301906 | 3 | 6  | 18 | AGC  | 9  | 4  |
| 197034 | 25 | 3304003 | 3304036 | 2 | 17 | 34 | CA   | 16 | 15 |
| 197036 | 25 | 3307663 | 3307678 | 2 | 8  | 16 | AG   | 29 | 3  |
| 197037 | 25 | 3309872 | 3309904 | 3 | 11 | 33 | AAT  | 15 | 14 |
| 197038 | 25 | 3310291 | 3310310 | 2 | 10 | 20 | TG   | 13 | 5  |
| 197040 | 25 | 3310454 | 3310479 | 2 | 13 | 26 | CA   | 13 | 14 |
| 197043 | 25 | 3321206 | 3321223 | 2 | 9  | 18 | AC   | 17 | 7  |
| 197057 | 25 | 3356352 | 3356379 | 2 | 14 | 28 | AC   | 15 | 8  |
| 197066 | 25 | 3373448 | 3373462 | 3 | 5  | 15 | ATT  | 28 | 11 |
| 197067 | 25 | 3374232 | 3374259 | 2 | 14 | 28 | AC   | 20 | 9  |
| 197076 | 25 | 3398915 | 3398952 | 2 | 19 | 38 | AG   | 15 | 11 |
| 197090 | 25 | 3439076 | 3439095 | 4 | 5  | 20 | TCTG | 22 | 8  |
| 197092 | 25 | 3440500 | 3440517 | 2 | 9  | 18 | CT   | 19 | 25 |
| 197100 | 25 | 3452297 | 3452312 | 2 | 8  | 16 | TG   | 18 | 7  |
| 197106 | 25 | 3457098 | 3457117 | 2 | 10 | 20 | CA   | 15 | 10 |
| 197119 | 25 | 3468606 | 3468629 | 4 | 6  | 24 | AATA | 18 | 3  |

|        |    |         |         |   |    |    |      |    |    |
|--------|----|---------|---------|---|----|----|------|----|----|
| 197120 | 25 | 3468681 | 3468706 | 2 | 13 | 26 | CA   | 6  | 5  |
| 197122 | 25 | 3469217 | 3469232 | 4 | 4  | 16 | ATTT | 22 | 8  |
| 197125 | 25 | 3470794 | 3470809 | 4 | 4  | 16 | ACAA | 13 | 5  |
| 197126 | 25 | 3470925 | 3470960 | 4 | 9  | 36 | AAGA | 10 | 11 |
| 197130 | 25 | 3472907 | 3472920 | 2 | 7  | 14 | TG   | 27 | 3  |
| 197131 | 25 | 3473924 | 3473944 | 3 | 7  | 21 | GAA  | 21 | 5  |
| 197134 | 25 | 3487274 | 3487307 | 2 | 17 | 34 | CA   | 9  | 8  |
| 197136 | 25 | 3491768 | 3491795 | 4 | 7  | 28 | GAGT | 21 | 4  |
| 197140 | 25 | 3504852 | 3504867 | 2 | 8  | 16 | TG   | 25 | 3  |
| 197142 | 25 | 3512569 | 3512584 | 2 | 8  | 16 | AT   | 16 | 4  |
| 197146 | 25 | 3521052 | 3521066 | 3 | 5  | 15 | GAG  | 27 | 3  |
| 197154 | 25 | 3547750 | 3547767 | 3 | 6  | 18 | TGT  | 23 | 3  |
| 197156 | 25 | 3551379 | 3551390 | 2 | 6  | 12 | AC   | 27 | 4  |
| 197165 | 25 | 3566059 | 3566090 | 4 | 8  | 32 | ATCC | 21 | 11 |
| 197177 | 25 | 3591876 | 3591907 | 4 | 8  | 32 | TGTA | 14 | 11 |
| 197194 | 25 | 3613465 | 3613498 | 2 | 17 | 34 | TG   | 8  | 7  |
| 197195 | 25 | 3613562 | 3613600 | 3 | 13 | 39 | GCA  | 25 | 11 |
| 197240 | 25 | 3688449 | 3688494 | 2 | 23 | 46 | CA   | 11 | 8  |
| 197249 | 25 | 3695011 | 3695031 | 3 | 7  | 21 | GGT  | 11 | 4  |
| 197256 | 25 | 3700838 | 3700859 | 2 | 11 | 22 | AC   | 12 | 6  |
| 197276 | 25 | 3753865 | 3753884 | 2 | 10 | 20 | GT   | 19 | 10 |
| 197277 | 25 | 3753919 | 3753934 | 2 | 8  | 16 | GT   | 19 | 5  |
| 197279 | 25 | 3756632 | 3756655 | 2 | 12 | 24 | GT   | 16 | 9  |
| 197286 | 25 | 3771543 | 3771558 | 2 | 8  | 16 | CT   | 17 | 3  |
| 197292 | 25 | 3802986 | 3803003 | 3 | 6  | 18 | ATT  | 17 | 4  |
| 197297 | 25 | 3811469 | 3811496 | 2 | 14 | 28 | AC   | 21 | 9  |
| 197301 | 25 | 3819820 | 3819837 | 2 | 9  | 18 | TG   | 20 | 3  |
| 197312 | 25 | 3833241 | 3833288 | 4 | 12 | 48 | ATCT | 6  | 6  |
| 197317 | 25 | 3843529 | 3843544 | 2 | 8  | 16 | GT   | 18 | 5  |
| 197320 | 25 | 3847913 | 3847933 | 3 | 7  | 21 | ATC  | 22 | 5  |
| 197323 | 25 | 3856572 | 3856585 | 2 | 7  | 14 | AT   | 19 | 9  |
| 197329 | 25 | 3867881 | 3867900 | 4 | 5  | 20 | AAAC | 21 | 6  |
| 197338 | 25 | 3887173 | 3887204 | 2 | 16 | 32 | TG   | 10 | 7  |
| 197354 | 25 | 3914524 | 3914543 | 2 | 10 | 20 | GT   | 26 | 6  |
| 197361 | 25 | 3933727 | 3933747 | 3 | 7  | 21 | GCT  | 22 | 5  |
| 197363 | 25 | 3939681 | 3939692 | 2 | 6  | 12 | GT   | 28 | 5  |
| 197365 | 25 | 3945084 | 3945101 | 3 | 6  | 18 | TTG  | 23 | 3  |
| 197366 | 25 | 3949609 | 3949620 | 2 | 6  | 12 | GT   | 27 | 5  |
| 197367 | 25 | 3949622 | 3949639 | 2 | 9  | 18 | TG   | 27 | 4  |
| 197368 | 25 | 3952922 | 3952941 | 2 | 10 | 20 | GT   | 8  | 12 |
| 197372 | 25 | 3980292 | 3980319 | 2 | 14 | 28 | GT   | 7  | 8  |
| 197375 | 25 | 3985618 | 3985635 | 3 | 6  | 18 | AGG  | 22 | 5  |
| 197376 | 25 | 3985696 | 3985727 | 4 | 8  | 32 | TATT | 21 | 6  |
| 197377 | 25 | 3987271 | 3987282 | 2 | 6  | 12 | CA   | 19 | 4  |
| 197388 | 25 | 4006536 | 4006553 | 2 | 9  | 18 | GT   | 16 | 7  |
| 197394 | 25 | 4038749 | 4038784 | 2 | 18 | 36 | GT   | 10 | 9  |
| 197396 | 25 | 4050487 | 4050504 | 3 | 6  | 18 | GGA  | 14 | 4  |
| 197397 | 25 | 4051448 | 4051469 | 2 | 11 | 22 | CA   | 19 | 8  |
| 197398 | 25 | 4053134 | 4053149 | 4 | 4  | 16 | AAAG | 27 | 4  |
| 197399 | 25 | 4053152 | 4053167 | 4 | 4  | 16 | AGAA | 25 | 3  |
| 197409 | 25 | 4079634 | 4079657 | 3 | 8  | 24 | ATG  | 17 | 6  |

|        |    |         |         |   |    |    |      |    |    |
|--------|----|---------|---------|---|----|----|------|----|----|
| 197413 | 25 | 4080080 | 4080099 | 4 | 5  | 20 | ATTT | 19 | 3  |
| 197417 | 25 | 4087922 | 4087947 | 2 | 13 | 26 | TG   | 13 | 16 |
| 197424 | 25 | 4107444 | 4107483 | 2 | 20 | 40 | TG   | 7  | 8  |
| 197427 | 25 | 4114728 | 4114747 | 2 | 10 | 20 | GT   | 17 | 5  |
| 197432 | 25 | 4143671 | 4143688 | 3 | 6  | 18 | GTT  | 22 | 5  |
| 197437 | 25 | 4168808 | 4168822 | 3 | 5  | 15 | CAG  | 31 | 4  |
| 197440 | 25 | 4185007 | 4185024 | 2 | 9  | 18 | TG   | 22 | 8  |
| 197466 | 25 | 4258267 | 4258282 | 4 | 4  | 16 | TCAT | 28 | 4  |
| 197470 | 25 | 4279624 | 4279641 | 3 | 6  | 18 | GAG  | 23 | 4  |
| 197471 | 25 | 4286229 | 4286242 | 2 | 7  | 14 | AC   | 18 | 5  |
| 197476 | 25 | 4298802 | 4298819 | 2 | 9  | 18 | AG   | 12 | 8  |
| 197480 | 25 | 4336461 | 4336472 | 2 | 6  | 12 | TA   | 17 | 11 |
| 197483 | 25 | 4337687 | 4337704 | 2 | 9  | 18 | TC   | 9  | 7  |
| 197489 | 25 | 4356506 | 4356521 | 2 | 8  | 16 | TG   | 27 | 8  |
| 197492 | 25 | 4367075 | 4367114 | 2 | 20 | 40 | CA   | 11 | 13 |
| 197494 | 25 | 4377511 | 4377540 | 2 | 15 | 30 | AC   | 13 | 8  |
| 197496 | 25 | 4381520 | 4381535 | 2 | 8  | 16 | GT   | 19 | 3  |
| 197502 | 25 | 4398356 | 4398377 | 2 | 11 | 22 | AC   | 23 | 9  |
| 197506 | 25 | 4406996 | 4407023 | 2 | 14 | 28 | TG   | 13 | 9  |
| 197512 | 25 | 4426064 | 4426078 | 3 | 5  | 15 | TGC  | 30 | 3  |
| 197522 | 25 | 4446654 | 4446667 | 2 | 7  | 14 | CA   | 26 | 10 |
| 197526 | 25 | 4447343 | 4447362 | 4 | 5  | 20 | TTTC | 16 | 5  |
| 197529 | 25 | 4447762 | 4447789 | 2 | 14 | 28 | TG   | 12 | 10 |
| 197532 | 25 | 4448714 | 4448725 | 2 | 6  | 12 | TG   | 15 | 4  |
| 197548 | 25 | 4476028 | 4476057 | 2 | 15 | 30 | CA   | 7  | 7  |
| 197549 | 25 | 4476199 | 4476210 | 2 | 6  | 12 | CT   | 18 | 4  |
| 197552 | 25 | 4478835 | 4478867 | 3 | 11 | 33 | ATG  | 26 | 5  |
| 197555 | 25 | 4499897 | 4499910 | 2 | 7  | 14 | CA   | 22 | 4  |
| 197556 | 25 | 4499913 | 4499924 | 2 | 6  | 12 | CA   | 21 | 4  |
| 197559 | 25 | 4505017 | 4505042 | 2 | 13 | 26 | CA   | 16 | 5  |
| 197565 | 25 | 4521064 | 4521075 | 2 | 6  | 12 | TA   | 12 | 8  |
| 197576 | 25 | 4543657 | 4543670 | 2 | 7  | 14 | CA   | 27 | 7  |
| 197598 | 25 | 4614436 | 4614447 | 2 | 6  | 12 | CA   | 32 | 3  |
| 197599 | 25 | 4614843 | 4614866 | 3 | 8  | 24 | GCT  | 17 | 5  |
| 197611 | 25 | 4628913 | 4628934 | 2 | 11 | 22 | GA   | 18 | 4  |
| 197624 | 25 | 4645701 | 4645716 | 2 | 8  | 16 | GA   | 22 | 4  |
| 197628 | 25 | 4646411 | 4646437 | 3 | 9  | 27 | AGC  | 7  | 4  |
| 197655 | 25 | 4689403 | 4689420 | 3 | 6  | 18 | TAT  | 6  | 4  |
| 197657 | 25 | 4695209 | 4695234 | 2 | 13 | 26 | GT   | 17 | 8  |
| 197667 | 25 | 4732478 | 4732497 | 4 | 5  | 20 | AAGC | 20 | 3  |
| 197668 | 25 | 4734297 | 4734322 | 2 | 13 | 26 | CA   | 7  | 6  |
| 197670 | 25 | 4734981 | 4734996 | 2 | 8  | 16 | GT   | 17 | 15 |
| 197671 | 25 | 4735021 | 4735038 | 3 | 6  | 18 | AGC  | 24 | 4  |
| 197673 | 25 | 4735137 | 4735151 | 3 | 5  | 15 | CAG  | 10 | 6  |
| 197674 | 25 | 4735155 | 4735169 | 3 | 5  | 15 | CAG  | 17 | 5  |
| 197675 | 25 | 4745175 | 4745189 | 3 | 5  | 15 | TTA  | 22 | 4  |
| 197684 | 25 | 4778494 | 4778509 | 2 | 8  | 16 | GT   | 24 | 8  |
| 197685 | 25 | 4778617 | 4778634 | 3 | 6  | 18 | TGT  | 23 | 3  |
| 197688 | 25 | 4801651 | 4801662 | 2 | 6  | 12 | AC   | 27 | 3  |
| 197694 | 25 | 4818455 | 4818481 | 3 | 9  | 27 | GCT  | 20 | 9  |
| 197695 | 25 | 4819905 | 4819924 | 2 | 10 | 20 | GT   | 23 | 8  |

|        |    |         |         |   |    |    |      |    |    |
|--------|----|---------|---------|---|----|----|------|----|----|
| 197697 | 25 | 4824228 | 4824255 | 2 | 14 | 28 | GT   | 12 | 5  |
| 197698 | 25 | 4828674 | 4828688 | 3 | 5  | 15 | GAG  | 19 | 3  |
| 197700 | 25 | 4834646 | 4834663 | 2 | 9  | 18 | GA   | 25 | 3  |
| 197705 | 25 | 4857989 | 4858010 | 2 | 11 | 22 | AT   | 7  | 3  |
| 197708 | 25 | 4874755 | 4874782 | 4 | 7  | 28 | AAAC | 10 | 7  |
| 197711 | 25 | 4884195 | 4884214 | 2 | 10 | 20 | TC   | 18 | 6  |
| 197727 | 25 | 4910905 | 4910937 | 3 | 11 | 33 | ACA  | 21 | 8  |
| 197728 | 25 | 4912284 | 4912295 | 2 | 6  | 12 | AT   | 24 | 3  |
| 197731 | 25 | 4913297 | 4913320 | 4 | 6  | 24 | AAAT | 11 | 5  |
| 197733 | 25 | 4923883 | 4923900 | 2 | 9  | 18 | AC   | 13 | 8  |
| 197736 | 25 | 4925207 | 4925227 | 3 | 7  | 21 | CAG  | 22 | 6  |
| 197737 | 25 | 4925499 | 4925513 | 3 | 5  | 15 | AAG  | 12 | 8  |
| 197738 | 25 | 4926360 | 4926373 | 2 | 7  | 14 | TG   | 31 | 4  |
| 197741 | 25 | 4927989 | 4928006 | 3 | 6  | 18 | ACA  | 24 | 8  |
| 197753 | 25 | 4979849 | 4979863 | 3 | 5  | 15 | GCT  | 10 | 4  |
| 197761 | 25 | 4997770 | 4997793 | 3 | 8  | 24 | AGC  | 27 | 8  |
| 197777 | 25 | 5052820 | 5052859 | 2 | 20 | 40 | TG   | 18 | 11 |
| 197782 | 25 | 5057206 | 5057225 | 2 | 10 | 20 | GT   | 9  | 6  |
| 197791 | 25 | 5067158 | 5067172 | 3 | 5  | 15 | GCT  | 18 | 3  |
| 197796 | 25 | 5097632 | 5097659 | 2 | 14 | 28 | CA   | 7  | 7  |
| 197797 | 25 | 5097984 | 5098023 | 2 | 20 | 40 | CT   | 7  | 7  |
| 197805 | 25 | 5110084 | 5110107 | 4 | 6  | 24 | GACA | 30 | 7  |
| 197808 | 25 | 5113484 | 5113497 | 2 | 7  | 14 | GT   | 21 | 3  |
| 197816 | 25 | 5140812 | 5140825 | 2 | 7  | 14 | AT   | 13 | 4  |
| 197823 | 25 | 5159458 | 5159473 | 4 | 4  | 16 | TTTA | 18 | 5  |
| 197825 | 25 | 5161845 | 5161860 | 2 | 8  | 16 | TG   | 20 | 6  |
| 197828 | 25 | 5163792 | 5163807 | 2 | 8  | 16 | GT   | 25 | 4  |
| 197829 | 25 | 5164194 | 5164205 | 2 | 6  | 12 | CA   | 23 | 6  |
| 197837 | 25 | 5166584 | 5166611 | 4 | 7  | 28 | TCTT | 14 | 5  |
| 197841 | 25 | 5177110 | 5177130 | 3 | 7  | 21 | TAT  | 9  | 3  |
| 197849 | 25 | 5182071 | 5182092 | 2 | 11 | 22 | AT   | 17 | 3  |
| 197851 | 25 | 5183018 | 5183041 | 3 | 8  | 24 | TTG  | 22 | 7  |
| 197855 | 25 | 5184067 | 5184082 | 2 | 8  | 16 | CA   | 8  | 4  |
| 197860 | 25 | 5187716 | 5187751 | 3 | 12 | 36 | CTG  | 26 | 10 |
| 197863 | 25 | 5188778 | 5188805 | 2 | 14 | 28 | CA   | 6  | 8  |
| 197869 | 25 | 5192751 | 5192762 | 2 | 6  | 12 | AC   | 17 | 3  |
| 197871 | 25 | 5194647 | 5194661 | 3 | 5  | 15 | GCA  | 26 | 4  |
| 197879 | 25 | 5197698 | 5197715 | 3 | 6  | 18 | CAC  | 24 | 3  |
| 197881 | 25 | 5198827 | 5198850 | 3 | 8  | 24 | GCT  | 18 | 4  |
| 197885 | 25 | 5200681 | 5200692 | 2 | 6  | 12 | TG   | 26 | 6  |
| 197886 | 25 | 5201347 | 5201367 | 3 | 7  | 21 | TTG  | 21 | 5  |
| 197891 | 25 | 5202446 | 5202459 | 2 | 7  | 14 | TC   | 19 | 8  |
| 197896 | 25 | 5204139 | 5204154 | 2 | 8  | 16 | TG   | 16 | 5  |
| 197898 | 25 | 5205280 | 5205299 | 2 | 10 | 20 | CA   | 7  | 11 |
| 197901 | 25 | 5207352 | 5207391 | 2 | 20 | 40 | TG   | 11 | 14 |
| 197918 | 25 | 5216856 | 5216877 | 2 | 11 | 22 | CA   | 12 | 3  |
| 197919 | 25 | 5217108 | 5217119 | 2 | 6  | 12 | CA   | 11 | 11 |
| 197921 | 25 | 5228791 | 5228823 | 3 | 11 | 33 | TTC  | 15 | 10 |
| 197922 | 25 | 5229186 | 5229200 | 3 | 5  | 15 | TGT  | 19 | 3  |
| 197927 | 25 | 5233817 | 5233828 | 2 | 6  | 12 | TC   | 26 | 3  |
| 197928 | 25 | 5234717 | 5234734 | 3 | 6  | 18 | AGC  | 24 | 4  |

|        |    |         |         |   |    |    |      |    |    |
|--------|----|---------|---------|---|----|----|------|----|----|
| 197931 | 25 | 5235875 | 5235896 | 2 | 11 | 22 | GT   | 6  | 7  |
| 197933 | 25 | 5236366 | 5236383 | 3 | 6  | 18 | TAT  | 8  | 5  |
| 197941 | 25 | 5246504 | 5246515 | 2 | 6  | 12 | CA   | 25 | 3  |
| 197944 | 25 | 5251457 | 5251474 | 3 | 6  | 18 | AAC  | 12 | 4  |
| 197952 | 25 | 5291454 | 5291465 | 2 | 6  | 12 | AG   | 25 | 7  |
| 197959 | 25 | 5304009 | 5304032 | 2 | 12 | 24 | TG   | 18 | 8  |
| 197961 | 25 | 5306763 | 5306796 | 2 | 17 | 34 | AC   | 11 | 11 |
| 197965 | 25 | 5312650 | 5312665 | 2 | 8  | 16 | AT   | 9  | 5  |
| 197966 | 25 | 5313326 | 5313353 | 2 | 14 | 28 | CA   | 12 | 6  |
| 197967 | 25 | 5314963 | 5314980 | 3 | 6  | 18 | CTG  | 31 | 4  |
| 197972 | 25 | 5326836 | 5326853 | 2 | 9  | 18 | TA   | 7  | 3  |
| 197973 | 25 | 5329875 | 5329902 | 2 | 14 | 28 | GT   | 16 | 11 |
| 197976 | 25 | 5336115 | 5336138 | 4 | 6  | 24 | TTTA | 22 | 4  |
| 197978 | 25 | 5343071 | 5343086 | 2 | 8  | 16 | TG   | 20 | 5  |
| 197981 | 25 | 5349154 | 5349181 | 2 | 14 | 28 | GT   | 12 | 3  |
| 197985 | 25 | 5366132 | 5366147 | 2 | 8  | 16 | AC   | 16 | 6  |
| 197986 | 25 | 5371535 | 5371562 | 2 | 14 | 28 | TG   | 14 | 6  |
| 197993 | 25 | 5395879 | 5395890 | 2 | 6  | 12 | AT   | 19 | 11 |
| 197994 | 25 | 5397346 | 5397357 | 2 | 6  | 12 | TG   | 26 | 4  |
| 197995 | 25 | 5404700 | 5404719 | 4 | 5  | 20 | GTGC | 22 | 4  |
| 198006 | 25 | 5445351 | 5445370 | 2 | 10 | 20 | CT   | 13 | 3  |
| 198007 | 25 | 5445601 | 5445612 | 2 | 6  | 12 | CA   | 17 | 7  |
| 198008 | 25 | 5448917 | 5448932 | 4 | 4  | 16 | TCTG | 22 | 3  |
| 198009 | 25 | 5451645 | 5451670 | 2 | 13 | 26 | TG   | 17 | 10 |
| 198011 | 25 | 5453886 | 5453909 | 3 | 8  | 24 | AGA  | 19 | 3  |
| 198013 | 25 | 5454683 | 5454704 | 2 | 11 | 22 | AC   | 21 | 11 |
| 198016 | 25 | 5455655 | 5455670 | 2 | 8  | 16 | CA   | 20 | 4  |
| 198017 | 25 | 5456108 | 5456129 | 2 | 11 | 22 | TG   | 17 | 5  |
| 198024 | 25 | 5464048 | 5464071 | 2 | 12 | 24 | GT   | 18 | 14 |
| 198026 | 25 | 5464636 | 5464669 | 2 | 17 | 34 | GT   | 16 | 5  |
| 198027 | 25 | 5466533 | 5466554 | 2 | 11 | 22 | GT   | 9  | 5  |
| 198033 | 25 | 5479009 | 5479026 | 2 | 9  | 18 | AC   | 17 | 9  |
| 198038 | 25 | 5490869 | 5490880 | 2 | 6  | 12 | TC   | 25 | 4  |
| 198039 | 25 | 5490922 | 5490937 | 4 | 4  | 16 | CACG | 26 | 3  |
| 198045 | 25 | 5501365 | 5501384 | 4 | 5  | 20 | TATC | 14 | 5  |
| 198049 | 25 | 5518986 | 5519001 | 4 | 4  | 16 | ATTC | 21 | 3  |
| 198054 | 25 | 5531637 | 5531660 | 2 | 12 | 24 | CA   | 15 | 7  |
| 198057 | 25 | 5538121 | 5538142 | 2 | 11 | 22 | TG   | 19 | 4  |
| 198062 | 25 | 5548046 | 5548065 | 2 | 10 | 20 | CA   | 18 | 7  |
| 198069 | 25 | 5552285 | 5552302 | 2 | 9  | 18 | AC   | 25 | 6  |
| 198070 | 25 | 5553634 | 5553651 | 2 | 9  | 18 | TA   | 20 | 8  |
| 198090 | 25 | 5594248 | 5594262 | 3 | 5  | 15 | GGA  | 21 | 5  |
| 198093 | 25 | 5601273 | 5601304 | 2 | 16 | 32 | TG   | 17 | 8  |
| 198103 | 25 | 5612899 | 5612920 | 2 | 11 | 22 | TG   | 16 | 6  |
| 198104 | 25 | 5613033 | 5613053 | 3 | 7  | 21 | GCA  | 24 | 4  |
| 198113 | 25 | 5630472 | 5630511 | 4 | 10 | 40 | TGGA | 22 | 7  |
| 198119 | 25 | 5648414 | 5648425 | 2 | 6  | 12 | CA   | 23 | 3  |
| 198125 | 25 | 5666587 | 5666604 | 3 | 6  | 18 | TCA  | 20 | 4  |
| 198131 | 25 | 5691156 | 5691171 | 2 | 8  | 16 | AG   | 25 | 4  |
| 198133 | 25 | 5693889 | 5693920 | 2 | 16 | 32 | AC   | 11 | 7  |
| 198135 | 25 | 5701505 | 5701536 | 2 | 16 | 32 | TG   | 16 | 8  |

|        |    |         |         |   |    |    |      |    |    |
|--------|----|---------|---------|---|----|----|------|----|----|
| 198136 | 25 | 5704625 | 5704645 | 3 | 7  | 21 | AGA  | 11 | 4  |
| 198138 | 25 | 5707260 | 5707293 | 2 | 17 | 34 | TG   | 13 | 10 |
| 198139 | 25 | 5712445 | 5712459 | 3 | 5  | 15 | AAC  | 29 | 6  |
| 198146 | 25 | 5730703 | 5730720 | 2 | 9  | 18 | GT   | 20 | 4  |
| 198151 | 25 | 5741444 | 5741475 | 2 | 16 | 32 | CA   | 12 | 12 |
| 198152 | 25 | 5741958 | 5741969 | 2 | 6  | 12 | CA   | 28 | 3  |
| 198154 | 25 | 5743317 | 5743350 | 2 | 17 | 34 | CA   | 8  | 8  |
| 198157 | 25 | 5745154 | 5745168 | 3 | 5  | 15 | CAG  | 30 | 4  |
| 198160 | 25 | 5748792 | 5748811 | 2 | 10 | 20 | TG   | 14 | 5  |
| 198161 | 25 | 5758505 | 5758524 | 2 | 10 | 20 | AG   | 26 | 6  |
| 198162 | 25 | 5768248 | 5768271 | 2 | 12 | 24 | GT   | 11 | 9  |
| 198165 | 25 | 5769646 | 5769663 | 2 | 9  | 18 | CT   | 20 | 10 |
| 198168 | 25 | 5772824 | 5772835 | 2 | 6  | 12 | AG   | 21 | 5  |
| 198170 | 25 | 5774538 | 5774563 | 2 | 13 | 26 | CT   | 20 | 6  |
| 198176 | 25 | 5780252 | 5780273 | 2 | 11 | 22 | TG   | 17 | 7  |
| 198177 | 25 | 5781717 | 5781734 | 2 | 9  | 18 | AG   | 16 | 5  |
| 198180 | 25 | 5803945 | 5803982 | 2 | 19 | 38 | CA   | 6  | 6  |
| 198187 | 25 | 5810440 | 5810454 | 3 | 5  | 15 | CCT  | 30 | 3  |
| 198191 | 25 | 5828772 | 5828792 | 3 | 7  | 21 | GCA  | 29 | 5  |
| 198194 | 25 | 5835943 | 5835960 | 3 | 6  | 18 | AAC  | 22 | 7  |
| 198195 | 25 | 5837366 | 5837377 | 2 | 6  | 12 | GA   | 27 | 3  |
| 198197 | 25 | 5846425 | 5846440 | 2 | 8  | 16 | AC   | 15 | 10 |
| 198198 | 25 | 5846870 | 5846895 | 2 | 13 | 26 | CA   | 16 | 12 |
| 198203 | 25 | 5853138 | 5853177 | 2 | 20 | 40 | AC   | 8  | 7  |
| 198204 | 25 | 5853660 | 5853689 | 3 | 10 | 30 | CTT  | 21 | 6  |
| 198211 | 25 | 5870128 | 5870145 | 3 | 6  | 18 | AAC  | 26 | 3  |
| 198218 | 25 | 5910995 | 5911006 | 2 | 6  | 12 | AC   | 20 | 12 |
| 198219 | 25 | 5911008 | 5911021 | 2 | 7  | 14 | CA   | 18 | 10 |
| 198223 | 25 | 5915833 | 5915854 | 2 | 11 | 22 | AG   | 11 | 5  |
| 198224 | 25 | 5916723 | 5916752 | 3 | 10 | 30 | CAT  | 21 | 4  |
| 198228 | 25 | 5925624 | 5925653 | 2 | 15 | 30 | TG   | 14 | 7  |
| 198237 | 25 | 5940542 | 5940573 | 2 | 16 | 32 | TG   | 10 | 8  |
| 198239 | 25 | 5942904 | 5942925 | 2 | 11 | 22 | GT   | 9  | 6  |
| 198243 | 25 | 5950152 | 5950166 | 3 | 5  | 15 | AAC  | 18 | 3  |
| 198244 | 25 | 5951531 | 5951546 | 2 | 8  | 16 | CA   | 19 | 9  |
| 198246 | 25 | 5954018 | 5954033 | 4 | 4  | 16 | AAAT | 25 | 3  |
| 198253 | 25 | 5972971 | 5972996 | 2 | 13 | 26 | CA   | 15 | 13 |
| 198255 | 25 | 5976136 | 5976171 | 2 | 18 | 36 | AC   | 13 | 8  |
| 198258 | 25 | 5990251 | 5990280 | 3 | 10 | 30 | TCA  | 10 | 10 |
| 198260 | 25 | 5991343 | 5991357 | 3 | 5  | 15 | CAG  | 21 | 7  |
| 198264 | 25 | 6009642 | 6009653 | 2 | 6  | 12 | TG   | 24 | 3  |
| 198266 | 25 | 6013804 | 6013815 | 2 | 6  | 12 | TG   | 31 | 5  |
| 198268 | 25 | 6024093 | 6024104 | 2 | 6  | 12 | TG   | 25 | 3  |
| 198269 | 25 | 6026678 | 6026691 | 2 | 7  | 14 | CT   | 24 | 3  |
| 198319 | 25 | 6183437 | 6183456 | 2 | 10 | 20 | CA   | 10 | 8  |
| 198330 | 25 | 6223732 | 6223759 | 2 | 14 | 28 | AC   | 15 | 9  |
| 198331 | 25 | 6225189 | 6225206 | 2 | 9  | 18 | TC   | 12 | 3  |
| 198338 | 25 | 6228916 | 6228941 | 2 | 13 | 26 | TG   | 26 | 7  |
| 198344 | 25 | 6230329 | 6230370 | 3 | 14 | 42 | AAT  | 12 | 4  |
| 198359 | 25 | 6241547 | 6241570 | 2 | 12 | 24 | GT   | 7  | 3  |
| 198360 | 25 | 6241907 | 6241930 | 3 | 8  | 24 | TTA  | 8  | 4  |



|        |    |         |         |   |    |    |      |    |    |
|--------|----|---------|---------|---|----|----|------|----|----|
| 198392 | 25 | 6293331 | 6293354 | 2 | 12 | 24 | CT   | 21 | 4  |
| 198400 | 25 | 6311014 | 6311025 | 2 | 6  | 12 | TC   | 15 | 3  |
| 198433 | 25 | 6368159 | 6368182 | 4 | 6  | 24 | ATTT | 14 | 5  |
| 198434 | 25 | 6368966 | 6368995 | 2 | 15 | 30 | TG   | 9  | 11 |
| 198436 | 25 | 6370227 | 6370266 | 2 | 20 | 40 | TC   | 24 | 10 |
| 198437 | 25 | 6371746 | 6371765 | 2 | 10 | 20 | TG   | 15 | 14 |
| 198438 | 25 | 6373431 | 6373448 | 3 | 6  | 18 | AAC  | 20 | 5  |
| 198457 | 25 | 6402373 | 6402388 | 4 | 4  | 16 | CATA | 33 | 3  |
| 198478 | 25 | 6458174 | 6458193 | 2 | 10 | 20 | AC   | 15 | 5  |
| 198480 | 25 | 6465828 | 6465839 | 2 | 6  | 12 | GA   | 13 | 5  |
| 198483 | 25 | 6474804 | 6474829 | 2 | 13 | 26 | AC   | 14 | 12 |
| 198486 | 25 | 6475557 | 6475590 | 2 | 17 | 34 | TC   | 10 | 13 |
| 198496 | 25 | 6487656 | 6487677 | 2 | 11 | 22 | TG   | 14 | 11 |
| 198508 | 25 | 6510082 | 6510099 | 3 | 6  | 18 | CTC  | 27 | 9  |
| 198512 | 25 | 6513950 | 6513961 | 2 | 6  | 12 | AG   | 10 | 3  |
| 198513 | 25 | 6514257 | 6514274 | 2 | 9  | 18 | AC   | 18 | 8  |
| 198514 | 25 | 6514317 | 6514334 | 2 | 9  | 18 | GA   | 24 | 4  |
| 198519 | 25 | 6525008 | 6525021 | 2 | 7  | 14 | TG   | 12 | 9  |
| 198524 | 25 | 6530822 | 6530841 | 4 | 5  | 20 | TGAG | 27 | 3  |
| 198537 | 25 | 6548300 | 6548314 | 3 | 5  | 15 | CTG  | 31 | 3  |
| 198538 | 25 | 6551428 | 6551447 | 2 | 10 | 20 | CA   | 17 | 5  |
| 198539 | 25 | 6552498 | 6552515 | 2 | 9  | 18 | AC   | 25 | 3  |
| 198540 | 25 | 6557995 | 6558038 | 2 | 22 | 44 | TG   | 11 | 12 |
| 198542 | 25 | 6558898 | 6558911 | 2 | 7  | 14 | TG   | 20 | 5  |
| 198549 | 25 | 6562983 | 6563008 | 2 | 13 | 26 | TG   | 17 | 7  |
| 198551 | 25 | 6566801 | 6566820 | 4 | 5  | 20 | ACAG | 23 | 4  |
| 198558 | 25 | 6582492 | 6582507 | 4 | 4  | 16 | TTTG | 9  | 5  |
| 198565 | 25 | 6588150 | 6588167 | 2 | 9  | 18 | TG   | 19 | 7  |
| 198571 | 25 | 6597903 | 6597916 | 2 | 7  | 14 | CT   | 19 | 3  |
| 198580 | 25 | 6632815 | 6632832 | 2 | 9  | 18 | TG   | 23 | 7  |
| 198584 | 25 | 6644062 | 6644075 | 2 | 7  | 14 | TG   | 28 | 4  |
| 198589 | 25 | 6660144 | 6660155 | 2 | 6  | 12 | AT   | 7  | 5  |
| 198595 | 25 | 6674377 | 6674404 | 2 | 14 | 28 | AG   | 7  | 6  |
| 198598 | 25 | 6674464 | 6674479 | 2 | 8  | 16 | GA   | 13 | 6  |
| 198601 | 25 | 6681958 | 6681977 | 2 | 10 | 20 | AC   | 12 | 7  |
| 198611 | 25 | 6709754 | 6709771 | 2 | 9  | 18 | AC   | 18 | 9  |
| 198615 | 25 | 6719962 | 6719977 | 2 | 8  | 16 | TG   | 26 | 11 |
| 198631 | 25 | 6747562 | 6747589 | 4 | 7  | 28 | TCAC | 17 | 6  |
| 198635 | 25 | 6760502 | 6760553 | 4 | 13 | 52 | TGAT | 18 | 11 |
| 198643 | 25 | 6806255 | 6806272 | 3 | 6  | 18 | GCA  | 25 | 3  |
| 198645 | 25 | 6811993 | 6812010 | 2 | 9  | 18 | GA   | 22 | 6  |
| 198658 | 25 | 6852615 | 6852628 | 2 | 7  | 14 | TC   | 29 | 5  |
| 198661 | 25 | 6857001 | 6857015 | 3 | 5  | 15 | ATG  | 18 | 3  |
| 198664 | 25 | 6867457 | 6867480 | 2 | 12 | 24 | AC   | 11 | 9  |
| 198665 | 25 | 6868345 | 6868368 | 2 | 12 | 24 | CA   | 16 | 8  |
| 198667 | 25 | 6869981 | 6869996 | 2 | 8  | 16 | GT   | 20 | 4  |
| 198671 | 25 | 6875241 | 6875252 | 2 | 6  | 12 | TC   | 13 | 8  |
| 198673 | 25 | 6876510 | 6876536 | 3 | 9  | 27 | CCT  | 20 | 7  |
| 198680 | 25 | 6887803 | 6887844 | 2 | 21 | 42 | GT   | 15 | 14 |
| 198684 | 25 | 6897139 | 6897159 | 3 | 7  | 21 | GGA  | 29 | 7  |
| 198685 | 25 | 6897512 | 6897529 | 2 | 9  | 18 | AT   | 13 | 6  |

|        |    |         |         |   |    |    |      |    |    |
|--------|----|---------|---------|---|----|----|------|----|----|
| 198689 | 25 | 6899335 | 6899366 | 2 | 16 | 32 | GT   | 16 | 11 |
| 198690 | 25 | 6899492 | 6899505 | 2 | 7  | 14 | CT   | 24 | 8  |
| 198695 | 25 | 6908381 | 6908418 | 2 | 19 | 38 | AC   | 14 | 8  |
| 198701 | 25 | 6947807 | 6947820 | 2 | 7  | 14 | AC   | 29 | 5  |
| 198705 | 25 | 6954791 | 6954804 | 2 | 7  | 14 | TG   | 23 | 5  |
| 198707 | 25 | 6958617 | 6958636 | 4 | 5  | 20 | TTGG | 29 | 4  |
| 198710 | 25 | 6968878 | 6968893 | 2 | 8  | 16 | GA   | 19 | 11 |
| 198722 | 25 | 7001273 | 7001294 | 2 | 11 | 22 | GA   | 9  | 6  |
| 198723 | 25 | 7001560 | 7001571 | 2 | 6  | 12 | TG   | 20 | 8  |
| 198730 | 25 | 7015343 | 7015363 | 3 | 7  | 21 | GCA  | 19 | 6  |
| 198737 | 25 | 7025991 | 7026014 | 2 | 12 | 24 | TC   | 18 | 7  |
| 198739 | 25 | 7031334 | 7031373 | 2 | 20 | 40 | TG   | 16 | 11 |
| 198741 | 25 | 7032413 | 7032427 | 3 | 5  | 15 | GAT  | 33 | 4  |
| 198746 | 25 | 7041099 | 7041134 | 3 | 12 | 36 | CCT  | 13 | 9  |
| 198748 | 25 | 7044467 | 7044490 | 2 | 12 | 24 | GT   | 22 | 7  |
| 198751 | 25 | 7047366 | 7047391 | 2 | 13 | 26 | TG   | 15 | 11 |
| 198752 | 25 | 7049578 | 7049617 | 2 | 20 | 40 | TG   | 10 | 8  |
| 198753 | 25 | 7050153 | 7050174 | 2 | 11 | 22 | AC   | 9  | 6  |
| 198754 | 25 | 7054038 | 7054053 | 2 | 8  | 16 | GT   | 27 | 3  |
| 198762 | 25 | 7064953 | 7064964 | 2 | 6  | 12 | TG   | 22 | 3  |
| 198763 | 25 | 7065240 | 7065255 | 2 | 8  | 16 | AC   | 26 | 5  |
| 198764 | 25 | 7065452 | 7065467 | 2 | 8  | 16 | CA   | 18 | 7  |
| 198765 | 25 | 7067802 | 7067825 | 2 | 12 | 24 | AC   | 17 | 5  |
| 198767 | 25 | 7072567 | 7072586 | 2 | 10 | 20 | TG   | 14 | 5  |
| 198768 | 25 | 7078530 | 7078543 | 2 | 7  | 14 | AC   | 20 | 5  |
| 198770 | 25 | 7083354 | 7083377 | 2 | 12 | 24 | CA   | 12 | 16 |
| 198775 | 25 | 7100793 | 7100807 | 3 | 5  | 15 | AAT  | 9  | 10 |
| 198777 | 25 | 7113934 | 7113948 | 3 | 5  | 15 | ACA  | 23 | 4  |
| 198788 | 25 | 7178060 | 7178071 | 2 | 6  | 12 | GT   | 23 | 3  |
| 198794 | 25 | 7184182 | 7184197 | 4 | 4  | 16 | TGGA | 16 | 3  |
| 198795 | 25 | 7184254 | 7184281 | 4 | 7  | 28 | TGGA | 18 | 7  |
| 198799 | 25 | 7187395 | 7187412 | 3 | 6  | 18 | GGT  | 29 | 3  |
| 198800 | 25 | 7188731 | 7188745 | 3 | 5  | 15 | CTG  | 22 | 3  |
| 198803 | 25 | 7189264 | 7189275 | 2 | 6  | 12 | AC   | 11 | 4  |
| 198805 | 25 | 7189415 | 7189432 | 3 | 6  | 18 | TTC  | 17 | 5  |
| 198806 | 25 | 7189798 | 7189825 | 2 | 14 | 28 | TG   | 21 | 15 |
| 198807 | 25 | 7189936 | 7189947 | 2 | 6  | 12 | AC   | 26 | 3  |
| 198808 | 25 | 7189981 | 7190010 | 2 | 15 | 30 | CA   | 15 | 14 |
| 198811 | 25 | 7192523 | 7192540 | 2 | 9  | 18 | GT   | 23 | 11 |
| 198812 | 25 | 7192912 | 7192929 | 2 | 9  | 18 | TG   | 20 | 9  |
| 198826 | 25 | 7211081 | 7211138 | 2 | 29 | 58 | TG   | 13 | 15 |
| 198828 | 25 | 7213427 | 7213450 | 2 | 12 | 24 | AC   | 17 | 14 |
| 198829 | 25 | 7218042 | 7218057 | 2 | 8  | 16 | GT   | 13 | 7  |
| 198831 | 25 | 7220889 | 7220912 | 2 | 12 | 24 | AC   | 19 | 6  |
| 198832 | 25 | 7222629 | 7222646 | 2 | 9  | 18 | GT   | 27 | 9  |
| 198833 | 25 | 7222967 | 7222984 | 3 | 6  | 18 | GCT  | 25 | 5  |
| 198835 | 25 | 7226285 | 7226296 | 2 | 6  | 12 | CA   | 20 | 4  |
| 198838 | 25 | 7226807 | 7226824 | 2 | 9  | 18 | TG   | 17 | 5  |
| 198839 | 25 | 7227271 | 7227284 | 2 | 7  | 14 | GT   | 27 | 8  |
| 198842 | 25 | 7229757 | 7229786 | 2 | 15 | 30 | TG   | 13 | 15 |
| 198844 | 25 | 7232407 | 7232420 | 2 | 7  | 14 | CA   | 23 | 3  |

|        |    |         |         |   |    |    |      |    |    |
|--------|----|---------|---------|---|----|----|------|----|----|
| 198845 | 25 | 7236551 | 7236570 | 2 | 10 | 20 | GT   | 24 | 10 |
| 198847 | 25 | 7243882 | 7243929 | 3 | 16 | 48 | TCT  | 15 | 7  |
| 198850 | 25 | 7244950 | 7244967 | 2 | 9  | 18 | CT   | 13 | 5  |
| 198855 | 25 | 7251913 | 7251930 | 2 | 9  | 18 | AC   | 12 | 7  |
| 198857 | 25 | 7253003 | 7253022 | 2 | 10 | 20 | AC   | 25 | 3  |
| 198858 | 25 | 7253187 | 7253210 | 4 | 6  | 24 | TGGA | 24 | 4  |
| 198860 | 25 | 7254969 | 7254986 | 2 | 9  | 18 | AC   | 24 | 7  |
| 198862 | 25 | 7255348 | 7255361 | 2 | 7  | 14 | AC   | 20 | 5  |
| 198863 | 25 | 7255908 | 7255921 | 2 | 7  | 14 | CA   | 19 | 7  |
| 198867 | 25 | 7257443 | 7257464 | 2 | 11 | 22 | CA   | 16 | 11 |
| 198870 | 25 | 7258805 | 7258819 | 3 | 5  | 15 | CTC  | 16 | 5  |
| 198871 | 25 | 7259318 | 7259339 | 2 | 11 | 22 | GT   | 21 | 11 |
| 198872 | 25 | 7259437 | 7259454 | 2 | 9  | 18 | AC   | 24 | 4  |
| 198874 | 25 | 7259782 | 7259793 | 2 | 6  | 12 | GT   | 15 | 5  |
| 198875 | 25 | 7259800 | 7259813 | 2 | 7  | 14 | GT   | 22 | 5  |
| 198881 | 25 | 7268643 | 7268662 | 4 | 5  | 20 | ACAG | 19 | 3  |
| 198882 | 25 | 7271127 | 7271138 | 2 | 6  | 12 | GT   | 19 | 7  |
| 198885 | 25 | 7271776 | 7271789 | 2 | 7  | 14 | AG   | 22 | 6  |
| 198891 | 25 | 7279668 | 7279681 | 2 | 7  | 14 | TG   | 21 | 3  |
| 198894 | 25 | 7284763 | 7284778 | 4 | 4  | 16 | AAAC | 24 | 4  |
| 198895 | 25 | 7284779 | 7284798 | 4 | 5  | 20 | AAAT | 20 | 4  |
| 198899 | 25 | 7292047 | 7292060 | 2 | 7  | 14 | GT   | 15 | 4  |
| 198901 | 25 | 7296970 | 7296981 | 2 | 6  | 12 | TA   | 21 | 3  |
| 198904 | 25 | 7320069 | 7320096 | 4 | 7  | 28 | GTGC | 23 | 9  |
| 198906 | 25 | 7323440 | 7323471 | 2 | 16 | 32 | AC   | 9  | 9  |
| 198907 | 25 | 7325010 | 7325031 | 2 | 11 | 22 | CA   | 19 | 7  |
| 198908 | 25 | 7329330 | 7329349 | 2 | 10 | 20 | CT   | 11 | 10 |
| 198909 | 25 | 7329351 | 7329366 | 2 | 8  | 16 | TC   | 12 | 9  |
| 198912 | 25 | 7336724 | 7336749 | 2 | 13 | 26 | CA   | 17 | 9  |
| 198913 | 25 | 7338720 | 7338753 | 2 | 17 | 34 | CA   | 9  | 10 |
| 198914 | 25 | 7339296 | 7339309 | 2 | 7  | 14 | CA   | 20 | 7  |
| 198921 | 25 | 7345769 | 7345783 | 3 | 5  | 15 | GAG  | 30 | 3  |
| 198925 | 25 | 7356332 | 7356359 | 2 | 14 | 28 | GT   | 9  | 7  |
| 198948 | 25 | 7375581 | 7375592 | 2 | 6  | 12 | AC   | 32 | 5  |
| 198952 | 25 | 7383019 | 7383038 | 2 | 10 | 20 | CA   | 29 | 4  |
| 198953 | 25 | 7383394 | 7383407 | 2 | 7  | 14 | CA   | 8  | 6  |
| 198956 | 25 | 7388711 | 7388766 | 4 | 14 | 56 | TAGA | 27 | 13 |
| 198957 | 25 | 7390701 | 7390715 | 3 | 5  | 15 | TCA  | 25 | 4  |
| 198964 | 25 | 7407784 | 7407807 | 2 | 12 | 24 | AC   | 12 | 7  |
| 198966 | 25 | 7419187 | 7419204 | 2 | 9  | 18 | CA   | 29 | 3  |
| 198970 | 25 | 7422937 | 7422978 | 3 | 14 | 42 | AAG  | 14 | 13 |
| 198971 | 25 | 7428995 | 7429014 | 4 | 5  | 20 | ACAG | 20 | 3  |
| 198977 | 25 | 7459451 | 7459474 | 4 | 6  | 24 | TTTG | 29 | 7  |
| 198978 | 25 | 7459574 | 7459589 | 4 | 4  | 16 | AAAC | 27 | 3  |
| 198979 | 25 | 7459862 | 7459885 | 2 | 12 | 24 | GT   | 11 | 8  |
| 198990 | 25 | 7499484 | 7499501 | 2 | 9  | 18 | AC   | 16 | 8  |
| 198992 | 25 | 7502891 | 7502914 | 4 | 6  | 24 | CTAA | 20 | 4  |
| 198996 | 25 | 7509050 | 7509076 | 3 | 9  | 27 | GCT  | 27 | 8  |
| 199001 | 25 | 7511379 | 7511402 | 2 | 12 | 24 | TG   | 11 | 10 |
| 199002 | 25 | 7511518 | 7511541 | 2 | 12 | 24 | TG   | 11 | 11 |
| 199003 | 25 | 7511716 | 7511737 | 2 | 11 | 22 | AC   | 21 | 8  |

|        |    |         |         |   |    |    |      |    |    |
|--------|----|---------|---------|---|----|----|------|----|----|
| 199009 | 25 | 7512388 | 7512401 | 2 | 7  | 14 | GC   | 30 | 20 |
| 199010 | 25 | 7512402 | 7512413 | 2 | 6  | 12 | AC   | 23 | 16 |
| 199019 | 25 | 7514857 | 7514896 | 2 | 20 | 40 | GT   | 7  | 9  |
| 199021 | 25 | 7515132 | 7515145 | 2 | 7  | 14 | TC   | 15 | 3  |
| 199022 | 25 | 7515833 | 7515868 | 2 | 18 | 36 | GT   | 12 | 7  |
| 199024 | 25 | 7516187 | 7516212 | 2 | 13 | 26 | CA   | 9  | 5  |
| 199034 | 25 | 7530512 | 7530533 | 2 | 11 | 22 | AC   | 20 | 4  |
| 199038 | 25 | 7534645 | 7534662 | 2 | 9  | 18 | GT   | 18 | 7  |
| 199045 | 25 | 7545948 | 7545963 | 2 | 8  | 16 | TG   | 8  | 5  |
| 199050 | 25 | 7558980 | 7559013 | 2 | 17 | 34 | AC   | 8  | 10 |
| 199053 | 25 | 7561863 | 7561878 | 4 | 4  | 16 | ATTT | 13 | 4  |
| 199058 | 25 | 7567851 | 7567882 | 2 | 16 | 32 | GT   | 6  | 8  |
| 199059 | 25 | 7567972 | 7567987 | 4 | 4  | 16 | CACT | 11 | 13 |
| 199060 | 25 | 7567988 | 7568007 | 2 | 10 | 20 | CA   | 12 | 14 |
| 199061 | 25 | 7573841 | 7573852 | 2 | 6  | 12 | GT   | 24 | 4  |
| 199073 | 25 | 7605371 | 7605386 | 2 | 8  | 16 | CT   | 25 | 8  |
| 199074 | 25 | 7608357 | 7608372 | 4 | 4  | 16 | AAAG | 29 | 3  |
| 199077 | 25 | 7609973 | 7609984 | 2 | 6  | 12 | TA   | 23 | 6  |
| 199078 | 25 | 7610793 | 7610808 | 2 | 8  | 16 | TA   | 9  | 7  |
| 199079 | 25 | 7610809 | 7610826 | 2 | 9  | 18 | TG   | 11 | 8  |
| 199081 | 25 | 7618465 | 7618484 | 2 | 10 | 20 | AG   | 16 | 5  |
| 199086 | 25 | 7621541 | 7621558 | 3 | 6  | 18 | AAC  | 12 | 5  |
| 199087 | 25 | 7623310 | 7623327 | 2 | 9  | 18 | CA   | 25 | 3  |
| 199089 | 25 | 7625833 | 7625862 | 2 | 15 | 30 | AC   | 9  | 7  |
| 199096 | 25 | 7642604 | 7642624 | 3 | 7  | 21 | GCA  | 16 | 4  |
| 199103 | 26 | 47810   | 47833   | 2 | 12 | 24 | GT   | 9  | 4  |
| 199105 | 26 | 49762   | 49783   | 2 | 11 | 22 | AC   | 23 | 8  |
| 199106 | 26 | 52276   | 52313   | 2 | 19 | 38 | AC   | 16 | 9  |
| 199109 | 26 | 54537   | 54560   | 2 | 12 | 24 | CA   | 14 | 9  |
| 199115 | 26 | 57174   | 57211   | 2 | 19 | 38 | CA   | 10 | 10 |
| 199117 | 26 | 59649   | 59688   | 2 | 20 | 40 | AC   | 9  | 9  |
| 199118 | 26 | 59784   | 59801   | 2 | 9  | 18 | GT   | 23 | 6  |
| 199121 | 26 | 62119   | 62132   | 2 | 7  | 14 | TG   | 25 | 3  |
| 199122 | 26 | 62387   | 62404   | 2 | 9  | 18 | TG   | 29 | 7  |
| 199123 | 26 | 62529   | 62546   | 2 | 9  | 18 | TG   | 20 | 8  |
| 199125 | 26 | 64688   | 64701   | 2 | 7  | 14 | TG   | 18 | 6  |
| 199126 | 26 | 64840   | 64863   | 2 | 12 | 24 | AC   | 8  | 5  |
| 199130 | 26 | 67416   | 67427   | 2 | 6  | 12 | CA   | 11 | 3  |
| 199131 | 26 | 68105   | 68116   | 2 | 6  | 12 | AC   | 16 | 5  |
| 199132 | 26 | 68285   | 68306   | 2 | 11 | 22 | AC   | 14 | 4  |
| 199134 | 26 | 68710   | 68725   | 2 | 8  | 16 | TC   | 14 | 3  |
| 199135 | 26 | 69112   | 69125   | 2 | 7  | 14 | CA   | 12 | 4  |
| 199138 | 26 | 72257   | 72276   | 2 | 10 | 20 | CA   | 17 | 9  |
| 199151 | 26 | 83937   | 83966   | 2 | 15 | 30 | AC   | 25 | 9  |
| 199152 | 26 | 84275   | 84301   | 3 | 9  | 27 | AGA  | 21 | 7  |
| 199153 | 26 | 85633   | 85652   | 2 | 10 | 20 | GT   | 19 | 6  |
| 199155 | 26 | 85920   | 85933   | 2 | 7  | 14 | CA   | 14 | 11 |
| 199156 | 26 | 87460   | 87479   | 2 | 10 | 20 | AG   | 21 | 3  |
| 199158 | 26 | 88038   | 88061   | 2 | 12 | 24 | AC   | 24 | 5  |
| 199161 | 26 | 92979   | 92993   | 3 | 5  | 15 | GGT  | 9  | 3  |
| 199162 | 26 | 93197   | 93212   | 2 | 8  | 16 | TG   | 18 | 8  |

|        |    |        |        |   |    |    |      |    |    |
|--------|----|--------|--------|---|----|----|------|----|----|
| 199164 | 26 | 94358  | 94385  | 2 | 14 | 28 | CA   | 20 | 11 |
| 199165 | 26 | 95102  | 95122  | 3 | 7  | 21 | TTG  | 25 | 7  |
| 199175 | 26 | 106282 | 106299 | 2 | 9  | 18 | TG   | 20 | 6  |
| 199176 | 26 | 106755 | 106774 | 4 | 5  | 20 | CTTT | 25 | 6  |
| 199177 | 26 | 106776 | 106791 | 4 | 4  | 16 | TCTT | 27 | 5  |
| 199181 | 26 | 122554 | 122581 | 2 | 14 | 28 | TC   | 9  | 5  |
| 199184 | 26 | 124611 | 124640 | 2 | 15 | 30 | TC   | 17 | 8  |
| 199186 | 26 | 124800 | 124817 | 2 | 9  | 18 | AC   | 20 | 11 |
| 199187 | 26 | 124934 | 124961 | 4 | 7  | 28 | GAAG | 19 | 5  |
| 199188 | 26 | 125043 | 125070 | 4 | 7  | 28 | TATT | 17 | 5  |
| 199189 | 26 | 125620 | 125649 | 2 | 15 | 30 | AC   | 11 | 7  |
| 199190 | 26 | 125807 | 125830 | 2 | 12 | 24 | GT   | 20 | 10 |
| 199194 | 26 | 127611 | 127634 | 2 | 12 | 24 | GT   | 20 | 14 |
| 199201 | 26 | 129008 | 129041 | 2 | 17 | 34 | CA   | 11 | 12 |
| 199202 | 26 | 129280 | 129291 | 2 | 6  | 12 | GT   | 19 | 5  |
| 199203 | 26 | 129394 | 129423 | 2 | 15 | 30 | CA   | 13 | 9  |
| 199204 | 26 | 130334 | 130347 | 2 | 7  | 14 | CG   | 28 | 14 |
| 199205 | 26 | 130617 | 130630 | 2 | 7  | 14 | TG   | 22 | 7  |
| 199208 | 26 | 133052 | 133081 | 2 | 15 | 30 | GT   | 13 | 9  |
| 199210 | 26 | 133995 | 134022 | 2 | 14 | 28 | CA   | 12 | 15 |
| 199211 | 26 | 134111 | 134122 | 2 | 6  | 12 | CA   | 16 | 4  |
| 199212 | 26 | 134546 | 134563 | 2 | 9  | 18 | AC   | 21 | 8  |
| 199213 | 26 | 134722 | 134745 | 2 | 12 | 24 | TG   | 20 | 10 |
| 199214 | 26 | 135781 | 135798 | 2 | 9  | 18 | GT   | 28 | 4  |
| 199215 | 26 | 137037 | 137076 | 2 | 20 | 40 | AC   | 15 | 11 |
| 199223 | 26 | 143952 | 143969 | 2 | 9  | 18 | TC   | 23 | 4  |
| 199225 | 26 | 144614 | 144631 | 3 | 6  | 18 | TTA  | 28 | 9  |
| 199226 | 26 | 145459 | 145472 | 2 | 7  | 14 | AC   | 21 | 6  |
| 199228 | 26 | 150582 | 150608 | 3 | 9  | 27 | AGA  | 24 | 14 |
| 199237 | 26 | 156792 | 156821 | 2 | 15 | 30 | AC   | 12 | 11 |
| 199243 | 26 | 162807 | 162820 | 2 | 7  | 14 | TG   | 24 | 5  |
| 199244 | 26 | 162823 | 162836 | 2 | 7  | 14 | TG   | 21 | 6  |
| 199246 | 26 | 167013 | 167030 | 2 | 9  | 18 | AC   | 19 | 5  |
| 199248 | 26 | 173467 | 173480 | 2 | 7  | 14 | CA   | 19 | 3  |
| 199254 | 26 | 186805 | 186816 | 2 | 6  | 12 | AC   | 34 | 3  |
| 199257 | 26 | 192106 | 192121 | 2 | 8  | 16 | GT   | 21 | 4  |
| 199259 | 26 | 195140 | 195153 | 2 | 7  | 14 | TG   | 26 | 8  |
| 199261 | 26 | 196171 | 196192 | 2 | 11 | 22 | AC   | 23 | 10 |
| 199264 | 26 | 199611 | 199624 | 2 | 7  | 14 | TC   | 7  | 8  |
| 199268 | 26 | 200712 | 200729 | 2 | 9  | 18 | CA   | 13 | 3  |
| 199269 | 26 | 200853 | 200868 | 2 | 8  | 16 | AC   | 26 | 5  |
| 199271 | 26 | 202130 | 202147 | 2 | 9  | 18 | TG   | 23 | 9  |
| 199272 | 26 | 202313 | 202324 | 2 | 6  | 12 | AC   | 30 | 3  |
| 199274 | 26 | 210480 | 210497 | 2 | 9  | 18 | CA   | 18 | 8  |
| 199280 | 26 | 212767 | 212788 | 2 | 11 | 22 | CA   | 12 | 4  |
| 199285 | 26 | 220951 | 220978 | 2 | 14 | 28 | GT   | 10 | 7  |
| 199290 | 26 | 223586 | 223601 | 2 | 8  | 16 | AC   | 14 | 6  |
| 199291 | 26 | 223683 | 223706 | 2 | 12 | 24 | AC   | 15 | 13 |
| 199292 | 26 | 226560 | 226589 | 2 | 15 | 30 | GT   | 18 | 8  |
| 199293 | 26 | 226780 | 226791 | 2 | 6  | 12 | CA   | 14 | 3  |
| 199294 | 26 | 227808 | 227821 | 2 | 7  | 14 | GT   | 21 | 5  |

|        |    |        |        |   |    |    |      |    |    |
|--------|----|--------|--------|---|----|----|------|----|----|
| 199296 | 26 | 230118 | 230133 | 2 | 8  | 16 | AC   | 15 | 3  |
| 199297 | 26 | 230271 | 230296 | 2 | 13 | 26 | CA   | 9  | 10 |
| 199298 | 26 | 230354 | 230369 | 2 | 8  | 16 | GT   | 9  | 3  |
| 199301 | 26 | 231336 | 231351 | 2 | 8  | 16 | TG   | 28 | 4  |
| 199302 | 26 | 231451 | 231465 | 3 | 5  | 15 | ATG  | 23 | 3  |
| 199307 | 26 | 236718 | 236733 | 2 | 8  | 16 | GT   | 18 | 5  |
| 199310 | 26 | 237223 | 237236 | 2 | 7  | 14 | GT   | 14 | 9  |
| 199316 | 26 | 241221 | 241252 | 2 | 16 | 32 | CA   | 11 | 8  |
| 199317 | 26 | 241384 | 241419 | 2 | 18 | 36 | AC   | 6  | 6  |
| 199321 | 26 | 247815 | 247826 | 2 | 6  | 12 | CA   | 21 | 3  |
| 199325 | 26 | 251788 | 251803 | 2 | 8  | 16 | CA   | 25 | 4  |
| 199326 | 26 | 252118 | 252143 | 2 | 13 | 26 | TG   | 16 | 13 |
| 199328 | 26 | 254538 | 254557 | 2 | 10 | 20 | AT   | 6  | 9  |
| 199329 | 26 | 254621 | 254634 | 2 | 7  | 14 | CA   | 21 | 3  |
| 199331 | 26 | 257637 | 257668 | 2 | 16 | 32 | CA   | 14 | 7  |
| 199332 | 26 | 258720 | 258749 | 2 | 15 | 30 | GT   | 14 | 7  |
| 199334 | 26 | 264283 | 264294 | 2 | 6  | 12 | TA   | 16 | 8  |
| 199335 | 26 | 265330 | 265351 | 2 | 11 | 22 | TG   | 25 | 7  |
| 199337 | 26 | 273068 | 273079 | 2 | 6  | 12 | GT   | 20 | 3  |
| 199339 | 26 | 284747 | 284758 | 2 | 6  | 12 | CA   | 26 | 3  |
| 199340 | 26 | 289142 | 289171 | 2 | 15 | 30 | CA   | 20 | 10 |
| 199363 | 26 | 326119 | 326152 | 2 | 17 | 34 | TG   | 10 | 6  |
| 199367 | 26 | 330533 | 330560 | 2 | 14 | 28 | AG   | 17 | 9  |
| 199370 | 26 | 332623 | 332644 | 2 | 11 | 22 | CA   | 6  | 3  |
| 199371 | 26 | 332763 | 332792 | 2 | 15 | 30 | CA   | 7  | 4  |
| 199373 | 26 | 333324 | 333353 | 2 | 15 | 30 | AC   | 6  | 5  |
| 199374 | 26 | 333508 | 333525 | 2 | 9  | 18 | TG   | 20 | 5  |
| 199375 | 26 | 333688 | 333709 | 2 | 11 | 22 | CA   | 22 | 10 |
| 199376 | 26 | 334633 | 334676 | 2 | 22 | 44 | CA   | 7  | 7  |
| 199377 | 26 | 334814 | 334829 | 2 | 8  | 16 | GT   | 28 | 3  |
| 199379 | 26 | 335410 | 335437 | 4 | 7  | 28 | ATCT | 14 | 10 |
| 199383 | 26 | 338405 | 338424 | 2 | 10 | 20 | AC   | 22 | 7  |
| 199384 | 26 | 338885 | 338898 | 2 | 7  | 14 | AC   | 24 | 4  |
| 199386 | 26 | 339927 | 339944 | 2 | 9  | 18 | TG   | 16 | 7  |
| 199389 | 26 | 342856 | 342871 | 2 | 8  | 16 | GT   | 25 | 4  |
| 199390 | 26 | 343239 | 343266 | 2 | 14 | 28 | CA   | 14 | 6  |
| 199392 | 26 | 345331 | 345358 | 2 | 14 | 28 | CA   | 12 | 7  |
| 199396 | 26 | 348649 | 348686 | 2 | 19 | 38 | GT   | 12 | 10 |
| 199397 | 26 | 349882 | 349897 | 2 | 8  | 16 | CA   | 26 | 3  |
| 199401 | 26 | 353659 | 353672 | 2 | 7  | 14 | AC   | 23 | 3  |
| 199402 | 26 | 353776 | 353787 | 2 | 6  | 12 | AC   | 27 | 3  |
| 199405 | 26 | 355833 | 355860 | 2 | 14 | 28 | GT   | 21 | 6  |
| 199411 | 26 | 370113 | 370130 | 2 | 9  | 18 | AG   | 31 | 4  |
| 199415 | 26 | 373218 | 373241 | 2 | 12 | 24 | AC   | 11 | 8  |
| 199417 | 26 | 378869 | 378884 | 2 | 8  | 16 | CA   | 22 | 17 |
| 199420 | 26 | 382692 | 382706 | 3 | 5  | 15 | AAT  | 10 | 3  |
| 199422 | 26 | 383462 | 383475 | 2 | 7  | 14 | GT   | 23 | 4  |
| 199428 | 26 | 406859 | 406894 | 2 | 18 | 36 | GT   | 11 | 8  |
| 199440 | 26 | 421533 | 421544 | 2 | 6  | 12 | GA   | 24 | 3  |
| 199446 | 26 | 433747 | 433762 | 2 | 8  | 16 | AC   | 20 | 6  |
| 199447 | 26 | 436391 | 436414 | 2 | 12 | 24 | CA   | 17 | 11 |

|        |    |        |        |   |    |    |      |    |    |
|--------|----|--------|--------|---|----|----|------|----|----|
| 199450 | 26 | 441107 | 441118 | 2 | 6  | 12 | AT   | 17 | 9  |
| 199456 | 26 | 453293 | 453330 | 2 | 19 | 38 | CA   | 6  | 8  |
| 199457 | 26 | 454637 | 454666 | 2 | 15 | 30 | AC   | 14 | 9  |
| 199458 | 26 | 456595 | 456610 | 2 | 8  | 16 | GT   | 25 | 9  |
| 199459 | 26 | 457076 | 457087 | 2 | 6  | 12 | CA   | 21 | 3  |
| 199460 | 26 | 458834 | 458859 | 2 | 13 | 26 | GT   | 9  | 13 |
| 199462 | 26 | 459040 | 459051 | 2 | 6  | 12 | AC   | 27 | 6  |
| 199463 | 26 | 459375 | 459390 | 2 | 8  | 16 | CA   | 22 | 5  |
| 199465 | 26 | 462237 | 462250 | 2 | 7  | 14 | CA   | 24 | 4  |
| 199467 | 26 | 465757 | 465790 | 2 | 17 | 34 | TC   | 15 | 5  |
| 199469 | 26 | 468167 | 468200 | 2 | 17 | 34 | GT   | 8  | 8  |
| 199470 | 26 | 468378 | 468391 | 2 | 7  | 14 | AC   | 19 | 4  |
| 199471 | 26 | 468622 | 468633 | 2 | 6  | 12 | TC   | 26 | 5  |
| 199474 | 26 | 473169 | 473190 | 2 | 11 | 22 | CT   | 14 | 4  |
| 199488 | 26 | 513392 | 513427 | 2 | 18 | 36 | AC   | 6  | 8  |
| 199489 | 26 | 515442 | 515479 | 2 | 19 | 38 | AC   | 8  | 10 |
| 199490 | 26 | 515581 | 515594 | 2 | 7  | 14 | TG   | 27 | 3  |
| 199491 | 26 | 517013 | 517026 | 2 | 7  | 14 | TG   | 27 | 4  |
| 199492 | 26 | 517205 | 517234 | 2 | 15 | 30 | GT   | 14 | 14 |
| 199493 | 26 | 518189 | 518206 | 2 | 9  | 18 | TG   | 19 | 7  |
| 199494 | 26 | 519382 | 519393 | 2 | 6  | 12 | TG   | 26 | 4  |
| 199507 | 26 | 528054 | 528069 | 2 | 8  | 16 | TG   | 16 | 5  |
| 199508 | 26 | 528229 | 528244 | 2 | 8  | 16 | TG   | 19 | 3  |
| 199509 | 26 | 528322 | 528349 | 2 | 14 | 28 | TG   | 20 | 8  |
| 199511 | 26 | 530925 | 530939 | 3 | 5  | 15 | CCT  | 26 | 3  |
| 199513 | 26 | 532209 | 532220 | 2 | 6  | 12 | TG   | 24 | 7  |
| 199514 | 26 | 532419 | 532448 | 2 | 15 | 30 | AC   | 18 | 10 |
| 199515 | 26 | 532505 | 532524 | 2 | 10 | 20 | TG   | 22 | 6  |
| 199519 | 26 | 534928 | 534945 | 2 | 9  | 18 | AG   | 13 | 6  |
| 199521 | 26 | 535615 | 535650 | 2 | 18 | 36 | TG   | 9  | 15 |
| 199523 | 26 | 537640 | 537651 | 2 | 6  | 12 | TG   | 27 | 11 |
| 199528 | 26 | 548920 | 548949 | 2 | 15 | 30 | GT   | 6  | 8  |
| 199530 | 26 | 553391 | 553410 | 2 | 10 | 20 | CA   | 20 | 9  |
| 199534 | 26 | 563465 | 563476 | 2 | 6  | 12 | GT   | 29 | 5  |
| 199545 | 26 | 575283 | 575308 | 2 | 13 | 26 | AC   | 12 | 6  |
| 199547 | 26 | 577496 | 577507 | 2 | 6  | 12 | AC   | 13 | 7  |
| 199551 | 26 | 591400 | 591411 | 2 | 6  | 12 | GT   | 18 | 7  |
| 199552 | 26 | 592002 | 592013 | 2 | 6  | 12 | GT   | 23 | 5  |
| 199556 | 26 | 596656 | 596671 | 2 | 8  | 16 | TG   | 18 | 8  |
| 199557 | 26 | 596773 | 596788 | 4 | 4  | 16 | AAAT | 12 | 3  |
| 199559 | 26 | 597207 | 597222 | 2 | 8  | 16 | TG   | 10 | 6  |
| 199566 | 26 | 613813 | 613832 | 2 | 10 | 20 | TG   | 18 | 8  |
| 199571 | 26 | 615695 | 615706 | 2 | 6  | 12 | AC   | 11 | 3  |
| 199574 | 26 | 621744 | 621755 | 2 | 6  | 12 | AC   | 19 | 4  |
| 199575 | 26 | 622093 | 622116 | 2 | 12 | 24 | GA   | 10 | 9  |
| 199581 | 26 | 634287 | 634320 | 2 | 17 | 34 | CA   | 14 | 7  |
| 199588 | 26 | 645319 | 645332 | 2 | 7  | 14 | GT   | 10 | 5  |
| 199590 | 26 | 645404 | 645433 | 2 | 15 | 30 | TG   | 12 | 10 |
| 199593 | 26 | 646347 | 646374 | 2 | 14 | 28 | CA   | 20 | 7  |
| 199594 | 26 | 647093 | 647119 | 3 | 9  | 27 | CCT  | 22 | 10 |
| 199596 | 26 | 647565 | 647586 | 2 | 11 | 22 | CT   | 15 | 12 |

|        |    |        |        |   |    |    |     |    |    |
|--------|----|--------|--------|---|----|----|-----|----|----|
| 199603 | 26 | 650495 | 650518 | 2 | 12 | 24 | TG  | 10 | 10 |
| 199607 | 26 | 651900 | 651921 | 2 | 11 | 22 | TG  | 11 | 5  |
| 199610 | 26 | 656216 | 656239 | 2 | 12 | 24 | TG  | 13 | 9  |
| 199614 | 26 | 658514 | 658539 | 2 | 13 | 26 | TC  | 14 | 6  |
| 199617 | 26 | 662539 | 662568 | 3 | 10 | 30 | CTG | 22 | 11 |
| 199618 | 26 | 663668 | 663681 | 2 | 7  | 14 | TG  | 24 | 5  |
| 199620 | 26 | 667190 | 667203 | 2 | 7  | 14 | CA  | 18 | 3  |
| 199622 | 26 | 667945 | 667960 | 2 | 8  | 16 | GT  | 32 | 3  |
| 199627 | 26 | 675626 | 675649 | 2 | 12 | 24 | CA  | 8  | 10 |
| 199628 | 26 | 676190 | 676201 | 2 | 6  | 12 | AC  | 11 | 3  |
| 199629 | 26 | 676353 | 676370 | 2 | 9  | 18 | AC  | 24 | 3  |
| 199632 | 26 | 681902 | 681933 | 2 | 16 | 32 | AC  | 18 | 6  |
| 199634 | 26 | 682139 | 682152 | 2 | 7  | 14 | AC  | 15 | 4  |
| 199635 | 26 | 682153 | 682164 | 2 | 6  | 12 | TC  | 15 | 5  |
| 199639 | 26 | 685034 | 685057 | 2 | 12 | 24 | GT  | 16 | 7  |
| 199640 | 26 | 685278 | 685327 | 2 | 25 | 50 | CA  | 9  | 8  |
| 199641 | 26 | 685406 | 685429 | 2 | 12 | 24 | AC  | 21 | 7  |
| 199646 | 26 | 694061 | 694072 | 2 | 6  | 12 | AC  | 24 | 3  |
| 199647 | 26 | 694170 | 694183 | 2 | 7  | 14 | AC  | 26 | 4  |
| 199648 | 26 | 695500 | 695545 | 2 | 23 | 46 | CA  | 7  | 11 |
| 199653 | 26 | 700696 | 700710 | 3 | 5  | 15 | CCA | 7  | 3  |
| 199658 | 26 | 704867 | 704890 | 2 | 12 | 24 | TC  | 9  | 6  |
| 199664 | 26 | 717449 | 717466 | 2 | 9  | 18 | CA  | 24 | 3  |
| 199667 | 26 | 720326 | 720345 | 2 | 10 | 20 | CA  | 14 | 13 |
| 199668 | 26 | 720407 | 720418 | 2 | 6  | 12 | GT  | 30 | 3  |
| 199669 | 26 | 720606 | 720631 | 2 | 13 | 26 | AC  | 18 | 7  |
| 199671 | 26 | 729774 | 729791 | 2 | 9  | 18 | CA  | 19 | 8  |
| 199676 | 26 | 734286 | 734333 | 2 | 24 | 48 | GT  | 7  | 7  |
| 199677 | 26 | 734491 | 734508 | 2 | 9  | 18 | CT  | 18 | 5  |
| 199679 | 26 | 736019 | 736056 | 2 | 19 | 38 | CA  | 7  | 7  |
| 199680 | 26 | 737893 | 737922 | 3 | 10 | 30 | GAG | 19 | 7  |
| 199682 | 26 | 738678 | 738701 | 2 | 12 | 24 | GT  | 8  | 7  |
| 199685 | 26 | 743143 | 743158 | 2 | 8  | 16 | AT  | 17 | 5  |
| 199687 | 26 | 745927 | 745952 | 2 | 13 | 26 | GT  | 10 | 9  |
| 199690 | 26 | 749001 | 749014 | 2 | 7  | 14 | GT  | 12 | 7  |
| 199691 | 26 | 749017 | 749034 | 2 | 9  | 18 | GT  | 12 | 8  |
| 199702 | 26 | 772512 | 772526 | 3 | 5  | 15 | CAG | 33 | 3  |
| 199706 | 26 | 775284 | 775297 | 2 | 7  | 14 | TG  | 15 | 3  |
| 199711 | 26 | 779099 | 779132 | 2 | 17 | 34 | CA  | 17 | 11 |
| 199712 | 26 | 782366 | 782377 | 2 | 6  | 12 | CA  | 15 | 3  |
| 199715 | 26 | 788337 | 788354 | 2 | 9  | 18 | TG  | 22 | 6  |
| 199716 | 26 | 789054 | 789067 | 2 | 7  | 14 | GT  | 21 | 3  |
| 199717 | 26 | 791437 | 791460 | 2 | 12 | 24 | TG  | 21 | 5  |
| 199718 | 26 | 791918 | 791937 | 2 | 10 | 20 | AC  | 18 | 4  |
| 199726 | 26 | 809267 | 809284 | 2 | 9  | 18 | GT  | 25 | 7  |
| 199729 | 26 | 814246 | 814261 | 2 | 8  | 16 | GT  | 23 | 4  |
| 199730 | 26 | 814393 | 814406 | 2 | 7  | 14 | GT  | 26 | 4  |
| 199734 | 26 | 818194 | 818208 | 3 | 5  | 15 | GGA | 8  | 3  |
| 199737 | 26 | 821016 | 821043 | 2 | 14 | 28 | AC  | 12 | 8  |
| 199738 | 26 | 823791 | 823832 | 2 | 21 | 42 | CA  | 12 | 12 |
| 199743 | 26 | 836826 | 836843 | 2 | 9  | 18 | AC  | 15 | 5  |



|        |    |         |         |   |    |    |      |    |    |
|--------|----|---------|---------|---|----|----|------|----|----|
| 199745 | 26 | 836991  | 837016  | 2 | 13 | 26 | CA   | 10 | 4  |
| 199747 | 26 | 841221  | 841252  | 2 | 16 | 32 | CA   | 16 | 8  |
| 199748 | 26 | 841321  | 841336  | 2 | 8  | 16 | TC   | 19 | 5  |
| 199749 | 26 | 841338  | 841353  | 2 | 8  | 16 | CT   | 19 | 4  |
| 199750 | 26 | 844817  | 844838  | 2 | 11 | 22 | TG   | 25 | 6  |
| 199752 | 26 | 850043  | 850056  | 2 | 7  | 14 | CA   | 23 | 4  |
| 199753 | 26 | 850183  | 850196  | 2 | 7  | 14 | CA   | 25 | 3  |
| 199760 | 26 | 855371  | 855382  | 2 | 6  | 12 | AC   | 21 | 5  |
| 199761 | 26 | 860256  | 860273  | 2 | 9  | 18 | AG   | 13 | 4  |
| 199764 | 26 | 864865  | 864888  | 2 | 12 | 24 | CA   | 15 | 5  |
| 199770 | 26 | 898041  | 898076  | 4 | 9  | 36 | AAAG | 19 | 16 |
| 199772 | 26 | 899350  | 899393  | 2 | 22 | 44 | TG   | 7  | 7  |
| 199773 | 26 | 899566  | 899585  | 2 | 10 | 20 | CA   | 13 | 13 |
| 199774 | 26 | 899934  | 899955  | 2 | 11 | 22 | GT   | 16 | 7  |
| 199775 | 26 | 899983  | 900000  | 2 | 9  | 18 | CA   | 18 | 10 |
| 199776 | 26 | 900085  | 900099  | 3 | 5  | 15 | GGT  | 20 | 3  |
| 199777 | 26 | 906028  | 906043  | 2 | 8  | 16 | TC   | 14 | 8  |
| 199778 | 26 | 906045  | 906060  | 2 | 8  | 16 | CT   | 18 | 9  |
| 199779 | 26 | 906817  | 906842  | 2 | 13 | 26 | GT   | 17 | 11 |
| 199780 | 26 | 907125  | 907176  | 2 | 26 | 52 | GT   | 8  | 10 |
| 199783 | 26 | 907618  | 907651  | 2 | 17 | 34 | GT   | 14 | 13 |
| 199788 | 26 | 909821  | 909838  | 2 | 9  | 18 | GT   | 14 | 12 |
| 199792 | 26 | 913027  | 913038  | 2 | 6  | 12 | GT   | 25 | 6  |
| 199793 | 26 | 913182  | 913205  | 3 | 8  | 24 | CTC  | 14 | 9  |
| 199795 | 26 | 917282  | 917296  | 3 | 5  | 15 | TGT  | 22 | 3  |
| 199796 | 26 | 919013  | 919040  | 2 | 14 | 28 | CA   | 17 | 10 |
| 199797 | 26 | 919355  | 919368  | 2 | 7  | 14 | GT   | 19 | 4  |
| 199798 | 26 | 920123  | 920162  | 2 | 20 | 40 | TG   | 10 | 11 |
| 199810 | 26 | 934614  | 934641  | 2 | 14 | 28 | TG   | 8  | 6  |
| 199814 | 26 | 945877  | 945894  | 3 | 6  | 18 | AAC  | 10 | 7  |
| 199823 | 26 | 961014  | 961037  | 2 | 12 | 24 | CA   | 11 | 6  |
| 199824 | 26 | 966001  | 966016  | 2 | 8  | 16 | CA   | 23 | 7  |
| 199825 | 26 | 976828  | 976857  | 2 | 15 | 30 | TG   | 7  | 6  |
| 199826 | 26 | 976988  | 977027  | 2 | 20 | 40 | TG   | 8  | 10 |
| 199839 | 26 | 995672  | 995687  | 2 | 8  | 16 | GT   | 19 | 7  |
| 199840 | 26 | 995691  | 995704  | 2 | 7  | 14 | GT   | 13 | 5  |
| 199841 | 26 | 995837  | 995860  | 2 | 12 | 24 | TG   | 8  | 9  |
| 199844 | 26 | 996783  | 996818  | 2 | 18 | 36 | TG   | 20 | 15 |
| 199845 | 26 | 996867  | 996890  | 2 | 12 | 24 | GT   | 21 | 8  |
| 199848 | 26 | 999527  | 999538  | 2 | 6  | 12 | TG   | 15 | 5  |
| 199850 | 26 | 1002241 | 1002262 | 2 | 11 | 22 | TG   | 7  | 4  |
| 199852 | 26 | 1005066 | 1005085 | 2 | 10 | 20 | CA   | 16 | 6  |
| 199853 | 26 | 1005344 | 1005361 | 3 | 6  | 18 | TTC  | 32 | 3  |
| 199857 | 26 | 1007710 | 1007724 | 3 | 5  | 15 | CCT  | 25 | 11 |
| 199858 | 26 | 1009436 | 1009467 | 2 | 16 | 32 | TG   | 8  | 7  |
| 199862 | 26 | 1011518 | 1011537 | 2 | 10 | 20 | AC   | 29 | 9  |
| 199863 | 26 | 1013198 | 1013229 | 2 | 16 | 32 | TG   | 13 | 12 |
| 199864 | 26 | 1013275 | 1013307 | 3 | 11 | 33 | GAG  | 14 | 3  |
| 199865 | 26 | 1013384 | 1013405 | 2 | 11 | 22 | GT   | 12 | 5  |
| 199869 | 26 | 1017097 | 1017116 | 2 | 10 | 20 | AC   | 15 | 4  |
| 199872 | 26 | 1020383 | 1020398 | 2 | 8  | 16 | TG   | 22 | 7  |

|        |    |         |         |   |    |    |      |    |    |
|--------|----|---------|---------|---|----|----|------|----|----|
| 199874 | 26 | 1021688 | 1021699 | 2 | 6  | 12 | GA   | 23 | 4  |
| 199883 | 26 | 1046033 | 1046052 | 2 | 10 | 20 | TG   | 23 | 12 |
| 199884 | 26 | 1048114 | 1048129 | 2 | 8  | 16 | TG   | 29 | 4  |
| 199885 | 26 | 1051283 | 1051297 | 3 | 5  | 15 | CTG  | 28 | 4  |
| 199888 | 26 | 1056085 | 1056106 | 2 | 11 | 22 | CA   | 21 | 11 |
| 199889 | 26 | 1056539 | 1056550 | 2 | 6  | 12 | TG   | 25 | 5  |
| 199900 | 26 | 1076735 | 1076756 | 2 | 11 | 22 | GT   | 7  | 8  |
| 199903 | 26 | 1093102 | 1093123 | 2 | 11 | 22 | AC   | 18 | 10 |
| 199906 | 26 | 1096327 | 1096340 | 2 | 7  | 14 | CA   | 26 | 3  |
| 199908 | 26 | 1098639 | 1098670 | 2 | 16 | 32 | TG   | 17 | 10 |
| 199909 | 26 | 1100998 | 1101009 | 2 | 6  | 12 | CA   | 24 | 4  |
| 199910 | 26 | 1101011 | 1101022 | 2 | 6  | 12 | AC   | 21 | 3  |
| 199912 | 26 | 1103338 | 1103351 | 2 | 7  | 14 | TC   | 28 | 6  |
| 199913 | 26 | 1103476 | 1103489 | 2 | 7  | 14 | GA   | 24 | 3  |
| 199915 | 26 | 1110411 | 1110444 | 2 | 17 | 34 | AC   | 9  | 8  |
| 199916 | 26 | 1116069 | 1116098 | 2 | 15 | 30 | AC   | 11 | 11 |
| 199921 | 26 | 1121367 | 1121382 | 2 | 8  | 16 | TC   | 14 | 4  |
| 199923 | 26 | 1122417 | 1122436 | 4 | 5  | 20 | AGAC | 30 | 5  |
| 199931 | 26 | 1130505 | 1130518 | 2 | 7  | 14 | GT   | 26 | 6  |
| 199934 | 26 | 1136424 | 1136441 | 3 | 6  | 18 | TCT  | 27 | 4  |
| 199936 | 26 | 1136665 | 1136678 | 2 | 7  | 14 | TC   | 16 | 4  |
| 199939 | 26 | 1137309 | 1137324 | 4 | 4  | 16 | TGCG | 20 | 3  |
| 199942 | 26 | 1147203 | 1147214 | 2 | 6  | 12 | CA   | 25 | 3  |
| 199953 | 26 | 1167944 | 1167965 | 2 | 11 | 22 | GT   | 19 | 12 |
| 199959 | 26 | 1187699 | 1187716 | 2 | 9  | 18 | AC   | 19 | 8  |
| 199969 | 26 | 1203775 | 1203798 | 3 | 8  | 24 | TTG  | 21 | 7  |
| 199970 | 26 | 1212738 | 1212755 | 2 | 9  | 18 | GT   | 19 | 8  |
| 199975 | 26 | 1226597 | 1226616 | 4 | 5  | 20 | TTTA | 23 | 4  |
| 199979 | 26 | 1232697 | 1232712 | 2 | 8  | 16 | TG   | 8  | 7  |
| 199988 | 26 | 1235240 | 1235251 | 2 | 6  | 12 | AC   | 18 | 4  |
| 199989 | 26 | 1235409 | 1235430 | 2 | 11 | 22 | GA   | 12 | 8  |
| 199990 | 26 | 1236872 | 1236909 | 2 | 19 | 38 | AC   | 10 | 10 |
| 199991 | 26 | 1237063 | 1237084 | 2 | 11 | 22 | GT   | 22 | 10 |
| 199992 | 26 | 1237252 | 1237267 | 2 | 8  | 16 | GA   | 17 | 4  |
| 199998 | 26 | 1240441 | 1240452 | 2 | 6  | 12 | AC   | 29 | 5  |
| 199999 | 26 | 1240618 | 1240659 | 2 | 21 | 42 | CA   | 16 | 9  |
| 200001 | 26 | 1240833 | 1240862 | 2 | 15 | 30 | CA   | 16 | 11 |
| 200018 | 26 | 1249684 | 1249701 | 2 | 9  | 18 | AC   | 12 | 5  |
| 200020 | 26 | 1250527 | 1250542 | 2 | 8  | 16 | CA   | 21 | 7  |
| 200035 | 26 | 1260047 | 1260066 | 2 | 10 | 20 | AC   | 12 | 4  |
| 200038 | 26 | 1265163 | 1265183 | 3 | 7  | 21 | CCT  | 28 | 4  |
| 200043 | 26 | 1268696 | 1268715 | 2 | 10 | 20 | CA   | 17 | 7  |
| 200044 | 26 | 1270476 | 1270503 | 2 | 14 | 28 | TG   | 12 | 5  |
| 200045 | 26 | 1271136 | 1271151 | 2 | 8  | 16 | TG   | 7  | 3  |
| 200046 | 26 | 1273282 | 1273317 | 3 | 12 | 36 | TTG  | 17 | 14 |
| 200048 | 26 | 1274627 | 1274650 | 3 | 8  | 24 | GCA  | 13 | 5  |
| 200063 | 26 | 1279518 | 1279559 | 2 | 21 | 42 | AC   | 9  | 10 |
| 200064 | 26 | 1279636 | 1279663 | 2 | 14 | 28 | CA   | 14 | 5  |
| 200066 | 26 | 1280383 | 1280400 | 2 | 9  | 18 | CA   | 18 | 5  |
| 200071 | 26 | 1289410 | 1289435 | 2 | 13 | 26 | TG   | 15 | 21 |
| 200072 | 26 | 1290317 | 1290334 | 3 | 6  | 18 | AAT  | 17 | 3  |

|        |    |         |         |   |    |    |      |    |    |
|--------|----|---------|---------|---|----|----|------|----|----|
| 200075 | 26 | 1293928 | 1293941 | 2 | 7  | 14 | AC   | 20 | 6  |
| 200077 | 26 | 1298398 | 1298421 | 4 | 6  | 24 | ATAC | 7  | 8  |
| 200084 | 26 | 1311307 | 1311350 | 2 | 22 | 44 | TG   | 19 | 9  |
| 200086 | 26 | 1316792 | 1316813 | 2 | 11 | 22 | TC   | 27 | 13 |
| 200088 | 26 | 1321187 | 1321198 | 2 | 6  | 12 | AC   | 20 | 13 |
| 200089 | 26 | 1321204 | 1321215 | 2 | 6  | 12 | CA   | 16 | 11 |
| 200090 | 26 | 1325532 | 1325551 | 2 | 10 | 20 | CA   | 14 | 9  |
| 200091 | 26 | 1327474 | 1327497 | 3 | 8  | 24 | TCA  | 19 | 3  |
| 200099 | 26 | 1333710 | 1333733 | 2 | 12 | 24 | GT   | 26 | 4  |
| 200102 | 26 | 1341759 | 1341788 | 2 | 15 | 30 | AC   | 15 | 9  |
| 200103 | 26 | 1345323 | 1345340 | 2 | 9  | 18 | GT   | 16 | 12 |
| 200104 | 26 | 1345342 | 1345359 | 2 | 9  | 18 | TG   | 20 | 12 |
| 200111 | 26 | 1370005 | 1370036 | 2 | 16 | 32 | TG   | 11 | 4  |
| 200114 | 26 | 1372161 | 1372178 | 2 | 9  | 18 | GA   | 17 | 7  |
| 200121 | 26 | 1384748 | 1384763 | 2 | 8  | 16 | AC   | 31 | 3  |
| 200122 | 26 | 1384921 | 1384968 | 2 | 24 | 48 | CA   | 6  | 9  |
| 200144 | 26 | 1432492 | 1432507 | 2 | 8  | 16 | AC   | 23 | 5  |
| 200145 | 26 | 1434832 | 1434852 | 3 | 7  | 21 | TGT  | 26 | 5  |
| 200158 | 26 | 1476600 | 1476617 | 3 | 6  | 18 | GGT  | 29 | 3  |
| 200160 | 26 | 1479745 | 1479758 | 2 | 7  | 14 | AC   | 12 | 5  |
| 200165 | 26 | 1492752 | 1492771 | 2 | 10 | 20 | CA   | 20 | 7  |
| 200169 | 26 | 1502926 | 1502952 | 3 | 9  | 27 | ATA  | 7  | 4  |
| 200170 | 26 | 1504969 | 1505012 | 2 | 22 | 44 | GT   | 15 | 12 |
| 200173 | 26 | 1518628 | 1518663 | 4 | 9  | 36 | CTGA | 26 | 12 |
| 200176 | 26 | 1522176 | 1522197 | 2 | 11 | 22 | GA   | 19 | 6  |
| 200190 | 26 | 1534418 | 1534429 | 2 | 6  | 12 | AC   | 19 | 3  |
| 200192 | 26 | 1536600 | 1536627 | 4 | 7  | 28 | TAAA | 19 | 4  |
| 200193 | 26 | 1538498 | 1538521 | 4 | 6  | 24 | TCAA | 35 | 4  |
| 200194 | 26 | 1539373 | 1539387 | 3 | 5  | 15 | TGC  | 22 | 4  |
| 200197 | 26 | 1541333 | 1541346 | 2 | 7  | 14 | GT   | 23 | 5  |
| 200201 | 26 | 1550871 | 1550896 | 2 | 13 | 26 | AC   | 18 | 17 |
| 200204 | 26 | 1555763 | 1555782 | 4 | 5  | 20 | GCCT | 26 | 4  |
| 200205 | 26 | 1559461 | 1559484 | 2 | 12 | 24 | TG   | 15 | 8  |
| 200209 | 26 | 1563444 | 1563459 | 4 | 4  | 16 | CTGT | 30 | 3  |
| 200211 | 26 | 1564859 | 1564882 | 2 | 12 | 24 | GA   | 27 | 7  |
| 200213 | 26 | 1566511 | 1566536 | 2 | 13 | 26 | TG   | 17 | 8  |
| 200216 | 26 | 1571418 | 1571439 | 2 | 11 | 22 | AC   | 9  | 6  |
| 200218 | 26 | 1576529 | 1576608 | 4 | 20 | 80 | GATA | 14 | 10 |
| 200229 | 26 | 1588933 | 1588950 | 2 | 9  | 18 | AG   | 18 | 3  |
| 200232 | 26 | 1592065 | 1592082 | 2 | 9  | 18 | TC   | 20 | 5  |
| 200233 | 26 | 1594315 | 1594336 | 2 | 11 | 22 | TG   | 17 | 3  |
| 200234 | 26 | 1594469 | 1594500 | 2 | 16 | 32 | AC   | 8  | 12 |
| 200235 | 26 | 1596321 | 1596344 | 2 | 12 | 24 | GT   | 17 | 7  |
| 200236 | 26 | 1598627 | 1598638 | 2 | 6  | 12 | TC   | 9  | 3  |
| 200238 | 26 | 1598976 | 1599015 | 2 | 20 | 40 | GT   | 8  | 9  |
| 200241 | 26 | 1605803 | 1605816 | 2 | 7  | 14 | GT   | 25 | 3  |
| 200246 | 26 | 1609112 | 1609125 | 2 | 7  | 14 | CA   | 15 | 7  |
| 200247 | 26 | 1609294 | 1609319 | 2 | 13 | 26 | GT   | 23 | 13 |
| 200253 | 26 | 1612454 | 1612465 | 2 | 6  | 12 | TC   | 17 | 3  |
| 200254 | 26 | 1612658 | 1612675 | 2 | 9  | 18 | AC   | 19 | 9  |
| 200255 | 26 | 1613113 | 1613128 | 2 | 8  | 16 | GA   | 16 | 5  |

|        |    |         |         |   |    |    |      |    |    |
|--------|----|---------|---------|---|----|----|------|----|----|
| 200257 | 26 | 1617288 | 1617331 | 2 | 22 | 44 | CT   | 10 | 6  |
| 200258 | 26 | 1617876 | 1617899 | 2 | 12 | 24 | TG   | 16 | 8  |
| 200262 | 26 | 1619523 | 1619546 | 2 | 12 | 24 | GT   | 21 | 12 |
| 200264 | 26 | 1619696 | 1619715 | 2 | 10 | 20 | CA   | 18 | 9  |
| 200265 | 26 | 1619805 | 1619830 | 2 | 13 | 26 | GT   | 20 | 8  |
| 200267 | 26 | 1624666 | 1624679 | 2 | 7  | 14 | AC   | 22 | 3  |
| 200268 | 26 | 1625528 | 1625561 | 2 | 17 | 34 | CA   | 12 | 11 |
| 200271 | 26 | 1628273 | 1628304 | 4 | 8  | 32 | GCCT | 28 | 8  |
| 200272 | 26 | 1629543 | 1629572 | 2 | 15 | 30 | CA   | 7  | 10 |
| 200273 | 26 | 1630247 | 1630262 | 2 | 8  | 16 | TG   | 21 | 5  |
| 200276 | 26 | 1635589 | 1635614 | 2 | 13 | 26 | AC   | 7  | 10 |
| 200285 | 26 | 1651861 | 1651872 | 2 | 6  | 12 | CA   | 28 | 3  |
| 200287 | 26 | 1655300 | 1655323 | 3 | 8  | 24 | AGA  | 22 | 6  |
| 200292 | 26 | 1657969 | 1658006 | 2 | 19 | 38 | TG   | 6  | 7  |
| 200296 | 26 | 1659954 | 1659965 | 2 | 6  | 12 | AG   | 10 | 5  |
| 200297 | 26 | 1660088 | 1660119 | 2 | 16 | 32 | CA   | 7  | 10 |
| 200301 | 26 | 1665325 | 1665350 | 2 | 13 | 26 | GT   | 17 | 8  |
| 200303 | 26 | 1668105 | 1668122 | 2 | 9  | 18 | GA   | 9  | 3  |
| 200304 | 26 | 1670767 | 1670796 | 2 | 15 | 30 | TG   | 19 | 10 |
| 200306 | 26 | 1673969 | 1673998 | 2 | 15 | 30 | AC   | 16 | 14 |
| 200307 | 26 | 1674487 | 1674502 | 2 | 8  | 16 | AC   | 7  | 5  |
| 200309 | 26 | 1675515 | 1675542 | 2 | 14 | 28 | TG   | 7  | 7  |
| 200310 | 26 | 1676476 | 1676496 | 3 | 7  | 21 | AAG  | 24 | 4  |
| 200313 | 26 | 1679248 | 1679275 | 2 | 14 | 28 | GT   | 13 | 5  |
| 200323 | 26 | 1692497 | 1692514 | 2 | 9  | 18 | TG   | 21 | 8  |
| 200325 | 26 | 1692757 | 1692778 | 2 | 11 | 22 | TC   | 24 | 4  |
| 200329 | 26 | 1701355 | 1701370 | 2 | 8  | 16 | CA   | 22 | 3  |
| 200335 | 26 | 1706167 | 1706192 | 2 | 13 | 26 | CA   | 7  | 10 |
| 200336 | 26 | 1708177 | 1708190 | 2 | 7  | 14 | GT   | 26 | 7  |
| 200337 | 26 | 1711315 | 1711346 | 2 | 16 | 32 | AC   | 8  | 5  |
| 200339 | 26 | 1714482 | 1714501 | 4 | 5  | 20 | TTTA | 16 | 13 |
| 200357 | 26 | 1791303 | 1791323 | 3 | 7  | 21 | GAA  | 20 | 7  |
| 200358 | 26 | 1795278 | 1795293 | 2 | 8  | 16 | TG   | 21 | 3  |
| 200359 | 26 | 1795405 | 1795416 | 2 | 6  | 12 | TG   | 26 | 12 |
| 200360 | 26 | 1797515 | 1797542 | 2 | 14 | 28 | GT   | 20 | 12 |
| 200372 | 26 | 1809407 | 1809438 | 2 | 16 | 32 | TG   | 7  | 7  |
| 200375 | 26 | 1818297 | 1818314 | 3 | 6  | 18 | GAT  | 25 | 3  |
| 200376 | 26 | 1819059 | 1819094 | 2 | 18 | 36 | TG   | 27 | 18 |
| 200377 | 26 | 1819181 | 1819200 | 2 | 10 | 20 | TG   | 16 | 8  |
| 200378 | 26 | 1819745 | 1819776 | 4 | 8  | 32 | CATC | 15 | 6  |
| 200385 | 26 | 1832060 | 1832093 | 2 | 17 | 34 | CA   | 13 | 13 |
| 200386 | 26 | 1833355 | 1833372 | 2 | 9  | 18 | GA   | 23 | 10 |
| 200387 | 26 | 1834318 | 1834331 | 2 | 7  | 14 | CA   | 16 | 3  |
| 200388 | 26 | 1834434 | 1834455 | 2 | 11 | 22 | CA   | 15 | 12 |
| 200395 | 26 | 1854020 | 1854047 | 2 | 14 | 28 | TG   | 17 | 17 |
| 200396 | 26 | 1857463 | 1857482 | 2 | 10 | 20 | TG   | 9  | 8  |
| 200397 | 26 | 1861754 | 1861768 | 3 | 5  | 15 | GAG  | 27 | 4  |
| 200403 | 26 | 1870918 | 1870933 | 2 | 8  | 16 | TG   | 18 | 5  |
| 200406 | 26 | 1876776 | 1876805 | 2 | 15 | 30 | AC   | 14 | 7  |
| 200407 | 26 | 1879811 | 1879822 | 2 | 6  | 12 | GT   | 22 | 3  |
| 200408 | 26 | 1880131 | 1880142 | 2 | 6  | 12 | AT   | 29 | 3  |

|        |    |         |         |   |    |    |      |    |    |
|--------|----|---------|---------|---|----|----|------|----|----|
| 200411 | 26 | 1882113 | 1882156 | 2 | 22 | 44 | GT   | 13 | 9  |
| 200412 | 26 | 1882214 | 1882233 | 2 | 10 | 20 | AC   | 18 | 5  |
| 200413 | 26 | 1882325 | 1882348 | 2 | 12 | 24 | CA   | 6  | 5  |
| 200415 | 26 | 1882948 | 1882961 | 2 | 7  | 14 | GT   | 13 | 10 |
| 200417 | 26 | 1883115 | 1883132 | 2 | 9  | 18 | CA   | 12 | 5  |
| 200421 | 26 | 1885281 | 1885314 | 2 | 17 | 34 | AC   | 11 | 9  |
| 200422 | 26 | 1890407 | 1890420 | 2 | 7  | 14 | AC   | 26 | 6  |
| 200423 | 26 | 1891491 | 1891524 | 2 | 17 | 34 | AC   | 17 | 7  |
| 200434 | 26 | 1896319 | 1896366 | 2 | 24 | 48 | AC   | 6  | 7  |
| 200436 | 26 | 1896556 | 1896573 | 2 | 9  | 18 | GA   | 11 | 3  |
| 200437 | 26 | 1896643 | 1896672 | 2 | 15 | 30 | CA   | 18 | 10 |
| 200440 | 26 | 1897279 | 1897294 | 2 | 8  | 16 | AG   | 12 | 4  |
| 200444 | 26 | 1901012 | 1901023 | 2 | 6  | 12 | AC   | 26 | 4  |
| 200446 | 26 | 1902245 | 1902272 | 2 | 14 | 28 | TG   | 15 | 14 |
| 200447 | 26 | 1902441 | 1902464 | 2 | 12 | 24 | CA   | 20 | 7  |
| 200450 | 26 | 1906171 | 1906206 | 4 | 9  | 36 | TTCT | 11 | 8  |
| 200451 | 26 | 1906318 | 1906347 | 2 | 15 | 30 | CA   | 13 | 9  |
| 200453 | 26 | 1913012 | 1913035 | 4 | 6  | 24 | AAGA | 23 | 3  |
| 200454 | 26 | 1913138 | 1913159 | 2 | 11 | 22 | AC   | 25 | 7  |
| 200455 | 26 | 1913287 | 1913306 | 2 | 10 | 20 | TG   | 17 | 7  |
| 200456 | 26 | 1913874 | 1913885 | 2 | 6  | 12 | TC   | 23 | 4  |
| 200460 | 26 | 1919585 | 1919596 | 2 | 6  | 12 | TG   | 24 | 5  |
| 200463 | 26 | 1922457 | 1922470 | 2 | 7  | 14 | GT   | 21 | 5  |
| 200464 | 26 | 1922494 | 1922513 | 2 | 10 | 20 | GT   | 12 | 7  |
| 200465 | 26 | 1922758 | 1922773 | 2 | 8  | 16 | CA   | 10 | 12 |
| 200466 | 26 | 1922774 | 1922787 | 2 | 7  | 14 | AC   | 13 | 11 |
| 200468 | 26 | 1927398 | 1927413 | 2 | 8  | 16 | AC   | 20 | 15 |
| 200469 | 26 | 1929753 | 1929770 | 2 | 9  | 18 | TG   | 24 | 3  |
| 200470 | 26 | 1930187 | 1930200 | 2 | 7  | 14 | AC   | 25 | 6  |
| 200472 | 26 | 1938351 | 1938366 | 2 | 8  | 16 | CA   | 32 | 8  |
| 200473 | 26 | 1941760 | 1941771 | 2 | 6  | 12 | GT   | 28 | 4  |
| 200475 | 26 | 1942299 | 1942320 | 2 | 11 | 22 | CT   | 6  | 9  |
| 200480 | 26 | 1948923 | 1948952 | 2 | 15 | 30 | GT   | 11 | 12 |
| 200482 | 26 | 1949242 | 1949285 | 2 | 22 | 44 | CA   | 15 | 15 |
| 200486 | 26 | 1950876 | 1950905 | 2 | 15 | 30 | CA   | 8  | 11 |
| 200487 | 26 | 1951019 | 1951052 | 2 | 17 | 34 | GT   | 14 | 12 |
| 200488 | 26 | 1951212 | 1951243 | 2 | 16 | 32 | CA   | 8  | 7  |
| 200491 | 26 | 1953503 | 1953522 | 2 | 10 | 20 | AC   | 24 | 4  |
| 200493 | 26 | 1955918 | 1955929 | 2 | 6  | 12 | GT   | 14 | 5  |
| 200494 | 26 | 1955931 | 1955944 | 2 | 7  | 14 | TG   | 15 | 8  |
| 200495 | 26 | 1958141 | 1958164 | 2 | 12 | 24 | CA   | 15 | 9  |
| 200496 | 26 | 1958342 | 1958369 | 2 | 14 | 28 | GA   | 14 | 4  |
| 200499 | 26 | 1960232 | 1960255 | 2 | 12 | 24 | AC   | 16 | 3  |
| 200500 | 26 | 1960307 | 1960318 | 2 | 6  | 12 | CA   | 19 | 3  |
| 200501 | 26 | 1960422 | 1960441 | 2 | 10 | 20 | GT   | 17 | 10 |
| 200504 | 26 | 1962759 | 1962778 | 2 | 10 | 20 | CA   | 13 | 9  |
| 200508 | 26 | 1963724 | 1963745 | 2 | 11 | 22 | AC   | 17 | 5  |
| 200511 | 26 | 1974492 | 1974509 | 3 | 6  | 18 | TTC  | 17 | 6  |
| 200516 | 26 | 1979002 | 1979021 | 2 | 10 | 20 | AG   | 23 | 4  |
| 200517 | 26 | 1979208 | 1979245 | 2 | 19 | 38 | TG   | 12 | 12 |
| 200518 | 26 | 1981662 | 1981683 | 2 | 11 | 22 | GT   | 24 | 5  |

|        |    |         |         |   |    |    |      |    |    |
|--------|----|---------|---------|---|----|----|------|----|----|
| 200524 | 26 | 1995876 | 1995891 | 2 | 8  | 16 | TG   | 21 | 3  |
| 200525 | 26 | 1997159 | 1997172 | 2 | 7  | 14 | AC   | 22 | 4  |
| 200544 | 26 | 2015927 | 2015952 | 2 | 13 | 26 | TC   | 18 | 5  |
| 200545 | 26 | 2017155 | 2017174 | 2 | 10 | 20 | TG   | 26 | 3  |
| 200546 | 26 | 2019397 | 2019410 | 2 | 7  | 14 | TG   | 19 | 4  |
| 200547 | 26 | 2019714 | 2019729 | 2 | 8  | 16 | AC   | 29 | 3  |
| 200551 | 26 | 2032101 | 2032140 | 2 | 20 | 40 | GT   | 8  | 11 |
| 200554 | 26 | 2040638 | 2040658 | 3 | 7  | 21 | AGA  | 17 | 3  |
| 200561 | 26 | 2050897 | 2050912 | 2 | 8  | 16 | AC   | 19 | 11 |
| 200562 | 26 | 2053097 | 2053114 | 2 | 9  | 18 | CT   | 17 | 4  |
| 200565 | 26 | 2058172 | 2058189 | 2 | 9  | 18 | TG   | 24 | 5  |
| 200582 | 26 | 2081473 | 2081494 | 2 | 11 | 22 | AG   | 6  | 7  |
| 200583 | 26 | 2081708 | 2081725 | 2 | 9  | 18 | AC   | 15 | 7  |
| 200584 | 26 | 2081728 | 2081739 | 2 | 6  | 12 | AC   | 15 | 8  |
| 200586 | 26 | 2081890 | 2081909 | 2 | 10 | 20 | AC   | 28 | 15 |
| 200589 | 26 | 2082179 | 2082192 | 2 | 7  | 14 | AC   | 15 | 6  |
| 200595 | 26 | 2089950 | 2089963 | 2 | 7  | 14 | TG   | 22 | 3  |
| 200597 | 26 | 2091395 | 2091414 | 2 | 10 | 20 | TG   | 12 | 6  |
| 200601 | 26 | 2100353 | 2100370 | 2 | 9  | 18 | TC   | 18 | 5  |
| 200603 | 26 | 2102909 | 2102920 | 2 | 6  | 12 | AG   | 23 | 3  |
| 200606 | 26 | 2107783 | 2107798 | 2 | 8  | 16 | AC   | 21 | 6  |
| 200615 | 26 | 2113629 | 2113643 | 3 | 5  | 15 | GGA  | 27 | 4  |
| 200616 | 26 | 2115020 | 2115055 | 4 | 9  | 36 | CATC | 29 | 17 |
| 200617 | 26 | 2116320 | 2116339 | 2 | 10 | 20 | CA   | 14 | 8  |
| 200618 | 26 | 2117549 | 2117572 | 3 | 8  | 24 | CCT  | 8  | 4  |
| 200623 | 26 | 2138722 | 2138747 | 2 | 13 | 26 | GT   | 11 | 9  |
| 200625 | 26 | 2140484 | 2140497 | 2 | 7  | 14 | GT   | 24 | 5  |
| 200630 | 26 | 2142779 | 2142792 | 2 | 7  | 14 | GT   | 26 | 7  |
| 200631 | 26 | 2144761 | 2144788 | 2 | 14 | 28 | GT   | 8  | 9  |
| 200632 | 26 | 2146857 | 2146878 | 2 | 11 | 22 | TC   | 23 | 7  |
| 200634 | 26 | 2148220 | 2148233 | 2 | 7  | 14 | GT   | 23 | 3  |
| 200639 | 26 | 2155595 | 2155616 | 2 | 11 | 22 | TG   | 14 | 9  |
| 200642 | 26 | 2172117 | 2172130 | 2 | 7  | 14 | TG   | 20 | 6  |
| 200657 | 26 | 2191996 | 2192013 | 3 | 6  | 18 | GAG  | 22 | 3  |
| 200661 | 26 | 2194658 | 2194669 | 2 | 6  | 12 | AG   | 15 | 4  |
| 200662 | 26 | 2194960 | 2194977 | 2 | 9  | 18 | AC   | 12 | 15 |
| 200663 | 26 | 2195144 | 2195157 | 2 | 7  | 14 | AC   | 11 | 4  |
| 200665 | 26 | 2196234 | 2196263 | 3 | 10 | 30 | AAG  | 24 | 5  |
| 200667 | 26 | 2197708 | 2197729 | 2 | 11 | 22 | CA   | 9  | 4  |
| 200671 | 26 | 2202609 | 2202628 | 2 | 10 | 20 | GT   | 6  | 4  |
| 200676 | 26 | 2215985 | 2216008 | 2 | 12 | 24 | CA   | 18 | 11 |
| 200679 | 26 | 2220776 | 2220805 | 2 | 15 | 30 | GT   | 16 | 9  |
| 200680 | 26 | 2221236 | 2221249 | 2 | 7  | 14 | TG   | 20 | 7  |
| 200684 | 26 | 2228761 | 2228793 | 3 | 11 | 33 | GAA  | 15 | 14 |
| 200689 | 26 | 2232504 | 2232533 | 2 | 15 | 30 | TG   | 16 | 10 |
| 200690 | 26 | 2236871 | 2236890 | 2 | 10 | 20 | GT   | 19 | 6  |
| 200691 | 26 | 2237652 | 2237679 | 2 | 14 | 28 | AC   | 14 | 11 |
| 200692 | 26 | 2238455 | 2238472 | 2 | 9  | 18 | AC   | 20 | 6  |
| 200693 | 26 | 2239236 | 2239257 | 2 | 11 | 22 | CA   | 22 | 6  |
| 200699 | 26 | 2246411 | 2246434 | 3 | 8  | 24 | CTC  | 17 | 3  |
| 200706 | 26 | 2252648 | 2252668 | 3 | 7  | 21 | CCT  | 22 | 3  |

|        |    |         |         |   |    |    |      |    |    |
|--------|----|---------|---------|---|----|----|------|----|----|
| 200707 | 26 | 2253511 | 2253546 | 2 | 18 | 36 | CA   | 6  | 6  |
| 200708 | 26 | 2254163 | 2254184 | 2 | 11 | 22 | TG   | 14 | 4  |
| 200709 | 26 | 2254570 | 2254591 | 2 | 11 | 22 | AC   | 11 | 7  |
| 200712 | 26 | 2255337 | 2255354 | 3 | 6  | 18 | GGT  | 26 | 7  |
| 200714 | 26 | 2256825 | 2256854 | 2 | 15 | 30 | CA   | 15 | 13 |
| 200721 | 26 | 2271771 | 2271784 | 2 | 7  | 14 | AC   | 17 | 3  |
| 200725 | 26 | 2274220 | 2274235 | 2 | 8  | 16 | CA   | 21 | 9  |
| 200726 | 26 | 2274644 | 2274659 | 2 | 8  | 16 | AG   | 24 | 10 |
| 200727 | 26 | 2274790 | 2274813 | 2 | 12 | 24 | AC   | 12 | 6  |
| 200739 | 26 | 2305306 | 2305319 | 2 | 7  | 14 | AC   | 18 | 3  |
| 200744 | 26 | 2323227 | 2323246 | 2 | 10 | 20 | AC   | 21 | 6  |
| 200745 | 26 | 2324482 | 2324495 | 2 | 7  | 14 | CA   | 23 | 3  |
| 200746 | 26 | 2326827 | 2326840 | 2 | 7  | 14 | GT   | 27 | 3  |
| 200748 | 26 | 2332720 | 2332735 | 2 | 8  | 16 | GT   | 24 | 6  |
| 200769 | 26 | 2350837 | 2350854 | 2 | 9  | 18 | AC   | 25 | 7  |
| 200770 | 26 | 2355431 | 2355444 | 2 | 7  | 14 | AC   | 21 | 6  |
| 200773 | 26 | 2362318 | 2362338 | 3 | 7  | 21 | CCA  | 23 | 5  |
| 200781 | 26 | 2374452 | 2374481 | 2 | 15 | 30 | TG   | 14 | 11 |
| 200787 | 26 | 2380978 | 2380995 | 2 | 9  | 18 | TG   | 22 | 3  |
| 200790 | 26 | 2382215 | 2382258 | 4 | 11 | 44 | CTAT | 10 | 10 |
| 200791 | 26 | 2382362 | 2382393 | 4 | 8  | 32 | TATC | 19 | 10 |
| 200792 | 26 | 2382888 | 2382907 | 4 | 5  | 20 | ATCT | 26 | 3  |
| 200798 | 26 | 2396322 | 2396335 | 2 | 7  | 14 | AC   | 30 | 3  |
| 200800 | 26 | 2400609 | 2400626 | 2 | 9  | 18 | GT   | 13 | 5  |
| 200804 | 26 | 2406904 | 2406937 | 2 | 17 | 34 | CA   | 7  | 5  |
| 200805 | 26 | 2407563 | 2407586 | 2 | 12 | 24 | TG   | 9  | 4  |
| 200808 | 26 | 2414044 | 2414073 | 2 | 15 | 30 | CT   | 14 | 7  |
| 200811 | 26 | 2415932 | 2415955 | 2 | 12 | 24 | TG   | 8  | 5  |
| 200819 | 26 | 2444059 | 2444072 | 2 | 7  | 14 | TG   | 15 | 4  |
| 200820 | 26 | 2445804 | 2445824 | 3 | 7  | 21 | GCA  | 30 | 5  |
| 200830 | 26 | 2455803 | 2455838 | 2 | 18 | 36 | AC   | 20 | 9  |
| 200832 | 26 | 2456103 | 2456128 | 2 | 13 | 26 | GT   | 15 | 13 |
| 200834 | 26 | 2456836 | 2456853 | 2 | 9  | 18 | GT   | 24 | 9  |
| 200836 | 26 | 2457231 | 2457254 | 2 | 12 | 24 | TG   | 12 | 4  |
| 200837 | 26 | 2461066 | 2461079 | 2 | 7  | 14 | CA   | 23 | 9  |
| 200842 | 26 | 2465706 | 2465735 | 2 | 15 | 30 | TG   | 6  | 7  |
| 200843 | 26 | 2465876 | 2465895 | 2 | 10 | 20 | AC   | 19 | 9  |
| 200844 | 26 | 2467674 | 2467705 | 2 | 16 | 32 | GT   | 8  | 5  |
| 200845 | 26 | 2467866 | 2467897 | 2 | 16 | 32 | AC   | 13 | 11 |
| 200848 | 26 | 2483573 | 2483596 | 2 | 12 | 24 | CT   | 12 | 6  |
| 200851 | 26 | 2489574 | 2489607 | 2 | 17 | 34 | TG   | 12 | 9  |
| 200853 | 26 | 2493945 | 2493966 | 2 | 11 | 22 | CA   | 6  | 6  |
| 200856 | 26 | 2498287 | 2498300 | 2 | 7  | 14 | TC   | 24 | 4  |
| 200859 | 26 | 2499312 | 2499337 | 2 | 13 | 26 | CA   | 17 | 7  |
| 200862 | 26 | 2506415 | 2506428 | 2 | 7  | 14 | AC   | 26 | 4  |
| 200879 | 26 | 2522660 | 2522683 | 2 | 12 | 24 | CA   | 17 | 10 |
| 200881 | 26 | 2526582 | 2526595 | 2 | 7  | 14 | TG   | 17 | 5  |
| 200882 | 26 | 2527306 | 2527321 | 2 | 8  | 16 | TG   | 26 | 4  |
| 200883 | 26 | 2532971 | 2532994 | 2 | 12 | 24 | CA   | 20 | 14 |
| 200885 | 26 | 2535814 | 2535843 | 2 | 15 | 30 | TG   | 16 | 7  |
| 200886 | 26 | 2536677 | 2536708 | 2 | 16 | 32 | TG   | 7  | 9  |

|        |    |         |         |   |    |    |      |    |    |
|--------|----|---------|---------|---|----|----|------|----|----|
| 200887 | 26 | 2541746 | 2541759 | 2 | 7  | 14 | TG   | 29 | 5  |
| 200891 | 26 | 2548472 | 2548499 | 2 | 14 | 28 | AC   | 19 | 11 |
| 200894 | 26 | 2554721 | 2554732 | 2 | 6  | 12 | TA   | 19 | 4  |
| 200895 | 26 | 2556307 | 2556324 | 3 | 6  | 18 | CAA  | 24 | 4  |
| 200903 | 26 | 2581387 | 2581400 | 2 | 7  | 14 | TG   | 24 | 3  |
| 200906 | 26 | 2589622 | 2589637 | 2 | 8  | 16 | CT   | 10 | 4  |
| 200908 | 26 | 2589771 | 2589790 | 2 | 10 | 20 | CA   | 21 | 6  |
| 200909 | 26 | 2589915 | 2589929 | 3 | 5  | 15 | TTC  | 23 | 3  |
| 200911 | 26 | 2590338 | 2590361 | 2 | 12 | 24 | TG   | 17 | 9  |
| 200915 | 26 | 2592766 | 2592785 | 2 | 10 | 20 | CA   | 12 | 8  |
| 200919 | 26 | 2598212 | 2598226 | 3 | 5  | 15 | GGA  | 19 | 6  |
| 200920 | 26 | 2598230 | 2598244 | 3 | 5  | 15 | GGA  | 16 | 4  |
| 200921 | 26 | 2600612 | 2600623 | 2 | 6  | 12 | TG   | 29 | 9  |
| 200923 | 26 | 2601718 | 2601732 | 3 | 5  | 15 | AGA  | 32 | 7  |
| 200925 | 26 | 2602969 | 2602986 | 2 | 9  | 18 | CT   | 19 | 9  |
| 200927 | 26 | 2612645 | 2612666 | 2 | 11 | 22 | TG   | 32 | 9  |
| 200929 | 26 | 2615907 | 2615922 | 2 | 8  | 16 | CA   | 24 | 6  |
| 200934 | 26 | 2620602 | 2620621 | 2 | 10 | 20 | CA   | 15 | 11 |
| 200939 | 26 | 2629978 | 2629991 | 2 | 7  | 14 | TC   | 19 | 8  |
| 200947 | 26 | 2639916 | 2639931 | 2 | 8  | 16 | GA   | 18 | 4  |
| 200949 | 26 | 2640693 | 2640704 | 2 | 6  | 12 | AG   | 23 | 3  |
| 200950 | 26 | 2641642 | 2641671 | 2 | 15 | 30 | TG   | 13 | 9  |
| 200956 | 26 | 2652171 | 2652204 | 2 | 17 | 34 | TG   | 12 | 12 |
| 200958 | 26 | 2656822 | 2656837 | 4 | 4  | 16 | GAAA | 32 | 4  |
| 200964 | 26 | 2669215 | 2669250 | 2 | 18 | 36 | AC   | 9  | 11 |
| 200967 | 26 | 2680818 | 2680832 | 3 | 5  | 15 | CCT  | 8  | 5  |
| 200968 | 26 | 2681618 | 2681649 | 2 | 16 | 32 | GT   | 22 | 11 |
| 200969 | 26 | 2683501 | 2683534 | 2 | 17 | 34 | TG   | 11 | 7  |
| 200974 | 26 | 2697288 | 2697301 | 2 | 7  | 14 | GT   | 21 | 8  |
| 200985 | 26 | 2728034 | 2728048 | 3 | 5  | 15 | CAC  | 13 | 4  |
| 200990 | 26 | 2735444 | 2735463 | 2 | 10 | 20 | TG   | 24 | 5  |
| 200999 | 26 | 2750281 | 2750304 | 2 | 12 | 24 | TC   | 11 | 3  |
| 201001 | 26 | 2751939 | 2751964 | 2 | 13 | 26 | GT   | 12 | 8  |
| 201007 | 26 | 2753427 | 2753440 | 2 | 7  | 14 | CA   | 14 | 4  |
| 201013 | 26 | 2765467 | 2765490 | 2 | 12 | 24 | AG   | 19 | 7  |
| 201014 | 26 | 2765623 | 2765640 | 2 | 9  | 18 | TG   | 19 | 8  |
| 201015 | 26 | 2766072 | 2766099 | 4 | 7  | 28 | ACTG | 33 | 5  |
| 201016 | 26 | 2768401 | 2768428 | 2 | 14 | 28 | GT   | 20 | 10 |
| 201017 | 26 | 2768794 | 2768817 | 2 | 12 | 24 | AC   | 9  | 9  |
| 201020 | 26 | 2769246 | 2769261 | 2 | 8  | 16 | AC   | 14 | 4  |
| 201021 | 26 | 2771080 | 2771097 | 3 | 6  | 18 | ATA  | 19 | 4  |
| 201023 | 26 | 2774128 | 2774141 | 2 | 7  | 14 | CA   | 22 | 4  |
| 201024 | 26 | 2774544 | 2774564 | 3 | 7  | 21 | TGC  | 18 | 5  |
| 201032 | 26 | 2805465 | 2805478 | 2 | 7  | 14 | AC   | 26 | 4  |
| 201034 | 26 | 2812093 | 2812124 | 4 | 8  | 32 | ATGA | 16 | 10 |
| 201039 | 26 | 2831116 | 2831153 | 2 | 19 | 38 | GT   | 12 | 10 |
| 201044 | 26 | 2837202 | 2837227 | 2 | 13 | 26 | TG   | 19 | 12 |
| 201053 | 26 | 2849963 | 2849989 | 3 | 9  | 27 | GAT  | 25 | 9  |
| 201059 | 26 | 2866053 | 2866068 | 2 | 8  | 16 | GT   | 17 | 8  |
| 201060 | 26 | 2874753 | 2874776 | 2 | 12 | 24 | TG   | 20 | 8  |
| 201070 | 26 | 2887309 | 2887326 | 3 | 6  | 18 | GTT  | 10 | 5  |



|        |    |         |         |   |    |    |      |    |    |
|--------|----|---------|---------|---|----|----|------|----|----|
| 201074 | 26 | 2894891 | 2894934 | 2 | 22 | 44 | GT   | 11 | 11 |
| 201075 | 26 | 2895235 | 2895254 | 2 | 10 | 20 | GT   | 24 | 10 |
| 201076 | 26 | 2899327 | 2899340 | 2 | 7  | 14 | AC   | 22 | 3  |
| 201080 | 26 | 2918801 | 2918826 | 2 | 13 | 26 | CA   | 20 | 5  |
| 201081 | 26 | 2919247 | 2919264 | 2 | 9  | 18 | TG   | 18 | 18 |
| 201083 | 26 | 2921022 | 2921037 | 4 | 4  | 16 | ACAG | 23 | 3  |
| 201086 | 26 | 2936144 | 2936161 | 2 | 9  | 18 | AG   | 24 | 7  |
| 201089 | 26 | 2941831 | 2941862 | 4 | 8  | 32 | AGAC | 22 | 7  |
| 201090 | 26 | 2943673 | 2943696 | 2 | 12 | 24 | TG   | 16 | 12 |
| 201091 | 26 | 2944229 | 2944249 | 3 | 7  | 21 | GAG  | 29 | 7  |
| 201094 | 26 | 2947441 | 2947455 | 3 | 5  | 15 | TCC  | 28 | 8  |
| 201098 | 26 | 2958445 | 2958470 | 2 | 13 | 26 | GT   | 20 | 14 |
| 201100 | 26 | 2959162 | 2959173 | 2 | 6  | 12 | TG   | 24 | 5  |
| 201101 | 26 | 2959220 | 2959240 | 3 | 7  | 21 | GCA  | 29 | 3  |
| 201104 | 26 | 2961429 | 2961443 | 3 | 5  | 15 | GCA  | 27 | 4  |
| 201108 | 26 | 2963194 | 2963205 | 2 | 6  | 12 | TC   | 25 | 3  |
| 201114 | 26 | 2968246 | 2968259 | 2 | 7  | 14 | TG   | 15 | 5  |
| 201115 | 26 | 2970912 | 2970923 | 2 | 6  | 12 | GT   | 34 | 3  |
| 201124 | 26 | 2992484 | 2992495 | 2 | 6  | 12 | AT   | 8  | 5  |
| 201125 | 26 | 2994013 | 2994028 | 2 | 8  | 16 | AC   | 21 | 3  |
| 201132 | 26 | 3007124 | 3007141 | 3 | 6  | 18 | TGC  | 27 | 5  |
| 201133 | 26 | 3007504 | 3007531 | 2 | 14 | 28 | TG   | 11 | 11 |
| 201134 | 26 | 3007680 | 3007693 | 2 | 7  | 14 | TG   | 19 | 9  |
| 201136 | 26 | 3013608 | 3013629 | 2 | 11 | 22 | CA   | 17 | 14 |
| 201139 | 26 | 3015808 | 3015823 | 2 | 8  | 16 | TG   | 27 | 5  |
| 201141 | 26 | 3022467 | 3022496 | 2 | 15 | 30 | AG   | 8  | 10 |
| 201144 | 26 | 3027672 | 3027683 | 2 | 6  | 12 | AC   | 23 | 3  |
| 201148 | 26 | 3041382 | 3041393 | 2 | 6  | 12 | TA   | 26 | 4  |
| 201149 | 26 | 3042566 | 3042585 | 2 | 10 | 20 | CA   | 11 | 5  |
| 201152 | 26 | 3043406 | 3043419 | 2 | 7  | 14 | TG   | 10 | 12 |
| 201157 | 26 | 3046677 | 3046698 | 2 | 11 | 22 | TC   | 16 | 7  |
| 201160 | 26 | 3062115 | 3062140 | 2 | 13 | 26 | GT   | 15 | 15 |
| 201162 | 26 | 3063650 | 3063663 | 2 | 7  | 14 | GT   | 17 | 4  |
| 201163 | 26 | 3064315 | 3064330 | 2 | 8  | 16 | GA   | 18 | 4  |
| 201164 | 26 | 3064385 | 3064396 | 2 | 6  | 12 | TG   | 14 | 3  |
| 201169 | 26 | 3073080 | 3073097 | 2 | 9  | 18 | GT   | 11 | 5  |
| 201171 | 26 | 3082875 | 3082894 | 2 | 10 | 20 | AC   | 20 | 4  |
| 201172 | 26 | 3085420 | 3085445 | 2 | 13 | 26 | AC   | 13 | 6  |
| 201173 | 26 | 3085578 | 3085619 | 2 | 21 | 42 | AC   | 13 | 12 |
| 201174 | 26 | 3091635 | 3091650 | 2 | 8  | 16 | AC   | 14 | 13 |
| 201186 | 26 | 3112518 | 3112557 | 2 | 20 | 40 | CA   | 9  | 11 |
| 201189 | 26 | 3114829 | 3114854 | 2 | 13 | 26 | AC   | 16 | 13 |
| 201194 | 26 | 3121013 | 3121032 | 2 | 10 | 20 | CT   | 17 | 5  |
| 201196 | 26 | 3126651 | 3126664 | 2 | 7  | 14 | TG   | 24 | 3  |
| 201198 | 26 | 3128332 | 3128359 | 2 | 14 | 28 | AC   | 21 | 10 |
| 201199 | 26 | 3136874 | 3136885 | 2 | 6  | 12 | TG   | 26 | 4  |
| 201202 | 26 | 3138017 | 3138036 | 2 | 10 | 20 | CT   | 23 | 3  |
| 201203 | 26 | 3139092 | 3139109 | 2 | 9  | 18 | CT   | 8  | 4  |
| 201206 | 26 | 3141779 | 3141802 | 2 | 12 | 24 | TG   | 10 | 10 |
| 201212 | 26 | 3151424 | 3151441 | 2 | 9  | 18 | AG   | 13 | 3  |
| 201223 | 26 | 3173689 | 3173722 | 2 | 17 | 34 | GT   | 10 | 10 |

|        |    |         |         |   |    |    |      |    |    |
|--------|----|---------|---------|---|----|----|------|----|----|
| 201225 | 26 | 3177567 | 3177586 | 2 | 10 | 20 | AG   | 12 | 4  |
| 201227 | 26 | 3180505 | 3180528 | 3 | 8  | 24 | TGA  | 27 | 5  |
| 201228 | 26 | 3184472 | 3184487 | 2 | 8  | 16 | GT   | 20 | 4  |
| 201229 | 26 | 3185758 | 3185773 | 2 | 8  | 16 | AG   | 21 | 4  |
| 201231 | 26 | 3194551 | 3194590 | 2 | 20 | 40 | AC   | 16 | 12 |
| 201232 | 26 | 3194720 | 3194743 | 2 | 12 | 24 | CA   | 8  | 7  |
| 201233 | 26 | 3195106 | 3195117 | 2 | 6  | 12 | AG   | 19 | 7  |
| 201235 | 26 | 3196331 | 3196350 | 2 | 10 | 20 | AC   | 13 | 5  |
| 201236 | 26 | 3200229 | 3200262 | 2 | 17 | 34 | CA   | 14 | 11 |
| 201237 | 26 | 3200413 | 3200440 | 2 | 14 | 28 | TG   | 6  | 8  |
| 201238 | 26 | 3200460 | 3200481 | 2 | 11 | 22 | GA   | 18 | 10 |
| 201239 | 26 | 3200741 | 3200760 | 2 | 10 | 20 | TC   | 11 | 4  |
| 201241 | 26 | 3202664 | 3202707 | 4 | 11 | 44 | ATAG | 8  | 8  |
| 201246 | 26 | 3212695 | 3212708 | 2 | 7  | 14 | GT   | 18 | 6  |
| 201248 | 26 | 3218032 | 3218067 | 4 | 9  | 36 | AGAT | 15 | 7  |
| 201255 | 26 | 3235272 | 3235286 | 3 | 5  | 15 | GGT  | 28 | 4  |
| 201257 | 26 | 3240286 | 3240299 | 2 | 7  | 14 | AC   | 19 | 3  |
| 201261 | 26 | 3241959 | 3241970 | 2 | 6  | 12 | AC   | 27 | 3  |
| 201262 | 26 | 3242370 | 3242387 | 3 | 6  | 18 | TCC  | 24 | 5  |
| 201266 | 26 | 3243298 | 3243312 | 3 | 5  | 15 | AGA  | 16 | 4  |
| 201270 | 26 | 3247820 | 3247835 | 2 | 8  | 16 | CT   | 29 | 3  |
| 201271 | 26 | 3248763 | 3248788 | 2 | 13 | 26 | AC   | 16 | 9  |
| 201273 | 26 | 3250684 | 3250695 | 2 | 6  | 12 | CA   | 26 | 4  |
| 201276 | 26 | 3251640 | 3251653 | 2 | 7  | 14 | AG   | 30 | 5  |
| 201278 | 26 | 3253249 | 3253266 | 3 | 6  | 18 | GAG  | 23 | 6  |
| 201279 | 26 | 3253415 | 3253436 | 2 | 11 | 22 | CA   | 13 | 13 |
| 201280 | 26 | 3257712 | 3257727 | 2 | 8  | 16 | GT   | 17 | 7  |
| 201285 | 26 | 3265856 | 3265871 | 2 | 8  | 16 | GT   | 24 | 9  |
| 201288 | 26 | 3269465 | 3269478 | 2 | 7  | 14 | TG   | 7  | 6  |
| 201289 | 26 | 3269479 | 3269492 | 2 | 7  | 14 | CG   | 20 | 15 |
| 201291 | 26 | 3269912 | 3269929 | 3 | 6  | 18 | GGA  | 18 | 4  |
| 201292 | 26 | 3269931 | 3269945 | 3 | 5  | 15 | GAG  | 18 | 4  |
| 201293 | 26 | 3272385 | 3272400 | 2 | 8  | 16 | AG   | 10 | 4  |
| 201295 | 26 | 3272951 | 3272982 | 2 | 16 | 32 | GT   | 12 | 11 |
| 201296 | 26 | 3273067 | 3273087 | 3 | 7  | 21 | TTG  | 19 | 5  |
| 201297 | 26 | 3273193 | 3273208 | 2 | 8  | 16 | AC   | 21 | 4  |
| 201298 | 26 | 3273398 | 3273429 | 2 | 16 | 32 | AC   | 6  | 10 |
| 201301 | 26 | 3274681 | 3274704 | 2 | 12 | 24 | AC   | 18 | 6  |
| 201304 | 26 | 3277004 | 3277015 | 2 | 6  | 12 | GT   | 25 | 4  |
| 201311 | 26 | 3283794 | 3283811 | 3 | 6  | 18 | CTT  | 25 | 7  |
| 201312 | 26 | 3284689 | 3284714 | 2 | 13 | 26 | GT   | 11 | 14 |
| 201314 | 26 | 3284922 | 3284941 | 2 | 10 | 20 | CA   | 11 | 14 |
| 201316 | 26 | 3285817 | 3285831 | 3 | 5  | 15 | AGG  | 14 | 3  |
| 201317 | 26 | 3285896 | 3285910 | 3 | 5  | 15 | GCC  | 16 | 6  |
| 201320 | 26 | 3288467 | 3288487 | 3 | 7  | 21 | TTA  | 14 | 13 |
| 201322 | 26 | 3289712 | 3289732 | 3 | 7  | 21 | TAA  | 26 | 8  |
| 201338 | 26 | 3297739 | 3297765 | 3 | 9  | 27 | CTT  | 14 | 7  |
| 201341 | 26 | 3298957 | 3298972 | 4 | 4  | 16 | TTGT | 24 | 3  |
| 201343 | 26 | 3299871 | 3299891 | 3 | 7  | 21 | CCT  | 13 | 11 |
| 201345 | 26 | 3300285 | 3300306 | 2 | 11 | 22 | AC   | 16 | 6  |
| 201346 | 26 | 3300470 | 3300485 | 2 | 8  | 16 | AC   | 18 | 10 |

|        |    |         |         |   |    |    |      |    |    |
|--------|----|---------|---------|---|----|----|------|----|----|
| 201347 | 26 | 3300568 | 3300589 | 2 | 11 | 22 | GT   | 19 | 6  |
| 201348 | 26 | 3300682 | 3300705 | 2 | 12 | 24 | TG   | 17 | 7  |
| 201352 | 26 | 3302968 | 3302985 | 3 | 6  | 18 | GGT  | 26 | 3  |
| 201353 | 26 | 3305870 | 3305884 | 3 | 5  | 15 | CAG  | 17 | 4  |
| 201354 | 26 | 3307063 | 3307078 | 2 | 8  | 16 | TG   | 26 | 5  |
| 201356 | 26 | 3310728 | 3310747 | 2 | 10 | 20 | AC   | 17 | 7  |
| 201358 | 26 | 3311414 | 3311434 | 3 | 7  | 21 | GCT  | 24 | 8  |
| 201362 | 26 | 3312527 | 3312544 | 2 | 9  | 18 | GT   | 21 | 10 |
| 201370 | 26 | 3321235 | 3321255 | 3 | 7  | 21 | CCT  | 25 | 4  |
| 201371 | 26 | 3321433 | 3321450 | 3 | 6  | 18 | AGG  | 25 | 6  |
| 201372 | 26 | 3322003 | 3322030 | 2 | 14 | 28 | TG   | 20 | 14 |
| 201373 | 26 | 3322381 | 3322394 | 2 | 7  | 14 | TA   | 10 | 4  |
| 201374 | 26 | 3322541 | 3322558 | 2 | 9  | 18 | GT   | 16 | 9  |
| 201375 | 26 | 3322795 | 3322814 | 2 | 10 | 20 | CA   | 13 | 6  |
| 201377 | 26 | 3323398 | 3323417 | 4 | 5  | 20 | TTTA | 16 | 6  |
| 201379 | 26 | 3332480 | 3332515 | 2 | 18 | 36 | AC   | 6  | 7  |
| 201380 | 26 | 3333653 | 3333673 | 3 | 7  | 21 | AGA  | 19 | 6  |
| 201382 | 26 | 3337829 | 3337872 | 2 | 22 | 44 | AC   | 9  | 12 |
| 201394 | 26 | 3361322 | 3361339 | 2 | 9  | 18 | TG   | 21 | 8  |
| 201395 | 26 | 3362076 | 3362093 | 2 | 9  | 18 | TG   | 21 | 9  |
| 201396 | 26 | 3362508 | 3362537 | 2 | 15 | 30 | CA   | 18 | 6  |
| 201405 | 26 | 3377276 | 3377287 | 2 | 6  | 12 | GT   | 18 | 3  |
| 201408 | 26 | 3381053 | 3381070 | 2 | 9  | 18 | AC   | 8  | 11 |
| 201410 | 26 | 3384881 | 3384898 | 2 | 9  | 18 | GT   | 27 | 4  |
| 201412 | 26 | 3385773 | 3385804 | 2 | 16 | 32 | AC   | 17 | 5  |
| 201414 | 26 | 3389209 | 3389240 | 4 | 8  | 32 | GGAT | 29 | 13 |
| 201415 | 26 | 3389722 | 3389737 | 4 | 4  | 16 | CAGT | 25 | 6  |
| 201416 | 26 | 3389738 | 3389757 | 4 | 5  | 20 | CAGG | 20 | 6  |
| 201421 | 26 | 3390585 | 3390600 | 2 | 8  | 16 | TC   | 23 | 5  |
| 201431 | 26 | 3403994 | 3404014 | 3 | 7  | 21 | CCT  | 23 | 6  |
| 201433 | 26 | 3405415 | 3405429 | 3 | 5  | 15 | CCA  | 13 | 6  |
| 201437 | 26 | 3409924 | 3409939 | 2 | 8  | 16 | CT   | 19 | 11 |
| 201438 | 26 | 3409942 | 3409953 | 2 | 6  | 12 | CT   | 18 | 9  |
| 201440 | 26 | 3410851 | 3410864 | 2 | 7  | 14 | AC   | 18 | 3  |
| 201448 | 26 | 3418979 | 3419002 | 2 | 12 | 24 | TA   | 12 | 7  |
| 201449 | 26 | 3419128 | 3419151 | 3 | 8  | 24 | CAA  | 26 | 13 |
| 201453 | 26 | 3420818 | 3420833 | 4 | 4  | 16 | TTTA | 14 | 3  |
| 201455 | 26 | 3423442 | 3423462 | 3 | 7  | 21 | CTC  | 28 | 4  |
| 201460 | 26 | 3429682 | 3429701 | 2 | 10 | 20 | GT   | 20 | 5  |
| 201461 | 26 | 3430944 | 3430961 | 2 | 9  | 18 | AC   | 23 | 3  |
| 201462 | 26 | 3432131 | 3432148 | 2 | 9  | 18 | AC   | 14 | 10 |
| 201463 | 26 | 3432190 | 3432213 | 2 | 12 | 24 | AC   | 21 | 11 |
| 201466 | 26 | 3434822 | 3434845 | 3 | 8  | 24 | CTG  | 29 | 7  |
| 201468 | 26 | 3437973 | 3437994 | 2 | 11 | 22 | TC   | 22 | 8  |
| 201469 | 26 | 3439519 | 3439558 | 2 | 20 | 40 | GT   | 6  | 8  |
| 201474 | 26 | 3441846 | 3441859 | 2 | 7  | 14 | AC   | 21 | 4  |
| 201476 | 26 | 3444425 | 3444438 | 2 | 7  | 14 | AC   | 13 | 5  |
| 201477 | 26 | 3445896 | 3445913 | 2 | 9  | 18 | AG   | 27 | 4  |
| 201478 | 26 | 3446669 | 3446690 | 2 | 11 | 22 | GT   | 17 | 9  |
| 201479 | 26 | 3448052 | 3448081 | 2 | 15 | 30 | TG   | 19 | 8  |
| 201480 | 26 | 3450022 | 3450049 | 2 | 14 | 28 | GT   | 16 | 17 |

|        |    |         |         |   |    |    |      |    |    |
|--------|----|---------|---------|---|----|----|------|----|----|
| 201483 | 26 | 3450496 | 3450531 | 2 | 18 | 36 | TG   | 19 | 12 |
| 201486 | 26 | 3453262 | 3453273 | 2 | 6  | 12 | AC   | 23 | 4  |
| 201489 | 26 | 3457912 | 3457923 | 2 | 6  | 12 | AG   | 11 | 3  |
| 201491 | 26 | 3458460 | 3458473 | 2 | 7  | 14 | GT   | 24 | 5  |
| 201492 | 26 | 3458475 | 3458488 | 2 | 7  | 14 | TG   | 25 | 7  |
| 201496 | 26 | 3463200 | 3463231 | 2 | 16 | 32 | AC   | 8  | 8  |
| 201497 | 26 | 3463421 | 3463452 | 2 | 16 | 32 | CA   | 15 | 15 |
| 201499 | 26 | 3465494 | 3465508 | 3 | 5  | 15 | AAT  | 25 | 5  |
| 201501 | 26 | 3467295 | 3467320 | 2 | 13 | 26 | CA   | 10 | 7  |
| 201502 | 26 | 3467727 | 3467741 | 3 | 5  | 15 | AAG  | 30 | 3  |
| 201503 | 26 | 3469312 | 3469323 | 2 | 6  | 12 | CA   | 26 | 6  |
| 201504 | 26 | 3469413 | 3469427 | 3 | 5  | 15 | CCT  | 18 | 6  |
| 201505 | 26 | 3469644 | 3469657 | 2 | 7  | 14 | CA   | 18 | 6  |
| 201506 | 26 | 3469857 | 3469876 | 2 | 10 | 20 | AC   | 16 | 8  |
| 201507 | 26 | 3470087 | 3470101 | 3 | 5  | 15 | CAG  | 27 | 3  |
| 201508 | 26 | 3470200 | 3470225 | 2 | 13 | 26 | GT   | 18 | 9  |
| 201510 | 26 | 3470661 | 3470688 | 2 | 14 | 28 | AC   | 14 | 6  |
| 201513 | 26 | 3471676 | 3471695 | 2 | 10 | 20 | AC   | 18 | 11 |
| 201514 | 26 | 3474365 | 3474390 | 2 | 13 | 26 | CA   | 24 | 7  |
| 201518 | 26 | 3476112 | 3476125 | 2 | 7  | 14 | AG   | 27 | 4  |
| 201520 | 26 | 3477870 | 3477896 | 3 | 9  | 27 | TGA  | 31 | 3  |
| 201521 | 26 | 3478584 | 3478601 | 3 | 6  | 18 | GAG  | 13 | 9  |
| 201522 | 26 | 3478810 | 3478827 | 3 | 6  | 18 | ATA  | 15 | 6  |
| 201524 | 26 | 3480580 | 3480595 | 2 | 8  | 16 | AC   | 15 | 5  |
| 201525 | 26 | 3480863 | 3480890 | 2 | 14 | 28 | GT   | 27 | 7  |
| 201527 | 26 | 3484728 | 3484742 | 3 | 5  | 15 | TCC  | 33 | 3  |
| 201528 | 26 | 3487637 | 3487652 | 2 | 8  | 16 | GT   | 23 | 7  |
| 201532 | 26 | 3488933 | 3488950 | 3 | 6  | 18 | GGA  | 20 | 4  |
| 201533 | 26 | 3489308 | 3489322 | 3 | 5  | 15 | AAT  | 18 | 3  |
| 201540 | 26 | 3491817 | 3491837 | 3 | 7  | 21 | GAG  | 16 | 7  |
| 201541 | 26 | 3493461 | 3493472 | 2 | 6  | 12 | AG   | 16 | 5  |
| 201542 | 26 | 3493589 | 3493604 | 2 | 8  | 16 | CA   | 28 | 4  |
| 201544 | 26 | 3494798 | 3494811 | 2 | 7  | 14 | AC   | 11 | 4  |
| 201545 | 26 | 3495130 | 3495151 | 2 | 11 | 22 | TG   | 21 | 10 |
| 201547 | 26 | 3501641 | 3501670 | 2 | 15 | 30 | GT   | 12 | 7  |
| 201548 | 26 | 3502123 | 3502146 | 2 | 12 | 24 | AC   | 20 | 7  |
| 201551 | 26 | 3508147 | 3508162 | 4 | 4  | 16 | GGAG | 9  | 5  |
| 201553 | 26 | 3508597 | 3508624 | 2 | 14 | 28 | GT   | 7  | 6  |
| 201554 | 26 | 3508699 | 3508724 | 2 | 13 | 26 | AG   | 11 | 9  |
| 201556 | 26 | 3508767 | 3508780 | 2 | 7  | 14 | GC   | 13 | 11 |
| 201557 | 26 | 3511405 | 3511426 | 2 | 11 | 22 | CA   | 19 | 14 |
| 201569 | 26 | 3519287 | 3519300 | 2 | 7  | 14 | CT   | 22 | 5  |
| 201570 | 26 | 3519642 | 3519656 | 3 | 5  | 15 | GAG  | 15 | 4  |
| 201571 | 26 | 3519665 | 3519679 | 3 | 5  | 15 | GGA  | 15 | 3  |
| 201572 | 26 | 3519801 | 3519816 | 2 | 8  | 16 | AC   | 10 | 7  |
| 201576 | 26 | 3520484 | 3520515 | 2 | 16 | 32 | TG   | 14 | 8  |
| 201577 | 26 | 3520699 | 3520714 | 2 | 8  | 16 | TG   | 9  | 8  |
| 201579 | 26 | 3523698 | 3523719 | 2 | 11 | 22 | AC   | 16 | 11 |
| 201580 | 26 | 3523915 | 3523938 | 2 | 12 | 24 | CA   | 18 | 11 |
| 201584 | 26 | 3529615 | 3529632 | 2 | 9  | 18 | TG   | 26 | 12 |
| 201591 | 26 | 3548454 | 3548467 | 2 | 7  | 14 | TG   | 21 | 4  |

|        |    |         |         |   |    |    |      |    |    |
|--------|----|---------|---------|---|----|----|------|----|----|
| 201592 | 26 | 3551061 | 3551074 | 2 | 7  | 14 | GT   | 20 | 6  |
| 201593 | 26 | 3552755 | 3552774 | 4 | 5  | 20 | AGAC | 26 | 6  |
| 201594 | 26 | 3553404 | 3553421 | 2 | 9  | 18 | TG   | 17 | 4  |
| 201596 | 26 | 3557781 | 3557794 | 2 | 7  | 14 | AC   | 21 | 5  |
| 201598 | 26 | 3560676 | 3560691 | 2 | 8  | 16 | GT   | 28 | 3  |
| 201601 | 26 | 3562619 | 3562630 | 2 | 6  | 12 | TG   | 22 | 7  |
| 201602 | 26 | 3562796 | 3562821 | 2 | 13 | 26 | TG   | 12 | 13 |
| 201603 | 26 | 3564845 | 3564872 | 2 | 14 | 28 | AC   | 25 | 13 |
| 201604 | 26 | 3565030 | 3565059 | 3 | 10 | 30 | GAG  | 20 | 7  |
| 201605 | 26 | 3568222 | 3568245 | 3 | 8  | 24 | GAG  | 25 | 3  |
| 201610 | 26 | 3577511 | 3577528 | 2 | 9  | 18 | TG   | 17 | 7  |
| 201611 | 26 | 3580427 | 3580441 | 3 | 5  | 15 | GAG  | 28 | 3  |
| 201613 | 26 | 3582618 | 3582638 | 3 | 7  | 21 | TTG  | 24 | 6  |
| 201617 | 26 | 3584096 | 3584110 | 3 | 5  | 15 | GTT  | 28 | 5  |
| 201621 | 26 | 3585703 | 3585726 | 3 | 8  | 24 | TCA  | 31 | 4  |
| 201622 | 26 | 3585840 | 3585867 | 2 | 14 | 28 | CA   | 19 | 13 |
| 201623 | 26 | 3585981 | 3586004 | 2 | 12 | 24 | TG   | 19 | 5  |
| 201624 | 26 | 3588004 | 3588036 | 3 | 11 | 33 | CTC  | 30 | 5  |
| 201625 | 26 | 3591170 | 3591183 | 2 | 7  | 14 | GT   | 25 | 6  |
| 201629 | 26 | 3591792 | 3591807 | 2 | 8  | 16 | TG   | 15 | 3  |
| 201631 | 26 | 3592155 | 3592170 | 2 | 8  | 16 | TG   | 18 | 4  |
| 201632 | 26 | 3592337 | 3592363 | 3 | 9  | 27 | CCT  | 6  | 4  |
| 201634 | 26 | 3593007 | 3593066 | 4 | 15 | 60 | ATCT | 19 | 9  |
| 201636 | 26 | 3595373 | 3595390 | 2 | 9  | 18 | GA   | 14 | 3  |
| 201637 | 26 | 3595761 | 3595794 | 2 | 17 | 34 | TG   | 6  | 7  |
| 201638 | 26 | 3596477 | 3596498 | 2 | 11 | 22 | CA   | 13 | 6  |
| 201639 | 26 | 3596691 | 3596734 | 2 | 22 | 44 | GT   | 7  | 10 |
| 201640 | 26 | 3596921 | 3596974 | 2 | 27 | 54 | TG   | 13 | 9  |
| 201641 | 26 | 3597078 | 3597095 | 2 | 9  | 18 | GT   | 25 | 5  |
| 201645 | 26 | 3600284 | 3600309 | 2 | 13 | 26 | CA   | 19 | 7  |
| 201649 | 26 | 3601686 | 3601699 | 2 | 7  | 14 | TG   | 14 | 3  |
| 201650 | 26 | 3601841 | 3601856 | 2 | 8  | 16 | GT   | 14 | 6  |
| 201651 | 26 | 3605120 | 3605143 | 4 | 6  | 24 | TTTC | 22 | 7  |
| 201652 | 26 | 3607398 | 3607417 | 2 | 10 | 20 | TG   | 25 | 10 |
| 201655 | 26 | 3612809 | 3612838 | 3 | 10 | 30 | ATC  | 23 | 5  |
| 201656 | 26 | 3615548 | 3615573 | 2 | 13 | 26 | TG   | 18 | 9  |
| 201657 | 26 | 3616385 | 3616399 | 3 | 5  | 15 | AGT  | 24 | 3  |
| 201658 | 26 | 3616800 | 3616811 | 2 | 6  | 12 | TA   | 10 | 4  |
| 201659 | 26 | 3617589 | 3617608 | 2 | 10 | 20 | AC   | 19 | 6  |
| 201660 | 26 | 3618940 | 3618971 | 2 | 16 | 32 | AC   | 16 | 12 |
| 201666 | 26 | 3628526 | 3628540 | 3 | 5  | 15 | TGA  | 24 | 4  |
| 201670 | 26 | 3630436 | 3630459 | 2 | 12 | 24 | TG   | 7  | 3  |
| 201672 | 26 | 3630795 | 3630820 | 2 | 13 | 26 | TG   | 12 | 11 |
| 201674 | 26 | 3631146 | 3631175 | 2 | 15 | 30 | TG   | 14 | 12 |
| 201679 | 26 | 3638977 | 3638992 | 2 | 8  | 16 | GT   | 22 | 13 |
| 201680 | 26 | 3643342 | 3643381 | 2 | 20 | 40 | TG   | 17 | 10 |
| 201687 | 26 | 3649510 | 3649525 | 2 | 8  | 16 | TC   | 22 | 3  |
| 201707 | 26 | 3664587 | 3664602 | 2 | 8  | 16 | TG   | 24 | 4  |
| 201713 | 26 | 3667197 | 3667228 | 2 | 16 | 32 | TG   | 11 | 8  |
| 201714 | 26 | 3667419 | 3667438 | 2 | 10 | 20 | GT   | 17 | 8  |
| 201715 | 26 | 3667519 | 3667536 | 2 | 9  | 18 | GT   | 8  | 3  |

|        |    |         |         |   |    |    |      |    |    |
|--------|----|---------|---------|---|----|----|------|----|----|
| 201718 | 26 | 3669045 | 3669056 | 2 | 6  | 12 | TG   | 25 | 3  |
| 201719 | 26 | 3669269 | 3669284 | 2 | 8  | 16 | CA   | 25 | 5  |
| 201720 | 26 | 3669601 | 3669626 | 2 | 13 | 26 | TG   | 19 | 9  |
| 201726 | 26 | 3672524 | 3672557 | 2 | 17 | 34 | GT   | 17 | 8  |
| 201727 | 26 | 3672605 | 3672622 | 2 | 9  | 18 | GT   | 18 | 4  |
| 201729 | 26 | 3673052 | 3673069 | 3 | 6  | 18 | AGC  | 24 | 3  |
| 201736 | 26 | 3679619 | 3679638 | 2 | 10 | 20 | GT   | 24 | 5  |
| 201738 | 26 | 3679998 | 3680025 | 2 | 14 | 28 | GT   | 13 | 10 |
| 201741 | 26 | 3681463 | 3681480 | 2 | 9  | 18 | AT   | 15 | 11 |
| 201742 | 26 | 3682547 | 3682568 | 2 | 11 | 22 | AC   | 21 | 6  |
| 201743 | 26 | 3682630 | 3682653 | 2 | 12 | 24 | AC   | 10 | 8  |
| 201744 | 26 | 3682683 | 3682710 | 2 | 14 | 28 | CA   | 12 | 14 |
| 201746 | 26 | 3682933 | 3682950 | 2 | 9  | 18 | GA   | 18 | 9  |
| 201749 | 26 | 3689292 | 3689321 | 3 | 10 | 30 | AGC  | 24 | 5  |
| 201756 | 26 | 3696751 | 3696782 | 4 | 8  | 32 | TATG | 12 | 10 |
| 201757 | 26 | 3696989 | 3697004 | 2 | 8  | 16 | TG   | 19 | 6  |
| 201758 | 26 | 3697206 | 3697239 | 2 | 17 | 34 | TG   | 10 | 9  |
| 201759 | 26 | 3698477 | 3698490 | 2 | 7  | 14 | AC   | 29 | 5  |
| 201761 | 26 | 3705888 | 3705899 | 2 | 6  | 12 | TA   | 21 | 3  |
| 201768 | 26 | 3715203 | 3715248 | 2 | 23 | 46 | AC   | 12 | 15 |
| 201770 | 26 | 3715744 | 3715755 | 2 | 6  | 12 | TG   | 27 | 3  |
| 201771 | 26 | 3715973 | 3715992 | 2 | 10 | 20 | CA   | 23 | 4  |
| 201772 | 26 | 3717630 | 3717659 | 2 | 15 | 30 | AC   | 25 | 3  |
| 201773 | 26 | 3718154 | 3718171 | 2 | 9  | 18 | GT   | 26 | 4  |
| 201774 | 26 | 3719039 | 3719052 | 2 | 7  | 14 | GT   | 27 | 5  |
| 201777 | 26 | 3722400 | 3722413 | 2 | 7  | 14 | TG   | 19 | 8  |
| 201782 | 26 | 3734280 | 3734299 | 2 | 10 | 20 | GT   | 20 | 7  |
| 201784 | 26 | 3734527 | 3734538 | 2 | 6  | 12 | TG   | 30 | 4  |
| 201788 | 26 | 3742977 | 3742996 | 2 | 10 | 20 | CA   | 11 | 8  |
| 201791 | 26 | 3750575 | 3750598 | 3 | 8  | 24 | AGC  | 22 | 3  |
| 201797 | 26 | 3756498 | 3756530 | 3 | 11 | 33 | CTC  | 14 | 5  |
| 201798 | 26 | 3756835 | 3756846 | 2 | 6  | 12 | GT   | 15 | 6  |
| 201800 | 26 | 3757048 | 3757065 | 2 | 9  | 18 | GT   | 23 | 5  |
| 201818 | 26 | 3765927 | 3765944 | 2 | 9  | 18 | GT   | 24 | 11 |
| 201819 | 26 | 3767250 | 3767261 | 2 | 6  | 12 | TG   | 23 | 4  |
| 201821 | 26 | 3767466 | 3767489 | 2 | 12 | 24 | TG   | 16 | 11 |
| 201822 | 26 | 3768990 | 3769005 | 2 | 8  | 16 | CA   | 21 | 8  |
| 201823 | 26 | 3769048 | 3769075 | 2 | 14 | 28 | TG   | 16 | 14 |
| 201824 | 26 | 3769216 | 3769249 | 2 | 17 | 34 | GA   | 15 | 9  |
| 201825 | 26 | 3769524 | 3769541 | 2 | 9  | 18 | TG   | 27 | 5  |
| 201831 | 26 | 3771113 | 3771136 | 2 | 12 | 24 | AC   | 14 | 10 |
| 201838 | 26 | 3779378 | 3779401 | 2 | 12 | 24 | CA   | 13 | 10 |
| 201839 | 26 | 3783846 | 3783871 | 2 | 13 | 26 | CA   | 18 | 6  |
| 201841 | 26 | 3790074 | 3790097 | 2 | 12 | 24 | AC   | 19 | 9  |
| 201843 | 26 | 3792258 | 3792285 | 2 | 14 | 28 | CT   | 12 | 6  |
| 201848 | 26 | 3796857 | 3796890 | 2 | 17 | 34 | AC   | 8  | 9  |
| 201855 | 26 | 3800878 | 3800899 | 2 | 11 | 22 | GT   | 21 | 10 |
| 201856 | 26 | 3803219 | 3803236 | 2 | 9  | 18 | TG   | 17 | 4  |
| 201859 | 26 | 3806699 | 3806732 | 2 | 17 | 34 | AG   | 6  | 6  |
| 201860 | 26 | 3808566 | 3808581 | 2 | 8  | 16 | CA   | 20 | 3  |
| 201861 | 26 | 3809058 | 3809085 | 2 | 14 | 28 | TG   | 11 | 7  |

|        |    |         |         |   |    |    |      |    |    |
|--------|----|---------|---------|---|----|----|------|----|----|
| 201862 | 26 | 3809288 | 3809329 | 3 | 14 | 42 | GCA  | 25 | 7  |
| 201863 | 26 | 3811228 | 3811247 | 2 | 10 | 20 | TG   | 11 | 9  |
| 201866 | 26 | 3812069 | 3812088 | 2 | 10 | 20 | AG   | 19 | 3  |
| 201867 | 26 | 3814926 | 3814952 | 3 | 9  | 27 | GAG  | 16 | 5  |
| 201870 | 26 | 3823034 | 3823048 | 3 | 5  | 15 | AGA  | 19 | 4  |
| 201871 | 26 | 3827100 | 3827117 | 2 | 9  | 18 | AC   | 22 | 7  |
| 201874 | 26 | 3849088 | 3849115 | 2 | 14 | 28 | GA   | 24 | 7  |
| 201876 | 26 | 3850642 | 3850661 | 2 | 10 | 20 | AC   | 17 | 3  |
| 201877 | 26 | 3850841 | 3850860 | 2 | 10 | 20 | AC   | 25 | 9  |
| 201878 | 26 | 3851282 | 3851311 | 2 | 15 | 30 | CA   | 9  | 8  |
| 201879 | 26 | 3851606 | 3851627 | 2 | 11 | 22 | AC   | 19 | 6  |
| 201880 | 26 | 3852068 | 3852082 | 3 | 5  | 15 | TCT  | 19 | 3  |
| 201881 | 26 | 3852809 | 3852824 | 2 | 8  | 16 | CT   | 27 | 3  |
| 201885 | 26 | 3861727 | 3861762 | 3 | 12 | 36 | CCT  | 12 | 6  |
| 201886 | 26 | 3863952 | 3863981 | 3 | 10 | 30 | ATC  | 16 | 5  |
| 201887 | 26 | 3864352 | 3864377 | 2 | 13 | 26 | CA   | 9  | 7  |
| 201891 | 26 | 3868598 | 3868617 | 2 | 10 | 20 | AC   | 22 | 8  |
| 201894 | 26 | 3871786 | 3871809 | 2 | 12 | 24 | CA   | 19 | 6  |
| 201895 | 26 | 3872563 | 3872576 | 2 | 7  | 14 | AC   | 23 | 3  |
| 201896 | 26 | 3872837 | 3872868 | 4 | 8  | 32 | AAAG | 24 | 7  |
| 201897 | 26 | 3873736 | 3873761 | 2 | 13 | 26 | GT   | 8  | 5  |
| 201898 | 26 | 3875231 | 3875250 | 2 | 10 | 20 | TC   | 26 | 5  |
| 201900 | 26 | 3875506 | 3875533 | 4 | 7  | 28 | ATAA | 13 | 12 |
| 201901 | 26 | 3875675 | 3875690 | 2 | 8  | 16 | AC   | 16 | 9  |
| 201902 | 26 | 3875882 | 3875905 | 3 | 8  | 24 | AAT  | 19 | 7  |
| 201903 | 26 | 3876338 | 3876353 | 2 | 8  | 16 | AG   | 17 | 8  |
| 201904 | 26 | 3879169 | 3879198 | 2 | 15 | 30 | AC   | 18 | 11 |
| 201907 | 26 | 3885517 | 3885530 | 2 | 7  | 14 | CA   | 17 | 4  |
| 201908 | 26 | 3887534 | 3887551 | 2 | 9  | 18 | TG   | 28 | 3  |
| 201909 | 26 | 3889481 | 3889498 | 2 | 9  | 18 | TG   | 23 | 3  |
| 201910 | 26 | 3889597 | 3889622 | 2 | 13 | 26 | TG   | 14 | 9  |
| 201911 | 26 | 3890230 | 3890250 | 3 | 7  | 21 | CCT  | 30 | 3  |
| 201912 | 26 | 3891892 | 3891919 | 2 | 14 | 28 | AC   | 20 | 7  |
| 201917 | 26 | 3898160 | 3898171 | 2 | 6  | 12 | AG   | 8  | 6  |
| 201918 | 26 | 3898173 | 3898188 | 2 | 8  | 16 | GA   | 12 | 7  |
| 201920 | 26 | 3901083 | 3901102 | 2 | 10 | 20 | TC   | 12 | 8  |
| 201922 | 26 | 3902300 | 3902333 | 2 | 17 | 34 | CA   | 6  | 9  |
| 201923 | 26 | 3904011 | 3904026 | 2 | 8  | 16 | TG   | 19 | 6  |
| 201927 | 26 | 3906321 | 3906335 | 3 | 5  | 15 | TTC  | 19 | 4  |
| 201930 | 26 | 3908520 | 3908541 | 2 | 11 | 22 | CT   | 17 | 4  |
| 201933 | 26 | 3913231 | 3913254 | 3 | 8  | 24 | CAG  | 35 | 4  |
| 201936 | 26 | 3918919 | 3918938 | 4 | 5  | 20 | CCAT | 29 | 5  |
| 201939 | 26 | 3922002 | 3922029 | 2 | 14 | 28 | GT   | 14 | 11 |
| 201941 | 26 | 3930583 | 3930602 | 2 | 10 | 20 | AC   | 23 | 5  |
| 201945 | 26 | 3937782 | 3937797 | 2 | 8  | 16 | TG   | 25 | 6  |
| 201946 | 26 | 3937856 | 3937875 | 2 | 10 | 20 | TG   | 18 | 3  |
| 201947 | 26 | 3937962 | 3937991 | 3 | 10 | 30 | CTC  | 7  | 7  |
| 201948 | 26 | 3938140 | 3938157 | 2 | 9  | 18 | TC   | 15 | 4  |
| 201951 | 26 | 3952871 | 3952886 | 2 | 8  | 16 | GT   | 25 | 15 |
| 201953 | 26 | 3955595 | 3955608 | 2 | 7  | 14 | TA   | 9  | 4  |
| 201954 | 26 | 3960837 | 3960851 | 3 | 5  | 15 | TAA  | 27 | 5  |

|        |    |         |         |   |    |    |      |    |    |
|--------|----|---------|---------|---|----|----|------|----|----|
| 201957 | 26 | 3963175 | 3963188 | 2 | 7  | 14 | CT   | 30 | 4  |
| 201958 | 26 | 3963543 | 3963570 | 2 | 14 | 28 | TG   | 19 | 7  |
| 201971 | 26 | 3997066 | 3997080 | 3 | 5  | 15 | GTT  | 29 | 3  |
| 201972 | 26 | 4001443 | 4001458 | 2 | 8  | 16 | TG   | 25 | 6  |
| 201981 | 26 | 4037003 | 4037023 | 3 | 7  | 21 | CAT  | 29 | 6  |
| 201982 | 26 | 4037784 | 4037797 | 2 | 7  | 14 | AT   | 6  | 4  |
| 201983 | 26 | 4038558 | 4038572 | 3 | 5  | 15 | TTC  | 21 | 3  |
| 201984 | 26 | 4038767 | 4038808 | 2 | 21 | 42 | AC   | 7  | 9  |
| 201986 | 26 | 4039828 | 4039855 | 2 | 14 | 28 | CA   | 17 | 11 |
| 201988 | 26 | 4043268 | 4043287 | 2 | 10 | 20 | AC   | 17 | 6  |
| 201993 | 26 | 4045477 | 4045503 | 3 | 9  | 27 | AGA  | 23 | 7  |
| 201997 | 26 | 4048856 | 4048867 | 2 | 6  | 12 | GA   | 24 | 3  |
| 201998 | 26 | 4049033 | 4049048 | 2 | 8  | 16 | CA   | 20 | 9  |
| 202000 | 26 | 4050572 | 4050591 | 2 | 10 | 20 | CA   | 22 | 11 |
| 202001 | 26 | 4050927 | 4050958 | 2 | 16 | 32 | GT   | 15 | 11 |
| 202002 | 26 | 4051146 | 4051157 | 2 | 6  | 12 | TA   | 7  | 4  |
| 202003 | 26 | 4051158 | 4051175 | 2 | 9  | 18 | TG   | 22 | 12 |
| 202004 | 26 | 4052815 | 4052850 | 2 | 18 | 36 | GT   | 6  | 5  |
| 202005 | 26 | 4052979 | 4053024 | 2 | 23 | 46 | CA   | 6  | 7  |
| 202012 | 26 | 4061933 | 4061972 | 2 | 20 | 40 | CA   | 14 | 8  |
| 202016 | 26 | 4066975 | 4066998 | 2 | 12 | 24 | CA   | 18 | 6  |
| 202017 | 26 | 4067678 | 4067701 | 2 | 12 | 24 | CA   | 14 | 7  |
| 202018 | 26 | 4070752 | 4070769 | 3 | 6  | 18 | GCA  | 35 | 6  |
| 202019 | 26 | 4071392 | 4071413 | 2 | 11 | 22 | TG   | 12 | 12 |
| 202021 | 26 | 4074064 | 4074083 | 2 | 10 | 20 | TG   | 17 | 8  |
| 202022 | 26 | 4074733 | 4074768 | 2 | 18 | 36 | TG   | 10 | 4  |
| 202023 | 26 | 4074889 | 4074922 | 2 | 17 | 34 | GT   | 12 | 12 |
| 202024 | 26 | 4079392 | 4079412 | 3 | 7  | 21 | TTC  | 14 | 5  |
| 202026 | 26 | 4080631 | 4080654 | 2 | 12 | 24 | TG   | 17 | 10 |
| 202030 | 26 | 4082238 | 4082252 | 3 | 5  | 15 | CCT  | 16 | 9  |
| 202036 | 26 | 4083343 | 4083354 | 2 | 6  | 12 | AT   | 7  | 3  |
| 202039 | 26 | 4083786 | 4083803 | 3 | 6  | 18 | AGC  | 10 | 6  |
| 202042 | 26 | 4086375 | 4086388 | 2 | 7  | 14 | GT   | 24 | 3  |
| 202043 | 26 | 4086610 | 4086621 | 2 | 6  | 12 | TA   | 23 | 7  |
| 202051 | 26 | 4091518 | 4091537 | 2 | 10 | 20 | GT   | 29 | 9  |
| 202052 | 26 | 4092588 | 4092603 | 4 | 4  | 16 | GTTT | 26 | 7  |
| 202053 | 26 | 4093966 | 4093989 | 3 | 8  | 24 | TTC  | 25 | 6  |
| 202059 | 26 | 4100817 | 4100830 | 2 | 7  | 14 | AC   | 29 | 5  |
| 202065 | 26 | 4108533 | 4108556 | 2 | 12 | 24 | GT   | 8  | 7  |
| 202067 | 26 | 4110492 | 4110519 | 2 | 14 | 28 | TG   | 12 | 10 |
| 202078 | 26 | 4121690 | 4121705 | 2 | 8  | 16 | TC   | 14 | 3  |
| 202079 | 26 | 4121710 | 4121725 | 2 | 8  | 16 | CT   | 20 | 6  |
| 202083 | 26 | 4128352 | 4128363 | 2 | 6  | 12 | AT   | 24 | 5  |
| 202087 | 26 | 4135204 | 4135219 | 2 | 8  | 16 | AG   | 11 | 8  |
| 202102 | 26 | 4148025 | 4148058 | 2 | 17 | 34 | TG   | 12 | 9  |
| 202109 | 26 | 4153848 | 4153867 | 2 | 10 | 20 | GT   | 9  | 3  |
| 202118 | 26 | 4160926 | 4160955 | 2 | 15 | 30 | GT   | 10 | 10 |
| 202122 | 26 | 4164670 | 4164697 | 2 | 14 | 28 | TG   | 18 | 15 |
| 202123 | 26 | 4164912 | 4164927 | 2 | 8  | 16 | TG   | 20 | 7  |
| 202126 | 26 | 4167374 | 4167385 | 2 | 6  | 12 | TG   | 16 | 6  |
| 202127 | 26 | 4167390 | 4167405 | 2 | 8  | 16 | TG   | 12 | 4  |



|        |    |         |         |   |    |    |      |    |    |
|--------|----|---------|---------|---|----|----|------|----|----|
| 202128 | 26 | 4167754 | 4167777 | 2 | 12 | 24 | CT   | 8  | 9  |
| 202129 | 26 | 4167900 | 4167919 | 2 | 10 | 20 | CT   | 17 | 6  |
| 202130 | 26 | 4168107 | 4168124 | 2 | 9  | 18 | CT   | 12 | 4  |
| 202131 | 26 | 4168816 | 4168835 | 2 | 10 | 20 | AC   | 16 | 4  |
| 202132 | 26 | 4168999 | 4169018 | 2 | 10 | 20 | CA   | 24 | 3  |
| 202133 | 26 | 4169127 | 4169156 | 2 | 15 | 30 | GT   | 16 | 8  |
| 202135 | 26 | 4173828 | 4173847 | 2 | 10 | 20 | GT   | 22 | 7  |
| 202136 | 26 | 4174165 | 4174176 | 2 | 6  | 12 | GT   | 34 | 3  |
| 202137 | 26 | 4174419 | 4174454 | 2 | 18 | 36 | TG   | 13 | 13 |
| 202141 | 26 | 4179023 | 4179040 | 2 | 9  | 18 | AC   | 17 | 6  |
| 202142 | 26 | 4179548 | 4179591 | 2 | 22 | 44 | CA   | 17 | 10 |
| 202143 | 26 | 4181058 | 4181079 | 2 | 11 | 22 | GT   | 23 | 6  |
| 202144 | 26 | 4181512 | 4181533 | 2 | 11 | 22 | CA   | 13 | 8  |
| 202146 | 26 | 4182181 | 4182204 | 2 | 12 | 24 | AC   | 21 | 13 |
| 202148 | 26 | 4186782 | 4186801 | 2 | 10 | 20 | CA   | 24 | 3  |
| 202151 | 26 | 4190008 | 4190023 | 2 | 8  | 16 | CT   | 24 | 3  |
| 202156 | 26 | 4195843 | 4195858 | 4 | 4  | 16 | ACAG | 23 | 4  |
| 202172 | 26 | 4212418 | 4212445 | 2 | 14 | 28 | GA   | 16 | 4  |
| 202174 | 26 | 4212988 | 4213005 | 3 | 6  | 18 | TTG  | 27 | 6  |
| 202178 | 26 | 4216135 | 4216154 | 2 | 10 | 20 | CA   | 11 | 7  |
| 202184 | 26 | 4221261 | 4221282 | 2 | 11 | 22 | TG   | 15 | 3  |
| 202189 | 26 | 4227273 | 4227290 | 3 | 6  | 18 | GCG  | 12 | 7  |
| 202192 | 26 | 4230762 | 4230773 | 2 | 6  | 12 | TG   | 18 | 3  |
| 202193 | 26 | 4231140 | 4231159 | 2 | 10 | 20 | TG   | 18 | 12 |
| 202196 | 26 | 4240648 | 4240665 | 2 | 9  | 18 | TG   | 28 | 4  |
| 202206 | 26 | 4246818 | 4246833 | 2 | 8  | 16 | TG   | 19 | 10 |
| 202209 | 26 | 4251268 | 4251287 | 2 | 10 | 20 | AG   | 23 | 5  |
| 202211 | 26 | 4252845 | 4252862 | 2 | 9  | 18 | TG   | 17 | 6  |
| 202214 | 26 | 4254734 | 4254753 | 2 | 10 | 20 | CA   | 18 | 14 |
| 202215 | 26 | 4255340 | 4255373 | 2 | 17 | 34 | CT   | 14 | 8  |
| 202221 | 26 | 4261723 | 4261762 | 2 | 20 | 40 | TG   | 19 | 12 |
| 202222 | 26 | 4261936 | 4261967 | 2 | 16 | 32 | TG   | 10 | 12 |
| 202233 | 26 | 4279317 | 4279342 | 2 | 13 | 26 | TC   | 16 | 10 |
| 202235 | 26 | 4279728 | 4279755 | 2 | 14 | 28 | AC   | 23 | 8  |
| 202238 | 26 | 4283650 | 4283689 | 2 | 20 | 40 | TG   | 10 | 10 |
| 202239 | 26 | 4284494 | 4284509 | 4 | 4  | 16 | ATTT | 22 | 8  |
| 202245 | 26 | 4286681 | 4286698 | 2 | 9  | 18 | CA   | 26 | 3  |
| 202246 | 26 | 4286855 | 4286869 | 3 | 5  | 15 | CAG  | 18 | 4  |
| 202250 | 26 | 4292469 | 4292484 | 2 | 8  | 16 | GT   | 26 | 5  |
| 202252 | 26 | 4293112 | 4293133 | 2 | 11 | 22 | TG   | 18 | 8  |
| 202254 | 26 | 4296999 | 4297024 | 2 | 13 | 26 | TG   | 11 | 9  |
| 202257 | 26 | 4299978 | 4299999 | 2 | 11 | 22 | TC   | 21 | 12 |
| 202261 | 26 | 4307642 | 4307680 | 3 | 13 | 39 | TGT  | 13 | 10 |
| 202264 | 26 | 4311110 | 4311137 | 2 | 14 | 28 | GT   | 14 | 11 |
| 202266 | 26 | 4311606 | 4311639 | 2 | 17 | 34 | GT   | 8  | 10 |
| 202267 | 26 | 4311716 | 4311737 | 2 | 11 | 22 | GT   | 13 | 12 |
| 202268 | 26 | 4312486 | 4312507 | 2 | 11 | 22 | CA   | 24 | 10 |
| 202269 | 26 | 4312660 | 4312695 | 2 | 18 | 36 | TG   | 7  | 5  |
| 202270 | 26 | 4312897 | 4312908 | 2 | 6  | 12 | TG   | 25 | 6  |
| 202271 | 26 | 4312991 | 4313012 | 2 | 11 | 22 | TG   | 14 | 3  |
| 202272 | 26 | 4313047 | 4313064 | 2 | 9  | 18 | TG   | 12 | 9  |

|        |    |         |         |   |    |    |      |    |    |
|--------|----|---------|---------|---|----|----|------|----|----|
| 202273 | 26 | 4313067 | 4313078 | 2 | 6  | 12 | TG   | 12 | 8  |
| 202281 | 26 | 4321400 | 4321423 | 2 | 12 | 24 | GT   | 18 | 8  |
| 202284 | 26 | 4324410 | 4324425 | 2 | 8  | 16 | TA   | 19 | 4  |
| 202285 | 26 | 4325592 | 4325605 | 2 | 7  | 14 | TG   | 22 | 7  |
| 202286 | 26 | 4325608 | 4325621 | 2 | 7  | 14 | TG   | 22 | 6  |
| 202291 | 26 | 4328509 | 4328528 | 2 | 10 | 20 | AG   | 16 | 4  |
| 202292 | 26 | 4328938 | 4328969 | 2 | 16 | 32 | TG   | 13 | 10 |
| 202293 | 26 | 4329126 | 4329159 | 2 | 17 | 34 | GT   | 12 | 8  |
| 202297 | 26 | 4332412 | 4332439 | 2 | 14 | 28 | TG   | 11 | 12 |
| 202301 | 26 | 4334231 | 4334248 | 2 | 9  | 18 | GT   | 18 | 3  |
| 202302 | 26 | 4334425 | 4334438 | 2 | 7  | 14 | TC   | 19 | 3  |
| 202303 | 26 | 4334465 | 4334484 | 2 | 10 | 20 | TG   | 23 | 9  |
| 202309 | 26 | 4340963 | 4340974 | 2 | 6  | 12 | GT   | 22 | 5  |
| 202310 | 26 | 4341563 | 4341576 | 2 | 7  | 14 | AC   | 20 | 5  |
| 202320 | 26 | 4365681 | 4365696 | 2 | 8  | 16 | TG   | 22 | 5  |
| 202323 | 26 | 4380937 | 4380972 | 2 | 18 | 36 | AC   | 17 | 8  |
| 202335 | 26 | 4410689 | 4410712 | 2 | 12 | 24 | TC   | 11 | 11 |
| 202339 | 26 | 4411778 | 4411789 | 2 | 6  | 12 | TG   | 26 | 3  |
| 202342 | 26 | 4422763 | 4422778 | 2 | 8  | 16 | CA   | 13 | 4  |
| 202344 | 26 | 4422839 | 4422860 | 2 | 11 | 22 | CA   | 15 | 9  |
| 202346 | 26 | 4423480 | 4423495 | 2 | 8  | 16 | TG   | 22 | 6  |
| 202347 | 26 | 4426120 | 4426134 | 3 | 5  | 15 | CCT  | 28 | 4  |
| 202348 | 26 | 4426912 | 4426927 | 2 | 8  | 16 | GT   | 15 | 3  |
| 202350 | 26 | 4428117 | 4428131 | 3 | 5  | 15 | TAT  | 26 | 4  |
| 202351 | 26 | 4430473 | 4430490 | 2 | 9  | 18 | GT   | 13 | 4  |
| 202355 | 26 | 4434177 | 4434192 | 2 | 8  | 16 | TG   | 31 | 6  |
| 202358 | 26 | 4442809 | 4442829 | 3 | 7  | 21 | ATG  | 26 | 4  |
| 202361 | 26 | 4447673 | 4447687 | 3 | 5  | 15 | GGC  | 17 | 3  |
| 202362 | 26 | 4448399 | 4448422 | 2 | 12 | 24 | TG   | 13 | 11 |
| 202366 | 26 | 4451084 | 4451104 | 3 | 7  | 21 | GCA  | 29 | 7  |
| 202380 | 26 | 4492024 | 4492037 | 2 | 7  | 14 | AC   | 22 | 3  |
| 202390 | 26 | 4508251 | 4508266 | 2 | 8  | 16 | CA   | 12 | 10 |
| 202391 | 26 | 4508269 | 4508282 | 2 | 7  | 14 | CA   | 16 | 14 |
| 202392 | 26 | 4509822 | 4509853 | 2 | 16 | 32 | AC   | 18 | 13 |
| 202393 | 26 | 4511233 | 4511250 | 2 | 9  | 18 | TC   | 15 | 4  |
| 202412 | 26 | 4542706 | 4542765 | 2 | 30 | 60 | AC   | 8  | 11 |
| 202413 | 26 | 4542830 | 4542849 | 2 | 10 | 20 | CA   | 18 | 6  |
| 202417 | 26 | 4558116 | 4558151 | 2 | 18 | 36 | TG   | 22 | 7  |
| 202422 | 26 | 4574678 | 4574697 | 2 | 10 | 20 | CA   | 9  | 9  |
| 202425 | 26 | 4581456 | 4581479 | 2 | 12 | 24 | GT   | 8  | 6  |
| 202428 | 26 | 4583422 | 4583445 | 2 | 12 | 24 | CA   | 13 | 11 |
| 202431 | 26 | 4586999 | 4587016 | 2 | 9  | 18 | TG   | 25 | 4  |
| 202435 | 26 | 4589866 | 4589877 | 2 | 6  | 12 | AT   | 30 | 3  |
| 202441 | 26 | 4596858 | 4596877 | 2 | 10 | 20 | TG   | 23 | 6  |
| 202442 | 26 | 4597506 | 4597523 | 2 | 9  | 18 | CT   | 13 | 5  |
| 202445 | 26 | 4603256 | 4603279 | 2 | 12 | 24 | GT   | 18 | 8  |
| 202456 | 26 | 4621630 | 4621661 | 4 | 8  | 32 | GCCA | 15 | 7  |
| 202457 | 26 | 4621789 | 4621808 | 2 | 10 | 20 | GA   | 12 | 7  |
| 202462 | 26 | 4624000 | 4624017 | 2 | 9  | 18 | TC   | 25 | 5  |
| 202466 | 26 | 4628632 | 4628663 | 2 | 16 | 32 | GT   | 18 | 6  |
| 202469 | 26 | 4629374 | 4629387 | 2 | 7  | 14 | GA   | 24 | 4  |

|        |    |         |         |   |    |    |      |    |    |
|--------|----|---------|---------|---|----|----|------|----|----|
| 202475 | 26 | 4631227 | 4631244 | 2 | 9  | 18 | TG   | 14 | 9  |
| 202476 | 26 | 4631684 | 4631695 | 2 | 6  | 12 | AC   | 26 | 5  |
| 202479 | 26 | 4636273 | 4636294 | 2 | 11 | 22 | CA   | 13 | 13 |
| 202483 | 26 | 4641243 | 4641260 | 2 | 9  | 18 | CA   | 21 | 7  |
| 202485 | 26 | 4643822 | 4643837 | 2 | 8  | 16 | AG   | 12 | 5  |
| 202486 | 26 | 4644040 | 4644055 | 2 | 8  | 16 | GA   | 23 | 6  |
| 202488 | 26 | 4650314 | 4650331 | 2 | 9  | 18 | TG   | 7  | 4  |
| 202489 | 26 | 4650495 | 4650532 | 2 | 19 | 38 | GT   | 10 | 9  |
| 202490 | 26 | 4650814 | 4650833 | 2 | 10 | 20 | AG   | 29 | 4  |
| 202491 | 26 | 4651205 | 4651228 | 2 | 12 | 24 | GT   | 22 | 5  |
| 202492 | 26 | 4651463 | 4651484 | 2 | 11 | 22 | AC   | 21 | 4  |
| 202493 | 26 | 4652026 | 4652041 | 4 | 4  | 16 | TGGT | 26 | 4  |
| 202495 | 26 | 4653999 | 4654014 | 2 | 8  | 16 | GA   | 26 | 5  |
| 202496 | 26 | 4654217 | 4654234 | 2 | 9  | 18 | TG   | 27 | 10 |
| 202497 | 26 | 4654353 | 4654376 | 2 | 12 | 24 | TG   | 13 | 7  |
| 202502 | 26 | 4655999 | 4656016 | 2 | 9  | 18 | GT   | 18 | 8  |
| 202503 | 26 | 4661269 | 4661294 | 2 | 13 | 26 | TG   | 15 | 8  |
| 202508 | 26 | 4663580 | 4663597 | 2 | 9  | 18 | CA   | 8  | 3  |
| 202517 | 26 | 4667534 | 4667549 | 4 | 4  | 16 | TTAT | 16 | 9  |
| 202520 | 26 | 4669276 | 4669299 | 2 | 12 | 24 | TG   | 22 | 5  |
| 202522 | 26 | 4673538 | 4673549 | 2 | 6  | 12 | GT   | 31 | 3  |
| 202524 | 26 | 4675878 | 4675903 | 2 | 13 | 26 | AC   | 18 | 5  |
| 202525 | 26 | 4677424 | 4677435 | 2 | 6  | 12 | TA   | 28 | 4  |
| 202526 | 26 | 4677592 | 4677615 | 2 | 12 | 24 | TG   | 12 | 15 |
| 202527 | 26 | 4678221 | 4678256 | 2 | 18 | 36 | AC   | 14 | 14 |
| 202528 | 26 | 4678419 | 4678442 | 2 | 12 | 24 | TG   | 7  | 5  |
| 202530 | 26 | 4680612 | 4680641 | 2 | 15 | 30 | CA   | 8  | 10 |
| 202531 | 26 | 4680868 | 4680885 | 3 | 6  | 18 | GCA  | 10 | 3  |
| 202534 | 26 | 4683548 | 4683563 | 2 | 8  | 16 | CA   | 15 | 12 |
| 202535 | 26 | 4686711 | 4686725 | 3 | 5  | 15 | CCT  | 21 | 14 |
| 202537 | 26 | 4686806 | 4686823 | 2 | 9  | 18 | CA   | 17 | 12 |
| 202538 | 26 | 4686826 | 4686837 | 2 | 6  | 12 | CA   | 7  | 6  |
| 202539 | 26 | 4687876 | 4687890 | 3 | 5  | 15 | CCT  | 21 | 5  |
| 202540 | 26 | 4688193 | 4688216 | 4 | 6  | 24 | CTGA | 21 | 14 |
| 202542 | 26 | 4690503 | 4690522 | 2 | 10 | 20 | CA   | 18 | 4  |
| 202545 | 26 | 4696634 | 4696651 | 3 | 6  | 18 | GAA  | 19 | 7  |
| 202547 | 26 | 4697045 | 4697076 | 2 | 16 | 32 | AG   | 19 | 10 |
| 202550 | 26 | 4702304 | 4702319 | 2 | 8  | 16 | AT   | 9  | 3  |
| 202551 | 26 | 4702931 | 4702950 | 2 | 10 | 20 | CA   | 14 | 12 |
| 202557 | 26 | 4706255 | 4706272 | 2 | 9  | 18 | CT   | 24 | 7  |
| 202559 | 26 | 4709828 | 4709849 | 2 | 11 | 22 | AC   | 23 | 14 |
| 202561 | 26 | 4712256 | 4712282 | 3 | 9  | 27 | ATT  | 17 | 3  |
| 202562 | 26 | 4713034 | 4713059 | 2 | 13 | 26 | TG   | 16 | 8  |
| 202563 | 26 | 4713674 | 4713689 | 4 | 4  | 16 | ATTT | 21 | 4  |
| 202571 | 26 | 4718801 | 4718812 | 2 | 6  | 12 | AG   | 24 | 5  |
| 202574 | 26 | 4719560 | 4719580 | 3 | 7  | 21 | TCC  | 11 | 5  |
| 202575 | 26 | 4720169 | 4720200 | 2 | 16 | 32 | GT   | 13 | 6  |
| 202576 | 26 | 4720293 | 4720322 | 2 | 15 | 30 | GT   | 16 | 13 |
| 202580 | 26 | 4720691 | 4720710 | 2 | 10 | 20 | TG   | 15 | 5  |
| 202581 | 26 | 4720768 | 4720791 | 2 | 12 | 24 | CA   | 20 | 6  |
| 202584 | 26 | 4723127 | 4723140 | 2 | 7  | 14 | TG   | 26 | 8  |

|        |    |         |         |   |    |    |     |    |    |
|--------|----|---------|---------|---|----|----|-----|----|----|
| 202589 | 26 | 4729754 | 4729777 | 2 | 12 | 24 | TG  | 10 | 8  |
| 202590 | 26 | 4729926 | 4729959 | 2 | 17 | 34 | CA  | 9  | 13 |
| 202593 | 26 | 4731259 | 4731273 | 3 | 5  | 15 | CTT | 22 | 3  |
| 202595 | 26 | 4734342 | 4734381 | 2 | 20 | 40 | CA  | 8  | 7  |
| 202597 | 26 | 4738056 | 4738083 | 2 | 14 | 28 | AC  | 28 | 7  |
| 202604 | 26 | 4749806 | 4749857 | 2 | 26 | 52 | GT  | 10 | 15 |
| 202608 | 26 | 4752780 | 4752794 | 3 | 5  | 15 | TAA | 27 | 3  |
| 202611 | 26 | 4756041 | 4756054 | 2 | 7  | 14 | TG  | 16 | 6  |
| 202613 | 26 | 4762449 | 4762464 | 2 | 8  | 16 | GA  | 17 | 6  |
| 202618 | 26 | 4765604 | 4765643 | 2 | 20 | 40 | AC  | 7  | 8  |
| 202619 | 26 | 4766131 | 4766154 | 2 | 12 | 24 | AC  | 24 | 6  |
| 202621 | 26 | 4767119 | 4767134 | 2 | 8  | 16 | GT  | 21 | 7  |
| 202624 | 26 | 4769050 | 4769065 | 2 | 8  | 16 | AG  | 29 | 11 |
| 202625 | 26 | 4769454 | 4769473 | 2 | 10 | 20 | GT  | 21 | 4  |
| 202626 | 26 | 4769506 | 4769527 | 2 | 11 | 22 | GT  | 25 | 7  |
| 202627 | 26 | 4769946 | 4769959 | 2 | 7  | 14 | GT  | 28 | 10 |
| 202628 | 26 | 4770265 | 4770294 | 2 | 15 | 30 | AG  | 17 | 4  |
| 202630 | 26 | 4774495 | 4774515 | 3 | 7  | 21 | TCC | 23 | 4  |
| 202631 | 26 | 4774942 | 4774959 | 2 | 9  | 18 | AC  | 18 | 6  |
| 202632 | 26 | 4775191 | 4775218 | 2 | 14 | 28 | GT  | 6  | 6  |
| 202633 | 26 | 4775345 | 4775366 | 2 | 11 | 22 | TG  | 12 | 7  |
| 202634 | 26 | 4777126 | 4777155 | 2 | 15 | 30 | AC  | 17 | 6  |
| 202635 | 26 | 4777299 | 4777316 | 2 | 9  | 18 | GT  | 18 | 7  |
| 202640 | 26 | 4779179 | 4779206 | 2 | 14 | 28 | TG  | 15 | 9  |
| 202641 | 26 | 4780559 | 4780572 | 2 | 7  | 14 | TG  | 31 | 5  |
| 202642 | 26 | 4780696 | 4780709 | 2 | 7  | 14 | TG  | 24 | 3  |
| 202643 | 26 | 4780882 | 4780909 | 2 | 14 | 28 | CA  | 17 | 11 |
| 202644 | 26 | 4781090 | 4781113 | 3 | 8  | 24 | ATG | 32 | 10 |
| 202646 | 26 | 4782652 | 4782663 | 2 | 6  | 12 | AC  | 27 | 8  |
| 202647 | 26 | 4783998 | 4784027 | 2 | 15 | 30 | TG  | 17 | 12 |
| 202648 | 26 | 4784227 | 4784252 | 2 | 13 | 26 | AC  | 23 | 3  |
| 202650 | 26 | 4785105 | 4785119 | 3 | 5  | 15 | GAA | 30 | 3  |
| 202655 | 26 | 4789176 | 4789217 | 2 | 21 | 42 | CA  | 8  | 8  |
| 202657 | 26 | 4793012 | 4793027 | 2 | 8  | 16 | AC  | 23 | 7  |
| 202659 | 26 | 4793735 | 4793756 | 2 | 11 | 22 | TG  | 10 | 8  |
| 202660 | 26 | 4794839 | 4794854 | 2 | 8  | 16 | CA  | 27 | 8  |
| 202663 | 26 | 4795648 | 4795665 | 2 | 9  | 18 | GT  | 23 | 6  |
| 202664 | 26 | 4795740 | 4795779 | 2 | 20 | 40 | GT  | 14 | 10 |
| 202667 | 26 | 4798046 | 4798073 | 2 | 14 | 28 | CA  | 15 | 6  |
| 202668 | 26 | 4799681 | 4799698 | 2 | 9  | 18 | GA  | 26 | 7  |
| 202669 | 26 | 4799816 | 4799827 | 2 | 6  | 12 | GT  | 28 | 3  |
| 202670 | 26 | 4799930 | 4799947 | 2 | 9  | 18 | AC  | 14 | 10 |
| 202672 | 26 | 4801273 | 4801288 | 2 | 8  | 16 | CT  | 12 | 7  |
| 202677 | 26 | 4802466 | 4802479 | 2 | 7  | 14 | TG  | 28 | 4  |
| 202679 | 26 | 4803544 | 4803557 | 2 | 7  | 14 | AT  | 12 | 6  |
| 202682 | 26 | 4804453 | 4804464 | 2 | 6  | 12 | TG  | 10 | 3  |
| 202689 | 26 | 4806674 | 4806695 | 2 | 11 | 22 | GT  | 23 | 7  |
| 202690 | 26 | 4807528 | 4807557 | 2 | 15 | 30 | TC  | 7  | 7  |
| 202691 | 26 | 4809378 | 4809407 | 2 | 15 | 30 | CA  | 14 | 12 |
| 202693 | 26 | 4810032 | 4810061 | 2 | 15 | 30 | AC  | 10 | 9  |
| 202694 | 26 | 4813026 | 4813043 | 2 | 9  | 18 | GT  | 13 | 11 |

|        |    |         |         |   |    |    |      |    |    |
|--------|----|---------|---------|---|----|----|------|----|----|
| 202695 | 26 | 4813973 | 4814014 | 2 | 21 | 42 | AC   | 8  | 9  |
| 202696 | 26 | 4814151 | 4814164 | 2 | 7  | 14 | GT   | 18 | 7  |
| 202697 | 26 | 4814167 | 4814182 | 2 | 8  | 16 | GT   | 19 | 6  |
| 202698 | 26 | 4814329 | 4814352 | 2 | 12 | 24 | TG   | 22 | 14 |
| 202699 | 26 | 4814434 | 4814457 | 3 | 8  | 24 | CTC  | 21 | 5  |
| 202700 | 26 | 4815380 | 4815393 | 2 | 7  | 14 | TG   | 16 | 5  |
| 202710 | 26 | 4820452 | 4820485 | 2 | 17 | 34 | TG   | 14 | 9  |
| 202712 | 26 | 4821722 | 4821739 | 2 | 9  | 18 | GT   | 23 | 10 |
| 202713 | 26 | 4821859 | 4821873 | 3 | 5  | 15 | TTC  | 26 | 5  |
| 202714 | 26 | 4822270 | 4822281 | 2 | 6  | 12 | GT   | 17 | 10 |
| 202717 | 26 | 4826156 | 4826179 | 2 | 12 | 24 | GT   | 19 | 12 |
| 202721 | 26 | 4828774 | 4828787 | 2 | 7  | 14 | GT   | 27 | 9  |
| 202722 | 26 | 4828927 | 4828942 | 2 | 8  | 16 | GA   | 27 | 3  |
| 202723 | 26 | 4829475 | 4829496 | 2 | 11 | 22 | CA   | 12 | 16 |
| 202725 | 26 | 4830298 | 4830315 | 3 | 6  | 18 | CTT  | 16 | 3  |
| 202726 | 26 | 4831608 | 4831637 | 3 | 10 | 30 | GGA  | 24 | 7  |
| 202727 | 26 | 4831762 | 4831781 | 2 | 10 | 20 | GT   | 12 | 6  |
| 202728 | 26 | 4831886 | 4831899 | 2 | 7  | 14 | GT   | 25 | 6  |
| 202730 | 26 | 4832749 | 4832760 | 2 | 6  | 12 | AC   | 22 | 6  |
| 202733 | 26 | 4834244 | 4834283 | 2 | 20 | 40 | GT   | 10 | 10 |
| 202734 | 26 | 4834557 | 4834576 | 2 | 10 | 20 | GT   | 15 | 5  |
| 202735 | 26 | 4834672 | 4834686 | 3 | 5  | 15 | GGT  | 9  | 7  |
| 202736 | 26 | 4834885 | 4834900 | 2 | 8  | 16 | AG   | 13 | 3  |
| 202740 | 26 | 4835811 | 4835860 | 2 | 25 | 50 | GT   | 6  | 9  |
| 202741 | 26 | 4835939 | 4835964 | 2 | 13 | 26 | CA   | 18 | 8  |
| 202742 | 26 | 4836067 | 4836081 | 3 | 5  | 15 | CCG  | 23 | 10 |
| 202744 | 26 | 4838159 | 4838173 | 3 | 5  | 15 | GGA  | 29 | 3  |
| 202745 | 26 | 4838274 | 4838306 | 3 | 11 | 33 | TCA  | 29 | 16 |
| 202747 | 26 | 4841868 | 4841893 | 2 | 13 | 26 | GA   | 9  | 12 |
| 202748 | 26 | 4844184 | 4844215 | 2 | 16 | 32 | AC   | 12 | 14 |
| 202749 | 26 | 4844361 | 4844386 | 2 | 13 | 26 | CA   | 17 | 8  |
| 202750 | 26 | 4844593 | 4844608 | 2 | 8  | 16 | CA   | 17 | 11 |
| 202754 | 26 | 4846517 | 4846548 | 2 | 16 | 32 | TG   | 17 | 16 |
| 202756 | 26 | 4848822 | 4848857 | 2 | 18 | 36 | GT   | 9  | 9  |
| 202762 | 26 | 4849550 | 4849565 | 2 | 8  | 16 | CT   | 17 | 6  |
| 202764 | 26 | 4849754 | 4849785 | 2 | 16 | 32 | GT   | 18 | 7  |
| 202765 | 26 | 4852471 | 4852491 | 3 | 7  | 21 | TCT  | 17 | 5  |
| 202766 | 26 | 4852535 | 4852555 | 3 | 7  | 21 | TTC  | 21 | 4  |
| 202767 | 26 | 4853417 | 4853442 | 2 | 13 | 26 | AC   | 12 | 6  |
| 202783 | 26 | 4858691 | 4858706 | 2 | 8  | 16 | TG   | 27 | 3  |
| 202784 | 26 | 4858889 | 4858916 | 2 | 14 | 28 | AC   | 20 | 10 |
| 202785 | 26 | 4859684 | 4859697 | 2 | 7  | 14 | CA   | 28 | 7  |
| 202786 | 26 | 4859898 | 4859919 | 2 | 11 | 22 | CA   | 12 | 5  |
| 202787 | 26 | 4859940 | 4859953 | 2 | 7  | 14 | CA   | 18 | 5  |
| 202789 | 26 | 4861341 | 4861356 | 2 | 8  | 16 | TC   | 13 | 4  |
| 202791 | 26 | 4861937 | 4861954 | 2 | 9  | 18 | CT   | 27 | 10 |
| 202793 | 26 | 4862351 | 4862396 | 2 | 23 | 46 | GT   | 21 | 9  |
| 202795 | 26 | 4863477 | 4863492 | 4 | 4  | 16 | TAAT | 31 | 3  |
| 202797 | 26 | 4866708 | 4866731 | 2 | 12 | 24 | TG   | 18 | 6  |
| 202798 | 26 | 4867334 | 4867360 | 3 | 9  | 27 | GGA  | 30 | 11 |
| 202799 | 26 | 4868356 | 4868373 | 2 | 9  | 18 | TG   | 12 | 6  |

|        |    |         |         |   |    |    |      |    |    |
|--------|----|---------|---------|---|----|----|------|----|----|
| 202801 | 26 | 4868539 | 4868560 | 2 | 11 | 22 | AC   | 21 | 10 |
| 202802 | 26 | 4870296 | 4870315 | 2 | 10 | 20 | TG   | 9  | 3  |
| 202804 | 26 | 4870870 | 4870901 | 2 | 16 | 32 | GT   | 10 | 8  |
| 202806 | 26 | 4877096 | 4877107 | 2 | 6  | 12 | GT   | 22 | 3  |
| 202807 | 26 | 4877178 | 4877207 | 2 | 15 | 30 | TG   | 12 | 8  |
| 202808 | 26 | 4877383 | 4877400 | 2 | 9  | 18 | TG   | 24 | 5  |
| 202809 | 26 | 4879997 | 4880010 | 2 | 7  | 14 | CA   | 18 | 3  |
| 202810 | 26 | 4884109 | 4884126 | 2 | 9  | 18 | CA   | 19 | 6  |
| 202817 | 26 | 4895697 | 4895722 | 2 | 13 | 26 | CA   | 24 | 12 |
| 202830 | 26 | 4916593 | 4916612 | 4 | 5  | 20 | AATA | 33 | 4  |
| 202834 | 26 | 4921813 | 4921828 | 4 | 4  | 16 | GAGG | 22 | 7  |
| 202837 | 26 | 4925720 | 4925740 | 3 | 7  | 21 | TGT  | 27 | 7  |
| 202841 | 26 | 4927682 | 4927711 | 2 | 15 | 30 | AC   | 16 | 12 |
| 202844 | 26 | 4936726 | 4936753 | 2 | 14 | 28 | GT   | 17 | 14 |
| 202849 | 26 | 4938506 | 4938521 | 2 | 8  | 16 | AG   | 10 | 3  |
| 202852 | 26 | 4940173 | 4940194 | 2 | 11 | 22 | GT   | 18 | 10 |
| 202860 | 26 | 4949622 | 4949651 | 3 | 10 | 30 | AAT  | 10 | 3  |
| 202861 | 26 | 4950096 | 4950123 | 2 | 14 | 28 | TG   | 15 | 16 |
| 202863 | 26 | 4950381 | 4950392 | 2 | 6  | 12 | AC   | 21 | 4  |
| 202868 | 26 | 4952153 | 4952176 | 3 | 8  | 24 | AGA  | 14 | 4  |
| 202882 | 26 | 4956928 | 4956951 | 3 | 8  | 24 | CTT  | 22 | 9  |
| 202883 | 26 | 4957546 | 4957569 | 3 | 8  | 24 | CCT  | 18 | 4  |
| 202885 | 26 | 4958343 | 4958357 | 3 | 5  | 15 | TCT  | 8  | 10 |
| 202891 | 26 | 4960575 | 4960594 | 2 | 10 | 20 | GT   | 21 | 6  |
| 202896 | 26 | 4964072 | 4964089 | 2 | 9  | 18 | AC   | 17 | 12 |
| 202899 | 26 | 4966321 | 4966344 | 3 | 8  | 24 | GGT  | 9  | 7  |
| 202904 | 26 | 4970112 | 4970131 | 2 | 10 | 20 | CA   | 21 | 11 |
| 202905 | 26 | 4970174 | 4970189 | 2 | 8  | 16 | AC   | 19 | 6  |
| 202906 | 26 | 4971112 | 4971131 | 4 | 5  | 20 | CCAA | 19 | 3  |
| 202907 | 26 | 4971868 | 4971885 | 2 | 9  | 18 | GT   | 16 | 11 |
| 202909 | 26 | 4972702 | 4972713 | 2 | 6  | 12 | TG   | 14 | 8  |
| 202910 | 26 | 4972864 | 4972899 | 2 | 18 | 36 | CA   | 7  | 6  |
| 202911 | 26 | 4973569 | 4973584 | 2 | 8  | 16 | AC   | 23 | 4  |
| 202912 | 26 | 4973645 | 4973666 | 2 | 11 | 22 | CA   | 15 | 5  |
| 202917 | 26 | 4975555 | 4975581 | 3 | 9  | 27 | CTC  | 21 | 7  |
| 202918 | 26 | 4975632 | 4975649 | 2 | 9  | 18 | CT   | 15 | 6  |
| 202919 | 26 | 4975828 | 4975845 | 3 | 6  | 18 | TCT  | 27 | 8  |
| 202920 | 26 | 4977713 | 4977728 | 4 | 4  | 16 | AAAT | 21 | 4  |
| 202928 | 26 | 4984524 | 4984551 | 2 | 14 | 28 | AC   | 18 | 8  |
| 202929 | 26 | 4984735 | 4984760 | 2 | 13 | 26 | CA   | 18 | 13 |
| 202930 | 26 | 4985042 | 4985061 | 2 | 10 | 20 | CT   | 16 | 6  |
| 202931 | 26 | 4985187 | 4985210 | 3 | 8  | 24 | GAG  | 11 | 5  |
| 202943 | 26 | 4993498 | 4993523 | 2 | 13 | 26 | TG   | 12 | 11 |
| 202949 | 26 | 4998524 | 4998551 | 2 | 14 | 28 | CA   | 10 | 11 |
| 202954 | 26 | 5002658 | 5002693 | 2 | 18 | 36 | AC   | 10 | 9  |
| 202955 | 26 | 5004449 | 5004468 | 2 | 10 | 20 | TG   | 17 | 6  |
| 202957 | 26 | 5005300 | 5005319 | 2 | 10 | 20 | CT   | 21 | 13 |
| 202966 | 26 | 5012083 | 5012104 | 2 | 11 | 22 | GT   | 17 | 5  |
| 202967 | 26 | 5012302 | 5012322 | 3 | 7  | 21 | CCA  | 12 | 6  |
| 202968 | 26 | 5013319 | 5013340 | 2 | 11 | 22 | TG   | 18 | 6  |
| 202972 | 26 | 5019094 | 5019109 | 2 | 8  | 16 | CA   | 15 | 6  |

|        |    |         |         |   |    |    |      |    |    |
|--------|----|---------|---------|---|----|----|------|----|----|
| 202975 | 26 | 5019324 | 5019356 | 3 | 11 | 33 | CCT  | 12 | 5  |
| 202979 | 26 | 5020841 | 5020866 | 2 | 13 | 26 | GA   | 19 | 8  |
| 202984 | 26 | 5023823 | 5023836 | 2 | 7  | 14 | AG   | 25 | 3  |
| 202987 | 26 | 5030042 | 5030097 | 2 | 28 | 56 | GT   | 10 | 7  |
| 202988 | 26 | 5030217 | 5030260 | 2 | 22 | 44 | GT   | 21 | 16 |
| 202994 | 26 | 5033340 | 5033355 | 4 | 4  | 16 | ATTT | 22 | 10 |
| 202996 | 26 | 5034646 | 5034681 | 3 | 12 | 36 | CTT  | 16 | 8  |
| 202998 | 26 | 5036006 | 5036021 | 2 | 8  | 16 | AC   | 20 | 4  |
| 203003 | 26 | 5041284 | 5041303 | 2 | 10 | 20 | TG   | 22 | 11 |
| 203007 | 26 | 5043640 | 5043675 | 3 | 12 | 36 | GCT  | 31 | 7  |
| 203009 | 26 | 5046350 | 5046375 | 2 | 13 | 26 | GT   | 14 | 5  |
| 203017 | 26 | 5061141 | 5061156 | 2 | 8  | 16 | CA   | 28 | 8  |
| 203022 | 26 | 5064834 | 5064849 | 2 | 8  | 16 | AT   | 15 | 11 |
| 203023 | 26 | 5065016 | 5065031 | 2 | 8  | 16 | GA   | 13 | 4  |
| 203024 | 26 | 5065175 | 5065188 | 2 | 7  | 14 | GA   | 19 | 4  |
| 203025 | 26 | 5065440 | 5065451 | 2 | 6  | 12 | AT   | 22 | 5  |
| 203032 | 26 | 5069202 | 5069217 | 2 | 8  | 16 | CA   | 22 | 10 |
| 203033 | 26 | 5069710 | 5069731 | 2 | 11 | 22 | CA   | 23 | 5  |
| 203035 | 26 | 5070545 | 5070559 | 3 | 5  | 15 | CCA  | 13 | 7  |
| 203037 | 26 | 5071463 | 5071474 | 2 | 6  | 12 | CT   | 25 | 4  |
| 203044 | 26 | 5073277 | 5073296 | 2 | 10 | 20 | CA   | 9  | 3  |
| 203045 | 26 | 5073564 | 5073581 | 3 | 6  | 18 | TCC  | 12 | 3  |
| 203046 | 26 | 5073658 | 5073681 | 2 | 12 | 24 | TG   | 14 | 7  |
| 203047 | 26 | 5073894 | 5073917 | 2 | 12 | 24 | TG   | 15 | 7  |
| 203051 | 26 | 5078059 | 5078078 | 2 | 10 | 20 | AC   | 17 | 5  |
| 203053 | 26 | 5079354 | 5079379 | 2 | 13 | 26 | TG   | 13 | 18 |
| 203054 | 26 | 5080702 | 5080713 | 2 | 6  | 12 | GT   | 21 | 5  |
| 203056 | 26 | 5082407 | 5082422 | 2 | 8  | 16 | AC   | 20 | 3  |
| 203064 | 26 | 5084245 | 5084266 | 2 | 11 | 22 | GT   | 21 | 7  |
| 203065 | 26 | 5084386 | 5084405 | 2 | 10 | 20 | AC   | 11 | 11 |
| 203074 | 26 | 5086488 | 5086507 | 2 | 10 | 20 | CA   | 15 | 8  |
| 203075 | 26 | 5086608 | 5086641 | 2 | 17 | 34 | GT   | 11 | 13 |
| 203076 | 26 | 5087422 | 5087435 | 2 | 7  | 14 | AC   | 24 | 6  |
| 203078 | 26 | 5087660 | 5087687 | 2 | 14 | 28 | TG   | 15 | 7  |
| 203087 | 26 | 5088865 | 5088876 | 2 | 6  | 12 | CA   | 17 | 3  |
| 203088 | 26 | 5089119 | 5089138 | 4 | 5  | 20 | TGCG | 22 | 15 |
| 203090 | 26 | 5089584 | 5089603 | 4 | 5  | 20 | AAAG | 14 | 5  |
| 203093 | 26 | 5090025 | 5090042 | 3 | 6  | 18 | CTG  | 17 | 6  |
| 203095 | 26 | 5090694 | 5090725 | 2 | 16 | 32 | CA   | 7  | 7  |
| 203097 | 26 | 5092608 | 5092619 | 2 | 6  | 12 | GT   | 22 | 3  |
| 203101 | 26 | 5094012 | 5094029 | 2 | 9  | 18 | GT   | 10 | 5  |
| 203105 | 26 | 5094331 | 5094360 | 2 | 15 | 30 | CA   | 15 | 19 |
| 203107 | 26 | 5094485 | 5094498 | 2 | 7  | 14 | AC   | 22 | 6  |
| 203109 | 26 | 5095272 | 5095289 | 3 | 6  | 18 | GTT  | 20 | 4  |
| 203110 | 26 | 5095461 | 5095480 | 2 | 10 | 20 | GA   | 22 | 3  |
| 203114 | 26 | 5095937 | 5095962 | 2 | 13 | 26 | GT   | 11 | 10 |
| 203115 | 26 | 5096000 | 5096021 | 2 | 11 | 22 | GT   | 12 | 19 |
| 203121 | 26 | 5097446 | 5097465 | 2 | 10 | 20 | CA   | 6  | 6  |
| 203124 | 26 | 5098406 | 5098437 | 2 | 16 | 32 | GT   | 15 | 11 |
| 203129 | 26 | 5107500 | 5107513 | 2 | 7  | 14 | TA   | 14 | 6  |
| 203130 | 26 | 5108167 | 5108182 | 2 | 8  | 16 | AG   | 24 | 4  |

|        |    |         |         |   |    |    |      |    |    |
|--------|----|---------|---------|---|----|----|------|----|----|
| 203133 | 26 | 5109673 | 5109692 | 2 | 10 | 20 | GA   | 26 | 5  |
| 203134 | 26 | 5109839 | 5109866 | 2 | 14 | 28 | CA   | 12 | 10 |
| 203136 | 26 | 5113842 | 5113873 | 2 | 16 | 32 | CA   | 20 | 5  |
| 203137 | 26 | 5115414 | 5115437 | 3 | 8  | 24 | GGA  | 21 | 8  |
| 203138 | 26 | 5115618 | 5115657 | 2 | 20 | 40 | TG   | 12 | 14 |
| 203139 | 26 | 5115785 | 5115804 | 2 | 10 | 20 | GT   | 13 | 7  |
| 203140 | 26 | 5115827 | 5115840 | 2 | 7  | 14 | GT   | 13 | 3  |
| 203143 | 26 | 5116176 | 5116189 | 2 | 7  | 14 | AC   | 15 | 3  |
| 203147 | 26 | 5124331 | 5124350 | 2 | 10 | 20 | CT   | 15 | 11 |
| 203151 | 26 | 5128135 | 5128166 | 2 | 16 | 32 | GT   | 21 | 9  |
| 203152 | 26 | 5128309 | 5128326 | 2 | 9  | 18 | CA   | 21 | 15 |
| 203153 | 26 | 5128328 | 5128339 | 2 | 6  | 12 | AC   | 7  | 6  |
| 203154 | 26 | 5129025 | 5129044 | 2 | 10 | 20 | GT   | 16 | 6  |
| 203156 | 26 | 5129507 | 5129527 | 3 | 7  | 21 | TCA  | 28 | 6  |
| 203160 | 26 | 5131283 | 5131300 | 2 | 9  | 18 | TG   | 23 | 9  |
| 203161 | 26 | 5132296 | 5132323 | 2 | 14 | 28 | GT   | 23 | 11 |
| 203162 | 26 | 5132815 | 5132828 | 2 | 7  | 14 | AC   | 26 | 3  |
| 203163 | 26 | 5134723 | 5134736 | 2 | 7  | 14 | TG   | 31 | 3  |
| 203166 | 26 | 5137156 | 5137167 | 2 | 6  | 12 | CA   | 25 | 7  |
| 203175 | 26 | 5142841 | 5142870 | 3 | 10 | 30 | CCT  | 10 | 6  |
| 203180 | 26 | 5147709 | 5147732 | 3 | 8  | 24 | AGG  | 21 | 8  |
| 203181 | 26 | 5148100 | 5148123 | 2 | 12 | 24 | AG   | 22 | 6  |
| 203183 | 26 | 5150383 | 5150410 | 4 | 7  | 28 | AGGA | 19 | 6  |
| 203184 | 26 | 5150697 | 5150712 | 4 | 4  | 16 | GAGG | 11 | 6  |
| 203187 | 26 | 5152011 | 5152022 | 2 | 6  | 12 | AC   | 16 | 7  |
| 203189 | 26 | 5152198 | 5152219 | 2 | 11 | 22 | AC   | 9  | 9  |
| 203190 | 26 | 5154476 | 5154501 | 2 | 13 | 26 | AC   | 18 | 11 |
| 203192 | 26 | 5154959 | 5154988 | 3 | 10 | 30 | TCC  | 8  | 5  |
| 203196 | 26 | 5155591 | 5155620 | 2 | 15 | 30 | GT   | 12 | 8  |
| 203203 | 26 | 5158382 | 5158399 | 3 | 6  | 18 | AGC  | 18 | 5  |
| 203207 | 26 | 5172424 | 5172445 | 2 | 11 | 22 | AC   | 28 | 4  |
| 203213 | 26 | 5174332 | 5174352 | 3 | 7  | 21 | CAT  | 12 | 3  |
| 203230 | 26 | 5185187 | 5185212 | 2 | 13 | 26 | CA   | 9  | 4  |
| 203231 | 26 | 5185313 | 5185327 | 3 | 5  | 15 | CTC  | 19 | 3  |
| 203234 | 26 | 5186296 | 5186313 | 3 | 6  | 18 | CCT  | 26 | 6  |
| 203238 | 26 | 5186654 | 5186671 | 2 | 9  | 18 | CA   | 12 | 4  |
| 203242 | 26 | 5187994 | 5188014 | 3 | 7  | 21 | CTT  | 26 | 9  |
| 203245 | 26 | 5189265 | 5189282 | 2 | 9  | 18 | GT   | 17 | 5  |
| 203246 | 26 | 5189540 | 5189555 | 2 | 8  | 16 | AC   | 27 | 3  |
| 203248 | 26 | 5190400 | 5190411 | 2 | 6  | 12 | AT   | 11 | 3  |
| 203251 | 26 | 5191923 | 5191940 | 2 | 9  | 18 | CA   | 27 | 7  |
| 203254 | 26 | 5199786 | 5199809 | 3 | 8  | 24 | AAG  | 22 | 6  |
| 203262 | 26 | 5223966 | 5223991 | 2 | 13 | 26 | TG   | 17 | 7  |
| 203263 | 26 | 5225645 | 5225659 | 3 | 5  | 15 | CAG  | 25 | 5  |
| 203265 | 26 | 5231365 | 5231396 | 2 | 16 | 32 | GT   | 22 | 8  |
| 203271 | 26 | 5241691 | 5241723 | 3 | 11 | 33 | GGA  | 15 | 6  |
| 203272 | 26 | 5243067 | 5243081 | 3 | 5  | 15 | AGC  | 30 | 8  |
| 203273 | 26 | 5243506 | 5243527 | 2 | 11 | 22 | CA   | 15 | 13 |
| 203275 | 26 | 5245598 | 5245621 | 3 | 8  | 24 | GAG  | 20 | 4  |
| 203278 | 26 | 5246619 | 5246636 | 2 | 9  | 18 | GA   | 22 | 3  |
| 203279 | 26 | 5259007 | 5259024 | 2 | 9  | 18 | TC   | 23 | 4  |



|        |    |         |         |   |    |    |      |    |    |
|--------|----|---------|---------|---|----|----|------|----|----|
| 203280 | 26 | 5259238 | 5259255 | 2 | 9  | 18 | GT   | 24 | 5  |
| 203286 | 26 | 5264519 | 5264551 | 3 | 11 | 33 | CTT  | 21 | 6  |
| 203289 | 26 | 5270833 | 5270852 | 2 | 10 | 20 | TG   | 15 | 5  |
| 203292 | 26 | 5273182 | 5273208 | 3 | 9  | 27 | CTC  | 21 | 5  |
| 203297 | 26 | 5277457 | 5277508 | 2 | 26 | 52 | AC   | 14 | 8  |
| 203298 | 26 | 5278435 | 5278460 | 2 | 13 | 26 | GT   | 18 | 16 |
| 203300 | 26 | 5280439 | 5280470 | 2 | 16 | 32 | AC   | 9  | 10 |
| 203301 | 26 | 5280703 | 5280720 | 2 | 9  | 18 | AC   | 21 | 4  |
| 203303 | 26 | 5282650 | 5282669 | 4 | 5  | 20 | GCAG | 27 | 7  |
| 203304 | 26 | 5284483 | 5284512 | 3 | 10 | 30 | ATG  | 22 | 3  |
| 203305 | 26 | 5285489 | 5285504 | 2 | 8  | 16 | AG   | 6  | 4  |
| 203310 | 26 | 5289455 | 5289484 | 2 | 15 | 30 | TG   | 11 | 6  |
| 203311 | 26 | 5290564 | 5290577 | 2 | 7  | 14 | TG   | 29 | 4  |
| 203313 | 26 | 5297003 | 5297018 | 2 | 8  | 16 | TG   | 16 | 9  |
| 203315 | 26 | 5299293 | 5299320 | 2 | 14 | 28 | GT   | 19 | 8  |
| 203320 | 26 | 5308839 | 5308870 | 4 | 8  | 32 | AGAA | 10 | 8  |
| 203332 | 26 | 5325325 | 5325350 | 2 | 13 | 26 | GT   | 15 | 7  |
| 203333 | 26 | 5325589 | 5325616 | 2 | 14 | 28 | AC   | 18 | 8  |
| 203334 | 26 | 5325681 | 5325706 | 2 | 13 | 26 | CA   | 8  | 8  |
| 203337 | 26 | 5328341 | 5328360 | 2 | 10 | 20 | AC   | 25 | 7  |
| 203344 | 26 | 5335714 | 5335731 | 2 | 9  | 18 | GA   | 16 | 4  |
| 203347 | 26 | 5337581 | 5337594 | 2 | 7  | 14 | GT   | 10 | 9  |
| 203350 | 26 | 5344164 | 5344183 | 2 | 10 | 20 | TG   | 17 | 6  |
| 203355 | 26 | 5347181 | 5347192 | 2 | 6  | 12 | AG   | 32 | 4  |
| 203356 | 26 | 5359980 | 5359991 | 2 | 6  | 12 | AG   | 18 | 5  |
| 203359 | 26 | 5364605 | 5364616 | 2 | 6  | 12 | TC   | 29 | 3  |
| 203373 | 26 | 5382414 | 5382434 | 3 | 7  | 21 | AGG  | 25 | 3  |
| 203375 | 26 | 5387409 | 5387426 | 2 | 9  | 18 | TG   | 20 | 8  |
| 203376 | 26 | 5387471 | 5387484 | 2 | 7  | 14 | CT   | 22 | 3  |
| 203377 | 26 | 5388415 | 5388444 | 2 | 15 | 30 | TG   | 11 | 7  |
| 203378 | 26 | 5388966 | 5388993 | 2 | 14 | 28 | TG   | 10 | 10 |
| 203380 | 26 | 5391749 | 5391762 | 2 | 7  | 14 | TG   | 26 | 3  |
| 203458 | 26 | 5462317 | 5462328 | 2 | 6  | 12 | TG   | 28 | 5  |
| 203462 | 26 | 5468436 | 5468447 | 2 | 6  | 12 | GA   | 10 | 3  |
| 203464 | 26 | 5468667 | 5468692 | 2 | 13 | 26 | TG   | 13 | 8  |
| 203482 | 26 | 5502692 | 5502707 | 4 | 4  | 16 | GAGC | 12 | 3  |
| 203487 | 26 | 5510000 | 5510015 | 2 | 8  | 16 | CT   | 19 | 4  |
| 203516 | 26 | 5544558 | 5544571 | 2 | 7  | 14 | AC   | 21 | 4  |
| 203520 | 26 | 5550210 | 5550227 | 2 | 9  | 18 | CT   | 15 | 4  |
| 203522 | 26 | 5550591 | 5550608 | 2 | 9  | 18 | TG   | 15 | 3  |
| 203527 | 26 | 5553957 | 5553974 | 3 | 6  | 18 | AAT  | 8  | 7  |
| 203534 | 26 | 5561501 | 5561512 | 2 | 6  | 12 | CA   | 15 | 12 |
| 203537 | 26 | 5565145 | 5565156 | 2 | 6  | 12 | TA   | 21 | 15 |
| 203538 | 26 | 5565375 | 5565394 | 2 | 10 | 20 | TG   | 23 | 8  |
| 203539 | 26 | 5566773 | 5566800 | 2 | 14 | 28 | GT   | 15 | 13 |
| 203540 | 26 | 5566936 | 5566953 | 2 | 9  | 18 | GT   | 15 | 11 |
| 203542 | 26 | 5579028 | 5579049 | 2 | 11 | 22 | CA   | 15 | 12 |
| 203543 | 26 | 5579164 | 5579181 | 2 | 9  | 18 | TG   | 20 | 10 |
| 203547 | 26 | 5580990 | 5581009 | 2 | 10 | 20 | CA   | 22 | 12 |
| 203548 | 26 | 5584018 | 5584039 | 2 | 11 | 22 | AC   | 7  | 8  |
| 203555 | 26 | 5590433 | 5590452 | 2 | 10 | 20 | AC   | 15 | 11 |

|        |    |         |         |   |    |    |      |    |    |
|--------|----|---------|---------|---|----|----|------|----|----|
| 203556 | 26 | 5590601 | 5590632 | 2 | 16 | 32 | TG   | 17 | 12 |
| 203558 | 26 | 5591007 | 5591026 | 2 | 10 | 20 | AC   | 6  | 8  |
| 203560 | 26 | 5591200 | 5591215 | 2 | 8  | 16 | CA   | 24 | 11 |
| 203561 | 26 | 5593193 | 5593206 | 2 | 7  | 14 | TG   | 30 | 8  |
| 203564 | 26 | 5597795 | 5597830 | 2 | 18 | 36 | GT   | 18 | 11 |
| 203566 | 26 | 5602627 | 5602646 | 2 | 10 | 20 | GA   | 19 | 5  |
| 203569 | 26 | 5606000 | 5606014 | 3 | 5  | 15 | TTA  | 24 | 4  |
| 203576 | 26 | 5609074 | 5609085 | 2 | 6  | 12 | CA   | 17 | 8  |
| 203578 | 26 | 5613987 | 5614006 | 2 | 10 | 20 | AC   | 11 | 9  |
| 203580 | 26 | 5615994 | 5616019 | 2 | 13 | 26 | CA   | 13 | 7  |
| 203581 | 26 | 5616202 | 5616229 | 2 | 14 | 28 | GT   | 16 | 16 |
| 203593 | 26 | 5621429 | 5621458 | 2 | 15 | 30 | CA   | 25 | 11 |
| 203594 | 26 | 5622029 | 5622066 | 2 | 19 | 38 | TG   | 9  | 8  |
| 203597 | 26 | 5624526 | 5624543 | 2 | 9  | 18 | TG   | 18 | 6  |
| 203601 | 26 | 5632730 | 5632751 | 2 | 11 | 22 | GT   | 24 | 6  |
| 203603 | 26 | 5636220 | 5636233 | 2 | 7  | 14 | TG   | 22 | 3  |
| 203606 | 26 | 5644949 | 5644972 | 2 | 12 | 24 | AC   | 24 | 5  |
| 203607 | 26 | 5645482 | 5645503 | 2 | 11 | 22 | TC   | 24 | 4  |
| 203611 | 26 | 5649718 | 5649743 | 2 | 13 | 26 | TG   | 22 | 5  |
| 203613 | 26 | 5650303 | 5650322 | 4 | 5  | 20 | TTCT | 32 | 6  |
| 203615 | 26 | 5652328 | 5652361 | 2 | 17 | 34 | TG   | 7  | 7  |
| 203616 | 26 | 5653400 | 5653423 | 2 | 12 | 24 | GT   | 22 | 10 |
| 203623 | 26 | 5664392 | 5664403 | 2 | 6  | 12 | GT   | 20 | 8  |
| 203624 | 26 | 5664546 | 5664559 | 2 | 7  | 14 | AC   | 23 | 4  |
| 203625 | 26 | 5668511 | 5668534 | 2 | 12 | 24 | TG   | 18 | 10 |
| 203628 | 26 | 5673394 | 5673411 | 3 | 6  | 18 | GAA  | 23 | 6  |
| 203629 | 26 | 5675148 | 5675167 | 2 | 10 | 20 | TC   | 20 | 6  |
| 203630 | 26 | 5679063 | 5679080 | 2 | 9  | 18 | CA   | 23 | 6  |
| 203634 | 26 | 5687913 | 5687946 | 2 | 17 | 34 | TG   | 10 | 10 |
| 203639 | 26 | 5696822 | 5696833 | 2 | 6  | 12 | GT   | 26 | 8  |
| 203649 | 26 | 5703918 | 5703943 | 2 | 13 | 26 | TG   | 14 | 7  |
| 203652 | 26 | 5705470 | 5705487 | 2 | 9  | 18 | TG   | 12 | 10 |
| 203654 | 26 | 5705628 | 5705641 | 2 | 7  | 14 | AC   | 20 | 7  |
| 203656 | 26 | 5709089 | 5709110 | 2 | 11 | 22 | AC   | 25 | 9  |
| 203658 | 26 | 5709735 | 5709754 | 4 | 5  | 20 | TCTT | 32 | 6  |
| 203661 | 26 | 5712312 | 5712345 | 2 | 17 | 34 | AC   | 8  | 10 |
| 203662 | 26 | 5714901 | 5714938 | 2 | 19 | 38 | TG   | 9  | 8  |
| 203663 | 26 | 5717313 | 5717340 | 4 | 7  | 28 | GCTT | 21 | 10 |
| 203669 | 26 | 5721464 | 5721475 | 2 | 6  | 12 | GT   | 14 | 3  |
| 203678 | 26 | 5728031 | 5728044 | 2 | 7  | 14 | GT   | 26 | 5  |
| 203679 | 26 | 5728875 | 5728900 | 2 | 13 | 26 | AC   | 24 | 6  |
| 203684 | 26 | 5735897 | 5735934 | 2 | 19 | 38 | TG   | 20 | 10 |
| 203685 | 26 | 5736750 | 5736773 | 4 | 6  | 24 | ATGA | 26 | 3  |
| 203687 | 26 | 5739232 | 5739255 | 2 | 12 | 24 | GT   | 10 | 8  |
| 203689 | 26 | 5740294 | 5740319 | 2 | 13 | 26 | GT   | 9  | 6  |
| 203692 | 26 | 5743809 | 5743830 | 2 | 11 | 22 | GT   | 25 | 6  |
| 203695 | 26 | 5748952 | 5748983 | 2 | 16 | 32 | GT   | 6  | 7  |
| 203697 | 26 | 5749490 | 5749525 | 2 | 18 | 36 | GT   | 7  | 8  |
| 203699 | 26 | 5751897 | 5751932 | 2 | 18 | 36 | TG   | 6  | 6  |
| 203700 | 26 | 5751954 | 5751967 | 2 | 7  | 14 | TG   | 16 | 5  |
| 203708 | 26 | 5762331 | 5762354 | 2 | 12 | 24 | TC   | 19 | 13 |

|        |    |         |         |   |    |    |      |    |    |
|--------|----|---------|---------|---|----|----|------|----|----|
| 203710 | 26 | 5763291 | 5763306 | 2 | 8  | 16 | AC   | 15 | 8  |
| 203732 | 26 | 5781532 | 5781561 | 2 | 15 | 30 | CA   | 21 | 10 |
| 203733 | 26 | 5781605 | 5781618 | 2 | 7  | 14 | GT   | 27 | 3  |
| 203737 | 26 | 5788563 | 5788586 | 2 | 12 | 24 | TG   | 22 | 4  |
| 203738 | 26 | 5788848 | 5788871 | 3 | 8  | 24 | TGT  | 24 | 4  |
| 203742 | 26 | 5794840 | 5794859 | 2 | 10 | 20 | TG   | 31 | 10 |
| 203746 | 26 | 5801331 | 5801342 | 2 | 6  | 12 | TC   | 28 | 4  |
| 203749 | 26 | 5804745 | 5804762 | 2 | 9  | 18 | TG   | 21 | 6  |
| 203750 | 26 | 5804864 | 5804889 | 2 | 13 | 26 | CA   | 18 | 13 |
| 203754 | 26 | 5816651 | 5816671 | 3 | 7  | 21 | GCA  | 27 | 3  |
| 203757 | 26 | 5829763 | 5829790 | 4 | 7  | 28 | CCTG | 25 | 7  |
| 203761 | 26 | 5834185 | 5834222 | 2 | 19 | 38 | TG   | 7  | 10 |
| 203763 | 26 | 5835030 | 5835041 | 2 | 6  | 12 | CT   | 20 | 3  |
| 203764 | 26 | 5835310 | 5835324 | 3 | 5  | 15 | GGT  | 27 | 7  |
| 203767 | 26 | 5841415 | 5841430 | 2 | 8  | 16 | AG   | 23 | 3  |
| 203772 | 26 | 5854593 | 5854612 | 2 | 10 | 20 | GT   | 22 | 6  |
| 203775 | 26 | 5857478 | 5857491 | 2 | 7  | 14 | AC   | 22 | 4  |
| 203776 | 26 | 5858588 | 5858615 | 2 | 14 | 28 | CA   | 17 | 7  |
| 203780 | 26 | 5864006 | 5864019 | 2 | 7  | 14 | CT   | 26 | 5  |
| 203782 | 26 | 5866284 | 5866298 | 3 | 5  | 15 | AGA  | 18 | 3  |
| 203784 | 26 | 5866651 | 5866662 | 2 | 6  | 12 | TA   | 16 | 10 |
| 203787 | 26 | 5870295 | 5870322 | 2 | 14 | 28 | GT   | 13 | 7  |
| 203792 | 26 | 5874220 | 5874245 | 2 | 13 | 26 | TC   | 8  | 5  |
| 203793 | 26 | 5874865 | 5874876 | 2 | 6  | 12 | TG   | 25 | 3  |
| 203794 | 26 | 5875509 | 5875524 | 2 | 8  | 16 | GA   | 16 | 4  |
| 203795 | 26 | 5876327 | 5876350 | 2 | 12 | 24 | TG   | 25 | 5  |
| 203796 | 26 | 5876514 | 5876537 | 2 | 12 | 24 | GT   | 15 | 7  |
| 203797 | 26 | 5876771 | 5876796 | 2 | 13 | 26 | AG   | 22 | 6  |
| 203799 | 26 | 5880285 | 5880308 | 2 | 12 | 24 | GT   | 14 | 7  |
| 203801 | 26 | 5880593 | 5880624 | 2 | 16 | 32 | AC   | 7  | 9  |
| 203802 | 26 | 5880752 | 5880769 | 2 | 9  | 18 | TC   | 20 | 4  |
| 203804 | 26 | 5881236 | 5881267 | 4 | 8  | 32 | GCCT | 19 | 9  |
| 203808 | 26 | 5884362 | 5884385 | 2 | 12 | 24 | TC   | 21 | 8  |
| 203809 | 26 | 5884462 | 5884476 | 3 | 5  | 15 | GGA  | 20 | 5  |
| 203810 | 26 | 5884712 | 5884735 | 3 | 8  | 24 | GGA  | 15 | 3  |
| 203811 | 26 | 5884865 | 5884876 | 2 | 6  | 12 | TC   | 19 | 5  |
| 203816 | 26 | 5885359 | 5885397 | 3 | 13 | 39 | AAG  | 22 | 11 |
| 203819 | 26 | 5885940 | 5885971 | 2 | 16 | 32 | CA   | 10 | 7  |
| 203821 | 26 | 5886061 | 5886072 | 2 | 6  | 12 | AG   | 28 | 3  |
| 203822 | 26 | 5886479 | 5886492 | 2 | 7  | 14 | CA   | 23 | 13 |
| 203829 | 26 | 5887964 | 5887981 | 2 | 9  | 18 | CT   | 25 | 4  |
| 203832 | 26 | 5889916 | 5889931 | 4 | 4  | 16 | CCTC | 7  | 4  |
| 203838 | 26 | 5892781 | 5892798 | 2 | 9  | 18 | GA   | 12 | 5  |
| 203840 | 26 | 5894494 | 5894515 | 2 | 11 | 22 | GT   | 7  | 3  |
| 203842 | 26 | 5894719 | 5894752 | 2 | 17 | 34 | TG   | 20 | 7  |
| 203844 | 26 | 5895063 | 5895082 | 2 | 10 | 20 | GA   | 12 | 8  |
| 203851 | 26 | 5899942 | 5899961 | 2 | 10 | 20 | TG   | 23 | 8  |
| 203852 | 26 | 5900169 | 5900200 | 2 | 16 | 32 | CA   | 10 | 11 |
| 203853 | 26 | 5900827 | 5900840 | 2 | 7  | 14 | GT   | 14 | 9  |
| 203854 | 26 | 5900923 | 5900950 | 2 | 14 | 28 | GT   | 11 | 15 |
| 203856 | 26 | 5901077 | 5901090 | 2 | 7  | 14 | CA   | 22 | 11 |

|        |    |         |         |   |    |    |     |    |    |
|--------|----|---------|---------|---|----|----|-----|----|----|
| 203858 | 26 | 5901202 | 5901225 | 2 | 12 | 24 | AC  | 12 | 12 |
| 203859 | 26 | 5901393 | 5901418 | 2 | 13 | 26 | CA  | 17 | 13 |
| 203860 | 26 | 5901463 | 5901482 | 2 | 10 | 20 | CA  | 15 | 8  |
| 203864 | 26 | 5905466 | 5905493 | 2 | 14 | 28 | AC  | 15 | 13 |
| 203866 | 26 | 5905928 | 5905943 | 2 | 8  | 16 | CT  | 15 | 3  |
| 203867 | 26 | 5905978 | 5906005 | 2 | 14 | 28 | CT  | 12 | 8  |
| 203868 | 26 | 5906185 | 5906202 | 2 | 9  | 18 | CT  | 21 | 5  |
| 203869 | 26 | 5906461 | 5906484 | 2 | 12 | 24 | GT  | 12 | 6  |
| 203870 | 26 | 5906814 | 5906829 | 2 | 8  | 16 | TG  | 14 | 13 |
| 203871 | 26 | 5906979 | 5907000 | 2 | 11 | 22 | TG  | 18 | 5  |
| 203882 | 26 | 5913625 | 5913638 | 2 | 7  | 14 | AG  | 18 | 7  |
| 203885 | 26 | 5914316 | 5914331 | 2 | 8  | 16 | CA  | 14 | 11 |
| 203886 | 26 | 5916922 | 5916933 | 2 | 6  | 12 | AT  | 21 | 14 |
| 203887 | 26 | 5919382 | 5919425 | 2 | 22 | 44 | AC  | 11 | 15 |
| 203888 | 26 | 5919668 | 5919689 | 2 | 11 | 22 | GT  | 9  | 7  |
| 203889 | 26 | 5919779 | 5919804 | 2 | 13 | 26 | TG  | 18 | 13 |
| 203890 | 26 | 5919854 | 5919887 | 2 | 17 | 34 | CA  | 20 | 10 |
| 203893 | 26 | 5922869 | 5922902 | 2 | 17 | 34 | CA  | 6  | 6  |
| 203894 | 26 | 5923096 | 5923113 | 2 | 9  | 18 | AT  | 17 | 8  |
| 203895 | 26 | 5923396 | 5923413 | 2 | 9  | 18 | CA  | 11 | 3  |
| 203896 | 26 | 5923744 | 5923767 | 2 | 12 | 24 | GT  | 24 | 12 |
| 203899 | 26 | 5924679 | 5924696 | 3 | 6  | 18 | GAG | 27 | 3  |
| 203900 | 26 | 5924765 | 5924792 | 2 | 14 | 28 | AC  | 18 | 9  |
| 203902 | 26 | 5925250 | 5925285 | 2 | 18 | 36 | GT  | 11 | 15 |
| 203904 | 26 | 5925568 | 5925601 | 2 | 17 | 34 | AC  | 8  | 8  |
| 203905 | 26 | 5928262 | 5928303 | 3 | 14 | 42 | GAA | 15 | 11 |
| 203910 | 26 | 5928973 | 5928996 | 2 | 12 | 24 | AC  | 14 | 10 |
| 203911 | 26 | 5929085 | 5929102 | 2 | 9  | 18 | AC  | 19 | 7  |
| 203912 | 26 | 5929163 | 5929174 | 2 | 6  | 12 | GT  | 21 | 7  |
| 203915 | 26 | 5929477 | 5929504 | 2 | 14 | 28 | TG  | 8  | 10 |
| 203917 | 26 | 5929547 | 5929566 | 2 | 10 | 20 | CA  | 25 | 5  |
| 203918 | 26 | 5929639 | 5929676 | 2 | 19 | 38 | GT  | 13 | 14 |
| 203919 | 26 | 5929814 | 5929837 | 2 | 12 | 24 | CA  | 14 | 8  |
| 203921 | 26 | 5929950 | 5929973 | 2 | 12 | 24 | CA  | 12 | 9  |
| 203923 | 26 | 5930158 | 5930193 | 2 | 18 | 36 | CT  | 11 | 7  |
| 203924 | 26 | 5930328 | 5930339 | 2 | 6  | 12 | CA  | 11 | 4  |
| 203927 | 26 | 5930496 | 5930509 | 2 | 7  | 14 | GT  | 16 | 5  |
| 203929 | 26 | 5931324 | 5931339 | 2 | 8  | 16 | GT  | 17 | 9  |
| 203930 | 26 | 5931341 | 5931352 | 2 | 6  | 12 | TG  | 14 | 6  |
| 203936 | 26 | 5932484 | 5932498 | 3 | 5  | 15 | GAG | 24 | 3  |
| 203938 | 26 | 5934640 | 5934665 | 2 | 13 | 26 | CA  | 9  | 13 |
| 203939 | 26 | 5935017 | 5935032 | 2 | 8  | 16 | CA  | 14 | 8  |
| 203940 | 26 | 5935035 | 5935048 | 2 | 7  | 14 | CA  | 22 | 8  |
| 203941 | 26 | 5937232 | 5937253 | 2 | 11 | 22 | CA  | 7  | 4  |
| 203944 | 26 | 5938758 | 5938773 | 2 | 8  | 16 | CA  | 25 | 6  |
| 203945 | 26 | 5941122 | 5941149 | 2 | 14 | 28 | TC  | 10 | 6  |
| 203947 | 26 | 5941679 | 5941708 | 2 | 15 | 30 | TG  | 10 | 9  |
| 203948 | 26 | 5941807 | 5941834 | 2 | 14 | 28 | GT  | 18 | 9  |
| 203949 | 26 | 5941988 | 5942005 | 2 | 9  | 18 | TG  | 21 | 5  |
| 203951 | 26 | 5942651 | 5942672 | 2 | 11 | 22 | CA  | 26 | 5  |
| 203952 | 26 | 5944570 | 5944581 | 2 | 6  | 12 | GA  | 15 | 6  |

|        |    |         |         |   |    |    |      |    |    |
|--------|----|---------|---------|---|----|----|------|----|----|
| 203953 | 26 | 5944734 | 5944757 | 2 | 12 | 24 | GT   | 11 | 11 |
| 203954 | 26 | 5944976 | 5944990 | 3 | 5  | 15 | ATA  | 17 | 7  |
| 203956 | 26 | 5946746 | 5946767 | 2 | 11 | 22 | AC   | 11 | 9  |
| 203962 | 26 | 5956316 | 5956331 | 2 | 8  | 16 | CT   | 12 | 7  |
| 203963 | 26 | 5956479 | 5956490 | 2 | 6  | 12 | AC   | 26 | 3  |
| 203964 | 26 | 5958650 | 5958665 | 2 | 8  | 16 | CA   | 25 | 12 |
| 203965 | 26 | 5959002 | 5959021 | 2 | 10 | 20 | CA   | 18 | 8  |
| 203966 | 26 | 5961927 | 5961948 | 2 | 11 | 22 | AC   | 9  | 8  |
| 203967 | 26 | 5962497 | 5962514 | 2 | 9  | 18 | TG   | 16 | 7  |
| 203968 | 26 | 5962741 | 5962762 | 2 | 11 | 22 | GT   | 13 | 10 |
| 203969 | 26 | 5962927 | 5962962 | 2 | 18 | 36 | TG   | 11 | 11 |
| 203970 | 26 | 5963478 | 5963509 | 2 | 16 | 32 | AC   | 10 | 10 |
| 203972 | 26 | 5966023 | 5966036 | 2 | 7  | 14 | GT   | 20 | 6  |
| 203974 | 26 | 5968317 | 5968338 | 2 | 11 | 22 | CA   | 14 | 9  |
| 203975 | 26 | 5970347 | 5970364 | 2 | 9  | 18 | GT   | 18 | 5  |
| 203977 | 26 | 5974024 | 5974063 | 2 | 20 | 40 | TG   | 10 | 14 |
| 203978 | 26 | 5974188 | 5974201 | 2 | 7  | 14 | TG   | 20 | 5  |
| 203979 | 26 | 5974381 | 5974402 | 2 | 11 | 22 | GT   | 9  | 8  |
| 203981 | 26 | 5974479 | 5974518 | 2 | 20 | 40 | AC   | 8  | 10 |
| 203982 | 26 | 5974560 | 5974573 | 2 | 7  | 14 | AC   | 13 | 3  |
| 203983 | 26 | 5977773 | 5977787 | 3 | 5  | 15 | GCC  | 14 | 3  |
| 203984 | 26 | 5977911 | 5977934 | 2 | 12 | 24 | GT   | 15 | 15 |
| 203992 | 26 | 5980151 | 5980170 | 2 | 10 | 20 | TG   | 11 | 5  |
| 203993 | 26 | 5980323 | 5980344 | 2 | 11 | 22 | CA   | 6  | 5  |
| 203994 | 26 | 5980443 | 5980456 | 2 | 7  | 14 | CA   | 13 | 3  |
| 203998 | 26 | 5984202 | 5984233 | 2 | 16 | 32 | CA   | 11 | 8  |
| 203999 | 26 | 5984254 | 5984265 | 2 | 6  | 12 | CA   | 19 | 4  |
| 204001 | 26 | 5984728 | 5984749 | 2 | 11 | 22 | TG   | 14 | 12 |
| 204003 | 26 | 5989276 | 5989303 | 2 | 14 | 28 | AC   | 16 | 11 |
| 204004 | 26 | 5989577 | 5989592 | 4 | 4  | 16 | TTTG | 6  | 8  |
| 204007 | 26 | 5994211 | 5994224 | 2 | 7  | 14 | AC   | 25 | 5  |
| 204016 | 26 | 6009548 | 6009562 | 3 | 5  | 15 | TCA  | 29 | 8  |
| 204017 | 26 | 6009981 | 6009998 | 3 | 6  | 18 | GCA  | 31 | 8  |
| 204020 | 26 | 6018780 | 6018817 | 2 | 19 | 38 | GT   | 8  | 9  |
| 204021 | 26 | 6021992 | 6022003 | 2 | 6  | 12 | AT   | 26 | 4  |
| 204022 | 26 | 6022929 | 6022940 | 2 | 6  | 12 | CA   | 23 | 7  |
| 204023 | 26 | 6028003 | 6028018 | 4 | 4  | 16 | TCTG | 34 | 4  |
| 204029 | 26 | 6034635 | 6034652 | 2 | 9  | 18 | AC   | 14 | 8  |
| 204034 | 26 | 6037275 | 6037296 | 2 | 11 | 22 | TC   | 13 | 13 |
| 204035 | 26 | 6037498 | 6037519 | 2 | 11 | 22 | AC   | 22 | 12 |
| 204037 | 26 | 6038832 | 6038849 | 2 | 9  | 18 | GT   | 20 | 3  |
| 204039 | 26 | 6039435 | 6039452 | 3 | 6  | 18 | GGA  | 26 | 7  |
| 204040 | 26 | 6039944 | 6039959 | 2 | 8  | 16 | TG   | 21 | 6  |
| 204041 | 26 | 6040389 | 6040416 | 2 | 14 | 28 | TG   | 12 | 6  |
| 204043 | 26 | 6045249 | 6045288 | 2 | 20 | 40 | AC   | 6  | 7  |
| 204045 | 26 | 6046494 | 6046507 | 2 | 7  | 14 | CA   | 16 | 14 |
| 204050 | 26 | 6050321 | 6050348 | 2 | 14 | 28 | CT   | 23 | 10 |
| 204052 | 26 | 6053101 | 6053130 | 2 | 15 | 30 | CA   | 15 | 11 |
| 204053 | 26 | 6053510 | 6053539 | 2 | 15 | 30 | GT   | 11 | 7  |
| 204054 | 26 | 6053686 | 6053697 | 2 | 6  | 12 | CA   | 28 | 9  |
| 204058 | 26 | 6059892 | 6059915 | 2 | 12 | 24 | CA   | 23 | 4  |

|        |    |         |         |   |    |    |      |    |    |
|--------|----|---------|---------|---|----|----|------|----|----|
| 204062 | 26 | 6065042 | 6065057 | 4 | 4  | 16 | TTTG | 21 | 4  |
| 204063 | 26 | 6068091 | 6068108 | 2 | 9  | 18 | TC   | 22 | 5  |
| 204064 | 26 | 6068280 | 6068295 | 4 | 4  | 16 | TGGA | 27 | 3  |
| 204072 | 26 | 6075473 | 6075488 | 2 | 8  | 16 | CA   | 22 | 5  |
| 204073 | 26 | 6075835 | 6075860 | 2 | 13 | 26 | AC   | 24 | 7  |
| 204074 | 26 | 6079380 | 6079391 | 2 | 6  | 12 | TG   | 23 | 10 |
| 204079 | 26 | 6084535 | 6084558 | 2 | 12 | 24 | AC   | 14 | 11 |
| 204082 | 26 | 6088879 | 6088894 | 4 | 4  | 16 | TTTG | 10 | 3  |
| 204085 | 26 | 6094880 | 6094903 | 2 | 12 | 24 | TG   | 23 | 8  |
| 204086 | 26 | 6095345 | 6095360 | 2 | 8  | 16 | AC   | 18 | 5  |
| 204090 | 26 | 6100712 | 6100725 | 2 | 7  | 14 | GC   | 15 | 3  |
| 204091 | 26 | 6105443 | 6105466 | 2 | 12 | 24 | AG   | 16 | 5  |
| 204092 | 26 | 6107798 | 6107809 | 2 | 6  | 12 | AC   | 15 | 6  |
| 204101 | 26 | 6124355 | 6124368 | 2 | 7  | 14 | GT   | 28 | 6  |
| 204102 | 26 | 6125685 | 6125744 | 2 | 30 | 60 | AC   | 14 | 15 |
| 204104 | 26 | 6133286 | 6133305 | 4 | 5  | 20 | TGGA | 21 | 3  |
| 204107 | 26 | 6136758 | 6136769 | 2 | 6  | 12 | GT   | 26 | 4  |
| 204108 | 26 | 6138893 | 6138904 | 2 | 6  | 12 | TG   | 27 | 3  |
| 204110 | 26 | 6141810 | 6141823 | 2 | 7  | 14 | AC   | 18 | 6  |
| 204111 | 26 | 6142751 | 6142788 | 2 | 19 | 38 | TG   | 6  | 5  |
| 204113 | 26 | 6148316 | 6148329 | 2 | 7  | 14 | TG   | 25 | 3  |
| 204114 | 26 | 6148655 | 6148668 | 2 | 7  | 14 | AG   | 26 | 9  |
| 204116 | 26 | 6151830 | 6151847 | 3 | 6  | 18 | TTG  | 19 | 5  |
| 204117 | 26 | 6152787 | 6152810 | 2 | 12 | 24 | CA   | 23 | 11 |
| 204119 | 26 | 6155249 | 6155274 | 2 | 13 | 26 | GT   | 16 | 9  |
| 204121 | 26 | 6158371 | 6158390 | 2 | 10 | 20 | GT   | 13 | 7  |
| 204125 | 26 | 6160476 | 6160487 | 2 | 6  | 12 | GT   | 21 | 6  |
| 204126 | 26 | 6161372 | 6161401 | 3 | 10 | 30 | CTG  | 28 | 6  |
| 204129 | 26 | 6165235 | 6165261 | 3 | 9  | 27 | GAA  | 29 | 11 |
| 204130 | 26 | 6165363 | 6165382 | 2 | 10 | 20 | GA   | 17 | 5  |
| 204132 | 26 | 6165748 | 6165777 | 2 | 15 | 30 | GT   | 8  | 12 |
| 204140 | 26 | 6177228 | 6177241 | 2 | 7  | 14 | GT   | 14 | 6  |
| 204141 | 26 | 6177276 | 6177297 | 2 | 11 | 22 | TG   | 15 | 14 |
| 204143 | 26 | 6178848 | 6178859 | 2 | 6  | 12 | CA   | 21 | 9  |
| 204149 | 26 | 6189787 | 6189802 | 2 | 8  | 16 | AG   | 29 | 8  |
| 204156 | 26 | 6192325 | 6192342 | 2 | 9  | 18 | TG   | 18 | 5  |
| 204159 | 26 | 6195794 | 6195805 | 2 | 6  | 12 | TG   | 16 | 10 |
| 204160 | 26 | 6196012 | 6196043 | 2 | 16 | 32 | CA   | 6  | 8  |
| 204161 | 26 | 6197325 | 6197338 | 2 | 7  | 14 | GT   | 16 | 4  |
| 204165 | 26 | 6202335 | 6202349 | 3 | 5  | 15 | AGA  | 27 | 6  |
| 204169 | 26 | 6208125 | 6208142 | 2 | 9  | 18 | CA   | 28 | 9  |
| 204171 | 26 | 6209636 | 6209647 | 2 | 6  | 12 | AC   | 20 | 10 |
| 204172 | 26 | 6211814 | 6211828 | 3 | 5  | 15 | GGA  | 10 | 4  |
| 204173 | 26 | 6211831 | 6211845 | 3 | 5  | 15 | GGA  | 9  | 6  |
| 204180 | 26 | 6216755 | 6216766 | 2 | 6  | 12 | AC   | 16 | 12 |
| 204183 | 26 | 6222147 | 6222158 | 2 | 6  | 12 | GA   | 25 | 4  |
| 204184 | 26 | 6222464 | 6222481 | 2 | 9  | 18 | CA   | 20 | 11 |
| 204185 | 26 | 6223167 | 6223192 | 2 | 13 | 26 | TG   | 20 | 10 |
| 204193 | 26 | 6235436 | 6235471 | 3 | 12 | 36 | AGG  | 19 | 10 |
| 204195 | 26 | 6242560 | 6242577 | 2 | 9  | 18 | CA   | 28 | 7  |
| 204196 | 26 | 6245684 | 6245707 | 2 | 12 | 24 | TG   | 18 | 7  |

|        |    |         |         |   |    |    |      |    |    |
|--------|----|---------|---------|---|----|----|------|----|----|
| 204197 | 26 | 6246139 | 6246168 | 3 | 10 | 30 | CAG  | 20 | 6  |
| 204198 | 26 | 6248331 | 6248362 | 2 | 16 | 32 | TG   | 17 | 10 |
| 204202 | 26 | 6251214 | 6251239 | 2 | 13 | 26 | GT   | 12 | 11 |
| 204203 | 26 | 6251484 | 6251515 | 2 | 16 | 32 | GT   | 21 | 7  |
| 204204 | 26 | 6253481 | 6253524 | 2 | 22 | 44 | AC   | 12 | 11 |
| 204209 | 26 | 6268843 | 6268862 | 4 | 5  | 20 | GGGA | 18 | 3  |
| 204210 | 26 | 6270379 | 6270402 | 2 | 12 | 24 | CA   | 12 | 13 |
| 204211 | 26 | 6272497 | 6272532 | 2 | 18 | 36 | AC   | 12 | 12 |
| 204212 | 26 | 6273604 | 6273621 | 2 | 9  | 18 | CT   | 24 | 3  |
| 204219 | 26 | 6285760 | 6285774 | 3 | 5  | 15 | TCC  | 12 | 6  |
| 204220 | 26 | 6285775 | 6285789 | 3 | 5  | 15 | TTC  | 15 | 4  |
| 204222 | 26 | 6292102 | 6292125 | 4 | 6  | 24 | TGAT | 29 | 4  |
| 204226 | 26 | 6298879 | 6298892 | 2 | 7  | 14 | GT   | 16 | 6  |
| 204227 | 26 | 6299769 | 6299782 | 2 | 7  | 14 | GT   | 23 | 7  |
| 204228 | 26 | 6300227 | 6300242 | 4 | 4  | 16 | ATAA | 12 | 5  |
| 204229 | 26 | 6301184 | 6301239 | 4 | 14 | 56 | AGAT | 16 | 14 |
| 204233 | 26 | 6312790 | 6312821 | 4 | 8  | 32 | AAAC | 26 | 8  |
| 204234 | 26 | 6323101 | 6323124 | 2 | 12 | 24 | AC   | 19 | 6  |
| 204236 | 26 | 6327317 | 6327346 | 3 | 10 | 30 | ATA  | 22 | 11 |
| 204237 | 26 | 6329050 | 6329079 | 2 | 15 | 30 | CA   | 10 | 14 |
| 204244 | 26 | 6334303 | 6334317 | 3 | 5  | 15 | ATC  | 27 | 6  |
| 204247 | 26 | 6346664 | 6346679 | 2 | 8  | 16 | TG   | 20 | 9  |
| 204248 | 26 | 6346708 | 6346725 | 2 | 9  | 18 | AC   | 20 | 9  |
| 204260 | 26 | 6357041 | 6357058 | 3 | 6  | 18 | GAG  | 14 | 4  |
| 204261 | 26 | 6357287 | 6357302 | 2 | 8  | 16 | TC   | 12 | 3  |
| 204270 | 26 | 6368654 | 6368671 | 3 | 6  | 18 | TAT  | 16 | 7  |
| 204275 | 26 | 6372518 | 6372541 | 2 | 12 | 24 | GT   | 16 | 9  |
| 204276 | 26 | 6372707 | 6372742 | 2 | 18 | 36 | AC   | 7  | 7  |
| 204279 | 26 | 6372946 | 6372965 | 2 | 10 | 20 | AC   | 10 | 14 |
| 204281 | 26 | 6373069 | 6373112 | 2 | 22 | 44 | CA   | 10 | 8  |
| 204284 | 26 | 6374826 | 6374839 | 2 | 7  | 14 | GT   | 18 | 16 |
| 204285 | 26 | 6374842 | 6374855 | 2 | 7  | 14 | GT   | 19 | 13 |
| 204288 | 26 | 6380160 | 6380171 | 2 | 6  | 12 | AC   | 17 | 11 |
| 204290 | 26 | 6380501 | 6380528 | 4 | 7  | 28 | ACTG | 24 | 4  |
| 204296 | 26 | 6387131 | 6387151 | 3 | 7  | 21 | TGA  | 21 | 5  |
| 204297 | 26 | 6390963 | 6390986 | 2 | 12 | 24 | CT   | 10 | 6  |
| 204303 | 26 | 6400079 | 6400102 | 3 | 8  | 24 | AGC  | 31 | 8  |
| 204305 | 26 | 6407667 | 6407704 | 2 | 19 | 38 | AC   | 9  | 9  |
| 204310 | 26 | 6411600 | 6411617 | 2 | 9  | 18 | AT   | 17 | 7  |
| 204311 | 26 | 6412035 | 6412056 | 2 | 11 | 22 | AC   | 12 | 9  |
| 204312 | 26 | 6412196 | 6412227 | 2 | 16 | 32 | GT   | 13 | 12 |
| 204313 | 26 | 6414929 | 6414940 | 2 | 6  | 12 | CA   | 27 | 6  |
| 204314 | 26 | 6415197 | 6415234 | 2 | 19 | 38 | TG   | 15 | 11 |
| 204316 | 26 | 6416554 | 6416579 | 2 | 13 | 26 | CA   | 16 | 13 |
| 204318 | 26 | 6420332 | 6420351 | 2 | 10 | 20 | CA   | 16 | 5  |
| 204319 | 26 | 6421120 | 6421139 | 2 | 10 | 20 | AG   | 13 | 13 |
| 204321 | 26 | 6421836 | 6421871 | 4 | 9  | 36 | AGAA | 18 | 8  |
| 204322 | 26 | 6422465 | 6422482 | 2 | 9  | 18 | CT   | 21 | 8  |
| 204323 | 26 | 6423763 | 6423786 | 2 | 12 | 24 | CA   | 18 | 6  |
| 204324 | 26 | 6425665 | 6425691 | 3 | 9  | 27 | ATT  | 13 | 4  |
| 204326 | 26 | 6426327 | 6426342 | 4 | 4  | 16 | GTGC | 18 | 10 |

|        |    |         |         |   |    |    |      |    |    |
|--------|----|---------|---------|---|----|----|------|----|----|
| 204327 | 26 | 6426343 | 6426354 | 2 | 6  | 12 | GT   | 14 | 7  |
| 204332 | 26 | 6429284 | 6429301 | 2 | 9  | 18 | TG   | 9  | 8  |
| 204333 | 26 | 6429478 | 6429507 | 2 | 15 | 30 | CA   | 19 | 9  |
| 204336 | 26 | 6432015 | 6432032 | 2 | 9  | 18 | CA   | 27 | 12 |
| 204337 | 26 | 6432171 | 6432182 | 2 | 6  | 12 | CT   | 21 | 3  |
| 204339 | 26 | 6437846 | 6437877 | 2 | 16 | 32 | CA   | 11 | 9  |
| 204340 | 26 | 6438200 | 6438213 | 2 | 7  | 14 | TA   | 13 | 6  |
| 204346 | 26 | 6449573 | 6449588 | 4 | 4  | 16 | AAAG | 23 | 4  |
| 204348 | 26 | 6454107 | 6454124 | 3 | 6  | 18 | TTC  | 24 | 3  |
| 204351 | 26 | 6460412 | 6460431 | 2 | 10 | 20 | TG   | 16 | 12 |
| 204352 | 26 | 6460472 | 6460485 | 2 | 7  | 14 | GT   | 31 | 4  |
| 204353 | 26 | 6460567 | 6460584 | 2 | 9  | 18 | TG   | 19 | 7  |
| 204354 | 26 | 6462366 | 6462413 | 2 | 24 | 48 | GT   | 10 | 9  |
| 204355 | 26 | 6463731 | 6463746 | 2 | 8  | 16 | AC   | 23 | 7  |
| 204356 | 26 | 6464103 | 6464114 | 2 | 6  | 12 | CT   | 23 | 8  |
| 204362 | 26 | 6471353 | 6471376 | 3 | 8  | 24 | TCA  | 6  | 7  |
| 204371 | 26 | 6483989 | 6484009 | 3 | 7  | 21 | GAG  | 18 | 4  |
| 204372 | 26 | 6484201 | 6484212 | 2 | 6  | 12 | CA   | 29 | 5  |
| 204373 | 26 | 6486120 | 6486137 | 2 | 9  | 18 | AG   | 24 | 11 |
| 204378 | 26 | 6492686 | 6492719 | 2 | 17 | 34 | TG   | 15 | 9  |
| 204380 | 26 | 6494994 | 6495005 | 2 | 6  | 12 | AC   | 16 | 8  |
| 204381 | 26 | 6495008 | 6495025 | 2 | 9  | 18 | AC   | 9  | 5  |
| 204384 | 26 | 6498339 | 6498374 | 2 | 18 | 36 | CA   | 8  | 10 |
| 204385 | 26 | 6502863 | 6502884 | 2 | 11 | 22 | CA   | 9  | 10 |
| 204386 | 26 | 6503261 | 6503298 | 2 | 19 | 38 | TG   | 11 | 8  |
| 204387 | 26 | 6503475 | 6503489 | 3 | 5  | 15 | GAG  | 23 | 4  |
| 204392 | 26 | 6510273 | 6510284 | 2 | 6  | 12 | GA   | 30 | 6  |
| 204402 | 26 | 6525442 | 6525516 | 3 | 25 | 75 | AGA  | 17 | 24 |
| 204406 | 26 | 6527476 | 6527499 | 2 | 12 | 24 | AC   | 12 | 14 |
| 204411 | 26 | 6543096 | 6543117 | 2 | 11 | 22 | TG   | 22 | 8  |
| 204412 | 26 | 6543569 | 6543610 | 2 | 21 | 42 | TG   | 7  | 10 |
| 204414 | 26 | 6545888 | 6545911 | 2 | 12 | 24 | TG   | 10 | 7  |
| 204415 | 26 | 6546116 | 6546136 | 3 | 7  | 21 | GAA  | 12 | 3  |
| 204417 | 26 | 6547737 | 6547762 | 2 | 13 | 26 | AC   | 14 | 13 |
| 204422 | 26 | 6551855 | 6551874 | 2 | 10 | 20 | TG   | 9  | 10 |
| 204423 | 26 | 6554194 | 6554215 | 2 | 11 | 22 | TG   | 18 | 16 |
| 204425 | 26 | 6554758 | 6554784 | 3 | 9  | 27 | CTC  | 20 | 6  |
| 204426 | 26 | 6558072 | 6558109 | 2 | 19 | 38 | AC   | 13 | 11 |
| 204427 | 26 | 6561194 | 6561229 | 2 | 18 | 36 | AC   | 10 | 13 |
| 204428 | 26 | 6561549 | 6561574 | 2 | 13 | 26 | AC   | 17 | 12 |
| 204431 | 26 | 6565348 | 6565365 | 3 | 6  | 18 | AAC  | 27 | 7  |
| 204434 | 26 | 6572139 | 6572154 | 2 | 8  | 16 | GA   | 12 | 12 |
| 204435 | 26 | 6572640 | 6572683 | 2 | 22 | 44 | AC   | 10 | 9  |
| 204437 | 26 | 6576749 | 6576768 | 2 | 10 | 20 | TG   | 20 | 8  |
| 204442 | 26 | 6584797 | 6584828 | 4 | 8  | 32 | GCAG | 30 | 8  |
| 204443 | 26 | 6590603 | 6590614 | 2 | 6  | 12 | GC   | 13 | 10 |
| 204444 | 26 | 6590615 | 6590628 | 2 | 7  | 14 | GT   | 23 | 19 |
| 204445 | 26 | 6594050 | 6594075 | 2 | 13 | 26 | GT   | 15 | 9  |
| 204449 | 26 | 6597508 | 6597527 | 2 | 10 | 20 | AC   | 14 | 12 |
| 204458 | 26 | 6603930 | 6603953 | 3 | 8  | 24 | GGA  | 21 | 7  |
| 204459 | 26 | 6604051 | 6604074 | 3 | 8  | 24 | CTT  | 26 | 4  |



|        |    |         |         |   |    |    |      |    |    |
|--------|----|---------|---------|---|----|----|------|----|----|
| 204460 | 26 | 6604184 | 6604201 | 3 | 6  | 18 | ATC  | 23 | 4  |
| 204462 | 26 | 6604903 | 6604926 | 3 | 8  | 24 | CCT  | 16 | 8  |
| 204463 | 26 | 6607466 | 6607486 | 3 | 7  | 21 | AGG  | 22 | 9  |
| 204467 | 26 | 6611176 | 6611191 | 4 | 4  | 16 | TCTT | 22 | 3  |
| 204468 | 26 | 6611595 | 6611610 | 2 | 8  | 16 | AC   | 27 | 3  |
| 204469 | 26 | 6614599 | 6614613 | 3 | 5  | 15 | TCT  | 26 | 3  |
| 204470 | 26 | 6616098 | 6616117 | 2 | 10 | 20 | TC   | 21 | 5  |
| 204471 | 26 | 6620331 | 6620357 | 3 | 9  | 27 | TCA  | 10 | 3  |
| 204474 | 26 | 6623157 | 6623178 | 2 | 11 | 22 | TG   | 6  | 9  |
| 204485 | 26 | 6634571 | 6634582 | 2 | 6  | 12 | GT   | 14 | 4  |
| 204486 | 26 | 6634605 | 6634626 | 2 | 11 | 22 | AC   | 16 | 14 |
| 204490 | 26 | 6641104 | 6641117 | 2 | 7  | 14 | TG   | 28 | 4  |
| 204491 | 26 | 6641119 | 6641130 | 2 | 6  | 12 | GT   | 29 | 4  |
| 204496 | 26 | 6646313 | 6646324 | 2 | 6  | 12 | TG   | 24 | 3  |
| 204499 | 26 | 6647450 | 6647501 | 2 | 26 | 52 | CA   | 6  | 9  |
| 204501 | 26 | 6654168 | 6654179 | 2 | 6  | 12 | GT   | 30 | 3  |
| 204510 | 26 | 6676746 | 6676771 | 2 | 13 | 26 | AC   | 18 | 10 |
| 204513 | 26 | 6681312 | 6681355 | 2 | 22 | 44 | AC   | 12 | 13 |
| 204517 | 26 | 6691948 | 6691971 | 3 | 8  | 24 | ATT  | 13 | 12 |
| 204522 | 26 | 6720481 | 6720506 | 2 | 13 | 26 | GT   | 6  | 5  |
| 204523 | 26 | 6723098 | 6723115 | 2 | 9  | 18 | TG   | 21 | 8  |
| 204529 | 26 | 6726934 | 6726951 | 2 | 9  | 18 | AC   | 17 | 10 |
| 204530 | 26 | 6728288 | 6728299 | 2 | 6  | 12 | AT   | 14 | 4  |
| 204533 | 26 | 6730106 | 6730145 | 2 | 20 | 40 | GT   | 16 | 12 |
| 204534 | 26 | 6731796 | 6731819 | 3 | 8  | 24 | AGA  | 16 | 8  |
| 204536 | 26 | 6737698 | 6737741 | 2 | 22 | 44 | CA   | 6  | 9  |
| 204538 | 26 | 6740560 | 6740573 | 2 | 7  | 14 | CA   | 29 | 5  |
| 204539 | 26 | 6740751 | 6740776 | 2 | 13 | 26 | CA   | 17 | 5  |
| 204540 | 26 | 6744377 | 6744392 | 2 | 8  | 16 | AT   | 14 | 7  |
| 204547 | 26 | 6752356 | 6752383 | 2 | 14 | 28 | TG   | 16 | 9  |
| 204548 | 26 | 6752506 | 6752527 | 2 | 11 | 22 | CA   | 17 | 8  |
| 204550 | 26 | 6753279 | 6753292 | 2 | 7  | 14 | GA   | 29 | 3  |
| 204551 | 26 | 6761019 | 6761046 | 4 | 7  | 28 | TATT | 6  | 5  |
| 204552 | 26 | 6761556 | 6761567 | 2 | 6  | 12 | TG   | 31 | 4  |
| 204553 | 26 | 6763177 | 6763197 | 3 | 7  | 21 | TAT  | 20 | 3  |
| 204554 | 26 | 6766400 | 6766417 | 2 | 9  | 18 | AC   | 16 | 9  |
| 204555 | 26 | 6766576 | 6766599 | 4 | 6  | 24 | TGGA | 22 | 3  |
| 204563 | 26 | 6794597 | 6794614 | 2 | 9  | 18 | AC   | 21 | 5  |
| 204564 | 26 | 6796890 | 6796921 | 2 | 16 | 32 | TG   | 11 | 9  |
| 204565 | 26 | 6797097 | 6797112 | 2 | 8  | 16 | AC   | 14 | 8  |
| 204572 | 26 | 6807936 | 6807967 | 2 | 16 | 32 | GT   | 14 | 7  |
| 204573 | 26 | 6809092 | 6809119 | 2 | 14 | 28 | GT   | 20 | 10 |
| 204575 | 26 | 6812032 | 6812055 | 2 | 12 | 24 | CA   | 12 | 7  |
| 204583 | 26 | 6823653 | 6823673 | 3 | 7  | 21 | GAA  | 27 | 4  |
| 204585 | 26 | 6828389 | 6828410 | 2 | 11 | 22 | TG   | 6  | 5  |
| 204586 | 26 | 6829694 | 6829708 | 3 | 5  | 15 | CAG  | 24 | 3  |
| 204587 | 26 | 6831765 | 6831792 | 2 | 14 | 28 | GT   | 18 | 10 |
| 204588 | 26 | 6831974 | 6832021 | 2 | 24 | 48 | CA   | 13 | 10 |
| 204591 | 26 | 6833365 | 6833379 | 3 | 5  | 15 | TCT  | 6  | 5  |
| 204594 | 26 | 6837445 | 6837464 | 2 | 10 | 20 | TG   | 7  | 5  |
| 204595 | 26 | 6841259 | 6841292 | 2 | 17 | 34 | TG   | 8  | 13 |

|        |    |         |         |   |    |    |      |    |    |
|--------|----|---------|---------|---|----|----|------|----|----|
| 204599 | 26 | 6843935 | 6843972 | 2 | 19 | 38 | GT   | 11 | 10 |
| 204602 | 26 | 6852510 | 6852531 | 2 | 11 | 22 | GT   | 17 | 12 |
| 204603 | 26 | 6852660 | 6852675 | 4 | 4  | 16 | TCCA | 20 | 11 |
| 204604 | 26 | 6853873 | 6853904 | 2 | 16 | 32 | AC   | 24 | 13 |
| 204609 | 26 | 6861813 | 6861826 | 2 | 7  | 14 | TG   | 19 | 5  |
| 204610 | 26 | 6862564 | 6862615 | 2 | 26 | 52 | TG   | 12 | 16 |
| 204612 | 26 | 6863906 | 6863935 | 2 | 15 | 30 | AC   | 6  | 8  |
| 204614 | 26 | 6865361 | 6865381 | 3 | 7  | 21 | CTT  | 26 | 4  |
| 204616 | 26 | 6867054 | 6867071 | 2 | 9  | 18 | TG   | 11 | 10 |
| 204617 | 26 | 6868623 | 6868655 | 3 | 11 | 33 | GAG  | 12 | 12 |
| 204626 | 26 | 6882915 | 6882950 | 3 | 12 | 36 | TCA  | 17 | 7  |
| 204635 | 26 | 6886453 | 6886492 | 2 | 20 | 40 | AC   | 14 | 12 |
| 204638 | 26 | 6886789 | 6886812 | 2 | 12 | 24 | AC   | 14 | 12 |
| 204641 | 26 | 6887283 | 6887306 | 2 | 12 | 24 | GT   | 10 | 6  |
| 204642 | 26 | 6888064 | 6888083 | 4 | 5  | 20 | CATT | 23 | 3  |
| 204643 | 26 | 6891142 | 6891163 | 2 | 11 | 22 | AC   | 21 | 7  |
| 204644 | 26 | 6891209 | 6891240 | 2 | 16 | 32 | GT   | 22 | 11 |
| 204645 | 26 | 6891621 | 6891636 | 4 | 4  | 16 | CCGT | 18 | 6  |
| 204647 | 26 | 6894348 | 6894369 | 2 | 11 | 22 | GT   | 14 | 6  |
| 204648 | 26 | 6894460 | 6894471 | 2 | 6  | 12 | CA   | 25 | 3  |
| 204649 | 26 | 6898058 | 6898087 | 2 | 15 | 30 | TG   | 18 | 13 |
| 204651 | 26 | 6900523 | 6900542 | 2 | 10 | 20 | AC   | 25 | 6  |
| 204653 | 26 | 6905304 | 6905373 | 2 | 35 | 70 | AC   | 20 | 13 |
| 204662 | 26 | 6912426 | 6912443 | 2 | 9  | 18 | TG   | 8  | 9  |
| 204663 | 26 | 6914234 | 6914263 | 3 | 10 | 30 | CCT  | 28 | 7  |
| 204664 | 26 | 6915672 | 6915687 | 2 | 8  | 16 | TG   | 22 | 4  |
| 204665 | 26 | 6918158 | 6918185 | 2 | 14 | 28 | CT   | 14 | 9  |
| 204668 | 26 | 6918618 | 6918637 | 2 | 10 | 20 | GT   | 15 | 3  |
| 204673 | 26 | 6919048 | 6919063 | 2 | 8  | 16 | TG   | 16 | 9  |
| 204674 | 26 | 6925695 | 6925706 | 2 | 6  | 12 | CA   | 25 | 4  |
| 204676 | 26 | 6925892 | 6925913 | 2 | 11 | 22 | AC   | 6  | 4  |
| 204678 | 26 | 6925967 | 6925984 | 2 | 9  | 18 | CA   | 9  | 11 |
| 204681 | 26 | 6926165 | 6926176 | 2 | 6  | 12 | GT   | 16 | 8  |
| 204682 | 26 | 6926246 | 6926259 | 2 | 7  | 14 | AC   | 16 | 7  |
| 204688 | 26 | 6928838 | 6928853 | 2 | 8  | 16 | TG   | 22 | 6  |
| 204689 | 26 | 6928911 | 6928928 | 2 | 9  | 18 | TC   | 25 | 4  |
| 204690 | 26 | 6928951 | 6928968 | 2 | 9  | 18 | TC   | 23 | 5  |
| 204695 | 26 | 6929363 | 6929390 | 2 | 14 | 28 | AC   | 13 | 12 |
| 204696 | 26 | 6930257 | 6930278 | 2 | 11 | 22 | CA   | 8  | 8  |
| 204698 | 26 | 6930378 | 6930405 | 2 | 14 | 28 | GT   | 11 | 14 |
| 204703 | 26 | 6930736 | 6930765 | 2 | 15 | 30 | AC   | 11 | 11 |
| 204707 | 26 | 6937689 | 6937712 | 2 | 12 | 24 | CA   | 20 | 8  |
| 204708 | 26 | 6937771 | 6937798 | 2 | 14 | 28 | TG   | 15 | 6  |
| 204710 | 26 | 6937974 | 6937985 | 2 | 6  | 12 | GT   | 19 | 5  |
| 204712 | 26 | 6938031 | 6938052 | 2 | 11 | 22 | TC   | 18 | 4  |
| 204714 | 26 | 6938438 | 6938451 | 2 | 7  | 14 | GA   | 20 | 9  |
| 204715 | 26 | 6938499 | 6938520 | 2 | 11 | 22 | TG   | 9  | 6  |
| 204716 | 26 | 6938577 | 6938620 | 2 | 22 | 44 | AC   | 11 | 12 |
| 204721 | 26 | 6938934 | 6938967 | 2 | 17 | 34 | TG   | 11 | 12 |
| 204724 | 26 | 6942197 | 6942242 | 2 | 23 | 46 | GT   | 14 | 15 |
| 204725 | 26 | 6942294 | 6942305 | 2 | 6  | 12 | GT   | 15 | 3  |

|        |    |         |         |   |    |    |      |    |    |
|--------|----|---------|---------|---|----|----|------|----|----|
| 204728 | 26 | 6946258 | 6946271 | 2 | 7  | 14 | AC   | 15 | 5  |
| 204736 | 26 | 6948507 | 6948526 | 2 | 10 | 20 | AC   | 14 | 15 |
| 204737 | 26 | 6948949 | 6948972 | 4 | 6  | 24 | TCCT | 21 | 5  |
| 204740 | 26 | 6949767 | 6949778 | 2 | 6  | 12 | CT   | 10 | 3  |
| 204743 | 26 | 6950138 | 6950157 | 2 | 10 | 20 | GT   | 11 | 5  |
| 204746 | 26 | 6950366 | 6950385 | 2 | 10 | 20 | GA   | 20 | 7  |
| 204747 | 26 | 6950482 | 6950507 | 2 | 13 | 26 | GT   | 10 | 9  |
| 204748 | 26 | 6951635 | 6951661 | 3 | 9  | 27 | TCT  | 28 | 11 |
| 204750 | 26 | 6954388 | 6954417 | 2 | 15 | 30 | GT   | 7  | 11 |
| 204752 | 26 | 6959863 | 6959896 | 2 | 17 | 34 | GT   | 8  | 8  |
| 204753 | 26 | 6960562 | 6960601 | 2 | 20 | 40 | TG   | 16 | 17 |
| 204756 | 26 | 6961078 | 6961093 | 2 | 8  | 16 | TG   | 10 | 5  |
| 204758 | 26 | 6961407 | 6961422 | 2 | 8  | 16 | CT   | 14 | 3  |
| 204760 | 26 | 6961932 | 6961965 | 2 | 17 | 34 | TG   | 9  | 9  |
| 204761 | 26 | 6962124 | 6962143 | 2 | 10 | 20 | CA   | 13 | 11 |
| 204763 | 26 | 6964391 | 6964404 | 2 | 7  | 14 | TG   | 8  | 9  |
| 204764 | 26 | 6964407 | 6964420 | 2 | 7  | 14 | TG   | 11 | 11 |
| 204765 | 26 | 6965520 | 6965559 | 2 | 20 | 40 | AC   | 8  | 9  |
| 204766 | 26 | 6967085 | 6967096 | 2 | 6  | 12 | GA   | 33 | 3  |
| 204767 | 26 | 6968173 | 6968184 | 2 | 6  | 12 | TG   | 21 | 4  |
| 204768 | 26 | 6973320 | 6973358 | 3 | 13 | 39 | ATG  | 27 | 6  |
| 204769 | 26 | 6973960 | 6973975 | 4 | 4  | 16 | TGTT | 12 | 3  |
| 204771 | 26 | 6975522 | 6975539 | 2 | 9  | 18 | TG   | 19 | 6  |
| 204772 | 26 | 6975636 | 6975647 | 2 | 6  | 12 | CA   | 20 | 4  |
| 204773 | 26 | 6976823 | 6976838 | 4 | 4  | 16 | TAGC | 26 | 4  |
| 204774 | 26 | 6978870 | 6978884 | 3 | 5  | 15 | CAT  | 26 | 5  |
| 204775 | 26 | 6980842 | 6980865 | 4 | 6  | 24 | CAAT | 34 | 8  |
| 204776 | 26 | 6985429 | 6985468 | 2 | 20 | 40 | AC   | 9  | 10 |
| 204777 | 26 | 6985580 | 6985594 | 3 | 5  | 15 | GGA  | 21 | 4  |
| 204780 | 26 | 6994565 | 6994594 | 2 | 15 | 30 | CA   | 16 | 8  |
| 204783 | 26 | 6997415 | 6997450 | 2 | 18 | 36 | CA   | 7  | 6  |
| 204784 | 26 | 6998299 | 6998340 | 2 | 21 | 42 | TG   | 25 | 12 |
| 204785 | 26 | 6998885 | 6998904 | 4 | 5  | 20 | ACAG | 30 | 3  |
| 204789 | 26 | 7002821 | 7002846 | 2 | 13 | 26 | AC   | 15 | 14 |
| 204797 | 26 | 7005517 | 7005550 | 2 | 17 | 34 | TG   | 12 | 10 |
| 204798 | 26 | 7006826 | 7006855 | 2 | 15 | 30 | AC   | 18 | 14 |
| 204800 | 26 | 7009499 | 7009524 | 2 | 13 | 26 | GT   | 19 | 8  |
| 204801 | 26 | 7009696 | 7009719 | 4 | 6  | 24 | ATTT | 29 | 4  |
| 204802 | 26 | 7014195 | 7014218 | 3 | 8  | 24 | TCT  | 28 | 7  |
| 204805 | 26 | 7021009 | 7021048 | 2 | 20 | 40 | AC   | 10 | 7  |
| 204806 | 26 | 7021429 | 7021448 | 2 | 10 | 20 | TG   | 10 | 13 |
| 204808 | 26 | 7021550 | 7021561 | 2 | 6  | 12 | AC   | 23 | 3  |
| 204811 | 26 | 7023368 | 7023395 | 2 | 14 | 28 | AC   | 10 | 8  |
| 204816 | 26 | 7024654 | 7024665 | 2 | 6  | 12 | GA   | 8  | 6  |
| 204824 | 26 | 7025183 | 7025209 | 3 | 9  | 27 | TCA  | 12 | 8  |
| 204831 | 26 | 7030244 | 7030267 | 2 | 12 | 24 | TG   | 22 | 9  |
| 204833 | 26 | 7030450 | 7030463 | 2 | 7  | 14 | AC   | 23 | 4  |
| 204837 | 26 | 7033340 | 7033363 | 2 | 12 | 24 | TG   | 15 | 5  |
| 204851 | 26 | 7049622 | 7049635 | 2 | 7  | 14 | CA   | 15 | 15 |
| 204869 | 26 | 7067168 | 7067189 | 2 | 11 | 22 | CA   | 13 | 16 |
| 204870 | 26 | 7067324 | 7067369 | 2 | 23 | 46 | CA   | 8  | 12 |

|        |    |         |         |   |    |    |      |    |    |
|--------|----|---------|---------|---|----|----|------|----|----|
| 204872 | 26 | 7068405 | 7068436 | 2 | 16 | 32 | GT   | 13 | 13 |
| 204873 | 26 | 7071336 | 7071377 | 2 | 21 | 42 | GT   | 13 | 11 |
| 204874 | 26 | 7071535 | 7071566 | 2 | 16 | 32 | AC   | 12 | 8  |
| 204879 | 26 | 7080211 | 7080232 | 2 | 11 | 22 | AC   | 13 | 9  |
| 204880 | 26 | 7082766 | 7082795 | 2 | 15 | 30 | TG   | 11 | 5  |
| 204881 | 26 | 7083170 | 7083209 | 2 | 20 | 40 | TG   | 14 | 8  |
| 204882 | 26 | 7083315 | 7083342 | 2 | 14 | 28 | CA   | 14 | 9  |
| 204883 | 26 | 7085707 | 7085733 | 3 | 9  | 27 | TTC  | 31 | 7  |
| 204884 | 26 | 7085864 | 7085889 | 2 | 13 | 26 | GT   | 19 | 11 |
| 204885 | 26 | 7085928 | 7085963 | 2 | 18 | 36 | AC   | 8  | 9  |
| 204888 | 26 | 7090869 | 7090888 | 2 | 10 | 20 | CA   | 13 | 6  |
| 204891 | 26 | 7092089 | 7092118 | 2 | 15 | 30 | CA   | 7  | 8  |
| 204892 | 26 | 7092646 | 7092681 | 2 | 18 | 36 | AC   | 10 | 9  |
| 204893 | 26 | 7092789 | 7092818 | 2 | 15 | 30 | TG   | 15 | 9  |
| 204894 | 26 | 7093003 | 7093056 | 2 | 27 | 54 | GT   | 11 | 12 |
| 204895 | 26 | 7093612 | 7093631 | 2 | 10 | 20 | TG   | 9  | 9  |
| 204896 | 26 | 7093822 | 7093857 | 3 | 12 | 36 | CTC  | 22 | 8  |
| 204897 | 26 | 7094238 | 7094255 | 3 | 6  | 18 | GAG  | 20 | 4  |
| 204898 | 26 | 7095352 | 7095375 | 3 | 8  | 24 | CTC  | 24 | 8  |
| 204899 | 26 | 7095540 | 7095567 | 2 | 14 | 28 | TG   | 16 | 10 |
| 204904 | 26 | 7096704 | 7096723 | 2 | 10 | 20 | GT   | 18 | 15 |
| 204910 | 26 | 7099291 | 7099317 | 3 | 9  | 27 | TCA  | 24 | 5  |
| 204911 | 26 | 7100116 | 7100155 | 2 | 20 | 40 | AC   | 14 | 12 |
| 204913 | 26 | 7101237 | 7101272 | 2 | 18 | 36 | TG   | 8  | 8  |
| 204914 | 26 | 7103060 | 7103085 | 2 | 13 | 26 | AC   | 9  | 11 |
| 204916 | 26 | 7103166 | 7103191 | 2 | 13 | 26 | CA   | 11 | 7  |
| 204917 | 26 | 7103278 | 7103291 | 2 | 7  | 14 | AC   | 23 | 3  |
| 204918 | 26 | 7103317 | 7103332 | 2 | 8  | 16 | CA   | 23 | 4  |
| 204931 | 26 | 7106974 | 7106997 | 2 | 12 | 24 | GT   | 20 | 13 |
| 204932 | 26 | 7107335 | 7107368 | 2 | 17 | 34 | TG   | 14 | 8  |
| 204933 | 26 | 7107442 | 7107457 | 2 | 8  | 16 | GA   | 21 | 6  |
| 204934 | 26 | 7107490 | 7107519 | 2 | 15 | 30 | AC   | 16 | 12 |
| 204935 | 26 | 7107599 | 7107612 | 2 | 7  | 14 | GT   | 20 | 4  |
| 204937 | 26 | 7107683 | 7107738 | 2 | 28 | 56 | GT   | 8  | 12 |
| 204941 | 26 | 7109043 | 7109068 | 2 | 13 | 26 | GT   | 9  | 11 |
| 204943 | 26 | 7109571 | 7109588 | 2 | 9  | 18 | CT   | 25 | 6  |
| 204945 | 26 | 7111006 | 7111043 | 2 | 19 | 38 | TG   | 7  | 8  |
| 204952 | 26 | 7112363 | 7112400 | 2 | 19 | 38 | TG   | 15 | 12 |
| 204953 | 26 | 7112431 | 7112444 | 2 | 7  | 14 | AC   | 15 | 7  |
| 204954 | 26 | 7112545 | 7112574 | 2 | 15 | 30 | AC   | 15 | 17 |
| 204955 | 26 | 7113510 | 7113545 | 4 | 9  | 36 | ATCA | 27 | 7  |
| 204956 | 26 | 7113735 | 7113758 | 3 | 8  | 24 | ATG  | 29 | 6  |
| 204963 | 26 | 7117384 | 7117407 | 4 | 6  | 24 | CGTC | 24 | 7  |
| 204970 | 26 | 7119797 | 7119824 | 2 | 14 | 28 | GT   | 14 | 14 |
| 204971 | 26 | 7119919 | 7119940 | 2 | 11 | 22 | CA   | 13 | 14 |
| 204972 | 26 | 7120458 | 7120487 | 2 | 15 | 30 | GT   | 14 | 9  |
| 204973 | 26 | 7120549 | 7120568 | 2 | 10 | 20 | GT   | 13 | 11 |
| 204974 | 26 | 7121883 | 7121918 | 2 | 18 | 36 | CA   | 16 | 10 |
| 204975 | 26 | 7122017 | 7122028 | 2 | 6  | 12 | GT   | 20 | 4  |
| 204976 | 26 | 7122074 | 7122099 | 2 | 13 | 26 | CA   | 10 | 13 |
| 204979 | 26 | 7130950 | 7130961 | 2 | 6  | 12 | TG   | 31 | 3  |

|        |    |         |         |   |    |    |      |    |    |
|--------|----|---------|---------|---|----|----|------|----|----|
| 204981 | 26 | 7134626 | 7134653 | 2 | 14 | 28 | TG   | 21 | 10 |
| 204982 | 26 | 7135170 | 7135217 | 2 | 24 | 48 | GT   | 6  | 9  |
| 204983 | 26 | 7136717 | 7136770 | 3 | 18 | 54 | TCT  | 11 | 15 |
| 204987 | 26 | 7139008 | 7139033 | 2 | 13 | 26 | CA   | 17 | 11 |
| 204988 | 26 | 7142031 | 7142051 | 3 | 7  | 21 | CCT  | 30 | 3  |
| 204989 | 26 | 7143705 | 7143748 | 2 | 22 | 44 | TG   | 7  | 9  |
| 204993 | 26 | 7160830 | 7160857 | 2 | 14 | 28 | TG   | 17 | 10 |
| 204995 | 26 | 7163543 | 7163558 | 4 | 4  | 16 | CAGA | 29 | 4  |
| 204996 | 26 | 7163660 | 7163671 | 2 | 6  | 12 | GT   | 26 | 5  |
| 204997 | 26 | 7166500 | 7166521 | 2 | 11 | 22 | GT   | 13 | 8  |
| 204999 | 26 | 7167786 | 7167813 | 2 | 14 | 28 | TG   | 10 | 15 |
| 205000 | 26 | 7169083 | 7169102 | 2 | 10 | 20 | TG   | 13 | 8  |
| 205003 | 26 | 7169861 | 7169878 | 2 | 9  | 18 | TG   | 25 | 5  |
| 205004 | 26 | 7169957 | 7169994 | 2 | 19 | 38 | AC   | 15 | 15 |
| 205007 | 26 | 7173265 | 7173282 | 2 | 9  | 18 | CT   | 11 | 3  |
| 205008 | 26 | 7173306 | 7173327 | 2 | 11 | 22 | TC   | 7  | 7  |
| 205009 | 26 | 7173671 | 7173686 | 2 | 8  | 16 | GT   | 26 | 7  |
| 205011 | 26 | 7174785 | 7174798 | 2 | 7  | 14 | AC   | 16 | 5  |
| 205012 | 26 | 7177265 | 7177276 | 2 | 6  | 12 | TG   | 33 | 14 |
| 205013 | 26 | 7179177 | 7179194 | 2 | 9  | 18 | TG   | 14 | 11 |
| 205016 | 26 | 7181940 | 7181963 | 2 | 12 | 24 | CA   | 12 | 10 |
| 205018 | 26 | 7189834 | 7189853 | 4 | 5  | 20 | GACA | 29 | 3  |
| 205020 | 26 | 7193565 | 7193579 | 3 | 5  | 15 | AGA  | 31 | 5  |
| 205022 | 26 | 7194594 | 7194619 | 2 | 13 | 26 | GT   | 20 | 13 |
| 205025 | 26 | 7194836 | 7194847 | 2 | 6  | 12 | GT   | 8  | 4  |
| 205026 | 26 | 7194850 | 7194861 | 2 | 6  | 12 | GT   | 20 | 5  |
| 205027 | 26 | 7195854 | 7195883 | 2 | 15 | 30 | GT   | 16 | 11 |
| 205028 | 26 | 7196240 | 7196257 | 2 | 9  | 18 | TG   | 12 | 10 |
| 205030 | 26 | 7200259 | 7200296 | 2 | 19 | 38 | TG   | 7  | 11 |
| 205031 | 26 | 7200403 | 7200434 | 2 | 16 | 32 | CA   | 7  | 9  |
| 205032 | 26 | 7200493 | 7200522 | 2 | 15 | 30 | GT   | 13 | 9  |
| 205034 | 26 | 7205956 | 7205995 | 2 | 20 | 40 | CA   | 8  | 10 |
| 205035 | 26 | 7206968 | 7206979 | 2 | 6  | 12 | AC   | 23 | 10 |
| 205036 | 26 | 7207474 | 7207499 | 2 | 13 | 26 | AC   | 24 | 13 |
| 205038 | 26 | 7209252 | 7209277 | 2 | 13 | 26 | AC   | 14 | 13 |
| 205039 | 26 | 7209378 | 7209411 | 2 | 17 | 34 | GT   | 15 | 8  |
| 205040 | 26 | 7210027 | 7210074 | 2 | 24 | 48 | TG   | 18 | 9  |
| 205041 | 26 | 7210163 | 7210202 | 2 | 20 | 40 | GT   | 14 | 13 |
| 205042 | 26 | 7210337 | 7210362 | 2 | 13 | 26 | TG   | 17 | 10 |
| 205043 | 26 | 7212301 | 7212326 | 2 | 13 | 26 | CA   | 15 | 8  |
| 205044 | 26 | 7213317 | 7213328 | 2 | 6  | 12 | TG   | 29 | 3  |
| 205045 | 26 | 7214537 | 7214550 | 2 | 7  | 14 | TG   | 24 | 12 |
| 205048 | 26 | 7221294 | 7221341 | 2 | 24 | 48 | GT   | 6  | 8  |
| 205049 | 26 | 7222189 | 7222220 | 4 | 8  | 32 | AGAA | 12 | 8  |
| 205051 | 26 | 7227744 | 7227765 | 2 | 11 | 22 | GT   | 22 | 8  |
| 205055 | 26 | 7229041 | 7229094 | 2 | 27 | 54 | GT   | 6  | 9  |
| 205064 | 26 | 7233181 | 7233226 | 2 | 23 | 46 | GT   | 8  | 11 |
| 205068 | 26 | 7234877 | 7234932 | 2 | 28 | 56 | TG   | 9  | 14 |
| 205071 | 26 | 7237744 | 7237761 | 3 | 6  | 18 | CAA  | 25 | 3  |
| 205073 | 26 | 7242328 | 7242348 | 3 | 7  | 21 | AGG  | 20 | 6  |
| 205074 | 26 | 7243602 | 7243619 | 2 | 9  | 18 | TC   | 26 | 3  |

|        |    |         |         |   |    |    |      |    |    |
|--------|----|---------|---------|---|----|----|------|----|----|
| 205075 | 26 | 7244283 | 7244312 | 2 | 15 | 30 | TG   | 22 | 10 |
| 205078 | 26 | 7250523 | 7250544 | 2 | 11 | 22 | TG   | 14 | 3  |
| 205079 | 26 | 7251792 | 7251819 | 2 | 14 | 28 | TG   | 14 | 14 |
| 205081 | 26 | 7252070 | 7252097 | 2 | 14 | 28 | GT   | 14 | 9  |
| 205082 | 26 | 7253389 | 7253406 | 2 | 9  | 18 | TG   | 15 | 14 |
| 205089 | 26 | 7256382 | 7256403 | 2 | 11 | 22 | GT   | 20 | 16 |
| 205090 | 26 | 7256974 | 7257006 | 3 | 11 | 33 | TCA  | 17 | 5  |
| 205093 | 26 | 7262563 | 7262592 | 2 | 15 | 30 | GT   | 13 | 10 |
| 205099 | 27 | 18351   | 18368   | 2 | 9  | 18 | GT   | 25 | 8  |
| 205100 | 27 | 23628   | 23639   | 2 | 6  | 12 | GA   | 31 | 3  |
| 205103 | 27 | 28771   | 28790   | 2 | 10 | 20 | GT   | 23 | 8  |
| 205115 | 27 | 64617   | 64634   | 2 | 9  | 18 | AC   | 16 | 4  |
| 205124 | 27 | 93934   | 93951   | 3 | 6  | 18 | GAT  | 11 | 4  |
| 205126 | 27 | 99841   | 99852   | 2 | 6  | 12 | AC   | 27 | 3  |
| 205129 | 27 | 109585  | 109596  | 2 | 6  | 12 | GT   | 25 | 12 |
| 205130 | 27 | 109646  | 109663  | 2 | 9  | 18 | TG   | 16 | 8  |
| 205131 | 27 | 110616  | 110635  | 4 | 5  | 20 | TTAT | 14 | 5  |
| 205134 | 27 | 116091  | 116124  | 2 | 17 | 34 | GT   | 12 | 12 |
| 205135 | 27 | 118345  | 118368  | 3 | 8  | 24 | ATT  | 24 | 12 |
| 205146 | 27 | 144308  | 144319  | 2 | 6  | 12 | TG   | 27 | 3  |
| 205148 | 27 | 145621  | 145676  | 4 | 14 | 56 | GATA | 14 | 9  |
| 205168 | 27 | 186235  | 186252  | 2 | 9  | 18 | CA   | 26 | 11 |
| 205169 | 27 | 186402  | 186413  | 2 | 6  | 12 | AT   | 21 | 3  |
| 205184 | 27 | 217970  | 217987  | 3 | 6  | 18 | ATC  | 25 | 5  |
| 205213 | 27 | 342170  | 342187  | 2 | 9  | 18 | CT   | 22 | 4  |
| 205242 | 27 | 419216  | 419245  | 2 | 15 | 30 | GA   | 10 | 6  |
| 205243 | 27 | 419882  | 419895  | 2 | 7  | 14 | TA   | 6  | 4  |
| 205248 | 27 | 432824  | 432849  | 2 | 13 | 26 | TG   | 17 | 6  |
| 205251 | 27 | 438264  | 438279  | 4 | 4  | 16 | AAAT | 25 | 5  |
| 205259 | 27 | 454397  | 454424  | 2 | 14 | 28 | AC   | 6  | 4  |
| 205276 | 27 | 504068  | 504081  | 2 | 7  | 14 | TG   | 30 | 5  |
| 205277 | 27 | 513200  | 513223  | 2 | 12 | 24 | TG   | 22 | 5  |
| 205282 | 27 | 521201  | 521214  | 2 | 7  | 14 | TG   | 23 | 3  |
| 205287 | 27 | 538589  | 538624  | 2 | 18 | 36 | CA   | 14 | 12 |
| 205289 | 27 | 542407  | 542420  | 2 | 7  | 14 | GA   | 13 | 3  |
| 205292 | 27 | 546278  | 546297  | 4 | 5  | 20 | TTTA | 13 | 5  |
| 205294 | 27 | 553567  | 553578  | 2 | 6  | 12 | AC   | 27 | 3  |
| 205295 | 27 | 557544  | 557567  | 2 | 12 | 24 | CA   | 14 | 8  |
| 205303 | 27 | 605353  | 605364  | 2 | 6  | 12 | TG   | 17 | 12 |
| 205308 | 27 | 617989  | 618002  | 2 | 7  | 14 | TG   | 22 | 3  |
| 205313 | 27 | 635205  | 635224  | 4 | 5  | 20 | TTGT | 15 | 6  |
| 205327 | 27 | 657583  | 657600  | 3 | 6  | 18 | CTG  | 24 | 5  |
| 205330 | 27 | 659560  | 659571  | 2 | 6  | 12 | CT   | 23 | 3  |
| 205331 | 27 | 663733  | 663744  | 2 | 6  | 12 | AG   | 33 | 3  |
| 205337 | 27 | 685708  | 685723  | 4 | 4  | 16 | TCTG | 23 | 3  |
| 205338 | 27 | 686798  | 686825  | 2 | 14 | 28 | CA   | 16 | 7  |
| 205346 | 27 | 714663  | 714674  | 2 | 6  | 12 | GT   | 6  | 4  |
| 205347 | 27 | 714677  | 714690  | 2 | 7  | 14 | GT   | 11 | 11 |
| 205349 | 27 | 720136  | 720167  | 2 | 16 | 32 | GT   | 12 | 11 |
| 205352 | 27 | 734721  | 734734  | 2 | 7  | 14 | GT   | 24 | 4  |
| 205353 | 27 | 737715  | 737734  | 4 | 5  | 20 | AAAT | 13 | 7  |

|        |    |         |         |   |    |    |      |    |    |
|--------|----|---------|---------|---|----|----|------|----|----|
| 205357 | 27 | 756073  | 756096  | 4 | 6  | 24 | CTGT | 22 | 5  |
| 205358 | 27 | 756292  | 756311  | 2 | 10 | 20 | CA   | 21 | 6  |
| 205359 | 27 | 759630  | 759645  | 2 | 8  | 16 | AG   | 27 | 6  |
| 205362 | 27 | 766245  | 766260  | 4 | 4  | 16 | TTTC | 23 | 3  |
| 205363 | 27 | 767287  | 767302  | 2 | 8  | 16 | AC   | 11 | 3  |
| 205365 | 27 | 776575  | 776604  | 2 | 15 | 30 | GT   | 14 | 12 |
| 205373 | 27 | 781380  | 781395  | 4 | 4  | 16 | AAAC | 9  | 4  |
| 205382 | 27 | 819632  | 819659  | 2 | 14 | 28 | CA   | 12 | 9  |
| 205387 | 27 | 828169  | 828212  | 4 | 11 | 44 | TTCT | 18 | 12 |
| 205389 | 27 | 841967  | 841982  | 4 | 4  | 16 | CACG | 12 | 5  |
| 205392 | 27 | 842815  | 842830  | 4 | 4  | 16 | AAAT | 16 | 3  |
| 205402 | 27 | 888364  | 888389  | 2 | 13 | 26 | TG   | 7  | 5  |
| 205408 | 27 | 909977  | 910004  | 2 | 14 | 28 | AC   | 13 | 4  |
| 205415 | 27 | 937546  | 937573  | 2 | 14 | 28 | GT   | 14 | 9  |
| 205417 | 27 | 939278  | 939295  | 3 | 6  | 18 | TGT  | 21 | 3  |
| 205421 | 27 | 940737  | 940752  | 2 | 8  | 16 | GA   | 10 | 10 |
| 205427 | 27 | 956049  | 956066  | 2 | 9  | 18 | TG   | 13 | 9  |
| 205430 | 27 | 961212  | 961243  | 2 | 16 | 32 | GT   | 23 | 10 |
| 205434 | 27 | 966943  | 966956  | 2 | 7  | 14 | CA   | 29 | 4  |
| 205438 | 27 | 968543  | 968558  | 2 | 8  | 16 | AC   | 15 | 7  |
| 205439 | 27 | 970259  | 970286  | 2 | 14 | 28 | TG   | 14 | 6  |
| 205440 | 27 | 970408  | 970447  | 2 | 20 | 40 | CA   | 7  | 8  |
| 205444 | 27 | 977250  | 977261  | 2 | 6  | 12 | GT   | 31 | 3  |
| 205446 | 27 | 983295  | 983310  | 2 | 8  | 16 | AC   | 27 | 4  |
| 205447 | 27 | 987072  | 987085  | 2 | 7  | 14 | GT   | 22 | 8  |
| 205448 | 27 | 987087  | 987104  | 2 | 9  | 18 | TG   | 16 | 7  |
| 205450 | 27 | 989507  | 989526  | 2 | 10 | 20 | CA   | 16 | 4  |
| 205459 | 27 | 993084  | 993097  | 2 | 7  | 14 | GT   | 17 | 7  |
| 205461 | 27 | 994203  | 994214  | 2 | 6  | 12 | GT   | 19 | 3  |
| 205462 | 27 | 994459  | 994482  | 2 | 12 | 24 | TG   | 18 | 12 |
| 205464 | 27 | 994667  | 994680  | 2 | 7  | 14 | CA   | 20 | 4  |
| 205467 | 27 | 998031  | 998042  | 2 | 6  | 12 | CA   | 17 | 3  |
| 205471 | 27 | 1001411 | 1001428 | 2 | 9  | 18 | AC   | 14 | 6  |
| 205472 | 27 | 1003965 | 1003994 | 3 | 10 | 30 | AGG  | 8  | 7  |
| 205473 | 27 | 1004289 | 1004310 | 2 | 11 | 22 | CA   | 19 | 5  |
| 205474 | 27 | 1005899 | 1005918 | 2 | 10 | 20 | TG   | 15 | 4  |
| 205475 | 27 | 1006202 | 1006227 | 2 | 13 | 26 | AC   | 15 | 12 |
| 205476 | 27 | 1007850 | 1007883 | 2 | 17 | 34 | TG   | 18 | 13 |
| 205477 | 27 | 1008068 | 1008087 | 2 | 10 | 20 | CA   | 14 | 9  |
| 205488 | 27 | 1017397 | 1017418 | 2 | 11 | 22 | TG   | 16 | 7  |
| 205489 | 27 | 1019643 | 1019676 | 2 | 17 | 34 | CT   | 16 | 7  |
| 205492 | 27 | 1021708 | 1021733 | 2 | 13 | 26 | CA   | 14 | 9  |
| 205493 | 27 | 1022224 | 1022267 | 2 | 22 | 44 | TG   | 13 | 11 |
| 205494 | 27 | 1022542 | 1022561 | 2 | 10 | 20 | CA   | 15 | 7  |
| 205498 | 27 | 1024794 | 1024807 | 2 | 7  | 14 | TG   | 7  | 7  |
| 205503 | 27 | 1026453 | 1026467 | 3 | 5  | 15 | GCT  | 16 | 6  |
| 205505 | 27 | 1028504 | 1028517 | 2 | 7  | 14 | TG   | 26 | 5  |
| 205510 | 27 | 1031240 | 1031263 | 2 | 12 | 24 | CA   | 11 | 7  |
| 205513 | 27 | 1033702 | 1033719 | 2 | 9  | 18 | AC   | 16 | 7  |
| 205515 | 27 | 1035091 | 1035104 | 2 | 7  | 14 | TA   | 10 | 7  |
| 205516 | 27 | 1036985 | 1037002 | 3 | 6  | 18 | ATC  | 26 | 3  |

|        |    |         |         |   |    |    |      |    |    |
|--------|----|---------|---------|---|----|----|------|----|----|
| 205519 | 27 | 1040077 | 1040098 | 2 | 11 | 22 | GT   | 16 | 7  |
| 205520 | 27 | 1040226 | 1040237 | 2 | 6  | 12 | TG   | 21 | 4  |
| 205521 | 27 | 1040240 | 1040253 | 2 | 7  | 14 | TG   | 21 | 4  |
| 205523 | 27 | 1040831 | 1040850 | 2 | 10 | 20 | CA   | 16 | 6  |
| 205529 | 27 | 1045317 | 1045328 | 2 | 6  | 12 | CA   | 27 | 4  |
| 205538 | 27 | 1050564 | 1050599 | 2 | 18 | 36 | GT   | 13 | 9  |
| 205540 | 27 | 1056156 | 1056215 | 3 | 20 | 60 | GAA  | 8  | 11 |
| 205542 | 27 | 1059535 | 1059548 | 2 | 7  | 14 | CA   | 17 | 5  |
| 205544 | 27 | 1060099 | 1060114 | 4 | 4  | 16 | TTAT | 25 | 3  |
| 205545 | 27 | 1064225 | 1064238 | 2 | 7  | 14 | CT   | 16 | 4  |
| 205547 | 27 | 1064267 | 1064282 | 2 | 8  | 16 | CA   | 17 | 6  |
| 205550 | 27 | 1064627 | 1064654 | 2 | 14 | 28 | CA   | 20 | 15 |
| 205561 | 27 | 1074568 | 1074591 | 2 | 12 | 24 | AC   | 16 | 11 |
| 205563 | 27 | 1077781 | 1077800 | 2 | 10 | 20 | TG   | 20 | 12 |
| 205564 | 27 | 1077991 | 1078006 | 2 | 8  | 16 | AC   | 25 | 6  |
| 205565 | 27 | 1078439 | 1078458 | 2 | 10 | 20 | GT   | 20 | 9  |
| 205566 | 27 | 1079067 | 1079100 | 2 | 17 | 34 | TG   | 23 | 13 |
| 205567 | 27 | 1079472 | 1079497 | 2 | 13 | 26 | GT   | 18 | 8  |
| 205568 | 27 | 1079652 | 1079669 | 2 | 9  | 18 | CA   | 17 | 6  |
| 205569 | 27 | 1079711 | 1079726 | 2 | 8  | 16 | CA   | 20 | 5  |
| 205571 | 27 | 1083219 | 1083246 | 2 | 14 | 28 | GT   | 11 | 11 |
| 205573 | 27 | 1083303 | 1083316 | 2 | 7  | 14 | GT   | 21 | 3  |
| 205574 | 27 | 1085424 | 1085451 | 2 | 14 | 28 | GT   | 13 | 11 |
| 205579 | 27 | 1090782 | 1090799 | 2 | 9  | 18 | CA   | 21 | 7  |
| 205586 | 27 | 1095919 | 1095932 | 2 | 7  | 14 | AC   | 19 | 5  |
| 205587 | 27 | 1097353 | 1097376 | 2 | 12 | 24 | TG   | 14 | 10 |
| 205588 | 27 | 1098945 | 1098970 | 2 | 13 | 26 | AC   | 13 | 7  |
| 205589 | 27 | 1101378 | 1101393 | 4 | 4  | 16 | TCTG | 22 | 7  |
| 205592 | 27 | 1101782 | 1101797 | 2 | 8  | 16 | AC   | 24 | 4  |
| 205593 | 27 | 1101957 | 1101980 | 2 | 12 | 24 | CA   | 11 | 8  |
| 205594 | 27 | 1102512 | 1102531 | 2 | 10 | 20 | CA   | 19 | 10 |
| 205597 | 27 | 1102956 | 1102975 | 2 | 10 | 20 | AC   | 11 | 3  |
| 205599 | 27 | 1103483 | 1103506 | 2 | 12 | 24 | GT   | 19 | 6  |
| 205601 | 27 | 1105576 | 1105587 | 2 | 6  | 12 | AC   | 17 | 7  |
| 205608 | 27 | 1108895 | 1108926 | 2 | 16 | 32 | AG   | 10 | 10 |
| 205609 | 27 | 1109168 | 1109187 | 2 | 10 | 20 | GT   | 25 | 16 |
| 205610 | 27 | 1109336 | 1109357 | 2 | 11 | 22 | CA   | 18 | 9  |
| 205611 | 27 | 1109487 | 1109506 | 2 | 10 | 20 | AC   | 17 | 4  |
| 205612 | 27 | 1109579 | 1109598 | 4 | 5  | 20 | TTTA | 6  | 5  |
| 205616 | 27 | 1110738 | 1110755 | 3 | 6  | 18 | TAT  | 11 | 3  |
| 205618 | 27 | 1112384 | 1112423 | 2 | 20 | 40 | GT   | 6  | 9  |
| 205624 | 27 | 1133562 | 1133575 | 2 | 7  | 14 | AC   | 23 | 5  |
| 205627 | 27 | 1136650 | 1136665 | 2 | 8  | 16 | TG   | 33 | 3  |
| 205628 | 27 | 1137079 | 1137092 | 2 | 7  | 14 | CA   | 29 | 4  |
| 205635 | 27 | 1144689 | 1144712 | 2 | 12 | 24 | GA   | 13 | 7  |
| 205641 | 27 | 1147865 | 1147894 | 2 | 15 | 30 | GA   | 9  | 7  |
| 205642 | 27 | 1147976 | 1147993 | 3 | 6  | 18 | AAC  | 16 | 4  |
| 205648 | 27 | 1153255 | 1153284 | 2 | 15 | 30 | GA   | 11 | 10 |
| 205654 | 27 | 1158949 | 1158978 | 2 | 15 | 30 | TG   | 6  | 6  |
| 205655 | 27 | 1161539 | 1161558 | 2 | 10 | 20 | GA   | 11 | 5  |
| 205659 | 27 | 1165364 | 1165379 | 2 | 8  | 16 | CA   | 16 | 8  |



|        |    |         |         |   |    |    |      |    |    |
|--------|----|---------|---------|---|----|----|------|----|----|
| 205665 | 27 | 1171527 | 1171550 | 3 | 8  | 24 | CTT  | 22 | 3  |
| 205667 | 27 | 1173098 | 1173125 | 4 | 7  | 28 | GTTT | 25 | 5  |
| 205668 | 27 | 1174062 | 1174077 | 4 | 4  | 16 | TTTG | 7  | 5  |
| 205669 | 27 | 1174446 | 1174469 | 2 | 12 | 24 | TG   | 24 | 10 |
| 205670 | 27 | 1176025 | 1176052 | 2 | 14 | 28 | CA   | 13 | 6  |
| 205673 | 27 | 1187760 | 1187775 | 2 | 8  | 16 | CA   | 28 | 6  |
| 205685 | 27 | 1216742 | 1216757 | 2 | 8  | 16 | CA   | 28 | 4  |
| 205691 | 27 | 1247296 | 1247325 | 2 | 15 | 30 | TG   | 22 | 4  |
| 205693 | 27 | 1255872 | 1255899 | 2 | 14 | 28 | TC   | 9  | 8  |
| 205700 | 27 | 1265469 | 1265482 | 2 | 7  | 14 | CA   | 25 | 4  |
| 205701 | 27 | 1271462 | 1271491 | 2 | 15 | 30 | GT   | 7  | 7  |
| 205702 | 27 | 1272018 | 1272035 | 3 | 6  | 18 | AAC  | 18 | 3  |
| 205706 | 27 | 1283496 | 1283507 | 2 | 6  | 12 | GT   | 26 | 3  |
| 205709 | 27 | 1285579 | 1285592 | 2 | 7  | 14 | GT   | 28 | 4  |
| 205718 | 27 | 1315172 | 1315191 | 2 | 10 | 20 | AC   | 23 | 5  |
| 205719 | 27 | 1316137 | 1316148 | 2 | 6  | 12 | AC   | 27 | 3  |
| 205722 | 27 | 1319587 | 1319601 | 3 | 5  | 15 | AAC  | 18 | 7  |
| 205724 | 27 | 1322732 | 1322745 | 2 | 7  | 14 | TG   | 20 | 5  |
| 205728 | 27 | 1332064 | 1332093 | 2 | 15 | 30 | GT   | 11 | 6  |
| 205730 | 27 | 1338687 | 1338712 | 2 | 13 | 26 | GA   | 7  | 6  |
| 205731 | 27 | 1343578 | 1343593 | 2 | 8  | 16 | AC   | 16 | 3  |
| 205733 | 27 | 1343964 | 1343991 | 2 | 14 | 28 | CA   | 18 | 10 |
| 205741 | 27 | 1359465 | 1359484 | 2 | 10 | 20 | AG   | 9  | 10 |
| 205742 | 27 | 1361293 | 1361306 | 2 | 7  | 14 | AC   | 26 | 5  |
| 205752 | 27 | 1373699 | 1373712 | 2 | 7  | 14 | GT   | 23 | 6  |
| 205753 | 27 | 1373893 | 1373910 | 2 | 9  | 18 | TC   | 25 | 4  |
| 205754 | 27 | 1375769 | 1375782 | 2 | 7  | 14 | AG   | 27 | 3  |
| 205755 | 27 | 1380182 | 1380203 | 2 | 11 | 22 | TG   | 26 | 6  |
| 205758 | 27 | 1380778 | 1380801 | 2 | 12 | 24 | TC   | 18 | 5  |
| 205762 | 27 | 1393142 | 1393165 | 2 | 12 | 24 | TG   | 8  | 7  |
| 205763 | 27 | 1393350 | 1393367 | 3 | 6  | 18 | CCG  | 21 | 5  |
| 205764 | 27 | 1395417 | 1395440 | 4 | 6  | 24 | TGTT | 20 | 3  |
| 205766 | 27 | 1406560 | 1406609 | 2 | 25 | 50 | AC   | 7  | 11 |
| 205774 | 27 | 1418784 | 1418825 | 3 | 14 | 42 | AAG  | 8  | 9  |
| 205787 | 27 | 1435540 | 1435551 | 2 | 6  | 12 | TG   | 30 | 3  |
| 205791 | 27 | 1462710 | 1462737 | 2 | 14 | 28 | AC   | 21 | 12 |
| 205792 | 27 | 1462770 | 1462783 | 2 | 7  | 14 | AG   | 20 | 4  |
| 205806 | 27 | 1480781 | 1480796 | 2 | 8  | 16 | TG   | 11 | 5  |
| 205811 | 27 | 1496194 | 1496205 | 2 | 6  | 12 | AG   | 25 | 3  |
| 205813 | 27 | 1504768 | 1504791 | 2 | 12 | 24 | AC   | 19 | 6  |
| 205816 | 27 | 1513040 | 1513057 | 3 | 6  | 18 | CTG  | 23 | 3  |
| 205821 | 27 | 1519279 | 1519294 | 2 | 8  | 16 | AC   | 25 | 3  |
| 205824 | 27 | 1519660 | 1519673 | 2 | 7  | 14 | AC   | 24 | 6  |
| 205829 | 27 | 1521659 | 1521712 | 2 | 27 | 54 | TG   | 10 | 9  |
| 205830 | 27 | 1521798 | 1521827 | 2 | 15 | 30 | AC   | 8  | 5  |
| 205832 | 27 | 1524281 | 1524310 | 2 | 15 | 30 | CA   | 15 | 6  |
| 205838 | 27 | 1524807 | 1524824 | 2 | 9  | 18 | AC   | 8  | 4  |
| 205839 | 27 | 1524904 | 1524921 | 2 | 9  | 18 | CA   | 8  | 3  |
| 205841 | 27 | 1524969 | 1524990 | 2 | 11 | 22 | TC   | 8  | 5  |
| 205846 | 27 | 1525379 | 1525396 | 2 | 9  | 18 | CA   | 15 | 3  |
| 205847 | 27 | 1525486 | 1525525 | 2 | 20 | 40 | AC   | 8  | 8  |

|        |    |         |         |   |    |    |      |    |    |
|--------|----|---------|---------|---|----|----|------|----|----|
| 205848 | 27 | 1525667 | 1525682 | 2 | 8  | 16 | CA   | 20 | 3  |
| 205849 | 27 | 1525784 | 1525813 | 2 | 15 | 30 | CA   | 17 | 5  |
| 205850 | 27 | 1525975 | 1525988 | 2 | 7  | 14 | AC   | 17 | 5  |
| 205852 | 27 | 1526145 | 1526168 | 2 | 12 | 24 | AC   | 14 | 5  |
| 205856 | 27 | 1526544 | 1526559 | 2 | 8  | 16 | AC   | 12 | 3  |
| 205859 | 27 | 1526876 | 1526895 | 2 | 10 | 20 | TC   | 7  | 3  |
| 205861 | 27 | 1527132 | 1527143 | 2 | 6  | 12 | AC   | 20 | 3  |
| 205867 | 27 | 1527415 | 1527434 | 2 | 10 | 20 | CA   | 7  | 5  |
| 205869 | 27 | 1527509 | 1527528 | 2 | 10 | 20 | AC   | 8  | 8  |
| 205896 | 27 | 1537598 | 1537609 | 2 | 6  | 12 | CA   | 11 | 3  |
| 205898 | 27 | 1537737 | 1537756 | 2 | 10 | 20 | AC   | 10 | 6  |
| 205899 | 27 | 1537794 | 1537817 | 2 | 12 | 24 | AC   | 11 | 6  |
| 205901 | 27 | 1537922 | 1537935 | 2 | 7  | 14 | CA   | 19 | 5  |
| 205903 | 27 | 1538143 | 1538174 | 2 | 16 | 32 | CT   | 8  | 5  |
| 205904 | 27 | 1538450 | 1538487 | 2 | 19 | 38 | AC   | 16 | 10 |
| 205906 | 27 | 1543398 | 1543449 | 4 | 13 | 52 | AAAG | 14 | 6  |
| 205907 | 27 | 1545007 | 1545034 | 2 | 14 | 28 | CA   | 14 | 5  |
| 205910 | 27 | 1548214 | 1548239 | 2 | 13 | 26 | CA   | 13 | 7  |
| 205911 | 27 | 1548376 | 1548391 | 2 | 8  | 16 | AC   | 15 | 5  |
| 205914 | 27 | 1548554 | 1548581 | 2 | 14 | 28 | AC   | 14 | 8  |
| 205915 | 27 | 1549150 | 1549167 | 3 | 6  | 18 | GAG  | 22 | 5  |
| 205917 | 27 | 1564008 | 1564025 | 3 | 6  | 18 | TCC  | 18 | 4  |
| 205918 | 27 | 1564154 | 1564173 | 2 | 10 | 20 | CT   | 27 | 3  |
| 205921 | 27 | 1573470 | 1573493 | 2 | 12 | 24 | CA   | 15 | 6  |
| 205922 | 27 | 1575007 | 1575020 | 2 | 7  | 14 | TG   | 24 | 4  |
| 205924 | 27 | 1576059 | 1576078 | 2 | 10 | 20 | AG   | 12 | 7  |
| 205931 | 27 | 1579161 | 1579196 | 2 | 18 | 36 | CA   | 15 | 9  |
| 205935 | 27 | 1582637 | 1582678 | 2 | 21 | 42 | AC   | 8  | 8  |
| 205940 | 27 | 1588261 | 1588296 | 2 | 18 | 36 | CA   | 12 | 6  |
| 205941 | 27 | 1588513 | 1588534 | 2 | 11 | 22 | GA   | 14 | 6  |
| 205946 | 27 | 1590102 | 1590129 | 2 | 14 | 28 | AC   | 24 | 7  |
| 205948 | 27 | 1590717 | 1590737 | 3 | 7  | 21 | GGA  | 11 | 5  |
| 205950 | 27 | 1595186 | 1595209 | 2 | 12 | 24 | AC   | 15 | 6  |
| 205954 | 27 | 1595942 | 1595969 | 2 | 14 | 28 | AG   | 9  | 9  |
| 205957 | 27 | 1596426 | 1596437 | 2 | 6  | 12 | CT   | 26 | 5  |
| 205958 | 27 | 1596440 | 1596453 | 2 | 7  | 14 | CT   | 27 | 4  |
| 205960 | 27 | 1597482 | 1597527 | 2 | 23 | 46 | AC   | 13 | 6  |
| 205965 | 27 | 1601379 | 1601408 | 2 | 15 | 30 | TG   | 11 | 8  |
| 205966 | 27 | 1602411 | 1602422 | 2 | 6  | 12 | CA   | 28 | 3  |
| 205971 | 27 | 1605265 | 1605288 | 2 | 12 | 24 | AC   | 16 | 11 |
| 205973 | 27 | 1607162 | 1607183 | 2 | 11 | 22 | TG   | 26 | 6  |
| 205977 | 27 | 1611003 | 1611035 | 3 | 11 | 33 | ATG  | 22 | 8  |
| 205980 | 27 | 1615515 | 1615530 | 2 | 8  | 16 | AC   | 20 | 3  |
| 205982 | 27 | 1617217 | 1617234 | 2 | 9  | 18 | AC   | 26 | 5  |
| 205985 | 27 | 1619315 | 1619342 | 2 | 14 | 28 | GT   | 9  | 5  |
| 205987 | 27 | 1620698 | 1620717 | 2 | 10 | 20 | GT   | 12 | 9  |
| 205993 | 27 | 1621261 | 1621294 | 2 | 17 | 34 | AC   | 15 | 8  |
| 205995 | 27 | 1624515 | 1624529 | 3 | 5  | 15 | TCC  | 24 | 4  |
| 205999 | 27 | 1630744 | 1630761 | 2 | 9  | 18 | GT   | 20 | 5  |
| 206003 | 27 | 1638367 | 1638408 | 2 | 21 | 42 | GT   | 8  | 8  |
| 206006 | 27 | 1639881 | 1639892 | 2 | 6  | 12 | GT   | 28 | 4  |

|        |    |         |         |   |    |    |    |    |    |
|--------|----|---------|---------|---|----|----|----|----|----|
| 206008 | 27 | 1640907 | 1640926 | 2 | 10 | 20 | GT | 23 | 3  |
| 206009 | 27 | 1642904 | 1642935 | 2 | 16 | 32 | GT | 9  | 13 |
| 206010 | 27 | 1645314 | 1645325 | 2 | 6  | 12 | AC | 29 | 5  |
| 206011 | 27 | 1646935 | 1646950 | 2 | 8  | 16 | CA | 14 | 5  |
| 206012 | 27 | 1648799 | 1648814 | 2 | 8  | 16 | AT | 12 | 4  |
| 206019 | 27 | 1662516 | 1662535 | 2 | 10 | 20 | CA | 23 | 6  |
| 206020 | 27 | 1664277 | 1664290 | 2 | 7  | 14 | TG | 24 | 8  |
| 206023 | 27 | 1664991 | 1665004 | 2 | 7  | 14 | CA | 32 | 3  |
| 206026 | 27 | 1670659 | 1670672 | 2 | 7  | 14 | CA | 21 | 4  |
| 206028 | 27 | 1672753 | 1672778 | 2 | 13 | 26 | AC | 21 | 5  |
| 206029 | 27 | 1675788 | 1675813 | 2 | 13 | 26 | GT | 21 | 8  |
| 206042 | 27 | 1699463 | 1699494 | 2 | 16 | 32 | CA | 11 | 11 |
| 206043 | 27 | 1700003 | 1700020 | 2 | 9  | 18 | TG | 21 | 6  |
| 206044 | 27 | 1700163 | 1700196 | 2 | 17 | 34 | CA | 7  | 11 |
| 206046 | 27 | 1700472 | 1700487 | 2 | 8  | 16 | GT | 20 | 5  |
| 206051 | 27 | 1709083 | 1709110 | 2 | 14 | 28 | AC | 18 | 8  |
| 206053 | 27 | 1710184 | 1710221 | 2 | 19 | 38 | TG | 7  | 6  |
| 206055 | 27 | 1715869 | 1715882 | 2 | 7  | 14 | TG | 25 | 4  |
| 206057 | 27 | 1718399 | 1718434 | 2 | 18 | 36 | AC | 17 | 11 |
| 206058 | 27 | 1718582 | 1718599 | 2 | 9  | 18 | AC | 24 | 5  |
| 206061 | 27 | 1719249 | 1719268 | 2 | 10 | 20 | AG | 20 | 4  |
| 206062 | 27 | 1719270 | 1719285 | 2 | 8  | 16 | GA | 23 | 4  |
| 206063 | 27 | 1719495 | 1719520 | 2 | 13 | 26 | CA | 19 | 8  |
| 206072 | 27 | 1734625 | 1734650 | 2 | 13 | 26 | AC | 27 | 10 |
| 206082 | 27 | 1768741 | 1768764 | 2 | 12 | 24 | CA | 9  | 6  |
| 206083 | 27 | 1768990 | 1769001 | 2 | 6  | 12 | CA | 22 | 6  |
| 206084 | 27 | 1769097 | 1769114 | 2 | 9  | 18 | GT | 26 | 9  |
| 206086 | 27 | 1769487 | 1769506 | 2 | 10 | 20 | GT | 25 | 6  |
| 206091 | 27 | 1775422 | 1775433 | 2 | 6  | 12 | AC | 21 | 3  |
| 206093 | 27 | 1775599 | 1775614 | 2 | 8  | 16 | CA | 23 | 6  |
| 206095 | 27 | 1780259 | 1780280 | 2 | 11 | 22 | AC | 13 | 8  |
| 206096 | 27 | 1780364 | 1780375 | 2 | 6  | 12 | AC | 23 | 4  |
| 206097 | 27 | 1780593 | 1780614 | 2 | 11 | 22 | GT | 21 | 7  |
| 206098 | 27 | 1784335 | 1784350 | 2 | 8  | 16 | AC | 18 | 5  |
| 206099 | 27 | 1784491 | 1784516 | 2 | 13 | 26 | CA | 24 | 10 |
| 206100 | 27 | 1786607 | 1786632 | 2 | 13 | 26 | AC | 29 | 8  |
| 206101 | 27 | 1786816 | 1786833 | 2 | 9  | 18 | CA | 22 | 9  |
| 206103 | 27 | 1787233 | 1787254 | 2 | 11 | 22 | GT | 9  | 6  |
| 206105 | 27 | 1788693 | 1788704 | 2 | 6  | 12 | AC | 28 | 4  |
| 206106 | 27 | 1791675 | 1791688 | 2 | 7  | 14 | AC | 18 | 4  |
| 206107 | 27 | 1791855 | 1791882 | 2 | 14 | 28 | CA | 13 | 6  |
| 206109 | 27 | 1792330 | 1792345 | 2 | 8  | 16 | GT | 21 | 9  |
| 206112 | 27 | 1798884 | 1798905 | 2 | 11 | 22 | TG | 12 | 6  |
| 206114 | 27 | 1802591 | 1802606 | 2 | 8  | 16 | GT | 24 | 7  |
| 206118 | 27 | 1807659 | 1807674 | 2 | 8  | 16 | CA | 14 | 7  |
| 206119 | 27 | 1807811 | 1807840 | 2 | 15 | 30 | GT | 8  | 14 |
| 206120 | 27 | 1809410 | 1809425 | 2 | 8  | 16 | CA | 13 | 4  |
| 206121 | 27 | 1809999 | 1810012 | 2 | 7  | 14 | GT | 15 | 5  |
| 206122 | 27 | 1810586 | 1810603 | 2 | 9  | 18 | CA | 15 | 8  |
| 206124 | 27 | 1813520 | 1813531 | 2 | 6  | 12 | GT | 19 | 5  |
| 206125 | 27 | 1813592 | 1813609 | 2 | 9  | 18 | TG | 22 | 4  |

|        |    |         |         |   |    |    |     |    |    |
|--------|----|---------|---------|---|----|----|-----|----|----|
| 206126 | 27 | 1813699 | 1813758 | 2 | 30 | 60 | GT  | 6  | 8  |
| 206129 | 27 | 1818933 | 1818944 | 2 | 6  | 12 | CT  | 23 | 5  |
| 206131 | 27 | 1819275 | 1819294 | 2 | 10 | 20 | AC  | 21 | 5  |
| 206140 | 27 | 1824842 | 1824861 | 2 | 10 | 20 | TG  | 12 | 13 |
| 206145 | 27 | 1825455 | 1825488 | 2 | 17 | 34 | TG  | 9  | 11 |
| 206149 | 27 | 1826236 | 1826261 | 2 | 13 | 26 | CT  | 17 | 8  |
| 206150 | 27 | 1826499 | 1826520 | 2 | 11 | 22 | CA  | 14 | 5  |
| 206152 | 27 | 1827025 | 1827056 | 2 | 16 | 32 | CA  | 8  | 9  |
| 206153 | 27 | 1827197 | 1827208 | 2 | 6  | 12 | CA  | 20 | 8  |
| 206155 | 27 | 1827527 | 1827540 | 2 | 7  | 14 | CA  | 17 | 8  |
| 206156 | 27 | 1827543 | 1827556 | 2 | 7  | 14 | CA  | 21 | 12 |
| 206157 | 27 | 1829936 | 1829953 | 2 | 9  | 18 | GT  | 22 | 5  |
| 206158 | 27 | 1832104 | 1832143 | 2 | 20 | 40 | AC  | 21 | 8  |
| 206159 | 27 | 1832237 | 1832262 | 2 | 13 | 26 | TG  | 17 | 13 |
| 206161 | 27 | 1832436 | 1832459 | 2 | 12 | 24 | AC  | 13 | 10 |
| 206163 | 27 | 1835162 | 1835173 | 2 | 6  | 12 | GT  | 25 | 11 |
| 206164 | 27 | 1836661 | 1836686 | 2 | 13 | 26 | GT  | 12 | 7  |
| 206165 | 27 | 1837193 | 1837218 | 2 | 13 | 26 | GT  | 16 | 9  |
| 206167 | 27 | 1837640 | 1837655 | 2 | 8  | 16 | GT  | 27 | 12 |
| 206168 | 27 | 1837752 | 1837763 | 2 | 6  | 12 | AC  | 18 | 3  |
| 206169 | 27 | 1838381 | 1838396 | 2 | 8  | 16 | GT  | 19 | 11 |
| 206172 | 27 | 1839444 | 1839479 | 2 | 18 | 36 | CA  | 8  | 8  |
| 206175 | 27 | 1841452 | 1841467 | 2 | 8  | 16 | GT  | 8  | 6  |
| 206177 | 27 | 1842021 | 1842032 | 2 | 6  | 12 | TC  | 25 | 3  |
| 206178 | 27 | 1843770 | 1843789 | 2 | 10 | 20 | TG  | 16 | 6  |
| 206179 | 27 | 1845659 | 1845676 | 3 | 6  | 18 | TTA | 21 | 3  |
| 206180 | 27 | 1846539 | 1846562 | 2 | 12 | 24 | TG  | 17 | 8  |
| 206183 | 27 | 1847014 | 1847025 | 2 | 6  | 12 | CA  | 33 | 4  |
| 206188 | 27 | 1850366 | 1850377 | 2 | 6  | 12 | GT  | 26 | 5  |
| 206190 | 27 | 1850467 | 1850482 | 2 | 8  | 16 | AC  | 26 | 4  |
| 206191 | 27 | 1850592 | 1850623 | 2 | 16 | 32 | TG  | 15 | 6  |
| 206194 | 27 | 1851575 | 1851600 | 2 | 13 | 26 | TG  | 11 | 8  |
| 206195 | 27 | 1852089 | 1852128 | 2 | 20 | 40 | TG  | 8  | 6  |
| 206196 | 27 | 1852248 | 1852275 | 2 | 14 | 28 | TG  | 15 | 13 |
| 206200 | 27 | 1855121 | 1855150 | 2 | 15 | 30 | CA  | 17 | 7  |
| 206201 | 27 | 1855212 | 1855229 | 2 | 9  | 18 | GT  | 24 | 3  |
| 206202 | 27 | 1855351 | 1855372 | 2 | 11 | 22 | AC  | 23 | 12 |
| 206209 | 27 | 1860818 | 1860833 | 2 | 8  | 16 | TG  | 24 | 6  |
| 206212 | 27 | 1863516 | 1863539 | 2 | 12 | 24 | GT  | 14 | 5  |
| 206213 | 27 | 1864152 | 1864175 | 3 | 8  | 24 | CAC | 12 | 3  |
| 206214 | 27 | 1864848 | 1864869 | 2 | 11 | 22 | TG  | 20 | 6  |
| 206215 | 27 | 1865028 | 1865065 | 2 | 19 | 38 | CA  | 13 | 12 |
| 206216 | 27 | 1865205 | 1865216 | 2 | 6  | 12 | GT  | 22 | 3  |
| 206217 | 27 | 1866319 | 1866334 | 2 | 8  | 16 | GT  | 23 | 6  |
| 206218 | 27 | 1866506 | 1866541 | 2 | 18 | 36 | TG  | 13 | 9  |
| 206219 | 27 | 1867527 | 1867542 | 2 | 8  | 16 | GT  | 28 | 3  |
| 206220 | 27 | 1869239 | 1869264 | 2 | 13 | 26 | GT  | 23 | 7  |
| 206223 | 27 | 1871469 | 1871484 | 2 | 8  | 16 | CA  | 21 | 4  |
| 206224 | 27 | 1871802 | 1871831 | 2 | 15 | 30 | GT  | 11 | 6  |
| 206226 | 27 | 1872094 | 1872109 | 2 | 8  | 16 | AC  | 22 | 5  |
| 206227 | 27 | 1872112 | 1872125 | 2 | 7  | 14 | AC  | 21 | 8  |

|        |    |         |         |   |    |    |    |    |    |
|--------|----|---------|---------|---|----|----|----|----|----|
| 206228 | 27 | 1872290 | 1872315 | 2 | 13 | 26 | GT | 16 | 13 |
| 206230 | 27 | 1872771 | 1872788 | 2 | 9  | 18 | TG | 26 | 3  |
| 206231 | 27 | 1872888 | 1872915 | 2 | 14 | 28 | AC | 13 | 13 |
| 206236 | 27 | 1882540 | 1882567 | 2 | 14 | 28 | GT | 7  | 7  |
| 206238 | 27 | 1883571 | 1883588 | 2 | 9  | 18 | TG | 13 | 4  |
| 206240 | 27 | 1883847 | 1883884 | 2 | 19 | 38 | AC | 11 | 8  |
| 206241 | 27 | 1884543 | 1884560 | 2 | 9  | 18 | TG | 12 | 4  |
| 206243 | 27 | 1884728 | 1884749 | 2 | 11 | 22 | AG | 7  | 12 |
| 206245 | 27 | 1884898 | 1884937 | 2 | 20 | 40 | GT | 13 | 11 |
| 206247 | 27 | 1885044 | 1885077 | 2 | 17 | 34 | TG | 7  | 5  |
| 206248 | 27 | 1885135 | 1885156 | 2 | 11 | 22 | TG | 13 | 7  |
| 206254 | 27 | 1887075 | 1887108 | 2 | 17 | 34 | AG | 9  | 11 |
| 206259 | 27 | 1887762 | 1887787 | 2 | 13 | 26 | AC | 10 | 9  |
| 206260 | 27 | 1887947 | 1887980 | 2 | 17 | 34 | TG | 11 | 13 |
| 206263 | 27 | 1889554 | 1889567 | 2 | 7  | 14 | AC | 17 | 4  |
| 206264 | 27 | 1889570 | 1889583 | 2 | 7  | 14 | AC | 19 | 5  |
| 206274 | 27 | 1892659 | 1892690 | 2 | 16 | 32 | AC | 8  | 11 |
| 206277 | 27 | 1895713 | 1895738 | 2 | 13 | 26 | TG | 12 | 4  |
| 206278 | 27 | 1895860 | 1895877 | 2 | 9  | 18 | AC | 19 | 4  |
| 206279 | 27 | 1896253 | 1896276 | 2 | 12 | 24 | AC | 24 | 9  |
| 206282 | 27 | 1896734 | 1896757 | 2 | 12 | 24 | AC | 13 | 13 |
| 206283 | 27 | 1896958 | 1896975 | 2 | 9  | 18 | CA | 16 | 4  |
| 206284 | 27 | 1897382 | 1897409 | 2 | 14 | 28 | GT | 14 | 9  |
| 206285 | 27 | 1897609 | 1897646 | 2 | 19 | 38 | CA | 7  | 9  |
| 206288 | 27 | 1899063 | 1899076 | 2 | 7  | 14 | CA | 18 | 4  |
| 206289 | 27 | 1899548 | 1899595 | 2 | 24 | 48 | GT | 9  | 12 |
| 206291 | 27 | 1899634 | 1899647 | 2 | 7  | 14 | GT | 6  | 6  |
| 206292 | 27 | 1899780 | 1899795 | 2 | 8  | 16 | AC | 13 | 4  |
| 206293 | 27 | 1899909 | 1899920 | 2 | 6  | 12 | GT | 27 | 3  |
| 206294 | 27 | 1900098 | 1900117 | 2 | 10 | 20 | GT | 11 | 4  |
| 206300 | 27 | 1901451 | 1901464 | 2 | 7  | 14 | CA | 31 | 3  |
| 206304 | 27 | 1901998 | 1902019 | 2 | 11 | 22 | CA | 15 | 8  |
| 206306 | 27 | 1902586 | 1902599 | 2 | 7  | 14 | GT | 19 | 5  |
| 206307 | 27 | 1902748 | 1902761 | 2 | 7  | 14 | TG | 20 | 7  |
| 206310 | 27 | 1903159 | 1903184 | 2 | 13 | 26 | AG | 7  | 7  |
| 206322 | 27 | 1910829 | 1910858 | 2 | 15 | 30 | TG | 12 | 13 |
| 206325 | 27 | 1912545 | 1912560 | 2 | 8  | 16 | AC | 25 | 3  |
| 206326 | 27 | 1912923 | 1912938 | 2 | 8  | 16 | AC | 20 | 5  |
| 206327 | 27 | 1913494 | 1913535 | 2 | 21 | 42 | TG | 12 | 10 |
| 206331 | 27 | 1915043 | 1915054 | 2 | 6  | 12 | TG | 29 | 3  |
| 206332 | 27 | 1915647 | 1915674 | 2 | 14 | 28 | GT | 17 | 9  |
| 206334 | 27 | 1916600 | 1916613 | 2 | 7  | 14 | GT | 29 | 7  |
| 206338 | 27 | 1917801 | 1917826 | 2 | 13 | 26 | TG | 16 | 8  |
| 206340 | 27 | 1919581 | 1919608 | 2 | 14 | 28 | TG | 11 | 10 |
| 206341 | 27 | 1919803 | 1919816 | 2 | 7  | 14 | AC | 25 | 4  |
| 206343 | 27 | 1921438 | 1921457 | 2 | 10 | 20 | GT | 13 | 7  |
| 206344 | 27 | 1921616 | 1921647 | 2 | 16 | 32 | TC | 6  | 6  |
| 206350 | 27 | 1929777 | 1929790 | 2 | 7  | 14 | GT | 23 | 5  |
| 206352 | 27 | 1931745 | 1931756 | 2 | 6  | 12 | AC | 28 | 3  |
| 206353 | 27 | 1932009 | 1932022 | 2 | 7  | 14 | AC | 27 | 4  |
| 206363 | 27 | 1939184 | 1939213 | 2 | 15 | 30 | AC | 17 | 10 |

|        |    |         |         |   |    |    |      |    |    |
|--------|----|---------|---------|---|----|----|------|----|----|
| 206367 | 27 | 1944434 | 1944447 | 2 | 7  | 14 | TG   | 17 | 8  |
| 206379 | 27 | 1976689 | 1976722 | 2 | 17 | 34 | CA   | 7  | 8  |
| 206380 | 27 | 1976845 | 1976865 | 3 | 7  | 21 | AGG  | 26 | 5  |
| 206384 | 27 | 1983243 | 1983266 | 2 | 12 | 24 | TG   | 13 | 10 |
| 206385 | 27 | 1983341 | 1983352 | 2 | 6  | 12 | AC   | 22 | 5  |
| 206386 | 27 | 1983455 | 1983472 | 2 | 9  | 18 | AC   | 15 | 6  |
| 206387 | 27 | 1983475 | 1983492 | 2 | 9  | 18 | AC   | 17 | 7  |
| 206391 | 27 | 1985499 | 1985524 | 2 | 13 | 26 | GT   | 7  | 5  |
| 206393 | 27 | 1985845 | 1985872 | 2 | 14 | 28 | GT   | 15 | 8  |
| 206396 | 27 | 1988220 | 1988255 | 2 | 18 | 36 | GT   | 12 | 7  |
| 206400 | 27 | 1996872 | 1996907 | 2 | 18 | 36 | AC   | 20 | 15 |
| 206407 | 27 | 2030328 | 2030342 | 3 | 5  | 15 | CAT  | 28 | 5  |
| 206413 | 27 | 2041409 | 2041430 | 2 | 11 | 22 | TC   | 21 | 6  |
| 206415 | 27 | 2042073 | 2042098 | 2 | 13 | 26 | CA   | 16 | 5  |
| 206418 | 27 | 2066740 | 2066763 | 4 | 6  | 24 | GTGC | 11 | 12 |
| 206421 | 27 | 2074850 | 2074861 | 2 | 6  | 12 | GA   | 19 | 3  |
| 206427 | 27 | 2082488 | 2082503 | 4 | 4  | 16 | AAAT | 30 | 4  |
| 206428 | 27 | 2086444 | 2086467 | 2 | 12 | 24 | GT   | 12 | 11 |
| 206432 | 27 | 2102761 | 2102788 | 2 | 14 | 28 | AC   | 21 | 10 |
| 206434 | 27 | 2103995 | 2104008 | 2 | 7  | 14 | GT   | 30 | 6  |
| 206436 | 27 | 2105097 | 2105110 | 2 | 7  | 14 | CA   | 31 | 3  |
| 206437 | 27 | 2105348 | 2105359 | 2 | 6  | 12 | TG   | 22 | 3  |
| 206443 | 27 | 2135054 | 2135080 | 3 | 9  | 27 | ATT  | 6  | 3  |
| 206444 | 27 | 2135562 | 2135583 | 2 | 11 | 22 | GT   | 20 | 7  |
| 206448 | 27 | 2136301 | 2136334 | 2 | 17 | 34 | AC   | 11 | 11 |
| 206450 | 27 | 2139593 | 2139604 | 2 | 6  | 12 | AC   | 22 | 3  |
| 206451 | 27 | 2140611 | 2140626 | 2 | 8  | 16 | CA   | 19 | 4  |
| 206455 | 27 | 2144984 | 2144995 | 2 | 6  | 12 | AC   | 20 | 3  |
| 206456 | 27 | 2145082 | 2145113 | 2 | 16 | 32 | CA   | 11 | 13 |
| 206457 | 27 | 2145775 | 2145786 | 2 | 6  | 12 | GT   | 28 | 7  |
| 206458 | 27 | 2147839 | 2147862 | 2 | 12 | 24 | GT   | 16 | 6  |
| 206460 | 27 | 2158923 | 2158940 | 2 | 9  | 18 | GT   | 14 | 5  |
| 206463 | 27 | 2162638 | 2162675 | 2 | 19 | 38 | AC   | 6  | 7  |
| 206464 | 27 | 2164721 | 2164735 | 3 | 5  | 15 | TCA  | 20 | 4  |
| 206465 | 27 | 2164739 | 2164753 | 3 | 5  | 15 | TCA  | 24 | 5  |
| 206466 | 27 | 2165556 | 2165567 | 2 | 6  | 12 | CA   | 19 | 5  |
| 206469 | 27 | 2168122 | 2168133 | 2 | 6  | 12 | CA   | 8  | 3  |
| 206470 | 27 | 2168246 | 2168257 | 2 | 6  | 12 | AC   | 26 | 5  |
| 206471 | 27 | 2168327 | 2168352 | 2 | 13 | 26 | CA   | 17 | 5  |
| 206472 | 27 | 2168709 | 2168752 | 2 | 22 | 44 | TG   | 15 | 11 |
| 206473 | 27 | 2168899 | 2168914 | 2 | 8  | 16 | CA   | 19 | 6  |
| 206474 | 27 | 2169205 | 2169220 | 2 | 8  | 16 | GT   | 21 | 3  |
| 206475 | 27 | 2171255 | 2171292 | 2 | 19 | 38 | GT   | 7  | 5  |
| 206478 | 27 | 2172765 | 2172800 | 3 | 12 | 36 | CAG  | 10 | 6  |
| 206479 | 27 | 2174641 | 2174656 | 2 | 8  | 16 | AC   | 26 | 3  |
| 206480 | 27 | 2174789 | 2174804 | 2 | 8  | 16 | CT   | 14 | 5  |
| 206484 | 27 | 2181175 | 2181198 | 2 | 12 | 24 | TG   | 16 | 12 |
| 206489 | 27 | 2188242 | 2188253 | 2 | 6  | 12 | GT   | 24 | 3  |
| 206491 | 27 | 2192594 | 2192609 | 2 | 8  | 16 | AC   | 18 | 8  |
| 206494 | 27 | 2193586 | 2193609 | 2 | 12 | 24 | GT   | 11 | 9  |
| 206495 | 27 | 2194032 | 2194049 | 2 | 9  | 18 | AC   | 20 | 4  |

|        |    |         |         |   |    |    |      |    |    |
|--------|----|---------|---------|---|----|----|------|----|----|
| 206500 | 27 | 2205430 | 2205447 | 2 | 9  | 18 | CA   | 28 | 5  |
| 206501 | 27 | 2207076 | 2207089 | 2 | 7  | 14 | TG   | 20 | 4  |
| 206507 | 27 | 2210975 | 2210996 | 2 | 11 | 22 | TG   | 18 | 8  |
| 206508 | 27 | 2213898 | 2213912 | 3 | 5  | 15 | AGC  | 28 | 4  |
| 206511 | 27 | 2215856 | 2215867 | 2 | 6  | 12 | AT   | 11 | 4  |
| 206512 | 27 | 2216665 | 2216700 | 3 | 12 | 36 | GAT  | 29 | 15 |
| 206513 | 27 | 2219138 | 2219155 | 2 | 9  | 18 | TG   | 14 | 4  |
| 206514 | 27 | 2219252 | 2219287 | 2 | 18 | 36 | AC   | 6  | 8  |
| 206515 | 27 | 2221894 | 2221913 | 2 | 10 | 20 | TG   | 16 | 5  |
| 206516 | 27 | 2222099 | 2222128 | 2 | 15 | 30 | AC   | 7  | 8  |
| 206517 | 27 | 2222828 | 2222849 | 2 | 11 | 22 | AC   | 22 | 10 |
| 206518 | 27 | 2223241 | 2223258 | 2 | 9  | 18 | AC   | 20 | 12 |
| 206519 | 27 | 2223424 | 2223441 | 2 | 9  | 18 | GT   | 28 | 4  |
| 206520 | 27 | 2223603 | 2223630 | 2 | 14 | 28 | CA   | 14 | 10 |
| 206524 | 27 | 2226538 | 2226575 | 2 | 19 | 38 | CA   | 12 | 6  |
| 206525 | 27 | 2226970 | 2226987 | 2 | 9  | 18 | CA   | 18 | 5  |
| 206526 | 27 | 2227141 | 2227156 | 2 | 8  | 16 | AC   | 19 | 3  |
| 206529 | 27 | 2228485 | 2228506 | 2 | 11 | 22 | GT   | 18 | 9  |
| 206543 | 27 | 2234444 | 2234459 | 2 | 8  | 16 | GT   | 24 | 5  |
| 206544 | 27 | 2234572 | 2234603 | 4 | 8  | 32 | AATA | 24 | 7  |
| 206553 | 27 | 2265619 | 2265636 | 2 | 9  | 18 | AC   | 28 | 5  |
| 206555 | 27 | 2269109 | 2269120 | 2 | 6  | 12 | GT   | 17 | 3  |
| 206562 | 27 | 2271283 | 2271298 | 2 | 8  | 16 | AC   | 17 | 3  |
| 206563 | 27 | 2273421 | 2273438 | 2 | 9  | 18 | AC   | 18 | 6  |
| 206564 | 27 | 2273673 | 2273716 | 2 | 22 | 44 | CA   | 12 | 12 |
| 206566 | 27 | 2276333 | 2276374 | 2 | 21 | 42 | AC   | 15 | 15 |
| 206570 | 27 | 2283335 | 2283366 | 2 | 16 | 32 | AC   | 10 | 7  |
| 206571 | 27 | 2286049 | 2286068 | 2 | 10 | 20 | GT   | 25 | 5  |
| 206576 | 27 | 2294529 | 2294576 | 2 | 24 | 48 | CA   | 15 | 13 |
| 206579 | 27 | 2298228 | 2298241 | 2 | 7  | 14 | GA   | 24 | 3  |
| 206580 | 27 | 2304378 | 2304389 | 2 | 6  | 12 | AC   | 16 | 4  |
| 206590 | 27 | 2325214 | 2325239 | 2 | 13 | 26 | GT   | 21 | 9  |
| 206591 | 27 | 2325403 | 2325430 | 2 | 14 | 28 | GT   | 15 | 6  |
| 206592 | 27 | 2325531 | 2325560 | 2 | 15 | 30 | CA   | 19 | 12 |
| 206593 | 27 | 2328903 | 2328930 | 2 | 14 | 28 | AG   | 15 | 10 |
| 206594 | 27 | 2329065 | 2329078 | 2 | 7  | 14 | GT   | 24 | 5  |
| 206595 | 27 | 2332922 | 2332935 | 2 | 7  | 14 | AC   | 23 | 3  |
| 206605 | 27 | 2352377 | 2352398 | 2 | 11 | 22 | TG   | 12 | 7  |
| 206606 | 27 | 2352543 | 2352568 | 2 | 13 | 26 | CA   | 11 | 10 |
| 206607 | 27 | 2352778 | 2352789 | 2 | 6  | 12 | CT   | 12 | 5  |
| 206611 | 27 | 2354995 | 2355014 | 4 | 5  | 20 | GTGC | 6  | 4  |
| 206614 | 27 | 2355269 | 2355290 | 2 | 11 | 22 | TG   | 9  | 8  |
| 206618 | 27 | 2356506 | 2356541 | 4 | 9  | 36 | CAGA | 8  | 6  |
| 206621 | 27 | 2360720 | 2360731 | 2 | 6  | 12 | CA   | 22 | 5  |
| 206623 | 27 | 2361514 | 2361529 | 4 | 4  | 16 | CCAT | 21 | 3  |
| 206628 | 27 | 2363180 | 2363191 | 2 | 6  | 12 | CA   | 19 | 4  |
| 206631 | 27 | 2364191 | 2364208 | 2 | 9  | 18 | CA   | 11 | 13 |
| 206634 | 27 | 2367487 | 2367518 | 2 | 16 | 32 | AC   | 20 | 14 |
| 206638 | 27 | 2367869 | 2367892 | 2 | 12 | 24 | GA   | 14 | 6  |
| 206640 | 27 | 2367920 | 2367933 | 2 | 7  | 14 | AG   | 20 | 3  |
| 206647 | 27 | 2377388 | 2377417 | 2 | 15 | 30 | CA   | 7  | 10 |

|        |    |         |         |   |    |    |      |    |    |
|--------|----|---------|---------|---|----|----|------|----|----|
| 206649 | 27 | 2377867 | 2377890 | 2 | 12 | 24 | GT   | 18 | 7  |
| 206650 | 27 | 2377986 | 2378013 | 4 | 7  | 28 | CGCA | 23 | 20 |
| 206652 | 27 | 2378324 | 2378335 | 2 | 6  | 12 | GT   | 22 | 4  |
| 206655 | 27 | 2383364 | 2383377 | 2 | 7  | 14 | TG   | 21 | 4  |
| 206658 | 27 | 2383747 | 2383758 | 2 | 6  | 12 | CA   | 25 | 4  |
| 206663 | 27 | 2389601 | 2389616 | 2 | 8  | 16 | CA   | 18 | 4  |
| 206666 | 27 | 2391368 | 2391385 | 2 | 9  | 18 | CA   | 12 | 7  |
| 206669 | 27 | 2392723 | 2392742 | 2 | 10 | 20 | AC   | 6  | 6  |
| 206675 | 27 | 2396107 | 2396118 | 2 | 6  | 12 | CA   | 31 | 4  |
| 206676 | 27 | 2397830 | 2397871 | 2 | 21 | 42 | AG   | 9  | 9  |
| 206677 | 27 | 2398069 | 2398084 | 2 | 8  | 16 | GA   | 12 | 9  |
| 206678 | 27 | 2398086 | 2398103 | 2 | 9  | 18 | AG   | 7  | 7  |
| 206681 | 27 | 2405280 | 2405311 | 2 | 16 | 32 | TC   | 9  | 5  |
| 206703 | 27 | 2421214 | 2421231 | 2 | 9  | 18 | TG   | 8  | 5  |
| 206707 | 27 | 2422278 | 2422289 | 2 | 6  | 12 | AC   | 17 | 3  |
| 206709 | 27 | 2424055 | 2424084 | 3 | 10 | 30 | GAG  | 26 | 6  |
| 206711 | 27 | 2425429 | 2425446 | 2 | 9  | 18 | AG   | 7  | 4  |
| 206714 | 27 | 2426112 | 2426126 | 3 | 5  | 15 | TAT  | 19 | 5  |
| 206718 | 27 | 2427654 | 2427685 | 2 | 16 | 32 | CA   | 7  | 8  |
| 206720 | 27 | 2427877 | 2427894 | 2 | 9  | 18 | CA   | 6  | 9  |
| 206728 | 27 | 2433272 | 2433291 | 2 | 10 | 20 | TG   | 13 | 6  |
| 206733 | 27 | 2435330 | 2435343 | 2 | 7  | 14 | TC   | 22 | 7  |
| 206736 | 27 | 2436522 | 2436548 | 3 | 9  | 27 | GGA  | 13 | 4  |
| 206737 | 27 | 2436661 | 2436694 | 2 | 17 | 34 | TG   | 15 | 10 |
| 206738 | 27 | 2436850 | 2436891 | 2 | 21 | 42 | CA   | 11 | 13 |
| 206745 | 27 | 2439969 | 2439982 | 2 | 7  | 14 | TG   | 24 | 3  |
| 206746 | 27 | 2440382 | 2440397 | 2 | 8  | 16 | CA   | 15 | 5  |
| 206747 | 27 | 2440590 | 2440605 | 2 | 8  | 16 | TA   | 11 | 6  |
| 206748 | 27 | 2442056 | 2442075 | 2 | 10 | 20 | CA   | 11 | 6  |
| 206749 | 27 | 2442109 | 2442124 | 2 | 8  | 16 | CA   | 18 | 7  |
| 206750 | 27 | 2442574 | 2442601 | 2 | 14 | 28 | GT   | 10 | 4  |
| 206751 | 27 | 2442631 | 2442660 | 2 | 15 | 30 | TG   | 7  | 7  |
| 206753 | 27 | 2444868 | 2444919 | 2 | 26 | 52 | TG   | 18 | 18 |
| 206754 | 27 | 2445302 | 2445319 | 2 | 9  | 18 | CA   | 12 | 6  |
| 206761 | 27 | 2448558 | 2448595 | 2 | 19 | 38 | GT   | 10 | 7  |
| 206765 | 27 | 2449341 | 2449352 | 2 | 6  | 12 | AC   | 15 | 4  |
| 206766 | 27 | 2449359 | 2449374 | 4 | 4  | 16 | ACGC | 18 | 4  |
| 206767 | 27 | 2449515 | 2449538 | 2 | 12 | 24 | AG   | 10 | 3  |
| 206768 | 27 | 2449733 | 2449746 | 2 | 7  | 14 | GT   | 11 | 5  |
| 206772 | 27 | 2450163 | 2450180 | 2 | 9  | 18 | GT   | 15 | 6  |
| 206773 | 27 | 2450421 | 2450436 | 2 | 8  | 16 | GT   | 22 | 4  |
| 206774 | 27 | 2451558 | 2451601 | 4 | 11 | 44 | TTTC | 18 | 10 |
| 206776 | 27 | 2452066 | 2452093 | 2 | 14 | 28 | GT   | 8  | 6  |
| 206778 | 27 | 2454254 | 2454273 | 2 | 10 | 20 | GT   | 17 | 9  |
| 206779 | 27 | 2454274 | 2454287 | 2 | 7  | 14 | GA   | 17 | 11 |
| 206785 | 27 | 2457955 | 2457968 | 2 | 7  | 14 | AG   | 27 | 5  |
| 206799 | 27 | 2464589 | 2464612 | 2 | 12 | 24 | AG   | 23 | 11 |
| 206801 | 27 | 2466432 | 2466464 | 3 | 11 | 33 | CTC  | 14 | 5  |
| 206802 | 27 | 2466619 | 2466656 | 2 | 19 | 38 | TG   | 17 | 10 |
| 206803 | 27 | 2468355 | 2468368 | 2 | 7  | 14 | GT   | 14 | 4  |
| 206804 | 27 | 2468824 | 2468851 | 2 | 14 | 28 | CA   | 6  | 7  |



|        |    |         |         |   |    |    |      |    |    |
|--------|----|---------|---------|---|----|----|------|----|----|
| 206806 | 27 | 2469045 | 2469068 | 2 | 12 | 24 | TG   | 16 | 6  |
| 206816 | 27 | 2476148 | 2476173 | 2 | 13 | 26 | TC   | 15 | 12 |
| 206820 | 27 | 2478943 | 2478988 | 2 | 23 | 46 | CA   | 12 | 8  |
| 206825 | 27 | 2481488 | 2481505 | 2 | 9  | 18 | TG   | 28 | 4  |
| 206828 | 27 | 2484293 | 2484304 | 2 | 6  | 12 | AT   | 23 | 5  |
| 206829 | 27 | 2485282 | 2485299 | 2 | 9  | 18 | CA   | 20 | 8  |
| 206832 | 27 | 2485788 | 2485809 | 2 | 11 | 22 | GT   | 10 | 4  |
| 206833 | 27 | 2486146 | 2486161 | 2 | 8  | 16 | GT   | 21 | 7  |
| 206834 | 27 | 2486292 | 2486312 | 3 | 7  | 21 | CCT  | 19 | 7  |
| 206835 | 27 | 2486922 | 2486933 | 2 | 6  | 12 | AC   | 32 | 3  |
| 206837 | 27 | 2490855 | 2490870 | 2 | 8  | 16 | AC   | 32 | 4  |
| 206838 | 27 | 2493897 | 2493918 | 2 | 11 | 22 | AC   | 16 | 12 |
| 206840 | 27 | 2494067 | 2494100 | 2 | 17 | 34 | TG   | 14 | 14 |
| 206842 | 27 | 2497615 | 2497638 | 2 | 12 | 24 | AC   | 22 | 11 |
| 206844 | 27 | 2507023 | 2507036 | 2 | 7  | 14 | GT   | 19 | 5  |
| 206845 | 27 | 2507266 | 2507285 | 2 | 10 | 20 | AC   | 13 | 11 |
| 206846 | 27 | 2507287 | 2507302 | 2 | 8  | 16 | CA   | 15 | 12 |
| 206847 | 27 | 2509711 | 2509746 | 2 | 18 | 36 | AC   | 7  | 11 |
| 206848 | 27 | 2510572 | 2510601 | 2 | 15 | 30 | AC   | 19 | 11 |
| 206849 | 27 | 2512023 | 2512034 | 2 | 6  | 12 | GT   | 25 | 3  |
| 206850 | 27 | 2513778 | 2513801 | 2 | 12 | 24 | CA   | 17 | 4  |
| 206853 | 27 | 2521902 | 2521953 | 4 | 13 | 52 | TATC | 14 | 6  |
| 206854 | 27 | 2526972 | 2526989 | 3 | 6  | 18 | TCA  | 35 | 3  |
| 206858 | 27 | 2533500 | 2533515 | 4 | 4  | 16 | TTTA | 28 | 6  |
| 206861 | 27 | 2555197 | 2555208 | 2 | 6  | 12 | AT   | 14 | 3  |
| 206870 | 27 | 2568900 | 2568933 | 2 | 17 | 34 | TG   | 16 | 11 |
| 206873 | 27 | 2579385 | 2579399 | 3 | 5  | 15 | GCA  | 26 | 5  |
| 206874 | 27 | 2579495 | 2579512 | 3 | 6  | 18 | ACA  | 23 | 4  |
| 206880 | 27 | 2594260 | 2594277 | 2 | 9  | 18 | TG   | 14 | 4  |
| 206886 | 27 | 2599109 | 2599126 | 3 | 6  | 18 | TCC  | 16 | 8  |
| 206888 | 27 | 2599879 | 2599890 | 2 | 6  | 12 | GT   | 27 | 5  |
| 206889 | 27 | 2599915 | 2599926 | 2 | 6  | 12 | GC   | 17 | 4  |
| 206890 | 27 | 2600100 | 2600117 | 2 | 9  | 18 | AG   | 15 | 5  |
| 206891 | 27 | 2600155 | 2600168 | 2 | 7  | 14 | GT   | 25 | 11 |
| 206895 | 27 | 2604252 | 2604263 | 2 | 6  | 12 | TG   | 12 | 4  |
| 206902 | 27 | 2613262 | 2613275 | 2 | 7  | 14 | AC   | 24 | 5  |
| 206903 | 27 | 2613659 | 2613678 | 2 | 10 | 20 | GT   | 17 | 4  |
| 206907 | 27 | 2619097 | 2619110 | 2 | 7  | 14 | GT   | 24 | 4  |
| 206910 | 27 | 2627323 | 2627378 | 4 | 14 | 56 | ACAT | 9  | 7  |
| 206911 | 27 | 2627937 | 2627972 | 4 | 9  | 36 | CACG | 21 | 24 |
| 206916 | 27 | 2639168 | 2639215 | 2 | 24 | 48 | AC   | 11 | 12 |
| 206920 | 27 | 2656397 | 2656414 | 3 | 6  | 18 | TCC  | 35 | 4  |
| 206927 | 27 | 2678475 | 2678518 | 4 | 11 | 44 | AAGA | 13 | 7  |
| 206929 | 27 | 2680132 | 2680149 | 2 | 9  | 18 | CA   | 15 | 10 |
| 206930 | 27 | 2680151 | 2680168 | 2 | 9  | 18 | AC   | 13 | 11 |
| 206932 | 27 | 2680411 | 2680436 | 2 | 13 | 26 | GT   | 11 | 8  |
| 206933 | 27 | 2681907 | 2681918 | 2 | 6  | 12 | AC   | 20 | 5  |
| 206940 | 27 | 2684085 | 2684111 | 3 | 9  | 27 | CAT  | 24 | 3  |
| 206947 | 27 | 2688681 | 2688718 | 2 | 19 | 38 | CA   | 10 | 11 |
| 206949 | 27 | 2692608 | 2692641 | 2 | 17 | 34 | TG   | 12 | 11 |
| 206950 | 27 | 2694318 | 2694341 | 2 | 12 | 24 | TG   | 9  | 10 |

|        |    |         |         |   |    |    |      |    |    |
|--------|----|---------|---------|---|----|----|------|----|----|
| 206951 | 27 | 2695749 | 2695776 | 2 | 14 | 28 | TG   | 18 | 12 |
| 206952 | 27 | 2695923 | 2695960 | 2 | 19 | 38 | TG   | 11 | 9  |
| 206953 | 27 | 2696882 | 2696901 | 4 | 5  | 20 | AGTG | 32 | 3  |
| 206955 | 27 | 2697861 | 2697880 | 2 | 10 | 20 | CT   | 23 | 7  |
| 206957 | 27 | 2700456 | 2700485 | 2 | 15 | 30 | GA   | 19 | 7  |
| 206958 | 27 | 2702401 | 2702414 | 2 | 7  | 14 | GT   | 28 | 3  |
| 206959 | 27 | 2702786 | 2702801 | 4 | 4  | 16 | GGAG | 15 | 4  |
| 206960 | 27 | 2705943 | 2705972 | 2 | 15 | 30 | TG   | 13 | 10 |
| 206962 | 27 | 2707560 | 2707574 | 3 | 5  | 15 | CCT  | 13 | 3  |
| 206963 | 27 | 2708680 | 2708695 | 4 | 4  | 16 | CAGG | 33 | 9  |
| 206969 | 27 | 2718414 | 2718425 | 2 | 6  | 12 | AG   | 23 | 3  |
| 206970 | 27 | 2721443 | 2721456 | 2 | 7  | 14 | AC   | 27 | 3  |
| 206972 | 27 | 2724542 | 2724575 | 2 | 17 | 34 | TG   | 14 | 14 |
| 206973 | 27 | 2726466 | 2726497 | 2 | 16 | 32 | TG   | 20 | 12 |
| 206974 | 27 | 2728504 | 2728530 | 3 | 9  | 27 | GCA  | 7  | 5  |
| 206975 | 27 | 2728630 | 2728659 | 2 | 15 | 30 | GT   | 16 | 10 |
| 206979 | 27 | 2731391 | 2731418 | 2 | 14 | 28 | AC   | 23 | 6  |
| 206991 | 27 | 2753610 | 2753627 | 2 | 9  | 18 | CT   | 33 | 7  |
| 206997 | 27 | 2760397 | 2760411 | 3 | 5  | 15 | TCC  | 33 | 3  |
| 207003 | 27 | 2779537 | 2779551 | 3 | 5  | 15 | CAG  | 29 | 4  |
| 207004 | 27 | 2781820 | 2781833 | 2 | 7  | 14 | GA   | 21 | 4  |
| 207006 | 27 | 2784873 | 2784898 | 2 | 13 | 26 | TG   | 14 | 8  |
| 207007 | 27 | 2785131 | 2785145 | 3 | 5  | 15 | CCT  | 17 | 4  |
| 207010 | 27 | 2788555 | 2788574 | 2 | 10 | 20 | GT   | 16 | 10 |
| 207011 | 27 | 2790158 | 2790173 | 2 | 8  | 16 | AC   | 14 | 6  |
| 207012 | 27 | 2790695 | 2790712 | 3 | 6  | 18 | GGA  | 11 | 3  |
| 207013 | 27 | 2790762 | 2790785 | 4 | 6  | 24 | AAAG | 11 | 4  |
| 207015 | 27 | 2791805 | 2791818 | 2 | 7  | 14 | TG   | 27 | 4  |
| 207018 | 27 | 2792232 | 2792251 | 2 | 10 | 20 | TC   | 18 | 18 |
| 207021 | 27 | 2793158 | 2793187 | 2 | 15 | 30 | CA   | 23 | 13 |
| 207027 | 27 | 2795864 | 2795875 | 2 | 6  | 12 | TG   | 25 | 8  |
| 207029 | 27 | 2796642 | 2796673 | 2 | 16 | 32 | GT   | 6  | 4  |
| 207033 | 27 | 2800131 | 2800150 | 2 | 10 | 20 | TG   | 20 | 9  |
| 207035 | 27 | 2802720 | 2802743 | 2 | 12 | 24 | CT   | 15 | 6  |
| 207037 | 27 | 2804221 | 2804236 | 2 | 8  | 16 | CT   | 15 | 4  |
| 207039 | 27 | 2805412 | 2805431 | 2 | 10 | 20 | CT   | 12 | 4  |
| 207041 | 27 | 2806145 | 2806174 | 2 | 15 | 30 | CA   | 15 | 12 |
| 207046 | 27 | 2813330 | 2813349 | 2 | 10 | 20 | CT   | 18 | 4  |
| 207050 | 27 | 2818635 | 2818662 | 2 | 14 | 28 | AC   | 8  | 6  |
| 207055 | 27 | 2819433 | 2819452 | 2 | 10 | 20 | TG   | 8  | 8  |
| 207063 | 27 | 2821027 | 2821044 | 2 | 9  | 18 | TG   | 13 | 5  |
| 207064 | 27 | 2822133 | 2822146 | 2 | 7  | 14 | GT   | 25 | 6  |
| 207071 | 27 | 2832973 | 2832992 | 2 | 10 | 20 | AC   | 22 | 14 |
| 207072 | 27 | 2833917 | 2833928 | 2 | 6  | 12 | TG   | 12 | 4  |
| 207073 | 27 | 2835377 | 2835396 | 2 | 10 | 20 | GT   | 17 | 11 |
| 207074 | 27 | 2835917 | 2835944 | 2 | 14 | 28 | AC   | 18 | 9  |
| 207075 | 27 | 2836361 | 2836372 | 2 | 6  | 12 | CA   | 18 | 8  |
| 207082 | 27 | 2838413 | 2838442 | 2 | 15 | 30 | CA   | 7  | 6  |
| 207084 | 27 | 2838588 | 2838605 | 2 | 9  | 18 | TG   | 17 | 6  |
| 207085 | 27 | 2838609 | 2838620 | 2 | 6  | 12 | GT   | 11 | 3  |
| 207086 | 27 | 2838746 | 2838761 | 2 | 8  | 16 | TG   | 20 | 9  |

|        |    |         |         |   |    |    |      |    |    |
|--------|----|---------|---------|---|----|----|------|----|----|
| 207087 | 27 | 2838906 | 2838921 | 2 | 8  | 16 | TA   | 16 | 3  |
| 207090 | 27 | 2843465 | 2843486 | 2 | 11 | 22 | GT   | 19 | 11 |
| 207093 | 27 | 2845961 | 2845990 | 2 | 15 | 30 | AC   | 12 | 4  |
| 207094 | 27 | 2846328 | 2846357 | 2 | 15 | 30 | AC   | 22 | 8  |
| 207096 | 27 | 2846953 | 2846972 | 2 | 10 | 20 | AC   | 20 | 7  |
| 207097 | 27 | 2847689 | 2847702 | 2 | 7  | 14 | CA   | 27 | 3  |
| 207099 | 27 | 2848016 | 2848047 | 2 | 16 | 32 | CA   | 9  | 10 |
| 207100 | 27 | 2848135 | 2848146 | 2 | 6  | 12 | AC   | 19 | 3  |
| 207106 | 27 | 2852102 | 2852113 | 2 | 6  | 12 | CA   | 22 | 9  |
| 207107 | 27 | 2852269 | 2852282 | 2 | 7  | 14 | TG   | 13 | 6  |
| 207118 | 27 | 2858838 | 2858857 | 2 | 10 | 20 | CA   | 15 | 6  |
| 207121 | 27 | 2859837 | 2859854 | 2 | 9  | 18 | AC   | 19 | 11 |
| 207126 | 27 | 2864597 | 2864634 | 2 | 19 | 38 | CA   | 7  | 7  |
| 207129 | 27 | 2866657 | 2866668 | 2 | 6  | 12 | AC   | 27 | 3  |
| 207130 | 27 | 2866781 | 2866812 | 2 | 16 | 32 | TG   | 11 | 7  |
| 207131 | 27 | 2871576 | 2871587 | 2 | 6  | 12 | TG   | 27 | 3  |
| 207132 | 27 | 2871644 | 2871671 | 2 | 14 | 28 | TG   | 12 | 8  |
| 207134 | 27 | 2872728 | 2872759 | 2 | 16 | 32 | CA   | 25 | 7  |
| 207136 | 27 | 2873520 | 2873534 | 3 | 5  | 15 | GAT  | 28 | 3  |
| 207137 | 27 | 2873619 | 2873634 | 2 | 8  | 16 | CA   | 28 | 3  |
| 207139 | 27 | 2874733 | 2874752 | 2 | 10 | 20 | AC   | 19 | 19 |
| 207141 | 27 | 2878042 | 2878055 | 2 | 7  | 14 | GT   | 20 | 4  |
| 207146 | 27 | 2882117 | 2882132 | 2 | 8  | 16 | AC   | 25 | 5  |
| 207147 | 27 | 2882210 | 2882225 | 2 | 8  | 16 | CA   | 21 | 9  |
| 207150 | 27 | 2882803 | 2882824 | 2 | 11 | 22 | GT   | 8  | 8  |
| 207153 | 27 | 2882974 | 2882989 | 2 | 8  | 16 | TG   | 16 | 4  |
| 207154 | 27 | 2883117 | 2883164 | 2 | 24 | 48 | TG   | 7  | 7  |
| 207158 | 27 | 2884418 | 2884429 | 2 | 6  | 12 | AC   | 7  | 4  |
| 207159 | 27 | 2884432 | 2884445 | 2 | 7  | 14 | AC   | 7  | 3  |
| 207162 | 27 | 2891600 | 2891611 | 2 | 6  | 12 | GT   | 20 | 11 |
| 207163 | 27 | 2891614 | 2891631 | 2 | 9  | 18 | GT   | 22 | 13 |
| 207164 | 27 | 2891770 | 2891784 | 3 | 5  | 15 | GGT  | 19 | 3  |
| 207165 | 27 | 2894370 | 2894383 | 2 | 7  | 14 | AC   | 26 | 5  |
| 207168 | 27 | 2895372 | 2895387 | 2 | 8  | 16 | CA   | 30 | 7  |
| 207173 | 27 | 2898773 | 2898798 | 2 | 13 | 26 | TG   | 13 | 8  |
| 207176 | 27 | 2900842 | 2900867 | 2 | 13 | 26 | AC   | 13 | 7  |
| 207180 | 27 | 2908264 | 2908281 | 2 | 9  | 18 | AC   | 17 | 15 |
| 207181 | 27 | 2908283 | 2908302 | 2 | 10 | 20 | CA   | 13 | 12 |
| 207182 | 27 | 2909363 | 2909378 | 2 | 8  | 16 | CT   | 27 | 5  |
| 207184 | 27 | 2909619 | 2909634 | 2 | 8  | 16 | AC   | 12 | 10 |
| 207195 | 27 | 2934729 | 2934746 | 2 | 9  | 18 | AC   | 26 | 4  |
| 207206 | 27 | 2948614 | 2948629 | 4 | 4  | 16 | TTTC | 17 | 4  |
| 207207 | 27 | 2952549 | 2952580 | 2 | 16 | 32 | CA   | 9  | 8  |
| 207212 | 27 | 2958150 | 2958173 | 2 | 12 | 24 | CA   | 8  | 6  |
| 207214 | 27 | 2961351 | 2961374 | 2 | 12 | 24 | CA   | 12 | 9  |
| 207220 | 27 | 2965398 | 2965413 | 2 | 8  | 16 | GT   | 18 | 3  |
| 207221 | 27 | 2966166 | 2966197 | 2 | 16 | 32 | TG   | 16 | 6  |
| 207224 | 27 | 2969838 | 2969849 | 2 | 6  | 12 | TG   | 17 | 6  |
| 207225 | 27 | 2969852 | 2969867 | 2 | 8  | 16 | TG   | 18 | 6  |
| 207228 | 27 | 2970613 | 2970626 | 2 | 7  | 14 | GT   | 17 | 10 |
| 207246 | 27 | 3030701 | 3030718 | 2 | 9  | 18 | GT   | 14 | 6  |

|        |    |         |         |   |    |    |      |    |    |
|--------|----|---------|---------|---|----|----|------|----|----|
| 207247 | 27 | 3030721 | 3030738 | 2 | 9  | 18 | GT   | 16 | 8  |
| 207264 | 27 | 3063794 | 3063821 | 2 | 14 | 28 | GT   | 24 | 19 |
| 207265 | 27 | 3067880 | 3067893 | 2 | 7  | 14 | CA   | 20 | 5  |
| 207272 | 27 | 3083710 | 3083757 | 2 | 24 | 48 | GA   | 9  | 10 |
| 207274 | 27 | 3084069 | 3084114 | 2 | 23 | 46 | CA   | 9  | 10 |
| 207276 | 27 | 3086550 | 3086569 | 2 | 10 | 20 | TG   | 21 | 7  |
| 207277 | 27 | 3086666 | 3086679 | 2 | 7  | 14 | GT   | 27 | 3  |
| 207280 | 27 | 3090520 | 3090545 | 2 | 13 | 26 | TG   | 8  | 8  |
| 207281 | 27 | 3090591 | 3090604 | 2 | 7  | 14 | GT   | 25 | 3  |
| 207283 | 27 | 3092575 | 3092586 | 2 | 6  | 12 | TG   | 13 | 7  |
| 207285 | 27 | 3095871 | 3095890 | 2 | 10 | 20 | AC   | 13 | 6  |
| 207286 | 27 | 3096537 | 3096566 | 2 | 15 | 30 | TG   | 11 | 8  |
| 207287 | 27 | 3099824 | 3099839 | 2 | 8  | 16 | TG   | 20 | 5  |
| 207289 | 27 | 3100497 | 3100512 | 2 | 8  | 16 | CA   | 25 | 7  |
| 207292 | 27 | 3101417 | 3101438 | 2 | 11 | 22 | AC   | 11 | 6  |
| 207293 | 27 | 3103926 | 3103945 | 2 | 10 | 20 | GA   | 23 | 4  |
| 207294 | 27 | 3104773 | 3104784 | 2 | 6  | 12 | GA   | 25 | 4  |
| 207296 | 27 | 3109194 | 3109215 | 2 | 11 | 22 | CA   | 32 | 6  |
| 207303 | 27 | 3113321 | 3113344 | 2 | 12 | 24 | CT   | 19 | 7  |
| 207308 | 27 | 3121618 | 3121663 | 2 | 23 | 46 | TC   | 7  | 11 |
| 207310 | 27 | 3122153 | 3122164 | 2 | 6  | 12 | AC   | 23 | 6  |
| 207311 | 27 | 3122166 | 3122179 | 2 | 7  | 14 | CA   | 25 | 6  |
| 207314 | 27 | 3129483 | 3129500 | 3 | 6  | 18 | CTG  | 25 | 5  |
| 207315 | 27 | 3132454 | 3132479 | 2 | 13 | 26 | AG   | 19 | 6  |
| 207316 | 27 | 3132840 | 3132863 | 2 | 12 | 24 | AG   | 6  | 7  |
| 207321 | 27 | 3136288 | 3136323 | 2 | 18 | 36 | AC   | 17 | 14 |
| 207327 | 27 | 3141752 | 3141765 | 2 | 7  | 14 | AC   | 26 | 3  |
| 207328 | 27 | 3144119 | 3144144 | 2 | 13 | 26 | AC   | 12 | 6  |
| 207329 | 27 | 3144507 | 3144540 | 2 | 17 | 34 | AC   | 12 | 6  |
| 207333 | 27 | 3151473 | 3151488 | 4 | 4  | 16 | AAAG | 29 | 4  |
| 207339 | 27 | 3157565 | 3157580 | 2 | 8  | 16 | GT   | 21 | 5  |
| 207352 | 27 | 3170476 | 3170491 | 4 | 4  | 16 | AAAT | 26 | 4  |
| 207353 | 27 | 3170672 | 3170701 | 3 | 10 | 30 | CTC  | 20 | 10 |
| 207359 | 27 | 3176061 | 3176078 | 2 | 9  | 18 | AC   | 15 | 4  |
| 207360 | 27 | 3177604 | 3177635 | 2 | 16 | 32 | TG   | 8  | 12 |
| 207362 | 27 | 3178291 | 3178310 | 2 | 10 | 20 | TG   | 23 | 6  |
| 207364 | 27 | 3179230 | 3179255 | 2 | 13 | 26 | GA   | 14 | 6  |
| 207366 | 27 | 3179834 | 3179847 | 2 | 7  | 14 | GT   | 15 | 3  |
| 207368 | 27 | 3180649 | 3180668 | 2 | 10 | 20 | CA   | 17 | 5  |
| 207369 | 27 | 3180866 | 3180877 | 2 | 6  | 12 | AC   | 19 | 6  |
| 207370 | 27 | 3180879 | 3180892 | 2 | 7  | 14 | CA   | 20 | 7  |
| 207372 | 27 | 3182027 | 3182040 | 2 | 7  | 14 | CA   | 11 | 4  |
| 207373 | 27 | 3182042 | 3182057 | 2 | 8  | 16 | AC   | 18 | 10 |
| 207374 | 27 | 3183559 | 3183586 | 2 | 14 | 28 | TG   | 21 | 7  |
| 207376 | 27 | 3185246 | 3185260 | 3 | 5  | 15 | CTC  | 21 | 4  |
| 207378 | 27 | 3188418 | 3188437 | 4 | 5  | 20 | TCTG | 22 | 4  |
| 207380 | 27 | 3188765 | 3188794 | 2 | 15 | 30 | GT   | 6  | 3  |
| 207381 | 27 | 3191447 | 3191466 | 2 | 10 | 20 | AG   | 11 | 5  |
| 207382 | 27 | 3191637 | 3191650 | 2 | 7  | 14 | CA   | 24 | 5  |
| 207386 | 27 | 3201642 | 3201659 | 2 | 9  | 18 | AC   | 20 | 12 |
| 207387 | 27 | 3202128 | 3202141 | 2 | 7  | 14 | GT   | 28 | 3  |

|        |    |         |         |   |    |    |     |    |    |
|--------|----|---------|---------|---|----|----|-----|----|----|
| 207390 | 27 | 3203877 | 3203888 | 2 | 6  | 12 | GT  | 22 | 3  |
| 207391 | 27 | 3204011 | 3204034 | 2 | 12 | 24 | AC  | 11 | 9  |
| 207392 | 27 | 3205144 | 3205171 | 2 | 14 | 28 | GT  | 18 | 8  |
| 207397 | 27 | 3215930 | 3215945 | 2 | 8  | 16 | TG  | 23 | 4  |
| 207401 | 27 | 3218847 | 3218886 | 2 | 20 | 40 | CA  | 11 | 9  |
| 207402 | 27 | 3219242 | 3219257 | 2 | 8  | 16 | TC  | 22 | 4  |
| 207403 | 27 | 3220692 | 3220733 | 2 | 21 | 42 | TG  | 17 | 14 |
| 207404 | 27 | 3221153 | 3221188 | 2 | 18 | 36 | GT  | 13 | 9  |
| 207405 | 27 | 3221526 | 3221553 | 2 | 14 | 28 | CA  | 10 | 7  |
| 207406 | 27 | 3224131 | 3224146 | 2 | 8  | 16 | CA  | 28 | 5  |
| 207409 | 27 | 3232592 | 3232607 | 2 | 8  | 16 | GT  | 28 | 7  |
| 207410 | 27 | 3235119 | 3235134 | 2 | 8  | 16 | TA  | 8  | 3  |
| 207421 | 27 | 3241286 | 3241313 | 2 | 14 | 28 | GT  | 16 | 11 |
| 207423 | 27 | 3245089 | 3245122 | 2 | 17 | 34 | AC  | 17 | 9  |
| 207425 | 27 | 3245489 | 3245510 | 2 | 11 | 22 | GA  | 14 | 6  |
| 207429 | 27 | 3249508 | 3249521 | 2 | 7  | 14 | TG  | 26 | 3  |
| 207431 | 27 | 3249833 | 3249853 | 3 | 7  | 21 | AGC | 24 | 5  |
| 207432 | 27 | 3251162 | 3251185 | 2 | 12 | 24 | TG  | 16 | 8  |
| 207433 | 27 | 3251367 | 3251384 | 2 | 9  | 18 | AC  | 24 | 9  |
| 207434 | 27 | 3251386 | 3251403 | 2 | 9  | 18 | CA  | 20 | 7  |
| 207436 | 27 | 3251645 | 3251658 | 2 | 7  | 14 | GA  | 17 | 5  |
| 207439 | 27 | 3253340 | 3253359 | 2 | 10 | 20 | GA  | 19 | 10 |
| 207443 | 27 | 3254677 | 3254692 | 2 | 8  | 16 | GT  | 18 | 14 |
| 207444 | 27 | 3254693 | 3254704 | 2 | 6  | 12 | GA  | 15 | 12 |
| 207445 | 27 | 3256052 | 3256079 | 2 | 14 | 28 | GT  | 10 | 7  |
| 207447 | 27 | 3256309 | 3256322 | 2 | 7  | 14 | CA  | 26 | 4  |
| 207449 | 27 | 3259108 | 3259119 | 2 | 6  | 12 | AC  | 23 | 3  |
| 207450 | 27 | 3262578 | 3262593 | 2 | 8  | 16 | GT  | 29 | 6  |
| 207451 | 27 | 3262733 | 3262744 | 2 | 6  | 12 | GT  | 17 | 6  |
| 207454 | 27 | 3268859 | 3268880 | 2 | 11 | 22 | AC  | 16 | 6  |
| 207456 | 27 | 3270211 | 3270225 | 3 | 5  | 15 | CCA | 24 | 3  |
| 207457 | 27 | 3270386 | 3270399 | 2 | 7  | 14 | CG  | 28 | 5  |
| 207464 | 27 | 3271501 | 3271526 | 2 | 13 | 26 | TC  | 7  | 5  |
| 207466 | 27 | 3271699 | 3271732 | 2 | 17 | 34 | GA  | 7  | 8  |
| 207467 | 27 | 3273509 | 3273548 | 2 | 20 | 40 | TC  | 14 | 12 |
| 207468 | 27 | 3273630 | 3273650 | 3 | 7  | 21 | GGT | 25 | 5  |
| 207471 | 27 | 3274440 | 3274457 | 3 | 6  | 18 | GTT | 32 | 3  |
| 207472 | 27 | 3275962 | 3275973 | 2 | 6  | 12 | AG  | 13 | 3  |
| 207473 | 27 | 3276277 | 3276290 | 2 | 7  | 14 | AC  | 25 | 3  |
| 207478 | 27 | 3281482 | 3281515 | 2 | 17 | 34 | GT  | 13 | 11 |
| 207479 | 27 | 3283270 | 3283297 | 2 | 14 | 28 | CA  | 13 | 13 |
| 207490 | 27 | 3291867 | 3291890 | 2 | 12 | 24 | GT  | 19 | 12 |
| 207491 | 27 | 3294851 | 3294874 | 2 | 12 | 24 | CA  | 18 | 10 |
| 207492 | 27 | 3295078 | 3295103 | 2 | 13 | 26 | CA  | 19 | 10 |
| 207497 | 27 | 3298030 | 3298057 | 2 | 14 | 28 | AC  | 16 | 8  |
| 207504 | 27 | 3303567 | 3303584 | 2 | 9  | 18 | CA  | 22 | 11 |
| 207507 | 27 | 3307660 | 3307681 | 2 | 11 | 22 | AC  | 16 | 7  |
| 207518 | 27 | 3323827 | 3323854 | 2 | 14 | 28 | GT  | 22 | 9  |
| 207520 | 27 | 3325061 | 3325078 | 2 | 9  | 18 | CA  | 13 | 10 |
| 207532 | 27 | 3342784 | 3342801 | 2 | 9  | 18 | CA  | 28 | 4  |
| 207536 | 27 | 3346700 | 3346733 | 2 | 17 | 34 | TG  | 10 | 8  |

|        |    |         |         |   |    |    |      |    |    |
|--------|----|---------|---------|---|----|----|------|----|----|
| 207537 | 27 | 3346781 | 3346798 | 2 | 9  | 18 | GT   | 19 | 10 |
| 207540 | 27 | 3348250 | 3348271 | 2 | 11 | 22 | GT   | 11 | 10 |
| 207543 | 27 | 3348746 | 3348759 | 2 | 7  | 14 | GT   | 24 | 8  |
| 207544 | 27 | 3348761 | 3348772 | 2 | 6  | 12 | TG   | 26 | 6  |
| 207545 | 27 | 3348927 | 3348950 | 2 | 12 | 24 | CA   | 19 | 10 |
| 207547 | 27 | 3351949 | 3351970 | 2 | 11 | 22 | CT   | 19 | 12 |
| 207550 | 27 | 3355835 | 3355866 | 2 | 16 | 32 | TG   | 19 | 21 |
| 207551 | 27 | 3356196 | 3356209 | 2 | 7  | 14 | AG   | 16 | 6  |
| 207552 | 27 | 3359532 | 3359545 | 2 | 7  | 14 | GT   | 13 | 4  |
| 207556 | 27 | 3370820 | 3370831 | 2 | 6  | 12 | CT   | 17 | 4  |
| 207559 | 27 | 3372438 | 3372461 | 3 | 8  | 24 | TTG  | 25 | 5  |
| 207560 | 27 | 3376427 | 3376448 | 2 | 11 | 22 | GT   | 14 | 5  |
| 207564 | 27 | 3379117 | 3379138 | 2 | 11 | 22 | GA   | 17 | 3  |
| 207571 | 27 | 3381706 | 3381723 | 2 | 9  | 18 | TG   | 7  | 5  |
| 207576 | 27 | 3383012 | 3383039 | 2 | 14 | 28 | GA   | 7  | 8  |
| 207581 | 27 | 3384455 | 3384478 | 2 | 12 | 24 | TG   | 10 | 3  |
| 207583 | 27 | 3385856 | 3385891 | 2 | 18 | 36 | TG   | 19 | 10 |
| 207584 | 27 | 3386369 | 3386392 | 2 | 12 | 24 | CT   | 9  | 3  |
| 207585 | 27 | 3386648 | 3386675 | 2 | 14 | 28 | TG   | 18 | 6  |
| 207589 | 27 | 3388495 | 3388518 | 2 | 12 | 24 | GT   | 16 | 12 |
| 207593 | 27 | 3390801 | 3390828 | 2 | 14 | 28 | TG   | 18 | 4  |
| 207597 | 27 | 3393762 | 3393777 | 2 | 8  | 16 | CA   | 12 | 8  |
| 207599 | 27 | 3398794 | 3398813 | 2 | 10 | 20 | CA   | 18 | 6  |
| 207600 | 27 | 3398882 | 3398897 | 2 | 8  | 16 | AC   | 17 | 3  |
| 207601 | 27 | 3400122 | 3400153 | 2 | 16 | 32 | TG   | 20 | 11 |
| 207602 | 27 | 3400714 | 3400737 | 2 | 12 | 24 | TG   | 16 | 11 |
| 207604 | 27 | 3400935 | 3400946 | 2 | 6  | 12 | CA   | 20 | 6  |
| 207609 | 27 | 3407569 | 3407584 | 2 | 8  | 16 | CA   | 23 | 10 |
| 207610 | 27 | 3407644 | 3407657 | 2 | 7  | 14 | TG   | 17 | 6  |
| 207612 | 27 | 3408240 | 3408251 | 2 | 6  | 12 | AG   | 25 | 7  |
| 207613 | 27 | 3408467 | 3408484 | 2 | 9  | 18 | AC   | 24 | 8  |
| 207623 | 27 | 3417819 | 3417854 | 2 | 18 | 36 | CA   | 12 | 11 |
| 207624 | 27 | 3418012 | 3418032 | 3 | 7  | 21 | CCT  | 21 | 3  |
| 207626 | 27 | 3419197 | 3419248 | 4 | 13 | 52 | GGAT | 10 | 4  |
| 207627 | 27 | 3419485 | 3419506 | 2 | 11 | 22 | AC   | 21 | 8  |
| 207628 | 27 | 3421319 | 3421332 | 2 | 7  | 14 | CA   | 16 | 4  |
| 207634 | 27 | 3430239 | 3430262 | 2 | 12 | 24 | GT   | 14 | 4  |
| 207635 | 27 | 3430993 | 3431030 | 2 | 19 | 38 | TG   | 10 | 13 |
| 207636 | 27 | 3431339 | 3431368 | 2 | 15 | 30 | TG   | 13 | 8  |
| 207637 | 27 | 3431531 | 3431554 | 2 | 12 | 24 | CA   | 12 | 7  |
| 207640 | 27 | 3433744 | 3433773 | 2 | 15 | 30 | CA   | 11 | 6  |
| 207641 | 27 | 3433922 | 3433965 | 4 | 11 | 44 | CTTT | 24 | 3  |
| 207645 | 27 | 3439520 | 3439531 | 2 | 6  | 12 | CA   | 14 | 4  |
| 207646 | 27 | 3440494 | 3440531 | 2 | 19 | 38 | CT   | 6  | 10 |
| 207647 | 27 | 3442427 | 3442498 | 4 | 18 | 72 | TATC | 16 | 11 |
| 207649 | 27 | 3446476 | 3446490 | 3 | 5  | 15 | CCG  | 10 | 3  |
| 207650 | 27 | 3446677 | 3446702 | 2 | 13 | 26 | GA   | 11 | 10 |
| 207652 | 27 | 3446874 | 3446891 | 3 | 6  | 18 | TTC  | 9  | 4  |
| 207653 | 27 | 3446957 | 3446980 | 3 | 8  | 24 | CCT  | 6  | 7  |
| 207654 | 27 | 3447088 | 3447111 | 2 | 12 | 24 | GT   | 17 | 8  |
| 207658 | 27 | 3450913 | 3450938 | 2 | 13 | 26 | TG   | 17 | 5  |

|        |    |         |         |   |    |    |      |    |    |
|--------|----|---------|---------|---|----|----|------|----|----|
| 207659 | 27 | 3451037 | 3451050 | 2 | 7  | 14 | TG   | 20 | 9  |
| 207662 | 27 | 3452361 | 3452382 | 2 | 11 | 22 | GT   | 16 | 3  |
| 207664 | 27 | 3452893 | 3452910 | 2 | 9  | 18 | CT   | 10 | 3  |
| 207670 | 27 | 3455073 | 3455088 | 2 | 8  | 16 | GT   | 16 | 5  |
| 207673 | 27 | 3457924 | 3457937 | 2 | 7  | 14 | CA   | 19 | 3  |
| 207674 | 27 | 3458695 | 3458726 | 2 | 16 | 32 | CA   | 12 | 8  |
| 207678 | 27 | 3462789 | 3462830 | 2 | 21 | 42 | CT   | 9  | 5  |
| 207679 | 27 | 3462851 | 3462868 | 2 | 9  | 18 | CA   | 12 | 5  |
| 207686 | 27 | 3472700 | 3472726 | 3 | 9  | 27 | TCT  | 25 | 7  |
| 207695 | 27 | 3476270 | 3476281 | 2 | 6  | 12 | CA   | 26 | 4  |
| 207696 | 27 | 3476407 | 3476426 | 4 | 5  | 20 | GTGC | 20 | 15 |
| 207697 | 27 | 3476694 | 3476725 | 2 | 16 | 32 | AC   | 14 | 8  |
| 207698 | 27 | 3477078 | 3477109 | 2 | 16 | 32 | TG   | 8  | 7  |
| 207704 | 27 | 3485898 | 3485915 | 2 | 9  | 18 | CA   | 20 | 3  |
| 207707 | 27 | 3487405 | 3487424 | 2 | 10 | 20 | CT   | 8  | 6  |
| 207708 | 27 | 3487584 | 3487621 | 2 | 19 | 38 | CT   | 6  | 6  |
| 207709 | 27 | 3488281 | 3488310 | 2 | 15 | 30 | CA   | 23 | 14 |
| 207710 | 27 | 3488390 | 3488415 | 2 | 13 | 26 | CA   | 14 | 13 |
| 207711 | 27 | 3488657 | 3488672 | 2 | 8  | 16 | CA   | 23 | 7  |
| 207714 | 27 | 3493409 | 3493442 | 2 | 17 | 34 | TG   | 6  | 9  |
| 207715 | 27 | 3493820 | 3493841 | 2 | 11 | 22 | CA   | 21 | 10 |
| 207721 | 27 | 3501619 | 3501639 | 3 | 7  | 21 | CTG  | 28 | 6  |
| 207722 | 27 | 3501784 | 3501797 | 2 | 7  | 14 | AC   | 23 | 4  |
| 207723 | 27 | 3501961 | 3501984 | 4 | 6  | 24 | CTCA | 32 | 5  |
| 207727 | 27 | 3505968 | 3505979 | 2 | 6  | 12 | CT   | 29 | 8  |
| 207729 | 27 | 3506706 | 3506723 | 2 | 9  | 18 | AC   | 13 | 8  |
| 207733 | 27 | 3511514 | 3511539 | 2 | 13 | 26 | TG   | 8  | 6  |
| 207738 | 27 | 3512445 | 3512471 | 3 | 9  | 27 | ACA  | 15 | 8  |
| 207741 | 27 | 3525889 | 3525932 | 4 | 11 | 44 | TTCT | 17 | 9  |
| 207744 | 27 | 3527478 | 3527493 | 2 | 8  | 16 | GA   | 12 | 4  |
| 207745 | 27 | 3527495 | 3527510 | 2 | 8  | 16 | AG   | 17 | 7  |
| 207746 | 27 | 3527581 | 3527598 | 2 | 9  | 18 | AC   | 16 | 7  |
| 207752 | 27 | 3529874 | 3529887 | 2 | 7  | 14 | GT   | 19 | 5  |
| 207753 | 27 | 3530394 | 3530425 | 2 | 16 | 32 | AC   | 15 | 12 |
| 207754 | 27 | 3530609 | 3530628 | 4 | 5  | 20 | GTGC | 24 | 4  |
| 207755 | 27 | 3531107 | 3531134 | 2 | 14 | 28 | GT   | 14 | 7  |
| 207763 | 27 | 3540960 | 3540975 | 2 | 8  | 16 | CA   | 24 | 5  |
| 207766 | 27 | 3545407 | 3545428 | 2 | 11 | 22 | AC   | 24 | 9  |
| 207769 | 27 | 3549675 | 3549692 | 3 | 6  | 18 | AAT  | 26 | 3  |
| 207770 | 27 | 3550121 | 3550136 | 2 | 8  | 16 | TG   | 25 | 9  |
| 207780 | 27 | 3570374 | 3570387 | 2 | 7  | 14 | AC   | 18 | 5  |
| 207782 | 27 | 3570779 | 3570792 | 2 | 7  | 14 | AC   | 26 | 4  |
| 207783 | 27 | 3571924 | 3571941 | 2 | 9  | 18 | GT   | 27 | 7  |
| 207785 | 27 | 3573134 | 3573149 | 2 | 8  | 16 | AG   | 27 | 3  |
| 207791 | 27 | 3593206 | 3593225 | 4 | 5  | 20 | TTTG | 19 | 4  |
| 207797 | 27 | 3616443 | 3616456 | 2 | 7  | 14 | GT   | 22 | 3  |
| 207798 | 27 | 3627275 | 3627310 | 2 | 18 | 36 | AC   | 16 | 10 |
| 207802 | 27 | 3631438 | 3631465 | 2 | 14 | 28 | CT   | 13 | 8  |
| 207803 | 27 | 3633675 | 3633710 | 4 | 9  | 36 | ATAG | 11 | 9  |
| 207806 | 27 | 3641614 | 3641640 | 3 | 9  | 27 | CAG  | 15 | 12 |
| 207816 | 27 | 3654446 | 3654471 | 2 | 13 | 26 | GT   | 14 | 11 |

|        |    |         |         |   |    |    |      |    |    |
|--------|----|---------|---------|---|----|----|------|----|----|
| 207818 | 27 | 3655516 | 3655527 | 2 | 6  | 12 | CA   | 18 | 11 |
| 207822 | 27 | 3657046 | 3657061 | 2 | 8  | 16 | CA   | 26 | 5  |
| 207823 | 27 | 3657910 | 3657929 | 2 | 10 | 20 | CA   | 20 | 4  |
| 207824 | 27 | 3659918 | 3659943 | 2 | 13 | 26 | AC   | 19 | 7  |
| 207825 | 27 | 3661269 | 3661304 | 2 | 18 | 36 | AC   | 16 | 10 |
| 207826 | 27 | 3661345 | 3661360 | 2 | 8  | 16 | AC   | 27 | 7  |
| 207828 | 27 | 3669989 | 3670028 | 4 | 10 | 40 | TTTC | 21 | 15 |
| 207831 | 27 | 3671341 | 3671364 | 3 | 8  | 24 | AGC  | 29 | 7  |
| 207832 | 27 | 3671967 | 3671994 | 4 | 7  | 28 | TTTA | 20 | 3  |
| 207849 | 27 | 3681923 | 3681936 | 2 | 7  | 14 | TC   | 21 | 3  |
| 207853 | 27 | 3690260 | 3690295 | 2 | 18 | 36 | CA   | 12 | 10 |
| 207855 | 27 | 3692237 | 3692254 | 2 | 9  | 18 | TG   | 20 | 13 |
| 207863 | 27 | 3708150 | 3708161 | 2 | 6  | 12 | AC   | 28 | 6  |
| 207871 | 27 | 3721451 | 3721470 | 4 | 5  | 20 | AAAT | 16 | 6  |
| 207881 | 27 | 3728949 | 3729004 | 2 | 28 | 56 | CA   | 17 | 8  |
| 207883 | 27 | 3731722 | 3731753 | 4 | 8  | 32 | CCAT | 20 | 7  |
| 207889 | 27 | 3742853 | 3742864 | 2 | 6  | 12 | TA   | 25 | 3  |
| 207897 | 27 | 3758711 | 3758731 | 3 | 7  | 21 | TGA  | 26 | 3  |
| 207898 | 27 | 3760142 | 3760186 | 3 | 15 | 45 | CTG  | 23 | 13 |
| 207901 | 27 | 3764083 | 3764098 | 2 | 8  | 16 | CA   | 21 | 8  |
| 207911 | 27 | 3785935 | 3785956 | 2 | 11 | 22 | AG   | 9  | 7  |
| 207916 | 27 | 3792175 | 3792190 | 2 | 8  | 16 | CA   | 9  | 3  |
| 207922 | 27 | 3796086 | 3796097 | 2 | 6  | 12 | CA   | 23 | 6  |
| 207927 | 27 | 3797981 | 3798008 | 2 | 14 | 28 | CA   | 11 | 13 |
| 207945 | 27 | 3817342 | 3817357 | 2 | 8  | 16 | GT   | 26 | 9  |
| 207953 | 27 | 3819589 | 3819600 | 2 | 6  | 12 | TC   | 27 | 3  |
| 207960 | 27 | 3827902 | 3827937 | 3 | 12 | 36 | TAA  | 14 | 8  |
| 207966 | 27 | 3835409 | 3835424 | 4 | 4  | 16 | GGAC | 15 | 4  |
| 207967 | 27 | 3835451 | 3835466 | 2 | 8  | 16 | CT   | 16 | 5  |
| 207969 | 27 | 3835888 | 3835913 | 2 | 13 | 26 | TG   | 24 | 12 |
| 207973 | 27 | 3847749 | 3847772 | 3 | 8  | 24 | TGC  | 17 | 12 |
| 207976 | 27 | 3857532 | 3857555 | 2 | 12 | 24 | TG   | 26 | 11 |
| 207977 | 27 | 3857994 | 3858017 | 2 | 12 | 24 | TG   | 21 | 15 |
| 207980 | 27 | 3873714 | 3873749 | 2 | 18 | 36 | TG   | 12 | 9  |
| 207981 | 27 | 3873785 | 3873814 | 2 | 15 | 30 | GA   | 11 | 10 |
| 207984 | 27 | 3879975 | 3879995 | 3 | 7  | 21 | TGT  | 20 | 6  |
| 207989 | 27 | 3883987 | 3883998 | 2 | 6  | 12 | CA   | 27 | 4  |
| 207991 | 27 | 3887890 | 3887903 | 2 | 7  | 14 | TC   | 20 | 4  |
| 207992 | 27 | 3888243 | 3888257 | 3 | 5  | 15 | TGC  | 15 | 3  |
| 207996 | 27 | 3897460 | 3897473 | 2 | 7  | 14 | CA   | 27 | 3  |
| 207997 | 27 | 3897611 | 3897630 | 2 | 10 | 20 | CA   | 24 | 5  |
| 207998 | 27 | 3897682 | 3897697 | 2 | 8  | 16 | GT   | 26 | 3  |
| 208005 | 27 | 3909330 | 3909355 | 2 | 13 | 26 | GT   | 20 | 4  |
| 208007 | 27 | 3913457 | 3913484 | 4 | 7  | 28 | AGAC | 22 | 5  |
| 208012 | 27 | 3921851 | 3921868 | 3 | 6  | 18 | GGA  | 17 | 3  |
| 208016 | 27 | 3931320 | 3931343 | 4 | 6  | 24 | TGTC | 30 | 5  |
| 208020 | 27 | 3938891 | 3938908 | 2 | 9  | 18 | AG   | 11 | 7  |
| 208021 | 27 | 3938911 | 3938922 | 2 | 6  | 12 | AG   | 15 | 6  |
| 208024 | 27 | 3939587 | 3939638 | 4 | 13 | 52 | AAAG | 12 | 10 |
| 208025 | 27 | 3940334 | 3940349 | 2 | 8  | 16 | CA   | 20 | 3  |
| 208034 | 27 | 3969048 | 3969085 | 2 | 19 | 38 | TG   | 22 | 7  |



|        |    |         |         |   |    |    |      |    |    |
|--------|----|---------|---------|---|----|----|------|----|----|
| 208037 | 27 | 3969242 | 3969253 | 2 | 6  | 12 | TC   | 16 | 3  |
| 208047 | 27 | 3979242 | 3979267 | 2 | 13 | 26 | CT   | 8  | 10 |
| 208048 | 27 | 3982316 | 3982329 | 2 | 7  | 14 | AC   | 20 | 4  |
| 208050 | 27 | 3982987 | 3983006 | 2 | 10 | 20 | TG   | 17 | 6  |
| 208056 | 27 | 3988568 | 3988587 | 2 | 10 | 20 | TG   | 17 | 4  |
| 208061 | 27 | 4000116 | 4000130 | 3 | 5  | 15 | TAA  | 12 | 6  |
| 208063 | 27 | 4005829 | 4005843 | 3 | 5  | 15 | GCA  | 20 | 4  |
| 208073 | 27 | 4042521 | 4042532 | 2 | 6  | 12 | GA   | 28 | 3  |
| 208078 | 27 | 4055559 | 4055580 | 2 | 11 | 22 | AC   | 17 | 7  |
| 208084 | 27 | 4058387 | 4058402 | 2 | 8  | 16 | GT   | 23 | 7  |
| 208090 | 27 | 4070149 | 4070178 | 2 | 15 | 30 | CA   | 15 | 10 |
| 208098 | 27 | 4089776 | 4089789 | 2 | 7  | 14 | AC   | 23 | 4  |
| 208099 | 27 | 4090178 | 4090204 | 3 | 9  | 27 | TCA  | 25 | 9  |
| 208102 | 27 | 4105272 | 4105291 | 4 | 5  | 20 | ACAA | 28 | 4  |
| 208110 | 27 | 4123299 | 4123328 | 2 | 15 | 30 | CA   | 16 | 12 |
| 208112 | 27 | 4131493 | 4131520 | 2 | 14 | 28 | TC   | 12 | 5  |
| 208114 | 27 | 4134211 | 4134230 | 4 | 5  | 20 | TTTC | 23 | 6  |
| 208115 | 27 | 4134606 | 4134632 | 3 | 9  | 27 | CTC  | 29 | 4  |
| 208119 | 27 | 4149050 | 4149085 | 4 | 9  | 36 | TCTG | 18 | 7  |
| 208121 | 27 | 4149756 | 4149771 | 4 | 4  | 16 | TTTG | 29 | 4  |
| 208122 | 27 | 4150746 | 4150765 | 4 | 5  | 20 | TGTC | 20 | 5  |
| 208130 | 27 | 4159457 | 4159482 | 2 | 13 | 26 | TG   | 12 | 8  |
| 208137 | 27 | 4164177 | 4164190 | 2 | 7  | 14 | GT   | 17 | 6  |
| 208138 | 27 | 4164194 | 4164209 | 2 | 8  | 16 | TG   | 24 | 6  |
| 208142 | 27 | 4179857 | 4179871 | 3 | 5  | 15 | TTA  | 10 | 3  |
| 208144 | 27 | 4180384 | 4180407 | 2 | 12 | 24 | CA   | 18 | 14 |
| 208145 | 27 | 4186579 | 4186594 | 4 | 4  | 16 | TTTC | 15 | 7  |
| 208148 | 27 | 4191865 | 4191878 | 2 | 7  | 14 | CT   | 25 | 3  |
| 208149 | 27 | 4192944 | 4192987 | 2 | 22 | 44 | GT   | 11 | 11 |
| 208150 | 27 | 4193640 | 4193669 | 2 | 15 | 30 | CA   | 11 | 8  |
| 208153 | 27 | 4200654 | 4200665 | 2 | 6  | 12 | GA   | 26 | 3  |
| 208154 | 27 | 4201348 | 4201383 | 4 | 9  | 36 | TCTT | 19 | 10 |
| 208156 | 27 | 4202956 | 4202989 | 2 | 17 | 34 | TG   | 13 | 7  |
| 208169 | 27 | 4211425 | 4211456 | 2 | 16 | 32 | GT   | 11 | 12 |
| 208175 | 27 | 4220642 | 4220661 | 2 | 10 | 20 | AC   | 16 | 7  |
| 208177 | 27 | 4220788 | 4220805 | 2 | 9  | 18 | CA   | 23 | 6  |
| 208178 | 27 | 4225073 | 4225094 | 2 | 11 | 22 | CA   | 18 | 7  |
| 208180 | 27 | 4227677 | 4227698 | 2 | 11 | 22 | TG   | 22 | 8  |
| 208189 | 27 | 4246620 | 4246647 | 2 | 14 | 28 | TG   | 16 | 16 |
| 208192 | 27 | 4248851 | 4248878 | 2 | 14 | 28 | CA   | 8  | 7  |
| 208196 | 27 | 4265813 | 4265826 | 2 | 7  | 14 | GT   | 31 | 4  |
| 208200 | 27 | 4292216 | 4292230 | 3 | 5  | 15 | GAG  | 21 | 3  |
| 208203 | 27 | 4301523 | 4301552 | 2 | 15 | 30 | CA   | 11 | 5  |
| 208205 | 27 | 4302449 | 4302466 | 2 | 9  | 18 | AC   | 15 | 11 |
| 208206 | 27 | 4312434 | 4312448 | 3 | 5  | 15 | CCA  | 28 | 3  |
| 208209 | 27 | 4315181 | 4315196 | 4 | 4  | 16 | ACAA | 16 | 5  |
| 208213 | 27 | 4322585 | 4322602 | 3 | 6  | 18 | CCT  | 25 | 11 |
| 208214 | 27 | 4322780 | 4322807 | 2 | 14 | 28 | TG   | 23 | 9  |
| 208215 | 27 | 4323215 | 4323228 | 2 | 7  | 14 | CT   | 34 | 4  |
| 208216 | 27 | 4323274 | 4323297 | 2 | 12 | 24 | TG   | 26 | 7  |
| 208217 | 27 | 4326307 | 4326332 | 2 | 13 | 26 | CA   | 15 | 13 |

|        |    |         |         |   |    |    |      |    |    |
|--------|----|---------|---------|---|----|----|------|----|----|
| 208234 | 27 | 4371829 | 4371854 | 2 | 13 | 26 | GT   | 12 | 9  |
| 208241 | 27 | 4392883 | 4392904 | 2 | 11 | 22 | GT   | 15 | 10 |
| 208243 | 27 | 4397297 | 4397318 | 2 | 11 | 22 | AC   | 11 | 10 |
| 208248 | 27 | 4406035 | 4406050 | 4 | 4  | 16 | TTTA | 11 | 6  |
| 208250 | 27 | 4410627 | 4410638 | 2 | 6  | 12 | GT   | 26 | 4  |
| 208251 | 27 | 4415588 | 4415619 | 2 | 16 | 32 | CA   | 11 | 7  |
| 208252 | 27 | 4416749 | 4416776 | 2 | 14 | 28 | AG   | 21 | 11 |
| 208253 | 27 | 4417723 | 4417752 | 3 | 10 | 30 | GAG  | 14 | 5  |
| 208255 | 27 | 4419521 | 4419548 | 2 | 14 | 28 | TG   | 14 | 11 |
| 208260 | 27 | 4433259 | 4433273 | 3 | 5  | 15 | TCC  | 32 | 3  |
| 208263 | 27 | 4437144 | 4437155 | 2 | 6  | 12 | AT   | 21 | 3  |
| 208270 | 27 | 4441921 | 4441944 | 2 | 12 | 24 | TG   | 10 | 8  |
| 208273 | 27 | 4444068 | 4444083 | 2 | 8  | 16 | AC   | 23 | 3  |
| 208274 | 27 | 4447022 | 4447035 | 2 | 7  | 14 | GT   | 22 | 5  |
| 208280 | 27 | 4451437 | 4451450 | 2 | 7  | 14 | GT   | 23 | 6  |
| 208285 | 27 | 4451927 | 4451938 | 2 | 6  | 12 | CT   | 23 | 3  |
| 208286 | 27 | 4452073 | 4452096 | 2 | 12 | 24 | AG   | 17 | 8  |
| 208289 | 27 | 4453692 | 4453711 | 4 | 5  | 20 | ACGG | 25 | 9  |
| 208290 | 27 | 4454464 | 4454487 | 3 | 8  | 24 | GGA  | 22 | 3  |
| 208296 | 27 | 4482540 | 4482551 | 2 | 6  | 12 | TA   | 7  | 5  |
| 208297 | 27 | 4483447 | 4483476 | 2 | 15 | 30 | TG   | 17 | 10 |
| 208309 | 27 | 4492989 | 4493024 | 2 | 18 | 36 | TG   | 6  | 6  |
| 208314 | 27 | 4500492 | 4500509 | 3 | 6  | 18 | GAG  | 17 | 3  |
| 208323 | 27 | 4504407 | 4504436 | 2 | 15 | 30 | GT   | 16 | 9  |
| 208324 | 27 | 4504927 | 4504941 | 3 | 5  | 15 | GCA  | 30 | 3  |
| 208325 | 27 | 4506265 | 4506286 | 2 | 11 | 22 | AC   | 19 | 5  |
| 208331 | 27 | 4509527 | 4509540 | 2 | 7  | 14 | GA   | 26 | 4  |
| 208338 | 27 | 4514355 | 4514369 | 3 | 5  | 15 | GGT  | 26 | 3  |
| 208339 | 27 | 4514824 | 4514841 | 2 | 9  | 18 | TG   | 25 | 6  |
| 208341 | 27 | 4516561 | 4516588 | 2 | 14 | 28 | TG   | 10 | 6  |
| 208343 | 27 | 4522369 | 4522392 | 3 | 8  | 24 | AGG  | 8  | 3  |
| 208345 | 27 | 4524604 | 4524641 | 2 | 19 | 38 | CA   | 8  | 11 |
| 208352 | 27 | 4530709 | 4530724 | 2 | 8  | 16 | AC   | 19 | 3  |
| 208360 | 27 | 4540593 | 4540604 | 2 | 6  | 12 | CA   | 18 | 3  |
| 208366 | 27 | 4547064 | 4547095 | 2 | 16 | 32 | GT   | 18 | 11 |
| 208368 | 27 | 4548738 | 4548759 | 2 | 11 | 22 | AC   | 19 | 7  |
| 208371 | 27 | 4550535 | 4550562 | 2 | 14 | 28 | GT   | 11 | 5  |
| 208372 | 27 | 4550675 | 4550700 | 2 | 13 | 26 | AC   | 10 | 9  |
| 208373 | 27 | 4551462 | 4551494 | 3 | 11 | 33 | TAA  | 9  | 4  |
| 208374 | 27 | 4551890 | 4551927 | 2 | 19 | 38 | GT   | 12 | 9  |
| 208376 | 27 | 4552776 | 4552811 | 2 | 18 | 36 | GT   | 18 | 15 |
| 208377 | 27 | 4552894 | 4552907 | 2 | 7  | 14 | AC   | 18 | 5  |
| 208378 | 27 | 4552930 | 4552955 | 2 | 13 | 26 | AC   | 17 | 10 |
| 208379 | 27 | 4553406 | 4553427 | 2 | 11 | 22 | CT   | 10 | 4  |
| 208387 | 27 | 4569084 | 4569095 | 2 | 6  | 12 | CG   | 30 | 12 |
| 208388 | 27 | 4569096 | 4569107 | 2 | 6  | 12 | TG   | 24 | 10 |
| 208389 | 27 | 4569548 | 4569561 | 2 | 7  | 14 | AC   | 20 | 7  |
| 208390 | 27 | 4571097 | 4571120 | 2 | 12 | 24 | CT   | 8  | 4  |
| 208393 | 27 | 4572790 | 4572829 | 2 | 20 | 40 | TG   | 9  | 11 |
| 208395 | 27 | 4573548 | 4573585 | 2 | 19 | 38 | CA   | 11 | 10 |
| 208403 | 27 | 4583785 | 4583820 | 2 | 18 | 36 | CA   | 8  | 9  |

|        |    |         |         |   |    |    |      |    |    |
|--------|----|---------|---------|---|----|----|------|----|----|
| 208404 | 27 | 4583985 | 4583996 | 2 | 6  | 12 | GT   | 27 | 8  |
| 208406 | 27 | 4585608 | 4585625 | 2 | 9  | 18 | AC   | 9  | 9  |
| 208407 | 27 | 4585766 | 4585781 | 2 | 8  | 16 | GT   | 13 | 6  |
| 208415 | 27 | 4589529 | 4589568 | 2 | 20 | 40 | AC   | 9  | 11 |
| 208417 | 27 | 4590948 | 4590973 | 2 | 13 | 26 | GA   | 12 | 9  |
| 208420 | 27 | 4594722 | 4594751 | 2 | 15 | 30 | GA   | 13 | 10 |
| 208422 | 27 | 4595902 | 4595922 | 3 | 7  | 21 | AAC  | 21 | 4  |
| 208424 | 27 | 4597244 | 4597261 | 2 | 9  | 18 | AC   | 8  | 6  |
| 208425 | 27 | 4597426 | 4597447 | 2 | 11 | 22 | AC   | 19 | 8  |
| 208426 | 27 | 4597952 | 4597969 | 2 | 9  | 18 | TG   | 18 | 3  |
| 208427 | 27 | 4598160 | 4598173 | 2 | 7  | 14 | CG   | 35 | 9  |
| 208429 | 27 | 4599349 | 4599374 | 2 | 13 | 26 | CA   | 16 | 13 |
| 208431 | 27 | 4599952 | 4599978 | 3 | 9  | 27 | AAG  | 9  | 7  |
| 208432 | 27 | 4602178 | 4602207 | 2 | 15 | 30 | GA   | 13 | 7  |
| 208434 | 27 | 4602385 | 4602398 | 2 | 7  | 14 | AC   | 13 | 3  |
| 208438 | 27 | 4603122 | 4603153 | 4 | 8  | 32 | ATAG | 23 | 14 |
| 208440 | 27 | 4604501 | 4604526 | 2 | 13 | 26 | GT   | 15 | 11 |
| 208443 | 27 | 4606842 | 4606895 | 2 | 27 | 54 | TG   | 6  | 10 |
| 208444 | 27 | 4607167 | 4607184 | 2 | 9  | 18 | GT   | 13 | 8  |
| 208445 | 27 | 4607859 | 4607874 | 4 | 4  | 16 | GCAG | 31 | 4  |
| 208450 | 27 | 4610109 | 4610122 | 2 | 7  | 14 | AC   | 10 | 4  |
| 208452 | 27 | 4610291 | 4610308 | 2 | 9  | 18 | AC   | 14 | 7  |
| 208457 | 27 | 4613863 | 4613898 | 3 | 12 | 36 | ATC  | 22 | 8  |
| 208458 | 27 | 4613930 | 4613941 | 2 | 6  | 12 | GT   | 16 | 3  |
| 208459 | 27 | 4614404 | 4614435 | 2 | 16 | 32 | CA   | 17 | 10 |
| 208460 | 27 | 4615094 | 4615109 | 4 | 4  | 16 | CAAA | 10 | 7  |
| 208462 | 27 | 4615399 | 4615412 | 2 | 7  | 14 | AC   | 15 | 4  |
| 208463 | 27 | 4615414 | 4615427 | 2 | 7  | 14 | CA   | 18 | 5  |
| 208465 | 27 | 4615739 | 4615768 | 2 | 15 | 30 | CA   | 15 | 8  |
| 208468 | 27 | 4617018 | 4617049 | 2 | 16 | 32 | TG   | 10 | 10 |
| 208477 | 27 | 4623437 | 4623474 | 2 | 19 | 38 | AC   | 8  | 9  |
| 208479 | 27 | 4624213 | 4624230 | 2 | 9  | 18 | TG   | 13 | 8  |
| 208482 | 27 | 4625647 | 4625664 | 2 | 9  | 18 | AG   | 18 | 3  |
| 208483 | 27 | 4626451 | 4626468 | 2 | 9  | 18 | AC   | 22 | 5  |
| 208488 | 27 | 4628117 | 4628132 | 2 | 8  | 16 | AC   | 22 | 3  |
| 208489 | 27 | 4628281 | 4628306 | 2 | 13 | 26 | AC   | 19 | 16 |
| 208490 | 27 | 4628385 | 4628398 | 2 | 7  | 14 | AC   | 20 | 4  |
| 208498 | 27 | 4635966 | 4635989 | 2 | 12 | 24 | GT   | 15 | 8  |
| 208501 | 27 | 4638389 | 4638420 | 4 | 8  | 32 | AAAG | 7  | 7  |
| 208502 | 27 | 4640664 | 4640695 | 2 | 16 | 32 | GA   | 17 | 6  |
| 208507 | 27 | 4643257 | 4643280 | 2 | 12 | 24 | CA   | 9  | 8  |
| 208510 | 27 | 4648373 | 4648402 | 2 | 15 | 30 | CA   | 21 | 8  |
| 208513 | 27 | 4653707 | 4653727 | 3 | 7  | 21 | TTC  | 7  | 4  |
| 208516 | 27 | 4657922 | 4657935 | 2 | 7  | 14 | AC   | 23 | 5  |
| 208518 | 27 | 4664491 | 4664502 | 2 | 6  | 12 | CA   | 12 | 4  |
| 208523 | 27 | 4680918 | 4680949 | 2 | 16 | 32 | CA   | 19 | 9  |
| 208543 | 27 | 4700458 | 4700478 | 3 | 7  | 21 | CAG  | 25 | 3  |
| 208544 | 27 | 4700521 | 4700544 | 3 | 8  | 24 | CTC  | 18 | 4  |
| 208546 | 27 | 4703816 | 4703829 | 2 | 7  | 14 | GT   | 33 | 3  |
| 208547 | 27 | 4703980 | 4703995 | 2 | 8  | 16 | TG   | 26 | 7  |
| 208548 | 27 | 4704506 | 4704517 | 2 | 6  | 12 | TC   | 19 | 3  |

|        |    |         |         |   |    |    |      |    |    |
|--------|----|---------|---------|---|----|----|------|----|----|
| 208549 | 27 | 4704579 | 4704612 | 2 | 17 | 34 | TC   | 10 | 5  |
| 208550 | 27 | 4704635 | 4704646 | 2 | 6  | 12 | TC   | 14 | 7  |
| 208551 | 27 | 4704647 | 4704660 | 2 | 7  | 14 | AC   | 14 | 6  |
| 208552 | 27 | 4707263 | 4707296 | 2 | 17 | 34 | AG   | 7  | 8  |
| 208558 | 27 | 4713486 | 4713529 | 4 | 11 | 44 | TCCA | 21 | 10 |
| 208562 | 27 | 4725301 | 4725322 | 2 | 11 | 22 | AC   | 13 | 9  |
| 208565 | 27 | 4733312 | 4733337 | 2 | 13 | 26 | TG   | 14 | 8  |
| 208567 | 27 | 4733632 | 4733655 | 2 | 12 | 24 | CA   | 10 | 10 |
| 208573 | 27 | 4740078 | 4740093 | 2 | 8  | 16 | TG   | 26 | 4  |
| 208581 | 27 | 4752751 | 4752798 | 3 | 16 | 48 | ATG  | 24 | 17 |
| 208584 | 27 | 4755902 | 4755935 | 2 | 17 | 34 | AC   | 10 | 8  |
| 208588 | 27 | 4766295 | 4766316 | 2 | 11 | 22 | AC   | 14 | 5  |
| 208590 | 27 | 4768617 | 4768658 | 2 | 21 | 42 | TG   | 8  | 9  |
| 208593 | 27 | 4768826 | 4768837 | 2 | 6  | 12 | AC   | 30 | 3  |
| 208595 | 27 | 4769549 | 4769572 | 2 | 12 | 24 | AG   | 7  | 9  |
| 208598 | 27 | 4769754 | 4769783 | 2 | 15 | 30 | TG   | 10 | 6  |
| 208602 | 27 | 4773443 | 4773502 | 4 | 15 | 60 | AGAA | 15 | 13 |
| 208603 | 27 | 4774888 | 4774917 | 2 | 15 | 30 | AC   | 9  | 9  |
| 208607 | 27 | 4777475 | 4777492 | 3 | 6  | 18 | GCT  | 20 | 5  |
| 208610 | 27 | 4780669 | 4780696 | 4 | 7  | 28 | TGTC | 26 | 5  |
| 208612 | 27 | 4783630 | 4783653 | 2 | 12 | 24 | TG   | 16 | 11 |
| 208614 | 27 | 4788111 | 4788142 | 2 | 16 | 32 | AC   | 11 | 11 |
| 208615 | 27 | 4794159 | 4794176 | 2 | 9  | 18 | TG   | 17 | 4  |
| 208617 | 27 | 4794927 | 4794962 | 2 | 18 | 36 | AC   | 7  | 9  |
| 208618 | 27 | 4797803 | 4797814 | 2 | 6  | 12 | AC   | 12 | 3  |
| 208619 | 27 | 4802215 | 4802228 | 2 | 7  | 14 | CT   | 33 | 4  |
| 208620 | 27 | 4802291 | 4802308 | 2 | 9  | 18 | AG   | 25 | 3  |
| 208648 | 27 | 4891877 | 4891902 | 2 | 13 | 26 | TG   | 15 | 8  |
| 208649 | 27 | 4892138 | 4892153 | 2 | 8  | 16 | CT   | 24 | 5  |
| 208653 | 27 | 4895302 | 4895313 | 2 | 6  | 12 | TG   | 14 | 5  |
| 208656 | 27 | 4895702 | 4895723 | 2 | 11 | 22 | TC   | 15 | 3  |
| 208657 | 27 | 4896087 | 4896102 | 2 | 8  | 16 | TG   | 25 | 7  |
| 208662 | 27 | 4900495 | 4900512 | 3 | 6  | 18 | TAA  | 17 | 3  |
| 208669 | 27 | 4908283 | 4908306 | 2 | 12 | 24 | CT   | 11 | 6  |
| 208682 | 27 | 4933078 | 4933113 | 2 | 18 | 36 | AC   | 7  | 7  |
| 208692 | 27 | 4943630 | 4943681 | 2 | 26 | 52 | AG   | 7  | 7  |
| 208693 | 27 | 4943892 | 4943905 | 2 | 7  | 14 | TG   | 23 | 4  |
| 208698 | 27 | 4950077 | 4950126 | 2 | 25 | 50 | TG   | 7  | 10 |
| 208707 | 27 | 4966486 | 4966517 | 4 | 8  | 32 | AGAA | 21 | 8  |
| 208713 | 27 | 4975222 | 4975255 | 2 | 17 | 34 | AC   | 13 | 8  |
| 208721 | 27 | 4995479 | 4995517 | 3 | 13 | 39 | TTA  | 7  | 6  |
| 208724 | 27 | 4996822 | 4996845 | 2 | 12 | 24 | TG   | 19 | 7  |
| 208726 | 27 | 4997129 | 4997150 | 2 | 11 | 22 | AC   | 22 | 12 |
| 208729 | 27 | 4999734 | 4999745 | 2 | 6  | 12 | CA   | 27 | 4  |
| 208730 | 27 | 4999747 | 4999760 | 2 | 7  | 14 | AC   | 25 | 4  |
| 208733 | 27 | 5002182 | 5002193 | 2 | 6  | 12 | CA   | 19 | 5  |
| 208734 | 27 | 5002472 | 5002507 | 2 | 18 | 36 | TG   | 16 | 12 |
| 208735 | 27 | 5002669 | 5002695 | 3 | 9  | 27 | CCT  | 10 | 6  |
| 208741 | 27 | 5005718 | 5005743 | 2 | 13 | 26 | TG   | 12 | 9  |
| 208744 | 27 | 5011420 | 5011449 | 2 | 15 | 30 | CA   | 11 | 10 |
| 208746 | 27 | 5011683 | 5011716 | 2 | 17 | 34 | TG   | 14 | 16 |

|        |    |         |         |   |    |    |      |    |    |
|--------|----|---------|---------|---|----|----|------|----|----|
| 208747 | 27 | 5014818 | 5014839 | 2 | 11 | 22 | TG   | 18 | 9  |
| 208750 | 27 | 5015789 | 5015800 | 2 | 6  | 12 | AC   | 19 | 5  |
| 208753 | 27 | 5017315 | 5017348 | 2 | 17 | 34 | GT   | 10 | 12 |
| 208757 | 27 | 5022146 | 5022179 | 2 | 17 | 34 | AC   | 20 | 7  |
| 208759 | 27 | 5025852 | 5025871 | 2 | 10 | 20 | AC   | 20 | 4  |
| 208761 | 27 | 5027104 | 5027123 | 4 | 5  | 20 | TTTG | 16 | 7  |
| 208767 | 27 | 5035912 | 5035927 | 2 | 8  | 16 | TC   | 13 | 3  |
| 208771 | 27 | 5040129 | 5040143 | 3 | 5  | 15 | CAG  | 17 | 3  |
| 208785 | 27 | 5073739 | 5073758 | 4 | 5  | 20 | TTTG | 24 | 7  |
| 208787 | 27 | 5074684 | 5074699 | 4 | 4  | 16 | GCTC | 22 | 4  |
| 208792 | 27 | 5094030 | 5094041 | 2 | 6  | 12 | TC   | 30 | 3  |
| 208798 | 27 | 5103833 | 5103860 | 4 | 7  | 28 | ATGT | 20 | 9  |
| 208800 | 27 | 5112022 | 5112036 | 3 | 5  | 15 | TGG  | 23 | 3  |
| 208802 | 27 | 5115600 | 5115615 | 2 | 8  | 16 | CA   | 22 | 9  |
| 208807 | 27 | 5121460 | 5121491 | 2 | 16 | 32 | TG   | 9  | 12 |
| 208812 | 27 | 5133284 | 5133305 | 2 | 11 | 22 | GT   | 22 | 3  |
| 208814 | 27 | 5133536 | 5133571 | 2 | 18 | 36 | GT   | 20 | 10 |
| 208820 | 27 | 5145472 | 5145529 | 2 | 29 | 58 | TG   | 10 | 10 |
| 208821 | 27 | 5147268 | 5147297 | 2 | 15 | 30 | GT   | 11 | 7  |
| 208823 | 27 | 5149125 | 5149138 | 2 | 7  | 14 | AC   | 26 | 3  |
| 208824 | 27 | 5150996 | 5151017 | 2 | 11 | 22 | TG   | 18 | 7  |
| 208825 | 27 | 5153903 | 5153917 | 3 | 5  | 15 | TGT  | 28 | 3  |
| 208836 | 27 | 5162208 | 5162225 | 2 | 9  | 18 | TG   | 14 | 5  |
| 208837 | 27 | 5162484 | 5162503 | 2 | 10 | 20 | TG   | 18 | 6  |
| 208839 | 27 | 5164485 | 5164496 | 2 | 6  | 12 | TG   | 19 | 3  |
| 208842 | 27 | 5165045 | 5165072 | 2 | 14 | 28 | CA   | 20 | 15 |
| 208843 | 27 | 5165406 | 5165425 | 2 | 10 | 20 | GT   | 18 | 9  |
| 208845 | 27 | 5166365 | 5166382 | 2 | 9  | 18 | AC   | 27 | 3  |
| 208848 | 27 | 5170020 | 5170045 | 2 | 13 | 26 | AG   | 18 | 9  |
| 208853 | 27 | 5176246 | 5176271 | 2 | 13 | 26 | AC   | 22 | 6  |
| 208863 | 27 | 5205225 | 5205248 | 3 | 8  | 24 | ATG  | 8  | 3  |
| 208870 | 27 | 5224592 | 5224627 | 4 | 9  | 36 | ACAT | 10 | 4  |
| 208871 | 27 | 5229030 | 5229043 | 2 | 7  | 14 | AC   | 21 | 4  |
| 208872 | 27 | 5229188 | 5229203 | 4 | 4  | 16 | GCAT | 30 | 5  |
| 208878 | 27 | 5236121 | 5236148 | 2 | 14 | 28 | CA   | 12 | 12 |
| 208879 | 27 | 5237953 | 5237966 | 2 | 7  | 14 | AC   | 21 | 4  |
| 208880 | 27 | 5238042 | 5238073 | 2 | 16 | 32 | AG   | 6  | 6  |
| 208881 | 27 | 5239353 | 5239366 | 2 | 7  | 14 | TG   | 30 | 5  |
| 208884 | 27 | 5244619 | 5244636 | 2 | 9  | 18 | AC   | 20 | 5  |
| 208891 | 27 | 5263833 | 5263862 | 2 | 15 | 30 | AC   | 12 | 12 |
| 208892 | 27 | 5267080 | 5267093 | 2 | 7  | 14 | GA   | 19 | 11 |
| 208893 | 27 | 5268451 | 5268478 | 2 | 14 | 28 | AC   | 16 | 8  |
| 208898 | 27 | 5270808 | 5270835 | 2 | 14 | 28 | CA   | 11 | 12 |
| 208900 | 27 | 5271264 | 5271289 | 2 | 13 | 26 | TG   | 8  | 6  |
| 208901 | 27 | 5271625 | 5271648 | 2 | 12 | 24 | AC   | 16 | 5  |
| 208903 | 27 | 5272295 | 5272318 | 2 | 12 | 24 | CT   | 12 | 8  |
| 208907 | 27 | 5279124 | 5279147 | 2 | 12 | 24 | GT   | 14 | 3  |
| 208908 | 27 | 5279602 | 5279613 | 2 | 6  | 12 | CA   | 25 | 3  |
| 208909 | 27 | 5280116 | 5280135 | 2 | 10 | 20 | GT   | 10 | 5  |
| 208910 | 27 | 5282163 | 5282194 | 2 | 16 | 32 | CA   | 25 | 6  |
| 208912 | 27 | 5283369 | 5283384 | 2 | 8  | 16 | CT   | 16 | 5  |

|        |    |         |         |   |    |    |      |    |    |
|--------|----|---------|---------|---|----|----|------|----|----|
| 208914 | 27 | 5283892 | 5283911 | 2 | 10 | 20 | CT   | 22 | 8  |
| 208915 | 27 | 5284129 | 5284158 | 2 | 15 | 30 | TG   | 20 | 11 |
| 208923 | 27 | 5288983 | 5288996 | 2 | 7  | 14 | TG   | 20 | 4  |
| 208924 | 27 | 5289344 | 5289355 | 2 | 6  | 12 | GT   | 24 | 6  |
| 208925 | 27 | 5295857 | 5295868 | 2 | 6  | 12 | CA   | 11 | 3  |
| 208926 | 27 | 5296360 | 5296373 | 2 | 7  | 14 | AC   | 21 | 4  |
| 208927 | 27 | 5296778 | 5296807 | 2 | 15 | 30 | TC   | 7  | 7  |
| 208928 | 27 | 5298052 | 5298073 | 2 | 11 | 22 | TG   | 15 | 4  |
| 208934 | 27 | 5302276 | 5302289 | 2 | 7  | 14 | TG   | 14 | 6  |
| 208935 | 27 | 5303225 | 5303257 | 3 | 11 | 33 | GAG  | 23 | 5  |
| 208938 | 27 | 5305581 | 5305592 | 2 | 6  | 12 | TG   | 15 | 5  |
| 208939 | 27 | 5305595 | 5305608 | 2 | 7  | 14 | TG   | 16 | 3  |
| 208957 | 27 | 5325776 | 5325803 | 2 | 14 | 28 | AC   | 8  | 8  |
| 208958 | 27 | 5327696 | 5327715 | 2 | 10 | 20 | CT   | 26 | 4  |
| 208961 | 27 | 5330393 | 5330404 | 2 | 6  | 12 | CA   | 23 | 3  |
| 208962 | 27 | 5330609 | 5330622 | 2 | 7  | 14 | AC   | 17 | 4  |
| 208963 | 27 | 5330756 | 5330767 | 2 | 6  | 12 | TG   | 28 | 5  |
| 208966 | 27 | 5338944 | 5338973 | 2 | 15 | 30 | GA   | 8  | 5  |
| 208970 | 27 | 5347292 | 5347321 | 3 | 10 | 30 | CCT  | 15 | 7  |
| 208972 | 27 | 5348330 | 5348351 | 2 | 11 | 22 | AG   | 13 | 7  |
| 208974 | 27 | 5348756 | 5348793 | 2 | 19 | 38 | AC   | 6  | 5  |
| 208975 | 27 | 5348892 | 5348909 | 2 | 9  | 18 | AC   | 15 | 4  |
| 208980 | 27 | 5361066 | 5361098 | 3 | 11 | 33 | ATT  | 6  | 4  |
| 208983 | 27 | 5364079 | 5364092 | 2 | 7  | 14 | CT   | 24 | 7  |
| 208984 | 27 | 5364250 | 5364263 | 2 | 7  | 14 | GT   | 30 | 4  |
| 208987 | 27 | 5370607 | 5370634 | 2 | 14 | 28 | AC   | 18 | 9  |
| 208988 | 27 | 5372316 | 5372369 | 2 | 27 | 54 | CA   | 9  | 10 |
| 208997 | 27 | 5389646 | 5389673 | 2 | 14 | 28 | TG   | 11 | 7  |
| 208999 | 27 | 5389888 | 5389907 | 2 | 10 | 20 | GT   | 23 | 17 |
| 209003 | 27 | 5398314 | 5398337 | 2 | 12 | 24 | TG   | 12 | 12 |
| 209004 | 27 | 5398414 | 5398443 | 3 | 10 | 30 | CCT  | 16 | 5  |
| 209007 | 27 | 5406423 | 5406444 | 2 | 11 | 22 | AC   | 25 | 7  |
| 209008 | 27 | 5412392 | 5412415 | 2 | 12 | 24 | CA   | 17 | 14 |
| 209009 | 27 | 5415571 | 5415582 | 2 | 6  | 12 | GT   | 7  | 5  |
| 209015 | 27 | 5423769 | 5423798 | 2 | 15 | 30 | CA   | 18 | 8  |
| 209017 | 27 | 5424831 | 5424880 | 2 | 25 | 50 | CA   | 7  | 11 |
| 209018 | 27 | 5425032 | 5425055 | 2 | 12 | 24 | CA   | 8  | 4  |
| 209019 | 27 | 5425164 | 5425183 | 2 | 10 | 20 | CA   | 15 | 8  |
| 209020 | 27 | 5426521 | 5426556 | 2 | 18 | 36 | AC   | 7  | 9  |
| 209022 | 27 | 5428184 | 5428195 | 2 | 6  | 12 | CA   | 6  | 7  |
| 209024 | 27 | 5430794 | 5430825 | 2 | 16 | 32 | AC   | 13 | 8  |
| 209042 | 27 | 5505623 | 5505654 | 2 | 16 | 32 | AC   | 11 | 9  |
| 209048 | 27 | 5518852 | 5518865 | 2 | 7  | 14 | CA   | 27 | 3  |
| 209049 | 27 | 5537348 | 5537371 | 2 | 12 | 24 | CA   | 7  | 5  |
| 209050 | 27 | 5537996 | 5538017 | 2 | 11 | 22 | CA   | 23 | 7  |
| 209052 | 27 | 5544618 | 5544633 | 4 | 4  | 16 | TCTG | 25 | 3  |
| 209054 | 27 | 5547612 | 5547623 | 2 | 6  | 12 | CT   | 18 | 3  |
| 209057 | 27 | 5553112 | 5553171 | 4 | 15 | 60 | TTCT | 17 | 11 |
| 209059 | 27 | 5553329 | 5553348 | 4 | 5  | 20 | TTAT | 26 | 6  |
| 209060 | 27 | 5554111 | 5554122 | 2 | 6  | 12 | AC   | 6  | 3  |
| 209061 | 27 | 5555492 | 5555507 | 2 | 8  | 16 | AC   | 21 | 5  |

|        |    |         |         |   |    |    |      |    |    |
|--------|----|---------|---------|---|----|----|------|----|----|
| 209065 | 27 | 5564341 | 5564364 | 2 | 12 | 24 | GT   | 15 | 5  |
| 209070 | 27 | 5570736 | 5570747 | 2 | 6  | 12 | GT   | 20 | 3  |
| 209071 | 27 | 5571250 | 5571275 | 2 | 13 | 26 | TG   | 20 | 8  |
| 209075 | 27 | 5581734 | 5581760 | 3 | 9  | 27 | TAA  | 8  | 5  |
| 209077 | 27 | 5585408 | 5585423 | 2 | 8  | 16 | GT   | 27 | 6  |
| 209083 | 27 | 5596149 | 5596182 | 2 | 17 | 34 | CA   | 9  | 9  |
| 209085 | 27 | 5600481 | 5600516 | 2 | 18 | 36 | TG   | 15 | 8  |
| 209090 | 27 | 5616026 | 5616041 | 4 | 4  | 16 | TCTT | 16 | 5  |
| 209091 | 27 | 5616736 | 5616769 | 2 | 17 | 34 | AC   | 9  | 9  |
| 209093 | 27 | 5621445 | 5621462 | 2 | 9  | 18 | TG   | 20 | 5  |
| 209095 | 27 | 5624994 | 5625005 | 2 | 6  | 12 | GT   | 19 | 10 |
| 209096 | 27 | 5625850 | 5625869 | 2 | 10 | 20 | GT   | 21 | 5  |
| 209097 | 27 | 5626324 | 5626343 | 2 | 10 | 20 | AC   | 22 | 8  |
| 209098 | 27 | 5627833 | 5627876 | 2 | 22 | 44 | GT   | 9  | 9  |
| 209099 | 27 | 5628158 | 5628171 | 2 | 7  | 14 | GA   | 29 | 3  |
| 209101 | 27 | 5629645 | 5629672 | 2 | 14 | 28 | TG   | 8  | 11 |
| 209104 | 27 | 5634501 | 5634526 | 2 | 13 | 26 | CA   | 22 | 10 |
| 209110 | 27 | 5638025 | 5638036 | 2 | 6  | 12 | CA   | 14 | 5  |
| 209113 | 27 | 5638214 | 5638227 | 2 | 7  | 14 | AC   | 24 | 5  |
| 209115 | 27 | 5639911 | 5639922 | 2 | 6  | 12 | AG   | 19 | 6  |
| 209116 | 27 | 5642143 | 5642184 | 2 | 21 | 42 | TG   | 6  | 11 |
| 209121 | 27 | 5653088 | 5653107 | 2 | 10 | 20 | GT   | 13 | 11 |
| 209125 | 27 | 5658956 | 5658973 | 2 | 9  | 18 | TC   | 18 | 3  |
| 209127 | 27 | 5662291 | 5662304 | 2 | 7  | 14 | TG   | 22 | 3  |
| 209128 | 27 | 5662560 | 5662577 | 2 | 9  | 18 | CA   | 17 | 9  |
| 209135 | 27 | 5688364 | 5688393 | 3 | 10 | 30 | CTC  | 22 | 7  |
| 209138 | 27 | 5695313 | 5695328 | 2 | 8  | 16 | GT   | 26 | 7  |
| 209148 | 27 | 5740004 | 5740021 | 3 | 6  | 18 | CTG  | 34 | 3  |
| 209149 | 27 | 5743386 | 5743397 | 2 | 6  | 12 | CA   | 22 | 4  |
| 209153 | 27 | 5749611 | 5749634 | 2 | 12 | 24 | AC   | 13 | 7  |
| 209156 | 27 | 5755619 | 5755636 | 2 | 9  | 18 | TG   | 12 | 7  |
| 209159 | 27 | 5760494 | 5760519 | 2 | 13 | 26 | GT   | 18 | 5  |
| 209163 | 27 | 5771742 | 5771765 | 3 | 8  | 24 | GAA  | 6  | 4  |
| 209165 | 27 | 5771841 | 5771858 | 3 | 6  | 18 | GAG  | 14 | 3  |
| 209166 | 27 | 5773511 | 5773537 | 3 | 9  | 27 | GAG  | 24 | 5  |
| 209170 | 27 | 5782579 | 5782596 | 2 | 9  | 18 | TG   | 26 | 7  |
| 209172 | 27 | 5783929 | 5783940 | 2 | 6  | 12 | GT   | 25 | 3  |
| 209173 | 27 | 5784079 | 5784098 | 2 | 10 | 20 | CA   | 6  | 4  |
| 209175 | 27 | 5786556 | 5786571 | 2 | 8  | 16 | TC   | 24 | 8  |
| 209178 | 27 | 5792502 | 5792531 | 2 | 15 | 30 | GT   | 16 | 6  |
| 209180 | 27 | 5792847 | 5792874 | 2 | 14 | 28 | AC   | 13 | 8  |
| 209181 | 27 | 5794693 | 5794712 | 2 | 10 | 20 | AC   | 8  | 4  |
| 209189 | 27 | 5803019 | 5803040 | 2 | 11 | 22 | CA   | 17 | 6  |
| 209195 | 27 | 5807241 | 5807262 | 2 | 11 | 22 | TG   | 19 | 14 |
| 209197 | 27 | 5808325 | 5808344 | 4 | 5  | 20 | AAAC | 8  | 4  |
| 209198 | 27 | 5811493 | 5811510 | 2 | 9  | 18 | CT   | 12 | 10 |
| 209200 | 27 | 5813014 | 5813037 | 2 | 12 | 24 | CA   | 6  | 5  |
| 209203 | 27 | 5815182 | 5815221 | 2 | 20 | 40 | CA   | 6  | 8  |
| 209206 | 27 | 5815404 | 5815431 | 2 | 14 | 28 | AC   | 8  | 4  |
| 209207 | 27 | 5815547 | 5815558 | 2 | 6  | 12 | TG   | 27 | 3  |
| 209209 | 27 | 5818209 | 5818224 | 2 | 8  | 16 | TC   | 23 | 7  |

|        |    |         |         |   |    |    |      |    |    |
|--------|----|---------|---------|---|----|----|------|----|----|
| 209210 | 27 | 5818228 | 5818245 | 2 | 9  | 18 | CA   | 17 | 6  |
| 209211 | 27 | 5822866 | 5822889 | 2 | 12 | 24 | GA   | 19 | 5  |
| 209212 | 27 | 5824855 | 5824874 | 2 | 10 | 20 | AT   | 15 | 7  |
| 209213 | 27 | 5825501 | 5825532 | 2 | 16 | 32 | AC   | 19 | 9  |
| 209224 | 27 | 5829412 | 5829471 | 4 | 15 | 60 | AGAA | 14 | 7  |
| 209226 | 27 | 5832021 | 5832044 | 2 | 12 | 24 | CA   | 18 | 9  |
| 209227 | 27 | 5834363 | 5834396 | 2 | 17 | 34 | GT   | 15 | 11 |
| 209229 | 27 | 5836132 | 5836143 | 2 | 6  | 12 | AC   | 20 | 4  |
| 209232 | 27 | 5840849 | 5840862 | 2 | 7  | 14 | AT   | 13 | 5  |
| 209237 | 27 | 5849020 | 5849035 | 2 | 8  | 16 | TG   | 26 | 3  |
| 209240 | 27 | 5851063 | 5851076 | 2 | 7  | 14 | AC   | 21 | 3  |
| 209244 | 27 | 5856687 | 5856730 | 4 | 11 | 44 | ATCT | 18 | 7  |
| 209245 | 27 | 5857787 | 5857802 | 2 | 8  | 16 | TG   | 13 | 11 |
| 209251 | 27 | 5864285 | 5864296 | 2 | 6  | 12 | TC   | 25 | 3  |
| 209254 | 27 | 5867642 | 5867657 | 2 | 8  | 16 | GT   | 29 | 5  |
| 209257 | 27 | 5874078 | 5874095 | 3 | 6  | 18 | ACT  | 16 | 4  |
| 209259 | 27 | 5879980 | 5879991 | 2 | 6  | 12 | TG   | 29 | 3  |
| 209260 | 27 | 5881564 | 5881577 | 2 | 7  | 14 | AC   | 20 | 3  |
| 209261 | 27 | 5883476 | 5883491 | 2 | 8  | 16 | TG   | 13 | 5  |
| 209265 | 27 | 5887799 | 5887820 | 2 | 11 | 22 | TG   | 13 | 8  |
| 209266 | 27 | 5888408 | 5888419 | 2 | 6  | 12 | GA   | 27 | 3  |
| 209267 | 27 | 5888777 | 5888792 | 4 | 4  | 16 | ATTT | 19 | 3  |
| 209269 | 27 | 5889671 | 5889698 | 2 | 14 | 28 | GA   | 14 | 11 |
| 209270 | 27 | 5889864 | 5889883 | 2 | 10 | 20 | GT   | 15 | 11 |
| 209282 | 27 | 5903856 | 5903871 | 2 | 8  | 16 | TG   | 26 | 12 |
| 209283 | 27 | 5903873 | 5903884 | 2 | 6  | 12 | GT   | 24 | 10 |
| 209292 | 27 | 5930014 | 5930037 | 3 | 8  | 24 | ATA  | 13 | 11 |
| 209294 | 27 | 5945199 | 5945220 | 2 | 11 | 22 | TG   | 12 | 11 |
| 209296 | 27 | 5948806 | 5948829 | 2 | 12 | 24 | AC   | 16 | 6  |
| 209309 | 27 | 5979295 | 5979312 | 2 | 9  | 18 | AC   | 22 | 7  |
| 209315 | 27 | 5989741 | 5989766 | 2 | 13 | 26 | AC   | 8  | 4  |
| 209319 | 27 | 5998823 | 5998852 | 2 | 15 | 30 | AC   | 17 | 12 |
| 209320 | 27 | 6000132 | 6000163 | 2 | 16 | 32 | CA   | 11 | 9  |
| 209323 | 27 | 6008054 | 6008081 | 2 | 14 | 28 | AC   | 16 | 6  |
| 209335 | 27 | 6018450 | 6018473 | 4 | 6  | 24 | CTTT | 9  | 3  |
| 209337 | 27 | 6019587 | 6019640 | 2 | 27 | 54 | TG   | 10 | 12 |
| 209340 | 27 | 6023194 | 6023205 | 2 | 6  | 12 | AT   | 16 | 3  |
| 209343 | 27 | 6026419 | 6026436 | 2 | 9  | 18 | GT   | 23 | 7  |
| 209346 | 27 | 6039094 | 6039149 | 4 | 14 | 56 | TAGA | 20 | 12 |
| 209360 | 27 | 6052669 | 6052708 | 2 | 20 | 40 | CA   | 10 | 9  |
| 209361 | 27 | 6053208 | 6053227 | 2 | 10 | 20 | CA   | 17 | 8  |
| 209368 | 27 | 6057123 | 6057138 | 2 | 8  | 16 | CA   | 29 | 7  |
| 209371 | 27 | 6072902 | 6072917 | 2 | 8  | 16 | CA   | 16 | 4  |
| 209401 | 27 | 6164013 | 6164040 | 2 | 14 | 28 | GT   | 10 | 14 |
| 209403 | 27 | 6170165 | 6170194 | 2 | 15 | 30 | AC   | 11 | 12 |
| 209404 | 27 | 6171444 | 6171483 | 2 | 20 | 40 | GT   | 8  | 10 |
| 209405 | 27 | 6179044 | 6179077 | 2 | 17 | 34 | TG   | 8  | 10 |
| 209406 | 27 | 6179255 | 6179282 | 2 | 14 | 28 | TG   | 7  | 5  |
| 209410 | 27 | 6180125 | 6180158 | 2 | 17 | 34 | GT   | 15 | 12 |
| 209411 | 27 | 6180290 | 6180303 | 2 | 7  | 14 | CA   | 26 | 4  |
| 209416 | 27 | 6183320 | 6183337 | 2 | 9  | 18 | GT   | 22 | 5  |



|        |    |         |         |   |    |    |      |    |    |
|--------|----|---------|---------|---|----|----|------|----|----|
| 209417 | 27 | 6187982 | 6187996 | 3 | 5  | 15 | TGT  | 29 | 4  |
| 209419 | 27 | 6191664 | 6191685 | 2 | 11 | 22 | TG   | 21 | 11 |
| 209430 | 27 | 6205857 | 6205868 | 2 | 6  | 12 | TC   | 31 | 3  |
| 209432 | 27 | 6207667 | 6207702 | 2 | 18 | 36 | CA   | 11 | 8  |
| 209434 | 27 | 6208818 | 6208831 | 2 | 7  | 14 | GT   | 12 | 5  |
| 209435 | 27 | 6210565 | 6210598 | 2 | 17 | 34 | TG   | 10 | 10 |
| 209436 | 27 | 6215681 | 6215696 | 4 | 4  | 16 | ATTT | 13 | 8  |
| 209439 | 27 | 6218213 | 6218234 | 2 | 11 | 22 | GT   | 20 | 7  |
| 209440 | 27 | 6219346 | 6219369 | 2 | 12 | 24 | TC   | 17 | 12 |
| 209441 | 27 | 6219464 | 6219477 | 2 | 7  | 14 | GT   | 13 | 4  |
| 209443 | 27 | 6225896 | 6225915 | 2 | 10 | 20 | TG   | 24 | 6  |
| 209444 | 27 | 6225971 | 6225986 | 2 | 8  | 16 | GT   | 28 | 5  |
| 209445 | 27 | 6226185 | 6226198 | 2 | 7  | 14 | CT   | 26 | 3  |
| 209447 | 27 | 6228693 | 6228713 | 3 | 7  | 21 | ATC  | 29 | 3  |
| 209453 | 27 | 6238458 | 6238493 | 2 | 18 | 36 | GT   | 6  | 10 |
| 209467 | 27 | 6255451 | 6255462 | 2 | 6  | 12 | GT   | 31 | 3  |
| 209469 | 27 | 6257855 | 6257868 | 2 | 7  | 14 | GT   | 18 | 8  |
| 209471 | 27 | 6269099 | 6269114 | 4 | 4  | 16 | CCTG | 25 | 3  |
| 209490 | 27 | 6302981 | 6302996 | 2 | 8  | 16 | AC   | 26 | 9  |
| 209492 | 27 | 6307106 | 6307129 | 3 | 8  | 24 | AGG  | 19 | 6  |
| 209494 | 27 | 6316413 | 6316424 | 2 | 6  | 12 | CA   | 33 | 3  |
| 209500 | 27 | 6331916 | 6331929 | 2 | 7  | 14 | GA   | 22 | 4  |
| 209508 | 27 | 6363751 | 6363768 | 2 | 9  | 18 | CA   | 17 | 5  |
| 209533 | 27 | 6417211 | 6417231 | 3 | 7  | 21 | AGC  | 27 | 8  |
| 209535 | 27 | 6423208 | 6423249 | 2 | 21 | 42 | CT   | 8  | 8  |
| 209538 | 27 | 6436672 | 6436692 | 3 | 7  | 21 | GAG  | 22 | 3  |
| 209539 | 27 | 6437665 | 6437692 | 2 | 14 | 28 | CA   | 19 | 9  |
| 209541 | 27 | 6450182 | 6450202 | 3 | 7  | 21 | CCT  | 14 | 4  |
| 209545 | 27 | 6468961 | 6469004 | 4 | 11 | 44 | ATTC | 20 | 6  |
| 209546 | 27 | 6478054 | 6478074 | 3 | 7  | 21 | CTG  | 22 | 3  |
| 209551 | 27 | 6490783 | 6490794 | 2 | 6  | 12 | GA   | 29 | 4  |
| 209555 | 27 | 6493833 | 6493850 | 2 | 9  | 18 | TG   | 22 | 10 |
| 209558 | 27 | 6501869 | 6501896 | 2 | 14 | 28 | CA   | 24 | 11 |
| 209559 | 27 | 6504236 | 6504255 | 2 | 10 | 20 | TA   | 22 | 3  |
| 209562 | 27 | 6509247 | 6509298 | 2 | 26 | 52 | AC   | 11 | 12 |
| 209565 | 27 | 6514205 | 6514226 | 2 | 11 | 22 | CA   | 21 | 13 |
| 209569 | 27 | 6520558 | 6520569 | 2 | 6  | 12 | TG   | 21 | 4  |
| 209577 | 27 | 6535257 | 6535296 | 2 | 20 | 40 | TG   | 7  | 7  |
| 209586 | 27 | 6554675 | 6554686 | 2 | 6  | 12 | GT   | 28 | 4  |
| 209587 | 27 | 6557420 | 6557435 | 2 | 8  | 16 | CA   | 27 | 4  |
| 209591 | 27 | 6562894 | 6562929 | 2 | 18 | 36 | GT   | 9  | 12 |
| 209595 | 27 | 6565598 | 6565613 | 4 | 4  | 16 | AAAT | 18 | 3  |
| 209596 | 27 | 6568309 | 6568338 | 2 | 15 | 30 | AC   | 10 | 12 |
| 209597 | 27 | 6569022 | 6569057 | 2 | 18 | 36 | AC   | 12 | 7  |
| 209599 | 27 | 6572272 | 6572293 | 2 | 11 | 22 | AC   | 17 | 9  |
| 209600 | 27 | 6572315 | 6572332 | 2 | 9  | 18 | CA   | 8  | 7  |
| 209601 | 27 | 6573364 | 6573375 | 2 | 6  | 12 | TG   | 29 | 3  |
| 209603 | 27 | 6578096 | 6578117 | 2 | 11 | 22 | TG   | 9  | 10 |
| 209609 | 27 | 6605915 | 6605946 | 4 | 8  | 32 | AATA | 9  | 8  |
| 209613 | 27 | 6634409 | 6634466 | 2 | 29 | 58 | AC   | 10 | 11 |
| 209617 | 27 | 6651794 | 6651829 | 4 | 9  | 36 | ATAG | 10 | 12 |

|        |    |         |         |   |    |    |      |    |    |
|--------|----|---------|---------|---|----|----|------|----|----|
| 209622 | 27 | 6668096 | 6668111 | 2 | 8  | 16 | TC   | 28 | 3  |
| 209626 | 27 | 6676047 | 6676072 | 2 | 13 | 26 | AC   | 21 | 8  |
| 209632 | 27 | 6689873 | 6689886 | 2 | 7  | 14 | TC   | 23 | 4  |
| 209633 | 27 | 6689887 | 6689904 | 2 | 9  | 18 | AC   | 22 | 5  |
| 209637 | 27 | 6703760 | 6703791 | 4 | 8  | 32 | TGAT | 19 | 8  |
| 209639 | 27 | 6705709 | 6705722 | 2 | 7  | 14 | AT   | 10 | 6  |
| 209640 | 27 | 6712701 | 6712720 | 2 | 10 | 20 | TG   | 18 | 5  |
| 209642 | 27 | 6713220 | 6713235 | 4 | 4  | 16 | TCAT | 23 | 3  |
| 209645 | 27 | 6721000 | 6721013 | 2 | 7  | 14 | CA   | 27 | 6  |
| 209647 | 27 | 6731116 | 6731155 | 4 | 10 | 40 | TAGA | 16 | 5  |
| 209654 | 27 | 6757280 | 6757299 | 4 | 5  | 20 | AGAC | 30 | 4  |
| 209655 | 27 | 6759648 | 6759662 | 3 | 5  | 15 | ATT  | 22 | 6  |
| 209659 | 27 | 6768066 | 6768080 | 3 | 5  | 15 | ATT  | 29 | 3  |
| 209670 | 27 | 6782161 | 6782178 | 2 | 9  | 18 | TG   | 17 | 8  |
| 209673 | 27 | 6786061 | 6786075 | 3 | 5  | 15 | AGC  | 30 | 5  |
| 209677 | 27 | 6793133 | 6793144 | 2 | 6  | 12 | TG   | 26 | 5  |
| 209682 | 27 | 6804695 | 6804726 | 2 | 16 | 32 | AC   | 10 | 12 |
| 209684 | 27 | 6810136 | 6810157 | 2 | 11 | 22 | GT   | 23 | 9  |
| 209686 | 27 | 6810606 | 6810631 | 2 | 13 | 26 | TG   | 20 | 11 |
| 209688 | 27 | 6812067 | 6812080 | 2 | 7  | 14 | TG   | 24 | 4  |
| 209689 | 27 | 6812504 | 6812518 | 3 | 5  | 15 | CAT  | 21 | 3  |
| 209695 | 27 | 6819336 | 6819371 | 2 | 18 | 36 | TG   | 9  | 8  |
| 209697 | 27 | 6822243 | 6822258 | 2 | 8  | 16 | AC   | 7  | 10 |
| 209700 | 27 | 6824037 | 6824056 | 2 | 10 | 20 | GT   | 16 | 11 |
| 209705 | 27 | 6828023 | 6828038 | 2 | 8  | 16 | GT   | 18 | 5  |
| 209710 | 27 | 6849821 | 6849848 | 4 | 7  | 28 | TGAT | 30 | 6  |
| 209712 | 27 | 6864007 | 6864066 | 3 | 20 | 60 | AAG  | 7  | 8  |
| 209716 | 27 | 6871597 | 6871614 | 2 | 9  | 18 | CA   | 18 | 10 |
| 209718 | 27 | 6874407 | 6874418 | 2 | 6  | 12 | GT   | 26 | 4  |
| 209719 | 27 | 6874481 | 6874512 | 2 | 16 | 32 | GT   | 15 | 7  |
| 209734 | 27 | 6904677 | 6904688 | 2 | 6  | 12 | TG   | 24 | 3  |
| 209736 | 27 | 6905478 | 6905498 | 3 | 7  | 21 | CTT  | 16 | 7  |
| 209739 | 27 | 6917899 | 6917916 | 3 | 6  | 18 | AAT  | 7  | 5  |
| 209746 | 27 | 6941427 | 6941441 | 3 | 5  | 15 | TTG  | 27 | 4  |
| 209747 | 27 | 6946138 | 6946151 | 2 | 7  | 14 | AC   | 27 | 3  |
| 209755 | 27 | 6965144 | 6965163 | 2 | 10 | 20 | AC   | 27 | 5  |
| 209757 | 27 | 6965854 | 6965871 | 2 | 9  | 18 | TG   | 20 | 8  |
| 209759 | 27 | 6968992 | 6969009 | 3 | 6  | 18 | TCC  | 25 | 3  |
| 209762 | 27 | 6972977 | 6972988 | 2 | 6  | 12 | CA   | 27 | 9  |
| 209764 | 27 | 6974594 | 6974609 | 2 | 8  | 16 | CT   | 23 | 4  |
| 209770 | 27 | 6979984 | 6979997 | 2 | 7  | 14 | AC   | 30 | 4  |
| 209773 | 27 | 6986466 | 6986486 | 3 | 7  | 21 | GCT  | 27 | 3  |
| 209784 | 27 | 7003723 | 7003736 | 2 | 7  | 14 | CA   | 24 | 3  |
| 209786 | 27 | 7007166 | 7007189 | 4 | 6  | 24 | TTGA | 19 | 4  |
| 209806 | 27 | 7055281 | 7055296 | 4 | 4  | 16 | TGTC | 25 | 3  |
| 209818 | 28 | 45866   | 45901   | 2 | 18 | 36 | AC   | 9  | 4  |
| 209838 | 28 | 86867   | 86878   | 2 | 6  | 12 | TG   | 8  | 9  |
| 209842 | 28 | 93042   | 93059   | 2 | 9  | 18 | AC   | 20 | 5  |
| 209844 | 28 | 97518   | 97529   | 2 | 6  | 12 | AC   | 9  | 4  |
| 209845 | 28 | 99763   | 99776   | 2 | 7  | 14 | GT   | 9  | 7  |
| 209846 | 28 | 99781   | 99792   | 2 | 6  | 12 | GT   | 8  | 7  |

|        |    |        |        |   |    |    |      |    |    |
|--------|----|--------|--------|---|----|----|------|----|----|
| 209849 | 28 | 110456 | 110499 | 2 | 22 | 44 | AC   | 10 | 10 |
| 209857 | 28 | 128326 | 128343 | 2 | 9  | 18 | TG   | 14 | 12 |
| 209860 | 28 | 136706 | 136717 | 2 | 6  | 12 | AG   | 25 | 3  |
| 209862 | 28 | 138597 | 138620 | 3 | 8  | 24 | GCT  | 28 | 3  |
| 209869 | 28 | 156224 | 156259 | 2 | 18 | 36 | CA   | 21 | 11 |
| 209870 | 28 | 156983 | 157002 | 2 | 10 | 20 | GT   | 7  | 4  |
| 209871 | 28 | 158980 | 159019 | 2 | 20 | 40 | TG   | 9  | 9  |
| 209876 | 28 | 163410 | 163427 | 3 | 6  | 18 | GAA  | 20 | 5  |
| 209877 | 28 | 164525 | 164550 | 2 | 13 | 26 | GT   | 15 | 8  |
| 209881 | 28 | 167195 | 167228 | 2 | 17 | 34 | GT   | 13 | 8  |
| 209882 | 28 | 168856 | 168870 | 3 | 5  | 15 | TCT  | 34 | 4  |
| 209884 | 28 | 174514 | 174534 | 3 | 7  | 21 | CTG  | 29 | 4  |
| 209885 | 28 | 174743 | 174762 | 2 | 10 | 20 | CA   | 7  | 4  |
| 209890 | 28 | 194633 | 194644 | 2 | 6  | 12 | GT   | 36 | 3  |
| 209899 | 28 | 223297 | 223312 | 4 | 4  | 16 | GTGA | 29 | 3  |
| 209901 | 28 | 237645 | 237674 | 2 | 15 | 30 | TG   | 6  | 9  |
| 209903 | 28 | 238873 | 238888 | 4 | 4  | 16 | AATA | 13 | 4  |
| 209914 | 28 | 252453 | 252480 | 2 | 14 | 28 | CA   | 12 | 13 |
| 209916 | 28 | 259644 | 259657 | 2 | 7  | 14 | CA   | 24 | 4  |
| 209917 | 28 | 267890 | 267916 | 3 | 9  | 27 | AGC  | 28 | 12 |
| 209918 | 28 | 270762 | 270773 | 2 | 6  | 12 | CA   | 23 | 6  |
| 209919 | 28 | 270778 | 270789 | 2 | 6  | 12 | CA   | 17 | 3  |
| 209933 | 28 | 282634 | 282651 | 2 | 9  | 18 | GT   | 27 | 3  |
| 209935 | 28 | 296141 | 296154 | 2 | 7  | 14 | AC   | 30 | 3  |
| 209940 | 28 | 305966 | 305983 | 2 | 9  | 18 | CT   | 25 | 4  |
| 209942 | 28 | 310649 | 310672 | 2 | 12 | 24 | TG   | 15 | 9  |
| 209952 | 28 | 336099 | 336110 | 2 | 6  | 12 | AT   | 18 | 3  |
| 209964 | 28 | 368502 | 368515 | 2 | 7  | 14 | AC   | 14 | 6  |
| 209972 | 28 | 406130 | 406145 | 4 | 4  | 16 | AAAT | 8  | 5  |
| 209975 | 28 | 409345 | 409374 | 2 | 15 | 30 | GT   | 17 | 6  |
| 209977 | 28 | 409807 | 409822 | 4 | 4  | 16 | CGCT | 14 | 4  |
| 209983 | 28 | 413338 | 413365 | 2 | 14 | 28 | TC   | 15 | 8  |
| 209985 | 28 | 420266 | 420295 | 2 | 15 | 30 | AC   | 6  | 8  |
| 209986 | 28 | 421297 | 421314 | 2 | 9  | 18 | AC   | 23 | 13 |
| 209990 | 28 | 426574 | 426593 | 2 | 10 | 20 | AC   | 20 | 7  |
| 209991 | 28 | 426673 | 426687 | 3 | 5  | 15 | AAC  | 15 | 4  |
| 209992 | 28 | 428770 | 428797 | 4 | 7  | 28 | AAAT | 15 | 6  |
| 209993 | 28 | 430271 | 430298 | 4 | 7  | 28 | AAAC | 24 | 5  |
| 209996 | 28 | 441585 | 441600 | 4 | 4  | 16 | AAAC | 24 | 5  |
| 209997 | 28 | 442338 | 442357 | 4 | 5  | 20 | TTTC | 13 | 3  |
| 210013 | 28 | 460409 | 460428 | 2 | 10 | 20 | CA   | 9  | 6  |
| 210016 | 28 | 464383 | 464404 | 2 | 11 | 22 | GT   | 16 | 10 |
| 210018 | 28 | 465853 | 465880 | 2 | 14 | 28 | GT   | 15 | 9  |
| 210019 | 28 | 466583 | 466602 | 2 | 10 | 20 | CA   | 22 | 7  |
| 210020 | 28 | 467808 | 467821 | 2 | 7  | 14 | TG   | 15 | 3  |
| 210021 | 28 | 469445 | 469476 | 2 | 16 | 32 | AC   | 17 | 13 |
| 210025 | 28 | 482759 | 482774 | 2 | 8  | 16 | GT   | 19 | 8  |
| 210026 | 28 | 492329 | 492342 | 2 | 7  | 14 | AG   | 21 | 3  |
| 210027 | 28 | 493373 | 493384 | 2 | 6  | 12 | TG   | 25 | 3  |
| 210028 | 28 | 496698 | 496718 | 3 | 7  | 21 | AAG  | 23 | 3  |
| 210031 | 28 | 502149 | 502164 | 2 | 8  | 16 | CA   | 11 | 8  |

|        |    |         |         |   |    |    |      |    |    |
|--------|----|---------|---------|---|----|----|------|----|----|
| 210039 | 28 | 510389  | 510400  | 2 | 6  | 12 | TG   | 14 | 8  |
| 210041 | 28 | 518927  | 518978  | 4 | 13 | 52 | AGAT | 20 | 16 |
| 210042 | 28 | 519566  | 519593  | 2 | 14 | 28 | AC   | 14 | 7  |
| 210047 | 28 | 528479  | 528498  | 4 | 5  | 20 | AGAA | 17 | 6  |
| 210052 | 28 | 538982  | 539015  | 2 | 17 | 34 | GT   | 13 | 8  |
| 210054 | 28 | 544700  | 544727  | 2 | 14 | 28 | AC   | 14 | 11 |
| 210055 | 28 | 544906  | 544933  | 2 | 14 | 28 | GT   | 16 | 10 |
| 210060 | 28 | 553007  | 553042  | 2 | 18 | 36 | TG   | 10 | 15 |
| 210061 | 28 | 553213  | 553242  | 2 | 15 | 30 | CA   | 12 | 8  |
| 210079 | 28 | 575893  | 575930  | 2 | 19 | 38 | AG   | 18 | 10 |
| 210086 | 28 | 593391  | 593420  | 2 | 15 | 30 | AC   | 18 | 10 |
| 210090 | 28 | 606754  | 606809  | 2 | 28 | 56 | TG   | 6  | 9  |
| 210094 | 28 | 611859  | 611888  | 3 | 10 | 30 | GGA  | 21 | 10 |
| 210095 | 28 | 612404  | 612419  | 2 | 8  | 16 | TC   | 26 | 6  |
| 210096 | 28 | 613636  | 613659  | 2 | 12 | 24 | AC   | 11 | 8  |
| 210097 | 28 | 614873  | 614890  | 2 | 9  | 18 | GT   | 21 | 7  |
| 210099 | 28 | 618312  | 618339  | 2 | 14 | 28 | GA   | 23 | 16 |
| 210106 | 28 | 630665  | 630678  | 2 | 7  | 14 | AC   | 23 | 14 |
| 210113 | 28 | 636110  | 636137  | 2 | 14 | 28 | CA   | 22 | 8  |
| 210116 | 28 | 637663  | 637684  | 2 | 11 | 22 | CA   | 10 | 6  |
| 210119 | 28 | 640601  | 640612  | 2 | 6  | 12 | GT   | 34 | 3  |
| 210127 | 28 | 669915  | 669936  | 2 | 11 | 22 | GT   | 18 | 8  |
| 210140 | 28 | 705090  | 705109  | 4 | 5  | 20 | TTAT | 24 | 5  |
| 210141 | 28 | 705939  | 705956  | 2 | 9  | 18 | CA   | 7  | 6  |
| 210175 | 28 | 755717  | 755730  | 2 | 7  | 14 | TG   | 28 | 5  |
| 210178 | 28 | 762964  | 762979  | 2 | 8  | 16 | AC   | 25 | 6  |
| 210179 | 28 | 763745  | 763766  | 2 | 11 | 22 | GT   | 14 | 5  |
| 210180 | 28 | 775289  | 775316  | 4 | 7  | 28 | ATGG | 25 | 3  |
| 210181 | 28 | 776420  | 776437  | 2 | 9  | 18 | TG   | 23 | 5  |
| 210183 | 28 | 783135  | 783160  | 2 | 13 | 26 | AC   | 13 | 8  |
| 210184 | 28 | 783369  | 783392  | 2 | 12 | 24 | GT   | 21 | 7  |
| 210187 | 28 | 790947  | 790974  | 2 | 14 | 28 | AC   | 15 | 14 |
| 210212 | 28 | 823271  | 823282  | 2 | 6  | 12 | AC   | 22 | 3  |
| 210215 | 28 | 835196  | 835215  | 2 | 10 | 20 | TG   | 23 | 11 |
| 210227 | 28 | 865547  | 865574  | 2 | 14 | 28 | CA   | 21 | 7  |
| 210248 | 28 | 930912  | 930925  | 2 | 7  | 14 | CT   | 25 | 3  |
| 210259 | 28 | 967243  | 967257  | 3 | 5  | 15 | TTG  | 26 | 4  |
| 210280 | 28 | 1055294 | 1055307 | 2 | 7  | 14 | GT   | 30 | 3  |
| 210285 | 28 | 1063621 | 1063644 | 4 | 6  | 24 | ACAG | 31 | 4  |
| 210288 | 28 | 1077904 | 1077931 | 2 | 14 | 28 | GT   | 15 | 11 |
| 210301 | 28 | 1097148 | 1097193 | 2 | 23 | 46 | TG   | 7  | 10 |
| 210302 | 28 | 1103073 | 1103096 | 2 | 12 | 24 | GT   | 12 | 14 |
| 210304 | 28 | 1103310 | 1103339 | 2 | 15 | 30 | AC   | 12 | 7  |
| 210305 | 28 | 1104190 | 1104203 | 2 | 7  | 14 | CA   | 28 | 6  |
| 210306 | 28 | 1108433 | 1108448 | 2 | 8  | 16 | TG   | 17 | 14 |
| 210307 | 28 | 1108989 | 1109006 | 3 | 6  | 18 | GGA  | 24 | 4  |
| 210311 | 28 | 1124444 | 1124482 | 3 | 13 | 39 | GGA  | 11 | 9  |
| 210314 | 28 | 1125044 | 1125065 | 2 | 11 | 22 | GA   | 6  | 3  |
| 210315 | 28 | 1126374 | 1126389 | 2 | 8  | 16 | CA   | 23 | 8  |
| 210316 | 28 | 1129404 | 1129417 | 2 | 7  | 14 | GT   | 20 | 7  |
| 210317 | 28 | 1133549 | 1133584 | 2 | 18 | 36 | CA   | 10 | 7  |

|        |    |         |         |   |    |    |      |    |    |
|--------|----|---------|---------|---|----|----|------|----|----|
| 210318 | 28 | 1135538 | 1135549 | 2 | 6  | 12 | GT   | 15 | 3  |
| 210319 | 28 | 1135552 | 1135567 | 2 | 8  | 16 | GT   | 16 | 4  |
| 210321 | 28 | 1135818 | 1135839 | 2 | 11 | 22 | GT   | 22 | 10 |
| 210322 | 28 | 1140050 | 1140075 | 2 | 13 | 26 | CA   | 7  | 7  |
| 210323 | 28 | 1141573 | 1141612 | 2 | 20 | 40 | TG   | 7  | 8  |
| 210324 | 28 | 1143075 | 1143116 | 2 | 21 | 42 | CA   | 11 | 9  |
| 210325 | 28 | 1145662 | 1145689 | 2 | 14 | 28 | GT   | 18 | 12 |
| 210333 | 28 | 1169411 | 1169440 | 2 | 15 | 30 | AC   | 17 | 10 |
| 210336 | 28 | 1178542 | 1178575 | 2 | 17 | 34 | AC   | 17 | 13 |
| 210337 | 28 | 1178626 | 1178641 | 2 | 8  | 16 | AC   | 25 | 8  |
| 210338 | 28 | 1178733 | 1178746 | 2 | 7  | 14 | TG   | 23 | 5  |
| 210340 | 28 | 1178950 | 1178973 | 4 | 6  | 24 | TCCA | 28 | 15 |
| 210341 | 28 | 1179899 | 1179912 | 2 | 7  | 14 | AC   | 17 | 10 |
| 210343 | 28 | 1195527 | 1195538 | 2 | 6  | 12 | GT   | 31 | 3  |
| 210349 | 28 | 1209681 | 1209708 | 2 | 14 | 28 | AC   | 13 | 11 |
| 210352 | 28 | 1212089 | 1212108 | 2 | 10 | 20 | GT   | 29 | 7  |
| 210355 | 28 | 1221528 | 1221545 | 2 | 9  | 18 | CA   | 6  | 4  |
| 210356 | 28 | 1221548 | 1221561 | 2 | 7  | 14 | CA   | 8  | 7  |
| 210360 | 28 | 1229629 | 1229650 | 2 | 11 | 22 | GT   | 13 | 12 |
| 210363 | 28 | 1246040 | 1246073 | 2 | 17 | 34 | AC   | 13 | 14 |
| 210366 | 28 | 1253727 | 1253758 | 4 | 8  | 32 | GTGA | 28 | 6  |
| 210367 | 28 | 1256243 | 1256270 | 2 | 14 | 28 | AC   | 7  | 7  |
| 210368 | 28 | 1262639 | 1262664 | 2 | 13 | 26 | CA   | 8  | 10 |
| 210371 | 28 | 1264894 | 1264905 | 2 | 6  | 12 | AC   | 23 | 5  |
| 210376 | 28 | 1278720 | 1278765 | 2 | 23 | 46 | AC   | 11 | 14 |
| 210377 | 28 | 1278896 | 1278947 | 2 | 26 | 52 | AC   | 12 | 13 |
| 210383 | 28 | 1289860 | 1289879 | 2 | 10 | 20 | TG   | 14 | 5  |
| 210386 | 28 | 1294007 | 1294036 | 2 | 15 | 30 | AC   | 21 | 13 |
| 210389 | 28 | 1300373 | 1300384 | 2 | 6  | 12 | TG   | 27 | 11 |
| 210391 | 28 | 1301828 | 1301851 | 2 | 12 | 24 | TG   | 11 | 4  |
| 210394 | 28 | 1309311 | 1309334 | 2 | 12 | 24 | AC   | 11 | 6  |
| 210396 | 28 | 1314584 | 1314609 | 2 | 13 | 26 | CA   | 13 | 6  |
| 210413 | 28 | 1340688 | 1340699 | 2 | 6  | 12 | CA   | 16 | 5  |
| 210420 | 28 | 1344725 | 1344760 | 2 | 18 | 36 | AC   | 7  | 5  |
| 210423 | 28 | 1366757 | 1366806 | 2 | 25 | 50 | CA   | 6  | 10 |
| 210424 | 28 | 1368588 | 1368599 | 2 | 6  | 12 | GT   | 27 | 5  |
| 210432 | 28 | 1386748 | 1386771 | 2 | 12 | 24 | AC   | 17 | 9  |
| 210433 | 28 | 1387023 | 1387038 | 2 | 8  | 16 | AC   | 24 | 5  |
| 210434 | 28 | 1388157 | 1388186 | 2 | 15 | 30 | TG   | 11 | 12 |
| 210435 | 28 | 1388275 | 1388300 | 2 | 13 | 26 | CA   | 20 | 7  |
| 210436 | 28 | 1388436 | 1388449 | 2 | 7  | 14 | GT   | 33 | 3  |
| 210437 | 28 | 1390655 | 1390684 | 3 | 10 | 30 | ATT  | 7  | 7  |
| 210438 | 28 | 1391612 | 1391633 | 2 | 11 | 22 | CA   | 18 | 8  |
| 210439 | 28 | 1392444 | 1392461 | 3 | 6  | 18 | TTA  | 26 | 5  |
| 210444 | 28 | 1400657 | 1400682 | 2 | 13 | 26 | GT   | 8  | 9  |
| 210445 | 28 | 1403547 | 1403570 | 4 | 6  | 24 | GGAG | 10 | 4  |
| 210446 | 28 | 1406253 | 1406264 | 2 | 6  | 12 | TG   | 6  | 5  |
| 210449 | 28 | 1413089 | 1413122 | 2 | 17 | 34 | TG   | 12 | 10 |
| 210450 | 28 | 1415101 | 1415112 | 2 | 6  | 12 | CT   | 29 | 4  |
| 210470 | 28 | 1440463 | 1440490 | 2 | 14 | 28 | CA   | 15 | 8  |
| 210471 | 28 | 1441419 | 1441432 | 2 | 7  | 14 | GT   | 25 | 5  |

|        |    |         |         |   |    |    |      |    |    |
|--------|----|---------|---------|---|----|----|------|----|----|
| 210472 | 28 | 1441640 | 1441651 | 2 | 6  | 12 | AC   | 27 | 3  |
| 210473 | 28 | 1444515 | 1444528 | 2 | 7  | 14 | TG   | 9  | 4  |
| 210481 | 28 | 1464408 | 1464421 | 2 | 7  | 14 | CT   | 19 | 3  |
| 210483 | 28 | 1467481 | 1467512 | 2 | 16 | 32 | TG   | 17 | 6  |
| 210485 | 28 | 1469635 | 1469660 | 2 | 13 | 26 | AC   | 12 | 11 |
| 210486 | 28 | 1469874 | 1469887 | 2 | 7  | 14 | AG   | 24 | 4  |
| 210487 | 28 | 1470013 | 1470046 | 2 | 17 | 34 | CA   | 16 | 14 |
| 210488 | 28 | 1470157 | 1470186 | 2 | 15 | 30 | TG   | 22 | 11 |
| 210489 | 28 | 1470257 | 1470272 | 2 | 8  | 16 | TG   | 23 | 6  |
| 210490 | 28 | 1470542 | 1470565 | 2 | 12 | 24 | CT   | 27 | 9  |
| 210493 | 28 | 1474347 | 1474368 | 2 | 11 | 22 | CA   | 15 | 17 |
| 210495 | 28 | 1474637 | 1474654 | 2 | 9  | 18 | TG   | 18 | 6  |
| 210496 | 28 | 1477522 | 1477551 | 2 | 15 | 30 | AC   | 10 | 12 |
| 210498 | 28 | 1479676 | 1479691 | 2 | 8  | 16 | CA   | 24 | 5  |
| 210500 | 28 | 1486886 | 1486907 | 2 | 11 | 22 | AC   | 19 | 7  |
| 210501 | 28 | 1486997 | 1487038 | 2 | 21 | 42 | AC   | 18 | 10 |
| 210503 | 28 | 1487599 | 1487624 | 2 | 13 | 26 | AC   | 6  | 3  |
| 210509 | 28 | 1488757 | 1488772 | 2 | 8  | 16 | CA   | 28 | 4  |
| 210510 | 28 | 1488996 | 1489015 | 2 | 10 | 20 | TG   | 18 | 5  |
| 210512 | 28 | 1494357 | 1494374 | 2 | 9  | 18 | CA   | 23 | 13 |
| 210513 | 28 | 1494375 | 1494386 | 2 | 6  | 12 | AC   | 19 | 9  |
| 210517 | 28 | 1496957 | 1496970 | 2 | 7  | 14 | TC   | 21 | 3  |
| 210520 | 28 | 1499678 | 1499707 | 2 | 15 | 30 | TG   | 19 | 9  |
| 210526 | 28 | 1511473 | 1511504 | 2 | 16 | 32 | AC   | 22 | 12 |
| 210527 | 28 | 1516039 | 1516056 | 3 | 6  | 18 | GAG  | 15 | 7  |
| 210532 | 28 | 1522967 | 1522978 | 2 | 6  | 12 | TG   | 21 | 5  |
| 210536 | 28 | 1533677 | 1533694 | 2 | 9  | 18 | GT   | 14 | 9  |
| 210537 | 28 | 1534141 | 1534170 | 2 | 15 | 30 | CA   | 17 | 6  |
| 210546 | 28 | 1549531 | 1549544 | 2 | 7  | 14 | TG   | 12 | 11 |
| 210550 | 28 | 1557302 | 1557313 | 2 | 6  | 12 | TG   | 31 | 6  |
| 210551 | 28 | 1558638 | 1558655 | 2 | 9  | 18 | TG   | 18 | 15 |
| 210554 | 28 | 1588368 | 1588381 | 2 | 7  | 14 | TG   | 25 | 6  |
| 210558 | 28 | 1596967 | 1596984 | 2 | 9  | 18 | AC   | 17 | 11 |
| 210559 | 28 | 1598242 | 1598257 | 4 | 4  | 16 | GTCA | 34 | 4  |
| 210567 | 28 | 1609047 | 1609074 | 2 | 14 | 28 | CA   | 20 | 6  |
| 210569 | 28 | 1617908 | 1617931 | 4 | 6  | 24 | AAGA | 29 | 15 |
| 210570 | 28 | 1619019 | 1619046 | 2 | 14 | 28 | TG   | 16 | 8  |
| 210579 | 28 | 1655772 | 1655791 | 4 | 5  | 20 | TATC | 19 | 3  |
| 210584 | 28 | 1667356 | 1667381 | 2 | 13 | 26 | TG   | 15 | 8  |
| 210586 | 28 | 1667716 | 1667731 | 4 | 4  | 16 | AGGC | 22 | 5  |
| 210587 | 28 | 1677980 | 1678012 | 3 | 11 | 33 | GAG  | 19 | 13 |
| 210588 | 28 | 1680382 | 1680401 | 2 | 10 | 20 | CA   | 26 | 6  |
| 210590 | 28 | 1685028 | 1685043 | 4 | 4  | 16 | TTTA | 22 | 4  |
| 210591 | 28 | 1687082 | 1687105 | 2 | 12 | 24 | GT   | 22 | 7  |
| 210595 | 28 | 1708362 | 1708388 | 3 | 9  | 27 | AAT  | 7  | 3  |
| 210597 | 28 | 1711068 | 1711087 | 2 | 10 | 20 | CA   | 20 | 12 |
| 210598 | 28 | 1717097 | 1717124 | 4 | 7  | 28 | TGAC | 31 | 6  |
| 210609 | 28 | 1748076 | 1748087 | 2 | 6  | 12 | TG   | 22 | 3  |
| 210614 | 28 | 1761665 | 1761679 | 3 | 5  | 15 | CAG  | 26 | 8  |
| 210616 | 28 | 1765551 | 1765568 | 2 | 9  | 18 | TG   | 24 | 9  |
| 210617 | 28 | 1766962 | 1766982 | 3 | 7  | 21 | CTG  | 21 | 6  |

|        |    |         |         |   |    |    |      |    |    |
|--------|----|---------|---------|---|----|----|------|----|----|
| 210618 | 28 | 1772661 | 1772675 | 3 | 5  | 15 | CTT  | 33 | 3  |
| 210621 | 28 | 1777920 | 1777951 | 2 | 16 | 32 | GT   | 17 | 8  |
| 210633 | 28 | 1795540 | 1795575 | 2 | 18 | 36 | TG   | 19 | 14 |
| 210634 | 28 | 1801231 | 1801262 | 2 | 16 | 32 | TG   | 14 | 12 |
| 210641 | 28 | 1811982 | 1811993 | 2 | 6  | 12 | TG   | 18 | 3  |
| 210642 | 28 | 1817935 | 1817950 | 4 | 4  | 16 | AAAT | 19 | 7  |
| 210651 | 28 | 1823483 | 1823522 | 2 | 20 | 40 | AC   | 10 | 9  |
| 210653 | 28 | 1828824 | 1828853 | 2 | 15 | 30 | CA   | 12 | 9  |
| 210654 | 28 | 1830738 | 1830771 | 2 | 17 | 34 | TG   | 13 | 9  |
| 210662 | 28 | 1850202 | 1850216 | 3 | 5  | 15 | GCT  | 23 | 3  |
| 210663 | 28 | 1852940 | 1852951 | 2 | 6  | 12 | AC   | 31 | 5  |
| 210664 | 28 | 1856568 | 1856591 | 3 | 8  | 24 | TAA  | 20 | 5  |
| 210666 | 28 | 1863126 | 1863141 | 2 | 8  | 16 | AC   | 7  | 4  |
| 210677 | 28 | 1893437 | 1893452 | 4 | 4  | 16 | TTTA | 31 | 3  |
| 210680 | 28 | 1913359 | 1913382 | 4 | 6  | 24 | AAAC | 25 | 6  |
| 210681 | 28 | 1920340 | 1920375 | 3 | 12 | 36 | ATC  | 25 | 4  |
| 210684 | 28 | 1923543 | 1923562 | 4 | 5  | 20 | ATCC | 21 | 3  |
| 210687 | 28 | 1927354 | 1927377 | 2 | 12 | 24 | TG   | 10 | 4  |
| 210689 | 28 | 1928375 | 1928394 | 2 | 10 | 20 | AC   | 18 | 10 |
| 210691 | 28 | 1932421 | 1932436 | 2 | 8  | 16 | TG   | 21 | 7  |
| 210699 | 28 | 1949719 | 1949730 | 2 | 6  | 12 | TG   | 26 | 3  |
| 210701 | 28 | 1956403 | 1956414 | 2 | 6  | 12 | AG   | 33 | 7  |
| 210702 | 28 | 1957073 | 1957104 | 4 | 8  | 32 | CAAT | 22 | 8  |
| 210703 | 28 | 1957581 | 1957604 | 4 | 6  | 24 | AAAC | 25 | 4  |
| 210704 | 28 | 1959340 | 1959357 | 3 | 6  | 18 | TGA  | 26 | 3  |
| 210705 | 28 | 1964687 | 1964706 | 2 | 10 | 20 | TG   | 10 | 5  |
| 210706 | 28 | 1964708 | 1964721 | 2 | 7  | 14 | GT   | 8  | 6  |
| 210710 | 28 | 1977876 | 1977891 | 2 | 8  | 16 | AC   | 21 | 8  |
| 210711 | 28 | 1986025 | 1986042 | 3 | 6  | 18 | ATA  | 6  | 6  |
| 210714 | 28 | 1992791 | 1992802 | 2 | 6  | 12 | TG   | 31 | 5  |
| 210715 | 28 | 1994087 | 1994118 | 4 | 8  | 32 | ACAT | 18 | 14 |
| 210717 | 28 | 1996356 | 1996371 | 2 | 8  | 16 | CA   | 21 | 12 |
| 210718 | 28 | 1997230 | 1997244 | 3 | 5  | 15 | TCG  | 33 | 8  |
| 210731 | 28 | 2036064 | 2036099 | 4 | 9  | 36 | TGTA | 10 | 8  |
| 210741 | 28 | 2062118 | 2062131 | 2 | 7  | 14 | TG   | 23 | 5  |
| 210742 | 28 | 2064427 | 2064448 | 2 | 11 | 22 | TG   | 16 | 9  |
| 210743 | 28 | 2064500 | 2064519 | 2 | 10 | 20 | TG   | 19 | 16 |
| 210749 | 28 | 2087619 | 2087630 | 2 | 6  | 12 | GT   | 28 | 3  |
| 210750 | 28 | 2089760 | 2089785 | 2 | 13 | 26 | AC   | 16 | 13 |
| 210762 | 28 | 2124034 | 2124063 | 3 | 10 | 30 | AAC  | 16 | 10 |
| 210767 | 28 | 2138410 | 2138457 | 2 | 24 | 48 | CA   | 13 | 13 |
| 210772 | 28 | 2165570 | 2165595 | 2 | 13 | 26 | TG   | 10 | 9  |
| 210775 | 28 | 2192469 | 2192502 | 2 | 17 | 34 | AC   | 17 | 11 |
| 210776 | 28 | 2192536 | 2192551 | 2 | 8  | 16 | CA   | 19 | 6  |
| 210778 | 28 | 2199629 | 2199654 | 2 | 13 | 26 | CA   | 12 | 7  |
| 210780 | 28 | 2200155 | 2200180 | 2 | 13 | 26 | CA   | 8  | 9  |
| 210785 | 28 | 2211498 | 2211513 | 4 | 4  | 16 | TCTG | 20 | 3  |
| 210797 | 28 | 2250007 | 2250026 | 2 | 10 | 20 | CA   | 7  | 6  |
| 210798 | 28 | 2250064 | 2250087 | 2 | 12 | 24 | CT   | 9  | 4  |
| 210800 | 28 | 2250919 | 2250948 | 2 | 15 | 30 | AC   | 15 | 16 |
| 210802 | 28 | 2252947 | 2252968 | 2 | 11 | 22 | TC   | 16 | 3  |

|        |    |         |         |   |    |    |      |    |    |
|--------|----|---------|---------|---|----|----|------|----|----|
| 210824 | 28 | 2286226 | 2286259 | 2 | 17 | 34 | AC   | 14 | 10 |
| 210825 | 28 | 2289500 | 2289523 | 2 | 12 | 24 | GT   | 16 | 13 |
| 210826 | 28 | 2290643 | 2290657 | 3 | 5  | 15 | TAT  | 21 | 3  |
| 210827 | 28 | 2296019 | 2296058 | 2 | 20 | 40 | AC   | 11 | 11 |
| 210829 | 28 | 2309965 | 2309992 | 2 | 14 | 28 | GT   | 17 | 8  |
| 210836 | 28 | 2351721 | 2351746 | 2 | 13 | 26 | GT   | 10 | 5  |
| 210837 | 28 | 2352083 | 2352102 | 2 | 10 | 20 | CA   | 7  | 6  |
| 210841 | 28 | 2361719 | 2361730 | 2 | 6  | 12 | AC   | 26 | 16 |
| 210842 | 28 | 2361732 | 2361751 | 2 | 10 | 20 | CA   | 22 | 16 |
| 210843 | 28 | 2366084 | 2366101 | 3 | 6  | 18 | TGA  | 27 | 5  |
| 210846 | 28 | 2369362 | 2369377 | 2 | 8  | 16 | GT   | 17 | 9  |
| 210848 | 28 | 2371935 | 2371956 | 2 | 11 | 22 | AC   | 17 | 8  |
| 210849 | 28 | 2372098 | 2372121 | 2 | 12 | 24 | CA   | 17 | 8  |
| 210852 | 28 | 2377590 | 2377617 | 2 | 14 | 28 | CA   | 8  | 9  |
| 210853 | 28 | 2381283 | 2381318 | 2 | 18 | 36 | TG   | 8  | 11 |
| 210857 | 28 | 2392121 | 2392138 | 2 | 9  | 18 | TG   | 12 | 8  |
| 210858 | 28 | 2392141 | 2392156 | 2 | 8  | 16 | TG   | 16 | 9  |
| 210860 | 28 | 2397983 | 2398006 | 2 | 12 | 24 | CA   | 11 | 6  |
| 210862 | 28 | 2402534 | 2402553 | 4 | 5  | 20 | CAAA | 24 | 3  |
| 210864 | 28 | 2405467 | 2405492 | 2 | 13 | 26 | AC   | 9  | 8  |
| 210866 | 28 | 2408940 | 2408954 | 3 | 5  | 15 | ACT  | 33 | 4  |
| 210868 | 28 | 2410150 | 2410177 | 2 | 14 | 28 | AC   | 12 | 11 |
| 210871 | 28 | 2416997 | 2417030 | 2 | 17 | 34 | TG   | 14 | 9  |
| 210873 | 28 | 2421689 | 2421710 | 2 | 11 | 22 | GT   | 16 | 12 |
| 210874 | 28 | 2422178 | 2422191 | 2 | 7  | 14 | GT   | 20 | 3  |
| 210875 | 28 | 2424864 | 2424887 | 2 | 12 | 24 | GT   | 14 | 7  |
| 210878 | 28 | 2431825 | 2431842 | 2 | 9  | 18 | GT   | 19 | 10 |
| 210879 | 28 | 2435348 | 2435375 | 4 | 7  | 28 | TATG | 17 | 8  |
| 210880 | 28 | 2435405 | 2435440 | 4 | 9  | 36 | ATCT | 7  | 6  |
| 210894 | 28 | 2469585 | 2469604 | 2 | 10 | 20 | GT   | 19 | 8  |
| 210895 | 28 | 2469816 | 2469837 | 2 | 11 | 22 | CA   | 11 | 3  |
| 210896 | 28 | 2472175 | 2472198 | 2 | 12 | 24 | CA   | 10 | 7  |
| 210916 | 28 | 2527381 | 2527402 | 2 | 11 | 22 | CA   | 14 | 5  |
| 210919 | 28 | 2533835 | 2533856 | 2 | 11 | 22 | TA   | 9  | 6  |
| 210920 | 28 | 2534164 | 2534189 | 2 | 13 | 26 | CA   | 18 | 7  |
| 210926 | 28 | 2541454 | 2541487 | 2 | 17 | 34 | AC   | 12 | 14 |
| 210930 | 28 | 2556128 | 2556153 | 2 | 13 | 26 | GT   | 8  | 8  |
| 210931 | 28 | 2566736 | 2566769 | 2 | 17 | 34 | GT   | 16 | 5  |
| 210933 | 28 | 2574510 | 2574535 | 2 | 13 | 26 | AC   | 13 | 13 |
| 210938 | 28 | 2603605 | 2603630 | 2 | 13 | 26 | GT   | 9  | 12 |
| 210946 | 28 | 2631510 | 2631533 | 4 | 6  | 24 | ATCT | 11 | 11 |
| 210947 | 28 | 2636061 | 2636084 | 2 | 12 | 24 | CA   | 11 | 12 |
| 210948 | 28 | 2637053 | 2637067 | 3 | 5  | 15 | GCT  | 26 | 6  |
| 210952 | 28 | 2645926 | 2645941 | 2 | 8  | 16 | AC   | 26 | 3  |
| 210953 | 28 | 2646662 | 2646715 | 2 | 27 | 54 | AC   | 8  | 9  |
| 210955 | 28 | 2649584 | 2649621 | 2 | 19 | 38 | GT   | 10 | 9  |
| 210958 | 28 | 2651153 | 2651186 | 2 | 17 | 34 | CA   | 8  | 9  |
| 210973 | 28 | 2668451 | 2668474 | 4 | 6  | 24 | AGAC | 6  | 5  |
| 210977 | 28 | 2671864 | 2671901 | 2 | 19 | 38 | GT   | 7  | 4  |
| 210988 | 28 | 2698883 | 2698904 | 2 | 11 | 22 | AG   | 21 | 3  |
| 210990 | 28 | 2710674 | 2710695 | 2 | 11 | 22 | CA   | 18 | 5  |



|        |    |         |         |   |    |    |      |    |    |
|--------|----|---------|---------|---|----|----|------|----|----|
| 210998 | 28 | 2742518 | 2742537 | 4 | 5  | 20 | CTTT | 35 | 4  |
| 211001 | 28 | 2755850 | 2755887 | 2 | 19 | 38 | GT   | 15 | 8  |
| 211002 | 28 | 2756270 | 2756299 | 2 | 15 | 30 | GT   | 12 | 4  |
| 211003 | 28 | 2765265 | 2765286 | 2 | 11 | 22 | TG   | 6  | 5  |
| 211005 | 28 | 2772308 | 2772321 | 2 | 7  | 14 | CA   | 12 | 6  |
| 211010 | 28 | 2775157 | 2775174 | 2 | 9  | 18 | AC   | 19 | 6  |
| 211011 | 28 | 2778992 | 2779039 | 2 | 24 | 48 | GT   | 6  | 10 |
| 211013 | 28 | 2786827 | 2786841 | 3 | 5  | 15 | CAG  | 26 | 5  |
| 211023 | 28 | 2826024 | 2826037 | 2 | 7  | 14 | AT   | 12 | 6  |
| 211024 | 28 | 2829671 | 2829686 | 2 | 8  | 16 | AC   | 17 | 14 |
| 211032 | 28 | 2843153 | 2843176 | 4 | 6  | 24 | TGGA | 22 | 7  |
| 211042 | 28 | 2868730 | 2868765 | 2 | 18 | 36 | AC   | 13 | 9  |
| 211048 | 28 | 2875369 | 2875384 | 2 | 8  | 16 | TG   | 23 | 8  |
| 211056 | 28 | 2877753 | 2877802 | 2 | 25 | 50 | GT   | 15 | 9  |
| 211058 | 28 | 2878648 | 2878665 | 3 | 6  | 18 | TGA  | 24 | 6  |
| 211060 | 28 | 2882820 | 2882833 | 2 | 7  | 14 | TC   | 21 | 7  |
| 211063 | 28 | 2885886 | 2885907 | 2 | 11 | 22 | TG   | 8  | 7  |
| 211073 | 28 | 2901921 | 2901948 | 4 | 7  | 28 | GTGC | 10 | 10 |
| 211075 | 28 | 2903759 | 2903774 | 2 | 8  | 16 | TG   | 16 | 7  |
| 211076 | 28 | 2904811 | 2904830 | 2 | 10 | 20 | GT   | 25 | 5  |
| 211077 | 28 | 2906213 | 2906234 | 2 | 11 | 22 | CA   | 23 | 5  |
| 211078 | 28 | 2906323 | 2906344 | 2 | 11 | 22 | CA   | 22 | 5  |
| 211079 | 28 | 2906452 | 2906465 | 2 | 7  | 14 | AC   | 26 | 3  |
| 211082 | 28 | 2912263 | 2912274 | 2 | 6  | 12 | GA   | 27 | 9  |
| 211083 | 28 | 2913069 | 2913083 | 3 | 5  | 15 | CAG  | 24 | 5  |
| 211088 | 28 | 2927339 | 2927354 | 2 | 8  | 16 | TG   | 25 | 17 |
| 211090 | 28 | 2931698 | 2931741 | 2 | 22 | 44 | GT   | 9  | 12 |
| 211091 | 28 | 2931844 | 2931859 | 2 | 8  | 16 | TG   | 17 | 3  |
| 211092 | 28 | 2936601 | 2936616 | 2 | 8  | 16 | AC   | 23 | 6  |
| 211093 | 28 | 2936618 | 2936629 | 2 | 6  | 12 | CA   | 24 | 7  |
| 211094 | 28 | 2938111 | 2938148 | 2 | 19 | 38 | TG   | 19 | 11 |
| 211098 | 28 | 2942425 | 2942444 | 4 | 5  | 20 | ACAA | 25 | 7  |
| 211103 | 28 | 2955152 | 2955181 | 2 | 15 | 30 | CA   | 10 | 11 |
| 211106 | 28 | 2975188 | 2975207 | 2 | 10 | 20 | CA   | 15 | 10 |
| 211108 | 28 | 2977722 | 2977751 | 2 | 15 | 30 | CA   | 12 | 10 |
| 211109 | 28 | 2978803 | 2978846 | 2 | 22 | 44 | TG   | 7  | 9  |
| 211112 | 28 | 2982628 | 2982673 | 2 | 23 | 46 | GT   | 8  | 9  |
| 211114 | 28 | 2998458 | 2998471 | 2 | 7  | 14 | GT   | 19 | 4  |
| 211118 | 28 | 3014791 | 3014806 | 2 | 8  | 16 | AC   | 24 | 5  |
| 211121 | 28 | 3030568 | 3030612 | 3 | 15 | 45 | TTG  | 13 | 9  |
| 211125 | 28 | 3044139 | 3044186 | 4 | 12 | 48 | ACAT | 6  | 7  |
| 211127 | 28 | 3049953 | 3049967 | 3 | 5  | 15 | GAG  | 32 | 3  |
| 211128 | 28 | 3054628 | 3054654 | 3 | 9  | 27 | ATG  | 16 | 10 |
| 211132 | 28 | 3065129 | 3065152 | 3 | 8  | 24 | GAG  | 18 | 7  |
| 211135 | 28 | 3071210 | 3071251 | 3 | 14 | 42 | AAC  | 15 | 5  |
| 211138 | 28 | 3101019 | 3101030 | 2 | 6  | 12 | CA   | 24 | 5  |
| 211139 | 28 | 3101088 | 3101121 | 2 | 17 | 34 | CA   | 15 | 11 |
| 211140 | 28 | 3104277 | 3104303 | 3 | 9  | 27 | AAC  | 25 | 12 |
| 211146 | 28 | 3115721 | 3115759 | 3 | 13 | 39 | TGT  | 7  | 7  |
| 211154 | 28 | 3133545 | 3133590 | 2 | 23 | 46 | GT   | 7  | 7  |
| 211164 | 28 | 3151402 | 3151419 | 2 | 9  | 18 | TA   | 14 | 5  |

|        |    |         |         |   |    |    |      |    |    |
|--------|----|---------|---------|---|----|----|------|----|----|
| 211166 | 28 | 3162009 | 3162056 | 4 | 12 | 48 | ATGT | 10 | 9  |
| 211171 | 28 | 3185023 | 3185037 | 3 | 5  | 15 | TAT  | 11 | 5  |
| 211176 | 28 | 3220581 | 3220594 | 2 | 7  | 14 | AC   | 26 | 5  |
| 211178 | 28 | 3228256 | 3228293 | 2 | 19 | 38 | CA   | 19 | 11 |
| 211179 | 28 | 3240225 | 3240236 | 2 | 6  | 12 | AC   | 21 | 9  |
| 211191 | 28 | 3275599 | 3275626 | 2 | 14 | 28 | CT   | 16 | 10 |
| 211192 | 28 | 3280347 | 3280362 | 2 | 8  | 16 | AG   | 8  | 5  |
| 211194 | 28 | 3281696 | 3281709 | 2 | 7  | 14 | TG   | 26 | 3  |
| 211195 | 28 | 3281914 | 3281927 | 2 | 7  | 14 | TG   | 10 | 5  |
| 211199 | 28 | 3283750 | 3283769 | 2 | 10 | 20 | CA   | 14 | 7  |
| 211201 | 28 | 3287271 | 3287286 | 4 | 4  | 16 | CACC | 21 | 3  |
| 211202 | 28 | 3287776 | 3287790 | 3 | 5  | 15 | AAC  | 25 | 3  |
| 211214 | 28 | 3301960 | 3301971 | 2 | 6  | 12 | TG   | 29 | 3  |
| 211224 | 28 | 3331509 | 3331548 | 2 | 20 | 40 | CA   | 15 | 17 |
| 211225 | 28 | 3332544 | 3332558 | 3 | 5  | 15 | ACT  | 23 | 4  |
| 211227 | 28 | 3337726 | 3337745 | 2 | 10 | 20 | CA   | 13 | 5  |
| 211230 | 28 | 3339161 | 3339172 | 2 | 6  | 12 | CA   | 20 | 6  |
| 211231 | 28 | 3341842 | 3341857 | 2 | 8  | 16 | AC   | 21 | 9  |
| 211232 | 28 | 3341859 | 3341874 | 2 | 8  | 16 | CA   | 25 | 10 |
| 211233 | 28 | 3343495 | 3343524 | 2 | 15 | 30 | GT   | 14 | 7  |
| 211234 | 28 | 3344689 | 3344700 | 2 | 6  | 12 | GT   | 16 | 7  |
| 211241 | 28 | 3354505 | 3354522 | 3 | 6  | 18 | GAG  | 25 | 4  |
| 211243 | 28 | 3361833 | 3361882 | 2 | 25 | 50 | CA   | 6  | 11 |
| 211246 | 28 | 3366979 | 3366996 | 2 | 9  | 18 | CA   | 17 | 7  |
| 211251 | 28 | 3379529 | 3379544 | 2 | 8  | 16 | CA   | 25 | 6  |
| 211258 | 28 | 3389988 | 3390017 | 2 | 15 | 30 | AC   | 11 | 9  |
| 211268 | 28 | 3411444 | 3411483 | 2 | 20 | 40 | TG   | 12 | 8  |
| 211270 | 28 | 3413444 | 3413473 | 2 | 15 | 30 | CA   | 11 | 5  |
| 211272 | 28 | 3414886 | 3414915 | 2 | 15 | 30 | TG   | 18 | 8  |
| 211279 | 28 | 3451847 | 3451880 | 2 | 17 | 34 | TG   | 18 | 16 |
| 211283 | 28 | 3462419 | 3462430 | 2 | 6  | 12 | GT   | 19 | 10 |
| 211284 | 28 | 3462687 | 3462714 | 2 | 14 | 28 | GT   | 18 | 7  |
| 211285 | 28 | 3464160 | 3464195 | 2 | 18 | 36 | GT   | 18 | 7  |
| 211287 | 28 | 3468213 | 3468232 | 4 | 5  | 20 | CAGA | 36 | 3  |
| 211293 | 28 | 3501120 | 3501134 | 3 | 5  | 15 | AGA  | 27 | 4  |
| 211296 | 28 | 3502329 | 3502340 | 2 | 6  | 12 | CA   | 23 | 7  |
| 211311 | 28 | 3523949 | 3523966 | 2 | 9  | 18 | CA   | 9  | 6  |
| 211315 | 28 | 3529438 | 3529467 | 2 | 15 | 30 | GT   | 13 | 11 |
| 211316 | 28 | 3530306 | 3530355 | 2 | 25 | 50 | GT   | 13 | 7  |
| 211320 | 28 | 3532712 | 3532725 | 2 | 7  | 14 | AC   | 11 | 6  |
| 211323 | 28 | 3538800 | 3538823 | 2 | 12 | 24 | TG   | 14 | 4  |
| 211325 | 28 | 3541105 | 3541122 | 2 | 9  | 18 | GA   | 21 | 4  |
| 211327 | 28 | 3542296 | 3542317 | 2 | 11 | 22 | TG   | 18 | 6  |
| 211328 | 28 | 3542635 | 3542662 | 2 | 14 | 28 | CA   | 9  | 10 |
| 211329 | 28 | 3543392 | 3543405 | 2 | 7  | 14 | AG   | 14 | 4  |
| 211330 | 28 | 3543408 | 3543425 | 2 | 9  | 18 | AG   | 12 | 4  |
| 211340 | 28 | 3556540 | 3556561 | 2 | 11 | 22 | AC   | 14 | 8  |
| 211341 | 28 | 3556668 | 3556685 | 2 | 9  | 18 | CA   | 25 | 3  |
| 211347 | 28 | 3559387 | 3559410 | 2 | 12 | 24 | CA   | 24 | 11 |
| 211348 | 28 | 3559559 | 3559588 | 2 | 15 | 30 | GT   | 13 | 6  |
| 211350 | 28 | 3562659 | 3562694 | 2 | 18 | 36 | CA   | 13 | 10 |

|        |    |         |         |   |    |    |      |    |    |
|--------|----|---------|---------|---|----|----|------|----|----|
| 211356 | 28 | 3571635 | 3571654 | 2 | 10 | 20 | AC   | 16 | 8  |
| 211361 | 28 | 3577847 | 3577878 | 2 | 16 | 32 | AC   | 12 | 10 |
| 211362 | 28 | 3577960 | 3577983 | 3 | 8  | 24 | CCT  | 18 | 4  |
| 211367 | 28 | 3583979 | 3583992 | 2 | 7  | 14 | AC   | 18 | 4  |
| 211369 | 28 | 3590061 | 3590074 | 2 | 7  | 14 | CT   | 24 | 5  |
| 211379 | 28 | 3611713 | 3611740 | 2 | 14 | 28 | CA   | 18 | 11 |
| 211382 | 28 | 3615439 | 3615462 | 2 | 12 | 24 | CT   | 14 | 12 |
| 211385 | 28 | 3623495 | 3623506 | 2 | 6  | 12 | GA   | 29 | 7  |
| 211386 | 28 | 3626333 | 3626366 | 2 | 17 | 34 | GT   | 10 | 9  |
| 211388 | 28 | 3628041 | 3628064 | 2 | 12 | 24 | GA   | 18 | 6  |
| 211390 | 28 | 3632855 | 3632874 | 2 | 10 | 20 | TG   | 20 | 8  |
| 211392 | 28 | 3634688 | 3634719 | 2 | 16 | 32 | GT   | 10 | 11 |
| 211393 | 28 | 3635191 | 3635206 | 2 | 8  | 16 | GT   | 26 | 9  |
| 211394 | 28 | 3635731 | 3635758 | 2 | 14 | 28 | GT   | 11 | 7  |
| 211396 | 28 | 3642376 | 3642389 | 2 | 7  | 14 | TG   | 11 | 7  |
| 211400 | 28 | 3656453 | 3656466 | 2 | 7  | 14 | CT   | 22 | 3  |
| 211401 | 28 | 3656496 | 3656507 | 2 | 6  | 12 | AC   | 33 | 5  |
| 211403 | 28 | 3659581 | 3659607 | 3 | 9  | 27 | GGA  | 6  | 3  |
| 211405 | 28 | 3660723 | 3660736 | 2 | 7  | 14 | GT   | 27 | 4  |
| 211406 | 28 | 3661778 | 3661805 | 4 | 7  | 28 | CTTT | 11 | 9  |
| 211408 | 28 | 3669723 | 3669737 | 3 | 5  | 15 | CCT  | 29 | 3  |
| 211410 | 28 | 3671106 | 3671129 | 2 | 12 | 24 | CA   | 13 | 10 |
| 211417 | 28 | 3678475 | 3678504 | 2 | 15 | 30 | CA   | 9  | 12 |
| 211420 | 28 | 3680772 | 3680791 | 2 | 10 | 20 | AC   | 18 | 3  |
| 211421 | 28 | 3680927 | 3680948 | 2 | 11 | 22 | AG   | 18 | 7  |
| 211423 | 28 | 3685836 | 3685861 | 2 | 13 | 26 | GT   | 16 | 7  |
| 211424 | 28 | 3686043 | 3686058 | 2 | 8  | 16 | AC   | 10 | 3  |
| 211425 | 28 | 3686276 | 3686303 | 4 | 7  | 28 | CTTT | 18 | 8  |
| 211430 | 28 | 3696057 | 3696104 | 2 | 24 | 48 | TG   | 7  | 11 |
| 211432 | 28 | 3699801 | 3699830 | 2 | 15 | 30 | CA   | 12 | 8  |
| 211439 | 28 | 3705808 | 3705834 | 3 | 9  | 27 | TGA  | 9  | 4  |
| 211440 | 28 | 3706112 | 3706127 | 2 | 8  | 16 | AC   | 16 | 3  |
| 211443 | 28 | 3713779 | 3713792 | 2 | 7  | 14 | AC   | 24 | 6  |
| 211444 | 28 | 3713794 | 3713805 | 2 | 6  | 12 | CA   | 17 | 6  |
| 211447 | 28 | 3714492 | 3714515 | 2 | 12 | 24 | AC   | 10 | 7  |
| 211448 | 28 | 3716875 | 3716902 | 2 | 14 | 28 | AC   | 19 | 17 |
| 211450 | 28 | 3717091 | 3717102 | 2 | 6  | 12 | AC   | 29 | 3  |
| 211451 | 28 | 3717570 | 3717601 | 2 | 16 | 32 | AC   | 9  | 5  |
| 211456 | 28 | 3720132 | 3720149 | 2 | 9  | 18 | GT   | 22 | 6  |
| 211457 | 28 | 3727045 | 3727058 | 2 | 7  | 14 | TG   | 19 | 5  |
| 211458 | 28 | 3728122 | 3728137 | 2 | 8  | 16 | AC   | 23 | 7  |
| 211459 | 28 | 3730790 | 3730805 | 2 | 8  | 16 | AC   | 21 | 7  |
| 211468 | 28 | 3754350 | 3754381 | 4 | 8  | 32 | TGGA | 30 | 9  |
| 211469 | 28 | 3758499 | 3758518 | 2 | 10 | 20 | CA   | 23 | 4  |
| 211470 | 28 | 3758673 | 3758698 | 2 | 13 | 26 | CA   | 10 | 10 |
| 211472 | 28 | 3759872 | 3759895 | 4 | 6  | 24 | AAGG | 22 | 4  |
| 211483 | 28 | 3778011 | 3778044 | 2 | 17 | 34 | GT   | 12 | 7  |
| 211484 | 28 | 3778579 | 3778590 | 2 | 6  | 12 | CA   | 16 | 4  |
| 211485 | 28 | 3780132 | 3780157 | 2 | 13 | 26 | CA   | 14 | 8  |
| 211490 | 28 | 3790416 | 3790447 | 2 | 16 | 32 | AC   | 23 | 9  |
| 211494 | 28 | 3798854 | 3798881 | 4 | 7  | 28 | GGTT | 11 | 4  |

|        |    |         |         |   |    |    |      |    |    |
|--------|----|---------|---------|---|----|----|------|----|----|
| 211497 | 28 | 3803172 | 3803195 | 2 | 12 | 24 | AC   | 15 | 9  |
| 211501 | 28 | 3805478 | 3805493 | 2 | 8  | 16 | GT   | 21 | 3  |
| 211505 | 28 | 3814050 | 3814077 | 2 | 14 | 28 | TG   | 7  | 8  |
| 211506 | 28 | 3815245 | 3815270 | 2 | 13 | 26 | AC   | 20 | 8  |
| 211508 | 28 | 3820081 | 3820106 | 2 | 13 | 26 | TG   | 8  | 5  |
| 211512 | 28 | 3823510 | 3823525 | 2 | 8  | 16 | CA   | 25 | 8  |
| 211517 | 28 | 3829930 | 3829947 | 2 | 9  | 18 | TG   | 21 | 8  |
| 211521 | 28 | 3831275 | 3831302 | 2 | 14 | 28 | AC   | 16 | 9  |
| 211523 | 28 | 3831675 | 3831704 | 2 | 15 | 30 | CA   | 11 | 10 |
| 211527 | 28 | 3838409 | 3838420 | 2 | 6  | 12 | CA   | 32 | 8  |
| 211528 | 28 | 3838971 | 3839004 | 2 | 17 | 34 | TG   | 10 | 6  |
| 211529 | 28 | 3840550 | 3840569 | 4 | 5  | 20 | GCCT | 20 | 5  |
| 211530 | 28 | 3840804 | 3840824 | 3 | 7  | 21 | CTG  | 25 | 5  |
| 211532 | 28 | 3845123 | 3845142 | 2 | 10 | 20 | AC   | 13 | 10 |
| 211535 | 28 | 3849377 | 3849418 | 2 | 21 | 42 | CA   | 10 | 11 |
| 211536 | 28 | 3849504 | 3849515 | 2 | 6  | 12 | AG   | 22 | 3  |
| 211546 | 28 | 3856557 | 3856572 | 2 | 8  | 16 | GT   | 26 | 3  |
| 211547 | 28 | 3856815 | 3856836 | 2 | 11 | 22 | TG   | 16 | 7  |
| 211552 | 28 | 3876313 | 3876328 | 4 | 4  | 16 | AAAT | 17 | 5  |
| 211555 | 28 | 3884492 | 3884524 | 3 | 11 | 33 | TGC  | 20 | 8  |
| 211556 | 28 | 3885258 | 3885271 | 2 | 7  | 14 | TG   | 21 | 4  |
| 211571 | 28 | 3921471 | 3921490 | 2 | 10 | 20 | AC   | 23 | 7  |
| 211576 | 28 | 3930165 | 3930180 | 2 | 8  | 16 | AC   | 25 | 15 |
| 211577 | 28 | 3933533 | 3933564 | 2 | 16 | 32 | CA   | 18 | 7  |
| 211584 | 28 | 3937498 | 3937511 | 2 | 7  | 14 | GT   | 19 | 3  |
| 211589 | 28 | 3951279 | 3951294 | 2 | 8  | 16 | AC   | 19 | 4  |
| 211591 | 28 | 3953559 | 3953585 | 3 | 9  | 27 | CAG  | 31 | 5  |
| 211592 | 28 | 3965139 | 3965160 | 2 | 11 | 22 | GT   | 11 | 4  |
| 211593 | 28 | 3965331 | 3965354 | 2 | 12 | 24 | TG   | 19 | 8  |
| 211613 | 28 | 3992537 | 3992566 | 2 | 15 | 30 | AC   | 14 | 10 |
| 211614 | 28 | 3993800 | 3993814 | 3 | 5  | 15 | ATT  | 20 | 8  |
| 211619 | 28 | 3997886 | 3997923 | 2 | 19 | 38 | CT   | 10 | 8  |
| 211620 | 28 | 3999231 | 3999246 | 2 | 8  | 16 | AC   | 10 | 4  |
| 211621 | 28 | 4000073 | 4000086 | 2 | 7  | 14 | TG   | 25 | 5  |
| 211622 | 28 | 4006522 | 4006549 | 2 | 14 | 28 | CA   | 10 | 6  |
| 211625 | 28 | 4007065 | 4007092 | 2 | 14 | 28 | CA   | 15 | 11 |
| 211627 | 28 | 4007558 | 4007569 | 2 | 6  | 12 | TG   | 24 | 3  |
| 211632 | 28 | 4022083 | 4022096 | 2 | 7  | 14 | GT   | 20 | 5  |
| 211633 | 28 | 4022220 | 4022239 | 2 | 10 | 20 | AC   | 16 | 7  |
| 211637 | 28 | 4023481 | 4023496 | 2 | 8  | 16 | CT   | 23 | 3  |
| 211645 | 28 | 4029271 | 4029294 | 2 | 12 | 24 | AC   | 21 | 12 |
| 211655 | 28 | 4048948 | 4048963 | 4 | 4  | 16 | ATGC | 27 | 3  |
| 211664 | 28 | 4069932 | 4069963 | 2 | 16 | 32 | TG   | 6  | 10 |
| 211687 | 28 | 4165759 | 4165776 | 3 | 6  | 18 | TGT  | 31 | 5  |
| 211691 | 28 | 4172677 | 4172700 | 3 | 8  | 24 | ATT  | 22 | 5  |
| 211693 | 28 | 4178604 | 4178619 | 2 | 8  | 16 | AC   | 6  | 5  |
| 211694 | 28 | 4178621 | 4178636 | 2 | 8  | 16 | CA   | 12 | 8  |
| 211705 | 28 | 4190527 | 4190554 | 2 | 14 | 28 | AC   | 7  | 9  |
| 211706 | 28 | 4201786 | 4201811 | 2 | 13 | 26 | AG   | 16 | 6  |
| 211710 | 28 | 4230705 | 4230720 | 4 | 4  | 16 | ATTA | 25 | 4  |
| 211711 | 28 | 4231743 | 4231775 | 3 | 11 | 33 | CTC  | 8  | 5  |

|        |    |         |         |   |    |    |      |    |    |
|--------|----|---------|---------|---|----|----|------|----|----|
| 211714 | 28 | 4239979 | 4239994 | 2 | 8  | 16 | CA   | 19 | 11 |
| 211722 | 28 | 4266190 | 4266215 | 2 | 13 | 26 | TG   | 15 | 8  |
| 211726 | 28 | 4278290 | 4278321 | 2 | 16 | 32 | CA   | 10 | 8  |
| 211734 | 28 | 4289909 | 4289926 | 2 | 9  | 18 | TG   | 19 | 6  |
| 211737 | 28 | 4291826 | 4291853 | 2 | 14 | 28 | TG   | 23 | 10 |
| 211738 | 28 | 4292495 | 4292516 | 2 | 11 | 22 | GT   | 21 | 3  |
| 211739 | 28 | 4297192 | 4297205 | 2 | 7  | 14 | TG   | 23 | 3  |
| 211741 | 28 | 4300540 | 4300555 | 2 | 8  | 16 | TG   | 14 | 4  |
| 211755 | 28 | 4324255 | 4324268 | 2 | 7  | 14 | GT   | 18 | 3  |
| 211757 | 28 | 4326537 | 4326556 | 4 | 5  | 20 | AGAC | 25 | 4  |
| 211759 | 28 | 4335645 | 4335666 | 2 | 11 | 22 | TG   | 20 | 13 |
| 211767 | 28 | 4354594 | 4354617 | 2 | 12 | 24 | TG   | 18 | 10 |
| 211768 | 28 | 4357001 | 4357028 | 2 | 14 | 28 | GT   | 15 | 4  |
| 211770 | 28 | 4359409 | 4359426 | 2 | 9  | 18 | AC   | 17 | 7  |
| 211771 | 28 | 4359589 | 4359608 | 2 | 10 | 20 | AC   | 18 | 8  |
| 211772 | 28 | 4359753 | 4359770 | 2 | 9  | 18 | TG   | 24 | 5  |
| 211786 | 28 | 4399206 | 4399223 | 2 | 9  | 18 | GT   | 19 | 4  |
| 211788 | 28 | 4406095 | 4406120 | 2 | 13 | 26 | TG   | 23 | 6  |
| 211790 | 28 | 4409299 | 4409332 | 2 | 17 | 34 | GT   | 15 | 8  |
| 211797 | 28 | 4410131 | 4410152 | 2 | 11 | 22 | CA   | 26 | 5  |
| 211807 | 28 | 4430319 | 4430332 | 2 | 7  | 14 | CA   | 33 | 8  |
| 211815 | 28 | 4445530 | 4445555 | 2 | 13 | 26 | CA   | 15 | 7  |
| 211819 | 28 | 4452272 | 4452299 | 2 | 14 | 28 | GT   | 6  | 7  |
| 211820 | 28 | 4455228 | 4455245 | 2 | 9  | 18 | AC   | 21 | 8  |
| 211824 | 28 | 4472328 | 4472345 | 2 | 9  | 18 | GT   | 20 | 3  |
| 211839 | 28 | 4500167 | 4500181 | 3 | 5  | 15 | TAA  | 14 | 4  |
| 211840 | 28 | 4501848 | 4501868 | 3 | 7  | 21 | GAC  | 17 | 3  |
| 211846 | 28 | 4523809 | 4523824 | 4 | 4  | 16 | TTTC | 17 | 6  |
| 211852 | 28 | 4539340 | 4539357 | 2 | 9  | 18 | TG   | 21 | 6  |
| 211854 | 28 | 4549885 | 4549906 | 2 | 11 | 22 | GT   | 9  | 5  |
| 211857 | 28 | 4550012 | 4550025 | 2 | 7  | 14 | TG   | 13 | 4  |
| 211858 | 28 | 4550569 | 4550580 | 2 | 6  | 12 | GT   | 29 | 3  |
| 211861 | 28 | 4553482 | 4553515 | 2 | 17 | 34 | TG   | 8  | 8  |
| 211862 | 28 | 4559868 | 4559883 | 2 | 8  | 16 | CT   | 10 | 6  |
| 211863 | 28 | 4566601 | 4566616 | 2 | 8  | 16 | AT   | 7  | 7  |
| 211866 | 28 | 4567190 | 4567207 | 2 | 9  | 18 | TG   | 14 | 5  |
| 211874 | 28 | 4573879 | 4573893 | 3 | 5  | 15 | TTC  | 30 | 4  |
| 211875 | 28 | 4576255 | 4576272 | 2 | 9  | 18 | TG   | 7  | 4  |
| 211878 | 28 | 4590632 | 4590646 | 3 | 5  | 15 | CCG  | 24 | 6  |
| 211880 | 28 | 4598179 | 4598192 | 2 | 7  | 14 | TC   | 21 | 4  |
| 211882 | 28 | 4609371 | 4609390 | 2 | 10 | 20 | CA   | 21 | 13 |
| 211884 | 28 | 4612983 | 4613000 | 3 | 6  | 18 | TGA  | 29 | 4  |
| 211885 | 28 | 4618638 | 4618658 | 3 | 7  | 21 | CTT  | 28 | 4  |
| 211891 | 28 | 4638989 | 4639010 | 2 | 11 | 22 | AC   | 20 | 7  |
| 211897 | 28 | 4648143 | 4648154 | 2 | 6  | 12 | AC   | 24 | 4  |
| 211905 | 28 | 4673719 | 4673756 | 2 | 19 | 38 | GT   | 7  | 5  |
| 211907 | 28 | 4677818 | 4677838 | 3 | 7  | 21 | CTC  | 17 | 4  |
| 211910 | 28 | 4681867 | 4681880 | 2 | 7  | 14 | CA   | 14 | 5  |
| 211915 | 28 | 4685076 | 4685093 | 3 | 6  | 18 | GCT  | 29 | 3  |
| 211917 | 28 | 4689552 | 4689575 | 2 | 12 | 24 | TG   | 16 | 11 |
| 211923 | 28 | 4699656 | 4699681 | 2 | 13 | 26 | TG   | 21 | 8  |

|        |    |         |         |   |    |    |      |    |    |
|--------|----|---------|---------|---|----|----|------|----|----|
| 211926 | 28 | 4705305 | 4705328 | 2 | 12 | 24 | TG   | 15 | 4  |
| 211927 | 28 | 4705509 | 4705520 | 2 | 6  | 12 | CA   | 23 | 3  |
| 211930 | 28 | 4711931 | 4711956 | 2 | 13 | 26 | GT   | 12 | 9  |
| 211934 | 28 | 4723180 | 4723203 | 2 | 12 | 24 | GT   | 16 | 4  |
| 211936 | 28 | 4726691 | 4726741 | 3 | 17 | 51 | GAA  | 22 | 11 |
| 211937 | 28 | 4728060 | 4728075 | 2 | 8  | 16 | AC   | 21 | 5  |
| 211939 | 28 | 4732539 | 4732560 | 2 | 11 | 22 | CA   | 14 | 5  |
| 211943 | 28 | 4745974 | 4745997 | 4 | 6  | 24 | GACA | 17 | 5  |
| 211944 | 28 | 4746110 | 4746131 | 2 | 11 | 22 | AC   | 14 | 4  |
| 211945 | 28 | 4746598 | 4746627 | 3 | 10 | 30 | GAG  | 16 | 4  |
| 211946 | 28 | 4746859 | 4746890 | 2 | 16 | 32 | CA   | 16 | 9  |
| 211947 | 28 | 4747039 | 4747064 | 2 | 13 | 26 | CT   | 12 | 7  |
| 211966 | 28 | 4768531 | 4768562 | 2 | 16 | 32 | AC   | 14 | 6  |
| 211968 | 28 | 4772412 | 4772427 | 2 | 8  | 16 | CT   | 30 | 3  |
| 211969 | 28 | 4774300 | 4774311 | 2 | 6  | 12 | GT   | 29 | 3  |
| 211970 | 28 | 4776642 | 4776655 | 2 | 7  | 14 | TG   | 20 | 10 |
| 211971 | 28 | 4776658 | 4776673 | 2 | 8  | 16 | TG   | 11 | 6  |
| 211972 | 28 | 4776995 | 4777006 | 2 | 6  | 12 | GT   | 21 | 4  |
| 211977 | 28 | 4788963 | 4788978 | 2 | 8  | 16 | TA   | 11 | 3  |
| 211978 | 28 | 4793776 | 4793791 | 2 | 8  | 16 | AC   | 17 | 4  |
| 211979 | 28 | 4806425 | 4806445 | 3 | 7  | 21 | ATA  | 6  | 3  |
| 211982 | 28 | 4809408 | 4809422 | 3 | 5  | 15 | GGA  | 17 | 6  |
| 211986 | 28 | 4814580 | 4814605 | 2 | 13 | 26 | AC   | 20 | 6  |
| 211987 | 28 | 4814804 | 4814831 | 2 | 14 | 28 | GT   | 19 | 13 |
| 211988 | 28 | 4816497 | 4816516 | 2 | 10 | 20 | GT   | 14 | 10 |
| 211989 | 28 | 4817118 | 4817133 | 2 | 8  | 16 | AC   | 14 | 4  |
| 211991 | 28 | 4819892 | 4819911 | 2 | 10 | 20 | TC   | 20 | 4  |
| 211992 | 28 | 4820701 | 4820724 | 3 | 8  | 24 | TCC  | 18 | 4  |
| 211996 | 28 | 4831587 | 4831612 | 2 | 13 | 26 | CA   | 11 | 10 |
| 211998 | 28 | 4831992 | 4832009 | 3 | 6  | 18 | GCA  | 30 | 3  |
| 212000 | 28 | 4834692 | 4834707 | 2 | 8  | 16 | AC   | 30 | 5  |
| 212001 | 28 | 4835407 | 4835452 | 2 | 23 | 46 | TG   | 16 | 14 |
| 212002 | 28 | 4840534 | 4840557 | 2 | 12 | 24 | GT   | 30 | 16 |
| 212003 | 28 | 4840704 | 4840727 | 2 | 12 | 24 | AC   | 17 | 9  |
| 212005 | 28 | 4845064 | 4845079 | 4 | 4  | 16 | AAAC | 33 | 3  |
| 212006 | 28 | 4845168 | 4845197 | 2 | 15 | 30 | CA   | 17 | 12 |
| 212007 | 28 | 4845338 | 4845369 | 2 | 16 | 32 | AC   | 13 | 10 |
| 212008 | 28 | 4848615 | 4848630 | 2 | 8  | 16 | AC   | 14 | 7  |
| 212009 | 28 | 4848882 | 4848915 | 2 | 17 | 34 | TG   | 12 | 10 |
| 212011 | 28 | 4854147 | 4854174 | 2 | 14 | 28 | GT   | 17 | 8  |
| 212014 | 28 | 4866363 | 4866392 | 2 | 15 | 30 | AC   | 13 | 8  |
| 212017 | 28 | 4866903 | 4866924 | 2 | 11 | 22 | AC   | 21 | 7  |
| 212018 | 28 | 4867047 | 4867072 | 2 | 13 | 26 | GT   | 18 | 8  |
| 212019 | 28 | 4868521 | 4868548 | 2 | 14 | 28 | TG   | 11 | 6  |
| 212020 | 28 | 4868668 | 4868693 | 2 | 13 | 26 | AC   | 10 | 12 |
| 212021 | 28 | 4868919 | 4868930 | 2 | 6  | 12 | TG   | 19 | 5  |
| 212022 | 28 | 4870354 | 4870395 | 2 | 21 | 42 | GT   | 10 | 10 |
| 212023 | 28 | 4871610 | 4871635 | 2 | 13 | 26 | CA   | 11 | 9  |
| 212032 | 28 | 4889485 | 4889502 | 2 | 9  | 18 | GA   | 19 | 3  |
| 212033 | 28 | 4889794 | 4889813 | 2 | 10 | 20 | CA   | 6  | 8  |
| 212035 | 28 | 4895444 | 4895459 | 2 | 8  | 16 | TG   | 21 | 6  |

|        |    |         |         |   |    |    |      |    |    |
|--------|----|---------|---------|---|----|----|------|----|----|
| 212036 | 28 | 4895532 | 4895555 | 2 | 12 | 24 | CA   | 12 | 7  |
| 212039 | 28 | 4900188 | 4900209 | 2 | 11 | 22 | GT   | 17 | 9  |
| 212045 | 28 | 4904603 | 4904628 | 2 | 13 | 26 | TG   | 8  | 8  |
| 212046 | 28 | 4906865 | 4906888 | 2 | 12 | 24 | TC   | 19 | 5  |
| 212050 | 28 | 4907438 | 4907449 | 2 | 6  | 12 | CA   | 29 | 3  |
| 212051 | 28 | 4912291 | 4912311 | 3 | 7  | 21 | AAG  | 28 | 4  |
| 212052 | 28 | 4917388 | 4917409 | 2 | 11 | 22 | CA   | 17 | 13 |
| 212054 | 28 | 4926666 | 4926685 | 4 | 5  | 20 | CAAC | 30 | 4  |
| 212055 | 28 | 4931092 | 4931107 | 2 | 8  | 16 | AC   | 25 | 7  |
| 212057 | 28 | 4932208 | 4932219 | 2 | 6  | 12 | TC   | 23 | 12 |
| 212060 | 28 | 4936574 | 4936585 | 2 | 6  | 12 | TG   | 17 | 4  |
| 212062 | 28 | 4948119 | 4948150 | 2 | 16 | 32 | CT   | 16 | 6  |
| 212064 | 28 | 4960293 | 4960310 | 3 | 6  | 18 | ATG  | 30 | 3  |
| 212066 | 28 | 4960940 | 4960963 | 2 | 12 | 24 | CA   | 12 | 6  |
| 212069 | 28 | 4967137 | 4967178 | 2 | 21 | 42 | TG   | 14 | 13 |
| 212074 | 28 | 4981181 | 4981208 | 4 | 7  | 28 | ATTT | 25 | 4  |
| 212077 | 28 | 4984273 | 4984294 | 2 | 11 | 22 | AC   | 7  | 11 |
| 212078 | 28 | 4984762 | 4984793 | 2 | 16 | 32 | AC   | 13 | 8  |
| 212079 | 28 | 4988994 | 4989021 | 2 | 14 | 28 | TG   | 12 | 6  |
| 212083 | 28 | 4998436 | 4998461 | 2 | 13 | 26 | CA   | 27 | 13 |
| 212088 | 28 | 5004101 | 5004122 | 2 | 11 | 22 | TG   | 19 | 5  |
| 212089 | 28 | 5004290 | 5004317 | 2 | 14 | 28 | CA   | 15 | 10 |
| 212091 | 28 | 5030907 | 5030922 | 2 | 8  | 16 | AC   | 24 | 3  |
| 212092 | 28 | 5033730 | 5033753 | 3 | 8  | 24 | CTC  | 24 | 6  |
| 212093 | 28 | 5033801 | 5033816 | 2 | 8  | 16 | CA   | 20 | 4  |
| 212095 | 28 | 5036440 | 5036451 | 2 | 6  | 12 | GT   | 16 | 9  |
| 212096 | 28 | 5038800 | 5038817 | 3 | 6  | 18 | CCT  | 22 | 4  |
| 212100 | 28 | 5045460 | 5045473 | 2 | 7  | 14 | AC   | 18 | 12 |
| 212106 | 28 | 5050716 | 5050731 | 2 | 8  | 16 | AC   | 21 | 6  |
| 212109 | 28 | 5057425 | 5057438 | 2 | 7  | 14 | AG   | 18 | 3  |
| 212112 | 28 | 5080546 | 5080559 | 2 | 7  | 14 | GT   | 26 | 5  |
| 212118 | 28 | 5104160 | 5104191 | 4 | 8  | 32 | AATC | 19 | 8  |
| 212122 | 28 | 5132229 | 5132261 | 3 | 11 | 33 | TGC  | 19 | 9  |
| 212131 | 28 | 5163106 | 5163125 | 2 | 10 | 20 | AC   | 14 | 5  |
| 212132 | 28 | 5167381 | 5167400 | 2 | 10 | 20 | TG   | 15 | 7  |
| 212142 | 28 | 5191678 | 5191709 | 2 | 16 | 32 | CA   | 10 | 7  |
| 212146 | 28 | 5199324 | 5199367 | 2 | 22 | 44 | CA   | 10 | 11 |
| 212147 | 28 | 5199519 | 5199552 | 2 | 17 | 34 | CA   | 7  | 8  |
| 212148 | 28 | 5201241 | 5201284 | 2 | 22 | 44 | GT   | 7  | 6  |
| 212154 | 28 | 5207401 | 5207418 | 2 | 9  | 18 | AC   | 23 | 3  |
| 212155 | 28 | 5207830 | 5207845 | 2 | 8  | 16 | AC   | 18 | 3  |
| 212157 | 28 | 5212259 | 5212270 | 2 | 6  | 12 | AG   | 11 | 6  |
| 212180 | 28 | 5295599 | 5295619 | 3 | 7  | 21 | TCC  | 20 | 8  |
| 212183 | 28 | 5300016 | 5300030 | 3 | 5  | 15 | CTG  | 19 | 4  |
| 212189 | 28 | 5327513 | 5327528 | 2 | 8  | 16 | AC   | 23 | 8  |
| 212192 | 28 | 5331689 | 5331700 | 2 | 6  | 12 | TG   | 14 | 3  |
| 212197 | 28 | 5347870 | 5347897 | 4 | 7  | 28 | TATC | 15 | 4  |
| 212201 | 28 | 5353817 | 5353834 | 3 | 6  | 18 | TGA  | 24 | 4  |
| 212202 | 28 | 5356245 | 5356268 | 3 | 8  | 24 | ATG  | 18 | 3  |
| 212204 | 28 | 5360570 | 5360599 | 2 | 15 | 30 | GT   | 6  | 4  |
| 212205 | 28 | 5360762 | 5360773 | 2 | 6  | 12 | AC   | 20 | 3  |

|        |    |         |         |   |    |    |      |    |    |
|--------|----|---------|---------|---|----|----|------|----|----|
| 212206 | 28 | 5361818 | 5361829 | 2 | 6  | 12 | TA   | 17 | 7  |
| 212210 | 28 | 5365283 | 5365318 | 3 | 12 | 36 | ATG  | 24 | 7  |
| 212216 | 28 | 5389197 | 5389228 | 4 | 8  | 32 | CAGA | 29 | 7  |
| 212221 | 28 | 5415963 | 5415974 | 2 | 6  | 12 | AG   | 15 | 3  |
| 212227 | 28 | 5421213 | 5421232 | 2 | 10 | 20 | AC   | 27 | 7  |
| 212228 | 28 | 5425082 | 5425093 | 2 | 6  | 12 | TA   | 21 | 4  |
| 212229 | 28 | 5443796 | 5443823 | 2 | 14 | 28 | TG   | 12 | 7  |
| 212247 | 28 | 5508639 | 5508654 | 4 | 4  | 16 | CTCC | 25 | 3  |
| 212248 | 28 | 5519231 | 5519248 | 2 | 9  | 18 | AC   | 18 | 3  |
| 212253 | 28 | 5548147 | 5548173 | 3 | 9  | 27 | TAT  | 9  | 3  |
| 212257 | 28 | 5562986 | 5563001 | 2 | 8  | 16 | CA   | 19 | 5  |
| 212259 | 28 | 5579728 | 5579763 | 4 | 9  | 36 | ATAG | 12 | 11 |
| 212261 | 28 | 5597462 | 5597482 | 3 | 7  | 21 | TTG  | 12 | 7  |
| 212263 | 28 | 5597820 | 5597847 | 4 | 7  | 28 | ATTT | 13 | 5  |
| 212265 | 28 | 5600727 | 5600780 | 2 | 27 | 54 | CA   | 14 | 14 |
| 212270 | 28 | 5622422 | 5622454 | 3 | 11 | 33 | ATT  | 10 | 3  |
| 212271 | 28 | 5629344 | 5629367 | 2 | 12 | 24 | CA   | 16 | 8  |
| 212273 | 28 | 5637863 | 5637886 | 2 | 12 | 24 | TG   | 15 | 7  |
| 212281 | 28 | 5669693 | 5669708 | 2 | 8  | 16 | CA   | 18 | 4  |
| 212282 | 28 | 5669882 | 5669897 | 2 | 8  | 16 | CA   | 16 | 4  |
| 212284 | 28 | 5670454 | 5670468 | 3 | 5  | 15 | CAG  | 29 | 4  |
| 212285 | 28 | 5670469 | 5670483 | 3 | 5  | 15 | GAG  | 30 | 4  |
| 212287 | 28 | 5672764 | 5672775 | 2 | 6  | 12 | CA   | 24 | 4  |
| 212294 | 28 | 5680325 | 5680340 | 2 | 8  | 16 | TG   | 20 | 7  |
| 212307 | 28 | 5689626 | 5689647 | 2 | 11 | 22 | CA   | 13 | 5  |
| 212311 | 28 | 5697471 | 5697484 | 2 | 7  | 14 | AT   | 17 | 3  |
| 212312 | 28 | 5700112 | 5700137 | 2 | 13 | 26 | TG   | 9  | 7  |
| 212314 | 28 | 5704780 | 5704795 | 4 | 4  | 16 | TTCT | 22 | 3  |
| 212315 | 28 | 5706825 | 5706840 | 2 | 8  | 16 | GT   | 18 | 3  |
| 212316 | 28 | 5707479 | 5707492 | 2 | 7  | 14 | TG   | 14 | 9  |
| 212317 | 28 | 5707495 | 5707512 | 2 | 9  | 18 | TG   | 15 | 8  |
| 212319 | 28 | 5719280 | 5719315 | 3 | 12 | 36 | GAT  | 21 | 6  |
| 212340 | 28 | 5751411 | 5751434 | 2 | 12 | 24 | GT   | 22 | 7  |
| 212343 | 28 | 5757062 | 5757079 | 2 | 9  | 18 | TG   | 20 | 11 |
| 212344 | 28 | 5758171 | 5758191 | 3 | 7  | 21 | CTT  | 23 | 4  |
| 212354 | 28 | 5795783 | 5795794 | 2 | 6  | 12 | TG   | 25 | 3  |
| 212355 | 28 | 5801531 | 5801560 | 2 | 15 | 30 | AC   | 13 | 9  |
| 212358 | 28 | 5809104 | 5809117 | 2 | 7  | 14 | TG   | 29 | 4  |
| 212361 | 28 | 5814559 | 5814588 | 2 | 15 | 30 | CA   | 6  | 5  |
| 212370 | 28 | 5883795 | 5883810 | 2 | 8  | 16 | CA   | 8  | 4  |
| 212378 | 28 | 5893657 | 5893676 | 2 | 10 | 20 | CA   | 17 | 7  |
| 212380 | 28 | 5899250 | 5899261 | 2 | 6  | 12 | TG   | 24 | 3  |
| 212386 | 28 | 5915450 | 5915483 | 2 | 17 | 34 | TG   | 11 | 6  |
| 212389 | 28 | 5933019 | 5933050 | 2 | 16 | 32 | TG   | 14 | 14 |
| 212391 | 28 | 5940042 | 5940065 | 2 | 12 | 24 | TG   | 14 | 10 |
| 212396 | 28 | 5953609 | 5953640 | 2 | 16 | 32 | TG   | 15 | 10 |
| 212397 | 28 | 5961898 | 5961925 | 2 | 14 | 28 | AC   | 15 | 10 |
| 212400 | 28 | 5972322 | 5972341 | 4 | 5  | 20 | TTTG | 26 | 3  |
| 212403 | 28 | 5978507 | 5978524 | 3 | 6  | 18 | CTC  | 21 | 5  |
| 212405 | 28 | 5983961 | 5983980 | 2 | 10 | 20 | AC   | 19 | 3  |
| 212417 | 28 | 6013377 | 6013402 | 2 | 13 | 26 | GT   | 16 | 10 |



|        |    |         |         |   |    |    |      |    |    |
|--------|----|---------|---------|---|----|----|------|----|----|
| 212418 | 28 | 6015240 | 6015261 | 2 | 11 | 22 | AC   | 10 | 8  |
| 212427 | 28 | 6026408 | 6026421 | 2 | 7  | 14 | CA   | 23 | 6  |
| 212433 | 28 | 6042118 | 6042132 | 3 | 5  | 15 | TTG  | 25 | 3  |
| 212438 | 28 | 6061176 | 6061205 | 2 | 15 | 30 | AC   | 8  | 10 |
| 212441 | 28 | 6073455 | 6073486 | 2 | 16 | 32 | CA   | 8  | 7  |
| 212442 | 28 | 6074943 | 6074966 | 2 | 12 | 24 | GT   | 12 | 8  |
| 212445 | 28 | 6084545 | 6084568 | 2 | 12 | 24 | AC   | 17 | 6  |
| 212447 | 28 | 6095818 | 6095837 | 2 | 10 | 20 | AC   | 23 | 4  |
| 212449 | 28 | 6096608 | 6096627 | 2 | 10 | 20 | TC   | 6  | 5  |
| 212453 | 28 | 6103717 | 6103746 | 2 | 15 | 30 | AC   | 22 | 9  |
| 212454 | 28 | 6105126 | 6105143 | 2 | 9  | 18 | GT   | 21 | 8  |
| 212470 | 28 | 6141802 | 6141815 | 2 | 7  | 14 | CA   | 23 | 6  |
| 212477 | 28 | 6198495 | 6198510 | 2 | 8  | 16 | AT   | 17 | 7  |
| 212484 | 28 | 6212180 | 6212194 | 3 | 5  | 15 | ACC  | 29 | 7  |
| 212488 | 28 | 6236529 | 6236548 | 2 | 10 | 20 | CT   | 11 | 10 |
| 212493 | 28 | 6237972 | 6238025 | 2 | 27 | 54 | CA   | 15 | 13 |
| 212494 | 28 | 6241615 | 6241644 | 2 | 15 | 30 | TG   | 10 | 7  |
| 212495 | 28 | 6256190 | 6256216 | 3 | 9  | 27 | CAG  | 27 | 6  |
| 212497 | 28 | 6258038 | 6258059 | 2 | 11 | 22 | CA   | 24 | 12 |
| 212499 | 28 | 6262618 | 6262631 | 2 | 7  | 14 | AC   | 17 | 6  |
| 212505 | 28 | 6274533 | 6274574 | 2 | 21 | 42 | TG   | 10 | 9  |
| 212508 | 28 | 6295802 | 6295817 | 2 | 8  | 16 | GT   | 28 | 3  |
| 212509 | 28 | 6296297 | 6296360 | 4 | 16 | 64 | GATA | 16 | 11 |
| 212544 | 28 | 6343991 | 6344024 | 2 | 17 | 34 | AC   | 11 | 6  |
| 212550 | 28 | 6349208 | 6349233 | 2 | 13 | 26 | TG   | 21 | 6  |
| 212552 | 28 | 6355085 | 6355100 | 2 | 8  | 16 | CA   | 24 | 4  |
| 212553 | 28 | 6355904 | 6355929 | 2 | 13 | 26 | CA   | 21 | 10 |
| 212554 | 28 | 6355957 | 6355970 | 2 | 7  | 14 | AC   | 21 | 3  |
| 212563 | 28 | 6391186 | 6391205 | 2 | 10 | 20 | GT   | 13 | 3  |
| 212565 | 28 | 6392070 | 6392093 | 2 | 12 | 24 | TG   | 17 | 4  |
| 212566 | 28 | 6392579 | 6392624 | 2 | 23 | 46 | CA   | 6  | 5  |
| 212567 | 28 | 6394187 | 6394230 | 4 | 11 | 44 | ATCT | 6  | 7  |
| 212569 | 28 | 6394611 | 6394640 | 2 | 15 | 30 | AC   | 14 | 7  |
| 212575 | 28 | 6418316 | 6418359 | 4 | 11 | 44 | AAAG | 16 | 8  |
| 212577 | 28 | 6427443 | 6427457 | 3 | 5  | 15 | GGA  | 14 | 3  |
| 212578 | 28 | 6427671 | 6427714 | 2 | 22 | 44 | AC   | 10 | 11 |
| 212597 | 28 | 6496060 | 6496092 | 3 | 11 | 33 | TTA  | 8  | 4  |
| 212602 | 28 | 6512689 | 6512702 | 2 | 7  | 14 | CT   | 23 | 4  |
| 212610 | 28 | 6523237 | 6523252 | 4 | 4  | 16 | CCAC | 25 | 3  |
| 212615 | 28 | 6541108 | 6541127 | 2 | 10 | 20 | GT   | 17 | 6  |
| 212617 | 28 | 6542211 | 6542225 | 3 | 5  | 15 | GCT  | 26 | 4  |
| 212651 | 28 | 6644970 | 6645001 | 4 | 8  | 32 | GTAT | 17 | 6  |
| 212662 | 28 | 6676600 | 6676613 | 2 | 7  | 14 | AC   | 25 | 5  |
| 212664 | 28 | 6689620 | 6689631 | 2 | 6  | 12 | CA   | 30 | 4  |
| 212665 | 28 | 6689633 | 6689644 | 2 | 6  | 12 | AC   | 28 | 3  |
| 212667 | 28 | 6700838 | 6700865 | 2 | 14 | 28 | CA   | 25 | 4  |
| 212686 | 28 | 6746335 | 6746350 | 2 | 8  | 16 | GT   | 10 | 3  |
| 212689 | 28 | 6748753 | 6748774 | 2 | 11 | 22 | CA   | 16 | 4  |
| 212712 | 28 | 6838874 | 6838885 | 2 | 6  | 12 | GT   | 21 | 3  |
| 212720 | 28 | 6857623 | 6857646 | 2 | 12 | 24 | TG   | 20 | 3  |
| 212724 | 28 | 6860997 | 6861014 | 2 | 9  | 18 | AG   | 10 | 5  |

|        |    |         |         |   |    |    |      |    |    |
|--------|----|---------|---------|---|----|----|------|----|----|
| 212726 | 28 | 6866558 | 6866575 | 2 | 9  | 18 | AC   | 12 | 4  |
| 212732 | 28 | 6881229 | 6881264 | 4 | 9  | 36 | GATA | 27 | 3  |
| 212733 | 28 | 6882200 | 6882217 | 3 | 6  | 18 | TTG  | 26 | 3  |
| 212740 | 29 | 7845    | 7860    | 2 | 8  | 16 | TG   | 14 | 7  |
| 212741 | 29 | 7893    | 7920    | 2 | 14 | 28 | TG   | 16 | 11 |
| 212742 | 29 | 7980    | 8013    | 2 | 17 | 34 | GT   | 19 | 12 |
| 212744 | 29 | 8306    | 8323    | 2 | 9  | 18 | TG   | 22 | 6  |
| 212745 | 29 | 8421    | 8435    | 3 | 5  | 15 | TCT  | 34 | 4  |
| 212748 | 29 | 10126   | 10155   | 2 | 15 | 30 | AC   | 7  | 9  |
| 212750 | 29 | 11652   | 11685   | 2 | 17 | 34 | TG   | 12 | 11 |
| 212751 | 29 | 13107   | 13130   | 3 | 8  | 24 | GAG  | 16 | 11 |
| 212752 | 29 | 14359   | 14374   | 2 | 8  | 16 | GT   | 14 | 11 |
| 212753 | 29 | 14632   | 14646   | 3 | 5  | 15 | CTG  | 22 | 7  |
| 212754 | 29 | 16698   | 16715   | 3 | 6  | 18 | TCC  | 26 | 4  |
| 212755 | 29 | 17160   | 17183   | 3 | 8  | 24 | CAC  | 26 | 13 |
| 212756 | 29 | 22669   | 22683   | 3 | 5  | 15 | CTG  | 28 | 4  |
| 212760 | 29 | 29522   | 29533   | 2 | 6  | 12 | TG   | 27 | 5  |
| 212763 | 29 | 31866   | 31919   | 2 | 27 | 54 | CA   | 10 | 9  |
| 212765 | 29 | 37562   | 37579   | 3 | 6  | 18 | GCA  | 27 | 4  |
| 212767 | 29 | 38339   | 38356   | 2 | 9  | 18 | GT   | 20 | 3  |
| 212769 | 29 | 41823   | 41838   | 2 | 8  | 16 | GT   | 22 | 10 |
| 212770 | 29 | 42055   | 42084   | 2 | 15 | 30 | GT   | 10 | 10 |
| 212771 | 29 | 42242   | 42262   | 3 | 7  | 21 | AAG  | 24 | 4  |
| 212772 | 29 | 42384   | 42405   | 2 | 11 | 22 | TG   | 12 | 12 |
| 212774 | 29 | 46042   | 46077   | 3 | 12 | 36 | GAG  | 16 | 11 |
| 212775 | 29 | 47255   | 47274   | 2 | 10 | 20 | CA   | 20 | 11 |
| 212785 | 29 | 69044   | 69064   | 3 | 7  | 21 | AGA  | 20 | 9  |
| 212786 | 29 | 72833   | 72866   | 2 | 17 | 34 | TG   | 10 | 13 |
| 212787 | 29 | 73026   | 73051   | 2 | 13 | 26 | CA   | 9  | 10 |
| 212792 | 29 | 74361   | 74406   | 2 | 23 | 46 | TG   | 16 | 16 |
| 212793 | 29 | 74557   | 74578   | 2 | 11 | 22 | GT   | 23 | 13 |
| 212798 | 29 | 81326   | 81346   | 3 | 7  | 21 | CCT  | 9  | 7  |
| 212799 | 29 | 85016   | 85033   | 3 | 6  | 18 | GGA  | 23 | 5  |
| 212800 | 29 | 93927   | 93950   | 3 | 8  | 24 | GGA  | 16 | 5  |
| 212801 | 29 | 94525   | 94545   | 3 | 7  | 21 | CTC  | 15 | 6  |
| 212802 | 29 | 97335   | 97356   | 2 | 11 | 22 | CA   | 16 | 10 |
| 212803 | 29 | 100175  | 100194  | 2 | 10 | 20 | TG   | 9  | 9  |
| 212804 | 29 | 100196  | 100207  | 2 | 6  | 12 | GT   | 11 | 14 |
| 212808 | 29 | 100479  | 100504  | 2 | 13 | 26 | TG   | 10 | 12 |
| 212809 | 29 | 100697  | 100710  | 2 | 7  | 14 | GT   | 17 | 5  |
| 212810 | 29 | 104242  | 104265  | 4 | 6  | 24 | CTCC | 8  | 8  |
| 212817 | 29 | 109994  | 110027  | 2 | 17 | 34 | CA   | 12 | 12 |
| 212823 | 29 | 118435  | 118467  | 3 | 11 | 33 | CCT  | 14 | 13 |
| 212830 | 29 | 127820  | 127843  | 2 | 12 | 24 | CA   | 14 | 8  |
| 212831 | 29 | 127927  | 127956  | 3 | 10 | 30 | TCA  | 24 | 9  |
| 212832 | 29 | 129038  | 129067  | 2 | 15 | 30 | GT   | 10 | 8  |
| 212846 | 29 | 138922  | 138973  | 2 | 26 | 52 | AC   | 7  | 9  |
| 212848 | 29 | 140660  | 140686  | 3 | 9  | 27 | TCC  | 13 | 8  |
| 212856 | 29 | 142971  | 142998  | 2 | 14 | 28 | TG   | 14 | 7  |
| 212863 | 29 | 149330  | 149359  | 2 | 15 | 30 | GT   | 22 | 12 |
| 212865 | 29 | 149517  | 149550  | 2 | 17 | 34 | TG   | 9  | 8  |

|        |    |        |        |   |    |    |      |    |    |
|--------|----|--------|--------|---|----|----|------|----|----|
| 212866 | 29 | 149912 | 149949 | 2 | 19 | 38 | GT   | 12 | 13 |
| 212867 | 29 | 152308 | 152321 | 2 | 7  | 14 | TG   | 25 | 3  |
| 212868 | 29 | 152492 | 152525 | 2 | 17 | 34 | TG   | 10 | 8  |
| 212869 | 29 | 152659 | 152678 | 2 | 10 | 20 | CA   | 8  | 15 |
| 212874 | 29 | 157575 | 157602 | 2 | 14 | 28 | TG   | 9  | 13 |
| 212875 | 29 | 158372 | 158409 | 2 | 19 | 38 | CA   | 15 | 11 |
| 212878 | 29 | 161437 | 161468 | 2 | 16 | 32 | CA   | 6  | 9  |
| 212879 | 29 | 161587 | 161600 | 2 | 7  | 14 | AC   | 6  | 10 |
| 212886 | 29 | 167549 | 167562 | 2 | 7  | 14 | AC   | 18 | 6  |
| 212887 | 29 | 167629 | 167652 | 2 | 12 | 24 | CA   | 19 | 10 |
| 212891 | 29 | 168561 | 168578 | 2 | 9  | 18 | GT   | 15 | 7  |
| 212894 | 29 | 176082 | 176101 | 2 | 10 | 20 | TG   | 23 | 8  |
| 212899 | 29 | 178153 | 178174 | 2 | 11 | 22 | TG   | 10 | 10 |
| 212908 | 29 | 211407 | 211430 | 2 | 12 | 24 | CA   | 10 | 8  |
| 212909 | 29 | 212406 | 212433 | 2 | 14 | 28 | GT   | 14 | 10 |
| 212910 | 29 | 216572 | 216599 | 2 | 14 | 28 | TG   | 18 | 14 |
| 212911 | 29 | 221602 | 221622 | 3 | 7  | 21 | CTG  | 22 | 8  |
| 212913 | 29 | 226324 | 226350 | 3 | 9  | 27 | GGA  | 18 | 7  |
| 212914 | 29 | 227238 | 227273 | 4 | 9  | 36 | GACA | 25 | 6  |
| 212918 | 29 | 229346 | 229387 | 3 | 14 | 42 | TCA  | 25 | 7  |
| 212919 | 29 | 231686 | 231711 | 2 | 13 | 26 | CA   | 20 | 11 |
| 212920 | 29 | 232343 | 232362 | 2 | 10 | 20 | TG   | 18 | 6  |
| 212931 | 29 | 252309 | 252336 | 2 | 14 | 28 | TG   | 20 | 8  |
| 212932 | 29 | 252380 | 252393 | 2 | 7  | 14 | AC   | 17 | 4  |
| 212935 | 29 | 255691 | 255702 | 2 | 6  | 12 | CA   | 17 | 13 |
| 212936 | 29 | 255705 | 255720 | 2 | 8  | 16 | CA   | 24 | 15 |
| 212939 | 29 | 258578 | 258589 | 2 | 6  | 12 | TG   | 27 | 3  |
| 212940 | 29 | 258821 | 258858 | 2 | 19 | 38 | CA   | 17 | 10 |
| 212941 | 29 | 258963 | 258986 | 2 | 12 | 24 | CA   | 14 | 6  |
| 212943 | 29 | 269889 | 269902 | 2 | 7  | 14 | TG   | 24 | 6  |
| 212946 | 29 | 272542 | 272559 | 2 | 9  | 18 | AC   | 20 | 7  |
| 212948 | 29 | 272807 | 272832 | 2 | 13 | 26 | AC   | 15 | 16 |
| 212950 | 29 | 273927 | 273942 | 4 | 4  | 16 | AAGA | 27 | 3  |
| 212951 | 29 | 274133 | 274168 | 2 | 18 | 36 | CA   | 11 | 9  |
| 212952 | 29 | 276444 | 276459 | 2 | 8  | 16 | TG   | 25 | 9  |
| 212953 | 29 | 288106 | 288149 | 2 | 22 | 44 | GT   | 16 | 15 |
| 212954 | 29 | 288304 | 288321 | 2 | 9  | 18 | AC   | 24 | 7  |
| 212955 | 29 | 288661 | 288675 | 3 | 5  | 15 | GCA  | 33 | 3  |
| 212958 | 29 | 298104 | 298147 | 2 | 22 | 44 | AC   | 7  | 8  |
| 212959 | 29 | 299063 | 299080 | 2 | 9  | 18 | CT   | 25 | 3  |
| 212967 | 29 | 312255 | 312272 | 2 | 9  | 18 | TG   | 22 | 5  |
| 212968 | 29 | 313244 | 313255 | 2 | 6  | 12 | TA   | 12 | 4  |
| 212970 | 29 | 317640 | 317671 | 2 | 16 | 32 | GT   | 11 | 8  |
| 212976 | 29 | 322093 | 322122 | 3 | 10 | 30 | GAG  | 15 | 7  |
| 212977 | 29 | 323423 | 323458 | 2 | 18 | 36 | TG   | 12 | 8  |
| 212982 | 29 | 331409 | 331440 | 2 | 16 | 32 | GT   | 12 | 8  |
| 212983 | 29 | 331662 | 331689 | 2 | 14 | 28 | GT   | 19 | 7  |
| 212985 | 29 | 334432 | 334471 | 2 | 20 | 40 | GT   | 14 | 17 |
| 212988 | 29 | 335293 | 335328 | 2 | 18 | 36 | GT   | 15 | 10 |
| 212989 | 29 | 336562 | 336589 | 2 | 14 | 28 | AC   | 16 | 10 |
| 212993 | 29 | 337743 | 337760 | 3 | 6  | 18 | GCA  | 26 | 8  |

|        |    |        |        |   |    |    |      |    |    |
|--------|----|--------|--------|---|----|----|------|----|----|
| 212995 | 29 | 340411 | 340426 | 2 | 8  | 16 | GT   | 28 | 4  |
| 212997 | 29 | 340752 | 340785 | 2 | 17 | 34 | TG   | 6  | 5  |
| 212998 | 29 | 340925 | 340956 | 2 | 16 | 32 | GT   | 11 | 8  |
| 213001 | 29 | 344653 | 344684 | 4 | 8  | 32 | CTTT | 18 | 4  |
| 213004 | 29 | 350284 | 350317 | 2 | 17 | 34 | AC   | 13 | 10 |
| 213005 | 29 | 353324 | 353341 | 3 | 6  | 18 | GGA  | 22 | 8  |
| 213006 | 29 | 356041 | 356054 | 2 | 7  | 14 | CA   | 16 | 5  |
| 213007 | 29 | 356058 | 356075 | 2 | 9  | 18 | AC   | 18 | 4  |
| 213009 | 29 | 361835 | 361852 | 2 | 9  | 18 | TG   | 22 | 7  |
| 213010 | 29 | 362017 | 362028 | 2 | 6  | 12 | TG   | 31 | 3  |
| 213013 | 29 | 364147 | 364162 | 2 | 8  | 16 | TG   | 15 | 7  |
| 213014 | 29 | 365296 | 365317 | 2 | 11 | 22 | GT   | 23 | 10 |
| 213015 | 29 | 366674 | 366697 | 3 | 8  | 24 | CAG  | 28 | 11 |
| 213016 | 29 | 368003 | 368022 | 2 | 10 | 20 | TG   | 27 | 6  |
| 213020 | 29 | 371055 | 371069 | 3 | 5  | 15 | AGC  | 25 | 4  |
| 213028 | 29 | 385681 | 385728 | 2 | 24 | 48 | AC   | 6  | 6  |
| 213032 | 29 | 389868 | 389887 | 2 | 10 | 20 | AC   | 19 | 6  |
| 213040 | 29 | 399961 | 399980 | 2 | 10 | 20 | GT   | 10 | 10 |
| 213043 | 29 | 404846 | 404885 | 2 | 20 | 40 | CA   | 7  | 7  |
| 213045 | 29 | 405042 | 405068 | 3 | 9  | 27 | CCT  | 15 | 9  |
| 213046 | 29 | 406521 | 406535 | 3 | 5  | 15 | GAG  | 29 | 4  |
| 213050 | 29 | 413710 | 413742 | 3 | 11 | 33 | CCT  | 20 | 7  |
| 213052 | 29 | 416869 | 416892 | 2 | 12 | 24 | AC   | 11 | 9  |
| 213053 | 29 | 420348 | 420367 | 4 | 5  | 20 | GACA | 23 | 7  |
| 213055 | 29 | 424826 | 424839 | 2 | 7  | 14 | AG   | 27 | 3  |
| 213056 | 29 | 429293 | 429316 | 2 | 12 | 24 | AG   | 10 | 11 |
| 213086 | 29 | 472208 | 472222 | 3 | 5  | 15 | TGT  | 9  | 5  |
| 213087 | 29 | 480777 | 480794 | 3 | 6  | 18 | GCT  | 32 | 5  |
| 213091 | 29 | 496682 | 496697 | 2 | 8  | 16 | CA   | 25 | 3  |
| 213093 | 29 | 508175 | 508198 | 2 | 12 | 24 | CA   | 9  | 11 |
| 213095 | 29 | 512947 | 512962 | 2 | 8  | 16 | AT   | 16 | 11 |
| 213096 | 29 | 513884 | 513897 | 2 | 7  | 14 | AG   | 15 | 3  |
| 213102 | 29 | 519149 | 519176 | 2 | 14 | 28 | GT   | 9  | 11 |
| 213108 | 29 | 534592 | 534603 | 2 | 6  | 12 | GA   | 25 | 4  |
| 213109 | 29 | 534892 | 534917 | 2 | 13 | 26 | GT   | 11 | 11 |
| 213110 | 29 | 537799 | 537830 | 2 | 16 | 32 | CA   | 15 | 18 |
| 213111 | 29 | 538409 | 538426 | 2 | 9  | 18 | CA   | 23 | 16 |
| 213112 | 29 | 538579 | 538606 | 2 | 14 | 28 | CA   | 9  | 9  |
| 213118 | 29 | 546660 | 546683 | 4 | 6  | 24 | GAGC | 21 | 9  |
| 213119 | 29 | 546890 | 546904 | 3 | 5  | 15 | GAG  | 22 | 9  |
| 213120 | 29 | 548007 | 548022 | 2 | 8  | 16 | AC   | 24 | 9  |
| 213121 | 29 | 548024 | 548035 | 2 | 6  | 12 | CA   | 24 | 8  |
| 213124 | 29 | 553744 | 553776 | 3 | 11 | 33 | GGA  | 17 | 13 |
| 213131 | 29 | 559205 | 559220 | 4 | 4  | 16 | TCCT | 31 | 3  |
| 213134 | 29 | 561317 | 561349 | 3 | 11 | 33 | CAG  | 25 | 14 |
| 213135 | 29 | 569378 | 569411 | 2 | 17 | 34 | AC   | 14 | 13 |
| 213136 | 29 | 570885 | 570899 | 3 | 5  | 15 | TCC  | 28 | 3  |
| 213139 | 29 | 573881 | 573910 | 2 | 15 | 30 | CA   | 11 | 15 |
| 213141 | 29 | 577693 | 577716 | 2 | 12 | 24 | CA   | 27 | 11 |
| 213145 | 29 | 598492 | 598515 | 3 | 8  | 24 | CAG  | 27 | 6  |
| 213146 | 29 | 603414 | 603429 | 4 | 4  | 16 | GCTC | 25 | 5  |

|        |    |        |        |   |    |    |      |    |    |
|--------|----|--------|--------|---|----|----|------|----|----|
| 213150 | 29 | 612440 | 612463 | 2 | 12 | 24 | TG   | 26 | 12 |
| 213151 | 29 | 615764 | 615781 | 2 | 9  | 18 | AC   | 21 | 5  |
| 213153 | 29 | 623392 | 623412 | 3 | 7  | 21 | CAG  | 32 | 5  |
| 213156 | 29 | 627387 | 627401 | 3 | 5  | 15 | AGA  | 20 | 6  |
| 213158 | 29 | 630249 | 630266 | 3 | 6  | 18 | AAG  | 30 | 13 |
| 213159 | 29 | 631759 | 631785 | 3 | 9  | 27 | GAT  | 6  | 5  |
| 213160 | 29 | 632150 | 632185 | 3 | 12 | 36 | AAC  | 30 | 7  |
| 213161 | 29 | 632922 | 632949 | 2 | 14 | 28 | AC   | 11 | 10 |
| 213168 | 29 | 640222 | 640249 | 2 | 14 | 28 | TG   | 9  | 7  |
| 213173 | 29 | 644259 | 644285 | 3 | 9  | 27 | AGG  | 16 | 18 |
| 213174 | 29 | 645796 | 645813 | 2 | 9  | 18 | CA   | 24 | 10 |
| 213176 | 29 | 656488 | 656503 | 2 | 8  | 16 | AC   | 15 | 5  |
| 213180 | 29 | 678609 | 678623 | 3 | 5  | 15 | AGG  | 26 | 9  |
| 213182 | 29 | 690559 | 690596 | 2 | 19 | 38 | GT   | 11 | 10 |
| 213183 | 29 | 691473 | 691502 | 3 | 10 | 30 | GAT  | 26 | 16 |
| 213189 | 29 | 703341 | 703356 | 2 | 8  | 16 | TG   | 8  | 8  |
| 213190 | 29 | 703359 | 703374 | 2 | 8  | 16 | TG   | 11 | 10 |
| 213192 | 29 | 707475 | 707498 | 3 | 8  | 24 | CCT  | 23 | 6  |
| 213197 | 29 | 721183 | 721198 | 2 | 8  | 16 | GA   | 21 | 8  |
| 213203 | 29 | 732656 | 732669 | 2 | 7  | 14 | GT   | 26 | 4  |
| 213204 | 29 | 735673 | 735693 | 3 | 7  | 21 | CCT  | 29 | 3  |
| 213207 | 29 | 736300 | 736326 | 3 | 9  | 27 | CTC  | 17 | 9  |
| 213215 | 29 | 750754 | 750773 | 2 | 10 | 20 | GT   | 27 | 4  |
| 213218 | 29 | 756481 | 756522 | 2 | 21 | 42 | CA   | 13 | 11 |
| 213220 | 29 | 761795 | 761854 | 2 | 30 | 60 | CA   | 13 | 14 |
| 213222 | 29 | 763117 | 763140 | 3 | 8  | 24 | CAG  | 30 | 7  |
| 213223 | 29 | 767572 | 767585 | 2 | 7  | 14 | GT   | 20 | 6  |
| 213225 | 29 | 777298 | 777312 | 3 | 5  | 15 | CTT  | 29 | 5  |
| 213227 | 29 | 777531 | 777554 | 2 | 12 | 24 | GT   | 16 | 15 |
| 213230 | 29 | 783030 | 783045 | 4 | 4  | 16 | CAGG | 24 | 6  |
| 213231 | 29 | 783048 | 783063 | 4 | 4  | 16 | GGCA | 22 | 11 |
| 213232 | 29 | 786396 | 786425 | 2 | 15 | 30 | CA   | 17 | 10 |
| 213233 | 29 | 790085 | 790111 | 3 | 9  | 27 | TGC  | 18 | 4  |
| 213234 | 29 | 790557 | 790568 | 2 | 6  | 12 | AC   | 26 | 5  |
| 213236 | 29 | 794028 | 794053 | 2 | 13 | 26 | AC   | 14 | 14 |
| 213238 | 29 | 794291 | 794320 | 2 | 15 | 30 | GT   | 19 | 16 |
| 213240 | 29 | 796300 | 796314 | 3 | 5  | 15 | CAG  | 29 | 5  |
| 213242 | 29 | 800148 | 800165 | 3 | 6  | 18 | CTT  | 18 | 4  |
| 213244 | 29 | 807218 | 807233 | 4 | 4  | 16 | ACAA | 12 | 4  |
| 213247 | 29 | 829872 | 829886 | 3 | 5  | 15 | GGA  | 18 | 4  |
| 213250 | 29 | 831828 | 831845 | 3 | 6  | 18 | GCT  | 18 | 6  |
| 213251 | 29 | 834575 | 834604 | 3 | 10 | 30 | CAC  | 19 | 9  |
| 213259 | 29 | 862695 | 862712 | 3 | 6  | 18 | CAG  | 26 | 3  |
| 213261 | 29 | 863743 | 863787 | 3 | 15 | 45 | TTC  | 19 | 11 |
| 213262 | 29 | 865136 | 865149 | 2 | 7  | 14 | CT   | 22 | 3  |
| 213264 | 29 | 866813 | 866830 | 2 | 9  | 18 | AC   | 21 | 4  |
| 213268 | 29 | 870997 | 871024 | 2 | 14 | 28 | AC   | 11 | 15 |
| 213269 | 29 | 873073 | 873099 | 3 | 9  | 27 | TCA  | 25 | 12 |
| 213274 | 29 | 877175 | 877198 | 4 | 6  | 24 | TCAA | 26 | 8  |
| 213275 | 29 | 877437 | 877460 | 4 | 6  | 24 | TTGT | 14 | 3  |
| 213283 | 29 | 890382 | 890397 | 2 | 8  | 16 | GT   | 29 | 9  |

|        |    |         |         |   |    |    |      |    |    |
|--------|----|---------|---------|---|----|----|------|----|----|
| 213284 | 29 | 897241  | 897258  | 2 | 9  | 18 | TG   | 22 | 8  |
| 213286 | 29 | 900707  | 900740  | 2 | 17 | 34 | TG   | 11 | 12 |
| 213288 | 29 | 902104  | 902121  | 2 | 9  | 18 | AC   | 18 | 9  |
| 213299 | 29 | 915976  | 915996  | 3 | 7  | 21 | CAG  | 20 | 7  |
| 213300 | 29 | 917106  | 917125  | 4 | 5  | 20 | TTTA | 11 | 3  |
| 213301 | 29 | 919802  | 919828  | 3 | 9  | 27 | AAC  | 23 | 6  |
| 213317 | 29 | 968112  | 968141  | 3 | 10 | 30 | TTC  | 20 | 9  |
| 213321 | 29 | 978667  | 978690  | 2 | 12 | 24 | CT   | 21 | 8  |
| 213330 | 29 | 996498  | 996511  | 2 | 7  | 14 | AC   | 21 | 4  |
| 213332 | 29 | 997294  | 997305  | 2 | 6  | 12 | AC   | 25 | 3  |
| 213333 | 29 | 1006782 | 1006795 | 2 | 7  | 14 | GT   | 21 | 6  |
| 213338 | 29 | 1015940 | 1015999 | 3 | 20 | 60 | CTT  | 13 | 10 |
| 213345 | 29 | 1021513 | 1021526 | 2 | 7  | 14 | TG   | 32 | 12 |
| 213347 | 29 | 1023180 | 1023194 | 3 | 5  | 15 | GAG  | 27 | 3  |
| 213349 | 29 | 1025635 | 1025670 | 2 | 18 | 36 | TG   | 8  | 10 |
| 213351 | 29 | 1030151 | 1030174 | 3 | 8  | 24 | GGA  | 21 | 9  |
| 213352 | 29 | 1030294 | 1030313 | 2 | 10 | 20 | TG   | 23 | 4  |
| 213356 | 29 | 1035134 | 1035161 | 2 | 14 | 28 | TG   | 13 | 16 |
| 213357 | 29 | 1036225 | 1036248 | 2 | 12 | 24 | AC   | 19 | 7  |
| 213372 | 29 | 1059979 | 1059994 | 4 | 4  | 16 | AAAC | 33 | 3  |
| 213379 | 29 | 1083234 | 1083248 | 3 | 5  | 15 | ATC  | 26 | 5  |
| 213382 | 29 | 1084089 | 1084112 | 3 | 8  | 24 | AAT  | 9  | 5  |
| 213386 | 29 | 1115397 | 1115423 | 3 | 9  | 27 | TCA  | 25 | 9  |
| 213389 | 29 | 1121051 | 1121070 | 2 | 10 | 20 | GT   | 12 | 7  |
| 213395 | 29 | 1134907 | 1134924 | 2 | 9  | 18 | GT   | 15 | 9  |
| 213397 | 29 | 1136788 | 1136823 | 3 | 12 | 36 | GAG  | 25 | 9  |
| 213400 | 29 | 1138165 | 1138198 | 2 | 17 | 34 | CA   | 16 | 16 |
| 213401 | 29 | 1138373 | 1138399 | 3 | 9  | 27 | CCA  | 12 | 5  |
| 213407 | 29 | 1146739 | 1146756 | 3 | 6  | 18 | TGA  | 10 | 7  |
| 213411 | 29 | 1156306 | 1156323 | 3 | 6  | 18 | GGA  | 19 | 11 |
| 213412 | 29 | 1157529 | 1157540 | 2 | 6  | 12 | AC   | 29 | 11 |
| 213413 | 29 | 1158074 | 1158097 | 3 | 8  | 24 | CTT  | 19 | 6  |
| 213415 | 29 | 1158321 | 1158338 | 3 | 6  | 18 | CCT  | 19 | 6  |
| 213418 | 29 | 1160293 | 1160316 | 4 | 6  | 24 | AAAC | 22 | 5  |
| 213419 | 29 | 1160616 | 1160629 | 2 | 7  | 14 | TC   | 18 | 3  |
| 213420 | 29 | 1162858 | 1162875 | 3 | 6  | 18 | AAG  | 23 | 7  |
| 213422 | 29 | 1163888 | 1163913 | 2 | 13 | 26 | TG   | 22 | 10 |
| 213424 | 29 | 1164531 | 1164558 | 2 | 14 | 28 | TG   | 26 | 10 |
| 213426 | 29 | 1168425 | 1168440 | 2 | 8  | 16 | AT   | 9  | 4  |
| 213428 | 29 | 1171035 | 1171060 | 2 | 13 | 26 | GT   | 14 | 8  |
| 213429 | 29 | 1171285 | 1171296 | 2 | 6  | 12 | AG   | 21 | 5  |
| 213431 | 29 | 1175504 | 1175518 | 3 | 5  | 15 | ATT  | 26 | 3  |
| 213432 | 29 | 1176369 | 1176380 | 2 | 6  | 12 | CA   | 27 | 8  |
| 213434 | 29 | 1179085 | 1179108 | 2 | 12 | 24 | GT   | 14 | 9  |
| 213445 | 29 | 1186299 | 1186319 | 3 | 7  | 21 | AGG  | 22 | 9  |
| 213447 | 29 | 1187628 | 1187677 | 2 | 25 | 50 | AC   | 10 | 9  |
| 213448 | 29 | 1187764 | 1187795 | 2 | 16 | 32 | TG   | 11 | 9  |
| 213449 | 29 | 1188969 | 1189010 | 3 | 14 | 42 | GGA  | 12 | 6  |
| 213455 | 29 | 1199301 | 1199312 | 2 | 6  | 12 | GT   | 15 | 8  |
| 213456 | 29 | 1199520 | 1199555 | 2 | 18 | 36 | TG   | 16 | 16 |
| 213458 | 29 | 1200373 | 1200396 | 2 | 12 | 24 | AC   | 17 | 16 |

|        |    |         |         |   |    |    |      |    |    |
|--------|----|---------|---------|---|----|----|------|----|----|
| 213460 | 29 | 1200554 | 1200571 | 2 | 9  | 18 | GT   | 12 | 13 |
| 213461 | 29 | 1200605 | 1200616 | 2 | 6  | 12 | CA   | 26 | 3  |
| 213477 | 29 | 1219768 | 1219807 | 2 | 20 | 40 | GT   | 7  | 9  |
| 213482 | 29 | 1225562 | 1225573 | 2 | 6  | 12 | CA   | 28 | 3  |
| 213484 | 29 | 1225689 | 1225706 | 3 | 6  | 18 | CTT  | 10 | 6  |
| 213485 | 29 | 1225707 | 1225721 | 3 | 5  | 15 | CCT  | 18 | 12 |
| 213488 | 29 | 1227944 | 1227983 | 2 | 20 | 40 | AC   | 11 | 8  |
| 213489 | 29 | 1229435 | 1229449 | 3 | 5  | 15 | GCC  | 33 | 8  |
| 213490 | 29 | 1232027 | 1232048 | 2 | 11 | 22 | AC   | 18 | 11 |
| 213491 | 29 | 1232234 | 1232255 | 2 | 11 | 22 | AC   | 13 | 9  |
| 213492 | 29 | 1233543 | 1233586 | 2 | 22 | 44 | GT   | 11 | 9  |
| 213493 | 29 | 1234110 | 1234143 | 2 | 17 | 34 | TG   | 7  | 9  |
| 213497 | 29 | 1234416 | 1234451 | 2 | 18 | 36 | AC   | 10 | 8  |
| 213498 | 29 | 1234610 | 1234643 | 2 | 17 | 34 | TG   | 9  | 8  |
| 213499 | 29 | 1235088 | 1235102 | 3 | 5  | 15 | AGA  | 21 | 3  |
| 213501 | 29 | 1237559 | 1237574 | 2 | 8  | 16 | GT   | 9  | 9  |
| 213505 | 29 | 1240594 | 1240623 | 2 | 15 | 30 | GT   | 26 | 16 |
| 213506 | 29 | 1240862 | 1240879 | 2 | 9  | 18 | GT   | 14 | 4  |
| 213508 | 29 | 1240978 | 1240997 | 2 | 10 | 20 | GT   | 14 | 7  |
| 213509 | 29 | 1241026 | 1241045 | 2 | 10 | 20 | GT   | 18 | 14 |
| 213510 | 29 | 1241343 | 1241374 | 2 | 16 | 32 | AC   | 7  | 6  |
| 213511 | 29 | 1242025 | 1242056 | 4 | 8  | 32 | ACAG | 24 | 7  |
| 213512 | 29 | 1242812 | 1242829 | 3 | 6  | 18 | TCC  | 15 | 3  |
| 213516 | 29 | 1244199 | 1244231 | 3 | 11 | 33 | CCT  | 11 | 7  |
| 213517 | 29 | 1244506 | 1244535 | 2 | 15 | 30 | GT   | 14 | 6  |
| 213522 | 29 | 1246344 | 1246369 | 2 | 13 | 26 | GT   | 22 | 4  |
| 213530 | 29 | 1250479 | 1250502 | 2 | 12 | 24 | GT   | 8  | 4  |
| 213532 | 29 | 1250840 | 1250871 | 2 | 16 | 32 | GA   | 15 | 8  |
| 213533 | 29 | 1250985 | 1251008 | 3 | 8  | 24 | CCT  | 8  | 3  |
| 213534 | 29 | 1251232 | 1251265 | 2 | 17 | 34 | GT   | 18 | 12 |
| 213537 | 29 | 1254272 | 1254295 | 2 | 12 | 24 | TG   | 15 | 8  |
| 213541 | 29 | 1254807 | 1254844 | 2 | 19 | 38 | CA   | 11 | 10 |
| 213542 | 29 | 1255007 | 1255050 | 2 | 22 | 44 | AC   | 13 | 11 |
| 213550 | 29 | 1259868 | 1259899 | 2 | 16 | 32 | AC   | 21 | 11 |
| 213551 | 29 | 1260092 | 1260121 | 2 | 15 | 30 | AC   | 25 | 11 |
| 213556 | 29 | 1262909 | 1262938 | 2 | 15 | 30 | CA   | 10 | 9  |
| 213558 | 29 | 1263058 | 1263078 | 3 | 7  | 21 | TAA  | 12 | 7  |
| 213561 | 29 | 1264498 | 1264512 | 3 | 5  | 15 | CAG  | 20 | 3  |
| 213562 | 29 | 1266621 | 1266656 | 3 | 12 | 36 | AGA  | 23 | 4  |
| 213567 | 29 | 1266996 | 1267011 | 2 | 8  | 16 | CA   | 21 | 9  |
| 213568 | 29 | 1267504 | 1267525 | 2 | 11 | 22 | CA   | 10 | 6  |
| 213577 | 29 | 1275930 | 1275945 | 2 | 8  | 16 | TG   | 22 | 7  |
| 213585 | 29 | 1284435 | 1284456 | 2 | 11 | 22 | GT   | 15 | 6  |
| 213586 | 29 | 1284549 | 1284570 | 2 | 11 | 22 | TG   | 16 | 8  |
| 213587 | 29 | 1284708 | 1284727 | 2 | 10 | 20 | CA   | 15 | 7  |
| 213594 | 29 | 1305083 | 1305103 | 3 | 7  | 21 | AGC  | 30 | 7  |
| 213595 | 29 | 1305830 | 1305849 | 2 | 10 | 20 | TG   | 16 | 8  |
| 213598 | 29 | 1309626 | 1309645 | 2 | 10 | 20 | CT   | 19 | 6  |
| 213599 | 29 | 1309669 | 1309701 | 3 | 11 | 33 | CCT  | 15 | 4  |
| 213601 | 29 | 1309906 | 1309938 | 3 | 11 | 33 | AGC  | 18 | 5  |
| 213602 | 29 | 1315241 | 1315256 | 2 | 8  | 16 | CA   | 19 | 7  |

|        |    |         |         |   |    |    |      |    |    |
|--------|----|---------|---------|---|----|----|------|----|----|
| 213605 | 29 | 1323739 | 1323758 | 2 | 10 | 20 | GA   | 24 | 5  |
| 213606 | 29 | 1324040 | 1324067 | 2 | 14 | 28 | AC   | 16 | 10 |
| 213607 | 29 | 1325155 | 1325192 | 2 | 19 | 38 | AC   | 19 | 20 |
| 213608 | 29 | 1326189 | 1326216 | 2 | 14 | 28 | CA   | 16 | 4  |
| 213610 | 29 | 1328926 | 1328947 | 2 | 11 | 22 | CT   | 22 | 11 |
| 213611 | 29 | 1329096 | 1329123 | 2 | 14 | 28 | AC   | 10 | 12 |
| 213612 | 29 | 1330635 | 1330660 | 2 | 13 | 26 | AC   | 15 | 8  |
| 213613 | 29 | 1332032 | 1332055 | 2 | 12 | 24 | AC   | 12 | 16 |
| 213619 | 29 | 1339413 | 1339434 | 2 | 11 | 22 | CA   | 18 | 6  |
| 213620 | 29 | 1345467 | 1345478 | 2 | 6  | 12 | GA   | 22 | 3  |
| 213625 | 29 | 1348861 | 1348887 | 3 | 9  | 27 | GAA  | 18 | 10 |
| 213626 | 29 | 1349047 | 1349068 | 2 | 11 | 22 | GT   | 18 | 9  |
| 213631 | 29 | 1352258 | 1352272 | 3 | 5  | 15 | AGC  | 12 | 4  |
| 213634 | 29 | 1352637 | 1352656 | 2 | 10 | 20 | AC   | 8  | 8  |
| 213635 | 29 | 1360964 | 1360977 | 2 | 7  | 14 | AG   | 18 | 3  |
| 213638 | 29 | 1364713 | 1364734 | 2 | 11 | 22 | CA   | 21 | 8  |
| 213639 | 29 | 1364790 | 1364821 | 2 | 16 | 32 | CA   | 21 | 13 |
| 213642 | 29 | 1366232 | 1366246 | 3 | 5  | 15 | GAG  | 25 | 4  |
| 213643 | 29 | 1368313 | 1368339 | 3 | 9  | 27 | AGA  | 23 | 6  |
| 213646 | 29 | 1377909 | 1377926 | 3 | 6  | 18 | CGC  | 26 | 3  |
| 213648 | 29 | 1378218 | 1378238 | 3 | 7  | 21 | TCC  | 21 | 4  |
| 213650 | 29 | 1379737 | 1379756 | 2 | 10 | 20 | CA   | 10 | 8  |
| 213653 | 29 | 1384262 | 1384285 | 2 | 12 | 24 | TG   | 21 | 7  |
| 213654 | 29 | 1384434 | 1384465 | 2 | 16 | 32 | GT   | 10 | 11 |
| 213655 | 29 | 1384505 | 1384540 | 2 | 18 | 36 | CA   | 8  | 7  |
| 213660 | 29 | 1387559 | 1387579 | 3 | 7  | 21 | CCT  | 20 | 9  |
| 213663 | 29 | 1396349 | 1396378 | 2 | 15 | 30 | TG   | 18 | 8  |
| 213665 | 29 | 1398071 | 1398088 | 3 | 6  | 18 | CAG  | 30 | 5  |
| 213666 | 29 | 1398298 | 1398329 | 4 | 8  | 32 | CTGC | 25 | 6  |
| 213668 | 29 | 1400318 | 1400338 | 3 | 7  | 21 | GGC  | 25 | 7  |
| 213684 | 29 | 1416959 | 1416994 | 2 | 18 | 36 | CA   | 7  | 7  |
| 213685 | 29 | 1417158 | 1417187 | 2 | 15 | 30 | TG   | 7  | 11 |
| 213686 | 29 | 1418188 | 1418211 | 2 | 12 | 24 | GT   | 8  | 9  |
| 213687 | 29 | 1419252 | 1419273 | 2 | 11 | 22 | TG   | 19 | 5  |
| 213689 | 29 | 1429586 | 1429600 | 3 | 5  | 15 | GAG  | 24 | 4  |
| 213690 | 29 | 1431580 | 1431593 | 2 | 7  | 14 | CA   | 17 | 12 |
| 213691 | 29 | 1431596 | 1431611 | 2 | 8  | 16 | CA   | 20 | 12 |
| 213694 | 29 | 1437563 | 1437578 | 2 | 8  | 16 | AG   | 11 | 6  |
| 213695 | 29 | 1437655 | 1437680 | 2 | 13 | 26 | CA   | 11 | 6  |
| 213696 | 29 | 1437733 | 1437756 | 2 | 12 | 24 | AC   | 7  | 6  |
| 213698 | 29 | 1439909 | 1439928 | 2 | 10 | 20 | AG   | 18 | 3  |
| 213701 | 29 | 1445563 | 1445574 | 2 | 6  | 12 | AC   | 28 | 4  |
| 213707 | 29 | 1469598 | 1469627 | 2 | 15 | 30 | GT   | 11 | 13 |
| 213708 | 29 | 1469744 | 1469765 | 2 | 11 | 22 | GT   | 15 | 4  |
| 213709 | 29 | 1469809 | 1469830 | 2 | 11 | 22 | TG   | 20 | 6  |
| 213711 | 29 | 1471443 | 1471469 | 3 | 9  | 27 | ATG  | 27 | 4  |
| 213712 | 29 | 1477451 | 1477476 | 2 | 13 | 26 | TG   | 19 | 11 |
| 213713 | 29 | 1478230 | 1478244 | 3 | 5  | 15 | TTA  | 17 | 4  |
| 213714 | 29 | 1480216 | 1480233 | 3 | 6  | 18 | GCA  | 26 | 3  |
| 213716 | 29 | 1481622 | 1481642 | 3 | 7  | 21 | TGA  | 23 | 8  |
| 213719 | 29 | 1491369 | 1491414 | 2 | 23 | 46 | GT   | 26 | 15 |



|        |    |         |         |   |    |    |      |    |    |
|--------|----|---------|---------|---|----|----|------|----|----|
| 213724 | 29 | 1494764 | 1494787 | 2 | 12 | 24 | CT   | 13 | 9  |
| 213726 | 29 | 1494867 | 1494890 | 2 | 12 | 24 | CA   | 20 | 11 |
| 213729 | 29 | 1496562 | 1496573 | 2 | 6  | 12 | TC   | 30 | 3  |
| 213730 | 29 | 1497432 | 1497445 | 2 | 7  | 14 | TG   | 19 | 5  |
| 213736 | 29 | 1505983 | 1505998 | 2 | 8  | 16 | GT   | 20 | 13 |
| 213739 | 29 | 1506251 | 1506296 | 2 | 23 | 46 | GT   | 12 | 13 |
| 213740 | 29 | 1506362 | 1506375 | 2 | 7  | 14 | TG   | 18 | 7  |
| 213741 | 29 | 1506420 | 1506437 | 2 | 9  | 18 | GT   | 22 | 8  |
| 213742 | 29 | 1507326 | 1507340 | 3 | 5  | 15 | TTG  | 27 | 3  |
| 213743 | 29 | 1508805 | 1508816 | 2 | 6  | 12 | TG   | 11 | 3  |
| 213747 | 29 | 1509341 | 1509355 | 3 | 5  | 15 | TCT  | 23 | 3  |
| 213748 | 29 | 1509447 | 1509472 | 2 | 13 | 26 | AC   | 21 | 6  |
| 213749 | 29 | 1509771 | 1509797 | 3 | 9  | 27 | TTC  | 15 | 9  |
| 213754 | 29 | 1521619 | 1521648 | 2 | 15 | 30 | CA   | 21 | 9  |
| 213755 | 29 | 1523956 | 1523976 | 3 | 7  | 21 | GAA  | 27 | 5  |
| 213759 | 29 | 1528595 | 1528636 | 2 | 21 | 42 | TG   | 9  | 14 |
| 213767 | 29 | 1540140 | 1540175 | 4 | 9  | 36 | TGGA | 20 | 14 |
| 213773 | 29 | 1551790 | 1551815 | 2 | 13 | 26 | CA   | 13 | 5  |
| 213777 | 29 | 1555334 | 1555353 | 2 | 10 | 20 | TC   | 20 | 3  |
| 213782 | 29 | 1556758 | 1556779 | 2 | 11 | 22 | GT   | 6  | 5  |
| 213785 | 29 | 1559099 | 1559114 | 2 | 8  | 16 | AC   | 20 | 5  |
| 213787 | 29 | 1562193 | 1562213 | 3 | 7  | 21 | TCC  | 14 | 7  |
| 213788 | 29 | 1562365 | 1562398 | 2 | 17 | 34 | AC   | 8  | 12 |
| 213794 | 29 | 1563283 | 1563298 | 2 | 8  | 16 | CA   | 15 | 7  |
| 213807 | 29 | 1583598 | 1583615 | 2 | 9  | 18 | TG   | 18 | 8  |
| 213808 | 29 | 1585331 | 1585358 | 2 | 14 | 28 | TG   | 13 | 5  |
| 213809 | 29 | 1585572 | 1585605 | 2 | 17 | 34 | GT   | 12 | 9  |
| 213812 | 29 | 1590912 | 1590929 | 2 | 9  | 18 | GT   | 11 | 7  |
| 213814 | 29 | 1592990 | 1593001 | 2 | 6  | 12 | TA   | 19 | 3  |
| 213816 | 29 | 1594349 | 1594368 | 4 | 5  | 20 | AAAC | 28 | 7  |
| 213819 | 29 | 1605928 | 1605959 | 4 | 8  | 32 | TCTT | 10 | 9  |
| 213821 | 29 | 1607537 | 1607557 | 3 | 7  | 21 | CCT  | 11 | 8  |
| 213822 | 29 | 1607779 | 1607806 | 2 | 14 | 28 | TG   | 17 | 8  |
| 213824 | 29 | 1609115 | 1609126 | 2 | 6  | 12 | GA   | 28 | 3  |
| 213825 | 29 | 1609361 | 1609372 | 2 | 6  | 12 | GA   | 8  | 4  |
| 213827 | 29 | 1616540 | 1616553 | 2 | 7  | 14 | AC   | 23 | 5  |
| 213828 | 29 | 1616619 | 1616648 | 2 | 15 | 30 | GT   | 12 | 16 |
| 213830 | 29 | 1617722 | 1617739 | 3 | 6  | 18 | CAG  | 19 | 7  |
| 213832 | 29 | 1623654 | 1623674 | 3 | 7  | 21 | GAG  | 28 | 4  |
| 213836 | 29 | 1632056 | 1632089 | 2 | 17 | 34 | CA   | 6  | 7  |
| 213839 | 29 | 1633242 | 1633265 | 4 | 6  | 24 | CAGC | 27 | 5  |
| 213841 | 29 | 1635503 | 1635520 | 3 | 6  | 18 | CTC  | 11 | 11 |
| 213842 | 29 | 1640218 | 1640229 | 2 | 6  | 12 | AC   | 11 | 10 |
| 213846 | 29 | 1650989 | 1651010 | 2 | 11 | 22 | TG   | 10 | 6  |
| 213847 | 29 | 1651511 | 1651534 | 3 | 8  | 24 | TCT  | 21 | 3  |
| 213849 | 29 | 1652755 | 1652772 | 3 | 6  | 18 | CTT  | 21 | 4  |
| 213850 | 29 | 1658377 | 1658388 | 2 | 6  | 12 | AT   | 18 | 5  |
| 213853 | 29 | 1665522 | 1665535 | 2 | 7  | 14 | AT   | 12 | 11 |
| 213861 | 29 | 1679941 | 1679956 | 2 | 8  | 16 | AC   | 19 | 5  |
| 213862 | 29 | 1680747 | 1680758 | 2 | 6  | 12 | TG   | 25 | 6  |
| 213864 | 29 | 1686376 | 1686387 | 2 | 6  | 12 | GT   | 22 | 7  |

|        |    |         |         |   |    |    |      |    |    |
|--------|----|---------|---------|---|----|----|------|----|----|
| 213868 | 29 | 1693664 | 1693687 | 3 | 8  | 24 | TCT  | 26 | 4  |
| 213872 | 29 | 1706447 | 1706462 | 2 | 8  | 16 | TG   | 16 | 7  |
| 213874 | 29 | 1709813 | 1709834 | 2 | 11 | 22 | AC   | 21 | 5  |
| 213875 | 29 | 1710726 | 1710739 | 2 | 7  | 14 | AT   | 22 | 5  |
| 213882 | 29 | 1719053 | 1719084 | 2 | 16 | 32 | AC   | 21 | 9  |
| 213883 | 29 | 1719967 | 1719980 | 2 | 7  | 14 | CA   | 23 | 5  |
| 213885 | 29 | 1720188 | 1720211 | 3 | 8  | 24 | CTC  | 7  | 7  |
| 213886 | 29 | 1720544 | 1720555 | 2 | 6  | 12 | GA   | 21 | 15 |
| 213889 | 29 | 1726791 | 1726806 | 2 | 8  | 16 | CA   | 19 | 10 |
| 213890 | 29 | 1729373 | 1729390 | 2 | 9  | 18 | AC   | 14 | 11 |
| 213894 | 29 | 1737938 | 1737961 | 3 | 8  | 24 | CCT  | 9  | 5  |
| 213895 | 29 | 1743834 | 1743848 | 3 | 5  | 15 | CTC  | 29 | 5  |
| 213901 | 29 | 1747358 | 1747395 | 2 | 19 | 38 | TG   | 11 | 7  |
| 213903 | 29 | 1748801 | 1748830 | 2 | 15 | 30 | AC   | 23 | 12 |
| 213908 | 29 | 1758265 | 1758282 | 2 | 9  | 18 | GT   | 21 | 11 |
| 213913 | 29 | 1763205 | 1763224 | 2 | 10 | 20 | CA   | 14 | 6  |
| 213914 | 29 | 1764036 | 1764049 | 2 | 7  | 14 | CA   | 18 | 4  |
| 213915 | 29 | 1764293 | 1764310 | 2 | 9  | 18 | GT   | 10 | 8  |
| 213916 | 29 | 1764338 | 1764349 | 2 | 6  | 12 | TG   | 19 | 4  |
| 213918 | 29 | 1769519 | 1769532 | 2 | 7  | 14 | GT   | 26 | 4  |
| 213920 | 29 | 1770210 | 1770221 | 2 | 6  | 12 | CA   | 26 | 3  |
| 213921 | 29 | 1770761 | 1770780 | 2 | 10 | 20 | AC   | 18 | 6  |
| 213926 | 29 | 1779060 | 1779089 | 3 | 10 | 30 | CCT  | 18 | 5  |
| 213928 | 29 | 1780884 | 1780898 | 3 | 5  | 15 | TGA  | 29 | 3  |
| 213930 | 29 | 1785473 | 1785484 | 2 | 6  | 12 | AC   | 27 | 3  |
| 213935 | 29 | 1789916 | 1789943 | 4 | 7  | 28 | TCCA | 23 | 7  |
| 213942 | 29 | 1799850 | 1799863 | 2 | 7  | 14 | TG   | 19 | 12 |
| 213944 | 29 | 1823311 | 1823328 | 2 | 9  | 18 | TG   | 29 | 6  |
| 213954 | 29 | 1832418 | 1832432 | 3 | 5  | 15 | CCT  | 16 | 4  |
| 213957 | 29 | 1840620 | 1840645 | 2 | 13 | 26 | GT   | 15 | 6  |
| 213958 | 29 | 1840822 | 1840833 | 2 | 6  | 12 | GA   | 28 | 4  |
| 213959 | 29 | 1843400 | 1843420 | 3 | 7  | 21 | GCT  | 10 | 5  |
| 213964 | 29 | 1847774 | 1847797 | 2 | 12 | 24 | TC   | 27 | 4  |
| 213972 | 29 | 1856858 | 1856869 | 2 | 6  | 12 | CA   | 11 | 4  |
| 213977 | 29 | 1867131 | 1867166 | 3 | 12 | 36 | TCC  | 10 | 8  |
| 213980 | 29 | 1871069 | 1871086 | 2 | 9  | 18 | TG   | 19 | 8  |
| 213981 | 29 | 1872382 | 1872409 | 2 | 14 | 28 | GT   | 10 | 10 |
| 213984 | 29 | 1882899 | 1882918 | 2 | 10 | 20 | GT   | 18 | 10 |
| 213985 | 29 | 1885600 | 1885611 | 2 | 6  | 12 | CA   | 26 | 6  |
| 213989 | 29 | 1889006 | 1889023 | 2 | 9  | 18 | TG   | 18 | 9  |
| 213990 | 29 | 1889097 | 1889124 | 4 | 7  | 28 | CTGT | 19 | 4  |
| 213992 | 29 | 1894880 | 1894893 | 2 | 7  | 14 | TG   | 21 | 4  |
| 213994 | 29 | 1898444 | 1898461 | 2 | 9  | 18 | TG   | 9  | 4  |
| 213995 | 29 | 1901005 | 1901016 | 2 | 6  | 12 | AC   | 25 | 5  |
| 213996 | 29 | 1901069 | 1901084 | 4 | 4  | 16 | CCTC | 21 | 6  |
| 213999 | 29 | 1907033 | 1907044 | 2 | 6  | 12 | AC   | 23 | 9  |
| 214005 | 29 | 1925889 | 1925918 | 2 | 15 | 30 | GT   | 10 | 7  |
| 214010 | 29 | 1927063 | 1927078 | 2 | 8  | 16 | AC   | 25 | 11 |
| 214013 | 29 | 1928517 | 1928531 | 3 | 5  | 15 | TAT  | 31 | 5  |
| 214021 | 29 | 1952670 | 1952691 | 2 | 11 | 22 | CA   | 23 | 7  |
| 214028 | 29 | 1973144 | 1973171 | 2 | 14 | 28 | GT   | 15 | 7  |

|        |    |         |         |   |    |    |      |    |    |
|--------|----|---------|---------|---|----|----|------|----|----|
| 214038 | 29 | 1999721 | 1999750 | 2 | 15 | 30 | TG   | 14 | 6  |
| 214045 | 29 | 2010047 | 2010070 | 2 | 12 | 24 | TC   | 16 | 4  |
| 214047 | 29 | 2012413 | 2012430 | 3 | 6  | 18 | TTG  | 23 | 4  |
| 214048 | 29 | 2013511 | 2013528 | 2 | 9  | 18 | CA   | 19 | 7  |
| 214049 | 29 | 2013729 | 2013743 | 3 | 5  | 15 | CAG  | 31 | 7  |
| 214050 | 29 | 2016610 | 2016633 | 2 | 12 | 24 | GT   | 19 | 6  |
| 214051 | 29 | 2018953 | 2018973 | 3 | 7  | 21 | GAG  | 18 | 15 |
| 214056 | 29 | 2028679 | 2028708 | 2 | 15 | 30 | TG   | 11 | 7  |
| 214058 | 29 | 2030648 | 2030665 | 2 | 9  | 18 | CA   | 14 | 13 |
| 214059 | 29 | 2030861 | 2030872 | 2 | 6  | 12 | CA   | 19 | 6  |
| 214060 | 29 | 2033190 | 2033213 | 2 | 12 | 24 | CA   | 27 | 18 |
| 214061 | 29 | 2037041 | 2037064 | 2 | 12 | 24 | GT   | 14 | 7  |
| 214064 | 29 | 2050473 | 2050487 | 3 | 5  | 15 | CAT  | 27 | 3  |
| 214069 | 29 | 2055600 | 2055615 | 4 | 4  | 16 | GGGA | 15 | 3  |
| 214070 | 29 | 2058902 | 2058928 | 3 | 9  | 27 | GAG  | 18 | 7  |
| 214072 | 29 | 2061327 | 2061350 | 3 | 8  | 24 | CTT  | 13 | 10 |
| 214073 | 29 | 2069244 | 2069261 | 3 | 6  | 18 | AGC  | 23 | 4  |
| 214075 | 29 | 2071284 | 2071322 | 3 | 13 | 39 | CTT  | 23 | 13 |
| 214077 | 29 | 2072382 | 2072397 | 2 | 8  | 16 | AG   | 15 | 7  |
| 214078 | 29 | 2072892 | 2072917 | 2 | 13 | 26 | CA   | 7  | 6  |
| 214083 | 29 | 2079911 | 2079922 | 2 | 6  | 12 | TC   | 16 | 3  |
| 214084 | 29 | 2080394 | 2080405 | 2 | 6  | 12 | AT   | 9  | 7  |
| 214087 | 29 | 2086698 | 2086713 | 4 | 4  | 16 | GAAA | 28 | 5  |
| 214099 | 29 | 2097621 | 2097662 | 3 | 14 | 42 | TTG  | 10 | 9  |
| 214101 | 29 | 2101560 | 2101577 | 3 | 6  | 18 | TCC  | 24 | 4  |
| 214102 | 29 | 2101720 | 2101741 | 2 | 11 | 22 | AG   | 19 | 7  |
| 214104 | 29 | 2112776 | 2112787 | 2 | 6  | 12 | AG   | 21 | 4  |
| 214107 | 29 | 2116328 | 2116349 | 2 | 11 | 22 | TG   | 17 | 9  |
| 214113 | 29 | 2120171 | 2120198 | 2 | 14 | 28 | CA   | 25 | 13 |
| 214143 | 29 | 2162567 | 2162594 | 2 | 14 | 28 | GT   | 16 | 13 |
| 214148 | 29 | 2169548 | 2169562 | 3 | 5  | 15 | TCT  | 25 | 3  |
| 214150 | 29 | 2179030 | 2179049 | 2 | 10 | 20 | AC   | 22 | 4  |
| 214151 | 29 | 2182152 | 2182166 | 3 | 5  | 15 | TCC  | 26 | 4  |
| 214152 | 29 | 2183337 | 2183362 | 2 | 13 | 26 | AC   | 17 | 9  |
| 214154 | 29 | 2184164 | 2184202 | 3 | 13 | 39 | TCT  | 18 | 13 |
| 214155 | 29 | 2187005 | 2187022 | 3 | 6  | 18 | TGC  | 28 | 7  |
| 214156 | 29 | 2190632 | 2190655 | 2 | 12 | 24 | AC   | 23 | 8  |
| 214159 | 29 | 2199752 | 2199767 | 4 | 4  | 16 | AAAT | 14 | 7  |
| 214160 | 29 | 2200470 | 2200493 | 2 | 12 | 24 | GT   | 17 | 13 |
| 214161 | 29 | 2200513 | 2200536 | 3 | 8  | 24 | GCT  | 22 | 8  |
| 214166 | 29 | 2206110 | 2206139 | 2 | 15 | 30 | AC   | 8  | 6  |
| 214168 | 29 | 2209480 | 2209511 | 4 | 8  | 32 | TTTA | 16 | 8  |
| 214175 | 29 | 2221397 | 2221417 | 3 | 7  | 21 | CAA  | 22 | 4  |
| 214176 | 29 | 2221665 | 2221694 | 3 | 10 | 30 | ATT  | 13 | 4  |
| 214179 | 29 | 2226272 | 2226287 | 4 | 4  | 16 | AAAT | 31 | 3  |
| 214181 | 29 | 2232752 | 2232778 | 3 | 9  | 27 | CCT  | 24 | 6  |
| 214182 | 29 | 2234239 | 2234250 | 2 | 6  | 12 | GA   | 19 | 3  |
| 214185 | 29 | 2242385 | 2242416 | 2 | 16 | 32 | GT   | 14 | 15 |
| 214186 | 29 | 2243300 | 2243311 | 2 | 6  | 12 | CT   | 32 | 3  |
| 214188 | 29 | 2246648 | 2246667 | 2 | 10 | 20 | GT   | 10 | 9  |
| 214197 | 29 | 2294182 | 2294203 | 2 | 11 | 22 | AG   | 16 | 10 |

|        |    |         |         |   |    |    |      |    |    |
|--------|----|---------|---------|---|----|----|------|----|----|
| 214202 | 29 | 2297170 | 2297191 | 2 | 11 | 22 | GT   | 16 | 10 |
| 214204 | 29 | 2298842 | 2298862 | 3 | 7  | 21 | GAG  | 30 | 3  |
| 214205 | 29 | 2302005 | 2302028 | 2 | 12 | 24 | CA   | 12 | 5  |
| 214206 | 29 | 2302876 | 2302889 | 2 | 7  | 14 | TG   | 20 | 5  |
| 214212 | 29 | 2308293 | 2308314 | 2 | 11 | 22 | TG   | 25 | 5  |
| 214213 | 29 | 2310309 | 2310322 | 2 | 7  | 14 | TG   | 20 | 8  |
| 214215 | 29 | 2313614 | 2313631 | 2 | 9  | 18 | AC   | 20 | 4  |
| 214216 | 29 | 2317383 | 2317396 | 2 | 7  | 14 | TG   | 31 | 5  |
| 214222 | 29 | 2343142 | 2343159 | 3 | 6  | 18 | GGT  | 29 | 5  |
| 214223 | 29 | 2344560 | 2344585 | 2 | 13 | 26 | GA   | 19 | 4  |
| 214224 | 29 | 2345657 | 2345680 | 3 | 8  | 24 | GAG  | 9  | 8  |
| 214226 | 29 | 2348549 | 2348576 | 2 | 14 | 28 | AC   | 13 | 9  |
| 214228 | 29 | 2357874 | 2357887 | 2 | 7  | 14 | AC   | 24 | 4  |
| 214230 | 29 | 2358363 | 2358386 | 2 | 12 | 24 | CT   | 15 | 5  |
| 214231 | 29 | 2364504 | 2364531 | 2 | 14 | 28 | TG   | 8  | 12 |
| 214232 | 29 | 2366197 | 2366220 | 3 | 8  | 24 | GAT  | 24 | 5  |
| 214233 | 29 | 2368301 | 2368320 | 2 | 10 | 20 | CA   | 23 | 11 |
| 214234 | 29 | 2369619 | 2369630 | 2 | 6  | 12 | AG   | 29 | 4  |
| 214240 | 29 | 2393956 | 2393975 | 2 | 10 | 20 | GT   | 10 | 4  |
| 214246 | 29 | 2397487 | 2397528 | 2 | 21 | 42 | GT   | 10 | 12 |
| 214248 | 29 | 2409240 | 2409271 | 4 | 8  | 32 | ACAT | 24 | 12 |
| 214249 | 29 | 2410966 | 2410981 | 4 | 4  | 16 | AGCT | 21 | 3  |
| 214251 | 29 | 2424222 | 2424248 | 3 | 9  | 27 | GAG  | 13 | 6  |
| 214252 | 29 | 2427534 | 2427572 | 3 | 13 | 39 | TTC  | 16 | 6  |
| 214253 | 29 | 2430671 | 2430691 | 3 | 7  | 21 | GCA  | 32 | 3  |
| 214270 | 29 | 2473318 | 2473337 | 2 | 10 | 20 | GT   | 17 | 9  |
| 214272 | 29 | 2475805 | 2475822 | 3 | 6  | 18 | GAG  | 20 | 3  |
| 214273 | 29 | 2487427 | 2487441 | 3 | 5  | 15 | CTC  | 24 | 4  |
| 214276 | 29 | 2508241 | 2508260 | 2 | 10 | 20 | TG   | 16 | 6  |
| 214278 | 29 | 2509277 | 2509303 | 3 | 9  | 27 | GAG  | 14 | 5  |
| 214279 | 29 | 2518108 | 2518131 | 2 | 12 | 24 | GT   | 15 | 6  |
| 214283 | 29 | 2542538 | 2542551 | 2 | 7  | 14 | TG   | 29 | 8  |
| 214285 | 29 | 2544561 | 2544574 | 2 | 7  | 14 | AG   | 23 | 3  |
| 214286 | 29 | 2544914 | 2544929 | 2 | 8  | 16 | AC   | 24 | 10 |
| 214289 | 29 | 2551059 | 2551072 | 2 | 7  | 14 | GT   | 21 | 3  |
| 214293 | 29 | 2556153 | 2556170 | 2 | 9  | 18 | TC   | 22 | 7  |
| 214297 | 29 | 2565654 | 2565665 | 2 | 6  | 12 | AT   | 12 | 3  |
| 214301 | 29 | 2574594 | 2574625 | 2 | 16 | 32 | GT   | 16 | 9  |
| 214303 | 29 | 2575955 | 2575980 | 2 | 13 | 26 | GT   | 16 | 7  |
| 214304 | 29 | 2576488 | 2576501 | 2 | 7  | 14 | GA   | 22 | 8  |
| 214306 | 29 | 2577836 | 2577869 | 2 | 17 | 34 | TG   | 12 | 10 |
| 214307 | 29 | 2578036 | 2578071 | 2 | 18 | 36 | TG   | 9  | 8  |
| 214308 | 29 | 2578214 | 2578241 | 2 | 14 | 28 | GT   | 14 | 13 |
| 214314 | 29 | 2581521 | 2581544 | 2 | 12 | 24 | GT   | 8  | 5  |
| 214315 | 29 | 2581670 | 2581701 | 4 | 8  | 32 | CTGC | 18 | 6  |
| 214318 | 29 | 2584023 | 2584058 | 3 | 12 | 36 | CCT  | 15 | 11 |
| 214319 | 29 | 2584433 | 2584484 | 4 | 13 | 52 | CTTT | 11 | 8  |
| 214322 | 29 | 2592883 | 2592908 | 2 | 13 | 26 | AC   | 16 | 5  |
| 214323 | 29 | 2595651 | 2595692 | 2 | 21 | 42 | CA   | 9  | 10 |
| 214324 | 29 | 2595954 | 2595977 | 2 | 12 | 24 | TG   | 21 | 8  |
| 214326 | 29 | 2605997 | 2606034 | 2 | 19 | 38 | CA   | 17 | 10 |

|        |    |         |         |   |    |    |      |    |    |
|--------|----|---------|---------|---|----|----|------|----|----|
| 214329 | 29 | 2609705 | 2609722 | 2 | 9  | 18 | GT   | 19 | 10 |
| 214330 | 29 | 2610118 | 2610135 | 2 | 9  | 18 | CT   | 25 | 3  |
| 214332 | 29 | 2619546 | 2619581 | 3 | 12 | 36 | AAC  | 18 | 13 |
| 214333 | 29 | 2623771 | 2623796 | 2 | 13 | 26 | CA   | 24 | 5  |
| 214335 | 29 | 2629411 | 2629434 | 2 | 12 | 24 | CA   | 23 | 13 |
| 214336 | 29 | 2632634 | 2632651 | 2 | 9  | 18 | TG   | 20 | 5  |
| 214341 | 29 | 2645452 | 2645463 | 2 | 6  | 12 | CA   | 21 | 3  |
| 214343 | 29 | 2646194 | 2646205 | 2 | 6  | 12 | TC   | 18 | 4  |
| 214345 | 29 | 2651213 | 2651230 | 2 | 9  | 18 | CA   | 17 | 5  |
| 214346 | 29 | 2653311 | 2653337 | 3 | 9  | 27 | GGA  | 8  | 4  |
| 214349 | 29 | 2656012 | 2656025 | 2 | 7  | 14 | GT   | 16 | 4  |
| 214350 | 29 | 2656321 | 2656336 | 2 | 8  | 16 | TG   | 25 | 5  |
| 214375 | 29 | 2723262 | 2723282 | 3 | 7  | 21 | TCC  | 17 | 6  |
| 214383 | 29 | 2738769 | 2738784 | 2 | 8  | 16 | AC   | 9  | 5  |
| 214387 | 29 | 2740779 | 2740796 | 3 | 6  | 18 | TGA  | 26 | 7  |
| 214389 | 29 | 2742112 | 2742127 | 4 | 4  | 16 | TCAT | 25 | 3  |
| 214395 | 29 | 2763312 | 2763335 | 2 | 12 | 24 | TG   | 27 | 5  |
| 214404 | 29 | 2837065 | 2837091 | 3 | 9  | 27 | TGT  | 28 | 10 |
| 214413 | 29 | 2847939 | 2847953 | 3 | 5  | 15 | CCT  | 13 | 8  |
| 214415 | 29 | 2861508 | 2861525 | 3 | 6  | 18 | ATG  | 10 | 6  |
| 214417 | 29 | 2893532 | 2893555 | 4 | 6  | 24 | ACAA | 14 | 3  |
| 214421 | 29 | 2904793 | 2904810 | 3 | 6  | 18 | CTG  | 20 | 4  |
| 214426 | 29 | 2905875 | 2905889 | 3 | 5  | 15 | CTG  | 17 | 6  |
| 214428 | 29 | 2905912 | 2905941 | 3 | 10 | 30 | TGC  | 9  | 5  |
| 214430 | 29 | 2913877 | 2913890 | 2 | 7  | 14 | AG   | 21 | 4  |
| 214432 | 29 | 2920073 | 2920120 | 3 | 16 | 48 | TTC  | 12 | 12 |
| 214433 | 29 | 2922016 | 2922027 | 2 | 6  | 12 | AC   | 19 | 3  |
| 214434 | 29 | 2929586 | 2929611 | 2 | 13 | 26 | AC   | 10 | 11 |
| 214443 | 29 | 3001222 | 3001235 | 2 | 7  | 14 | TC   | 23 | 3  |
| 214448 | 29 | 3026111 | 3026134 | 2 | 12 | 24 | CA   | 23 | 14 |
| 214457 | 29 | 3037690 | 3037719 | 2 | 15 | 30 | GT   | 14 | 9  |
| 214460 | 29 | 3042410 | 3042445 | 4 | 9  | 36 | AAAC | 20 | 10 |
| 214462 | 29 | 3045355 | 3045372 | 3 | 6  | 18 | GAT  | 20 | 3  |
| 214477 | 29 | 3083323 | 3083340 | 2 | 9  | 18 | TG   | 24 | 9  |
| 214478 | 29 | 3083529 | 3083564 | 2 | 18 | 36 | CA   | 14 | 4  |
| 214483 | 29 | 3104149 | 3104172 | 3 | 8  | 24 | TCC  | 15 | 3  |
| 214484 | 29 | 3104495 | 3104518 | 4 | 6  | 24 | CTGG | 30 | 11 |
| 214485 | 29 | 3106628 | 3106659 | 2 | 16 | 32 | CA   | 18 | 12 |
| 214486 | 29 | 3107002 | 3107019 | 2 | 9  | 18 | CA   | 16 | 8  |
| 214488 | 29 | 3116254 | 3116267 | 2 | 7  | 14 | AT   | 27 | 3  |
| 214492 | 29 | 3126186 | 3126213 | 2 | 14 | 28 | CT   | 11 | 7  |
| 214499 | 29 | 3136035 | 3136050 | 4 | 4  | 16 | TTTC | 12 | 3  |
| 214500 | 29 | 3136084 | 3136099 | 4 | 4  | 16 | CTTT | 7  | 3  |
| 214502 | 29 | 3145835 | 3145849 | 3 | 5  | 15 | CAG  | 6  | 3  |
| 214506 | 29 | 3159610 | 3159641 | 2 | 16 | 32 | AG   | 9  | 11 |
| 214514 | 29 | 3181855 | 3181870 | 2 | 8  | 16 | AG   | 16 | 11 |
| 214515 | 29 | 3181924 | 3181938 | 3 | 5  | 15 | GCT  | 28 | 7  |
| 214521 | 29 | 3215720 | 3215737 | 3 | 6  | 18 | GAA  | 31 | 4  |
| 214523 | 29 | 3217430 | 3217455 | 2 | 13 | 26 | AC   | 8  | 3  |
| 214528 | 29 | 3223816 | 3223830 | 3 | 5  | 15 | GCA  | 20 | 4  |
| 214532 | 29 | 3225023 | 3225050 | 2 | 14 | 28 | TG   | 19 | 9  |

|        |    |         |         |   |    |    |      |    |    |
|--------|----|---------|---------|---|----|----|------|----|----|
| 214533 | 29 | 3225831 | 3225846 | 4 | 4  | 16 | GTCC | 26 | 3  |
| 214534 | 29 | 3226374 | 3226397 | 3 | 8  | 24 | CAG  | 18 | 8  |
| 214537 | 29 | 3238002 | 3238025 | 2 | 12 | 24 | CA   | 12 | 4  |
| 214538 | 29 | 3238057 | 3238074 | 2 | 9  | 18 | AC   | 18 | 8  |
| 214540 | 29 | 3238536 | 3238553 | 3 | 6  | 18 | GCA  | 15 | 6  |
| 214551 | 29 | 3246919 | 3246936 | 3 | 6  | 18 | GCA  | 20 | 6  |
| 214554 | 29 | 3247392 | 3247423 | 2 | 16 | 32 | TG   | 7  | 5  |
| 214555 | 29 | 3248412 | 3248435 | 3 | 8  | 24 | CCT  | 9  | 5  |
| 214566 | 29 | 3268703 | 3268720 | 3 | 6  | 18 | TGA  | 19 | 5  |
| 214567 | 29 | 3269014 | 3269069 | 4 | 14 | 56 | ATCT | 9  | 9  |
| 214575 | 29 | 3299355 | 3299384 | 3 | 10 | 30 | ATA  | 8  | 5  |
| 214587 | 29 | 3325779 | 3325799 | 3 | 7  | 21 | ATT  | 19 | 3  |
| 214588 | 29 | 3330930 | 3330967 | 2 | 19 | 38 | AC   | 11 | 8  |
| 214592 | 29 | 3345456 | 3345479 | 2 | 12 | 24 | GT   | 21 | 11 |
| 214595 | 29 | 3350155 | 3350172 | 2 | 9  | 18 | TG   | 21 | 9  |
| 214596 | 29 | 3351449 | 3351468 | 2 | 10 | 20 | AC   | 22 | 7  |
| 214603 | 29 | 3364418 | 3364433 | 2 | 8  | 16 | TG   | 15 | 6  |
| 214606 | 29 | 3368164 | 3368181 | 3 | 6  | 18 | AAG  | 28 | 3  |
| 214607 | 29 | 3385067 | 3385084 | 3 | 6  | 18 | CTT  | 32 | 3  |
| 214611 | 29 | 3399934 | 3399957 | 3 | 8  | 24 | TCC  | 20 | 5  |
| 214616 | 29 | 3409256 | 3409301 | 2 | 23 | 46 | TG   | 8  | 8  |
| 214620 | 29 | 3413075 | 3413101 | 3 | 9  | 27 | CCT  | 23 | 4  |
| 214622 | 29 | 3413886 | 3413909 | 4 | 6  | 24 | CAGT | 8  | 6  |
| 214627 | 29 | 3417466 | 3417485 | 2 | 10 | 20 | CA   | 17 | 6  |
| 214628 | 29 | 3417617 | 3417631 | 3 | 5  | 15 | AAC  | 15 | 4  |
| 214630 | 29 | 3417980 | 3417999 | 2 | 10 | 20 | CT   | 20 | 8  |
| 214646 | 29 | 3472641 | 3472654 | 2 | 7  | 14 | GT   | 24 | 6  |
| 214650 | 29 | 3476822 | 3476836 | 3 | 5  | 15 | TCT  | 32 | 5  |
| 214651 | 29 | 3477587 | 3477604 | 3 | 6  | 18 | GAG  | 24 | 4  |
| 214653 | 29 | 3488363 | 3488380 | 3 | 6  | 18 | GAG  | 21 | 6  |
| 214655 | 29 | 3494850 | 3494871 | 2 | 11 | 22 | AG   | 26 | 3  |
| 214656 | 29 | 3495221 | 3495241 | 3 | 7  | 21 | GCT  | 25 | 4  |
| 214659 | 29 | 3508701 | 3508714 | 2 | 7  | 14 | TG   | 21 | 5  |
| 214660 | 29 | 3510007 | 3510030 | 4 | 6  | 24 | TATT | 28 | 6  |
| 214661 | 29 | 3513027 | 3513038 | 2 | 6  | 12 | TC   | 22 | 11 |
| 214662 | 29 | 3513039 | 3513052 | 2 | 7  | 14 | TA   | 22 | 12 |
| 214663 | 29 | 3513419 | 3513448 | 2 | 15 | 30 | AC   | 22 | 11 |
| 214667 | 29 | 3518639 | 3518671 | 3 | 11 | 33 | CAT  | 24 | 9  |
| 214668 | 29 | 3519070 | 3519101 | 2 | 16 | 32 | AC   | 12 | 7  |
| 214669 | 29 | 3519159 | 3519170 | 2 | 6  | 12 | TC   | 24 | 6  |
| 214670 | 29 | 3520088 | 3520105 | 3 | 6  | 18 | TTC  | 29 | 3  |
| 214673 | 29 | 3524649 | 3524672 | 2 | 12 | 24 | AC   | 18 | 6  |
| 214675 | 29 | 3526247 | 3526267 | 3 | 7  | 21 | GAG  | 22 | 3  |
| 214677 | 29 | 3527702 | 3527717 | 4 | 4  | 16 | GATG | 27 | 3  |
| 214680 | 29 | 3531244 | 3531267 | 3 | 8  | 24 | CTC  | 19 | 4  |
| 214681 | 29 | 3531821 | 3531847 | 3 | 9  | 27 | CCT  | 23 | 5  |
| 214682 | 29 | 3532262 | 3532281 | 2 | 10 | 20 | AG   | 24 | 4  |
| 214683 | 29 | 3536862 | 3536895 | 2 | 17 | 34 | GT   | 6  | 9  |
| 214688 | 29 | 3557103 | 3557141 | 3 | 13 | 39 | TCT  | 23 | 7  |
| 214698 | 29 | 3585141 | 3585155 | 3 | 5  | 15 | GAG  | 26 | 3  |
| 214702 | 29 | 3599028 | 3599051 | 3 | 8  | 24 | GCA  | 25 | 4  |

|        |    |         |         |   |    |    |      |    |    |
|--------|----|---------|---------|---|----|----|------|----|----|
| 214703 | 29 | 3603307 | 3603327 | 3 | 7  | 21 | GAT  | 30 | 3  |
| 214708 | 29 | 3609369 | 3609396 | 2 | 14 | 28 | AC   | 10 | 9  |
| 214712 | 29 | 3619505 | 3619522 | 3 | 6  | 18 | ACC  | 24 | 4  |
| 214713 | 29 | 3623607 | 3623620 | 2 | 7  | 14 | TG   | 31 | 3  |
| 214715 | 29 | 3626378 | 3626389 | 2 | 6  | 12 | CT   | 27 | 3  |
| 214718 | 29 | 3638988 | 3639017 | 2 | 15 | 30 | CT   | 16 | 7  |
| 214720 | 29 | 3663633 | 3663646 | 2 | 7  | 14 | TA   | 19 | 8  |
| 214721 | 29 | 3663647 | 3663660 | 2 | 7  | 14 | TG   | 7  | 8  |
| 214725 | 29 | 3663787 | 3663804 | 2 | 9  | 18 | TG   | 13 | 13 |
| 214728 | 29 | 3677784 | 3677815 | 4 | 8  | 32 | TATC | 21 | 8  |
| 214733 | 29 | 3686102 | 3686121 | 2 | 10 | 20 | TG   | 22 | 7  |
| 214735 | 29 | 3689174 | 3689189 | 2 | 8  | 16 | TG   | 26 | 5  |
| 214736 | 29 | 3690666 | 3690679 | 2 | 7  | 14 | GT   | 20 | 8  |
| 214737 | 29 | 3690681 | 3690692 | 2 | 6  | 12 | TG   | 10 | 6  |
| 214745 | 29 | 3701551 | 3701576 | 2 | 13 | 26 | CA   | 18 | 8  |
| 214749 | 29 | 3708835 | 3708848 | 2 | 7  | 14 | TG   | 6  | 6  |
| 214761 | 29 | 3718740 | 3718757 | 3 | 6  | 18 | CTG  | 28 | 3  |
| 214772 | 29 | 3745583 | 3745612 | 2 | 15 | 30 | GT   | 16 | 10 |
| 214777 | 29 | 3761184 | 3761195 | 2 | 6  | 12 | AT   | 18 | 9  |
| 214781 | 29 | 3762269 | 3762300 | 2 | 16 | 32 | CA   | 13 | 9  |
| 214782 | 29 | 3764042 | 3764065 | 3 | 8  | 24 | TCC  | 16 | 4  |
| 214788 | 29 | 3788738 | 3788759 | 2 | 11 | 22 | TG   | 25 | 7  |
| 214802 | 29 | 3829148 | 3829167 | 2 | 10 | 20 | CA   | 14 | 7  |
| 214806 | 29 | 3854386 | 3854401 | 4 | 4  | 16 | GGAA | 34 | 4  |
| 214815 | 29 | 3881142 | 3881153 | 2 | 6  | 12 | TA   | 21 | 3  |
| 214826 | 29 | 3901313 | 3901327 | 3 | 5  | 15 | GCT  | 35 | 3  |
| 214827 | 29 | 3910637 | 3910654 | 3 | 6  | 18 | CAG  | 26 | 3  |
| 214829 | 29 | 3911049 | 3911064 | 2 | 8  | 16 | TC   | 15 | 12 |
| 214833 | 29 | 3920003 | 3920026 | 2 | 12 | 24 | GT   | 21 | 6  |
| 214837 | 29 | 3926615 | 3926635 | 3 | 7  | 21 | TTA  | 19 | 3  |
| 214838 | 29 | 3930140 | 3930163 | 2 | 12 | 24 | GT   | 25 | 12 |
| 214850 | 29 | 3935198 | 3935221 | 3 | 8  | 24 | TCT  | 9  | 7  |
| 214853 | 29 | 3939645 | 3939659 | 3 | 5  | 15 | TGC  | 23 | 5  |
| 214869 | 29 | 3970859 | 3970870 | 2 | 6  | 12 | GA   | 17 | 4  |
| 214875 | 29 | 3978734 | 3978751 | 3 | 6  | 18 | CTT  | 28 | 3  |
| 214876 | 29 | 3979187 | 3979204 | 2 | 9  | 18 | AC   | 19 | 7  |
| 214877 | 29 | 3979207 | 3979218 | 2 | 6  | 12 | AC   | 20 | 8  |
| 214878 | 29 | 3980454 | 3980468 | 3 | 5  | 15 | GGA  | 20 | 3  |
| 214880 | 29 | 3984026 | 3984039 | 2 | 7  | 14 | TG   | 14 | 3  |
| 214881 | 29 | 3984084 | 3984115 | 2 | 16 | 32 | AC   | 17 | 13 |
| 214882 | 29 | 3984798 | 3984809 | 2 | 6  | 12 | TA   | 21 | 4  |
| 214883 | 29 | 3987780 | 3987807 | 4 | 7  | 28 | CAGT | 23 | 4  |
| 214884 | 29 | 3989644 | 3989683 | 2 | 20 | 40 | TG   | 10 | 6  |
| 214885 | 29 | 3989826 | 3989837 | 2 | 6  | 12 | AG   | 30 | 3  |
| 214888 | 29 | 3994102 | 3994127 | 2 | 13 | 26 | GT   | 18 | 10 |
| 214889 | 29 | 3994318 | 3994335 | 2 | 9  | 18 | CA   | 12 | 6  |
| 214891 | 29 | 4000923 | 4000938 | 2 | 8  | 16 | TG   | 24 | 6  |
| 214892 | 29 | 4001010 | 4001025 | 2 | 8  | 16 | CA   | 28 | 3  |
| 214900 | 29 | 4008609 | 4008638 | 2 | 15 | 30 | CA   | 16 | 6  |
| 214905 | 29 | 4017071 | 4017086 | 4 | 4  | 16 | AAAT | 21 | 4  |
| 214906 | 29 | 4017810 | 4017853 | 2 | 22 | 44 | AC   | 10 | 11 |

|        |    |         |         |   |    |    |      |    |    |
|--------|----|---------|---------|---|----|----|------|----|----|
| 214912 | 29 | 4023520 | 4023557 | 2 | 19 | 38 | TG   | 11 | 10 |
| 214931 | 29 | 4045118 | 4045141 | 2 | 12 | 24 | AC   | 14 | 11 |
| 214936 | 29 | 4051116 | 4051147 | 2 | 16 | 32 | GT   | 10 | 11 |
| 214938 | 29 | 4063280 | 4063315 | 3 | 12 | 36 | GGA  | 8  | 7  |
| 214950 | 29 | 4089362 | 4089389 | 2 | 14 | 28 | AC   | 13 | 10 |
| 214956 | 29 | 4102971 | 4102986 | 2 | 8  | 16 | CA   | 23 | 3  |
| 214964 | 29 | 4115181 | 4115210 | 3 | 10 | 30 | GCT  | 29 | 8  |
| 214965 | 29 | 4115285 | 4115326 | 3 | 14 | 42 | TTG  | 18 | 9  |
| 214970 | 29 | 4119654 | 4119674 | 3 | 7  | 21 | GCA  | 23 | 5  |
| 214974 | 29 | 4120092 | 4120109 | 2 | 9  | 18 | TC   | 15 | 4  |
| 214975 | 29 | 4120147 | 4120162 | 4 | 4  | 16 | GGCA | 10 | 3  |
| 214976 | 29 | 4121184 | 4121215 | 2 | 16 | 32 | CA   | 6  | 5  |
| 214979 | 29 | 4145390 | 4145407 | 2 | 9  | 18 | CT   | 19 | 4  |
| 214982 | 29 | 4154987 | 4155016 | 2 | 15 | 30 | CA   | 15 | 10 |
| 214984 | 29 | 4156336 | 4156359 | 3 | 8  | 24 | GAT  | 29 | 9  |
| 214985 | 29 | 4158753 | 4158784 | 2 | 16 | 32 | CA   | 7  | 7  |
| 214987 | 29 | 4161981 | 4162002 | 2 | 11 | 22 | CA   | 23 | 7  |
| 214988 | 29 | 4163051 | 4163065 | 3 | 5  | 15 | AGA  | 21 | 5  |
| 214989 | 29 | 4163068 | 4163085 | 3 | 6  | 18 | AAG  | 20 | 4  |
| 214991 | 29 | 4169223 | 4169248 | 2 | 13 | 26 | CA   | 15 | 7  |
| 214992 | 29 | 4170797 | 4170811 | 3 | 5  | 15 | GTT  | 29 | 4  |
| 214993 | 29 | 4171587 | 4171600 | 2 | 7  | 14 | CA   | 31 | 5  |
| 214994 | 29 | 4171862 | 4171879 | 2 | 9  | 18 | GT   | 20 | 7  |
| 214997 | 29 | 4173431 | 4173484 | 2 | 27 | 54 | TC   | 6  | 8  |
| 215001 | 29 | 4175623 | 4175636 | 2 | 7  | 14 | AC   | 23 | 3  |
| 215005 | 29 | 4179187 | 4179214 | 2 | 14 | 28 | TG   | 13 | 6  |
| 215006 | 29 | 4179332 | 4179355 | 2 | 12 | 24 | CA   | 22 | 8  |
| 215011 | 29 | 4186969 | 4186994 | 2 | 13 | 26 | GT   | 24 | 8  |
| 215012 | 29 | 4187084 | 4187097 | 2 | 7  | 14 | GT   | 18 | 4  |
| 215014 | 29 | 4190174 | 4190209 | 2 | 18 | 36 | CA   | 19 | 7  |
| 215016 | 29 | 4195074 | 4195105 | 2 | 16 | 32 | AC   | 10 | 12 |
| 215017 | 29 | 4195913 | 4195968 | 4 | 14 | 56 | TAGA | 22 | 9  |
| 215018 | 29 | 4196857 | 4196872 | 2 | 8  | 16 | TG   | 21 | 4  |
| 215048 | 29 | 4264147 | 4264160 | 2 | 7  | 14 | AC   | 20 | 5  |
| 215055 | 29 | 4297407 | 4297451 | 3 | 15 | 45 | GGA  | 18 | 8  |
| 215057 | 29 | 4309449 | 4309468 | 4 | 5  | 20 | TGGT | 23 | 3  |
| 215067 | 29 | 4344587 | 4344602 | 4 | 4  | 16 | GATG | 36 | 3  |
| 215069 | 29 | 4344939 | 4344950 | 2 | 6  | 12 | TG   | 16 | 3  |
| 215070 | 29 | 4347748 | 4347769 | 2 | 11 | 22 | CA   | 23 | 9  |
| 215071 | 29 | 4348605 | 4348636 | 2 | 16 | 32 | TG   | 8  | 8  |
| 215074 | 29 | 4361351 | 4361366 | 2 | 8  | 16 | CA   | 24 | 12 |
| 215079 | 29 | 4366654 | 4366669 | 4 | 4  | 16 | GCCA | 27 | 7  |
| 215080 | 29 | 4368889 | 4368903 | 3 | 5  | 15 | CCT  | 14 | 6  |
| 215083 | 29 | 4379879 | 4379896 | 2 | 9  | 18 | CA   | 22 | 15 |
| 215084 | 29 | 4380153 | 4380167 | 3 | 5  | 15 | CTC  | 27 | 3  |
| 215085 | 29 | 4380514 | 4380529 | 2 | 8  | 16 | AC   | 18 | 4  |
| 215089 | 29 | 4390102 | 4390125 | 3 | 8  | 24 | TTG  | 21 | 3  |
| 215102 | 29 | 4426720 | 4426739 | 2 | 10 | 20 | AC   | 19 | 6  |
| 215103 | 29 | 4427044 | 4427061 | 2 | 9  | 18 | TG   | 18 | 11 |
| 215105 | 29 | 4429748 | 4429759 | 2 | 6  | 12 | AC   | 17 | 10 |
| 215106 | 29 | 4429761 | 4429780 | 2 | 10 | 20 | CA   | 16 | 10 |



|        |    |         |         |   |    |    |      |    |    |
|--------|----|---------|---------|---|----|----|------|----|----|
| 215108 | 29 | 4432109 | 4432135 | 3 | 9  | 27 | TGC  | 16 | 11 |
| 215111 | 29 | 4436455 | 4436484 | 3 | 10 | 30 | GGA  | 17 | 7  |
| 215113 | 29 | 4445160 | 4445193 | 2 | 17 | 34 | AC   | 10 | 7  |
| 215116 | 29 | 4451648 | 4451667 | 2 | 10 | 20 | TG   | 19 | 6  |
| 215118 | 29 | 4453888 | 4453907 | 2 | 10 | 20 | TG   | 6  | 8  |
| 215122 | 29 | 4467132 | 4467151 | 2 | 10 | 20 | GA   | 18 | 6  |
| 215124 | 29 | 4469855 | 4469868 | 2 | 7  | 14 | GT   | 21 | 4  |
| 215128 | 29 | 4504004 | 4504017 | 2 | 7  | 14 | TG   | 26 | 5  |
| 215129 | 29 | 4504159 | 4504174 | 2 | 8  | 16 | CT   | 27 | 4  |
| 215134 | 29 | 4527579 | 4527602 | 2 | 12 | 24 | AC   | 24 | 14 |
| 215135 | 29 | 4527759 | 4527779 | 3 | 7  | 21 | GAT  | 27 | 4  |
| 215143 | 29 | 4546983 | 4546998 | 2 | 8  | 16 | TA   | 20 | 5  |
| 215146 | 29 | 4549931 | 4549962 | 2 | 16 | 32 | GT   | 13 | 11 |
| 215147 | 29 | 4550172 | 4550201 | 3 | 10 | 30 | GAG  | 14 | 5  |
| 215157 | 29 | 4569367 | 4569396 | 3 | 10 | 30 | AGG  | 22 | 5  |
| 215158 | 29 | 4569671 | 4569696 | 2 | 13 | 26 | TG   | 14 | 13 |
| 215159 | 29 | 4574868 | 4574887 | 2 | 10 | 20 | GT   | 27 | 8  |
| 215160 | 29 | 4576209 | 4576238 | 3 | 10 | 30 | AGG  | 24 | 8  |
| 215161 | 29 | 4576377 | 4576388 | 2 | 6  | 12 | AC   | 26 | 6  |
| 215162 | 29 | 4577576 | 4577587 | 2 | 6  | 12 | TG   | 15 | 3  |
| 215168 | 29 | 4582158 | 4582197 | 2 | 20 | 40 | TG   | 10 | 11 |
| 215170 | 29 | 4585949 | 4585962 | 2 | 7  | 14 | TG   | 27 | 5  |
| 215172 | 29 | 4586440 | 4586457 | 2 | 9  | 18 | GT   | 28 | 3  |
| 215173 | 29 | 4586535 | 4586554 | 2 | 10 | 20 | TG   | 13 | 5  |
| 215174 | 29 | 4586624 | 4586645 | 2 | 11 | 22 | CA   | 11 | 12 |
| 215177 | 29 | 4586835 | 4586850 | 4 | 4  | 16 | GCGT | 17 | 11 |
| 215178 | 29 | 4587430 | 4587449 | 4 | 5  | 20 | CAGT | 21 | 4  |
| 215181 | 29 | 4588196 | 4588211 | 2 | 8  | 16 | TG   | 20 | 5  |
| 215184 | 29 | 4588898 | 4588909 | 2 | 6  | 12 | CA   | 17 | 9  |
| 215185 | 29 | 4588912 | 4588929 | 2 | 9  | 18 | CA   | 9  | 4  |
| 215187 | 29 | 4589822 | 4589843 | 2 | 11 | 22 | TG   | 10 | 13 |
| 215188 | 29 | 4590082 | 4590099 | 2 | 9  | 18 | GT   | 27 | 12 |
| 215189 | 29 | 4590554 | 4590567 | 2 | 7  | 14 | GA   | 29 | 3  |
| 215191 | 29 | 4591779 | 4591794 | 2 | 8  | 16 | TG   | 13 | 3  |
| 215192 | 29 | 4592285 | 4592308 | 2 | 12 | 24 | AC   | 12 | 11 |
| 215193 | 29 | 4593262 | 4593293 | 2 | 16 | 32 | GT   | 8  | 7  |
| 215194 | 29 | 4603443 | 4603458 | 2 | 8  | 16 | AC   | 23 | 5  |
| 215195 | 29 | 4603546 | 4603559 | 2 | 7  | 14 | CA   | 11 | 9  |
| 215197 | 29 | 4604147 | 4604164 | 2 | 9  | 18 | GT   | 17 | 4  |
| 215198 | 29 | 4604316 | 4604331 | 2 | 8  | 16 | GT   | 24 | 4  |
| 215199 | 29 | 4604389 | 4604408 | 2 | 10 | 20 | GT   | 13 | 4  |
| 215200 | 29 | 4604556 | 4604591 | 2 | 18 | 36 | GT   | 7  | 8  |
| 215202 | 29 | 4604760 | 4604773 | 2 | 7  | 14 | CA   | 16 | 8  |
| 215207 | 29 | 4605971 | 4605984 | 2 | 7  | 14 | AC   | 10 | 9  |
| 215208 | 29 | 4606184 | 4606203 | 2 | 10 | 20 | CA   | 14 | 12 |
| 215210 | 29 | 4606347 | 4606376 | 2 | 15 | 30 | CA   | 13 | 17 |
| 215211 | 29 | 4606524 | 4606537 | 2 | 7  | 14 | GT   | 29 | 14 |
| 215212 | 29 | 4606767 | 4606782 | 2 | 8  | 16 | AG   | 22 | 4  |
| 215215 | 29 | 4614021 | 4614041 | 3 | 7  | 21 | ACA  | 25 | 7  |
| 215220 | 29 | 4620175 | 4620186 | 2 | 6  | 12 | CA   | 22 | 3  |
| 215226 | 29 | 4620921 | 4620932 | 2 | 6  | 12 | CA   | 16 | 7  |

|        |    |         |         |   |    |    |      |    |    |
|--------|----|---------|---------|---|----|----|------|----|----|
| 215227 | 29 | 4621124 | 4621147 | 2 | 12 | 24 | CT   | 21 | 11 |
| 215229 | 29 | 4621671 | 4621694 | 2 | 12 | 24 | TG   | 9  | 9  |
| 215234 | 29 | 4625244 | 4625271 | 2 | 14 | 28 | AC   | 22 | 9  |
| 215237 | 29 | 4626555 | 4626569 | 3 | 5  | 15 | CTG  | 22 | 3  |
| 215239 | 29 | 4628341 | 4628355 | 3 | 5  | 15 | TCA  | 29 | 5  |
| 215242 | 29 | 4632215 | 4632228 | 2 | 7  | 14 | GA   | 21 | 15 |
| 215244 | 29 | 4635370 | 4635413 | 2 | 22 | 44 | TG   | 9  | 10 |
| 215245 | 29 | 4635870 | 4635893 | 2 | 12 | 24 | AC   | 19 | 7  |
| 215247 | 29 | 4636085 | 4636104 | 2 | 10 | 20 | CA   | 9  | 4  |
| 215254 | 29 | 4642060 | 4642075 | 2 | 8  | 16 | GT   | 15 | 3  |
| 215255 | 29 | 4643365 | 4643380 | 4 | 4  | 16 | ATGG | 20 | 3  |
| 215260 | 29 | 4650875 | 4650886 | 2 | 6  | 12 | GT   | 26 | 5  |
| 215264 | 29 | 4652393 | 4652408 | 2 | 8  | 16 | CA   | 11 | 3  |
| 215265 | 29 | 4652672 | 4652685 | 2 | 7  | 14 | CT   | 19 | 5  |
| 215267 | 29 | 4653696 | 4653715 | 2 | 10 | 20 | GT   | 13 | 6  |
| 215268 | 29 | 4655548 | 4655579 | 2 | 16 | 32 | AC   | 15 | 9  |
| 215272 | 29 | 4660046 | 4660059 | 2 | 7  | 14 | GT   | 21 | 11 |
| 215275 | 29 | 4660491 | 4660524 | 2 | 17 | 34 | GT   | 10 | 9  |
| 215277 | 29 | 4664140 | 4664155 | 4 | 4  | 16 | GAGC | 33 | 6  |
| 215281 | 29 | 4670530 | 4670563 | 2 | 17 | 34 | GT   | 15 | 6  |
| 215285 | 29 | 4687770 | 4687787 | 2 | 9  | 18 | GT   | 12 | 3  |
| 215287 | 29 | 4688181 | 4688202 | 2 | 11 | 22 | CA   | 19 | 14 |
| 215291 | 29 | 4690768 | 4690785 | 2 | 9  | 18 | AC   | 15 | 9  |
| 215292 | 29 | 4694999 | 4695012 | 2 | 7  | 14 | AG   | 15 | 3  |
| 215295 | 29 | 4701863 | 4701882 | 4 | 5  | 20 | AACA | 23 | 7  |
| 215296 | 29 | 4703993 | 4704049 | 3 | 19 | 57 | CAT  | 23 | 12 |
| 215297 | 29 | 4705146 | 4705167 | 2 | 11 | 22 | TG   | 6  | 5  |
| 215298 | 29 | 4705297 | 4705324 | 2 | 14 | 28 | CT   | 10 | 6  |
| 215299 | 29 | 4705370 | 4705391 | 2 | 11 | 22 | AC   | 12 | 10 |
| 215300 | 29 | 4705555 | 4705566 | 2 | 6  | 12 | GT   | 17 | 4  |
| 215302 | 29 | 4705761 | 4705780 | 2 | 10 | 20 | CA   | 25 | 12 |
| 215303 | 29 | 4705920 | 4705953 | 2 | 17 | 34 | GT   | 11 | 10 |
| 215304 | 29 | 4708645 | 4708670 | 2 | 13 | 26 | GT   | 20 | 7  |
| 215305 | 29 | 4709252 | 4709273 | 2 | 11 | 22 | CA   | 10 | 8  |
| 215309 | 29 | 4717379 | 4717422 | 2 | 22 | 44 | CA   | 8  | 8  |
| 215311 | 29 | 4717531 | 4717552 | 2 | 11 | 22 | AC   | 23 | 13 |
| 215316 | 29 | 4720246 | 4720267 | 2 | 11 | 22 | GT   | 21 | 3  |
| 215319 | 29 | 4722741 | 4722764 | 2 | 12 | 24 | AC   | 19 | 6  |
| 215326 | 29 | 4732219 | 4732234 | 2 | 8  | 16 | CA   | 24 | 6  |
| 215329 | 29 | 4733309 | 4733326 | 2 | 9  | 18 | CA   | 21 | 5  |
| 215331 | 29 | 4734753 | 4734784 | 2 | 16 | 32 | CA   | 11 | 8  |
| 215334 | 29 | 4735428 | 4735445 | 2 | 9  | 18 | AG   | 21 | 4  |
| 215335 | 29 | 4736058 | 4736091 | 2 | 17 | 34 | TG   | 10 | 9  |
| 215336 | 29 | 4736190 | 4736217 | 2 | 14 | 28 | GT   | 6  | 8  |
| 215337 | 29 | 4737145 | 4737172 | 2 | 14 | 28 | TG   | 18 | 7  |
| 215341 | 29 | 4739873 | 4739900 | 2 | 14 | 28 | TG   | 19 | 11 |
| 215343 | 29 | 4741581 | 4741600 | 2 | 10 | 20 | AC   | 20 | 5  |
| 215344 | 29 | 4741721 | 4741740 | 2 | 10 | 20 | CA   | 21 | 8  |
| 215346 | 29 | 4741974 | 4741997 | 2 | 12 | 24 | TG   | 15 | 9  |
| 215347 | 29 | 4742312 | 4742335 | 4 | 6  | 24 | TCTG | 25 | 4  |
| 215349 | 29 | 4746172 | 4746187 | 2 | 8  | 16 | TA   | 18 | 8  |

|        |    |         |         |   |    |    |      |    |    |
|--------|----|---------|---------|---|----|----|------|----|----|
| 215352 | 29 | 4747025 | 4747044 | 2 | 10 | 20 | GT   | 17 | 4  |
| 215360 | 29 | 4755863 | 4755874 | 2 | 6  | 12 | CT   | 14 | 4  |
| 215367 | 29 | 4757106 | 4757135 | 2 | 15 | 30 | GT   | 10 | 6  |
| 215368 | 29 | 4757385 | 4757400 | 2 | 8  | 16 | GT   | 27 | 5  |
| 215371 | 29 | 4759194 | 4759223 | 2 | 15 | 30 | GT   | 10 | 6  |
| 215372 | 29 | 4759369 | 4759389 | 3 | 7  | 21 | GAG  | 15 | 8  |
| 215373 | 29 | 4759430 | 4759443 | 2 | 7  | 14 | GA   | 14 | 6  |
| 215374 | 29 | 4759648 | 4759673 | 2 | 13 | 26 | TG   | 15 | 8  |
| 215375 | 29 | 4761565 | 4761580 | 2 | 8  | 16 | AG   | 21 | 8  |
| 215376 | 29 | 4761878 | 4761895 | 2 | 9  | 18 | TG   | 16 | 6  |
| 215377 | 29 | 4763848 | 4763865 | 2 | 9  | 18 | AC   | 19 | 5  |
| 215378 | 29 | 4764725 | 4764754 | 2 | 15 | 30 | AC   | 14 | 11 |
| 215379 | 29 | 4764820 | 4764843 | 2 | 12 | 24 | CA   | 19 | 8  |
| 215381 | 29 | 4765295 | 4765310 | 2 | 8  | 16 | AC   | 19 | 3  |
| 215396 | 29 | 4791979 | 4791994 | 4 | 4  | 16 | CATT | 33 | 3  |
| 215401 | 29 | 4796931 | 4796951 | 3 | 7  | 21 | CAT  | 29 | 5  |
| 215402 | 29 | 4797058 | 4797073 | 4 | 4  | 16 | GGAG | 27 | 3  |
| 215403 | 29 | 4804708 | 4804728 | 3 | 7  | 21 | CCT  | 25 | 4  |
| 215413 | 29 | 4816111 | 4816132 | 2 | 11 | 22 | TG   | 23 | 6  |
| 215414 | 29 | 4816601 | 4816634 | 2 | 17 | 34 | GT   | 14 | 6  |
| 215418 | 29 | 4825581 | 4825594 | 2 | 7  | 14 | AC   | 10 | 3  |
| 215419 | 29 | 4825768 | 4825793 | 2 | 13 | 26 | CA   | 19 | 10 |
| 215420 | 29 | 4826009 | 4826024 | 2 | 8  | 16 | CA   | 14 | 8  |
| 215423 | 29 | 4826788 | 4826811 | 2 | 12 | 24 | AG   | 12 | 5  |
| 215424 | 29 | 4830044 | 4830059 | 2 | 8  | 16 | AC   | 17 | 10 |
| 215425 | 29 | 4833581 | 4833594 | 2 | 7  | 14 | CA   | 24 | 3  |
| 215426 | 29 | 4833684 | 4833709 | 2 | 13 | 26 | AC   | 14 | 10 |
| 215427 | 29 | 4833807 | 4833818 | 2 | 6  | 12 | CA   | 25 | 5  |
| 215433 | 29 | 4846630 | 4846645 | 2 | 8  | 16 | CG   | 10 | 16 |
| 215435 | 29 | 4847135 | 4847148 | 2 | 7  | 14 | GT   | 26 | 4  |
| 215443 | 29 | 4854035 | 4854054 | 2 | 10 | 20 | CT   | 25 | 5  |
| 215445 | 29 | 4855616 | 4855637 | 2 | 11 | 22 | AC   | 16 | 6  |
| 215446 | 29 | 4855732 | 4855761 | 2 | 15 | 30 | TG   | 17 | 10 |
| 215452 | 29 | 4857921 | 4857932 | 2 | 6  | 12 | TC   | 9  | 5  |
| 215453 | 29 | 4858124 | 4858141 | 2 | 9  | 18 | CA   | 21 | 4  |
| 215461 | 29 | 4862443 | 4862462 | 2 | 10 | 20 | AC   | 14 | 7  |
| 215462 | 29 | 4862595 | 4862614 | 2 | 10 | 20 | CA   | 23 | 3  |
| 215464 | 29 | 4864680 | 4864695 | 4 | 4  | 16 | AAAT | 29 | 3  |
| 215467 | 29 | 4868367 | 4868384 | 2 | 9  | 18 | GT   | 19 | 9  |
| 215475 | 29 | 4872777 | 4872808 | 2 | 16 | 32 | TG   | 12 | 7  |
| 215476 | 29 | 4873292 | 4873321 | 3 | 10 | 30 | TTA  | 13 | 9  |
| 215481 | 29 | 4883759 | 4883770 | 2 | 6  | 12 | TG   | 11 | 4  |
| 215491 | 29 | 4894651 | 4894666 | 4 | 4  | 16 | TTTG | 33 | 3  |
| 215500 | 29 | 4902996 | 4903022 | 3 | 9  | 27 | CCT  | 14 | 6  |
| 215501 | 29 | 4903056 | 4903073 | 2 | 9  | 18 | AC   | 12 | 3  |
| 215502 | 29 | 4903106 | 4903143 | 2 | 19 | 38 | CA   | 6  | 9  |
| 215503 | 29 | 4903379 | 4903398 | 2 | 10 | 20 | CT   | 12 | 5  |
| 215507 | 29 | 4909737 | 4909748 | 2 | 6  | 12 | GA   | 15 | 3  |
| 215508 | 29 | 4909932 | 4909949 | 3 | 6  | 18 | GAA  | 17 | 3  |
| 215510 | 29 | 4910160 | 4910171 | 2 | 6  | 12 | GA   | 18 | 3  |
| 215512 | 29 | 4910242 | 4910265 | 2 | 12 | 24 | AG   | 12 | 5  |

|        |    |         |         |   |    |    |     |    |    |
|--------|----|---------|---------|---|----|----|-----|----|----|
| 215514 | 29 | 4910521 | 4910542 | 2 | 11 | 22 | CT  | 22 | 8  |
| 215521 | 29 | 4921752 | 4921781 | 2 | 15 | 30 | CA  | 11 | 10 |
| 215524 | 29 | 4928922 | 4928937 | 2 | 8  | 16 | TG  | 12 | 8  |
| 215525 | 29 | 4928940 | 4928957 | 2 | 9  | 18 | TG  | 19 | 9  |
| 215529 | 29 | 4932296 | 4932307 | 2 | 6  | 12 | GT  | 14 | 4  |
| 215530 | 29 | 4932310 | 4932323 | 2 | 7  | 14 | GT  | 21 | 4  |
| 215531 | 29 | 4932572 | 4932598 | 3 | 9  | 27 | TCC | 22 | 9  |
| 215534 | 29 | 4942971 | 4942992 | 2 | 11 | 22 | GT  | 26 | 7  |
| 215535 | 29 | 4943225 | 4943252 | 2 | 14 | 28 | GT  | 20 | 4  |
| 215537 | 29 | 4948760 | 4948775 | 2 | 8  | 16 | GT  | 30 | 3  |
| 215539 | 29 | 4950002 | 4950025 | 2 | 12 | 24 | AG  | 7  | 8  |
| 215541 | 29 | 4953620 | 4953653 | 2 | 17 | 34 | GT  | 12 | 7  |
| 215542 | 29 | 4954460 | 4954513 | 2 | 27 | 54 | GT  | 7  | 12 |
| 215543 | 29 | 4954627 | 4954638 | 2 | 6  | 12 | TG  | 16 | 6  |
| 215544 | 29 | 4954640 | 4954657 | 2 | 9  | 18 | GT  | 18 | 6  |
| 215548 | 29 | 4959251 | 4959276 | 2 | 13 | 26 | AC  | 11 | 11 |
| 215551 | 29 | 4961113 | 4961126 | 2 | 7  | 14 | CA  | 6  | 7  |
| 215553 | 29 | 4961685 | 4961702 | 2 | 9  | 18 | GT  | 29 | 10 |
| 215554 | 29 | 4963321 | 4963332 | 2 | 6  | 12 | CT  | 28 | 3  |
| 215557 | 29 | 4966900 | 4966919 | 2 | 10 | 20 | AC  | 17 | 7  |
| 215559 | 29 | 4971737 | 4971754 | 3 | 6  | 18 | AAT | 28 | 3  |
| 215560 | 29 | 4972209 | 4972224 | 2 | 8  | 16 | TC  | 22 | 3  |
| 215561 | 29 | 4973963 | 4973974 | 2 | 6  | 12 | AC  | 22 | 7  |
| 215562 | 29 | 4974123 | 4974148 | 2 | 13 | 26 | AC  | 20 | 8  |
| 215571 | 29 | 4985779 | 4985790 | 2 | 6  | 12 | AC  | 10 | 3  |
| 215572 | 29 | 4985791 | 4985806 | 2 | 8  | 16 | AT  | 12 | 3  |
| 215573 | 29 | 4986757 | 4986777 | 3 | 7  | 21 | TCC | 19 | 11 |
| 215574 | 29 | 4988144 | 4988158 | 3 | 5  | 15 | CCT | 25 | 3  |
| 215578 | 29 | 4991291 | 4991320 | 2 | 15 | 30 | TG  | 20 | 8  |
| 215579 | 29 | 4993101 | 4993118 | 2 | 9  | 18 | GT  | 17 | 15 |
| 215580 | 29 | 4993477 | 4993491 | 3 | 5  | 15 | GAG | 14 | 3  |
| 215583 | 29 | 4994123 | 4994140 | 2 | 9  | 18 | CT  | 21 | 6  |
| 215591 | 29 | 4995915 | 4995934 | 2 | 10 | 20 | AC  | 28 | 6  |
| 215592 | 29 | 4996564 | 4996581 | 2 | 9  | 18 | GT  | 15 | 4  |
| 215593 | 29 | 4996647 | 4996664 | 3 | 6  | 18 | CAC | 20 | 3  |
| 215594 | 29 | 4997591 | 4997614 | 2 | 12 | 24 | TG  | 17 | 7  |
| 215601 | 29 | 5010400 | 5010429 | 3 | 10 | 30 | CTC | 23 | 3  |
| 215602 | 29 | 5010822 | 5010842 | 3 | 7  | 21 | GCG | 24 | 5  |
| 215605 | 29 | 5012441 | 5012462 | 2 | 11 | 22 | TC  | 23 | 4  |
| 215607 | 29 | 5012852 | 5012869 | 2 | 9  | 18 | TG  | 20 | 12 |
| 215611 | 29 | 5013879 | 5013912 | 2 | 17 | 34 | CA  | 7  | 10 |
| 215613 | 29 | 5014084 | 5014107 | 3 | 8  | 24 | GCT | 10 | 9  |
| 215619 | 29 | 5019570 | 5019599 | 2 | 15 | 30 | GT  | 11 | 8  |
| 215620 | 29 | 5020255 | 5020284 | 2 | 15 | 30 | GT  | 12 | 8  |
| 215622 | 29 | 5022713 | 5022734 | 2 | 11 | 22 | TG  | 18 | 11 |
| 215626 | 29 | 5023440 | 5023471 | 2 | 16 | 32 | CT  | 10 | 6  |
| 215631 | 29 | 5026783 | 5026796 | 2 | 7  | 14 | CA  | 26 | 4  |
| 215633 | 29 | 5032588 | 5032603 | 2 | 8  | 16 | CA  | 24 | 5  |
| 215634 | 29 | 5032798 | 5032819 | 2 | 11 | 22 | GT  | 18 | 14 |
| 215636 | 29 | 5033551 | 5033582 | 2 | 16 | 32 | TG  | 8  | 9  |
| 215644 | 29 | 5043880 | 5043899 | 2 | 10 | 20 | AC  | 20 | 15 |

|        |    |         |         |   |    |    |      |    |    |
|--------|----|---------|---------|---|----|----|------|----|----|
| 215646 | 29 | 5045617 | 5045640 | 2 | 12 | 24 | TC   | 11 | 4  |
| 215648 | 29 | 5045938 | 5045952 | 3 | 5  | 15 | CCT  | 20 | 6  |
| 215650 | 29 | 5046820 | 5046837 | 2 | 9  | 18 | GT   | 16 | 10 |
| 215653 | 29 | 5047198 | 5047213 | 2 | 8  | 16 | AC   | 26 | 7  |
| 215654 | 29 | 5047365 | 5047382 | 2 | 9  | 18 | TG   | 23 | 5  |
| 215655 | 29 | 5047973 | 5047998 | 2 | 13 | 26 | GT   | 10 | 6  |
| 215659 | 29 | 5052100 | 5052113 | 2 | 7  | 14 | GA   | 8  | 3  |
| 215662 | 29 | 5054860 | 5054885 | 2 | 13 | 26 | GT   | 15 | 11 |
| 215664 | 29 | 5055026 | 5055055 | 2 | 15 | 30 | TG   | 9  | 7  |
| 215665 | 29 | 5055226 | 5055237 | 2 | 6  | 12 | GT   | 25 | 3  |
| 215666 | 29 | 5055382 | 5055421 | 2 | 20 | 40 | TG   | 10 | 8  |
| 215667 | 29 | 5055825 | 5055846 | 2 | 11 | 22 | AC   | 17 | 5  |
| 215668 | 29 | 5060940 | 5060969 | 3 | 10 | 30 | GAG  | 6  | 4  |
| 215704 | 29 | 5158613 | 5158627 | 3 | 5  | 15 | AGC  | 24 | 3  |
| 215707 | 29 | 5160810 | 5160827 | 2 | 9  | 18 | TG   | 24 | 6  |
| 215709 | 29 | 5162285 | 5162316 | 2 | 16 | 32 | TG   | 9  | 10 |
| 215710 | 29 | 5165307 | 5165318 | 2 | 6  | 12 | GT   | 33 | 3  |
| 215717 | 29 | 5179624 | 5179639 | 2 | 8  | 16 | CA   | 22 | 3  |
| 215718 | 29 | 5179908 | 5179927 | 2 | 10 | 20 | TG   | 26 | 5  |
| 215719 | 29 | 5180102 | 5180116 | 3 | 5  | 15 | CTT  | 23 | 4  |
| 215727 | 29 | 5192358 | 5192384 | 3 | 9  | 27 | GCT  | 22 | 9  |
| 215737 | 29 | 5204453 | 5204472 | 2 | 10 | 20 | CA   | 7  | 4  |
| 215739 | 29 | 5208932 | 5208955 | 2 | 12 | 24 | TG   | 25 | 11 |
| 215743 | 29 | 5215017 | 5215046 | 3 | 10 | 30 | AGA  | 23 | 14 |
| 215745 | 29 | 5215312 | 5215327 | 4 | 4  | 16 | CTGC | 23 | 16 |
| 215750 | 29 | 5219510 | 5219533 | 2 | 12 | 24 | CA   | 15 | 7  |
| 215759 | 29 | 5258547 | 5258560 | 2 | 7  | 14 | CA   | 22 | 7  |
| 215761 | 29 | 5263262 | 5263277 | 4 | 4  | 16 | AATA | 27 | 3  |
| 215763 | 29 | 5265157 | 5265180 | 4 | 6  | 24 | GGAA | 26 | 4  |
| 215768 | 29 | 5279606 | 5279631 | 2 | 13 | 26 | CA   | 13 | 9  |
| 215773 | 29 | 5284549 | 5284562 | 2 | 7  | 14 | GT   | 18 | 5  |
| 215778 | 29 | 5286056 | 5286075 | 2 | 10 | 20 | CA   | 18 | 3  |
| 215784 | 29 | 5289423 | 5289438 | 2 | 8  | 16 | GT   | 21 | 11 |
| 215785 | 29 | 5289904 | 5289929 | 2 | 13 | 26 | GA   | 18 | 5  |
| 215786 | 29 | 5291453 | 5291474 | 2 | 11 | 22 | CT   | 23 | 5  |
| 215791 | 29 | 5293351 | 5293368 | 2 | 9  | 18 | CA   | 18 | 9  |
| 215792 | 29 | 5293662 | 5293681 | 4 | 5  | 20 | TTTC | 23 | 5  |
| 215795 | 29 | 5295601 | 5295624 | 3 | 8  | 24 | TGA  | 20 | 4  |
| 215796 | 29 | 5295730 | 5295753 | 2 | 12 | 24 | CA   | 18 | 13 |
| 215800 | 29 | 5299610 | 5299645 | 2 | 18 | 36 | TG   | 6  | 7  |
| 215805 | 29 | 5302140 | 5302151 | 2 | 6  | 12 | TG   | 25 | 8  |
| 215806 | 29 | 5302262 | 5302277 | 2 | 8  | 16 | GT   | 24 | 3  |
| 215810 | 29 | 5304248 | 5304267 | 2 | 10 | 20 | AC   | 13 | 9  |
| 215816 | 29 | 5310165 | 5310185 | 3 | 7  | 21 | TCT  | 21 | 5  |
| 215820 | 29 | 5310948 | 5310969 | 2 | 11 | 22 | TG   | 13 | 4  |
| 215822 | 29 | 5317266 | 5317289 | 2 | 12 | 24 | AC   | 13 | 10 |
| 215826 | 29 | 5318519 | 5318532 | 2 | 7  | 14 | AC   | 20 | 3  |
| 215827 | 29 | 5321442 | 5321459 | 3 | 6  | 18 | TCA  | 24 | 3  |
| 215828 | 29 | 5321496 | 5321511 | 2 | 8  | 16 | CA   | 14 | 4  |
| 215829 | 29 | 5321538 | 5321553 | 2 | 8  | 16 | CA   | 18 | 7  |
| 215831 | 29 | 5329810 | 5329825 | 4 | 4  | 16 | GGCT | 22 | 3  |

|        |    |         |         |   |    |    |      |    |    |
|--------|----|---------|---------|---|----|----|------|----|----|
| 215834 | 29 | 5353532 | 5353559 | 4 | 7  | 28 | AAAC | 13 | 4  |
| 215836 | 29 | 5356530 | 5356569 | 4 | 10 | 40 | TGAA | 29 | 8  |
| 215843 | 29 | 5377457 | 5377489 | 3 | 11 | 33 | GGA  | 20 | 6  |
| 215845 | 29 | 5383249 | 5383266 | 2 | 9  | 18 | AC   | 13 | 8  |
| 215847 | 29 | 5383366 | 5383385 | 2 | 10 | 20 | GT   | 8  | 5  |
| 215849 | 29 | 5386585 | 5386608 | 2 | 12 | 24 | AC   | 16 | 10 |
| 215852 | 29 | 5389534 | 5389557 | 2 | 12 | 24 | GT   | 14 | 11 |
| 215856 | 29 | 5390984 | 5391033 | 2 | 25 | 50 | AC   | 8  | 10 |
| 215857 | 29 | 5393413 | 5393426 | 2 | 7  | 14 | TC   | 24 | 6  |
| 215859 | 29 | 5398251 | 5398270 | 2 | 10 | 20 | GT   | 27 | 14 |
| 215860 | 29 | 5399591 | 5399610 | 2 | 10 | 20 | CA   | 19 | 6  |
| 215865 | 29 | 5403144 | 5403161 | 3 | 6  | 18 | GAG  | 23 | 4  |
| 215866 | 29 | 5403572 | 5403591 | 2 | 10 | 20 | AG   | 19 | 3  |
| 215867 | 29 | 5404075 | 5404088 | 2 | 7  | 14 | GT   | 22 | 3  |
| 215869 | 29 | 5405124 | 5405143 | 2 | 10 | 20 | CA   | 14 | 6  |
| 215870 | 29 | 5406138 | 5406161 | 3 | 8  | 24 | TCC  | 22 | 9  |
| 215871 | 29 | 5408441 | 5408456 | 2 | 8  | 16 | AC   | 21 | 5  |
| 215872 | 29 | 5409709 | 5409736 | 2 | 14 | 28 | CT   | 11 | 9  |
| 215875 | 29 | 5410872 | 5410905 | 2 | 17 | 34 | TC   | 7  | 8  |
| 215876 | 29 | 5411021 | 5411068 | 2 | 24 | 48 | GT   | 14 | 13 |
| 215877 | 29 | 5414150 | 5414163 | 2 | 7  | 14 | AC   | 30 | 5  |
| 215878 | 29 | 5414326 | 5414343 | 2 | 9  | 18 | TG   | 12 | 7  |
| 215880 | 29 | 5416241 | 5416272 | 2 | 16 | 32 | TG   | 20 | 13 |
| 215882 | 29 | 5417998 | 5418021 | 2 | 12 | 24 | TG   | 16 | 13 |
| 215887 | 29 | 5433057 | 5433074 | 2 | 9  | 18 | CT   | 21 | 3  |
| 215888 | 29 | 5434091 | 5434132 | 2 | 21 | 42 | GT   | 6  | 6  |
| 215890 | 29 | 5442509 | 5442528 | 4 | 5  | 20 | ATAG | 15 | 10 |
| 215892 | 29 | 5443797 | 5443808 | 2 | 6  | 12 | TG   | 12 | 5  |
| 215912 | 29 | 5480984 | 5481001 | 2 | 9  | 18 | CA   | 26 | 5  |
| 215918 | 29 | 5502292 | 5502335 | 4 | 11 | 44 | TTTC | 14 | 11 |
| 215920 | 29 | 5503752 | 5503769 | 3 | 6  | 18 | TCC  | 12 | 6  |
| 215922 | 29 | 5503901 | 5503924 | 3 | 8  | 24 | CTC  | 7  | 3  |
| 215926 | 29 | 5511927 | 5511954 | 2 | 14 | 28 | GT   | 20 | 5  |
| 215931 | 29 | 5518665 | 5518679 | 3 | 5  | 15 | TTG  | 21 | 4  |
| 215936 | 29 | 5519119 | 5519140 | 2 | 11 | 22 | GA   | 15 | 6  |
| 215938 | 29 | 5520865 | 5520888 | 2 | 12 | 24 | TG   | 9  | 4  |
| 215939 | 29 | 5522011 | 5522066 | 4 | 14 | 56 | ATCT | 11 | 11 |
| 215941 | 29 | 5527201 | 5527221 | 3 | 7  | 21 | TGT  | 22 | 5  |
| 215950 | 29 | 5536324 | 5536343 | 2 | 10 | 20 | CT   | 6  | 4  |
| 215954 | 29 | 5551306 | 5551333 | 4 | 7  | 28 | TTTG | 10 | 4  |
| 215964 | 29 | 5577442 | 5577461 | 4 | 5  | 20 | TGGA | 24 | 4  |
| 215969 | 29 | 5590079 | 5590098 | 2 | 10 | 20 | TC   | 27 | 4  |
| 215972 | 29 | 5593671 | 5593686 | 2 | 8  | 16 | AG   | 24 | 4  |
| 215973 | 29 | 5593688 | 5593701 | 2 | 7  | 14 | GA   | 23 | 5  |
| 215980 | 29 | 5597170 | 5597189 | 2 | 10 | 20 | GT   | 21 | 4  |
| 215981 | 29 | 5604842 | 5604889 | 4 | 12 | 48 | GAAA | 14 | 8  |
| 215983 | 29 | 5628410 | 5628423 | 2 | 7  | 14 | CT   | 22 | 3  |
| 215986 | 29 | 5643285 | 5643304 | 2 | 10 | 20 | AC   | 22 | 4  |
| 215990 | 29 | 5647743 | 5647774 | 4 | 8  | 32 | TAGA | 19 | 13 |
| 215996 | 29 | 5656781 | 5656800 | 2 | 10 | 20 | AC   | 22 | 5  |
| 215997 | 29 | 5656986 | 5657009 | 2 | 12 | 24 | GT   | 17 | 7  |

|        |    |         |         |   |    |    |      |    |    |
|--------|----|---------|---------|---|----|----|------|----|----|
| 215999 | 29 | 5663391 | 5663406 | 2 | 8  | 16 | TG   | 25 | 10 |
| 216000 | 29 | 5671856 | 5671873 | 2 | 9  | 18 | TG   | 26 | 7  |
| 216009 | 29 | 5686093 | 5686107 | 3 | 5  | 15 | CAA  | 26 | 8  |
| 216010 | 29 | 5686219 | 5686232 | 2 | 7  | 14 | AC   | 21 | 6  |
| 216013 | 29 | 5688524 | 5688539 | 2 | 8  | 16 | TG   | 20 | 4  |
| 216025 | 29 | 5700019 | 5700038 | 2 | 10 | 20 | TG   | 13 | 4  |
| 216026 | 29 | 5700097 | 5700124 | 2 | 14 | 28 | TG   | 8  | 8  |
| 216027 | 29 | 5700317 | 5700336 | 2 | 10 | 20 | AC   | 14 | 4  |
| 216028 | 29 | 5701308 | 5701323 | 2 | 8  | 16 | CA   | 27 | 4  |
| 216031 | 29 | 5705086 | 5705113 | 2 | 14 | 28 | GT   | 14 | 8  |
| 216033 | 29 | 5705265 | 5705276 | 2 | 6  | 12 | CA   | 28 | 5  |
| 216034 | 29 | 5705307 | 5705318 | 2 | 6  | 12 | AC   | 26 | 4  |
| 216035 | 29 | 5707411 | 5707442 | 2 | 16 | 32 | CA   | 13 | 11 |
| 216042 | 29 | 5715333 | 5715352 | 2 | 10 | 20 | CA   | 16 | 4  |
| 216047 | 29 | 5717148 | 5717177 | 2 | 15 | 30 | TG   | 16 | 9  |
| 216052 | 29 | 5726568 | 5726607 | 4 | 10 | 40 | GAAA | 16 | 12 |
| 216054 | 29 | 5727808 | 5727829 | 2 | 11 | 22 | TG   | 18 | 9  |
| 216057 | 29 | 5730656 | 5730685 | 2 | 15 | 30 | AC   | 7  | 4  |
| 216060 | 29 | 5733752 | 5733767 | 2 | 8  | 16 | AC   | 30 | 7  |
| 216066 | 29 | 5736178 | 5736210 | 3 | 11 | 33 | GAG  | 16 | 7  |
| 216069 | 29 | 5742825 | 5742844 | 4 | 5  | 20 | CACT | 15 | 5  |
| 216072 | 29 | 5746954 | 5746967 | 2 | 7  | 14 | AC   | 15 | 3  |
| 216075 | 29 | 5750384 | 5750431 | 2 | 24 | 48 | GT   | 12 | 13 |
| 216076 | 29 | 5750740 | 5750765 | 2 | 13 | 26 | GT   | 19 | 9  |
| 216085 | 29 | 5752487 | 5752514 | 2 | 14 | 28 | AC   | 7  | 9  |
| 216086 | 29 | 5753009 | 5753036 | 2 | 14 | 28 | CA   | 7  | 5  |
| 216087 | 29 | 5753703 | 5753720 | 2 | 9  | 18 | CT   | 10 | 6  |
| 216097 | 29 | 5766286 | 5766299 | 2 | 7  | 14 | AC   | 13 | 3  |
| 216098 | 29 | 5766302 | 5766317 | 2 | 8  | 16 | AC   | 15 | 4  |
| 216101 | 29 | 5778033 | 5778052 | 2 | 10 | 20 | AC   | 21 | 5  |
| 216105 | 29 | 5781878 | 5781901 | 2 | 12 | 24 | GT   | 12 | 9  |
| 216108 | 29 | 5785224 | 5785241 | 2 | 9  | 18 | AC   | 20 | 5  |
| 216111 | 29 | 5788566 | 5788583 | 2 | 9  | 18 | CA   | 14 | 4  |
| 216116 | 29 | 5796005 | 5796034 | 2 | 15 | 30 | CA   | 20 | 10 |
| 216117 | 29 | 5798963 | 5798974 | 2 | 6  | 12 | CA   | 23 | 3  |
| 216125 | 29 | 5820851 | 5820884 | 2 | 17 | 34 | CA   | 12 | 10 |
| 216131 | 29 | 5850454 | 5850469 | 4 | 4  | 16 | TTTC | 11 | 5  |
| 216132 | 29 | 5850864 | 5850875 | 2 | 6  | 12 | TG   | 18 | 4  |
| 216133 | 29 | 5850905 | 5850920 | 4 | 4  | 16 | TGGA | 11 | 5  |
| 216140 | 29 | 5865868 | 5865879 | 2 | 6  | 12 | CA   | 32 | 3  |
| 216146 | 29 | 5875771 | 5875792 | 2 | 11 | 22 | GT   | 13 | 11 |
| 216147 | 29 | 5879156 | 5879171 | 4 | 4  | 16 | CTGT | 24 | 3  |
| 216153 | 29 | 5893591 | 5893608 | 2 | 9  | 18 | AC   | 23 | 4  |
| 216154 | 29 | 5894264 | 5894275 | 2 | 6  | 12 | TG   | 27 | 3  |
| 216155 | 29 | 5895546 | 5895559 | 2 | 7  | 14 | GT   | 20 | 10 |
| 216162 | 29 | 5911197 | 5911217 | 3 | 7  | 21 | GAA  | 15 | 10 |
| 216163 | 29 | 5913429 | 5913444 | 4 | 4  | 16 | AAAC | 23 | 6  |
| 216164 | 29 | 5916139 | 5916152 | 2 | 7  | 14 | TC   | 29 | 4  |
| 216165 | 29 | 5920257 | 5920272 | 2 | 8  | 16 | CA   | 13 | 6  |
| 216169 | 29 | 5926856 | 5926869 | 2 | 7  | 14 | TG   | 17 | 3  |
| 216171 | 29 | 5941136 | 5941155 | 4 | 5  | 20 | ACTC | 23 | 4  |

|        |    |         |         |   |    |    |      |    |    |
|--------|----|---------|---------|---|----|----|------|----|----|
| 216172 | 29 | 5952219 | 5952252 | 2 | 17 | 34 | CA   | 14 | 13 |
| 216174 | 29 | 5974926 | 5974941 | 2 | 8  | 16 | GT   | 21 | 5  |
| 216177 | 29 | 5988254 | 5988277 | 3 | 8  | 24 | GTA  | 17 | 6  |
| 216178 | 29 | 5989416 | 5989427 | 2 | 6  | 12 | TG   | 19 | 5  |
| 216181 | 29 | 6001893 | 6001920 | 2 | 14 | 28 | GT   | 21 | 7  |
| 216182 | 29 | 6004666 | 6004697 | 2 | 16 | 32 | GA   | 18 | 8  |
| 216183 | 29 | 6006779 | 6006794 | 2 | 8  | 16 | AC   | 19 | 4  |
| 216184 | 29 | 6008643 | 6008654 | 2 | 6  | 12 | CA   | 26 | 3  |
| 216187 | 29 | 6010966 | 6010997 | 2 | 16 | 32 | TG   | 17 | 6  |
| 216188 | 29 | 6011579 | 6011594 | 2 | 8  | 16 | AT   | 20 | 6  |
| 216189 | 29 | 6012626 | 6012639 | 2 | 7  | 14 | TG   | 30 | 3  |
| 216201 | 29 | 6026281 | 6026295 | 3 | 5  | 15 | CTG  | 26 | 3  |
| 216202 | 29 | 6028141 | 6028154 | 2 | 7  | 14 | CA   | 26 | 3  |
| 216204 | 29 | 6032355 | 6032386 | 2 | 16 | 32 | TG   | 9  | 8  |
| 216208 | 29 | 6040608 | 6040641 | 2 | 17 | 34 | TG   | 16 | 9  |
| 216212 | 29 | 6047723 | 6047750 | 2 | 14 | 28 | TG   | 13 | 12 |
| 216213 | 29 | 6050305 | 6050322 | 2 | 9  | 18 | GA   | 24 | 3  |
| 216216 | 29 | 6054286 | 6054303 | 2 | 9  | 18 | TG   | 29 | 3  |
| 216218 | 29 | 6066097 | 6066110 | 2 | 7  | 14 | AG   | 23 | 3  |
| 216222 | 29 | 6079590 | 6079607 | 2 | 9  | 18 | CT   | 22 | 5  |
| 216231 | 29 | 6081375 | 6081394 | 2 | 10 | 20 | CA   | 21 | 7  |
| 216246 | 29 | 6101801 | 6101816 | 4 | 4  | 16 | AACT | 22 | 3  |
| 216248 | 29 | 6104189 | 6104200 | 2 | 6  | 12 | CT   | 29 | 3  |
| 216254 | 29 | 6117334 | 6117345 | 2 | 6  | 12 | CT   | 25 | 5  |
| 216255 | 29 | 6122001 | 6122015 | 3 | 5  | 15 | AAG  | 31 | 6  |
| 216257 | 29 | 6122906 | 6122925 | 4 | 5  | 20 | TACA | 14 | 7  |
| 216260 | 29 | 6124264 | 6124275 | 2 | 6  | 12 | AG   | 22 | 3  |
| 216262 | 29 | 6130939 | 6130950 | 2 | 6  | 12 | TG   | 27 | 4  |
| 216265 | 29 | 6137922 | 6137933 | 2 | 6  | 12 | GT   | 25 | 10 |
| 216274 | 29 | 6163022 | 6163033 | 2 | 6  | 12 | GT   | 26 | 7  |
| 216283 | 29 | 6186993 | 6187006 | 2 | 7  | 14 | AG   | 25 | 3  |
| 216289 | 29 | 6199055 | 6199070 | 2 | 8  | 16 | TG   | 17 | 3  |
| 216294 | 29 | 6212377 | 6212398 | 2 | 11 | 22 | TG   | 19 | 9  |
| 216295 | 29 | 6213125 | 6213136 | 2 | 6  | 12 | GT   | 24 | 4  |
| 216300 | 29 | 6226710 | 6226737 | 2 | 14 | 28 | CA   | 8  | 8  |
| 216304 | 29 | 6231509 | 6231530 | 2 | 11 | 22 | CA   | 20 | 14 |
| 216320 | 29 | 6260111 | 6260134 | 4 | 6  | 24 | CTGT | 30 | 3  |
| 216321 | 29 | 6261543 | 6261566 | 2 | 12 | 24 | GT   | 19 | 6  |
| 216330 | 29 | 6270154 | 6270169 | 4 | 4  | 16 | AAAG | 25 | 7  |
| 216332 | 29 | 6271740 | 6271759 | 2 | 10 | 20 | AC   | 23 | 5  |
| 216337 | 29 | 6278292 | 6278317 | 2 | 13 | 26 | CA   | 15 | 6  |
| 216343 | 29 | 6283393 | 6283416 | 3 | 8  | 24 | GCT  | 25 | 4  |
| 216348 | 29 | 6286056 | 6286069 | 2 | 7  | 14 | AC   | 17 | 3  |
| 216353 | 29 | 6300598 | 6300609 | 2 | 6  | 12 | TG   | 25 | 4  |
| 216357 | 29 | 6306085 | 6306098 | 2 | 7  | 14 | CT   | 14 | 4  |
| 216362 | 29 | 6310876 | 6310891 | 2 | 8  | 16 | TC   | 25 | 6  |
| 216372 | 29 | 6321310 | 6321337 | 2 | 14 | 28 | AG   | 12 | 4  |
| 216376 | 29 | 6330306 | 6330345 | 2 | 20 | 40 | GT   | 14 | 10 |
| 216377 | 29 | 6330505 | 6330526 | 2 | 11 | 22 | TC   | 9  | 7  |
| 216380 | 29 | 6334186 | 6334215 | 2 | 15 | 30 | AC   | 6  | 7  |
| 216381 | 29 | 6334810 | 6334839 | 2 | 15 | 30 | AC   | 13 | 6  |



|        |    |         |         |   |    |    |      |    |    |
|--------|----|---------|---------|---|----|----|------|----|----|
| 216387 | 29 | 6340296 | 6340331 | 2 | 18 | 36 | GT   | 11 | 11 |
| 216398 | 29 | 6351146 | 6351167 | 2 | 11 | 22 | AC   | 9  | 9  |
| 216414 | 29 | 6365804 | 6365821 | 2 | 9  | 18 | CA   | 17 | 3  |
| 216423 | 29 | 6385109 | 6385126 | 2 | 9  | 18 | TC   | 26 | 4  |
| 216424 | 29 | 6385458 | 6385481 | 2 | 12 | 24 | AC   | 16 | 7  |
| 216430 | 29 | 6394440 | 6394473 | 2 | 17 | 34 | TG   | 12 | 13 |
| 216435 | 29 | 6409431 | 6409444 | 2 | 7  | 14 | GT   | 27 | 7  |
| 216437 | 29 | 6410829 | 6410844 | 4 | 4  | 16 | TTCT | 30 | 3  |
| 216438 | 29 | 6410960 | 6410977 | 2 | 9  | 18 | AC   | 18 | 5  |
| 216444 | 29 | 6423591 | 6423622 | 2 | 16 | 32 | TG   | 9  | 7  |
| 216445 | 29 | 6424270 | 6424285 | 4 | 4  | 16 | CCTC | 22 | 3  |
| 216447 | 29 | 6426555 | 6426574 | 2 | 10 | 20 | AG   | 20 | 4  |
| 216448 | 29 | 6427148 | 6427161 | 2 | 7  | 14 | TG   | 7  | 8  |
| 216460 | 29 | 6434395 | 6434410 | 2 | 8  | 16 | AG   | 19 | 3  |
| 216461 | 29 | 6434867 | 6434886 | 4 | 5  | 20 | AAAT | 18 | 4  |
| 216462 | 29 | 6435298 | 6435324 | 3 | 9  | 27 | TCC  | 19 | 3  |
| 216463 | 29 | 6435507 | 6435528 | 2 | 11 | 22 | AC   | 9  | 5  |
| 216468 | 29 | 6437626 | 6437641 | 4 | 4  | 16 | AAAC | 16 | 4  |
| 216470 | 29 | 6438328 | 6438343 | 4 | 4  | 16 | AAAG | 8  | 3  |
| 216471 | 29 | 6438399 | 6438416 | 3 | 6  | 18 | CAG  | 21 | 3  |
| 216480 | 29 | 6443535 | 6443560 | 2 | 13 | 26 | AG   | 16 | 6  |
| 216481 | 29 | 6443853 | 6443870 | 2 | 9  | 18 | TG   | 14 | 5  |
| 216489 | 29 | 6452518 | 6452537 | 2 | 10 | 20 | GA   | 22 | 10 |
| 216493 | 29 | 6461429 | 6461446 | 2 | 9  | 18 | AC   | 25 | 7  |
| 216494 | 29 | 6461775 | 6461794 | 2 | 10 | 20 | AC   | 10 | 6  |
| 216498 | 29 | 6467130 | 6467147 | 2 | 9  | 18 | TG   | 18 | 4  |
| 216499 | 29 | 6467493 | 6467508 | 2 | 8  | 16 | GT   | 26 | 5  |
| 216500 | 29 | 6467549 | 6467566 | 2 | 9  | 18 | GT   | 21 | 5  |
| 216502 | 29 | 6468978 | 6468999 | 2 | 11 | 22 | TG   | 16 | 5  |
| 216505 | 29 | 6470632 | 6470645 | 2 | 7  | 14 | GA   | 29 | 3  |
| 216506 | 29 | 6470913 | 6470942 | 2 | 15 | 30 | AC   | 10 | 7  |
| 216507 | 29 | 6472274 | 6472317 | 2 | 22 | 44 | TG   | 7  | 6  |
| 216508 | 29 | 6472383 | 6472416 | 2 | 17 | 34 | GT   | 16 | 13 |
| 216510 | 29 | 6473186 | 6473197 | 2 | 6  | 12 | AC   | 19 | 3  |
| 216511 | 29 | 6473319 | 6473346 | 2 | 14 | 28 | AC   | 22 | 6  |
| 216513 | 29 | 6474023 | 6474038 | 2 | 8  | 16 | TG   | 27 | 5  |
| 216514 | 29 | 6474680 | 6474695 | 2 | 8  | 16 | AT   | 14 | 4  |
| 216516 | 29 | 6475812 | 6475823 | 2 | 6  | 12 | AC   | 26 | 3  |
| 216518 | 29 | 6476937 | 6476954 | 2 | 9  | 18 | TC   | 22 | 3  |
| 216524 | 29 | 6479645 | 6479660 | 2 | 8  | 16 | TG   | 17 | 3  |
| 216529 | 29 | 6482461 | 6482472 | 2 | 6  | 12 | GC   | 27 | 9  |
| 216530 | 29 | 6482473 | 6482484 | 2 | 6  | 12 | GT   | 26 | 8  |
| 216538 | 29 | 6488368 | 6488381 | 2 | 7  | 14 | TA   | 22 | 4  |
| 216540 | 29 | 6492810 | 6492837 | 2 | 14 | 28 | GT   | 15 | 5  |
| 216544 | 29 | 6497199 | 6497228 | 2 | 15 | 30 | TG   | 15 | 8  |
| 216545 | 29 | 6497810 | 6497829 | 2 | 10 | 20 | AC   | 23 | 4  |
| 216563 | 29 | 6509618 | 6509629 | 2 | 6  | 12 | GT   | 19 | 5  |
| 216567 | 29 | 6510913 | 6510924 | 2 | 6  | 12 | AC   | 21 | 4  |
| 216570 | 29 | 6514515 | 6514546 | 2 | 16 | 32 | GT   | 9  | 10 |
| 216571 | 29 | 6514622 | 6514635 | 2 | 7  | 14 | AC   | 20 | 5  |
| 216573 | 29 | 6515447 | 6515458 | 2 | 6  | 12 | TG   | 16 | 4  |

|        |    |         |         |   |    |    |      |    |    |
|--------|----|---------|---------|---|----|----|------|----|----|
| 216575 | 29 | 6515759 | 6515782 | 2 | 12 | 24 | AG   | 17 | 3  |
| 216576 | 29 | 6516292 | 6516311 | 2 | 10 | 20 | AC   | 21 | 8  |
| 216577 | 29 | 6518043 | 6518056 | 2 | 7  | 14 | TC   | 25 | 3  |
| 216579 | 29 | 6518897 | 6518917 | 3 | 7  | 21 | AGG  | 27 | 3  |
| 216580 | 29 | 6518974 | 6518987 | 2 | 7  | 14 | CA   | 24 | 6  |
| 216581 | 29 | 6519434 | 6519447 | 2 | 7  | 14 | GT   | 22 | 6  |
| 216583 | 29 | 6521915 | 6521940 | 2 | 13 | 26 | TC   | 14 | 4  |
| 216586 | 29 | 6524465 | 6524484 | 2 | 10 | 20 | AG   | 26 | 6  |
| 216591 | 29 | 6525126 | 6525151 | 2 | 13 | 26 | AC   | 12 | 10 |
| 216597 | 29 | 6528085 | 6528096 | 2 | 6  | 12 | GT   | 24 | 9  |
| 216598 | 29 | 6528282 | 6528299 | 2 | 9  | 18 | CA   | 19 | 13 |
| 216604 | 29 | 6531357 | 6531374 | 2 | 9  | 18 | TC   | 19 | 5  |
| 216605 | 29 | 6531540 | 6531557 | 3 | 6  | 18 | TCC  | 22 | 4  |
| 216608 | 29 | 6532991 | 6533008 | 3 | 6  | 18 | TGG  | 22 | 6  |
| 216615 | 29 | 6536834 | 6536847 | 2 | 7  | 14 | CA   | 12 | 13 |
| 216618 | 29 | 6540600 | 6540614 | 3 | 5  | 15 | TTG  | 22 | 3  |
| 216624 | 29 | 6550134 | 6550165 | 2 | 16 | 32 | AC   | 11 | 9  |
| 216625 | 29 | 6554244 | 6554265 | 2 | 11 | 22 | TC   | 14 | 4  |
| 216630 | 29 | 6556968 | 6556985 | 2 | 9  | 18 | CA   | 18 | 8  |
| 216632 | 29 | 6557509 | 6557522 | 2 | 7  | 14 | GT   | 19 | 7  |
| 216634 | 29 | 6559769 | 6559780 | 2 | 6  | 12 | GA   | 25 | 3  |
| 216640 | 29 | 6568597 | 6568612 | 4 | 4  | 16 | AGGC | 24 | 7  |
| 216645 | 29 | 6575166 | 6575179 | 2 | 7  | 14 | GT   | 20 | 4  |
| 216658 | 29 | 6592610 | 6592623 | 2 | 7  | 14 | GT   | 22 | 3  |
| 216661 | 29 | 6595652 | 6595667 | 4 | 4  | 16 | GTCT | 24 | 3  |
| 216663 | 29 | 6597794 | 6597829 | 2 | 18 | 36 | TG   | 20 | 8  |
| 216670 | 29 | 6609836 | 6609853 | 2 | 9  | 18 | CA   | 13 | 3  |
| 216673 | 29 | 6610804 | 6610815 | 2 | 6  | 12 | CT   | 25 | 3  |
| 216679 | 29 | 6624456 | 6624471 | 2 | 8  | 16 | CA   | 26 | 3  |
| 216680 | 29 | 6624626 | 6624640 | 3 | 5  | 15 | CCA  | 18 | 4  |
| 216691 | 29 | 6640519 | 6640530 | 2 | 6  | 12 | CA   | 18 | 7  |
| 216692 | 29 | 6640532 | 6640549 | 2 | 9  | 18 | AC   | 19 | 5  |
| 216693 | 29 | 6641422 | 6641447 | 2 | 13 | 26 | AG   | 19 | 8  |
| 216695 | 29 | 6645036 | 6645047 | 2 | 6  | 12 | GT   | 15 | 7  |
| 216696 | 29 | 6645049 | 6645064 | 2 | 8  | 16 | TG   | 19 | 9  |
| 216697 | 29 | 6646175 | 6646186 | 2 | 6  | 12 | TC   | 20 | 4  |
| 216705 | 29 | 6654696 | 6654727 | 2 | 16 | 32 | TG   | 10 | 11 |
| 216708 | 29 | 6661856 | 6661889 | 2 | 17 | 34 | CT   | 13 | 13 |
| 216711 | 29 | 6665830 | 6665849 | 4 | 5  | 20 | GGCT | 30 | 4  |
| 216713 | 29 | 6666887 | 6666902 | 2 | 8  | 16 | AG   | 12 | 12 |
| 216718 | 29 | 6672761 | 6672776 | 2 | 8  | 16 | TG   | 20 | 4  |
| 216719 | 29 | 6672799 | 6672810 | 2 | 6  | 12 | TG   | 10 | 6  |
| 216720 | 29 | 6672813 | 6672828 | 2 | 8  | 16 | TG   | 13 | 7  |
| 216725 | 29 | 6674908 | 6674939 | 2 | 16 | 32 | CA   | 8  | 5  |
| 216731 | 29 | 6681056 | 6681067 | 2 | 6  | 12 | GT   | 24 | 4  |
| 216732 | 29 | 6681069 | 6681080 | 2 | 6  | 12 | TG   | 26 | 3  |
| 216744 | 29 | 6700289 | 6700302 | 2 | 7  | 14 | CA   | 31 | 3  |
| 216753 | 29 | 6736900 | 6736919 | 2 | 10 | 20 | GT   | 13 | 5  |
| 216760 | 29 | 6764093 | 6764120 | 2 | 14 | 28 | AC   | 8  | 8  |
| 216773 | 30 | 35167   | 35186   | 2 | 10 | 20 | TG   | 15 | 9  |
| 216777 | 30 | 49901   | 49916   | 2 | 8  | 16 | AT   | 16 | 4  |

|        |    |        |        |   |    |    |      |    |    |
|--------|----|--------|--------|---|----|----|------|----|----|
| 216782 | 30 | 61994  | 62009  | 4 | 4  | 16 | ATTT | 26 | 9  |
| 216783 | 30 | 62318  | 62329  | 2 | 6  | 12 | TC   | 22 | 6  |
| 216785 | 30 | 63968  | 63983  | 2 | 8  | 16 | CA   | 13 | 9  |
| 216788 | 30 | 82050  | 82063  | 2 | 7  | 14 | AC   | 17 | 7  |
| 216793 | 30 | 86009  | 86023  | 3 | 5  | 15 | AGG  | 23 | 3  |
| 216796 | 30 | 92326  | 92377  | 2 | 26 | 52 | CA   | 12 | 10 |
| 216797 | 30 | 95234  | 95271  | 2 | 19 | 38 | GT   | 14 | 12 |
| 216801 | 30 | 100359 | 100374 | 4 | 4  | 16 | AAAT | 15 | 6  |
| 216804 | 30 | 108762 | 108773 | 2 | 6  | 12 | CA   | 25 | 4  |
| 216811 | 30 | 122222 | 122235 | 2 | 7  | 14 | TA   | 16 | 6  |
| 216837 | 30 | 203511 | 203544 | 2 | 17 | 34 | AG   | 10 | 6  |
| 216841 | 30 | 208159 | 208170 | 2 | 6  | 12 | CA   | 19 | 6  |
| 216856 | 30 | 236649 | 236684 | 2 | 18 | 36 | AC   | 10 | 10 |
| 216857 | 30 | 240659 | 240682 | 4 | 6  | 24 | TAGA | 15 | 8  |
| 216867 | 30 | 257117 | 257130 | 2 | 7  | 14 | AC   | 22 | 3  |
| 216869 | 30 | 261597 | 261616 | 4 | 5  | 20 | ATCC | 9  | 4  |
| 216875 | 30 | 276381 | 276392 | 2 | 6  | 12 | CA   | 28 | 3  |
| 216882 | 30 | 296103 | 296126 | 2 | 12 | 24 | AC   | 24 | 8  |
| 216883 | 30 | 297409 | 297424 | 4 | 4  | 16 | TTTA | 15 | 3  |
| 216891 | 30 | 306402 | 306419 | 2 | 9  | 18 | AC   | 16 | 5  |
| 216901 | 30 | 314092 | 314107 | 4 | 4  | 16 | TTTG | 17 | 3  |
| 216906 | 30 | 327102 | 327117 | 2 | 8  | 16 | CA   | 19 | 4  |
| 216910 | 30 | 332057 | 332074 | 2 | 9  | 18 | AC   | 19 | 3  |
| 216911 | 30 | 332191 | 332206 | 2 | 8  | 16 | TG   | 29 | 3  |
| 216933 | 30 | 361624 | 361647 | 2 | 12 | 24 | TC   | 26 | 7  |
| 216934 | 30 | 364257 | 364274 | 2 | 9  | 18 | TC   | 19 | 4  |
| 216941 | 30 | 374682 | 374695 | 2 | 7  | 14 | AC   | 21 | 5  |
| 216945 | 30 | 384452 | 384465 | 2 | 7  | 14 | AC   | 31 | 4  |
| 216946 | 30 | 385071 | 385106 | 2 | 18 | 36 | AC   | 7  | 6  |
| 216957 | 30 | 423109 | 423122 | 2 | 7  | 14 | TG   | 29 | 4  |
| 216963 | 30 | 434755 | 434772 | 2 | 9  | 18 | AC   | 25 | 7  |
| 216971 | 30 | 446430 | 446443 | 2 | 7  | 14 | GT   | 24 | 4  |
| 216976 | 30 | 454912 | 454935 | 2 | 12 | 24 | TG   | 17 | 9  |
| 216986 | 30 | 465998 | 466037 | 2 | 20 | 40 | CT   | 8  | 10 |
| 216994 | 30 | 471242 | 471259 | 2 | 9  | 18 | CT   | 21 | 5  |
| 216995 | 30 | 471423 | 471436 | 2 | 7  | 14 | CT   | 29 | 4  |
| 217006 | 30 | 480072 | 480092 | 3 | 7  | 21 | GCT  | 24 | 4  |
| 217007 | 30 | 480719 | 480730 | 2 | 6  | 12 | GT   | 22 | 9  |
| 217014 | 30 | 496436 | 496451 | 2 | 8  | 16 | AT   | 10 | 3  |
| 217019 | 30 | 511410 | 511423 | 2 | 7  | 14 | GT   | 34 | 3  |
| 217030 | 30 | 539822 | 539837 | 4 | 4  | 16 | TAGC | 25 | 3  |
| 217037 | 30 | 557923 | 557936 | 2 | 7  | 14 | AC   | 16 | 5  |
| 217041 | 30 | 565375 | 565400 | 2 | 13 | 26 | GA   | 20 | 4  |
| 217045 | 30 | 576113 | 576136 | 2 | 12 | 24 | TG   | 14 | 9  |
| 217046 | 30 | 577457 | 577478 | 2 | 11 | 22 | AG   | 18 | 5  |
| 217049 | 30 | 584340 | 584365 | 2 | 13 | 26 | CT   | 13 | 4  |
| 217050 | 30 | 585856 | 585867 | 2 | 6  | 12 | TA   | 9  | 5  |
| 217051 | 30 | 586300 | 586313 | 2 | 7  | 14 | AC   | 24 | 5  |
| 217056 | 30 | 589994 | 590005 | 2 | 6  | 12 | CA   | 18 | 4  |
| 217058 | 30 | 590451 | 590472 | 2 | 11 | 22 | CT   | 7  | 4  |
| 217059 | 30 | 590991 | 591004 | 2 | 7  | 14 | GT   | 18 | 4  |

|        |    |        |        |   |    |    |      |    |    |
|--------|----|--------|--------|---|----|----|------|----|----|
| 217064 | 30 | 593094 | 593117 | 2 | 12 | 24 | CA   | 20 | 11 |
| 217065 | 30 | 593763 | 593780 | 2 | 9  | 18 | CA   | 29 | 9  |
| 217066 | 30 | 595192 | 595207 | 2 | 8  | 16 | AC   | 19 | 3  |
| 217068 | 30 | 597517 | 597530 | 2 | 7  | 14 | CA   | 14 | 5  |
| 217071 | 30 | 600038 | 600058 | 3 | 7  | 21 | CCA  | 31 | 4  |
| 217081 | 30 | 612776 | 612795 | 2 | 10 | 20 | CA   | 20 | 5  |
| 217087 | 30 | 617675 | 617696 | 2 | 11 | 22 | CA   | 11 | 3  |
| 217089 | 30 | 619769 | 619788 | 2 | 10 | 20 | GT   | 12 | 10 |
| 217092 | 30 | 622336 | 622391 | 4 | 14 | 56 | TAGA | 22 | 9  |
| 217096 | 30 | 623668 | 623687 | 4 | 5  | 20 | AAAG | 11 | 6  |
| 217102 | 30 | 626717 | 626730 | 2 | 7  | 14 | CA   | 15 | 4  |
| 217107 | 30 | 634839 | 634854 | 2 | 8  | 16 | TG   | 19 | 8  |
| 217108 | 30 | 636424 | 636438 | 3 | 5  | 15 | AAT  | 24 | 5  |
| 217113 | 30 | 638718 | 638729 | 2 | 6  | 12 | AC   | 20 | 4  |
| 217115 | 30 | 640327 | 640358 | 2 | 16 | 32 | CA   | 7  | 6  |
| 217117 | 30 | 642332 | 642363 | 2 | 16 | 32 | GA   | 10 | 11 |
| 217122 | 30 | 647943 | 647962 | 2 | 10 | 20 | GA   | 14 | 5  |
| 217124 | 30 | 654625 | 654636 | 2 | 6  | 12 | TG   | 29 | 6  |
| 217125 | 30 | 655103 | 655114 | 2 | 6  | 12 | AC   | 23 | 4  |
| 217126 | 30 | 655677 | 655688 | 2 | 6  | 12 | TG   | 21 | 4  |
| 217127 | 30 | 666439 | 666464 | 2 | 13 | 26 | TG   | 13 | 8  |
| 217128 | 30 | 666598 | 666615 | 2 | 9  | 18 | CA   | 22 | 8  |
| 217130 | 30 | 679103 | 679114 | 2 | 6  | 12 | AT   | 26 | 5  |
| 217131 | 30 | 681415 | 681432 | 2 | 9  | 18 | AG   | 31 | 4  |
| 217133 | 30 | 685218 | 685229 | 2 | 6  | 12 | AC   | 29 | 3  |
| 217135 | 30 | 686361 | 686384 | 4 | 6  | 24 | ATTT | 12 | 4  |
| 217139 | 30 | 693701 | 693716 | 2 | 8  | 16 | CA   | 29 | 3  |
| 217143 | 30 | 706894 | 706917 | 2 | 12 | 24 | CA   | 17 | 8  |
| 217144 | 30 | 711924 | 711941 | 3 | 6  | 18 | TTC  | 18 | 3  |
| 217145 | 30 | 712217 | 712236 | 2 | 10 | 20 | CA   | 19 | 6  |
| 217146 | 30 | 712330 | 712343 | 2 | 7  | 14 | AC   | 16 | 13 |
| 217157 | 30 | 736618 | 736633 | 4 | 4  | 16 | TTTG | 19 | 5  |
| 217162 | 30 | 741863 | 741888 | 2 | 13 | 26 | CA   | 15 | 4  |
| 217165 | 30 | 742494 | 742515 | 2 | 11 | 22 | TG   | 20 | 12 |
| 217166 | 30 | 746527 | 746544 | 2 | 9  | 18 | AC   | 24 | 4  |
| 217174 | 30 | 761175 | 761192 | 2 | 9  | 18 | CA   | 19 | 9  |
| 217178 | 30 | 769261 | 769286 | 2 | 13 | 26 | CT   | 13 | 7  |
| 217180 | 30 | 779147 | 779164 | 3 | 6  | 18 | GGT  | 30 | 3  |
| 217181 | 30 | 779381 | 779398 | 3 | 6  | 18 | GGA  | 21 | 4  |
| 217184 | 30 | 790662 | 790683 | 2 | 11 | 22 | TG   | 21 | 9  |
| 217186 | 30 | 795439 | 795453 | 3 | 5  | 15 | TTC  | 23 | 7  |
| 217195 | 30 | 810799 | 810812 | 2 | 7  | 14 | GT   | 23 | 4  |
| 217201 | 30 | 827733 | 827746 | 2 | 7  | 14 | TC   | 18 | 3  |
| 217202 | 30 | 828006 | 828035 | 2 | 15 | 30 | CA   | 13 | 6  |
| 217213 | 30 | 832975 | 832996 | 2 | 11 | 22 | AC   | 15 | 7  |
| 217215 | 30 | 838969 | 839014 | 2 | 23 | 46 | AC   | 7  | 6  |
| 217217 | 30 | 842860 | 842883 | 2 | 12 | 24 | AC   | 19 | 12 |
| 217218 | 30 | 843362 | 843387 | 2 | 13 | 26 | CA   | 22 | 13 |
| 217219 | 30 | 844212 | 844227 | 2 | 8  | 16 | GT   | 22 | 7  |
| 217222 | 30 | 845183 | 845198 | 2 | 8  | 16 | GT   | 19 | 15 |
| 217225 | 30 | 845990 | 846009 | 2 | 10 | 20 | GT   | 11 | 9  |

|        |    |         |         |   |    |    |      |    |    |
|--------|----|---------|---------|---|----|----|------|----|----|
| 217227 | 30 | 847180  | 847199  | 2 | 10 | 20 | AC   | 19 | 6  |
| 217228 | 30 | 847232  | 847243  | 2 | 6  | 12 | AC   | 15 | 5  |
| 217239 | 30 | 850701  | 850724  | 2 | 12 | 24 | AC   | 10 | 5  |
| 217240 | 30 | 850913  | 850924  | 2 | 6  | 12 | AC   | 17 | 3  |
| 217241 | 30 | 851436  | 851459  | 2 | 12 | 24 | AC   | 12 | 4  |
| 217249 | 30 | 856281  | 856292  | 2 | 6  | 12 | CA   | 30 | 3  |
| 217253 | 30 | 858606  | 858625  | 2 | 10 | 20 | GT   | 22 | 3  |
| 217254 | 30 | 858717  | 858750  | 2 | 17 | 34 | AC   | 10 | 10 |
| 217255 | 30 | 860543  | 860566  | 2 | 12 | 24 | TG   | 20 | 15 |
| 217256 | 30 | 860626  | 860639  | 2 | 7  | 14 | TG   | 22 | 4  |
| 217267 | 30 | 871829  | 871840  | 2 | 6  | 12 | GT   | 33 | 3  |
| 217268 | 30 | 872850  | 872889  | 4 | 10 | 40 | ATCT | 16 | 11 |
| 217279 | 30 | 880704  | 880731  | 2 | 14 | 28 | GA   | 13 | 5  |
| 217282 | 30 | 882362  | 882403  | 2 | 21 | 42 | TG   | 8  | 8  |
| 217283 | 30 | 882460  | 882483  | 3 | 8  | 24 | ATC  | 20 | 7  |
| 217285 | 30 | 883948  | 883967  | 4 | 5  | 20 | ACAG | 26 | 3  |
| 217286 | 30 | 886294  | 886309  | 4 | 4  | 16 | TTTG | 27 | 4  |
| 217288 | 30 | 890760  | 890775  | 2 | 8  | 16 | GT   | 22 | 6  |
| 217289 | 30 | 891545  | 891565  | 3 | 7  | 21 | CTC  | 28 | 3  |
| 217291 | 30 | 898368  | 898385  | 3 | 6  | 18 | AAC  | 21 | 3  |
| 217296 | 30 | 909086  | 909111  | 2 | 13 | 26 | CA   | 24 | 8  |
| 217302 | 30 | 929668  | 929691  | 2 | 12 | 24 | AC   | 24 | 3  |
| 217303 | 30 | 933653  | 933672  | 2 | 10 | 20 | TG   | 31 | 5  |
| 217306 | 30 | 939636  | 939647  | 2 | 6  | 12 | GT   | 29 | 3  |
| 217311 | 30 | 949022  | 949037  | 2 | 8  | 16 | CA   | 19 | 11 |
| 217312 | 30 | 956606  | 956623  | 2 | 9  | 18 | AG   | 17 | 4  |
| 217313 | 30 | 956870  | 956897  | 2 | 14 | 28 | AC   | 16 | 11 |
| 217315 | 30 | 959513  | 959530  | 3 | 6  | 18 | GGA  | 14 | 3  |
| 217319 | 30 | 962428  | 962447  | 2 | 10 | 20 | TG   | 13 | 3  |
| 217320 | 30 | 962508  | 962531  | 2 | 12 | 24 | TG   | 9  | 9  |
| 217321 | 30 | 962718  | 962759  | 2 | 21 | 42 | GT   | 10 | 9  |
| 217328 | 30 | 973294  | 973314  | 3 | 7  | 21 | GGA  | 15 | 5  |
| 217332 | 30 | 975251  | 975262  | 2 | 6  | 12 | CT   | 26 | 3  |
| 217333 | 30 | 977205  | 977225  | 3 | 7  | 21 | CAG  | 25 | 6  |
| 217347 | 30 | 987023  | 987040  | 2 | 9  | 18 | CT   | 16 | 7  |
| 217348 | 30 | 987576  | 987591  | 2 | 8  | 16 | AC   | 13 | 4  |
| 217349 | 30 | 988164  | 988179  | 2 | 8  | 16 | CA   | 16 | 9  |
| 217351 | 30 | 994321  | 994334  | 2 | 7  | 14 | TA   | 16 | 3  |
| 217356 | 30 | 1009831 | 1009851 | 3 | 7  | 21 | CCT  | 27 | 4  |
| 217359 | 30 | 1017726 | 1017752 | 3 | 9  | 27 | TCA  | 26 | 5  |
| 217360 | 30 | 1020222 | 1020237 | 2 | 8  | 16 | AC   | 24 | 4  |
| 217361 | 30 | 1027622 | 1027639 | 2 | 9  | 18 | CA   | 20 | 6  |
| 217376 | 30 | 1061845 | 1061858 | 2 | 7  | 14 | GT   | 24 | 4  |
| 217392 | 30 | 1089000 | 1089023 | 2 | 12 | 24 | CA   | 14 | 7  |
| 217395 | 30 | 1089370 | 1089390 | 3 | 7  | 21 | GGA  | 16 | 10 |
| 217415 | 30 | 1140080 | 1140097 | 3 | 6  | 18 | AAT  | 11 | 3  |
| 217419 | 30 | 1140984 | 1141003 | 2 | 10 | 20 | TG   | 13 | 10 |
| 217427 | 30 | 1153918 | 1153945 | 2 | 14 | 28 | TG   | 17 | 9  |
| 217428 | 30 | 1155351 | 1155366 | 2 | 8  | 16 | TG   | 14 | 9  |
| 217429 | 30 | 1156585 | 1156596 | 2 | 6  | 12 | CA   | 30 | 7  |
| 217430 | 30 | 1156801 | 1156812 | 2 | 6  | 12 | AC   | 12 | 3  |

|        |    |         |         |   |    |    |      |    |    |
|--------|----|---------|---------|---|----|----|------|----|----|
| 217432 | 30 | 1159252 | 1159273 | 2 | 11 | 22 | CA   | 18 | 8  |
| 217435 | 30 | 1160824 | 1160857 | 2 | 17 | 34 | TG   | 8  | 7  |
| 217439 | 30 | 1165057 | 1165096 | 4 | 10 | 40 | CATC | 21 | 9  |
| 217440 | 30 | 1167635 | 1167664 | 2 | 15 | 30 | TG   | 15 | 13 |
| 217442 | 30 | 1171828 | 1171867 | 4 | 10 | 40 | TCTT | 13 | 8  |
| 217444 | 30 | 1174425 | 1174454 | 3 | 10 | 30 | CCT  | 18 | 10 |
| 217446 | 30 | 1192166 | 1192193 | 2 | 14 | 28 | AC   | 11 | 9  |
| 217448 | 30 | 1198366 | 1198386 | 3 | 7  | 21 | CCT  | 19 | 4  |
| 217449 | 30 | 1200258 | 1200293 | 2 | 18 | 36 | TG   | 10 | 9  |
| 217450 | 30 | 1201752 | 1201763 | 2 | 6  | 12 | AC   | 26 | 3  |
| 217452 | 30 | 1203111 | 1203134 | 2 | 12 | 24 | TG   | 19 | 6  |
| 217454 | 30 | 1208004 | 1208025 | 2 | 11 | 22 | TC   | 14 | 13 |
| 217457 | 30 | 1217403 | 1217418 | 2 | 8  | 16 | AC   | 13 | 4  |
| 217463 | 30 | 1238462 | 1238493 | 2 | 16 | 32 | CT   | 7  | 11 |
| 217469 | 30 | 1260345 | 1260356 | 2 | 6  | 12 | TG   | 23 | 6  |
| 217476 | 30 | 1285063 | 1285100 | 2 | 19 | 38 | CA   | 15 | 12 |
| 217477 | 30 | 1285461 | 1285472 | 2 | 6  | 12 | AC   | 16 | 9  |
| 217478 | 30 | 1285476 | 1285487 | 2 | 6  | 12 | CA   | 8  | 3  |
| 217481 | 30 | 1289601 | 1289612 | 2 | 6  | 12 | GT   | 34 | 4  |
| 217485 | 30 | 1296938 | 1296969 | 2 | 16 | 32 | TG   | 11 | 5  |
| 217487 | 30 | 1298432 | 1298443 | 2 | 6  | 12 | AC   | 15 | 3  |
| 217488 | 30 | 1298445 | 1298456 | 2 | 6  | 12 | CA   | 26 | 4  |
| 217490 | 30 | 1300509 | 1300536 | 2 | 14 | 28 | GT   | 12 | 10 |
| 217497 | 30 | 1309907 | 1309924 | 2 | 9  | 18 | CA   | 8  | 6  |
| 217498 | 30 | 1311837 | 1311862 | 2 | 13 | 26 | GT   | 23 | 4  |
| 217503 | 30 | 1329257 | 1329268 | 2 | 6  | 12 | GT   | 30 | 3  |
| 217520 | 30 | 1344896 | 1344915 | 2 | 10 | 20 | CT   | 24 | 6  |
| 217521 | 30 | 1345034 | 1345045 | 2 | 6  | 12 | GA   | 24 | 5  |
| 217522 | 30 | 1345303 | 1345362 | 2 | 30 | 60 | CA   | 6  | 7  |
| 217532 | 30 | 1360716 | 1360735 | 2 | 10 | 20 | GT   | 14 | 7  |
| 217533 | 30 | 1362516 | 1362547 | 2 | 16 | 32 | CA   | 7  | 7  |
| 217536 | 30 | 1363097 | 1363110 | 2 | 7  | 14 | GA   | 19 | 3  |
| 217537 | 30 | 1363192 | 1363219 | 2 | 14 | 28 | TG   | 15 | 7  |
| 217540 | 30 | 1365070 | 1365087 | 2 | 9  | 18 | GT   | 24 | 3  |
| 217541 | 30 | 1365163 | 1365176 | 2 | 7  | 14 | TG   | 16 | 4  |
| 217545 | 30 | 1365670 | 1365683 | 2 | 7  | 14 | TG   | 20 | 4  |
| 217546 | 30 | 1366906 | 1366925 | 2 | 10 | 20 | AC   | 17 | 8  |
| 217548 | 30 | 1368342 | 1368363 | 2 | 11 | 22 | AC   | 13 | 10 |
| 217549 | 30 | 1368448 | 1368469 | 2 | 11 | 22 | AC   | 23 | 12 |
| 217550 | 30 | 1371511 | 1371532 | 2 | 11 | 22 | CA   | 22 | 9  |
| 217551 | 30 | 1372310 | 1372337 | 2 | 14 | 28 | GT   | 22 | 4  |
| 217556 | 30 | 1381972 | 1381995 | 2 | 12 | 24 | TG   | 18 | 6  |
| 217565 | 30 | 1396523 | 1396552 | 2 | 15 | 30 | AC   | 8  | 9  |
| 217574 | 30 | 1410137 | 1410170 | 2 | 17 | 34 | CA   | 9  | 8  |
| 217576 | 30 | 1411210 | 1411230 | 3 | 7  | 21 | GCT  | 17 | 8  |
| 217583 | 30 | 1420312 | 1420369 | 2 | 29 | 58 | AC   | 7  | 10 |
| 217584 | 30 | 1420721 | 1420748 | 2 | 14 | 28 | AC   | 10 | 6  |
| 217593 | 30 | 1429234 | 1429245 | 2 | 6  | 12 | CA   | 23 | 6  |
| 217599 | 30 | 1434812 | 1434837 | 2 | 13 | 26 | CA   | 10 | 11 |
| 217600 | 30 | 1439840 | 1439853 | 2 | 7  | 14 | TG   | 24 | 6  |
| 217604 | 30 | 1461696 | 1461735 | 2 | 20 | 40 | TG   | 6  | 9  |

|        |    |         |         |   |    |    |      |    |    |
|--------|----|---------|---------|---|----|----|------|----|----|
| 217625 | 30 | 1496997 | 1497026 | 2 | 15 | 30 | GT   | 14 | 8  |
| 217633 | 30 | 1511017 | 1511034 | 2 | 9  | 18 | AC   | 25 | 3  |
| 217635 | 30 | 1516577 | 1516588 | 2 | 6  | 12 | GT   | 32 | 3  |
| 217644 | 30 | 1529302 | 1529317 | 2 | 8  | 16 | AC   | 20 | 4  |
| 217646 | 30 | 1531247 | 1531278 | 2 | 16 | 32 | TG   | 12 | 12 |
| 217647 | 30 | 1531435 | 1531458 | 4 | 6  | 24 | ACAA | 21 | 4  |
| 217648 | 30 | 1534399 | 1534416 | 2 | 9  | 18 | GA   | 16 | 4  |
| 217658 | 30 | 1568998 | 1569011 | 2 | 7  | 14 | AC   | 24 | 5  |
| 217674 | 30 | 1590326 | 1590355 | 2 | 15 | 30 | TG   | 13 | 11 |
| 217677 | 30 | 1593107 | 1593120 | 2 | 7  | 14 | AT   | 10 | 7  |
| 217683 | 30 | 1597682 | 1597701 | 2 | 10 | 20 | AC   | 25 | 3  |
| 217686 | 30 | 1603050 | 1603067 | 2 | 9  | 18 | TG   | 16 | 14 |
| 217687 | 30 | 1603071 | 1603086 | 2 | 8  | 16 | GT   | 9  | 11 |
| 217699 | 30 | 1614067 | 1614084 | 2 | 9  | 18 | AC   | 22 | 7  |
| 217700 | 30 | 1625811 | 1625824 | 2 | 7  | 14 | TG   | 31 | 6  |
| 217708 | 30 | 1659064 | 1659083 | 4 | 5  | 20 | GTCT | 20 | 4  |
| 217709 | 30 | 1659382 | 1659403 | 2 | 11 | 22 | CA   | 22 | 7  |
| 217713 | 30 | 1673760 | 1673777 | 2 | 9  | 18 | GT   | 25 | 5  |
| 217718 | 30 | 1680358 | 1680371 | 2 | 7  | 14 | CA   | 15 | 8  |
| 217719 | 30 | 1680373 | 1680384 | 2 | 6  | 12 | AC   | 6  | 6  |
| 217721 | 30 | 1680532 | 1680553 | 2 | 11 | 22 | AC   | 17 | 6  |
| 217724 | 30 | 1685371 | 1685402 | 2 | 16 | 32 | GT   | 17 | 13 |
| 217725 | 30 | 1688005 | 1688032 | 2 | 14 | 28 | AC   | 13 | 7  |
| 217726 | 30 | 1688691 | 1688704 | 2 | 7  | 14 | AC   | 17 | 3  |
| 217727 | 30 | 1690370 | 1690383 | 2 | 7  | 14 | TG   | 16 | 6  |
| 217728 | 30 | 1690711 | 1690742 | 2 | 16 | 32 | GT   | 12 | 7  |
| 217729 | 30 | 1691079 | 1691104 | 2 | 13 | 26 | TG   | 12 | 7  |
| 217730 | 30 | 1691580 | 1691593 | 2 | 7  | 14 | TG   | 24 | 8  |
| 217733 | 30 | 1692942 | 1692961 | 2 | 10 | 20 | AC   | 20 | 7  |
| 217735 | 30 | 1694245 | 1694282 | 2 | 19 | 38 | AC   | 10 | 11 |
| 217738 | 30 | 1696285 | 1696320 | 3 | 12 | 36 | CCT  | 21 | 4  |
| 217746 | 30 | 1706533 | 1706548 | 4 | 4  | 16 | CTGT | 25 | 3  |
| 217750 | 30 | 1709379 | 1709402 | 2 | 12 | 24 | CA   | 7  | 3  |
| 217751 | 30 | 1710428 | 1710471 | 4 | 11 | 44 | ATCT | 17 | 17 |
| 217754 | 30 | 1715716 | 1715735 | 2 | 10 | 20 | GT   | 11 | 7  |
| 217759 | 30 | 1723483 | 1723516 | 2 | 17 | 34 | GT   | 7  | 7  |
| 217760 | 30 | 1723612 | 1723623 | 2 | 6  | 12 | AC   | 27 | 10 |
| 217762 | 30 | 1727151 | 1727170 | 2 | 10 | 20 | AG   | 21 | 5  |
| 217763 | 30 | 1730694 | 1730723 | 3 | 10 | 30 | ATA  | 12 | 3  |
| 217764 | 30 | 1733694 | 1733711 | 2 | 9  | 18 | TA   | 8  | 6  |
| 217767 | 30 | 1736346 | 1736375 | 2 | 15 | 30 | AC   | 19 | 11 |
| 217770 | 30 | 1741071 | 1741114 | 2 | 22 | 44 | AC   | 16 | 11 |
| 217772 | 30 | 1741598 | 1741618 | 3 | 7  | 21 | GAG  | 13 | 7  |
| 217775 | 30 | 1742654 | 1742671 | 3 | 6  | 18 | GGA  | 28 | 4  |
| 217783 | 30 | 1748041 | 1748055 | 3 | 5  | 15 | CCT  | 26 | 4  |
| 217785 | 30 | 1750506 | 1750537 | 4 | 8  | 32 | GTCA | 20 | 4  |
| 217789 | 30 | 1761596 | 1761609 | 2 | 7  | 14 | TG   | 18 | 6  |
| 217799 | 30 | 1781448 | 1781489 | 2 | 21 | 42 | CA   | 8  | 8  |
| 217805 | 30 | 1790678 | 1790691 | 2 | 7  | 14 | TG   | 18 | 4  |
| 217817 | 30 | 1804801 | 1804818 | 2 | 9  | 18 | AC   | 27 | 5  |
| 217820 | 30 | 1808230 | 1808247 | 2 | 9  | 18 | GT   | 18 | 4  |

|        |    |         |         |   |    |    |      |    |    |
|--------|----|---------|---------|---|----|----|------|----|----|
| 217821 | 30 | 1808390 | 1808405 | 2 | 8  | 16 | TG   | 20 | 3  |
| 217822 | 30 | 1809497 | 1809510 | 2 | 7  | 14 | CT   | 24 | 3  |
| 217827 | 30 | 1814569 | 1814590 | 2 | 11 | 22 | AC   | 8  | 4  |
| 217828 | 30 | 1815921 | 1815936 | 2 | 8  | 16 | AC   | 13 | 7  |
| 217830 | 30 | 1816045 | 1816068 | 2 | 12 | 24 | AC   | 20 | 7  |
| 217831 | 30 | 1816924 | 1816939 | 2 | 8  | 16 | CA   | 24 | 5  |
| 217832 | 30 | 1818301 | 1818324 | 3 | 8  | 24 | AGG  | 19 | 8  |
| 217839 | 30 | 1824774 | 1824799 | 2 | 13 | 26 | GT   | 8  | 5  |
| 217847 | 30 | 1832292 | 1832311 | 2 | 10 | 20 | CA   | 7  | 5  |
| 217848 | 30 | 1832313 | 1832328 | 2 | 8  | 16 | AC   | 13 | 8  |
| 217873 | 30 | 1864731 | 1864750 | 2 | 10 | 20 | TG   | 19 | 9  |
| 217878 | 30 | 1866616 | 1866635 | 2 | 10 | 20 | TG   | 13 | 9  |
| 217891 | 30 | 1880701 | 1880721 | 3 | 7  | 21 | AAT  | 23 | 3  |
| 217900 | 30 | 1887670 | 1887681 | 2 | 6  | 12 | GT   | 25 | 3  |
| 217903 | 30 | 1892810 | 1892824 | 3 | 5  | 15 | CTG  | 23 | 4  |
| 217911 | 30 | 1910001 | 1910032 | 2 | 16 | 32 | TC   | 11 | 8  |
| 217926 | 30 | 1965601 | 1965634 | 2 | 17 | 34 | AC   | 17 | 11 |
| 217927 | 30 | 1970370 | 1970389 | 2 | 10 | 20 | AC   | 6  | 6  |
| 217928 | 30 | 1972223 | 1972240 | 3 | 6  | 18 | ATT  | 24 | 5  |
| 217940 | 30 | 2012087 | 2012114 | 4 | 7  | 28 | CAAT | 20 | 7  |
| 217943 | 30 | 2015998 | 2016012 | 3 | 5  | 15 | GCA  | 28 | 5  |
| 217945 | 30 | 2016943 | 2016980 | 2 | 19 | 38 | TG   | 16 | 12 |
| 217948 | 30 | 2024367 | 2024390 | 3 | 8  | 24 | TCC  | 20 | 6  |
| 217962 | 30 | 2050280 | 2050299 | 4 | 5  | 20 | GTCC | 27 | 8  |
| 217963 | 30 | 2050300 | 2050315 | 4 | 4  | 16 | GTCT | 29 | 11 |
| 217965 | 30 | 2061532 | 2061567 | 2 | 18 | 36 | AC   | 10 | 9  |
| 217968 | 30 | 2062749 | 2062766 | 2 | 9  | 18 | AC   | 11 | 6  |
| 217969 | 30 | 2064538 | 2064553 | 2 | 8  | 16 | GT   | 16 | 4  |
| 217973 | 30 | 2071146 | 2071161 | 2 | 8  | 16 | GT   | 16 | 10 |
| 217975 | 30 | 2071267 | 2071284 | 3 | 6  | 18 | CCA  | 9  | 4  |
| 217986 | 30 | 2084132 | 2084149 | 2 | 9  | 18 | TG   | 15 | 5  |
| 217990 | 30 | 2088981 | 2089006 | 2 | 13 | 26 | GA   | 7  | 3  |
| 217992 | 30 | 2097653 | 2097666 | 2 | 7  | 14 | CA   | 27 | 7  |
| 217993 | 30 | 2097813 | 2097856 | 2 | 22 | 44 | AC   | 6  | 8  |
| 217998 | 30 | 2104904 | 2104919 | 2 | 8  | 16 | CT   | 17 | 6  |
| 218000 | 30 | 2107233 | 2107248 | 2 | 8  | 16 | TG   | 14 | 8  |
| 218002 | 30 | 2108210 | 2108233 | 2 | 12 | 24 | GT   | 16 | 14 |
| 218003 | 30 | 2110544 | 2110573 | 2 | 15 | 30 | CA   | 7  | 7  |
| 218006 | 30 | 2113252 | 2113263 | 2 | 6  | 12 | AC   | 29 | 4  |
| 218008 | 30 | 2115886 | 2115907 | 2 | 11 | 22 | CA   | 13 | 6  |
| 218009 | 30 | 2118403 | 2118417 | 3 | 5  | 15 | CCA  | 20 | 5  |
| 218010 | 30 | 2119200 | 2119214 | 3 | 5  | 15 | CCT  | 15 | 5  |
| 218011 | 30 | 2119216 | 2119230 | 3 | 5  | 15 | CTC  | 10 | 5  |
| 218021 | 30 | 2130411 | 2130428 | 3 | 6  | 18 | GCT  | 16 | 6  |
| 218025 | 30 | 2132101 | 2132120 | 2 | 10 | 20 | GT   | 23 | 11 |
| 218028 | 30 | 2137168 | 2137201 | 2 | 17 | 34 | AC   | 11 | 9  |
| 218034 | 30 | 2148303 | 2148316 | 2 | 7  | 14 | TG   | 25 | 6  |
| 218040 | 30 | 2159286 | 2159301 | 2 | 8  | 16 | GT   | 26 | 5  |
| 218041 | 30 | 2159499 | 2159518 | 2 | 10 | 20 | CA   | 12 | 3  |
| 218048 | 30 | 2168662 | 2168685 | 2 | 12 | 24 | TG   | 11 | 10 |
| 218049 | 30 | 2168837 | 2168848 | 2 | 6  | 12 | TG   | 29 | 4  |



|        |    |         |         |   |    |    |      |    |    |
|--------|----|---------|---------|---|----|----|------|----|----|
| 218050 | 30 | 2169555 | 2169590 | 2 | 18 | 36 | AC   | 7  | 8  |
| 218053 | 30 | 2171856 | 2171887 | 2 | 16 | 32 | AC   | 8  | 11 |
| 218055 | 30 | 2175366 | 2175383 | 2 | 9  | 18 | AC   | 14 | 10 |
| 218062 | 30 | 2184550 | 2184571 | 2 | 11 | 22 | TG   | 9  | 7  |
| 218063 | 30 | 2184733 | 2184744 | 2 | 6  | 12 | CA   | 30 | 3  |
| 218064 | 30 | 2184899 | 2184912 | 2 | 7  | 14 | AC   | 20 | 6  |
| 218065 | 30 | 2185120 | 2185131 | 2 | 6  | 12 | CA   | 24 | 4  |
| 218066 | 30 | 2185359 | 2185370 | 2 | 6  | 12 | GT   | 13 | 4  |
| 218067 | 30 | 2186286 | 2186297 | 2 | 6  | 12 | GT   | 20 | 9  |
| 218068 | 30 | 2187296 | 2187325 | 2 | 15 | 30 | TG   | 9  | 9  |
| 218071 | 30 | 2189202 | 2189219 | 3 | 6  | 18 | CAG  | 27 | 7  |
| 218072 | 30 | 2190187 | 2190210 | 4 | 6  | 24 | CCAT | 21 | 3  |
| 218073 | 30 | 2191828 | 2191851 | 2 | 12 | 24 | TG   | 17 | 10 |
| 218079 | 30 | 2199576 | 2199603 | 2 | 14 | 28 | TG   | 16 | 8  |
| 218081 | 30 | 2205215 | 2205230 | 2 | 8  | 16 | CA   | 21 | 3  |
| 218083 | 30 | 2207015 | 2207028 | 2 | 7  | 14 | TG   | 22 | 7  |
| 218084 | 30 | 2207029 | 2207040 | 2 | 6  | 12 | TC   | 24 | 5  |
| 218086 | 30 | 2208810 | 2208839 | 2 | 15 | 30 | CA   | 12 | 9  |
| 218089 | 30 | 2210914 | 2210939 | 2 | 13 | 26 | AC   | 15 | 7  |
| 218091 | 30 | 2212633 | 2212646 | 2 | 7  | 14 | GT   | 14 | 7  |
| 218092 | 30 | 2212648 | 2212659 | 2 | 6  | 12 | TG   | 16 | 7  |
| 218093 | 30 | 2214142 | 2214155 | 2 | 7  | 14 | TG   | 10 | 6  |
| 218094 | 30 | 2214157 | 2214174 | 2 | 9  | 18 | GT   | 8  | 5  |
| 218097 | 30 | 2218786 | 2218813 | 2 | 14 | 28 | CA   | 14 | 10 |
| 218098 | 30 | 2220522 | 2220535 | 2 | 7  | 14 | GT   | 26 | 4  |
| 218102 | 30 | 2235674 | 2235695 | 2 | 11 | 22 | GT   | 14 | 7  |
| 218103 | 30 | 2237200 | 2237215 | 4 | 4  | 16 | AAAG | 23 | 8  |
| 218104 | 30 | 2237469 | 2237488 | 4 | 5  | 20 | AAAG | 16 | 7  |
| 218107 | 30 | 2244689 | 2244706 | 3 | 6  | 18 | TTG  | 28 | 4  |
| 218109 | 30 | 2251931 | 2251978 | 2 | 24 | 48 | TG   | 14 | 19 |
| 218115 | 30 | 2257729 | 2257756 | 2 | 14 | 28 | AC   | 19 | 9  |
| 218117 | 30 | 2267323 | 2267346 | 3 | 8  | 24 | AAC  | 24 | 10 |
| 218120 | 30 | 2276556 | 2276585 | 2 | 15 | 30 | GT   | 13 | 9  |
| 218126 | 30 | 2285757 | 2285770 | 2 | 7  | 14 | CA   | 29 | 3  |
| 218127 | 30 | 2285915 | 2285932 | 2 | 9  | 18 | GT   | 12 | 9  |
| 218128 | 30 | 2288107 | 2288120 | 2 | 7  | 14 | GT   | 15 | 8  |
| 218129 | 30 | 2288122 | 2288141 | 2 | 10 | 20 | TG   | 21 | 10 |
| 218131 | 30 | 2292357 | 2292370 | 2 | 7  | 14 | TC   | 21 | 4  |
| 218137 | 30 | 2306228 | 2306243 | 2 | 8  | 16 | TG   | 21 | 4  |
| 218143 | 30 | 2323132 | 2323169 | 2 | 19 | 38 | GT   | 9  | 7  |
| 218151 | 30 | 2337699 | 2337726 | 2 | 14 | 28 | AC   | 15 | 9  |
| 218154 | 30 | 2345180 | 2345197 | 2 | 9  | 18 | GT   | 27 | 8  |
| 218157 | 30 | 2346635 | 2346650 | 2 | 8  | 16 | TG   | 14 | 3  |
| 218158 | 30 | 2346862 | 2346905 | 2 | 22 | 44 | TG   | 9  | 11 |
| 218159 | 30 | 2347388 | 2347405 | 3 | 6  | 18 | ATT  | 14 | 5  |
| 218160 | 30 | 2350629 | 2350648 | 2 | 10 | 20 | TG   | 18 | 8  |
| 218167 | 30 | 2364048 | 2364061 | 2 | 7  | 14 | AG   | 18 | 4  |
| 218168 | 30 | 2364291 | 2364308 | 2 | 9  | 18 | GT   | 9  | 6  |
| 218172 | 30 | 2375384 | 2375403 | 2 | 10 | 20 | AC   | 16 | 10 |
| 218181 | 30 | 2384488 | 2384513 | 2 | 13 | 26 | TG   | 6  | 8  |
| 218182 | 30 | 2386686 | 2386719 | 2 | 17 | 34 | TG   | 19 | 8  |

|        |    |         |         |   |    |    |      |    |    |
|--------|----|---------|---------|---|----|----|------|----|----|
| 218183 | 30 | 2386808 | 2386825 | 2 | 9  | 18 | TG   | 13 | 4  |
| 218185 | 30 | 2387021 | 2387036 | 2 | 8  | 16 | GT   | 16 | 5  |
| 218186 | 30 | 2387116 | 2387129 | 2 | 7  | 14 | TC   | 21 | 3  |
| 218187 | 30 | 2387131 | 2387144 | 2 | 7  | 14 | CT   | 25 | 3  |
| 218188 | 30 | 2387374 | 2387407 | 2 | 17 | 34 | AC   | 8  | 7  |
| 218191 | 30 | 2394640 | 2394653 | 2 | 7  | 14 | GT   | 15 | 4  |
| 218193 | 30 | 2395199 | 2395222 | 3 | 8  | 24 | CCT  | 16 | 7  |
| 218194 | 30 | 2396191 | 2396222 | 2 | 16 | 32 | GT   | 15 | 7  |
| 218195 | 30 | 2396778 | 2396799 | 2 | 11 | 22 | GA   | 15 | 11 |
| 218199 | 30 | 2402824 | 2402847 | 2 | 12 | 24 | GT   | 18 | 8  |
| 218200 | 30 | 2419050 | 2419071 | 2 | 11 | 22 | AC   | 12 | 11 |
| 218210 | 30 | 2430880 | 2430895 | 2 | 8  | 16 | TG   | 21 | 5  |
| 218211 | 30 | 2431048 | 2431061 | 2 | 7  | 14 | TG   | 18 | 9  |
| 218212 | 30 | 2431558 | 2431595 | 2 | 19 | 38 | GT   | 10 | 9  |
| 218215 | 30 | 2432718 | 2432745 | 2 | 14 | 28 | GA   | 7  | 10 |
| 218216 | 30 | 2435296 | 2435331 | 2 | 18 | 36 | GT   | 13 | 10 |
| 218221 | 30 | 2446424 | 2446447 | 2 | 12 | 24 | GT   | 17 | 7  |
| 218222 | 30 | 2449488 | 2449514 | 3 | 9  | 27 | GAT  | 26 | 6  |
| 218225 | 30 | 2451571 | 2451586 | 2 | 8  | 16 | GA   | 27 | 3  |
| 218229 | 30 | 2453589 | 2453610 | 2 | 11 | 22 | AC   | 19 | 12 |
| 218230 | 30 | 2454146 | 2454159 | 2 | 7  | 14 | TG   | 30 | 6  |
| 218236 | 30 | 2459592 | 2459623 | 4 | 8  | 32 | CTGT | 23 | 8  |
| 218241 | 30 | 2463539 | 2463560 | 2 | 11 | 22 | TG   | 18 | 10 |
| 218243 | 30 | 2463690 | 2463711 | 2 | 11 | 22 | AC   | 14 | 5  |
| 218248 | 30 | 2463990 | 2464027 | 2 | 19 | 38 | GT   | 10 | 11 |
| 218249 | 30 | 2464312 | 2464356 | 3 | 15 | 45 | TGT  | 21 | 7  |
| 218250 | 30 | 2464559 | 2464584 | 2 | 13 | 26 | TG   | 20 | 7  |
| 218252 | 30 | 2466113 | 2466126 | 2 | 7  | 14 | TG   | 22 | 7  |
| 218253 | 30 | 2466130 | 2466141 | 2 | 6  | 12 | GT   | 25 | 10 |
| 218254 | 30 | 2467397 | 2467428 | 2 | 16 | 32 | CA   | 18 | 8  |
| 218255 | 30 | 2467564 | 2467575 | 2 | 6  | 12 | AC   | 19 | 3  |
| 218256 | 30 | 2467979 | 2468008 | 2 | 15 | 30 | GT   | 14 | 8  |
| 218266 | 30 | 2488801 | 2488816 | 2 | 8  | 16 | GT   | 20 | 7  |
| 218274 | 30 | 2499760 | 2499774 | 3 | 5  | 15 | TTC  | 6  | 3  |
| 218275 | 30 | 2500128 | 2500157 | 3 | 10 | 30 | CCT  | 13 | 7  |
| 218276 | 30 | 2500359 | 2500382 | 4 | 6  | 24 | ATTT | 20 | 8  |
| 218281 | 30 | 2502949 | 2502988 | 2 | 20 | 40 | CA   | 12 | 14 |
| 218282 | 30 | 2503737 | 2503768 | 2 | 16 | 32 | GT   | 11 | 6  |
| 218288 | 30 | 2507515 | 2507548 | 2 | 17 | 34 | AC   | 16 | 12 |
| 218298 | 30 | 2527388 | 2527411 | 2 | 12 | 24 | AC   | 17 | 15 |
| 218299 | 30 | 2527726 | 2527737 | 2 | 6  | 12 | GT   | 30 | 7  |
| 218302 | 30 | 2535279 | 2535302 | 3 | 8  | 24 | TCA  | 23 | 5  |
| 218304 | 30 | 2542556 | 2542576 | 3 | 7  | 21 | GAT  | 28 | 21 |
| 218305 | 30 | 2542869 | 2542888 | 4 | 5  | 20 | TTTA | 12 | 10 |
| 218306 | 30 | 2547062 | 2547076 | 3 | 5  | 15 | AGA  | 24 | 5  |
| 218309 | 30 | 2552865 | 2552886 | 2 | 11 | 22 | TG   | 17 | 10 |
| 218315 | 30 | 2565413 | 2565426 | 2 | 7  | 14 | AC   | 31 | 3  |
| 218319 | 30 | 2574094 | 2574107 | 2 | 7  | 14 | AT   | 21 | 9  |
| 218320 | 30 | 2574482 | 2574493 | 2 | 6  | 12 | AC   | 30 | 6  |
| 218324 | 30 | 2581764 | 2581783 | 2 | 10 | 20 | TG   | 14 | 10 |
| 218326 | 30 | 2587649 | 2587660 | 2 | 6  | 12 | TG   | 7  | 4  |

|        |    |         |         |   |    |    |      |    |    |
|--------|----|---------|---------|---|----|----|------|----|----|
| 218329 | 30 | 2593299 | 2593310 | 2 | 6  | 12 | CA   | 27 | 3  |
| 218330 | 30 | 2597914 | 2597929 | 4 | 4  | 16 | CACG | 19 | 8  |
| 218337 | 30 | 2606671 | 2606691 | 3 | 7  | 21 | ATG  | 20 | 5  |
| 218338 | 30 | 2607148 | 2607159 | 2 | 6  | 12 | GT   | 19 | 11 |
| 218340 | 30 | 2609036 | 2609051 | 2 | 8  | 16 | GT   | 25 | 12 |
| 218344 | 30 | 2610279 | 2610290 | 2 | 6  | 12 | CA   | 13 | 11 |
| 218347 | 30 | 2612288 | 2612315 | 2 | 14 | 28 | CA   | 14 | 14 |
| 218349 | 30 | 2614027 | 2614058 | 2 | 16 | 32 | CA   | 15 | 11 |
| 218351 | 30 | 2619146 | 2619171 | 2 | 13 | 26 | TG   | 17 | 14 |
| 218352 | 30 | 2621879 | 2621908 | 2 | 15 | 30 | CA   | 15 | 9  |
| 218353 | 30 | 2624142 | 2624171 | 2 | 15 | 30 | CA   | 19 | 13 |
| 218354 | 30 | 2624402 | 2624435 | 2 | 17 | 34 | AC   | 6  | 11 |
| 218355 | 30 | 2628396 | 2628409 | 2 | 7  | 14 | GT   | 20 | 5  |
| 218357 | 30 | 2635952 | 2635971 | 4 | 5  | 20 | ATTT | 23 | 3  |
| 218364 | 30 | 2651712 | 2651726 | 3 | 5  | 15 | AAC  | 30 | 3  |
| 218365 | 30 | 2655435 | 2655462 | 4 | 7  | 28 | GGTT | 27 | 6  |
| 218370 | 30 | 2674210 | 2674223 | 2 | 7  | 14 | CT   | 20 | 4  |
| 218373 | 30 | 2680469 | 2680494 | 2 | 13 | 26 | TG   | 11 | 4  |
| 218374 | 30 | 2681034 | 2681077 | 2 | 22 | 44 | CT   | 18 | 13 |
| 218376 | 30 | 2690384 | 2690435 | 2 | 26 | 52 | AC   | 10 | 12 |
| 218382 | 30 | 2703551 | 2703576 | 2 | 13 | 26 | CA   | 19 | 10 |
| 218385 | 30 | 2710750 | 2710763 | 2 | 7  | 14 | GT   | 8  | 7  |
| 218386 | 30 | 2710764 | 2710781 | 2 | 9  | 18 | GA   | 7  | 9  |
| 218387 | 30 | 2712287 | 2712314 | 4 | 7  | 28 | CCAT | 24 | 5  |
| 218391 | 30 | 2732807 | 2732834 | 4 | 7  | 28 | GATG | 28 | 8  |
| 218398 | 30 | 2737924 | 2737963 | 2 | 20 | 40 | AC   | 8  | 11 |
| 218408 | 30 | 2757817 | 2757840 | 3 | 8  | 24 | TTC  | 9  | 6  |
| 218415 | 30 | 2758483 | 2758496 | 2 | 7  | 14 | CA   | 18 | 5  |
| 218416 | 30 | 2760628 | 2760643 | 2 | 8  | 16 | CT   | 19 | 5  |
| 218432 | 30 | 2798090 | 2798101 | 2 | 6  | 12 | CA   | 27 | 5  |
| 218433 | 30 | 2799375 | 2799386 | 2 | 6  | 12 | TG   | 23 | 4  |
| 218440 | 30 | 2819273 | 2819304 | 2 | 16 | 32 | AC   | 13 | 10 |
| 218446 | 30 | 2828128 | 2828153 | 2 | 13 | 26 | TC   | 7  | 7  |
| 218459 | 30 | 2853893 | 2853914 | 2 | 11 | 22 | GT   | 24 | 8  |
| 218460 | 30 | 2856396 | 2856419 | 2 | 12 | 24 | GT   | 14 | 14 |
| 218465 | 30 | 2862046 | 2862057 | 2 | 6  | 12 | AC   | 12 | 8  |
| 218466 | 30 | 2862060 | 2862073 | 2 | 7  | 14 | AC   | 12 | 8  |
| 218471 | 30 | 2867069 | 2867080 | 2 | 6  | 12 | AT   | 15 | 6  |
| 218475 | 30 | 2874008 | 2874019 | 2 | 6  | 12 | CA   | 19 | 4  |
| 218478 | 30 | 2878261 | 2878278 | 2 | 9  | 18 | TG   | 14 | 6  |
| 218492 | 30 | 2887531 | 2887557 | 3 | 9  | 27 | CTG  | 24 | 4  |
| 218496 | 30 | 2896273 | 2896288 | 2 | 8  | 16 | AC   | 22 | 3  |
| 218502 | 30 | 2906865 | 2906908 | 2 | 22 | 44 | GT   | 9  | 10 |
| 218503 | 30 | 2908732 | 2908759 | 2 | 14 | 28 | TG   | 11 | 8  |
| 218504 | 30 | 2908848 | 2908869 | 2 | 11 | 22 | TG   | 17 | 3  |
| 218506 | 30 | 2909066 | 2909077 | 2 | 6  | 12 | TG   | 20 | 4  |
| 218507 | 30 | 2909079 | 2909094 | 2 | 8  | 16 | GT   | 24 | 5  |
| 218508 | 30 | 2911121 | 2911138 | 2 | 9  | 18 | TG   | 17 | 4  |
| 218509 | 30 | 2912727 | 2912744 | 2 | 9  | 18 | AC   | 17 | 6  |
| 218519 | 30 | 2920650 | 2920687 | 2 | 19 | 38 | CA   | 8  | 11 |
| 218520 | 30 | 2920999 | 2921016 | 2 | 9  | 18 | AC   | 22 | 5  |

|        |    |         |         |   |    |    |      |    |    |
|--------|----|---------|---------|---|----|----|------|----|----|
| 218528 | 30 | 2936210 | 2936227 | 3 | 6  | 18 | AAC  | 18 | 5  |
| 218536 | 30 | 2943911 | 2943924 | 2 | 7  | 14 | TG   | 20 | 5  |
| 218543 | 30 | 2952582 | 2952603 | 2 | 11 | 22 | TG   | 10 | 7  |
| 218548 | 30 | 2965743 | 2965754 | 2 | 6  | 12 | CA   | 18 | 14 |
| 218549 | 30 | 2965757 | 2965770 | 2 | 7  | 14 | CA   | 23 | 11 |
| 218550 | 30 | 2968464 | 2968517 | 3 | 18 | 54 | CTG  | 21 | 8  |
| 218552 | 30 | 2969495 | 2969514 | 2 | 10 | 20 | CA   | 10 | 8  |
| 218562 | 30 | 2979980 | 2979991 | 2 | 6  | 12 | GT   | 29 | 5  |
| 218563 | 30 | 2986348 | 2986362 | 3 | 5  | 15 | TTC  | 22 | 5  |
| 218564 | 30 | 2986651 | 2986686 | 4 | 9  | 36 | CTTT | 6  | 5  |
| 218565 | 30 | 2990641 | 2990656 | 4 | 4  | 16 | AAAT | 16 | 4  |
| 218570 | 30 | 3007372 | 3007387 | 2 | 8  | 16 | AG   | 20 | 5  |
| 218576 | 30 | 3014030 | 3014044 | 3 | 5  | 15 | CCA  | 25 | 4  |
| 218577 | 30 | 3014413 | 3014442 | 2 | 15 | 30 | TG   | 7  | 10 |
| 218584 | 30 | 3019430 | 3019449 | 2 | 10 | 20 | CA   | 14 | 5  |
| 218585 | 30 | 3028862 | 3028909 | 4 | 12 | 48 | TTCT | 20 | 11 |
| 218586 | 30 | 3033370 | 3033381 | 2 | 6  | 12 | CA   | 14 | 5  |
| 218587 | 30 | 3041660 | 3041683 | 4 | 6  | 24 | TATC | 17 | 5  |
| 218601 | 30 | 3066349 | 3066364 | 2 | 8  | 16 | AT   | 11 | 8  |
| 218613 | 30 | 3100955 | 3100968 | 2 | 7  | 14 | TG   | 18 | 3  |
| 218616 | 30 | 3105051 | 3105064 | 2 | 7  | 14 | CA   | 29 | 4  |
| 218617 | 30 | 3107782 | 3107797 | 2 | 8  | 16 | CA   | 31 | 10 |
| 218619 | 30 | 3108782 | 3108819 | 2 | 19 | 38 | GT   | 15 | 11 |
| 218631 | 30 | 3115458 | 3115469 | 2 | 6  | 12 | GT   | 27 | 5  |
| 218633 | 30 | 3116860 | 3116895 | 2 | 18 | 36 | TG   | 9  | 10 |
| 218635 | 30 | 3119332 | 3119349 | 2 | 9  | 18 | AC   | 19 | 7  |
| 218644 | 30 | 3122704 | 3122715 | 2 | 6  | 12 | CA   | 23 | 5  |
| 218653 | 30 | 3140756 | 3140813 | 2 | 29 | 58 | TG   | 10 | 13 |
| 218654 | 30 | 3143621 | 3143652 | 4 | 8  | 32 | CAGA | 24 | 14 |
| 218655 | 30 | 3147564 | 3147583 | 2 | 10 | 20 | TC   | 25 | 6  |
| 218658 | 30 | 3149416 | 3149427 | 2 | 6  | 12 | TG   | 23 | 3  |
| 218662 | 30 | 3160119 | 3160148 | 2 | 15 | 30 | AC   | 17 | 8  |
| 218668 | 30 | 3170604 | 3170621 | 2 | 9  | 18 | TC   | 15 | 9  |
| 218669 | 30 | 3173485 | 3173500 | 2 | 8  | 16 | CA   | 20 | 8  |
| 218670 | 30 | 3173503 | 3173520 | 2 | 9  | 18 | CA   | 22 | 7  |
| 218671 | 30 | 3173834 | 3173853 | 2 | 10 | 20 | GT   | 18 | 9  |
| 218676 | 30 | 3180865 | 3180876 | 2 | 6  | 12 | GT   | 20 | 3  |
| 218677 | 30 | 3180974 | 3181007 | 2 | 17 | 34 | AC   | 18 | 14 |
| 218678 | 30 | 3185033 | 3185056 | 3 | 8  | 24 | AAC  | 18 | 6  |
| 218679 | 30 | 3186006 | 3186025 | 2 | 10 | 20 | AC   | 15 | 7  |
| 218681 | 30 | 3187938 | 3187963 | 2 | 13 | 26 | AC   | 9  | 11 |
| 218685 | 30 | 3192576 | 3192591 | 2 | 8  | 16 | AT   | 18 | 6  |
| 218686 | 30 | 3192943 | 3192966 | 2 | 12 | 24 | CA   | 14 | 8  |
| 218690 | 30 | 3195665 | 3195682 | 2 | 9  | 18 | AC   | 23 | 10 |
| 218691 | 30 | 3197210 | 3197231 | 2 | 11 | 22 | CA   | 9  | 7  |
| 218692 | 30 | 3199681 | 3199700 | 2 | 10 | 20 | TG   | 12 | 7  |
| 218693 | 30 | 3200038 | 3200052 | 3 | 5  | 15 | GGC  | 34 | 5  |
| 218697 | 30 | 3202189 | 3202212 | 2 | 12 | 24 | CA   | 15 | 7  |
| 218699 | 30 | 3204484 | 3204519 | 2 | 18 | 36 | GA   | 15 | 9  |
| 218708 | 30 | 3216434 | 3216463 | 2 | 15 | 30 | TG   | 17 | 8  |
| 218709 | 30 | 3219002 | 3219019 | 3 | 6  | 18 | AAT  | 13 | 3  |

|        |    |         |         |   |    |    |      |    |    |
|--------|----|---------|---------|---|----|----|------|----|----|
| 218716 | 30 | 3229991 | 3230014 | 2 | 12 | 24 | CA   | 7  | 5  |
| 218722 | 30 | 3231889 | 3231908 | 4 | 5  | 20 | AAAC | 26 | 4  |
| 218723 | 30 | 3232563 | 3232574 | 2 | 6  | 12 | TG   | 22 | 5  |
| 218729 | 30 | 3247194 | 3247213 | 4 | 5  | 20 | AATA | 25 | 4  |
| 218730 | 30 | 3247333 | 3247352 | 2 | 10 | 20 | TG   | 16 | 9  |
| 218732 | 30 | 3256372 | 3256419 | 2 | 24 | 48 | GT   | 9  | 12 |
| 218734 | 30 | 3264862 | 3264887 | 2 | 13 | 26 | CA   | 14 | 14 |
| 218736 | 30 | 3269019 | 3269052 | 2 | 17 | 34 | CA   | 6  | 9  |
| 218737 | 30 | 3270036 | 3270047 | 2 | 6  | 12 | TG   | 27 | 4  |
| 218739 | 30 | 3272134 | 3272175 | 2 | 21 | 42 | AC   | 11 | 15 |
| 218744 | 30 | 3275998 | 3276029 | 2 | 16 | 32 | CA   | 13 | 10 |
| 218746 | 30 | 3280310 | 3280321 | 2 | 6  | 12 | AC   | 26 | 3  |
| 218750 | 30 | 3281478 | 3281497 | 2 | 10 | 20 | GT   | 17 | 8  |
| 218752 | 30 | 3287608 | 3287619 | 2 | 6  | 12 | AT   | 6  | 6  |
| 218757 | 30 | 3302134 | 3302160 | 3 | 9  | 27 | TTC  | 16 | 7  |
| 218763 | 30 | 3307778 | 3307793 | 4 | 4  | 16 | AGTT | 21 | 3  |
| 218768 | 30 | 3317230 | 3317251 | 2 | 11 | 22 | CA   | 7  | 12 |
| 218769 | 30 | 3317664 | 3317675 | 2 | 6  | 12 | GA   | 30 | 3  |
| 218771 | 30 | 3317823 | 3317848 | 2 | 13 | 26 | CA   | 7  | 5  |
| 218772 | 30 | 3317952 | 3317973 | 2 | 11 | 22 | CA   | 6  | 4  |
| 218773 | 30 | 3319695 | 3319716 | 2 | 11 | 22 | AC   | 18 | 7  |
| 218775 | 30 | 3320877 | 3320888 | 2 | 6  | 12 | CT   | 21 | 6  |
| 218785 | 30 | 3332053 | 3332064 | 2 | 6  | 12 | GT   | 20 | 3  |
| 218792 | 30 | 3348125 | 3348140 | 2 | 8  | 16 | GA   | 19 | 3  |
| 218797 | 30 | 3352634 | 3352645 | 2 | 6  | 12 | CA   | 19 | 4  |
| 218798 | 30 | 3354355 | 3354372 | 2 | 9  | 18 | GT   | 15 | 16 |
| 218815 | 30 | 3378071 | 3378100 | 3 | 10 | 30 | AAT  | 17 | 6  |
| 218819 | 30 | 3385616 | 3385635 | 4 | 5  | 20 | TTTA | 26 | 4  |
| 218822 | 30 | 3391437 | 3391464 | 2 | 14 | 28 | TG   | 8  | 6  |
| 218823 | 30 | 3395457 | 3395468 | 2 | 6  | 12 | AC   | 19 | 6  |
| 218825 | 30 | 3396064 | 3396081 | 2 | 9  | 18 | CA   | 16 | 6  |
| 218826 | 30 | 3396290 | 3396313 | 2 | 12 | 24 | GT   | 8  | 10 |
| 218833 | 30 | 3416252 | 3416271 | 4 | 5  | 20 | AGTT | 19 | 4  |
| 218847 | 30 | 3438394 | 3438411 | 2 | 9  | 18 | AC   | 6  | 10 |
| 218853 | 30 | 3448884 | 3448895 | 2 | 6  | 12 | GT   | 23 | 3  |
| 218865 | 30 | 3469253 | 3469282 | 3 | 10 | 30 | AAG  | 19 | 6  |
| 218878 | 30 | 3486148 | 3486165 | 2 | 9  | 18 | AC   | 13 | 4  |
| 218881 | 30 | 3488498 | 3488529 | 2 | 16 | 32 | GT   | 7  | 6  |
| 218884 | 30 | 3491304 | 3491331 | 2 | 14 | 28 | GA   | 6  | 3  |
| 218890 | 30 | 3497245 | 3497268 | 2 | 12 | 24 | TG   | 20 | 7  |
| 218904 | 30 | 3502885 | 3502904 | 2 | 10 | 20 | TG   | 25 | 5  |
| 218907 | 30 | 3508344 | 3508397 | 2 | 27 | 54 | TC   | 6  | 10 |
| 218914 | 30 | 3524272 | 3524291 | 2 | 10 | 20 | CA   | 21 | 8  |
| 218915 | 30 | 3524712 | 3524727 | 2 | 8  | 16 | AC   | 27 | 5  |
| 218922 | 30 | 3527711 | 3527738 | 2 | 14 | 28 | GT   | 15 | 6  |
| 218925 | 30 | 3535631 | 3535648 | 2 | 9  | 18 | TG   | 24 | 4  |
| 218933 | 30 | 3560866 | 3560877 | 2 | 6  | 12 | GT   | 35 | 3  |
| 218938 | 30 | 3573140 | 3573154 | 3 | 5  | 15 | TGG  | 29 | 3  |
| 218942 | 30 | 3593237 | 3593258 | 2 | 11 | 22 | CT   | 20 | 9  |
| 218943 | 30 | 3593330 | 3593347 | 2 | 9  | 18 | AC   | 19 | 4  |
| 218944 | 30 | 3594258 | 3594285 | 2 | 14 | 28 | CA   | 11 | 11 |

|        |    |         |         |   |    |    |      |    |    |
|--------|----|---------|---------|---|----|----|------|----|----|
| 218946 | 30 | 3605999 | 3606018 | 4 | 5  | 20 | CCCT | 8  | 4  |
| 218955 | 30 | 3627917 | 3627942 | 2 | 13 | 26 | TG   | 15 | 11 |
| 218957 | 30 | 3628754 | 3628771 | 2 | 9  | 18 | TA   | 9  | 5  |
| 218962 | 30 | 3637153 | 3637184 | 2 | 16 | 32 | CA   | 21 | 8  |
| 218971 | 30 | 3665481 | 3665508 | 2 | 14 | 28 | AC   | 10 | 4  |
| 218973 | 30 | 3671028 | 3671047 | 2 | 10 | 20 | CA   | 6  | 6  |
| 218981 | 30 | 3694927 | 3694940 | 2 | 7  | 14 | TG   | 16 | 4  |
| 218984 | 30 | 3704202 | 3704215 | 2 | 7  | 14 | GT   | 33 | 6  |
| 219021 | 30 | 3760232 | 3760258 | 3 | 9  | 27 | TAG  | 23 | 10 |
| 219026 | 30 | 3772555 | 3772568 | 2 | 7  | 14 | TG   | 28 | 3  |
| 219027 | 30 | 3774873 | 3774904 | 2 | 16 | 32 | TG   | 18 | 9  |
| 219048 | 30 | 3806965 | 3806984 | 2 | 10 | 20 | CT   | 23 | 4  |
| 219049 | 30 | 3807120 | 3807135 | 2 | 8  | 16 | CT   | 24 | 5  |
| 219053 | 30 | 3807857 | 3807882 | 2 | 13 | 26 | AC   | 13 | 9  |
| 219054 | 30 | 3807999 | 3808016 | 2 | 9  | 18 | CA   | 21 | 5  |
| 219058 | 30 | 3809919 | 3809936 | 3 | 6  | 18 | TGC  | 34 | 6  |
| 219068 | 30 | 3822565 | 3822578 | 2 | 7  | 14 | TG   | 20 | 7  |
| 219093 | 30 | 3867978 | 3868005 | 2 | 14 | 28 | GT   | 19 | 10 |
| 219103 | 30 | 3884356 | 3884371 | 4 | 4  | 16 | ATCA | 36 | 3  |
| 219112 | 30 | 3907849 | 3907862 | 2 | 7  | 14 | AC   | 20 | 7  |
| 219126 | 30 | 3939954 | 3939975 | 2 | 11 | 22 | GT   | 22 | 13 |
| 219129 | 30 | 3948931 | 3948946 | 2 | 8  | 16 | TG   | 13 | 3  |
| 219130 | 30 | 3949169 | 3949180 | 2 | 6  | 12 | GT   | 16 | 7  |
| 219132 | 30 | 3954316 | 3954333 | 3 | 6  | 18 | CAG  | 23 | 3  |
| 219134 | 30 | 3957533 | 3957552 | 2 | 10 | 20 | CA   | 19 | 13 |
| 219137 | 30 | 3962349 | 3962382 | 2 | 17 | 34 | AC   | 13 | 15 |
| 219139 | 30 | 3964276 | 3964291 | 2 | 8  | 16 | AC   | 28 | 6  |
| 219145 | 30 | 3966692 | 3966719 | 2 | 14 | 28 | GT   | 13 | 16 |
| 219151 | 30 | 3968615 | 3968630 | 4 | 4  | 16 | AAAG | 16 | 3  |
| 219153 | 30 | 3969828 | 3969854 | 3 | 9  | 27 | CCT  | 20 | 11 |
| 219154 | 30 | 3969971 | 3969992 | 2 | 11 | 22 | AC   | 16 | 15 |
| 219157 | 30 | 3972068 | 3972079 | 2 | 6  | 12 | GT   | 34 | 5  |
| 219158 | 30 | 3972494 | 3972509 | 4 | 4  | 16 | AAAC | 29 | 3  |
| 219166 | 30 | 3993676 | 3993699 | 2 | 12 | 24 | AC   | 19 | 6  |
| 219172 | 30 | 4007663 | 4007702 | 2 | 20 | 40 | AC   | 16 | 9  |
| 219175 | 30 | 4013092 | 4013119 | 2 | 14 | 28 | AC   | 8  | 7  |
| 219183 | 30 | 4028412 | 4028447 | 2 | 18 | 36 | AC   | 15 | 8  |
| 219184 | 30 | 4029356 | 4029369 | 2 | 7  | 14 | AC   | 7  | 4  |
| 219195 | 30 | 4050757 | 4050772 | 2 | 8  | 16 | AC   | 16 | 10 |
| 219201 | 30 | 4055549 | 4055564 | 4 | 4  | 16 | ACAA | 22 | 4  |
| 219203 | 30 | 4055710 | 4055727 | 2 | 9  | 18 | TG   | 20 | 8  |
| 219209 | 30 | 4063805 | 4063852 | 2 | 24 | 48 | TG   | 15 | 13 |
| 219212 | 30 | 4067191 | 4067210 | 2 | 10 | 20 | TG   | 11 | 10 |
| 219213 | 30 | 4068709 | 4068724 | 2 | 8  | 16 | AC   | 24 | 3  |
| 219220 | 30 | 4083318 | 4083367 | 2 | 25 | 50 | TG   | 8  | 9  |
| 219227 | 30 | 4094134 | 4094147 | 2 | 7  | 14 | AC   | 21 | 3  |
| 219229 | 30 | 4095908 | 4095925 | 2 | 9  | 18 | AC   | 13 | 3  |
| 219233 | 30 | 4097890 | 4097907 | 2 | 9  | 18 | CA   | 24 | 5  |
| 219238 | 30 | 4100940 | 4100957 | 2 | 9  | 18 | AC   | 22 | 4  |
| 219239 | 30 | 4102988 | 4103007 | 4 | 5  | 20 | TAAC | 25 | 5  |
| 219252 | 30 | 4131401 | 4131416 | 4 | 4  | 16 | AAAT | 11 | 4  |

|        |    |         |         |   |    |    |      |    |    |
|--------|----|---------|---------|---|----|----|------|----|----|
| 219254 | 30 | 4137927 | 4137950 | 3 | 8  | 24 | CTT  | 17 | 5  |
| 219263 | 30 | 4151183 | 4151214 | 2 | 16 | 32 | AC   | 11 | 11 |
| 219273 | 30 | 4185510 | 4185527 | 2 | 9  | 18 | TG   | 23 | 6  |
| 219277 | 30 | 4200686 | 4200699 | 2 | 7  | 14 | AC   | 26 | 3  |
| 219280 | 30 | 4204856 | 4204877 | 2 | 11 | 22 | GT   | 15 | 3  |
| 219282 | 30 | 4213443 | 4213466 | 4 | 6  | 24 | ACCA | 26 | 5  |
| 219289 | 30 | 4230591 | 4230606 | 2 | 8  | 16 | TA   | 9  | 5  |
| 219291 | 30 | 4232854 | 4232869 | 4 | 4  | 16 | TTTA | 19 | 9  |
| 219292 | 30 | 4233247 | 4233262 | 4 | 4  | 16 | AAAC | 22 | 5  |
| 219296 | 30 | 4239011 | 4239026 | 4 | 4  | 16 | AAAC | 25 | 5  |
| 219303 | 30 | 4255663 | 4255684 | 2 | 11 | 22 | TG   | 26 | 12 |
| 219304 | 30 | 4256993 | 4257016 | 2 | 12 | 24 | TG   | 19 | 4  |
| 219311 | 30 | 4284084 | 4284131 | 4 | 12 | 48 | GATG | 25 | 10 |
| 219319 | 30 | 4304033 | 4304047 | 3 | 5  | 15 | AAT  | 17 | 3  |
| 219332 | 30 | 4342516 | 4342547 | 2 | 16 | 32 | GT   | 18 | 9  |
| 219339 | 30 | 4357337 | 4357354 | 2 | 9  | 18 | AC   | 20 | 7  |
| 219365 | 30 | 4427685 | 4427696 | 2 | 6  | 12 | GT   | 9  | 6  |
| 219366 | 30 | 4428087 | 4428110 | 4 | 6  | 24 | CATC | 28 | 5  |
| 219368 | 30 | 4435547 | 4435560 | 2 | 7  | 14 | GT   | 23 | 4  |
| 219381 | 30 | 4468857 | 4468880 | 3 | 8  | 24 | CTC  | 12 | 11 |
| 219384 | 30 | 4483192 | 4483207 | 4 | 4  | 16 | TATT | 22 | 5  |
| 219398 | 30 | 4514231 | 4514250 | 4 | 5  | 20 | TTTG | 18 | 3  |
| 219405 | 30 | 4526466 | 4526493 | 2 | 14 | 28 | AC   | 15 | 13 |
| 219407 | 30 | 4530398 | 4530417 | 2 | 10 | 20 | CT   | 26 | 5  |
| 219412 | 30 | 4543692 | 4543711 | 2 | 10 | 20 | GT   | 10 | 11 |
| 219422 | 30 | 4560462 | 4560495 | 2 | 17 | 34 | CA   | 19 | 9  |
| 219432 | 30 | 4582780 | 4582800 | 3 | 7  | 21 | AAT  | 12 | 10 |
| 219434 | 30 | 4596703 | 4596752 | 2 | 25 | 50 | AG   | 16 | 11 |
| 219439 | 30 | 4602803 | 4602822 | 4 | 5  | 20 | TTTC | 17 | 7  |
| 219454 | 30 | 4632247 | 4632274 | 2 | 14 | 28 | GT   | 8  | 10 |
| 219459 | 30 | 4649767 | 4649788 | 2 | 11 | 22 | AC   | 16 | 10 |
| 219462 | 30 | 4650885 | 4650900 | 4 | 4  | 16 | AGAC | 19 | 4  |
| 219463 | 30 | 4651095 | 4651110 | 2 | 8  | 16 | AG   | 27 | 4  |
| 219470 | 30 | 4718384 | 4718407 | 4 | 6  | 24 | TGTA | 18 | 3  |
| 219476 | 30 | 4723547 | 4723570 | 2 | 12 | 24 | TG   | 15 | 14 |
| 219482 | 30 | 4729364 | 4729391 | 4 | 7  | 28 | GAAG | 15 | 3  |
| 219484 | 30 | 4736702 | 4736723 | 2 | 11 | 22 | TG   | 16 | 6  |
| 219489 | 30 | 4756310 | 4756327 | 3 | 6  | 18 | AAT  | 13 | 7  |
| 219493 | 30 | 4775898 | 4775923 | 2 | 13 | 26 | TG   | 15 | 7  |
| 219495 | 30 | 4785014 | 4785031 | 2 | 9  | 18 | AC   | 23 | 5  |
| 219496 | 30 | 4785206 | 4785241 | 2 | 18 | 36 | CA   | 8  | 10 |
| 219497 | 30 | 4787808 | 4787828 | 3 | 7  | 21 | CCA  | 27 | 4  |
| 219499 | 30 | 4795935 | 4795954 | 2 | 10 | 20 | CA   | 10 | 13 |
| 219505 | 30 | 4812355 | 4812369 | 3 | 5  | 15 | AAC  | 14 | 4  |
| 219509 | 30 | 4821796 | 4821810 | 3 | 5  | 15 | ATT  | 37 | 3  |
| 219512 | 30 | 4826533 | 4826550 | 2 | 9  | 18 | GT   | 12 | 7  |
| 219513 | 30 | 4826573 | 4826596 | 2 | 12 | 24 | AC   | 17 | 9  |
| 219515 | 30 | 4827300 | 4827314 | 3 | 5  | 15 | GAG  | 24 | 6  |
| 219516 | 30 | 4827783 | 4827806 | 2 | 12 | 24 | TG   | 7  | 6  |
| 219517 | 30 | 4828077 | 4828097 | 3 | 7  | 21 | TTA  | 12 | 9  |
| 219521 | 30 | 4829528 | 4829545 | 3 | 6  | 18 | ATA  | 6  | 5  |

|        |    |         |         |   |    |    |      |    |    |
|--------|----|---------|---------|---|----|----|------|----|----|
| 219522 | 30 | 4830916 | 4830959 | 4 | 11 | 44 | GATG | 9  | 7  |
| 219528 | 30 | 4839079 | 4839092 | 2 | 7  | 14 | AC   | 29 | 3  |
| 219535 | 30 | 4852549 | 4852568 | 2 | 10 | 20 | TC   | 23 | 3  |
| 219537 | 30 | 4853873 | 4853896 | 2 | 12 | 24 | TG   | 14 | 10 |
| 219543 | 30 | 4868496 | 4868511 | 2 | 8  | 16 | CA   | 21 | 7  |
| 219544 | 30 | 4870364 | 4870381 | 2 | 9  | 18 | TG   | 16 | 8  |
| 219551 | 30 | 4889141 | 4889176 | 2 | 18 | 36 | CA   | 11 | 17 |
| 219556 | 30 | 4902968 | 4902989 | 2 | 11 | 22 | TG   | 17 | 13 |
| 219558 | 30 | 4907896 | 4907911 | 2 | 8  | 16 | AG   | 25 | 3  |
| 219560 | 30 | 4912196 | 4912209 | 2 | 7  | 14 | CA   | 17 | 4  |
| 219561 | 30 | 4912720 | 4912737 | 2 | 9  | 18 | GT   | 23 | 12 |
| 219563 | 30 | 4916478 | 4916493 | 2 | 8  | 16 | CA   | 26 | 3  |
| 219577 | 30 | 4978187 | 4978206 | 2 | 10 | 20 | AC   | 25 | 6  |
| 219593 | 30 | 5010693 | 5010710 | 2 | 9  | 18 | CA   | 20 | 8  |
| 219595 | 30 | 5032290 | 5032305 | 2 | 8  | 16 | TG   | 25 | 7  |
| 219604 | 30 | 5064986 | 5065013 | 2 | 14 | 28 | TG   | 9  | 9  |
| 219610 | 30 | 5078773 | 5078796 | 2 | 12 | 24 | TG   | 21 | 7  |
| 219613 | 30 | 5082621 | 5082634 | 2 | 7  | 14 | CA   | 28 | 4  |
| 219615 | 30 | 5083023 | 5083048 | 2 | 13 | 26 | CA   | 14 | 8  |
| 219617 | 30 | 5093245 | 5093272 | 2 | 14 | 28 | GT   | 11 | 7  |
| 219639 | 30 | 5170786 | 5170815 | 2 | 15 | 30 | AC   | 10 | 7  |
| 219645 | 30 | 5184737 | 5184778 | 3 | 14 | 42 | ATA  | 11 | 12 |
| 219648 | 30 | 5188306 | 5188326 | 3 | 7  | 21 | AAC  | 11 | 13 |
| 219649 | 30 | 5190234 | 5190257 | 4 | 6  | 24 | ATAG | 19 | 4  |
| 219654 | 30 | 5201839 | 5201856 | 2 | 9  | 18 | AC   | 18 | 6  |
| 219655 | 30 | 5201891 | 5201908 | 2 | 9  | 18 | AC   | 23 | 5  |
| 219656 | 30 | 5203437 | 5203450 | 2 | 7  | 14 | TC   | 17 | 7  |
| 219665 | 30 | 5254995 | 5255009 | 3 | 5  | 15 | ATC  | 27 | 3  |
| 219668 | 30 | 5269274 | 5269303 | 2 | 15 | 30 | CA   | 18 | 9  |
| 219669 | 30 | 5272956 | 5272979 | 4 | 6  | 24 | TATC | 6  | 5  |
| 219670 | 30 | 5273302 | 5273313 | 2 | 6  | 12 | TA   | 12 | 3  |
| 219674 | 30 | 5279689 | 5279712 | 4 | 6  | 24 | ATGG | 27 | 3  |
| 219683 | 30 | 5293260 | 5293293 | 2 | 17 | 34 | AC   | 20 | 18 |
| 219684 | 30 | 5297629 | 5297644 | 4 | 4  | 16 | ACCA | 6  | 3  |
| 219686 | 30 | 5297901 | 5297916 | 4 | 4  | 16 | AAAC | 19 | 4  |
| 219687 | 30 | 5298093 | 5298118 | 2 | 13 | 26 | CA   | 11 | 8  |
| 219692 | 30 | 5311735 | 5311764 | 2 | 15 | 30 | GT   | 8  | 15 |
| 219696 | 30 | 5312214 | 5312235 | 2 | 11 | 22 | AC   | 11 | 6  |
| 219699 | 30 | 5330282 | 5330293 | 2 | 6  | 12 | AT   | 10 | 4  |
| 219703 | 30 | 5337016 | 5337030 | 3 | 5  | 15 | TTC  | 32 | 3  |
| 219710 | 30 | 5354603 | 5354614 | 2 | 6  | 12 | AC   | 34 | 3  |
| 219712 | 30 | 5358919 | 5358930 | 2 | 6  | 12 | AT   | 22 | 8  |
| 219720 | 30 | 5371246 | 5371261 | 4 | 4  | 16 | AAAC | 22 | 3  |
| 219721 | 30 | 5374375 | 5374395 | 3 | 7  | 21 | ATT  | 21 | 9  |
| 219724 | 30 | 5391745 | 5391766 | 2 | 11 | 22 | CA   | 25 | 6  |
| 219731 | 30 | 5407894 | 5407913 | 2 | 10 | 20 | AC   | 10 | 6  |
| 219732 | 30 | 5408031 | 5408050 | 2 | 10 | 20 | CA   | 22 | 9  |
| 219733 | 30 | 5411228 | 5411245 | 3 | 6  | 18 | AAC  | 17 | 4  |
| 219734 | 30 | 5416079 | 5416098 | 4 | 5  | 20 | GCAC | 17 | 12 |
| 219736 | 30 | 5424964 | 5424984 | 3 | 7  | 21 | GGA  | 19 | 4  |
| 219741 | 30 | 5435719 | 5435744 | 2 | 13 | 26 | GT   | 10 | 7  |



|        |    |         |         |   |    |    |      |    |    |
|--------|----|---------|---------|---|----|----|------|----|----|
| 219742 | 30 | 5437639 | 5437659 | 3 | 7  | 21 | CAG  | 24 | 7  |
| 219743 | 30 | 5437776 | 5437801 | 2 | 13 | 26 | GT   | 15 | 6  |
| 219744 | 30 | 5437911 | 5437940 | 2 | 15 | 30 | CA   | 9  | 11 |
| 219745 | 30 | 5438377 | 5438388 | 2 | 6  | 12 | CA   | 30 | 8  |
| 219746 | 30 | 5438857 | 5438880 | 2 | 12 | 24 | AG   | 15 | 3  |
| 219750 | 30 | 5445471 | 5445488 | 2 | 9  | 18 | TG   | 9  | 3  |
| 219754 | 30 | 5448231 | 5448254 | 2 | 12 | 24 | AC   | 21 | 10 |
| 219755 | 30 | 5450513 | 5450540 | 2 | 14 | 28 | TG   | 16 | 12 |
| 219756 | 30 | 5451025 | 5451046 | 2 | 11 | 22 | TC   | 13 | 8  |
| 219762 | 30 | 5460091 | 5460124 | 2 | 17 | 34 | TG   | 12 | 8  |
| 219764 | 30 | 5460336 | 5460355 | 2 | 10 | 20 | AG   | 18 | 4  |
| 219781 | 30 | 5493979 | 5494004 | 2 | 13 | 26 | CA   | 16 | 11 |
| 219784 | 30 | 5496229 | 5496258 | 2 | 15 | 30 | AC   | 17 | 9  |
| 219786 | 30 | 5497830 | 5497875 | 2 | 23 | 46 | CT   | 6  | 8  |
| 219792 | 30 | 5501082 | 5501101 | 2 | 10 | 20 | CA   | 19 | 8  |
| 219799 | 30 | 5511410 | 5511453 | 2 | 22 | 44 | TG   | 8  | 10 |
| 219802 | 30 | 5517145 | 5517160 | 2 | 8  | 16 | TG   | 23 | 7  |
| 219808 | 30 | 5532192 | 5532227 | 2 | 18 | 36 | TG   | 14 | 10 |
| 219819 | 30 | 5540245 | 5540264 | 2 | 10 | 20 | GT   | 22 | 8  |
| 219820 | 30 | 5540406 | 5540419 | 2 | 7  | 14 | GT   | 31 | 9  |
| 219822 | 30 | 5541281 | 5541300 | 2 | 10 | 20 | AC   | 16 | 5  |
| 219823 | 30 | 5541454 | 5541467 | 2 | 7  | 14 | CA   | 22 | 4  |
| 219824 | 30 | 5541561 | 5541580 | 2 | 10 | 20 | AC   | 23 | 11 |
| 219825 | 30 | 5541726 | 5541743 | 2 | 9  | 18 | TG   | 15 | 6  |
| 219826 | 30 | 5541928 | 5541939 | 2 | 6  | 12 | AC   | 16 | 5  |
| 219831 | 30 | 5547785 | 5547814 | 2 | 15 | 30 | TG   | 20 | 9  |
| 219832 | 30 | 5547867 | 5547884 | 2 | 9  | 18 | GT   | 15 | 7  |
| 219833 | 30 | 5547886 | 5547899 | 2 | 7  | 14 | TG   | 19 | 8  |
| 219837 | 30 | 5551085 | 5551104 | 4 | 5  | 20 | CTCA | 28 | 5  |
| 219839 | 30 | 5551417 | 5551430 | 2 | 7  | 14 | AC   | 20 | 5  |
| 219840 | 30 | 5551855 | 5551866 | 2 | 6  | 12 | CA   | 31 | 6  |
| 219841 | 30 | 5552023 | 5552046 | 2 | 12 | 24 | TG   | 20 | 9  |
| 219842 | 30 | 5553400 | 5553417 | 2 | 9  | 18 | GA   | 29 | 3  |
| 219845 | 30 | 5557493 | 5557512 | 4 | 5  | 20 | GCAG | 24 | 3  |
| 219850 | 30 | 5562300 | 5562321 | 2 | 11 | 22 | CA   | 21 | 14 |
| 219851 | 30 | 5562632 | 5562655 | 2 | 12 | 24 | AC   | 16 | 10 |
| 219853 | 30 | 5565797 | 5565822 | 2 | 13 | 26 | AC   | 12 | 8  |
| 219854 | 30 | 5566090 | 5566109 | 2 | 10 | 20 | GT   | 25 | 7  |
| 219855 | 30 | 5566692 | 5566749 | 2 | 29 | 58 | CA   | 6  | 8  |
| 219857 | 30 | 5566857 | 5566882 | 2 | 13 | 26 | CA   | 10 | 16 |
| 219859 | 30 | 5568392 | 5568411 | 2 | 10 | 20 | AC   | 14 | 7  |
| 219861 | 30 | 5568753 | 5568786 | 2 | 17 | 34 | CA   | 16 | 9  |
| 219870 | 30 | 5582540 | 5582557 | 2 | 9  | 18 | GT   | 22 | 3  |
| 219878 | 30 | 5597781 | 5597812 | 2 | 16 | 32 | GT   | 13 | 9  |
| 219879 | 30 | 5598090 | 5598103 | 2 | 7  | 14 | CT   | 27 | 6  |
| 219880 | 30 | 5598385 | 5598400 | 2 | 8  | 16 | CA   | 25 | 9  |
| 219885 | 30 | 5605248 | 5605271 | 2 | 12 | 24 | AC   | 8  | 8  |
| 219886 | 30 | 5606567 | 5606580 | 2 | 7  | 14 | GT   | 21 | 9  |
| 219887 | 30 | 5606581 | 5606594 | 2 | 7  | 14 | GA   | 21 | 8  |
| 219892 | 30 | 5615118 | 5615147 | 2 | 15 | 30 | CA   | 14 | 13 |
| 219902 | 30 | 5616775 | 5616798 | 3 | 8  | 24 | TTC  | 18 | 3  |

|        |    |         |         |   |    |    |      |    |    |
|--------|----|---------|---------|---|----|----|------|----|----|
| 219907 | 30 | 5620302 | 5620325 | 3 | 8  | 24 | GAA  | 8  | 4  |
| 219909 | 30 | 5621196 | 5621223 | 2 | 14 | 28 | GT   | 14 | 7  |
| 219911 | 30 | 5622728 | 5622761 | 2 | 17 | 34 | TG   | 8  | 8  |
| 219912 | 30 | 5623464 | 5623485 | 2 | 11 | 22 | GA   | 18 | 5  |
| 219915 | 30 | 5624854 | 5624879 | 2 | 13 | 26 | CT   | 11 | 8  |
| 219919 | 30 | 5627885 | 5627908 | 2 | 12 | 24 | CA   | 15 | 5  |
| 219921 | 30 | 5630305 | 5630326 | 2 | 11 | 22 | TC   | 18 | 5  |
| 219922 | 30 | 5631057 | 5631072 | 2 | 8  | 16 | GT   | 20 | 6  |
| 219923 | 30 | 5631150 | 5631161 | 2 | 6  | 12 | GT   | 19 | 5  |
| 219924 | 30 | 5631467 | 5631496 | 3 | 10 | 30 | GAG  | 11 | 7  |
| 219925 | 30 | 5632272 | 5632295 | 2 | 12 | 24 | TG   | 12 | 8  |
| 219926 | 30 | 5632383 | 5632397 | 3 | 5  | 15 | CCA  | 19 | 5  |
| 219929 | 30 | 5633472 | 5633511 | 2 | 20 | 40 | TG   | 13 | 12 |
| 219945 | 30 | 5643181 | 5643198 | 2 | 9  | 18 | GT   | 9  | 6  |
| 219949 | 30 | 5646796 | 5646813 | 3 | 6  | 18 | ATC  | 26 | 5  |
| 219958 | 30 | 5660446 | 5660457 | 2 | 6  | 12 | TG   | 14 | 3  |
| 219959 | 30 | 5660481 | 5660496 | 2 | 8  | 16 | TG   | 18 | 6  |
| 219960 | 30 | 5660603 | 5660658 | 2 | 28 | 56 | AC   | 8  | 12 |
| 219961 | 30 | 5660707 | 5660720 | 2 | 7  | 14 | AC   | 29 | 4  |
| 219962 | 30 | 5660837 | 5660868 | 2 | 16 | 32 | GT   | 13 | 7  |
| 219966 | 30 | 5663381 | 5663398 | 2 | 9  | 18 | CT   | 8  | 3  |
| 219967 | 30 | 5663420 | 5663443 | 2 | 12 | 24 | TC   | 11 | 8  |
| 219969 | 30 | 5664598 | 5664631 | 2 | 17 | 34 | TG   | 9  | 9  |
| 219975 | 30 | 5668530 | 5668549 | 2 | 10 | 20 | GT   | 14 | 4  |
| 219981 | 30 | 5671869 | 5671920 | 2 | 26 | 52 | AC   | 16 | 11 |
| 219983 | 30 | 5673988 | 5674001 | 2 | 7  | 14 | TG   | 19 | 4  |
| 219984 | 30 | 5674101 | 5674134 | 2 | 17 | 34 | AC   | 8  | 9  |
| 219990 | 30 | 5679646 | 5679663 | 2 | 9  | 18 | TG   | 19 | 14 |
| 219992 | 30 | 5681563 | 5681582 | 2 | 10 | 20 | GT   | 14 | 6  |
| 219994 | 30 | 5690867 | 5690884 | 2 | 9  | 18 | TG   | 17 | 6  |
| 219999 | 30 | 5693461 | 5693478 | 2 | 9  | 18 | CT   | 26 | 4  |
| 220003 | 30 | 5696929 | 5696940 | 2 | 6  | 12 | TG   | 26 | 3  |
| 220004 | 30 | 5697044 | 5697061 | 3 | 6  | 18 | GAG  | 13 | 5  |
| 220006 | 30 | 5697880 | 5697913 | 2 | 17 | 34 | AC   | 7  | 7  |
| 220008 | 30 | 5700579 | 5700614 | 3 | 12 | 36 | CTG  | 20 | 9  |
| 220009 | 30 | 5700728 | 5700745 | 2 | 9  | 18 | CT   | 13 | 4  |
| 220014 | 30 | 5703711 | 5703738 | 2 | 14 | 28 | CA   | 17 | 10 |
| 220015 | 30 | 5703839 | 5703854 | 2 | 8  | 16 | TG   | 26 | 9  |
| 220024 | 30 | 5712400 | 5712419 | 2 | 10 | 20 | CA   | 20 | 11 |
| 220029 | 30 | 5718129 | 5718144 | 2 | 8  | 16 | TG   | 20 | 5  |
| 220031 | 30 | 5718904 | 5718963 | 2 | 30 | 60 | TG   | 8  | 8  |
| 220033 | 30 | 5719521 | 5719534 | 2 | 7  | 14 | GT   | 24 | 8  |
| 220034 | 30 | 5719657 | 5719694 | 2 | 19 | 38 | TG   | 9  | 12 |
| 220035 | 30 | 5719871 | 5719886 | 2 | 8  | 16 | AC   | 18 | 7  |
| 220036 | 30 | 5719890 | 5719905 | 2 | 8  | 16 | CA   | 18 | 8  |
| 220037 | 30 | 5720216 | 5720247 | 4 | 8  | 32 | TTTC | 15 | 10 |
| 220045 | 30 | 5732638 | 5732655 | 2 | 9  | 18 | TG   | 8  | 4  |
| 220047 | 30 | 5732831 | 5732856 | 2 | 13 | 26 | AC   | 14 | 7  |
| 220048 | 30 | 5733467 | 5733492 | 2 | 13 | 26 | CA   | 20 | 12 |
| 220050 | 30 | 5734117 | 5734130 | 2 | 7  | 14 | AT   | 11 | 6  |
| 220054 | 30 | 5737336 | 5737355 | 2 | 10 | 20 | TG   | 19 | 5  |

|        |    |         |         |   |    |    |      |    |    |
|--------|----|---------|---------|---|----|----|------|----|----|
| 220055 | 30 | 5743427 | 5743460 | 2 | 17 | 34 | TC   | 6  | 6  |
| 220058 | 30 | 5744465 | 5744484 | 2 | 10 | 20 | GT   | 11 | 11 |
| 220062 | 30 | 5748011 | 5748048 | 2 | 19 | 38 | CA   | 8  | 8  |
| 220063 | 30 | 5748091 | 5748112 | 2 | 11 | 22 | CA   | 8  | 4  |
| 220075 | 30 | 5751031 | 5751044 | 2 | 7  | 14 | GT   | 14 | 7  |
| 220076 | 30 | 5751045 | 5751062 | 2 | 9  | 18 | GA   | 16 | 7  |
| 220089 | 30 | 5761188 | 5761201 | 2 | 7  | 14 | TA   | 14 | 3  |
| 220094 | 30 | 5766214 | 5766233 | 2 | 10 | 20 | TG   | 19 | 4  |
| 220098 | 30 | 5767115 | 5767140 | 2 | 13 | 26 | CA   | 16 | 5  |
| 220099 | 30 | 5768666 | 5768677 | 2 | 6  | 12 | CA   | 17 | 3  |
| 220101 | 30 | 5768858 | 5768881 | 2 | 12 | 24 | CA   | 17 | 8  |
| 220102 | 30 | 5769053 | 5769070 | 2 | 9  | 18 | TG   | 15 | 6  |
| 220105 | 30 | 5770071 | 5770124 | 2 | 27 | 54 | AC   | 10 | 7  |
| 220112 | 30 | 5772090 | 5772117 | 2 | 14 | 28 | CA   | 15 | 4  |
| 220115 | 30 | 5773689 | 5773710 | 2 | 11 | 22 | GT   | 22 | 3  |
| 220117 | 30 | 5773873 | 5773888 | 2 | 8  | 16 | GT   | 11 | 4  |
| 220129 | 30 | 5790166 | 5790181 | 2 | 8  | 16 | CA   | 19 | 6  |
| 220132 | 30 | 5791882 | 5791893 | 2 | 6  | 12 | AC   | 21 | 4  |
| 220133 | 30 | 5792170 | 5792221 | 2 | 26 | 52 | CA   | 7  | 7  |
| 220141 | 30 | 5805317 | 5805340 | 2 | 12 | 24 | GT   | 12 | 10 |
| 220142 | 30 | 5805510 | 5805525 | 2 | 8  | 16 | CA   | 20 | 7  |
| 220143 | 30 | 5805642 | 5805657 | 2 | 8  | 16 | TG   | 14 | 14 |
| 220149 | 30 | 5810373 | 5810394 | 2 | 11 | 22 | GT   | 21 | 6  |
| 220157 | 30 | 5812435 | 5812462 | 2 | 14 | 28 | TG   | 13 | 8  |
| 220160 | 30 | 5812914 | 5812927 | 2 | 7  | 14 | AG   | 22 | 5  |
| 220169 | 30 | 5820897 | 5820916 | 2 | 10 | 20 | TC   | 22 | 5  |
| 220172 | 30 | 5821900 | 5821921 | 2 | 11 | 22 | CA   | 12 | 9  |
| 220175 | 30 | 5822446 | 5822463 | 3 | 6  | 18 | AGG  | 18 | 3  |
| 220179 | 30 | 5824064 | 5824087 | 2 | 12 | 24 | AC   | 6  | 4  |
| 220181 | 30 | 5825008 | 5825025 | 2 | 9  | 18 | AG   | 6  | 6  |
| 220182 | 30 | 5832409 | 5832424 | 2 | 8  | 16 | TG   | 11 | 8  |
| 220183 | 30 | 5833522 | 5833536 | 3 | 5  | 15 | GCT  | 20 | 3  |
| 220186 | 30 | 5835330 | 5835349 | 2 | 10 | 20 | TC   | 10 | 4  |
| 220189 | 30 | 5835383 | 5835394 | 2 | 6  | 12 | CA   | 10 | 3  |
| 220191 | 30 | 5835630 | 5835645 | 2 | 8  | 16 | AC   | 6  | 7  |
| 220192 | 30 | 5835648 | 5835663 | 2 | 8  | 16 | AC   | 6  | 8  |
| 220193 | 30 | 5835805 | 5835832 | 2 | 14 | 28 | CA   | 16 | 8  |
| 220194 | 30 | 5836553 | 5836567 | 3 | 5  | 15 | AAG  | 22 | 5  |
| 220195 | 30 | 5836773 | 5836794 | 2 | 11 | 22 | GT   | 17 | 6  |
| 220196 | 30 | 5836940 | 5836961 | 2 | 11 | 22 | CT   | 17 | 6  |
| 220197 | 30 | 5837060 | 5837073 | 2 | 7  | 14 | TC   | 6  | 3  |
| 220199 | 30 | 5837323 | 5837362 | 4 | 10 | 40 | TCAG | 18 | 4  |
| 220200 | 30 | 5837666 | 5837693 | 2 | 14 | 28 | AC   | 12 | 10 |
| 220201 | 30 | 5839112 | 5839129 | 2 | 9  | 18 | CT   | 29 | 4  |
| 220205 | 30 | 5842500 | 5842517 | 2 | 9  | 18 | GA   | 14 | 5  |
| 220210 | 30 | 5844108 | 5844119 | 2 | 6  | 12 | CA   | 21 | 3  |
| 220212 | 30 | 5846489 | 5846506 | 2 | 9  | 18 | CA   | 23 | 4  |
| 220215 | 30 | 5849036 | 5849051 | 4 | 4  | 16 | AAAT | 9  | 6  |
| 220228 | 30 | 5862962 | 5862991 | 3 | 10 | 30 | GAG  | 15 | 10 |
| 220231 | 30 | 5866607 | 5866622 | 4 | 4  | 16 | CAGA | 26 | 6  |
| 220233 | 30 | 5868212 | 5868225 | 2 | 7  | 14 | TG   | 17 | 5  |

|        |    |         |         |   |    |    |      |    |    |
|--------|----|---------|---------|---|----|----|------|----|----|
| 220234 | 30 | 5868372 | 5868385 | 2 | 7  | 14 | CT   | 24 | 8  |
| 220238 | 30 | 5871408 | 5871441 | 2 | 17 | 34 | AC   | 20 | 11 |
| 220239 | 30 | 5873262 | 5873287 | 2 | 13 | 26 | CA   | 20 | 6  |
| 220250 | 30 | 5879373 | 5879394 | 2 | 11 | 22 | CA   | 27 | 4  |
| 220251 | 30 | 5879948 | 5879961 | 2 | 7  | 14 | AC   | 13 | 4  |
| 220257 | 30 | 5890914 | 5890939 | 2 | 13 | 26 | GT   | 9  | 6  |
| 220258 | 30 | 5891026 | 5891039 | 2 | 7  | 14 | CA   | 24 | 5  |
| 220266 | 30 | 5901774 | 5901797 | 2 | 12 | 24 | AC   | 24 | 7  |
| 220268 | 30 | 5904982 | 5905021 | 2 | 20 | 40 | GT   | 6  | 7  |
| 220270 | 30 | 5905197 | 5905224 | 2 | 14 | 28 | CA   | 9  | 4  |
| 220271 | 30 | 5907521 | 5907534 | 2 | 7  | 14 | TC   | 20 | 3  |
| 220273 | 30 | 5911272 | 5911283 | 2 | 6  | 12 | CT   | 22 | 3  |
| 220274 | 30 | 5911285 | 5911296 | 2 | 6  | 12 | TC   | 23 | 3  |
| 220285 | 30 | 5936197 | 5936210 | 2 | 7  | 14 | CA   | 6  | 4  |
| 220290 | 30 | 5958855 | 5958874 | 2 | 10 | 20 | AC   | 13 | 8  |
| 220292 | 30 | 5961673 | 5961704 | 2 | 16 | 32 | AC   | 13 | 12 |
| 220294 | 30 | 5964185 | 5964196 | 2 | 6  | 12 | AT   | 9  | 4  |
| 220305 | 30 | 5977759 | 5977774 | 2 | 8  | 16 | CA   | 23 | 5  |
| 220308 | 30 | 5988183 | 5988210 | 2 | 14 | 28 | GT   | 11 | 7  |
| 220309 | 30 | 5988331 | 5988352 | 2 | 11 | 22 | AC   | 19 | 7  |
| 220312 | 30 | 5992889 | 5992910 | 2 | 11 | 22 | CA   | 18 | 7  |
| 220331 | 30 | 6002558 | 6002585 | 4 | 7  | 28 | TATC | 24 | 5  |
| 220335 | 30 | 6007472 | 6007507 | 2 | 18 | 36 | GT   | 9  | 7  |
| 220340 | 30 | 6014597 | 6014624 | 2 | 14 | 28 | TG   | 8  | 7  |
| 220341 | 30 | 6014844 | 6014859 | 2 | 8  | 16 | CA   | 11 | 4  |
| 220345 | 30 | 6017041 | 6017052 | 2 | 6  | 12 | GA   | 23 | 3  |
| 220346 | 30 | 6017536 | 6017549 | 2 | 7  | 14 | AC   | 18 | 5  |
| 220351 | 30 | 6022386 | 6022419 | 2 | 17 | 34 | TG   | 15 | 10 |
| 220352 | 30 | 6022512 | 6022535 | 2 | 12 | 24 | TG   | 13 | 9  |
| 220353 | 30 | 6022630 | 6022653 | 2 | 12 | 24 | AG   | 21 | 5  |
| 220355 | 30 | 6026412 | 6026455 | 2 | 22 | 44 | GA   | 7  | 6  |
| 220356 | 30 | 6027353 | 6027380 | 2 | 14 | 28 | TG   | 7  | 9  |
| 220358 | 30 | 6032029 | 6032042 | 2 | 7  | 14 | TG   | 29 | 3  |
| 220362 | 30 | 6032774 | 6032787 | 2 | 7  | 14 | TC   | 20 | 6  |
| 220363 | 30 | 6033127 | 6033156 | 2 | 15 | 30 | CA   | 12 | 5  |
| 220364 | 30 | 6033286 | 6033297 | 2 | 6  | 12 | AC   | 22 | 4  |
| 220365 | 30 | 6033427 | 6033442 | 2 | 8  | 16 | CA   | 31 | 9  |
| 220371 | 30 | 6041976 | 6041999 | 2 | 12 | 24 | CA   | 21 | 10 |
| 220375 | 30 | 6045569 | 6045580 | 2 | 6  | 12 | GT   | 18 | 10 |
| 220376 | 30 | 6045584 | 6045595 | 2 | 6  | 12 | TG   | 11 | 4  |
| 220379 | 30 | 6047696 | 6047721 | 2 | 13 | 26 | CA   | 18 | 10 |
| 220380 | 30 | 6049902 | 6049921 | 4 | 5  | 20 | TTTG | 8  | 4  |
| 220382 | 30 | 6052850 | 6052879 | 2 | 15 | 30 | AC   | 16 | 10 |
| 220383 | 30 | 6052904 | 6052917 | 2 | 7  | 14 | AC   | 23 | 4  |
| 220384 | 30 | 6060119 | 6060134 | 2 | 8  | 16 | TG   | 13 | 4  |
| 220387 | 30 | 6067380 | 6067413 | 2 | 17 | 34 | AG   | 13 | 7  |
| 220388 | 30 | 6068981 | 6069028 | 2 | 24 | 48 | CA   | 10 | 15 |
| 220389 | 30 | 6069372 | 6069395 | 2 | 12 | 24 | CT   | 14 | 6  |
| 220392 | 30 | 6071165 | 6071180 | 2 | 8  | 16 | CA   | 6  | 9  |
| 220394 | 30 | 6071389 | 6071400 | 2 | 6  | 12 | AG   | 28 | 3  |
| 220398 | 30 | 6073693 | 6073722 | 2 | 15 | 30 | GT   | 12 | 13 |

|        |    |         |         |   |    |    |      |    |    |
|--------|----|---------|---------|---|----|----|------|----|----|
| 220399 | 30 | 6073870 | 6073881 | 2 | 6  | 12 | TG   | 19 | 3  |
| 220400 | 30 | 6073886 | 6073901 | 2 | 8  | 16 | TG   | 21 | 4  |
| 220401 | 30 | 6074015 | 6074040 | 2 | 13 | 26 | TG   | 11 | 6  |
| 220402 | 30 | 6074193 | 6074214 | 2 | 11 | 22 | CA   | 21 | 12 |
| 220404 | 30 | 6075014 | 6075041 | 2 | 14 | 28 | TG   | 25 | 13 |
| 220405 | 30 | 6075220 | 6075237 | 2 | 9  | 18 | CA   | 29 | 5  |
| 220407 | 30 | 6077245 | 6077264 | 2 | 10 | 20 | CA   | 11 | 10 |
| 220410 | 30 | 6078537 | 6078560 | 2 | 12 | 24 | GT   | 6  | 6  |
| 220414 | 30 | 6079503 | 6079522 | 2 | 10 | 20 | CA   | 12 | 3  |
| 220416 | 30 | 6079632 | 6079649 | 2 | 9  | 18 | TG   | 16 | 7  |
| 220418 | 30 | 6081423 | 6081436 | 2 | 7  | 14 | CA   | 25 | 4  |
| 220419 | 30 | 6081593 | 6081604 | 2 | 6  | 12 | GT   | 7  | 4  |
| 220420 | 30 | 6081617 | 6081630 | 2 | 7  | 14 | GA   | 18 | 5  |
| 220421 | 30 | 6085604 | 6085651 | 4 | 12 | 48 | GGAA | 19 | 8  |
| 220422 | 30 | 6088581 | 6088600 | 2 | 10 | 20 | CA   | 24 | 8  |
| 220424 | 30 | 6088852 | 6088871 | 2 | 10 | 20 | TG   | 15 | 4  |
| 220425 | 30 | 6089282 | 6089297 | 2 | 8  | 16 | CT   | 20 | 3  |
| 220426 | 30 | 6089426 | 6089447 | 2 | 11 | 22 | AC   | 20 | 8  |
| 220427 | 30 | 6089674 | 6089689 | 2 | 8  | 16 | CA   | 22 | 10 |
| 220428 | 30 | 6090341 | 6090364 | 2 | 12 | 24 | CA   | 12 | 9  |
| 220429 | 30 | 6090708 | 6090733 | 2 | 13 | 26 | TC   | 9  | 5  |
| 220431 | 30 | 6091135 | 6091170 | 2 | 18 | 36 | GT   | 14 | 11 |
| 220432 | 30 | 6091291 | 6091322 | 2 | 16 | 32 | CA   | 9  | 9  |
| 220433 | 30 | 6091434 | 6091451 | 2 | 9  | 18 | AC   | 18 | 3  |
| 220434 | 30 | 6091534 | 6091565 | 2 | 16 | 32 | CA   | 8  | 8  |
| 220435 | 30 | 6091635 | 6091652 | 2 | 9  | 18 | AC   | 19 | 5  |
| 220436 | 30 | 6092043 | 6092066 | 2 | 12 | 24 | GT   | 17 | 10 |
| 220439 | 30 | 6092951 | 6092962 | 2 | 6  | 12 | AG   | 11 | 4  |
| 220444 | 30 | 6096876 | 6096893 | 2 | 9  | 18 | TG   | 27 | 6  |
| 220445 | 30 | 6097025 | 6097056 | 2 | 16 | 32 | CA   | 14 | 12 |
| 220453 | 30 | 6099435 | 6099456 | 2 | 11 | 22 | TG   | 18 | 9  |
| 220457 | 30 | 6101271 | 6101286 | 4 | 4  | 16 | AAAC | 27 | 4  |
| 220466 | 30 | 6105635 | 6105652 | 3 | 6  | 18 | GAG  | 19 | 5  |
| 220468 | 30 | 6105969 | 6105986 | 2 | 9  | 18 | CT   | 15 | 8  |
| 220469 | 30 | 6106176 | 6106201 | 2 | 13 | 26 | AC   | 15 | 14 |
| 220470 | 30 | 6106528 | 6106554 | 3 | 9  | 27 | GAG  | 9  | 3  |
| 220472 | 30 | 6106748 | 6106761 | 2 | 7  | 14 | GT   | 12 | 4  |
| 220478 | 30 | 6107898 | 6107909 | 2 | 6  | 12 | CA   | 16 | 6  |
| 220480 | 30 | 6108469 | 6108483 | 3 | 5  | 15 | TCT  | 15 | 9  |
| 220481 | 30 | 6108484 | 6108498 | 3 | 5  | 15 | TAT  | 20 | 11 |
| 220482 | 30 | 6108843 | 6108862 | 2 | 10 | 20 | CA   | 13 | 10 |
| 220488 | 30 | 6110349 | 6110368 | 2 | 10 | 20 | GT   | 21 | 14 |
| 220490 | 30 | 6111459 | 6111472 | 2 | 7  | 14 | TC   | 19 | 10 |
| 220492 | 30 | 6112342 | 6112356 | 3 | 5  | 15 | AAG  | 15 | 6  |
| 220493 | 30 | 6114742 | 6114761 | 2 | 10 | 20 | TG   | 10 | 6  |
| 220495 | 30 | 6115279 | 6115310 | 2 | 16 | 32 | AC   | 10 | 7  |
| 220498 | 30 | 6123448 | 6123463 | 2 | 8  | 16 | TG   | 19 | 3  |
| 220499 | 30 | 6124047 | 6124072 | 2 | 13 | 26 | GT   | 17 | 13 |
| 220500 | 30 | 6124337 | 6124358 | 2 | 11 | 22 | GT   | 7  | 7  |
| 220501 | 30 | 6124529 | 6124556 | 2 | 14 | 28 | TG   | 18 | 10 |
| 220503 | 30 | 6126090 | 6126123 | 2 | 17 | 34 | CA   | 13 | 5  |

|        |    |         |         |   |    |    |      |    |    |
|--------|----|---------|---------|---|----|----|------|----|----|
| 220504 | 30 | 6126275 | 6126312 | 2 | 19 | 38 | CA   | 12 | 13 |
| 220505 | 30 | 6126418 | 6126455 | 2 | 19 | 38 | CA   | 12 | 11 |
| 220510 | 30 | 6131397 | 6131410 | 2 | 7  | 14 | GT   | 22 | 5  |
| 220511 | 30 | 6131770 | 6131801 | 2 | 16 | 32 | CA   | 21 | 7  |
| 220512 | 30 | 6132664 | 6132691 | 2 | 14 | 28 | TG   | 16 | 7  |
| 220515 | 30 | 6134061 | 6134082 | 2 | 11 | 22 | GT   | 11 | 6  |
| 220517 | 30 | 6135925 | 6135948 | 4 | 6  | 24 | GGAG | 9  | 3  |
| 220519 | 30 | 6137142 | 6137167 | 2 | 13 | 26 | GT   | 13 | 7  |
| 220526 | 30 | 6148127 | 6148144 | 2 | 9  | 18 | AC   | 15 | 7  |
| 220532 | 30 | 6161839 | 6161862 | 4 | 6  | 24 | TTTA | 14 | 10 |
| 220534 | 30 | 6166298 | 6166309 | 2 | 6  | 12 | CA   | 17 | 6  |
| 220535 | 30 | 6166443 | 6166486 | 2 | 22 | 44 | AC   | 9  | 12 |
| 220536 | 30 | 6166767 | 6166784 | 2 | 9  | 18 | GT   | 19 | 8  |
| 220538 | 30 | 6167822 | 6167841 | 2 | 10 | 20 | CA   | 21 | 5  |
| 220553 | 30 | 6195055 | 6195094 | 2 | 20 | 40 | TG   | 16 | 9  |
| 220557 | 30 | 6202634 | 6202647 | 2 | 7  | 14 | CA   | 19 | 4  |
| 220559 | 30 | 6205499 | 6205513 | 3 | 5  | 15 | ATT  | 10 | 4  |
| 220561 | 30 | 6207217 | 6207228 | 2 | 6  | 12 | TG   | 15 | 3  |
| 220572 | 30 | 6221150 | 6221167 | 3 | 6  | 18 | TTC  | 8  | 4  |
| 220573 | 30 | 6221277 | 6221290 | 2 | 7  | 14 | AT   | 16 | 7  |
| 220574 | 30 | 6221528 | 6221541 | 2 | 7  | 14 | CT   | 20 | 6  |
| 220582 | 30 | 6226971 | 6226984 | 2 | 7  | 14 | CA   | 18 | 3  |
| 220583 | 30 | 6227222 | 6227245 | 2 | 12 | 24 | CA   | 8  | 5  |
| 220588 | 30 | 6234799 | 6234822 | 2 | 12 | 24 | GA   | 15 | 4  |
| 220589 | 30 | 6239077 | 6239122 | 2 | 23 | 46 | CA   | 14 | 15 |
| 220590 | 30 | 6245112 | 6245138 | 3 | 9  | 27 | TTC  | 20 | 4  |
| 220596 | 30 | 6255110 | 6255131 | 2 | 11 | 22 | CA   | 21 | 8  |
| 220597 | 30 | 6255893 | 6255930 | 2 | 19 | 38 | TG   | 11 | 10 |
| 220599 | 30 | 6259803 | 6259854 | 4 | 13 | 52 | TCAT | 21 | 10 |
| 220604 | 30 | 6263477 | 6263520 | 4 | 11 | 44 | AAGA | 13 | 11 |
| 220611 | 30 | 6272637 | 6272652 | 2 | 8  | 16 | TA   | 14 | 3  |
| 220617 | 30 | 6279097 | 6279114 | 2 | 9  | 18 | AG   | 21 | 4  |
| 220621 | 30 | 6281968 | 6281995 | 2 | 14 | 28 | CA   | 17 | 8  |
| 220622 | 30 | 6282120 | 6282137 | 3 | 6  | 18 | CAT  | 21 | 6  |
| 220631 | 30 | 6302773 | 6302786 | 2 | 7  | 14 | CA   | 13 | 5  |
| 220633 | 30 | 6306551 | 6306566 | 2 | 8  | 16 | AC   | 17 | 3  |
| 220634 | 30 | 6307280 | 6307291 | 2 | 6  | 12 | AC   | 30 | 4  |
| 220635 | 30 | 6307476 | 6307497 | 2 | 11 | 22 | AC   | 14 | 6  |
| 220637 | 30 | 6307624 | 6307639 | 2 | 8  | 16 | TG   | 23 | 5  |
| 220643 | 30 | 6312190 | 6312204 | 3 | 5  | 15 | ATT  | 16 | 3  |
| 220644 | 30 | 6312961 | 6312984 | 2 | 12 | 24 | CA   | 19 | 5  |
| 220645 | 30 | 6313160 | 6313171 | 2 | 6  | 12 | TG   | 12 | 5  |
| 220646 | 30 | 6313481 | 6313500 | 2 | 10 | 20 | TG   | 24 | 4  |
| 220647 | 30 | 6313635 | 6313648 | 2 | 7  | 14 | CA   | 21 | 5  |
| 220651 | 30 | 6317626 | 6317673 | 2 | 24 | 48 | GT   | 17 | 10 |
| 220654 | 30 | 6321579 | 6321602 | 2 | 12 | 24 | GT   | 15 | 9  |
| 220656 | 30 | 6322588 | 6322607 | 2 | 10 | 20 | TG   | 19 | 7  |
| 220658 | 30 | 6327493 | 6327518 | 2 | 13 | 26 | GT   | 18 | 4  |
| 220662 | 30 | 6330378 | 6330391 | 2 | 7  | 14 | GT   | 20 | 4  |
| 220663 | 30 | 6332086 | 6332106 | 3 | 7  | 21 | CTG  | 27 | 4  |
| 220664 | 30 | 6333200 | 6333233 | 2 | 17 | 34 | GT   | 14 | 10 |

|        |    |         |         |   |    |    |      |    |    |
|--------|----|---------|---------|---|----|----|------|----|----|
| 220666 | 30 | 6333545 | 6333564 | 2 | 10 | 20 | AC   | 12 | 4  |
| 220670 | 30 | 6336491 | 6336516 | 2 | 13 | 26 | AC   | 11 | 7  |
| 220674 | 30 | 6338697 | 6338724 | 4 | 7  | 28 | ATGG | 24 | 3  |
| 220683 | 30 | 6344290 | 6344307 | 2 | 9  | 18 | TG   | 21 | 8  |
| 220686 | 30 | 6345256 | 6345277 | 2 | 11 | 22 | GT   | 18 | 8  |
| 220688 | 30 | 6345602 | 6345631 | 2 | 15 | 30 | GT   | 8  | 6  |
| 220690 | 30 | 6347807 | 6347830 | 2 | 12 | 24 | GT   | 15 | 14 |
| 220691 | 30 | 6347962 | 6347981 | 2 | 10 | 20 | GT   | 17 | 9  |
| 220692 | 30 | 6348125 | 6348146 | 2 | 11 | 22 | CA   | 16 | 5  |
| 220694 | 30 | 6350922 | 6350935 | 2 | 7  | 14 | CT   | 21 | 4  |
| 220700 | 30 | 6354695 | 6354710 | 2 | 8  | 16 | CA   | 19 | 9  |
| 220701 | 30 | 6355502 | 6355519 | 2 | 9  | 18 | AC   | 24 | 5  |
| 220704 | 30 | 6362564 | 6362575 | 2 | 6  | 12 | GA   | 29 | 3  |
| 220707 | 30 | 6367748 | 6367781 | 2 | 17 | 34 | CA   | 22 | 11 |
| 220713 | 30 | 6370401 | 6370415 | 3 | 5  | 15 | GAG  | 18 | 5  |
| 220719 | 30 | 6373180 | 6373191 | 2 | 6  | 12 | GT   | 28 | 3  |
| 220720 | 30 | 6373314 | 6373333 | 2 | 10 | 20 | GT   | 13 | 7  |
| 220721 | 30 | 6373504 | 6373531 | 2 | 14 | 28 | GT   | 22 | 16 |
| 220722 | 30 | 6373672 | 6373695 | 2 | 12 | 24 | GT   | 19 | 10 |
| 220724 | 30 | 6374585 | 6374604 | 2 | 10 | 20 | GT   | 15 | 8  |
| 220725 | 30 | 6374674 | 6374703 | 2 | 15 | 30 | AC   | 14 | 8  |
| 220726 | 30 | 6374995 | 6375014 | 2 | 10 | 20 | AG   | 23 | 9  |
| 220727 | 30 | 6375144 | 6375167 | 3 | 8  | 24 | AGG  | 24 | 6  |
| 220731 | 30 | 6376040 | 6376063 | 2 | 12 | 24 | GT   | 25 | 16 |
| 220732 | 30 | 6376222 | 6376239 | 2 | 9  | 18 | AC   | 17 | 11 |
| 220733 | 30 | 6376437 | 6376458 | 2 | 11 | 22 | CA   | 25 | 14 |
| 220741 | 30 | 6381198 | 6381215 | 2 | 9  | 18 | AC   | 18 | 7  |
| 220742 | 30 | 6381218 | 6381229 | 2 | 6  | 12 | AC   | 16 | 5  |
| 220743 | 30 | 6383064 | 6383077 | 2 | 7  | 14 | GT   | 19 | 12 |
| 220745 | 30 | 6383242 | 6383253 | 2 | 6  | 12 | AC   | 15 | 6  |
| 220746 | 30 | 6383255 | 6383266 | 2 | 6  | 12 | CA   | 22 | 11 |
| 220748 | 30 | 6384709 | 6384736 | 2 | 14 | 28 | AC   | 15 | 10 |
| 220750 | 30 | 6387140 | 6387159 | 2 | 10 | 20 | TG   | 10 | 8  |
| 220754 | 30 | 6390088 | 6390103 | 2 | 8  | 16 | CA   | 19 | 9  |
| 220759 | 30 | 6398456 | 6398471 | 2 | 8  | 16 | CA   | 26 | 4  |
| 220761 | 30 | 6399861 | 6399880 | 2 | 10 | 20 | CA   | 13 | 8  |
| 220768 | 30 | 6428657 | 6428676 | 4 | 5  | 20 | ATCC | 31 | 3  |
| 220771 | 30 | 6435841 | 6435868 | 2 | 14 | 28 | GT   | 21 | 7  |
| 220779 | 30 | 6453013 | 6453050 | 2 | 19 | 38 | AC   | 8  | 5  |
| 220786 | 30 | 6470957 | 6470974 | 2 | 9  | 18 | GT   | 20 | 3  |
| 220793 | 30 | 6479960 | 6479999 | 2 | 20 | 40 | TG   | 13 | 12 |
| 220812 | 31 | 43667   | 43678   | 2 | 6  | 12 | GA   | 21 | 4  |
| 220813 | 31 | 43711   | 43728   | 2 | 9  | 18 | GT   | 12 | 8  |
| 220814 | 31 | 45289   | 45300   | 2 | 6  | 12 | AT   | 11 | 8  |
| 220819 | 31 | 93795   | 93818   | 2 | 12 | 24 | CA   | 25 | 12 |
| 220820 | 31 | 99348   | 99375   | 2 | 14 | 28 | TG   | 15 | 9  |
| 220827 | 31 | 123072  | 123095  | 3 | 8  | 24 | TGA  | 24 | 6  |
| 220836 | 31 | 143770  | 143787  | 2 | 9  | 18 | GT   | 19 | 6  |
| 220842 | 31 | 163496  | 163511  | 2 | 8  | 16 | CA   | 22 | 8  |
| 220844 | 31 | 174438  | 174457  | 2 | 10 | 20 | TC   | 22 | 4  |
| 220845 | 31 | 176297  | 176312  | 4 | 4  | 16 | TGAG | 26 | 3  |

|        |    |        |        |   |    |    |      |    |    |
|--------|----|--------|--------|---|----|----|------|----|----|
| 220858 | 31 | 205849 | 205869 | 3 | 7  | 21 | AGG  | 23 | 3  |
| 220861 | 31 | 210681 | 210702 | 2 | 11 | 22 | AC   | 17 | 8  |
| 220862 | 31 | 215687 | 215724 | 2 | 19 | 38 | TG   | 13 | 9  |
| 220868 | 31 | 231725 | 231736 | 2 | 6  | 12 | AT   | 24 | 6  |
| 220869 | 31 | 236584 | 236609 | 2 | 13 | 26 | AC   | 16 | 5  |
| 220879 | 31 | 255422 | 255435 | 2 | 7  | 14 | AC   | 16 | 4  |
| 220880 | 31 | 257144 | 257169 | 2 | 13 | 26 | TG   | 21 | 7  |
| 220881 | 31 | 260993 | 261024 | 2 | 16 | 32 | CA   | 10 | 9  |
| 220886 | 31 | 267258 | 267273 | 2 | 8  | 16 | GT   | 19 | 12 |
| 220893 | 31 | 271018 | 271039 | 2 | 11 | 22 | TG   | 11 | 7  |
| 220895 | 31 | 273651 | 273674 | 3 | 8  | 24 | TTC  | 18 | 6  |
| 220901 | 31 | 285403 | 285426 | 2 | 12 | 24 | GA   | 23 | 3  |
| 220903 | 31 | 286631 | 286642 | 2 | 6  | 12 | CT   | 23 | 5  |
| 220908 | 31 | 302224 | 302237 | 2 | 7  | 14 | GT   | 15 | 5  |
| 220909 | 31 | 302714 | 302729 | 2 | 8  | 16 | GT   | 21 | 4  |
| 220912 | 31 | 303510 | 303541 | 2 | 16 | 32 | GT   | 20 | 5  |
| 220926 | 31 | 326785 | 326806 | 2 | 11 | 22 | GT   | 18 | 8  |
| 220932 | 31 | 342936 | 342983 | 2 | 24 | 48 | TG   | 8  | 10 |
| 220934 | 31 | 347168 | 347185 | 2 | 9  | 18 | GT   | 23 | 4  |
| 220935 | 31 | 349641 | 349660 | 2 | 10 | 20 | GT   | 12 | 4  |
| 220936 | 31 | 350270 | 350281 | 2 | 6  | 12 | AT   | 20 | 3  |
| 220939 | 31 | 362269 | 362280 | 2 | 6  | 12 | CA   | 18 | 7  |
| 220942 | 31 | 365175 | 365208 | 2 | 17 | 34 | TG   | 14 | 14 |
| 220955 | 31 | 379422 | 379453 | 2 | 16 | 32 | GT   | 9  | 10 |
| 220956 | 31 | 379593 | 379628 | 2 | 18 | 36 | AC   | 14 | 17 |
| 220962 | 31 | 391059 | 391084 | 2 | 13 | 26 | TG   | 16 | 8  |
| 220965 | 31 | 393809 | 393850 | 2 | 21 | 42 | GT   | 7  | 11 |
| 220967 | 31 | 394244 | 394270 | 3 | 9  | 27 | GAG  | 19 | 4  |
| 220972 | 31 | 401339 | 401376 | 2 | 19 | 38 | CA   | 17 | 10 |
| 220974 | 31 | 408617 | 408650 | 2 | 17 | 34 | GT   | 7  | 7  |
| 220975 | 31 | 412941 | 412970 | 2 | 15 | 30 | TG   | 11 | 7  |
| 220976 | 31 | 416423 | 416452 | 2 | 15 | 30 | CT   | 15 | 8  |
| 220978 | 31 | 421286 | 421305 | 2 | 10 | 20 | CA   | 23 | 5  |
| 220982 | 31 | 424370 | 424427 | 2 | 29 | 58 | GT   | 6  | 12 |
| 220984 | 31 | 428072 | 428087 | 4 | 4  | 16 | ATCA | 25 | 4  |
| 220985 | 31 | 428972 | 428997 | 2 | 13 | 26 | TG   | 14 | 9  |
| 220988 | 31 | 438698 | 438715 | 2 | 9  | 18 | TC   | 12 | 4  |
| 220991 | 31 | 439777 | 439788 | 2 | 6  | 12 | TA   | 15 | 3  |
| 220993 | 31 | 440212 | 440239 | 2 | 14 | 28 | TG   | 8  | 11 |
| 220996 | 31 | 440507 | 440528 | 2 | 11 | 22 | AC   | 10 | 7  |
| 220997 | 31 | 440860 | 440891 | 2 | 16 | 32 | AC   | 6  | 10 |
| 220999 | 31 | 441388 | 441421 | 2 | 17 | 34 | TG   | 27 | 12 |
| 221002 | 31 | 444777 | 444803 | 3 | 9  | 27 | CCT  | 22 | 6  |
| 221003 | 31 | 447872 | 447897 | 2 | 13 | 26 | TG   | 11 | 10 |
| 221005 | 31 | 450228 | 450242 | 3 | 5  | 15 | AAG  | 21 | 7  |
| 221006 | 31 | 452024 | 452038 | 3 | 5  | 15 | CTG  | 19 | 3  |
| 221012 | 31 | 481782 | 481801 | 4 | 5  | 20 | TGAA | 28 | 4  |
| 221013 | 31 | 482922 | 482947 | 2 | 13 | 26 | GT   | 7  | 8  |
| 221015 | 31 | 488421 | 488432 | 2 | 6  | 12 | TG   | 25 | 5  |
| 221016 | 31 | 488464 | 488479 | 2 | 8  | 16 | GT   | 13 | 7  |
| 221026 | 31 | 550983 | 551004 | 2 | 11 | 22 | GT   | 9  | 6  |



|        |    |        |        |   |    |    |      |    |    |
|--------|----|--------|--------|---|----|----|------|----|----|
| 221030 | 31 | 558818 | 558853 | 4 | 9  | 36 | TGAA | 25 | 5  |
| 221032 | 31 | 559883 | 559926 | 4 | 11 | 44 | AAAC | 22 | 9  |
| 221034 | 31 | 563103 | 563120 | 2 | 9  | 18 | AC   | 18 | 9  |
| 221037 | 31 | 565369 | 565380 | 2 | 6  | 12 | CA   | 21 | 3  |
| 221043 | 31 | 577133 | 577148 | 2 | 8  | 16 | AG   | 24 | 5  |
| 221045 | 31 | 577294 | 577311 | 2 | 9  | 18 | CA   | 9  | 9  |
| 221046 | 31 | 577349 | 577364 | 2 | 8  | 16 | TG   | 22 | 8  |
| 221048 | 31 | 583235 | 583268 | 2 | 17 | 34 | CA   | 9  | 9  |
| 221050 | 31 | 584206 | 584217 | 2 | 6  | 12 | CA   | 29 | 5  |
| 221053 | 31 | 587403 | 587420 | 2 | 9  | 18 | AC   | 18 | 10 |
| 221055 | 31 | 593566 | 593579 | 2 | 7  | 14 | CA   | 18 | 3  |
| 221056 | 31 | 593765 | 593794 | 2 | 15 | 30 | GT   | 19 | 9  |
| 221062 | 31 | 598973 | 598996 | 3 | 8  | 24 | AGC  | 31 | 4  |
| 221064 | 31 | 599457 | 599474 | 3 | 6  | 18 | TGT  | 7  | 4  |
| 221070 | 31 | 622817 | 622828 | 2 | 6  | 12 | CA   | 14 | 5  |
| 221071 | 31 | 623771 | 623784 | 2 | 7  | 14 | TG   | 34 | 4  |
| 221072 | 31 | 624354 | 624367 | 2 | 7  | 14 | AC   | 14 | 4  |
| 221078 | 31 | 644677 | 644694 | 2 | 9  | 18 | TG   | 17 | 19 |
| 221084 | 31 | 651720 | 651735 | 4 | 4  | 16 | AATC | 18 | 5  |
| 221090 | 31 | 668080 | 668099 | 2 | 10 | 20 | CA   | 17 | 5  |
| 221094 | 31 | 686397 | 686420 | 3 | 8  | 24 | GGA  | 21 | 7  |
| 221096 | 31 | 690129 | 690144 | 2 | 8  | 16 | AG   | 23 | 3  |
| 221101 | 31 | 701104 | 701121 | 2 | 9  | 18 | AC   | 18 | 10 |
| 221103 | 31 | 717229 | 717242 | 2 | 7  | 14 | TG   | 31 | 3  |
| 221104 | 31 | 719246 | 719269 | 2 | 12 | 24 | TG   | 16 | 6  |
| 221107 | 31 | 723132 | 723149 | 2 | 9  | 18 | CA   | 17 | 4  |
| 221110 | 31 | 752332 | 752351 | 2 | 10 | 20 | TG   | 16 | 5  |
| 221112 | 31 | 758922 | 758937 | 4 | 4  | 16 | AACC | 26 | 3  |
| 221114 | 31 | 763130 | 763163 | 2 | 17 | 34 | TG   | 10 | 10 |
| 221115 | 31 | 766364 | 766375 | 2 | 6  | 12 | GT   | 26 | 4  |
| 221121 | 31 | 784542 | 784563 | 2 | 11 | 22 | AC   | 18 | 6  |
| 221122 | 31 | 785689 | 785702 | 2 | 7  | 14 | AC   | 33 | 4  |
| 221124 | 31 | 793889 | 793924 | 2 | 18 | 36 | AC   | 9  | 15 |
| 221128 | 31 | 795960 | 795971 | 2 | 6  | 12 | AT   | 18 | 5  |
| 221129 | 31 | 797247 | 797260 | 2 | 7  | 14 | CA   | 27 | 6  |
| 221130 | 31 | 802112 | 802131 | 2 | 10 | 20 | CA   | 22 | 9  |
| 221133 | 31 | 803217 | 803252 | 4 | 9  | 36 | GATG | 30 | 9  |
| 221135 | 31 | 805561 | 805576 | 2 | 8  | 16 | TG   | 17 | 7  |
| 221141 | 31 | 816742 | 816761 | 2 | 10 | 20 | TG   | 20 | 6  |
| 221143 | 31 | 820148 | 820165 | 2 | 9  | 18 | TG   | 18 | 6  |
| 221144 | 31 | 820432 | 820449 | 2 | 9  | 18 | TG   | 16 | 9  |
| 221145 | 31 | 825844 | 825855 | 2 | 6  | 12 | CA   | 26 | 5  |
| 221146 | 31 | 825857 | 825868 | 2 | 6  | 12 | AC   | 29 | 5  |
| 221147 | 31 | 825969 | 825982 | 2 | 7  | 14 | TG   | 19 | 5  |
| 221154 | 31 | 843503 | 843532 | 2 | 15 | 30 | GA   | 18 | 14 |
| 221155 | 31 | 849340 | 849363 | 2 | 12 | 24 | GA   | 9  | 10 |
| 221157 | 31 | 853973 | 853994 | 2 | 11 | 22 | AC   | 26 | 11 |
| 221159 | 31 | 857581 | 857610 | 2 | 15 | 30 | TG   | 9  | 6  |
| 221161 | 31 | 860998 | 861011 | 2 | 7  | 14 | TG   | 22 | 9  |
| 221162 | 31 | 861153 | 861164 | 2 | 6  | 12 | TC   | 15 | 5  |
| 221163 | 31 | 861165 | 861178 | 2 | 7  | 14 | AC   | 21 | 4  |

|        |    |         |         |   |    |    |      |    |    |
|--------|----|---------|---------|---|----|----|------|----|----|
| 221165 | 31 | 864654  | 864689  | 2 | 18 | 36 | GT   | 12 | 7  |
| 221169 | 31 | 870178  | 870215  | 2 | 19 | 38 | AG   | 14 | 10 |
| 221179 | 31 | 880032  | 880047  | 2 | 8  | 16 | TG   | 8  | 3  |
| 221180 | 31 | 880255  | 880270  | 2 | 8  | 16 | TG   | 23 | 8  |
| 221185 | 31 | 892566  | 892589  | 4 | 6  | 24 | ATGA | 13 | 5  |
| 221191 | 31 | 900097  | 900110  | 2 | 7  | 14 | TG   | 29 | 3  |
| 221192 | 31 | 902356  | 902375  | 2 | 10 | 20 | TG   | 18 | 8  |
| 221193 | 31 | 904101  | 904136  | 2 | 18 | 36 | CA   | 15 | 11 |
| 221196 | 31 | 917324  | 917335  | 2 | 6  | 12 | AC   | 15 | 7  |
| 221197 | 31 | 917419  | 917458  | 2 | 20 | 40 | TG   | 8  | 9  |
| 221200 | 31 | 923986  | 923997  | 2 | 6  | 12 | AC   | 23 | 5  |
| 221201 | 31 | 924160  | 924179  | 2 | 10 | 20 | AC   | 13 | 6  |
| 221208 | 31 | 932888  | 932919  | 2 | 16 | 32 | CA   | 17 | 7  |
| 221209 | 31 | 933005  | 933042  | 2 | 19 | 38 | GT   | 7  | 8  |
| 221210 | 31 | 933180  | 933191  | 2 | 6  | 12 | AC   | 22 | 11 |
| 221211 | 31 | 933511  | 933540  | 2 | 15 | 30 | CA   | 10 | 5  |
| 221212 | 31 | 936320  | 936341  | 2 | 11 | 22 | GT   | 7  | 9  |
| 221214 | 31 | 936941  | 936964  | 2 | 12 | 24 | CA   | 21 | 8  |
| 221216 | 31 | 937866  | 937881  | 2 | 8  | 16 | GA   | 20 | 5  |
| 221217 | 31 | 940003  | 940018  | 4 | 4  | 16 | AGTT | 26 | 5  |
| 221219 | 31 | 948427  | 948438  | 2 | 6  | 12 | CA   | 20 | 4  |
| 221221 | 31 | 949753  | 949772  | 2 | 10 | 20 | GT   | 28 | 6  |
| 221224 | 31 | 952876  | 952887  | 2 | 6  | 12 | GT   | 7  | 8  |
| 221226 | 31 | 954911  | 954942  | 2 | 16 | 32 | TG   | 10 | 10 |
| 221229 | 31 | 964734  | 964751  | 2 | 9  | 18 | AC   | 25 | 5  |
| 221244 | 31 | 994545  | 994602  | 2 | 29 | 58 | TG   | 18 | 13 |
| 221246 | 31 | 994999  | 995020  | 2 | 11 | 22 | GT   | 21 | 5  |
| 221248 | 31 | 996447  | 996470  | 2 | 12 | 24 | AC   | 15 | 3  |
| 221249 | 31 | 996815  | 996852  | 2 | 19 | 38 | TG   | 8  | 11 |
| 221250 | 31 | 997111  | 997128  | 2 | 9  | 18 | AT   | 14 | 4  |
| 221252 | 31 | 999763  | 999774  | 2 | 6  | 12 | GT   | 25 | 5  |
| 221254 | 31 | 1000828 | 1000865 | 2 | 19 | 38 | TG   | 11 | 12 |
| 221255 | 31 | 1002855 | 1002866 | 2 | 6  | 12 | GT   | 16 | 4  |
| 221256 | 31 | 1002867 | 1002878 | 2 | 6  | 12 | AT   | 6  | 3  |
| 221257 | 31 | 1003821 | 1003854 | 2 | 17 | 34 | GT   | 11 | 15 |
| 221261 | 31 | 1005571 | 1005584 | 2 | 7  | 14 | AC   | 32 | 7  |
| 221262 | 31 | 1005943 | 1005980 | 2 | 19 | 38 | TG   | 20 | 9  |
| 221263 | 31 | 1007518 | 1007541 | 2 | 12 | 24 | AC   | 19 | 10 |
| 221264 | 31 | 1007658 | 1007691 | 2 | 17 | 34 | AC   | 9  | 9  |
| 221267 | 31 | 1013747 | 1013764 | 2 | 9  | 18 | CA   | 18 | 6  |
| 221270 | 31 | 1014656 | 1014679 | 2 | 12 | 24 | AG   | 8  | 6  |
| 221275 | 31 | 1015741 | 1015762 | 2 | 11 | 22 | TG   | 25 | 6  |
| 221277 | 31 | 1018307 | 1018318 | 2 | 6  | 12 | CA   | 12 | 4  |
| 221279 | 31 | 1019607 | 1019638 | 2 | 16 | 32 | GT   | 8  | 9  |
| 221281 | 31 | 1019997 | 1020012 | 2 | 8  | 16 | GA   | 19 | 5  |
| 221282 | 31 | 1021514 | 1021535 | 2 | 11 | 22 | AC   | 6  | 7  |
| 221284 | 31 | 1026151 | 1026166 | 2 | 8  | 16 | TG   | 20 | 4  |
| 221285 | 31 | 1027295 | 1027330 | 2 | 18 | 36 | AC   | 12 | 10 |
| 221291 | 31 | 1030225 | 1030244 | 2 | 10 | 20 | GT   | 20 | 4  |
| 221292 | 31 | 1030576 | 1030591 | 2 | 8  | 16 | AC   | 12 | 3  |
| 221293 | 31 | 1031819 | 1031852 | 2 | 17 | 34 | AC   | 11 | 13 |

|        |    |         |         |   |    |    |      |    |    |
|--------|----|---------|---------|---|----|----|------|----|----|
| 221299 | 31 | 1037635 | 1037658 | 2 | 12 | 24 | GT   | 14 | 5  |
| 221300 | 31 | 1038163 | 1038188 | 2 | 13 | 26 | CT   | 18 | 7  |
| 221303 | 31 | 1040257 | 1040274 | 2 | 9  | 18 | GT   | 10 | 7  |
| 221304 | 31 | 1040504 | 1040515 | 2 | 6  | 12 | CA   | 15 | 8  |
| 221305 | 31 | 1040579 | 1040600 | 2 | 11 | 22 | CA   | 19 | 7  |
| 221306 | 31 | 1041532 | 1041543 | 2 | 6  | 12 | CT   | 7  | 3  |
| 221308 | 31 | 1041584 | 1041603 | 2 | 10 | 20 | CT   | 6  | 6  |
| 221311 | 31 | 1048242 | 1048257 | 2 | 8  | 16 | GT   | 8  | 5  |
| 221312 | 31 | 1051821 | 1051848 | 2 | 14 | 28 | TG   | 19 | 14 |
| 221313 | 31 | 1052025 | 1052040 | 2 | 8  | 16 | GT   | 18 | 16 |
| 221314 | 31 | 1053695 | 1053712 | 2 | 9  | 18 | AC   | 27 | 4  |
| 221315 | 31 | 1053922 | 1053941 | 4 | 5  | 20 | TTTA | 10 | 10 |
| 221318 | 31 | 1055612 | 1055635 | 3 | 8  | 24 | GAG  | 13 | 6  |
| 221319 | 31 | 1055929 | 1055968 | 2 | 20 | 40 | CA   | 23 | 16 |
| 221320 | 31 | 1058456 | 1058470 | 3 | 5  | 15 | TTG  | 10 | 5  |
| 221324 | 31 | 1059334 | 1059345 | 2 | 6  | 12 | AG   | 26 | 3  |
| 221326 | 31 | 1059522 | 1059541 | 2 | 10 | 20 | GT   | 9  | 6  |
| 221330 | 31 | 1059838 | 1059853 | 2 | 8  | 16 | GT   | 16 | 5  |
| 221332 | 31 | 1060371 | 1060410 | 2 | 20 | 40 | GT   | 17 | 12 |
| 221335 | 31 | 1068046 | 1068085 | 2 | 20 | 40 | TG   | 12 | 12 |
| 221336 | 31 | 1068147 | 1068158 | 2 | 6  | 12 | TG   | 19 | 7  |
| 221337 | 31 | 1068357 | 1068376 | 2 | 10 | 20 | TG   | 25 | 4  |
| 221339 | 31 | 1072803 | 1072832 | 2 | 15 | 30 | TG   | 17 | 11 |
| 221341 | 31 | 1076580 | 1076613 | 2 | 17 | 34 | CA   | 19 | 8  |
| 221342 | 31 | 1076715 | 1076732 | 2 | 9  | 18 | AC   | 25 | 5  |
| 221343 | 31 | 1076787 | 1076816 | 2 | 15 | 30 | CA   | 9  | 8  |
| 221344 | 31 | 1076980 | 1076997 | 2 | 9  | 18 | TA   | 23 | 6  |
| 221346 | 31 | 1084242 | 1084253 | 2 | 6  | 12 | TG   | 18 | 3  |
| 221347 | 31 | 1085278 | 1085289 | 2 | 6  | 12 | AT   | 28 | 6  |
| 221351 | 31 | 1093025 | 1093048 | 3 | 8  | 24 | ATG  | 20 | 5  |
| 221357 | 31 | 1106463 | 1106496 | 2 | 17 | 34 | TG   | 8  | 4  |
| 221363 | 31 | 1115904 | 1115925 | 2 | 11 | 22 | TG   | 20 | 5  |
| 221365 | 31 | 1116197 | 1116216 | 2 | 10 | 20 | CA   | 8  | 6  |
| 221374 | 31 | 1127257 | 1127270 | 2 | 7  | 14 | GT   | 25 | 4  |
| 221379 | 31 | 1129781 | 1129808 | 2 | 14 | 28 | TG   | 8  | 7  |
| 221383 | 31 | 1132767 | 1132784 | 2 | 9  | 18 | GT   | 19 | 9  |
| 221388 | 31 | 1144707 | 1144720 | 2 | 7  | 14 | AC   | 19 | 9  |
| 221391 | 31 | 1154095 | 1154112 | 2 | 9  | 18 | TG   | 21 | 8  |
| 221393 | 31 | 1154504 | 1154535 | 2 | 16 | 32 | TG   | 20 | 10 |
| 221394 | 31 | 1155507 | 1155538 | 2 | 16 | 32 | TG   | 6  | 9  |
| 221396 | 31 | 1160626 | 1160641 | 2 | 8  | 16 | AC   | 14 | 4  |
| 221397 | 31 | 1160737 | 1160764 | 2 | 14 | 28 | AC   | 19 | 7  |
| 221399 | 31 | 1162067 | 1162082 | 2 | 8  | 16 | CA   | 24 | 6  |
| 221400 | 31 | 1162835 | 1162846 | 2 | 6  | 12 | AC   | 17 | 9  |
| 221405 | 31 | 1168372 | 1168383 | 2 | 6  | 12 | GA   | 22 | 3  |
| 221406 | 31 | 1168994 | 1169011 | 2 | 9  | 18 | AC   | 25 | 4  |
| 221409 | 31 | 1174335 | 1174350 | 2 | 8  | 16 | TG   | 17 | 3  |
| 221410 | 31 | 1174495 | 1174518 | 2 | 12 | 24 | TG   | 14 | 13 |
| 221411 | 31 | 1178993 | 1179012 | 2 | 10 | 20 | TG   | 11 | 9  |
| 221412 | 31 | 1179044 | 1179069 | 2 | 13 | 26 | GT   | 14 | 5  |
| 221417 | 31 | 1182353 | 1182364 | 2 | 6  | 12 | AC   | 21 | 3  |

|        |    |         |         |   |    |    |      |    |    |
|--------|----|---------|---------|---|----|----|------|----|----|
| 221420 | 31 | 1188992 | 1189027 | 2 | 18 | 36 | GT   | 14 | 9  |
| 221421 | 31 | 1190200 | 1190215 | 2 | 8  | 16 | TG   | 28 | 4  |
| 221445 | 31 | 1244134 | 1244145 | 2 | 6  | 12 | TG   | 23 | 3  |
| 221446 | 31 | 1244200 | 1244215 | 2 | 8  | 16 | GT   | 19 | 6  |
| 221455 | 31 | 1265940 | 1265959 | 2 | 10 | 20 | CA   | 11 | 6  |
| 221460 | 31 | 1276842 | 1276867 | 2 | 13 | 26 | TG   | 19 | 9  |
| 221463 | 31 | 1284841 | 1284858 | 3 | 6  | 18 | CCA  | 23 | 4  |
| 221465 | 31 | 1289438 | 1289465 | 4 | 7  | 28 | ATGG | 28 | 12 |
| 221469 | 31 | 1292103 | 1292120 | 3 | 6  | 18 | TTA  | 16 | 3  |
| 221471 | 31 | 1293104 | 1293143 | 2 | 20 | 40 | TG   | 14 | 9  |
| 221473 | 31 | 1301012 | 1301037 | 2 | 13 | 26 | TG   | 17 | 16 |
| 221479 | 31 | 1308074 | 1308089 | 4 | 4  | 16 | CTTT | 24 | 3  |
| 221482 | 31 | 1332973 | 1333008 | 2 | 18 | 36 | CA   | 16 | 10 |
| 221484 | 31 | 1334065 | 1334086 | 2 | 11 | 22 | TG   | 12 | 6  |
| 221488 | 31 | 1345700 | 1345719 | 2 | 10 | 20 | CA   | 11 | 7  |
| 221489 | 31 | 1345721 | 1345736 | 2 | 8  | 16 | AC   | 7  | 6  |
| 221490 | 31 | 1349945 | 1349970 | 2 | 13 | 26 | TG   | 11 | 12 |
| 221491 | 31 | 1350515 | 1350534 | 4 | 5  | 20 | TTTA | 17 | 4  |
| 221492 | 31 | 1355232 | 1355249 | 2 | 9  | 18 | GT   | 17 | 7  |
| 221494 | 31 | 1365986 | 1366017 | 4 | 8  | 32 | TATG | 19 | 6  |
| 221507 | 31 | 1403082 | 1403109 | 2 | 14 | 28 | AC   | 6  | 6  |
| 221513 | 31 | 1421121 | 1421136 | 4 | 4  | 16 | TGAC | 32 | 4  |
| 221514 | 31 | 1423784 | 1423795 | 2 | 6  | 12 | CA   | 18 | 9  |
| 221521 | 31 | 1431343 | 1431392 | 2 | 25 | 50 | CA   | 16 | 15 |
| 221525 | 31 | 1438452 | 1438483 | 2 | 16 | 32 | AC   | 19 | 10 |
| 221526 | 31 | 1440339 | 1440370 | 2 | 16 | 32 | TG   | 19 | 12 |
| 221529 | 31 | 1443666 | 1443687 | 2 | 11 | 22 | GT   | 22 | 6  |
| 221531 | 31 | 1445616 | 1445633 | 2 | 9  | 18 | AC   | 24 | 9  |
| 221535 | 31 | 1448688 | 1448701 | 2 | 7  | 14 | CA   | 21 | 8  |
| 221536 | 31 | 1448799 | 1448812 | 2 | 7  | 14 | AC   | 24 | 5  |
| 221541 | 31 | 1454157 | 1454180 | 4 | 6  | 24 | TCAA | 29 | 6  |
| 221545 | 31 | 1463373 | 1463404 | 2 | 16 | 32 | TG   | 12 | 15 |
| 221549 | 31 | 1465778 | 1465799 | 2 | 11 | 22 | AC   | 20 | 6  |
| 221554 | 31 | 1468825 | 1468856 | 2 | 16 | 32 | CA   | 12 | 14 |
| 221557 | 31 | 1475870 | 1475891 | 2 | 11 | 22 | AC   | 19 | 6  |
| 221560 | 31 | 1480097 | 1480118 | 2 | 11 | 22 | GT   | 22 | 10 |
| 221563 | 31 | 1494902 | 1494919 | 2 | 9  | 18 | TG   | 15 | 4  |
| 221564 | 31 | 1498568 | 1498621 | 2 | 27 | 54 | CA   | 7  | 11 |
| 221570 | 31 | 1511929 | 1511952 | 4 | 6  | 24 | ACCA | 24 | 4  |
| 221571 | 31 | 1514112 | 1514147 | 2 | 18 | 36 | CA   | 17 | 8  |
| 221572 | 31 | 1516245 | 1516260 | 2 | 8  | 16 | TG   | 10 | 9  |
| 221573 | 31 | 1516263 | 1516276 | 2 | 7  | 14 | TA   | 8  | 7  |
| 221574 | 31 | 1519652 | 1519675 | 2 | 12 | 24 | AC   | 21 | 7  |
| 221576 | 31 | 1519730 | 1519755 | 2 | 13 | 26 | CA   | 12 | 9  |
| 221580 | 31 | 1525106 | 1525135 | 2 | 15 | 30 | TG   | 17 | 10 |
| 221581 | 31 | 1535125 | 1535146 | 2 | 11 | 22 | TG   | 24 | 9  |
| 221584 | 31 | 1544655 | 1544676 | 2 | 11 | 22 | GT   | 11 | 6  |
| 221587 | 31 | 1545048 | 1545071 | 2 | 12 | 24 | TG   | 21 | 5  |
| 221596 | 31 | 1564952 | 1564965 | 2 | 7  | 14 | CA   | 12 | 9  |
| 221597 | 31 | 1564967 | 1564984 | 2 | 9  | 18 | AC   | 20 | 11 |
| 221602 | 31 | 1577134 | 1577153 | 2 | 10 | 20 | AC   | 20 | 6  |

|        |    |         |         |   |    |    |      |    |    |
|--------|----|---------|---------|---|----|----|------|----|----|
| 221608 | 31 | 1597764 | 1597785 | 2 | 11 | 22 | CA   | 16 | 14 |
| 221609 | 31 | 1598148 | 1598167 | 4 | 5  | 20 | ACAT | 30 | 6  |
| 221621 | 31 | 1632647 | 1632674 | 2 | 14 | 28 | CA   | 9  | 6  |
| 221622 | 31 | 1633935 | 1633958 | 2 | 12 | 24 | AT   | 7  | 10 |
| 221631 | 31 | 1642180 | 1642227 | 3 | 16 | 48 | GAA  | 12 | 11 |
| 221636 | 31 | 1657667 | 1657704 | 2 | 19 | 38 | GT   | 18 | 9  |
| 221647 | 31 | 1680456 | 1680489 | 2 | 17 | 34 | TG   | 12 | 9  |
| 221649 | 31 | 1684737 | 1684769 | 3 | 11 | 33 | AGG  | 26 | 7  |
| 221664 | 31 | 1701002 | 1701013 | 2 | 6  | 12 | AC   | 15 | 3  |
| 221667 | 31 | 1703466 | 1703481 | 4 | 4  | 16 | ATTG | 25 | 4  |
| 221673 | 31 | 1708010 | 1708041 | 2 | 16 | 32 | AC   | 18 | 12 |
| 221674 | 31 | 1710601 | 1710620 | 4 | 5  | 20 | TTTG | 21 | 4  |
| 221678 | 31 | 1715558 | 1715572 | 3 | 5  | 15 | GCA  | 22 | 8  |
| 221682 | 31 | 1719104 | 1719123 | 2 | 10 | 20 | GT   | 14 | 11 |
| 221684 | 31 | 1720119 | 1720144 | 2 | 13 | 26 | GT   | 13 | 11 |
| 221685 | 31 | 1722603 | 1722617 | 3 | 5  | 15 | TAT  | 21 | 3  |
| 221686 | 31 | 1722863 | 1722884 | 2 | 11 | 22 | AC   | 6  | 6  |
| 221713 | 31 | 1785154 | 1785183 | 2 | 15 | 30 | TG   | 17 | 7  |
| 221717 | 31 | 1791139 | 1791154 | 2 | 8  | 16 | GT   | 23 | 4  |
| 221730 | 31 | 1808527 | 1808538 | 2 | 6  | 12 | GT   | 25 | 3  |
| 221731 | 31 | 1810758 | 1810785 | 2 | 14 | 28 | TG   | 11 | 8  |
| 221739 | 31 | 1822799 | 1822832 | 2 | 17 | 34 | CT   | 6  | 8  |
| 221748 | 31 | 1827813 | 1827836 | 2 | 12 | 24 | TG   | 19 | 9  |
| 221762 | 31 | 1858851 | 1858878 | 2 | 14 | 28 | AC   | 12 | 9  |
| 221768 | 31 | 1865059 | 1865094 | 2 | 18 | 36 | CA   | 9  | 6  |
| 221775 | 31 | 1874736 | 1874801 | 2 | 33 | 66 | GT   | 6  | 10 |
| 221777 | 31 | 1877015 | 1877030 | 4 | 4  | 16 | AAAT | 8  | 3  |
| 221783 | 31 | 1888974 | 1888997 | 3 | 8  | 24 | GGA  | 18 | 6  |
| 221787 | 31 | 1894852 | 1894869 | 3 | 6  | 18 | CCT  | 20 | 4  |
| 221793 | 31 | 1896871 | 1896894 | 2 | 12 | 24 | GT   | 29 | 6  |
| 221794 | 31 | 1897101 | 1897134 | 2 | 17 | 34 | TG   | 23 | 9  |
| 221799 | 31 | 1903334 | 1903361 | 2 | 14 | 28 | CA   | 19 | 9  |
| 221801 | 31 | 1904477 | 1904496 | 4 | 5  | 20 | ATCA | 25 | 4  |
| 221807 | 31 | 1922410 | 1922431 | 2 | 11 | 22 | GT   | 14 | 15 |
| 221810 | 31 | 1925947 | 1925964 | 2 | 9  | 18 | TG   | 26 | 10 |
| 221825 | 31 | 1943870 | 1943887 | 2 | 9  | 18 | AC   | 20 | 3  |
| 221835 | 31 | 1951586 | 1951597 | 2 | 6  | 12 | CA   | 22 | 3  |
| 221848 | 31 | 1961076 | 1961087 | 2 | 6  | 12 | AC   | 27 | 5  |
| 221852 | 31 | 1964884 | 1964897 | 2 | 7  | 14 | AT   | 14 | 6  |
| 221854 | 31 | 1966546 | 1966572 | 3 | 9  | 27 | ATT  | 26 | 7  |
| 221862 | 31 | 1974229 | 1974244 | 2 | 8  | 16 | TA   | 15 | 4  |
| 221865 | 31 | 1978703 | 1978724 | 2 | 11 | 22 | AC   | 19 | 5  |
| 221869 | 31 | 1983930 | 1983949 | 4 | 5  | 20 | AAAT | 22 | 3  |
| 221872 | 31 | 1987084 | 1987099 | 2 | 8  | 16 | GT   | 17 | 3  |
| 221886 | 31 | 2006044 | 2006097 | 2 | 27 | 54 | GT   | 7  | 9  |
| 221889 | 31 | 2006538 | 2006561 | 2 | 12 | 24 | AT   | 18 | 10 |
| 221891 | 31 | 2010733 | 2010754 | 2 | 11 | 22 | AC   | 8  | 3  |
| 221894 | 31 | 2015572 | 2015585 | 2 | 7  | 14 | GA   | 26 | 4  |
| 221895 | 31 | 2016544 | 2016563 | 4 | 5  | 20 | ATTC | 15 | 4  |
| 221899 | 31 | 2021055 | 2021074 | 4 | 5  | 20 | AAAT | 14 | 4  |
| 221900 | 31 | 2022253 | 2022270 | 2 | 9  | 18 | AC   | 21 | 11 |

|        |    |         |         |   |    |    |      |    |    |
|--------|----|---------|---------|---|----|----|------|----|----|
| 221909 | 31 | 2042057 | 2042092 | 4 | 9  | 36 | TATC | 15 | 11 |
| 221936 | 31 | 2097411 | 2097424 | 2 | 7  | 14 | GT   | 28 | 9  |
| 221951 | 31 | 2109751 | 2109778 | 2 | 14 | 28 | TG   | 12 | 8  |
| 221952 | 31 | 2109835 | 2109850 | 2 | 8  | 16 | CA   | 20 | 7  |
| 221953 | 31 | 2110675 | 2110692 | 2 | 9  | 18 | GT   | 25 | 13 |
| 221957 | 31 | 2113974 | 2114007 | 2 | 17 | 34 | TC   | 9  | 8  |
| 221960 | 31 | 2118116 | 2118127 | 2 | 6  | 12 | CA   | 32 | 3  |
| 221965 | 31 | 2121963 | 2121974 | 2 | 6  | 12 | TA   | 23 | 4  |
| 221971 | 31 | 2126923 | 2126944 | 2 | 11 | 22 | AC   | 8  | 7  |
| 221977 | 31 | 2133358 | 2133381 | 2 | 12 | 24 | AC   | 14 | 7  |
| 221978 | 31 | 2133557 | 2133577 | 3 | 7  | 21 | CTT  | 19 | 3  |
| 221980 | 31 | 2136270 | 2136283 | 2 | 7  | 14 | TA   | 12 | 6  |
| 221981 | 31 | 2137325 | 2137342 | 2 | 9  | 18 | CA   | 29 | 3  |
| 221985 | 31 | 2142044 | 2142061 | 2 | 9  | 18 | AT   | 6  | 4  |
| 221988 | 31 | 2148227 | 2148262 | 2 | 18 | 36 | CA   | 8  | 10 |
| 222000 | 31 | 2171175 | 2171190 | 2 | 8  | 16 | AT   | 16 | 4  |
| 222005 | 31 | 2177124 | 2177135 | 2 | 6  | 12 | AT   | 26 | 4  |
| 222013 | 31 | 2184574 | 2184589 | 4 | 4  | 16 | TTTC | 7  | 3  |
| 222018 | 31 | 2189911 | 2189926 | 4 | 4  | 16 | AAAT | 23 | 5  |
| 222019 | 31 | 2190510 | 2190521 | 2 | 6  | 12 | GT   | 19 | 3  |
| 222021 | 31 | 2192070 | 2192085 | 2 | 8  | 16 | AC   | 29 | 5  |
| 222022 | 31 | 2192215 | 2192240 | 2 | 13 | 26 | GT   | 23 | 13 |
| 222024 | 31 | 2199693 | 2199722 | 2 | 15 | 30 | AC   | 17 | 9  |
| 222026 | 31 | 2215214 | 2215237 | 2 | 12 | 24 | AC   | 17 | 6  |
| 222027 | 31 | 2216919 | 2216932 | 2 | 7  | 14 | GA   | 34 | 5  |
| 222041 | 31 | 2249418 | 2249429 | 2 | 6  | 12 | GT   | 18 | 4  |
| 222042 | 31 | 2249508 | 2249523 | 2 | 8  | 16 | CT   | 21 | 3  |
| 222044 | 31 | 2252790 | 2252816 | 3 | 9  | 27 | CTC  | 29 | 4  |
| 222046 | 31 | 2257080 | 2257107 | 2 | 14 | 28 | AC   | 11 | 5  |
| 222047 | 31 | 2257129 | 2257148 | 2 | 10 | 20 | CA   | 15 | 5  |
| 222055 | 31 | 2274410 | 2274421 | 2 | 6  | 12 | GA   | 11 | 4  |
| 222056 | 31 | 2274578 | 2274589 | 2 | 6  | 12 | GA   | 11 | 3  |
| 222060 | 31 | 2299183 | 2299198 | 4 | 4  | 16 | CTGT | 24 | 3  |
| 222062 | 31 | 2303446 | 2303459 | 2 | 7  | 14 | TA   | 10 | 6  |
| 222064 | 31 | 2311646 | 2311661 | 2 | 8  | 16 | AC   | 19 | 5  |
| 222065 | 31 | 2311763 | 2311800 | 2 | 19 | 38 | TG   | 9  | 7  |
| 222068 | 31 | 2316458 | 2316473 | 2 | 8  | 16 | GT   | 17 | 3  |
| 222074 | 31 | 2324073 | 2324098 | 2 | 13 | 26 | GT   | 8  | 9  |
| 222078 | 31 | 2329888 | 2329899 | 2 | 6  | 12 | TC   | 17 | 9  |
| 222079 | 31 | 2329902 | 2329917 | 2 | 8  | 16 | TC   | 9  | 5  |
| 222089 | 31 | 2353636 | 2353647 | 2 | 6  | 12 | GA   | 29 | 3  |
| 222094 | 31 | 2360256 | 2360283 | 2 | 14 | 28 | TG   | 26 | 8  |
| 222095 | 31 | 2360402 | 2360443 | 2 | 21 | 42 | CA   | 16 | 15 |
| 222096 | 31 | 2360556 | 2360611 | 2 | 28 | 56 | TG   | 10 | 13 |
| 222098 | 31 | 2364673 | 2364702 | 2 | 15 | 30 | TG   | 13 | 10 |
| 222100 | 31 | 2366092 | 2366109 | 2 | 9  | 18 | CT   | 27 | 5  |
| 222101 | 31 | 2369203 | 2369217 | 3 | 5  | 15 | GAG  | 17 | 4  |
| 222102 | 31 | 2369361 | 2369386 | 2 | 13 | 26 | GT   | 11 | 11 |
| 222104 | 31 | 2370773 | 2370794 | 2 | 11 | 22 | GA   | 18 | 7  |
| 222109 | 31 | 2379829 | 2379850 | 2 | 11 | 22 | TG   | 23 | 9  |
| 222113 | 31 | 2388005 | 2388034 | 2 | 15 | 30 | CA   | 14 | 7  |

|        |    |         |         |   |    |    |      |    |    |
|--------|----|---------|---------|---|----|----|------|----|----|
| 222117 | 31 | 2403501 | 2403526 | 2 | 13 | 26 | GA   | 15 | 13 |
| 222119 | 31 | 2404996 | 2405010 | 3 | 5  | 15 | AAC  | 18 | 7  |
| 222123 | 31 | 2406180 | 2406195 | 4 | 4  | 16 | CTTT | 21 | 5  |
| 222129 | 31 | 2424407 | 2424421 | 3 | 5  | 15 | CCT  | 23 | 6  |
| 222130 | 31 | 2424620 | 2424639 | 4 | 5  | 20 | AGTG | 22 | 3  |
| 222135 | 31 | 2439616 | 2439633 | 2 | 9  | 18 | TC   | 20 | 5  |
| 222136 | 31 | 2449595 | 2449608 | 2 | 7  | 14 | CT   | 26 | 4  |
| 222137 | 31 | 2452594 | 2452605 | 2 | 6  | 12 | TC   | 30 | 4  |
| 222140 | 31 | 2463785 | 2463812 | 2 | 14 | 28 | CA   | 18 | 8  |
| 222142 | 31 | 2471174 | 2471185 | 2 | 6  | 12 | GA   | 20 | 5  |
| 222143 | 31 | 2473243 | 2473254 | 2 | 6  | 12 | AC   | 29 | 3  |
| 222144 | 31 | 2473547 | 2473566 | 2 | 10 | 20 | CA   | 13 | 8  |
| 222145 | 31 | 2474417 | 2474460 | 2 | 22 | 44 | TC   | 9  | 11 |
| 222146 | 31 | 2476073 | 2476114 | 2 | 21 | 42 | CA   | 10 | 8  |
| 222147 | 31 | 2476207 | 2476240 | 2 | 17 | 34 | TG   | 10 | 8  |
| 222148 | 31 | 2478910 | 2478923 | 2 | 7  | 14 | AC   | 27 | 10 |
| 222149 | 31 | 2479483 | 2479502 | 2 | 10 | 20 | TG   | 27 | 8  |
| 222157 | 31 | 2489806 | 2489823 | 2 | 9  | 18 | GT   | 10 | 4  |
| 222158 | 31 | 2491207 | 2491250 | 4 | 11 | 44 | TAGA | 18 | 16 |
| 222163 | 31 | 2503759 | 2503770 | 2 | 6  | 12 | CA   | 26 | 3  |
| 222165 | 31 | 2504047 | 2504078 | 2 | 16 | 32 | GT   | 10 | 7  |
| 222166 | 31 | 2504185 | 2504200 | 2 | 8  | 16 | AC   | 18 | 11 |
| 222169 | 31 | 2509454 | 2509495 | 2 | 21 | 42 | GT   | 14 | 9  |
| 222170 | 31 | 2511766 | 2511793 | 2 | 14 | 28 | CA   | 17 | 12 |
| 222171 | 31 | 2512175 | 2512192 | 2 | 9  | 18 | TG   | 18 | 6  |
| 222172 | 31 | 2512354 | 2512377 | 2 | 12 | 24 | AC   | 25 | 9  |
| 222173 | 31 | 2513549 | 2513566 | 2 | 9  | 18 | AC   | 27 | 8  |
| 222176 | 31 | 2514930 | 2514947 | 2 | 9  | 18 | TG   | 19 | 6  |
| 222189 | 31 | 2541440 | 2541465 | 2 | 13 | 26 | TG   | 7  | 5  |
| 222190 | 31 | 2544639 | 2544656 | 2 | 9  | 18 | AC   | 24 | 6  |
| 222193 | 31 | 2554510 | 2554521 | 2 | 6  | 12 | GT   | 23 | 3  |
| 222196 | 31 | 2562167 | 2562186 | 4 | 5  | 20 | ACCA | 31 | 6  |
| 222207 | 31 | 2579909 | 2579935 | 3 | 9  | 27 | TCC  | 25 | 5  |
| 222208 | 31 | 2583369 | 2583392 | 2 | 12 | 24 | TG   | 17 | 13 |
| 222212 | 31 | 2585147 | 2585164 | 2 | 9  | 18 | GT   | 13 | 4  |
| 222217 | 31 | 2591294 | 2591307 | 2 | 7  | 14 | CA   | 21 | 4  |
| 222230 | 31 | 2621016 | 2621048 | 3 | 11 | 33 | TTA  | 13 | 6  |
| 222235 | 31 | 2622976 | 2623003 | 2 | 14 | 28 | GT   | 12 | 11 |
| 222239 | 31 | 2625928 | 2625939 | 2 | 6  | 12 | CA   | 8  | 3  |
| 222242 | 31 | 2634386 | 2634401 | 2 | 8  | 16 | AC   | 25 | 4  |
| 222249 | 31 | 2644485 | 2644506 | 2 | 11 | 22 | GT   | 13 | 5  |
| 222260 | 31 | 2657168 | 2657203 | 2 | 18 | 36 | TG   | 14 | 16 |
| 222264 | 31 | 2658939 | 2658966 | 2 | 14 | 28 | AC   | 18 | 10 |
| 222265 | 31 | 2662257 | 2662274 | 2 | 9  | 18 | AC   | 28 | 6  |
| 222266 | 31 | 2664257 | 2664282 | 2 | 13 | 26 | GT   | 11 | 5  |
| 222268 | 31 | 2667404 | 2667433 | 2 | 15 | 30 | TC   | 12 | 11 |
| 222282 | 31 | 2701684 | 2701707 | 2 | 12 | 24 | GT   | 18 | 9  |
| 222284 | 31 | 2704238 | 2704255 | 2 | 9  | 18 | CA   | 18 | 7  |
| 222288 | 31 | 2715206 | 2715219 | 2 | 7  | 14 | TG   | 19 | 7  |
| 222289 | 31 | 2715966 | 2715995 | 2 | 15 | 30 | CA   | 19 | 8  |
| 222290 | 31 | 2719208 | 2719225 | 2 | 9  | 18 | TG   | 22 | 8  |

|        |    |         |         |   |    |    |      |    |    |
|--------|----|---------|---------|---|----|----|------|----|----|
| 222292 | 31 | 2719869 | 2719882 | 2 | 7  | 14 | CA   | 25 | 5  |
| 222294 | 31 | 2721763 | 2721782 | 4 | 5  | 20 | GTCT | 21 | 6  |
| 222295 | 31 | 2723427 | 2723438 | 2 | 6  | 12 | TG   | 13 | 4  |
| 222296 | 31 | 2724066 | 2724099 | 2 | 17 | 34 | TG   | 11 | 13 |
| 222300 | 31 | 2728074 | 2728087 | 2 | 7  | 14 | AT   | 16 | 5  |
| 222303 | 31 | 2736511 | 2736528 | 2 | 9  | 18 | TG   | 24 | 4  |
| 222305 | 31 | 2739266 | 2739281 | 4 | 4  | 16 | AAAG | 22 | 3  |
| 222306 | 31 | 2740546 | 2740575 | 2 | 15 | 30 | AC   | 14 | 7  |
| 222307 | 31 | 2740690 | 2740707 | 2 | 9  | 18 | CA   | 21 | 3  |
| 222311 | 31 | 2747320 | 2747345 | 2 | 13 | 26 | GT   | 15 | 11 |
| 222312 | 31 | 2747538 | 2747551 | 2 | 7  | 14 | AG   | 25 | 4  |
| 222316 | 31 | 2747870 | 2747897 | 2 | 14 | 28 | CA   | 8  | 7  |
| 222317 | 31 | 2749775 | 2749788 | 2 | 7  | 14 | GT   | 24 | 3  |
| 222320 | 31 | 2754871 | 2754892 | 2 | 11 | 22 | TG   | 19 | 16 |
| 222321 | 31 | 2754973 | 2755002 | 2 | 15 | 30 | GT   | 15 | 10 |
| 222329 | 31 | 2760470 | 2760487 | 2 | 9  | 18 | GT   | 12 | 5  |
| 222338 | 31 | 2770057 | 2770088 | 2 | 16 | 32 | GT   | 7  | 7  |
| 222340 | 31 | 2772447 | 2772466 | 2 | 10 | 20 | GT   | 24 | 6  |
| 222343 | 31 | 2774967 | 2774988 | 2 | 11 | 22 | GT   | 18 | 10 |
| 222344 | 31 | 2775177 | 2775206 | 2 | 15 | 30 | AC   | 15 | 8  |
| 222345 | 31 | 2775742 | 2775761 | 4 | 5  | 20 | TTTA | 27 | 4  |
| 222346 | 31 | 2777911 | 2777928 | 2 | 9  | 18 | CA   | 23 | 4  |
| 222348 | 31 | 2778714 | 2778731 | 3 | 6  | 18 | CCT  | 22 | 3  |
| 222349 | 31 | 2779716 | 2779735 | 2 | 10 | 20 | GT   | 12 | 5  |
| 222351 | 31 | 2783388 | 2783413 | 2 | 13 | 26 | CA   | 15 | 7  |
| 222352 | 31 | 2783503 | 2783526 | 2 | 12 | 24 | AC   | 15 | 9  |
| 222362 | 31 | 2795870 | 2795889 | 2 | 10 | 20 | AC   | 12 | 12 |
| 222369 | 31 | 2798861 | 2798875 | 3 | 5  | 15 | GGA  | 12 | 6  |
| 222370 | 31 | 2799311 | 2799324 | 2 | 7  | 14 | GA   | 11 | 3  |
| 222385 | 31 | 2817742 | 2817757 | 4 | 4  | 16 | TGTT | 18 | 4  |
| 222388 | 31 | 2831796 | 2831809 | 2 | 7  | 14 | AC   | 12 | 8  |
| 222389 | 31 | 2833927 | 2833970 | 2 | 22 | 44 | TG   | 11 | 12 |
| 222397 | 31 | 2858479 | 2858492 | 2 | 7  | 14 | TG   | 10 | 7  |
| 222398 | 31 | 2862872 | 2862885 | 2 | 7  | 14 | TG   | 26 | 5  |
| 222399 | 31 | 2864474 | 2864505 | 2 | 16 | 32 | TG   | 10 | 7  |
| 222404 | 31 | 2872229 | 2872242 | 2 | 7  | 14 | TG   | 25 | 4  |
| 222405 | 31 | 2873553 | 2873572 | 2 | 10 | 20 | CA   | 14 | 12 |
| 222422 | 31 | 2912607 | 2912618 | 2 | 6  | 12 | CA   | 24 | 3  |
| 222429 | 31 | 2918942 | 2918957 | 2 | 8  | 16 | GT   | 9  | 9  |
| 222432 | 31 | 2925968 | 2925985 | 2 | 9  | 18 | TC   | 19 | 4  |
| 222438 | 31 | 2935401 | 2935412 | 2 | 6  | 12 | AC   | 22 | 5  |
| 222439 | 31 | 2936970 | 2936985 | 4 | 4  | 16 | CCAT | 26 | 3  |
| 222440 | 31 | 2938224 | 2938237 | 2 | 7  | 14 | CA   | 21 | 6  |
| 222441 | 31 | 2940239 | 2940256 | 2 | 9  | 18 | TC   | 27 | 3  |
| 222447 | 31 | 2970311 | 2970324 | 2 | 7  | 14 | TC   | 17 | 3  |
| 222464 | 31 | 3003839 | 3003852 | 2 | 7  | 14 | GT   | 23 | 3  |
| 222476 | 31 | 3029670 | 3029681 | 2 | 6  | 12 | GT   | 32 | 4  |
| 222487 | 31 | 3061911 | 3061922 | 2 | 6  | 12 | GT   | 23 | 4  |
| 222491 | 31 | 3069231 | 3069244 | 2 | 7  | 14 | AT   | 19 | 4  |
| 222497 | 31 | 3079618 | 3079639 | 2 | 11 | 22 | TC   | 13 | 7  |
| 222498 | 31 | 3080185 | 3080208 | 3 | 8  | 24 | GCT  | 15 | 4  |



|        |    |         |         |   |    |    |      |    |    |
|--------|----|---------|---------|---|----|----|------|----|----|
| 222504 | 31 | 3082587 | 3082620 | 2 | 17 | 34 | GT   | 12 | 14 |
| 222527 | 31 | 3112046 | 3112059 | 2 | 7  | 14 | GA   | 20 | 8  |
| 222528 | 31 | 3112061 | 3112076 | 2 | 8  | 16 | AG   | 17 | 8  |
| 222529 | 31 | 3112326 | 3112359 | 2 | 17 | 34 | CA   | 16 | 9  |
| 222533 | 31 | 3114263 | 3114304 | 2 | 21 | 42 | TG   | 11 | 12 |
| 222543 | 31 | 3120279 | 3120290 | 2 | 6  | 12 | CA   | 23 | 4  |
| 222549 | 31 | 3123531 | 3123551 | 3 | 7  | 21 | CAG  | 27 | 3  |
| 222567 | 31 | 3173310 | 3173324 | 3 | 5  | 15 | CCT  | 28 | 3  |
| 222572 | 31 | 3185079 | 3185100 | 2 | 11 | 22 | TG   | 22 | 7  |
| 222573 | 31 | 3185320 | 3185333 | 2 | 7  | 14 | GT   | 9  | 7  |
| 222574 | 31 | 3185488 | 3185505 | 2 | 9  | 18 | AC   | 18 | 14 |
| 222575 | 31 | 3186496 | 3186519 | 2 | 12 | 24 | AC   | 11 | 12 |
| 222578 | 31 | 3190893 | 3190940 | 4 | 12 | 48 | GTAT | 12 | 9  |
| 222584 | 31 | 3199430 | 3199445 | 2 | 8  | 16 | CA   | 32 | 4  |
| 222585 | 31 | 3199552 | 3199563 | 2 | 6  | 12 | CA   | 25 | 4  |
| 222587 | 31 | 3201375 | 3201386 | 2 | 6  | 12 | GT   | 21 | 5  |
| 222590 | 31 | 3203054 | 3203097 | 2 | 22 | 44 | CA   | 12 | 9  |
| 222591 | 31 | 3203438 | 3203465 | 2 | 14 | 28 | GT   | 6  | 5  |
| 222598 | 31 | 3209050 | 3209063 | 2 | 7  | 14 | CA   | 24 | 4  |
| 222599 | 31 | 3209331 | 3209342 | 2 | 6  | 12 | CA   | 23 | 3  |
| 222603 | 31 | 3212035 | 3212052 | 2 | 9  | 18 | CA   | 27 | 7  |
| 222610 | 31 | 3217519 | 3217530 | 2 | 6  | 12 | AC   | 17 | 10 |
| 222611 | 31 | 3218230 | 3218265 | 3 | 12 | 36 | GAG  | 18 | 4  |
| 222615 | 31 | 3226190 | 3226209 | 2 | 10 | 20 | CA   | 20 | 7  |
| 222616 | 31 | 3227259 | 3227280 | 2 | 11 | 22 | GT   | 23 | 6  |
| 222623 | 31 | 3234671 | 3234686 | 2 | 8  | 16 | TC   | 18 | 8  |
| 222625 | 31 | 3235243 | 3235254 | 2 | 6  | 12 | AC   | 30 | 3  |
| 222628 | 31 | 3238022 | 3238042 | 3 | 7  | 21 | TCC  | 16 | 9  |
| 222631 | 31 | 3240213 | 3240232 | 2 | 10 | 20 | CA   | 21 | 16 |
| 222632 | 31 | 3240597 | 3240608 | 2 | 6  | 12 | CA   | 6  | 8  |
| 222633 | 31 | 3240696 | 3240715 | 2 | 10 | 20 | TG   | 23 | 10 |
| 222636 | 31 | 3242561 | 3242580 | 4 | 5  | 20 | CTTT | 23 | 5  |
| 222637 | 31 | 3243307 | 3243330 | 2 | 12 | 24 | AC   | 18 | 6  |
| 222638 | 31 | 3243423 | 3243446 | 2 | 12 | 24 | GT   | 17 | 9  |
| 222645 | 31 | 3253991 | 3254014 | 3 | 8  | 24 | CAC  | 25 | 8  |
| 222646 | 31 | 3254466 | 3254477 | 2 | 6  | 12 | AG   | 19 | 3  |
| 222647 | 31 | 3254869 | 3254896 | 2 | 14 | 28 | GA   | 16 | 5  |
| 222648 | 31 | 3255237 | 3255260 | 2 | 12 | 24 | CA   | 14 | 8  |
| 222649 | 31 | 3255400 | 3255420 | 3 | 7  | 21 | AAG  | 14 | 6  |
| 222650 | 31 | 3255658 | 3255703 | 2 | 23 | 46 | CA   | 7  | 7  |
| 222651 | 31 | 3257159 | 3257178 | 4 | 5  | 20 | TCTA | 15 | 10 |
| 222654 | 31 | 3259150 | 3259175 | 2 | 13 | 26 | CT   | 20 | 10 |
| 222655 | 31 | 3259265 | 3259288 | 3 | 8  | 24 | CCT  | 23 | 9  |
| 222656 | 31 | 3259795 | 3259806 | 2 | 6  | 12 | AG   | 21 | 3  |
| 222659 | 31 | 3260785 | 3260808 | 2 | 12 | 24 | GT   | 20 | 14 |
| 222660 | 31 | 3260842 | 3260853 | 2 | 6  | 12 | CT   | 27 | 5  |
| 222662 | 31 | 3262074 | 3262085 | 2 | 6  | 12 | GA   | 19 | 5  |
| 222665 | 31 | 3265348 | 3265381 | 2 | 17 | 34 | CA   | 14 | 8  |
| 222666 | 31 | 3265476 | 3265487 | 2 | 6  | 12 | AC   | 23 | 3  |
| 222673 | 31 | 3279379 | 3279396 | 2 | 9  | 18 | GT   | 20 | 8  |
| 222675 | 31 | 3282494 | 3282511 | 2 | 9  | 18 | GT   | 23 | 7  |

|        |    |         |         |   |    |    |      |    |    |
|--------|----|---------|---------|---|----|----|------|----|----|
| 222683 | 31 | 3286107 | 3286132 | 2 | 13 | 26 | AC   | 9  | 9  |
| 222685 | 31 | 3292696 | 3292711 | 4 | 4  | 16 | GCAG | 33 | 6  |
| 222692 | 31 | 3299691 | 3299708 | 2 | 9  | 18 | CA   | 22 | 4  |
| 222694 | 31 | 3301365 | 3301380 | 2 | 8  | 16 | TG   | 15 | 3  |
| 222695 | 31 | 3302139 | 3302150 | 2 | 6  | 12 | GT   | 30 | 4  |
| 222698 | 31 | 3309737 | 3309754 | 2 | 9  | 18 | AC   | 25 | 5  |
| 222710 | 31 | 3326055 | 3326086 | 2 | 16 | 32 | AC   | 15 | 7  |
| 222730 | 31 | 3364413 | 3364428 | 2 | 8  | 16 | TG   | 26 | 3  |
| 222756 | 31 | 3405831 | 3405866 | 2 | 18 | 36 | AG   | 18 | 11 |
| 222760 | 31 | 3423164 | 3423181 | 3 | 6  | 18 | TTG  | 22 | 6  |
| 222763 | 31 | 3427694 | 3427723 | 2 | 15 | 30 | TG   | 12 | 8  |
| 222765 | 31 | 3431817 | 3431837 | 3 | 7  | 21 | TTA  | 11 | 7  |
| 222767 | 31 | 3432721 | 3432742 | 2 | 11 | 22 | CA   | 21 | 5  |
| 222773 | 31 | 3440010 | 3440023 | 2 | 7  | 14 | GT   | 19 | 12 |
| 222783 | 31 | 3459389 | 3459406 | 2 | 9  | 18 | TG   | 21 | 6  |
| 222791 | 31 | 3481725 | 3481740 | 2 | 8  | 16 | CA   | 18 | 3  |
| 222792 | 31 | 3487720 | 3487745 | 2 | 13 | 26 | CA   | 15 | 9  |
| 222795 | 31 | 3488748 | 3488767 | 4 | 5  | 20 | AGAC | 20 | 3  |
| 222807 | 31 | 3500581 | 3500592 | 2 | 6  | 12 | TG   | 26 | 4  |
| 222813 | 31 | 3508582 | 3508605 | 2 | 12 | 24 | TC   | 15 | 5  |
| 222822 | 31 | 3525184 | 3525210 | 3 | 9  | 27 | AAC  | 15 | 5  |
| 222827 | 31 | 3531784 | 3531807 | 2 | 12 | 24 | TG   | 20 | 5  |
| 222828 | 31 | 3532030 | 3532055 | 2 | 13 | 26 | TG   | 23 | 6  |
| 222829 | 31 | 3536819 | 3536844 | 2 | 13 | 26 | GA   | 13 | 7  |
| 222832 | 31 | 3540648 | 3540687 | 2 | 20 | 40 | CA   | 9  | 11 |
| 222835 | 31 | 3559916 | 3559927 | 2 | 6  | 12 | GT   | 17 | 3  |
| 222838 | 31 | 3563396 | 3563429 | 2 | 17 | 34 | CA   | 10 | 8  |
| 222839 | 31 | 3564445 | 3564458 | 2 | 7  | 14 | GT   | 26 | 4  |
| 222845 | 31 | 3574660 | 3574691 | 2 | 16 | 32 | AC   | 13 | 15 |
| 222846 | 31 | 3576734 | 3576745 | 2 | 6  | 12 | AC   | 12 | 8  |
| 222847 | 31 | 3576748 | 3576761 | 2 | 7  | 14 | AC   | 6  | 4  |
| 222848 | 31 | 3577475 | 3577508 | 2 | 17 | 34 | TG   | 9  | 9  |
| 222853 | 31 | 3593571 | 3593582 | 2 | 6  | 12 | TG   | 29 | 3  |
| 222875 | 31 | 3626332 | 3626361 | 2 | 15 | 30 | GT   | 12 | 10 |
| 222877 | 31 | 3627334 | 3627351 | 2 | 9  | 18 | AC   | 22 | 8  |
| 222878 | 31 | 3627401 | 3627428 | 2 | 14 | 28 | TG   | 13 | 9  |
| 222879 | 31 | 3630275 | 3630298 | 2 | 12 | 24 | GT   | 14 | 6  |
| 222880 | 31 | 3630458 | 3630469 | 2 | 6  | 12 | TG   | 23 | 3  |
| 222892 | 31 | 3655530 | 3655545 | 2 | 8  | 16 | TG   | 14 | 5  |
| 222896 | 31 | 3662774 | 3662791 | 2 | 9  | 18 | AT   | 8  | 3  |
| 222905 | 31 | 3682388 | 3682401 | 2 | 7  | 14 | CT   | 17 | 4  |
| 222908 | 31 | 3684244 | 3684267 | 4 | 6  | 24 | AAAT | 12 | 5  |
| 222910 | 31 | 3689902 | 3689913 | 2 | 6  | 12 | AG   | 25 | 3  |
| 222911 | 31 | 3690064 | 3690089 | 2 | 13 | 26 | AG   | 23 | 8  |
| 222917 | 31 | 3693359 | 3693374 | 2 | 8  | 16 | TC   | 12 | 5  |
| 222919 | 31 | 3696700 | 3696723 | 2 | 12 | 24 | AC   | 12 | 10 |
| 222924 | 31 | 3712379 | 3712394 | 2 | 8  | 16 | AC   | 25 | 4  |
| 222941 | 31 | 3729412 | 3729429 | 2 | 9  | 18 | TG   | 16 | 5  |
| 222955 | 31 | 3750905 | 3750938 | 2 | 17 | 34 | AC   | 10 | 13 |
| 222957 | 31 | 3754361 | 3754398 | 2 | 19 | 38 | AC   | 13 | 8  |
| 222967 | 31 | 3771260 | 3771271 | 2 | 6  | 12 | GT   | 25 | 5  |

|        |    |         |         |   |    |    |      |    |    |
|--------|----|---------|---------|---|----|----|------|----|----|
| 222969 | 31 | 3776892 | 3776917 | 2 | 13 | 26 | CA   | 16 | 16 |
| 222971 | 31 | 3785949 | 3785976 | 2 | 14 | 28 | TG   | 11 | 8  |
| 222974 | 31 | 3790624 | 3790644 | 3 | 7  | 21 | CCA  | 24 | 6  |
| 222975 | 31 | 3790829 | 3790840 | 2 | 6  | 12 | CA   | 24 | 6  |
| 222980 | 31 | 3797626 | 3797643 | 2 | 9  | 18 | TG   | 19 | 6  |
| 222982 | 31 | 3797893 | 3797906 | 2 | 7  | 14 | CT   | 25 | 9  |
| 222983 | 31 | 3797908 | 3797921 | 2 | 7  | 14 | TC   | 28 | 9  |
| 222985 | 31 | 3798821 | 3798836 | 4 | 4  | 16 | AAAT | 22 | 7  |
| 222986 | 31 | 3799239 | 3799253 | 3 | 5  | 15 | CCG  | 27 | 7  |
| 222988 | 31 | 3799827 | 3799854 | 4 | 7  | 28 | TTTA | 16 | 10 |
| 222989 | 31 | 3803938 | 3803961 | 2 | 12 | 24 | TG   | 18 | 11 |
| 222990 | 31 | 3804823 | 3804850 | 2 | 14 | 28 | TG   | 16 | 6  |
| 222994 | 31 | 3813097 | 3813110 | 2 | 7  | 14 | CA   | 13 | 6  |
| 223008 | 31 | 3847062 | 3847079 | 2 | 9  | 18 | GT   | 27 | 7  |
| 223009 | 31 | 3850742 | 3850797 | 2 | 28 | 56 | TG   | 7  | 7  |
| 223014 | 31 | 3859529 | 3859542 | 2 | 7  | 14 | TG   | 26 | 3  |
| 223015 | 31 | 3860863 | 3860874 | 2 | 6  | 12 | TG   | 25 | 7  |
| 223017 | 31 | 3865339 | 3865350 | 2 | 6  | 12 | TA   | 25 | 4  |
| 223018 | 31 | 3872430 | 3872449 | 2 | 10 | 20 | TC   | 15 | 6  |
| 223024 | 31 | 3887508 | 3887529 | 2 | 11 | 22 | GT   | 10 | 9  |
| 223032 | 31 | 3892293 | 3892310 | 2 | 9  | 18 | TC   | 19 | 5  |
| 223033 | 31 | 3894240 | 3894263 | 3 | 8  | 24 | GAG  | 19 | 5  |
| 223034 | 31 | 3895057 | 3895068 | 2 | 6  | 12 | TG   | 22 | 4  |
| 223049 | 31 | 3906845 | 3906856 | 2 | 6  | 12 | GT   | 15 | 3  |
| 223050 | 31 | 3907070 | 3907085 | 4 | 4  | 16 | CGCT | 23 | 3  |
| 223053 | 31 | 3909868 | 3909888 | 3 | 7  | 21 | TCC  | 17 | 3  |
| 223057 | 31 | 3914432 | 3914453 | 2 | 11 | 22 | CA   | 14 | 6  |
| 223058 | 31 | 3914836 | 3914847 | 2 | 6  | 12 | CT   | 26 | 3  |
| 223073 | 31 | 3933015 | 3933038 | 2 | 12 | 24 | CT   | 15 | 6  |
| 223075 | 31 | 3933384 | 3933411 | 2 | 14 | 28 | AC   | 13 | 4  |
| 223081 | 31 | 3939495 | 3939510 | 2 | 8  | 16 | GT   | 6  | 3  |
| 223089 | 31 | 3949682 | 3949705 | 2 | 12 | 24 | AC   | 16 | 7  |
| 223091 | 31 | 3951389 | 3951408 | 2 | 10 | 20 | GT   | 12 | 4  |
| 223092 | 31 | 3951643 | 3951657 | 3 | 5  | 15 | CTT  | 14 | 3  |
| 223093 | 31 | 3952163 | 3952182 | 4 | 5  | 20 | CCAG | 19 | 3  |
| 223099 | 31 | 3957434 | 3957449 | 2 | 8  | 16 | TG   | 20 | 4  |
| 223100 | 31 | 3957783 | 3957800 | 2 | 9  | 18 | TG   | 19 | 11 |
| 223107 | 31 | 3964820 | 3964839 | 2 | 10 | 20 | CA   | 17 | 8  |
| 223109 | 31 | 3964998 | 3965013 | 2 | 8  | 16 | AC   | 16 | 5  |
| 223124 | 31 | 3989278 | 3989313 | 3 | 12 | 36 | TCC  | 14 | 4  |
| 223140 | 31 | 4003281 | 4003306 | 2 | 13 | 26 | AC   | 14 | 5  |
| 223142 | 31 | 4004138 | 4004153 | 2 | 8  | 16 | AC   | 9  | 3  |
| 223146 | 31 | 4020395 | 4020406 | 2 | 6  | 12 | TG   | 31 | 3  |
| 223150 | 31 | 4029191 | 4029218 | 2 | 14 | 28 | GT   | 15 | 10 |
| 223155 | 31 | 4038490 | 4038507 | 2 | 9  | 18 | AC   | 20 | 3  |
| 223156 | 31 | 4038867 | 4038882 | 4 | 4  | 16 | GCCA | 24 | 3  |
| 223170 | 31 | 4067192 | 4067205 | 2 | 7  | 14 | AT   | 18 | 6  |
| 223171 | 31 | 4067536 | 4067556 | 3 | 7  | 21 | AAT  | 12 | 3  |
| 223174 | 31 | 4075076 | 4075103 | 2 | 14 | 28 | AC   | 15 | 7  |
| 223178 | 31 | 4076798 | 4076819 | 2 | 11 | 22 | CA   | 8  | 6  |
| 223179 | 31 | 4079383 | 4079398 | 2 | 8  | 16 | CA   | 28 | 6  |

|        |    |         |         |   |    |    |      |    |    |
|--------|----|---------|---------|---|----|----|------|----|----|
| 223181 | 31 | 4079568 | 4079585 | 2 | 9  | 18 | CA   | 27 | 3  |
| 223182 | 31 | 4079712 | 4079725 | 2 | 7  | 14 | GT   | 25 | 3  |
| 223183 | 31 | 4081584 | 4081599 | 2 | 8  | 16 | GT   | 24 | 3  |
| 223185 | 31 | 4084216 | 4084231 | 2 | 8  | 16 | AC   | 17 | 7  |
| 223186 | 31 | 4084777 | 4084788 | 2 | 6  | 12 | TC   | 17 | 5  |
| 223187 | 31 | 4085001 | 4085016 | 2 | 8  | 16 | CT   | 14 | 7  |
| 223188 | 31 | 4085696 | 4085713 | 2 | 9  | 18 | GT   | 10 | 8  |
| 223191 | 31 | 4088342 | 4088359 | 3 | 6  | 18 | CTT  | 21 | 5  |
| 223192 | 31 | 4089797 | 4089820 | 2 | 12 | 24 | GA   | 13 | 13 |
| 223193 | 31 | 4089899 | 4089918 | 2 | 10 | 20 | CA   | 14 | 5  |
| 223195 | 31 | 4091368 | 4091387 | 2 | 10 | 20 | CA   | 10 | 7  |
| 223196 | 31 | 4092196 | 4092210 | 3 | 5  | 15 | GAT  | 28 | 6  |
| 223197 | 31 | 4092579 | 4092594 | 2 | 8  | 16 | TC   | 7  | 12 |
| 223200 | 31 | 4095334 | 4095355 | 2 | 11 | 22 | CA   | 21 | 9  |
| 223201 | 31 | 4096543 | 4096563 | 3 | 7  | 21 | GGA  | 6  | 5  |
| 223202 | 31 | 4097106 | 4097121 | 2 | 8  | 16 | TG   | 15 | 7  |
| 223203 | 31 | 4097270 | 4097283 | 2 | 7  | 14 | AC   | 18 | 4  |
| 223204 | 31 | 4099918 | 4099931 | 2 | 7  | 14 | GT   | 26 | 4  |
| 223219 | 31 | 4111409 | 4111420 | 2 | 6  | 12 | GA   | 22 | 5  |
| 223222 | 31 | 4116275 | 4116289 | 3 | 5  | 15 | AGG  | 29 | 4  |
| 223230 | 31 | 4121284 | 4121307 | 2 | 12 | 24 | TG   | 24 | 5  |
| 223231 | 31 | 4121960 | 4121971 | 2 | 6  | 12 | CG   | 10 | 6  |
| 223233 | 31 | 4123431 | 4123442 | 2 | 6  | 12 | GT   | 20 | 5  |
| 223236 | 31 | 4124326 | 4124349 | 2 | 12 | 24 | GT   | 12 | 5  |
| 223237 | 31 | 4124439 | 4124458 | 2 | 10 | 20 | AC   | 9  | 7  |
| 223247 | 31 | 4152846 | 4152857 | 2 | 6  | 12 | AT   | 10 | 3  |
| 223248 | 31 | 4153156 | 4153179 | 2 | 12 | 24 | GT   | 24 | 13 |
| 223261 | 31 | 4173432 | 4173445 | 2 | 7  | 14 | TG   | 22 | 3  |
| 223265 | 31 | 4180324 | 4180347 | 4 | 6  | 24 | TTCT | 12 | 7  |
| 223272 | 31 | 4188216 | 4188247 | 2 | 16 | 32 | TG   | 6  | 5  |
| 223273 | 31 | 4193578 | 4193597 | 2 | 10 | 20 | TG   | 16 | 5  |
| 223277 | 31 | 4197269 | 4197282 | 2 | 7  | 14 | AG   | 18 | 3  |
| 223278 | 31 | 4200645 | 4200668 | 2 | 12 | 24 | GA   | 14 | 6  |
| 223280 | 31 | 4205617 | 4205644 | 2 | 14 | 28 | AC   | 10 | 11 |
| 223282 | 31 | 4210004 | 4210019 | 2 | 8  | 16 | AC   | 16 | 10 |
| 223287 | 31 | 4211724 | 4211743 | 2 | 10 | 20 | GT   | 21 | 6  |
| 223292 | 31 | 4216143 | 4216158 | 4 | 4  | 16 | GAGG | 14 | 4  |
| 223300 | 31 | 4220809 | 4220830 | 2 | 11 | 22 | TC   | 18 | 3  |
| 223302 | 31 | 4221241 | 4221267 | 3 | 9  | 27 | CTT  | 23 | 7  |
| 223303 | 31 | 4223556 | 4223569 | 2 | 7  | 14 | CA   | 23 | 9  |
| 223304 | 31 | 4223920 | 4223949 | 3 | 10 | 30 | CAT  | 19 | 6  |
| 223305 | 31 | 4224071 | 4224097 | 3 | 9  | 27 | TCC  | 16 | 5  |
| 223318 | 31 | 4238537 | 4238552 | 2 | 8  | 16 | TC   | 19 | 4  |
| 223323 | 31 | 4244216 | 4244251 | 2 | 18 | 36 | TG   | 15 | 9  |
| 223324 | 31 | 4244383 | 4244396 | 2 | 7  | 14 | CA   | 19 | 5  |
| 223336 | 31 | 4263849 | 4263880 | 2 | 16 | 32 | GT   | 9  | 8  |
| 223341 | 31 | 4268603 | 4268620 | 2 | 9  | 18 | CA   | 13 | 6  |
| 223342 | 31 | 4268771 | 4268784 | 2 | 7  | 14 | GA   | 16 | 6  |
| 223351 | 31 | 4276765 | 4276778 | 2 | 7  | 14 | CA   | 18 | 6  |
| 223353 | 31 | 4277321 | 4277346 | 2 | 13 | 26 | GT   | 15 | 10 |
| 223360 | 31 | 4283447 | 4283461 | 3 | 5  | 15 | GGT  | 14 | 4  |

|        |    |         |         |   |    |    |      |    |    |
|--------|----|---------|---------|---|----|----|------|----|----|
| 223361 | 31 | 4283599 | 4283614 | 2 | 8  | 16 | AC   | 21 | 4  |
| 223364 | 31 | 4284705 | 4284724 | 2 | 10 | 20 | GA   | 16 | 3  |
| 223365 | 31 | 4285084 | 4285109 | 2 | 13 | 26 | TG   | 13 | 12 |
| 223367 | 31 | 4287119 | 4287140 | 2 | 11 | 22 | AC   | 7  | 4  |
| 223370 | 31 | 4289732 | 4289743 | 2 | 6  | 12 | TG   | 15 | 3  |
| 223372 | 31 | 4289949 | 4289960 | 2 | 6  | 12 | TG   | 18 | 12 |
| 223384 | 31 | 4295213 | 4295230 | 2 | 9  | 18 | CA   | 18 | 4  |
| 223386 | 31 | 4306207 | 4306230 | 2 | 12 | 24 | TC   | 8  | 5  |
| 223398 | 31 | 4336823 | 4336840 | 3 | 6  | 18 | TGC  | 19 | 3  |
| 223403 | 31 | 4342629 | 4342654 | 2 | 13 | 26 | CT   | 23 | 6  |
| 223406 | 31 | 4345973 | 4345988 | 2 | 8  | 16 | AC   | 25 | 6  |
| 223407 | 31 | 4346073 | 4346088 | 2 | 8  | 16 | CA   | 22 | 7  |
| 223413 | 31 | 4353652 | 4353679 | 2 | 14 | 28 | AC   | 20 | 11 |
| 223417 | 31 | 4361510 | 4361527 | 3 | 6  | 18 | GGT  | 24 | 3  |
| 223425 | 31 | 4369365 | 4369380 | 2 | 8  | 16 | CT   | 24 | 4  |
| 223433 | 31 | 4385133 | 4385148 | 2 | 8  | 16 | TG   | 28 | 3  |
| 223435 | 31 | 4395640 | 4395651 | 2 | 6  | 12 | CA   | 21 | 4  |
| 223436 | 31 | 4395653 | 4395666 | 2 | 7  | 14 | AC   | 18 | 3  |
| 223441 | 31 | 4418904 | 4418931 | 2 | 14 | 28 | GT   | 17 | 8  |
| 223449 | 31 | 4426133 | 4426158 | 2 | 13 | 26 | TC   | 6  | 3  |
| 223461 | 31 | 4432144 | 4432157 | 2 | 7  | 14 | AG   | 21 | 6  |
| 223464 | 31 | 4433282 | 4433297 | 4 | 4  | 16 | TTTC | 20 | 4  |
| 223469 | 31 | 4436963 | 4436982 | 2 | 10 | 20 | CA   | 6  | 9  |
| 223470 | 31 | 4437399 | 4437412 | 2 | 7  | 14 | TG   | 20 | 3  |
| 223475 | 31 | 4442835 | 4442854 | 2 | 10 | 20 | AC   | 16 | 9  |
| 223477 | 31 | 4449216 | 4449239 | 2 | 12 | 24 | AC   | 14 | 11 |
| 223479 | 31 | 4459718 | 4459741 | 2 | 12 | 24 | TG   | 8  | 9  |
| 223484 | 31 | 4462258 | 4462275 | 2 | 9  | 18 | TG   | 17 | 4  |
| 223486 | 31 | 4463252 | 4463277 | 2 | 13 | 26 | AG   | 11 | 6  |
| 223488 | 31 | 4464736 | 4464747 | 2 | 6  | 12 | AC   | 21 | 3  |
| 223490 | 31 | 4465516 | 4465537 | 2 | 11 | 22 | AC   | 18 | 7  |
| 223492 | 31 | 4468062 | 4468087 | 2 | 13 | 26 | GT   | 24 | 10 |
| 223497 | 31 | 4473910 | 4473935 | 2 | 13 | 26 | GT   | 10 | 10 |
| 223500 | 31 | 4476811 | 4476830 | 4 | 5  | 20 | AAAG | 32 | 3  |
| 223503 | 31 | 4481639 | 4481656 | 2 | 9  | 18 | TC   | 17 | 3  |
| 223505 | 31 | 4485924 | 4485939 | 4 | 4  | 16 | GGAA | 27 | 3  |
| 223509 | 31 | 4490916 | 4490933 | 3 | 6  | 18 | GTT  | 15 | 4  |
| 223510 | 31 | 4491349 | 4491380 | 2 | 16 | 32 | CA   | 6  | 6  |
| 223513 | 31 | 4494107 | 4494118 | 2 | 6  | 12 | GA   | 24 | 3  |
| 223515 | 31 | 4499869 | 4499906 | 2 | 19 | 38 | GT   | 9  | 11 |
| 223516 | 31 | 4501537 | 4501560 | 3 | 8  | 24 | CTC  | 15 | 6  |
| 223518 | 31 | 4502913 | 4502934 | 2 | 11 | 22 | TG   | 18 | 9  |
| 223522 | 31 | 4506206 | 4506233 | 2 | 14 | 28 | CA   | 9  | 10 |
| 223524 | 31 | 4508858 | 4508875 | 2 | 9  | 18 | AT   | 13 | 4  |
| 223525 | 31 | 4509140 | 4509161 | 2 | 11 | 22 | AG   | 17 | 12 |
| 223526 | 31 | 4509281 | 4509302 | 2 | 11 | 22 | TG   | 20 | 4  |
| 223527 | 31 | 4509448 | 4509471 | 2 | 12 | 24 | GT   | 19 | 10 |
| 223528 | 31 | 4509518 | 4509531 | 2 | 7  | 14 | GT   | 17 | 3  |
| 223529 | 31 | 4511065 | 4511088 | 2 | 12 | 24 | CA   | 20 | 9  |
| 223530 | 31 | 4511202 | 4511217 | 4 | 4  | 16 | GACA | 19 | 3  |
| 223533 | 31 | 4515440 | 4515477 | 2 | 19 | 38 | TC   | 7  | 11 |

|        |    |         |         |   |    |    |      |    |    |
|--------|----|---------|---------|---|----|----|------|----|----|
| 223536 | 31 | 4520438 | 4520449 | 2 | 6  | 12 | AG   | 26 | 4  |
| 223538 | 31 | 4521609 | 4521622 | 2 | 7  | 14 | AG   | 19 | 7  |
| 223540 | 31 | 4524890 | 4524913 | 2 | 12 | 24 | CA   | 21 | 10 |
| 223546 | 31 | 4534762 | 4534773 | 2 | 6  | 12 | AG   | 35 | 3  |
| 223550 | 31 | 4540039 | 4540056 | 2 | 9  | 18 | TG   | 20 | 7  |
| 223553 | 31 | 4552021 | 4552034 | 2 | 7  | 14 | AG   | 27 | 5  |
| 223558 | 31 | 4556151 | 4556170 | 2 | 10 | 20 | GT   | 8  | 9  |
| 223561 | 31 | 4559923 | 4559950 | 2 | 14 | 28 | AC   | 15 | 6  |
| 223562 | 31 | 4560468 | 4560488 | 3 | 7  | 21 | TTG  | 14 | 7  |
| 223567 | 31 | 4569796 | 4569821 | 2 | 13 | 26 | AC   | 16 | 4  |
| 223568 | 31 | 4570045 | 4570068 | 4 | 6  | 24 | ATGG | 23 | 7  |
| 223569 | 31 | 4571790 | 4571809 | 4 | 5  | 20 | AGCC | 28 | 3  |
| 223571 | 31 | 4572416 | 4572436 | 3 | 7  | 21 | GGA  | 15 | 4  |
| 223574 | 31 | 4574531 | 4574546 | 2 | 8  | 16 | AC   | 14 | 3  |
| 223586 | 31 | 4583947 | 4583976 | 3 | 10 | 30 | CTC  | 21 | 4  |
| 223588 | 31 | 4589915 | 4589928 | 2 | 7  | 14 | TG   | 26 | 4  |
| 223589 | 31 | 4592101 | 4592114 | 2 | 7  | 14 | GA   | 28 | 3  |
| 223591 | 31 | 4594265 | 4594282 | 2 | 9  | 18 | TG   | 7  | 6  |
| 223592 | 31 | 4594921 | 4594964 | 2 | 22 | 44 | CA   | 7  | 7  |
| 223594 | 31 | 4596349 | 4596382 | 2 | 17 | 34 | CA   | 9  | 14 |
| 223595 | 31 | 4596832 | 4596843 | 2 | 6  | 12 | GA   | 20 | 3  |
| 223596 | 31 | 4597417 | 4597442 | 2 | 13 | 26 | CT   | 17 | 10 |
| 223597 | 31 | 4597794 | 4597808 | 3 | 5  | 15 | GTT  | 24 | 3  |
| 223598 | 31 | 4597905 | 4597918 | 2 | 7  | 14 | TG   | 30 | 5  |
| 223599 | 31 | 4600233 | 4600254 | 2 | 11 | 22 | CA   | 19 | 8  |
| 223609 | 31 | 4609518 | 4609537 | 2 | 10 | 20 | TG   | 19 | 8  |
| 223611 | 31 | 4610377 | 4610396 | 2 | 10 | 20 | TC   | 18 | 7  |
| 223614 | 31 | 4620210 | 4620233 | 2 | 12 | 24 | CA   | 9  | 13 |
| 223615 | 31 | 4622147 | 4622158 | 2 | 6  | 12 | CA   | 17 | 5  |
| 223616 | 31 | 4623639 | 4623676 | 2 | 19 | 38 | AC   | 10 | 11 |
| 223622 | 31 | 4635571 | 4635594 | 2 | 12 | 24 | GT   | 13 | 8  |
| 223623 | 31 | 4643994 | 4644013 | 4 | 5  | 20 | TACA | 13 | 3  |
| 223633 | 31 | 4675735 | 4675752 | 2 | 9  | 18 | CA   | 14 | 5  |
| 223636 | 31 | 4683795 | 4683812 | 2 | 9  | 18 | GT   | 27 | 4  |
| 223637 | 31 | 4684945 | 4684968 | 2 | 12 | 24 | GT   | 10 | 7  |
| 223638 | 31 | 4691746 | 4691779 | 2 | 17 | 34 | AC   | 13 | 9  |
| 223642 | 31 | 4698915 | 4698941 | 3 | 9  | 27 | GTG  | 21 | 9  |
| 223645 | 31 | 4707797 | 4707810 | 2 | 7  | 14 | CA   | 17 | 6  |
| 223646 | 31 | 4712083 | 4712098 | 2 | 8  | 16 | AC   | 31 | 3  |
| 223669 | 31 | 4754489 | 4754524 | 2 | 18 | 36 | TG   | 16 | 10 |
| 223670 | 31 | 4755985 | 4756034 | 2 | 25 | 50 | AC   | 9  | 8  |
| 223671 | 31 | 4764843 | 4764854 | 2 | 6  | 12 | CA   | 23 | 4  |
| 223675 | 31 | 4776217 | 4776288 | 4 | 18 | 72 | TATC | 18 | 11 |
| 223677 | 31 | 4792208 | 4792221 | 2 | 7  | 14 | AC   | 15 | 3  |
| 223683 | 31 | 4807818 | 4807835 | 2 | 9  | 18 | TG   | 7  | 5  |
| 223684 | 31 | 4815097 | 4815110 | 2 | 7  | 14 | CA   | 26 | 4  |
| 223685 | 31 | 4815572 | 4815607 | 2 | 18 | 36 | GT   | 16 | 6  |
| 223691 | 31 | 4827822 | 4827847 | 2 | 13 | 26 | CA   | 17 | 6  |
| 223692 | 31 | 4829973 | 4829998 | 2 | 13 | 26 | GT   | 16 | 6  |
| 223693 | 31 | 4830206 | 4830235 | 2 | 15 | 30 | AC   | 19 | 8  |
| 223694 | 31 | 4831264 | 4831277 | 2 | 7  | 14 | AG   | 26 | 3  |

|        |    |         |         |   |    |    |      |    |    |
|--------|----|---------|---------|---|----|----|------|----|----|
| 223696 | 31 | 4832297 | 4832308 | 2 | 6  | 12 | GT   | 24 | 8  |
| 223697 | 31 | 4835072 | 4835101 | 2 | 15 | 30 | CA   | 12 | 6  |
| 223698 | 31 | 4835291 | 4835308 | 2 | 9  | 18 | TG   | 20 | 5  |
| 223701 | 31 | 4836377 | 4836418 | 2 | 21 | 42 | CA   | 6  | 7  |
| 223703 | 31 | 4837831 | 4837842 | 2 | 6  | 12 | AC   | 24 | 8  |
| 223706 | 31 | 4840038 | 4840057 | 2 | 10 | 20 | TC   | 17 | 5  |
| 223707 | 31 | 4840117 | 4840132 | 2 | 8  | 16 | AG   | 17 | 4  |
| 223709 | 31 | 4841214 | 4841251 | 2 | 19 | 38 | CA   | 7  | 8  |
| 223711 | 31 | 4841601 | 4841620 | 2 | 10 | 20 | CA   | 28 | 5  |
| 223715 | 31 | 4846025 | 4846036 | 2 | 6  | 12 | TG   | 27 | 3  |
| 223717 | 31 | 4849760 | 4849777 | 2 | 9  | 18 | AC   | 18 | 6  |
| 223719 | 31 | 4850751 | 4850766 | 2 | 8  | 16 | CA   | 18 | 9  |
| 223722 | 31 | 4853326 | 4853379 | 2 | 27 | 54 | GT   | 12 | 13 |
| 223723 | 31 | 4853494 | 4853529 | 2 | 18 | 36 | CA   | 6  | 6  |
| 223725 | 31 | 4855985 | 4856000 | 2 | 8  | 16 | CA   | 24 | 6  |
| 223726 | 31 | 4856144 | 4856165 | 2 | 11 | 22 | CT   | 16 | 7  |
| 223727 | 31 | 4857390 | 4857405 | 2 | 8  | 16 | TG   | 28 | 4  |
| 223729 | 31 | 4859146 | 4859161 | 2 | 8  | 16 | TG   | 6  | 8  |
| 223732 | 31 | 4862307 | 4862328 | 2 | 11 | 22 | TC   | 19 | 7  |
| 223733 | 31 | 4862456 | 4862475 | 2 | 10 | 20 | CA   | 15 | 14 |
| 223734 | 31 | 4863010 | 4863029 | 2 | 10 | 20 | TG   | 17 | 14 |
| 223737 | 31 | 4866146 | 4866159 | 2 | 7  | 14 | CT   | 25 | 3  |
| 223738 | 31 | 4866161 | 4866172 | 2 | 6  | 12 | TC   | 21 | 5  |
| 223740 | 31 | 4867783 | 4867800 | 2 | 9  | 18 | TG   | 20 | 3  |
| 223741 | 31 | 4867908 | 4867937 | 2 | 15 | 30 | GT   | 12 | 5  |
| 223743 | 31 | 4868130 | 4868155 | 2 | 13 | 26 | TC   | 7  | 8  |
| 223748 | 31 | 4870333 | 4870352 | 2 | 10 | 20 | AC   | 14 | 7  |
| 223750 | 31 | 4870585 | 4870604 | 4 | 5  | 20 | GTGC | 11 | 7  |
| 223758 | 31 | 4882369 | 4882380 | 2 | 6  | 12 | AC   | 33 | 3  |
| 223760 | 31 | 4885055 | 4885069 | 3 | 5  | 15 | AAT  | 11 | 4  |
| 223764 | 31 | 4891139 | 4891150 | 2 | 6  | 12 | AC   | 19 | 7  |
| 223765 | 31 | 4891152 | 4891165 | 2 | 7  | 14 | CA   | 20 | 8  |
| 223768 | 31 | 4902964 | 4902977 | 2 | 7  | 14 | AC   | 25 | 7  |
| 223775 | 31 | 4917310 | 4917325 | 4 | 4  | 16 | ATAA | 18 | 3  |
| 223783 | 31 | 4939755 | 4939784 | 2 | 15 | 30 | GT   | 18 | 13 |
| 223785 | 31 | 4942545 | 4942560 | 4 | 4  | 16 | TTAC | 11 | 4  |
| 223791 | 31 | 4952062 | 4952079 | 3 | 6  | 18 | CAA  | 29 | 4  |
| 223799 | 31 | 4987446 | 4987463 | 2 | 9  | 18 | AC   | 25 | 9  |
| 223802 | 31 | 4992037 | 4992060 | 2 | 12 | 24 | AC   | 22 | 11 |
| 223809 | 31 | 5007527 | 5007556 | 2 | 15 | 30 | AC   | 12 | 7  |
| 223813 | 31 | 5014018 | 5014029 | 2 | 6  | 12 | TC   | 18 | 3  |
| 223819 | 31 | 5028818 | 5028841 | 3 | 8  | 24 | GAG  | 22 | 7  |
| 223832 | 31 | 5053906 | 5053919 | 2 | 7  | 14 | TA   | 9  | 3  |
| 223839 | 31 | 5078684 | 5078695 | 2 | 6  | 12 | GT   | 23 | 5  |
| 223843 | 31 | 5081216 | 5081239 | 3 | 8  | 24 | GAA  | 26 | 7  |
| 223844 | 31 | 5082941 | 5082992 | 2 | 26 | 52 | AC   | 11 | 9  |
| 223869 | 31 | 5124867 | 5124912 | 2 | 23 | 46 | GT   | 7  | 11 |
| 223870 | 31 | 5128765 | 5128778 | 2 | 7  | 14 | TG   | 25 | 10 |
| 223871 | 31 | 5130555 | 5130569 | 3 | 5  | 15 | TGC  | 28 | 6  |
| 223878 | 31 | 5142361 | 5142386 | 2 | 13 | 26 | TG   | 6  | 9  |
| 223896 | 31 | 5173228 | 5173272 | 3 | 15 | 45 | GAT  | 26 | 17 |

|        |    |         |         |   |    |    |      |    |    |
|--------|----|---------|---------|---|----|----|------|----|----|
| 223900 | 31 | 5195561 | 5195604 | 2 | 22 | 44 | GT   | 11 | 12 |
| 223905 | 31 | 5203636 | 5203647 | 2 | 6  | 12 | GA   | 28 | 4  |
| 223907 | 31 | 5217401 | 5217414 | 2 | 7  | 14 | TG   | 29 | 4  |
| 223908 | 31 | 5217608 | 5217623 | 2 | 8  | 16 | AC   | 16 | 5  |
| 223911 | 31 | 5231422 | 5231447 | 2 | 13 | 26 | GT   | 12 | 6  |
| 223915 | 31 | 5241497 | 5241508 | 2 | 6  | 12 | AT   | 7  | 3  |
| 223921 | 31 | 5247986 | 5248013 | 2 | 14 | 28 | CA   | 10 | 10 |
| 223922 | 31 | 5257483 | 5257514 | 2 | 16 | 32 | GT   | 13 | 11 |
| 223924 | 31 | 5260778 | 5260789 | 2 | 6  | 12 | TA   | 22 | 3  |
| 223956 | 31 | 5339315 | 5339340 | 2 | 13 | 26 | CA   | 7  | 7  |
| 223958 | 31 | 5342390 | 5342415 | 2 | 13 | 26 | CA   | 19 | 11 |
| 223960 | 31 | 5343169 | 5343200 | 2 | 16 | 32 | TG   | 7  | 9  |
| 223961 | 31 | 5343924 | 5343949 | 2 | 13 | 26 | GT   | 16 | 17 |
| 223969 | 31 | 5356130 | 5356149 | 4 | 5  | 20 | TACA | 16 | 11 |
| 223974 | 31 | 5382627 | 5382654 | 4 | 7  | 28 | ATTC | 23 | 9  |
| 223975 | 31 | 5389991 | 5390004 | 2 | 7  | 14 | TG   | 15 | 4  |
| 223979 | 31 | 5411518 | 5411529 | 2 | 6  | 12 | GT   | 15 | 7  |
| 223980 | 31 | 5411532 | 5411547 | 2 | 8  | 16 | GT   | 11 | 6  |
| 223981 | 31 | 5411729 | 5411744 | 2 | 8  | 16 | GT   | 9  | 3  |
| 223984 | 31 | 5412385 | 5412399 | 3 | 5  | 15 | TAT  | 22 | 3  |
| 223996 | 31 | 5457990 | 5458007 | 2 | 9  | 18 | CA   | 22 | 5  |
| 223998 | 31 | 5461493 | 5461514 | 2 | 11 | 22 | AC   | 16 | 12 |
| 224005 | 31 | 5484998 | 5485009 | 2 | 6  | 12 | TG   | 19 | 4  |
| 224006 | 31 | 5497286 | 5497303 | 2 | 9  | 18 | TG   | 28 | 6  |
| 224022 | 31 | 5523517 | 5523530 | 2 | 7  | 14 | AG   | 18 | 5  |
| 224035 | 31 | 5538280 | 5538293 | 2 | 7  | 14 | AC   | 20 | 3  |
| 224051 | 31 | 5573353 | 5573390 | 2 | 19 | 38 | TG   | 9  | 8  |
| 224052 | 31 | 5573484 | 5573495 | 2 | 6  | 12 | GT   | 15 | 4  |
| 224054 | 31 | 5574703 | 5574726 | 2 | 12 | 24 | GT   | 12 | 9  |
| 224070 | 31 | 5591318 | 5591359 | 2 | 21 | 42 | GT   | 12 | 14 |
| 224072 | 31 | 5599584 | 5599617 | 2 | 17 | 34 | TC   | 16 | 10 |
| 224080 | 31 | 5609734 | 5609753 | 2 | 10 | 20 | AC   | 18 | 8  |
| 224081 | 31 | 5611786 | 5611819 | 2 | 17 | 34 | CA   | 7  | 6  |
| 224084 | 31 | 5614575 | 5614598 | 2 | 12 | 24 | AC   | 18 | 8  |
| 224086 | 31 | 5615822 | 5615845 | 2 | 12 | 24 | CA   | 12 | 6  |
| 224087 | 31 | 5618721 | 5618756 | 2 | 18 | 36 | AC   | 7  | 8  |
| 224090 | 31 | 5622237 | 5622256 | 2 | 10 | 20 | CA   | 18 | 3  |
| 224095 | 31 | 5626164 | 5626175 | 2 | 6  | 12 | CA   | 23 | 3  |
| 224096 | 31 | 5626215 | 5626236 | 2 | 11 | 22 | CT   | 12 | 3  |
| 224097 | 31 | 5626433 | 5626447 | 3 | 5  | 15 | TCT  | 14 | 3  |
| 224099 | 31 | 5628532 | 5628553 | 2 | 11 | 22 | CT   | 16 | 3  |
| 224108 | 31 | 5645257 | 5645272 | 2 | 8  | 16 | TC   | 24 | 3  |
| 224118 | 31 | 5664551 | 5664568 | 2 | 9  | 18 | TG   | 29 | 8  |
| 224120 | 31 | 5669368 | 5669385 | 2 | 9  | 18 | CT   | 6  | 4  |
| 224122 | 31 | 5669739 | 5669770 | 2 | 16 | 32 | GT   | 21 | 5  |
| 224124 | 31 | 5677158 | 5677189 | 2 | 16 | 32 | AC   | 15 | 8  |
| 224126 | 31 | 5677624 | 5677645 | 2 | 11 | 22 | TG   | 17 | 4  |
| 224128 | 31 | 5677988 | 5678025 | 2 | 19 | 38 | TG   | 9  | 6  |
| 224130 | 31 | 5679903 | 5679924 | 2 | 11 | 22 | CA   | 7  | 3  |
| 224133 | 31 | 5683501 | 5683520 | 2 | 10 | 20 | TG   | 18 | 5  |
| 224145 | 31 | 5710070 | 5710083 | 2 | 7  | 14 | AC   | 22 | 5  |



|        |    |         |         |   |    |    |      |    |    |
|--------|----|---------|---------|---|----|----|------|----|----|
| 224146 | 31 | 5711440 | 5711471 | 2 | 16 | 32 | AC   | 23 | 12 |
| 224147 | 31 | 5711860 | 5711879 | 2 | 10 | 20 | AC   | 16 | 11 |
| 224148 | 31 | 5712003 | 5712022 | 2 | 10 | 20 | AC   | 20 | 7  |
| 224155 | 31 | 5721239 | 5721258 | 2 | 10 | 20 | AC   | 26 | 3  |
| 224162 | 31 | 5728319 | 5728352 | 2 | 17 | 34 | CA   | 17 | 10 |
| 224164 | 31 | 5728606 | 5728629 | 2 | 12 | 24 | AG   | 12 | 9  |
| 224165 | 31 | 5732081 | 5732092 | 2 | 6  | 12 | AT   | 15 | 4  |
| 224166 | 31 | 5733929 | 5733942 | 2 | 7  | 14 | AG   | 22 | 5  |
| 224167 | 31 | 5735413 | 5735462 | 2 | 25 | 50 | AC   | 9  | 13 |
| 224168 | 31 | 5736998 | 5737021 | 2 | 12 | 24 | GT   | 11 | 8  |
| 224171 | 31 | 5740820 | 5740855 | 2 | 18 | 36 | GT   | 23 | 10 |
| 224175 | 31 | 5742638 | 5742655 | 2 | 9  | 18 | GA   | 26 | 8  |
| 224176 | 31 | 5742924 | 5742957 | 2 | 17 | 34 | TG   | 16 | 15 |
| 224177 | 31 | 5746584 | 5746603 | 2 | 10 | 20 | CT   | 18 | 5  |
| 224178 | 31 | 5746705 | 5746724 | 2 | 10 | 20 | AC   | 13 | 3  |
| 224185 | 31 | 5758099 | 5758112 | 2 | 7  | 14 | CA   | 25 | 3  |
| 224186 | 31 | 5758453 | 5758484 | 2 | 16 | 32 | AC   | 18 | 13 |
| 224197 | 31 | 5772640 | 5772651 | 2 | 6  | 12 | GT   | 25 | 7  |
| 224198 | 31 | 5772654 | 5772671 | 2 | 9  | 18 | GT   | 29 | 9  |
| 224200 | 31 | 5780046 | 5780078 | 3 | 11 | 33 | CCT  | 8  | 8  |
| 224201 | 31 | 5780193 | 5780222 | 2 | 15 | 30 | TG   | 7  | 10 |
| 224204 | 31 | 5782366 | 5782380 | 3 | 5  | 15 | TCT  | 20 | 4  |
| 224212 | 31 | 5786795 | 5786824 | 2 | 15 | 30 | CA   | 8  | 5  |
| 224215 | 31 | 5788699 | 5788718 | 2 | 10 | 20 | CT   | 8  | 3  |
| 224223 | 31 | 5807311 | 5807343 | 3 | 11 | 33 | TTC  | 26 | 6  |
| 224225 | 31 | 5809962 | 5809975 | 2 | 7  | 14 | CA   | 28 | 5  |
| 224226 | 31 | 5810133 | 5810150 | 2 | 9  | 18 | CA   | 21 | 14 |
| 224230 | 31 | 5819507 | 5819536 | 2 | 15 | 30 | CA   | 8  | 5  |
| 224232 | 31 | 5827334 | 5827361 | 2 | 14 | 28 | TC   | 15 | 13 |
| 224234 | 31 | 5827576 | 5827595 | 2 | 10 | 20 | AC   | 27 | 4  |
| 224246 | 31 | 5858365 | 5858384 | 4 | 5  | 20 | ACAA | 36 | 3  |
| 224247 | 31 | 5860333 | 5860347 | 3 | 5  | 15 | CAG  | 29 | 5  |
| 224249 | 31 | 5876450 | 5876461 | 2 | 6  | 12 | GT   | 30 | 6  |
| 224259 | 31 | 5905820 | 5905845 | 2 | 13 | 26 | CT   | 12 | 4  |
| 224265 | 31 | 5917615 | 5917638 | 2 | 12 | 24 | TG   | 19 | 7  |
| 224266 | 31 | 5921192 | 5921215 | 2 | 12 | 24 | GT   | 19 | 6  |
| 224269 | 31 | 5924211 | 5924224 | 2 | 7  | 14 | AC   | 14 | 3  |
| 224272 | 31 | 5925835 | 5925850 | 4 | 4  | 16 | ATAG | 21 | 3  |
| 224280 | 31 | 5934005 | 5934042 | 2 | 19 | 38 | GT   | 10 | 8  |
| 224281 | 31 | 5942733 | 5942752 | 2 | 10 | 20 | CT   | 15 | 4  |
| 224284 | 31 | 5946954 | 5946969 | 4 | 4  | 16 | TGGA | 19 | 5  |
| 224285 | 31 | 5950996 | 5951007 | 2 | 6  | 12 | CA   | 8  | 5  |
| 224287 | 31 | 5951287 | 5951302 | 2 | 8  | 16 | TG   | 17 | 6  |
| 224288 | 31 | 5951304 | 5951315 | 2 | 6  | 12 | GT   | 20 | 6  |
| 224289 | 31 | 5952280 | 5952299 | 2 | 10 | 20 | AC   | 18 | 6  |
| 224290 | 31 | 5952530 | 5952543 | 2 | 7  | 14 | AC   | 16 | 4  |
| 224295 | 31 | 5962470 | 5962481 | 2 | 6  | 12 | CT   | 26 | 3  |
| 224299 | 31 | 5971184 | 5971203 | 2 | 10 | 20 | CA   | 18 | 9  |
| 224302 | 31 | 5977343 | 5977368 | 2 | 13 | 26 | TG   | 9  | 9  |
| 224307 | 31 | 5988401 | 5988414 | 2 | 7  | 14 | CT   | 21 | 5  |
| 224308 | 31 | 5988712 | 5988729 | 2 | 9  | 18 | CT   | 22 | 4  |

|        |    |         |         |   |    |    |      |    |    |
|--------|----|---------|---------|---|----|----|------|----|----|
| 224315 | 31 | 5995281 | 5995308 | 4 | 7  | 28 | GTTG | 16 | 6  |
| 224317 | 31 | 5997998 | 5998025 | 2 | 14 | 28 | GT   | 20 | 13 |
| 224321 | 31 | 6000660 | 6000681 | 2 | 11 | 22 | GT   | 13 | 4  |
| 224324 | 31 | 6007133 | 6007172 | 2 | 20 | 40 | GT   | 13 | 13 |
| 224325 | 31 | 6007279 | 6007304 | 2 | 13 | 26 | CA   | 17 | 11 |
| 224326 | 31 | 6007970 | 6007999 | 2 | 15 | 30 | AG   | 7  | 5  |
| 224331 | 31 | 6014617 | 6014652 | 2 | 18 | 36 | AC   | 12 | 8  |
| 224333 | 31 | 6015172 | 6015183 | 2 | 6  | 12 | AC   | 23 | 3  |
| 224337 | 31 | 6026111 | 6026128 | 2 | 9  | 18 | AC   | 19 | 4  |
| 224338 | 31 | 6026535 | 6026562 | 2 | 14 | 28 | CA   | 16 | 9  |
| 224344 | 31 | 6043863 | 6043880 | 3 | 6  | 18 | GGA  | 34 | 3  |
| 224345 | 31 | 6044013 | 6044030 | 2 | 9  | 18 | GT   | 31 | 4  |
| 224347 | 31 | 6052533 | 6052544 | 2 | 6  | 12 | CT   | 22 | 3  |
| 224353 | 31 | 6059059 | 6059074 | 4 | 4  | 16 | GGAG | 22 | 3  |
| 224354 | 31 | 6059960 | 6059971 | 2 | 6  | 12 | AT   | 33 | 3  |
| 224356 | 31 | 6072717 | 6072732 | 2 | 8  | 16 | TG   | 18 | 6  |
| 224358 | 31 | 6073398 | 6073409 | 2 | 6  | 12 | AG   | 33 | 3  |
| 224360 | 31 | 6084686 | 6084703 | 2 | 9  | 18 | AC   | 21 | 8  |
| 224363 | 31 | 6089284 | 6089297 | 2 | 7  | 14 | CA   | 10 | 11 |
| 224365 | 31 | 6090919 | 6090934 | 2 | 8  | 16 | TG   | 20 | 5  |
| 224371 | 31 | 6098197 | 6098220 | 2 | 12 | 24 | GA   | 13 | 12 |
| 224372 | 31 | 6099735 | 6099764 | 2 | 15 | 30 | CA   | 10 | 11 |
| 224374 | 31 | 6101499 | 6101520 | 2 | 11 | 22 | AG   | 15 | 6  |
| 224378 | 31 | 6104848 | 6104865 | 2 | 9  | 18 | GT   | 18 | 8  |
| 224379 | 31 | 6107873 | 6107899 | 3 | 9  | 27 | GCA  | 30 | 11 |
| 224387 | 31 | 6117409 | 6117420 | 2 | 6  | 12 | AC   | 16 | 10 |
| 224388 | 31 | 6117568 | 6117579 | 2 | 6  | 12 | CA   | 19 | 9  |
| 224390 | 31 | 6119579 | 6119598 | 2 | 10 | 20 | GT   | 20 | 7  |
| 224391 | 31 | 6119782 | 6119817 | 2 | 18 | 36 | TG   | 9  | 8  |
| 224392 | 31 | 6121741 | 6121772 | 2 | 16 | 32 | GT   | 17 | 7  |
| 224393 | 31 | 6121924 | 6121937 | 2 | 7  | 14 | GT   | 16 | 4  |
| 224394 | 31 | 6126605 | 6126632 | 2 | 14 | 28 | TG   | 18 | 5  |
| 224395 | 31 | 6130258 | 6130281 | 2 | 12 | 24 | GT   | 18 | 9  |
| 224401 | 31 | 6142217 | 6142228 | 2 | 6  | 12 | CA   | 13 | 6  |
| 224402 | 31 | 6142230 | 6142241 | 2 | 6  | 12 | AC   | 13 | 5  |
| 224405 | 31 | 6143620 | 6143639 | 2 | 10 | 20 | CA   | 24 | 6  |
| 224408 | 31 | 6148448 | 6148471 | 2 | 12 | 24 | AC   | 14 | 10 |
| 224409 | 31 | 6153444 | 6153471 | 2 | 14 | 28 | TG   | 14 | 13 |
| 224419 | 31 | 6175977 | 6175991 | 3 | 5  | 15 | AGA  | 26 | 3  |
| 224420 | 31 | 6176568 | 6176587 | 2 | 10 | 20 | AT   | 6  | 7  |
| 224422 | 31 | 6177310 | 6177321 | 2 | 6  | 12 | GT   | 15 | 9  |
| 224423 | 31 | 6183915 | 6183934 | 2 | 10 | 20 | TG   | 23 | 8  |
| 224425 | 31 | 6191633 | 6191652 | 2 | 10 | 20 | TG   | 18 | 8  |
| 224428 | 31 | 6199800 | 6199814 | 3 | 5  | 15 | ATC  | 21 | 3  |
| 224430 | 31 | 6210951 | 6210976 | 2 | 13 | 26 | GT   | 18 | 4  |
| 224431 | 31 | 6211576 | 6211607 | 2 | 16 | 32 | CA   | 13 | 12 |
| 224432 | 31 | 6212370 | 6212409 | 2 | 20 | 40 | AC   | 14 | 18 |
| 224434 | 31 | 6213911 | 6213937 | 3 | 9  | 27 | GAG  | 10 | 8  |
| 224437 | 31 | 6223287 | 6223302 | 2 | 8  | 16 | CA   | 22 | 6  |
| 224439 | 31 | 6227182 | 6227193 | 2 | 6  | 12 | CA   | 20 | 4  |
| 224440 | 31 | 6227383 | 6227410 | 2 | 14 | 28 | CA   | 11 | 12 |

|        |    |         |         |   |    |    |      |    |    |
|--------|----|---------|---------|---|----|----|------|----|----|
| 224441 | 31 | 6227548 | 6227571 | 2 | 12 | 24 | TG   | 14 | 9  |
| 224445 | 31 | 6235636 | 6235651 | 2 | 8  | 16 | TG   | 30 | 3  |
| 224446 | 31 | 6239985 | 6239996 | 2 | 6  | 12 | TG   | 19 | 7  |
| 224450 | 31 | 6243757 | 6243786 | 2 | 15 | 30 | TG   | 14 | 8  |
| 224452 | 31 | 6255288 | 6255305 | 2 | 9  | 18 | CA   | 15 | 10 |
| 224460 | 31 | 6263903 | 6263914 | 2 | 6  | 12 | GT   | 28 | 4  |
| 224463 | 31 | 6272313 | 6272330 | 3 | 6  | 18 | GGA  | 11 | 8  |
| 224466 | 31 | 6274923 | 6274942 | 2 | 10 | 20 | CA   | 19 | 13 |
| 224477 | 31 | 6294427 | 6294438 | 2 | 6  | 12 | AG   | 26 | 6  |
| 224482 | 31 | 6319677 | 6319702 | 2 | 13 | 26 | TG   | 13 | 10 |
| 224490 | 31 | 6359478 | 6359491 | 2 | 7  | 14 | TG   | 11 | 3  |
| 224494 | 31 | 6376056 | 6376069 | 2 | 7  | 14 | CA   | 23 | 4  |
| 224496 | 31 | 6383362 | 6383377 | 2 | 8  | 16 | TG   | 23 | 9  |
| 224499 | 31 | 6391960 | 6391971 | 2 | 6  | 12 | AC   | 13 | 3  |
| 224503 | 31 | 6399260 | 6399274 | 3 | 5  | 15 | TGT  | 27 | 3  |
| 224506 | 31 | 6409931 | 6409958 | 2 | 14 | 28 | CA   | 13 | 7  |
| 224509 | 31 | 6416410 | 6416424 | 3 | 5  | 15 | GCT  | 25 | 5  |
| 224510 | 31 | 6416634 | 6416651 | 2 | 9  | 18 | GA   | 24 | 9  |
| 224511 | 31 | 6416652 | 6416665 | 2 | 7  | 14 | GT   | 23 | 7  |
| 224512 | 31 | 6416722 | 6416735 | 2 | 7  | 14 | AC   | 28 | 4  |
| 224519 | 31 | 6424410 | 6424443 | 2 | 17 | 34 | GA   | 8  | 6  |
| 224528 | 31 | 6441799 | 6441822 | 3 | 8  | 24 | TGT  | 24 | 11 |
| 224533 | 31 | 6448883 | 6448903 | 3 | 7  | 21 | ATG  | 19 | 9  |
| 224544 | 31 | 6467163 | 6467174 | 2 | 6  | 12 | GA   | 28 | 4  |
| 224545 | 31 | 6468567 | 6468594 | 2 | 14 | 28 | CA   | 14 | 12 |
| 224546 | 31 | 6474637 | 6474669 | 3 | 11 | 33 | TGA  | 31 | 6  |
| 224551 | 31 | 6527361 | 6527372 | 2 | 6  | 12 | TG   | 23 | 7  |
| 224553 | 31 | 6528709 | 6528732 | 3 | 8  | 24 | TCT  | 29 | 4  |
| 224554 | 31 | 6538313 | 6538348 | 2 | 18 | 36 | GT   | 13 | 13 |
| 224555 | 31 | 6541926 | 6541945 | 2 | 10 | 20 | AG   | 19 | 8  |
| 224558 | 31 | 6557890 | 6557909 | 2 | 10 | 20 | AG   | 16 | 4  |
| 224588 | 31 | 6664811 | 6664826 | 4 | 4  | 16 | GAGT | 17 | 4  |
| 224589 | 31 | 6670719 | 6670740 | 2 | 11 | 22 | TG   | 18 | 11 |
| 224591 | 31 | 6674660 | 6674679 | 2 | 10 | 20 | CA   | 27 | 5  |
| 224595 | 31 | 6683550 | 6683563 | 2 | 7  | 14 | AC   | 21 | 3  |
| 224597 | 31 | 6698340 | 6698367 | 4 | 7  | 28 | ATTT | 20 | 3  |
| 224598 | 31 | 6699481 | 6699519 | 3 | 13 | 39 | TAT  | 6  | 8  |
| 224603 | 31 | 6709027 | 6709056 | 2 | 15 | 30 | GT   | 15 | 5  |
| 224606 | 31 | 6726570 | 6726597 | 2 | 14 | 28 | TG   | 13 | 11 |
| 224608 | 31 | 6734326 | 6734337 | 2 | 6  | 12 | TG   | 35 | 3  |
| 224610 | 31 | 6743081 | 6743108 | 4 | 7  | 28 | TTTA | 23 | 12 |
| 224614 | 31 | 6759154 | 6759189 | 2 | 18 | 36 | GT   | 10 | 11 |
| 224616 | 31 | 6761314 | 6761347 | 2 | 17 | 34 | GT   | 17 | 5  |
| 224618 | 31 | 6761693 | 6761704 | 2 | 6  | 12 | TG   | 28 | 3  |
| 224619 | 31 | 6765396 | 6765407 | 2 | 6  | 12 | AT   | 15 | 3  |
| 224620 | 31 | 6765478 | 6765505 | 2 | 14 | 28 | TG   | 11 | 8  |
| 224629 | 31 | 6784752 | 6784783 | 2 | 16 | 32 | TG   | 10 | 9  |
| 224640 | 31 | 6806645 | 6806656 | 2 | 6  | 12 | TA   | 20 | 3  |
| 224641 | 31 | 6806697 | 6806712 | 2 | 8  | 16 | GT   | 25 | 5  |
| 224645 | 31 | 6817932 | 6817947 | 2 | 8  | 16 | GT   | 26 | 8  |
| 224650 | 31 | 6827047 | 6827092 | 2 | 23 | 46 | GT   | 15 | 12 |

|        |    |         |         |   |    |    |      |    |    |
|--------|----|---------|---------|---|----|----|------|----|----|
| 224657 | 31 | 6841519 | 6841540 | 2 | 11 | 22 | TG   | 17 | 9  |
| 224660 | 31 | 6841827 | 6841852 | 2 | 13 | 26 | AC   | 16 | 12 |
| 224661 | 31 | 6842234 | 6842255 | 2 | 11 | 22 | AC   | 16 | 3  |
| 224667 | 31 | 6844139 | 6844162 | 2 | 12 | 24 | GT   | 13 | 8  |
| 224670 | 31 | 6846910 | 6846925 | 2 | 8  | 16 | TG   | 18 | 6  |
| 224671 | 31 | 6847513 | 6847534 | 2 | 11 | 22 | AC   | 15 | 7  |
| 224673 | 31 | 6849326 | 6849343 | 2 | 9  | 18 | GT   | 21 | 6  |
| 224676 | 31 | 6851762 | 6851779 | 2 | 9  | 18 | CA   | 16 | 6  |
| 224677 | 31 | 6851879 | 6851892 | 2 | 7  | 14 | GT   | 33 | 5  |
| 224678 | 31 | 6858526 | 6858557 | 2 | 16 | 32 | AC   | 15 | 7  |
| 224679 | 31 | 6863954 | 6863983 | 2 | 15 | 30 | AC   | 9  | 12 |
| 224681 | 31 | 6866900 | 6866919 | 4 | 5  | 20 | TCTG | 22 | 9  |
| 224683 | 31 | 6870887 | 6870918 | 2 | 16 | 32 | TG   | 26 | 11 |
| 224685 | 31 | 6872647 | 6872662 | 2 | 8  | 16 | GT   | 19 | 3  |
| 224687 | 31 | 6875218 | 6875229 | 2 | 6  | 12 | TG   | 24 | 3  |
| 224688 | 31 | 6875540 | 6875575 | 2 | 18 | 36 | AC   | 12 | 11 |
| 224691 | 31 | 6877603 | 6877618 | 2 | 8  | 16 | GT   | 27 | 9  |
| 224694 | 31 | 6880910 | 6880929 | 2 | 10 | 20 | GA   | 6  | 4  |
| 224695 | 31 | 6881681 | 6881714 | 2 | 17 | 34 | TG   | 11 | 11 |
| 224697 | 31 | 6883378 | 6883392 | 3 | 5  | 15 | TTG  | 30 | 3  |
| 224698 | 31 | 6883860 | 6883879 | 2 | 10 | 20 | TG   | 6  | 3  |
| 224700 | 31 | 6885434 | 6885449 | 2 | 8  | 16 | TG   | 21 | 3  |
| 224701 | 31 | 6886101 | 6886118 | 2 | 9  | 18 | GT   | 25 | 10 |
| 224702 | 31 | 6887031 | 6887054 | 2 | 12 | 24 | GT   | 11 | 5  |
| 224704 | 31 | 6888480 | 6888503 | 3 | 8  | 24 | CCT  | 16 | 3  |
| 224705 | 31 | 6888761 | 6888788 | 2 | 14 | 28 | GT   | 18 | 12 |
| 224706 | 31 | 6890538 | 6890569 | 2 | 16 | 32 | CA   | 19 | 13 |
| 224707 | 31 | 6892968 | 6893003 | 2 | 18 | 36 | GT   | 15 | 8  |
| 224708 | 31 | 6897036 | 6897055 | 2 | 10 | 20 | GT   | 18 | 8  |
| 224712 | 31 | 6901033 | 6901048 | 2 | 8  | 16 | GT   | 23 | 5  |
| 224713 | 31 | 6902592 | 6902603 | 2 | 6  | 12 | GT   | 25 | 5  |
| 224715 | 31 | 6902781 | 6902806 | 2 | 13 | 26 | CA   | 14 | 5  |
| 224718 | 31 | 6908094 | 6908141 | 2 | 24 | 48 | CA   | 8  | 12 |
| 224722 | 31 | 6911426 | 6911453 | 2 | 14 | 28 | CA   | 11 | 9  |
| 224723 | 31 | 6912810 | 6912821 | 2 | 6  | 12 | AG   | 19 | 7  |
| 224725 | 31 | 6912940 | 6912961 | 2 | 11 | 22 | GT   | 17 | 8  |
| 224726 | 31 | 6914980 | 6914997 | 2 | 9  | 18 | GT   | 21 | 3  |
| 224727 | 31 | 6918180 | 6918191 | 2 | 6  | 12 | GT   | 26 | 4  |
| 224733 | 31 | 6921383 | 6921408 | 2 | 13 | 26 | TG   | 19 | 6  |
| 224735 | 31 | 6923265 | 6923276 | 2 | 6  | 12 | AC   | 10 | 14 |
| 224736 | 31 | 6923407 | 6923430 | 2 | 12 | 24 | AC   | 11 | 8  |
| 224737 | 31 | 6923508 | 6923519 | 2 | 6  | 12 | AC   | 28 | 3  |
| 224743 | 31 | 6930497 | 6930524 | 2 | 14 | 28 | TG   | 21 | 13 |
| 224745 | 31 | 6934544 | 6934555 | 2 | 6  | 12 | TC   | 9  | 3  |
| 224748 | 31 | 6939300 | 6939321 | 2 | 11 | 22 | GT   | 13 | 10 |
| 224750 | 31 | 6941587 | 6941618 | 2 | 16 | 32 | TC   | 7  | 8  |
| 224751 | 31 | 6943634 | 6943657 | 2 | 12 | 24 | CA   | 14 | 5  |
| 224753 | 31 | 6944556 | 6944577 | 2 | 11 | 22 | AC   | 13 | 5  |
| 224758 | 31 | 6949221 | 6949242 | 2 | 11 | 22 | CA   | 16 | 6  |
| 224763 | 31 | 6955006 | 6955017 | 2 | 6  | 12 | AC   | 30 | 3  |
| 224764 | 31 | 6956001 | 6956018 | 3 | 6  | 18 | GAG  | 24 | 4  |

|        |    |         |         |   |    |    |      |    |    |
|--------|----|---------|---------|---|----|----|------|----|----|
| 224771 | 31 | 6961341 | 6961368 | 2 | 14 | 28 | AC   | 8  | 8  |
| 224772 | 31 | 6961513 | 6961536 | 2 | 12 | 24 | AC   | 18 | 12 |
| 224774 | 31 | 6965762 | 6965779 | 2 | 9  | 18 | TG   | 27 | 3  |
| 224775 | 31 | 6968569 | 6968584 | 2 | 8  | 16 | AG   | 29 | 3  |
| 224776 | 31 | 6969161 | 6969184 | 2 | 12 | 24 | CA   | 21 | 11 |
| 224777 | 31 | 6971981 | 6971996 | 2 | 8  | 16 | AG   | 25 | 4  |
| 224778 | 31 | 6973890 | 6973909 | 2 | 10 | 20 | AC   | 6  | 5  |
| 224781 | 31 | 6976425 | 6976442 | 2 | 9  | 18 | CA   | 18 | 13 |
| 224783 | 31 | 6979097 | 6979118 | 2 | 11 | 22 | TG   | 20 | 8  |
| 224788 | 31 | 6988682 | 6988709 | 4 | 7  | 28 | CAGA | 25 | 4  |
| 224790 | 31 | 6991770 | 6991787 | 2 | 9  | 18 | AG   | 18 | 6  |
| 224800 | 31 | 6995579 | 6995608 | 2 | 15 | 30 | AC   | 18 | 11 |
| 224802 | 31 | 6995809 | 6995826 | 2 | 9  | 18 | TG   | 11 | 7  |
| 224803 | 31 | 6995987 | 6996004 | 2 | 9  | 18 | TC   | 15 | 7  |
| 224804 | 31 | 6996171 | 6996186 | 2 | 8  | 16 | GA   | 23 | 3  |
| 224808 | 31 | 6998515 | 6998526 | 2 | 6  | 12 | AC   | 24 | 3  |
| 224810 | 31 | 6999187 | 6999210 | 4 | 6  | 24 | TTTA | 21 | 6  |
| 224817 | 31 | 7011728 | 7011747 | 2 | 10 | 20 | TC   | 18 | 5  |
| 224818 | 31 | 7014264 | 7014285 | 2 | 11 | 22 | AC   | 23 | 9  |
| 224821 | 31 | 7016254 | 7016271 | 2 | 9  | 18 | GT   | 18 | 3  |
| 224822 | 31 | 7016706 | 7016723 | 3 | 6  | 18 | CCA  | 22 | 4  |
| 224825 | 31 | 7026058 | 7026085 | 2 | 14 | 28 | TG   | 10 | 8  |
| 224832 | 31 | 7028529 | 7028566 | 2 | 19 | 38 | CA   | 11 | 12 |
| 224835 | 31 | 7031071 | 7031088 | 3 | 6  | 18 | CAC  | 24 | 3  |
| 224836 | 31 | 7031690 | 7031705 | 2 | 8  | 16 | TC   | 18 | 4  |
| 224845 | 31 | 7051466 | 7051491 | 2 | 13 | 26 | AC   | 16 | 7  |
| 224849 | 31 | 7056405 | 7056418 | 2 | 7  | 14 | AC   | 24 | 3  |
| 224851 | 31 | 7059233 | 7059254 | 2 | 11 | 22 | TG   | 14 | 8  |
| 224852 | 31 | 7061958 | 7061969 | 2 | 6  | 12 | CA   | 22 | 5  |
| 224853 | 31 | 7062323 | 7062354 | 4 | 8  | 32 | ATAG | 11 | 11 |
| 224857 | 31 | 7067783 | 7067798 | 2 | 8  | 16 | AC   | 21 | 4  |
| 224858 | 31 | 7068144 | 7068179 | 2 | 18 | 36 | CA   | 16 | 10 |
| 224859 | 31 | 7068332 | 7068355 | 2 | 12 | 24 | CA   | 19 | 6  |
| 224861 | 31 | 7069714 | 7069735 | 2 | 11 | 22 | AC   | 19 | 10 |
| 224878 | 31 | 7080684 | 7080695 | 2 | 6  | 12 | CA   | 23 | 3  |
| 224881 | 31 | 7081841 | 7081858 | 2 | 9  | 18 | AC   | 16 | 3  |
| 224885 | 31 | 7084342 | 7084361 | 2 | 10 | 20 | AC   | 24 | 5  |
| 224886 | 31 | 7084498 | 7084517 | 2 | 10 | 20 | AC   | 25 | 5  |
| 224891 | 31 | 7086123 | 7086160 | 2 | 19 | 38 | CA   | 7  | 9  |
| 224894 | 31 | 7091300 | 7091325 | 2 | 13 | 26 | TC   | 20 | 7  |
| 224899 | 31 | 7095760 | 7095775 | 2 | 8  | 16 | AC   | 22 | 4  |
| 224907 | 31 | 7102976 | 7102995 | 2 | 10 | 20 | AC   | 22 | 5  |
| 224908 | 31 | 7103118 | 7103141 | 2 | 12 | 24 | TG   | 18 | 9  |
| 224909 | 31 | 7105565 | 7105580 | 2 | 8  | 16 | CA   | 32 | 8  |
| 224911 | 31 | 7105927 | 7105944 | 2 | 9  | 18 | AC   | 22 | 9  |
| 224912 | 31 | 7106477 | 7106498 | 2 | 11 | 22 | TG   | 9  | 9  |
| 224919 | 31 | 7114590 | 7114621 | 2 | 16 | 32 | CT   | 10 | 9  |
| 224920 | 31 | 7114819 | 7114832 | 2 | 7  | 14 | TC   | 20 | 3  |
| 224921 | 31 | 7114835 | 7114850 | 2 | 8  | 16 | AC   | 22 | 4  |
| 224922 | 31 | 7115202 | 7115219 | 2 | 9  | 18 | GT   | 13 | 12 |
| 224923 | 31 | 7115349 | 7115382 | 2 | 17 | 34 | GT   | 13 | 11 |

|        |    |         |         |   |    |    |      |    |    |
|--------|----|---------|---------|---|----|----|------|----|----|
| 224928 | 31 | 7124999 | 7125018 | 2 | 10 | 20 | CA   | 11 | 4  |
| 224930 | 31 | 7125335 | 7125355 | 3 | 7  | 21 | GTC  | 23 | 7  |
| 224933 | 31 | 7129174 | 7129189 | 2 | 8  | 16 | GA   | 24 | 3  |
| 224935 | 31 | 7130143 | 7130182 | 2 | 20 | 40 | TG   | 8  | 11 |
| 224936 | 31 | 7130619 | 7130642 | 2 | 12 | 24 | CA   | 19 | 6  |
| 224937 | 31 | 7131083 | 7131098 | 2 | 8  | 16 | GT   | 18 | 6  |
| 224940 | 31 | 7137087 | 7137120 | 2 | 17 | 34 | CA   | 11 | 15 |
| 224941 | 31 | 7137302 | 7137323 | 2 | 11 | 22 | AC   | 18 | 10 |
| 224946 | 31 | 7141073 | 7141084 | 2 | 6  | 12 | CA   | 19 | 5  |
| 224948 | 31 | 7149356 | 7149379 | 2 | 12 | 24 | CA   | 10 | 9  |
| 224951 | 31 | 7155751 | 7155762 | 2 | 6  | 12 | CT   | 19 | 3  |
| 224952 | 31 | 7156445 | 7156480 | 2 | 18 | 36 | GT   | 10 | 12 |
| 224954 | 31 | 7156720 | 7156735 | 2 | 8  | 16 | TG   | 11 | 3  |
| 224956 | 31 | 7161244 | 7161263 | 2 | 10 | 20 | TG   | 20 | 6  |
| 224958 | 31 | 7164459 | 7164510 | 2 | 26 | 52 | CA   | 7  | 10 |
| 224959 | 31 | 7165972 | 7165985 | 2 | 7  | 14 | CT   | 23 | 5  |
| 224960 | 31 | 7166694 | 7166720 | 3 | 9  | 27 | AGA  | 22 | 3  |
| 224962 | 31 | 7168513 | 7168538 | 2 | 13 | 26 | CA   | 9  | 9  |
| 224968 | 31 | 7173696 | 7173739 | 2 | 22 | 44 | CA   | 6  | 7  |
| 224977 | 31 | 7180629 | 7180654 | 2 | 13 | 26 | GT   | 21 | 11 |
| 224980 | 31 | 7186640 | 7186679 | 2 | 20 | 40 | TG   | 8  | 7  |
| 224985 | 31 | 7189735 | 7189752 | 2 | 9  | 18 | TC   | 17 | 3  |
| 224986 | 31 | 7190804 | 7190841 | 2 | 19 | 38 | AC   | 7  | 8  |
| 225001 | 31 | 7209333 | 7209350 | 2 | 9  | 18 | TG   | 21 | 3  |
| 225003 | 31 | 7213475 | 7213494 | 2 | 10 | 20 | GT   | 14 | 15 |
| 225008 | 31 | 7222761 | 7222778 | 2 | 9  | 18 | TG   | 14 | 5  |
| 225009 | 31 | 7224388 | 7224405 | 2 | 9  | 18 | GT   | 31 | 3  |
| 225010 | 31 | 7224603 | 7224632 | 2 | 15 | 30 | GA   | 18 | 5  |
| 225012 | 31 | 7226060 | 7226079 | 2 | 10 | 20 | AC   | 16 | 8  |
| 225015 | 31 | 7228428 | 7228453 | 2 | 13 | 26 | GA   | 10 | 9  |
| 225016 | 31 | 7232169 | 7232184 | 2 | 8  | 16 | AC   | 27 | 5  |
| 225018 | 31 | 7234333 | 7234344 | 2 | 6  | 12 | AC   | 23 | 3  |
| 225021 | 31 | 7236378 | 7236405 | 2 | 14 | 28 | GT   | 8  | 9  |
| 225023 | 31 | 7236568 | 7236585 | 2 | 9  | 18 | GT   | 12 | 6  |
| 225025 | 31 | 7237269 | 7237302 | 2 | 17 | 34 | GT   | 14 | 7  |
| 225026 | 31 | 7237363 | 7237386 | 2 | 12 | 24 | GT   | 9  | 4  |
| 225027 | 31 | 7237664 | 7237675 | 2 | 6  | 12 | CA   | 13 | 6  |
| 225031 | 31 | 7239057 | 7239072 | 2 | 8  | 16 | CA   | 11 | 6  |
| 225036 | 31 | 7243421 | 7243458 | 2 | 19 | 38 | AC   | 8  | 9  |
| 225037 | 31 | 7244168 | 7244181 | 2 | 7  | 14 | CA   | 25 | 8  |
| 225040 | 31 | 7245001 | 7245018 | 2 | 9  | 18 | GT   | 8  | 7  |
| 225043 | 31 | 7247918 | 7247949 | 4 | 8  | 32 | CCTG | 21 | 8  |
| 225045 | 31 | 7249969 | 7249980 | 2 | 6  | 12 | AT   | 18 | 4  |
| 225050 | 31 | 7254473 | 7254492 | 2 | 10 | 20 | TG   | 23 | 5  |
| 225051 | 31 | 7254679 | 7254704 | 2 | 13 | 26 | AC   | 15 | 7  |
| 225057 | 31 | 7261215 | 7261232 | 3 | 6  | 18 | CAC  | 21 | 4  |
| 225058 | 31 | 7261630 | 7261657 | 2 | 14 | 28 | AC   | 14 | 6  |
| 225061 | 31 | 7263657 | 7263670 | 2 | 7  | 14 | AC   | 21 | 5  |
| 225062 | 31 | 7263673 | 7263690 | 2 | 9  | 18 | AC   | 20 | 3  |
| 225064 | 31 | 7268323 | 7268336 | 2 | 7  | 14 | GT   | 21 | 4  |
| 225070 | 31 | 7272556 | 7272581 | 2 | 13 | 26 | CA   | 13 | 10 |

|        |    |         |         |   |    |    |      |    |    |
|--------|----|---------|---------|---|----|----|------|----|----|
| 225071 | 31 | 7273925 | 7273964 | 4 | 10 | 40 | ATAG | 23 | 17 |
| 225072 | 31 | 7274086 | 7274111 | 2 | 13 | 26 | AC   | 13 | 9  |
| 225075 | 31 | 7276393 | 7276414 | 2 | 11 | 22 | GT   | 19 | 6  |
| 225081 | 31 | 7281858 | 7281875 | 2 | 9  | 18 | GT   | 15 | 6  |
| 225090 | 31 | 7289477 | 7289492 | 2 | 8  | 16 | CA   | 25 | 3  |
| 225099 | 31 | 7293260 | 7293289 | 2 | 15 | 30 | AC   | 10 | 8  |
| 225101 | 31 | 7296756 | 7296777 | 2 | 11 | 22 | TC   | 13 | 3  |
| 225106 | 31 | 7301898 | 7301937 | 2 | 20 | 40 | GA   | 8  | 9  |
| 225110 | 31 | 7307682 | 7307699 | 3 | 6  | 18 | AGG  | 27 | 4  |
| 225117 | 31 | 7315596 | 7315613 | 3 | 6  | 18 | TGG  | 21 | 6  |
| 225118 | 31 | 7316575 | 7316596 | 2 | 11 | 22 | TG   | 20 | 9  |
| 225122 | 31 | 7319653 | 7319674 | 2 | 11 | 22 | AG   | 14 | 5  |
| 225124 | 31 | 7322817 | 7322838 | 2 | 11 | 22 | TG   | 10 | 5  |
| 225156 | 31 | 7353886 | 7353911 | 2 | 13 | 26 | GA   | 8  | 4  |
| 225160 | 31 | 7355138 | 7355151 | 2 | 7  | 14 | TC   | 13 | 5  |
| 225163 | 31 | 7356032 | 7356055 | 2 | 12 | 24 | GT   | 10 | 4  |
| 225167 | 31 | 7356356 | 7356375 | 2 | 10 | 20 | CA   | 19 | 8  |
| 225174 | 31 | 7358275 | 7358310 | 2 | 18 | 36 | CA   | 12 | 15 |
| 225175 | 31 | 7358405 | 7358436 | 2 | 16 | 32 | AG   | 13 | 10 |
| 225178 | 31 | 7359231 | 7359252 | 2 | 11 | 22 | GA   | 9  | 6  |
| 225182 | 31 | 7360555 | 7360570 | 4 | 4  | 16 | AAAG | 9  | 5  |
| 225187 | 31 | 7361295 | 7361314 | 2 | 10 | 20 | GT   | 8  | 4  |
| 225189 | 31 | 7362057 | 7362098 | 2 | 21 | 42 | GT   | 12 | 10 |
| 225193 | 31 | 7363981 | 7363992 | 2 | 6  | 12 | AC   | 9  | 6  |
| 225196 | 31 | 7364343 | 7364360 | 3 | 6  | 18 | GAA  | 25 | 8  |
| 225203 | 31 | 7365658 | 7365681 | 2 | 12 | 24 | CA   | 14 | 8  |
| 225210 | 31 | 7367658 | 7367671 | 2 | 7  | 14 | GT   | 12 | 9  |
| 225211 | 31 | 7367674 | 7367687 | 2 | 7  | 14 | GT   | 10 | 9  |
| 225220 | 31 | 7381152 | 7381166 | 3 | 5  | 15 | CCA  | 26 | 4  |
| 225221 | 31 | 7381322 | 7381343 | 2 | 11 | 22 | TG   | 6  | 7  |
| 225225 | 31 | 7389945 | 7389966 | 2 | 11 | 22 | TG   | 19 | 14 |
| 225226 | 31 | 7390496 | 7390509 | 2 | 7  | 14 | AC   | 20 | 3  |
| 225227 | 31 | 7390906 | 7390933 | 2 | 14 | 28 | CA   | 8  | 9  |
| 225229 | 31 | 7398542 | 7398567 | 2 | 13 | 26 | GT   | 17 | 11 |
| 225234 | 31 | 7405473 | 7405490 | 2 | 9  | 18 | GT   | 22 | 7  |
| 225239 | 31 | 7411272 | 7411289 | 2 | 9  | 18 | TG   | 10 | 9  |
| 225241 | 31 | 7413365 | 7413382 | 2 | 9  | 18 | AC   | 16 | 4  |
| 225242 | 31 | 7415372 | 7415389 | 2 | 9  | 18 | TG   | 27 | 3  |
| 225245 | 31 | 7415579 | 7415602 | 2 | 12 | 24 | TG   | 19 | 10 |
| 225248 | 31 | 7416365 | 7416378 | 2 | 7  | 14 | AC   | 19 | 8  |
| 225249 | 31 | 7420170 | 7420181 | 2 | 6  | 12 | TG   | 23 | 4  |
| 225251 | 31 | 7421549 | 7421560 | 2 | 6  | 12 | GT   | 29 | 11 |
| 225252 | 31 | 7423291 | 7423312 | 2 | 11 | 22 | AC   | 20 | 14 |
| 225253 | 31 | 7423808 | 7423837 | 2 | 15 | 30 | GT   | 18 | 5  |
| 225254 | 31 | 7423946 | 7423967 | 2 | 11 | 22 | AC   | 14 | 5  |
| 225260 | 31 | 7433163 | 7433184 | 2 | 11 | 22 | AC   | 17 | 8  |
| 225262 | 31 | 7437586 | 7437599 | 2 | 7  | 14 | GT   | 33 | 3  |
| 225264 | 31 | 7439230 | 7439243 | 2 | 7  | 14 | TG   | 24 | 5  |
| 225276 | 31 | 7448038 | 7448061 | 4 | 6  | 24 | AAGC | 10 | 4  |
| 225278 | 31 | 7448262 | 7448281 | 2 | 10 | 20 | CA   | 18 | 7  |
| 225279 | 31 | 7448584 | 7448598 | 3 | 5  | 15 | AAC  | 27 | 6  |

|        |    |         |         |   |    |    |      |    |    |
|--------|----|---------|---------|---|----|----|------|----|----|
| 225280 | 31 | 7449369 | 7449422 | 2 | 27 | 54 | GT   | 12 | 12 |
| 225281 | 31 | 7452882 | 7452897 | 4 | 4  | 16 | CAGA | 12 | 4  |
| 225285 | 31 | 7466500 | 7466519 | 2 | 10 | 20 | CA   | 11 | 8  |
| 225286 | 31 | 7472966 | 7472995 | 2 | 15 | 30 | TG   | 13 | 12 |
| 225300 | 31 | 7494848 | 7494871 | 2 | 12 | 24 | AC   | 13 | 9  |
| 225314 | 31 | 7514413 | 7514428 | 4 | 4  | 16 | TTGT | 26 | 3  |
| 225315 | 31 | 7514730 | 7514745 | 4 | 4  | 16 | AAAT | 7  | 6  |
| 225317 | 31 | 7517097 | 7517112 | 2 | 8  | 16 | TA   | 11 | 4  |
| 225321 | 31 | 7523830 | 7523851 | 2 | 11 | 22 | TG   | 18 | 6  |
| 225327 | 31 | 7525574 | 7525588 | 3 | 5  | 15 | TCC  | 19 | 3  |
| 225328 | 31 | 7526023 | 7526034 | 2 | 6  | 12 | AC   | 25 | 3  |
| 225329 | 31 | 7526548 | 7526574 | 3 | 9  | 27 | GAG  | 26 | 6  |
| 225330 | 31 | 7526884 | 7526903 | 2 | 10 | 20 | CA   | 14 | 15 |
| 225331 | 31 | 7527073 | 7527092 | 2 | 10 | 20 | CA   | 22 | 11 |
| 225333 | 31 | 7532380 | 7532397 | 2 | 9  | 18 | GT   | 22 | 4  |
| 225335 | 31 | 7534313 | 7534358 | 2 | 23 | 46 | AC   | 21 | 15 |
| 225340 | 31 | 7542614 | 7542627 | 2 | 7  | 14 | CA   | 25 | 6  |
| 225344 | 31 | 7543438 | 7543471 | 2 | 17 | 34 | AC   | 8  | 7  |
| 225345 | 31 | 7543624 | 7543641 | 2 | 9  | 18 | CA   | 19 | 4  |
| 225346 | 31 | 7543961 | 7543980 | 2 | 10 | 20 | GA   | 13 | 6  |
| 225348 | 31 | 7548992 | 7549017 | 2 | 13 | 26 | TG   | 18 | 8  |
| 225349 | 31 | 7550516 | 7550535 | 2 | 10 | 20 | TC   | 17 | 6  |
| 225352 | 31 | 7566942 | 7566980 | 3 | 13 | 39 | TAT  | 13 | 7  |
| 225353 | 31 | 7571004 | 7571029 | 2 | 13 | 26 | TG   | 20 | 10 |
| 225357 | 31 | 7589215 | 7589228 | 2 | 7  | 14 | CA   | 33 | 3  |
| 225359 | 31 | 7592879 | 7592922 | 2 | 22 | 44 | TG   | 7  | 10 |
| 225360 | 31 | 7594356 | 7594401 | 2 | 23 | 46 | CA   | 14 | 12 |
| 225367 | 31 | 7610647 | 7610660 | 2 | 7  | 14 | TG   | 27 | 3  |
| 225376 | 31 | 7619219 | 7619230 | 2 | 6  | 12 | GT   | 28 | 5  |
| 225383 | 31 | 7624215 | 7624234 | 2 | 10 | 20 | GT   | 21 | 10 |
| 225385 | 31 | 7627160 | 7627175 | 2 | 8  | 16 | TG   | 13 | 10 |
| 225386 | 31 | 7627177 | 7627188 | 2 | 6  | 12 | GT   | 7  | 6  |
| 225387 | 31 | 7630238 | 7630291 | 2 | 27 | 54 | GT   | 6  | 8  |
| 225388 | 31 | 7630398 | 7630421 | 2 | 12 | 24 | AC   | 23 | 12 |
| 225389 | 31 | 7633148 | 7633163 | 2 | 8  | 16 | GT   | 21 | 7  |
| 225390 | 31 | 7633509 | 7633522 | 2 | 7  | 14 | CA   | 22 | 5  |
| 225392 | 31 | 7645276 | 7645291 | 2 | 8  | 16 | TG   | 10 | 4  |
| 225393 | 31 | 7646447 | 7646480 | 2 | 17 | 34 | TG   | 16 | 8  |
| 225397 | 31 | 7648146 | 7648175 | 2 | 15 | 30 | AC   | 7  | 11 |
| 225401 | 31 | 7660953 | 7660976 | 2 | 12 | 24 | TC   | 10 | 9  |
| 225405 | 31 | 7673923 | 7673942 | 4 | 5  | 20 | TTTG | 30 | 4  |
| 225406 | 31 | 7674093 | 7674110 | 2 | 9  | 18 | TG   | 20 | 4  |
| 225408 | 31 | 7677301 | 7677334 | 2 | 17 | 34 | TG   | 16 | 17 |
| 225413 | 31 | 7690848 | 7690859 | 2 | 6  | 12 | AG   | 23 | 5  |
| 225417 | 31 | 7698592 | 7698609 | 2 | 9  | 18 | TG   | 30 | 4  |
| 225418 | 31 | 7701507 | 7701518 | 2 | 6  | 12 | AC   | 24 | 5  |
| 225419 | 31 | 7701696 | 7701725 | 2 | 15 | 30 | CA   | 20 | 10 |
| 225423 | 31 | 7705739 | 7705760 | 2 | 11 | 22 | TC   | 14 | 8  |
| 225430 | 31 | 7711909 | 7711934 | 2 | 13 | 26 | CA   | 14 | 10 |
| 225432 | 31 | 7716971 | 7717020 | 2 | 25 | 50 | TG   | 8  | 10 |
| 225440 | 31 | 7737641 | 7737654 | 2 | 7  | 14 | GT   | 33 | 8  |



|        |    |         |         |   |    |    |      |    |    |
|--------|----|---------|---------|---|----|----|------|----|----|
| 225443 | 31 | 7739520 | 7739539 | 2 | 10 | 20 | TG   | 17 | 10 |
| 225444 | 31 | 7739641 | 7739658 | 2 | 9  | 18 | GT   | 17 | 9  |
| 225445 | 31 | 7740798 | 7740827 | 2 | 15 | 30 | TG   | 14 | 4  |
| 225446 | 31 | 7741201 | 7741212 | 2 | 6  | 12 | TG   | 26 | 3  |
| 225449 | 31 | 7745253 | 7745264 | 2 | 6  | 12 | CT   | 22 | 3  |
| 225452 | 31 | 7747346 | 7747367 | 2 | 11 | 22 | CA   | 14 | 10 |
| 225456 | 31 | 7750527 | 7750540 | 2 | 7  | 14 | AC   | 20 | 4  |
| 225457 | 31 | 7751383 | 7751412 | 2 | 15 | 30 | TC   | 16 | 10 |
| 225462 | 31 | 7766652 | 7766681 | 2 | 15 | 30 | CA   | 16 | 10 |
| 225470 | 31 | 7778243 | 7778256 | 2 | 7  | 14 | TG   | 25 | 3  |
| 225471 | 31 | 7778336 | 7778367 | 2 | 16 | 32 | GT   | 8  | 12 |
| 225473 | 31 | 7779663 | 7779678 | 2 | 8  | 16 | AC   | 10 | 10 |
| 225477 | 31 | 7783903 | 7783920 | 2 | 9  | 18 | GA   | 24 | 3  |
| 225480 | 31 | 7788553 | 7788574 | 2 | 11 | 22 | AG   | 12 | 11 |
| 225482 | 31 | 7789148 | 7789165 | 2 | 9  | 18 | AG   | 12 | 10 |
| 225483 | 31 | 7790814 | 7790827 | 2 | 7  | 14 | AC   | 27 | 3  |
| 225484 | 31 | 7791885 | 7791910 | 2 | 13 | 26 | AC   | 17 | 13 |
| 225485 | 31 | 7792260 | 7792277 | 2 | 9  | 18 | AC   | 10 | 9  |
| 225493 | 31 | 7801587 | 7801600 | 2 | 7  | 14 | CA   | 26 | 6  |
| 225494 | 31 | 7801719 | 7801738 | 2 | 10 | 20 | GT   | 17 | 6  |
| 225496 | 31 | 7801931 | 7801946 | 2 | 8  | 16 | AC   | 27 | 5  |
| 225497 | 31 | 7803476 | 7803521 | 2 | 23 | 46 | TG   | 15 | 12 |
| 225499 | 31 | 7805265 | 7805279 | 3 | 5  | 15 | TGT  | 26 | 3  |
| 225500 | 31 | 7806176 | 7806193 | 2 | 9  | 18 | GT   | 26 | 5  |
| 225501 | 31 | 7807432 | 7807487 | 2 | 28 | 56 | GT   | 7  | 11 |
| 225504 | 31 | 7810568 | 7810583 | 2 | 8  | 16 | AG   | 24 | 4  |
| 225505 | 31 | 7810721 | 7810741 | 3 | 7  | 21 | GGT  | 19 | 7  |
| 225506 | 31 | 7813197 | 7813230 | 2 | 17 | 34 | TG   | 9  | 8  |
| 225508 | 31 | 7813603 | 7813616 | 2 | 7  | 14 | CA   | 22 | 5  |
| 225509 | 31 | 7814233 | 7814262 | 2 | 15 | 30 | GT   | 8  | 8  |
| 225516 | 31 | 7830396 | 7830411 | 2 | 8  | 16 | TG   | 28 | 4  |
| 225517 | 31 | 7830936 | 7830963 | 2 | 14 | 28 | TG   | 15 | 16 |
| 225518 | 31 | 7833389 | 7833402 | 2 | 7  | 14 | AC   | 16 | 3  |
| 225524 | 31 | 7837373 | 7837392 | 2 | 10 | 20 | CA   | 17 | 8  |
| 225525 | 31 | 7840256 | 7840277 | 2 | 11 | 22 | TG   | 10 | 16 |
| 225536 | 31 | 7847640 | 7847661 | 2 | 11 | 22 | GT   | 26 | 4  |
| 225554 | 31 | 7893187 | 7893207 | 3 | 7  | 21 | GAG  | 19 | 5  |
| 225555 | 31 | 7893746 | 7893757 | 2 | 6  | 12 | CA   | 28 | 5  |
| 225557 | 31 | 7894033 | 7894044 | 2 | 6  | 12 | CA   | 32 | 3  |
| 225558 | 31 | 7894463 | 7894476 | 2 | 7  | 14 | CA   | 18 | 6  |
| 225562 | 31 | 7894865 | 7894888 | 2 | 12 | 24 | AG   | 12 | 7  |
| 225568 | 31 | 7898169 | 7898184 | 2 | 8  | 16 | AC   | 25 | 6  |
| 225571 | 31 | 7900534 | 7900549 | 2 | 8  | 16 | TG   | 16 | 3  |
| 225574 | 31 | 7900934 | 7900951 | 3 | 6  | 18 | CTG  | 16 | 5  |
| 225575 | 31 | 7901006 | 7901033 | 2 | 14 | 28 | GT   | 13 | 14 |
| 225576 | 31 | 7905443 | 7905454 | 2 | 6  | 12 | CA   | 20 | 4  |
| 225577 | 31 | 7910391 | 7910410 | 4 | 5  | 20 | TCTT | 24 | 8  |
| 225579 | 31 | 7912634 | 7912665 | 2 | 16 | 32 | TG   | 8  | 11 |
| 225580 | 31 | 7912777 | 7912798 | 2 | 11 | 22 | GT   | 13 | 11 |
| 225590 | 31 | 7931905 | 7931932 | 2 | 14 | 28 | AC   | 19 | 4  |
| 225595 | 31 | 7935213 | 7935226 | 2 | 7  | 14 | AC   | 23 | 10 |

|        |    |         |         |   |    |    |      |    |    |
|--------|----|---------|---------|---|----|----|------|----|----|
| 225602 | 31 | 7942543 | 7942568 | 2 | 13 | 26 | TG   | 15 | 4  |
| 225606 | 31 | 7948791 | 7948810 | 2 | 10 | 20 | TG   | 25 | 3  |
| 225607 | 31 | 7949378 | 7949403 | 2 | 13 | 26 | AC   | 22 | 17 |
| 225609 | 31 | 7950678 | 7950689 | 2 | 6  | 12 | AC   | 24 | 6  |
| 225627 | 31 | 7966363 | 7966400 | 2 | 19 | 38 | CA   | 7  | 8  |
| 225629 | 31 | 7967566 | 7967599 | 2 | 17 | 34 | GT   | 9  | 9  |
| 225632 | 31 | 7971174 | 7971187 | 2 | 7  | 14 | TG   | 17 | 3  |
| 225633 | 31 | 7973691 | 7973734 | 2 | 22 | 44 | TG   | 10 | 10 |
| 225641 | 31 | 7975785 | 7975796 | 2 | 6  | 12 | GA   | 18 | 3  |
| 225643 | 31 | 7980398 | 7980411 | 2 | 7  | 14 | GT   | 14 | 8  |
| 225645 | 31 | 7981841 | 7981852 | 2 | 6  | 12 | CT   | 24 | 3  |
| 225653 | 31 | 7996756 | 7996771 | 2 | 8  | 16 | GT   | 27 | 6  |
| 225654 | 31 | 7997654 | 7997698 | 3 | 15 | 45 | TCA  | 21 | 8  |
| 225657 | 31 | 7998751 | 7998762 | 2 | 6  | 12 | AC   | 28 | 3  |
| 225658 | 31 | 8000763 | 8000792 | 2 | 15 | 30 | TG   | 21 | 10 |
| 225659 | 31 | 8000997 | 8001011 | 3 | 5  | 15 | AGG  | 23 | 3  |
| 225662 | 31 | 8012530 | 8012565 | 2 | 18 | 36 | CA   | 13 | 11 |
| 225665 | 31 | 8016860 | 8016881 | 2 | 11 | 22 | TG   | 22 | 8  |
| 225666 | 31 | 8017452 | 8017479 | 2 | 14 | 28 | TG   | 13 | 10 |
| 225671 | 31 | 8024104 | 8024123 | 4 | 5  | 20 | CACT | 23 | 4  |
| 225683 | 31 | 8031426 | 8031469 | 2 | 22 | 44 | TG   | 8  | 7  |
| 225685 | 31 | 8033377 | 8033388 | 2 | 6  | 12 | AC   | 27 | 6  |
| 225688 | 31 | 8034575 | 8034614 | 2 | 20 | 40 | TG   | 6  | 7  |
| 225695 | 31 | 8047226 | 8047243 | 2 | 9  | 18 | GT   | 30 | 5  |
| 225696 | 31 | 8050685 | 8050732 | 2 | 24 | 48 | CA   | 12 | 13 |
| 225697 | 31 | 8050839 | 8050872 | 2 | 17 | 34 | CA   | 12 | 13 |
| 225698 | 31 | 8051457 | 8051470 | 2 | 7  | 14 | GT   | 9  | 4  |
| 225701 | 31 | 8053436 | 8053447 | 2 | 6  | 12 | CA   | 26 | 4  |
| 225703 | 31 | 8060766 | 8060797 | 2 | 16 | 32 | AC   | 14 | 10 |
| 225704 | 31 | 8060973 | 8060996 | 2 | 12 | 24 | TG   | 14 | 5  |
| 225707 | 31 | 8067675 | 8067686 | 2 | 6  | 12 | CT   | 26 | 4  |
| 225708 | 31 | 8068378 | 8068407 | 3 | 10 | 30 | CTC  | 15 | 5  |
| 225710 | 31 | 8068897 | 8068914 | 2 | 9  | 18 | CA   | 22 | 8  |
| 225711 | 31 | 8069617 | 8069634 | 3 | 6  | 18 | GGA  | 25 | 4  |
| 225713 | 31 | 8071135 | 8071174 | 2 | 20 | 40 | CA   | 12 | 11 |
| 225714 | 31 | 8071296 | 8071307 | 2 | 6  | 12 | AC   | 26 | 3  |
| 225716 | 31 | 8073655 | 8073670 | 2 | 8  | 16 | TA   | 10 | 6  |
| 225720 | 31 | 8085803 | 8085830 | 2 | 14 | 28 | TG   | 13 | 6  |
| 225723 | 31 | 8089650 | 8089681 | 2 | 16 | 32 | AC   | 7  | 6  |
| 225724 | 31 | 8091079 | 8091108 | 2 | 15 | 30 | TG   | 14 | 11 |
| 225725 | 31 | 8091235 | 8091250 | 2 | 8  | 16 | AC   | 24 | 7  |
| 225726 | 31 | 8091381 | 8091414 | 2 | 17 | 34 | CA   | 9  | 8  |
| 225727 | 31 | 8095942 | 8095959 | 2 | 9  | 18 | AC   | 20 | 6  |
| 225728 | 31 | 8096385 | 8096396 | 2 | 6  | 12 | TG   | 13 | 8  |
| 225729 | 31 | 8096398 | 8096417 | 2 | 10 | 20 | GT   | 13 | 12 |
| 225730 | 31 | 8097127 | 8097158 | 2 | 16 | 32 | GT   | 7  | 9  |
| 225736 | 31 | 8101959 | 8101982 | 4 | 6  | 24 | TCTG | 12 | 3  |
| 225737 | 31 | 8104261 | 8104280 | 2 | 10 | 20 | CA   | 17 | 5  |
| 225738 | 31 | 8105276 | 8105303 | 2 | 14 | 28 | TC   | 17 | 7  |
| 225740 | 31 | 8105446 | 8105477 | 2 | 16 | 32 | AC   | 9  | 8  |
| 225742 | 31 | 8106270 | 8106289 | 4 | 5  | 20 | CATA | 19 | 4  |

|        |    |         |         |   |    |    |      |    |    |
|--------|----|---------|---------|---|----|----|------|----|----|
| 225743 | 31 | 8107370 | 8107381 | 2 | 6  | 12 | AC   | 18 | 6  |
| 225749 | 31 | 8109661 | 8109680 | 2 | 10 | 20 | GA   | 19 | 8  |
| 225750 | 31 | 8110390 | 8110403 | 2 | 7  | 14 | GT   | 23 | 4  |
| 225762 | 31 | 8124144 | 8124165 | 2 | 11 | 22 | AC   | 20 | 3  |
| 225766 | 31 | 8126626 | 8126639 | 2 | 7  | 14 | GT   | 28 | 3  |
| 225768 | 31 | 8127027 | 8127044 | 2 | 9  | 18 | GT   | 7  | 3  |
| 225770 | 31 | 8127199 | 8127224 | 2 | 13 | 26 | GT   | 18 | 6  |
| 225771 | 31 | 8127615 | 8127628 | 2 | 7  | 14 | TG   | 16 | 3  |
| 225781 | 31 | 8135738 | 8135749 | 2 | 6  | 12 | AG   | 20 | 4  |
| 225786 | 31 | 8136692 | 8136705 | 2 | 7  | 14 | AC   | 15 | 8  |
| 225787 | 31 | 8136707 | 8136722 | 2 | 8  | 16 | CA   | 18 | 6  |
| 225789 | 31 | 8139515 | 8139526 | 2 | 6  | 12 | TG   | 27 | 14 |
| 225790 | 31 | 8139528 | 8139545 | 2 | 9  | 18 | GT   | 30 | 17 |
| 225809 | 31 | 8151911 | 8151922 | 2 | 6  | 12 | AG   | 6  | 4  |
| 225811 | 31 | 8151976 | 8151999 | 2 | 12 | 24 | GA   | 17 | 5  |
| 225813 | 31 | 8152773 | 8152814 | 2 | 21 | 42 | TG   | 14 | 10 |
| 225814 | 31 | 8152993 | 8153008 | 2 | 8  | 16 | CA   | 13 | 13 |
| 225815 | 31 | 8153235 | 8153246 | 2 | 6  | 12 | GT   | 23 | 8  |
| 225819 | 31 | 8154827 | 8154844 | 2 | 9  | 18 | GA   | 26 | 8  |
| 225820 | 31 | 8155694 | 8155711 | 2 | 9  | 18 | GT   | 8  | 4  |
| 225828 | 31 | 8158287 | 8158310 | 4 | 6  | 24 | TTGT | 17 | 6  |
| 225829 | 31 | 8158390 | 8158403 | 2 | 7  | 14 | TG   | 16 | 8  |
| 225830 | 31 | 8159028 | 8159057 | 2 | 15 | 30 | CA   | 9  | 8  |
| 225836 | 31 | 8160715 | 8160730 | 2 | 8  | 16 | TG   | 22 | 6  |
| 225843 | 31 | 8162518 | 8162531 | 2 | 7  | 14 | AC   | 25 | 6  |
| 225845 | 31 | 8163851 | 8163871 | 3 | 7  | 21 | TTA  | 8  | 3  |
| 225849 | 31 | 8165534 | 8165551 | 2 | 9  | 18 | AC   | 21 | 3  |
| 225850 | 31 | 8165744 | 8165775 | 2 | 16 | 32 | TG   | 19 | 10 |
| 225851 | 31 | 8176261 | 8176282 | 2 | 11 | 22 | GT   | 8  | 4  |
| 225853 | 31 | 8176723 | 8176754 | 4 | 8  | 32 | CAGC | 12 | 3  |
| 225856 | 31 | 8181268 | 8181289 | 2 | 11 | 22 | GT   | 24 | 7  |
| 225857 | 31 | 8181877 | 8181892 | 2 | 8  | 16 | GT   | 27 | 3  |
| 225858 | 31 | 8182264 | 8182297 | 2 | 17 | 34 | CT   | 12 | 10 |
| 225872 | 31 | 8187366 | 8187377 | 2 | 6  | 12 | TG   | 20 | 3  |
| 225873 | 31 | 8187924 | 8187959 | 2 | 18 | 36 | CA   | 15 | 12 |
| 225875 | 31 | 8190239 | 8190272 | 2 | 17 | 34 | GT   | 11 | 10 |
| 225877 | 31 | 8191784 | 8191795 | 2 | 6  | 12 | GT   | 15 | 5  |
| 225878 | 31 | 8191800 | 8191815 | 2 | 8  | 16 | GT   | 14 | 6  |
| 225880 | 31 | 8193827 | 8193848 | 2 | 11 | 22 | GT   | 7  | 5  |
| 225889 | 31 | 8208421 | 8208438 | 2 | 9  | 18 | GT   | 14 | 11 |
| 225890 | 31 | 8208625 | 8208642 | 2 | 9  | 18 | GT   | 15 | 7  |
| 225910 | 31 | 8223049 | 8223060 | 2 | 6  | 12 | AC   | 25 | 11 |
| 225912 | 31 | 8224820 | 8224841 | 2 | 11 | 22 | AC   | 14 | 10 |
| 225915 | 31 | 8225509 | 8225530 | 2 | 11 | 22 | GT   | 15 | 8  |
| 225916 | 31 | 8225631 | 8225656 | 2 | 13 | 26 | AC   | 8  | 9  |
| 225917 | 31 | 8225847 | 8225862 | 2 | 8  | 16 | TC   | 16 | 4  |
| 225920 | 31 | 8227027 | 8227038 | 2 | 6  | 12 | TG   | 29 | 3  |
| 225923 | 31 | 8232036 | 8232055 | 2 | 10 | 20 | AC   | 11 | 7  |
| 225925 | 31 | 8232865 | 8232894 | 2 | 15 | 30 | AC   | 8  | 5  |
| 225926 | 31 | 8233362 | 8233377 | 2 | 8  | 16 | CA   | 26 | 9  |
| 225927 | 31 | 8233632 | 8233677 | 2 | 23 | 46 | AC   | 12 | 10 |

|        |    |         |         |   |    |    |     |    |    |
|--------|----|---------|---------|---|----|----|-----|----|----|
| 225929 | 31 | 8234706 | 8234721 | 2 | 8  | 16 | AC  | 28 | 6  |
| 225930 | 31 | 8234784 | 8234799 | 2 | 8  | 16 | CA  | 28 | 4  |
| 225932 | 31 | 8236296 | 8236325 | 2 | 15 | 30 | GT  | 16 | 12 |
| 225939 | 31 | 8237941 | 8237978 | 2 | 19 | 38 | GT  | 10 | 8  |
| 225944 | 31 | 8239162 | 8239183 | 2 | 11 | 22 | AG  | 7  | 4  |
| 225946 | 31 | 8240288 | 8240321 | 2 | 17 | 34 | CA  | 10 | 5  |
| 225947 | 31 | 8240872 | 8240897 | 2 | 13 | 26 | GT  | 26 | 7  |
| 225949 | 31 | 8241194 | 8241205 | 2 | 6  | 12 | AC  | 31 | 5  |
| 225955 | 31 | 8243885 | 8243902 | 2 | 9  | 18 | AC  | 20 | 8  |
| 225958 | 31 | 8244433 | 8244458 | 2 | 13 | 26 | GT  | 20 | 10 |
| 225959 | 31 | 8244565 | 8244606 | 2 | 21 | 42 | TG  | 16 | 14 |
| 225963 | 31 | 8246238 | 8246253 | 2 | 8  | 16 | AG  | 20 | 4  |
| 225966 | 31 | 8249831 | 8249845 | 3 | 5  | 15 | GTG | 24 | 4  |
| 225967 | 31 | 8250440 | 8250451 | 2 | 6  | 12 | AC  | 25 | 4  |
| 225969 | 31 | 8261862 | 8261879 | 3 | 6  | 18 | CTC | 17 | 3  |
| 225982 | 31 | 8277087 | 8277102 | 2 | 8  | 16 | AG  | 7  | 4  |
| 225986 | 31 | 8278272 | 8278295 | 2 | 12 | 24 | CA  | 18 | 8  |
| 225989 | 31 | 8279812 | 8279831 | 2 | 10 | 20 | TC  | 12 | 6  |
| 226015 | 31 | 8294417 | 8294431 | 3 | 5  | 15 | CCA | 18 | 4  |
| 226016 | 31 | 8294727 | 8294738 | 2 | 6  | 12 | GT  | 27 | 4  |
| 226017 | 31 | 8295070 | 8295085 | 2 | 8  | 16 | AC  | 11 | 9  |
| 226018 | 31 | 8295088 | 8295101 | 2 | 7  | 14 | AC  | 11 | 10 |
| 226024 | 31 | 8298927 | 8298940 | 2 | 7  | 14 | GT  | 20 | 3  |
| 226027 | 31 | 8301176 | 8301203 | 2 | 14 | 28 | TG  | 16 | 7  |
| 226030 | 31 | 8310582 | 8310601 | 2 | 10 | 20 | AG  | 23 | 4  |
| 226034 | 31 | 8319083 | 8319104 | 2 | 11 | 22 | AC  | 13 | 11 |
| 226035 | 31 | 8319241 | 8319256 | 2 | 8  | 16 | CA  | 15 | 13 |
| 226036 | 31 | 8319258 | 8319269 | 2 | 6  | 12 | AC  | 9  | 7  |
| 226038 | 31 | 8322997 | 8323014 | 2 | 9  | 18 | CA  | 23 | 3  |
| 226039 | 31 | 8324299 | 8324316 | 2 | 9  | 18 | CA  | 16 | 5  |
| 226044 | 31 | 8326216 | 8326231 | 2 | 8  | 16 | CA  | 29 | 3  |
| 226049 | 31 | 8328041 | 8328058 | 2 | 9  | 18 | AC  | 12 | 4  |
| 226051 | 31 | 8329598 | 8329631 | 2 | 17 | 34 | CA  | 22 | 10 |
| 226053 | 31 | 8333407 | 8333424 | 2 | 9  | 18 | TG  | 12 | 10 |
| 226054 | 31 | 8333501 | 8333524 | 2 | 12 | 24 | AC  | 18 | 7  |
| 226064 | 31 | 8342284 | 8342295 | 2 | 6  | 12 | GT  | 18 | 3  |
| 226068 | 31 | 8344386 | 8344413 | 2 | 14 | 28 | TG  | 15 | 13 |
| 226069 | 31 | 8344600 | 8344613 | 2 | 7  | 14 | CA  | 23 | 4  |
| 226071 | 31 | 8345896 | 8345925 | 2 | 15 | 30 | TG  | 19 | 7  |
| 226072 | 31 | 8346067 | 8346096 | 2 | 15 | 30 | TG  | 18 | 10 |
| 226073 | 31 | 8346766 | 8346787 | 2 | 11 | 22 | TG  | 28 | 8  |
| 226079 | 31 | 8353186 | 8353207 | 2 | 11 | 22 | TG  | 16 | 9  |
| 226093 | 31 | 8365084 | 8365104 | 3 | 7  | 21 | CCA | 18 | 3  |
| 226095 | 31 | 8368214 | 8368229 | 2 | 8  | 16 | CA  | 21 | 15 |
| 226099 | 31 | 8374245 | 8374258 | 2 | 7  | 14 | AC  | 30 | 4  |
| 226103 | 31 | 8378467 | 8378478 | 2 | 6  | 12 | TA  | 19 | 3  |
| 226104 | 31 | 8379254 | 8379267 | 2 | 7  | 14 | AG  | 25 | 3  |
| 226107 | 31 | 8380699 | 8380710 | 2 | 6  | 12 | CA  | 28 | 3  |
| 226108 | 31 | 8381056 | 8381075 | 2 | 10 | 20 | AC  | 18 | 4  |
| 226123 | 31 | 8392940 | 8392951 | 2 | 6  | 12 | AC  | 32 | 4  |
| 226125 | 31 | 8393893 | 8393920 | 2 | 14 | 28 | CT  | 6  | 3  |

|        |    |         |         |   |    |    |      |    |    |
|--------|----|---------|---------|---|----|----|------|----|----|
| 226128 | 31 | 8397337 | 8397352 | 2 | 8  | 16 | GT   | 23 | 6  |
| 226129 | 31 | 8397522 | 8397541 | 2 | 10 | 20 | CA   | 14 | 8  |
| 226130 | 31 | 8398050 | 8398065 | 2 | 8  | 16 | TG   | 25 | 4  |
| 226135 | 31 | 8402712 | 8402727 | 2 | 8  | 16 | TG   | 25 | 4  |
| 226138 | 31 | 8403721 | 8403754 | 2 | 17 | 34 | CA   | 14 | 11 |
| 226139 | 31 | 8403881 | 8403894 | 2 | 7  | 14 | AC   | 15 | 3  |
| 226140 | 31 | 8404547 | 8404562 | 2 | 8  | 16 | CA   | 21 | 6  |
| 226141 | 31 | 8404650 | 8404679 | 2 | 15 | 30 | AC   | 18 | 8  |
| 226142 | 31 | 8405767 | 8405782 | 2 | 8  | 16 | GT   | 22 | 6  |
| 226143 | 31 | 8405862 | 8405873 | 2 | 6  | 12 | TC   | 26 | 3  |
| 226144 | 31 | 8409495 | 8409512 | 2 | 9  | 18 | TG   | 21 | 6  |
| 226145 | 31 | 8414509 | 8414532 | 2 | 12 | 24 | CA   | 12 | 6  |
| 226150 | 31 | 8424666 | 8424677 | 2 | 6  | 12 | TG   | 14 | 4  |
| 226151 | 31 | 8425686 | 8425705 | 2 | 10 | 20 | CA   | 17 | 4  |
| 226152 | 31 | 8427167 | 8427194 | 2 | 14 | 28 | TG   | 9  | 6  |
| 226156 | 31 | 8434248 | 8434261 | 2 | 7  | 14 | AG   | 12 | 4  |
| 226161 | 31 | 8436177 | 8436196 | 2 | 10 | 20 | TG   | 11 | 4  |
| 226163 | 31 | 8437830 | 8437845 | 2 | 8  | 16 | GT   | 15 | 12 |
| 226170 | 31 | 8443185 | 8443198 | 2 | 7  | 14 | CA   | 23 | 5  |
| 226171 | 31 | 8445141 | 8445156 | 4 | 4  | 16 | GAGC | 28 | 3  |
| 226174 | 31 | 8451451 | 8451488 | 2 | 19 | 38 | AC   | 16 | 8  |
| 226177 | 31 | 8455446 | 8455471 | 2 | 13 | 26 | CA   | 16 | 9  |
| 226179 | 31 | 8457422 | 8457443 | 2 | 11 | 22 | CA   | 25 | 8  |
| 226196 | 31 | 8469552 | 8469565 | 2 | 7  | 14 | AC   | 22 | 3  |
| 226197 | 31 | 8469972 | 8469983 | 2 | 6  | 12 | TG   | 28 | 3  |
| 226199 | 31 | 8471314 | 8471341 | 2 | 14 | 28 | CA   | 23 | 7  |
| 226207 | 31 | 8480287 | 8480332 | 2 | 23 | 46 | AC   | 11 | 11 |
| 226208 | 31 | 8480442 | 8480473 | 2 | 16 | 32 | TG   | 10 | 11 |
| 226209 | 31 | 8481122 | 8481155 | 2 | 17 | 34 | GT   | 9  | 11 |
| 226212 | 31 | 8487002 | 8487017 | 2 | 8  | 16 | GT   | 14 | 4  |
| 226213 | 31 | 8487501 | 8487518 | 2 | 9  | 18 | TC   | 9  | 6  |
| 226217 | 31 | 8490968 | 8490995 | 2 | 14 | 28 | GT   | 10 | 7  |
| 226218 | 31 | 8493555 | 8493590 | 2 | 18 | 36 | GT   | 7  | 7  |
| 226232 | 31 | 8513852 | 8513883 | 2 | 16 | 32 | CA   | 16 | 12 |
| 226236 | 31 | 8517681 | 8517694 | 2 | 7  | 14 | GT   | 23 | 3  |
| 226241 | 31 | 8530379 | 8530402 | 2 | 12 | 24 | CA   | 24 | 9  |
| 226245 | 31 | 8536120 | 8536133 | 2 | 7  | 14 | TC   | 20 | 4  |
| 226246 | 31 | 8536178 | 8536221 | 2 | 22 | 44 | AC   | 9  | 8  |
| 226247 | 31 | 8536783 | 8536802 | 4 | 5  | 20 | ATTT | 20 | 8  |
| 226250 | 31 | 8539037 | 8539048 | 2 | 6  | 12 | TC   | 33 | 3  |
| 226253 | 31 | 8542633 | 8542646 | 2 | 7  | 14 | GT   | 24 | 5  |
| 226256 | 31 | 8544953 | 8544976 | 4 | 6  | 24 | TCAG | 30 | 6  |
| 226262 | 31 | 8549042 | 8549063 | 2 | 11 | 22 | GT   | 8  | 3  |
| 226264 | 31 | 8551318 | 8551337 | 2 | 10 | 20 | AT   | 10 | 6  |
| 226271 | 31 | 8560121 | 8560148 | 4 | 7  | 28 | ACAG | 19 | 6  |
| 226280 | 31 | 8571962 | 8571975 | 2 | 7  | 14 | GT   | 26 | 3  |
| 226281 | 31 | 8572643 | 8572660 | 2 | 9  | 18 | AC   | 14 | 4  |
| 226282 | 31 | 8573665 | 8573686 | 2 | 11 | 22 | GA   | 11 | 11 |
| 226285 | 31 | 8588638 | 8588651 | 2 | 7  | 14 | AC   | 28 | 3  |
| 226287 | 31 | 8593329 | 8593344 | 2 | 8  | 16 | TG   | 17 | 10 |
| 226288 | 31 | 8595019 | 8595030 | 2 | 6  | 12 | CA   | 18 | 5  |

|        |    |         |         |   |    |    |      |    |    |
|--------|----|---------|---------|---|----|----|------|----|----|
| 226290 | 31 | 8600575 | 8600589 | 3 | 5  | 15 | AAT  | 21 | 4  |
| 226292 | 31 | 8605106 | 8605121 | 2 | 8  | 16 | CA   | 23 | 6  |
| 226293 | 31 | 8607395 | 8607408 | 2 | 7  | 14 | AG   | 17 | 3  |
| 226296 | 31 | 8619690 | 8619717 | 2 | 14 | 28 | AC   | 16 | 10 |
| 226299 | 31 | 8624479 | 8624496 | 2 | 9  | 18 | TG   | 23 | 4  |
| 226300 | 31 | 8624796 | 8624817 | 2 | 11 | 22 | CA   | 7  | 7  |
| 226303 | 31 | 8625143 | 8625184 | 2 | 21 | 42 | TG   | 8  | 9  |
| 226304 | 31 | 8627592 | 8627609 | 2 | 9  | 18 | AC   | 24 | 8  |
| 226316 | 31 | 8645687 | 8645704 | 3 | 6  | 18 | GGA  | 18 | 3  |
| 226318 | 31 | 8645956 | 8645987 | 2 | 16 | 32 | CA   | 7  | 11 |
| 226320 | 31 | 8648198 | 8648209 | 2 | 6  | 12 | GA   | 8  | 3  |
| 226322 | 31 | 8655623 | 8655646 | 2 | 12 | 24 | CA   | 15 | 11 |
| 226328 | 31 | 8663694 | 8663721 | 2 | 14 | 28 | TG   | 7  | 5  |
| 226334 | 31 | 8674131 | 8674142 | 2 | 6  | 12 | CA   | 31 | 4  |
| 226335 | 31 | 8674992 | 8675015 | 2 | 12 | 24 | CA   | 11 | 7  |
| 226339 | 31 | 8683061 | 8683082 | 2 | 11 | 22 | TG   | 21 | 4  |
| 226344 | 31 | 8686670 | 8686697 | 2 | 14 | 28 | GT   | 17 | 5  |
| 226346 | 31 | 8689170 | 8689183 | 2 | 7  | 14 | TG   | 21 | 3  |
| 226350 | 31 | 8693603 | 8693618 | 2 | 8  | 16 | CA   | 17 | 11 |
| 226353 | 31 | 8698278 | 8698301 | 2 | 12 | 24 | CA   | 13 | 10 |
| 226363 | 31 | 8719386 | 8719425 | 2 | 20 | 40 | GT   | 10 | 9  |
| 226364 | 31 | 8720890 | 8720905 | 2 | 8  | 16 | TC   | 10 | 8  |
| 226382 | 31 | 8741417 | 8741432 | 2 | 8  | 16 | CA   | 19 | 4  |
| 226385 | 31 | 8747483 | 8747498 | 4 | 4  | 16 | GATA | 19 | 13 |
| 226388 | 31 | 8749856 | 8749867 | 2 | 6  | 12 | TG   | 24 | 4  |
| 226393 | 31 | 8755883 | 8755896 | 2 | 7  | 14 | AC   | 18 | 5  |
| 226394 | 31 | 8759454 | 8759467 | 2 | 7  | 14 | GT   | 17 | 3  |
| 226395 | 31 | 8759469 | 8759482 | 2 | 7  | 14 | TG   | 12 | 4  |
| 226398 | 31 | 8762382 | 8762399 | 2 | 9  | 18 | TG   | 8  | 8  |
| 226403 | 31 | 8775318 | 8775345 | 4 | 7  | 28 | CACT | 21 | 11 |
| 226404 | 31 | 8776546 | 8776560 | 3 | 5  | 15 | CAA  | 25 | 3  |
| 226405 | 31 | 8782024 | 8782039 | 4 | 4  | 16 | AGGC | 24 | 4  |
| 226411 | 31 | 8790444 | 8790481 | 2 | 19 | 38 | CA   | 17 | 17 |
| 226412 | 31 | 8790791 | 8790810 | 2 | 10 | 20 | GT   | 17 | 9  |
| 226416 | 31 | 8798207 | 8798222 | 2 | 8  | 16 | GT   | 28 | 6  |
| 226418 | 31 | 8798949 | 8798982 | 2 | 17 | 34 | CA   | 8  | 11 |
| 226419 | 31 | 8799085 | 8799110 | 2 | 13 | 26 | TG   | 10 | 10 |
| 226434 | 31 | 8834349 | 8834364 | 2 | 8  | 16 | CA   | 31 | 4  |
| 226437 | 31 | 8843742 | 8843755 | 2 | 7  | 14 | GT   | 17 | 6  |
| 226440 | 31 | 8852732 | 8852749 | 2 | 9  | 18 | GA   | 10 | 3  |
| 226441 | 31 | 8852751 | 8852762 | 2 | 6  | 12 | AG   | 18 | 8  |
| 226443 | 31 | 8856987 | 8857002 | 2 | 8  | 16 | GT   | 21 | 6  |
| 226450 | 31 | 8866207 | 8866218 | 2 | 6  | 12 | CA   | 26 | 4  |
| 226454 | 31 | 8872293 | 8872328 | 2 | 18 | 36 | AC   | 11 | 13 |
| 226458 | 31 | 8874579 | 8874616 | 2 | 19 | 38 | AC   | 18 | 13 |
| 226459 | 31 | 8875494 | 8875505 | 2 | 6  | 12 | CA   | 26 | 6  |
| 226460 | 31 | 8875859 | 8875890 | 2 | 16 | 32 | CA   | 13 | 11 |
| 226464 | 31 | 8884045 | 8884072 | 2 | 14 | 28 | AC   | 12 | 8  |
| 226466 | 31 | 8884548 | 8884559 | 2 | 6  | 12 | TG   | 23 | 4  |
| 226467 | 31 | 8886028 | 8886077 | 2 | 25 | 50 | AC   | 11 | 11 |
| 226468 | 31 | 8886976 | 8886987 | 2 | 6  | 12 | AG   | 28 | 3  |

|        |    |         |         |   |    |    |     |    |    |
|--------|----|---------|---------|---|----|----|-----|----|----|
| 226470 | 31 | 8887462 | 8887483 | 2 | 11 | 22 | AC  | 24 | 3  |
| 226472 | 31 | 8892411 | 8892428 | 2 | 9  | 18 | GT  | 22 | 10 |
| 226478 | 31 | 8904335 | 8904352 | 2 | 9  | 18 | TA  | 13 | 5  |
| 226479 | 31 | 8908100 | 8908121 | 2 | 11 | 22 | AC  | 21 | 5  |
| 226481 | 31 | 8909600 | 8909613 | 2 | 7  | 14 | CA  | 16 | 4  |
| 226482 | 31 | 8909738 | 8909751 | 2 | 7  | 14 | TG  | 11 | 8  |
| 226483 | 31 | 8911670 | 8911685 | 2 | 8  | 16 | GT  | 18 | 6  |
| 226485 | 31 | 8913267 | 8913300 | 2 | 17 | 34 | CA  | 9  | 14 |
| 226487 | 31 | 8916932 | 8916945 | 2 | 7  | 14 | AC  | 21 | 4  |
| 226490 | 31 | 8921552 | 8921569 | 3 | 6  | 18 | ATT | 23 | 4  |
| 226491 | 31 | 8927704 | 8927747 | 2 | 22 | 44 | CA  | 13 | 16 |
| 226500 | 31 | 8935678 | 8935697 | 2 | 10 | 20 | CA  | 23 | 3  |
| 226509 | 31 | 8946716 | 8946737 | 2 | 11 | 22 | CA  | 20 | 3  |
| 226512 | 31 | 8947678 | 8947695 | 2 | 9  | 18 | GT  | 11 | 3  |
| 226523 | 31 | 8967806 | 8967825 | 2 | 10 | 20 | AC  | 24 | 13 |
| 226524 | 31 | 8970007 | 8970028 | 2 | 11 | 22 | CA  | 13 | 3  |
| 226525 | 31 | 8970057 | 8970070 | 2 | 7  | 14 | GA  | 32 | 8  |
| 226529 | 31 | 8973277 | 8973322 | 2 | 23 | 46 | AC  | 8  | 8  |
| 226533 | 31 | 8985656 | 8985667 | 2 | 6  | 12 | TG  | 22 | 4  |
| 226535 | 31 | 8988424 | 8988453 | 2 | 15 | 30 | TG  | 7  | 6  |
| 226538 | 31 | 8988951 | 8988978 | 2 | 14 | 28 | CA  | 15 | 8  |
| 226540 | 31 | 8990486 | 8990507 | 2 | 11 | 22 | CA  | 12 | 5  |
| 226542 | 31 | 8991399 | 8991444 | 2 | 23 | 46 | GT  | 6  | 7  |
| 226544 | 31 | 8994900 | 8994921 | 2 | 11 | 22 | AC  | 15 | 5  |
| 226547 | 31 | 8995812 | 8995823 | 2 | 6  | 12 | CT  | 30 | 3  |
| 226549 | 31 | 8996447 | 8996480 | 2 | 17 | 34 | CA  | 7  | 6  |
| 226555 | 31 | 9002885 | 9002914 | 2 | 15 | 30 | TG  | 17 | 6  |
| 226556 | 31 | 9003750 | 9003773 | 2 | 12 | 24 | AC  | 12 | 10 |
| 226561 | 31 | 9005280 | 9005295 | 2 | 8  | 16 | AC  | 21 | 7  |
| 226563 | 31 | 9007372 | 9007397 | 2 | 13 | 26 | TG  | 12 | 10 |
| 226566 | 31 | 9012644 | 9012657 | 2 | 7  | 14 | TG  | 23 | 3  |
| 226567 | 31 | 9012752 | 9012775 | 2 | 12 | 24 | CA  | 18 | 8  |
| 226568 | 31 | 9017043 | 9017066 | 2 | 12 | 24 | AC  | 14 | 9  |
| 226574 | 31 | 9023460 | 9023477 | 2 | 9  | 18 | TG  | 9  | 5  |
| 226576 | 31 | 9025452 | 9025467 | 2 | 8  | 16 | AG  | 29 | 3  |
| 226588 | 31 | 9029882 | 9029901 | 2 | 10 | 20 | AC  | 14 | 8  |
| 226589 | 31 | 9030020 | 9030037 | 2 | 9  | 18 | AC  | 22 | 6  |
| 226590 | 31 | 9030363 | 9030394 | 2 | 16 | 32 | TG  | 6  | 5  |
| 226592 | 31 | 9037608 | 9037625 | 2 | 9  | 18 | GT  | 13 | 8  |
| 226599 | 31 | 9056407 | 9056418 | 2 | 6  | 12 | GT  | 29 | 5  |
| 226600 | 31 | 9057919 | 9057932 | 2 | 7  | 14 | AC  | 17 | 3  |
| 226604 | 31 | 9073439 | 9073458 | 2 | 10 | 20 | TG  | 18 | 7  |
| 226606 | 31 | 9079651 | 9079680 | 3 | 10 | 30 | ATT | 8  | 3  |
| 226618 | 31 | 9101601 | 9101640 | 2 | 20 | 40 | AC  | 10 | 15 |
| 226620 | 31 | 9102266 | 9102279 | 2 | 7  | 14 | AC  | 23 | 6  |
| 226623 | 31 | 9104632 | 9104659 | 2 | 14 | 28 | AC  | 8  | 7  |
| 226630 | 31 | 9115800 | 9115839 | 2 | 20 | 40 | AC  | 7  | 9  |
| 226633 | 31 | 9117858 | 9117873 | 2 | 8  | 16 | AG  | 21 | 4  |
| 226634 | 31 | 9118099 | 9118110 | 2 | 6  | 12 | CA  | 22 | 14 |
| 226643 | 31 | 9121913 | 9121938 | 2 | 13 | 26 | CA  | 16 | 7  |
| 226645 | 31 | 9123027 | 9123056 | 2 | 15 | 30 | CT  | 23 | 12 |

|        |    |         |         |   |    |    |      |    |    |
|--------|----|---------|---------|---|----|----|------|----|----|
| 226647 | 31 | 9123848 | 9123863 | 2 | 8  | 16 | CA   | 23 | 6  |
| 226651 | 31 | 9127834 | 9127853 | 2 | 10 | 20 | TG   | 12 | 10 |
| 226652 | 31 | 9128669 | 9128683 | 3 | 5  | 15 | CGG  | 27 | 5  |
| 226653 | 31 | 9129301 | 9129340 | 4 | 10 | 40 | GATA | 16 | 13 |
| 226658 | 31 | 9134043 | 9134072 | 2 | 15 | 30 | TG   | 21 | 11 |
| 226662 | 31 | 9135877 | 9135914 | 2 | 19 | 38 | CT   | 10 | 10 |
| 226668 | 31 | 9137574 | 9137594 | 3 | 7  | 21 | GCT  | 26 | 4  |
| 226670 | 31 | 9137807 | 9137832 | 2 | 13 | 26 | TG   | 18 | 8  |
| 226673 | 31 | 9139111 | 9139138 | 2 | 14 | 28 | CA   | 8  | 6  |
| 226674 | 31 | 9139981 | 9140032 | 2 | 26 | 52 | CT   | 6  | 5  |
| 226678 | 31 | 9142481 | 9142512 | 4 | 8  | 32 | CTGT | 24 | 3  |
| 226683 | 31 | 9143712 | 9143747 | 4 | 9  | 36 | TGGA | 14 | 4  |
| 226692 | 31 | 9145636 | 9145659 | 2 | 12 | 24 | CA   | 15 | 13 |
| 226696 | 31 | 9150068 | 9150079 | 2 | 6  | 12 | TC   | 23 | 3  |
| 226698 | 31 | 9150264 | 9150285 | 2 | 11 | 22 | AC   | 19 | 11 |
| 226702 | 31 | 9150963 | 9150990 | 2 | 14 | 28 | AC   | 10 | 10 |
| 226703 | 31 | 9151257 | 9151274 | 3 | 6  | 18 | TTG  | 24 | 8  |
| 226705 | 31 | 9153255 | 9153280 | 2 | 13 | 26 | GT   | 18 | 13 |
| 226708 | 31 | 9153562 | 9153582 | 3 | 7  | 21 | TCC  | 16 | 3  |
| 226710 | 31 | 9154615 | 9154628 | 2 | 7  | 14 | TG   | 13 | 5  |
| 226712 | 31 | 9155470 | 9155497 | 2 | 14 | 28 | GT   | 7  | 3  |
| 226713 | 31 | 9155659 | 9155684 | 2 | 13 | 26 | GT   | 7  | 9  |
| 226714 | 31 | 9155800 | 9155817 | 2 | 9  | 18 | TG   | 14 | 8  |
| 226715 | 31 | 9156032 | 9156047 | 2 | 8  | 16 | GT   | 24 | 6  |
| 226716 | 31 | 9158782 | 9158823 | 2 | 21 | 42 | TG   | 11 | 10 |
| 226717 | 31 | 9159911 | 9159942 | 2 | 16 | 32 | GT   | 12 | 10 |
| 226719 | 31 | 9163017 | 9163036 | 2 | 10 | 20 | GT   | 23 | 9  |
| 226720 | 31 | 9163270 | 9163289 | 2 | 10 | 20 | AG   | 13 | 9  |
| 226726 | 31 | 9167601 | 9167614 | 2 | 7  | 14 | CA   | 17 | 5  |
| 226727 | 31 | 9168064 | 9168077 | 2 | 7  | 14 | GT   | 9  | 6  |
| 226730 | 31 | 9168241 | 9168290 | 2 | 25 | 50 | AC   | 12 | 9  |
| 226731 | 31 | 9169236 | 9169283 | 2 | 24 | 48 | AC   | 15 | 13 |
| 226733 | 31 | 9170244 | 9170293 | 2 | 25 | 50 | CA   | 8  | 10 |
| 226735 | 31 | 9170560 | 9170587 | 2 | 14 | 28 | CA   | 11 | 9  |
| 226736 | 31 | 9170717 | 9170742 | 2 | 13 | 26 | CA   | 14 | 6  |
| 226737 | 31 | 9170880 | 9170913 | 2 | 17 | 34 | GT   | 11 | 11 |
| 226739 | 31 | 9172065 | 9172092 | 2 | 14 | 28 | GT   | 12 | 4  |
| 226741 | 31 | 9175988 | 9176005 | 2 | 9  | 18 | GT   | 20 | 8  |
| 226743 | 31 | 9176191 | 9176220 | 2 | 15 | 30 | GT   | 15 | 10 |
| 226749 | 31 | 9179024 | 9179038 | 3 | 5  | 15 | CTC  | 23 | 3  |
| 226757 | 31 | 9187754 | 9187767 | 2 | 7  | 14 | GT   | 10 | 9  |
| 226758 | 31 | 9187770 | 9187783 | 2 | 7  | 14 | GT   | 12 | 13 |
| 226763 | 31 | 9198231 | 9198246 | 2 | 8  | 16 | AC   | 14 | 5  |
| 226766 | 31 | 9200462 | 9200473 | 2 | 6  | 12 | AC   | 31 | 3  |
| 226768 | 31 | 9209024 | 9209049 | 2 | 13 | 26 | AC   | 9  | 7  |
| 226769 | 31 | 9209952 | 9209967 | 2 | 8  | 16 | GA   | 23 | 3  |
| 226771 | 31 | 9210617 | 9210670 | 2 | 27 | 54 | GT   | 7  | 10 |
| 226775 | 31 | 9212376 | 9212407 | 2 | 16 | 32 | GT   | 19 | 11 |
| 226777 | 31 | 9214215 | 9214244 | 2 | 15 | 30 | CA   | 26 | 13 |
| 226781 | 31 | 9215940 | 9215963 | 2 | 12 | 24 | CA   | 12 | 8  |
| 226782 | 31 | 9216352 | 9216375 | 4 | 6  | 24 | ATAC | 30 | 8  |



|        |    |         |         |   |    |    |      |    |    |
|--------|----|---------|---------|---|----|----|------|----|----|
| 226783 | 31 | 9216765 | 9216790 | 2 | 13 | 26 | CT   | 6  | 5  |
| 226784 | 31 | 9216846 | 9216881 | 2 | 18 | 36 | CT   | 7  | 4  |
| 226799 | 31 | 9223712 | 9223726 | 3 | 5  | 15 | CCT  | 20 | 3  |
| 226801 | 31 | 9224831 | 9224850 | 4 | 5  | 20 | AAAC | 20 | 7  |
| 226802 | 31 | 9225233 | 9225247 | 3 | 5  | 15 | GCT  | 24 | 3  |
| 226808 | 31 | 9230890 | 9230915 | 2 | 13 | 26 | CA   | 15 | 10 |
| 226809 | 31 | 9231484 | 9231535 | 2 | 26 | 52 | AC   | 7  | 7  |
| 226810 | 31 | 9232470 | 9232487 | 2 | 9  | 18 | AG   | 22 | 6  |
| 226813 | 31 | 9236110 | 9236133 | 3 | 8  | 24 | AAT  | 17 | 5  |
| 226814 | 31 | 9236439 | 9236458 | 4 | 5  | 20 | TTTC | 18 | 4  |
| 226817 | 31 | 9238716 | 9238739 | 2 | 12 | 24 | CA   | 11 | 5  |
| 226827 | 31 | 9254816 | 9254847 | 2 | 16 | 32 | GT   | 13 | 9  |
| 226829 | 31 | 9255219 | 9255238 | 2 | 10 | 20 | AC   | 21 | 4  |
| 226833 | 31 | 9263051 | 9263068 | 2 | 9  | 18 | TG   | 23 | 6  |
| 226835 | 31 | 9270224 | 9270238 | 3 | 5  | 15 | GAG  | 28 | 4  |
| 226836 | 31 | 9270764 | 9270784 | 3 | 7  | 21 | TGT  | 28 | 5  |
| 226842 | 31 | 9285166 | 9285183 | 3 | 6  | 18 | TGT  | 25 | 3  |
| 226847 | 31 | 9300953 | 9300972 | 2 | 10 | 20 | CA   | 21 | 8  |
| 226848 | 31 | 9304456 | 9304488 | 3 | 11 | 33 | CAA  | 28 | 14 |
| 226851 | 31 | 9316352 | 9316369 | 3 | 6  | 18 | TGT  | 26 | 5  |
| 226852 | 31 | 9316875 | 9316894 | 2 | 10 | 20 | TG   | 24 | 10 |
| 226853 | 31 | 9317965 | 9317998 | 2 | 17 | 34 | CA   | 16 | 11 |
| 226855 | 31 | 9320021 | 9320034 | 2 | 7  | 14 | TC   | 19 | 3  |
| 226857 | 31 | 9326415 | 9326434 | 2 | 10 | 20 | TG   | 17 | 9  |
| 226860 | 31 | 9332963 | 9332980 | 3 | 6  | 18 | AGC  | 24 | 3  |
| 226863 | 31 | 9345454 | 9345503 | 2 | 25 | 50 | AC   | 12 | 11 |
| 226866 | 31 | 9349616 | 9349657 | 2 | 21 | 42 | GT   | 17 | 15 |
| 226867 | 31 | 9352712 | 9352725 | 2 | 7  | 14 | AC   | 23 | 3  |
| 226869 | 31 | 9354583 | 9354596 | 2 | 7  | 14 | AT   | 8  | 3  |
| 226870 | 31 | 9355796 | 9355811 | 2 | 8  | 16 | AC   | 27 | 6  |
| 226883 | 31 | 9376670 | 9376699 | 2 | 15 | 30 | AC   | 14 | 12 |
| 226884 | 31 | 9376947 | 9376970 | 4 | 6  | 24 | ACAG | 24 | 4  |
| 226887 | 31 | 9386980 | 9386997 | 2 | 9  | 18 | AC   | 20 | 5  |
| 226898 | 31 | 9397839 | 9397856 | 2 | 9  | 18 | TG   | 24 | 14 |
| 226909 | 31 | 9427970 | 9427995 | 2 | 13 | 26 | TG   | 16 | 3  |
| 226912 | 31 | 9429059 | 9429070 | 2 | 6  | 12 | AG   | 20 | 8  |
| 226916 | 31 | 9433102 | 9433131 | 2 | 15 | 30 | AC   | 18 | 8  |
| 226917 | 31 | 9433432 | 9433449 | 2 | 9  | 18 | CA   | 22 | 8  |
| 226918 | 31 | 9433644 | 9433659 | 2 | 8  | 16 | TG   | 16 | 6  |
| 226924 | 31 | 9440061 | 9440074 | 2 | 7  | 14 | AG   | 7  | 6  |
| 226926 | 31 | 9444340 | 9444355 | 2 | 8  | 16 | AC   | 9  | 5  |
| 226929 | 31 | 9447084 | 9447099 | 2 | 8  | 16 | GT   | 21 | 7  |
| 226940 | 31 | 9469908 | 9469933 | 2 | 13 | 26 | AC   | 18 | 8  |
| 226942 | 31 | 9476674 | 9476700 | 3 | 9  | 27 | CCT  | 14 | 4  |
| 226943 | 31 | 9477174 | 9477185 | 2 | 6  | 12 | TG   | 32 | 5  |
| 226947 | 31 | 9482013 | 9482034 | 2 | 11 | 22 | AC   | 13 | 13 |
| 226950 | 31 | 9486259 | 9486282 | 2 | 12 | 24 | AC   | 17 | 7  |
| 226958 | 31 | 9494258 | 9494285 | 2 | 14 | 28 | GA   | 13 | 9  |
| 226981 | 31 | 9545349 | 9545360 | 2 | 6  | 12 | TA   | 14 | 3  |
| 226984 | 31 | 9554190 | 9554204 | 3 | 5  | 15 | AAG  | 11 | 7  |
| 226988 | 31 | 9559366 | 9559399 | 2 | 17 | 34 | AC   | 23 | 9  |

|        |    |         |         |   |    |    |      |    |    |
|--------|----|---------|---------|---|----|----|------|----|----|
| 227007 | 31 | 9577485 | 9577500 | 2 | 8  | 16 | CA   | 12 | 3  |
| 227009 | 31 | 9581730 | 9581753 | 4 | 6  | 24 | ATCC | 28 | 6  |
| 227010 | 31 | 9582161 | 9582172 | 2 | 6  | 12 | CA   | 28 | 3  |
| 227011 | 31 | 9585319 | 9585334 | 2 | 8  | 16 | CA   | 20 | 7  |
| 227012 | 31 | 9585336 | 9585347 | 2 | 6  | 12 | AC   | 21 | 9  |
| 227015 | 31 | 9586205 | 9586216 | 2 | 6  | 12 | CA   | 29 | 3  |
| 227017 | 31 | 9587216 | 9587235 | 2 | 10 | 20 | CA   | 23 | 9  |
| 227024 | 31 | 9592243 | 9592258 | 2 | 8  | 16 | GT   | 14 | 5  |
| 227028 | 31 | 9595783 | 9595818 | 2 | 18 | 36 | TG   | 17 | 16 |
| 227029 | 31 | 9596378 | 9596401 | 2 | 12 | 24 | AC   | 8  | 6  |
| 227030 | 31 | 9598354 | 9598369 | 4 | 4  | 16 | GAGG | 19 | 4  |
| 227032 | 31 | 9601066 | 9601083 | 2 | 9  | 18 | TG   | 10 | 6  |
| 227033 | 31 | 9601085 | 9601102 | 2 | 9  | 18 | GT   | 15 | 8  |
| 227040 | 31 | 9604770 | 9604805 | 2 | 18 | 36 | CA   | 7  | 5  |
| 227052 | 31 | 9614746 | 9614773 | 2 | 14 | 28 | CA   | 7  | 4  |
| 227059 | 31 | 9620134 | 9620147 | 2 | 7  | 14 | GT   | 14 | 8  |
| 227060 | 31 | 9623590 | 9623617 | 2 | 14 | 28 | AC   | 11 | 9  |
| 227062 | 31 | 9625242 | 9625261 | 2 | 10 | 20 | TG   | 20 | 7  |
| 227069 | 31 | 9628299 | 9628320 | 2 | 11 | 22 | GA   | 14 | 5  |
| 227073 | 31 | 9631899 | 9631924 | 2 | 13 | 26 | AC   | 15 | 6  |
| 227074 | 31 | 9632840 | 9632851 | 2 | 6  | 12 | AC   | 23 | 6  |
| 227075 | 31 | 9632854 | 9632865 | 2 | 6  | 12 | AC   | 25 | 5  |
| 227080 | 31 | 9646905 | 9646924 | 2 | 10 | 20 | AC   | 22 | 8  |
| 227081 | 31 | 9648990 | 9649003 | 2 | 7  | 14 | GT   | 31 | 4  |
| 227083 | 31 | 9658629 | 9658648 | 4 | 5  | 20 | CAGA | 30 | 3  |
| 227092 | 31 | 9669556 | 9669579 | 2 | 12 | 24 | CA   | 12 | 6  |
| 227093 | 31 | 9669614 | 9669635 | 2 | 11 | 22 | CA   | 12 | 8  |
| 227102 | 31 | 9683494 | 9683513 | 2 | 10 | 20 | AC   | 23 | 9  |
| 227103 | 31 | 9683864 | 9683875 | 2 | 6  | 12 | CA   | 35 | 3  |
| 227111 | 31 | 9691461 | 9691490 | 2 | 15 | 30 | AC   | 19 | 8  |
| 227113 | 31 | 9692480 | 9692497 | 2 | 9  | 18 | TG   | 9  | 4  |
| 227117 | 31 | 9697717 | 9697736 | 2 | 10 | 20 | CA   | 21 | 6  |
| 227125 | 31 | 9706289 | 9706308 | 2 | 10 | 20 | TG   | 20 | 14 |
| 227135 | 31 | 9742944 | 9742973 | 2 | 15 | 30 | TG   | 11 | 9  |
| 227141 | 31 | 9757710 | 9757725 | 2 | 8  | 16 | TG   | 24 | 4  |
| 227143 | 31 | 9769149 | 9769172 | 4 | 6  | 24 | ATAG | 12 | 7  |
| 227144 | 31 | 9769937 | 9769956 | 4 | 5  | 20 | TAAT | 29 | 3  |
| 227145 | 31 | 9773322 | 9773335 | 2 | 7  | 14 | TG   | 21 | 4  |
| 227146 | 31 | 9773454 | 9773469 | 4 | 4  | 16 | TTTA | 13 | 7  |
| 227152 | 31 | 9786337 | 9786354 | 2 | 9  | 18 | CA   | 29 | 13 |
| 227153 | 31 | 9786791 | 9786804 | 2 | 7  | 14 | TG   | 27 | 11 |
| 227161 | 31 | 9794258 | 9794271 | 2 | 7  | 14 | GA   | 26 | 6  |
| 227177 | 31 | 9827591 | 9827606 | 4 | 4  | 16 | ATTT | 25 | 7  |
| 227182 | 31 | 9832444 | 9832457 | 2 | 7  | 14 | TG   | 16 | 3  |
| 227183 | 31 | 9832522 | 9832573 | 2 | 26 | 52 | TG   | 12 | 10 |
| 227184 | 31 | 9832790 | 9832807 | 2 | 9  | 18 | TG   | 23 | 7  |
| 227185 | 31 | 9832946 | 9832961 | 2 | 8  | 16 | GT   | 21 | 10 |
| 227192 | 31 | 9842932 | 9842945 | 2 | 7  | 14 | AC   | 26 | 4  |
| 227197 | 31 | 9852244 | 9852258 | 3 | 5  | 15 | AAC  | 23 | 4  |
| 227198 | 31 | 9852651 | 9852662 | 2 | 6  | 12 | GT   | 30 | 4  |
| 227200 | 31 | 9853205 | 9853224 | 2 | 10 | 20 | GT   | 18 | 4  |

|        |    |          |          |   |    |    |      |    |    |
|--------|----|----------|----------|---|----|----|------|----|----|
| 227201 | 31 | 9853473  | 9853500  | 2 | 14 | 28 | CT   | 13 | 12 |
| 227204 | 31 | 9857622  | 9857661  | 2 | 20 | 40 | GT   | 10 | 9  |
| 227206 | 31 | 9858362  | 9858375  | 2 | 7  | 14 | GT   | 24 | 3  |
| 227208 | 31 | 9861794  | 9861826  | 3 | 11 | 33 | GCT  | 23 | 8  |
| 227210 | 31 | 9863844  | 9863867  | 2 | 12 | 24 | TG   | 11 | 7  |
| 227216 | 31 | 9871545  | 9871564  | 2 | 10 | 20 | AC   | 12 | 5  |
| 227217 | 31 | 9872799  | 9872822  | 3 | 8  | 24 | TAA  | 22 | 3  |
| 227220 | 31 | 9881456  | 9881467  | 2 | 6  | 12 | TG   | 22 | 3  |
| 227226 | 31 | 9892035  | 9892074  | 2 | 20 | 40 | CA   | 11 | 10 |
| 227232 | 31 | 9896425  | 9896438  | 2 | 7  | 14 | AT   | 19 | 13 |
| 227240 | 31 | 9910241  | 9910266  | 2 | 13 | 26 | AC   | 6  | 6  |
| 227242 | 31 | 9917293  | 9917318  | 2 | 13 | 26 | GT   | 16 | 6  |
| 227244 | 31 | 9919619  | 9919638  | 2 | 10 | 20 | CA   | 22 | 7  |
| 227245 | 31 | 9919779  | 9919798  | 2 | 10 | 20 | CA   | 10 | 6  |
| 227250 | 31 | 9923351  | 9923364  | 2 | 7  | 14 | AC   | 23 | 5  |
| 227253 | 31 | 9927908  | 9927925  | 3 | 6  | 18 | GCT  | 15 | 3  |
| 227254 | 31 | 9930924  | 9930955  | 2 | 16 | 32 | GT   | 16 | 10 |
| 227255 | 31 | 9934681  | 9934701  | 3 | 7  | 21 | GTG  | 24 | 3  |
| 227257 | 31 | 9937010  | 9937027  | 2 | 9  | 18 | GT   | 13 | 8  |
| 227258 | 31 | 9937029  | 9937044  | 2 | 8  | 16 | TG   | 17 | 6  |
| 227261 | 31 | 9938080  | 9938109  | 2 | 15 | 30 | GT   | 25 | 9  |
| 227266 | 31 | 9946553  | 9946588  | 2 | 18 | 36 | AC   | 7  | 8  |
| 227267 | 31 | 9946796  | 9946817  | 2 | 11 | 22 | AG   | 12 | 7  |
| 227274 | 31 | 9955105  | 9955122  | 2 | 9  | 18 | CT   | 27 | 11 |
| 227276 | 31 | 9955816  | 9955847  | 4 | 8  | 32 | TCTT | 10 | 9  |
| 227278 | 31 | 9957887  | 9957902  | 2 | 8  | 16 | GT   | 27 | 4  |
| 227284 | 31 | 9967927  | 9967952  | 2 | 13 | 26 | CA   | 11 | 9  |
| 227289 | 31 | 9980424  | 9980435  | 2 | 6  | 12 | TG   | 26 | 3  |
| 227291 | 31 | 9988413  | 9988472  | 2 | 30 | 60 | AC   | 14 | 14 |
| 227292 | 31 | 9989662  | 9989725  | 4 | 16 | 64 | TCTA | 17 | 11 |
| 227293 | 31 | 9990437  | 9990454  | 3 | 6  | 18 | TTC  | 24 | 8  |
| 227294 | 31 | 9991640  | 9991660  | 3 | 7  | 21 | ACA  | 18 | 4  |
| 227296 | 31 | 9992086  | 9992101  | 4 | 4  | 16 | TTAA | 24 | 3  |
| 227298 | 31 | 9996739  | 9996758  | 2 | 10 | 20 | TG   | 6  | 4  |
| 227300 | 31 | 9998843  | 9998880  | 2 | 19 | 38 | GT   | 15 | 15 |
| 227302 | 31 | 10003070 | 10003083 | 2 | 7  | 14 | TG   | 13 | 4  |
| 227303 | 31 | 10003086 | 10003097 | 2 | 6  | 12 | TG   | 25 | 5  |
| 227304 | 31 | 10003372 | 10003387 | 2 | 8  | 16 | CA   | 17 | 6  |
| 227305 | 31 | 10005099 | 10005114 | 2 | 8  | 16 | TG   | 13 | 8  |
| 227306 | 31 | 10005116 | 10005127 | 2 | 6  | 12 | TG   | 14 | 6  |
| 227307 | 31 | 10011228 | 10011241 | 2 | 7  | 14 | TG   | 15 | 6  |
| 227308 | 31 | 10016332 | 10016343 | 2 | 6  | 12 | GT   | 21 | 11 |
| 227311 | 31 | 10020255 | 10020272 | 3 | 6  | 18 | GGA  | 19 | 3  |
| 227312 | 31 | 10022122 | 10022173 | 2 | 26 | 52 | TG   | 12 | 11 |
| 227314 | 31 | 10024771 | 10024786 | 2 | 8  | 16 | AG   | 7  | 3  |
| 227320 | 31 | 10035061 | 10035084 | 2 | 12 | 24 | GT   | 21 | 8  |
| 227322 | 31 | 10035401 | 10035418 | 2 | 9  | 18 | TG   | 20 | 8  |
| 227323 | 31 | 10038353 | 10038400 | 2 | 24 | 48 | TG   | 7  | 8  |
| 227324 | 31 | 10038913 | 10038936 | 4 | 6  | 24 | TGTT | 32 | 3  |
| 227326 | 31 | 10041438 | 10041453 | 2 | 8  | 16 | GT   | 15 | 8  |
| 227327 | 31 | 10043108 | 10043122 | 3 | 5  | 15 | TAA  | 10 | 3  |

|        |    |          |          |   |    |    |      |    |    |
|--------|----|----------|----------|---|----|----|------|----|----|
| 227341 | 31 | 10060146 | 10060159 | 2 | 7  | 14 | GT   | 17 | 9  |
| 227350 | 31 | 10071970 | 10072003 | 2 | 17 | 34 | CA   | 13 | 11 |
| 227351 | 31 | 10073917 | 10073950 | 2 | 17 | 34 | GA   | 14 | 5  |
| 227354 | 31 | 10077983 | 10078006 | 2 | 12 | 24 | AC   | 19 | 6  |
| 227355 | 31 | 10078295 | 10078314 | 2 | 10 | 20 | AC   | 16 | 12 |
| 227356 | 31 | 10081737 | 10081764 | 4 | 7  | 28 | AAAG | 21 | 6  |
| 227358 | 31 | 10090145 | 10090160 | 4 | 4  | 16 | AAAT | 26 | 6  |
| 227361 | 31 | 10093665 | 10093714 | 2 | 25 | 50 | TG   | 9  | 10 |
| 227379 | 31 | 10136600 | 10136615 | 2 | 8  | 16 | GT   | 15 | 12 |
| 227409 | 31 | 10173453 | 10173468 | 4 | 4  | 16 | TCTT | 22 | 6  |
| 227410 | 31 | 10173712 | 10173735 | 2 | 12 | 24 | AG   | 15 | 10 |
| 227419 | 31 | 10185724 | 10185755 | 2 | 16 | 32 | CA   | 15 | 8  |
| 227423 | 31 | 10189795 | 10189814 | 4 | 5  | 20 | AAAG | 15 | 7  |
| 227425 | 31 | 10192997 | 10193008 | 2 | 6  | 12 | CA   | 28 | 4  |
| 227426 | 31 | 10194662 | 10194681 | 2 | 10 | 20 | TG   | 14 | 4  |
| 227431 | 31 | 10200303 | 10200330 | 2 | 14 | 28 | TG   | 18 | 16 |
| 227433 | 31 | 10200970 | 10201021 | 4 | 13 | 52 | AAAG | 13 | 13 |
| 227436 | 31 | 10202297 | 10202322 | 2 | 13 | 26 | CT   | 15 | 6  |
| 227438 | 31 | 10205985 | 10205996 | 2 | 6  | 12 | AT   | 15 | 11 |
| 227441 | 31 | 10210598 | 10210623 | 2 | 13 | 26 | GT   | 23 | 9  |
| 227442 | 31 | 10211354 | 10211367 | 2 | 7  | 14 | AG   | 25 | 3  |
| 227454 | 31 | 10226662 | 10226685 | 3 | 8  | 24 | GAG  | 17 | 6  |
| 227457 | 31 | 10232578 | 10232597 | 2 | 10 | 20 | CA   | 12 | 5  |
| 227474 | 31 | 10247614 | 10247627 | 2 | 7  | 14 | AC   | 8  | 5  |
| 227475 | 31 | 10247702 | 10247727 | 2 | 13 | 26 | GT   | 6  | 4  |
| 227495 | 31 | 10284655 | 10284678 | 4 | 6  | 24 | AGAT | 21 | 5  |
| 227498 | 31 | 10298407 | 10298420 | 2 | 7  | 14 | TG   | 19 | 3  |
| 227500 | 31 | 10301288 | 10301307 | 2 | 10 | 20 | CA   | 7  | 8  |
| 227501 | 31 | 10301308 | 10301319 | 2 | 6  | 12 | CG   | 14 | 13 |
| 227514 | 31 | 10327537 | 10327556 | 4 | 5  | 20 | AACC | 21 | 4  |
| 227516 | 31 | 10329753 | 10329776 | 2 | 12 | 24 | AC   | 23 | 7  |
| 227525 | 31 | 10355734 | 10355751 | 3 | 6  | 18 | CCA  | 22 | 4  |
| 227526 | 31 | 10356143 | 10356156 | 2 | 7  | 14 | TG   | 13 | 4  |
| 227528 | 31 | 10362972 | 10362991 | 2 | 10 | 20 | TG   | 12 | 7  |
| 227530 | 31 | 10367953 | 10367964 | 2 | 6  | 12 | AT   | 18 | 4  |
| 227542 | 31 | 10410021 | 10410032 | 2 | 6  | 12 | GT   | 26 | 3  |
| 227543 | 31 | 10421260 | 10421275 | 2 | 8  | 16 | GT   | 17 | 7  |
| 227546 | 31 | 10426742 | 10426761 | 2 | 10 | 20 | TC   | 18 | 3  |
| 227547 | 31 | 10430460 | 10430473 | 2 | 7  | 14 | GT   | 26 | 4  |
| 227549 | 31 | 10433164 | 10433177 | 2 | 7  | 14 | TG   | 28 | 5  |
| 227551 | 31 | 10435794 | 10435813 | 2 | 10 | 20 | GT   | 24 | 7  |
| 227556 | 31 | 10463429 | 10463452 | 2 | 12 | 24 | TG   | 7  | 9  |
| 227557 | 31 | 10463995 | 10464014 | 2 | 10 | 20 | AG   | 23 | 8  |
| 227559 | 31 | 10464199 | 10464219 | 3 | 7  | 21 | CCT  | 20 | 8  |
| 227564 | 31 | 10468112 | 10468135 | 2 | 12 | 24 | CA   | 15 | 10 |
| 227569 | 31 | 10471018 | 10471033 | 2 | 8  | 16 | TG   | 25 | 6  |
| 227572 | 31 | 10475139 | 10475166 | 2 | 14 | 28 | AC   | 16 | 13 |
| 227574 | 31 | 10477292 | 10477325 | 2 | 17 | 34 | CA   | 19 | 13 |
| 227575 | 31 | 10480997 | 10481014 | 3 | 6  | 18 | CAG  | 28 | 5  |
| 227576 | 31 | 10482052 | 10482083 | 2 | 16 | 32 | TG   | 12 | 9  |
| 227578 | 31 | 10483531 | 10483554 | 2 | 12 | 24 | AG   | 15 | 5  |

|        |    |          |          |   |    |    |      |    |    |
|--------|----|----------|----------|---|----|----|------|----|----|
| 227579 | 31 | 10486661 | 10486678 | 2 | 9  | 18 | TC   | 25 | 3  |
| 227580 | 31 | 10490156 | 10490181 | 2 | 13 | 26 | GT   | 13 | 10 |
| 227601 | 31 | 10522170 | 10522184 | 3 | 5  | 15 | TTC  | 30 | 3  |
| 227602 | 31 | 10531055 | 10531070 | 2 | 8  | 16 | TG   | 15 | 8  |
| 227605 | 31 | 10539293 | 10539312 | 2 | 10 | 20 | AC   | 11 | 10 |
| 227606 | 31 | 10540813 | 10540838 | 2 | 13 | 26 | CA   | 15 | 8  |
| 227609 | 31 | 10546566 | 10546591 | 2 | 13 | 26 | TG   | 7  | 8  |
| 227611 | 31 | 10546839 | 10546862 | 2 | 12 | 24 | GT   | 13 | 4  |
| 227613 | 31 | 10548503 | 10548514 | 2 | 6  | 12 | TC   | 18 | 3  |
| 227615 | 31 | 10549016 | 10549029 | 2 | 7  | 14 | AT   | 15 | 4  |
| 227616 | 31 | 10551559 | 10551588 | 2 | 15 | 30 | TG   | 7  | 7  |
| 227629 | 31 | 10573871 | 10573882 | 2 | 6  | 12 | CA   | 26 | 3  |
| 227632 | 31 | 10581912 | 10581927 | 2 | 8  | 16 | GT   | 15 | 9  |
| 227633 | 31 | 10584620 | 10584635 | 4 | 4  | 16 | CACG | 7  | 3  |
| 227638 | 31 | 10586060 | 10586071 | 2 | 6  | 12 | TC   | 26 | 4  |
| 227639 | 31 | 10590060 | 10590071 | 2 | 6  | 12 | AT   | 23 | 5  |
| 227640 | 31 | 10591067 | 10591082 | 2 | 8  | 16 | CA   | 20 | 8  |
| 227642 | 31 | 10591509 | 10591530 | 2 | 11 | 22 | TG   | 15 | 11 |
| 227658 | 31 | 10626251 | 10626294 | 2 | 22 | 44 | CA   | 9  | 13 |
| 227659 | 31 | 10626483 | 10626512 | 2 | 15 | 30 | GT   | 13 | 7  |
| 227660 | 31 | 10626630 | 10626647 | 2 | 9  | 18 | TG   | 25 | 4  |
| 227661 | 31 | 10627165 | 10627194 | 2 | 15 | 30 | AC   | 15 | 11 |
| 227662 | 31 | 10628554 | 10628581 | 2 | 14 | 28 | GT   | 25 | 8  |
| 227664 | 31 | 10630253 | 10630284 | 2 | 16 | 32 | TG   | 6  | 5  |
| 227665 | 31 | 10630341 | 10630352 | 2 | 6  | 12 | AG   | 22 | 3  |
| 227666 | 31 | 10632477 | 10632490 | 2 | 7  | 14 | AC   | 23 | 6  |
| 227667 | 31 | 10635487 | 10635528 | 2 | 21 | 42 | CA   | 7  | 9  |
| 227669 | 31 | 10638330 | 10638349 | 2 | 10 | 20 | GT   | 17 | 13 |
| 227670 | 31 | 10643935 | 10643974 | 2 | 20 | 40 | GA   | 8  | 9  |
| 227671 | 31 | 10644659 | 10644688 | 2 | 15 | 30 | TG   | 9  | 9  |
| 227672 | 31 | 10650550 | 10650561 | 2 | 6  | 12 | AT   | 30 | 4  |
| 227673 | 31 | 10658861 | 10658872 | 2 | 6  | 12 | TG   | 24 | 4  |
| 227674 | 31 | 10660922 | 10660951 | 2 | 15 | 30 | TG   | 22 | 8  |
| 227675 | 31 | 10664082 | 10664096 | 3 | 5  | 15 | AAC  | 24 | 3  |
| 227676 | 31 | 10664576 | 10664593 | 3 | 6  | 18 | TTC  | 31 | 5  |
| 227685 | 31 | 10683150 | 10683169 | 2 | 10 | 20 | TG   | 21 | 3  |
| 227687 | 31 | 10686071 | 10686094 | 2 | 12 | 24 | AC   | 12 | 11 |
| 227693 | 31 | 10696096 | 10696122 | 3 | 9  | 27 | GCT  | 29 | 4  |
| 227695 | 31 | 10702723 | 10702738 | 2 | 8  | 16 | TA   | 13 | 5  |
| 227697 | 31 | 10710475 | 10710490 | 2 | 8  | 16 | CA   | 20 | 5  |
| 227698 | 31 | 10710686 | 10710697 | 2 | 6  | 12 | GT   | 32 | 3  |
| 227709 | 31 | 10729202 | 10729219 | 2 | 9  | 18 | AC   | 20 | 4  |
| 227711 | 31 | 10732264 | 10732291 | 2 | 14 | 28 | CA   | 10 | 11 |
| 227712 | 31 | 10732481 | 10732506 | 2 | 13 | 26 | GT   | 27 | 10 |
| 227718 | 31 | 10742714 | 10742733 | 2 | 10 | 20 | AC   | 15 | 6  |
| 227730 | 31 | 10769273 | 10769288 | 2 | 8  | 16 | TG   | 6  | 4  |
| 227735 | 31 | 10779673 | 10779688 | 4 | 4  | 16 | TTTG | 31 | 3  |
| 227742 | 31 | 10782145 | 10782159 | 3 | 5  | 15 | AAC  | 29 | 4  |
| 227746 | 31 | 10785535 | 10785548 | 2 | 7  | 14 | GT   | 7  | 6  |
| 227747 | 31 | 10785549 | 10785560 | 2 | 6  | 12 | GC   | 18 | 13 |
| 227749 | 31 | 10789135 | 10789146 | 2 | 6  | 12 | GT   | 14 | 5  |

|        |    |          |          |   |    |    |      |    |    |
|--------|----|----------|----------|---|----|----|------|----|----|
| 227750 | 31 | 10789301 | 10789316 | 2 | 8  | 16 | CA   | 26 | 9  |
| 227752 | 31 | 10790619 | 10790632 | 2 | 7  | 14 | CA   | 29 | 5  |
| 227753 | 31 | 10791259 | 10791274 | 2 | 8  | 16 | CA   | 23 | 9  |
| 227754 | 31 | 10793920 | 10793943 | 2 | 12 | 24 | CA   | 14 | 13 |
| 227755 | 31 | 10796927 | 10796938 | 2 | 6  | 12 | GT   | 23 | 6  |
| 227758 | 31 | 10807212 | 10807223 | 2 | 6  | 12 | CA   | 23 | 4  |
| 227760 | 31 | 10808884 | 10808903 | 2 | 10 | 20 | TG   | 15 | 8  |
| 227768 | 31 | 10841625 | 10841658 | 2 | 17 | 34 | CT   | 9  | 9  |
| 227769 | 31 | 10842568 | 10842581 | 2 | 7  | 14 | AC   | 30 | 7  |
| 227770 | 31 | 10843964 | 10843985 | 2 | 11 | 22 | TG   | 11 | 14 |
| 227771 | 31 | 10844194 | 10844239 | 2 | 23 | 46 | CA   | 8  | 9  |
| 227775 | 31 | 10849752 | 10849769 | 2 | 9  | 18 | CA   | 28 | 3  |
| 227776 | 31 | 10851292 | 10851305 | 2 | 7  | 14 | GT   | 20 | 4  |
| 227777 | 31 | 10851637 | 10851666 | 2 | 15 | 30 | TG   | 7  | 7  |
| 227780 | 31 | 10867681 | 10867700 | 2 | 10 | 20 | CA   | 20 | 5  |
| 227781 | 31 | 10868416 | 10868441 | 2 | 13 | 26 | CA   | 18 | 6  |
| 227783 | 31 | 10876700 | 10876765 | 3 | 22 | 66 | AGA  | 9  | 11 |
| 227785 | 31 | 10879696 | 10879715 | 2 | 10 | 20 | CA   | 16 | 7  |
| 227786 | 31 | 10879717 | 10879728 | 2 | 6  | 12 | AC   | 16 | 8  |
| 227789 | 31 | 10889666 | 10889679 | 2 | 7  | 14 | AC   | 26 | 3  |
| 227791 | 31 | 10889860 | 10889877 | 2 | 9  | 18 | CA   | 8  | 5  |
| 227793 | 31 | 10891497 | 10891512 | 2 | 8  | 16 | CA   | 11 | 3  |
| 227795 | 31 | 10892800 | 10892863 | 4 | 16 | 64 | TATC | 7  | 6  |
| 227799 | 31 | 10905234 | 10905247 | 2 | 7  | 14 | AG   | 16 | 5  |
| 227800 | 31 | 10905494 | 10905523 | 2 | 15 | 30 | CA   | 9  | 8  |
| 227802 | 31 | 10907528 | 10907539 | 2 | 6  | 12 | AC   | 24 | 3  |
| 227804 | 31 | 10910533 | 10910566 | 2 | 17 | 34 | CA   | 6  | 5  |
| 227810 | 31 | 10913350 | 10913383 | 2 | 17 | 34 | GT   | 16 | 9  |
| 227816 | 31 | 10921960 | 10921977 | 2 | 9  | 18 | CA   | 20 | 8  |
| 227821 | 31 | 10926983 | 10926994 | 2 | 6  | 12 | CA   | 26 | 4  |
| 227822 | 31 | 10927969 | 10927992 | 4 | 6  | 24 | TCCA | 24 | 3  |
| 227824 | 31 | 10929174 | 10929187 | 2 | 7  | 14 | GA   | 19 | 6  |
| 227827 | 31 | 10933102 | 10933128 | 3 | 9  | 27 | AGG  | 23 | 8  |
| 227829 | 31 | 10942319 | 10942334 | 2 | 8  | 16 | TG   | 25 | 7  |
| 227831 | 31 | 10945928 | 10945957 | 2 | 15 | 30 | AC   | 13 | 6  |
| 227835 | 31 | 10949789 | 10949814 | 2 | 13 | 26 | AC   | 9  | 8  |
| 227849 | 31 | 10986384 | 10986421 | 2 | 19 | 38 | TG   | 15 | 11 |
| 227850 | 31 | 10988859 | 10988872 | 2 | 7  | 14 | TA   | 28 | 4  |
| 227855 | 31 | 10994951 | 10994962 | 2 | 6  | 12 | AG   | 23 | 3  |
| 227857 | 31 | 10998080 | 10998111 | 2 | 16 | 32 | TG   | 16 | 11 |
| 227858 | 31 | 10999471 | 10999492 | 2 | 11 | 22 | CA   | 9  | 4  |
| 227860 | 31 | 11000376 | 11000389 | 2 | 7  | 14 | AT   | 21 | 5  |
| 227866 | 31 | 11019508 | 11019523 | 2 | 8  | 16 | CT   | 7  | 3  |
| 227867 | 31 | 11019539 | 11019554 | 2 | 8  | 16 | TC   | 14 | 3  |
| 227871 | 31 | 11025976 | 11025993 | 2 | 9  | 18 | GT   | 22 | 16 |
| 227872 | 31 | 11025994 | 11026005 | 2 | 6  | 12 | GC   | 20 | 13 |
| 227873 | 31 | 11026240 | 11026257 | 3 | 6  | 18 | AGA  | 17 | 4  |
| 227881 | 31 | 11056627 | 11056644 | 3 | 6  | 18 | CTT  | 29 | 3  |
| 227898 | 31 | 11066517 | 11066576 | 2 | 30 | 60 | TG   | 11 | 9  |
| 227899 | 31 | 11066650 | 11066665 | 2 | 8  | 16 | GT   | 16 | 6  |
| 227903 | 31 | 11073247 | 11073266 | 4 | 5  | 20 | TTTG | 15 | 3  |

|        |    |          |          |   |    |    |      |    |    |
|--------|----|----------|----------|---|----|----|------|----|----|
| 227905 | 31 | 11077773 | 11077788 | 2 | 8  | 16 | CA   | 23 | 5  |
| 227909 | 31 | 11082053 | 11082076 | 4 | 6  | 24 | AAAG | 19 | 3  |
| 227912 | 31 | 11086172 | 11086193 | 2 | 11 | 22 | TG   | 11 | 4  |
| 227917 | 31 | 11101952 | 11101965 | 2 | 7  | 14 | CT   | 22 | 4  |
| 227920 | 31 | 11104805 | 11104820 | 2 | 8  | 16 | AC   | 22 | 4  |
| 227921 | 31 | 11104921 | 11104936 | 2 | 8  | 16 | GT   | 24 | 3  |
| 227929 | 31 | 11112034 | 11112059 | 2 | 13 | 26 | TG   | 18 | 7  |
| 227932 | 31 | 11114392 | 11114409 | 2 | 9  | 18 | GT   | 18 | 3  |
| 227937 | 31 | 11120814 | 11120833 | 2 | 10 | 20 | GT   | 19 | 5  |
| 227938 | 31 | 11121379 | 11121404 | 2 | 13 | 26 | GA   | 13 | 7  |
| 227940 | 31 | 11121706 | 11121745 | 2 | 20 | 40 | CA   | 12 | 8  |
| 227941 | 31 | 11122550 | 11122567 | 2 | 9  | 18 | TG   | 16 | 9  |
| 227945 | 31 | 11129787 | 11129802 | 2 | 8  | 16 | GT   | 21 | 7  |
| 227954 | 31 | 11142712 | 11142749 | 2 | 19 | 38 | AC   | 10 | 10 |
| 227958 | 31 | 11148737 | 11148756 | 2 | 10 | 20 | TG   | 21 | 5  |
| 227963 | 31 | 11161391 | 11161412 | 2 | 11 | 22 | GT   | 18 | 9  |
| 227969 | 31 | 11177303 | 11177318 | 4 | 4  | 16 | TTTG | 26 | 4  |
| 227975 | 31 | 11195976 | 11195991 | 2 | 8  | 16 | CA   | 33 | 3  |
| 227977 | 31 | 11204937 | 11204960 | 4 | 6  | 24 | TAGA | 21 | 9  |
| 227984 | 31 | 11221833 | 11221848 | 2 | 8  | 16 | TG   | 20 | 4  |
| 227990 | 31 | 11224890 | 11224907 | 2 | 9  | 18 | TG   | 26 | 8  |
| 227994 | 31 | 11237463 | 11237490 | 4 | 7  | 28 | GTGC | 20 | 12 |
| 227996 | 31 | 11240618 | 11240635 | 3 | 6  | 18 | GCA  | 26 | 3  |
| 228019 | 31 | 11261570 | 11261581 | 2 | 6  | 12 | GT   | 28 | 4  |
| 228020 | 31 | 11261584 | 11261597 | 2 | 7  | 14 | GT   | 22 | 5  |
| 228025 | 31 | 11263985 | 11263998 | 2 | 7  | 14 | AC   | 10 | 3  |
| 228031 | 31 | 11273157 | 11273180 | 2 | 12 | 24 | CA   | 8  | 5  |
| 228032 | 31 | 11273345 | 11273366 | 2 | 11 | 22 | GT   | 16 | 10 |
| 228033 | 31 | 11274158 | 11274187 | 2 | 15 | 30 | TG   | 20 | 9  |
| 228035 | 31 | 11281488 | 11281508 | 3 | 7  | 21 | GAG  | 22 | 7  |
| 228038 | 31 | 11285126 | 11285147 | 2 | 11 | 22 | GT   | 22 | 9  |
| 228044 | 31 | 11304344 | 11304355 | 2 | 6  | 12 | CA   | 23 | 3  |
| 228046 | 31 | 11306622 | 11306645 | 2 | 12 | 24 | TC   | 22 | 8  |
| 228048 | 31 | 11311470 | 11311497 | 4 | 7  | 28 | GATA | 9  | 12 |
| 228049 | 31 | 11311851 | 11311866 | 2 | 8  | 16 | CA   | 19 | 11 |
| 228053 | 31 | 11324130 | 11324145 | 2 | 8  | 16 | AC   | 26 | 8  |
| 228054 | 31 | 11326283 | 11326294 | 2 | 6  | 12 | AC   | 35 | 5  |
| 228057 | 31 | 11329064 | 11329075 | 2 | 6  | 12 | CA   | 33 | 3  |
| 228058 | 31 | 11330417 | 11330432 | 2 | 8  | 16 | AC   | 16 | 9  |
| 228060 | 31 | 11333102 | 11333113 | 2 | 6  | 12 | GA   | 27 | 3  |
| 228062 | 31 | 11351912 | 11351931 | 4 | 5  | 20 | TATC | 24 | 6  |
| 228064 | 31 | 11356519 | 11356536 | 2 | 9  | 18 | GT   | 22 | 3  |
| 228065 | 31 | 11358542 | 11358563 | 2 | 11 | 22 | CA   | 16 | 11 |
| 228068 | 31 | 11360835 | 11360852 | 2 | 9  | 18 | CA   | 12 | 9  |
| 228081 | 31 | 11414604 | 11414625 | 2 | 11 | 22 | TC   | 7  | 5  |
| 228084 | 31 | 11425680 | 11425697 | 3 | 6  | 18 | CAA  | 28 | 9  |
| 228085 | 31 | 11436936 | 11436965 | 3 | 10 | 30 | ATC  | 25 | 8  |
| 228090 | 31 | 11448772 | 11448795 | 2 | 12 | 24 | AC   | 13 | 6  |
| 228093 | 31 | 11453855 | 11453882 | 2 | 14 | 28 | CA   | 16 | 9  |
| 228095 | 31 | 11456742 | 11456757 | 2 | 8  | 16 | AG   | 22 | 7  |
| 228099 | 31 | 11469588 | 11469599 | 2 | 6  | 12 | TG   | 30 | 5  |

|        |    |          |          |   |    |    |      |    |    |
|--------|----|----------|----------|---|----|----|------|----|----|
| 228103 | 31 | 11477597 | 11477608 | 2 | 6  | 12 | TG   | 25 | 3  |
| 228105 | 31 | 11482231 | 11482254 | 2 | 12 | 24 | GT   | 17 | 7  |
| 228108 | 31 | 11491096 | 11491111 | 2 | 8  | 16 | AC   | 27 | 4  |
| 228111 | 31 | 11499893 | 11499918 | 2 | 13 | 26 | CA   | 10 | 9  |
| 228120 | 31 | 11522606 | 11522623 | 2 | 9  | 18 | CA   | 11 | 8  |
| 228121 | 31 | 11524485 | 11524514 | 2 | 15 | 30 | AC   | 20 | 13 |
| 228129 | 31 | 11539650 | 11539661 | 2 | 6  | 12 | GA   | 23 | 4  |
| 228131 | 31 | 11540932 | 11540965 | 2 | 17 | 34 | CA   | 9  | 8  |
| 228136 | 31 | 11546271 | 11546294 | 2 | 12 | 24 | AC   | 16 | 12 |
| 228138 | 31 | 11553288 | 11553311 | 4 | 6  | 24 | ACTC | 32 | 3  |
| 228139 | 31 | 11553866 | 11553887 | 2 | 11 | 22 | AG   | 15 | 5  |
| 228140 | 31 | 11554082 | 11554096 | 3 | 5  | 15 | CAC  | 27 | 3  |
| 228141 | 31 | 11557477 | 11557496 | 2 | 10 | 20 | AC   | 16 | 6  |
| 228144 | 31 | 11564460 | 11564483 | 2 | 12 | 24 | CT   | 10 | 7  |
| 228147 | 31 | 11568294 | 11568319 | 2 | 13 | 26 | AC   | 20 | 8  |
| 228156 | 31 | 11583525 | 11583544 | 2 | 10 | 20 | TG   | 25 | 6  |
| 228157 | 31 | 11583768 | 11583791 | 2 | 12 | 24 | AC   | 11 | 12 |
| 228160 | 31 | 11587515 | 11587530 | 2 | 8  | 16 | GT   | 16 | 9  |
| 228161 | 31 | 11590753 | 11590766 | 2 | 7  | 14 | CA   | 28 | 3  |
| 228162 | 31 | 11593898 | 11593921 | 4 | 6  | 24 | TGTT | 18 | 6  |
| 228168 | 31 | 11606340 | 11606361 | 2 | 11 | 22 | AG   | 24 | 9  |
| 228178 | 31 | 11623932 | 11623953 | 2 | 11 | 22 | TG   | 16 | 6  |
| 228182 | 31 | 11628831 | 11628848 | 2 | 9  | 18 | CT   | 23 | 8  |
| 228184 | 31 | 11631306 | 11631319 | 2 | 7  | 14 | TG   | 24 | 4  |
| 228185 | 31 | 11637717 | 11637760 | 4 | 11 | 44 | TTTC | 20 | 9  |
| 228186 | 31 | 11637881 | 11637916 | 2 | 18 | 36 | AC   | 7  | 9  |
| 228192 | 31 | 11655567 | 11655586 | 2 | 10 | 20 | TG   | 13 | 7  |
| 228196 | 31 | 11659532 | 11659543 | 2 | 6  | 12 | GT   | 21 | 3  |
| 228201 | 31 | 11667182 | 11667214 | 3 | 11 | 33 | CAG  | 21 | 10 |
| 228202 | 31 | 11669690 | 11669729 | 2 | 20 | 40 | TG   | 12 | 13 |
| 228207 | 31 | 11675481 | 11675510 | 2 | 15 | 30 | TG   | 21 | 14 |
| 228208 | 31 | 11676055 | 11676078 | 2 | 12 | 24 | CA   | 26 | 7  |
| 228210 | 31 | 11678422 | 11678454 | 3 | 11 | 33 | TCC  | 20 | 7  |
| 228211 | 31 | 11681539 | 11681556 | 3 | 6  | 18 | GGA  | 26 | 6  |
| 228212 | 31 | 11681689 | 11681712 | 2 | 12 | 24 | AC   | 28 | 16 |
| 228213 | 31 | 11682861 | 11682882 | 2 | 11 | 22 | CA   | 11 | 4  |
| 228218 | 31 | 11689873 | 11689892 | 4 | 5  | 20 | TTTA | 18 | 10 |
| 228222 | 31 | 11702286 | 11702313 | 2 | 14 | 28 | CA   | 20 | 7  |
| 228226 | 31 | 11705175 | 11705190 | 2 | 8  | 16 | TG   | 18 | 8  |
| 228233 | 31 | 11716939 | 11716958 | 4 | 5  | 20 | AATA | 20 | 3  |
| 228236 | 31 | 11738289 | 11738302 | 2 | 7  | 14 | TA   | 20 | 5  |
| 228237 | 31 | 11738864 | 11738899 | 2 | 18 | 36 | AC   | 15 | 14 |
| 228238 | 31 | 11740527 | 11740544 | 2 | 9  | 18 | TG   | 18 | 8  |
| 228239 | 31 | 11743024 | 11743071 | 4 | 12 | 48 | TATC | 13 | 12 |
| 228245 | 31 | 11756055 | 11756080 | 2 | 13 | 26 | TG   | 11 | 6  |
| 228254 | 31 | 11763005 | 11763020 | 2 | 8  | 16 | GT   | 19 | 6  |
| 228257 | 31 | 11765355 | 11765370 | 2 | 8  | 16 | AC   | 12 | 5  |
| 228263 | 31 | 11775938 | 11775965 | 2 | 14 | 28 | TG   | 14 | 7  |
| 228265 | 31 | 11780064 | 11780081 | 2 | 9  | 18 | AC   | 17 | 3  |
| 228266 | 31 | 11780727 | 11780740 | 2 | 7  | 14 | GA   | 33 | 4  |
| 228273 | 31 | 11791744 | 11791773 | 2 | 15 | 30 | AC   | 12 | 8  |



|        |    |          |          |   |    |    |      |    |    |
|--------|----|----------|----------|---|----|----|------|----|----|
| 228283 | 31 | 11813988 | 11814020 | 3 | 11 | 33 | AAG  | 19 | 11 |
| 228284 | 31 | 11814069 | 11814080 | 2 | 6  | 12 | CA   | 21 | 4  |
| 228285 | 31 | 11814970 | 11814991 | 2 | 11 | 22 | AC   | 19 | 10 |
| 228287 | 31 | 11819308 | 11819341 | 2 | 17 | 34 | AC   | 20 | 11 |
| 228291 | 31 | 11822402 | 11822443 | 2 | 21 | 42 | TG   | 24 | 9  |
| 228292 | 31 | 11822585 | 11822598 | 2 | 7  | 14 | AC   | 27 | 7  |
| 228293 | 31 | 11822600 | 11822613 | 2 | 7  | 14 | CA   | 31 | 7  |
| 228300 | 31 | 11830353 | 11830366 | 2 | 7  | 14 | GT   | 15 | 3  |
| 228301 | 31 | 11830368 | 11830379 | 2 | 6  | 12 | TG   | 8  | 3  |
| 228302 | 31 | 11830649 | 11830660 | 2 | 6  | 12 | TG   | 26 | 4  |
| 228305 | 31 | 11842342 | 11842353 | 2 | 6  | 12 | CA   | 30 | 6  |
| 228306 | 31 | 11853524 | 11853539 | 2 | 8  | 16 | CA   | 7  | 6  |
| 228309 | 31 | 11861336 | 11861359 | 2 | 12 | 24 | AC   | 12 | 10 |
| 228313 | 31 | 11867386 | 11867406 | 3 | 7  | 21 | CAG  | 25 | 3  |
| 228314 | 31 | 11867466 | 11867485 | 2 | 10 | 20 | GT   | 20 | 4  |
| 228327 | 31 | 11903064 | 11903081 | 2 | 9  | 18 | TG   | 19 | 4  |
| 228329 | 31 | 11915459 | 11915473 | 3 | 5  | 15 | TTA  | 28 | 5  |
| 228330 | 31 | 11918781 | 11918792 | 2 | 6  | 12 | TG   | 15 | 3  |
| 228336 | 31 | 11947958 | 11947991 | 2 | 17 | 34 | GT   | 9  | 10 |
| 228339 | 31 | 11953251 | 11953266 | 4 | 4  | 16 | AAAT | 21 | 3  |
| 228340 | 31 | 11953624 | 11953637 | 2 | 7  | 14 | AG   | 18 | 4  |
| 228343 | 31 | 11955944 | 11955957 | 2 | 7  | 14 | GT   | 21 | 4  |
| 228344 | 31 | 11961763 | 11961790 | 4 | 7  | 28 | TCCA | 22 | 13 |
| 228345 | 31 | 11962200 | 11962221 | 2 | 11 | 22 | GT   | 17 | 10 |
| 228347 | 31 | 11962891 | 11962902 | 2 | 6  | 12 | GT   | 27 | 3  |
| 228348 | 31 | 11963241 | 11963252 | 2 | 6  | 12 | GT   | 33 | 3  |
| 228349 | 31 | 11963254 | 11963265 | 2 | 6  | 12 | TG   | 7  | 4  |
| 228352 | 31 | 11964345 | 11964370 | 2 | 13 | 26 | GT   | 13 | 9  |
| 228355 | 31 | 11964724 | 11964741 | 2 | 9  | 18 | TG   | 13 | 8  |
| 228357 | 31 | 11965728 | 11965747 | 4 | 5  | 20 | AAGA | 25 | 9  |
| 228358 | 31 | 11965879 | 11965894 | 2 | 8  | 16 | CT   | 25 | 4  |
| 228359 | 31 | 11966011 | 11966034 | 2 | 12 | 24 | GA   | 14 | 9  |
| 228362 | 31 | 11966681 | 11966701 | 3 | 7  | 21 | GAG  | 25 | 12 |
| 228371 | 31 | 11973955 | 11973968 | 2 | 7  | 14 | CA   | 31 | 3  |
| 228392 | 31 | 11987693 | 11987722 | 3 | 10 | 30 | CTC  | 19 | 6  |
| 228394 | 31 | 11990047 | 11990073 | 3 | 9  | 27 | CCT  | 21 | 5  |
| 228400 | 31 | 12000192 | 12000213 | 2 | 11 | 22 | GT   | 20 | 12 |
| 228401 | 31 | 12001611 | 12001626 | 2 | 8  | 16 | CA   | 17 | 5  |
| 228403 | 31 | 12001831 | 12001848 | 2 | 9  | 18 | TC   | 17 | 3  |
| 228404 | 31 | 12001880 | 12001901 | 2 | 11 | 22 | CA   | 16 | 4  |
| 228408 | 31 | 12017820 | 12017833 | 2 | 7  | 14 | GT   | 21 | 5  |
| 228420 | 31 | 12026004 | 12026023 | 2 | 10 | 20 | GT   | 8  | 8  |
| 228427 | 31 | 12032247 | 12032274 | 2 | 14 | 28 | CA   | 19 | 12 |
| 228428 | 31 | 12034170 | 12034207 | 2 | 19 | 38 | CA   | 10 | 10 |
| 228432 | 31 | 12052755 | 12052768 | 2 | 7  | 14 | AC   | 12 | 5  |
| 228436 | 31 | 12057958 | 12057971 | 2 | 7  | 14 | CA   | 35 | 4  |
| 228442 | 31 | 12070525 | 12070542 | 2 | 9  | 18 | TG   | 21 | 13 |
| 228443 | 31 | 12082864 | 12082875 | 2 | 6  | 12 | TG   | 25 | 3  |
| 228448 | 31 | 12098255 | 12098266 | 2 | 6  | 12 | TG   | 19 | 8  |
| 228451 | 31 | 12100996 | 12101013 | 2 | 9  | 18 | TG   | 22 | 3  |
| 228454 | 31 | 12114955 | 12114984 | 2 | 15 | 30 | GT   | 8  | 7  |

|        |    |          |          |   |    |    |      |    |    |
|--------|----|----------|----------|---|----|----|------|----|----|
| 228457 | 31 | 12119586 | 12119603 | 3 | 6  | 18 | GAG  | 20 | 3  |
| 228461 | 31 | 12123222 | 12123241 | 2 | 10 | 20 | TG   | 11 | 10 |
| 228462 | 31 | 12123795 | 12123820 | 2 | 13 | 26 | GT   | 8  | 9  |
| 228463 | 31 | 12124150 | 12124161 | 2 | 6  | 12 | GT   | 22 | 4  |
| 228466 | 31 | 12130787 | 12130813 | 3 | 9  | 27 | TGA  | 9  | 3  |
| 228467 | 31 | 12130986 | 12131006 | 3 | 7  | 21 | TCC  | 26 | 3  |
| 228468 | 31 | 12131422 | 12131449 | 2 | 14 | 28 | CA   | 16 | 8  |
| 228469 | 31 | 12131637 | 12131666 | 2 | 15 | 30 | GT   | 15 | 10 |
| 228470 | 31 | 12134792 | 12134811 | 4 | 5  | 20 | ACAA | 19 | 5  |
| 228474 | 31 | 12137073 | 12137090 | 2 | 9  | 18 | AC   | 12 | 8  |
| 228477 | 31 | 12145492 | 12145505 | 2 | 7  | 14 | GT   | 16 | 3  |
| 228480 | 31 | 12148730 | 12148747 | 2 | 9  | 18 | AC   | 21 | 7  |
| 228490 | 31 | 12177576 | 12177589 | 2 | 7  | 14 | TG   | 22 | 5  |
| 228491 | 31 | 12181345 | 12181364 | 4 | 5  | 20 | ACAA | 23 | 4  |
| 228493 | 31 | 12183090 | 12183115 | 2 | 13 | 26 | CA   | 15 | 11 |
| 228497 | 31 | 12185165 | 12185186 | 2 | 11 | 22 | CA   | 9  | 9  |
| 228499 | 31 | 12191999 | 12192014 | 2 | 8  | 16 | TG   | 24 | 12 |
| 228500 | 31 | 12201567 | 12201586 | 2 | 10 | 20 | AC   | 21 | 8  |
| 228502 | 31 | 12203957 | 12203984 | 2 | 14 | 28 | TC   | 11 | 7  |
| 228507 | 31 | 12218877 | 12218894 | 3 | 6  | 18 | CCA  | 22 | 11 |
| 228508 | 31 | 12219220 | 12219239 | 2 | 10 | 20 | CA   | 21 | 12 |
| 228509 | 31 | 12219369 | 12219383 | 3 | 5  | 15 | CCT  | 15 | 5  |
| 228510 | 31 | 12219871 | 12219891 | 3 | 7  | 21 | CAG  | 20 | 16 |
| 228514 | 31 | 12223846 | 12223863 | 2 | 9  | 18 | GT   | 20 | 6  |
| 228515 | 31 | 12225266 | 12225280 | 3 | 5  | 15 | GAG  | 33 | 3  |
| 228516 | 31 | 12225344 | 12225355 | 2 | 6  | 12 | GT   | 24 | 5  |
| 228519 | 31 | 12226531 | 12226542 | 2 | 6  | 12 | GT   | 32 | 4  |
| 228520 | 31 | 12226620 | 12226633 | 2 | 7  | 14 | GT   | 26 | 5  |
| 228521 | 31 | 12232853 | 12232876 | 2 | 12 | 24 | CA   | 14 | 5  |
| 228525 | 31 | 12237845 | 12237862 | 2 | 9  | 18 | CA   | 20 | 14 |
| 228528 | 31 | 12242208 | 12242227 | 2 | 10 | 20 | TG   | 22 | 6  |
| 228533 | 31 | 12256540 | 12256551 | 2 | 6  | 12 | GT   | 24 | 5  |
| 228534 | 31 | 12258639 | 12258656 | 3 | 6  | 18 | AGC  | 23 | 8  |
| 228537 | 31 | 12260013 | 12260036 | 2 | 12 | 24 | TG   | 11 | 6  |
| 228538 | 31 | 12262123 | 12262136 | 2 | 7  | 14 | GT   | 19 | 6  |
| 228539 | 31 | 12262137 | 12262150 | 2 | 7  | 14 | AT   | 19 | 7  |
| 228544 | 31 | 12268143 | 12268154 | 2 | 6  | 12 | TC   | 11 | 4  |
| 228546 | 31 | 12270668 | 12270679 | 2 | 6  | 12 | GT   | 29 | 3  |
| 228551 | 31 | 12286150 | 12286169 | 2 | 10 | 20 | TG   | 16 | 10 |
| 228554 | 31 | 12290254 | 12290269 | 2 | 8  | 16 | TG   | 19 | 4  |
| 228555 | 31 | 12291288 | 12291307 | 2 | 10 | 20 | CA   | 21 | 8  |
| 228556 | 31 | 12291495 | 12291516 | 2 | 11 | 22 | TG   | 22 | 5  |
| 228558 | 31 | 12292362 | 12292381 | 2 | 10 | 20 | TG   | 8  | 5  |
| 228559 | 31 | 12294207 | 12294222 | 2 | 8  | 16 | TG   | 21 | 6  |
| 228560 | 31 | 12294433 | 12294460 | 2 | 14 | 28 | AC   | 20 | 13 |
| 228563 | 31 | 12295696 | 12295715 | 2 | 10 | 20 | TG   | 18 | 5  |
| 228564 | 31 | 12296142 | 12296157 | 2 | 8  | 16 | GT   | 20 | 9  |
| 228566 | 31 | 12300096 | 12300135 | 2 | 20 | 40 | CA   | 6  | 9  |
| 228567 | 31 | 12300303 | 12300328 | 2 | 13 | 26 | TG   | 14 | 10 |
| 228569 | 31 | 12300515 | 12300526 | 2 | 6  | 12 | TG   | 26 | 3  |
| 228573 | 31 | 12303591 | 12303622 | 2 | 16 | 32 | TG   | 11 | 12 |

|        |    |          |          |   |    |    |      |    |    |
|--------|----|----------|----------|---|----|----|------|----|----|
| 228576 | 31 | 12306659 | 12306670 | 2 | 6  | 12 | GT   | 27 | 3  |
| 228577 | 31 | 12309874 | 12309887 | 2 | 7  | 14 | GT   | 27 | 4  |
| 228578 | 31 | 12311857 | 12311870 | 2 | 7  | 14 | AC   | 19 | 3  |
| 228579 | 31 | 12311872 | 12311887 | 2 | 8  | 16 | CA   | 20 | 4  |
| 228584 | 31 | 12314805 | 12314820 | 2 | 8  | 16 | CT   | 31 | 4  |
| 228586 | 31 | 12314973 | 12314984 | 2 | 6  | 12 | TG   | 12 | 5  |
| 228587 | 31 | 12316551 | 12316576 | 2 | 13 | 26 | CA   | 12 | 8  |
| 228588 | 31 | 12316803 | 12316854 | 2 | 26 | 52 | TG   | 10 | 9  |
| 228590 | 31 | 12317232 | 12317251 | 4 | 5  | 20 | ATTT | 25 | 3  |
| 228601 | 31 | 12334484 | 12334517 | 2 | 17 | 34 | AC   | 7  | 8  |
| 228603 | 31 | 12334988 | 12335013 | 2 | 13 | 26 | TC   | 10 | 12 |
| 228605 | 31 | 12336979 | 12337017 | 3 | 13 | 39 | TCT  | 26 | 14 |
| 228606 | 31 | 12337167 | 12337188 | 2 | 11 | 22 | CA   | 16 | 12 |
| 228607 | 31 | 12338851 | 12338880 | 2 | 15 | 30 | CA   | 9  | 6  |
| 228610 | 31 | 12340005 | 12340030 | 2 | 13 | 26 | TG   | 20 | 7  |
| 228613 | 31 | 12340516 | 12340535 | 2 | 10 | 20 | GA   | 17 | 4  |
| 228616 | 31 | 12340904 | 12340937 | 2 | 17 | 34 | GT   | 11 | 10 |
| 228619 | 31 | 12341291 | 12341312 | 2 | 11 | 22 | TG   | 7  | 6  |
| 228625 | 31 | 12342667 | 12342682 | 2 | 8  | 16 | CA   | 28 | 4  |
| 228626 | 31 | 12342817 | 12342834 | 2 | 9  | 18 | AC   | 17 | 9  |
| 228629 | 31 | 12347656 | 12347679 | 2 | 12 | 24 | TG   | 11 | 9  |
| 228630 | 31 | 12347880 | 12347913 | 2 | 17 | 34 | CA   | 6  | 6  |
| 228633 | 31 | 12351558 | 12351579 | 2 | 11 | 22 | GT   | 27 | 7  |
| 228635 | 31 | 12356074 | 12356091 | 2 | 9  | 18 | GT   | 24 | 4  |
| 228636 | 31 | 12356994 | 12357025 | 2 | 16 | 32 | CA   | 14 | 7  |
| 228637 | 31 | 12357339 | 12357366 | 2 | 14 | 28 | GT   | 15 | 12 |
| 228640 | 31 | 12359565 | 12359579 | 3 | 5  | 15 | TTG  | 22 | 3  |
| 228641 | 31 | 12361411 | 12361440 | 2 | 15 | 30 | TG   | 11 | 13 |
| 228645 | 31 | 12363547 | 12363566 | 2 | 10 | 20 | CT   | 13 | 8  |
| 228646 | 31 | 12363884 | 12363916 | 3 | 11 | 33 | TTC  | 16 | 14 |
| 228647 | 31 | 12364045 | 12364066 | 2 | 11 | 22 | GT   | 12 | 8  |
| 228648 | 31 | 12364199 | 12364210 | 2 | 6  | 12 | TG   | 30 | 5  |
| 228649 | 31 | 12364250 | 12364267 | 2 | 9  | 18 | AC   | 19 | 10 |
| 228658 | 31 | 12379256 | 12379275 | 2 | 10 | 20 | AC   | 13 | 11 |
| 228660 | 31 | 12381722 | 12381739 | 2 | 9  | 18 | TG   | 18 | 4  |
| 228663 | 31 | 12384171 | 12384190 | 2 | 10 | 20 | GT   | 18 | 9  |
| 228664 | 31 | 12384378 | 12384393 | 2 | 8  | 16 | CA   | 17 | 3  |
| 228665 | 31 | 12385327 | 12385354 | 2 | 14 | 28 | AC   | 21 | 9  |
| 228669 | 31 | 12389241 | 12389260 | 2 | 10 | 20 | TG   | 10 | 8  |
| 228670 | 31 | 12389411 | 12389462 | 2 | 26 | 52 | AC   | 6  | 4  |
| 228671 | 31 | 12400158 | 12400175 | 3 | 6  | 18 | TGC  | 15 | 6  |
| 228673 | 31 | 12400244 | 12400261 | 3 | 6  | 18 | CTG  | 19 | 4  |
| 228674 | 31 | 12400563 | 12400577 | 3 | 5  | 15 | TGC  | 28 | 9  |
| 228675 | 31 | 12400580 | 12400597 | 3 | 6  | 18 | CTG  | 29 | 10 |
| 228681 | 31 | 12423234 | 12423254 | 3 | 7  | 21 | GCT  | 30 | 3  |
| 228682 | 31 | 12423378 | 12423389 | 2 | 6  | 12 | GT   | 22 | 9  |
| 228684 | 31 | 12426070 | 12426084 | 3 | 5  | 15 | TGC  | 34 | 3  |
| 228686 | 31 | 12433725 | 12433739 | 3 | 5  | 15 | TTG  | 23 | 3  |
| 228694 | 31 | 12457652 | 12457667 | 2 | 8  | 16 | CA   | 23 | 5  |
| 228695 | 31 | 12461795 | 12461816 | 2 | 11 | 22 | CA   | 19 | 10 |
| 228698 | 31 | 12472282 | 12472305 | 3 | 8  | 24 | AGC  | 32 | 5  |

|        |    |          |          |   |    |    |      |    |    |
|--------|----|----------|----------|---|----|----|------|----|----|
| 228702 | 31 | 12485167 | 12485199 | 3 | 11 | 33 | TCT  | 21 | 7  |
| 228704 | 31 | 12490943 | 12490964 | 2 | 11 | 22 | TG   | 7  | 3  |
| 228705 | 31 | 12491089 | 12491116 | 2 | 14 | 28 | AC   | 20 | 9  |
| 228712 | 31 | 12510478 | 12510501 | 2 | 12 | 24 | TC   | 18 | 6  |
| 228715 | 31 | 12515511 | 12515528 | 3 | 6  | 18 | AAC  | 23 | 3  |
| 228718 | 31 | 12518399 | 12518422 | 4 | 6  | 24 | AACA | 22 | 4  |
| 228725 | 31 | 12529277 | 12529290 | 2 | 7  | 14 | CA   | 19 | 7  |
| 228727 | 31 | 12534642 | 12534661 | 4 | 5  | 20 | CTGT | 16 | 5  |
| 228741 | 31 | 12611153 | 12611170 | 3 | 6  | 18 | ATT  | 17 | 13 |
| 228750 | 31 | 12631389 | 12631416 | 2 | 14 | 28 | CA   | 10 | 6  |
| 228754 | 31 | 12640354 | 12640371 | 2 | 9  | 18 | TC   | 20 | 6  |
| 228760 | 31 | 12670934 | 12670949 | 2 | 8  | 16 | GT   | 22 | 4  |
| 228771 | 31 | 12714073 | 12714096 | 2 | 12 | 24 | GT   | 16 | 14 |
| 228774 | 31 | 12717896 | 12717915 | 4 | 5  | 20 | AAAC | 18 | 5  |
| 228778 | 31 | 12718880 | 12718915 | 3 | 12 | 36 | TCT  | 18 | 9  |
| 228780 | 31 | 12723125 | 12723140 | 2 | 8  | 16 | AC   | 18 | 3  |
| 228781 | 31 | 12723894 | 12723929 | 2 | 18 | 36 | CA   | 10 | 10 |
| 228786 | 31 | 12732174 | 12732191 | 2 | 9  | 18 | TC   | 17 | 8  |
| 228787 | 31 | 12732600 | 12732625 | 2 | 13 | 26 | TG   | 13 | 9  |
| 228797 | 31 | 12740948 | 12740959 | 2 | 6  | 12 | GA   | 14 | 7  |
| 228817 | 31 | 12774749 | 12774768 | 2 | 10 | 20 | AC   | 21 | 10 |
| 228818 | 31 | 12789525 | 12789539 | 3 | 5  | 15 | GCA  | 29 | 3  |
| 228821 | 31 | 12795881 | 12795904 | 4 | 6  | 24 | TGAC | 17 | 3  |
| 228823 | 31 | 12796516 | 12796549 | 2 | 17 | 34 | AG   | 6  | 8  |
| 228825 | 31 | 12798297 | 12798320 | 2 | 12 | 24 | AC   | 10 | 8  |
| 228833 | 31 | 12809882 | 12809902 | 3 | 7  | 21 | CAG  | 25 | 7  |
| 228834 | 31 | 12810556 | 12810571 | 2 | 8  | 16 | AC   | 14 | 5  |
| 228836 | 31 | 12812731 | 12812756 | 2 | 13 | 26 | TG   | 20 | 11 |
| 228837 | 31 | 12812865 | 12812878 | 2 | 7  | 14 | TC   | 33 | 4  |
| 228844 | 31 | 12821663 | 12821684 | 2 | 11 | 22 | GA   | 14 | 6  |
| 228846 | 31 | 12822621 | 12822632 | 2 | 6  | 12 | AC   | 13 | 4  |
| 228847 | 31 | 12822704 | 12822715 | 2 | 6  | 12 | CA   | 8  | 5  |
| 228850 | 31 | 12826851 | 12826876 | 2 | 13 | 26 | GT   | 14 | 9  |
| 228855 | 31 | 12829794 | 12829821 | 2 | 14 | 28 | GT   | 18 | 14 |
| 228877 | 31 | 12865217 | 12865256 | 2 | 20 | 40 | GT   | 13 | 10 |
| 228878 | 31 | 12865423 | 12865436 | 2 | 7  | 14 | AC   | 25 | 3  |
| 228882 | 31 | 12871583 | 12871600 | 2 | 9  | 18 | TC   | 22 | 4  |
| 228889 | 31 | 12887925 | 12887942 | 2 | 9  | 18 | GT   | 14 | 7  |
| 228890 | 31 | 12888676 | 12888695 | 2 | 10 | 20 | CT   | 25 | 5  |
| 228894 | 31 | 12897710 | 12897721 | 2 | 6  | 12 | CA   | 31 | 3  |
| 228896 | 31 | 12897875 | 12897886 | 2 | 6  | 12 | GT   | 23 | 6  |
| 228898 | 31 | 12899088 | 12899135 | 2 | 24 | 48 | CA   | 15 | 11 |
| 228901 | 31 | 12911990 | 12912015 | 2 | 13 | 26 | GT   | 16 | 11 |
| 228902 | 31 | 12915105 | 12915116 | 2 | 6  | 12 | AC   | 25 | 3  |
| 228908 | 31 | 12921136 | 12921161 | 2 | 13 | 26 | GT   | 18 | 9  |
| 228909 | 31 | 12922768 | 12922781 | 2 | 7  | 14 | AC   | 21 | 6  |
| 228910 | 31 | 12922782 | 12922797 | 2 | 8  | 16 | CA   | 19 | 5  |
| 228914 | 31 | 12935419 | 12935430 | 2 | 6  | 12 | GT   | 19 | 3  |
| 228916 | 31 | 12939580 | 12939603 | 2 | 12 | 24 | TG   | 16 | 6  |
| 228917 | 31 | 12941771 | 12941782 | 2 | 6  | 12 | GT   | 28 | 3  |
| 228918 | 31 | 12941829 | 12941840 | 2 | 6  | 12 | GT   | 24 | 7  |

|        |    |          |          |   |    |    |      |    |    |
|--------|----|----------|----------|---|----|----|------|----|----|
| 228921 | 31 | 12947891 | 12947906 | 2 | 8  | 16 | TG   | 21 | 8  |
| 228929 | 31 | 12956574 | 12956585 | 2 | 6  | 12 | GT   | 31 | 3  |
| 228932 | 31 | 12960537 | 12960548 | 2 | 6  | 12 | TG   | 15 | 4  |
| 228933 | 31 | 12961925 | 12961944 | 2 | 10 | 20 | TG   | 18 | 4  |
| 228943 | 31 | 13004392 | 13004413 | 2 | 11 | 22 | AC   | 19 | 3  |
| 228944 | 31 | 13005143 | 13005156 | 2 | 7  | 14 | CT   | 27 | 4  |
| 228946 | 31 | 13029823 | 13029846 | 3 | 8  | 24 | CCT  | 24 | 5  |
| 228948 | 31 | 13033406 | 13033423 | 3 | 6  | 18 | AGA  | 21 | 4  |
| 228951 | 31 | 13037143 | 13037156 | 2 | 7  | 14 | TG   | 10 | 4  |
| 228952 | 31 | 13037159 | 13037176 | 2 | 9  | 18 | TG   | 12 | 4  |
| 228956 | 31 | 13040785 | 13040802 | 2 | 9  | 18 | TG   | 30 | 4  |
| 228960 | 31 | 13043122 | 13043151 | 2 | 15 | 30 | GT   | 19 | 9  |
| 228963 | 31 | 13049302 | 13049333 | 4 | 8  | 32 | CAGT | 21 | 10 |
| 228970 | 31 | 13078577 | 13078596 | 2 | 10 | 20 | TG   | 16 | 7  |
| 228971 | 31 | 13078729 | 13078746 | 2 | 9  | 18 | AG   | 29 | 6  |
| 228972 | 31 | 13080088 | 13080137 | 2 | 25 | 50 | GT   | 10 | 15 |
| 228979 | 31 | 13086820 | 13086837 | 2 | 9  | 18 | CA   | 12 | 4  |
| 228982 | 31 | 13088584 | 13088595 | 2 | 6  | 12 | AT   | 10 | 3  |
| 228996 | 31 | 13154351 | 13154366 | 2 | 8  | 16 | AC   | 28 | 4  |
| 228998 | 31 | 13164396 | 13164433 | 2 | 19 | 38 | TG   | 12 | 10 |
| 229005 | 31 | 13174650 | 13174661 | 2 | 6  | 12 | CA   | 24 | 3  |
| 229009 | 31 | 13193332 | 13193343 | 2 | 6  | 12 | AT   | 12 | 3  |
| 229010 | 31 | 13194715 | 13194730 | 2 | 8  | 16 | AC   | 19 | 3  |
| 229020 | 31 | 13209237 | 13209256 | 4 | 5  | 20 | TCCA | 26 | 3  |
| 229022 | 31 | 13211600 | 13211614 | 3 | 5  | 15 | ATC  | 29 | 3  |
| 229023 | 31 | 13216759 | 13216772 | 2 | 7  | 14 | TA   | 19 | 4  |
| 229029 | 31 | 13224442 | 13224459 | 2 | 9  | 18 | TG   | 13 | 8  |
| 229032 | 31 | 13233397 | 13233422 | 2 | 13 | 26 | GT   | 8  | 6  |
| 229039 | 31 | 13239285 | 13239317 | 3 | 11 | 33 | TTG  | 19 | 7  |
| 229044 | 31 | 13267643 | 13267664 | 2 | 11 | 22 | AC   | 6  | 4  |
| 229059 | 31 | 13319854 | 13319869 | 2 | 8  | 16 | AC   | 22 | 6  |
| 229061 | 31 | 13321891 | 13321904 | 2 | 7  | 14 | TG   | 26 | 3  |
| 229062 | 31 | 13324615 | 13324626 | 2 | 6  | 12 | AT   | 7  | 6  |
| 229078 | 31 | 13363697 | 13363708 | 2 | 6  | 12 | AC   | 27 | 3  |
| 229080 | 31 | 13364096 | 13364123 | 2 | 14 | 28 | AC   | 12 | 7  |
| 229081 | 31 | 13364221 | 13364236 | 2 | 8  | 16 | GT   | 33 | 8  |
| 229082 | 31 | 13364454 | 13364475 | 2 | 11 | 22 | GT   | 16 | 6  |
| 229086 | 31 | 13373154 | 13373177 | 2 | 12 | 24 | AC   | 13 | 4  |
| 229087 | 31 | 13375734 | 13375748 | 3 | 5  | 15 | CTG  | 28 | 5  |
| 229090 | 31 | 13376815 | 13376844 | 2 | 15 | 30 | TG   | 12 | 9  |
| 229092 | 31 | 13376978 | 13377025 | 2 | 24 | 48 | CA   | 8  | 12 |
| 229094 | 31 | 13381770 | 13381815 | 2 | 23 | 46 | TG   | 11 | 12 |
| 229120 | 31 | 13404594 | 13404614 | 3 | 7  | 21 | GCT  | 28 | 7  |
| 229131 | 31 | 13418970 | 13418999 | 2 | 15 | 30 | AG   | 13 | 8  |
| 229143 | 31 | 13440136 | 13440159 | 4 | 6  | 24 | TGGA | 31 | 5  |
| 229145 | 31 | 13440483 | 13440506 | 2 | 12 | 24 | CA   | 17 | 9  |
| 229146 | 31 | 13440722 | 13440751 | 2 | 15 | 30 | TG   | 21 | 15 |
| 229149 | 31 | 13445449 | 13445460 | 2 | 6  | 12 | AG   | 19 | 3  |
| 229153 | 31 | 13464690 | 13464743 | 2 | 27 | 54 | TG   | 6  | 4  |
| 229155 | 31 | 13466027 | 13466041 | 3 | 5  | 15 | TCC  | 26 | 5  |
| 229158 | 31 | 13470922 | 13470947 | 2 | 13 | 26 | TG   | 23 | 6  |

|        |    |          |          |   |    |    |      |    |    |
|--------|----|----------|----------|---|----|----|------|----|----|
| 229167 | 31 | 13483483 | 13483500 | 2 | 9  | 18 | AC   | 17 | 5  |
| 229169 | 31 | 13487918 | 13487950 | 3 | 11 | 33 | GCT  | 20 | 10 |
| 229171 | 31 | 13489619 | 13489634 | 2 | 8  | 16 | TG   | 17 | 4  |
| 229172 | 31 | 13490577 | 13490612 | 4 | 9  | 36 | TTTC | 17 | 8  |
| 229174 | 31 | 13492471 | 13492496 | 2 | 13 | 26 | CA   | 10 | 6  |
| 229177 | 31 | 13513732 | 13513743 | 2 | 6  | 12 | GC   | 21 | 11 |
| 229178 | 31 | 13513744 | 13513761 | 2 | 9  | 18 | AC   | 22 | 12 |
| 229194 | 31 | 13547665 | 13547709 | 3 | 15 | 45 | GCA  | 28 | 13 |
| 229195 | 31 | 13551947 | 13551976 | 3 | 10 | 30 | GCT  | 24 | 6  |
| 229200 | 31 | 13555753 | 13555768 | 4 | 4  | 16 | TTGT | 20 | 4  |
| 229204 | 31 | 13563323 | 13563334 | 2 | 6  | 12 | TG   | 21 | 3  |
| 229206 | 31 | 13564114 | 13564129 | 2 | 8  | 16 | AC   | 25 | 5  |
| 229207 | 31 | 13564732 | 13564746 | 3 | 5  | 15 | ACC  | 21 | 5  |
| 229213 | 31 | 13573937 | 13573966 | 2 | 15 | 30 | TG   | 11 | 7  |
| 229216 | 31 | 13587956 | 13587969 | 2 | 7  | 14 | TC   | 19 | 4  |
| 229218 | 31 | 13589908 | 13589939 | 2 | 16 | 32 | TG   | 20 | 8  |
| 229219 | 31 | 13590088 | 13590109 | 2 | 11 | 22 | CA   | 21 | 5  |
| 229225 | 31 | 13611974 | 13611987 | 2 | 7  | 14 | CA   | 18 | 4  |
| 229230 | 31 | 13625292 | 13625309 | 2 | 9  | 18 | GT   | 25 | 3  |
| 229234 | 31 | 13630269 | 13630314 | 2 | 23 | 46 | TG   | 10 | 9  |
| 229237 | 31 | 13631002 | 13631013 | 2 | 6  | 12 | AC   | 15 | 14 |
| 229241 | 31 | 13631602 | 13631616 | 3 | 5  | 15 | CAG  | 31 | 3  |
| 229247 | 31 | 13642110 | 13642127 | 3 | 6  | 18 | GGT  | 29 | 5  |
| 229249 | 31 | 13643488 | 13643503 | 2 | 8  | 16 | CA   | 27 | 4  |
| 229258 | 31 | 13665227 | 13665242 | 4 | 4  | 16 | ATCA | 24 | 5  |
| 229260 | 31 | 13666919 | 13666939 | 3 | 7  | 21 | CCT  | 17 | 6  |
| 229261 | 31 | 13676829 | 13676843 | 3 | 5  | 15 | AGA  | 14 | 4  |
| 229262 | 31 | 13679359 | 13679376 | 3 | 6  | 18 | ACA  | 24 | 7  |
| 229283 | 31 | 13705200 | 13705220 | 3 | 7  | 21 | TTC  | 25 | 3  |
| 229284 | 31 | 13706497 | 13706516 | 2 | 10 | 20 | CA   | 18 | 9  |
| 229286 | 31 | 13717595 | 13717620 | 2 | 13 | 26 | TG   | 13 | 8  |
| 229312 | 31 | 13764584 | 13764595 | 2 | 6  | 12 | GT   | 15 | 9  |
| 229313 | 31 | 13764972 | 13764993 | 2 | 11 | 22 | TG   | 18 | 10 |
| 229320 | 31 | 13778335 | 13778362 | 4 | 7  | 28 | TAAA | 7  | 6  |
| 229326 | 31 | 13789985 | 13790002 | 2 | 9  | 18 | TG   | 16 | 5  |
| 229343 | 31 | 13837246 | 13837289 | 2 | 22 | 44 | TG   | 10 | 6  |
| 229347 | 31 | 13849505 | 13849518 | 2 | 7  | 14 | CA   | 13 | 5  |
| 229348 | 31 | 13849521 | 13849532 | 2 | 6  | 12 | CA   | 12 | 4  |
| 229351 | 31 | 13864453 | 13864470 | 2 | 9  | 18 | AC   | 7  | 5  |
| 229353 | 31 | 13864514 | 13864529 | 2 | 8  | 16 | CA   | 10 | 4  |
| 229358 | 31 | 13872701 | 13872718 | 2 | 9  | 18 | GT   | 26 | 4  |
| 229365 | 31 | 13879516 | 13879542 | 3 | 9  | 27 | CAT  | 17 | 3  |
| 229375 | 31 | 13912463 | 13912482 | 2 | 10 | 20 | CA   | 18 | 10 |
| 229376 | 31 | 13916044 | 13916061 | 2 | 9  | 18 | CA   | 8  | 6  |
| 229379 | 31 | 13920299 | 13920332 | 2 | 17 | 34 | CA   | 6  | 11 |
| 229382 | 31 | 13927505 | 13927540 | 2 | 18 | 36 | TG   | 7  | 9  |
| 229389 | 31 | 13943535 | 13943552 | 2 | 9  | 18 | TA   | 7  | 4  |
| 229398 | 31 | 13962148 | 13962185 | 2 | 19 | 38 | CA   | 8  | 8  |
| 229405 | 31 | 13973357 | 13973371 | 3 | 5  | 15 | TGT  | 26 | 5  |
| 229407 | 31 | 13983523 | 13983542 | 2 | 10 | 20 | AT   | 10 | 8  |
| 229409 | 31 | 13984674 | 13984703 | 3 | 10 | 30 | GGA  | 26 | 5  |

|        |    |          |          |   |    |    |      |    |    |
|--------|----|----------|----------|---|----|----|------|----|----|
| 229410 | 31 | 13985112 | 13985126 | 3 | 5  | 15 | CTC  | 17 | 3  |
| 229411 | 31 | 13985261 | 13985284 | 2 | 12 | 24 | CA   | 14 | 10 |
| 229416 | 31 | 14006292 | 14006311 | 2 | 10 | 20 | CA   | 20 | 13 |
| 229417 | 31 | 14007447 | 14007482 | 2 | 18 | 36 | AC   | 15 | 12 |
| 229432 | 31 | 14034713 | 14034730 | 2 | 9  | 18 | GT   | 26 | 6  |
| 229461 | 31 | 14174011 | 14174028 | 2 | 9  | 18 | CA   | 9  | 11 |
| 229466 | 31 | 14193769 | 14193784 | 4 | 4  | 16 | TTGA | 32 | 4  |
| 229471 | 31 | 14204792 | 14204809 | 3 | 6  | 18 | GAT  | 28 | 3  |
| 229472 | 31 | 14211635 | 14211670 | 2 | 18 | 36 | CA   | 9  | 8  |
| 229473 | 31 | 14211793 | 14211818 | 2 | 13 | 26 | TG   | 24 | 6  |
| 229481 | 31 | 14225949 | 14225968 | 2 | 10 | 20 | AC   | 20 | 9  |
| 229483 | 31 | 14228539 | 14228578 | 2 | 20 | 40 | GT   | 15 | 10 |
| 229486 | 31 | 14232412 | 14232457 | 2 | 23 | 46 | TG   | 14 | 13 |
| 229493 | 31 | 14234599 | 14234625 | 3 | 9  | 27 | AAG  | 14 | 8  |
| 229494 | 31 | 14235386 | 14235400 | 3 | 5  | 15 | GGA  | 14 | 3  |
| 229499 | 31 | 14237731 | 14237748 | 3 | 6  | 18 | CTG  | 25 | 3  |
| 229507 | 31 | 14242959 | 14242978 | 2 | 10 | 20 | TG   | 19 | 18 |
| 229509 | 31 | 14243225 | 14243242 | 2 | 9  | 18 | GT   | 19 | 8  |
| 229513 | 31 | 14247078 | 14247092 | 3 | 5  | 15 | TCC  | 24 | 4  |
| 229514 | 31 | 14247381 | 14247404 | 3 | 8  | 24 | CCT  | 19 | 5  |
| 229515 | 31 | 14247594 | 14247626 | 3 | 11 | 33 | AGA  | 18 | 7  |
| 229517 | 31 | 14248544 | 14248567 | 3 | 8  | 24 | GGA  | 23 | 9  |
| 229518 | 31 | 14252049 | 14252060 | 2 | 6  | 12 | GA   | 16 | 8  |
| 229520 | 31 | 14253225 | 14253239 | 3 | 5  | 15 | GAT  | 15 | 5  |
| 229526 | 31 | 14267768 | 14267785 | 2 | 9  | 18 | CA   | 10 | 3  |
| 229538 | 31 | 14292216 | 14292249 | 2 | 17 | 34 | CA   | 9  | 9  |
| 229539 | 31 | 14294573 | 14294586 | 2 | 7  | 14 | CA   | 26 | 4  |
| 229540 | 31 | 14296322 | 14296339 | 2 | 9  | 18 | AC   | 27 | 10 |
| 229542 | 31 | 14296508 | 14296527 | 2 | 10 | 20 | AC   | 13 | 5  |
| 229543 | 31 | 14297628 | 14297639 | 2 | 6  | 12 | TA   | 16 | 3  |
| 229544 | 31 | 14299961 | 14299988 | 2 | 14 | 28 | AC   | 12 | 7  |
| 229546 | 31 | 14301962 | 14301997 | 2 | 18 | 36 | GA   | 6  | 8  |
| 229547 | 31 | 14305111 | 14305122 | 2 | 6  | 12 | CT   | 15 | 5  |
| 229548 | 31 | 14307449 | 14307478 | 2 | 15 | 30 | CA   | 16 | 8  |
| 229550 | 31 | 14310484 | 14310497 | 2 | 7  | 14 | CA   | 17 | 7  |
| 229553 | 31 | 14316843 | 14316878 | 2 | 18 | 36 | CA   | 13 | 9  |
| 229559 | 31 | 14330071 | 14330082 | 2 | 6  | 12 | CA   | 26 | 3  |
| 229560 | 31 | 14331003 | 14331014 | 2 | 6  | 12 | AC   | 30 | 3  |
| 229567 | 31 | 14383641 | 14383656 | 4 | 4  | 16 | AAAC | 16 | 4  |
| 229573 | 31 | 14408220 | 14408243 | 2 | 12 | 24 | GT   | 11 | 7  |
| 229578 | 31 | 14440796 | 14440825 | 2 | 15 | 30 | GT   | 23 | 8  |
| 229579 | 31 | 14441019 | 14441033 | 3 | 5  | 15 | CAC  | 30 | 3  |
| 229583 | 31 | 14452197 | 14452208 | 2 | 6  | 12 | AT   | 13 | 3  |
| 229584 | 31 | 14453432 | 14453445 | 2 | 7  | 14 | AT   | 18 | 14 |
| 229585 | 31 | 14453743 | 14453768 | 2 | 13 | 26 | GT   | 24 | 13 |
| 229609 | 31 | 14546723 | 14546736 | 2 | 7  | 14 | AG   | 31 | 3  |
| 229611 | 31 | 14550279 | 14550294 | 2 | 8  | 16 | CA   | 9  | 8  |
| 229615 | 31 | 14559253 | 14559280 | 2 | 14 | 28 | CA   | 8  | 7  |
| 229617 | 31 | 14560174 | 14560187 | 2 | 7  | 14 | AT   | 10 | 4  |
| 229619 | 31 | 14566727 | 14566740 | 2 | 7  | 14 | GT   | 28 | 6  |
| 229620 | 31 | 14566948 | 14566967 | 2 | 10 | 20 | GT   | 21 | 11 |

|        |    |          |          |   |    |    |      |    |    |
|--------|----|----------|----------|---|----|----|------|----|----|
| 229621 | 31 | 14574134 | 14574149 | 2 | 8  | 16 | TG   | 14 | 3  |
| 229637 | 31 | 14608547 | 14608561 | 3 | 5  | 15 | GCA  | 23 | 3  |
| 229638 | 31 | 14608681 | 14608694 | 2 | 7  | 14 | CA   | 18 | 10 |
| 229640 | 31 | 14609366 | 14609387 | 2 | 11 | 22 | CA   | 13 | 10 |
| 229641 | 31 | 14609819 | 14609833 | 3 | 5  | 15 | TTG  | 20 | 4  |
| 229642 | 31 | 14610049 | 14610066 | 2 | 9  | 18 | GT   | 17 | 10 |
| 229643 | 31 | 14610198 | 14610217 | 2 | 10 | 20 | CA   | 12 | 5  |
| 229644 | 31 | 14610302 | 14610319 | 3 | 6  | 18 | GAA  | 27 | 9  |
| 229646 | 31 | 14610724 | 14610771 | 4 | 12 | 48 | TATC | 13 | 12 |
| 229652 | 31 | 14621860 | 14621895 | 2 | 18 | 36 | GT   | 18 | 11 |
| 229658 | 31 | 14634175 | 14634200 | 2 | 13 | 26 | AC   | 18 | 12 |
| 229659 | 31 | 14634493 | 14634516 | 2 | 12 | 24 | TG   | 16 | 4  |
| 229660 | 31 | 14634915 | 14634930 | 2 | 8  | 16 | CT   | 13 | 8  |
| 229662 | 31 | 14640805 | 14640820 | 2 | 8  | 16 | GT   | 23 | 4  |
| 229664 | 31 | 14642422 | 14642445 | 3 | 8  | 24 | TCA  | 25 | 6  |
| 229666 | 31 | 14650806 | 14650839 | 2 | 17 | 34 | CA   | 7  | 8  |
| 229681 | 31 | 14695058 | 14695075 | 3 | 6  | 18 | TAC  | 27 | 5  |
| 229683 | 31 | 14697941 | 14697968 | 2 | 14 | 28 | GT   | 24 | 9  |
| 229684 | 31 | 14699106 | 14699133 | 4 | 7  | 28 | TAGA | 13 | 4  |
| 229695 | 31 | 14740716 | 14740727 | 2 | 6  | 12 | CT   | 23 | 8  |
| 229702 | 31 | 14761356 | 14761367 | 2 | 6  | 12 | TG   | 26 | 4  |
| 229704 | 31 | 14769930 | 14769951 | 2 | 11 | 22 | CA   | 9  | 11 |
| 229705 | 31 | 14771449 | 14771463 | 3 | 5  | 15 | AAG  | 29 | 3  |
| 229707 | 31 | 14774582 | 14774609 | 4 | 7  | 28 | CATC | 21 | 7  |
| 229708 | 31 | 14775284 | 14775299 | 2 | 8  | 16 | TG   | 14 | 12 |
| 229709 | 31 | 14775434 | 14775466 | 3 | 11 | 33 | TAA  | 11 | 9  |
| 229711 | 31 | 14779870 | 14779883 | 2 | 7  | 14 | TG   | 19 | 6  |
| 229713 | 31 | 14786194 | 14786209 | 2 | 8  | 16 | TG   | 10 | 9  |
| 229725 | 31 | 14806626 | 14806645 | 2 | 10 | 20 | TG   | 21 | 5  |
| 229727 | 31 | 14814944 | 14814979 | 2 | 18 | 36 | TG   | 7  | 10 |
| 229729 | 31 | 14819531 | 14819552 | 2 | 11 | 22 | CA   | 21 | 11 |
| 229731 | 31 | 14819927 | 14819940 | 2 | 7  | 14 | GT   | 19 | 5  |
| 229734 | 31 | 14826389 | 14826402 | 2 | 7  | 14 | CT   | 13 | 3  |
| 229735 | 31 | 14826404 | 14826421 | 2 | 9  | 18 | TC   | 13 | 4  |
| 229736 | 31 | 14827390 | 14827403 | 2 | 7  | 14 | CA   | 27 | 3  |
| 229738 | 31 | 14829764 | 14829801 | 2 | 19 | 38 | CA   | 9  | 8  |
| 229739 | 31 | 14829920 | 14829937 | 2 | 9  | 18 | TG   | 24 | 7  |
| 229743 | 31 | 14834719 | 14834744 | 2 | 13 | 26 | TG   | 22 | 7  |
| 229755 | 31 | 14856792 | 14856813 | 2 | 11 | 22 | GT   | 26 | 4  |
| 229760 | 31 | 14859681 | 14859701 | 3 | 7  | 21 | TTG  | 12 | 5  |
| 229761 | 31 | 14861074 | 14861085 | 2 | 6  | 12 | GT   | 18 | 4  |
| 229765 | 31 | 14861635 | 14861676 | 2 | 21 | 42 | CA   | 9  | 9  |
| 229774 | 31 | 14886975 | 14886996 | 2 | 11 | 22 | TG   | 29 | 5  |
| 229784 | 31 | 14891844 | 14891855 | 2 | 6  | 12 | TC   | 8  | 7  |
| 229785 | 31 | 14892064 | 14892081 | 3 | 6  | 18 | CAG  | 25 | 4  |
| 229795 | 31 | 14897539 | 14897554 | 4 | 4  | 16 | TGTT | 30 | 3  |
| 229797 | 31 | 14903528 | 14903541 | 2 | 7  | 14 | AC   | 28 | 3  |
| 229813 | 31 | 14927616 | 14927631 | 2 | 8  | 16 | TG   | 21 | 3  |
| 229814 | 31 | 14928136 | 14928149 | 2 | 7  | 14 | AC   | 24 | 4  |
| 229815 | 31 | 14928378 | 14928392 | 3 | 5  | 15 | CAG  | 28 | 3  |
| 229835 | 31 | 14947020 | 14947083 | 4 | 16 | 64 | TCTG | 16 | 10 |



|        |    |          |          |   |    |    |      |    |    |
|--------|----|----------|----------|---|----|----|------|----|----|
| 229837 | 31 | 14947905 | 14947944 | 2 | 20 | 40 | AC   | 10 | 11 |
| 229854 | 31 | 14981843 | 14981858 | 2 | 8  | 16 | AC   | 23 | 4  |
| 229856 | 31 | 14986481 | 14986494 | 2 | 7  | 14 | TG   | 32 | 3  |
| 229858 | 31 | 14987697 | 14987708 | 2 | 6  | 12 | AT   | 23 | 4  |
| 229860 | 31 | 15000795 | 15000810 | 2 | 8  | 16 | CA   | 17 | 5  |
| 229861 | 31 | 15002189 | 15002218 | 2 | 15 | 30 | TG   | 13 | 12 |
| 229864 | 31 | 15023402 | 15023421 | 4 | 5  | 20 | AACA | 22 | 4  |
| 229873 | 31 | 15037393 | 15037410 | 3 | 6  | 18 | CCT  | 22 | 7  |
| 229875 | 31 | 15049943 | 15049957 | 3 | 5  | 15 | CAG  | 12 | 4  |
| 229879 | 31 | 15057282 | 15057301 | 2 | 10 | 20 | CA   | 12 | 9  |
| 229882 | 31 | 15063418 | 15063453 | 2 | 18 | 36 | CA   | 11 | 12 |
| 229884 | 31 | 15069903 | 15069920 | 2 | 9  | 18 | TG   | 30 | 8  |
| 229885 | 31 | 15073164 | 15073185 | 2 | 11 | 22 | CA   | 15 | 9  |
| 229888 | 31 | 15081136 | 15081161 | 2 | 13 | 26 | CA   | 9  | 9  |
| 229891 | 31 | 15100405 | 15100422 | 2 | 9  | 18 | AC   | 21 | 6  |
| 229896 | 31 | 15113101 | 15113130 | 2 | 15 | 30 | AC   | 17 | 5  |
| 229898 | 31 | 15117165 | 15117176 | 2 | 6  | 12 | TG   | 9  | 3  |
| 229906 | 31 | 15120340 | 15120353 | 2 | 7  | 14 | CA   | 16 | 4  |
| 229907 | 31 | 15121548 | 15121577 | 2 | 15 | 30 | CA   | 19 | 9  |
| 229908 | 31 | 15124290 | 15124313 | 2 | 12 | 24 | TG   | 22 | 8  |
| 229912 | 31 | 15129344 | 15129399 | 4 | 14 | 56 | ATCT | 21 | 11 |
| 229915 | 31 | 15133918 | 15133941 | 2 | 12 | 24 | AC   | 11 | 11 |
| 229920 | 31 | 15139370 | 15139389 | 2 | 10 | 20 | CA   | 11 | 8  |
| 229924 | 31 | 15146698 | 15146718 | 3 | 7  | 21 | CTG  | 25 | 3  |
| 229930 | 31 | 15168083 | 15168102 | 4 | 5  | 20 | CAAA | 21 | 5  |
| 229940 | 31 | 15181834 | 15181901 | 4 | 17 | 68 | CTAT | 12 | 9  |
| 229941 | 31 | 15182738 | 15182751 | 2 | 7  | 14 | AT   | 19 | 17 |
| 229943 | 31 | 15183425 | 15183442 | 3 | 6  | 18 | TTC  | 25 | 3  |
| 229958 | 31 | 15210920 | 15210955 | 2 | 18 | 36 | GT   | 13 | 11 |
| 229964 | 31 | 15220661 | 15220690 | 2 | 15 | 30 | TG   | 16 | 4  |
| 229967 | 31 | 15222840 | 15222853 | 2 | 7  | 14 | TG   | 26 | 4  |
| 229968 | 31 | 15224296 | 15224339 | 4 | 11 | 44 | TAGA | 14 | 6  |
| 229975 | 31 | 15235454 | 15235467 | 2 | 7  | 14 | GA   | 19 | 3  |
| 229976 | 31 | 15235470 | 15235481 | 2 | 6  | 12 | AC   | 14 | 4  |
| 229980 | 31 | 15240073 | 15240090 | 2 | 9  | 18 | GT   | 17 | 7  |
| 229983 | 31 | 15242511 | 15242538 | 2 | 14 | 28 | TG   | 24 | 7  |
| 229987 | 31 | 15245641 | 15245670 | 3 | 10 | 30 | ACA  | 10 | 5  |
| 229992 | 31 | 15254093 | 15254112 | 2 | 10 | 20 | GT   | 21 | 12 |
| 229993 | 31 | 15254289 | 15254304 | 2 | 8  | 16 | GT   | 15 | 5  |
| 229997 | 31 | 15261658 | 15261675 | 2 | 9  | 18 | TC   | 10 | 6  |
| 230000 | 31 | 15269366 | 15269385 | 4 | 5  | 20 | GCAC | 26 | 3  |
| 230011 | 31 | 15289504 | 15289515 | 2 | 6  | 12 | AC   | 22 | 7  |
| 230020 | 31 | 15316953 | 15316986 | 2 | 17 | 34 | CA   | 18 | 10 |
| 230021 | 31 | 15318867 | 15318880 | 2 | 7  | 14 | AC   | 31 | 4  |
| 230022 | 31 | 15319707 | 15319726 | 2 | 10 | 20 | TG   | 15 | 8  |
| 230043 | 31 | 15338803 | 15338816 | 2 | 7  | 14 | GT   | 17 | 6  |
| 230057 | 31 | 15356747 | 15356766 | 2 | 10 | 20 | TG   | 18 | 7  |
| 230068 | 31 | 15394854 | 15394873 | 2 | 10 | 20 | AC   | 17 | 8  |
| 230073 | 31 | 15402755 | 15402774 | 2 | 10 | 20 | AC   | 19 | 11 |
| 230077 | 31 | 15414909 | 15414922 | 2 | 7  | 14 | GA   | 18 | 4  |
| 230079 | 31 | 15415813 | 15415869 | 3 | 19 | 57 | AGA  | 13 | 16 |

|        |    |          |          |   |    |    |      |    |    |
|--------|----|----------|----------|---|----|----|------|----|----|
| 230080 | 31 | 15415994 | 15416013 | 2 | 10 | 20 | TG   | 7  | 9  |
| 230081 | 31 | 15416475 | 15416496 | 2 | 11 | 22 | CA   | 20 | 8  |
| 230082 | 31 | 15417228 | 15417243 | 4 | 4  | 16 | AAAT | 27 | 7  |
| 230086 | 31 | 15421801 | 15421830 | 2 | 15 | 30 | CA   | 17 | 13 |
| 230090 | 31 | 15422851 | 15422862 | 2 | 6  | 12 | GT   | 24 | 4  |
| 230091 | 31 | 15425736 | 15425793 | 2 | 29 | 58 | TG   | 8  | 9  |
| 230092 | 31 | 15425900 | 15425919 | 2 | 10 | 20 | TG   | 13 | 10 |
| 230097 | 31 | 15428606 | 15428621 | 2 | 8  | 16 | GT   | 22 | 4  |
| 230098 | 31 | 15428717 | 15428734 | 2 | 9  | 18 | AC   | 17 | 5  |
| 230100 | 31 | 15429934 | 15429963 | 2 | 15 | 30 | CA   | 13 | 9  |
| 230101 | 31 | 15431832 | 15431849 | 2 | 9  | 18 | GT   | 18 | 6  |
| 230103 | 31 | 15434407 | 15434452 | 2 | 23 | 46 | TG   | 18 | 16 |
| 230109 | 31 | 15440565 | 15440582 | 2 | 9  | 18 | GA   | 23 | 4  |
| 230110 | 31 | 15440757 | 15440780 | 3 | 8  | 24 | GAG  | 9  | 4  |
| 230118 | 31 | 15450560 | 15450586 | 3 | 9  | 27 | CAT  | 27 | 5  |
| 230120 | 31 | 15450826 | 15450840 | 3 | 5  | 15 | GCT  | 28 | 11 |
| 230121 | 31 | 15450874 | 15450893 | 2 | 10 | 20 | CA   | 21 | 7  |
| 230124 | 31 | 15452573 | 15452584 | 2 | 6  | 12 | CA   | 23 | 5  |
| 230127 | 31 | 15458879 | 15458908 | 2 | 15 | 30 | CA   | 7  | 8  |
| 230128 | 31 | 15459818 | 15459829 | 2 | 6  | 12 | GT   | 37 | 3  |
| 230132 | 31 | 15473809 | 15473840 | 2 | 16 | 32 | CA   | 12 | 6  |
| 230139 | 31 | 15482644 | 15482657 | 2 | 7  | 14 | GT   | 27 | 4  |
| 230141 | 31 | 15485291 | 15485306 | 2 | 8  | 16 | TC   | 20 | 5  |
| 230155 | 31 | 15498871 | 15498888 | 2 | 9  | 18 | CA   | 14 | 5  |
| 230160 | 31 | 15509003 | 15509042 | 2 | 20 | 40 | AC   | 8  | 6  |
| 230161 | 31 | 15511331 | 15511346 | 2 | 8  | 16 | CA   | 19 | 5  |
| 230166 | 31 | 15515226 | 15515249 | 3 | 8  | 24 | GAA  | 11 | 7  |
| 230167 | 31 | 15516244 | 15516283 | 2 | 20 | 40 | TG   | 8  | 7  |
| 230174 | 31 | 15524463 | 15524490 | 2 | 14 | 28 | TG   | 21 | 10 |
| 230175 | 31 | 15524531 | 15524546 | 2 | 8  | 16 | TG   | 17 | 6  |
| 230177 | 31 | 15524872 | 15524889 | 3 | 6  | 18 | AAT  | 19 | 4  |
| 230178 | 31 | 15526926 | 15526947 | 2 | 11 | 22 | CT   | 19 | 8  |
| 230179 | 31 | 15528924 | 15528944 | 3 | 7  | 21 | ATG  | 25 | 3  |
| 230182 | 31 | 15532941 | 15532954 | 2 | 7  | 14 | CA   | 21 | 4  |
| 230183 | 31 | 15533319 | 15533340 | 2 | 11 | 22 | CA   | 21 | 6  |
| 230185 | 31 | 15537253 | 15537270 | 2 | 9  | 18 | TG   | 21 | 7  |
| 230188 | 31 | 15540990 | 15541017 | 2 | 14 | 28 | TG   | 7  | 10 |
| 230189 | 31 | 15541168 | 15541183 | 2 | 8  | 16 | GT   | 17 | 3  |
| 230190 | 31 | 15543455 | 15543478 | 2 | 12 | 24 | CA   | 20 | 12 |
| 230191 | 31 | 15543612 | 15543625 | 2 | 7  | 14 | AC   | 20 | 4  |
| 230193 | 31 | 15546106 | 15546119 | 2 | 7  | 14 | TG   | 23 | 6  |
| 230195 | 31 | 15550081 | 15550108 | 2 | 14 | 28 | AC   | 8  | 12 |
| 230197 | 31 | 15563614 | 15563628 | 3 | 5  | 15 | CCT  | 23 | 6  |
| 230198 | 31 | 15563629 | 15563643 | 3 | 5  | 15 | GCT  | 27 | 8  |
| 230199 | 31 | 15566968 | 15566988 | 3 | 7  | 21 | CAG  | 32 | 6  |
| 230204 | 31 | 15570336 | 15570359 | 3 | 8  | 24 | TCC  | 22 | 4  |
| 230209 | 31 | 15571969 | 15571983 | 3 | 5  | 15 | TGT  | 26 | 4  |
| 230210 | 31 | 15573401 | 15573415 | 3 | 5  | 15 | ACA  | 31 | 3  |
| 230218 | 31 | 15591904 | 15591917 | 2 | 7  | 14 | AT   | 9  | 4  |
| 230223 | 31 | 15608014 | 15608029 | 2 | 8  | 16 | CA   | 14 | 6  |
| 230227 | 31 | 15627987 | 15628012 | 2 | 13 | 26 | TG   | 25 | 5  |

|        |    |          |          |   |    |    |      |    |    |
|--------|----|----------|----------|---|----|----|------|----|----|
| 230228 | 31 | 15628399 | 15628444 | 2 | 23 | 46 | AC   | 9  | 7  |
| 230234 | 31 | 15641775 | 15641808 | 2 | 17 | 34 | GT   | 15 | 12 |
| 230235 | 31 | 15641979 | 15641994 | 2 | 8  | 16 | CA   | 12 | 5  |
| 230237 | 31 | 15643890 | 15643901 | 2 | 6  | 12 | AG   | 26 | 5  |
| 230238 | 31 | 15643903 | 15643918 | 2 | 8  | 16 | GA   | 28 | 6  |
| 230246 | 31 | 15650937 | 15650948 | 2 | 6  | 12 | AT   | 8  | 7  |
| 230247 | 31 | 15651251 | 15651274 | 3 | 8  | 24 | AAG  | 22 | 5  |
| 230249 | 31 | 15654433 | 15654446 | 2 | 7  | 14 | CA   | 19 | 7  |
| 230251 | 31 | 15657035 | 15657050 | 2 | 8  | 16 | AC   | 25 | 4  |
| 230252 | 31 | 15659826 | 15659843 | 2 | 9  | 18 | CA   | 27 | 8  |
| 230253 | 31 | 15662960 | 15662977 | 2 | 9  | 18 | TG   | 12 | 7  |
| 230258 | 31 | 15674537 | 15674558 | 2 | 11 | 22 | AG   | 23 | 10 |
| 230263 | 31 | 15683041 | 15683064 | 2 | 12 | 24 | TG   | 21 | 7  |
| 230264 | 31 | 15683238 | 15683249 | 2 | 6  | 12 | CA   | 27 | 6  |
| 230265 | 31 | 15685015 | 15685032 | 2 | 9  | 18 | CA   | 12 | 6  |
| 230267 | 31 | 15685929 | 15685942 | 2 | 7  | 14 | AC   | 22 | 5  |
| 230268 | 31 | 15686674 | 15686707 | 2 | 17 | 34 | AG   | 7  | 11 |
| 230286 | 31 | 15717775 | 15717790 | 2 | 8  | 16 | TG   | 31 | 4  |
| 230298 | 31 | 15739071 | 15739086 | 2 | 8  | 16 | GT   | 15 | 6  |
| 230305 | 31 | 15744077 | 15744118 | 2 | 21 | 42 | GT   | 10 | 12 |
| 230315 | 31 | 15754738 | 15754765 | 2 | 14 | 28 | TG   | 21 | 10 |
| 230316 | 31 | 15754951 | 15754968 | 2 | 9  | 18 | GT   | 24 | 15 |
| 230317 | 31 | 15755177 | 15755190 | 2 | 7  | 14 | TG   | 16 | 4  |
| 230320 | 31 | 15756248 | 15756263 | 2 | 8  | 16 | TG   | 17 | 7  |
| 230321 | 31 | 15756461 | 15756472 | 2 | 6  | 12 | TG   | 27 | 4  |
| 230322 | 31 | 15758163 | 15758189 | 3 | 9  | 27 | AGC  | 25 | 7  |
| 230328 | 31 | 15761149 | 15761168 | 2 | 10 | 20 | AG   | 17 | 7  |
| 230331 | 31 | 15762044 | 15762055 | 2 | 6  | 12 | TA   | 23 | 5  |
| 230336 | 31 | 15769644 | 15769663 | 2 | 10 | 20 | GA   | 23 | 4  |
| 230340 | 31 | 15775835 | 15775860 | 2 | 13 | 26 | GT   | 17 | 6  |
| 230347 | 31 | 15803845 | 15803865 | 3 | 7  | 21 | AGA  | 15 | 10 |
| 230365 | 31 | 15876119 | 15876132 | 2 | 7  | 14 | AG   | 24 | 3  |
| 230370 | 31 | 15894143 | 15894166 | 2 | 12 | 24 | GT   | 17 | 7  |
| 230372 | 31 | 15897560 | 15897571 | 2 | 6  | 12 | AC   | 9  | 3  |
| 230373 | 31 | 15897579 | 15897590 | 2 | 6  | 12 | CA   | 9  | 3  |
| 230376 | 31 | 15904492 | 15904523 | 4 | 8  | 32 | TTTA | 14 | 6  |
| 230378 | 31 | 15909984 | 15909995 | 2 | 6  | 12 | GT   | 21 | 3  |
| 230381 | 31 | 15924122 | 15924133 | 2 | 6  | 12 | TA   | 14 | 6  |
| 230382 | 31 | 15925508 | 15925525 | 2 | 9  | 18 | TG   | 21 | 5  |
| 230384 | 31 | 15928480 | 15928491 | 2 | 6  | 12 | TC   | 24 | 3  |
| 230385 | 31 | 15930255 | 15930270 | 2 | 8  | 16 | AC   | 15 | 10 |
| 230389 | 31 | 15931512 | 15931535 | 2 | 12 | 24 | AC   | 6  | 9  |
| 230390 | 31 | 15931641 | 15931664 | 2 | 12 | 24 | AC   | 7  | 6  |
| 230391 | 31 | 15933307 | 15933324 | 2 | 9  | 18 | CT   | 17 | 5  |
| 230392 | 31 | 15937804 | 15937815 | 2 | 6  | 12 | GA   | 25 | 3  |
| 230397 | 31 | 15957664 | 15957685 | 2 | 11 | 22 | CA   | 19 | 7  |
| 230398 | 31 | 15958887 | 15958904 | 2 | 9  | 18 | GT   | 15 | 4  |
| 230399 | 31 | 15966148 | 15966161 | 2 | 7  | 14 | TC   | 27 | 3  |
| 230400 | 31 | 15968832 | 15968843 | 2 | 6  | 12 | GT   | 26 | 3  |
| 230401 | 31 | 15972431 | 15972468 | 2 | 19 | 38 | GT   | 13 | 15 |
| 230406 | 31 | 15988442 | 15988465 | 2 | 12 | 24 | CA   | 22 | 10 |

|        |    |          |          |   |    |    |      |    |    |
|--------|----|----------|----------|---|----|----|------|----|----|
| 230407 | 31 | 15988491 | 15988506 | 2 | 8  | 16 | TG   | 28 | 5  |
| 230408 | 31 | 15989234 | 15989247 | 2 | 7  | 14 | TG   | 28 | 5  |
| 230409 | 31 | 15990602 | 15990617 | 2 | 8  | 16 | TA   | 11 | 3  |
| 230410 | 31 | 15993070 | 15993083 | 2 | 7  | 14 | GT   | 14 | 3  |
| 230412 | 31 | 15993551 | 15993566 | 2 | 8  | 16 | CA   | 25 | 3  |
| 230415 | 31 | 15994408 | 15994419 | 2 | 6  | 12 | CA   | 9  | 4  |
| 230416 | 31 | 15995948 | 15995961 | 2 | 7  | 14 | CT   | 20 | 3  |
| 230417 | 31 | 15996447 | 15996461 | 3 | 5  | 15 | CCA  | 18 | 4  |
| 230420 | 31 | 15998225 | 15998260 | 2 | 18 | 36 | AC   | 10 | 6  |
| 230421 | 31 | 15998358 | 15998375 | 2 | 9  | 18 | AC   | 14 | 5  |
| 230425 | 31 | 16004371 | 16004388 | 2 | 9  | 18 | AC   | 18 | 10 |
| 230427 | 31 | 16011269 | 16011294 | 2 | 13 | 26 | GT   | 13 | 10 |
| 230432 | 31 | 16019484 | 16019509 | 2 | 13 | 26 | GT   | 22 | 10 |
| 230444 | 31 | 16039310 | 16039329 | 2 | 10 | 20 | AC   | 19 | 5  |
| 230445 | 31 | 16046383 | 16046400 | 2 | 9  | 18 | TG   | 22 | 7  |
| 230449 | 31 | 16047254 | 16047269 | 2 | 8  | 16 | TG   | 13 | 3  |
| 230451 | 31 | 16053078 | 16053099 | 2 | 11 | 22 | CT   | 16 | 4  |
| 230455 | 31 | 16057123 | 16057152 | 3 | 10 | 30 | GAG  | 10 | 7  |
| 230461 | 31 | 16059909 | 16059920 | 2 | 6  | 12 | CT   | 12 | 7  |
| 230465 | 31 | 16061671 | 16061694 | 3 | 8  | 24 | GAG  | 18 | 6  |
| 230473 | 31 | 16066781 | 16066800 | 2 | 10 | 20 | GT   | 21 | 6  |
| 230477 | 31 | 16074380 | 16074409 | 2 | 15 | 30 | TC   | 20 | 10 |
| 230481 | 31 | 16077834 | 16077849 | 2 | 8  | 16 | CT   | 16 | 3  |
| 230482 | 31 | 16078454 | 16078469 | 4 | 4  | 16 | TTTC | 11 | 8  |
| 230485 | 31 | 16082347 | 16082364 | 3 | 6  | 18 | CTC  | 20 | 9  |
| 230487 | 31 | 16082984 | 16083015 | 2 | 16 | 32 | GA   | 7  | 6  |
| 230494 | 31 | 16085673 | 16085688 | 2 | 8  | 16 | TC   | 24 | 8  |
| 230496 | 31 | 16087431 | 16087446 | 4 | 4  | 16 | TTTA | 21 | 3  |
| 230497 | 31 | 16088644 | 16088673 | 3 | 10 | 30 | AGG  | 12 | 5  |
| 230499 | 31 | 16089049 | 16089066 | 3 | 6  | 18 | CTC  | 13 | 4  |
| 230500 | 31 | 16089091 | 16089122 | 2 | 16 | 32 | CA   | 13 | 11 |
| 230508 | 31 | 16091336 | 16091347 | 2 | 6  | 12 | CT   | 22 | 3  |
| 230511 | 31 | 16092730 | 16092745 | 4 | 4  | 16 | TTTC | 10 | 6  |
| 230517 | 31 | 16094402 | 16094413 | 2 | 6  | 12 | GA   | 12 | 3  |
| 230522 | 31 | 16096002 | 16096029 | 2 | 14 | 28 | TG   | 18 | 6  |
| 230528 | 31 | 16099738 | 16099755 | 3 | 6  | 18 | AGA  | 24 | 4  |
| 230529 | 31 | 16099910 | 16099929 | 4 | 5  | 20 | AATA | 20 | 4  |
| 230534 | 31 | 16101048 | 16101065 | 3 | 6  | 18 | AAG  | 25 | 4  |
| 230549 | 31 | 16106212 | 16106225 | 2 | 7  | 14 | TG   | 8  | 6  |
| 230553 | 31 | 16106822 | 16106837 | 2 | 8  | 16 | AC   | 10 | 4  |
| 230564 | 31 | 16109486 | 16109511 | 2 | 13 | 26 | TG   | 8  | 7  |
| 230570 | 31 | 16112422 | 16112447 | 2 | 13 | 26 | TG   | 11 | 10 |
| 230575 | 31 | 16146206 | 16146221 | 4 | 4  | 16 | TTTG | 14 | 8  |
| 230584 | 31 | 16167763 | 16167780 | 2 | 9  | 18 | TG   | 20 | 4  |
| 230593 | 31 | 16185726 | 16185741 | 2 | 8  | 16 | TG   | 21 | 12 |
| 230602 | 31 | 16210415 | 16210440 | 2 | 13 | 26 | AG   | 19 | 8  |
| 230606 | 31 | 16215836 | 16215873 | 2 | 19 | 38 | CA   | 10 | 10 |
| 230608 | 31 | 16221979 | 16222002 | 2 | 12 | 24 | TG   | 11 | 3  |
| 230617 | 31 | 16253661 | 16253682 | 2 | 11 | 22 | TC   | 9  | 7  |
| 230621 | 31 | 16263808 | 16263819 | 2 | 6  | 12 | GT   | 26 | 6  |
| 230623 | 31 | 16269954 | 16269967 | 2 | 7  | 14 | TA   | 21 | 7  |

|        |    |          |          |   |    |    |      |    |    |
|--------|----|----------|----------|---|----|----|------|----|----|
| 230629 | 31 | 16284288 | 16284303 | 2 | 8  | 16 | GT   | 12 | 4  |
| 230635 | 31 | 16296815 | 16296834 | 2 | 10 | 20 | AT   | 17 | 5  |
| 230636 | 31 | 16303635 | 16303656 | 2 | 11 | 22 | AC   | 25 | 7  |
| 230640 | 31 | 16323854 | 16323874 | 3 | 7  | 21 | GCT  | 17 | 5  |
| 230643 | 31 | 16330278 | 16330293 | 4 | 4  | 16 | CTAG | 27 | 3  |
| 230655 | 31 | 16364157 | 16364180 | 4 | 6  | 24 | CTGA | 9  | 3  |
| 230658 | 31 | 16368691 | 16368708 | 3 | 6  | 18 | CTC  | 28 | 4  |
| 230665 | 31 | 16376163 | 16376174 | 2 | 6  | 12 | TG   | 12 | 3  |
| 230676 | 31 | 16383468 | 16383491 | 2 | 12 | 24 | GT   | 17 | 4  |
| 230693 | 31 | 16401129 | 16401146 | 2 | 9  | 18 | GT   | 19 | 8  |
| 230697 | 31 | 16413729 | 16413752 | 2 | 12 | 24 | CA   | 12 | 8  |
| 230705 | 31 | 16422634 | 16422661 | 4 | 7  | 28 | ATTT | 22 | 9  |
| 230711 | 31 | 16427848 | 16427867 | 2 | 10 | 20 | CT   | 17 | 9  |
| 230713 | 31 | 16428341 | 16428354 | 2 | 7  | 14 | GA   | 7  | 5  |
| 230720 | 31 | 16433398 | 16433409 | 2 | 6  | 12 | CA   | 25 | 3  |
| 230721 | 31 | 16434955 | 16434966 | 2 | 6  | 12 | TG   | 25 | 5  |
| 230722 | 31 | 16435395 | 16435420 | 2 | 13 | 26 | TG   | 14 | 8  |
| 230723 | 31 | 16436110 | 16436135 | 2 | 13 | 26 | TG   | 12 | 7  |
| 230726 | 31 | 16438345 | 16438366 | 2 | 11 | 22 | AC   | 20 | 8  |
| 230727 | 31 | 16438548 | 16438565 | 2 | 9  | 18 | TG   | 23 | 5  |
| 230728 | 31 | 16438702 | 16438721 | 2 | 10 | 20 | CA   | 13 | 13 |
| 230731 | 31 | 16440203 | 16440226 | 2 | 12 | 24 | AG   | 19 | 6  |
| 230732 | 31 | 16440372 | 16440407 | 3 | 12 | 36 | GCA  | 24 | 8  |
| 230741 | 31 | 16452148 | 16452167 | 2 | 10 | 20 | AC   | 20 | 8  |
| 230743 | 31 | 16454584 | 16454597 | 2 | 7  | 14 | GT   | 20 | 4  |
| 230747 | 31 | 16459046 | 16459060 | 3 | 5  | 15 | TGC  | 20 | 3  |
| 230753 | 31 | 16460147 | 16460178 | 2 | 16 | 32 | AC   | 15 | 12 |
| 230755 | 31 | 16460789 | 16460809 | 3 | 7  | 21 | TCC  | 27 | 8  |
| 230763 | 31 | 16482374 | 16482401 | 4 | 7  | 28 | AAGA | 12 | 5  |
| 230769 | 31 | 16510771 | 16510790 | 2 | 10 | 20 | AC   | 19 | 7  |
| 230771 | 31 | 16521867 | 16521904 | 2 | 19 | 38 | AG   | 16 | 9  |
| 230773 | 31 | 16522486 | 16522503 | 2 | 9  | 18 | AC   | 15 | 3  |
| 230774 | 31 | 16526028 | 16526048 | 3 | 7  | 21 | GAG  | 31 | 5  |
| 230776 | 31 | 16537516 | 16537549 | 2 | 17 | 34 | TG   | 8  | 8  |
| 230783 | 31 | 16556953 | 16556976 | 3 | 8  | 24 | AGG  | 6  | 6  |
| 230795 | 31 | 16579362 | 16579376 | 3 | 5  | 15 | GTT  | 27 | 3  |
| 230801 | 31 | 16589107 | 16589126 | 2 | 10 | 20 | GT   | 23 | 8  |
| 230806 | 31 | 16592815 | 16592832 | 3 | 6  | 18 | CCA  | 15 | 3  |
| 230808 | 31 | 16594180 | 16594203 | 3 | 8  | 24 | AGC  | 15 | 8  |
| 230809 | 31 | 16594397 | 16594411 | 3 | 5  | 15 | CCT  | 11 | 7  |
| 230814 | 31 | 16597169 | 16597186 | 3 | 6  | 18 | AGG  | 28 | 3  |
| 230826 | 31 | 16606801 | 16606820 | 2 | 10 | 20 | GT   | 8  | 3  |
| 230828 | 31 | 16607001 | 16607018 | 2 | 9  | 18 | GT   | 7  | 3  |
| 230835 | 31 | 16611387 | 16611401 | 3 | 5  | 15 | GAG  | 26 | 3  |
| 230836 | 31 | 16611608 | 16611631 | 2 | 12 | 24 | CA   | 23 | 4  |
| 230837 | 31 | 16613448 | 16613461 | 2 | 7  | 14 | TG   | 26 | 4  |
| 230839 | 31 | 16614102 | 16614119 | 2 | 9  | 18 | CA   | 12 | 10 |
| 230840 | 31 | 16614483 | 16614502 | 2 | 10 | 20 | GT   | 16 | 10 |
| 230842 | 31 | 16615940 | 16615957 | 2 | 9  | 18 | CT   | 19 | 5  |
| 230843 | 31 | 16616693 | 16616704 | 2 | 6  | 12 | TC   | 28 | 3  |
| 230857 | 31 | 16629050 | 16629071 | 2 | 11 | 22 | CA   | 16 | 9  |

|        |    |          |          |   |    |    |      |    |    |
|--------|----|----------|----------|---|----|----|------|----|----|
| 230869 | 31 | 16641537 | 16641550 | 2 | 7  | 14 | GT   | 24 | 4  |
| 230871 | 31 | 16643120 | 16643147 | 2 | 14 | 28 | CA   | 16 | 7  |
| 230876 | 31 | 16643971 | 16643990 | 2 | 10 | 20 | TG   | 8  | 3  |
| 230877 | 31 | 16647025 | 16647036 | 2 | 6  | 12 | TG   | 32 | 3  |
| 230878 | 31 | 16650175 | 16650192 | 3 | 6  | 18 | CCT  | 20 | 4  |
| 230879 | 31 | 16652949 | 16652966 | 3 | 6  | 18 | GGT  | 18 | 3  |
| 230882 | 31 | 16657989 | 16658012 | 3 | 8  | 24 | GAG  | 27 | 6  |
| 230893 | 31 | 16667459 | 16667472 | 2 | 7  | 14 | AG   | 17 | 6  |
| 230895 | 31 | 16667786 | 16667815 | 3 | 10 | 30 | GGA  | 14 | 8  |
| 230897 | 31 | 16668459 | 16668494 | 2 | 18 | 36 | TG   | 17 | 14 |
| 230902 | 31 | 16671807 | 16671836 | 2 | 15 | 30 | CA   | 16 | 13 |
| 230907 | 31 | 16679883 | 16679902 | 2 | 10 | 20 | TG   | 29 | 4  |
| 230908 | 31 | 16680069 | 16680096 | 2 | 14 | 28 | GT   | 14 | 8  |
| 230912 | 31 | 16682750 | 16682761 | 2 | 6  | 12 | AC   | 16 | 4  |
| 230921 | 31 | 16692581 | 16692606 | 2 | 13 | 26 | TG   | 24 | 13 |
| 230930 | 31 | 16731348 | 16731368 | 3 | 7  | 21 | GAG  | 19 | 4  |
| 230937 | 31 | 16748716 | 16748727 | 2 | 6  | 12 | GT   | 21 | 3  |
| 230939 | 31 | 16750592 | 16750617 | 2 | 13 | 26 | AC   | 20 | 6  |
| 230940 | 31 | 16754536 | 16754551 | 4 | 4  | 16 | GATA | 14 | 9  |
| 230945 | 31 | 16771538 | 16771559 | 2 | 11 | 22 | AC   | 18 | 8  |
| 230946 | 31 | 16773024 | 16773049 | 2 | 13 | 26 | GT   | 15 | 12 |
| 230981 | 31 | 16874861 | 16874874 | 2 | 7  | 14 | AT   | 19 | 5  |
| 230994 | 31 | 16897066 | 16897086 | 3 | 7  | 21 | CTG  | 28 | 4  |
| 231002 | 31 | 16910237 | 16910254 | 2 | 9  | 18 | AG   | 22 | 3  |
| 231003 | 31 | 16914128 | 16914148 | 3 | 7  | 21 | TCT  | 30 | 6  |
| 231018 | 31 | 16923944 | 16923977 | 2 | 17 | 34 | CA   | 8  | 5  |
| 231019 | 31 | 16924089 | 16924100 | 2 | 6  | 12 | GA   | 21 | 5  |
| 231020 | 31 | 16924557 | 16924586 | 3 | 10 | 30 | GAG  | 25 | 6  |
| 231023 | 31 | 16933971 | 16933986 | 4 | 4  | 16 | ATAA | 20 | 3  |
| 231025 | 31 | 16939356 | 16939391 | 4 | 9  | 36 | TCTA | 24 | 12 |
| 231026 | 31 | 16940782 | 16940801 | 2 | 10 | 20 | GT   | 9  | 6  |
| 231030 | 31 | 16949042 | 16949071 | 2 | 15 | 30 | TG   | 14 | 8  |
| 231032 | 31 | 16961350 | 16961365 | 4 | 4  | 16 | GCAG | 29 | 5  |
| 231037 | 31 | 16965851 | 16965868 | 3 | 6  | 18 | TCC  | 23 | 8  |
| 231039 | 31 | 16971296 | 16971316 | 3 | 7  | 21 | AAT  | 16 | 3  |
| 231040 | 31 | 16971774 | 16971785 | 2 | 6  | 12 | TG   | 24 | 4  |
| 231043 | 31 | 16974161 | 16974212 | 2 | 26 | 52 | AC   | 11 | 11 |
| 231047 | 31 | 16980185 | 16980196 | 2 | 6  | 12 | AT   | 17 | 3  |
| 231051 | 31 | 16987665 | 16987714 | 2 | 25 | 50 | CA   | 15 | 10 |
| 231053 | 31 | 16990334 | 16990367 | 2 | 17 | 34 | AC   | 8  | 9  |
| 231057 | 31 | 16998766 | 16998783 | 2 | 9  | 18 | TG   | 23 | 8  |
| 231063 | 31 | 17020821 | 17020841 | 3 | 7  | 21 | CAG  | 28 | 4  |
| 231064 | 31 | 17027049 | 17027066 | 3 | 6  | 18 | AAG  | 11 | 3  |
| 231067 | 31 | 17036297 | 17036320 | 2 | 12 | 24 | GA   | 15 | 7  |
| 231070 | 31 | 17039675 | 17039690 | 2 | 8  | 16 | CT   | 19 | 3  |
| 231071 | 31 | 17040154 | 17040165 | 2 | 6  | 12 | GA   | 29 | 3  |
| 231076 | 31 | 17045070 | 17045101 | 2 | 16 | 32 | TG   | 26 | 6  |
| 231078 | 31 | 17050986 | 17051013 | 2 | 14 | 28 | AC   | 10 | 9  |
| 231079 | 31 | 17052766 | 17052785 | 2 | 10 | 20 | AC   | 20 | 4  |
| 231080 | 31 | 17054010 | 17054027 | 3 | 6  | 18 | CTT  | 20 | 3  |
| 231088 | 31 | 17065954 | 17065971 | 2 | 9  | 18 | CA   | 21 | 11 |

|        |    |          |          |   |    |    |      |    |    |
|--------|----|----------|----------|---|----|----|------|----|----|
| 231110 | 31 | 17087533 | 17087568 | 2 | 18 | 36 | AC   | 6  | 7  |
| 231114 | 31 | 17092459 | 17092474 | 2 | 8  | 16 | GT   | 19 | 7  |
| 231115 | 31 | 17092523 | 17092538 | 4 | 4  | 16 | GGAA | 13 | 4  |
| 231118 | 31 | 17098156 | 17098173 | 3 | 6  | 18 | CTG  | 31 | 5  |
| 231123 | 31 | 17104200 | 17104217 | 2 | 9  | 18 | TG   | 13 | 4  |
| 231124 | 31 | 17105411 | 17105446 | 2 | 18 | 36 | AC   | 12 | 12 |
| 231125 | 31 | 17107814 | 17107829 | 2 | 8  | 16 | CA   | 13 | 4  |
| 231126 | 31 | 17114476 | 17114487 | 2 | 6  | 12 | GA   | 23 | 9  |
| 231127 | 31 | 17114488 | 17114501 | 2 | 7  | 14 | AG   | 20 | 8  |
| 231132 | 31 | 17128001 | 17128014 | 2 | 7  | 14 | CA   | 17 | 7  |
| 231136 | 31 | 17137692 | 17137723 | 2 | 16 | 32 | GT   | 13 | 10 |
| 231141 | 31 | 17145807 | 17145828 | 2 | 11 | 22 | TA   | 6  | 9  |
| 231145 | 31 | 17148325 | 17148339 | 3 | 5  | 15 | AAT  | 20 | 4  |
| 231152 | 31 | 17168267 | 17168290 | 2 | 12 | 24 | GT   | 17 | 7  |
| 231156 | 31 | 17172900 | 17172911 | 2 | 6  | 12 | AT   | 26 | 3  |
| 231161 | 31 | 17183740 | 17183755 | 4 | 4  | 16 | ATTT | 26 | 3  |
| 231165 | 31 | 17193669 | 17193686 | 2 | 9  | 18 | AG   | 22 | 4  |
| 231168 | 31 | 17197075 | 17197089 | 3 | 5  | 15 | CCA  | 9  | 6  |
| 231169 | 31 | 17199907 | 17199918 | 2 | 6  | 12 | AG   | 14 | 3  |
| 231171 | 31 | 17201408 | 17201437 | 2 | 15 | 30 | CT   | 12 | 7  |
| 231180 | 31 | 17205515 | 17205534 | 4 | 5  | 20 | AAAT | 28 | 3  |
| 231183 | 31 | 17206167 | 17206184 | 3 | 6  | 18 | GAG  | 16 | 8  |
| 231184 | 31 | 17206295 | 17206348 | 3 | 18 | 54 | GAA  | 11 | 15 |
| 231207 | 31 | 17245889 | 17245924 | 3 | 12 | 36 | TTC  | 16 | 14 |
| 231214 | 31 | 17254383 | 17254398 | 2 | 8  | 16 | CA   | 7  | 4  |
| 231220 | 31 | 17262794 | 17262811 | 3 | 6  | 18 | TGC  | 29 | 3  |
| 231221 | 31 | 17263409 | 17263428 | 4 | 5  | 20 | GTTG | 23 | 6  |
| 231223 | 31 | 17274272 | 17274295 | 3 | 8  | 24 | GAG  | 16 | 8  |
| 231225 | 31 | 17277063 | 17277084 | 2 | 11 | 22 | GT   | 10 | 8  |
| 231227 | 31 | 17294701 | 17294712 | 2 | 6  | 12 | AC   | 28 | 5  |
| 231230 | 31 | 17304904 | 17304923 | 2 | 10 | 20 | TG   | 20 | 13 |
| 231233 | 31 | 17310619 | 17310634 | 2 | 8  | 16 | TG   | 24 | 3  |
| 231234 | 31 | 17312401 | 17312424 | 4 | 6  | 24 | TTTG | 7  | 5  |
| 231250 | 32 | 32753    | 32779    | 3 | 9  | 27 | TGA  | 23 | 4  |
| 231256 | 32 | 42798    | 42827    | 3 | 10 | 30 | AAG  | 28 | 5  |
| 231260 | 32 | 53938    | 53958    | 3 | 7  | 21 | TTC  | 29 | 5  |
| 231264 | 32 | 66224    | 66238    | 3 | 5  | 15 | ATT  | 24 | 6  |
| 231272 | 32 | 127939   | 127952   | 2 | 7  | 14 | AT   | 7  | 3  |
| 231273 | 32 | 129426   | 129447   | 2 | 11 | 22 | CA   | 20 | 8  |
| 231274 | 32 | 131369   | 131383   | 3 | 5  | 15 | TTG  | 17 | 3  |
| 231277 | 32 | 131554   | 131571   | 3 | 6  | 18 | TTC  | 9  | 3  |
| 231283 | 32 | 144560   | 144615   | 2 | 28 | 56 | AC   | 10 | 10 |
| 231285 | 32 | 148315   | 148340   | 2 | 13 | 26 | GT   | 18 | 8  |
| 231286 | 32 | 149343   | 149398   | 4 | 14 | 56 | TCTA | 16 | 12 |
| 231289 | 32 | 160186   | 160209   | 2 | 12 | 24 | GT   | 9  | 12 |
| 231292 | 32 | 178809   | 178824   | 2 | 8  | 16 | TG   | 19 | 6  |
| 231301 | 32 | 196501   | 196528   | 2 | 14 | 28 | TC   | 13 | 6  |
| 231302 | 32 | 196804   | 196821   | 2 | 9  | 18 | TC   | 23 | 5  |
| 231306 | 32 | 197233   | 197259   | 3 | 9  | 27 | TTC  | 13 | 5  |
| 231308 | 32 | 199728   | 199739   | 2 | 6  | 12 | GT   | 29 | 4  |
| 231309 | 32 | 202004   | 202029   | 2 | 13 | 26 | TG   | 15 | 6  |

|        |    |        |        |   |    |    |      |    |    |
|--------|----|--------|--------|---|----|----|------|----|----|
| 231319 | 32 | 207381 | 207420 | 2 | 20 | 40 | AC   | 14 | 19 |
| 231330 | 32 | 218810 | 218833 | 2 | 12 | 24 | TC   | 6  | 5  |
| 231332 | 32 | 219121 | 219134 | 2 | 7  | 14 | TG   | 20 | 6  |
| 231333 | 32 | 219156 | 219185 | 2 | 15 | 30 | TG   | 16 | 7  |
| 231334 | 32 | 219328 | 219341 | 2 | 7  | 14 | TG   | 27 | 3  |
| 231336 | 32 | 224850 | 224867 | 2 | 9  | 18 | AC   | 22 | 14 |
| 231338 | 32 | 227515 | 227534 | 2 | 10 | 20 | TG   | 19 | 6  |
| 231339 | 32 | 228009 | 228038 | 2 | 15 | 30 | TG   | 16 | 7  |
| 231341 | 32 | 228811 | 228856 | 2 | 23 | 46 | TG   | 6  | 8  |
| 231342 | 32 | 229074 | 229085 | 2 | 6  | 12 | TG   | 19 | 4  |
| 231355 | 32 | 243926 | 243963 | 2 | 19 | 38 | TG   | 18 | 12 |
| 231356 | 32 | 244343 | 244354 | 2 | 6  | 12 | TC   | 25 | 3  |
| 231359 | 32 | 245311 | 245330 | 2 | 10 | 20 | GT   | 10 | 5  |
| 231371 | 32 | 255628 | 255665 | 2 | 19 | 38 | GT   | 9  | 7  |
| 231376 | 32 | 257280 | 257299 | 2 | 10 | 20 | CA   | 10 | 4  |
| 231377 | 32 | 257415 | 257456 | 2 | 21 | 42 | TG   | 8  | 8  |
| 231378 | 32 | 257616 | 257637 | 2 | 11 | 22 | TG   | 16 | 9  |
| 231379 | 32 | 259029 | 259048 | 2 | 10 | 20 | TC   | 20 | 3  |
| 231380 | 32 | 259320 | 259333 | 2 | 7  | 14 | CA   | 18 | 8  |
| 231381 | 32 | 261572 | 261589 | 2 | 9  | 18 | GT   | 26 | 4  |
| 231382 | 32 | 263744 | 263757 | 2 | 7  | 14 | TC   | 29 | 3  |
| 231384 | 32 | 268243 | 268264 | 2 | 11 | 22 | TC   | 19 | 3  |
| 231400 | 32 | 298930 | 298945 | 2 | 8  | 16 | GT   | 26 | 3  |
| 231403 | 32 | 302993 | 303016 | 2 | 12 | 24 | GT   | 24 | 6  |
| 231404 | 32 | 304071 | 304090 | 2 | 10 | 20 | TA   | 10 | 5  |
| 231405 | 32 | 306197 | 306228 | 4 | 8  | 32 | CTGT | 17 | 5  |
| 231419 | 32 | 326613 | 326644 | 2 | 16 | 32 | GA   | 9  | 9  |
| 231422 | 32 | 327344 | 327357 | 2 | 7  | 14 | CA   | 29 | 4  |
| 231423 | 32 | 327581 | 327600 | 4 | 5  | 20 | ATTT | 26 | 4  |
| 231429 | 32 | 334997 | 335030 | 2 | 17 | 34 | TG   | 13 | 14 |
| 231432 | 32 | 339963 | 339996 | 2 | 17 | 34 | AC   | 15 | 9  |
| 231435 | 32 | 343824 | 343855 | 4 | 8  | 32 | CCAT | 27 | 11 |
| 231440 | 32 | 350602 | 350621 | 4 | 5  | 20 | ACAA | 25 | 3  |
| 231441 | 32 | 352271 | 352294 | 2 | 12 | 24 | GA   | 14 | 12 |
| 231442 | 32 | 353648 | 353683 | 2 | 18 | 36 | AC   | 8  | 10 |
| 231454 | 32 | 377300 | 377343 | 4 | 11 | 44 | CGCA | 16 | 11 |
| 231455 | 32 | 380382 | 380405 | 2 | 12 | 24 | AC   | 17 | 5  |
| 231461 | 32 | 386573 | 386606 | 2 | 17 | 34 | GT   | 10 | 5  |
| 231469 | 32 | 415411 | 415454 | 2 | 22 | 44 | GT   | 12 | 10 |
| 231476 | 32 | 426755 | 426780 | 2 | 13 | 26 | AC   | 14 | 7  |
| 231477 | 32 | 428188 | 428213 | 2 | 13 | 26 | AC   | 12 | 12 |
| 231478 | 32 | 429840 | 429863 | 4 | 6  | 24 | GGCA | 30 | 6  |
| 231483 | 32 | 435750 | 435775 | 2 | 13 | 26 | CA   | 16 | 13 |
| 231484 | 32 | 436344 | 436375 | 4 | 8  | 32 | AAAC | 22 | 5  |
| 231487 | 32 | 437610 | 437623 | 2 | 7  | 14 | AG   | 22 | 3  |
| 231488 | 32 | 439611 | 439636 | 2 | 13 | 26 | TG   | 12 | 13 |
| 231491 | 32 | 441331 | 441366 | 2 | 18 | 36 | AC   | 6  | 6  |
| 231492 | 32 | 441489 | 441504 | 4 | 4  | 16 | GTCA | 25 | 4  |
| 231494 | 32 | 442722 | 442737 | 2 | 8  | 16 | GA   | 24 | 4  |
| 231495 | 32 | 442906 | 442939 | 2 | 17 | 34 | TC   | 13 | 13 |
| 231497 | 32 | 449405 | 449418 | 2 | 7  | 14 | CA   | 20 | 6  |



|        |    |        |        |   |    |    |      |    |    |
|--------|----|--------|--------|---|----|----|------|----|----|
| 231499 | 32 | 454406 | 454417 | 2 | 6  | 12 | AC   | 26 | 3  |
| 231505 | 32 | 471644 | 471655 | 2 | 6  | 12 | AC   | 20 | 6  |
| 231506 | 32 | 471657 | 471668 | 2 | 6  | 12 | CA   | 23 | 3  |
| 231510 | 32 | 478533 | 478556 | 2 | 12 | 24 | AG   | 27 | 7  |
| 231511 | 32 | 480883 | 480897 | 3 | 5  | 15 | TCC  | 28 | 4  |
| 231512 | 32 | 484931 | 484950 | 2 | 10 | 20 | TC   | 6  | 3  |
| 231514 | 32 | 487880 | 487893 | 2 | 7  | 14 | TG   | 21 | 3  |
| 231515 | 32 | 488209 | 488242 | 2 | 17 | 34 | CA   | 16 | 10 |
| 231516 | 32 | 488307 | 488334 | 2 | 14 | 28 | CA   | 12 | 8  |
| 231517 | 32 | 488430 | 488443 | 2 | 7  | 14 | TG   | 19 | 3  |
| 231518 | 32 | 491749 | 491766 | 2 | 9  | 18 | TA   | 10 | 4  |
| 231520 | 32 | 493587 | 493608 | 2 | 11 | 22 | CA   | 8  | 9  |
| 231521 | 32 | 494575 | 494590 | 2 | 8  | 16 | TG   | 27 | 5  |
| 231526 | 32 | 510857 | 510870 | 2 | 7  | 14 | AC   | 18 | 4  |
| 231527 | 32 | 510915 | 510936 | 2 | 11 | 22 | AC   | 14 | 9  |
| 231532 | 32 | 529355 | 529388 | 2 | 17 | 34 | GT   | 15 | 12 |
| 231533 | 32 | 529670 | 529705 | 2 | 18 | 36 | TG   | 6  | 7  |
| 231535 | 32 | 534964 | 534977 | 2 | 7  | 14 | CA   | 22 | 3  |
| 231544 | 32 | 561613 | 561624 | 2 | 6  | 12 | CA   | 28 | 3  |
| 231548 | 32 | 569438 | 569452 | 3 | 5  | 15 | TCA  | 25 | 3  |
| 231551 | 32 | 586822 | 586835 | 2 | 7  | 14 | TA   | 21 | 8  |
| 231557 | 32 | 616931 | 616946 | 2 | 8  | 16 | AC   | 10 | 3  |
| 231562 | 32 | 634258 | 634269 | 2 | 6  | 12 | AT   | 20 | 3  |
| 231563 | 32 | 639470 | 639487 | 2 | 9  | 18 | TA   | 9  | 3  |
| 231569 | 32 | 676917 | 676932 | 4 | 4  | 16 | TAGC | 26 | 3  |
| 231577 | 32 | 705983 | 706004 | 2 | 11 | 22 | GT   | 18 | 9  |
| 231580 | 32 | 708537 | 708554 | 2 | 9  | 18 | CA   | 28 | 8  |
| 231583 | 32 | 718964 | 718977 | 2 | 7  | 14 | AG   | 31 | 3  |
| 231584 | 32 | 721129 | 721196 | 4 | 17 | 68 | TATC | 6  | 7  |
| 231586 | 32 | 727613 | 727626 | 2 | 7  | 14 | GT   | 20 | 3  |
| 231587 | 32 | 727676 | 727689 | 2 | 7  | 14 | TC   | 19 | 5  |
| 231590 | 32 | 733197 | 733212 | 2 | 8  | 16 | GT   | 9  | 9  |
| 231594 | 32 | 738090 | 738103 | 2 | 7  | 14 | TG   | 20 | 3  |
| 231600 | 32 | 754131 | 754148 | 2 | 9  | 18 | GT   | 18 | 5  |
| 231601 | 32 | 755456 | 755491 | 2 | 18 | 36 | CA   | 12 | 8  |
| 231602 | 32 | 760732 | 760747 | 2 | 8  | 16 | TG   | 17 | 4  |
| 231604 | 32 | 762553 | 762564 | 2 | 6  | 12 | AC   | 21 | 5  |
| 231614 | 32 | 783312 | 783327 | 4 | 4  | 16 | ATTT | 31 | 3  |
| 231616 | 32 | 788396 | 788410 | 3 | 5  | 15 | ATA  | 8  | 5  |
| 231629 | 32 | 809191 | 809202 | 2 | 6  | 12 | GT   | 21 | 6  |
| 231630 | 32 | 811582 | 811611 | 3 | 10 | 30 | TCC  | 22 | 5  |
| 231636 | 32 | 819717 | 819746 | 2 | 15 | 30 | TG   | 24 | 14 |
| 231641 | 32 | 828197 | 828224 | 2 | 14 | 28 | AC   | 10 | 6  |
| 231642 | 32 | 831626 | 831641 | 2 | 8  | 16 | AC   | 26 | 4  |
| 231646 | 32 | 832797 | 832820 | 3 | 8  | 24 | GCT  | 19 | 5  |
| 231647 | 32 | 833911 | 833930 | 4 | 5  | 20 | TTTA | 17 | 3  |
| 231653 | 32 | 845156 | 845170 | 3 | 5  | 15 | AAG  | 23 | 4  |
| 231654 | 32 | 845560 | 845579 | 2 | 10 | 20 | CA   | 15 | 15 |
| 231655 | 32 | 849025 | 849044 | 2 | 10 | 20 | TG   | 17 | 5  |
| 231656 | 32 | 850232 | 850259 | 2 | 14 | 28 | TG   | 17 | 7  |
| 231657 | 32 | 850387 | 850424 | 2 | 19 | 38 | AC   | 19 | 12 |

|        |    |         |         |   |    |    |      |    |    |
|--------|----|---------|---------|---|----|----|------|----|----|
| 231660 | 32 | 858494  | 858508  | 3 | 5  | 15 | AAT  | 22 | 6  |
| 231662 | 32 | 859220  | 859235  | 2 | 8  | 16 | CA   | 17 | 3  |
| 231663 | 32 | 859246  | 859257  | 2 | 6  | 12 | CA   | 17 | 3  |
| 231670 | 32 | 875168  | 875231  | 4 | 16 | 64 | AGAA | 13 | 10 |
| 231675 | 32 | 881042  | 881085  | 2 | 22 | 44 | CA   | 6  | 7  |
| 231678 | 32 | 888357  | 888372  | 2 | 8  | 16 | TG   | 25 | 6  |
| 231680 | 32 | 895206  | 895244  | 3 | 13 | 39 | TTC  | 22 | 11 |
| 231681 | 32 | 899544  | 899575  | 2 | 16 | 32 | GT   | 22 | 12 |
| 231682 | 32 | 906302  | 906349  | 3 | 16 | 48 | CAT  | 26 | 5  |
| 231684 | 32 | 909544  | 909589  | 2 | 23 | 46 | GT   | 10 | 8  |
| 231688 | 32 | 914253  | 914268  | 2 | 8  | 16 | GT   | 24 | 3  |
| 231689 | 32 | 914769  | 914792  | 2 | 12 | 24 | GA   | 13 | 5  |
| 231690 | 32 | 915093  | 915118  | 2 | 13 | 26 | GT   | 12 | 6  |
| 231696 | 32 | 922469  | 922486  | 2 | 9  | 18 | GT   | 11 | 7  |
| 231698 | 32 | 922790  | 922845  | 4 | 14 | 56 | AAGA | 14 | 8  |
| 231705 | 32 | 939306  | 939325  | 4 | 5  | 20 | TCTG | 35 | 3  |
| 231707 | 32 | 940731  | 940748  | 2 | 9  | 18 | CA   | 24 | 5  |
| 231711 | 32 | 945812  | 945823  | 2 | 6  | 12 | TG   | 25 | 4  |
| 231712 | 32 | 947139  | 947170  | 2 | 16 | 32 | AC   | 9  | 6  |
| 231713 | 32 | 948712  | 948729  | 2 | 9  | 18 | CA   | 15 | 7  |
| 231714 | 32 | 949566  | 949592  | 3 | 9  | 27 | AAT  | 17 | 5  |
| 231719 | 32 | 987240  | 987259  | 2 | 10 | 20 | AC   | 11 | 10 |
| 231722 | 32 | 1008692 | 1008711 | 4 | 5  | 20 | GTTA | 28 | 4  |
| 231738 | 32 | 1029969 | 1029990 | 2 | 11 | 22 | TG   | 15 | 13 |
| 231743 | 32 | 1039644 | 1039659 | 2 | 8  | 16 | AT   | 16 | 6  |
| 231766 | 32 | 1111221 | 1111236 | 4 | 4  | 16 | TTTG | 19 | 4  |
| 231781 | 32 | 1148009 | 1148028 | 4 | 5  | 20 | TGGC | 26 | 3  |
| 231782 | 32 | 1152451 | 1152474 | 3 | 8  | 24 | CAT  | 15 | 3  |
| 231784 | 32 | 1152737 | 1152757 | 3 | 7  | 21 | CAC  | 29 | 6  |
| 231791 | 32 | 1155913 | 1155930 | 2 | 9  | 18 | TC   | 18 | 9  |
| 231792 | 32 | 1156183 | 1156198 | 2 | 8  | 16 | TC   | 20 | 4  |
| 231794 | 32 | 1160677 | 1160700 | 3 | 8  | 24 | CAG  | 26 | 18 |
| 231801 | 32 | 1174606 | 1174625 | 4 | 5  | 20 | TTTG | 20 | 6  |
| 231817 | 32 | 1198964 | 1198983 | 2 | 10 | 20 | AC   | 16 | 4  |
| 231818 | 32 | 1199433 | 1199446 | 2 | 7  | 14 | GT   | 30 | 3  |
| 231819 | 32 | 1199575 | 1199594 | 2 | 10 | 20 | AC   | 22 | 7  |
| 231820 | 32 | 1200549 | 1200580 | 4 | 8  | 32 | CCTT | 15 | 7  |
| 231821 | 32 | 1205080 | 1205097 | 2 | 9  | 18 | GT   | 20 | 4  |
| 231824 | 32 | 1206652 | 1206673 | 2 | 11 | 22 | GT   | 18 | 5  |
| 231826 | 32 | 1211585 | 1211600 | 2 | 8  | 16 | AC   | 19 | 6  |
| 231827 | 32 | 1211945 | 1211956 | 2 | 6  | 12 | CA   | 6  | 4  |
| 231840 | 32 | 1222955 | 1222970 | 2 | 8  | 16 | TC   | 23 | 3  |
| 231841 | 32 | 1226781 | 1226806 | 2 | 13 | 26 | CT   | 16 | 9  |
| 231842 | 32 | 1227749 | 1227760 | 2 | 6  | 12 | GT   | 25 | 4  |
| 231843 | 32 | 1229746 | 1229763 | 2 | 9  | 18 | AC   | 23 | 8  |
| 231845 | 32 | 1229853 | 1229864 | 2 | 6  | 12 | GT   | 25 | 4  |
| 231849 | 32 | 1238099 | 1238122 | 2 | 12 | 24 | CA   | 15 | 6  |
| 231852 | 32 | 1241346 | 1241363 | 3 | 6  | 18 | CTT  | 26 | 3  |
| 231854 | 32 | 1245258 | 1245269 | 2 | 6  | 12 | TG   | 25 | 6  |
| 231862 | 32 | 1252010 | 1252033 | 3 | 8  | 24 | CAG  | 21 | 4  |
| 231866 | 32 | 1260077 | 1260088 | 2 | 6  | 12 | TG   | 27 | 3  |

|        |    |         |         |   |    |    |      |    |    |
|--------|----|---------|---------|---|----|----|------|----|----|
| 231874 | 32 | 1288812 | 1288823 | 2 | 6  | 12 | TA   | 26 | 4  |
| 231877 | 32 | 1293009 | 1293040 | 2 | 16 | 32 | TG   | 6  | 7  |
| 231878 | 32 | 1293140 | 1293171 | 2 | 16 | 32 | AC   | 10 | 8  |
| 231879 | 32 | 1293320 | 1293347 | 2 | 14 | 28 | GT   | 17 | 8  |
| 231880 | 32 | 1293477 | 1293508 | 2 | 16 | 32 | CA   | 14 | 9  |
| 231881 | 32 | 1294557 | 1294582 | 2 | 13 | 26 | TG   | 18 | 8  |
| 231882 | 32 | 1294710 | 1294729 | 2 | 10 | 20 | AC   | 13 | 7  |
| 231883 | 32 | 1294768 | 1294813 | 2 | 23 | 46 | AC   | 6  | 6  |
| 231887 | 32 | 1299003 | 1299018 | 2 | 8  | 16 | AC   | 18 | 10 |
| 231888 | 32 | 1299126 | 1299157 | 2 | 16 | 32 | CA   | 19 | 12 |
| 231889 | 32 | 1299941 | 1299962 | 2 | 11 | 22 | TG   | 14 | 6  |
| 231890 | 32 | 1300794 | 1300807 | 2 | 7  | 14 | TG   | 14 | 15 |
| 231897 | 32 | 1307007 | 1307020 | 2 | 7  | 14 | AC   | 14 | 10 |
| 231898 | 32 | 1308968 | 1308985 | 2 | 9  | 18 | CT   | 19 | 4  |
| 231900 | 32 | 1309215 | 1309240 | 2 | 13 | 26 | AC   | 16 | 9  |
| 231901 | 32 | 1310029 | 1310067 | 3 | 13 | 39 | AGA  | 6  | 10 |
| 231903 | 32 | 1310600 | 1310629 | 2 | 15 | 30 | AC   | 8  | 13 |
| 231904 | 32 | 1312950 | 1312971 | 2 | 11 | 22 | AC   | 13 | 9  |
| 231905 | 32 | 1315852 | 1315877 | 2 | 13 | 26 | AC   | 24 | 6  |
| 231909 | 32 | 1318029 | 1318052 | 2 | 12 | 24 | TG   | 10 | 6  |
| 231913 | 32 | 1321405 | 1321448 | 2 | 22 | 44 | AC   | 6  | 8  |
| 231919 | 32 | 1326566 | 1326589 | 2 | 12 | 24 | AG   | 10 | 6  |
| 231922 | 32 | 1331294 | 1331305 | 2 | 6  | 12 | CA   | 19 | 3  |
| 231924 | 32 | 1334600 | 1334620 | 3 | 7  | 21 | AGG  | 20 | 4  |
| 231928 | 32 | 1340867 | 1340890 | 2 | 12 | 24 | TG   | 16 | 8  |
| 231931 | 32 | 1346170 | 1346181 | 2 | 6  | 12 | TG   | 24 | 3  |
| 231932 | 32 | 1346389 | 1346410 | 2 | 11 | 22 | TG   | 25 | 9  |
| 231933 | 32 | 1346552 | 1346572 | 3 | 7  | 21 | AAT  | 23 | 4  |
| 231934 | 32 | 1346897 | 1346912 | 2 | 8  | 16 | TG   | 16 | 3  |
| 231935 | 32 | 1348577 | 1348604 | 2 | 14 | 28 | AC   | 16 | 12 |
| 231936 | 32 | 1348723 | 1348746 | 4 | 6  | 24 | TTTA | 15 | 3  |
| 231938 | 32 | 1349517 | 1349536 | 2 | 10 | 20 | GT   | 17 | 6  |
| 231939 | 32 | 1349581 | 1349596 | 2 | 8  | 16 | GT   | 20 | 11 |
| 231940 | 32 | 1349597 | 1349608 | 2 | 6  | 12 | GA   | 12 | 4  |
| 231943 | 32 | 1350718 | 1350751 | 2 | 17 | 34 | GT   | 6  | 7  |
| 231944 | 32 | 1350822 | 1350851 | 2 | 15 | 30 | TG   | 13 | 13 |
| 231945 | 32 | 1350989 | 1351004 | 2 | 8  | 16 | GT   | 18 | 14 |
| 231946 | 32 | 1353230 | 1353251 | 2 | 11 | 22 | GT   | 15 | 9  |
| 231948 | 32 | 1353482 | 1353509 | 2 | 14 | 28 | GT   | 8  | 8  |
| 231949 | 32 | 1354017 | 1354046 | 2 | 15 | 30 | CA   | 21 | 14 |
| 231955 | 32 | 1355189 | 1355206 | 2 | 9  | 18 | AC   | 18 | 8  |
| 231958 | 32 | 1356185 | 1356222 | 2 | 19 | 38 | GT   | 9  | 11 |
| 231959 | 32 | 1356268 | 1356279 | 2 | 6  | 12 | TG   | 21 | 3  |
| 231963 | 32 | 1359856 | 1359876 | 3 | 7  | 21 | AGG  | 18 | 6  |
| 231965 | 32 | 1361257 | 1361274 | 2 | 9  | 18 | TC   | 19 | 6  |
| 231966 | 32 | 1361412 | 1361423 | 2 | 6  | 12 | GT   | 23 | 6  |
| 231970 | 32 | 1362740 | 1362755 | 2 | 8  | 16 | TG   | 32 | 5  |
| 231972 | 32 | 1363411 | 1363444 | 2 | 17 | 34 | TG   | 7  | 10 |
| 231974 | 32 | 1363854 | 1363867 | 2 | 7  | 14 | TG   | 16 | 3  |
| 231976 | 32 | 1367245 | 1367260 | 2 | 8  | 16 | GT   | 27 | 5  |
| 231980 | 32 | 1368903 | 1368926 | 2 | 12 | 24 | GT   | 14 | 9  |

|        |    |         |         |   |    |    |      |    |    |
|--------|----|---------|---------|---|----|----|------|----|----|
| 231981 | 32 | 1371206 | 1371217 | 2 | 6  | 12 | TC   | 13 | 5  |
| 231983 | 32 | 1371437 | 1371450 | 2 | 7  | 14 | CA   | 22 | 5  |
| 231987 | 32 | 1373285 | 1373308 | 2 | 12 | 24 | CA   | 19 | 9  |
| 231988 | 32 | 1373483 | 1373514 | 2 | 16 | 32 | CA   | 8  | 9  |
| 231994 | 32 | 1374648 | 1374659 | 2 | 6  | 12 | AC   | 25 | 7  |
| 231995 | 32 | 1374662 | 1374673 | 2 | 6  | 12 | AC   | 25 | 6  |
| 231996 | 32 | 1374726 | 1374755 | 2 | 15 | 30 | AC   | 15 | 7  |
| 231998 | 32 | 1374856 | 1374873 | 2 | 9  | 18 | CA   | 10 | 12 |
| 231999 | 32 | 1375022 | 1375059 | 2 | 19 | 38 | AC   | 14 | 9  |
| 232002 | 32 | 1376093 | 1376118 | 2 | 13 | 26 | GT   | 13 | 8  |
| 232003 | 32 | 1376168 | 1376187 | 2 | 10 | 20 | TG   | 10 | 4  |
| 232005 | 32 | 1378458 | 1378489 | 2 | 16 | 32 | TG   | 9  | 9  |
| 232008 | 32 | 1379550 | 1379571 | 2 | 11 | 22 | GT   | 25 | 6  |
| 232010 | 32 | 1381325 | 1381338 | 2 | 7  | 14 | CA   | 14 | 8  |
| 232011 | 32 | 1381402 | 1381413 | 2 | 6  | 12 | TG   | 26 | 3  |
| 232012 | 32 | 1381566 | 1381591 | 2 | 13 | 26 | CA   | 6  | 10 |
| 232013 | 32 | 1382317 | 1382336 | 2 | 10 | 20 | CT   | 22 | 7  |
| 232016 | 32 | 1384567 | 1384580 | 2 | 7  | 14 | GA   | 30 | 4  |
| 232018 | 32 | 1387087 | 1387112 | 2 | 13 | 26 | TG   | 16 | 7  |
| 232022 | 32 | 1387629 | 1387644 | 2 | 8  | 16 | AC   | 29 | 3  |
| 232024 | 32 | 1387811 | 1387838 | 2 | 14 | 28 | AC   | 9  | 11 |
| 232026 | 32 | 1388337 | 1388354 | 2 | 9  | 18 | CT   | 26 | 4  |
| 232027 | 32 | 1390409 | 1390424 | 4 | 4  | 16 | AAAT | 12 | 5  |
| 232028 | 32 | 1390885 | 1390898 | 2 | 7  | 14 | TG   | 16 | 3  |
| 232029 | 32 | 1391009 | 1391026 | 2 | 9  | 18 | GT   | 6  | 4  |
| 232037 | 32 | 1394891 | 1394936 | 2 | 23 | 46 | AC   | 8  | 10 |
| 232038 | 32 | 1395002 | 1395013 | 2 | 6  | 12 | CA   | 19 | 3  |
| 232039 | 32 | 1395109 | 1395128 | 2 | 10 | 20 | CA   | 12 | 10 |
| 232040 | 32 | 1395247 | 1395260 | 2 | 7  | 14 | GT   | 9  | 10 |
| 232041 | 32 | 1395262 | 1395277 | 2 | 8  | 16 | TG   | 7  | 7  |
| 232043 | 32 | 1396523 | 1396536 | 2 | 7  | 14 | TG   | 22 | 4  |
| 232045 | 32 | 1397099 | 1397138 | 2 | 20 | 40 | GT   | 14 | 11 |
| 232047 | 32 | 1397345 | 1397364 | 2 | 10 | 20 | AC   | 25 | 10 |
| 232050 | 32 | 1399254 | 1399267 | 2 | 7  | 14 | GT   | 15 | 4  |
| 232052 | 32 | 1401271 | 1401292 | 2 | 11 | 22 | AC   | 21 | 10 |
| 232056 | 32 | 1401611 | 1401644 | 2 | 17 | 34 | CA   | 17 | 13 |
| 232061 | 32 | 1405839 | 1405898 | 4 | 15 | 60 | AGAT | 13 | 14 |
| 232062 | 32 | 1407129 | 1407146 | 3 | 6  | 18 | CCT  | 19 | 3  |
| 232063 | 32 | 1408044 | 1408057 | 2 | 7  | 14 | GT   | 23 | 3  |
| 232064 | 32 | 1408156 | 1408179 | 2 | 12 | 24 | CA   | 12 | 12 |
| 232069 | 32 | 1409016 | 1409031 | 4 | 4  | 16 | TTGA | 30 | 3  |
| 232075 | 32 | 1410684 | 1410715 | 2 | 16 | 32 | TG   | 10 | 10 |
| 232079 | 32 | 1412554 | 1412605 | 2 | 26 | 52 | GT   | 13 | 6  |
| 232081 | 32 | 1414619 | 1414638 | 2 | 10 | 20 | GT   | 14 | 10 |
| 232083 | 32 | 1417746 | 1417777 | 2 | 16 | 32 | AC   | 13 | 11 |
| 232084 | 32 | 1421599 | 1421630 | 2 | 16 | 32 | CA   | 14 | 13 |
| 232086 | 32 | 1422614 | 1422637 | 2 | 12 | 24 | AG   | 15 | 5  |
| 232094 | 32 | 1425852 | 1425863 | 2 | 6  | 12 | AG   | 17 | 7  |
| 232096 | 32 | 1426558 | 1426609 | 2 | 26 | 52 | CT   | 6  | 7  |
| 232102 | 32 | 1431816 | 1431835 | 2 | 10 | 20 | TC   | 15 | 5  |
| 232103 | 32 | 1432317 | 1432342 | 2 | 13 | 26 | AC   | 17 | 12 |

|        |    |         |         |   |    |    |      |    |    |
|--------|----|---------|---------|---|----|----|------|----|----|
| 232109 | 32 | 1437189 | 1437214 | 2 | 13 | 26 | GT   | 26 | 7  |
| 232112 | 32 | 1439040 | 1439063 | 2 | 12 | 24 | CA   | 11 | 10 |
| 232113 | 32 | 1439440 | 1439453 | 2 | 7  | 14 | TG   | 8  | 5  |
| 232116 | 32 | 1443938 | 1443965 | 4 | 7  | 28 | TCCT | 19 | 4  |
| 232117 | 32 | 1444331 | 1444362 | 2 | 16 | 32 | AC   | 18 | 18 |
| 232118 | 32 | 1446395 | 1446418 | 4 | 6  | 24 | TGGA | 19 | 5  |
| 232120 | 32 | 1446851 | 1446864 | 2 | 7  | 14 | TG   | 24 | 4  |
| 232122 | 32 | 1446948 | 1446965 | 2 | 9  | 18 | TG   | 6  | 6  |
| 232124 | 32 | 1447265 | 1447322 | 2 | 29 | 58 | AC   | 18 | 9  |
| 232125 | 32 | 1447394 | 1447411 | 2 | 9  | 18 | CA   | 17 | 13 |
| 232126 | 32 | 1447501 | 1447538 | 2 | 19 | 38 | AC   | 18 | 9  |
| 232127 | 32 | 1448325 | 1448336 | 2 | 6  | 12 | TG   | 28 | 3  |
| 232132 | 32 | 1450376 | 1450393 | 2 | 9  | 18 | CA   | 21 | 5  |
| 232133 | 32 | 1453007 | 1453024 | 2 | 9  | 18 | AG   | 26 | 6  |
| 232135 | 32 | 1456972 | 1457007 | 2 | 18 | 36 | TG   | 6  | 5  |
| 232137 | 32 | 1458134 | 1458151 | 2 | 9  | 18 | TG   | 11 | 12 |
| 232139 | 32 | 1458284 | 1458299 | 2 | 8  | 16 | CA   | 21 | 5  |
| 232140 | 32 | 1458880 | 1458897 | 2 | 9  | 18 | AC   | 15 | 5  |
| 232141 | 32 | 1459335 | 1459354 | 2 | 10 | 20 | AC   | 22 | 8  |
| 232143 | 32 | 1460840 | 1460855 | 2 | 8  | 16 | TG   | 17 | 9  |
| 232144 | 32 | 1460857 | 1460870 | 2 | 7  | 14 | GT   | 17 | 8  |
| 232146 | 32 | 1464056 | 1464075 | 2 | 10 | 20 | GT   | 24 | 6  |
| 232148 | 32 | 1465005 | 1465020 | 2 | 8  | 16 | GA   | 28 | 3  |
| 232149 | 32 | 1466613 | 1466630 | 2 | 9  | 18 | TG   | 11 | 6  |
| 232150 | 32 | 1467011 | 1467028 | 2 | 9  | 18 | GT   | 23 | 8  |
| 232151 | 32 | 1467198 | 1467219 | 2 | 11 | 22 | GT   | 22 | 10 |
| 232152 | 32 | 1467745 | 1467759 | 3 | 5  | 15 | TCA  | 30 | 4  |
| 232153 | 32 | 1468802 | 1468817 | 2 | 8  | 16 | TG   | 24 | 10 |
| 232155 | 32 | 1470681 | 1470714 | 2 | 17 | 34 | CA   | 13 | 8  |
| 232157 | 32 | 1472434 | 1472467 | 2 | 17 | 34 | TG   | 10 | 7  |
| 232159 | 32 | 1476287 | 1476310 | 2 | 12 | 24 | CA   | 17 | 10 |
| 232160 | 32 | 1476459 | 1476510 | 2 | 26 | 52 | TG   | 6  | 9  |
| 232163 | 32 | 1478535 | 1478558 | 2 | 12 | 24 | AC   | 15 | 13 |
| 232175 | 32 | 1490777 | 1490804 | 2 | 14 | 28 | AC   | 8  | 11 |
| 232176 | 32 | 1492363 | 1492406 | 4 | 11 | 44 | CCAA | 21 | 13 |
| 232177 | 32 | 1492986 | 1493007 | 2 | 11 | 22 | GT   | 18 | 5  |
| 232178 | 32 | 1493059 | 1493084 | 2 | 13 | 26 | TG   | 19 | 6  |
| 232184 | 32 | 1500723 | 1500756 | 2 | 17 | 34 | GT   | 19 | 7  |
| 232186 | 32 | 1500895 | 1500906 | 2 | 6  | 12 | CA   | 25 | 3  |
| 232192 | 32 | 1504354 | 1504387 | 2 | 17 | 34 | GT   | 9  | 8  |
| 232197 | 32 | 1507096 | 1507107 | 2 | 6  | 12 | CA   | 14 | 4  |
| 232203 | 32 | 1510745 | 1510768 | 2 | 12 | 24 | CA   | 19 | 8  |
| 232205 | 32 | 1511677 | 1511688 | 2 | 6  | 12 | TG   | 21 | 7  |
| 232208 | 32 | 1514890 | 1514905 | 2 | 8  | 16 | AC   | 23 | 8  |
| 232209 | 32 | 1516217 | 1516236 | 2 | 10 | 20 | GA   | 18 | 4  |
| 232213 | 32 | 1516890 | 1516901 | 2 | 6  | 12 | GA   | 22 | 3  |
| 232214 | 32 | 1523796 | 1523813 | 2 | 9  | 18 | AC   | 31 | 10 |
| 232216 | 32 | 1524091 | 1524108 | 2 | 9  | 18 | CA   | 7  | 4  |
| 232219 | 32 | 1526553 | 1526586 | 2 | 17 | 34 | TG   | 17 | 11 |
| 232220 | 32 | 1526732 | 1526745 | 2 | 7  | 14 | TG   | 19 | 9  |
| 232222 | 32 | 1528553 | 1528580 | 2 | 14 | 28 | TG   | 17 | 8  |

|        |    |         |         |   |    |    |     |    |    |
|--------|----|---------|---------|---|----|----|-----|----|----|
| 232223 | 32 | 1529628 | 1529641 | 2 | 7  | 14 | CA  | 22 | 3  |
| 232225 | 32 | 1529795 | 1529814 | 2 | 10 | 20 | GT  | 9  | 8  |
| 232226 | 32 | 1531446 | 1531459 | 2 | 7  | 14 | AG  | 24 | 5  |
| 232232 | 32 | 1538997 | 1539024 | 2 | 14 | 28 | AC  | 26 | 8  |
| 232233 | 32 | 1539186 | 1539211 | 2 | 13 | 26 | AC  | 23 | 10 |
| 232235 | 32 | 1544539 | 1544560 | 2 | 11 | 22 | CA  | 23 | 8  |
| 232236 | 32 | 1545229 | 1545266 | 2 | 19 | 38 | CA  | 23 | 9  |
| 232237 | 32 | 1547098 | 1547121 | 2 | 12 | 24 | GT  | 20 | 8  |
| 232240 | 32 | 1548513 | 1548530 | 2 | 9  | 18 | AC  | 18 | 7  |
| 232241 | 32 | 1550145 | 1550164 | 2 | 10 | 20 | AC  | 14 | 16 |
| 232243 | 32 | 1553438 | 1553499 | 2 | 31 | 62 | TG  | 12 | 10 |
| 232247 | 32 | 1554673 | 1554694 | 2 | 11 | 22 | GT  | 18 | 7  |
| 232253 | 32 | 1560839 | 1560860 | 2 | 11 | 22 | TG  | 22 | 5  |
| 232254 | 32 | 1561074 | 1561091 | 2 | 9  | 18 | TA  | 17 | 5  |
| 232256 | 32 | 1562055 | 1562070 | 2 | 8  | 16 | TG  | 25 | 4  |
| 232257 | 32 | 1563784 | 1563799 | 2 | 8  | 16 | GT  | 19 | 7  |
| 232259 | 32 | 1565351 | 1565362 | 2 | 6  | 12 | AC  | 19 | 4  |
| 232260 | 32 | 1568258 | 1568281 | 3 | 8  | 24 | CTG | 27 | 11 |
| 232263 | 32 | 1570438 | 1570449 | 2 | 6  | 12 | AC  | 17 | 3  |
| 232264 | 32 | 1572218 | 1572235 | 2 | 9  | 18 | CA  | 25 | 3  |
| 232267 | 32 | 1575233 | 1575246 | 2 | 7  | 14 | GA  | 22 | 3  |
| 232269 | 32 | 1578963 | 1578974 | 2 | 6  | 12 | AC  | 16 | 9  |
| 232270 | 32 | 1578977 | 1578990 | 2 | 7  | 14 | AC  | 14 | 8  |
| 232271 | 32 | 1579121 | 1579156 | 2 | 18 | 36 | TG  | 8  | 9  |
| 232273 | 32 | 1579190 | 1579211 | 2 | 11 | 22 | GT  | 9  | 9  |
| 232278 | 32 | 1584388 | 1584405 | 2 | 9  | 18 | CA  | 16 | 5  |
| 232282 | 32 | 1584523 | 1584536 | 2 | 7  | 14 | AC  | 12 | 7  |
| 232283 | 32 | 1584658 | 1584681 | 2 | 12 | 24 | AG  | 10 | 5  |
| 232285 | 32 | 1584706 | 1584723 | 2 | 9  | 18 | AG  | 7  | 3  |
| 232293 | 32 | 1592998 | 1593023 | 2 | 13 | 26 | GT  | 13 | 4  |
| 232298 | 32 | 1599256 | 1599269 | 2 | 7  | 14 | TC  | 21 | 5  |
| 232299 | 32 | 1600714 | 1600731 | 2 | 9  | 18 | AC  | 8  | 8  |
| 232300 | 32 | 1600879 | 1600906 | 2 | 14 | 28 | AC  | 18 | 6  |
| 232301 | 32 | 1601192 | 1601205 | 2 | 7  | 14 | GA  | 17 | 3  |
| 232302 | 32 | 1605558 | 1605573 | 2 | 8  | 16 | TG  | 24 | 5  |
| 232303 | 32 | 1610893 | 1610904 | 2 | 6  | 12 | TG  | 21 | 4  |
| 232307 | 32 | 1614835 | 1614856 | 2 | 11 | 22 | AC  | 21 | 4  |
| 232310 | 32 | 1618749 | 1618760 | 2 | 6  | 12 | CA  | 22 | 3  |
| 232311 | 32 | 1619737 | 1619754 | 2 | 9  | 18 | CA  | 32 | 3  |
| 232315 | 32 | 1628754 | 1628769 | 2 | 8  | 16 | GT  | 24 | 4  |
| 232321 | 32 | 1633072 | 1633083 | 2 | 6  | 12 | TC  | 28 | 4  |
| 232326 | 32 | 1636592 | 1636621 | 2 | 15 | 30 | AC  | 10 | 9  |
| 232331 | 32 | 1641906 | 1641917 | 2 | 6  | 12 | TA  | 23 | 3  |
| 232336 | 32 | 1655527 | 1655538 | 2 | 6  | 12 | TG  | 23 | 4  |
| 232340 | 32 | 1666943 | 1666986 | 2 | 22 | 44 | TG  | 11 | 9  |
| 232342 | 32 | 1668670 | 1668697 | 2 | 14 | 28 | AC  | 21 | 9  |
| 232345 | 32 | 1669251 | 1669270 | 2 | 10 | 20 | CT  | 13 | 4  |
| 232351 | 32 | 1680341 | 1680352 | 2 | 6  | 12 | GT  | 13 | 5  |
| 232354 | 32 | 1697313 | 1697332 | 2 | 10 | 20 | AC  | 11 | 5  |
| 232356 | 32 | 1700082 | 1700103 | 2 | 11 | 22 | CA  | 19 | 10 |
| 232358 | 32 | 1703129 | 1703150 | 2 | 11 | 22 | AC  | 22 | 6  |

|        |    |         |         |   |    |    |      |    |    |
|--------|----|---------|---------|---|----|----|------|----|----|
| 232361 | 32 | 1704988 | 1705025 | 2 | 19 | 38 | AC   | 9  | 8  |
| 232364 | 32 | 1707100 | 1707135 | 2 | 18 | 36 | AC   | 15 | 13 |
| 232365 | 32 | 1707345 | 1707372 | 2 | 14 | 28 | GT   | 21 | 10 |
| 232367 | 32 | 1709237 | 1709260 | 4 | 6  | 24 | CTCC | 7  | 3  |
| 232368 | 32 | 1709432 | 1709471 | 2 | 20 | 40 | CA   | 19 | 7  |
| 232372 | 32 | 1711165 | 1711204 | 2 | 20 | 40 | TG   | 11 | 11 |
| 232373 | 32 | 1712097 | 1712140 | 2 | 22 | 44 | CA   | 9  | 8  |
| 232374 | 32 | 1712275 | 1712290 | 4 | 4  | 16 | AGAA | 10 | 6  |
| 232378 | 32 | 1713877 | 1713896 | 2 | 10 | 20 | CT   | 21 | 4  |
| 232379 | 32 | 1714068 | 1714082 | 3 | 5  | 15 | AGA  | 31 | 3  |
| 232382 | 32 | 1717055 | 1717068 | 2 | 7  | 14 | GT   | 21 | 6  |
| 232383 | 32 | 1717287 | 1717298 | 2 | 6  | 12 | CA   | 29 | 3  |
| 232384 | 32 | 1719341 | 1719364 | 2 | 12 | 24 | GT   | 12 | 6  |
| 232386 | 32 | 1719445 | 1719462 | 2 | 9  | 18 | CA   | 15 | 15 |
| 232388 | 32 | 1721749 | 1721764 | 2 | 8  | 16 | GT   | 20 | 3  |
| 232389 | 32 | 1722153 | 1722173 | 3 | 7  | 21 | GAG  | 16 | 6  |
| 232391 | 32 | 1723788 | 1723801 | 2 | 7  | 14 | GT   | 32 | 6  |
| 232392 | 32 | 1723993 | 1724010 | 3 | 6  | 18 | GGA  | 17 | 6  |
| 232394 | 32 | 1726175 | 1726186 | 2 | 6  | 12 | AC   | 18 | 7  |
| 232397 | 32 | 1732450 | 1732469 | 2 | 10 | 20 | GA   | 20 | 6  |
| 232398 | 32 | 1732689 | 1732706 | 2 | 9  | 18 | AC   | 26 | 10 |
| 232399 | 32 | 1734424 | 1734435 | 2 | 6  | 12 | TG   | 29 | 6  |
| 232400 | 32 | 1734681 | 1734692 | 2 | 6  | 12 | AC   | 24 | 4  |
| 232401 | 32 | 1734745 | 1734756 | 2 | 6  | 12 | TG   | 26 | 6  |
| 232405 | 32 | 1737603 | 1737622 | 4 | 5  | 20 | AGAC | 26 | 7  |
| 232408 | 32 | 1742616 | 1742635 | 2 | 10 | 20 | TG   | 18 | 9  |
| 232409 | 32 | 1744374 | 1744388 | 3 | 5  | 15 | AAT  | 16 | 11 |
| 232410 | 32 | 1745538 | 1745563 | 2 | 13 | 26 | GT   | 21 | 4  |
| 232412 | 32 | 1746984 | 1746995 | 2 | 6  | 12 | AG   | 21 | 5  |
| 232414 | 32 | 1750973 | 1750990 | 3 | 6  | 18 | CCT  | 21 | 6  |
| 232418 | 32 | 1751327 | 1751340 | 2 | 7  | 14 | TG   | 20 | 8  |
| 232420 | 32 | 1751597 | 1751640 | 2 | 22 | 44 | AC   | 19 | 19 |
| 232421 | 32 | 1751765 | 1751806 | 2 | 21 | 42 | TG   | 6  | 8  |
| 232422 | 32 | 1758864 | 1758889 | 2 | 13 | 26 | TG   | 17 | 9  |
| 232426 | 32 | 1763337 | 1763368 | 2 | 16 | 32 | AC   | 13 | 14 |
| 232429 | 32 | 1765560 | 1765571 | 2 | 6  | 12 | TG   | 18 | 3  |
| 232430 | 32 | 1765731 | 1765762 | 2 | 16 | 32 | TG   | 10 | 12 |
| 232432 | 32 | 1766647 | 1766668 | 2 | 11 | 22 | GT   | 26 | 6  |
| 232433 | 32 | 1768062 | 1768073 | 2 | 6  | 12 | CA   | 28 | 5  |
| 232436 | 32 | 1769067 | 1769080 | 2 | 7  | 14 | GT   | 25 | 5  |
| 232437 | 32 | 1769191 | 1769222 | 2 | 16 | 32 | TG   | 7  | 3  |
| 232440 | 32 | 1772691 | 1772720 | 2 | 15 | 30 | GT   | 12 | 8  |
| 232445 | 32 | 1775618 | 1775637 | 2 | 10 | 20 | TG   | 6  | 4  |
| 232449 | 32 | 1778781 | 1778810 | 2 | 15 | 30 | CA   | 22 | 11 |
| 232450 | 32 | 1778891 | 1778922 | 2 | 16 | 32 | AC   | 9  | 6  |
| 232451 | 32 | 1779076 | 1779090 | 3 | 5  | 15 | GAG  | 23 | 3  |
| 232454 | 32 | 1781278 | 1781311 | 2 | 17 | 34 | AC   | 15 | 7  |
| 232456 | 32 | 1783525 | 1783539 | 3 | 5  | 15 | CTT  | 8  | 4  |
| 232457 | 32 | 1783832 | 1783849 | 2 | 9  | 18 | TG   | 21 | 3  |
| 232458 | 32 | 1784879 | 1784890 | 2 | 6  | 12 | AC   | 24 | 5  |
| 232461 | 32 | 1787658 | 1787679 | 2 | 11 | 22 | CA   | 12 | 5  |

|        |    |         |         |   |    |    |      |    |    |
|--------|----|---------|---------|---|----|----|------|----|----|
| 232465 | 32 | 1794964 | 1794981 | 3 | 6  | 18 | TCC  | 25 | 4  |
| 232467 | 32 | 1795375 | 1795390 | 2 | 8  | 16 | GT   | 15 | 5  |
| 232471 | 32 | 1796920 | 1796941 | 2 | 11 | 22 | GT   | 24 | 3  |
| 232473 | 32 | 1800202 | 1800237 | 2 | 18 | 36 | TG   | 17 | 8  |
| 232475 | 32 | 1805501 | 1805520 | 2 | 10 | 20 | TG   | 15 | 6  |
| 232477 | 32 | 1809409 | 1809422 | 2 | 7  | 14 | CA   | 14 | 3  |
| 232482 | 32 | 1820706 | 1820735 | 2 | 15 | 30 | AC   | 16 | 7  |
| 232483 | 32 | 1823281 | 1823296 | 2 | 8  | 16 | AC   | 25 | 3  |
| 232487 | 32 | 1832695 | 1832726 | 4 | 8  | 32 | ATAG | 14 | 13 |
| 232490 | 32 | 1834036 | 1834063 | 2 | 14 | 28 | GT   | 10 | 3  |
| 232495 | 32 | 1834690 | 1834705 | 4 | 4  | 16 | TTTG | 17 | 3  |
| 232499 | 32 | 1835693 | 1835714 | 2 | 11 | 22 | CA   | 12 | 10 |
| 232503 | 32 | 1838643 | 1838660 | 2 | 9  | 18 | TG   | 21 | 5  |
| 232505 | 32 | 1839331 | 1839358 | 2 | 14 | 28 | GT   | 17 | 8  |
| 232506 | 32 | 1841027 | 1841046 | 2 | 10 | 20 | TG   | 15 | 3  |
| 232513 | 32 | 1843298 | 1843339 | 2 | 21 | 42 | AG   | 9  | 8  |
| 232514 | 32 | 1844984 | 1845013 | 2 | 15 | 30 | TG   | 16 | 9  |
| 232524 | 32 | 1855888 | 1855899 | 2 | 6  | 12 | AC   | 23 | 3  |
| 232526 | 32 | 1859015 | 1859032 | 2 | 9  | 18 | TG   | 21 | 5  |
| 232528 | 32 | 1859192 | 1859213 | 2 | 11 | 22 | GT   | 14 | 11 |
| 232531 | 32 | 1865018 | 1865038 | 3 | 7  | 21 | TCT  | 24 | 4  |
| 232532 | 32 | 1865290 | 1865310 | 3 | 7  | 21 | CTG  | 20 | 4  |
| 232537 | 32 | 1871271 | 1871285 | 3 | 5  | 15 | TGC  | 19 | 5  |
| 232541 | 32 | 1874587 | 1874607 | 3 | 7  | 21 | TCT  | 16 | 5  |
| 232546 | 32 | 1879965 | 1879988 | 2 | 12 | 24 | GT   | 9  | 10 |
| 232547 | 32 | 1880136 | 1880173 | 2 | 19 | 38 | AC   | 17 | 16 |
| 232548 | 32 | 1880519 | 1880550 | 2 | 16 | 32 | AC   | 11 | 12 |
| 232549 | 32 | 1881409 | 1881420 | 2 | 6  | 12 | CA   | 15 | 7  |
| 232550 | 32 | 1881423 | 1881438 | 2 | 8  | 16 | CA   | 16 | 5  |
| 232553 | 32 | 1882673 | 1882708 | 2 | 18 | 36 | TG   | 11 | 10 |
| 232556 | 32 | 1886529 | 1886542 | 2 | 7  | 14 | CT   | 24 | 4  |
| 232557 | 32 | 1887499 | 1887512 | 2 | 7  | 14 | TG   | 18 | 11 |
| 232558 | 32 | 1887544 | 1887557 | 2 | 7  | 14 | AC   | 20 | 3  |
| 232560 | 32 | 1888067 | 1888104 | 2 | 19 | 38 | AC   | 15 | 8  |
| 232562 | 32 | 1890654 | 1890669 | 4 | 4  | 16 | GAGG | 7  | 3  |
| 232563 | 32 | 1891012 | 1891033 | 2 | 11 | 22 | AC   | 24 | 9  |
| 232568 | 32 | 1899370 | 1899391 | 2 | 11 | 22 | CA   | 13 | 7  |
| 232570 | 32 | 1903854 | 1903887 | 2 | 17 | 34 | TG   | 19 | 13 |
| 232571 | 32 | 1905297 | 1905311 | 3 | 5  | 15 | ACT  | 19 | 4  |
| 232572 | 32 | 1905453 | 1905466 | 2 | 7  | 14 | TG   | 19 | 4  |
| 232573 | 32 | 1905545 | 1905570 | 2 | 13 | 26 | GT   | 11 | 5  |
| 232574 | 32 | 1907553 | 1907572 | 2 | 10 | 20 | AG   | 15 | 6  |
| 232576 | 32 | 1910475 | 1910490 | 4 | 4  | 16 | GGAT | 28 | 3  |
| 232579 | 32 | 1914153 | 1914176 | 2 | 12 | 24 | AC   | 24 | 4  |
| 232586 | 32 | 1925431 | 1925444 | 2 | 7  | 14 | AC   | 17 | 10 |
| 232591 | 32 | 1933284 | 1933307 | 2 | 12 | 24 | CA   | 23 | 8  |
| 232592 | 32 | 1933529 | 1933542 | 2 | 7  | 14 | CA   | 28 | 9  |
| 232593 | 32 | 1933610 | 1933645 | 2 | 18 | 36 | CA   | 22 | 9  |
| 232595 | 32 | 1936700 | 1936715 | 2 | 8  | 16 | GT   | 17 | 11 |
| 232597 | 32 | 1942303 | 1942322 | 2 | 10 | 20 | GT   | 15 | 7  |
| 232601 | 32 | 1956225 | 1956242 | 2 | 9  | 18 | TG   | 21 | 8  |



|        |    |         |         |   |    |    |      |    |    |
|--------|----|---------|---------|---|----|----|------|----|----|
| 232602 | 32 | 1956388 | 1956413 | 2 | 13 | 26 | AC   | 17 | 13 |
| 232608 | 32 | 1957654 | 1957669 | 2 | 8  | 16 | GA   | 15 | 3  |
| 232612 | 32 | 1961735 | 1961768 | 2 | 17 | 34 | AC   | 8  | 7  |
| 232619 | 32 | 1967549 | 1967570 | 2 | 11 | 22 | TG   | 10 | 8  |
| 232621 | 32 | 1969399 | 1969424 | 2 | 13 | 26 | TG   | 11 | 10 |
| 232625 | 32 | 1969808 | 1969819 | 2 | 6  | 12 | AC   | 18 | 3  |
| 232626 | 32 | 1970000 | 1970015 | 2 | 8  | 16 | GT   | 20 | 12 |
| 232632 | 32 | 1973718 | 1973747 | 2 | 15 | 30 | CA   | 11 | 9  |
| 232635 | 32 | 1977216 | 1977257 | 2 | 21 | 42 | CA   | 7  | 8  |
| 232636 | 32 | 1977284 | 1977311 | 2 | 14 | 28 | CA   | 12 | 5  |
| 232637 | 32 | 1978288 | 1978305 | 3 | 6  | 18 | GAG  | 18 | 3  |
| 232639 | 32 | 1979923 | 1979952 | 2 | 15 | 30 | GT   | 6  | 8  |
| 232642 | 32 | 1980137 | 1980152 | 2 | 8  | 16 | AC   | 21 | 3  |
| 232649 | 32 | 1990173 | 1990184 | 2 | 6  | 12 | AC   | 26 | 4  |
| 232650 | 32 | 1990335 | 1990354 | 2 | 10 | 20 | AC   | 22 | 6  |
| 232651 | 32 | 1990504 | 1990519 | 2 | 8  | 16 | TG   | 11 | 6  |
| 232653 | 32 | 1990664 | 1990679 | 2 | 8  | 16 | AG   | 16 | 6  |
| 232655 | 32 | 1990802 | 1990831 | 2 | 15 | 30 | GT   | 15 | 8  |
| 232656 | 32 | 1991140 | 1991167 | 2 | 14 | 28 | CA   | 19 | 17 |
| 232657 | 32 | 1994813 | 1994834 | 2 | 11 | 22 | CA   | 15 | 7  |
| 232659 | 32 | 1995044 | 1995063 | 2 | 10 | 20 | TG   | 15 | 3  |
| 232660 | 32 | 1995204 | 1995219 | 2 | 8  | 16 | CA   | 15 | 5  |
| 232661 | 32 | 1995306 | 1995343 | 2 | 19 | 38 | AC   | 7  | 11 |
| 232668 | 32 | 1997904 | 1997931 | 4 | 7  | 28 | CAGA | 15 | 5  |
| 232669 | 32 | 1997972 | 1997991 | 4 | 5  | 20 | CTGT | 23 | 4  |
| 232670 | 32 | 1998115 | 1998144 | 2 | 15 | 30 | CA   | 9  | 7  |
| 232672 | 32 | 1999676 | 1999699 | 2 | 12 | 24 | AC   | 24 | 12 |
| 232673 | 32 | 1999902 | 1999933 | 2 | 16 | 32 | TG   | 16 | 17 |
| 232678 | 32 | 2007014 | 2007043 | 2 | 15 | 30 | CA   | 15 | 8  |
| 232682 | 32 | 2009762 | 2009791 | 2 | 15 | 30 | GT   | 7  | 9  |
| 232684 | 32 | 2010350 | 2010381 | 2 | 16 | 32 | AC   | 9  | 6  |
| 232685 | 32 | 2010793 | 2010807 | 3 | 5  | 15 | GGA  | 27 | 4  |
| 232687 | 32 | 2014486 | 2014501 | 2 | 8  | 16 | TG   | 22 | 6  |
| 232690 | 32 | 2029808 | 2029819 | 2 | 6  | 12 | GT   | 26 | 5  |
| 232693 | 32 | 2033788 | 2033807 | 4 | 5  | 20 | CTTT | 24 | 7  |
| 232694 | 32 | 2033876 | 2033899 | 2 | 12 | 24 | CA   | 11 | 10 |
| 232696 | 32 | 2040777 | 2040804 | 2 | 14 | 28 | TG   | 18 | 10 |
| 232704 | 32 | 2051809 | 2051822 | 2 | 7  | 14 | AC   | 8  | 8  |
| 232705 | 32 | 2054347 | 2054360 | 2 | 7  | 14 | GA   | 33 | 3  |
| 232706 | 32 | 2054596 | 2054615 | 2 | 10 | 20 | CA   | 34 | 6  |
| 232708 | 32 | 2057969 | 2058000 | 2 | 16 | 32 | CA   | 10 | 7  |
| 232715 | 32 | 2069633 | 2069646 | 2 | 7  | 14 | CA   | 22 | 6  |
| 232717 | 32 | 2073296 | 2073325 | 2 | 15 | 30 | GT   | 20 | 9  |
| 232721 | 32 | 2077483 | 2077494 | 2 | 6  | 12 | AT   | 24 | 4  |
| 232727 | 32 | 2100318 | 2100338 | 3 | 7  | 21 | AAT  | 14 | 6  |
| 232729 | 32 | 2100706 | 2100723 | 2 | 9  | 18 | AC   | 12 | 12 |
| 232730 | 32 | 2102882 | 2102903 | 2 | 11 | 22 | CA   | 11 | 9  |
| 232732 | 32 | 2108934 | 2108951 | 2 | 9  | 18 | TC   | 16 | 10 |
| 232736 | 32 | 2112990 | 2113005 | 2 | 8  | 16 | AC   | 19 | 12 |
| 232740 | 32 | 2120491 | 2120508 | 3 | 6  | 18 | AGG  | 15 | 10 |
| 232768 | 32 | 2187016 | 2187033 | 3 | 6  | 18 | TAA  | 9  | 3  |

|        |    |         |         |   |    |    |      |    |    |
|--------|----|---------|---------|---|----|----|------|----|----|
| 232782 | 32 | 2225042 | 2225057 | 2 | 8  | 16 | AG   | 30 | 6  |
| 232790 | 32 | 2241442 | 2241463 | 2 | 11 | 22 | CA   | 8  | 9  |
| 232791 | 32 | 2243364 | 2243393 | 2 | 15 | 30 | AC   | 16 | 12 |
| 232792 | 32 | 2248468 | 2248479 | 2 | 6  | 12 | GA   | 21 | 7  |
| 232793 | 32 | 2248533 | 2248546 | 2 | 7  | 14 | CT   | 16 | 5  |
| 232797 | 32 | 2249849 | 2249878 | 2 | 15 | 30 | TG   | 19 | 15 |
| 232806 | 32 | 2262906 | 2262949 | 2 | 22 | 44 | TG   | 13 | 8  |
| 232811 | 32 | 2270136 | 2270153 | 2 | 9  | 18 | GA   | 20 | 4  |
| 232816 | 32 | 2282903 | 2282920 | 2 | 9  | 18 | TG   | 21 | 6  |
| 232821 | 32 | 2287852 | 2287877 | 2 | 13 | 26 | GT   | 13 | 7  |
| 232823 | 32 | 2290792 | 2290805 | 2 | 7  | 14 | GT   | 25 | 3  |
| 232828 | 32 | 2298905 | 2298944 | 2 | 20 | 40 | TG   | 15 | 7  |
| 232833 | 32 | 2309678 | 2309701 | 4 | 6  | 24 | TTTG | 17 | 3  |
| 232838 | 32 | 2315315 | 2315336 | 2 | 11 | 22 | TG   | 16 | 7  |
| 232848 | 32 | 2331521 | 2331554 | 2 | 17 | 34 | GT   | 17 | 8  |
| 232870 | 32 | 2380615 | 2380626 | 2 | 6  | 12 | AC   | 17 | 4  |
| 232878 | 32 | 2399703 | 2399720 | 2 | 9  | 18 | TG   | 26 | 6  |
| 232879 | 32 | 2400720 | 2400737 | 2 | 9  | 18 | TG   | 22 | 4  |
| 232882 | 32 | 2408319 | 2408334 | 2 | 8  | 16 | TG   | 22 | 6  |
| 232889 | 32 | 2422671 | 2422688 | 2 | 9  | 18 | TG   | 21 | 6  |
| 232891 | 32 | 2430534 | 2430571 | 2 | 19 | 38 | TG   | 18 | 13 |
| 232893 | 32 | 2435277 | 2435296 | 2 | 10 | 20 | GT   | 16 | 4  |
| 232897 | 32 | 2440798 | 2440847 | 2 | 25 | 50 | GT   | 14 | 9  |
| 232902 | 32 | 2451492 | 2451513 | 2 | 11 | 22 | CA   | 11 | 6  |
| 232912 | 32 | 2466726 | 2466737 | 2 | 6  | 12 | TA   | 27 | 3  |
| 232913 | 32 | 2468233 | 2468258 | 2 | 13 | 26 | AC   | 16 | 13 |
| 232921 | 32 | 2494494 | 2494507 | 2 | 7  | 14 | AC   | 14 | 7  |
| 232923 | 32 | 2501456 | 2501469 | 2 | 7  | 14 | CA   | 22 | 4  |
| 232931 | 32 | 2533464 | 2533477 | 2 | 7  | 14 | TA   | 10 | 3  |
| 232940 | 32 | 2550905 | 2550919 | 3 | 5  | 15 | TCA  | 29 | 3  |
| 232961 | 32 | 2605294 | 2605305 | 2 | 6  | 12 | GT   | 19 | 5  |
| 232978 | 32 | 2657462 | 2657489 | 2 | 14 | 28 | TG   | 16 | 8  |
| 232980 | 32 | 2662405 | 2662426 | 2 | 11 | 22 | AG   | 16 | 5  |
| 232984 | 32 | 2663530 | 2663553 | 4 | 6  | 24 | TTGT | 17 | 5  |
| 232986 | 32 | 2667517 | 2667540 | 2 | 12 | 24 | TG   | 21 | 13 |
| 232995 | 32 | 2679600 | 2679611 | 2 | 6  | 12 | AC   | 20 | 3  |
| 233003 | 32 | 2692838 | 2692852 | 3 | 5  | 15 | TAA  | 25 | 4  |
| 233005 | 32 | 2695256 | 2695269 | 2 | 7  | 14 | AG   | 31 | 4  |
| 233009 | 32 | 2712372 | 2712409 | 2 | 19 | 38 | TG   | 10 | 9  |
| 233018 | 32 | 2743428 | 2743475 | 3 | 16 | 48 | ATG  | 26 | 10 |
| 233019 | 32 | 2745622 | 2745653 | 4 | 8  | 32 | AAAG | 9  | 5  |
| 233026 | 32 | 2752887 | 2752898 | 2 | 6  | 12 | CA   | 24 | 5  |
| 233028 | 32 | 2753900 | 2753911 | 2 | 6  | 12 | CA   | 29 | 3  |
| 233033 | 32 | 2761892 | 2761911 | 2 | 10 | 20 | AC   | 8  | 3  |
| 233038 | 32 | 2763147 | 2763162 | 4 | 4  | 16 | GACG | 25 | 4  |
| 233050 | 32 | 2799939 | 2799954 | 4 | 4  | 16 | AACC | 27 | 3  |
| 233054 | 32 | 2812029 | 2812044 | 2 | 8  | 16 | TA   | 8  | 4  |
| 233055 | 32 | 2813414 | 2813443 | 2 | 15 | 30 | TG   | 22 | 5  |
| 233057 | 32 | 2817487 | 2817512 | 2 | 13 | 26 | TG   | 10 | 10 |
| 233067 | 32 | 2851655 | 2851692 | 2 | 19 | 38 | GT   | 11 | 10 |
| 233069 | 32 | 2865148 | 2865163 | 2 | 8  | 16 | GT   | 9  | 13 |

|        |    |         |         |   |    |    |      |    |    |
|--------|----|---------|---------|---|----|----|------|----|----|
| 233071 | 32 | 2868945 | 2868960 | 2 | 8  | 16 | AC   | 21 | 3  |
| 233072 | 32 | 2874950 | 2874969 | 2 | 10 | 20 | TG   | 17 | 6  |
| 233073 | 32 | 2874971 | 2874984 | 2 | 7  | 14 | GT   | 20 | 6  |
| 233075 | 32 | 2881574 | 2881588 | 3 | 5  | 15 | AAG  | 20 | 3  |
| 233076 | 32 | 2882636 | 2882649 | 2 | 7  | 14 | GT   | 6  | 5  |
| 233086 | 32 | 2895989 | 2896008 | 2 | 10 | 20 | TG   | 18 | 9  |
| 233088 | 32 | 2896758 | 2896769 | 2 | 6  | 12 | TG   | 23 | 3  |
| 233093 | 32 | 2902340 | 2902361 | 2 | 11 | 22 | GT   | 21 | 10 |
| 233105 | 32 | 2939048 | 2939062 | 3 | 5  | 15 | CTT  | 16 | 4  |
| 233106 | 32 | 2940238 | 2940253 | 2 | 8  | 16 | GT   | 22 | 8  |
| 233112 | 32 | 2950023 | 2950062 | 2 | 20 | 40 | CA   | 7  | 9  |
| 233116 | 32 | 2952454 | 2952468 | 3 | 5  | 15 | TTC  | 20 | 7  |
| 233117 | 32 | 2952695 | 2952710 | 2 | 8  | 16 | TG   | 21 | 7  |
| 233118 | 32 | 2952775 | 2952789 | 3 | 5  | 15 | TGT  | 8  | 7  |
| 233119 | 32 | 2954339 | 2954352 | 2 | 7  | 14 | AG   | 16 | 3  |
| 233125 | 32 | 2956492 | 2956506 | 3 | 5  | 15 | TTC  | 10 | 3  |
| 233134 | 32 | 2968490 | 2968507 | 2 | 9  | 18 | TG   | 13 | 9  |
| 233136 | 32 | 2968974 | 2968991 | 2 | 9  | 18 | TG   | 18 | 11 |
| 233142 | 32 | 2988913 | 2988954 | 2 | 21 | 42 | AC   | 13 | 11 |
| 233156 | 32 | 3016438 | 3016449 | 2 | 6  | 12 | TG   | 28 | 7  |
| 233164 | 32 | 3029478 | 3029493 | 2 | 8  | 16 | GT   | 16 | 8  |
| 233171 | 32 | 3040725 | 3040748 | 2 | 12 | 24 | AC   | 17 | 13 |
| 233174 | 32 | 3051649 | 3051672 | 2 | 12 | 24 | TG   | 17 | 6  |
| 233183 | 32 | 3062831 | 3062846 | 2 | 8  | 16 | TG   | 25 | 9  |
| 233184 | 32 | 3062849 | 3062860 | 2 | 6  | 12 | TG   | 18 | 7  |
| 233188 | 32 | 3072806 | 3072817 | 2 | 6  | 12 | AG   | 16 | 4  |
| 233201 | 32 | 3120746 | 3120787 | 2 | 21 | 42 | AC   | 10 | 9  |
| 233219 | 32 | 3149532 | 3149549 | 3 | 6  | 18 | GCT  | 29 | 12 |
| 233220 | 32 | 3155094 | 3155107 | 2 | 7  | 14 | AC   | 24 | 3  |
| 233222 | 32 | 3155315 | 3155358 | 2 | 22 | 44 | CT   | 12 | 5  |
| 233224 | 32 | 3157807 | 3157820 | 2 | 7  | 14 | GT   | 33 | 4  |
| 233225 | 32 | 3169033 | 3169050 | 2 | 9  | 18 | GT   | 17 | 14 |
| 233229 | 32 | 3189946 | 3189969 | 4 | 6  | 24 | TAGA | 20 | 10 |
| 233238 | 32 | 3202363 | 3202378 | 2 | 8  | 16 | TC   | 19 | 4  |
| 233244 | 32 | 3211436 | 3211453 | 3 | 6  | 18 | AGC  | 29 | 3  |
| 233253 | 32 | 3232909 | 3232938 | 2 | 15 | 30 | AG   | 10 | 7  |
| 233255 | 32 | 3235020 | 3235051 | 2 | 16 | 32 | TG   | 18 | 6  |
| 233256 | 32 | 3236227 | 3236240 | 2 | 7  | 14 | TG   | 20 | 9  |
| 233257 | 32 | 3236521 | 3236544 | 2 | 12 | 24 | CA   | 12 | 5  |
| 233266 | 32 | 3257685 | 3257704 | 4 | 5  | 20 | CAAA | 30 | 3  |
| 233267 | 32 | 3259001 | 3259030 | 2 | 15 | 30 | CA   | 25 | 7  |
| 233268 | 32 | 3263680 | 3263691 | 2 | 6  | 12 | CA   | 27 | 7  |
| 233269 | 32 | 3263696 | 3263711 | 2 | 8  | 16 | CA   | 26 | 8  |
| 233270 | 32 | 3267331 | 3267357 | 3 | 9  | 27 | TTC  | 24 | 3  |
| 233273 | 32 | 3274805 | 3274824 | 2 | 10 | 20 | CA   | 26 | 5  |
| 233275 | 32 | 3275661 | 3275684 | 3 | 8  | 24 | GCT  | 22 | 4  |
| 233277 | 32 | 3276101 | 3276114 | 2 | 7  | 14 | AC   | 20 | 3  |
| 233281 | 32 | 3285591 | 3285611 | 3 | 7  | 21 | TGT  | 24 | 3  |
| 233289 | 32 | 3299400 | 3299419 | 2 | 10 | 20 | AC   | 20 | 5  |
| 233292 | 32 | 3309000 | 3309027 | 2 | 14 | 28 | GT   | 19 | 11 |
| 233295 | 32 | 3313635 | 3313646 | 2 | 6  | 12 | AC   | 21 | 5  |

|        |    |         |         |   |    |    |      |    |    |
|--------|----|---------|---------|---|----|----|------|----|----|
| 233301 | 32 | 3327032 | 3327045 | 2 | 7  | 14 | CT   | 33 | 3  |
| 233306 | 32 | 3339036 | 3339051 | 2 | 8  | 16 | CA   | 32 | 5  |
| 233310 | 32 | 3351320 | 3351333 | 2 | 7  | 14 | AG   | 22 | 4  |
| 233312 | 32 | 3353109 | 3353126 | 2 | 9  | 18 | TG   | 17 | 3  |
| 233313 | 32 | 3354694 | 3354713 | 4 | 5  | 20 | TATC | 23 | 7  |
| 233316 | 32 | 3371084 | 3371127 | 2 | 22 | 44 | TG   | 15 | 16 |
| 233319 | 32 | 3378931 | 3378942 | 2 | 6  | 12 | AC   | 15 | 3  |
| 233322 | 32 | 3386096 | 3386117 | 2 | 11 | 22 | TG   | 19 | 6  |
| 233326 | 32 | 3408016 | 3408071 | 2 | 28 | 56 | CA   | 10 | 12 |
| 233327 | 32 | 3411240 | 3411261 | 2 | 11 | 22 | GT   | 23 | 8  |
| 233331 | 32 | 3418480 | 3418501 | 2 | 11 | 22 | TC   | 23 | 3  |
| 233338 | 32 | 3427607 | 3427622 | 2 | 8  | 16 | AC   | 21 | 8  |
| 233339 | 32 | 3427625 | 3427638 | 2 | 7  | 14 | AC   | 25 | 7  |
| 233340 | 32 | 3428983 | 3429000 | 2 | 9  | 18 | TG   | 16 | 6  |
| 233361 | 32 | 3474336 | 3474377 | 2 | 21 | 42 | AC   | 12 | 10 |
| 233375 | 32 | 3498397 | 3498414 | 2 | 9  | 18 | TG   | 15 | 5  |
| 233380 | 32 | 3510967 | 3510978 | 2 | 6  | 12 | TC   | 25 | 3  |
| 233402 | 32 | 3544015 | 3544038 | 2 | 12 | 24 | TC   | 21 | 7  |
| 233404 | 32 | 3550830 | 3550856 | 3 | 9  | 27 | CCT  | 17 | 5  |
| 233419 | 32 | 3570000 | 3570019 | 2 | 10 | 20 | AC   | 24 | 5  |
| 233430 | 32 | 3600353 | 3600382 | 2 | 15 | 30 | AC   | 17 | 11 |
| 233431 | 32 | 3606522 | 3606541 | 2 | 10 | 20 | CA   | 22 | 3  |
| 233432 | 32 | 3606905 | 3606918 | 2 | 7  | 14 | TG   | 23 | 3  |
| 233437 | 32 | 3616491 | 3616502 | 2 | 6  | 12 | TA   | 6  | 4  |
| 233439 | 32 | 3619199 | 3619216 | 3 | 6  | 18 | CCA  | 14 | 3  |
| 233441 | 32 | 3624731 | 3624751 | 3 | 7  | 21 | ACT  | 29 | 4  |
| 233442 | 32 | 3626226 | 3626259 | 2 | 17 | 34 | TG   | 19 | 19 |
| 233446 | 32 | 3633291 | 3633305 | 3 | 5  | 15 | GAA  | 28 | 3  |
| 233456 | 32 | 3648902 | 3648931 | 3 | 10 | 30 | ATT  | 9  | 6  |
| 233457 | 32 | 3655314 | 3655331 | 2 | 9  | 18 | AG   | 14 | 7  |
| 233458 | 32 | 3660754 | 3660765 | 2 | 6  | 12 | TG   | 12 | 3  |
| 233461 | 32 | 3665656 | 3665679 | 2 | 12 | 24 | GT   | 17 | 13 |
| 233467 | 32 | 3681004 | 3681017 | 2 | 7  | 14 | TG   | 23 | 5  |
| 233469 | 32 | 3681602 | 3681619 | 3 | 6  | 18 | CTC  | 22 | 4  |
| 233470 | 32 | 3681791 | 3681810 | 2 | 10 | 20 | CA   | 29 | 6  |
| 233476 | 32 | 3702752 | 3702763 | 2 | 6  | 12 | AT   | 22 | 4  |
| 233478 | 32 | 3711640 | 3711659 | 4 | 5  | 20 | TATT | 21 | 3  |
| 233488 | 32 | 3735120 | 3735139 | 4 | 5  | 20 | CTTC | 19 | 8  |
| 233489 | 32 | 3737180 | 3737199 | 2 | 10 | 20 | TG   | 7  | 8  |
| 233491 | 32 | 3741804 | 3741821 | 3 | 6  | 18 | ATT  | 17 | 4  |
| 233494 | 32 | 3772407 | 3772422 | 4 | 4  | 16 | ACAT | 29 | 3  |
| 233515 | 32 | 3870896 | 3870907 | 2 | 6  | 12 | TA   | 22 | 7  |
| 233518 | 32 | 3884234 | 3884253 | 4 | 5  | 20 | CCTG | 33 | 3  |
| 233530 | 32 | 3921682 | 3921697 | 2 | 8  | 16 | CA   | 6  | 3  |
| 233536 | 32 | 3948653 | 3948668 | 2 | 8  | 16 | AC   | 22 | 4  |
| 233537 | 32 | 3949066 | 3949081 | 2 | 8  | 16 | AC   | 7  | 5  |
| 233562 | 32 | 4004026 | 4004045 | 4 | 5  | 20 | TGTA | 22 | 4  |
| 233567 | 32 | 4029955 | 4029978 | 3 | 8  | 24 | ATG  | 6  | 3  |
| 233575 | 32 | 4047135 | 4047149 | 3 | 5  | 15 | AAT  | 29 | 3  |
| 233579 | 32 | 4056610 | 4056625 | 4 | 4  | 16 | GTGC | 26 | 6  |
| 233582 | 32 | 4062102 | 4062125 | 2 | 12 | 24 | TC   | 12 | 6  |

|        |    |         |         |   |    |    |      |    |    |
|--------|----|---------|---------|---|----|----|------|----|----|
| 233583 | 32 | 4062354 | 4062365 | 2 | 6  | 12 | GT   | 24 | 3  |
| 233586 | 32 | 4077977 | 4077990 | 2 | 7  | 14 | CA   | 18 | 4  |
| 233587 | 32 | 4078279 | 4078306 | 2 | 14 | 28 | CA   | 9  | 9  |
| 233606 | 32 | 4133410 | 4133429 | 2 | 10 | 20 | CT   | 11 | 3  |
| 233611 | 32 | 4142554 | 4142575 | 2 | 11 | 22 | AC   | 16 | 13 |
| 233612 | 32 | 4147399 | 4147414 | 2 | 8  | 16 | AC   | 14 | 5  |
| 233618 | 32 | 4161808 | 4161819 | 2 | 6  | 12 | TC   | 24 | 8  |
| 233620 | 32 | 4164221 | 4164238 | 2 | 9  | 18 | CA   | 6  | 4  |
| 233621 | 32 | 4165563 | 4165574 | 2 | 6  | 12 | CA   | 20 | 4  |
| 233638 | 32 | 4235846 | 4235869 | 2 | 12 | 24 | AC   | 12 | 7  |
| 233641 | 32 | 4251879 | 4251892 | 2 | 7  | 14 | AT   | 9  | 4  |
| 233642 | 32 | 4253044 | 4253061 | 2 | 9  | 18 | TA   | 7  | 4  |
| 233643 | 32 | 4253637 | 4253650 | 2 | 7  | 14 | AC   | 23 | 4  |
| 233644 | 32 | 4262619 | 4262646 | 2 | 14 | 28 | AC   | 11 | 10 |
| 233646 | 32 | 4272462 | 4272475 | 2 | 7  | 14 | AT   | 12 | 3  |
| 233660 | 32 | 4302367 | 4302378 | 2 | 6  | 12 | GT   | 30 | 3  |
| 233676 | 32 | 4342807 | 4342818 | 2 | 6  | 12 | GT   | 24 | 4  |
| 233683 | 32 | 4364398 | 4364424 | 3 | 9  | 27 | TCT  | 21 | 3  |
| 233701 | 32 | 4418208 | 4418233 | 2 | 13 | 26 | CT   | 14 | 4  |
| 233720 | 32 | 4489586 | 4489617 | 2 | 16 | 32 | GA   | 11 | 6  |
| 233741 | 32 | 4541460 | 4541477 | 2 | 9  | 18 | CA   | 17 | 4  |
| 233748 | 32 | 4548768 | 4548787 | 2 | 10 | 20 | TG   | 9  | 5  |
| 233749 | 32 | 4550832 | 4550855 | 2 | 12 | 24 | TG   | 17 | 4  |
| 233750 | 32 | 4552504 | 4552527 | 2 | 12 | 24 | TG   | 10 | 4  |
| 233751 | 32 | 4552628 | 4552639 | 2 | 6  | 12 | TG   | 16 | 3  |
| 233752 | 32 | 4552640 | 4552653 | 2 | 7  | 14 | GT   | 21 | 5  |
| 233760 | 32 | 4573504 | 4573521 | 3 | 6  | 18 | TGT  | 22 | 4  |
| 233761 | 32 | 4578829 | 4578852 | 4 | 6  | 24 | TAGA | 19 | 6  |
| 233763 | 32 | 4583083 | 4583100 | 2 | 9  | 18 | AC   | 25 | 7  |
| 233769 | 32 | 4604018 | 4604043 | 2 | 13 | 26 | TG   | 9  | 7  |
| 233772 | 32 | 4614708 | 4614721 | 2 | 7  | 14 | TG   | 27 | 3  |
| 233775 | 32 | 4622680 | 4622695 | 2 | 8  | 16 | TG   | 36 | 3  |
| 233778 | 32 | 4625259 | 4625274 | 2 | 8  | 16 | CA   | 17 | 4  |
| 233779 | 32 | 4626779 | 4626796 | 2 | 9  | 18 | TA   | 8  | 3  |
| 233780 | 32 | 4627400 | 4627423 | 2 | 12 | 24 | CT   | 12 | 5  |
| 233798 | 32 | 4649167 | 4649198 | 2 | 16 | 32 | CA   | 7  | 8  |
| 233804 | 32 | 4658935 | 4658986 | 2 | 26 | 52 | TG   | 9  | 8  |
| 233808 | 32 | 4670694 | 4670708 | 3 | 5  | 15 | ATC  | 27 | 4  |
| 233825 | 32 | 4701796 | 4701807 | 2 | 6  | 12 | AT   | 23 | 3  |
| 233830 | 32 | 4736035 | 4736060 | 2 | 13 | 26 | AC   | 7  | 6  |
| 233834 | 32 | 4747214 | 4747231 | 3 | 6  | 18 | TAA  | 16 | 4  |
| 233835 | 32 | 4752652 | 4752669 | 2 | 9  | 18 | TG   | 22 | 6  |
| 233838 | 32 | 4760486 | 4760533 | 3 | 16 | 48 | TAA  | 9  | 7  |
| 233841 | 32 | 4779694 | 4779729 | 2 | 18 | 36 | TG   | 7  | 8  |
| 233844 | 32 | 4784832 | 4784843 | 2 | 6  | 12 | CA   | 32 | 4  |
| 233851 | 32 | 4804857 | 4804868 | 2 | 6  | 12 | GT   | 30 | 3  |
| 233852 | 32 | 4807874 | 4807901 | 2 | 14 | 28 | GT   | 8  | 3  |
| 233859 | 32 | 4830025 | 4830056 | 2 | 16 | 32 | CA   | 20 | 8  |
| 233866 | 32 | 4844782 | 4844811 | 3 | 10 | 30 | ATC  | 19 | 9  |
| 233867 | 32 | 4850110 | 4850149 | 2 | 20 | 40 | CA   | 9  | 10 |
| 233872 | 32 | 4856445 | 4856458 | 2 | 7  | 14 | CA   | 8  | 3  |

|        |    |         |         |   |    |    |      |    |    |
|--------|----|---------|---------|---|----|----|------|----|----|
| 233880 | 32 | 4879457 | 4879482 | 2 | 13 | 26 | TG   | 15 | 9  |
| 233882 | 32 | 4886730 | 4886755 | 2 | 13 | 26 | CT   | 10 | 13 |
| 233886 | 32 | 4893271 | 4893282 | 2 | 6  | 12 | AC   | 11 | 5  |
| 233888 | 32 | 4902993 | 4903013 | 3 | 7  | 21 | AAC  | 23 | 3  |
| 233892 | 32 | 4908894 | 4908909 | 4 | 4  | 16 | TGTT | 12 | 5  |
| 233918 | 32 | 4972265 | 4972276 | 2 | 6  | 12 | TG   | 26 | 3  |
| 233921 | 32 | 4987030 | 4987049 | 2 | 10 | 20 | CT   | 9  | 8  |
| 233929 | 32 | 5005007 | 5005030 | 3 | 8  | 24 | TTA  | 19 | 7  |
| 233937 | 32 | 5052558 | 5052575 | 2 | 9  | 18 | TG   | 16 | 7  |
| 233940 | 32 | 5060539 | 5060550 | 2 | 6  | 12 | TG   | 21 | 3  |
| 233941 | 32 | 5061675 | 5061690 | 2 | 8  | 16 | AC   | 25 | 5  |
| 233943 | 32 | 5072897 | 5072936 | 4 | 10 | 40 | TATG | 7  | 5  |
| 233955 | 32 | 5098330 | 5098359 | 2 | 15 | 30 | TG   | 13 | 6  |
| 233968 | 32 | 5119162 | 5119177 | 2 | 8  | 16 | AC   | 22 | 4  |
| 233987 | 32 | 5141858 | 5141883 | 2 | 13 | 26 | CA   | 23 | 9  |
| 233994 | 32 | 5152243 | 5152269 | 3 | 9  | 27 | CAT  | 16 | 6  |
| 234001 | 32 | 5185533 | 5185560 | 2 | 14 | 28 | GT   | 11 | 10 |
| 234009 | 32 | 5200192 | 5200221 | 3 | 10 | 30 | TCT  | 19 | 6  |
| 234011 | 32 | 5217298 | 5217319 | 2 | 11 | 22 | CA   | 15 | 9  |
| 234016 | 32 | 5227205 | 5227220 | 4 | 4  | 16 | TTTC | 27 | 3  |
| 234021 | 32 | 5250633 | 5250662 | 3 | 10 | 30 | AGT  | 22 | 4  |
| 234038 | 32 | 5273553 | 5273570 | 2 | 9  | 18 | AT   | 12 | 3  |
| 234044 | 32 | 5306915 | 5306959 | 3 | 15 | 45 | TTC  | 12 | 11 |
| 234046 | 32 | 5316925 | 5316956 | 2 | 16 | 32 | TC   | 11 | 11 |
| 234054 | 32 | 5338789 | 5338808 | 2 | 10 | 20 | CA   | 25 | 7  |
| 234064 | 32 | 5380033 | 5380056 | 2 | 12 | 24 | TG   | 11 | 8  |
| 234074 | 32 | 5400322 | 5400347 | 2 | 13 | 26 | GT   | 11 | 5  |
| 234084 | 32 | 5436560 | 5436589 | 3 | 10 | 30 | AAT  | 7  | 4  |
| 234097 | 32 | 5494956 | 5494971 | 2 | 8  | 16 | AT   | 11 | 3  |
| 234099 | 32 | 5496923 | 5496936 | 2 | 7  | 14 | AG   | 30 | 3  |
| 234102 | 32 | 5502889 | 5502932 | 4 | 11 | 44 | TATC | 10 | 5  |
| 234114 | 32 | 5507860 | 5507909 | 2 | 25 | 50 | CT   | 7  | 8  |
| 234144 | 32 | 5553310 | 5553349 | 4 | 10 | 40 | TCTA | 14 | 10 |
| 234147 | 32 | 5563830 | 5563850 | 3 | 7  | 21 | TTG  | 13 | 3  |
| 234159 | 32 | 5578786 | 5578813 | 4 | 7  | 28 | TATC | 23 | 3  |
| 234187 | 32 | 5649655 | 5649675 | 3 | 7  | 21 | TGC  | 23 | 3  |
| 234191 | 32 | 5667958 | 5668005 | 3 | 16 | 48 | ATT  | 7  | 9  |
| 234212 | 32 | 5716433 | 5716498 | 3 | 22 | 66 | TCT  | 8  | 9  |
| 234214 | 32 | 5718159 | 5718184 | 2 | 13 | 26 | CA   | 8  | 4  |
| 234220 | 32 | 5724590 | 5724619 | 3 | 10 | 30 | AAG  | 18 | 3  |
| 234222 | 32 | 5725724 | 5725756 | 3 | 11 | 33 | TTA  | 9  | 3  |
| 234230 | 32 | 5743898 | 5743918 | 3 | 7  | 21 | TAT  | 14 | 4  |
| 234233 | 32 | 5749512 | 5749535 | 2 | 12 | 24 | GA   | 24 | 4  |
| 234257 | 32 | 5843082 | 5843101 | 4 | 5  | 20 | ATTT | 15 | 3  |
| 234275 | 32 | 5884079 | 5884102 | 2 | 12 | 24 | CA   | 12 | 4  |
| 234288 | 32 | 5933630 | 5933651 | 2 | 11 | 22 | TG   | 20 | 3  |
| 234291 | 32 | 5943161 | 5943176 | 2 | 8  | 16 | GT   | 25 | 3  |
| 234292 | 32 | 5944868 | 5944894 | 3 | 9  | 27 | TAC  | 25 | 5  |
| 234293 | 32 | 5951082 | 5951109 | 4 | 7  | 28 | GAAT | 29 | 3  |
| 234294 | 32 | 5951167 | 5951180 | 2 | 7  | 14 | GT   | 21 | 5  |
| 234295 | 32 | 5952316 | 5952331 | 2 | 8  | 16 | CA   | 18 | 3  |

|        |    |         |         |   |    |    |      |    |    |
|--------|----|---------|---------|---|----|----|------|----|----|
| 234299 | 32 | 5961675 | 5961704 | 2 | 15 | 30 | TG   | 10 | 3  |
| 234302 | 32 | 5968360 | 5968403 | 4 | 11 | 44 | GAAA | 11 | 5  |
| 234317 | 32 | 5993103 | 5993130 | 2 | 14 | 28 | CA   | 12 | 6  |
| 234328 | 32 | 6021406 | 6021453 | 4 | 12 | 48 | TGAT | 21 | 6  |
| 234331 | 32 | 6027441 | 6027454 | 2 | 7  | 14 | AC   | 22 | 5  |
| 234332 | 32 | 6028895 | 6028910 | 2 | 8  | 16 | CA   | 15 | 4  |
| 234335 | 32 | 6032394 | 6032427 | 2 | 17 | 34 | TG   | 7  | 6  |
| 234348 | 32 | 6056460 | 6056509 | 2 | 25 | 50 | GT   | 10 | 11 |
| 234381 | 32 | 6168513 | 6168534 | 2 | 11 | 22 | AC   | 21 | 4  |
| 234384 | 32 | 6177374 | 6177387 | 2 | 7  | 14 | AC   | 16 | 5  |
| 234389 | 32 | 6186899 | 6186910 | 2 | 6  | 12 | GT   | 22 | 3  |
| 234393 | 32 | 6203094 | 6203105 | 2 | 6  | 12 | TA   | 16 | 3  |
| 234400 | 32 | 6222156 | 6222183 | 2 | 14 | 28 | GT   | 13 | 7  |
| 234402 | 32 | 6227001 | 6227020 | 4 | 5  | 20 | AATG | 26 | 3  |
| 234412 | 32 | 6262330 | 6262375 | 2 | 23 | 46 | GT   | 8  | 10 |
| 234413 | 32 | 6274957 | 6274980 | 2 | 12 | 24 | TG   | 10 | 6  |
| 234414 | 32 | 6279350 | 6279371 | 2 | 11 | 22 | TG   | 19 | 6  |
| 234416 | 32 | 6283742 | 6283755 | 2 | 7  | 14 | AC   | 16 | 6  |
| 234417 | 32 | 6283758 | 6283769 | 2 | 6  | 12 | AC   | 24 | 8  |
| 234420 | 32 | 6292637 | 6292652 | 4 | 4  | 16 | TCCT | 14 | 4  |
| 234421 | 32 | 6295157 | 6295172 | 2 | 8  | 16 | AC   | 11 | 4  |
| 234431 | 32 | 6343105 | 6343130 | 2 | 13 | 26 | AC   | 8  | 5  |
| 234438 | 32 | 6368608 | 6368639 | 4 | 8  | 32 | TCCA | 21 | 4  |
| 234441 | 32 | 6394070 | 6394085 | 2 | 8  | 16 | TG   | 29 | 7  |
| 234442 | 32 | 6394133 | 6394144 | 2 | 6  | 12 | GT   | 28 | 3  |
| 234467 | 32 | 6463839 | 6463852 | 2 | 7  | 14 | TG   | 11 | 5  |
| 234469 | 32 | 6467338 | 6467365 | 2 | 14 | 28 | CA   | 13 | 14 |
| 234470 | 32 | 6468166 | 6468183 | 3 | 6  | 18 | TAA  | 16 | 3  |
| 234471 | 32 | 6468762 | 6468781 | 2 | 10 | 20 | AC   | 20 | 3  |
| 234472 | 32 | 6475035 | 6475056 | 2 | 11 | 22 | AC   | 16 | 7  |
| 234477 | 32 | 6503242 | 6503273 | 4 | 8  | 32 | ATCC | 24 | 5  |
| 234481 | 32 | 6510506 | 6510531 | 2 | 13 | 26 | AC   | 11 | 9  |
| 234489 | 32 | 6543632 | 6543643 | 2 | 6  | 12 | TC   | 13 | 3  |
| 234499 | 32 | 6564001 | 6564015 | 3 | 5  | 15 | TTG  | 26 | 4  |
| 234508 | 32 | 6603860 | 6603881 | 2 | 11 | 22 | AC   | 17 | 9  |
| 234510 | 32 | 6609715 | 6609744 | 2 | 15 | 30 | CA   | 7  | 5  |
| 234516 | 32 | 6642433 | 6642444 | 2 | 6  | 12 | AC   | 20 | 5  |
| 234518 | 32 | 6646105 | 6646132 | 4 | 7  | 28 | GATT | 23 | 4  |
| 234522 | 32 | 6654103 | 6654123 | 3 | 7  | 21 | CTC  | 21 | 4  |
| 234526 | 32 | 6669591 | 6669608 | 2 | 9  | 18 | CA   | 13 | 3  |
| 234531 | 32 | 6685343 | 6685354 | 2 | 6  | 12 | CA   | 17 | 4  |
| 234532 | 32 | 6685595 | 6685628 | 2 | 17 | 34 | CA   | 20 | 11 |
| 234535 | 32 | 6689591 | 6689618 | 4 | 7  | 28 | CTCA | 27 | 6  |
| 234542 | 32 | 6711590 | 6711625 | 4 | 9  | 36 | GATT | 21 | 4  |
| 234543 | 32 | 6712227 | 6712242 | 2 | 8  | 16 | CA   | 23 | 5  |
| 234544 | 32 | 6714573 | 6714588 | 2 | 8  | 16 | TG   | 19 | 3  |
| 234557 | 33 | 11868   | 11882   | 3 | 5  | 15 | CCA  | 22 | 3  |
| 234569 | 33 | 68441   | 68452   | 2 | 6  | 12 | AC   | 27 | 4  |
| 234574 | 33 | 80011   | 80028   | 2 | 9  | 18 | GT   | 16 | 3  |
| 234577 | 33 | 81271   | 81308   | 2 | 19 | 38 | AC   | 6  | 10 |
| 234578 | 33 | 81617   | 81644   | 2 | 14 | 28 | AC   | 14 | 8  |

|        |    |        |        |   |    |    |      |    |    |
|--------|----|--------|--------|---|----|----|------|----|----|
| 234580 | 33 | 85810  | 85830  | 3 | 7  | 21 | CAG  | 20 | 6  |
| 234582 | 33 | 87545  | 87559  | 3 | 5  | 15 | TCA  | 14 | 7  |
| 234583 | 33 | 89462  | 89473  | 2 | 6  | 12 | AC   | 33 | 4  |
| 234585 | 33 | 91028  | 91042  | 3 | 5  | 15 | GCA  | 20 | 3  |
| 234588 | 33 | 94268  | 94311  | 2 | 22 | 44 | TG   | 9  | 10 |
| 234590 | 33 | 99319  | 99334  | 2 | 8  | 16 | CA   | 27 | 5  |
| 234593 | 33 | 132775 | 132790 | 2 | 8  | 16 | GA   | 18 | 6  |
| 234594 | 33 | 135916 | 135936 | 3 | 7  | 21 | TCT  | 22 | 5  |
| 234596 | 33 | 146678 | 146693 | 4 | 4  | 16 | GTCA | 36 | 3  |
| 234597 | 33 | 148462 | 148477 | 2 | 8  | 16 | CA   | 24 | 5  |
| 234600 | 33 | 153417 | 153434 | 3 | 6  | 18 | CCA  | 25 | 3  |
| 234601 | 33 | 153745 | 153758 | 2 | 7  | 14 | CA   | 23 | 4  |
| 234603 | 33 | 154023 | 154058 | 2 | 18 | 36 | CA   | 14 | 10 |
| 234604 | 33 | 154475 | 154488 | 2 | 7  | 14 | TC   | 22 | 4  |
| 234606 | 33 | 157805 | 157822 | 2 | 9  | 18 | GT   | 11 | 5  |
| 234607 | 33 | 157825 | 157836 | 2 | 6  | 12 | GT   | 6  | 5  |
| 234609 | 33 | 162154 | 162193 | 2 | 20 | 40 | GT   | 6  | 7  |
| 234612 | 33 | 172138 | 172185 | 3 | 16 | 48 | TCT  | 16 | 11 |
| 234614 | 33 | 185237 | 185248 | 2 | 6  | 12 | CA   | 21 | 3  |
| 234616 | 33 | 187013 | 187026 | 2 | 7  | 14 | TG   | 19 | 4  |
| 234619 | 33 | 192484 | 192497 | 2 | 7  | 14 | GT   | 24 | 5  |
| 234623 | 33 | 202214 | 202229 | 4 | 4  | 16 | GTCA | 19 | 4  |
| 234639 | 33 | 234799 | 234819 | 3 | 7  | 21 | AGG  | 22 | 6  |
| 234643 | 33 | 238259 | 238308 | 2 | 25 | 50 | TG   | 16 | 11 |
| 234649 | 33 | 251224 | 251239 | 2 | 8  | 16 | CA   | 19 | 6  |
| 234650 | 33 | 252353 | 252376 | 2 | 12 | 24 | TG   | 17 | 8  |
| 234654 | 33 | 259122 | 259149 | 2 | 14 | 28 | AC   | 24 | 17 |
| 234655 | 33 | 262340 | 262357 | 2 | 9  | 18 | AC   | 24 | 6  |
| 234657 | 33 | 264262 | 264279 | 2 | 9  | 18 | GT   | 18 | 14 |
| 234658 | 33 | 264490 | 264507 | 3 | 6  | 18 | AGA  | 11 | 8  |
| 234665 | 33 | 266994 | 267021 | 2 | 14 | 28 | TG   | 12 | 6  |
| 234667 | 33 | 270087 | 270102 | 2 | 8  | 16 | AC   | 30 | 4  |
| 234670 | 33 | 274897 | 274916 | 4 | 5  | 20 | AAAC | 17 | 4  |
| 234671 | 33 | 276776 | 276835 | 4 | 15 | 60 | ATAG | 21 | 7  |
| 234672 | 33 | 277433 | 277450 | 3 | 6  | 18 | CCT  | 11 | 5  |
| 234676 | 33 | 280995 | 281012 | 2 | 9  | 18 | CA   | 13 | 3  |
| 234681 | 33 | 285137 | 285151 | 3 | 5  | 15 | TTC  | 19 | 3  |
| 234685 | 33 | 290323 | 290338 | 2 | 8  | 16 | CT   | 15 | 3  |
| 234696 | 33 | 292144 | 292163 | 2 | 10 | 20 | TG   | 10 | 9  |
| 234697 | 33 | 292265 | 292286 | 2 | 11 | 22 | TG   | 11 | 8  |
| 234702 | 33 | 297299 | 297310 | 2 | 6  | 12 | TG   | 26 | 3  |
| 234704 | 33 | 299301 | 299322 | 2 | 11 | 22 | CA   | 13 | 9  |
| 234708 | 33 | 299886 | 299901 | 2 | 8  | 16 | GT   | 26 | 8  |
| 234715 | 33 | 320687 | 320698 | 2 | 6  | 12 | CA   | 32 | 3  |
| 234722 | 33 | 340655 | 340668 | 2 | 7  | 14 | CT   | 24 | 4  |
| 234725 | 33 | 349466 | 349477 | 2 | 6  | 12 | AC   | 27 | 4  |
| 234726 | 33 | 349537 | 349572 | 2 | 18 | 36 | GT   | 16 | 13 |
| 234729 | 33 | 364735 | 364782 | 2 | 24 | 48 | GT   | 12 | 11 |
| 234734 | 33 | 367706 | 367717 | 2 | 6  | 12 | TG   | 19 | 3  |
| 234738 | 33 | 376858 | 376875 | 2 | 9  | 18 | CA   | 22 | 5  |
| 234744 | 33 | 393291 | 393304 | 2 | 7  | 14 | AG   | 25 | 3  |



|        |    |        |        |   |    |    |      |    |    |
|--------|----|--------|--------|---|----|----|------|----|----|
| 234748 | 33 | 403909 | 403924 | 4 | 4  | 16 | GACT | 26 | 5  |
| 234753 | 33 | 438268 | 438297 | 3 | 10 | 30 | TAC  | 10 | 4  |
| 234754 | 33 | 442415 | 442430 | 4 | 4  | 16 | ATTG | 26 | 3  |
| 234760 | 33 | 461615 | 461626 | 2 | 6  | 12 | AC   | 24 | 4  |
| 234767 | 33 | 468587 | 468606 | 2 | 10 | 20 | GA   | 12 | 4  |
| 234772 | 33 | 474848 | 474887 | 2 | 20 | 40 | CA   | 11 | 8  |
| 234773 | 33 | 477543 | 477562 | 2 | 10 | 20 | GT   | 19 | 8  |
| 234776 | 33 | 486925 | 486954 | 2 | 15 | 30 | AC   | 27 | 6  |
| 234778 | 33 | 488557 | 488568 | 2 | 6  | 12 | GA   | 23 | 5  |
| 234779 | 33 | 488708 | 488723 | 2 | 8  | 16 | CA   | 26 | 4  |
| 234785 | 33 | 491654 | 491665 | 2 | 6  | 12 | TG   | 29 | 6  |
| 234787 | 33 | 491786 | 491803 | 2 | 9  | 18 | TG   | 18 | 3  |
| 234791 | 33 | 493292 | 493311 | 2 | 10 | 20 | AC   | 12 | 7  |
| 234793 | 33 | 498250 | 498269 | 2 | 10 | 20 | GA   | 8  | 5  |
| 234795 | 33 | 498353 | 498366 | 2 | 7  | 14 | GA   | 23 | 3  |
| 234797 | 33 | 500872 | 500891 | 2 | 10 | 20 | AC   | 6  | 3  |
| 234799 | 33 | 502184 | 502201 | 3 | 6  | 18 | GCA  | 29 | 4  |
| 234801 | 33 | 502385 | 502406 | 2 | 11 | 22 | AC   | 9  | 9  |
| 234814 | 33 | 520368 | 520379 | 2 | 6  | 12 | CA   | 34 | 5  |
| 234816 | 33 | 521046 | 521057 | 2 | 6  | 12 | CA   | 18 | 8  |
| 234819 | 33 | 526494 | 526531 | 2 | 19 | 38 | CA   | 7  | 12 |
| 234823 | 33 | 529238 | 529261 | 2 | 12 | 24 | AC   | 23 | 15 |
| 234824 | 33 | 534581 | 534592 | 2 | 6  | 12 | AC   | 30 | 4  |
| 234826 | 33 | 537294 | 537327 | 2 | 17 | 34 | TG   | 13 | 11 |
| 234831 | 33 | 540898 | 540915 | 3 | 6  | 18 | AAT  | 19 | 5  |
| 234832 | 33 | 541917 | 541934 | 2 | 9  | 18 | AC   | 17 | 4  |
| 234833 | 33 | 545171 | 545194 | 2 | 12 | 24 | GA   | 23 | 6  |
| 234834 | 33 | 545461 | 545486 | 2 | 13 | 26 | TG   | 22 | 7  |
| 234838 | 33 | 548521 | 548540 | 2 | 10 | 20 | CT   | 18 | 3  |
| 234839 | 33 | 549012 | 549029 | 2 | 9  | 18 | TG   | 21 | 4  |
| 234840 | 33 | 549055 | 549072 | 2 | 9  | 18 | GT   | 16 | 5  |
| 234846 | 33 | 555485 | 555510 | 2 | 13 | 26 | TG   | 21 | 5  |
| 234847 | 33 | 558584 | 558605 | 2 | 11 | 22 | AC   | 21 | 7  |
| 234849 | 33 | 561723 | 561752 | 2 | 15 | 30 | CA   | 14 | 4  |
| 234850 | 33 | 567935 | 567962 | 2 | 14 | 28 | CA   | 18 | 7  |
| 234851 | 33 | 568337 | 568354 | 3 | 6  | 18 | GGA  | 20 | 3  |
| 234854 | 33 | 572760 | 572799 | 2 | 20 | 40 | AC   | 15 | 10 |
| 234856 | 33 | 575752 | 575767 | 2 | 8  | 16 | CA   | 21 | 3  |
| 234858 | 33 | 576335 | 576348 | 2 | 7  | 14 | CA   | 22 | 7  |
| 234860 | 33 | 577389 | 577412 | 2 | 12 | 24 | AG   | 25 | 6  |
| 234861 | 33 | 580914 | 580925 | 2 | 6  | 12 | AC   | 35 | 3  |
| 234862 | 33 | 581238 | 581267 | 2 | 15 | 30 | GT   | 18 | 10 |
| 234863 | 33 | 583377 | 583394 | 3 | 6  | 18 | CAT  | 18 | 9  |
| 234865 | 33 | 584581 | 584602 | 2 | 11 | 22 | TG   | 15 | 9  |
| 234873 | 33 | 589633 | 589668 | 2 | 18 | 36 | TG   | 14 | 12 |
| 234878 | 33 | 601346 | 601361 | 2 | 8  | 16 | AG   | 28 | 3  |
| 234887 | 33 | 633056 | 633067 | 2 | 6  | 12 | GA   | 22 | 3  |
| 234892 | 33 | 638899 | 638934 | 2 | 18 | 36 | TG   | 7  | 10 |
| 234893 | 33 | 639858 | 639875 | 2 | 9  | 18 | CA   | 20 | 7  |
| 234898 | 33 | 641661 | 641674 | 2 | 7  | 14 | CA   | 19 | 3  |
| 234902 | 33 | 655769 | 655798 | 3 | 10 | 30 | TCT  | 34 | 6  |

|        |    |         |         |   |    |    |      |    |    |
|--------|----|---------|---------|---|----|----|------|----|----|
| 234905 | 33 | 659090  | 659111  | 2 | 11 | 22 | AC   | 20 | 8  |
| 234906 | 33 | 659139  | 659150  | 2 | 6  | 12 | TG   | 15 | 3  |
| 234910 | 33 | 663097  | 663126  | 3 | 10 | 30 | CCT  | 17 | 8  |
| 234915 | 33 | 681888  | 681899  | 2 | 6  | 12 | GT   | 24 | 12 |
| 234918 | 33 | 684918  | 684951  | 2 | 17 | 34 | TG   | 10 | 11 |
| 234920 | 33 | 687208  | 687235  | 2 | 14 | 28 | AC   | 19 | 11 |
| 234924 | 33 | 695621  | 695635  | 3 | 5  | 15 | GGA  | 28 | 3  |
| 234935 | 33 | 714094  | 714133  | 4 | 10 | 40 | CTTT | 18 | 7  |
| 234937 | 33 | 720027  | 720046  | 2 | 10 | 20 | CA   | 18 | 6  |
| 234945 | 33 | 737331  | 737348  | 2 | 9  | 18 | AC   | 23 | 3  |
| 234948 | 33 | 741654  | 741687  | 2 | 17 | 34 | GT   | 16 | 11 |
| 234949 | 33 | 743554  | 743574  | 3 | 7  | 21 | AAT  | 18 | 7  |
| 234960 | 33 | 756867  | 756890  | 3 | 8  | 24 | TTG  | 18 | 3  |
| 234968 | 33 | 771744  | 771773  | 2 | 15 | 30 | CA   | 13 | 9  |
| 234972 | 33 | 776145  | 776162  | 2 | 9  | 18 | AC   | 14 | 4  |
| 234974 | 33 | 784552  | 784575  | 2 | 12 | 24 | TG   | 22 | 14 |
| 234978 | 33 | 794522  | 794533  | 2 | 6  | 12 | AT   | 16 | 8  |
| 234979 | 33 | 797020  | 797037  | 3 | 6  | 18 | AGC  | 31 | 5  |
| 234981 | 33 | 798520  | 798543  | 3 | 8  | 24 | TTG  | 24 | 3  |
| 234984 | 33 | 804442  | 804457  | 4 | 4  | 16 | TCTG | 23 | 6  |
| 234996 | 33 | 832030  | 832045  | 4 | 4  | 16 | ATTT | 18 | 5  |
| 234999 | 33 | 838451  | 838472  | 2 | 11 | 22 | GA   | 22 | 6  |
| 235000 | 33 | 838529  | 838542  | 2 | 7  | 14 | AC   | 30 | 5  |
| 235004 | 33 | 844156  | 844179  | 2 | 12 | 24 | CA   | 23 | 7  |
| 235008 | 33 | 850409  | 850428  | 2 | 10 | 20 | AC   | 14 | 8  |
| 235014 | 33 | 853935  | 853952  | 2 | 9  | 18 | TG   | 12 | 10 |
| 235018 | 33 | 860579  | 860599  | 3 | 7  | 21 | ATG  | 29 | 4  |
| 235019 | 33 | 861049  | 861078  | 2 | 15 | 30 | CA   | 16 | 9  |
| 235022 | 33 | 864208  | 864247  | 2 | 20 | 40 | CA   | 13 | 11 |
| 235024 | 33 | 865085  | 865108  | 3 | 8  | 24 | CCT  | 28 | 6  |
| 235026 | 33 | 866157  | 866194  | 2 | 19 | 38 | TG   | 13 | 10 |
| 235039 | 33 | 882607  | 882634  | 4 | 7  | 28 | ATAG | 17 | 12 |
| 235050 | 33 | 903562  | 903575  | 2 | 7  | 14 | TG   | 25 | 15 |
| 235056 | 33 | 922052  | 922063  | 2 | 6  | 12 | CA   | 25 | 4  |
| 235057 | 33 | 922663  | 922676  | 2 | 7  | 14 | AC   | 24 | 4  |
| 235058 | 33 | 922678  | 922689  | 2 | 6  | 12 | CA   | 6  | 3  |
| 235060 | 33 | 923610  | 923624  | 3 | 5  | 15 | GAC  | 29 | 4  |
| 235061 | 33 | 937494  | 937517  | 2 | 12 | 24 | AC   | 8  | 5  |
| 235063 | 33 | 943050  | 943073  | 2 | 12 | 24 | TG   | 18 | 14 |
| 235066 | 33 | 950780  | 950791  | 2 | 6  | 12 | AC   | 23 | 6  |
| 235067 | 33 | 951739  | 951764  | 2 | 13 | 26 | AC   | 6  | 5  |
| 235068 | 33 | 952323  | 952336  | 2 | 7  | 14 | CA   | 24 | 13 |
| 235075 | 33 | 957849  | 957866  | 2 | 9  | 18 | AC   | 21 | 6  |
| 235076 | 33 | 958263  | 958280  | 2 | 9  | 18 | GT   | 22 | 4  |
| 235084 | 33 | 963043  | 963057  | 3 | 5  | 15 | CAT  | 23 | 11 |
| 235087 | 33 | 979285  | 979299  | 3 | 5  | 15 | AGA  | 10 | 5  |
| 235101 | 33 | 1008168 | 1008207 | 2 | 20 | 40 | CA   | 20 | 9  |
| 235103 | 33 | 1009210 | 1009227 | 2 | 9  | 18 | GT   | 17 | 12 |
| 235106 | 33 | 1013738 | 1013753 | 2 | 8  | 16 | GT   | 8  | 4  |
| 235107 | 33 | 1015845 | 1015860 | 4 | 4  | 16 | TCCT | 35 | 3  |
| 235109 | 33 | 1018830 | 1018869 | 2 | 20 | 40 | AC   | 16 | 13 |

|        |    |         |         |   |    |    |      |    |    |
|--------|----|---------|---------|---|----|----|------|----|----|
| 235110 | 33 | 1021109 | 1021126 | 2 | 9  | 18 | AC   | 23 | 9  |
| 235111 | 33 | 1021129 | 1021140 | 2 | 6  | 12 | AC   | 12 | 6  |
| 235112 | 33 | 1021796 | 1021819 | 3 | 8  | 24 | TGT  | 16 | 6  |
| 235114 | 33 | 1025427 | 1025456 | 3 | 10 | 30 | TGT  | 29 | 9  |
| 235115 | 33 | 1025986 | 1026000 | 3 | 5  | 15 | TAT  | 27 | 5  |
| 235127 | 33 | 1039461 | 1039480 | 4 | 5  | 20 | TAAA | 17 | 7  |
| 235130 | 33 | 1060730 | 1060745 | 2 | 8  | 16 | TG   | 29 | 3  |
| 235138 | 33 | 1073341 | 1073352 | 2 | 6  | 12 | GT   | 25 | 3  |
| 235139 | 33 | 1077501 | 1077516 | 2 | 8  | 16 | TG   | 20 | 6  |
| 235145 | 33 | 1084012 | 1084037 | 2 | 13 | 26 | GA   | 13 | 7  |
| 235160 | 33 | 1105586 | 1105603 | 2 | 9  | 18 | GT   | 17 | 10 |
| 235165 | 33 | 1109408 | 1109427 | 2 | 10 | 20 | TG   | 18 | 9  |
| 235166 | 33 | 1109578 | 1109601 | 4 | 6  | 24 | CAGA | 35 | 4  |
| 235167 | 33 | 1109717 | 1109742 | 2 | 13 | 26 | TG   | 14 | 6  |
| 235170 | 33 | 1112222 | 1112236 | 3 | 5  | 15 | GAG  | 21 | 3  |
| 235171 | 33 | 1112473 | 1112516 | 2 | 22 | 44 | CA   | 10 | 9  |
| 235172 | 33 | 1112616 | 1112645 | 2 | 15 | 30 | TG   | 10 | 6  |
| 235174 | 33 | 1112799 | 1112818 | 2 | 10 | 20 | CA   | 8  | 5  |
| 235176 | 33 | 1114549 | 1114578 | 2 | 15 | 30 | GT   | 19 | 7  |
| 235177 | 33 | 1115076 | 1115115 | 2 | 20 | 40 | GT   | 12 | 7  |
| 235179 | 33 | 1115877 | 1115902 | 2 | 13 | 26 | GT   | 13 | 5  |
| 235183 | 33 | 1119974 | 1119989 | 2 | 8  | 16 | CA   | 17 | 8  |
| 235184 | 33 | 1120156 | 1120173 | 2 | 9  | 18 | TG   | 18 | 5  |
| 235185 | 33 | 1120348 | 1120383 | 2 | 18 | 36 | AC   | 10 | 6  |
| 235186 | 33 | 1124377 | 1124392 | 2 | 8  | 16 | GT   | 22 | 7  |
| 235188 | 33 | 1124971 | 1124992 | 2 | 11 | 22 | TG   | 6  | 4  |
| 235189 | 33 | 1125094 | 1125113 | 2 | 10 | 20 | TG   | 23 | 6  |
| 235190 | 33 | 1125981 | 1125994 | 2 | 7  | 14 | TG   | 19 | 3  |
| 235193 | 33 | 1129970 | 1129983 | 2 | 7  | 14 | GT   | 14 | 4  |
| 235200 | 33 | 1132588 | 1132613 | 2 | 13 | 26 | CA   | 17 | 11 |
| 235202 | 33 | 1134892 | 1134919 | 2 | 14 | 28 | GT   | 12 | 6  |
| 235206 | 33 | 1137712 | 1137739 | 2 | 14 | 28 | AC   | 22 | 8  |
| 235208 | 33 | 1138282 | 1138296 | 3 | 5  | 15 | CCT  | 10 | 3  |
| 235214 | 33 | 1145980 | 1146001 | 2 | 11 | 22 | AC   | 15 | 8  |
| 235218 | 33 | 1155246 | 1155277 | 2 | 16 | 32 | AC   | 19 | 9  |
| 235221 | 33 | 1160069 | 1160092 | 3 | 8  | 24 | CTC  | 23 | 6  |
| 235222 | 33 | 1160396 | 1160423 | 2 | 14 | 28 | TG   | 24 | 9  |
| 235223 | 33 | 1161476 | 1161499 | 2 | 12 | 24 | CA   | 11 | 8  |
| 235225 | 33 | 1163287 | 1163318 | 2 | 16 | 32 | TG   | 11 | 9  |
| 235228 | 33 | 1163663 | 1163684 | 2 | 11 | 22 | CA   | 18 | 7  |
| 235229 | 33 | 1164789 | 1164808 | 2 | 10 | 20 | TG   | 22 | 7  |
| 235231 | 33 | 1166994 | 1167013 | 2 | 10 | 20 | TG   | 23 | 13 |
| 235234 | 33 | 1171034 | 1171047 | 2 | 7  | 14 | AG   | 20 | 4  |
| 235245 | 33 | 1176435 | 1176462 | 2 | 14 | 28 | GT   | 13 | 5  |
| 235249 | 33 | 1180832 | 1180843 | 2 | 6  | 12 | CT   | 24 | 3  |
| 235250 | 33 | 1180924 | 1180945 | 2 | 11 | 22 | GA   | 16 | 6  |
| 235252 | 33 | 1181207 | 1181239 | 3 | 11 | 33 | GAG  | 24 | 10 |
| 235257 | 33 | 1185106 | 1185123 | 3 | 6  | 18 | CCG  | 25 | 5  |
| 235258 | 33 | 1185190 | 1185207 | 2 | 9  | 18 | AC   | 17 | 5  |
| 235260 | 33 | 1185378 | 1185405 | 2 | 14 | 28 | CA   | 23 | 11 |
| 235263 | 33 | 1188055 | 1188070 | 2 | 8  | 16 | TC   | 27 | 4  |

|        |    |         |         |   |    |    |      |    |    |
|--------|----|---------|---------|---|----|----|------|----|----|
| 235264 | 33 | 1188337 | 1188378 | 2 | 21 | 42 | AG   | 8  | 8  |
| 235266 | 33 | 1191618 | 1191639 | 2 | 11 | 22 | AC   | 10 | 3  |
| 235268 | 33 | 1193967 | 1193980 | 2 | 7  | 14 | CT   | 22 | 3  |
| 235274 | 33 | 1197685 | 1197700 | 2 | 8  | 16 | CA   | 24 | 5  |
| 235275 | 33 | 1198310 | 1198327 | 2 | 9  | 18 | TG   | 16 | 7  |
| 235278 | 33 | 1201120 | 1201135 | 2 | 8  | 16 | GT   | 9  | 8  |
| 235280 | 33 | 1203412 | 1203433 | 2 | 11 | 22 | TG   | 23 | 7  |
| 235281 | 33 | 1206213 | 1206248 | 2 | 18 | 36 | AC   | 11 | 5  |
| 235287 | 33 | 1217421 | 1217434 | 2 | 7  | 14 | GT   | 26 | 6  |
| 235290 | 33 | 1217985 | 1218010 | 2 | 13 | 26 | CA   | 12 | 9  |
| 235292 | 33 | 1219567 | 1219580 | 2 | 7  | 14 | TG   | 19 | 8  |
| 235294 | 33 | 1221928 | 1221945 | 2 | 9  | 18 | GT   | 24 | 5  |
| 235295 | 33 | 1223812 | 1223827 | 4 | 4  | 16 | AGAC | 31 | 4  |
| 235296 | 33 | 1224002 | 1224017 | 4 | 4  | 16 | GTCT | 26 | 4  |
| 235297 | 33 | 1224368 | 1224389 | 2 | 11 | 22 | TG   | 12 | 6  |
| 235302 | 33 | 1227876 | 1227890 | 3 | 5  | 15 | TTG  | 9  | 3  |
| 235304 | 33 | 1230460 | 1230481 | 2 | 11 | 22 | AC   | 21 | 8  |
| 235317 | 33 | 1238370 | 1238387 | 2 | 9  | 18 | GT   | 27 | 3  |
| 235320 | 33 | 1239174 | 1239187 | 2 | 7  | 14 | TG   | 25 | 5  |
| 235322 | 33 | 1240604 | 1240617 | 2 | 7  | 14 | TG   | 22 | 3  |
| 235323 | 33 | 1240956 | 1240975 | 2 | 10 | 20 | GT   | 13 | 4  |
| 235324 | 33 | 1241564 | 1241615 | 2 | 26 | 52 | TG   | 15 | 13 |
| 235325 | 33 | 1241768 | 1241787 | 2 | 10 | 20 | CA   | 15 | 7  |
| 235326 | 33 | 1242139 | 1242164 | 2 | 13 | 26 | CA   | 16 | 6  |
| 235327 | 33 | 1242418 | 1242429 | 2 | 6  | 12 | AG   | 27 | 3  |
| 235330 | 33 | 1245044 | 1245059 | 2 | 8  | 16 | GT   | 23 | 3  |
| 235331 | 33 | 1245360 | 1245377 | 2 | 9  | 18 | CA   | 19 | 13 |
| 235332 | 33 | 1246924 | 1246949 | 2 | 13 | 26 | TC   | 20 | 8  |
| 235333 | 33 | 1248284 | 1248301 | 2 | 9  | 18 | TG   | 6  | 6  |
| 235334 | 33 | 1250973 | 1250986 | 2 | 7  | 14 | CA   | 24 | 8  |
| 235335 | 33 | 1250989 | 1251000 | 2 | 6  | 12 | CA   | 17 | 6  |
| 235340 | 33 | 1255213 | 1255232 | 2 | 10 | 20 | AC   | 12 | 4  |
| 235350 | 33 | 1260712 | 1260723 | 2 | 6  | 12 | TA   | 22 | 5  |
| 235355 | 33 | 1272302 | 1272315 | 2 | 7  | 14 | AC   | 19 | 7  |
| 235357 | 33 | 1273707 | 1273728 | 2 | 11 | 22 | CA   | 10 | 7  |
| 235359 | 33 | 1276403 | 1276414 | 2 | 6  | 12 | AC   | 23 | 4  |
| 235366 | 33 | 1287681 | 1287708 | 4 | 7  | 28 | GCGT | 12 | 11 |
| 235367 | 33 | 1287912 | 1287951 | 2 | 20 | 40 | CT   | 10 | 8  |
| 235370 | 33 | 1289087 | 1289106 | 2 | 10 | 20 | TC   | 17 | 4  |
| 235371 | 33 | 1289302 | 1289331 | 2 | 15 | 30 | AC   | 16 | 7  |
| 235374 | 33 | 1294659 | 1294706 | 2 | 24 | 48 | GT   | 9  | 8  |
| 235383 | 33 | 1310352 | 1310363 | 2 | 6  | 12 | AC   | 28 | 3  |
| 235387 | 33 | 1316716 | 1316731 | 2 | 8  | 16 | TC   | 20 | 4  |
| 235388 | 33 | 1317072 | 1317087 | 4 | 4  | 16 | GGTG | 19 | 3  |
| 235392 | 33 | 1326846 | 1326861 | 2 | 8  | 16 | TC   | 10 | 3  |
| 235393 | 33 | 1327923 | 1327942 | 2 | 10 | 20 | AC   | 11 | 5  |
| 235396 | 33 | 1333390 | 1333405 | 2 | 8  | 16 | TG   | 27 | 3  |
| 235397 | 33 | 1333958 | 1333975 | 2 | 9  | 18 | AC   | 17 | 7  |
| 235399 | 33 | 1334431 | 1334445 | 3 | 5  | 15 | GAG  | 20 | 9  |
| 235405 | 33 | 1347837 | 1347858 | 2 | 11 | 22 | AC   | 23 | 6  |
| 235409 | 33 | 1350471 | 1350488 | 2 | 9  | 18 | CA   | 29 | 3  |

|        |    |         |         |   |    |    |      |    |    |
|--------|----|---------|---------|---|----|----|------|----|----|
| 235410 | 33 | 1350808 | 1350837 | 2 | 15 | 30 | TG   | 12 | 4  |
| 235412 | 33 | 1351961 | 1351980 | 2 | 10 | 20 | GT   | 18 | 10 |
| 235419 | 33 | 1359882 | 1359903 | 2 | 11 | 22 | AC   | 19 | 10 |
| 235420 | 33 | 1362493 | 1362508 | 2 | 8  | 16 | CA   | 22 | 5  |
| 235421 | 33 | 1363825 | 1363844 | 2 | 10 | 20 | AC   | 14 | 10 |
| 235422 | 33 | 1365236 | 1365251 | 2 | 8  | 16 | AC   | 22 | 4  |
| 235424 | 33 | 1367531 | 1367546 | 2 | 8  | 16 | GT   | 17 | 5  |
| 235425 | 33 | 1367906 | 1367929 | 2 | 12 | 24 | TG   | 20 | 7  |
| 235428 | 33 | 1371260 | 1371275 | 2 | 8  | 16 | CT   | 26 | 3  |
| 235429 | 33 | 1374083 | 1374110 | 2 | 14 | 28 | TG   | 19 | 6  |
| 235430 | 33 | 1375482 | 1375495 | 2 | 7  | 14 | GA   | 12 | 3  |
| 235434 | 33 | 1380882 | 1380895 | 2 | 7  | 14 | GT   | 23 | 6  |
| 235435 | 33 | 1381370 | 1381383 | 2 | 7  | 14 | AG   | 27 | 5  |
| 235436 | 33 | 1381386 | 1381401 | 2 | 8  | 16 | AG   | 27 | 5  |
| 235439 | 33 | 1382247 | 1382258 | 2 | 6  | 12 | GA   | 25 | 3  |
| 235440 | 33 | 1382398 | 1382425 | 2 | 14 | 28 | AC   | 21 | 7  |
| 235442 | 33 | 1384756 | 1384775 | 2 | 10 | 20 | AC   | 17 | 9  |
| 235463 | 33 | 1417571 | 1417602 | 2 | 16 | 32 | AC   | 16 | 9  |
| 235466 | 33 | 1421767 | 1421780 | 2 | 7  | 14 | AC   | 21 | 5  |
| 235469 | 33 | 1424100 | 1424129 | 2 | 15 | 30 | TC   | 18 | 10 |
| 235471 | 33 | 1424568 | 1424579 | 2 | 6  | 12 | AT   | 16 | 9  |
| 235472 | 33 | 1424988 | 1425001 | 2 | 7  | 14 | AG   | 11 | 3  |
| 235474 | 33 | 1427906 | 1427931 | 2 | 13 | 26 | CA   | 14 | 11 |
| 235477 | 33 | 1428712 | 1428745 | 2 | 17 | 34 | CA   | 17 | 16 |
| 235478 | 33 | 1432141 | 1432164 | 4 | 6  | 24 | ATGT | 27 | 5  |
| 235482 | 33 | 1435433 | 1435466 | 2 | 17 | 34 | CA   | 9  | 8  |
| 235486 | 33 | 1437234 | 1437259 | 2 | 13 | 26 | GT   | 24 | 9  |
| 235489 | 33 | 1440261 | 1440280 | 2 | 10 | 20 | CT   | 14 | 5  |
| 235490 | 33 | 1442763 | 1442778 | 2 | 8  | 16 | CT   | 14 | 7  |
| 235495 | 33 | 1444797 | 1444816 | 2 | 10 | 20 | TG   | 22 | 7  |
| 235497 | 33 | 1448620 | 1448639 | 2 | 10 | 20 | TG   | 27 | 7  |
| 235505 | 33 | 1454351 | 1454368 | 2 | 9  | 18 | GT   | 6  | 4  |
| 235510 | 33 | 1455447 | 1455460 | 2 | 7  | 14 | AC   | 19 | 6  |
| 235512 | 33 | 1460692 | 1460703 | 2 | 6  | 12 | CA   | 24 | 4  |
| 235513 | 33 | 1463139 | 1463166 | 2 | 14 | 28 | AC   | 23 | 5  |
| 235514 | 33 | 1466013 | 1466026 | 2 | 7  | 14 | GA   | 29 | 3  |
| 235515 | 33 | 1466317 | 1466356 | 2 | 20 | 40 | AC   | 19 | 13 |
| 235516 | 33 | 1466681 | 1466710 | 2 | 15 | 30 | TG   | 11 | 7  |
| 235518 | 33 | 1470301 | 1470318 | 2 | 9  | 18 | AG   | 27 | 4  |
| 235519 | 33 | 1471864 | 1471899 | 2 | 18 | 36 | TG   | 7  | 8  |
| 235520 | 33 | 1472397 | 1472412 | 2 | 8  | 16 | AC   | 17 | 12 |
| 235521 | 33 | 1473868 | 1473883 | 4 | 4  | 16 | TTTC | 11 | 4  |
| 235524 | 33 | 1475600 | 1475625 | 2 | 13 | 26 | GA   | 12 | 11 |
| 235529 | 33 | 1486473 | 1486490 | 2 | 9  | 18 | AC   | 13 | 14 |
| 235530 | 33 | 1487140 | 1487160 | 3 | 7  | 21 | CAG  | 28 | 11 |
| 235531 | 33 | 1487423 | 1487436 | 2 | 7  | 14 | CA   | 23 | 3  |
| 235534 | 33 | 1491372 | 1491391 | 2 | 10 | 20 | AG   | 23 | 9  |
| 235535 | 33 | 1491767 | 1491794 | 4 | 7  | 28 | ACTG | 23 | 5  |
| 235538 | 33 | 1495871 | 1495906 | 2 | 18 | 36 | TG   | 12 | 10 |
| 235546 | 33 | 1502516 | 1502533 | 3 | 6  | 18 | CTC  | 26 | 3  |
| 235547 | 33 | 1503148 | 1503171 | 2 | 12 | 24 | TC   | 17 | 5  |

|        |    |         |         |   |    |    |      |    |    |
|--------|----|---------|---------|---|----|----|------|----|----|
| 235549 | 33 | 1509040 | 1509063 | 2 | 12 | 24 | AG   | 12 | 12 |
| 235550 | 33 | 1509670 | 1509695 | 2 | 13 | 26 | AC   | 10 | 9  |
| 235554 | 33 | 1513249 | 1513286 | 2 | 19 | 38 | GA   | 7  | 6  |
| 235568 | 33 | 1529841 | 1529856 | 2 | 8  | 16 | AC   | 19 | 8  |
| 235569 | 33 | 1529998 | 1530041 | 2 | 22 | 44 | AC   | 9  | 6  |
| 235595 | 33 | 1573197 | 1573217 | 3 | 7  | 21 | TCG  | 28 | 5  |
| 235596 | 33 | 1574443 | 1574466 | 4 | 6  | 24 | TGCC | 23 | 5  |
| 235609 | 33 | 1593584 | 1593603 | 2 | 10 | 20 | TG   | 23 | 6  |
| 235611 | 33 | 1593800 | 1593825 | 2 | 13 | 26 | GT   | 8  | 9  |
| 235615 | 33 | 1598951 | 1598968 | 2 | 9  | 18 | AT   | 16 | 8  |
| 235617 | 33 | 1601262 | 1601285 | 2 | 12 | 24 | GT   | 25 | 8  |
| 235621 | 33 | 1601553 | 1601590 | 2 | 19 | 38 | CA   | 10 | 7  |
| 235641 | 33 | 1617634 | 1617645 | 2 | 6  | 12 | TG   | 20 | 6  |
| 235644 | 33 | 1622436 | 1622475 | 2 | 20 | 40 | CA   | 9  | 10 |
| 235649 | 33 | 1629210 | 1629237 | 4 | 7  | 28 | GGCA | 26 | 8  |
| 235651 | 33 | 1636859 | 1636890 | 2 | 16 | 32 | GT   | 13 | 10 |
| 235656 | 33 | 1640946 | 1640971 | 2 | 13 | 26 | CA   | 12 | 10 |
| 235662 | 33 | 1647851 | 1647865 | 3 | 5  | 15 | TTG  | 19 | 5  |
| 235665 | 33 | 1649089 | 1649104 | 2 | 8  | 16 | TG   | 24 | 3  |
| 235675 | 33 | 1656007 | 1656018 | 2 | 6  | 12 | CT   | 16 | 5  |
| 235677 | 33 | 1656212 | 1656227 | 2 | 8  | 16 | GT   | 21 | 5  |
| 235678 | 33 | 1657407 | 1657422 | 2 | 8  | 16 | GT   | 23 | 6  |
| 235679 | 33 | 1659846 | 1659859 | 2 | 7  | 14 | CT   | 22 | 5  |
| 235680 | 33 | 1660565 | 1660594 | 3 | 10 | 30 | AAT  | 17 | 4  |
| 235681 | 33 | 1661785 | 1661806 | 2 | 11 | 22 | CA   | 18 | 8  |
| 235702 | 33 | 1684063 | 1684083 | 3 | 7  | 21 | CAT  | 25 | 4  |
| 235703 | 33 | 1684181 | 1684194 | 2 | 7  | 14 | AC   | 29 | 3  |
| 235717 | 33 | 1716431 | 1716442 | 2 | 6  | 12 | AG   | 22 | 6  |
| 235722 | 33 | 1723849 | 1723860 | 2 | 6  | 12 | AC   | 17 | 3  |
| 235725 | 33 | 1726470 | 1726487 | 2 | 9  | 18 | AT   | 13 | 8  |
| 235728 | 33 | 1729382 | 1729395 | 2 | 7  | 14 | AC   | 14 | 4  |
| 235730 | 33 | 1733414 | 1733429 | 4 | 4  | 16 | TTTA | 18 | 9  |
| 235736 | 33 | 1737900 | 1737931 | 2 | 16 | 32 | AC   | 11 | 6  |
| 235738 | 33 | 1738374 | 1738387 | 2 | 7  | 14 | GT   | 18 | 6  |
| 235743 | 33 | 1745080 | 1745099 | 2 | 10 | 20 | GT   | 16 | 6  |
| 235748 | 33 | 1758350 | 1758367 | 2 | 9  | 18 | AC   | 20 | 6  |
| 235749 | 33 | 1758369 | 1758386 | 2 | 9  | 18 | CA   | 24 | 9  |
| 235750 | 33 | 1758619 | 1758630 | 2 | 6  | 12 | AC   | 23 | 3  |
| 235751 | 33 | 1758699 | 1758722 | 2 | 12 | 24 | TC   | 21 | 6  |
| 235757 | 33 | 1762019 | 1762032 | 2 | 7  | 14 | TG   | 20 | 3  |
| 235763 | 33 | 1774151 | 1774168 | 2 | 9  | 18 | AC   | 30 | 5  |
| 235766 | 33 | 1776896 | 1776919 | 2 | 12 | 24 | CA   | 19 | 5  |
| 235771 | 33 | 1787158 | 1787173 | 2 | 8  | 16 | TG   | 7  | 6  |
| 235772 | 33 | 1787556 | 1787583 | 2 | 14 | 28 | AC   | 14 | 11 |
| 235781 | 33 | 1798369 | 1798386 | 2 | 9  | 18 | AC   | 13 | 5  |
| 235782 | 33 | 1798388 | 1798399 | 2 | 6  | 12 | CA   | 16 | 7  |
| 235786 | 33 | 1807004 | 1807015 | 2 | 6  | 12 | GT   | 21 | 4  |
| 235801 | 33 | 1825475 | 1825488 | 2 | 7  | 14 | GA   | 25 | 5  |
| 235809 | 33 | 1840716 | 1840729 | 2 | 7  | 14 | TC   | 14 | 3  |
| 235815 | 33 | 1844646 | 1844665 | 2 | 10 | 20 | GA   | 14 | 4  |
| 235819 | 33 | 1850802 | 1850816 | 3 | 5  | 15 | TTG  | 21 | 3  |

|        |    |         |         |   |    |    |      |    |    |
|--------|----|---------|---------|---|----|----|------|----|----|
| 235823 | 33 | 1862945 | 1862982 | 2 | 19 | 38 | TG   | 11 | 14 |
| 235830 | 33 | 1893575 | 1893590 | 4 | 4  | 16 | GTTT | 26 | 5  |
| 235831 | 33 | 1898003 | 1898020 | 2 | 9  | 18 | AC   | 20 | 3  |
| 235847 | 33 | 1933131 | 1933156 | 2 | 13 | 26 | AG   | 15 | 7  |
| 235853 | 33 | 1943261 | 1943274 | 2 | 7  | 14 | GT   | 28 | 6  |
| 235854 | 33 | 1946907 | 1946918 | 2 | 6  | 12 | GT   | 28 | 4  |
| 235855 | 33 | 1947109 | 1947120 | 2 | 6  | 12 | TC   | 25 | 7  |
| 235856 | 33 | 1947125 | 1947138 | 2 | 7  | 14 | TC   | 16 | 4  |
| 235858 | 33 | 1951949 | 1951960 | 2 | 6  | 12 | AC   | 14 | 3  |
| 235860 | 33 | 1952241 | 1952255 | 3 | 5  | 15 | GCA  | 19 | 7  |
| 235862 | 33 | 1957648 | 1957668 | 3 | 7  | 21 | CAT  | 29 | 6  |
| 235867 | 33 | 1971836 | 1971863 | 2 | 14 | 28 | CA   | 22 | 12 |
| 235870 | 33 | 1993723 | 1993750 | 2 | 14 | 28 | TG   | 18 | 18 |
| 235872 | 33 | 1999817 | 1999831 | 3 | 5  | 15 | TAC  | 19 | 3  |
| 235873 | 33 | 2002453 | 2002473 | 3 | 7  | 21 | ATG  | 25 | 11 |
| 235878 | 33 | 2027224 | 2027235 | 2 | 6  | 12 | AC   | 24 | 5  |
| 235895 | 33 | 2046860 | 2046893 | 2 | 17 | 34 | TC   | 12 | 12 |
| 235896 | 33 | 2059822 | 2059837 | 4 | 4  | 16 | AAAT | 28 | 8  |
| 235902 | 33 | 2062250 | 2062273 | 2 | 12 | 24 | TG   | 8  | 6  |
| 235903 | 33 | 2063601 | 2063618 | 2 | 9  | 18 | AT   | 12 | 3  |
| 235906 | 33 | 2070374 | 2070389 | 2 | 8  | 16 | AT   | 13 | 7  |
| 235908 | 33 | 2071538 | 2071555 | 2 | 9  | 18 | GT   | 23 | 3  |
| 235909 | 33 | 2072295 | 2072306 | 2 | 6  | 12 | CA   | 16 | 9  |
| 235911 | 33 | 2073360 | 2073379 | 2 | 10 | 20 | GT   | 21 | 4  |
| 235912 | 33 | 2074512 | 2074535 | 2 | 12 | 24 | CA   | 12 | 6  |
| 235921 | 33 | 2105198 | 2105217 | 2 | 10 | 20 | TC   | 19 | 5  |
| 235926 | 33 | 2111601 | 2111614 | 2 | 7  | 14 | TG   | 18 | 7  |
| 235927 | 33 | 2111616 | 2111629 | 2 | 7  | 14 | GT   | 18 | 6  |
| 235932 | 33 | 2116139 | 2116162 | 2 | 12 | 24 | GT   | 7  | 7  |
| 235934 | 33 | 2119052 | 2119067 | 2 | 8  | 16 | CA   | 17 | 5  |
| 235948 | 33 | 2137157 | 2137200 | 4 | 11 | 44 | AAGA | 13 | 11 |
| 235950 | 33 | 2145966 | 2145979 | 2 | 7  | 14 | TA   | 7  | 4  |
| 235954 | 33 | 2151344 | 2151361 | 2 | 9  | 18 | AC   | 19 | 4  |
| 235955 | 33 | 2151610 | 2151621 | 2 | 6  | 12 | TG   | 24 | 4  |
| 235960 | 33 | 2160140 | 2160154 | 3 | 5  | 15 | GAG  | 17 | 4  |
| 235963 | 33 | 2162305 | 2162328 | 3 | 8  | 24 | CTG  | 18 | 6  |
| 235964 | 33 | 2162523 | 2162548 | 2 | 13 | 26 | GT   | 14 | 10 |
| 235973 | 33 | 2165597 | 2165626 | 3 | 10 | 30 | TCC  | 22 | 8  |
| 235976 | 33 | 2169659 | 2169676 | 2 | 9  | 18 | TC   | 25 | 5  |
| 235978 | 33 | 2171895 | 2171908 | 2 | 7  | 14 | GT   | 19 | 5  |
| 235984 | 33 | 2188473 | 2188484 | 2 | 6  | 12 | CA   | 15 | 3  |
| 235985 | 33 | 2190245 | 2190260 | 2 | 8  | 16 | TC   | 31 | 3  |
| 235986 | 33 | 2198058 | 2198083 | 2 | 13 | 26 | TG   | 12 | 10 |
| 235988 | 33 | 2204450 | 2204463 | 2 | 7  | 14 | AC   | 18 | 13 |
| 235989 | 33 | 2205397 | 2205414 | 2 | 9  | 18 | GT   | 22 | 7  |
| 235997 | 33 | 2221683 | 2221728 | 2 | 23 | 46 | AC   | 7  | 7  |
| 236002 | 33 | 2227877 | 2227896 | 2 | 10 | 20 | TG   | 20 | 10 |
| 236003 | 33 | 2229128 | 2229147 | 2 | 10 | 20 | TG   | 20 | 10 |
| 236010 | 33 | 2252955 | 2252974 | 4 | 5  | 20 | TTAT | 30 | 3  |
| 236011 | 33 | 2255249 | 2255262 | 2 | 7  | 14 | GT   | 16 | 6  |
| 236012 | 33 | 2255297 | 2255314 | 2 | 9  | 18 | CA   | 22 | 5  |

|        |    |         |         |   |    |    |      |    |    |
|--------|----|---------|---------|---|----|----|------|----|----|
| 236016 | 33 | 2261344 | 2261365 | 2 | 11 | 22 | CA   | 11 | 8  |
| 236018 | 33 | 2262141 | 2262152 | 2 | 6  | 12 | TG   | 21 | 6  |
| 236031 | 33 | 2267850 | 2267865 | 2 | 8  | 16 | AT   | 13 | 5  |
| 236040 | 33 | 2278771 | 2278796 | 2 | 13 | 26 | TG   | 14 | 10 |
| 236049 | 33 | 2298302 | 2298317 | 2 | 8  | 16 | AC   | 19 | 12 |
| 236050 | 33 | 2298320 | 2298337 | 2 | 9  | 18 | AC   | 21 | 13 |
| 236051 | 33 | 2298522 | 2298545 | 2 | 12 | 24 | TG   | 7  | 9  |
| 236056 | 33 | 2303389 | 2303418 | 3 | 10 | 30 | CCT  | 18 | 3  |
| 236063 | 33 | 2307928 | 2307945 | 2 | 9  | 18 | AC   | 24 | 3  |
| 236072 | 33 | 2322980 | 2322991 | 2 | 6  | 12 | CT   | 21 | 6  |
| 236074 | 33 | 2324116 | 2324141 | 2 | 13 | 26 | AC   | 14 | 13 |
| 236076 | 33 | 2325322 | 2325341 | 2 | 10 | 20 | CA   | 12 | 5  |
| 236079 | 33 | 2329653 | 2329670 | 2 | 9  | 18 | TG   | 18 | 12 |
| 236086 | 33 | 2339688 | 2339725 | 2 | 19 | 38 | AC   | 10 | 11 |
| 236089 | 33 | 2343765 | 2343776 | 2 | 6  | 12 | TG   | 18 | 3  |
| 236094 | 33 | 2348400 | 2348413 | 2 | 7  | 14 | GT   | 18 | 6  |
| 236096 | 33 | 2350035 | 2350084 | 2 | 25 | 50 | AG   | 14 | 9  |
| 236097 | 33 | 2350886 | 2350925 | 4 | 10 | 40 | GATG | 14 | 10 |
| 236099 | 33 | 2358754 | 2358769 | 2 | 8  | 16 | AG   | 18 | 5  |
| 236104 | 33 | 2365249 | 2365263 | 3 | 5  | 15 | AAT  | 21 | 3  |
| 236105 | 33 | 2365551 | 2365562 | 2 | 6  | 12 | AG   | 21 | 4  |
| 236106 | 33 | 2366200 | 2366215 | 2 | 8  | 16 | AC   | 22 | 4  |
| 236108 | 33 | 2366679 | 2366714 | 3 | 12 | 36 | TTC  | 17 | 6  |
| 236109 | 33 | 2366844 | 2366857 | 2 | 7  | 14 | GA   | 21 | 6  |
| 236110 | 33 | 2367040 | 2367051 | 2 | 6  | 12 | GA   | 19 | 4  |
| 236115 | 33 | 2368797 | 2368820 | 4 | 6  | 24 | ACAG | 27 | 7  |
| 236117 | 33 | 2377378 | 2377395 | 2 | 9  | 18 | AC   | 24 | 3  |
| 236119 | 33 | 2384320 | 2384331 | 2 | 6  | 12 | GT   | 24 | 3  |
| 236121 | 33 | 2385135 | 2385164 | 3 | 10 | 30 | GAG  | 9  | 7  |
| 236127 | 33 | 2404095 | 2404115 | 3 | 7  | 21 | GCA  | 23 | 6  |
| 236134 | 33 | 2412694 | 2412723 | 2 | 15 | 30 | CT   | 14 | 8  |
| 236136 | 33 | 2431671 | 2431720 | 2 | 25 | 50 | GT   | 15 | 12 |
| 236149 | 33 | 2483819 | 2483836 | 3 | 6  | 18 | GAG  | 21 | 4  |
| 236157 | 33 | 2525966 | 2525977 | 2 | 6  | 12 | CA   | 23 | 4  |
| 236160 | 33 | 2536462 | 2536481 | 2 | 10 | 20 | AC   | 24 | 4  |
| 236161 | 33 | 2538224 | 2538241 | 3 | 6  | 18 | ATG  | 27 | 3  |
| 236170 | 33 | 2571855 | 2571886 | 2 | 16 | 32 | AC   | 8  | 9  |
| 236172 | 33 | 2575898 | 2575915 | 2 | 9  | 18 | TG   | 24 | 5  |
| 236187 | 33 | 2597282 | 2597301 | 2 | 10 | 20 | TG   | 18 | 3  |
| 236190 | 33 | 2600496 | 2600519 | 2 | 12 | 24 | AC   | 21 | 10 |
| 236191 | 33 | 2604213 | 2604224 | 2 | 6  | 12 | TG   | 13 | 3  |
| 236200 | 33 | 2632646 | 2632675 | 2 | 15 | 30 | CA   | 26 | 4  |
| 236202 | 33 | 2643397 | 2643418 | 2 | 11 | 22 | TG   | 9  | 6  |
| 236203 | 33 | 2643568 | 2643589 | 2 | 11 | 22 | CA   | 22 | 11 |
| 236204 | 33 | 2647394 | 2647411 | 2 | 9  | 18 | GT   | 15 | 12 |
| 236205 | 33 | 2647656 | 2647677 | 2 | 11 | 22 | AC   | 20 | 6  |
| 236216 | 33 | 2668808 | 2668823 | 2 | 8  | 16 | CT   | 14 | 8  |
| 236218 | 33 | 2669289 | 2669304 | 2 | 8  | 16 | AC   | 25 | 4  |
| 236223 | 33 | 2683296 | 2683333 | 2 | 19 | 38 | AC   | 11 | 6  |
| 236224 | 33 | 2684409 | 2684460 | 2 | 26 | 52 | AG   | 9  | 11 |
| 236231 | 33 | 2690750 | 2690763 | 2 | 7  | 14 | GT   | 24 | 6  |



|        |    |         |         |   |    |    |      |    |    |
|--------|----|---------|---------|---|----|----|------|----|----|
| 236234 | 33 | 2698613 | 2698648 | 2 | 18 | 36 | AC   | 8  | 6  |
| 236235 | 33 | 2700958 | 2700971 | 2 | 7  | 14 | TG   | 28 | 3  |
| 236241 | 33 | 2711988 | 2712017 | 2 | 15 | 30 | TG   | 14 | 8  |
| 236246 | 33 | 2717455 | 2717480 | 2 | 13 | 26 | AC   | 20 | 8  |
| 236249 | 33 | 2721375 | 2721394 | 4 | 5  | 20 | TTTG | 24 | 4  |
| 236251 | 33 | 2727499 | 2727510 | 2 | 6  | 12 | TG   | 25 | 6  |
| 236252 | 33 | 2727543 | 2727557 | 3 | 5  | 15 | GTT  | 26 | 3  |
| 236255 | 33 | 2734764 | 2734789 | 2 | 13 | 26 | TG   | 17 | 8  |
| 236256 | 33 | 2741117 | 2741131 | 3 | 5  | 15 | GAT  | 26 | 3  |
| 236262 | 33 | 2756120 | 2756134 | 3 | 5  | 15 | TCT  | 25 | 3  |
| 236263 | 33 | 2756291 | 2756306 | 2 | 8  | 16 | TG   | 17 | 5  |
| 236268 | 33 | 2759631 | 2759651 | 3 | 7  | 21 | TCC  | 21 | 4  |
| 236269 | 33 | 2760037 | 2760064 | 2 | 14 | 28 | AC   | 14 | 6  |
| 236270 | 33 | 2761923 | 2761944 | 2 | 11 | 22 | GT   | 13 | 17 |
| 236272 | 33 | 2768556 | 2768573 | 2 | 9  | 18 | GT   | 22 | 8  |
| 236275 | 33 | 2774977 | 2775024 | 3 | 16 | 48 | TGT  | 22 | 12 |
| 236276 | 33 | 2775884 | 2775897 | 2 | 7  | 14 | GT   | 21 | 3  |
| 236281 | 33 | 2781160 | 2781179 | 2 | 10 | 20 | TG   | 30 | 7  |
| 236288 | 33 | 2789315 | 2789328 | 2 | 7  | 14 | AC   | 21 | 6  |
| 236290 | 33 | 2790714 | 2790737 | 3 | 8  | 24 | GAG  | 23 | 4  |
| 236291 | 33 | 2790858 | 2790872 | 3 | 5  | 15 | AAT  | 32 | 3  |
| 236297 | 33 | 2811082 | 2811109 | 2 | 14 | 28 | AC   | 13 | 10 |
| 236300 | 33 | 2821854 | 2821865 | 2 | 6  | 12 | CA   | 24 | 3  |
| 236305 | 33 | 2834958 | 2834973 | 2 | 8  | 16 | TC   | 16 | 4  |
| 236309 | 33 | 2845299 | 2845314 | 2 | 8  | 16 | CT   | 22 | 4  |
| 236312 | 33 | 2847337 | 2847352 | 2 | 8  | 16 | CA   | 21 | 5  |
| 236314 | 33 | 2858925 | 2858956 | 2 | 16 | 32 | CA   | 18 | 10 |
| 236315 | 33 | 2859796 | 2859821 | 2 | 13 | 26 | GT   | 17 | 14 |
| 236318 | 33 | 2865086 | 2865103 | 2 | 9  | 18 | AC   | 32 | 3  |
| 236319 | 33 | 2866119 | 2866138 | 2 | 10 | 20 | AT   | 26 | 7  |
| 236320 | 33 | 2870248 | 2870262 | 3 | 5  | 15 | CTT  | 28 | 4  |
| 236321 | 33 | 2870433 | 2870446 | 2 | 7  | 14 | AT   | 11 | 7  |
| 236324 | 33 | 2879805 | 2879816 | 2 | 6  | 12 | AC   | 33 | 3  |
| 236325 | 33 | 2880293 | 2880304 | 2 | 6  | 12 | AG   | 24 | 3  |
| 236326 | 33 | 2880469 | 2880484 | 2 | 8  | 16 | GA   | 18 | 3  |
| 236327 | 33 | 2880949 | 2880968 | 2 | 10 | 20 | AC   | 15 | 4  |
| 236329 | 33 | 2881511 | 2881528 | 2 | 9  | 18 | GT   | 22 | 6  |
| 236330 | 33 | 2881697 | 2881734 | 2 | 19 | 38 | TG   | 15 | 11 |
| 236332 | 33 | 2883615 | 2883638 | 2 | 12 | 24 | TG   | 15 | 7  |
| 236335 | 33 | 2886249 | 2886268 | 2 | 10 | 20 | CA   | 20 | 5  |
| 236337 | 33 | 2886976 | 2886991 | 4 | 4  | 16 | TTTC | 26 | 5  |
| 236338 | 33 | 2887275 | 2887304 | 2 | 15 | 30 | GT   | 22 | 10 |
| 236339 | 33 | 2887443 | 2887470 | 2 | 14 | 28 | CA   | 13 | 11 |
| 236343 | 33 | 2897793 | 2897812 | 2 | 10 | 20 | TG   | 11 | 9  |
| 236349 | 33 | 2905652 | 2905673 | 2 | 11 | 22 | CA   | 20 | 8  |
| 236350 | 33 | 2905821 | 2905832 | 2 | 6  | 12 | CA   | 17 | 3  |
| 236352 | 33 | 2905858 | 2905871 | 2 | 7  | 14 | CA   | 19 | 4  |
| 236353 | 33 | 2908133 | 2908154 | 2 | 11 | 22 | GT   | 22 | 12 |
| 236356 | 33 | 2916159 | 2916174 | 2 | 8  | 16 | AG   | 22 | 4  |
| 236358 | 33 | 2921450 | 2921477 | 2 | 14 | 28 | AC   | 16 | 7  |
| 236359 | 33 | 2922261 | 2922278 | 2 | 9  | 18 | GT   | 24 | 3  |

|        |    |         |         |   |    |    |      |    |    |
|--------|----|---------|---------|---|----|----|------|----|----|
| 236362 | 33 | 2932847 | 2932864 | 2 | 9  | 18 | GA   | 21 | 4  |
| 236363 | 33 | 2935093 | 2935154 | 2 | 31 | 62 | CA   | 9  | 12 |
| 236364 | 33 | 2936238 | 2936287 | 2 | 25 | 50 | AC   | 7  | 8  |
| 236367 | 33 | 2943493 | 2943506 | 2 | 7  | 14 | CA   | 22 | 4  |
| 236368 | 33 | 2945006 | 2945027 | 2 | 11 | 22 | CA   | 29 | 5  |
| 236369 | 33 | 2947683 | 2947694 | 2 | 6  | 12 | CA   | 24 | 3  |
| 236373 | 33 | 2952013 | 2952026 | 2 | 7  | 14 | AG   | 22 | 5  |
| 236375 | 33 | 2956310 | 2956321 | 2 | 6  | 12 | TG   | 10 | 6  |
| 236391 | 33 | 2982917 | 2982934 | 3 | 6  | 18 | CCT  | 11 | 3  |
| 236397 | 33 | 2989349 | 2989396 | 4 | 12 | 48 | ATCT | 15 | 7  |
| 236399 | 33 | 2989739 | 2989782 | 4 | 11 | 44 | AGAA | 21 | 11 |
| 236400 | 33 | 2990937 | 2990952 | 4 | 4  | 16 | TTTC | 15 | 4  |
| 236408 | 33 | 3012972 | 3013011 | 2 | 20 | 40 | CA   | 10 | 11 |
| 236415 | 33 | 3033877 | 3033888 | 2 | 6  | 12 | AC   | 25 | 4  |
| 236417 | 33 | 3036331 | 3036362 | 2 | 16 | 32 | GT   | 16 | 7  |
| 236423 | 33 | 3058845 | 3058900 | 2 | 28 | 56 | AC   | 6  | 8  |
| 236429 | 33 | 3074537 | 3074557 | 3 | 7  | 21 | GGA  | 22 | 6  |
| 236431 | 33 | 3075538 | 3075561 | 2 | 12 | 24 | CA   | 19 | 4  |
| 236434 | 33 | 3078581 | 3078616 | 2 | 18 | 36 | CA   | 21 | 9  |
| 236435 | 33 | 3081425 | 3081442 | 2 | 9  | 18 | TG   | 27 | 12 |
| 236442 | 33 | 3097013 | 3097028 | 2 | 8  | 16 | TG   | 11 | 6  |
| 236445 | 33 | 3100721 | 3100736 | 2 | 8  | 16 | GT   | 18 | 4  |
| 236446 | 33 | 3100961 | 3100994 | 2 | 17 | 34 | CA   | 12 | 12 |
| 236448 | 33 | 3101798 | 3101827 | 2 | 15 | 30 | GT   | 18 | 10 |
| 236463 | 33 | 3111470 | 3111493 | 2 | 12 | 24 | AC   | 14 | 9  |
| 236468 | 33 | 3113569 | 3113598 | 2 | 15 | 30 | AC   | 19 | 7  |
| 236469 | 33 | 3115829 | 3115849 | 3 | 7  | 21 | AGG  | 24 | 5  |
| 236470 | 33 | 3116675 | 3116694 | 2 | 10 | 20 | TG   | 26 | 6  |
| 236473 | 33 | 3121771 | 3121798 | 4 | 7  | 28 | CAGG | 15 | 7  |
| 236474 | 33 | 3121997 | 3122012 | 2 | 8  | 16 | GT   | 18 | 8  |
| 236481 | 33 | 3133528 | 3133549 | 2 | 11 | 22 | AC   | 12 | 11 |
| 236484 | 33 | 3140533 | 3140554 | 2 | 11 | 22 | AC   | 9  | 4  |
| 236487 | 33 | 3140779 | 3140794 | 2 | 8  | 16 | TG   | 26 | 5  |
| 236491 | 33 | 3145757 | 3145768 | 2 | 6  | 12 | CA   | 24 | 3  |
| 236496 | 33 | 3156373 | 3156406 | 2 | 17 | 34 | GT   | 22 | 12 |
| 236497 | 33 | 3163239 | 3163276 | 2 | 19 | 38 | TC   | 7  | 7  |
| 236499 | 33 | 3166718 | 3166755 | 2 | 19 | 38 | TG   | 9  | 10 |
| 236506 | 33 | 3196857 | 3196880 | 3 | 8  | 24 | CAT  | 27 | 3  |
| 236515 | 33 | 3215657 | 3215678 | 2 | 11 | 22 | CA   | 21 | 11 |
| 236519 | 33 | 3229665 | 3229680 | 4 | 4  | 16 | AACC | 24 | 3  |
| 236523 | 33 | 3243355 | 3243366 | 2 | 6  | 12 | TG   | 23 | 5  |
| 236525 | 33 | 3246525 | 3246552 | 2 | 14 | 28 | CA   | 21 | 6  |
| 236526 | 33 | 3246681 | 3246724 | 2 | 22 | 44 | AG   | 7  | 7  |
| 236528 | 33 | 3246890 | 3246907 | 2 | 9  | 18 | GA   | 12 | 5  |
| 236529 | 33 | 3247157 | 3247182 | 2 | 13 | 26 | AC   | 22 | 12 |
| 236532 | 33 | 3250425 | 3250436 | 2 | 6  | 12 | TG   | 32 | 3  |
| 236536 | 33 | 3263201 | 3263216 | 2 | 8  | 16 | TG   | 20 | 3  |
| 236538 | 33 | 3267667 | 3267694 | 2 | 14 | 28 | AC   | 20 | 12 |
| 236539 | 33 | 3267767 | 3267784 | 2 | 9  | 18 | AG   | 10 | 4  |
| 236541 | 33 | 3268398 | 3268409 | 2 | 6  | 12 | GT   | 17 | 4  |
| 236549 | 33 | 3281782 | 3281795 | 2 | 7  | 14 | AC   | 31 | 3  |

|        |    |         |         |   |    |    |      |    |    |
|--------|----|---------|---------|---|----|----|------|----|----|
| 236554 | 33 | 3293539 | 3293558 | 2 | 10 | 20 | GT   | 13 | 7  |
| 236556 | 33 | 3302019 | 3302034 | 2 | 8  | 16 | AT   | 10 | 3  |
| 236557 | 33 | 3307592 | 3307605 | 2 | 7  | 14 | CA   | 15 | 4  |
| 236558 | 33 | 3309061 | 3309074 | 2 | 7  | 14 | CT   | 15 | 3  |
| 236561 | 33 | 3315480 | 3315503 | 2 | 12 | 24 | CA   | 9  | 9  |
| 236562 | 33 | 3315615 | 3315638 | 2 | 12 | 24 | AC   | 6  | 6  |
| 236563 | 33 | 3318082 | 3318111 | 3 | 10 | 30 | CAG  | 30 | 13 |
| 236565 | 33 | 3320419 | 3320460 | 2 | 21 | 42 | CA   | 6  | 8  |
| 236572 | 33 | 3332567 | 3332598 | 2 | 16 | 32 | TG   | 17 | 9  |
| 236586 | 33 | 3359765 | 3359778 | 2 | 7  | 14 | CT   | 18 | 4  |
| 236595 | 33 | 3393167 | 3393180 | 2 | 7  | 14 | CT   | 13 | 5  |
| 236613 | 33 | 3460092 | 3460107 | 4 | 4  | 16 | AAAC | 27 | 6  |
| 236619 | 33 | 3481066 | 3481083 | 3 | 6  | 18 | GAT  | 25 | 4  |
| 236620 | 33 | 3483854 | 3483877 | 3 | 8  | 24 | AAG  | 27 | 5  |
| 236622 | 33 | 3487595 | 3487610 | 2 | 8  | 16 | CA   | 24 | 11 |
| 236627 | 33 | 3493069 | 3493100 | 2 | 16 | 32 | GT   | 12 | 7  |
| 236628 | 33 | 3502497 | 3502508 | 2 | 6  | 12 | GT   | 21 | 3  |
| 236633 | 33 | 3530192 | 3530213 | 2 | 11 | 22 | CA   | 21 | 11 |
| 236639 | 33 | 3540329 | 3540384 | 4 | 14 | 56 | TTCT | 15 | 10 |
| 236644 | 33 | 3551556 | 3551569 | 2 | 7  | 14 | AC   | 24 | 5  |
| 236645 | 33 | 3554053 | 3554078 | 2 | 13 | 26 | CA   | 13 | 13 |
| 236651 | 33 | 3565329 | 3565340 | 2 | 6  | 12 | AC   | 28 | 3  |
| 236658 | 33 | 3581390 | 3581409 | 2 | 10 | 20 | AC   | 12 | 13 |
| 236693 | 33 | 3667801 | 3667812 | 2 | 6  | 12 | TG   | 31 | 3  |
| 236696 | 33 | 3672842 | 3672871 | 2 | 15 | 30 | CA   | 14 | 12 |
| 236697 | 33 | 3672903 | 3672916 | 2 | 7  | 14 | CT   | 19 | 5  |
| 236698 | 33 | 3675058 | 3675107 | 2 | 25 | 50 | GT   | 12 | 11 |
| 236702 | 33 | 3691807 | 3691854 | 4 | 12 | 48 | TATC | 16 | 10 |
| 236713 | 33 | 3724901 | 3724924 | 3 | 8  | 24 | GAG  | 17 | 6  |
| 236718 | 33 | 3731009 | 3731029 | 3 | 7  | 21 | TGC  | 24 | 3  |
| 236721 | 33 | 3735167 | 3735202 | 2 | 18 | 36 | GT   | 7  | 9  |
| 236726 | 33 | 3735591 | 3735602 | 2 | 6  | 12 | GT   | 9  | 3  |
| 236730 | 33 | 3736029 | 3736042 | 2 | 7  | 14 | TC   | 26 | 3  |
| 236733 | 33 | 3739233 | 3739244 | 2 | 6  | 12 | TC   | 12 | 4  |
| 236738 | 33 | 3740095 | 3740109 | 3 | 5  | 15 | GGT  | 21 | 4  |
| 236743 | 33 | 3740957 | 3740970 | 2 | 7  | 14 | CA   | 17 | 3  |
| 236744 | 33 | 3741379 | 3741394 | 2 | 8  | 16 | AC   | 30 | 3  |
| 236746 | 33 | 3741756 | 3741771 | 2 | 8  | 16 | TG   | 29 | 3  |
| 236750 | 33 | 3748022 | 3748047 | 2 | 13 | 26 | CA   | 15 | 3  |
| 236752 | 33 | 3748809 | 3748852 | 2 | 22 | 44 | TG   | 8  | 8  |
| 236757 | 33 | 3758116 | 3758135 | 2 | 10 | 20 | GT   | 20 | 8  |
| 236758 | 33 | 3758528 | 3758547 | 2 | 10 | 20 | AG   | 20 | 4  |
| 236759 | 33 | 3758841 | 3758860 | 2 | 10 | 20 | CT   | 17 | 5  |
| 236761 | 33 | 3761784 | 3761795 | 2 | 6  | 12 | TG   | 15 | 13 |
| 236766 | 33 | 3765889 | 3765904 | 2 | 8  | 16 | TG   | 21 | 4  |
| 236768 | 33 | 3766280 | 3766293 | 2 | 7  | 14 | AC   | 28 | 3  |
| 236770 | 33 | 3767249 | 3767260 | 2 | 6  | 12 | AG   | 17 | 3  |
| 236771 | 33 | 3768190 | 3768227 | 2 | 19 | 38 | AG   | 7  | 3  |
| 236772 | 33 | 3768407 | 3768428 | 2 | 11 | 22 | CA   | 12 | 8  |
| 236777 | 33 | 3770652 | 3770675 | 2 | 12 | 24 | AC   | 14 | 7  |
| 236782 | 33 | 3778206 | 3778229 | 2 | 12 | 24 | TG   | 13 | 4  |

|        |    |         |         |   |    |    |      |    |    |
|--------|----|---------|---------|---|----|----|------|----|----|
| 236783 | 33 | 3778306 | 3778337 | 2 | 16 | 32 | AC   | 12 | 4  |
| 236784 | 33 | 3778571 | 3778584 | 2 | 7  | 14 | GT   | 19 | 5  |
| 236785 | 33 | 3778730 | 3778769 | 2 | 20 | 40 | CA   | 6  | 5  |
| 236788 | 33 | 3784768 | 3784783 | 2 | 8  | 16 | CA   | 17 | 6  |
| 236791 | 33 | 3785366 | 3785383 | 2 | 9  | 18 | TG   | 13 | 3  |
| 236793 | 33 | 3786326 | 3786365 | 2 | 20 | 40 | GT   | 8  | 6  |
| 236794 | 33 | 3786765 | 3786788 | 2 | 12 | 24 | CA   | 6  | 8  |
| 236797 | 33 | 3790592 | 3790605 | 2 | 7  | 14 | TG   | 33 | 4  |
| 236803 | 33 | 3793939 | 3793966 | 2 | 14 | 28 | TG   | 15 | 10 |
| 236804 | 33 | 3795297 | 3795314 | 2 | 9  | 18 | AC   | 16 | 9  |
| 236805 | 33 | 3795578 | 3795593 | 2 | 8  | 16 | GT   | 26 | 3  |
| 236807 | 33 | 3800802 | 3800825 | 2 | 12 | 24 | AC   | 15 | 12 |
| 236811 | 33 | 3802678 | 3802699 | 2 | 11 | 22 | TG   | 12 | 9  |
| 236812 | 33 | 3802875 | 3802896 | 2 | 11 | 22 | AC   | 7  | 6  |
| 236813 | 33 | 3803026 | 3803049 | 2 | 12 | 24 | CA   | 6  | 11 |
| 236819 | 33 | 3808631 | 3808642 | 2 | 6  | 12 | GT   | 32 | 9  |
| 236820 | 33 | 3811267 | 3811292 | 2 | 13 | 26 | AC   | 13 | 10 |
| 236821 | 33 | 3811377 | 3811402 | 2 | 13 | 26 | GT   | 13 | 10 |
| 236822 | 33 | 3811528 | 3811543 | 2 | 8  | 16 | GT   | 9  | 3  |
| 236823 | 33 | 3811620 | 3811635 | 2 | 8  | 16 | AC   | 17 | 10 |
| 236825 | 33 | 3812761 | 3812782 | 2 | 11 | 22 | GA   | 24 | 5  |
| 236828 | 33 | 3813222 | 3813237 | 2 | 8  | 16 | AC   | 21 | 6  |
| 236832 | 33 | 3817766 | 3817781 | 2 | 8  | 16 | TG   | 19 | 6  |
| 236833 | 33 | 3817851 | 3817868 | 2 | 9  | 18 | GT   | 20 | 10 |
| 236834 | 33 | 3818157 | 3818186 | 2 | 15 | 30 | GT   | 21 | 9  |
| 236835 | 33 | 3818339 | 3818354 | 2 | 8  | 16 | AC   | 23 | 8  |
| 236839 | 33 | 3820018 | 3820033 | 2 | 8  | 16 | TG   | 27 | 5  |
| 236841 | 33 | 3820586 | 3820600 | 3 | 5  | 15 | GAG  | 19 | 5  |
| 236842 | 33 | 3820601 | 3820615 | 3 | 5  | 15 | AGG  | 22 | 3  |
| 236843 | 33 | 3821546 | 3821577 | 2 | 16 | 32 | AC   | 30 | 7  |
| 236845 | 33 | 3824434 | 3824453 | 2 | 10 | 20 | GT   | 22 | 4  |
| 236846 | 33 | 3825015 | 3825032 | 3 | 6  | 18 | TGG  | 14 | 4  |
| 236847 | 33 | 3825302 | 3825329 | 2 | 14 | 28 | AC   | 11 | 4  |
| 236848 | 33 | 3825468 | 3825507 | 2 | 20 | 40 | TG   | 19 | 9  |
| 236849 | 33 | 3825653 | 3825666 | 2 | 7  | 14 | TG   | 20 | 4  |
| 236850 | 33 | 3825842 | 3825857 | 2 | 8  | 16 | GT   | 22 | 5  |
| 236851 | 33 | 3825859 | 3825870 | 2 | 6  | 12 | TG   | 14 | 3  |
| 236853 | 33 | 3826594 | 3826621 | 2 | 14 | 28 | TG   | 15 | 9  |
| 236855 | 33 | 3828561 | 3828576 | 2 | 8  | 16 | AG   | 14 | 5  |
| 236856 | 33 | 3828683 | 3828698 | 2 | 8  | 16 | GT   | 24 | 4  |
| 236857 | 33 | 3829125 | 3829136 | 2 | 6  | 12 | CA   | 21 | 3  |
| 236859 | 33 | 3829364 | 3829383 | 2 | 10 | 20 | CA   | 8  | 6  |
| 236861 | 33 | 3831117 | 3831176 | 4 | 15 | 60 | TCTA | 21 | 11 |
| 236862 | 33 | 3831522 | 3831575 | 2 | 27 | 54 | GT   | 6  | 9  |
| 236864 | 33 | 3833186 | 3833203 | 3 | 6  | 18 | TCC  | 15 | 4  |
| 236867 | 33 | 3835620 | 3835653 | 2 | 17 | 34 | TG   | 8  | 8  |
| 236871 | 33 | 3835952 | 3835977 | 2 | 13 | 26 | CT   | 15 | 9  |
| 236872 | 33 | 3836075 | 3836090 | 2 | 8  | 16 | TC   | 13 | 3  |
| 236881 | 33 | 3847669 | 3847690 | 2 | 11 | 22 | TG   | 11 | 5  |
| 236883 | 33 | 3852514 | 3852547 | 2 | 17 | 34 | GT   | 12 | 8  |
| 236884 | 33 | 3853007 | 3853024 | 2 | 9  | 18 | CA   | 11 | 7  |

|        |    |         |         |   |    |    |      |    |    |
|--------|----|---------|---------|---|----|----|------|----|----|
| 236886 | 33 | 3855812 | 3855831 | 2 | 10 | 20 | AC   | 22 | 5  |
| 236888 | 33 | 3857406 | 3857429 | 2 | 12 | 24 | GT   | 17 | 7  |
| 236890 | 33 | 3861649 | 3861678 | 2 | 15 | 30 | GT   | 9  | 4  |
| 236891 | 33 | 3863363 | 3863382 | 2 | 10 | 20 | TG   | 22 | 3  |
| 236892 | 33 | 3863884 | 3863909 | 2 | 13 | 26 | TG   | 19 | 3  |
| 236893 | 33 | 3864039 | 3864056 | 3 | 6  | 18 | CTG  | 21 | 7  |
| 236897 | 33 | 3866444 | 3866479 | 2 | 18 | 36 | AC   | 9  | 9  |
| 236907 | 33 | 3883466 | 3883495 | 2 | 15 | 30 | CA   | 17 | 7  |
| 236913 | 33 | 3885477 | 3885502 | 2 | 13 | 26 | AC   | 14 | 9  |
| 236914 | 33 | 3887256 | 3887276 | 3 | 7  | 21 | CCT  | 11 | 5  |
| 236915 | 33 | 3887529 | 3887548 | 2 | 10 | 20 | GA   | 18 | 5  |
| 236916 | 33 | 3887595 | 3887616 | 2 | 11 | 22 | AG   | 22 | 5  |
| 236918 | 33 | 3889095 | 3889118 | 2 | 12 | 24 | AC   | 11 | 11 |
| 236920 | 33 | 3890563 | 3890592 | 2 | 15 | 30 | CA   | 6  | 12 |
| 236921 | 33 | 3892332 | 3892361 | 2 | 15 | 30 | GA   | 9  | 4  |
| 236923 | 33 | 3893024 | 3893041 | 2 | 9  | 18 | AG   | 19 | 3  |
| 236924 | 33 | 3895739 | 3895759 | 3 | 7  | 21 | CAG  | 29 | 5  |
| 236927 | 33 | 3897908 | 3897923 | 2 | 8  | 16 | GT   | 13 | 4  |
| 236938 | 33 | 3903658 | 3903681 | 2 | 12 | 24 | CA   | 16 | 11 |
| 236943 | 33 | 3904776 | 3904808 | 3 | 11 | 33 | GAT  | 27 | 3  |
| 236944 | 33 | 3904874 | 3904893 | 2 | 10 | 20 | AC   | 15 | 12 |
| 236946 | 33 | 3905763 | 3905794 | 4 | 8  | 32 | AGAA | 18 | 4  |
| 236948 | 33 | 3907551 | 3907572 | 2 | 11 | 22 | CA   | 15 | 4  |
| 236949 | 33 | 3907638 | 3907649 | 2 | 6  | 12 | CA   | 17 | 5  |
| 236951 | 33 | 3908360 | 3908371 | 2 | 6  | 12 | CA   | 22 | 3  |
| 236952 | 33 | 3908560 | 3908593 | 2 | 17 | 34 | GT   | 17 | 7  |
| 236956 | 33 | 3911386 | 3911403 | 3 | 6  | 18 | GCT  | 20 | 3  |
| 236961 | 33 | 3915163 | 3915180 | 2 | 9  | 18 | GT   | 19 | 8  |
| 236962 | 33 | 3915509 | 3915524 | 2 | 8  | 16 | CA   | 13 | 3  |
| 236964 | 33 | 3915762 | 3915777 | 2 | 8  | 16 | AC   | 11 | 9  |
| 236968 | 33 | 3918431 | 3918446 | 2 | 8  | 16 | CT   | 25 | 4  |
| 236972 | 33 | 3925136 | 3925151 | 2 | 8  | 16 | GT   | 21 | 6  |
| 236982 | 33 | 3931433 | 3931472 | 2 | 20 | 40 | GT   | 9  | 9  |
| 236996 | 33 | 3956218 | 3956229 | 2 | 6  | 12 | AG   | 19 | 4  |
| 236998 | 33 | 3966669 | 3966690 | 2 | 11 | 22 | TG   | 6  | 5  |
| 237002 | 33 | 3981733 | 3981750 | 2 | 9  | 18 | TG   | 10 | 7  |
| 237003 | 33 | 3983770 | 3983787 | 3 | 6  | 18 | CTC  | 30 | 5  |
| 237010 | 33 | 4032713 | 4032748 | 2 | 18 | 36 | AC   | 12 | 11 |
| 237013 | 33 | 4035924 | 4035941 | 2 | 9  | 18 | CA   | 14 | 9  |
| 237014 | 33 | 4037882 | 4037899 | 2 | 9  | 18 | TG   | 21 | 4  |
| 237019 | 33 | 4043904 | 4043931 | 4 | 7  | 28 | CTCA | 13 | 5  |
| 237023 | 33 | 4045816 | 4045853 | 2 | 19 | 38 | GT   | 9  | 7  |
| 237028 | 33 | 4059278 | 4059303 | 2 | 13 | 26 | CA   | 10 | 9  |
| 237040 | 33 | 4082738 | 4082767 | 2 | 15 | 30 | GA   | 14 | 5  |
| 237042 | 33 | 4088024 | 4088049 | 2 | 13 | 26 | CA   | 6  | 5  |
| 237046 | 33 | 4118103 | 4118120 | 2 | 9  | 18 | TG   | 20 | 8  |
| 237051 | 33 | 4133581 | 4133608 | 2 | 14 | 28 | AC   | 19 | 6  |
| 237069 | 33 | 4167118 | 4167131 | 2 | 7  | 14 | GT   | 29 | 5  |
| 237074 | 33 | 4169421 | 4169440 | 2 | 10 | 20 | CA   | 15 | 6  |
| 237077 | 33 | 4172154 | 4172174 | 3 | 7  | 21 | GGA  | 26 | 6  |
| 237083 | 33 | 4190557 | 4190574 | 2 | 9  | 18 | CA   | 17 | 14 |

|        |    |         |         |   |    |    |      |    |    |
|--------|----|---------|---------|---|----|----|------|----|----|
| 237084 | 33 | 4190577 | 4190594 | 2 | 9  | 18 | CA   | 17 | 16 |
| 237088 | 33 | 4208460 | 4208475 | 4 | 4  | 16 | TTTG | 25 | 4  |
| 237097 | 33 | 4226635 | 4226652 | 2 | 9  | 18 | CA   | 12 | 6  |
| 237098 | 33 | 4229574 | 4229591 | 2 | 9  | 18 | GT   | 21 | 3  |
| 237107 | 33 | 4247154 | 4247165 | 2 | 6  | 12 | CA   | 27 | 3  |
| 237110 | 33 | 4257165 | 4257184 | 2 | 10 | 20 | CT   | 27 | 4  |
| 237120 | 33 | 4267480 | 4267511 | 2 | 16 | 32 | GT   | 11 | 10 |
| 237123 | 33 | 4268237 | 4268260 | 2 | 12 | 24 | GT   | 7  | 4  |
| 237124 | 33 | 4268399 | 4268410 | 2 | 6  | 12 | AC   | 24 | 11 |
| 237125 | 33 | 4269068 | 4269085 | 2 | 9  | 18 | GT   | 12 | 9  |
| 237127 | 33 | 4269294 | 4269313 | 2 | 10 | 20 | CA   | 12 | 6  |
| 237128 | 33 | 4269789 | 4269808 | 2 | 10 | 20 | GT   | 30 | 6  |
| 237129 | 33 | 4273581 | 4273595 | 3 | 5  | 15 | GGT  | 24 | 7  |
| 237130 | 33 | 4274305 | 4274336 | 2 | 16 | 32 | TG   | 8  | 11 |
| 237131 | 33 | 4274886 | 4274915 | 2 | 15 | 30 | AC   | 9  | 8  |
| 237132 | 33 | 4275091 | 4275118 | 2 | 14 | 28 | GT   | 17 | 8  |
| 237137 | 33 | 4278570 | 4278595 | 2 | 13 | 26 | TG   | 16 | 13 |
| 237139 | 33 | 4279641 | 4279664 | 2 | 12 | 24 | CA   | 24 | 7  |
| 237141 | 33 | 4284411 | 4284426 | 2 | 8  | 16 | AT   | 11 | 7  |
| 237142 | 33 | 4285268 | 4285281 | 2 | 7  | 14 | TG   | 31 | 5  |
| 237153 | 33 | 4313969 | 4313990 | 2 | 11 | 22 | AC   | 27 | 6  |
| 237154 | 33 | 4317348 | 4317373 | 2 | 13 | 26 | TG   | 16 | 7  |
| 237156 | 33 | 4327797 | 4327840 | 2 | 22 | 44 | TG   | 12 | 12 |
| 237158 | 33 | 4337345 | 4337360 | 4 | 4  | 16 | TTTC | 15 | 6  |
| 237159 | 33 | 4340894 | 4340909 | 4 | 4  | 16 | AAAG | 32 | 3  |
| 237166 | 33 | 4356685 | 4356708 | 2 | 12 | 24 | GT   | 11 | 10 |
| 237173 | 33 | 4363207 | 4363233 | 3 | 9  | 27 | TCC  | 25 | 7  |
| 237182 | 33 | 4412564 | 4412583 | 4 | 5  | 20 | ATGG | 18 | 5  |
| 237195 | 33 | 4472546 | 4472561 | 4 | 4  | 16 | GTGA | 21 | 3  |
| 237197 | 33 | 4482044 | 4482071 | 2 | 14 | 28 | CT   | 8  | 9  |
| 237199 | 33 | 4482320 | 4482340 | 3 | 7  | 21 | AGG  | 15 | 4  |
| 237213 | 33 | 4510427 | 4510446 | 2 | 10 | 20 | TG   | 12 | 4  |
| 237219 | 33 | 4528267 | 4528290 | 4 | 6  | 24 | TTTA | 17 | 6  |
| 237223 | 33 | 4533127 | 4533140 | 2 | 7  | 14 | GT   | 21 | 7  |
| 237224 | 33 | 4534411 | 4534432 | 2 | 11 | 22 | AG   | 23 | 4  |
| 237225 | 33 | 4537899 | 4537910 | 2 | 6  | 12 | AG   | 31 | 5  |
| 237226 | 33 | 4539397 | 4539410 | 2 | 7  | 14 | CA   | 24 | 7  |
| 237227 | 33 | 4540094 | 4540111 | 3 | 6  | 18 | AGG  | 18 | 4  |
| 237230 | 33 | 4544119 | 4544140 | 2 | 11 | 22 | AC   | 19 | 7  |
| 237233 | 33 | 4550673 | 4550700 | 2 | 14 | 28 | AC   | 11 | 5  |
| 237234 | 33 | 4553099 | 4553110 | 2 | 6  | 12 | CA   | 19 | 3  |
| 237235 | 33 | 4554382 | 4554399 | 2 | 9  | 18 | CA   | 18 | 3  |
| 237236 | 33 | 4554424 | 4554439 | 2 | 8  | 16 | AC   | 21 | 5  |
| 237239 | 33 | 4554825 | 4554844 | 2 | 10 | 20 | CA   | 19 | 5  |
| 237240 | 33 | 4558233 | 4558266 | 2 | 17 | 34 | CA   | 19 | 15 |
| 237241 | 33 | 4558774 | 4558803 | 2 | 15 | 30 | TG   | 10 | 6  |
| 237245 | 33 | 4560791 | 4560802 | 2 | 6  | 12 | AC   | 18 | 3  |
| 237247 | 33 | 4571677 | 4571692 | 2 | 8  | 16 | TG   | 21 | 4  |
| 237253 | 33 | 4590107 | 4590150 | 2 | 22 | 44 | CA   | 7  | 8  |
| 237258 | 33 | 4605922 | 4605947 | 2 | 13 | 26 | AC   | 19 | 6  |
| 237260 | 33 | 4616726 | 4616749 | 2 | 12 | 24 | TG   | 14 | 9  |

|        |    |         |         |   |    |    |      |    |    |
|--------|----|---------|---------|---|----|----|------|----|----|
| 237261 | 33 | 4618722 | 4618733 | 2 | 6  | 12 | AC   | 24 | 7  |
| 237262 | 33 | 4620654 | 4620669 | 2 | 8  | 16 | CA   | 24 | 4  |
| 237263 | 33 | 4620879 | 4620898 | 2 | 10 | 20 | AC   | 19 | 8  |
| 237268 | 33 | 4622528 | 4622543 | 4 | 4  | 16 | AATA | 24 | 3  |
| 237269 | 33 | 4623771 | 4623784 | 2 | 7  | 14 | AC   | 10 | 5  |
| 237270 | 33 | 4623834 | 4623877 | 2 | 22 | 44 | AC   | 15 | 9  |
| 237271 | 33 | 4624354 | 4624371 | 2 | 9  | 18 | AC   | 21 | 4  |
| 237272 | 33 | 4624432 | 4624451 | 2 | 10 | 20 | AC   | 14 | 9  |
| 237275 | 33 | 4633739 | 4633750 | 2 | 6  | 12 | GT   | 18 | 3  |
| 237282 | 33 | 4663772 | 4663805 | 2 | 17 | 34 | TG   | 11 | 10 |
| 237283 | 33 | 4663927 | 4663966 | 2 | 20 | 40 | GT   | 13 | 15 |
| 237285 | 33 | 4667570 | 4667595 | 2 | 13 | 26 | GT   | 8  | 10 |
| 237286 | 33 | 4668735 | 4668749 | 3 | 5  | 15 | CCT  | 31 | 3  |
| 237289 | 33 | 4670708 | 4670719 | 2 | 6  | 12 | TC   | 33 | 3  |
| 237290 | 33 | 4670900 | 4670921 | 2 | 11 | 22 | TG   | 16 | 12 |
| 237300 | 33 | 4702088 | 4702111 | 2 | 12 | 24 | AC   | 15 | 10 |
| 237304 | 33 | 4722597 | 4722622 | 2 | 13 | 26 | TG   | 14 | 12 |
| 237306 | 33 | 4723314 | 4723337 | 4 | 6  | 24 | TGAA | 21 | 8  |
| 237309 | 33 | 4732580 | 4732599 | 2 | 10 | 20 | TG   | 22 | 6  |
| 237310 | 33 | 4742008 | 4742031 | 2 | 12 | 24 | AC   | 19 | 8  |
| 237320 | 33 | 4762603 | 4762620 | 2 | 9  | 18 | GT   | 14 | 9  |
| 237324 | 33 | 4775966 | 4775977 | 2 | 6  | 12 | AT   | 20 | 5  |
| 237326 | 33 | 4778625 | 4778644 | 2 | 10 | 20 | TG   | 21 | 4  |
| 237329 | 33 | 4783679 | 4783698 | 2 | 10 | 20 | CA   | 6  | 8  |
| 237330 | 33 | 4787059 | 4787079 | 3 | 7  | 21 | TGA  | 23 | 3  |
| 237333 | 33 | 4788056 | 4788070 | 3 | 5  | 15 | AAG  | 25 | 3  |
| 237334 | 33 | 4788385 | 4788418 | 2 | 17 | 34 | CA   | 18 | 12 |
| 237337 | 33 | 4789586 | 4789605 | 2 | 10 | 20 | GA   | 27 | 3  |
| 237341 | 33 | 4795119 | 4795136 | 2 | 9  | 18 | GA   | 14 | 3  |
| 237344 | 33 | 4797478 | 4797499 | 2 | 11 | 22 | AT   | 10 | 4  |
| 237349 | 33 | 4799986 | 4799997 | 2 | 6  | 12 | AC   | 23 | 3  |
| 237353 | 33 | 4801172 | 4801195 | 4 | 6  | 24 | ACAG | 16 | 8  |
| 237355 | 33 | 4803291 | 4803310 | 2 | 10 | 20 | CA   | 14 | 13 |
| 237361 | 33 | 4810339 | 4810350 | 2 | 6  | 12 | CA   | 17 | 8  |
| 237362 | 33 | 4810352 | 4810367 | 2 | 8  | 16 | AC   | 16 | 8  |
| 237365 | 33 | 4811990 | 4812003 | 2 | 7  | 14 | TG   | 15 | 7  |
| 237366 | 33 | 4812006 | 4812019 | 2 | 7  | 14 | TG   | 13 | 6  |
| 237370 | 33 | 4820138 | 4820153 | 2 | 8  | 16 | TC   | 17 | 3  |
| 237382 | 33 | 4830614 | 4830629 | 2 | 8  | 16 | TG   | 22 | 4  |
| 237387 | 33 | 4860792 | 4860827 | 2 | 18 | 36 | CA   | 16 | 11 |
| 237391 | 33 | 4896599 | 4896612 | 2 | 7  | 14 | AG   | 34 | 4  |
| 237401 | 33 | 4910866 | 4910889 | 3 | 8  | 24 | TGC  | 24 | 6  |
| 237407 | 33 | 4916114 | 4916167 | 2 | 27 | 54 | TG   | 9  | 12 |
| 237408 | 33 | 4916298 | 4916351 | 2 | 27 | 54 | CT   | 10 | 9  |
| 237411 | 33 | 4918896 | 4918925 | 2 | 15 | 30 | GT   | 14 | 8  |
| 237412 | 33 | 4923786 | 4923801 | 2 | 8  | 16 | TG   | 22 | 7  |
| 237434 | 33 | 4955815 | 4955838 | 3 | 8  | 24 | CAA  | 26 | 3  |
| 237436 | 33 | 4956513 | 4956524 | 2 | 6  | 12 | TA   | 18 | 4  |
| 237446 | 33 | 4960332 | 4960357 | 2 | 13 | 26 | GT   | 13 | 5  |
| 237449 | 33 | 4966031 | 4966044 | 2 | 7  | 14 | GT   | 28 | 3  |
| 237452 | 33 | 4971220 | 4971235 | 4 | 4  | 16 | AACA | 28 | 6  |

|        |    |         |         |   |    |    |      |    |    |
|--------|----|---------|---------|---|----|----|------|----|----|
| 237465 | 33 | 4991956 | 4991970 | 3 | 5  | 15 | TGA  | 23 | 3  |
| 237466 | 33 | 4993870 | 4993883 | 2 | 7  | 14 | CA   | 19 | 4  |
| 237468 | 33 | 4995462 | 4995487 | 2 | 13 | 26 | TG   | 17 | 10 |
| 237469 | 33 | 4995738 | 4995753 | 4 | 4  | 16 | AACC | 14 | 8  |
| 237471 | 33 | 4996337 | 4996350 | 2 | 7  | 14 | CA   | 18 | 11 |
| 237494 | 33 | 5042462 | 5042491 | 2 | 15 | 30 | TG   | 17 | 10 |
| 237528 | 33 | 5103205 | 5103218 | 2 | 7  | 14 | TG   | 24 | 7  |
| 237529 | 33 | 5103421 | 5103436 | 2 | 8  | 16 | AC   | 25 | 8  |
| 237535 | 33 | 5106800 | 5106827 | 2 | 14 | 28 | AC   | 10 | 9  |
| 237551 | 33 | 5130870 | 5130887 | 2 | 9  | 18 | CA   | 22 | 3  |
| 237553 | 33 | 5136200 | 5136219 | 2 | 10 | 20 | GA   | 14 | 4  |
| 237554 | 33 | 5136288 | 5136299 | 2 | 6  | 12 | AC   | 26 | 3  |
| 237557 | 33 | 5138573 | 5138592 | 2 | 10 | 20 | TC   | 28 | 3  |
| 237562 | 33 | 5145027 | 5145044 | 3 | 6  | 18 | AAT  | 8  | 3  |
| 237579 | 33 | 5184708 | 5184721 | 2 | 7  | 14 | CA   | 22 | 3  |
| 237582 | 33 | 5189852 | 5189869 | 2 | 9  | 18 | AC   | 18 | 4  |
| 237585 | 33 | 5199561 | 5199576 | 2 | 8  | 16 | TG   | 15 | 8  |
| 237587 | 33 | 5208499 | 5208512 | 2 | 7  | 14 | GT   | 12 | 3  |
| 237588 | 33 | 5208691 | 5208726 | 4 | 9  | 36 | GCCT | 28 | 10 |
| 237592 | 33 | 5215771 | 5215782 | 2 | 6  | 12 | CT   | 16 | 3  |
| 237601 | 33 | 5234158 | 5234199 | 2 | 21 | 42 | GT   | 11 | 11 |
| 237609 | 33 | 5254957 | 5254976 | 2 | 10 | 20 | GT   | 20 | 9  |
| 237619 | 33 | 5261695 | 5261714 | 2 | 10 | 20 | CA   | 14 | 5  |
| 237626 | 33 | 5266656 | 5266676 | 3 | 7  | 21 | AGC  | 14 | 7  |
| 237634 | 33 | 5269600 | 5269623 | 3 | 8  | 24 | TCT  | 18 | 7  |
| 237640 | 33 | 5278731 | 5278766 | 2 | 18 | 36 | AC   | 9  | 9  |
| 237654 | 33 | 5297009 | 5297026 | 2 | 9  | 18 | GT   | 14 | 14 |
| 237656 | 33 | 5302654 | 5302699 | 2 | 23 | 46 | GT   | 10 | 12 |
| 237661 | 33 | 5321343 | 5321358 | 2 | 8  | 16 | TA   | 8  | 3  |
| 237663 | 33 | 5330160 | 5330191 | 2 | 16 | 32 | AC   | 13 | 8  |
| 237668 | 33 | 5343085 | 5343100 | 2 | 8  | 16 | AT   | 16 | 10 |
| 237669 | 33 | 5343101 | 5343114 | 2 | 7  | 14 | AC   | 14 | 9  |
| 237671 | 33 | 5350446 | 5350457 | 2 | 6  | 12 | TG   | 29 | 3  |
| 237677 | 33 | 5368713 | 5368744 | 2 | 16 | 32 | TG   | 19 | 11 |
| 237679 | 33 | 5370027 | 5370046 | 4 | 5  | 20 | TTTA | 25 | 3  |
| 237680 | 33 | 5370706 | 5370729 | 2 | 12 | 24 | CA   | 22 | 9  |
| 237687 | 33 | 5390440 | 5390466 | 3 | 9  | 27 | GAA  | 24 | 4  |
| 237691 | 33 | 5392364 | 5392403 | 2 | 20 | 40 | TC   | 12 | 16 |
| 237693 | 33 | 5409246 | 5409257 | 2 | 6  | 12 | TG   | 6  | 7  |
| 237702 | 33 | 5430221 | 5430248 | 2 | 14 | 28 | GT   | 10 | 13 |
| 237703 | 33 | 5430398 | 5430445 | 2 | 24 | 48 | TG   | 14 | 11 |
| 237705 | 33 | 5433919 | 5433936 | 3 | 6  | 18 | TGT  | 21 | 7  |
| 237708 | 33 | 5436438 | 5436463 | 2 | 13 | 26 | GT   | 10 | 7  |
| 237711 | 33 | 5441314 | 5441325 | 2 | 6  | 12 | CA   | 23 | 4  |
| 237712 | 33 | 5441332 | 5441343 | 2 | 6  | 12 | CA   | 19 | 4  |
| 237714 | 33 | 5441609 | 5441622 | 2 | 7  | 14 | CA   | 23 | 4  |
| 237722 | 33 | 5445583 | 5445598 | 2 | 8  | 16 | TC   | 28 | 6  |
| 237727 | 33 | 5458022 | 5458033 | 2 | 6  | 12 | CA   | 17 | 5  |
| 237728 | 33 | 5458677 | 5458690 | 2 | 7  | 14 | CA   | 16 | 6  |
| 237729 | 33 | 5458949 | 5458964 | 2 | 8  | 16 | GT   | 20 | 6  |
| 237730 | 33 | 5459643 | 5459678 | 2 | 18 | 36 | AC   | 16 | 9  |



|        |    |         |         |   |    |    |      |    |    |
|--------|----|---------|---------|---|----|----|------|----|----|
| 237731 | 33 | 5460409 | 5460420 | 2 | 6  | 12 | GT   | 13 | 12 |
| 237732 | 33 | 5460423 | 5460440 | 2 | 9  | 18 | GT   | 15 | 14 |
| 237734 | 33 | 5462296 | 5462307 | 2 | 6  | 12 | AC   | 26 | 3  |
| 237736 | 33 | 5463036 | 5463051 | 2 | 8  | 16 | GT   | 20 | 6  |
| 237741 | 33 | 5465246 | 5465259 | 2 | 7  | 14 | GT   | 9  | 5  |
| 237742 | 33 | 5466995 | 5467008 | 2 | 7  | 14 | GT   | 21 | 3  |
| 237743 | 33 | 5467311 | 5467340 | 3 | 10 | 30 | TGC  | 28 | 6  |
| 237744 | 33 | 5469569 | 5469584 | 2 | 8  | 16 | TG   | 26 | 8  |
| 237753 | 33 | 5474285 | 5474299 | 3 | 5  | 15 | GCA  | 23 | 6  |
| 237754 | 33 | 5474640 | 5474661 | 2 | 11 | 22 | AC   | 13 | 6  |
| 237755 | 33 | 5474869 | 5474888 | 2 | 10 | 20 | AC   | 20 | 10 |
| 237766 | 33 | 5480596 | 5480611 | 2 | 8  | 16 | GA   | 18 | 7  |
| 237771 | 33 | 5485940 | 5485959 | 2 | 10 | 20 | AC   | 19 | 7  |
| 237772 | 33 | 5486142 | 5486163 | 2 | 11 | 22 | AC   | 23 | 8  |
| 237773 | 33 | 5491606 | 5491633 | 2 | 14 | 28 | TG   | 13 | 6  |
| 237779 | 33 | 5496588 | 5496609 | 2 | 11 | 22 | GT   | 17 | 6  |
| 237784 | 33 | 5503845 | 5503876 | 2 | 16 | 32 | GT   | 14 | 10 |
| 237785 | 33 | 5504004 | 5504029 | 2 | 13 | 26 | TG   | 18 | 6  |
| 237787 | 33 | 5505988 | 5506021 | 2 | 17 | 34 | TG   | 8  | 10 |
| 237791 | 33 | 5510379 | 5510392 | 2 | 7  | 14 | AC   | 23 | 4  |
| 237792 | 33 | 5510498 | 5510529 | 2 | 16 | 32 | GT   | 15 | 8  |
| 237801 | 33 | 5518245 | 5518264 | 2 | 10 | 20 | GA   | 19 | 4  |
| 237805 | 33 | 5525575 | 5525586 | 2 | 6  | 12 | GT   | 23 | 6  |
| 237807 | 33 | 5527869 | 5527882 | 2 | 7  | 14 | CA   | 15 | 8  |
| 237810 | 33 | 5532670 | 5532689 | 2 | 10 | 20 | TG   | 20 | 6  |
| 237811 | 33 | 5532818 | 5532829 | 2 | 6  | 12 | AC   | 29 | 3  |
| 237815 | 33 | 5540275 | 5540294 | 2 | 10 | 20 | AC   | 29 | 8  |
| 237828 | 33 | 5554155 | 5554166 | 2 | 6  | 12 | GT   | 27 | 5  |
| 237831 | 33 | 5557093 | 5557108 | 2 | 8  | 16 | AC   | 20 | 4  |
| 237834 | 33 | 5562695 | 5562709 | 3 | 5  | 15 | ATT  | 16 | 3  |
| 237835 | 33 | 5566877 | 5566902 | 2 | 13 | 26 | TG   | 20 | 10 |
| 237836 | 33 | 5567620 | 5567631 | 2 | 6  | 12 | CA   | 27 | 4  |
| 237840 | 33 | 5571096 | 5571111 | 4 | 4  | 16 | GTCT | 23 | 3  |
| 237841 | 33 | 5571508 | 5571519 | 2 | 6  | 12 | AC   | 18 | 4  |
| 237847 | 33 | 5581268 | 5581279 | 2 | 6  | 12 | GT   | 32 | 3  |
| 237860 | 33 | 5595362 | 5595373 | 2 | 6  | 12 | CA   | 31 | 3  |
| 237861 | 33 | 5595829 | 5595840 | 2 | 6  | 12 | AT   | 20 | 3  |
| 237870 | 33 | 5617042 | 5617073 | 2 | 16 | 32 | AC   | 8  | 8  |
| 237872 | 33 | 5624158 | 5624172 | 3 | 5  | 15 | GCA  | 29 | 3  |
| 237875 | 33 | 5635643 | 5635670 | 2 | 14 | 28 | GT   | 22 | 9  |
| 237884 | 33 | 5654841 | 5654864 | 2 | 12 | 24 | AC   | 22 | 8  |
| 237889 | 33 | 5672054 | 5672085 | 4 | 8  | 32 | AATT | 17 | 3  |
| 237892 | 33 | 5674378 | 5674389 | 2 | 6  | 12 | AC   | 23 | 4  |
| 237893 | 33 | 5674506 | 5674529 | 2 | 12 | 24 | AC   | 21 | 10 |
| 237896 | 33 | 5683974 | 5684009 | 4 | 9  | 36 | TATG | 21 | 11 |
| 237901 | 33 | 5699791 | 5699812 | 2 | 11 | 22 | TG   | 19 | 10 |
| 237904 | 33 | 5704283 | 5704294 | 2 | 6  | 12 | AG   | 35 | 3  |
| 237906 | 33 | 5710416 | 5710429 | 2 | 7  | 14 | GT   | 26 | 3  |
| 237907 | 33 | 5712886 | 5712903 | 2 | 9  | 18 | CA   | 15 | 5  |
| 237909 | 33 | 5713745 | 5713770 | 2 | 13 | 26 | CA   | 9  | 10 |
| 237910 | 33 | 5719737 | 5719774 | 2 | 19 | 38 | CA   | 11 | 12 |

|        |    |         |         |   |    |    |      |    |    |
|--------|----|---------|---------|---|----|----|------|----|----|
| 237918 | 33 | 5721585 | 5721608 | 3 | 8  | 24 | GCT  | 24 | 5  |
| 237925 | 33 | 5725104 | 5725129 | 2 | 13 | 26 | CA   | 15 | 12 |
| 237926 | 33 | 5729225 | 5729256 | 2 | 16 | 32 | CA   | 12 | 11 |
| 237927 | 33 | 5737034 | 5737045 | 2 | 6  | 12 | GT   | 34 | 3  |
| 237933 | 33 | 5740206 | 5740235 | 2 | 15 | 30 | CA   | 10 | 8  |
| 237934 | 33 | 5740379 | 5740406 | 2 | 14 | 28 | GT   | 22 | 13 |
| 237941 | 33 | 5746004 | 5746027 | 4 | 6  | 24 | TTTC | 16 | 6  |
| 237946 | 33 | 5778598 | 5778613 | 2 | 8  | 16 | GT   | 22 | 5  |
| 237949 | 33 | 5784784 | 5784803 | 2 | 10 | 20 | TG   | 20 | 6  |
| 237952 | 33 | 5787540 | 5787565 | 2 | 13 | 26 | TG   | 11 | 11 |
| 237962 | 33 | 5805607 | 5805638 | 2 | 16 | 32 | TG   | 13 | 5  |
| 237963 | 33 | 5806200 | 5806213 | 2 | 7  | 14 | TG   | 6  | 5  |
| 237966 | 33 | 5817813 | 5817844 | 2 | 16 | 32 | TG   | 13 | 9  |
| 237973 | 33 | 5822263 | 5822276 | 2 | 7  | 14 | TG   | 25 | 3  |
| 237977 | 33 | 5828840 | 5828853 | 2 | 7  | 14 | TG   | 13 | 4  |
| 237981 | 33 | 5831468 | 5831497 | 2 | 15 | 30 | GA   | 14 | 9  |
| 237982 | 33 | 5836613 | 5836644 | 2 | 16 | 32 | TG   | 13 | 11 |
| 237984 | 33 | 5837443 | 5837463 | 3 | 7  | 21 | TGC  | 17 | 6  |
| 237988 | 33 | 5839604 | 5839619 | 4 | 4  | 16 | TTTG | 23 | 3  |
| 237991 | 33 | 5846810 | 5846845 | 2 | 18 | 36 | TG   | 18 | 10 |
| 237993 | 33 | 5847191 | 5847210 | 2 | 10 | 20 | CA   | 8  | 5  |
| 237995 | 33 | 5849311 | 5849334 | 2 | 12 | 24 | CA   | 17 | 14 |
| 237996 | 33 | 5849718 | 5849731 | 2 | 7  | 14 | GT   | 19 | 3  |
| 237999 | 33 | 5852763 | 5852790 | 2 | 14 | 28 | CA   | 16 | 6  |
| 238001 | 33 | 5854359 | 5854398 | 2 | 20 | 40 | TG   | 12 | 15 |
| 238002 | 33 | 5854627 | 5854660 | 2 | 17 | 34 | CA   | 15 | 10 |
| 238013 | 33 | 5871750 | 5871767 | 2 | 9  | 18 | AC   | 19 | 4  |
| 238014 | 33 | 5871931 | 5871954 | 2 | 12 | 24 | GT   | 11 | 8  |
| 238015 | 33 | 5878204 | 5878229 | 2 | 13 | 26 | TG   | 20 | 6  |
| 238016 | 33 | 5878725 | 5878744 | 2 | 10 | 20 | CT   | 11 | 5  |
| 238021 | 33 | 5900582 | 5900599 | 2 | 9  | 18 | CT   | 11 | 9  |
| 238032 | 33 | 5913444 | 5913455 | 2 | 6  | 12 | GT   | 18 | 7  |
| 238033 | 33 | 5913457 | 5913476 | 2 | 10 | 20 | TG   | 15 | 9  |
| 238034 | 33 | 5916919 | 5916930 | 2 | 6  | 12 | CA   | 25 | 5  |
| 238049 | 33 | 5941218 | 5941241 | 3 | 8  | 24 | TTG  | 29 | 5  |
| 238050 | 33 | 5945343 | 5945362 | 2 | 10 | 20 | TG   | 23 | 18 |
| 238051 | 33 | 5947038 | 5947052 | 3 | 5  | 15 | GGA  | 16 | 4  |
| 238056 | 33 | 5948999 | 5949012 | 2 | 7  | 14 | AG   | 27 | 3  |
| 238057 | 33 | 5950599 | 5950630 | 2 | 16 | 32 | CA   | 21 | 7  |
| 238063 | 33 | 5953340 | 5953371 | 2 | 16 | 32 | TG   | 12 | 9  |
| 238064 | 33 | 5955892 | 5955907 | 4 | 4  | 16 | CCTC | 11 | 3  |
| 238066 | 33 | 5959342 | 5959353 | 2 | 6  | 12 | TG   | 17 | 8  |
| 238071 | 33 | 5964509 | 5964524 | 2 | 8  | 16 | CT   | 28 | 3  |
| 238074 | 33 | 5965923 | 5965948 | 2 | 13 | 26 | TG   | 14 | 10 |
| 238075 | 33 | 5966062 | 5966077 | 2 | 8  | 16 | AC   | 14 | 7  |
| 238077 | 33 | 5966830 | 5966857 | 2 | 14 | 28 | TG   | 19 | 5  |
| 238078 | 33 | 5967063 | 5967096 | 2 | 17 | 34 | AC   | 13 | 10 |
| 238079 | 33 | 5967151 | 5967184 | 2 | 17 | 34 | TG   | 13 | 11 |
| 238082 | 33 | 5972034 | 5972049 | 2 | 8  | 16 | TG   | 23 | 9  |
| 238085 | 33 | 5976251 | 5976300 | 2 | 25 | 50 | GT   | 6  | 8  |
| 238086 | 33 | 5976857 | 5976882 | 2 | 13 | 26 | GT   | 16 | 9  |

|        |    |         |         |   |    |    |      |    |    |
|--------|----|---------|---------|---|----|----|------|----|----|
| 238088 | 33 | 5977137 | 5977178 | 2 | 21 | 42 | TG   | 10 | 9  |
| 238089 | 33 | 5977259 | 5977274 | 2 | 8  | 16 | GT   | 12 | 7  |
| 238090 | 33 | 5977275 | 5977286 | 2 | 6  | 12 | GA   | 13 | 6  |
| 238093 | 33 | 5979177 | 5979190 | 2 | 7  | 14 | CA   | 17 | 3  |
| 238097 | 33 | 5993291 | 5993344 | 2 | 27 | 54 | TC   | 7  | 8  |
| 238102 | 33 | 5998470 | 5998505 | 3 | 12 | 36 | TCT  | 22 | 10 |
| 238103 | 33 | 5999738 | 5999769 | 2 | 16 | 32 | TG   | 21 | 9  |
| 238106 | 33 | 6011842 | 6011885 | 2 | 22 | 44 | GT   | 7  | 6  |
| 238115 | 33 | 6047642 | 6047663 | 2 | 11 | 22 | GT   | 15 | 7  |
| 238118 | 33 | 6051898 | 6051927 | 2 | 15 | 30 | TG   | 12 | 9  |
| 238123 | 33 | 6061637 | 6061668 | 2 | 16 | 32 | AC   | 14 | 12 |
| 238127 | 33 | 6064929 | 6064948 | 2 | 10 | 20 | CA   | 19 | 8  |
| 238132 | 33 | 6074328 | 6074363 | 3 | 12 | 36 | GAA  | 29 | 5  |
| 238133 | 33 | 6074574 | 6074597 | 3 | 8  | 24 | GAG  | 13 | 4  |
| 238136 | 33 | 6077987 | 6078004 | 2 | 9  | 18 | AG   | 23 | 6  |
| 238137 | 33 | 6078148 | 6078163 | 2 | 8  | 16 | GT   | 13 | 5  |
| 238139 | 33 | 6079453 | 6079486 | 2 | 17 | 34 | AC   | 6  | 5  |
| 238143 | 33 | 6088114 | 6088145 | 2 | 16 | 32 | TG   | 10 | 9  |
| 238144 | 33 | 6089825 | 6089846 | 2 | 11 | 22 | AC   | 14 | 7  |
| 238150 | 33 | 6105086 | 6105099 | 2 | 7  | 14 | AC   | 24 | 4  |
| 238152 | 33 | 6106268 | 6106279 | 2 | 6  | 12 | TG   | 35 | 5  |
| 238156 | 33 | 6119678 | 6119737 | 4 | 15 | 60 | AGAA | 9  | 11 |
| 238160 | 33 | 6141653 | 6141668 | 4 | 4  | 16 | AACA | 15 | 4  |
| 238162 | 33 | 6156613 | 6156628 | 2 | 8  | 16 | GT   | 17 | 10 |
| 238195 | 33 | 6333448 | 6333481 | 2 | 17 | 34 | CA   | 24 | 21 |
| 238196 | 33 | 6334734 | 6334763 | 3 | 10 | 30 | AAC  | 7  | 6  |
| 238199 | 33 | 6337116 | 6337131 | 2 | 8  | 16 | AC   | 26 | 8  |
| 238200 | 33 | 6341667 | 6341686 | 4 | 5  | 20 | AATT | 18 | 9  |
| 238212 | 33 | 6361821 | 6361834 | 2 | 7  | 14 | AC   | 25 | 7  |
| 238220 | 33 | 6399037 | 6399072 | 2 | 18 | 36 | AC   | 18 | 10 |
| 238228 | 33 | 6420919 | 6420946 | 2 | 14 | 28 | AC   | 15 | 16 |
| 238240 | 33 | 6460384 | 6460397 | 2 | 7  | 14 | GT   | 19 | 3  |
| 238249 | 33 | 6493415 | 6493442 | 2 | 14 | 28 | GT   | 8  | 12 |
| 238250 | 33 | 6498160 | 6498175 | 2 | 8  | 16 | TG   | 13 | 9  |
| 238260 | 33 | 6520276 | 6520295 | 2 | 10 | 20 | TG   | 16 | 6  |
| 238275 | 33 | 6562668 | 6562683 | 4 | 4  | 16 | GCAC | 14 | 4  |
| 238281 | 33 | 6568386 | 6568407 | 2 | 11 | 22 | AC   | 21 | 8  |
| 238282 | 34 | 412     | 427     | 4 | 4  | 16 | ACAT | 22 | 5  |
| 238286 | 34 | 15833   | 15853   | 3 | 7  | 21 | ATT  | 14 | 3  |
| 238292 | 34 | 32471   | 32494   | 2 | 12 | 24 | AC   | 13 | 8  |
| 238294 | 34 | 33585   | 33596   | 2 | 6  | 12 | TG   | 28 | 4  |
| 238297 | 34 | 41178   | 41191   | 2 | 7  | 14 | GT   | 25 | 10 |
| 238302 | 34 | 41619   | 41642   | 2 | 12 | 24 | CA   | 13 | 11 |
| 238305 | 34 | 45164   | 45203   | 4 | 10 | 40 | AAAC | 23 | 11 |
| 238306 | 34 | 46611   | 46642   | 2 | 16 | 32 | CA   | 10 | 14 |
| 238307 | 34 | 46849   | 46864   | 2 | 8  | 16 | TG   | 12 | 6  |
| 238317 | 34 | 60152   | 60195   | 2 | 22 | 44 | TG   | 9  | 8  |
| 238320 | 34 | 61216   | 61237   | 2 | 11 | 22 | TG   | 19 | 6  |
| 238327 | 34 | 68710   | 68724   | 3 | 5  | 15 | TTG  | 31 | 3  |
| 238335 | 34 | 84533   | 84548   | 4 | 4  | 16 | GCTA | 22 | 3  |
| 238344 | 34 | 94356   | 94375   | 2 | 10 | 20 | TG   | 16 | 6  |

|        |    |        |        |   |    |    |      |    |    |
|--------|----|--------|--------|---|----|----|------|----|----|
| 238349 | 34 | 102192 | 102211 | 2 | 10 | 20 | CA   | 8  | 8  |
| 238351 | 34 | 106233 | 106246 | 2 | 7  | 14 | AC   | 24 | 4  |
| 238353 | 34 | 111023 | 111060 | 2 | 19 | 38 | GT   | 14 | 10 |
| 238354 | 34 | 114060 | 114089 | 2 | 15 | 30 | GT   | 9  | 6  |
| 238359 | 34 | 127268 | 127289 | 2 | 11 | 22 | AC   | 29 | 13 |
| 238360 | 34 | 127671 | 127682 | 2 | 6  | 12 | AC   | 13 | 3  |
| 238362 | 34 | 130623 | 130650 | 2 | 14 | 28 | AC   | 10 | 8  |
| 238363 | 34 | 132487 | 132510 | 2 | 12 | 24 | TG   | 18 | 11 |
| 238367 | 34 | 133456 | 133473 | 2 | 9  | 18 | GT   | 19 | 6  |
| 238374 | 34 | 139520 | 139545 | 2 | 13 | 26 | AC   | 17 | 3  |
| 238375 | 34 | 142533 | 142553 | 3 | 7  | 21 | GCT  | 25 | 4  |
| 238376 | 34 | 144601 | 144615 | 3 | 5  | 15 | CTT  | 27 | 3  |
| 238377 | 34 | 145045 | 145068 | 2 | 12 | 24 | GT   | 18 | 9  |
| 238382 | 34 | 148670 | 148683 | 2 | 7  | 14 | TG   | 27 | 3  |
| 238385 | 34 | 154282 | 154295 | 2 | 7  | 14 | CA   | 24 | 6  |
| 238386 | 34 | 154373 | 154396 | 2 | 12 | 24 | AC   | 15 | 8  |
| 238387 | 34 | 154754 | 154773 | 4 | 5  | 20 | TTTC | 22 | 13 |
| 238389 | 34 | 154946 | 154973 | 2 | 14 | 28 | TG   | 17 | 13 |
| 238391 | 34 | 155142 | 155179 | 2 | 19 | 38 | TG   | 8  | 8  |
| 238401 | 34 | 163503 | 163526 | 2 | 12 | 24 | TG   | 18 | 4  |
| 238403 | 34 | 171136 | 171167 | 2 | 16 | 32 | AC   | 17 | 13 |
| 238407 | 34 | 178418 | 178453 | 2 | 18 | 36 | CA   | 7  | 4  |
| 238415 | 34 | 188471 | 188500 | 2 | 15 | 30 | TG   | 13 | 9  |
| 238418 | 34 | 189477 | 189500 | 2 | 12 | 24 | GT   | 16 | 14 |
| 238420 | 34 | 189733 | 189752 | 2 | 10 | 20 | GT   | 18 | 18 |
| 238423 | 34 | 190707 | 190728 | 2 | 11 | 22 | CA   | 16 | 7  |
| 238427 | 34 | 195625 | 195640 | 2 | 8  | 16 | AC   | 21 | 6  |
| 238428 | 34 | 195942 | 195955 | 2 | 7  | 14 | AG   | 10 | 4  |
| 238429 | 34 | 195958 | 195969 | 2 | 6  | 12 | AG   | 15 | 5  |
| 238435 | 34 | 203423 | 203440 | 2 | 9  | 18 | GT   | 25 | 10 |
| 238452 | 34 | 236763 | 236778 | 2 | 8  | 16 | TG   | 22 | 5  |
| 238453 | 34 | 237081 | 237092 | 2 | 6  | 12 | TG   | 25 | 5  |
| 238455 | 34 | 237528 | 237555 | 2 | 14 | 28 | CA   | 7  | 6  |
| 238456 | 34 | 237681 | 237696 | 2 | 8  | 16 | TG   | 19 | 6  |
| 238457 | 34 | 238299 | 238325 | 3 | 9  | 27 | ACA  | 22 | 3  |
| 238461 | 34 | 242893 | 242928 | 2 | 18 | 36 | TG   | 11 | 10 |
| 238462 | 34 | 244256 | 244279 | 2 | 12 | 24 | TG   | 23 | 10 |
| 238464 | 34 | 245417 | 245432 | 2 | 8  | 16 | GT   | 22 | 8  |
| 238467 | 34 | 245863 | 245892 | 2 | 15 | 30 | TG   | 13 | 10 |
| 238469 | 34 | 253680 | 253699 | 2 | 10 | 20 | AC   | 14 | 8  |
| 238470 | 34 | 253786 | 253801 | 2 | 8  | 16 | AC   | 16 | 5  |
| 238472 | 34 | 256540 | 256561 | 2 | 11 | 22 | CA   | 12 | 7  |
| 238473 | 34 | 256810 | 256827 | 2 | 9  | 18 | CA   | 21 | 6  |
| 238475 | 34 | 257175 | 257198 | 3 | 8  | 24 | AAC  | 14 | 4  |
| 238476 | 34 | 257623 | 257640 | 2 | 9  | 18 | CA   | 13 | 6  |
| 238481 | 34 | 263779 | 263798 | 2 | 10 | 20 | GT   | 11 | 9  |
| 238482 | 34 | 264193 | 264216 | 2 | 12 | 24 | AC   | 16 | 9  |
| 238483 | 34 | 264388 | 264405 | 2 | 9  | 18 | CT   | 27 | 5  |
| 238486 | 34 | 267121 | 267146 | 2 | 13 | 26 | AC   | 17 | 6  |
| 238487 | 34 | 267538 | 267557 | 2 | 10 | 20 | GT   | 11 | 6  |
| 238488 | 34 | 268812 | 268825 | 2 | 7  | 14 | GT   | 18 | 6  |

|        |    |        |        |   |    |    |      |    |    |
|--------|----|--------|--------|---|----|----|------|----|----|
| 238489 | 34 | 268993 | 269026 | 2 | 17 | 34 | TG   | 6  | 6  |
| 238490 | 34 | 269363 | 269404 | 2 | 21 | 42 | GT   | 15 | 13 |
| 238491 | 34 | 269517 | 269544 | 2 | 14 | 28 | AC   | 6  | 5  |
| 238492 | 34 | 270548 | 270559 | 2 | 6  | 12 | GT   | 14 | 7  |
| 238493 | 34 | 270925 | 270942 | 2 | 9  | 18 | CA   | 20 | 7  |
| 238494 | 34 | 271411 | 271425 | 3 | 5  | 15 | CTT  | 15 | 6  |
| 238496 | 34 | 271758 | 271773 | 4 | 4  | 16 | AAAG | 8  | 6  |
| 238499 | 34 | 272576 | 272603 | 2 | 14 | 28 | AG   | 18 | 6  |
| 238500 | 34 | 276144 | 276161 | 3 | 6  | 18 | CTT  | 27 | 4  |
| 238503 | 34 | 277521 | 277564 | 2 | 22 | 44 | CA   | 12 | 9  |
| 238512 | 34 | 280956 | 280979 | 3 | 8  | 24 | GAA  | 20 | 10 |
| 238513 | 34 | 282222 | 282247 | 2 | 13 | 26 | AC   | 21 | 9  |
| 238515 | 34 | 282691 | 282724 | 2 | 17 | 34 | GA   | 10 | 7  |
| 238533 | 34 | 307515 | 307526 | 2 | 6  | 12 | AC   | 22 | 3  |
| 238535 | 34 | 324015 | 324030 | 2 | 8  | 16 | GT   | 19 | 3  |
| 238536 | 34 | 324482 | 324501 | 4 | 5  | 20 | ATAG | 9  | 6  |
| 238539 | 34 | 326067 | 326087 | 3 | 7  | 21 | TGG  | 25 | 4  |
| 238540 | 34 | 326320 | 326343 | 3 | 8  | 24 | GCT  | 25 | 5  |
| 238547 | 34 | 331697 | 331720 | 2 | 12 | 24 | TG   | 15 | 6  |
| 238553 | 34 | 340849 | 340882 | 2 | 17 | 34 | TG   | 9  | 5  |
| 238555 | 34 | 344683 | 344702 | 2 | 10 | 20 | AG   | 9  | 3  |
| 238559 | 34 | 348813 | 348826 | 2 | 7  | 14 | TC   | 29 | 3  |
| 238560 | 34 | 348981 | 349010 | 2 | 15 | 30 | GT   | 12 | 8  |
| 238564 | 34 | 352157 | 352170 | 2 | 7  | 14 | AC   | 28 | 4  |
| 238566 | 34 | 355143 | 355166 | 2 | 12 | 24 | CA   | 19 | 10 |
| 238567 | 34 | 355252 | 355271 | 2 | 10 | 20 | AG   | 19 | 6  |
| 238569 | 34 | 356766 | 356781 | 2 | 8  | 16 | GT   | 18 | 12 |
| 238571 | 34 | 357201 | 357232 | 2 | 16 | 32 | TG   | 6  | 6  |
| 238574 | 34 | 358444 | 358471 | 2 | 14 | 28 | TG   | 10 | 4  |
| 238575 | 34 | 359293 | 359308 | 2 | 8  | 16 | CT   | 35 | 7  |
| 238576 | 34 | 362064 | 362087 | 3 | 8  | 24 | ACC  | 21 | 6  |
| 238577 | 34 | 362490 | 362510 | 3 | 7  | 21 | AGG  | 17 | 5  |
| 238581 | 34 | 371839 | 371856 | 2 | 9  | 18 | TG   | 13 | 4  |
| 238582 | 34 | 372222 | 372237 | 2 | 8  | 16 | CT   | 8  | 3  |
| 238583 | 34 | 372323 | 372336 | 2 | 7  | 14 | GA   | 16 | 3  |
| 238587 | 34 | 378965 | 378984 | 2 | 10 | 20 | CA   | 22 | 11 |
| 238588 | 34 | 379126 | 379145 | 2 | 10 | 20 | AC   | 18 | 4  |
| 238589 | 34 | 379236 | 379251 | 2 | 8  | 16 | CA   | 26 | 7  |
| 238590 | 34 | 387304 | 387321 | 2 | 9  | 18 | AC   | 16 | 3  |
| 238591 | 34 | 388613 | 388628 | 4 | 4  | 16 | TGTT | 24 | 6  |
| 238595 | 34 | 391305 | 391324 | 2 | 10 | 20 | AC   | 18 | 4  |
| 238596 | 34 | 391403 | 391420 | 2 | 9  | 18 | AC   | 21 | 4  |
| 238597 | 34 | 391906 | 391921 | 4 | 4  | 16 | CTGA | 32 | 3  |
| 238599 | 34 | 392259 | 392300 | 2 | 21 | 42 | TC   | 15 | 9  |
| 238601 | 34 | 393791 | 393806 | 2 | 8  | 16 | CA   | 22 | 3  |
| 238604 | 34 | 404637 | 404666 | 2 | 15 | 30 | TG   | 21 | 10 |
| 238605 | 34 | 409321 | 409340 | 4 | 5  | 20 | ATCA | 20 | 5  |
| 238606 | 34 | 412029 | 412054 | 2 | 13 | 26 | TG   | 16 | 8  |
| 238607 | 34 | 412457 | 412474 | 2 | 9  | 18 | AC   | 23 | 6  |
| 238611 | 34 | 417418 | 417463 | 2 | 23 | 46 | CA   | 14 | 15 |
| 238615 | 34 | 423311 | 423338 | 2 | 14 | 28 | CA   | 9  | 9  |

|        |    |        |        |   |    |    |      |    |    |
|--------|----|--------|--------|---|----|----|------|----|----|
| 238624 | 34 | 424450 | 424465 | 2 | 8  | 16 | AG   | 16 | 3  |
| 238627 | 34 | 428337 | 428366 | 2 | 15 | 30 | CA   | 23 | 5  |
| 238630 | 34 | 434523 | 434538 | 2 | 8  | 16 | GT   | 21 | 8  |
| 238635 | 34 | 444070 | 444103 | 2 | 17 | 34 | TG   | 8  | 7  |
| 238636 | 34 | 444653 | 444664 | 2 | 6  | 12 | AC   | 12 | 4  |
| 238637 | 34 | 445144 | 445187 | 2 | 22 | 44 | GT   | 8  | 9  |
| 238639 | 34 | 446622 | 446653 | 2 | 16 | 32 | GT   | 15 | 8  |
| 238643 | 34 | 454474 | 454499 | 2 | 13 | 26 | AC   | 15 | 7  |
| 238654 | 34 | 466862 | 466877 | 4 | 4  | 16 | AAAT | 12 | 9  |
| 238658 | 34 | 479304 | 479317 | 2 | 7  | 14 | GT   | 28 | 9  |
| 238662 | 34 | 483279 | 483296 | 3 | 6  | 18 | AAT  | 9  | 3  |
| 238665 | 34 | 492930 | 492945 | 4 | 4  | 16 | AAAC | 26 | 3  |
| 238666 | 34 | 496884 | 496897 | 2 | 7  | 14 | AC   | 16 | 5  |
| 238667 | 34 | 497092 | 497105 | 2 | 7  | 14 | GA   | 26 | 4  |
| 238671 | 34 | 505298 | 505309 | 2 | 6  | 12 | CA   | 13 | 8  |
| 238673 | 34 | 505960 | 505977 | 2 | 9  | 18 | TG   | 15 | 4  |
| 238674 | 34 | 505980 | 505991 | 2 | 6  | 12 | TG   | 16 | 5  |
| 238690 | 34 | 533576 | 533593 | 2 | 9  | 18 | CA   | 24 | 6  |
| 238699 | 34 | 541143 | 541170 | 2 | 14 | 28 | GT   | 15 | 10 |
| 238703 | 34 | 542446 | 542459 | 2 | 7  | 14 | AC   | 32 | 4  |
| 238704 | 34 | 542576 | 542587 | 2 | 6  | 12 | TC   | 29 | 4  |
| 238705 | 34 | 543349 | 543376 | 2 | 14 | 28 | TG   | 19 | 11 |
| 238707 | 34 | 544845 | 544862 | 2 | 9  | 18 | GT   | 19 | 6  |
| 238708 | 34 | 545176 | 545187 | 2 | 6  | 12 | CA   | 30 | 4  |
| 238715 | 34 | 554315 | 554338 | 2 | 12 | 24 | TG   | 6  | 5  |
| 238720 | 34 | 560862 | 560873 | 2 | 6  | 12 | TC   | 20 | 4  |
| 238721 | 34 | 561629 | 561640 | 2 | 6  | 12 | TG   | 31 | 3  |
| 238731 | 34 | 572147 | 572158 | 2 | 6  | 12 | TG   | 23 | 6  |
| 238733 | 34 | 574527 | 574542 | 2 | 8  | 16 | GT   | 21 | 5  |
| 238737 | 34 | 577533 | 577554 | 2 | 11 | 22 | CA   | 14 | 4  |
| 238738 | 34 | 577718 | 577739 | 2 | 11 | 22 | CA   | 23 | 9  |
| 238739 | 34 | 579363 | 579378 | 2 | 8  | 16 | AC   | 18 | 6  |
| 238744 | 34 | 585084 | 585101 | 2 | 9  | 18 | GT   | 14 | 6  |
| 238748 | 34 | 594679 | 594712 | 2 | 17 | 34 | AC   | 7  | 5  |
| 238749 | 34 | 595423 | 595450 | 2 | 14 | 28 | TG   | 11 | 10 |
| 238751 | 34 | 597213 | 597238 | 2 | 13 | 26 | TC   | 18 | 11 |
| 238761 | 34 | 604853 | 604882 | 3 | 10 | 30 | TGC  | 26 | 4  |
| 238765 | 34 | 610461 | 610478 | 2 | 9  | 18 | AC   | 17 | 6  |
| 238776 | 34 | 619661 | 619694 | 2 | 17 | 34 | CA   | 10 | 10 |
| 238777 | 34 | 620065 | 620090 | 2 | 13 | 26 | GT   | 16 | 10 |
| 238778 | 34 | 622076 | 622101 | 2 | 13 | 26 | AC   | 23 | 10 |
| 238779 | 34 | 622320 | 622339 | 2 | 10 | 20 | GT   | 14 | 6  |
| 238781 | 34 | 623720 | 623741 | 2 | 11 | 22 | AC   | 15 | 7  |
| 238787 | 34 | 628611 | 628642 | 2 | 16 | 32 | TC   | 11 | 7  |
| 238790 | 34 | 638134 | 638163 | 2 | 15 | 30 | GT   | 23 | 7  |
| 238797 | 34 | 645288 | 645303 | 2 | 8  | 16 | TG   | 13 | 6  |
| 238798 | 34 | 645898 | 645913 | 2 | 8  | 16 | CA   | 18 | 12 |
| 238799 | 34 | 645915 | 645928 | 2 | 7  | 14 | AC   | 14 | 9  |
| 238800 | 34 | 646505 | 646519 | 3 | 5  | 15 | CAA  | 12 | 5  |
| 238801 | 34 | 649396 | 649411 | 2 | 8  | 16 | CA   | 15 | 7  |
| 238802 | 34 | 649414 | 649427 | 2 | 7  | 14 | CA   | 10 | 3  |

|        |    |        |        |   |    |    |      |    |    |
|--------|----|--------|--------|---|----|----|------|----|----|
| 238811 | 34 | 661466 | 661497 | 2 | 16 | 32 | AC   | 6  | 8  |
| 238812 | 34 | 663149 | 663172 | 4 | 6  | 24 | AAAT | 23 | 4  |
| 238819 | 34 | 669228 | 669239 | 2 | 6  | 12 | CT   | 25 | 6  |
| 238820 | 34 | 671517 | 671540 | 3 | 8  | 24 | AAT  | 13 | 8  |
| 238823 | 34 | 675804 | 675823 | 4 | 5  | 20 | AAAT | 6  | 8  |
| 238830 | 34 | 682555 | 682581 | 3 | 9  | 27 | ATT  | 19 | 3  |
| 238831 | 34 | 684439 | 684486 | 2 | 24 | 48 | TG   | 7  | 8  |
| 238832 | 34 | 686281 | 686298 | 2 | 9  | 18 | GT   | 29 | 5  |
| 238836 | 34 | 689314 | 689337 | 3 | 8  | 24 | GTT  | 19 | 10 |
| 238837 | 34 | 691699 | 691719 | 3 | 7  | 21 | AGG  | 25 | 5  |
| 238845 | 34 | 708010 | 708023 | 2 | 7  | 14 | AC   | 24 | 5  |
| 238849 | 34 | 712817 | 712828 | 2 | 6  | 12 | CT   | 25 | 3  |
| 238853 | 34 | 719214 | 719251 | 2 | 19 | 38 | CA   | 9  | 11 |
| 238855 | 34 | 719531 | 719562 | 2 | 16 | 32 | GT   | 16 | 10 |
| 238856 | 34 | 720743 | 720754 | 2 | 6  | 12 | TA   | 11 | 3  |
| 238875 | 34 | 759031 | 759048 | 2 | 9  | 18 | GT   | 22 | 3  |
| 238876 | 34 | 760333 | 760366 | 2 | 17 | 34 | CA   | 22 | 5  |
| 238881 | 34 | 772039 | 772070 | 2 | 16 | 32 | AC   | 10 | 9  |
| 238886 | 34 | 782118 | 782145 | 2 | 14 | 28 | CT   | 6  | 6  |
| 238889 | 34 | 783291 | 783312 | 2 | 11 | 22 | AC   | 13 | 7  |
| 238893 | 34 | 788367 | 788386 | 2 | 10 | 20 | GT   | 11 | 8  |
| 238904 | 34 | 815565 | 815582 | 3 | 6  | 18 | TTG  | 26 | 3  |
| 238906 | 34 | 816440 | 816451 | 2 | 6  | 12 | GT   | 22 | 8  |
| 238909 | 34 | 817111 | 817128 | 2 | 9  | 18 | TG   | 23 | 8  |
| 238918 | 34 | 832285 | 832296 | 2 | 6  | 12 | GT   | 17 | 14 |
| 238920 | 34 | 833197 | 833220 | 2 | 12 | 24 | CT   | 15 | 3  |
| 238921 | 34 | 833799 | 833816 | 2 | 9  | 18 | GT   | 16 | 5  |
| 238922 | 34 | 833819 | 833832 | 2 | 7  | 14 | GT   | 15 | 4  |
| 238924 | 34 | 835922 | 835947 | 2 | 13 | 26 | TG   | 15 | 10 |
| 238925 | 34 | 837664 | 837677 | 2 | 7  | 14 | TG   | 17 | 4  |
| 238926 | 34 | 837678 | 837691 | 2 | 7  | 14 | AG   | 12 | 4  |
| 238929 | 34 | 838146 | 838181 | 2 | 18 | 36 | TC   | 6  | 6  |
| 238930 | 34 | 838759 | 838776 | 2 | 9  | 18 | CA   | 25 | 6  |
| 238931 | 34 | 841317 | 841336 | 2 | 10 | 20 | AC   | 21 | 9  |
| 238933 | 34 | 845431 | 845456 | 2 | 13 | 26 | AC   | 10 | 5  |
| 238938 | 34 | 854121 | 854144 | 2 | 12 | 24 | CA   | 10 | 8  |
| 238943 | 34 | 855102 | 855129 | 2 | 14 | 28 | AC   | 19 | 15 |
| 238944 | 34 | 855214 | 855233 | 2 | 10 | 20 | GA   | 16 | 4  |
| 238945 | 34 | 855311 | 855322 | 2 | 6  | 12 | GA   | 17 | 3  |
| 238947 | 34 | 855540 | 855557 | 2 | 9  | 18 | GT   | 9  | 4  |
| 238949 | 34 | 856860 | 856879 | 2 | 10 | 20 | GT   | 12 | 7  |
| 238951 | 34 | 857548 | 857575 | 4 | 7  | 28 | TTCT | 25 | 3  |
| 238958 | 34 | 859391 | 859408 | 2 | 9  | 18 | AG   | 6  | 6  |
| 238959 | 34 | 860019 | 860030 | 2 | 6  | 12 | AC   | 21 | 3  |
| 238960 | 34 | 860049 | 860060 | 2 | 6  | 12 | CA   | 29 | 3  |
| 238961 | 34 | 862822 | 862849 | 2 | 14 | 28 | TG   | 16 | 8  |
| 238962 | 34 | 863389 | 863414 | 2 | 13 | 26 | CA   | 6  | 7  |
| 238965 | 34 | 864846 | 864879 | 2 | 17 | 34 | CA   | 12 | 9  |
| 238982 | 34 | 878980 | 878995 | 2 | 8  | 16 | CA   | 12 | 5  |
| 238988 | 34 | 883457 | 883476 | 2 | 10 | 20 | AC   | 22 | 9  |
| 238993 | 34 | 889543 | 889568 | 2 | 13 | 26 | TC   | 16 | 6  |

|        |    |         |         |   |    |    |      |    |    |
|--------|----|---------|---------|---|----|----|------|----|----|
| 238994 | 34 | 889849  | 889863  | 3 | 5  | 15 | TTC  | 21 | 6  |
| 238996 | 34 | 890476  | 890493  | 2 | 9  | 18 | GT   | 21 | 4  |
| 238998 | 34 | 890933  | 890964  | 2 | 16 | 32 | GT   | 7  | 9  |
| 239004 | 34 | 893136  | 893151  | 2 | 8  | 16 | AC   | 14 | 4  |
| 239007 | 34 | 893760  | 893774  | 3 | 5  | 15 | GAG  | 16 | 3  |
| 239008 | 34 | 893874  | 893895  | 2 | 11 | 22 | TG   | 19 | 6  |
| 239009 | 34 | 894027  | 894062  | 2 | 18 | 36 | TG   | 8  | 9  |
| 239010 | 34 | 894135  | 894170  | 2 | 18 | 36 | GT   | 10 | 9  |
| 239011 | 34 | 894339  | 894362  | 2 | 12 | 24 | GT   | 18 | 6  |
| 239012 | 34 | 894419  | 894430  | 2 | 6  | 12 | GT   | 25 | 3  |
| 239014 | 34 | 894846  | 894883  | 2 | 19 | 38 | CT   | 8  | 9  |
| 239019 | 34 | 898017  | 898032  | 2 | 8  | 16 | CA   | 13 | 8  |
| 239020 | 34 | 898034  | 898047  | 2 | 7  | 14 | AC   | 17 | 10 |
| 239038 | 34 | 904532  | 904549  | 2 | 9  | 18 | CA   | 24 | 6  |
| 239045 | 34 | 911624  | 911635  | 2 | 6  | 12 | AC   | 26 | 4  |
| 239048 | 34 | 916029  | 916060  | 2 | 16 | 32 | AC   | 7  | 7  |
| 239061 | 34 | 923096  | 923109  | 2 | 7  | 14 | AC   | 27 | 3  |
| 239072 | 34 | 933235  | 933264  | 2 | 15 | 30 | CA   | 16 | 4  |
| 239073 | 34 | 933743  | 933756  | 2 | 7  | 14 | CA   | 29 | 3  |
| 239074 | 34 | 934645  | 934668  | 2 | 12 | 24 | GT   | 8  | 5  |
| 239076 | 34 | 935109  | 935132  | 2 | 12 | 24 | CA   | 8  | 9  |
| 239078 | 34 | 938178  | 938191  | 2 | 7  | 14 | CA   | 28 | 6  |
| 239080 | 34 | 938969  | 938983  | 3 | 5  | 15 | GTG  | 20 | 3  |
| 239083 | 34 | 940126  | 940149  | 2 | 12 | 24 | GT   | 18 | 7  |
| 239085 | 34 | 941162  | 941177  | 2 | 8  | 16 | GA   | 24 | 4  |
| 239086 | 34 | 941618  | 941631  | 2 | 7  | 14 | TG   | 33 | 6  |
| 239088 | 34 | 941916  | 941933  | 2 | 9  | 18 | AT   | 9  | 7  |
| 239090 | 34 | 943226  | 943243  | 2 | 9  | 18 | CA   | 24 | 8  |
| 239091 | 34 | 943354  | 943379  | 2 | 13 | 26 | CA   | 15 | 6  |
| 239092 | 34 | 944482  | 944513  | 2 | 16 | 32 | AC   | 16 | 12 |
| 239093 | 34 | 944674  | 944689  | 2 | 8  | 16 | AC   | 20 | 9  |
| 239099 | 34 | 953186  | 953201  | 2 | 8  | 16 | CA   | 20 | 6  |
| 239103 | 34 | 954125  | 954140  | 2 | 8  | 16 | CA   | 29 | 6  |
| 239111 | 34 | 957205  | 957218  | 2 | 7  | 14 | CT   | 21 | 7  |
| 239118 | 34 | 963084  | 963097  | 2 | 7  | 14 | AG   | 6  | 3  |
| 239119 | 34 | 963683  | 963694  | 2 | 6  | 12 | GT   | 13 | 3  |
| 239140 | 34 | 1001524 | 1001544 | 3 | 7  | 21 | CAC  | 22 | 5  |
| 239148 | 34 | 1044088 | 1044099 | 2 | 6  | 12 | AT   | 16 | 10 |
| 239154 | 34 | 1058091 | 1058106 | 4 | 4  | 16 | TTTA | 30 | 4  |
| 239161 | 34 | 1063808 | 1063833 | 2 | 13 | 26 | GT   | 22 | 9  |
| 239167 | 34 | 1067349 | 1067360 | 2 | 6  | 12 | TG   | 26 | 3  |
| 239168 | 34 | 1069603 | 1069630 | 2 | 14 | 28 | GT   | 8  | 9  |
| 239170 | 34 | 1069807 | 1069830 | 4 | 6  | 24 | GCGT | 17 | 8  |
| 239174 | 34 | 1073086 | 1073111 | 2 | 13 | 26 | GT   | 12 | 7  |
| 239177 | 34 | 1074868 | 1074881 | 2 | 7  | 14 | TG   | 20 | 4  |
| 239178 | 34 | 1075077 | 1075088 | 2 | 6  | 12 | CA   | 10 | 6  |
| 239179 | 34 | 1075091 | 1075102 | 2 | 6  | 12 | CA   | 10 | 6  |
| 239180 | 34 | 1075442 | 1075453 | 2 | 6  | 12 | CA   | 33 | 3  |
| 239183 | 34 | 1079028 | 1079051 | 2 | 12 | 24 | GT   | 8  | 10 |
| 239184 | 34 | 1079767 | 1079780 | 2 | 7  | 14 | CT   | 20 | 7  |
| 239198 | 34 | 1088109 | 1088136 | 2 | 14 | 28 | CT   | 7  | 4  |



|        |    |         |         |   |    |    |      |    |    |
|--------|----|---------|---------|---|----|----|------|----|----|
| 239200 | 34 | 1089225 | 1089240 | 2 | 8  | 16 | AG   | 21 | 5  |
| 239201 | 34 | 1092040 | 1092065 | 2 | 13 | 26 | TG   | 22 | 10 |
| 239203 | 34 | 1092164 | 1092181 | 2 | 9  | 18 | GT   | 8  | 3  |
| 239204 | 34 | 1092357 | 1092386 | 2 | 15 | 30 | TG   | 13 | 8  |
| 239206 | 34 | 1093416 | 1093437 | 2 | 11 | 22 | TG   | 14 | 11 |
| 239207 | 34 | 1093751 | 1093766 | 2 | 8  | 16 | AC   | 20 | 6  |
| 239209 | 34 | 1094756 | 1094775 | 4 | 5  | 20 | CTTC | 14 | 3  |
| 239211 | 34 | 1095159 | 1095180 | 2 | 11 | 22 | AC   | 19 | 10 |
| 239219 | 34 | 1107679 | 1107694 | 4 | 4  | 16 | CGCA | 20 | 4  |
| 239220 | 34 | 1107729 | 1107742 | 2 | 7  | 14 | CA   | 20 | 3  |
| 239221 | 34 | 1108598 | 1108617 | 2 | 10 | 20 | GT   | 20 | 6  |
| 239222 | 34 | 1109293 | 1109326 | 2 | 17 | 34 | TG   | 13 | 11 |
| 239223 | 34 | 1112317 | 1112350 | 2 | 17 | 34 | GT   | 15 | 9  |
| 239225 | 34 | 1114282 | 1114305 | 2 | 12 | 24 | GT   | 16 | 8  |
| 239228 | 34 | 1115817 | 1115834 | 2 | 9  | 18 | TG   | 22 | 7  |
| 239229 | 34 | 1115977 | 1115990 | 2 | 7  | 14 | GT   | 13 | 4  |
| 239230 | 34 | 1116399 | 1116410 | 2 | 6  | 12 | CA   | 25 | 3  |
| 239231 | 34 | 1116577 | 1116590 | 2 | 7  | 14 | AC   | 22 | 5  |
| 239232 | 34 | 1116744 | 1116761 | 2 | 9  | 18 | CA   | 19 | 9  |
| 239246 | 34 | 1124111 | 1124130 | 2 | 10 | 20 | TG   | 12 | 7  |
| 239248 | 34 | 1124669 | 1124688 | 2 | 10 | 20 | TG   | 8  | 3  |
| 239252 | 34 | 1126120 | 1126131 | 2 | 6  | 12 | TG   | 29 | 3  |
| 239256 | 34 | 1128708 | 1128737 | 2 | 15 | 30 | GT   | 16 | 6  |
| 239259 | 34 | 1130914 | 1130935 | 2 | 11 | 22 | GT   | 14 | 6  |
| 239260 | 34 | 1132499 | 1132522 | 4 | 6  | 24 | ATCT | 13 | 12 |
| 239264 | 34 | 1134298 | 1134313 | 2 | 8  | 16 | CA   | 20 | 6  |
| 239266 | 34 | 1135055 | 1135070 | 2 | 8  | 16 | GT   | 10 | 4  |
| 239272 | 34 | 1143543 | 1143556 | 2 | 7  | 14 | AC   | 19 | 4  |
| 239273 | 34 | 1143712 | 1143723 | 2 | 6  | 12 | CA   | 19 | 7  |
| 239274 | 34 | 1143726 | 1143739 | 2 | 7  | 14 | CA   | 18 | 4  |
| 239275 | 34 | 1144067 | 1144080 | 2 | 7  | 14 | GT   | 24 | 8  |
| 239276 | 34 | 1144267 | 1144304 | 2 | 19 | 38 | AC   | 11 | 10 |
| 239277 | 34 | 1144558 | 1144593 | 2 | 18 | 36 | CA   | 9  | 9  |
| 239280 | 34 | 1147676 | 1147691 | 2 | 8  | 16 | CA   | 25 | 5  |
| 239283 | 34 | 1148940 | 1148963 | 2 | 12 | 24 | TG   | 21 | 8  |
| 239289 | 34 | 1153496 | 1153511 | 2 | 8  | 16 | AT   | 16 | 6  |
| 239295 | 34 | 1156492 | 1156503 | 2 | 6  | 12 | CA   | 21 | 10 |
| 239296 | 34 | 1156505 | 1156516 | 2 | 6  | 12 | AC   | 21 | 10 |
| 239297 | 34 | 1156799 | 1156818 | 2 | 10 | 20 | GA   | 21 | 7  |
| 239298 | 34 | 1156973 | 1156992 | 2 | 10 | 20 | TG   | 14 | 6  |
| 239300 | 34 | 1157293 | 1157322 | 2 | 15 | 30 | TG   | 11 | 4  |
| 239302 | 34 | 1157636 | 1157647 | 2 | 6  | 12 | GA   | 23 | 3  |
| 239303 | 34 | 1157816 | 1157835 | 2 | 10 | 20 | CA   | 13 | 8  |
| 239304 | 34 | 1158030 | 1158045 | 2 | 8  | 16 | AC   | 20 | 4  |
| 239305 | 34 | 1158551 | 1158568 | 2 | 9  | 18 | AG   | 13 | 3  |
| 239310 | 34 | 1159334 | 1159353 | 2 | 10 | 20 | CA   | 11 | 9  |
| 239314 | 34 | 1162254 | 1162271 | 2 | 9  | 18 | GT   | 19 | 11 |
| 239319 | 34 | 1164992 | 1165027 | 2 | 18 | 36 | AC   | 11 | 13 |
| 239320 | 34 | 1165286 | 1165303 | 2 | 9  | 18 | GT   | 17 | 7  |
| 239329 | 34 | 1169165 | 1169180 | 2 | 8  | 16 | AC   | 18 | 4  |
| 239330 | 34 | 1170015 | 1170038 | 2 | 12 | 24 | TG   | 19 | 8  |

|        |    |         |         |   |    |    |      |    |    |
|--------|----|---------|---------|---|----|----|------|----|----|
| 239336 | 34 | 1171340 | 1171387 | 2 | 24 | 48 | TG   | 16 | 10 |
| 239337 | 34 | 1171766 | 1171779 | 2 | 7  | 14 | TG   | 19 | 3  |
| 239342 | 34 | 1173024 | 1173039 | 2 | 8  | 16 | GT   | 16 | 3  |
| 239359 | 34 | 1181524 | 1181541 | 2 | 9  | 18 | GT   | 11 | 7  |
| 239360 | 34 | 1181773 | 1181784 | 2 | 6  | 12 | GT   | 26 | 5  |
| 239363 | 34 | 1183831 | 1183848 | 3 | 6  | 18 | CTG  | 30 | 5  |
| 239365 | 34 | 1184863 | 1184904 | 2 | 21 | 42 | AG   | 8  | 8  |
| 239366 | 34 | 1185255 | 1185276 | 2 | 11 | 22 | TG   | 19 | 11 |
| 239368 | 34 | 1186102 | 1186141 | 2 | 20 | 40 | AC   | 16 | 14 |
| 239369 | 34 | 1186196 | 1186227 | 4 | 8  | 32 | TAAA | 22 | 4  |
| 239377 | 34 | 1196306 | 1196325 | 2 | 10 | 20 | TC   | 20 | 3  |
| 239379 | 34 | 1196754 | 1196767 | 2 | 7  | 14 | TG   | 18 | 4  |
| 239380 | 34 | 1196770 | 1196785 | 2 | 8  | 16 | TG   | 18 | 4  |
| 239382 | 34 | 1197199 | 1197214 | 2 | 8  | 16 | AC   | 15 | 7  |
| 239383 | 34 | 1198481 | 1198504 | 2 | 12 | 24 | CA   | 26 | 13 |
| 239385 | 34 | 1201623 | 1201642 | 2 | 10 | 20 | AC   | 23 | 3  |
| 239387 | 34 | 1206145 | 1206178 | 2 | 17 | 34 | TG   | 12 | 7  |
| 239388 | 34 | 1208264 | 1208275 | 2 | 6  | 12 | TG   | 24 | 4  |
| 239391 | 34 | 1214720 | 1214734 | 3 | 5  | 15 | GAA  | 19 | 6  |
| 239394 | 34 | 1216087 | 1216114 | 2 | 14 | 28 | TG   | 13 | 11 |
| 239396 | 34 | 1216758 | 1216813 | 2 | 28 | 56 | CA   | 6  | 10 |
| 239400 | 34 | 1224551 | 1224580 | 3 | 10 | 30 | AGG  | 16 | 8  |
| 239411 | 34 | 1240011 | 1240024 | 2 | 7  | 14 | GT   | 25 | 4  |
| 239413 | 34 | 1243349 | 1243368 | 2 | 10 | 20 | TG   | 19 | 4  |
| 239415 | 34 | 1244712 | 1244737 | 2 | 13 | 26 | AG   | 16 | 4  |
| 239416 | 34 | 1245615 | 1245644 | 3 | 10 | 30 | CTT  | 23 | 6  |
| 239420 | 34 | 1247259 | 1247272 | 2 | 7  | 14 | AC   | 26 | 5  |
| 239422 | 34 | 1247965 | 1247978 | 2 | 7  | 14 | TG   | 18 | 5  |
| 239424 | 34 | 1249693 | 1249708 | 2 | 8  | 16 | TG   | 17 | 3  |
| 239429 | 34 | 1252661 | 1252672 | 2 | 6  | 12 | AG   | 13 | 5  |
| 239430 | 34 | 1252816 | 1252857 | 2 | 21 | 42 | CA   | 8  | 8  |
| 239431 | 34 | 1253282 | 1253307 | 2 | 13 | 26 | TG   | 20 | 6  |
| 239433 | 34 | 1254386 | 1254397 | 2 | 6  | 12 | TG   | 21 | 4  |
| 239436 | 34 | 1255548 | 1255569 | 2 | 11 | 22 | CA   | 24 | 6  |
| 239437 | 34 | 1256731 | 1256744 | 2 | 7  | 14 | GT   | 23 | 5  |
| 239439 | 34 | 1261248 | 1261265 | 2 | 9  | 18 | GT   | 23 | 6  |
| 239444 | 34 | 1269976 | 1269993 | 2 | 9  | 18 | TG   | 27 | 6  |
| 239445 | 34 | 1270268 | 1270299 | 2 | 16 | 32 | TG   | 8  | 6  |
| 239451 | 34 | 1274386 | 1274407 | 2 | 11 | 22 | AC   | 8  | 7  |
| 239454 | 34 | 1278831 | 1278870 | 2 | 20 | 40 | CA   | 8  | 12 |
| 239455 | 34 | 1279107 | 1279124 | 3 | 6  | 18 | GCA  | 24 | 5  |
| 239460 | 34 | 1287405 | 1287448 | 2 | 22 | 44 | AC   | 9  | 10 |
| 239465 | 34 | 1298113 | 1298140 | 2 | 14 | 28 | GT   | 7  | 6  |
| 239466 | 34 | 1299341 | 1299364 | 2 | 12 | 24 | AC   | 10 | 6  |
| 239467 | 34 | 1300378 | 1300409 | 2 | 16 | 32 | TG   | 17 | 7  |
| 239470 | 34 | 1306121 | 1306142 | 2 | 11 | 22 | AC   | 10 | 9  |
| 239471 | 34 | 1309325 | 1309346 | 2 | 11 | 22 | GA   | 12 | 5  |
| 239472 | 34 | 1309668 | 1309685 | 2 | 9  | 18 | GT   | 22 | 5  |
| 239473 | 34 | 1314509 | 1314534 | 2 | 13 | 26 | AC   | 10 | 10 |
| 239479 | 34 | 1317363 | 1317386 | 2 | 12 | 24 | AC   | 22 | 11 |
| 239486 | 34 | 1325402 | 1325419 | 2 | 9  | 18 | CA   | 14 | 7  |

|        |    |         |         |   |    |    |      |    |    |
|--------|----|---------|---------|---|----|----|------|----|----|
| 239499 | 34 | 1349858 | 1349879 | 2 | 11 | 22 | CA   | 20 | 8  |
| 239509 | 34 | 1377115 | 1377132 | 2 | 9  | 18 | AC   | 17 | 6  |
| 239511 | 34 | 1394325 | 1394336 | 2 | 6  | 12 | AT   | 17 | 3  |
| 239512 | 34 | 1396618 | 1396629 | 2 | 6  | 12 | TG   | 20 | 4  |
| 239513 | 34 | 1396647 | 1396660 | 2 | 7  | 14 | GT   | 21 | 3  |
| 239520 | 34 | 1406972 | 1406989 | 2 | 9  | 18 | TC   | 22 | 3  |
| 239522 | 34 | 1410019 | 1410036 | 2 | 9  | 18 | CA   | 12 | 4  |
| 239527 | 34 | 1413932 | 1413943 | 2 | 6  | 12 | AC   | 20 | 7  |
| 239529 | 34 | 1416412 | 1416423 | 2 | 6  | 12 | CA   | 28 | 4  |
| 239531 | 34 | 1418774 | 1418795 | 2 | 11 | 22 | AC   | 20 | 5  |
| 239532 | 34 | 1418955 | 1418966 | 2 | 6  | 12 | TG   | 27 | 3  |
| 239533 | 34 | 1419251 | 1419270 | 2 | 10 | 20 | CA   | 23 | 6  |
| 239534 | 34 | 1419640 | 1419655 | 2 | 8  | 16 | TG   | 17 | 6  |
| 239539 | 34 | 1426409 | 1426432 | 2 | 12 | 24 | AC   | 17 | 8  |
| 239542 | 34 | 1429421 | 1429446 | 2 | 13 | 26 | CA   | 11 | 11 |
| 239543 | 34 | 1429681 | 1429696 | 2 | 8  | 16 | GA   | 26 | 7  |
| 239544 | 34 | 1429699 | 1429714 | 2 | 8  | 16 | GA   | 21 | 6  |
| 239547 | 34 | 1431534 | 1431545 | 2 | 6  | 12 | GT   | 28 | 4  |
| 239548 | 34 | 1431636 | 1431647 | 2 | 6  | 12 | GT   | 29 | 5  |
| 239551 | 34 | 1433519 | 1433538 | 2 | 10 | 20 | AC   | 18 | 8  |
| 239552 | 34 | 1434381 | 1434396 | 2 | 8  | 16 | GT   | 21 | 5  |
| 239560 | 34 | 1441290 | 1441303 | 2 | 7  | 14 | TC   | 28 | 3  |
| 239565 | 34 | 1448062 | 1448093 | 2 | 16 | 32 | TG   | 11 | 9  |
| 239567 | 34 | 1449721 | 1449734 | 2 | 7  | 14 | GA   | 23 | 3  |
| 239568 | 34 | 1450093 | 1450126 | 2 | 17 | 34 | GT   | 12 | 14 |
| 239570 | 34 | 1450293 | 1450310 | 3 | 6  | 18 | CAG  | 17 | 3  |
| 239572 | 34 | 1455574 | 1455589 | 4 | 4  | 16 | CTAT | 12 | 4  |
| 239573 | 34 | 1455767 | 1455778 | 2 | 6  | 12 | AC   | 26 | 4  |
| 239575 | 34 | 1459260 | 1459273 | 2 | 7  | 14 | CA   | 24 | 6  |
| 239578 | 34 | 1462706 | 1462741 | 4 | 9  | 36 | AGAA | 25 | 6  |
| 239589 | 34 | 1473437 | 1473476 | 2 | 20 | 40 | AC   | 15 | 8  |
| 239593 | 34 | 1478766 | 1478783 | 2 | 9  | 18 | AC   | 27 | 7  |
| 239596 | 34 | 1479138 | 1479159 | 2 | 11 | 22 | TA   | 11 | 7  |
| 239598 | 34 | 1480296 | 1480313 | 3 | 6  | 18 | AGC  | 28 | 3  |
| 239599 | 34 | 1481755 | 1481766 | 2 | 6  | 12 | CT   | 14 | 3  |
| 239617 | 34 | 1502011 | 1502022 | 2 | 6  | 12 | AC   | 32 | 3  |
| 239625 | 34 | 1514441 | 1514462 | 2 | 11 | 22 | TG   | 17 | 3  |
| 239627 | 34 | 1519681 | 1519692 | 2 | 6  | 12 | TG   | 25 | 3  |
| 239635 | 34 | 1536197 | 1536214 | 2 | 9  | 18 | CA   | 19 | 4  |
| 239636 | 34 | 1536217 | 1536228 | 2 | 6  | 12 | CA   | 11 | 3  |
| 239644 | 34 | 1543655 | 1543674 | 2 | 10 | 20 | AC   | 15 | 8  |
| 239650 | 34 | 1548628 | 1548641 | 2 | 7  | 14 | AG   | 18 | 3  |
| 239654 | 34 | 1556328 | 1556339 | 2 | 6  | 12 | AC   | 24 | 3  |
| 239656 | 34 | 1558951 | 1558992 | 2 | 21 | 42 | CA   | 9  | 9  |
| 239665 | 34 | 1564208 | 1564227 | 2 | 10 | 20 | AC   | 23 | 5  |
| 239666 | 34 | 1564881 | 1564908 | 2 | 14 | 28 | TG   | 12 | 10 |
| 239667 | 34 | 1565009 | 1565028 | 2 | 10 | 20 | AC   | 25 | 8  |
| 239671 | 34 | 1568854 | 1568869 | 2 | 8  | 16 | AC   | 24 | 6  |
| 239674 | 34 | 1570228 | 1570275 | 2 | 24 | 48 | TG   | 10 | 10 |
| 239675 | 34 | 1573776 | 1573793 | 2 | 9  | 18 | GT   | 29 | 7  |
| 239676 | 34 | 1576886 | 1576911 | 2 | 13 | 26 | AC   | 14 | 7  |

|        |    |         |         |   |    |    |      |    |    |
|--------|----|---------|---------|---|----|----|------|----|----|
| 239678 | 34 | 1578117 | 1578128 | 2 | 6  | 12 | GT   | 20 | 3  |
| 239684 | 34 | 1584145 | 1584156 | 2 | 6  | 12 | AC   | 19 | 4  |
| 239685 | 34 | 1584350 | 1584377 | 2 | 14 | 28 | CA   | 6  | 6  |
| 239689 | 34 | 1589971 | 1589990 | 2 | 10 | 20 | TG   | 16 | 7  |
| 239693 | 34 | 1590827 | 1590858 | 2 | 16 | 32 | CA   | 7  | 8  |
| 239697 | 34 | 1599552 | 1599573 | 2 | 11 | 22 | CA   | 22 | 9  |
| 239703 | 34 | 1604923 | 1604937 | 3 | 5  | 15 | GTT  | 23 | 3  |
| 239709 | 34 | 1607655 | 1607674 | 2 | 10 | 20 | CA   | 22 | 5  |
| 239711 | 34 | 1609134 | 1609149 | 2 | 8  | 16 | TG   | 9  | 5  |
| 239712 | 34 | 1609747 | 1609788 | 2 | 21 | 42 | AC   | 9  | 9  |
| 239714 | 34 | 1612569 | 1612582 | 2 | 7  | 14 | GT   | 28 | 5  |
| 239720 | 34 | 1615157 | 1615168 | 2 | 6  | 12 | TG   | 13 | 8  |
| 239721 | 34 | 1615277 | 1615308 | 2 | 16 | 32 | AC   | 11 | 10 |
| 239722 | 34 | 1615345 | 1615366 | 2 | 11 | 22 | AC   | 17 | 10 |
| 239725 | 34 | 1622115 | 1622126 | 2 | 6  | 12 | CA   | 28 | 4  |
| 239728 | 34 | 1627102 | 1627115 | 2 | 7  | 14 | GT   | 14 | 3  |
| 239729 | 34 | 1629033 | 1629068 | 3 | 12 | 36 | CTT  | 19 | 9  |
| 239733 | 34 | 1641839 | 1641852 | 2 | 7  | 14 | AC   | 14 | 13 |
| 239736 | 34 | 1648645 | 1648664 | 4 | 5  | 20 | AAAC | 21 | 5  |
| 239741 | 34 | 1651908 | 1651933 | 2 | 13 | 26 | GT   | 13 | 6  |
| 239744 | 34 | 1652097 | 1652112 | 2 | 8  | 16 | CA   | 21 | 6  |
| 239747 | 34 | 1654463 | 1654476 | 2 | 7  | 14 | TA   | 15 | 6  |
| 239751 | 34 | 1660313 | 1660328 | 4 | 4  | 16 | AAAT | 20 | 4  |
| 239752 | 34 | 1662483 | 1662510 | 2 | 14 | 28 | AC   | 15 | 10 |
| 239754 | 34 | 1671635 | 1671654 | 4 | 5  | 20 | AAAT | 19 | 3  |
| 239755 | 34 | 1673630 | 1673645 | 2 | 8  | 16 | TG   | 18 | 8  |
| 239756 | 34 | 1673646 | 1673657 | 2 | 6  | 12 | AG   | 16 | 5  |
| 239763 | 34 | 1683488 | 1683499 | 2 | 6  | 12 | TG   | 30 | 3  |
| 239765 | 34 | 1687351 | 1687371 | 3 | 7  | 21 | GGA  | 28 | 6  |
| 239771 | 34 | 1691387 | 1691407 | 3 | 7  | 21 | AGA  | 22 | 6  |
| 239772 | 34 | 1694920 | 1694933 | 2 | 7  | 14 | AC   | 13 | 9  |
| 239774 | 34 | 1697435 | 1697448 | 2 | 7  | 14 | AC   | 28 | 5  |
| 239782 | 34 | 1707580 | 1707591 | 2 | 6  | 12 | CA   | 21 | 3  |
| 239785 | 34 | 1712478 | 1712491 | 2 | 7  | 14 | GT   | 12 | 10 |
| 239786 | 34 | 1717140 | 1717160 | 3 | 7  | 21 | ACC  | 27 | 6  |
| 239787 | 34 | 1717414 | 1717441 | 2 | 14 | 28 | CA   | 14 | 10 |
| 239788 | 34 | 1717961 | 1717975 | 3 | 5  | 15 | GCA  | 24 | 4  |
| 239791 | 34 | 1734848 | 1734874 | 3 | 9  | 27 | AAG  | 19 | 7  |
| 239792 | 34 | 1735155 | 1735168 | 2 | 7  | 14 | TG   | 19 | 6  |
| 239793 | 34 | 1735171 | 1735186 | 2 | 8  | 16 | TG   | 16 | 5  |
| 239795 | 34 | 1735821 | 1735834 | 2 | 7  | 14 | GT   | 26 | 5  |
| 239798 | 34 | 1738933 | 1738976 | 4 | 11 | 44 | AAAG | 15 | 9  |
| 239799 | 34 | 1741076 | 1741109 | 2 | 17 | 34 | AC   | 17 | 10 |
| 239800 | 34 | 1742837 | 1742850 | 2 | 7  | 14 | TG   | 23 | 4  |
| 239802 | 34 | 1744514 | 1744540 | 3 | 9  | 27 | AAC  | 22 | 8  |
| 239804 | 34 | 1748370 | 1748385 | 2 | 8  | 16 | TG   | 14 | 4  |
| 239805 | 34 | 1748696 | 1748721 | 2 | 13 | 26 | AC   | 16 | 7  |
| 239806 | 34 | 1751183 | 1751210 | 2 | 14 | 28 | GT   | 9  | 7  |
| 239810 | 34 | 1755215 | 1755234 | 4 | 5  | 20 | AATA | 19 | 3  |
| 239814 | 34 | 1757694 | 1757713 | 2 | 10 | 20 | GT   | 13 | 4  |
| 239816 | 34 | 1758616 | 1758627 | 2 | 6  | 12 | GA   | 21 | 4  |

|        |    |         |         |   |    |    |      |    |    |
|--------|----|---------|---------|---|----|----|------|----|----|
| 239817 | 34 | 1760393 | 1760422 | 2 | 15 | 30 | GT   | 15 | 8  |
| 239824 | 34 | 1764769 | 1764784 | 4 | 4  | 16 | GGAA | 22 | 3  |
| 239827 | 34 | 1775366 | 1775379 | 2 | 7  | 14 | AG   | 22 | 3  |
| 239828 | 34 | 1775741 | 1775770 | 2 | 15 | 30 | CT   | 14 | 10 |
| 239831 | 34 | 1778902 | 1778923 | 2 | 11 | 22 | GT   | 15 | 8  |
| 239833 | 34 | 1780896 | 1780913 | 2 | 9  | 18 | GA   | 15 | 4  |
| 239834 | 34 | 1781187 | 1781198 | 2 | 6  | 12 | CA   | 17 | 7  |
| 239836 | 34 | 1783845 | 1783866 | 2 | 11 | 22 | GT   | 9  | 6  |
| 239837 | 34 | 1785493 | 1785510 | 3 | 6  | 18 | GCA  | 27 | 4  |
| 239840 | 34 | 1786199 | 1786231 | 3 | 11 | 33 | TCC  | 17 | 6  |
| 239844 | 34 | 1789829 | 1789852 | 2 | 12 | 24 | AC   | 11 | 8  |
| 239851 | 34 | 1803172 | 1803183 | 2 | 6  | 12 | CA   | 10 | 3  |
| 239855 | 34 | 1808896 | 1808915 | 2 | 10 | 20 | AC   | 16 | 6  |
| 239857 | 34 | 1810667 | 1810688 | 2 | 11 | 22 | TG   | 29 | 4  |
| 239858 | 34 | 1812045 | 1812062 | 3 | 6  | 18 | TCC  | 21 | 3  |
| 239859 | 34 | 1812550 | 1812573 | 2 | 12 | 24 | TG   | 19 | 7  |
| 239860 | 34 | 1813295 | 1813318 | 2 | 12 | 24 | GT   | 11 | 5  |
| 239872 | 34 | 1825816 | 1825831 | 4 | 4  | 16 | TTTG | 22 | 4  |
| 239873 | 34 | 1826762 | 1826785 | 2 | 12 | 24 | AC   | 13 | 8  |
| 239881 | 34 | 1839255 | 1839272 | 2 | 9  | 18 | GT   | 14 | 4  |
| 239882 | 34 | 1845994 | 1846005 | 2 | 6  | 12 | CA   | 27 | 3  |
| 239887 | 34 | 1854246 | 1854283 | 2 | 19 | 38 | AC   | 14 | 8  |
| 239892 | 34 | 1858404 | 1858421 | 2 | 9  | 18 | CA   | 22 | 6  |
| 239893 | 34 | 1858573 | 1858594 | 2 | 11 | 22 | GT   | 18 | 5  |
| 239896 | 34 | 1862868 | 1862879 | 2 | 6  | 12 | CA   | 18 | 5  |
| 239902 | 34 | 1873015 | 1873035 | 3 | 7  | 21 | ATC  | 23 | 3  |
| 239911 | 34 | 1882263 | 1882300 | 2 | 19 | 38 | AC   | 9  | 6  |
| 239912 | 34 | 1886331 | 1886342 | 2 | 6  | 12 | GT   | 23 | 3  |
| 239937 | 34 | 1972911 | 1972936 | 2 | 13 | 26 | CA   | 7  | 5  |
| 239947 | 34 | 1987182 | 1987199 | 2 | 9  | 18 | CA   | 15 | 5  |
| 239949 | 34 | 1998640 | 1998651 | 2 | 6  | 12 | CA   | 25 | 3  |
| 239951 | 34 | 2009714 | 2009733 | 2 | 10 | 20 | CT   | 18 | 9  |
| 239954 | 34 | 2019590 | 2019609 | 2 | 10 | 20 | CA   | 20 | 6  |
| 239957 | 34 | 2020028 | 2020057 | 2 | 15 | 30 | AC   | 21 | 14 |
| 239959 | 34 | 2021978 | 2021995 | 3 | 6  | 18 | CTG  | 29 | 3  |
| 239960 | 34 | 2023020 | 2023045 | 2 | 13 | 26 | CA   | 25 | 5  |
| 239976 | 34 | 2059505 | 2059518 | 2 | 7  | 14 | AC   | 24 | 5  |
| 239984 | 34 | 2082784 | 2082797 | 2 | 7  | 14 | GT   | 27 | 9  |
| 239985 | 34 | 2082798 | 2082811 | 2 | 7  | 14 | GA   | 25 | 8  |
| 239987 | 34 | 2086076 | 2086107 | 2 | 16 | 32 | TG   | 12 | 10 |
| 239988 | 34 | 2092321 | 2092334 | 2 | 7  | 14 | AC   | 23 | 5  |
| 239993 | 34 | 2104744 | 2104759 | 2 | 8  | 16 | GT   | 24 | 4  |
| 240001 | 34 | 2125516 | 2125535 | 2 | 10 | 20 | CA   | 25 | 9  |
| 240004 | 34 | 2128497 | 2128510 | 2 | 7  | 14 | AC   | 27 | 5  |
| 240008 | 34 | 2137993 | 2138028 | 2 | 18 | 36 | TG   | 9  | 9  |
| 240010 | 34 | 2140509 | 2140532 | 2 | 12 | 24 | GT   | 22 | 12 |
| 240011 | 34 | 2140909 | 2140940 | 2 | 16 | 32 | GT   | 14 | 12 |
| 240013 | 34 | 2142529 | 2142562 | 2 | 17 | 34 | TG   | 18 | 7  |
| 240024 | 34 | 2151836 | 2151859 | 2 | 12 | 24 | TG   | 12 | 7  |
| 240025 | 34 | 2152503 | 2152518 | 2 | 8  | 16 | GT   | 17 | 7  |
| 240026 | 34 | 2154313 | 2154326 | 2 | 7  | 14 | CA   | 18 | 4  |

|        |    |         |         |   |    |    |      |    |    |
|--------|----|---------|---------|---|----|----|------|----|----|
| 240027 | 34 | 2154328 | 2154343 | 2 | 8  | 16 | AC   | 23 | 4  |
| 240028 | 34 | 2154682 | 2154695 | 2 | 7  | 14 | TG   | 23 | 3  |
| 240031 | 34 | 2160044 | 2160073 | 2 | 15 | 30 | CA   | 14 | 11 |
| 240032 | 34 | 2163434 | 2163445 | 2 | 6  | 12 | TC   | 29 | 5  |
| 240034 | 34 | 2163774 | 2163787 | 2 | 7  | 14 | CA   | 18 | 3  |
| 240042 | 34 | 2173271 | 2173290 | 2 | 10 | 20 | CA   | 17 | 3  |
| 240045 | 34 | 2175239 | 2175250 | 2 | 6  | 12 | AG   | 21 | 4  |
| 240047 | 34 | 2178018 | 2178039 | 2 | 11 | 22 | GT   | 16 | 11 |
| 240048 | 34 | 2178537 | 2178572 | 4 | 9  | 36 | GAAA | 7  | 5  |
| 240049 | 34 | 2179232 | 2179269 | 2 | 19 | 38 | TG   | 13 | 15 |
| 240055 | 34 | 2180585 | 2180598 | 2 | 7  | 14 | AC   | 21 | 3  |
| 240056 | 34 | 2180891 | 2180910 | 2 | 10 | 20 | AC   | 12 | 6  |
| 240057 | 34 | 2181266 | 2181289 | 2 | 12 | 24 | GT   | 8  | 4  |
| 240060 | 34 | 2181432 | 2181459 | 2 | 14 | 28 | CA   | 6  | 10 |
| 240061 | 34 | 2181591 | 2181616 | 2 | 13 | 26 | CA   | 12 | 11 |
| 240062 | 34 | 2182153 | 2182176 | 2 | 12 | 24 | CA   | 15 | 6  |
| 240063 | 34 | 2182545 | 2182570 | 2 | 13 | 26 | TG   | 25 | 8  |
| 240065 | 34 | 2185431 | 2185458 | 2 | 14 | 28 | AG   | 8  | 3  |
| 240071 | 34 | 2199817 | 2199832 | 4 | 4  | 16 | TCTT | 10 | 7  |
| 240079 | 34 | 2206767 | 2206782 | 4 | 4  | 16 | CTCA | 32 | 7  |
| 240080 | 34 | 2207322 | 2207341 | 2 | 10 | 20 | AC   | 21 | 9  |
| 240082 | 34 | 2211010 | 2211025 | 2 | 8  | 16 | AC   | 16 | 7  |
| 240085 | 34 | 2227810 | 2227829 | 2 | 10 | 20 | TG   | 17 | 10 |
| 240088 | 34 | 2236080 | 2236097 | 2 | 9  | 18 | TG   | 19 | 5  |
| 240095 | 34 | 2261739 | 2261764 | 2 | 13 | 26 | GT   | 16 | 10 |
| 240096 | 34 | 2263033 | 2263058 | 2 | 13 | 26 | CT   | 12 | 4  |
| 240098 | 34 | 2277381 | 2277394 | 2 | 7  | 14 | AC   | 8  | 4  |
| 240104 | 34 | 2279514 | 2279529 | 2 | 8  | 16 | AC   | 19 | 7  |
| 240105 | 34 | 2280368 | 2280382 | 3 | 5  | 15 | AAG  | 9  | 5  |
| 240109 | 34 | 2283417 | 2283449 | 3 | 11 | 33 | TCC  | 11 | 6  |
| 240110 | 34 | 2284093 | 2284132 | 2 | 20 | 40 | TG   | 10 | 7  |
| 240111 | 34 | 2284332 | 2284365 | 2 | 17 | 34 | CA   | 19 | 6  |
| 240116 | 34 | 2286579 | 2286612 | 2 | 17 | 34 | GT   | 12 | 17 |
| 240121 | 34 | 2289558 | 2289571 | 2 | 7  | 14 | GT   | 21 | 5  |
| 240122 | 34 | 2290048 | 2290063 | 2 | 8  | 16 | TG   | 21 | 5  |
| 240125 | 34 | 2295289 | 2295318 | 2 | 15 | 30 | TG   | 14 | 10 |
| 240128 | 34 | 2295845 | 2295874 | 2 | 15 | 30 | TG   | 17 | 7  |
| 240129 | 34 | 2296097 | 2296122 | 2 | 13 | 26 | AC   | 16 | 7  |
| 240131 | 34 | 2296490 | 2296505 | 2 | 8  | 16 | AC   | 17 | 3  |
| 240136 | 34 | 2296979 | 2297002 | 2 | 12 | 24 | CT   | 7  | 3  |
| 240144 | 34 | 2299025 | 2299048 | 2 | 12 | 24 | TG   | 8  | 5  |
| 240145 | 34 | 2299299 | 2299324 | 2 | 13 | 26 | CA   | 21 | 4  |
| 240146 | 34 | 2299938 | 2299951 | 2 | 7  | 14 | TG   | 18 | 5  |
| 240147 | 34 | 2299953 | 2299970 | 2 | 9  | 18 | GT   | 13 | 7  |
| 240148 | 34 | 2301166 | 2301186 | 3 | 7  | 21 | AGG  | 23 | 3  |
| 240149 | 34 | 2301345 | 2301366 | 2 | 11 | 22 | AC   | 18 | 7  |
| 240153 | 34 | 2303005 | 2303032 | 2 | 14 | 28 | CA   | 17 | 11 |
| 240154 | 34 | 2303746 | 2303757 | 2 | 6  | 12 | CT   | 21 | 3  |
| 240155 | 34 | 2303897 | 2303908 | 2 | 6  | 12 | CA   | 25 | 3  |
| 240158 | 34 | 2307838 | 2307855 | 3 | 6  | 18 | CCT  | 22 | 3  |
| 240160 | 34 | 2308741 | 2308762 | 2 | 11 | 22 | TG   | 23 | 6  |

|        |    |         |         |   |    |    |      |    |    |
|--------|----|---------|---------|---|----|----|------|----|----|
| 240166 | 34 | 2312265 | 2312278 | 2 | 7  | 14 | CA   | 21 | 4  |
| 240169 | 34 | 2317457 | 2317474 | 2 | 9  | 18 | GT   | 25 | 8  |
| 240171 | 34 | 2318175 | 2318202 | 2 | 14 | 28 | CA   | 11 | 9  |
| 240172 | 34 | 2319017 | 2319036 | 2 | 10 | 20 | GT   | 17 | 4  |
| 240180 | 34 | 2323061 | 2323078 | 2 | 9  | 18 | AC   | 20 | 7  |
| 240183 | 34 | 2326548 | 2326581 | 2 | 17 | 34 | CT   | 6  | 7  |
| 240185 | 34 | 2327559 | 2327579 | 3 | 7  | 21 | TTC  | 17 | 4  |
| 240187 | 34 | 2331819 | 2331858 | 2 | 20 | 40 | CA   | 9  | 9  |
| 240191 | 34 | 2336357 | 2336374 | 2 | 9  | 18 | TG   | 18 | 3  |
| 240192 | 34 | 2336853 | 2336867 | 3 | 5  | 15 | TCT  | 19 | 6  |
| 240195 | 34 | 2338690 | 2338707 | 2 | 9  | 18 | AC   | 20 | 6  |
| 240200 | 34 | 2343377 | 2343410 | 2 | 17 | 34 | AC   | 16 | 5  |
| 240201 | 34 | 2344597 | 2344618 | 2 | 11 | 22 | CA   | 27 | 8  |
| 240202 | 34 | 2344845 | 2344860 | 2 | 8  | 16 | CA   | 23 | 4  |
| 240204 | 34 | 2345404 | 2345421 | 2 | 9  | 18 | CA   | 17 | 5  |
| 240205 | 34 | 2345480 | 2345500 | 3 | 7  | 21 | GAG  | 24 | 3  |
| 240212 | 34 | 2351102 | 2351115 | 2 | 7  | 14 | AC   | 28 | 4  |
| 240213 | 34 | 2351265 | 2351276 | 2 | 6  | 12 | GT   | 20 | 3  |
| 240214 | 34 | 2351300 | 2351325 | 2 | 13 | 26 | GA   | 12 | 3  |
| 240217 | 34 | 2351891 | 2351906 | 2 | 8  | 16 | TG   | 20 | 6  |
| 240218 | 34 | 2351998 | 2352013 | 2 | 8  | 16 | GT   | 22 | 5  |
| 240220 | 34 | 2352400 | 2352427 | 2 | 14 | 28 | AG   | 20 | 6  |
| 240221 | 34 | 2352745 | 2352786 | 2 | 21 | 42 | GT   | 10 | 12 |
| 240222 | 34 | 2355025 | 2355086 | 2 | 31 | 62 | TG   | 7  | 11 |
| 240223 | 34 | 2355371 | 2355392 | 2 | 11 | 22 | CA   | 18 | 6  |
| 240224 | 34 | 2355616 | 2355653 | 2 | 19 | 38 | CA   | 13 | 14 |
| 240228 | 34 | 2356881 | 2356900 | 2 | 10 | 20 | AC   | 26 | 4  |
| 240229 | 34 | 2358106 | 2358117 | 2 | 6  | 12 | GT   | 20 | 4  |
| 240230 | 34 | 2358161 | 2358176 | 2 | 8  | 16 | TG   | 21 | 4  |
| 240231 | 34 | 2358258 | 2358277 | 2 | 10 | 20 | TG   | 17 | 12 |
| 240232 | 34 | 2358767 | 2358786 | 4 | 5  | 20 | CAGC | 19 | 3  |
| 240235 | 34 | 2359873 | 2359898 | 2 | 13 | 26 | CA   | 19 | 12 |
| 240236 | 34 | 2360178 | 2360201 | 3 | 8  | 24 | TCT  | 20 | 4  |
| 240239 | 34 | 2360813 | 2360830 | 2 | 9  | 18 | CA   | 19 | 7  |
| 240240 | 34 | 2361419 | 2361430 | 2 | 6  | 12 | TC   | 28 | 4  |
| 240244 | 34 | 2363652 | 2363663 | 2 | 6  | 12 | AC   | 20 | 4  |
| 240245 | 34 | 2364098 | 2364131 | 2 | 17 | 34 | AC   | 11 | 9  |
| 240252 | 34 | 2378351 | 2378364 | 2 | 7  | 14 | TC   | 26 | 4  |
| 240254 | 34 | 2378540 | 2378557 | 2 | 9  | 18 | GT   | 6  | 6  |
| 240257 | 34 | 2389138 | 2389152 | 3 | 5  | 15 | TTG  | 22 | 4  |
| 240258 | 34 | 2390299 | 2390326 | 4 | 7  | 28 | ATGA | 13 | 13 |
| 240259 | 34 | 2395319 | 2395344 | 2 | 13 | 26 | GT   | 18 | 12 |
| 240261 | 34 | 2402296 | 2402315 | 4 | 5  | 20 | AAAC | 23 | 6  |
| 240262 | 34 | 2404466 | 2404499 | 2 | 17 | 34 | CA   | 12 | 10 |
| 240263 | 34 | 2410759 | 2410770 | 2 | 6  | 12 | GT   | 23 | 4  |
| 240269 | 34 | 2428831 | 2428848 | 3 | 6  | 18 | TCC  | 23 | 3  |
| 240270 | 34 | 2428989 | 2429002 | 2 | 7  | 14 | TG   | 24 | 4  |
| 240273 | 34 | 2429420 | 2429431 | 2 | 6  | 12 | GT   | 17 | 3  |
| 240275 | 34 | 2431255 | 2431274 | 2 | 10 | 20 | GA   | 14 | 3  |
| 240276 | 34 | 2431428 | 2431443 | 4 | 4  | 16 | CCTC | 21 | 3  |
| 240278 | 34 | 2432395 | 2432440 | 2 | 23 | 46 | AC   | 7  | 9  |

|        |    |         |         |   |    |    |      |    |    |
|--------|----|---------|---------|---|----|----|------|----|----|
| 240280 | 34 | 2433533 | 2433544 | 2 | 6  | 12 | CT   | 17 | 5  |
| 240281 | 34 | 2434977 | 2435026 | 2 | 25 | 50 | TG   | 7  | 9  |
| 240283 | 34 | 2438137 | 2438154 | 2 | 9  | 18 | AG   | 21 | 3  |
| 240284 | 34 | 2438336 | 2438347 | 2 | 6  | 12 | TG   | 31 | 7  |
| 240285 | 34 | 2438678 | 2438697 | 2 | 10 | 20 | CA   | 14 | 12 |
| 240286 | 34 | 2439270 | 2439283 | 2 | 7  | 14 | AC   | 21 | 4  |
| 240287 | 34 | 2439499 | 2439516 | 2 | 9  | 18 | GT   | 20 | 3  |
| 240289 | 34 | 2440556 | 2440581 | 2 | 13 | 26 | TG   | 24 | 8  |
| 240306 | 34 | 2451856 | 2451881 | 2 | 13 | 26 | GT   | 10 | 6  |
| 240314 | 34 | 2460061 | 2460082 | 2 | 11 | 22 | AC   | 21 | 13 |
| 240318 | 34 | 2463861 | 2463876 | 2 | 8  | 16 | TG   | 25 | 8  |
| 240319 | 34 | 2465598 | 2465629 | 2 | 16 | 32 | TG   | 13 | 9  |
| 240320 | 34 | 2465825 | 2465844 | 2 | 10 | 20 | TC   | 23 | 5  |
| 240323 | 34 | 2475429 | 2475440 | 2 | 6  | 12 | CA   | 31 | 6  |
| 240337 | 34 | 2494841 | 2494866 | 2 | 13 | 26 | CA   | 17 | 5  |
| 240338 | 34 | 2495739 | 2495750 | 2 | 6  | 12 | GT   | 23 | 13 |
| 240341 | 34 | 2501001 | 2501030 | 2 | 15 | 30 | CA   | 15 | 7  |
| 240342 | 34 | 2501109 | 2501130 | 2 | 11 | 22 | AC   | 22 | 8  |
| 240343 | 34 | 2501496 | 2501507 | 2 | 6  | 12 | TG   | 27 | 3  |
| 240350 | 34 | 2504496 | 2504507 | 2 | 6  | 12 | AT   | 25 | 3  |
| 240351 | 34 | 2505300 | 2505315 | 2 | 8  | 16 | CA   | 24 | 3  |
| 240354 | 34 | 2509492 | 2509515 | 2 | 12 | 24 | CA   | 16 | 9  |
| 240355 | 34 | 2511038 | 2511058 | 3 | 7  | 21 | TAA  | 20 | 5  |
| 240356 | 34 | 2513674 | 2513689 | 2 | 8  | 16 | CA   | 25 | 8  |
| 240359 | 34 | 2518225 | 2518260 | 2 | 18 | 36 | TG   | 18 | 8  |
| 240361 | 34 | 2522041 | 2522064 | 3 | 8  | 24 | ACC  | 8  | 3  |
| 240366 | 34 | 2529689 | 2529700 | 2 | 6  | 12 | AC   | 16 | 7  |
| 240367 | 34 | 2531254 | 2531277 | 4 | 6  | 24 | TGTT | 23 | 7  |
| 240368 | 34 | 2531818 | 2531849 | 2 | 16 | 32 | CA   | 6  | 8  |
| 240371 | 34 | 2535524 | 2535549 | 2 | 13 | 26 | CA   | 18 | 7  |
| 240377 | 34 | 2537986 | 2538012 | 3 | 9  | 27 | ACA  | 17 | 9  |
| 240382 | 34 | 2542419 | 2542439 | 3 | 7  | 21 | GGA  | 30 | 4  |
| 240388 | 34 | 2550467 | 2550490 | 4 | 6  | 24 | TGCC | 25 | 6  |
| 240393 | 34 | 2560385 | 2560398 | 2 | 7  | 14 | GT   | 27 | 6  |
| 240398 | 34 | 2568818 | 2568833 | 2 | 8  | 16 | TG   | 8  | 4  |
| 240400 | 34 | 2580629 | 2580664 | 3 | 12 | 36 | TCT  | 17 | 9  |
| 240401 | 34 | 2585841 | 2585856 | 2 | 8  | 16 | TG   | 19 | 7  |
| 240405 | 34 | 2596180 | 2596215 | 2 | 18 | 36 | CA   | 10 | 10 |
| 240407 | 34 | 2602570 | 2602587 | 3 | 6  | 18 | CTG  | 28 | 5  |
| 240409 | 34 | 2605449 | 2605466 | 2 | 9  | 18 | CA   | 13 | 5  |
| 240412 | 34 | 2612457 | 2612468 | 2 | 6  | 12 | GT   | 31 | 3  |
| 240418 | 34 | 2628260 | 2628275 | 2 | 8  | 16 | TG   | 17 | 7  |
| 240419 | 34 | 2628278 | 2628293 | 2 | 8  | 16 | TG   | 21 | 7  |
| 240420 | 34 | 2629079 | 2629098 | 2 | 10 | 20 | CA   | 25 | 8  |
| 240422 | 34 | 2631896 | 2631913 | 2 | 9  | 18 | CT   | 22 | 4  |
| 240442 | 34 | 2694712 | 2694743 | 2 | 16 | 32 | CA   | 7  | 9  |
| 240443 | 34 | 2706552 | 2706563 | 2 | 6  | 12 | CT   | 6  | 5  |
| 240444 | 34 | 2713152 | 2713175 | 2 | 12 | 24 | CA   | 10 | 11 |
| 240449 | 34 | 2722798 | 2722813 | 2 | 8  | 16 | TG   | 17 | 10 |
| 240450 | 34 | 2723923 | 2723962 | 4 | 10 | 40 | AACC | 17 | 3  |
| 240455 | 34 | 2730034 | 2730061 | 2 | 14 | 28 | AC   | 13 | 8  |



|        |    |         |         |   |    |    |      |    |    |
|--------|----|---------|---------|---|----|----|------|----|----|
| 240456 | 34 | 2730237 | 2730256 | 2 | 10 | 20 | TG   | 20 | 10 |
| 240462 | 34 | 2741091 | 2741106 | 4 | 4  | 16 | AATT | 28 | 3  |
| 240465 | 34 | 2753290 | 2753311 | 2 | 11 | 22 | CT   | 21 | 4  |
| 240466 | 34 | 2753367 | 2753386 | 2 | 10 | 20 | CA   | 18 | 7  |
| 240475 | 34 | 2777058 | 2777073 | 4 | 4  | 16 | AAAC | 17 | 5  |
| 240488 | 34 | 2824377 | 2824397 | 3 | 7  | 21 | GGA  | 33 | 5  |
| 240492 | 34 | 2828411 | 2828430 | 2 | 10 | 20 | AC   | 16 | 8  |
| 240493 | 34 | 2832316 | 2832329 | 2 | 7  | 14 | CA   | 30 | 3  |
| 240495 | 34 | 2840819 | 2840836 | 2 | 9  | 18 | AC   | 29 | 4  |
| 240498 | 34 | 2847093 | 2847108 | 2 | 8  | 16 | AT   | 16 | 10 |
| 240500 | 34 | 2852802 | 2852813 | 2 | 6  | 12 | CA   | 17 | 4  |
| 240503 | 34 | 2855950 | 2855969 | 2 | 10 | 20 | CA   | 17 | 10 |
| 240508 | 34 | 2868882 | 2868899 | 2 | 9  | 18 | TA   | 10 | 3  |
| 240513 | 34 | 2887370 | 2887405 | 4 | 9  | 36 | ATCT | 14 | 7  |
| 240514 | 34 | 2890904 | 2890923 | 4 | 5  | 20 | TTCT | 19 | 11 |
| 240518 | 34 | 2913423 | 2913438 | 4 | 4  | 16 | TTTA | 8  | 4  |
| 240522 | 34 | 2923110 | 2923133 | 4 | 6  | 24 | TAAA | 17 | 3  |
| 240532 | 34 | 2967995 | 2968030 | 2 | 18 | 36 | GT   | 10 | 11 |
| 240536 | 34 | 2977753 | 2977766 | 2 | 7  | 14 | CA   | 24 | 4  |
| 240544 | 34 | 3013216 | 3013247 | 4 | 8  | 32 | CATA | 22 | 8  |
| 240577 | 34 | 3102198 | 3102209 | 2 | 6  | 12 | AC   | 26 | 5  |
| 240585 | 34 | 3112079 | 3112104 | 2 | 13 | 26 | TG   | 18 | 10 |
| 240590 | 34 | 3130500 | 3130520 | 3 | 7  | 21 | AAC  | 16 | 4  |
| 240591 | 34 | 3131879 | 3131896 | 2 | 9  | 18 | GT   | 11 | 8  |
| 240592 | 34 | 3131899 | 3131910 | 2 | 6  | 12 | GT   | 13 | 7  |
| 240598 | 34 | 3146433 | 3146446 | 2 | 7  | 14 | TG   | 20 | 3  |
| 240599 | 34 | 3151292 | 3151306 | 3 | 5  | 15 | TTC  | 13 | 3  |
| 240604 | 34 | 3153442 | 3153467 | 2 | 13 | 26 | CT   | 13 | 5  |
| 240605 | 34 | 3155018 | 3155039 | 2 | 11 | 22 | CA   | 20 | 7  |
| 240608 | 34 | 3157476 | 3157523 | 2 | 24 | 48 | TG   | 9  | 12 |
| 240612 | 34 | 3166845 | 3166860 | 2 | 8  | 16 | CA   | 25 | 5  |
| 240617 | 34 | 3179152 | 3179171 | 2 | 10 | 20 | CT   | 16 | 8  |
| 240619 | 34 | 3185451 | 3185492 | 2 | 21 | 42 | CT   | 6  | 8  |
| 240621 | 34 | 3188338 | 3188351 | 2 | 7  | 14 | TG   | 30 | 6  |
| 240633 | 34 | 3228943 | 3228956 | 2 | 7  | 14 | CA   | 22 | 6  |
| 240634 | 34 | 3234659 | 3234672 | 2 | 7  | 14 | CA   | 16 | 3  |
| 240635 | 34 | 3240437 | 3240448 | 2 | 6  | 12 | TG   | 21 | 3  |
| 240645 | 34 | 3255063 | 3255083 | 3 | 7  | 21 | AGG  | 20 | 4  |
| 240646 | 34 | 3255277 | 3255306 | 2 | 15 | 30 | GT   | 11 | 4  |
| 240647 | 34 | 3256988 | 3257007 | 2 | 10 | 20 | TG   | 20 | 8  |
| 240649 | 34 | 3258214 | 3258237 | 2 | 12 | 24 | AC   | 21 | 8  |
| 240652 | 34 | 3263977 | 3264006 | 2 | 15 | 30 | GT   | 20 | 9  |
| 240655 | 34 | 3267397 | 3267416 | 2 | 10 | 20 | AC   | 27 | 7  |
| 240659 | 34 | 3270312 | 3270329 | 2 | 9  | 18 | GA   | 21 | 5  |
| 240660 | 34 | 3271248 | 3271259 | 2 | 6  | 12 | TG   | 30 | 10 |
| 240662 | 34 | 3278553 | 3278576 | 3 | 8  | 24 | GAG  | 15 | 8  |
| 240674 | 34 | 3306480 | 3306497 | 2 | 9  | 18 | GT   | 19 | 3  |
| 240675 | 34 | 3306936 | 3306953 | 2 | 9  | 18 | GT   | 11 | 10 |
| 240676 | 34 | 3308391 | 3308414 | 3 | 8  | 24 | TCC  | 28 | 3  |
| 240682 | 34 | 3316398 | 3316413 | 4 | 4  | 16 | TGTT | 21 | 4  |
| 240684 | 34 | 3318078 | 3318101 | 2 | 12 | 24 | AC   | 15 | 6  |

|        |    |         |         |   |    |    |      |    |    |
|--------|----|---------|---------|---|----|----|------|----|----|
| 240690 | 34 | 3326749 | 3326778 | 2 | 15 | 30 | GT   | 17 | 7  |
| 240696 | 34 | 3334061 | 3334078 | 3 | 6  | 18 | TGG  | 19 | 4  |
| 240698 | 34 | 3334471 | 3334492 | 2 | 11 | 22 | TG   | 24 | 4  |
| 240701 | 34 | 3338836 | 3338865 | 2 | 15 | 30 | CA   | 11 | 11 |
| 240731 | 34 | 3403192 | 3403207 | 2 | 8  | 16 | CA   | 28 | 6  |
| 240732 | 34 | 3403487 | 3403507 | 3 | 7  | 21 | AAT  | 15 | 8  |
| 240737 | 34 | 3406075 | 3406114 | 2 | 20 | 40 | TG   | 14 | 13 |
| 240739 | 34 | 3407345 | 3407360 | 4 | 4  | 16 | ATTT | 34 | 4  |
| 240741 | 34 | 3411495 | 3411530 | 2 | 18 | 36 | CA   | 12 | 12 |
| 240743 | 34 | 3413402 | 3413413 | 2 | 6  | 12 | TA   | 12 | 6  |
| 240750 | 34 | 3418438 | 3418467 | 2 | 15 | 30 | AG   | 15 | 5  |
| 240751 | 34 | 3419095 | 3419134 | 2 | 20 | 40 | TG   | 8  | 7  |
| 240752 | 34 | 3422475 | 3422486 | 2 | 6  | 12 | TG   | 17 | 3  |
| 240755 | 34 | 3427181 | 3427196 | 4 | 4  | 16 | AAAC | 25 | 5  |
| 240756 | 34 | 3427494 | 3427511 | 2 | 9  | 18 | CT   | 14 | 8  |
| 240759 | 34 | 3431893 | 3431922 | 2 | 15 | 30 | GT   | 13 | 19 |
| 240760 | 34 | 3433021 | 3433046 | 2 | 13 | 26 | GT   | 19 | 15 |
| 240761 | 34 | 3436035 | 3436076 | 2 | 21 | 42 | GT   | 8  | 7  |
| 240774 | 34 | 3448420 | 3448433 | 2 | 7  | 14 | CA   | 23 | 6  |
| 240775 | 34 | 3455660 | 3455689 | 2 | 15 | 30 | GA   | 18 | 6  |
| 240777 | 34 | 3458340 | 3458359 | 2 | 10 | 20 | CT   | 14 | 3  |
| 240778 | 34 | 3458664 | 3458689 | 2 | 13 | 26 | GT   | 6  | 6  |
| 240779 | 34 | 3463533 | 3463550 | 2 | 9  | 18 | CT   | 25 | 4  |
| 240783 | 34 | 3468225 | 3468238 | 2 | 7  | 14 | TG   | 18 | 3  |
| 240785 | 34 | 3471760 | 3471775 | 2 | 8  | 16 | TG   | 23 | 3  |
| 240793 | 34 | 3493155 | 3493178 | 2 | 12 | 24 | TG   | 17 | 9  |
| 240796 | 34 | 3495892 | 3495905 | 2 | 7  | 14 | AC   | 28 | 5  |
| 240801 | 34 | 3512554 | 3512581 | 2 | 14 | 28 | AC   | 11 | 7  |
| 240802 | 34 | 3513882 | 3513905 | 2 | 12 | 24 | AC   | 15 | 11 |
| 240804 | 34 | 3517841 | 3517864 | 2 | 12 | 24 | GT   | 21 | 3  |
| 240805 | 34 | 3521888 | 3521923 | 2 | 18 | 36 | GT   | 17 | 10 |
| 240814 | 34 | 3537582 | 3537597 | 4 | 4  | 16 | ACAA | 15 | 5  |
| 240822 | 34 | 3572784 | 3572799 | 2 | 8  | 16 | GT   | 10 | 14 |
| 240826 | 34 | 3589965 | 3589988 | 2 | 12 | 24 | AC   | 24 | 10 |
| 240828 | 34 | 3592815 | 3592830 | 4 | 4  | 16 | AGCC | 21 | 4  |
| 240829 | 34 | 3593690 | 3593715 | 2 | 13 | 26 | GT   | 11 | 6  |
| 240840 | 34 | 3605496 | 3605509 | 2 | 7  | 14 | GT   | 28 | 6  |
| 240846 | 34 | 3616976 | 3617008 | 3 | 11 | 33 | TGT  | 28 | 11 |
| 240860 | 34 | 3633443 | 3633463 | 3 | 7  | 21 | TGC  | 31 | 9  |
| 240862 | 34 | 3634700 | 3634715 | 4 | 4  | 16 | CATT | 27 | 3  |
| 240867 | 34 | 3650185 | 3650202 | 2 | 9  | 18 | TG   | 18 | 15 |
| 240878 | 34 | 3677890 | 3677904 | 3 | 5  | 15 | AAG  | 15 | 3  |
| 240881 | 34 | 3683691 | 3683704 | 2 | 7  | 14 | GA   | 18 | 3  |
| 240882 | 34 | 3684295 | 3684316 | 2 | 11 | 22 | AC   | 20 | 15 |
| 240883 | 34 | 3687538 | 3687559 | 2 | 11 | 22 | CA   | 21 | 3  |
| 240885 | 34 | 3691587 | 3691604 | 2 | 9  | 18 | AC   | 17 | 4  |
| 240887 | 34 | 3699689 | 3699708 | 2 | 10 | 20 | TG   | 23 | 7  |
| 240890 | 34 | 3706703 | 3706714 | 2 | 6  | 12 | CA   | 20 | 8  |
| 240892 | 34 | 3710538 | 3710585 | 4 | 12 | 48 | CTAT | 14 | 8  |
| 240900 | 34 | 3727307 | 3727328 | 2 | 11 | 22 | GT   | 19 | 12 |
| 240910 | 34 | 3741026 | 3741049 | 2 | 12 | 24 | GT   | 10 | 11 |

|        |    |         |         |   |    |    |      |    |    |
|--------|----|---------|---------|---|----|----|------|----|----|
| 240912 | 34 | 3743929 | 3743944 | 2 | 8  | 16 | AT   | 13 | 7  |
| 240918 | 34 | 3756859 | 3756874 | 2 | 8  | 16 | GT   | 26 | 5  |
| 240919 | 34 | 3757346 | 3757369 | 2 | 12 | 24 | AC   | 15 | 9  |
| 240921 | 34 | 3760308 | 3760331 | 4 | 6  | 24 | GAGT | 27 | 5  |
| 240927 | 34 | 3768036 | 3768059 | 3 | 8  | 24 | TCT  | 25 | 7  |
| 240934 | 34 | 3780149 | 3780181 | 3 | 11 | 33 | AGA  | 23 | 10 |
| 240935 | 34 | 3780437 | 3780460 | 3 | 8  | 24 | GAT  | 29 | 9  |
| 240947 | 34 | 3786878 | 3786893 | 4 | 4  | 16 | AAAC | 16 | 5  |
| 240949 | 34 | 3800605 | 3800632 | 2 | 14 | 28 | TC   | 16 | 9  |
| 240965 | 34 | 3849557 | 3849586 | 2 | 15 | 30 | AC   | 22 | 14 |
| 240967 | 34 | 3852687 | 3852714 | 2 | 14 | 28 | CT   | 19 | 16 |
| 240970 | 34 | 3858385 | 3858408 | 2 | 12 | 24 | GA   | 15 | 8  |
| 240975 | 34 | 3870344 | 3870361 | 2 | 9  | 18 | CA   | 24 | 7  |
| 240978 | 34 | 3884335 | 3884346 | 2 | 6  | 12 | CA   | 31 | 4  |
| 240981 | 34 | 3890207 | 3890230 | 2 | 12 | 24 | AC   | 10 | 9  |
| 240982 | 34 | 3890814 | 3890831 | 2 | 9  | 18 | TG   | 26 | 6  |
| 240983 | 34 | 3891013 | 3891030 | 2 | 9  | 18 | AC   | 13 | 3  |
| 240984 | 34 | 3891516 | 3891555 | 4 | 10 | 40 | TCTT | 12 | 10 |
| 240986 | 34 | 3896701 | 3896716 | 2 | 8  | 16 | CA   | 19 | 13 |
| 240987 | 34 | 3896847 | 3896866 | 2 | 10 | 20 | AC   | 17 | 6  |
| 240988 | 34 | 3898442 | 3898461 | 2 | 10 | 20 | CA   | 12 | 6  |
| 240993 | 34 | 3902735 | 3902754 | 2 | 10 | 20 | CA   | 15 | 15 |
| 240995 | 34 | 3911144 | 3911163 | 2 | 10 | 20 | GT   | 19 | 4  |
| 240997 | 34 | 3915476 | 3915491 | 2 | 8  | 16 | AC   | 17 | 4  |
| 241000 | 34 | 3919488 | 3919505 | 2 | 9  | 18 | AC   | 13 | 6  |
| 241002 | 34 | 3931032 | 3931055 | 2 | 12 | 24 | AC   | 17 | 6  |
| 241005 | 34 | 3934036 | 3934055 | 2 | 10 | 20 | AC   | 19 | 11 |
| 241009 | 34 | 3939544 | 3939575 | 2 | 16 | 32 | AC   | 10 | 13 |
| 241011 | 34 | 3942239 | 3942252 | 2 | 7  | 14 | TG   | 15 | 11 |
| 241022 | 34 | 3959774 | 3959785 | 2 | 6  | 12 | GT   | 17 | 3  |
| 241024 | 34 | 3961143 | 3961162 | 4 | 5  | 20 | ATAG | 19 | 6  |
| 241027 | 34 | 3972671 | 3972702 | 2 | 16 | 32 | CA   | 26 | 8  |
| 241030 | 34 | 3980692 | 3980705 | 2 | 7  | 14 | GT   | 14 | 8  |
| 241033 | 34 | 3982695 | 3982726 | 2 | 16 | 32 | TC   | 9  | 11 |
| 241040 | 34 | 3988560 | 3988583 | 2 | 12 | 24 | GT   | 18 | 12 |
| 241048 | 34 | 4016888 | 4016901 | 2 | 7  | 14 | TA   | 31 | 3  |
| 241053 | 34 | 4026554 | 4026585 | 2 | 16 | 32 | AC   | 15 | 9  |
| 241059 | 34 | 4054466 | 4054479 | 2 | 7  | 14 | CA   | 22 | 3  |
| 241062 | 34 | 4061869 | 4061883 | 3 | 5  | 15 | TGG  | 26 | 4  |
| 241067 | 34 | 4087684 | 4087719 | 2 | 18 | 36 | AC   | 14 | 4  |
| 241068 | 34 | 4090041 | 4090055 | 3 | 5  | 15 | TAA  | 24 | 6  |
| 241082 | 34 | 4103088 | 4103111 | 3 | 8  | 24 | CAC  | 18 | 6  |
| 241085 | 34 | 4103414 | 4103435 | 2 | 11 | 22 | AG   | 14 | 9  |
| 241090 | 34 | 4109745 | 4109760 | 2 | 8  | 16 | TA   | 6  | 3  |
| 241095 | 34 | 4126182 | 4126223 | 2 | 21 | 42 | AC   | 10 | 10 |
| 241096 | 34 | 4128423 | 4128444 | 2 | 11 | 22 | AG   | 26 | 5  |
| 241098 | 34 | 4132055 | 4132074 | 2 | 10 | 20 | CT   | 19 | 6  |
| 241103 | 34 | 4136794 | 4136809 | 2 | 8  | 16 | GT   | 15 | 5  |
| 241110 | 34 | 4147429 | 4147449 | 3 | 7  | 21 | TTA  | 14 | 5  |
| 241113 | 34 | 4149497 | 4149516 | 2 | 10 | 20 | GA   | 29 | 4  |
| 241114 | 34 | 4155237 | 4155266 | 2 | 15 | 30 | CT   | 11 | 6  |

|        |    |         |         |   |    |    |     |    |    |
|--------|----|---------|---------|---|----|----|-----|----|----|
| 241118 | 34 | 4159510 | 4159521 | 2 | 6  | 12 | AG  | 18 | 6  |
| 241119 | 34 | 4161155 | 4161178 | 2 | 12 | 24 | GT  | 16 | 8  |
| 241124 | 34 | 4176143 | 4176160 | 3 | 6  | 18 | TCC | 33 | 3  |
| 241131 | 34 | 4183985 | 4183998 | 2 | 7  | 14 | AC  | 29 | 3  |
| 241132 | 34 | 4184057 | 4184068 | 2 | 6  | 12 | AC  | 29 | 6  |
| 241144 | 34 | 4203468 | 4203493 | 2 | 13 | 26 | CA  | 19 | 9  |
| 241162 | 34 | 4219109 | 4219123 | 3 | 5  | 15 | GCT | 16 | 4  |
| 241163 | 34 | 4219297 | 4219316 | 2 | 10 | 20 | AC  | 21 | 7  |
| 241167 | 34 | 4226176 | 4226187 | 2 | 6  | 12 | GT  | 22 | 4  |
| 241177 | 34 | 4234447 | 4234466 | 2 | 10 | 20 | TG  | 15 | 6  |
| 241210 | 34 | 4307823 | 4307844 | 2 | 11 | 22 | TG  | 12 | 11 |
| 241213 | 34 | 4317230 | 4317241 | 2 | 6  | 12 | CT  | 24 | 5  |
| 241215 | 34 | 4322764 | 4322777 | 2 | 7  | 14 | TG  | 23 | 4  |
| 241226 | 34 | 4337651 | 4337686 | 2 | 18 | 36 | CA  | 6  | 7  |
| 241228 | 34 | 4342573 | 4342588 | 2 | 8  | 16 | GT  | 20 | 7  |
| 241238 | 34 | 4343297 | 4343317 | 3 | 7  | 21 | TCT | 10 | 6  |
| 241244 | 34 | 4347732 | 4347751 | 2 | 10 | 20 | CA  | 16 | 7  |
| 241253 | 34 | 4358805 | 4358834 | 2 | 15 | 30 | TG  | 10 | 7  |
| 241257 | 34 | 4365627 | 4365653 | 3 | 9  | 27 | CCT | 10 | 6  |
| 241258 | 34 | 4365762 | 4365777 | 2 | 8  | 16 | TC  | 23 | 4  |
| 241259 | 34 | 4369422 | 4369437 | 2 | 8  | 16 | GA  | 23 | 6  |
| 241260 | 34 | 4371073 | 4371099 | 3 | 9  | 27 | GGA | 10 | 4  |
| 241264 | 34 | 4373899 | 4373926 | 2 | 14 | 28 | CA  | 12 | 6  |
| 241266 | 34 | 4375941 | 4375980 | 2 | 20 | 40 | AG  | 10 | 6  |
| 241273 | 34 | 4388794 | 4388817 | 2 | 12 | 24 | CT  | 10 | 4  |
| 241274 | 34 | 4390316 | 4390333 | 2 | 9  | 18 | TC  | 32 | 6  |
| 241275 | 34 | 4390423 | 4390440 | 2 | 9  | 18 | AG  | 26 | 6  |
| 241283 | 34 | 4395162 | 4395173 | 2 | 6  | 12 | TG  | 14 | 3  |
| 241284 | 34 | 4395217 | 4395246 | 2 | 15 | 30 | TG  | 23 | 8  |
| 241288 | 34 | 4404904 | 4404929 | 2 | 13 | 26 | GT  | 10 | 9  |
| 241289 | 34 | 4409219 | 4409250 | 2 | 16 | 32 | AC  | 22 | 9  |
| 241302 | 34 | 4429205 | 4429218 | 2 | 7  | 14 | CT  | 20 | 4  |
| 241303 | 34 | 4430216 | 4430231 | 2 | 8  | 16 | AC  | 20 | 6  |
| 241304 | 34 | 4430891 | 4430912 | 2 | 11 | 22 | AC  | 28 | 4  |
| 241312 | 34 | 4460124 | 4460141 | 2 | 9  | 18 | CA  | 24 | 5  |
| 241313 | 34 | 4460564 | 4460578 | 3 | 5  | 15 | TGC | 21 | 3  |
| 241314 | 34 | 4460841 | 4460858 | 2 | 9  | 18 | GT  | 23 | 3  |
| 241318 | 34 | 4464226 | 4464241 | 2 | 8  | 16 | CA  | 13 | 3  |
| 241329 | 34 | 4473874 | 4473891 | 2 | 9  | 18 | GT  | 17 | 4  |
| 241332 | 34 | 4482099 | 4482116 | 2 | 9  | 18 | CA  | 27 | 3  |
| 241333 | 34 | 4482176 | 4482187 | 2 | 6  | 12 | CA  | 28 | 3  |
| 241334 | 34 | 4482686 | 4482715 | 2 | 15 | 30 | AC  | 14 | 15 |
| 241335 | 34 | 4483854 | 4483868 | 3 | 5  | 15 | GGA | 16 | 3  |
| 241340 | 34 | 4487752 | 4487769 | 2 | 9  | 18 | GA  | 16 | 6  |
| 241355 | 34 | 4510487 | 4510512 | 2 | 13 | 26 | TC  | 19 | 12 |
| 241356 | 34 | 4511509 | 4511526 | 3 | 6  | 18 | GCA | 26 | 4  |
| 241357 | 34 | 4512536 | 4512551 | 2 | 8  | 16 | TG  | 17 | 7  |
| 241358 | 34 | 4512553 | 4512564 | 2 | 6  | 12 | GT  | 21 | 9  |
| 241363 | 34 | 4518669 | 4518680 | 2 | 6  | 12 | TG  | 21 | 4  |
| 241370 | 34 | 4538814 | 4538834 | 3 | 7  | 21 | CTC | 23 | 4  |
| 241372 | 34 | 4539321 | 4539354 | 2 | 17 | 34 | GT  | 16 | 16 |

|        |    |         |         |   |    |    |      |    |    |
|--------|----|---------|---------|---|----|----|------|----|----|
| 241384 | 34 | 4571082 | 4571099 | 3 | 6  | 18 | TTG  | 22 | 6  |
| 241391 | 34 | 4590103 | 4590116 | 2 | 7  | 14 | CA   | 14 | 5  |
| 241395 | 34 | 4596558 | 4596611 | 2 | 27 | 54 | TC   | 11 | 10 |
| 241401 | 34 | 4603333 | 4603346 | 2 | 7  | 14 | GT   | 22 | 7  |
| 241403 | 34 | 4606768 | 4606781 | 2 | 7  | 14 | GT   | 20 | 7  |
| 241410 | 34 | 4627053 | 4627066 | 2 | 7  | 14 | GT   | 21 | 8  |
| 241411 | 34 | 4628541 | 4628554 | 2 | 7  | 14 | TC   | 31 | 3  |
| 241413 | 34 | 4630194 | 4630217 | 2 | 12 | 24 | CA   | 15 | 8  |
| 241414 | 34 | 4630741 | 4630756 | 2 | 8  | 16 | TG   | 6  | 4  |
| 241416 | 34 | 4632772 | 4632783 | 2 | 6  | 12 | AC   | 20 | 3  |
| 241420 | 34 | 4639221 | 4639234 | 2 | 7  | 14 | CA   | 26 | 4  |
| 241423 | 34 | 4644706 | 4644719 | 2 | 7  | 14 | GT   | 18 | 5  |
| 241424 | 34 | 4646206 | 4646220 | 3 | 5  | 15 | TTC  | 14 | 8  |
| 241425 | 34 | 4651561 | 4651576 | 2 | 8  | 16 | GT   | 20 | 4  |
| 241426 | 34 | 4652017 | 4652028 | 2 | 6  | 12 | CA   | 23 | 6  |
| 241427 | 34 | 4653990 | 4654009 | 4 | 5  | 20 | AAAT | 25 | 4  |
| 241432 | 34 | 4659910 | 4659929 | 2 | 10 | 20 | GT   | 16 | 7  |
| 241434 | 34 | 4660138 | 4660161 | 4 | 6  | 24 | GAAA | 34 | 3  |
| 241435 | 34 | 4660476 | 4660491 | 2 | 8  | 16 | CT   | 20 | 3  |
| 241453 | 34 | 4682101 | 4682136 | 3 | 12 | 36 | CTT  | 15 | 10 |
| 241455 | 34 | 4685103 | 4685124 | 2 | 11 | 22 | GA   | 15 | 7  |
| 241458 | 34 | 4707466 | 4707483 | 2 | 9  | 18 | AC   | 25 | 5  |
| 241460 | 34 | 4718789 | 4718804 | 2 | 8  | 16 | AC   | 20 | 12 |
| 241463 | 34 | 4743297 | 4743332 | 2 | 18 | 36 | AC   | 10 | 12 |
| 241464 | 34 | 4743590 | 4743603 | 2 | 7  | 14 | AG   | 25 | 3  |
| 241466 | 34 | 4747921 | 4747950 | 2 | 15 | 30 | GT   | 13 | 7  |
| 241467 | 34 | 4748872 | 4748923 | 4 | 13 | 52 | TCAA | 12 | 11 |
| 241475 | 34 | 4760549 | 4760570 | 2 | 11 | 22 | TG   | 23 | 3  |
| 241480 | 34 | 4769266 | 4769293 | 2 | 14 | 28 | AC   | 24 | 9  |
| 241481 | 34 | 4770744 | 4770759 | 4 | 4  | 16 | AAAC | 13 | 4  |
| 241483 | 34 | 4774511 | 4774524 | 2 | 7  | 14 | CA   | 25 | 13 |
| 241485 | 34 | 4778028 | 4778055 | 2 | 14 | 28 | CA   | 10 | 9  |
| 241486 | 34 | 4778622 | 4778637 | 2 | 8  | 16 | AC   | 24 | 3  |
| 241487 | 34 | 4780391 | 4780408 | 3 | 6  | 18 | TCT  | 26 | 3  |
| 241491 | 34 | 4800878 | 4800895 | 2 | 9  | 18 | TG   | 18 | 4  |
| 241492 | 34 | 4801469 | 4801500 | 2 | 16 | 32 | CA   | 17 | 10 |
| 241502 | 34 | 4807513 | 4807534 | 2 | 11 | 22 | GT   | 16 | 9  |
| 241503 | 34 | 4807625 | 4807670 | 2 | 23 | 46 | CA   | 10 | 10 |
| 241517 | 34 | 4821236 | 4821249 | 2 | 7  | 14 | GT   | 19 | 3  |
| 241531 | 34 | 4841050 | 4841064 | 3 | 5  | 15 | CAT  | 33 | 10 |
| 241532 | 34 | 4841065 | 4841085 | 3 | 7  | 21 | CAG  | 32 | 6  |
| 241536 | 34 | 4853889 | 4853900 | 2 | 6  | 12 | TG   | 25 | 4  |
| 241541 | 34 | 4874131 | 4874150 | 2 | 10 | 20 | CA   | 21 | 5  |
| 241546 | 34 | 4881476 | 4881503 | 2 | 14 | 28 | TG   | 15 | 8  |
| 241551 | 34 | 4886258 | 4886293 | 2 | 18 | 36 | CA   | 17 | 12 |
| 241552 | 34 | 4888201 | 4888216 | 2 | 8  | 16 | GT   | 17 | 5  |
| 241553 | 34 | 4888247 | 4888262 | 2 | 8  | 16 | TG   | 10 | 3  |
| 241556 | 34 | 4890094 | 4890123 | 2 | 15 | 30 | CA   | 10 | 11 |
| 241560 | 34 | 4894100 | 4894149 | 2 | 25 | 50 | AC   | 7  | 8  |
| 241565 | 34 | 4905492 | 4905507 | 2 | 8  | 16 | GT   | 20 | 7  |
| 241568 | 34 | 4907605 | 4907628 | 2 | 12 | 24 | CA   | 24 | 7  |

|        |    |         |         |   |    |    |      |    |    |
|--------|----|---------|---------|---|----|----|------|----|----|
| 241574 | 34 | 4911616 | 4911651 | 2 | 18 | 36 | CT   | 12 | 9  |
| 241577 | 34 | 4917133 | 4917165 | 3 | 11 | 33 | GCA  | 20 | 6  |
| 241595 | 34 | 4946644 | 4946679 | 2 | 18 | 36 | GT   | 18 | 9  |
| 241597 | 34 | 4955008 | 4955039 | 2 | 16 | 32 | AC   | 17 | 12 |
| 241605 | 34 | 4971009 | 4971034 | 2 | 13 | 26 | GT   | 11 | 9  |
| 241607 | 34 | 4971279 | 4971308 | 2 | 15 | 30 | AC   | 11 | 9  |
| 241623 | 34 | 4992032 | 4992047 | 2 | 8  | 16 | AG   | 6  | 3  |
| 241626 | 34 | 4995359 | 4995388 | 2 | 15 | 30 | AG   | 17 | 3  |
| 241635 | 34 | 5019857 | 5019878 | 2 | 11 | 22 | AC   | 19 | 11 |
| 241640 | 34 | 5022494 | 5022513 | 2 | 10 | 20 | GT   | 21 | 5  |
| 241645 | 34 | 5024751 | 5024764 | 2 | 7  | 14 | GT   | 19 | 6  |
| 241651 | 34 | 5032180 | 5032199 | 2 | 10 | 20 | GT   | 27 | 10 |
| 241652 | 34 | 5032797 | 5032808 | 2 | 6  | 12 | TG   | 27 | 3  |
| 241668 | 34 | 5074981 | 5075028 | 3 | 16 | 48 | GTT  | 21 | 9  |
| 241674 | 34 | 5082716 | 5082736 | 3 | 7  | 21 | ATT  | 14 | 5  |
| 241682 | 34 | 5090496 | 5090511 | 4 | 4  | 16 | CAGA | 23 | 3  |
| 241684 | 34 | 5094457 | 5094486 | 2 | 15 | 30 | GT   | 11 | 12 |
| 241687 | 34 | 5107614 | 5107629 | 2 | 8  | 16 | GT   | 25 | 12 |
| 241688 | 34 | 5108178 | 5108191 | 2 | 7  | 14 | GT   | 26 | 4  |
| 241689 | 34 | 5108312 | 5108325 | 2 | 7  | 14 | CA   | 31 | 3  |
| 241697 | 34 | 5122994 | 5123015 | 2 | 11 | 22 | TC   | 18 | 4  |
| 241725 | 34 | 5142534 | 5142557 | 2 | 12 | 24 | GT   | 21 | 7  |
| 241736 | 34 | 5168516 | 5168545 | 2 | 15 | 30 | AC   | 17 | 16 |
| 241745 | 34 | 5197426 | 5197445 | 4 | 5  | 20 | AAAT | 32 | 5  |
| 241749 | 34 | 5209621 | 5209634 | 2 | 7  | 14 | AT   | 13 | 6  |
| 241750 | 34 | 5210104 | 5210129 | 2 | 13 | 26 | AC   | 18 | 8  |
| 241754 | 34 | 5218439 | 5218459 | 3 | 7  | 21 | CTG  | 22 | 10 |
| 241755 | 34 | 5219589 | 5219600 | 2 | 6  | 12 | AT   | 14 | 4  |
| 241757 | 34 | 5221257 | 5221304 | 2 | 24 | 48 | TG   | 16 | 13 |
| 241760 | 34 | 5226197 | 5226224 | 2 | 14 | 28 | CA   | 18 | 8  |
| 241761 | 34 | 5226510 | 5226527 | 2 | 9  | 18 | AC   | 20 | 12 |
| 241764 | 34 | 5234412 | 5234431 | 4 | 5  | 20 | AAAT | 23 | 8  |
| 241767 | 34 | 5236881 | 5236901 | 3 | 7  | 21 | TCT  | 27 | 4  |
| 241768 | 34 | 5237380 | 5237391 | 2 | 6  | 12 | AC   | 25 | 5  |
| 241769 | 34 | 5238086 | 5238099 | 2 | 7  | 14 | AT   | 17 | 3  |
| 241785 | 34 | 5258032 | 5258055 | 2 | 12 | 24 | GT   | 26 | 8  |
| 241799 | 34 | 5290408 | 5290425 | 3 | 6  | 18 | TAA  | 22 | 3  |
| 241805 | 34 | 5321407 | 5321421 | 3 | 5  | 15 | TGT  | 24 | 3  |
| 241809 | 34 | 5333266 | 5333291 | 2 | 13 | 26 | GT   | 14 | 12 |
| 241810 | 34 | 5333883 | 5333914 | 2 | 16 | 32 | TG   | 17 | 18 |
| 241812 | 34 | 5345192 | 5345223 | 4 | 8  | 32 | TAGA | 22 | 12 |
| 241820 | 34 | 5353976 | 5353991 | 2 | 8  | 16 | GT   | 17 | 9  |
| 241830 | 34 | 5368863 | 5368878 | 2 | 8  | 16 | GA   | 23 | 4  |
| 241831 | 34 | 5369301 | 5369328 | 2 | 14 | 28 | TG   | 17 | 8  |
| 241834 | 34 | 5371097 | 5371110 | 2 | 7  | 14 | TA   | 13 | 8  |
| 241835 | 34 | 5371434 | 5371445 | 2 | 6  | 12 | TG   | 20 | 3  |
| 241838 | 34 | 5371556 | 5371569 | 2 | 7  | 14 | AG   | 11 | 11 |
| 241839 | 34 | 5371720 | 5371749 | 2 | 15 | 30 | TG   | 16 | 10 |
| 241841 | 34 | 5371824 | 5371844 | 3 | 7  | 21 | TCC  | 11 | 5  |
| 241842 | 34 | 5371878 | 5371901 | 3 | 8  | 24 | CTT  | 23 | 13 |
| 241843 | 34 | 5372242 | 5372261 | 4 | 5  | 20 | GACA | 23 | 8  |

|        |    |         |         |   |    |    |      |    |    |
|--------|----|---------|---------|---|----|----|------|----|----|
| 241845 | 34 | 5373002 | 5373017 | 2 | 8  | 16 | TG   | 20 | 9  |
| 241846 | 34 | 5373314 | 5373337 | 3 | 8  | 24 | CTC  | 18 | 7  |
| 241852 | 34 | 5377795 | 5377834 | 4 | 10 | 40 | AAAG | 27 | 5  |
| 241855 | 34 | 5381688 | 5381709 | 2 | 11 | 22 | CA   | 17 | 10 |
| 241856 | 34 | 5383928 | 5383961 | 2 | 17 | 34 | CA   | 15 | 10 |
| 241865 | 34 | 5392750 | 5392761 | 2 | 6  | 12 | AC   | 9  | 5  |
| 241866 | 34 | 5392764 | 5392775 | 2 | 6  | 12 | AC   | 10 | 5  |
| 241870 | 34 | 5393172 | 5393193 | 2 | 11 | 22 | CA   | 13 | 10 |
| 241871 | 34 | 5393445 | 5393474 | 3 | 10 | 30 | CTG  | 17 | 8  |
| 241872 | 34 | 5393514 | 5393528 | 3 | 5  | 15 | GAG  | 19 | 3  |
| 241875 | 34 | 5397056 | 5397073 | 2 | 9  | 18 | AT   | 20 | 5  |
| 241877 | 34 | 5397977 | 5398006 | 3 | 10 | 30 | CTC  | 6  | 3  |
| 241885 | 34 | 5408435 | 5408448 | 2 | 7  | 14 | AG   | 7  | 7  |
| 241889 | 34 | 5411382 | 5411413 | 2 | 16 | 32 | GT   | 14 | 14 |
| 241890 | 34 | 5414059 | 5414070 | 2 | 6  | 12 | GT   | 21 | 11 |
| 241891 | 34 | 5414073 | 5414084 | 2 | 6  | 12 | GT   | 21 | 10 |
| 241892 | 34 | 5414484 | 5414505 | 2 | 11 | 22 | TG   | 27 | 14 |
| 241895 | 34 | 5433429 | 5433440 | 2 | 6  | 12 | GT   | 21 | 3  |
| 241897 | 34 | 5438186 | 5438212 | 3 | 9  | 27 | AGG  | 25 | 3  |
| 241907 | 34 | 5462162 | 5462183 | 2 | 11 | 22 | AC   | 19 | 8  |
| 241908 | 34 | 5463944 | 5463963 | 2 | 10 | 20 | TG   | 14 | 8  |
| 241909 | 34 | 5469086 | 5469106 | 3 | 7  | 21 | GCA  | 29 | 7  |
| 241910 | 34 | 5470514 | 5470525 | 2 | 6  | 12 | CA   | 20 | 3  |
| 241912 | 34 | 5474211 | 5474234 | 3 | 8  | 24 | GCA  | 30 | 6  |
| 241913 | 34 | 5474643 | 5474656 | 2 | 7  | 14 | GT   | 31 | 7  |
| 241916 | 34 | 5484372 | 5484387 | 4 | 4  | 16 | CTTT | 18 | 3  |
| 241921 | 34 | 5494950 | 5494961 | 2 | 6  | 12 | CA   | 30 | 4  |
| 241922 | 34 | 5499634 | 5499651 | 3 | 6  | 18 | GAA  | 25 | 5  |
| 241924 | 34 | 5509245 | 5509260 | 2 | 8  | 16 | TG   | 24 | 7  |
| 241925 | 34 | 5512605 | 5512620 | 4 | 4  | 16 | TTTA | 22 | 5  |
| 241943 | 34 | 5552013 | 5552026 | 2 | 7  | 14 | AC   | 29 | 12 |
| 241952 | 34 | 5576473 | 5576488 | 2 | 8  | 16 | TG   | 22 | 5  |
| 241969 | 34 | 5625896 | 5625907 | 2 | 6  | 12 | GT   | 31 | 4  |
| 241984 | 34 | 5641712 | 5641739 | 2 | 14 | 28 | TG   | 19 | 7  |
| 241985 | 34 | 5642632 | 5642679 | 2 | 24 | 48 | CT   | 10 | 9  |
| 241986 | 34 | 5642945 | 5642962 | 2 | 9  | 18 | TG   | 13 | 3  |
| 241987 | 34 | 5643451 | 5643462 | 2 | 6  | 12 | AC   | 13 | 7  |
| 241988 | 34 | 5643465 | 5643478 | 2 | 7  | 14 | AC   | 11 | 5  |
| 241989 | 34 | 5643718 | 5643753 | 2 | 18 | 36 | GA   | 10 | 6  |
| 241990 | 34 | 5644404 | 5644423 | 4 | 5  | 20 | TCTG | 21 | 5  |
| 241993 | 34 | 5646770 | 5646805 | 2 | 18 | 36 | TG   | 9  | 10 |
| 241996 | 34 | 5646958 | 5646981 | 2 | 12 | 24 | AC   | 12 | 8  |
| 241998 | 34 | 5647368 | 5647385 | 2 | 9  | 18 | TG   | 20 | 5  |
| 242000 | 34 | 5648935 | 5648986 | 2 | 26 | 52 | TG   | 12 | 10 |
| 242001 | 34 | 5650741 | 5650772 | 2 | 16 | 32 | AC   | 7  | 6  |
| 242002 | 34 | 5650880 | 5650893 | 2 | 7  | 14 | AG   | 13 | 4  |
| 242004 | 34 | 5653552 | 5653579 | 4 | 7  | 28 | ACAG | 18 | 6  |
| 242008 | 34 | 5653813 | 5653856 | 2 | 22 | 44 | GA   | 7  | 8  |
| 242009 | 34 | 5653925 | 5653944 | 2 | 10 | 20 | CA   | 17 | 5  |
| 242010 | 34 | 5654560 | 5654573 | 2 | 7  | 14 | AC   | 28 | 4  |
| 242011 | 34 | 5656842 | 5656871 | 2 | 15 | 30 | CA   | 20 | 8  |

|        |    |         |         |   |    |    |      |    |    |
|--------|----|---------|---------|---|----|----|------|----|----|
| 242012 | 34 | 5656916 | 5656945 | 2 | 15 | 30 | GT   | 20 | 8  |
| 242014 | 34 | 5659023 | 5659042 | 2 | 10 | 20 | GT   | 14 | 15 |
| 242015 | 34 | 5659179 | 5659196 | 2 | 9  | 18 | TC   | 28 | 5  |
| 242024 | 34 | 5667347 | 5667362 | 4 | 4  | 16 | GGAG | 23 | 4  |
| 242025 | 34 | 5667585 | 5667606 | 2 | 11 | 22 | CA   | 16 | 5  |
| 242034 | 34 | 5672076 | 5672107 | 2 | 16 | 32 | GA   | 6  | 7  |
| 242040 | 34 | 5679322 | 5679351 | 2 | 15 | 30 | TG   | 15 | 8  |
| 242042 | 34 | 5680365 | 5680386 | 2 | 11 | 22 | CA   | 11 | 11 |
| 242044 | 34 | 5680599 | 5680612 | 2 | 7  | 14 | CA   | 12 | 5  |
| 242045 | 34 | 5681859 | 5681876 | 3 | 6  | 18 | CCA  | 16 | 3  |
| 242047 | 34 | 5683770 | 5683801 | 2 | 16 | 32 | GT   | 13 | 5  |
| 242051 | 34 | 5688271 | 5688290 | 2 | 10 | 20 | TG   | 13 | 4  |
| 242053 | 34 | 5688688 | 5688731 | 2 | 22 | 44 | TG   | 6  | 7  |
| 242057 | 34 | 5691697 | 5691714 | 2 | 9  | 18 | CT   | 26 | 3  |
| 242061 | 34 | 5693204 | 5693225 | 2 | 11 | 22 | GA   | 15 | 4  |
| 242070 | 34 | 5703717 | 5703730 | 2 | 7  | 14 | CA   | 22 | 3  |
| 242072 | 34 | 5703992 | 5704013 | 2 | 11 | 22 | TG   | 15 | 7  |
| 242074 | 34 | 5704776 | 5704797 | 2 | 11 | 22 | TG   | 12 | 10 |
| 242078 | 34 | 5709057 | 5709102 | 2 | 23 | 46 | GT   | 9  | 11 |
| 242083 | 34 | 5716517 | 5716538 | 2 | 11 | 22 | TC   | 18 | 5  |
| 242088 | 34 | 5723942 | 5723971 | 2 | 15 | 30 | GA   | 9  | 5  |
| 242089 | 34 | 5724433 | 5724448 | 2 | 8  | 16 | GT   | 27 | 11 |
| 242095 | 34 | 5728091 | 5728106 | 2 | 8  | 16 | TG   | 13 | 7  |
| 242097 | 34 | 5731150 | 5731167 | 2 | 9  | 18 | GT   | 20 | 4  |
| 242098 | 34 | 5731489 | 5731528 | 2 | 20 | 40 | TG   | 9  | 10 |
| 242111 | 34 | 5743214 | 5743239 | 2 | 13 | 26 | CA   | 16 | 6  |
| 242112 | 34 | 5743499 | 5743514 | 2 | 8  | 16 | TG   | 26 | 3  |
| 242114 | 34 | 5743722 | 5743753 | 2 | 16 | 32 | TG   | 25 | 14 |
| 242121 | 34 | 5747645 | 5747680 | 4 | 9  | 36 | TGGA | 26 | 3  |
| 242123 | 34 | 5752722 | 5752735 | 2 | 7  | 14 | CA   | 8  | 4  |
| 242124 | 34 | 5757779 | 5757804 | 2 | 13 | 26 | TG   | 11 | 12 |
| 242128 | 34 | 5764020 | 5764031 | 2 | 6  | 12 | CA   | 35 | 4  |
| 242131 | 35 | 13938   | 14003   | 3 | 22 | 66 | AGA  | 8  | 9  |
| 242133 | 35 | 14433   | 14450   | 2 | 9  | 18 | GA   | 7  | 4  |
| 242150 | 35 | 60689   | 60732   | 2 | 22 | 44 | GT   | 7  | 11 |
| 242151 | 35 | 62042   | 62057   | 4 | 4  | 16 | CTTT | 7  | 3  |
| 242162 | 35 | 82381   | 82428   | 2 | 24 | 48 | AC   | 12 | 9  |
| 242166 | 35 | 85180   | 85191   | 2 | 6  | 12 | AC   | 22 | 14 |
| 242167 | 35 | 85193   | 85208   | 2 | 8  | 16 | CA   | 20 | 11 |
| 242188 | 35 | 111624  | 111638  | 3 | 5  | 15 | ACA  | 32 | 3  |
| 242194 | 35 | 123724  | 123738  | 3 | 5  | 15 | TTG  | 20 | 7  |
| 242196 | 35 | 131438  | 131465  | 2 | 14 | 28 | TG   | 21 | 11 |
| 242198 | 35 | 140549  | 140569  | 3 | 7  | 21 | GAG  | 24 | 4  |
| 242200 | 35 | 146065  | 146088  | 2 | 12 | 24 | TG   | 13 | 5  |
| 242210 | 35 | 171214  | 171237  | 2 | 12 | 24 | TC   | 20 | 14 |
| 242213 | 35 | 176889  | 176912  | 4 | 6  | 24 | AATA | 7  | 3  |
| 242214 | 35 | 177168  | 177185  | 3 | 6  | 18 | CTC  | 18 | 3  |
| 242217 | 35 | 190632  | 190643  | 2 | 6  | 12 | AT   | 12 | 3  |
| 242224 | 35 | 191889  | 191908  | 2 | 10 | 20 | GT   | 15 | 8  |
| 242227 | 35 | 192210  | 192230  | 3 | 7  | 21 | CCT  | 10 | 3  |
| 242228 | 35 | 192514  | 192525  | 2 | 6  | 12 | CA   | 16 | 3  |



|        |    |        |        |   |    |    |      |    |    |
|--------|----|--------|--------|---|----|----|------|----|----|
| 242231 | 35 | 192911 | 192932 | 2 | 11 | 22 | TG   | 14 | 6  |
| 242232 | 35 | 196036 | 196049 | 2 | 7  | 14 | AG   | 22 | 3  |
| 242241 | 35 | 209940 | 209961 | 2 | 11 | 22 | TG   | 21 | 3  |
| 242243 | 35 | 213900 | 213911 | 2 | 6  | 12 | TG   | 7  | 3  |
| 242262 | 35 | 224134 | 224147 | 2 | 7  | 14 | GT   | 19 | 3  |
| 242263 | 35 | 224867 | 224884 | 2 | 9  | 18 | AC   | 26 | 4  |
| 242267 | 35 | 226947 | 226970 | 3 | 8  | 24 | CAT  | 26 | 8  |
| 242273 | 35 | 238359 | 238378 | 4 | 5  | 20 | TTCC | 13 | 5  |
| 242276 | 35 | 247187 | 247210 | 4 | 6  | 24 | TATT | 24 | 4  |
| 242281 | 35 | 255777 | 255798 | 2 | 11 | 22 | CA   | 25 | 4  |
| 242285 | 35 | 259980 | 260000 | 3 | 7  | 21 | TTA  | 8  | 3  |
| 242293 | 35 | 271045 | 271058 | 2 | 7  | 14 | GA   | 21 | 5  |
| 242297 | 35 | 271865 | 271876 | 2 | 6  | 12 | GT   | 20 | 4  |
| 242298 | 35 | 272591 | 272620 | 2 | 15 | 30 | AC   | 21 | 16 |
| 242299 | 35 | 272817 | 272830 | 2 | 7  | 14 | TG   | 27 | 6  |
| 242300 | 35 | 274727 | 274742 | 2 | 8  | 16 | CT   | 10 | 3  |
| 242301 | 35 | 274916 | 274963 | 3 | 16 | 48 | TCT  | 8  | 9  |
| 242302 | 35 | 275159 | 275170 | 2 | 6  | 12 | TC   | 13 | 4  |
| 242305 | 35 | 275489 | 275500 | 2 | 6  | 12 | CT   | 23 | 4  |
| 242312 | 35 | 287410 | 287433 | 2 | 12 | 24 | TG   | 13 | 10 |
| 242313 | 35 | 288985 | 289002 | 2 | 9  | 18 | AG   | 32 | 4  |
| 242317 | 35 | 291510 | 291521 | 2 | 6  | 12 | TG   | 26 | 3  |
| 242318 | 35 | 293424 | 293443 | 2 | 10 | 20 | GT   | 21 | 6  |
| 242319 | 35 | 293487 | 293498 | 2 | 6  | 12 | TG   | 30 | 3  |
| 242321 | 35 | 297734 | 297753 | 4 | 5  | 20 | AACA | 30 | 3  |
| 242326 | 35 | 314274 | 314293 | 2 | 10 | 20 | AC   | 21 | 6  |
| 242328 | 35 | 321983 | 322015 | 3 | 11 | 33 | GAG  | 20 | 4  |
| 242329 | 35 | 329050 | 329076 | 3 | 9  | 27 | CTG  | 26 | 3  |
| 242333 | 35 | 341476 | 341493 | 3 | 6  | 18 | GCT  | 30 | 5  |
| 242336 | 35 | 345620 | 345640 | 3 | 7  | 21 | TCT  | 22 | 10 |
| 242347 | 35 | 364208 | 364221 | 2 | 7  | 14 | AC   | 33 | 3  |
| 242349 | 35 | 366818 | 366871 | 2 | 27 | 54 | AC   | 11 | 13 |
| 242350 | 35 | 367052 | 367075 | 3 | 8  | 24 | TCC  | 15 | 4  |
| 242351 | 35 | 367153 | 367168 | 2 | 8  | 16 | TC   | 10 | 4  |
| 242352 | 35 | 367535 | 367558 | 4 | 6  | 24 | AAAT | 16 | 5  |
| 242353 | 35 | 369689 | 369709 | 3 | 7  | 21 | CTC  | 32 | 6  |
| 242357 | 35 | 376150 | 376173 | 3 | 8  | 24 | TGC  | 22 | 7  |
| 242360 | 35 | 384817 | 384836 | 2 | 10 | 20 | AC   | 15 | 4  |
| 242361 | 35 | 390328 | 390343 | 2 | 8  | 16 | TG   | 6  | 4  |
| 242364 | 35 | 396316 | 396339 | 3 | 8  | 24 | GAA  | 15 | 8  |
| 242365 | 35 | 398655 | 398682 | 2 | 14 | 28 | GT   | 17 | 11 |
| 242367 | 35 | 400613 | 400628 | 4 | 4  | 16 | GTTT | 22 | 4  |
| 242370 | 35 | 401030 | 401065 | 2 | 18 | 36 | CA   | 14 | 11 |
| 242371 | 35 | 401960 | 401977 | 3 | 6  | 18 | CTC  | 18 | 4  |
| 242372 | 35 | 404665 | 404700 | 3 | 12 | 36 | CTC  | 14 | 12 |
| 242383 | 35 | 425324 | 425339 | 2 | 8  | 16 | GT   | 26 | 4  |
| 242386 | 35 | 436139 | 436166 | 2 | 14 | 28 | AC   | 13 | 12 |
| 242387 | 35 | 439506 | 439519 | 2 | 7  | 14 | GA   | 26 | 3  |
| 242397 | 35 | 448974 | 448995 | 2 | 11 | 22 | AC   | 24 | 9  |
| 242402 | 35 | 460322 | 460337 | 2 | 8  | 16 | AC   | 14 | 5  |
| 242408 | 35 | 467051 | 467068 | 3 | 6  | 18 | TTC  | 20 | 3  |

|        |    |        |        |   |    |    |      |    |    |
|--------|----|--------|--------|---|----|----|------|----|----|
| 242410 | 35 | 471737 | 471754 | 2 | 9  | 18 | TG   | 20 | 4  |
| 242411 | 35 | 471782 | 471799 | 2 | 9  | 18 | GT   | 14 | 8  |
| 242413 | 35 | 474843 | 474870 | 2 | 14 | 28 | GT   | 23 | 16 |
| 242422 | 35 | 477265 | 477290 | 2 | 13 | 26 | GT   | 12 | 6  |
| 242423 | 35 | 477344 | 477361 | 3 | 6  | 18 | TTC  | 19 | 7  |
| 242424 | 35 | 477445 | 477460 | 4 | 4  | 16 | TTTA | 16 | 4  |
| 242425 | 35 | 477509 | 477522 | 2 | 7  | 14 | GA   | 19 | 4  |
| 242426 | 35 | 477553 | 477564 | 2 | 6  | 12 | AG   | 15 | 3  |
| 242429 | 35 | 477862 | 477881 | 2 | 10 | 20 | CT   | 10 | 5  |
| 242436 | 35 | 484632 | 484649 | 2 | 9  | 18 | AC   | 24 | 3  |
| 242440 | 35 | 489803 | 489826 | 3 | 8  | 24 | TGA  | 23 | 3  |
| 242441 | 35 | 490584 | 490616 | 3 | 11 | 33 | GCA  | 26 | 8  |
| 242444 | 35 | 498843 | 498860 | 3 | 6  | 18 | CAA  | 28 | 3  |
| 242450 | 35 | 518170 | 518201 | 2 | 16 | 32 | AC   | 15 | 9  |
| 242451 | 35 | 519452 | 519469 | 2 | 9  | 18 | CA   | 28 | 5  |
| 242452 | 35 | 522243 | 522272 | 2 | 15 | 30 | CA   | 8  | 11 |
| 242454 | 35 | 524910 | 524937 | 4 | 7  | 28 | TAAT | 15 | 6  |
| 242459 | 35 | 547149 | 547160 | 2 | 6  | 12 | TG   | 14 | 3  |
| 242464 | 35 | 558081 | 558094 | 2 | 7  | 14 | TG   | 8  | 3  |
| 242468 | 35 | 565388 | 565399 | 2 | 6  | 12 | AT   | 9  | 6  |
| 242478 | 35 | 589439 | 589450 | 2 | 6  | 12 | AC   | 11 | 3  |
| 242488 | 35 | 605316 | 605331 | 4 | 4  | 16 | TTCT | 28 | 6  |
| 242489 | 35 | 609796 | 609817 | 2 | 11 | 22 | AC   | 16 | 11 |
| 242495 | 35 | 618237 | 618260 | 2 | 12 | 24 | AC   | 15 | 9  |
| 242511 | 35 | 660043 | 660078 | 2 | 18 | 36 | TG   | 15 | 10 |
| 242512 | 35 | 662450 | 662487 | 2 | 19 | 38 | TC   | 24 | 5  |
| 242519 | 35 | 681477 | 681490 | 2 | 7  | 14 | CG   | 24 | 10 |
| 242520 | 35 | 681491 | 681508 | 2 | 9  | 18 | CA   | 19 | 8  |
| 242522 | 35 | 683443 | 683487 | 3 | 15 | 45 | AAC  | 21 | 7  |
| 242524 | 35 | 685816 | 685841 | 2 | 13 | 26 | GT   | 14 | 11 |
| 242526 | 35 | 688378 | 688391 | 2 | 7  | 14 | GT   | 16 | 4  |
| 242527 | 35 | 688393 | 688406 | 2 | 7  | 14 | TG   | 14 | 4  |
| 242531 | 35 | 698931 | 698948 | 2 | 9  | 18 | CA   | 14 | 5  |
| 242535 | 35 | 702407 | 702432 | 2 | 13 | 26 | TG   | 15 | 8  |
| 242537 | 35 | 705602 | 705635 | 2 | 17 | 34 | AC   | 8  | 9  |
| 242538 | 35 | 708284 | 708309 | 2 | 13 | 26 | AC   | 16 | 11 |
| 242540 | 35 | 713479 | 713510 | 2 | 16 | 32 | CA   | 8  | 5  |
| 242541 | 35 | 713666 | 713689 | 2 | 12 | 24 | CA   | 19 | 6  |
| 242543 | 35 | 714009 | 714024 | 2 | 8  | 16 | CA   | 10 | 8  |
| 242544 | 35 | 714026 | 714045 | 2 | 10 | 20 | AC   | 9  | 10 |
| 242548 | 35 | 717294 | 717325 | 4 | 8  | 32 | GGAT | 28 | 10 |
| 242549 | 35 | 718743 | 718754 | 2 | 6  | 12 | GA   | 20 | 3  |
| 242553 | 35 | 726205 | 726226 | 2 | 11 | 22 | AC   | 15 | 6  |
| 242558 | 35 | 730005 | 730016 | 2 | 6  | 12 | GT   | 14 | 3  |
| 242561 | 35 | 736247 | 736278 | 2 | 16 | 32 | CA   | 18 | 8  |
| 242562 | 35 | 740641 | 740655 | 3 | 5  | 15 | GGA  | 20 | 7  |
| 242570 | 35 | 756314 | 756361 | 2 | 24 | 48 | CA   | 15 | 10 |
| 242573 | 35 | 761424 | 761477 | 2 | 27 | 54 | CA   | 8  | 9  |
| 242588 | 35 | 775118 | 775153 | 3 | 12 | 36 | CTC  | 9  | 5  |
| 242592 | 35 | 782567 | 782582 | 2 | 8  | 16 | CT   | 22 | 7  |
| 242594 | 35 | 783300 | 783335 | 3 | 12 | 36 | AGG  | 17 | 4  |

|        |    |         |         |   |    |    |      |    |    |
|--------|----|---------|---------|---|----|----|------|----|----|
| 242595 | 35 | 785143  | 785178  | 3 | 12 | 36 | CTT  | 26 | 7  |
| 242597 | 35 | 788293  | 788318  | 2 | 13 | 26 | CA   | 23 | 11 |
| 242601 | 35 | 802771  | 802782  | 2 | 6  | 12 | AG   | 20 | 4  |
| 242606 | 35 | 811916  | 811929  | 2 | 7  | 14 | TC   | 26 | 4  |
| 242607 | 35 | 813230  | 813257  | 2 | 14 | 28 | CA   | 14 | 7  |
| 242611 | 35 | 820412  | 820427  | 2 | 8  | 16 | CA   | 14 | 8  |
| 242612 | 35 | 820633  | 820646  | 2 | 7  | 14 | GT   | 17 | 6  |
| 242613 | 35 | 822006  | 822025  | 2 | 10 | 20 | AC   | 27 | 6  |
| 242614 | 35 | 825577  | 825590  | 2 | 7  | 14 | AC   | 11 | 5  |
| 242615 | 35 | 829456  | 829473  | 3 | 6  | 18 | ATT  | 16 | 3  |
| 242618 | 35 | 841169  | 841180  | 2 | 6  | 12 | AC   | 29 | 4  |
| 242621 | 35 | 844186  | 844200  | 3 | 5  | 15 | CAG  | 22 | 3  |
| 242622 | 35 | 848065  | 848082  | 3 | 6  | 18 | CCT  | 13 | 5  |
| 242629 | 35 | 860579  | 860593  | 3 | 5  | 15 | GAG  | 10 | 8  |
| 242630 | 35 | 860695  | 860712  | 3 | 6  | 18 | TGA  | 31 | 3  |
| 242633 | 35 | 875876  | 875891  | 2 | 8  | 16 | AC   | 16 | 6  |
| 242634 | 35 | 879792  | 879821  | 2 | 15 | 30 | AC   | 15 | 7  |
| 242639 | 35 | 902287  | 902314  | 2 | 14 | 28 | TG   | 7  | 5  |
| 242653 | 35 | 929740  | 929757  | 2 | 9  | 18 | CT   | 27 | 4  |
| 242664 | 35 | 961649  | 961666  | 2 | 9  | 18 | GT   | 17 | 5  |
| 242665 | 35 | 961701  | 961732  | 2 | 16 | 32 | GT   | 16 | 6  |
| 242671 | 35 | 962993  | 963006  | 2 | 7  | 14 | TC   | 21 | 4  |
| 242676 | 35 | 963513  | 963546  | 2 | 17 | 34 | CA   | 15 | 10 |
| 242681 | 35 | 968213  | 968233  | 3 | 7  | 21 | TGC  | 28 | 9  |
| 242684 | 35 | 981836  | 981855  | 2 | 10 | 20 | AC   | 19 | 4  |
| 242687 | 35 | 981979  | 981994  | 2 | 8  | 16 | CA   | 16 | 3  |
| 242688 | 35 | 982095  | 982108  | 2 | 7  | 14 | TG   | 30 | 4  |
| 242689 | 35 | 982150  | 982161  | 2 | 6  | 12 | CA   | 26 | 4  |
| 242693 | 35 | 989192  | 989213  | 2 | 11 | 22 | TA   | 7  | 7  |
| 242694 | 35 | 993159  | 993179  | 3 | 7  | 21 | TCA  | 15 | 3  |
| 242695 | 35 | 993346  | 993373  | 4 | 7  | 28 | TGCC | 22 | 6  |
| 242702 | 35 | 1003265 | 1003279 | 3 | 5  | 15 | GGT  | 14 | 4  |
| 242708 | 35 | 1013750 | 1013767 | 2 | 9  | 18 | AC   | 12 | 5  |
| 242713 | 35 | 1024141 | 1024152 | 2 | 6  | 12 | AG   | 20 | 3  |
| 242730 | 35 | 1041894 | 1041907 | 2 | 7  | 14 | TG   | 26 | 4  |
| 242737 | 35 | 1061417 | 1061437 | 3 | 7  | 21 | TTC  | 21 | 8  |
| 242738 | 35 | 1061777 | 1061804 | 4 | 7  | 28 | GACT | 29 | 6  |
| 242744 | 35 | 1073905 | 1073916 | 2 | 6  | 12 | AG   | 29 | 4  |
| 242748 | 35 | 1083978 | 1083999 | 2 | 11 | 22 | CA   | 17 | 9  |
| 242769 | 35 | 1111668 | 1111679 | 2 | 6  | 12 | GA   | 24 | 5  |
| 242780 | 35 | 1133222 | 1133239 | 2 | 9  | 18 | AC   | 12 | 8  |
| 242781 | 35 | 1133635 | 1133656 | 2 | 11 | 22 | GA   | 10 | 4  |
| 242782 | 35 | 1133977 | 1134004 | 2 | 14 | 28 | AC   | 7  | 6  |
| 242786 | 35 | 1144142 | 1144159 | 2 | 9  | 18 | AG   | 25 | 4  |
| 242788 | 35 | 1147694 | 1147707 | 2 | 7  | 14 | AC   | 23 | 4  |
| 242789 | 35 | 1147710 | 1147721 | 2 | 6  | 12 | AC   | 28 | 7  |
| 242791 | 35 | 1151156 | 1151181 | 2 | 13 | 26 | AC   | 17 | 7  |
| 242796 | 35 | 1157606 | 1157635 | 2 | 15 | 30 | CA   | 12 | 11 |
| 242797 | 35 | 1160521 | 1160542 | 2 | 11 | 22 | GA   | 21 | 6  |
| 242798 | 35 | 1160622 | 1160641 | 2 | 10 | 20 | TG   | 10 | 7  |
| 242812 | 35 | 1172426 | 1172467 | 2 | 21 | 42 | GA   | 7  | 10 |

|        |    |         |         |   |    |    |      |    |    |
|--------|----|---------|---------|---|----|----|------|----|----|
| 242814 | 35 | 1173759 | 1173776 | 3 | 6  | 18 | TTC  | 22 | 3  |
| 242820 | 35 | 1179372 | 1179383 | 2 | 6  | 12 | AC   | 10 | 7  |
| 242821 | 35 | 1180194 | 1180217 | 4 | 6  | 24 | ACAG | 28 | 6  |
| 242823 | 35 | 1181325 | 1181348 | 2 | 12 | 24 | AT   | 6  | 4  |
| 242828 | 35 | 1190772 | 1190797 | 2 | 13 | 26 | GT   | 6  | 8  |
| 242829 | 35 | 1199945 | 1199976 | 2 | 16 | 32 | AG   | 27 | 13 |
| 242832 | 35 | 1203668 | 1203697 | 2 | 15 | 30 | AC   | 10 | 11 |
| 242838 | 35 | 1209554 | 1209573 | 2 | 10 | 20 | AC   | 23 | 10 |
| 242839 | 35 | 1209728 | 1209743 | 2 | 8  | 16 | CA   | 20 | 3  |
| 242846 | 35 | 1220528 | 1220551 | 3 | 8  | 24 | AAG  | 16 | 11 |
| 242847 | 35 | 1220796 | 1220817 | 2 | 11 | 22 | AC   | 8  | 14 |
| 242849 | 35 | 1223672 | 1223685 | 2 | 7  | 14 | AC   | 24 | 6  |
| 242850 | 35 | 1226610 | 1226633 | 2 | 12 | 24 | CT   | 21 | 10 |
| 242851 | 35 | 1226955 | 1226986 | 2 | 16 | 32 | GT   | 9  | 7  |
| 242853 | 35 | 1229682 | 1229699 | 2 | 9  | 18 | GT   | 24 | 3  |
| 242863 | 35 | 1243241 | 1243254 | 2 | 7  | 14 | AC   | 33 | 5  |
| 242869 | 35 | 1252496 | 1252513 | 2 | 9  | 18 | TC   | 23 | 4  |
| 242871 | 35 | 1255321 | 1255336 | 2 | 8  | 16 | GA   | 15 | 5  |
| 242874 | 35 | 1255456 | 1255471 | 2 | 8  | 16 | AG   | 14 | 3  |
| 242876 | 35 | 1258062 | 1258101 | 2 | 20 | 40 | CA   | 8  | 9  |
| 242878 | 35 | 1258554 | 1258575 | 2 | 11 | 22 | CA   | 16 | 10 |
| 242879 | 35 | 1258767 | 1258784 | 2 | 9  | 18 | CA   | 21 | 3  |
| 242889 | 35 | 1260164 | 1260183 | 4 | 5  | 20 | GAGT | 8  | 8  |
| 242891 | 35 | 1260267 | 1260292 | 2 | 13 | 26 | GA   | 10 | 15 |
| 242892 | 35 | 1260521 | 1260538 | 2 | 9  | 18 | GT   | 7  | 8  |
| 242897 | 35 | 1274742 | 1274759 | 3 | 6  | 18 | CCT  | 20 | 7  |
| 242912 | 35 | 1300694 | 1300705 | 2 | 6  | 12 | CA   | 12 | 5  |
| 242913 | 35 | 1300708 | 1300721 | 2 | 7  | 14 | CA   | 14 | 4  |
| 242917 | 35 | 1304987 | 1305001 | 3 | 5  | 15 | GAG  | 6  | 4  |
| 242918 | 35 | 1305207 | 1305221 | 3 | 5  | 15 | CAG  | 26 | 5  |
| 242919 | 35 | 1305331 | 1305346 | 2 | 8  | 16 | AT   | 20 | 14 |
| 242920 | 35 | 1305602 | 1305623 | 2 | 11 | 22 | TG   | 13 | 8  |
| 242921 | 35 | 1305881 | 1305904 | 3 | 8  | 24 | CAA  | 26 | 4  |
| 242924 | 35 | 1309503 | 1309518 | 2 | 8  | 16 | GA   | 11 | 3  |
| 242928 | 35 | 1317140 | 1317161 | 2 | 11 | 22 | TG   | 10 | 3  |
| 242929 | 35 | 1317791 | 1317808 | 2 | 9  | 18 | AC   | 10 | 8  |
| 242930 | 35 | 1326788 | 1326815 | 2 | 14 | 28 | CA   | 16 | 11 |
| 242931 | 35 | 1326995 | 1327006 | 2 | 6  | 12 | TG   | 26 | 4  |
| 242932 | 35 | 1329227 | 1329258 | 2 | 16 | 32 | CA   | 15 | 10 |
| 242934 | 35 | 1329725 | 1329736 | 2 | 6  | 12 | AG   | 25 | 4  |
| 242935 | 35 | 1333810 | 1333849 | 2 | 20 | 40 | GT   | 13 | 10 |
| 242939 | 35 | 1336783 | 1336798 | 2 | 8  | 16 | CT   | 20 | 16 |
| 242940 | 35 | 1336799 | 1336814 | 2 | 8  | 16 | AT   | 14 | 11 |
| 242941 | 35 | 1337916 | 1337930 | 3 | 5  | 15 | TGT  | 25 | 3  |
| 242942 | 35 | 1348378 | 1348413 | 4 | 9  | 36 | ATAA | 22 | 8  |
| 242944 | 35 | 1353767 | 1353790 | 2 | 12 | 24 | CA   | 12 | 7  |
| 242947 | 35 | 1355267 | 1355278 | 2 | 6  | 12 | AC   | 31 | 5  |
| 242950 | 35 | 1360605 | 1360620 | 2 | 8  | 16 | TG   | 24 | 3  |
| 242953 | 35 | 1378986 | 1378999 | 2 | 7  | 14 | TG   | 19 | 5  |
| 242958 | 35 | 1384266 | 1384281 | 2 | 8  | 16 | AC   | 21 | 4  |
| 242960 | 35 | 1388778 | 1388792 | 3 | 5  | 15 | CCT  | 19 | 4  |

|        |    |         |         |   |    |    |      |    |    |
|--------|----|---------|---------|---|----|----|------|----|----|
| 242963 | 35 | 1402942 | 1402962 | 3 | 7  | 21 | AGG  | 20 | 4  |
| 242968 | 35 | 1419362 | 1419375 | 2 | 7  | 14 | GT   | 17 | 8  |
| 242970 | 35 | 1434702 | 1434719 | 2 | 9  | 18 | GT   | 10 | 8  |
| 242978 | 35 | 1448549 | 1448566 | 3 | 6  | 18 | ACA  | 15 | 9  |
| 242980 | 35 | 1452418 | 1452435 | 2 | 9  | 18 | TG   | 31 | 4  |
| 242984 | 35 | 1460507 | 1460526 | 2 | 10 | 20 | TG   | 25 | 4  |
| 242990 | 35 | 1466897 | 1466912 | 2 | 8  | 16 | CA   | 19 | 8  |
| 242995 | 35 | 1475052 | 1475079 | 4 | 7  | 28 | GACT | 30 | 9  |
| 243000 | 35 | 1482374 | 1482391 | 3 | 6  | 18 | GGC  | 19 | 10 |
| 243005 | 35 | 1492908 | 1492923 | 2 | 8  | 16 | AG   | 18 | 4  |
| 243006 | 35 | 1495197 | 1495210 | 2 | 7  | 14 | GA   | 19 | 6  |
| 243007 | 35 | 1495442 | 1495471 | 3 | 10 | 30 | CCT  | 10 | 7  |
| 243009 | 35 | 1496177 | 1496190 | 2 | 7  | 14 | GA   | 26 | 3  |
| 243010 | 35 | 1497352 | 1497375 | 2 | 12 | 24 | AC   | 14 | 6  |
| 243011 | 35 | 1498605 | 1498624 | 2 | 10 | 20 | GT   | 24 | 5  |
| 243014 | 35 | 1498811 | 1498826 | 2 | 8  | 16 | TG   | 8  | 8  |
| 243019 | 35 | 1504437 | 1504456 | 2 | 10 | 20 | TC   | 18 | 5  |
| 243021 | 35 | 1507429 | 1507449 | 3 | 7  | 21 | TCT  | 19 | 9  |
| 243025 | 35 | 1508857 | 1508888 | 2 | 16 | 32 | CA   | 8  | 7  |
| 243029 | 35 | 1512664 | 1512691 | 2 | 14 | 28 | AG   | 18 | 6  |
| 243030 | 35 | 1513444 | 1513467 | 3 | 8  | 24 | GGA  | 13 | 7  |
| 243031 | 35 | 1515954 | 1515969 | 2 | 8  | 16 | GA   | 15 | 5  |
| 243034 | 35 | 1519284 | 1519301 | 3 | 6  | 18 | AAG  | 21 | 4  |
| 243035 | 35 | 1519474 | 1519497 | 2 | 12 | 24 | CA   | 16 | 4  |
| 243036 | 35 | 1522405 | 1522422 | 2 | 9  | 18 | AT   | 29 | 4  |
| 243038 | 35 | 1525756 | 1525773 | 2 | 9  | 18 | CA   | 23 | 9  |
| 243039 | 35 | 1528002 | 1528017 | 2 | 8  | 16 | AC   | 24 | 5  |
| 243040 | 35 | 1528018 | 1528031 | 2 | 7  | 14 | TC   | 27 | 5  |
| 243044 | 35 | 1538650 | 1538667 | 2 | 9  | 18 | CA   | 18 | 5  |
| 243045 | 35 | 1539307 | 1539345 | 3 | 13 | 39 | ACA  | 18 | 8  |
| 243047 | 35 | 1539467 | 1539494 | 2 | 14 | 28 | CA   | 7  | 9  |
| 243049 | 35 | 1540613 | 1540634 | 2 | 11 | 22 | TG   | 25 | 13 |
| 243052 | 35 | 1543601 | 1543620 | 2 | 10 | 20 | AC   | 17 | 8  |
| 243057 | 35 | 1548393 | 1548416 | 4 | 6  | 24 | GGAT | 20 | 5  |
| 243062 | 35 | 1555966 | 1555979 | 2 | 7  | 14 | AC   | 9  | 4  |
| 243065 | 35 | 1559803 | 1559816 | 2 | 7  | 14 | GT   | 12 | 5  |
| 243067 | 35 | 1561252 | 1561275 | 3 | 8  | 24 | CAG  | 25 | 4  |
| 243072 | 35 | 1562225 | 1562250 | 2 | 13 | 26 | AC   | 6  | 3  |
| 243073 | 35 | 1562391 | 1562406 | 2 | 8  | 16 | GT   | 16 | 7  |
| 243078 | 35 | 1569886 | 1569901 | 4 | 4  | 16 | AAAT | 32 | 5  |
| 243080 | 35 | 1573167 | 1573186 | 4 | 5  | 20 | AAAT | 25 | 3  |
| 243085 | 35 | 1580392 | 1580403 | 2 | 6  | 12 | GT   | 20 | 3  |
| 243094 | 35 | 1623572 | 1623592 | 3 | 7  | 21 | CTG  | 22 | 3  |
| 243100 | 35 | 1638593 | 1638618 | 2 | 13 | 26 | CA   | 15 | 4  |
| 243103 | 35 | 1648222 | 1648236 | 3 | 5  | 15 | TCC  | 19 | 3  |
| 243104 | 35 | 1649247 | 1649260 | 2 | 7  | 14 | AG   | 27 | 3  |
| 243106 | 35 | 1649437 | 1649448 | 2 | 6  | 12 | TG   | 15 | 5  |
| 243115 | 35 | 1665763 | 1665786 | 2 | 12 | 24 | TG   | 21 | 3  |
| 243125 | 35 | 1681047 | 1681064 | 2 | 9  | 18 | AG   | 26 | 8  |
| 243128 | 35 | 1682561 | 1682578 | 3 | 6  | 18 | AGC  | 23 | 3  |
| 243134 | 35 | 1686955 | 1687002 | 2 | 24 | 48 | TG   | 11 | 12 |

|        |    |         |         |   |    |    |      |    |    |
|--------|----|---------|---------|---|----|----|------|----|----|
| 243135 | 35 | 1687069 | 1687098 | 2 | 15 | 30 | GT   | 17 | 11 |
| 243140 | 35 | 1693994 | 1694009 | 2 | 8  | 16 | AT   | 13 | 7  |
| 243145 | 35 | 1710874 | 1710897 | 4 | 6  | 24 | TCTA | 7  | 7  |
| 243147 | 35 | 1712305 | 1712320 | 4 | 4  | 16 | ATAA | 28 | 3  |
| 243153 | 35 | 1724788 | 1724833 | 2 | 23 | 46 | AG   | 14 | 9  |
| 243167 | 35 | 1744340 | 1744367 | 2 | 14 | 28 | CA   | 15 | 7  |
| 243168 | 35 | 1744481 | 1744496 | 2 | 8  | 16 | CA   | 20 | 9  |
| 243169 | 35 | 1744750 | 1744767 | 2 | 9  | 18 | CA   | 20 | 5  |
| 243171 | 35 | 1747026 | 1747055 | 2 | 15 | 30 | AC   | 12 | 7  |
| 243182 | 35 | 1757305 | 1757328 | 2 | 12 | 24 | AG   | 13 | 4  |
| 243186 | 35 | 1761436 | 1761455 | 2 | 10 | 20 | GT   | 10 | 8  |
| 243187 | 35 | 1763376 | 1763389 | 2 | 7  | 14 | GA   | 23 | 4  |
| 243188 | 35 | 1763575 | 1763590 | 4 | 4  | 16 | GCGT | 29 | 3  |
| 243189 | 35 | 1763657 | 1763686 | 2 | 15 | 30 | CA   | 20 | 8  |
| 243190 | 35 | 1765318 | 1765333 | 4 | 4  | 16 | TTCT | 27 | 3  |
| 243192 | 35 | 1765879 | 1765898 | 2 | 10 | 20 | GA   | 18 | 6  |
| 243195 | 35 | 1767670 | 1767693 | 2 | 12 | 24 | GT   | 11 | 10 |
| 243196 | 35 | 1768629 | 1768643 | 3 | 5  | 15 | CGG  | 13 | 4  |
| 243197 | 35 | 1768899 | 1768913 | 3 | 5  | 15 | AAC  | 17 | 3  |
| 243198 | 35 | 1769368 | 1769395 | 2 | 14 | 28 | TG   | 24 | 10 |
| 243202 | 35 | 1771488 | 1771505 | 2 | 9  | 18 | CA   | 15 | 16 |
| 243204 | 35 | 1775463 | 1775482 | 2 | 10 | 20 | GA   | 16 | 8  |
| 243206 | 35 | 1775982 | 1775996 | 3 | 5  | 15 | TGT  | 20 | 4  |
| 243209 | 35 | 1781571 | 1781586 | 2 | 8  | 16 | TC   | 24 | 4  |
| 243214 | 35 | 1790433 | 1790450 | 3 | 6  | 18 | TTC  | 20 | 3  |
| 243221 | 35 | 1793535 | 1793552 | 3 | 6  | 18 | GCT  | 28 | 4  |
| 243222 | 35 | 1793577 | 1793594 | 3 | 6  | 18 | GTT  | 27 | 3  |
| 243223 | 35 | 1794258 | 1794283 | 2 | 13 | 26 | AC   | 14 | 6  |
| 243225 | 35 | 1798130 | 1798141 | 2 | 6  | 12 | GT   | 18 | 4  |
| 243226 | 35 | 1798295 | 1798320 | 2 | 13 | 26 | CA   | 11 | 11 |
| 243227 | 35 | 1798616 | 1798641 | 2 | 13 | 26 | AC   | 15 | 4  |
| 243231 | 35 | 1801679 | 1801692 | 2 | 7  | 14 | GA   | 23 | 6  |
| 243233 | 35 | 1804744 | 1804755 | 2 | 6  | 12 | AT   | 21 | 4  |
| 243236 | 35 | 1809374 | 1809403 | 2 | 15 | 30 | GT   | 11 | 8  |
| 243237 | 35 | 1810616 | 1810643 | 2 | 14 | 28 | AC   | 12 | 6  |
| 243239 | 35 | 1814229 | 1814254 | 2 | 13 | 26 | CA   | 18 | 6  |
| 243242 | 35 | 1819833 | 1819854 | 2 | 11 | 22 | TG   | 19 | 13 |
| 243244 | 35 | 1823789 | 1823808 | 4 | 5  | 20 | GAGT | 22 | 6  |
| 243250 | 35 | 1826609 | 1826656 | 2 | 24 | 48 | CA   | 8  | 6  |
| 243251 | 35 | 1830426 | 1830441 | 2 | 8  | 16 | CT   | 21 | 4  |
| 243253 | 35 | 1830946 | 1830971 | 2 | 13 | 26 | GT   | 18 | 5  |
| 243255 | 35 | 1831077 | 1831096 | 2 | 10 | 20 | AC   | 20 | 5  |
| 243256 | 35 | 1831185 | 1831198 | 2 | 7  | 14 | CA   | 14 | 6  |
| 243259 | 35 | 1833678 | 1833693 | 2 | 8  | 16 | CA   | 21 | 6  |
| 243260 | 35 | 1833694 | 1833707 | 2 | 7  | 14 | AC   | 21 | 8  |
| 243265 | 35 | 1836352 | 1836379 | 2 | 14 | 28 | TC   | 12 | 6  |
| 243269 | 35 | 1837197 | 1837212 | 2 | 8  | 16 | AC   | 14 | 3  |
| 243270 | 35 | 1837433 | 1837460 | 2 | 14 | 28 | TG   | 16 | 14 |
| 243271 | 35 | 1838504 | 1838519 | 2 | 8  | 16 | TG   | 23 | 4  |
| 243272 | 35 | 1839117 | 1839152 | 2 | 18 | 36 | TG   | 13 | 10 |
| 243277 | 35 | 1844542 | 1844557 | 2 | 8  | 16 | AC   | 13 | 10 |

|        |    |         |         |   |    |    |      |    |    |
|--------|----|---------|---------|---|----|----|------|----|----|
| 243278 | 35 | 1845046 | 1845065 | 2 | 10 | 20 | AC   | 20 | 4  |
| 243280 | 35 | 1845551 | 1845568 | 2 | 9  | 18 | TG   | 19 | 5  |
| 243281 | 35 | 1845788 | 1845811 | 2 | 12 | 24 | CA   | 12 | 9  |
| 243282 | 35 | 1845882 | 1845909 | 2 | 14 | 28 | TG   | 11 | 8  |
| 243285 | 35 | 1846251 | 1846266 | 4 | 4  | 16 | AGCG | 14 | 5  |
| 243288 | 35 | 1846714 | 1846725 | 2 | 6  | 12 | TG   | 16 | 8  |
| 243294 | 35 | 1848536 | 1848569 | 2 | 17 | 34 | AC   | 6  | 5  |
| 243300 | 35 | 1854152 | 1854185 | 2 | 17 | 34 | TG   | 7  | 10 |
| 243303 | 35 | 1856956 | 1856971 | 2 | 8  | 16 | AC   | 16 | 6  |
| 243304 | 35 | 1857212 | 1857229 | 2 | 9  | 18 | AC   | 25 | 5  |
| 243305 | 35 | 1857381 | 1857406 | 2 | 13 | 26 | CA   | 23 | 10 |
| 243306 | 35 | 1857609 | 1857634 | 2 | 13 | 26 | CA   | 20 | 13 |
| 243307 | 35 | 1857734 | 1857748 | 3 | 5  | 15 | GCA  | 33 | 3  |
| 243308 | 35 | 1857767 | 1857793 | 3 | 9  | 27 | CAG  | 21 | 7  |
| 243312 | 35 | 1858282 | 1858297 | 2 | 8  | 16 | TG   | 18 | 5  |
| 243313 | 35 | 1858298 | 1858309 | 2 | 6  | 12 | AG   | 19 | 5  |
| 243316 | 35 | 1858613 | 1858630 | 3 | 6  | 18 | CGG  | 24 | 5  |
| 243321 | 35 | 1860220 | 1860249 | 2 | 15 | 30 | TG   | 17 | 6  |
| 243322 | 35 | 1860290 | 1860317 | 2 | 14 | 28 | GT   | 18 | 16 |
| 243323 | 35 | 1860421 | 1860454 | 2 | 17 | 34 | TG   | 10 | 11 |
| 243325 | 35 | 1861549 | 1861562 | 2 | 7  | 14 | TC   | 23 | 7  |
| 243327 | 35 | 1864411 | 1864436 | 2 | 13 | 26 | AC   | 17 | 5  |
| 243332 | 35 | 1872013 | 1872028 | 4 | 4  | 16 | CCTT | 26 | 3  |
| 243333 | 35 | 1872550 | 1872571 | 2 | 11 | 22 | TG   | 14 | 8  |
| 243334 | 35 | 1872714 | 1872740 | 3 | 9  | 27 | CCT  | 16 | 7  |
| 243338 | 35 | 1877480 | 1877515 | 2 | 18 | 36 | CA   | 15 | 15 |
| 243339 | 35 | 1877631 | 1877642 | 2 | 6  | 12 | AC   | 15 | 3  |
| 243340 | 35 | 1879178 | 1879209 | 2 | 16 | 32 | TC   | 21 | 9  |
| 243343 | 35 | 1883382 | 1883411 | 2 | 15 | 30 | CA   | 10 | 7  |
| 243344 | 35 | 1884294 | 1884333 | 2 | 20 | 40 | CA   | 6  | 9  |
| 243354 | 35 | 1891289 | 1891320 | 2 | 16 | 32 | GT   | 14 | 20 |
| 243358 | 35 | 1892761 | 1892774 | 2 | 7  | 14 | TC   | 9  | 3  |
| 243361 | 35 | 1895257 | 1895282 | 2 | 13 | 26 | TG   | 17 | 8  |
| 243373 | 35 | 1922547 | 1922562 | 4 | 4  | 16 | TTTC | 10 | 5  |
| 243380 | 35 | 1933928 | 1933945 | 2 | 9  | 18 | TG   | 17 | 12 |
| 243383 | 35 | 1943443 | 1943468 | 2 | 13 | 26 | AC   | 22 | 13 |
| 243384 | 35 | 1945142 | 1945159 | 2 | 9  | 18 | CA   | 25 | 4  |
| 243385 | 35 | 1946295 | 1946320 | 2 | 13 | 26 | CA   | 22 | 9  |
| 243391 | 35 | 1955743 | 1955758 | 4 | 4  | 16 | AGTC | 27 | 5  |
| 243392 | 35 | 1956255 | 1956274 | 2 | 10 | 20 | GT   | 9  | 12 |
| 243393 | 35 | 1959920 | 1959946 | 3 | 9  | 27 | TGA  | 24 | 10 |
| 243394 | 35 | 1960631 | 1960644 | 2 | 7  | 14 | GT   | 14 | 12 |
| 243397 | 35 | 1965991 | 1966006 | 2 | 8  | 16 | TC   | 27 | 4  |
| 243398 | 35 | 1966062 | 1966091 | 2 | 15 | 30 | AC   | 12 | 10 |
| 243399 | 35 | 1966170 | 1966183 | 2 | 7  | 14 | CA   | 20 | 10 |
| 243404 | 35 | 1987163 | 1987177 | 3 | 5  | 15 | GAA  | 29 | 4  |
| 243405 | 35 | 1988953 | 1989006 | 2 | 27 | 54 | GT   | 6  | 7  |
| 243406 | 35 | 1989358 | 1989378 | 3 | 7  | 21 | AGA  | 16 | 4  |
| 243418 | 35 | 2013671 | 2013690 | 2 | 10 | 20 | CA   | 8  | 3  |
| 243419 | 35 | 2014686 | 2014709 | 4 | 6  | 24 | GACT | 26 | 4  |
| 243423 | 35 | 2018442 | 2018463 | 2 | 11 | 22 | GA   | 15 | 3  |

|        |    |         |         |   |    |    |      |    |    |
|--------|----|---------|---------|---|----|----|------|----|----|
| 243427 | 35 | 2020840 | 2020861 | 2 | 11 | 22 | CT   | 18 | 6  |
| 243429 | 35 | 2021068 | 2021089 | 2 | 11 | 22 | AC   | 19 | 7  |
| 243434 | 35 | 2027148 | 2027163 | 2 | 8  | 16 | TA   | 7  | 4  |
| 243435 | 35 | 2028179 | 2028200 | 2 | 11 | 22 | AC   | 11 | 5  |
| 243438 | 35 | 2031281 | 2031296 | 2 | 8  | 16 | GT   | 22 | 5  |
| 243440 | 35 | 2032865 | 2032885 | 3 | 7  | 21 | CCT  | 20 | 8  |
| 243444 | 35 | 2033617 | 2033644 | 2 | 14 | 28 | AC   | 11 | 11 |
| 243447 | 35 | 2034031 | 2034050 | 2 | 10 | 20 | CT   | 9  | 4  |
| 243457 | 35 | 2036902 | 2036929 | 2 | 14 | 28 | AC   | 6  | 5  |
| 243458 | 35 | 2036991 | 2037008 | 2 | 9  | 18 | TG   | 12 | 5  |
| 243459 | 35 | 2037078 | 2037103 | 2 | 13 | 26 | AC   | 15 | 13 |
| 243460 | 35 | 2037242 | 2037255 | 2 | 7  | 14 | CA   | 11 | 8  |
| 243464 | 35 | 2037558 | 2037583 | 2 | 13 | 26 | CA   | 6  | 7  |
| 243467 | 35 | 2039846 | 2039869 | 2 | 12 | 24 | AC   | 14 | 7  |
| 243468 | 35 | 2039995 | 2040022 | 2 | 14 | 28 | AC   | 13 | 14 |
| 243472 | 35 | 2051882 | 2051903 | 2 | 11 | 22 | CA   | 20 | 9  |
| 243483 | 35 | 2083258 | 2083275 | 3 | 6  | 18 | CCT  | 20 | 6  |
| 243488 | 35 | 2087398 | 2087415 | 2 | 9  | 18 | CA   | 21 | 14 |
| 243499 | 35 | 2092523 | 2092543 | 3 | 7  | 21 | ACA  | 26 | 12 |
| 243501 | 35 | 2104182 | 2104221 | 2 | 20 | 40 | GT   | 17 | 12 |
| 243503 | 35 | 2105546 | 2105565 | 4 | 5  | 20 | TTTA | 24 | 9  |
| 243504 | 35 | 2105995 | 2106009 | 3 | 5  | 15 | CAA  | 24 | 4  |
| 243505 | 35 | 2106597 | 2106632 | 3 | 12 | 36 | ATG  | 24 | 6  |
| 243506 | 35 | 2108925 | 2108948 | 4 | 6  | 24 | TGTT | 26 | 4  |
| 243507 | 35 | 2113847 | 2113872 | 2 | 13 | 26 | CA   | 14 | 11 |
| 243508 | 35 | 2114011 | 2114036 | 2 | 13 | 26 | AC   | 17 | 8  |
| 243511 | 35 | 2123770 | 2123797 | 2 | 14 | 28 | TG   | 16 | 9  |
| 243523 | 35 | 2162132 | 2162149 | 3 | 6  | 18 | AAC  | 25 | 8  |
| 243525 | 35 | 2169480 | 2169494 | 3 | 5  | 15 | ATT  | 7  | 4  |
| 243526 | 35 | 2173935 | 2173946 | 2 | 6  | 12 | TC   | 28 | 3  |
| 243534 | 35 | 2184377 | 2184392 | 2 | 8  | 16 | CA   | 21 | 4  |
| 243537 | 35 | 2191786 | 2191823 | 2 | 19 | 38 | TG   | 14 | 15 |
| 243540 | 35 | 2198596 | 2198627 | 2 | 16 | 32 | AC   | 14 | 8  |
| 243542 | 35 | 2223155 | 2223169 | 3 | 5  | 15 | CAG  | 27 | 3  |
| 243550 | 35 | 2245538 | 2245561 | 3 | 8  | 24 | GAG  | 23 | 8  |
| 243554 | 35 | 2256658 | 2256675 | 2 | 9  | 18 | TG   | 21 | 8  |
| 243555 | 35 | 2256820 | 2256837 | 2 | 9  | 18 | AC   | 23 | 3  |
| 243558 | 35 | 2269398 | 2269411 | 2 | 7  | 14 | AC   | 32 | 5  |
| 243560 | 35 | 2275754 | 2275765 | 2 | 6  | 12 | AC   | 30 | 3  |
| 243566 | 35 | 2283056 | 2283085 | 2 | 15 | 30 | AC   | 12 | 10 |
| 243571 | 35 | 2297506 | 2297547 | 2 | 21 | 42 | GT   | 7  | 6  |
| 243574 | 35 | 2331746 | 2331789 | 2 | 22 | 44 | TG   | 22 | 10 |
| 243583 | 35 | 2364723 | 2364736 | 2 | 7  | 14 | AT   | 16 | 8  |
| 243586 | 35 | 2366773 | 2366793 | 3 | 7  | 21 | AAC  | 13 | 6  |
| 243587 | 35 | 2370412 | 2370425 | 2 | 7  | 14 | CT   | 20 | 8  |
| 243592 | 35 | 2374370 | 2374405 | 3 | 12 | 36 | GTT  | 16 | 7  |
| 243598 | 35 | 2380898 | 2380921 | 3 | 8  | 24 | TTC  | 31 | 6  |
| 243599 | 35 | 2381929 | 2381955 | 3 | 9  | 27 | CTG  | 22 | 7  |
| 243602 | 35 | 2385081 | 2385102 | 2 | 11 | 22 | GT   | 10 | 6  |
| 243603 | 35 | 2385425 | 2385439 | 3 | 5  | 15 | AGA  | 29 | 3  |
| 243605 | 35 | 2387653 | 2387674 | 2 | 11 | 22 | GT   | 21 | 6  |



|        |    |         |         |   |    |    |      |    |    |
|--------|----|---------|---------|---|----|----|------|----|----|
| 243606 | 35 | 2388289 | 2388322 | 2 | 17 | 34 | GT   | 13 | 14 |
| 243607 | 35 | 2390267 | 2390282 | 4 | 4  | 16 | AAAT | 9  | 4  |
| 243613 | 35 | 2394957 | 2394974 | 3 | 6  | 18 | CAG  | 26 | 4  |
| 243614 | 35 | 2395342 | 2395353 | 2 | 6  | 12 | AG   | 14 | 7  |
| 243615 | 35 | 2395387 | 2395402 | 4 | 4  | 16 | AGTG | 10 | 3  |
| 243627 | 35 | 2426919 | 2426930 | 2 | 6  | 12 | GT   | 28 | 3  |
| 243628 | 35 | 2432021 | 2432040 | 2 | 10 | 20 | TG   | 10 | 7  |
| 243632 | 35 | 2440824 | 2440841 | 2 | 9  | 18 | GT   | 21 | 6  |
| 243634 | 35 | 2456431 | 2456442 | 2 | 6  | 12 | TC   | 31 | 4  |
| 243637 | 35 | 2464960 | 2464975 | 2 | 8  | 16 | TC   | 13 | 3  |
| 243638 | 35 | 2467068 | 2467087 | 2 | 10 | 20 | TG   | 14 | 3  |
| 243639 | 35 | 2468900 | 2468917 | 2 | 9  | 18 | TG   | 25 | 5  |
| 243641 | 35 | 2475377 | 2475392 | 4 | 4  | 16 | CAGT | 30 | 3  |
| 243642 | 35 | 2476849 | 2476866 | 2 | 9  | 18 | AC   | 20 | 4  |
| 243656 | 35 | 2498892 | 2498939 | 2 | 24 | 48 | TG   | 10 | 9  |
| 243669 | 35 | 2532361 | 2532380 | 4 | 5  | 20 | ATAC | 12 | 6  |
| 243678 | 35 | 2547273 | 2547310 | 2 | 19 | 38 | TG   | 7  | 11 |
| 243680 | 35 | 2551213 | 2551244 | 2 | 16 | 32 | AC   | 16 | 11 |
| 243683 | 35 | 2555269 | 2555280 | 2 | 6  | 12 | CA   | 28 | 4  |
| 243693 | 35 | 2571756 | 2571791 | 2 | 18 | 36 | AC   | 9  | 10 |
| 243697 | 35 | 2600990 | 2601004 | 3 | 5  | 15 | GCA  | 21 | 4  |
| 243698 | 35 | 2605754 | 2605775 | 2 | 11 | 22 | AC   | 15 | 12 |
| 243699 | 35 | 2620409 | 2620426 | 2 | 9  | 18 | AG   | 21 | 3  |
| 243703 | 35 | 2627223 | 2627240 | 3 | 6  | 18 | TCA  | 29 | 4  |
| 243704 | 35 | 2627288 | 2627305 | 2 | 9  | 18 | AC   | 24 | 9  |
| 243706 | 35 | 2637493 | 2637524 | 2 | 16 | 32 | CA   | 12 | 10 |
| 243707 | 35 | 2643747 | 2643760 | 2 | 7  | 14 | GT   | 19 | 3  |
| 243708 | 35 | 2643801 | 2643816 | 2 | 8  | 16 | GT   | 15 | 8  |
| 243710 | 35 | 2644725 | 2644736 | 2 | 6  | 12 | CT   | 27 | 3  |
| 243712 | 35 | 2646578 | 2646595 | 3 | 6  | 18 | GAG  | 7  | 4  |
| 243721 | 35 | 2665713 | 2665748 | 2 | 18 | 36 | TG   | 9  | 5  |
| 243723 | 35 | 2668937 | 2668952 | 2 | 8  | 16 | GT   | 17 | 8  |
| 243728 | 35 | 2672103 | 2672114 | 2 | 6  | 12 | CA   | 19 | 9  |
| 243729 | 35 | 2673861 | 2673872 | 2 | 6  | 12 | AC   | 29 | 9  |
| 243730 | 35 | 2673901 | 2673918 | 2 | 9  | 18 | AC   | 26 | 9  |
| 243731 | 35 | 2674021 | 2674056 | 2 | 18 | 36 | AC   | 8  | 13 |
| 243733 | 35 | 2676177 | 2676208 | 2 | 16 | 32 | TG   | 20 | 7  |
| 243734 | 35 | 2677079 | 2677102 | 3 | 8  | 24 | ACA  | 23 | 3  |
| 243735 | 35 | 2677685 | 2677708 | 2 | 12 | 24 | AC   | 17 | 10 |
| 243740 | 35 | 2679986 | 2680007 | 2 | 11 | 22 | TC   | 19 | 7  |
| 243741 | 35 | 2682029 | 2682049 | 3 | 7  | 21 | GGT  | 26 | 3  |
| 243742 | 35 | 2682454 | 2682511 | 2 | 29 | 58 | GT   | 12 | 17 |
| 243747 | 35 | 2684141 | 2684152 | 2 | 6  | 12 | AC   | 20 | 6  |
| 243750 | 35 | 2688326 | 2688346 | 3 | 7  | 21 | TCC  | 18 | 4  |
| 243751 | 35 | 2688672 | 2688687 | 2 | 8  | 16 | CA   | 29 | 5  |
| 243756 | 35 | 2694203 | 2694214 | 2 | 6  | 12 | AC   | 21 | 7  |
| 243759 | 35 | 2694767 | 2694792 | 2 | 13 | 26 | CA   | 17 | 7  |
| 243760 | 35 | 2695276 | 2695307 | 4 | 8  | 32 | TATC | 21 | 5  |
| 243761 | 35 | 2695421 | 2695447 | 3 | 9  | 27 | TTA  | 15 | 11 |
| 243762 | 35 | 2696771 | 2696786 | 2 | 8  | 16 | GT   | 18 | 10 |
| 243763 | 35 | 2696881 | 2696894 | 2 | 7  | 14 | TG   | 27 | 4  |

|        |    |         |         |   |    |    |      |    |    |
|--------|----|---------|---------|---|----|----|------|----|----|
| 243764 | 35 | 2696942 | 2696959 | 2 | 9  | 18 | TG   | 24 | 14 |
| 243766 | 35 | 2702443 | 2702460 | 3 | 6  | 18 | AAG  | 28 | 7  |
| 243768 | 35 | 2706054 | 2706071 | 3 | 6  | 18 | AAC  | 25 | 6  |
| 243771 | 35 | 2708550 | 2708563 | 2 | 7  | 14 | AT   | 20 | 4  |
| 243777 | 35 | 2711140 | 2711159 | 2 | 10 | 20 | TG   | 21 | 6  |
| 243778 | 35 | 2711254 | 2711267 | 2 | 7  | 14 | TG   | 26 | 7  |
| 243779 | 35 | 2713115 | 2713130 | 2 | 8  | 16 | AC   | 19 | 10 |
| 243784 | 35 | 2727217 | 2727244 | 2 | 14 | 28 | AG   | 13 | 9  |
| 243786 | 35 | 2727443 | 2727474 | 2 | 16 | 32 | AC   | 7  | 9  |
| 243788 | 35 | 2728998 | 2729025 | 2 | 14 | 28 | GT   | 16 | 9  |
| 243798 | 35 | 2734124 | 2734155 | 2 | 16 | 32 | CA   | 12 | 8  |
| 243814 | 35 | 2747035 | 2747052 | 2 | 9  | 18 | AC   | 12 | 6  |
| 243815 | 35 | 2747215 | 2747266 | 2 | 26 | 52 | CA   | 8  | 9  |
| 243818 | 35 | 2747874 | 2747891 | 3 | 6  | 18 | AAC  | 9  | 4  |
| 243823 | 35 | 2760419 | 2760476 | 2 | 29 | 58 | TG   | 9  | 9  |
| 243824 | 35 | 2760622 | 2760635 | 2 | 7  | 14 | GT   | 20 | 5  |
| 243827 | 35 | 2768778 | 2768798 | 3 | 7  | 21 | CTC  | 15 | 5  |
| 243828 | 35 | 2769240 | 2769275 | 4 | 9  | 36 | GACC | 20 | 15 |
| 243834 | 35 | 2781304 | 2781323 | 4 | 5  | 20 | TCTT | 28 | 7  |
| 243835 | 35 | 2783511 | 2783525 | 3 | 5  | 15 | GGC  | 25 | 5  |
| 243843 | 35 | 2813285 | 2813304 | 2 | 10 | 20 | GT   | 22 | 8  |
| 243844 | 35 | 2813473 | 2813494 | 2 | 11 | 22 | TG   | 25 | 14 |
| 243846 | 35 | 2814494 | 2814505 | 2 | 6  | 12 | GA   | 16 | 5  |
| 243853 | 35 | 2833995 | 2834026 | 2 | 16 | 32 | GA   | 21 | 9  |
| 243854 | 35 | 2838570 | 2838595 | 2 | 13 | 26 | CA   | 10 | 13 |
| 243858 | 35 | 2846426 | 2846459 | 2 | 17 | 34 | AC   | 13 | 7  |
| 243859 | 35 | 2846487 | 2846504 | 2 | 9  | 18 | AC   | 22 | 12 |
| 243866 | 35 | 2847852 | 2847867 | 2 | 8  | 16 | AC   | 19 | 9  |
| 243867 | 35 | 2854074 | 2854101 | 2 | 14 | 28 | TG   | 16 | 5  |
| 243868 | 35 | 2856508 | 2856529 | 2 | 11 | 22 | CA   | 18 | 12 |
| 243871 | 35 | 2858477 | 2858492 | 2 | 8  | 16 | AG   | 6  | 3  |
| 243872 | 35 | 2858836 | 2858867 | 4 | 8  | 32 | GGAT | 19 | 7  |
| 243876 | 35 | 2864270 | 2864284 | 3 | 5  | 15 | CTT  | 28 | 5  |
| 243879 | 35 | 2866710 | 2866753 | 2 | 22 | 44 | AC   | 20 | 13 |
| 243880 | 35 | 2870685 | 2870706 | 2 | 11 | 22 | TC   | 24 | 3  |
| 243881 | 35 | 2871463 | 2871477 | 3 | 5  | 15 | GCA  | 30 | 5  |
| 243883 | 35 | 2873986 | 2874017 | 2 | 16 | 32 | CA   | 7  | 10 |
| 243884 | 35 | 2876988 | 2877005 | 3 | 6  | 18 | AAG  | 15 | 9  |
| 243885 | 35 | 2877006 | 2877020 | 3 | 5  | 15 | AAC  | 14 | 7  |
| 243889 | 35 | 2877662 | 2877689 | 2 | 14 | 28 | CA   | 21 | 8  |
| 243891 | 35 | 2880309 | 2880324 | 2 | 8  | 16 | GT   | 21 | 8  |
| 243893 | 35 | 2882246 | 2882273 | 2 | 14 | 28 | AC   | 14 | 9  |
| 243896 | 35 | 2884390 | 2884435 | 2 | 23 | 46 | TG   | 14 | 13 |
| 243897 | 35 | 2884498 | 2884518 | 3 | 7  | 21 | TCA  | 28 | 5  |
| 243911 | 35 | 2911166 | 2911183 | 2 | 9  | 18 | TA   | 11 | 11 |
| 243913 | 35 | 2912433 | 2912456 | 3 | 8  | 24 | AGG  | 26 | 4  |
| 243921 | 35 | 2916906 | 2916931 | 2 | 13 | 26 | CA   | 16 | 14 |
| 243922 | 35 | 2917062 | 2917087 | 2 | 13 | 26 | CA   | 13 | 12 |
| 243923 | 35 | 2917154 | 2917169 | 2 | 8  | 16 | CA   | 24 | 3  |
| 243925 | 35 | 2919895 | 2919922 | 2 | 14 | 28 | GT   | 10 | 8  |
| 243926 | 35 | 2921624 | 2921651 | 2 | 14 | 28 | TG   | 19 | 13 |

|        |    |         |         |   |    |    |      |    |    |
|--------|----|---------|---------|---|----|----|------|----|----|
| 243927 | 35 | 2921857 | 2921880 | 2 | 12 | 24 | GT   | 9  | 8  |
| 243928 | 35 | 2922852 | 2922869 | 3 | 6  | 18 | TTG  | 34 | 5  |
| 243929 | 35 | 2924123 | 2924152 | 3 | 10 | 30 | GAG  | 17 | 5  |
| 243932 | 35 | 2927456 | 2927497 | 3 | 14 | 42 | TCT  | 14 | 8  |
| 243942 | 35 | 2952830 | 2952847 | 3 | 6  | 18 | CAA  | 23 | 3  |
| 243944 | 35 | 2957604 | 2957631 | 2 | 14 | 28 | TG   | 23 | 7  |
| 243948 | 35 | 2972232 | 2972247 | 2 | 8  | 16 | TG   | 21 | 3  |
| 243955 | 35 | 2991951 | 2991980 | 2 | 15 | 30 | GT   | 15 | 8  |
| 243957 | 35 | 2993973 | 2993984 | 2 | 6  | 12 | AT   | 18 | 9  |
| 243960 | 35 | 3006647 | 3006680 | 2 | 17 | 34 | TG   | 9  | 14 |
| 243961 | 35 | 3012501 | 3012532 | 2 | 16 | 32 | TC   | 8  | 8  |
| 243965 | 35 | 3015433 | 3015452 | 2 | 10 | 20 | GT   | 20 | 6  |
| 243966 | 35 | 3016078 | 3016092 | 3 | 5  | 15 | CTT  | 29 | 3  |
| 243969 | 35 | 3021384 | 3021415 | 2 | 16 | 32 | TG   | 14 | 11 |
| 243972 | 35 | 3029660 | 3029675 | 2 | 8  | 16 | TG   | 17 | 8  |
| 243974 | 35 | 3030068 | 3030094 | 3 | 9  | 27 | GAG  | 18 | 6  |
| 243975 | 35 | 3030253 | 3030266 | 2 | 7  | 14 | TG   | 20 | 3  |
| 243981 | 35 | 3039239 | 3039252 | 2 | 7  | 14 | GA   | 26 | 7  |
| 243983 | 35 | 3040780 | 3040799 | 4 | 5  | 20 | CAGA | 13 | 7  |
| 243984 | 35 | 3040961 | 3041012 | 2 | 26 | 52 | AC   | 6  | 7  |
| 243986 | 35 | 3042192 | 3042215 | 2 | 12 | 24 | GT   | 23 | 9  |
| 243988 | 35 | 3045199 | 3045228 | 2 | 15 | 30 | AC   | 15 | 14 |
| 243990 | 35 | 3048985 | 3049012 | 2 | 14 | 28 | CA   | 10 | 8  |
| 243993 | 35 | 3053861 | 3053884 | 2 | 12 | 24 | CA   | 19 | 11 |
| 243994 | 35 | 3055757 | 3055782 | 2 | 13 | 26 | TG   | 13 | 8  |
| 243998 | 35 | 3057519 | 3057552 | 2 | 17 | 34 | CA   | 10 | 12 |
| 244000 | 35 | 3058316 | 3058345 | 2 | 15 | 30 | GT   | 16 | 8  |
| 244001 | 35 | 3058902 | 3058927 | 2 | 13 | 26 | TG   | 6  | 9  |
| 244002 | 35 | 3059045 | 3059090 | 2 | 23 | 46 | GT   | 7  | 10 |
| 244004 | 35 | 3059248 | 3059271 | 2 | 12 | 24 | GT   | 13 | 11 |
| 244005 | 35 | 3060566 | 3060581 | 2 | 8  | 16 | TC   | 12 | 9  |
| 244009 | 35 | 3060864 | 3060893 | 3 | 10 | 30 | GGA  | 10 | 7  |
| 244010 | 35 | 3061580 | 3061615 | 2 | 18 | 36 | AC   | 11 | 13 |
| 244013 | 35 | 3062647 | 3062676 | 3 | 10 | 30 | CCT  | 6  | 5  |
| 244016 | 35 | 3064394 | 3064409 | 2 | 8  | 16 | GT   | 20 | 3  |
| 244018 | 35 | 3064576 | 3064589 | 2 | 7  | 14 | GT   | 16 | 3  |
| 244019 | 35 | 3066133 | 3066160 | 2 | 14 | 28 | GT   | 15 | 10 |
| 244020 | 35 | 3066199 | 3066222 | 2 | 12 | 24 | AC   | 19 | 9  |
| 244023 | 35 | 3067447 | 3067464 | 2 | 9  | 18 | GT   | 21 | 3  |
| 244042 | 35 | 3095019 | 3095040 | 2 | 11 | 22 | GT   | 17 | 11 |
| 244048 | 35 | 3096718 | 3096735 | 2 | 9  | 18 | TG   | 20 | 11 |
| 244049 | 35 | 3096737 | 3096750 | 2 | 7  | 14 | GT   | 21 | 9  |
| 244051 | 35 | 3102131 | 3102160 | 2 | 15 | 30 | GT   | 12 | 12 |
| 244060 | 35 | 3122799 | 3122818 | 2 | 10 | 20 | AC   | 20 | 7  |
| 244062 | 35 | 3123172 | 3123186 | 3 | 5  | 15 | CAG  | 26 | 7  |
| 244063 | 35 | 3125020 | 3125037 | 3 | 6  | 18 | GCT  | 25 | 4  |
| 244064 | 35 | 3126331 | 3126344 | 2 | 7  | 14 | GT   | 22 | 4  |
| 244065 | 35 | 3126643 | 3126690 | 2 | 24 | 48 | GT   | 12 | 11 |
| 244069 | 35 | 3138386 | 3138411 | 2 | 13 | 26 | GT   | 12 | 9  |
| 244072 | 35 | 3139297 | 3139328 | 2 | 16 | 32 | AC   | 15 | 9  |
| 244075 | 35 | 3141505 | 3141526 | 2 | 11 | 22 | AG   | 25 | 8  |

|        |    |         |         |   |    |    |      |    |    |
|--------|----|---------|---------|---|----|----|------|----|----|
| 244085 | 35 | 3146997 | 3147024 | 2 | 14 | 28 | CA   | 8  | 9  |
| 244086 | 35 | 3147101 | 3147127 | 3 | 9  | 27 | CCT  | 18 | 4  |
| 244088 | 35 | 3150046 | 3150096 | 3 | 17 | 51 | GAA  | 12 | 10 |
| 244094 | 35 | 3171306 | 3171321 | 2 | 8  | 16 | TG   | 15 | 6  |
| 244105 | 35 | 3206898 | 3206909 | 2 | 6  | 12 | GA   | 27 | 5  |
| 244106 | 35 | 3207750 | 3207773 | 4 | 6  | 24 | ATTT | 21 | 11 |
| 244108 | 35 | 3211519 | 3211530 | 2 | 6  | 12 | CA   | 7  | 5  |
| 244109 | 35 | 3212955 | 3212966 | 2 | 6  | 12 | AG   | 18 | 3  |
| 244111 | 35 | 3218988 | 3218999 | 2 | 6  | 12 | AT   | 21 | 8  |
| 244115 | 35 | 3229473 | 3229493 | 3 | 7  | 21 | AGC  | 20 | 7  |
| 244116 | 35 | 3230389 | 3230408 | 4 | 5  | 20 | TATT | 25 | 7  |
| 244119 | 35 | 3236958 | 3236983 | 2 | 13 | 26 | AC   | 9  | 7  |
| 244120 | 35 | 3242459 | 3242470 | 2 | 6  | 12 | TC   | 32 | 3  |
| 244123 | 35 | 3249618 | 3249645 | 2 | 14 | 28 | AC   | 9  | 9  |
| 244124 | 35 | 3249848 | 3249865 | 2 | 9  | 18 | AC   | 26 | 3  |
| 244125 | 35 | 3250176 | 3250203 | 2 | 14 | 28 | GT   | 6  | 11 |
| 244126 | 35 | 3251099 | 3251110 | 2 | 6  | 12 | AC   | 21 | 4  |
| 244127 | 35 | 3251194 | 3251217 | 2 | 12 | 24 | AC   | 18 | 8  |
| 244128 | 35 | 3251471 | 3251490 | 2 | 10 | 20 | AC   | 19 | 12 |
| 244131 | 35 | 3269774 | 3269793 | 2 | 10 | 20 | AC   | 19 | 9  |
| 244134 | 35 | 3275560 | 3275585 | 2 | 13 | 26 | GT   | 17 | 14 |
| 244135 | 35 | 3276919 | 3276938 | 2 | 10 | 20 | TG   | 19 | 7  |
| 244136 | 35 | 3277204 | 3277227 | 2 | 12 | 24 | CA   | 6  | 7  |
| 244139 | 35 | 3277586 | 3277609 | 2 | 12 | 24 | TC   | 9  | 8  |
| 244140 | 35 | 3279282 | 3279296 | 3 | 5  | 15 | GGA  | 8  | 5  |
| 244141 | 35 | 3279380 | 3279406 | 3 | 9  | 27 | CCT  | 13 | 6  |
| 244143 | 35 | 3280717 | 3280740 | 2 | 12 | 24 | CA   | 17 | 4  |
| 244147 | 35 | 3283333 | 3283354 | 2 | 11 | 22 | CA   | 6  | 4  |
| 244151 | 35 | 3284286 | 3284305 | 2 | 10 | 20 | TG   | 12 | 5  |
| 244155 | 35 | 3288146 | 3288163 | 2 | 9  | 18 | GT   | 14 | 3  |
| 244156 | 35 | 3288246 | 3288269 | 2 | 12 | 24 | TG   | 14 | 15 |
| 244158 | 35 | 3289971 | 3290008 | 2 | 19 | 38 | CA   | 18 | 15 |
| 244159 | 35 | 3290075 | 3290090 | 2 | 8  | 16 | TG   | 12 | 7  |
| 244164 | 35 | 3290847 | 3290872 | 2 | 13 | 26 | TG   | 10 | 9  |
| 244165 | 35 | 3292250 | 3292281 | 2 | 16 | 32 | GT   | 19 | 14 |
| 244166 | 35 | 3292413 | 3292450 | 2 | 19 | 38 | AC   | 8  | 9  |
| 244169 | 35 | 3295428 | 3295448 | 3 | 7  | 21 | TTC  | 19 | 3  |
| 244170 | 35 | 3295483 | 3295497 | 3 | 5  | 15 | TTC  | 18 | 3  |
| 244171 | 35 | 3299325 | 3299336 | 2 | 6  | 12 | TG   | 26 | 4  |
| 244173 | 35 | 3303037 | 3303062 | 2 | 13 | 26 | AC   | 16 | 12 |
| 244175 | 35 | 3303835 | 3303856 | 2 | 11 | 22 | AC   | 7  | 12 |
| 244176 | 35 | 3304063 | 3304078 | 2 | 8  | 16 | TG   | 22 | 5  |
| 244177 | 35 | 3304121 | 3304136 | 2 | 8  | 16 | TG   | 27 | 8  |
| 244178 | 35 | 3306083 | 3306108 | 2 | 13 | 26 | GT   | 19 | 10 |
| 244179 | 35 | 3306261 | 3306278 | 2 | 9  | 18 | AG   | 10 | 4  |
| 244181 | 35 | 3306375 | 3306388 | 2 | 7  | 14 | TG   | 12 | 8  |
| 244184 | 35 | 3306683 | 3306704 | 2 | 11 | 22 | AC   | 13 | 12 |
| 244188 | 35 | 3311101 | 3311114 | 2 | 7  | 14 | CT   | 20 | 4  |
| 244193 | 35 | 3313434 | 3313453 | 2 | 10 | 20 | GT   | 23 | 5  |
| 244198 | 35 | 3318680 | 3318694 | 3 | 5  | 15 | CAA  | 29 | 4  |
| 244199 | 35 | 3319185 | 3319199 | 3 | 5  | 15 | GGA  | 25 | 4  |

|        |    |         |         |   |    |    |      |    |    |
|--------|----|---------|---------|---|----|----|------|----|----|
| 244200 | 35 | 3320814 | 3320829 | 4 | 4  | 16 | GAGG | 15 | 6  |
| 244203 | 35 | 3321608 | 3321633 | 2 | 13 | 26 | GT   | 17 | 10 |
| 244208 | 35 | 3329387 | 3329404 | 2 | 9  | 18 | CA   | 22 | 9  |
| 244213 | 35 | 3331382 | 3331401 | 2 | 10 | 20 | TG   | 10 | 8  |
| 244214 | 35 | 3331641 | 3331656 | 4 | 4  | 16 | AGAA | 6  | 6  |
| 244227 | 35 | 3347821 | 3347842 | 2 | 11 | 22 | CA   | 18 | 11 |
| 244230 | 35 | 3348024 | 3348045 | 2 | 11 | 22 | CA   | 11 | 11 |
| 244232 | 35 | 3349588 | 3349619 | 2 | 16 | 32 | CA   | 21 | 11 |
| 244235 | 35 | 3351736 | 3351753 | 2 | 9  | 18 | AC   | 15 | 4  |
| 244236 | 35 | 3351969 | 3351984 | 2 | 8  | 16 | CA   | 24 | 11 |
| 244239 | 35 | 3359029 | 3359068 | 4 | 10 | 40 | GATA | 8  | 9  |
| 244243 | 35 | 3371585 | 3371626 | 2 | 21 | 42 | AC   | 22 | 16 |
| 244245 | 35 | 3385178 | 3385193 | 2 | 8  | 16 | AC   | 27 | 5  |
| 244250 | 35 | 3394286 | 3394299 | 2 | 7  | 14 | GT   | 10 | 4  |
| 244253 | 35 | 3398977 | 3398991 | 3 | 5  | 15 | CTG  | 28 | 6  |
| 244259 | 35 | 3409627 | 3409644 | 2 | 9  | 18 | GT   | 24 | 6  |
| 244267 | 35 | 3437437 | 3437462 | 2 | 13 | 26 | AC   | 13 | 6  |
| 244272 | 35 | 3443001 | 3443014 | 2 | 7  | 14 | GT   | 24 | 4  |
| 244273 | 35 | 3443319 | 3443334 | 2 | 8  | 16 | TG   | 21 | 4  |
| 244279 | 35 | 3445230 | 3445245 | 2 | 8  | 16 | GT   | 17 | 4  |
| 244283 | 35 | 3462614 | 3462637 | 2 | 12 | 24 | TG   | 17 | 12 |
| 244284 | 35 | 3464502 | 3464529 | 2 | 14 | 28 | CA   | 15 | 9  |
| 244285 | 35 | 3466171 | 3466186 | 4 | 4  | 16 | ATTT | 27 | 9  |
| 244286 | 35 | 3469339 | 3469358 | 2 | 10 | 20 | AC   | 15 | 9  |
| 244288 | 35 | 3471676 | 3471691 | 2 | 8  | 16 | AT   | 6  | 3  |
| 244293 | 35 | 3475630 | 3475671 | 2 | 21 | 42 | CA   | 11 | 10 |
| 244296 | 35 | 3479598 | 3479611 | 2 | 7  | 14 | CA   | 21 | 16 |
| 244298 | 35 | 3483370 | 3483391 | 2 | 11 | 22 | AC   | 10 | 4  |
| 244301 | 35 | 3486827 | 3486856 | 2 | 15 | 30 | AC   | 12 | 13 |
| 244311 | 35 | 3492836 | 3492857 | 2 | 11 | 22 | AG   | 17 | 7  |
| 244312 | 35 | 3494668 | 3494691 | 3 | 8  | 24 | TGG  | 16 | 3  |
| 244313 | 35 | 3497021 | 3497040 | 4 | 5  | 20 | ATTT | 19 | 10 |
| 244314 | 35 | 3497260 | 3497279 | 2 | 10 | 20 | GA   | 12 | 8  |
| 244324 | 35 | 3502136 | 3502165 | 2 | 15 | 30 | GT   | 15 | 8  |
| 244325 | 35 | 3502386 | 3502415 | 2 | 15 | 30 | GT   | 15 | 9  |
| 244326 | 35 | 3503312 | 3503327 | 2 | 8  | 16 | AT   | 14 | 6  |
| 244331 | 35 | 3508706 | 3508723 | 2 | 9  | 18 | AC   | 21 | 9  |
| 244332 | 35 | 3508726 | 3508739 | 2 | 7  | 14 | AC   | 22 | 12 |
| 244336 | 35 | 3516662 | 3516675 | 2 | 7  | 14 | AG   | 26 | 4  |
| 244337 | 35 | 3518840 | 3518851 | 2 | 6  | 12 | AC   | 30 | 5  |
| 244339 | 35 | 3520152 | 3520169 | 2 | 9  | 18 | TC   | 25 | 6  |
| 244343 | 35 | 3522286 | 3522303 | 2 | 9  | 18 | GT   | 8  | 6  |
| 244345 | 35 | 3522461 | 3522478 | 3 | 6  | 18 | CTC  | 19 | 12 |
| 244350 | 35 | 3530954 | 3530977 | 2 | 12 | 24 | GA   | 14 | 8  |
| 244351 | 35 | 3535624 | 3535639 | 2 | 8  | 16 | AC   | 8  | 8  |
| 244353 | 35 | 3536331 | 3536350 | 2 | 10 | 20 | GT   | 8  | 9  |
| 244356 | 35 | 3544001 | 3544028 | 2 | 14 | 28 | GT   | 12 | 9  |
| 244357 | 35 | 3544096 | 3544117 | 2 | 11 | 22 | AC   | 19 | 12 |
| 244358 | 35 | 3546068 | 3546099 | 2 | 16 | 32 | AC   | 18 | 11 |
| 244360 | 35 | 3548142 | 3548157 | 2 | 8  | 16 | CT   | 30 | 8  |
| 244361 | 35 | 3551035 | 3551048 | 2 | 7  | 14 | AC   | 28 | 4  |

|        |    |         |         |   |    |    |      |    |    |
|--------|----|---------|---------|---|----|----|------|----|----|
| 244362 | 35 | 3553299 | 3553316 | 2 | 9  | 18 | AG   | 18 | 8  |
| 244367 | 35 | 3559505 | 3559519 | 3 | 5  | 15 | TAT  | 7  | 4  |
| 244370 | 35 | 3562838 | 3562865 | 2 | 14 | 28 | TG   | 9  | 4  |
| 244375 | 35 | 3569457 | 3569468 | 2 | 6  | 12 | TC   | 10 | 8  |
| 244379 | 35 | 3579602 | 3579621 | 4 | 5  | 20 | CCTG | 24 | 7  |
| 244385 | 35 | 3586794 | 3586817 | 2 | 12 | 24 | GT   | 18 | 7  |
| 244386 | 35 | 3586867 | 3586894 | 2 | 14 | 28 | GT   | 17 | 9  |
| 244388 | 35 | 3588017 | 3588036 | 2 | 10 | 20 | TC   | 14 | 10 |
| 244389 | 35 | 3588195 | 3588208 | 2 | 7  | 14 | TC   | 24 | 5  |
| 244394 | 35 | 3591752 | 3591777 | 2 | 13 | 26 | AC   | 20 | 14 |
| 244396 | 35 | 3598733 | 3598748 | 2 | 8  | 16 | GT   | 23 | 4  |
| 244397 | 35 | 3598946 | 3598957 | 2 | 6  | 12 | TG   | 22 | 4  |
| 244398 | 35 | 3603705 | 3603720 | 2 | 8  | 16 | AC   | 28 | 4  |
| 244400 | 35 | 3605583 | 3605594 | 2 | 6  | 12 | AG   | 28 | 8  |
| 244401 | 35 | 3605897 | 3605916 | 2 | 10 | 20 | AC   | 20 | 5  |
| 244408 | 35 | 3613548 | 3613563 | 2 | 8  | 16 | AC   | 23 | 9  |
| 244409 | 35 | 3613781 | 3613807 | 3 | 9  | 27 | GAG  | 21 | 7  |
| 244411 | 35 | 3622215 | 3622226 | 2 | 6  | 12 | CA   | 29 | 6  |
| 244413 | 35 | 3625047 | 3625073 | 3 | 9  | 27 | TGG  | 14 | 6  |
| 244415 | 35 | 3627746 | 3627769 | 2 | 12 | 24 | AC   | 20 | 8  |
| 244417 | 35 | 3629639 | 3629660 | 2 | 11 | 22 | GT   | 13 | 6  |
| 244419 | 35 | 3633079 | 3633110 | 2 | 16 | 32 | GT   | 11 | 7  |
| 244425 | 35 | 3645307 | 3645324 | 3 | 6  | 18 | GGA  | 20 | 6  |
| 244427 | 35 | 3649931 | 3649952 | 2 | 11 | 22 | AC   | 14 | 8  |
| 244428 | 35 | 3653390 | 3653401 | 2 | 6  | 12 | AG   | 30 | 3  |
| 244429 | 35 | 3655186 | 3655206 | 3 | 7  | 21 | CAG  | 27 | 7  |
| 244432 | 35 | 3657944 | 3657963 | 2 | 10 | 20 | TG   | 21 | 10 |
| 244434 | 35 | 3659154 | 3659169 | 4 | 4  | 16 | AAAG | 31 | 3  |
| 244435 | 35 | 3666757 | 3666771 | 3 | 5  | 15 | ACA  | 20 | 3  |
| 244436 | 35 | 3673988 | 3674021 | 2 | 17 | 34 | GT   | 11 | 10 |
| 244437 | 35 | 3675455 | 3675469 | 3 | 5  | 15 | GAT  | 10 | 4  |
| 244446 | 35 | 3689370 | 3689390 | 3 | 7  | 21 | AAC  | 26 | 8  |
| 244447 | 35 | 3689706 | 3689723 | 3 | 6  | 18 | GCT  | 34 | 5  |
| 244448 | 35 | 3694038 | 3694091 | 2 | 27 | 54 | TG   | 8  | 11 |
| 244453 | 35 | 3703146 | 3703157 | 2 | 6  | 12 | TG   | 21 | 4  |
| 244458 | 35 | 3710558 | 3710571 | 2 | 7  | 14 | TG   | 15 | 12 |
| 244462 | 35 | 3716303 | 3716346 | 4 | 11 | 44 | TTTC | 19 | 14 |
| 244463 | 35 | 3717091 | 3717108 | 2 | 9  | 18 | CA   | 16 | 8  |
| 244468 | 35 | 3721562 | 3721589 | 2 | 14 | 28 | TG   | 21 | 8  |
| 244469 | 35 | 3722035 | 3722049 | 3 | 5  | 15 | TTC  | 24 | 10 |
| 244470 | 35 | 3723175 | 3723186 | 2 | 6  | 12 | GT   | 26 | 3  |
| 244473 | 35 | 3726196 | 3726221 | 2 | 13 | 26 | CT   | 18 | 9  |
| 244474 | 35 | 3726494 | 3726515 | 2 | 11 | 22 | GT   | 22 | 13 |
| 244476 | 35 | 3730457 | 3730500 | 2 | 22 | 44 | GT   | 17 | 9  |
| 244477 | 35 | 3730788 | 3730814 | 3 | 9  | 27 | CCT  | 17 | 7  |
| 244478 | 35 | 3731085 | 3731102 | 3 | 6  | 18 | AAG  | 14 | 6  |
| 244479 | 35 | 3731414 | 3731447 | 2 | 17 | 34 | CA   | 12 | 13 |
| 244485 | 35 | 3741156 | 3741187 | 2 | 16 | 32 | TG   | 12 | 12 |
| 244489 | 35 | 3749996 | 3750011 | 2 | 8  | 16 | AC   | 25 | 5  |
| 244490 | 35 | 3752576 | 3752590 | 3 | 5  | 15 | TTC  | 26 | 6  |
| 244492 | 35 | 3757335 | 3757346 | 2 | 6  | 12 | CA   | 27 | 3  |

|        |    |         |         |   |    |    |      |    |    |
|--------|----|---------|---------|---|----|----|------|----|----|
| 244498 | 35 | 3762384 | 3762395 | 2 | 6  | 12 | AC   | 21 | 3  |
| 244501 | 35 | 3765095 | 3765122 | 2 | 14 | 28 | GT   | 11 | 10 |
| 244503 | 35 | 3766780 | 3766805 | 2 | 13 | 26 | GT   | 13 | 5  |
| 244509 | 35 | 3782452 | 3782465 | 2 | 7  | 14 | CA   | 17 | 13 |
| 244511 | 35 | 3787271 | 3787288 | 3 | 6  | 18 | GGC  | 25 | 16 |
| 244529 | 35 | 3833855 | 3833868 | 2 | 7  | 14 | AC   | 19 | 6  |
| 244530 | 35 | 3836244 | 3836265 | 2 | 11 | 22 | CA   | 10 | 9  |
| 244532 | 35 | 3836614 | 3836629 | 2 | 8  | 16 | GT   | 24 | 6  |
| 244535 | 35 | 3842654 | 3842671 | 2 | 9  | 18 | AG   | 15 | 6  |
| 244540 | 35 | 3857404 | 3857415 | 2 | 6  | 12 | CA   | 25 | 3  |
| 244541 | 35 | 3859631 | 3859654 | 2 | 12 | 24 | GT   | 23 | 8  |
| 244542 | 35 | 3861422 | 3861433 | 2 | 6  | 12 | GT   | 23 | 6  |
| 244543 | 35 | 3861562 | 3861577 | 2 | 8  | 16 | AC   | 26 | 4  |
| 244545 | 35 | 3861886 | 3861905 | 2 | 10 | 20 | GA   | 18 | 11 |
| 244546 | 35 | 3862110 | 3862133 | 2 | 12 | 24 | GA   | 18 | 7  |
| 244547 | 35 | 3870048 | 3870059 | 2 | 6  | 12 | AT   | 25 | 3  |
| 244548 | 35 | 3870231 | 3870248 | 3 | 6  | 18 | GAG  | 24 | 8  |
| 244553 | 35 | 3886369 | 3886392 | 2 | 12 | 24 | GA   | 27 | 14 |
| 244554 | 35 | 3886970 | 3886987 | 2 | 9  | 18 | AG   | 29 | 3  |
| 244559 | 35 | 3893626 | 3893655 | 2 | 15 | 30 | CT   | 11 | 9  |
| 244561 | 35 | 3893796 | 3893807 | 2 | 6  | 12 | AG   | 18 | 3  |
| 244565 | 35 | 3899510 | 3899541 | 2 | 16 | 32 | TG   | 13 | 11 |
| 244570 | 35 | 3916078 | 3916105 | 2 | 14 | 28 | TG   | 13 | 7  |
| 244575 | 35 | 3940604 | 3940629 | 2 | 13 | 26 | CA   | 16 | 9  |
| 244577 | 35 | 3942990 | 3943005 | 2 | 8  | 16 | GA   | 15 | 3  |
| 244579 | 35 | 3948311 | 3948328 | 2 | 9  | 18 | TG   | 14 | 7  |
| 244582 | 35 | 3950335 | 3950352 | 3 | 6  | 18 | CAA  | 21 | 6  |
| 244583 | 35 | 3950696 | 3950719 | 2 | 12 | 24 | AC   | 25 | 9  |
| 244586 | 35 | 3963171 | 3963188 | 2 | 9  | 18 | TA   | 21 | 9  |
| 244592 | 35 | 3968871 | 3968882 | 2 | 6  | 12 | CT   | 17 | 5  |
| 244594 | 35 | 3979488 | 3979511 | 4 | 6  | 24 | AAAT | 24 | 4  |
| 244603 | 35 | 4001718 | 4001731 | 2 | 7  | 14 | CT   | 23 | 3  |
| 244610 | 35 | 4011883 | 4011896 | 2 | 7  | 14 | GA   | 20 | 3  |
| 244613 | 35 | 4012345 | 4012372 | 2 | 14 | 28 | CA   | 21 | 7  |
| 244614 | 35 | 4012709 | 4012726 | 3 | 6  | 18 | GAG  | 23 | 7  |
| 244618 | 35 | 4014162 | 4014173 | 2 | 6  | 12 | CA   | 16 | 7  |
| 244619 | 35 | 4014422 | 4014441 | 2 | 10 | 20 | CT   | 21 | 8  |
| 244620 | 35 | 4014917 | 4014928 | 2 | 6  | 12 | GT   | 21 | 15 |
| 244622 | 35 | 4016274 | 4016293 | 2 | 10 | 20 | TG   | 18 | 10 |
| 244624 | 35 | 4016833 | 4016847 | 3 | 5  | 15 | ATT  | 10 | 8  |
| 244628 | 35 | 4017379 | 4017393 | 3 | 5  | 15 | ATT  | 18 | 6  |
| 244633 | 35 | 4021696 | 4021719 | 3 | 8  | 24 | CCA  | 12 | 4  |
| 244634 | 35 | 4022493 | 4022532 | 2 | 20 | 40 | CA   | 8  | 9  |
| 244635 | 35 | 4023838 | 4023861 | 2 | 12 | 24 | GT   | 26 | 11 |
| 244641 | 35 | 4026743 | 4026776 | 2 | 17 | 34 | CA   | 19 | 12 |
| 244642 | 35 | 4027694 | 4027713 | 2 | 10 | 20 | GT   | 28 | 7  |
| 244643 | 35 | 4028081 | 4028094 | 2 | 7  | 14 | AG   | 23 | 6  |
| 244650 | 35 | 4031826 | 4031843 | 3 | 6  | 18 | AAT  | 14 | 4  |
| 244666 | 35 | 4067154 | 4067191 | 2 | 19 | 38 | AG   | 11 | 10 |
| 244675 | 35 | 4099569 | 4099584 | 4 | 4  | 16 | ACTG | 20 | 4  |
| 244676 | 35 | 4100792 | 4100807 | 4 | 4  | 16 | TATC | 13 | 7  |

|        |    |         |         |   |    |    |      |    |    |
|--------|----|---------|---------|---|----|----|------|----|----|
| 244681 | 35 | 4134591 | 4134602 | 2 | 6  | 12 | TC   | 28 | 5  |
| 244685 | 35 | 4144555 | 4144566 | 2 | 6  | 12 | TA   | 29 | 5  |
| 244686 | 35 | 4145246 | 4145269 | 3 | 8  | 24 | ACA  | 22 | 10 |
| 244688 | 35 | 4149585 | 4149608 | 2 | 12 | 24 | AC   | 17 | 10 |
| 244691 | 35 | 4151852 | 4151889 | 2 | 19 | 38 | CA   | 13 | 15 |
| 244692 | 35 | 4152998 | 4153021 | 2 | 12 | 24 | TG   | 9  | 10 |
| 244696 | 35 | 4161042 | 4161085 | 2 | 22 | 44 | TG   | 18 | 14 |
| 244698 | 35 | 4163582 | 4163596 | 3 | 5  | 15 | TCA  | 6  | 6  |
| 244700 | 35 | 4163831 | 4163854 | 3 | 8  | 24 | GAG  | 23 | 8  |
| 244701 | 35 | 4164720 | 4164740 | 3 | 7  | 21 | TTG  | 22 | 3  |
| 244707 | 35 | 4175126 | 4175147 | 2 | 11 | 22 | AG   | 21 | 5  |
| 244720 | 35 | 4195029 | 4195046 | 2 | 9  | 18 | CT   | 24 | 9  |
| 244722 | 35 | 4196357 | 4196371 | 3 | 5  | 15 | GCA  | 10 | 3  |
| 244727 | 35 | 4199380 | 4199403 | 2 | 12 | 24 | AG   | 16 | 7  |
| 244731 | 35 | 4207733 | 4207747 | 3 | 5  | 15 | CAG  | 26 | 5  |
| 244733 | 35 | 4213914 | 4213927 | 2 | 7  | 14 | TC   | 16 | 6  |
| 244735 | 35 | 4221310 | 4221331 | 2 | 11 | 22 | CA   | 14 | 11 |
| 244737 | 35 | 4226022 | 4226036 | 3 | 5  | 15 | ATA  | 26 | 6  |
| 244745 | 35 | 4247290 | 4247309 | 4 | 5  | 20 | TACC | 33 | 8  |
| 244747 | 35 | 4248601 | 4248626 | 2 | 13 | 26 | CA   | 14 | 16 |
| 244748 | 35 | 4251068 | 4251081 | 2 | 7  | 14 | AC   | 7  | 8  |
| 244751 | 35 | 4261530 | 4261557 | 4 | 7  | 28 | ACTA | 21 | 11 |
| 244760 | 35 | 4286393 | 4286408 | 2 | 8  | 16 | GT   | 15 | 12 |
| 244761 | 35 | 4287810 | 4287839 | 2 | 15 | 30 | CA   | 19 | 13 |
| 244763 | 35 | 4291236 | 4291261 | 2 | 13 | 26 | CA   | 6  | 6  |
| 244765 | 35 | 4292367 | 4292396 | 3 | 10 | 30 | GAG  | 15 | 7  |
| 244767 | 35 | 4293280 | 4293309 | 2 | 15 | 30 | TG   | 16 | 9  |
| 244768 | 35 | 4293400 | 4293429 | 2 | 15 | 30 | CA   | 10 | 9  |
| 244769 | 35 | 4294328 | 4294359 | 2 | 16 | 32 | CA   | 16 | 16 |
| 244770 | 35 | 4295587 | 4295612 | 2 | 13 | 26 | AC   | 11 | 7  |
| 244771 | 35 | 4295902 | 4295931 | 2 | 15 | 30 | CA   | 11 | 8  |
| 244772 | 35 | 4296132 | 4296153 | 2 | 11 | 22 | CA   | 20 | 7  |
| 244773 | 35 | 4296261 | 4296292 | 2 | 16 | 32 | GT   | 14 | 11 |
| 244774 | 35 | 4297810 | 4297831 | 2 | 11 | 22 | CA   | 23 | 12 |
| 244775 | 35 | 4299075 | 4299092 | 2 | 9  | 18 | AC   | 16 | 6  |
| 244776 | 35 | 4301200 | 4301219 | 2 | 10 | 20 | TG   | 26 | 5  |
| 244778 | 35 | 4302275 | 4302296 | 2 | 11 | 22 | TG   | 18 | 8  |
| 244780 | 35 | 4302922 | 4302967 | 2 | 23 | 46 | CA   | 12 | 10 |
| 244781 | 35 | 4304255 | 4304310 | 2 | 28 | 56 | AC   | 9  | 13 |
| 244782 | 35 | 4304672 | 4304686 | 3 | 5  | 15 | TTC  | 35 | 4  |
| 244783 | 35 | 4305520 | 4305545 | 2 | 13 | 26 | TG   | 12 | 11 |
| 244791 | 35 | 4308924 | 4308957 | 2 | 17 | 34 | CA   | 13 | 14 |
| 244792 | 35 | 4309155 | 4309186 | 2 | 16 | 32 | TG   | 11 | 9  |
| 244793 | 35 | 4309279 | 4309302 | 2 | 12 | 24 | GT   | 17 | 9  |
| 244794 | 35 | 4309413 | 4309433 | 3 | 7  | 21 | TCC  | 24 | 5  |
| 244795 | 35 | 4311587 | 4311620 | 2 | 17 | 34 | CA   | 14 | 9  |
| 244797 | 35 | 4311779 | 4311804 | 2 | 13 | 26 | CA   | 10 | 11 |
| 244798 | 35 | 4313015 | 4313029 | 3 | 5  | 15 | TTG  | 16 | 4  |
| 244799 | 35 | 4313200 | 4313221 | 2 | 11 | 22 | AG   | 11 | 8  |
| 244800 | 35 | 4313319 | 4313332 | 2 | 7  | 14 | CA   | 19 | 3  |
| 244801 | 35 | 4313457 | 4313476 | 2 | 10 | 20 | CA   | 24 | 3  |



|        |    |         |         |   |    |    |     |    |    |
|--------|----|---------|---------|---|----|----|-----|----|----|
| 244802 | 35 | 4316694 | 4316705 | 2 | 6  | 12 | AC  | 25 | 3  |
| 244804 | 35 | 4320449 | 4320460 | 2 | 6  | 12 | CA  | 20 | 5  |
| 244805 | 35 | 4320591 | 4320616 | 2 | 13 | 26 | CA  | 18 | 11 |
| 244807 | 35 | 4322484 | 4322509 | 2 | 13 | 26 | CA  | 14 | 10 |
| 244808 | 35 | 4323041 | 4323055 | 3 | 5  | 15 | ATA | 21 | 4  |
| 244810 | 35 | 4325703 | 4325729 | 3 | 9  | 27 | TCC | 17 | 9  |
| 244811 | 35 | 4325880 | 4325909 | 2 | 15 | 30 | TG  | 13 | 8  |
| 244813 | 35 | 4327905 | 4327916 | 2 | 6  | 12 | AC  | 29 | 3  |
| 244814 | 35 | 4327986 | 4328017 | 2 | 16 | 32 | GT  | 14 | 17 |
| 244816 | 35 | 4329808 | 4329829 | 2 | 11 | 22 | AC  | 23 | 8  |
| 244817 | 35 | 4329964 | 4329995 | 2 | 16 | 32 | AC  | 10 | 14 |
| 244818 | 35 | 4330144 | 4330155 | 2 | 6  | 12 | CA  | 20 | 9  |
| 244819 | 35 | 4330157 | 4330168 | 2 | 6  | 12 | AC  | 21 | 10 |
| 244820 | 35 | 4331533 | 4331556 | 2 | 12 | 24 | CA  | 25 | 11 |
| 244821 | 35 | 4331807 | 4331832 | 2 | 13 | 26 | GT  | 16 | 11 |
| 244828 | 35 | 4334705 | 4334728 | 2 | 12 | 24 | GT  | 11 | 7  |
| 244829 | 35 | 4334904 | 4334919 | 2 | 8  | 16 | GT  | 9  | 12 |
| 244830 | 35 | 4336081 | 4336126 | 2 | 23 | 46 | GT  | 8  | 8  |
| 244831 | 35 | 4336540 | 4336565 | 2 | 13 | 26 | AC  | 11 | 7  |
| 244832 | 35 | 4336920 | 4336955 | 2 | 18 | 36 | GT  | 7  | 8  |
| 244838 | 35 | 4340064 | 4340105 | 2 | 21 | 42 | CA  | 9  | 10 |
| 244839 | 35 | 4340244 | 4340281 | 2 | 19 | 38 | AC  | 7  | 10 |
| 244841 | 35 | 4340561 | 4340580 | 2 | 10 | 20 | GT  | 9  | 13 |
| 244842 | 35 | 4341178 | 4341221 | 2 | 22 | 44 | AC  | 12 | 11 |
| 244844 | 35 | 4341398 | 4341417 | 2 | 10 | 20 | CA  | 15 | 10 |
| 244846 | 35 | 4341779 | 4341804 | 2 | 13 | 26 | AC  | 21 | 12 |
| 244847 | 35 | 4342288 | 4342314 | 3 | 9  | 27 | GGA | 17 | 7  |
| 244848 | 35 | 4343427 | 4343441 | 3 | 5  | 15 | CTC | 28 | 4  |
| 244850 | 35 | 4346309 | 4346328 | 2 | 10 | 20 | AC  | 9  | 9  |
| 244851 | 35 | 4348316 | 4348341 | 2 | 13 | 26 | GT  | 11 | 8  |
| 244852 | 35 | 4349380 | 4349415 | 2 | 18 | 36 | AC  | 12 | 7  |
| 244853 | 35 | 4349538 | 4349575 | 2 | 19 | 38 | AC  | 12 | 9  |
| 244854 | 35 | 4350098 | 4350127 | 2 | 15 | 30 | TG  | 14 | 6  |
| 244856 | 35 | 4352215 | 4352236 | 2 | 11 | 22 | AC  | 22 | 10 |
| 244858 | 35 | 4355502 | 4355517 | 2 | 8  | 16 | AC  | 25 | 4  |
| 244864 | 35 | 4358469 | 4358502 | 2 | 17 | 34 | GT  | 10 | 7  |
| 244865 | 35 | 4359782 | 4359807 | 2 | 13 | 26 | TG  | 18 | 10 |
| 244866 | 35 | 4359941 | 4359974 | 2 | 17 | 34 | CA  | 11 | 10 |
| 244871 | 35 | 4361264 | 4361283 | 2 | 10 | 20 | AC  | 25 | 9  |
| 244872 | 35 | 4361360 | 4361391 | 2 | 16 | 32 | TG  | 24 | 9  |
| 244873 | 35 | 4361472 | 4361497 | 2 | 13 | 26 | TG  | 23 | 10 |
| 244874 | 35 | 4362556 | 4362567 | 2 | 6  | 12 | AC  | 32 | 4  |
| 244875 | 35 | 4362711 | 4362726 | 2 | 8  | 16 | CA  | 11 | 4  |
| 244876 | 35 | 4362760 | 4362773 | 2 | 7  | 14 | CA  | 12 | 7  |
| 244880 | 35 | 4364255 | 4364280 | 2 | 13 | 26 | GT  | 7  | 9  |
| 244881 | 35 | 4364351 | 4364386 | 2 | 18 | 36 | GA  | 10 | 10 |
| 244883 | 35 | 4364557 | 4364578 | 2 | 11 | 22 | AC  | 16 | 3  |
| 244884 | 35 | 4364696 | 4364717 | 2 | 11 | 22 | CA  | 16 | 4  |
| 244886 | 35 | 4364814 | 4364833 | 2 | 10 | 20 | CA  | 14 | 11 |
| 244887 | 35 | 4364906 | 4364941 | 2 | 18 | 36 | AC  | 14 | 11 |
| 244888 | 35 | 4365670 | 4365693 | 2 | 12 | 24 | AC  | 22 | 8  |

|        |    |         |         |   |    |    |     |    |    |
|--------|----|---------|---------|---|----|----|-----|----|----|
| 244889 | 35 | 4365803 | 4365824 | 2 | 11 | 22 | TG  | 20 | 11 |
| 244891 | 35 | 4367326 | 4367359 | 2 | 17 | 34 | TG  | 21 | 17 |
| 244892 | 35 | 4367429 | 4367442 | 2 | 7  | 14 | TG  | 15 | 6  |
| 244893 | 35 | 4367520 | 4367539 | 2 | 10 | 20 | TG  | 16 | 12 |
| 244894 | 35 | 4368753 | 4368780 | 2 | 14 | 28 | GT  | 22 | 13 |
| 244895 | 35 | 4368903 | 4368928 | 2 | 13 | 26 | GT  | 22 | 7  |
| 244896 | 35 | 4369083 | 4369100 | 2 | 9  | 18 | TG  | 26 | 9  |
| 244897 | 35 | 4369150 | 4369175 | 2 | 13 | 26 | GT  | 30 | 8  |
| 244899 | 35 | 4369967 | 4369998 | 2 | 16 | 32 | TG  | 19 | 9  |
| 244900 | 35 | 4370043 | 4370054 | 2 | 6  | 12 | AC  | 34 | 3  |
| 244902 | 35 | 4370327 | 4370348 | 2 | 11 | 22 | GT  | 20 | 14 |
| 244903 | 35 | 4370431 | 4370442 | 2 | 6  | 12 | TG  | 19 | 6  |
| 244904 | 35 | 4370532 | 4370555 | 2 | 12 | 24 | TG  | 12 | 10 |
| 244905 | 35 | 4370612 | 4370635 | 2 | 12 | 24 | CA  | 10 | 9  |
| 244906 | 35 | 4372242 | 4372269 | 2 | 14 | 28 | CA  | 29 | 13 |
| 244908 | 35 | 4374765 | 4374779 | 3 | 5  | 15 | CTT | 26 | 3  |
| 244909 | 35 | 4375077 | 4375096 | 2 | 10 | 20 | GT  | 14 | 9  |
| 244910 | 35 | 4375196 | 4375221 | 2 | 13 | 26 | TG  | 16 | 9  |
| 244911 | 35 | 4376558 | 4376571 | 2 | 7  | 14 | TG  | 17 | 5  |
| 244912 | 35 | 4376626 | 4376649 | 2 | 12 | 24 | GT  | 13 | 11 |
| 244913 | 35 | 4376815 | 4376834 | 2 | 10 | 20 | TG  | 17 | 11 |
| 244914 | 35 | 4376991 | 4377016 | 2 | 13 | 26 | CA  | 18 | 6  |
| 244917 | 35 | 4377316 | 4377327 | 2 | 6  | 12 | TG  | 17 | 10 |
| 244918 | 35 | 4377400 | 4377423 | 2 | 12 | 24 | TG  | 17 | 8  |
| 244919 | 35 | 4377485 | 4377516 | 2 | 16 | 32 | GT  | 7  | 6  |
| 244920 | 35 | 4379007 | 4379032 | 2 | 13 | 26 | CA  | 23 | 14 |
| 244933 | 35 | 4381803 | 4381830 | 2 | 14 | 28 | AC  | 9  | 9  |
| 244934 | 35 | 4382001 | 4382030 | 2 | 15 | 30 | TG  | 23 | 21 |
| 244936 | 35 | 4385265 | 4385284 | 2 | 10 | 20 | TG  | 19 | 9  |
| 244937 | 35 | 4385610 | 4385637 | 2 | 14 | 28 | TG  | 16 | 8  |
| 244938 | 35 | 4385778 | 4385815 | 2 | 19 | 38 | CA  | 8  | 8  |
| 244939 | 35 | 4387725 | 4387744 | 2 | 10 | 20 | TG  | 19 | 9  |
| 244942 | 35 | 4390028 | 4390045 | 2 | 9  | 18 | GT  | 17 | 7  |
| 244943 | 35 | 4390103 | 4390129 | 3 | 9  | 27 | CCT | 17 | 3  |
| 244944 | 35 | 4390216 | 4390239 | 2 | 12 | 24 | AC  | 10 | 4  |
| 244945 | 35 | 4390325 | 4390336 | 2 | 6  | 12 | CA  | 17 | 7  |
| 244946 | 35 | 4390401 | 4390430 | 2 | 15 | 30 | CA  | 9  | 11 |
| 244947 | 35 | 4390565 | 4390582 | 3 | 6  | 18 | GAG | 20 | 4  |
| 244948 | 35 | 4390647 | 4390672 | 2 | 13 | 26 | CT  | 17 | 9  |
| 244949 | 35 | 4390841 | 4390858 | 2 | 9  | 18 | CA  | 20 | 7  |
| 244951 | 35 | 4392014 | 4392029 | 2 | 8  | 16 | GT  | 13 | 7  |
| 244952 | 35 | 4392031 | 4392048 | 2 | 9  | 18 | TG  | 13 | 7  |
| 244953 | 35 | 4392931 | 4392968 | 2 | 19 | 38 | TG  | 14 | 13 |
| 244954 | 35 | 4393190 | 4393211 | 2 | 11 | 22 | TG  | 9  | 10 |
| 244956 | 35 | 4393307 | 4393342 | 3 | 12 | 36 | TCT | 22 | 9  |
| 244958 | 35 | 4394131 | 4394150 | 2 | 10 | 20 | GA  | 15 | 5  |
| 244960 | 35 | 4396135 | 4396158 | 2 | 12 | 24 | AG  | 14 | 11 |
| 244964 | 35 | 4396799 | 4396814 | 2 | 8  | 16 | AC  | 20 | 5  |
| 244965 | 35 | 4396885 | 4396908 | 2 | 12 | 24 | CA  | 13 | 8  |
| 244969 | 35 | 4398684 | 4398697 | 2 | 7  | 14 | AC  | 23 | 6  |
| 244970 | 35 | 4398836 | 4398850 | 3 | 5  | 15 | GGA | 22 | 6  |

|        |    |         |         |   |    |    |      |    |    |
|--------|----|---------|---------|---|----|----|------|----|----|
| 244973 | 35 | 4400278 | 4400293 | 2 | 8  | 16 | AC   | 21 | 6  |
| 244974 | 35 | 4400299 | 4400310 | 2 | 6  | 12 | CA   | 10 | 3  |
| 244975 | 35 | 4400331 | 4400346 | 2 | 8  | 16 | AC   | 8  | 6  |
| 244976 | 35 | 4400470 | 4400489 | 2 | 10 | 20 | AC   | 18 | 5  |
| 244977 | 35 | 4400662 | 4400685 | 2 | 12 | 24 | GT   | 13 | 10 |
| 244980 | 35 | 4401439 | 4401452 | 2 | 7  | 14 | GA   | 29 | 6  |
| 244981 | 35 | 4401592 | 4401603 | 2 | 6  | 12 | GA   | 22 | 3  |
| 244983 | 35 | 4402784 | 4402795 | 2 | 6  | 12 | GT   | 17 | 4  |
| 244987 | 35 | 4403218 | 4403241 | 2 | 12 | 24 | CA   | 12 | 6  |
| 244993 | 35 | 4404721 | 4404744 | 2 | 12 | 24 | CA   | 13 | 5  |
| 244994 | 35 | 4404810 | 4404825 | 2 | 8  | 16 | TG   | 11 | 3  |
| 244996 | 35 | 4404958 | 4404991 | 2 | 17 | 34 | TG   | 16 | 12 |
| 244997 | 35 | 4405407 | 4405422 | 2 | 8  | 16 | AC   | 18 | 4  |
| 245000 | 35 | 4406261 | 4406282 | 2 | 11 | 22 | TG   | 12 | 11 |
| 245001 | 35 | 4406321 | 4406342 | 2 | 11 | 22 | CA   | 15 | 7  |
| 245002 | 35 | 4406432 | 4406459 | 2 | 14 | 28 | GT   | 18 | 14 |
| 245004 | 35 | 4406874 | 4406893 | 2 | 10 | 20 | CA   | 24 | 6  |
| 245005 | 35 | 4407206 | 4407219 | 2 | 7  | 14 | TG   | 21 | 8  |
| 245010 | 35 | 4418133 | 4418166 | 2 | 17 | 34 | CA   | 11 | 12 |
| 245011 | 35 | 4418223 | 4418244 | 2 | 11 | 22 | AC   | 17 | 5  |
| 245012 | 35 | 4418314 | 4418331 | 2 | 9  | 18 | AC   | 6  | 3  |
| 245013 | 35 | 4418527 | 4418546 | 2 | 10 | 20 | CA   | 16 | 5  |
| 245022 | 35 | 4426089 | 4426106 | 2 | 9  | 18 | GT   | 12 | 8  |
| 245023 | 35 | 4427314 | 4427337 | 3 | 8  | 24 | ATG  | 23 | 3  |
| 245024 | 35 | 4427706 | 4427745 | 2 | 20 | 40 | TG   | 7  | 9  |
| 245025 | 35 | 4427879 | 4427916 | 2 | 19 | 38 | GT   | 8  | 8  |
| 245028 | 35 | 4429387 | 4429408 | 2 | 11 | 22 | GT   | 17 | 15 |
| 245030 | 35 | 4431265 | 4431286 | 2 | 11 | 22 | GT   | 20 | 11 |
| 245033 | 35 | 4431582 | 4431603 | 2 | 11 | 22 | TG   | 9  | 6  |
| 245034 | 35 | 4432916 | 4432949 | 2 | 17 | 34 | AC   | 6  | 7  |
| 245035 | 35 | 4433086 | 4433103 | 2 | 9  | 18 | TG   | 21 | 8  |
| 245036 | 35 | 4433189 | 4433234 | 2 | 23 | 46 | CA   | 11 | 16 |
| 245037 | 35 | 4433339 | 4433364 | 2 | 13 | 26 | CA   | 7  | 9  |
| 245040 | 35 | 4435485 | 4435516 | 4 | 8  | 32 | GTTT | 15 | 5  |
| 245057 | 35 | 4447739 | 4447756 | 2 | 9  | 18 | CA   | 11 | 4  |
| 245059 | 35 | 4447929 | 4447948 | 4 | 5  | 20 | GACT | 22 | 5  |
| 245060 | 35 | 4448383 | 4448406 | 3 | 8  | 24 | GAA  | 8  | 11 |
| 245068 | 35 | 4461919 | 4461930 | 2 | 6  | 12 | AC   | 12 | 5  |
| 245075 | 35 | 4466537 | 4466560 | 2 | 12 | 24 | GT   | 10 | 9  |
| 245076 | 35 | 4468824 | 4468839 | 2 | 8  | 16 | GT   | 29 | 7  |
| 245077 | 35 | 4469016 | 4469029 | 2 | 7  | 14 | GT   | 18 | 5  |
| 245078 | 35 | 4469032 | 4469045 | 2 | 7  | 14 | TG   | 25 | 5  |
| 245079 | 35 | 4472222 | 4472242 | 3 | 7  | 21 | TGC  | 23 | 5  |
| 245080 | 35 | 4483561 | 4483578 | 3 | 6  | 18 | CTG  | 28 | 6  |
| 245084 | 35 | 4489783 | 4489818 | 2 | 18 | 36 | TG   | 9  | 13 |
| 245085 | 35 | 4489983 | 4490020 | 2 | 19 | 38 | TG   | 13 | 8  |
| 245086 | 35 | 4490178 | 4490195 | 2 | 9  | 18 | GT   | 20 | 13 |
| 245088 | 35 | 4490942 | 4490979 | 2 | 19 | 38 | GT   | 9  | 12 |
| 245090 | 35 | 4492976 | 4492989 | 2 | 7  | 14 | TG   | 26 | 3  |
| 245093 | 35 | 4496334 | 4496360 | 3 | 9  | 27 | TCT  | 13 | 9  |
| 245095 | 35 | 4497451 | 4497462 | 2 | 6  | 12 | TG   | 15 | 4  |

|        |    |         |         |   |    |    |      |    |    |
|--------|----|---------|---------|---|----|----|------|----|----|
| 245099 | 35 | 4508032 | 4508045 | 2 | 7  | 14 | AG   | 24 | 9  |
| 245100 | 35 | 4508048 | 4508065 | 2 | 9  | 18 | AG   | 23 | 10 |
| 245104 | 35 | 4510141 | 4510154 | 2 | 7  | 14 | TA   | 25 | 4  |
| 245105 | 35 | 4510157 | 4510170 | 2 | 7  | 14 | AC   | 22 | 6  |
| 245106 | 35 | 4510428 | 4510461 | 2 | 17 | 34 | GT   | 13 | 11 |
| 245107 | 35 | 4510571 | 4510592 | 2 | 11 | 22 | CA   | 20 | 16 |
| 245109 | 35 | 4511987 | 4512002 | 2 | 8  | 16 | AC   | 26 | 3  |
| 245112 | 35 | 4512123 | 4512144 | 2 | 11 | 22 | AC   | 13 | 6  |
| 245113 | 35 | 4512217 | 4512232 | 2 | 8  | 16 | TG   | 24 | 7  |
| 245114 | 35 | 4512384 | 4512405 | 2 | 11 | 22 | TG   | 18 | 8  |
| 245115 | 35 | 4512483 | 4512500 | 2 | 9  | 18 | GT   | 20 | 6  |
| 245117 | 35 | 4515395 | 4515412 | 2 | 9  | 18 | TG   | 23 | 6  |
| 245121 | 35 | 4516044 | 4516055 | 2 | 6  | 12 | CA   | 22 | 5  |
| 245123 | 35 | 4523835 | 4523858 | 4 | 6  | 24 | GAAA | 29 | 4  |
| 245124 | 35 | 4524147 | 4524166 | 2 | 10 | 20 | TG   | 23 | 7  |
| 245126 | 35 | 4525965 | 4525994 | 2 | 15 | 30 | TG   | 9  | 11 |
| 245129 | 35 | 4527432 | 4527461 | 2 | 15 | 30 | GT   | 8  | 9  |
| 245132 | 35 | 4527707 | 4527734 | 2 | 14 | 28 | AC   | 12 | 9  |
| 245135 | 35 | 4532269 | 4532296 | 2 | 14 | 28 | AC   | 20 | 13 |
| 245136 | 35 | 4532441 | 4532456 | 2 | 8  | 16 | GT   | 9  | 4  |
| 245137 | 35 | 4532559 | 4532594 | 2 | 18 | 36 | AC   | 10 | 6  |
| 245138 | 35 | 4534513 | 4534524 | 2 | 6  | 12 | TG   | 20 | 3  |
| 245144 | 35 | 4538721 | 4538746 | 2 | 13 | 26 | GT   | 6  | 8  |
| 245145 | 35 | 4538981 | 4539004 | 2 | 12 | 24 | TG   | 15 | 6  |
| 245146 | 35 | 4539091 | 4539104 | 2 | 7  | 14 | TC   | 17 | 3  |
| 245163 | 35 | 4549912 | 4549927 | 2 | 8  | 16 | AC   | 18 | 7  |
| 245165 | 35 | 4552356 | 4552373 | 2 | 9  | 18 | AC   | 6  | 3  |
| 245167 | 35 | 4552496 | 4552511 | 2 | 8  | 16 | CA   | 15 | 5  |
| 245173 | 35 | 4555998 | 4556027 | 2 | 15 | 30 | CT   | 14 | 10 |
| 245175 | 35 | 4557888 | 4557901 | 2 | 7  | 14 | CA   | 15 | 3  |
| 245177 | 35 | 4559766 | 4559799 | 2 | 17 | 34 | CT   | 10 | 8  |
| 245179 | 35 | 4562294 | 4562307 | 2 | 7  | 14 | CT   | 23 | 3  |
| 245180 | 35 | 4562375 | 4562412 | 2 | 19 | 38 | AC   | 10 | 9  |
| 245184 | 35 | 4562684 | 4562731 | 2 | 24 | 48 | AC   | 6  | 8  |
| 245198 | 35 | 4568147 | 4568180 | 2 | 17 | 34 | TG   | 6  | 7  |
| 245200 | 35 | 4568215 | 4568226 | 2 | 6  | 12 | TG   | 15 | 4  |
| 245201 | 35 | 4568513 | 4568540 | 2 | 14 | 28 | TG   | 14 | 13 |
| 245202 | 35 | 4568636 | 4568663 | 2 | 14 | 28 | GT   | 15 | 5  |
| 245204 | 35 | 4569579 | 4569600 | 2 | 11 | 22 | GT   | 9  | 11 |
| 245207 | 35 | 4571472 | 4571483 | 2 | 6  | 12 | GT   | 27 | 3  |
| 245208 | 35 | 4571565 | 4571588 | 2 | 12 | 24 | GT   | 17 | 7  |
| 245211 | 35 | 4571800 | 4571825 | 2 | 13 | 26 | CA   | 11 | 11 |
| 245213 | 35 | 4571986 | 4572009 | 2 | 12 | 24 | TG   | 20 | 10 |
| 245214 | 35 | 4573041 | 4573066 | 2 | 13 | 26 | AC   | 8  | 9  |
| 245215 | 35 | 4573207 | 4573240 | 2 | 17 | 34 | GT   | 6  | 9  |
| 245217 | 35 | 4574630 | 4574647 | 2 | 9  | 18 | GT   | 23 | 7  |
| 245220 | 35 | 4578168 | 4578205 | 2 | 19 | 38 | GT   | 12 | 13 |
| 245221 | 35 | 4578442 | 4578455 | 2 | 7  | 14 | TG   | 6  | 10 |
| 245222 | 35 | 4578517 | 4578548 | 2 | 16 | 32 | GT   | 12 | 7  |
| 245223 | 35 | 4578670 | 4578711 | 2 | 21 | 42 | CA   | 12 | 7  |
| 245224 | 35 | 4578983 | 4578996 | 2 | 7  | 14 | GT   | 23 | 6  |

|        |    |         |         |   |    |    |     |    |    |
|--------|----|---------|---------|---|----|----|-----|----|----|
| 245229 | 35 | 4581156 | 4581189 | 2 | 17 | 34 | TG  | 6  | 5  |
| 245231 | 35 | 4581377 | 4581400 | 2 | 12 | 24 | TG  | 19 | 8  |
| 245232 | 35 | 4581537 | 4581554 | 2 | 9  | 18 | CA  | 12 | 3  |
| 245234 | 35 | 4582491 | 4582510 | 2 | 10 | 20 | CA  | 12 | 10 |
| 245235 | 35 | 4582717 | 4582749 | 3 | 11 | 33 | CTC | 17 | 9  |
| 245236 | 35 | 4584028 | 4584039 | 2 | 6  | 12 | CA  | 21 | 8  |
| 245237 | 35 | 4584042 | 4584053 | 2 | 6  | 12 | CA  | 29 | 12 |
| 245238 | 35 | 4584189 | 4584218 | 2 | 15 | 30 | AC  | 12 | 11 |
| 245239 | 35 | 4584318 | 4584347 | 2 | 15 | 30 | TG  | 6  | 7  |
| 245243 | 35 | 4584898 | 4584955 | 2 | 29 | 58 | AC  | 9  | 14 |
| 245244 | 35 | 4586396 | 4586410 | 3 | 5  | 15 | CCT | 22 | 6  |
| 245248 | 35 | 4590862 | 4590885 | 3 | 8  | 24 | CTC | 12 | 8  |
| 245251 | 35 | 4591465 | 4591484 | 2 | 10 | 20 | GT  | 6  | 3  |
| 245254 | 35 | 4592808 | 4592833 | 2 | 13 | 26 | AC  | 8  | 11 |
| 245255 | 35 | 4593020 | 4593033 | 2 | 7  | 14 | AC  | 25 | 4  |
| 245260 | 35 | 4593633 | 4593644 | 2 | 6  | 12 | GT  | 14 | 9  |
| 245262 | 35 | 4593763 | 4593774 | 2 | 6  | 12 | CA  | 14 | 5  |
| 245264 | 35 | 4595039 | 4595084 | 2 | 23 | 46 | AC  | 7  | 8  |
| 245265 | 35 | 4595420 | 4595446 | 3 | 9  | 27 | TCT | 23 | 7  |
| 245266 | 35 | 4595672 | 4595685 | 2 | 7  | 14 | GT  | 26 | 10 |
| 245268 | 35 | 4596310 | 4596321 | 2 | 6  | 12 | TG  | 27 | 3  |
| 245270 | 35 | 4598259 | 4598276 | 2 | 9  | 18 | AC  | 18 | 5  |
| 245277 | 35 | 4599180 | 4599215 | 2 | 18 | 36 | CA  | 13 | 10 |
| 245278 | 35 | 4602731 | 4602742 | 2 | 6  | 12 | AC  | 25 | 3  |
| 245280 | 35 | 4602839 | 4602870 | 2 | 16 | 32 | AC  | 9  | 10 |
| 245282 | 35 | 4603239 | 4603256 | 2 | 9  | 18 | CA  | 19 | 10 |
| 245283 | 35 | 4605865 | 4605890 | 2 | 13 | 26 | CA  | 21 | 13 |
| 245284 | 35 | 4605975 | 4605996 | 2 | 11 | 22 | GA  | 19 | 5  |
| 245285 | 35 | 4606156 | 4606189 | 2 | 17 | 34 | AC  | 16 | 10 |
| 245289 | 35 | 4610714 | 4610741 | 2 | 14 | 28 | TG  | 20 | 9  |
| 245291 | 35 | 4613972 | 4614003 | 2 | 16 | 32 | GT  | 11 | 9  |
| 245293 | 35 | 4614237 | 4614270 | 2 | 17 | 34 | AC  | 7  | 9  |
| 245298 | 35 | 4615857 | 4615884 | 2 | 14 | 28 | AC  | 12 | 12 |
| 245299 | 35 | 4615968 | 4615983 | 2 | 8  | 16 | CA  | 22 | 3  |
| 245300 | 35 | 4616052 | 4616079 | 2 | 14 | 28 | AC  | 17 | 8  |
| 245303 | 35 | 4616747 | 4616764 | 2 | 9  | 18 | AC  | 19 | 9  |
| 245304 | 35 | 4616918 | 4616933 | 2 | 8  | 16 | AC  | 21 | 4  |
| 245306 | 35 | 4617264 | 4617297 | 2 | 17 | 34 | AC  | 12 | 8  |
| 245307 | 35 | 4617374 | 4617387 | 2 | 7  | 14 | AC  | 16 | 7  |
| 245308 | 35 | 4617390 | 4617405 | 2 | 8  | 16 | AC  | 16 | 4  |
| 245309 | 35 | 4617498 | 4617511 | 2 | 7  | 14 | TG  | 22 | 9  |
| 245310 | 35 | 4617594 | 4617605 | 2 | 6  | 12 | GT  | 20 | 4  |
| 245311 | 35 | 4618628 | 4618651 | 3 | 8  | 24 | AGA | 26 | 5  |
| 245312 | 35 | 4618828 | 4618853 | 2 | 13 | 26 | AC  | 13 | 12 |
| 245313 | 35 | 4620199 | 4620228 | 2 | 15 | 30 | CA  | 11 | 9  |
| 245314 | 35 | 4620411 | 4620426 | 2 | 8  | 16 | TG  | 28 | 9  |
| 245315 | 35 | 4620759 | 4620782 | 2 | 12 | 24 | TG  | 10 | 8  |
| 245316 | 35 | 4620872 | 4620883 | 2 | 6  | 12 | TG  | 21 | 3  |
| 245318 | 35 | 4620952 | 4620977 | 2 | 13 | 26 | CA  | 10 | 11 |
| 245321 | 35 | 4621298 | 4621321 | 2 | 12 | 24 | CA  | 15 | 10 |
| 245324 | 35 | 4621809 | 4621848 | 2 | 20 | 40 | AC  | 13 | 11 |

|        |    |         |         |   |    |    |      |    |    |
|--------|----|---------|---------|---|----|----|------|----|----|
| 245327 | 35 | 4623142 | 4623167 | 2 | 13 | 26 | AC   | 13 | 9  |
| 245332 | 35 | 4624201 | 4624216 | 2 | 8  | 16 | CA   | 13 | 12 |
| 245336 | 35 | 4626575 | 4626596 | 2 | 11 | 22 | GT   | 20 | 10 |
| 245337 | 35 | 4626703 | 4626714 | 2 | 6  | 12 | CT   | 26 | 3  |
| 245338 | 35 | 4626780 | 4626819 | 2 | 20 | 40 | AC   | 10 | 12 |
| 245339 | 35 | 4627027 | 4627044 | 2 | 9  | 18 | GT   | 22 | 14 |
| 245342 | 35 | 4628144 | 4628167 | 2 | 12 | 24 | CA   | 9  | 8  |
| 245346 | 35 | 4631821 | 4631856 | 4 | 9  | 36 | TTCT | 10 | 11 |
| 245347 | 35 | 4632066 | 4632101 | 2 | 18 | 36 | CA   | 12 | 10 |
| 245350 | 35 | 4633676 | 4633699 | 2 | 12 | 24 | CA   | 13 | 8  |
| 245352 | 35 | 4633916 | 4633948 | 3 | 11 | 33 | TCC  | 23 | 11 |
| 245353 | 35 | 4635615 | 4635652 | 2 | 19 | 38 | GT   | 6  | 8  |
| 245354 | 35 | 4635701 | 4635724 | 3 | 8  | 24 | TGA  | 16 | 4  |
| 245355 | 35 | 4635797 | 4635836 | 2 | 20 | 40 | AC   | 7  | 7  |
| 245367 | 35 | 4646019 | 4646058 | 2 | 20 | 40 | AC   | 11 | 9  |
| 245368 | 35 | 4646191 | 4646210 | 2 | 10 | 20 | GT   | 19 | 14 |
| 245372 | 35 | 4646620 | 4646643 | 2 | 12 | 24 | TG   | 10 | 11 |
| 245376 | 35 | 4647138 | 4647151 | 2 | 7  | 14 | TC   | 24 | 12 |
| 245380 | 35 | 4648528 | 4648563 | 2 | 18 | 36 | AC   | 19 | 13 |
| 245383 | 35 | 4649097 | 4649116 | 2 | 10 | 20 | TG   | 13 | 14 |
| 245384 | 35 | 4649240 | 4649253 | 2 | 7  | 14 | GT   | 9  | 6  |
| 245385 | 35 | 4649280 | 4649307 | 2 | 14 | 28 | CA   | 7  | 6  |
| 245386 | 35 | 4649403 | 4649436 | 2 | 17 | 34 | AC   | 8  | 10 |
| 245387 | 35 | 4649548 | 4649573 | 2 | 13 | 26 | AC   | 13 | 9  |
| 245391 | 35 | 4654025 | 4654036 | 2 | 6  | 12 | TG   | 21 | 12 |
| 245392 | 35 | 4654038 | 4654051 | 2 | 7  | 14 | GT   | 27 | 15 |
| 245393 | 35 | 4654958 | 4654987 | 2 | 15 | 30 | CA   | 14 | 11 |
| 245395 | 35 | 4655162 | 4655181 | 2 | 10 | 20 | CA   | 13 | 14 |
| 245396 | 35 | 4655319 | 4655342 | 2 | 12 | 24 | GT   | 6  | 9  |
| 245397 | 35 | 4656691 | 4656718 | 2 | 14 | 28 | AC   | 14 | 10 |
| 245398 | 35 | 4656956 | 4656991 | 2 | 18 | 36 | CA   | 11 | 7  |
| 245399 | 35 | 4657015 | 4657052 | 2 | 19 | 38 | GT   | 9  | 10 |
| 245400 | 35 | 4658185 | 4658196 | 2 | 6  | 12 | CA   | 27 | 5  |
| 245412 | 35 | 4664927 | 4664946 | 2 | 10 | 20 | AC   | 13 | 11 |
| 245414 | 35 | 4666450 | 4666503 | 3 | 18 | 54 | TCT  | 9  | 9  |
| 245415 | 35 | 4666679 | 4666705 | 3 | 9  | 27 | GGA  | 21 | 9  |
| 245416 | 35 | 4666906 | 4666923 | 2 | 9  | 18 | AG   | 24 | 5  |
| 245419 | 35 | 4667961 | 4667984 | 3 | 8  | 24 | CCT  | 24 | 5  |
| 245420 | 35 | 4669818 | 4669850 | 3 | 11 | 33 | GGA  | 12 | 8  |
| 245424 | 35 | 4680498 | 4680512 | 3 | 5  | 15 | AAG  | 28 | 4  |
| 245426 | 35 | 4681964 | 4681983 | 2 | 10 | 20 | AC   | 9  | 7  |
| 245427 | 35 | 4682011 | 4682026 | 2 | 8  | 16 | TG   | 12 | 7  |
| 245429 | 35 | 4683454 | 4683474 | 3 | 7  | 21 | CCT  | 9  | 5  |
| 245430 | 35 | 4683668 | 4683693 | 2 | 13 | 26 | AC   | 10 | 6  |
| 245432 | 35 | 4685139 | 4685186 | 3 | 16 | 48 | AGA  | 15 | 11 |
| 245433 | 35 | 4685594 | 4685619 | 2 | 13 | 26 | AC   | 16 | 8  |
| 245434 | 35 | 4687384 | 4687399 | 2 | 8  | 16 | GT   | 19 | 10 |
| 245436 | 35 | 4688563 | 4688596 | 2 | 17 | 34 | AC   | 12 | 9  |
| 245437 | 35 | 4688768 | 4688805 | 2 | 19 | 38 | AC   | 8  | 11 |
| 245438 | 35 | 4690922 | 4690953 | 2 | 16 | 32 | CA   | 17 | 12 |
| 245439 | 35 | 4691100 | 4691133 | 2 | 17 | 34 | AC   | 13 | 9  |

|        |    |         |         |   |    |    |      |    |    |
|--------|----|---------|---------|---|----|----|------|----|----|
| 245440 | 35 | 4691176 | 4691207 | 2 | 16 | 32 | GT   | 8  | 6  |
| 245441 | 35 | 4691318 | 4691355 | 2 | 19 | 38 | GT   | 7  | 10 |
| 245442 | 35 | 4691491 | 4691526 | 2 | 18 | 36 | TG   | 9  | 16 |
| 245443 | 35 | 4691678 | 4691707 | 2 | 15 | 30 | AC   | 9  | 10 |
| 245444 | 35 | 4695324 | 4695344 | 3 | 7  | 21 | ATT  | 8  | 3  |
| 245445 | 35 | 4696408 | 4696425 | 3 | 6  | 18 | CAA  | 24 | 6  |
| 245446 | 35 | 4700662 | 4700673 | 2 | 6  | 12 | CA   | 23 | 3  |
| 245452 | 35 | 4717550 | 4717573 | 2 | 12 | 24 | TG   | 21 | 11 |
| 245459 | 35 | 4731572 | 4731586 | 3 | 5  | 15 | TCC  | 23 | 4  |
| 245462 | 35 | 4740033 | 4740058 | 2 | 13 | 26 | TG   | 12 | 10 |
| 245465 | 35 | 4748521 | 4748536 | 2 | 8  | 16 | GT   | 12 | 8  |
| 245466 | 35 | 4748541 | 4748552 | 2 | 6  | 12 | TG   | 7  | 6  |
| 245468 | 35 | 4751342 | 4751357 | 2 | 8  | 16 | AG   | 19 | 6  |
| 245476 | 35 | 4755296 | 4755327 | 2 | 16 | 32 | AC   | 7  | 10 |
| 245478 | 35 | 4760660 | 4760673 | 2 | 7  | 14 | TC   | 18 | 6  |
| 245482 | 35 | 4764251 | 4764283 | 3 | 11 | 33 | CAG  | 17 | 9  |
| 245491 | 35 | 4783569 | 4783592 | 2 | 12 | 24 | CA   | 24 | 8  |
| 245533 | 35 | 4860062 | 4860101 | 2 | 20 | 40 | AC   | 9  | 5  |
| 245536 | 35 | 4870505 | 4870536 | 2 | 16 | 32 | GT   | 7  | 4  |
| 245539 | 35 | 4878422 | 4878455 | 2 | 17 | 34 | GT   | 18 | 12 |
| 245560 | 35 | 4890050 | 4890081 | 2 | 16 | 32 | AC   | 14 | 8  |
| 245564 | 35 | 4890633 | 4890650 | 2 | 9  | 18 | TG   | 13 | 9  |
| 245566 | 35 | 4890849 | 4890870 | 2 | 11 | 22 | GT   | 15 | 14 |
| 245567 | 35 | 4891027 | 4891056 | 2 | 15 | 30 | GT   | 6  | 5  |
| 245568 | 35 | 4891135 | 4891154 | 4 | 5  | 20 | TCCG | 20 | 10 |
| 245569 | 35 | 4891473 | 4891490 | 3 | 6  | 18 | CCT  | 18 | 6  |
| 245571 | 35 | 4891669 | 4891710 | 3 | 14 | 42 | GAA  | 7  | 9  |
| 245572 | 35 | 4893017 | 4893040 | 3 | 8  | 24 | CTC  | 26 | 9  |
| 245574 | 35 | 4895495 | 4895510 | 2 | 8  | 16 | GA   | 11 | 3  |
| 245578 | 35 | 4899303 | 4899322 | 4 | 5  | 20 | GTTT | 28 | 3  |
| 245580 | 35 | 4899910 | 4899929 | 2 | 10 | 20 | TG   | 26 | 5  |
| 245581 | 35 | 4900097 | 4900112 | 2 | 8  | 16 | TG   | 22 | 4  |
| 245584 | 35 | 4902758 | 4902789 | 2 | 16 | 32 | GT   | 12 | 11 |
| 245585 | 35 | 4904593 | 4904622 | 3 | 10 | 30 | GGA  | 22 | 5  |
| 245588 | 35 | 4906286 | 4906323 | 2 | 19 | 38 | AC   | 7  | 8  |
| 245589 | 35 | 4906685 | 4906698 | 2 | 7  | 14 | TC   | 19 | 4  |
| 245590 | 35 | 4907685 | 4907712 | 2 | 14 | 28 | GT   | 7  | 6  |
| 245592 | 35 | 4907973 | 4908012 | 2 | 20 | 40 | TG   | 13 | 14 |
| 245598 | 35 | 4909529 | 4909542 | 2 | 7  | 14 | GT   | 13 | 5  |
| 245599 | 35 | 4909671 | 4909694 | 2 | 12 | 24 | AC   | 8  | 9  |
| 245600 | 35 | 4909771 | 4909818 | 2 | 24 | 48 | TG   | 18 | 15 |
| 245610 | 35 | 4928643 | 4928657 | 3 | 5  | 15 | GCC  | 25 | 7  |
| 245612 | 35 | 4929019 | 4929036 | 3 | 6  | 18 | TCT  | 13 | 3  |
| 245613 | 35 | 4929950 | 4929985 | 2 | 18 | 36 | AC   | 14 | 8  |
| 245614 | 35 | 4932990 | 4933016 | 3 | 9  | 27 | GTG  | 25 | 5  |
| 245615 | 35 | 4937601 | 4937626 | 2 | 13 | 26 | AG   | 15 | 8  |
| 245620 | 35 | 4941313 | 4941330 | 2 | 9  | 18 | TC   | 16 | 5  |
| 245621 | 35 | 4941516 | 4941529 | 2 | 7  | 14 | CT   | 14 | 8  |
| 245622 | 35 | 4941704 | 4941727 | 3 | 8  | 24 | TCC  | 12 | 3  |
| 245627 | 35 | 4947092 | 4947107 | 2 | 8  | 16 | AG   | 15 | 6  |
| 245628 | 35 | 4947293 | 4947324 | 2 | 16 | 32 | CA   | 6  | 8  |

|        |    |         |         |   |    |    |      |    |    |
|--------|----|---------|---------|---|----|----|------|----|----|
| 245632 | 35 | 4949008 | 4949031 | 2 | 12 | 24 | AC   | 10 | 8  |
| 245635 | 35 | 4949493 | 4949510 | 3 | 6  | 18 | AGG  | 32 | 3  |
| 245642 | 35 | 4956688 | 4956711 | 2 | 12 | 24 | CA   | 9  | 6  |
| 245643 | 35 | 4957143 | 4957182 | 2 | 20 | 40 | GT   | 10 | 8  |
| 245653 | 35 | 4961885 | 4961924 | 4 | 10 | 40 | AAGG | 23 | 9  |
| 245654 | 35 | 4962529 | 4962562 | 2 | 17 | 34 | AG   | 6  | 5  |
| 245656 | 35 | 4962758 | 4962783 | 2 | 13 | 26 | GT   | 17 | 11 |
| 245660 | 35 | 4966695 | 4966712 | 2 | 9  | 18 | TG   | 18 | 5  |
| 245661 | 35 | 4970109 | 4970126 | 3 | 6  | 18 | GGT  | 9  | 3  |
| 245662 | 35 | 4970231 | 4970242 | 2 | 6  | 12 | CA   | 12 | 3  |
| 245663 | 35 | 4970245 | 4970256 | 2 | 6  | 12 | CA   | 24 | 6  |
| 245664 | 35 | 4972645 | 4972674 | 2 | 15 | 30 | CA   | 13 | 6  |
| 245665 | 35 | 4973075 | 4973088 | 2 | 7  | 14 | GA   | 28 | 4  |
| 245666 | 35 | 4973885 | 4973910 | 2 | 13 | 26 | AC   | 12 | 10 |
| 245667 | 35 | 4973985 | 4974002 | 3 | 6  | 18 | AGA  | 13 | 4  |
| 245668 | 35 | 4975586 | 4975613 | 2 | 14 | 28 | GT   | 9  | 11 |
| 245669 | 35 | 4975684 | 4975703 | 2 | 10 | 20 | TG   | 10 | 5  |
| 245678 | 35 | 4981284 | 4981301 | 2 | 9  | 18 | GA   | 20 | 5  |
| 245679 | 35 | 4981935 | 4981954 | 4 | 5  | 20 | CAAT | 30 | 7  |
| 245680 | 35 | 4982838 | 4982864 | 3 | 9  | 27 | GAA  | 17 | 7  |
| 245684 | 35 | 4983903 | 4983932 | 2 | 15 | 30 | CA   | 15 | 10 |
| 245685 | 35 | 4984587 | 4984604 | 3 | 6  | 18 | AAG  | 29 | 3  |
| 245686 | 35 | 4986294 | 4986319 | 2 | 13 | 26 | GT   | 12 | 11 |
| 245688 | 35 | 4988001 | 4988028 | 2 | 14 | 28 | GT   | 7  | 11 |
| 245691 | 35 | 4988499 | 4988522 | 4 | 6  | 24 | GGAT | 22 | 7  |
| 245692 | 35 | 4989138 | 4989155 | 2 | 9  | 18 | AG   | 22 | 5  |
| 245693 | 35 | 4989957 | 4989978 | 2 | 11 | 22 | CA   | 21 | 11 |
| 245695 | 35 | 4990972 | 4990995 | 3 | 8  | 24 | CTG  | 14 | 10 |
| 245706 | 35 | 4999181 | 4999196 | 4 | 4  | 16 | CGCT | 19 | 4  |
| 245707 | 35 | 5001015 | 5001029 | 3 | 5  | 15 | TCA  | 11 | 4  |
| 245708 | 35 | 5002154 | 5002165 | 2 | 6  | 12 | GC   | 27 | 6  |
| 245712 | 35 | 5016862 | 5016900 | 3 | 13 | 39 | TCT  | 16 | 12 |
| 245716 | 35 | 5017913 | 5017928 | 2 | 8  | 16 | GT   | 7  | 5  |
| 245722 | 35 | 5019764 | 5019781 | 3 | 6  | 18 | CTG  | 28 | 9  |
| 245724 | 35 | 5020169 | 5020195 | 3 | 9  | 27 | AGA  | 6  | 7  |
| 245725 | 35 | 5021441 | 5021476 | 3 | 12 | 36 | AAG  | 14 | 9  |
| 245729 | 35 | 5022511 | 5022544 | 2 | 17 | 34 | GT   | 12 | 14 |
| 245730 | 35 | 5026407 | 5026430 | 3 | 8  | 24 | GGA  | 15 | 8  |
| 245731 | 35 | 5027097 | 5027116 | 4 | 5  | 20 | AAAG | 10 | 5  |
| 245732 | 35 | 5027247 | 5027274 | 2 | 14 | 28 | TG   | 8  | 9  |
| 245735 | 35 | 5027957 | 5027968 | 2 | 6  | 12 | GT   | 17 | 8  |
| 245736 | 35 | 5028223 | 5028246 | 2 | 12 | 24 | GT   | 12 | 9  |
| 245737 | 35 | 5028618 | 5028631 | 2 | 7  | 14 | TC   | 23 | 5  |
| 245739 | 35 | 5028985 | 5029004 | 2 | 10 | 20 | GT   | 21 | 13 |
| 245740 | 35 | 5029148 | 5029163 | 2 | 8  | 16 | CA   | 14 | 5  |
| 245741 | 35 | 5029189 | 5029208 | 2 | 10 | 20 | GT   | 10 | 7  |
| 245742 | 35 | 5029995 | 5030012 | 2 | 9  | 18 | TG   | 12 | 9  |
| 245744 | 35 | 5031556 | 5031579 | 2 | 12 | 24 | TG   | 12 | 7  |
| 245747 | 35 | 5031807 | 5031834 | 2 | 14 | 28 | GT   | 11 | 8  |
| 245751 | 35 | 5034657 | 5034676 | 4 | 5  | 20 | TGCC | 9  | 6  |
| 245752 | 35 | 5035334 | 5035348 | 3 | 5  | 15 | GAG  | 22 | 7  |



|        |    |         |         |   |    |    |      |    |    |
|--------|----|---------|---------|---|----|----|------|----|----|
| 245755 | 35 | 5038456 | 5038495 | 2 | 20 | 40 | GT   | 10 | 8  |
| 245757 | 35 | 5039648 | 5039659 | 2 | 6  | 12 | AG   | 23 | 3  |
| 245759 | 35 | 5040573 | 5040596 | 2 | 12 | 24 | TG   | 14 | 10 |
| 245761 | 35 | 5041847 | 5041873 | 3 | 9  | 27 | GGA  | 24 | 11 |
| 245766 | 35 | 5043331 | 5043356 | 2 | 13 | 26 | AC   | 18 | 9  |
| 245768 | 35 | 5045227 | 5045240 | 2 | 7  | 14 | GA   | 27 | 3  |
| 245770 | 35 | 5045726 | 5045749 | 2 | 12 | 24 | GT   | 12 | 9  |
| 245771 | 35 | 5045952 | 5045969 | 2 | 9  | 18 | GT   | 19 | 15 |
| 245772 | 35 | 5047763 | 5047778 | 4 | 4  | 16 | GAGC | 20 | 6  |
| 245774 | 35 | 5048025 | 5048044 | 2 | 10 | 20 | GT   | 19 | 7  |
| 245778 | 35 | 5050169 | 5050184 | 2 | 8  | 16 | TG   | 19 | 4  |
| 245779 | 35 | 5051911 | 5051942 | 2 | 16 | 32 | GT   | 16 | 11 |
| 245781 | 35 | 5053044 | 5053073 | 2 | 15 | 30 | AC   | 12 | 10 |
| 245783 | 35 | 5053280 | 5053301 | 2 | 11 | 22 | AC   | 12 | 6  |
| 245784 | 35 | 5053339 | 5053364 | 2 | 13 | 26 | AC   | 9  | 14 |
| 245786 | 35 | 5055689 | 5055702 | 2 | 7  | 14 | AC   | 12 | 3  |
| 245789 | 35 | 5061255 | 5061278 | 2 | 12 | 24 | CA   | 21 | 9  |
| 245790 | 35 | 5063583 | 5063597 | 3 | 5  | 15 | AAG  | 27 | 6  |
| 245791 | 35 | 5063917 | 5063931 | 3 | 5  | 15 | ATT  | 14 | 3  |
| 245794 | 35 | 5065531 | 5065557 | 3 | 9  | 27 | GAG  | 25 | 4  |
| 245798 | 35 | 5071469 | 5071502 | 2 | 17 | 34 | AC   | 18 | 13 |
| 245799 | 35 | 5071816 | 5071841 | 2 | 13 | 26 | CA   | 12 | 13 |
| 245800 | 35 | 5074692 | 5074725 | 2 | 17 | 34 | TG   | 17 | 8  |
| 245801 | 35 | 5074756 | 5074785 | 2 | 15 | 30 | TG   | 17 | 8  |
| 245802 | 35 | 5074877 | 5074896 | 2 | 10 | 20 | TG   | 14 | 14 |
| 245808 | 35 | 5080202 | 5080216 | 3 | 5  | 15 | CAG  | 27 | 3  |
| 245811 | 35 | 5084422 | 5084437 | 2 | 8  | 16 | AC   | 18 | 4  |
| 245812 | 35 | 5085284 | 5085319 | 2 | 18 | 36 | GT   | 8  | 11 |
| 245815 | 35 | 5093756 | 5093777 | 2 | 11 | 22 | CA   | 28 | 13 |
| 245820 | 35 | 5105553 | 5105572 | 2 | 10 | 20 | AC   | 19 | 14 |
| 245821 | 35 | 5109428 | 5109471 | 4 | 11 | 44 | TAGA | 20 | 15 |
| 245823 | 35 | 5129087 | 5129116 | 2 | 15 | 30 | GT   | 19 | 13 |
| 245827 | 35 | 5138679 | 5138694 | 4 | 4  | 16 | GACA | 21 | 5  |
| 245829 | 35 | 5138921 | 5138935 | 3 | 5  | 15 | TCC  | 14 | 7  |
| 245833 | 35 | 5168202 | 5168217 | 4 | 4  | 16 | TTTA | 6  | 4  |
| 245835 | 35 | 5180238 | 5180257 | 4 | 5  | 20 | AAAC | 11 | 4  |
| 245850 | 35 | 5237524 | 5237535 | 2 | 6  | 12 | CA   | 7  | 5  |
| 245860 | 35 | 5257205 | 5257225 | 3 | 7  | 21 | GGA  | 27 | 5  |
| 245864 | 35 | 5262764 | 5262777 | 2 | 7  | 14 | AC   | 16 | 12 |
| 245869 | 35 | 5272425 | 5272442 | 2 | 9  | 18 | AC   | 20 | 8  |
| 245878 | 35 | 5299197 | 5299238 | 3 | 14 | 42 | TGA  | 24 | 7  |
| 245893 | 35 | 5315285 | 5315305 | 3 | 7  | 21 | GAG  | 17 | 15 |
| 245896 | 35 | 5329166 | 5329186 | 3 | 7  | 21 | TCT  | 26 | 8  |
| 245901 | 35 | 5332183 | 5332203 | 3 | 7  | 21 | CAA  | 29 | 10 |
| 245906 | 35 | 5333850 | 5333867 | 2 | 9  | 18 | CA   | 27 | 6  |
| 245907 | 35 | 5333923 | 5333942 | 4 | 5  | 20 | AGGA | 22 | 3  |
| 245910 | 35 | 5335153 | 5335164 | 2 | 6  | 12 | AC   | 14 | 6  |
| 245912 | 35 | 5338667 | 5338684 | 2 | 9  | 18 | TG   | 9  | 6  |
| 245913 | 35 | 5352300 | 5352323 | 4 | 6  | 24 | TAGC | 18 | 3  |
| 245914 | 35 | 5353050 | 5353065 | 2 | 8  | 16 | GT   | 25 | 11 |
| 245916 | 35 | 5365073 | 5365099 | 3 | 9  | 27 | GAG  | 14 | 7  |

|        |    |         |         |   |    |    |      |    |    |
|--------|----|---------|---------|---|----|----|------|----|----|
| 245918 | 35 | 5367552 | 5367575 | 2 | 12 | 24 | GT   | 9  | 5  |
| 245919 | 35 | 5369419 | 5369468 | 2 | 25 | 50 | AC   | 11 | 11 |
| 245921 | 35 | 5371125 | 5371139 | 3 | 5  | 15 | CAG  | 28 | 3  |
| 245938 | 35 | 5373984 | 5374003 | 4 | 5  | 20 | CATC | 8  | 3  |
| 245945 | 35 | 5377803 | 5377818 | 2 | 8  | 16 | AT   | 15 | 4  |
| 245946 | 35 | 5380669 | 5380683 | 3 | 5  | 15 | TGT  | 21 | 5  |
| 245948 | 35 | 5382185 | 5382217 | 3 | 11 | 33 | CAT  | 27 | 9  |
| 245949 | 35 | 5382767 | 5382793 | 3 | 9  | 27 | AGG  | 10 | 7  |
| 245951 | 35 | 5389185 | 5389208 | 2 | 12 | 24 | AC   | 15 | 14 |
| 245954 | 35 | 5395697 | 5395730 | 2 | 17 | 34 | AC   | 10 | 7  |
| 245956 | 35 | 5403676 | 5403695 | 4 | 5  | 20 | TTTG | 25 | 4  |
| 245962 | 35 | 5409645 | 5409692 | 2 | 24 | 48 | CT   | 15 | 9  |
| 245963 | 35 | 5413343 | 5413366 | 4 | 6  | 24 | CTGT | 20 | 5  |
| 245968 | 35 | 5436135 | 5436160 | 2 | 13 | 26 | AC   | 15 | 9  |
| 245974 | 35 | 5446527 | 5446541 | 3 | 5  | 15 | AAT  | 14 | 4  |
| 245975 | 35 | 5449761 | 5449790 | 2 | 15 | 30 | CA   | 8  | 10 |
| 245981 | 35 | 5459876 | 5459927 | 2 | 26 | 52 | CA   | 12 | 12 |
| 245982 | 35 | 5460307 | 5460318 | 2 | 6  | 12 | AC   | 21 | 4  |
| 245983 | 35 | 5462937 | 5462960 | 3 | 8  | 24 | GGA  | 18 | 6  |
| 245995 | 35 | 5480424 | 5480463 | 4 | 10 | 40 | TTTG | 16 | 8  |
| 246002 | 35 | 5488320 | 5488334 | 3 | 5  | 15 | CCG  | 23 | 5  |
| 246003 | 35 | 5491826 | 5491861 | 2 | 18 | 36 | TG   | 15 | 7  |
| 246008 | 35 | 5493596 | 5493633 | 2 | 19 | 38 | AC   | 10 | 10 |
| 246012 | 35 | 5497336 | 5497351 | 2 | 8  | 16 | AC   | 12 | 8  |
| 246024 | 35 | 5502563 | 5502580 | 2 | 9  | 18 | TG   | 18 | 7  |
| 246025 | 35 | 5502619 | 5502640 | 2 | 11 | 22 | GT   | 17 | 10 |
| 246030 | 35 | 5515509 | 5515552 | 2 | 22 | 44 | AC   | 18 | 13 |
| 246039 | 35 | 5516824 | 5516841 | 2 | 9  | 18 | TG   | 17 | 5  |
| 246040 | 35 | 5516870 | 5516897 | 2 | 14 | 28 | TG   | 6  | 8  |
| 246043 | 35 | 5517774 | 5517795 | 2 | 11 | 22 | CA   | 15 | 6  |
| 246044 | 35 | 5517828 | 5517859 | 2 | 16 | 32 | GT   | 16 | 10 |
| 246046 | 35 | 5518148 | 5518181 | 2 | 17 | 34 | GT   | 18 | 10 |
| 246047 | 35 | 5518274 | 5518311 | 2 | 19 | 38 | CA   | 12 | 13 |
| 246049 | 35 | 5519261 | 5519275 | 3 | 5  | 15 | CTC  | 17 | 3  |
| 246050 | 35 | 5520349 | 5520360 | 2 | 6  | 12 | AG   | 8  | 4  |
| 246054 | 35 | 5521318 | 5521369 | 2 | 26 | 52 | TG   | 8  | 9  |
| 246056 | 35 | 5523941 | 5523979 | 3 | 13 | 39 | AAG  | 18 | 6  |
| 246060 | 35 | 5524592 | 5524629 | 2 | 19 | 38 | AC   | 15 | 13 |
| 246062 | 35 | 5524932 | 5524951 | 2 | 10 | 20 | CT   | 17 | 4  |
| 246068 | 35 | 5528712 | 5528744 | 3 | 11 | 33 | CAT  | 19 | 15 |
| 246073 | 35 | 5529094 | 5529113 | 2 | 10 | 20 | GT   | 9  | 11 |
| 246075 | 35 | 5530710 | 5530730 | 3 | 7  | 21 | AGA  | 28 | 7  |
| 246077 | 35 | 5534034 | 5534057 | 2 | 12 | 24 | CA   | 21 | 10 |
| 246078 | 35 | 5534326 | 5534341 | 2 | 8  | 16 | CA   | 23 | 15 |
| 246079 | 35 | 5536240 | 5536267 | 4 | 7  | 28 | ACAA | 21 | 3  |
| 246082 | 35 | 5536512 | 5536529 | 2 | 9  | 18 | TG   | 23 | 4  |
| 246083 | 35 | 5536584 | 5536607 | 2 | 12 | 24 | AC   | 16 | 7  |
| 246084 | 35 | 5536689 | 5536722 | 2 | 17 | 34 | TG   | 7  | 8  |
| 246085 | 35 | 5536877 | 5536912 | 2 | 18 | 36 | TG   | 25 | 13 |
| 246086 | 35 | 5538223 | 5538240 | 2 | 9  | 18 | AG   | 27 | 4  |
| 246087 | 35 | 5538710 | 5538729 | 2 | 10 | 20 | GT   | 15 | 12 |

|        |    |         |         |   |    |    |      |    |    |
|--------|----|---------|---------|---|----|----|------|----|----|
| 246088 | 35 | 5538947 | 5538960 | 2 | 7  | 14 | GT   | 30 | 11 |
| 246092 | 35 | 5541227 | 5541250 | 2 | 12 | 24 | GT   | 8  | 7  |
| 246094 | 35 | 5541358 | 5541389 | 2 | 16 | 32 | TG   | 7  | 7  |
| 246095 | 35 | 5542035 | 5542050 | 2 | 8  | 16 | TG   | 26 | 3  |
| 246096 | 35 | 5543236 | 5543263 | 2 | 14 | 28 | CA   | 10 | 8  |
| 246097 | 35 | 5543318 | 5543331 | 2 | 7  | 14 | CA   | 9  | 5  |
| 246098 | 35 | 5543419 | 5543438 | 2 | 10 | 20 | AC   | 11 | 15 |
| 246101 | 35 | 5543800 | 5543837 | 2 | 19 | 38 | CA   | 7  | 10 |
| 246105 | 35 | 5546046 | 5546057 | 2 | 6  | 12 | CT   | 20 | 7  |
| 246106 | 35 | 5547552 | 5547579 | 2 | 14 | 28 | CA   | 17 | 11 |
| 246107 | 35 | 5547747 | 5547767 | 3 | 7  | 21 | AGA  | 8  | 4  |
| 246109 | 35 | 5548139 | 5548165 | 3 | 9  | 27 | AGG  | 19 | 6  |
| 246110 | 35 | 5550219 | 5550230 | 2 | 6  | 12 | GT   | 24 | 3  |
| 246117 | 35 | 5552510 | 5552535 | 2 | 13 | 26 | GT   | 15 | 7  |
| 246127 | 35 | 5554733 | 5554754 | 2 | 11 | 22 | TG   | 10 | 12 |
| 246128 | 35 | 5554919 | 5554938 | 4 | 5  | 20 | AAGG | 6  | 3  |
| 246131 | 35 | 5556123 | 5556138 | 2 | 8  | 16 | TG   | 19 | 5  |
| 246132 | 35 | 5556199 | 5556230 | 2 | 16 | 32 | TG   | 7  | 8  |
| 246133 | 35 | 5556295 | 5556320 | 2 | 13 | 26 | TG   | 12 | 11 |
| 246137 | 35 | 5557600 | 5557629 | 2 | 15 | 30 | AC   | 15 | 15 |
| 246141 | 35 | 5558079 | 5558112 | 2 | 17 | 34 | AC   | 10 | 7  |
| 246145 | 35 | 5559783 | 5559797 | 3 | 5  | 15 | CAT  | 18 | 9  |
| 246146 | 35 | 5560259 | 5560286 | 2 | 14 | 28 | TG   | 14 | 19 |
| 246147 | 35 | 5560807 | 5560826 | 4 | 5  | 20 | AGGA | 10 | 3  |
| 246153 | 35 | 5563476 | 5563493 | 3 | 6  | 18 | CTC  | 7  | 5  |
| 246158 | 35 | 5564433 | 5564464 | 2 | 16 | 32 | GT   | 11 | 7  |
| 246166 | 35 | 5568256 | 5568275 | 2 | 10 | 20 | AC   | 15 | 7  |
| 246167 | 35 | 5568775 | 5568786 | 2 | 6  | 12 | AC   | 24 | 9  |
| 246169 | 35 | 5570440 | 5570469 | 2 | 15 | 30 | AC   | 18 | 11 |
| 246174 | 35 | 5572817 | 5572832 | 4 | 4  | 16 | GGGA | 13 | 3  |
| 246175 | 35 | 5573152 | 5573183 | 2 | 16 | 32 | TG   | 10 | 8  |
| 246177 | 35 | 5573349 | 5573366 | 3 | 6  | 18 | GGA  | 12 | 8  |
| 246178 | 35 | 5574642 | 5574677 | 2 | 18 | 36 | AC   | 6  | 8  |
| 246179 | 35 | 5575134 | 5575167 | 2 | 17 | 34 | GT   | 9  | 11 |
| 246180 | 35 | 5575370 | 5575387 | 3 | 6  | 18 | TCC  | 12 | 11 |
| 246181 | 35 | 5575553 | 5575584 | 2 | 16 | 32 | GT   | 8  | 12 |
| 246182 | 35 | 5575634 | 5575645 | 2 | 6  | 12 | TG   | 16 | 5  |
| 246184 | 35 | 5576374 | 5576397 | 2 | 12 | 24 | AC   | 12 | 10 |
| 246192 | 35 | 5577052 | 5577099 | 2 | 24 | 48 | GT   | 6  | 9  |
| 246200 | 35 | 5580594 | 5580617 | 2 | 12 | 24 | GT   | 21 | 11 |
| 246201 | 35 | 5580709 | 5580748 | 2 | 20 | 40 | GT   | 6  | 7  |
| 246202 | 35 | 5581126 | 5581153 | 2 | 14 | 28 | CA   | 16 | 10 |
| 246205 | 35 | 5581803 | 5581834 | 2 | 16 | 32 | TG   | 9  | 10 |
| 246206 | 35 | 5581910 | 5581929 | 2 | 10 | 20 | TG   | 16 | 9  |
| 246207 | 35 | 5581995 | 5582018 | 2 | 12 | 24 | TG   | 15 | 11 |
| 246216 | 35 | 5583953 | 5583972 | 2 | 10 | 20 | TG   | 10 | 7  |
| 246217 | 35 | 5584051 | 5584084 | 2 | 17 | 34 | AC   | 6  | 6  |
| 246220 | 35 | 5584360 | 5584393 | 2 | 17 | 34 | GT   | 6  | 6  |
| 246223 | 35 | 5586834 | 5586859 | 2 | 13 | 26 | GT   | 16 | 10 |
| 246229 | 35 | 5587062 | 5587091 | 2 | 15 | 30 | CA   | 6  | 7  |
| 246231 | 35 | 5588637 | 5588660 | 3 | 8  | 24 | AGC  | 17 | 6  |

|        |    |         |         |   |    |    |      |    |    |
|--------|----|---------|---------|---|----|----|------|----|----|
| 246246 | 35 | 5607419 | 5607446 | 2 | 14 | 28 | TG   | 16 | 10 |
| 246247 | 35 | 5609451 | 5609470 | 2 | 10 | 20 | CA   | 15 | 14 |
| 246250 | 35 | 5612476 | 5612517 | 2 | 21 | 42 | CA   | 11 | 7  |
| 246251 | 35 | 5613860 | 5613875 | 2 | 8  | 16 | AC   | 9  | 12 |
| 246252 | 35 | 5613877 | 5613894 | 2 | 9  | 18 | CA   | 8  | 9  |
| 246253 | 35 | 5614015 | 5614042 | 2 | 14 | 28 | CA   | 8  | 10 |
| 246254 | 35 | 5614072 | 5614089 | 2 | 9  | 18 | AC   | 14 | 11 |
| 246255 | 35 | 5614179 | 5614202 | 2 | 12 | 24 | CA   | 18 | 18 |
| 246256 | 35 | 5615710 | 5615761 | 2 | 26 | 52 | GT   | 6  | 9  |
| 246257 | 35 | 5616642 | 5616662 | 3 | 7  | 21 | CAT  | 26 | 9  |
| 246258 | 35 | 5616815 | 5616838 | 3 | 8  | 24 | ACA  | 20 | 11 |
| 246260 | 35 | 5617798 | 5617815 | 3 | 6  | 18 | CTT  | 6  | 4  |
| 246266 | 35 | 5619743 | 5619758 | 2 | 8  | 16 | CA   | 12 | 5  |
| 246268 | 35 | 5620017 | 5620038 | 2 | 11 | 22 | AC   | 13 | 14 |
| 246269 | 35 | 5621889 | 5621910 | 2 | 11 | 22 | GT   | 15 | 5  |
| 246272 | 35 | 5622424 | 5622447 | 2 | 12 | 24 | CA   | 19 | 9  |
| 246273 | 35 | 5622553 | 5622568 | 2 | 8  | 16 | AC   | 17 | 10 |
| 246274 | 35 | 5622610 | 5622627 | 2 | 9  | 18 | GT   | 15 | 7  |
| 246277 | 35 | 5627148 | 5627163 | 2 | 8  | 16 | AC   | 17 | 15 |
| 246279 | 35 | 5627331 | 5627348 | 3 | 6  | 18 | CAA  | 6  | 3  |
| 246280 | 35 | 5627462 | 5627485 | 2 | 12 | 24 | GT   | 11 | 3  |
| 246283 | 35 | 5627930 | 5627961 | 2 | 16 | 32 | CA   | 19 | 6  |
| 246284 | 35 | 5629682 | 5629715 | 2 | 17 | 34 | TG   | 17 | 9  |
| 246289 | 35 | 5632184 | 5632207 | 2 | 12 | 24 | CT   | 15 | 7  |
| 246294 | 35 | 5633664 | 5633681 | 3 | 6  | 18 | CCT  | 25 | 4  |
| 246302 | 35 | 5635524 | 5635551 | 4 | 7  | 28 | TTTG | 24 | 7  |
| 246308 | 35 | 5635935 | 5635964 | 2 | 15 | 30 | TG   | 11 | 8  |
| 246309 | 35 | 5636097 | 5636126 | 2 | 15 | 30 | GT   | 14 | 11 |
| 246312 | 35 | 5638364 | 5638403 | 2 | 20 | 40 | AC   | 18 | 9  |
| 246313 | 35 | 5638629 | 5638652 | 2 | 12 | 24 | CA   | 16 | 11 |
| 246315 | 35 | 5643101 | 5643114 | 2 | 7  | 14 | CA   | 25 | 3  |
| 246316 | 35 | 5646087 | 5646104 | 2 | 9  | 18 | GT   | 20 | 18 |
| 246317 | 35 | 5646206 | 5646221 | 2 | 8  | 16 | CA   | 17 | 14 |
| 246324 | 36 | 12170   | 12195   | 2 | 13 | 26 | TG   | 8  | 9  |
| 246337 | 36 | 33733   | 33748   | 2 | 8  | 16 | TA   | 8  | 3  |
| 246338 | 36 | 76378   | 76407   | 2 | 15 | 30 | GT   | 18 | 13 |
| 246341 | 36 | 80314   | 80349   | 3 | 12 | 36 | CTG  | 14 | 9  |
| 246348 | 36 | 90789   | 90810   | 2 | 11 | 22 | GA   | 15 | 6  |
| 246350 | 36 | 93397   | 93416   | 4 | 5  | 20 | TGAT | 21 | 4  |
| 246369 | 36 | 120611  | 120642  | 2 | 16 | 32 | TG   | 6  | 9  |
| 246370 | 36 | 122259  | 122284  | 2 | 13 | 26 | AC   | 10 | 12 |
| 246372 | 36 | 128961  | 128984  | 2 | 12 | 24 | AC   | 23 | 9  |
| 246373 | 36 | 131573  | 131602  | 2 | 15 | 30 | GT   | 16 | 13 |
| 246374 | 36 | 138385  | 138400  | 2 | 8  | 16 | AC   | 18 | 15 |
| 246376 | 36 | 142739  | 142782  | 2 | 22 | 44 | GT   | 13 | 13 |
| 246385 | 36 | 153281  | 153334  | 2 | 27 | 54 | AC   | 6  | 7  |
| 246393 | 36 | 175099  | 175128  | 2 | 15 | 30 | AC   | 12 | 5  |
| 246400 | 36 | 208023  | 208038  | 2 | 8  | 16 | TG   | 22 | 4  |
| 246401 | 36 | 208190  | 208213  | 2 | 12 | 24 | TG   | 17 | 11 |
| 246403 | 36 | 209977  | 210016  | 2 | 20 | 40 | TG   | 11 | 11 |
| 246404 | 36 | 210174  | 210215  | 2 | 21 | 42 | GT   | 12 | 12 |

|        |    |        |        |   |    |    |      |    |    |
|--------|----|--------|--------|---|----|----|------|----|----|
| 246406 | 36 | 214410 | 214421 | 2 | 6  | 12 | TG   | 21 | 5  |
| 246407 | 36 | 214506 | 214527 | 2 | 11 | 22 | CT   | 18 | 4  |
| 246408 | 36 | 214678 | 214704 | 3 | 9  | 27 | CTT  | 33 | 3  |
| 246411 | 36 | 220439 | 220454 | 2 | 8  | 16 | GT   | 16 | 5  |
| 246412 | 36 | 220768 | 220795 | 2 | 14 | 28 | GT   | 14 | 7  |
| 246414 | 36 | 225804 | 225830 | 3 | 9  | 27 | AGC  | 36 | 3  |
| 246415 | 36 | 226199 | 226224 | 2 | 13 | 26 | GT   | 23 | 17 |
| 246422 | 36 | 233066 | 233093 | 2 | 14 | 28 | GT   | 10 | 8  |
| 246424 | 36 | 234768 | 234795 | 2 | 14 | 28 | AC   | 20 | 13 |
| 246426 | 36 | 237212 | 237233 | 2 | 11 | 22 | TG   | 12 | 13 |
| 246432 | 36 | 242979 | 243002 | 2 | 12 | 24 | GT   | 16 | 11 |
| 246433 | 36 | 246134 | 246149 | 2 | 8  | 16 | AC   | 22 | 9  |
| 246436 | 36 | 249112 | 249141 | 2 | 15 | 30 | GT   | 9  | 11 |
| 246437 | 36 | 251154 | 251173 | 4 | 5  | 20 | GTAT | 17 | 7  |
| 246444 | 36 | 253259 | 253304 | 2 | 23 | 46 | AC   | 7  | 7  |
| 246453 | 36 | 258086 | 258099 | 2 | 7  | 14 | TG   | 23 | 12 |
| 246454 | 36 | 262172 | 262195 | 2 | 12 | 24 | GA   | 8  | 8  |
| 246458 | 36 | 264283 | 264298 | 2 | 8  | 16 | CA   | 8  | 10 |
| 246459 | 36 | 264597 | 264626 | 2 | 15 | 30 | GT   | 15 | 14 |
| 246460 | 36 | 264780 | 264793 | 2 | 7  | 14 | GT   | 23 | 5  |
| 246461 | 36 | 264885 | 264899 | 3 | 5  | 15 | CAG  | 23 | 6  |
| 246462 | 36 | 266609 | 266646 | 2 | 19 | 38 | AC   | 10 | 11 |
| 246463 | 36 | 266813 | 266834 | 2 | 11 | 22 | TC   | 7  | 8  |
| 246465 | 36 | 270856 | 270873 | 2 | 9  | 18 | GA   | 19 | 7  |
| 246470 | 36 | 280720 | 280741 | 2 | 11 | 22 | AC   | 19 | 9  |
| 246471 | 36 | 281189 | 281215 | 3 | 9  | 27 | GAG  | 7  | 5  |
| 246473 | 36 | 281652 | 281672 | 3 | 7  | 21 | CTC  | 26 | 5  |
| 246474 | 36 | 281751 | 281776 | 2 | 13 | 26 | CA   | 22 | 11 |
| 246480 | 36 | 287673 | 287688 | 4 | 4  | 16 | CCTC | 25 | 3  |
| 246481 | 36 | 288904 | 288923 | 2 | 10 | 20 | TG   | 22 | 10 |
| 246482 | 36 | 291026 | 291041 | 4 | 4  | 16 | ACAA | 26 | 7  |
| 246489 | 36 | 294534 | 294567 | 2 | 17 | 34 | CA   | 7  | 9  |
| 246490 | 36 | 294756 | 294781 | 2 | 13 | 26 | AC   | 8  | 9  |
| 246497 | 36 | 299606 | 299641 | 2 | 18 | 36 | TG   | 12 | 16 |
| 246498 | 36 | 299843 | 299872 | 2 | 15 | 30 | CA   | 18 | 12 |
| 246501 | 36 | 301742 | 301755 | 2 | 7  | 14 | TC   | 23 | 4  |
| 246502 | 36 | 303179 | 303214 | 2 | 18 | 36 | GT   | 12 | 15 |
| 246503 | 36 | 304584 | 304615 | 2 | 16 | 32 | GT   | 26 | 12 |
| 246504 | 36 | 305142 | 305169 | 2 | 14 | 28 | GT   | 12 | 18 |
| 246505 | 36 | 305257 | 305282 | 2 | 13 | 26 | CA   | 12 | 9  |
| 246508 | 36 | 321377 | 321404 | 2 | 14 | 28 | TG   | 13 | 7  |
| 246509 | 36 | 322031 | 322045 | 3 | 5  | 15 | TTC  | 20 | 4  |
| 246511 | 36 | 328998 | 329031 | 2 | 17 | 34 | GT   | 10 | 8  |
| 246515 | 36 | 331842 | 331869 | 2 | 14 | 28 | CA   | 22 | 9  |
| 246516 | 36 | 332212 | 332231 | 2 | 10 | 20 | TG   | 19 | 10 |
| 246520 | 36 | 336137 | 336152 | 4 | 4  | 16 | TTTC | 16 | 10 |
| 246523 | 36 | 343497 | 343522 | 2 | 13 | 26 | CA   | 16 | 11 |
| 246526 | 36 | 349535 | 349552 | 3 | 6  | 18 | GAG  | 29 | 5  |
| 246528 | 36 | 349842 | 349857 | 2 | 8  | 16 | AC   | 20 | 10 |
| 246533 | 36 | 356182 | 356199 | 2 | 9  | 18 | CA   | 28 | 14 |
| 246535 | 36 | 359735 | 359754 | 2 | 10 | 20 | TG   | 20 | 8  |

|        |    |        |        |   |    |    |      |    |    |
|--------|----|--------|--------|---|----|----|------|----|----|
| 246539 | 36 | 364087 | 364107 | 3 | 7  | 21 | GAA  | 23 | 10 |
| 246540 | 36 | 364488 | 364503 | 2 | 8  | 16 | CA   | 10 | 7  |
| 246541 | 36 | 364722 | 364748 | 3 | 9  | 27 | AGG  | 19 | 3  |
| 246542 | 36 | 364795 | 364810 | 4 | 4  | 16 | GTTA | 30 | 3  |
| 246543 | 36 | 366260 | 366275 | 2 | 8  | 16 | CA   | 25 | 9  |
| 246545 | 36 | 370359 | 370388 | 2 | 15 | 30 | GT   | 15 | 11 |
| 246547 | 36 | 382751 | 382764 | 2 | 7  | 14 | GA   | 6  | 6  |
| 246548 | 36 | 385039 | 385062 | 2 | 12 | 24 | GT   | 14 | 8  |
| 246552 | 36 | 388627 | 388644 | 2 | 9  | 18 | CA   | 21 | 9  |
| 246558 | 36 | 422890 | 422925 | 2 | 18 | 36 | TG   | 18 | 8  |
| 246561 | 36 | 436612 | 436639 | 2 | 14 | 28 | CA   | 6  | 4  |
| 246571 | 36 | 463903 | 463920 | 3 | 6  | 18 | TCA  | 21 | 3  |
| 246580 | 36 | 484161 | 484176 | 2 | 8  | 16 | AC   | 13 | 3  |
| 246585 | 36 | 509402 | 509413 | 2 | 6  | 12 | GA   | 26 | 3  |
| 246586 | 36 | 511292 | 511305 | 2 | 7  | 14 | CA   | 24 | 4  |
| 246587 | 36 | 529705 | 529725 | 3 | 7  | 21 | GAG  | 26 | 5  |
| 246588 | 36 | 532502 | 532533 | 4 | 8  | 32 | ACAT | 16 | 5  |
| 246592 | 36 | 546058 | 546075 | 2 | 9  | 18 | CA   | 21 | 8  |
| 246595 | 36 | 554509 | 554556 | 2 | 24 | 48 | AC   | 10 | 11 |
| 246597 | 36 | 564629 | 564646 | 3 | 6  | 18 | CAG  | 27 | 3  |
| 246598 | 36 | 565486 | 565501 | 4 | 4  | 16 | TTCA | 26 | 4  |
| 246599 | 36 | 573608 | 573631 | 3 | 8  | 24 | GCT  | 18 | 8  |
| 246601 | 36 | 574052 | 574066 | 3 | 5  | 15 | CAT  | 25 | 3  |
| 246603 | 36 | 575062 | 575113 | 2 | 26 | 52 | CA   | 7  | 11 |
| 246604 | 36 | 577624 | 577641 | 2 | 9  | 18 | CA   | 18 | 5  |
| 246605 | 36 | 578726 | 578761 | 2 | 18 | 36 | CA   | 10 | 8  |
| 246606 | 36 | 579948 | 579962 | 3 | 5  | 15 | TTA  | 26 | 5  |
| 246612 | 36 | 594331 | 594388 | 2 | 29 | 58 | CA   | 9  | 10 |
| 246614 | 36 | 603980 | 604003 | 2 | 12 | 24 | TG   | 10 | 10 |
| 246619 | 36 | 622521 | 622536 | 4 | 4  | 16 | ATTG | 27 | 4  |
| 246620 | 36 | 626478 | 626493 | 2 | 8  | 16 | TG   | 18 | 3  |
| 246622 | 36 | 629363 | 629380 | 2 | 9  | 18 | CT   | 26 | 6  |
| 246623 | 36 | 637899 | 637930 | 2 | 16 | 32 | GT   | 10 | 8  |
| 246627 | 36 | 652770 | 652802 | 3 | 11 | 33 | GCT  | 23 | 9  |
| 246628 | 36 | 652989 | 653006 | 3 | 6  | 18 | TTG  | 21 | 8  |
| 246642 | 36 | 659092 | 659103 | 2 | 6  | 12 | TG   | 10 | 4  |
| 246647 | 36 | 663546 | 663565 | 2 | 10 | 20 | CA   | 11 | 9  |
| 246651 | 36 | 669694 | 669709 | 2 | 8  | 16 | AC   | 18 | 8  |
| 246652 | 36 | 670362 | 670381 | 2 | 10 | 20 | TG   | 28 | 5  |
| 246655 | 36 | 676783 | 676798 | 2 | 8  | 16 | CT   | 16 | 3  |
| 246656 | 36 | 687587 | 687598 | 2 | 6  | 12 | TC   | 18 | 4  |
| 246658 | 36 | 692428 | 692453 | 2 | 13 | 26 | GT   | 6  | 7  |
| 246663 | 36 | 696192 | 696205 | 2 | 7  | 14 | GA   | 32 | 3  |
| 246664 | 36 | 700294 | 700365 | 3 | 24 | 72 | CTT  | 20 | 19 |
| 246666 | 36 | 705331 | 705354 | 2 | 12 | 24 | TG   | 9  | 6  |
| 246667 | 36 | 708903 | 708920 | 2 | 9  | 18 | GT   | 15 | 13 |
| 246669 | 36 | 709068 | 709089 | 2 | 11 | 22 | AC   | 17 | 12 |
| 246670 | 36 | 710188 | 710202 | 3 | 5  | 15 | CTC  | 9  | 3  |
| 246672 | 36 | 710629 | 710640 | 2 | 6  | 12 | AC   | 17 | 17 |
| 246673 | 36 | 710642 | 710657 | 2 | 8  | 16 | CA   | 15 | 16 |
| 246678 | 36 | 714422 | 714447 | 2 | 13 | 26 | AC   | 9  | 9  |

|        |    |        |        |   |    |    |      |    |    |
|--------|----|--------|--------|---|----|----|------|----|----|
| 246690 | 36 | 731421 | 731448 | 2 | 14 | 28 | TG   | 11 | 10 |
| 246692 | 36 | 732314 | 732355 | 2 | 21 | 42 | TG   | 7  | 9  |
| 246693 | 36 | 732505 | 732546 | 2 | 21 | 42 | AC   | 6  | 8  |
| 246696 | 36 | 737226 | 737249 | 4 | 6  | 24 | TGTT | 25 | 7  |
| 246697 | 36 | 740072 | 740087 | 2 | 8  | 16 | TC   | 22 | 4  |
| 246714 | 36 | 783601 | 783616 | 4 | 4  | 16 | CAGG | 20 | 6  |
| 246715 | 36 | 783870 | 783887 | 3 | 6  | 18 | CTT  | 18 | 11 |
| 246716 | 36 | 798750 | 798769 | 2 | 10 | 20 | GT   | 19 | 3  |
| 246718 | 36 | 800710 | 800729 | 2 | 10 | 20 | TG   | 19 | 5  |
| 246721 | 36 | 819640 | 819661 | 2 | 11 | 22 | TG   | 19 | 4  |
| 246723 | 36 | 827184 | 827197 | 2 | 7  | 14 | CA   | 18 | 9  |
| 246726 | 36 | 829904 | 829924 | 3 | 7  | 21 | GCT  | 21 | 4  |
| 246727 | 36 | 834770 | 834791 | 2 | 11 | 22 | AC   | 10 | 9  |
| 246729 | 36 | 842906 | 842921 | 2 | 8  | 16 | CA   | 18 | 9  |
| 246730 | 36 | 847140 | 847173 | 2 | 17 | 34 | TG   | 11 | 17 |
| 246731 | 36 | 847281 | 847312 | 2 | 16 | 32 | CA   | 9  | 12 |
| 246732 | 36 | 847427 | 847450 | 2 | 12 | 24 | AC   | 16 | 11 |
| 246733 | 36 | 849778 | 849801 | 2 | 12 | 24 | CA   | 10 | 8  |
| 246738 | 36 | 854434 | 854455 | 2 | 11 | 22 | TG   | 15 | 13 |
| 246740 | 36 | 856304 | 856321 | 3 | 6  | 18 | CTC  | 21 | 4  |
| 246741 | 36 | 857424 | 857453 | 2 | 15 | 30 | AC   | 10 | 6  |
| 246742 | 36 | 857758 | 857775 | 3 | 6  | 18 | GCA  | 28 | 3  |
| 246743 | 36 | 857847 | 857872 | 2 | 13 | 26 | GT   | 14 | 7  |
| 246745 | 36 | 861556 | 861603 | 2 | 24 | 48 | TG   | 7  | 11 |
| 246747 | 36 | 862546 | 862573 | 2 | 14 | 28 | GT   | 12 | 9  |
| 246748 | 36 | 862643 | 862654 | 2 | 6  | 12 | CT   | 22 | 5  |
| 246749 | 36 | 865740 | 865763 | 2 | 12 | 24 | AC   | 11 | 4  |
| 246750 | 36 | 865940 | 865969 | 2 | 15 | 30 | CA   | 21 | 11 |
| 246756 | 36 | 876821 | 876844 | 2 | 12 | 24 | TG   | 6  | 4  |
| 246758 | 36 | 881217 | 881236 | 2 | 10 | 20 | AC   | 20 | 15 |
| 246760 | 36 | 885865 | 885888 | 4 | 6  | 24 | ATTG | 26 | 9  |
| 246761 | 36 | 898732 | 898758 | 3 | 9  | 27 | CTT  | 15 | 3  |
| 246763 | 36 | 902987 | 903046 | 2 | 30 | 60 | GT   | 11 | 8  |
| 246765 | 36 | 905044 | 905079 | 3 | 12 | 36 | GAG  | 24 | 7  |
| 246766 | 36 | 906402 | 906421 | 2 | 10 | 20 | TG   | 17 | 9  |
| 246767 | 36 | 907884 | 907899 | 4 | 4  | 16 | ATAA | 24 | 3  |
| 246768 | 36 | 908684 | 908699 | 4 | 4  | 16 | AACA | 32 | 14 |
| 246769 | 36 | 909707 | 909730 | 3 | 8  | 24 | AAG  | 17 | 6  |
| 246770 | 36 | 914835 | 914864 | 2 | 15 | 30 | TG   | 9  | 9  |
| 246772 | 36 | 917898 | 917912 | 3 | 5  | 15 | TCT  | 25 | 4  |
| 246774 | 36 | 922138 | 922161 | 3 | 8  | 24 | CCT  | 21 | 5  |
| 246775 | 36 | 924170 | 924213 | 2 | 22 | 44 | CA   | 13 | 12 |
| 246787 | 36 | 930044 | 930075 | 4 | 8  | 32 | AATC | 20 | 8  |
| 246788 | 36 | 932737 | 932762 | 2 | 13 | 26 | AC   | 8  | 7  |
| 246795 | 36 | 944829 | 944852 | 3 | 8  | 24 | TCA  | 15 | 10 |
| 246802 | 36 | 955634 | 955651 | 3 | 6  | 18 | CAG  | 33 | 4  |
| 246804 | 36 | 969665 | 969678 | 2 | 7  | 14 | TA   | 9  | 5  |
| 246805 | 36 | 970179 | 970192 | 2 | 7  | 14 | GT   | 16 | 5  |
| 246806 | 36 | 972239 | 972262 | 2 | 12 | 24 | AC   | 22 | 10 |
| 246809 | 36 | 978597 | 978624 | 2 | 14 | 28 | GT   | 15 | 16 |
| 246810 | 36 | 980117 | 980146 | 3 | 10 | 30 | GAG  | 19 | 4  |

|        |    |         |         |   |    |    |      |    |    |
|--------|----|---------|---------|---|----|----|------|----|----|
| 246813 | 36 | 983344  | 983363  | 4 | 5  | 20 | GAAC | 32 | 5  |
| 246816 | 36 | 1008104 | 1008143 | 2 | 20 | 40 | AC   | 9  | 9  |
| 246818 | 36 | 1011769 | 1011800 | 2 | 16 | 32 | GT   | 18 | 9  |
| 246821 | 36 | 1013598 | 1013617 | 2 | 10 | 20 | TG   | 17 | 10 |
| 246823 | 36 | 1015194 | 1015205 | 2 | 6  | 12 | AC   | 23 | 5  |
| 246824 | 36 | 1017794 | 1017829 | 2 | 18 | 36 | GT   | 8  | 10 |
| 246828 | 36 | 1036638 | 1036665 | 2 | 14 | 28 | CA   | 14 | 6  |
| 246829 | 36 | 1036864 | 1036881 | 2 | 9  | 18 | CA   | 26 | 4  |
| 246834 | 36 | 1051506 | 1051519 | 2 | 7  | 14 | GT   | 27 | 4  |
| 246838 | 36 | 1070709 | 1070729 | 3 | 7  | 21 | GGA  | 6  | 5  |
| 246839 | 36 | 1074745 | 1074764 | 2 | 10 | 20 | AC   | 17 | 10 |
| 246842 | 36 | 1082270 | 1082290 | 3 | 7  | 21 | TTC  | 34 | 6  |
| 246843 | 36 | 1082542 | 1082561 | 2 | 10 | 20 | CA   | 17 | 10 |
| 246845 | 36 | 1085056 | 1085073 | 2 | 9  | 18 | GT   | 28 | 10 |
| 246846 | 36 | 1087054 | 1087071 | 3 | 6  | 18 | TCT  | 26 | 5  |
| 246850 | 36 | 1090415 | 1090432 | 3 | 6  | 18 | AGA  | 14 | 3  |
| 246854 | 36 | 1094180 | 1094207 | 2 | 14 | 28 | GT   | 14 | 10 |
| 246860 | 36 | 1101476 | 1101511 | 2 | 18 | 36 | GT   | 22 | 13 |
| 246861 | 36 | 1101728 | 1101745 | 2 | 9  | 18 | CA   | 12 | 13 |
| 246865 | 36 | 1104788 | 1104801 | 2 | 7  | 14 | TC   | 18 | 7  |
| 246872 | 36 | 1120078 | 1120091 | 2 | 7  | 14 | CT   | 14 | 3  |
| 246874 | 36 | 1133613 | 1133624 | 2 | 6  | 12 | TG   | 28 | 4  |
| 246878 | 36 | 1147100 | 1147111 | 2 | 6  | 12 | AC   | 13 | 4  |
| 246882 | 36 | 1153327 | 1153348 | 2 | 11 | 22 | AC   | 20 | 7  |
| 246888 | 36 | 1164411 | 1164438 | 2 | 14 | 28 | TG   | 8  | 10 |
| 246890 | 36 | 1164539 | 1164574 | 2 | 18 | 36 | TG   | 9  | 5  |
| 246891 | 36 | 1166768 | 1166787 | 2 | 10 | 20 | AG   | 17 | 6  |
| 246894 | 36 | 1171275 | 1171290 | 4 | 4  | 16 | CAAT | 24 | 3  |
| 246895 | 36 | 1172348 | 1172377 | 2 | 15 | 30 | TG   | 14 | 12 |
| 246897 | 36 | 1175693 | 1175718 | 2 | 13 | 26 | TG   | 15 | 10 |
| 246904 | 36 | 1196584 | 1196603 | 2 | 10 | 20 | AC   | 11 | 12 |
| 246907 | 36 | 1198325 | 1198350 | 2 | 13 | 26 | AC   | 17 | 12 |
| 246908 | 36 | 1199785 | 1199814 | 2 | 15 | 30 | CA   | 14 | 10 |
| 246910 | 36 | 1200085 | 1200118 | 2 | 17 | 34 | AC   | 10 | 8  |
| 246911 | 36 | 1200269 | 1200286 | 2 | 9  | 18 | TG   | 12 | 12 |
| 246912 | 36 | 1201060 | 1201075 | 4 | 4  | 16 | AATA | 23 | 9  |
| 246913 | 36 | 1204112 | 1204126 | 3 | 5  | 15 | AGA  | 25 | 3  |
| 246915 | 36 | 1205371 | 1205415 | 3 | 15 | 45 | GAT  | 18 | 8  |
| 246919 | 36 | 1220797 | 1220811 | 3 | 5  | 15 | CTG  | 20 | 6  |
| 246921 | 36 | 1227852 | 1227875 | 2 | 12 | 24 | TG   | 11 | 6  |
| 246923 | 36 | 1242884 | 1242895 | 2 | 6  | 12 | TG   | 18 | 4  |
| 246925 | 36 | 1243499 | 1243531 | 3 | 11 | 33 | GAG  | 9  | 8  |
| 246926 | 36 | 1244097 | 1244118 | 2 | 11 | 22 | GA   | 8  | 4  |
| 246938 | 36 | 1269245 | 1269276 | 2 | 16 | 32 | TG   | 12 | 9  |
| 246943 | 36 | 1277533 | 1277554 | 2 | 11 | 22 | GT   | 10 | 9  |
| 246946 | 36 | 1289683 | 1289702 | 4 | 5  | 20 | TGTT | 26 | 4  |
| 246947 | 36 | 1291819 | 1291830 | 2 | 6  | 12 | GA   | 25 | 3  |
| 246948 | 36 | 1293134 | 1293179 | 2 | 23 | 46 | GT   | 14 | 8  |
| 246949 | 36 | 1294948 | 1294974 | 3 | 9  | 27 | AGC  | 21 | 5  |
| 246950 | 36 | 1296817 | 1296848 | 2 | 16 | 32 | TG   | 8  | 8  |
| 246951 | 36 | 1301405 | 1301422 | 3 | 6  | 18 | CAG  | 24 | 4  |



|        |    |         |         |   |    |    |      |    |    |
|--------|----|---------|---------|---|----|----|------|----|----|
| 246952 | 36 | 1302314 | 1302339 | 2 | 13 | 26 | GT   | 9  | 8  |
| 246954 | 36 | 1319533 | 1319546 | 2 | 7  | 14 | GT   | 30 | 10 |
| 246960 | 36 | 1326633 | 1326654 | 2 | 11 | 22 | TG   | 21 | 15 |
| 246961 | 36 | 1329049 | 1329063 | 3 | 5  | 15 | CTC  | 18 | 9  |
| 246965 | 36 | 1344889 | 1344909 | 3 | 7  | 21 | TCG  | 34 | 5  |
| 246968 | 36 | 1361165 | 1361186 | 2 | 11 | 22 | GT   | 22 | 11 |
| 246970 | 36 | 1363405 | 1363431 | 3 | 9  | 27 | GCT  | 30 | 8  |
| 246971 | 36 | 1365870 | 1365884 | 3 | 5  | 15 | ATA  | 20 | 4  |
| 246972 | 36 | 1366404 | 1366424 | 3 | 7  | 21 | TGC  | 9  | 4  |
| 246975 | 36 | 1368375 | 1368390 | 4 | 4  | 16 | TGAC | 25 | 3  |
| 246978 | 36 | 1371629 | 1371642 | 2 | 7  | 14 | GT   | 31 | 3  |
| 246983 | 36 | 1388637 | 1388650 | 2 | 7  | 14 | AT   | 14 | 5  |
| 246985 | 36 | 1389495 | 1389524 | 2 | 15 | 30 | CA   | 18 | 14 |
| 246986 | 36 | 1392305 | 1392319 | 3 | 5  | 15 | GAT  | 8  | 4  |
| 246987 | 36 | 1393101 | 1393128 | 4 | 7  | 28 | CATC | 19 | 9  |
| 246989 | 36 | 1395139 | 1395168 | 3 | 10 | 30 | GAA  | 21 | 6  |
| 247000 | 36 | 1426462 | 1426475 | 2 | 7  | 14 | AC   | 26 | 3  |
| 247003 | 36 | 1430405 | 1430425 | 3 | 7  | 21 | TCT  | 19 | 3  |
| 247004 | 36 | 1430750 | 1430773 | 3 | 8  | 24 | TTC  | 18 | 12 |
| 247005 | 36 | 1431636 | 1431650 | 3 | 5  | 15 | AGC  | 15 | 3  |
| 247007 | 36 | 1434111 | 1434124 | 2 | 7  | 14 | TC   | 32 | 3  |
| 247009 | 36 | 1437855 | 1437890 | 2 | 18 | 36 | CA   | 17 | 14 |
| 247010 | 36 | 1440273 | 1440302 | 3 | 10 | 30 | TGA  | 22 | 4  |
| 247011 | 36 | 1441483 | 1441512 | 2 | 15 | 30 | GT   | 20 | 10 |
| 247016 | 36 | 1450468 | 1450481 | 2 | 7  | 14 | AC   | 21 | 8  |
| 247024 | 36 | 1463009 | 1463026 | 3 | 6  | 18 | TTC  | 13 | 3  |
| 247025 | 36 | 1466018 | 1466061 | 2 | 22 | 44 | AC   | 10 | 8  |
| 247026 | 36 | 1467065 | 1467096 | 2 | 16 | 32 | GT   | 13 | 15 |
| 247027 | 36 | 1467549 | 1467576 | 2 | 14 | 28 | GT   | 23 | 13 |
| 247028 | 36 | 1470060 | 1470077 | 3 | 6  | 18 | GAT  | 30 | 3  |
| 247029 | 36 | 1470643 | 1470680 | 2 | 19 | 38 | CA   | 8  | 9  |
| 247031 | 36 | 1472265 | 1472284 | 4 | 5  | 20 | CTTT | 27 | 4  |
| 247033 | 36 | 1475202 | 1475223 | 2 | 11 | 22 | GT   | 16 | 14 |
| 247034 | 36 | 1475393 | 1475412 | 2 | 10 | 20 | TG   | 12 | 9  |
| 247035 | 36 | 1478704 | 1478733 | 2 | 15 | 30 | TG   | 20 | 7  |
| 247036 | 36 | 1481606 | 1481629 | 2 | 12 | 24 | CA   | 13 | 16 |
| 247038 | 36 | 1482911 | 1482924 | 2 | 7  | 14 | TG   | 32 | 3  |
| 247042 | 36 | 1490570 | 1490599 | 2 | 15 | 30 | CA   | 10 | 10 |
| 247043 | 36 | 1490628 | 1490660 | 3 | 11 | 33 | TGA  | 17 | 9  |
| 247044 | 36 | 1492087 | 1492116 | 2 | 15 | 30 | CA   | 16 | 9  |
| 247045 | 36 | 1492151 | 1492183 | 3 | 11 | 33 | GAG  | 22 | 8  |
| 247049 | 36 | 1508437 | 1508454 | 2 | 9  | 18 | GT   | 21 | 5  |
| 247050 | 36 | 1508959 | 1508973 | 3 | 5  | 15 | CCT  | 15 | 13 |
| 247051 | 36 | 1508975 | 1508992 | 3 | 6  | 18 | CTC  | 6  | 10 |
| 247052 | 36 | 1509441 | 1509462 | 2 | 11 | 22 | AC   | 15 | 16 |
| 247055 | 36 | 1511446 | 1511465 | 4 | 5  | 20 | TTTA | 19 | 3  |
| 247056 | 36 | 1514859 | 1514876 | 3 | 6  | 18 | TTA  | 20 | 10 |
| 247058 | 36 | 1516670 | 1516683 | 2 | 7  | 14 | GT   | 25 | 8  |
| 247062 | 36 | 1523154 | 1523181 | 4 | 7  | 28 | TCAT | 24 | 6  |
| 247063 | 36 | 1529547 | 1529568 | 2 | 11 | 22 | TC   | 27 | 4  |
| 247064 | 36 | 1531874 | 1531889 | 2 | 8  | 16 | TG   | 23 | 3  |

|        |    |         |         |   |    |    |      |    |    |
|--------|----|---------|---------|---|----|----|------|----|----|
| 247065 | 36 | 1532431 | 1532460 | 2 | 15 | 30 | CA   | 8  | 12 |
| 247068 | 36 | 1542428 | 1542454 | 3 | 9  | 27 | CAG  | 29 | 10 |
| 247069 | 36 | 1542575 | 1542606 | 2 | 16 | 32 | GT   | 16 | 16 |
| 247070 | 36 | 1543185 | 1543236 | 2 | 26 | 52 | AC   | 10 | 11 |
| 247072 | 36 | 1548299 | 1548316 | 2 | 9  | 18 | GT   | 24 | 4  |
| 247075 | 36 | 1550888 | 1550903 | 2 | 8  | 16 | AC   | 22 | 18 |
| 247077 | 36 | 1551835 | 1551888 | 2 | 27 | 54 | GT   | 7  | 9  |
| 247079 | 36 | 1555575 | 1555604 | 2 | 15 | 30 | AC   | 19 | 8  |
| 247084 | 36 | 1560665 | 1560694 | 2 | 15 | 30 | CA   | 10 | 13 |
| 247092 | 36 | 1577787 | 1577808 | 2 | 11 | 22 | GT   | 12 | 10 |
| 247093 | 36 | 1579506 | 1579535 | 2 | 15 | 30 | GT   | 14 | 9  |
| 247094 | 36 | 1580352 | 1580381 | 2 | 15 | 30 | TG   | 25 | 11 |
| 247098 | 36 | 1583604 | 1583623 | 2 | 10 | 20 | AC   | 17 | 9  |
| 247099 | 36 | 1586963 | 1586977 | 3 | 5  | 15 | AAG  | 23 | 3  |
| 247101 | 36 | 1588869 | 1588898 | 3 | 10 | 30 | ACC  | 27 | 5  |
| 247106 | 36 | 1597178 | 1597213 | 2 | 18 | 36 | AC   | 9  | 8  |
| 247107 | 36 | 1597319 | 1597348 | 2 | 15 | 30 | TG   | 13 | 13 |
| 247109 | 36 | 1597452 | 1597481 | 2 | 15 | 30 | AC   | 17 | 9  |
| 247110 | 36 | 1597555 | 1597586 | 2 | 16 | 32 | TG   | 8  | 10 |
| 247111 | 36 | 1597685 | 1597706 | 2 | 11 | 22 | AC   | 8  | 6  |
| 247113 | 36 | 1598761 | 1598776 | 2 | 8  | 16 | TG   | 27 | 9  |
| 247114 | 36 | 1598959 | 1598990 | 2 | 16 | 32 | TG   | 23 | 13 |
| 247115 | 36 | 1603383 | 1603398 | 2 | 8  | 16 | GA   | 9  | 6  |
| 247119 | 36 | 1619265 | 1619288 | 4 | 6  | 24 | TAGC | 32 | 7  |
| 247120 | 36 | 1626799 | 1626822 | 2 | 12 | 24 | AC   | 21 | 8  |
| 247124 | 36 | 1630383 | 1630394 | 2 | 6  | 12 | CT   | 28 | 3  |
| 247125 | 36 | 1630677 | 1630714 | 2 | 19 | 38 | AC   | 7  | 7  |
| 247126 | 36 | 1636631 | 1636646 | 4 | 4  | 16 | CTTT | 30 | 3  |
| 247130 | 36 | 1644219 | 1644236 | 2 | 9  | 18 | AC   | 17 | 7  |
| 247131 | 36 | 1645544 | 1645559 | 2 | 8  | 16 | TG   | 29 | 3  |
| 247132 | 36 | 1650855 | 1650888 | 2 | 17 | 34 | TG   | 23 | 7  |
| 247133 | 36 | 1657785 | 1657799 | 3 | 5  | 15 | TCC  | 23 | 5  |
| 247138 | 36 | 1664543 | 1664558 | 4 | 4  | 16 | AAAT | 23 | 10 |
| 247142 | 36 | 1669111 | 1669122 | 2 | 6  | 12 | CA   | 10 | 3  |
| 247143 | 36 | 1669500 | 1669520 | 3 | 7  | 21 | AGG  | 30 | 12 |
| 247144 | 36 | 1669717 | 1669734 | 2 | 9  | 18 | GT   | 12 | 4  |
| 247146 | 36 | 1669817 | 1669828 | 2 | 6  | 12 | TG   | 19 | 4  |
| 247147 | 36 | 1669871 | 1669890 | 2 | 10 | 20 | GT   | 20 | 16 |
| 247148 | 36 | 1676828 | 1676845 | 3 | 6  | 18 | CCT  | 27 | 3  |
| 247149 | 36 | 1678684 | 1678721 | 2 | 19 | 38 | GT   | 12 | 9  |
| 247150 | 36 | 1682710 | 1682735 | 2 | 13 | 26 | AC   | 17 | 14 |
| 247151 | 36 | 1683237 | 1683278 | 2 | 21 | 42 | AC   | 7  | 10 |
| 247155 | 36 | 1683955 | 1683970 | 2 | 8  | 16 | AT   | 15 | 6  |
| 247157 | 36 | 1691360 | 1691401 | 2 | 21 | 42 | GT   | 6  | 7  |
| 247163 | 36 | 1698393 | 1698420 | 4 | 7  | 28 | TATC | 20 | 4  |
| 247165 | 36 | 1702596 | 1702627 | 2 | 16 | 32 | CA   | 15 | 11 |
| 247167 | 36 | 1705470 | 1705485 | 2 | 8  | 16 | TC   | 23 | 3  |
| 247174 | 36 | 1707248 | 1707295 | 2 | 24 | 48 | TG   | 11 | 12 |
| 247184 | 36 | 1738921 | 1738960 | 2 | 20 | 40 | TG   | 12 | 9  |
| 247185 | 36 | 1741859 | 1741918 | 4 | 15 | 60 | GAAA | 15 | 10 |
| 247189 | 36 | 1750041 | 1750058 | 2 | 9  | 18 | AC   | 6  | 3  |

|        |    |         |         |   |    |    |      |    |    |
|--------|----|---------|---------|---|----|----|------|----|----|
| 247190 | 36 | 1763691 | 1763705 | 3 | 5  | 15 | TAA  | 6  | 9  |
| 247195 | 36 | 1773160 | 1773180 | 3 | 7  | 21 | TCC  | 18 | 3  |
| 247197 | 36 | 1779306 | 1779337 | 2 | 16 | 32 | CA   | 10 | 10 |
| 247203 | 36 | 1789288 | 1789303 | 2 | 8  | 16 | AG   | 24 | 8  |
| 247205 | 36 | 1789428 | 1789441 | 2 | 7  | 14 | CA   | 17 | 4  |
| 247208 | 36 | 1789787 | 1789801 | 3 | 5  | 15 | GGT  | 21 | 3  |
| 247212 | 36 | 1791287 | 1791310 | 3 | 8  | 24 | TTG  | 21 | 5  |
| 247214 | 36 | 1794495 | 1794530 | 2 | 18 | 36 | TG   | 12 | 10 |
| 247215 | 36 | 1796231 | 1796242 | 2 | 6  | 12 | TG   | 16 | 4  |
| 247216 | 36 | 1796370 | 1796387 | 2 | 9  | 18 | TC   | 12 | 4  |
| 247220 | 36 | 1806102 | 1806135 | 2 | 17 | 34 | CA   | 11 | 10 |
| 247223 | 36 | 1809984 | 1809997 | 2 | 7  | 14 | AG   | 15 | 7  |
| 247228 | 36 | 1813600 | 1813633 | 2 | 17 | 34 | GT   | 18 | 9  |
| 247229 | 36 | 1813674 | 1813700 | 3 | 9  | 27 | GAG  | 12 | 4  |
| 247232 | 36 | 1815953 | 1815966 | 2 | 7  | 14 | GT   | 6  | 4  |
| 247233 | 36 | 1815969 | 1815984 | 2 | 8  | 16 | GT   | 11 | 10 |
| 247235 | 36 | 1816055 | 1816092 | 2 | 19 | 38 | TG   | 12 | 12 |
| 247237 | 36 | 1819081 | 1819101 | 3 | 7  | 21 | TGC  | 25 | 5  |
| 247239 | 36 | 1820751 | 1820764 | 2 | 7  | 14 | AG   | 11 | 5  |
| 247244 | 36 | 1829946 | 1829969 | 2 | 12 | 24 | TG   | 22 | 13 |
| 247245 | 36 | 1834978 | 1835023 | 2 | 23 | 46 | GT   | 23 | 11 |
| 247246 | 36 | 1836712 | 1836739 | 2 | 14 | 28 | AC   | 18 | 17 |
| 247249 | 36 | 1840789 | 1840810 | 2 | 11 | 22 | GT   | 20 | 7  |
| 247253 | 36 | 1846416 | 1846431 | 2 | 8  | 16 | GT   | 19 | 9  |
| 247254 | 36 | 1847874 | 1847893 | 4 | 5  | 20 | AATG | 21 | 3  |
| 247255 | 36 | 1856366 | 1856379 | 2 | 7  | 14 | TC   | 15 | 3  |
| 247256 | 36 | 1858792 | 1858807 | 2 | 8  | 16 | TC   | 21 | 6  |
| 247257 | 36 | 1859900 | 1859921 | 2 | 11 | 22 | CA   | 17 | 3  |
| 247258 | 36 | 1861799 | 1861838 | 2 | 20 | 40 | TG   | 7  | 11 |
| 247259 | 36 | 1864085 | 1864117 | 3 | 11 | 33 | TCA  | 20 | 12 |
| 247261 | 36 | 1870021 | 1870032 | 2 | 6  | 12 | TG   | 29 | 4  |
| 247266 | 36 | 1880723 | 1880736 | 2 | 7  | 14 | GT   | 27 | 3  |
| 247267 | 36 | 1880740 | 1880753 | 2 | 7  | 14 | TG   | 23 | 4  |
| 247268 | 36 | 1882017 | 1882042 | 2 | 13 | 26 | AC   | 11 | 12 |
| 247269 | 36 | 1884471 | 1884492 | 2 | 11 | 22 | TG   | 21 | 9  |
| 247275 | 36 | 1890522 | 1890543 | 2 | 11 | 22 | AC   | 20 | 9  |
| 247276 | 36 | 1891781 | 1891806 | 2 | 13 | 26 | CA   | 14 | 9  |
| 247277 | 36 | 1896135 | 1896150 | 2 | 8  | 16 | AG   | 23 | 3  |
| 247278 | 36 | 1898668 | 1898685 | 3 | 6  | 18 | TGG  | 22 | 5  |
| 247281 | 36 | 1901188 | 1901203 | 2 | 8  | 16 | AC   | 15 | 10 |
| 247284 | 36 | 1903876 | 1903893 | 3 | 6  | 18 | TGA  | 27 | 3  |
| 247286 | 36 | 1907090 | 1907109 | 2 | 10 | 20 | CA   | 22 | 14 |
| 247288 | 36 | 1908492 | 1908515 | 2 | 12 | 24 | CA   | 13 | 12 |
| 247293 | 36 | 1912700 | 1912713 | 2 | 7  | 14 | CA   | 17 | 13 |
| 247294 | 36 | 1912881 | 1912901 | 3 | 7  | 21 | AAG  | 17 | 7  |
| 247298 | 36 | 1918240 | 1918272 | 3 | 11 | 33 | CAA  | 26 | 8  |
| 247299 | 36 | 1920028 | 1920048 | 3 | 7  | 21 | AAC  | 29 | 12 |
| 247300 | 36 | 1920307 | 1920340 | 2 | 17 | 34 | AC   | 17 | 12 |
| 247305 | 36 | 1921027 | 1921047 | 3 | 7  | 21 | CCT  | 27 | 3  |
| 247306 | 36 | 1921258 | 1921273 | 4 | 4  | 16 | CTGC | 7  | 3  |
| 247307 | 36 | 1921302 | 1921325 | 4 | 6  | 24 | CAGG | 6  | 8  |

|        |    |         |         |   |    |    |      |    |    |
|--------|----|---------|---------|---|----|----|------|----|----|
| 247308 | 36 | 1921442 | 1921468 | 3 | 9  | 27 | ATT  | 16 | 8  |
| 247311 | 36 | 1934214 | 1934237 | 2 | 12 | 24 | AC   | 16 | 8  |
| 247313 | 36 | 1940750 | 1940765 | 4 | 4  | 16 | ACTG | 32 | 5  |
| 247316 | 36 | 1942200 | 1942239 | 4 | 10 | 40 | TATT | 17 | 10 |
| 247318 | 36 | 1944921 | 1944966 | 2 | 23 | 46 | GT   | 12 | 9  |
| 247319 | 36 | 1948208 | 1948240 | 3 | 11 | 33 | TCT  | 16 | 7  |
| 247320 | 36 | 1949663 | 1949677 | 3 | 5  | 15 | AAC  | 30 | 4  |
| 247322 | 36 | 1952751 | 1952768 | 2 | 9  | 18 | AG   | 24 | 6  |
| 247324 | 36 | 1969766 | 1969793 | 2 | 14 | 28 | TG   | 20 | 18 |
| 247328 | 36 | 1972086 | 1972097 | 2 | 6  | 12 | GT   | 29 | 5  |
| 247330 | 36 | 1974924 | 1974937 | 2 | 7  | 14 | AT   | 11 | 6  |
| 247332 | 36 | 1983843 | 1983856 | 2 | 7  | 14 | TG   | 23 | 4  |
| 247333 | 36 | 1986525 | 1986539 | 3 | 5  | 15 | AGA  | 25 | 8  |
| 247334 | 36 | 1987196 | 1987207 | 2 | 6  | 12 | TG   | 25 | 9  |
| 247335 | 36 | 1987241 | 1987254 | 2 | 7  | 14 | TG   | 22 | 6  |
| 247336 | 36 | 1987299 | 1987312 | 2 | 7  | 14 | GT   | 27 | 3  |
| 247337 | 36 | 1987959 | 1987970 | 2 | 6  | 12 | TG   | 26 | 3  |
| 247338 | 36 | 1988375 | 1988410 | 3 | 12 | 36 | AAC  | 26 | 8  |
| 247342 | 36 | 1994676 | 1994693 | 2 | 9  | 18 | TG   | 24 | 20 |
| 247344 | 36 | 1997998 | 1998019 | 2 | 11 | 22 | GA   | 18 | 7  |
| 247348 | 36 | 2002260 | 2002289 | 2 | 15 | 30 | AC   | 16 | 10 |
| 247351 | 36 | 2006718 | 2006761 | 2 | 22 | 44 | GT   | 7  | 9  |
| 247357 | 36 | 2010355 | 2010376 | 2 | 11 | 22 | AC   | 21 | 4  |
| 247360 | 36 | 2012720 | 2012747 | 2 | 14 | 28 | AC   | 7  | 6  |
| 247362 | 36 | 2015626 | 2015640 | 3 | 5  | 15 | GCT  | 26 | 6  |
| 247363 | 36 | 2016418 | 2016443 | 2 | 13 | 26 | CA   | 12 | 6  |
| 247370 | 36 | 2028300 | 2028323 | 2 | 12 | 24 | GT   | 23 | 12 |
| 247371 | 36 | 2031830 | 2031865 | 4 | 9  | 36 | ATTC | 26 | 6  |
| 247372 | 36 | 2033816 | 2033837 | 2 | 11 | 22 | GT   | 18 | 3  |
| 247376 | 36 | 2043699 | 2043713 | 3 | 5  | 15 | TTC  | 15 | 3  |
| 247377 | 36 | 2044355 | 2044369 | 3 | 5  | 15 | GCA  | 20 | 3  |
| 247378 | 36 | 2044610 | 2044642 | 3 | 11 | 33 | AGG  | 16 | 11 |
| 247379 | 36 | 2056164 | 2056199 | 2 | 18 | 36 | CA   | 10 | 12 |
| 247381 | 36 | 2063467 | 2063498 | 4 | 8  | 32 | CTGT | 22 | 10 |
| 247384 | 36 | 2076545 | 2076562 | 3 | 6  | 18 | GTT  | 23 | 3  |
| 247386 | 36 | 2078607 | 2078621 | 3 | 5  | 15 | AGC  | 29 | 6  |
| 247387 | 36 | 2080112 | 2080145 | 2 | 17 | 34 | TG   | 18 | 9  |
| 247389 | 36 | 2081706 | 2081721 | 2 | 8  | 16 | GA   | 19 | 7  |
| 247397 | 36 | 2094513 | 2094532 | 4 | 5  | 20 | GACT | 26 | 4  |
| 247398 | 36 | 2100488 | 2100517 | 3 | 10 | 30 | GAG  | 28 | 7  |
| 247399 | 36 | 2100754 | 2100781 | 2 | 14 | 28 | GT   | 17 | 8  |
| 247400 | 36 | 2100968 | 2100989 | 2 | 11 | 22 | GT   | 20 | 9  |
| 247401 | 36 | 2101561 | 2101572 | 2 | 6  | 12 | TG   | 27 | 5  |
| 247406 | 36 | 2105079 | 2105094 | 2 | 8  | 16 | GA   | 20 | 10 |
| 247407 | 36 | 2107223 | 2107254 | 2 | 16 | 32 | TG   | 14 | 14 |
| 247408 | 36 | 2107900 | 2107923 | 2 | 12 | 24 | TG   | 24 | 8  |
| 247410 | 36 | 2108602 | 2108625 | 2 | 12 | 24 | AC   | 19 | 4  |
| 247411 | 36 | 2108990 | 2109027 | 2 | 19 | 38 | TG   | 9  | 9  |
| 247412 | 36 | 2109181 | 2109208 | 2 | 14 | 28 | TG   | 23 | 8  |
| 247413 | 36 | 2109310 | 2109327 | 2 | 9  | 18 | GT   | 12 | 11 |
| 247416 | 36 | 2110643 | 2110660 | 3 | 6  | 18 | TTC  | 15 | 4  |

|        |    |         |         |   |    |    |      |    |    |
|--------|----|---------|---------|---|----|----|------|----|----|
| 247419 | 36 | 2115773 | 2115786 | 2 | 7  | 14 | CA   | 31 | 5  |
| 247421 | 36 | 2117731 | 2117746 | 4 | 4  | 16 | TTAT | 21 | 3  |
| 247423 | 36 | 2120753 | 2120782 | 3 | 10 | 30 | GAG  | 15 | 8  |
| 247427 | 36 | 2122680 | 2122697 | 2 | 9  | 18 | AG   | 28 | 3  |
| 247430 | 36 | 2124715 | 2124732 | 2 | 9  | 18 | GA   | 16 | 6  |
| 247432 | 36 | 2131337 | 2131360 | 3 | 8  | 24 | CCT  | 19 | 6  |
| 247439 | 36 | 2142998 | 2143009 | 2 | 6  | 12 | AC   | 22 | 13 |
| 247440 | 36 | 2143481 | 2143494 | 2 | 7  | 14 | TG   | 17 | 5  |
| 247441 | 36 | 2144457 | 2144470 | 2 | 7  | 14 | TA   | 17 | 3  |
| 247442 | 36 | 2148557 | 2148577 | 3 | 7  | 21 | AGG  | 23 | 3  |
| 247443 | 36 | 2149757 | 2149768 | 2 | 6  | 12 | GA   | 27 | 3  |
| 247445 | 36 | 2153452 | 2153475 | 4 | 6  | 24 | TGAA | 20 | 17 |
| 247447 | 36 | 2157020 | 2157049 | 3 | 10 | 30 | TGT  | 28 | 12 |
| 247451 | 36 | 2162756 | 2162770 | 3 | 5  | 15 | CTT  | 28 | 3  |
| 247456 | 36 | 2174263 | 2174278 | 2 | 8  | 16 | TG   | 22 | 6  |
| 247458 | 36 | 2176225 | 2176239 | 3 | 5  | 15 | AGC  | 23 | 3  |
| 247459 | 36 | 2176503 | 2176523 | 3 | 7  | 21 | CTG  | 18 | 3  |
| 247460 | 36 | 2176708 | 2176719 | 2 | 6  | 12 | CT   | 21 | 9  |
| 247462 | 36 | 2181475 | 2181492 | 2 | 9  | 18 | GT   | 22 | 18 |
| 247465 | 36 | 2188619 | 2188634 | 2 | 8  | 16 | CA   | 23 | 8  |
| 247468 | 36 | 2191888 | 2191915 | 2 | 14 | 28 | AC   | 12 | 15 |
| 247475 | 36 | 2206973 | 2207006 | 2 | 17 | 34 | CT   | 19 | 8  |
| 247477 | 36 | 2207504 | 2207521 | 2 | 9  | 18 | CA   | 29 | 11 |
| 247479 | 36 | 2213966 | 2213987 | 2 | 11 | 22 | TG   | 17 | 3  |
| 247481 | 36 | 2219890 | 2219915 | 2 | 13 | 26 | AC   | 7  | 9  |
| 247484 | 36 | 2226358 | 2226369 | 2 | 6  | 12 | CA   | 21 | 4  |
| 247485 | 36 | 2229330 | 2229357 | 2 | 14 | 28 | CA   | 12 | 4  |
| 247486 | 36 | 2232482 | 2232495 | 2 | 7  | 14 | AT   | 22 | 3  |
| 247489 | 36 | 2234840 | 2234865 | 2 | 13 | 26 | AC   | 8  | 9  |
| 247490 | 36 | 2235302 | 2235316 | 3 | 5  | 15 | TAA  | 23 | 3  |
| 247492 | 36 | 2241453 | 2241468 | 4 | 4  | 16 | CAAA | 20 | 5  |
| 247494 | 36 | 2256171 | 2256214 | 2 | 22 | 44 | GT   | 6  | 8  |
| 247495 | 36 | 2256363 | 2256396 | 2 | 17 | 34 | GT   | 10 | 9  |
| 247499 | 36 | 2268384 | 2268399 | 2 | 8  | 16 | CT   | 22 | 3  |
| 247505 | 36 | 2286534 | 2286547 | 2 | 7  | 14 | AC   | 27 | 12 |
| 247508 | 36 | 2292999 | 2293018 | 4 | 5  | 20 | AAAT | 24 | 4  |
| 247511 | 36 | 2297656 | 2297675 | 2 | 10 | 20 | AC   | 15 | 7  |
| 247515 | 36 | 2313220 | 2313234 | 3 | 5  | 15 | TGC  | 23 | 6  |
| 247516 | 36 | 2313530 | 2313565 | 2 | 18 | 36 | GT   | 11 | 12 |
| 247523 | 36 | 2322315 | 2322341 | 3 | 9  | 27 | AAG  | 15 | 5  |
| 247524 | 36 | 2322463 | 2322478 | 2 | 8  | 16 | CA   | 16 | 3  |
| 247531 | 36 | 2345541 | 2345560 | 2 | 10 | 20 | AC   | 21 | 4  |
| 247532 | 36 | 2347567 | 2347582 | 4 | 4  | 16 | TCTG | 32 | 4  |
| 247533 | 36 | 2351009 | 2351040 | 4 | 8  | 32 | CATC | 25 | 9  |
| 247537 | 36 | 2376832 | 2376857 | 2 | 13 | 26 | AC   | 16 | 8  |
| 247540 | 36 | 2378499 | 2378516 | 3 | 6  | 18 | TCT  | 21 | 9  |
| 247541 | 36 | 2378742 | 2378765 | 3 | 8  | 24 | AGG  | 17 | 4  |
| 247542 | 36 | 2379021 | 2379041 | 3 | 7  | 21 | AAG  | 14 | 6  |
| 247543 | 36 | 2380053 | 2380064 | 2 | 6  | 12 | TC   | 21 | 5  |
| 247544 | 36 | 2382019 | 2382042 | 2 | 12 | 24 | GT   | 16 | 9  |
| 247547 | 36 | 2382168 | 2382187 | 2 | 10 | 20 | GT   | 7  | 9  |

|        |    |         |         |   |    |    |      |    |    |
|--------|----|---------|---------|---|----|----|------|----|----|
| 247550 | 36 | 2382504 | 2382515 | 2 | 6  | 12 | GT   | 12 | 7  |
| 247551 | 36 | 2382912 | 2382926 | 3 | 5  | 15 | CTT  | 26 | 8  |
| 247552 | 36 | 2383232 | 2383247 | 2 | 8  | 16 | TC   | 15 | 3  |
| 247555 | 36 | 2388526 | 2388555 | 2 | 15 | 30 | GA   | 16 | 9  |
| 247559 | 36 | 2392367 | 2392396 | 3 | 10 | 30 | AGA  | 20 | 7  |
| 247563 | 36 | 2400442 | 2400456 | 3 | 5  | 15 | GTT  | 26 | 4  |
| 247593 | 36 | 2453418 | 2453455 | 2 | 19 | 38 | TG   | 11 | 11 |
| 247594 | 36 | 2453694 | 2453711 | 2 | 9  | 18 | CT   | 23 | 5  |
| 247596 | 36 | 2459709 | 2459730 | 2 | 11 | 22 | AG   | 9  | 6  |
| 247600 | 36 | 2465397 | 2465426 | 2 | 15 | 30 | AC   | 21 | 10 |
| 247602 | 36 | 2472720 | 2472743 | 2 | 12 | 24 | CA   | 19 | 13 |
| 247603 | 36 | 2472922 | 2472933 | 2 | 6  | 12 | CA   | 30 | 6  |
| 247604 | 36 | 2473056 | 2473079 | 2 | 12 | 24 | GT   | 10 | 7  |
| 247606 | 36 | 2476380 | 2476419 | 2 | 20 | 40 | GT   | 8  | 8  |
| 247609 | 36 | 2481248 | 2481281 | 2 | 17 | 34 | GT   | 10 | 10 |
| 247610 | 36 | 2481825 | 2481836 | 2 | 6  | 12 | GT   | 28 | 4  |
| 247611 | 36 | 2484828 | 2484843 | 2 | 8  | 16 | CA   | 25 | 13 |
| 247612 | 36 | 2484991 | 2485006 | 4 | 4  | 16 | TAGA | 20 | 8  |
| 247626 | 36 | 2502695 | 2502710 | 2 | 8  | 16 | AC   | 21 | 7  |
| 247637 | 36 | 2522933 | 2522968 | 2 | 18 | 36 | CA   | 18 | 13 |
| 247640 | 36 | 2528012 | 2528031 | 2 | 10 | 20 | TG   | 19 | 9  |
| 247641 | 36 | 2528153 | 2528172 | 2 | 10 | 20 | GT   | 10 | 10 |
| 247642 | 36 | 2528487 | 2528512 | 2 | 13 | 26 | AC   | 7  | 10 |
| 247651 | 36 | 2545221 | 2545232 | 2 | 6  | 12 | CT   | 19 | 3  |
| 247653 | 36 | 2547910 | 2547935 | 2 | 13 | 26 | AC   | 19 | 10 |
| 247654 | 36 | 2550201 | 2550230 | 2 | 15 | 30 | CA   | 8  | 3  |
| 247658 | 36 | 2563012 | 2563026 | 3 | 5  | 15 | GCC  | 28 | 9  |
| 247659 | 36 | 2563363 | 2563378 | 4 | 4  | 16 | TGTC | 27 | 3  |
| 247663 | 36 | 2572684 | 2572695 | 2 | 6  | 12 | AT   | 17 | 4  |
| 247664 | 36 | 2575084 | 2575095 | 2 | 6  | 12 | AG   | 27 | 5  |
| 247665 | 36 | 2575233 | 2575254 | 2 | 11 | 22 | CA   | 7  | 7  |
| 247666 | 36 | 2575455 | 2575470 | 2 | 8  | 16 | CA   | 18 | 7  |
| 247676 | 36 | 2584075 | 2584092 | 2 | 9  | 18 | CT   | 12 | 4  |
| 247678 | 36 | 2584815 | 2584829 | 3 | 5  | 15 | ATA  | 28 | 5  |
| 247683 | 36 | 2586964 | 2586985 | 2 | 11 | 22 | AG   | 17 | 6  |
| 247686 | 36 | 2587700 | 2587723 | 4 | 6  | 24 | AAAG | 20 | 12 |
| 247688 | 36 | 2588849 | 2588874 | 2 | 13 | 26 | TG   | 18 | 14 |
| 247691 | 36 | 2589218 | 2589255 | 2 | 19 | 38 | TG   | 7  | 11 |
| 247694 | 36 | 2590385 | 2590400 | 2 | 8  | 16 | TC   | 13 | 14 |
| 247695 | 36 | 2590429 | 2590442 | 2 | 7  | 14 | CT   | 10 | 3  |
| 247696 | 36 | 2590935 | 2590948 | 2 | 7  | 14 | CT   | 21 | 6  |
| 247698 | 36 | 2591971 | 2591984 | 2 | 7  | 14 | TA   | 9  | 4  |
| 247705 | 36 | 2594348 | 2594362 | 3 | 5  | 15 | TCC  | 22 | 6  |
| 247708 | 36 | 2594779 | 2594792 | 2 | 7  | 14 | AC   | 21 | 3  |
| 247709 | 36 | 2595177 | 2595192 | 2 | 8  | 16 | AG   | 21 | 4  |
| 247710 | 36 | 2595193 | 2595208 | 4 | 4  | 16 | AAAG | 21 | 4  |
| 247712 | 36 | 2595545 | 2595570 | 2 | 13 | 26 | GT   | 17 | 15 |
| 247717 | 36 | 2597560 | 2597579 | 2 | 10 | 20 | TG   | 19 | 12 |
| 247720 | 36 | 2598202 | 2598223 | 2 | 11 | 22 | TG   | 13 | 9  |
| 247721 | 36 | 2598428 | 2598445 | 2 | 9  | 18 | CA   | 19 | 10 |
| 247724 | 36 | 2606787 | 2606807 | 3 | 7  | 21 | GGA  | 21 | 12 |

|        |    |         |         |   |    |    |      |    |    |
|--------|----|---------|---------|---|----|----|------|----|----|
| 247726 | 36 | 2609803 | 2609824 | 2 | 11 | 22 | GT   | 24 | 7  |
| 247727 | 36 | 2610031 | 2610048 | 2 | 9  | 18 | GT   | 15 | 10 |
| 247728 | 36 | 2610051 | 2610062 | 2 | 6  | 12 | GT   | 13 | 5  |
| 247730 | 36 | 2611579 | 2611598 | 2 | 10 | 20 | GT   | 11 | 5  |
| 247736 | 36 | 2617605 | 2617634 | 2 | 15 | 30 | AC   | 12 | 7  |
| 247737 | 36 | 2618483 | 2618494 | 2 | 6  | 12 | AG   | 20 | 5  |
| 247744 | 36 | 2623753 | 2623766 | 2 | 7  | 14 | AT   | 13 | 5  |
| 247745 | 36 | 2623849 | 2623869 | 3 | 7  | 21 | ATC  | 20 | 3  |
| 247752 | 36 | 2629270 | 2629283 | 2 | 7  | 14 | TC   | 16 | 4  |
| 247757 | 36 | 2635645 | 2635676 | 2 | 16 | 32 | TG   | 13 | 12 |
| 247758 | 36 | 2635804 | 2635823 | 2 | 10 | 20 | CT   | 25 | 6  |
| 247760 | 36 | 2642469 | 2642482 | 2 | 7  | 14 | AG   | 12 | 7  |
| 247761 | 36 | 2642742 | 2642765 | 3 | 8  | 24 | AGG  | 18 | 5  |
| 247764 | 36 | 2644977 | 2644992 | 4 | 4  | 16 | CCAG | 22 | 3  |
| 247766 | 36 | 2654280 | 2654299 | 2 | 10 | 20 | TG   | 21 | 7  |
| 247768 | 36 | 2655358 | 2655409 | 2 | 26 | 52 | AG   | 6  | 9  |
| 247776 | 36 | 2666280 | 2666303 | 3 | 8  | 24 | CAA  | 22 | 5  |
| 247777 | 36 | 2667698 | 2667713 | 2 | 8  | 16 | AC   | 18 | 4  |
| 247778 | 36 | 2667799 | 2667836 | 2 | 19 | 38 | TG   | 10 | 11 |
| 247779 | 36 | 2670502 | 2670515 | 2 | 7  | 14 | AT   | 11 | 8  |
| 247780 | 36 | 2671988 | 2672021 | 2 | 17 | 34 | CA   | 9  | 11 |
| 247785 | 36 | 2673950 | 2673987 | 2 | 19 | 38 | TG   | 7  | 4  |
| 247790 | 36 | 2674292 | 2674324 | 3 | 11 | 33 | TCT  | 8  | 8  |
| 247791 | 36 | 2674391 | 2674404 | 2 | 7  | 14 | CA   | 17 | 4  |
| 247792 | 36 | 2674510 | 2674524 | 3 | 5  | 15 | CCT  | 18 | 4  |
| 247793 | 36 | 2674980 | 2674997 | 2 | 9  | 18 | GT   | 16 | 7  |
| 247794 | 36 | 2676941 | 2676970 | 2 | 15 | 30 | AC   | 8  | 7  |
| 247795 | 36 | 2677291 | 2677308 | 2 | 9  | 18 | AC   | 17 | 6  |
| 247796 | 36 | 2677391 | 2677404 | 2 | 7  | 14 | CA   | 21 | 5  |
| 247800 | 36 | 2684439 | 2684453 | 3 | 5  | 15 | CCT  | 9  | 5  |
| 247802 | 36 | 2685230 | 2685245 | 2 | 8  | 16 | GT   | 16 | 12 |
| 247806 | 36 | 2687517 | 2687538 | 2 | 11 | 22 | AG   | 12 | 4  |
| 247812 | 36 | 2688857 | 2688868 | 2 | 6  | 12 | GT   | 12 | 4  |
| 247813 | 36 | 2690329 | 2690344 | 4 | 4  | 16 | GAAA | 18 | 4  |
| 247815 | 36 | 2691856 | 2691871 | 4 | 4  | 16 | GAGG | 6  | 3  |
| 247816 | 36 | 2692169 | 2692190 | 2 | 11 | 22 | AC   | 26 | 6  |
| 247817 | 36 | 2692563 | 2692578 | 2 | 8  | 16 | AT   | 10 | 8  |
| 247818 | 36 | 2693873 | 2693898 | 2 | 13 | 26 | CA   | 20 | 8  |
| 247819 | 36 | 2694790 | 2694821 | 2 | 16 | 32 | TG   | 6  | 9  |
| 247820 | 36 | 2701789 | 2701812 | 2 | 12 | 24 | AC   | 14 | 8  |
| 247821 | 36 | 2701994 | 2702013 | 2 | 10 | 20 | CA   | 18 | 7  |
| 247823 | 36 | 2702285 | 2702300 | 2 | 8  | 16 | AC   | 15 | 14 |
| 247826 | 36 | 2711938 | 2711964 | 3 | 9  | 27 | CAG  | 33 | 6  |
| 247834 | 36 | 2726529 | 2726546 | 2 | 9  | 18 | CA   | 12 | 13 |
| 247835 | 36 | 2731147 | 2731161 | 3 | 5  | 15 | GCT  | 22 | 3  |
| 247838 | 36 | 2733882 | 2733909 | 2 | 14 | 28 | GT   | 16 | 5  |
| 247841 | 36 | 2735328 | 2735351 | 2 | 12 | 24 | CA   | 16 | 12 |
| 247843 | 36 | 2737859 | 2737872 | 2 | 7  | 14 | TG   | 16 | 6  |
| 247845 | 36 | 2740269 | 2740283 | 3 | 5  | 15 | ATA  | 14 | 6  |
| 247846 | 36 | 2740543 | 2740558 | 2 | 8  | 16 | TG   | 23 | 7  |
| 247848 | 36 | 2747689 | 2747710 | 2 | 11 | 22 | AC   | 15 | 5  |

|        |    |         |         |   |    |    |      |    |    |
|--------|----|---------|---------|---|----|----|------|----|----|
| 247851 | 36 | 2757958 | 2757985 | 2 | 14 | 28 | CA   | 21 | 12 |
| 247854 | 36 | 2768185 | 2768220 | 2 | 18 | 36 | AC   | 13 | 12 |
| 247857 | 36 | 2768500 | 2768523 | 3 | 8  | 24 | TTC  | 6  | 4  |
| 247858 | 36 | 2769025 | 2769036 | 2 | 6  | 12 | AC   | 6  | 4  |
| 247866 | 36 | 2777865 | 2777890 | 2 | 13 | 26 | AC   | 16 | 15 |
| 247869 | 36 | 2781454 | 2781467 | 2 | 7  | 14 | TG   | 19 | 6  |
| 247870 | 36 | 2781686 | 2781707 | 2 | 11 | 22 | TG   | 17 | 13 |
| 247871 | 36 | 2782992 | 2783019 | 2 | 14 | 28 | AC   | 16 | 6  |
| 247872 | 36 | 2783538 | 2783577 | 2 | 20 | 40 | CA   | 10 | 14 |
| 247877 | 36 | 2793960 | 2793979 | 4 | 5  | 20 | AGAA | 16 | 4  |
| 247878 | 36 | 2794235 | 2794249 | 3 | 5  | 15 | ACT  | 31 | 3  |
| 247879 | 36 | 2795284 | 2795316 | 3 | 11 | 33 | CCT  | 12 | 12 |
| 247880 | 36 | 2795920 | 2795937 | 3 | 6  | 18 | GAA  | 7  | 4  |
| 247883 | 36 | 2798139 | 2798160 | 2 | 11 | 22 | TG   | 15 | 4  |
| 247884 | 36 | 2798317 | 2798331 | 3 | 5  | 15 | GGT  | 8  | 4  |
| 247885 | 36 | 2798663 | 2798680 | 2 | 9  | 18 | CT   | 19 | 8  |
| 247886 | 36 | 2798718 | 2798738 | 3 | 7  | 21 | TCC  | 21 | 3  |
| 247893 | 36 | 2817309 | 2817323 | 3 | 5  | 15 | GAA  | 27 | 4  |
| 247900 | 36 | 2836623 | 2836643 | 3 | 7  | 21 | CAG  | 23 | 7  |
| 247902 | 36 | 2843836 | 2843853 | 2 | 9  | 18 | TG   | 23 | 8  |
| 247917 | 36 | 2868887 | 2868900 | 2 | 7  | 14 | TC   | 26 | 8  |
| 247919 | 36 | 2869387 | 2869400 | 2 | 7  | 14 | TC   | 32 | 4  |
| 247924 | 36 | 2901324 | 2901335 | 2 | 6  | 12 | AC   | 30 | 3  |
| 247926 | 36 | 2907132 | 2907145 | 2 | 7  | 14 | TC   | 26 | 4  |
| 247928 | 36 | 2915011 | 2915022 | 2 | 6  | 12 | TG   | 31 | 3  |
| 247935 | 36 | 2925791 | 2925805 | 3 | 5  | 15 | ATA  | 30 | 3  |
| 247938 | 36 | 2931482 | 2931499 | 2 | 9  | 18 | AC   | 18 | 6  |
| 247942 | 36 | 2933922 | 2933945 | 2 | 12 | 24 | AG   | 22 | 8  |
| 247946 | 36 | 2938693 | 2938724 | 2 | 16 | 32 | AC   | 8  | 9  |
| 247953 | 36 | 2946434 | 2946455 | 2 | 11 | 22 | AC   | 23 | 9  |
| 247958 | 36 | 2951462 | 2951476 | 3 | 5  | 15 | GGC  | 28 | 14 |
| 247959 | 36 | 2952226 | 2952245 | 2 | 10 | 20 | GA   | 17 | 13 |
| 247964 | 36 | 2956369 | 2956392 | 4 | 6  | 24 | ATCT | 24 | 6  |
| 247965 | 36 | 2957184 | 2957203 | 2 | 10 | 20 | TG   | 19 | 7  |
| 247977 | 36 | 2983981 | 2984004 | 3 | 8  | 24 | TCT  | 13 | 5  |
| 247986 | 36 | 2989907 | 2989924 | 3 | 6  | 18 | TAA  | 22 | 4  |
| 247990 | 36 | 2993424 | 2993447 | 3 | 8  | 24 | TCC  | 10 | 3  |
| 247992 | 36 | 2994210 | 2994239 | 3 | 10 | 30 | CTC  | 11 | 6  |
| 248000 | 36 | 3002704 | 3002721 | 2 | 9  | 18 | AC   | 9  | 3  |
| 248001 | 36 | 3002883 | 3002902 | 2 | 10 | 20 | TG   | 20 | 8  |
| 248004 | 36 | 3004536 | 3004568 | 3 | 11 | 33 | GGA  | 16 | 6  |
| 248006 | 36 | 3009220 | 3009233 | 2 | 7  | 14 | GT   | 24 | 4  |
| 248009 | 36 | 3009771 | 3009788 | 2 | 9  | 18 | GT   | 19 | 13 |
| 248010 | 36 | 3010470 | 3010485 | 4 | 4  | 16 | CCAG | 9  | 3  |
| 248011 | 36 | 3010647 | 3010666 | 2 | 10 | 20 | CA   | 25 | 4  |
| 248013 | 36 | 3013100 | 3013129 | 2 | 15 | 30 | GT   | 9  | 9  |
| 248015 | 36 | 3015052 | 3015101 | 2 | 25 | 50 | GT   | 19 | 10 |
| 248020 | 36 | 3018803 | 3018822 | 2 | 10 | 20 | TG   | 22 | 6  |
| 248026 | 36 | 3025463 | 3025496 | 2 | 17 | 34 | AC   | 14 | 10 |
| 248027 | 36 | 3025765 | 3025791 | 3 | 9  | 27 | GAA  | 29 | 3  |
| 248028 | 36 | 3026105 | 3026126 | 2 | 11 | 22 | TG   | 18 | 9  |



|        |    |         |         |   |    |    |      |    |    |
|--------|----|---------|---------|---|----|----|------|----|----|
| 248030 | 36 | 3030953 | 3030970 | 2 | 9  | 18 | AG   | 14 | 3  |
| 248033 | 36 | 3033531 | 3033552 | 2 | 11 | 22 | TG   | 30 | 9  |
| 248035 | 36 | 3036718 | 3036733 | 2 | 8  | 16 | TG   | 19 | 5  |
| 248036 | 36 | 3036977 | 3036988 | 2 | 6  | 12 | AC   | 19 | 4  |
| 248040 | 36 | 3051095 | 3051112 | 3 | 6  | 18 | CAG  | 26 | 5  |
| 248042 | 36 | 3054138 | 3054149 | 2 | 6  | 12 | TG   | 11 | 7  |
| 248061 | 36 | 3094622 | 3094639 | 2 | 9  | 18 | CA   | 23 | 7  |
| 248062 | 36 | 3094828 | 3094854 | 3 | 9  | 27 | GAG  | 6  | 4  |
| 248064 | 36 | 3095097 | 3095110 | 2 | 7  | 14 | AC   | 16 | 4  |
| 248067 | 36 | 3100887 | 3100898 | 2 | 6  | 12 | AC   | 13 | 6  |
| 248070 | 36 | 3101437 | 3101458 | 2 | 11 | 22 | TG   | 21 | 6  |
| 248078 | 36 | 3117283 | 3117314 | 2 | 16 | 32 | TG   | 20 | 7  |
| 248080 | 36 | 3117604 | 3117636 | 3 | 11 | 33 | TGT  | 22 | 9  |
| 248082 | 36 | 3122048 | 3122069 | 2 | 11 | 22 | TC   | 20 | 9  |
| 248083 | 36 | 3123610 | 3123630 | 3 | 7  | 21 | TTG  | 24 | 11 |
| 248084 | 36 | 3125135 | 3125188 | 3 | 18 | 54 | TTC  | 17 | 13 |
| 248089 | 36 | 3127913 | 3127938 | 2 | 13 | 26 | TG   | 15 | 9  |
| 248090 | 36 | 3129221 | 3129235 | 3 | 5  | 15 | CAC  | 22 | 3  |
| 248092 | 36 | 3132085 | 3132108 | 2 | 12 | 24 | CA   | 15 | 9  |
| 248098 | 36 | 3141160 | 3141183 | 3 | 8  | 24 | CAG  | 19 | 3  |
| 248102 | 36 | 3144062 | 3144089 | 2 | 14 | 28 | AC   | 8  | 9  |
| 248107 | 36 | 3149180 | 3149195 | 2 | 8  | 16 | CT   | 17 | 3  |
| 248110 | 36 | 3149744 | 3149773 | 2 | 15 | 30 | GT   | 22 | 7  |
| 248116 | 36 | 3164270 | 3164289 | 2 | 10 | 20 | CA   | 12 | 9  |
| 248117 | 36 | 3165537 | 3165563 | 3 | 9  | 27 | GAG  | 15 | 7  |
| 248119 | 36 | 3165731 | 3165746 | 2 | 8  | 16 | AG   | 19 | 4  |
| 248131 | 36 | 3175427 | 3175460 | 2 | 17 | 34 | AC   | 7  | 9  |
| 248133 | 36 | 3176551 | 3176574 | 3 | 8  | 24 | AGC  | 23 | 10 |
| 248138 | 36 | 3178326 | 3178339 | 2 | 7  | 14 | AC   | 17 | 3  |
| 248145 | 36 | 3179927 | 3179940 | 2 | 7  | 14 | TC   | 12 | 5  |
| 248148 | 36 | 3180743 | 3180760 | 3 | 6  | 18 | GAG  | 10 | 4  |
| 248149 | 36 | 3180976 | 3181001 | 2 | 13 | 26 | GT   | 15 | 6  |
| 248150 | 36 | 3181972 | 3181987 | 2 | 8  | 16 | GT   | 12 | 4  |
| 248151 | 36 | 3182013 | 3182036 | 2 | 12 | 24 | GT   | 13 | 10 |
| 248154 | 36 | 3183380 | 3183399 | 2 | 10 | 20 | AG   | 24 | 7  |
| 248158 | 36 | 3186188 | 3186202 | 3 | 5  | 15 | GGA  | 30 | 3  |
| 248160 | 36 | 3186898 | 3186909 | 2 | 6  | 12 | TG   | 14 | 3  |
| 248161 | 36 | 3186962 | 3186981 | 2 | 10 | 20 | AC   | 13 | 9  |
| 248162 | 36 | 3187141 | 3187168 | 2 | 14 | 28 | TC   | 16 | 6  |
| 248165 | 36 | 3190736 | 3190767 | 2 | 16 | 32 | CA   | 22 | 9  |
| 248166 | 36 | 3191233 | 3191246 | 2 | 7  | 14 | TG   | 27 | 4  |
| 248167 | 36 | 3194277 | 3194304 | 2 | 14 | 28 | TG   | 18 | 7  |
| 248170 | 36 | 3197696 | 3197719 | 2 | 12 | 24 | GT   | 17 | 6  |
| 248172 | 36 | 3198865 | 3198879 | 3 | 5  | 15 | AAG  | 12 | 4  |
| 248173 | 36 | 3198880 | 3198894 | 3 | 5  | 15 | GAG  | 26 | 5  |
| 248175 | 36 | 3199019 | 3199030 | 2 | 6  | 12 | TG   | 21 | 5  |
| 248179 | 36 | 3201215 | 3201234 | 2 | 10 | 20 | CT   | 14 | 4  |
| 248183 | 36 | 3202993 | 3203024 | 4 | 8  | 32 | AGAA | 17 | 5  |
| 248189 | 36 | 3205376 | 3205397 | 2 | 11 | 22 | AC   | 13 | 9  |
| 248192 | 36 | 3207282 | 3207325 | 2 | 22 | 44 | GT   | 19 | 13 |
| 248197 | 36 | 3211257 | 3211276 | 2 | 10 | 20 | TG   | 25 | 11 |

|        |    |         |         |   |    |    |      |    |    |
|--------|----|---------|---------|---|----|----|------|----|----|
| 248204 | 36 | 3213753 | 3213776 | 2 | 12 | 24 | CA   | 19 | 12 |
| 248205 | 36 | 3215812 | 3215839 | 2 | 14 | 28 | CA   | 13 | 13 |
| 248209 | 36 | 3216870 | 3216885 | 2 | 8  | 16 | CA   | 14 | 3  |
| 248214 | 36 | 3219818 | 3219837 | 2 | 10 | 20 | CT   | 7  | 4  |
| 248219 | 36 | 3223871 | 3223888 | 3 | 6  | 18 | CCT  | 25 | 4  |
| 248222 | 36 | 3227473 | 3227500 | 2 | 14 | 28 | AC   | 15 | 6  |
| 248241 | 36 | 3248673 | 3248702 | 2 | 15 | 30 | CA   | 15 | 14 |
| 248243 | 36 | 3258124 | 3258161 | 2 | 19 | 38 | AC   | 7  | 9  |
| 248244 | 36 | 3260828 | 3260839 | 2 | 6  | 12 | TC   | 19 | 4  |
| 248250 | 36 | 3276958 | 3276997 | 2 | 20 | 40 | GT   | 7  | 9  |
| 248251 | 36 | 3277321 | 3277335 | 3 | 5  | 15 | GAA  | 14 | 3  |
| 248252 | 36 | 3277339 | 3277353 | 3 | 5  | 15 | GAA  | 16 | 3  |
| 248254 | 36 | 3278749 | 3278764 | 2 | 8  | 16 | GT   | 20 | 4  |
| 248255 | 36 | 3282373 | 3282402 | 2 | 15 | 30 | CA   | 7  | 8  |
| 248259 | 36 | 3285086 | 3285103 | 2 | 9  | 18 | AC   | 7  | 7  |
| 248260 | 36 | 3285131 | 3285142 | 2 | 6  | 12 | CA   | 11 | 3  |
| 248263 | 36 | 3287665 | 3287680 | 4 | 4  | 16 | TTTA | 27 | 5  |
| 248266 | 36 | 3289321 | 3289340 | 2 | 10 | 20 | CA   | 18 | 9  |
| 248268 | 36 | 3295006 | 3295023 | 2 | 9  | 18 | GT   | 14 | 9  |
| 248269 | 36 | 3295748 | 3295761 | 2 | 7  | 14 | GT   | 18 | 11 |
| 248270 | 36 | 3296457 | 3296476 | 2 | 10 | 20 | AC   | 19 | 7  |
| 248272 | 36 | 3297419 | 3297445 | 3 | 9  | 27 | GGA  | 18 | 5  |
| 248280 | 36 | 3305026 | 3305039 | 2 | 7  | 14 | CA   | 26 | 3  |
| 248286 | 36 | 3308573 | 3308604 | 2 | 16 | 32 | CA   | 11 | 11 |
| 248288 | 36 | 3310814 | 3310829 | 4 | 4  | 16 | CTTT | 16 | 7  |
| 248289 | 36 | 3311315 | 3311326 | 2 | 6  | 12 | GA   | 23 | 8  |
| 248294 | 36 | 3322276 | 3322290 | 3 | 5  | 15 | GCT  | 31 | 3  |
| 248295 | 36 | 3324041 | 3324076 | 2 | 18 | 36 | CA   | 8  | 11 |
| 248296 | 36 | 3325271 | 3325291 | 3 | 7  | 21 | GGA  | 12 | 3  |
| 248297 | 36 | 3325395 | 3325408 | 2 | 7  | 14 | CT   | 19 | 4  |
| 248301 | 36 | 3332592 | 3332603 | 2 | 6  | 12 | AC   | 35 | 6  |
| 248306 | 36 | 3341079 | 3341120 | 2 | 21 | 42 | GT   | 8  | 10 |
| 248307 | 36 | 3341370 | 3341401 | 2 | 16 | 32 | TG   | 17 | 13 |
| 248308 | 36 | 3341871 | 3341886 | 2 | 8  | 16 | TA   | 23 | 6  |
| 248317 | 36 | 3364000 | 3364023 | 3 | 8  | 24 | TTC  | 16 | 17 |
| 248318 | 36 | 3365156 | 3365169 | 2 | 7  | 14 | CT   | 12 | 3  |
| 248319 | 36 | 3365484 | 3365495 | 2 | 6  | 12 | GT   | 22 | 8  |
| 248320 | 36 | 3365498 | 3365509 | 2 | 6  | 12 | GT   | 20 | 8  |
| 248330 | 36 | 3384284 | 3384295 | 2 | 6  | 12 | TC   | 14 | 4  |
| 248336 | 36 | 3391900 | 3391917 | 2 | 9  | 18 | AC   | 25 | 6  |
| 248340 | 36 | 3400004 | 3400049 | 2 | 23 | 46 | CA   | 8  | 8  |
| 248344 | 36 | 3408121 | 3408138 | 2 | 9  | 18 | CT   | 14 | 4  |
| 248349 | 36 | 3414156 | 3414182 | 3 | 9  | 27 | GCA  | 23 | 9  |
| 248365 | 36 | 3425940 | 3425969 | 3 | 10 | 30 | AGA  | 13 | 5  |
| 248367 | 36 | 3429528 | 3429555 | 2 | 14 | 28 | GT   | 20 | 10 |
| 248368 | 36 | 3431417 | 3431432 | 4 | 4  | 16 | AATC | 26 | 8  |
| 248371 | 36 | 3433249 | 3433269 | 3 | 7  | 21 | AAT  | 19 | 4  |
| 248375 | 36 | 3435201 | 3435216 | 2 | 8  | 16 | GA   | 28 | 8  |
| 248377 | 36 | 3439623 | 3439646 | 2 | 12 | 24 | CA   | 27 | 4  |
| 248378 | 36 | 3441827 | 3441862 | 3 | 12 | 36 | CCT  | 21 | 15 |
| 248381 | 36 | 3446353 | 3446374 | 2 | 11 | 22 | TC   | 18 | 5  |

|        |    |         |         |   |    |    |      |    |    |
|--------|----|---------|---------|---|----|----|------|----|----|
| 248383 | 36 | 3449662 | 3449677 | 2 | 8  | 16 | TG   | 7  | 7  |
| 248385 | 36 | 3450101 | 3450116 | 4 | 4  | 16 | CAAA | 32 | 3  |
| 248393 | 36 | 3455642 | 3455657 | 2 | 8  | 16 | TG   | 32 | 3  |
| 248399 | 36 | 3463943 | 3463974 | 2 | 16 | 32 | AC   | 15 | 15 |
| 248409 | 36 | 3481825 | 3481848 | 2 | 12 | 24 | CA   | 16 | 7  |
| 248411 | 36 | 3489659 | 3489672 | 2 | 7  | 14 | AT   | 12 | 5  |
| 248418 | 36 | 3495839 | 3495856 | 2 | 9  | 18 | CA   | 24 | 8  |
| 248424 | 36 | 3507796 | 3507819 | 2 | 12 | 24 | AC   | 14 | 8  |
| 248433 | 36 | 3513239 | 3513256 | 2 | 9  | 18 | AC   | 15 | 8  |
| 248442 | 36 | 3531473 | 3531484 | 2 | 6  | 12 | AG   | 23 | 4  |
| 248443 | 36 | 3531791 | 3531820 | 3 | 10 | 30 | TTG  | 23 | 10 |
| 248445 | 36 | 3535213 | 3535224 | 2 | 6  | 12 | AC   | 23 | 3  |
| 248450 | 36 | 3554983 | 3555009 | 3 | 9  | 27 | TAT  | 19 | 8  |
| 248454 | 36 | 3557860 | 3557901 | 2 | 21 | 42 | GT   | 8  | 11 |
| 248455 | 36 | 3558009 | 3558022 | 2 | 7  | 14 | TC   | 27 | 5  |
| 248457 | 36 | 3559367 | 3559378 | 2 | 6  | 12 | CT   | 32 | 4  |
| 248458 | 36 | 3559380 | 3559391 | 2 | 6  | 12 | TC   | 32 | 4  |
| 248465 | 36 | 3567124 | 3567151 | 2 | 14 | 28 | TG   | 11 | 10 |
| 248468 | 36 | 3570733 | 3570750 | 2 | 9  | 18 | AC   | 27 | 5  |
| 248469 | 36 | 3573113 | 3573136 | 2 | 12 | 24 | GT   | 21 | 16 |
| 248477 | 36 | 3592265 | 3592302 | 2 | 19 | 38 | GT   | 18 | 14 |
| 248482 | 36 | 3601262 | 3601277 | 2 | 8  | 16 | CA   | 20 | 6  |
| 248483 | 36 | 3601279 | 3601294 | 2 | 8  | 16 | AC   | 12 | 7  |
| 248485 | 36 | 3602037 | 3602066 | 2 | 15 | 30 | GT   | 9  | 11 |
| 248487 | 36 | 3603879 | 3603898 | 2 | 10 | 20 | AC   | 19 | 8  |
| 248495 | 36 | 3609006 | 3609020 | 3 | 5  | 15 | TCC  | 19 | 3  |
| 248497 | 36 | 3609758 | 3609772 | 3 | 5  | 15 | TGC  | 31 | 6  |
| 248499 | 36 | 3618435 | 3618454 | 2 | 10 | 20 | CA   | 18 | 13 |
| 248500 | 36 | 3618598 | 3618637 | 2 | 20 | 40 | TG   | 11 | 11 |
| 248502 | 36 | 3619894 | 3619913 | 2 | 10 | 20 | TG   | 24 | 9  |
| 248506 | 36 | 3625832 | 3625843 | 2 | 6  | 12 | TG   | 21 | 6  |
| 248516 | 36 | 3641864 | 3641899 | 2 | 18 | 36 | CA   | 8  | 9  |
| 248518 | 36 | 3645242 | 3645257 | 2 | 8  | 16 | TG   | 23 | 4  |
| 248519 | 36 | 3645353 | 3645368 | 2 | 8  | 16 | AG   | 29 | 5  |
| 248520 | 36 | 3645460 | 3645479 | 2 | 10 | 20 | TG   | 12 | 9  |
| 248521 | 36 | 3645694 | 3645713 | 2 | 10 | 20 | CA   | 24 | 10 |
| 248531 | 36 | 3655942 | 3655955 | 2 | 7  | 14 | CT   | 12 | 6  |
| 248532 | 36 | 3655958 | 3655971 | 2 | 7  | 14 | CT   | 15 | 6  |
| 248533 | 36 | 3656125 | 3656136 | 2 | 6  | 12 | CT   | 8  | 4  |
| 248534 | 36 | 3656691 | 3656702 | 2 | 6  | 12 | CT   | 22 | 3  |
| 248535 | 36 | 3656788 | 3656799 | 2 | 6  | 12 | AC   | 18 | 3  |
| 248538 | 36 | 3658360 | 3658381 | 2 | 11 | 22 | CA   | 21 | 13 |
| 248540 | 36 | 3661166 | 3661179 | 2 | 7  | 14 | TG   | 29 | 3  |
| 248553 | 36 | 3673151 | 3673168 | 3 | 6  | 18 | GCT  | 26 | 4  |
| 248560 | 36 | 3700382 | 3700393 | 2 | 6  | 12 | TG   | 21 | 5  |
| 248561 | 36 | 3700774 | 3700788 | 3 | 5  | 15 | GGT  | 12 | 3  |
| 248567 | 36 | 3710872 | 3710889 | 2 | 9  | 18 | CA   | 6  | 7  |
| 248571 | 36 | 3716157 | 3716174 | 2 | 9  | 18 | AC   | 30 | 5  |
| 248572 | 36 | 3718704 | 3718723 | 2 | 10 | 20 | AT   | 11 | 5  |
| 248577 | 36 | 3731778 | 3731793 | 2 | 8  | 16 | AT   | 8  | 4  |
| 248580 | 36 | 3734985 | 3734998 | 2 | 7  | 14 | AC   | 28 | 6  |

|        |    |         |         |   |    |    |      |    |    |
|--------|----|---------|---------|---|----|----|------|----|----|
| 248581 | 36 | 3735134 | 3735154 | 3 | 7  | 21 | CCT  | 21 | 9  |
| 248586 | 36 | 3737034 | 3737048 | 3 | 5  | 15 | CCA  | 19 | 3  |
| 248589 | 36 | 3737829 | 3737876 | 4 | 12 | 48 | TAGA | 11 | 8  |
| 248590 | 36 | 3738148 | 3738159 | 2 | 6  | 12 | AC   | 23 | 4  |
| 248591 | 36 | 3738161 | 3738174 | 2 | 7  | 14 | CA   | 22 | 5  |
| 248592 | 36 | 3739536 | 3739559 | 3 | 8  | 24 | GGA  | 7  | 5  |
| 248598 | 36 | 3742354 | 3742368 | 3 | 5  | 15 | GCT  | 25 | 6  |
| 248606 | 36 | 3746993 | 3747014 | 2 | 11 | 22 | GT   | 16 | 4  |
| 248607 | 36 | 3748653 | 3748698 | 2 | 23 | 46 | AC   | 8  | 13 |
| 248614 | 36 | 3759823 | 3759846 | 4 | 6  | 24 | CTGT | 24 | 7  |
| 248618 | 36 | 3767292 | 3767309 | 2 | 9  | 18 | TG   | 15 | 7  |
| 248619 | 36 | 3767312 | 3767323 | 2 | 6  | 12 | TG   | 12 | 6  |
| 248622 | 36 | 3769214 | 3769231 | 2 | 9  | 18 | GA   | 18 | 4  |
| 248627 | 36 | 3776183 | 3776198 | 2 | 8  | 16 | GT   | 18 | 4  |
| 248628 | 36 | 3776353 | 3776386 | 2 | 17 | 34 | TG   | 17 | 10 |
| 248632 | 36 | 3779951 | 3779980 | 2 | 15 | 30 | AC   | 15 | 8  |
| 248635 | 36 | 3786303 | 3786332 | 2 | 15 | 30 | GT   | 12 | 7  |
| 248641 | 36 | 3797429 | 3797454 | 2 | 13 | 26 | TG   | 11 | 6  |
| 248644 | 36 | 3798996 | 3799025 | 2 | 15 | 30 | TC   | 18 | 6  |
| 248645 | 36 | 3799076 | 3799093 | 2 | 9  | 18 | GT   | 21 | 8  |
| 248646 | 36 | 3800804 | 3800821 | 2 | 9  | 18 | TG   | 16 | 6  |
| 248649 | 36 | 3801357 | 3801370 | 2 | 7  | 14 | AC   | 17 | 7  |
| 248650 | 36 | 3802636 | 3802647 | 2 | 6  | 12 | GT   | 25 | 5  |
| 248651 | 36 | 3803054 | 3803079 | 2 | 13 | 26 | AG   | 14 | 5  |
| 248657 | 36 | 3809932 | 3809951 | 2 | 10 | 20 | TG   | 17 | 9  |
| 248658 | 36 | 3810913 | 3810928 | 2 | 8  | 16 | AC   | 21 | 5  |
| 248661 | 36 | 3816858 | 3816879 | 2 | 11 | 22 | CA   | 21 | 6  |
| 248664 | 36 | 3824876 | 3824887 | 2 | 6  | 12 | TG   | 31 | 3  |
| 248666 | 36 | 3825683 | 3825694 | 2 | 6  | 12 | AC   | 22 | 3  |
| 248670 | 36 | 3826416 | 3826427 | 2 | 6  | 12 | AC   | 12 | 3  |
| 248671 | 36 | 3826430 | 3826447 | 2 | 9  | 18 | AC   | 22 | 4  |
| 248673 | 36 | 3830308 | 3830329 | 2 | 11 | 22 | TG   | 21 | 4  |
| 248674 | 36 | 3830675 | 3830690 | 2 | 8  | 16 | CA   | 17 | 7  |
| 248675 | 36 | 3831633 | 3831658 | 2 | 13 | 26 | AC   | 16 | 7  |
| 248676 | 36 | 3832799 | 3832825 | 3 | 9  | 27 | CTC  | 18 | 4  |
| 248690 | 36 | 3852060 | 3852083 | 2 | 12 | 24 | TG   | 13 | 10 |
| 248698 | 36 | 3863202 | 3863223 | 2 | 11 | 22 | TG   | 24 | 5  |
| 248700 | 36 | 3863327 | 3863354 | 4 | 7  | 28 | GCTG | 19 | 4  |
| 248701 | 36 | 3863768 | 3863799 | 2 | 16 | 32 | CA   | 10 | 7  |
| 248702 | 36 | 3865197 | 3865208 | 2 | 6  | 12 | GT   | 12 | 4  |
| 248703 | 36 | 3865220 | 3865235 | 2 | 8  | 16 | TG   | 17 | 5  |
| 248704 | 36 | 3865358 | 3865381 | 2 | 12 | 24 | GT   | 20 | 7  |
| 248706 | 36 | 3867738 | 3867767 | 2 | 15 | 30 | TG   | 13 | 11 |
| 248708 | 36 | 3872383 | 3872394 | 2 | 6  | 12 | AT   | 24 | 7  |
| 248709 | 36 | 3873667 | 3873680 | 2 | 7  | 14 | TG   | 19 | 4  |
| 248710 | 36 | 3873683 | 3873696 | 2 | 7  | 14 | TG   | 20 | 4  |
| 248713 | 36 | 3877077 | 3877098 | 2 | 11 | 22 | CA   | 11 | 12 |
| 248720 | 36 | 3882590 | 3882603 | 2 | 7  | 14 | CT   | 29 | 3  |
| 248721 | 36 | 3884096 | 3884111 | 2 | 8  | 16 | CA   | 21 | 5  |
| 248722 | 36 | 3886494 | 3886505 | 2 | 6  | 12 | GT   | 20 | 3  |
| 248723 | 36 | 3886510 | 3886523 | 2 | 7  | 14 | GT   | 25 | 6  |

|        |    |         |         |   |    |    |      |    |    |
|--------|----|---------|---------|---|----|----|------|----|----|
| 248732 | 36 | 3897043 | 3897068 | 2 | 13 | 26 | TG   | 13 | 9  |
| 248736 | 36 | 3897942 | 3897959 | 3 | 6  | 18 | GAG  | 22 | 4  |
| 248738 | 36 | 3898336 | 3898355 | 2 | 10 | 20 | AG   | 13 | 3  |
| 248742 | 36 | 3901955 | 3901984 | 2 | 15 | 30 | TG   | 13 | 9  |
| 248743 | 36 | 3903057 | 3903078 | 2 | 11 | 22 | AG   | 19 | 5  |
| 248747 | 36 | 3908878 | 3908895 | 2 | 9  | 18 | AC   | 24 | 6  |
| 248756 | 36 | 3925224 | 3925249 | 2 | 13 | 26 | CA   | 14 | 12 |
| 248761 | 36 | 3930210 | 3930231 | 2 | 11 | 22 | AC   | 11 | 8  |
| 248762 | 36 | 3930662 | 3930688 | 3 | 9  | 27 | AGG  | 21 | 6  |
| 248768 | 36 | 3932245 | 3932274 | 2 | 15 | 30 | GT   | 9  | 10 |
| 248769 | 36 | 3932466 | 3932483 | 3 | 6  | 18 | AGC  | 22 | 3  |
| 248777 | 36 | 3934034 | 3934065 | 4 | 8  | 32 | TCCA | 8  | 5  |
| 248781 | 36 | 3935071 | 3935094 | 3 | 8  | 24 | GTG  | 34 | 4  |
| 248788 | 36 | 3937722 | 3937751 | 2 | 15 | 30 | GT   | 11 | 8  |
| 248792 | 36 | 3938376 | 3938390 | 3 | 5  | 15 | GGA  | 10 | 5  |
| 248798 | 36 | 3938981 | 3938998 | 2 | 9  | 18 | AC   | 13 | 12 |
| 248800 | 36 | 3939199 | 3939216 | 2 | 9  | 18 | AC   | 17 | 7  |
| 248801 | 36 | 3939254 | 3939265 | 2 | 6  | 12 | GA   | 23 | 5  |
| 248805 | 36 | 3940288 | 3940303 | 2 | 8  | 16 | GT   | 8  | 8  |
| 248808 | 36 | 3942384 | 3942403 | 2 | 10 | 20 | TG   | 22 | 3  |
| 248810 | 36 | 3942758 | 3942784 | 3 | 9  | 27 | TGA  | 22 | 5  |
| 248811 | 36 | 3946989 | 3947006 | 2 | 9  | 18 | TC   | 17 | 4  |
| 248813 | 36 | 3948550 | 3948567 | 3 | 6  | 18 | GGT  | 15 | 5  |
| 248815 | 36 | 3949102 | 3949121 | 2 | 10 | 20 | TG   | 19 | 8  |
| 248818 | 36 | 3951631 | 3951650 | 2 | 10 | 20 | TG   | 23 | 3  |
| 248822 | 36 | 3954885 | 3954896 | 2 | 6  | 12 | AC   | 30 | 3  |
| 248823 | 36 | 3955115 | 3955140 | 2 | 13 | 26 | AC   | 20 | 12 |
| 248830 | 36 | 3965604 | 3965647 | 2 | 22 | 44 | GT   | 15 | 11 |
| 248837 | 36 | 3969666 | 3969679 | 2 | 7  | 14 | TG   | 30 | 3  |
| 248838 | 36 | 3969734 | 3969747 | 2 | 7  | 14 | TG   | 26 | 3  |
| 248842 | 36 | 3973668 | 3973700 | 3 | 11 | 33 | CAT  | 20 | 13 |
| 248844 | 36 | 3975475 | 3975508 | 2 | 17 | 34 | CA   | 7  | 7  |
| 248845 | 36 | 3975631 | 3975644 | 2 | 7  | 14 | AC   | 21 | 4  |
| 248846 | 36 | 3975976 | 3975993 | 2 | 9  | 18 | CA   | 20 | 4  |
| 248847 | 36 | 3976039 | 3976058 | 2 | 10 | 20 | GT   | 23 | 7  |
| 248848 | 36 | 3976564 | 3976587 | 2 | 12 | 24 | TG   | 9  | 5  |
| 248849 | 36 | 3977540 | 3977561 | 2 | 11 | 22 | GT   | 14 | 9  |
| 248851 | 36 | 3977976 | 3977995 | 2 | 10 | 20 | CA   | 13 | 11 |
| 248854 | 36 | 3980683 | 3980694 | 2 | 6  | 12 | GT   | 27 | 5  |
| 248855 | 36 | 3983564 | 3983577 | 2 | 7  | 14 | CA   | 34 | 3  |
| 248858 | 36 | 3986092 | 3986115 | 2 | 12 | 24 | CA   | 25 | 5  |
| 248859 | 36 | 3986365 | 3986376 | 2 | 6  | 12 | AC   | 24 | 3  |
| 248860 | 36 | 3986379 | 3986390 | 2 | 6  | 12 | AC   | 26 | 3  |
| 248861 | 36 | 3990181 | 3990196 | 4 | 4  | 16 | AAAT | 25 | 7  |
| 248862 | 36 | 3993736 | 3993779 | 4 | 11 | 44 | AAAC | 23 | 3  |
| 248872 | 36 | 4007449 | 4007466 | 3 | 6  | 18 | TCC  | 28 | 3  |
| 248874 | 36 | 4011185 | 4011204 | 2 | 10 | 20 | TG   | 16 | 8  |
| 248875 | 36 | 4013347 | 4013358 | 2 | 6  | 12 | TC   | 26 | 3  |
| 248887 | 36 | 4027979 | 4028032 | 2 | 27 | 54 | AC   | 8  | 9  |
| 248890 | 36 | 4032657 | 4032688 | 2 | 16 | 32 | TG   | 9  | 5  |
| 248891 | 36 | 4033029 | 4033049 | 3 | 7  | 21 | CAC  | 23 | 3  |

|        |    |         |         |   |    |    |      |    |    |
|--------|----|---------|---------|---|----|----|------|----|----|
| 248893 | 36 | 4036109 | 4036120 | 2 | 6  | 12 | TG   | 24 | 9  |
| 248904 | 36 | 4046770 | 4046793 | 2 | 12 | 24 | AG   | 11 | 4  |
| 248916 | 36 | 4059672 | 4059685 | 2 | 7  | 14 | CA   | 25 | 3  |
| 248918 | 36 | 4065212 | 4065231 | 4 | 5  | 20 | ATCA | 23 | 5  |
| 248919 | 36 | 4065587 | 4065606 | 2 | 10 | 20 | TG   | 13 | 12 |
| 248924 | 36 | 4072499 | 4072513 | 3 | 5  | 15 | CAC  | 14 | 6  |
| 248925 | 36 | 4074145 | 4074158 | 2 | 7  | 14 | CA   | 24 | 3  |
| 248934 | 36 | 4088653 | 4088670 | 2 | 9  | 18 | GT   | 17 | 5  |
| 248938 | 36 | 4095155 | 4095174 | 2 | 10 | 20 | TG   | 21 | 5  |
| 248950 | 36 | 4109896 | 4109909 | 2 | 7  | 14 | GA   | 11 | 4  |
| 248952 | 36 | 4110926 | 4110943 | 2 | 9  | 18 | AG   | 27 | 5  |
| 248953 | 36 | 4111708 | 4111759 | 2 | 26 | 52 | CT   | 10 | 10 |
| 248957 | 36 | 4113872 | 4113899 | 2 | 14 | 28 | CA   | 16 | 13 |
| 248958 | 36 | 4114065 | 4114088 | 2 | 12 | 24 | AC   | 15 | 7  |
| 248959 | 36 | 4114811 | 4114844 | 2 | 17 | 34 | TG   | 16 | 8  |
| 248972 | 36 | 4123765 | 4123776 | 2 | 6  | 12 | AC   | 26 | 4  |
| 248975 | 36 | 4125997 | 4126016 | 2 | 10 | 20 | CA   | 22 | 7  |
| 248978 | 36 | 4131664 | 4131681 | 3 | 6  | 18 | ACA  | 13 | 8  |
| 248980 | 36 | 4132331 | 4132352 | 2 | 11 | 22 | AC   | 17 | 7  |
| 248988 | 36 | 4137025 | 4137036 | 2 | 6  | 12 | CA   | 15 | 8  |
| 248993 | 36 | 4140959 | 4140974 | 2 | 8  | 16 | GA   | 23 | 6  |
| 248999 | 36 | 4144960 | 4144986 | 3 | 9  | 27 | GAG  | 19 | 5  |
| 249004 | 36 | 4147837 | 4147850 | 2 | 7  | 14 | AC   | 17 | 4  |
| 249006 | 36 | 4148235 | 4148280 | 2 | 23 | 46 | TG   | 10 | 9  |
| 249009 | 36 | 4149546 | 4149561 | 4 | 4  | 16 | AAAT | 14 | 3  |
| 249011 | 36 | 4149666 | 4149677 | 2 | 6  | 12 | TC   | 11 | 5  |
| 249025 | 36 | 4153811 | 4153830 | 2 | 10 | 20 | AG   | 14 | 9  |
| 249032 | 36 | 4156486 | 4156509 | 4 | 6  | 24 | AGAC | 18 | 5  |
| 249034 | 36 | 4156948 | 4156965 | 3 | 6  | 18 | ATT  | 9  | 7  |
| 249037 | 36 | 4157613 | 4157646 | 2 | 17 | 34 | AG   | 11 | 14 |
| 249041 | 36 | 4159101 | 4159116 | 2 | 8  | 16 | TG   | 17 | 9  |
| 249045 | 36 | 4161562 | 4161573 | 2 | 6  | 12 | CA   | 22 | 6  |
| 249051 | 36 | 4171785 | 4171798 | 2 | 7  | 14 | TG   | 27 | 3  |
| 249052 | 36 | 4172191 | 4172204 | 2 | 7  | 14 | CA   | 26 | 5  |
| 249053 | 36 | 4177709 | 4177724 | 2 | 8  | 16 | TG   | 13 | 6  |
| 249054 | 36 | 4177750 | 4177787 | 2 | 19 | 38 | TG   | 7  | 9  |
| 249057 | 36 | 4180682 | 4180697 | 2 | 8  | 16 | TG   | 22 | 6  |
| 249058 | 36 | 4181386 | 4181401 | 2 | 8  | 16 | GT   | 19 | 7  |
| 249059 | 36 | 4181403 | 4181416 | 2 | 7  | 14 | TG   | 22 | 5  |
| 249062 | 36 | 4191614 | 4191645 | 2 | 16 | 32 | CA   | 6  | 5  |
| 249065 | 36 | 4196603 | 4196617 | 3 | 5  | 15 | AAC  | 19 | 3  |
| 249066 | 36 | 4199001 | 4199016 | 2 | 8  | 16 | GT   | 9  | 5  |
| 249067 | 36 | 4201300 | 4201315 | 2 | 8  | 16 | CA   | 6  | 3  |
| 249078 | 36 | 4210534 | 4210565 | 2 | 16 | 32 | CA   | 7  | 9  |
| 249090 | 36 | 4233899 | 4233910 | 2 | 6  | 12 | GT   | 23 | 3  |
| 249096 | 36 | 4244355 | 4244370 | 4 | 4  | 16 | TTTA | 16 | 7  |
| 249097 | 36 | 4245083 | 4245120 | 2 | 19 | 38 | AC   | 11 | 11 |
| 249104 | 36 | 4260695 | 4260709 | 3 | 5  | 15 | AAG  | 23 | 3  |
| 249113 | 36 | 4281062 | 4281109 | 4 | 12 | 48 | AGAT | 17 | 8  |
| 249120 | 36 | 4296615 | 4296628 | 2 | 7  | 14 | GT   | 15 | 4  |
| 249121 | 36 | 4296851 | 4296870 | 2 | 10 | 20 | GT   | 21 | 8  |

|        |    |         |         |   |    |    |      |    |    |
|--------|----|---------|---------|---|----|----|------|----|----|
| 249128 | 36 | 4308511 | 4308536 | 2 | 13 | 26 | GT   | 9  | 7  |
| 249129 | 36 | 4309212 | 4309225 | 2 | 7  | 14 | CT   | 20 | 3  |
| 249132 | 36 | 4313024 | 4313043 | 2 | 10 | 20 | TG   | 25 | 6  |
| 249133 | 36 | 4314537 | 4314568 | 2 | 16 | 32 | CA   | 13 | 9  |
| 249144 | 36 | 4326668 | 4326699 | 2 | 16 | 32 | GT   | 11 | 10 |
| 249145 | 36 | 4326781 | 4326804 | 2 | 12 | 24 | CA   | 19 | 3  |
| 249149 | 36 | 4331005 | 4331032 | 2 | 14 | 28 | CA   | 11 | 8  |
| 249150 | 36 | 4332082 | 4332101 | 2 | 10 | 20 | TG   | 11 | 5  |
| 249152 | 36 | 4333593 | 4333610 | 2 | 9  | 18 | TG   | 14 | 5  |
| 249179 | 36 | 4386286 | 4386313 | 2 | 14 | 28 | TG   | 27 | 7  |
| 249180 | 36 | 4386360 | 4386395 | 2 | 18 | 36 | CA   | 15 | 11 |
| 249181 | 36 | 4386859 | 4386898 | 2 | 20 | 40 | AC   | 24 | 11 |
| 249183 | 36 | 4388324 | 4388341 | 2 | 9  | 18 | TC   | 23 | 5  |
| 249190 | 36 | 4399645 | 4399660 | 2 | 8  | 16 | CA   | 20 | 3  |
| 249191 | 36 | 4399689 | 4399708 | 2 | 10 | 20 | AC   | 11 | 6  |
| 249196 | 36 | 4412160 | 4412197 | 2 | 19 | 38 | CA   | 7  | 7  |
| 249202 | 36 | 4431796 | 4431816 | 3 | 7  | 21 | GGA  | 8  | 4  |
| 249204 | 36 | 4440401 | 4440432 | 2 | 16 | 32 | GT   | 11 | 7  |
| 249205 | 36 | 4440720 | 4440735 | 2 | 8  | 16 | AG   | 22 | 4  |
| 249207 | 36 | 4444717 | 4444736 | 2 | 10 | 20 | TG   | 14 | 7  |
| 249209 | 36 | 4446152 | 4446171 | 2 | 10 | 20 | CA   | 20 | 5  |
| 249214 | 36 | 4451029 | 4451052 | 2 | 12 | 24 | CA   | 15 | 10 |
| 249215 | 36 | 4452780 | 4452795 | 2 | 8  | 16 | GT   | 19 | 7  |
| 249216 | 36 | 4452796 | 4452807 | 2 | 6  | 12 | GA   | 20 | 10 |
| 249217 | 36 | 4455205 | 4455230 | 2 | 13 | 26 | CT   | 11 | 6  |
| 249218 | 36 | 4455436 | 4455459 | 2 | 12 | 24 | CA   | 21 | 15 |
| 249224 | 36 | 4471846 | 4471859 | 2 | 7  | 14 | AT   | 6  | 3  |
| 249227 | 36 | 4477135 | 4477154 | 4 | 5  | 20 | ATGG | 15 | 5  |
| 249228 | 36 | 4478052 | 4478069 | 2 | 9  | 18 | TG   | 27 | 6  |
| 249234 | 36 | 4487460 | 4487475 | 2 | 8  | 16 | GT   | 19 | 4  |
| 249235 | 36 | 4488462 | 4488475 | 2 | 7  | 14 | AC   | 21 | 5  |
| 249237 | 36 | 4497842 | 4497879 | 2 | 19 | 38 | GT   | 13 | 9  |
| 249240 | 36 | 4501979 | 4502012 | 2 | 17 | 34 | GT   | 9  | 7  |
| 249243 | 36 | 4503089 | 4503104 | 4 | 4  | 16 | CGCT | 17 | 4  |
| 249244 | 36 | 4503197 | 4503211 | 3 | 5  | 15 | GCT  | 18 | 3  |
| 249250 | 36 | 4513946 | 4513973 | 2 | 14 | 28 | CA   | 13 | 6  |
| 249251 | 36 | 4516502 | 4516533 | 2 | 16 | 32 | TG   | 9  | 9  |
| 249253 | 36 | 4519628 | 4519651 | 2 | 12 | 24 | TG   | 13 | 5  |
| 249254 | 36 | 4520519 | 4520554 | 2 | 18 | 36 | GT   | 6  | 5  |
| 249260 | 36 | 4525137 | 4525168 | 2 | 16 | 32 | AC   | 16 | 9  |
| 249280 | 36 | 4551278 | 4551301 | 2 | 12 | 24 | AG   | 19 | 5  |
| 249281 | 36 | 4551400 | 4551415 | 2 | 8  | 16 | TC   | 21 | 3  |
| 249286 | 36 | 4553672 | 4553699 | 2 | 14 | 28 | GA   | 7  | 7  |
| 249288 | 36 | 4555804 | 4555831 | 2 | 14 | 28 | TG   | 16 | 6  |
| 249289 | 36 | 4557671 | 4557690 | 2 | 10 | 20 | GT   | 20 | 4  |
| 249290 | 36 | 4559237 | 4559256 | 2 | 10 | 20 | AG   | 20 | 3  |
| 249297 | 36 | 4569380 | 4569397 | 2 | 9  | 18 | GT   | 11 | 3  |
| 249303 | 36 | 4589071 | 4589092 | 2 | 11 | 22 | AG   | 20 | 5  |
| 249305 | 36 | 4594887 | 4594908 | 2 | 11 | 22 | GT   | 14 | 6  |
| 249306 | 36 | 4595538 | 4595569 | 2 | 16 | 32 | CT   | 9  | 8  |
| 249312 | 36 | 4601288 | 4601321 | 2 | 17 | 34 | TG   | 6  | 7  |

|        |    |         |         |   |    |    |      |    |    |
|--------|----|---------|---------|---|----|----|------|----|----|
| 249313 | 36 | 4604219 | 4604232 | 2 | 7  | 14 | AC   | 27 | 6  |
| 249314 | 36 | 4605360 | 4605373 | 2 | 7  | 14 | CA   | 20 | 3  |
| 249317 | 36 | 4608747 | 4608774 | 2 | 14 | 28 | AC   | 20 | 12 |
| 249319 | 36 | 4609074 | 4609101 | 2 | 14 | 28 | TG   | 18 | 7  |
| 249321 | 36 | 4610950 | 4610973 | 2 | 12 | 24 | TG   | 19 | 12 |
| 249325 | 36 | 4616236 | 4616255 | 2 | 10 | 20 | AC   | 27 | 4  |
| 249333 | 36 | 4623901 | 4623920 | 2 | 10 | 20 | CA   | 26 | 5  |
| 249335 | 36 | 4624250 | 4624265 | 2 | 8  | 16 | CA   | 22 | 6  |
| 249336 | 36 | 4626837 | 4626860 | 2 | 12 | 24 | AC   | 11 | 10 |
| 249338 | 36 | 4632829 | 4632842 | 2 | 7  | 14 | CA   | 28 | 4  |
| 249339 | 36 | 4632937 | 4632956 | 2 | 10 | 20 | CA   | 19 | 12 |
| 249345 | 36 | 4638342 | 4638389 | 2 | 24 | 48 | GT   | 7  | 10 |
| 249354 | 36 | 4650445 | 4650470 | 2 | 13 | 26 | GT   | 20 | 8  |
| 249355 | 36 | 4650684 | 4650721 | 2 | 19 | 38 | GT   | 6  | 8  |
| 249358 | 36 | 4651680 | 4651705 | 2 | 13 | 26 | CA   | 15 | 12 |
| 249360 | 36 | 4654962 | 4654981 | 2 | 10 | 20 | GT   | 19 | 5  |
| 249361 | 36 | 4655219 | 4655236 | 3 | 6  | 18 | AGG  | 23 | 4  |
| 249364 | 36 | 4658760 | 4658785 | 2 | 13 | 26 | GT   | 6  | 11 |
| 249372 | 36 | 4664067 | 4664090 | 2 | 12 | 24 | CA   | 13 | 6  |
| 249373 | 36 | 4664926 | 4664949 | 2 | 12 | 24 | CA   | 16 | 9  |
| 249375 | 36 | 4665802 | 4665815 | 2 | 7  | 14 | TA   | 10 | 4  |
| 249378 | 36 | 4667260 | 4667275 | 2 | 8  | 16 | AG   | 12 | 3  |
| 249381 | 36 | 4667933 | 4667950 | 2 | 9  | 18 | CA   | 13 | 5  |
| 249382 | 36 | 4668361 | 4668382 | 2 | 11 | 22 | TG   | 25 | 8  |
| 249386 | 36 | 4671923 | 4671934 | 2 | 6  | 12 | CA   | 18 | 3  |
| 249387 | 36 | 4672009 | 4672034 | 2 | 13 | 26 | TC   | 26 | 5  |
| 249388 | 36 | 4672338 | 4672359 | 2 | 11 | 22 | CT   | 19 | 8  |
| 249395 | 36 | 4676720 | 4676749 | 2 | 15 | 30 | AG   | 6  | 6  |
| 249400 | 36 | 4679657 | 4679670 | 2 | 7  | 14 | CT   | 24 | 4  |
| 249402 | 36 | 4681079 | 4681140 | 2 | 31 | 62 | GT   | 8  | 8  |
| 249404 | 36 | 4682922 | 4682941 | 2 | 10 | 20 | AC   | 12 | 5  |
| 249405 | 36 | 4683210 | 4683225 | 2 | 8  | 16 | AC   | 22 | 4  |
| 249408 | 36 | 4685413 | 4685457 | 3 | 15 | 45 | AAG  | 14 | 12 |
| 249417 | 36 | 4691580 | 4691600 | 3 | 7  | 21 | CAG  | 13 | 5  |
| 249424 | 36 | 4696057 | 4696076 | 4 | 5  | 20 | AAAT | 17 | 7  |
| 249439 | 36 | 4725047 | 4725064 | 2 | 9  | 18 | AC   | 17 | 6  |
| 249446 | 36 | 4728406 | 4728431 | 2 | 13 | 26 | AC   | 20 | 7  |
| 249447 | 36 | 4728613 | 4728624 | 2 | 6  | 12 | GT   | 13 | 4  |
| 249452 | 36 | 4729982 | 4729999 | 2 | 9  | 18 | AC   | 18 | 3  |
| 249456 | 36 | 4732022 | 4732037 | 2 | 8  | 16 | TG   | 30 | 3  |
| 249458 | 36 | 4733677 | 4733694 | 3 | 6  | 18 | TCA  | 22 | 3  |
| 249462 | 36 | 4746755 | 4746772 | 3 | 6  | 18 | TCC  | 31 | 5  |
| 249463 | 36 | 4750161 | 4750178 | 2 | 9  | 18 | GA   | 19 | 3  |
| 249465 | 36 | 4751427 | 4751450 | 2 | 12 | 24 | TG   | 25 | 9  |
| 249468 | 36 | 4754374 | 4754389 | 2 | 8  | 16 | AG   | 15 | 6  |
| 249484 | 36 | 4792051 | 4792074 | 3 | 8  | 24 | TGA  | 27 | 9  |
| 249490 | 36 | 4802380 | 4802405 | 2 | 13 | 26 | TC   | 20 | 8  |
| 249492 | 36 | 4804118 | 4804129 | 2 | 6  | 12 | GT   | 28 | 3  |
| 249495 | 36 | 4805832 | 4805851 | 2 | 10 | 20 | CA   | 17 | 7  |
| 249496 | 36 | 4805871 | 4805898 | 2 | 14 | 28 | AC   | 14 | 10 |
| 249498 | 36 | 4807985 | 4807999 | 3 | 5  | 15 | CTC  | 13 | 7  |



|        |    |         |         |   |    |    |      |    |    |
|--------|----|---------|---------|---|----|----|------|----|----|
| 249500 | 36 | 4811172 | 4811197 | 2 | 13 | 26 | CA   | 15 | 9  |
| 249505 | 36 | 4813599 | 4813620 | 2 | 11 | 22 | TG   | 23 | 3  |
| 249507 | 36 | 4822371 | 4822384 | 2 | 7  | 14 | CA   | 34 | 3  |
| 249508 | 36 | 4825115 | 4825148 | 2 | 17 | 34 | TG   | 9  | 11 |
| 249512 | 36 | 4827599 | 4827610 | 2 | 6  | 12 | AT   | 19 | 3  |
| 249513 | 36 | 4828023 | 4828038 | 2 | 8  | 16 | TG   | 20 | 5  |
| 249519 | 36 | 4849479 | 4849508 | 2 | 15 | 30 | CA   | 19 | 6  |
| 249522 | 36 | 4856639 | 4856666 | 2 | 14 | 28 | GT   | 9  | 7  |
| 249524 | 36 | 4859477 | 4859492 | 2 | 8  | 16 | GT   | 19 | 5  |
| 249525 | 36 | 4861651 | 4861692 | 2 | 21 | 42 | AC   | 14 | 13 |
| 249536 | 36 | 4879670 | 4879681 | 2 | 6  | 12 | AC   | 19 | 8  |
| 249537 | 36 | 4879683 | 4879700 | 2 | 9  | 18 | CA   | 21 | 10 |
| 249547 | 36 | 4936582 | 4936609 | 2 | 14 | 28 | TG   | 23 | 7  |
| 249548 | 36 | 4939777 | 4939798 | 2 | 11 | 22 | GT   | 21 | 5  |
| 249552 | 36 | 4942225 | 4942236 | 2 | 6  | 12 | GA   | 19 | 3  |
| 249554 | 36 | 4942392 | 4942403 | 2 | 6  | 12 | GT   | 17 | 6  |
| 249566 | 36 | 4974211 | 4974246 | 3 | 12 | 36 | CTG  | 18 | 12 |
| 249567 | 36 | 4974365 | 4974382 | 3 | 6  | 18 | AGG  | 18 | 5  |
| 249570 | 36 | 4976082 | 4976109 | 2 | 14 | 28 | TG   | 11 | 8  |
| 249581 | 36 | 5013730 | 5013747 | 3 | 6  | 18 | AAC  | 23 | 5  |
| 249582 | 36 | 5014877 | 5014904 | 2 | 14 | 28 | GT   | 22 | 12 |
| 249583 | 36 | 5015664 | 5015691 | 2 | 14 | 28 | TG   | 10 | 7  |
| 249589 | 36 | 5049399 | 5049412 | 2 | 7  | 14 | TG   | 28 | 4  |
| 249591 | 36 | 5052165 | 5052185 | 3 | 7  | 21 | TGT  | 24 | 9  |
| 249596 | 36 | 5057917 | 5057934 | 2 | 9  | 18 | GT   | 20 | 8  |
| 249603 | 36 | 5080084 | 5080099 | 4 | 4  | 16 | AAAC | 9  | 8  |
| 249607 | 36 | 5085830 | 5085853 | 2 | 12 | 24 | CA   | 16 | 15 |
| 249610 | 36 | 5091366 | 5091389 | 2 | 12 | 24 | CA   | 13 | 9  |
| 249612 | 36 | 5100316 | 5100336 | 3 | 7  | 21 | TCC  | 23 | 3  |
| 249614 | 36 | 5102159 | 5102194 | 2 | 18 | 36 | TG   | 9  | 9  |
| 249615 | 36 | 5104967 | 5104990 | 2 | 12 | 24 | AG   | 21 | 12 |
| 249617 | 36 | 5105959 | 5105978 | 2 | 10 | 20 | CA   | 26 | 7  |
| 249619 | 36 | 5107257 | 5107296 | 4 | 10 | 40 | TAGA | 8  | 9  |
| 249621 | 36 | 5121131 | 5121144 | 2 | 7  | 14 | TG   | 12 | 6  |
| 249623 | 36 | 5122202 | 5122233 | 2 | 16 | 32 | CA   | 8  | 9  |
| 249624 | 36 | 5122753 | 5122770 | 3 | 6  | 18 | GGA  | 13 | 3  |
| 249632 | 36 | 5131995 | 5132036 | 2 | 21 | 42 | GT   | 9  | 9  |
| 249634 | 36 | 5137052 | 5137067 | 2 | 8  | 16 | GT   | 17 | 3  |
| 249638 | 36 | 5139244 | 5139255 | 2 | 6  | 12 | AG   | 17 | 4  |
| 249640 | 36 | 5141286 | 5141339 | 2 | 27 | 54 | CA   | 11 | 14 |
| 249643 | 36 | 5143188 | 5143207 | 2 | 10 | 20 | TG   | 15 | 5  |
| 249646 | 36 | 5144179 | 5144206 | 2 | 14 | 28 | TG   | 16 | 8  |
| 249648 | 36 | 5145407 | 5145421 | 3 | 5  | 15 | CCT  | 21 | 3  |
| 249649 | 36 | 5145424 | 5145438 | 3 | 5  | 15 | TCC  | 20 | 3  |
| 249650 | 36 | 5147288 | 5147311 | 2 | 12 | 24 | TG   | 19 | 7  |
| 249651 | 36 | 5148794 | 5148805 | 2 | 6  | 12 | AG   | 22 | 3  |
| 249653 | 36 | 5148972 | 5148985 | 2 | 7  | 14 | GT   | 8  | 10 |
| 249655 | 36 | 5155468 | 5155493 | 2 | 13 | 26 | CA   | 12 | 11 |
| 249657 | 36 | 5171651 | 5171670 | 2 | 10 | 20 | CA   | 23 | 6  |
| 249670 | 36 | 5201616 | 5201643 | 2 | 14 | 28 | TG   | 6  | 5  |
| 249673 | 36 | 5205102 | 5205116 | 3 | 5  | 15 | GGA  | 17 | 3  |

|        |    |         |         |   |    |    |      |    |    |
|--------|----|---------|---------|---|----|----|------|----|----|
| 249675 | 36 | 5208727 | 5208741 | 3 | 5  | 15 | GCT  | 22 | 3  |
| 249676 | 36 | 5209919 | 5209934 | 2 | 8  | 16 | AC   | 23 | 7  |
| 249679 | 36 | 5220656 | 5220679 | 4 | 6  | 24 | TCCA | 30 | 11 |
| 249680 | 36 | 5223953 | 5223966 | 2 | 7  | 14 | AC   | 25 | 3  |
| 249683 | 36 | 5227380 | 5227401 | 2 | 11 | 22 | GT   | 11 | 6  |
| 249684 | 36 | 5227585 | 5227620 | 2 | 18 | 36 | GT   | 17 | 15 |
| 249685 | 36 | 5228520 | 5228531 | 2 | 6  | 12 | AC   | 26 | 5  |
| 249697 | 36 | 5239747 | 5239772 | 2 | 13 | 26 | GT   | 18 | 7  |
| 249702 | 36 | 5244840 | 5244863 | 2 | 12 | 24 | GT   | 10 | 5  |
| 249709 | 36 | 5256650 | 5256673 | 2 | 12 | 24 | GT   | 19 | 5  |
| 249712 | 36 | 5269361 | 5269372 | 2 | 6  | 12 | TG   | 18 | 11 |
| 249714 | 36 | 5270279 | 5270292 | 2 | 7  | 14 | TG   | 15 | 5  |
| 249724 | 36 | 5299182 | 5299205 | 2 | 12 | 24 | TG   | 17 | 11 |
| 249731 | 36 | 5308954 | 5308977 | 3 | 8  | 24 | TGA  | 18 | 4  |
| 249733 | 36 | 5309169 | 5309212 | 2 | 22 | 44 | CT   | 21 | 7  |
| 249736 | 36 | 5314255 | 5314272 | 2 | 9  | 18 | TG   | 22 | 10 |
| 249746 | 36 | 5334736 | 5334753 | 2 | 9  | 18 | AG   | 21 | 3  |
| 249768 | 36 | 5381277 | 5381306 | 3 | 10 | 30 | CAT  | 23 | 6  |
| 249770 | 36 | 5389395 | 5389433 | 3 | 13 | 39 | ACA  | 26 | 9  |
| 249772 | 36 | 5391343 | 5391375 | 3 | 11 | 33 | AAC  | 21 | 15 |
| 249775 | 36 | 5393771 | 5393784 | 2 | 7  | 14 | AT   | 13 | 4  |
| 249776 | 36 | 5395338 | 5395358 | 3 | 7  | 21 | GGA  | 22 | 6  |
| 249794 | 36 | 5416752 | 5416767 | 2 | 8  | 16 | AC   | 24 | 4  |
| 249798 | 36 | 5422515 | 5422550 | 2 | 18 | 36 | TG   | 15 | 10 |
| 249799 | 36 | 5426976 | 5427009 | 2 | 17 | 34 | GT   | 7  | 6  |
| 249800 | 36 | 5427787 | 5427798 | 2 | 6  | 12 | CT   | 31 | 3  |
| 249804 | 36 | 5434140 | 5434153 | 2 | 7  | 14 | GA   | 32 | 3  |
| 249813 | 36 | 5438656 | 5438709 | 2 | 27 | 54 | AC   | 8  | 11 |
| 249825 | 36 | 5456139 | 5456152 | 2 | 7  | 14 | GT   | 16 | 3  |
| 249831 | 36 | 5463208 | 5463223 | 2 | 8  | 16 | GT   | 12 | 3  |
| 249838 | 36 | 5476403 | 5476434 | 2 | 16 | 32 | TG   | 10 | 6  |
| 249840 | 36 | 5478002 | 5478015 | 2 | 7  | 14 | TG   | 22 | 3  |
| 249842 | 36 | 5480151 | 5480178 | 2 | 14 | 28 | TC   | 21 | 6  |
| 249852 | 36 | 5490093 | 5490118 | 2 | 13 | 26 | CT   | 8  | 7  |
| 249854 | 36 | 5495352 | 5495365 | 2 | 7  | 14 | CT   | 25 | 4  |
| 249856 | 36 | 5496011 | 5496030 | 2 | 10 | 20 | TG   | 7  | 5  |
| 249858 | 36 | 5496395 | 5496412 | 2 | 9  | 18 | TG   | 21 | 11 |
| 249862 | 36 | 5505080 | 5505095 | 2 | 8  | 16 | GT   | 24 | 6  |
| 249864 | 36 | 5505260 | 5505291 | 2 | 16 | 32 | TG   | 11 | 11 |
| 249868 | 36 | 5510963 | 5510980 | 2 | 9  | 18 | CA   | 28 | 4  |
| 249875 | 36 | 5530390 | 5530405 | 4 | 4  | 16 | ATTT | 23 | 4  |
| 249878 | 36 | 5531241 | 5531272 | 4 | 8  | 32 | GTTT | 32 | 5  |
| 249888 | 36 | 5554106 | 5554139 | 2 | 17 | 34 | CT   | 17 | 8  |
| 249889 | 36 | 5558380 | 5558397 | 3 | 6  | 18 | TTA  | 19 | 5  |
| 249891 | 36 | 5561368 | 5561381 | 2 | 7  | 14 | GT   | 16 | 3  |
| 249892 | 36 | 5563367 | 5563388 | 2 | 11 | 22 | AC   | 8  | 4  |
| 249894 | 36 | 5570427 | 5570458 | 2 | 16 | 32 | AC   | 10 | 10 |
| 249896 | 36 | 5575955 | 5575984 | 2 | 15 | 30 | AC   | 17 | 10 |
| 249897 | 36 | 5576071 | 5576086 | 4 | 4  | 16 | CCTC | 26 | 4  |
| 249898 | 36 | 5577016 | 5577035 | 4 | 5  | 20 | AAAG | 25 | 3  |
| 249906 | 36 | 5596186 | 5596219 | 2 | 17 | 34 | TG   | 10 | 11 |

|        |    |         |         |   |    |    |      |    |    |
|--------|----|---------|---------|---|----|----|------|----|----|
| 249919 | 36 | 5624045 | 5624065 | 3 | 7  | 21 | AGC  | 25 | 4  |
| 249930 | 36 | 5680175 | 5680200 | 2 | 13 | 26 | TG   | 13 | 5  |
| 249934 | 36 | 5683570 | 5683585 | 4 | 4  | 16 | GATG | 18 | 3  |
| 249940 | 36 | 5711507 | 5711562 | 4 | 14 | 56 | AAAT | 6  | 6  |
| 249951 | 36 | 5725675 | 5725688 | 2 | 7  | 14 | AT   | 8  | 4  |
| 249968 | 36 | 5771955 | 5771966 | 2 | 6  | 12 | TG   | 23 | 3  |
| 249982 | 36 | 5811967 | 5811986 | 2 | 10 | 20 | TG   | 19 | 6  |
| 249985 | 36 | 5813098 | 5813117 | 4 | 5  | 20 | TTGT | 23 | 7  |
| 249990 | 36 | 5824085 | 5824104 | 4 | 5  | 20 | GAGT | 33 | 5  |
| 250001 | 36 | 5841610 | 5841627 | 2 | 9  | 18 | TG   | 14 | 3  |
| 250007 | 37 | 32160   | 32171   | 2 | 6  | 12 | CA   | 24 | 3  |
| 250017 | 37 | 49875   | 49898   | 4 | 6  | 24 | ATTC | 19 | 3  |
| 250021 | 37 | 57450   | 57467   | 2 | 9  | 18 | GT   | 25 | 3  |
| 250036 | 37 | 97779   | 97796   | 3 | 6  | 18 | AAT  | 18 | 3  |
| 250038 | 37 | 101471  | 101492  | 2 | 11 | 22 | CA   | 19 | 9  |
| 250050 | 37 | 152971  | 152988  | 3 | 6  | 18 | ACA  | 24 | 5  |
| 250053 | 37 | 161240  | 161279  | 4 | 10 | 40 | CAAT | 26 | 7  |
| 250063 | 37 | 184321  | 184360  | 2 | 20 | 40 | AC   | 10 | 8  |
| 250069 | 37 | 202837  | 202852  | 2 | 8  | 16 | TG   | 19 | 4  |
| 250070 | 37 | 202919  | 202930  | 2 | 6  | 12 | GT   | 15 | 4  |
| 250073 | 37 | 211805  | 211832  | 2 | 14 | 28 | TG   | 20 | 7  |
| 250077 | 37 | 219186  | 219215  | 2 | 15 | 30 | AC   | 7  | 8  |
| 250083 | 37 | 222506  | 222529  | 2 | 12 | 24 | TG   | 20 | 3  |
| 250085 | 37 | 223958  | 223971  | 2 | 7  | 14 | TG   | 21 | 3  |
| 250086 | 37 | 224234  | 224251  | 2 | 9  | 18 | TG   | 22 | 6  |
| 250087 | 37 | 226130  | 226149  | 4 | 5  | 20 | TTGT | 19 | 3  |
| 250090 | 37 | 230380  | 230419  | 2 | 20 | 40 | TG   | 6  | 10 |
| 250095 | 37 | 236015  | 236032  | 2 | 9  | 18 | CA   | 20 | 3  |
| 250101 | 37 | 247737  | 247762  | 2 | 13 | 26 | GT   | 13 | 6  |
| 250104 | 37 | 253797  | 253812  | 2 | 8  | 16 | TG   | 15 | 3  |
| 250107 | 37 | 266389  | 266416  | 4 | 7  | 28 | TCTG | 9  | 5  |
| 250109 | 37 | 268331  | 268346  | 2 | 8  | 16 | CA   | 22 | 4  |
| 250114 | 37 | 274072  | 274095  | 2 | 12 | 24 | TG   | 11 | 6  |
| 250115 | 37 | 274139  | 274156  | 2 | 9  | 18 | TG   | 17 | 4  |
| 250123 | 37 | 288797  | 288812  | 2 | 8  | 16 | CA   | 24 | 4  |
| 250125 | 37 | 297914  | 297929  | 4 | 4  | 16 | AATT | 24 | 7  |
| 250126 | 37 | 297930  | 297945  | 4 | 4  | 16 | CATT | 24 | 7  |
| 250135 | 37 | 328191  | 328211  | 3 | 7  | 21 | TTA  | 19 | 7  |
| 250148 | 37 | 337252  | 337267  | 2 | 8  | 16 | AC   | 22 | 3  |
| 250150 | 37 | 337842  | 337875  | 2 | 17 | 34 | AC   | 18 | 10 |
| 250153 | 37 | 348459  | 348472  | 2 | 7  | 14 | CA   | 20 | 4  |
| 250158 | 37 | 363444  | 363461  | 2 | 9  | 18 | AC   | 16 | 3  |
| 250160 | 37 | 363678  | 363707  | 2 | 15 | 30 | CA   | 10 | 12 |
| 250181 | 37 | 385156  | 385191  | 2 | 18 | 36 | TG   | 7  | 5  |
| 250185 | 37 | 391850  | 391873  | 2 | 12 | 24 | CA   | 18 | 9  |
| 250189 | 37 | 404279  | 404294  | 2 | 8  | 16 | GT   | 29 | 3  |
| 250198 | 37 | 406966  | 407005  | 2 | 20 | 40 | CT   | 7  | 7  |
| 250200 | 37 | 407249  | 407282  | 2 | 17 | 34 | GT   | 19 | 10 |
| 250201 | 37 | 409176  | 409205  | 2 | 15 | 30 | CA   | 12 | 9  |
| 250207 | 37 | 419702  | 419725  | 2 | 12 | 24 | GT   | 19 | 8  |
| 250211 | 37 | 432878  | 432913  | 3 | 12 | 36 | TTC  | 16 | 5  |

|        |    |         |         |   |    |    |      |    |    |
|--------|----|---------|---------|---|----|----|------|----|----|
| 250216 | 37 | 439708  | 439743  | 2 | 18 | 36 | AC   | 13 | 10 |
| 250252 | 37 | 544301  | 544318  | 3 | 6  | 18 | AAC  | 19 | 3  |
| 250254 | 37 | 553345  | 553376  | 2 | 16 | 32 | TG   | 22 | 8  |
| 250258 | 37 | 566854  | 566877  | 2 | 12 | 24 | TG   | 8  | 6  |
| 250278 | 37 | 607088  | 607123  | 4 | 9  | 36 | TTTC | 18 | 5  |
| 250304 | 37 | 695448  | 695467  | 2 | 10 | 20 | AC   | 23 | 7  |
| 250308 | 37 | 705318  | 705349  | 2 | 16 | 32 | CA   | 21 | 11 |
| 250328 | 37 | 751971  | 751996  | 2 | 13 | 26 | GT   | 14 | 6  |
| 250332 | 37 | 766415  | 766440  | 2 | 13 | 26 | GT   | 20 | 6  |
| 250334 | 37 | 770751  | 770762  | 2 | 6  | 12 | CA   | 22 | 3  |
| 250343 | 37 | 800120  | 800140  | 3 | 7  | 21 | ATC  | 19 | 5  |
| 250344 | 37 | 800141  | 800158  | 3 | 6  | 18 | AGC  | 22 | 7  |
| 250345 | 37 | 801582  | 801597  | 2 | 8  | 16 | AG   | 18 | 3  |
| 250359 | 37 | 813565  | 813578  | 2 | 7  | 14 | AC   | 23 | 3  |
| 250367 | 37 | 851175  | 851190  | 2 | 8  | 16 | GT   | 16 | 3  |
| 250373 | 37 | 860171  | 860191  | 3 | 7  | 21 | CAT  | 14 | 4  |
| 250375 | 37 | 866209  | 866220  | 2 | 6  | 12 | CA   | 24 | 7  |
| 250377 | 37 | 873323  | 873374  | 4 | 13 | 52 | TATC | 22 | 10 |
| 250395 | 37 | 911630  | 911647  | 2 | 9  | 18 | GT   | 19 | 3  |
| 250396 | 37 | 915204  | 915233  | 2 | 15 | 30 | CA   | 6  | 9  |
| 250401 | 37 | 938222  | 938235  | 2 | 7  | 14 | TG   | 10 | 3  |
| 250402 | 37 | 950113  | 950128  | 4 | 4  | 16 | TTTA | 20 | 5  |
| 250410 | 37 | 987838  | 987869  | 2 | 16 | 32 | GT   | 10 | 6  |
| 250435 | 37 | 1067541 | 1067562 | 2 | 11 | 22 | CA   | 7  | 4  |
| 250444 | 37 | 1082872 | 1082901 | 2 | 15 | 30 | CA   | 22 | 8  |
| 250490 | 37 | 1209554 | 1209569 | 4 | 4  | 16 | TAGC | 21 | 3  |
| 250491 | 37 | 1210535 | 1210555 | 3 | 7  | 21 | TAT  | 10 | 3  |
| 250493 | 37 | 1213258 | 1213277 | 4 | 5  | 20 | ATTT | 29 | 4  |
| 250501 | 37 | 1235769 | 1235783 | 3 | 5  | 15 | GAG  | 20 | 8  |
| 250504 | 37 | 1237331 | 1237356 | 2 | 13 | 26 | GT   | 6  | 5  |
| 250509 | 37 | 1245696 | 1245717 | 2 | 11 | 22 | TG   | 19 | 16 |
| 250516 | 37 | 1261226 | 1261261 | 4 | 9  | 36 | TTGA | 16 | 12 |
| 250519 | 37 | 1275572 | 1275583 | 2 | 6  | 12 | TG   | 29 | 5  |
| 250521 | 37 | 1284164 | 1284181 | 2 | 9  | 18 | GT   | 15 | 13 |
| 250522 | 37 | 1286149 | 1286160 | 2 | 6  | 12 | GT   | 29 | 3  |
| 250524 | 37 | 1286865 | 1286878 | 2 | 7  | 14 | AC   | 19 | 5  |
| 250525 | 37 | 1287180 | 1287213 | 2 | 17 | 34 | AC   | 11 | 10 |
| 250530 | 37 | 1308413 | 1308428 | 2 | 8  | 16 | GT   | 13 | 4  |
| 250543 | 37 | 1326230 | 1326243 | 2 | 7  | 14 | AC   | 17 | 6  |
| 250544 | 37 | 1326245 | 1326260 | 2 | 8  | 16 | CA   | 18 | 8  |
| 250545 | 37 | 1328485 | 1328504 | 4 | 5  | 20 | GTCT | 26 | 6  |
| 250550 | 37 | 1337163 | 1337178 | 4 | 4  | 16 | TCAG | 22 | 5  |
| 250553 | 37 | 1342921 | 1342940 | 4 | 5  | 20 | GTTA | 22 | 4  |
| 250556 | 37 | 1349639 | 1349664 | 2 | 13 | 26 | GT   | 20 | 11 |
| 250558 | 37 | 1356959 | 1356978 | 2 | 10 | 20 | AC   | 14 | 13 |
| 250562 | 37 | 1374053 | 1374068 | 4 | 4  | 16 | AATA | 9  | 4  |
| 250569 | 37 | 1386639 | 1386662 | 4 | 6  | 24 | ACAG | 30 | 3  |
| 250572 | 37 | 1398216 | 1398239 | 2 | 12 | 24 | CA   | 18 | 8  |
| 250573 | 37 | 1401822 | 1401835 | 2 | 7  | 14 | TA   | 13 | 9  |
| 250575 | 37 | 1406797 | 1406826 | 2 | 15 | 30 | GT   | 16 | 11 |
| 250576 | 37 | 1408967 | 1408982 | 2 | 8  | 16 | CA   | 15 | 3  |

|        |    |         |         |   |    |    |      |    |    |
|--------|----|---------|---------|---|----|----|------|----|----|
| 250579 | 37 | 1418060 | 1418073 | 2 | 7  | 14 | AC   | 27 | 4  |
| 250582 | 37 | 1425347 | 1425390 | 2 | 22 | 44 | GT   | 6  | 8  |
| 250583 | 37 | 1430763 | 1430794 | 2 | 16 | 32 | TG   | 10 | 7  |
| 250605 | 37 | 1479564 | 1479583 | 4 | 5  | 20 | TTTA | 24 | 4  |
| 250613 | 37 | 1495570 | 1495603 | 2 | 17 | 34 | CA   | 10 | 9  |
| 250614 | 37 | 1496729 | 1496740 | 2 | 6  | 12 | GT   | 24 | 3  |
| 250615 | 37 | 1496742 | 1496753 | 2 | 6  | 12 | TG   | 27 | 6  |
| 250616 | 37 | 1498665 | 1498680 | 4 | 4  | 16 | AAAT | 8  | 3  |
| 250617 | 37 | 1498932 | 1498963 | 2 | 16 | 32 | GT   | 15 | 12 |
| 250625 | 37 | 1509320 | 1509359 | 4 | 10 | 40 | TTGA | 18 | 11 |
| 250627 | 37 | 1511049 | 1511090 | 2 | 21 | 42 | CA   | 6  | 9  |
| 250628 | 37 | 1511345 | 1511402 | 2 | 29 | 58 | AC   | 8  | 7  |
| 250630 | 37 | 1515881 | 1515896 | 4 | 4  | 16 | ACAG | 26 | 3  |
| 250637 | 37 | 1529508 | 1529531 | 3 | 8  | 24 | TTA  | 13 | 5  |
| 250639 | 37 | 1530466 | 1530481 | 2 | 8  | 16 | AC   | 30 | 3  |
| 250640 | 37 | 1531010 | 1531055 | 2 | 23 | 46 | AC   | 10 | 14 |
| 250643 | 37 | 1560001 | 1560026 | 2 | 13 | 26 | TG   | 22 | 11 |
| 250648 | 37 | 1576851 | 1576890 | 2 | 20 | 40 | CA   | 6  | 9  |
| 250664 | 37 | 1592630 | 1592659 | 2 | 15 | 30 | CA   | 6  | 8  |
| 250678 | 37 | 1635914 | 1635928 | 3 | 5  | 15 | AGA  | 20 | 4  |
| 250679 | 37 | 1636247 | 1636303 | 3 | 19 | 57 | TTG  | 25 | 13 |
| 250691 | 37 | 1662140 | 1662157 | 2 | 9  | 18 | CA   | 20 | 8  |
| 250692 | 37 | 1664039 | 1664090 | 4 | 13 | 52 | TTCT | 12 | 8  |
| 250707 | 37 | 1729903 | 1729920 | 3 | 6  | 18 | AAC  | 19 | 6  |
| 250711 | 37 | 1737811 | 1737842 | 4 | 8  | 32 | ATCT | 13 | 7  |
| 250716 | 37 | 1755664 | 1755683 | 4 | 5  | 20 | TTTG | 22 | 3  |
| 250730 | 37 | 1797820 | 1797831 | 2 | 6  | 12 | CA   | 22 | 5  |
| 250733 | 37 | 1822531 | 1822552 | 2 | 11 | 22 | TG   | 19 | 9  |
| 250734 | 37 | 1825550 | 1825567 | 3 | 6  | 18 | AAT  | 11 | 5  |
| 250736 | 37 | 1837591 | 1837604 | 2 | 7  | 14 | CA   | 23 | 14 |
| 250738 | 37 | 1846791 | 1846828 | 2 | 19 | 38 | GT   | 11 | 9  |
| 250739 | 37 | 1848932 | 1848953 | 2 | 11 | 22 | TG   | 9  | 11 |
| 250748 | 37 | 1856654 | 1856685 | 4 | 8  | 32 | TCTG | 26 | 5  |
| 250750 | 37 | 1872679 | 1872698 | 4 | 5  | 20 | GAAA | 12 | 9  |
| 250752 | 37 | 1875622 | 1875637 | 2 | 8  | 16 | GT   | 19 | 8  |
| 250756 | 37 | 1877645 | 1877670 | 2 | 13 | 26 | GT   | 17 | 9  |
| 250757 | 37 | 1878318 | 1878333 | 2 | 8  | 16 | TG   | 14 | 5  |
| 250758 | 37 | 1881805 | 1881838 | 2 | 17 | 34 | TC   | 9  | 10 |
| 250760 | 37 | 1883800 | 1883843 | 2 | 22 | 44 | TG   | 13 | 12 |
| 250763 | 37 | 1887792 | 1887803 | 2 | 6  | 12 | GT   | 19 | 3  |
| 250764 | 37 | 1887925 | 1887938 | 2 | 7  | 14 | CA   | 26 | 8  |
| 250765 | 37 | 1888381 | 1888394 | 2 | 7  | 14 | AT   | 12 | 6  |
| 250770 | 37 | 1894412 | 1894437 | 2 | 13 | 26 | AC   | 9  | 6  |
| 250771 | 37 | 1894696 | 1894719 | 2 | 12 | 24 | TG   | 18 | 16 |
| 250774 | 37 | 1898229 | 1898250 | 2 | 11 | 22 | GT   | 23 | 10 |
| 250775 | 37 | 1899319 | 1899334 | 2 | 8  | 16 | TG   | 23 | 5  |
| 250785 | 37 | 1917194 | 1917229 | 2 | 18 | 36 | AG   | 9  | 7  |
| 250792 | 37 | 1937178 | 1937193 | 2 | 8  | 16 | CA   | 24 | 10 |
| 250798 | 37 | 1943869 | 1943920 | 2 | 26 | 52 | GT   | 6  | 7  |
| 250799 | 37 | 1944296 | 1944319 | 2 | 12 | 24 | GT   | 23 | 15 |
| 250800 | 37 | 1944821 | 1944842 | 2 | 11 | 22 | TG   | 9  | 5  |

|        |    |         |         |   |    |    |      |    |    |
|--------|----|---------|---------|---|----|----|------|----|----|
| 250803 | 37 | 1952595 | 1952606 | 2 | 6  | 12 | GT   | 31 | 4  |
| 250806 | 37 | 1957259 | 1957290 | 2 | 16 | 32 | GT   | 23 | 12 |
| 250815 | 37 | 1971902 | 1971929 | 2 | 14 | 28 | TG   | 17 | 10 |
| 250817 | 37 | 1972560 | 1972575 | 2 | 8  | 16 | GT   | 22 | 4  |
| 250821 | 37 | 1977770 | 1977805 | 2 | 18 | 36 | AC   | 8  | 7  |
| 250824 | 37 | 1980549 | 1980584 | 2 | 18 | 36 | AC   | 11 | 7  |
| 250825 | 37 | 1980751 | 1980762 | 2 | 6  | 12 | GT   | 23 | 3  |
| 250829 | 37 | 1989655 | 1989680 | 2 | 13 | 26 | GT   | 25 | 7  |
| 250832 | 37 | 1998292 | 1998311 | 2 | 10 | 20 | CA   | 16 | 13 |
| 250835 | 37 | 2007877 | 2007891 | 3 | 5  | 15 | AAC  | 29 | 4  |
| 250837 | 37 | 2013050 | 2013065 | 2 | 8  | 16 | TG   | 15 | 14 |
| 250842 | 37 | 2015608 | 2015621 | 2 | 7  | 14 | GT   | 21 | 3  |
| 250844 | 37 | 2015824 | 2015837 | 2 | 7  | 14 | TC   | 14 | 6  |
| 250845 | 37 | 2015842 | 2015857 | 2 | 8  | 16 | AC   | 19 | 10 |
| 250846 | 37 | 2016884 | 2016904 | 3 | 7  | 21 | GAG  | 21 | 9  |
| 250847 | 37 | 2017045 | 2017068 | 4 | 6  | 24 | TCCA | 14 | 7  |
| 250848 | 37 | 2019387 | 2019404 | 3 | 6  | 18 | GAG  | 18 | 6  |
| 250860 | 37 | 2032376 | 2032391 | 2 | 8  | 16 | GT   | 24 | 4  |
| 250861 | 37 | 2037641 | 2037654 | 2 | 7  | 14 | TG   | 15 | 3  |
| 250869 | 37 | 2044036 | 2044071 | 2 | 18 | 36 | TG   | 11 | 9  |
| 250870 | 37 | 2044138 | 2044161 | 2 | 12 | 24 | CA   | 9  | 7  |
| 250871 | 37 | 2046525 | 2046564 | 2 | 20 | 40 | TG   | 6  | 7  |
| 250873 | 37 | 2047583 | 2047594 | 2 | 6  | 12 | AT   | 21 | 3  |
| 250875 | 37 | 2057644 | 2057663 | 4 | 5  | 20 | AAAT | 14 | 5  |
| 250879 | 37 | 2066422 | 2066445 | 4 | 6  | 24 | GATG | 31 | 5  |
| 250880 | 37 | 2067811 | 2067824 | 2 | 7  | 14 | TG   | 18 | 4  |
| 250881 | 37 | 2067966 | 2067977 | 2 | 6  | 12 | AC   | 31 | 4  |
| 250882 | 37 | 2070596 | 2070613 | 2 | 9  | 18 | TG   | 16 | 3  |
| 250889 | 37 | 2089081 | 2089100 | 2 | 10 | 20 | CA   | 21 | 8  |
| 250892 | 37 | 2098459 | 2098474 | 2 | 8  | 16 | TG   | 17 | 5  |
| 250898 | 37 | 2123830 | 2123849 | 4 | 5  | 20 | AATA | 26 | 5  |
| 250902 | 37 | 2128994 | 2129011 | 2 | 9  | 18 | GT   | 23 | 10 |
| 250903 | 37 | 2129013 | 2129024 | 2 | 6  | 12 | TG   | 18 | 7  |
| 250909 | 37 | 2135296 | 2135333 | 2 | 19 | 38 | CA   | 6  | 6  |
| 250919 | 37 | 2152800 | 2152811 | 2 | 6  | 12 | GT   | 18 | 4  |
| 250933 | 37 | 2182150 | 2182173 | 2 | 12 | 24 | GT   | 16 | 11 |
| 250938 | 37 | 2190009 | 2190032 | 2 | 12 | 24 | TG   | 8  | 5  |
| 250950 | 37 | 2207937 | 2207966 | 2 | 15 | 30 | GT   | 7  | 12 |
| 250959 | 37 | 2224940 | 2224967 | 2 | 14 | 28 | CA   | 17 | 7  |
| 250962 | 37 | 2229088 | 2229115 | 2 | 14 | 28 | TG   | 7  | 8  |
| 250965 | 37 | 2241100 | 2241117 | 3 | 6  | 18 | CTG  | 23 | 5  |
| 250968 | 37 | 2252622 | 2252641 | 4 | 5  | 20 | ACAG | 29 | 4  |
| 250970 | 37 | 2256265 | 2256278 | 2 | 7  | 14 | TG   | 33 | 3  |
| 250977 | 37 | 2259723 | 2259742 | 2 | 10 | 20 | GT   | 14 | 5  |
| 250992 | 37 | 2297084 | 2297129 | 2 | 23 | 46 | AC   | 12 | 11 |
| 250996 | 37 | 2314412 | 2314427 | 2 | 8  | 16 | GT   | 11 | 6  |
| 250998 | 37 | 2318203 | 2318216 | 2 | 7  | 14 | AC   | 25 | 7  |
| 250999 | 37 | 2318390 | 2318405 | 4 | 4  | 16 | GGAG | 24 | 5  |
| 251002 | 37 | 2320881 | 2320894 | 2 | 7  | 14 | CA   | 27 | 4  |
| 251004 | 37 | 2322676 | 2322703 | 2 | 14 | 28 | AC   | 7  | 5  |
| 251006 | 37 | 2325033 | 2325044 | 2 | 6  | 12 | GT   | 30 | 4  |

|        |    |         |         |   |    |    |      |    |    |
|--------|----|---------|---------|---|----|----|------|----|----|
| 251007 | 37 | 2325500 | 2325525 | 2 | 13 | 26 | GT   | 15 | 5  |
| 251009 | 37 | 2326420 | 2326447 | 4 | 7  | 28 | CAGT | 26 | 7  |
| 251018 | 37 | 2338875 | 2338898 | 2 | 12 | 24 | CA   | 14 | 6  |
| 251020 | 37 | 2342774 | 2342821 | 2 | 24 | 48 | CA   | 7  | 9  |
| 251027 | 37 | 2345764 | 2345779 | 4 | 4  | 16 | CAGG | 28 | 5  |
| 251028 | 37 | 2346121 | 2346138 | 2 | 9  | 18 | GT   | 9  | 6  |
| 251029 | 37 | 2351689 | 2351704 | 4 | 4  | 16 | CAGA | 27 | 8  |
| 251032 | 37 | 2361334 | 2361381 | 2 | 24 | 48 | GT   | 12 | 9  |
| 251034 | 37 | 2362903 | 2362914 | 2 | 6  | 12 | GT   | 33 | 3  |
| 251035 | 37 | 2366899 | 2366919 | 3 | 7  | 21 | ATT  | 13 | 3  |
| 251036 | 37 | 2367859 | 2367884 | 2 | 13 | 26 | GT   | 17 | 19 |
| 251040 | 37 | 2376234 | 2376249 | 2 | 8  | 16 | TG   | 19 | 15 |
| 251044 | 37 | 2389000 | 2389063 | 2 | 32 | 64 | GT   | 10 | 9  |
| 251046 | 37 | 2397107 | 2397124 | 3 | 6  | 18 | TTC  | 17 | 6  |
| 251047 | 37 | 2397598 | 2397609 | 2 | 6  | 12 | CA   | 15 | 3  |
| 251048 | 37 | 2397781 | 2397814 | 2 | 17 | 34 | GT   | 14 | 10 |
| 251049 | 37 | 2399498 | 2399551 | 2 | 27 | 54 | AC   | 8  | 7  |
| 251051 | 37 | 2399944 | 2399967 | 2 | 12 | 24 | TG   | 16 | 10 |
| 251052 | 37 | 2401145 | 2401186 | 2 | 21 | 42 | GT   | 6  | 10 |
| 251053 | 37 | 2409695 | 2409716 | 2 | 11 | 22 | TG   | 20 | 9  |
| 251061 | 37 | 2421101 | 2421128 | 2 | 14 | 28 | TG   | 13 | 12 |
| 251064 | 37 | 2431219 | 2431232 | 2 | 7  | 14 | TG   | 23 | 4  |
| 251066 | 37 | 2431556 | 2431575 | 2 | 10 | 20 | TG   | 15 | 3  |
| 251079 | 37 | 2449223 | 2449238 | 2 | 8  | 16 | AC   | 21 | 3  |
| 251081 | 37 | 2449597 | 2449612 | 2 | 8  | 16 | TG   | 17 | 6  |
| 251082 | 37 | 2449614 | 2449629 | 2 | 8  | 16 | GT   | 14 | 7  |
| 251089 | 37 | 2464985 | 2465002 | 2 | 9  | 18 | AC   | 7  | 4  |
| 251090 | 37 | 2466317 | 2466346 | 2 | 15 | 30 | AC   | 18 | 8  |
| 251092 | 37 | 2469643 | 2469664 | 2 | 11 | 22 | TC   | 22 | 4  |
| 251095 | 37 | 2479440 | 2479471 | 2 | 16 | 32 | CA   | 17 | 6  |
| 251096 | 37 | 2481982 | 2482015 | 2 | 17 | 34 | AC   | 19 | 16 |
| 251100 | 37 | 2488733 | 2488748 | 2 | 8  | 16 | AC   | 22 | 3  |
| 251101 | 37 | 2488751 | 2488766 | 2 | 8  | 16 | AC   | 17 | 5  |
| 251104 | 37 | 2501819 | 2501838 | 2 | 10 | 20 | CA   | 20 | 13 |
| 251110 | 37 | 2514733 | 2514752 | 4 | 5  | 20 | AACT | 25 | 3  |
| 251111 | 37 | 2514885 | 2514922 | 2 | 19 | 38 | GT   | 7  | 10 |
| 251118 | 37 | 2521206 | 2521220 | 3 | 5  | 15 | TAT  | 8  | 3  |
| 251123 | 37 | 2526012 | 2526023 | 2 | 6  | 12 | CT   | 13 | 6  |
| 251126 | 37 | 2531913 | 2531936 | 3 | 8  | 24 | TCT  | 11 | 6  |
| 251127 | 37 | 2533540 | 2533559 | 2 | 10 | 20 | GT   | 17 | 5  |
| 251129 | 37 | 2533700 | 2533719 | 2 | 10 | 20 | GT   | 20 | 3  |
| 251133 | 37 | 2541729 | 2541750 | 2 | 11 | 22 | AC   | 15 | 8  |
| 251135 | 37 | 2543929 | 2543958 | 2 | 15 | 30 | GT   | 14 | 6  |
| 251137 | 37 | 2548727 | 2548740 | 2 | 7  | 14 | GT   | 25 | 3  |
| 251138 | 37 | 2552044 | 2552057 | 2 | 7  | 14 | GT   | 26 | 4  |
| 251145 | 37 | 2560885 | 2560906 | 2 | 11 | 22 | AC   | 8  | 7  |
| 251150 | 37 | 2565057 | 2565086 | 2 | 15 | 30 | CA   | 22 | 7  |
| 251159 | 37 | 2575181 | 2575198 | 2 | 9  | 18 | CA   | 21 | 5  |
| 251160 | 37 | 2576339 | 2576352 | 2 | 7  | 14 | TG   | 29 | 5  |
| 251163 | 37 | 2578438 | 2578463 | 2 | 13 | 26 | CA   | 15 | 8  |
| 251169 | 37 | 2580596 | 2580617 | 2 | 11 | 22 | AC   | 8  | 5  |

|        |    |         |         |   |    |    |      |    |    |
|--------|----|---------|---------|---|----|----|------|----|----|
| 251171 | 37 | 2580678 | 2580695 | 2 | 9  | 18 | CA   | 7  | 4  |
| 251175 | 37 | 2588734 | 2588753 | 2 | 10 | 20 | TG   | 17 | 5  |
| 251180 | 37 | 2592946 | 2592957 | 2 | 6  | 12 | CG   | 23 | 13 |
| 251181 | 37 | 2592958 | 2592975 | 2 | 9  | 18 | CA   | 9  | 9  |
| 251184 | 37 | 2597284 | 2597315 | 4 | 8  | 32 | TATT | 19 | 9  |
| 251188 | 37 | 2599940 | 2599969 | 3 | 10 | 30 | GCT  | 26 | 12 |
| 251190 | 37 | 2603348 | 2603395 | 2 | 24 | 48 | AC   | 6  | 8  |
| 251194 | 37 | 2605073 | 2605090 | 2 | 9  | 18 | CA   | 12 | 7  |
| 251196 | 37 | 2608944 | 2608965 | 2 | 11 | 22 | CA   | 20 | 5  |
| 251198 | 37 | 2611593 | 2611608 | 2 | 8  | 16 | AG   | 20 | 3  |
| 251200 | 37 | 2612035 | 2612054 | 2 | 10 | 20 | AC   | 7  | 6  |
| 251203 | 37 | 2613706 | 2613727 | 2 | 11 | 22 | GT   | 20 | 10 |
| 251206 | 37 | 2616890 | 2616905 | 4 | 4  | 16 | CTGA | 29 | 3  |
| 251209 | 37 | 2623169 | 2623210 | 2 | 21 | 42 | AC   | 9  | 4  |
| 251210 | 37 | 2631603 | 2631614 | 2 | 6  | 12 | CT   | 23 | 4  |
| 251211 | 37 | 2632548 | 2632568 | 3 | 7  | 21 | ACC  | 23 | 5  |
| 251219 | 37 | 2641701 | 2641712 | 2 | 6  | 12 | GT   | 14 | 11 |
| 251221 | 37 | 2648206 | 2648229 | 3 | 8  | 24 | GGA  | 24 | 6  |
| 251222 | 37 | 2648507 | 2648524 | 2 | 9  | 18 | TG   | 11 | 7  |
| 251225 | 37 | 2650685 | 2650705 | 3 | 7  | 21 | CAG  | 25 | 3  |
| 251226 | 37 | 2651933 | 2651952 | 4 | 5  | 20 | GATG | 33 | 3  |
| 251229 | 37 | 2661516 | 2661530 | 3 | 5  | 15 | GAG  | 25 | 5  |
| 251230 | 37 | 2663900 | 2663911 | 2 | 6  | 12 | TG   | 21 | 7  |
| 251232 | 37 | 2667533 | 2667548 | 2 | 8  | 16 | TG   | 18 | 5  |
| 251236 | 37 | 2677717 | 2677740 | 3 | 8  | 24 | TGA  | 31 | 3  |
| 251240 | 37 | 2714925 | 2714942 | 3 | 6  | 18 | AAG  | 25 | 4  |
| 251242 | 37 | 2718099 | 2718113 | 3 | 5  | 15 | GAG  | 22 | 3  |
| 251243 | 37 | 2718253 | 2718264 | 2 | 6  | 12 | AC   | 14 | 5  |
| 251249 | 37 | 2729210 | 2729230 | 3 | 7  | 21 | TCC  | 19 | 3  |
| 251251 | 37 | 2730952 | 2730977 | 2 | 13 | 26 | TG   | 13 | 9  |
| 251253 | 37 | 2732154 | 2732175 | 2 | 11 | 22 | AC   | 10 | 3  |
| 251259 | 37 | 2740743 | 2740754 | 2 | 6  | 12 | CT   | 27 | 3  |
| 251266 | 37 | 2751926 | 2751957 | 2 | 16 | 32 | GT   | 16 | 8  |
| 251276 | 37 | 2771316 | 2771375 | 3 | 20 | 60 | AGA  | 11 | 10 |
| 251278 | 37 | 2773897 | 2773930 | 2 | 17 | 34 | CT   | 9  | 9  |
| 251281 | 37 | 2775639 | 2775654 | 4 | 4  | 16 | TTTA | 19 | 6  |
| 251284 | 37 | 2782864 | 2782895 | 4 | 8  | 32 | GATA | 18 | 5  |
| 251285 | 37 | 2783122 | 2783145 | 2 | 12 | 24 | TG   | 19 | 9  |
| 251288 | 37 | 2791790 | 2791807 | 2 | 9  | 18 | AC   | 21 | 6  |
| 251293 | 37 | 2803536 | 2803549 | 2 | 7  | 14 | CA   | 24 | 8  |
| 251303 | 37 | 2831855 | 2831886 | 2 | 16 | 32 | AC   | 14 | 9  |
| 251304 | 37 | 2831996 | 2832035 | 2 | 20 | 40 | GT   | 6  | 5  |
| 251305 | 37 | 2832190 | 2832201 | 2 | 6  | 12 | CA   | 22 | 4  |
| 251310 | 37 | 2846063 | 2846078 | 4 | 4  | 16 | AAAT | 31 | 4  |
| 251316 | 37 | 2858368 | 2858387 | 2 | 10 | 20 | CA   | 12 | 3  |
| 251317 | 37 | 2858410 | 2858431 | 2 | 11 | 22 | AC   | 11 | 7  |
| 251319 | 37 | 2859792 | 2859818 | 3 | 9  | 27 | AGC  | 23 | 14 |
| 251321 | 37 | 2877375 | 2877389 | 3 | 5  | 15 | GGA  | 30 | 3  |
| 251326 | 37 | 2881143 | 2881170 | 2 | 14 | 28 | AC   | 15 | 11 |
| 251329 | 37 | 2887995 | 2888022 | 2 | 14 | 28 | AC   | 15 | 5  |
| 251330 | 37 | 2890396 | 2890407 | 2 | 6  | 12 | AC   | 27 | 3  |



|        |    |         |         |   |    |    |      |    |    |
|--------|----|---------|---------|---|----|----|------|----|----|
| 251331 | 37 | 2891307 | 2891334 | 2 | 14 | 28 | AC   | 16 | 10 |
| 251332 | 37 | 2891471 | 2891484 | 2 | 7  | 14 | CA   | 15 | 3  |
| 251334 | 37 | 2892009 | 2892022 | 2 | 7  | 14 | TG   | 16 | 4  |
| 251337 | 37 | 2894607 | 2894642 | 2 | 18 | 36 | TG   | 6  | 8  |
| 251338 | 37 | 2896925 | 2896944 | 2 | 10 | 20 | AC   | 20 | 7  |
| 251341 | 37 | 2898720 | 2898741 | 2 | 11 | 22 | AC   | 12 | 4  |
| 251351 | 37 | 2920574 | 2920621 | 4 | 12 | 48 | TCAA | 14 | 10 |
| 251366 | 37 | 2958708 | 2958737 | 2 | 15 | 30 | GT   | 10 | 7  |
| 251370 | 37 | 2961224 | 2961263 | 2 | 20 | 40 | AC   | 9  | 12 |
| 251372 | 37 | 2963174 | 2963203 | 2 | 15 | 30 | CA   | 7  | 10 |
| 251373 | 37 | 2964017 | 2964032 | 2 | 8  | 16 | TA   | 11 | 4  |
| 251376 | 37 | 2969044 | 2969069 | 2 | 13 | 26 | TC   | 19 | 6  |
| 251377 | 37 | 2970909 | 2970920 | 2 | 6  | 12 | CA   | 12 | 3  |
| 251378 | 37 | 2970948 | 2970971 | 4 | 6  | 24 | ACGC | 14 | 21 |
| 251379 | 37 | 2971512 | 2971533 | 2 | 11 | 22 | AC   | 18 | 10 |
| 251381 | 37 | 2971892 | 2971917 | 2 | 13 | 26 | TG   | 17 | 12 |
| 251389 | 37 | 2976903 | 2976926 | 2 | 12 | 24 | CA   | 20 | 6  |
| 251392 | 37 | 2981961 | 2981972 | 2 | 6  | 12 | TG   | 22 | 3  |
| 251402 | 37 | 2997387 | 2997404 | 2 | 9  | 18 | TG   | 22 | 6  |
| 251405 | 37 | 2999083 | 2999106 | 2 | 12 | 24 | AC   | 14 | 6  |
| 251411 | 37 | 3008135 | 3008146 | 2 | 6  | 12 | AC   | 20 | 4  |
| 251412 | 37 | 3008149 | 3008162 | 2 | 7  | 14 | AC   | 19 | 7  |
| 251415 | 37 | 3010393 | 3010412 | 2 | 10 | 20 | TG   | 25 | 4  |
| 251417 | 37 | 3012597 | 3012618 | 2 | 11 | 22 | CA   | 24 | 8  |
| 251418 | 37 | 3012723 | 3012766 | 2 | 22 | 44 | GT   | 13 | 9  |
| 251422 | 37 | 3020962 | 3020997 | 2 | 18 | 36 | CA   | 11 | 11 |
| 251426 | 37 | 3032035 | 3032062 | 4 | 7  | 28 | GACA | 22 | 9  |
| 251431 | 37 | 3038850 | 3038861 | 2 | 6  | 12 | CA   | 18 | 8  |
| 251432 | 37 | 3041200 | 3041211 | 2 | 6  | 12 | GA   | 33 | 3  |
| 251440 | 37 | 3044870 | 3044889 | 2 | 10 | 20 | CA   | 17 | 15 |
| 251448 | 37 | 3050757 | 3050782 | 2 | 13 | 26 | GT   | 17 | 12 |
| 251461 | 37 | 3064617 | 3064636 | 2 | 10 | 20 | CT   | 10 | 10 |
| 251465 | 37 | 3073952 | 3073965 | 2 | 7  | 14 | GT   | 28 | 4  |
| 251466 | 37 | 3074121 | 3074136 | 4 | 4  | 16 | CACG | 22 | 7  |
| 251470 | 37 | 3077390 | 3077401 | 2 | 6  | 12 | TG   | 18 | 4  |
| 251471 | 37 | 3077403 | 3077416 | 2 | 7  | 14 | GT   | 19 | 4  |
| 251477 | 37 | 3085979 | 3085990 | 2 | 6  | 12 | CA   | 11 | 9  |
| 251478 | 37 | 3085992 | 3086009 | 2 | 9  | 18 | AC   | 10 | 8  |
| 251482 | 37 | 3095278 | 3095315 | 2 | 19 | 38 | GT   | 14 | 11 |
| 251489 | 37 | 3111384 | 3111405 | 2 | 11 | 22 | GT   | 20 | 10 |
| 251491 | 37 | 3117075 | 3117098 | 2 | 12 | 24 | GT   | 7  | 6  |
| 251492 | 37 | 3117260 | 3117283 | 2 | 12 | 24 | CA   | 9  | 13 |
| 251494 | 37 | 3117680 | 3117703 | 3 | 8  | 24 | TAT  | 10 | 3  |
| 251495 | 37 | 3118523 | 3118540 | 2 | 9  | 18 | CA   | 10 | 3  |
| 251504 | 37 | 3132338 | 3132369 | 4 | 8  | 32 | GGAT | 23 | 10 |
| 251513 | 37 | 3160138 | 3160161 | 2 | 12 | 24 | AC   | 7  | 5  |
| 251514 | 37 | 3160904 | 3160915 | 2 | 6  | 12 | GT   | 24 | 7  |
| 251516 | 37 | 3169721 | 3169744 | 4 | 6  | 24 | AATC | 16 | 4  |
| 251521 | 37 | 3190655 | 3190696 | 2 | 21 | 42 | AC   | 9  | 7  |
| 251524 | 37 | 3207576 | 3207619 | 4 | 11 | 44 | AGAT | 19 | 8  |
| 251539 | 37 | 3240508 | 3240522 | 3 | 5  | 15 | TCC  | 16 | 3  |

|        |    |         |         |   |    |    |      |    |    |
|--------|----|---------|---------|---|----|----|------|----|----|
| 251548 | 37 | 3263865 | 3263880 | 2 | 8  | 16 | GA   | 21 | 5  |
| 251559 | 37 | 3280953 | 3280976 | 2 | 12 | 24 | TG   | 12 | 9  |
| 251563 | 37 | 3290910 | 3290941 | 2 | 16 | 32 | GT   | 8  | 6  |
| 251585 | 37 | 3356012 | 3356029 | 3 | 6  | 18 | CTG  | 30 | 4  |
| 251586 | 37 | 3358644 | 3358685 | 2 | 21 | 42 | GT   | 10 | 10 |
| 251587 | 37 | 3360395 | 3360412 | 2 | 9  | 18 | AC   | 23 | 6  |
| 251600 | 37 | 3390668 | 3390687 | 2 | 10 | 20 | GT   | 18 | 6  |
| 251601 | 37 | 3390689 | 3390702 | 2 | 7  | 14 | TG   | 25 | 8  |
| 251607 | 37 | 3413551 | 3413570 | 2 | 10 | 20 | AC   | 12 | 15 |
| 251612 | 37 | 3418828 | 3418859 | 2 | 16 | 32 | AC   | 10 | 11 |
| 251615 | 37 | 3422987 | 3423008 | 2 | 11 | 22 | GT   | 15 | 6  |
| 251618 | 37 | 3423409 | 3423424 | 2 | 8  | 16 | CA   | 15 | 3  |
| 251625 | 37 | 3443845 | 3443868 | 2 | 12 | 24 | TG   | 23 | 10 |
| 251628 | 37 | 3449027 | 3449038 | 2 | 6  | 12 | AC   | 28 | 5  |
| 251635 | 37 | 3478495 | 3478538 | 2 | 22 | 44 | AC   | 8  | 7  |
| 251643 | 37 | 3488396 | 3488407 | 2 | 6  | 12 | TG   | 32 | 3  |
| 251647 | 37 | 3494342 | 3494369 | 2 | 14 | 28 | GT   | 14 | 8  |
| 251649 | 37 | 3497894 | 3497923 | 2 | 15 | 30 | AC   | 14 | 13 |
| 251655 | 37 | 3507793 | 3507804 | 2 | 6  | 12 | TA   | 18 | 3  |
| 251657 | 37 | 3509497 | 3509514 | 2 | 9  | 18 | TG   | 18 | 8  |
| 251658 | 37 | 3511991 | 3512016 | 2 | 13 | 26 | AC   | 14 | 5  |
| 251669 | 37 | 3523199 | 3523244 | 2 | 23 | 46 | GT   | 7  | 8  |
| 251673 | 37 | 3527255 | 3527270 | 2 | 8  | 16 | AC   | 16 | 3  |
| 251685 | 37 | 3555315 | 3555340 | 2 | 13 | 26 | AC   | 17 | 8  |
| 251687 | 37 | 3557535 | 3557566 | 4 | 8  | 32 | AAAG | 12 | 4  |
| 251688 | 37 | 3558098 | 3558123 | 2 | 13 | 26 | AC   | 7  | 6  |
| 251690 | 37 | 3568576 | 3568595 | 2 | 10 | 20 | TG   | 16 | 4  |
| 251699 | 37 | 3600998 | 3601015 | 2 | 9  | 18 | GT   | 24 | 3  |
| 251705 | 37 | 3616029 | 3616056 | 4 | 7  | 28 | TACA | 20 | 3  |
| 251712 | 37 | 3629599 | 3629628 | 2 | 15 | 30 | AG   | 12 | 5  |
| 251714 | 37 | 3633187 | 3633201 | 3 | 5  | 15 | AAT  | 20 | 4  |
| 251715 | 37 | 3637359 | 3637374 | 4 | 4  | 16 | CAAA | 16 | 5  |
| 251726 | 37 | 3648887 | 3648904 | 2 | 9  | 18 | CA   | 24 | 4  |
| 251733 | 37 | 3664594 | 3664615 | 2 | 11 | 22 | TG   | 27 | 3  |
| 251741 | 37 | 3674835 | 3674855 | 3 | 7  | 21 | CAA  | 22 | 7  |
| 251742 | 37 | 3677469 | 3677490 | 2 | 11 | 22 | AC   | 24 | 5  |
| 251752 | 37 | 3699315 | 3699334 | 4 | 5  | 20 | ATCT | 18 | 10 |
| 251754 | 37 | 3708330 | 3708347 | 3 | 6  | 18 | TGT  | 33 | 3  |
| 251767 | 37 | 3731658 | 3731671 | 2 | 7  | 14 | TG   | 26 | 7  |
| 251768 | 37 | 3736674 | 3736687 | 2 | 7  | 14 | CA   | 25 | 5  |
| 251770 | 37 | 3753946 | 3753975 | 2 | 15 | 30 | AC   | 8  | 8  |
| 251785 | 37 | 3781211 | 3781238 | 2 | 14 | 28 | CA   | 22 | 9  |
| 251794 | 37 | 3800756 | 3800777 | 2 | 11 | 22 | CA   | 24 | 13 |
| 251795 | 37 | 3803379 | 3803394 | 4 | 4  | 16 | TTTG | 20 | 3  |
| 251800 | 37 | 3817173 | 3817192 | 2 | 10 | 20 | TG   | 16 | 9  |
| 251809 | 37 | 3825238 | 3825261 | 2 | 12 | 24 | AC   | 10 | 5  |
| 251813 | 37 | 3847885 | 3847904 | 4 | 5  | 20 | CTGT | 19 | 3  |
| 251822 | 37 | 3864312 | 3864327 | 4 | 4  | 16 | AAAC | 19 | 5  |
| 251831 | 37 | 3876574 | 3876587 | 2 | 7  | 14 | AT   | 12 | 11 |
| 251835 | 37 | 3880325 | 3880344 | 2 | 10 | 20 | AC   | 17 | 6  |
| 251838 | 37 | 3886794 | 3886811 | 3 | 6  | 18 | AAT  | 18 | 4  |

|        |    |         |         |   |    |    |      |    |    |
|--------|----|---------|---------|---|----|----|------|----|----|
| 251839 | 37 | 3888185 | 3888204 | 2 | 10 | 20 | TG   | 14 | 13 |
| 251842 | 37 | 3896251 | 3896280 | 2 | 15 | 30 | AC   | 16 | 11 |
| 251852 | 37 | 3903247 | 3903270 | 4 | 6  | 24 | AAAT | 26 | 11 |
| 251855 | 37 | 3904665 | 3904676 | 2 | 6  | 12 | TG   | 19 | 4  |
| 251859 | 37 | 3913129 | 3913154 | 2 | 13 | 26 | TG   | 14 | 13 |
| 251863 | 37 | 3916439 | 3916453 | 3 | 5  | 15 | CAC  | 18 | 5  |
| 251864 | 37 | 3916698 | 3916717 | 2 | 10 | 20 | CA   | 19 | 5  |
| 251867 | 37 | 3921765 | 3921776 | 2 | 6  | 12 | CA   | 26 | 3  |
| 251876 | 37 | 3943439 | 3943462 | 2 | 12 | 24 | GT   | 14 | 8  |
| 251882 | 37 | 3962890 | 3962933 | 4 | 11 | 44 | AGAT | 17 | 11 |
| 251899 | 37 | 3982537 | 3982560 | 2 | 12 | 24 | TG   | 24 | 9  |
| 251904 | 37 | 3989613 | 3989624 | 2 | 6  | 12 | AG   | 21 | 7  |
| 251906 | 37 | 3991489 | 3991502 | 2 | 7  | 14 | AC   | 18 | 4  |
| 251909 | 37 | 4005541 | 4005558 | 2 | 9  | 18 | TC   | 20 | 7  |
| 251928 | 37 | 4044409 | 4044430 | 2 | 11 | 22 | TG   | 19 | 11 |
| 251932 | 37 | 4047244 | 4047277 | 2 | 17 | 34 | TG   | 8  | 10 |
| 251940 | 37 | 4063054 | 4063080 | 3 | 9  | 27 | GAA  | 10 | 9  |
| 251943 | 37 | 4066526 | 4066541 | 4 | 4  | 16 | ATGT | 22 | 3  |
| 251961 | 37 | 4085075 | 4085090 | 2 | 8  | 16 | GT   | 13 | 5  |
| 251966 | 37 | 4096144 | 4096164 | 3 | 7  | 21 | TAT  | 19 | 3  |
| 251976 | 37 | 4110564 | 4110579 | 4 | 4  | 16 | AAAT | 12 | 4  |
| 251985 | 37 | 4132261 | 4132275 | 3 | 5  | 15 | CAA  | 27 | 8  |
| 251994 | 37 | 4142987 | 4143010 | 3 | 8  | 24 | CCT  | 26 | 3  |
| 251998 | 37 | 4152112 | 4152139 | 4 | 7  | 28 | TATT | 14 | 3  |
| 251999 | 37 | 4156131 | 4156150 | 4 | 5  | 20 | TTTA | 7  | 6  |
| 252000 | 37 | 4157807 | 4157838 | 2 | 16 | 32 | TG   | 13 | 10 |
| 252001 | 37 | 4160230 | 4160253 | 2 | 12 | 24 | AC   | 20 | 9  |
| 252005 | 37 | 4165251 | 4165266 | 2 | 8  | 16 | AC   | 23 | 6  |
| 252008 | 37 | 4167618 | 4167635 | 2 | 9  | 18 | TC   | 7  | 7  |
| 252018 | 37 | 4198144 | 4198169 | 2 | 13 | 26 | GA   | 13 | 10 |
| 252023 | 37 | 4204132 | 4204143 | 2 | 6  | 12 | TG   | 27 | 3  |
| 252030 | 37 | 4221663 | 4221690 | 2 | 14 | 28 | TG   | 13 | 7  |
| 252033 | 37 | 4227028 | 4227063 | 2 | 18 | 36 | TC   | 6  | 5  |
| 252035 | 37 | 4229512 | 4229537 | 2 | 13 | 26 | TG   | 21 | 15 |
| 252038 | 37 | 4230360 | 4230375 | 4 | 4  | 16 | AAAT | 20 | 5  |
| 252043 | 37 | 4236483 | 4236496 | 2 | 7  | 14 | GT   | 17 | 9  |
| 252045 | 37 | 4237416 | 4237429 | 2 | 7  | 14 | TC   | 14 | 4  |
| 252048 | 37 | 4238848 | 4238883 | 2 | 18 | 36 | TG   | 16 | 11 |
| 252049 | 37 | 4243671 | 4243694 | 4 | 6  | 24 | TTTG | 26 | 3  |
| 252050 | 37 | 4244714 | 4244725 | 2 | 6  | 12 | GT   | 31 | 4  |
| 252063 | 37 | 4275438 | 4275457 | 2 | 10 | 20 | CA   | 25 | 5  |
| 252075 | 37 | 4297958 | 4297969 | 2 | 6  | 12 | AT   | 20 | 4  |
| 252078 | 37 | 4310054 | 4310083 | 2 | 15 | 30 | GT   | 16 | 8  |
| 252091 | 37 | 4333504 | 4333519 | 2 | 8  | 16 | TG   | 18 | 10 |
| 252097 | 37 | 4340935 | 4340946 | 2 | 6  | 12 | GA   | 19 | 4  |
| 252108 | 37 | 4359972 | 4359995 | 3 | 8  | 24 | GGA  | 12 | 6  |
| 252109 | 37 | 4361029 | 4361088 | 4 | 15 | 60 | CTTT | 17 | 12 |
| 252111 | 37 | 4369779 | 4369790 | 2 | 6  | 12 | GA   | 26 | 4  |
| 252125 | 37 | 4406605 | 4406616 | 2 | 6  | 12 | AT   | 18 | 3  |
| 252126 | 37 | 4406771 | 4406784 | 2 | 7  | 14 | CA   | 20 | 3  |
| 252127 | 37 | 4406802 | 4406813 | 2 | 6  | 12 | CA   | 11 | 3  |

|        |    |         |         |   |    |    |      |    |    |
|--------|----|---------|---------|---|----|----|------|----|----|
| 252130 | 37 | 4410031 | 4410050 | 4 | 5  | 20 | GTTT | 17 | 3  |
| 252143 | 37 | 4421922 | 4421939 | 2 | 9  | 18 | AC   | 12 | 4  |
| 252144 | 37 | 4422127 | 4422144 | 2 | 9  | 18 | CA   | 14 | 4  |
| 252150 | 37 | 4433557 | 4433568 | 2 | 6  | 12 | AC   | 10 | 6  |
| 252151 | 37 | 4434860 | 4434879 | 2 | 10 | 20 | CA   | 21 | 8  |
| 252153 | 37 | 4438013 | 4438056 | 2 | 22 | 44 | TC   | 8  | 9  |
| 252155 | 37 | 4442119 | 4442130 | 2 | 6  | 12 | TG   | 19 | 4  |
| 252160 | 37 | 4447365 | 4447376 | 2 | 6  | 12 | TA   | 17 | 3  |
| 252168 | 37 | 4453319 | 4453336 | 2 | 9  | 18 | AC   | 29 | 3  |
| 252171 | 37 | 4458738 | 4458761 | 4 | 6  | 24 | TTTA | 8  | 4  |
| 252176 | 37 | 4470182 | 4470193 | 2 | 6  | 12 | GT   | 19 | 3  |
| 252179 | 37 | 4470907 | 4470926 | 2 | 10 | 20 | AC   | 20 | 3  |
| 252183 | 37 | 4473144 | 4473163 | 2 | 10 | 20 | AC   | 23 | 4  |
| 252197 | 37 | 4492461 | 4492472 | 2 | 6  | 12 | TG   | 22 | 11 |
| 252200 | 37 | 4504554 | 4504567 | 2 | 7  | 14 | GT   | 25 | 7  |
| 252209 | 37 | 4513138 | 4513149 | 2 | 6  | 12 | CA   | 22 | 3  |
| 252213 | 37 | 4514873 | 4514918 | 2 | 23 | 46 | TG   | 15 | 13 |
| 252215 | 37 | 4516266 | 4516298 | 3 | 11 | 33 | TCT  | 15 | 9  |
| 252216 | 37 | 4516656 | 4516687 | 4 | 8  | 32 | TCCA | 17 | 5  |
| 252217 | 37 | 4517881 | 4517895 | 3 | 5  | 15 | CTG  | 23 | 3  |
| 252218 | 37 | 4519445 | 4519462 | 3 | 6  | 18 | CTT  | 19 | 4  |
| 252225 | 37 | 4533037 | 4533054 | 2 | 9  | 18 | TG   | 10 | 6  |
| 252226 | 37 | 4533057 | 4533068 | 2 | 6  | 12 | TG   | 7  | 4  |
| 252228 | 37 | 4536175 | 4536188 | 2 | 7  | 14 | CA   | 15 | 8  |
| 252232 | 37 | 4540343 | 4540358 | 4 | 4  | 16 | TTTA | 19 | 8  |
| 252238 | 37 | 4548793 | 4548812 | 2 | 10 | 20 | TC   | 8  | 7  |
| 252247 | 37 | 4555156 | 4555170 | 3 | 5  | 15 | GCT  | 19 | 6  |
| 252251 | 37 | 4556117 | 4556128 | 2 | 6  | 12 | CA   | 28 | 3  |
| 252256 | 37 | 4564257 | 4564270 | 2 | 7  | 14 | CA   | 7  | 3  |
| 252261 | 37 | 4574427 | 4574444 | 2 | 9  | 18 | GT   | 6  | 6  |
| 252274 | 37 | 4592471 | 4592500 | 2 | 15 | 30 | GA   | 12 | 11 |
| 252287 | 37 | 4600629 | 4600646 | 2 | 9  | 18 | TC   | 18 | 4  |
| 252293 | 37 | 4605796 | 4605829 | 2 | 17 | 34 | CA   | 15 | 7  |
| 252310 | 37 | 4653817 | 4653828 | 2 | 6  | 12 | TA   | 21 | 3  |
| 252315 | 37 | 4657514 | 4657541 | 2 | 14 | 28 | AC   | 14 | 7  |
| 252319 | 37 | 4663159 | 4663173 | 3 | 5  | 15 | CTT  | 28 | 7  |
| 252320 | 37 | 4663176 | 4663190 | 3 | 5  | 15 | TCT  | 28 | 9  |
| 252329 | 37 | 4689027 | 4689038 | 2 | 6  | 12 | CA   | 24 | 3  |
| 252334 | 37 | 4695659 | 4695670 | 2 | 6  | 12 | AG   | 29 | 3  |
| 252335 | 37 | 4698424 | 4698444 | 3 | 7  | 21 | ACA  | 22 | 4  |
| 252339 | 37 | 4704815 | 4704829 | 3 | 5  | 15 | ATC  | 27 | 3  |
| 252343 | 37 | 4720210 | 4720237 | 2 | 14 | 28 | CA   | 12 | 9  |
| 252346 | 37 | 4725814 | 4725837 | 2 | 12 | 24 | AC   | 22 | 6  |
| 252352 | 37 | 4736012 | 4736041 | 2 | 15 | 30 | TG   | 19 | 7  |
| 252356 | 37 | 4752340 | 4752355 | 2 | 8  | 16 | GT   | 23 | 5  |
| 252357 | 37 | 4752620 | 4752655 | 2 | 18 | 36 | AC   | 9  | 9  |
| 252360 | 37 | 4759712 | 4759731 | 2 | 10 | 20 | TG   | 12 | 7  |
| 252361 | 37 | 4760920 | 4760975 | 2 | 28 | 56 | GT   | 7  | 8  |
| 252362 | 37 | 4761449 | 4761464 | 4 | 4  | 16 | ATTC | 31 | 5  |
| 252370 | 37 | 4777263 | 4777278 | 2 | 8  | 16 | TC   | 31 | 3  |
| 252382 | 37 | 4802910 | 4802937 | 4 | 7  | 28 | GTAG | 21 | 6  |

|        |    |         |         |   |    |    |      |    |    |
|--------|----|---------|---------|---|----|----|------|----|----|
| 252389 | 37 | 4849190 | 4849209 | 2 | 10 | 20 | AC   | 8  | 6  |
| 252400 | 37 | 4893580 | 4893607 | 4 | 7  | 28 | ATCC | 21 | 5  |
| 252401 | 37 | 4893747 | 4893758 | 2 | 6  | 12 | GT   | 26 | 3  |
| 252402 | 37 | 4895792 | 4895813 | 2 | 11 | 22 | GT   | 8  | 7  |
| 252403 | 37 | 4896622 | 4896637 | 2 | 8  | 16 | GT   | 21 | 8  |
| 252410 | 37 | 4921807 | 4921826 | 4 | 5  | 20 | AAAC | 27 | 3  |
| 252412 | 37 | 4924157 | 4924168 | 2 | 6  | 12 | TG   | 26 | 5  |
| 252413 | 37 | 4924732 | 4924757 | 2 | 13 | 26 | TG   | 20 | 14 |
| 252421 | 37 | 4933922 | 4933945 | 2 | 12 | 24 | AC   | 12 | 9  |
| 252424 | 37 | 4940078 | 4940093 | 2 | 8  | 16 | GT   | 28 | 6  |
| 252425 | 37 | 4944322 | 4944355 | 2 | 17 | 34 | TG   | 14 | 13 |
| 252427 | 37 | 4944859 | 4944886 | 2 | 14 | 28 | CA   | 18 | 10 |
| 252428 | 37 | 4944964 | 4944977 | 2 | 7  | 14 | TG   | 22 | 4  |
| 252438 | 37 | 4957378 | 4957407 | 2 | 15 | 30 | TG   | 9  | 12 |
| 252444 | 37 | 4966942 | 4966961 | 2 | 10 | 20 | GT   | 14 | 12 |
| 252445 | 37 | 4968967 | 4968984 | 3 | 6  | 18 | TGG  | 6  | 3  |
| 252446 | 37 | 4970991 | 4971014 | 3 | 8  | 24 | TCA  | 34 | 4  |
| 252447 | 37 | 4971036 | 4971051 | 4 | 4  | 16 | CTGC | 35 | 3  |
| 252448 | 37 | 4971568 | 4971607 | 2 | 20 | 40 | AC   | 20 | 11 |
| 252450 | 37 | 4972082 | 4972113 | 4 | 8  | 32 | TGGA | 22 | 10 |
| 252453 | 37 | 4977857 | 4977892 | 2 | 18 | 36 | TG   | 10 | 8  |
| 252454 | 37 | 4978500 | 4978521 | 2 | 11 | 22 | GT   | 16 | 5  |
| 252455 | 37 | 4979552 | 4979563 | 2 | 6  | 12 | TG   | 33 | 4  |
| 252460 | 37 | 4984976 | 4985019 | 2 | 22 | 44 | CA   | 6  | 10 |
| 252461 | 37 | 4986578 | 4986595 | 2 | 9  | 18 | TC   | 23 | 3  |
| 252463 | 37 | 4986806 | 4986843 | 2 | 19 | 38 | TG   | 7  | 11 |
| 252465 | 37 | 4988018 | 4988031 | 2 | 7  | 14 | AC   | 12 | 4  |
| 252466 | 37 | 4988588 | 4988613 | 2 | 13 | 26 | AC   | 19 | 5  |
| 252467 | 37 | 4988939 | 4988950 | 2 | 6  | 12 | TG   | 26 | 4  |
| 252469 | 37 | 4998453 | 4998496 | 2 | 22 | 44 | GT   | 8  | 9  |
| 252470 | 37 | 4998616 | 4998631 | 2 | 8  | 16 | CA   | 28 | 3  |
| 252472 | 37 | 5001868 | 5001891 | 2 | 12 | 24 | CA   | 18 | 9  |
| 252474 | 37 | 5002079 | 5002118 | 4 | 10 | 40 | TCTT | 11 | 9  |
| 252479 | 37 | 5020310 | 5020325 | 4 | 4  | 16 | AAAC | 25 | 3  |
| 252484 | 37 | 5021670 | 5021689 | 2 | 10 | 20 | GT   | 20 | 6  |
| 252485 | 37 | 5030919 | 5030962 | 4 | 11 | 44 | TTTC | 15 | 14 |
| 252488 | 37 | 5036105 | 5036138 | 2 | 17 | 34 | CA   | 13 | 8  |
| 252489 | 37 | 5036325 | 5036376 | 2 | 26 | 52 | TG   | 17 | 9  |
| 252491 | 37 | 5038236 | 5038247 | 2 | 6  | 12 | GT   | 10 | 9  |
| 252492 | 37 | 5040258 | 5040277 | 2 | 10 | 20 | AC   | 18 | 5  |
| 252494 | 37 | 5040471 | 5040486 | 2 | 8  | 16 | AC   | 18 | 8  |
| 252495 | 37 | 5040618 | 5040629 | 2 | 6  | 12 | TG   | 25 | 9  |
| 252497 | 37 | 5046725 | 5046762 | 2 | 19 | 38 | TG   | 6  | 10 |
| 252498 | 37 | 5046930 | 5046955 | 2 | 13 | 26 | CA   | 7  | 10 |
| 252507 | 37 | 5061144 | 5061171 | 2 | 14 | 28 | GT   | 18 | 9  |
| 252509 | 37 | 5063114 | 5063125 | 2 | 6  | 12 | AT   | 23 | 3  |
| 252510 | 37 | 5063700 | 5063761 | 2 | 31 | 62 | TG   | 9  | 10 |
| 252511 | 37 | 5063933 | 5063972 | 2 | 20 | 40 | CA   | 8  | 7  |
| 252513 | 37 | 5065828 | 5065865 | 2 | 19 | 38 | GT   | 16 | 10 |
| 252516 | 37 | 5074492 | 5074517 | 2 | 13 | 26 | GT   | 8  | 8  |
| 252535 | 37 | 5127072 | 5127083 | 2 | 6  | 12 | TG   | 22 | 12 |

|        |    |         |         |   |    |    |      |    |    |
|--------|----|---------|---------|---|----|----|------|----|----|
| 252538 | 37 | 5132873 | 5132888 | 2 | 8  | 16 | AC   | 17 | 4  |
| 252539 | 37 | 5135864 | 5135881 | 2 | 9  | 18 | GA   | 15 | 3  |
| 252542 | 37 | 5142425 | 5142442 | 2 | 9  | 18 | GA   | 26 | 4  |
| 252544 | 37 | 5143101 | 5143128 | 2 | 14 | 28 | TG   | 9  | 7  |
| 252553 | 37 | 5150657 | 5150680 | 2 | 12 | 24 | GT   | 13 | 3  |
| 252554 | 37 | 5150863 | 5150884 | 2 | 11 | 22 | TG   | 21 | 9  |
| 252555 | 37 | 5151261 | 5151282 | 2 | 11 | 22 | CA   | 20 | 4  |
| 252561 | 37 | 5164186 | 5164199 | 2 | 7  | 14 | TG   | 28 | 5  |
| 252568 | 37 | 5182483 | 5182494 | 2 | 6  | 12 | GT   | 23 | 4  |
| 252569 | 37 | 5184834 | 5184857 | 2 | 12 | 24 | GT   | 8  | 5  |
| 252570 | 37 | 5184878 | 5184891 | 2 | 7  | 14 | TG   | 23 | 5  |
| 252571 | 37 | 5185049 | 5185070 | 2 | 11 | 22 | GT   | 18 | 6  |
| 252575 | 37 | 5192022 | 5192061 | 2 | 20 | 40 | GT   | 7  | 10 |
| 252577 | 37 | 5192964 | 5192983 | 2 | 10 | 20 | GT   | 26 | 3  |
| 252584 | 37 | 5198392 | 5198431 | 2 | 20 | 40 | GT   | 8  | 6  |
| 252588 | 37 | 5199264 | 5199283 | 2 | 10 | 20 | AC   | 14 | 7  |
| 252592 | 37 | 5206082 | 5206103 | 2 | 11 | 22 | GT   | 10 | 12 |
| 252595 | 37 | 5208864 | 5208891 | 2 | 14 | 28 | GA   | 13 | 8  |
| 252597 | 37 | 5212532 | 5212575 | 2 | 22 | 44 | CA   | 8  | 5  |
| 252598 | 37 | 5213082 | 5213093 | 2 | 6  | 12 | CA   | 21 | 4  |
| 252605 | 37 | 5216731 | 5216768 | 2 | 19 | 38 | AC   | 10 | 9  |
| 252614 | 37 | 5234079 | 5234102 | 2 | 12 | 24 | TG   | 23 | 5  |
| 252618 | 37 | 5240081 | 5240094 | 2 | 7  | 14 | GT   | 32 | 6  |
| 252619 | 37 | 5242153 | 5242190 | 2 | 19 | 38 | CA   | 13 | 12 |
| 252623 | 37 | 5243523 | 5243550 | 2 | 14 | 28 | TG   | 16 | 7  |
| 252630 | 37 | 5253790 | 5253811 | 2 | 11 | 22 | GT   | 17 | 7  |
| 252633 | 37 | 5255251 | 5255282 | 2 | 16 | 32 | GT   | 6  | 7  |
| 252634 | 37 | 5255401 | 5255412 | 2 | 6  | 12 | CA   | 20 | 4  |
| 252636 | 37 | 5256007 | 5256046 | 2 | 20 | 40 | TG   | 17 | 9  |
| 252637 | 37 | 5256163 | 5256176 | 2 | 7  | 14 | GT   | 19 | 6  |
| 252638 | 37 | 5256178 | 5256189 | 2 | 6  | 12 | TG   | 15 | 6  |
| 252639 | 37 | 5259106 | 5259153 | 2 | 24 | 48 | CA   | 9  | 10 |
| 252640 | 37 | 5264019 | 5264033 | 3 | 5  | 15 | CCT  | 19 | 3  |
| 252642 | 37 | 5264394 | 5264425 | 2 | 16 | 32 | GT   | 10 | 10 |
| 252643 | 37 | 5265579 | 5265612 | 2 | 17 | 34 | GT   | 8  | 6  |
| 252647 | 37 | 5267868 | 5267903 | 2 | 18 | 36 | GA   | 18 | 7  |
| 252648 | 37 | 5268086 | 5268113 | 2 | 14 | 28 | TG   | 21 | 10 |
| 252653 | 37 | 5269793 | 5269804 | 2 | 6  | 12 | TG   | 23 | 4  |
| 252654 | 37 | 5271213 | 5271228 | 2 | 8  | 16 | AT   | 15 | 3  |
| 252658 | 37 | 5271729 | 5271760 | 2 | 16 | 32 | AC   | 6  | 9  |
| 252660 | 37 | 5273428 | 5273443 | 2 | 8  | 16 | AC   | 18 | 9  |
| 252662 | 37 | 5277771 | 5277794 | 4 | 6  | 24 | ATCC | 17 | 4  |
| 252663 | 37 | 5279742 | 5279759 | 2 | 9  | 18 | AC   | 15 | 7  |
| 252669 | 37 | 5280278 | 5280295 | 2 | 9  | 18 | AG   | 19 | 4  |
| 252673 | 37 | 5282549 | 5282564 | 2 | 8  | 16 | CA   | 20 | 10 |
| 252674 | 37 | 5282731 | 5282748 | 2 | 9  | 18 | GT   | 19 | 7  |
| 252676 | 37 | 5285120 | 5285137 | 2 | 9  | 18 | GT   | 21 | 7  |
| 252677 | 37 | 5285220 | 5285241 | 2 | 11 | 22 | CA   | 25 | 4  |
| 252705 | 37 | 5305907 | 5305918 | 2 | 6  | 12 | GA   | 17 | 4  |
| 252706 | 37 | 5306028 | 5306061 | 2 | 17 | 34 | TG   | 9  | 11 |
| 252712 | 37 | 5311388 | 5311411 | 2 | 12 | 24 | CT   | 12 | 7  |

|        |    |         |         |   |    |    |     |    |    |
|--------|----|---------|---------|---|----|----|-----|----|----|
| 252719 | 37 | 5314833 | 5314860 | 2 | 14 | 28 | CA  | 11 | 6  |
| 252722 | 37 | 5315300 | 5315321 | 2 | 11 | 22 | GT  | 18 | 13 |
| 252723 | 37 | 5315568 | 5315597 | 2 | 15 | 30 | TG  | 11 | 5  |
| 252727 | 37 | 5320934 | 5320959 | 2 | 13 | 26 | AC  | 17 | 9  |
| 252728 | 37 | 5321081 | 5321108 | 2 | 14 | 28 | CA  | 18 | 8  |
| 252732 | 37 | 5322612 | 5322623 | 2 | 6  | 12 | CA  | 20 | 3  |
| 252733 | 37 | 5322750 | 5322779 | 2 | 15 | 30 | GT  | 12 | 8  |
| 252735 | 37 | 5322855 | 5322876 | 2 | 11 | 22 | AC  | 13 | 6  |
| 252741 | 37 | 5324065 | 5324092 | 2 | 14 | 28 | TG  | 17 | 7  |
| 252742 | 37 | 5325802 | 5325821 | 2 | 10 | 20 | TG  | 14 | 3  |
| 252743 | 37 | 5325869 | 5325886 | 2 | 9  | 18 | GT  | 15 | 7  |
| 252745 | 37 | 5331848 | 5331859 | 2 | 6  | 12 | CA  | 18 | 9  |
| 252747 | 37 | 5332148 | 5332171 | 2 | 12 | 24 | CT  | 12 | 8  |
| 252762 | 37 | 5338354 | 5338371 | 3 | 6  | 18 | AAT | 13 | 3  |
| 252766 | 37 | 5339151 | 5339180 | 3 | 10 | 30 | AGC | 19 | 8  |
| 252772 | 37 | 5341885 | 5341898 | 2 | 7  | 14 | GT  | 21 | 7  |
| 252789 | 37 | 5345441 | 5345461 | 3 | 7  | 21 | AGG | 19 | 3  |
| 252799 | 37 | 5349920 | 5349935 | 2 | 8  | 16 | TG  | 15 | 11 |
| 252814 | 37 | 5356027 | 5356044 | 2 | 9  | 18 | AC  | 24 | 6  |
| 252816 | 37 | 5358917 | 5358928 | 2 | 6  | 12 | TG  | 33 | 4  |
| 252820 | 37 | 5361353 | 5361388 | 3 | 12 | 36 | CTC | 16 | 6  |
| 252821 | 37 | 5361502 | 5361517 | 2 | 8  | 16 | AC  | 21 | 7  |
| 252824 | 37 | 5364027 | 5364062 | 2 | 18 | 36 | GT  | 11 | 11 |
| 252825 | 37 | 5366325 | 5366346 | 2 | 11 | 22 | TG  | 13 | 7  |
| 252831 | 37 | 5368912 | 5368933 | 2 | 11 | 22 | GT  | 12 | 8  |
| 252833 | 37 | 5372950 | 5372969 | 2 | 10 | 20 | CA  | 19 | 6  |
| 252840 | 37 | 5382229 | 5382256 | 2 | 14 | 28 | GT  | 6  | 5  |
| 252848 | 37 | 5385659 | 5385670 | 2 | 6  | 12 | CT  | 10 | 7  |
| 252850 | 37 | 5385940 | 5385955 | 2 | 8  | 16 | TC  | 17 | 14 |
| 252851 | 37 | 5385956 | 5385967 | 2 | 6  | 12 | AC  | 7  | 6  |
| 252855 | 37 | 5388463 | 5388474 | 2 | 6  | 12 | GT  | 19 | 3  |
| 252856 | 37 | 5388804 | 5388845 | 2 | 21 | 42 | AC  | 20 | 12 |
| 252857 | 37 | 5390371 | 5390388 | 2 | 9  | 18 | AC  | 6  | 7  |
| 252860 | 37 | 5390574 | 5390593 | 2 | 10 | 20 | TG  | 13 | 8  |
| 252861 | 37 | 5390972 | 5390983 | 2 | 6  | 12 | AC  | 18 | 3  |
| 252868 | 37 | 5399075 | 5399110 | 2 | 18 | 36 | CA  | 10 | 11 |
| 252869 | 37 | 5399244 | 5399257 | 2 | 7  | 14 | CA  | 13 | 5  |
| 252873 | 37 | 5400109 | 5400120 | 2 | 6  | 12 | TC  | 13 | 9  |
| 252875 | 37 | 5403939 | 5403952 | 2 | 7  | 14 | TG  | 13 | 6  |
| 252876 | 37 | 5403954 | 5403969 | 2 | 8  | 16 | GT  | 17 | 6  |
| 252881 | 37 | 5405791 | 5405816 | 2 | 13 | 26 | TG  | 10 | 9  |
| 252886 | 37 | 5408480 | 5408491 | 2 | 6  | 12 | CT  | 8  | 7  |
| 252887 | 37 | 5408610 | 5408625 | 2 | 8  | 16 | CA  | 23 | 4  |
| 252888 | 37 | 5408698 | 5408719 | 2 | 11 | 22 | GT  | 17 | 8  |
| 252889 | 37 | 5410901 | 5410922 | 2 | 11 | 22 | AC  | 23 | 5  |
| 252893 | 37 | 5412860 | 5412905 | 2 | 23 | 46 | AC  | 8  | 12 |
| 252895 | 37 | 5416850 | 5416863 | 2 | 7  | 14 | GT  | 26 | 3  |
| 252896 | 37 | 5417076 | 5417091 | 2 | 8  | 16 | CA  | 16 | 4  |
| 252897 | 37 | 5417093 | 5417108 | 2 | 8  | 16 | AC  | 19 | 7  |
| 252905 | 37 | 5421287 | 5421304 | 2 | 9  | 18 | TG  | 8  | 6  |
| 252906 | 37 | 5422684 | 5422697 | 2 | 7  | 14 | TG  | 21 | 3  |

|        |    |         |         |   |    |    |     |    |    |
|--------|----|---------|---------|---|----|----|-----|----|----|
| 252907 | 37 | 5424175 | 5424202 | 2 | 14 | 28 | TG  | 14 | 6  |
| 252909 | 37 | 5425333 | 5425356 | 2 | 12 | 24 | TG  | 10 | 3  |
| 252912 | 37 | 5425519 | 5425538 | 2 | 10 | 20 | CA  | 17 | 8  |
| 252914 | 37 | 5425782 | 5425809 | 2 | 14 | 28 | GT  | 6  | 6  |
| 252917 | 37 | 5425973 | 5425984 | 2 | 6  | 12 | AC  | 28 | 3  |
| 252920 | 37 | 5432906 | 5432923 | 2 | 9  | 18 | AC  | 12 | 3  |
| 252921 | 37 | 5433059 | 5433070 | 2 | 6  | 12 | TC  | 21 | 3  |
| 252922 | 37 | 5433176 | 5433207 | 2 | 16 | 32 | TG  | 11 | 14 |
| 252923 | 37 | 5433412 | 5433437 | 2 | 13 | 26 | TG  | 15 | 4  |
| 252924 | 37 | 5434722 | 5434767 | 2 | 23 | 46 | AC  | 8  | 8  |
| 252927 | 37 | 5440604 | 5440627 | 2 | 12 | 24 | GA  | 17 | 7  |
| 252931 | 37 | 5442371 | 5442408 | 2 | 19 | 38 | AC  | 15 | 14 |
| 252932 | 37 | 5442756 | 5442771 | 2 | 8  | 16 | CA  | 21 | 10 |
| 252934 | 37 | 5442898 | 5442913 | 2 | 8  | 16 | TG  | 14 | 3  |
| 252946 | 37 | 5449814 | 5449828 | 3 | 5  | 15 | TTG | 13 | 3  |
| 252947 | 37 | 5452078 | 5452103 | 2 | 13 | 26 | GT  | 11 | 11 |
| 252949 | 37 | 5452569 | 5452596 | 2 | 14 | 28 | AC  | 20 | 4  |
| 252950 | 37 | 5454866 | 5454895 | 2 | 15 | 30 | AC  | 16 | 10 |
| 252951 | 37 | 5455030 | 5455059 | 2 | 15 | 30 | CA  | 11 | 7  |
| 252952 | 37 | 5459580 | 5459609 | 2 | 15 | 30 | TG  | 13 | 6  |
| 252954 | 37 | 5463272 | 5463335 | 2 | 32 | 64 | GT  | 6  | 10 |
| 252955 | 37 | 5463438 | 5463457 | 2 | 10 | 20 | GT  | 15 | 9  |
| 252957 | 37 | 5467444 | 5467487 | 2 | 22 | 44 | CA  | 14 | 10 |
| 252961 | 37 | 5470186 | 5470206 | 3 | 7  | 21 | TTA | 19 | 7  |
| 252966 | 37 | 5475332 | 5475347 | 2 | 8  | 16 | GT  | 21 | 11 |
| 252971 | 37 | 5479528 | 5479555 | 2 | 14 | 28 | TG  | 7  | 5  |
| 252972 | 37 | 5479660 | 5479691 | 2 | 16 | 32 | AC  | 6  | 5  |
| 252973 | 37 | 5479785 | 5479810 | 2 | 13 | 26 | GT  | 15 | 15 |
| 252974 | 37 | 5480240 | 5480273 | 2 | 17 | 34 | GT  | 7  | 8  |
| 252980 | 37 | 5483528 | 5483543 | 2 | 8  | 16 | GT  | 16 | 5  |
| 252981 | 37 | 5483656 | 5483699 | 2 | 22 | 44 | CA  | 6  | 8  |
| 252983 | 37 | 5483878 | 5483895 | 2 | 9  | 18 | CT  | 24 | 10 |
| 252987 | 37 | 5485774 | 5485793 | 2 | 10 | 20 | GT  | 7  | 5  |
| 252989 | 37 | 5487082 | 5487105 | 2 | 12 | 24 | CA  | 7  | 5  |
| 252991 | 37 | 5490332 | 5490355 | 2 | 12 | 24 | AC  | 12 | 9  |
| 252992 | 37 | 5491031 | 5491064 | 2 | 17 | 34 | CA  | 9  | 8  |
| 252996 | 37 | 5494443 | 5494454 | 2 | 6  | 12 | AC  | 20 | 4  |
| 252997 | 37 | 5494654 | 5494679 | 2 | 13 | 26 | AC  | 21 | 9  |
| 253004 | 37 | 5501231 | 5501254 | 2 | 12 | 24 | GA  | 23 | 7  |
| 253005 | 37 | 5501495 | 5501514 | 2 | 10 | 20 | AG  | 17 | 4  |
| 253026 | 37 | 5511728 | 5511751 | 2 | 12 | 24 | GT  | 14 | 14 |
| 253028 | 37 | 5511859 | 5511870 | 2 | 6  | 12 | GT  | 19 | 3  |
| 253029 | 37 | 5511943 | 5511956 | 2 | 7  | 14 | TG  | 26 | 3  |
| 253030 | 37 | 5512008 | 5512037 | 2 | 15 | 30 | GT  | 9  | 7  |
| 253033 | 37 | 5512253 | 5512284 | 2 | 16 | 32 | TG  | 7  | 11 |
| 253036 | 37 | 5513160 | 5513219 | 3 | 20 | 60 | TTC | 16 | 9  |
| 253037 | 37 | 5516528 | 5516545 | 2 | 9  | 18 | GT  | 22 | 9  |
| 253039 | 37 | 5516610 | 5516621 | 2 | 6  | 12 | GT  | 17 | 6  |
| 253040 | 37 | 5516622 | 5516633 | 2 | 6  | 12 | GA  | 19 | 4  |
| 253047 | 37 | 5521715 | 5521728 | 2 | 7  | 14 | CA  | 23 | 4  |
| 253049 | 37 | 5523832 | 5523851 | 2 | 10 | 20 | GT  | 24 | 4  |



|        |    |         |         |   |    |    |      |    |    |
|--------|----|---------|---------|---|----|----|------|----|----|
| 253055 | 37 | 5531516 | 5531529 | 2 | 7  | 14 | TG   | 19 | 5  |
| 253056 | 37 | 5532136 | 5532149 | 2 | 7  | 14 | GA   | 21 | 3  |
| 253058 | 37 | 5533462 | 5533473 | 2 | 6  | 12 | TC   | 27 | 3  |
| 253063 | 37 | 5536507 | 5536530 | 2 | 12 | 24 | CA   | 13 | 15 |
| 253065 | 37 | 5538477 | 5538496 | 2 | 10 | 20 | TG   | 21 | 4  |
| 253068 | 37 | 5541193 | 5541206 | 2 | 7  | 14 | CA   | 7  | 3  |
| 253070 | 37 | 5542937 | 5542962 | 2 | 13 | 26 | AC   | 11 | 6  |
| 253071 | 37 | 5546592 | 5546619 | 2 | 14 | 28 | AC   | 18 | 5  |
| 253072 | 37 | 5546714 | 5546727 | 2 | 7  | 14 | AG   | 21 | 3  |
| 253075 | 37 | 5548150 | 5548177 | 2 | 14 | 28 | AC   | 8  | 7  |
| 253076 | 37 | 5548306 | 5548325 | 2 | 10 | 20 | GT   | 12 | 6  |
| 253078 | 37 | 5548480 | 5548495 | 2 | 8  | 16 | CA   | 13 | 3  |
| 253097 | 37 | 5561593 | 5561604 | 2 | 6  | 12 | TG   | 29 | 7  |
| 253098 | 37 | 5561809 | 5561838 | 2 | 15 | 30 | AC   | 13 | 6  |
| 253104 | 37 | 5566976 | 5566987 | 2 | 6  | 12 | CA   | 26 | 6  |
| 253105 | 37 | 5566989 | 5567002 | 2 | 7  | 14 | AC   | 19 | 4  |
| 253107 | 37 | 5570152 | 5570163 | 2 | 6  | 12 | AC   | 24 | 3  |
| 253108 | 37 | 5570778 | 5570791 | 2 | 7  | 14 | CA   | 23 | 3  |
| 253109 | 37 | 5570793 | 5570804 | 2 | 6  | 12 | AC   | 14 | 5  |
| 253113 | 37 | 5572346 | 5572405 | 2 | 30 | 60 | CA   | 8  | 10 |
| 253124 | 37 | 5620863 | 5620874 | 2 | 6  | 12 | AC   | 25 | 6  |
| 253126 | 37 | 5624338 | 5624349 | 2 | 6  | 12 | TG   | 18 | 6  |
| 253128 | 37 | 5627255 | 5627276 | 2 | 11 | 22 | GT   | 16 | 8  |
| 253130 | 37 | 5643270 | 5643281 | 2 | 6  | 12 | TG   | 22 | 5  |
| 253136 | 37 | 5647478 | 5647517 | 2 | 20 | 40 | AC   | 11 | 12 |
| 253142 | 37 | 5660385 | 5660400 | 2 | 8  | 16 | AC   | 25 | 7  |
| 253143 | 37 | 5668007 | 5668022 | 2 | 8  | 16 | AC   | 15 | 3  |
| 253144 | 37 | 5672948 | 5672967 | 4 | 5  | 20 | AGAC | 25 | 7  |
| 253145 | 37 | 5674609 | 5674626 | 2 | 9  | 18 | TG   | 21 | 7  |
| 253146 | 37 | 5676823 | 5676852 | 3 | 10 | 30 | ATT  | 12 | 9  |
| 253161 | 37 | 5715081 | 5715096 | 2 | 8  | 16 | AC   | 20 | 6  |
| 253166 | 37 | 5722580 | 5722599 | 2 | 10 | 20 | CA   | 16 | 8  |
| 253172 | 37 | 5729500 | 5729537 | 2 | 19 | 38 | GT   | 7  | 10 |
| 253173 | 37 | 5729722 | 5729751 | 2 | 15 | 30 | CA   | 10 | 6  |
| 253174 | 37 | 5729936 | 5729953 | 2 | 9  | 18 | CA   | 24 | 7  |
| 253177 | 37 | 5735139 | 5735168 | 3 | 10 | 30 | TCC  | 15 | 5  |
| 253181 | 37 | 5760110 | 5760141 | 2 | 16 | 32 | GT   | 8  | 5  |
| 253184 | 37 | 5764287 | 5764300 | 2 | 7  | 14 | CA   | 24 | 4  |
| 253186 | 37 | 5774869 | 5774886 | 2 | 9  | 18 | GT   | 8  | 7  |
| 253187 | 37 | 5774888 | 5774899 | 2 | 6  | 12 | TG   | 22 | 13 |
| 253195 | 37 | 5795665 | 5795708 | 4 | 11 | 44 | ATCA | 11 | 9  |
| 253216 | 38 | 8506    | 8525    | 4 | 5  | 20 | GTTT | 21 | 3  |
| 253217 | 38 | 8623    | 8638    | 4 | 4  | 16 | AATA | 11 | 3  |
| 253220 | 38 | 18642   | 18675   | 2 | 17 | 34 | AC   | 18 | 6  |
| 253221 | 38 | 18964   | 19011   | 4 | 12 | 48 | TAGA | 15 | 7  |
| 253230 | 38 | 53845   | 53888   | 4 | 11 | 44 | ATAG | 6  | 6  |
| 253235 | 38 | 79009   | 79028   | 2 | 10 | 20 | AG   | 25 | 5  |
| 253237 | 38 | 81934   | 81945   | 2 | 6  | 12 | TG   | 29 | 4  |
| 253239 | 38 | 84500   | 84539   | 2 | 20 | 40 | CA   | 12 | 10 |
| 253249 | 38 | 88072   | 88097   | 2 | 13 | 26 | AC   | 10 | 8  |
| 253250 | 38 | 91673   | 91686   | 2 | 7  | 14 | CA   | 17 | 5  |

|        |    |        |        |   |    |    |      |    |    |
|--------|----|--------|--------|---|----|----|------|----|----|
| 253257 | 38 | 96095  | 96108  | 2 | 7  | 14 | GT   | 18 | 7  |
| 253262 | 38 | 97235  | 97250  | 2 | 8  | 16 | CA   | 26 | 8  |
| 253270 | 38 | 101263 | 101286 | 2 | 12 | 24 | TG   | 12 | 8  |
| 253274 | 38 | 114600 | 114651 | 2 | 26 | 52 | CA   | 13 | 17 |
| 253277 | 38 | 128244 | 128327 | 4 | 21 | 84 | ATCA | 9  | 8  |
| 253289 | 38 | 165351 | 165364 | 2 | 7  | 14 | TG   | 36 | 3  |
| 253290 | 38 | 167900 | 167917 | 2 | 9  | 18 | CA   | 8  | 5  |
| 253295 | 38 | 201271 | 201304 | 2 | 17 | 34 | CT   | 12 | 9  |
| 253296 | 38 | 202854 | 202869 | 2 | 8  | 16 | GT   | 13 | 4  |
| 253309 | 38 | 228433 | 228446 | 2 | 7  | 14 | TG   | 23 | 3  |
| 253313 | 38 | 251361 | 251372 | 2 | 6  | 12 | TG   | 16 | 3  |
| 253315 | 38 | 251593 | 251604 | 2 | 6  | 12 | GT   | 28 | 3  |
| 253316 | 38 | 251737 | 251756 | 2 | 10 | 20 | TG   | 14 | 5  |
| 253326 | 38 | 274937 | 274957 | 3 | 7  | 21 | ACA  | 28 | 5  |
| 253327 | 38 | 279115 | 279126 | 2 | 6  | 12 | CA   | 26 | 6  |
| 253330 | 38 | 282793 | 282826 | 2 | 17 | 34 | GT   | 7  | 6  |
| 253333 | 38 | 291431 | 291470 | 4 | 10 | 40 | TTGT | 15 | 11 |
| 253348 | 38 | 326446 | 326461 | 4 | 4  | 16 | ATAG | 16 | 11 |
| 253349 | 38 | 328043 | 328062 | 2 | 10 | 20 | TG   | 24 | 10 |
| 253358 | 38 | 353702 | 353719 | 3 | 6  | 18 | AAC  | 17 | 3  |
| 253361 | 38 | 364055 | 364080 | 2 | 13 | 26 | CA   | 27 | 6  |
| 253362 | 38 | 364434 | 364447 | 2 | 7  | 14 | TG   | 25 | 6  |
| 253365 | 38 | 371450 | 371469 | 2 | 10 | 20 | GT   | 24 | 8  |
| 253377 | 38 | 394458 | 394487 | 2 | 15 | 30 | AC   | 21 | 7  |
| 253383 | 38 | 401156 | 401167 | 2 | 6  | 12 | GT   | 21 | 4  |
| 253385 | 38 | 403097 | 403130 | 2 | 17 | 34 | TG   | 15 | 16 |
| 253387 | 38 | 405552 | 405567 | 4 | 4  | 16 | ATTT | 27 | 3  |
| 253388 | 38 | 407630 | 407647 | 2 | 9  | 18 | TG   | 13 | 7  |
| 253390 | 38 | 410175 | 410192 | 2 | 9  | 18 | TG   | 19 | 11 |
| 253395 | 38 | 417377 | 417424 | 2 | 24 | 48 | CA   | 16 | 12 |
| 253397 | 38 | 426227 | 426246 | 2 | 10 | 20 | CA   | 20 | 10 |
| 253398 | 38 | 426439 | 426464 | 2 | 13 | 26 | AC   | 19 | 8  |
| 253404 | 38 | 439039 | 439058 | 2 | 10 | 20 | CA   | 24 | 8  |
| 253405 | 38 | 439239 | 439254 | 2 | 8  | 16 | CA   | 22 | 6  |
| 253406 | 38 | 439523 | 439546 | 4 | 6  | 24 | AGAA | 30 | 3  |
| 253407 | 38 | 440257 | 440282 | 2 | 13 | 26 | GT   | 16 | 7  |
| 253410 | 38 | 444540 | 444561 | 2 | 11 | 22 | TG   | 16 | 11 |
| 253412 | 38 | 447210 | 447243 | 2 | 17 | 34 | AC   | 16 | 14 |
| 253414 | 38 | 447649 | 447660 | 2 | 6  | 12 | CA   | 24 | 5  |
| 253415 | 38 | 447883 | 447896 | 2 | 7  | 14 | AT   | 20 | 11 |
| 253418 | 38 | 453243 | 453254 | 2 | 6  | 12 | TG   | 21 | 3  |
| 253419 | 38 | 453255 | 453268 | 2 | 7  | 14 | AG   | 17 | 4  |
| 253420 | 38 | 453308 | 453339 | 2 | 16 | 32 | TG   | 18 | 7  |
| 253421 | 38 | 453406 | 453423 | 2 | 9  | 18 | TG   | 12 | 4  |
| 253422 | 38 | 455859 | 455890 | 2 | 16 | 32 | AC   | 18 | 9  |
| 253425 | 38 | 461053 | 461090 | 2 | 19 | 38 | CA   | 10 | 8  |
| 253433 | 38 | 478266 | 478277 | 2 | 6  | 12 | TG   | 27 | 3  |
| 253437 | 38 | 487752 | 487777 | 2 | 13 | 26 | AC   | 11 | 11 |
| 253439 | 38 | 491678 | 491697 | 2 | 10 | 20 | TG   | 21 | 10 |
| 253442 | 38 | 500943 | 500960 | 2 | 9  | 18 | AC   | 20 | 8  |
| 253445 | 38 | 507579 | 507608 | 2 | 15 | 30 | TG   | 20 | 15 |

|        |    |        |        |   |    |    |     |    |    |
|--------|----|--------|--------|---|----|----|-----|----|----|
| 253446 | 38 | 508294 | 508313 | 2 | 10 | 20 | AC  | 18 | 12 |
| 253447 | 38 | 509321 | 509344 | 2 | 12 | 24 | CA  | 18 | 7  |
| 253450 | 38 | 515166 | 515185 | 2 | 10 | 20 | AC  | 22 | 6  |
| 253451 | 38 | 515396 | 515407 | 2 | 6  | 12 | GT  | 22 | 3  |
| 253461 | 38 | 527871 | 527903 | 3 | 11 | 33 | ATG | 19 | 6  |
| 253462 | 38 | 528137 | 528154 | 2 | 9  | 18 | GA  | 18 | 6  |
| 253466 | 38 | 529464 | 529477 | 2 | 7  | 14 | TG  | 25 | 7  |
| 253473 | 38 | 548002 | 548013 | 2 | 6  | 12 | AC  | 27 | 6  |
| 253479 | 38 | 556583 | 556596 | 2 | 7  | 14 | GT  | 30 | 3  |
| 253490 | 38 | 589256 | 589276 | 3 | 7  | 21 | GAT | 22 | 6  |
| 253498 | 38 | 603725 | 603754 | 2 | 15 | 30 | CA  | 20 | 17 |
| 253512 | 38 | 646051 | 646090 | 2 | 20 | 40 | TG  | 12 | 9  |
| 253522 | 38 | 656523 | 656538 | 2 | 8  | 16 | CT  | 27 | 5  |
| 253525 | 38 | 658873 | 658888 | 2 | 8  | 16 | TG  | 6  | 4  |
| 253528 | 38 | 661352 | 661363 | 2 | 6  | 12 | AG  | 21 | 5  |
| 253529 | 38 | 663691 | 663706 | 2 | 8  | 16 | GT  | 21 | 3  |
| 253531 | 38 | 663860 | 663873 | 2 | 7  | 14 | AC  | 27 | 4  |
| 253536 | 38 | 669553 | 669576 | 2 | 12 | 24 | CA  | 20 | 8  |
| 253538 | 38 | 673872 | 673895 | 2 | 12 | 24 | GT  | 16 | 5  |
| 253545 | 38 | 678316 | 678335 | 2 | 10 | 20 | CA  | 20 | 4  |
| 253546 | 38 | 678466 | 678483 | 2 | 9  | 18 | AC  | 20 | 14 |
| 253553 | 38 | 681423 | 681440 | 2 | 9  | 18 | AC  | 29 | 7  |
| 253554 | 38 | 681580 | 681597 | 2 | 9  | 18 | CA  | 14 | 10 |
| 253556 | 38 | 682611 | 682622 | 2 | 6  | 12 | GA  | 20 | 4  |
| 253561 | 38 | 687579 | 687592 | 2 | 7  | 14 | GA  | 17 | 4  |
| 253564 | 38 | 688062 | 688085 | 2 | 12 | 24 | TG  | 16 | 6  |
| 253565 | 38 | 688269 | 688294 | 2 | 13 | 26 | CA  | 17 | 6  |
| 253567 | 38 | 689774 | 689789 | 2 | 8  | 16 | AC  | 21 | 12 |
| 253568 | 38 | 689792 | 689805 | 2 | 7  | 14 | AC  | 19 | 11 |
| 253569 | 38 | 689906 | 689927 | 2 | 11 | 22 | AG  | 13 | 6  |
| 253570 | 38 | 690089 | 690100 | 2 | 6  | 12 | TC  | 21 | 3  |
| 253571 | 38 | 690337 | 690364 | 2 | 14 | 28 | AC  | 20 | 12 |
| 253572 | 38 | 690839 | 690850 | 2 | 6  | 12 | GA  | 15 | 7  |
| 253573 | 38 | 690852 | 690863 | 2 | 6  | 12 | AG  | 17 | 5  |
| 253574 | 38 | 691472 | 691483 | 2 | 6  | 12 | CA  | 19 | 6  |
| 253575 | 38 | 691485 | 691496 | 2 | 6  | 12 | AC  | 23 | 5  |
| 253576 | 38 | 694215 | 694230 | 2 | 8  | 16 | TG  | 14 | 3  |
| 253577 | 38 | 694313 | 694356 | 2 | 22 | 44 | TC  | 15 | 10 |
| 253580 | 38 | 702255 | 702274 | 2 | 10 | 20 | AG  | 16 | 7  |
| 253586 | 38 | 709902 | 709927 | 2 | 13 | 26 | AG  | 14 | 6  |
| 253588 | 38 | 711285 | 711296 | 2 | 6  | 12 | AC  | 16 | 4  |
| 253590 | 38 | 711336 | 711347 | 2 | 6  | 12 | CA  | 26 | 12 |
| 253592 | 38 | 711495 | 711514 | 2 | 10 | 20 | AC  | 20 | 14 |
| 253596 | 38 | 712031 | 712048 | 2 | 9  | 18 | CA  | 17 | 5  |
| 253600 | 38 | 715200 | 715219 | 2 | 10 | 20 | TG  | 14 | 3  |
| 253603 | 38 | 719016 | 719029 | 2 | 7  | 14 | GT  | 18 | 7  |
| 253605 | 38 | 719175 | 719186 | 2 | 6  | 12 | CT  | 20 | 5  |
| 253606 | 38 | 721382 | 721397 | 2 | 8  | 16 | GA  | 26 | 4  |
| 253608 | 38 | 722247 | 722272 | 2 | 13 | 26 | CT  | 10 | 8  |
| 253609 | 38 | 722663 | 722688 | 2 | 13 | 26 | CA  | 10 | 6  |
| 253615 | 38 | 723857 | 723882 | 2 | 13 | 26 | TG  | 9  | 5  |

|        |    |         |         |   |    |    |      |    |    |
|--------|----|---------|---------|---|----|----|------|----|----|
| 253617 | 38 | 727016  | 727047  | 2 | 16 | 32 | CA   | 8  | 9  |
| 253619 | 38 | 727433  | 727454  | 2 | 11 | 22 | GA   | 18 | 5  |
| 253620 | 38 | 727557  | 727570  | 2 | 7  | 14 | GA   | 27 | 3  |
| 253635 | 38 | 742061  | 742082  | 2 | 11 | 22 | AG   | 8  | 3  |
| 253641 | 38 | 746320  | 746335  | 4 | 4  | 16 | TGTC | 21 | 3  |
| 253647 | 38 | 750962  | 750973  | 2 | 6  | 12 | CA   | 10 | 3  |
| 253648 | 38 | 750997  | 751008  | 2 | 6  | 12 | AC   | 17 | 9  |
| 253649 | 38 | 751011  | 751024  | 2 | 7  | 14 | AC   | 16 | 8  |
| 253656 | 38 | 756303  | 756328  | 2 | 13 | 26 | GA   | 12 | 10 |
| 253659 | 38 | 758763  | 758774  | 2 | 6  | 12 | TG   | 16 | 3  |
| 253660 | 38 | 762621  | 762634  | 2 | 7  | 14 | GT   | 18 | 9  |
| 253661 | 38 | 762637  | 762654  | 2 | 9  | 18 | GT   | 19 | 8  |
| 253668 | 38 | 771320  | 771331  | 2 | 6  | 12 | GT   | 22 | 11 |
| 253669 | 38 | 771334  | 771345  | 2 | 6  | 12 | GT   | 18 | 6  |
| 253674 | 38 | 774353  | 774380  | 2 | 14 | 28 | AC   | 13 | 8  |
| 253678 | 38 | 774909  | 774932  | 2 | 12 | 24 | GT   | 13 | 8  |
| 253688 | 38 | 797541  | 797554  | 2 | 7  | 14 | CA   | 18 | 5  |
| 253691 | 38 | 798395  | 798406  | 2 | 6  | 12 | CA   | 19 | 12 |
| 253694 | 38 | 803953  | 803966  | 2 | 7  | 14 | TG   | 16 | 4  |
| 253696 | 38 | 806129  | 806144  | 4 | 4  | 16 | GTAA | 29 | 3  |
| 253707 | 38 | 816436  | 816455  | 2 | 10 | 20 | CA   | 14 | 7  |
| 253709 | 38 | 816675  | 816712  | 2 | 19 | 38 | CA   | 12 | 9  |
| 253712 | 38 | 823274  | 823299  | 2 | 13 | 26 | AC   | 9  | 6  |
| 253714 | 38 | 826295  | 826306  | 2 | 6  | 12 | AC   | 30 | 4  |
| 253721 | 38 | 836699  | 836724  | 2 | 13 | 26 | CA   | 16 | 9  |
| 253726 | 38 | 841556  | 841577  | 2 | 11 | 22 | GA   | 11 | 8  |
| 253727 | 38 | 841664  | 841691  | 4 | 7  | 28 | ATTT | 14 | 5  |
| 253728 | 38 | 841953  | 841967  | 3 | 5  | 15 | CAA  | 22 | 4  |
| 253731 | 38 | 849698  | 849761  | 4 | 16 | 64 | TTGA | 15 | 12 |
| 253733 | 38 | 850727  | 850740  | 2 | 7  | 14 | TG   | 14 | 7  |
| 253734 | 38 | 850743  | 850758  | 2 | 8  | 16 | TG   | 11 | 3  |
| 253738 | 38 | 852349  | 852360  | 2 | 6  | 12 | AC   | 15 | 5  |
| 253739 | 38 | 852467  | 852494  | 2 | 14 | 28 | TG   | 10 | 9  |
| 253743 | 38 | 854388  | 854403  | 2 | 8  | 16 | GT   | 24 | 5  |
| 253745 | 38 | 856187  | 856220  | 2 | 17 | 34 | TG   | 6  | 6  |
| 253752 | 38 | 862490  | 862503  | 2 | 7  | 14 | TG   | 14 | 5  |
| 253753 | 38 | 862828  | 862845  | 3 | 6  | 18 | TCC  | 8  | 4  |
| 253754 | 38 | 867768  | 867783  | 4 | 4  | 16 | TTTA | 7  | 3  |
| 253760 | 38 | 876115  | 876144  | 2 | 15 | 30 | AC   | 15 | 10 |
| 253762 | 38 | 883341  | 883352  | 2 | 6  | 12 | CA   | 10 | 4  |
| 253770 | 38 | 908931  | 908958  | 2 | 14 | 28 | CA   | 13 | 7  |
| 253774 | 38 | 914741  | 914772  | 2 | 16 | 32 | TG   | 20 | 8  |
| 253779 | 38 | 919583  | 919594  | 2 | 6  | 12 | AC   | 27 | 3  |
| 253786 | 38 | 944848  | 944885  | 2 | 19 | 38 | GT   | 8  | 7  |
| 253794 | 38 | 955063  | 955082  | 2 | 10 | 20 | GT   | 22 | 13 |
| 253797 | 38 | 955815  | 955834  | 2 | 10 | 20 | GA   | 24 | 3  |
| 253798 | 38 | 955970  | 955993  | 2 | 12 | 24 | TG   | 14 | 9  |
| 253801 | 38 | 958286  | 958303  | 2 | 9  | 18 | AC   | 22 | 8  |
| 253804 | 38 | 964692  | 964719  | 2 | 14 | 28 | TG   | 6  | 7  |
| 253829 | 38 | 1004575 | 1004588 | 2 | 7  | 14 | CA   | 18 | 7  |
| 253830 | 38 | 1006856 | 1006879 | 2 | 12 | 24 | AC   | 12 | 7  |

|        |    |         |         |   |    |    |      |    |    |
|--------|----|---------|---------|---|----|----|------|----|----|
| 253833 | 38 | 1015893 | 1015938 | 2 | 23 | 46 | TG   | 6  | 11 |
| 253835 | 38 | 1016733 | 1016747 | 3 | 5  | 15 | GTT  | 17 | 5  |
| 253839 | 38 | 1026189 | 1026202 | 2 | 7  | 14 | CT   | 18 | 8  |
| 253840 | 38 | 1026203 | 1026216 | 2 | 7  | 14 | CA   | 13 | 8  |
| 253841 | 38 | 1029936 | 1029959 | 2 | 12 | 24 | GA   | 6  | 5  |
| 253847 | 38 | 1041819 | 1041842 | 2 | 12 | 24 | CA   | 18 | 8  |
| 253849 | 38 | 1045959 | 1045980 | 2 | 11 | 22 | TG   | 12 | 12 |
| 253850 | 38 | 1046162 | 1046185 | 2 | 12 | 24 | TG   | 17 | 8  |
| 253853 | 38 | 1048168 | 1048195 | 2 | 14 | 28 | TC   | 16 | 7  |
| 253863 | 38 | 1078001 | 1078012 | 2 | 6  | 12 | CA   | 25 | 6  |
| 253864 | 38 | 1080936 | 1080950 | 3 | 5  | 15 | AGC  | 26 | 4  |
| 253872 | 38 | 1095244 | 1095276 | 3 | 11 | 33 | GAG  | 24 | 6  |
| 253874 | 38 | 1100480 | 1100507 | 2 | 14 | 28 | CT   | 10 | 7  |
| 253875 | 38 | 1111144 | 1111155 | 2 | 6  | 12 | GT   | 28 | 3  |
| 253882 | 38 | 1127805 | 1127828 | 2 | 12 | 24 | AC   | 20 | 12 |
| 253883 | 38 | 1128461 | 1128472 | 2 | 6  | 12 | CA   | 24 | 5  |
| 253884 | 38 | 1128475 | 1128486 | 2 | 6  | 12 | CA   | 19 | 4  |
| 253885 | 38 | 1132255 | 1132280 | 2 | 13 | 26 | AC   | 15 | 8  |
| 253892 | 38 | 1145768 | 1145795 | 2 | 14 | 28 | CA   | 19 | 10 |
| 253906 | 38 | 1171780 | 1171793 | 2 | 7  | 14 | CT   | 23 | 7  |
| 253908 | 38 | 1174228 | 1174243 | 2 | 8  | 16 | AC   | 28 | 4  |
| 253919 | 38 | 1177729 | 1177748 | 2 | 10 | 20 | AC   | 12 | 6  |
| 253925 | 38 | 1180317 | 1180336 | 2 | 10 | 20 | TG   | 12 | 5  |
| 253929 | 38 | 1183054 | 1183065 | 2 | 6  | 12 | AC   | 16 | 3  |
| 253935 | 38 | 1187671 | 1187702 | 2 | 16 | 32 | GT   | 12 | 9  |
| 253944 | 38 | 1204907 | 1204920 | 2 | 7  | 14 | GT   | 27 | 3  |
| 253946 | 38 | 1209832 | 1209853 | 2 | 11 | 22 | CA   | 6  | 6  |
| 253947 | 38 | 1220692 | 1220721 | 2 | 15 | 30 | TG   | 11 | 12 |
| 253948 | 38 | 1228256 | 1228279 | 3 | 8  | 24 | TTG  | 17 | 4  |
| 253955 | 38 | 1247430 | 1247441 | 2 | 6  | 12 | AC   | 18 | 6  |
| 253958 | 38 | 1258536 | 1258551 | 2 | 8  | 16 | TC   | 14 | 7  |
| 253961 | 38 | 1264027 | 1264044 | 2 | 9  | 18 | TG   | 17 | 5  |
| 253970 | 38 | 1280165 | 1280178 | 2 | 7  | 14 | TG   | 23 | 4  |
| 253978 | 38 | 1308170 | 1308221 | 2 | 26 | 52 | AC   | 12 | 10 |
| 253980 | 38 | 1310736 | 1310751 | 4 | 4  | 16 | AAAC | 28 | 4  |
| 253985 | 38 | 1323998 | 1324013 | 4 | 4  | 16 | ACAA | 30 | 3  |
| 253988 | 38 | 1328086 | 1328112 | 3 | 9  | 27 | CAT  | 21 | 4  |
| 253989 | 38 | 1354523 | 1354538 | 4 | 4  | 16 | AAAT | 28 | 3  |
| 253994 | 38 | 1375222 | 1375241 | 2 | 10 | 20 | TG   | 18 | 7  |
| 254003 | 38 | 1391992 | 1392009 | 2 | 9  | 18 | TG   | 15 | 3  |
| 254004 | 38 | 1398438 | 1398451 | 2 | 7  | 14 | GT   | 15 | 5  |
| 254005 | 38 | 1398682 | 1398721 | 2 | 20 | 40 | CA   | 13 | 10 |
| 254006 | 38 | 1398982 | 1398999 | 3 | 6  | 18 | TCC  | 16 | 8  |
| 254016 | 38 | 1414381 | 1414404 | 2 | 12 | 24 | GT   | 12 | 6  |
| 254023 | 38 | 1435740 | 1435767 | 2 | 14 | 28 | CA   | 20 | 20 |
| 254024 | 38 | 1438858 | 1438879 | 2 | 11 | 22 | CT   | 7  | 4  |
| 254028 | 38 | 1449294 | 1449325 | 2 | 16 | 32 | TG   | 8  | 10 |
| 254033 | 38 | 1454560 | 1454574 | 3 | 5  | 15 | ATC  | 32 | 3  |
| 254034 | 38 | 1455100 | 1455125 | 2 | 13 | 26 | AC   | 12 | 6  |
| 254036 | 38 | 1461029 | 1461048 | 4 | 5  | 20 | AAAT | 14 | 5  |
| 254043 | 38 | 1478267 | 1478284 | 2 | 9  | 18 | AC   | 21 | 8  |

|        |    |         |         |   |    |    |      |    |    |
|--------|----|---------|---------|---|----|----|------|----|----|
| 254046 | 38 | 1496048 | 1496069 | 2 | 11 | 22 | CT   | 11 | 12 |
| 254047 | 38 | 1496219 | 1496236 | 3 | 6  | 18 | GCT  | 16 | 5  |
| 254048 | 38 | 1496659 | 1496682 | 2 | 12 | 24 | CA   | 17 | 7  |
| 254049 | 38 | 1497718 | 1497735 | 3 | 6  | 18 | AAT  | 23 | 6  |
| 254050 | 38 | 1498017 | 1498042 | 2 | 13 | 26 | CA   | 19 | 11 |
| 254052 | 38 | 1498825 | 1498840 | 2 | 8  | 16 | CT   | 17 | 4  |
| 254053 | 38 | 1499255 | 1499275 | 3 | 7  | 21 | CCT  | 22 | 6  |
| 254062 | 38 | 1514781 | 1514800 | 4 | 5  | 20 | AGTC | 17 | 4  |
| 254066 | 38 | 1521751 | 1521766 | 4 | 4  | 16 | TGTC | 26 | 6  |
| 254067 | 38 | 1544297 | 1544314 | 2 | 9  | 18 | GT   | 26 | 11 |
| 254075 | 38 | 1565611 | 1565638 | 2 | 14 | 28 | CA   | 12 | 11 |
| 254085 | 38 | 1577638 | 1577653 | 2 | 8  | 16 | TC   | 33 | 4  |
| 254090 | 38 | 1584762 | 1584781 | 4 | 5  | 20 | AAAC | 15 | 9  |
| 254091 | 38 | 1590542 | 1590559 | 3 | 6  | 18 | GGA  | 18 | 3  |
| 254096 | 38 | 1602312 | 1602331 | 2 | 10 | 20 | TG   | 17 | 7  |
| 254099 | 38 | 1602775 | 1602796 | 2 | 11 | 22 | TG   | 9  | 12 |
| 254102 | 38 | 1609608 | 1609633 | 2 | 13 | 26 | CT   | 18 | 4  |
| 254105 | 38 | 1613913 | 1613928 | 2 | 8  | 16 | AC   | 16 | 5  |
| 254106 | 38 | 1613931 | 1613946 | 2 | 8  | 16 | AC   | 14 | 5  |
| 254113 | 38 | 1621213 | 1621244 | 2 | 16 | 32 | CA   | 18 | 15 |
| 254114 | 38 | 1622329 | 1622356 | 2 | 14 | 28 | CA   | 12 | 12 |
| 254119 | 38 | 1629231 | 1629242 | 2 | 6  | 12 | TG   | 21 | 3  |
| 254122 | 38 | 1633378 | 1633395 | 2 | 9  | 18 | TG   | 20 | 9  |
| 254123 | 38 | 1633563 | 1633578 | 2 | 8  | 16 | GT   | 27 | 8  |
| 254124 | 38 | 1637684 | 1637715 | 2 | 16 | 32 | AC   | 17 | 7  |
| 254132 | 38 | 1652735 | 1652796 | 2 | 31 | 62 | TG   | 6  | 10 |
| 254135 | 38 | 1657836 | 1657861 | 2 | 13 | 26 | GT   | 16 | 8  |
| 254137 | 38 | 1660710 | 1660724 | 3 | 5  | 15 | ACA  | 32 | 3  |
| 254138 | 38 | 1668214 | 1668239 | 2 | 13 | 26 | AC   | 21 | 11 |
| 254140 | 38 | 1669168 | 1669191 | 2 | 12 | 24 | GT   | 13 | 6  |
| 254141 | 38 | 1669368 | 1669389 | 2 | 11 | 22 | TG   | 20 | 7  |
| 254143 | 38 | 1669673 | 1669700 | 2 | 14 | 28 | TG   | 20 | 11 |
| 254144 | 38 | 1671226 | 1671241 | 2 | 8  | 16 | CA   | 26 | 6  |
| 254150 | 38 | 1685343 | 1685360 | 2 | 9  | 18 | CA   | 20 | 7  |
| 254151 | 38 | 1687653 | 1687676 | 2 | 12 | 24 | AC   | 17 | 15 |
| 254152 | 38 | 1689492 | 1689515 | 2 | 12 | 24 | AC   | 13 | 10 |
| 254154 | 38 | 1691617 | 1691636 | 2 | 10 | 20 | GT   | 16 | 12 |
| 254155 | 38 | 1691813 | 1691824 | 2 | 6  | 12 | CT   | 23 | 11 |
| 254156 | 38 | 1693993 | 1694006 | 2 | 7  | 14 | CA   | 14 | 4  |
| 254158 | 38 | 1696342 | 1696359 | 2 | 9  | 18 | TC   | 21 | 11 |
| 254159 | 38 | 1696623 | 1696638 | 2 | 8  | 16 | TG   | 30 | 9  |
| 254160 | 38 | 1696684 | 1696695 | 2 | 6  | 12 | GT   | 25 | 4  |
| 254161 | 38 | 1699112 | 1699125 | 2 | 7  | 14 | AC   | 15 | 6  |
| 254162 | 38 | 1699150 | 1699167 | 2 | 9  | 18 | TG   | 23 | 6  |
| 254163 | 38 | 1700018 | 1700035 | 2 | 9  | 18 | CA   | 26 | 7  |
| 254165 | 38 | 1703169 | 1703204 | 2 | 18 | 36 | GT   | 15 | 12 |
| 254167 | 38 | 1711049 | 1711076 | 2 | 14 | 28 | GT   | 13 | 10 |
| 254169 | 38 | 1713333 | 1713354 | 2 | 11 | 22 | GT   | 15 | 6  |
| 254171 | 38 | 1714924 | 1714935 | 2 | 6  | 12 | TG   | 6  | 6  |
| 254174 | 38 | 1716757 | 1716770 | 2 | 7  | 14 | AT   | 18 | 5  |
| 254180 | 38 | 1725525 | 1725536 | 2 | 6  | 12 | GT   | 27 | 3  |

|        |    |         |         |   |    |    |      |    |    |
|--------|----|---------|---------|---|----|----|------|----|----|
| 254181 | 38 | 1726613 | 1726628 | 2 | 8  | 16 | CA   | 15 | 3  |
| 254182 | 38 | 1727380 | 1727395 | 2 | 8  | 16 | TG   | 17 | 6  |
| 254186 | 38 | 1734312 | 1734327 | 2 | 8  | 16 | CT   | 15 | 3  |
| 254187 | 38 | 1738513 | 1738526 | 2 | 7  | 14 | AC   | 18 | 7  |
| 254188 | 38 | 1740312 | 1740335 | 2 | 12 | 24 | GT   | 20 | 5  |
| 254189 | 38 | 1740533 | 1740590 | 2 | 29 | 58 | AC   | 7  | 8  |
| 254191 | 38 | 1741058 | 1741071 | 2 | 7  | 14 | CA   | 7  | 3  |
| 254195 | 38 | 1744503 | 1744532 | 2 | 15 | 30 | AC   | 7  | 8  |
| 254196 | 38 | 1747483 | 1747494 | 2 | 6  | 12 | GA   | 18 | 3  |
| 254197 | 38 | 1747823 | 1747834 | 2 | 6  | 12 | AG   | 27 | 3  |
| 254203 | 38 | 1756439 | 1756452 | 2 | 7  | 14 | CA   | 9  | 4  |
| 254204 | 38 | 1756454 | 1756467 | 2 | 7  | 14 | AC   | 16 | 5  |
| 254205 | 38 | 1756566 | 1756585 | 2 | 10 | 20 | GT   | 16 | 15 |
| 254212 | 38 | 1762954 | 1762985 | 2 | 16 | 32 | GT   | 7  | 5  |
| 254215 | 38 | 1772046 | 1772057 | 2 | 6  | 12 | GT   | 17 | 6  |
| 254216 | 38 | 1772346 | 1772357 | 2 | 6  | 12 | GT   | 14 | 7  |
| 254220 | 38 | 1773731 | 1773750 | 2 | 10 | 20 | GT   | 17 | 3  |
| 254223 | 38 | 1774790 | 1774811 | 2 | 11 | 22 | TG   | 16 | 5  |
| 254224 | 38 | 1774911 | 1774938 | 2 | 14 | 28 | AC   | 20 | 15 |
| 254227 | 38 | 1776446 | 1776459 | 2 | 7  | 14 | TG   | 17 | 3  |
| 254228 | 38 | 1776481 | 1776502 | 2 | 11 | 22 | AC   | 21 | 10 |
| 254229 | 38 | 1779654 | 1779671 | 3 | 6  | 18 | TAA  | 20 | 4  |
| 254235 | 38 | 1784982 | 1785013 | 2 | 16 | 32 | AC   | 8  | 7  |
| 254249 | 38 | 1794859 | 1794888 | 2 | 15 | 30 | AC   | 16 | 10 |
| 254251 | 38 | 1796161 | 1796208 | 4 | 12 | 48 | GGAT | 13 | 9  |
| 254255 | 38 | 1799176 | 1799191 | 2 | 8  | 16 | CT   | 12 | 3  |
| 254256 | 38 | 1800866 | 1800885 | 2 | 10 | 20 | AC   | 17 | 5  |
| 254257 | 38 | 1802646 | 1802661 | 2 | 8  | 16 | AC   | 24 | 10 |
| 254261 | 38 | 1806346 | 1806361 | 2 | 8  | 16 | AC   | 23 | 8  |
| 254263 | 38 | 1807655 | 1807676 | 2 | 11 | 22 | AC   | 16 | 10 |
| 254266 | 38 | 1809202 | 1809215 | 2 | 7  | 14 | TG   | 25 | 10 |
| 254267 | 38 | 1809498 | 1809509 | 2 | 6  | 12 | TG   | 17 | 8  |
| 254268 | 38 | 1809511 | 1809530 | 2 | 10 | 20 | GT   | 15 | 8  |
| 254269 | 38 | 1810870 | 1810881 | 2 | 6  | 12 | AC   | 31 | 3  |
| 254270 | 38 | 1811709 | 1811734 | 2 | 13 | 26 | CA   | 8  | 5  |
| 254272 | 38 | 1814315 | 1814326 | 2 | 6  | 12 | AC   | 27 | 5  |
| 254273 | 38 | 1814327 | 1814338 | 2 | 6  | 12 | TC   | 24 | 3  |
| 254276 | 38 | 1817594 | 1817623 | 2 | 15 | 30 | TG   | 19 | 10 |
| 254277 | 38 | 1818407 | 1818422 | 2 | 8  | 16 | TG   | 21 | 5  |
| 254280 | 38 | 1821099 | 1821112 | 2 | 7  | 14 | TG   | 20 | 4  |
| 254281 | 38 | 1821114 | 1821125 | 2 | 6  | 12 | GT   | 22 | 4  |
| 254283 | 38 | 1821477 | 1821492 | 2 | 8  | 16 | AC   | 26 | 3  |
| 254286 | 38 | 1825012 | 1825047 | 2 | 18 | 36 | AC   | 14 | 10 |
| 254287 | 38 | 1825092 | 1825105 | 2 | 7  | 14 | AC   | 22 | 3  |
| 254288 | 38 | 1825263 | 1825280 | 2 | 9  | 18 | AC   | 21 | 14 |
| 254289 | 38 | 1825508 | 1825525 | 2 | 9  | 18 | AC   | 23 | 4  |
| 254290 | 38 | 1827727 | 1827740 | 2 | 7  | 14 | GT   | 24 | 4  |
| 254291 | 38 | 1827943 | 1827966 | 4 | 6  | 24 | CCTC | 23 | 4  |
| 254292 | 38 | 1828271 | 1828282 | 2 | 6  | 12 | GT   | 26 | 6  |
| 254294 | 38 | 1828466 | 1828481 | 2 | 8  | 16 | TG   | 12 | 4  |
| 254295 | 38 | 1828711 | 1828732 | 2 | 11 | 22 | CA   | 19 | 12 |

|        |    |         |         |   |    |    |      |    |    |
|--------|----|---------|---------|---|----|----|------|----|----|
| 254297 | 38 | 1830986 | 1830997 | 2 | 6  | 12 | TG   | 34 | 3  |
| 254301 | 38 | 1836328 | 1836343 | 2 | 8  | 16 | CA   | 27 | 7  |
| 254302 | 38 | 1837480 | 1837505 | 2 | 13 | 26 | TC   | 16 | 10 |
| 254304 | 38 | 1840163 | 1840198 | 2 | 18 | 36 | GT   | 10 | 11 |
| 254309 | 38 | 1850376 | 1850389 | 2 | 7  | 14 | GT   | 28 | 4  |
| 254315 | 38 | 1859283 | 1859296 | 2 | 7  | 14 | CA   | 14 | 7  |
| 254317 | 38 | 1861503 | 1861514 | 2 | 6  | 12 | TG   | 27 | 5  |
| 254318 | 38 | 1862783 | 1862806 | 2 | 12 | 24 | AC   | 20 | 11 |
| 254321 | 38 | 1866985 | 1867006 | 2 | 11 | 22 | CT   | 21 | 9  |
| 254323 | 38 | 1870853 | 1870884 | 2 | 16 | 32 | CA   | 11 | 15 |
| 254324 | 38 | 1871435 | 1871464 | 2 | 15 | 30 | GT   | 13 | 10 |
| 254325 | 38 | 1874346 | 1874359 | 2 | 7  | 14 | TG   | 23 | 4  |
| 254328 | 38 | 1877980 | 1877993 | 2 | 7  | 14 | TG   | 24 | 7  |
| 254332 | 38 | 1882225 | 1882244 | 4 | 5  | 20 | GCGT | 17 | 3  |
| 254333 | 38 | 1883041 | 1883058 | 2 | 9  | 18 | CA   | 24 | 4  |
| 254335 | 38 | 1893744 | 1893765 | 2 | 11 | 22 | CA   | 12 | 10 |
| 254338 | 38 | 1898047 | 1898072 | 2 | 13 | 26 | TG   | 22 | 9  |
| 254343 | 38 | 1902058 | 1902089 | 2 | 16 | 32 | TG   | 12 | 9  |
| 254344 | 38 | 1903428 | 1903453 | 2 | 13 | 26 | CA   | 10 | 4  |
| 254345 | 38 | 1905786 | 1905801 | 2 | 8  | 16 | CA   | 20 | 5  |
| 254351 | 38 | 1907622 | 1907635 | 2 | 7  | 14 | CA   | 22 | 3  |
| 254352 | 38 | 1907671 | 1907686 | 2 | 8  | 16 | AC   | 21 | 5  |
| 254353 | 38 | 1909362 | 1909405 | 2 | 22 | 44 | GT   | 6  | 7  |
| 254354 | 38 | 1909894 | 1909917 | 2 | 12 | 24 | TG   | 13 | 6  |
| 254356 | 38 | 1911923 | 1911936 | 2 | 7  | 14 | TG   | 23 | 4  |
| 254361 | 38 | 1917771 | 1917790 | 2 | 10 | 20 | AC   | 26 | 8  |
| 254363 | 38 | 1918796 | 1918811 | 2 | 8  | 16 | TG   | 26 | 5  |
| 254364 | 38 | 1921141 | 1921164 | 2 | 12 | 24 | AC   | 18 | 17 |
| 254366 | 38 | 1921470 | 1921485 | 2 | 8  | 16 | CT   | 23 | 3  |
| 254367 | 38 | 1922768 | 1922781 | 2 | 7  | 14 | GT   | 29 | 5  |
| 254368 | 38 | 1924041 | 1924068 | 2 | 14 | 28 | CT   | 19 | 12 |
| 254371 | 38 | 1924812 | 1924827 | 2 | 8  | 16 | AC   | 23 | 11 |
| 254372 | 38 | 1925020 | 1925045 | 2 | 13 | 26 | CT   | 11 | 12 |
| 254374 | 38 | 1926314 | 1926359 | 2 | 23 | 46 | AC   | 18 | 12 |
| 254377 | 38 | 1932547 | 1932578 | 2 | 16 | 32 | GA   | 12 | 6  |
| 254378 | 38 | 1933008 | 1933021 | 2 | 7  | 14 | GT   | 20 | 3  |
| 254381 | 38 | 1937259 | 1937270 | 2 | 6  | 12 | TG   | 32 | 4  |
| 254385 | 38 | 1946143 | 1946156 | 2 | 7  | 14 | CA   | 22 | 5  |
| 254390 | 38 | 1958156 | 1958173 | 2 | 9  | 18 | GA   | 24 | 3  |
| 254393 | 38 | 1963928 | 1963949 | 2 | 11 | 22 | TG   | 10 | 3  |
| 254395 | 38 | 1966002 | 1966029 | 2 | 14 | 28 | TG   | 10 | 10 |
| 254397 | 38 | 1973528 | 1973547 | 4 | 5  | 20 | TCTG | 23 | 5  |
| 254398 | 38 | 1974124 | 1974157 | 2 | 17 | 34 | TG   | 10 | 9  |
| 254402 | 38 | 1975057 | 1975088 | 2 | 16 | 32 | AC   | 8  | 9  |
| 254404 | 38 | 1976033 | 1976060 | 2 | 14 | 28 | CA   | 12 | 7  |
| 254407 | 38 | 1979767 | 1979778 | 2 | 6  | 12 | AC   | 25 | 5  |
| 254412 | 38 | 1991803 | 1991816 | 2 | 7  | 14 | AC   | 18 | 11 |
| 254414 | 38 | 1992558 | 1992585 | 2 | 14 | 28 | TG   | 13 | 13 |
| 254415 | 38 | 1993106 | 1993133 | 2 | 14 | 28 | TG   | 6  | 8  |
| 254422 | 38 | 2008631 | 2008666 | 2 | 18 | 36 | TG   | 18 | 8  |
| 254423 | 38 | 2008772 | 2008785 | 2 | 7  | 14 | AC   | 21 | 9  |



|        |    |         |         |   |    |    |      |    |    |
|--------|----|---------|---------|---|----|----|------|----|----|
| 254424 | 38 | 2008984 | 2009003 | 2 | 10 | 20 | GT   | 21 | 5  |
| 254425 | 38 | 2009535 | 2009574 | 2 | 20 | 40 | GA   | 6  | 7  |
| 254426 | 38 | 2011740 | 2011761 | 2 | 11 | 22 | AG   | 12 | 4  |
| 254436 | 38 | 2040012 | 2040035 | 2 | 12 | 24 | AG   | 17 | 7  |
| 254439 | 38 | 2055676 | 2055691 | 4 | 4  | 16 | AACA | 27 | 3  |
| 254440 | 38 | 2055990 | 2056021 | 2 | 16 | 32 | CA   | 14 | 11 |
| 254441 | 38 | 2056621 | 2056632 | 2 | 6  | 12 | GT   | 26 | 4  |
| 254448 | 38 | 2077112 | 2077133 | 2 | 11 | 22 | AC   | 24 | 12 |
| 254452 | 38 | 2084116 | 2084175 | 2 | 30 | 60 | AC   | 8  | 13 |
| 254453 | 38 | 2084294 | 2084305 | 2 | 6  | 12 | CA   | 22 | 3  |
| 254455 | 38 | 2087920 | 2087971 | 2 | 26 | 52 | GT   | 15 | 14 |
| 254459 | 38 | 2096548 | 2096562 | 3 | 5  | 15 | CAC  | 31 | 3  |
| 254460 | 38 | 2098361 | 2098382 | 2 | 11 | 22 | CA   | 24 | 7  |
| 254462 | 38 | 2098550 | 2098573 | 4 | 6  | 24 | TCCA | 23 | 3  |
| 254464 | 38 | 2104440 | 2104471 | 4 | 8  | 32 | TTTA | 22 | 8  |
| 254466 | 38 | 2107553 | 2107588 | 4 | 9  | 36 | AGGA | 24 | 4  |
| 254468 | 38 | 2107773 | 2107794 | 2 | 11 | 22 | CA   | 14 | 10 |
| 254479 | 38 | 2122191 | 2122214 | 2 | 12 | 24 | TC   | 6  | 7  |
| 254485 | 38 | 2129231 | 2129254 | 2 | 12 | 24 | GT   | 24 | 11 |
| 254489 | 38 | 2138439 | 2138454 | 2 | 8  | 16 | TG   | 25 | 5  |
| 254490 | 38 | 2146135 | 2146158 | 2 | 12 | 24 | AC   | 23 | 14 |
| 254494 | 38 | 2147001 | 2147016 | 2 | 8  | 16 | AC   | 6  | 3  |
| 254496 | 38 | 2148486 | 2148501 | 2 | 8  | 16 | GA   | 32 | 3  |
| 254497 | 38 | 2149184 | 2149205 | 2 | 11 | 22 | CA   | 15 | 11 |
| 254500 | 38 | 2150367 | 2150382 | 2 | 8  | 16 | AC   | 22 | 5  |
| 254501 | 38 | 2150385 | 2150398 | 2 | 7  | 14 | AC   | 23 | 7  |
| 254502 | 38 | 2151856 | 2151899 | 2 | 22 | 44 | AC   | 7  | 7  |
| 254503 | 38 | 2155449 | 2155478 | 2 | 15 | 30 | AC   | 13 | 10 |
| 254510 | 38 | 2163351 | 2163382 | 2 | 16 | 32 | CA   | 13 | 9  |
| 254513 | 38 | 2171794 | 2171805 | 2 | 6  | 12 | CA   | 18 | 16 |
| 254515 | 38 | 2172566 | 2172599 | 2 | 17 | 34 | AC   | 9  | 12 |
| 254516 | 38 | 2172944 | 2172955 | 2 | 6  | 12 | GT   | 34 | 3  |
| 254519 | 38 | 2175513 | 2175540 | 2 | 14 | 28 | CA   | 17 | 10 |
| 254521 | 38 | 2204069 | 2204090 | 2 | 11 | 22 | AC   | 13 | 7  |
| 254525 | 38 | 2221290 | 2221319 | 2 | 15 | 30 | CA   | 19 | 14 |
| 254526 | 38 | 2221433 | 2221458 | 2 | 13 | 26 | TG   | 16 | 8  |
| 254528 | 38 | 2234386 | 2234397 | 2 | 6  | 12 | AG   | 18 | 4  |
| 254529 | 38 | 2237296 | 2237310 | 3 | 5  | 15 | GCA  | 28 | 3  |
| 254530 | 38 | 2238230 | 2238253 | 2 | 12 | 24 | GT   | 20 | 8  |
| 254537 | 38 | 2249378 | 2249405 | 2 | 14 | 28 | GT   | 10 | 5  |
| 254544 | 38 | 2261872 | 2261897 | 2 | 13 | 26 | GT   | 21 | 9  |
| 254545 | 38 | 2266604 | 2266629 | 2 | 13 | 26 | CA   | 14 | 10 |
| 254550 | 38 | 2280078 | 2280091 | 2 | 7  | 14 | CA   | 18 | 7  |
| 254554 | 38 | 2289612 | 2289643 | 2 | 16 | 32 | AC   | 6  | 7  |
| 254558 | 38 | 2300543 | 2300566 | 2 | 12 | 24 | CA   | 15 | 8  |
| 254560 | 38 | 2306221 | 2306250 | 2 | 15 | 30 | GT   | 18 | 10 |
| 254571 | 38 | 2329389 | 2329404 | 2 | 8  | 16 | GT   | 21 | 6  |
| 254575 | 38 | 2352877 | 2352892 | 2 | 8  | 16 | AG   | 18 | 3  |
| 254577 | 38 | 2354466 | 2354477 | 2 | 6  | 12 | GT   | 30 | 5  |
| 254578 | 38 | 2354478 | 2354491 | 2 | 7  | 14 | GA   | 29 | 4  |
| 254582 | 38 | 2359538 | 2359555 | 2 | 9  | 18 | CA   | 20 | 3  |

|        |    |         |         |   |    |    |      |    |    |
|--------|----|---------|---------|---|----|----|------|----|----|
| 254584 | 38 | 2362615 | 2362632 | 3 | 6  | 18 | ACA  | 26 | 3  |
| 254587 | 38 | 2364066 | 2364083 | 2 | 9  | 18 | GA   | 22 | 5  |
| 254590 | 38 | 2371149 | 2371160 | 2 | 6  | 12 | GT   | 30 | 3  |
| 254591 | 38 | 2371411 | 2371426 | 2 | 8  | 16 | TG   | 23 | 9  |
| 254595 | 38 | 2390079 | 2390092 | 2 | 7  | 14 | GT   | 24 | 3  |
| 254597 | 38 | 2392384 | 2392397 | 2 | 7  | 14 | AC   | 25 | 3  |
| 254604 | 38 | 2410145 | 2410162 | 2 | 9  | 18 | AC   | 10 | 10 |
| 254607 | 38 | 2415931 | 2415944 | 2 | 7  | 14 | GT   | 19 | 4  |
| 254608 | 38 | 2418254 | 2418281 | 2 | 14 | 28 | GA   | 31 | 5  |
| 254610 | 38 | 2426175 | 2426206 | 2 | 16 | 32 | CA   | 18 | 5  |
| 254611 | 38 | 2426581 | 2426606 | 2 | 13 | 26 | AG   | 14 | 8  |
| 254614 | 38 | 2427386 | 2427413 | 2 | 14 | 28 | CA   | 10 | 9  |
| 254616 | 38 | 2429587 | 2429600 | 2 | 7  | 14 | TG   | 29 | 3  |
| 254617 | 38 | 2429689 | 2429710 | 2 | 11 | 22 | AC   | 6  | 4  |
| 254619 | 38 | 2432368 | 2432383 | 2 | 8  | 16 | AC   | 21 | 3  |
| 254620 | 38 | 2433132 | 2433145 | 2 | 7  | 14 | CA   | 20 | 7  |
| 254621 | 38 | 2433147 | 2433160 | 2 | 7  | 14 | AC   | 13 | 6  |
| 254624 | 38 | 2439034 | 2439049 | 4 | 4  | 16 | CTCC | 6  | 3  |
| 254627 | 38 | 2447145 | 2447176 | 2 | 16 | 32 | AC   | 18 | 13 |
| 254630 | 38 | 2450823 | 2450852 | 2 | 15 | 30 | TG   | 8  | 10 |
| 254632 | 38 | 2452996 | 2453033 | 2 | 19 | 38 | GT   | 7  | 9  |
| 254636 | 38 | 2460282 | 2460303 | 2 | 11 | 22 | GT   | 16 | 6  |
| 254638 | 38 | 2469297 | 2469320 | 2 | 12 | 24 | AC   | 13 | 4  |
| 254639 | 38 | 2471033 | 2471060 | 2 | 14 | 28 | AC   | 13 | 5  |
| 254642 | 38 | 2471535 | 2471548 | 2 | 7  | 14 | AC   | 24 | 3  |
| 254644 | 38 | 2474332 | 2474365 | 2 | 17 | 34 | GT   | 9  | 10 |
| 254651 | 38 | 2481892 | 2481903 | 2 | 6  | 12 | CA   | 18 | 4  |
| 254653 | 38 | 2483261 | 2483292 | 2 | 16 | 32 | AC   | 9  | 7  |
| 254662 | 38 | 2489175 | 2489186 | 2 | 6  | 12 | AC   | 22 | 3  |
| 254663 | 38 | 2489391 | 2489404 | 2 | 7  | 14 | AC   | 21 | 3  |
| 254666 | 38 | 2492742 | 2492783 | 2 | 21 | 42 | TG   | 8  | 10 |
| 254674 | 38 | 2506227 | 2506250 | 2 | 12 | 24 | CA   | 17 | 10 |
| 254676 | 38 | 2513593 | 2513604 | 2 | 6  | 12 | CA   | 35 | 5  |
| 254678 | 38 | 2514883 | 2514914 | 2 | 16 | 32 | GT   | 11 | 13 |
| 254681 | 38 | 2522691 | 2522724 | 2 | 17 | 34 | TG   | 12 | 12 |
| 254683 | 38 | 2528205 | 2528230 | 2 | 13 | 26 | GT   | 18 | 7  |
| 254684 | 38 | 2528349 | 2528375 | 3 | 9  | 27 | GGA  | 21 | 4  |
| 254686 | 38 | 2536570 | 2536603 | 2 | 17 | 34 | GA   | 7  | 11 |
| 254694 | 38 | 2538102 | 2538117 | 2 | 8  | 16 | CA   | 15 | 5  |
| 254695 | 38 | 2539774 | 2539801 | 2 | 14 | 28 | CA   | 10 | 11 |
| 254699 | 38 | 2544039 | 2544083 | 3 | 15 | 45 | TTC  | 16 | 10 |
| 254704 | 38 | 2548150 | 2548161 | 2 | 6  | 12 | GT   | 6  | 7  |
| 254705 | 38 | 2548163 | 2548178 | 2 | 8  | 16 | TG   | 11 | 11 |
| 254707 | 38 | 2548350 | 2548377 | 2 | 14 | 28 | GT   | 11 | 7  |
| 254709 | 38 | 2550377 | 2550390 | 2 | 7  | 14 | GT   | 26 | 3  |
| 254711 | 38 | 2554088 | 2554109 | 2 | 11 | 22 | TG   | 15 | 11 |
| 254713 | 38 | 2554378 | 2554403 | 2 | 13 | 26 | TG   | 7  | 5  |
| 254722 | 38 | 2558591 | 2558604 | 2 | 7  | 14 | TG   | 25 | 3  |
| 254726 | 38 | 2561197 | 2561214 | 2 | 9  | 18 | GT   | 18 | 5  |
| 254727 | 38 | 2561462 | 2561495 | 2 | 17 | 34 | GT   | 7  | 9  |
| 254728 | 38 | 2561622 | 2561633 | 2 | 6  | 12 | AC   | 25 | 3  |

|        |    |         |         |   |    |    |      |    |    |
|--------|----|---------|---------|---|----|----|------|----|----|
| 254729 | 38 | 2562182 | 2562229 | 2 | 24 | 48 | TG   | 9  | 12 |
| 254731 | 38 | 2562402 | 2562425 | 2 | 12 | 24 | CA   | 14 | 11 |
| 254733 | 38 | 2563312 | 2563349 | 2 | 19 | 38 | GT   | 13 | 11 |
| 254743 | 38 | 2567616 | 2567631 | 4 | 4  | 16 | CAAG | 11 | 3  |
| 254744 | 38 | 2568109 | 2568124 | 2 | 8  | 16 | AC   | 29 | 3  |
| 254748 | 38 | 2572049 | 2572060 | 2 | 6  | 12 | CT   | 28 | 3  |
| 254752 | 38 | 2585608 | 2585635 | 2 | 14 | 28 | TG   | 16 | 8  |
| 254755 | 38 | 2593349 | 2593362 | 2 | 7  | 14 | AC   | 20 | 5  |
| 254756 | 38 | 2593822 | 2593837 | 2 | 8  | 16 | TC   | 24 | 5  |
| 254761 | 38 | 2597536 | 2597579 | 4 | 11 | 44 | TCTT | 15 | 8  |
| 254762 | 38 | 2598466 | 2598481 | 2 | 8  | 16 | AC   | 14 | 5  |
| 254764 | 38 | 2598847 | 2598858 | 2 | 6  | 12 | TC   | 18 | 4  |
| 254767 | 38 | 2603583 | 2603596 | 2 | 7  | 14 | GT   | 20 | 10 |
| 254772 | 38 | 2608574 | 2608587 | 2 | 7  | 14 | GT   | 17 | 12 |
| 254774 | 38 | 2611363 | 2611395 | 3 | 11 | 33 | ATG  | 25 | 18 |
| 254775 | 38 | 2615589 | 2615603 | 3 | 5  | 15 | AAC  | 11 | 9  |
| 254776 | 38 | 2618593 | 2618607 | 3 | 5  | 15 | GTG  | 22 | 3  |
| 254785 | 38 | 2636914 | 2636933 | 2 | 10 | 20 | GT   | 21 | 7  |
| 254787 | 38 | 2639255 | 2639272 | 2 | 9  | 18 | CA   | 16 | 6  |
| 254795 | 38 | 2651067 | 2651090 | 2 | 12 | 24 | AC   | 29 | 8  |
| 254796 | 38 | 2654344 | 2654363 | 2 | 10 | 20 | GT   | 27 | 8  |
| 254797 | 38 | 2654566 | 2654583 | 2 | 9  | 18 | AC   | 24 | 7  |
| 254800 | 38 | 2660980 | 2661001 | 2 | 11 | 22 | GT   | 23 | 6  |
| 254801 | 38 | 2662712 | 2662731 | 2 | 10 | 20 | GT   | 20 | 4  |
| 254802 | 38 | 2664064 | 2664075 | 2 | 6  | 12 | AC   | 21 | 4  |
| 254803 | 38 | 2664231 | 2664242 | 2 | 6  | 12 | AC   | 30 | 6  |
| 254804 | 38 | 2665344 | 2665359 | 2 | 8  | 16 | CA   | 9  | 9  |
| 254806 | 38 | 2671819 | 2671834 | 2 | 8  | 16 | CA   | 6  | 6  |
| 254809 | 38 | 2674068 | 2674079 | 2 | 6  | 12 | CA   | 25 | 3  |
| 254814 | 38 | 2688286 | 2688303 | 3 | 6  | 18 | TGC  | 24 | 6  |
| 254820 | 38 | 2694300 | 2694317 | 2 | 9  | 18 | CA   | 11 | 9  |
| 254821 | 38 | 2694319 | 2694336 | 2 | 9  | 18 | AC   | 17 | 8  |
| 254822 | 38 | 2694710 | 2694721 | 2 | 6  | 12 | GA   | 17 | 3  |
| 254825 | 38 | 2695129 | 2695150 | 2 | 11 | 22 | CA   | 17 | 11 |
| 254826 | 38 | 2695289 | 2695304 | 2 | 8  | 16 | AC   | 25 | 5  |
| 254829 | 38 | 2701213 | 2701236 | 4 | 6  | 24 | AAAT | 20 | 4  |
| 254830 | 38 | 2701884 | 2701901 | 2 | 9  | 18 | AG   | 13 | 3  |
| 254834 | 38 | 2714936 | 2714961 | 2 | 13 | 26 | AC   | 16 | 10 |
| 254840 | 38 | 2725541 | 2725578 | 2 | 19 | 38 | AG   | 7  | 8  |
| 254842 | 38 | 2726399 | 2726420 | 2 | 11 | 22 | CA   | 16 | 5  |
| 254843 | 38 | 2726546 | 2726559 | 2 | 7  | 14 | CA   | 22 | 5  |
| 254844 | 38 | 2726785 | 2726802 | 2 | 9  | 18 | TG   | 22 | 7  |
| 254845 | 38 | 2727286 | 2727299 | 2 | 7  | 14 | GT   | 26 | 3  |
| 254846 | 38 | 2728379 | 2728402 | 2 | 12 | 24 | TC   | 20 | 7  |
| 254847 | 38 | 2730345 | 2730370 | 2 | 13 | 26 | CA   | 15 | 15 |
| 254850 | 38 | 2732614 | 2732625 | 2 | 6  | 12 | GT   | 22 | 3  |
| 254851 | 38 | 2732680 | 2732691 | 2 | 6  | 12 | GT   | 18 | 7  |
| 254852 | 38 | 2733242 | 2733257 | 2 | 8  | 16 | CA   | 11 | 9  |
| 254856 | 38 | 2740435 | 2740458 | 2 | 12 | 24 | CA   | 24 | 12 |
| 254858 | 38 | 2743388 | 2743415 | 2 | 14 | 28 | GT   | 11 | 12 |
| 254859 | 38 | 2743598 | 2743630 | 3 | 11 | 33 | TCA  | 25 | 4  |

|        |    |         |         |   |    |    |      |    |    |
|--------|----|---------|---------|---|----|----|------|----|----|
| 254861 | 38 | 2745006 | 2745031 | 2 | 13 | 26 | CA   | 19 | 6  |
| 254862 | 38 | 2746589 | 2746632 | 4 | 11 | 44 | TCTT | 21 | 9  |
| 254874 | 38 | 2790890 | 2790925 | 2 | 18 | 36 | TG   | 23 | 12 |
| 254875 | 38 | 2791543 | 2791556 | 2 | 7  | 14 | GT   | 16 | 6  |
| 254877 | 38 | 2802390 | 2802405 | 2 | 8  | 16 | TG   | 22 | 5  |
| 254880 | 38 | 2810383 | 2810398 | 2 | 8  | 16 | TG   | 10 | 12 |
| 254888 | 38 | 2826590 | 2826603 | 2 | 7  | 14 | GT   | 20 | 3  |
| 254895 | 38 | 2847297 | 2847312 | 2 | 8  | 16 | AC   | 15 | 5  |
| 254896 | 38 | 2847467 | 2847484 | 2 | 9  | 18 | CA   | 15 | 15 |
| 254901 | 38 | 2853252 | 2853281 | 2 | 15 | 30 | TG   | 12 | 10 |
| 254903 | 38 | 2853727 | 2853746 | 4 | 5  | 20 | CTGC | 29 | 3  |
| 254904 | 38 | 2856203 | 2856224 | 2 | 11 | 22 | CA   | 11 | 11 |
| 254905 | 38 | 2856923 | 2856938 | 2 | 8  | 16 | GT   | 17 | 12 |
| 254906 | 38 | 2857590 | 2857611 | 2 | 11 | 22 | AC   | 22 | 14 |
| 254912 | 38 | 2863387 | 2863428 | 2 | 21 | 42 | TG   | 24 | 12 |
| 254913 | 38 | 2863619 | 2863650 | 2 | 16 | 32 | AC   | 12 | 12 |
| 254914 | 38 | 2863864 | 2863881 | 3 | 6  | 18 | CCT  | 23 | 6  |
| 254916 | 38 | 2866961 | 2866974 | 2 | 7  | 14 | GT   | 31 | 3  |
| 254917 | 38 | 2871695 | 2871714 | 4 | 5  | 20 | TGTA | 24 | 3  |
| 254921 | 38 | 2877449 | 2877468 | 2 | 10 | 20 | TG   | 19 | 7  |
| 254922 | 38 | 2879106 | 2879129 | 4 | 6  | 24 | TCAA | 25 | 6  |
| 254923 | 38 | 2879953 | 2879972 | 2 | 10 | 20 | TG   | 9  | 4  |
| 254924 | 38 | 2880113 | 2880134 | 2 | 11 | 22 | CA   | 15 | 12 |
| 254925 | 38 | 2882695 | 2882710 | 2 | 8  | 16 | TG   | 17 | 3  |
| 254926 | 38 | 2882770 | 2882817 | 4 | 12 | 48 | GATA | 19 | 9  |
| 254927 | 38 | 2882935 | 2882946 | 2 | 6  | 12 | GT   | 19 | 3  |
| 254928 | 38 | 2883172 | 2883187 | 2 | 8  | 16 | TG   | 18 | 4  |
| 254929 | 38 | 2883294 | 2883315 | 2 | 11 | 22 | TG   | 7  | 9  |
| 254932 | 38 | 2884423 | 2884450 | 2 | 14 | 28 | AC   | 11 | 7  |
| 254933 | 38 | 2884779 | 2884808 | 2 | 15 | 30 | TG   | 22 | 10 |
| 254934 | 38 | 2885042 | 2885063 | 2 | 11 | 22 | GT   | 13 | 11 |
| 254936 | 38 | 2888890 | 2888907 | 2 | 9  | 18 | TG   | 10 | 5  |
| 254937 | 38 | 2889292 | 2889317 | 2 | 13 | 26 | TG   | 10 | 12 |
| 254938 | 38 | 2891082 | 2891103 | 2 | 11 | 22 | TG   | 14 | 9  |
| 254939 | 38 | 2891540 | 2891554 | 3 | 5  | 15 | GGA  | 17 | 4  |
| 254943 | 38 | 2898886 | 2898923 | 2 | 19 | 38 | CA   | 8  | 10 |
| 254944 | 38 | 2904146 | 2904163 | 2 | 9  | 18 | GT   | 29 | 4  |
| 254945 | 38 | 2905615 | 2905626 | 2 | 6  | 12 | GT   | 20 | 4  |
| 254946 | 38 | 2913089 | 2913106 | 2 | 9  | 18 | TG   | 6  | 7  |
| 254947 | 38 | 2915220 | 2915241 | 2 | 11 | 22 | GT   | 23 | 9  |
| 254953 | 38 | 2931499 | 2931519 | 3 | 7  | 21 | TTC  | 25 | 3  |
| 254954 | 38 | 2937946 | 2937987 | 2 | 21 | 42 | TG   | 8  | 6  |
| 254966 | 38 | 2942387 | 2942400 | 2 | 7  | 14 | CA   | 17 | 4  |
| 254968 | 38 | 2942853 | 2942876 | 2 | 12 | 24 | GT   | 15 | 10 |
| 254969 | 38 | 2943022 | 2943039 | 2 | 9  | 18 | TG   | 24 | 4  |
| 254971 | 38 | 2950210 | 2950239 | 2 | 15 | 30 | AG   | 15 | 7  |
| 254976 | 38 | 2959157 | 2959172 | 4 | 4  | 16 | CACG | 23 | 25 |
| 254977 | 38 | 2959173 | 2959192 | 2 | 10 | 20 | CA   | 15 | 17 |
| 254979 | 38 | 2962304 | 2962327 | 2 | 12 | 24 | CA   | 12 | 11 |
| 254981 | 38 | 2965618 | 2965641 | 2 | 12 | 24 | AC   | 18 | 14 |
| 254984 | 38 | 2977065 | 2977088 | 2 | 12 | 24 | TG   | 25 | 11 |

|        |    |         |         |   |    |    |      |    |    |
|--------|----|---------|---------|---|----|----|------|----|----|
| 254985 | 38 | 2977221 | 2977236 | 2 | 8  | 16 | GT   | 18 | 5  |
| 254986 | 38 | 2979433 | 2979448 | 2 | 8  | 16 | TC   | 25 | 6  |
| 254994 | 38 | 2993730 | 2993757 | 4 | 7  | 28 | TAGA | 15 | 8  |
| 255006 | 38 | 3025406 | 3025423 | 2 | 9  | 18 | CA   | 19 | 5  |
| 255007 | 38 | 3025720 | 3025735 | 2 | 8  | 16 | TG   | 19 | 3  |
| 255023 | 38 | 3081670 | 3081684 | 3 | 5  | 15 | GTT  | 23 | 3  |
| 255025 | 38 | 3084936 | 3084979 | 4 | 11 | 44 | ATGG | 23 | 5  |
| 255027 | 38 | 3088482 | 3088495 | 2 | 7  | 14 | TG   | 26 | 4  |
| 255028 | 38 | 3096705 | 3096719 | 3 | 5  | 15 | AGA  | 22 | 3  |
| 255029 | 38 | 3096754 | 3096773 | 2 | 10 | 20 | CT   | 23 | 8  |
| 255032 | 38 | 3110607 | 3110638 | 2 | 16 | 32 | CA   | 12 | 10 |
| 255036 | 38 | 3130424 | 3130449 | 2 | 13 | 26 | CA   | 17 | 10 |
| 255040 | 38 | 3145279 | 3145302 | 2 | 12 | 24 | TG   | 18 | 10 |
| 255053 | 38 | 3175307 | 3175326 | 2 | 10 | 20 | CA   | 17 | 10 |
| 255054 | 38 | 3176512 | 3176527 | 2 | 8  | 16 | GT   | 29 | 3  |
| 255062 | 38 | 3193504 | 3193535 | 2 | 16 | 32 | CA   | 8  | 9  |
| 255063 | 38 | 3201568 | 3201581 | 2 | 7  | 14 | AG   | 27 | 10 |
| 255065 | 38 | 3206107 | 3206133 | 3 | 9  | 27 | GGA  | 23 | 6  |
| 255067 | 38 | 3212639 | 3212652 | 2 | 7  | 14 | CA   | 24 | 8  |
| 255068 | 38 | 3212727 | 3212754 | 2 | 14 | 28 | AC   | 16 | 8  |
| 255070 | 38 | 3214104 | 3214117 | 2 | 7  | 14 | AC   | 17 | 4  |
| 255071 | 38 | 3221033 | 3221056 | 2 | 12 | 24 | CA   | 12 | 9  |
| 255076 | 38 | 3230880 | 3230909 | 2 | 15 | 30 | CT   | 15 | 5  |
| 255086 | 38 | 3250854 | 3250867 | 2 | 7  | 14 | TG   | 23 | 4  |
| 255088 | 38 | 3254657 | 3254676 | 4 | 5  | 20 | TATC | 14 | 7  |
| 255089 | 38 | 3255492 | 3255507 | 4 | 4  | 16 | CAGA | 30 | 3  |
| 255092 | 38 | 3263121 | 3263164 | 2 | 22 | 44 | AC   | 11 | 11 |
| 255094 | 38 | 3265369 | 3265386 | 2 | 9  | 18 | AC   | 15 | 8  |
| 255103 | 38 | 3277074 | 3277103 | 3 | 10 | 30 | TCT  | 31 | 7  |
| 255104 | 38 | 3277630 | 3277644 | 3 | 5  | 15 | AGC  | 33 | 4  |
| 255111 | 38 | 3292539 | 3292554 | 2 | 8  | 16 | TG   | 26 | 4  |
| 255114 | 38 | 3300940 | 3300978 | 3 | 13 | 39 | TTA  | 11 | 6  |
| 255117 | 38 | 3312550 | 3312565 | 4 | 4  | 16 | ATTG | 21 | 5  |
| 255118 | 38 | 3313359 | 3313382 | 2 | 12 | 24 | AC   | 16 | 7  |
| 255121 | 38 | 3315331 | 3315346 | 2 | 8  | 16 | GT   | 10 | 7  |
| 255122 | 38 | 3317201 | 3317232 | 2 | 16 | 32 | AC   | 12 | 10 |
| 255123 | 38 | 3322166 | 3322177 | 2 | 6  | 12 | CA   | 21 | 5  |
| 255124 | 38 | 3328183 | 3328206 | 2 | 12 | 24 | AG   | 9  | 3  |
| 255126 | 38 | 3331816 | 3331831 | 2 | 8  | 16 | GT   | 26 | 3  |
| 255129 | 38 | 3331986 | 3331997 | 2 | 6  | 12 | TG   | 13 | 7  |
| 255130 | 38 | 3332003 | 3332014 | 2 | 6  | 12 | GT   | 7  | 4  |
| 255136 | 38 | 3334779 | 3334794 | 2 | 8  | 16 | AC   | 13 | 5  |
| 255139 | 38 | 3336453 | 3336488 | 2 | 18 | 36 | GT   | 18 | 12 |
| 255140 | 38 | 3339170 | 3339193 | 2 | 12 | 24 | GT   | 18 | 8  |
| 255141 | 38 | 3341610 | 3341633 | 2 | 12 | 24 | TG   | 13 | 11 |
| 255144 | 38 | 3341873 | 3341884 | 2 | 6  | 12 | CA   | 18 | 5  |
| 255146 | 38 | 3345935 | 3345956 | 2 | 11 | 22 | AC   | 15 | 6  |
| 255147 | 38 | 3346064 | 3346081 | 2 | 9  | 18 | AC   | 17 | 4  |
| 255148 | 38 | 3347192 | 3347227 | 2 | 18 | 36 | TG   | 19 | 8  |
| 255166 | 38 | 3357054 | 3357085 | 2 | 16 | 32 | AC   | 12 | 8  |
| 255170 | 38 | 3359107 | 3359139 | 3 | 11 | 33 | GAG  | 10 | 4  |

|        |    |         |         |   |    |    |     |    |    |
|--------|----|---------|---------|---|----|----|-----|----|----|
| 255180 | 38 | 3365364 | 3365379 | 2 | 8  | 16 | GT  | 24 | 5  |
| 255181 | 38 | 3366518 | 3366531 | 2 | 7  | 14 | CA  | 22 | 4  |
| 255184 | 38 | 3366819 | 3366850 | 2 | 16 | 32 | TG  | 18 | 6  |
| 255187 | 38 | 3367124 | 3367135 | 2 | 6  | 12 | TG  | 19 | 4  |
| 255188 | 38 | 3367168 | 3367199 | 2 | 16 | 32 | TG  | 13 | 6  |
| 255198 | 38 | 3375058 | 3375081 | 2 | 12 | 24 | GT  | 23 | 6  |
| 255199 | 38 | 3375985 | 3375998 | 2 | 7  | 14 | GT  | 23 | 4  |
| 255201 | 38 | 3379587 | 3379602 | 2 | 8  | 16 | TC  | 25 | 3  |
| 255204 | 38 | 3380300 | 3380311 | 2 | 6  | 12 | AC  | 19 | 4  |
| 255205 | 38 | 3380914 | 3380927 | 2 | 7  | 14 | GT  | 29 | 9  |
| 255210 | 38 | 3385373 | 3385396 | 2 | 12 | 24 | CT  | 17 | 9  |
| 255213 | 38 | 3387861 | 3387881 | 3 | 7  | 21 | CAT | 30 | 3  |
| 255217 | 38 | 3388226 | 3388247 | 2 | 11 | 22 | AC  | 21 | 14 |
| 255218 | 38 | 3388397 | 3388408 | 2 | 6  | 12 | CA  | 7  | 3  |
| 255223 | 38 | 3390836 | 3390861 | 2 | 13 | 26 | CA  | 16 | 6  |
| 255224 | 38 | 3391562 | 3391597 | 3 | 12 | 36 | AAC | 18 | 13 |
| 255227 | 38 | 3416850 | 3416873 | 2 | 12 | 24 | TG  | 11 | 5  |
| 255228 | 38 | 3417777 | 3417804 | 2 | 14 | 28 | GT  | 17 | 8  |
| 255229 | 38 | 3419353 | 3419408 | 2 | 28 | 56 | TG  | 7  | 7  |
| 255236 | 38 | 3432065 | 3432094 | 2 | 15 | 30 | CA  | 11 | 7  |
| 255238 | 38 | 3432441 | 3432455 | 3 | 5  | 15 | TCC | 18 | 3  |
| 255239 | 38 | 3433749 | 3433766 | 3 | 6  | 18 | CAG | 24 | 5  |
| 255240 | 38 | 3434323 | 3434364 | 2 | 21 | 42 | CA  | 19 | 16 |
| 255241 | 38 | 3434877 | 3434890 | 2 | 7  | 14 | CA  | 23 | 3  |
| 255242 | 38 | 3437672 | 3437689 | 3 | 6  | 18 | CAA | 14 | 3  |
| 255245 | 38 | 3439226 | 3439243 | 3 | 6  | 18 | CCT | 17 | 4  |
| 255246 | 38 | 3439270 | 3439291 | 2 | 11 | 22 | GT  | 14 | 8  |
| 255250 | 38 | 3443118 | 3443131 | 2 | 7  | 14 | TC  | 28 | 3  |
| 255252 | 38 | 3444081 | 3444108 | 2 | 14 | 28 | CT  | 11 | 11 |
| 255254 | 38 | 3446301 | 3446314 | 2 | 7  | 14 | GT  | 18 | 8  |
| 255255 | 38 | 3446316 | 3446331 | 2 | 8  | 16 | TG  | 16 | 7  |
| 255256 | 38 | 3446495 | 3446532 | 2 | 19 | 38 | CA  | 16 | 15 |
| 255261 | 38 | 3449655 | 3449680 | 2 | 13 | 26 | TG  | 11 | 11 |
| 255262 | 38 | 3456066 | 3456079 | 2 | 7  | 14 | TG  | 20 | 3  |
| 255263 | 38 | 3456132 | 3456145 | 2 | 7  | 14 | GT  | 24 | 3  |
| 255264 | 38 | 3456153 | 3456166 | 2 | 7  | 14 | TG  | 21 | 3  |
| 255265 | 38 | 3457109 | 3457120 | 2 | 6  | 12 | TG  | 23 | 3  |
| 255268 | 38 | 3459416 | 3459427 | 2 | 6  | 12 | TG  | 13 | 3  |
| 255269 | 38 | 3459430 | 3459445 | 2 | 8  | 16 | TG  | 12 | 4  |
| 255272 | 38 | 3462458 | 3462473 | 2 | 8  | 16 | TG  | 9  | 3  |
| 255274 | 38 | 3464099 | 3464128 | 2 | 15 | 30 | CT  | 6  | 7  |
| 255278 | 38 | 3468288 | 3468313 | 2 | 13 | 26 | CA  | 17 | 7  |
| 255280 | 38 | 3469078 | 3469103 | 2 | 13 | 26 | GT  | 8  | 8  |
| 255281 | 38 | 3469393 | 3469420 | 2 | 14 | 28 | TC  | 19 | 10 |
| 255289 | 38 | 3472725 | 3472736 | 2 | 6  | 12 | AC  | 20 | 5  |
| 255296 | 38 | 3473778 | 3473789 | 2 | 6  | 12 | CA  | 28 | 3  |
| 255297 | 38 | 3473846 | 3473879 | 2 | 17 | 34 | GT  | 11 | 8  |
| 255300 | 38 | 3484152 | 3484167 | 2 | 8  | 16 | AC  | 23 | 4  |
| 255307 | 38 | 3496641 | 3496658 | 2 | 9  | 18 | CA  | 20 | 9  |
| 255314 | 38 | 3502392 | 3502419 | 2 | 14 | 28 | AG  | 14 | 8  |
| 255315 | 38 | 3504892 | 3504923 | 2 | 16 | 32 | TG  | 13 | 9  |

|        |    |         |         |   |    |    |      |    |    |
|--------|----|---------|---------|---|----|----|------|----|----|
| 255318 | 38 | 3505805 | 3505816 | 2 | 6  | 12 | AC   | 26 | 3  |
| 255319 | 38 | 3509583 | 3509612 | 2 | 15 | 30 | TG   | 14 | 12 |
| 255325 | 38 | 3513580 | 3513601 | 2 | 11 | 22 | GT   | 16 | 13 |
| 255326 | 38 | 3513841 | 3513854 | 2 | 7  | 14 | CA   | 16 | 6  |
| 255327 | 38 | 3515633 | 3515660 | 2 | 14 | 28 | CA   | 16 | 9  |
| 255331 | 38 | 3520274 | 3520301 | 2 | 14 | 28 | TG   | 18 | 10 |
| 255335 | 38 | 3523010 | 3523029 | 2 | 10 | 20 | CA   | 25 | 6  |
| 255343 | 38 | 3527068 | 3527111 | 2 | 22 | 44 | CA   | 6  | 9  |
| 255345 | 38 | 3531892 | 3531943 | 2 | 26 | 52 | TG   | 13 | 17 |
| 255350 | 38 | 3536655 | 3536678 | 2 | 12 | 24 | CA   | 22 | 9  |
| 255351 | 38 | 3537426 | 3537443 | 2 | 9  | 18 | TG   | 24 | 6  |
| 255356 | 38 | 3537794 | 3537807 | 2 | 7  | 14 | CA   | 16 | 12 |
| 255357 | 38 | 3537810 | 3537823 | 2 | 7  | 14 | CA   | 17 | 7  |
| 255358 | 38 | 3537993 | 3538030 | 2 | 19 | 38 | GT   | 7  | 8  |
| 255359 | 38 | 3538364 | 3538387 | 2 | 12 | 24 | TG   | 14 | 10 |
| 255361 | 38 | 3539910 | 3539931 | 2 | 11 | 22 | CA   | 15 | 7  |
| 255362 | 38 | 3540172 | 3540185 | 2 | 7  | 14 | AC   | 25 | 11 |
| 255363 | 38 | 3540381 | 3540394 | 2 | 7  | 14 | AC   | 16 | 8  |
| 255364 | 38 | 3540532 | 3540558 | 3 | 9  | 27 | GAG  | 26 | 6  |
| 255367 | 38 | 3543212 | 3543235 | 4 | 6  | 24 | GAAA | 25 | 4  |
| 255368 | 38 | 3545226 | 3545243 | 2 | 9  | 18 | GT   | 21 | 5  |
| 255371 | 38 | 3546700 | 3546735 | 2 | 18 | 36 | TG   | 11 | 6  |
| 255372 | 38 | 3546816 | 3546831 | 2 | 8  | 16 | GA   | 22 | 3  |
| 255375 | 38 | 3547984 | 3548003 | 2 | 10 | 20 | GT   | 18 | 9  |
| 255376 | 38 | 3548168 | 3548197 | 2 | 15 | 30 | GT   | 7  | 7  |
| 255380 | 38 | 3549496 | 3549523 | 2 | 14 | 28 | TG   | 22 | 6  |
| 255381 | 38 | 3552066 | 3552077 | 2 | 6  | 12 | TG   | 27 | 3  |
| 255382 | 38 | 3552101 | 3552114 | 2 | 7  | 14 | GT   | 27 | 4  |
| 255385 | 38 | 3554219 | 3554234 | 2 | 8  | 16 | GT   | 24 | 6  |
| 255387 | 38 | 3555628 | 3555649 | 2 | 11 | 22 | AC   | 26 | 7  |
| 255390 | 38 | 3558169 | 3558196 | 2 | 14 | 28 | TG   | 21 | 7  |
| 255392 | 38 | 3559529 | 3559540 | 2 | 6  | 12 | AC   | 29 | 3  |
| 255394 | 38 | 3560703 | 3560724 | 2 | 11 | 22 | CA   | 17 | 12 |
| 255396 | 38 | 3561332 | 3561347 | 2 | 8  | 16 | GT   | 19 | 7  |
| 255397 | 38 | 3561859 | 3561878 | 2 | 10 | 20 | CA   | 19 | 9  |
| 255399 | 38 | 3562394 | 3562409 | 2 | 8  | 16 | TG   | 20 | 3  |
| 255401 | 38 | 3562911 | 3562962 | 2 | 26 | 52 | GT   | 9  | 8  |
| 255402 | 38 | 3563155 | 3563184 | 2 | 15 | 30 | TG   | 9  | 8  |
| 255408 | 38 | 3567517 | 3567554 | 2 | 19 | 38 | GT   | 6  | 6  |
| 255415 | 38 | 3569610 | 3569621 | 2 | 6  | 12 | CA   | 21 | 3  |
| 255417 | 38 | 3572315 | 3572336 | 2 | 11 | 22 | GT   | 7  | 6  |
| 255419 | 38 | 3573394 | 3573405 | 2 | 6  | 12 | CT   | 23 | 3  |
| 255420 | 38 | 3573648 | 3573677 | 2 | 15 | 30 | TG   | 16 | 12 |
| 255424 | 38 | 3575288 | 3575325 | 2 | 19 | 38 | CA   | 6  | 5  |
| 255427 | 38 | 3575723 | 3575740 | 2 | 9  | 18 | AG   | 15 | 4  |
| 255428 | 38 | 3575821 | 3575836 | 2 | 8  | 16 | AC   | 19 | 3  |
| 255430 | 38 | 3576100 | 3576123 | 2 | 12 | 24 | GT   | 21 | 7  |
| 255432 | 38 | 3578032 | 3578043 | 2 | 6  | 12 | GT   | 16 | 3  |
| 255435 | 38 | 3578968 | 3578991 | 2 | 12 | 24 | GT   | 11 | 8  |
| 255437 | 38 | 3579390 | 3579405 | 2 | 8  | 16 | GA   | 15 | 5  |
| 255439 | 38 | 3579954 | 3579967 | 2 | 7  | 14 | AG   | 21 | 4  |

|        |    |         |         |   |    |    |      |    |    |
|--------|----|---------|---------|---|----|----|------|----|----|
| 255442 | 38 | 3582960 | 3582987 | 2 | 14 | 28 | AC   | 16 | 7  |
| 255444 | 38 | 3583566 | 3583599 | 2 | 17 | 34 | CA   | 11 | 10 |
| 255447 | 38 | 3585934 | 3585971 | 2 | 19 | 38 | CA   | 6  | 9  |
| 255448 | 38 | 3586556 | 3586603 | 2 | 24 | 48 | GT   | 8  | 12 |
| 255450 | 38 | 3587574 | 3587611 | 2 | 19 | 38 | CA   | 6  | 9  |
| 255453 | 38 | 3588416 | 3588437 | 2 | 11 | 22 | CA   | 14 | 6  |
| 255454 | 38 | 3588607 | 3588630 | 2 | 12 | 24 | TC   | 19 | 5  |
| 255455 | 38 | 3588946 | 3588965 | 4 | 5  | 20 | ATCT | 18 | 6  |
| 255457 | 38 | 3589968 | 3589985 | 2 | 9  | 18 | AC   | 17 | 8  |
| 255458 | 38 | 3590852 | 3590869 | 2 | 9  | 18 | TG   | 19 | 5  |
| 255461 | 38 | 3591367 | 3591386 | 2 | 10 | 20 | TG   | 12 | 9  |
| 255465 | 38 | 3592540 | 3592555 | 2 | 8  | 16 | GT   | 17 | 3  |
| 255468 | 38 | 3593070 | 3593085 | 2 | 8  | 16 | CA   | 20 | 6  |
| 255469 | 38 | 3593342 | 3593355 | 2 | 7  | 14 | GT   | 18 | 5  |
| 255470 | 38 | 3593641 | 3593654 | 2 | 7  | 14 | TG   | 7  | 4  |
| 255471 | 38 | 3595201 | 3595214 | 2 | 7  | 14 | CT   | 19 | 5  |
| 255472 | 38 | 3595215 | 3595228 | 2 | 7  | 14 | CA   | 17 | 4  |
| 255473 | 38 | 3595377 | 3595398 | 2 | 11 | 22 | AC   | 20 | 8  |
| 255484 | 38 | 3601499 | 3601510 | 2 | 6  | 12 | GA   | 17 | 3  |
| 255485 | 38 | 3601679 | 3601704 | 2 | 13 | 26 | TG   | 9  | 10 |
| 255487 | 38 | 3602594 | 3602611 | 2 | 9  | 18 | TG   | 26 | 6  |
| 255489 | 38 | 3604709 | 3604730 | 2 | 11 | 22 | TG   | 9  | 11 |
| 255493 | 38 | 3605308 | 3605345 | 2 | 19 | 38 | TG   | 12 | 11 |
| 255494 | 38 | 3605549 | 3605574 | 2 | 13 | 26 | AC   | 13 | 10 |
| 255497 | 38 | 3606189 | 3606210 | 2 | 11 | 22 | AC   | 19 | 7  |
| 255499 | 38 | 3606734 | 3606745 | 2 | 6  | 12 | CA   | 20 | 6  |
| 255500 | 38 | 3610572 | 3610601 | 2 | 15 | 30 | CA   | 17 | 8  |
| 255501 | 38 | 3611505 | 3611520 | 2 | 8  | 16 | AC   | 6  | 8  |
| 255503 | 38 | 3611847 | 3611874 | 2 | 14 | 28 | AC   | 10 | 6  |
| 255505 | 38 | 3612205 | 3612242 | 2 | 19 | 38 | AG   | 15 | 8  |
| 255507 | 38 | 3612595 | 3612624 | 2 | 15 | 30 | AG   | 16 | 10 |
| 255508 | 38 | 3612725 | 3612740 | 2 | 8  | 16 | AC   | 24 | 5  |
| 255514 | 38 | 3614937 | 3614950 | 2 | 7  | 14 | TG   | 28 | 3  |
| 255519 | 38 | 3620256 | 3620279 | 2 | 12 | 24 | AC   | 8  | 7  |
| 255521 | 38 | 3621144 | 3621163 | 2 | 10 | 20 | AC   | 31 | 10 |
| 255524 | 38 | 3622838 | 3622855 | 2 | 9  | 18 | GA   | 19 | 3  |
| 255526 | 38 | 3623297 | 3623322 | 2 | 13 | 26 | TC   | 7  | 6  |
| 255528 | 38 | 3623482 | 3623505 | 2 | 12 | 24 | AC   | 13 | 12 |
| 255529 | 38 | 3623931 | 3623944 | 2 | 7  | 14 | CA   | 28 | 4  |
| 255535 | 38 | 3627284 | 3627295 | 2 | 6  | 12 | AG   | 18 | 7  |
| 255536 | 38 | 3628208 | 3628225 | 2 | 9  | 18 | GT   | 28 | 4  |
| 255540 | 38 | 3629604 | 3629615 | 2 | 6  | 12 | TG   | 21 | 4  |
| 255549 | 38 | 3642878 | 3642903 | 2 | 13 | 26 | AC   | 9  | 8  |
| 255550 | 38 | 3643207 | 3643218 | 2 | 6  | 12 | GT   | 17 | 8  |
| 255553 | 38 | 3643767 | 3643796 | 2 | 15 | 30 | CA   | 13 | 6  |
| 255554 | 38 | 3645816 | 3645839 | 2 | 12 | 24 | CA   | 16 | 6  |
| 255555 | 38 | 3645952 | 3645967 | 2 | 8  | 16 | GA   | 19 | 4  |
| 255556 | 38 | 3646035 | 3646070 | 2 | 18 | 36 | GT   | 15 | 8  |
| 255559 | 38 | 3648248 | 3648263 | 2 | 8  | 16 | GT   | 15 | 13 |
| 255560 | 38 | 3648861 | 3648884 | 2 | 12 | 24 | TG   | 7  | 6  |
| 255565 | 38 | 3655102 | 3655125 | 2 | 12 | 24 | CA   | 21 | 6  |



|        |    |         |         |   |    |    |      |    |    |
|--------|----|---------|---------|---|----|----|------|----|----|
| 255566 | 38 | 3657752 | 3657763 | 2 | 6  | 12 | CA   | 19 | 3  |
| 255567 | 38 | 3660486 | 3660509 | 2 | 12 | 24 | TC   | 17 | 7  |
| 255568 | 38 | 3660908 | 3660933 | 2 | 13 | 26 | GT   | 21 | 6  |
| 255571 | 38 | 3664326 | 3664361 | 2 | 18 | 36 | TG   | 8  | 8  |
| 255572 | 38 | 3664799 | 3664822 | 2 | 12 | 24 | CA   | 17 | 10 |
| 255573 | 38 | 3664874 | 3664891 | 2 | 9  | 18 | GA   | 20 | 5  |
| 255574 | 38 | 3665059 | 3665082 | 2 | 12 | 24 | AC   | 24 | 12 |
| 255577 | 38 | 3667676 | 3667691 | 4 | 4  | 16 | TTTG | 22 | 4  |
| 255582 | 38 | 3668730 | 3668749 | 2 | 10 | 20 | GT   | 11 | 6  |
| 255603 | 38 | 3697515 | 3697530 | 2 | 8  | 16 | CA   | 32 | 3  |
| 255604 | 38 | 3698290 | 3698309 | 2 | 10 | 20 | CA   | 21 | 6  |
| 255607 | 38 | 3699133 | 3699168 | 2 | 18 | 36 | GT   | 9  | 7  |
| 255608 | 38 | 3699338 | 3699351 | 2 | 7  | 14 | GT   | 25 | 3  |
| 255613 | 38 | 3702949 | 3702970 | 2 | 11 | 22 | CA   | 22 | 5  |
| 255615 | 38 | 3704970 | 3704993 | 2 | 12 | 24 | TG   | 14 | 9  |
| 255616 | 38 | 3705176 | 3705191 | 2 | 8  | 16 | AG   | 19 | 4  |
| 255617 | 38 | 3705489 | 3705514 | 2 | 13 | 26 | GT   | 13 | 8  |
| 255620 | 38 | 3708119 | 3708136 | 2 | 9  | 18 | CA   | 23 | 7  |
| 255621 | 38 | 3710277 | 3710291 | 3 | 5  | 15 | AGA  | 15 | 4  |
| 255622 | 38 | 3710575 | 3710586 | 2 | 6  | 12 | AC   | 21 | 7  |
| 255641 | 38 | 3725525 | 3725540 | 2 | 8  | 16 | AC   | 19 | 4  |
| 255643 | 38 | 3725768 | 3725815 | 2 | 24 | 48 | CA   | 10 | 11 |
| 255644 | 38 | 3725932 | 3725951 | 2 | 10 | 20 | AC   | 14 | 10 |
| 255645 | 38 | 3725952 | 3725967 | 4 | 4  | 16 | GCAC | 15 | 10 |
| 255646 | 38 | 3727458 | 3727471 | 2 | 7  | 14 | CA   | 17 | 5  |
| 255648 | 38 | 3728175 | 3728198 | 2 | 12 | 24 | TG   | 11 | 10 |
| 255649 | 38 | 3728609 | 3728624 | 2 | 8  | 16 | GT   | 27 | 7  |
| 255651 | 38 | 3732991 | 3733008 | 2 | 9  | 18 | AC   | 19 | 8  |
| 255653 | 38 | 3734754 | 3734777 | 2 | 12 | 24 | CA   | 16 | 7  |
| 255654 | 38 | 3735881 | 3735894 | 2 | 7  | 14 | CA   | 18 | 5  |
| 255656 | 38 | 3736220 | 3736265 | 2 | 23 | 46 | TG   | 8  | 9  |
| 255661 | 38 | 3739493 | 3739504 | 2 | 6  | 12 | CA   | 20 | 5  |
| 255664 | 38 | 3741916 | 3741937 | 2 | 11 | 22 | AC   | 13 | 6  |
| 255668 | 38 | 3743605 | 3743618 | 2 | 7  | 14 | AC   | 20 | 5  |
| 255669 | 38 | 3743820 | 3743831 | 2 | 6  | 12 | CA   | 9  | 6  |
| 255670 | 38 | 3743834 | 3743845 | 2 | 6  | 12 | CA   | 22 | 10 |
| 255671 | 38 | 3743971 | 3743994 | 2 | 12 | 24 | CT   | 14 | 11 |
| 255672 | 38 | 3744035 | 3744058 | 2 | 12 | 24 | CT   | 12 | 5  |
| 255673 | 38 | 3745838 | 3745857 | 2 | 10 | 20 | CT   | 22 | 6  |
| 255674 | 38 | 3748702 | 3748721 | 2 | 10 | 20 | CA   | 21 | 3  |
| 255679 | 38 | 3752277 | 3752288 | 2 | 6  | 12 | AC   | 22 | 4  |
| 255680 | 38 | 3752290 | 3752307 | 2 | 9  | 18 | CA   | 23 | 5  |
| 255682 | 38 | 3753321 | 3753354 | 2 | 17 | 34 | CT   | 7  | 5  |
| 255683 | 38 | 3755438 | 3755467 | 2 | 15 | 30 | CA   | 8  | 7  |
| 255684 | 38 | 3755645 | 3755662 | 3 | 6  | 18 | GGA  | 23 | 4  |
| 255687 | 38 | 3759090 | 3759113 | 2 | 12 | 24 | CA   | 8  | 6  |
| 255688 | 38 | 3761558 | 3761581 | 2 | 12 | 24 | CA   | 17 | 5  |
| 255690 | 38 | 3765818 | 3765831 | 2 | 7  | 14 | CA   | 24 | 3  |
| 255701 | 38 | 3775868 | 3775903 | 4 | 9  | 36 | ACAT | 9  | 5  |
| 255702 | 38 | 3776911 | 3776948 | 2 | 19 | 38 | GT   | 17 | 6  |
| 255704 | 38 | 3777581 | 3777610 | 2 | 15 | 30 | TG   | 17 | 9  |

|        |    |         |         |   |    |    |      |    |    |
|--------|----|---------|---------|---|----|----|------|----|----|
| 255707 | 38 | 3778591 | 3778614 | 2 | 12 | 24 | AC   | 16 | 6  |
| 255708 | 38 | 3778738 | 3778755 | 2 | 9  | 18 | GT   | 17 | 11 |
| 255710 | 38 | 3779045 | 3779056 | 2 | 6  | 12 | AC   | 19 | 3  |
| 255715 | 38 | 3780149 | 3780160 | 2 | 6  | 12 | AC   | 22 | 4  |
| 255716 | 38 | 3780859 | 3780882 | 3 | 8  | 24 | TTC  | 26 | 3  |
| 255722 | 38 | 3794697 | 3794714 | 3 | 6  | 18 | CAG  | 23 | 3  |
| 255723 | 38 | 3795583 | 3795600 | 3 | 6  | 18 | CTG  | 30 | 6  |
| 255724 | 38 | 3801204 | 3801225 | 2 | 11 | 22 | AC   | 15 | 4  |
| 255730 | 38 | 3803046 | 3803061 | 2 | 8  | 16 | AC   | 21 | 6  |
| 255738 | 38 | 3803975 | 3803990 | 2 | 8  | 16 | AC   | 24 | 4  |
| 255739 | 38 | 3804382 | 3804395 | 2 | 7  | 14 | TG   | 25 | 3  |
| 255740 | 38 | 3804502 | 3804539 | 2 | 19 | 38 | CT   | 21 | 22 |
| 255742 | 38 | 3810340 | 3810365 | 2 | 13 | 26 | TG   | 19 | 12 |
| 255745 | 38 | 3817177 | 3817190 | 2 | 7  | 14 | TG   | 8  | 5  |
| 255746 | 38 | 3817705 | 3817728 | 4 | 6  | 24 | ACAG | 29 | 4  |
| 255747 | 38 | 3818034 | 3818057 | 2 | 12 | 24 | GT   | 12 | 10 |
| 255748 | 38 | 3819683 | 3819712 | 2 | 15 | 30 | TC   | 11 | 7  |
| 255750 | 38 | 3821016 | 3821029 | 2 | 7  | 14 | GT   | 23 | 3  |
| 255751 | 38 | 3821190 | 3821203 | 2 | 7  | 14 | GT   | 27 | 10 |
| 255752 | 38 | 3821389 | 3821412 | 2 | 12 | 24 | AC   | 15 | 9  |
| 255753 | 38 | 3821646 | 3821667 | 2 | 11 | 22 | AC   | 15 | 11 |
| 255755 | 38 | 3822165 | 3822176 | 2 | 6  | 12 | TG   | 21 | 3  |
| 255756 | 38 | 3823566 | 3823579 | 2 | 7  | 14 | GT   | 10 | 7  |
| 255757 | 38 | 3823721 | 3823738 | 2 | 9  | 18 | GT   | 22 | 3  |
| 255761 | 38 | 3826541 | 3826564 | 2 | 12 | 24 | GT   | 18 | 7  |
| 255763 | 38 | 3828022 | 3828071 | 2 | 25 | 50 | TC   | 9  | 9  |
| 255767 | 38 | 3830219 | 3830234 | 4 | 4  | 16 | GACT | 19 | 4  |
| 255768 | 38 | 3830417 | 3830434 | 2 | 9  | 18 | TG   | 16 | 14 |
| 255769 | 38 | 3830595 | 3830612 | 2 | 9  | 18 | GT   | 6  | 6  |
| 255772 | 38 | 3832226 | 3832243 | 2 | 9  | 18 | TG   | 24 | 3  |
| 255774 | 38 | 3832427 | 3832440 | 2 | 7  | 14 | CA   | 14 | 4  |
| 255775 | 38 | 3832746 | 3832775 | 2 | 15 | 30 | GT   | 16 | 10 |
| 255776 | 38 | 3835071 | 3835082 | 2 | 6  | 12 | TC   | 32 | 5  |
| 255783 | 38 | 3842783 | 3842798 | 2 | 8  | 16 | CA   | 17 | 10 |
| 255784 | 38 | 3843783 | 3843814 | 2 | 16 | 32 | AC   | 8  | 9  |
| 255786 | 38 | 3847213 | 3847226 | 2 | 7  | 14 | GT   | 21 | 5  |
| 255797 | 38 | 3855455 | 3855466 | 2 | 6  | 12 | TG   | 25 | 5  |
| 255798 | 38 | 3855522 | 3855545 | 4 | 6  | 24 | TGGT | 18 | 3  |
| 255802 | 38 | 3869281 | 3869302 | 2 | 11 | 22 | TG   | 18 | 6  |
| 255803 | 38 | 3869618 | 3869641 | 2 | 12 | 24 | AC   | 16 | 6  |
| 255804 | 38 | 3869831 | 3869850 | 2 | 10 | 20 | TG   | 26 | 4  |
| 255806 | 38 | 3877451 | 3877468 | 2 | 9  | 18 | CA   | 22 | 7  |
| 255808 | 38 | 3879501 | 3879536 | 2 | 18 | 36 | TG   | 18 | 9  |
| 255809 | 38 | 3882507 | 3882524 | 2 | 9  | 18 | AC   | 16 | 3  |
| 255811 | 38 | 3886591 | 3886608 | 3 | 6  | 18 | CCT  | 7  | 7  |
| 255812 | 38 | 3887085 | 3887136 | 2 | 26 | 52 | TG   | 8  | 11 |
| 255813 | 38 | 3887212 | 3887237 | 2 | 13 | 26 | CA   | 10 | 10 |
| 255817 | 38 | 3892671 | 3892690 | 2 | 10 | 20 | TG   | 19 | 5  |
| 255819 | 38 | 3894226 | 3894249 | 2 | 12 | 24 | GT   | 12 | 9  |
| 255820 | 38 | 3894416 | 3894431 | 2 | 8  | 16 | TG   | 25 | 4  |
| 255821 | 38 | 3894614 | 3894629 | 2 | 8  | 16 | CA   | 30 | 3  |

|        |    |         |         |   |    |    |      |    |    |
|--------|----|---------|---------|---|----|----|------|----|----|
| 255825 | 38 | 3896624 | 3896667 | 2 | 22 | 44 | CA   | 12 | 10 |
| 255827 | 38 | 3897098 | 3897113 | 4 | 4  | 16 | CTCA | 25 | 4  |
| 255833 | 38 | 3907934 | 3907947 | 2 | 7  | 14 | GT   | 25 | 6  |
| 255834 | 38 | 3909135 | 3909148 | 2 | 7  | 14 | AC   | 27 | 10 |
| 255835 | 38 | 3909224 | 3909251 | 2 | 14 | 28 | AG   | 31 | 6  |
| 255840 | 38 | 3918664 | 3918687 | 3 | 8  | 24 | GAG  | 26 | 7  |
| 255841 | 38 | 3921790 | 3921833 | 2 | 22 | 44 | AC   | 14 | 11 |
| 255842 | 38 | 3924210 | 3924225 | 2 | 8  | 16 | GT   | 23 | 7  |
| 255846 | 38 | 3927874 | 3927899 | 2 | 13 | 26 | AC   | 16 | 9  |
| 255847 | 38 | 3930570 | 3930609 | 2 | 20 | 40 | GT   | 7  | 9  |
| 255848 | 38 | 3931338 | 3931363 | 2 | 13 | 26 | GT   | 16 | 5  |
| 255851 | 38 | 3938442 | 3938453 | 2 | 6  | 12 | GT   | 24 | 4  |
| 255855 | 38 | 3946174 | 3946197 | 2 | 12 | 24 | AC   | 15 | 13 |
| 255858 | 38 | 3968525 | 3968540 | 2 | 8  | 16 | TC   | 16 | 3  |
| 255860 | 38 | 3971322 | 3971341 | 4 | 5  | 20 | CAGA | 20 | 5  |
| 255865 | 38 | 3984356 | 3984385 | 3 | 10 | 30 | AAC  | 21 | 6  |
| 255866 | 38 | 3984827 | 3984842 | 4 | 4  | 16 | CTGT | 14 | 4  |
| 255869 | 38 | 3987490 | 3987510 | 3 | 7  | 21 | GCT  | 22 | 9  |
| 255870 | 38 | 3990580 | 3990593 | 2 | 7  | 14 | TG   | 25 | 3  |
| 255880 | 38 | 4004152 | 4004189 | 2 | 19 | 38 | GT   | 17 | 15 |
| 255881 | 38 | 4010722 | 4010755 | 2 | 17 | 34 | GT   | 16 | 8  |
| 255882 | 38 | 4013631 | 4013645 | 3 | 5  | 15 | ATC  | 27 | 3  |
| 255883 | 38 | 4015433 | 4015456 | 2 | 12 | 24 | AC   | 18 | 7  |
| 255889 | 38 | 4023520 | 4023539 | 2 | 10 | 20 | GT   | 25 | 9  |
| 255890 | 38 | 4023923 | 4023938 | 2 | 8  | 16 | TG   | 23 | 4  |
| 255893 | 38 | 4028102 | 4028125 | 2 | 12 | 24 | TG   | 15 | 7  |
| 255896 | 38 | 4040471 | 4040504 | 2 | 17 | 34 | CA   | 11 | 7  |
| 255902 | 38 | 4064639 | 4064660 | 2 | 11 | 22 | GT   | 23 | 6  |
| 255905 | 38 | 4073566 | 4073585 | 2 | 10 | 20 | AC   | 11 | 7  |
| 255907 | 38 | 4075142 | 4075155 | 2 | 7  | 14 | AC   | 19 | 8  |
| 255908 | 38 | 4079161 | 4079178 | 2 | 9  | 18 | AG   | 15 | 9  |
| 255910 | 38 | 4079955 | 4079976 | 2 | 11 | 22 | TC   | 16 | 6  |
| 255915 | 38 | 4084287 | 4084304 | 2 | 9  | 18 | TG   | 14 | 8  |
| 255916 | 38 | 4087660 | 4087677 | 2 | 9  | 18 | AC   | 25 | 3  |
| 255920 | 38 | 4099805 | 4099824 | 2 | 10 | 20 | CT   | 26 | 8  |
| 255922 | 38 | 4104044 | 4104067 | 2 | 12 | 24 | AC   | 22 | 7  |
| 255924 | 38 | 4111569 | 4111598 | 2 | 15 | 30 | AC   | 16 | 9  |
| 255941 | 38 | 4177094 | 4177127 | 2 | 17 | 34 | TG   | 10 | 11 |
| 255943 | 38 | 4183006 | 4183020 | 3 | 5  | 15 | TTG  | 25 | 3  |
| 255944 | 38 | 4185547 | 4185578 | 4 | 8  | 32 | TTTG | 18 | 6  |
| 255946 | 38 | 4193800 | 4193831 | 2 | 16 | 32 | TC   | 20 | 7  |
| 255947 | 38 | 4195792 | 4195813 | 2 | 11 | 22 | CA   | 14 | 7  |
| 255951 | 38 | 4202621 | 4202644 | 2 | 12 | 24 | TG   | 22 | 8  |
| 255954 | 38 | 4205585 | 4205610 | 2 | 13 | 26 | GT   | 13 | 5  |
| 255964 | 38 | 4222142 | 4222169 | 2 | 14 | 28 | AC   | 27 | 7  |
| 255966 | 38 | 4234955 | 4234968 | 2 | 7  | 14 | AC   | 9  | 6  |
| 255971 | 38 | 4235320 | 4235351 | 2 | 16 | 32 | CA   | 6  | 7  |
| 255972 | 38 | 4236603 | 4236622 | 4 | 5  | 20 | TTCA | 27 | 4  |
| 255973 | 38 | 4238533 | 4238556 | 4 | 6  | 24 | GGAT | 27 | 6  |
| 255977 | 38 | 4248512 | 4248523 | 2 | 6  | 12 | CA   | 29 | 3  |
| 255983 | 38 | 4261227 | 4261244 | 3 | 6  | 18 | TGC  | 25 | 6  |

|        |    |         |         |   |    |    |      |    |    |
|--------|----|---------|---------|---|----|----|------|----|----|
| 255984 | 38 | 4267574 | 4267591 | 2 | 9  | 18 | CA   | 21 | 12 |
| 255988 | 38 | 4281846 | 4281857 | 2 | 6  | 12 | GT   | 25 | 5  |
| 255996 | 38 | 4314972 | 4314983 | 2 | 6  | 12 | CA   | 22 | 5  |
| 256005 | 38 | 4329737 | 4329763 | 3 | 9  | 27 | GTT  | 20 | 10 |
| 256028 | 38 | 4427852 | 4427869 | 2 | 9  | 18 | CA   | 20 | 7  |
| 256029 | 38 | 4427894 | 4427911 | 2 | 9  | 18 | CA   | 25 | 13 |
| 256032 | 38 | 4435729 | 4435772 | 2 | 22 | 44 | AC   | 13 | 12 |
| 256037 | 38 | 4444727 | 4444762 | 3 | 12 | 36 | CCT  | 7  | 6  |
| 256042 | 38 | 4455802 | 4455815 | 2 | 7  | 14 | AC   | 9  | 4  |
| 256043 | 38 | 4458963 | 4458974 | 2 | 6  | 12 | AT   | 26 | 3  |
| 256045 | 38 | 4461676 | 4461708 | 3 | 11 | 33 | CCT  | 10 | 6  |
| 256054 | 38 | 4466945 | 4466996 | 4 | 13 | 52 | GATA | 7  | 8  |
| 256056 | 38 | 4467629 | 4467648 | 2 | 10 | 20 | CA   | 20 | 7  |
| 256057 | 38 | 4467972 | 4467987 | 4 | 4  | 16 | AAAC | 23 | 3  |
| 256062 | 38 | 4493713 | 4493736 | 2 | 12 | 24 | TC   | 24 | 7  |
| 256064 | 38 | 4505006 | 4505017 | 2 | 6  | 12 | TC   | 25 | 3  |
| 256065 | 38 | 4507129 | 4507148 | 4 | 5  | 20 | AAAT | 9  | 5  |
| 256067 | 38 | 4513392 | 4513406 | 3 | 5  | 15 | GCT  | 13 | 3  |
| 256073 | 38 | 4540642 | 4540656 | 3 | 5  | 15 | AGG  | 26 | 3  |
| 256075 | 38 | 4543857 | 4543882 | 2 | 13 | 26 | CA   | 16 | 13 |
| 256081 | 38 | 4569545 | 4569580 | 4 | 9  | 36 | ATCA | 22 | 9  |
| 256088 | 38 | 4597486 | 4597509 | 4 | 6  | 24 | GACA | 24 | 3  |
| 256091 | 38 | 4604785 | 4604800 | 4 | 4  | 16 | TTAT | 25 | 3  |
| 256095 | 38 | 4609786 | 4609813 | 4 | 7  | 28 | GATG | 27 | 3  |
| 256099 | 38 | 4621643 | 4621678 | 4 | 9  | 36 | TATC | 7  | 7  |
| 256100 | 38 | 4623082 | 4623103 | 2 | 11 | 22 | AC   | 12 | 10 |
| 256103 | 38 | 4633069 | 4633084 | 2 | 8  | 16 | TA   | 21 | 3  |
| 256110 | 38 | 4639663 | 4639682 | 4 | 5  | 20 | TTTA | 19 | 3  |
| 256116 | 38 | 4650684 | 4650695 | 2 | 6  | 12 | TC   | 18 | 8  |
| 256122 | 38 | 4663578 | 4663607 | 2 | 15 | 30 | TG   | 7  | 6  |
| 256126 | 38 | 4674467 | 4674484 | 3 | 6  | 18 | CCT  | 23 | 5  |
| 256130 | 38 | 4685938 | 4685973 | 2 | 18 | 36 | TG   | 13 | 15 |
| 256132 | 38 | 4686859 | 4686882 | 2 | 12 | 24 | AG   | 22 | 13 |
| 256140 | 38 | 4728126 | 4728137 | 2 | 6  | 12 | TG   | 24 | 4  |
| 256142 | 38 | 4733548 | 4733563 | 2 | 8  | 16 | AC   | 14 | 4  |
| 256149 | 38 | 4739951 | 4739970 | 2 | 10 | 20 | TG   | 19 | 17 |
| 256150 | 38 | 4739971 | 4739982 | 2 | 6  | 12 | CG   | 11 | 11 |
| 256151 | 38 | 4740064 | 4740075 | 2 | 6  | 12 | AG   | 27 | 4  |
| 256159 | 38 | 4774436 | 4774455 | 2 | 10 | 20 | CA   | 14 | 12 |
| 256162 | 38 | 4777273 | 4777287 | 3 | 5  | 15 | CAG  | 21 | 4  |
| 256165 | 38 | 4781188 | 4781209 | 2 | 11 | 22 | TG   | 25 | 6  |
| 256167 | 38 | 4788018 | 4788041 | 4 | 6  | 24 | AAAC | 11 | 4  |
| 256170 | 38 | 4794006 | 4794017 | 2 | 6  | 12 | TG   | 28 | 3  |
| 256174 | 38 | 4799863 | 4799884 | 2 | 11 | 22 | AC   | 31 | 4  |
| 256181 | 38 | 4804879 | 4804916 | 2 | 19 | 38 | AC   | 13 | 11 |
| 256182 | 38 | 4805177 | 4805204 | 2 | 14 | 28 | CA   | 14 | 8  |
| 256183 | 38 | 4805419 | 4805436 | 2 | 9  | 18 | CA   | 15 | 10 |
| 256190 | 38 | 4808151 | 4808168 | 2 | 9  | 18 | CA   | 28 | 6  |
| 256202 | 38 | 4825210 | 4825239 | 2 | 15 | 30 | TC   | 7  | 8  |
| 256212 | 38 | 4844095 | 4844108 | 2 | 7  | 14 | AG   | 22 | 5  |
| 256216 | 38 | 4848208 | 4848221 | 2 | 7  | 14 | CA   | 26 | 6  |

|        |    |         |         |   |    |    |      |    |    |
|--------|----|---------|---------|---|----|----|------|----|----|
| 256220 | 38 | 4853274 | 4853289 | 2 | 8  | 16 | GA   | 14 | 3  |
| 256221 | 38 | 4857194 | 4857211 | 2 | 9  | 18 | GT   | 19 | 13 |
| 256223 | 38 | 4871537 | 4871563 | 3 | 9  | 27 | ATC  | 24 | 3  |
| 256226 | 38 | 4872167 | 4872178 | 2 | 6  | 12 | CA   | 31 | 3  |
| 256227 | 38 | 4872335 | 4872348 | 2 | 7  | 14 | AC   | 25 | 3  |
| 256235 | 38 | 4881145 | 4881165 | 3 | 7  | 21 | GCT  | 19 | 4  |
| 256236 | 38 | 4882878 | 4882899 | 2 | 11 | 22 | GT   | 18 | 5  |
| 256237 | 38 | 4885228 | 4885259 | 2 | 16 | 32 | AC   | 10 | 5  |
| 256239 | 38 | 4887442 | 4887459 | 2 | 9  | 18 | TG   | 27 | 4  |
| 256240 | 38 | 4887797 | 4887808 | 2 | 6  | 12 | TG   | 18 | 12 |
| 256241 | 38 | 4887809 | 4887826 | 2 | 9  | 18 | GT   | 16 | 9  |
| 256242 | 38 | 4892158 | 4892171 | 2 | 7  | 14 | AC   | 25 | 7  |
| 256243 | 38 | 4892658 | 4892691 | 2 | 17 | 34 | AC   | 15 | 15 |
| 256250 | 38 | 4900899 | 4900916 | 2 | 9  | 18 | AC   | 12 | 3  |
| 256252 | 38 | 4905469 | 4905500 | 2 | 16 | 32 | AC   | 16 | 16 |
| 256253 | 38 | 4907426 | 4907443 | 2 | 9  | 18 | TG   | 20 | 6  |
| 256254 | 38 | 4908579 | 4908614 | 2 | 18 | 36 | CA   | 10 | 6  |
| 256256 | 38 | 4910530 | 4910541 | 2 | 6  | 12 | TC   | 19 | 4  |
| 256257 | 38 | 4910543 | 4910554 | 2 | 6  | 12 | CT   | 20 | 3  |
| 256267 | 38 | 4918950 | 4918964 | 3 | 5  | 15 | CAG  | 15 | 5  |
| 256268 | 38 | 4918967 | 4918981 | 3 | 5  | 15 | GCA  | 17 | 5  |
| 256270 | 38 | 4920209 | 4920242 | 2 | 17 | 34 | GT   | 15 | 10 |
| 256274 | 38 | 4920642 | 4920662 | 3 | 7  | 21 | TTA  | 21 | 4  |
| 256277 | 38 | 4931797 | 4931812 | 2 | 8  | 16 | CA   | 18 | 8  |
| 256278 | 38 | 4931815 | 4931828 | 2 | 7  | 14 | CA   | 20 | 8  |
| 256280 | 38 | 4934249 | 4934286 | 2 | 19 | 38 | TG   | 10 | 11 |
| 256291 | 38 | 4958789 | 4958818 | 3 | 10 | 30 | TCT  | 23 | 3  |
| 256292 | 38 | 4959492 | 4959509 | 2 | 9  | 18 | AC   | 20 | 6  |
| 256297 | 38 | 4963749 | 4963768 | 2 | 10 | 20 | GT   | 17 | 7  |
| 256298 | 38 | 4963867 | 4963878 | 2 | 6  | 12 | TC   | 29 | 3  |
| 256305 | 38 | 4968850 | 4968867 | 2 | 9  | 18 | TG   | 21 | 5  |
| 256307 | 38 | 4976032 | 4976063 | 2 | 16 | 32 | AC   | 8  | 8  |
| 256318 | 38 | 4999651 | 4999670 | 2 | 10 | 20 | GT   | 26 | 8  |
| 256323 | 38 | 5010359 | 5010374 | 2 | 8  | 16 | TG   | 28 | 4  |
| 256324 | 38 | 5017503 | 5017522 | 2 | 10 | 20 | AC   | 18 | 13 |
| 256325 | 38 | 5025041 | 5025062 | 2 | 11 | 22 | CA   | 21 | 8  |
| 256328 | 38 | 5026832 | 5026849 | 2 | 9  | 18 | CA   | 24 | 4  |
| 256329 | 38 | 5027182 | 5027195 | 2 | 7  | 14 | GT   | 30 | 3  |
| 256353 | 39 | 40917   | 40928   | 2 | 6  | 12 | AG   | 33 | 4  |
| 256358 | 39 | 75639   | 75654   | 2 | 8  | 16 | AC   | 23 | 3  |
| 256365 | 39 | 103173  | 103186  | 2 | 7  | 14 | CA   | 18 | 5  |
| 256366 | 39 | 111129  | 111144  | 4 | 4  | 16 | TGTT | 27 | 3  |
| 256374 | 39 | 141097  | 141108  | 2 | 6  | 12 | AC   | 31 | 5  |
| 256376 | 39 | 144748  | 144765  | 2 | 9  | 18 | CA   | 24 | 4  |
| 256378 | 39 | 155378  | 155405  | 2 | 14 | 28 | AC   | 9  | 6  |
| 256385 | 39 | 176243  | 176278  | 3 | 12 | 36 | ATG  | 19 | 4  |
| 256390 | 39 | 191793  | 191812  | 2 | 10 | 20 | CA   | 18 | 3  |
| 256391 | 39 | 194028  | 194041  | 2 | 7  | 14 | CA   | 23 | 5  |
| 256392 | 39 | 194255  | 194266  | 2 | 6  | 12 | CT   | 12 | 4  |
| 256394 | 39 | 196038  | 196053  | 2 | 8  | 16 | TG   | 18 | 3  |
| 256403 | 39 | 204747  | 204773  | 3 | 9  | 27 | TGA  | 19 | 3  |

|        |    |        |        |   |    |    |      |    |    |
|--------|----|--------|--------|---|----|----|------|----|----|
| 256418 | 39 | 218373 | 218390 | 3 | 6  | 18 | TGC  | 23 | 6  |
| 256424 | 39 | 241665 | 241688 | 4 | 6  | 24 | GATG | 22 | 3  |
| 256426 | 39 | 246566 | 246587 | 2 | 11 | 22 | AT   | 6  | 4  |
| 256449 | 39 | 311128 | 311142 | 3 | 5  | 15 | AAC  | 21 | 3  |
| 256450 | 39 | 311527 | 311558 | 2 | 16 | 32 | AC   | 13 | 10 |
| 256453 | 39 | 316886 | 316937 | 4 | 13 | 52 | TATC | 7  | 7  |
| 256454 | 39 | 321479 | 321514 | 4 | 9  | 36 | AGAT | 17 | 8  |
| 256455 | 39 | 323487 | 323506 | 2 | 10 | 20 | GT   | 17 | 13 |
| 256459 | 39 | 333842 | 333867 | 2 | 13 | 26 | CA   | 16 | 6  |
| 256463 | 39 | 347415 | 347430 | 4 | 4  | 16 | AAAT | 32 | 3  |
| 256465 | 39 | 349640 | 349661 | 2 | 11 | 22 | AC   | 18 | 11 |
| 256469 | 39 | 370786 | 370797 | 2 | 6  | 12 | GT   | 32 | 3  |
| 256474 | 39 | 387239 | 387256 | 3 | 6  | 18 | TTC  | 22 | 5  |
| 256480 | 39 | 404552 | 404563 | 2 | 6  | 12 | GT   | 15 | 3  |
| 256490 | 39 | 417660 | 417701 | 2 | 21 | 42 | GT   | 13 | 10 |
| 256496 | 39 | 433774 | 433797 | 4 | 6  | 24 | AGAC | 18 | 5  |
| 256498 | 39 | 441604 | 441623 | 2 | 10 | 20 | GT   | 17 | 7  |
| 256501 | 39 | 447885 | 447900 | 4 | 4  | 16 | ACAG | 20 | 3  |
| 256502 | 39 | 448198 | 448221 | 4 | 6  | 24 | GCAC | 18 | 11 |
| 256506 | 39 | 464906 | 464921 | 4 | 4  | 16 | ATCC | 20 | 3  |
| 256510 | 39 | 479417 | 479444 | 2 | 14 | 28 | TG   | 17 | 12 |
| 256512 | 39 | 484380 | 484400 | 3 | 7  | 21 | AAG  | 27 | 3  |
| 256513 | 39 | 485121 | 485135 | 3 | 5  | 15 | AGA  | 12 | 5  |
| 256515 | 39 | 490628 | 490641 | 2 | 7  | 14 | GT   | 23 | 9  |
| 256516 | 39 | 492430 | 492457 | 2 | 14 | 28 | TG   | 11 | 16 |
| 256517 | 39 | 494209 | 494226 | 2 | 9  | 18 | CA   | 29 | 7  |
| 256519 | 39 | 496367 | 496382 | 2 | 8  | 16 | GA   | 11 | 3  |
| 256520 | 39 | 496383 | 496402 | 2 | 10 | 20 | GT   | 17 | 6  |
| 256521 | 39 | 496535 | 496552 | 2 | 9  | 18 | AC   | 24 | 6  |
| 256522 | 39 | 496732 | 496779 | 2 | 24 | 48 | TG   | 8  | 9  |
| 256524 | 39 | 500873 | 500892 | 2 | 10 | 20 | CA   | 7  | 13 |
| 256525 | 39 | 501378 | 501392 | 3 | 5  | 15 | TAC  | 20 | 3  |
| 256527 | 39 | 503173 | 503198 | 2 | 13 | 26 | AC   | 8  | 12 |
| 256529 | 39 | 508255 | 508280 | 2 | 13 | 26 | TG   | 14 | 10 |
| 256531 | 39 | 510938 | 510958 | 3 | 7  | 21 | AAT  | 10 | 4  |
| 256532 | 39 | 512969 | 512988 | 2 | 10 | 20 | AC   | 18 | 8  |
| 256534 | 39 | 519260 | 519277 | 2 | 9  | 18 | AC   | 31 | 4  |
| 256538 | 39 | 521727 | 521746 | 4 | 5  | 20 | CATA | 25 | 4  |
| 256545 | 39 | 546218 | 546239 | 2 | 11 | 22 | GT   | 15 | 11 |
| 256546 | 39 | 549467 | 549492 | 2 | 13 | 26 | AC   | 13 | 8  |
| 256547 | 39 | 551418 | 551429 | 2 | 6  | 12 | GT   | 24 | 3  |
| 256548 | 39 | 553352 | 553379 | 2 | 14 | 28 | GT   | 29 | 11 |
| 256560 | 39 | 590384 | 590397 | 2 | 7  | 14 | CA   | 20 | 6  |
| 256563 | 39 | 599056 | 599067 | 2 | 6  | 12 | AC   | 20 | 5  |
| 256564 | 39 | 599118 | 599147 | 2 | 15 | 30 | AC   | 12 | 8  |
| 256573 | 39 | 620332 | 620359 | 2 | 14 | 28 | CT   | 21 | 5  |
| 256575 | 39 | 633771 | 633782 | 2 | 6  | 12 | GT   | 22 | 4  |
| 256576 | 39 | 634370 | 634389 | 2 | 10 | 20 | AC   | 23 | 6  |
| 256582 | 39 | 640764 | 640787 | 3 | 8  | 24 | TCA  | 17 | 4  |
| 256591 | 39 | 642658 | 642671 | 2 | 7  | 14 | TG   | 23 | 3  |
| 256593 | 39 | 645897 | 645911 | 3 | 5  | 15 | TTA  | 16 | 3  |

|        |    |         |         |   |    |    |      |    |    |
|--------|----|---------|---------|---|----|----|------|----|----|
| 256597 | 39 | 654809  | 654848  | 2 | 20 | 40 | CA   | 22 | 8  |
| 256598 | 39 | 658146  | 658173  | 4 | 7  | 28 | TGTC | 18 | 10 |
| 256614 | 39 | 681701  | 681730  | 2 | 15 | 30 | TG   | 19 | 6  |
| 256615 | 39 | 681939  | 681968  | 2 | 15 | 30 | CA   | 17 | 13 |
| 256619 | 39 | 690016  | 690031  | 4 | 4  | 16 | TCTG | 33 | 3  |
| 256625 | 39 | 709475  | 709486  | 2 | 6  | 12 | AG   | 22 | 3  |
| 256627 | 39 | 727002  | 727013  | 2 | 6  | 12 | GT   | 9  | 4  |
| 256631 | 39 | 738395  | 738418  | 4 | 6  | 24 | AAAC | 15 | 4  |
| 256632 | 39 | 739270  | 739313  | 2 | 22 | 44 | AG   | 9  | 11 |
| 256638 | 39 | 752690  | 752705  | 2 | 8  | 16 | AC   | 20 | 6  |
| 256642 | 39 | 768287  | 768301  | 3 | 5  | 15 | CTG  | 32 | 3  |
| 256644 | 39 | 769013  | 769052  | 2 | 20 | 40 | TG   | 9  | 8  |
| 256655 | 39 | 792831  | 792860  | 3 | 10 | 30 | ATT  | 11 | 6  |
| 256656 | 39 | 798961  | 798974  | 2 | 7  | 14 | AT   | 33 | 3  |
| 256657 | 39 | 801653  | 801680  | 2 | 14 | 28 | GT   | 13 | 8  |
| 256659 | 39 | 827583  | 827598  | 4 | 4  | 16 | TATG | 14 | 6  |
| 256660 | 39 | 828344  | 828371  | 2 | 14 | 28 | CA   | 10 | 6  |
| 256662 | 39 | 835135  | 835164  | 2 | 15 | 30 | GT   | 16 | 8  |
| 256663 | 39 | 835397  | 835414  | 2 | 9  | 18 | CA   | 26 | 6  |
| 256665 | 39 | 842657  | 842682  | 2 | 13 | 26 | AC   | 17 | 8  |
| 256667 | 39 | 844251  | 844270  | 4 | 5  | 20 | CAGG | 27 | 4  |
| 256669 | 39 | 850523  | 850543  | 3 | 7  | 21 | CAT  | 28 | 3  |
| 256670 | 39 | 855849  | 855882  | 2 | 17 | 34 | TG   | 9  | 15 |
| 256671 | 39 | 857299  | 857310  | 2 | 6  | 12 | GA   | 31 | 3  |
| 256676 | 39 | 865335  | 865350  | 4 | 4  | 16 | TTTC | 18 | 9  |
| 256678 | 39 | 868594  | 868605  | 2 | 6  | 12 | AT   | 26 | 4  |
| 256681 | 39 | 877838  | 877849  | 2 | 6  | 12 | TA   | 13 | 3  |
| 256685 | 39 | 885158  | 885209  | 2 | 26 | 52 | TG   | 9  | 9  |
| 256693 | 39 | 910473  | 910500  | 2 | 14 | 28 | CA   | 19 | 14 |
| 256702 | 39 | 945299  | 945310  | 2 | 6  | 12 | GT   | 32 | 3  |
| 256703 | 39 | 947279  | 947304  | 2 | 13 | 26 | AC   | 8  | 8  |
| 256706 | 39 | 952208  | 952229  | 2 | 11 | 22 | GT   | 10 | 13 |
| 256714 | 39 | 974589  | 974606  | 2 | 9  | 18 | AC   | 7  | 6  |
| 256717 | 39 | 994812  | 994843  | 2 | 16 | 32 | CA   | 11 | 8  |
| 256724 | 39 | 1005092 | 1005115 | 2 | 12 | 24 | TG   | 7  | 10 |
| 256725 | 39 | 1005607 | 1005639 | 3 | 11 | 33 | TAC  | 12 | 5  |
| 256735 | 39 | 1022149 | 1022174 | 2 | 13 | 26 | CA   | 7  | 4  |
| 256740 | 39 | 1038093 | 1038107 | 3 | 5  | 15 | CAG  | 30 | 5  |
| 256745 | 39 | 1043740 | 1043755 | 2 | 8  | 16 | AT   | 13 | 17 |
| 256753 | 39 | 1067438 | 1067449 | 2 | 6  | 12 | AC   | 27 | 3  |
| 256756 | 39 | 1070226 | 1070261 | 2 | 18 | 36 | GT   | 18 | 10 |
| 256757 | 39 | 1072650 | 1072681 | 2 | 16 | 32 | AC   | 7  | 7  |
| 256758 | 39 | 1072912 | 1072923 | 2 | 6  | 12 | CT   | 20 | 8  |
| 256759 | 39 | 1072924 | 1072937 | 2 | 7  | 14 | CA   | 21 | 6  |
| 256761 | 39 | 1074853 | 1074870 | 3 | 6  | 18 | GCT  | 28 | 5  |
| 256762 | 39 | 1079675 | 1079688 | 2 | 7  | 14 | GT   | 19 | 3  |
| 256770 | 39 | 1096005 | 1096026 | 2 | 11 | 22 | AC   | 19 | 11 |
| 256771 | 39 | 1101575 | 1101608 | 2 | 17 | 34 | CA   | 6  | 9  |
| 256772 | 39 | 1102224 | 1102235 | 2 | 6  | 12 | AC   | 29 | 5  |
| 256773 | 39 | 1107560 | 1107580 | 3 | 7  | 21 | ATA  | 21 | 5  |
| 256777 | 39 | 1116512 | 1116523 | 2 | 6  | 12 | CT   | 27 | 5  |

|        |    |         |         |   |    |    |      |    |    |
|--------|----|---------|---------|---|----|----|------|----|----|
| 256787 | 39 | 1141596 | 1141623 | 2 | 14 | 28 | CA   | 20 | 10 |
| 256799 | 39 | 1156308 | 1156323 | 2 | 8  | 16 | CT   | 8  | 3  |
| 256801 | 39 | 1157613 | 1157628 | 2 | 8  | 16 | AC   | 24 | 7  |
| 256803 | 39 | 1159049 | 1159064 | 2 | 8  | 16 | AC   | 25 | 3  |
| 256804 | 39 | 1160384 | 1160409 | 2 | 13 | 26 | GT   | 11 | 6  |
| 256822 | 39 | 1188524 | 1188557 | 2 | 17 | 34 | AC   | 11 | 10 |
| 256826 | 39 | 1192332 | 1192383 | 4 | 13 | 52 | AAAG | 10 | 9  |
| 256828 | 39 | 1197488 | 1197515 | 2 | 14 | 28 | GT   | 11 | 6  |
| 256829 | 39 | 1203404 | 1203424 | 3 | 7  | 21 | GAT  | 26 | 3  |
| 256830 | 39 | 1204053 | 1204068 | 2 | 8  | 16 | CA   | 23 | 11 |
| 256831 | 39 | 1209788 | 1209803 | 2 | 8  | 16 | TG   | 6  | 3  |
| 256832 | 39 | 1209833 | 1209848 | 4 | 4  | 16 | GTGC | 18 | 5  |
| 256833 | 39 | 1212901 | 1212938 | 2 | 19 | 38 | TG   | 8  | 11 |
| 256835 | 39 | 1220219 | 1220258 | 2 | 20 | 40 | AC   | 11 | 10 |
| 256840 | 39 | 1234678 | 1234705 | 4 | 7  | 28 | AAAG | 22 | 8  |
| 256841 | 39 | 1236169 | 1236186 | 3 | 6  | 18 | TAC  | 8  | 4  |
| 256844 | 39 | 1253639 | 1253670 | 2 | 16 | 32 | GT   | 21 | 7  |
| 256845 | 39 | 1255016 | 1255033 | 2 | 9  | 18 | TG   | 7  | 5  |
| 256846 | 39 | 1256104 | 1256119 | 2 | 8  | 16 | CA   | 21 | 10 |
| 256854 | 39 | 1273820 | 1273833 | 2 | 7  | 14 | TG   | 23 | 3  |
| 256856 | 39 | 1275417 | 1275450 | 2 | 17 | 34 | GT   | 7  | 8  |
| 256857 | 39 | 1278680 | 1278693 | 2 | 7  | 14 | TG   | 31 | 4  |
| 256861 | 39 | 1293726 | 1293755 | 2 | 15 | 30 | TG   | 18 | 7  |
| 256862 | 39 | 1294006 | 1294037 | 2 | 16 | 32 | GT   | 16 | 11 |
| 256865 | 39 | 1299263 | 1299280 | 2 | 9  | 18 | GT   | 18 | 10 |
| 256871 | 39 | 1313100 | 1313113 | 2 | 7  | 14 | GT   | 22 | 3  |
| 256879 | 39 | 1344736 | 1344763 | 2 | 14 | 28 | CA   | 8  | 7  |
| 256883 | 39 | 1354830 | 1354861 | 2 | 16 | 32 | AC   | 9  | 10 |
| 256884 | 39 | 1360803 | 1360822 | 4 | 5  | 20 | AAAC | 18 | 8  |
| 256885 | 39 | 1376060 | 1376081 | 2 | 11 | 22 | GT   | 11 | 5  |
| 256893 | 39 | 1391802 | 1391819 | 2 | 9  | 18 | TG   | 15 | 6  |
| 256897 | 39 | 1398006 | 1398033 | 4 | 7  | 28 | TCCA | 14 | 3  |
| 256906 | 39 | 1418153 | 1418166 | 2 | 7  | 14 | AT   | 20 | 4  |
| 256919 | 39 | 1437630 | 1437647 | 3 | 6  | 18 | AAG  | 29 | 4  |
| 256920 | 39 | 1440528 | 1440539 | 2 | 6  | 12 | CA   | 26 | 4  |
| 256924 | 39 | 1456213 | 1456246 | 2 | 17 | 34 | TG   | 7  | 7  |
| 256925 | 39 | 1456426 | 1456483 | 2 | 29 | 58 | GT   | 8  | 9  |
| 256927 | 39 | 1457218 | 1457250 | 3 | 11 | 33 | TTC  | 20 | 13 |
| 256929 | 39 | 1462007 | 1462020 | 2 | 7  | 14 | GT   | 24 | 4  |
| 256931 | 39 | 1465611 | 1465634 | 2 | 12 | 24 | CA   | 9  | 5  |
| 256935 | 39 | 1470834 | 1470861 | 2 | 14 | 28 | CA   | 7  | 4  |
| 256941 | 39 | 1483099 | 1483118 | 2 | 10 | 20 | AC   | 15 | 5  |
| 256945 | 39 | 1496395 | 1496409 | 3 | 5  | 15 | ACC  | 32 | 3  |
| 256954 | 39 | 1503446 | 1503461 | 2 | 8  | 16 | AC   | 17 | 7  |
| 256956 | 39 | 1504133 | 1504148 | 4 | 4  | 16 | AAAT | 11 | 3  |
| 256958 | 39 | 1524023 | 1524054 | 2 | 16 | 32 | TG   | 16 | 9  |
| 256959 | 39 | 1526827 | 1526860 | 2 | 17 | 34 | TG   | 11 | 11 |
| 256964 | 39 | 1528660 | 1528679 | 4 | 5  | 20 | CATC | 20 | 3  |
| 256969 | 39 | 1552530 | 1552567 | 2 | 19 | 38 | TG   | 15 | 14 |
| 256973 | 39 | 1563306 | 1563329 | 2 | 12 | 24 | AC   | 7  | 5  |
| 256976 | 39 | 1574330 | 1574371 | 2 | 21 | 42 | AC   | 10 | 12 |



|        |    |         |         |   |    |    |      |    |    |
|--------|----|---------|---------|---|----|----|------|----|----|
| 256977 | 39 | 1578107 | 1578138 | 2 | 16 | 32 | CA   | 10 | 8  |
| 256983 | 39 | 1591550 | 1591583 | 2 | 17 | 34 | AC   | 9  | 6  |
| 256997 | 39 | 1629305 | 1629342 | 2 | 19 | 38 | AC   | 7  | 9  |
| 256999 | 39 | 1635153 | 1635168 | 2 | 8  | 16 | GT   | 24 | 8  |
| 257001 | 39 | 1644411 | 1644432 | 2 | 11 | 22 | GA   | 20 | 5  |
| 257005 | 39 | 1647691 | 1647708 | 2 | 9  | 18 | CA   | 14 | 10 |
| 257011 | 39 | 1649181 | 1649208 | 2 | 14 | 28 | AC   | 12 | 9  |
| 257023 | 39 | 1661533 | 1661550 | 2 | 9  | 18 | TG   | 27 | 4  |
| 257027 | 39 | 1663847 | 1663872 | 2 | 13 | 26 | TG   | 20 | 9  |
| 257031 | 39 | 1665679 | 1665702 | 2 | 12 | 24 | GA   | 15 | 5  |
| 257033 | 39 | 1665900 | 1665933 | 2 | 17 | 34 | CA   | 19 | 13 |
| 257034 | 39 | 1665983 | 1665996 | 2 | 7  | 14 | AC   | 15 | 4  |
| 257037 | 39 | 1666124 | 1666151 | 2 | 14 | 28 | AC   | 8  | 9  |
| 257038 | 39 | 1666764 | 1666793 | 3 | 10 | 30 | GAG  | 8  | 4  |
| 257041 | 39 | 1669824 | 1669849 | 2 | 13 | 26 | CA   | 12 | 5  |
| 257042 | 39 | 1670090 | 1670103 | 2 | 7  | 14 | AC   | 24 | 3  |
| 257046 | 39 | 1674009 | 1674066 | 2 | 29 | 58 | AC   | 11 | 10 |
| 257047 | 39 | 1674209 | 1674222 | 2 | 7  | 14 | AT   | 25 | 3  |
| 257049 | 39 | 1676390 | 1676401 | 2 | 6  | 12 | GT   | 20 | 3  |
| 257050 | 39 | 1676467 | 1676498 | 2 | 16 | 32 | CA   | 12 | 10 |
| 257054 | 39 | 1682981 | 1682994 | 2 | 7  | 14 | GA   | 8  | 3  |
| 257056 | 39 | 1686147 | 1686162 | 2 | 8  | 16 | CA   | 13 | 8  |
| 257057 | 39 | 1686164 | 1686175 | 2 | 6  | 12 | AC   | 13 | 7  |
| 257059 | 39 | 1686201 | 1686220 | 2 | 10 | 20 | CA   | 19 | 7  |
| 257062 | 39 | 1689541 | 1689552 | 2 | 6  | 12 | CT   | 14 | 7  |
| 257063 | 39 | 1689555 | 1689570 | 2 | 8  | 16 | CT   | 11 | 4  |
| 257064 | 39 | 1690621 | 1690632 | 2 | 6  | 12 | TG   | 23 | 7  |
| 257069 | 39 | 1695408 | 1695421 | 2 | 7  | 14 | TG   | 26 | 4  |
| 257070 | 39 | 1695597 | 1695610 | 2 | 7  | 14 | AC   | 25 | 3  |
| 257071 | 39 | 1698781 | 1698804 | 3 | 8  | 24 | CTT  | 19 | 5  |
| 257078 | 39 | 1704981 | 1705000 | 2 | 10 | 20 | CA   | 6  | 9  |
| 257081 | 39 | 1710153 | 1710176 | 2 | 12 | 24 | GT   | 10 | 8  |
| 257085 | 39 | 1715079 | 1715102 | 2 | 12 | 24 | CA   | 11 | 9  |
| 257086 | 39 | 1716516 | 1716529 | 2 | 7  | 14 | CT   | 26 | 5  |
| 257092 | 39 | 1717136 | 1717151 | 2 | 8  | 16 | AC   | 20 | 7  |
| 257093 | 39 | 1717153 | 1717164 | 2 | 6  | 12 | CA   | 17 | 8  |
| 257097 | 39 | 1725393 | 1725418 | 2 | 13 | 26 | TG   | 23 | 9  |
| 257099 | 39 | 1727965 | 1728008 | 2 | 22 | 44 | GT   | 10 | 12 |
| 257100 | 39 | 1728146 | 1728167 | 2 | 11 | 22 | CA   | 18 | 7  |
| 257116 | 39 | 1742640 | 1742661 | 2 | 11 | 22 | AC   | 11 | 6  |
| 257117 | 39 | 1742688 | 1742701 | 2 | 7  | 14 | TC   | 16 | 4  |
| 257121 | 39 | 1743082 | 1743119 | 2 | 19 | 38 | TG   | 8  | 10 |
| 257126 | 39 | 1744035 | 1744064 | 2 | 15 | 30 | AC   | 12 | 7  |
| 257137 | 39 | 1756262 | 1756281 | 4 | 5  | 20 | CAGC | 14 | 3  |
| 257140 | 39 | 1758176 | 1758189 | 2 | 7  | 14 | AC   | 24 | 3  |
| 257142 | 39 | 1763405 | 1763416 | 2 | 6  | 12 | CA   | 21 | 3  |
| 257147 | 39 | 1766313 | 1766328 | 4 | 4  | 16 | TGTC | 24 | 3  |
| 257148 | 39 | 1766407 | 1766424 | 2 | 9  | 18 | CA   | 19 | 5  |
| 257150 | 39 | 1769901 | 1769918 | 2 | 9  | 18 | CA   | 15 | 11 |
| 257151 | 39 | 1770272 | 1770285 | 2 | 7  | 14 | TG   | 25 | 3  |
| 257152 | 39 | 1773380 | 1773391 | 2 | 6  | 12 | TG   | 27 | 5  |

|        |    |         |         |   |    |    |      |    |    |
|--------|----|---------|---------|---|----|----|------|----|----|
| 257162 | 39 | 1796151 | 1796182 | 2 | 16 | 32 | GT   | 8  | 9  |
| 257163 | 39 | 1796409 | 1796422 | 2 | 7  | 14 | AG   | 33 | 4  |
| 257164 | 39 | 1799607 | 1799624 | 2 | 9  | 18 | GT   | 23 | 9  |
| 257172 | 39 | 1803077 | 1803090 | 2 | 7  | 14 | AG   | 27 | 4  |
| 257173 | 39 | 1803203 | 1803230 | 2 | 14 | 28 | TG   | 25 | 11 |
| 257175 | 39 | 1813597 | 1813618 | 2 | 11 | 22 | CA   | 19 | 11 |
| 257178 | 39 | 1822550 | 1822567 | 2 | 9  | 18 | CA   | 22 | 6  |
| 257179 | 39 | 1823236 | 1823255 | 4 | 5  | 20 | TGAA | 22 | 5  |
| 257181 | 39 | 1824645 | 1824656 | 2 | 6  | 12 | GT   | 23 | 3  |
| 257183 | 39 | 1825117 | 1825142 | 2 | 13 | 26 | AC   | 16 | 5  |
| 257185 | 39 | 1826951 | 1826968 | 3 | 6  | 18 | AAC  | 19 | 7  |
| 257187 | 39 | 1830836 | 1830869 | 2 | 17 | 34 | TC   | 18 | 12 |
| 257188 | 39 | 1832754 | 1832779 | 2 | 13 | 26 | GT   | 12 | 9  |
| 257194 | 39 | 1841538 | 1841567 | 2 | 15 | 30 | AC   | 13 | 7  |
| 257197 | 39 | 1844256 | 1844276 | 3 | 7  | 21 | CCT  | 28 | 3  |
| 257198 | 39 | 1845872 | 1845887 | 2 | 8  | 16 | AC   | 20 | 8  |
| 257199 | 39 | 1845963 | 1846000 | 2 | 19 | 38 | CA   | 9  | 12 |
| 257202 | 39 | 1851354 | 1851365 | 2 | 6  | 12 | CA   | 14 | 3  |
| 257206 | 39 | 1851993 | 1852013 | 3 | 7  | 21 | GCA  | 31 | 9  |
| 257208 | 39 | 1852889 | 1852902 | 2 | 7  | 14 | TG   | 29 | 9  |
| 257214 | 39 | 1865267 | 1865280 | 2 | 7  | 14 | CT   | 24 | 4  |
| 257216 | 39 | 1866276 | 1866293 | 2 | 9  | 18 | AC   | 27 | 5  |
| 257219 | 39 | 1872128 | 1872141 | 2 | 7  | 14 | AG   | 26 | 4  |
| 257220 | 39 | 1872217 | 1872232 | 2 | 8  | 16 | AC   | 18 | 4  |
| 257221 | 39 | 1874325 | 1874342 | 3 | 6  | 18 | TTG  | 20 | 8  |
| 257224 | 39 | 1879783 | 1879800 | 2 | 9  | 18 | CA   | 13 | 17 |
| 257229 | 39 | 1883975 | 1884000 | 2 | 13 | 26 | GA   | 7  | 6  |
| 257232 | 39 | 1885989 | 1886002 | 2 | 7  | 14 | CA   | 19 | 3  |
| 257236 | 39 | 1889268 | 1889281 | 2 | 7  | 14 | AC   | 25 | 4  |
| 257237 | 39 | 1889397 | 1889422 | 2 | 13 | 26 | AG   | 9  | 7  |
| 257242 | 39 | 1892813 | 1892824 | 2 | 6  | 12 | AC   | 19 | 6  |
| 257243 | 39 | 1899523 | 1899538 | 2 | 8  | 16 | TC   | 21 | 5  |
| 257246 | 39 | 1903415 | 1903446 | 2 | 16 | 32 | TG   | 6  | 8  |
| 257254 | 39 | 1936843 | 1936856 | 2 | 7  | 14 | TG   | 22 | 6  |
| 257255 | 39 | 1937430 | 1937447 | 3 | 6  | 18 | AGC  | 16 | 3  |
| 257257 | 39 | 1938018 | 1938029 | 2 | 6  | 12 | GT   | 12 | 6  |
| 257259 | 39 | 1943775 | 1943792 | 2 | 9  | 18 | GT   | 11 | 5  |
| 257261 | 39 | 1947180 | 1947193 | 2 | 7  | 14 | GT   | 23 | 9  |
| 257262 | 39 | 1947698 | 1947709 | 2 | 6  | 12 | CA   | 24 | 3  |
| 257263 | 39 | 1947789 | 1947802 | 2 | 7  | 14 | TG   | 19 | 4  |
| 257264 | 39 | 1947807 | 1947818 | 2 | 6  | 12 | TG   | 25 | 8  |
| 257265 | 39 | 1947897 | 1947910 | 2 | 7  | 14 | CA   | 19 | 13 |
| 257268 | 39 | 1952677 | 1952714 | 2 | 19 | 38 | TG   | 11 | 9  |
| 257269 | 39 | 1956602 | 1956621 | 2 | 10 | 20 | GT   | 21 | 7  |
| 257270 | 39 | 1956755 | 1956776 | 2 | 11 | 22 | AC   | 17 | 7  |
| 257272 | 39 | 1956825 | 1956836 | 2 | 6  | 12 | AC   | 19 | 3  |
| 257273 | 39 | 1956946 | 1956975 | 2 | 15 | 30 | AC   | 12 | 13 |
| 257274 | 39 | 1957275 | 1957302 | 2 | 14 | 28 | AC   | 10 | 9  |
| 257275 | 39 | 1957416 | 1957447 | 2 | 16 | 32 | AC   | 14 | 10 |
| 257280 | 39 | 1966849 | 1966874 | 2 | 13 | 26 | CA   | 16 | 7  |
| 257282 | 39 | 1968212 | 1968233 | 2 | 11 | 22 | TG   | 7  | 9  |

|        |    |         |         |   |    |    |      |    |    |
|--------|----|---------|---------|---|----|----|------|----|----|
| 257284 | 39 | 1974012 | 1974033 | 2 | 11 | 22 | AC   | 20 | 3  |
| 257288 | 39 | 1982607 | 1982622 | 2 | 8  | 16 | AC   | 9  | 13 |
| 257292 | 39 | 1986986 | 1987007 | 2 | 11 | 22 | GT   | 10 | 12 |
| 257293 | 39 | 1987092 | 1987111 | 2 | 10 | 20 | AC   | 13 | 5  |
| 257294 | 39 | 1987660 | 1987675 | 2 | 8  | 16 | AC   | 27 | 6  |
| 257297 | 39 | 1989282 | 1989313 | 2 | 16 | 32 | AC   | 6  | 6  |
| 257298 | 39 | 1989407 | 1989450 | 2 | 22 | 44 | GT   | 11 | 11 |
| 257299 | 39 | 1990781 | 1990794 | 2 | 7  | 14 | CA   | 21 | 4  |
| 257300 | 39 | 1990796 | 1990809 | 2 | 7  | 14 | AC   | 23 | 4  |
| 257303 | 39 | 1991732 | 1991747 | 2 | 8  | 16 | AC   | 8  | 4  |
| 257309 | 39 | 2002589 | 2002602 | 2 | 7  | 14 | CT   | 23 | 5  |
| 257310 | 39 | 2004870 | 2004885 | 2 | 8  | 16 | GT   | 21 | 5  |
| 257312 | 39 | 2008126 | 2008140 | 3 | 5  | 15 | CAT  | 21 | 3  |
| 257314 | 39 | 2012034 | 2012053 | 2 | 10 | 20 | CT   | 6  | 7  |
| 257320 | 39 | 2015848 | 2015859 | 2 | 6  | 12 | AC   | 12 | 6  |
| 257322 | 39 | 2017110 | 2017157 | 2 | 24 | 48 | GT   | 7  | 9  |
| 257323 | 39 | 2017354 | 2017377 | 2 | 12 | 24 | TG   | 12 | 4  |
| 257327 | 39 | 2018574 | 2018588 | 3 | 5  | 15 | GTG  | 23 | 6  |
| 257328 | 39 | 2018666 | 2018693 | 2 | 14 | 28 | GA   | 15 | 9  |
| 257331 | 39 | 2020544 | 2020561 | 2 | 9  | 18 | TG   | 24 | 6  |
| 257338 | 39 | 2029004 | 2029029 | 2 | 13 | 26 | CA   | 14 | 6  |
| 257341 | 39 | 2031781 | 2031802 | 2 | 11 | 22 | GT   | 17 | 7  |
| 257342 | 39 | 2031987 | 2032016 | 2 | 15 | 30 | GT   | 8  | 6  |
| 257349 | 39 | 2039034 | 2039059 | 2 | 13 | 26 | GT   | 18 | 11 |
| 257351 | 39 | 2039271 | 2039302 | 2 | 16 | 32 | CA   | 10 | 9  |
| 257353 | 39 | 2039569 | 2039586 | 2 | 9  | 18 | CA   | 26 | 7  |
| 257355 | 39 | 2039729 | 2039766 | 2 | 19 | 38 | TG   | 22 | 12 |
| 257356 | 39 | 2040473 | 2040488 | 2 | 8  | 16 | AT   | 12 | 8  |
| 257357 | 39 | 2041799 | 2041824 | 2 | 13 | 26 | GT   | 6  | 6  |
| 257358 | 39 | 2041994 | 2042013 | 2 | 10 | 20 | GT   | 10 | 5  |
| 257360 | 39 | 2042216 | 2042233 | 2 | 9  | 18 | CA   | 17 | 17 |
| 257361 | 39 | 2042528 | 2042548 | 3 | 7  | 21 | GGA  | 10 | 5  |
| 257362 | 39 | 2044321 | 2044332 | 2 | 6  | 12 | TG   | 22 | 4  |
| 257363 | 39 | 2044482 | 2044505 | 2 | 12 | 24 | GT   | 13 | 7  |
| 257365 | 39 | 2045844 | 2045867 | 2 | 12 | 24 | TG   | 27 | 7  |
| 257370 | 39 | 2050603 | 2050614 | 2 | 6  | 12 | GA   | 23 | 3  |
| 257371 | 39 | 2050883 | 2050896 | 2 | 7  | 14 | TG   | 22 | 3  |
| 257373 | 39 | 2052870 | 2052884 | 3 | 5  | 15 | ATT  | 25 | 10 |
| 257374 | 39 | 2053985 | 2054005 | 3 | 7  | 21 | GAT  | 23 | 4  |
| 257376 | 39 | 2056774 | 2056789 | 2 | 8  | 16 | CA   | 12 | 5  |
| 257378 | 39 | 2060988 | 2061007 | 4 | 5  | 20 | TTTA | 8  | 5  |
| 257379 | 39 | 2061714 | 2061725 | 2 | 6  | 12 | CA   | 19 | 3  |
| 257380 | 39 | 2061732 | 2061745 | 2 | 7  | 14 | CA   | 23 | 5  |
| 257382 | 39 | 2062226 | 2062245 | 2 | 10 | 20 | TG   | 22 | 9  |
| 257385 | 39 | 2064206 | 2064229 | 2 | 12 | 24 | TG   | 16 | 6  |
| 257389 | 39 | 2066773 | 2066800 | 2 | 14 | 28 | TG   | 8  | 6  |
| 257390 | 39 | 2066904 | 2066919 | 2 | 8  | 16 | AC   | 26 | 4  |
| 257391 | 39 | 2071040 | 2071066 | 3 | 9  | 27 | CAT  | 34 | 6  |
| 257393 | 39 | 2071758 | 2071772 | 3 | 5  | 15 | AAG  | 12 | 5  |
| 257398 | 39 | 2091268 | 2091283 | 2 | 8  | 16 | GT   | 22 | 3  |
| 257407 | 39 | 2103894 | 2103911 | 2 | 9  | 18 | GT   | 18 | 5  |

|        |    |         |         |   |    |    |      |    |    |
|--------|----|---------|---------|---|----|----|------|----|----|
| 257408 | 39 | 2104241 | 2104288 | 2 | 24 | 48 | TG   | 6  | 8  |
| 257409 | 39 | 2104551 | 2104572 | 2 | 11 | 22 | CA   | 14 | 8  |
| 257414 | 39 | 2109320 | 2109363 | 2 | 22 | 44 | TG   | 8  | 11 |
| 257415 | 39 | 2109490 | 2109509 | 2 | 10 | 20 | GT   | 16 | 6  |
| 257416 | 39 | 2109712 | 2109753 | 2 | 21 | 42 | AC   | 16 | 13 |
| 257418 | 39 | 2110437 | 2110448 | 2 | 6  | 12 | AC   | 22 | 6  |
| 257419 | 39 | 2110450 | 2110463 | 2 | 7  | 14 | CA   | 21 | 9  |
| 257423 | 39 | 2117299 | 2117314 | 2 | 8  | 16 | GT   | 18 | 3  |
| 257425 | 39 | 2118132 | 2118155 | 4 | 6  | 24 | TGAC | 28 | 3  |
| 257428 | 39 | 2123421 | 2123436 | 2 | 8  | 16 | TG   | 23 | 3  |
| 257429 | 39 | 2129353 | 2129368 | 2 | 8  | 16 | TG   | 18 | 5  |
| 257431 | 39 | 2134422 | 2134439 | 2 | 9  | 18 | TG   | 17 | 4  |
| 257432 | 39 | 2134616 | 2134633 | 2 | 9  | 18 | TG   | 30 | 4  |
| 257438 | 39 | 2148275 | 2148300 | 2 | 13 | 26 | CA   | 17 | 7  |
| 257439 | 39 | 2149703 | 2149714 | 2 | 6  | 12 | AC   | 13 | 3  |
| 257440 | 39 | 2150100 | 2150129 | 2 | 15 | 30 | AC   | 17 | 12 |
| 257441 | 39 | 2151773 | 2151802 | 2 | 15 | 30 | TG   | 9  | 11 |
| 257442 | 39 | 2151911 | 2151926 | 2 | 8  | 16 | GT   | 12 | 4  |
| 257443 | 39 | 2153182 | 2153203 | 2 | 11 | 22 | CA   | 24 | 9  |
| 257450 | 39 | 2167194 | 2167209 | 2 | 8  | 16 | TC   | 18 | 5  |
| 257452 | 39 | 2169611 | 2169631 | 3 | 7  | 21 | TGA  | 24 | 8  |
| 257464 | 39 | 2181385 | 2181398 | 2 | 7  | 14 | TG   | 18 | 8  |
| 257467 | 39 | 2190770 | 2190795 | 2 | 13 | 26 | AC   | 14 | 8  |
| 257468 | 39 | 2190874 | 2190907 | 2 | 17 | 34 | CA   | 19 | 9  |
| 257471 | 39 | 2195628 | 2195663 | 2 | 18 | 36 | CA   | 11 | 11 |
| 257480 | 39 | 2204145 | 2204170 | 2 | 13 | 26 | GT   | 14 | 13 |
| 257481 | 39 | 2204470 | 2204495 | 2 | 13 | 26 | TG   | 11 | 8  |
| 257483 | 39 | 2204701 | 2204716 | 4 | 4  | 16 | CACG | 22 | 9  |
| 257484 | 39 | 2204717 | 2204728 | 2 | 6  | 12 | CA   | 23 | 6  |
| 257485 | 39 | 2204927 | 2204940 | 2 | 7  | 14 | GA   | 13 | 3  |
| 257493 | 39 | 2207770 | 2207781 | 2 | 6  | 12 | CA   | 24 | 4  |
| 257495 | 39 | 2209405 | 2209418 | 2 | 7  | 14 | AT   | 16 | 4  |
| 257498 | 39 | 2212672 | 2212697 | 2 | 13 | 26 | CA   | 12 | 11 |
| 257500 | 39 | 2217582 | 2217603 | 2 | 11 | 22 | AC   | 20 | 6  |
| 257505 | 39 | 2227905 | 2227924 | 4 | 5  | 20 | CAGA | 28 | 3  |
| 257508 | 39 | 2239889 | 2239906 | 2 | 9  | 18 | GT   | 19 | 9  |
| 257517 | 39 | 2266978 | 2266991 | 2 | 7  | 14 | AC   | 20 | 3  |
| 257520 | 39 | 2274141 | 2274160 | 2 | 10 | 20 | TG   | 14 | 6  |
| 257532 | 39 | 2307246 | 2307269 | 3 | 8  | 24 | ATC  | 23 | 5  |
| 257533 | 39 | 2311428 | 2311439 | 2 | 6  | 12 | CA   | 28 | 3  |
| 257534 | 39 | 2312466 | 2312485 | 2 | 10 | 20 | AC   | 27 | 7  |
| 257535 | 39 | 2316895 | 2316928 | 2 | 17 | 34 | TG   | 15 | 10 |
| 257536 | 39 | 2320519 | 2320534 | 2 | 8  | 16 | AC   | 22 | 3  |
| 257537 | 39 | 2321689 | 2321708 | 4 | 5  | 20 | CAAC | 23 | 6  |
| 257538 | 39 | 2324972 | 2324983 | 2 | 6  | 12 | TA   | 18 | 3  |
| 257539 | 39 | 2328573 | 2328594 | 2 | 11 | 22 | AG   | 16 | 6  |
| 257552 | 39 | 2339613 | 2339636 | 2 | 12 | 24 | TG   | 20 | 9  |
| 257554 | 39 | 2346460 | 2346481 | 2 | 11 | 22 | CA   | 12 | 14 |
| 257555 | 39 | 2350425 | 2350442 | 3 | 6  | 18 | GCA  | 33 | 3  |
| 257556 | 39 | 2350732 | 2350759 | 2 | 14 | 28 | CT   | 10 | 8  |
| 257557 | 39 | 2353261 | 2353272 | 2 | 6  | 12 | AC   | 20 | 8  |

|        |    |         |         |   |    |    |      |    |    |
|--------|----|---------|---------|---|----|----|------|----|----|
| 257560 | 39 | 2355763 | 2355788 | 2 | 13 | 26 | TG   | 10 | 10 |
| 257561 | 39 | 2355892 | 2355907 | 2 | 8  | 16 | CT   | 21 | 6  |
| 257563 | 39 | 2357447 | 2357482 | 2 | 18 | 36 | CA   | 18 | 18 |
| 257569 | 39 | 2380616 | 2380653 | 2 | 19 | 38 | AC   | 6  | 7  |
| 257573 | 39 | 2388656 | 2388673 | 3 | 6  | 18 | TTC  | 20 | 7  |
| 257574 | 39 | 2389715 | 2389738 | 3 | 8  | 24 | TCC  | 25 | 3  |
| 257575 | 39 | 2392187 | 2392224 | 2 | 19 | 38 | TG   | 7  | 6  |
| 257578 | 39 | 2393351 | 2393362 | 2 | 6  | 12 | CA   | 35 | 3  |
| 257580 | 39 | 2396948 | 2396975 | 2 | 14 | 28 | GT   | 12 | 15 |
| 257586 | 39 | 2425010 | 2425029 | 2 | 10 | 20 | AC   | 20 | 12 |
| 257592 | 39 | 2433275 | 2433288 | 2 | 7  | 14 | AC   | 31 | 3  |
| 257597 | 39 | 2447735 | 2447748 | 2 | 7  | 14 | TG   | 21 | 3  |
| 257607 | 39 | 2483338 | 2483364 | 3 | 9  | 27 | ATG  | 24 | 4  |
| 257610 | 39 | 2489997 | 2490024 | 2 | 14 | 28 | TG   | 18 | 12 |
| 257624 | 39 | 2541697 | 2541712 | 4 | 4  | 16 | AAAT | 19 | 7  |
| 257630 | 39 | 2550197 | 2550212 | 4 | 4  | 16 | TCTT | 13 | 3  |
| 257633 | 39 | 2553758 | 2553789 | 2 | 16 | 32 | CA   | 19 | 8  |
| 257636 | 39 | 2556939 | 2556953 | 3 | 5  | 15 | GGT  | 21 | 3  |
| 257639 | 39 | 2560005 | 2560028 | 2 | 12 | 24 | TG   | 7  | 9  |
| 257650 | 39 | 2584420 | 2584453 | 2 | 17 | 34 | TG   | 8  | 9  |
| 257652 | 39 | 2588381 | 2588392 | 2 | 6  | 12 | AC   | 26 | 4  |
| 257654 | 39 | 2592588 | 2592617 | 2 | 15 | 30 | CA   | 10 | 13 |
| 257668 | 39 | 2605808 | 2605833 | 2 | 13 | 26 | GA   | 19 | 12 |
| 257673 | 39 | 2631394 | 2631433 | 2 | 20 | 40 | GT   | 13 | 9  |
| 257695 | 39 | 2683446 | 2683463 | 3 | 6  | 18 | GCA  | 28 | 4  |
| 257696 | 39 | 2684714 | 2684769 | 2 | 28 | 56 | TG   | 8  | 9  |
| 257698 | 39 | 2687179 | 2687198 | 2 | 10 | 20 | TG   | 10 | 5  |
| 257704 | 39 | 2693695 | 2693718 | 3 | 8  | 24 | AGG  | 13 | 4  |
| 257708 | 39 | 2699238 | 2699253 | 2 | 8  | 16 | CA   | 17 | 5  |
| 257712 | 39 | 2701777 | 2701790 | 2 | 7  | 14 | TC   | 29 | 3  |
| 257717 | 39 | 2712985 | 2712996 | 2 | 6  | 12 | GT   | 33 | 4  |
| 257718 | 39 | 2713094 | 2713117 | 2 | 12 | 24 | TG   | 6  | 6  |
| 257724 | 39 | 2718326 | 2718347 | 2 | 11 | 22 | TG   | 24 | 8  |
| 257729 | 39 | 2728164 | 2728181 | 2 | 9  | 18 | GA   | 12 | 6  |
| 257730 | 39 | 2728280 | 2728293 | 2 | 7  | 14 | CA   | 24 | 4  |
| 257731 | 39 | 2728440 | 2728455 | 2 | 8  | 16 | CA   | 25 | 4  |
| 257733 | 39 | 2730452 | 2730465 | 2 | 7  | 14 | GT   | 20 | 5  |
| 257734 | 39 | 2730684 | 2730699 | 2 | 8  | 16 | TG   | 13 | 4  |
| 257736 | 39 | 2734113 | 2734140 | 2 | 14 | 28 | CA   | 12 | 11 |
| 257738 | 39 | 2737426 | 2737475 | 2 | 25 | 50 | CA   | 9  | 13 |
| 257741 | 39 | 2743554 | 2743571 | 2 | 9  | 18 | TG   | 13 | 12 |
| 257742 | 39 | 2743740 | 2743781 | 2 | 21 | 42 | AC   | 8  | 12 |
| 257745 | 39 | 2749453 | 2749482 | 2 | 15 | 30 | CA   | 13 | 12 |
| 257749 | 39 | 2750479 | 2750504 | 2 | 13 | 26 | TG   | 8  | 8  |
| 257752 | 39 | 2757761 | 2757780 | 2 | 10 | 20 | AC   | 20 | 9  |
| 257754 | 39 | 2758083 | 2758094 | 2 | 6  | 12 | AC   | 15 | 3  |
| 257759 | 39 | 2768244 | 2768255 | 2 | 6  | 12 | GT   | 22 | 7  |
| 257761 | 39 | 2769817 | 2769836 | 2 | 10 | 20 | AC   | 21 | 9  |
| 257763 | 39 | 2775729 | 2775748 | 2 | 10 | 20 | AG   | 7  | 3  |
| 257764 | 39 | 2776244 | 2776271 | 2 | 14 | 28 | TG   | 16 | 6  |
| 257765 | 39 | 2777594 | 2777605 | 2 | 6  | 12 | AC   | 22 | 3  |

|        |    |         |         |   |    |    |      |    |    |
|--------|----|---------|---------|---|----|----|------|----|----|
| 257769 | 39 | 2787106 | 2787125 | 4 | 5  | 20 | GTCT | 27 | 5  |
| 257770 | 39 | 2793637 | 2793651 | 3 | 5  | 15 | AAG  | 30 | 3  |
| 257771 | 39 | 2794452 | 2794467 | 4 | 4  | 16 | AAAC | 27 | 3  |
| 257773 | 39 | 2796680 | 2796705 | 2 | 13 | 26 | AC   | 13 | 8  |
| 257778 | 39 | 2800794 | 2800805 | 2 | 6  | 12 | CA   | 23 | 14 |
| 257782 | 39 | 2810757 | 2810776 | 2 | 10 | 20 | CA   | 25 | 8  |
| 257783 | 39 | 2810953 | 2810964 | 2 | 6  | 12 | TG   | 27 | 4  |
| 257788 | 39 | 2815129 | 2815156 | 2 | 14 | 28 | GT   | 17 | 10 |
| 257789 | 39 | 2821129 | 2821148 | 2 | 10 | 20 | GT   | 10 | 7  |
| 257792 | 39 | 2827091 | 2827108 | 2 | 9  | 18 | AG   | 18 | 3  |
| 257799 | 39 | 2850462 | 2850485 | 2 | 12 | 24 | TG   | 13 | 7  |
| 257806 | 39 | 2869774 | 2869799 | 2 | 13 | 26 | TG   | 15 | 14 |
| 257807 | 39 | 2877884 | 2877907 | 4 | 6  | 24 | CATC | 22 | 6  |
| 257811 | 39 | 2881420 | 2881443 | 2 | 12 | 24 | TG   | 6  | 6  |
| 257813 | 39 | 2885527 | 2885540 | 2 | 7  | 14 | TC   | 26 | 4  |
| 257816 | 39 | 2892971 | 2892982 | 2 | 6  | 12 | AC   | 13 | 7  |
| 257822 | 39 | 2897032 | 2897043 | 2 | 6  | 12 | CA   | 24 | 3  |
| 257823 | 39 | 2897658 | 2897673 | 4 | 4  | 16 | AGCG | 20 | 6  |
| 257825 | 39 | 2899898 | 2899925 | 4 | 7  | 28 | GAAA | 20 | 12 |
| 257832 | 39 | 2912233 | 2912256 | 2 | 12 | 24 | AC   | 15 | 10 |
| 257849 | 39 | 2924294 | 2924327 | 2 | 17 | 34 | GT   | 8  | 8  |
| 257853 | 39 | 2928099 | 2928110 | 2 | 6  | 12 | TG   | 21 | 3  |
| 257854 | 39 | 2928401 | 2928422 | 2 | 11 | 22 | AC   | 16 | 10 |
| 257855 | 39 | 2932804 | 2932815 | 2 | 6  | 12 | GT   | 20 | 3  |
| 257857 | 39 | 2934132 | 2934143 | 2 | 6  | 12 | TG   | 27 | 3  |
| 257858 | 39 | 2935224 | 2935245 | 2 | 11 | 22 | TG   | 19 | 5  |
| 257859 | 39 | 2936851 | 2936894 | 2 | 22 | 44 | TG   | 13 | 10 |
| 257866 | 39 | 2949044 | 2949058 | 3 | 5  | 15 | TTG  | 29 | 4  |
| 257869 | 39 | 2954269 | 2954286 | 2 | 9  | 18 | GA   | 22 | 4  |
| 257878 | 39 | 2980799 | 2980824 | 2 | 13 | 26 | TG   | 19 | 7  |
| 257879 | 39 | 2982572 | 2982591 | 2 | 10 | 20 | TG   | 22 | 5  |
| 257880 | 39 | 2983374 | 2983389 | 2 | 8  | 16 | TA   | 9  | 6  |
| 257884 | 39 | 2989569 | 2989594 | 2 | 13 | 26 | TG   | 13 | 10 |
| 257887 | 39 | 2994074 | 2994105 | 2 | 16 | 32 | TG   | 19 | 15 |
| 257888 | 39 | 2994468 | 2994493 | 2 | 13 | 26 | TG   | 11 | 10 |
| 257890 | 39 | 2994635 | 2994670 | 2 | 18 | 36 | GT   | 21 | 12 |
| 257895 | 39 | 2996881 | 2996894 | 2 | 7  | 14 | CA   | 20 | 3  |
| 257897 | 39 | 3000970 | 3001007 | 2 | 19 | 38 | GT   | 13 | 8  |
| 257898 | 39 | 3001467 | 3001480 | 2 | 7  | 14 | AT   | 8  | 6  |
| 257904 | 39 | 3013387 | 3013402 | 2 | 8  | 16 | GT   | 30 | 8  |
| 257905 | 39 | 3014068 | 3014087 | 2 | 10 | 20 | CA   | 18 | 7  |
| 257907 | 39 | 3018589 | 3018602 | 2 | 7  | 14 | GT   | 24 | 6  |
| 257911 | 39 | 3020375 | 3020416 | 2 | 21 | 42 | GT   | 8  | 8  |
| 257912 | 39 | 3029477 | 3029528 | 2 | 26 | 52 | CA   | 14 | 9  |
| 257913 | 39 | 3029881 | 3029898 | 2 | 9  | 18 | GT   | 24 | 7  |
| 257914 | 39 | 3030372 | 3030385 | 2 | 7  | 14 | GT   | 27 | 11 |
| 257917 | 39 | 3040940 | 3040997 | 2 | 29 | 58 | TG   | 8  | 12 |
| 257918 | 39 | 3042085 | 3042096 | 2 | 6  | 12 | GC   | 9  | 9  |
| 257921 | 39 | 3044697 | 3044708 | 2 | 6  | 12 | TG   | 22 | 3  |
| 257923 | 39 | 3050932 | 3050957 | 2 | 13 | 26 | GT   | 19 | 7  |
| 257924 | 39 | 3051108 | 3051125 | 2 | 9  | 18 | AC   | 23 | 3  |

|        |    |         |         |   |    |    |      |    |    |
|--------|----|---------|---------|---|----|----|------|----|----|
| 257925 | 39 | 3053275 | 3053314 | 2 | 20 | 40 | TG   | 16 | 11 |
| 257926 | 39 | 3055548 | 3055591 | 2 | 22 | 44 | AC   | 14 | 11 |
| 257933 | 39 | 3066947 | 3066978 | 4 | 8  | 32 | GATG | 24 | 8  |
| 257935 | 39 | 3068340 | 3068383 | 2 | 22 | 44 | GT   | 6  | 7  |
| 257936 | 39 | 3075609 | 3075640 | 2 | 16 | 32 | AG   | 9  | 11 |
| 257940 | 39 | 3088642 | 3088675 | 2 | 17 | 34 | AC   | 12 | 6  |
| 257941 | 39 | 3096998 | 3097013 | 2 | 8  | 16 | GT   | 25 | 4  |
| 257951 | 39 | 3107495 | 3107510 | 2 | 8  | 16 | CT   | 21 | 5  |
| 257956 | 39 | 3114404 | 3114423 | 2 | 10 | 20 | TG   | 10 | 9  |
| 257963 | 39 | 3133650 | 3133669 | 2 | 10 | 20 | AC   | 20 | 7  |
| 257964 | 39 | 3135771 | 3135812 | 2 | 21 | 42 | AC   | 11 | 10 |
| 257972 | 39 | 3158812 | 3158839 | 2 | 14 | 28 | AC   | 13 | 13 |
| 257976 | 39 | 3165448 | 3165459 | 2 | 6  | 12 | CA   | 12 | 3  |
| 257977 | 39 | 3165712 | 3165723 | 2 | 6  | 12 | CA   | 21 | 3  |
| 257979 | 39 | 3166327 | 3166354 | 2 | 14 | 28 | AC   | 17 | 8  |
| 257980 | 39 | 3166466 | 3166489 | 2 | 12 | 24 | GT   | 11 | 5  |
| 257987 | 39 | 3179386 | 3179403 | 2 | 9  | 18 | AC   | 27 | 7  |
| 257990 | 39 | 3187426 | 3187451 | 2 | 13 | 26 | GT   | 12 | 10 |
| 257991 | 39 | 3188300 | 3188335 | 2 | 18 | 36 | AG   | 11 | 10 |
| 257993 | 39 | 3196085 | 3196096 | 2 | 6  | 12 | AC   | 21 | 6  |
| 257995 | 39 | 3196225 | 3196244 | 2 | 10 | 20 | AG   | 26 | 3  |
| 257996 | 39 | 3196427 | 3196438 | 2 | 6  | 12 | GT   | 33 | 4  |
| 257998 | 39 | 3201990 | 3202007 | 2 | 9  | 18 | CA   | 22 | 6  |
| 258002 | 39 | 3207486 | 3207499 | 2 | 7  | 14 | GA   | 25 | 5  |
| 258003 | 39 | 3207502 | 3207515 | 2 | 7  | 14 | GA   | 22 | 5  |
| 258004 | 39 | 3208144 | 3208175 | 2 | 16 | 32 | AC   | 7  | 9  |
| 258006 | 39 | 3208519 | 3208568 | 2 | 25 | 50 | TG   | 7  | 9  |
| 258007 | 39 | 3209826 | 3209837 | 2 | 6  | 12 | CA   | 26 | 3  |
| 258011 | 39 | 3212440 | 3212471 | 2 | 16 | 32 | AC   | 8  | 8  |
| 258012 | 39 | 3212748 | 3212807 | 3 | 20 | 60 | GAA  | 17 | 13 |
| 258013 | 39 | 3215659 | 3215679 | 3 | 7  | 21 | GCA  | 28 | 4  |
| 258024 | 39 | 3229092 | 3229119 | 2 | 14 | 28 | CA   | 11 | 11 |
| 258030 | 39 | 3262125 | 3262138 | 2 | 7  | 14 | AT   | 16 | 8  |
| 258031 | 39 | 3268494 | 3268511 | 3 | 6  | 18 | GAA  | 12 | 3  |
| 258032 | 39 | 3270709 | 3270724 | 4 | 4  | 16 | TCAA | 27 | 3  |
| 258037 | 39 | 3277543 | 3277558 | 4 | 4  | 16 | TGTT | 24 | 8  |
| 258038 | 39 | 3278491 | 3278518 | 2 | 14 | 28 | CA   | 15 | 8  |
| 258039 | 39 | 3282136 | 3282163 | 2 | 14 | 28 | CT   | 12 | 7  |
| 258041 | 39 | 3292449 | 3292470 | 2 | 11 | 22 | GT   | 19 | 7  |
| 258042 | 39 | 3293434 | 3293467 | 2 | 17 | 34 | GT   | 11 | 7  |
| 258059 | 39 | 3311402 | 3311413 | 2 | 6  | 12 | AC   | 22 | 5  |
| 258060 | 39 | 3315993 | 3316004 | 2 | 6  | 12 | CA   | 29 | 3  |
| 258064 | 39 | 3318829 | 3318858 | 2 | 15 | 30 | CT   | 14 | 5  |
| 258068 | 39 | 3324433 | 3324444 | 2 | 6  | 12 | AC   | 23 | 6  |
| 258078 | 39 | 3348818 | 3348833 | 2 | 8  | 16 | AG   | 23 | 4  |
| 258079 | 39 | 3353904 | 3353915 | 2 | 6  | 12 | GA   | 30 | 5  |
| 258086 | 39 | 3359215 | 3359230 | 2 | 8  | 16 | GA   | 19 | 5  |
| 258088 | 39 | 3359338 | 3359361 | 2 | 12 | 24 | GA   | 9  | 4  |
| 258090 | 39 | 3369384 | 3369419 | 2 | 18 | 36 | TG   | 12 | 12 |
| 258095 | 39 | 3376131 | 3376158 | 2 | 14 | 28 | AC   | 18 | 4  |
| 258096 | 39 | 3376701 | 3376740 | 2 | 20 | 40 | AC   | 15 | 16 |

|        |    |         |         |   |    |    |      |    |    |
|--------|----|---------|---------|---|----|----|------|----|----|
| 258098 | 39 | 3377906 | 3377929 | 4 | 6  | 24 | ATAA | 28 | 4  |
| 258105 | 39 | 3394269 | 3394286 | 2 | 9  | 18 | GT   | 26 | 6  |
| 258113 | 39 | 3405650 | 3405663 | 2 | 7  | 14 | TG   | 28 | 3  |
| 258115 | 39 | 3419410 | 3419429 | 2 | 10 | 20 | CA   | 7  | 5  |
| 258132 | 39 | 3448264 | 3448291 | 2 | 14 | 28 | AC   | 12 | 8  |
| 258133 | 39 | 3448857 | 3448886 | 2 | 15 | 30 | CA   | 6  | 8  |
| 258151 | 39 | 3482261 | 3482281 | 3 | 7  | 21 | TGC  | 22 | 14 |
| 258154 | 39 | 3482627 | 3482644 | 2 | 9  | 18 | CA   | 7  | 7  |
| 258165 | 39 | 3489307 | 3489328 | 2 | 11 | 22 | GT   | 25 | 10 |
| 258166 | 39 | 3489461 | 3489475 | 3 | 5  | 15 | ATT  | 23 | 3  |
| 258175 | 39 | 3514928 | 3514947 | 2 | 10 | 20 | TG   | 25 | 5  |
| 258176 | 39 | 3518050 | 3518113 | 2 | 32 | 64 | GT   | 13 | 12 |
| 258182 | 39 | 3546468 | 3546507 | 4 | 10 | 40 | ATGG | 14 | 13 |
| 258188 | 39 | 3566752 | 3566775 | 2 | 12 | 24 | TG   | 17 | 11 |
| 258193 | 39 | 3570212 | 3570227 | 4 | 4  | 16 | TTTC | 23 | 6  |
| 258199 | 39 | 3576807 | 3576818 | 2 | 6  | 12 | AC   | 18 | 4  |
| 258200 | 39 | 3577440 | 3577451 | 2 | 6  | 12 | CA   | 17 | 4  |
| 258201 | 39 | 3577454 | 3577467 | 2 | 7  | 14 | CA   | 19 | 4  |
| 258212 | 39 | 3597602 | 3597613 | 2 | 6  | 12 | CA   | 23 | 3  |
| 258213 | 39 | 3597915 | 3597932 | 2 | 9  | 18 | TG   | 19 | 4  |
| 258214 | 39 | 3598025 | 3598039 | 3 | 5  | 15 | ATA  | 28 | 3  |
| 258215 | 39 | 3598126 | 3598141 | 2 | 8  | 16 | AC   | 26 | 6  |
| 258216 | 39 | 3600591 | 3600614 | 2 | 12 | 24 | TG   | 17 | 8  |
| 258220 | 39 | 3607720 | 3607749 | 2 | 15 | 30 | AC   | 13 | 7  |
| 258231 | 39 | 3617866 | 3617883 | 2 | 9  | 18 | CA   | 15 | 10 |
| 258234 | 39 | 3629248 | 3629277 | 2 | 15 | 30 | TG   | 17 | 11 |
| 258235 | 39 | 3630009 | 3630026 | 2 | 9  | 18 | GT   | 22 | 9  |
| 258236 | 39 | 3631376 | 3631387 | 2 | 6  | 12 | CA   | 30 | 4  |
| 258240 | 39 | 3633590 | 3633609 | 2 | 10 | 20 | CA   | 23 | 6  |
| 258242 | 39 | 3634947 | 3634982 | 2 | 18 | 36 | AC   | 33 | 10 |
| 258243 | 39 | 3636534 | 3636547 | 2 | 7  | 14 | AC   | 21 | 3  |
| 258247 | 39 | 3638399 | 3638428 | 2 | 15 | 30 | TG   | 15 | 11 |
| 258248 | 39 | 3639652 | 3639677 | 2 | 13 | 26 | TG   | 14 | 13 |
| 258249 | 39 | 3640509 | 3640526 | 2 | 9  | 18 | GT   | 12 | 5  |
| 258252 | 39 | 3641118 | 3641133 | 2 | 8  | 16 | AC   | 21 | 3  |
| 258253 | 39 | 3641267 | 3641306 | 2 | 20 | 40 | CA   | 13 | 11 |
| 258255 | 39 | 3647850 | 3647870 | 3 | 7  | 21 | TCT  | 30 | 6  |
| 258256 | 39 | 3650051 | 3650066 | 2 | 8  | 16 | TG   | 19 | 7  |
| 258259 | 39 | 3653543 | 3653566 | 2 | 12 | 24 | AC   | 6  | 8  |
| 258261 | 39 | 3655651 | 3655678 | 2 | 14 | 28 | CA   | 15 | 9  |
| 258266 | 39 | 3660163 | 3660222 | 2 | 30 | 60 | CA   | 7  | 12 |
| 258267 | 39 | 3660852 | 3660867 | 4 | 4  | 16 | ATTT | 25 | 3  |
| 258269 | 39 | 3662041 | 3662064 | 2 | 12 | 24 | TG   | 16 | 8  |
| 258273 | 39 | 3669876 | 3669905 | 2 | 15 | 30 | AC   | 14 | 12 |
| 258275 | 39 | 3672043 | 3672058 | 2 | 8  | 16 | TG   | 22 | 3  |
| 258276 | 39 | 3672304 | 3672323 | 2 | 10 | 20 | TC   | 22 | 7  |
| 258277 | 39 | 3672373 | 3672392 | 2 | 10 | 20 | CT   | 23 | 4  |
| 258283 | 39 | 3675266 | 3675297 | 2 | 16 | 32 | GT   | 12 | 10 |
| 258287 | 39 | 3685810 | 3685833 | 2 | 12 | 24 | TG   | 29 | 7  |
| 258290 | 39 | 3689637 | 3689652 | 2 | 8  | 16 | CA   | 11 | 5  |
| 258291 | 39 | 3692146 | 3692161 | 2 | 8  | 16 | TG   | 18 | 3  |



|        |    |         |         |   |    |    |      |    |    |
|--------|----|---------|---------|---|----|----|------|----|----|
| 258293 | 39 | 3692854 | 3692869 | 4 | 4  | 16 | CTGT | 22 | 5  |
| 258298 | 39 | 3698881 | 3698900 | 2 | 10 | 20 | TG   | 23 | 6  |
| 258299 | 39 | 3699055 | 3699070 | 2 | 8  | 16 | GT   | 31 | 6  |
| 258300 | 39 | 3700734 | 3700757 | 2 | 12 | 24 | TG   | 16 | 12 |
| 258301 | 39 | 3700914 | 3700935 | 2 | 11 | 22 | TC   | 13 | 12 |
| 258302 | 39 | 3701054 | 3701071 | 2 | 9  | 18 | GT   | 20 | 7  |
| 258303 | 39 | 3709885 | 3709896 | 2 | 6  | 12 | AC   | 22 | 3  |
| 258304 | 39 | 3710027 | 3710044 | 2 | 9  | 18 | CA   | 22 | 5  |
| 258306 | 39 | 3710325 | 3710346 | 2 | 11 | 22 | AC   | 12 | 7  |
| 258321 | 39 | 3740230 | 3740245 | 4 | 4  | 16 | TTTG | 21 | 8  |
| 258335 | 39 | 3757355 | 3757378 | 2 | 12 | 24 | TC   | 10 | 9  |
| 258336 | 39 | 3759633 | 3759646 | 2 | 7  | 14 | GT   | 7  | 4  |
| 258340 | 39 | 3764544 | 3764559 | 2 | 8  | 16 | TG   | 18 | 6  |
| 258345 | 39 | 3775126 | 3775151 | 2 | 13 | 26 | GT   | 7  | 6  |
| 258349 | 39 | 3776891 | 3776912 | 2 | 11 | 22 | TG   | 7  | 6  |
| 258350 | 39 | 3778582 | 3778595 | 2 | 7  | 14 | GT   | 19 | 5  |
| 258354 | 39 | 3780708 | 3780719 | 2 | 6  | 12 | TG   | 23 | 4  |
| 258359 | 39 | 3785305 | 3785336 | 2 | 16 | 32 | TG   | 10 | 6  |
| 258363 | 39 | 3790434 | 3790457 | 3 | 8  | 24 | GTG  | 22 | 5  |
| 258364 | 39 | 3790694 | 3790705 | 2 | 6  | 12 | TA   | 28 | 4  |
| 258365 | 39 | 3795499 | 3795528 | 2 | 15 | 30 | GT   | 17 | 6  |
| 258368 | 39 | 3797157 | 3797170 | 2 | 7  | 14 | CA   | 22 | 3  |
| 258370 | 39 | 3801960 | 3801977 | 3 | 6  | 18 | CTT  | 30 | 4  |
| 258371 | 39 | 3806253 | 3806288 | 2 | 18 | 36 | TG   | 9  | 10 |
| 258372 | 39 | 3808238 | 3808252 | 3 | 5  | 15 | GCG  | 31 | 5  |
| 258373 | 39 | 3816479 | 3816492 | 2 | 7  | 14 | GT   | 16 | 6  |
| 258374 | 39 | 3821183 | 3821196 | 2 | 7  | 14 | TC   | 23 | 4  |
| 258377 | 39 | 3825819 | 3825832 | 2 | 7  | 14 | TG   | 21 | 4  |
| 258378 | 39 | 3825919 | 3825948 | 3 | 10 | 30 | TTA  | 16 | 7  |
| 258380 | 39 | 3830081 | 3830106 | 2 | 13 | 26 | CA   | 14 | 10 |
| 258383 | 39 | 3836607 | 3836632 | 2 | 13 | 26 | TG   | 16 | 11 |
| 258387 | 39 | 3843883 | 3843896 | 2 | 7  | 14 | TG   | 26 | 4  |
| 258388 | 39 | 3845620 | 3845631 | 2 | 6  | 12 | GA   | 28 | 4  |
| 258389 | 39 | 3845905 | 3845924 | 4 | 5  | 20 | GGCA | 23 | 8  |
| 258391 | 39 | 3846356 | 3846379 | 2 | 12 | 24 | CA   | 16 | 11 |
| 258400 | 39 | 3850913 | 3850930 | 2 | 9  | 18 | GT   | 16 | 6  |
| 258401 | 39 | 3851279 | 3851298 | 2 | 10 | 20 | CA   | 12 | 10 |
| 258403 | 39 | 3852975 | 3853000 | 2 | 13 | 26 | TG   | 9  | 7  |
| 258405 | 39 | 3857632 | 3857661 | 2 | 15 | 30 | CA   | 6  | 7  |
| 258408 | 39 | 3862279 | 3862296 | 2 | 9  | 18 | AC   | 14 | 8  |
| 258410 | 39 | 3866009 | 3866024 | 2 | 8  | 16 | TG   | 22 | 4  |
| 258414 | 39 | 3871641 | 3871654 | 2 | 7  | 14 | GT   | 15 | 5  |
| 258417 | 39 | 3879844 | 3879883 | 2 | 20 | 40 | CA   | 13 | 12 |
| 258419 | 39 | 3880579 | 3880590 | 2 | 6  | 12 | GT   | 28 | 3  |
| 258421 | 39 | 3881096 | 3881121 | 2 | 13 | 26 | AC   | 16 | 12 |
| 258427 | 39 | 3884940 | 3884951 | 2 | 6  | 12 | AG   | 7  | 3  |
| 258431 | 39 | 3891332 | 3891371 | 2 | 20 | 40 | CA   | 12 | 11 |
| 258433 | 39 | 3892338 | 3892349 | 2 | 6  | 12 | GT   | 31 | 4  |
| 258434 | 39 | 3892422 | 3892441 | 4 | 5  | 20 | TCTG | 20 | 5  |
| 258439 | 39 | 3898376 | 3898387 | 2 | 6  | 12 | GA   | 26 | 5  |
| 258440 | 39 | 3900608 | 3900635 | 2 | 14 | 28 | AC   | 16 | 5  |

|        |    |         |         |   |    |    |      |    |    |
|--------|----|---------|---------|---|----|----|------|----|----|
| 258445 | 39 | 3906670 | 3906693 | 2 | 12 | 24 | TG   | 12 | 6  |
| 258446 | 39 | 3906835 | 3906848 | 2 | 7  | 14 | TC   | 8  | 4  |
| 258450 | 39 | 3912101 | 3912112 | 2 | 6  | 12 | GT   | 18 | 8  |
| 258451 | 39 | 3912222 | 3912260 | 3 | 13 | 39 | TCC  | 6  | 7  |
| 258453 | 39 | 3915456 | 3915487 | 2 | 16 | 32 | CA   | 6  | 8  |
| 258455 | 39 | 3919775 | 3919818 | 2 | 22 | 44 | TG   | 12 | 11 |
| 258456 | 39 | 3920479 | 3920502 | 3 | 8  | 24 | CTC  | 11 | 4  |
| 258460 | 39 | 3923134 | 3923153 | 2 | 10 | 20 | AC   | 10 | 9  |
| 258461 | 39 | 3923155 | 3923170 | 2 | 8  | 16 | CA   | 13 | 13 |
| 258464 | 39 | 3925235 | 3925246 | 2 | 6  | 12 | CA   | 24 | 3  |
| 258471 | 39 | 3930799 | 3930826 | 2 | 14 | 28 | AC   | 24 | 10 |
| 258475 | 39 | 3933074 | 3933093 | 2 | 10 | 20 | TG   | 23 | 9  |
| 258479 | 39 | 3936208 | 3936221 | 2 | 7  | 14 | GA   | 25 | 11 |
| 258480 | 39 | 3936223 | 3936240 | 2 | 9  | 18 | GT   | 18 | 7  |
| 258482 | 39 | 3938258 | 3938279 | 2 | 11 | 22 | AG   | 12 | 6  |
| 258483 | 39 | 3938449 | 3938476 | 2 | 14 | 28 | AC   | 7  | 7  |
| 258485 | 39 | 3940533 | 3940544 | 2 | 6  | 12 | CA   | 17 | 4  |
| 258487 | 39 | 3946802 | 3946815 | 2 | 7  | 14 | AC   | 27 | 4  |
| 258496 | 39 | 3974407 | 3974444 | 2 | 19 | 38 | GT   | 12 | 9  |
| 258504 | 39 | 3989009 | 3989024 | 4 | 4  | 16 | TTTG | 23 | 3  |
| 258506 | 39 | 3989743 | 3989760 | 2 | 9  | 18 | AC   | 25 | 11 |
| 258507 | 39 | 3997542 | 3997553 | 2 | 6  | 12 | AT   | 19 | 3  |
| 258513 | 39 | 4007363 | 4007374 | 2 | 6  | 12 | AG   | 25 | 3  |
| 258514 | 39 | 4007488 | 4007508 | 3 | 7  | 21 | GCA  | 30 | 6  |
| 258518 | 39 | 4012875 | 4012890 | 2 | 8  | 16 | TC   | 27 | 4  |
| 258519 | 39 | 4014644 | 4014661 | 3 | 6  | 18 | CAG  | 28 | 3  |
| 258522 | 39 | 4015887 | 4015918 | 2 | 16 | 32 | AC   | 11 | 14 |
| 258526 | 39 | 4023431 | 4023452 | 2 | 11 | 22 | GT   | 6  | 5  |
| 258533 | 39 | 4062831 | 4062846 | 2 | 8  | 16 | AC   | 24 | 4  |
| 258535 | 39 | 4068648 | 4068663 | 4 | 4  | 16 | AAAT | 23 | 16 |
| 258541 | 39 | 4088512 | 4088525 | 2 | 7  | 14 | AT   | 6  | 3  |
| 258544 | 39 | 4102944 | 4102975 | 4 | 8  | 32 | TTTC | 8  | 5  |
| 258549 | 39 | 4123432 | 4123447 | 4 | 4  | 16 | AATT | 25 | 3  |
| 258558 | 39 | 4152998 | 4153013 | 2 | 8  | 16 | AG   | 25 | 6  |
| 258560 | 39 | 4158258 | 4158277 | 2 | 10 | 20 | TG   | 14 | 7  |
| 258561 | 39 | 4160431 | 4160444 | 2 | 7  | 14 | TG   | 22 | 3  |
| 258564 | 39 | 4162813 | 4162824 | 2 | 6  | 12 | TG   | 15 | 9  |
| 258575 | 39 | 4220363 | 4220395 | 3 | 11 | 33 | CCT  | 14 | 8  |
| 258587 | 39 | 4246033 | 4246052 | 2 | 10 | 20 | TG   | 19 | 5  |
| 258590 | 39 | 4249382 | 4249399 | 2 | 9  | 18 | AC   | 17 | 9  |
| 258596 | 39 | 4263184 | 4263225 | 2 | 21 | 42 | GT   | 15 | 10 |
| 258597 | 39 | 4268416 | 4268433 | 3 | 6  | 18 | TAC  | 13 | 3  |
| 258599 | 39 | 4274992 | 4275003 | 2 | 6  | 12 | AC   | 31 | 3  |
| 258607 | 39 | 4302545 | 4302592 | 2 | 24 | 48 | AC   | 12 | 11 |
| 258608 | 39 | 4302782 | 4302801 | 2 | 10 | 20 | GT   | 11 | 7  |
| 258611 | 39 | 4305498 | 4305511 | 2 | 7  | 14 | GT   | 21 | 4  |
| 258612 | 39 | 4309903 | 4309914 | 2 | 6  | 12 | GT   | 25 | 3  |
| 258622 | 39 | 4322096 | 4322151 | 2 | 28 | 56 | TG   | 10 | 9  |
| 258628 | 39 | 4325909 | 4325930 | 2 | 11 | 22 | CA   | 11 | 7  |
| 258631 | 39 | 4332282 | 4332299 | 2 | 9  | 18 | AC   | 23 | 5  |
| 258637 | 39 | 4359647 | 4359674 | 2 | 14 | 28 | TG   | 11 | 9  |

|        |    |         |         |   |    |    |      |    |    |
|--------|----|---------|---------|---|----|----|------|----|----|
| 258639 | 39 | 4369439 | 4369462 | 4 | 6  | 24 | ACAA | 26 | 4  |
| 258641 | 39 | 4373583 | 4373598 | 2 | 8  | 16 | GT   | 23 | 5  |
| 258648 | 39 | 4390893 | 4390920 | 2 | 14 | 28 | AC   | 12 | 9  |
| 258649 | 39 | 4393446 | 4393467 | 2 | 11 | 22 | GT   | 9  | 3  |
| 258650 | 39 | 4396218 | 4396253 | 2 | 18 | 36 | AC   | 21 | 7  |
| 258657 | 39 | 4431105 | 4431119 | 3 | 5  | 15 | ACA  | 32 | 4  |
| 258662 | 39 | 4489244 | 4489255 | 2 | 6  | 12 | GT   | 29 | 4  |
| 258663 | 39 | 4491181 | 4491195 | 3 | 5  | 15 | ATT  | 13 | 5  |
| 258664 | 39 | 4492261 | 4492290 | 3 | 10 | 30 | ATC  | 14 | 7  |
| 258665 | 39 | 4493016 | 4493030 | 3 | 5  | 15 | TTG  | 27 | 3  |
| 258666 | 39 | 4497200 | 4497214 | 3 | 5  | 15 | TGC  | 30 | 4  |
| 258667 | 39 | 4499620 | 4499635 | 4 | 4  | 16 | CTTT | 21 | 5  |
| 258669 | 39 | 4520975 | 4520992 | 2 | 9  | 18 | TG   | 19 | 8  |
| 258675 | 39 | 4536839 | 4536853 | 3 | 5  | 15 | AGG  | 18 | 3  |
| 258681 | 39 | 4565261 | 4565290 | 2 | 15 | 30 | AC   | 14 | 11 |
| 258689 | 39 | 4587359 | 4587392 | 2 | 17 | 34 | GT   | 8  | 6  |
| 258691 | 39 | 4597500 | 4597511 | 2 | 6  | 12 | GT   | 27 | 3  |
| 258692 | 39 | 4598685 | 4598699 | 3 | 5  | 15 | TTA  | 6  | 3  |
| 258698 | 39 | 4625398 | 4625417 | 4 | 5  | 20 | AACA | 24 | 3  |
| 258699 | 39 | 4627382 | 4627411 | 2 | 15 | 30 | GT   | 15 | 9  |
| 258705 | 39 | 4651321 | 4651348 | 2 | 14 | 28 | CA   | 13 | 9  |
| 258706 | 39 | 4651565 | 4651584 | 2 | 10 | 20 | GT   | 17 | 10 |
| 258722 | 39 | 4675805 | 4675826 | 2 | 11 | 22 | AC   | 16 | 9  |
| 258724 | 40 | 56      | 81      | 2 | 13 | 26 | AC   | 14 | 7  |
| 258743 | 40 | 53499   | 53534   | 2 | 18 | 36 | AC   | 12 | 10 |
| 258746 | 40 | 75404   | 75425   | 2 | 11 | 22 | GT   | 18 | 12 |
| 258747 | 40 | 80458   | 80493   | 4 | 9  | 36 | ATTT | 8  | 6  |
| 258750 | 40 | 86995   | 87006   | 2 | 6  | 12 | GT   | 19 | 3  |
| 258759 | 40 | 99650   | 99681   | 2 | 16 | 32 | CA   | 11 | 10 |
| 258760 | 40 | 99904   | 99917   | 2 | 7  | 14 | AC   | 15 | 3  |
| 258765 | 40 | 107803  | 107816  | 2 | 7  | 14 | GT   | 20 | 8  |
| 258766 | 40 | 107878  | 107893  | 2 | 8  | 16 | AC   | 27 | 3  |
| 258767 | 40 | 108078  | 108093  | 2 | 8  | 16 | AC   | 28 | 5  |
| 258768 | 40 | 108710  | 108743  | 2 | 17 | 34 | AG   | 20 | 11 |
| 258769 | 40 | 109216  | 109233  | 3 | 6  | 18 | GTT  | 25 | 4  |
| 258771 | 40 | 110710  | 110723  | 2 | 7  | 14 | CA   | 20 | 6  |
| 258773 | 40 | 110926  | 110949  | 2 | 12 | 24 | CA   | 15 | 8  |
| 258775 | 40 | 111184  | 111201  | 2 | 9  | 18 | TG   | 14 | 12 |
| 258776 | 40 | 111427  | 111458  | 2 | 16 | 32 | CA   | 16 | 16 |
| 258789 | 40 | 134790  | 134804  | 3 | 5  | 15 | GCT  | 25 | 8  |
| 258792 | 40 | 138455  | 138493  | 3 | 13 | 39 | AGG  | 20 | 6  |
| 258793 | 40 | 138836  | 138861  | 2 | 13 | 26 | AG   | 24 | 3  |
| 258794 | 40 | 140025  | 140044  | 2 | 10 | 20 | AC   | 16 | 6  |
| 258801 | 40 | 162033  | 162060  | 2 | 14 | 28 | GT   | 8  | 8  |
| 258811 | 40 | 176090  | 176127  | 2 | 19 | 38 | TG   | 19 | 14 |
| 258815 | 40 | 182859  | 182878  | 2 | 10 | 20 | AC   | 17 | 4  |
| 258816 | 40 | 183304  | 183317  | 2 | 7  | 14 | GT   | 22 | 4  |
| 258821 | 40 | 193425  | 193436  | 2 | 6  | 12 | AG   | 23 | 6  |
| 258822 | 40 | 196639  | 196656  | 2 | 9  | 18 | GT   | 16 | 8  |
| 258823 | 40 | 196812  | 196845  | 2 | 17 | 34 | CA   | 17 | 8  |
| 258831 | 40 | 218097  | 218112  | 4 | 4  | 16 | CAAA | 25 | 5  |

|        |    |        |        |   |    |    |      |    |    |
|--------|----|--------|--------|---|----|----|------|----|----|
| 258832 | 40 | 219027 | 219038 | 2 | 6  | 12 | GT   | 21 | 8  |
| 258834 | 40 | 227808 | 227825 | 2 | 9  | 18 | AT   | 7  | 3  |
| 258835 | 40 | 230007 | 230018 | 2 | 6  | 12 | CA   | 27 | 4  |
| 258847 | 40 | 247438 | 247455 | 3 | 6  | 18 | CCT  | 21 | 3  |
| 258850 | 40 | 248548 | 248574 | 3 | 9  | 27 | GAT  | 22 | 4  |
| 258852 | 40 | 252824 | 252843 | 2 | 10 | 20 | TC   | 13 | 8  |
| 258865 | 40 | 281699 | 281736 | 2 | 19 | 38 | GT   | 17 | 8  |
| 258866 | 40 | 281993 | 282032 | 2 | 20 | 40 | GT   | 7  | 8  |
| 258867 | 40 | 285375 | 285414 | 2 | 20 | 40 | TG   | 19 | 12 |
| 258872 | 40 | 292020 | 292033 | 2 | 7  | 14 | AC   | 14 | 9  |
| 258873 | 40 | 292144 | 292161 | 2 | 9  | 18 | AC   | 12 | 6  |
| 258874 | 40 | 292163 | 292174 | 2 | 6  | 12 | CA   | 22 | 9  |
| 258876 | 40 | 293022 | 293055 | 2 | 17 | 34 | TG   | 15 | 11 |
| 258877 | 40 | 293468 | 293482 | 3 | 5  | 15 | AAG  | 19 | 9  |
| 258879 | 40 | 299734 | 299751 | 2 | 9  | 18 | CA   | 20 | 6  |
| 258882 | 40 | 301701 | 301714 | 2 | 7  | 14 | TG   | 21 | 6  |
| 258883 | 40 | 301716 | 301729 | 2 | 7  | 14 | TG   | 7  | 4  |
| 258885 | 40 | 304608 | 304647 | 2 | 20 | 40 | TG   | 15 | 11 |
| 258886 | 40 | 305948 | 305963 | 4 | 4  | 16 | GTCA | 30 | 5  |
| 258887 | 40 | 314090 | 314109 | 4 | 5  | 20 | GAGG | 12 | 3  |
| 258888 | 40 | 314497 | 314518 | 2 | 11 | 22 | TG   | 23 | 11 |
| 258890 | 40 | 314692 | 314703 | 2 | 6  | 12 | GT   | 26 | 4  |
| 258892 | 40 | 322103 | 322126 | 3 | 8  | 24 | GGA  | 12 | 8  |
| 258894 | 40 | 322482 | 322503 | 2 | 11 | 22 | TG   | 17 | 3  |
| 258895 | 40 | 323077 | 323100 | 2 | 12 | 24 | GT   | 9  | 7  |
| 258897 | 40 | 323239 | 323262 | 2 | 12 | 24 | GT   | 6  | 8  |
| 258898 | 40 | 327751 | 327796 | 2 | 23 | 46 | GT   | 10 | 8  |
| 258902 | 40 | 331166 | 331177 | 2 | 6  | 12 | GT   | 29 | 3  |
| 258903 | 40 | 344498 | 344515 | 2 | 9  | 18 | CA   | 16 | 4  |
| 258905 | 40 | 348687 | 348710 | 2 | 12 | 24 | AC   | 17 | 6  |
| 258906 | 40 | 355392 | 355419 | 2 | 14 | 28 | CT   | 20 | 4  |
| 258911 | 40 | 359643 | 359694 | 2 | 26 | 52 | CA   | 8  | 10 |
| 258916 | 40 | 379517 | 379532 | 2 | 8  | 16 | TG   | 15 | 5  |
| 258920 | 40 | 385313 | 385344 | 2 | 16 | 32 | CA   | 10 | 6  |
| 258923 | 40 | 394113 | 394144 | 2 | 16 | 32 | TG   | 6  | 5  |
| 258925 | 40 | 400823 | 400878 | 2 | 28 | 56 | AC   | 7  | 9  |
| 258928 | 40 | 402044 | 402059 | 4 | 4  | 16 | TGCG | 20 | 13 |
| 258931 | 40 | 412245 | 412276 | 2 | 16 | 32 | AG   | 13 | 14 |
| 258938 | 40 | 441050 | 441075 | 2 | 13 | 26 | TG   | 17 | 10 |
| 258941 | 40 | 443285 | 443302 | 2 | 9  | 18 | AC   | 11 | 7  |
| 258946 | 40 | 452784 | 452804 | 3 | 7  | 21 | ATA  | 14 | 3  |
| 258947 | 40 | 454402 | 454451 | 2 | 25 | 50 | AC   | 12 | 13 |
| 258951 | 40 | 461450 | 461467 | 2 | 9  | 18 | TC   | 24 | 3  |
| 258954 | 40 | 465620 | 465657 | 2 | 19 | 38 | GT   | 12 | 9  |
| 258960 | 40 | 470848 | 470871 | 2 | 12 | 24 | AC   | 22 | 8  |
| 258961 | 40 | 471436 | 471461 | 2 | 13 | 26 | AC   | 8  | 9  |
| 258963 | 40 | 473783 | 473800 | 2 | 9  | 18 | AC   | 14 | 9  |
| 258965 | 40 | 477743 | 477778 | 2 | 18 | 36 | TG   | 14 | 9  |
| 258966 | 40 | 478491 | 478510 | 2 | 10 | 20 | AC   | 20 | 4  |
| 258967 | 40 | 480982 | 481005 | 2 | 12 | 24 | TG   | 12 | 6  |
| 258968 | 40 | 481172 | 481185 | 2 | 7  | 14 | AC   | 24 | 4  |

|        |    |        |        |   |    |    |      |    |    |
|--------|----|--------|--------|---|----|----|------|----|----|
| 258969 | 40 | 481187 | 481200 | 2 | 7  | 14 | CA   | 24 | 3  |
| 258972 | 40 | 490807 | 490820 | 2 | 7  | 14 | AC   | 28 | 3  |
| 258977 | 40 | 495126 | 495137 | 2 | 6  | 12 | GT   | 21 | 4  |
| 258978 | 40 | 497114 | 497129 | 2 | 8  | 16 | GT   | 21 | 5  |
| 258980 | 40 | 497286 | 497309 | 2 | 12 | 24 | AG   | 17 | 4  |
| 258981 | 40 | 497420 | 497437 | 2 | 9  | 18 | TG   | 14 | 5  |
| 258982 | 40 | 497579 | 497610 | 2 | 16 | 32 | AC   | 13 | 16 |
| 258984 | 40 | 497832 | 497843 | 2 | 6  | 12 | CA   | 11 | 4  |
| 258985 | 40 | 497931 | 497952 | 2 | 11 | 22 | GT   | 10 | 9  |
| 258986 | 40 | 500646 | 500659 | 2 | 7  | 14 | TC   | 17 | 4  |
| 258988 | 40 | 501023 | 501044 | 2 | 11 | 22 | GT   | 7  | 8  |
| 258994 | 40 | 503848 | 503859 | 2 | 6  | 12 | GT   | 27 | 3  |
| 259002 | 40 | 518599 | 518616 | 3 | 6  | 18 | GAG  | 27 | 3  |
| 259007 | 40 | 533187 | 533210 | 2 | 12 | 24 | CA   | 15 | 4  |
| 259008 | 40 | 534687 | 534702 | 2 | 8  | 16 | TG   | 21 | 8  |
| 259009 | 40 | 534703 | 534714 | 2 | 6  | 12 | AG   | 25 | 8  |
| 259010 | 40 | 534788 | 534799 | 2 | 6  | 12 | TG   | 24 | 4  |
| 259012 | 40 | 535284 | 535295 | 2 | 6  | 12 | GT   | 14 | 5  |
| 259013 | 40 | 535352 | 535371 | 2 | 10 | 20 | TG   | 14 | 4  |
| 259017 | 40 | 540087 | 540098 | 2 | 6  | 12 | CA   | 32 | 3  |
| 259020 | 40 | 547871 | 547888 | 2 | 9  | 18 | CA   | 26 | 7  |
| 259025 | 40 | 550949 | 550976 | 2 | 14 | 28 | AC   | 12 | 10 |
| 259028 | 40 | 551101 | 551126 | 2 | 13 | 26 | CA   | 13 | 9  |
| 259030 | 40 | 553042 | 553055 | 2 | 7  | 14 | TG   | 18 | 3  |
| 259031 | 40 | 559726 | 559761 | 2 | 18 | 36 | CA   | 13 | 5  |
| 259032 | 40 | 561289 | 561309 | 3 | 7  | 21 | TCC  | 24 | 5  |
| 259033 | 40 | 561920 | 561937 | 2 | 9  | 18 | GT   | 13 | 8  |
| 259034 | 40 | 562079 | 562112 | 2 | 17 | 34 | TG   | 17 | 10 |
| 259036 | 40 | 562490 | 562505 | 2 | 8  | 16 | CA   | 20 | 7  |
| 259037 | 40 | 562873 | 562884 | 2 | 6  | 12 | TG   | 28 | 4  |
| 259044 | 40 | 571417 | 571428 | 2 | 6  | 12 | CA   | 27 | 5  |
| 259045 | 40 | 571700 | 571715 | 2 | 8  | 16 | AG   | 26 | 3  |
| 259046 | 40 | 579323 | 579340 | 2 | 9  | 18 | TC   | 24 | 3  |
| 259047 | 40 | 579483 | 579502 | 2 | 10 | 20 | GT   | 22 | 7  |
| 259050 | 40 | 582727 | 582740 | 2 | 7  | 14 | CA   | 22 | 3  |
| 259051 | 40 | 582861 | 582880 | 2 | 10 | 20 | AC   | 15 | 8  |
| 259052 | 40 | 587547 | 587558 | 2 | 6  | 12 | AC   | 21 | 9  |
| 259056 | 40 | 597779 | 597812 | 2 | 17 | 34 | CA   | 14 | 6  |
| 259058 | 40 | 601760 | 601786 | 3 | 9  | 27 | GAG  | 26 | 4  |
| 259059 | 40 | 602025 | 602082 | 2 | 29 | 58 | CA   | 16 | 11 |
| 259061 | 40 | 604774 | 604789 | 4 | 4  | 16 | AAAC | 22 | 4  |
| 259069 | 40 | 619104 | 619135 | 2 | 16 | 32 | TG   | 16 | 7  |
| 259073 | 40 | 626892 | 626907 | 2 | 8  | 16 | TG   | 6  | 5  |
| 259076 | 40 | 627266 | 627279 | 2 | 7  | 14 | GT   | 27 | 4  |
| 259080 | 40 | 634104 | 634121 | 2 | 9  | 18 | TG   | 15 | 6  |
| 259083 | 40 | 634503 | 634548 | 2 | 23 | 46 | AC   | 12 | 11 |
| 259084 | 40 | 635067 | 635098 | 2 | 16 | 32 | CA   | 15 | 12 |
| 259085 | 40 | 635584 | 635597 | 2 | 7  | 14 | AC   | 15 | 5  |
| 259092 | 40 | 642464 | 642481 | 2 | 9  | 18 | AG   | 27 | 4  |
| 259098 | 40 | 644040 | 644057 | 2 | 9  | 18 | CA   | 24 | 6  |
| 259113 | 40 | 671165 | 671184 | 2 | 10 | 20 | CA   | 26 | 7  |

|        |    |         |         |   |    |    |      |    |    |
|--------|----|---------|---------|---|----|----|------|----|----|
| 259114 | 40 | 676905  | 676934  | 2 | 15 | 30 | GT   | 12 | 6  |
| 259115 | 40 | 678595  | 678612  | 2 | 9  | 18 | AC   | 13 | 4  |
| 259119 | 40 | 687995  | 688009  | 3 | 5  | 15 | TCC  | 27 | 4  |
| 259121 | 40 | 693880  | 693903  | 2 | 12 | 24 | AC   | 11 | 9  |
| 259134 | 40 | 731579  | 731596  | 2 | 9  | 18 | AG   | 32 | 4  |
| 259141 | 40 | 769951  | 769974  | 2 | 12 | 24 | TG   | 9  | 8  |
| 259155 | 40 | 838254  | 838268  | 3 | 5  | 15 | TTG  | 27 | 7  |
| 259156 | 40 | 859044  | 859107  | 2 | 32 | 64 | AC   | 8  | 11 |
| 259157 | 40 | 859765  | 859820  | 2 | 28 | 56 | CA   | 8  | 14 |
| 259158 | 40 | 862564  | 862584  | 3 | 7  | 21 | TTA  | 25 | 3  |
| 259161 | 40 | 868647  | 868664  | 2 | 9  | 18 | AG   | 18 | 8  |
| 259169 | 40 | 888798  | 888809  | 2 | 6  | 12 | GA   | 20 | 3  |
| 259173 | 40 | 891991  | 892010  | 2 | 10 | 20 | CA   | 23 | 9  |
| 259174 | 40 | 893738  | 893769  | 2 | 16 | 32 | AC   | 10 | 8  |
| 259177 | 40 | 906689  | 906704  | 2 | 8  | 16 | CA   | 16 | 4  |
| 259178 | 40 | 906706  | 906719  | 2 | 7  | 14 | AC   | 25 | 8  |
| 259179 | 40 | 916049  | 916060  | 2 | 6  | 12 | AT   | 31 | 3  |
| 259180 | 40 | 917699  | 917724  | 2 | 13 | 26 | TG   | 18 | 19 |
| 259182 | 40 | 921677  | 921688  | 2 | 6  | 12 | AC   | 25 | 5  |
| 259185 | 40 | 925051  | 925074  | 4 | 6  | 24 | TTTA | 21 | 5  |
| 259186 | 40 | 926813  | 926828  | 2 | 8  | 16 | TC   | 9  | 4  |
| 259188 | 40 | 929165  | 929186  | 2 | 11 | 22 | GT   | 20 | 9  |
| 259190 | 40 | 929612  | 929623  | 2 | 6  | 12 | GT   | 27 | 5  |
| 259191 | 40 | 929736  | 929753  | 2 | 9  | 18 | AC   | 22 | 5  |
| 259192 | 40 | 930225  | 930248  | 2 | 12 | 24 | AC   | 12 | 10 |
| 259195 | 40 | 930472  | 930493  | 2 | 11 | 22 | GT   | 9  | 5  |
| 259196 | 40 | 930653  | 930680  | 2 | 14 | 28 | AC   | 12 | 10 |
| 259199 | 40 | 939198  | 939215  | 2 | 9  | 18 | GT   | 11 | 4  |
| 259205 | 40 | 960674  | 960687  | 2 | 7  | 14 | AC   | 16 | 3  |
| 259211 | 40 | 1010555 | 1010568 | 2 | 7  | 14 | TG   | 21 | 7  |
| 259213 | 40 | 1023053 | 1023068 | 2 | 8  | 16 | AC   | 31 | 5  |
| 259217 | 40 | 1041155 | 1041180 | 2 | 13 | 26 | AC   | 17 | 8  |
| 259218 | 40 | 1042535 | 1042564 | 3 | 10 | 30 | AGC  | 29 | 12 |
| 259222 | 40 | 1046934 | 1046947 | 2 | 7  | 14 | CA   | 28 | 7  |
| 259223 | 40 | 1047653 | 1047684 | 2 | 16 | 32 | GT   | 17 | 13 |
| 259225 | 40 | 1055994 | 1056027 | 2 | 17 | 34 | AC   | 9  | 11 |
| 259228 | 40 | 1064161 | 1064188 | 2 | 14 | 28 | AC   | 6  | 7  |
| 259230 | 40 | 1071030 | 1071051 | 2 | 11 | 22 | GT   | 13 | 8  |
| 259232 | 40 | 1075002 | 1075015 | 2 | 7  | 14 | GT   | 27 | 5  |
| 259236 | 40 | 1082535 | 1082574 | 2 | 20 | 40 | GT   | 16 | 10 |
| 259237 | 40 | 1082817 | 1082834 | 2 | 9  | 18 | CA   | 29 | 5  |
| 259238 | 40 | 1085851 | 1085892 | 2 | 21 | 42 | AC   | 12 | 9  |
| 259239 | 40 | 1086131 | 1086142 | 2 | 6  | 12 | CA   | 26 | 5  |
| 259241 | 40 | 1090109 | 1090140 | 2 | 16 | 32 | TG   | 6  | 6  |
| 259242 | 40 | 1090507 | 1090520 | 2 | 7  | 14 | CA   | 20 | 8  |
| 259244 | 40 | 1093319 | 1093342 | 3 | 8  | 24 | TCT  | 21 | 5  |
| 259248 | 40 | 1094731 | 1094748 | 3 | 6  | 18 | CTC  | 29 | 3  |
| 259249 | 40 | 1095188 | 1095214 | 3 | 9  | 27 | CTC  | 24 | 9  |
| 259252 | 40 | 1097639 | 1097672 | 2 | 17 | 34 | AC   | 8  | 6  |
| 259253 | 40 | 1101660 | 1101673 | 2 | 7  | 14 | GT   | 23 | 10 |
| 259256 | 40 | 1105792 | 1105805 | 2 | 7  | 14 | AC   | 28 | 7  |

|        |    |         |         |   |    |    |      |    |    |
|--------|----|---------|---------|---|----|----|------|----|----|
| 259258 | 40 | 1109785 | 1109810 | 2 | 13 | 26 | TG   | 15 | 9  |
| 259260 | 40 | 1118337 | 1118362 | 2 | 13 | 26 | CA   | 6  | 4  |
| 259261 | 40 | 1118456 | 1118471 | 2 | 8  | 16 | CA   | 10 | 3  |
| 259263 | 40 | 1126409 | 1126424 | 4 | 4  | 16 | AAAC | 20 | 3  |
| 259264 | 40 | 1128469 | 1128484 | 2 | 8  | 16 | TG   | 27 | 9  |
| 259265 | 40 | 1128487 | 1128498 | 2 | 6  | 12 | TG   | 26 | 10 |
| 259267 | 40 | 1129176 | 1129205 | 2 | 15 | 30 | CA   | 6  | 9  |
| 259270 | 40 | 1133042 | 1133055 | 2 | 7  | 14 | TC   | 23 | 3  |
| 259272 | 40 | 1133236 | 1133251 | 2 | 8  | 16 | TG   | 18 | 4  |
| 259273 | 40 | 1135833 | 1135870 | 2 | 19 | 38 | AC   | 9  | 11 |
| 259276 | 40 | 1142591 | 1142605 | 3 | 5  | 15 | ATA  | 22 | 5  |
| 259281 | 40 | 1149168 | 1149189 | 2 | 11 | 22 | GT   | 6  | 6  |
| 259285 | 40 | 1157671 | 1157688 | 2 | 9  | 18 | AC   | 19 | 7  |
| 259286 | 40 | 1159670 | 1159685 | 2 | 8  | 16 | GT   | 14 | 6  |
| 259295 | 40 | 1169630 | 1169641 | 2 | 6  | 12 | GA   | 13 | 5  |
| 259296 | 40 | 1170466 | 1170485 | 2 | 10 | 20 | CA   | 20 | 6  |
| 259297 | 40 | 1172913 | 1172924 | 2 | 6  | 12 | CA   | 24 | 5  |
| 259301 | 40 | 1176564 | 1176579 | 4 | 4  | 16 | AAAC | 20 | 6  |
| 259309 | 40 | 1186555 | 1186570 | 2 | 8  | 16 | GT   | 11 | 3  |
| 259318 | 40 | 1194895 | 1194918 | 2 | 12 | 24 | CA   | 27 | 9  |
| 259321 | 40 | 1200363 | 1200380 | 3 | 6  | 18 | GGA  | 31 | 3  |
| 259325 | 40 | 1207753 | 1207788 | 4 | 9  | 36 | AAAG | 26 | 11 |
| 259331 | 40 | 1211342 | 1211355 | 2 | 7  | 14 | TG   | 23 | 3  |
| 259335 | 40 | 1218797 | 1218816 | 4 | 5  | 20 | ACCA | 17 | 4  |
| 259336 | 40 | 1222246 | 1222273 | 2 | 14 | 28 | TG   | 13 | 11 |
| 259349 | 40 | 1234931 | 1234954 | 2 | 12 | 24 | CT   | 11 | 5  |
| 259350 | 40 | 1235254 | 1235267 | 2 | 7  | 14 | GT   | 25 | 3  |
| 259353 | 40 | 1247481 | 1247500 | 2 | 10 | 20 | TG   | 17 | 10 |
| 259354 | 40 | 1247749 | 1247764 | 2 | 8  | 16 | GT   | 26 | 5  |
| 259359 | 40 | 1260666 | 1260683 | 2 | 9  | 18 | GT   | 21 | 13 |
| 259369 | 40 | 1266608 | 1266621 | 2 | 7  | 14 | TC   | 17 | 3  |
| 259374 | 40 | 1271734 | 1271751 | 2 | 9  | 18 | GT   | 12 | 4  |
| 259375 | 40 | 1271817 | 1271842 | 2 | 13 | 26 | GT   | 16 | 7  |
| 259383 | 40 | 1286397 | 1286430 | 2 | 17 | 34 | TG   | 9  | 6  |
| 259384 | 40 | 1286539 | 1286558 | 2 | 10 | 20 | CA   | 22 | 10 |
| 259385 | 40 | 1287477 | 1287494 | 2 | 9  | 18 | CA   | 20 | 4  |
| 259387 | 40 | 1287607 | 1287618 | 2 | 6  | 12 | AC   | 26 | 4  |
| 259395 | 40 | 1302070 | 1302089 | 2 | 10 | 20 | TG   | 21 | 8  |
| 259397 | 40 | 1305671 | 1305682 | 2 | 6  | 12 | GA   | 17 | 4  |
| 259399 | 40 | 1306268 | 1306279 | 2 | 6  | 12 | CA   | 23 | 3  |
| 259400 | 40 | 1306992 | 1307035 | 4 | 11 | 44 | AAAG | 14 | 9  |
| 259402 | 40 | 1307323 | 1307350 | 2 | 14 | 28 | AC   | 9  | 8  |
| 259410 | 40 | 1316456 | 1316467 | 2 | 6  | 12 | TA   | 7  | 6  |
| 259414 | 40 | 1320274 | 1320289 | 2 | 8  | 16 | CA   | 16 | 4  |
| 259417 | 40 | 1320540 | 1320557 | 2 | 9  | 18 | TG   | 21 | 6  |
| 259421 | 40 | 1323432 | 1323461 | 2 | 15 | 30 | TG   | 10 | 12 |
| 259422 | 40 | 1323617 | 1323630 | 2 | 7  | 14 | GT   | 29 | 7  |
| 259423 | 40 | 1323636 | 1323647 | 2 | 6  | 12 | TG   | 11 | 5  |
| 259427 | 40 | 1324183 | 1324224 | 2 | 21 | 42 | CA   | 6  | 8  |
| 259435 | 40 | 1333663 | 1333696 | 2 | 17 | 34 | TG   | 6  | 7  |
| 259436 | 40 | 1333821 | 1333836 | 2 | 8  | 16 | AC   | 20 | 6  |

|        |    |         |         |   |    |    |      |    |    |
|--------|----|---------|---------|---|----|----|------|----|----|
| 259437 | 40 | 1336332 | 1336367 | 2 | 18 | 36 | CA   | 10 | 9  |
| 259440 | 40 | 1341384 | 1341423 | 2 | 20 | 40 | TG   | 10 | 10 |
| 259445 | 40 | 1348009 | 1348054 | 2 | 23 | 46 | TC   | 8  | 7  |
| 259448 | 40 | 1352782 | 1352803 | 2 | 11 | 22 | AC   | 18 | 8  |
| 259449 | 40 | 1353444 | 1353458 | 3 | 5  | 15 | CTG  | 18 | 7  |
| 259454 | 40 | 1353764 | 1353777 | 2 | 7  | 14 | AC   | 19 | 6  |
| 259459 | 40 | 1358051 | 1358071 | 3 | 7  | 21 | TTC  | 18 | 6  |
| 259464 | 40 | 1363882 | 1363913 | 4 | 8  | 32 | AGAA | 20 | 5  |
| 259468 | 40 | 1369705 | 1369722 | 3 | 6  | 18 | CCT  | 26 | 3  |
| 259470 | 40 | 1372068 | 1372103 | 2 | 18 | 36 | TG   | 12 | 9  |
| 259475 | 40 | 1386183 | 1386206 | 4 | 6  | 24 | TTTA | 8  | 4  |
| 259476 | 40 | 1387639 | 1387658 | 4 | 5  | 20 | AGAC | 23 | 3  |
| 259481 | 40 | 1401211 | 1401226 | 4 | 4  | 16 | GGAG | 20 | 3  |
| 259485 | 40 | 1404073 | 1404088 | 2 | 8  | 16 | CA   | 28 | 3  |
| 259487 | 40 | 1404209 | 1404232 | 2 | 12 | 24 | CA   | 19 | 10 |
| 259492 | 40 | 1425291 | 1425342 | 4 | 13 | 52 | AAAG | 15 | 9  |
| 259495 | 40 | 1426167 | 1426196 | 2 | 15 | 30 | CA   | 6  | 6  |
| 259499 | 40 | 1433069 | 1433088 | 4 | 5  | 20 | GAAA | 27 | 5  |
| 259504 | 40 | 1442192 | 1442235 | 2 | 22 | 44 | GT   | 6  | 7  |
| 259505 | 40 | 1442354 | 1442383 | 2 | 15 | 30 | TG   | 12 | 14 |
| 259506 | 40 | 1442412 | 1442427 | 2 | 8  | 16 | GT   | 16 | 5  |
| 259510 | 40 | 1443513 | 1443534 | 2 | 11 | 22 | AG   | 9  | 4  |
| 259512 | 40 | 1444977 | 1444996 | 2 | 10 | 20 | AC   | 24 | 4  |
| 259514 | 40 | 1450236 | 1450255 | 2 | 10 | 20 | TG   | 22 | 6  |
| 259517 | 40 | 1452642 | 1452671 | 2 | 15 | 30 | CA   | 12 | 15 |
| 259521 | 40 | 1467936 | 1467953 | 2 | 9  | 18 | CA   | 17 | 11 |
| 259524 | 40 | 1470731 | 1470750 | 4 | 5  | 20 | AATT | 10 | 3  |
| 259529 | 40 | 1475177 | 1475196 | 4 | 5  | 20 | AAAT | 32 | 3  |
| 259532 | 40 | 1484675 | 1484694 | 4 | 5  | 20 | TAGA | 19 | 4  |
| 259533 | 40 | 1485368 | 1485395 | 2 | 14 | 28 | GT   | 12 | 7  |
| 259534 | 40 | 1486138 | 1486157 | 4 | 5  | 20 | AAGG | 18 | 3  |
| 259543 | 40 | 1496104 | 1496123 | 2 | 10 | 20 | TG   | 26 | 4  |
| 259544 | 40 | 1496216 | 1496233 | 3 | 6  | 18 | GCA  | 33 | 3  |
| 259545 | 40 | 1496510 | 1496521 | 2 | 6  | 12 | TG   | 28 | 3  |
| 259547 | 40 | 1498530 | 1498559 | 3 | 10 | 30 | AGG  | 14 | 4  |
| 259552 | 40 | 1513618 | 1513635 | 2 | 9  | 18 | TG   | 26 | 4  |
| 259554 | 40 | 1515336 | 1515365 | 3 | 10 | 30 | CAG  | 24 | 5  |
| 259555 | 40 | 1519299 | 1519346 | 4 | 12 | 48 | AAAG | 9  | 6  |
| 259557 | 40 | 1521810 | 1521827 | 2 | 9  | 18 | CA   | 24 | 5  |
| 259558 | 40 | 1527697 | 1527712 | 4 | 4  | 16 | CAAC | 27 | 3  |
| 259559 | 40 | 1528739 | 1528766 | 2 | 14 | 28 | AC   | 11 | 6  |
| 259561 | 40 | 1528902 | 1528913 | 2 | 6  | 12 | CT   | 9  | 6  |
| 259562 | 40 | 1528917 | 1528930 | 2 | 7  | 14 | TC   | 6  | 5  |
| 259565 | 40 | 1535457 | 1535468 | 2 | 6  | 12 | GT   | 27 | 7  |
| 259570 | 40 | 1543970 | 1544035 | 2 | 33 | 66 | CA   | 13 | 14 |
| 259577 | 40 | 1547051 | 1547068 | 2 | 9  | 18 | GT   | 20 | 9  |
| 259578 | 40 | 1547070 | 1547083 | 2 | 7  | 14 | TG   | 10 | 5  |
| 259580 | 40 | 1551869 | 1551890 | 2 | 11 | 22 | GT   | 16 | 9  |
| 259584 | 40 | 1558595 | 1558612 | 2 | 9  | 18 | CA   | 12 | 5  |
| 259596 | 40 | 1604459 | 1604470 | 2 | 6  | 12 | GT   | 19 | 3  |
| 259597 | 40 | 1604924 | 1604939 | 2 | 8  | 16 | TG   | 16 | 7  |



|        |    |         |         |   |    |    |      |    |    |
|--------|----|---------|---------|---|----|----|------|----|----|
| 259598 | 40 | 1605068 | 1605091 | 4 | 6  | 24 | GATG | 25 | 4  |
| 259601 | 40 | 1608133 | 1608168 | 2 | 18 | 36 | AC   | 9  | 9  |
| 259603 | 40 | 1610319 | 1610346 | 2 | 14 | 28 | TG   | 20 | 9  |
| 259607 | 40 | 1611531 | 1611542 | 2 | 6  | 12 | CT   | 22 | 4  |
| 259608 | 40 | 1615885 | 1615898 | 2 | 7  | 14 | CA   | 23 | 6  |
| 259609 | 40 | 1615948 | 1615959 | 2 | 6  | 12 | AC   | 13 | 3  |
| 259610 | 40 | 1615991 | 1616018 | 2 | 14 | 28 | CA   | 14 | 10 |
| 259611 | 40 | 1630118 | 1630141 | 2 | 12 | 24 | AC   | 8  | 7  |
| 259612 | 40 | 1630197 | 1630234 | 2 | 19 | 38 | TG   | 9  | 8  |
| 259616 | 40 | 1634891 | 1634910 | 2 | 10 | 20 | AC   | 20 | 7  |
| 259618 | 40 | 1635118 | 1635169 | 2 | 26 | 52 | AC   | 6  | 7  |
| 259620 | 40 | 1637546 | 1637561 | 4 | 4  | 16 | ACGC | 12 | 8  |
| 259624 | 40 | 1648285 | 1648300 | 2 | 8  | 16 | TG   | 10 | 4  |
| 259629 | 40 | 1656111 | 1656126 | 2 | 8  | 16 | AC   | 24 | 4  |
| 259631 | 40 | 1660080 | 1660091 | 2 | 6  | 12 | TG   | 16 | 6  |
| 259632 | 40 | 1660092 | 1660103 | 2 | 6  | 12 | AG   | 11 | 5  |
| 259634 | 40 | 1660301 | 1660332 | 2 | 16 | 32 | CA   | 12 | 12 |
| 259635 | 40 | 1661741 | 1661762 | 2 | 11 | 22 | TG   | 13 | 7  |
| 259636 | 40 | 1663707 | 1663722 | 2 | 8  | 16 | CA   | 25 | 10 |
| 259637 | 40 | 1664162 | 1664199 | 2 | 19 | 38 | AC   | 10 | 12 |
| 259639 | 40 | 1664260 | 1664293 | 2 | 17 | 34 | CA   | 10 | 10 |
| 259652 | 40 | 1677157 | 1677184 | 2 | 14 | 28 | GT   | 11 | 12 |
| 259653 | 40 | 1677604 | 1677623 | 2 | 10 | 20 | TG   | 15 | 6  |
| 259654 | 40 | 1677879 | 1677904 | 2 | 13 | 26 | TG   | 11 | 5  |
| 259656 | 40 | 1681461 | 1681488 | 2 | 14 | 28 | GT   | 14 | 8  |
| 259659 | 40 | 1685555 | 1685580 | 2 | 13 | 26 | AC   | 19 | 8  |
| 259670 | 40 | 1708143 | 1708160 | 2 | 9  | 18 | GT   | 22 | 3  |
| 259671 | 40 | 1713004 | 1713045 | 2 | 21 | 42 | GT   | 10 | 7  |
| 259675 | 40 | 1719801 | 1719814 | 2 | 7  | 14 | AC   | 21 | 4  |
| 259676 | 40 | 1719900 | 1719915 | 2 | 8  | 16 | CA   | 23 | 7  |
| 259677 | 40 | 1725419 | 1725430 | 2 | 6  | 12 | AC   | 24 | 3  |
| 259684 | 40 | 1732708 | 1732733 | 2 | 13 | 26 | AC   | 8  | 6  |
| 259685 | 40 | 1732860 | 1732871 | 2 | 6  | 12 | GT   | 24 | 7  |
| 259689 | 40 | 1735502 | 1735521 | 2 | 10 | 20 | TG   | 22 | 5  |
| 259691 | 40 | 1741029 | 1741080 | 4 | 13 | 52 | TAGA | 10 | 7  |
| 259695 | 40 | 1743648 | 1743667 | 2 | 10 | 20 | AC   | 19 | 6  |
| 259699 | 40 | 1752303 | 1752314 | 2 | 6  | 12 | TG   | 13 | 8  |
| 259706 | 40 | 1762111 | 1762134 | 2 | 12 | 24 | GT   | 13 | 9  |
| 259707 | 40 | 1763651 | 1763668 | 2 | 9  | 18 | AC   | 11 | 6  |
| 259712 | 40 | 1763966 | 1763989 | 2 | 12 | 24 | GT   | 10 | 12 |
| 259713 | 40 | 1764131 | 1764150 | 2 | 10 | 20 | AC   | 24 | 6  |
| 259714 | 40 | 1764446 | 1764467 | 2 | 11 | 22 | GT   | 22 | 4  |
| 259716 | 40 | 1767126 | 1767151 | 2 | 13 | 26 | AC   | 10 | 10 |
| 259721 | 40 | 1767902 | 1767921 | 2 | 10 | 20 | CA   | 13 | 7  |
| 259722 | 40 | 1767998 | 1768009 | 2 | 6  | 12 | AC   | 15 | 7  |
| 259723 | 40 | 1768012 | 1768029 | 2 | 9  | 18 | AC   | 14 | 8  |
| 259724 | 40 | 1768128 | 1768139 | 2 | 6  | 12 | AC   | 21 | 3  |
| 259725 | 40 | 1771386 | 1771405 | 2 | 10 | 20 | AG   | 11 | 10 |
| 259728 | 40 | 1773981 | 1774020 | 2 | 20 | 40 | AC   | 19 | 8  |
| 259729 | 40 | 1777019 | 1777036 | 3 | 6  | 18 | TTC  | 18 | 4  |
| 259734 | 40 | 1783404 | 1783423 | 2 | 10 | 20 | TG   | 13 | 9  |

|        |    |         |         |   |    |    |      |    |    |
|--------|----|---------|---------|---|----|----|------|----|----|
| 259737 | 40 | 1783633 | 1783652 | 2 | 10 | 20 | TG   | 14 | 7  |
| 259740 | 40 | 1786004 | 1786033 | 2 | 15 | 30 | AC   | 14 | 8  |
| 259745 | 40 | 1797744 | 1797757 | 2 | 7  | 14 | GT   | 29 | 5  |
| 259746 | 40 | 1797848 | 1797861 | 2 | 7  | 14 | TG   | 22 | 4  |
| 259747 | 40 | 1800217 | 1800242 | 2 | 13 | 26 | CA   | 10 | 10 |
| 259748 | 40 | 1800313 | 1800332 | 2 | 10 | 20 | AC   | 13 | 6  |
| 259749 | 40 | 1800441 | 1800462 | 2 | 11 | 22 | GT   | 15 | 9  |
| 259750 | 40 | 1800503 | 1800522 | 2 | 10 | 20 | TG   | 21 | 7  |
| 259751 | 40 | 1802610 | 1802623 | 2 | 7  | 14 | GC   | 16 | 8  |
| 259752 | 40 | 1802624 | 1802637 | 2 | 7  | 14 | GT   | 14 | 6  |
| 259754 | 40 | 1802773 | 1802784 | 2 | 6  | 12 | CA   | 17 | 14 |
| 259756 | 40 | 1806224 | 1806235 | 2 | 6  | 12 | AC   | 12 | 7  |
| 259764 | 40 | 1833817 | 1833838 | 2 | 11 | 22 | GT   | 7  | 7  |
| 259780 | 40 | 1852561 | 1852580 | 2 | 10 | 20 | AC   | 14 | 10 |
| 259782 | 40 | 1853033 | 1853054 | 2 | 11 | 22 | TG   | 18 | 11 |
| 259784 | 40 | 1856746 | 1856765 | 4 | 5  | 20 | ATTT | 22 | 7  |
| 259785 | 40 | 1859887 | 1859930 | 2 | 22 | 44 | AG   | 9  | 7  |
| 259786 | 40 | 1859983 | 1860016 | 2 | 17 | 34 | AC   | 8  | 8  |
| 259790 | 40 | 1864673 | 1864726 | 2 | 27 | 54 | AC   | 7  | 7  |
| 259792 | 40 | 1864883 | 1864902 | 2 | 10 | 20 | TG   | 12 | 3  |
| 259797 | 40 | 1867949 | 1867970 | 2 | 11 | 22 | TG   | 11 | 7  |
| 259803 | 40 | 1874969 | 1874998 | 2 | 15 | 30 | AC   | 13 | 9  |
| 259804 | 40 | 1880542 | 1880553 | 2 | 6  | 12 | TG   | 20 | 4  |
| 259806 | 40 | 1881934 | 1881959 | 2 | 13 | 26 | TG   | 12 | 4  |
| 259808 | 40 | 1893930 | 1893955 | 2 | 13 | 26 | TG   | 14 | 12 |
| 259810 | 40 | 1894934 | 1894957 | 2 | 12 | 24 | CA   | 18 | 6  |
| 259822 | 40 | 1901398 | 1901423 | 2 | 13 | 26 | TG   | 14 | 6  |
| 259824 | 40 | 1902834 | 1902849 | 2 | 8  | 16 | TG   | 9  | 3  |
| 259829 | 40 | 1904421 | 1904434 | 2 | 7  | 14 | AC   | 23 | 9  |
| 259830 | 40 | 1904755 | 1904776 | 2 | 11 | 22 | CA   | 15 | 3  |
| 259831 | 40 | 1904873 | 1904892 | 2 | 10 | 20 | CA   | 21 | 7  |
| 259832 | 40 | 1906876 | 1906889 | 2 | 7  | 14 | TG   | 26 | 3  |
| 259833 | 40 | 1906891 | 1906902 | 2 | 6  | 12 | GT   | 28 | 5  |
| 259838 | 40 | 1911994 | 1912013 | 2 | 10 | 20 | TC   | 9  | 5  |
| 259849 | 40 | 1920701 | 1920716 | 2 | 8  | 16 | AC   | 19 | 5  |
| 259851 | 40 | 1920974 | 1920995 | 2 | 11 | 22 | GT   | 21 | 4  |
| 259852 | 40 | 1922283 | 1922300 | 2 | 9  | 18 | CA   | 11 | 7  |
| 259853 | 40 | 1922303 | 1922320 | 2 | 9  | 18 | CA   | 13 | 10 |
| 259856 | 40 | 1923667 | 1923682 | 2 | 8  | 16 | AG   | 30 | 5  |
| 259858 | 40 | 1926893 | 1926908 | 2 | 8  | 16 | CA   | 25 | 7  |
| 259865 | 40 | 1929216 | 1929245 | 2 | 15 | 30 | AC   | 9  | 10 |
| 259866 | 40 | 1931647 | 1931676 | 2 | 15 | 30 | AC   | 9  | 11 |
| 259874 | 40 | 1937968 | 1937983 | 2 | 8  | 16 | TC   | 13 | 5  |
| 259875 | 40 | 1939984 | 1940009 | 2 | 13 | 26 | GT   | 13 | 7  |
| 259879 | 40 | 1941922 | 1941967 | 2 | 23 | 46 | GT   | 9  | 10 |
| 259881 | 40 | 1944909 | 1944932 | 2 | 12 | 24 | CA   | 18 | 3  |
| 259882 | 40 | 1945086 | 1945109 | 2 | 12 | 24 | CA   | 21 | 4  |
| 259884 | 40 | 1948479 | 1948520 | 2 | 21 | 42 | TG   | 10 | 11 |
| 259885 | 40 | 1948669 | 1948702 | 2 | 17 | 34 | AC   | 12 | 10 |
| 259886 | 40 | 1949604 | 1949615 | 2 | 6  | 12 | GT   | 22 | 5  |
| 259887 | 40 | 1949617 | 1949630 | 2 | 7  | 14 | TG   | 18 | 5  |

|        |    |         |         |   |    |    |      |    |    |
|--------|----|---------|---------|---|----|----|------|----|----|
| 259891 | 40 | 1957873 | 1957884 | 2 | 6  | 12 | CA   | 13 | 8  |
| 259892 | 40 | 1957974 | 1957997 | 2 | 12 | 24 | AC   | 6  | 7  |
| 259895 | 40 | 1961769 | 1961798 | 2 | 15 | 30 | CA   | 11 | 9  |
| 259896 | 40 | 1963662 | 1963683 | 2 | 11 | 22 | CA   | 20 | 9  |
| 259899 | 40 | 1964016 | 1964061 | 2 | 23 | 46 | GT   | 15 | 16 |
| 259900 | 40 | 1964247 | 1964258 | 2 | 6  | 12 | CA   | 24 | 3  |
| 259902 | 40 | 1964864 | 1964877 | 2 | 7  | 14 | AC   | 14 | 6  |
| 259906 | 40 | 1972447 | 1972488 | 2 | 21 | 42 | AC   | 8  | 5  |
| 259911 | 40 | 1976908 | 1976955 | 4 | 12 | 48 | ATCT | 7  | 9  |
| 259920 | 40 | 1997279 | 1997300 | 2 | 11 | 22 | TG   | 17 | 5  |
| 259921 | 40 | 1997427 | 1997442 | 2 | 8  | 16 | GT   | 23 | 4  |
| 259927 | 40 | 2006276 | 2006291 | 2 | 8  | 16 | GT   | 19 | 6  |
| 259928 | 40 | 2008208 | 2008237 | 2 | 15 | 30 | CA   | 9  | 8  |
| 259929 | 40 | 2008800 | 2008831 | 2 | 16 | 32 | TG   | 17 | 12 |
| 259931 | 40 | 2011594 | 2011609 | 4 | 4  | 16 | CAAC | 27 | 3  |
| 259932 | 40 | 2013047 | 2013074 | 2 | 14 | 28 | CA   | 8  | 4  |
| 259934 | 40 | 2024034 | 2024051 | 2 | 9  | 18 | AC   | 11 | 3  |
| 259935 | 40 | 2024923 | 2024940 | 2 | 9  | 18 | AC   | 21 | 11 |
| 259936 | 40 | 2025125 | 2025136 | 2 | 6  | 12 | AC   | 18 | 4  |
| 259944 | 40 | 2027474 | 2027511 | 2 | 19 | 38 | CA   | 18 | 14 |
| 259945 | 40 | 2027750 | 2027779 | 2 | 15 | 30 | AG   | 14 | 11 |
| 259950 | 40 | 2043469 | 2043482 | 2 | 7  | 14 | CA   | 26 | 3  |
| 259954 | 40 | 2053636 | 2053647 | 2 | 6  | 12 | AC   | 24 | 3  |
| 259955 | 40 | 2053750 | 2053761 | 2 | 6  | 12 | TG   | 35 | 3  |
| 259956 | 40 | 2054905 | 2054918 | 2 | 7  | 14 | TC   | 29 | 3  |
| 259957 | 40 | 2057720 | 2057735 | 2 | 8  | 16 | AC   | 12 | 5  |
| 259959 | 40 | 2061472 | 2061483 | 2 | 6  | 12 | TA   | 27 | 3  |
| 259960 | 40 | 2072044 | 2072069 | 2 | 13 | 26 | CA   | 15 | 9  |
| 259962 | 40 | 2072251 | 2072288 | 2 | 19 | 38 | AC   | 10 | 9  |
| 259966 | 40 | 2075522 | 2075535 | 2 | 7  | 14 | TG   | 18 | 3  |
| 259969 | 40 | 2079926 | 2079959 | 2 | 17 | 34 | GA   | 10 | 8  |
| 259976 | 40 | 2085314 | 2085369 | 2 | 28 | 56 | CA   | 9  | 10 |
| 259980 | 40 | 2098777 | 2098804 | 2 | 14 | 28 | CA   | 15 | 9  |
| 259981 | 40 | 2100665 | 2100684 | 2 | 10 | 20 | AC   | 14 | 4  |
| 259983 | 40 | 2101074 | 2101087 | 2 | 7  | 14 | AC   | 20 | 16 |
| 259991 | 40 | 2115698 | 2115733 | 2 | 18 | 36 | AC   | 14 | 8  |
| 259993 | 40 | 2115981 | 2116000 | 2 | 10 | 20 | AC   | 20 | 6  |
| 259995 | 40 | 2123072 | 2123103 | 2 | 16 | 32 | TG   | 13 | 11 |
| 259997 | 40 | 2128131 | 2128168 | 2 | 19 | 38 | AC   | 12 | 10 |
| 259998 | 40 | 2128206 | 2128217 | 2 | 6  | 12 | AG   | 25 | 4  |
| 259999 | 40 | 2129872 | 2129885 | 2 | 7  | 14 | TG   | 26 | 3  |
| 260001 | 40 | 2139744 | 2139779 | 2 | 18 | 36 | CA   | 14 | 7  |
| 260004 | 40 | 2150322 | 2150342 | 3 | 7  | 21 | AGG  | 20 | 4  |
| 260005 | 40 | 2151722 | 2151735 | 2 | 7  | 14 | TG   | 23 | 4  |
| 260006 | 40 | 2151929 | 2151942 | 2 | 7  | 14 | GT   | 19 | 7  |
| 260007 | 40 | 2152416 | 2152429 | 2 | 7  | 14 | TG   | 24 | 3  |
| 260008 | 40 | 2153862 | 2153899 | 2 | 19 | 38 | TG   | 12 | 14 |
| 260011 | 40 | 2159336 | 2159357 | 2 | 11 | 22 | AC   | 18 | 5  |
| 260012 | 40 | 2161835 | 2161846 | 2 | 6  | 12 | CA   | 23 | 3  |
| 260014 | 40 | 2164271 | 2164292 | 2 | 11 | 22 | AC   | 24 | 4  |
| 260015 | 40 | 2164404 | 2164439 | 2 | 18 | 36 | AC   | 18 | 12 |

|        |    |         |         |   |    |    |      |    |    |
|--------|----|---------|---------|---|----|----|------|----|----|
| 260016 | 40 | 2164513 | 2164544 | 2 | 16 | 32 | TG   | 17 | 6  |
| 260017 | 40 | 2164759 | 2164788 | 2 | 15 | 30 | AC   | 19 | 10 |
| 260020 | 40 | 2167122 | 2167147 | 2 | 13 | 26 | CA   | 25 | 10 |
| 260021 | 40 | 2168706 | 2168721 | 2 | 8  | 16 | AG   | 23 | 5  |
| 260022 | 40 | 2169078 | 2169109 | 2 | 16 | 32 | TG   | 19 | 14 |
| 260026 | 40 | 2172508 | 2172523 | 2 | 8  | 16 | AC   | 20 | 6  |
| 260028 | 40 | 2175726 | 2175749 | 2 | 12 | 24 | GT   | 20 | 12 |
| 260032 | 40 | 2215168 | 2215193 | 2 | 13 | 26 | GA   | 14 | 8  |
| 260048 | 40 | 2236929 | 2236978 | 2 | 25 | 50 | AC   | 9  | 9  |
| 260054 | 40 | 2250286 | 2250297 | 2 | 6  | 12 | AC   | 15 | 3  |
| 260056 | 40 | 2252356 | 2252369 | 2 | 7  | 14 | TG   | 25 | 7  |
| 260057 | 40 | 2254107 | 2254120 | 2 | 7  | 14 | GT   | 28 | 7  |
| 260060 | 40 | 2258255 | 2258280 | 2 | 13 | 26 | CA   | 20 | 7  |
| 260061 | 40 | 2260732 | 2260765 | 2 | 17 | 34 | TG   | 16 | 12 |
| 260065 | 40 | 2272002 | 2272043 | 2 | 21 | 42 | AC   | 11 | 12 |
| 260069 | 40 | 2278613 | 2278628 | 2 | 8  | 16 | AC   | 29 | 5  |
| 260070 | 40 | 2285631 | 2285656 | 2 | 13 | 26 | GT   | 7  | 8  |
| 260083 | 40 | 2307573 | 2307588 | 2 | 8  | 16 | TG   | 23 | 5  |
| 260089 | 40 | 2317134 | 2317166 | 3 | 11 | 33 | ATC  | 16 | 8  |
| 260096 | 40 | 2330112 | 2330129 | 2 | 9  | 18 | GT   | 24 | 12 |
| 260097 | 40 | 2331325 | 2331348 | 4 | 6  | 24 | CTCA | 23 | 5  |
| 260109 | 40 | 2360860 | 2360883 | 2 | 12 | 24 | TG   | 6  | 4  |
| 260111 | 40 | 2360916 | 2360931 | 2 | 8  | 16 | CA   | 8  | 4  |
| 260117 | 40 | 2368417 | 2368428 | 2 | 6  | 12 | TG   | 30 | 4  |
| 260118 | 40 | 2371086 | 2371097 | 2 | 6  | 12 | CA   | 31 | 3  |
| 260121 | 40 | 2375974 | 2375991 | 2 | 9  | 18 | CA   | 29 | 6  |
| 260122 | 40 | 2377904 | 2377919 | 2 | 8  | 16 | GT   | 21 | 3  |
| 260123 | 40 | 2378120 | 2378131 | 2 | 6  | 12 | GT   | 31 | 6  |
| 260146 | 40 | 2409554 | 2409565 | 2 | 6  | 12 | CA   | 26 | 4  |
| 260147 | 40 | 2411183 | 2411202 | 2 | 10 | 20 | TG   | 10 | 6  |
| 260150 | 40 | 2414653 | 2414674 | 2 | 11 | 22 | TG   | 17 | 3  |
| 260151 | 40 | 2415891 | 2415908 | 2 | 9  | 18 | TG   | 22 | 8  |
| 260152 | 40 | 2420108 | 2420119 | 2 | 6  | 12 | GT   | 16 | 7  |
| 260154 | 40 | 2421609 | 2421624 | 2 | 8  | 16 | AC   | 23 | 5  |
| 260159 | 40 | 2425908 | 2425933 | 2 | 13 | 26 | AG   | 15 | 9  |
| 260160 | 40 | 2426259 | 2426276 | 3 | 6  | 18 | AAC  | 27 | 3  |
| 260163 | 40 | 2429231 | 2429248 | 2 | 9  | 18 | GT   | 26 | 4  |
| 260165 | 40 | 2433591 | 2433602 | 2 | 6  | 12 | TG   | 26 | 6  |
| 260167 | 40 | 2437087 | 2437104 | 3 | 6  | 18 | CTC  | 9  | 4  |
| 260171 | 40 | 2444658 | 2444691 | 2 | 17 | 34 | TG   | 13 | 7  |
| 260176 | 40 | 2450149 | 2450192 | 2 | 22 | 44 | CA   | 14 | 10 |
| 260177 | 40 | 2452212 | 2452223 | 2 | 6  | 12 | TG   | 28 | 3  |
| 260180 | 40 | 2454114 | 2454127 | 2 | 7  | 14 | AC   | 24 | 3  |
| 260182 | 40 | 2454269 | 2454282 | 2 | 7  | 14 | TC   | 23 | 7  |
| 260185 | 40 | 2454570 | 2454585 | 2 | 8  | 16 | CA   | 18 | 7  |
| 260186 | 40 | 2457460 | 2457485 | 2 | 13 | 26 | TG   | 24 | 5  |
| 260191 | 40 | 2467833 | 2467870 | 2 | 19 | 38 | AC   | 7  | 13 |
| 260192 | 40 | 2468022 | 2468033 | 2 | 6  | 12 | GT   | 18 | 4  |
| 260193 | 40 | 2468060 | 2468073 | 2 | 7  | 14 | GT   | 21 | 3  |
| 260194 | 40 | 2471612 | 2471637 | 2 | 13 | 26 | CA   | 10 | 9  |
| 260195 | 40 | 2474737 | 2474762 | 2 | 13 | 26 | GT   | 12 | 8  |

|        |    |         |         |   |    |    |      |    |    |
|--------|----|---------|---------|---|----|----|------|----|----|
| 260197 | 40 | 2476984 | 2476999 | 2 | 8  | 16 | CA   | 20 | 12 |
| 260204 | 40 | 2491218 | 2491231 | 2 | 7  | 14 | GT   | 25 | 3  |
| 260219 | 40 | 2524101 | 2524112 | 2 | 6  | 12 | CA   | 15 | 6  |
| 260224 | 40 | 2527495 | 2527509 | 3 | 5  | 15 | AAC  | 31 | 4  |
| 260226 | 40 | 2532941 | 2532960 | 4 | 5  | 20 | AAAC | 25 | 7  |
| 260228 | 40 | 2533559 | 2533572 | 2 | 7  | 14 | AC   | 23 | 7  |
| 260233 | 40 | 2539182 | 2539217 | 3 | 12 | 36 | GAG  | 10 | 7  |
| 260239 | 40 | 2541532 | 2541551 | 4 | 5  | 20 | AAAT | 20 | 4  |
| 260241 | 40 | 2544422 | 2544457 | 2 | 18 | 36 | TG   | 26 | 11 |
| 260244 | 40 | 2546760 | 2546783 | 2 | 12 | 24 | TG   | 16 | 5  |
| 260246 | 40 | 2549290 | 2549301 | 2 | 6  | 12 | AC   | 28 | 3  |
| 260248 | 40 | 2549608 | 2549623 | 2 | 8  | 16 | CA   | 11 | 10 |
| 260252 | 40 | 2555830 | 2555853 | 4 | 6  | 24 | ATAG | 27 | 4  |
| 260254 | 40 | 2557864 | 2557889 | 2 | 13 | 26 | TG   | 23 | 10 |
| 260256 | 40 | 2564322 | 2564339 | 2 | 9  | 18 | AC   | 20 | 5  |
| 260257 | 40 | 2564380 | 2564417 | 2 | 19 | 38 | AC   | 12 | 7  |
| 260258 | 40 | 2566332 | 2566349 | 2 | 9  | 18 | GT   | 16 | 4  |
| 260260 | 40 | 2568418 | 2568441 | 4 | 6  | 24 | TCAG | 31 | 4  |
| 260261 | 40 | 2569199 | 2569212 | 2 | 7  | 14 | TC   | 22 | 4  |
| 260263 | 40 | 2573753 | 2573804 | 4 | 13 | 52 | GGAT | 23 | 13 |
| 260264 | 40 | 2576171 | 2576206 | 2 | 18 | 36 | GT   | 8  | 9  |
| 260265 | 40 | 2576650 | 2576677 | 2 | 14 | 28 | AC   | 15 | 8  |
| 260267 | 40 | 2578946 | 2578983 | 2 | 19 | 38 | GT   | 8  | 7  |
| 260278 | 40 | 2608045 | 2608066 | 2 | 11 | 22 | GT   | 14 | 9  |
| 260279 | 40 | 2613287 | 2613302 | 2 | 8  | 16 | GT   | 18 | 6  |
| 260281 | 40 | 2618322 | 2618357 | 4 | 9  | 36 | TTTC | 19 | 5  |
| 260282 | 40 | 2618502 | 2618535 | 2 | 17 | 34 | TG   | 14 | 13 |
| 260288 | 40 | 2624730 | 2624745 | 2 | 8  | 16 | GT   | 21 | 10 |
| 260289 | 40 | 2624915 | 2624932 | 2 | 9  | 18 | AC   | 23 | 6  |
| 260290 | 40 | 2625294 | 2625343 | 2 | 25 | 50 | AC   | 16 | 13 |
| 260291 | 40 | 2627277 | 2627318 | 2 | 21 | 42 | AC   | 8  | 10 |
| 260301 | 40 | 2645714 | 2645733 | 2 | 10 | 20 | GT   | 7  | 9  |
| 260304 | 40 | 2648408 | 2648431 | 2 | 12 | 24 | AC   | 11 | 3  |
| 260306 | 40 | 2654135 | 2654154 | 4 | 5  | 20 | CTCA | 30 | 3  |
| 260316 | 40 | 2704803 | 2704820 | 2 | 9  | 18 | TG   | 27 | 4  |
| 260318 | 40 | 2708143 | 2708178 | 4 | 9  | 36 | AACA | 15 | 4  |
| 260320 | 40 | 2708779 | 2708794 | 2 | 8  | 16 | GT   | 24 | 7  |
| 260324 | 40 | 2715721 | 2715746 | 2 | 13 | 26 | GT   | 17 | 11 |
| 260336 | 40 | 2730255 | 2730266 | 2 | 6  | 12 | AG   | 28 | 5  |
| 260337 | 40 | 2732298 | 2732343 | 2 | 23 | 46 | TG   | 20 | 11 |
| 260348 | 40 | 2753439 | 2753462 | 4 | 6  | 24 | TCTG | 28 | 7  |
| 260353 | 40 | 2761902 | 2761931 | 2 | 15 | 30 | TG   | 7  | 7  |
| 260354 | 40 | 2764515 | 2764532 | 2 | 9  | 18 | AC   | 26 | 5  |
| 260356 | 40 | 2767167 | 2767180 | 2 | 7  | 14 | TG   | 26 | 3  |
| 260357 | 40 | 2769355 | 2769381 | 3 | 9  | 27 | GCA  | 31 | 6  |
| 260358 | 40 | 2770467 | 2770490 | 2 | 12 | 24 | GT   | 21 | 7  |
| 260362 | 40 | 2779760 | 2779775 | 4 | 4  | 16 | TTAA | 23 | 3  |
| 260365 | 40 | 2786030 | 2786047 | 2 | 9  | 18 | GT   | 18 | 7  |
| 260368 | 40 | 2796723 | 2796738 | 2 | 8  | 16 | TG   | 22 | 6  |
| 260374 | 40 | 2802854 | 2802873 | 2 | 10 | 20 | GT   | 12 | 7  |
| 260378 | 40 | 2806050 | 2806061 | 2 | 6  | 12 | TG   | 32 | 3  |

|        |    |         |         |   |    |    |      |    |    |
|--------|----|---------|---------|---|----|----|------|----|----|
| 260380 | 40 | 2806779 | 2806814 | 2 | 18 | 36 | GT   | 14 | 10 |
| 260385 | 40 | 2810654 | 2810695 | 2 | 21 | 42 | GT   | 11 | 7  |
| 260387 | 40 | 2813056 | 2813075 | 2 | 10 | 20 | CA   | 16 | 7  |
| 260388 | 40 | 2813203 | 2813240 | 2 | 19 | 38 | TG   | 19 | 6  |
| 260390 | 40 | 2813395 | 2813428 | 2 | 17 | 34 | GT   | 18 | 8  |
| 260393 | 40 | 2821399 | 2821434 | 2 | 18 | 36 | TG   | 17 | 8  |
| 260394 | 40 | 2822862 | 2822895 | 2 | 17 | 34 | AC   | 14 | 12 |
| 260401 | 40 | 2840370 | 2840383 | 2 | 7  | 14 | AC   | 20 | 4  |
| 260408 | 40 | 2853097 | 2853117 | 3 | 7  | 21 | TGT  | 25 | 3  |
| 260413 | 40 | 2862138 | 2862199 | 2 | 31 | 62 | CA   | 15 | 10 |
| 260419 | 40 | 2878414 | 2878473 | 4 | 15 | 60 | AAGA | 18 | 15 |
| 260424 | 40 | 2882984 | 2883007 | 2 | 12 | 24 | CA   | 13 | 5  |
| 260432 | 40 | 2895066 | 2895103 | 2 | 19 | 38 | AC   | 13 | 9  |
| 260433 | 40 | 2895406 | 2895465 | 2 | 30 | 60 | CA   | 10 | 13 |
| 260438 | 40 | 2914259 | 2914270 | 2 | 6  | 12 | GT   | 23 | 3  |
| 260439 | 40 | 2914363 | 2914382 | 2 | 10 | 20 | GT   | 14 | 7  |
| 260441 | 40 | 2915508 | 2915525 | 2 | 9  | 18 | TG   | 18 | 9  |
| 260442 | 40 | 2918373 | 2918388 | 2 | 8  | 16 | AC   | 15 | 8  |
| 260448 | 40 | 2932609 | 2932620 | 2 | 6  | 12 | AT   | 18 | 10 |
| 260459 | 40 | 2943042 | 2943073 | 2 | 16 | 32 | AC   | 20 | 10 |
| 260470 | 40 | 2963944 | 2963969 | 2 | 13 | 26 | CT   | 16 | 11 |
| 260473 | 40 | 2964352 | 2964371 | 2 | 10 | 20 | TG   | 15 | 6  |
| 260477 | 40 | 2967404 | 2967431 | 2 | 14 | 28 | CA   | 8  | 9  |
| 260478 | 40 | 2967514 | 2967527 | 2 | 7  | 14 | TG   | 14 | 6  |
| 260481 | 40 | 2968321 | 2968346 | 2 | 13 | 26 | CA   | 11 | 6  |
| 260485 | 40 | 2972672 | 2972689 | 2 | 9  | 18 | CT   | 22 | 7  |
| 260489 | 40 | 2977302 | 2977317 | 4 | 4  | 16 | CTGT | 25 | 4  |
| 260499 | 40 | 2988151 | 2988190 | 2 | 20 | 40 | GT   | 9  | 12 |
| 260500 | 40 | 2989184 | 2989223 | 2 | 20 | 40 | TG   | 6  | 9  |
| 260511 | 40 | 3010688 | 3010709 | 2 | 11 | 22 | TC   | 14 | 10 |
| 260521 | 40 | 3019097 | 3019116 | 2 | 10 | 20 | AC   | 13 | 10 |
| 260525 | 40 | 3027388 | 3027403 | 2 | 8  | 16 | AT   | 14 | 9  |
| 260527 | 40 | 3029021 | 3029046 | 2 | 13 | 26 | TG   | 9  | 6  |
| 260533 | 40 | 3029976 | 3029991 | 2 | 8  | 16 | TG   | 21 | 7  |
| 260534 | 40 | 3030084 | 3030097 | 2 | 7  | 14 | TG   | 24 | 3  |
| 260535 | 40 | 3030099 | 3030110 | 2 | 6  | 12 | GT   | 31 | 7  |
| 260544 | 40 | 3040913 | 3040940 | 2 | 14 | 28 | AC   | 21 | 7  |
| 260545 | 40 | 3041020 | 3041031 | 2 | 6  | 12 | CT   | 26 | 4  |
| 260546 | 40 | 3041205 | 3041224 | 2 | 10 | 20 | TG   | 13 | 10 |
| 260552 | 40 | 3047241 | 3047256 | 2 | 8  | 16 | GT   | 17 | 9  |
| 260553 | 40 | 3047416 | 3047427 | 2 | 6  | 12 | GT   | 25 | 3  |
| 260554 | 40 | 3047563 | 3047574 | 2 | 6  | 12 | GA   | 29 | 4  |
| 260555 | 40 | 3047973 | 3047996 | 2 | 12 | 24 | AC   | 11 | 8  |
| 260569 | 40 | 3076803 | 3076830 | 2 | 14 | 28 | AG   | 12 | 8  |
| 260571 | 40 | 3082863 | 3082884 | 2 | 11 | 22 | GT   | 14 | 8  |
| 260579 | 40 | 3090343 | 3090362 | 2 | 10 | 20 | AC   | 13 | 3  |
| 260591 | 40 | 3118995 | 3119014 | 4 | 5  | 20 | GACA | 6  | 3  |
| 260592 | 40 | 3124844 | 3124875 | 2 | 16 | 32 | CA   | 17 | 9  |
| 260593 | 40 | 3125011 | 3125028 | 2 | 9  | 18 | TG   | 21 | 4  |
| 260594 | 40 | 3125305 | 3125316 | 2 | 6  | 12 | CA   | 28 | 6  |
| 260595 | 40 | 3125834 | 3125851 | 2 | 9  | 18 | GT   | 20 | 5  |

|        |    |         |         |   |    |    |      |    |    |
|--------|----|---------|---------|---|----|----|------|----|----|
| 260596 | 40 | 3126061 | 3126078 | 2 | 9  | 18 | CA   | 17 | 7  |
| 260599 | 40 | 3128984 | 3128997 | 2 | 7  | 14 | AC   | 22 | 8  |
| 260601 | 40 | 3129133 | 3129168 | 2 | 18 | 36 | CA   | 8  | 9  |
| 260605 | 40 | 3139551 | 3139574 | 2 | 12 | 24 | TG   | 15 | 12 |
| 260610 | 40 | 3141742 | 3141775 | 2 | 17 | 34 | GT   | 15 | 10 |
| 260612 | 40 | 3141907 | 3141924 | 2 | 9  | 18 | AC   | 14 | 7  |
| 260613 | 40 | 3143605 | 3143632 | 4 | 7  | 28 | CAAC | 19 | 3  |
| 260614 | 40 | 3144145 | 3144160 | 4 | 4  | 16 | AAAT | 23 | 3  |
| 260622 | 40 | 3159146 | 3159167 | 2 | 11 | 22 | CT   | 11 | 3  |
| 260625 | 40 | 3163889 | 3163912 | 2 | 12 | 24 | GT   | 13 | 9  |
| 260628 | 40 | 3166636 | 3166653 | 2 | 9  | 18 | TG   | 25 | 4  |
| 260629 | 40 | 3166916 | 3166927 | 2 | 6  | 12 | CT   | 22 | 3  |
| 260630 | 40 | 3166928 | 3166945 | 2 | 9  | 18 | CA   | 20 | 5  |
| 260631 | 40 | 3171438 | 3171453 | 2 | 8  | 16 | AC   | 30 | 3  |
| 260657 | 40 | 3210093 | 3210122 | 2 | 15 | 30 | CA   | 14 | 8  |
| 260665 | 40 | 3220371 | 3220400 | 2 | 15 | 30 | TG   | 12 | 9  |
| 260669 | 40 | 3230127 | 3230146 | 4 | 5  | 20 | ATGG | 26 | 5  |
| 260680 | 40 | 3257616 | 3257631 | 4 | 4  | 16 | AAAC | 28 | 3  |
| 260694 | 40 | 3281691 | 3281702 | 2 | 6  | 12 | TG   | 22 | 3  |
| 260697 | 40 | 3289534 | 3289549 | 4 | 4  | 16 | AAAT | 15 | 8  |
| 260705 | 40 | 3300160 | 3300183 | 2 | 12 | 24 | CA   | 19 | 11 |
| 260706 | 40 | 3300376 | 3300387 | 2 | 6  | 12 | AC   | 29 | 4  |
| 260711 | 40 | 3305342 | 3305375 | 2 | 17 | 34 | AC   | 14 | 5  |
| 260718 | 40 | 3312667 | 3312690 | 4 | 6  | 24 | TTTA | 25 | 3  |
| 260719 | 40 | 3314532 | 3314543 | 2 | 6  | 12 | CA   | 30 | 4  |
| 260720 | 40 | 3314652 | 3314671 | 2 | 10 | 20 | AC   | 17 | 6  |
| 260722 | 40 | 3317738 | 3317765 | 2 | 14 | 28 | CA   | 17 | 8  |
| 260724 | 40 | 3317929 | 3317942 | 2 | 7  | 14 | GA   | 16 | 6  |
| 260735 | 40 | 3333191 | 3333208 | 2 | 9  | 18 | TG   | 20 | 7  |
| 260741 | 40 | 3337354 | 3337379 | 2 | 13 | 26 | CA   | 13 | 9  |
| 260762 | 40 | 3345724 | 3345741 | 2 | 9  | 18 | GA   | 22 | 11 |
| 260764 | 40 | 3348825 | 3348840 | 2 | 8  | 16 | AT   | 20 | 5  |
| 260774 | 40 | 3369281 | 3369322 | 2 | 21 | 42 | CA   | 10 | 9  |
| 260775 | 40 | 3369424 | 3369451 | 2 | 14 | 28 | CA   | 17 | 5  |
| 260777 | 40 | 3386659 | 3386686 | 2 | 14 | 28 | CA   | 12 | 6  |
| 260779 | 40 | 3389171 | 3389224 | 2 | 27 | 54 | TG   | 7  | 8  |
| 260784 | 40 | 3393099 | 3393130 | 2 | 16 | 32 | GT   | 8  | 5  |
| 260785 | 40 | 3395608 | 3395627 | 2 | 10 | 20 | CA   | 12 | 9  |
| 260786 | 40 | 3395764 | 3395779 | 2 | 8  | 16 | CA   | 6  | 4  |
| 260789 | 40 | 3396361 | 3396440 | 4 | 20 | 80 | AGAT | 16 | 9  |
| 260793 | 40 | 3401604 | 3401621 | 2 | 9  | 18 | TG   | 24 | 9  |
| 260794 | 40 | 3401745 | 3401766 | 2 | 11 | 22 | AC   | 23 | 6  |
| 260795 | 40 | 3401804 | 3401817 | 2 | 7  | 14 | GT   | 32 | 3  |
| 260797 | 40 | 3403366 | 3403381 | 4 | 4  | 16 | AAAT | 18 | 6  |
| 260799 | 40 | 3405900 | 3405921 | 2 | 11 | 22 | GT   | 21 | 8  |
| 260802 | 40 | 3408106 | 3408117 | 2 | 6  | 12 | TG   | 20 | 3  |
| 260803 | 40 | 3410850 | 3410869 | 2 | 10 | 20 | TG   | 12 | 7  |
| 260806 | 40 | 3416768 | 3416811 | 2 | 22 | 44 | AC   | 8  | 7  |
| 260811 | 40 | 3424260 | 3424273 | 2 | 7  | 14 | AG   | 23 | 3  |
| 260812 | 40 | 3424368 | 3424379 | 2 | 6  | 12 | AG   | 24 | 3  |
| 260820 | 40 | 3432564 | 3432583 | 2 | 10 | 20 | GA   | 26 | 6  |

|        |    |         |         |   |    |    |      |    |    |
|--------|----|---------|---------|---|----|----|------|----|----|
| 260842 | 40 | 3466197 | 3466228 | 2 | 16 | 32 | AC   | 11 | 7  |
| 260847 | 40 | 3470345 | 3470360 | 2 | 8  | 16 | GT   | 14 | 8  |
| 260850 | 40 | 3478651 | 3478674 | 4 | 6  | 24 | TCTG | 29 | 3  |
| 260855 | 40 | 3486717 | 3486750 | 2 | 17 | 34 | GT   | 17 | 16 |
| 260860 | 40 | 3488983 | 3489006 | 4 | 6  | 24 | ATAA | 14 | 5  |
| 260872 | 40 | 3502782 | 3502795 | 2 | 7  | 14 | GT   | 19 | 3  |
| 260877 | 40 | 3512153 | 3512174 | 2 | 11 | 22 | AG   | 18 | 9  |
| 260879 | 40 | 3515757 | 3515772 | 2 | 8  | 16 | TG   | 17 | 5  |
| 260880 | 40 | 3519636 | 3519659 | 2 | 12 | 24 | TG   | 17 | 15 |
| 260885 | 40 | 3527906 | 3527929 | 4 | 6  | 24 | TTTG | 13 | 8  |
| 260889 | 40 | 3536676 | 3536701 | 2 | 13 | 26 | AC   | 10 | 8  |
| 260891 | 40 | 3537686 | 3537711 | 2 | 13 | 26 | GT   | 7  | 11 |
| 260899 | 40 | 3549853 | 3549878 | 2 | 13 | 26 | GT   | 14 | 7  |
| 260900 | 40 | 3550028 | 3550041 | 2 | 7  | 14 | CA   | 26 | 3  |
| 260901 | 40 | 3550299 | 3550318 | 2 | 10 | 20 | GT   | 26 | 6  |
| 260904 | 40 | 3561840 | 3561877 | 2 | 19 | 38 | CA   | 8  | 13 |
| 260906 | 40 | 3562864 | 3562875 | 2 | 6  | 12 | AC   | 25 | 6  |
| 260909 | 40 | 3567964 | 3567981 | 2 | 9  | 18 | CA   | 18 | 7  |
| 260919 | 40 | 3598009 | 3598024 | 2 | 8  | 16 | CT   | 16 | 4  |
| 260925 | 40 | 3610636 | 3610659 | 4 | 6  | 24 | TCAA | 30 | 3  |
| 260934 | 40 | 3624316 | 3624336 | 3 | 7  | 21 | GAT  | 14 | 3  |
| 260938 | 40 | 3632202 | 3632215 | 2 | 7  | 14 | AG   | 17 | 5  |
| 260947 | 40 | 3645020 | 3645047 | 2 | 14 | 28 | TG   | 6  | 9  |
| 260951 | 40 | 3655651 | 3655686 | 2 | 18 | 36 | AC   | 11 | 12 |
| 260952 | 40 | 3657712 | 3657727 | 4 | 4  | 16 | AAAT | 24 | 3  |
| 260957 | 40 | 3670202 | 3670223 | 2 | 11 | 22 | TG   | 15 | 9  |
| 260958 | 40 | 3670424 | 3670438 | 3 | 5  | 15 | ATA  | 27 | 3  |
| 260959 | 40 | 3671652 | 3671691 | 4 | 10 | 40 | ATCC | 21 | 14 |
| 260960 | 40 | 3676158 | 3676177 | 2 | 10 | 20 | GT   | 14 | 4  |
| 260961 | 40 | 3676211 | 3676242 | 2 | 16 | 32 | TG   | 7  | 9  |
| 260962 | 40 | 3676281 | 3676308 | 2 | 14 | 28 | AC   | 6  | 4  |
| 260963 | 40 | 3677174 | 3677187 | 2 | 7  | 14 | CA   | 28 | 6  |
| 260969 | 40 | 3682031 | 3682046 | 4 | 4  | 16 | ATTT | 29 | 4  |
| 260973 | 40 | 3696038 | 3696075 | 2 | 19 | 38 | CA   | 9  | 5  |
| 260976 | 40 | 3699037 | 3699050 | 2 | 7  | 14 | AC   | 19 | 8  |
| 260980 | 40 | 3705577 | 3705588 | 2 | 6  | 12 | CA   | 21 | 3  |
| 260982 | 40 | 3707777 | 3707796 | 2 | 10 | 20 | CA   | 21 | 11 |
| 260988 | 40 | 3710191 | 3710248 | 2 | 29 | 58 | AC   | 10 | 7  |
| 260997 | 40 | 3722306 | 3722320 | 3 | 5  | 15 | AAT  | 10 | 8  |
| 260998 | 40 | 3723389 | 3723402 | 2 | 7  | 14 | AT   | 16 | 4  |
| 261001 | 40 | 3727877 | 3727900 | 4 | 6  | 24 | ATAA | 23 | 3  |
| 261003 | 40 | 3732884 | 3732903 | 2 | 10 | 20 | CA   | 26 | 5  |
| 261005 | 40 | 3737751 | 3737795 | 3 | 15 | 45 | TCT  | 18 | 10 |
| 261006 | 40 | 3738234 | 3738263 | 2 | 15 | 30 | AC   | 13 | 5  |
| 261022 | 40 | 3766132 | 3766163 | 2 | 16 | 32 | CA   | 9  | 10 |
| 261023 | 40 | 3767412 | 3767455 | 2 | 22 | 44 | GA   | 6  | 7  |
| 261026 | 40 | 3774847 | 3774866 | 2 | 10 | 20 | TG   | 20 | 8  |
| 261029 | 40 | 3780018 | 3780033 | 2 | 8  | 16 | TG   | 22 | 4  |
| 261031 | 40 | 3789440 | 3789475 | 2 | 18 | 36 | AG   | 6  | 5  |
| 261036 | 40 | 3798016 | 3798047 | 2 | 16 | 32 | TG   | 6  | 8  |
| 261037 | 40 | 3798196 | 3798239 | 2 | 22 | 44 | GT   | 16 | 19 |



|        |    |         |         |   |    |    |      |    |    |
|--------|----|---------|---------|---|----|----|------|----|----|
| 261038 | 40 | 3800008 | 3800033 | 2 | 13 | 26 | AC   | 13 | 5  |
| 261039 | 40 | 3804049 | 3804072 | 2 | 12 | 24 | CA   | 11 | 11 |
| 261046 | 40 | 3818288 | 3818319 | 4 | 8  | 32 | ATGT | 16 | 7  |
| 261051 | 40 | 3824784 | 3824815 | 4 | 8  | 32 | GATG | 24 | 5  |
| 261055 | 40 | 3830643 | 3830658 | 4 | 4  | 16 | TGTC | 25 | 4  |
| 261058 | 40 | 3866670 | 3866683 | 2 | 7  | 14 | AC   | 24 | 3  |
| 261064 | 40 | 3876335 | 3876370 | 2 | 18 | 36 | TG   | 12 | 10 |
| 261066 | 40 | 3880093 | 3880116 | 2 | 12 | 24 | CA   | 15 | 10 |
| 261067 | 40 | 3886262 | 3886273 | 2 | 6  | 12 | CA   | 26 | 3  |
| 261071 | 40 | 3902101 | 3902118 | 2 | 9  | 18 | TG   | 13 | 7  |
| 261075 | 40 | 3905697 | 3905716 | 2 | 10 | 20 | AC   | 16 | 6  |
| 261078 | 40 | 3910285 | 3910322 | 2 | 19 | 38 | CA   | 11 | 8  |
| 261081 | 40 | 3913656 | 3913671 | 4 | 4  | 16 | TGCA | 30 | 3  |
| 261084 | 40 | 3920473 | 3920496 | 2 | 12 | 24 | CA   | 12 | 10 |
| 261086 | 40 | 3920794 | 3920835 | 2 | 21 | 42 | TG   | 11 | 9  |
| 261087 | 40 | 3921133 | 3921156 | 4 | 6  | 24 | TCCA | 21 | 5  |
| 261092 | 40 | 3930112 | 3930133 | 2 | 11 | 22 | AC   | 27 | 5  |
| 261099 | 40 | 3945198 | 3945233 | 2 | 18 | 36 | GT   | 9  | 9  |
| 261100 | 40 | 3946228 | 3946241 | 2 | 7  | 14 | GT   | 18 | 22 |
| 261111 | 40 | 3967310 | 3967347 | 2 | 19 | 38 | TG   | 15 | 14 |
| 261112 | 40 | 3968526 | 3968541 | 4 | 4  | 16 | AAAC | 23 | 7  |
| 261119 | 40 | 3977138 | 3977165 | 2 | 14 | 28 | TG   | 12 | 7  |
| 261120 | 40 | 3977328 | 3977347 | 2 | 10 | 20 | TG   | 20 | 19 |
| 261127 | 40 | 3996655 | 3996678 | 2 | 12 | 24 | AC   | 13 | 10 |
| 261132 | 40 | 4005285 | 4005304 | 4 | 5  | 20 | GATT | 26 | 11 |
| 261133 | 40 | 4006352 | 4006369 | 2 | 9  | 18 | AC   | 20 | 6  |
| 261134 | 40 | 4007164 | 4007197 | 2 | 17 | 34 | CA   | 6  | 6  |
| 261139 | 40 | 4028122 | 4028135 | 2 | 7  | 14 | TG   | 16 | 4  |
| 261140 | 40 | 4028186 | 4028199 | 2 | 7  | 14 | GT   | 20 | 5  |
| 261145 | 40 | 4038557 | 4038580 | 2 | 12 | 24 | TG   | 18 | 4  |
| 261146 | 40 | 4044154 | 4044203 | 2 | 25 | 50 | AC   | 9  | 9  |
| 261156 | 40 | 4060060 | 4060073 | 2 | 7  | 14 | CA   | 27 | 4  |
| 261161 | 40 | 4065142 | 4065153 | 2 | 6  | 12 | AC   | 11 | 4  |
| 261162 | 40 | 4065653 | 4065670 | 2 | 9  | 18 | GT   | 27 | 5  |
| 261164 | 40 | 4068974 | 4069007 | 2 | 17 | 34 | CT   | 9  | 8  |
| 261166 | 40 | 4069183 | 4069200 | 2 | 9  | 18 | AC   | 19 | 5  |
| 261167 | 40 | 4069398 | 4069411 | 2 | 7  | 14 | AC   | 18 | 3  |
| 261168 | 40 | 4069413 | 4069424 | 2 | 6  | 12 | CA   | 16 | 4  |
| 261169 | 40 | 4069650 | 4069661 | 2 | 6  | 12 | AC   | 23 | 4  |
| 261170 | 40 | 4071318 | 4071339 | 2 | 11 | 22 | AC   | 16 | 11 |
| 261172 | 40 | 4073979 | 4073990 | 2 | 6  | 12 | TG   | 12 | 9  |
| 261179 | 40 | 4077163 | 4077190 | 2 | 14 | 28 | GT   | 11 | 10 |
| 261184 | 40 | 4082035 | 4082056 | 2 | 11 | 22 | AC   | 13 | 10 |
| 261185 | 40 | 4082593 | 4082606 | 2 | 7  | 14 | GT   | 25 | 4  |
| 261186 | 40 | 4082836 | 4082871 | 4 | 9  | 36 | CTTT | 22 | 7  |
| 261188 | 40 | 4085003 | 4085026 | 2 | 12 | 24 | TG   | 8  | 5  |
| 261190 | 40 | 4087876 | 4087889 | 2 | 7  | 14 | TG   | 9  | 5  |
| 261191 | 40 | 4091561 | 4091574 | 2 | 7  | 14 | AC   | 17 | 5  |
| 261192 | 40 | 4092813 | 4092828 | 4 | 4  | 16 | ATCC | 30 | 5  |
| 261198 | 40 | 4098700 | 4098715 | 2 | 8  | 16 | GT   | 13 | 11 |
| 261199 | 40 | 4098823 | 4098850 | 2 | 14 | 28 | TG   | 14 | 5  |

|        |    |         |         |   |    |    |      |    |    |
|--------|----|---------|---------|---|----|----|------|----|----|
| 261205 | 40 | 4101518 | 4101547 | 2 | 15 | 30 | AC   | 8  | 7  |
| 261206 | 40 | 4101613 | 4101640 | 2 | 14 | 28 | TG   | 8  | 4  |
| 261207 | 40 | 4101704 | 4101725 | 2 | 11 | 22 | AC   | 21 | 3  |
| 261211 | 40 | 4106800 | 4106825 | 2 | 13 | 26 | CA   | 13 | 7  |
| 261215 | 40 | 4114043 | 4114070 | 4 | 7  | 28 | CTGT | 22 | 6  |
| 261216 | 40 | 4114291 | 4114308 | 2 | 9  | 18 | GT   | 7  | 4  |
| 261226 | 40 | 4125031 | 4125056 | 2 | 13 | 26 | CA   | 6  | 6  |
| 261241 | 40 | 4142033 | 4142066 | 2 | 17 | 34 | GT   | 14 | 8  |
| 261242 | 40 | 4147814 | 4147827 | 2 | 7  | 14 | AC   | 21 | 3  |
| 261243 | 40 | 4148397 | 4148408 | 2 | 6  | 12 | GA   | 29 | 3  |
| 261245 | 40 | 4149101 | 4149122 | 2 | 11 | 22 | AC   | 11 | 10 |
| 261248 | 40 | 4151995 | 4152012 | 2 | 9  | 18 | AG   | 13 | 4  |
| 261259 | 40 | 4170506 | 4170535 | 2 | 15 | 30 | AC   | 7  | 6  |
| 261261 | 40 | 4170706 | 4170725 | 2 | 10 | 20 | CA   | 17 | 10 |
| 261273 | 40 | 4192760 | 4192787 | 2 | 14 | 28 | TG   | 20 | 12 |
| 261274 | 40 | 4192853 | 4192886 | 2 | 17 | 34 | GT   | 11 | 10 |
| 261277 | 40 | 4193134 | 4193155 | 2 | 11 | 22 | CA   | 12 | 8  |
| 261278 | 40 | 4193235 | 4193262 | 2 | 14 | 28 | AC   | 10 | 8  |
| 261280 | 40 | 4197068 | 4197089 | 2 | 11 | 22 | TC   | 15 | 4  |
| 261290 | 40 | 4213579 | 4213606 | 2 | 14 | 28 | TG   | 9  | 9  |
| 261304 | 40 | 4220224 | 4220244 | 3 | 7  | 21 | ACA  | 22 | 9  |
| 261306 | 40 | 4221843 | 4221856 | 2 | 7  | 14 | CA   | 18 | 3  |
| 261307 | 40 | 4221986 | 4222011 | 2 | 13 | 26 | TG   | 18 | 8  |
| 261308 | 40 | 4222369 | 4222392 | 2 | 12 | 24 | TG   | 6  | 4  |
| 261311 | 40 | 4224936 | 4224959 | 4 | 6  | 24 | TAAA | 11 | 4  |
| 261320 | 40 | 4246169 | 4246204 | 2 | 18 | 36 | TG   | 12 | 10 |
| 261323 | 40 | 4246415 | 4246430 | 2 | 8  | 16 | CA   | 15 | 6  |
| 261325 | 40 | 4246558 | 4246575 | 2 | 9  | 18 | GT   | 23 | 3  |
| 261327 | 40 | 4246931 | 4246944 | 2 | 7  | 14 | GT   | 19 | 7  |
| 261329 | 40 | 4247888 | 4247909 | 2 | 11 | 22 | GA   | 17 | 8  |
| 261331 | 40 | 4254279 | 4254290 | 2 | 6  | 12 | TG   | 19 | 3  |
| 261332 | 40 | 4254393 | 4254420 | 2 | 14 | 28 | CA   | 26 | 5  |
| 261333 | 40 | 4254525 | 4254548 | 2 | 12 | 24 | GT   | 21 | 5  |
| 261335 | 40 | 4254926 | 4254939 | 2 | 7  | 14 | TG   | 24 | 11 |
| 261336 | 40 | 4256539 | 4256576 | 2 | 19 | 38 | TG   | 10 | 5  |
| 261341 | 40 | 4261915 | 4261930 | 4 | 4  | 16 | AAAT | 18 | 5  |
| 261347 | 40 | 4269709 | 4269732 | 4 | 6  | 24 | ATTC | 29 | 5  |
| 261368 | 40 | 4305108 | 4305131 | 3 | 8  | 24 | ATA  | 15 | 7  |
| 261379 | 40 | 4318119 | 4318148 | 2 | 15 | 30 | AC   | 16 | 11 |
| 261383 | 40 | 4321281 | 4321300 | 2 | 10 | 20 | TG   | 25 | 9  |
| 261384 | 40 | 4321687 | 4321701 | 3 | 5  | 15 | AAT  | 13 | 6  |
| 261385 | 40 | 4322903 | 4322918 | 2 | 8  | 16 | TG   | 13 | 6  |
| 261386 | 40 | 4324638 | 4324653 | 2 | 8  | 16 | GT   | 12 | 3  |
| 261388 | 40 | 4330215 | 4330226 | 2 | 6  | 12 | CA   | 19 | 5  |
| 261399 | 40 | 4352720 | 4352759 | 2 | 20 | 40 | CA   | 17 | 9  |
| 261400 | 40 | 4353746 | 4353763 | 2 | 9  | 18 | AT   | 18 | 5  |
| 261404 | 40 | 4359429 | 4359470 | 3 | 14 | 42 | ATG  | 7  | 4  |
| 261407 | 40 | 4364889 | 4364914 | 2 | 13 | 26 | GT   | 25 | 5  |
| 261411 | 40 | 4372212 | 4372227 | 2 | 8  | 16 | CA   | 21 | 7  |
| 261412 | 40 | 4372421 | 4372456 | 2 | 18 | 36 | AC   | 8  | 10 |
| 261413 | 40 | 4372534 | 4372553 | 2 | 10 | 20 | CA   | 16 | 10 |

|        |    |         |         |   |    |    |      |    |    |
|--------|----|---------|---------|---|----|----|------|----|----|
| 261418 | 40 | 4378551 | 4378580 | 2 | 15 | 30 | TG   | 13 | 6  |
| 261427 | 40 | 4392976 | 4392989 | 2 | 7  | 14 | AC   | 34 | 4  |
| 261430 | 40 | 4398090 | 4398111 | 2 | 11 | 22 | CA   | 12 | 12 |
| 261432 | 40 | 4399086 | 4399105 | 2 | 10 | 20 | GT   | 19 | 9  |
| 261441 | 40 | 4415836 | 4415865 | 2 | 15 | 30 | GT   | 16 | 8  |
| 261446 | 40 | 4434588 | 4434602 | 3 | 5  | 15 | GGA  | 27 | 3  |
| 261447 | 40 | 4435271 | 4435296 | 2 | 13 | 26 | TG   | 24 | 8  |
| 261450 | 40 | 4438245 | 4438260 | 2 | 8  | 16 | AT   | 13 | 8  |
| 261456 | 40 | 4454555 | 4454570 | 4 | 4  | 16 | TTTA | 14 | 6  |
| 261463 | 40 | 4464332 | 4464349 | 2 | 9  | 18 | CA   | 8  | 7  |
| 261468 | 40 | 4466917 | 4466958 | 2 | 21 | 42 | TG   | 6  | 7  |
| 261471 | 40 | 4470013 | 4470032 | 2 | 10 | 20 | AG   | 17 | 4  |
| 261474 | 40 | 4486149 | 4486163 | 3 | 5  | 15 | AGC  | 25 | 4  |
| 261484 | 40 | 4501026 | 4501059 | 2 | 17 | 34 | GT   | 11 | 8  |
| 261487 | 40 | 4507554 | 4507601 | 2 | 24 | 48 | GT   | 8  | 10 |
| 261490 | 40 | 4509803 | 4509826 | 2 | 12 | 24 | AC   | 14 | 10 |
| 261492 | 40 | 4513212 | 4513225 | 2 | 7  | 14 | AC   | 26 | 3  |
| 261494 | 40 | 4515641 | 4515676 | 4 | 9  | 36 | TCTT | 30 | 4  |
| 261497 | 40 | 4528667 | 4528706 | 2 | 20 | 40 | TC   | 10 | 9  |
| 261505 | 40 | 4549617 | 4549632 | 4 | 4  | 16 | ATTT | 28 | 3  |
| 261507 | 40 | 4556535 | 4556550 | 2 | 8  | 16 | CA   | 24 | 6  |
| 261510 | 40 | 4557634 | 4557679 | 2 | 23 | 46 | AC   | 13 | 9  |
| 261511 | 40 | 4557814 | 4557839 | 2 | 13 | 26 | TG   | 13 | 8  |
| 261513 | 40 | 4562710 | 4562739 | 2 | 15 | 30 | CA   | 25 | 6  |
| 261515 | 40 | 4563710 | 4563723 | 2 | 7  | 14 | TC   | 22 | 3  |
| 261521 | 40 | 4565925 | 4565944 | 2 | 10 | 20 | CA   | 19 | 4  |
| 261530 | 40 | 4576466 | 4576489 | 2 | 12 | 24 | GA   | 12 | 7  |
| 261537 | 41 | 29700   | 29717   | 2 | 9  | 18 | AT   | 15 | 4  |
| 261546 | 41 | 68523   | 68564   | 2 | 21 | 42 | CA   | 6  | 10 |
| 261550 | 41 | 79579   | 79602   | 2 | 12 | 24 | TG   | 13 | 6  |
| 261553 | 41 | 90156   | 90169   | 2 | 7  | 14 | GT   | 20 | 5  |
| 261556 | 41 | 103437  | 103463  | 3 | 9  | 27 | TTC  | 21 | 6  |
| 261565 | 41 | 122843  | 122872  | 2 | 15 | 30 | GT   | 15 | 14 |
| 261568 | 41 | 125491  | 125504  | 2 | 7  | 14 | AC   | 21 | 3  |
| 261569 | 41 | 125751  | 125764  | 2 | 7  | 14 | TG   | 20 | 5  |
| 261570 | 41 | 126495  | 126546  | 4 | 13 | 52 | ATCT | 9  | 8  |
| 261573 | 41 | 139213  | 139232  | 2 | 10 | 20 | GT   | 16 | 10 |
| 261576 | 41 | 148862  | 148881  | 2 | 10 | 20 | TG   | 14 | 8  |
| 261578 | 41 | 154281  | 154300  | 4 | 5  | 20 | CTTT | 20 | 7  |
| 261580 | 41 | 164317  | 164334  | 3 | 6  | 18 | TCT  | 29 | 5  |
| 261594 | 41 | 227391  | 227422  | 2 | 16 | 32 | TG   | 13 | 8  |
| 261600 | 41 | 259883  | 259898  | 2 | 8  | 16 | TG   | 17 | 14 |
| 261605 | 41 | 271893  | 271904  | 2 | 6  | 12 | GT   | 34 | 3  |
| 261606 | 41 | 273496  | 273511  | 4 | 4  | 16 | GCAG | 28 | 5  |
| 261610 | 41 | 281803  | 281824  | 2 | 11 | 22 | TG   | 19 | 5  |
| 261614 | 41 | 295128  | 295141  | 2 | 7  | 14 | TG   | 21 | 7  |
| 261625 | 41 | 325829  | 325846  | 3 | 6  | 18 | GGA  | 22 | 5  |
| 261627 | 41 | 327934  | 327953  | 2 | 10 | 20 | TG   | 12 | 4  |
| 261630 | 41 | 337302  | 337323  | 2 | 11 | 22 | CA   | 20 | 7  |
| 261631 | 41 | 337520  | 337549  | 2 | 15 | 30 | TG   | 14 | 10 |
| 261632 | 41 | 338429  | 338452  | 2 | 12 | 24 | CA   | 12 | 5  |

|        |    |         |         |   |    |    |      |    |    |
|--------|----|---------|---------|---|----|----|------|----|----|
| 261634 | 41 | 342824  | 342839  | 2 | 8  | 16 | GT   | 18 | 7  |
| 261644 | 41 | 366815  | 366826  | 2 | 6  | 12 | AC   | 30 | 6  |
| 261649 | 41 | 381033  | 381054  | 2 | 11 | 22 | TG   | 21 | 10 |
| 261660 | 41 | 414722  | 414745  | 3 | 8  | 24 | GAA  | 21 | 9  |
| 261661 | 41 | 424511  | 424528  | 3 | 6  | 18 | GAG  | 26 | 6  |
| 261679 | 41 | 491822  | 491835  | 2 | 7  | 14 | AC   | 22 | 5  |
| 261681 | 41 | 509367  | 509378  | 2 | 6  | 12 | TG   | 26 | 3  |
| 261682 | 41 | 522694  | 522709  | 2 | 8  | 16 | CA   | 23 | 5  |
| 261693 | 41 | 575642  | 575656  | 3 | 5  | 15 | GCA  | 28 | 4  |
| 261695 | 41 | 585067  | 585094  | 4 | 7  | 28 | CTAT | 7  | 4  |
| 261700 | 41 | 600716  | 600731  | 2 | 8  | 16 | AC   | 18 | 5  |
| 261704 | 41 | 619212  | 619229  | 3 | 6  | 18 | AAC  | 21 | 6  |
| 261706 | 41 | 630400  | 630414  | 3 | 5  | 15 | ACC  | 20 | 3  |
| 261707 | 41 | 631587  | 631624  | 2 | 19 | 38 | AC   | 16 | 17 |
| 261708 | 41 | 638036  | 638063  | 4 | 7  | 28 | TGAG | 28 | 6  |
| 261715 | 41 | 667162  | 667173  | 2 | 6  | 12 | CA   | 33 | 3  |
| 261724 | 41 | 710286  | 710306  | 3 | 7  | 21 | CTG  | 29 | 8  |
| 261734 | 41 | 765548  | 765577  | 3 | 10 | 30 | GAT  | 12 | 9  |
| 261737 | 41 | 774877  | 774892  | 2 | 8  | 16 | TG   | 16 | 6  |
| 261748 | 41 | 803827  | 803852  | 2 | 13 | 26 | TG   | 25 | 6  |
| 261752 | 41 | 818024  | 818045  | 2 | 11 | 22 | AC   | 17 | 5  |
| 261760 | 41 | 825337  | 825348  | 2 | 6  | 12 | TG   | 17 | 7  |
| 261773 | 41 | 880801  | 880812  | 2 | 6  | 12 | AG   | 25 | 3  |
| 261778 | 41 | 902424  | 902453  | 2 | 15 | 30 | TG   | 7  | 9  |
| 261781 | 41 | 919444  | 919461  | 3 | 6  | 18 | AAC  | 19 | 3  |
| 261793 | 41 | 940869  | 940898  | 3 | 10 | 30 | CAG  | 21 | 9  |
| 261796 | 41 | 947762  | 947775  | 2 | 7  | 14 | AC   | 19 | 11 |
| 261807 | 41 | 974696  | 974709  | 2 | 7  | 14 | AC   | 22 | 3  |
| 261809 | 41 | 984350  | 984367  | 3 | 6  | 18 | ATA  | 17 | 4  |
| 261815 | 41 | 1001931 | 1001942 | 2 | 6  | 12 | AT   | 18 | 6  |
| 261818 | 41 | 1008740 | 1008763 | 2 | 12 | 24 | GT   | 7  | 4  |
| 261819 | 41 | 1012987 | 1013010 | 4 | 6  | 24 | AAAT | 21 | 3  |
| 261826 | 41 | 1031797 | 1031832 | 3 | 12 | 36 | TCC  | 18 | 7  |
| 261836 | 41 | 1052647 | 1052670 | 2 | 12 | 24 | AC   | 17 | 5  |
| 261837 | 41 | 1052950 | 1052965 | 2 | 8  | 16 | AG   | 21 | 3  |
| 261845 | 41 | 1064822 | 1064841 | 2 | 10 | 20 | CA   | 18 | 5  |
| 261875 | 41 | 1142949 | 1142968 | 4 | 5  | 20 | TTGG | 14 | 3  |
| 261879 | 41 | 1160778 | 1160792 | 3 | 5  | 15 | CTC  | 27 | 5  |
| 261881 | 41 | 1167549 | 1167578 | 2 | 15 | 30 | TC   | 7  | 6  |
| 261887 | 41 | 1178149 | 1178164 | 2 | 8  | 16 | GT   | 22 | 8  |
| 261888 | 41 | 1178613 | 1178628 | 2 | 8  | 16 | GT   | 26 | 10 |
| 261889 | 41 | 1181851 | 1181880 | 3 | 10 | 30 | TTG  | 23 | 3  |
| 261891 | 41 | 1186697 | 1186708 | 2 | 6  | 12 | TG   | 12 | 7  |
| 261893 | 41 | 1193098 | 1193112 | 3 | 5  | 15 | GAA  | 30 | 3  |
| 261894 | 41 | 1194041 | 1194062 | 2 | 11 | 22 | TG   | 21 | 13 |
| 261895 | 41 | 1194805 | 1194820 | 2 | 8  | 16 | AC   | 6  | 3  |
| 261898 | 41 | 1211726 | 1211747 | 2 | 11 | 22 | TG   | 18 | 7  |
| 261901 | 41 | 1211911 | 1211926 | 2 | 8  | 16 | TC   | 24 | 6  |
| 261902 | 41 | 1211929 | 1211940 | 2 | 6  | 12 | TC   | 26 | 6  |
| 261904 | 41 | 1212129 | 1212160 | 2 | 16 | 32 | GT   | 11 | 10 |
| 261907 | 41 | 1217124 | 1217151 | 2 | 14 | 28 | TG   | 19 | 9  |

|        |    |         |         |   |    |    |      |    |    |
|--------|----|---------|---------|---|----|----|------|----|----|
| 261911 | 41 | 1227822 | 1227845 | 2 | 12 | 24 | AC   | 12 | 10 |
| 261912 | 41 | 1228313 | 1228346 | 2 | 17 | 34 | GT   | 10 | 10 |
| 261917 | 41 | 1233518 | 1233553 | 4 | 9  | 36 | TAGA | 12 | 8  |
| 261918 | 41 | 1236303 | 1236320 | 3 | 6  | 18 | CAG  | 19 | 5  |
| 261919 | 41 | 1236365 | 1236391 | 3 | 9  | 27 | GCA  | 25 | 9  |
| 261922 | 41 | 1241526 | 1241565 | 2 | 20 | 40 | CA   | 6  | 7  |
| 261931 | 41 | 1254767 | 1254790 | 2 | 12 | 24 | AC   | 10 | 12 |
| 261932 | 41 | 1255809 | 1255824 | 2 | 8  | 16 | TG   | 16 | 3  |
| 261938 | 41 | 1278832 | 1278855 | 2 | 12 | 24 | TG   | 13 | 4  |
| 261950 | 41 | 1303535 | 1303548 | 2 | 7  | 14 | AC   | 25 | 5  |
| 261951 | 41 | 1303615 | 1303640 | 2 | 13 | 26 | TG   | 11 | 8  |
| 261954 | 41 | 1318011 | 1318024 | 2 | 7  | 14 | CA   | 22 | 6  |
| 261960 | 41 | 1354307 | 1354321 | 3 | 5  | 15 | TGC  | 21 | 5  |
| 261965 | 41 | 1371288 | 1371308 | 3 | 7  | 21 | CCT  | 23 | 7  |
| 261972 | 41 | 1393969 | 1394020 | 4 | 13 | 52 | ATGT | 21 | 11 |
| 261977 | 41 | 1411079 | 1411093 | 3 | 5  | 15 | CCA  | 25 | 3  |
| 261988 | 41 | 1456407 | 1456433 | 3 | 9  | 27 | GCA  | 12 | 12 |
| 261990 | 41 | 1465442 | 1465473 | 4 | 8  | 32 | GGTA | 22 | 8  |
| 261991 | 41 | 1467680 | 1467703 | 2 | 12 | 24 | GT   | 17 | 6  |
| 261994 | 41 | 1480056 | 1480069 | 2 | 7  | 14 | CA   | 22 | 5  |
| 261997 | 41 | 1490863 | 1490890 | 2 | 14 | 28 | GT   | 7  | 10 |
| 262003 | 41 | 1499545 | 1499574 | 2 | 15 | 30 | CA   | 17 | 14 |
| 262004 | 41 | 1501315 | 1501332 | 2 | 9  | 18 | TG   | 22 | 5  |
| 262010 | 41 | 1525284 | 1525298 | 3 | 5  | 15 | ATG  | 21 | 4  |
| 262012 | 41 | 1528145 | 1528159 | 3 | 5  | 15 | GCA  | 28 | 4  |
| 262017 | 41 | 1538162 | 1538191 | 2 | 15 | 30 | TG   | 22 | 9  |
| 262018 | 41 | 1539259 | 1539270 | 2 | 6  | 12 | AT   | 18 | 8  |
| 262020 | 41 | 1544729 | 1544752 | 3 | 8  | 24 | TCC  | 25 | 3  |
| 262034 | 41 | 1580769 | 1580780 | 2 | 6  | 12 | AG   | 28 | 4  |
| 262042 | 41 | 1597841 | 1597856 | 2 | 8  | 16 | TG   | 28 | 5  |
| 262048 | 41 | 1637031 | 1637042 | 2 | 6  | 12 | TG   | 12 | 5  |
| 262050 | 41 | 1647399 | 1647424 | 2 | 13 | 26 | TG   | 8  | 8  |
| 262052 | 41 | 1650329 | 1650340 | 2 | 6  | 12 | TC   | 24 | 3  |
| 262058 | 41 | 1662726 | 1662740 | 3 | 5  | 15 | AGA  | 21 | 5  |
| 262060 | 41 | 1664404 | 1664433 | 2 | 15 | 30 | AC   | 19 | 9  |
| 262067 | 41 | 1673793 | 1673824 | 4 | 8  | 32 | TACA | 24 | 4  |
| 262070 | 41 | 1682252 | 1682285 | 2 | 17 | 34 | AC   | 11 | 9  |
| 262071 | 41 | 1684850 | 1684867 | 3 | 6  | 18 | TAG  | 30 | 3  |
| 262077 | 41 | 1702735 | 1702762 | 2 | 14 | 28 | TG   | 11 | 12 |
| 262080 | 41 | 1704989 | 1705008 | 2 | 10 | 20 | CA   | 16 | 15 |
| 262090 | 41 | 1759378 | 1759407 | 2 | 15 | 30 | TG   | 14 | 11 |
| 262103 | 41 | 1807961 | 1807980 | 2 | 10 | 20 | TG   | 10 | 5  |
| 262110 | 41 | 1817419 | 1817434 | 4 | 4  | 16 | GTGC | 34 | 3  |
| 262113 | 41 | 1830072 | 1830089 | 3 | 6  | 18 | CAA  | 24 | 3  |
| 262114 | 41 | 1834218 | 1834235 | 2 | 9  | 18 | GT   | 28 | 9  |
| 262122 | 41 | 1851063 | 1851088 | 2 | 13 | 26 | CA   | 21 | 17 |
| 262126 | 41 | 1863700 | 1863719 | 4 | 5  | 20 | ATTT | 23 | 3  |
| 262128 | 41 | 1868098 | 1868111 | 2 | 7  | 14 | GT   | 25 | 3  |
| 262138 | 41 | 1891089 | 1891115 | 3 | 9  | 27 | ATA  | 14 | 9  |
| 262140 | 41 | 1894295 | 1894314 | 4 | 5  | 20 | TGAA | 19 | 4  |
| 262154 | 41 | 1934516 | 1934533 | 2 | 9  | 18 | CA   | 20 | 4  |

|        |    |         |         |   |    |    |      |    |    |
|--------|----|---------|---------|---|----|----|------|----|----|
| 262167 | 41 | 1952820 | 1952841 | 2 | 11 | 22 | GT   | 20 | 11 |
| 262177 | 41 | 1973658 | 1973672 | 3 | 5  | 15 | AAC  | 19 | 3  |
| 262179 | 41 | 1980816 | 1980841 | 2 | 13 | 26 | CA   | 10 | 8  |
| 262180 | 41 | 1986490 | 1986503 | 2 | 7  | 14 | CA   | 30 | 6  |
| 262182 | 41 | 1990696 | 1990723 | 4 | 7  | 28 | TATG | 13 | 6  |
| 262192 | 41 | 2020521 | 2020534 | 2 | 7  | 14 | AC   | 22 | 3  |
| 262194 | 41 | 2021591 | 2021614 | 2 | 12 | 24 | TG   | 20 | 9  |
| 262195 | 41 | 2022124 | 2022135 | 2 | 6  | 12 | GT   | 22 | 4  |
| 262197 | 41 | 2029960 | 2030001 | 2 | 21 | 42 | AC   | 22 | 11 |
| 262198 | 41 | 2036669 | 2036696 | 2 | 14 | 28 | GT   | 9  | 4  |
| 262209 | 41 | 2066768 | 2066785 | 2 | 9  | 18 | AC   | 18 | 4  |
| 262210 | 41 | 2073614 | 2073635 | 2 | 11 | 22 | CA   | 15 | 11 |
| 262243 | 41 | 2159592 | 2159627 | 3 | 12 | 36 | GAG  | 6  | 4  |
| 262260 | 41 | 2208428 | 2208441 | 2 | 7  | 14 | AC   | 12 | 5  |
| 262262 | 41 | 2211216 | 2211243 | 2 | 14 | 28 | AC   | 10 | 8  |
| 262288 | 41 | 2254252 | 2254266 | 3 | 5  | 15 | GGT  | 29 | 5  |
| 262290 | 41 | 2257808 | 2257831 | 2 | 12 | 24 | GT   | 10 | 6  |
| 262293 | 41 | 2260794 | 2260813 | 2 | 10 | 20 | AC   | 28 | 9  |
| 262299 | 41 | 2284491 | 2284526 | 2 | 18 | 36 | GT   | 19 | 13 |
| 262300 | 41 | 2287455 | 2287466 | 2 | 6  | 12 | CA   | 31 | 3  |
| 262302 | 41 | 2298035 | 2298048 | 2 | 7  | 14 | CA   | 20 | 14 |
| 262314 | 41 | 2332788 | 2332799 | 2 | 6  | 12 | GT   | 27 | 7  |
| 262315 | 41 | 2334736 | 2334763 | 2 | 14 | 28 | CA   | 19 | 5  |
| 262316 | 41 | 2335626 | 2335673 | 4 | 12 | 48 | ATAG | 18 | 9  |
| 262320 | 41 | 2338155 | 2338178 | 2 | 12 | 24 | AC   | 19 | 13 |
| 262322 | 41 | 2342007 | 2342018 | 2 | 6  | 12 | CA   | 28 | 3  |
| 262323 | 41 | 2342730 | 2342757 | 4 | 7  | 28 | TCCA | 21 | 11 |
| 262324 | 41 | 2344756 | 2344769 | 2 | 7  | 14 | TG   | 7  | 3  |
| 262336 | 41 | 2362743 | 2362754 | 2 | 6  | 12 | TG   | 17 | 16 |
| 262337 | 41 | 2362999 | 2363026 | 4 | 7  | 28 | TCTG | 21 | 9  |
| 262338 | 41 | 2363132 | 2363146 | 3 | 5  | 15 | ATT  | 16 | 3  |
| 262339 | 41 | 2363318 | 2363333 | 2 | 8  | 16 | GA   | 18 | 11 |
| 262342 | 41 | 2363564 | 2363585 | 2 | 11 | 22 | TG   | 13 | 8  |
| 262351 | 41 | 2380736 | 2380747 | 2 | 6  | 12 | AC   | 24 | 3  |
| 262357 | 41 | 2386633 | 2386648 | 4 | 4  | 16 | TTAT | 32 | 3  |
| 262360 | 41 | 2391489 | 2391514 | 2 | 13 | 26 | GT   | 18 | 8  |
| 262361 | 41 | 2394531 | 2394546 | 2 | 8  | 16 | TG   | 20 | 7  |
| 262366 | 41 | 2402317 | 2402328 | 2 | 6  | 12 | TG   | 27 | 6  |
| 262367 | 41 | 2402333 | 2402346 | 2 | 7  | 14 | GT   | 22 | 4  |
| 262373 | 41 | 2404917 | 2404938 | 2 | 11 | 22 | GA   | 17 | 6  |
| 262374 | 41 | 2409417 | 2409440 | 3 | 8  | 24 | TTC  | 6  | 5  |
| 262379 | 41 | 2415404 | 2415453 | 2 | 25 | 50 | GT   | 7  | 11 |
| 262386 | 41 | 2431560 | 2431585 | 2 | 13 | 26 | AC   | 18 | 9  |
| 262387 | 41 | 2433315 | 2433330 | 2 | 8  | 16 | CT   | 30 | 5  |
| 262391 | 41 | 2440866 | 2440883 | 3 | 6  | 18 | TCC  | 35 | 3  |
| 262392 | 41 | 2440982 | 2440999 | 3 | 6  | 18 | GCT  | 32 | 12 |
| 262401 | 41 | 2456454 | 2456465 | 2 | 6  | 12 | TG   | 32 | 3  |
| 262403 | 41 | 2458277 | 2458294 | 2 | 9  | 18 | CT   | 25 | 6  |
| 262405 | 41 | 2459960 | 2459985 | 2 | 13 | 26 | AC   | 17 | 6  |
| 262417 | 41 | 2481029 | 2481054 | 2 | 13 | 26 | TG   | 13 | 7  |
| 262437 | 41 | 2505524 | 2505551 | 2 | 14 | 28 | CA   | 8  | 5  |

|        |    |         |         |   |    |    |      |    |    |
|--------|----|---------|---------|---|----|----|------|----|----|
| 262440 | 41 | 2513116 | 2513127 | 2 | 6  | 12 | GT   | 25 | 4  |
| 262444 | 41 | 2516235 | 2516252 | 2 | 9  | 18 | TC   | 21 | 4  |
| 262448 | 41 | 2522027 | 2522044 | 2 | 9  | 18 | CT   | 21 | 3  |
| 262450 | 41 | 2524799 | 2524820 | 2 | 11 | 22 | CA   | 15 | 6  |
| 262467 | 41 | 2547939 | 2547966 | 2 | 14 | 28 | GT   | 20 | 10 |
| 262469 | 41 | 2548673 | 2548692 | 2 | 10 | 20 | GT   | 20 | 9  |
| 262472 | 41 | 2552346 | 2552363 | 2 | 9  | 18 | TG   | 18 | 8  |
| 262475 | 41 | 2556140 | 2556163 | 3 | 8  | 24 | CAT  | 13 | 5  |
| 262476 | 41 | 2561245 | 2561256 | 2 | 6  | 12 | GT   | 29 | 5  |
| 262477 | 41 | 2563156 | 2563170 | 3 | 5  | 15 | AAT  | 29 | 4  |
| 262480 | 41 | 2569517 | 2569530 | 2 | 7  | 14 | CA   | 24 | 7  |
| 262487 | 41 | 2589581 | 2589612 | 2 | 16 | 32 | CA   | 7  | 8  |
| 262489 | 41 | 2591502 | 2591513 | 2 | 6  | 12 | CA   | 16 | 3  |
| 262490 | 41 | 2591516 | 2591531 | 2 | 8  | 16 | CA   | 16 | 4  |
| 262500 | 41 | 2609310 | 2609327 | 2 | 9  | 18 | TA   | 9  | 6  |
| 262506 | 41 | 2624794 | 2624809 | 4 | 4  | 16 | CTGT | 20 | 5  |
| 262507 | 41 | 2627649 | 2627664 | 4 | 4  | 16 | TTTA | 17 | 5  |
| 262512 | 41 | 2640132 | 2640143 | 2 | 6  | 12 | CT   | 26 | 7  |
| 262515 | 41 | 2646727 | 2646746 | 2 | 10 | 20 | AG   | 32 | 11 |
| 262523 | 41 | 2655280 | 2655311 | 2 | 16 | 32 | TG   | 15 | 9  |
| 262524 | 41 | 2657254 | 2657269 | 2 | 8  | 16 | AC   | 23 | 7  |
| 262530 | 41 | 2662428 | 2662449 | 2 | 11 | 22 | CT   | 7  | 7  |
| 262532 | 41 | 2665089 | 2665106 | 3 | 6  | 18 | CAG  | 34 | 4  |
| 262533 | 41 | 2666702 | 2666725 | 4 | 6  | 24 | CTTC | 22 | 6  |
| 262540 | 41 | 2673020 | 2673031 | 2 | 6  | 12 | AG   | 25 | 4  |
| 262542 | 41 | 2673526 | 2673537 | 2 | 6  | 12 | GT   | 18 | 3  |
| 262543 | 41 | 2675084 | 2675105 | 2 | 11 | 22 | CA   | 23 | 4  |
| 262545 | 41 | 2677069 | 2677089 | 3 | 7  | 21 | TCT  | 26 | 3  |
| 262546 | 41 | 2677925 | 2677942 | 2 | 9  | 18 | AC   | 17 | 7  |
| 262548 | 41 | 2680681 | 2680698 | 3 | 6  | 18 | CCA  | 15 | 4  |
| 262550 | 41 | 2685047 | 2685082 | 3 | 12 | 36 | CTC  | 14 | 7  |
| 262560 | 41 | 2701098 | 2701111 | 2 | 7  | 14 | TG   | 25 | 4  |
| 262569 | 41 | 2738529 | 2738540 | 2 | 6  | 12 | CT   | 19 | 7  |
| 262570 | 41 | 2740066 | 2740097 | 2 | 16 | 32 | CA   | 24 | 11 |
| 262573 | 41 | 2742832 | 2742867 | 2 | 18 | 36 | AC   | 14 | 8  |
| 262578 | 41 | 2748922 | 2748945 | 4 | 6  | 24 | GAAA | 13 | 9  |
| 262579 | 41 | 2749435 | 2749454 | 2 | 10 | 20 | TG   | 15 | 8  |
| 262584 | 41 | 2767726 | 2767737 | 2 | 6  | 12 | TA   | 24 | 4  |
| 262586 | 41 | 2769653 | 2769676 | 3 | 8  | 24 | TTA  | 7  | 4  |
| 262591 | 41 | 2788165 | 2788182 | 2 | 9  | 18 | GT   | 12 | 8  |
| 262593 | 41 | 2788918 | 2788933 | 4 | 4  | 16 | AAAT | 27 | 3  |
| 262595 | 41 | 2797085 | 2797104 | 2 | 10 | 20 | AC   | 24 | 10 |
| 262598 | 41 | 2797310 | 2797335 | 2 | 13 | 26 | GT   | 9  | 6  |
| 262603 | 41 | 2798953 | 2798968 | 4 | 4  | 16 | TTTA | 12 | 3  |
| 262611 | 41 | 2806603 | 2806636 | 2 | 17 | 34 | GT   | 18 | 12 |
| 262612 | 41 | 2806710 | 2806729 | 2 | 10 | 20 | CT   | 17 | 4  |
| 262614 | 41 | 2806948 | 2806965 | 2 | 9  | 18 | CA   | 20 | 17 |
| 262618 | 41 | 2825310 | 2825325 | 2 | 8  | 16 | GA   | 19 | 4  |
| 262619 | 41 | 2826149 | 2826178 | 2 | 15 | 30 | TG   | 12 | 12 |
| 262620 | 41 | 2827546 | 2827565 | 2 | 10 | 20 | GT   | 15 | 9  |
| 262621 | 41 | 2828488 | 2828505 | 2 | 9  | 18 | CA   | 14 | 11 |

|        |    |         |         |   |    |    |      |    |    |
|--------|----|---------|---------|---|----|----|------|----|----|
| 262625 | 41 | 2831875 | 2831900 | 2 | 13 | 26 | AC   | 22 | 12 |
| 262626 | 41 | 2832147 | 2832161 | 3 | 5  | 15 | CAG  | 29 | 6  |
| 262628 | 41 | 2833753 | 2833770 | 2 | 9  | 18 | AC   | 16 | 7  |
| 262629 | 41 | 2837157 | 2837196 | 2 | 20 | 40 | AC   | 13 | 9  |
| 262633 | 41 | 2844101 | 2844121 | 3 | 7  | 21 | GAG  | 11 | 7  |
| 262639 | 41 | 2848198 | 2848213 | 2 | 8  | 16 | GA   | 29 | 3  |
| 262640 | 41 | 2850121 | 2850141 | 3 | 7  | 21 | GCA  | 29 | 6  |
| 262643 | 41 | 2855530 | 2855543 | 2 | 7  | 14 | GA   | 23 | 6  |
| 262644 | 41 | 2855860 | 2855881 | 2 | 11 | 22 | GT   | 21 | 9  |
| 262645 | 41 | 2857016 | 2857042 | 3 | 9  | 27 | GAG  | 11 | 3  |
| 262648 | 41 | 2859993 | 2860010 | 2 | 9  | 18 | TC   | 22 | 3  |
| 262650 | 41 | 2861273 | 2861300 | 2 | 14 | 28 | GT   | 21 | 7  |
| 262651 | 41 | 2861324 | 2861337 | 2 | 7  | 14 | TG   | 22 | 3  |
| 262654 | 41 | 2864138 | 2864149 | 2 | 6  | 12 | CA   | 26 | 3  |
| 262655 | 41 | 2865195 | 2865220 | 2 | 13 | 26 | CA   | 20 | 6  |
| 262661 | 41 | 2880187 | 2880216 | 2 | 15 | 30 | TG   | 9  | 9  |
| 262663 | 41 | 2883958 | 2883977 | 2 | 10 | 20 | GT   | 20 | 7  |
| 262667 | 41 | 2887633 | 2887648 | 4 | 4  | 16 | GGAG | 17 | 3  |
| 262670 | 41 | 2889271 | 2889304 | 2 | 17 | 34 | CT   | 10 | 5  |
| 262671 | 41 | 2889377 | 2889398 | 2 | 11 | 22 | AG   | 21 | 3  |
| 262674 | 41 | 2895359 | 2895370 | 2 | 6  | 12 | GA   | 18 | 5  |
| 262676 | 41 | 2897098 | 2897123 | 2 | 13 | 26 | AC   | 15 | 7  |
| 262679 | 41 | 2899394 | 2899413 | 2 | 10 | 20 | AC   | 20 | 11 |
| 262681 | 41 | 2903942 | 2903955 | 2 | 7  | 14 | CT   | 26 | 9  |
| 262682 | 41 | 2904090 | 2904105 | 2 | 8  | 16 | GT   | 18 | 13 |
| 262688 | 41 | 2906189 | 2906204 | 2 | 8  | 16 | CA   | 9  | 8  |
| 262690 | 41 | 2910521 | 2910534 | 2 | 7  | 14 | AC   | 30 | 8  |
| 262691 | 41 | 2911836 | 2911865 | 2 | 15 | 30 | CA   | 7  | 7  |
| 262693 | 41 | 2917287 | 2917322 | 2 | 18 | 36 | GT   | 6  | 7  |
| 262694 | 41 | 2917479 | 2917514 | 4 | 9  | 36 | AGAA | 20 | 11 |
| 262695 | 41 | 2921074 | 2921091 | 3 | 6  | 18 | TGA  | 22 | 5  |
| 262701 | 41 | 2931926 | 2931937 | 2 | 6  | 12 | GA   | 32 | 3  |
| 262704 | 41 | 2938434 | 2938445 | 2 | 6  | 12 | AT   | 14 | 3  |
| 262707 | 41 | 2942396 | 2942411 | 2 | 8  | 16 | TG   | 16 | 9  |
| 262708 | 41 | 2942437 | 2942448 | 2 | 6  | 12 | CA   | 18 | 3  |
| 262709 | 41 | 2942783 | 2942794 | 2 | 6  | 12 | CA   | 25 | 4  |
| 262710 | 41 | 2942831 | 2942854 | 2 | 12 | 24 | TG   | 23 | 7  |
| 262711 | 41 | 2944121 | 2944152 | 2 | 16 | 32 | GT   | 11 | 9  |
| 262721 | 41 | 2954218 | 2954245 | 2 | 14 | 28 | CA   | 14 | 7  |
| 262722 | 41 | 2956638 | 2956661 | 4 | 6  | 24 | TCTG | 23 | 5  |
| 262723 | 41 | 2958800 | 2958815 | 2 | 8  | 16 | AC   | 25 | 8  |
| 262724 | 41 | 2958817 | 2958828 | 2 | 6  | 12 | CA   | 27 | 7  |
| 262726 | 41 | 2960825 | 2960840 | 2 | 8  | 16 | CT   | 18 | 8  |
| 262729 | 41 | 2962165 | 2962182 | 2 | 9  | 18 | AC   | 18 | 10 |
| 262734 | 41 | 2964899 | 2964913 | 3 | 5  | 15 | ACA  | 20 | 3  |
| 262735 | 41 | 2965329 | 2965352 | 2 | 12 | 24 | TG   | 11 | 9  |
| 262736 | 41 | 2965579 | 2965602 | 2 | 12 | 24 | GT   | 18 | 11 |
| 262737 | 41 | 2967801 | 2967820 | 2 | 10 | 20 | AG   | 20 | 13 |
| 262738 | 41 | 2967967 | 2967980 | 2 | 7  | 14 | TG   | 22 | 13 |
| 262740 | 41 | 2968894 | 2968911 | 3 | 6  | 18 | TGT  | 20 | 5  |
| 262741 | 41 | 2971203 | 2971218 | 2 | 8  | 16 | CA   | 20 | 8  |



|        |    |         |         |   |    |    |      |    |    |
|--------|----|---------|---------|---|----|----|------|----|----|
| 262746 | 41 | 2975073 | 2975084 | 2 | 6  | 12 | GA   | 24 | 5  |
| 262748 | 41 | 2982095 | 2982109 | 3 | 5  | 15 | ATT  | 25 | 3  |
| 262749 | 41 | 2991412 | 2991429 | 3 | 6  | 18 | CTC  | 9  | 8  |
| 262750 | 41 | 2991500 | 2991513 | 2 | 7  | 14 | TC   | 17 | 3  |
| 262751 | 41 | 2993268 | 2993279 | 2 | 6  | 12 | TG   | 30 | 3  |
| 262752 | 41 | 2994249 | 2994274 | 2 | 13 | 26 | TG   | 25 | 10 |
| 262753 | 41 | 2994764 | 2994789 | 2 | 13 | 26 | TC   | 16 | 8  |
| 262755 | 41 | 2995425 | 2995436 | 2 | 6  | 12 | TG   | 21 | 14 |
| 262758 | 41 | 2999410 | 2999421 | 2 | 6  | 12 | TC   | 19 | 6  |
| 262760 | 41 | 3000603 | 3000618 | 4 | 4  | 16 | TTAT | 17 | 4  |
| 262762 | 41 | 3002212 | 3002235 | 2 | 12 | 24 | TG   | 13 | 6  |
| 262764 | 41 | 3004046 | 3004059 | 2 | 7  | 14 | AG   | 25 | 6  |
| 262765 | 41 | 3007301 | 3007316 | 4 | 4  | 16 | ATAA | 9  | 3  |
| 262766 | 41 | 3013294 | 3013314 | 3 | 7  | 21 | TTG  | 21 | 10 |
| 262767 | 41 | 3017490 | 3017505 | 4 | 4  | 16 | TTCA | 29 | 8  |
| 262768 | 41 | 3019442 | 3019465 | 2 | 12 | 24 | AG   | 17 | 10 |
| 262769 | 41 | 3022527 | 3022544 | 2 | 9  | 18 | TG   | 16 | 5  |
| 262772 | 41 | 3023577 | 3023622 | 2 | 23 | 46 | AC   | 6  | 8  |
| 262776 | 41 | 3029346 | 3029366 | 3 | 7  | 21 | TTA  | 16 | 4  |
| 262777 | 41 | 3029582 | 3029597 | 2 | 8  | 16 | GA   | 11 | 11 |
| 262780 | 41 | 3029958 | 3029985 | 4 | 7  | 28 | AAAG | 8  | 9  |
| 262783 | 41 | 3030430 | 3030441 | 2 | 6  | 12 | CT   | 19 | 3  |
| 262787 | 41 | 3031064 | 3031083 | 4 | 5  | 20 | AAAT | 21 | 5  |
| 262802 | 41 | 3054667 | 3054680 | 2 | 7  | 14 | AG   | 21 | 10 |
| 262803 | 41 | 3055934 | 3055951 | 3 | 6  | 18 | GAG  | 29 | 5  |
| 262818 | 41 | 3079991 | 3080011 | 3 | 7  | 21 | ATA  | 13 | 11 |
| 262819 | 41 | 3086562 | 3086575 | 2 | 7  | 14 | TG   | 34 | 3  |
| 262820 | 41 | 3103384 | 3103399 | 4 | 4  | 16 | TAAA | 23 | 4  |
| 262821 | 41 | 3104259 | 3104276 | 3 | 6  | 18 | TGT  | 23 | 6  |
| 262833 | 41 | 3118017 | 3118042 | 2 | 13 | 26 | CA   | 13 | 8  |
| 262834 | 41 | 3118144 | 3118157 | 2 | 7  | 14 | CA   | 10 | 4  |
| 262835 | 41 | 3118236 | 3118251 | 2 | 8  | 16 | CT   | 13 | 8  |
| 262838 | 41 | 3119079 | 3119090 | 2 | 6  | 12 | CT   | 25 | 3  |
| 262839 | 41 | 3119633 | 3119646 | 2 | 7  | 14 | CA   | 24 | 11 |
| 262840 | 41 | 3122702 | 3122735 | 2 | 17 | 34 | AC   | 18 | 14 |
| 262842 | 41 | 3124522 | 3124537 | 2 | 8  | 16 | GT   | 31 | 8  |
| 262844 | 41 | 3124615 | 3124629 | 3 | 5  | 15 | TGA  | 27 | 14 |
| 262846 | 41 | 3124813 | 3124836 | 3 | 8  | 24 | CTC  | 26 | 5  |
| 262847 | 41 | 3125080 | 3125095 | 2 | 8  | 16 | GT   | 19 | 10 |
| 262849 | 41 | 3125496 | 3125533 | 2 | 19 | 38 | TG   | 6  | 5  |
| 262855 | 41 | 3127753 | 3127772 | 2 | 10 | 20 | TG   | 14 | 16 |
| 262857 | 41 | 3127980 | 3128001 | 2 | 11 | 22 | GA   | 18 | 5  |
| 262858 | 41 | 3128159 | 3128176 | 2 | 9  | 18 | AG   | 20 | 3  |
| 262859 | 41 | 3128272 | 3128307 | 3 | 12 | 36 | GGA  | 11 | 4  |
| 262861 | 41 | 3133139 | 3133156 | 3 | 6  | 18 | GAG  | 28 | 4  |
| 262863 | 41 | 3133648 | 3133675 | 4 | 7  | 28 | AAAG | 15 | 3  |
| 262864 | 41 | 3133869 | 3133888 | 4 | 5  | 20 | AAAT | 9  | 4  |
| 262869 | 41 | 3140526 | 3140541 | 2 | 8  | 16 | TG   | 25 | 8  |
| 262883 | 41 | 3182548 | 3182574 | 3 | 9  | 27 | CTC  | 24 | 3  |
| 262885 | 41 | 3183197 | 3183228 | 2 | 16 | 32 | AG   | 10 | 7  |
| 262886 | 41 | 3184725 | 3184745 | 3 | 7  | 21 | CCT  | 28 | 3  |

|        |    |         |         |   |    |    |      |    |    |
|--------|----|---------|---------|---|----|----|------|----|----|
| 262888 | 41 | 3187007 | 3187024 | 2 | 9  | 18 | TG   | 14 | 3  |
| 262893 | 41 | 3193324 | 3193345 | 2 | 11 | 22 | CA   | 15 | 7  |
| 262895 | 41 | 3200371 | 3200382 | 2 | 6  | 12 | GA   | 35 | 3  |
| 262896 | 41 | 3203645 | 3203668 | 2 | 12 | 24 | AC   | 10 | 10 |
| 262900 | 41 | 3217288 | 3217305 | 3 | 6  | 18 | GAG  | 14 | 6  |
| 262901 | 41 | 3222825 | 3222836 | 2 | 6  | 12 | AT   | 14 | 7  |
| 262902 | 41 | 3222838 | 3222849 | 2 | 6  | 12 | TA   | 12 | 6  |
| 262922 | 41 | 3256137 | 3256156 | 2 | 10 | 20 | CA   | 23 | 7  |
| 262923 | 41 | 3256761 | 3256776 | 2 | 8  | 16 | GT   | 21 | 14 |
| 262924 | 41 | 3258219 | 3258230 | 2 | 6  | 12 | TG   | 33 | 3  |
| 262926 | 41 | 3259652 | 3259673 | 2 | 11 | 22 | AC   | 19 | 8  |
| 262927 | 41 | 3260856 | 3260869 | 2 | 7  | 14 | TA   | 8  | 8  |
| 262929 | 41 | 3262603 | 3262642 | 2 | 20 | 40 | GT   | 8  | 10 |
| 262930 | 41 | 3262793 | 3262820 | 2 | 14 | 28 | TG   | 17 | 15 |
| 262935 | 41 | 3272391 | 3272422 | 2 | 16 | 32 | TG   | 13 | 9  |
| 262936 | 41 | 3272534 | 3272547 | 2 | 7  | 14 | CT   | 13 | 4  |
| 262937 | 41 | 3272579 | 3272606 | 2 | 14 | 28 | AC   | 8  | 7  |
| 262940 | 41 | 3275093 | 3275106 | 2 | 7  | 14 | GA   | 25 | 4  |
| 262941 | 41 | 3275225 | 3275240 | 4 | 4  | 16 | CCTC | 10 | 5  |
| 262942 | 41 | 3275745 | 3275774 | 2 | 15 | 30 | AC   | 15 | 7  |
| 262944 | 41 | 3276658 | 3276677 | 2 | 10 | 20 | GT   | 16 | 11 |
| 262945 | 41 | 3276992 | 3277015 | 4 | 6  | 24 | TCTT | 20 | 7  |
| 262946 | 41 | 3277372 | 3277399 | 2 | 14 | 28 | AG   | 15 | 9  |
| 262947 | 41 | 3279026 | 3279063 | 2 | 19 | 38 | AC   | 13 | 10 |
| 262950 | 41 | 3282078 | 3282089 | 2 | 6  | 12 | AT   | 6  | 3  |
| 262953 | 41 | 3283427 | 3283446 | 2 | 10 | 20 | TG   | 15 | 11 |
| 262956 | 41 | 3285799 | 3285822 | 3 | 8  | 24 | CCT  | 18 | 6  |
| 262964 | 41 | 3293174 | 3293215 | 2 | 21 | 42 | AC   | 14 | 13 |
| 262965 | 41 | 3293289 | 3293304 | 2 | 8  | 16 | AT   | 8  | 5  |
| 262968 | 41 | 3303442 | 3303455 | 2 | 7  | 14 | AT   | 21 | 3  |
| 262973 | 41 | 3318262 | 3318291 | 2 | 15 | 30 | TG   | 12 | 10 |
| 262975 | 41 | 3319804 | 3319827 | 2 | 12 | 24 | AT   | 25 | 5  |
| 262985 | 41 | 3337445 | 3337462 | 2 | 9  | 18 | TG   | 17 | 5  |
| 262988 | 41 | 3340606 | 3340637 | 2 | 16 | 32 | CA   | 16 | 10 |
| 262989 | 41 | 3341945 | 3341964 | 2 | 10 | 20 | TC   | 12 | 5  |
| 262992 | 41 | 3343229 | 3343262 | 2 | 17 | 34 | CA   | 15 | 13 |
| 262993 | 41 | 3343678 | 3343705 | 2 | 14 | 28 | TG   | 17 | 9  |
| 262995 | 41 | 3348254 | 3348271 | 2 | 9  | 18 | GT   | 13 | 8  |
| 262996 | 41 | 3366464 | 3366475 | 2 | 6  | 12 | TG   | 8  | 6  |
| 262997 | 41 | 3368731 | 3368780 | 2 | 25 | 50 | AC   | 7  | 9  |
| 262998 | 41 | 3370160 | 3370189 | 2 | 15 | 30 | TG   | 12 | 11 |
| 262999 | 41 | 3370358 | 3370373 | 2 | 8  | 16 | GT   | 26 | 12 |
| 263000 | 41 | 3370376 | 3370387 | 2 | 6  | 12 | GT   | 28 | 10 |
| 263001 | 41 | 3371285 | 3371322 | 2 | 19 | 38 | CA   | 8  | 8  |
| 263002 | 41 | 3372073 | 3372086 | 2 | 7  | 14 | TG   | 20 | 10 |
| 263010 | 41 | 3376505 | 3376524 | 2 | 10 | 20 | CA   | 15 | 12 |
| 263012 | 41 | 3378174 | 3378213 | 2 | 20 | 40 | CA   | 16 | 9  |
| 263013 | 41 | 3381215 | 3381229 | 3 | 5  | 15 | CTG  | 24 | 4  |
| 263021 | 41 | 3404620 | 3404633 | 2 | 7  | 14 | AT   | 13 | 5  |
| 263022 | 41 | 3405211 | 3405240 | 2 | 15 | 30 | CA   | 9  | 9  |
| 263023 | 41 | 3411823 | 3411840 | 3 | 6  | 18 | CTT  | 30 | 4  |

|        |    |         |         |   |    |    |     |    |    |
|--------|----|---------|---------|---|----|----|-----|----|----|
| 263025 | 41 | 3411923 | 3411950 | 2 | 14 | 28 | AC  | 6  | 4  |
| 263027 | 41 | 3429723 | 3429746 | 3 | 8  | 24 | AGG | 17 | 5  |
| 263029 | 41 | 3445373 | 3445404 | 2 | 16 | 32 | AC  | 16 | 12 |
| 263031 | 41 | 3449813 | 3449830 | 2 | 9  | 18 | CA  | 23 | 11 |
| 263041 | 41 | 3459657 | 3459674 | 2 | 9  | 18 | CA  | 27 | 6  |
| 263043 | 41 | 3462942 | 3462961 | 2 | 10 | 20 | CT  | 18 | 5  |
| 263044 | 41 | 3464434 | 3464449 | 2 | 8  | 16 | GT  | 20 | 6  |
| 263045 | 41 | 3464708 | 3464719 | 2 | 6  | 12 | AC  | 23 | 4  |
| 263047 | 41 | 3467222 | 3467235 | 2 | 7  | 14 | AC  | 22 | 10 |
| 263049 | 41 | 3468738 | 3468761 | 2 | 12 | 24 | GT  | 18 | 6  |
| 263052 | 41 | 3470877 | 3470910 | 2 | 17 | 34 | AC  | 15 | 14 |
| 263053 | 41 | 3471352 | 3471363 | 2 | 6  | 12 | GA  | 15 | 3  |
| 263057 | 41 | 3476645 | 3476664 | 2 | 10 | 20 | AC  | 21 | 4  |
| 263058 | 41 | 3477506 | 3477521 | 2 | 8  | 16 | TG  | 24 | 4  |
| 263060 | 41 | 3482240 | 3482257 | 2 | 9  | 18 | TG  | 15 | 3  |
| 263062 | 41 | 3485127 | 3485141 | 3 | 5  | 15 | TTG | 26 | 5  |
| 263063 | 41 | 3485684 | 3485715 | 2 | 16 | 32 | AC  | 10 | 7  |
| 263064 | 41 | 3485840 | 3485873 | 2 | 17 | 34 | GT  | 7  | 9  |
| 263068 | 41 | 3491405 | 3491426 | 2 | 11 | 22 | GT  | 28 | 11 |
| 263069 | 41 | 3491585 | 3491599 | 3 | 5  | 15 | CTG | 25 | 4  |
| 263071 | 41 | 3491839 | 3491852 | 2 | 7  | 14 | CA  | 20 | 3  |
| 263072 | 41 | 3492399 | 3492424 | 2 | 13 | 26 | GT  | 13 | 12 |
| 263073 | 41 | 3492510 | 3492524 | 3 | 5  | 15 | CAT | 21 | 8  |
| 263074 | 41 | 3492695 | 3492716 | 2 | 11 | 22 | CA  | 22 | 10 |
| 263076 | 41 | 3493049 | 3493068 | 2 | 10 | 20 | GA  | 11 | 10 |
| 263077 | 41 | 3493225 | 3493248 | 3 | 8  | 24 | CTG | 28 | 5  |
| 263080 | 41 | 3501865 | 3501886 | 2 | 11 | 22 | AC  | 18 | 5  |
| 263082 | 41 | 3506500 | 3506535 | 3 | 12 | 36 | CTC | 9  | 7  |
| 263083 | 41 | 3506973 | 3506998 | 2 | 13 | 26 | CA  | 33 | 14 |
| 263088 | 41 | 3510387 | 3510400 | 2 | 7  | 14 | AT  | 25 | 6  |
| 263090 | 41 | 3515233 | 3515248 | 2 | 8  | 16 | AC  | 19 | 14 |
| 263091 | 41 | 3515511 | 3515536 | 2 | 13 | 26 | CA  | 18 | 15 |
| 263100 | 41 | 3532929 | 3532944 | 2 | 8  | 16 | AG  | 24 | 6  |
| 263101 | 41 | 3542184 | 3542201 | 2 | 9  | 18 | AC  | 13 | 8  |
| 263104 | 41 | 3543712 | 3543737 | 2 | 13 | 26 | CA  | 11 | 5  |
| 263107 | 41 | 3554795 | 3554810 | 2 | 8  | 16 | GT  | 9  | 8  |
| 263114 | 41 | 3564785 | 3564810 | 2 | 13 | 26 | TG  | 14 | 10 |
| 263134 | 41 | 3591507 | 3591524 | 2 | 9  | 18 | AG  | 16 | 6  |
| 263135 | 41 | 3591772 | 3591785 | 2 | 7  | 14 | CA  | 15 | 3  |
| 263136 | 41 | 3592393 | 3592406 | 2 | 7  | 14 | TC  | 20 | 11 |
| 263137 | 41 | 3592407 | 3592418 | 2 | 6  | 12 | TA  | 15 | 8  |
| 263143 | 41 | 3609366 | 3609397 | 2 | 16 | 32 | GT  | 12 | 12 |
| 263144 | 41 | 3610147 | 3610173 | 3 | 9  | 27 | CAG | 32 | 9  |
| 263146 | 41 | 3611299 | 3611326 | 2 | 14 | 28 | GT  | 11 | 6  |
| 263147 | 41 | 3611402 | 3611425 | 2 | 12 | 24 | GT  | 21 | 13 |
| 263149 | 41 | 3611596 | 3611621 | 2 | 13 | 26 | GT  | 6  | 4  |
| 263151 | 41 | 3612263 | 3612300 | 2 | 19 | 38 | GT  | 11 | 7  |
| 263155 | 41 | 3618559 | 3618576 | 3 | 6  | 18 | TCA | 31 | 5  |
| 263162 | 41 | 3620630 | 3620659 | 2 | 15 | 30 | AC  | 21 | 15 |
| 263163 | 41 | 3622957 | 3622968 | 2 | 6  | 12 | AC  | 19 | 4  |
| 263164 | 41 | 3623158 | 3623171 | 2 | 7  | 14 | AC  | 24 | 4  |

|        |    |         |         |   |    |    |      |    |    |
|--------|----|---------|---------|---|----|----|------|----|----|
| 263165 | 41 | 3629940 | 3629967 | 2 | 14 | 28 | GT   | 19 | 9  |
| 263166 | 41 | 3631850 | 3631871 | 2 | 11 | 22 | TC   | 10 | 7  |
| 263172 | 41 | 3641961 | 3641974 | 2 | 7  | 14 | CA   | 20 | 6  |
| 263173 | 41 | 3642663 | 3642689 | 3 | 9  | 27 | TCC  | 26 | 6  |
| 263175 | 41 | 3644201 | 3644214 | 2 | 7  | 14 | GA   | 20 | 3  |
| 263176 | 41 | 3644251 | 3644282 | 2 | 16 | 32 | TC   | 10 | 14 |
| 263178 | 41 | 3649648 | 3649671 | 3 | 8  | 24 | TCA  | 22 | 3  |
| 263179 | 41 | 3650823 | 3650854 | 2 | 16 | 32 | AC   | 13 | 12 |
| 263181 | 41 | 3655625 | 3655636 | 2 | 6  | 12 | CA   | 31 | 6  |
| 263183 | 41 | 3656453 | 3656476 | 2 | 12 | 24 | CA   | 22 | 13 |
| 263184 | 41 | 3659472 | 3659487 | 2 | 8  | 16 | GT   | 24 | 3  |
| 263185 | 41 | 3659515 | 3659538 | 4 | 6  | 24 | CTTC | 20 | 3  |
| 263198 | 41 | 3659971 | 3659996 | 2 | 13 | 26 | AC   | 7  | 5  |
| 263199 | 41 | 3664475 | 3664526 | 2 | 26 | 52 | AC   | 6  | 11 |
| 263202 | 41 | 3669451 | 3669476 | 2 | 13 | 26 | TG   | 18 | 10 |
| 263203 | 41 | 3669594 | 3669611 | 2 | 9  | 18 | CA   | 16 | 12 |
| 263205 | 41 | 3670067 | 3670078 | 2 | 6  | 12 | AC   | 18 | 6  |
| 263207 | 41 | 3671497 | 3671518 | 2 | 11 | 22 | TG   | 21 | 11 |
| 263208 | 41 | 3671639 | 3671656 | 2 | 9  | 18 | AC   | 18 | 5  |
| 263211 | 41 | 3673451 | 3673472 | 2 | 11 | 22 | AC   | 15 | 6  |
| 263212 | 41 | 3674275 | 3674286 | 2 | 6  | 12 | TG   | 6  | 3  |
| 263213 | 41 | 3676042 | 3676068 | 3 | 9  | 27 | AGA  | 24 | 7  |
| 263215 | 41 | 3677310 | 3677325 | 2 | 8  | 16 | CA   | 11 | 11 |
| 263220 | 41 | 3683132 | 3683143 | 2 | 6  | 12 | TG   | 25 | 7  |
| 263222 | 41 | 3685973 | 3685992 | 2 | 10 | 20 | TG   | 15 | 8  |
| 263223 | 41 | 3690280 | 3690305 | 2 | 13 | 26 | CA   | 23 | 9  |
| 263226 | 41 | 3694101 | 3694116 | 2 | 8  | 16 | GT   | 19 | 10 |
| 263229 | 41 | 3697132 | 3697161 | 3 | 10 | 30 | GCA  | 25 | 7  |
| 263231 | 41 | 3699170 | 3699187 | 3 | 6  | 18 | TAT  | 13 | 3  |
| 263237 | 41 | 3702506 | 3702523 | 3 | 6  | 18 | GAT  | 18 | 6  |
| 263240 | 41 | 3703751 | 3703765 | 3 | 5  | 15 | TGC  | 22 | 4  |
| 263243 | 41 | 3705514 | 3705534 | 3 | 7  | 21 | GGA  | 23 | 3  |
| 263244 | 41 | 3705716 | 3705763 | 2 | 24 | 48 | AC   | 18 | 14 |
| 263245 | 41 | 3706834 | 3706861 | 2 | 14 | 28 | CA   | 14 | 9  |
| 263246 | 41 | 3707739 | 3707772 | 2 | 17 | 34 | GT   | 13 | 9  |
| 263249 | 41 | 3709314 | 3709339 | 2 | 13 | 26 | AC   | 14 | 11 |
| 263250 | 41 | 3712640 | 3712653 | 2 | 7  | 14 | GT   | 22 | 7  |
| 263251 | 41 | 3712767 | 3712790 | 3 | 8  | 24 | AGG  | 24 | 6  |
| 263252 | 41 | 3716956 | 3716975 | 2 | 10 | 20 | TG   | 20 | 9  |
| 263253 | 41 | 3718131 | 3718194 | 4 | 16 | 64 | ATGG | 28 | 19 |
| 263254 | 41 | 3718346 | 3718379 | 2 | 17 | 34 | AC   | 10 | 8  |
| 263255 | 41 | 3718509 | 3718536 | 2 | 14 | 28 | GT   | 7  | 9  |
| 263257 | 41 | 3720046 | 3720065 | 2 | 10 | 20 | GT   | 15 | 9  |
| 263259 | 41 | 3720406 | 3720429 | 2 | 12 | 24 | AC   | 8  | 6  |
| 263265 | 41 | 3722079 | 3722100 | 2 | 11 | 22 | CA   | 7  | 8  |
| 263267 | 41 | 3722246 | 3722265 | 2 | 10 | 20 | CT   | 21 | 4  |
| 263269 | 41 | 3724918 | 3724931 | 2 | 7  | 14 | TC   | 26 | 4  |
| 263271 | 41 | 3725115 | 3725128 | 2 | 7  | 14 | CA   | 16 | 4  |
| 263272 | 41 | 3725133 | 3725144 | 2 | 6  | 12 | CA   | 14 | 3  |
| 263273 | 41 | 3725240 | 3725259 | 2 | 10 | 20 | CA   | 23 | 8  |
| 263275 | 41 | 3725733 | 3725748 | 2 | 8  | 16 | TG   | 17 | 7  |

|        |    |         |         |   |    |    |      |    |    |
|--------|----|---------|---------|---|----|----|------|----|----|
| 263284 | 41 | 3727495 | 3727520 | 2 | 13 | 26 | GT   | 15 | 12 |
| 263285 | 41 | 3727572 | 3727593 | 2 | 11 | 22 | GT   | 14 | 12 |
| 263288 | 41 | 3728528 | 3728569 | 2 | 21 | 42 | AC   | 11 | 16 |
| 263292 | 41 | 3730044 | 3730071 | 4 | 7  | 28 | AAAT | 22 | 3  |
| 263293 | 41 | 3730153 | 3730176 | 2 | 12 | 24 | TG   | 8  | 4  |
| 263301 | 41 | 3734623 | 3734640 | 2 | 9  | 18 | CA   | 15 | 10 |
| 263302 | 41 | 3734785 | 3734810 | 2 | 13 | 26 | CA   | 10 | 4  |
| 263303 | 41 | 3734834 | 3734849 | 2 | 8  | 16 | GT   | 11 | 12 |
| 263308 | 41 | 3735551 | 3735570 | 4 | 5  | 20 | TTCT | 24 | 3  |
| 263309 | 41 | 3735574 | 3735589 | 4 | 4  | 16 | TTTC | 22 | 4  |
| 263313 | 41 | 3738163 | 3738178 | 2 | 8  | 16 | CA   | 26 | 6  |
| 263315 | 41 | 3738302 | 3738327 | 2 | 13 | 26 | GT   | 14 | 15 |
| 263316 | 41 | 3739065 | 3739076 | 2 | 6  | 12 | GT   | 30 | 7  |
| 263322 | 41 | 3740873 | 3740886 | 2 | 7  | 14 | AC   | 28 | 4  |
| 263328 | 41 | 3742064 | 3742079 | 2 | 8  | 16 | TG   | 15 | 5  |
| 263329 | 41 | 3742210 | 3742231 | 2 | 11 | 22 | TG   | 13 | 7  |
| 263331 | 41 | 3742456 | 3742485 | 2 | 15 | 30 | TG   | 26 | 11 |
| 263339 | 41 | 3750496 | 3750531 | 3 | 12 | 36 | GAG  | 17 | 5  |
| 263340 | 41 | 3750617 | 3750631 | 3 | 5  | 15 | GAT  | 31 | 3  |
| 263341 | 41 | 3751849 | 3751874 | 2 | 13 | 26 | CA   | 17 | 7  |
| 263342 | 41 | 3752418 | 3752437 | 2 | 10 | 20 | CA   | 21 | 10 |
| 263343 | 41 | 3752483 | 3752494 | 2 | 6  | 12 | AC   | 24 | 3  |
| 263344 | 41 | 3752623 | 3752640 | 2 | 9  | 18 | CA   | 21 | 8  |
| 263346 | 41 | 3755075 | 3755089 | 3 | 5  | 15 | TGC  | 30 | 3  |
| 263348 | 41 | 3755832 | 3755865 | 2 | 17 | 34 | TG   | 9  | 6  |
| 263350 | 41 | 3756324 | 3756365 | 2 | 21 | 42 | CA   | 8  | 9  |
| 263355 | 41 | 3756662 | 3756693 | 2 | 16 | 32 | CA   | 7  | 7  |
| 263357 | 41 | 3757300 | 3757327 | 2 | 14 | 28 | AC   | 14 | 5  |
| 263358 | 41 | 3757627 | 3757648 | 2 | 11 | 22 | AC   | 13 | 3  |
| 263359 | 41 | 3757748 | 3757779 | 2 | 16 | 32 | AC   | 17 | 14 |
| 263361 | 41 | 3758399 | 3758412 | 2 | 7  | 14 | TG   | 28 | 4  |
| 263363 | 41 | 3759621 | 3759636 | 2 | 8  | 16 | AC   | 16 | 4  |
| 263365 | 41 | 3759900 | 3759917 | 2 | 9  | 18 | AG   | 18 | 3  |
| 263371 | 41 | 3764043 | 3764060 | 2 | 9  | 18 | TG   | 22 | 4  |
| 263382 | 41 | 3767346 | 3767359 | 2 | 7  | 14 | GT   | 23 | 5  |
| 263383 | 41 | 3767644 | 3767661 | 3 | 6  | 18 | GGA  | 10 | 4  |
| 263387 | 41 | 3771402 | 3771431 | 2 | 15 | 30 | TG   | 10 | 8  |
| 263388 | 41 | 3771544 | 3771565 | 2 | 11 | 22 | TC   | 8  | 9  |
| 263391 | 41 | 3773741 | 3773776 | 4 | 9  | 36 | TGTT | 8  | 5  |
| 263399 | 41 | 3777517 | 3777537 | 3 | 7  | 21 | TAA  | 19 | 4  |
| 263407 | 41 | 3780020 | 3780047 | 2 | 14 | 28 | AC   | 10 | 5  |
| 263421 | 41 | 3790002 | 3790035 | 2 | 17 | 34 | GT   | 9  | 9  |
| 263424 | 41 | 3792808 | 3792843 | 2 | 18 | 36 | CA   | 22 | 7  |
| 263425 | 41 | 3792993 | 3793016 | 2 | 12 | 24 | TG   | 20 | 11 |
| 263426 | 41 | 3793094 | 3793133 | 2 | 20 | 40 | GT   | 13 | 7  |
| 263439 | 41 | 3803397 | 3803414 | 2 | 9  | 18 | AC   | 15 | 5  |
| 263440 | 41 | 3805085 | 3805120 | 3 | 12 | 36 | CTT  | 15 | 11 |
| 263441 | 41 | 3805487 | 3805514 | 2 | 14 | 28 | CA   | 15 | 5  |
| 263446 | 41 | 3806424 | 3806449 | 2 | 13 | 26 | TC   | 17 | 7  |
| 263451 | 41 | 3806898 | 3806935 | 2 | 19 | 38 | AC   | 10 | 10 |
| 263452 | 41 | 3810233 | 3810248 | 2 | 8  | 16 | AG   | 24 | 3  |

|        |    |         |         |   |    |    |      |    |    |
|--------|----|---------|---------|---|----|----|------|----|----|
| 263458 | 41 | 3812334 | 3812347 | 2 | 7  | 14 | GA   | 14 | 10 |
| 263460 | 41 | 3821953 | 3821974 | 2 | 11 | 22 | CT   | 17 | 7  |
| 263461 | 41 | 3823084 | 3823101 | 3 | 6  | 18 | GGA  | 20 | 8  |
| 263462 | 41 | 3825062 | 3825091 | 2 | 15 | 30 | CA   | 19 | 8  |
| 263463 | 41 | 3828478 | 3828511 | 2 | 17 | 34 | CA   | 10 | 7  |
| 263464 | 41 | 3828610 | 3828637 | 2 | 14 | 28 | TC   | 11 | 4  |
| 263465 | 41 | 3829183 | 3829200 | 3 | 6  | 18 | GAA  | 19 | 3  |
| 263467 | 41 | 3830618 | 3830637 | 4 | 5  | 20 | TCAA | 28 | 4  |
| 263468 | 41 | 3830813 | 3830840 | 2 | 14 | 28 | CA   | 11 | 7  |
| 263469 | 41 | 3830959 | 3830986 | 2 | 14 | 28 | GT   | 9  | 11 |
| 263472 | 41 | 3831629 | 3831642 | 2 | 7  | 14 | CA   | 20 | 7  |
| 263474 | 41 | 3831800 | 3831827 | 2 | 14 | 28 | CA   | 16 | 12 |
| 263475 | 41 | 3833559 | 3833578 | 4 | 5  | 20 | GAGG | 11 | 4  |
| 263476 | 41 | 3833660 | 3833679 | 4 | 5  | 20 | GACA | 26 | 4  |
| 263480 | 41 | 3834602 | 3834629 | 2 | 14 | 28 | GT   | 15 | 12 |
| 263484 | 41 | 3836364 | 3836379 | 2 | 8  | 16 | TG   | 10 | 4  |
| 263485 | 41 | 3836467 | 3836488 | 2 | 11 | 22 | AC   | 19 | 5  |
| 263489 | 41 | 3839810 | 3839825 | 2 | 8  | 16 | AC   | 27 | 5  |
| 263490 | 41 | 3839973 | 3839999 | 3 | 9  | 27 | GCT  | 29 | 8  |
| 263491 | 41 | 3840854 | 3840883 | 2 | 15 | 30 | AC   | 22 | 9  |
| 263498 | 41 | 3844727 | 3844750 | 2 | 12 | 24 | AG   | 17 | 6  |
| 263499 | 41 | 3845890 | 3845925 | 2 | 18 | 36 | AC   | 6  | 10 |
| 263500 | 41 | 3846065 | 3846096 | 2 | 16 | 32 | CA   | 12 | 7  |
| 263501 | 41 | 3848331 | 3848350 | 2 | 10 | 20 | CA   | 16 | 7  |
| 263502 | 41 | 3848399 | 3848434 | 2 | 18 | 36 | CA   | 7  | 6  |
| 263513 | 41 | 3857945 | 3857962 | 2 | 9  | 18 | AG   | 16 | 3  |
| 263514 | 41 | 3858456 | 3858473 | 2 | 9  | 18 | CT   | 26 | 4  |
| 263516 | 41 | 3860647 | 3860680 | 2 | 17 | 34 | AC   | 13 | 6  |
| 263517 | 41 | 3860852 | 3860867 | 2 | 8  | 16 | CA   | 21 | 8  |
| 263523 | 41 | 3861193 | 3861220 | 2 | 14 | 28 | CA   | 13 | 13 |
| 263526 | 41 | 3864860 | 3864877 | 2 | 9  | 18 | AG   | 21 | 5  |
| 263527 | 41 | 3865048 | 3865107 | 3 | 20 | 60 | TGA  | 14 | 11 |
| 263535 | 41 | 3868277 | 3868326 | 2 | 25 | 50 | GA   | 8  | 10 |
| 263536 | 41 | 3868769 | 3868812 | 4 | 11 | 44 | AAAG | 9  | 6  |
| 263538 | 41 | 3870639 | 3870650 | 2 | 6  | 12 | AC   | 22 | 4  |
| 263543 | 41 | 3876546 | 3876561 | 2 | 8  | 16 | AC   | 19 | 4  |
| 263549 | 41 | 3911610 | 3911639 | 3 | 10 | 30 | TCT  | 16 | 8  |
| 263552 | 41 | 3915515 | 3915550 | 2 | 18 | 36 | AC   | 10 | 9  |
| 263553 | 41 | 3915711 | 3915730 | 2 | 10 | 20 | GT   | 14 | 9  |
| 263555 | 41 | 3916724 | 3916739 | 4 | 4  | 16 | GATG | 21 | 4  |
| 263556 | 41 | 3919570 | 3919603 | 2 | 17 | 34 | TG   | 15 | 12 |
| 263560 | 41 | 3923975 | 3924000 | 2 | 13 | 26 | GT   | 12 | 14 |
| 263562 | 41 | 3929324 | 3929341 | 2 | 9  | 18 | AC   | 24 | 6  |
| 263566 | 41 | 3941228 | 3941247 | 2 | 10 | 20 | TG   | 18 | 9  |
| 263568 | 41 | 3944416 | 3944439 | 2 | 12 | 24 | TG   | 11 | 10 |
| 263573 | 41 | 3973012 | 3973033 | 2 | 11 | 22 | AC   | 7  | 10 |
| 263574 | 41 | 3973118 | 3973139 | 2 | 11 | 22 | TG   | 15 | 8  |
| 263575 | 41 | 3973259 | 3973270 | 2 | 6  | 12 | AG   | 25 | 6  |
| 263578 | 41 | 3978187 | 3978204 | 3 | 6  | 18 | GAG  | 21 | 5  |
| 263579 | 41 | 3978334 | 3978351 | 3 | 6  | 18 | GAG  | 24 | 3  |
| 263580 | 41 | 3978468 | 3978511 | 4 | 11 | 44 | CTTT | 22 | 17 |

|        |    |         |         |   |    |    |      |    |    |
|--------|----|---------|---------|---|----|----|------|----|----|
| 263583 | 41 | 3986895 | 3986910 | 2 | 8  | 16 | GT   | 22 | 5  |
| 263585 | 41 | 3992773 | 3992798 | 2 | 13 | 26 | CA   | 18 | 11 |
| 263586 | 41 | 3994362 | 3994377 | 2 | 8  | 16 | GT   | 19 | 11 |
| 263587 | 41 | 3994524 | 3994541 | 3 | 6  | 18 | AGA  | 28 | 3  |
| 263589 | 41 | 4007029 | 4007040 | 2 | 6  | 12 | AC   | 34 | 7  |
| 263594 | 41 | 4021830 | 4021855 | 2 | 13 | 26 | GT   | 17 | 11 |
| 263596 | 41 | 4024230 | 4024245 | 4 | 4  | 16 | GGAC | 21 | 5  |
| 263597 | 41 | 4024819 | 4024834 | 2 | 8  | 16 | CG   | 19 | 26 |
| 263599 | 41 | 4026581 | 4026600 | 2 | 10 | 20 | CA   | 11 | 13 |
| 263600 | 41 | 4027728 | 4027755 | 2 | 14 | 28 | AC   | 14 | 9  |
| 263603 | 41 | 4029770 | 4029781 | 2 | 6  | 12 | AC   | 18 | 4  |
| 263609 | 41 | 4036897 | 4036920 | 2 | 12 | 24 | AG   | 11 | 8  |
| 263611 | 41 | 4048369 | 4048382 | 2 | 7  | 14 | CA   | 28 | 3  |
| 263614 | 41 | 4051487 | 4051500 | 2 | 7  | 14 | AG   | 13 | 7  |
| 263615 | 41 | 4051501 | 4051516 | 2 | 8  | 16 | TG   | 11 | 3  |
| 263618 | 41 | 4055505 | 4055516 | 2 | 6  | 12 | TG   | 15 | 4  |
| 263620 | 41 | 4058399 | 4058420 | 2 | 11 | 22 | TC   | 20 | 5  |
| 263622 | 41 | 4059098 | 4059133 | 2 | 18 | 36 | GA   | 16 | 13 |
| 263624 | 41 | 4059947 | 4059966 | 2 | 10 | 20 | GT   | 25 | 8  |
| 263626 | 41 | 4068576 | 4068595 | 2 | 10 | 20 | GT   | 15 | 3  |
| 263628 | 41 | 4072468 | 4072481 | 2 | 7  | 14 | CA   | 21 | 3  |
| 263630 | 41 | 4085664 | 4085709 | 2 | 23 | 46 | AC   | 6  | 9  |
| 263633 | 41 | 4090141 | 4090168 | 2 | 14 | 28 | TG   | 13 | 5  |
| 263635 | 41 | 4090317 | 4090340 | 2 | 12 | 24 | CA   | 12 | 12 |
| 263637 | 41 | 4092975 | 4093004 | 3 | 10 | 30 | TGA  | 25 | 4  |
| 263638 | 41 | 4112461 | 4112480 | 2 | 10 | 20 | TG   | 8  | 6  |
| 263640 | 41 | 4124563 | 4124582 | 2 | 10 | 20 | AC   | 11 | 8  |
| 263641 | 41 | 4124820 | 4124864 | 3 | 15 | 45 | CAG  | 21 | 7  |
| 263642 | 41 | 4125689 | 4125706 | 3 | 6  | 18 | TTG  | 29 | 4  |
| 263647 | 41 | 4133553 | 4133566 | 2 | 7  | 14 | CA   | 22 | 3  |
| 263649 | 41 | 4138068 | 4138079 | 2 | 6  | 12 | GT   | 36 | 3  |
| 263650 | 41 | 4143343 | 4143358 | 2 | 8  | 16 | TG   | 23 | 3  |
| 263656 | 41 | 4153491 | 4153536 | 2 | 23 | 46 | AC   | 15 | 19 |
| 263660 | 41 | 4165695 | 4165706 | 2 | 6  | 12 | GT   | 20 | 3  |
| 263661 | 41 | 4165708 | 4165719 | 2 | 6  | 12 | TG   | 21 | 5  |
| 263663 | 41 | 4167091 | 4167108 | 2 | 9  | 18 | AC   | 14 | 10 |
| 263664 | 41 | 4167111 | 4167128 | 2 | 9  | 18 | AC   | 8  | 6  |
| 263665 | 41 | 4168273 | 4168292 | 2 | 10 | 20 | GT   | 14 | 9  |
| 263667 | 41 | 4171385 | 4171400 | 4 | 4  | 16 | GTCT | 17 | 3  |
| 263679 | 41 | 4215564 | 4215577 | 2 | 7  | 14 | AT   | 19 | 4  |
| 263683 | 41 | 4223433 | 4223462 | 2 | 15 | 30 | GT   | 16 | 11 |
| 263684 | 41 | 4227491 | 4227502 | 2 | 6  | 12 | AC   | 18 | 7  |
| 263685 | 41 | 4230663 | 4230698 | 2 | 18 | 36 | CA   | 11 | 9  |
| 263686 | 41 | 4230796 | 4230831 | 2 | 18 | 36 | CA   | 6  | 8  |
| 263688 | 41 | 4232303 | 4232318 | 2 | 8  | 16 | TG   | 9  | 11 |
| 263690 | 41 | 4232463 | 4232498 | 2 | 18 | 36 | GT   | 12 | 10 |
| 263692 | 41 | 4234932 | 4234973 | 2 | 21 | 42 | GT   | 13 | 13 |
| 263696 | 41 | 4238067 | 4238082 | 4 | 4  | 16 | CAGA | 14 | 3  |
| 263698 | 41 | 4239654 | 4239679 | 2 | 13 | 26 | TG   | 21 | 9  |
| 263699 | 41 | 4240256 | 4240281 | 2 | 13 | 26 | GT   | 17 | 9  |
| 263700 | 41 | 4265256 | 4265281 | 2 | 13 | 26 | GT   | 21 | 7  |

|        |    |         |         |   |    |    |      |    |    |
|--------|----|---------|---------|---|----|----|------|----|----|
| 263701 | 41 | 4272039 | 4272058 | 2 | 10 | 20 | AC   | 10 | 10 |
| 263705 | 41 | 4276005 | 4276026 | 2 | 11 | 22 | AC   | 18 | 7  |
| 263708 | 41 | 4276391 | 4276410 | 2 | 10 | 20 | GT   | 9  | 11 |
| 263709 | 41 | 4277860 | 4277889 | 2 | 15 | 30 | TG   | 8  | 10 |
| 263712 | 41 | 4282700 | 4282731 | 2 | 16 | 32 | GT   | 14 | 8  |
| 263713 | 41 | 4282909 | 4282930 | 2 | 11 | 22 | CA   | 11 | 5  |
| 263714 | 41 | 4283005 | 4283026 | 2 | 11 | 22 | CA   | 24 | 5  |
| 263715 | 41 | 4283110 | 4283123 | 2 | 7  | 14 | GT   | 21 | 4  |
| 263720 | 41 | 4283632 | 4283647 | 2 | 8  | 16 | CA   | 22 | 4  |
| 263721 | 41 | 4285724 | 4285751 | 2 | 14 | 28 | TG   | 19 | 5  |
| 263723 | 41 | 4287689 | 4287706 | 3 | 6  | 18 | GGA  | 16 | 7  |
| 263725 | 41 | 4289975 | 4289986 | 2 | 6  | 12 | CG   | 16 | 15 |
| 263726 | 41 | 4289987 | 4290006 | 2 | 10 | 20 | CA   | 26 | 18 |
| 263727 | 41 | 4291586 | 4291609 | 2 | 12 | 24 | CA   | 15 | 9  |
| 263728 | 41 | 4294887 | 4294922 | 2 | 18 | 36 | TG   | 13 | 13 |
| 263730 | 41 | 4295056 | 4295095 | 2 | 20 | 40 | AC   | 6  | 8  |
| 263731 | 41 | 4296311 | 4296324 | 2 | 7  | 14 | GT   | 29 | 6  |
| 263732 | 41 | 4298517 | 4298542 | 2 | 13 | 26 | GT   | 17 | 10 |
| 263733 | 41 | 4302214 | 4302235 | 2 | 11 | 22 | TG   | 7  | 7  |
| 263735 | 41 | 4305442 | 4305467 | 2 | 13 | 26 | AC   | 32 | 4  |
| 263736 | 41 | 4305822 | 4305839 | 2 | 9  | 18 | AT   | 20 | 4  |
| 263737 | 41 | 4310920 | 4310957 | 2 | 19 | 38 | AC   | 6  | 10 |
| 263738 | 41 | 4311063 | 4311074 | 2 | 6  | 12 | CA   | 30 | 3  |
| 263741 | 41 | 4313274 | 4313299 | 2 | 13 | 26 | TG   | 14 | 17 |
| 263742 | 41 | 4313498 | 4313515 | 2 | 9  | 18 | TC   | 21 | 4  |
| 263746 | 41 | 4320294 | 4320307 | 2 | 7  | 14 | GT   | 20 | 8  |
| 263748 | 41 | 4321731 | 4321754 | 2 | 12 | 24 | CA   | 20 | 10 |
| 263749 | 41 | 4321954 | 4321989 | 3 | 12 | 36 | GAG  | 20 | 8  |
| 263752 | 41 | 4325710 | 4325733 | 3 | 8  | 24 | AAT  | 21 | 3  |
| 263753 | 41 | 4325809 | 4325820 | 2 | 6  | 12 | AC   | 23 | 7  |
| 263755 | 41 | 4328225 | 4328240 | 4 | 4  | 16 | GCAC | 18 | 4  |
| 263756 | 41 | 4328552 | 4328589 | 2 | 19 | 38 | CA   | 12 | 13 |
| 263758 | 41 | 4330494 | 4330513 | 4 | 5  | 20 | TTTC | 24 | 3  |
| 263759 | 41 | 4333165 | 4333186 | 2 | 11 | 22 | AC   | 24 | 13 |
| 263760 | 41 | 4336023 | 4336034 | 2 | 6  | 12 | TA   | 24 | 6  |
| 263766 | 42 | 12127   | 12147   | 3 | 7  | 21 | GAA  | 23 | 7  |
| 263770 | 42 | 16831   | 16858   | 2 | 14 | 28 | GT   | 9  | 8  |
| 263776 | 42 | 32875   | 32894   | 2 | 10 | 20 | GA   | 20 | 4  |
| 263782 | 42 | 43131   | 43152   | 2 | 11 | 22 | GT   | 13 | 5  |
| 263787 | 42 | 47875   | 47892   | 2 | 9  | 18 | GT   | 24 | 3  |
| 263789 | 42 | 48696   | 48709   | 2 | 7  | 14 | AG   | 27 | 3  |
| 263794 | 42 | 61252   | 61263   | 2 | 6  | 12 | CA   | 13 | 3  |
| 263797 | 42 | 65177   | 65196   | 2 | 10 | 20 | TG   | 14 | 10 |
| 263799 | 42 | 73133   | 73147   | 3 | 5  | 15 | TGT  | 20 | 4  |
| 263805 | 42 | 80393   | 80408   | 4 | 4  | 16 | GTCT | 30 | 4  |
| 263807 | 42 | 81668   | 81695   | 2 | 14 | 28 | AC   | 16 | 8  |
| 263809 | 42 | 84671   | 84684   | 2 | 7  | 14 | GT   | 21 | 4  |
| 263812 | 42 | 96454   | 96474   | 3 | 7  | 21 | GCT  | 27 | 4  |
| 263819 | 42 | 97816   | 97835   | 2 | 10 | 20 | CA   | 15 | 3  |
| 263825 | 42 | 108446  | 108469  | 2 | 12 | 24 | GT   | 13 | 10 |
| 263827 | 42 | 109086  | 109105  | 4 | 5  | 20 | CAGG | 23 | 10 |



|        |    |        |        |   |    |    |      |    |    |
|--------|----|--------|--------|---|----|----|------|----|----|
| 263839 | 42 | 144494 | 144523 | 2 | 15 | 30 | TG   | 10 | 7  |
| 263850 | 42 | 155759 | 155772 | 2 | 7  | 14 | GT   | 22 | 3  |
| 263856 | 42 | 172606 | 172621 | 2 | 8  | 16 | TG   | 25 | 3  |
| 263863 | 42 | 195290 | 195303 | 2 | 7  | 14 | AC   | 26 | 11 |
| 263869 | 42 | 205266 | 205277 | 2 | 6  | 12 | TC   | 26 | 3  |
| 263885 | 42 | 244990 | 245003 | 2 | 7  | 14 | GT   | 6  | 5  |
| 263894 | 42 | 262224 | 262239 | 2 | 8  | 16 | CT   | 19 | 5  |
| 263896 | 42 | 263934 | 263949 | 2 | 8  | 16 | CT   | 17 | 3  |
| 263898 | 42 | 266958 | 266977 | 2 | 10 | 20 | AC   | 14 | 6  |
| 263900 | 42 | 270138 | 270151 | 2 | 7  | 14 | CA   | 10 | 3  |
| 263908 | 42 | 275738 | 275758 | 3 | 7  | 21 | CTT  | 27 | 4  |
| 263909 | 42 | 281069 | 281094 | 2 | 13 | 26 | AC   | 6  | 3  |
| 263911 | 42 | 285373 | 285396 | 3 | 8  | 24 | GGA  | 19 | 10 |
| 263912 | 42 | 285757 | 285768 | 2 | 6  | 12 | TC   | 28 | 4  |
| 263918 | 42 | 293378 | 293407 | 2 | 15 | 30 | AG   | 19 | 5  |
| 263919 | 42 | 296492 | 296507 | 2 | 8  | 16 | AC   | 24 | 4  |
| 263920 | 42 | 296879 | 296918 | 2 | 20 | 40 | TG   | 6  | 8  |
| 263921 | 42 | 299027 | 299044 | 2 | 9  | 18 | TG   | 23 | 5  |
| 263927 | 42 | 299660 | 299675 | 4 | 4  | 16 | TCTG | 25 | 6  |
| 263929 | 42 | 300753 | 300768 | 2 | 8  | 16 | TC   | 21 | 10 |
| 263932 | 42 | 301036 | 301059 | 4 | 6  | 24 | TAAA | 20 | 6  |
| 263933 | 42 | 301296 | 301323 | 2 | 14 | 28 | CA   | 7  | 4  |
| 263938 | 42 | 305377 | 305392 | 2 | 8  | 16 | GT   | 27 | 4  |
| 263941 | 42 | 316366 | 316380 | 3 | 5  | 15 | GCA  | 18 | 3  |
| 263942 | 42 | 318068 | 318079 | 2 | 6  | 12 | GT   | 8  | 3  |
| 263953 | 42 | 343368 | 343393 | 2 | 13 | 26 | CA   | 25 | 18 |
| 263955 | 42 | 345687 | 345710 | 2 | 12 | 24 | AC   | 22 | 10 |
| 263958 | 42 | 350877 | 350900 | 2 | 12 | 24 | TC   | 6  | 6  |
| 263960 | 42 | 356019 | 356048 | 3 | 10 | 30 | TAA  | 10 | 9  |
| 263961 | 42 | 356440 | 356465 | 2 | 13 | 26 | CA   | 10 | 9  |
| 263968 | 42 | 367667 | 367686 | 2 | 10 | 20 | AG   | 28 | 4  |
| 263969 | 42 | 372595 | 372612 | 2 | 9  | 18 | GA   | 26 | 3  |
| 263971 | 42 | 377755 | 377784 | 2 | 15 | 30 | AC   | 10 | 11 |
| 263973 | 42 | 381387 | 381408 | 2 | 11 | 22 | CA   | 9  | 9  |
| 263976 | 42 | 387824 | 387841 | 2 | 9  | 18 | TG   | 18 | 4  |
| 263977 | 42 | 388127 | 388144 | 2 | 9  | 18 | AC   | 20 | 3  |
| 263978 | 42 | 388448 | 388461 | 2 | 7  | 14 | CA   | 26 | 6  |
| 263984 | 42 | 403659 | 403672 | 2 | 7  | 14 | AC   | 26 | 4  |
| 263985 | 42 | 404124 | 404147 | 2 | 12 | 24 | TG   | 12 | 12 |
| 263995 | 42 | 414386 | 414415 | 2 | 15 | 30 | AC   | 19 | 11 |
| 264022 | 42 | 450188 | 450211 | 4 | 6  | 24 | TTTG | 17 | 4  |
| 264025 | 42 | 455736 | 455749 | 2 | 7  | 14 | CA   | 27 | 12 |
| 264026 | 42 | 455840 | 455854 | 3 | 5  | 15 | GAT  | 24 | 4  |
| 264027 | 42 | 457889 | 457902 | 2 | 7  | 14 | CA   | 30 | 3  |
| 264040 | 42 | 497126 | 497141 | 2 | 8  | 16 | AC   | 22 | 4  |
| 264041 | 42 | 500416 | 500451 | 2 | 18 | 36 | CA   | 9  | 7  |
| 264043 | 42 | 505641 | 505660 | 4 | 5  | 20 | AGAC | 21 | 6  |
| 264044 | 42 | 505985 | 506010 | 2 | 13 | 26 | AC   | 12 | 9  |
| 264051 | 42 | 525474 | 525491 | 3 | 6  | 18 | AAT  | 17 | 4  |
| 264060 | 42 | 557215 | 557228 | 2 | 7  | 14 | AG   | 28 | 4  |
| 264065 | 42 | 562182 | 562217 | 2 | 18 | 36 | AC   | 8  | 8  |

|        |    |        |        |   |    |    |      |    |    |
|--------|----|--------|--------|---|----|----|------|----|----|
| 264066 | 42 | 565984 | 566011 | 4 | 7  | 28 | ATGG | 26 | 4  |
| 264069 | 42 | 575252 | 575265 | 2 | 7  | 14 | CA   | 9  | 3  |
| 264078 | 42 | 613637 | 613660 | 3 | 8  | 24 | GGA  | 15 | 4  |
| 264080 | 42 | 614166 | 614201 | 2 | 18 | 36 | GT   | 7  | 8  |
| 264082 | 42 | 615814 | 615839 | 2 | 13 | 26 | GT   | 21 | 8  |
| 264083 | 42 | 616378 | 616415 | 2 | 19 | 38 | TG   | 12 | 5  |
| 264084 | 42 | 619209 | 619224 | 2 | 8  | 16 | TC   | 19 | 3  |
| 264086 | 42 | 622061 | 622082 | 2 | 11 | 22 | TC   | 20 | 8  |
| 264090 | 42 | 625787 | 625816 | 2 | 15 | 30 | CT   | 22 | 9  |
| 264092 | 42 | 628891 | 628910 | 2 | 10 | 20 | CT   | 21 | 4  |
| 264101 | 42 | 663764 | 663823 | 2 | 30 | 60 | TG   | 7  | 7  |
| 264104 | 42 | 669288 | 669305 | 2 | 9  | 18 | TG   | 17 | 4  |
| 264108 | 42 | 677357 | 677372 | 2 | 8  | 16 | TC   | 15 | 5  |
| 264110 | 42 | 678619 | 678632 | 2 | 7  | 14 | GT   | 8  | 6  |
| 264132 | 42 | 746466 | 746497 | 4 | 8  | 32 | AGAA | 21 | 13 |
| 264133 | 42 | 748043 | 748054 | 2 | 6  | 12 | TA   | 9  | 3  |
| 264134 | 42 | 749831 | 749844 | 2 | 7  | 14 | GT   | 27 | 4  |
| 264135 | 42 | 753111 | 753150 | 2 | 20 | 40 | TG   | 19 | 11 |
| 264143 | 42 | 769305 | 769325 | 3 | 7  | 21 | GGA  | 19 | 7  |
| 264148 | 42 | 778672 | 778697 | 2 | 13 | 26 | CA   | 19 | 7  |
| 264149 | 42 | 781350 | 781371 | 2 | 11 | 22 | AC   | 6  | 9  |
| 264153 | 42 | 786238 | 786261 | 2 | 12 | 24 | AC   | 13 | 7  |
| 264154 | 42 | 788053 | 788064 | 2 | 6  | 12 | AT   | 13 | 9  |
| 264161 | 42 | 800806 | 800823 | 2 | 9  | 18 | TG   | 15 | 6  |
| 264171 | 42 | 806410 | 806433 | 2 | 12 | 24 | AG   | 15 | 4  |
| 264174 | 42 | 811240 | 811253 | 2 | 7  | 14 | TG   | 24 | 6  |
| 264188 | 42 | 858442 | 858474 | 3 | 11 | 33 | CAG  | 26 | 7  |
| 264189 | 42 | 860007 | 860046 | 2 | 20 | 40 | AC   | 6  | 11 |
| 264192 | 42 | 875153 | 875164 | 2 | 6  | 12 | AT   | 19 | 6  |
| 264198 | 42 | 882556 | 882577 | 2 | 11 | 22 | AG   | 30 | 6  |
| 264199 | 42 | 882833 | 882846 | 2 | 7  | 14 | CA   | 31 | 6  |
| 264211 | 42 | 910025 | 910054 | 2 | 15 | 30 | CA   | 8  | 6  |
| 264215 | 42 | 920887 | 920902 | 2 | 8  | 16 | GT   | 26 | 5  |
| 264221 | 42 | 936428 | 936443 | 2 | 8  | 16 | GT   | 23 | 3  |
| 264224 | 42 | 946053 | 946082 | 3 | 10 | 30 | CAG  | 27 | 11 |
| 264226 | 42 | 951612 | 951629 | 2 | 9  | 18 | CA   | 21 | 6  |
| 264227 | 42 | 962230 | 962275 | 2 | 23 | 46 | TG   | 6  | 6  |
| 264232 | 42 | 971575 | 971592 | 3 | 6  | 18 | TCA  | 12 | 3  |
| 264233 | 42 | 971826 | 971845 | 2 | 10 | 20 | CG   | 16 | 23 |
| 264235 | 42 | 972565 | 972612 | 4 | 12 | 48 | TTTC | 12 | 10 |
| 264236 | 42 | 972713 | 972728 | 2 | 8  | 16 | GT   | 15 | 6  |
| 264244 | 42 | 975255 | 975272 | 2 | 9  | 18 | TC   | 18 | 11 |
| 264247 | 42 | 976938 | 976955 | 3 | 6  | 18 | ATT  | 18 | 3  |
| 264252 | 42 | 978849 | 978886 | 2 | 19 | 38 | TG   | 7  | 8  |
| 264253 | 42 | 979132 | 979155 | 3 | 8  | 24 | AGG  | 8  | 9  |
| 264257 | 42 | 980635 | 980654 | 2 | 10 | 20 | AC   | 11 | 5  |
| 264261 | 42 | 983468 | 983511 | 2 | 22 | 44 | CA   | 12 | 11 |
| 264266 | 42 | 985506 | 985529 | 2 | 12 | 24 | TG   | 11 | 7  |
| 264267 | 42 | 986039 | 986058 | 2 | 10 | 20 | CT   | 20 | 3  |
| 264268 | 42 | 986523 | 986534 | 2 | 6  | 12 | AT   | 23 | 5  |
| 264270 | 42 | 987641 | 987662 | 2 | 11 | 22 | TC   | 19 | 4  |

|        |    |         |         |   |    |    |      |    |    |
|--------|----|---------|---------|---|----|----|------|----|----|
| 264281 | 42 | 994228  | 994243  | 2 | 8  | 16 | TG   | 18 | 4  |
| 264283 | 42 | 996378  | 996403  | 2 | 13 | 26 | TC   | 21 | 13 |
| 264287 | 42 | 1002102 | 1002113 | 2 | 6  | 12 | TG   | 16 | 3  |
| 264293 | 42 | 1011274 | 1011295 | 2 | 11 | 22 | GT   | 15 | 10 |
| 264299 | 42 | 1017273 | 1017290 | 3 | 6  | 18 | GCA  | 26 | 5  |
| 264300 | 42 | 1017455 | 1017468 | 2 | 7  | 14 | GT   | 27 | 5  |
| 264303 | 42 | 1020530 | 1020549 | 2 | 10 | 20 | TG   | 17 | 5  |
| 264304 | 42 | 1020839 | 1020856 | 2 | 9  | 18 | AC   | 26 | 3  |
| 264307 | 42 | 1028517 | 1028536 | 2 | 10 | 20 | TC   | 24 | 11 |
| 264308 | 42 | 1029396 | 1029411 | 2 | 8  | 16 | TG   | 15 | 3  |
| 264312 | 42 | 1034728 | 1034751 | 2 | 12 | 24 | TG   | 20 | 7  |
| 264313 | 42 | 1034796 | 1034841 | 2 | 23 | 46 | GT   | 7  | 6  |
| 264315 | 42 | 1036313 | 1036328 | 2 | 8  | 16 | GT   | 25 | 5  |
| 264332 | 42 | 1054070 | 1054085 | 2 | 8  | 16 | GA   | 24 | 6  |
| 264335 | 42 | 1057459 | 1057470 | 2 | 6  | 12 | CT   | 29 | 3  |
| 264338 | 42 | 1065551 | 1065582 | 2 | 16 | 32 | GT   | 10 | 8  |
| 264344 | 42 | 1074637 | 1074648 | 2 | 6  | 12 | GT   | 31 | 3  |
| 264347 | 42 | 1078870 | 1078905 | 2 | 18 | 36 | AG   | 9  | 5  |
| 264351 | 42 | 1084992 | 1085013 | 2 | 11 | 22 | AG   | 21 | 4  |
| 264353 | 42 | 1089000 | 1089023 | 2 | 12 | 24 | AG   | 17 | 4  |
| 264358 | 42 | 1091029 | 1091058 | 3 | 10 | 30 | AGG  | 14 | 3  |
| 264364 | 42 | 1094459 | 1094480 | 2 | 11 | 22 | CT   | 14 | 7  |
| 264374 | 42 | 1106184 | 1106199 | 2 | 8  | 16 | AC   | 27 | 3  |
| 264375 | 42 | 1106790 | 1106819 | 2 | 15 | 30 | AC   | 7  | 7  |
| 264389 | 42 | 1140803 | 1140814 | 2 | 6  | 12 | AC   | 23 | 3  |
| 264390 | 42 | 1143769 | 1143780 | 2 | 6  | 12 | GT   | 20 | 3  |
| 264393 | 42 | 1149472 | 1149503 | 2 | 16 | 32 | AG   | 9  | 6  |
| 264397 | 42 | 1155741 | 1155756 | 2 | 8  | 16 | GT   | 19 | 13 |
| 264402 | 42 | 1164328 | 1164353 | 2 | 13 | 26 | GT   | 6  | 5  |
| 264403 | 42 | 1164553 | 1164570 | 2 | 9  | 18 | AC   | 7  | 3  |
| 264405 | 42 | 1164630 | 1164653 | 2 | 12 | 24 | AC   | 8  | 4  |
| 264408 | 42 | 1172266 | 1172281 | 2 | 8  | 16 | AT   | 9  | 4  |
| 264409 | 42 | 1177816 | 1177836 | 3 | 7  | 21 | AAG  | 27 | 8  |
| 264415 | 42 | 1187964 | 1187981 | 3 | 6  | 18 | TTG  | 9  | 3  |
| 264419 | 42 | 1196871 | 1196886 | 2 | 8  | 16 | AC   | 8  | 3  |
| 264438 | 42 | 1232251 | 1232282 | 4 | 8  | 32 | TGAA | 31 | 4  |
| 264444 | 42 | 1238823 | 1238834 | 2 | 6  | 12 | CT   | 23 | 3  |
| 264454 | 42 | 1249990 | 1250011 | 2 | 11 | 22 | AT   | 6  | 5  |
| 264455 | 42 | 1250509 | 1250532 | 2 | 12 | 24 | TG   | 8  | 6  |
| 264459 | 42 | 1260466 | 1260477 | 2 | 6  | 12 | AT   | 25 | 3  |
| 264470 | 42 | 1275766 | 1275785 | 2 | 10 | 20 | TG   | 13 | 3  |
| 264499 | 42 | 1328252 | 1328269 | 2 | 9  | 18 | GT   | 17 | 8  |
| 264502 | 42 | 1329609 | 1329628 | 2 | 10 | 20 | GT   | 13 | 8  |
| 264505 | 42 | 1330284 | 1330301 | 2 | 9  | 18 | AC   | 25 | 5  |
| 264507 | 42 | 1330643 | 1330663 | 3 | 7  | 21 | CAG  | 29 | 4  |
| 264508 | 42 | 1330838 | 1330855 | 3 | 6  | 18 | GCT  | 26 | 3  |
| 264510 | 42 | 1332635 | 1332666 | 2 | 16 | 32 | TG   | 14 | 10 |
| 264514 | 42 | 1333757 | 1333788 | 2 | 16 | 32 | AC   | 8  | 6  |
| 264519 | 42 | 1340587 | 1340606 | 4 | 5  | 20 | TGAT | 23 | 6  |
| 264523 | 42 | 1351755 | 1351784 | 2 | 15 | 30 | GT   | 8  | 5  |
| 264526 | 42 | 1353840 | 1353851 | 2 | 6  | 12 | CT   | 23 | 3  |

|        |    |         |         |   |    |    |      |    |    |
|--------|----|---------|---------|---|----|----|------|----|----|
| 264529 | 42 | 1354864 | 1354881 | 2 | 9  | 18 | CT   | 19 | 6  |
| 264535 | 42 | 1367551 | 1367562 | 2 | 6  | 12 | GC   | 29 | 12 |
| 264536 | 42 | 1367707 | 1367728 | 2 | 11 | 22 | TG   | 21 | 8  |
| 264542 | 42 | 1380308 | 1380322 | 3 | 5  | 15 | ATA  | 25 | 3  |
| 264548 | 42 | 1394742 | 1394761 | 2 | 10 | 20 | AG   | 22 | 5  |
| 264567 | 42 | 1433594 | 1433617 | 3 | 8  | 24 | TCT  | 16 | 3  |
| 264578 | 42 | 1469627 | 1469654 | 2 | 14 | 28 | GT   | 16 | 11 |
| 264582 | 42 | 1473086 | 1473101 | 2 | 8  | 16 | TG   | 25 | 5  |
| 264583 | 42 | 1474522 | 1474543 | 2 | 11 | 22 | TG   | 16 | 4  |
| 264584 | 42 | 1476207 | 1476240 | 2 | 17 | 34 | TG   | 14 | 9  |
| 264588 | 42 | 1483545 | 1483558 | 2 | 7  | 14 | TA   | 8  | 7  |
| 264589 | 42 | 1489958 | 1489973 | 2 | 8  | 16 | CA   | 29 | 3  |
| 264591 | 42 | 1491513 | 1491528 | 2 | 8  | 16 | TG   | 24 | 4  |
| 264597 | 42 | 1499485 | 1499518 | 2 | 17 | 34 | GT   | 10 | 8  |
| 264600 | 42 | 1504425 | 1504444 | 2 | 10 | 20 | AC   | 10 | 3  |
| 264602 | 42 | 1506233 | 1506256 | 2 | 12 | 24 | TG   | 17 | 7  |
| 264608 | 42 | 1525536 | 1525549 | 2 | 7  | 14 | GT   | 24 | 7  |
| 264613 | 42 | 1537393 | 1537408 | 4 | 4  | 16 | CTAT | 26 | 5  |
| 264620 | 42 | 1559937 | 1559958 | 2 | 11 | 22 | CT   | 17 | 5  |
| 264622 | 42 | 1567587 | 1567610 | 2 | 12 | 24 | TG   | 19 | 4  |
| 264627 | 42 | 1574504 | 1574531 | 2 | 14 | 28 | AG   | 7  | 4  |
| 264630 | 42 | 1576245 | 1576266 | 2 | 11 | 22 | AC   | 20 | 6  |
| 264633 | 42 | 1583100 | 1583113 | 2 | 7  | 14 | CA   | 21 | 11 |
| 264653 | 42 | 1627842 | 1627857 | 4 | 4  | 16 | ATCT | 26 | 3  |
| 264654 | 42 | 1628038 | 1628049 | 2 | 6  | 12 | TG   | 31 | 5  |
| 264669 | 42 | 1671525 | 1671545 | 3 | 7  | 21 | GCT  | 20 | 10 |
| 264673 | 42 | 1683478 | 1683504 | 3 | 9  | 27 | GAG  | 27 | 11 |
| 264677 | 42 | 1695253 | 1695266 | 2 | 7  | 14 | CA   | 18 | 4  |
| 264678 | 42 | 1696495 | 1696510 | 4 | 4  | 16 | ACAG | 34 | 3  |
| 264686 | 42 | 1725258 | 1725275 | 2 | 9  | 18 | GT   | 24 | 6  |
| 264690 | 42 | 1733131 | 1733145 | 3 | 5  | 15 | CTG  | 17 | 4  |
| 264692 | 42 | 1739454 | 1739469 | 2 | 8  | 16 | GA   | 10 | 5  |
| 264693 | 42 | 1741624 | 1741643 | 4 | 5  | 20 | TTTG | 28 | 6  |
| 264696 | 42 | 1747014 | 1747051 | 2 | 19 | 38 | TG   | 6  | 7  |
| 264713 | 42 | 1785844 | 1785861 | 2 | 9  | 18 | CA   | 10 | 8  |
| 264717 | 42 | 1798911 | 1798926 | 2 | 8  | 16 | GT   | 6  | 7  |
| 264719 | 42 | 1802455 | 1802468 | 2 | 7  | 14 | TG   | 29 | 5  |
| 264729 | 42 | 1815910 | 1815921 | 2 | 6  | 12 | AT   | 20 | 5  |
| 264731 | 42 | 1827150 | 1827161 | 2 | 6  | 12 | TG   | 25 | 6  |
| 264742 | 42 | 1852222 | 1852241 | 4 | 5  | 20 | TTAT | 12 | 5  |
| 264747 | 42 | 1857108 | 1857131 | 4 | 6  | 24 | TATC | 24 | 10 |
| 264765 | 42 | 1909258 | 1909275 | 2 | 9  | 18 | GA   | 17 | 4  |
| 264768 | 42 | 1915143 | 1915158 | 2 | 8  | 16 | CA   | 22 | 6  |
| 264778 | 42 | 1936470 | 1936481 | 2 | 6  | 12 | GT   | 24 | 3  |
| 264782 | 42 | 1947078 | 1947119 | 2 | 21 | 42 | CA   | 7  | 6  |
| 264783 | 42 | 1947329 | 1947356 | 4 | 7  | 28 | CAAA | 29 | 4  |
| 264792 | 42 | 2001007 | 2001024 | 3 | 6  | 18 | CAG  | 31 | 4  |
| 264797 | 42 | 2014196 | 2014215 | 2 | 10 | 20 | AG   | 20 | 6  |
| 264802 | 42 | 2036096 | 2036109 | 2 | 7  | 14 | AC   | 25 | 8  |
| 264807 | 42 | 2048790 | 2048823 | 2 | 17 | 34 | GT   | 19 | 12 |
| 264815 | 42 | 2057876 | 2057889 | 2 | 7  | 14 | CA   | 32 | 6  |

|        |    |         |         |   |    |    |      |    |    |
|--------|----|---------|---------|---|----|----|------|----|----|
| 264819 | 42 | 2072147 | 2072164 | 3 | 6  | 18 | CCT  | 30 | 3  |
| 264836 | 42 | 2123706 | 2123749 | 2 | 22 | 44 | CA   | 13 | 7  |
| 264850 | 42 | 2145804 | 2145819 | 2 | 8  | 16 | AG   | 27 | 4  |
| 264854 | 42 | 2154447 | 2154466 | 2 | 10 | 20 | AC   | 21 | 7  |
| 264856 | 42 | 2158893 | 2158908 | 2 | 8  | 16 | CA   | 32 | 6  |
| 264859 | 42 | 2164100 | 2164111 | 2 | 6  | 12 | TA   | 17 | 3  |
| 264865 | 42 | 2171936 | 2171961 | 2 | 13 | 26 | TG   | 21 | 9  |
| 264871 | 42 | 2198864 | 2198893 | 2 | 15 | 30 | AC   | 7  | 8  |
| 264886 | 42 | 2252633 | 2252648 | 4 | 4  | 16 | GGCA | 24 | 3  |
| 264888 | 42 | 2253634 | 2253655 | 2 | 11 | 22 | GA   | 11 | 4  |
| 264891 | 42 | 2271078 | 2271109 | 4 | 8  | 32 | TATC | 22 | 9  |
| 264895 | 42 | 2290113 | 2290128 | 2 | 8  | 16 | TG   | 21 | 5  |
| 264897 | 42 | 2293944 | 2293987 | 2 | 22 | 44 | GT   | 9  | 8  |
| 264899 | 42 | 2294973 | 2294999 | 3 | 9  | 27 | TTA  | 6  | 4  |
| 264901 | 42 | 2307397 | 2307442 | 2 | 23 | 46 | CA   | 9  | 9  |
| 264909 | 42 | 2323981 | 2323998 | 3 | 6  | 18 | GAG  | 32 | 6  |
| 264918 | 42 | 2337331 | 2337350 | 2 | 10 | 20 | CA   | 17 | 5  |
| 264919 | 42 | 2337380 | 2337399 | 2 | 10 | 20 | AC   | 13 | 3  |
| 264944 | 42 | 2390080 | 2390148 | 3 | 23 | 69 | TTC  | 18 | 13 |
| 264952 | 42 | 2402676 | 2402693 | 2 | 9  | 18 | CA   | 13 | 4  |
| 264956 | 42 | 2433958 | 2433971 | 2 | 7  | 14 | AC   | 29 | 11 |
| 264957 | 42 | 2433973 | 2433984 | 2 | 6  | 12 | CA   | 25 | 9  |
| 264958 | 42 | 2438263 | 2438277 | 3 | 5  | 15 | CAG  | 34 | 3  |
| 264964 | 42 | 2449080 | 2449095 | 2 | 8  | 16 | CA   | 12 | 3  |
| 264965 | 42 | 2449101 | 2449116 | 4 | 4  | 16 | ACAT | 13 | 4  |
| 264966 | 42 | 2454030 | 2454056 | 3 | 9  | 27 | CTG  | 25 | 6  |
| 264968 | 42 | 2466021 | 2466036 | 2 | 8  | 16 | TG   | 21 | 7  |
| 264969 | 42 | 2470325 | 2470346 | 2 | 11 | 22 | GT   | 11 | 11 |
| 264980 | 42 | 2509429 | 2509440 | 2 | 6  | 12 | GT   | 14 | 3  |
| 264989 | 42 | 2533123 | 2533146 | 4 | 6  | 24 | AGAA | 12 | 4  |
| 265001 | 42 | 2574934 | 2574951 | 3 | 6  | 18 | CAG  | 24 | 3  |
| 265005 | 42 | 2578910 | 2578923 | 2 | 7  | 14 | TC   | 14 | 7  |
| 265011 | 42 | 2592857 | 2592868 | 2 | 6  | 12 | AC   | 25 | 3  |
| 265012 | 42 | 2592967 | 2592986 | 2 | 10 | 20 | AC   | 21 | 6  |
| 265017 | 42 | 2611298 | 2611321 | 3 | 8  | 24 | CAG  | 22 | 5  |
| 265018 | 42 | 2611418 | 2611438 | 3 | 7  | 21 | CAG  | 25 | 7  |
| 265019 | 42 | 2612384 | 2612431 | 2 | 24 | 48 | TG   | 9  | 7  |
| 265021 | 42 | 2614201 | 2614218 | 3 | 6  | 18 | CCT  | 22 | 4  |
| 265024 | 42 | 2616453 | 2616488 | 3 | 12 | 36 | GCA  | 25 | 5  |
| 265027 | 42 | 2622433 | 2622454 | 2 | 11 | 22 | TG   | 16 | 7  |
| 265030 | 42 | 2626879 | 2626906 | 2 | 14 | 28 | CA   | 9  | 5  |
| 265031 | 42 | 2628178 | 2628197 | 2 | 10 | 20 | CA   | 21 | 3  |
| 265037 | 42 | 2636772 | 2636799 | 4 | 7  | 28 | CAGA | 20 | 5  |
| 265038 | 42 | 2640565 | 2640582 | 2 | 9  | 18 | GA   | 21 | 7  |
| 265063 | 42 | 2735505 | 2735537 | 3 | 11 | 33 | TTA  | 9  | 5  |
| 265066 | 42 | 2747858 | 2747883 | 2 | 13 | 26 | GT   | 11 | 8  |
| 265072 | 42 | 2758862 | 2758879 | 2 | 9  | 18 | GT   | 22 | 5  |
| 265076 | 42 | 2764214 | 2764261 | 2 | 24 | 48 | CA   | 6  | 7  |
| 265077 | 42 | 2764420 | 2764441 | 2 | 11 | 22 | CA   | 20 | 5  |
| 265081 | 42 | 2776494 | 2776509 | 2 | 8  | 16 | AC   | 14 | 3  |
| 265082 | 42 | 2776675 | 2776696 | 2 | 11 | 22 | CA   | 21 | 5  |

|        |    |         |         |   |    |    |      |    |    |
|--------|----|---------|---------|---|----|----|------|----|----|
| 265083 | 42 | 2778324 | 2778353 | 2 | 15 | 30 | GT   | 14 | 7  |
| 265084 | 42 | 2778516 | 2778533 | 2 | 9  | 18 | GT   | 14 | 3  |
| 265086 | 42 | 2787364 | 2787397 | 2 | 17 | 34 | TG   | 19 | 6  |
| 265112 | 42 | 2870261 | 2870274 | 2 | 7  | 14 | GA   | 13 | 3  |
| 265119 | 42 | 2892751 | 2892770 | 2 | 10 | 20 | AC   | 25 | 4  |
| 265132 | 42 | 2916068 | 2916085 | 3 | 6  | 18 | TTA  | 16 | 5  |
| 265148 | 42 | 2967188 | 2967201 | 2 | 7  | 14 | CA   | 21 | 4  |
| 265150 | 42 | 2969742 | 2969775 | 2 | 17 | 34 | AC   | 7  | 11 |
| 265151 | 42 | 2971274 | 2971287 | 2 | 7  | 14 | AC   | 30 | 9  |
| 265152 | 42 | 2971499 | 2971520 | 2 | 11 | 22 | CA   | 8  | 5  |
| 265160 | 42 | 2978827 | 2978858 | 2 | 16 | 32 | AC   | 19 | 11 |
| 265162 | 42 | 2985875 | 2985890 | 2 | 8  | 16 | CA   | 22 | 4  |
| 265164 | 42 | 2988665 | 2988684 | 2 | 10 | 20 | TG   | 20 | 3  |
| 265172 | 42 | 3001335 | 3001370 | 2 | 18 | 36 | GA   | 7  | 7  |
| 265174 | 42 | 3001404 | 3001429 | 2 | 13 | 26 | AG   | 10 | 4  |
| 265180 | 42 | 3011513 | 3011540 | 4 | 7  | 28 | CTGC | 22 | 4  |
| 265181 | 42 | 3012956 | 3012979 | 2 | 12 | 24 | CA   | 22 | 9  |
| 265184 | 42 | 3014731 | 3014754 | 3 | 8  | 24 | TAA  | 21 | 3  |
| 265188 | 42 | 3017019 | 3017040 | 2 | 11 | 22 | GA   | 17 | 5  |
| 265191 | 42 | 3021436 | 3021456 | 3 | 7  | 21 | CAG  | 22 | 8  |
| 265193 | 42 | 3022100 | 3022127 | 2 | 14 | 28 | TG   | 12 | 6  |
| 265202 | 42 | 3042901 | 3042916 | 2 | 8  | 16 | CA   | 18 | 3  |
| 265203 | 42 | 3043902 | 3043923 | 2 | 11 | 22 | CA   | 19 | 6  |
| 265206 | 42 | 3046530 | 3046561 | 2 | 16 | 32 | TG   | 20 | 12 |
| 265215 | 42 | 3058538 | 3058555 | 2 | 9  | 18 | AC   | 28 | 4  |
| 265216 | 42 | 3059943 | 3059954 | 2 | 6  | 12 | GA   | 21 | 3  |
| 265220 | 42 | 3069391 | 3069412 | 2 | 11 | 22 | TG   | 16 | 3  |
| 265222 | 42 | 3070532 | 3070551 | 2 | 10 | 20 | CA   | 16 | 6  |
| 265224 | 42 | 3071258 | 3071271 | 2 | 7  | 14 | AG   | 28 | 4  |
| 265230 | 42 | 3076387 | 3076416 | 2 | 15 | 30 | TG   | 14 | 9  |
| 265231 | 42 | 3076437 | 3076460 | 3 | 8  | 24 | CTC  | 27 | 3  |
| 265233 | 42 | 3078690 | 3078703 | 2 | 7  | 14 | TG   | 16 | 4  |
| 265234 | 42 | 3079691 | 3079702 | 2 | 6  | 12 | AC   | 20 | 5  |
| 265237 | 42 | 3080274 | 3080321 | 2 | 24 | 48 | TC   | 11 | 8  |
| 265239 | 42 | 3081307 | 3081322 | 2 | 8  | 16 | CA   | 15 | 5  |
| 265241 | 42 | 3083331 | 3083351 | 3 | 7  | 21 | GAG  | 18 | 3  |
| 265246 | 42 | 3084617 | 3084630 | 2 | 7  | 14 | TG   | 16 | 7  |
| 265247 | 42 | 3084735 | 3084756 | 2 | 11 | 22 | TG   | 17 | 7  |
| 265250 | 42 | 3085276 | 3085289 | 2 | 7  | 14 | AC   | 15 | 3  |
| 265254 | 42 | 3088404 | 3088429 | 2 | 13 | 26 | CA   | 20 | 11 |
| 265257 | 42 | 3089158 | 3089177 | 2 | 10 | 20 | CA   | 16 | 7  |
| 265260 | 42 | 3090434 | 3090454 | 3 | 7  | 21 | TGA  | 7  | 4  |
| 265262 | 42 | 3093332 | 3093347 | 2 | 8  | 16 | AC   | 6  | 3  |
| 265269 | 42 | 3096917 | 3096928 | 2 | 6  | 12 | AT   | 18 | 4  |
| 265274 | 42 | 3102515 | 3102534 | 2 | 10 | 20 | TA   | 7  | 4  |
| 265275 | 42 | 3102859 | 3102870 | 2 | 6  | 12 | GT   | 25 | 4  |
| 265291 | 42 | 3122925 | 3122944 | 2 | 10 | 20 | AC   | 24 | 7  |
| 265292 | 42 | 3123838 | 3123857 | 2 | 10 | 20 | TG   | 23 | 4  |
| 265295 | 42 | 3133698 | 3133730 | 3 | 11 | 33 | GGA  | 20 | 5  |
| 265298 | 42 | 3143900 | 3143923 | 2 | 12 | 24 | AC   | 18 | 4  |
| 265299 | 42 | 3144160 | 3144183 | 2 | 12 | 24 | GA   | 8  | 5  |

|        |    |         |         |   |    |    |      |    |    |
|--------|----|---------|---------|---|----|----|------|----|----|
| 265302 | 42 | 3145042 | 3145059 | 2 | 9  | 18 | CA   | 21 | 4  |
| 265303 | 42 | 3145923 | 3145942 | 4 | 5  | 20 | TATT | 12 | 8  |
| 265308 | 42 | 3151384 | 3151405 | 2 | 11 | 22 | AC   | 12 | 5  |
| 265311 | 42 | 3153528 | 3153545 | 2 | 9  | 18 | TG   | 16 | 8  |
| 265313 | 42 | 3153659 | 3153670 | 2 | 6  | 12 | GT   | 29 | 5  |
| 265330 | 42 | 3186906 | 3186929 | 2 | 12 | 24 | GA   | 18 | 11 |
| 265331 | 42 | 3187379 | 3187402 | 2 | 12 | 24 | GT   | 18 | 7  |
| 265347 | 42 | 3192573 | 3192586 | 2 | 7  | 14 | TC   | 31 | 3  |
| 265348 | 42 | 3192864 | 3192887 | 2 | 12 | 24 | TG   | 20 | 6  |
| 265350 | 42 | 3193328 | 3193339 | 2 | 6  | 12 | AC   | 21 | 3  |
| 265357 | 42 | 3204744 | 3204773 | 2 | 15 | 30 | CA   | 20 | 12 |
| 265363 | 42 | 3208888 | 3208911 | 2 | 12 | 24 | GA   | 15 | 6  |
| 265366 | 42 | 3210016 | 3210030 | 3 | 5  | 15 | AAG  | 18 | 8  |
| 265372 | 42 | 3214526 | 3214537 | 2 | 6  | 12 | GT   | 8  | 4  |
| 265373 | 42 | 3214635 | 3214650 | 2 | 8  | 16 | AG   | 8  | 3  |
| 265374 | 42 | 3215087 | 3215104 | 2 | 9  | 18 | GA   | 17 | 5  |
| 265376 | 42 | 3216601 | 3216616 | 2 | 8  | 16 | GT   | 13 | 4  |
| 265378 | 42 | 3216844 | 3216865 | 2 | 11 | 22 | TC   | 8  | 3  |
| 265379 | 42 | 3219130 | 3219145 | 4 | 4  | 16 | CTTC | 32 | 3  |
| 265385 | 42 | 3223542 | 3223565 | 2 | 12 | 24 | CA   | 11 | 4  |
| 265389 | 42 | 3239099 | 3239110 | 2 | 6  | 12 | TG   | 33 | 5  |
| 265399 | 42 | 3249930 | 3249953 | 2 | 12 | 24 | AG   | 14 | 7  |
| 265400 | 42 | 3250431 | 3250446 | 4 | 4  | 16 | AAAT | 25 | 9  |
| 265401 | 42 | 3255182 | 3255197 | 4 | 4  | 16 | TAAA | 25 | 6  |
| 265402 | 42 | 3255199 | 3255210 | 2 | 6  | 12 | GT   | 8  | 4  |
| 265403 | 42 | 3255432 | 3255497 | 2 | 33 | 66 | TG   | 14 | 11 |
| 265408 | 42 | 3268292 | 3268331 | 2 | 20 | 40 | AC   | 12 | 13 |
| 265410 | 42 | 3269582 | 3269603 | 2 | 11 | 22 | CT   | 14 | 5  |
| 265412 | 42 | 3273337 | 3273348 | 2 | 6  | 12 | AT   | 17 | 13 |
| 265417 | 42 | 3283970 | 3283989 | 2 | 10 | 20 | CA   | 18 | 4  |
| 265422 | 42 | 3291969 | 3292004 | 2 | 18 | 36 | GT   | 9  | 8  |
| 265427 | 42 | 3311916 | 3311927 | 2 | 6  | 12 | GA   | 10 | 3  |
| 265429 | 42 | 3321060 | 3321081 | 2 | 11 | 22 | CA   | 24 | 6  |
| 265435 | 42 | 3332613 | 3332648 | 2 | 18 | 36 | TG   | 6  | 4  |
| 265442 | 42 | 3364613 | 3364640 | 2 | 14 | 28 | CA   | 12 | 4  |
| 265448 | 42 | 3375992 | 3376025 | 2 | 17 | 34 | CT   | 9  | 9  |
| 265449 | 42 | 3376801 | 3376814 | 2 | 7  | 14 | AG   | 26 | 3  |
| 265450 | 42 | 3376852 | 3376875 | 3 | 8  | 24 | CTG  | 22 | 5  |
| 265451 | 42 | 3377112 | 3377126 | 3 | 5  | 15 | GAA  | 27 | 3  |
| 265461 | 42 | 3387859 | 3387870 | 2 | 6  | 12 | GT   | 25 | 3  |
| 265466 | 42 | 3401746 | 3401785 | 4 | 10 | 40 | TACA | 12 | 7  |
| 265467 | 42 | 3403610 | 3403621 | 2 | 6  | 12 | CA   | 24 | 3  |
| 265470 | 42 | 3416293 | 3416322 | 2 | 15 | 30 | CA   | 10 | 10 |
| 265475 | 42 | 3436211 | 3436230 | 2 | 10 | 20 | TC   | 20 | 4  |
| 265486 | 42 | 3461611 | 3461624 | 2 | 7  | 14 | TG   | 19 | 3  |
| 265487 | 42 | 3461751 | 3461784 | 2 | 17 | 34 | GT   | 23 | 11 |
| 265489 | 42 | 3466687 | 3466718 | 2 | 16 | 32 | CA   | 9  | 6  |
| 265490 | 42 | 3485907 | 3485924 | 3 | 6  | 18 | ATT  | 13 | 3  |
| 265494 | 42 | 3496382 | 3496403 | 2 | 11 | 22 | TG   | 15 | 15 |
| 265496 | 42 | 3498177 | 3498198 | 2 | 11 | 22 | AC   | 12 | 13 |
| 265500 | 42 | 3500089 | 3500120 | 2 | 16 | 32 | GA   | 15 | 7  |

|        |    |         |         |   |    |    |      |    |    |
|--------|----|---------|---------|---|----|----|------|----|----|
| 265502 | 42 | 3500827 | 3500842 | 4 | 4  | 16 | CTGT | 26 | 3  |
| 265513 | 42 | 3520476 | 3520490 | 3 | 5  | 15 | CTG  | 33 | 3  |
| 265514 | 42 | 3523510 | 3523523 | 2 | 7  | 14 | AC   | 10 | 4  |
| 265526 | 42 | 3547201 | 3547216 | 2 | 8  | 16 | CA   | 23 | 11 |
| 265529 | 42 | 3549344 | 3549375 | 2 | 16 | 32 | TG   | 13 | 7  |
| 265532 | 42 | 3554091 | 3554114 | 3 | 8  | 24 | CAG  | 27 | 6  |
| 265541 | 42 | 3566477 | 3566504 | 2 | 14 | 28 | CA   | 19 | 9  |
| 265542 | 42 | 3575307 | 3575318 | 2 | 6  | 12 | CA   | 12 | 4  |
| 265543 | 42 | 3576010 | 3576033 | 2 | 12 | 24 | GT   | 22 | 9  |
| 265552 | 42 | 3598359 | 3598388 | 3 | 10 | 30 | GAG  | 27 | 8  |
| 265554 | 42 | 3601233 | 3601252 | 2 | 10 | 20 | TG   | 23 | 3  |
| 265555 | 42 | 3602408 | 3602427 | 2 | 10 | 20 | AC   | 16 | 6  |
| 265556 | 42 | 3602533 | 3602546 | 2 | 7  | 14 | AC   | 29 | 4  |
| 265559 | 42 | 3607846 | 3607865 | 2 | 10 | 20 | AC   | 19 | 11 |
| 265574 | 42 | 3651935 | 3651948 | 2 | 7  | 14 | AT   | 19 | 6  |
| 265581 | 42 | 3665431 | 3665463 | 3 | 11 | 33 | TGA  | 24 | 11 |
| 265584 | 42 | 3668173 | 3668186 | 2 | 7  | 14 | TG   | 27 | 5  |
| 265601 | 42 | 3685198 | 3685217 | 2 | 10 | 20 | AC   | 29 | 7  |
| 265606 | 42 | 3695468 | 3695499 | 2 | 16 | 32 | CA   | 8  | 9  |
| 265612 | 42 | 3707897 | 3707932 | 4 | 9  | 36 | TTTC | 26 | 6  |
| 265613 | 42 | 3717277 | 3717300 | 4 | 6  | 24 | AACA | 19 | 7  |
| 265618 | 42 | 3728362 | 3728385 | 3 | 8  | 24 | TGT  | 27 | 4  |
| 265620 | 42 | 3734125 | 3734139 | 3 | 5  | 15 | AAG  | 25 | 3  |
| 265622 | 42 | 3734856 | 3734885 | 2 | 15 | 30 | GT   | 14 | 11 |
| 265630 | 42 | 3738338 | 3738359 | 2 | 11 | 22 | TG   | 19 | 5  |
| 265637 | 42 | 3751558 | 3751595 | 2 | 19 | 38 | GT   | 10 | 10 |
| 265639 | 42 | 3753689 | 3753712 | 2 | 12 | 24 | AC   | 20 | 7  |
| 265641 | 42 | 3763039 | 3763053 | 3 | 5  | 15 | TCA  | 24 | 9  |
| 265655 | 42 | 3785011 | 3785024 | 2 | 7  | 14 | AG   | 20 | 3  |
| 265672 | 42 | 3823695 | 3823712 | 2 | 9  | 18 | AC   | 25 | 4  |
| 265673 | 42 | 3823845 | 3823858 | 2 | 7  | 14 | GT   | 22 | 4  |
| 265676 | 42 | 3828394 | 3828411 | 3 | 6  | 18 | TCA  | 33 | 3  |
| 265678 | 42 | 3833849 | 3833866 | 3 | 6  | 18 | TCG  | 25 | 8  |
| 265690 | 42 | 3865196 | 3865215 | 2 | 10 | 20 | AG   | 13 | 13 |
| 265691 | 42 | 3865672 | 3865731 | 4 | 15 | 60 | ATGT | 10 | 9  |
| 265699 | 42 | 3897507 | 3897532 | 2 | 13 | 26 | CA   | 18 | 6  |
| 265701 | 42 | 3906283 | 3906296 | 2 | 7  | 14 | AC   | 19 | 7  |
| 265706 | 42 | 3909032 | 3909046 | 3 | 5  | 15 | CTG  | 26 | 3  |
| 265707 | 42 | 3909741 | 3909764 | 2 | 12 | 24 | AC   | 15 | 6  |
| 265740 | 42 | 4016607 | 4016634 | 4 | 7  | 28 | TCTG | 32 | 5  |
| 265745 | 42 | 4025955 | 4025969 | 3 | 5  | 15 | TTA  | 22 | 3  |
| 265748 | 42 | 4036478 | 4036491 | 2 | 7  | 14 | AT   | 9  | 4  |
| 265749 | 42 | 4036815 | 4036835 | 3 | 7  | 21 | GAG  | 14 | 7  |
| 265752 | 42 | 4037416 | 4037443 | 2 | 14 | 28 | AC   | 16 | 7  |
| 265760 | 42 | 4100249 | 4100280 | 2 | 16 | 32 | TG   | 10 | 8  |
| 265763 | 42 | 4111085 | 4111108 | 3 | 8  | 24 | GAG  | 24 | 3  |
| 265766 | 42 | 4116980 | 4117006 | 3 | 9  | 27 | ATT  | 13 | 5  |
| 265772 | 42 | 4135821 | 4135832 | 2 | 6  | 12 | TA   | 14 | 3  |
| 265773 | 42 | 4142479 | 4142500 | 2 | 11 | 22 | TG   | 13 | 10 |
| 265779 | 42 | 4152773 | 4152787 | 3 | 5  | 15 | TAA  | 28 | 3  |
| 265780 | 42 | 4155256 | 4155267 | 2 | 6  | 12 | AG   | 28 | 3  |



|        |    |         |         |   |    |    |      |    |    |
|--------|----|---------|---------|---|----|----|------|----|----|
| 265784 | 42 | 4162551 | 4162577 | 3 | 9  | 27 | TCC  | 18 | 4  |
| 265794 | 42 | 4194067 | 4194096 | 3 | 10 | 30 | AAC  | 26 | 4  |
| 265801 | 42 | 4209244 | 4209259 | 2 | 8  | 16 | GT   | 22 | 6  |
| 265807 | 42 | 4219965 | 4219992 | 2 | 14 | 28 | TG   | 7  | 6  |
| 265823 | 42 | 4266542 | 4266559 | 2 | 9  | 18 | GT   | 22 | 4  |
| 265824 | 42 | 4267969 | 4267996 | 2 | 14 | 28 | AC   | 9  | 8  |
| 265825 | 42 | 4269671 | 4269716 | 2 | 23 | 46 | TG   | 15 | 17 |
| 265828 | 42 | 4281114 | 4281146 | 3 | 11 | 33 | CAT  | 18 | 6  |
| 265833 | 42 | 4296595 | 4296614 | 2 | 10 | 20 | CA   | 7  | 5  |
| 265834 | 42 | 4296896 | 4296913 | 2 | 9  | 18 | TG   | 14 | 6  |
| 265836 | 42 | 4300832 | 4300843 | 2 | 6  | 12 | AC   | 25 | 4  |
| 265838 | 42 | 4302897 | 4302922 | 2 | 13 | 26 | AC   | 12 | 6  |
| 265839 | 42 | 4303776 | 4303796 | 3 | 7  | 21 | TCC  | 18 | 5  |
| 265846 | 42 | 4320442 | 4320465 | 2 | 12 | 24 | AC   | 7  | 6  |
| 265847 | 42 | 4320678 | 4320689 | 2 | 6  | 12 | AC   | 22 | 6  |
| 265848 | 42 | 4320691 | 4320706 | 2 | 8  | 16 | CA   | 21 | 6  |
| 265849 | 42 | 4323055 | 4323072 | 2 | 9  | 18 | AC   | 16 | 5  |
| 265862 | 43 | 14379   | 14404   | 2 | 13 | 26 | TG   | 15 | 5  |
| 265867 | 43 | 22009   | 22020   | 2 | 6  | 12 | CA   | 12 | 6  |
| 265876 | 43 | 43904   | 43927   | 2 | 12 | 24 | TG   | 19 | 6  |
| 265878 | 43 | 48720   | 48734   | 3 | 5  | 15 | CAT  | 25 | 4  |
| 265879 | 43 | 52579   | 52642   | 4 | 16 | 64 | AAAC | 8  | 5  |
| 265883 | 43 | 63052   | 63063   | 2 | 6  | 12 | CA   | 16 | 4  |
| 265888 | 43 | 68926   | 68937   | 2 | 6  | 12 | CT   | 20 | 6  |
| 265889 | 43 | 68938   | 68951   | 2 | 7  | 14 | CA   | 20 | 6  |
| 265894 | 43 | 70501   | 70544   | 2 | 22 | 44 | GT   | 6  | 8  |
| 265895 | 43 | 72159   | 72180   | 2 | 11 | 22 | GT   | 26 | 3  |
| 265897 | 43 | 75973   | 75986   | 2 | 7  | 14 | AC   | 23 | 4  |
| 265904 | 43 | 84843   | 84868   | 2 | 13 | 26 | AC   | 22 | 9  |
| 265910 | 43 | 94892   | 94911   | 2 | 10 | 20 | AG   | 16 | 3  |
| 265915 | 43 | 95935   | 95960   | 2 | 13 | 26 | AC   | 12 | 9  |
| 265919 | 43 | 98218   | 98259   | 2 | 21 | 42 | AC   | 15 | 9  |
| 265931 | 43 | 109595  | 109618  | 2 | 12 | 24 | TG   | 25 | 7  |
| 265935 | 43 | 121145  | 121164  | 4 | 5  | 20 | CAGT | 24 | 4  |
| 265941 | 43 | 134194  | 134215  | 2 | 11 | 22 | CA   | 21 | 9  |
| 265948 | 43 | 137141  | 137170  | 3 | 10 | 30 | AGG  | 19 | 11 |
| 265949 | 43 | 137582  | 137601  | 2 | 10 | 20 | AC   | 20 | 3  |
| 265951 | 43 | 138663  | 138714  | 4 | 13 | 52 | GAAA | 17 | 10 |
| 265955 | 43 | 141676  | 141693  | 2 | 9  | 18 | TC   | 29 | 10 |
| 265956 | 43 | 141770  | 141783  | 2 | 7  | 14 | GT   | 19 | 5  |
| 265957 | 43 | 141913  | 141928  | 2 | 8  | 16 | AC   | 13 | 6  |
| 265963 | 43 | 144395  | 144424  | 2 | 15 | 30 | CA   | 12 | 6  |
| 265968 | 43 | 144869  | 144896  | 2 | 14 | 28 | CT   | 13 | 9  |
| 265970 | 43 | 151184  | 151201  | 2 | 9  | 18 | GT   | 13 | 4  |
| 265973 | 43 | 153015  | 153040  | 2 | 13 | 26 | GT   | 15 | 8  |
| 265976 | 43 | 155967  | 155992  | 2 | 13 | 26 | GT   | 6  | 3  |
| 265979 | 43 | 158891  | 158922  | 2 | 16 | 32 | TG   | 10 | 8  |
| 265981 | 43 | 160447  | 160464  | 2 | 9  | 18 | GT   | 21 | 3  |
| 265982 | 43 | 161863  | 161904  | 2 | 21 | 42 | AC   | 9  | 11 |
| 265983 | 43 | 161998  | 162011  | 2 | 7  | 14 | AC   | 21 | 4  |
| 265984 | 43 | 163612  | 163627  | 2 | 8  | 16 | AC   | 11 | 6  |

|        |    |        |        |   |    |    |      |    |    |
|--------|----|--------|--------|---|----|----|------|----|----|
| 265985 | 43 | 163629 | 163644 | 2 | 8  | 16 | CA   | 14 | 7  |
| 265993 | 43 | 167140 | 167155 | 4 | 4  | 16 | TCTG | 23 | 4  |
| 266000 | 43 | 171949 | 171978 | 2 | 15 | 30 | AG   | 18 | 8  |
| 266001 | 43 | 173603 | 173616 | 2 | 7  | 14 | AC   | 15 | 7  |
| 266010 | 43 | 179332 | 179365 | 2 | 17 | 34 | CA   | 20 | 10 |
| 266011 | 43 | 181812 | 181839 | 2 | 14 | 28 | AC   | 8  | 9  |
| 266012 | 43 | 183434 | 183465 | 2 | 16 | 32 | TG   | 10 | 7  |
| 266018 | 43 | 198347 | 198358 | 2 | 6  | 12 | CT   | 14 | 6  |
| 266019 | 43 | 198360 | 198371 | 2 | 6  | 12 | TC   | 15 | 4  |
| 266023 | 43 | 202771 | 202786 | 2 | 8  | 16 | CA   | 13 | 7  |
| 266024 | 43 | 202788 | 202801 | 2 | 7  | 14 | AC   | 13 | 7  |
| 266025 | 43 | 204364 | 204387 | 2 | 12 | 24 | CA   | 8  | 6  |
| 266026 | 43 | 204419 | 204460 | 2 | 21 | 42 | AC   | 11 | 10 |
| 266030 | 43 | 205788 | 205815 | 2 | 14 | 28 | TG   | 9  | 4  |
| 266032 | 43 | 206161 | 206184 | 2 | 12 | 24 | AC   | 12 | 7  |
| 266034 | 43 | 207259 | 207282 | 2 | 12 | 24 | AC   | 13 | 8  |
| 266036 | 43 | 208014 | 208037 | 2 | 12 | 24 | AC   | 14 | 10 |
| 266039 | 43 | 213260 | 213293 | 2 | 17 | 34 | AC   | 8  | 8  |
| 266040 | 43 | 217495 | 217510 | 2 | 8  | 16 | AT   | 9  | 4  |
| 266045 | 43 | 227641 | 227654 | 2 | 7  | 14 | CT   | 28 | 3  |
| 266047 | 43 | 232046 | 232065 | 2 | 10 | 20 | AC   | 19 | 9  |
| 266050 | 43 | 233029 | 233060 | 4 | 8  | 32 | ATGG | 15 | 7  |
| 266051 | 43 | 233571 | 233608 | 2 | 19 | 38 | TG   | 17 | 11 |
| 266053 | 43 | 235741 | 235760 | 2 | 10 | 20 | AC   | 12 | 5  |
| 266055 | 43 | 235884 | 235915 | 2 | 16 | 32 | CA   | 14 | 12 |
| 266072 | 43 | 248693 | 248724 | 4 | 8  | 32 | TCTT | 24 | 10 |
| 266082 | 43 | 266293 | 266318 | 2 | 13 | 26 | CA   | 17 | 9  |
| 266083 | 43 | 266433 | 266454 | 2 | 11 | 22 | CA   | 19 | 9  |
| 266084 | 43 | 266534 | 266559 | 2 | 13 | 26 | GT   | 9  | 8  |
| 266090 | 43 | 275258 | 275273 | 2 | 8  | 16 | TA   | 9  | 3  |
| 266105 | 43 | 306895 | 306916 | 2 | 11 | 22 | CA   | 22 | 10 |
| 266106 | 43 | 310173 | 310184 | 2 | 6  | 12 | GT   | 24 | 5  |
| 266111 | 43 | 326448 | 326462 | 3 | 5  | 15 | TGA  | 17 | 6  |
| 266112 | 43 | 326464 | 326478 | 3 | 5  | 15 | GAT  | 19 | 7  |
| 266113 | 43 | 328110 | 328125 | 4 | 4  | 16 | TGAA | 14 | 4  |
| 266118 | 43 | 347275 | 347286 | 2 | 6  | 12 | CA   | 26 | 3  |
| 266120 | 43 | 347906 | 347941 | 2 | 18 | 36 | CA   | 13 | 15 |
| 266121 | 43 | 348151 | 348174 | 2 | 12 | 24 | AC   | 15 | 4  |
| 266122 | 43 | 348259 | 348284 | 2 | 13 | 26 | AC   | 16 | 14 |
| 266129 | 43 | 359477 | 359488 | 2 | 6  | 12 | AC   | 24 | 4  |
| 266130 | 43 | 359632 | 359681 | 2 | 25 | 50 | TG   | 18 | 10 |
| 266132 | 43 | 364281 | 364298 | 2 | 9  | 18 | CA   | 10 | 7  |
| 266133 | 43 | 365719 | 365758 | 4 | 10 | 40 | TTCT | 18 | 11 |
| 266135 | 43 | 367030 | 367045 | 2 | 8  | 16 | AC   | 16 | 4  |
| 266143 | 43 | 373818 | 373847 | 2 | 15 | 30 | TG   | 8  | 7  |
| 266151 | 43 | 383110 | 383127 | 2 | 9  | 18 | CA   | 22 | 4  |
| 266168 | 43 | 400919 | 400950 | 2 | 16 | 32 | GA   | 21 | 5  |
| 266173 | 43 | 411717 | 411738 | 2 | 11 | 22 | CT   | 16 | 7  |
| 266184 | 43 | 425217 | 425231 | 3 | 5  | 15 | ATA  | 29 | 3  |
| 266185 | 43 | 427934 | 427957 | 2 | 12 | 24 | TG   | 6  | 7  |
| 266187 | 43 | 431096 | 431129 | 2 | 17 | 34 | GT   | 10 | 9  |

|        |    |        |        |   |    |    |      |    |    |
|--------|----|--------|--------|---|----|----|------|----|----|
| 266189 | 43 | 433687 | 433732 | 2 | 23 | 46 | CA   | 7  | 7  |
| 266191 | 43 | 434328 | 434359 | 4 | 8  | 32 | AGAA | 12 | 3  |
| 266194 | 43 | 435595 | 435640 | 2 | 23 | 46 | CA   | 6  | 10 |
| 266196 | 43 | 438643 | 438656 | 2 | 7  | 14 | TG   | 20 | 8  |
| 266197 | 43 | 439231 | 439250 | 2 | 10 | 20 | CA   | 7  | 8  |
| 266198 | 43 | 441167 | 441184 | 2 | 9  | 18 | TG   | 18 | 10 |
| 266199 | 43 | 441384 | 441397 | 2 | 7  | 14 | GT   | 26 | 12 |
| 266201 | 43 | 443445 | 443460 | 2 | 8  | 16 | CT   | 26 | 3  |
| 266208 | 43 | 447152 | 447171 | 4 | 5  | 20 | CTGC | 20 | 3  |
| 266209 | 43 | 447506 | 447526 | 3 | 7  | 21 | TCC  | 19 | 5  |
| 266212 | 43 | 451203 | 451220 | 2 | 9  | 18 | AC   | 18 | 9  |
| 266214 | 43 | 467338 | 467367 | 2 | 15 | 30 | CA   | 10 | 6  |
| 266224 | 43 | 483772 | 483793 | 2 | 11 | 22 | CA   | 11 | 10 |
| 266226 | 43 | 485117 | 485146 | 2 | 15 | 30 | AC   | 13 | 14 |
| 266227 | 43 | 485247 | 485258 | 2 | 6  | 12 | TG   | 23 | 7  |
| 266228 | 43 | 485261 | 485272 | 2 | 6  | 12 | TG   | 23 | 6  |
| 266230 | 43 | 485474 | 485523 | 2 | 25 | 50 | AG   | 11 | 11 |
| 266235 | 43 | 487977 | 487992 | 2 | 8  | 16 | GA   | 22 | 3  |
| 266239 | 43 | 491024 | 491035 | 2 | 6  | 12 | TG   | 20 | 5  |
| 266241 | 43 | 492685 | 492712 | 2 | 14 | 28 | CA   | 12 | 6  |
| 266242 | 43 | 492869 | 492889 | 3 | 7  | 21 | CCT  | 23 | 4  |
| 266247 | 43 | 494418 | 494459 | 2 | 21 | 42 | AC   | 8  | 7  |
| 266250 | 43 | 496314 | 496327 | 2 | 7  | 14 | CA   | 24 | 3  |
| 266251 | 43 | 496356 | 496393 | 2 | 19 | 38 | TC   | 12 | 9  |
| 266257 | 43 | 500657 | 500672 | 2 | 8  | 16 | GT   | 25 | 8  |
| 266259 | 43 | 503415 | 503454 | 2 | 20 | 40 | AC   | 6  | 6  |
| 266261 | 43 | 503563 | 503576 | 2 | 7  | 14 | AC   | 10 | 4  |
| 266269 | 43 | 505543 | 505558 | 2 | 8  | 16 | AC   | 17 | 6  |
| 266270 | 43 | 505682 | 505715 | 2 | 17 | 34 | AC   | 6  | 9  |
| 266287 | 43 | 508549 | 508566 | 2 | 9  | 18 | AC   | 19 | 12 |
| 266289 | 43 | 509954 | 509979 | 2 | 13 | 26 | CA   | 22 | 15 |
| 266290 | 43 | 511124 | 511151 | 2 | 14 | 28 | AC   | 24 | 7  |
| 266291 | 43 | 511238 | 511253 | 4 | 4  | 16 | CGTG | 10 | 6  |
| 266292 | 43 | 515174 | 515185 | 2 | 6  | 12 | GT   | 16 | 7  |
| 266293 | 43 | 515188 | 515201 | 2 | 7  | 14 | GT   | 18 | 8  |
| 266295 | 43 | 515334 | 515359 | 2 | 13 | 26 | TC   | 14 | 6  |
| 266300 | 43 | 516629 | 516640 | 2 | 6  | 12 | CA   | 12 | 5  |
| 266301 | 43 | 516842 | 516879 | 2 | 19 | 38 | CA   | 11 | 11 |
| 266306 | 43 | 520589 | 520609 | 3 | 7  | 21 | GAA  | 21 | 6  |
| 266307 | 43 | 520863 | 520878 | 4 | 4  | 16 | ATCC | 26 | 3  |
| 266310 | 43 | 523514 | 523549 | 4 | 9  | 36 | CAGA | 25 | 9  |
| 266313 | 43 | 524822 | 524841 | 2 | 10 | 20 | GT   | 12 | 5  |
| 266315 | 43 | 524865 | 524882 | 2 | 9  | 18 | AG   | 7  | 4  |
| 266316 | 43 | 524936 | 524961 | 2 | 13 | 26 | AC   | 12 | 6  |
| 266317 | 43 | 525851 | 525871 | 3 | 7  | 21 | GGA  | 30 | 4  |
| 266318 | 43 | 526492 | 526517 | 2 | 13 | 26 | GT   | 9  | 8  |
| 266322 | 43 | 531185 | 531198 | 2 | 7  | 14 | AC   | 20 | 5  |
| 266328 | 43 | 536084 | 536099 | 4 | 4  | 16 | AATC | 36 | 3  |
| 266329 | 43 | 536390 | 536419 | 2 | 15 | 30 | TG   | 18 | 13 |
| 266332 | 43 | 544963 | 544982 | 2 | 10 | 20 | CA   | 18 | 4  |
| 266345 | 43 | 563763 | 563774 | 2 | 6  | 12 | GT   | 26 | 3  |

|        |    |        |        |   |    |    |      |    |    |
|--------|----|--------|--------|---|----|----|------|----|----|
| 266349 | 43 | 569883 | 569894 | 2 | 6  | 12 | AC   | 25 | 3  |
| 266350 | 43 | 578578 | 578595 | 2 | 9  | 18 | AC   | 23 | 13 |
| 266351 | 43 | 578838 | 578849 | 2 | 6  | 12 | TG   | 26 | 3  |
| 266352 | 43 | 579023 | 579048 | 2 | 13 | 26 | TG   | 17 | 3  |
| 266356 | 43 | 585172 | 585193 | 2 | 11 | 22 | AG   | 18 | 7  |
| 266361 | 43 | 594553 | 594576 | 4 | 6  | 24 | AAAG | 6  | 3  |
| 266365 | 43 | 597544 | 597565 | 2 | 11 | 22 | AG   | 13 | 12 |
| 266369 | 43 | 603498 | 603519 | 2 | 11 | 22 | GT   | 23 | 8  |
| 266371 | 43 | 603634 | 603663 | 2 | 15 | 30 | TG   | 9  | 9  |
| 266372 | 43 | 604385 | 604408 | 2 | 12 | 24 | AC   | 7  | 4  |
| 266375 | 43 | 609546 | 609559 | 2 | 7  | 14 | AC   | 25 | 3  |
| 266376 | 43 | 611731 | 611754 | 2 | 12 | 24 | TG   | 13 | 7  |
| 266377 | 43 | 611822 | 611873 | 2 | 26 | 52 | TG   | 8  | 12 |
| 266379 | 43 | 611969 | 611982 | 2 | 7  | 14 | CA   | 16 | 6  |
| 266380 | 43 | 611985 | 611996 | 2 | 6  | 12 | CA   | 12 | 4  |
| 266383 | 43 | 613286 | 613305 | 2 | 10 | 20 | TG   | 14 | 4  |
| 266384 | 43 | 613494 | 613517 | 2 | 12 | 24 | TG   | 13 | 5  |
| 266385 | 43 | 614853 | 614868 | 2 | 8  | 16 | GA   | 19 | 7  |
| 266388 | 43 | 615188 | 615227 | 2 | 20 | 40 | TG   | 13 | 15 |
| 266389 | 43 | 617571 | 617594 | 2 | 12 | 24 | CA   | 17 | 14 |
| 266390 | 43 | 620167 | 620178 | 2 | 6  | 12 | CA   | 31 | 4  |
| 266391 | 43 | 620273 | 620284 | 2 | 6  | 12 | GT   | 29 | 3  |
| 266392 | 43 | 623435 | 623446 | 2 | 6  | 12 | GT   | 22 | 3  |
| 266393 | 43 | 624374 | 624403 | 2 | 15 | 30 | GT   | 12 | 11 |
| 266400 | 43 | 627786 | 627801 | 2 | 8  | 16 | GT   | 25 | 6  |
| 266401 | 43 | 632963 | 633014 | 2 | 26 | 52 | TG   | 8  | 10 |
| 266402 | 43 | 633688 | 633699 | 2 | 6  | 12 | CA   | 11 | 3  |
| 266407 | 43 | 638963 | 638994 | 2 | 16 | 32 | AC   | 19 | 9  |
| 266409 | 43 | 645908 | 645963 | 2 | 28 | 56 | TG   | 8  | 12 |
| 266410 | 43 | 654944 | 654959 | 2 | 8  | 16 | AC   | 27 | 6  |
| 266411 | 43 | 655732 | 655751 | 2 | 10 | 20 | CA   | 25 | 7  |
| 266413 | 43 | 658776 | 658803 | 2 | 14 | 28 | GT   | 15 | 5  |
| 266423 | 43 | 665043 | 665062 | 2 | 10 | 20 | GT   | 16 | 9  |
| 266425 | 43 | 671113 | 671140 | 2 | 14 | 28 | AC   | 15 | 9  |
| 266427 | 43 | 671718 | 671743 | 2 | 13 | 26 | AG   | 15 | 7  |
| 266442 | 43 | 681730 | 681749 | 2 | 10 | 20 | CA   | 16 | 6  |
| 266443 | 43 | 682911 | 682926 | 2 | 8  | 16 | AC   | 17 | 5  |
| 266444 | 43 | 682937 | 682948 | 2 | 6  | 12 | AC   | 15 | 3  |
| 266445 | 43 | 684220 | 684235 | 2 | 8  | 16 | GT   | 21 | 7  |
| 266446 | 43 | 684595 | 684618 | 2 | 12 | 24 | AC   | 14 | 10 |
| 266447 | 43 | 686104 | 686129 | 2 | 13 | 26 | GT   | 12 | 7  |
| 266448 | 43 | 686237 | 686262 | 2 | 13 | 26 | AC   | 12 | 8  |
| 266473 | 43 | 735011 | 735034 | 2 | 12 | 24 | GT   | 25 | 6  |
| 266476 | 43 | 750129 | 750152 | 2 | 12 | 24 | CA   | 20 | 10 |
| 266480 | 43 | 755781 | 755794 | 2 | 7  | 14 | CA   | 27 | 10 |
| 266501 | 43 | 793277 | 793308 | 2 | 16 | 32 | TG   | 27 | 4  |
| 266502 | 43 | 796707 | 796730 | 2 | 12 | 24 | GT   | 20 | 14 |
| 266506 | 43 | 817603 | 817622 | 2 | 10 | 20 | GT   | 15 | 7  |
| 266511 | 43 | 832266 | 832283 | 2 | 9  | 18 | CA   | 11 | 8  |
| 266512 | 43 | 833263 | 833290 | 2 | 14 | 28 | GT   | 17 | 8  |
| 266516 | 43 | 837376 | 837389 | 2 | 7  | 14 | GT   | 22 | 4  |

|        |    |        |        |   |    |    |      |    |    |
|--------|----|--------|--------|---|----|----|------|----|----|
| 266519 | 43 | 837764 | 837791 | 2 | 14 | 28 | CA   | 11 | 13 |
| 266525 | 43 | 844307 | 844326 | 2 | 10 | 20 | TG   | 18 | 4  |
| 266526 | 43 | 844425 | 844446 | 2 | 11 | 22 | TG   | 12 | 5  |
| 266527 | 43 | 844484 | 844513 | 2 | 15 | 30 | GT   | 10 | 7  |
| 266528 | 43 | 844580 | 844609 | 2 | 15 | 30 | TG   | 6  | 6  |
| 266530 | 43 | 846103 | 846124 | 2 | 11 | 22 | TG   | 13 | 4  |
| 266535 | 43 | 847426 | 847455 | 2 | 15 | 30 | GT   | 11 | 12 |
| 266536 | 43 | 847601 | 847648 | 2 | 24 | 48 | TG   | 16 | 9  |
| 266541 | 43 | 851152 | 851179 | 2 | 14 | 28 | AG   | 10 | 9  |
| 266544 | 43 | 851549 | 851570 | 2 | 11 | 22 | GT   | 15 | 8  |
| 266545 | 43 | 851760 | 851785 | 2 | 13 | 26 | TG   | 18 | 12 |
| 266547 | 43 | 854911 | 854922 | 2 | 6  | 12 | TG   | 19 | 4  |
| 266549 | 43 | 857675 | 857692 | 2 | 9  | 18 | CA   | 27 | 3  |
| 266550 | 43 | 857834 | 857875 | 2 | 21 | 42 | GT   | 9  | 7  |
| 266553 | 43 | 858200 | 858221 | 2 | 11 | 22 | TG   | 11 | 11 |
| 266560 | 43 | 864799 | 864830 | 2 | 16 | 32 | TG   | 12 | 9  |
| 266561 | 43 | 865088 | 865123 | 2 | 18 | 36 | GT   | 18 | 9  |
| 266562 | 43 | 866894 | 866905 | 2 | 6  | 12 | GT   | 21 | 3  |
| 266563 | 43 | 867720 | 867735 | 2 | 8  | 16 | CA   | 28 | 5  |
| 266564 | 43 | 868032 | 868065 | 2 | 17 | 34 | TG   | 9  | 8  |
| 266569 | 43 | 871786 | 871807 | 2 | 11 | 22 | GA   | 12 | 6  |
| 266570 | 43 | 872205 | 872218 | 2 | 7  | 14 | TG   | 20 | 7  |
| 266571 | 43 | 872219 | 872232 | 2 | 7  | 14 | TA   | 19 | 7  |
| 266572 | 43 | 873003 | 873020 | 2 | 9  | 18 | GT   | 20 | 3  |
| 266580 | 43 | 881172 | 881197 | 2 | 13 | 26 | GT   | 19 | 8  |
| 266583 | 43 | 882537 | 882552 | 2 | 8  | 16 | TG   | 20 | 4  |
| 266584 | 43 | 882789 | 882826 | 2 | 19 | 38 | TC   | 15 | 15 |
| 266589 | 43 | 889415 | 889426 | 2 | 6  | 12 | AC   | 25 | 4  |
| 266592 | 43 | 893176 | 893205 | 2 | 15 | 30 | AC   | 24 | 9  |
| 266593 | 43 | 893485 | 893514 | 2 | 15 | 30 | GT   | 7  | 8  |
| 266594 | 43 | 893699 | 893718 | 2 | 10 | 20 | CT   | 10 | 4  |
| 266609 | 43 | 912133 | 912165 | 3 | 11 | 33 | CTT  | 21 | 8  |
| 266615 | 43 | 914931 | 914948 | 2 | 9  | 18 | GA   | 21 | 4  |
| 266623 | 43 | 917838 | 917849 | 2 | 6  | 12 | AT   | 20 | 4  |
| 266639 | 43 | 924965 | 924988 | 3 | 8  | 24 | TGA  | 15 | 5  |
| 266642 | 43 | 926420 | 926435 | 2 | 8  | 16 | TG   | 15 | 11 |
| 266649 | 43 | 932268 | 932287 | 2 | 10 | 20 | GT   | 13 | 3  |
| 266652 | 43 | 933526 | 933537 | 2 | 6  | 12 | AC   | 21 | 4  |
| 266655 | 43 | 934893 | 934916 | 4 | 6  | 24 | TTTC | 17 | 7  |
| 266656 | 43 | 935277 | 935294 | 3 | 6  | 18 | GCT  | 28 | 6  |
| 266659 | 43 | 943442 | 943457 | 2 | 8  | 16 | CA   | 7  | 5  |
| 266661 | 43 | 949412 | 949425 | 2 | 7  | 14 | GT   | 33 | 5  |
| 266662 | 43 | 949946 | 949967 | 2 | 11 | 22 | AG   | 20 | 10 |
| 266668 | 43 | 958032 | 958057 | 2 | 13 | 26 | AG   | 9  | 9  |
| 266672 | 43 | 965586 | 965601 | 2 | 8  | 16 | CT   | 31 | 4  |
| 266674 | 43 | 966433 | 966446 | 2 | 7  | 14 | AC   | 25 | 3  |
| 266676 | 43 | 970778 | 970795 | 2 | 9  | 18 | TG   | 16 | 4  |
| 266678 | 43 | 972425 | 972436 | 2 | 6  | 12 | GT   | 18 | 9  |
| 266679 | 43 | 972441 | 972452 | 2 | 6  | 12 | GT   | 21 | 10 |
| 266680 | 43 | 975901 | 975915 | 3 | 5  | 15 | TGG  | 28 | 3  |
| 266682 | 43 | 976213 | 976234 | 2 | 11 | 22 | AC   | 25 | 11 |

|        |    |         |         |   |    |    |      |    |    |
|--------|----|---------|---------|---|----|----|------|----|----|
| 266686 | 43 | 979123  | 979136  | 2 | 7  | 14 | TG   | 20 | 10 |
| 266687 | 43 | 979895  | 979906  | 2 | 6  | 12 | AC   | 6  | 8  |
| 266697 | 43 | 989013  | 989030  | 2 | 9  | 18 | TG   | 21 | 7  |
| 266702 | 43 | 997197  | 997226  | 2 | 15 | 30 | CA   | 6  | 8  |
| 266705 | 43 | 1002274 | 1002329 | 2 | 28 | 56 | GT   | 9  | 8  |
| 266718 | 43 | 1019607 | 1019638 | 2 | 16 | 32 | TG   | 10 | 10 |
| 266721 | 43 | 1027553 | 1027574 | 2 | 11 | 22 | CA   | 20 | 6  |
| 266722 | 43 | 1028060 | 1028093 | 2 | 17 | 34 | TG   | 9  | 9  |
| 266723 | 43 | 1028705 | 1028732 | 4 | 7  | 28 | GCAG | 22 | 7  |
| 266730 | 43 | 1033144 | 1033157 | 2 | 7  | 14 | GA   | 18 | 3  |
| 266731 | 43 | 1033179 | 1033190 | 2 | 6  | 12 | TG   | 21 | 3  |
| 266732 | 43 | 1033652 | 1033671 | 2 | 10 | 20 | GT   | 22 | 5  |
| 266737 | 43 | 1040744 | 1040767 | 4 | 6  | 24 | TTTA | 20 | 5  |
| 266746 | 43 | 1064216 | 1064251 | 2 | 18 | 36 | TG   | 8  | 7  |
| 266761 | 43 | 1109309 | 1109326 | 2 | 9  | 18 | GT   | 20 | 10 |
| 266762 | 43 | 1109490 | 1109517 | 2 | 14 | 28 | AC   | 10 | 8  |
| 266763 | 43 | 1110060 | 1110083 | 2 | 12 | 24 | GT   | 15 | 13 |
| 266765 | 43 | 1116500 | 1116517 | 2 | 9  | 18 | AG   | 17 | 6  |
| 266766 | 43 | 1116519 | 1116530 | 2 | 6  | 12 | GA   | 17 | 3  |
| 266776 | 43 | 1133506 | 1133525 | 2 | 10 | 20 | GT   | 22 | 6  |
| 266780 | 43 | 1138841 | 1138854 | 2 | 7  | 14 | CA   | 13 | 4  |
| 266784 | 43 | 1146114 | 1146127 | 2 | 7  | 14 | TG   | 22 | 3  |
| 266786 | 43 | 1146497 | 1146532 | 2 | 18 | 36 | TG   | 17 | 12 |
| 266788 | 43 | 1150775 | 1150800 | 2 | 13 | 26 | TG   | 21 | 11 |
| 266790 | 43 | 1151978 | 1151995 | 2 | 9  | 18 | CT   | 21 | 6  |
| 266791 | 43 | 1152794 | 1152839 | 2 | 23 | 46 | TG   | 11 | 13 |
| 266802 | 43 | 1172923 | 1172954 | 2 | 16 | 32 | TG   | 8  | 7  |
| 266804 | 43 | 1175627 | 1175638 | 2 | 6  | 12 | GT   | 27 | 3  |
| 266805 | 43 | 1177947 | 1177968 | 2 | 11 | 22 | TC   | 12 | 4  |
| 266806 | 43 | 1178759 | 1178782 | 4 | 6  | 24 | GAAA | 31 | 8  |
| 266807 | 43 | 1179127 | 1179140 | 2 | 7  | 14 | CA   | 26 | 6  |
| 266812 | 43 | 1186811 | 1186848 | 2 | 19 | 38 | GA   | 11 | 8  |
| 266815 | 43 | 1190362 | 1190397 | 3 | 12 | 36 | GCT  | 22 | 9  |
| 266826 | 43 | 1198517 | 1198532 | 2 | 8  | 16 | CA   | 24 | 5  |
| 266827 | 43 | 1198668 | 1198687 | 2 | 10 | 20 | CA   | 12 | 8  |
| 266832 | 43 | 1220082 | 1220097 | 4 | 4  | 16 | GCTG | 27 | 4  |
| 266834 | 43 | 1220314 | 1220337 | 4 | 6  | 24 | TTAT | 9  | 3  |
| 266839 | 43 | 1223451 | 1223462 | 2 | 6  | 12 | AG   | 23 | 6  |
| 266855 | 43 | 1243070 | 1243087 | 3 | 6  | 18 | TCC  | 25 | 3  |
| 266856 | 43 | 1243843 | 1243862 | 2 | 10 | 20 | GA   | 20 | 4  |
| 266857 | 43 | 1245993 | 1246010 | 2 | 9  | 18 | GT   | 12 | 8  |
| 266858 | 43 | 1247341 | 1247352 | 2 | 6  | 12 | GT   | 22 | 7  |
| 266859 | 43 | 1249984 | 1249999 | 2 | 8  | 16 | TG   | 32 | 4  |
| 266863 | 43 | 1258141 | 1258174 | 2 | 17 | 34 | TG   | 10 | 7  |
| 266869 | 43 | 1263773 | 1263798 | 2 | 13 | 26 | TG   | 6  | 10 |
| 266871 | 43 | 1266076 | 1266103 | 2 | 14 | 28 | TC   | 9  | 8  |
| 266874 | 43 | 1274615 | 1274628 | 2 | 7  | 14 | GA   | 26 | 3  |
| 266880 | 43 | 1286308 | 1286337 | 2 | 15 | 30 | AG   | 20 | 5  |
| 266882 | 43 | 1288350 | 1288387 | 2 | 19 | 38 | TG   | 11 | 7  |
| 266883 | 43 | 1288519 | 1288540 | 2 | 11 | 22 | GT   | 19 | 7  |
| 266885 | 43 | 1298364 | 1298377 | 2 | 7  | 14 | AC   | 17 | 5  |

|        |    |         |         |   |    |    |      |    |    |
|--------|----|---------|---------|---|----|----|------|----|----|
| 266886 | 43 | 1303560 | 1303591 | 4 | 8  | 32 | TCAC | 27 | 5  |
| 266889 | 43 | 1310667 | 1310680 | 2 | 7  | 14 | AT   | 16 | 4  |
| 266899 | 43 | 1332364 | 1332395 | 2 | 16 | 32 | CA   | 19 | 10 |
| 266901 | 43 | 1349463 | 1349482 | 2 | 10 | 20 | CA   | 13 | 8  |
| 266905 | 43 | 1370479 | 1370492 | 2 | 7  | 14 | AC   | 15 | 3  |
| 266916 | 43 | 1406023 | 1406042 | 2 | 10 | 20 | AC   | 9  | 8  |
| 266917 | 43 | 1406159 | 1406190 | 2 | 16 | 32 | TG   | 9  | 10 |
| 266919 | 43 | 1408945 | 1408966 | 2 | 11 | 22 | AC   | 22 | 7  |
| 266921 | 43 | 1411027 | 1411052 | 2 | 13 | 26 | TG   | 15 | 6  |
| 266926 | 43 | 1423731 | 1423756 | 2 | 13 | 26 | CT   | 19 | 9  |
| 266928 | 43 | 1426071 | 1426082 | 2 | 6  | 12 | AC   | 21 | 3  |
| 266930 | 43 | 1427016 | 1427043 | 4 | 7  | 28 | TCTG | 27 | 5  |
| 266931 | 43 | 1429275 | 1429286 | 2 | 6  | 12 | AC   | 24 | 3  |
| 266932 | 43 | 1431311 | 1431344 | 2 | 17 | 34 | AC   | 22 | 9  |
| 266936 | 43 | 1435482 | 1435511 | 2 | 15 | 30 | CA   | 14 | 6  |
| 266937 | 43 | 1436691 | 1436708 | 2 | 9  | 18 | GA   | 20 | 3  |
| 266938 | 43 | 1437114 | 1437133 | 2 | 10 | 20 | AC   | 24 | 4  |
| 266939 | 43 | 1438638 | 1438661 | 2 | 12 | 24 | TG   | 16 | 9  |
| 266941 | 43 | 1441270 | 1441295 | 2 | 13 | 26 | TG   | 20 | 10 |
| 266950 | 43 | 1449938 | 1449953 | 2 | 8  | 16 | AC   | 21 | 4  |
| 266960 | 43 | 1464915 | 1464942 | 4 | 7  | 28 | AGAA | 15 | 6  |
| 266961 | 43 | 1470049 | 1470062 | 2 | 7  | 14 | CA   | 14 | 4  |
| 266962 | 43 | 1470096 | 1470117 | 2 | 11 | 22 | AC   | 14 | 9  |
| 266965 | 43 | 1470563 | 1470582 | 4 | 5  | 20 | TAGA | 7  | 5  |
| 267018 | 43 | 1512951 | 1512962 | 2 | 6  | 12 | AC   | 12 | 4  |
| 267036 | 43 | 1535015 | 1535030 | 2 | 8  | 16 | GA   | 29 | 4  |
| 267037 | 43 | 1535065 | 1535084 | 2 | 10 | 20 | GT   | 20 | 7  |
| 267042 | 43 | 1538524 | 1538535 | 2 | 6  | 12 | TG   | 12 | 6  |
| 267043 | 43 | 1538537 | 1538550 | 2 | 7  | 14 | GT   | 11 | 6  |
| 267066 | 43 | 1564044 | 1564063 | 2 | 10 | 20 | TG   | 13 | 9  |
| 267070 | 43 | 1565978 | 1565997 | 2 | 10 | 20 | CA   | 16 | 5  |
| 267071 | 43 | 1566082 | 1566111 | 2 | 15 | 30 | CT   | 12 | 8  |
| 267114 | 43 | 1614303 | 1614320 | 2 | 9  | 18 | AC   | 30 | 5  |
| 267123 | 43 | 1627746 | 1627757 | 2 | 6  | 12 | TC   | 14 | 4  |
| 267124 | 43 | 1629062 | 1629079 | 2 | 9  | 18 | CA   | 20 | 7  |
| 267126 | 43 | 1629792 | 1629805 | 2 | 7  | 14 | CA   | 24 | 3  |
| 267127 | 43 | 1629840 | 1629871 | 2 | 16 | 32 | CA   | 16 | 14 |
| 267130 | 43 | 1631364 | 1631377 | 2 | 7  | 14 | GT   | 19 | 3  |
| 267131 | 43 | 1631663 | 1631684 | 2 | 11 | 22 | AC   | 20 | 12 |
| 267133 | 43 | 1632035 | 1632048 | 2 | 7  | 14 | TG   | 24 | 4  |
| 267138 | 43 | 1633271 | 1633290 | 2 | 10 | 20 | AC   | 14 | 4  |
| 267141 | 43 | 1634148 | 1634161 | 2 | 7  | 14 | CT   | 17 | 4  |
| 267142 | 43 | 1634182 | 1634213 | 2 | 16 | 32 | CA   | 12 | 11 |
| 267143 | 43 | 1634268 | 1634285 | 2 | 9  | 18 | GT   | 11 | 6  |
| 267147 | 43 | 1638783 | 1638804 | 2 | 11 | 22 | TG   | 10 | 8  |
| 267150 | 43 | 1644515 | 1644546 | 2 | 16 | 32 | GT   | 11 | 9  |
| 267151 | 43 | 1644840 | 1644867 | 2 | 14 | 28 | TG   | 20 | 11 |
| 267152 | 43 | 1645414 | 1645447 | 2 | 17 | 34 | AC   | 8  | 9  |
| 267165 | 43 | 1663603 | 1663632 | 2 | 15 | 30 | CA   | 6  | 5  |
| 267168 | 43 | 1665024 | 1665039 | 2 | 8  | 16 | GA   | 21 | 10 |
| 267169 | 43 | 1665356 | 1665383 | 4 | 7  | 28 | CAGA | 30 | 6  |

|        |    |         |         |   |    |    |      |    |    |
|--------|----|---------|---------|---|----|----|------|----|----|
| 267172 | 43 | 1668440 | 1668457 | 3 | 6  | 18 | TGC  | 6  | 3  |
| 267174 | 43 | 1669058 | 1669069 | 2 | 6  | 12 | CA   | 23 | 4  |
| 267177 | 43 | 1672254 | 1672279 | 2 | 13 | 26 | GT   | 21 | 19 |
| 267181 | 43 | 1673909 | 1673932 | 2 | 12 | 24 | AC   | 19 | 13 |
| 267186 | 43 | 1678375 | 1678400 | 2 | 13 | 26 | TG   | 15 | 14 |
| 267194 | 43 | 1682844 | 1682863 | 2 | 10 | 20 | CA   | 18 | 3  |
| 267196 | 43 | 1683240 | 1683255 | 4 | 4  | 16 | AAAT | 11 | 5  |
| 267198 | 43 | 1683653 | 1683666 | 2 | 7  | 14 | CT   | 16 | 3  |
| 267200 | 43 | 1684095 | 1684116 | 2 | 11 | 22 | GT   | 16 | 8  |
| 267203 | 43 | 1689369 | 1689396 | 2 | 14 | 28 | AC   | 22 | 12 |
| 267204 | 43 | 1689739 | 1689754 | 2 | 8  | 16 | TG   | 15 | 11 |
| 267205 | 43 | 1691209 | 1691224 | 4 | 4  | 16 | TTTC | 21 | 3  |
| 267223 | 43 | 1700842 | 1700859 | 2 | 9  | 18 | TG   | 24 | 10 |
| 267224 | 43 | 1702062 | 1702077 | 2 | 8  | 16 | CA   | 20 | 11 |
| 267230 | 43 | 1708869 | 1708890 | 2 | 11 | 22 | GT   | 16 | 14 |
| 267231 | 43 | 1708938 | 1708957 | 2 | 10 | 20 | CT   | 18 | 8  |
| 267232 | 43 | 1711159 | 1711196 | 2 | 19 | 38 | GT   | 10 | 6  |
| 267233 | 43 | 1714318 | 1714355 | 2 | 19 | 38 | GT   | 17 | 6  |
| 267255 | 43 | 1755819 | 1755834 | 2 | 8  | 16 | TC   | 18 | 5  |
| 267256 | 43 | 1755856 | 1755867 | 2 | 6  | 12 | AC   | 22 | 3  |
| 267257 | 43 | 1756683 | 1756710 | 2 | 14 | 28 | CA   | 25 | 6  |
| 267261 | 43 | 1771082 | 1771095 | 2 | 7  | 14 | CA   | 27 | 6  |
| 267265 | 43 | 1777094 | 1777111 | 2 | 9  | 18 | TA   | 10 | 4  |
| 267266 | 43 | 1779939 | 1779982 | 2 | 22 | 44 | CA   | 9  | 10 |
| 267274 | 43 | 1798741 | 1798772 | 2 | 16 | 32 | AG   | 11 | 7  |
| 267285 | 43 | 1807846 | 1807857 | 2 | 6  | 12 | AC   | 22 | 5  |
| 267286 | 43 | 1807978 | 1808001 | 2 | 12 | 24 | GA   | 16 | 9  |
| 267288 | 43 | 1808888 | 1808901 | 2 | 7  | 14 | TG   | 25 | 4  |
| 267298 | 43 | 1819765 | 1819792 | 2 | 14 | 28 | AC   | 12 | 8  |
| 267300 | 43 | 1819918 | 1819931 | 2 | 7  | 14 | GT   | 13 | 6  |
| 267301 | 43 | 1822470 | 1822481 | 2 | 6  | 12 | AT   | 31 | 4  |
| 267305 | 43 | 1826114 | 1826129 | 4 | 4  | 16 | AAAT | 27 | 3  |
| 267316 | 43 | 1836388 | 1836405 | 2 | 9  | 18 | AC   | 23 | 9  |
| 267317 | 43 | 1836602 | 1836641 | 2 | 20 | 40 | CA   | 21 | 15 |
| 267320 | 43 | 1846937 | 1846948 | 2 | 6  | 12 | AG   | 26 | 3  |
| 267322 | 43 | 1849931 | 1849942 | 2 | 6  | 12 | GT   | 22 | 3  |
| 267325 | 43 | 1855164 | 1855185 | 2 | 11 | 22 | CA   | 29 | 7  |
| 267331 | 43 | 1858612 | 1858644 | 3 | 11 | 33 | AGA  | 24 | 6  |
| 267343 | 43 | 1879265 | 1879280 | 2 | 8  | 16 | CA   | 19 | 3  |
| 267345 | 43 | 1882571 | 1882594 | 2 | 12 | 24 | TG   | 15 | 6  |
| 267346 | 43 | 1885053 | 1885068 | 2 | 8  | 16 | GA   | 19 | 8  |
| 267349 | 43 | 1889164 | 1889191 | 2 | 14 | 28 | GA   | 19 | 7  |
| 267355 | 43 | 1898777 | 1898794 | 2 | 9  | 18 | TC   | 22 | 6  |
| 267357 | 43 | 1899937 | 1899951 | 3 | 5  | 15 | GGT  | 29 | 4  |
| 267358 | 43 | 1900034 | 1900055 | 2 | 11 | 22 | GA   | 23 | 4  |
| 267363 | 43 | 1911005 | 1911018 | 2 | 7  | 14 | TG   | 16 | 4  |
| 267366 | 43 | 1915787 | 1915806 | 2 | 10 | 20 | GT   | 9  | 4  |
| 267369 | 43 | 1916497 | 1916536 | 2 | 20 | 40 | TG   | 6  | 9  |
| 267370 | 43 | 1916793 | 1916834 | 2 | 21 | 42 | CA   | 7  | 10 |
| 267376 | 43 | 1925400 | 1925415 | 2 | 8  | 16 | TC   | 21 | 6  |
| 267388 | 43 | 1939501 | 1939514 | 2 | 7  | 14 | AT   | 13 | 6  |



|        |    |         |         |   |    |    |      |    |    |
|--------|----|---------|---------|---|----|----|------|----|----|
| 267391 | 43 | 1940083 | 1940114 | 2 | 16 | 32 | GT   | 8  | 10 |
| 267397 | 43 | 1942127 | 1942144 | 2 | 9  | 18 | TG   | 13 | 8  |
| 267398 | 43 | 1950033 | 1950052 | 2 | 10 | 20 | TC   | 6  | 5  |
| 267401 | 43 | 1954330 | 1954341 | 2 | 6  | 12 | TG   | 30 | 3  |
| 267402 | 43 | 1960397 | 1960408 | 2 | 6  | 12 | CA   | 27 | 3  |
| 267408 | 43 | 1976523 | 1976548 | 2 | 13 | 26 | TG   | 13 | 10 |
| 267411 | 43 | 1983762 | 1983797 | 2 | 18 | 36 | AC   | 13 | 17 |
| 267412 | 43 | 1984336 | 1984365 | 2 | 15 | 30 | GT   | 10 | 9  |
| 267417 | 43 | 1985796 | 1985819 | 3 | 8  | 24 | CAG  | 22 | 7  |
| 267418 | 43 | 1990686 | 1990697 | 2 | 6  | 12 | AC   | 33 | 3  |
| 267420 | 43 | 1994558 | 1994579 | 2 | 11 | 22 | GT   | 17 | 11 |
| 267422 | 43 | 1995587 | 1995613 | 3 | 9  | 27 | AGA  | 9  | 5  |
| 267428 | 43 | 1997645 | 1997658 | 2 | 7  | 14 | GT   | 14 | 12 |
| 267429 | 43 | 1997661 | 1997678 | 2 | 9  | 18 | GT   | 11 | 11 |
| 267432 | 43 | 2001623 | 2001634 | 2 | 6  | 12 | CA   | 25 | 6  |
| 267436 | 43 | 2004782 | 2004815 | 2 | 17 | 34 | AC   | 9  | 13 |
| 267437 | 43 | 2004949 | 2004966 | 2 | 9  | 18 | CA   | 15 | 4  |
| 267438 | 43 | 2005449 | 2005474 | 2 | 13 | 26 | AC   | 20 | 14 |
| 267439 | 43 | 2005774 | 2005819 | 2 | 23 | 46 | TG   | 16 | 9  |
| 267441 | 43 | 2007005 | 2007016 | 2 | 6  | 12 | GT   | 28 | 5  |
| 267448 | 43 | 2014933 | 2014954 | 2 | 11 | 22 | CT   | 20 | 9  |
| 267451 | 43 | 2037777 | 2037788 | 2 | 6  | 12 | CA   | 21 | 5  |
| 267456 | 43 | 2042520 | 2042537 | 2 | 9  | 18 | CA   | 14 | 5  |
| 267458 | 43 | 2043268 | 2043291 | 2 | 12 | 24 | CA   | 14 | 12 |
| 267459 | 43 | 2043411 | 2043434 | 2 | 12 | 24 | AC   | 14 | 6  |
| 267460 | 43 | 2043822 | 2043845 | 2 | 12 | 24 | CA   | 14 | 10 |
| 267461 | 43 | 2044571 | 2044585 | 3 | 5  | 15 | CCA  | 22 | 3  |
| 267462 | 43 | 2044729 | 2044744 | 2 | 8  | 16 | GT   | 16 | 8  |
| 267465 | 43 | 2046383 | 2046402 | 2 | 10 | 20 | CT   | 18 | 10 |
| 267494 | 43 | 2062522 | 2062547 | 2 | 13 | 26 | GT   | 12 | 10 |
| 267515 | 43 | 2081349 | 2081364 | 2 | 8  | 16 | AC   | 12 | 3  |
| 267517 | 43 | 2084359 | 2084370 | 2 | 6  | 12 | TG   | 28 | 4  |
| 267518 | 43 | 2084712 | 2084723 | 2 | 6  | 12 | TG   | 22 | 6  |
| 267519 | 43 | 2084930 | 2084965 | 2 | 18 | 36 | GT   | 15 | 13 |
| 267520 | 43 | 2085184 | 2085195 | 2 | 6  | 12 | GT   | 17 | 11 |
| 267521 | 43 | 2085703 | 2085728 | 2 | 13 | 26 | CA   | 19 | 8  |
| 267527 | 43 | 2102971 | 2103020 | 2 | 25 | 50 | AC   | 15 | 13 |
| 267528 | 43 | 2104996 | 2105009 | 2 | 7  | 14 | TA   | 15 | 5  |
| 267529 | 43 | 2108650 | 2108663 | 2 | 7  | 14 | AC   | 18 | 13 |
| 267530 | 43 | 2108664 | 2108681 | 2 | 9  | 18 | CA   | 11 | 9  |
| 267535 | 43 | 2122958 | 2122985 | 2 | 14 | 28 | TG   | 17 | 5  |
| 267536 | 43 | 2125329 | 2125360 | 2 | 16 | 32 | AC   | 13 | 9  |
| 267544 | 43 | 2143263 | 2143282 | 4 | 5  | 20 | GTTT | 32 | 4  |
| 267545 | 43 | 2144254 | 2144279 | 2 | 13 | 26 | CA   | 17 | 7  |
| 267549 | 43 | 2154617 | 2154652 | 2 | 18 | 36 | TG   | 9  | 11 |
| 267551 | 43 | 2155247 | 2155272 | 2 | 13 | 26 | GT   | 11 | 10 |
| 267555 | 43 | 2164961 | 2164975 | 3 | 5  | 15 | GAG  | 24 | 3  |
| 267574 | 43 | 2194603 | 2194632 | 2 | 15 | 30 | GT   | 6  | 7  |
| 267576 | 43 | 2199154 | 2199165 | 2 | 6  | 12 | GT   | 25 | 6  |
| 267577 | 43 | 2199409 | 2199426 | 3 | 6  | 18 | AAC  | 27 | 7  |
| 267578 | 43 | 2199682 | 2199697 | 2 | 8  | 16 | GT   | 20 | 7  |

|        |    |         |         |   |    |    |      |    |    |
|--------|----|---------|---------|---|----|----|------|----|----|
| 267587 | 43 | 2217949 | 2217976 | 2 | 14 | 28 | AC   | 11 | 7  |
| 267591 | 43 | 2234708 | 2234731 | 2 | 12 | 24 | AC   | 16 | 11 |
| 267592 | 43 | 2234856 | 2234869 | 2 | 7  | 14 | GA   | 14 | 6  |
| 267604 | 43 | 2285880 | 2285905 | 2 | 13 | 26 | CA   | 13 | 11 |
| 267608 | 43 | 2291162 | 2291187 | 2 | 13 | 26 | CA   | 21 | 6  |
| 267611 | 43 | 2319270 | 2319297 | 2 | 14 | 28 | CA   | 9  | 10 |
| 267615 | 43 | 2333768 | 2333797 | 2 | 15 | 30 | GA   | 15 | 9  |
| 267622 | 43 | 2347680 | 2347701 | 2 | 11 | 22 | GT   | 18 | 13 |
| 267623 | 43 | 2347797 | 2347817 | 3 | 7  | 21 | CAG  | 22 | 5  |
| 267624 | 43 | 2347845 | 2347860 | 2 | 8  | 16 | GT   | 16 | 7  |
| 267625 | 43 | 2348884 | 2348895 | 2 | 6  | 12 | CA   | 24 | 12 |
| 267628 | 43 | 2362434 | 2362445 | 2 | 6  | 12 | GT   | 23 | 6  |
| 267635 | 43 | 2375539 | 2375554 | 2 | 8  | 16 | CA   | 25 | 6  |
| 267641 | 43 | 2393401 | 2393414 | 2 | 7  | 14 | AC   | 21 | 3  |
| 267642 | 43 | 2393524 | 2393544 | 3 | 7  | 21 | AGG  | 21 | 4  |
| 267643 | 43 | 2393662 | 2393676 | 3 | 5  | 15 | GGA  | 10 | 5  |
| 267644 | 43 | 2394539 | 2394556 | 2 | 9  | 18 | GA   | 27 | 9  |
| 267645 | 43 | 2395918 | 2395949 | 2 | 16 | 32 | GT   | 13 | 11 |
| 267646 | 43 | 2396748 | 2396763 | 2 | 8  | 16 | GT   | 19 | 10 |
| 267648 | 43 | 2397430 | 2397447 | 2 | 9  | 18 | GT   | 21 | 9  |
| 267650 | 43 | 2397524 | 2397535 | 2 | 6  | 12 | CT   | 28 | 3  |
| 267651 | 43 | 2403201 | 2403216 | 2 | 8  | 16 | GT   | 22 | 8  |
| 267655 | 43 | 2405890 | 2405907 | 3 | 6  | 18 | GCT  | 10 | 7  |
| 267656 | 43 | 2406837 | 2406852 | 4 | 4  | 16 | AAAT | 18 | 12 |
| 267660 | 43 | 2413517 | 2413534 | 3 | 6  | 18 | CTG  | 24 | 3  |
| 267662 | 43 | 2415724 | 2415743 | 2 | 10 | 20 | CT   | 26 | 15 |
| 267663 | 43 | 2416419 | 2416434 | 4 | 4  | 16 | TTTA | 20 | 8  |
| 267669 | 43 | 2426792 | 2426807 | 2 | 8  | 16 | CA   | 21 | 6  |
| 267670 | 43 | 2427390 | 2427431 | 2 | 21 | 42 | GT   | 9  | 9  |
| 267672 | 43 | 2427728 | 2427739 | 2 | 6  | 12 | TG   | 20 | 5  |
| 267674 | 43 | 2428382 | 2428399 | 2 | 9  | 18 | CA   | 20 | 8  |
| 267675 | 43 | 2428784 | 2428799 | 2 | 8  | 16 | GT   | 18 | 6  |
| 267677 | 43 | 2431163 | 2431186 | 2 | 12 | 24 | CT   | 12 | 3  |
| 267679 | 43 | 2431436 | 2431447 | 2 | 6  | 12 | GT   | 20 | 10 |
| 267680 | 43 | 2431636 | 2431647 | 2 | 6  | 12 | CG   | 32 | 4  |
| 267681 | 43 | 2431788 | 2431799 | 2 | 6  | 12 | CA   | 23 | 4  |
| 267682 | 43 | 2432308 | 2432325 | 3 | 6  | 18 | GGA  | 29 | 3  |
| 267687 | 43 | 2438535 | 2438548 | 2 | 7  | 14 | TC   | 8  | 10 |
| 267688 | 43 | 2438857 | 2438868 | 2 | 6  | 12 | TC   | 15 | 3  |
| 267692 | 43 | 2442007 | 2442033 | 3 | 9  | 27 | CCT  | 17 | 8  |
| 267694 | 43 | 2442957 | 2442970 | 2 | 7  | 14 | TG   | 22 | 10 |
| 267695 | 43 | 2443071 | 2443096 | 2 | 13 | 26 | AC   | 16 | 8  |
| 267696 | 43 | 2443147 | 2443172 | 2 | 13 | 26 | CA   | 16 | 15 |
| 267697 | 43 | 2443880 | 2443905 | 2 | 13 | 26 | TG   | 18 | 8  |
| 267700 | 43 | 2445278 | 2445293 | 2 | 8  | 16 | GT   | 19 | 7  |
| 267701 | 43 | 2445479 | 2445492 | 2 | 7  | 14 | AC   | 25 | 6  |
| 267712 | 43 | 2447166 | 2447181 | 4 | 4  | 16 | CGCA | 25 | 4  |
| 267713 | 43 | 2447378 | 2447397 | 2 | 10 | 20 | TG   | 20 | 6  |
| 267714 | 43 | 2448134 | 2448145 | 2 | 6  | 12 | TG   | 15 | 6  |
| 267715 | 43 | 2448148 | 2448163 | 2 | 8  | 16 | GT   | 21 | 8  |
| 267717 | 43 | 2450002 | 2450025 | 2 | 12 | 24 | TG   | 15 | 12 |

|        |    |         |         |   |    |    |      |    |    |
|--------|----|---------|---------|---|----|----|------|----|----|
| 267718 | 43 | 2450179 | 2450198 | 2 | 10 | 20 | AC   | 25 | 4  |
| 267719 | 43 | 2450751 | 2450762 | 2 | 6  | 12 | CA   | 18 | 8  |
| 267720 | 43 | 2450928 | 2450943 | 2 | 8  | 16 | TG   | 21 | 3  |
| 267721 | 43 | 2451112 | 2451137 | 2 | 13 | 26 | TG   | 11 | 9  |
| 267723 | 43 | 2452114 | 2452129 | 4 | 4  | 16 | ATTC | 17 | 4  |
| 267724 | 43 | 2453740 | 2453757 | 2 | 9  | 18 | AC   | 15 | 4  |
| 267727 | 43 | 2454231 | 2454248 | 2 | 9  | 18 | GT   | 16 | 9  |
| 267732 | 43 | 2457657 | 2457670 | 2 | 7  | 14 | CT   | 12 | 3  |
| 267741 | 43 | 2482256 | 2482283 | 2 | 14 | 28 | AC   | 17 | 7  |
| 267742 | 43 | 2483097 | 2483124 | 2 | 14 | 28 | CA   | 12 | 8  |
| 267743 | 43 | 2483499 | 2483526 | 2 | 14 | 28 | AC   | 12 | 5  |
| 267748 | 43 | 2484299 | 2484314 | 2 | 8  | 16 | GT   | 17 | 14 |
| 267749 | 43 | 2484316 | 2484327 | 2 | 6  | 12 | GC   | 17 | 12 |
| 267752 | 43 | 2487280 | 2487297 | 3 | 6  | 18 | TGC  | 19 | 3  |
| 267770 | 43 | 2492975 | 2492994 | 2 | 10 | 20 | GT   | 14 | 11 |
| 267771 | 43 | 2493163 | 2493190 | 2 | 14 | 28 | GT   | 19 | 11 |
| 267772 | 43 | 2493309 | 2493326 | 2 | 9  | 18 | TG   | 20 | 9  |
| 267775 | 43 | 2496362 | 2496381 | 4 | 5  | 20 | TGTC | 21 | 5  |
| 267776 | 43 | 2496460 | 2496480 | 3 | 7  | 21 | CCT  | 11 | 5  |
| 267779 | 43 | 2497390 | 2497417 | 2 | 14 | 28 | TC   | 13 | 11 |
| 267781 | 43 | 2498501 | 2498512 | 2 | 6  | 12 | AC   | 8  | 3  |
| 267783 | 43 | 2498674 | 2498691 | 2 | 9  | 18 | GT   | 18 | 8  |
| 267787 | 43 | 2499108 | 2499125 | 2 | 9  | 18 | AC   | 23 | 17 |
| 267788 | 43 | 2500219 | 2500242 | 3 | 8  | 24 | ATT  | 22 | 21 |
| 267801 | 43 | 2515114 | 2515137 | 2 | 12 | 24 | GT   | 12 | 4  |
| 267802 | 43 | 2516983 | 2516994 | 2 | 6  | 12 | GT   | 27 | 4  |
| 267803 | 43 | 2517176 | 2517191 | 2 | 8  | 16 | TG   | 23 | 4  |
| 267806 | 43 | 2517597 | 2517608 | 2 | 6  | 12 | CA   | 17 | 3  |
| 267807 | 43 | 2517776 | 2517797 | 2 | 11 | 22 | GA   | 6  | 4  |
| 267812 | 43 | 2523054 | 2523065 | 2 | 6  | 12 | GT   | 16 | 4  |
| 267815 | 43 | 2524435 | 2524460 | 2 | 13 | 26 | TG   | 20 | 16 |
| 267816 | 43 | 2524501 | 2524520 | 2 | 10 | 20 | TG   | 16 | 7  |
| 267817 | 43 | 2524662 | 2524695 | 2 | 17 | 34 | GT   | 7  | 9  |
| 267818 | 43 | 2524857 | 2524868 | 2 | 6  | 12 | CA   | 16 | 6  |
| 267820 | 43 | 2525321 | 2525350 | 2 | 15 | 30 | CA   | 17 | 8  |
| 267821 | 43 | 2525516 | 2525549 | 2 | 17 | 34 | CA   | 10 | 15 |
| 267822 | 43 | 2527809 | 2527820 | 2 | 6  | 12 | GT   | 16 | 11 |
| 267823 | 43 | 2527823 | 2527834 | 2 | 6  | 12 | GT   | 19 | 10 |
| 267824 | 43 | 2527990 | 2528007 | 2 | 9  | 18 | CA   | 7  | 10 |
| 267825 | 43 | 2528109 | 2528124 | 2 | 8  | 16 | CA   | 19 | 11 |
| 267826 | 43 | 2529901 | 2529952 | 2 | 26 | 52 | CA   | 11 | 17 |
| 267828 | 43 | 2533257 | 2533280 | 2 | 12 | 24 | TG   | 21 | 13 |
| 267829 | 43 | 2533360 | 2533391 | 2 | 16 | 32 | TG   | 11 | 8  |
| 267831 | 43 | 2534027 | 2534044 | 2 | 9  | 18 | TG   | 31 | 8  |
| 267833 | 43 | 2535154 | 2535173 | 2 | 10 | 20 | TC   | 21 | 9  |
| 267836 | 43 | 2548329 | 2548384 | 4 | 14 | 56 | TATC | 13 | 13 |
| 267843 | 43 | 2579066 | 2579080 | 3 | 5  | 15 | CTT  | 24 | 3  |
| 267845 | 43 | 2583388 | 2583419 | 2 | 16 | 32 | AC   | 17 | 16 |
| 267851 | 43 | 2600267 | 2600296 | 3 | 10 | 30 | CAG  | 28 | 10 |
| 267860 | 43 | 2625769 | 2625780 | 2 | 6  | 12 | CA   | 20 | 3  |
| 267861 | 43 | 2630309 | 2630344 | 2 | 18 | 36 | AC   | 12 | 7  |

|        |    |         |         |   |    |    |      |    |    |
|--------|----|---------|---------|---|----|----|------|----|----|
| 267869 | 43 | 2641991 | 2642029 | 3 | 13 | 39 | TCT  | 15 | 12 |
| 267872 | 43 | 2653052 | 2653073 | 2 | 11 | 22 | GT   | 18 | 8  |
| 267877 | 43 | 2658098 | 2658119 | 2 | 11 | 22 | TG   | 13 | 11 |
| 267878 | 43 | 2659034 | 2659053 | 4 | 5  | 20 | TTTA | 26 | 6  |
| 267882 | 43 | 2663443 | 2663460 | 3 | 6  | 18 | CTG  | 31 | 4  |
| 267883 | 43 | 2664371 | 2664382 | 2 | 6  | 12 | AC   | 25 | 3  |
| 267891 | 43 | 2693663 | 2693726 | 4 | 16 | 64 | GAAA | 16 | 8  |
| 267895 | 43 | 2698742 | 2698767 | 2 | 13 | 26 | TG   | 16 | 10 |
| 267901 | 43 | 2714572 | 2714585 | 2 | 7  | 14 | CA   | 17 | 13 |
| 267904 | 43 | 2720713 | 2720736 | 2 | 12 | 24 | CA   | 19 | 14 |
| 267905 | 43 | 2722073 | 2722116 | 4 | 11 | 44 | TATC | 21 | 19 |
| 267907 | 43 | 2722743 | 2722754 | 2 | 6  | 12 | TG   | 22 | 7  |
| 267909 | 43 | 2726148 | 2726159 | 2 | 6  | 12 | TG   | 20 | 4  |
| 267910 | 43 | 2728212 | 2728223 | 2 | 6  | 12 | GT   | 31 | 3  |
| 267912 | 43 | 2747810 | 2747823 | 2 | 7  | 14 | CA   | 20 | 5  |
| 267921 | 43 | 2775128 | 2775147 | 2 | 10 | 20 | CA   | 8  | 9  |
| 267940 | 43 | 2803706 | 2803731 | 2 | 13 | 26 | TG   | 16 | 9  |
| 267944 | 43 | 2807867 | 2807884 | 2 | 9  | 18 | GT   | 17 | 3  |
| 267946 | 43 | 2816082 | 2816107 | 2 | 13 | 26 | CA   | 12 | 6  |
| 267950 | 43 | 2824822 | 2824849 | 2 | 14 | 28 | CA   | 11 | 12 |
| 267956 | 43 | 2830845 | 2830856 | 2 | 6  | 12 | GA   | 32 | 3  |
| 267958 | 43 | 2839726 | 2839745 | 2 | 10 | 20 | TG   | 13 | 6  |
| 267964 | 43 | 2845761 | 2845780 | 4 | 5  | 20 | AAAC | 22 | 6  |
| 267968 | 43 | 2848840 | 2848857 | 2 | 9  | 18 | GT   | 18 | 11 |
| 267972 | 43 | 2853497 | 2853524 | 2 | 14 | 28 | GT   | 10 | 7  |
| 267974 | 43 | 2858377 | 2858394 | 2 | 9  | 18 | GT   | 16 | 8  |
| 267975 | 43 | 2858580 | 2858605 | 2 | 13 | 26 | GT   | 15 | 10 |
| 267977 | 43 | 2861598 | 2861611 | 2 | 7  | 14 | TG   | 24 | 4  |
| 267982 | 43 | 2887486 | 2887507 | 2 | 11 | 22 | AC   | 18 | 7  |
| 267983 | 43 | 2891284 | 2891295 | 2 | 6  | 12 | TG   | 32 | 3  |
| 267984 | 43 | 2894167 | 2894180 | 2 | 7  | 14 | GT   | 16 | 4  |
| 267988 | 43 | 2900144 | 2900179 | 2 | 18 | 36 | CA   | 12 | 10 |
| 267998 | 43 | 2925296 | 2925307 | 2 | 6  | 12 | TG   | 27 | 5  |
| 268002 | 43 | 2931426 | 2931465 | 2 | 20 | 40 | GT   | 12 | 15 |
| 268003 | 43 | 2931957 | 2931980 | 3 | 8  | 24 | AGC  | 30 | 11 |
| 268011 | 43 | 2933429 | 2933446 | 2 | 9  | 18 | TC   | 18 | 8  |
| 268012 | 43 | 2933798 | 2933817 | 4 | 5  | 20 | TTTC | 9  | 8  |
| 268013 | 43 | 2933929 | 2933950 | 2 | 11 | 22 | CA   | 15 | 6  |
| 268015 | 43 | 2934201 | 2934236 | 2 | 18 | 36 | TC   | 12 | 9  |
| 268018 | 43 | 2934922 | 2934951 | 2 | 15 | 30 | CA   | 11 | 11 |
| 268020 | 43 | 2938900 | 2938917 | 2 | 9  | 18 | CA   | 21 | 5  |
| 268022 | 43 | 2952861 | 2952904 | 2 | 22 | 44 | GT   | 17 | 11 |
| 268024 | 43 | 2955105 | 2955118 | 2 | 7  | 14 | GT   | 9  | 6  |
| 268029 | 43 | 2960650 | 2960665 | 2 | 8  | 16 | TG   | 28 | 3  |
| 268032 | 43 | 2973871 | 2973896 | 2 | 13 | 26 | CA   | 19 | 11 |
| 268034 | 43 | 2976610 | 2976623 | 2 | 7  | 14 | TC   | 27 | 3  |
| 268042 | 43 | 2980888 | 2980937 | 2 | 25 | 50 | CT   | 15 | 16 |
| 268043 | 43 | 2981124 | 2981149 | 2 | 13 | 26 | GA   | 12 | 7  |
| 268054 | 43 | 2994420 | 2994435 | 2 | 8  | 16 | TG   | 24 | 4  |
| 268069 | 43 | 3008556 | 3008583 | 2 | 14 | 28 | AG   | 14 | 14 |
| 268072 | 43 | 3014715 | 3014728 | 2 | 7  | 14 | CA   | 23 | 7  |

|        |    |         |         |   |    |    |      |    |    |
|--------|----|---------|---------|---|----|----|------|----|----|
| 268073 | 43 | 3015975 | 3015988 | 2 | 7  | 14 | CA   | 30 | 3  |
| 268074 | 43 | 3016115 | 3016130 | 2 | 8  | 16 | AC   | 24 | 3  |
| 268079 | 43 | 3024852 | 3024867 | 2 | 8  | 16 | TG   | 12 | 4  |
| 268082 | 43 | 3026482 | 3026509 | 2 | 14 | 28 | AC   | 20 | 11 |
| 268095 | 43 | 3040556 | 3040575 | 2 | 10 | 20 | CT   | 20 | 7  |
| 268096 | 43 | 3040663 | 3040710 | 2 | 24 | 48 | TG   | 8  | 9  |
| 268098 | 43 | 3044779 | 3044794 | 2 | 8  | 16 | AC   | 19 | 3  |
| 268101 | 43 | 3047746 | 3047773 | 4 | 7  | 28 | TTGG | 27 | 6  |
| 268102 | 43 | 3048857 | 3048882 | 2 | 13 | 26 | GT   | 20 | 10 |
| 268104 | 43 | 3056384 | 3056413 | 3 | 10 | 30 | CAG  | 26 | 9  |
| 268107 | 43 | 3060001 | 3060022 | 2 | 11 | 22 | GT   | 12 | 8  |
| 268112 | 43 | 3065404 | 3065423 | 2 | 10 | 20 | AC   | 30 | 3  |
| 268113 | 43 | 3068940 | 3068971 | 2 | 16 | 32 | CA   | 13 | 10 |
| 268114 | 43 | 3069407 | 3069420 | 2 | 7  | 14 | AC   | 21 | 8  |
| 268115 | 43 | 3069562 | 3069587 | 2 | 13 | 26 | CA   | 21 | 7  |
| 268116 | 43 | 3071115 | 3071154 | 2 | 20 | 40 | CA   | 7  | 10 |
| 268121 | 43 | 3079158 | 3079172 | 3 | 5  | 15 | ATC  | 31 | 3  |
| 268123 | 43 | 3082610 | 3082633 | 2 | 12 | 24 | AC   | 10 | 9  |
| 268124 | 43 | 3083931 | 3083942 | 2 | 6  | 12 | AC   | 24 | 3  |
| 268130 | 43 | 3093042 | 3093053 | 2 | 6  | 12 | GT   | 22 | 7  |
| 268137 | 43 | 3105008 | 3105021 | 2 | 7  | 14 | CT   | 23 | 4  |
| 268139 | 43 | 3114278 | 3114289 | 2 | 6  | 12 | TG   | 29 | 4  |
| 268147 | 43 | 3123736 | 3123787 | 2 | 26 | 52 | GT   | 6  | 7  |
| 268150 | 43 | 3135397 | 3135418 | 2 | 11 | 22 | TG   | 24 | 17 |
| 268151 | 43 | 3137312 | 3137337 | 2 | 13 | 26 | TG   | 9  | 10 |
| 268155 | 43 | 3140003 | 3140023 | 3 | 7  | 21 | GAG  | 18 | 4  |
| 268172 | 43 | 3170390 | 3170409 | 4 | 5  | 20 | TGTT | 26 | 4  |
| 268175 | 43 | 3183231 | 3183242 | 2 | 6  | 12 | CA   | 23 | 8  |
| 268176 | 43 | 3183546 | 3183559 | 2 | 7  | 14 | AC   | 25 | 3  |
| 268178 | 43 | 3188352 | 3188367 | 4 | 4  | 16 | TTTG | 24 | 4  |
| 268180 | 43 | 3190976 | 3190989 | 2 | 7  | 14 | GT   | 25 | 4  |
| 268182 | 43 | 3193314 | 3193351 | 2 | 19 | 38 | CA   | 8  | 8  |
| 268183 | 43 | 3193908 | 3193945 | 2 | 19 | 38 | CT   | 11 | 8  |
| 268184 | 43 | 3194311 | 3194336 | 2 | 13 | 26 | CA   | 9  | 3  |
| 268189 | 43 | 3194783 | 3194798 | 2 | 8  | 16 | GT   | 8  | 3  |
| 268190 | 43 | 3196864 | 3196879 | 2 | 8  | 16 | CA   | 23 | 3  |
| 268192 | 43 | 3199751 | 3199768 | 3 | 6  | 18 | GTG  | 15 | 3  |
| 268212 | 43 | 3210388 | 3210407 | 2 | 10 | 20 | GA   | 7  | 4  |
| 268216 | 43 | 3214527 | 3214554 | 2 | 14 | 28 | TG   | 9  | 6  |
| 268225 | 43 | 3232099 | 3232114 | 2 | 8  | 16 | TG   | 21 | 3  |
| 268229 | 43 | 3241093 | 3241106 | 2 | 7  | 14 | TA   | 24 | 8  |
| 268234 | 43 | 3256313 | 3256340 | 4 | 7  | 28 | GTAT | 17 | 5  |
| 268237 | 43 | 3264687 | 3264734 | 2 | 24 | 48 | TG   | 7  | 10 |
| 268240 | 43 | 3268287 | 3268326 | 2 | 20 | 40 | AC   | 6  | 7  |
| 268244 | 43 | 3273112 | 3273131 | 2 | 10 | 20 | AC   | 24 | 6  |
| 268246 | 43 | 3277365 | 3277394 | 2 | 15 | 30 | CA   | 13 | 14 |
| 268250 | 43 | 3287537 | 3287552 | 2 | 8  | 16 | AT   | 17 | 8  |
| 268254 | 43 | 3313689 | 3313704 | 2 | 8  | 16 | TC   | 27 | 4  |
| 268259 | 43 | 3320777 | 3320796 | 4 | 5  | 20 | ACAG | 27 | 5  |
| 268260 | 43 | 3320935 | 3320946 | 2 | 6  | 12 | CG   | 30 | 7  |
| 268262 | 43 | 3324907 | 3324940 | 2 | 17 | 34 | TC   | 7  | 7  |

|        |    |         |         |   |    |    |      |    |    |
|--------|----|---------|---------|---|----|----|------|----|----|
| 268264 | 43 | 3326875 | 3326902 | 2 | 14 | 28 | AC   | 18 | 8  |
| 268265 | 43 | 3332051 | 3332070 | 2 | 10 | 20 | AC   | 20 | 11 |
| 268275 | 43 | 3369653 | 3369696 | 2 | 22 | 44 | GT   | 12 | 7  |
| 268276 | 43 | 3374500 | 3374521 | 2 | 11 | 22 | AG   | 17 | 8  |
| 268277 | 43 | 3379275 | 3379298 | 2 | 12 | 24 | CA   | 17 | 10 |
| 268278 | 43 | 3383257 | 3383272 | 2 | 8  | 16 | AC   | 17 | 11 |
| 268283 | 43 | 3385324 | 3385341 | 3 | 6  | 18 | CAC  | 25 | 6  |
| 268285 | 43 | 3391709 | 3391732 | 2 | 12 | 24 | CA   | 21 | 9  |
| 268286 | 43 | 3392787 | 3392802 | 2 | 8  | 16 | TC   | 28 | 7  |
| 268287 | 43 | 3392805 | 3392818 | 2 | 7  | 14 | TC   | 17 | 4  |
| 268289 | 43 | 3395430 | 3395461 | 2 | 16 | 32 | CA   | 10 | 9  |
| 268296 | 43 | 3398636 | 3398657 | 2 | 11 | 22 | TC   | 6  | 3  |
| 268299 | 43 | 3403953 | 3403976 | 2 | 12 | 24 | TG   | 23 | 13 |
| 268305 | 43 | 3405810 | 3405845 | 2 | 18 | 36 | AC   | 17 | 11 |
| 268311 | 43 | 3411993 | 3412007 | 3 | 5  | 15 | GGT  | 28 | 3  |
| 268313 | 43 | 3412921 | 3412940 | 2 | 10 | 20 | CA   | 19 | 18 |
| 268315 | 43 | 3413633 | 3413666 | 2 | 17 | 34 | GT   | 13 | 13 |
| 268320 | 43 | 3418193 | 3418207 | 3 | 5  | 15 | AAT  | 20 | 6  |
| 268321 | 43 | 3418372 | 3418391 | 2 | 10 | 20 | GT   | 9  | 4  |
| 268327 | 43 | 3421431 | 3421468 | 2 | 19 | 38 | CA   | 10 | 9  |
| 268335 | 43 | 3427293 | 3427316 | 2 | 12 | 24 | GT   | 22 | 7  |
| 268350 | 43 | 3445730 | 3445765 | 2 | 18 | 36 | AC   | 9  | 8  |
| 268351 | 43 | 3449828 | 3449847 | 4 | 5  | 20 | CACG | 20 | 13 |
| 268354 | 43 | 3454380 | 3454394 | 3 | 5  | 15 | GGA  | 20 | 4  |
| 268357 | 43 | 3456853 | 3456872 | 2 | 10 | 20 | TG   | 14 | 4  |
| 268371 | 43 | 3463374 | 3463403 | 2 | 15 | 30 | TG   | 9  | 6  |
| 268372 | 43 | 3463563 | 3463604 | 2 | 21 | 42 | AC   | 9  | 9  |
| 268374 | 43 | 3469889 | 3469912 | 2 | 12 | 24 | AC   | 22 | 6  |
| 268375 | 43 | 3470216 | 3470245 | 2 | 15 | 30 | CA   | 8  | 9  |
| 268381 | 43 | 3475891 | 3475906 | 2 | 8  | 16 | AC   | 14 | 3  |
| 268385 | 43 | 3484606 | 3484625 | 2 | 10 | 20 | AC   | 19 | 5  |
| 268386 | 43 | 3484874 | 3484905 | 2 | 16 | 32 | CA   | 17 | 10 |
| 268387 | 43 | 3484954 | 3484977 | 2 | 12 | 24 | AC   | 14 | 5  |
| 268389 | 43 | 3486977 | 3486992 | 2 | 8  | 16 | GT   | 21 | 7  |
| 268397 | 43 | 3490405 | 3490418 | 2 | 7  | 14 | CT   | 31 | 3  |
| 268403 | 43 | 3493582 | 3493593 | 2 | 6  | 12 | CA   | 30 | 3  |
| 268408 | 43 | 3498470 | 3498481 | 2 | 6  | 12 | CA   | 31 | 4  |
| 268409 | 43 | 3500530 | 3500553 | 2 | 12 | 24 | TG   | 12 | 6  |
| 268413 | 43 | 3504707 | 3504718 | 2 | 6  | 12 | TG   | 30 | 4  |
| 268418 | 43 | 3512371 | 3512408 | 2 | 19 | 38 | TG   | 7  | 8  |
| 268419 | 43 | 3518447 | 3518486 | 2 | 20 | 40 | GT   | 12 | 10 |
| 268423 | 43 | 3525718 | 3525747 | 2 | 15 | 30 | GT   | 19 | 10 |
| 268426 | 43 | 3529105 | 3529118 | 2 | 7  | 14 | GT   | 25 | 6  |
| 268429 | 43 | 3532037 | 3532054 | 3 | 6  | 18 | GAA  | 28 | 4  |
| 268430 | 43 | 3534144 | 3534169 | 2 | 13 | 26 | CA   | 12 | 12 |
| 268432 | 43 | 3535030 | 3535045 | 2 | 8  | 16 | GA   | 15 | 8  |
| 268437 | 43 | 3543368 | 3543385 | 2 | 9  | 18 | TG   | 17 | 4  |
| 268439 | 43 | 3544078 | 3544093 | 2 | 8  | 16 | GT   | 24 | 3  |
| 268444 | 43 | 3551924 | 3551951 | 2 | 14 | 28 | GA   | 10 | 5  |
| 268448 | 43 | 3561491 | 3561502 | 2 | 6  | 12 | CA   | 24 | 13 |
| 268449 | 43 | 3562122 | 3562147 | 2 | 13 | 26 | AC   | 24 | 16 |

|        |    |         |         |   |    |    |      |    |    |
|--------|----|---------|---------|---|----|----|------|----|----|
| 268453 | 43 | 3564920 | 3564934 | 3 | 5  | 15 | CAG  | 32 | 7  |
| 268454 | 43 | 3566131 | 3566150 | 4 | 5  | 20 | AATA | 12 | 4  |
| 268455 | 43 | 3575557 | 3575570 | 2 | 7  | 14 | TG   | 24 | 3  |
| 268460 | 43 | 3589415 | 3589474 | 2 | 30 | 60 | AC   | 11 | 9  |
| 268464 | 43 | 3596596 | 3596610 | 3 | 5  | 15 | CAG  | 31 | 5  |
| 268473 | 43 | 3630857 | 3630884 | 2 | 14 | 28 | GT   | 28 | 10 |
| 268475 | 43 | 3632732 | 3632749 | 2 | 9  | 18 | GT   | 20 | 10 |
| 268476 | 43 | 3637505 | 3637526 | 2 | 11 | 22 | GT   | 17 | 7  |
| 268477 | 43 | 3638601 | 3638612 | 2 | 6  | 12 | CA   | 9  | 5  |
| 268480 | 43 | 3642457 | 3642468 | 2 | 6  | 12 | TG   | 18 | 4  |
| 268486 | 43 | 3658863 | 3658877 | 3 | 5  | 15 | GAT  | 27 | 3  |
| 268488 | 43 | 3661939 | 3661966 | 2 | 14 | 28 | CA   | 18 | 9  |
| 268492 | 43 | 3668175 | 3668194 | 2 | 10 | 20 | TG   | 16 | 17 |
| 268493 | 43 | 3668196 | 3668213 | 2 | 9  | 18 | GT   | 17 | 16 |
| 268494 | 43 | 3668460 | 3668483 | 2 | 12 | 24 | AC   | 24 | 7  |
| 268495 | 43 | 3670692 | 3670717 | 2 | 13 | 26 | CA   | 9  | 14 |
| 268496 | 43 | 3670798 | 3670824 | 3 | 9  | 27 | GAT  | 21 | 7  |
| 268498 | 43 | 3670939 | 3670974 | 2 | 18 | 36 | AC   | 12 | 12 |
| 268503 | 43 | 3686806 | 3686823 | 3 | 6  | 18 | GGA  | 21 | 4  |
| 268504 | 43 | 3687948 | 3687965 | 3 | 6  | 18 | ATT  | 21 | 7  |
| 268514 | 43 | 3708129 | 3708158 | 3 | 10 | 30 | GAG  | 14 | 6  |
| 268524 | 43 | 3729648 | 3729671 | 4 | 6  | 24 | AAAT | 13 | 3  |
| 268526 | 43 | 3736734 | 3736759 | 2 | 13 | 26 | GA   | 21 | 9  |
| 268527 | 43 | 3739465 | 3739486 | 2 | 11 | 22 | CA   | 15 | 14 |
| 268529 | 43 | 3744349 | 3744399 | 3 | 17 | 51 | AGA  | 15 | 11 |
| 268530 | 43 | 3745626 | 3745646 | 3 | 7  | 21 | GCA  | 17 | 6  |
| 268531 | 43 | 3745779 | 3745793 | 3 | 5  | 15 | CCA  | 21 | 3  |
| 268533 | 43 | 3748102 | 3748113 | 2 | 6  | 12 | AC   | 34 | 3  |
| 268535 | 43 | 3752131 | 3752164 | 2 | 17 | 34 | GT   | 18 | 15 |
| 268536 | 43 | 3753507 | 3753518 | 2 | 6  | 12 | TG   | 17 | 3  |
| 268537 | 43 | 3755466 | 3755499 | 2 | 17 | 34 | TG   | 14 | 6  |
| 268538 | 43 | 3763591 | 3763610 | 4 | 5  | 20 | AAAG | 26 | 4  |
| 268541 | 43 | 3772928 | 3772961 | 2 | 17 | 34 | GT   | 7  | 8  |
| 268545 | 43 | 3777187 | 3777198 | 2 | 6  | 12 | AC   | 26 | 3  |
| 268546 | 43 | 3777538 | 3777569 | 2 | 16 | 32 | CT   | 6  | 8  |
| 268552 | 43 | 3790994 | 3791008 | 3 | 5  | 15 | TAT  | 29 | 13 |
| 268560 | 43 | 3802496 | 3802507 | 2 | 6  | 12 | CA   | 28 | 3  |
| 268561 | 43 | 3802547 | 3802566 | 2 | 10 | 20 | CA   | 27 | 3  |
| 268563 | 43 | 3806711 | 3806724 | 2 | 7  | 14 | TG   | 27 | 3  |
| 268569 | 43 | 3819929 | 3819966 | 2 | 19 | 38 | GT   | 11 | 11 |
| 268574 | 43 | 3826380 | 3826391 | 2 | 6  | 12 | TG   | 18 | 3  |
| 268576 | 43 | 3829395 | 3829442 | 2 | 24 | 48 | AC   | 7  | 8  |
| 268577 | 43 | 3830006 | 3830020 | 3 | 5  | 15 | CTT  | 22 | 5  |
| 268583 | 43 | 3838513 | 3838536 | 2 | 12 | 24 | CT   | 24 | 6  |
| 268595 | 43 | 3859348 | 3859374 | 3 | 9  | 27 | AAT  | 15 | 7  |
| 268602 | 43 | 3888447 | 3888470 | 4 | 6  | 24 | AAGA | 9  | 9  |
| 268603 | 43 | 3892631 | 3892644 | 2 | 7  | 14 | GA   | 25 | 3  |
| 268604 | 43 | 3897765 | 3897780 | 4 | 4  | 16 | TTTA | 22 | 6  |
| 268614 | 43 | 3910245 | 3910256 | 2 | 6  | 12 | TG   | 17 | 3  |
| 268615 | 43 | 3910259 | 3910276 | 2 | 9  | 18 | TG   | 22 | 5  |
| 268616 | 43 | 3916551 | 3916562 | 2 | 6  | 12 | GT   | 21 | 7  |

|        |    |         |         |   |    |    |      |    |    |
|--------|----|---------|---------|---|----|----|------|----|----|
| 268617 | 43 | 3916597 | 3916616 | 2 | 10 | 20 | GT   | 18 | 5  |
| 268622 | 43 | 3929097 | 3929114 | 3 | 6  | 18 | ATA  | 23 | 7  |
| 268624 | 43 | 3939513 | 3939524 | 2 | 6  | 12 | TG   | 27 | 3  |
| 268627 | 43 | 3950973 | 3950994 | 2 | 11 | 22 | GT   | 11 | 4  |
| 268629 | 43 | 3954664 | 3954679 | 4 | 4  | 16 | ACAA | 31 | 3  |
| 268643 | 43 | 3980732 | 3980759 | 2 | 14 | 28 | AC   | 18 | 10 |
| 268644 | 43 | 3982308 | 3982327 | 2 | 10 | 20 | AC   | 12 | 5  |
| 268646 | 43 | 3986952 | 3986969 | 2 | 9  | 18 | GT   | 13 | 5  |
| 268648 | 43 | 3987413 | 3987432 | 4 | 5  | 20 | TAAA | 23 | 7  |
| 268652 | 43 | 3988236 | 3988253 | 3 | 6  | 18 | TGC  | 28 | 3  |
| 268653 | 43 | 3989382 | 3989393 | 2 | 6  | 12 | TA   | 16 | 3  |
| 268655 | 43 | 3992301 | 3992338 | 2 | 19 | 38 | CA   | 19 | 10 |
| 268657 | 43 | 3998482 | 3998493 | 2 | 6  | 12 | TA   | 12 | 3  |
| 268659 | 43 | 4000947 | 4000960 | 2 | 7  | 14 | TC   | 21 | 4  |
| 268661 | 43 | 4017455 | 4017484 | 2 | 15 | 30 | GT   | 25 | 6  |
| 268663 | 43 | 4023958 | 4023987 | 2 | 15 | 30 | GT   | 15 | 10 |
| 268666 | 43 | 4028214 | 4028227 | 2 | 7  | 14 | TC   | 10 | 10 |
| 268667 | 43 | 4028228 | 4028243 | 2 | 8  | 16 | AC   | 11 | 9  |
| 268668 | 43 | 4028394 | 4028425 | 2 | 16 | 32 | TG   | 21 | 10 |
| 268669 | 43 | 4028570 | 4028589 | 2 | 10 | 20 | CA   | 16 | 7  |
| 268686 | 43 | 4073403 | 4073434 | 4 | 8  | 32 | ATTG | 15 | 8  |
| 268687 | 43 | 4082832 | 4082847 | 4 | 4  | 16 | CTTT | 23 | 7  |
| 268688 | 43 | 4084032 | 4084043 | 2 | 6  | 12 | AC   | 22 | 4  |
| 268697 | 43 | 4105441 | 4105458 | 2 | 9  | 18 | CA   | 11 | 5  |
| 268712 | 43 | 4139228 | 4139241 | 2 | 7  | 14 | TC   | 19 | 8  |
| 268713 | 43 | 4139242 | 4139253 | 2 | 6  | 12 | AC   | 16 | 8  |
| 268714 | 43 | 4139418 | 4139429 | 2 | 6  | 12 | TC   | 19 | 15 |
| 268715 | 43 | 4139430 | 4139447 | 2 | 9  | 18 | AC   | 19 | 16 |
| 268721 | 43 | 4146179 | 4146190 | 2 | 6  | 12 | CA   | 27 | 3  |
| 268723 | 43 | 4151555 | 4151566 | 2 | 6  | 12 | CT   | 19 | 3  |
| 268726 | 43 | 4158108 | 4158129 | 2 | 11 | 22 | AC   | 22 | 9  |
| 268727 | 43 | 4159228 | 4159242 | 3 | 5  | 15 | ATT  | 13 | 3  |
| 268734 | 43 | 4181457 | 4181476 | 2 | 10 | 20 | TG   | 28 | 6  |
| 268739 | 43 | 4206756 | 4206801 | 2 | 23 | 46 | AC   | 12 | 9  |
| 268744 | 43 | 4235236 | 4235253 | 2 | 9  | 18 | GT   | 7  | 3  |
| 268753 | 44 | 31922   | 31939   | 2 | 9  | 18 | TC   | 21 | 4  |
| 268756 | 44 | 42852   | 42878   | 3 | 9  | 27 | ATA  | 14 | 5  |
| 268767 | 44 | 75468   | 75489   | 2 | 11 | 22 | TG   | 8  | 3  |
| 268777 | 44 | 104634  | 104659  | 2 | 13 | 26 | CA   | 13 | 7  |
| 268780 | 44 | 112819  | 112830  | 2 | 6  | 12 | AC   | 9  | 3  |
| 268787 | 44 | 160058  | 160081  | 4 | 6  | 24 | AAAT | 15 | 6  |
| 268791 | 44 | 165548  | 165575  | 2 | 14 | 28 | TG   | 26 | 8  |
| 268802 | 44 | 192538  | 192558  | 3 | 7  | 21 | TTA  | 15 | 3  |
| 268804 | 44 | 200236  | 200283  | 4 | 12 | 48 | ATAG | 12 | 7  |
| 268807 | 44 | 208688  | 208701  | 2 | 7  | 14 | AG   | 11 | 3  |
| 268809 | 44 | 214690  | 214704  | 3 | 5  | 15 | GTT  | 17 | 4  |
| 268813 | 44 | 226293  | 226306  | 2 | 7  | 14 | TA   | 11 | 3  |
| 268815 | 44 | 230146  | 230184  | 3 | 13 | 39 | GAT  | 7  | 6  |
| 268818 | 44 | 232917  | 232936  | 4 | 5  | 20 | AAAT | 26 | 5  |
| 268839 | 44 | 265777  | 265797  | 3 | 7  | 21 | GAA  | 15 | 3  |
| 268845 | 44 | 286263  | 286274  | 2 | 6  | 12 | GT   | 14 | 9  |



|        |    |         |         |   |    |    |      |    |    |
|--------|----|---------|---------|---|----|----|------|----|----|
| 268846 | 44 | 286311  | 286322  | 2 | 6  | 12 | GT   | 11 | 3  |
| 268848 | 44 | 287825  | 287857  | 3 | 11 | 33 | GCT  | 19 | 9  |
| 268874 | 44 | 349509  | 349520  | 2 | 6  | 12 | CT   | 10 | 3  |
| 268889 | 44 | 401348  | 401381  | 2 | 17 | 34 | TG   | 6  | 5  |
| 268896 | 44 | 411193  | 411207  | 3 | 5  | 15 | TTG  | 14 | 5  |
| 268904 | 44 | 421564  | 421579  | 2 | 8  | 16 | TC   | 27 | 3  |
| 268912 | 44 | 454720  | 454734  | 3 | 5  | 15 | ATA  | 24 | 3  |
| 268913 | 44 | 456057  | 456080  | 2 | 12 | 24 | GT   | 14 | 4  |
| 268915 | 44 | 465917  | 465928  | 2 | 6  | 12 | CA   | 32 | 4  |
| 268916 | 44 | 466325  | 466342  | 2 | 9  | 18 | AC   | 21 | 5  |
| 268922 | 44 | 472898  | 472927  | 2 | 15 | 30 | TG   | 14 | 9  |
| 268924 | 44 | 474782  | 474805  | 2 | 12 | 24 | GT   | 24 | 4  |
| 268929 | 44 | 482225  | 482290  | 2 | 33 | 66 | GT   | 8  | 8  |
| 268935 | 44 | 511543  | 511570  | 4 | 7  | 28 | GGAT | 29 | 5  |
| 268938 | 44 | 518686  | 518699  | 2 | 7  | 14 | AT   | 17 | 8  |
| 268952 | 44 | 545789  | 545808  | 2 | 10 | 20 | GT   | 10 | 11 |
| 268955 | 44 | 557755  | 557782  | 4 | 7  | 28 | TCTG | 25 | 6  |
| 268957 | 44 | 567124  | 567135  | 2 | 6  | 12 | TG   | 19 | 4  |
| 268963 | 44 | 581028  | 581057  | 2 | 15 | 30 | GT   | 9  | 9  |
| 268971 | 44 | 589447  | 589464  | 3 | 6  | 18 | TAC  | 28 | 3  |
| 268973 | 44 | 593512  | 593537  | 2 | 13 | 26 | GT   | 14 | 8  |
| 268978 | 44 | 602227  | 602246  | 4 | 5  | 20 | GATG | 6  | 3  |
| 268980 | 44 | 611921  | 611932  | 2 | 6  | 12 | AC   | 21 | 4  |
| 268981 | 44 | 615235  | 615261  | 3 | 9  | 27 | TAA  | 15 | 4  |
| 268991 | 44 | 640497  | 640520  | 2 | 12 | 24 | GT   | 8  | 3  |
| 268996 | 44 | 668223  | 668252  | 3 | 10 | 30 | AAC  | 17 | 7  |
| 269000 | 44 | 691168  | 691181  | 2 | 7  | 14 | CA   | 25 | 8  |
| 269003 | 44 | 703796  | 703811  | 2 | 8  | 16 | AT   | 11 | 3  |
| 269007 | 44 | 724024  | 724039  | 2 | 8  | 16 | TG   | 20 | 4  |
| 269008 | 44 | 726133  | 726176  | 4 | 11 | 44 | AAAG | 8  | 5  |
| 269018 | 44 | 754117  | 754130  | 2 | 7  | 14 | TG   | 25 | 3  |
| 269037 | 44 | 795502  | 795543  | 2 | 21 | 42 | GT   | 7  | 6  |
| 269040 | 44 | 795583  | 795594  | 2 | 6  | 12 | TG   | 11 | 3  |
| 269042 | 44 | 799286  | 799306  | 3 | 7  | 21 | GAG  | 24 | 3  |
| 269049 | 44 | 816986  | 817003  | 2 | 9  | 18 | TG   | 27 | 6  |
| 269051 | 44 | 824403  | 824430  | 4 | 7  | 28 | GATG | 23 | 4  |
| 269055 | 44 | 835599  | 835616  | 2 | 9  | 18 | TC   | 23 | 3  |
| 269059 | 44 | 841552  | 841565  | 2 | 7  | 14 | TG   | 13 | 5  |
| 269063 | 44 | 848481  | 848492  | 2 | 6  | 12 | AC   | 9  | 3  |
| 269068 | 44 | 867214  | 867239  | 2 | 13 | 26 | CA   | 18 | 6  |
| 269091 | 44 | 912262  | 912300  | 3 | 13 | 39 | TAA  | 8  | 7  |
| 269093 | 44 | 914792  | 914817  | 2 | 13 | 26 | GT   | 10 | 10 |
| 269105 | 44 | 936291  | 936316  | 2 | 13 | 26 | AC   | 6  | 4  |
| 269107 | 44 | 936445  | 936466  | 2 | 11 | 22 | CA   | 14 | 3  |
| 269113 | 44 | 944379  | 944404  | 2 | 13 | 26 | CA   | 23 | 5  |
| 269152 | 44 | 989806  | 989829  | 4 | 6  | 24 | CCAT | 16 | 4  |
| 269163 | 44 | 1029906 | 1029926 | 3 | 7  | 21 | AGG  | 24 | 4  |
| 269192 | 44 | 1079300 | 1079357 | 2 | 29 | 58 | CA   | 6  | 9  |
| 269209 | 44 | 1127652 | 1127673 | 2 | 11 | 22 | TG   | 24 | 4  |
| 269213 | 44 | 1133785 | 1133804 | 2 | 10 | 20 | GT   | 29 | 5  |
| 269214 | 44 | 1134682 | 1134713 | 2 | 16 | 32 | TG   | 6  | 7  |

|        |    |         |         |   |    |    |      |    |    |
|--------|----|---------|---------|---|----|----|------|----|----|
| 269219 | 44 | 1140634 | 1140653 | 2 | 10 | 20 | AC   | 21 | 7  |
| 269220 | 44 | 1140655 | 1140672 | 2 | 9  | 18 | CA   | 12 | 6  |
| 269222 | 44 | 1147080 | 1147113 | 2 | 17 | 34 | TG   | 11 | 9  |
| 269229 | 44 | 1154948 | 1154991 | 2 | 22 | 44 | AC   | 11 | 8  |
| 269235 | 44 | 1157783 | 1157851 | 3 | 23 | 69 | TTC  | 11 | 14 |
| 269240 | 44 | 1169091 | 1169118 | 2 | 14 | 28 | AC   | 8  | 5  |
| 269246 | 44 | 1178006 | 1178021 | 2 | 8  | 16 | AC   | 18 | 3  |
| 269247 | 44 | 1178165 | 1178196 | 4 | 8  | 32 | GTCT | 26 | 8  |
| 269251 | 44 | 1182596 | 1182627 | 2 | 16 | 32 | GT   | 27 | 5  |
| 269252 | 44 | 1182741 | 1182758 | 2 | 9  | 18 | GT   | 19 | 3  |
| 269253 | 44 | 1185218 | 1185237 | 2 | 10 | 20 | AC   | 24 | 4  |
| 269254 | 44 | 1185455 | 1185498 | 2 | 22 | 44 | GT   | 9  | 13 |
| 269259 | 44 | 1187489 | 1187516 | 2 | 14 | 28 | CA   | 12 | 5  |
| 269260 | 44 | 1189487 | 1189507 | 3 | 7  | 21 | CCT  | 20 | 4  |
| 269265 | 44 | 1194917 | 1194932 | 2 | 8  | 16 | AC   | 13 | 4  |
| 269266 | 44 | 1194934 | 1194949 | 2 | 8  | 16 | CA   | 15 | 6  |
| 269268 | 44 | 1198624 | 1198663 | 4 | 10 | 40 | TTCA | 29 | 6  |
| 269273 | 44 | 1203440 | 1203473 | 2 | 17 | 34 | AC   | 16 | 10 |
| 269279 | 44 | 1206816 | 1206843 | 2 | 14 | 28 | GT   | 14 | 6  |
| 269293 | 44 | 1231758 | 1231775 | 3 | 6  | 18 | CTC  | 16 | 4  |
| 269299 | 44 | 1237192 | 1237206 | 3 | 5  | 15 | GCT  | 28 | 4  |
| 269302 | 44 | 1238450 | 1238483 | 2 | 17 | 34 | GA   | 8  | 8  |
| 269303 | 44 | 1238698 | 1238711 | 2 | 7  | 14 | TG   | 21 | 3  |
| 269309 | 44 | 1241018 | 1241045 | 2 | 14 | 28 | GT   | 17 | 8  |
| 269312 | 44 | 1243776 | 1243799 | 2 | 12 | 24 | GT   | 7  | 4  |
| 269314 | 44 | 1244091 | 1244114 | 2 | 12 | 24 | TG   | 17 | 8  |
| 269321 | 44 | 1259082 | 1259099 | 2 | 9  | 18 | AC   | 10 | 5  |
| 269322 | 44 | 1259358 | 1259375 | 2 | 9  | 18 | GT   | 15 | 6  |
| 269325 | 44 | 1263760 | 1263779 | 2 | 10 | 20 | TG   | 7  | 7  |
| 269329 | 44 | 1270192 | 1270209 | 2 | 9  | 18 | TG   | 9  | 4  |
| 269333 | 44 | 1278567 | 1278582 | 4 | 4  | 16 | ATTT | 30 | 3  |
| 269342 | 44 | 1286544 | 1286559 | 4 | 4  | 16 | ACTG | 23 | 4  |
| 269345 | 44 | 1291779 | 1291806 | 2 | 14 | 28 | AC   | 15 | 7  |
| 269352 | 44 | 1298881 | 1298906 | 2 | 13 | 26 | GT   | 8  | 6  |
| 269355 | 44 | 1301041 | 1301066 | 2 | 13 | 26 | GT   | 10 | 7  |
| 269357 | 44 | 1302906 | 1302939 | 2 | 17 | 34 | GT   | 8  | 5  |
| 269364 | 44 | 1327748 | 1327763 | 2 | 8  | 16 | AC   | 22 | 4  |
| 269365 | 44 | 1327948 | 1327961 | 2 | 7  | 14 | CA   | 12 | 5  |
| 269382 | 44 | 1342348 | 1342373 | 2 | 13 | 26 | CA   | 26 | 6  |
| 269383 | 44 | 1342844 | 1342857 | 2 | 7  | 14 | AC   | 17 | 3  |
| 269384 | 44 | 1342860 | 1342871 | 2 | 6  | 12 | AC   | 18 | 3  |
| 269386 | 44 | 1346808 | 1346829 | 2 | 11 | 22 | GT   | 18 | 8  |
| 269387 | 44 | 1347759 | 1347778 | 2 | 10 | 20 | CA   | 21 | 4  |
| 269390 | 44 | 1360330 | 1360345 | 2 | 8  | 16 | CA   | 19 | 3  |
| 269401 | 44 | 1364690 | 1364719 | 2 | 15 | 30 | CA   | 13 | 9  |
| 269409 | 44 | 1375186 | 1375203 | 2 | 9  | 18 | AC   | 24 | 4  |
| 269411 | 44 | 1379509 | 1379532 | 4 | 6  | 24 | GATG | 17 | 4  |
| 269415 | 44 | 1384432 | 1384463 | 2 | 16 | 32 | CA   | 14 | 13 |
| 269420 | 44 | 1388093 | 1388110 | 2 | 9  | 18 | GA   | 27 | 3  |
| 269422 | 44 | 1389829 | 1389840 | 2 | 6  | 12 | CA   | 24 | 3  |
| 269423 | 44 | 1392326 | 1392339 | 2 | 7  | 14 | GT   | 18 | 9  |

|        |    |         |         |   |    |    |      |    |    |
|--------|----|---------|---------|---|----|----|------|----|----|
| 269426 | 44 | 1392910 | 1392949 | 2 | 20 | 40 | GT   | 10 | 13 |
| 269429 | 44 | 1393999 | 1394016 | 2 | 9  | 18 | CA   | 22 | 6  |
| 269431 | 44 | 1398670 | 1398701 | 2 | 16 | 32 | GT   | 26 | 15 |
| 269444 | 44 | 1430276 | 1430297 | 2 | 11 | 22 | TG   | 20 | 3  |
| 269457 | 44 | 1445048 | 1445077 | 2 | 15 | 30 | AC   | 11 | 11 |
| 269464 | 44 | 1454346 | 1454369 | 2 | 12 | 24 | AC   | 14 | 5  |
| 269473 | 44 | 1473896 | 1473910 | 3 | 5  | 15 | GAA  | 19 | 4  |
| 269481 | 44 | 1508038 | 1508049 | 2 | 6  | 12 | AC   | 28 | 4  |
| 269482 | 44 | 1508214 | 1508235 | 2 | 11 | 22 | GT   | 11 | 6  |
| 269502 | 44 | 1528178 | 1528197 | 4 | 5  | 20 | TTAT | 6  | 3  |
| 269503 | 44 | 1531130 | 1531167 | 2 | 19 | 38 | AC   | 7  | 6  |
| 269504 | 44 | 1531842 | 1531877 | 2 | 18 | 36 | TG   | 10 | 9  |
| 269505 | 44 | 1534445 | 1534470 | 2 | 13 | 26 | AC   | 13 | 5  |
| 269522 | 44 | 1566199 | 1566220 | 2 | 11 | 22 | AC   | 12 | 9  |
| 269523 | 44 | 1570398 | 1570413 | 4 | 4  | 16 | GATG | 29 | 3  |
| 269531 | 44 | 1580960 | 1580983 | 2 | 12 | 24 | TG   | 13 | 10 |
| 269558 | 44 | 1617172 | 1617199 | 2 | 14 | 28 | AC   | 10 | 8  |
| 269559 | 44 | 1617243 | 1617262 | 2 | 10 | 20 | CA   | 12 | 3  |
| 269567 | 44 | 1625633 | 1625646 | 2 | 7  | 14 | AC   | 22 | 5  |
| 269570 | 44 | 1626020 | 1626041 | 2 | 11 | 22 | CA   | 17 | 4  |
| 269585 | 44 | 1628165 | 1628186 | 2 | 11 | 22 | AC   | 7  | 6  |
| 269597 | 44 | 1631026 | 1631037 | 2 | 6  | 12 | CA   | 28 | 3  |
| 269598 | 44 | 1631241 | 1631252 | 2 | 6  | 12 | CA   | 24 | 3  |
| 269599 | 44 | 1633104 | 1633125 | 2 | 11 | 22 | AC   | 18 | 5  |
| 269601 | 44 | 1633159 | 1633170 | 2 | 6  | 12 | CA   | 29 | 5  |
| 269603 | 44 | 1633497 | 1633510 | 2 | 7  | 14 | CA   | 20 | 3  |
| 269606 | 44 | 1636144 | 1636157 | 2 | 7  | 14 | TG   | 16 | 8  |
| 269607 | 44 | 1636160 | 1636173 | 2 | 7  | 14 | TG   | 16 | 7  |
| 269629 | 44 | 1659339 | 1659376 | 2 | 19 | 38 | CA   | 6  | 6  |
| 269633 | 44 | 1661489 | 1661510 | 2 | 11 | 22 | TG   | 17 | 5  |
| 269635 | 44 | 1661945 | 1661966 | 2 | 11 | 22 | TG   | 20 | 8  |
| 269636 | 44 | 1662094 | 1662121 | 2 | 14 | 28 | GT   | 15 | 10 |
| 269637 | 44 | 1663269 | 1663306 | 2 | 19 | 38 | AC   | 10 | 8  |
| 269638 | 44 | 1663447 | 1663472 | 2 | 13 | 26 | AG   | 18 | 12 |
| 269640 | 44 | 1666924 | 1666949 | 2 | 13 | 26 | CA   | 19 | 8  |
| 269641 | 44 | 1667165 | 1667176 | 2 | 6  | 12 | CA   | 26 | 3  |
| 269645 | 44 | 1669403 | 1669428 | 2 | 13 | 26 | GT   | 9  | 8  |
| 269647 | 44 | 1669728 | 1669757 | 2 | 15 | 30 | TG   | 17 | 8  |
| 269648 | 44 | 1670041 | 1670060 | 4 | 5  | 20 | AAAT | 22 | 4  |
| 269661 | 44 | 1680349 | 1680384 | 2 | 18 | 36 | CA   | 7  | 11 |
| 269666 | 44 | 1687525 | 1687550 | 2 | 13 | 26 | AC   | 12 | 5  |
| 269671 | 44 | 1690979 | 1691006 | 2 | 14 | 28 | CA   | 15 | 9  |
| 269674 | 44 | 1692851 | 1692886 | 2 | 18 | 36 | TG   | 6  | 8  |
| 269676 | 44 | 1693227 | 1693240 | 2 | 7  | 14 | GT   | 18 | 4  |
| 269677 | 44 | 1693761 | 1693776 | 2 | 8  | 16 | CA   | 16 | 10 |
| 269679 | 44 | 1694361 | 1694390 | 2 | 15 | 30 | CA   | 19 | 9  |
| 269683 | 44 | 1698872 | 1698887 | 2 | 8  | 16 | TG   | 21 | 3  |
| 269684 | 44 | 1699065 | 1699084 | 2 | 10 | 20 | AC   | 21 | 6  |
| 269685 | 44 | 1699816 | 1699831 | 4 | 4  | 16 | CATA | 24 | 4  |
| 269686 | 44 | 1699988 | 1699999 | 2 | 6  | 12 | CA   | 21 | 4  |
| 269693 | 44 | 1707947 | 1707970 | 2 | 12 | 24 | TG   | 11 | 7  |

|        |    |         |         |   |    |    |      |    |    |
|--------|----|---------|---------|---|----|----|------|----|----|
| 269698 | 44 | 1712769 | 1712790 | 2 | 11 | 22 | AC   | 16 | 6  |
| 269702 | 44 | 1716358 | 1716391 | 2 | 17 | 34 | CA   | 14 | 8  |
| 269704 | 44 | 1717728 | 1717763 | 2 | 18 | 36 | TG   | 7  | 6  |
| 269720 | 44 | 1745042 | 1745059 | 2 | 9  | 18 | AC   | 23 | 3  |
| 269723 | 44 | 1748381 | 1748392 | 2 | 6  | 12 | CA   | 16 | 3  |
| 269725 | 44 | 1748656 | 1748679 | 2 | 12 | 24 | AC   | 17 | 8  |
| 269730 | 44 | 1753331 | 1753348 | 2 | 9  | 18 | TC   | 24 | 5  |
| 269731 | 44 | 1754161 | 1754174 | 2 | 7  | 14 | GT   | 16 | 3  |
| 269732 | 44 | 1754796 | 1754829 | 2 | 17 | 34 | CA   | 17 | 9  |
| 269736 | 44 | 1758954 | 1758985 | 2 | 16 | 32 | CA   | 11 | 7  |
| 269737 | 44 | 1759823 | 1759870 | 2 | 24 | 48 | TG   | 6  | 12 |
| 269741 | 44 | 1760903 | 1760928 | 2 | 13 | 26 | AC   | 16 | 8  |
| 269742 | 44 | 1761065 | 1761076 | 2 | 6  | 12 | TG   | 24 | 3  |
| 269743 | 44 | 1761306 | 1761323 | 2 | 9  | 18 | TG   | 29 | 3  |
| 269752 | 44 | 1769147 | 1769168 | 2 | 11 | 22 | AC   | 28 | 6  |
| 269753 | 44 | 1770916 | 1770939 | 2 | 12 | 24 | CA   | 26 | 7  |
| 269754 | 44 | 1774356 | 1774371 | 2 | 8  | 16 | AC   | 29 | 6  |
| 269757 | 44 | 1776802 | 1776815 | 2 | 7  | 14 | TG   | 32 | 3  |
| 269771 | 44 | 1798783 | 1798796 | 2 | 7  | 14 | GT   | 13 | 4  |
| 269773 | 44 | 1798903 | 1798928 | 2 | 13 | 26 | TG   | 7  | 9  |
| 269784 | 44 | 1811847 | 1811862 | 2 | 8  | 16 | AC   | 18 | 4  |
| 269790 | 44 | 1816541 | 1816560 | 2 | 10 | 20 | GT   | 13 | 7  |
| 269791 | 44 | 1816663 | 1816686 | 2 | 12 | 24 | TG   | 20 | 9  |
| 269792 | 44 | 1816780 | 1816823 | 2 | 22 | 44 | AC   | 7  | 5  |
| 269794 | 44 | 1818827 | 1818858 | 2 | 16 | 32 | CA   | 21 | 11 |
| 269800 | 44 | 1820274 | 1820293 | 2 | 10 | 20 | GT   | 18 | 5  |
| 269801 | 44 | 1820567 | 1820602 | 2 | 18 | 36 | TC   | 6  | 9  |
| 269802 | 44 | 1822048 | 1822083 | 2 | 18 | 36 | GT   | 9  | 10 |
| 269811 | 44 | 1831078 | 1831099 | 2 | 11 | 22 | TG   | 14 | 8  |
| 269829 | 44 | 1839958 | 1839985 | 2 | 14 | 28 | CA   | 16 | 6  |
| 269830 | 44 | 1842641 | 1842658 | 2 | 9  | 18 | CA   | 9  | 8  |
| 269831 | 44 | 1843392 | 1843429 | 2 | 19 | 38 | AC   | 6  | 7  |
| 269834 | 44 | 1846665 | 1846690 | 2 | 13 | 26 | GT   | 9  | 6  |
| 269838 | 44 | 1853846 | 1853869 | 4 | 6  | 24 | TCTA | 26 | 4  |
| 269839 | 44 | 1853895 | 1853906 | 2 | 6  | 12 | CT   | 14 | 3  |
| 269840 | 44 | 1853908 | 1853923 | 2 | 8  | 16 | TC   | 19 | 4  |
| 269844 | 44 | 1854384 | 1854399 | 2 | 8  | 16 | AC   | 17 | 4  |
| 269845 | 44 | 1856800 | 1856823 | 2 | 12 | 24 | AC   | 20 | 3  |
| 269852 | 44 | 1867357 | 1867372 | 2 | 8  | 16 | GT   | 24 | 3  |
| 269854 | 44 | 1872629 | 1872642 | 2 | 7  | 14 | CT   | 22 | 6  |
| 269861 | 44 | 1878310 | 1878331 | 2 | 11 | 22 | AC   | 15 | 8  |
| 269862 | 44 | 1879916 | 1879943 | 2 | 14 | 28 | TG   | 18 | 14 |
| 269863 | 44 | 1880406 | 1880426 | 3 | 7  | 21 | GGA  | 9  | 6  |
| 269864 | 44 | 1880510 | 1880536 | 3 | 9  | 27 | GAG  | 16 | 5  |
| 269868 | 44 | 1883003 | 1883026 | 4 | 6  | 24 | AAAG | 26 | 7  |
| 269870 | 44 | 1885504 | 1885523 | 4 | 5  | 20 | ATTT | 19 | 3  |
| 269872 | 44 | 1885649 | 1885684 | 2 | 18 | 36 | TG   | 7  | 9  |
| 269873 | 44 | 1885846 | 1885867 | 2 | 11 | 22 | AC   | 16 | 7  |
| 269875 | 44 | 1886901 | 1886948 | 4 | 12 | 48 | AAAG | 29 | 13 |
| 269883 | 44 | 1887949 | 1887970 | 2 | 11 | 22 | TG   | 15 | 12 |
| 269887 | 44 | 1890435 | 1890460 | 2 | 13 | 26 | TG   | 11 | 8  |

|        |    |         |         |   |    |    |      |    |    |
|--------|----|---------|---------|---|----|----|------|----|----|
| 269893 | 44 | 1894841 | 1894858 | 2 | 9  | 18 | AG   | 17 | 11 |
| 269896 | 44 | 1895337 | 1895350 | 2 | 7  | 14 | CA   | 20 | 3  |
| 269897 | 44 | 1896296 | 1896316 | 3 | 7  | 21 | CCT  | 12 | 4  |
| 269898 | 44 | 1896834 | 1896887 | 2 | 27 | 54 | AG   | 7  | 10 |
| 269906 | 44 | 1915874 | 1915901 | 2 | 14 | 28 | CA   | 20 | 7  |
| 269909 | 44 | 1917367 | 1917394 | 2 | 14 | 28 | GT   | 13 | 16 |
| 269910 | 44 | 1917783 | 1917802 | 2 | 10 | 20 | GT   | 27 | 8  |
| 269915 | 44 | 1922824 | 1922845 | 2 | 11 | 22 | TG   | 16 | 5  |
| 269916 | 44 | 1924392 | 1924406 | 3 | 5  | 15 | GCA  | 23 | 4  |
| 269928 | 44 | 1936320 | 1936334 | 3 | 5  | 15 | GAA  | 12 | 6  |
| 269931 | 44 | 1941737 | 1941763 | 3 | 9  | 27 | GCA  | 25 | 10 |
| 269937 | 44 | 1967138 | 1967163 | 2 | 13 | 26 | CA   | 19 | 10 |
| 269954 | 44 | 2015372 | 2015385 | 2 | 7  | 14 | TG   | 15 | 6  |
| 269955 | 44 | 2018202 | 2018213 | 2 | 6  | 12 | CA   | 9  | 4  |
| 269957 | 44 | 2022282 | 2022301 | 2 | 10 | 20 | AC   | 16 | 9  |
| 269969 | 44 | 2070551 | 2070564 | 2 | 7  | 14 | TG   | 27 | 3  |
| 269973 | 44 | 2079809 | 2079832 | 2 | 12 | 24 | AC   | 20 | 15 |
| 269983 | 44 | 2099937 | 2099964 | 4 | 7  | 28 | GTGC | 27 | 17 |
| 269986 | 44 | 2108259 | 2108276 | 2 | 9  | 18 | TG   | 16 | 12 |
| 269990 | 44 | 2111374 | 2111391 | 2 | 9  | 18 | TC   | 18 | 3  |
| 269993 | 44 | 2116971 | 2116991 | 3 | 7  | 21 | CTA  | 26 | 7  |
| 270002 | 44 | 2137412 | 2137435 | 2 | 12 | 24 | GT   | 14 | 7  |
| 270004 | 44 | 2141932 | 2141952 | 3 | 7  | 21 | GCT  | 23 | 7  |
| 270012 | 44 | 2154607 | 2154632 | 2 | 13 | 26 | AC   | 10 | 7  |
| 270017 | 44 | 2163071 | 2163090 | 4 | 5  | 20 | TTTA | 20 | 3  |
| 270022 | 44 | 2172769 | 2172816 | 4 | 12 | 48 | ACAT | 8  | 8  |
| 270026 | 44 | 2182236 | 2182255 | 2 | 10 | 20 | AC   | 28 | 6  |
| 270028 | 44 | 2185756 | 2185795 | 4 | 10 | 40 | CACT | 18 | 7  |
| 270036 | 44 | 2201561 | 2201578 | 2 | 9  | 18 | TG   | 22 | 6  |
| 270037 | 44 | 2202740 | 2202787 | 2 | 24 | 48 | AC   | 12 | 12 |
| 270040 | 44 | 2218795 | 2218812 | 2 | 9  | 18 | GT   | 22 | 9  |
| 270041 | 44 | 2218945 | 2218960 | 4 | 4  | 16 | TCAG | 31 | 3  |
| 270054 | 44 | 2243088 | 2243102 | 3 | 5  | 15 | GCT  | 28 | 8  |
| 270055 | 44 | 2246159 | 2246180 | 2 | 11 | 22 | TG   | 15 | 9  |
| 270059 | 44 | 2263637 | 2263660 | 2 | 12 | 24 | GT   | 13 | 5  |
| 270068 | 44 | 2299198 | 2299221 | 4 | 6  | 24 | CAAA | 29 | 3  |
| 270069 | 44 | 2306717 | 2306732 | 2 | 8  | 16 | GT   | 19 | 5  |
| 270073 | 44 | 2309077 | 2309096 | 2 | 10 | 20 | AG   | 16 | 7  |
| 270081 | 44 | 2317934 | 2317969 | 2 | 18 | 36 | AC   | 8  | 9  |
| 270088 | 44 | 2328308 | 2328325 | 3 | 6  | 18 | TCC  | 26 | 4  |
| 270091 | 44 | 2330687 | 2330726 | 2 | 20 | 40 | CA   | 6  | 11 |
| 270093 | 44 | 2334375 | 2334390 | 2 | 8  | 16 | GT   | 20 | 3  |
| 270096 | 44 | 2335769 | 2335798 | 2 | 15 | 30 | GT   | 11 | 11 |
| 270098 | 44 | 2335973 | 2335986 | 2 | 7  | 14 | AC   | 32 | 3  |
| 270100 | 44 | 2341197 | 2341214 | 2 | 9  | 18 | AG   | 18 | 6  |
| 270103 | 44 | 2346682 | 2346701 | 2 | 10 | 20 | TG   | 17 | 6  |
| 270110 | 44 | 2360296 | 2360315 | 2 | 10 | 20 | CA   | 17 | 14 |
| 270113 | 44 | 2374129 | 2374162 | 2 | 17 | 34 | GT   | 11 | 12 |
| 270114 | 44 | 2374959 | 2374978 | 2 | 10 | 20 | AC   | 29 | 7  |
| 270137 | 44 | 2433430 | 2433453 | 3 | 8  | 24 | ATC  | 19 | 5  |
| 270153 | 44 | 2483509 | 2483538 | 2 | 15 | 30 | TG   | 9  | 10 |

|        |    |         |         |   |    |    |      |    |    |
|--------|----|---------|---------|---|----|----|------|----|----|
| 270161 | 44 | 2504039 | 2504052 | 2 | 7  | 14 | TG   | 23 | 10 |
| 270162 | 44 | 2509923 | 2509954 | 4 | 8  | 32 | TGTA | 14 | 10 |
| 270164 | 44 | 2515435 | 2515458 | 3 | 8  | 24 | TGC  | 15 | 5  |
| 270176 | 44 | 2529075 | 2529088 | 2 | 7  | 14 | AC   | 18 | 8  |
| 270179 | 44 | 2533986 | 2533999 | 2 | 7  | 14 | TG   | 16 | 3  |
| 270187 | 44 | 2549558 | 2549584 | 3 | 9  | 27 | GAA  | 19 | 6  |
| 270193 | 44 | 2560345 | 2560372 | 2 | 14 | 28 | GT   | 11 | 9  |
| 270194 | 44 | 2560619 | 2560657 | 3 | 13 | 39 | GAG  | 20 | 11 |
| 270196 | 44 | 2564389 | 2564428 | 4 | 10 | 40 | TTCA | 19 | 3  |
| 270197 | 44 | 2564842 | 2564865 | 2 | 12 | 24 | AC   | 6  | 6  |
| 270201 | 44 | 2569820 | 2569839 | 2 | 10 | 20 | AC   | 18 | 9  |
| 270204 | 44 | 2574121 | 2574160 | 2 | 20 | 40 | TG   | 6  | 7  |
| 270207 | 44 | 2582892 | 2582912 | 3 | 7  | 21 | GAG  | 23 | 6  |
| 270208 | 44 | 2583036 | 2583061 | 2 | 13 | 26 | CA   | 13 | 6  |
| 270212 | 44 | 2586926 | 2586939 | 2 | 7  | 14 | CA   | 11 | 3  |
| 270214 | 44 | 2588308 | 2588329 | 2 | 11 | 22 | TG   | 16 | 3  |
| 270216 | 44 | 2589644 | 2589667 | 4 | 6  | 24 | GTCT | 28 | 5  |
| 270228 | 44 | 2602973 | 2602984 | 2 | 6  | 12 | TG   | 30 | 3  |
| 270236 | 44 | 2620220 | 2620239 | 2 | 10 | 20 | CA   | 9  | 5  |
| 270245 | 44 | 2648150 | 2648179 | 2 | 15 | 30 | TG   | 8  | 11 |
| 270246 | 44 | 2656118 | 2656131 | 2 | 7  | 14 | GT   | 17 | 4  |
| 270250 | 44 | 2657590 | 2657603 | 2 | 7  | 14 | AC   | 11 | 4  |
| 270255 | 44 | 2662932 | 2662955 | 2 | 12 | 24 | TG   | 25 | 8  |
| 270256 | 44 | 2663314 | 2663329 | 2 | 8  | 16 | GT   | 19 | 9  |
| 270260 | 44 | 2664997 | 2665014 | 2 | 9  | 18 | TG   | 26 | 7  |
| 270261 | 44 | 2665595 | 2665634 | 2 | 20 | 40 | CT   | 6  | 6  |
| 270268 | 44 | 2666502 | 2666515 | 2 | 7  | 14 | CT   | 9  | 3  |
| 270270 | 44 | 2666727 | 2666754 | 2 | 14 | 28 | TG   | 7  | 6  |
| 270273 | 44 | 2667756 | 2667777 | 2 | 11 | 22 | GT   | 19 | 7  |
| 270275 | 44 | 2670481 | 2670504 | 4 | 6  | 24 | AGAC | 20 | 4  |
| 270277 | 44 | 2671463 | 2671504 | 2 | 21 | 42 | GT   | 8  | 9  |
| 270279 | 44 | 2671952 | 2671971 | 2 | 10 | 20 | TG   | 14 | 6  |
| 270283 | 44 | 2681077 | 2681104 | 4 | 7  | 28 | CATT | 11 | 3  |
| 270291 | 44 | 2697197 | 2697230 | 2 | 17 | 34 | TG   | 13 | 9  |
| 270305 | 44 | 2710429 | 2710460 | 4 | 8  | 32 | AAGA | 6  | 3  |
| 270306 | 44 | 2713719 | 2713730 | 2 | 6  | 12 | GT   | 24 | 4  |
| 270308 | 44 | 2716438 | 2716457 | 4 | 5  | 20 | AAAT | 11 | 4  |
| 270311 | 44 | 2721523 | 2721536 | 2 | 7  | 14 | CA   | 23 | 11 |
| 270317 | 44 | 2724168 | 2724187 | 2 | 10 | 20 | GT   | 18 | 7  |
| 270337 | 44 | 2751344 | 2751373 | 2 | 15 | 30 | CA   | 9  | 8  |
| 270338 | 44 | 2751481 | 2751534 | 2 | 27 | 54 | CA   | 11 | 9  |
| 270340 | 44 | 2754764 | 2754781 | 2 | 9  | 18 | GT   | 19 | 10 |
| 270351 | 44 | 2763048 | 2763065 | 2 | 9  | 18 | TG   | 26 | 3  |
| 270353 | 44 | 2768090 | 2768117 | 4 | 7  | 28 | TCTT | 33 | 4  |
| 270357 | 44 | 2775243 | 2775260 | 2 | 9  | 18 | AC   | 23 | 10 |
| 270371 | 44 | 2811247 | 2811273 | 3 | 9  | 27 | CAT  | 21 | 9  |
| 270372 | 44 | 2813521 | 2813546 | 2 | 13 | 26 | GT   | 7  | 6  |
| 270374 | 44 | 2814793 | 2814808 | 2 | 8  | 16 | TG   | 23 | 5  |
| 270379 | 44 | 2817377 | 2817404 | 2 | 14 | 28 | GA   | 11 | 6  |
| 270380 | 44 | 2824387 | 2824432 | 2 | 23 | 46 | GT   | 8  | 9  |
| 270382 | 44 | 2835293 | 2835316 | 3 | 8  | 24 | TAA  | 12 | 7  |

|        |    |         |         |   |    |    |      |    |    |
|--------|----|---------|---------|---|----|----|------|----|----|
| 270410 | 44 | 2920441 | 2920468 | 2 | 14 | 28 | TG   | 17 | 7  |
| 270412 | 44 | 2928208 | 2928231 | 4 | 6  | 24 | TGAT | 18 | 6  |
| 270422 | 44 | 2972163 | 2972180 | 3 | 6  | 18 | ATG  | 28 | 3  |
| 270425 | 44 | 2983061 | 2983080 | 4 | 5  | 20 | ATTG | 29 | 4  |
| 270434 | 44 | 2998430 | 2998457 | 2 | 14 | 28 | CA   | 16 | 10 |
| 270435 | 44 | 2998553 | 2998586 | 2 | 17 | 34 | AC   | 21 | 18 |
| 270438 | 44 | 3001467 | 3001514 | 2 | 24 | 48 | CA   | 14 | 8  |
| 270439 | 44 | 3003135 | 3003156 | 2 | 11 | 22 | CA   | 16 | 7  |
| 270444 | 44 | 3014673 | 3014686 | 2 | 7  | 14 | CA   | 28 | 4  |
| 270446 | 44 | 3016208 | 3016223 | 2 | 8  | 16 | CA   | 19 | 4  |
| 270451 | 44 | 3029878 | 3029889 | 2 | 6  | 12 | CA   | 20 | 5  |
| 270453 | 44 | 3033619 | 3033645 | 3 | 9  | 27 | GAG  | 10 | 6  |
| 270455 | 44 | 3034942 | 3034973 | 2 | 16 | 32 | CA   | 6  | 9  |
| 270456 | 44 | 3039930 | 3039959 | 2 | 15 | 30 | AC   | 19 | 10 |
| 270458 | 44 | 3044166 | 3044180 | 3 | 5  | 15 | CTG  | 33 | 3  |
| 270461 | 44 | 3049677 | 3049712 | 2 | 18 | 36 | TG   | 15 | 12 |
| 270467 | 44 | 3059550 | 3059561 | 2 | 6  | 12 | AC   | 20 | 6  |
| 270468 | 44 | 3060808 | 3060825 | 2 | 9  | 18 | CA   | 22 | 8  |
| 270470 | 44 | 3062117 | 3062144 | 2 | 14 | 28 | TG   | 9  | 3  |
| 270473 | 44 | 3080647 | 3080668 | 2 | 11 | 22 | AC   | 10 | 5  |
| 270475 | 44 | 3088157 | 3088168 | 2 | 6  | 12 | AG   | 27 | 3  |
| 270481 | 44 | 3102384 | 3102411 | 2 | 14 | 28 | AC   | 23 | 10 |
| 270492 | 44 | 3125090 | 3125113 | 3 | 8  | 24 | AGC  | 16 | 6  |
| 270495 | 44 | 3129048 | 3129061 | 2 | 7  | 14 | GT   | 25 | 5  |
| 270498 | 44 | 3138840 | 3138851 | 2 | 6  | 12 | AC   | 32 | 3  |
| 270500 | 44 | 3148631 | 3148663 | 3 | 11 | 33 | CAT  | 14 | 5  |
| 270503 | 44 | 3154961 | 3154974 | 2 | 7  | 14 | CT   | 17 | 3  |
| 270506 | 44 | 3163174 | 3163191 | 2 | 9  | 18 | CA   | 22 | 7  |
| 270507 | 44 | 3165319 | 3165346 | 2 | 14 | 28 | TG   | 16 | 7  |
| 270513 | 44 | 3182210 | 3182249 | 2 | 20 | 40 | AC   | 8  | 9  |
| 270517 | 44 | 3195397 | 3195426 | 2 | 15 | 30 | GT   | 12 | 8  |
| 270519 | 44 | 3196112 | 3196123 | 2 | 6  | 12 | GA   | 14 | 4  |
| 270521 | 44 | 3198831 | 3198854 | 3 | 8  | 24 | AGG  | 17 | 6  |
| 270522 | 44 | 3199246 | 3199257 | 2 | 6  | 12 | CA   | 9  | 13 |
| 270526 | 44 | 3216363 | 3216386 | 2 | 12 | 24 | GT   | 13 | 5  |
| 270527 | 44 | 3218980 | 3219029 | 2 | 25 | 50 | GT   | 12 | 14 |
| 270530 | 44 | 3234387 | 3234398 | 2 | 6  | 12 | GT   | 31 | 3  |
| 270531 | 44 | 3234540 | 3234561 | 2 | 11 | 22 | GT   | 17 | 9  |
| 270533 | 44 | 3234737 | 3234776 | 2 | 20 | 40 | CT   | 18 | 12 |
| 270534 | 44 | 3238562 | 3238583 | 2 | 11 | 22 | AC   | 26 | 5  |
| 270536 | 44 | 3241139 | 3241190 | 4 | 13 | 52 | AGAT | 12 | 10 |
| 270540 | 44 | 3272592 | 3272611 | 2 | 10 | 20 | GT   | 25 | 4  |
| 270541 | 44 | 3273184 | 3273201 | 3 | 6  | 18 | CCT  | 28 | 4  |
| 270542 | 44 | 3275051 | 3275078 | 2 | 14 | 28 | CA   | 14 | 7  |
| 270543 | 44 | 3275822 | 3275836 | 3 | 5  | 15 | AAT  | 20 | 6  |
| 270544 | 44 | 3276066 | 3276079 | 2 | 7  | 14 | CA   | 22 | 10 |
| 270545 | 44 | 3276476 | 3276501 | 2 | 13 | 26 | AG   | 8  | 9  |
| 270549 | 44 | 3281397 | 3281420 | 2 | 12 | 24 | CA   | 7  | 5  |
| 270552 | 44 | 3282545 | 3282558 | 2 | 7  | 14 | AC   | 25 | 3  |
| 270557 | 44 | 3286927 | 3286972 | 2 | 23 | 46 | TG   | 7  | 8  |
| 270560 | 44 | 3289522 | 3289537 | 2 | 8  | 16 | AC   | 19 | 8  |

|        |    |         |         |   |    |    |     |    |    |
|--------|----|---------|---------|---|----|----|-----|----|----|
| 270561 | 44 | 3290637 | 3290680 | 2 | 22 | 44 | CA  | 10 | 11 |
| 270562 | 44 | 3294754 | 3294789 | 2 | 18 | 36 | CA  | 9  | 12 |
| 270568 | 44 | 3304512 | 3304525 | 2 | 7  | 14 | TC  | 27 | 5  |
| 270570 | 44 | 3305206 | 3305237 | 2 | 16 | 32 | CA  | 21 | 10 |
| 270572 | 44 | 3316511 | 3316536 | 2 | 13 | 26 | TG  | 16 | 8  |
| 270582 | 44 | 3333108 | 3333121 | 2 | 7  | 14 | TG  | 17 | 12 |
| 270583 | 44 | 3333126 | 3333139 | 2 | 7  | 14 | TG  | 6  | 6  |
| 270590 | 44 | 3336559 | 3336570 | 2 | 6  | 12 | TG  | 16 | 4  |
| 270591 | 44 | 3336733 | 3336760 | 2 | 14 | 28 | TG  | 13 | 11 |
| 270593 | 44 | 3337900 | 3337929 | 2 | 15 | 30 | GT  | 22 | 13 |
| 270595 | 44 | 3338380 | 3338393 | 2 | 7  | 14 | AC  | 16 | 6  |
| 270596 | 44 | 3339641 | 3339682 | 2 | 21 | 42 | TG  | 16 | 9  |
| 270602 | 44 | 3343217 | 3343228 | 2 | 6  | 12 | GT  | 17 | 3  |
| 270603 | 44 | 3343737 | 3343750 | 2 | 7  | 14 | TG  | 28 | 3  |
| 270607 | 44 | 3360280 | 3360305 | 2 | 13 | 26 | CA  | 10 | 10 |
| 270609 | 44 | 3361697 | 3361714 | 2 | 9  | 18 | AC  | 20 | 6  |
| 270610 | 44 | 3362653 | 3362664 | 2 | 6  | 12 | AG  | 22 | 3  |
| 270615 | 44 | 3382193 | 3382206 | 2 | 7  | 14 | AC  | 22 | 6  |
| 270616 | 44 | 3382210 | 3382221 | 2 | 6  | 12 | CA  | 22 | 6  |
| 270617 | 44 | 3385254 | 3385267 | 2 | 7  | 14 | TG  | 25 | 5  |
| 270622 | 44 | 3399667 | 3399684 | 2 | 9  | 18 | GT  | 16 | 5  |
| 270625 | 44 | 3405977 | 3405998 | 2 | 11 | 22 | TG  | 17 | 16 |
| 270628 | 44 | 3411694 | 3411720 | 3 | 9  | 27 | TCT | 19 | 12 |
| 270631 | 44 | 3419787 | 3419802 | 2 | 8  | 16 | GT  | 18 | 6  |
| 270632 | 44 | 3419837 | 3419850 | 2 | 7  | 14 | AG  | 13 | 9  |
| 270633 | 44 | 3420001 | 3420024 | 2 | 12 | 24 | AC  | 18 | 8  |
| 270634 | 44 | 3420234 | 3420245 | 2 | 6  | 12 | CA  | 28 | 4  |
| 270635 | 44 | 3420306 | 3420327 | 2 | 11 | 22 | GT  | 27 | 7  |
| 270636 | 44 | 3422390 | 3422439 | 2 | 25 | 50 | AC  | 12 | 5  |
| 270642 | 44 | 3429203 | 3429214 | 2 | 6  | 12 | GT  | 22 | 3  |
| 270644 | 44 | 3431567 | 3431602 | 2 | 18 | 36 | CA  | 9  | 10 |
| 270646 | 44 | 3432623 | 3432646 | 2 | 12 | 24 | AC  | 22 | 13 |
| 270647 | 44 | 3432782 | 3432803 | 2 | 11 | 22 | AC  | 16 | 7  |
| 270649 | 44 | 3433739 | 3433768 | 2 | 15 | 30 | TG  | 7  | 8  |
| 270653 | 44 | 3436462 | 3436473 | 2 | 6  | 12 | AG  | 22 | 3  |
| 270654 | 44 | 3437895 | 3437926 | 2 | 16 | 32 | GT  | 13 | 8  |
| 270657 | 44 | 3441745 | 3441756 | 2 | 6  | 12 | TA  | 17 | 5  |
| 270663 | 44 | 3461132 | 3461147 | 2 | 8  | 16 | AT  | 13 | 6  |
| 270667 | 44 | 3463671 | 3463712 | 2 | 21 | 42 | AC  | 13 | 10 |
| 270668 | 44 | 3463848 | 3463874 | 3 | 9  | 27 | GCT | 24 | 6  |
| 270669 | 44 | 3463953 | 3463976 | 2 | 12 | 24 | CT  | 19 | 6  |
| 270673 | 44 | 3464229 | 3464248 | 2 | 10 | 20 | AC  | 18 | 8  |
| 270674 | 44 | 3467545 | 3467558 | 2 | 7  | 14 | TG  | 15 | 11 |
| 270675 | 44 | 3467561 | 3467576 | 2 | 8  | 16 | TG  | 8  | 9  |
| 270676 | 44 | 3469984 | 3470001 | 2 | 9  | 18 | AC  | 22 | 10 |
| 270679 | 44 | 3472718 | 3472735 | 2 | 9  | 18 | CT  | 23 | 5  |
| 270681 | 44 | 3473936 | 3473965 | 2 | 15 | 30 | GT  | 19 | 7  |
| 270684 | 44 | 3477322 | 3477339 | 2 | 9  | 18 | GT  | 16 | 10 |
| 270689 | 44 | 3500661 | 3500680 | 2 | 10 | 20 | AC  | 21 | 10 |
| 270701 | 44 | 3531282 | 3531297 | 2 | 8  | 16 | AC  | 19 | 5  |
| 270703 | 44 | 3531424 | 3531461 | 2 | 19 | 38 | CA  | 12 | 12 |



|        |    |         |         |   |    |    |      |    |    |
|--------|----|---------|---------|---|----|----|------|----|----|
| 270706 | 44 | 3537560 | 3537573 | 2 | 7  | 14 | AC   | 28 | 3  |
| 270707 | 44 | 3537731 | 3537746 | 2 | 8  | 16 | CA   | 28 | 11 |
| 270714 | 44 | 3548187 | 3548228 | 2 | 21 | 42 | TG   | 6  | 6  |
| 270716 | 44 | 3549644 | 3549659 | 2 | 8  | 16 | CA   | 22 | 6  |
| 270720 | 44 | 3575225 | 3575236 | 2 | 6  | 12 | AC   | 16 | 4  |
| 270722 | 44 | 3578529 | 3578542 | 2 | 7  | 14 | AC   | 28 | 3  |
| 270740 | 44 | 3662024 | 3662061 | 2 | 19 | 38 | CA   | 8  | 8  |
| 270750 | 44 | 3687628 | 3687643 | 2 | 8  | 16 | TG   | 14 | 3  |
| 270778 | 44 | 3811177 | 3811200 | 4 | 6  | 24 | CATT | 18 | 3  |
| 270780 | 44 | 3812293 | 3812320 | 2 | 14 | 28 | AC   | 8  | 7  |
| 270782 | 44 | 3821350 | 3821387 | 2 | 19 | 38 | CA   | 20 | 13 |
| 270791 | 44 | 3847086 | 3847101 | 4 | 4  | 16 | ATGA | 31 | 3  |
| 270803 | 44 | 3870003 | 3870024 | 2 | 11 | 22 | TG   | 19 | 7  |
| 270808 | 44 | 3875472 | 3875489 | 3 | 6  | 18 | ATT  | 22 | 5  |
| 270809 | 44 | 3890222 | 3890247 | 2 | 13 | 26 | GT   | 19 | 10 |
| 270810 | 44 | 3890873 | 3890898 | 2 | 13 | 26 | CA   | 18 | 11 |
| 270811 | 44 | 3892445 | 3892494 | 2 | 25 | 50 | TG   | 18 | 8  |
| 270816 | 44 | 3893824 | 3893847 | 2 | 12 | 24 | CA   | 12 | 7  |
| 270817 | 44 | 3895971 | 3896006 | 2 | 18 | 36 | GT   | 14 | 9  |
| 270818 | 44 | 3896304 | 3896325 | 2 | 11 | 22 | GT   | 19 | 14 |
| 270820 | 44 | 3898825 | 3898840 | 2 | 8  | 16 | TG   | 30 | 3  |
| 270822 | 44 | 3903693 | 3903718 | 2 | 13 | 26 | GT   | 15 | 6  |
| 270823 | 44 | 3907465 | 3907488 | 2 | 12 | 24 | GT   | 14 | 8  |
| 270824 | 44 | 3907524 | 3907541 | 2 | 9  | 18 | GT   | 19 | 8  |
| 270826 | 44 | 3908460 | 3908477 | 2 | 9  | 18 | TG   | 23 | 3  |
| 270837 | 44 | 3926831 | 3926856 | 2 | 13 | 26 | GT   | 19 | 14 |
| 270841 | 44 | 3938958 | 3938981 | 3 | 8  | 24 | TGT  | 25 | 6  |
| 270843 | 44 | 3942479 | 3942506 | 2 | 14 | 28 | CA   | 11 | 5  |
| 270845 | 44 | 3946005 | 3946028 | 2 | 12 | 24 | CA   | 17 | 6  |
| 270846 | 44 | 3948335 | 3948356 | 2 | 11 | 22 | TG   | 21 | 7  |
| 270859 | 44 | 3968608 | 3968622 | 3 | 5  | 15 | CTT  | 29 | 4  |
| 270860 | 44 | 3973152 | 3973163 | 2 | 6  | 12 | AC   | 30 | 3  |
| 270862 | 44 | 3974980 | 3975015 | 2 | 18 | 36 | AC   | 13 | 10 |
| 270866 | 44 | 3993517 | 3993528 | 2 | 6  | 12 | GT   | 24 | 4  |
| 270872 | 44 | 4000426 | 4000463 | 2 | 19 | 38 | TG   | 7  | 8  |
| 270873 | 44 | 4000863 | 4000878 | 2 | 8  | 16 | TG   | 24 | 6  |
| 270874 | 44 | 4002038 | 4002057 | 2 | 10 | 20 | TG   | 18 | 9  |
| 270875 | 44 | 4002216 | 4002227 | 2 | 6  | 12 | CA   | 19 | 7  |
| 270877 | 44 | 4007832 | 4007843 | 2 | 6  | 12 | AC   | 20 | 11 |
| 270878 | 44 | 4007844 | 4007855 | 2 | 6  | 12 | GC   | 23 | 17 |
| 270879 | 44 | 4008286 | 4008319 | 2 | 17 | 34 | TG   | 8  | 9  |
| 270884 | 44 | 4010894 | 4010923 | 2 | 15 | 30 | AG   | 7  | 5  |
| 270885 | 44 | 4012929 | 4012966 | 2 | 19 | 38 | AC   | 11 | 11 |
| 270892 | 44 | 4033230 | 4033271 | 2 | 21 | 42 | TG   | 11 | 14 |
| 270904 | 44 | 4072413 | 4072426 | 2 | 7  | 14 | TG   | 27 | 3  |
| 270905 | 44 | 4076438 | 4076469 | 2 | 16 | 32 | GT   | 7  | 7  |
| 270906 | 44 | 4078444 | 4078457 | 2 | 7  | 14 | TG   | 8  | 6  |
| 270907 | 44 | 4078459 | 4078472 | 2 | 7  | 14 | GT   | 12 | 7  |
| 270908 | 44 | 4079206 | 4079239 | 2 | 17 | 34 | GT   | 13 | 14 |
| 270910 | 44 | 4081848 | 4081891 | 2 | 22 | 44 | CA   | 9  | 10 |
| 270912 | 44 | 4084812 | 4084833 | 2 | 11 | 22 | GT   | 19 | 12 |

|        |    |         |         |   |    |    |      |    |    |
|--------|----|---------|---------|---|----|----|------|----|----|
| 270913 | 44 | 4085066 | 4085081 | 2 | 8  | 16 | TG   | 24 | 10 |
| 270917 | 44 | 4100593 | 4100616 | 4 | 6  | 24 | TTTA | 18 | 11 |
| 270918 | 44 | 4103209 | 4103236 | 2 | 14 | 28 | AC   | 24 | 10 |
| 270919 | 44 | 4106699 | 4106720 | 2 | 11 | 22 | GT   | 20 | 7  |
| 270920 | 44 | 4107531 | 4107562 | 4 | 8  | 32 | GACA | 16 | 7  |
| 270923 | 44 | 4109565 | 4109588 | 2 | 12 | 24 | TG   | 15 | 10 |
| 270928 | 44 | 4120886 | 4120903 | 2 | 9  | 18 | GT   | 21 | 9  |
| 270934 | 44 | 4127574 | 4127605 | 4 | 8  | 32 | TCAC | 28 | 7  |
| 270937 | 44 | 4130478 | 4130493 | 2 | 8  | 16 | TG   | 15 | 9  |
| 270938 | 44 | 4130495 | 4130510 | 2 | 8  | 16 | GT   | 11 | 9  |
| 270942 | 44 | 4139200 | 4139215 | 2 | 8  | 16 | AC   | 28 | 4  |
| 270944 | 44 | 4147335 | 4147354 | 4 | 5  | 20 | AATA | 8  | 5  |
| 270948 | 44 | 4150304 | 4150319 | 4 | 4  | 16 | ACAG | 21 | 5  |
| 270949 | 44 | 4151975 | 4151986 | 2 | 6  | 12 | GT   | 24 | 9  |
| 270953 | 44 | 4160520 | 4160535 | 4 | 4  | 16 | GAGG | 11 | 5  |
| 270954 | 44 | 4160747 | 4160758 | 2 | 6  | 12 | TG   | 28 | 3  |
| 270956 | 44 | 4161308 | 4161333 | 2 | 13 | 26 | TG   | 13 | 7  |
| 270957 | 44 | 4161434 | 4161447 | 2 | 7  | 14 | TG   | 26 | 3  |
| 270970 | 44 | 4180493 | 4180522 | 2 | 15 | 30 | AC   | 18 | 13 |
| 270971 | 44 | 4185410 | 4185435 | 2 | 13 | 26 | GT   | 17 | 7  |
| 270973 | 44 | 4187442 | 4187453 | 2 | 6  | 12 | AT   | 20 | 5  |
| 270977 | 44 | 4196425 | 4196439 | 3 | 5  | 15 | GAG  | 29 | 4  |
| 270981 | 44 | 4206299 | 4206314 | 2 | 8  | 16 | TG   | 15 | 6  |
| 270984 | 45 | 6018    | 6035    | 3 | 6  | 18 | ATA  | 8  | 3  |
| 270985 | 45 | 7204    | 7218    | 3 | 5  | 15 | TTC  | 31 | 9  |
| 270986 | 45 | 9384    | 9422    | 3 | 13 | 39 | CAT  | 21 | 12 |
| 270987 | 45 | 9603    | 9630    | 2 | 14 | 28 | GT   | 20 | 12 |
| 270988 | 45 | 9785    | 9826    | 2 | 21 | 42 | CA   | 9  | 11 |
| 270989 | 45 | 9873    | 9892    | 2 | 10 | 20 | CA   | 10 | 3  |
| 270993 | 45 | 12730   | 12743   | 2 | 7  | 14 | CA   | 23 | 9  |
| 270994 | 45 | 12841   | 12872   | 2 | 16 | 32 | TG   | 11 | 8  |
| 270995 | 45 | 15534   | 15563   | 2 | 15 | 30 | AC   | 16 | 9  |
| 270996 | 45 | 16258   | 16297   | 2 | 20 | 40 | TG   | 11 | 14 |
| 270997 | 45 | 16649   | 16702   | 2 | 27 | 54 | GT   | 12 | 17 |
| 270998 | 45 | 16835   | 16864   | 2 | 15 | 30 | CA   | 7  | 6  |
| 270999 | 45 | 18268   | 18295   | 2 | 14 | 28 | TG   | 18 | 10 |
| 271004 | 45 | 19541   | 19572   | 2 | 16 | 32 | AC   | 8  | 9  |
| 271005 | 45 | 19786   | 19807   | 2 | 11 | 22 | TG   | 27 | 9  |
| 271007 | 45 | 19917   | 19934   | 2 | 9  | 18 | TG   | 8  | 8  |
| 271009 | 45 | 21917   | 21952   | 2 | 18 | 36 | TG   | 11 | 7  |
| 271011 | 45 | 26176   | 26191   | 2 | 8  | 16 | AG   | 24 | 8  |
| 271013 | 45 | 30425   | 30468   | 2 | 22 | 44 | AC   | 7  | 8  |
| 271014 | 45 | 31416   | 31443   | 2 | 14 | 28 | GT   | 13 | 9  |
| 271016 | 45 | 38475   | 38488   | 2 | 7  | 14 | CA   | 13 | 3  |
| 271018 | 45 | 48970   | 48995   | 2 | 13 | 26 | CA   | 14 | 13 |
| 271021 | 45 | 54505   | 54546   | 2 | 21 | 42 | TG   | 9  | 11 |
| 271023 | 45 | 55521   | 55538   | 2 | 9  | 18 | GT   | 20 | 8  |
| 271024 | 45 | 55676   | 55691   | 2 | 8  | 16 | TG   | 21 | 4  |
| 271025 | 45 | 59162   | 59177   | 2 | 8  | 16 | GT   | 23 | 7  |
| 271026 | 45 | 60717   | 60732   | 4 | 4  | 16 | CAGA | 30 | 3  |
| 271027 | 45 | 60813   | 60828   | 2 | 8  | 16 | AC   | 26 | 5  |

|        |    |        |        |   |    |    |      |    |    |
|--------|----|--------|--------|---|----|----|------|----|----|
| 271028 | 45 | 64353  | 64366  | 2 | 7  | 14 | CA   | 13 | 5  |
| 271030 | 45 | 64638  | 64661  | 2 | 12 | 24 | CA   | 9  | 10 |
| 271034 | 45 | 68448  | 68471  | 2 | 12 | 24 | TG   | 18 | 6  |
| 271035 | 45 | 69857  | 69878  | 2 | 11 | 22 | AC   | 12 | 3  |
| 271036 | 45 | 70166  | 70180  | 3 | 5  | 15 | ATT  | 16 | 3  |
| 271039 | 45 | 74283  | 74294  | 2 | 6  | 12 | GT   | 16 | 3  |
| 271044 | 45 | 82240  | 82289  | 2 | 25 | 50 | TG   | 7  | 8  |
| 271045 | 45 | 82496  | 82549  | 2 | 27 | 54 | TG   | 13 | 14 |
| 271046 | 45 | 83819  | 83840  | 2 | 11 | 22 | AC   | 16 | 6  |
| 271047 | 45 | 85129  | 85146  | 2 | 9  | 18 | CT   | 21 | 6  |
| 271048 | 45 | 85457  | 85482  | 2 | 13 | 26 | TG   | 23 | 6  |
| 271054 | 45 | 89842  | 89863  | 2 | 11 | 22 | AC   | 25 | 4  |
| 271056 | 45 | 90516  | 90555  | 2 | 20 | 40 | TG   | 9  | 8  |
| 271058 | 45 | 93878  | 93898  | 3 | 7  | 21 | CTT  | 19 | 8  |
| 271059 | 45 | 94951  | 94978  | 4 | 7  | 28 | GTCT | 29 | 9  |
| 271069 | 45 | 103039 | 103058 | 4 | 5  | 20 | TTGT | 23 | 3  |
| 271070 | 45 | 103205 | 103232 | 2 | 14 | 28 | GT   | 12 | 12 |
| 271072 | 45 | 103351 | 103380 | 2 | 15 | 30 | GT   | 12 | 7  |
| 271073 | 45 | 106189 | 106204 | 4 | 4  | 16 | AAAC | 15 | 5  |
| 271076 | 45 | 109465 | 109492 | 2 | 14 | 28 | TG   | 11 | 12 |
| 271077 | 45 | 109713 | 109728 | 2 | 8  | 16 | GT   | 19 | 4  |
| 271079 | 45 | 109789 | 109814 | 2 | 13 | 26 | CA   | 12 | 11 |
| 271080 | 45 | 109943 | 109972 | 2 | 15 | 30 | CA   | 22 | 4  |
| 271086 | 45 | 111405 | 111426 | 2 | 11 | 22 | GT   | 10 | 12 |
| 271092 | 45 | 111640 | 111659 | 2 | 10 | 20 | AC   | 15 | 7  |
| 271102 | 45 | 119476 | 119496 | 3 | 7  | 21 | TCT  | 22 | 6  |
| 271107 | 45 | 123192 | 123219 | 4 | 7  | 28 | AGGA | 15 | 8  |
| 271110 | 45 | 124357 | 124370 | 2 | 7  | 14 | GT   | 10 | 13 |
| 271113 | 45 | 125634 | 125648 | 3 | 5  | 15 | GCA  | 23 | 3  |
| 271122 | 45 | 151007 | 151034 | 2 | 14 | 28 | TG   | 19 | 8  |
| 271136 | 45 | 214828 | 214843 | 2 | 8  | 16 | GT   | 11 | 6  |
| 271138 | 45 | 219658 | 219669 | 2 | 6  | 12 | GT   | 17 | 3  |
| 271139 | 45 | 219756 | 219779 | 3 | 8  | 24 | CAT  | 28 | 5  |
| 271140 | 45 | 219885 | 219904 | 4 | 5  | 20 | AAAC | 26 | 5  |
| 271145 | 45 | 232613 | 232627 | 3 | 5  | 15 | GCT  | 27 | 4  |
| 271147 | 45 | 234241 | 234252 | 2 | 6  | 12 | AC   | 18 | 9  |
| 271148 | 45 | 234255 | 234266 | 2 | 6  | 12 | AC   | 19 | 15 |
| 271150 | 45 | 234939 | 234962 | 3 | 8  | 24 | GAG  | 21 | 6  |
| 271154 | 45 | 237699 | 237716 | 2 | 9  | 18 | TC   | 16 | 3  |
| 271155 | 45 | 239302 | 239355 | 2 | 27 | 54 | CA   | 7  | 8  |
| 271156 | 45 | 239455 | 239474 | 2 | 10 | 20 | CA   | 14 | 10 |
| 271159 | 45 | 240743 | 240760 | 2 | 9  | 18 | CT   | 6  | 4  |
| 271161 | 45 | 241277 | 241300 | 3 | 8  | 24 | AGA  | 23 | 6  |
| 271167 | 45 | 247937 | 247975 | 3 | 13 | 39 | ATC  | 22 | 10 |
| 271168 | 45 | 248104 | 248135 | 2 | 16 | 32 | CA   | 17 | 10 |
| 271173 | 45 | 259300 | 259327 | 2 | 14 | 28 | TG   | 18 | 10 |
| 271175 | 45 | 266417 | 266444 | 4 | 7  | 28 | ATCA | 29 | 12 |
| 271176 | 45 | 269012 | 269025 | 2 | 7  | 14 | CT   | 22 | 6  |
| 271184 | 45 | 282824 | 282838 | 3 | 5  | 15 | AAG  | 20 | 4  |
| 271188 | 45 | 289569 | 289586 | 3 | 6  | 18 | GGA  | 29 | 3  |
| 271197 | 45 | 311414 | 311443 | 2 | 15 | 30 | CA   | 13 | 5  |

|        |    |        |        |   |    |    |      |    |    |
|--------|----|--------|--------|---|----|----|------|----|----|
| 271201 | 45 | 317140 | 317169 | 3 | 10 | 30 | GAG  | 12 | 13 |
| 271202 | 45 | 317240 | 317254 | 3 | 5  | 15 | TCA  | 13 | 3  |
| 271204 | 45 | 319980 | 319997 | 3 | 6  | 18 | AAG  | 24 | 7  |
| 271205 | 45 | 320999 | 321042 | 2 | 22 | 44 | AC   | 7  | 7  |
| 271225 | 45 | 364864 | 364877 | 2 | 7  | 14 | GA   | 18 | 3  |
| 271226 | 45 | 364941 | 364967 | 3 | 9  | 27 | GAG  | 20 | 6  |
| 271227 | 45 | 365057 | 365074 | 3 | 6  | 18 | GCT  | 24 | 5  |
| 271228 | 45 | 366752 | 366781 | 3 | 10 | 30 | TCT  | 29 | 12 |
| 271229 | 45 | 368137 | 368151 | 3 | 5  | 15 | GAA  | 30 | 4  |
| 271232 | 45 | 368921 | 368941 | 3 | 7  | 21 | TTC  | 22 | 3  |
| 271235 | 45 | 372662 | 372679 | 3 | 6  | 18 | GCC  | 27 | 9  |
| 271239 | 45 | 383114 | 383128 | 3 | 5  | 15 | GAG  | 26 | 4  |
| 271240 | 45 | 383276 | 383290 | 3 | 5  | 15 | GAG  | 23 | 9  |
| 271241 | 45 | 383473 | 383496 | 3 | 8  | 24 | TGC  | 28 | 6  |
| 271246 | 45 | 388084 | 388097 | 2 | 7  | 14 | CT   | 23 | 8  |
| 271248 | 45 | 389841 | 389868 | 2 | 14 | 28 | AC   | 12 | 6  |
| 271249 | 45 | 390069 | 390092 | 3 | 8  | 24 | TTC  | 19 | 5  |
| 271250 | 45 | 390216 | 390235 | 2 | 10 | 20 | TG   | 12 | 9  |
| 271251 | 45 | 390364 | 390387 | 4 | 6  | 24 | GCCA | 29 | 9  |
| 271252 | 45 | 392237 | 392251 | 3 | 5  | 15 | GAG  | 22 | 4  |
| 271256 | 45 | 396859 | 396876 | 2 | 9  | 18 | AC   | 22 | 12 |
| 271257 | 45 | 398076 | 398095 | 2 | 10 | 20 | AC   | 19 | 5  |
| 271258 | 45 | 401099 | 401112 | 2 | 7  | 14 | TG   | 19 | 9  |
| 271265 | 45 | 409650 | 409663 | 2 | 7  | 14 | TG   | 17 | 3  |
| 271266 | 45 | 417504 | 417525 | 2 | 11 | 22 | CA   | 26 | 10 |
| 271275 | 45 | 453676 | 453691 | 2 | 8  | 16 | GA   | 15 | 4  |
| 271276 | 45 | 454743 | 454754 | 2 | 6  | 12 | GT   | 24 | 8  |
| 271279 | 45 | 455851 | 455872 | 2 | 11 | 22 | GT   | 11 | 8  |
| 271287 | 45 | 469390 | 469401 | 2 | 6  | 12 | TG   | 22 | 8  |
| 271288 | 45 | 469536 | 469550 | 3 | 5  | 15 | CCT  | 30 | 5  |
| 271291 | 45 | 471374 | 471391 | 2 | 9  | 18 | CT   | 22 | 5  |
| 271300 | 45 | 475932 | 475952 | 3 | 7  | 21 | AGA  | 20 | 12 |
| 271309 | 45 | 493431 | 493444 | 2 | 7  | 14 | TC   | 30 | 3  |
| 271312 | 45 | 509244 | 509261 | 3 | 6  | 18 | TGT  | 26 | 4  |
| 271313 | 45 | 510724 | 510743 | 2 | 10 | 20 | CT   | 16 | 10 |
| 271320 | 45 | 523384 | 523401 | 3 | 6  | 18 | TTG  | 21 | 4  |
| 271324 | 45 | 524488 | 524505 | 3 | 6  | 18 | GCT  | 28 | 8  |
| 271328 | 45 | 527076 | 527087 | 2 | 6  | 12 | CT   | 31 | 3  |
| 271330 | 45 | 531436 | 531465 | 3 | 10 | 30 | GAG  | 14 | 4  |
| 271332 | 45 | 533516 | 533542 | 3 | 9  | 27 | CCT  | 23 | 7  |
| 271333 | 45 | 536221 | 536244 | 2 | 12 | 24 | GT   | 6  | 7  |
| 271334 | 45 | 536402 | 536425 | 2 | 12 | 24 | GT   | 8  | 7  |
| 271341 | 45 | 551030 | 551050 | 3 | 7  | 21 | CCG  | 33 | 21 |
| 271346 | 45 | 557434 | 557457 | 4 | 6  | 24 | CTTT | 12 | 3  |
| 271349 | 45 | 564131 | 564145 | 3 | 5  | 15 | AAC  | 23 | 8  |
| 271350 | 45 | 567753 | 567767 | 3 | 5  | 15 | AAG  | 18 | 3  |
| 271352 | 45 | 573244 | 573275 | 2 | 16 | 32 | TG   | 14 | 10 |
| 271363 | 45 | 595628 | 595643 | 2 | 8  | 16 | AC   | 8  | 6  |
| 271364 | 45 | 597811 | 597826 | 4 | 4  | 16 | CCTC | 9  | 6  |
| 271365 | 45 | 597972 | 597986 | 3 | 5  | 15 | CTT  | 9  | 3  |
| 271366 | 45 | 598113 | 598128 | 2 | 8  | 16 | CA   | 24 | 5  |

|        |    |        |        |   |    |    |      |    |    |
|--------|----|--------|--------|---|----|----|------|----|----|
| 271367 | 45 | 598580 | 598597 | 2 | 9  | 18 | GT   | 28 | 6  |
| 271368 | 45 | 600795 | 600828 | 2 | 17 | 34 | AC   | 10 | 13 |
| 271369 | 45 | 601485 | 601506 | 2 | 11 | 22 | AT   | 13 | 6  |
| 271371 | 45 | 602045 | 602066 | 2 | 11 | 22 | CA   | 23 | 9  |
| 271379 | 45 | 615233 | 615272 | 2 | 20 | 40 | AC   | 12 | 13 |
| 271382 | 45 | 623559 | 623574 | 4 | 4  | 16 | AGAC | 25 | 3  |
| 271384 | 45 | 628426 | 628452 | 3 | 9  | 27 | CTC  | 25 | 10 |
| 271385 | 45 | 628962 | 628981 | 4 | 5  | 20 | AAAT | 14 | 6  |
| 271404 | 45 | 669572 | 669607 | 3 | 12 | 36 | ATT  | 10 | 8  |
| 271414 | 45 | 692575 | 692607 | 3 | 11 | 33 | AGA  | 18 | 11 |
| 271422 | 45 | 700448 | 700465 | 2 | 9  | 18 | TG   | 25 | 5  |
| 271425 | 45 | 710489 | 710504 | 4 | 4  | 16 | TTTA | 12 | 6  |
| 271427 | 45 | 711547 | 711561 | 3 | 5  | 15 | TTA  | 28 | 6  |
| 271429 | 45 | 713992 | 714003 | 2 | 6  | 12 | AC   | 24 | 4  |
| 271430 | 45 | 716201 | 716234 | 2 | 17 | 34 | GT   | 11 | 8  |
| 271436 | 45 | 723137 | 723148 | 2 | 6  | 12 | CA   | 24 | 7  |
| 271437 | 45 | 723476 | 723495 | 2 | 10 | 20 | CA   | 25 | 6  |
| 271443 | 45 | 726410 | 726423 | 2 | 7  | 14 | AG   | 9  | 7  |
| 271445 | 45 | 726714 | 726731 | 2 | 9  | 18 | GT   | 7  | 5  |
| 271446 | 45 | 730568 | 730581 | 2 | 7  | 14 | TG   | 25 | 7  |
| 271450 | 45 | 732771 | 732800 | 2 | 15 | 30 | CA   | 20 | 11 |
| 271451 | 45 | 733418 | 733431 | 2 | 7  | 14 | TG   | 26 | 7  |
| 271452 | 45 | 734243 | 734262 | 4 | 5  | 20 | AACA | 13 | 4  |
| 271458 | 45 | 739543 | 739554 | 2 | 6  | 12 | GT   | 28 | 4  |
| 271463 | 45 | 754609 | 754626 | 3 | 6  | 18 | TTA  | 22 | 8  |
| 271464 | 45 | 756345 | 756360 | 2 | 8  | 16 | TG   | 18 | 3  |
| 271471 | 45 | 764454 | 764481 | 2 | 14 | 28 | TG   | 15 | 16 |
| 271472 | 45 | 765008 | 765019 | 2 | 6  | 12 | TG   | 21 | 4  |
| 271473 | 45 | 765376 | 765390 | 3 | 5  | 15 | CCT  | 26 | 3  |
| 271475 | 45 | 765779 | 765792 | 2 | 7  | 14 | TG   | 18 | 7  |
| 271476 | 45 | 766381 | 766400 | 2 | 10 | 20 | GT   | 24 | 9  |
| 271478 | 45 | 770317 | 770337 | 3 | 7  | 21 | GAG  | 17 | 5  |
| 271481 | 45 | 771316 | 771331 | 4 | 4  | 16 | GAGG | 11 | 3  |
| 271484 | 45 | 772198 | 772219 | 2 | 11 | 22 | CT   | 21 | 12 |
| 271485 | 45 | 772360 | 772371 | 2 | 6  | 12 | GT   | 28 | 6  |
| 271486 | 45 | 774466 | 774483 | 2 | 9  | 18 | TG   | 21 | 7  |
| 271487 | 45 | 774723 | 774734 | 2 | 6  | 12 | CT   | 7  | 3  |
| 271493 | 45 | 783369 | 783383 | 3 | 5  | 15 | CCT  | 10 | 3  |
| 271494 | 45 | 783952 | 783983 | 2 | 16 | 32 | GT   | 6  | 6  |
| 271498 | 45 | 786631 | 786642 | 2 | 6  | 12 | AT   | 19 | 4  |
| 271499 | 45 | 786802 | 786831 | 3 | 10 | 30 | TCT  | 18 | 13 |
| 271504 | 45 | 792139 | 792156 | 2 | 9  | 18 | GT   | 6  | 8  |
| 271509 | 45 | 795608 | 795645 | 2 | 19 | 38 | AC   | 17 | 13 |
| 271512 | 45 | 796691 | 796722 | 2 | 16 | 32 | CA   | 17 | 8  |
| 271518 | 45 | 800728 | 800742 | 3 | 5  | 15 | CGC  | 25 | 4  |
| 271521 | 45 | 802239 | 802253 | 3 | 5  | 15 | CTT  | 32 | 3  |
| 271526 | 45 | 817326 | 817343 | 2 | 9  | 18 | CA   | 27 | 7  |
| 271527 | 45 | 819538 | 819549 | 2 | 6  | 12 | CT   | 24 | 5  |
| 271528 | 45 | 819550 | 819563 | 2 | 7  | 14 | CA   | 25 | 6  |
| 271529 | 45 | 822646 | 822666 | 3 | 7  | 21 | CTC  | 16 | 7  |
| 271534 | 45 | 830354 | 830368 | 3 | 5  | 15 | GCT  | 23 | 4  |

|        |    |         |         |   |    |    |      |    |    |
|--------|----|---------|---------|---|----|----|------|----|----|
| 271535 | 45 | 832950  | 832961  | 2 | 6  | 12 | AC   | 28 | 4  |
| 271541 | 45 | 848670  | 848703  | 2 | 17 | 34 | GT   | 11 | 10 |
| 271546 | 45 | 855053  | 855086  | 2 | 17 | 34 | CA   | 15 | 12 |
| 271554 | 45 | 864808  | 864822  | 3 | 5  | 15 | ATT  | 21 | 4  |
| 271556 | 45 | 867478  | 867489  | 2 | 6  | 12 | CA   | 17 | 6  |
| 271581 | 45 | 885737  | 885770  | 2 | 17 | 34 | CA   | 12 | 7  |
| 271582 | 45 | 885989  | 886003  | 3 | 5  | 15 | GAA  | 26 | 9  |
| 271583 | 45 | 886098  | 886127  | 2 | 15 | 30 | GT   | 15 | 6  |
| 271585 | 45 | 886432  | 886461  | 2 | 15 | 30 | AC   | 13 | 16 |
| 271586 | 45 | 886997  | 887014  | 2 | 9  | 18 | CA   | 12 | 12 |
| 271587 | 45 | 887232  | 887245  | 2 | 7  | 14 | GA   | 10 | 5  |
| 271588 | 45 | 887280  | 887295  | 2 | 8  | 16 | AG   | 22 | 4  |
| 271590 | 45 | 887598  | 887615  | 2 | 9  | 18 | GT   | 11 | 7  |
| 271594 | 45 | 887950  | 887961  | 2 | 6  | 12 | TC   | 18 | 3  |
| 271598 | 45 | 899149  | 899166  | 2 | 9  | 18 | GT   | 20 | 8  |
| 271600 | 45 | 899537  | 899560  | 2 | 12 | 24 | TC   | 19 | 8  |
| 271601 | 45 | 899638  | 899655  | 2 | 9  | 18 | AG   | 20 | 5  |
| 271609 | 45 | 905850  | 905871  | 2 | 11 | 22 | TG   | 15 | 6  |
| 271628 | 45 | 921465  | 921478  | 2 | 7  | 14 | TG   | 17 | 3  |
| 271631 | 45 | 925706  | 925721  | 2 | 8  | 16 | TC   | 29 | 3  |
| 271646 | 45 | 950794  | 950831  | 2 | 19 | 38 | GT   | 17 | 9  |
| 271660 | 45 | 965056  | 965069  | 2 | 7  | 14 | CA   | 15 | 5  |
| 271669 | 45 | 970945  | 970962  | 3 | 6  | 18 | CCT  | 15 | 6  |
| 271671 | 45 | 981840  | 981865  | 2 | 13 | 26 | AC   | 8  | 7  |
| 271677 | 45 | 997052  | 997081  | 3 | 10 | 30 | TCC  | 17 | 7  |
| 271678 | 45 | 997418  | 997435  | 2 | 9  | 18 | AT   | 17 | 15 |
| 271679 | 45 | 1002103 | 1002120 | 2 | 9  | 18 | TG   | 30 | 5  |
| 271688 | 45 | 1013940 | 1013961 | 2 | 11 | 22 | AC   | 18 | 5  |
| 271689 | 45 | 1014285 | 1014304 | 4 | 5  | 20 | AAAT | 18 | 9  |
| 271690 | 45 | 1019072 | 1019089 | 2 | 9  | 18 | TG   | 17 | 6  |
| 271696 | 45 | 1025181 | 1025220 | 4 | 10 | 40 | TGGA | 22 | 5  |
| 271699 | 45 | 1028750 | 1028767 | 3 | 6  | 18 | ATT  | 19 | 13 |
| 271702 | 45 | 1040777 | 1040810 | 2 | 17 | 34 | TG   | 10 | 9  |
| 271707 | 45 | 1051963 | 1051978 | 2 | 8  | 16 | GT   | 22 | 5  |
| 271710 | 45 | 1056527 | 1056540 | 2 | 7  | 14 | TG   | 7  | 8  |
| 271711 | 45 | 1056990 | 1057010 | 3 | 7  | 21 | GCT  | 28 | 6  |
| 271728 | 45 | 1079588 | 1079599 | 2 | 6  | 12 | AC   | 18 | 5  |
| 271734 | 45 | 1088414 | 1088425 | 2 | 6  | 12 | TC   | 6  | 3  |
| 271742 | 45 | 1095491 | 1095524 | 2 | 17 | 34 | CA   | 13 | 9  |
| 271750 | 45 | 1112023 | 1112052 | 2 | 15 | 30 | AC   | 14 | 12 |
| 271767 | 45 | 1153695 | 1153722 | 2 | 14 | 28 | GT   | 16 | 11 |
| 271773 | 45 | 1172911 | 1172928 | 2 | 9  | 18 | AC   | 17 | 16 |
| 271783 | 45 | 1192532 | 1192543 | 2 | 6  | 12 | TA   | 14 | 3  |
| 271790 | 45 | 1209687 | 1209706 | 2 | 10 | 20 | AC   | 11 | 7  |
| 271801 | 45 | 1243545 | 1243559 | 3 | 5  | 15 | TAT  | 13 | 3  |
| 271805 | 45 | 1253433 | 1253448 | 4 | 4  | 16 | AAAT | 27 | 6  |
| 271817 | 45 | 1286107 | 1286126 | 2 | 10 | 20 | AC   | 16 | 8  |
| 271824 | 45 | 1295831 | 1295842 | 2 | 6  | 12 | AG   | 21 | 3  |
| 271825 | 45 | 1298874 | 1298893 | 2 | 10 | 20 | GT   | 14 | 10 |
| 271830 | 45 | 1315375 | 1315388 | 2 | 7  | 14 | AC   | 19 | 7  |
| 271833 | 45 | 1319896 | 1319911 | 2 | 8  | 16 | GA   | 27 | 3  |

|        |    |         |         |   |    |    |      |    |    |
|--------|----|---------|---------|---|----|----|------|----|----|
| 271837 | 45 | 1323004 | 1323019 | 4 | 4  | 16 | AAAT | 12 | 4  |
| 271863 | 45 | 1349195 | 1349212 | 2 | 9  | 18 | CT   | 15 | 8  |
| 271869 | 45 | 1357860 | 1357895 | 4 | 9  | 36 | ATGG | 20 | 8  |
| 271889 | 45 | 1391464 | 1391483 | 4 | 5  | 20 | TTTA | 16 | 4  |
| 271892 | 45 | 1395310 | 1395325 | 2 | 8  | 16 | AC   | 12 | 9  |
| 271897 | 45 | 1402966 | 1402993 | 4 | 7  | 28 | CCAT | 21 | 6  |
| 271901 | 45 | 1410348 | 1410363 | 4 | 4  | 16 | AACA | 22 | 5  |
| 271911 | 45 | 1421714 | 1421739 | 2 | 13 | 26 | AC   | 22 | 8  |
| 271918 | 45 | 1432913 | 1432932 | 2 | 10 | 20 | TC   | 21 | 4  |
| 271933 | 45 | 1450846 | 1450859 | 2 | 7  | 14 | AC   | 22 | 3  |
| 271940 | 45 | 1458497 | 1458510 | 2 | 7  | 14 | CA   | 32 | 5  |
| 271948 | 45 | 1474834 | 1474853 | 2 | 10 | 20 | GT   | 19 | 6  |
| 271963 | 45 | 1508282 | 1508297 | 4 | 4  | 16 | AAAT | 19 | 6  |
| 271964 | 45 | 1508463 | 1508480 | 2 | 9  | 18 | TG   | 26 | 8  |
| 271970 | 45 | 1524131 | 1524144 | 2 | 7  | 14 | TC   | 30 | 3  |
| 271971 | 45 | 1524146 | 1524157 | 2 | 6  | 12 | CT   | 27 | 6  |
| 271980 | 45 | 1564525 | 1564538 | 2 | 7  | 14 | TG   | 17 | 6  |
| 271984 | 45 | 1567452 | 1567465 | 2 | 7  | 14 | CA   | 21 | 10 |
| 271989 | 45 | 1579408 | 1579423 | 2 | 8  | 16 | CT   | 21 | 3  |
| 271990 | 45 | 1582706 | 1582720 | 3 | 5  | 15 | ATT  | 18 | 3  |
| 272009 | 45 | 1625065 | 1625076 | 2 | 6  | 12 | TG   | 27 | 3  |
| 272012 | 45 | 1651901 | 1651916 | 4 | 4  | 16 | TACA | 19 | 4  |
| 272013 | 45 | 1654672 | 1654695 | 4 | 6  | 24 | TGAC | 29 | 4  |
| 272015 | 45 | 1656389 | 1656402 | 2 | 7  | 14 | AG   | 13 | 3  |
| 272016 | 45 | 1656653 | 1656676 | 2 | 12 | 24 | CA   | 9  | 14 |
| 272019 | 45 | 1663203 | 1663246 | 4 | 11 | 44 | ATTT | 6  | 6  |
| 272021 | 45 | 1668387 | 1668398 | 2 | 6  | 12 | TC   | 15 | 4  |
| 272034 | 45 | 1695702 | 1695727 | 2 | 13 | 26 | GT   | 18 | 12 |
| 272036 | 45 | 1696038 | 1696051 | 2 | 7  | 14 | CT   | 7  | 5  |
| 272041 | 45 | 1702688 | 1702727 | 4 | 10 | 40 | AAAC | 22 | 10 |
| 272043 | 45 | 1703854 | 1703865 | 2 | 6  | 12 | TG   | 18 | 12 |
| 272056 | 45 | 1729930 | 1729959 | 2 | 15 | 30 | GT   | 8  | 7  |
| 272057 | 45 | 1730792 | 1730811 | 4 | 5  | 20 | ATTT | 24 | 8  |
| 272058 | 45 | 1731948 | 1731971 | 4 | 6  | 24 | AAAT | 22 | 7  |
| 272063 | 45 | 1744005 | 1744036 | 4 | 8  | 32 | TAGA | 25 | 8  |
| 272065 | 45 | 1747694 | 1747727 | 2 | 17 | 34 | CA   | 8  | 8  |
| 272081 | 45 | 1775474 | 1775488 | 3 | 5  | 15 | AAT  | 22 | 3  |
| 272083 | 45 | 1785368 | 1785389 | 2 | 11 | 22 | TG   | 12 | 6  |
| 272085 | 45 | 1785693 | 1785714 | 2 | 11 | 22 | CA   | 14 | 10 |
| 272088 | 45 | 1786762 | 1786777 | 4 | 4  | 16 | TATT | 23 | 3  |
| 272096 | 45 | 1809629 | 1809650 | 2 | 11 | 22 | TG   | 15 | 5  |
| 272097 | 45 | 1809882 | 1809914 | 3 | 11 | 33 | GGA  | 25 | 8  |
| 272101 | 45 | 1831512 | 1831541 | 3 | 10 | 30 | CTG  | 31 | 6  |
| 272102 | 45 | 1834679 | 1834696 | 3 | 6  | 18 | TCA  | 29 | 5  |
| 272106 | 45 | 1853446 | 1853471 | 2 | 13 | 26 | TC   | 9  | 8  |
| 272107 | 45 | 1853764 | 1853789 | 2 | 13 | 26 | CA   | 24 | 7  |
| 272116 | 45 | 1884437 | 1884466 | 2 | 15 | 30 | GT   | 20 | 15 |
| 272117 | 45 | 1888077 | 1888102 | 2 | 13 | 26 | AC   | 14 | 10 |
| 272120 | 45 | 1895143 | 1895156 | 2 | 7  | 14 | AC   | 9  | 5  |
| 272122 | 45 | 1899476 | 1899514 | 3 | 13 | 39 | ATG  | 13 | 15 |
| 272127 | 45 | 1908482 | 1908511 | 2 | 15 | 30 | TG   | 10 | 11 |

|        |    |         |         |   |    |    |      |    |    |
|--------|----|---------|---------|---|----|----|------|----|----|
| 272148 | 45 | 1959695 | 1959714 | 4 | 5  | 20 | GTTG | 33 | 4  |
| 272150 | 45 | 1965544 | 1965557 | 2 | 7  | 14 | GT   | 29 | 3  |
| 272154 | 45 | 1969718 | 1969733 | 2 | 8  | 16 | AG   | 15 | 5  |
| 272156 | 45 | 1970437 | 1970450 | 2 | 7  | 14 | CA   | 7  | 6  |
| 272158 | 45 | 1971446 | 1971461 | 4 | 4  | 16 | AAAT | 27 | 6  |
| 272163 | 45 | 1983062 | 1983089 | 2 | 14 | 28 | TG   | 12 | 13 |
| 272167 | 45 | 1990827 | 1990846 | 2 | 10 | 20 | GA   | 21 | 4  |
| 272174 | 45 | 2001135 | 2001150 | 4 | 4  | 16 | TTGG | 29 | 3  |
| 272176 | 45 | 2013811 | 2013834 | 3 | 8  | 24 | GTA  | 22 | 5  |
| 272179 | 45 | 2016974 | 2016995 | 2 | 11 | 22 | GT   | 12 | 7  |
| 272186 | 45 | 2025422 | 2025442 | 3 | 7  | 21 | GCT  | 23 | 5  |
| 272188 | 45 | 2026421 | 2026432 | 2 | 6  | 12 | GT   | 16 | 9  |
| 272191 | 45 | 2032937 | 2032978 | 2 | 21 | 42 | TG   | 17 | 13 |
| 272196 | 45 | 2039418 | 2039449 | 2 | 16 | 32 | TG   | 13 | 11 |
| 272205 | 45 | 2054248 | 2054277 | 2 | 15 | 30 | TG   | 19 | 12 |
| 272207 | 45 | 2055481 | 2055504 | 2 | 12 | 24 | CA   | 22 | 4  |
| 272209 | 45 | 2058744 | 2058771 | 2 | 14 | 28 | TG   | 13 | 11 |
| 272210 | 45 | 2058854 | 2058877 | 3 | 8  | 24 | CAG  | 21 | 6  |
| 272215 | 45 | 2079267 | 2079282 | 4 | 4  | 16 | AAAG | 15 | 3  |
| 272217 | 45 | 2079706 | 2079720 | 3 | 5  | 15 | GAG  | 16 | 5  |
| 272220 | 45 | 2080417 | 2080440 | 3 | 8  | 24 | CAG  | 15 | 10 |
| 272221 | 45 | 2081341 | 2081361 | 3 | 7  | 21 | TGA  | 31 | 9  |
| 272225 | 45 | 2094177 | 2094194 | 3 | 6  | 18 | TTG  | 26 | 11 |
| 272226 | 45 | 2097206 | 2097223 | 3 | 6  | 18 | GAG  | 34 | 3  |
| 272236 | 45 | 2114179 | 2114194 | 2 | 8  | 16 | TC   | 26 | 8  |
| 272239 | 45 | 2119868 | 2119897 | 2 | 15 | 30 | CA   | 9  | 10 |
| 272240 | 45 | 2120181 | 2120216 | 3 | 12 | 36 | CCT  | 11 | 9  |
| 272243 | 45 | 2122122 | 2122137 | 2 | 8  | 16 | GT   | 21 | 7  |
| 272244 | 45 | 2125103 | 2125126 | 3 | 8  | 24 | TAT  | 21 | 9  |
| 272246 | 45 | 2125953 | 2125967 | 3 | 5  | 15 | TCA  | 7  | 4  |
| 272250 | 45 | 2129178 | 2129193 | 2 | 8  | 16 | AC   | 25 | 15 |
| 272252 | 45 | 2131050 | 2131079 | 2 | 15 | 30 | AC   | 10 | 7  |
| 272256 | 45 | 2135408 | 2135431 | 2 | 12 | 24 | AC   | 7  | 10 |
| 272261 | 45 | 2139992 | 2140033 | 3 | 14 | 42 | GAA  | 25 | 17 |
| 272262 | 45 | 2142353 | 2142366 | 2 | 7  | 14 | TC   | 27 | 3  |
| 272267 | 45 | 2146326 | 2146337 | 2 | 6  | 12 | GT   | 21 | 8  |
| 272269 | 45 | 2148033 | 2148052 | 2 | 10 | 20 | CA   | 20 | 6  |
| 272272 | 45 | 2151911 | 2151930 | 2 | 10 | 20 | GT   | 13 | 10 |
| 272276 | 45 | 2159178 | 2159215 | 2 | 19 | 38 | AC   | 9  | 7  |
| 272277 | 45 | 2161180 | 2161197 | 3 | 6  | 18 | GAA  | 21 | 7  |
| 272279 | 45 | 2162464 | 2162478 | 3 | 5  | 15 | CTT  | 33 | 8  |
| 272282 | 45 | 2164305 | 2164328 | 2 | 12 | 24 | TG   | 15 | 13 |
| 272284 | 45 | 2164786 | 2164809 | 2 | 12 | 24 | GT   | 21 | 10 |
| 272285 | 45 | 2164835 | 2164850 | 2 | 8  | 16 | AG   | 21 | 3  |
| 272293 | 45 | 2175686 | 2175715 | 2 | 15 | 30 | GT   | 14 | 14 |
| 272307 | 45 | 2198470 | 2198481 | 2 | 6  | 12 | GT   | 13 | 7  |
| 272309 | 45 | 2201679 | 2201702 | 3 | 8  | 24 | CTC  | 14 | 7  |
| 272310 | 45 | 2202786 | 2202809 | 3 | 8  | 24 | GCA  | 29 | 10 |
| 272311 | 45 | 2203684 | 2203711 | 2 | 14 | 28 | CA   | 7  | 9  |
| 272312 | 45 | 2205712 | 2205735 | 3 | 8  | 24 | CTC  | 16 | 12 |
| 272313 | 45 | 2205850 | 2205865 | 2 | 8  | 16 | AC   | 11 | 11 |



|        |    |         |         |   |    |    |      |    |    |
|--------|----|---------|---------|---|----|----|------|----|----|
| 272315 | 45 | 2209350 | 2209367 | 2 | 9  | 18 | CA   | 21 | 8  |
| 272324 | 45 | 2234650 | 2234670 | 3 | 7  | 21 | CTC  | 28 | 5  |
| 272325 | 45 | 2237698 | 2237721 | 2 | 12 | 24 | AC   | 15 | 8  |
| 272326 | 45 | 2239623 | 2239656 | 2 | 17 | 34 | AG   | 15 | 7  |
| 272329 | 45 | 2243509 | 2243538 | 2 | 15 | 30 | AC   | 15 | 14 |
| 272331 | 45 | 2246923 | 2246934 | 2 | 6  | 12 | AC   | 30 | 7  |
| 272334 | 45 | 2252847 | 2252860 | 2 | 7  | 14 | AC   | 21 | 7  |
| 272336 | 45 | 2257602 | 2257613 | 2 | 6  | 12 | TG   | 25 | 3  |
| 272338 | 45 | 2258559 | 2258578 | 4 | 5  | 20 | AACT | 15 | 6  |
| 272339 | 45 | 2258810 | 2258821 | 2 | 6  | 12 | TG   | 23 | 6  |
| 272342 | 45 | 2263722 | 2263735 | 2 | 7  | 14 | CT   | 32 | 3  |
| 272345 | 45 | 2268576 | 2268595 | 2 | 10 | 20 | TG   | 16 | 4  |
| 272346 | 45 | 2268748 | 2268762 | 3 | 5  | 15 | GCT  | 29 | 6  |
| 272350 | 45 | 2275780 | 2275824 | 3 | 15 | 45 | GAA  | 13 | 10 |
| 272353 | 45 | 2287545 | 2287562 | 2 | 9  | 18 | AT   | 6  | 5  |
| 272354 | 45 | 2287646 | 2287667 | 2 | 11 | 22 | AG   | 14 | 4  |
| 272355 | 45 | 2290159 | 2290186 | 2 | 14 | 28 | AC   | 8  | 3  |
| 272356 | 45 | 2298153 | 2298178 | 2 | 13 | 26 | AG   | 16 | 7  |
| 272357 | 45 | 2298979 | 2298992 | 2 | 7  | 14 | GT   | 29 | 3  |
| 272359 | 45 | 2301156 | 2301167 | 2 | 6  | 12 | AT   | 9  | 3  |
| 272361 | 45 | 2314961 | 2314974 | 2 | 7  | 14 | CA   | 31 | 4  |
| 272363 | 45 | 2317644 | 2317673 | 2 | 15 | 30 | AC   | 23 | 12 |
| 272365 | 45 | 2319887 | 2319910 | 2 | 12 | 24 | GT   | 21 | 9  |
| 272368 | 45 | 2324021 | 2324044 | 3 | 8  | 24 | CTG  | 15 | 3  |
| 272379 | 45 | 2325608 | 2325631 | 2 | 12 | 24 | GA   | 6  | 6  |
| 272383 | 45 | 2336738 | 2336753 | 2 | 8  | 16 | TC   | 31 | 4  |
| 272392 | 45 | 2354943 | 2354957 | 3 | 5  | 15 | AGC  | 33 | 3  |
| 272394 | 45 | 2356325 | 2356336 | 2 | 6  | 12 | CA   | 19 | 4  |
| 272401 | 45 | 2373659 | 2373678 | 2 | 10 | 20 | GT   | 19 | 6  |
| 272405 | 45 | 2383040 | 2383060 | 3 | 7  | 21 | AGA  | 16 | 3  |
| 272406 | 45 | 2388296 | 2388316 | 3 | 7  | 21 | CAG  | 20 | 5  |
| 272408 | 45 | 2390043 | 2390070 | 2 | 14 | 28 | AC   | 7  | 7  |
| 272409 | 45 | 2390254 | 2390273 | 2 | 10 | 20 | GA   | 13 | 7  |
| 272410 | 45 | 2392560 | 2392597 | 2 | 19 | 38 | GT   | 11 | 10 |
| 272417 | 45 | 2401081 | 2401110 | 2 | 15 | 30 | GT   | 7  | 9  |
| 272425 | 45 | 2412649 | 2412694 | 2 | 23 | 46 | TC   | 10 | 7  |
| 272426 | 45 | 2416577 | 2416612 | 2 | 18 | 36 | AC   | 19 | 13 |
| 272430 | 45 | 2426207 | 2426227 | 3 | 7  | 21 | GGA  | 23 | 4  |
| 272433 | 45 | 2428647 | 2428662 | 4 | 4  | 16 | AATC | 22 | 5  |
| 272435 | 45 | 2434627 | 2434642 | 4 | 4  | 16 | CATA | 22 | 4  |
| 272440 | 45 | 2438363 | 2438377 | 3 | 5  | 15 | CAG  | 14 | 4  |
| 272446 | 45 | 2455975 | 2455986 | 2 | 6  | 12 | AC   | 23 | 4  |
| 272450 | 45 | 2461310 | 2461333 | 2 | 12 | 24 | GT   | 21 | 9  |
| 272451 | 45 | 2461570 | 2461585 | 2 | 8  | 16 | CA   | 19 | 15 |
| 272454 | 45 | 2462586 | 2462607 | 2 | 11 | 22 | TG   | 25 | 9  |
| 272456 | 45 | 2468102 | 2468113 | 2 | 6  | 12 | AC   | 21 | 3  |
| 272457 | 45 | 2471880 | 2471894 | 3 | 5  | 15 | TTC  | 33 | 3  |
| 272458 | 45 | 2473415 | 2473438 | 2 | 12 | 24 | TG   | 31 | 8  |
| 272459 | 45 | 2473939 | 2473956 | 3 | 6  | 18 | CCT  | 25 | 14 |
| 272461 | 45 | 2483336 | 2483347 | 2 | 6  | 12 | CA   | 26 | 7  |
| 272481 | 45 | 2517243 | 2517278 | 2 | 18 | 36 | AC   | 11 | 10 |

|        |    |         |         |   |    |    |      |    |    |
|--------|----|---------|---------|---|----|----|------|----|----|
| 272483 | 45 | 2518535 | 2518552 | 3 | 6  | 18 | GAG  | 14 | 6  |
| 272484 | 45 | 2518553 | 2518570 | 3 | 6  | 18 | AGG  | 17 | 7  |
| 272485 | 45 | 2541831 | 2541854 | 3 | 8  | 24 | CAA  | 22 | 7  |
| 272488 | 45 | 2549328 | 2549341 | 2 | 7  | 14 | GT   | 12 | 4  |
| 272492 | 45 | 2549639 | 2549650 | 2 | 6  | 12 | TG   | 22 | 6  |
| 272493 | 45 | 2549873 | 2549894 | 2 | 11 | 22 | TG   | 14 | 9  |
| 272496 | 45 | 2551400 | 2551411 | 2 | 6  | 12 | CA   | 31 | 3  |
| 272499 | 45 | 2562211 | 2562224 | 2 | 7  | 14 | GT   | 15 | 3  |
| 272500 | 45 | 2562367 | 2562404 | 2 | 19 | 38 | TG   | 9  | 6  |
| 272502 | 45 | 2567138 | 2567153 | 2 | 8  | 16 | AT   | 13 | 10 |
| 272503 | 45 | 2568140 | 2568163 | 2 | 12 | 24 | CA   | 16 | 17 |
| 272505 | 45 | 2570183 | 2570196 | 2 | 7  | 14 | CA   | 22 | 8  |
| 272506 | 45 | 2570329 | 2570340 | 2 | 6  | 12 | GA   | 31 | 3  |
| 272507 | 45 | 2572196 | 2572209 | 2 | 7  | 14 | GT   | 20 | 3  |
| 272509 | 45 | 2577504 | 2577523 | 2 | 10 | 20 | AC   | 20 | 6  |
| 272510 | 45 | 2577761 | 2577780 | 2 | 10 | 20 | GT   | 7  | 10 |
| 272512 | 45 | 2580696 | 2580715 | 2 | 10 | 20 | TG   | 8  | 5  |
| 272515 | 45 | 2590495 | 2590508 | 2 | 7  | 14 | GA   | 7  | 8  |
| 272519 | 45 | 2599446 | 2599457 | 2 | 6  | 12 | AC   | 26 | 4  |
| 272520 | 45 | 2600000 | 2600011 | 2 | 6  | 12 | GT   | 25 | 3  |
| 272521 | 45 | 2600106 | 2600119 | 2 | 7  | 14 | CA   | 22 | 6  |
| 272522 | 45 | 2600166 | 2600180 | 3 | 5  | 15 | CGC  | 24 | 5  |
| 272524 | 45 | 2605838 | 2605855 | 2 | 9  | 18 | CA   | 14 | 7  |
| 272526 | 45 | 2608475 | 2608502 | 2 | 14 | 28 | GT   | 8  | 9  |
| 272528 | 45 | 2610402 | 2610415 | 2 | 7  | 14 | AC   | 21 | 8  |
| 272531 | 45 | 2616916 | 2616931 | 4 | 4  | 16 | ATGG | 27 | 4  |
| 272532 | 45 | 2617108 | 2617127 | 4 | 5  | 20 | GATG | 23 | 4  |
| 272533 | 45 | 2620731 | 2620750 | 2 | 10 | 20 | AG   | 27 | 6  |
| 272535 | 45 | 2622294 | 2622313 | 2 | 10 | 20 | TG   | 15 | 9  |
| 272538 | 45 | 2623927 | 2623954 | 2 | 14 | 28 | TG   | 13 | 12 |
| 272539 | 45 | 2624077 | 2624100 | 2 | 12 | 24 | TG   | 18 | 15 |
| 272542 | 45 | 2625784 | 2625829 | 2 | 23 | 46 | CA   | 8  | 11 |
| 272545 | 45 | 2629871 | 2629898 | 2 | 14 | 28 | TG   | 19 | 9  |
| 272546 | 45 | 2630050 | 2630063 | 2 | 7  | 14 | CA   | 15 | 5  |
| 272547 | 45 | 2633580 | 2633599 | 2 | 10 | 20 | TG   | 22 | 5  |
| 272551 | 45 | 2638067 | 2638096 | 2 | 15 | 30 | CA   | 15 | 6  |
| 272557 | 45 | 2644955 | 2644978 | 2 | 12 | 24 | CT   | 17 | 6  |
| 272558 | 45 | 2645123 | 2645138 | 4 | 4  | 16 | AATG | 17 | 3  |
| 272561 | 45 | 2649120 | 2649137 | 2 | 9  | 18 | GT   | 28 | 8  |
| 272563 | 45 | 2651193 | 2651208 | 2 | 8  | 16 | TG   | 22 | 6  |
| 272566 | 45 | 2653237 | 2653256 | 2 | 10 | 20 | TG   | 23 | 4  |
| 272570 | 45 | 2663183 | 2663200 | 2 | 9  | 18 | CA   | 24 | 5  |
| 272572 | 45 | 2665614 | 2665633 | 2 | 10 | 20 | TC   | 13 | 6  |
| 272574 | 45 | 2665857 | 2665880 | 2 | 12 | 24 | CA   | 16 | 9  |
| 272576 | 45 | 2667752 | 2667771 | 2 | 10 | 20 | CA   | 29 | 11 |
| 272578 | 45 | 2671408 | 2671419 | 2 | 6  | 12 | CA   | 14 | 3  |
| 272579 | 45 | 2672626 | 2672641 | 2 | 8  | 16 | AG   | 27 | 4  |
| 272580 | 45 | 2673249 | 2673260 | 2 | 6  | 12 | AC   | 28 | 6  |
| 272584 | 45 | 2676010 | 2676035 | 2 | 13 | 26 | AC   | 13 | 5  |
| 272585 | 45 | 2676244 | 2676283 | 2 | 20 | 40 | TG   | 6  | 5  |
| 272595 | 45 | 2688897 | 2688952 | 2 | 28 | 56 | TG   | 7  | 6  |

|        |    |         |         |   |    |    |      |    |    |
|--------|----|---------|---------|---|----|----|------|----|----|
| 272596 | 45 | 2689103 | 2689120 | 2 | 9  | 18 | CA   | 15 | 8  |
| 272597 | 45 | 2689331 | 2689352 | 2 | 11 | 22 | CA   | 21 | 5  |
| 272601 | 45 | 2694689 | 2694722 | 2 | 17 | 34 | TG   | 18 | 11 |
| 272602 | 45 | 2694852 | 2694867 | 2 | 8  | 16 | CA   | 25 | 5  |
| 272609 | 45 | 2699404 | 2699425 | 2 | 11 | 22 | AC   | 15 | 4  |
| 272616 | 45 | 2700469 | 2700484 | 2 | 8  | 16 | GT   | 24 | 4  |
| 272617 | 45 | 2700520 | 2700531 | 2 | 6  | 12 | CG   | 27 | 5  |
| 272618 | 45 | 2703263 | 2703278 | 2 | 8  | 16 | GT   | 21 | 5  |
| 272622 | 45 | 2713039 | 2713072 | 2 | 17 | 34 | TG   | 9  | 11 |
| 272635 | 45 | 2745445 | 2745462 | 2 | 9  | 18 | AC   | 13 | 9  |
| 272636 | 45 | 2747591 | 2747622 | 2 | 16 | 32 | AC   | 14 | 9  |
| 272637 | 45 | 2750636 | 2750663 | 2 | 14 | 28 | AC   | 24 | 6  |
| 272638 | 45 | 2753944 | 2753969 | 2 | 13 | 26 | TG   | 9  | 8  |
| 272640 | 45 | 2754526 | 2754552 | 3 | 9  | 27 | GAT  | 25 | 8  |
| 272642 | 45 | 2755895 | 2755912 | 3 | 6  | 18 | CTG  | 21 | 5  |
| 272643 | 45 | 2756023 | 2756054 | 2 | 16 | 32 | CA   | 18 | 10 |
| 272646 | 45 | 2756415 | 2756430 | 2 | 8  | 16 | CA   | 23 | 5  |
| 272649 | 45 | 2756732 | 2756763 | 2 | 16 | 32 | GT   | 11 | 9  |
| 272650 | 45 | 2756926 | 2756940 | 3 | 5  | 15 | GAG  | 30 | 8  |
| 272651 | 45 | 2761619 | 2761646 | 2 | 14 | 28 | CA   | 13 | 6  |
| 272652 | 45 | 2761881 | 2761904 | 4 | 6  | 24 | GAAA | 13 | 9  |
| 272654 | 45 | 2763971 | 2763986 | 4 | 4  | 16 | AAAC | 21 | 9  |
| 272655 | 45 | 2764354 | 2764368 | 3 | 5  | 15 | AAC  | 25 | 4  |
| 272660 | 45 | 2776176 | 2776220 | 3 | 15 | 45 | AGA  | 8  | 7  |
| 272661 | 45 | 2776375 | 2776404 | 2 | 15 | 30 | TG   | 12 | 10 |
| 272662 | 45 | 2776520 | 2776561 | 2 | 21 | 42 | TG   | 10 | 9  |
| 272664 | 45 | 2776744 | 2776761 | 2 | 9  | 18 | GT   | 19 | 11 |
| 272665 | 45 | 2778727 | 2778738 | 2 | 6  | 12 | CA   | 17 | 20 |
| 272669 | 45 | 2782441 | 2782454 | 2 | 7  | 14 | AG   | 32 | 3  |
| 272673 | 45 | 2785450 | 2785461 | 2 | 6  | 12 | TG   | 18 | 10 |
| 272674 | 45 | 2785519 | 2785536 | 2 | 9  | 18 | TG   | 23 | 7  |
| 272679 | 45 | 2787058 | 2787069 | 2 | 6  | 12 | AC   | 16 | 3  |
| 272684 | 45 | 2799106 | 2799138 | 3 | 11 | 33 | GAG  | 16 | 6  |
| 272703 | 45 | 2847280 | 2847305 | 2 | 13 | 26 | AC   | 19 | 9  |
| 272704 | 45 | 2850875 | 2850888 | 2 | 7  | 14 | TG   | 29 | 3  |
| 272718 | 45 | 2878099 | 2878112 | 2 | 7  | 14 | GT   | 16 | 4  |
| 272719 | 45 | 2879474 | 2879489 | 2 | 8  | 16 | TG   | 30 | 3  |
| 272721 | 45 | 2883663 | 2883684 | 2 | 11 | 22 | AC   | 17 | 8  |
| 272722 | 45 | 2887747 | 2887761 | 3 | 5  | 15 | GAT  | 28 | 4  |
| 272733 | 45 | 2910187 | 2910198 | 2 | 6  | 12 | AC   | 32 | 6  |
| 272736 | 45 | 2914993 | 2915040 | 4 | 12 | 48 | TCTT | 16 | 12 |
| 272737 | 45 | 2915094 | 2915109 | 4 | 4  | 16 | GTGA | 15 | 4  |
| 272748 | 45 | 2943653 | 2943678 | 2 | 13 | 26 | AC   | 8  | 4  |
| 272749 | 45 | 2943723 | 2943754 | 2 | 16 | 32 | GT   | 10 | 9  |
| 272750 | 45 | 2945263 | 2945274 | 2 | 6  | 12 | TA   | 20 | 9  |
| 272753 | 45 | 2951446 | 2951469 | 2 | 12 | 24 | AC   | 14 | 7  |
| 272755 | 45 | 2951509 | 2951520 | 2 | 6  | 12 | AC   | 24 | 3  |
| 272757 | 45 | 2952556 | 2952575 | 4 | 5  | 20 | GAAA | 13 | 4  |
| 272769 | 45 | 2978177 | 2978190 | 2 | 7  | 14 | AC   | 29 | 3  |
| 272777 | 45 | 2991058 | 2991075 | 3 | 6  | 18 | GAG  | 20 | 13 |
| 272778 | 45 | 2991335 | 2991361 | 3 | 9  | 27 | GGA  | 10 | 6  |

|        |    |         |         |   |    |    |      |    |    |
|--------|----|---------|---------|---|----|----|------|----|----|
| 272783 | 45 | 2996499 | 2996522 | 3 | 8  | 24 | AGG  | 28 | 6  |
| 272784 | 45 | 2998651 | 2998666 | 4 | 4  | 16 | TTTA | 31 | 6  |
| 272786 | 45 | 2999053 | 2999070 | 2 | 9  | 18 | TG   | 13 | 11 |
| 272791 | 45 | 3003524 | 3003541 | 2 | 9  | 18 | CA   | 15 | 12 |
| 272792 | 45 | 3004190 | 3004201 | 2 | 6  | 12 | AC   | 6  | 3  |
| 272793 | 45 | 3004208 | 3004219 | 2 | 6  | 12 | AC   | 9  | 9  |
| 272795 | 45 | 3006286 | 3006306 | 3 | 7  | 21 | AGG  | 24 | 5  |
| 272796 | 45 | 3008434 | 3008448 | 3 | 5  | 15 | GCT  | 17 | 11 |
| 272802 | 45 | 3018191 | 3018206 | 4 | 4  | 16 | ACAA | 29 | 3  |
| 272804 | 45 | 3036998 | 3037009 | 2 | 6  | 12 | AG   | 23 | 3  |
| 272807 | 45 | 3041668 | 3041685 | 2 | 9  | 18 | CT   | 20 | 3  |
| 272808 | 45 | 3043263 | 3043295 | 3 | 11 | 33 | AGG  | 7  | 4  |
| 272809 | 45 | 3046747 | 3046766 | 2 | 10 | 20 | GA   | 13 | 3  |
| 272810 | 45 | 3048788 | 3048815 | 2 | 14 | 28 | GT   | 15 | 6  |
| 272812 | 45 | 3059572 | 3059585 | 2 | 7  | 14 | CT   | 28 | 3  |
| 272821 | 45 | 3082041 | 3082056 | 2 | 8  | 16 | TC   | 21 | 3  |
| 272825 | 45 | 3095760 | 3095771 | 2 | 6  | 12 | CA   | 32 | 4  |
| 272826 | 45 | 3098612 | 3098632 | 3 | 7  | 21 | GAA  | 25 | 10 |
| 272828 | 45 | 3103874 | 3103893 | 2 | 10 | 20 | TG   | 20 | 10 |
| 272829 | 45 | 3105997 | 3106008 | 2 | 6  | 12 | CA   | 29 | 3  |
| 272834 | 45 | 3120392 | 3120407 | 4 | 4  | 16 | AACA | 11 | 6  |
| 272835 | 45 | 3121418 | 3121437 | 4 | 5  | 20 | CTTA | 21 | 3  |
| 272839 | 45 | 3131793 | 3131840 | 4 | 12 | 48 | TTCT | 22 | 7  |
| 272840 | 45 | 3139212 | 3139232 | 3 | 7  | 21 | CCA  | 22 | 5  |
| 272847 | 45 | 3160995 | 3161015 | 3 | 7  | 21 | CAG  | 9  | 4  |
| 272852 | 45 | 3163609 | 3163626 | 2 | 9  | 18 | GT   | 13 | 3  |
| 272854 | 45 | 3164090 | 3164109 | 2 | 10 | 20 | AG   | 22 | 7  |
| 272856 | 45 | 3172766 | 3172785 | 2 | 10 | 20 | GT   | 20 | 6  |
| 272859 | 45 | 3176656 | 3176681 | 2 | 13 | 26 | CA   | 22 | 8  |
| 272867 | 45 | 3192653 | 3192672 | 2 | 10 | 20 | GT   | 20 | 10 |
| 272873 | 45 | 3201022 | 3201036 | 3 | 5  | 15 | CAC  | 9  | 4  |
| 272876 | 45 | 3210208 | 3210235 | 2 | 14 | 28 | TG   | 16 | 8  |
| 272880 | 45 | 3216280 | 3216305 | 2 | 13 | 26 | CA   | 13 | 13 |
| 272881 | 45 | 3218200 | 3218219 | 2 | 10 | 20 | CA   | 26 | 7  |
| 272882 | 45 | 3218844 | 3218855 | 2 | 6  | 12 | CT   | 35 | 4  |
| 272883 | 45 | 3226823 | 3226850 | 2 | 14 | 28 | GT   | 13 | 8  |
| 272885 | 45 | 3230412 | 3230438 | 3 | 9  | 27 | CTA  | 25 | 3  |
| 272886 | 45 | 3231879 | 3231905 | 3 | 9  | 27 | GAG  | 17 | 6  |
| 272887 | 45 | 3232080 | 3232091 | 2 | 6  | 12 | CA   | 21 | 3  |
| 272893 | 45 | 3237718 | 3237743 | 2 | 13 | 26 | AC   | 10 | 7  |
| 272895 | 45 | 3240569 | 3240580 | 2 | 6  | 12 | TG   | 15 | 4  |
| 272896 | 45 | 3241244 | 3241257 | 2 | 7  | 14 | CA   | 26 | 3  |
| 272903 | 45 | 3250110 | 3250160 | 3 | 17 | 51 | TCT  | 13 | 12 |
| 272905 | 45 | 3251528 | 3251541 | 2 | 7  | 14 | CA   | 22 | 7  |
| 272906 | 45 | 3254857 | 3254877 | 3 | 7  | 21 | CAT  | 26 | 6  |
| 272908 | 45 | 3263529 | 3263540 | 2 | 6  | 12 | AT   | 12 | 8  |
| 272919 | 45 | 3288649 | 3288670 | 2 | 11 | 22 | TG   | 21 | 8  |
| 272924 | 45 | 3300445 | 3300460 | 2 | 8  | 16 | TG   | 24 | 6  |
| 272926 | 45 | 3301283 | 3301298 | 4 | 4  | 16 | AAAT | 20 | 6  |
| 272932 | 45 | 3303864 | 3303893 | 2 | 15 | 30 | GT   | 9  | 12 |
| 272933 | 45 | 3306360 | 3306377 | 2 | 9  | 18 | AC   | 25 | 7  |

|        |    |         |         |   |    |    |      |    |    |
|--------|----|---------|---------|---|----|----|------|----|----|
| 272934 | 45 | 3311552 | 3311589 | 2 | 19 | 38 | GT   | 15 | 13 |
| 272935 | 45 | 3311700 | 3311741 | 2 | 21 | 42 | CA   | 9  | 11 |
| 272937 | 45 | 3333299 | 3333318 | 2 | 10 | 20 | CA   | 20 | 4  |
| 272946 | 45 | 3360792 | 3360823 | 2 | 16 | 32 | TG   | 6  | 10 |
| 272953 | 45 | 3372896 | 3372909 | 2 | 7  | 14 | AT   | 13 | 4  |
| 272954 | 45 | 3373165 | 3373176 | 2 | 6  | 12 | TA   | 27 | 5  |
| 272955 | 45 | 3373545 | 3373562 | 2 | 9  | 18 | AT   | 11 | 12 |
| 272956 | 45 | 3377853 | 3377866 | 2 | 7  | 14 | AG   | 21 | 3  |
| 272958 | 45 | 3380336 | 3380349 | 2 | 7  | 14 | AC   | 27 | 6  |
| 272960 | 45 | 3385413 | 3385428 | 2 | 8  | 16 | AG   | 19 | 12 |
| 272963 | 45 | 3386911 | 3386930 | 2 | 10 | 20 | AC   | 21 | 8  |
| 272964 | 45 | 3390894 | 3390911 | 3 | 6  | 18 | CGG  | 18 | 7  |
| 272975 | 45 | 3409688 | 3409701 | 2 | 7  | 14 | TG   | 18 | 5  |
| 272977 | 45 | 3412292 | 3412305 | 2 | 7  | 14 | CA   | 15 | 4  |
| 272979 | 45 | 3414079 | 3414108 | 3 | 10 | 30 | GGA  | 24 | 8  |
| 272980 | 45 | 3416757 | 3416780 | 2 | 12 | 24 | AC   | 13 | 6  |
| 272984 | 45 | 3421593 | 3421622 | 3 | 10 | 30 | GGA  | 25 | 6  |
| 272985 | 45 | 3429500 | 3429523 | 4 | 6  | 24 | TTCA | 26 | 5  |
| 272986 | 45 | 3434350 | 3434361 | 2 | 6  | 12 | GT   | 22 | 4  |
| 272990 | 45 | 3441406 | 3441435 | 3 | 10 | 30 | GCT  | 22 | 5  |
| 272991 | 45 | 3441474 | 3441488 | 3 | 5  | 15 | TGC  | 26 | 3  |
| 272993 | 45 | 3443738 | 3443761 | 3 | 8  | 24 | ACC  | 19 | 7  |
| 272999 | 45 | 3451187 | 3451216 | 3 | 10 | 30 | GAG  | 6  | 5  |
| 273005 | 45 | 3469544 | 3469575 | 2 | 16 | 32 | AC   | 12 | 13 |
| 273006 | 45 | 3469828 | 3469857 | 2 | 15 | 30 | TG   | 12 | 12 |
| 273007 | 45 | 3470712 | 3470731 | 2 | 10 | 20 | GT   | 18 | 9  |
| 273008 | 45 | 3471006 | 3471039 | 2 | 17 | 34 | CA   | 14 | 14 |
| 273009 | 45 | 3471300 | 3471319 | 2 | 10 | 20 | CA   | 17 | 6  |
| 273010 | 45 | 3474020 | 3474035 | 2 | 8  | 16 | TC   | 22 | 6  |
| 273011 | 45 | 3474109 | 3474130 | 2 | 11 | 22 | TC   | 20 | 10 |
| 273016 | 45 | 3486848 | 3486865 | 2 | 9  | 18 | CT   | 27 | 8  |
| 273034 | 45 | 3572851 | 3572882 | 2 | 16 | 32 | TG   | 19 | 7  |
| 273039 | 45 | 3581117 | 3581134 | 3 | 6  | 18 | GGT  | 15 | 4  |
| 273054 | 45 | 3597660 | 3597674 | 3 | 5  | 15 | AAT  | 26 | 8  |
| 273056 | 45 | 3598418 | 3598445 | 2 | 14 | 28 | CA   | 11 | 10 |
| 273061 | 45 | 3608563 | 3608583 | 3 | 7  | 21 | AGC  | 30 | 5  |
| 273062 | 45 | 3608991 | 3609034 | 2 | 22 | 44 | AG   | 14 | 12 |
| 273063 | 45 | 3612382 | 3612395 | 2 | 7  | 14 | CA   | 17 | 7  |
| 273078 | 45 | 3638043 | 3638072 | 3 | 10 | 30 | GGA  | 11 | 8  |
| 273079 | 45 | 3640298 | 3640341 | 2 | 22 | 44 | TG   | 13 | 11 |
| 273080 | 45 | 3641311 | 3641328 | 2 | 9  | 18 | CT   | 7  | 3  |
| 273086 | 45 | 3649441 | 3649467 | 3 | 9  | 27 | GGA  | 14 | 6  |
| 273093 | 45 | 3666048 | 3666065 | 3 | 6  | 18 | CAG  | 18 | 6  |
| 273096 | 45 | 3677562 | 3677589 | 2 | 14 | 28 | AC   | 21 | 12 |
| 273099 | 45 | 3683992 | 3684033 | 2 | 21 | 42 | AC   | 11 | 12 |
| 273107 | 45 | 3690243 | 3690254 | 2 | 6  | 12 | AG   | 23 | 4  |
| 273109 | 45 | 3697839 | 3697870 | 2 | 16 | 32 | CA   | 16 | 13 |
| 273112 | 45 | 3709275 | 3709290 | 2 | 8  | 16 | AC   | 22 | 14 |
| 273121 | 45 | 3732476 | 3732487 | 2 | 6  | 12 | TA   | 15 | 3  |
| 273122 | 45 | 3732728 | 3732761 | 2 | 17 | 34 | GA   | 15 | 10 |
| 273125 | 45 | 3734029 | 3734056 | 4 | 7  | 28 | TTCC | 17 | 3  |

|        |    |         |         |   |    |    |      |    |    |
|--------|----|---------|---------|---|----|----|------|----|----|
| 273133 | 45 | 3740903 | 3740924 | 2 | 11 | 22 | TC   | 17 | 11 |
| 273135 | 45 | 3741625 | 3741656 | 2 | 16 | 32 | CA   | 11 | 11 |
| 273136 | 45 | 3741761 | 3741788 | 2 | 14 | 28 | AC   | 16 | 11 |
| 273144 | 45 | 3768280 | 3768299 | 4 | 5  | 20 | AAAT | 6  | 3  |
| 273146 | 45 | 3772870 | 3772895 | 2 | 13 | 26 | TG   | 11 | 9  |
| 273148 | 45 | 3784832 | 3784849 | 2 | 9  | 18 | AG   | 21 | 4  |
| 273158 | 45 | 3818340 | 3818363 | 4 | 6  | 24 | TCCA | 29 | 4  |
| 273166 | 45 | 3842145 | 3842156 | 2 | 6  | 12 | CA   | 24 | 4  |
| 273183 | 45 | 3881701 | 3881732 | 2 | 16 | 32 | TG   | 16 | 10 |
| 273185 | 45 | 3889201 | 3889221 | 3 | 7  | 21 | GGA  | 27 | 3  |
| 273193 | 45 | 3900480 | 3900501 | 2 | 11 | 22 | TC   | 27 | 4  |
| 273194 | 45 | 3902369 | 3902382 | 2 | 7  | 14 | AT   | 6  | 4  |
| 273196 | 45 | 3904226 | 3904239 | 2 | 7  | 14 | CA   | 22 | 5  |
| 273200 | 45 | 3907086 | 3907097 | 2 | 6  | 12 | TA   | 13 | 6  |
| 273212 | 45 | 3924513 | 3924534 | 2 | 11 | 22 | AG   | 11 | 7  |
| 273217 | 45 | 3936329 | 3936340 | 2 | 6  | 12 | AG   | 14 | 4  |
| 273221 | 45 | 3945441 | 3945468 | 2 | 14 | 28 | CA   | 10 | 7  |
| 273230 | 45 | 3955552 | 3955603 | 2 | 26 | 52 | AC   | 7  | 10 |
| 273243 | 45 | 3978392 | 3978421 | 2 | 15 | 30 | CA   | 20 | 13 |
| 273260 | 46 | 58724   | 58743   | 2 | 10 | 20 | TG   | 19 | 6  |
| 273269 | 46 | 77108   | 77131   | 2 | 12 | 24 | GT   | 14 | 10 |
| 273277 | 46 | 88385   | 88402   | 2 | 9  | 18 | TG   | 23 | 3  |
| 273280 | 46 | 88927   | 88960   | 2 | 17 | 34 | CA   | 11 | 8  |
| 273281 | 46 | 89148   | 89159   | 2 | 6  | 12 | CA   | 19 | 6  |
| 273284 | 46 | 91473   | 91498   | 2 | 13 | 26 | CA   | 17 | 9  |
| 273286 | 46 | 91992   | 92005   | 2 | 7  | 14 | CA   | 34 | 4  |
| 273287 | 46 | 92131   | 92142   | 2 | 6  | 12 | GT   | 29 | 5  |
| 273292 | 46 | 100148  | 100207  | 4 | 15 | 60 | AGAT | 16 | 15 |
| 273294 | 46 | 101964  | 101979  | 2 | 8  | 16 | TG   | 24 | 4  |
| 273295 | 46 | 106987  | 107016  | 2 | 15 | 30 | TG   | 16 | 7  |
| 273297 | 46 | 107570  | 107585  | 2 | 8  | 16 | AC   | 22 | 3  |
| 273303 | 46 | 117461  | 117494  | 2 | 17 | 34 | AC   | 17 | 10 |
| 273304 | 46 | 117558  | 117577  | 2 | 10 | 20 | TG   | 18 | 8  |
| 273305 | 46 | 118396  | 118428  | 3 | 11 | 33 | GTT  | 18 | 9  |
| 273306 | 46 | 118834  | 118861  | 2 | 14 | 28 | GA   | 16 | 10 |
| 273310 | 46 | 125452  | 125479  | 2 | 14 | 28 | CT   | 17 | 9  |
| 273312 | 46 | 130293  | 130318  | 2 | 13 | 26 | CA   | 17 | 9  |
| 273313 | 46 | 133283  | 133300  | 2 | 9  | 18 | TG   | 17 | 9  |
| 273314 | 46 | 135015  | 135026  | 2 | 6  | 12 | GA   | 30 | 6  |
| 273318 | 46 | 149509  | 149520  | 2 | 6  | 12 | TG   | 20 | 3  |
| 273319 | 46 | 150815  | 150840  | 2 | 13 | 26 | AC   | 11 | 8  |
| 273320 | 46 | 153524  | 153535  | 2 | 6  | 12 | CA   | 24 | 4  |
| 273322 | 46 | 157703  | 157722  | 2 | 10 | 20 | TG   | 10 | 7  |
| 273324 | 46 | 161980  | 162009  | 2 | 15 | 30 | TG   | 12 | 8  |
| 273325 | 46 | 163151  | 163180  | 2 | 15 | 30 | TG   | 18 | 12 |
| 273329 | 46 | 165557  | 165572  | 4 | 4  | 16 | TTAT | 24 | 5  |
| 273330 | 46 | 166371  | 166384  | 2 | 7  | 14 | TG   | 22 | 3  |
| 273334 | 46 | 173314  | 173325  | 2 | 6  | 12 | TG   | 30 | 4  |
| 273335 | 46 | 173329  | 173340  | 2 | 6  | 12 | GT   | 30 | 5  |
| 273340 | 46 | 179840  | 179853  | 2 | 7  | 14 | TG   | 21 | 3  |
| 273341 | 46 | 183461  | 183475  | 3 | 5  | 15 | TAG  | 25 | 4  |

|        |    |        |        |   |    |    |     |    |    |
|--------|----|--------|--------|---|----|----|-----|----|----|
| 273343 | 46 | 192275 | 192302 | 2 | 14 | 28 | CA  | 9  | 6  |
| 273344 | 46 | 192982 | 192995 | 2 | 7  | 14 | AG  | 25 | 7  |
| 273349 | 46 | 196190 | 196203 | 2 | 7  | 14 | GA  | 10 | 10 |
| 273351 | 46 | 196485 | 196498 | 2 | 7  | 14 | AC  | 22 | 15 |
| 273354 | 46 | 204150 | 204173 | 2 | 12 | 24 | CA  | 6  | 5  |
| 273356 | 46 | 207000 | 207014 | 3 | 5  | 15 | ATG | 32 | 5  |
| 273361 | 46 | 216455 | 216468 | 2 | 7  | 14 | AC  | 14 | 3  |
| 273362 | 46 | 218605 | 218634 | 2 | 15 | 30 | AC  | 9  | 8  |
| 273370 | 46 | 232487 | 232508 | 2 | 11 | 22 | TG  | 17 | 11 |
| 273372 | 46 | 234940 | 234953 | 2 | 7  | 14 | TG  | 19 | 3  |
| 273374 | 46 | 238328 | 238351 | 2 | 12 | 24 | TG  | 9  | 13 |
| 273375 | 46 | 242077 | 242100 | 2 | 12 | 24 | GT  | 15 | 11 |
| 273376 | 46 | 242242 | 242257 | 2 | 8  | 16 | GT  | 21 | 5  |
| 273379 | 46 | 243431 | 243456 | 2 | 13 | 26 | TG  | 18 | 12 |
| 273383 | 46 | 246281 | 246296 | 2 | 8  | 16 | GT  | 19 | 9  |
| 273390 | 46 | 247066 | 247079 | 2 | 7  | 14 | TC  | 8  | 4  |
| 273394 | 46 | 248416 | 248431 | 2 | 8  | 16 | AG  | 12 | 8  |
| 273396 | 46 | 248993 | 249010 | 2 | 9  | 18 | AC  | 16 | 8  |
| 273397 | 46 | 249450 | 249477 | 2 | 14 | 28 | AC  | 19 | 7  |
| 273399 | 46 | 250980 | 251005 | 2 | 13 | 26 | AC  | 9  | 7  |
| 273400 | 46 | 251528 | 251539 | 2 | 6  | 12 | GA  | 15 | 4  |
| 273401 | 46 | 251870 | 251889 | 2 | 10 | 20 | GT  | 23 | 5  |
| 273403 | 46 | 254132 | 254145 | 2 | 7  | 14 | CA  | 7  | 8  |
| 273407 | 46 | 257212 | 257231 | 2 | 10 | 20 | TG  | 10 | 3  |
| 273408 | 46 | 257867 | 257894 | 2 | 14 | 28 | AC  | 23 | 10 |
| 273409 | 46 | 258636 | 258649 | 2 | 7  | 14 | TG  | 22 | 4  |
| 273411 | 46 | 261083 | 261116 | 2 | 17 | 34 | AC  | 8  | 7  |
| 273412 | 46 | 262490 | 262503 | 2 | 7  | 14 | AC  | 20 | 5  |
| 273415 | 46 | 264437 | 264454 | 2 | 9  | 18 | GT  | 22 | 4  |
| 273416 | 46 | 265071 | 265084 | 2 | 7  | 14 | CT  | 22 | 7  |
| 273419 | 46 | 265862 | 265881 | 2 | 10 | 20 | TG  | 18 | 5  |
| 273420 | 46 | 267887 | 267922 | 2 | 18 | 36 | CA  | 15 | 9  |
| 273421 | 46 | 268484 | 268523 | 2 | 20 | 40 | TG  | 10 | 8  |
| 273422 | 46 | 268632 | 268643 | 2 | 6  | 12 | TG  | 17 | 10 |
| 273426 | 46 | 272200 | 272237 | 2 | 19 | 38 | GA  | 7  | 9  |
| 273429 | 46 | 273874 | 273887 | 2 | 7  | 14 | AC  | 24 | 10 |
| 273430 | 46 | 275074 | 275097 | 2 | 12 | 24 | GT  | 10 | 7  |
| 273432 | 46 | 275520 | 275539 | 2 | 10 | 20 | GA  | 11 | 4  |
| 273433 | 46 | 275698 | 275712 | 3 | 5  | 15 | TTC | 16 | 3  |
| 273434 | 46 | 275841 | 275873 | 3 | 11 | 33 | AGA | 20 | 8  |
| 273435 | 46 | 276005 | 276042 | 2 | 19 | 38 | TG  | 11 | 11 |
| 273436 | 46 | 276129 | 276144 | 2 | 8  | 16 | CT  | 12 | 6  |
| 273437 | 46 | 277795 | 277806 | 2 | 6  | 12 | CA  | 16 | 4  |
| 273439 | 46 | 278456 | 278469 | 2 | 7  | 14 | GT  | 22 | 4  |
| 273440 | 46 | 278537 | 278564 | 2 | 14 | 28 | AC  | 22 | 15 |
| 273441 | 46 | 278713 | 278730 | 2 | 9  | 18 | AC  | 25 | 8  |
| 273442 | 46 | 279076 | 279099 | 2 | 12 | 24 | AC  | 17 | 11 |
| 273444 | 46 | 282211 | 282226 | 2 | 8  | 16 | CA  | 14 | 9  |
| 273446 | 46 | 284426 | 284449 | 2 | 12 | 24 | GT  | 13 | 6  |
| 273447 | 46 | 284565 | 284594 | 2 | 15 | 30 | AC  | 7  | 8  |
| 273448 | 46 | 284895 | 284924 | 2 | 15 | 30 | CA  | 10 | 11 |

|        |    |        |        |   |    |    |      |    |    |
|--------|----|--------|--------|---|----|----|------|----|----|
| 273451 | 46 | 287916 | 287927 | 2 | 6  | 12 | CA   | 28 | 8  |
| 273452 | 46 | 288094 | 288125 | 2 | 16 | 32 | AC   | 9  | 8  |
| 273453 | 46 | 288306 | 288321 | 4 | 4  | 16 | TTAT | 20 | 4  |
| 273454 | 46 | 288869 | 288892 | 2 | 12 | 24 | TG   | 22 | 10 |
| 273456 | 46 | 291646 | 291673 | 2 | 14 | 28 | TG   | 19 | 5  |
| 273458 | 46 | 294157 | 294176 | 2 | 10 | 20 | CA   | 27 | 4  |
| 273459 | 46 | 294295 | 294306 | 2 | 6  | 12 | TG   | 23 | 3  |
| 273460 | 46 | 294448 | 294469 | 2 | 11 | 22 | AC   | 23 | 7  |
| 273462 | 46 | 295213 | 295234 | 2 | 11 | 22 | GT   | 13 | 11 |
| 273463 | 46 | 295655 | 295678 | 2 | 12 | 24 | AC   | 19 | 8  |
| 273464 | 46 | 295867 | 295884 | 2 | 9  | 18 | AC   | 19 | 6  |
| 273466 | 46 | 298162 | 298191 | 2 | 15 | 30 | TG   | 19 | 9  |
| 273468 | 46 | 299481 | 299504 | 2 | 12 | 24 | TG   | 21 | 12 |
| 273473 | 46 | 303966 | 303987 | 2 | 11 | 22 | TG   | 15 | 9  |
| 273475 | 46 | 305527 | 305548 | 2 | 11 | 22 | CA   | 19 | 12 |
| 273476 | 46 | 305673 | 305688 | 2 | 8  | 16 | GT   | 25 | 8  |
| 273477 | 46 | 305760 | 305783 | 2 | 12 | 24 | GT   | 11 | 4  |
| 273480 | 46 | 307498 | 307545 | 2 | 24 | 48 | GA   | 7  | 7  |
| 273481 | 46 | 309579 | 309596 | 2 | 9  | 18 | GT   | 12 | 4  |
| 273485 | 46 | 312661 | 312676 | 4 | 4  | 16 | TTTA | 23 | 4  |
| 273486 | 46 | 312844 | 312865 | 2 | 11 | 22 | TG   | 21 | 12 |
| 273487 | 46 | 313138 | 313153 | 2 | 8  | 16 | AC   | 12 | 6  |
| 273489 | 46 | 313934 | 313957 | 2 | 12 | 24 | GT   | 21 | 5  |
| 273494 | 46 | 319428 | 319443 | 2 | 8  | 16 | CA   | 16 | 4  |
| 273495 | 46 | 322648 | 322661 | 2 | 7  | 14 | AG   | 22 | 4  |
| 273496 | 46 | 323169 | 323194 | 2 | 13 | 26 | CA   | 26 | 7  |
| 273497 | 46 | 323296 | 323315 | 2 | 10 | 20 | AC   | 23 | 9  |
| 273498 | 46 | 323396 | 323413 | 2 | 9  | 18 | AC   | 15 | 4  |
| 273500 | 46 | 324961 | 324974 | 2 | 7  | 14 | AG   | 17 | 4  |
| 273504 | 46 | 331487 | 331518 | 2 | 16 | 32 | GT   | 12 | 6  |
| 273507 | 46 | 339952 | 339983 | 2 | 16 | 32 | GT   | 25 | 10 |
| 273508 | 46 | 340046 | 340083 | 2 | 19 | 38 | TG   | 12 | 12 |
| 273509 | 46 | 341431 | 341450 | 2 | 10 | 20 | AC   | 24 | 10 |
| 273511 | 46 | 342799 | 342810 | 2 | 6  | 12 | AC   | 10 | 3  |
| 273519 | 46 | 348339 | 348362 | 2 | 12 | 24 | CA   | 13 | 5  |
| 273520 | 46 | 349424 | 349445 | 2 | 11 | 22 | GT   | 14 | 9  |
| 273521 | 46 | 350396 | 350417 | 2 | 11 | 22 | TG   | 16 | 10 |
| 273522 | 46 | 352555 | 352568 | 2 | 7  | 14 | GT   | 20 | 4  |
| 273523 | 46 | 353232 | 353245 | 2 | 7  | 14 | CA   | 20 | 6  |
| 273526 | 46 | 356917 | 356930 | 2 | 7  | 14 | TG   | 7  | 9  |
| 273527 | 46 | 356932 | 356949 | 2 | 9  | 18 | GT   | 9  | 10 |
| 273528 | 46 | 357336 | 357363 | 2 | 14 | 28 | CA   | 21 | 6  |
| 273533 | 46 | 362110 | 362135 | 2 | 13 | 26 | TC   | 15 | 6  |
| 273538 | 46 | 364669 | 364688 | 2 | 10 | 20 | TG   | 7  | 9  |
| 273542 | 46 | 375302 | 375321 | 4 | 5  | 20 | CTTT | 26 | 6  |
| 273549 | 46 | 381859 | 381870 | 2 | 6  | 12 | GT   | 13 | 8  |
| 273553 | 46 | 385762 | 385777 | 2 | 8  | 16 | GT   | 29 | 4  |
| 273556 | 46 | 386414 | 386437 | 2 | 12 | 24 | CA   | 20 | 3  |
| 273557 | 46 | 387857 | 387886 | 2 | 15 | 30 | CA   | 24 | 12 |
| 273565 | 46 | 399775 | 399814 | 2 | 20 | 40 | CT   | 9  | 12 |
| 273569 | 46 | 401194 | 401215 | 2 | 11 | 22 | GT   | 22 | 3  |



|        |    |        |        |   |    |    |      |    |    |
|--------|----|--------|--------|---|----|----|------|----|----|
| 273570 | 46 | 401437 | 401454 | 2 | 9  | 18 | CA   | 18 | 11 |
| 273575 | 46 | 403489 | 403526 | 2 | 19 | 38 | GT   | 20 | 10 |
| 273583 | 46 | 412456 | 412467 | 2 | 6  | 12 | CA   | 22 | 3  |
| 273588 | 46 | 416630 | 416647 | 2 | 9  | 18 | CA   | 30 | 5  |
| 273590 | 46 | 416967 | 416984 | 3 | 6  | 18 | TCC  | 15 | 4  |
| 273592 | 46 | 420084 | 420103 | 2 | 10 | 20 | TG   | 24 | 7  |
| 273595 | 46 | 427992 | 428019 | 2 | 14 | 28 | GT   | 21 | 7  |
| 273596 | 46 | 428085 | 428100 | 2 | 8  | 16 | TG   | 12 | 5  |
| 273597 | 46 | 428103 | 428116 | 2 | 7  | 14 | TG   | 16 | 6  |
| 273601 | 46 | 430354 | 430373 | 2 | 10 | 20 | GT   | 11 | 10 |
| 273602 | 46 | 430751 | 430778 | 2 | 14 | 28 | TG   | 17 | 9  |
| 273609 | 46 | 453494 | 453521 | 2 | 14 | 28 | GT   | 15 | 13 |
| 273615 | 46 | 457240 | 457254 | 3 | 5  | 15 | TTC  | 17 | 9  |
| 273617 | 46 | 457665 | 457708 | 4 | 11 | 44 | ATCT | 19 | 9  |
| 273619 | 46 | 461502 | 461541 | 2 | 20 | 40 | CA   | 16 | 13 |
| 273622 | 46 | 463660 | 463675 | 2 | 8  | 16 | CA   | 9  | 8  |
| 273624 | 46 | 465923 | 465950 | 2 | 14 | 28 | AC   | 17 | 8  |
| 273625 | 46 | 466697 | 466722 | 2 | 13 | 26 | AC   | 27 | 12 |
| 273628 | 46 | 470142 | 470157 | 2 | 8  | 16 | AG   | 25 | 4  |
| 273629 | 46 | 470444 | 470473 | 2 | 15 | 30 | TG   | 14 | 9  |
| 273630 | 46 | 470632 | 470643 | 2 | 6  | 12 | GT   | 28 | 3  |
| 273632 | 46 | 473786 | 473803 | 2 | 9  | 18 | TG   | 22 | 11 |
| 273635 | 46 | 474704 | 474721 | 2 | 9  | 18 | TG   | 18 | 8  |
| 273636 | 46 | 475271 | 475284 | 2 | 7  | 14 | AC   | 19 | 9  |
| 273638 | 46 | 475428 | 475441 | 2 | 7  | 14 | GT   | 8  | 7  |
| 273639 | 46 | 475442 | 475461 | 2 | 10 | 20 | GA   | 16 | 11 |
| 273640 | 46 | 476296 | 476311 | 2 | 8  | 16 | CA   | 27 | 4  |
| 273641 | 46 | 477255 | 477268 | 2 | 7  | 14 | GA   | 13 | 6  |
| 273644 | 46 | 478187 | 478204 | 3 | 6  | 18 | CTT  | 19 | 4  |
| 273645 | 46 | 478916 | 478931 | 2 | 8  | 16 | TG   | 18 | 4  |
| 273646 | 46 | 479278 | 479289 | 2 | 6  | 12 | TG   | 26 | 4  |
| 273647 | 46 | 482424 | 482437 | 2 | 7  | 14 | CA   | 13 | 9  |
| 273648 | 46 | 482439 | 482450 | 2 | 6  | 12 | AC   | 19 | 8  |
| 273649 | 46 | 485714 | 485743 | 2 | 15 | 30 | AC   | 14 | 9  |
| 273651 | 46 | 488501 | 488530 | 2 | 15 | 30 | TG   | 15 | 15 |
| 273653 | 46 | 489843 | 489862 | 2 | 10 | 20 | TG   | 22 | 9  |
| 273658 | 46 | 501114 | 501131 | 3 | 6  | 18 | GTT  | 23 | 3  |
| 273664 | 46 | 507529 | 507546 | 2 | 9  | 18 | AG   | 21 | 6  |
| 273665 | 46 | 508094 | 508115 | 2 | 11 | 22 | CA   | 22 | 6  |
| 273666 | 46 | 510425 | 510440 | 4 | 4  | 16 | AAAG | 28 | 3  |
| 273668 | 46 | 510623 | 510634 | 2 | 6  | 12 | TG   | 19 | 3  |
| 273670 | 46 | 512334 | 512373 | 2 | 20 | 40 | TG   | 8  | 9  |
| 273672 | 46 | 512465 | 512488 | 2 | 12 | 24 | CA   | 22 | 14 |
| 273673 | 46 | 513896 | 513907 | 2 | 6  | 12 | CA   | 33 | 3  |
| 273680 | 46 | 520643 | 520684 | 2 | 21 | 42 | TG   | 16 | 10 |
| 273681 | 46 | 520799 | 520824 | 2 | 13 | 26 | AC   | 14 | 7  |
| 273682 | 46 | 523576 | 523605 | 2 | 15 | 30 | CA   | 15 | 14 |
| 273685 | 46 | 526511 | 526526 | 4 | 4  | 16 | GTCT | 32 | 4  |
| 273686 | 46 | 528506 | 528519 | 2 | 7  | 14 | CA   | 21 | 3  |
| 273693 | 46 | 539347 | 539386 | 2 | 20 | 40 | GA   | 18 | 9  |
| 273694 | 46 | 540769 | 540786 | 3 | 6  | 18 | TTG  | 25 | 3  |

|        |    |         |         |   |    |    |      |    |    |
|--------|----|---------|---------|---|----|----|------|----|----|
| 273695 | 46 | 541765  | 541784  | 2 | 10 | 20 | TG   | 16 | 15 |
| 273697 | 46 | 543373  | 543400  | 2 | 14 | 28 | AC   | 18 | 6  |
| 273703 | 46 | 548932  | 548945  | 2 | 7  | 14 | AC   | 20 | 5  |
| 273705 | 46 | 550948  | 550971  | 2 | 12 | 24 | AC   | 18 | 4  |
| 273706 | 46 | 551220  | 551237  | 2 | 9  | 18 | CA   | 22 | 13 |
| 273709 | 46 | 552110  | 552121  | 2 | 6  | 12 | CT   | 19 | 4  |
| 273711 | 46 | 553492  | 553506  | 3 | 5  | 15 | AGG  | 30 | 4  |
| 273714 | 46 | 565909  | 565924  | 2 | 8  | 16 | AG   | 29 | 3  |
| 273715 | 46 | 571680  | 571697  | 2 | 9  | 18 | AC   | 24 | 5  |
| 273716 | 46 | 575709  | 575724  | 2 | 8  | 16 | AC   | 28 | 4  |
| 273718 | 46 | 576279  | 576334  | 2 | 28 | 56 | GT   | 9  | 10 |
| 273724 | 46 | 590616  | 590639  | 2 | 12 | 24 | AC   | 20 | 5  |
| 273748 | 46 | 688365  | 688376  | 2 | 6  | 12 | AT   | 17 | 3  |
| 273749 | 46 | 691392  | 691421  | 2 | 15 | 30 | TG   | 9  | 3  |
| 273752 | 46 | 696782  | 696799  | 3 | 6  | 18 | ACG  | 18 | 6  |
| 273754 | 46 | 706812  | 706827  | 2 | 8  | 16 | AC   | 16 | 4  |
| 273778 | 46 | 765610  | 765642  | 3 | 11 | 33 | TAA  | 21 | 5  |
| 273780 | 46 | 770781  | 770795  | 3 | 5  | 15 | GTT  | 15 | 3  |
| 273781 | 46 | 775574  | 775587  | 2 | 7  | 14 | TG   | 23 | 6  |
| 273787 | 46 | 791391  | 791402  | 2 | 6  | 12 | CA   | 29 | 3  |
| 273805 | 46 | 857441  | 857452  | 2 | 6  | 12 | TA   | 13 | 11 |
| 273812 | 46 | 879885  | 879900  | 4 | 4  | 16 | CATA | 11 | 3  |
| 273828 | 46 | 937630  | 937647  | 2 | 9  | 18 | AC   | 13 | 6  |
| 273831 | 46 | 941333  | 941352  | 2 | 10 | 20 | TG   | 8  | 5  |
| 273848 | 46 | 979191  | 979230  | 2 | 20 | 40 | TG   | 16 | 12 |
| 273850 | 46 | 987497  | 987514  | 2 | 9  | 18 | GA   | 13 | 7  |
| 273851 | 46 | 988029  | 988046  | 2 | 9  | 18 | AC   | 10 | 9  |
| 273852 | 46 | 988676  | 988691  | 2 | 8  | 16 | AC   | 20 | 7  |
| 273853 | 46 | 992432  | 992455  | 2 | 12 | 24 | TG   | 22 | 8  |
| 273854 | 46 | 996679  | 996704  | 2 | 13 | 26 | GT   | 13 | 11 |
| 273855 | 46 | 996803  | 996864  | 2 | 31 | 62 | AC   | 9  | 10 |
| 273856 | 46 | 997091  | 997130  | 2 | 20 | 40 | AC   | 21 | 10 |
| 273857 | 46 | 997746  | 997757  | 2 | 6  | 12 | AC   | 27 | 4  |
| 273858 | 46 | 1000967 | 1000990 | 2 | 12 | 24 | AC   | 13 | 8  |
| 273863 | 46 | 1002214 | 1002247 | 2 | 17 | 34 | AC   | 18 | 15 |
| 273865 | 46 | 1002859 | 1002892 | 2 | 17 | 34 | TG   | 10 | 10 |
| 273866 | 46 | 1004397 | 1004434 | 2 | 19 | 38 | TG   | 7  | 10 |
| 273874 | 46 | 1018194 | 1018217 | 2 | 12 | 24 | AG   | 21 | 6  |
| 273875 | 46 | 1023160 | 1023171 | 2 | 6  | 12 | AG   | 29 | 4  |
| 273883 | 46 | 1045676 | 1045701 | 2 | 13 | 26 | GT   | 18 | 12 |
| 273884 | 46 | 1048206 | 1048223 | 2 | 9  | 18 | TG   | 25 | 3  |
| 273888 | 46 | 1054514 | 1054535 | 2 | 11 | 22 | GT   | 11 | 10 |
| 273891 | 46 | 1061066 | 1061080 | 3 | 5  | 15 | TAA  | 7  | 4  |
| 273894 | 46 | 1068202 | 1068219 | 2 | 9  | 18 | CA   | 18 | 9  |
| 273896 | 46 | 1072228 | 1072247 | 4 | 5  | 20 | ATTT | 31 | 3  |
| 273897 | 46 | 1072559 | 1072592 | 2 | 17 | 34 | AC   | 13 | 6  |
| 273901 | 46 | 1076132 | 1076157 | 2 | 13 | 26 | GT   | 16 | 12 |
| 273903 | 46 | 1077606 | 1077625 | 2 | 10 | 20 | TG   | 15 | 12 |
| 273906 | 46 | 1083255 | 1083290 | 2 | 18 | 36 | GT   | 10 | 9  |
| 273909 | 46 | 1085383 | 1085400 | 2 | 9  | 18 | CA   | 25 | 4  |
| 273914 | 46 | 1109442 | 1109461 | 2 | 10 | 20 | GT   | 18 | 4  |

|        |    |         |         |   |    |    |      |    |    |
|--------|----|---------|---------|---|----|----|------|----|----|
| 273917 | 46 | 1110724 | 1110755 | 2 | 16 | 32 | AC   | 16 | 7  |
| 273919 | 46 | 1111928 | 1111939 | 2 | 6  | 12 | AC   | 20 | 6  |
| 273923 | 46 | 1114410 | 1114429 | 2 | 10 | 20 | AG   | 15 | 11 |
| 273925 | 46 | 1116163 | 1116180 | 3 | 6  | 18 | ACC  | 26 | 7  |
| 273928 | 46 | 1119403 | 1119454 | 2 | 26 | 52 | AC   | 6  | 8  |
| 273931 | 46 | 1123022 | 1123067 | 2 | 23 | 46 | AC   | 9  | 11 |
| 273939 | 46 | 1128857 | 1128880 | 2 | 12 | 24 | CA   | 23 | 14 |
| 273941 | 46 | 1135973 | 1135994 | 2 | 11 | 22 | AC   | 21 | 4  |
| 273943 | 46 | 1138680 | 1138697 | 2 | 9  | 18 | AC   | 17 | 6  |
| 273944 | 46 | 1142086 | 1142121 | 2 | 18 | 36 | GT   | 12 | 11 |
| 273949 | 46 | 1149873 | 1149914 | 2 | 21 | 42 | TG   | 7  | 7  |
| 273950 | 46 | 1150101 | 1150112 | 2 | 6  | 12 | TG   | 19 | 3  |
| 273954 | 46 | 1155828 | 1155851 | 2 | 12 | 24 | GT   | 9  | 6  |
| 273955 | 46 | 1156673 | 1156692 | 2 | 10 | 20 | AT   | 11 | 6  |
| 273958 | 46 | 1157764 | 1157781 | 2 | 9  | 18 | GT   | 22 | 4  |
| 273961 | 46 | 1158728 | 1158739 | 2 | 6  | 12 | TG   | 21 | 3  |
| 273962 | 46 | 1160454 | 1160487 | 2 | 17 | 34 | CA   | 13 | 9  |
| 273963 | 46 | 1161895 | 1161906 | 2 | 6  | 12 | CA   | 31 | 3  |
| 273964 | 46 | 1161927 | 1161940 | 2 | 7  | 14 | CA   | 25 | 4  |
| 273965 | 46 | 1161995 | 1162006 | 2 | 6  | 12 | AC   | 29 | 3  |
| 273967 | 46 | 1162551 | 1162564 | 2 | 7  | 14 | CA   | 24 | 6  |
| 273969 | 46 | 1162753 | 1162776 | 2 | 12 | 24 | CT   | 15 | 7  |
| 273970 | 46 | 1162802 | 1162817 | 2 | 8  | 16 | AC   | 10 | 7  |
| 273972 | 46 | 1163329 | 1163343 | 3 | 5  | 15 | GCA  | 19 | 3  |
| 273974 | 46 | 1164904 | 1164925 | 2 | 11 | 22 | TG   | 11 | 6  |
| 273977 | 46 | 1165829 | 1165846 | 2 | 9  | 18 | AG   | 29 | 5  |
| 273978 | 46 | 1167503 | 1167514 | 2 | 6  | 12 | AC   | 14 | 4  |
| 273979 | 46 | 1167808 | 1167829 | 2 | 11 | 22 | CA   | 12 | 12 |
| 273981 | 46 | 1167990 | 1168013 | 2 | 12 | 24 | CA   | 10 | 4  |
| 273985 | 46 | 1168244 | 1168257 | 2 | 7  | 14 | GT   | 18 | 4  |
| 273987 | 46 | 1170972 | 1171005 | 2 | 17 | 34 | AC   | 13 | 14 |
| 273990 | 46 | 1172292 | 1172307 | 2 | 8  | 16 | GT   | 31 | 3  |
| 273992 | 46 | 1172614 | 1172637 | 2 | 12 | 24 | GT   | 22 | 8  |
| 273994 | 46 | 1175300 | 1175315 | 2 | 8  | 16 | AC   | 7  | 8  |
| 273995 | 46 | 1176418 | 1176435 | 2 | 9  | 18 | GT   | 12 | 10 |
| 273996 | 46 | 1176577 | 1176598 | 2 | 11 | 22 | AC   | 8  | 10 |
| 273998 | 46 | 1176703 | 1176718 | 4 | 4  | 16 | ATTT | 29 | 3  |
| 273999 | 46 | 1177895 | 1177918 | 2 | 12 | 24 | TG   | 17 | 12 |
| 274001 | 46 | 1182759 | 1182786 | 4 | 7  | 28 | CTGT | 19 | 6  |
| 274003 | 46 | 1183613 | 1183624 | 2 | 6  | 12 | CT   | 22 | 3  |
| 274006 | 46 | 1183825 | 1183840 | 2 | 8  | 16 | GT   | 21 | 5  |
| 274008 | 46 | 1183999 | 1184034 | 2 | 18 | 36 | AC   | 11 | 11 |
| 274010 | 46 | 1186844 | 1186885 | 2 | 21 | 42 | CA   | 7  | 7  |
| 274013 | 46 | 1188874 | 1188897 | 2 | 12 | 24 | GT   | 21 | 8  |
| 274014 | 46 | 1189042 | 1189059 | 2 | 9  | 18 | TG   | 13 | 9  |
| 274015 | 46 | 1189639 | 1189664 | 2 | 13 | 26 | CA   | 23 | 11 |
| 274016 | 46 | 1190024 | 1190053 | 2 | 15 | 30 | AC   | 10 | 7  |
| 274017 | 46 | 1191233 | 1191256 | 2 | 12 | 24 | TG   | 14 | 7  |
| 274023 | 46 | 1196290 | 1196303 | 2 | 7  | 14 | CA   | 28 | 5  |
| 274024 | 46 | 1196446 | 1196463 | 2 | 9  | 18 | CA   | 25 | 13 |
| 274029 | 46 | 1200420 | 1200433 | 2 | 7  | 14 | AC   | 24 | 4  |

|        |    |         |         |   |    |    |      |    |    |
|--------|----|---------|---------|---|----|----|------|----|----|
| 274053 | 46 | 1232903 | 1232930 | 4 | 7  | 28 | AAGA | 25 | 11 |
| 274054 | 46 | 1233136 | 1233151 | 4 | 4  | 16 | AAAG | 20 | 3  |
| 274055 | 46 | 1233237 | 1233256 | 2 | 10 | 20 | GT   | 17 | 8  |
| 274058 | 46 | 1243576 | 1243593 | 2 | 9  | 18 | CA   | 23 | 3  |
| 274059 | 46 | 1243890 | 1243919 | 2 | 15 | 30 | TG   | 8  | 7  |
| 274061 | 46 | 1244546 | 1244559 | 2 | 7  | 14 | CA   | 23 | 3  |
| 274063 | 46 | 1245892 | 1245909 | 2 | 9  | 18 | CA   | 18 | 7  |
| 274064 | 46 | 1246978 | 1246997 | 2 | 10 | 20 | AC   | 22 | 7  |
| 274065 | 46 | 1247537 | 1247550 | 2 | 7  | 14 | TC   | 22 | 5  |
| 274068 | 46 | 1250497 | 1250520 | 2 | 12 | 24 | GT   | 11 | 6  |
| 274071 | 46 | 1258437 | 1258454 | 2 | 9  | 18 | TG   | 28 | 6  |
| 274072 | 46 | 1258456 | 1258467 | 2 | 6  | 12 | GT   | 16 | 6  |
| 274073 | 46 | 1259458 | 1259473 | 4 | 4  | 16 | CTCC | 8  | 3  |
| 274074 | 46 | 1259572 | 1259585 | 2 | 7  | 14 | GT   | 8  | 6  |
| 274078 | 46 | 1261507 | 1261524 | 2 | 9  | 18 | AG   | 23 | 4  |
| 274079 | 46 | 1261602 | 1261615 | 2 | 7  | 14 | CA   | 23 | 7  |
| 274081 | 46 | 1265245 | 1265272 | 2 | 14 | 28 | AC   | 11 | 8  |
| 274084 | 46 | 1265636 | 1265667 | 2 | 16 | 32 | CA   | 13 | 13 |
| 274085 | 46 | 1265815 | 1265828 | 2 | 7  | 14 | GT   | 22 | 5  |
| 274088 | 46 | 1269162 | 1269199 | 2 | 19 | 38 | AC   | 11 | 12 |
| 274089 | 46 | 1271474 | 1271493 | 2 | 10 | 20 | GT   | 12 | 8  |
| 274090 | 46 | 1271612 | 1271623 | 2 | 6  | 12 | CA   | 12 | 3  |
| 274093 | 46 | 1277415 | 1277434 | 2 | 10 | 20 | CA   | 7  | 10 |
| 274096 | 46 | 1277815 | 1277836 | 2 | 11 | 22 | CA   | 18 | 10 |
| 274097 | 46 | 1277914 | 1277929 | 2 | 8  | 16 | GT   | 24 | 5  |
| 274098 | 46 | 1278129 | 1278172 | 2 | 22 | 44 | AC   | 7  | 8  |
| 274099 | 46 | 1280069 | 1280084 | 2 | 8  | 16 | CA   | 22 | 8  |
| 274104 | 46 | 1280438 | 1280469 | 2 | 16 | 32 | GT   | 15 | 11 |
| 274105 | 46 | 1283036 | 1283067 | 2 | 16 | 32 | GT   | 12 | 9  |
| 274106 | 46 | 1283434 | 1283473 | 2 | 20 | 40 | AC   | 8  | 3  |
| 274108 | 46 | 1285307 | 1285344 | 2 | 19 | 38 | CA   | 11 | 8  |
| 274111 | 46 | 1289116 | 1289127 | 2 | 6  | 12 | AT   | 24 | 4  |
| 274113 | 46 | 1289708 | 1289747 | 2 | 20 | 40 | CA   | 10 | 10 |
| 274116 | 46 | 1290832 | 1290861 | 2 | 15 | 30 | CA   | 21 | 14 |
| 274117 | 46 | 1291008 | 1291025 | 2 | 9  | 18 | AC   | 15 | 5  |
| 274119 | 46 | 1291165 | 1291184 | 2 | 10 | 20 | CT   | 16 | 6  |
| 274121 | 46 | 1291342 | 1291369 | 2 | 14 | 28 | AC   | 11 | 8  |
| 274122 | 46 | 1291500 | 1291531 | 2 | 16 | 32 | AC   | 18 | 7  |
| 274125 | 46 | 1297663 | 1297680 | 2 | 9  | 18 | TG   | 11 | 5  |
| 274126 | 46 | 1297683 | 1297698 | 2 | 8  | 16 | TG   | 16 | 6  |
| 274129 | 46 | 1301464 | 1301475 | 2 | 6  | 12 | TG   | 26 | 4  |
| 274131 | 46 | 1302853 | 1302868 | 2 | 8  | 16 | AC   | 19 | 4  |
| 274134 | 46 | 1303143 | 1303166 | 2 | 12 | 24 | CA   | 12 | 9  |
| 274135 | 46 | 1303192 | 1303215 | 2 | 12 | 24 | AC   | 14 | 12 |
| 274137 | 46 | 1303386 | 1303405 | 2 | 10 | 20 | AG   | 19 | 5  |
| 274139 | 46 | 1303930 | 1303945 | 2 | 8  | 16 | TC   | 6  | 4  |
| 274140 | 46 | 1303947 | 1303966 | 2 | 10 | 20 | CT   | 6  | 7  |
| 274142 | 46 | 1311902 | 1311919 | 3 | 6  | 18 | GCA  | 34 | 4  |
| 274149 | 46 | 1334740 | 1334775 | 2 | 18 | 36 | CA   | 8  | 8  |
| 274155 | 46 | 1356602 | 1356637 | 2 | 18 | 36 | AC   | 12 | 7  |
| 274160 | 46 | 1361849 | 1361874 | 2 | 13 | 26 | CA   | 19 | 18 |

|        |    |         |         |   |    |    |      |    |    |
|--------|----|---------|---------|---|----|----|------|----|----|
| 274167 | 46 | 1366409 | 1366438 | 2 | 15 | 30 | GT   | 19 | 9  |
| 274168 | 46 | 1366667 | 1366681 | 3 | 5  | 15 | CAG  | 28 | 7  |
| 274169 | 46 | 1367202 | 1367215 | 2 | 7  | 14 | AT   | 13 | 6  |
| 274170 | 46 | 1367382 | 1367401 | 2 | 10 | 20 | CA   | 14 | 7  |
| 274171 | 46 | 1368407 | 1368421 | 3 | 5  | 15 | GGA  | 22 | 6  |
| 274177 | 46 | 1392648 | 1392668 | 3 | 7  | 21 | GTG  | 24 | 5  |
| 274180 | 46 | 1407819 | 1407840 | 2 | 11 | 22 | CA   | 11 | 7  |
| 274181 | 46 | 1407863 | 1407880 | 2 | 9  | 18 | CA   | 16 | 3  |
| 274186 | 46 | 1417923 | 1417950 | 2 | 14 | 28 | TG   | 8  | 6  |
| 274187 | 46 | 1418132 | 1418143 | 2 | 6  | 12 | GT   | 30 | 3  |
| 274199 | 46 | 1454582 | 1454615 | 2 | 17 | 34 | AC   | 15 | 13 |
| 274203 | 46 | 1461805 | 1461822 | 3 | 6  | 18 | TTA  | 22 | 4  |
| 274205 | 46 | 1482269 | 1482283 | 3 | 5  | 15 | TTC  | 19 | 3  |
| 274209 | 46 | 1508310 | 1508345 | 2 | 18 | 36 | CA   | 8  | 6  |
| 274218 | 46 | 1535453 | 1535466 | 2 | 7  | 14 | CA   | 28 | 3  |
| 274222 | 46 | 1543515 | 1543542 | 2 | 14 | 28 | GT   | 17 | 10 |
| 274223 | 46 | 1546819 | 1546834 | 2 | 8  | 16 | GT   | 15 | 5  |
| 274224 | 46 | 1546837 | 1546848 | 2 | 6  | 12 | GA   | 16 | 6  |
| 274238 | 46 | 1560550 | 1560575 | 2 | 13 | 26 | TG   | 20 | 8  |
| 274250 | 46 | 1570199 | 1570218 | 2 | 10 | 20 | AC   | 16 | 8  |
| 274252 | 46 | 1572406 | 1572427 | 2 | 11 | 22 | TG   | 19 | 6  |
| 274253 | 46 | 1576422 | 1576435 | 2 | 7  | 14 | AT   | 7  | 3  |
| 274269 | 46 | 1601472 | 1601485 | 2 | 7  | 14 | GT   | 25 | 8  |
| 274272 | 46 | 1602360 | 1602389 | 2 | 15 | 30 | CT   | 10 | 10 |
| 274274 | 46 | 1602878 | 1602905 | 4 | 7  | 28 | TATT | 23 | 11 |
| 274277 | 46 | 1613813 | 1613848 | 3 | 12 | 36 | CTT  | 16 | 10 |
| 274278 | 46 | 1619810 | 1619824 | 3 | 5  | 15 | ATT  | 27 | 5  |
| 274289 | 46 | 1647910 | 1647927 | 2 | 9  | 18 | CT   | 20 | 4  |
| 274290 | 46 | 1648578 | 1648599 | 2 | 11 | 22 | TC   | 7  | 8  |
| 274293 | 46 | 1651108 | 1651139 | 2 | 16 | 32 | CA   | 13 | 13 |
| 274294 | 46 | 1656123 | 1656149 | 3 | 9  | 27 | AAG  | 13 | 5  |
| 274305 | 46 | 1681892 | 1681907 | 2 | 8  | 16 | TG   | 29 | 3  |
| 274321 | 46 | 1709986 | 1710009 | 4 | 6  | 24 | TGTC | 11 | 4  |
| 274332 | 46 | 1726559 | 1726574 | 2 | 8  | 16 | TG   | 20 | 4  |
| 274333 | 46 | 1729100 | 1729113 | 2 | 7  | 14 | TG   | 24 | 4  |
| 274336 | 46 | 1733553 | 1733564 | 2 | 6  | 12 | TA   | 8  | 5  |
| 274347 | 46 | 1745459 | 1745488 | 2 | 15 | 30 | AC   | 8  | 7  |
| 274354 | 46 | 1765209 | 1765266 | 2 | 29 | 58 | AC   | 7  | 13 |
| 274373 | 46 | 1819647 | 1819690 | 2 | 22 | 44 | AC   | 12 | 10 |
| 274376 | 46 | 1826761 | 1826804 | 4 | 11 | 44 | TCTT | 16 | 16 |
| 274385 | 46 | 1851722 | 1851739 | 2 | 9  | 18 | AC   | 27 | 6  |
| 274396 | 46 | 1868549 | 1868578 | 3 | 10 | 30 | ATA  | 13 | 5  |
| 274399 | 46 | 1882010 | 1882027 | 2 | 9  | 18 | AT   | 14 | 4  |
| 274403 | 46 | 1905272 | 1905315 | 2 | 22 | 44 | AC   | 14 | 12 |
| 274407 | 46 | 1915012 | 1915043 | 2 | 16 | 32 | TG   | 14 | 7  |
| 274418 | 46 | 1937789 | 1937806 | 2 | 9  | 18 | TA   | 14 | 3  |
| 274422 | 46 | 1943026 | 1943041 | 2 | 8  | 16 | TG   | 6  | 5  |
| 274423 | 46 | 1943044 | 1943057 | 2 | 7  | 14 | TG   | 16 | 14 |
| 274424 | 46 | 1949445 | 1949476 | 2 | 16 | 32 | GT   | 15 | 6  |
| 274428 | 46 | 1957203 | 1957216 | 2 | 7  | 14 | TC   | 28 | 3  |
| 274431 | 46 | 1964149 | 1964184 | 3 | 12 | 36 | CTC  | 6  | 4  |

|        |    |         |         |   |    |    |      |    |    |
|--------|----|---------|---------|---|----|----|------|----|----|
| 274440 | 46 | 1977244 | 1977263 | 4 | 5  | 20 | TCCA | 21 | 5  |
| 274443 | 46 | 1991686 | 1991697 | 2 | 6  | 12 | GT   | 26 | 5  |
| 274448 | 46 | 2022199 | 2022219 | 3 | 7  | 21 | TCA  | 13 | 3  |
| 274451 | 46 | 2041026 | 2041043 | 3 | 6  | 18 | AAC  | 12 | 4  |
| 274452 | 46 | 2044851 | 2044866 | 2 | 8  | 16 | AC   | 20 | 4  |
| 274457 | 46 | 2054869 | 2054896 | 2 | 14 | 28 | GT   | 12 | 5  |
| 274463 | 46 | 2070440 | 2070467 | 2 | 14 | 28 | TG   | 16 | 9  |
| 274465 | 46 | 2072600 | 2072641 | 2 | 21 | 42 | CA   | 9  | 11 |
| 274466 | 46 | 2072767 | 2072792 | 2 | 13 | 26 | GT   | 14 | 9  |
| 274468 | 46 | 2073912 | 2073925 | 2 | 7  | 14 | TG   | 26 | 12 |
| 274469 | 46 | 2074135 | 2074152 | 3 | 6  | 18 | CTT  | 16 | 4  |
| 274470 | 46 | 2074539 | 2074552 | 2 | 7  | 14 | TG   | 20 | 3  |
| 274471 | 46 | 2074737 | 2074752 | 2 | 8  | 16 | AG   | 27 | 6  |
| 274472 | 46 | 2074943 | 2074960 | 2 | 9  | 18 | AG   | 21 | 3  |
| 274475 | 46 | 2079795 | 2079812 | 2 | 9  | 18 | CA   | 10 | 9  |
| 274479 | 46 | 2083194 | 2083225 | 2 | 16 | 32 | GT   | 8  | 5  |
| 274483 | 46 | 2086075 | 2086092 | 3 | 6  | 18 | GAT  | 25 | 8  |
| 274507 | 46 | 2099025 | 2099040 | 2 | 8  | 16 | CT   | 15 | 4  |
| 274509 | 46 | 2099842 | 2099865 | 2 | 12 | 24 | GT   | 11 | 8  |
| 274511 | 46 | 2113246 | 2113260 | 3 | 5  | 15 | GCC  | 23 | 6  |
| 274512 | 46 | 2114068 | 2114079 | 2 | 6  | 12 | TG   | 18 | 4  |
| 274515 | 46 | 2115970 | 2115999 | 2 | 15 | 30 | CA   | 6  | 9  |
| 274525 | 46 | 2120359 | 2120378 | 2 | 10 | 20 | AC   | 15 | 9  |
| 274526 | 46 | 2121919 | 2121942 | 2 | 12 | 24 | CA   | 14 | 11 |
| 274528 | 46 | 2122327 | 2122366 | 2 | 20 | 40 | AC   | 6  | 8  |
| 274529 | 46 | 2122450 | 2122495 | 2 | 23 | 46 | TG   | 8  | 11 |
| 274530 | 46 | 2122689 | 2122722 | 2 | 17 | 34 | CA   | 6  | 6  |
| 274531 | 46 | 2125342 | 2125371 | 2 | 15 | 30 | TG   | 20 | 8  |
| 274536 | 46 | 2128112 | 2128138 | 3 | 9  | 27 | GAG  | 20 | 11 |
| 274537 | 46 | 2128206 | 2128223 | 2 | 9  | 18 | AC   | 16 | 5  |
| 274538 | 46 | 2128272 | 2128317 | 2 | 23 | 46 | CA   | 11 | 7  |
| 274550 | 46 | 2141523 | 2141534 | 2 | 6  | 12 | AT   | 29 | 7  |
| 274553 | 46 | 2148015 | 2148028 | 2 | 7  | 14 | AG   | 18 | 3  |
| 274554 | 46 | 2150729 | 2150744 | 2 | 8  | 16 | TG   | 23 | 10 |
| 274555 | 46 | 2151494 | 2151531 | 2 | 19 | 38 | TG   | 11 | 11 |
| 274556 | 46 | 2151563 | 2151580 | 2 | 9  | 18 | GT   | 10 | 8  |
| 274564 | 46 | 2155372 | 2155399 | 2 | 14 | 28 | CA   | 10 | 7  |
| 274565 | 46 | 2155471 | 2155484 | 2 | 7  | 14 | AC   | 15 | 4  |
| 274566 | 46 | 2155520 | 2155543 | 2 | 12 | 24 | CA   | 15 | 9  |
| 274567 | 46 | 2155686 | 2155709 | 3 | 8  | 24 | TCT  | 19 | 6  |
| 274569 | 46 | 2157421 | 2157454 | 2 | 17 | 34 | TG   | 8  | 6  |
| 274574 | 46 | 2159587 | 2159620 | 2 | 17 | 34 | TG   | 11 | 12 |
| 274578 | 46 | 2162447 | 2162478 | 2 | 16 | 32 | TG   | 11 | 7  |
| 274581 | 46 | 2162760 | 2162777 | 2 | 9  | 18 | TG   | 13 | 3  |
| 274582 | 46 | 2162825 | 2162860 | 2 | 18 | 36 | CA   | 7  | 10 |
| 274583 | 46 | 2163125 | 2163144 | 2 | 10 | 20 | AG   | 8  | 5  |
| 274585 | 46 | 2163550 | 2163585 | 4 | 9  | 36 | GAAA | 7  | 3  |
| 274590 | 46 | 2166514 | 2166549 | 2 | 18 | 36 | AC   | 7  | 13 |
| 274592 | 46 | 2167962 | 2167979 | 2 | 9  | 18 | GT   | 13 | 13 |
| 274594 | 46 | 2168140 | 2168163 | 2 | 12 | 24 | CA   | 7  | 8  |
| 274605 | 46 | 2175050 | 2175069 | 2 | 10 | 20 | CA   | 21 | 7  |

|        |    |         |         |   |    |    |      |    |    |
|--------|----|---------|---------|---|----|----|------|----|----|
| 274606 | 46 | 2175229 | 2175262 | 2 | 17 | 34 | TG   | 15 | 7  |
| 274607 | 46 | 2175367 | 2175382 | 2 | 8  | 16 | TG   | 18 | 9  |
| 274609 | 46 | 2175446 | 2175475 | 2 | 15 | 30 | AG   | 8  | 7  |
| 274614 | 46 | 2177771 | 2177800 | 2 | 15 | 30 | AC   | 8  | 9  |
| 274615 | 46 | 2177874 | 2177887 | 2 | 7  | 14 | CA   | 19 | 5  |
| 274616 | 46 | 2177971 | 2177994 | 2 | 12 | 24 | GT   | 21 | 12 |
| 274618 | 46 | 2179187 | 2179218 | 2 | 16 | 32 | GT   | 11 | 10 |
| 274623 | 46 | 2181782 | 2181809 | 2 | 14 | 28 | TG   | 15 | 11 |
| 274625 | 46 | 2184936 | 2184959 | 4 | 6  | 24 | TGTT | 20 | 4  |
| 274626 | 46 | 2185131 | 2185156 | 2 | 13 | 26 | GT   | 10 | 6  |
| 274629 | 46 | 2187121 | 2187150 | 2 | 15 | 30 | CA   | 21 | 9  |
| 274631 | 46 | 2189025 | 2189054 | 3 | 10 | 30 | AAG  | 6  | 7  |
| 274632 | 46 | 2191275 | 2191300 | 2 | 13 | 26 | AC   | 9  | 11 |
| 274634 | 46 | 2191504 | 2191543 | 2 | 20 | 40 | GT   | 11 | 11 |
| 274644 | 46 | 2195945 | 2195980 | 2 | 18 | 36 | AC   | 13 | 11 |
| 274659 | 46 | 2222706 | 2222721 | 2 | 8  | 16 | GT   | 23 | 8  |
| 274660 | 46 | 2222723 | 2222734 | 2 | 6  | 12 | TG   | 20 | 8  |
| 274663 | 46 | 2223962 | 2223981 | 2 | 10 | 20 | AC   | 14 | 14 |
| 274664 | 46 | 2224114 | 2224149 | 2 | 18 | 36 | CA   | 8  | 12 |
| 274665 | 46 | 2224277 | 2224292 | 2 | 8  | 16 | AG   | 18 | 3  |
| 274669 | 46 | 2235171 | 2235186 | 4 | 4  | 16 | ACAG | 29 | 3  |
| 274672 | 46 | 2239476 | 2239493 | 2 | 9  | 18 | TG   | 25 | 6  |
| 274673 | 46 | 2239541 | 2239558 | 2 | 9  | 18 | AG   | 10 | 7  |
| 274675 | 46 | 2239928 | 2239959 | 2 | 16 | 32 | GT   | 19 | 15 |
| 274676 | 46 | 2241380 | 2241397 | 3 | 6  | 18 | TGC  | 28 | 9  |
| 274677 | 46 | 2241817 | 2241834 | 3 | 6  | 18 | AAG  | 32 | 3  |
| 274680 | 46 | 2248191 | 2248212 | 2 | 11 | 22 | TG   | 13 | 14 |
| 274681 | 46 | 2248282 | 2248293 | 2 | 6  | 12 | AC   | 26 | 3  |
| 274682 | 46 | 2249462 | 2249493 | 4 | 8  | 32 | AAAC | 20 | 6  |
| 274684 | 46 | 2249652 | 2249665 | 2 | 7  | 14 | AC   | 9  | 7  |
| 274688 | 46 | 2250502 | 2250525 | 2 | 12 | 24 | CA   | 18 | 6  |
| 274689 | 46 | 2251702 | 2251729 | 2 | 14 | 28 | GA   | 15 | 10 |
| 274696 | 46 | 2257444 | 2257457 | 2 | 7  | 14 | AC   | 15 | 5  |
| 274697 | 46 | 2257645 | 2257658 | 2 | 7  | 14 | AC   | 28 | 3  |
| 274699 | 46 | 2257842 | 2257869 | 2 | 14 | 28 | AC   | 10 | 4  |
| 274701 | 46 | 2260187 | 2260210 | 2 | 12 | 24 | CA   | 14 | 11 |
| 274702 | 46 | 2260349 | 2260380 | 2 | 16 | 32 | CA   | 10 | 11 |
| 274704 | 46 | 2260569 | 2260598 | 2 | 15 | 30 | AC   | 9  | 8  |
| 274725 | 46 | 2263790 | 2263815 | 2 | 13 | 26 | TG   | 16 | 8  |
| 274729 | 46 | 2266427 | 2266446 | 2 | 10 | 20 | TA   | 9  | 5  |
| 274731 | 46 | 2270176 | 2270191 | 4 | 4  | 16 | AATC | 27 | 6  |
| 274737 | 46 | 2273484 | 2273497 | 2 | 7  | 14 | AC   | 13 | 8  |
| 274738 | 46 | 2273658 | 2273685 | 2 | 14 | 28 | GT   | 12 | 12 |
| 274739 | 46 | 2273768 | 2273785 | 2 | 9  | 18 | GA   | 13 | 4  |
| 274741 | 46 | 2274872 | 2274901 | 2 | 15 | 30 | GT   | 13 | 16 |
| 274742 | 46 | 2275578 | 2275592 | 3 | 5  | 15 | AAT  | 19 | 9  |
| 274747 | 46 | 2276303 | 2276322 | 2 | 10 | 20 | AC   | 18 | 15 |
| 274748 | 46 | 2276534 | 2276561 | 2 | 14 | 28 | AC   | 23 | 10 |
| 274749 | 46 | 2276605 | 2276630 | 2 | 13 | 26 | AC   | 14 | 13 |
| 274752 | 46 | 2289469 | 2289482 | 2 | 7  | 14 | GA   | 31 | 3  |
| 274753 | 46 | 2289747 | 2289772 | 2 | 13 | 26 | CA   | 21 | 12 |

|        |    |         |         |   |    |    |      |    |    |
|--------|----|---------|---------|---|----|----|------|----|----|
| 274755 | 46 | 2296829 | 2296852 | 2 | 12 | 24 | GT   | 10 | 11 |
| 274756 | 46 | 2297019 | 2297074 | 2 | 28 | 56 | GT   | 9  | 7  |
| 274758 | 46 | 2297544 | 2297575 | 2 | 16 | 32 | AC   | 6  | 8  |
| 274759 | 46 | 2297702 | 2297743 | 2 | 21 | 42 | TG   | 7  | 8  |
| 274760 | 46 | 2297875 | 2297908 | 2 | 17 | 34 | AC   | 17 | 6  |
| 274763 | 46 | 2298060 | 2298091 | 2 | 16 | 32 | GT   | 7  | 6  |
| 274765 | 46 | 2298271 | 2298288 | 2 | 9  | 18 | CA   | 7  | 5  |
| 274767 | 46 | 2299523 | 2299560 | 2 | 19 | 38 | CA   | 18 | 13 |
| 274768 | 46 | 2299591 | 2299602 | 2 | 6  | 12 | AC   | 14 | 5  |
| 274769 | 46 | 2300238 | 2300261 | 2 | 12 | 24 | GT   | 14 | 7  |
| 274771 | 46 | 2300361 | 2300386 | 2 | 13 | 26 | AC   | 20 | 13 |
| 274772 | 46 | 2302663 | 2302680 | 2 | 9  | 18 | CA   | 14 | 7  |
| 274777 | 46 | 2308268 | 2308289 | 2 | 11 | 22 | CA   | 12 | 9  |
| 274779 | 46 | 2318143 | 2318160 | 2 | 9  | 18 | GT   | 12 | 9  |
| 274780 | 46 | 2318162 | 2318173 | 2 | 6  | 12 | TG   | 8  | 8  |
| 274781 | 46 | 2318579 | 2318602 | 2 | 12 | 24 | GT   | 9  | 4  |
| 274783 | 46 | 2321506 | 2321537 | 2 | 16 | 32 | TG   | 8  | 7  |
| 274785 | 46 | 2321724 | 2321745 | 2 | 11 | 22 | AC   | 9  | 4  |
| 274787 | 46 | 2322745 | 2322756 | 2 | 6  | 12 | TA   | 13 | 6  |
| 274791 | 46 | 2324180 | 2324203 | 4 | 6  | 24 | TATT | 22 | 6  |
| 274792 | 46 | 2324399 | 2324420 | 2 | 11 | 22 | TG   | 7  | 7  |
| 274793 | 46 | 2324483 | 2324494 | 2 | 6  | 12 | TG   | 18 | 7  |
| 274794 | 46 | 2325480 | 2325491 | 2 | 6  | 12 | TA   | 17 | 5  |
| 274795 | 46 | 2325677 | 2325720 | 2 | 22 | 44 | GT   | 9  | 13 |
| 274808 | 46 | 2332153 | 2332180 | 2 | 14 | 28 | GT   | 14 | 11 |
| 274818 | 46 | 2335174 | 2335185 | 2 | 6  | 12 | GT   | 22 | 10 |
| 274819 | 46 | 2335604 | 2335621 | 2 | 9  | 18 | AC   | 31 | 6  |
| 274820 | 46 | 2335826 | 2335851 | 2 | 13 | 26 | TG   | 10 | 8  |
| 274822 | 46 | 2337424 | 2337435 | 2 | 6  | 12 | AG   | 24 | 4  |
| 274823 | 46 | 2337537 | 2337574 | 2 | 19 | 38 | CA   | 8  | 6  |
| 274827 | 46 | 2338645 | 2338674 | 2 | 15 | 30 | CA   | 6  | 5  |
| 274828 | 46 | 2338829 | 2338852 | 4 | 6  | 24 | TCTT | 14 | 3  |
| 274829 | 46 | 2338985 | 2339018 | 2 | 17 | 34 | CA   | 9  | 9  |
| 274830 | 46 | 2339125 | 2339154 | 2 | 15 | 30 | TG   | 12 | 12 |
| 274831 | 46 | 2339201 | 2339218 | 2 | 9  | 18 | CA   | 26 | 6  |
| 274832 | 46 | 2339418 | 2339433 | 2 | 8  | 16 | AC   | 24 | 5  |
| 274833 | 46 | 2339574 | 2339615 | 2 | 21 | 42 | TG   | 9  | 12 |
| 274834 | 46 | 2341661 | 2341698 | 2 | 19 | 38 | CA   | 6  | 8  |
| 274836 | 46 | 2341827 | 2341846 | 2 | 10 | 20 | AC   | 16 | 5  |
| 274840 | 46 | 2345243 | 2345258 | 2 | 8  | 16 | CA   | 16 | 5  |
| 274841 | 46 | 2348503 | 2348540 | 2 | 19 | 38 | AC   | 8  | 10 |
| 274843 | 46 | 2351060 | 2351071 | 2 | 6  | 12 | AC   | 33 | 3  |
| 274846 | 46 | 2354342 | 2354357 | 2 | 8  | 16 | AG   | 12 | 3  |
| 274847 | 46 | 2354389 | 2354424 | 2 | 18 | 36 | GA   | 8  | 7  |
| 274851 | 46 | 2364594 | 2364635 | 2 | 21 | 42 | TG   | 16 | 9  |
| 274855 | 46 | 2368143 | 2368182 | 2 | 20 | 40 | TG   | 27 | 9  |
| 274856 | 46 | 2369346 | 2369371 | 2 | 13 | 26 | AG   | 21 | 8  |
| 274857 | 46 | 2369548 | 2369585 | 2 | 19 | 38 | AC   | 12 | 10 |
| 274860 | 46 | 2374298 | 2374323 | 2 | 13 | 26 | AC   | 10 | 6  |
| 274861 | 46 | 2374394 | 2374417 | 2 | 12 | 24 | GT   | 18 | 9  |
| 274868 | 46 | 2389671 | 2389698 | 2 | 14 | 28 | TG   | 17 | 8  |



|        |    |         |         |   |    |    |      |    |    |
|--------|----|---------|---------|---|----|----|------|----|----|
| 274869 | 46 | 2391387 | 2391407 | 3 | 7  | 21 | CTC  | 16 | 4  |
| 274871 | 46 | 2392066 | 2392097 | 2 | 16 | 32 | TG   | 12 | 10 |
| 274872 | 46 | 2395853 | 2395866 | 2 | 7  | 14 | CA   | 13 | 7  |
| 274873 | 46 | 2397163 | 2397184 | 2 | 11 | 22 | TG   | 19 | 9  |
| 274874 | 46 | 2398037 | 2398070 | 2 | 17 | 34 | AC   | 10 | 7  |
| 274878 | 46 | 2419043 | 2419058 | 4 | 4  | 16 | CTTC | 26 | 8  |
| 274887 | 46 | 2435848 | 2435861 | 2 | 7  | 14 | CT   | 18 | 4  |
| 274890 | 46 | 2447160 | 2447171 | 2 | 6  | 12 | AC   | 27 | 3  |
| 274891 | 46 | 2448391 | 2448411 | 3 | 7  | 21 | TTA  | 23 | 5  |
| 274895 | 46 | 2453136 | 2453155 | 4 | 5  | 20 | CCTC | 6  | 3  |
| 274896 | 46 | 2454796 | 2454827 | 2 | 16 | 32 | GT   | 12 | 10 |
| 274899 | 46 | 2461001 | 2461027 | 3 | 9  | 27 | CAT  | 25 | 8  |
| 274901 | 46 | 2461810 | 2461849 | 2 | 20 | 40 | TG   | 13 | 13 |
| 274908 | 46 | 2469135 | 2469170 | 2 | 18 | 36 | CA   | 7  | 8  |
| 274909 | 46 | 2470460 | 2470471 | 2 | 6  | 12 | TG   | 21 | 3  |
| 274912 | 46 | 2473710 | 2473730 | 3 | 7  | 21 | CTT  | 10 | 3  |
| 274914 | 46 | 2478545 | 2478558 | 2 | 7  | 14 | AG   | 16 | 6  |
| 274915 | 46 | 2479836 | 2479851 | 4 | 4  | 16 | CCTC | 15 | 6  |
| 274916 | 46 | 2480116 | 2480129 | 2 | 7  | 14 | TG   | 23 | 4  |
| 274917 | 46 | 2481843 | 2481888 | 2 | 23 | 46 | AC   | 13 | 12 |
| 274926 | 46 | 2507899 | 2507913 | 3 | 5  | 15 | ATA  | 18 | 3  |
| 274928 | 46 | 2519686 | 2519701 | 2 | 8  | 16 | CA   | 11 | 6  |
| 274930 | 46 | 2528690 | 2528701 | 2 | 6  | 12 | TG   | 29 | 3  |
| 274931 | 46 | 2528857 | 2528888 | 2 | 16 | 32 | AC   | 21 | 17 |
| 274933 | 46 | 2529621 | 2529650 | 2 | 15 | 30 | TG   | 19 | 17 |
| 274935 | 46 | 2535758 | 2535783 | 2 | 13 | 26 | AC   | 17 | 15 |
| 274939 | 46 | 2536075 | 2536086 | 2 | 6  | 12 | CA   | 9  | 13 |
| 274940 | 46 | 2536087 | 2536102 | 2 | 8  | 16 | AC   | 14 | 11 |
| 274941 | 46 | 2538809 | 2538830 | 2 | 11 | 22 | GT   | 15 | 4  |
| 274944 | 46 | 2540707 | 2540745 | 3 | 13 | 39 | GGA  | 15 | 10 |
| 274948 | 46 | 2541595 | 2541614 | 4 | 5  | 20 | GACA | 10 | 4  |
| 274949 | 46 | 2541646 | 2541665 | 4 | 5  | 20 | AGAC | 12 | 7  |
| 274950 | 46 | 2541832 | 2541869 | 2 | 19 | 38 | AC   | 7  | 7  |
| 274960 | 46 | 2556012 | 2556035 | 4 | 6  | 24 | AGAC | 25 | 5  |
| 274963 | 46 | 2560080 | 2560113 | 2 | 17 | 34 | GT   | 9  | 9  |
| 274964 | 46 | 2560288 | 2560303 | 2 | 8  | 16 | TG   | 10 | 3  |
| 274967 | 46 | 2562499 | 2562518 | 2 | 10 | 20 | CA   | 21 | 5  |
| 274968 | 46 | 2562663 | 2562676 | 2 | 7  | 14 | CT   | 21 | 4  |
| 274970 | 46 | 2570307 | 2570340 | 2 | 17 | 34 | GT   | 13 | 8  |
| 274971 | 46 | 2570466 | 2570489 | 2 | 12 | 24 | AC   | 17 | 9  |
| 274974 | 46 | 2575460 | 2575474 | 3 | 5  | 15 | AAT  | 33 | 3  |
| 274977 | 46 | 2583072 | 2583092 | 3 | 7  | 21 | AAG  | 29 | 4  |
| 274978 | 46 | 2583354 | 2583369 | 4 | 4  | 16 | TTTG | 29 | 5  |
| 274979 | 46 | 2586443 | 2586460 | 3 | 6  | 18 | TTG  | 14 | 11 |
| 274980 | 46 | 2587355 | 2587378 | 3 | 8  | 24 | AGA  | 7  | 4  |
| 274983 | 46 | 2591686 | 2591727 | 2 | 21 | 42 | CA   | 9  | 10 |
| 274984 | 46 | 2595034 | 2595049 | 2 | 8  | 16 | TG   | 13 | 10 |
| 274986 | 46 | 2597517 | 2597532 | 2 | 8  | 16 | AT   | 23 | 13 |
| 274988 | 46 | 2598989 | 2599024 | 2 | 18 | 36 | TC   | 7  | 8  |
| 274991 | 46 | 2599216 | 2599227 | 2 | 6  | 12 | GT   | 24 | 3  |
| 274993 | 46 | 2603047 | 2603066 | 2 | 10 | 20 | AG   | 15 | 8  |

|        |    |         |         |   |    |    |      |    |    |
|--------|----|---------|---------|---|----|----|------|----|----|
| 274995 | 46 | 2618337 | 2618366 | 2 | 15 | 30 | AC   | 13 | 12 |
| 274996 | 46 | 2623918 | 2623956 | 3 | 13 | 39 | CAG  | 19 | 12 |
| 274998 | 46 | 2624289 | 2624324 | 3 | 12 | 36 | TCT  | 25 | 12 |
| 274999 | 46 | 2629718 | 2629733 | 2 | 8  | 16 | TG   | 29 | 5  |
| 275003 | 46 | 2640731 | 2640756 | 2 | 13 | 26 | GT   | 15 | 11 |
| 275004 | 46 | 2640917 | 2640940 | 2 | 12 | 24 | CA   | 15 | 6  |
| 275009 | 46 | 2645737 | 2645758 | 2 | 11 | 22 | CA   | 16 | 9  |
| 275010 | 46 | 2649091 | 2649108 | 2 | 9  | 18 | GT   | 24 | 7  |
| 275014 | 46 | 2656556 | 2656582 | 3 | 9  | 27 | GAA  | 20 | 10 |
| 275015 | 46 | 2657991 | 2658008 | 2 | 9  | 18 | AC   | 20 | 10 |
| 275016 | 46 | 2660993 | 2661020 | 2 | 14 | 28 | TG   | 12 | 13 |
| 275018 | 46 | 2663086 | 2663099 | 2 | 7  | 14 | GA   | 20 | 4  |
| 275022 | 46 | 2689705 | 2689724 | 2 | 10 | 20 | CA   | 21 | 9  |
| 275023 | 46 | 2691770 | 2691785 | 4 | 4  | 16 | TTTG | 25 | 4  |
| 275027 | 46 | 2705275 | 2705290 | 2 | 8  | 16 | AC   | 22 | 5  |
| 275028 | 46 | 2705869 | 2705902 | 2 | 17 | 34 | CA   | 24 | 11 |
| 275029 | 46 | 2707175 | 2707194 | 2 | 10 | 20 | AC   | 11 | 5  |
| 275031 | 46 | 2707306 | 2707321 | 4 | 4  | 16 | GGAT | 19 | 3  |
| 275042 | 46 | 2710989 | 2711002 | 2 | 7  | 14 | AT   | 20 | 5  |
| 275043 | 46 | 2711590 | 2711615 | 2 | 13 | 26 | AC   | 14 | 6  |
| 275045 | 46 | 2713305 | 2713328 | 2 | 12 | 24 | AC   | 16 | 8  |
| 275048 | 46 | 2716228 | 2716249 | 2 | 11 | 22 | AC   | 12 | 9  |
| 275052 | 46 | 2725146 | 2725178 | 3 | 11 | 33 | TGC  | 27 | 8  |
| 275055 | 46 | 2729040 | 2729059 | 2 | 10 | 20 | TG   | 9  | 10 |
| 275062 | 46 | 2750422 | 2750441 | 2 | 10 | 20 | CA   | 8  | 7  |
| 275065 | 46 | 2750589 | 2750610 | 2 | 11 | 22 | TG   | 11 | 13 |
| 275067 | 46 | 2750768 | 2750797 | 2 | 15 | 30 | AC   | 14 | 9  |
| 275069 | 46 | 2755305 | 2755338 | 2 | 17 | 34 | GT   | 13 | 13 |
| 275071 | 46 | 2761199 | 2761216 | 3 | 6  | 18 | GGA  | 26 | 4  |
| 275074 | 46 | 2771182 | 2771196 | 3 | 5  | 15 | TTG  | 12 | 3  |
| 275076 | 46 | 2780521 | 2780547 | 3 | 9  | 27 | ATA  | 17 | 12 |
| 275081 | 46 | 2786714 | 2786739 | 2 | 13 | 26 | CA   | 14 | 16 |
| 275086 | 46 | 2796400 | 2796417 | 2 | 9  | 18 | AC   | 20 | 3  |
| 275088 | 46 | 2798983 | 2799003 | 3 | 7  | 21 | CAG  | 25 | 5  |
| 275092 | 46 | 2804732 | 2804779 | 2 | 24 | 48 | AC   | 11 | 13 |
| 275093 | 46 | 2804984 | 2804999 | 2 | 8  | 16 | AC   | 17 | 13 |
| 275095 | 46 | 2807941 | 2807972 | 2 | 16 | 32 | AC   | 10 | 13 |
| 275096 | 46 | 2808848 | 2808899 | 2 | 26 | 52 | TG   | 16 | 13 |
| 275097 | 46 | 2810769 | 2810788 | 4 | 5  | 20 | ATCC | 18 | 4  |
| 275102 | 46 | 2818991 | 2819002 | 2 | 6  | 12 | TA   | 9  | 3  |
| 275103 | 46 | 2826798 | 2826821 | 2 | 12 | 24 | AC   | 15 | 15 |
| 275104 | 46 | 2827022 | 2827047 | 2 | 13 | 26 | CA   | 10 | 11 |
| 275106 | 46 | 2828228 | 2828241 | 2 | 7  | 14 | GA   | 22 | 5  |
| 275108 | 46 | 2828914 | 2828933 | 2 | 10 | 20 | CA   | 32 | 4  |
| 275109 | 46 | 2829023 | 2829056 | 2 | 17 | 34 | TG   | 18 | 11 |
| 275112 | 46 | 2831432 | 2831465 | 2 | 17 | 34 | AC   | 24 | 8  |
| 275117 | 46 | 2847706 | 2847721 | 4 | 4  | 16 | TTCT | 23 | 7  |
| 275118 | 46 | 2847764 | 2847790 | 3 | 9  | 27 | CCT  | 25 | 10 |
| 275120 | 46 | 2848078 | 2848097 | 2 | 10 | 20 | GA   | 16 | 4  |
| 275121 | 46 | 2848201 | 2848221 | 3 | 7  | 21 | GCT  | 19 | 10 |
| 275123 | 46 | 2850189 | 2850202 | 2 | 7  | 14 | CA   | 17 | 13 |

|        |    |         |         |   |    |    |      |    |    |
|--------|----|---------|---------|---|----|----|------|----|----|
| 275124 | 46 | 2850205 | 2850222 | 2 | 9  | 18 | CA   | 17 | 15 |
| 275127 | 46 | 2850555 | 2850587 | 3 | 11 | 33 | ATC  | 20 | 7  |
| 275128 | 46 | 2854708 | 2854731 | 2 | 12 | 24 | GT   | 10 | 11 |
| 275133 | 46 | 2855712 | 2855735 | 2 | 12 | 24 | CA   | 13 | 8  |
| 275136 | 46 | 2856754 | 2856791 | 2 | 19 | 38 | GT   | 16 | 13 |
| 275137 | 46 | 2857383 | 2857400 | 2 | 9  | 18 | CT   | 19 | 3  |
| 275139 | 46 | 2857689 | 2857734 | 2 | 23 | 46 | GT   | 11 | 15 |
| 275140 | 46 | 2857883 | 2857906 | 3 | 8  | 24 | GAG  | 14 | 11 |
| 275142 | 46 | 2859709 | 2859732 | 2 | 12 | 24 | AC   | 22 | 10 |
| 275155 | 46 | 2866291 | 2866316 | 2 | 13 | 26 | GT   | 18 | 11 |
| 275156 | 46 | 2868901 | 2868918 | 3 | 6  | 18 | GGA  | 20 | 9  |
| 275157 | 46 | 2869278 | 2869313 | 2 | 18 | 36 | TG   | 6  | 6  |
| 275158 | 46 | 2869469 | 2869498 | 2 | 15 | 30 | GT   | 13 | 13 |
| 275162 | 46 | 2872319 | 2872358 | 2 | 20 | 40 | AC   | 11 | 11 |
| 275163 | 46 | 2874255 | 2874274 | 2 | 10 | 20 | AC   | 22 | 6  |
| 275165 | 46 | 2875268 | 2875293 | 2 | 13 | 26 | AG   | 19 | 11 |
| 275176 | 46 | 2881212 | 2881233 | 2 | 11 | 22 | TG   | 23 | 8  |
| 275178 | 46 | 2882270 | 2882281 | 2 | 6  | 12 | CA   | 12 | 4  |
| 275182 | 46 | 2883580 | 2883639 | 2 | 30 | 60 | TG   | 11 | 13 |
| 275188 | 46 | 2884643 | 2884686 | 2 | 22 | 44 | TG   | 6  | 6  |
| 275189 | 46 | 2885070 | 2885099 | 2 | 15 | 30 | TG   | 11 | 13 |
| 275191 | 46 | 2887109 | 2887129 | 3 | 7  | 21 | GAT  | 24 | 12 |
| 275196 | 46 | 2887615 | 2887650 | 2 | 18 | 36 | AC   | 20 | 16 |
| 275198 | 46 | 2890161 | 2890198 | 2 | 19 | 38 | GT   | 8  | 10 |
| 275204 | 46 | 2893824 | 2893841 | 3 | 6  | 18 | TGT  | 12 | 6  |
| 275208 | 46 | 2900860 | 2900889 | 2 | 15 | 30 | CA   | 12 | 12 |
| 275209 | 46 | 2901468 | 2901517 | 2 | 25 | 50 | CA   | 11 | 8  |
| 275210 | 46 | 2902341 | 2902378 | 2 | 19 | 38 | AC   | 13 | 12 |
| 275211 | 46 | 2903105 | 2903134 | 2 | 15 | 30 | AC   | 8  | 7  |
| 275215 | 46 | 2905369 | 2905386 | 3 | 6  | 18 | TCT  | 21 | 9  |
| 275217 | 46 | 2905933 | 2905954 | 2 | 11 | 22 | GT   | 21 | 10 |
| 275221 | 46 | 2906931 | 2906966 | 2 | 18 | 36 | TG   | 7  | 6  |
| 275223 | 46 | 2908128 | 2908175 | 3 | 16 | 48 | CTT  | 15 | 7  |
| 275228 | 46 | 2913031 | 2913046 | 2 | 8  | 16 | CA   | 13 | 12 |
| 275232 | 46 | 2919084 | 2919113 | 2 | 15 | 30 | AC   | 7  | 8  |
| 275233 | 46 | 2921585 | 2921608 | 2 | 12 | 24 | CA   | 19 | 7  |
| 275234 | 46 | 2922256 | 2922279 | 2 | 12 | 24 | AC   | 23 | 17 |
| 275235 | 46 | 2925040 | 2925067 | 2 | 14 | 28 | TG   | 17 | 12 |
| 275236 | 46 | 2925328 | 2925359 | 2 | 16 | 32 | GT   | 15 | 11 |
| 275239 | 46 | 2928095 | 2928108 | 2 | 7  | 14 | CT   | 22 | 3  |
| 275240 | 46 | 2929096 | 2929119 | 2 | 12 | 24 | AC   | 17 | 10 |
| 275246 | 46 | 2943647 | 2943666 | 2 | 10 | 20 | GT   | 14 | 8  |
| 275247 | 46 | 2945317 | 2945336 | 2 | 10 | 20 | CA   | 10 | 3  |
| 275249 | 46 | 2946894 | 2946931 | 2 | 19 | 38 | CA   | 15 | 10 |
| 275250 | 46 | 2948764 | 2948787 | 4 | 6  | 24 | TTTG | 19 | 8  |
| 275253 | 46 | 2951584 | 2951599 | 2 | 8  | 16 | AG   | 29 | 9  |
| 275254 | 46 | 2953919 | 2953942 | 2 | 12 | 24 | CA   | 14 | 11 |
| 275257 | 46 | 2956797 | 2956814 | 3 | 6  | 18 | TAA  | 10 | 5  |
| 275259 | 46 | 2959041 | 2959082 | 2 | 21 | 42 | GT   | 9  | 10 |
| 275266 | 46 | 2962789 | 2962846 | 2 | 29 | 58 | GT   | 11 | 12 |
| 275267 | 46 | 2964439 | 2964482 | 2 | 22 | 44 | GT   | 6  | 6  |

|        |    |         |         |   |    |    |      |    |    |
|--------|----|---------|---------|---|----|----|------|----|----|
| 275268 | 46 | 2966384 | 2966409 | 2 | 13 | 26 | GT   | 16 | 13 |
| 275270 | 46 | 2968857 | 2968874 | 3 | 6  | 18 | GAA  | 24 | 4  |
| 275273 | 46 | 2970128 | 2970141 | 2 | 7  | 14 | CA   | 22 | 8  |
| 275274 | 46 | 2972140 | 2972172 | 3 | 11 | 33 | CTT  | 6  | 8  |
| 275275 | 46 | 2972752 | 2972779 | 2 | 14 | 28 | GT   | 18 | 13 |
| 275280 | 46 | 2977578 | 2977593 | 4 | 4  | 16 | TTTA | 25 | 4  |
| 275281 | 46 | 2979081 | 2979095 | 3 | 5  | 15 | TAT  | 24 | 5  |
| 275284 | 46 | 2985830 | 2985845 | 2 | 8  | 16 | TG   | 12 | 3  |
| 275288 | 46 | 2989165 | 2989190 | 2 | 13 | 26 | TG   | 20 | 15 |
| 275290 | 46 | 2991062 | 2991093 | 2 | 16 | 32 | CT   | 20 | 13 |
| 275291 | 46 | 2994356 | 2994397 | 2 | 21 | 42 | TG   | 6  | 9  |
| 275292 | 46 | 2995955 | 2995972 | 3 | 6  | 18 | CCT  | 22 | 3  |
| 275295 | 46 | 2997719 | 2997742 | 2 | 12 | 24 | CA   | 20 | 9  |
| 275297 | 46 | 3002089 | 3002112 | 4 | 6  | 24 | TGAT | 32 | 5  |
| 275301 | 46 | 3007313 | 3007362 | 2 | 25 | 50 | AC   | 7  | 12 |
| 275307 | 46 | 3016857 | 3016890 | 2 | 17 | 34 | TG   | 10 | 9  |
| 275308 | 46 | 3020321 | 3020336 | 4 | 4  | 16 | AAGG | 26 | 3  |
| 275309 | 46 | 3020456 | 3020479 | 4 | 6  | 24 | AAGG | 16 | 3  |
| 275323 | 46 | 3048342 | 3048357 | 2 | 8  | 16 | AC   | 9  | 8  |
| 275324 | 46 | 3048562 | 3048585 | 2 | 12 | 24 | AC   | 13 | 10 |
| 275333 | 46 | 3055805 | 3055822 | 3 | 6  | 18 | AAT  | 25 | 3  |
| 275342 | 46 | 3065882 | 3065893 | 2 | 6  | 12 | GT   | 25 | 3  |
| 275343 | 46 | 3069322 | 3069337 | 4 | 4  | 16 | AAAC | 26 | 3  |
| 275344 | 46 | 3069794 | 3069808 | 3 | 5  | 15 | AAG  | 19 | 9  |
| 275357 | 46 | 3074746 | 3074765 | 4 | 5  | 20 | CCGT | 21 | 4  |
| 275359 | 46 | 3076442 | 3076461 | 2 | 10 | 20 | GA   | 9  | 6  |
| 275360 | 46 | 3076536 | 3076559 | 4 | 6  | 24 | TCGG | 17 | 4  |
| 275361 | 46 | 3076680 | 3076703 | 3 | 8  | 24 | TAA  | 13 | 4  |
| 275394 | 46 | 3102589 | 3102660 | 4 | 18 | 72 | GGAT | 21 | 16 |
| 275395 | 46 | 3103437 | 3103451 | 3 | 5  | 15 | CAT  | 15 | 6  |
| 275396 | 46 | 3103640 | 3103665 | 2 | 13 | 26 | GT   | 10 | 10 |
| 275399 | 46 | 3103922 | 3103969 | 2 | 24 | 48 | CT   | 22 | 15 |
| 275401 | 46 | 3106029 | 3106054 | 2 | 13 | 26 | TG   | 19 | 11 |
| 275403 | 46 | 3108336 | 3108367 | 2 | 16 | 32 | TG   | 21 | 11 |
| 275404 | 46 | 3110242 | 3110259 | 3 | 6  | 18 | CTC  | 16 | 6  |
| 275405 | 46 | 3110317 | 3110355 | 3 | 13 | 39 | AGG  | 11 | 11 |
| 275408 | 46 | 3111516 | 3111543 | 2 | 14 | 28 | AC   | 14 | 6  |
| 275410 | 46 | 3112355 | 3112372 | 3 | 6  | 18 | GAG  | 23 | 3  |
| 275411 | 46 | 3112525 | 3112539 | 3 | 5  | 15 | GGA  | 32 | 4  |
| 275412 | 46 | 3113569 | 3113610 | 2 | 21 | 42 | TG   | 11 | 14 |
| 275415 | 46 | 3114763 | 3114782 | 2 | 10 | 20 | CA   | 15 | 7  |
| 275416 | 46 | 3115015 | 3115036 | 2 | 11 | 22 | AC   | 12 | 6  |
| 275417 | 46 | 3115495 | 3115509 | 3 | 5  | 15 | AGC  | 21 | 3  |
| 275419 | 46 | 3118626 | 3118649 | 2 | 12 | 24 | GA   | 7  | 6  |
| 275422 | 46 | 3120072 | 3120083 | 2 | 6  | 12 | AC   | 30 | 3  |
| 275424 | 46 | 3120731 | 3120758 | 2 | 14 | 28 | TG   | 9  | 13 |
| 275427 | 46 | 3121096 | 3121109 | 2 | 7  | 14 | AT   | 12 | 4  |
| 275429 | 46 | 3121883 | 3121918 | 3 | 12 | 36 | AGG  | 8  | 8  |
| 275431 | 46 | 3122149 | 3122170 | 2 | 11 | 22 | GT   | 7  | 7  |
| 275433 | 46 | 3122266 | 3122309 | 2 | 22 | 44 | AC   | 8  | 12 |
| 275436 | 46 | 3124070 | 3124089 | 2 | 10 | 20 | TC   | 9  | 3  |

|        |    |         |         |   |    |    |      |    |    |
|--------|----|---------|---------|---|----|----|------|----|----|
| 275441 | 46 | 3124666 | 3124699 | 2 | 17 | 34 | GT   | 13 | 10 |
| 275442 | 46 | 3124848 | 3124879 | 2 | 16 | 32 | AC   | 6  | 9  |
| 275444 | 46 | 3126817 | 3126830 | 2 | 7  | 14 | AC   | 22 | 5  |
| 275447 | 46 | 3129938 | 3129970 | 3 | 11 | 33 | CAT  | 12 | 9  |
| 275453 | 46 | 3132775 | 3132792 | 2 | 9  | 18 | CA   | 9  | 6  |
| 275454 | 46 | 3132826 | 3132851 | 2 | 13 | 26 | AC   | 16 | 12 |
| 275455 | 46 | 3135881 | 3135904 | 3 | 8  | 24 | TCA  | 6  | 3  |
| 275461 | 46 | 3137283 | 3137314 | 4 | 8  | 32 | AAGG | 21 | 6  |
| 275462 | 46 | 3137760 | 3137786 | 3 | 9  | 27 | ATG  | 27 | 15 |
| 275463 | 46 | 3137933 | 3137976 | 2 | 22 | 44 | GT   | 6  | 11 |
| 275469 | 46 | 3139127 | 3139138 | 2 | 6  | 12 | GT   | 18 | 10 |
| 275470 | 46 | 3139141 | 3139154 | 2 | 7  | 14 | GT   | 17 | 8  |
| 275472 | 46 | 3139554 | 3139593 | 2 | 20 | 40 | CA   | 6  | 7  |
| 275481 | 46 | 3141426 | 3141453 | 2 | 14 | 28 | CA   | 6  | 6  |
| 275484 | 46 | 3142485 | 3142502 | 3 | 6  | 18 | GAG  | 9  | 8  |
| 275487 | 46 | 3142714 | 3142727 | 2 | 7  | 14 | TG   | 19 | 3  |
| 275489 | 46 | 3144997 | 3145008 | 2 | 6  | 12 | CA   | 19 | 10 |
| 275490 | 46 | 3146788 | 3146819 | 2 | 16 | 32 | GT   | 6  | 11 |
| 275491 | 46 | 3147138 | 3147155 | 2 | 9  | 18 | AG   | 19 | 4  |
| 275492 | 46 | 3148051 | 3148068 | 2 | 9  | 18 | AC   | 21 | 8  |
| 275493 | 46 | 3148716 | 3148735 | 2 | 10 | 20 | TC   | 22 | 3  |
| 275494 | 46 | 3149133 | 3149164 | 2 | 16 | 32 | AC   | 10 | 11 |
| 275498 | 46 | 3151835 | 3151850 | 2 | 8  | 16 | CA   | 18 | 10 |
| 275499 | 46 | 3152651 | 3152674 | 2 | 12 | 24 | CA   | 16 | 9  |
| 275501 | 46 | 3154775 | 3154808 | 2 | 17 | 34 | GT   | 8  | 11 |
| 275505 | 46 | 3156740 | 3156766 | 3 | 9  | 27 | TCT  | 8  | 9  |
| 275506 | 46 | 3157273 | 3157314 | 2 | 21 | 42 | CA   | 8  | 8  |
| 275507 | 46 | 3157558 | 3157581 | 3 | 8  | 24 | CCT  | 21 | 8  |
| 275513 | 46 | 3159273 | 3159288 | 2 | 8  | 16 | GT   | 22 | 4  |
| 275514 | 46 | 3159332 | 3159359 | 2 | 14 | 28 | TG   | 13 | 13 |
| 275517 | 46 | 3161875 | 3161914 | 2 | 20 | 40 | GT   | 9  | 11 |
| 275533 | 46 | 3170823 | 3170838 | 2 | 8  | 16 | GT   | 8  | 6  |
| 275540 | 46 | 3179900 | 3179913 | 2 | 7  | 14 | CT   | 24 | 4  |
| 275543 | 46 | 3181760 | 3181780 | 3 | 7  | 21 | GGA  | 20 | 9  |
| 275544 | 46 | 3181885 | 3181911 | 3 | 9  | 27 | GAG  | 19 | 8  |
| 275555 | 46 | 3187765 | 3187794 | 2 | 15 | 30 | CA   | 9  | 11 |
| 275558 | 46 | 3188214 | 3188234 | 3 | 7  | 21 | TTC  | 20 | 5  |
| 275563 | 46 | 3188624 | 3188641 | 2 | 9  | 18 | CA   | 11 | 10 |
| 275566 | 46 | 3190616 | 3190657 | 2 | 21 | 42 | AC   | 8  | 9  |
| 275594 | 46 | 3210488 | 3210514 | 3 | 9  | 27 | AAG  | 13 | 5  |
| 275597 | 46 | 3210726 | 3210747 | 2 | 11 | 22 | GT   | 10 | 11 |
| 275601 | 46 | 3214198 | 3214225 | 2 | 14 | 28 | CA   | 8  | 7  |
| 275602 | 46 | 3214475 | 3214498 | 2 | 12 | 24 | CA   | 12 | 14 |
| 275606 | 46 | 3215580 | 3215605 | 2 | 13 | 26 | TG   | 29 | 6  |
| 275608 | 46 | 3217786 | 3217821 | 2 | 18 | 36 | AC   | 11 | 9  |
| 275617 | 46 | 3221388 | 3221413 | 2 | 13 | 26 | CT   | 14 | 9  |
| 275619 | 46 | 3221631 | 3221672 | 2 | 21 | 42 | AC   | 10 | 16 |
| 275620 | 46 | 3221700 | 3221717 | 3 | 6  | 18 | AGC  | 18 | 4  |
| 275622 | 46 | 3221825 | 3221846 | 2 | 11 | 22 | AC   | 7  | 6  |
| 275623 | 46 | 3221919 | 3221930 | 2 | 6  | 12 | AC   | 11 | 8  |
| 275624 | 46 | 3221933 | 3221944 | 2 | 6  | 12 | AC   | 7  | 5  |

|        |    |         |         |   |    |    |      |    |    |
|--------|----|---------|---------|---|----|----|------|----|----|
| 275625 | 46 | 3222880 | 3222903 | 4 | 6  | 24 | CATC | 18 | 7  |
| 275626 | 46 | 3222923 | 3222940 | 2 | 9  | 18 | TC   | 20 | 3  |
| 275627 | 46 | 3223043 | 3223068 | 2 | 13 | 26 | TC   | 23 | 6  |
| 275628 | 46 | 3223092 | 3223121 | 3 | 10 | 30 | CTC  | 19 | 5  |
| 275629 | 46 | 3224514 | 3224537 | 2 | 12 | 24 | AC   | 18 | 10 |
| 275631 | 46 | 3224862 | 3224894 | 3 | 11 | 33 | TCC  | 11 | 4  |
| 275632 | 46 | 3225293 | 3225308 | 2 | 8  | 16 | CA   | 14 | 12 |
| 275633 | 46 | 3225310 | 3225325 | 2 | 8  | 16 | AC   | 17 | 12 |
| 275635 | 46 | 3229605 | 3229628 | 3 | 8  | 24 | GGA  | 9  | 5  |
| 275637 | 46 | 3230966 | 3230987 | 2 | 11 | 22 | GT   | 7  | 7  |
| 275639 | 46 | 3232331 | 3232350 | 2 | 10 | 20 | CA   | 11 | 9  |
| 275640 | 46 | 3232424 | 3232451 | 2 | 14 | 28 | CA   | 12 | 9  |
| 275641 | 46 | 3232478 | 3232511 | 2 | 17 | 34 | AC   | 10 | 14 |
| 275642 | 46 | 3232612 | 3232639 | 2 | 14 | 28 | GT   | 12 | 10 |
| 275644 | 46 | 3234039 | 3234062 | 2 | 12 | 24 | AC   | 12 | 4  |
| 275646 | 46 | 3234259 | 3234282 | 2 | 12 | 24 | GT   | 18 | 11 |
| 275648 | 46 | 3234378 | 3234413 | 2 | 18 | 36 | AC   | 8  | 10 |
| 275649 | 46 | 3238082 | 3238117 | 2 | 18 | 36 | TC   | 8  | 7  |
| 275651 | 46 | 3240251 | 3240268 | 3 | 6  | 18 | CCT  | 12 | 7  |
| 275652 | 46 | 3241260 | 3241285 | 2 | 13 | 26 | AC   | 20 | 11 |
| 275656 | 46 | 3244623 | 3244648 | 2 | 13 | 26 | GT   | 18 | 14 |
| 275658 | 46 | 3245864 | 3245884 | 3 | 7  | 21 | GAG  | 7  | 7  |
| 275659 | 46 | 3249744 | 3249759 | 4 | 4  | 16 | TGCT | 27 | 4  |
| 275669 | 46 | 3254326 | 3254377 | 2 | 26 | 52 | CA   | 12 | 11 |
| 275672 | 46 | 3254644 | 3254661 | 2 | 9  | 18 | CA   | 20 | 10 |
| 275673 | 46 | 3254824 | 3254845 | 2 | 11 | 22 | CA   | 19 | 4  |
| 275676 | 46 | 3260273 | 3260296 | 2 | 12 | 24 | AC   | 19 | 6  |
| 275677 | 46 | 3260436 | 3260467 | 2 | 16 | 32 | AC   | 11 | 5  |
| 275678 | 46 | 3260584 | 3260601 | 2 | 9  | 18 | CA   | 18 | 15 |
| 275679 | 46 | 3260794 | 3260837 | 2 | 22 | 44 | AC   | 8  | 12 |
| 275681 | 46 | 3262729 | 3262776 | 2 | 24 | 48 | CA   | 11 | 11 |
| 275684 | 46 | 3263216 | 3263233 | 2 | 9  | 18 | GT   | 10 | 15 |
| 275697 | 46 | 3274062 | 3274085 | 2 | 12 | 24 | CA   | 8  | 6  |
| 275701 | 46 | 3279112 | 3279129 | 2 | 9  | 18 | TG   | 19 | 8  |
| 275706 | 46 | 3283228 | 3283251 | 2 | 12 | 24 | GA   | 19 | 5  |
| 275707 | 46 | 3283458 | 3283479 | 2 | 11 | 22 | GA   | 21 | 12 |
| 275708 | 46 | 3283899 | 3283912 | 2 | 7  | 14 | TG   | 25 | 4  |
| 275711 | 46 | 3287916 | 3287933 | 2 | 9  | 18 | CA   | 22 | 5  |
| 275712 | 46 | 3290253 | 3290272 | 2 | 10 | 20 | AC   | 12 | 13 |
| 275713 | 46 | 3290399 | 3290434 | 2 | 18 | 36 | CA   | 16 | 12 |
| 275714 | 46 | 3291161 | 3291182 | 2 | 11 | 22 | CA   | 10 | 11 |
| 275717 | 46 | 3291320 | 3291351 | 2 | 16 | 32 | CA   | 9  | 12 |
| 275718 | 46 | 3291497 | 3291520 | 2 | 12 | 24 | CA   | 13 | 7  |
| 275719 | 46 | 3291705 | 3291760 | 2 | 28 | 56 | AC   | 10 | 14 |
| 275720 | 46 | 3291843 | 3291856 | 2 | 7  | 14 | AC   | 17 | 4  |
| 275721 | 46 | 3291888 | 3291909 | 2 | 11 | 22 | AC   | 23 | 16 |
| 275722 | 46 | 3292046 | 3292078 | 3 | 11 | 33 | TCT  | 18 | 4  |
| 275724 | 46 | 3294646 | 3294659 | 2 | 7  | 14 | TG   | 21 | 3  |
| 275725 | 46 | 3294872 | 3294904 | 3 | 11 | 33 | GGA  | 22 | 8  |
| 275726 | 46 | 3295084 | 3295101 | 3 | 6  | 18 | GAG  | 6  | 6  |
| 275728 | 46 | 3295978 | 3295991 | 2 | 7  | 14 | CA   | 23 | 13 |

|        |    |         |         |   |    |    |      |    |    |
|--------|----|---------|---------|---|----|----|------|----|----|
| 275729 | 46 | 3299687 | 3299698 | 2 | 6  | 12 | CT   | 26 | 5  |
| 275730 | 46 | 3299798 | 3299827 | 2 | 15 | 30 | CA   | 12 | 6  |
| 275731 | 46 | 3300741 | 3300758 | 2 | 9  | 18 | AC   | 24 | 9  |
| 275733 | 46 | 3303674 | 3303697 | 2 | 12 | 24 | AC   | 17 | 7  |
| 275734 | 46 | 3304706 | 3304717 | 2 | 6  | 12 | TC   | 22 | 4  |
| 275736 | 46 | 3306256 | 3306275 | 2 | 10 | 20 | CT   | 20 | 17 |
| 275737 | 46 | 3307413 | 3307427 | 3 | 5  | 15 | CAG  | 11 | 3  |
| 275738 | 46 | 3307661 | 3307702 | 2 | 21 | 42 | CA   | 14 | 11 |
| 275739 | 46 | 3307767 | 3307800 | 2 | 17 | 34 | GT   | 17 | 10 |
| 275740 | 46 | 3311104 | 3311141 | 2 | 19 | 38 | GT   | 15 | 8  |
| 275741 | 46 | 3311246 | 3311271 | 2 | 13 | 26 | TG   | 15 | 12 |
| 275742 | 46 | 3312623 | 3312646 | 2 | 12 | 24 | TG   | 6  | 5  |
| 275743 | 46 | 3312671 | 3312684 | 2 | 7  | 14 | TC   | 9  | 3  |
| 275746 | 46 | 3314610 | 3314643 | 2 | 17 | 34 | AC   | 22 | 11 |
| 275747 | 46 | 3315875 | 3315916 | 2 | 21 | 42 | GT   | 6  | 8  |
| 275748 | 46 | 3316617 | 3316648 | 2 | 16 | 32 | AC   | 11 | 9  |
| 275749 | 46 | 3316767 | 3316812 | 2 | 23 | 46 | GT   | 8  | 10 |
| 275750 | 46 | 3316939 | 3316966 | 4 | 7  | 28 | TCTT | 18 | 10 |
| 275757 | 46 | 3351821 | 3351832 | 2 | 6  | 12 | AT   | 6  | 6  |
| 275760 | 46 | 3354881 | 3354900 | 2 | 10 | 20 | GT   | 17 | 5  |
| 275763 | 46 | 3359750 | 3359767 | 2 | 9  | 18 | GT   | 27 | 10 |
| 275764 | 46 | 3360001 | 3360018 | 2 | 9  | 18 | TG   | 25 | 8  |
| 275768 | 46 | 3365050 | 3365071 | 2 | 11 | 22 | GT   | 14 | 16 |
| 275769 | 46 | 3365787 | 3365798 | 2 | 6  | 12 | AG   | 23 | 5  |
| 275771 | 46 | 3366702 | 3366731 | 2 | 15 | 30 | CT   | 23 | 9  |
| 275772 | 46 | 3367879 | 3367908 | 2 | 15 | 30 | GT   | 8  | 6  |
| 275773 | 46 | 3368913 | 3368932 | 2 | 10 | 20 | AC   | 21 | 11 |
| 275777 | 46 | 3373265 | 3373280 | 2 | 8  | 16 | AC   | 19 | 9  |
| 275784 | 46 | 3379842 | 3379885 | 2 | 22 | 44 | TG   | 7  | 6  |
| 275785 | 46 | 3380044 | 3380055 | 2 | 6  | 12 | AC   | 26 | 4  |
| 275793 | 46 | 3420619 | 3420630 | 2 | 6  | 12 | TG   | 12 | 3  |
| 275798 | 46 | 3435122 | 3435139 | 2 | 9  | 18 | GA   | 19 | 4  |
| 275808 | 46 | 3453111 | 3453130 | 4 | 5  | 20 | TTTG | 20 | 7  |
| 275812 | 46 | 3477163 | 3477174 | 2 | 6  | 12 | GT   | 26 | 4  |
| 275825 | 46 | 3527125 | 3527160 | 2 | 18 | 36 | AC   | 6  | 8  |
| 275830 | 46 | 3532779 | 3532798 | 2 | 10 | 20 | GT   | 23 | 17 |
| 275831 | 46 | 3532948 | 3532975 | 2 | 14 | 28 | CA   | 8  | 10 |
| 275832 | 46 | 3533536 | 3533565 | 2 | 15 | 30 | GT   | 7  | 8  |
| 275846 | 46 | 3551252 | 3551269 | 2 | 9  | 18 | AC   | 17 | 6  |
| 275847 | 46 | 3552366 | 3552381 | 2 | 8  | 16 | AC   | 13 | 13 |
| 275848 | 46 | 3553317 | 3553346 | 2 | 15 | 30 | AC   | 12 | 8  |
| 275850 | 46 | 3554802 | 3554813 | 2 | 6  | 12 | GT   | 11 | 11 |
| 275852 | 46 | 3554984 | 3555013 | 2 | 15 | 30 | TG   | 17 | 9  |
| 275853 | 46 | 3555324 | 3555335 | 2 | 6  | 12 | GT   | 22 | 3  |
| 275854 | 46 | 3555367 | 3555378 | 2 | 6  | 12 | CA   | 22 | 15 |
| 275855 | 46 | 3556529 | 3556552 | 2 | 12 | 24 | GT   | 22 | 8  |
| 275858 | 46 | 3556963 | 3556984 | 2 | 11 | 22 | TG   | 25 | 8  |
| 275859 | 46 | 3557146 | 3557179 | 2 | 17 | 34 | GT   | 16 | 15 |
| 275860 | 46 | 3557482 | 3557507 | 2 | 13 | 26 | CA   | 18 | 19 |
| 275861 | 46 | 3558924 | 3558943 | 2 | 10 | 20 | CA   | 9  | 11 |
| 275862 | 46 | 3559281 | 3559295 | 3 | 5  | 15 | GTT  | 14 | 3  |

|        |    |         |         |   |    |    |      |    |    |
|--------|----|---------|---------|---|----|----|------|----|----|
| 275863 | 46 | 3560911 | 3560937 | 3 | 9  | 27 | CTC  | 14 | 6  |
| 275864 | 46 | 3561026 | 3561045 | 2 | 10 | 20 | GT   | 9  | 10 |
| 275867 | 46 | 3561715 | 3561738 | 4 | 6  | 24 | GATG | 30 | 5  |
| 275869 | 46 | 3563018 | 3563053 | 2 | 18 | 36 | GT   | 6  | 7  |
| 275872 | 46 | 3565887 | 3565912 | 2 | 13 | 26 | AC   | 7  | 10 |
| 275873 | 46 | 3569464 | 3569484 | 3 | 7  | 21 | CAT  | 26 | 8  |
| 275874 | 46 | 3569806 | 3569825 | 4 | 5  | 20 | AGTA | 32 | 4  |
| 275875 | 46 | 3570806 | 3570831 | 2 | 13 | 26 | GT   | 9  | 11 |
| 275876 | 46 | 3570978 | 3571011 | 2 | 17 | 34 | AC   | 10 | 11 |
| 275882 | 46 | 3572408 | 3572435 | 2 | 14 | 28 | AC   | 18 | 11 |
| 275883 | 46 | 3572502 | 3572531 | 3 | 10 | 30 | ACA  | 13 | 13 |
| 275886 | 46 | 3574402 | 3574440 | 3 | 13 | 39 | GGA  | 21 | 7  |
| 275888 | 46 | 3575734 | 3575765 | 2 | 16 | 32 | TG   | 8  | 10 |
| 275890 | 46 | 3576453 | 3576467 | 3 | 5  | 15 | CAT  | 25 | 7  |
| 275891 | 46 | 3576684 | 3576705 | 2 | 11 | 22 | GT   | 8  | 7  |
| 275896 | 46 | 3580905 | 3580920 | 4 | 4  | 16 | AAGA | 22 | 3  |
| 275899 | 46 | 3583620 | 3583639 | 2 | 10 | 20 | GT   | 17 | 4  |
| 275900 | 46 | 3583984 | 3584003 | 2 | 10 | 20 | GT   | 15 | 8  |
| 275902 | 46 | 3584210 | 3584229 | 2 | 10 | 20 | GT   | 15 | 8  |
| 275907 | 46 | 3586199 | 3586210 | 2 | 6  | 12 | AC   | 10 | 8  |
| 275908 | 46 | 3586212 | 3586223 | 2 | 6  | 12 | CA   | 7  | 7  |
| 275911 | 46 | 3586531 | 3586545 | 3 | 5  | 15 | AGC  | 21 | 5  |
| 275920 | 46 | 3591627 | 3591647 | 3 | 7  | 21 | TCT  | 31 | 9  |
| 275922 | 46 | 3593697 | 3593710 | 2 | 7  | 14 | CT   | 16 | 6  |
| 275929 | 46 | 3597293 | 3597316 | 4 | 6  | 24 | GTCT | 28 | 8  |
| 275932 | 46 | 3597670 | 3597690 | 3 | 7  | 21 | CTC  | 21 | 8  |
| 275934 | 46 | 3600308 | 3600339 | 2 | 16 | 32 | AC   | 12 | 11 |
| 275937 | 46 | 3600611 | 3600631 | 3 | 7  | 21 | TCT  | 17 | 4  |
| 275943 | 46 | 3602757 | 3602784 | 2 | 14 | 28 | TG   | 7  | 7  |
| 275945 | 46 | 3603701 | 3603722 | 2 | 11 | 22 | GT   | 6  | 8  |
| 275954 | 46 | 3606134 | 3606153 | 2 | 10 | 20 | AC   | 13 | 9  |
| 275955 | 46 | 3609031 | 3609042 | 2 | 6  | 12 | CA   | 22 | 3  |
| 275956 | 46 | 3610284 | 3610304 | 3 | 7  | 21 | AAC  | 11 | 5  |
| 275977 | 46 | 3668115 | 3668134 | 2 | 10 | 20 | AC   | 19 | 15 |
| 275980 | 46 | 3671411 | 3671425 | 3 | 5  | 15 | CGG  | 25 | 5  |
| 275981 | 46 | 3672023 | 3672042 | 2 | 10 | 20 | TC   | 19 | 5  |
| 275982 | 46 | 3681141 | 3681168 | 2 | 14 | 28 | TG   | 12 | 8  |
| 275983 | 46 | 3681217 | 3681248 | 2 | 16 | 32 | CA   | 11 | 7  |
| 275985 | 46 | 3681343 | 3681364 | 2 | 11 | 22 | CA   | 11 | 19 |
| 275986 | 46 | 3681496 | 3681517 | 2 | 11 | 22 | TG   | 16 | 15 |
| 275987 | 46 | 3681682 | 3681713 | 2 | 16 | 32 | GT   | 20 | 22 |
| 275989 | 46 | 3683128 | 3683159 | 2 | 16 | 32 | GT   | 20 | 14 |
| 275990 | 46 | 3684730 | 3684759 | 2 | 15 | 30 | CA   | 22 | 14 |
| 275991 | 46 | 3684828 | 3684859 | 2 | 16 | 32 | AC   | 20 | 10 |
| 275993 | 46 | 3687948 | 3687967 | 2 | 10 | 20 | AC   | 25 | 13 |
| 275994 | 46 | 3689230 | 3689259 | 2 | 15 | 30 | CA   | 6  | 8  |
| 275998 | 46 | 3690978 | 3691029 | 2 | 26 | 52 | TG   | 6  | 9  |
| 276004 | 46 | 3691687 | 3691724 | 2 | 19 | 38 | TG   | 7  | 10 |
| 276005 | 46 | 3691795 | 3691818 | 2 | 12 | 24 | CA   | 12 | 9  |
| 276006 | 46 | 3691878 | 3691913 | 2 | 18 | 36 | TG   | 9  | 12 |
| 276008 | 46 | 3693240 | 3693273 | 2 | 17 | 34 | TG   | 9  | 12 |



|        |    |         |         |   |    |    |     |    |    |
|--------|----|---------|---------|---|----|----|-----|----|----|
| 276009 | 46 | 3693362 | 3693385 | 2 | 12 | 24 | GT  | 11 | 8  |
| 276010 | 46 | 3693474 | 3693521 | 2 | 24 | 48 | TG  | 8  | 9  |
| 276048 | 46 | 3717262 | 3717300 | 3 | 13 | 39 | TCC | 7  | 6  |
| 276049 | 46 | 3717360 | 3717375 | 2 | 8  | 16 | AG  | 16 | 8  |
| 276050 | 46 | 3717410 | 3717435 | 2 | 13 | 26 | CA  | 9  | 6  |
| 276052 | 46 | 3717584 | 3717613 | 2 | 15 | 30 | AC  | 17 | 15 |
| 276054 | 46 | 3717744 | 3717787 | 2 | 22 | 44 | GT  | 13 | 8  |
| 276055 | 46 | 3719939 | 3719968 | 2 | 15 | 30 | GT  | 7  | 5  |
| 276058 | 46 | 3720230 | 3720241 | 2 | 6  | 12 | AC  | 7  | 6  |
| 276059 | 46 | 3720478 | 3720498 | 3 | 7  | 21 | AGG | 21 | 4  |
| 276062 | 46 | 3722978 | 3722995 | 2 | 9  | 18 | GT  | 22 | 10 |
| 276064 | 46 | 3724233 | 3724260 | 2 | 14 | 28 | CA  | 13 | 7  |
| 276066 | 46 | 3726492 | 3726523 | 2 | 16 | 32 | CA  | 11 | 11 |
| 276068 | 46 | 3729655 | 3729690 | 3 | 12 | 36 | AGG | 11 | 7  |
| 276070 | 46 | 3731227 | 3731242 | 2 | 8  | 16 | GA  | 13 | 12 |
| 276071 | 46 | 3731418 | 3731443 | 2 | 13 | 26 | GT  | 14 | 7  |
| 276072 | 46 | 3731507 | 3731528 | 2 | 11 | 22 | GT  | 24 | 15 |
| 276073 | 46 | 3731684 | 3731707 | 2 | 12 | 24 | GT  | 6  | 5  |
| 276077 | 46 | 3735661 | 3735684 | 3 | 8  | 24 | CCT | 7  | 5  |
| 276078 | 46 | 3735801 | 3735822 | 2 | 11 | 22 | GT  | 7  | 8  |
| 276080 | 46 | 3735994 | 3736013 | 2 | 10 | 20 | GT  | 11 | 7  |
| 276082 | 46 | 3737834 | 3737853 | 2 | 10 | 20 | AC  | 29 | 13 |
| 276083 | 46 | 3738114 | 3738135 | 2 | 11 | 22 | TG  | 21 | 12 |
| 276090 | 46 | 3745993 | 3746008 | 2 | 8  | 16 | TG  | 18 | 13 |
| 276091 | 46 | 3747934 | 3747985 | 2 | 26 | 52 | GT  | 10 | 13 |
| 276095 | 46 | 3748386 | 3748421 | 3 | 12 | 36 | GAG | 20 | 5  |
| 276097 | 46 | 3749066 | 3749089 | 2 | 12 | 24 | AC  | 17 | 16 |
| 276100 | 46 | 3754024 | 3754041 | 3 | 6  | 18 | GAG | 30 | 8  |
| 276103 | 46 | 3754237 | 3754256 | 2 | 10 | 20 | TG  | 13 | 6  |
| 276107 | 46 | 3755452 | 3755479 | 2 | 14 | 28 | TG  | 10 | 13 |
| 276108 | 46 | 3755549 | 3755572 | 2 | 12 | 24 | AC  | 10 | 9  |
| 276120 | 46 | 3759840 | 3759857 | 2 | 9  | 18 | AC  | 10 | 9  |
| 276123 | 46 | 3765432 | 3765452 | 3 | 7  | 21 | CCT | 15 | 3  |
| 276127 | 46 | 3768869 | 3768902 | 2 | 17 | 34 | GT  | 10 | 15 |
| 276128 | 46 | 3770556 | 3770576 | 3 | 7  | 21 | TCT | 26 | 4  |
| 276129 | 46 | 3772399 | 3772434 | 2 | 18 | 36 | CA  | 12 | 11 |
| 276136 | 46 | 3777310 | 3777339 | 2 | 15 | 30 | CA  | 16 | 7  |
| 276137 | 46 | 3779755 | 3779776 | 2 | 11 | 22 | CA  | 9  | 9  |
| 276141 | 46 | 3780126 | 3780143 | 3 | 6  | 18 | TGA | 18 | 10 |
| 276143 | 46 | 3780205 | 3780231 | 3 | 9  | 27 | GAT | 15 | 5  |
| 276144 | 46 | 3781476 | 3781499 | 3 | 8  | 24 | GAG | 16 | 7  |
| 276147 | 46 | 3787136 | 3787163 | 2 | 14 | 28 | CA  | 7  | 8  |
| 276150 | 46 | 3787476 | 3787497 | 2 | 11 | 22 | GT  | 13 | 8  |
| 276152 | 46 | 3787561 | 3787588 | 2 | 14 | 28 | CA  | 12 | 11 |
| 276155 | 46 | 3787926 | 3787943 | 3 | 6  | 18 | GAG | 13 | 4  |
| 276156 | 46 | 3787992 | 3788009 | 2 | 9  | 18 | GT  | 6  | 3  |
| 276158 | 46 | 3788148 | 3788171 | 2 | 12 | 24 | GT  | 6  | 9  |
| 276159 | 46 | 3788212 | 3788225 | 2 | 7  | 14 | GT  | 12 | 8  |
| 276164 | 46 | 3796586 | 3796601 | 2 | 8  | 16 | GA  | 15 | 4  |
| 276166 | 46 | 3796829 | 3796848 | 2 | 10 | 20 | GT  | 6  | 9  |
| 276167 | 46 | 3796912 | 3796929 | 3 | 6  | 18 | TTC | 19 | 7  |

|        |    |         |         |   |    |    |     |    |    |
|--------|----|---------|---------|---|----|----|-----|----|----|
| 276168 | 46 | 3797464 | 3797489 | 2 | 13 | 26 | CA  | 16 | 9  |
| 276176 | 46 | 3802581 | 3802602 | 2 | 11 | 22 | GT  | 16 | 11 |
| 276179 | 46 | 3802720 | 3802733 | 2 | 7  | 14 | TG  | 7  | 6  |
| 276181 | 46 | 3804666 | 3804689 | 3 | 8  | 24 | GGA | 14 | 7  |
| 276183 | 46 | 3805064 | 3805079 | 2 | 8  | 16 | AG  | 16 | 7  |
| 276184 | 46 | 3807495 | 3807508 | 2 | 7  | 14 | AG  | 26 | 3  |
| 276190 | 46 | 3811020 | 3811043 | 2 | 12 | 24 | TC  | 6  | 5  |
| 276191 | 46 | 3811070 | 3811111 | 2 | 21 | 42 | TC  | 6  | 9  |
| 276194 | 46 | 3813839 | 3813852 | 2 | 7  | 14 | CT  | 27 | 3  |
| 276202 | 46 | 3818829 | 3818840 | 2 | 6  | 12 | TG  | 17 | 13 |
| 276206 | 46 | 3822764 | 3822779 | 2 | 8  | 16 | GT  | 18 | 8  |
| 276214 | 46 | 3834226 | 3834240 | 3 | 5  | 15 | TCT | 32 | 14 |
| 276219 | 46 | 3836773 | 3836820 | 2 | 24 | 48 | GT  | 7  | 7  |
| 276227 | 46 | 3838825 | 3838880 | 2 | 28 | 56 | TG  | 7  | 9  |
| 276229 | 46 | 3839045 | 3839083 | 3 | 13 | 39 | TCT | 13 | 9  |
| 276232 | 46 | 3839736 | 3839749 | 2 | 7  | 14 | CA  | 29 | 4  |
| 276234 | 46 | 3840405 | 3840440 | 2 | 18 | 36 | CA  | 13 | 11 |
| 276235 | 46 | 3840602 | 3840617 | 2 | 8  | 16 | GA  | 27 | 4  |
| 276236 | 46 | 3841094 | 3841111 | 2 | 9  | 18 | CT  | 27 | 4  |
| 276238 | 46 | 3844633 | 3844656 | 2 | 12 | 24 | CT  | 18 | 8  |
| 276240 | 46 | 3847361 | 3847400 | 2 | 20 | 40 | GT  | 15 | 14 |
| 276241 | 46 | 3847545 | 3847596 | 2 | 26 | 52 | TG  | 14 | 13 |
| 276242 | 46 | 3848757 | 3848780 | 2 | 12 | 24 | AC  | 16 | 9  |
| 276243 | 46 | 3850048 | 3850073 | 2 | 13 | 26 | GT  | 12 | 9  |
| 276244 | 46 | 3851501 | 3851521 | 3 | 7  | 21 | GTT | 18 | 3  |
| 276247 | 46 | 3852864 | 3852881 | 2 | 9  | 18 | TG  | 15 | 7  |
| 276248 | 46 | 3854204 | 3854218 | 3 | 5  | 15 | TGA | 31 | 3  |
| 276252 | 46 | 3860689 | 3860706 | 3 | 6  | 18 | CTG | 26 | 6  |
| 276254 | 46 | 3861191 | 3861216 | 2 | 13 | 26 | AC  | 17 | 12 |
| 276256 | 46 | 3865443 | 3865464 | 2 | 11 | 22 | TG  | 19 | 15 |
| 276257 | 46 | 3865623 | 3865650 | 2 | 14 | 28 | GT  | 8  | 7  |
| 276266 | 46 | 3879960 | 3879977 | 2 | 9  | 18 | AC  | 28 | 6  |
| 276268 | 46 | 3880395 | 3880412 | 2 | 9  | 18 | AC  | 17 | 9  |
| 276269 | 46 | 3880784 | 3880809 | 2 | 13 | 26 | GT  | 15 | 11 |
| 276270 | 46 | 3882116 | 3882151 | 2 | 18 | 36 | GT  | 6  | 6  |
| 276271 | 46 | 3883795 | 3883812 | 3 | 6  | 18 | TCC | 21 | 3  |
| 276273 | 46 | 3883928 | 3883943 | 2 | 8  | 16 | GT  | 17 | 12 |
| 276274 | 46 | 3884758 | 3884783 | 2 | 13 | 26 | CA  | 7  | 6  |
| 276282 | 46 | 3889224 | 3889243 | 2 | 10 | 20 | GT  | 20 | 9  |
| 276284 | 46 | 3889411 | 3889432 | 2 | 11 | 22 | CA  | 18 | 19 |
| 276285 | 46 | 3889524 | 3889559 | 2 | 18 | 36 | AC  | 9  | 8  |
| 276286 | 46 | 3889695 | 3889718 | 2 | 12 | 24 | AC  | 22 | 10 |
| 276287 | 46 | 3890878 | 3890915 | 2 | 19 | 38 | TG  | 7  | 7  |
| 276288 | 46 | 3892589 | 3892614 | 2 | 13 | 26 | TG  | 12 | 6  |
| 276293 | 46 | 3902283 | 3902308 | 2 | 13 | 26 | AC  | 17 | 14 |
| 276297 | 46 | 3904657 | 3904682 | 2 | 13 | 26 | AC  | 6  | 10 |
| 276298 | 46 | 3905300 | 3905315 | 2 | 8  | 16 | AC  | 29 | 4  |
| 276300 | 46 | 3906248 | 3906263 | 2 | 8  | 16 | AC  | 21 | 11 |
| 276302 | 46 | 3906424 | 3906451 | 2 | 14 | 28 | CA  | 17 | 16 |
| 276322 | 46 | 3930316 | 3930337 | 2 | 11 | 22 | TG  | 9  | 8  |
| 276324 | 46 | 3932283 | 3932314 | 2 | 16 | 32 | AC  | 7  | 10 |

|        |    |         |         |   |    |    |      |    |    |
|--------|----|---------|---------|---|----|----|------|----|----|
| 276325 | 46 | 3933751 | 3933776 | 2 | 13 | 26 | GT   | 14 | 9  |
| 276326 | 46 | 3935687 | 3935704 | 3 | 6  | 18 | TTC  | 23 | 5  |
| 276327 | 46 | 3937835 | 3937864 | 2 | 15 | 30 | AC   | 11 | 4  |
| 276328 | 46 | 3938019 | 3938056 | 2 | 19 | 38 | AC   | 9  | 8  |
| 276329 | 46 | 3938312 | 3938341 | 2 | 15 | 30 | AC   | 15 | 8  |
| 276333 | 46 | 3942148 | 3942177 | 2 | 15 | 30 | TG   | 10 | 7  |
| 276335 | 46 | 3945960 | 3945983 | 2 | 12 | 24 | AC   | 7  | 9  |
| 276336 | 46 | 3947426 | 3947479 | 2 | 27 | 54 | GT   | 8  | 8  |
| 276337 | 46 | 3947700 | 3947733 | 2 | 17 | 34 | CA   | 8  | 7  |
| 276340 | 47 | 216     | 227     | 2 | 6  | 12 | TA   | 21 | 3  |
| 276341 | 47 | 1387    | 1401    | 3 | 5  | 15 | TAA  | 31 | 3  |
| 276344 | 47 | 7413    | 7432    | 2 | 10 | 20 | CA   | 24 | 4  |
| 276345 | 47 | 8073    | 8098    | 2 | 13 | 26 | TG   | 14 | 10 |
| 276346 | 47 | 12547   | 12562   | 2 | 8  | 16 | GT   | 22 | 7  |
| 276347 | 47 | 12811   | 12825   | 3 | 5  | 15 | CCT  | 6  | 3  |
| 276349 | 47 | 13253   | 13270   | 2 | 9  | 18 | AC   | 16 | 10 |
| 276353 | 47 | 13748   | 13771   | 2 | 12 | 24 | AC   | 24 | 7  |
| 276361 | 47 | 28661   | 28674   | 2 | 7  | 14 | AC   | 25 | 3  |
| 276365 | 47 | 31749   | 31772   | 2 | 12 | 24 | TG   | 14 | 6  |
| 276366 | 47 | 31817   | 31840   | 2 | 12 | 24 | TG   | 12 | 8  |
| 276372 | 47 | 36678   | 36693   | 4 | 4  | 16 | AAAT | 22 | 6  |
| 276379 | 47 | 44890   | 44929   | 2 | 20 | 40 | TG   | 6  | 8  |
| 276387 | 47 | 57907   | 57922   | 2 | 8  | 16 | GT   | 22 | 5  |
| 276389 | 47 | 62814   | 62827   | 2 | 7  | 14 | CA   | 21 | 4  |
| 276392 | 47 | 70089   | 70122   | 2 | 17 | 34 | CA   | 14 | 4  |
| 276399 | 47 | 77148   | 77165   | 2 | 9  | 18 | TG   | 23 | 7  |
| 276406 | 47 | 98122   | 98135   | 2 | 7  | 14 | CA   | 20 | 5  |
| 276417 | 47 | 111520  | 111531  | 2 | 6  | 12 | CT   | 14 | 13 |
| 276420 | 47 | 116388  | 116409  | 2 | 11 | 22 | GT   | 11 | 14 |
| 276428 | 47 | 143647  | 143664  | 2 | 9  | 18 | GT   | 23 | 4  |
| 276432 | 47 | 151468  | 151487  | 2 | 10 | 20 | AC   | 23 | 5  |
| 276434 | 47 | 152899  | 152918  | 2 | 10 | 20 | AC   | 23 | 4  |
| 276436 | 47 | 167220  | 167237  | 2 | 9  | 18 | CA   | 14 | 5  |
| 276440 | 47 | 172727  | 172746  | 2 | 10 | 20 | GT   | 17 | 4  |
| 276441 | 47 | 175767  | 175782  | 4 | 4  | 16 | AAAT | 16 | 3  |
| 276443 | 47 | 177432  | 177449  | 2 | 9  | 18 | TC   | 26 | 4  |
| 276444 | 47 | 178277  | 178292  | 2 | 8  | 16 | AC   | 15 | 6  |
| 276447 | 47 | 184733  | 184754  | 2 | 11 | 22 | CT   | 18 | 9  |
| 276448 | 47 | 187286  | 187307  | 2 | 11 | 22 | CA   | 21 | 10 |
| 276449 | 47 | 192599  | 192614  | 2 | 8  | 16 | AC   | 22 | 4  |
| 276452 | 47 | 196085  | 196098  | 2 | 7  | 14 | AT   | 13 | 6  |
| 276458 | 47 | 201915  | 201926  | 2 | 6  | 12 | TG   | 22 | 3  |
| 276463 | 47 | 220225  | 220236  | 2 | 6  | 12 | TC   | 27 | 3  |
| 276464 | 47 | 220904  | 220923  | 2 | 10 | 20 | AC   | 15 | 5  |
| 276465 | 47 | 221060  | 221080  | 3 | 7  | 21 | GCT  | 13 | 3  |
| 276468 | 47 | 221318  | 221337  | 2 | 10 | 20 | GT   | 13 | 9  |
| 276469 | 47 | 223746  | 223763  | 2 | 9  | 18 | TG   | 11 | 3  |
| 276472 | 47 | 231827  | 231850  | 2 | 12 | 24 | GT   | 11 | 5  |
| 276474 | 47 | 231976  | 231997  | 2 | 11 | 22 | AC   | 18 | 4  |
| 276476 | 47 | 239013  | 239032  | 2 | 10 | 20 | AC   | 19 | 6  |
| 276477 | 47 | 240030  | 240071  | 2 | 21 | 42 | CA   | 8  | 9  |

|        |    |        |        |   |    |    |      |    |    |
|--------|----|--------|--------|---|----|----|------|----|----|
| 276478 | 47 | 246261 | 246290 | 2 | 15 | 30 | TG   | 17 | 9  |
| 276479 | 47 | 247374 | 247413 | 2 | 20 | 40 | GT   | 25 | 12 |
| 276480 | 47 | 248888 | 248927 | 2 | 20 | 40 | AC   | 10 | 6  |
| 276484 | 47 | 263475 | 263490 | 2 | 8  | 16 | TG   | 11 | 6  |
| 276485 | 47 | 263726 | 263743 | 2 | 9  | 18 | TG   | 18 | 5  |
| 276486 | 47 | 263870 | 263901 | 2 | 16 | 32 | AC   | 8  | 9  |
| 276488 | 47 | 272603 | 272614 | 2 | 6  | 12 | GA   | 30 | 3  |
| 276491 | 47 | 281254 | 281275 | 2 | 11 | 22 | TG   | 20 | 4  |
| 276493 | 47 | 281477 | 281506 | 2 | 15 | 30 | GT   | 10 | 10 |
| 276494 | 47 | 281799 | 281824 | 2 | 13 | 26 | AC   | 22 | 8  |
| 276496 | 47 | 288258 | 288289 | 2 | 16 | 32 | CA   | 11 | 10 |
| 276502 | 47 | 297174 | 297197 | 2 | 12 | 24 | AC   | 14 | 7  |
| 276504 | 47 | 301992 | 302011 | 2 | 10 | 20 | GT   | 18 | 11 |
| 276505 | 47 | 302310 | 302327 | 2 | 9  | 18 | AC   | 27 | 3  |
| 276510 | 47 | 306486 | 306499 | 2 | 7  | 14 | CA   | 27 | 3  |
| 276512 | 47 | 307882 | 307901 | 2 | 10 | 20 | TG   | 12 | 13 |
| 276513 | 47 | 307973 | 307994 | 2 | 11 | 22 | AC   | 18 | 9  |
| 276515 | 47 | 310696 | 310727 | 2 | 16 | 32 | CA   | 14 | 9  |
| 276516 | 47 | 311010 | 311031 | 2 | 11 | 22 | GT   | 11 | 8  |
| 276520 | 47 | 311588 | 311605 | 3 | 6  | 18 | TCC  | 14 | 3  |
| 276521 | 47 | 311668 | 311699 | 2 | 16 | 32 | AC   | 21 | 5  |
| 276522 | 47 | 312433 | 312447 | 3 | 5  | 15 | CCA  | 29 | 3  |
| 276527 | 47 | 320581 | 320596 | 4 | 4  | 16 | AATA | 31 | 3  |
| 276530 | 47 | 321698 | 321713 | 4 | 4  | 16 | TCTG | 27 | 4  |
| 276531 | 47 | 324973 | 324988 | 4 | 4  | 16 | TTTG | 19 | 5  |
| 276539 | 47 | 329724 | 329741 | 2 | 9  | 18 | AC   | 17 | 5  |
| 276540 | 47 | 330014 | 330029 | 2 | 8  | 16 | TG   | 17 | 5  |
| 276541 | 47 | 330186 | 330205 | 2 | 10 | 20 | TG   | 17 | 5  |
| 276559 | 47 | 342302 | 342319 | 2 | 9  | 18 | TG   | 19 | 7  |
| 276560 | 47 | 344417 | 344452 | 2 | 18 | 36 | GT   | 17 | 11 |
| 276561 | 47 | 346956 | 346985 | 2 | 15 | 30 | AC   | 10 | 7  |
| 276562 | 47 | 347106 | 347127 | 2 | 11 | 22 | CA   | 11 | 3  |
| 276563 | 47 | 350097 | 350112 | 2 | 8  | 16 | CA   | 24 | 4  |
| 276565 | 47 | 352072 | 352089 | 2 | 9  | 18 | TG   | 22 | 4  |
| 276567 | 47 | 353683 | 353698 | 2 | 8  | 16 | TG   | 23 | 9  |
| 276570 | 47 | 354064 | 354081 | 2 | 9  | 18 | AC   | 8  | 5  |
| 276571 | 47 | 354218 | 354267 | 2 | 25 | 50 | CA   | 11 | 9  |
| 276572 | 47 | 354335 | 354350 | 2 | 8  | 16 | AC   | 21 | 3  |
| 276573 | 47 | 354437 | 354458 | 2 | 11 | 22 | AC   | 6  | 6  |
| 276574 | 47 | 354600 | 354631 | 2 | 16 | 32 | CA   | 16 | 10 |
| 276576 | 47 | 356121 | 356150 | 2 | 15 | 30 | GT   | 13 | 11 |
| 276577 | 47 | 357158 | 357171 | 2 | 7  | 14 | CT   | 26 | 5  |
| 276581 | 47 | 358892 | 358909 | 2 | 9  | 18 | AC   | 16 | 4  |
| 276583 | 47 | 360232 | 360246 | 3 | 5  | 15 | AAG  | 21 | 7  |
| 276584 | 47 | 360361 | 360380 | 2 | 10 | 20 | GT   | 17 | 8  |
| 276586 | 47 | 361126 | 361149 | 2 | 12 | 24 | CA   | 18 | 10 |
| 276587 | 47 | 361321 | 361334 | 2 | 7  | 14 | AC   | 23 | 4  |
| 276588 | 47 | 361829 | 361849 | 3 | 7  | 21 | CCT  | 17 | 4  |
| 276589 | 47 | 362078 | 362095 | 2 | 9  | 18 | CT   | 6  | 3  |
| 276594 | 47 | 364539 | 364562 | 3 | 8  | 24 | GAG  | 24 | 5  |
| 276595 | 47 | 364796 | 364825 | 2 | 15 | 30 | AC   | 9  | 6  |

|        |    |        |        |   |    |    |      |    |    |
|--------|----|--------|--------|---|----|----|------|----|----|
| 276596 | 47 | 364873 | 364898 | 2 | 13 | 26 | CA   | 16 | 9  |
| 276602 | 47 | 367100 | 367135 | 4 | 9  | 36 | TATC | 12 | 6  |
| 276603 | 47 | 367316 | 367333 | 3 | 6  | 18 | TCA  | 26 | 3  |
| 276606 | 47 | 370438 | 370449 | 2 | 6  | 12 | AC   | 17 | 3  |
| 276609 | 47 | 372352 | 372371 | 2 | 10 | 20 | TG   | 21 | 8  |
| 276614 | 47 | 374445 | 374474 | 2 | 15 | 30 | AC   | 16 | 9  |
| 276618 | 47 | 375436 | 375457 | 2 | 11 | 22 | AC   | 21 | 3  |
| 276619 | 47 | 376259 | 376290 | 2 | 16 | 32 | TG   | 6  | 3  |
| 276620 | 47 | 376458 | 376475 | 2 | 9  | 18 | TG   | 21 | 7  |
| 276621 | 47 | 376657 | 376686 | 2 | 15 | 30 | CA   | 12 | 8  |
| 276622 | 47 | 376783 | 376814 | 2 | 16 | 32 | TG   | 8  | 10 |
| 276641 | 47 | 388409 | 388438 | 2 | 15 | 30 | CA   | 7  | 7  |
| 276643 | 47 | 390691 | 390711 | 3 | 7  | 21 | AAT  | 13 | 3  |
| 276645 | 47 | 392504 | 392517 | 2 | 7  | 14 | TG   | 23 | 7  |
| 276646 | 47 | 392654 | 392674 | 3 | 7  | 21 | ATA  | 19 | 4  |
| 276652 | 47 | 394838 | 394857 | 4 | 5  | 20 | TTTC | 22 | 3  |
| 276656 | 47 | 396012 | 396029 | 3 | 6  | 18 | CAA  | 16 | 3  |
| 276662 | 47 | 397075 | 397106 | 2 | 16 | 32 | AG   | 10 | 7  |
| 276664 | 47 | 399338 | 399351 | 2 | 7  | 14 | AC   | 30 | 5  |
| 276667 | 47 | 399754 | 399785 | 2 | 16 | 32 | TG   | 24 | 10 |
| 276668 | 47 | 399956 | 399991 | 2 | 18 | 36 | TG   | 9  | 11 |
| 276670 | 47 | 400926 | 400945 | 2 | 10 | 20 | GT   | 16 | 4  |
| 276686 | 47 | 409003 | 409016 | 2 | 7  | 14 | GT   | 26 | 9  |
| 276689 | 47 | 411210 | 411229 | 2 | 10 | 20 | GT   | 17 | 6  |
| 276693 | 47 | 414052 | 414067 | 4 | 4  | 16 | AAAC | 19 | 3  |
| 276696 | 47 | 434967 | 434992 | 2 | 13 | 26 | TG   | 17 | 8  |
| 276697 | 47 | 435135 | 435152 | 2 | 9  | 18 | TG   | 23 | 10 |
| 276701 | 47 | 438153 | 438188 | 2 | 18 | 36 | CA   | 9  | 9  |
| 276703 | 47 | 454084 | 454095 | 2 | 6  | 12 | TA   | 23 | 3  |
| 276706 | 47 | 457870 | 457899 | 2 | 15 | 30 | TG   | 7  | 10 |
| 276707 | 47 | 460315 | 460332 | 3 | 6  | 18 | AGA  | 13 | 4  |
| 276708 | 47 | 460470 | 460490 | 3 | 7  | 21 | CAG  | 25 | 4  |
| 276709 | 47 | 460571 | 460585 | 3 | 5  | 15 | TCC  | 26 | 3  |
| 276715 | 47 | 470958 | 470981 | 4 | 6  | 24 | CCAT | 27 | 12 |
| 276716 | 47 | 471107 | 471122 | 4 | 4  | 16 | GTCT | 30 | 3  |
| 276718 | 47 | 471279 | 471300 | 2 | 11 | 22 | AC   | 23 | 8  |
| 276722 | 47 | 474673 | 474688 | 2 | 8  | 16 | TG   | 20 | 4  |
| 276724 | 47 | 480953 | 480998 | 2 | 23 | 46 | TG   | 6  | 5  |
| 276725 | 47 | 483255 | 483286 | 2 | 16 | 32 | CA   | 15 | 8  |
| 276726 | 47 | 483876 | 483893 | 2 | 9  | 18 | GT   | 19 | 6  |
| 276731 | 47 | 485581 | 485608 | 2 | 14 | 28 | AC   | 17 | 9  |
| 276738 | 47 | 498355 | 498368 | 2 | 7  | 14 | TG   | 7  | 3  |
| 276741 | 47 | 504883 | 504910 | 2 | 14 | 28 | TC   | 16 | 5  |
| 276746 | 47 | 513195 | 513208 | 2 | 7  | 14 | CA   | 21 | 7  |
| 276747 | 47 | 515536 | 515565 | 2 | 15 | 30 | CA   | 18 | 13 |
| 276748 | 47 | 516180 | 516201 | 2 | 11 | 22 | AC   | 23 | 12 |
| 276752 | 47 | 520376 | 520389 | 2 | 7  | 14 | TG   | 17 | 13 |
| 276753 | 47 | 523327 | 523340 | 2 | 7  | 14 | GT   | 27 | 3  |
| 276754 | 47 | 523535 | 523546 | 2 | 6  | 12 | TG   | 33 | 4  |
| 276758 | 47 | 530203 | 530234 | 2 | 16 | 32 | TG   | 8  | 15 |
| 276759 | 47 | 532789 | 532804 | 2 | 8  | 16 | AC   | 30 | 3  |

|        |    |        |        |   |    |    |      |    |    |
|--------|----|--------|--------|---|----|----|------|----|----|
| 276760 | 47 | 533013 | 533030 | 2 | 9  | 18 | GT   | 7  | 6  |
| 276763 | 47 | 537200 | 537217 | 2 | 9  | 18 | CA   | 21 | 8  |
| 276764 | 47 | 537291 | 537304 | 2 | 7  | 14 | AC   | 25 | 3  |
| 276765 | 47 | 537431 | 537446 | 2 | 8  | 16 | CA   | 17 | 7  |
| 276766 | 47 | 538363 | 538392 | 2 | 15 | 30 | GT   | 14 | 9  |
| 276769 | 47 | 547851 | 547880 | 2 | 15 | 30 | GT   | 15 | 5  |
| 276778 | 47 | 561180 | 561197 | 2 | 9  | 18 | CA   | 20 | 11 |
| 276781 | 47 | 575562 | 575573 | 2 | 6  | 12 | GT   | 31 | 3  |
| 276784 | 47 | 581583 | 581616 | 2 | 17 | 34 | AC   | 12 | 9  |
| 276785 | 47 | 583230 | 583249 | 2 | 10 | 20 | TG   | 17 | 4  |
| 276791 | 47 | 599247 | 599272 | 2 | 13 | 26 | AC   | 17 | 10 |
| 276794 | 47 | 602922 | 602943 | 2 | 11 | 22 | AC   | 9  | 6  |
| 276795 | 47 | 609493 | 609504 | 2 | 6  | 12 | GT   | 13 | 12 |
| 276796 | 47 | 609792 | 609817 | 2 | 13 | 26 | TG   | 16 | 8  |
| 276802 | 47 | 633400 | 633423 | 4 | 6  | 24 | GGAA | 26 | 5  |
| 276809 | 47 | 643401 | 643422 | 2 | 11 | 22 | AG   | 15 | 7  |
| 276811 | 47 | 648312 | 648327 | 2 | 8  | 16 | GT   | 25 | 3  |
| 276813 | 47 | 650062 | 650079 | 3 | 6  | 18 | GGA  | 23 | 3  |
| 276814 | 47 | 650271 | 650284 | 2 | 7  | 14 | AC   | 17 | 3  |
| 276816 | 47 | 652301 | 652312 | 2 | 6  | 12 | AC   | 19 | 4  |
| 276817 | 47 | 652401 | 652418 | 2 | 9  | 18 | CA   | 27 | 4  |
| 276818 | 47 | 652544 | 652559 | 2 | 8  | 16 | AC   | 18 | 4  |
| 276819 | 47 | 653201 | 653221 | 3 | 7  | 21 | TTC  | 29 | 3  |
| 276820 | 47 | 654405 | 654428 | 4 | 6  | 24 | CTCC | 12 | 3  |
| 276825 | 47 | 655732 | 655759 | 2 | 14 | 28 | TG   | 13 | 10 |
| 276826 | 47 | 656729 | 656744 | 2 | 8  | 16 | TG   | 22 | 6  |
| 276830 | 47 | 662295 | 662312 | 2 | 9  | 18 | TG   | 10 | 7  |
| 276831 | 47 | 663501 | 663522 | 2 | 11 | 22 | TG   | 9  | 11 |
| 276832 | 47 | 665622 | 665636 | 3 | 5  | 15 | TTC  | 27 | 6  |
| 276837 | 47 | 687713 | 687732 | 2 | 10 | 20 | CA   | 20 | 9  |
| 276850 | 47 | 709174 | 709191 | 3 | 6  | 18 | AGC  | 20 | 4  |
| 276852 | 47 | 710413 | 710442 | 3 | 10 | 30 | CAG  | 23 | 12 |
| 276853 | 47 | 712774 | 712795 | 2 | 11 | 22 | GA   | 11 | 11 |
| 276862 | 47 | 728165 | 728188 | 2 | 12 | 24 | GT   | 27 | 8  |
| 276863 | 47 | 728739 | 728760 | 2 | 11 | 22 | AC   | 14 | 12 |
| 276874 | 47 | 751561 | 751582 | 2 | 11 | 22 | GT   | 20 | 10 |
| 276875 | 47 | 755628 | 755643 | 2 | 8  | 16 | CT   | 17 | 7  |
| 276879 | 47 | 762977 | 763000 | 2 | 12 | 24 | GT   | 15 | 6  |
| 276880 | 47 | 763209 | 763230 | 2 | 11 | 22 | GT   | 12 | 5  |
| 276890 | 47 | 788607 | 788620 | 2 | 7  | 14 | TC   | 28 | 3  |
| 276891 | 47 | 788857 | 788876 | 2 | 10 | 20 | AG   | 21 | 5  |
| 276892 | 47 | 790307 | 790320 | 2 | 7  | 14 | TG   | 36 | 3  |
| 276897 | 47 | 792221 | 792242 | 2 | 11 | 22 | GA   | 11 | 8  |
| 276899 | 47 | 794222 | 794239 | 3 | 6  | 18 | CTG  | 25 | 3  |
| 276900 | 47 | 796953 | 796978 | 2 | 13 | 26 | TG   | 13 | 8  |
| 276907 | 47 | 806952 | 806979 | 2 | 14 | 28 | TG   | 14 | 10 |
| 276913 | 47 | 807713 | 807730 | 2 | 9  | 18 | TC   | 6  | 5  |
| 276917 | 47 | 811737 | 811752 | 2 | 8  | 16 | CT   | 19 | 3  |
| 276918 | 47 | 811883 | 811912 | 2 | 15 | 30 | AG   | 12 | 10 |
| 276923 | 47 | 813348 | 813367 | 2 | 10 | 20 | TG   | 14 | 6  |
| 276924 | 47 | 813421 | 813436 | 2 | 8  | 16 | AC   | 11 | 4  |

|        |    |         |         |   |    |    |      |    |    |
|--------|----|---------|---------|---|----|----|------|----|----|
| 276925 | 47 | 813439  | 813454  | 2 | 8  | 16 | AC   | 12 | 5  |
| 276927 | 47 | 818923  | 818946  | 3 | 8  | 24 | TGC  | 25 | 6  |
| 276928 | 47 | 819168  | 819201  | 2 | 17 | 34 | CA   | 19 | 16 |
| 276932 | 47 | 833316  | 833345  | 2 | 15 | 30 | AC   | 10 | 8  |
| 276934 | 47 | 836091  | 836105  | 3 | 5  | 15 | CTG  | 29 | 5  |
| 276935 | 47 | 841388  | 841421  | 2 | 17 | 34 | TG   | 12 | 10 |
| 276937 | 47 | 847340  | 847391  | 4 | 13 | 52 | ATAG | 18 | 13 |
| 276949 | 47 | 875451  | 875484  | 2 | 17 | 34 | TG   | 19 | 9  |
| 276952 | 47 | 876716  | 876727  | 2 | 6  | 12 | CT   | 28 | 3  |
| 276953 | 47 | 878133  | 878144  | 2 | 6  | 12 | TG   | 30 | 5  |
| 276963 | 47 | 884877  | 884900  | 2 | 12 | 24 | TG   | 11 | 7  |
| 276973 | 47 | 908923  | 908958  | 2 | 18 | 36 | TG   | 10 | 12 |
| 276974 | 47 | 909102  | 909119  | 2 | 9  | 18 | AC   | 27 | 7  |
| 276976 | 47 | 913351  | 913365  | 3 | 5  | 15 | AAC  | 14 | 3  |
| 276981 | 47 | 924067  | 924096  | 3 | 10 | 30 | ATG  | 30 | 12 |
| 276988 | 47 | 938446  | 938465  | 2 | 10 | 20 | TG   | 23 | 6  |
| 276992 | 47 | 946487  | 946501  | 3 | 5  | 15 | CTT  | 20 | 3  |
| 276993 | 47 | 951163  | 951182  | 2 | 10 | 20 | GT   | 20 | 5  |
| 276994 | 47 | 951645  | 951670  | 2 | 13 | 26 | CT   | 19 | 7  |
| 276997 | 47 | 964174  | 964199  | 2 | 13 | 26 | CA   | 7  | 9  |
| 276998 | 47 | 964297  | 964310  | 2 | 7  | 14 | CA   | 25 | 3  |
| 276999 | 47 | 964959  | 964972  | 2 | 7  | 14 | TG   | 19 | 3  |
| 277001 | 47 | 969727  | 969744  | 2 | 9  | 18 | CA   | 19 | 3  |
| 277003 | 47 | 979112  | 979129  | 2 | 9  | 18 | GT   | 14 | 6  |
| 277005 | 47 | 981779  | 981810  | 2 | 16 | 32 | AC   | 6  | 7  |
| 277008 | 47 | 984027  | 984038  | 2 | 6  | 12 | TG   | 12 | 8  |
| 277009 | 47 | 984081  | 984094  | 2 | 7  | 14 | TG   | 10 | 4  |
| 277015 | 47 | 989831  | 989844  | 2 | 7  | 14 | AG   | 12 | 3  |
| 277019 | 47 | 1006779 | 1006822 | 2 | 22 | 44 | TG   | 9  | 7  |
| 277022 | 47 | 1008810 | 1008829 | 2 | 10 | 20 | CA   | 23 | 8  |
| 277023 | 47 | 1010063 | 1010092 | 2 | 15 | 30 | GT   | 15 | 11 |
| 277035 | 47 | 1046691 | 1046738 | 4 | 12 | 48 | ATCT | 13 | 10 |
| 277036 | 47 | 1047095 | 1047112 | 3 | 6  | 18 | TTG  | 6  | 6  |
| 277038 | 47 | 1047639 | 1047653 | 3 | 5  | 15 | GCT  | 28 | 6  |
| 277042 | 47 | 1056900 | 1056921 | 2 | 11 | 22 | AC   | 17 | 4  |
| 277045 | 47 | 1060622 | 1060635 | 2 | 7  | 14 | AC   | 28 | 7  |
| 277046 | 47 | 1061701 | 1061726 | 2 | 13 | 26 | AC   | 24 | 8  |
| 277047 | 47 | 1064659 | 1064696 | 2 | 19 | 38 | CA   | 7  | 8  |
| 277053 | 47 | 1065726 | 1065746 | 3 | 7  | 21 | AGG  | 11 | 4  |
| 277054 | 47 | 1065983 | 1066030 | 2 | 24 | 48 | AC   | 6  | 7  |
| 277056 | 47 | 1066637 | 1066656 | 2 | 10 | 20 | GT   | 14 | 7  |
| 277057 | 47 | 1066947 | 1066982 | 2 | 18 | 36 | GT   | 12 | 9  |
| 277061 | 47 | 1070512 | 1070547 | 2 | 18 | 36 | TG   | 6  | 10 |
| 277063 | 47 | 1070984 | 1070995 | 2 | 6  | 12 | CA   | 21 | 3  |
| 277064 | 47 | 1073668 | 1073681 | 2 | 7  | 14 | GT   | 21 | 5  |
| 277066 | 47 | 1074023 | 1074036 | 2 | 7  | 14 | AC   | 20 | 3  |
| 277067 | 47 | 1074280 | 1074299 | 2 | 10 | 20 | GT   | 24 | 10 |
| 277068 | 47 | 1080739 | 1080764 | 2 | 13 | 26 | TA   | 15 | 16 |
| 277074 | 47 | 1087270 | 1087281 | 2 | 6  | 12 | CT   | 34 | 4  |
| 277075 | 47 | 1089207 | 1089222 | 2 | 8  | 16 | AC   | 16 | 3  |
| 277077 | 47 | 1089397 | 1089426 | 2 | 15 | 30 | CA   | 8  | 8  |

|        |    |         |         |   |    |    |      |    |    |
|--------|----|---------|---------|---|----|----|------|----|----|
| 277078 | 47 | 1091568 | 1091587 | 2 | 10 | 20 | AG   | 13 | 5  |
| 277082 | 47 | 1104892 | 1104903 | 2 | 6  | 12 | TG   | 20 | 7  |
| 277083 | 47 | 1106481 | 1106504 | 2 | 12 | 24 | AC   | 15 | 8  |
| 277088 | 47 | 1116163 | 1116176 | 2 | 7  | 14 | AC   | 28 | 3  |
| 277089 | 47 | 1116188 | 1116199 | 2 | 6  | 12 | CA   | 23 | 3  |
| 277091 | 47 | 1118142 | 1118165 | 3 | 8  | 24 | CTC  | 18 | 7  |
| 277095 | 47 | 1121424 | 1121459 | 2 | 18 | 36 | TG   | 11 | 9  |
| 277101 | 47 | 1121909 | 1121922 | 2 | 7  | 14 | CA   | 25 | 6  |
| 277106 | 47 | 1125992 | 1126021 | 2 | 15 | 30 | TC   | 16 | 6  |
| 277112 | 47 | 1136542 | 1136557 | 2 | 8  | 16 | TA   | 11 | 5  |
| 277115 | 47 | 1144787 | 1144828 | 2 | 21 | 42 | TG   | 8  | 9  |
| 277124 | 47 | 1165129 | 1165152 | 2 | 12 | 24 | GT   | 15 | 9  |
| 277128 | 47 | 1166724 | 1166749 | 2 | 13 | 26 | AC   | 12 | 7  |
| 277131 | 47 | 1168238 | 1168255 | 3 | 6  | 18 | AGA  | 28 | 4  |
| 277132 | 47 | 1168964 | 1169001 | 2 | 19 | 38 | CA   | 16 | 19 |
| 277136 | 47 | 1170618 | 1170633 | 4 | 4  | 16 | AAAG | 23 | 8  |
| 277137 | 47 | 1170951 | 1170965 | 3 | 5  | 15 | CTC  | 29 | 4  |
| 277142 | 47 | 1181325 | 1181336 | 2 | 6  | 12 | GT   | 27 | 3  |
| 277148 | 47 | 1201684 | 1201719 | 2 | 18 | 36 | GT   | 10 | 9  |
| 277156 | 47 | 1227318 | 1227331 | 2 | 7  | 14 | CA   | 21 | 5  |
| 277161 | 47 | 1235379 | 1235408 | 2 | 15 | 30 | TG   | 6  | 6  |
| 277163 | 47 | 1239681 | 1239696 | 2 | 8  | 16 | GT   | 19 | 4  |
| 277169 | 47 | 1249035 | 1249064 | 3 | 10 | 30 | CAG  | 29 | 11 |
| 277170 | 47 | 1250720 | 1250731 | 2 | 6  | 12 | AC   | 22 | 3  |
| 277173 | 47 | 1256242 | 1256262 | 3 | 7  | 21 | GCT  | 14 | 11 |
| 277174 | 47 | 1256414 | 1256440 | 3 | 9  | 27 | CTC  | 10 | 10 |
| 277178 | 47 | 1256860 | 1256875 | 2 | 8  | 16 | GA   | 11 | 4  |
| 277190 | 47 | 1274039 | 1274056 | 3 | 6  | 18 | GTT  | 15 | 10 |
| 277200 | 47 | 1296768 | 1296799 | 2 | 16 | 32 | AC   | 22 | 12 |
| 277201 | 47 | 1297078 | 1297091 | 2 | 7  | 14 | AC   | 12 | 3  |
| 277202 | 47 | 1297093 | 1297104 | 2 | 6  | 12 | CA   | 18 | 4  |
| 277204 | 47 | 1308846 | 1308857 | 2 | 6  | 12 | GT   | 23 | 4  |
| 277205 | 47 | 1317500 | 1317521 | 2 | 11 | 22 | TG   | 16 | 9  |
| 277206 | 47 | 1317701 | 1317712 | 2 | 6  | 12 | AG   | 24 | 4  |
| 277224 | 47 | 1341407 | 1341424 | 3 | 6  | 18 | CCA  | 17 | 7  |
| 277235 | 47 | 1354661 | 1354675 | 3 | 5  | 15 | CCT  | 22 | 3  |
| 277240 | 47 | 1366488 | 1366501 | 2 | 7  | 14 | CA   | 27 | 5  |
| 277243 | 47 | 1370285 | 1370320 | 2 | 18 | 36 | AC   | 9  | 8  |
| 277245 | 47 | 1372811 | 1372840 | 2 | 15 | 30 | GT   | 11 | 5  |
| 277246 | 47 | 1373401 | 1373442 | 3 | 14 | 42 | GAT  | 20 | 8  |
| 277259 | 47 | 1387999 | 1388010 | 2 | 6  | 12 | AC   | 16 | 8  |
| 277260 | 47 | 1388013 | 1388028 | 2 | 8  | 16 | AC   | 12 | 6  |
| 277273 | 47 | 1413222 | 1413241 | 2 | 10 | 20 | TG   | 18 | 6  |
| 277275 | 47 | 1414587 | 1414598 | 2 | 6  | 12 | TG   | 11 | 4  |
| 277276 | 47 | 1414600 | 1414615 | 2 | 8  | 16 | GT   | 10 | 4  |
| 277277 | 47 | 1414709 | 1414734 | 2 | 13 | 26 | GA   | 10 | 5  |
| 277281 | 47 | 1415495 | 1415524 | 2 | 15 | 30 | TG   | 12 | 7  |
| 277286 | 47 | 1428097 | 1428114 | 2 | 9  | 18 | CA   | 23 | 5  |
| 277291 | 47 | 1436151 | 1436182 | 2 | 16 | 32 | CA   | 14 | 13 |
| 277294 | 47 | 1439760 | 1439777 | 2 | 9  | 18 | CA   | 9  | 4  |
| 277299 | 47 | 1448652 | 1448665 | 2 | 7  | 14 | TG   | 21 | 13 |



|        |    |         |         |   |    |    |      |    |    |
|--------|----|---------|---------|---|----|----|------|----|----|
| 277300 | 47 | 1448821 | 1448844 | 2 | 12 | 24 | CA   | 15 | 3  |
| 277303 | 47 | 1449672 | 1449692 | 3 | 7  | 21 | GCA  | 32 | 6  |
| 277305 | 47 | 1451306 | 1451317 | 2 | 6  | 12 | CA   | 26 | 5  |
| 277307 | 47 | 1454027 | 1454059 | 3 | 11 | 33 | ATC  | 26 | 8  |
| 277309 | 47 | 1455828 | 1455843 | 2 | 8  | 16 | AC   | 21 | 4  |
| 277310 | 47 | 1457732 | 1457759 | 4 | 7  | 28 | AAAG | 30 | 4  |
| 277313 | 47 | 1467499 | 1467516 | 2 | 9  | 18 | TG   | 9  | 3  |
| 277316 | 47 | 1478940 | 1478971 | 2 | 16 | 32 | TG   | 8  | 12 |
| 277318 | 47 | 1480733 | 1480756 | 2 | 12 | 24 | TG   | 21 | 10 |
| 277320 | 47 | 1483747 | 1483776 | 2 | 15 | 30 | AC   | 27 | 6  |
| 277321 | 47 | 1484126 | 1484139 | 2 | 7  | 14 | AC   | 17 | 4  |
| 277322 | 47 | 1485329 | 1485343 | 3 | 5  | 15 | GGC  | 23 | 4  |
| 277326 | 47 | 1497083 | 1497106 | 2 | 12 | 24 | CA   | 23 | 14 |
| 277335 | 47 | 1517074 | 1517095 | 2 | 11 | 22 | TG   | 7  | 4  |
| 277339 | 47 | 1526926 | 1526961 | 4 | 9  | 36 | TTTC | 26 | 11 |
| 277341 | 47 | 1535735 | 1535746 | 2 | 6  | 12 | GT   | 28 | 4  |
| 277342 | 47 | 1536328 | 1536373 | 2 | 23 | 46 | GA   | 8  | 9  |
| 277346 | 47 | 1549979 | 1550002 | 2 | 12 | 24 | GT   | 19 | 5  |
| 277352 | 47 | 1555305 | 1555342 | 2 | 19 | 38 | TG   | 21 | 11 |
| 277356 | 47 | 1560225 | 1560238 | 2 | 7  | 14 | TC   | 18 | 7  |
| 277361 | 47 | 1570954 | 1570973 | 2 | 10 | 20 | TG   | 25 | 12 |
| 277364 | 47 | 1572141 | 1572156 | 2 | 8  | 16 | AC   | 7  | 5  |
| 277365 | 47 | 1572194 | 1572211 | 2 | 9  | 18 | AC   | 22 | 5  |
| 277367 | 47 | 1572555 | 1572570 | 4 | 4  | 16 | TTAT | 27 | 3  |
| 277371 | 47 | 1578072 | 1578085 | 2 | 7  | 14 | TA   | 13 | 11 |
| 277373 | 47 | 1579142 | 1579165 | 2 | 12 | 24 | GA   | 15 | 3  |
| 277378 | 47 | 1586200 | 1586213 | 2 | 7  | 14 | CA   | 28 | 8  |
| 277379 | 47 | 1586418 | 1586433 | 2 | 8  | 16 | GA   | 21 | 7  |
| 277380 | 47 | 1586611 | 1586636 | 2 | 13 | 26 | GT   | 13 | 8  |
| 277389 | 47 | 1592791 | 1592808 | 2 | 9  | 18 | GT   | 18 | 6  |
| 277396 | 47 | 1599284 | 1599315 | 2 | 16 | 32 | GT   | 9  | 7  |
| 277399 | 47 | 1600614 | 1600629 | 2 | 8  | 16 | GT   | 18 | 5  |
| 277400 | 47 | 1600714 | 1600753 | 2 | 20 | 40 | TG   | 8  | 7  |
| 277416 | 47 | 1632315 | 1632346 | 2 | 16 | 32 | GT   | 6  | 9  |
| 277421 | 47 | 1641066 | 1641080 | 3 | 5  | 15 | AAG  | 35 | 4  |
| 277427 | 47 | 1647120 | 1647143 | 2 | 12 | 24 | GT   | 23 | 5  |
| 277431 | 47 | 1650676 | 1650690 | 3 | 5  | 15 | AGA  | 23 | 3  |
| 277433 | 47 | 1658170 | 1658185 | 2 | 8  | 16 | TA   | 8  | 5  |
| 277436 | 47 | 1662081 | 1662100 | 2 | 10 | 20 | GA   | 20 | 4  |
| 277442 | 47 | 1670942 | 1670969 | 2 | 14 | 28 | TG   | 11 | 9  |
| 277444 | 47 | 1672766 | 1672789 | 2 | 12 | 24 | AC   | 9  | 6  |
| 277448 | 47 | 1679692 | 1679706 | 3 | 5  | 15 | GCC  | 16 | 6  |
| 277449 | 47 | 1684241 | 1684252 | 2 | 6  | 12 | TG   | 28 | 3  |
| 277452 | 47 | 1689020 | 1689031 | 2 | 6  | 12 | GT   | 19 | 5  |
| 277453 | 47 | 1689178 | 1689209 | 2 | 16 | 32 | AC   | 20 | 8  |
| 277460 | 47 | 1697898 | 1697912 | 3 | 5  | 15 | TCA  | 27 | 3  |
| 277470 | 47 | 1720189 | 1720214 | 2 | 13 | 26 | TG   | 15 | 9  |
| 277472 | 47 | 1722183 | 1722206 | 2 | 12 | 24 | GT   | 13 | 9  |
| 277477 | 47 | 1731514 | 1731539 | 2 | 13 | 26 | AC   | 23 | 17 |
| 277479 | 47 | 1733785 | 1733812 | 4 | 7  | 28 | TCAA | 21 | 3  |
| 277485 | 47 | 1746891 | 1746902 | 2 | 6  | 12 | AC   | 23 | 5  |

|        |    |         |         |   |    |    |      |    |    |
|--------|----|---------|---------|---|----|----|------|----|----|
| 277487 | 47 | 1748179 | 1748206 | 2 | 14 | 28 | GT   | 14 | 9  |
| 277503 | 47 | 1787855 | 1787868 | 2 | 7  | 14 | TG   | 19 | 4  |
| 277509 | 47 | 1799934 | 1799949 | 4 | 4  | 16 | TTTC | 14 | 6  |
| 277515 | 47 | 1804146 | 1804165 | 4 | 5  | 20 | ATTC | 25 | 3  |
| 277517 | 47 | 1806875 | 1806888 | 2 | 7  | 14 | CA   | 8  | 6  |
| 277520 | 47 | 1808913 | 1808926 | 2 | 7  | 14 | GT   | 7  | 5  |
| 277522 | 47 | 1811366 | 1811383 | 2 | 9  | 18 | GT   | 22 | 14 |
| 277523 | 47 | 1811498 | 1811515 | 2 | 9  | 18 | TC   | 25 | 5  |
| 277535 | 47 | 1819664 | 1819687 | 4 | 6  | 24 | TCAT | 8  | 3  |
| 277536 | 47 | 1821622 | 1821635 | 2 | 7  | 14 | TG   | 21 | 6  |
| 277538 | 47 | 1823213 | 1823230 | 2 | 9  | 18 | TG   | 15 | 9  |
| 277539 | 47 | 1823731 | 1823744 | 2 | 7  | 14 | GT   | 29 | 3  |
| 277543 | 47 | 1824654 | 1824671 | 2 | 9  | 18 | AC   | 15 | 3  |
| 277544 | 47 | 1829396 | 1829417 | 2 | 11 | 22 | CA   | 18 | 9  |
| 277545 | 47 | 1830586 | 1830609 | 2 | 12 | 24 | TC   | 28 | 6  |
| 277546 | 47 | 1830853 | 1830874 | 2 | 11 | 22 | TG   | 15 | 6  |
| 277547 | 47 | 1832250 | 1832273 | 2 | 12 | 24 | CA   | 21 | 7  |
| 277551 | 47 | 1835294 | 1835309 | 4 | 4  | 16 | TATT | 12 | 5  |
| 277552 | 47 | 1836070 | 1836087 | 2 | 9  | 18 | TG   | 15 | 10 |
| 277557 | 47 | 1836506 | 1836533 | 2 | 14 | 28 | AC   | 10 | 9  |
| 277558 | 47 | 1841875 | 1841914 | 2 | 20 | 40 | CA   | 21 | 8  |
| 277560 | 47 | 1842495 | 1842510 | 2 | 8  | 16 | GT   | 32 | 13 |
| 277562 | 47 | 1844611 | 1844622 | 2 | 6  | 12 | CA   | 10 | 4  |
| 277563 | 47 | 1844624 | 1844637 | 2 | 7  | 14 | AC   | 26 | 6  |
| 277564 | 47 | 1844905 | 1844924 | 2 | 10 | 20 | TG   | 16 | 7  |
| 277565 | 47 | 1845470 | 1845503 | 2 | 17 | 34 | GT   | 17 | 8  |
| 277566 | 47 | 1848341 | 1848367 | 3 | 9  | 27 | GGA  | 12 | 6  |
| 277573 | 47 | 1860158 | 1860173 | 2 | 8  | 16 | AC   | 17 | 6  |
| 277574 | 47 | 1862904 | 1862923 | 2 | 10 | 20 | AG   | 15 | 9  |
| 277577 | 47 | 1865909 | 1865950 | 2 | 21 | 42 | CA   | 8  | 9  |
| 277588 | 47 | 1875654 | 1875709 | 2 | 28 | 56 | TG   | 15 | 14 |
| 277592 | 47 | 1878088 | 1878117 | 2 | 15 | 30 | CA   | 20 | 10 |
| 277598 | 47 | 1883640 | 1883665 | 2 | 13 | 26 | TG   | 9  | 5  |
| 277604 | 47 | 1893412 | 1893445 | 2 | 17 | 34 | CA   | 8  | 7  |
| 277613 | 47 | 1916779 | 1916790 | 2 | 6  | 12 | GT   | 27 | 3  |
| 277614 | 47 | 1916900 | 1916913 | 2 | 7  | 14 | TG   | 26 | 3  |
| 277617 | 47 | 1919397 | 1919412 | 2 | 8  | 16 | TG   | 23 | 5  |
| 277623 | 47 | 1922515 | 1922540 | 2 | 13 | 26 | TG   | 6  | 5  |
| 277627 | 47 | 1923857 | 1923874 | 2 | 9  | 18 | AC   | 12 | 4  |
| 277628 | 47 | 1924941 | 1924967 | 3 | 9  | 27 | TTG  | 22 | 8  |
| 277632 | 47 | 1928939 | 1928966 | 2 | 14 | 28 | TG   | 9  | 9  |
| 277640 | 47 | 1936312 | 1936331 | 2 | 10 | 20 | AC   | 12 | 8  |
| 277644 | 47 | 1942445 | 1942468 | 2 | 12 | 24 | AC   | 9  | 5  |
| 277646 | 47 | 1944829 | 1944846 | 2 | 9  | 18 | GT   | 23 | 10 |
| 277651 | 47 | 1947922 | 1947967 | 2 | 23 | 46 | TG   | 12 | 11 |
| 277653 | 47 | 1950259 | 1950270 | 2 | 6  | 12 | CA   | 21 | 10 |
| 277654 | 47 | 1951523 | 1951556 | 2 | 17 | 34 | AC   | 9  | 8  |
| 277658 | 47 | 1952092 | 1952105 | 2 | 7  | 14 | AG   | 26 | 3  |
| 277669 | 47 | 1967753 | 1967768 | 2 | 8  | 16 | GT   | 19 | 3  |
| 277672 | 47 | 1971568 | 1971603 | 2 | 18 | 36 | TC   | 18 | 9  |
| 277682 | 47 | 1990489 | 1990522 | 2 | 17 | 34 | TG   | 6  | 6  |

|        |    |         |         |   |    |    |      |    |    |
|--------|----|---------|---------|---|----|----|------|----|----|
| 277688 | 47 | 2004735 | 2004750 | 2 | 8  | 16 | AC   | 17 | 7  |
| 277692 | 47 | 2008338 | 2008359 | 2 | 11 | 22 | AC   | 21 | 8  |
| 277694 | 47 | 2008543 | 2008563 | 3 | 7  | 21 | CTG  | 21 | 4  |
| 277696 | 47 | 2011464 | 2011489 | 2 | 13 | 26 | AC   | 9  | 10 |
| 277697 | 47 | 2011893 | 2011910 | 3 | 6  | 18 | TGC  | 27 | 5  |
| 277698 | 47 | 2012408 | 2012427 | 2 | 10 | 20 | TG   | 8  | 5  |
| 277699 | 47 | 2012578 | 2012613 | 2 | 18 | 36 | CA   | 6  | 6  |
| 277703 | 47 | 2013496 | 2013511 | 2 | 8  | 16 | AC   | 17 | 8  |
| 277704 | 47 | 2014200 | 2014247 | 2 | 24 | 48 | TC   | 10 | 15 |
| 277705 | 47 | 2014489 | 2014506 | 3 | 6  | 18 | CAG  | 14 | 6  |
| 277706 | 47 | 2014597 | 2014608 | 2 | 6  | 12 | AC   | 11 | 4  |
| 277711 | 47 | 2018398 | 2018417 | 2 | 10 | 20 | GT   | 13 | 5  |
| 277712 | 47 | 2020784 | 2020807 | 2 | 12 | 24 | CA   | 15 | 9  |
| 277724 | 47 | 2037663 | 2037678 | 2 | 8  | 16 | GA   | 17 | 3  |
| 277725 | 47 | 2041072 | 2041085 | 2 | 7  | 14 | CT   | 31 | 5  |
| 277726 | 47 | 2042711 | 2042722 | 2 | 6  | 12 | CA   | 28 | 3  |
| 277729 | 47 | 2043999 | 2044012 | 2 | 7  | 14 | GT   | 15 | 16 |
| 277731 | 47 | 2046297 | 2046312 | 2 | 8  | 16 | AC   | 18 | 11 |
| 277733 | 47 | 2054129 | 2054154 | 2 | 13 | 26 | GT   | 15 | 7  |
| 277735 | 47 | 2060467 | 2060490 | 3 | 8  | 24 | TTC  | 7  | 8  |
| 277745 | 47 | 2070450 | 2070467 | 2 | 9  | 18 | TG   | 13 | 4  |
| 277756 | 47 | 2095719 | 2095742 | 3 | 8  | 24 | CAA  | 22 | 3  |
| 277761 | 47 | 2097990 | 2098022 | 3 | 11 | 33 | TTG  | 15 | 10 |
| 277762 | 47 | 2098106 | 2098119 | 2 | 7  | 14 | AG   | 18 | 15 |
| 277765 | 47 | 2103053 | 2103064 | 2 | 6  | 12 | CG   | 17 | 7  |
| 277766 | 47 | 2103065 | 2103080 | 2 | 8  | 16 | CA   | 18 | 4  |
| 277767 | 47 | 2103189 | 2103214 | 2 | 13 | 26 | GT   | 16 | 6  |
| 277771 | 47 | 2107644 | 2107671 | 2 | 14 | 28 | TG   | 19 | 11 |
| 277778 | 47 | 2124337 | 2124351 | 3 | 5  | 15 | GAA  | 24 | 4  |
| 277797 | 47 | 2155280 | 2155313 | 2 | 17 | 34 | GT   | 20 | 12 |
| 277799 | 47 | 2163706 | 2163717 | 2 | 6  | 12 | CT   | 24 | 7  |
| 277800 | 47 | 2163718 | 2163729 | 2 | 6  | 12 | GT   | 24 | 7  |
| 277803 | 47 | 2177797 | 2177814 | 2 | 9  | 18 | AT   | 9  | 3  |
| 277804 | 47 | 2181582 | 2181595 | 2 | 7  | 14 | GT   | 16 | 6  |
| 277805 | 47 | 2196458 | 2196481 | 2 | 12 | 24 | GT   | 23 | 9  |
| 277806 | 47 | 2196603 | 2196618 | 4 | 4  | 16 | GACA | 22 | 4  |
| 277807 | 47 | 2198157 | 2198178 | 2 | 11 | 22 | CA   | 25 | 7  |
| 277813 | 47 | 2201834 | 2201849 | 2 | 8  | 16 | GT   | 19 | 6  |
| 277819 | 47 | 2205791 | 2205814 | 4 | 6  | 24 | GACA | 33 | 4  |
| 277821 | 47 | 2216790 | 2216801 | 2 | 6  | 12 | TG   | 31 | 3  |
| 277823 | 47 | 2220270 | 2220287 | 2 | 9  | 18 | AC   | 14 | 5  |
| 277824 | 47 | 2220421 | 2220454 | 2 | 17 | 34 | CA   | 7  | 10 |
| 277826 | 47 | 2221669 | 2221690 | 2 | 11 | 22 | AC   | 6  | 6  |
| 277833 | 47 | 2235328 | 2235349 | 2 | 11 | 22 | AC   | 12 | 5  |
| 277834 | 47 | 2237773 | 2237806 | 2 | 17 | 34 | TG   | 9  | 8  |
| 277843 | 47 | 2257661 | 2257672 | 2 | 6  | 12 | TG   | 30 | 4  |
| 277845 | 47 | 2258936 | 2258955 | 4 | 5  | 20 | ATTT | 23 | 4  |
| 277846 | 47 | 2259462 | 2259475 | 2 | 7  | 14 | TA   | 25 | 8  |
| 277848 | 47 | 2262848 | 2262863 | 2 | 8  | 16 | TG   | 20 | 3  |
| 277850 | 47 | 2263775 | 2263792 | 2 | 9  | 18 | AC   | 25 | 4  |
| 277851 | 47 | 2264186 | 2264201 | 2 | 8  | 16 | CA   | 20 | 4  |

|        |    |         |         |   |    |    |      |    |    |
|--------|----|---------|---------|---|----|----|------|----|----|
| 277854 | 47 | 2267121 | 2267142 | 2 | 11 | 22 | TG   | 22 | 13 |
| 277856 | 47 | 2267510 | 2267524 | 3 | 5  | 15 | TTG  | 26 | 10 |
| 277868 | 47 | 2276332 | 2276343 | 2 | 6  | 12 | CA   | 24 | 5  |
| 277872 | 47 | 2278486 | 2278501 | 2 | 8  | 16 | TG   | 9  | 3  |
| 277873 | 47 | 2279561 | 2279584 | 4 | 6  | 24 | CACT | 12 | 6  |
| 277879 | 47 | 2280721 | 2280738 | 2 | 9  | 18 | GT   | 23 | 5  |
| 277882 | 47 | 2282539 | 2282554 | 2 | 8  | 16 | AC   | 21 | 6  |
| 277883 | 47 | 2282705 | 2282732 | 2 | 14 | 28 | GT   | 13 | 6  |
| 277885 | 47 | 2282947 | 2282966 | 2 | 10 | 20 | AC   | 26 | 7  |
| 277886 | 47 | 2283068 | 2283097 | 2 | 15 | 30 | CA   | 20 | 5  |
| 277887 | 47 | 2284307 | 2284326 | 2 | 10 | 20 | GT   | 18 | 5  |
| 277889 | 47 | 2284426 | 2284449 | 2 | 12 | 24 | AC   | 11 | 7  |
| 277890 | 47 | 2285239 | 2285250 | 2 | 6  | 12 | CT   | 15 | 4  |
| 277891 | 47 | 2285315 | 2285334 | 2 | 10 | 20 | CA   | 19 | 6  |
| 277893 | 47 | 2293284 | 2293295 | 2 | 6  | 12 | CA   | 28 | 3  |
| 277898 | 47 | 2295897 | 2295922 | 2 | 13 | 26 | TG   | 15 | 15 |
| 277899 | 47 | 2296344 | 2296359 | 2 | 8  | 16 | TG   | 25 | 4  |
| 277901 | 47 | 2296729 | 2296748 | 2 | 10 | 20 | TG   | 14 | 3  |
| 277903 | 47 | 2297669 | 2297714 | 2 | 23 | 46 | GT   | 13 | 10 |
| 277904 | 47 | 2297953 | 2297964 | 2 | 6  | 12 | AC   | 17 | 3  |
| 277905 | 47 | 2297967 | 2297982 | 2 | 8  | 16 | AC   | 21 | 4  |
| 277908 | 47 | 2299512 | 2299533 | 2 | 11 | 22 | AC   | 12 | 7  |
| 277909 | 47 | 2299638 | 2299655 | 2 | 9  | 18 | AC   | 24 | 6  |
| 277913 | 47 | 2301392 | 2301407 | 2 | 8  | 16 | GT   | 15 | 3  |
| 277914 | 47 | 2302750 | 2302781 | 2 | 16 | 32 | CA   | 21 | 13 |
| 277915 | 47 | 2303407 | 2303424 | 2 | 9  | 18 | TG   | 23 | 6  |
| 277917 | 47 | 2303753 | 2303776 | 2 | 12 | 24 | AC   | 9  | 6  |
| 277921 | 47 | 2306682 | 2306711 | 2 | 15 | 30 | CA   | 13 | 8  |
| 277923 | 47 | 2308003 | 2308020 | 2 | 9  | 18 | AC   | 13 | 3  |
| 277925 | 47 | 2309495 | 2309520 | 2 | 13 | 26 | TG   | 17 | 6  |
| 277926 | 47 | 2309658 | 2309689 | 2 | 16 | 32 | GT   | 14 | 11 |
| 277927 | 47 | 2309828 | 2309863 | 2 | 18 | 36 | AC   | 19 | 12 |
| 277928 | 47 | 2309984 | 2309997 | 2 | 7  | 14 | TG   | 15 | 3  |
| 277929 | 47 | 2310088 | 2310103 | 2 | 8  | 16 | TG   | 18 | 5  |
| 277933 | 47 | 2310722 | 2310743 | 2 | 11 | 22 | GT   | 19 | 5  |
| 277934 | 47 | 2310851 | 2310880 | 2 | 15 | 30 | TG   | 8  | 7  |
| 277935 | 47 | 2311560 | 2311591 | 2 | 16 | 32 | TG   | 20 | 9  |
| 277936 | 47 | 2311725 | 2311739 | 3 | 5  | 15 | CCA  | 23 | 3  |
| 277939 | 47 | 2312920 | 2312935 | 2 | 8  | 16 | AC   | 27 | 5  |
| 277941 | 47 | 2314300 | 2314317 | 2 | 9  | 18 | AC   | 18 | 8  |
| 277942 | 47 | 2314470 | 2314485 | 4 | 4  | 16 | CACG | 13 | 9  |
| 277943 | 47 | 2314486 | 2314503 | 2 | 9  | 18 | CA   | 13 | 9  |
| 277946 | 47 | 2317995 | 2318018 | 2 | 12 | 24 | TG   | 22 | 8  |
| 277947 | 47 | 2318125 | 2318138 | 2 | 7  | 14 | AC   | 24 | 7  |
| 277948 | 47 | 2318240 | 2318257 | 2 | 9  | 18 | GT   | 22 | 7  |
| 277949 | 47 | 2318580 | 2318591 | 2 | 6  | 12 | GT   | 27 | 3  |
| 277950 | 47 | 2319148 | 2319165 | 2 | 9  | 18 | CA   | 27 | 6  |
| 277952 | 47 | 2319498 | 2319521 | 2 | 12 | 24 | TG   | 26 | 11 |
| 277953 | 47 | 2319769 | 2319796 | 2 | 14 | 28 | GT   | 14 | 8  |
| 277955 | 47 | 2320306 | 2320323 | 2 | 9  | 18 | AC   | 18 | 5  |
| 277956 | 47 | 2320527 | 2320538 | 2 | 6  | 12 | CA   | 28 | 3  |

|        |    |         |         |   |    |    |      |    |    |
|--------|----|---------|---------|---|----|----|------|----|----|
| 277957 | 47 | 2321378 | 2321411 | 2 | 17 | 34 | TC   | 12 | 7  |
| 277958 | 47 | 2321861 | 2321882 | 2 | 11 | 22 | TC   | 20 | 6  |
| 277963 | 47 | 2325507 | 2325530 | 2 | 12 | 24 | TG   | 17 | 6  |
| 277968 | 47 | 2332083 | 2332100 | 2 | 9  | 18 | GT   | 11 | 5  |
| 277973 | 47 | 2336465 | 2336480 | 2 | 8  | 16 | CA   | 19 | 5  |
| 277975 | 47 | 2336630 | 2336649 | 2 | 10 | 20 | TG   | 15 | 14 |
| 277979 | 47 | 2340615 | 2340638 | 4 | 6  | 24 | TGGA | 14 | 5  |
| 277989 | 47 | 2345572 | 2345583 | 2 | 6  | 12 | CA   | 24 | 7  |
| 277991 | 47 | 2347543 | 2347558 | 2 | 8  | 16 | GT   | 26 | 6  |
| 277995 | 47 | 2348276 | 2348311 | 4 | 9  | 36 | AGAA | 17 | 9  |
| 277998 | 47 | 2352814 | 2352825 | 2 | 6  | 12 | CA   | 25 | 4  |
| 278001 | 47 | 2361816 | 2361829 | 2 | 7  | 14 | AC   | 18 | 9  |
| 278002 | 47 | 2361831 | 2361846 | 2 | 8  | 16 | CA   | 26 | 9  |
| 278011 | 47 | 2370822 | 2370855 | 2 | 17 | 34 | TG   | 17 | 11 |
| 278012 | 47 | 2370962 | 2370977 | 2 | 8  | 16 | CA   | 24 | 6  |
| 278013 | 47 | 2376224 | 2376241 | 2 | 9  | 18 | GT   | 26 | 3  |
| 278014 | 47 | 2376372 | 2376401 | 2 | 15 | 30 | GT   | 20 | 8  |
| 278015 | 47 | 2379221 | 2379252 | 2 | 16 | 32 | TG   | 10 | 10 |
| 278016 | 47 | 2380035 | 2380058 | 3 | 8  | 24 | CCT  | 9  | 3  |
| 278019 | 47 | 2381611 | 2381624 | 2 | 7  | 14 | TG   | 25 | 3  |
| 278020 | 47 | 2383875 | 2383912 | 2 | 19 | 38 | CA   | 11 | 8  |
| 278021 | 47 | 2385781 | 2385808 | 2 | 14 | 28 | TG   | 20 | 9  |
| 278022 | 47 | 2386519 | 2386552 | 2 | 17 | 34 | AC   | 6  | 6  |
| 278024 | 47 | 2386778 | 2386797 | 2 | 10 | 20 | GT   | 19 | 7  |
| 278025 | 47 | 2388069 | 2388080 | 2 | 6  | 12 | AC   | 26 | 4  |
| 278026 | 47 | 2388315 | 2388334 | 2 | 10 | 20 | CA   | 13 | 6  |
| 278030 | 47 | 2389883 | 2389926 | 4 | 11 | 44 | TTTC | 9  | 5  |
| 278040 | 47 | 2391510 | 2391521 | 2 | 6  | 12 | TG   | 16 | 4  |
| 278041 | 47 | 2391533 | 2391546 | 2 | 7  | 14 | GT   | 19 | 4  |
| 278051 | 47 | 2398796 | 2398821 | 2 | 13 | 26 | AG   | 16 | 7  |
| 278052 | 47 | 2399863 | 2399884 | 2 | 11 | 22 | GT   | 20 | 6  |
| 278053 | 47 | 2400416 | 2400465 | 2 | 25 | 50 | CA   | 7  | 11 |
| 278056 | 47 | 2402591 | 2402606 | 2 | 8  | 16 | AC   | 19 | 3  |
| 278059 | 47 | 2405146 | 2405161 | 2 | 8  | 16 | GT   | 17 | 12 |
| 278060 | 47 | 2405302 | 2405329 | 2 | 14 | 28 | GT   | 17 | 11 |
| 278065 | 47 | 2406127 | 2406154 | 2 | 14 | 28 | TG   | 14 | 6  |
| 278066 | 47 | 2407848 | 2407859 | 2 | 6  | 12 | TG   | 10 | 4  |
| 278072 | 47 | 2409000 | 2409019 | 2 | 10 | 20 | GT   | 12 | 5  |
| 278079 | 47 | 2417184 | 2417211 | 2 | 14 | 28 | GT   | 8  | 10 |
| 278080 | 47 | 2417609 | 2417630 | 2 | 11 | 22 | AC   | 16 | 10 |
| 278083 | 47 | 2419366 | 2419393 | 2 | 14 | 28 | GT   | 19 | 12 |
| 278086 | 47 | 2419804 | 2419837 | 2 | 17 | 34 | AC   | 8  | 8  |
| 278087 | 47 | 2420040 | 2420055 | 2 | 8  | 16 | AC   | 19 | 11 |
| 278088 | 47 | 2420057 | 2420072 | 2 | 8  | 16 | CA   | 11 | 8  |
| 278089 | 47 | 2422129 | 2422154 | 2 | 13 | 26 | TG   | 18 | 7  |
| 278090 | 47 | 2424844 | 2424855 | 2 | 6  | 12 | AC   | 31 | 3  |
| 278092 | 47 | 2426735 | 2426746 | 2 | 6  | 12 | GT   | 22 | 3  |
| 278094 | 47 | 2426943 | 2426978 | 2 | 18 | 36 | CA   | 8  | 10 |
| 278095 | 47 | 2427071 | 2427096 | 2 | 13 | 26 | AC   | 10 | 8  |
| 278096 | 47 | 2427203 | 2427236 | 2 | 17 | 34 | AC   | 8  | 12 |
| 278097 | 47 | 2427266 | 2427301 | 2 | 18 | 36 | AC   | 12 | 11 |

|        |    |         |         |   |    |    |      |    |    |
|--------|----|---------|---------|---|----|----|------|----|----|
| 278098 | 47 | 2427395 | 2427408 | 2 | 7  | 14 | AC   | 19 | 5  |
| 278099 | 47 | 2430107 | 2430126 | 2 | 10 | 20 | CA   | 15 | 3  |
| 278104 | 47 | 2431372 | 2431395 | 2 | 12 | 24 | GT   | 16 | 12 |
| 278105 | 47 | 2434147 | 2434186 | 2 | 20 | 40 | GT   | 6  | 12 |
| 278108 | 47 | 2435688 | 2435719 | 2 | 16 | 32 | TG   | 13 | 12 |
| 278110 | 47 | 2435907 | 2435954 | 2 | 24 | 48 | TC   | 8  | 8  |
| 278111 | 47 | 2436574 | 2436585 | 2 | 6  | 12 | CA   | 26 | 6  |
| 278113 | 47 | 2436749 | 2436764 | 2 | 8  | 16 | CA   | 20 | 8  |
| 278115 | 47 | 2438482 | 2438501 | 2 | 10 | 20 | AC   | 11 | 6  |
| 278117 | 47 | 2439213 | 2439224 | 2 | 6  | 12 | AC   | 24 | 4  |
| 278118 | 47 | 2440509 | 2440528 | 2 | 10 | 20 | CA   | 24 | 5  |
| 278122 | 47 | 2445866 | 2445885 | 2 | 10 | 20 | GT   | 22 | 4  |
| 278123 | 47 | 2446127 | 2446142 | 2 | 8  | 16 | GT   | 12 | 9  |
| 278124 | 47 | 2446246 | 2446281 | 2 | 18 | 36 | AC   | 9  | 8  |
| 278131 | 47 | 2459115 | 2459128 | 2 | 7  | 14 | GT   | 8  | 11 |
| 278154 | 47 | 2469419 | 2469440 | 2 | 11 | 22 | GT   | 24 | 6  |
| 278156 | 47 | 2474557 | 2474624 | 4 | 17 | 68 | TCTT | 8  | 7  |
| 278157 | 47 | 2475289 | 2475303 | 3 | 5  | 15 | TTG  | 26 | 3  |
| 278159 | 47 | 2476682 | 2476695 | 2 | 7  | 14 | AT   | 18 | 3  |
| 278160 | 47 | 2477674 | 2477695 | 2 | 11 | 22 | TG   | 14 | 3  |
| 278161 | 47 | 2477738 | 2477749 | 2 | 6  | 12 | AC   | 18 | 4  |
| 278163 | 47 | 2482992 | 2483039 | 2 | 24 | 48 | GT   | 7  | 10 |
| 278164 | 47 | 2484876 | 2484899 | 2 | 12 | 24 | TG   | 20 | 4  |
| 278167 | 47 | 2486000 | 2486017 | 2 | 9  | 18 | CA   | 24 | 8  |
| 278174 | 47 | 2498234 | 2498271 | 2 | 19 | 38 | AC   | 7  | 7  |
| 278175 | 47 | 2498411 | 2498422 | 2 | 6  | 12 | TG   | 19 | 3  |
| 278177 | 47 | 2498606 | 2498625 | 2 | 10 | 20 | CT   | 16 | 6  |
| 278179 | 47 | 2500730 | 2500743 | 2 | 7  | 14 | TG   | 12 | 10 |
| 278180 | 47 | 2500868 | 2500891 | 2 | 12 | 24 | CA   | 7  | 4  |
| 278185 | 47 | 2502120 | 2502151 | 2 | 16 | 32 | AC   | 12 | 10 |
| 278186 | 47 | 2502481 | 2502500 | 2 | 10 | 20 | AC   | 26 | 5  |
| 278188 | 47 | 2504264 | 2504277 | 2 | 7  | 14 | AC   | 22 | 5  |
| 278196 | 47 | 2510576 | 2510595 | 2 | 10 | 20 | CA   | 6  | 3  |
| 278198 | 47 | 2510863 | 2510878 | 2 | 8  | 16 | AC   | 21 | 3  |
| 278201 | 47 | 2514145 | 2514170 | 2 | 13 | 26 | AC   | 10 | 9  |
| 278206 | 47 | 2517186 | 2517227 | 2 | 21 | 42 | CA   | 8  | 8  |
| 278207 | 47 | 2517390 | 2517401 | 2 | 6  | 12 | AC   | 28 | 5  |
| 278211 | 47 | 2518708 | 2518723 | 2 | 8  | 16 | AG   | 14 | 3  |
| 278212 | 47 | 2518846 | 2518867 | 2 | 11 | 22 | TG   | 7  | 5  |
| 278213 | 47 | 2520092 | 2520125 | 2 | 17 | 34 | GA   | 11 | 10 |
| 278214 | 47 | 2520248 | 2520267 | 4 | 5  | 20 | GAAA | 14 | 3  |
| 278218 | 47 | 2521015 | 2521040 | 2 | 13 | 26 | GT   | 13 | 11 |
| 278224 | 47 | 2522626 | 2522655 | 2 | 15 | 30 | CA   | 9  | 7  |
| 278225 | 47 | 2523706 | 2523735 | 2 | 15 | 30 | AC   | 18 | 12 |
| 278228 | 47 | 2531100 | 2531119 | 2 | 10 | 20 | AC   | 15 | 5  |
| 278231 | 47 | 2533558 | 2533583 | 2 | 13 | 26 | CA   | 15 | 8  |
| 278233 | 47 | 2534730 | 2534745 | 2 | 8  | 16 | GT   | 20 | 3  |
| 278236 | 47 | 2535611 | 2535630 | 2 | 10 | 20 | CA   | 21 | 3  |
| 278239 | 47 | 2536590 | 2536611 | 2 | 11 | 22 | TG   | 15 | 7  |
| 278240 | 47 | 2536728 | 2536759 | 2 | 16 | 32 | TG   | 15 | 11 |
| 278241 | 47 | 2537325 | 2537346 | 2 | 11 | 22 | CA   | 20 | 6  |

|        |    |         |         |   |    |    |      |    |    |
|--------|----|---------|---------|---|----|----|------|----|----|
| 278244 | 47 | 2537651 | 2537664 | 2 | 7  | 14 | AG   | 18 | 3  |
| 278245 | 47 | 2538026 | 2538049 | 2 | 12 | 24 | TG   | 13 | 9  |
| 278246 | 47 | 2538848 | 2538859 | 2 | 6  | 12 | CA   | 25 | 3  |
| 278247 | 47 | 2539224 | 2539235 | 2 | 6  | 12 | TG   | 24 | 5  |
| 278248 | 47 | 2539823 | 2539836 | 2 | 7  | 14 | AC   | 22 | 4  |
| 278251 | 47 | 2541299 | 2541314 | 4 | 4  | 16 | CATC | 28 | 3  |
| 278253 | 47 | 2542479 | 2542494 | 2 | 8  | 16 | GA   | 10 | 4  |
| 278257 | 47 | 2542791 | 2542804 | 2 | 7  | 14 | TG   | 13 | 10 |
| 278258 | 47 | 2542807 | 2542822 | 2 | 8  | 16 | TG   | 14 | 10 |
| 278260 | 47 | 2543342 | 2543355 | 2 | 7  | 14 | GT   | 30 | 3  |
| 278261 | 47 | 2543429 | 2543440 | 2 | 6  | 12 | AC   | 27 | 4  |
| 278262 | 47 | 2544076 | 2544101 | 2 | 13 | 26 | GT   | 13 | 12 |
| 278264 | 47 | 2546024 | 2546047 | 2 | 12 | 24 | CA   | 9  | 7  |
| 278265 | 47 | 2546811 | 2546822 | 2 | 6  | 12 | CA   | 25 | 3  |
| 278266 | 47 | 2547669 | 2547686 | 3 | 6  | 18 | AGC  | 37 | 3  |
| 278271 | 47 | 2552874 | 2552891 | 2 | 9  | 18 | AC   | 25 | 4  |
| 278272 | 47 | 2553092 | 2553107 | 2 | 8  | 16 | GA   | 23 | 3  |
| 278276 | 47 | 2554849 | 2554862 | 2 | 7  | 14 | TG   | 23 | 5  |
| 278277 | 47 | 2554969 | 2554980 | 2 | 6  | 12 | CA   | 24 | 3  |
| 278278 | 47 | 2555619 | 2555634 | 2 | 8  | 16 | AG   | 19 | 6  |
| 278285 | 47 | 2558890 | 2558913 | 2 | 12 | 24 | GT   | 16 | 6  |
| 278290 | 47 | 2570865 | 2570890 | 2 | 13 | 26 | CA   | 18 | 5  |
| 278293 | 47 | 2573221 | 2573246 | 2 | 13 | 26 | CA   | 22 | 6  |
| 278294 | 47 | 2574729 | 2574746 | 2 | 9  | 18 | AC   | 21 | 3  |
| 278295 | 47 | 2575324 | 2575347 | 2 | 12 | 24 | TG   | 26 | 4  |
| 278298 | 47 | 2577190 | 2577225 | 2 | 18 | 36 | AC   | 7  | 6  |
| 278300 | 47 | 2578045 | 2578090 | 2 | 23 | 46 | AG   | 13 | 10 |
| 278301 | 47 | 2578614 | 2578647 | 2 | 17 | 34 | CA   | 11 | 12 |
| 278302 | 47 | 2578905 | 2578920 | 2 | 8  | 16 | AC   | 26 | 4  |
| 278303 | 47 | 2579166 | 2579177 | 2 | 6  | 12 | AG   | 20 | 4  |
| 278311 | 47 | 2592265 | 2592282 | 2 | 9  | 18 | GT   | 20 | 7  |
| 278314 | 47 | 2593115 | 2593132 | 2 | 9  | 18 | GT   | 23 | 3  |
| 278317 | 47 | 2594479 | 2594493 | 3 | 5  | 15 | GGT  | 22 | 3  |
| 278326 | 47 | 2599300 | 2599315 | 2 | 8  | 16 | CA   | 25 | 3  |
| 278328 | 47 | 2599623 | 2599650 | 2 | 14 | 28 | GT   | 10 | 11 |
| 278333 | 47 | 2600559 | 2600570 | 2 | 6  | 12 | TA   | 25 | 3  |
| 278335 | 47 | 2601607 | 2601630 | 2 | 12 | 24 | AC   | 17 | 3  |
| 278337 | 47 | 2601759 | 2601770 | 2 | 6  | 12 | GT   | 26 | 3  |
| 278339 | 47 | 2603707 | 2603724 | 2 | 9  | 18 | CA   | 15 | 7  |
| 278340 | 47 | 2603726 | 2603739 | 2 | 7  | 14 | AC   | 19 | 7  |
| 278344 | 47 | 2605493 | 2605504 | 2 | 6  | 12 | TG   | 21 | 4  |
| 278345 | 47 | 2605597 | 2605610 | 2 | 7  | 14 | AC   | 23 | 5  |
| 278346 | 47 | 2605777 | 2605804 | 2 | 14 | 28 | AC   | 16 | 7  |
| 278347 | 47 | 2606496 | 2606509 | 2 | 7  | 14 | TG   | 24 | 4  |
| 278350 | 47 | 2607821 | 2607854 | 2 | 17 | 34 | TG   | 12 | 7  |
| 278352 | 47 | 2609558 | 2609587 | 2 | 15 | 30 | GT   | 16 | 11 |
| 278356 | 47 | 2610257 | 2610272 | 2 | 8  | 16 | GT   | 11 | 7  |
| 278357 | 47 | 2610302 | 2610347 | 2 | 23 | 46 | TG   | 8  | 7  |
| 278360 | 47 | 2612313 | 2612334 | 2 | 11 | 22 | AC   | 9  | 9  |
| 278362 | 47 | 2614030 | 2614051 | 2 | 11 | 22 | TG   | 14 | 6  |
| 278364 | 47 | 2615479 | 2615498 | 2 | 10 | 20 | AC   | 28 | 3  |

|        |    |         |         |   |    |    |      |    |    |
|--------|----|---------|---------|---|----|----|------|----|----|
| 278365 | 47 | 2621580 | 2621597 | 2 | 9  | 18 | GA   | 21 | 3  |
| 278368 | 47 | 2623531 | 2623544 | 2 | 7  | 14 | CA   | 20 | 4  |
| 278369 | 47 | 2623944 | 2623957 | 2 | 7  | 14 | TC   | 28 | 3  |
| 278373 | 47 | 2626738 | 2626749 | 2 | 6  | 12 | TG   | 22 | 3  |
| 278374 | 47 | 2626900 | 2626913 | 2 | 7  | 14 | TG   | 26 | 3  |
| 278375 | 47 | 2627023 | 2627058 | 2 | 18 | 36 | AC   | 7  | 6  |
| 278378 | 47 | 2628862 | 2628891 | 2 | 15 | 30 | CT   | 6  | 4  |
| 278380 | 47 | 2630818 | 2630849 | 2 | 16 | 32 | CA   | 9  | 8  |
| 278382 | 47 | 2633863 | 2633884 | 2 | 11 | 22 | TG   | 11 | 9  |
| 278383 | 47 | 2635653 | 2635720 | 4 | 17 | 68 | TAGA | 12 | 8  |
| 278385 | 47 | 2636773 | 2636784 | 2 | 6  | 12 | GT   | 29 | 4  |
| 278386 | 47 | 2637029 | 2637040 | 2 | 6  | 12 | AG   | 18 | 4  |
| 278391 | 47 | 2645720 | 2645735 | 2 | 8  | 16 | GT   | 17 | 6  |
| 278394 | 47 | 2648556 | 2648567 | 2 | 6  | 12 | GT   | 32 | 9  |
| 278398 | 47 | 2655899 | 2655926 | 2 | 14 | 28 | GA   | 7  | 5  |
| 278400 | 47 | 2656534 | 2656551 | 2 | 9  | 18 | AC   | 26 | 5  |
| 278410 | 47 | 2671566 | 2671583 | 2 | 9  | 18 | AG   | 9  | 7  |
| 278411 | 47 | 2671928 | 2671943 | 2 | 8  | 16 | TG   | 10 | 3  |
| 278413 | 47 | 2673702 | 2673721 | 2 | 10 | 20 | AC   | 24 | 8  |
| 278416 | 47 | 2677757 | 2677772 | 2 | 8  | 16 | AC   | 20 | 12 |
| 278418 | 47 | 2678952 | 2678969 | 2 | 9  | 18 | AC   | 9  | 7  |
| 278419 | 47 | 2678972 | 2678985 | 2 | 7  | 14 | AC   | 18 | 8  |
| 278420 | 47 | 2679485 | 2679510 | 2 | 13 | 26 | TG   | 24 | 8  |
| 278421 | 47 | 2679606 | 2679621 | 2 | 8  | 16 | GT   | 27 | 8  |
| 278422 | 47 | 2679944 | 2679959 | 2 | 8  | 16 | TC   | 25 | 3  |
| 278430 | 47 | 2689090 | 2689105 | 2 | 8  | 16 | CA   | 21 | 6  |
| 278432 | 47 | 2693941 | 2693966 | 2 | 13 | 26 | TG   | 8  | 9  |
| 278433 | 47 | 2695172 | 2695185 | 2 | 7  | 14 | TG   | 24 | 3  |
| 278434 | 47 | 2695286 | 2695297 | 2 | 6  | 12 | AC   | 22 | 3  |
| 278435 | 47 | 2698645 | 2698666 | 2 | 11 | 22 | AC   | 13 | 5  |
| 278443 | 47 | 2706498 | 2706515 | 2 | 9  | 18 | GT   | 20 | 4  |
| 278444 | 47 | 2706743 | 2706760 | 2 | 9  | 18 | AC   | 24 | 5  |
| 278448 | 47 | 2717354 | 2717373 | 2 | 10 | 20 | CA   | 26 | 3  |
| 278449 | 47 | 2717932 | 2717957 | 2 | 13 | 26 | AC   | 15 | 15 |
| 278450 | 47 | 2718066 | 2718085 | 2 | 10 | 20 | CA   | 21 | 9  |
| 278457 | 47 | 2726925 | 2726940 | 2 | 8  | 16 | AG   | 22 | 6  |
| 278458 | 47 | 2726967 | 2726978 | 2 | 6  | 12 | GA   | 16 | 3  |
| 278460 | 47 | 2729270 | 2729285 | 2 | 8  | 16 | TG   | 17 | 7  |
| 278462 | 47 | 2729615 | 2729634 | 2 | 10 | 20 | AC   | 16 | 10 |
| 278465 | 47 | 2729805 | 2729826 | 2 | 11 | 22 | CA   | 12 | 6  |
| 278466 | 47 | 2729863 | 2729874 | 2 | 6  | 12 | TG   | 26 | 3  |
| 278467 | 47 | 2730301 | 2730330 | 2 | 15 | 30 | TG   | 10 | 7  |
| 278468 | 47 | 2730520 | 2730535 | 2 | 8  | 16 | CA   | 27 | 8  |
| 278479 | 47 | 2733994 | 2734015 | 2 | 11 | 22 | CT   | 21 | 4  |
| 278483 | 47 | 2737263 | 2737276 | 2 | 7  | 14 | CA   | 14 | 5  |
| 278487 | 47 | 2741260 | 2741291 | 2 | 16 | 32 | CA   | 15 | 12 |
| 278488 | 47 | 2741473 | 2741492 | 2 | 10 | 20 | TG   | 18 | 10 |
| 278489 | 47 | 2743132 | 2743159 | 2 | 14 | 28 | TG   | 17 | 8  |
| 278490 | 47 | 2744469 | 2744482 | 2 | 7  | 14 | TG   | 27 | 6  |
| 278494 | 47 | 2748346 | 2748367 | 2 | 11 | 22 | GT   | 13 | 3  |
| 278496 | 47 | 2749370 | 2749391 | 2 | 11 | 22 | GA   | 26 | 6  |



|        |    |         |         |   |    |    |      |    |    |
|--------|----|---------|---------|---|----|----|------|----|----|
| 278503 | 47 | 2753942 | 2753965 | 2 | 12 | 24 | TG   | 16 | 10 |
| 278504 | 47 | 2755285 | 2755312 | 4 | 7  | 28 | TATT | 11 | 3  |
| 278506 | 47 | 2757855 | 2757874 | 2 | 10 | 20 | CA   | 23 | 6  |
| 278511 | 47 | 2759859 | 2759880 | 2 | 11 | 22 | CA   | 23 | 9  |
| 278517 | 47 | 2767306 | 2767331 | 2 | 13 | 26 | TC   | 21 | 4  |
| 278519 | 47 | 2769770 | 2769805 | 2 | 18 | 36 | CA   | 11 | 8  |
| 278523 | 47 | 2773515 | 2773534 | 2 | 10 | 20 | TG   | 7  | 8  |
| 278528 | 47 | 2775273 | 2775286 | 2 | 7  | 14 | TG   | 23 | 3  |
| 278532 | 47 | 2783182 | 2783207 | 2 | 13 | 26 | TG   | 18 | 6  |
| 278533 | 47 | 2783316 | 2783335 | 2 | 10 | 20 | CA   | 26 | 4  |
| 278538 | 47 | 2790941 | 2790952 | 2 | 6  | 12 | CT   | 35 | 3  |
| 278539 | 47 | 2791876 | 2791893 | 2 | 9  | 18 | TC   | 19 | 6  |
| 278542 | 47 | 2795397 | 2795418 | 2 | 11 | 22 | AC   | 14 | 6  |
| 278543 | 47 | 2795795 | 2795810 | 2 | 8  | 16 | AC   | 15 | 4  |
| 278548 | 47 | 2798908 | 2798921 | 2 | 7  | 14 | TC   | 18 | 3  |
| 278549 | 47 | 2799947 | 2799962 | 2 | 8  | 16 | AC   | 21 | 5  |
| 278552 | 47 | 2801019 | 2801056 | 2 | 19 | 38 | CA   | 7  | 9  |
| 278559 | 47 | 2804279 | 2804290 | 2 | 6  | 12 | GT   | 11 | 4  |
| 278560 | 47 | 2804416 | 2804429 | 2 | 7  | 14 | TG   | 22 | 8  |
| 278564 | 47 | 2808837 | 2808864 | 2 | 14 | 28 | AC   | 12 | 8  |
| 278565 | 47 | 2808980 | 2809003 | 2 | 12 | 24 | CA   | 16 | 7  |
| 278568 | 47 | 2811303 | 2811330 | 2 | 14 | 28 | TG   | 11 | 9  |
| 278569 | 47 | 2811374 | 2811389 | 2 | 8  | 16 | GT   | 17 | 3  |
| 278570 | 47 | 2811659 | 2811690 | 2 | 16 | 32 | GT   | 12 | 11 |
| 278571 | 47 | 2811807 | 2811818 | 2 | 6  | 12 | TG   | 29 | 5  |
| 278573 | 47 | 2812256 | 2812269 | 2 | 7  | 14 | AG   | 15 | 6  |
| 278575 | 47 | 2812454 | 2812473 | 2 | 10 | 20 | GT   | 18 | 5  |
| 278579 | 47 | 2814349 | 2814364 | 2 | 8  | 16 | TC   | 7  | 7  |
| 278580 | 47 | 2815996 | 2816029 | 2 | 17 | 34 | AC   | 13 | 6  |
| 278581 | 47 | 2816509 | 2816522 | 2 | 7  | 14 | GT   | 24 | 4  |
| 278582 | 47 | 2816741 | 2816754 | 2 | 7  | 14 | CA   | 29 | 4  |
| 278583 | 47 | 2816779 | 2816792 | 2 | 7  | 14 | CA   | 25 | 3  |
| 278587 | 47 | 2818252 | 2818265 | 2 | 7  | 14 | GT   | 11 | 6  |
| 278588 | 47 | 2818267 | 2818280 | 2 | 7  | 14 | TG   | 12 | 4  |
| 278592 | 47 | 2824058 | 2824071 | 2 | 7  | 14 | AG   | 15 | 4  |
| 278593 | 47 | 2824721 | 2824742 | 2 | 11 | 22 | TG   | 15 | 5  |
| 278599 | 47 | 2831779 | 2831790 | 2 | 6  | 12 | CA   | 27 | 3  |
| 278600 | 47 | 2832487 | 2832512 | 2 | 13 | 26 | AC   | 9  | 8  |
| 278607 | 47 | 2838714 | 2838745 | 2 | 16 | 32 | TG   | 17 | 14 |
| 278608 | 47 | 2839176 | 2839195 | 2 | 10 | 20 | AC   | 18 | 7  |
| 278612 | 47 | 2848882 | 2848901 | 2 | 10 | 20 | AC   | 15 | 4  |
| 278618 | 47 | 2855999 | 2856026 | 4 | 7  | 28 | GAAA | 28 | 4  |
| 278619 | 47 | 2863003 | 2863026 | 2 | 12 | 24 | CA   | 22 | 11 |
| 278625 | 47 | 2873162 | 2873181 | 2 | 10 | 20 | CA   | 20 | 4  |
| 278634 | 47 | 2883205 | 2883222 | 2 | 9  | 18 | TG   | 15 | 7  |
| 278636 | 47 | 2885372 | 2885387 | 2 | 8  | 16 | TG   | 29 | 4  |
| 278643 | 47 | 2897428 | 2897441 | 2 | 7  | 14 | TG   | 29 | 3  |
| 278644 | 47 | 2900642 | 2900659 | 2 | 9  | 18 | GA   | 8  | 4  |
| 278645 | 47 | 2901845 | 2901856 | 2 | 6  | 12 | AC   | 30 | 3  |
| 278651 | 47 | 2916212 | 2916229 | 2 | 9  | 18 | AC   | 27 | 8  |
| 278655 | 47 | 2919737 | 2919762 | 2 | 13 | 26 | TG   | 22 | 12 |

|        |    |         |         |   |    |    |      |    |    |
|--------|----|---------|---------|---|----|----|------|----|----|
| 278656 | 47 | 2919892 | 2919917 | 2 | 13 | 26 | AC   | 16 | 8  |
| 278660 | 47 | 2935459 | 2935474 | 2 | 8  | 16 | GT   | 33 | 6  |
| 278667 | 47 | 2960520 | 2960549 | 2 | 15 | 30 | TG   | 12 | 8  |
| 278671 | 47 | 2960912 | 2960933 | 2 | 11 | 22 | GT   | 14 | 5  |
| 278672 | 47 | 2961058 | 2961087 | 2 | 15 | 30 | GT   | 13 | 8  |
| 278678 | 47 | 2961855 | 2961882 | 2 | 14 | 28 | TG   | 6  | 6  |
| 278679 | 47 | 2963499 | 2963514 | 2 | 8  | 16 | AG   | 27 | 5  |
| 278681 | 47 | 2964167 | 2964190 | 4 | 6  | 24 | TTCA | 22 | 6  |
| 278683 | 47 | 2966268 | 2966293 | 2 | 13 | 26 | AC   | 26 | 11 |
| 278684 | 47 | 2966954 | 2966979 | 2 | 13 | 26 | GT   | 12 | 6  |
| 278686 | 47 | 2968752 | 2968763 | 2 | 6  | 12 | TG   | 28 | 5  |
| 278688 | 47 | 2970838 | 2970855 | 2 | 9  | 18 | GT   | 18 | 8  |
| 278690 | 47 | 2972783 | 2972798 | 2 | 8  | 16 | AG   | 23 | 5  |
| 278691 | 47 | 2973473 | 2973518 | 2 | 23 | 46 | AC   | 9  | 8  |
| 278692 | 47 | 2973647 | 2973664 | 2 | 9  | 18 | TG   | 30 | 7  |
| 278693 | 47 | 2973831 | 2973850 | 2 | 10 | 20 | GT   | 17 | 7  |
| 278695 | 47 | 2973985 | 2973996 | 2 | 6  | 12 | GT   | 7  | 3  |
| 278697 | 47 | 2975467 | 2975480 | 2 | 7  | 14 | GT   | 26 | 4  |
| 278698 | 47 | 2975640 | 2975655 | 2 | 8  | 16 | CA   | 28 | 3  |
| 278699 | 47 | 2975758 | 2975775 | 2 | 9  | 18 | TG   | 18 | 7  |
| 278701 | 47 | 2976375 | 2976386 | 2 | 6  | 12 | GT   | 22 | 4  |
| 278702 | 47 | 2976452 | 2976465 | 2 | 7  | 14 | CT   | 9  | 3  |
| 278705 | 47 | 2977300 | 2977311 | 2 | 6  | 12 | GT   | 14 | 6  |
| 278708 | 47 | 2978844 | 2978859 | 2 | 8  | 16 | GT   | 15 | 8  |
| 278709 | 47 | 2979001 | 2979020 | 2 | 10 | 20 | CA   | 17 | 4  |
| 278711 | 47 | 2979186 | 2979197 | 2 | 6  | 12 | AC   | 20 | 4  |
| 278714 | 47 | 2983482 | 2983507 | 2 | 13 | 26 | GT   | 10 | 9  |
| 278715 | 47 | 2983773 | 2983786 | 2 | 7  | 14 | CT   | 26 | 5  |
| 278716 | 47 | 2984540 | 2984551 | 2 | 6  | 12 | GT   | 28 | 3  |
| 278720 | 47 | 2986357 | 2986376 | 2 | 10 | 20 | TG   | 12 | 8  |
| 278721 | 47 | 2986533 | 2986576 | 2 | 22 | 44 | CA   | 9  | 10 |
| 278723 | 47 | 2989773 | 2989788 | 2 | 8  | 16 | TG   | 12 | 8  |
| 278724 | 47 | 2994315 | 2994370 | 4 | 14 | 56 | TCTT | 12 | 8  |
| 278726 | 47 | 2994812 | 2994827 | 2 | 8  | 16 | CA   | 17 | 5  |
| 278731 | 47 | 2997699 | 2997730 | 2 | 16 | 32 | TG   | 8  | 6  |
| 278733 | 47 | 2997959 | 2998002 | 2 | 22 | 44 | AC   | 13 | 15 |
| 278734 | 47 | 2998490 | 2998513 | 2 | 12 | 24 | TG   | 12 | 5  |
| 278736 | 47 | 3000108 | 3000145 | 2 | 19 | 38 | GT   | 8  | 9  |
| 278742 | 47 | 3004503 | 3004518 | 2 | 8  | 16 | TG   | 9  | 4  |
| 278745 | 47 | 3007777 | 3007800 | 2 | 12 | 24 | GT   | 18 | 11 |
| 278746 | 47 | 3009826 | 3009837 | 2 | 6  | 12 | AC   | 24 | 5  |
| 278749 | 47 | 3011816 | 3011827 | 2 | 6  | 12 | AG   | 26 | 4  |
| 278750 | 47 | 3012844 | 3012859 | 2 | 8  | 16 | GT   | 21 | 10 |
| 278751 | 47 | 3012861 | 3012874 | 2 | 7  | 14 | TG   | 24 | 10 |
| 278752 | 47 | 3013044 | 3013065 | 2 | 11 | 22 | CA   | 14 | 8  |
| 278756 | 47 | 3019052 | 3019077 | 2 | 13 | 26 | CA   | 19 | 8  |
| 278757 | 47 | 3019413 | 3019440 | 2 | 14 | 28 | CA   | 9  | 7  |
| 278763 | 47 | 3022868 | 3022881 | 2 | 7  | 14 | TG   | 29 | 3  |
| 278764 | 47 | 3023785 | 3023796 | 2 | 6  | 12 | CA   | 24 | 5  |
| 278765 | 47 | 3023994 | 3024005 | 2 | 6  | 12 | CA   | 29 | 3  |
| 278781 | 47 | 3031426 | 3031443 | 2 | 9  | 18 | TC   | 20 | 6  |

|        |    |         |         |   |    |    |     |    |    |
|--------|----|---------|---------|---|----|----|-----|----|----|
| 278785 | 47 | 3039132 | 3039151 | 2 | 10 | 20 | GT  | 21 | 7  |
| 278790 | 47 | 3046965 | 3046984 | 2 | 10 | 20 | TG  | 22 | 4  |
| 278791 | 47 | 3047591 | 3047604 | 2 | 7  | 14 | TC  | 20 | 3  |
| 278796 | 47 | 3049334 | 3049349 | 2 | 8  | 16 | AC  | 14 | 4  |
| 278803 | 47 | 3053308 | 3053331 | 2 | 12 | 24 | AC  | 8  | 8  |
| 278804 | 47 | 3053861 | 3053890 | 2 | 15 | 30 | CA  | 14 | 11 |
| 278805 | 47 | 3057188 | 3057207 | 2 | 10 | 20 | GT  | 12 | 8  |
| 278807 | 47 | 3057524 | 3057541 | 2 | 9  | 18 | TC  | 10 | 10 |
| 278811 | 47 | 3061223 | 3061248 | 2 | 13 | 26 | AC  | 19 | 13 |
| 278812 | 47 | 3061679 | 3061702 | 2 | 12 | 24 | AC  | 15 | 8  |
| 278813 | 47 | 3061849 | 3061864 | 2 | 8  | 16 | TG  | 15 | 3  |
| 278814 | 47 | 3062124 | 3062141 | 2 | 9  | 18 | AG  | 20 | 3  |
| 278815 | 47 | 3062260 | 3062273 | 2 | 7  | 14 | AG  | 12 | 5  |
| 278817 | 47 | 3062644 | 3062657 | 2 | 7  | 14 | TG  | 26 | 9  |
| 278819 | 47 | 3064965 | 3064978 | 2 | 7  | 14 | CT  | 22 | 3  |
| 278823 | 47 | 3066328 | 3066349 | 2 | 11 | 22 | GA  | 14 | 11 |
| 278828 | 47 | 3068670 | 3068693 | 2 | 12 | 24 | TG  | 11 | 4  |
| 278835 | 47 | 3071774 | 3071787 | 2 | 7  | 14 | AC  | 25 | 3  |
| 278836 | 47 | 3071852 | 3071865 | 2 | 7  | 14 | TG  | 28 | 6  |
| 278846 | 47 | 3086473 | 3086500 | 2 | 14 | 28 | AC  | 8  | 11 |
| 278847 | 47 | 3086613 | 3086634 | 2 | 11 | 22 | CA  | 25 | 6  |
| 278848 | 47 | 3088066 | 3088103 | 2 | 19 | 38 | AC  | 21 | 11 |
| 278850 | 47 | 3090882 | 3090903 | 2 | 11 | 22 | GT  | 18 | 8  |
| 278854 | 47 | 3092602 | 3092631 | 2 | 15 | 30 | TG  | 18 | 12 |
| 278860 | 47 | 3096243 | 3096270 | 2 | 14 | 28 | GT  | 21 | 7  |
| 278862 | 47 | 3097054 | 3097065 | 2 | 6  | 12 | GT  | 18 | 4  |
| 278866 | 47 | 3098331 | 3098378 | 2 | 24 | 48 | CA  | 12 | 12 |
| 278888 | 47 | 3113799 | 3113810 | 2 | 6  | 12 | TG  | 27 | 7  |
| 278891 | 47 | 3119458 | 3119499 | 2 | 21 | 42 | TG  | 11 | 9  |
| 278893 | 47 | 3120118 | 3120149 | 2 | 16 | 32 | AC  | 12 | 9  |
| 278896 | 47 | 3120410 | 3120459 | 2 | 25 | 50 | TG  | 6  | 7  |
| 278901 | 47 | 3123980 | 3124021 | 2 | 21 | 42 | CA  | 13 | 9  |
| 278902 | 47 | 3124246 | 3124261 | 2 | 8  | 16 | AC  | 27 | 3  |
| 278906 | 47 | 3128874 | 3128889 | 2 | 8  | 16 | CA  | 8  | 4  |
| 278911 | 47 | 3129721 | 3129758 | 2 | 19 | 38 | AC  | 8  | 9  |
| 278912 | 47 | 3131718 | 3131735 | 2 | 9  | 18 | CA  | 20 | 13 |
| 278913 | 47 | 3133021 | 3133048 | 2 | 14 | 28 | GT  | 10 | 7  |
| 278914 | 47 | 3133424 | 3133447 | 2 | 12 | 24 | CA  | 25 | 7  |
| 278916 | 47 | 3135732 | 3135759 | 2 | 14 | 28 | CA  | 9  | 9  |
| 278919 | 47 | 3137912 | 3137949 | 2 | 19 | 38 | GT  | 16 | 8  |
| 278920 | 47 | 3138620 | 3138645 | 2 | 13 | 26 | GT  | 21 | 8  |
| 278921 | 47 | 3140302 | 3140333 | 2 | 16 | 32 | TG  | 11 | 5  |
| 278922 | 47 | 3140429 | 3140443 | 3 | 5  | 15 | GGA | 23 | 3  |
| 278923 | 47 | 3140704 | 3140721 | 3 | 6  | 18 | AGG | 28 | 3  |
| 278924 | 47 | 3140882 | 3140919 | 2 | 19 | 38 | GT  | 9  | 7  |
| 278929 | 47 | 3143767 | 3143780 | 2 | 7  | 14 | TG  | 14 | 6  |
| 278933 | 47 | 3143990 | 3144001 | 2 | 6  | 12 | AC  | 11 | 6  |
| 278938 | 47 | 3158421 | 3158448 | 2 | 14 | 28 | TG  | 11 | 5  |
| 278940 | 47 | 3159714 | 3159751 | 2 | 19 | 38 | TG  | 6  | 9  |
| 278941 | 47 | 3161849 | 3161870 | 2 | 11 | 22 | TC  | 18 | 6  |
| 278942 | 47 | 3162140 | 3162153 | 2 | 7  | 14 | TG  | 25 | 4  |

|        |    |         |         |   |    |    |      |    |    |
|--------|----|---------|---------|---|----|----|------|----|----|
| 278944 | 47 | 3163435 | 3163454 | 2 | 10 | 20 | GA   | 18 | 6  |
| 278946 | 47 | 3165319 | 3165332 | 2 | 7  | 14 | AC   | 30 | 3  |
| 278947 | 47 | 3167263 | 3167274 | 2 | 6  | 12 | TG   | 27 | 5  |
| 278951 | 47 | 3182962 | 3182973 | 2 | 6  | 12 | CA   | 25 | 5  |
| 278952 | 47 | 3183585 | 3183600 | 2 | 8  | 16 | TC   | 25 | 5  |
| 278953 | 47 | 3184352 | 3184383 | 4 | 8  | 32 | ATAG | 17 | 3  |
| 278955 | 47 | 3190083 | 3190094 | 2 | 6  | 12 | CA   | 23 | 4  |
| 278956 | 47 | 3190496 | 3190507 | 2 | 6  | 12 | GT   | 25 | 3  |
| 278958 | 47 | 3199765 | 3199782 | 3 | 6  | 18 | TCA  | 22 | 3  |
| 278960 | 47 | 3205298 | 3205313 | 2 | 8  | 16 | AG   | 29 | 3  |
| 278962 | 47 | 3211926 | 3211941 | 2 | 8  | 16 | CT   | 17 | 7  |
| 278963 | 47 | 3213522 | 3213548 | 3 | 9  | 27 | TAT  | 14 | 4  |
| 278967 | 47 | 3215110 | 3215135 | 2 | 13 | 26 | CA   | 19 | 7  |
| 278969 | 47 | 3216046 | 3216077 | 2 | 16 | 32 | AC   | 12 | 10 |
| 278970 | 47 | 3218757 | 3218786 | 2 | 15 | 30 | GT   | 23 | 4  |
| 278975 | 47 | 3229017 | 3229032 | 2 | 8  | 16 | GT   | 17 | 3  |
| 278977 | 47 | 3230089 | 3230124 | 2 | 18 | 36 | TG   | 11 | 8  |
| 278982 | 47 | 3234773 | 3234790 | 2 | 9  | 18 | TG   | 21 | 10 |
| 278983 | 47 | 3239091 | 3239104 | 2 | 7  | 14 | CA   | 28 | 6  |
| 278984 | 47 | 3240722 | 3240741 | 2 | 10 | 20 | GT   | 24 | 4  |
| 278985 | 47 | 3245001 | 3245016 | 2 | 8  | 16 | AG   | 21 | 9  |
| 278989 | 47 | 3247381 | 3247408 | 4 | 7  | 28 | TAGA | 16 | 10 |
| 278993 | 47 | 3252647 | 3252664 | 2 | 9  | 18 | TG   | 14 | 3  |
| 278995 | 47 | 3259682 | 3259701 | 2 | 10 | 20 | AC   | 23 | 9  |
| 278996 | 47 | 3259851 | 3259872 | 2 | 11 | 22 | TG   | 26 | 16 |
| 278997 | 47 | 3259981 | 3260004 | 2 | 12 | 24 | TG   | 17 | 7  |
| 279000 | 47 | 3264033 | 3264062 | 2 | 15 | 30 | TG   | 10 | 8  |
| 279001 | 47 | 3265471 | 3265522 | 4 | 13 | 52 | ATCT | 20 | 10 |
| 279002 | 47 | 3270074 | 3270105 | 4 | 8  | 32 | TTTC | 12 | 5  |
| 279008 | 47 | 3279597 | 3279611 | 3 | 5  | 15 | TTG  | 17 | 10 |
| 279011 | 47 | 3280223 | 3280234 | 2 | 6  | 12 | GT   | 24 | 11 |
| 279031 | 47 | 3313666 | 3313681 | 2 | 8  | 16 | CA   | 18 | 5  |
| 279036 | 47 | 3318727 | 3318742 | 2 | 8  | 16 | CA   | 17 | 5  |
| 279043 | 47 | 3321544 | 3321555 | 2 | 6  | 12 | CA   | 18 | 4  |
| 279044 | 47 | 3322862 | 3322885 | 3 | 8  | 24 | CCT  | 14 | 6  |
| 279045 | 47 | 3323939 | 3323970 | 2 | 16 | 32 | AC   | 9  | 10 |
| 279052 | 47 | 3343559 | 3343574 | 2 | 8  | 16 | GT   | 20 | 6  |
| 279053 | 47 | 3345077 | 3345090 | 2 | 7  | 14 | AC   | 25 | 3  |
| 279055 | 47 | 3348801 | 3348812 | 2 | 6  | 12 | TG   | 22 | 4  |
| 279057 | 47 | 3353591 | 3353602 | 2 | 6  | 12 | AC   | 20 | 3  |
| 279061 | 47 | 3369108 | 3369143 | 4 | 9  | 36 | ATAA | 6  | 3  |
| 279071 | 47 | 3392738 | 3392751 | 2 | 7  | 14 | TG   | 26 | 7  |
| 279073 | 47 | 3396541 | 3396576 | 2 | 18 | 36 | AC   | 7  | 8  |
| 279080 | 47 | 3402446 | 3402487 | 2 | 21 | 42 | GT   | 11 | 7  |
| 279083 | 47 | 3403482 | 3403497 | 2 | 8  | 16 | AC   | 19 | 7  |
| 279084 | 47 | 3403953 | 3403970 | 2 | 9  | 18 | GT   | 7  | 5  |
| 279086 | 47 | 3405927 | 3405948 | 2 | 11 | 22 | AC   | 17 | 9  |
| 279087 | 47 | 3406901 | 3406916 | 2 | 8  | 16 | AC   | 23 | 3  |
| 279088 | 47 | 3407027 | 3407046 | 4 | 5  | 20 | GACA | 30 | 4  |
| 279089 | 47 | 3407084 | 3407115 | 2 | 16 | 32 | TG   | 15 | 13 |
| 279090 | 47 | 3412333 | 3412356 | 2 | 12 | 24 | AC   | 16 | 8  |

|        |    |         |         |   |    |    |      |    |    |
|--------|----|---------|---------|---|----|----|------|----|----|
| 279091 | 47 | 3415401 | 3415420 | 2 | 10 | 20 | CA   | 13 | 6  |
| 279092 | 47 | 3419332 | 3419365 | 2 | 17 | 34 | CA   | 14 | 10 |
| 279093 | 47 | 3420587 | 3420614 | 2 | 14 | 28 | AC   | 20 | 10 |
| 279098 | 47 | 3423449 | 3423460 | 2 | 6  | 12 | TG   | 17 | 4  |
| 279099 | 47 | 3424536 | 3424563 | 2 | 14 | 28 | GT   | 22 | 7  |
| 279105 | 47 | 3429905 | 3429940 | 2 | 18 | 36 | AC   | 17 | 12 |
| 279106 | 47 | 3430713 | 3430724 | 2 | 6  | 12 | AC   | 17 | 4  |
| 279107 | 47 | 3430727 | 3430738 | 2 | 6  | 12 | AC   | 17 | 4  |
| 279115 | 47 | 3441069 | 3441086 | 2 | 9  | 18 | CA   | 12 | 7  |
| 279116 | 47 | 3441407 | 3441418 | 2 | 6  | 12 | CA   | 25 | 7  |
| 279126 | 47 | 3445347 | 3445364 | 2 | 9  | 18 | TG   | 22 | 7  |
| 279127 | 47 | 3445919 | 3445934 | 4 | 4  | 16 | ATGG | 31 | 5  |
| 279129 | 47 | 3454754 | 3454774 | 3 | 7  | 21 | CCT  | 27 | 9  |
| 279130 | 47 | 3456877 | 3456898 | 2 | 11 | 22 | GT   | 12 | 12 |
| 279131 | 47 | 3457011 | 3457030 | 4 | 5  | 20 | ACAG | 27 | 5  |
| 279132 | 47 | 3457294 | 3457311 | 2 | 9  | 18 | TG   | 28 | 5  |
| 279137 | 47 | 3471597 | 3471622 | 2 | 13 | 26 | TG   | 16 | 9  |
| 279139 | 47 | 3473524 | 3473547 | 2 | 12 | 24 | AC   | 16 | 10 |
| 279140 | 47 | 3478517 | 3478532 | 2 | 8  | 16 | AC   | 9  | 4  |
| 279143 | 47 | 3481590 | 3481607 | 2 | 9  | 18 | GA   | 28 | 5  |
| 279145 | 47 | 3483643 | 3483658 | 4 | 4  | 16 | TTTA | 6  | 5  |
| 279146 | 47 | 3484210 | 3484239 | 2 | 15 | 30 | CA   | 13 | 7  |
| 279147 | 47 | 3486311 | 3486325 | 3 | 5  | 15 | CCT  | 31 | 3  |
| 279154 | 47 | 3497619 | 3497634 | 2 | 8  | 16 | CA   | 13 | 12 |
| 279156 | 47 | 3499707 | 3499745 | 3 | 13 | 39 | ATT  | 7  | 8  |
| 279169 | 47 | 3534270 | 3534293 | 2 | 12 | 24 | GT   | 13 | 8  |
| 279175 | 47 | 3541398 | 3541421 | 2 | 12 | 24 | TG   | 25 | 6  |
| 279176 | 47 | 3542821 | 3542832 | 2 | 6  | 12 | GA   | 25 | 4  |
| 279178 | 47 | 3543057 | 3543072 | 2 | 8  | 16 | GT   | 22 | 9  |
| 279180 | 47 | 3544126 | 3544147 | 2 | 11 | 22 | TG   | 10 | 8  |
| 279181 | 47 | 3544273 | 3544284 | 2 | 6  | 12 | TG   | 26 | 6  |
| 279182 | 47 | 3545183 | 3545200 | 2 | 9  | 18 | TG   | 23 | 5  |
| 279183 | 47 | 3546932 | 3546951 | 2 | 10 | 20 | CA   | 20 | 10 |
| 279184 | 47 | 3547043 | 3547068 | 2 | 13 | 26 | CA   | 17 | 8  |
| 279185 | 47 | 3547142 | 3547161 | 2 | 10 | 20 | AG   | 18 | 5  |
| 279188 | 47 | 3550295 | 3550318 | 2 | 12 | 24 | TG   | 8  | 8  |
| 279189 | 47 | 3550380 | 3550399 | 2 | 10 | 20 | TG   | 17 | 9  |
| 279190 | 47 | 3550880 | 3550895 | 2 | 8  | 16 | AG   | 23 | 4  |
| 279192 | 47 | 3551318 | 3551337 | 2 | 10 | 20 | TG   | 12 | 11 |
| 279195 | 47 | 3562032 | 3562049 | 2 | 9  | 18 | TG   | 21 | 4  |
| 279196 | 47 | 3562226 | 3562259 | 2 | 17 | 34 | CA   | 15 | 12 |
| 279198 | 47 | 3562754 | 3562771 | 2 | 9  | 18 | AC   | 24 | 7  |
| 279202 | 47 | 3578195 | 3578208 | 2 | 7  | 14 | TG   | 22 | 8  |
| 279206 | 47 | 3580680 | 3580697 | 2 | 9  | 18 | AC   | 9  | 5  |
| 279209 | 47 | 3583350 | 3583373 | 2 | 12 | 24 | TG   | 12 | 9  |
| 279211 | 47 | 3584948 | 3584959 | 2 | 6  | 12 | TG   | 29 | 3  |
| 279212 | 47 | 3585425 | 3585444 | 2 | 10 | 20 | CA   | 10 | 6  |
| 279214 | 47 | 3585791 | 3585806 | 2 | 8  | 16 | CA   | 17 | 8  |
| 279216 | 47 | 3589363 | 3589378 | 2 | 8  | 16 | AG   | 17 | 3  |
| 279222 | 47 | 3591338 | 3591357 | 2 | 10 | 20 | TC   | 16 | 8  |
| 279224 | 47 | 3591443 | 3591460 | 2 | 9  | 18 | AC   | 22 | 10 |

|        |    |         |         |   |    |    |      |    |    |
|--------|----|---------|---------|---|----|----|------|----|----|
| 279225 | 47 | 3592418 | 3592447 | 2 | 15 | 30 | TG   | 13 | 7  |
| 279232 | 47 | 3594559 | 3594570 | 2 | 6  | 12 | AC   | 25 | 3  |
| 279233 | 47 | 3594609 | 3594624 | 2 | 8  | 16 | AC   | 18 | 4  |
| 279239 | 47 | 3601033 | 3601062 | 2 | 15 | 30 | CA   | 9  | 12 |
| 279240 | 47 | 3601553 | 3601567 | 3 | 5  | 15 | CTG  | 31 | 7  |
| 279246 | 47 | 3604638 | 3604653 | 2 | 8  | 16 | AC   | 17 | 6  |
| 279248 | 47 | 3605553 | 3605566 | 2 | 7  | 14 | GC   | 21 | 5  |
| 279249 | 47 | 3605582 | 3605597 | 2 | 8  | 16 | TG   | 17 | 4  |
| 279250 | 47 | 3606066 | 3606079 | 2 | 7  | 14 | TG   | 19 | 3  |
| 279251 | 47 | 3606150 | 3606179 | 2 | 15 | 30 | CA   | 16 | 10 |
| 279261 | 47 | 3615011 | 3615024 | 2 | 7  | 14 | TC   | 31 | 4  |
| 279266 | 47 | 3618766 | 3618795 | 2 | 15 | 30 | AC   | 8  | 9  |
| 279268 | 47 | 3619180 | 3619203 | 2 | 12 | 24 | GT   | 19 | 5  |
| 279271 | 47 | 3619648 | 3619661 | 2 | 7  | 14 | CA   | 24 | 3  |
| 279272 | 47 | 3621819 | 3621840 | 2 | 11 | 22 | TG   | 19 | 6  |
| 279278 | 47 | 3628603 | 3628622 | 2 | 10 | 20 | TG   | 23 | 9  |
| 279282 | 47 | 3631007 | 3631028 | 2 | 11 | 22 | TG   | 15 | 7  |
| 279290 | 47 | 3636005 | 3636030 | 2 | 13 | 26 | TG   | 12 | 4  |
| 279291 | 47 | 3636071 | 3636094 | 2 | 12 | 24 | GT   | 9  | 4  |
| 279292 | 47 | 3636225 | 3636244 | 2 | 10 | 20 | TG   | 19 | 7  |
| 279294 | 47 | 3637006 | 3637027 | 2 | 11 | 22 | AC   | 15 | 8  |
| 279297 | 47 | 3641627 | 3641650 | 3 | 8  | 24 | GAT  | 21 | 6  |
| 279300 | 47 | 3645854 | 3645867 | 2 | 7  | 14 | AC   | 13 | 7  |
| 279302 | 47 | 3646456 | 3646487 | 4 | 8  | 32 | GAAA | 21 | 11 |
| 279306 | 47 | 3647506 | 3647519 | 2 | 7  | 14 | GT   | 24 | 5  |
| 279309 | 47 | 3648115 | 3648128 | 2 | 7  | 14 | TG   | 24 | 4  |
| 279325 | 47 | 3664962 | 3664981 | 2 | 10 | 20 | AC   | 13 | 8  |
| 279326 | 47 | 3665658 | 3665672 | 3 | 5  | 15 | GAG  | 28 | 3  |
| 279327 | 47 | 3665832 | 3665845 | 2 | 7  | 14 | GT   | 17 | 5  |
| 279328 | 47 | 3666132 | 3666149 | 2 | 9  | 18 | GT   | 18 | 13 |
| 279329 | 47 | 3669141 | 3669160 | 2 | 10 | 20 | TG   | 26 | 7  |
| 279330 | 47 | 3670983 | 3671002 | 4 | 5  | 20 | TTTG | 27 | 3  |
| 279331 | 47 | 3672818 | 3672841 | 4 | 6  | 24 | TGCG | 32 | 6  |
| 279348 | 47 | 3728456 | 3728483 | 2 | 14 | 28 | TG   | 13 | 8  |
| 279351 | 47 | 3736830 | 3736865 | 2 | 18 | 36 | AC   | 8  | 7  |
| 279354 | 47 | 3746111 | 3746134 | 2 | 12 | 24 | AC   | 7  | 7  |
| 279357 | 47 | 3754362 | 3754407 | 2 | 23 | 46 | CA   | 8  | 7  |
| 279358 | 47 | 3763538 | 3763555 | 2 | 9  | 18 | AC   | 22 | 6  |
| 279359 | 47 | 3763837 | 3763852 | 4 | 4  | 16 | GGAT | 24 | 6  |
| 279360 | 47 | 3764323 | 3764340 | 3 | 6  | 18 | AAC  | 6  | 3  |
| 279370 | 47 | 3776623 | 3776652 | 2 | 15 | 30 | CA   | 9  | 7  |
| 279371 | 47 | 3777908 | 3777923 | 4 | 4  | 16 | AAAT | 23 | 7  |
| 279372 | 47 | 3778759 | 3778776 | 2 | 9  | 18 | GT   | 25 | 8  |
| 279373 | 47 | 3781082 | 3781101 | 2 | 10 | 20 | CA   | 20 | 10 |
| 279375 | 47 | 3785506 | 3785527 | 2 | 11 | 22 | GT   | 23 | 8  |
| 279377 | 47 | 3788249 | 3788284 | 2 | 18 | 36 | GT   | 14 | 13 |
| 279379 | 47 | 3790126 | 3790139 | 2 | 7  | 14 | TG   | 19 | 4  |
| 279380 | 47 | 3796756 | 3796791 | 2 | 18 | 36 | AC   | 11 | 7  |
| 279382 | 47 | 3797928 | 3797949 | 2 | 11 | 22 | AC   | 17 | 6  |
| 279383 | 47 | 3799689 | 3799700 | 2 | 6  | 12 | CT   | 27 | 3  |
| 279384 | 47 | 3801310 | 3801323 | 2 | 7  | 14 | TC   | 28 | 3  |

|        |    |         |         |   |    |    |      |    |    |
|--------|----|---------|---------|---|----|----|------|----|----|
| 279387 | 47 | 3804024 | 3804041 | 2 | 9  | 18 | TG   | 21 | 3  |
| 279389 | 47 | 3804110 | 3804147 | 2 | 19 | 38 | TG   | 13 | 14 |
| 279392 | 47 | 3805210 | 3805230 | 3 | 7  | 21 | ATC  | 27 | 7  |
| 279393 | 47 | 3810098 | 3810113 | 2 | 8  | 16 | AC   | 15 | 5  |
| 279394 | 47 | 3814852 | 3814875 | 2 | 12 | 24 | TG   | 25 | 8  |
| 279395 | 47 | 3817595 | 3817610 | 2 | 8  | 16 | GA   | 29 | 5  |
| 279397 | 47 | 3821818 | 3821855 | 2 | 19 | 38 | AC   | 12 | 7  |
| 279400 | 47 | 3828459 | 3828476 | 3 | 6  | 18 | AAC  | 25 | 4  |
| 279403 | 47 | 3840168 | 3840179 | 2 | 6  | 12 | TG   | 15 | 3  |
| 279410 | 47 | 3849263 | 3849284 | 2 | 11 | 22 | AC   | 18 | 9  |
| 279411 | 47 | 3849478 | 3849491 | 2 | 7  | 14 | GT   | 32 | 4  |
| 279418 | 47 | 3858785 | 3858812 | 2 | 14 | 28 | TG   | 7  | 6  |
| 279419 | 47 | 3862087 | 3862106 | 4 | 5  | 20 | ATCA | 34 | 5  |
| 279424 | 47 | 3876970 | 3876983 | 2 | 7  | 14 | TG   | 8  | 3  |
| 279425 | 47 | 3876992 | 3877005 | 2 | 7  | 14 | TG   | 7  | 3  |
| 279430 | 48 | 8482    | 8539    | 2 | 29 | 58 | AC   | 9  | 10 |
| 279432 | 48 | 14386   | 14399   | 2 | 7  | 14 | CA   | 19 | 8  |
| 279434 | 48 | 16286   | 16297   | 2 | 6  | 12 | CA   | 22 | 3  |
| 279440 | 48 | 22561   | 22584   | 4 | 6  | 24 | GATG | 26 | 5  |
| 279443 | 48 | 28621   | 28634   | 2 | 7  | 14 | AT   | 16 | 4  |
| 279446 | 48 | 35218   | 35237   | 2 | 10 | 20 | CA   | 19 | 9  |
| 279447 | 48 | 35362   | 35383   | 2 | 11 | 22 | AC   | 21 | 11 |
| 279448 | 48 | 35561   | 35580   | 2 | 10 | 20 | GT   | 30 | 7  |
| 279452 | 48 | 42796   | 42811   | 2 | 8  | 16 | CA   | 11 | 4  |
| 279453 | 48 | 46678   | 46717   | 2 | 20 | 40 | CT   | 15 | 12 |
| 279457 | 48 | 47185   | 47196   | 2 | 6  | 12 | CA   | 23 | 4  |
| 279460 | 48 | 57295   | 57308   | 2 | 7  | 14 | AG   | 29 | 4  |
| 279465 | 48 | 63340   | 63357   | 2 | 9  | 18 | CT   | 13 | 3  |
| 279471 | 48 | 75381   | 75396   | 2 | 8  | 16 | TG   | 17 | 12 |
| 279472 | 48 | 77037   | 77054   | 2 | 9  | 18 | CA   | 22 | 4  |
| 279473 | 48 | 79378   | 79389   | 2 | 6  | 12 | TG   | 17 | 6  |
| 279487 | 48 | 89694   | 89721   | 2 | 14 | 28 | GT   | 6  | 5  |
| 279491 | 48 | 94105   | 94122   | 2 | 9  | 18 | GT   | 13 | 4  |
| 279492 | 48 | 96346   | 96369   | 3 | 8  | 24 | CTC  | 22 | 8  |
| 279495 | 48 | 98522   | 98555   | 2 | 17 | 34 | CA   | 18 | 13 |
| 279496 | 48 | 98654   | 98671   | 2 | 9  | 18 | GT   | 23 | 6  |
| 279501 | 48 | 103352  | 103369  | 2 | 9  | 18 | GA   | 23 | 4  |
| 279509 | 48 | 120039  | 120058  | 2 | 10 | 20 | AC   | 23 | 6  |
| 279510 | 48 | 124105  | 124131  | 3 | 9  | 27 | ATC  | 21 | 5  |
| 279511 | 48 | 134660  | 134681  | 2 | 11 | 22 | AC   | 22 | 7  |
| 279518 | 48 | 145152  | 145163  | 2 | 6  | 12 | GT   | 25 | 3  |
| 279522 | 48 | 160062  | 160087  | 2 | 13 | 26 | AG   | 15 | 8  |
| 279541 | 48 | 209571  | 209590  | 2 | 10 | 20 | GT   | 18 | 9  |
| 279543 | 48 | 217600  | 217625  | 2 | 13 | 26 | GT   | 17 | 13 |
| 279544 | 48 | 219942  | 219959  | 2 | 9  | 18 | TG   | 22 | 8  |
| 279545 | 48 | 220504  | 220521  | 2 | 9  | 18 | GT   | 19 | 6  |
| 279549 | 48 | 226860  | 226873  | 2 | 7  | 14 | CA   | 22 | 5  |
| 279550 | 48 | 226929  | 226940  | 2 | 6  | 12 | CA   | 25 | 7  |
| 279551 | 48 | 228403  | 228426  | 4 | 6  | 24 | ACTC | 17 | 4  |
| 279553 | 48 | 228904  | 228921  | 2 | 9  | 18 | AC   | 17 | 6  |
| 279562 | 48 | 236174  | 236197  | 2 | 12 | 24 | TG   | 14 | 13 |

|        |    |        |        |   |    |    |      |    |    |
|--------|----|--------|--------|---|----|----|------|----|----|
| 279564 | 48 | 237543 | 237562 | 2 | 10 | 20 | AC   | 21 | 7  |
| 279565 | 48 | 238016 | 238043 | 2 | 14 | 28 | AC   | 22 | 8  |
| 279569 | 48 | 243434 | 243445 | 2 | 6  | 12 | CA   | 30 | 4  |
| 279570 | 48 | 246358 | 246377 | 2 | 10 | 20 | AC   | 21 | 9  |
| 279572 | 48 | 246525 | 246548 | 2 | 12 | 24 | TG   | 12 | 7  |
| 279576 | 48 | 249292 | 249327 | 2 | 18 | 36 | AC   | 9  | 9  |
| 279577 | 48 | 249844 | 249877 | 2 | 17 | 34 | TG   | 14 | 12 |
| 279585 | 48 | 254476 | 254493 | 2 | 9  | 18 | GT   | 16 | 3  |
| 279586 | 48 | 256677 | 256710 | 2 | 17 | 34 | TG   | 11 | 8  |
| 279587 | 48 | 256858 | 256903 | 2 | 23 | 46 | AC   | 6  | 8  |
| 279589 | 48 | 257194 | 257205 | 2 | 6  | 12 | AC   | 28 | 3  |
| 279592 | 48 | 257737 | 257750 | 2 | 7  | 14 | TG   | 25 | 5  |
| 279593 | 48 | 257858 | 257877 | 2 | 10 | 20 | TG   | 18 | 4  |
| 279594 | 48 | 258196 | 258213 | 2 | 9  | 18 | GT   | 17 | 5  |
| 279595 | 48 | 258428 | 258447 | 2 | 10 | 20 | TG   | 12 | 4  |
| 279599 | 48 | 261372 | 261389 | 2 | 9  | 18 | CA   | 18 | 9  |
| 279601 | 48 | 262906 | 262929 | 2 | 12 | 24 | AC   | 6  | 3  |
| 279602 | 48 | 264462 | 264477 | 2 | 8  | 16 | AC   | 21 | 7  |
| 279607 | 48 | 268771 | 268782 | 2 | 6  | 12 | GT   | 17 | 5  |
| 279612 | 48 | 271473 | 271484 | 2 | 6  | 12 | GT   | 7  | 5  |
| 279613 | 48 | 271485 | 271504 | 2 | 10 | 20 | GA   | 8  | 3  |
| 279615 | 48 | 271586 | 271600 | 3 | 5  | 15 | CTC  | 19 | 3  |
| 279617 | 48 | 271922 | 271942 | 3 | 7  | 21 | CTC  | 21 | 5  |
| 279624 | 48 | 277523 | 277548 | 2 | 13 | 26 | CA   | 8  | 7  |
| 279626 | 48 | 278036 | 278067 | 2 | 16 | 32 | GT   | 14 | 11 |
| 279629 | 48 | 282708 | 282733 | 2 | 13 | 26 | CA   | 22 | 16 |
| 279630 | 48 | 282937 | 282972 | 3 | 12 | 36 | CCT  | 21 | 13 |
| 279634 | 48 | 287737 | 287757 | 3 | 7  | 21 | AGG  | 19 | 3  |
| 279636 | 48 | 291073 | 291092 | 2 | 10 | 20 | TG   | 19 | 7  |
| 279639 | 48 | 291718 | 291741 | 2 | 12 | 24 | TG   | 14 | 10 |
| 279640 | 48 | 291886 | 291921 | 2 | 18 | 36 | TG   | 10 | 9  |
| 279641 | 48 | 292090 | 292113 | 2 | 12 | 24 | CA   | 21 | 13 |
| 279642 | 48 | 292254 | 292269 | 2 | 8  | 16 | CA   | 22 | 8  |
| 279643 | 48 | 292997 | 293048 | 2 | 26 | 52 | CA   | 7  | 9  |
| 279648 | 48 | 295606 | 295627 | 2 | 11 | 22 | AC   | 11 | 6  |
| 279651 | 48 | 295974 | 295993 | 2 | 10 | 20 | GT   | 12 | 13 |
| 279652 | 48 | 296222 | 296233 | 2 | 6  | 12 | GT   | 30 | 3  |
| 279653 | 48 | 300021 | 300038 | 2 | 9  | 18 | TG   | 23 | 5  |
| 279655 | 48 | 305707 | 305724 | 2 | 9  | 18 | TG   | 16 | 4  |
| 279656 | 48 | 305727 | 305740 | 2 | 7  | 14 | TG   | 17 | 5  |
| 279657 | 48 | 305894 | 305909 | 2 | 8  | 16 | TG   | 16 | 5  |
| 279659 | 48 | 306240 | 306255 | 4 | 4  | 16 | AAAT | 16 | 3  |
| 279660 | 48 | 306317 | 306340 | 2 | 12 | 24 | CA   | 12 | 8  |
| 279661 | 48 | 307727 | 307760 | 2 | 17 | 34 | TG   | 18 | 8  |
| 279662 | 48 | 307799 | 307812 | 2 | 7  | 14 | GT   | 17 | 4  |
| 279664 | 48 | 308068 | 308097 | 2 | 15 | 30 | CA   | 9  | 7  |
| 279666 | 48 | 310840 | 310865 | 2 | 13 | 26 | GT   | 16 | 9  |
| 279667 | 48 | 310896 | 310907 | 2 | 6  | 12 | AG   | 24 | 3  |
| 279671 | 48 | 314193 | 314208 | 2 | 8  | 16 | TC   | 28 | 5  |
| 279672 | 48 | 314336 | 314356 | 3 | 7  | 21 | CCT  | 18 | 3  |
| 279674 | 48 | 314557 | 314616 | 4 | 15 | 60 | TCTT | 19 | 8  |



|        |    |        |        |   |    |    |      |    |    |
|--------|----|--------|--------|---|----|----|------|----|----|
| 279676 | 48 | 315450 | 315465 | 2 | 8  | 16 | TC   | 27 | 3  |
| 279677 | 48 | 315505 | 315518 | 2 | 7  | 14 | TG   | 24 | 3  |
| 279679 | 48 | 317799 | 317830 | 2 | 16 | 32 | TG   | 11 | 8  |
| 279680 | 48 | 318817 | 318855 | 3 | 13 | 39 | GGA  | 11 | 4  |
| 279685 | 48 | 322834 | 322849 | 2 | 8  | 16 | TG   | 18 | 6  |
| 279687 | 48 | 325405 | 325428 | 4 | 6  | 24 | GACA | 14 | 4  |
| 279690 | 48 | 331748 | 331759 | 2 | 6  | 12 | GT   | 15 | 9  |
| 279694 | 48 | 334892 | 334915 | 2 | 12 | 24 | GT   | 17 | 6  |
| 279695 | 48 | 335305 | 335316 | 2 | 6  | 12 | AG   | 24 | 3  |
| 279702 | 48 | 345056 | 345073 | 2 | 9  | 18 | TG   | 26 | 3  |
| 279712 | 48 | 357652 | 357671 | 2 | 10 | 20 | TG   | 6  | 6  |
| 279715 | 48 | 362329 | 362350 | 2 | 11 | 22 | GT   | 20 | 7  |
| 279716 | 48 | 362471 | 362484 | 2 | 7  | 14 | TG   | 26 | 3  |
| 279717 | 48 | 362593 | 362608 | 2 | 8  | 16 | AC   | 14 | 5  |
| 279719 | 48 | 364504 | 364521 | 2 | 9  | 18 | TG   | 29 | 8  |
| 279721 | 48 | 365709 | 365742 | 2 | 17 | 34 | AC   | 16 | 14 |
| 279722 | 48 | 365953 | 365972 | 2 | 10 | 20 | TG   | 13 | 9  |
| 279725 | 48 | 368562 | 368595 | 2 | 17 | 34 | AC   | 7  | 8  |
| 279727 | 48 | 368889 | 368914 | 2 | 13 | 26 | CA   | 22 | 11 |
| 279734 | 48 | 376922 | 376941 | 2 | 10 | 20 | AC   | 19 | 12 |
| 279738 | 48 | 379826 | 379847 | 2 | 11 | 22 | TG   | 19 | 9  |
| 279741 | 48 | 381905 | 381920 | 2 | 8  | 16 | AC   | 29 | 3  |
| 279742 | 48 | 382150 | 382185 | 2 | 18 | 36 | GT   | 10 | 7  |
| 279759 | 48 | 395411 | 395426 | 2 | 8  | 16 | CA   | 12 | 8  |
| 279760 | 48 | 395428 | 395443 | 2 | 8  | 16 | AC   | 18 | 14 |
| 279762 | 48 | 396851 | 396894 | 2 | 22 | 44 | GT   | 11 | 11 |
| 279763 | 48 | 399546 | 399583 | 2 | 19 | 38 | GT   | 9  | 8  |
| 279765 | 48 | 400852 | 400895 | 2 | 22 | 44 | TG   | 11 | 13 |
| 279767 | 48 | 406674 | 406687 | 2 | 7  | 14 | TG   | 25 | 6  |
| 279772 | 48 | 409681 | 409710 | 2 | 15 | 30 | TG   | 20 | 20 |
| 279773 | 48 | 410004 | 410019 | 2 | 8  | 16 | AC   | 17 | 10 |
| 279774 | 48 | 410153 | 410170 | 2 | 9  | 18 | CA   | 26 | 4  |
| 279776 | 48 | 412244 | 412259 | 2 | 8  | 16 | AC   | 20 | 4  |
| 279778 | 48 | 413805 | 413852 | 2 | 24 | 48 | AC   | 13 | 14 |
| 279783 | 48 | 428087 | 428106 | 2 | 10 | 20 | TG   | 18 | 12 |
| 279784 | 48 | 428108 | 428119 | 2 | 6  | 12 | GT   | 19 | 11 |
| 279785 | 48 | 428510 | 428524 | 3 | 5  | 15 | GCA  | 27 | 9  |
| 279787 | 48 | 430972 | 430993 | 2 | 11 | 22 | TG   | 23 | 12 |
| 279788 | 48 | 431370 | 431393 | 2 | 12 | 24 | GA   | 15 | 10 |
| 279793 | 48 | 437784 | 437801 | 2 | 9  | 18 | CA   | 25 | 14 |
| 279798 | 48 | 441933 | 441950 | 2 | 9  | 18 | CA   | 17 | 5  |
| 279799 | 48 | 444120 | 444133 | 2 | 7  | 14 | GT   | 24 | 10 |
| 279801 | 48 | 450376 | 450393 | 2 | 9  | 18 | AC   | 18 | 3  |
| 279802 | 48 | 450789 | 450812 | 2 | 12 | 24 | TG   | 16 | 12 |
| 279807 | 48 | 452024 | 452047 | 2 | 12 | 24 | CA   | 12 | 10 |
| 279811 | 48 | 457595 | 457618 | 2 | 12 | 24 | CA   | 12 | 6  |
| 279812 | 48 | 459917 | 459934 | 2 | 9  | 18 | CA   | 13 | 9  |
| 279816 | 48 | 461930 | 461951 | 2 | 11 | 22 | AC   | 13 | 8  |
| 279820 | 48 | 464388 | 464413 | 2 | 13 | 26 | CA   | 19 | 5  |
| 279821 | 48 | 464930 | 464961 | 2 | 16 | 32 | CA   | 11 | 11 |
| 279822 | 48 | 465103 | 465116 | 2 | 7  | 14 | TG   | 15 | 4  |

|        |    |        |        |   |    |    |      |    |    |
|--------|----|--------|--------|---|----|----|------|----|----|
| 279825 | 48 | 468218 | 468233 | 2 | 8  | 16 | AC   | 17 | 9  |
| 279826 | 48 | 468237 | 468250 | 2 | 7  | 14 | CA   | 19 | 10 |
| 279827 | 48 | 468720 | 468747 | 2 | 14 | 28 | CT   | 11 | 9  |
| 279828 | 48 | 468998 | 469013 | 2 | 8  | 16 | TG   | 23 | 5  |
| 279830 | 48 | 473253 | 473274 | 2 | 11 | 22 | CA   | 18 | 10 |
| 279832 | 48 | 474038 | 474057 | 2 | 10 | 20 | CA   | 19 | 4  |
| 279833 | 48 | 475015 | 475046 | 2 | 16 | 32 | TG   | 21 | 7  |
| 279868 | 48 | 507864 | 507879 | 2 | 8  | 16 | TG   | 25 | 4  |
| 279870 | 48 | 509950 | 509995 | 2 | 23 | 46 | TG   | 7  | 7  |
| 279871 | 48 | 510159 | 510170 | 2 | 6  | 12 | TC   | 26 | 3  |
| 279872 | 48 | 510340 | 510357 | 2 | 9  | 18 | TA   | 9  | 7  |
| 279873 | 48 | 512958 | 512979 | 2 | 11 | 22 | TG   | 21 | 7  |
| 279874 | 48 | 513513 | 513530 | 2 | 9  | 18 | AC   | 8  | 7  |
| 279878 | 48 | 516393 | 516412 | 2 | 10 | 20 | GT   | 14 | 3  |
| 279881 | 48 | 518042 | 518059 | 2 | 9  | 18 | CA   | 21 | 5  |
| 279882 | 48 | 521858 | 521895 | 2 | 19 | 38 | CA   | 8  | 5  |
| 279884 | 48 | 524193 | 524224 | 4 | 8  | 32 | ATTT | 17 | 11 |
| 279885 | 48 | 524340 | 524359 | 4 | 5  | 20 | CAGA | 29 | 7  |
| 279886 | 48 | 525721 | 525748 | 2 | 14 | 28 | CT   | 13 | 11 |
| 279887 | 48 | 525799 | 525816 | 2 | 9  | 18 | CT   | 13 | 5  |
| 279888 | 48 | 526208 | 526219 | 2 | 6  | 12 | GT   | 26 | 9  |
| 279890 | 48 | 529326 | 529365 | 4 | 10 | 40 | ATCT | 18 | 6  |
| 279892 | 48 | 533071 | 533100 | 2 | 15 | 30 | TC   | 18 | 8  |
| 279895 | 48 | 536455 | 536480 | 2 | 13 | 26 | CA   | 15 | 6  |
| 279898 | 48 | 539586 | 539603 | 2 | 9  | 18 | CT   | 9  | 5  |
| 279899 | 48 | 539835 | 539862 | 2 | 14 | 28 | TG   | 13 | 10 |
| 279900 | 48 | 540387 | 540438 | 2 | 26 | 52 | TC   | 6  | 8  |
| 279911 | 48 | 551113 | 551134 | 2 | 11 | 22 | GT   | 10 | 14 |
| 279912 | 48 | 551408 | 551427 | 2 | 10 | 20 | AC   | 18 | 11 |
| 279913 | 48 | 553052 | 553077 | 2 | 13 | 26 | CA   | 12 | 8  |
| 279916 | 48 | 559926 | 559963 | 2 | 19 | 38 | GT   | 17 | 9  |
| 279918 | 48 | 562320 | 562351 | 2 | 16 | 32 | CA   | 16 | 11 |
| 279919 | 48 | 562469 | 562482 | 2 | 7  | 14 | TG   | 31 | 3  |
| 279921 | 48 | 563138 | 563153 | 2 | 8  | 16 | AC   | 25 | 4  |
| 279922 | 48 | 564296 | 564319 | 3 | 8  | 24 | TGT  | 19 | 4  |
| 279923 | 48 | 564955 | 564968 | 2 | 7  | 14 | GT   | 11 | 5  |
| 279936 | 48 | 594385 | 594420 | 3 | 12 | 36 | TAA  | 10 | 4  |
| 279938 | 48 | 598655 | 598686 | 2 | 16 | 32 | TG   | 8  | 7  |
| 279939 | 48 | 602058 | 602069 | 2 | 6  | 12 | AC   | 10 | 6  |
| 279940 | 48 | 602074 | 602089 | 2 | 8  | 16 | AC   | 24 | 7  |
| 279945 | 48 | 605993 | 606020 | 2 | 14 | 28 | TG   | 26 | 7  |
| 279946 | 48 | 607124 | 607151 | 2 | 14 | 28 | TG   | 19 | 13 |
| 279947 | 48 | 607279 | 607290 | 2 | 6  | 12 | GT   | 19 | 5  |
| 279950 | 48 | 618150 | 618163 | 2 | 7  | 14 | TG   | 17 | 12 |
| 279951 | 48 | 620218 | 620253 | 2 | 18 | 36 | GT   | 11 | 10 |
| 279953 | 48 | 621550 | 621571 | 2 | 11 | 22 | GT   | 14 | 12 |
| 279954 | 48 | 624081 | 624118 | 2 | 19 | 38 | CT   | 12 | 10 |
| 279959 | 48 | 631043 | 631062 | 2 | 10 | 20 | AC   | 20 | 5  |
| 279961 | 48 | 632951 | 632964 | 2 | 7  | 14 | AC   | 24 | 4  |
| 279962 | 48 | 634580 | 634607 | 2 | 14 | 28 | TG   | 8  | 7  |
| 279964 | 48 | 638669 | 638688 | 2 | 10 | 20 | AC   | 14 | 7  |

|        |    |        |        |   |    |    |      |    |    |
|--------|----|--------|--------|---|----|----|------|----|----|
| 279968 | 48 | 644000 | 644031 | 2 | 16 | 32 | AC   | 19 | 8  |
| 279969 | 48 | 645366 | 645397 | 2 | 16 | 32 | TG   | 12 | 10 |
| 279983 | 48 | 656012 | 656023 | 2 | 6  | 12 | TG   | 24 | 3  |
| 279984 | 48 | 656025 | 656036 | 2 | 6  | 12 | GT   | 33 | 5  |
| 279985 | 48 | 656580 | 656597 | 2 | 9  | 18 | AC   | 24 | 6  |
| 279990 | 48 | 665867 | 665890 | 2 | 12 | 24 | AG   | 9  | 8  |
| 279991 | 48 | 666048 | 666077 | 2 | 15 | 30 | CA   | 9  | 6  |
| 279992 | 48 | 666375 | 666398 | 2 | 12 | 24 | TG   | 15 | 12 |
| 279993 | 48 | 671271 | 671282 | 2 | 6  | 12 | CA   | 22 | 6  |
| 279994 | 48 | 671422 | 671435 | 2 | 7  | 14 | GT   | 23 | 4  |
| 279995 | 48 | 671439 | 671454 | 2 | 8  | 16 | TG   | 21 | 3  |
| 279998 | 48 | 684319 | 684344 | 2 | 13 | 26 | GA   | 9  | 8  |
| 279999 | 48 | 686495 | 686530 | 2 | 18 | 36 | GT   | 7  | 9  |
| 280003 | 48 | 691762 | 691775 | 2 | 7  | 14 | GT   | 18 | 3  |
| 280007 | 48 | 700988 | 700999 | 2 | 6  | 12 | TG   | 23 | 4  |
| 280011 | 48 | 705717 | 705740 | 2 | 12 | 24 | TG   | 14 | 12 |
| 280013 | 48 | 718882 | 718895 | 2 | 7  | 14 | GT   | 11 | 3  |
| 280014 | 48 | 718902 | 718915 | 2 | 7  | 14 | GT   | 19 | 3  |
| 280015 | 48 | 718989 | 719012 | 3 | 8  | 24 | ATT  | 17 | 5  |
| 280019 | 48 | 719470 | 719481 | 2 | 6  | 12 | AG   | 6  | 3  |
| 280022 | 48 | 725167 | 725196 | 2 | 15 | 30 | AC   | 19 | 11 |
| 280032 | 48 | 733201 | 733218 | 2 | 9  | 18 | TC   | 13 | 3  |
| 280033 | 48 | 733352 | 733369 | 2 | 9  | 18 | AC   | 20 | 7  |
| 280034 | 48 | 734340 | 734351 | 2 | 6  | 12 | GA   | 28 | 3  |
| 280035 | 48 | 735813 | 735836 | 3 | 8  | 24 | CTT  | 26 | 12 |
| 280036 | 48 | 741737 | 741760 | 2 | 12 | 24 | GT   | 18 | 11 |
| 280038 | 48 | 742142 | 742167 | 2 | 13 | 26 | CA   | 22 | 19 |
| 280039 | 48 | 743891 | 743904 | 2 | 7  | 14 | AG   | 17 | 3  |
| 280042 | 48 | 754348 | 754359 | 2 | 6  | 12 | AC   | 20 | 4  |
| 280043 | 48 | 756183 | 756212 | 2 | 15 | 30 | TG   | 14 | 7  |
| 280044 | 48 | 756858 | 756891 | 2 | 17 | 34 | AC   | 13 | 6  |
| 280047 | 48 | 757596 | 757623 | 2 | 14 | 28 | TG   | 12 | 15 |
| 280052 | 48 | 759853 | 759879 | 3 | 9  | 27 | GAG  | 24 | 7  |
| 280054 | 48 | 760375 | 760398 | 3 | 8  | 24 | GAG  | 15 | 3  |
| 280058 | 48 | 762518 | 762549 | 2 | 16 | 32 | AC   | 22 | 6  |
| 280060 | 48 | 766238 | 766267 | 2 | 15 | 30 | AC   | 15 | 12 |
| 280062 | 48 | 770004 | 770021 | 2 | 9  | 18 | AC   | 26 | 5  |
| 280066 | 48 | 773984 | 773997 | 2 | 7  | 14 | GT   | 23 | 8  |
| 280067 | 48 | 775967 | 775990 | 2 | 12 | 24 | AC   | 23 | 5  |
| 280068 | 48 | 778187 | 778208 | 2 | 11 | 22 | TG   | 11 | 4  |
| 280071 | 48 | 781663 | 781674 | 2 | 6  | 12 | CA   | 10 | 7  |
| 280072 | 48 | 783513 | 783536 | 2 | 12 | 24 | AC   | 12 | 13 |
| 280074 | 48 | 787312 | 787325 | 2 | 7  | 14 | CA   | 18 | 4  |
| 280075 | 48 | 798431 | 798456 | 2 | 13 | 26 | CA   | 25 | 9  |
| 280082 | 48 | 838102 | 838115 | 2 | 7  | 14 | TG   | 20 | 7  |
| 280096 | 48 | 858301 | 858339 | 3 | 13 | 39 | CCT  | 6  | 3  |
| 280097 | 48 | 861807 | 861821 | 3 | 5  | 15 | GGA  | 19 | 3  |
| 280098 | 48 | 874268 | 874287 | 4 | 5  | 20 | GAAT | 36 | 3  |
| 280107 | 48 | 899648 | 899677 | 2 | 15 | 30 | TG   | 13 | 6  |
| 280108 | 48 | 899821 | 899840 | 2 | 10 | 20 | AC   | 20 | 9  |
| 280109 | 48 | 900386 | 900405 | 2 | 10 | 20 | GT   | 10 | 10 |

|        |    |         |         |   |    |    |      |    |    |
|--------|----|---------|---------|---|----|----|------|----|----|
| 280110 | 48 | 901509  | 901520  | 2 | 6  | 12 | AC   | 28 | 4  |
| 280113 | 48 | 907481  | 907514  | 2 | 17 | 34 | GT   | 11 | 9  |
| 280114 | 48 | 907713  | 907738  | 2 | 13 | 26 | CT   | 21 | 10 |
| 280115 | 48 | 909486  | 909503  | 3 | 6  | 18 | CCT  | 31 | 5  |
| 280116 | 48 | 909682  | 909713  | 2 | 16 | 32 | TG   | 15 | 5  |
| 280118 | 48 | 917185  | 917204  | 2 | 10 | 20 | GT   | 21 | 11 |
| 280120 | 48 | 918716  | 918729  | 2 | 7  | 14 | GT   | 20 | 15 |
| 280122 | 48 | 919216  | 919236  | 3 | 7  | 21 | GCA  | 20 | 4  |
| 280124 | 48 | 919804  | 919831  | 2 | 14 | 28 | TG   | 10 | 7  |
| 280134 | 48 | 924480  | 924503  | 2 | 12 | 24 | GA   | 17 | 7  |
| 280135 | 48 | 925768  | 925783  | 2 | 8  | 16 | TG   | 21 | 4  |
| 280141 | 48 | 934570  | 934587  | 2 | 9  | 18 | CA   | 27 | 4  |
| 280148 | 48 | 940847  | 940882  | 2 | 18 | 36 | GT   | 7  | 9  |
| 280149 | 48 | 941052  | 941087  | 2 | 18 | 36 | TG   | 8  | 4  |
| 280150 | 48 | 941731  | 941742  | 2 | 6  | 12 | GT   | 11 | 4  |
| 280151 | 48 | 942003  | 942014  | 2 | 6  | 12 | AC   | 25 | 3  |
| 280154 | 48 | 942667  | 942686  | 2 | 10 | 20 | TG   | 25 | 6  |
| 280156 | 48 | 955406  | 955417  | 2 | 6  | 12 | TG   | 9  | 5  |
| 280157 | 48 | 958447  | 958458  | 2 | 6  | 12 | GT   | 19 | 4  |
| 280160 | 48 | 962226  | 962253  | 4 | 7  | 28 | TTTC | 30 | 7  |
| 280162 | 48 | 965951  | 965970  | 2 | 10 | 20 | GT   | 23 | 4  |
| 280164 | 48 | 972051  | 972086  | 2 | 18 | 36 | GA   | 7  | 6  |
| 280167 | 48 | 975749  | 975772  | 2 | 12 | 24 | GT   | 14 | 8  |
| 280168 | 48 | 975872  | 975887  | 2 | 8  | 16 | TG   | 18 | 5  |
| 280169 | 48 | 975888  | 975901  | 2 | 7  | 14 | AG   | 17 | 6  |
| 280172 | 48 | 976295  | 976312  | 2 | 9  | 18 | TG   | 17 | 8  |
| 280173 | 48 | 976315  | 976326  | 2 | 6  | 12 | TG   | 17 | 6  |
| 280180 | 48 | 987255  | 987266  | 2 | 6  | 12 | GT   | 16 | 5  |
| 280183 | 48 | 989083  | 989120  | 2 | 19 | 38 | TG   | 7  | 9  |
| 280184 | 48 | 989268  | 989281  | 2 | 7  | 14 | CA   | 25 | 3  |
| 280185 | 48 | 989767  | 989792  | 2 | 13 | 26 | CA   | 14 | 6  |
| 280187 | 48 | 991910  | 991925  | 2 | 8  | 16 | TG   | 17 | 8  |
| 280191 | 48 | 994472  | 994515  | 2 | 22 | 44 | TG   | 6  | 6  |
| 280194 | 48 | 995065  | 995090  | 2 | 13 | 26 | TG   | 9  | 11 |
| 280200 | 48 | 1009983 | 1009998 | 2 | 8  | 16 | TG   | 13 | 6  |
| 280202 | 48 | 1015798 | 1015809 | 2 | 6  | 12 | CA   | 20 | 4  |
| 280217 | 48 | 1030751 | 1030778 | 4 | 7  | 28 | AAGA | 10 | 8  |
| 280221 | 48 | 1032052 | 1032073 | 2 | 11 | 22 | CA   | 12 | 9  |
| 280222 | 48 | 1034647 | 1034661 | 3 | 5  | 15 | AGG  | 28 | 4  |
| 280225 | 48 | 1035924 | 1035937 | 2 | 7  | 14 | TG   | 15 | 5  |
| 280226 | 48 | 1036055 | 1036086 | 2 | 16 | 32 | AC   | 8  | 6  |
| 280227 | 48 | 1038111 | 1038132 | 2 | 11 | 22 | GT   | 11 | 8  |
| 280230 | 48 | 1043328 | 1043365 | 2 | 19 | 38 | AC   | 16 | 16 |
| 280232 | 48 | 1045786 | 1045803 | 2 | 9  | 18 | CA   | 23 | 9  |
| 280233 | 48 | 1047347 | 1047388 | 2 | 21 | 42 | AC   | 11 | 10 |
| 280234 | 48 | 1049357 | 1049384 | 2 | 14 | 28 | CA   | 17 | 14 |
| 280237 | 48 | 1052607 | 1052638 | 2 | 16 | 32 | CA   | 15 | 7  |
| 280243 | 48 | 1053049 | 1053062 | 2 | 7  | 14 | GT   | 8  | 4  |
| 280245 | 48 | 1053615 | 1053634 | 2 | 10 | 20 | AT   | 9  | 6  |
| 280246 | 48 | 1053851 | 1053870 | 2 | 10 | 20 | GT   | 17 | 13 |
| 280250 | 48 | 1054414 | 1054439 | 2 | 13 | 26 | CA   | 12 | 9  |

|        |    |         |         |   |    |    |      |    |    |
|--------|----|---------|---------|---|----|----|------|----|----|
| 280251 | 48 | 1054788 | 1054811 | 2 | 12 | 24 | TG   | 18 | 10 |
| 280254 | 48 | 1060039 | 1060060 | 2 | 11 | 22 | CA   | 16 | 7  |
| 280255 | 48 | 1060183 | 1060194 | 2 | 6  | 12 | AC   | 23 | 3  |
| 280256 | 48 | 1060319 | 1060358 | 2 | 20 | 40 | CA   | 13 | 13 |
| 280261 | 48 | 1064285 | 1064302 | 2 | 9  | 18 | TG   | 13 | 4  |
| 280264 | 48 | 1064980 | 1065001 | 2 | 11 | 22 | CA   | 25 | 9  |
| 280269 | 48 | 1068905 | 1068930 | 2 | 13 | 26 | CA   | 15 | 11 |
| 280276 | 48 | 1079903 | 1079914 | 2 | 6  | 12 | CA   | 23 | 3  |
| 280282 | 48 | 1087419 | 1087440 | 2 | 11 | 22 | CA   | 15 | 10 |
| 280285 | 48 | 1087878 | 1087899 | 2 | 11 | 22 | CA   | 12 | 7  |
| 280286 | 48 | 1088036 | 1088063 | 2 | 14 | 28 | TG   | 10 | 12 |
| 280287 | 48 | 1089075 | 1089096 | 2 | 11 | 22 | AC   | 9  | 7  |
| 280290 | 48 | 1093018 | 1093037 | 2 | 10 | 20 | AC   | 14 | 7  |
| 280293 | 48 | 1094198 | 1094221 | 2 | 12 | 24 | CA   | 12 | 11 |
| 280294 | 48 | 1097725 | 1097738 | 2 | 7  | 14 | GT   | 24 | 3  |
| 280295 | 48 | 1098341 | 1098368 | 2 | 14 | 28 | TG   | 11 | 13 |
| 280297 | 48 | 1099066 | 1099077 | 2 | 6  | 12 | CA   | 14 | 10 |
| 280298 | 48 | 1099250 | 1099273 | 2 | 12 | 24 | AC   | 13 | 8  |
| 280300 | 48 | 1102585 | 1102608 | 2 | 12 | 24 | CA   | 7  | 14 |
| 280323 | 48 | 1128862 | 1128875 | 2 | 7  | 14 | CA   | 22 | 5  |
| 280325 | 48 | 1131255 | 1131275 | 3 | 7  | 21 | TTA  | 21 | 4  |
| 280328 | 48 | 1136570 | 1136603 | 2 | 17 | 34 | TG   | 6  | 5  |
| 280329 | 48 | 1137488 | 1137535 | 3 | 16 | 48 | CAT  | 17 | 7  |
| 280335 | 48 | 1146390 | 1146409 | 2 | 10 | 20 | GT   | 10 | 5  |
| 280337 | 48 | 1146563 | 1146582 | 4 | 5  | 20 | ACAG | 23 | 3  |
| 280343 | 48 | 1160354 | 1160373 | 4 | 5  | 20 | TGTC | 32 | 3  |
| 280345 | 48 | 1164130 | 1164147 | 2 | 9  | 18 | GT   | 16 | 3  |
| 280346 | 48 | 1165515 | 1165532 | 2 | 9  | 18 | TG   | 19 | 9  |
| 280347 | 48 | 1165878 | 1165905 | 2 | 14 | 28 | CA   | 15 | 9  |
| 280348 | 48 | 1166189 | 1166209 | 3 | 7  | 21 | CTG  | 24 | 6  |
| 280354 | 48 | 1179977 | 1179994 | 2 | 9  | 18 | CA   | 20 | 5  |
| 280355 | 48 | 1180978 | 1181001 | 2 | 12 | 24 | GT   | 9  | 7  |
| 280356 | 48 | 1181275 | 1181304 | 2 | 15 | 30 | CA   | 26 | 19 |
| 280357 | 48 | 1182657 | 1182680 | 2 | 12 | 24 | AC   | 22 | 7  |
| 280358 | 48 | 1182942 | 1182953 | 2 | 6  | 12 | GT   | 23 | 4  |
| 280366 | 48 | 1189176 | 1189211 | 2 | 18 | 36 | GT   | 7  | 10 |
| 280367 | 48 | 1192267 | 1192280 | 2 | 7  | 14 | CA   | 28 | 7  |
| 280368 | 48 | 1196919 | 1196934 | 2 | 8  | 16 | CA   | 19 | 5  |
| 280371 | 48 | 1200310 | 1200327 | 2 | 9  | 18 | AC   | 16 | 8  |
| 280372 | 48 | 1200545 | 1200574 | 2 | 15 | 30 | TG   | 19 | 6  |
| 280376 | 48 | 1203113 | 1203126 | 2 | 7  | 14 | AC   | 13 | 4  |
| 280378 | 48 | 1206952 | 1206971 | 4 | 5  | 20 | TTTG | 24 | 13 |
| 280379 | 48 | 1207459 | 1207476 | 2 | 9  | 18 | TG   | 17 | 15 |
| 280380 | 48 | 1207606 | 1207633 | 2 | 14 | 28 | AC   | 14 | 13 |
| 280397 | 48 | 1238093 | 1238120 | 2 | 14 | 28 | CA   | 10 | 12 |
| 280398 | 48 | 1240797 | 1240818 | 2 | 11 | 22 | GT   | 21 | 11 |
| 280399 | 48 | 1241912 | 1241929 | 2 | 9  | 18 | TG   | 16 | 4  |
| 280400 | 48 | 1242251 | 1242278 | 2 | 14 | 28 | TG   | 17 | 7  |
| 280401 | 48 | 1245162 | 1245181 | 2 | 10 | 20 | CA   | 6  | 3  |
| 280402 | 48 | 1246241 | 1246254 | 2 | 7  | 14 | GT   | 9  | 6  |
| 280403 | 48 | 1247017 | 1247044 | 2 | 14 | 28 | GT   | 20 | 12 |

|        |    |         |         |   |    |    |      |    |    |
|--------|----|---------|---------|---|----|----|------|----|----|
| 280412 | 48 | 1254356 | 1254367 | 2 | 6  | 12 | CT   | 16 | 4  |
| 280414 | 48 | 1254842 | 1254855 | 2 | 7  | 14 | CA   | 14 | 8  |
| 280417 | 48 | 1255432 | 1255459 | 2 | 14 | 28 | AG   | 16 | 15 |
| 280419 | 48 | 1260146 | 1260169 | 2 | 12 | 24 | CA   | 7  | 9  |
| 280420 | 48 | 1264214 | 1264231 | 3 | 6  | 18 | AGG  | 29 | 3  |
| 280421 | 48 | 1265099 | 1265125 | 3 | 9  | 27 | GTT  | 24 | 8  |
| 280422 | 48 | 1269747 | 1269790 | 2 | 22 | 44 | CA   | 12 | 11 |
| 280426 | 48 | 1273932 | 1273943 | 2 | 6  | 12 | AC   | 27 | 6  |
| 280427 | 48 | 1273946 | 1273961 | 2 | 8  | 16 | AC   | 21 | 5  |
| 280428 | 48 | 1281992 | 1282017 | 2 | 13 | 26 | AC   | 9  | 6  |
| 280429 | 48 | 1282181 | 1282202 | 2 | 11 | 22 | CA   | 13 | 7  |
| 280432 | 48 | 1288306 | 1288321 | 4 | 4  | 16 | GCCT | 32 | 3  |
| 280436 | 48 | 1295828 | 1295869 | 2 | 21 | 42 | GT   | 7  | 10 |
| 280437 | 48 | 1295906 | 1295921 | 2 | 8  | 16 | GT   | 17 | 8  |
| 280438 | 48 | 1296040 | 1296077 | 2 | 19 | 38 | AC   | 14 | 11 |
| 280439 | 48 | 1296628 | 1296659 | 2 | 16 | 32 | GT   | 13 | 6  |
| 280444 | 48 | 1308668 | 1308687 | 2 | 10 | 20 | GT   | 15 | 11 |
| 280445 | 48 | 1308821 | 1308852 | 2 | 16 | 32 | CA   | 12 | 9  |
| 280446 | 48 | 1308890 | 1308907 | 2 | 9  | 18 | GT   | 18 | 4  |
| 280447 | 48 | 1309018 | 1309039 | 2 | 11 | 22 | GT   | 11 | 9  |
| 280448 | 48 | 1309151 | 1309164 | 2 | 7  | 14 | TG   | 24 | 5  |
| 280449 | 48 | 1309329 | 1309348 | 2 | 10 | 20 | GT   | 15 | 8  |
| 280451 | 48 | 1311113 | 1311138 | 2 | 13 | 26 | GT   | 6  | 4  |
| 280456 | 48 | 1316871 | 1316888 | 2 | 9  | 18 | AC   | 8  | 5  |
| 280457 | 48 | 1316990 | 1317027 | 2 | 19 | 38 | AC   | 15 | 16 |
| 280458 | 48 | 1320274 | 1320289 | 2 | 8  | 16 | GT   | 16 | 7  |
| 280459 | 48 | 1320997 | 1321010 | 2 | 7  | 14 | TG   | 18 | 3  |
| 280467 | 48 | 1339272 | 1339287 | 2 | 8  | 16 | AC   | 11 | 15 |
| 280470 | 48 | 1343694 | 1343717 | 2 | 12 | 24 | TG   | 6  | 5  |
| 280472 | 48 | 1354293 | 1354318 | 2 | 13 | 26 | AC   | 14 | 9  |
| 280476 | 48 | 1354879 | 1354902 | 2 | 12 | 24 | AC   | 16 | 6  |
| 280477 | 48 | 1355069 | 1355084 | 4 | 4  | 16 | CTGG | 19 | 5  |
| 280489 | 48 | 1373161 | 1373196 | 2 | 18 | 36 | TG   | 11 | 10 |
| 280495 | 48 | 1382666 | 1382693 | 2 | 14 | 28 | GT   | 14 | 11 |
| 280497 | 48 | 1396257 | 1396284 | 2 | 14 | 28 | GT   | 20 | 16 |
| 280499 | 48 | 1403416 | 1403465 | 2 | 25 | 50 | CA   | 6  | 7  |
| 280504 | 48 | 1408865 | 1408890 | 2 | 13 | 26 | TG   | 14 | 6  |
| 280507 | 48 | 1414907 | 1414926 | 2 | 10 | 20 | CA   | 16 | 4  |
| 280508 | 48 | 1415075 | 1415086 | 2 | 6  | 12 | CA   | 13 | 4  |
| 280509 | 48 | 1415138 | 1415161 | 2 | 12 | 24 | AC   | 13 | 10 |
| 280512 | 48 | 1425830 | 1425853 | 2 | 12 | 24 | AC   | 9  | 10 |
| 280522 | 48 | 1432400 | 1432421 | 2 | 11 | 22 | TG   | 18 | 7  |
| 280523 | 48 | 1433056 | 1433082 | 3 | 9  | 27 | AGG  | 17 | 6  |
| 280525 | 48 | 1435592 | 1435603 | 2 | 6  | 12 | AC   | 13 | 3  |
| 280526 | 48 | 1439539 | 1439554 | 2 | 8  | 16 | AG   | 17 | 7  |
| 280527 | 48 | 1441734 | 1441757 | 2 | 12 | 24 | TG   | 13 | 13 |
| 280529 | 48 | 1445671 | 1445682 | 2 | 6  | 12 | GT   | 18 | 3  |
| 280531 | 48 | 1446468 | 1446481 | 2 | 7  | 14 | TG   | 15 | 12 |
| 280532 | 48 | 1447296 | 1447315 | 4 | 5  | 20 | TTTA | 25 | 3  |
| 280537 | 48 | 1452981 | 1453013 | 3 | 11 | 33 | CCT  | 10 | 3  |
| 280538 | 48 | 1453337 | 1453366 | 2 | 15 | 30 | GT   | 14 | 5  |

|        |    |         |         |   |    |    |      |    |    |
|--------|----|---------|---------|---|----|----|------|----|----|
| 280539 | 48 | 1453507 | 1453528 | 2 | 11 | 22 | AC   | 24 | 9  |
| 280540 | 48 | 1453662 | 1453673 | 2 | 6  | 12 | GT   | 20 | 4  |
| 280541 | 48 | 1453704 | 1453757 | 2 | 27 | 54 | AC   | 9  | 7  |
| 280545 | 48 | 1455956 | 1455993 | 2 | 19 | 38 | CA   | 15 | 10 |
| 280547 | 48 | 1458868 | 1458885 | 2 | 9  | 18 | AC   | 21 | 8  |
| 280557 | 48 | 1471441 | 1471460 | 4 | 5  | 20 | TGGA | 19 | 3  |
| 280558 | 48 | 1474690 | 1474705 | 2 | 8  | 16 | GT   | 21 | 3  |
| 280559 | 48 | 1476340 | 1476351 | 2 | 6  | 12 | TG   | 21 | 3  |
| 280560 | 48 | 1476401 | 1476414 | 2 | 7  | 14 | GT   | 6  | 6  |
| 280562 | 48 | 1480731 | 1480752 | 2 | 11 | 22 | AC   | 15 | 6  |
| 280563 | 48 | 1484590 | 1484643 | 2 | 27 | 54 | CA   | 8  | 11 |
| 280564 | 48 | 1484787 | 1484814 | 2 | 14 | 28 | TG   | 10 | 4  |
| 280569 | 48 | 1493600 | 1493621 | 2 | 11 | 22 | AC   | 11 | 7  |
| 280570 | 48 | 1493739 | 1493752 | 2 | 7  | 14 | GT   | 7  | 6  |
| 280571 | 48 | 1500677 | 1500692 | 4 | 4  | 16 | TTTA | 14 | 4  |
| 280574 | 48 | 1502740 | 1502755 | 2 | 8  | 16 | CA   | 24 | 5  |
| 280575 | 48 | 1503690 | 1503710 | 3 | 7  | 21 | AGT  | 23 | 7  |
| 280580 | 48 | 1508956 | 1508987 | 4 | 8  | 32 | TTTG | 29 | 6  |
| 280584 | 48 | 1509963 | 1509992 | 2 | 15 | 30 | AC   | 10 | 6  |
| 280585 | 48 | 1512347 | 1512370 | 3 | 8  | 24 | AGA  | 17 | 3  |
| 280586 | 48 | 1513189 | 1513206 | 2 | 9  | 18 | GT   | 8  | 4  |
| 280587 | 48 | 1519078 | 1519107 | 3 | 10 | 30 | ATA  | 12 | 15 |
| 280593 | 48 | 1548812 | 1548851 | 2 | 20 | 40 | GA   | 6  | 4  |
| 280597 | 48 | 1553832 | 1553846 | 3 | 5  | 15 | AGC  | 28 | 4  |
| 280603 | 48 | 1583776 | 1583795 | 2 | 10 | 20 | AC   | 11 | 4  |
| 280607 | 48 | 1611073 | 1611088 | 2 | 8  | 16 | TA   | 13 | 3  |
| 280613 | 48 | 1623805 | 1623818 | 2 | 7  | 14 | AT   | 24 | 6  |
| 280624 | 48 | 1647680 | 1647691 | 2 | 6  | 12 | GC   | 16 | 4  |
| 280627 | 48 | 1652948 | 1652959 | 2 | 6  | 12 | TG   | 27 | 3  |
| 280630 | 48 | 1657823 | 1657868 | 2 | 23 | 46 | AC   | 6  | 8  |
| 280631 | 48 | 1657916 | 1657941 | 2 | 13 | 26 | CA   | 6  | 4  |
| 280641 | 48 | 1672148 | 1672167 | 4 | 5  | 20 | AAAC | 22 | 5  |
| 280653 | 48 | 1698735 | 1698754 | 4 | 5  | 20 | AAAC | 31 | 3  |
| 280656 | 48 | 1711228 | 1711255 | 2 | 14 | 28 | TC   | 14 | 7  |
| 280658 | 48 | 1717466 | 1717481 | 2 | 8  | 16 | CA   | 20 | 4  |
| 280675 | 48 | 1781459 | 1781478 | 2 | 10 | 20 | GA   | 22 | 5  |
| 280678 | 48 | 1788794 | 1788823 | 2 | 15 | 30 | AC   | 9  | 4  |
| 280691 | 48 | 1809787 | 1809828 | 2 | 21 | 42 | TG   | 6  | 5  |
| 280698 | 48 | 1834579 | 1834606 | 2 | 14 | 28 | CA   | 13 | 7  |
| 280735 | 48 | 1941806 | 1941819 | 2 | 7  | 14 | TC   | 24 | 3  |
| 280737 | 48 | 1942693 | 1942730 | 2 | 19 | 38 | TG   | 9  | 8  |
| 280740 | 48 | 1954032 | 1954059 | 2 | 14 | 28 | CA   | 12 | 9  |
| 280751 | 48 | 1970074 | 1970095 | 2 | 11 | 22 | TC   | 16 | 3  |
| 280756 | 48 | 1991990 | 1992007 | 2 | 9  | 18 | AC   | 15 | 5  |
| 280757 | 48 | 1992555 | 1992592 | 2 | 19 | 38 | AC   | 7  | 7  |
| 280759 | 48 | 1992669 | 1992684 | 2 | 8  | 16 | TG   | 14 | 3  |
| 280760 | 48 | 1994638 | 1994667 | 2 | 15 | 30 | TG   | 7  | 5  |
| 280762 | 48 | 1999251 | 1999274 | 2 | 12 | 24 | TG   | 18 | 3  |
| 280768 | 48 | 2014429 | 2014452 | 2 | 12 | 24 | TG   | 13 | 7  |
| 280774 | 48 | 2021919 | 2021934 | 2 | 8  | 16 | GT   | 17 | 3  |
| 280775 | 48 | 2026798 | 2026809 | 2 | 6  | 12 | AT   | 21 | 9  |

|        |    |         |         |   |    |    |      |    |    |
|--------|----|---------|---------|---|----|----|------|----|----|
| 280782 | 48 | 2036371 | 2036382 | 2 | 6  | 12 | TG   | 31 | 3  |
| 280785 | 48 | 2055712 | 2055739 | 2 | 14 | 28 | GT   | 11 | 6  |
| 280790 | 48 | 2067161 | 2067182 | 2 | 11 | 22 | GA   | 26 | 3  |
| 280795 | 48 | 2084605 | 2084622 | 2 | 9  | 18 | AC   | 17 | 7  |
| 280799 | 48 | 2101434 | 2101447 | 2 | 7  | 14 | CA   | 16 | 3  |
| 280812 | 48 | 2135492 | 2135503 | 2 | 6  | 12 | TG   | 30 | 3  |
| 280813 | 48 | 2136645 | 2136668 | 4 | 6  | 24 | TCTG | 19 | 5  |
| 280816 | 48 | 2144108 | 2144119 | 2 | 6  | 12 | AC   | 14 | 5  |
| 280817 | 48 | 2144121 | 2144134 | 2 | 7  | 14 | CA   | 17 | 6  |
| 280818 | 48 | 2144157 | 2144180 | 4 | 6  | 24 | TACA | 15 | 4  |
| 280819 | 48 | 2145081 | 2145094 | 2 | 7  | 14 | TG   | 27 | 3  |
| 280827 | 48 | 2149008 | 2149028 | 3 | 7  | 21 | GAT  | 23 | 11 |
| 280832 | 48 | 2165420 | 2165447 | 2 | 14 | 28 | AC   | 13 | 14 |
| 280834 | 48 | 2170410 | 2170421 | 2 | 6  | 12 | TC   | 24 | 5  |
| 280838 | 48 | 2188559 | 2188570 | 2 | 6  | 12 | AT   | 6  | 3  |
| 280839 | 48 | 2190611 | 2190622 | 2 | 6  | 12 | AC   | 22 | 4  |
| 280845 | 48 | 2207966 | 2207981 | 2 | 8  | 16 | GT   | 27 | 5  |
| 280848 | 48 | 2219440 | 2219457 | 2 | 9  | 18 | CA   | 22 | 3  |
| 280879 | 48 | 2287448 | 2287479 | 2 | 16 | 32 | GT   | 12 | 8  |
| 280886 | 48 | 2315786 | 2315806 | 3 | 7  | 21 | ATA  | 8  | 3  |
| 280889 | 48 | 2327233 | 2327248 | 2 | 8  | 16 | AC   | 21 | 5  |
| 280897 | 48 | 2336769 | 2336788 | 4 | 5  | 20 | GTGA | 30 | 4  |
| 280898 | 48 | 2347903 | 2347918 | 2 | 8  | 16 | TG   | 22 | 9  |
| 280910 | 48 | 2382713 | 2382742 | 2 | 15 | 30 | CA   | 7  | 7  |
| 280916 | 48 | 2392712 | 2392737 | 2 | 13 | 26 | GT   | 14 | 8  |
| 280928 | 48 | 2415658 | 2415677 | 2 | 10 | 20 | TG   | 17 | 6  |
| 280929 | 48 | 2415809 | 2415828 | 2 | 10 | 20 | TG   | 19 | 6  |
| 280935 | 48 | 2421111 | 2421156 | 2 | 23 | 46 | TG   | 6  | 7  |
| 280939 | 48 | 2430067 | 2430112 | 2 | 23 | 46 | TG   | 7  | 8  |
| 280942 | 48 | 2461349 | 2461364 | 2 | 8  | 16 | AC   | 22 | 4  |
| 280954 | 48 | 2491483 | 2491502 | 4 | 5  | 20 | TTTC | 10 | 5  |
| 280956 | 48 | 2496087 | 2496144 | 2 | 29 | 58 | AG   | 11 | 9  |
| 280965 | 48 | 2541420 | 2541434 | 3 | 5  | 15 | GAG  | 24 | 3  |
| 280969 | 48 | 2553115 | 2553130 | 2 | 8  | 16 | TG   | 10 | 7  |
| 280972 | 48 | 2557852 | 2557865 | 2 | 7  | 14 | AC   | 25 | 4  |
| 280973 | 48 | 2558158 | 2558171 | 2 | 7  | 14 | GT   | 29 | 3  |
| 280974 | 48 | 2562551 | 2562574 | 2 | 12 | 24 | AC   | 10 | 4  |
| 280975 | 48 | 2563831 | 2563846 | 2 | 8  | 16 | TC   | 19 | 4  |
| 280981 | 48 | 2579112 | 2579143 | 2 | 16 | 32 | TG   | 10 | 4  |
| 280984 | 48 | 2588814 | 2588829 | 2 | 8  | 16 | AT   | 8  | 4  |
| 280985 | 48 | 2597506 | 2597519 | 2 | 7  | 14 | AC   | 21 | 5  |
| 280989 | 48 | 2602067 | 2602084 | 2 | 9  | 18 | GA   | 15 | 7  |
| 280995 | 48 | 2609318 | 2609341 | 2 | 12 | 24 | TC   | 16 | 8  |
| 280997 | 48 | 2615307 | 2615328 | 2 | 11 | 22 | CA   | 10 | 9  |
| 281010 | 48 | 2638919 | 2638932 | 2 | 7  | 14 | AC   | 7  | 3  |
| 281011 | 48 | 2638938 | 2638949 | 2 | 6  | 12 | CA   | 20 | 5  |
| 281013 | 48 | 2641638 | 2641663 | 2 | 13 | 26 | TG   | 10 | 8  |
| 281015 | 48 | 2643852 | 2643869 | 2 | 9  | 18 | TG   | 29 | 7  |
| 281017 | 48 | 2646666 | 2646689 | 3 | 8  | 24 | ACA  | 29 | 6  |
| 281018 | 48 | 2648121 | 2648142 | 2 | 11 | 22 | AC   | 15 | 7  |
| 281022 | 48 | 2652282 | 2652297 | 4 | 4  | 16 | ATGT | 25 | 3  |



|        |    |         |         |   |    |    |      |    |    |
|--------|----|---------|---------|---|----|----|------|----|----|
| 281024 | 48 | 2655791 | 2655814 | 2 | 12 | 24 | GT   | 13 | 6  |
| 281035 | 48 | 2698325 | 2698340 | 2 | 8  | 16 | CA   | 18 | 5  |
| 281046 | 48 | 2714095 | 2714130 | 2 | 18 | 36 | AC   | 8  | 8  |
| 281049 | 48 | 2721761 | 2721772 | 2 | 6  | 12 | TG   | 30 | 3  |
| 281060 | 48 | 2740218 | 2740231 | 2 | 7  | 14 | CA   | 24 | 5  |
| 281067 | 48 | 2745683 | 2745698 | 2 | 8  | 16 | CT   | 16 | 3  |
| 281073 | 48 | 2746544 | 2746559 | 2 | 8  | 16 | TA   | 8  | 5  |
| 281082 | 48 | 2760083 | 2760100 | 2 | 9  | 18 | TG   | 9  | 6  |
| 281088 | 48 | 2766123 | 2766186 | 2 | 32 | 64 | GA   | 9  | 8  |
| 281093 | 48 | 2773553 | 2773564 | 2 | 6  | 12 | CA   | 29 | 3  |
| 281104 | 48 | 2798854 | 2798899 | 2 | 23 | 46 | GT   | 6  | 8  |
| 281113 | 48 | 2836425 | 2836454 | 2 | 15 | 30 | GT   | 10 | 7  |
| 281125 | 48 | 2843560 | 2843577 | 2 | 9  | 18 | TG   | 26 | 4  |
| 281127 | 48 | 2848333 | 2848358 | 2 | 13 | 26 | GA   | 10 | 8  |
| 281129 | 48 | 2852188 | 2852203 | 4 | 4  | 16 | AAAT | 13 | 3  |
| 281133 | 48 | 2860120 | 2860137 | 2 | 9  | 18 | GT   | 18 | 8  |
| 281135 | 48 | 2866481 | 2866516 | 2 | 18 | 36 | CA   | 9  | 10 |
| 281136 | 48 | 2868772 | 2868801 | 2 | 15 | 30 | CA   | 7  | 5  |
| 281142 | 48 | 2887187 | 2887232 | 2 | 23 | 46 | GA   | 10 | 10 |
| 281149 | 48 | 2895932 | 2895967 | 2 | 18 | 36 | CA   | 6  | 8  |
| 281151 | 48 | 2896372 | 2896389 | 2 | 9  | 18 | CA   | 22 | 7  |
| 281155 | 48 | 2903483 | 2903524 | 2 | 21 | 42 | GT   | 8  | 12 |
| 281157 | 48 | 2905687 | 2905722 | 2 | 18 | 36 | CA   | 13 | 17 |
| 281158 | 48 | 2906075 | 2906100 | 2 | 13 | 26 | CA   | 10 | 6  |
| 281159 | 48 | 2907037 | 2907078 | 2 | 21 | 42 | CA   | 13 | 10 |
| 281163 | 48 | 2909640 | 2909657 | 2 | 9  | 18 | AC   | 22 | 6  |
| 281165 | 48 | 2911486 | 2911505 | 2 | 10 | 20 | AC   | 13 | 8  |
| 281166 | 48 | 2911975 | 2911990 | 2 | 8  | 16 | TG   | 16 | 7  |
| 281169 | 48 | 2918904 | 2918935 | 2 | 16 | 32 | GA   | 7  | 7  |
| 281177 | 48 | 2938390 | 2938409 | 4 | 5  | 20 | AAAC | 17 | 4  |
| 281181 | 48 | 2942009 | 2942030 | 2 | 11 | 22 | CA   | 16 | 12 |
| 281184 | 48 | 2942450 | 2942473 | 2 | 12 | 24 | GT   | 17 | 12 |
| 281186 | 48 | 2944775 | 2944814 | 2 | 20 | 40 | AC   | 7  | 7  |
| 281191 | 48 | 2949796 | 2949807 | 2 | 6  | 12 | GA   | 26 | 3  |
| 281198 | 48 | 2958393 | 2958406 | 2 | 7  | 14 | GT   | 13 | 5  |
| 281202 | 48 | 2966776 | 2966799 | 4 | 6  | 24 | TGGA | 12 | 6  |
| 281207 | 48 | 2979399 | 2979412 | 2 | 7  | 14 | CT   | 14 | 8  |
| 281213 | 48 | 2987192 | 2987205 | 2 | 7  | 14 | TG   | 26 | 3  |
| 281214 | 48 | 2988335 | 2988346 | 2 | 6  | 12 | GT   | 21 | 4  |
| 281217 | 48 | 2993117 | 2993132 | 2 | 8  | 16 | TG   | 26 | 8  |
| 281218 | 48 | 2993642 | 2993665 | 4 | 6  | 24 | AAAC | 21 | 3  |
| 281223 | 48 | 2999339 | 2999362 | 2 | 12 | 24 | AC   | 11 | 6  |
| 281227 | 48 | 3007655 | 3007668 | 2 | 7  | 14 | TG   | 26 | 3  |
| 281230 | 48 | 3014296 | 3014307 | 2 | 6  | 12 | GT   | 13 | 6  |
| 281231 | 48 | 3015780 | 3015791 | 2 | 6  | 12 | AC   | 26 | 9  |
| 281232 | 48 | 3015794 | 3015809 | 2 | 8  | 16 | AC   | 27 | 9  |
| 281233 | 48 | 3016109 | 3016122 | 2 | 7  | 14 | AC   | 24 | 5  |
| 281234 | 48 | 3016728 | 3016743 | 2 | 8  | 16 | GT   | 25 | 3  |
| 281235 | 48 | 3019772 | 3019783 | 2 | 6  | 12 | TG   | 32 | 4  |
| 281237 | 48 | 3022847 | 3022860 | 2 | 7  | 14 | AC   | 24 | 4  |
| 281249 | 48 | 3043435 | 3043450 | 2 | 8  | 16 | CA   | 27 | 8  |

|        |    |         |         |   |    |    |      |    |    |
|--------|----|---------|---------|---|----|----|------|----|----|
| 281276 | 48 | 3066157 | 3066178 | 2 | 11 | 22 | CA   | 14 | 12 |
| 281284 | 48 | 3077656 | 3077693 | 2 | 19 | 38 | GT   | 19 | 10 |
| 281286 | 48 | 3078144 | 3078159 | 4 | 4  | 16 | AAAT | 23 | 5  |
| 281287 | 48 | 3078494 | 3078505 | 2 | 6  | 12 | CA   | 29 | 4  |
| 281289 | 48 | 3080101 | 3080122 | 2 | 11 | 22 | AG   | 9  | 8  |
| 281306 | 48 | 3092585 | 3092600 | 2 | 8  | 16 | GA   | 25 | 6  |
| 281315 | 48 | 3105028 | 3105045 | 2 | 9  | 18 | GT   | 15 | 7  |
| 281317 | 48 | 3107670 | 3107683 | 2 | 7  | 14 | AC   | 26 | 5  |
| 281320 | 48 | 3113591 | 3113610 | 2 | 10 | 20 | CA   | 26 | 7  |
| 281324 | 48 | 3119700 | 3119725 | 2 | 13 | 26 | CA   | 20 | 7  |
| 281326 | 48 | 3131934 | 3131953 | 2 | 10 | 20 | AC   | 14 | 11 |
| 281330 | 48 | 3139405 | 3139418 | 2 | 7  | 14 | GT   | 14 | 7  |
| 281336 | 48 | 3151625 | 3151648 | 3 | 8  | 24 | TTG  | 28 | 3  |
| 281341 | 48 | 3159355 | 3159372 | 2 | 9  | 18 | TG   | 18 | 6  |
| 281345 | 48 | 3164398 | 3164421 | 2 | 12 | 24 | GT   | 6  | 3  |
| 281358 | 48 | 3179584 | 3179598 | 3 | 5  | 15 | AAT  | 22 | 6  |
| 281359 | 48 | 3179713 | 3179734 | 2 | 11 | 22 | TG   | 11 | 9  |
| 281361 | 48 | 3179887 | 3179898 | 2 | 6  | 12 | CA   | 15 | 9  |
| 281369 | 48 | 3190520 | 3190563 | 4 | 11 | 44 | TCTT | 13 | 7  |
| 281370 | 48 | 3190606 | 3190637 | 2 | 16 | 32 | TC   | 8  | 10 |
| 281372 | 48 | 3195771 | 3195826 | 4 | 14 | 56 | CTTT | 6  | 8  |
| 281377 | 48 | 3199416 | 3199445 | 2 | 15 | 30 | TC   | 7  | 7  |
| 281380 | 48 | 3202984 | 3202999 | 2 | 8  | 16 | CA   | 12 | 6  |
| 281386 | 48 | 3209325 | 3209340 | 4 | 4  | 16 | AGAC | 24 | 3  |
| 281391 | 48 | 3221880 | 3221923 | 2 | 22 | 44 | CA   | 10 | 15 |
| 281395 | 48 | 3227115 | 3227136 | 2 | 11 | 22 | CT   | 11 | 3  |
| 281397 | 48 | 3227771 | 3227788 | 2 | 9  | 18 | GA   | 10 | 11 |
| 281400 | 48 | 3230017 | 3230058 | 2 | 21 | 42 | CT   | 10 | 8  |
| 281405 | 48 | 3236042 | 3236073 | 4 | 8  | 32 | TTTG | 28 | 5  |
| 281418 | 48 | 3248760 | 3248773 | 2 | 7  | 14 | TA   | 15 | 5  |
| 281420 | 48 | 3252483 | 3252514 | 4 | 8  | 32 | ATTT | 20 | 9  |
| 281421 | 48 | 3255019 | 3255045 | 3 | 9  | 27 | CCT  | 23 | 6  |
| 281425 | 48 | 3258038 | 3258053 | 2 | 8  | 16 | GT   | 14 | 3  |
| 281426 | 48 | 3258765 | 3258776 | 2 | 6  | 12 | AT   | 28 | 4  |
| 281433 | 48 | 3266276 | 3266293 | 2 | 9  | 18 | CA   | 23 | 6  |
| 281435 | 48 | 3270104 | 3270119 | 2 | 8  | 16 | GT   | 19 | 7  |
| 281436 | 48 | 3273795 | 3273812 | 2 | 9  | 18 | GT   | 22 | 7  |
| 281437 | 48 | 3274475 | 3274500 | 2 | 13 | 26 | TG   | 19 | 16 |
| 281439 | 48 | 3276418 | 3276439 | 2 | 11 | 22 | AC   | 17 | 5  |
| 281441 | 48 | 3281354 | 3281369 | 2 | 8  | 16 | AC   | 21 | 5  |
| 281442 | 48 | 3281739 | 3281764 | 2 | 13 | 26 | GT   | 12 | 6  |
| 281443 | 48 | 3281869 | 3281880 | 2 | 6  | 12 | GT   | 22 | 18 |
| 281448 | 48 | 3285527 | 3285560 | 2 | 17 | 34 | TG   | 16 | 9  |
| 281450 | 48 | 3290870 | 3290891 | 2 | 11 | 22 | TG   | 11 | 13 |
| 281453 | 48 | 3293590 | 3293607 | 2 | 9  | 18 | AC   | 27 | 5  |
| 281462 | 48 | 3302964 | 3303003 | 4 | 10 | 40 | GAAA | 16 | 12 |
| 281468 | 48 | 3308541 | 3308564 | 4 | 6  | 24 | AAAT | 24 | 9  |
| 281470 | 48 | 3311092 | 3311121 | 2 | 15 | 30 | AC   | 21 | 9  |
| 281471 | 48 | 3311278 | 3311301 | 2 | 12 | 24 | CA   | 14 | 11 |
| 281486 | 48 | 3334650 | 3334669 | 2 | 10 | 20 | TG   | 25 | 8  |
| 281493 | 48 | 3344824 | 3344835 | 2 | 6  | 12 | TG   | 18 | 10 |

|        |    |         |         |   |    |    |      |    |    |
|--------|----|---------|---------|---|----|----|------|----|----|
| 281494 | 48 | 3344838 | 3344849 | 2 | 6  | 12 | TG   | 18 | 7  |
| 281495 | 48 | 3346190 | 3346229 | 2 | 20 | 40 | CA   | 14 | 18 |
| 281496 | 48 | 3348130 | 3348141 | 2 | 6  | 12 | CA   | 18 | 8  |
| 281497 | 48 | 3348211 | 3348222 | 2 | 6  | 12 | AC   | 27 | 4  |
| 281498 | 48 | 3349100 | 3349129 | 2 | 15 | 30 | GT   | 14 | 8  |
| 281500 | 48 | 3350717 | 3350744 | 2 | 14 | 28 | CA   | 19 | 10 |
| 281501 | 48 | 3351110 | 3351129 | 2 | 10 | 20 | AC   | 9  | 3  |
| 281503 | 48 | 3358772 | 3358785 | 2 | 7  | 14 | AG   | 33 | 4  |
| 281506 | 48 | 3363174 | 3363189 | 4 | 4  | 16 | TTGT | 26 | 4  |
| 281509 | 48 | 3369686 | 3369701 | 2 | 8  | 16 | CA   | 25 | 6  |
| 281510 | 48 | 3371138 | 3371153 | 2 | 8  | 16 | AC   | 23 | 6  |
| 281512 | 48 | 3372546 | 3372575 | 2 | 15 | 30 | CA   | 13 | 9  |
| 281516 | 48 | 3375610 | 3375623 | 2 | 7  | 14 | AC   | 17 | 13 |
| 281519 | 48 | 3376633 | 3376659 | 3 | 9  | 27 | GCT  | 20 | 6  |
| 281521 | 48 | 3377688 | 3377726 | 3 | 13 | 39 | CTC  | 16 | 4  |
| 281526 | 48 | 3384379 | 3384393 | 3 | 5  | 15 | TTG  | 24 | 3  |
| 281529 | 48 | 3402901 | 3402914 | 2 | 7  | 14 | AG   | 29 | 3  |
| 281534 | 48 | 3414970 | 3415001 | 2 | 16 | 32 | TG   | 15 | 5  |
| 281537 | 48 | 3423836 | 3423851 | 2 | 8  | 16 | GT   | 25 | 5  |
| 281538 | 48 | 3424147 | 3424158 | 2 | 6  | 12 | AC   | 24 | 3  |
| 281541 | 48 | 3425179 | 3425202 | 2 | 12 | 24 | CA   | 7  | 5  |
| 281546 | 48 | 3436059 | 3436074 | 2 | 8  | 16 | CA   | 19 | 6  |
| 281549 | 48 | 3442552 | 3442565 | 2 | 7  | 14 | CA   | 25 | 4  |
| 281550 | 48 | 3443817 | 3443854 | 2 | 19 | 38 | TG   | 8  | 9  |
| 281551 | 48 | 3443924 | 3443935 | 2 | 6  | 12 | TG   | 23 | 3  |
| 281558 | 48 | 3458596 | 3458627 | 2 | 16 | 32 | AC   | 12 | 5  |
| 281564 | 48 | 3466149 | 3466176 | 2 | 14 | 28 | AC   | 19 | 5  |
| 281566 | 48 | 3472632 | 3472658 | 3 | 9  | 27 | CCT  | 6  | 4  |
| 281568 | 48 | 3474611 | 3474628 | 3 | 6  | 18 | GCA  | 16 | 3  |
| 281569 | 48 | 3475458 | 3475485 | 2 | 14 | 28 | TG   | 19 | 9  |
| 281570 | 48 | 3475992 | 3476018 | 3 | 9  | 27 | CCT  | 19 | 4  |
| 281573 | 48 | 3476784 | 3476809 | 2 | 13 | 26 | TC   | 11 | 12 |
| 281575 | 48 | 3477206 | 3477221 | 2 | 8  | 16 | CT   | 13 | 6  |
| 281576 | 48 | 3477224 | 3477239 | 2 | 8  | 16 | CT   | 15 | 6  |
| 281579 | 48 | 3478088 | 3478109 | 2 | 11 | 22 | AC   | 9  | 6  |
| 281580 | 48 | 3478837 | 3478852 | 2 | 8  | 16 | CA   | 21 | 6  |
| 281609 | 48 | 3515462 | 3515489 | 4 | 7  | 28 | TACA | 23 | 5  |
| 281618 | 48 | 3537155 | 3537174 | 2 | 10 | 20 | GT   | 24 | 3  |
| 281620 | 48 | 3544797 | 3544820 | 2 | 12 | 24 | TG   | 14 | 9  |
| 281624 | 48 | 3561169 | 3561186 | 2 | 9  | 18 | GT   | 12 | 9  |
| 281629 | 48 | 3591160 | 3591181 | 2 | 11 | 22 | CA   | 27 | 11 |
| 281630 | 48 | 3593262 | 3593283 | 2 | 11 | 22 | TG   | 17 | 8  |
| 281638 | 48 | 3625208 | 3625221 | 2 | 7  | 14 | AC   | 28 | 3  |
| 281640 | 48 | 3626772 | 3626785 | 2 | 7  | 14 | TA   | 23 | 5  |
| 281661 | 48 | 3686748 | 3686763 | 4 | 4  | 16 | TGTA | 27 | 6  |
| 281675 | 49 | 4964    | 4975    | 2 | 6  | 12 | AC   | 15 | 3  |
| 281685 | 49 | 37516   | 37535   | 4 | 5  | 20 | AGAC | 11 | 3  |
| 281686 | 49 | 40624   | 40635   | 2 | 6  | 12 | GT   | 30 | 7  |
| 281687 | 49 | 43209   | 43236   | 4 | 7  | 28 | AATA | 16 | 3  |
| 281689 | 49 | 45055   | 45070   | 2 | 8  | 16 | TG   | 21 | 4  |
| 281696 | 49 | 55765   | 55797   | 3 | 11 | 33 | ATT  | 13 | 10 |

|        |    |        |        |   |    |    |      |    |    |
|--------|----|--------|--------|---|----|----|------|----|----|
| 281701 | 49 | 70457  | 70471  | 3 | 5  | 15 | CTT  | 26 | 4  |
| 281704 | 49 | 79685  | 79705  | 3 | 7  | 21 | ACA  | 10 | 5  |
| 281705 | 49 | 79862  | 79875  | 2 | 7  | 14 | TC   | 29 | 5  |
| 281717 | 49 | 89820  | 89833  | 2 | 7  | 14 | CT   | 26 | 5  |
| 281720 | 49 | 108671 | 108698 | 4 | 7  | 28 | TTTC | 13 | 10 |
| 281734 | 49 | 140690 | 140710 | 3 | 7  | 21 | GAG  | 18 | 7  |
| 281735 | 49 | 140736 | 140774 | 3 | 13 | 39 | AGA  | 15 | 6  |
| 281736 | 49 | 142097 | 142111 | 3 | 5  | 15 | TGT  | 31 | 3  |
| 281737 | 49 | 143734 | 143749 | 2 | 8  | 16 | CA   | 23 | 6  |
| 281747 | 49 | 147530 | 147549 | 2 | 10 | 20 | GT   | 20 | 6  |
| 281749 | 49 | 149783 | 149794 | 2 | 6  | 12 | CA   | 22 | 3  |
| 281752 | 49 | 151936 | 151955 | 2 | 10 | 20 | AC   | 19 | 7  |
| 281753 | 49 | 152135 | 152150 | 2 | 8  | 16 | TG   | 27 | 4  |
| 281759 | 49 | 156445 | 156472 | 2 | 14 | 28 | GT   | 14 | 6  |
| 281760 | 49 | 157267 | 157282 | 2 | 8  | 16 | TG   | 24 | 3  |
| 281761 | 49 | 157391 | 157404 | 2 | 7  | 14 | GT   | 22 | 3  |
| 281762 | 49 | 157478 | 157491 | 2 | 7  | 14 | GT   | 21 | 3  |
| 281768 | 49 | 164513 | 164528 | 2 | 8  | 16 | GT   | 10 | 9  |
| 281770 | 49 | 164812 | 164823 | 2 | 6  | 12 | TG   | 9  | 3  |
| 281771 | 49 | 164825 | 164838 | 2 | 7  | 14 | GT   | 13 | 3  |
| 281772 | 49 | 164951 | 164982 | 2 | 16 | 32 | GT   | 14 | 11 |
| 281773 | 49 | 165857 | 165892 | 4 | 9  | 36 | CCAT | 10 | 6  |
| 281775 | 49 | 166218 | 166233 | 2 | 8  | 16 | TG   | 22 | 4  |
| 281777 | 49 | 166662 | 166677 | 2 | 8  | 16 | AC   | 25 | 8  |
| 281783 | 49 | 170956 | 170983 | 2 | 14 | 28 | AC   | 15 | 6  |
| 281784 | 49 | 171317 | 171332 | 2 | 8  | 16 | CA   | 15 | 5  |
| 281786 | 49 | 173758 | 173789 | 2 | 16 | 32 | GT   | 15 | 11 |
| 281787 | 49 | 174143 | 174158 | 2 | 8  | 16 | GT   | 20 | 5  |
| 281792 | 49 | 188549 | 188564 | 2 | 8  | 16 | AC   | 13 | 5  |
| 281793 | 49 | 188610 | 188631 | 2 | 11 | 22 | GT   | 24 | 10 |
| 281794 | 49 | 190438 | 190453 | 2 | 8  | 16 | AC   | 20 | 3  |
| 281804 | 49 | 204059 | 204082 | 2 | 12 | 24 | GT   | 13 | 10 |
| 281806 | 49 | 209448 | 209479 | 4 | 8  | 32 | TCCA | 31 | 4  |
| 281810 | 49 | 215411 | 215426 | 2 | 8  | 16 | GT   | 23 | 5  |
| 281818 | 49 | 219836 | 219849 | 2 | 7  | 14 | TG   | 24 | 3  |
| 281819 | 49 | 220057 | 220080 | 2 | 12 | 24 | GT   | 8  | 5  |
| 281828 | 49 | 225079 | 225092 | 2 | 7  | 14 | TG   | 26 | 3  |
| 281829 | 49 | 225317 | 225330 | 2 | 7  | 14 | TG   | 27 | 5  |
| 281833 | 49 | 230323 | 230338 | 2 | 8  | 16 | GT   | 23 | 8  |
| 281834 | 49 | 230434 | 230463 | 2 | 15 | 30 | TG   | 20 | 12 |
| 281835 | 49 | 230607 | 230632 | 2 | 13 | 26 | TG   | 18 | 6  |
| 281836 | 49 | 230734 | 230749 | 2 | 8  | 16 | TG   | 8  | 6  |
| 281837 | 49 | 230751 | 230762 | 2 | 6  | 12 | GT   | 9  | 8  |
| 281840 | 49 | 231171 | 231200 | 2 | 15 | 30 | TG   | 17 | 6  |
| 281843 | 49 | 231463 | 231478 | 2 | 8  | 16 | CA   | 14 | 6  |
| 281845 | 49 | 234448 | 234489 | 2 | 21 | 42 | GA   | 20 | 16 |
| 281849 | 49 | 239243 | 239254 | 2 | 6  | 12 | TG   | 19 | 7  |
| 281850 | 49 | 241322 | 241339 | 2 | 9  | 18 | TG   | 12 | 8  |
| 281851 | 49 | 241457 | 241476 | 2 | 10 | 20 | TG   | 18 | 6  |
| 281854 | 49 | 243734 | 243751 | 2 | 9  | 18 | TG   | 21 | 3  |
| 281862 | 49 | 244826 | 244853 | 4 | 7  | 28 | AAGA | 18 | 4  |

|        |    |        |        |   |    |    |      |    |    |
|--------|----|--------|--------|---|----|----|------|----|----|
| 281866 | 49 | 246757 | 246786 | 2 | 15 | 30 | GT   | 10 | 6  |
| 281871 | 49 | 248162 | 248193 | 2 | 16 | 32 | CA   | 9  | 7  |
| 281874 | 49 | 248487 | 248510 | 2 | 12 | 24 | TG   | 14 | 4  |
| 281885 | 49 | 257532 | 257551 | 2 | 10 | 20 | CT   | 9  | 3  |
| 281887 | 49 | 257647 | 257664 | 3 | 6  | 18 | CCT  | 14 | 4  |
| 281894 | 49 | 265373 | 265392 | 4 | 5  | 20 | ACAG | 25 | 5  |
| 281897 | 49 | 267679 | 267708 | 2 | 15 | 30 | CA   | 12 | 11 |
| 281899 | 49 | 269152 | 269181 | 2 | 15 | 30 | TG   | 8  | 10 |
| 281900 | 49 | 269407 | 269418 | 2 | 6  | 12 | CA   | 12 | 7  |
| 281901 | 49 | 269665 | 269700 | 2 | 18 | 36 | CA   | 8  | 10 |
| 281903 | 49 | 269840 | 269857 | 2 | 9  | 18 | AG   | 22 | 3  |
| 281904 | 49 | 269997 | 270016 | 2 | 10 | 20 | GT   | 21 | 6  |
| 281905 | 49 | 270235 | 270274 | 4 | 10 | 40 | GTAT | 15 | 5  |
| 281907 | 49 | 271060 | 271081 | 2 | 11 | 22 | GT   | 21 | 3  |
| 281908 | 49 | 272414 | 272429 | 2 | 8  | 16 | AC   | 16 | 4  |
| 281909 | 49 | 274230 | 274265 | 3 | 12 | 36 | GAT  | 12 | 5  |
| 281913 | 49 | 278902 | 278925 | 2 | 12 | 24 | AC   | 9  | 5  |
| 281914 | 49 | 282162 | 282191 | 2 | 15 | 30 | AC   | 8  | 6  |
| 281918 | 49 | 285596 | 285621 | 2 | 13 | 26 | TC   | 7  | 8  |
| 281920 | 49 | 289990 | 290009 | 2 | 10 | 20 | AC   | 18 | 6  |
| 281921 | 49 | 293670 | 293691 | 2 | 11 | 22 | GT   | 29 | 6  |
| 281927 | 49 | 303701 | 303734 | 2 | 17 | 34 | TG   | 8  | 8  |
| 281933 | 49 | 307970 | 307981 | 2 | 6  | 12 | AC   | 16 | 5  |
| 281934 | 49 | 308051 | 308064 | 2 | 7  | 14 | CA   | 15 | 3  |
| 281936 | 49 | 308183 | 308214 | 2 | 16 | 32 | GA   | 10 | 9  |
| 281937 | 49 | 308349 | 308404 | 2 | 28 | 56 | GT   | 7  | 9  |
| 281938 | 49 | 309519 | 309542 | 4 | 6  | 24 | GAAA | 25 | 5  |
| 281941 | 49 | 310872 | 310887 | 2 | 8  | 16 | AC   | 22 | 3  |
| 281943 | 49 | 315096 | 315109 | 2 | 7  | 14 | TG   | 25 | 4  |
| 281944 | 49 | 315361 | 315372 | 2 | 6  | 12 | TC   | 14 | 3  |
| 281945 | 49 | 315409 | 315422 | 2 | 7  | 14 | TC   | 20 | 3  |
| 281954 | 49 | 326800 | 326845 | 2 | 23 | 46 | TG   | 15 | 10 |
| 281963 | 49 | 336085 | 336102 | 2 | 9  | 18 | CA   | 16 | 17 |
| 281968 | 49 | 347304 | 347315 | 2 | 6  | 12 | AC   | 24 | 3  |
| 281969 | 49 | 347425 | 347440 | 2 | 8  | 16 | TG   | 26 | 3  |
| 281971 | 49 | 349388 | 349433 | 2 | 23 | 46 | GT   | 6  | 7  |
| 281972 | 49 | 349484 | 349497 | 2 | 7  | 14 | GT   | 20 | 5  |
| 281976 | 49 | 350290 | 350313 | 2 | 12 | 24 | CA   | 19 | 8  |
| 281978 | 49 | 358069 | 358102 | 2 | 17 | 34 | TG   | 6  | 6  |
| 281980 | 49 | 360331 | 360342 | 2 | 6  | 12 | AG   | 23 | 4  |
| 281981 | 49 | 360345 | 360356 | 2 | 6  | 12 | AG   | 26 | 3  |
| 281982 | 49 | 361458 | 361483 | 2 | 13 | 26 | TG   | 9  | 7  |
| 281984 | 49 | 361941 | 361988 | 2 | 24 | 48 | AC   | 7  | 10 |
| 281985 | 49 | 363682 | 363699 | 2 | 9  | 18 | GA   | 13 | 6  |
| 281989 | 49 | 374619 | 374632 | 2 | 7  | 14 | GA   | 30 | 4  |
| 282006 | 49 | 473344 | 473377 | 2 | 17 | 34 | CA   | 10 | 6  |
| 282010 | 49 | 484285 | 484312 | 4 | 7  | 28 | TTTC | 23 | 9  |
| 282012 | 49 | 494762 | 494801 | 2 | 20 | 40 | GT   | 9  | 9  |
| 282013 | 49 | 494926 | 494975 | 2 | 25 | 50 | GT   | 10 | 10 |
| 282015 | 49 | 495092 | 495103 | 2 | 6  | 12 | TC   | 8  | 4  |
| 282016 | 49 | 495105 | 495120 | 2 | 8  | 16 | CT   | 12 | 4  |

|        |    |        |        |   |    |    |      |    |    |
|--------|----|--------|--------|---|----|----|------|----|----|
| 282017 | 49 | 497692 | 497723 | 2 | 16 | 32 | AG   | 18 | 10 |
| 282019 | 49 | 499497 | 499514 | 2 | 9  | 18 | GT   | 17 | 5  |
| 282020 | 49 | 499651 | 499670 | 4 | 5  | 20 | TAAA | 16 | 4  |
| 282045 | 49 | 548061 | 548087 | 3 | 9  | 27 | GAG  | 17 | 4  |
| 282048 | 49 | 548857 | 548880 | 3 | 8  | 24 | CAG  | 20 | 10 |
| 282049 | 49 | 549475 | 549488 | 2 | 7  | 14 | AT   | 16 | 7  |
| 282050 | 49 | 556661 | 556692 | 2 | 16 | 32 | TG   | 16 | 11 |
| 282055 | 49 | 562617 | 562642 | 2 | 13 | 26 | AG   | 17 | 9  |
| 282057 | 49 | 564307 | 564330 | 2 | 12 | 24 | AC   | 14 | 6  |
| 282058 | 49 | 565670 | 565687 | 2 | 9  | 18 | AC   | 22 | 7  |
| 282059 | 49 | 567162 | 567177 | 2 | 8  | 16 | CA   | 22 | 10 |
| 282061 | 49 | 571472 | 571485 | 2 | 7  | 14 | GT   | 8  | 5  |
| 282062 | 49 | 571487 | 571504 | 2 | 9  | 18 | TG   | 21 | 9  |
| 282067 | 49 | 580257 | 580278 | 2 | 11 | 22 | TG   | 12 | 12 |
| 282068 | 49 | 582336 | 582347 | 2 | 6  | 12 | AC   | 26 | 4  |
| 282069 | 49 | 586054 | 586073 | 2 | 10 | 20 | TG   | 14 | 11 |
| 282070 | 49 | 586245 | 586286 | 2 | 21 | 42 | TG   | 7  | 7  |
| 282071 | 49 | 587800 | 587815 | 2 | 8  | 16 | GT   | 25 | 6  |
| 282072 | 49 | 587966 | 587979 | 2 | 7  | 14 | GT   | 30 | 4  |
| 282074 | 49 | 588971 | 588986 | 4 | 4  | 16 | TTCC | 13 | 3  |
| 282076 | 49 | 589778 | 589791 | 2 | 7  | 14 | CA   | 8  | 6  |
| 282077 | 49 | 589884 | 589899 | 2 | 8  | 16 | AC   | 19 | 7  |
| 282081 | 49 | 593333 | 593344 | 2 | 6  | 12 | GT   | 20 | 3  |
| 282084 | 49 | 594612 | 594631 | 2 | 10 | 20 | GA   | 16 | 8  |
| 282085 | 49 | 594924 | 594949 | 2 | 13 | 26 | AC   | 19 | 6  |
| 282087 | 49 | 595914 | 595933 | 2 | 10 | 20 | CA   | 9  | 6  |
| 282088 | 49 | 596009 | 596044 | 2 | 18 | 36 | TG   | 13 | 8  |
| 282091 | 49 | 598465 | 598502 | 2 | 19 | 38 | AC   | 8  | 10 |
| 282092 | 49 | 601852 | 601871 | 2 | 10 | 20 | CA   | 9  | 5  |
| 282094 | 49 | 602551 | 602586 | 4 | 9  | 36 | AATC | 18 | 9  |
| 282096 | 49 | 602948 | 602961 | 2 | 7  | 14 | AG   | 29 | 3  |
| 282098 | 49 | 603903 | 603918 | 2 | 8  | 16 | AC   | 23 | 7  |
| 282101 | 49 | 604394 | 604405 | 2 | 6  | 12 | CA   | 26 | 5  |
| 282102 | 49 | 604543 | 604560 | 2 | 9  | 18 | GT   | 26 | 3  |
| 282103 | 49 | 604640 | 604671 | 2 | 16 | 32 | GT   | 16 | 6  |
| 282104 | 49 | 604782 | 604819 | 2 | 19 | 38 | TG   | 13 | 9  |
| 282105 | 49 | 605600 | 605615 | 2 | 8  | 16 | TG   | 29 | 6  |
| 282107 | 49 | 606597 | 606608 | 2 | 6  | 12 | GA   | 21 | 4  |
| 282108 | 49 | 608108 | 608135 | 4 | 7  | 28 | ATTT | 24 | 4  |
| 282109 | 49 | 609007 | 609024 | 2 | 9  | 18 | CA   | 18 | 10 |
| 282114 | 49 | 616364 | 616381 | 2 | 9  | 18 | GT   | 12 | 5  |
| 282115 | 49 | 616465 | 616492 | 2 | 14 | 28 | CA   | 10 | 12 |
| 282116 | 49 | 616552 | 616578 | 3 | 9  | 27 | TCC  | 20 | 4  |
| 282118 | 49 | 619363 | 619376 | 2 | 7  | 14 | TG   | 19 | 4  |
| 282119 | 49 | 619463 | 619508 | 2 | 23 | 46 | TG   | 9  | 12 |
| 282120 | 49 | 619629 | 619658 | 2 | 15 | 30 | GT   | 17 | 10 |
| 282122 | 49 | 622149 | 622168 | 2 | 10 | 20 | CA   | 20 | 9  |
| 282128 | 49 | 628150 | 628163 | 2 | 7  | 14 | AC   | 11 | 4  |
| 282129 | 49 | 628218 | 628235 | 2 | 9  | 18 | TC   | 19 | 4  |
| 282133 | 49 | 632081 | 632098 | 2 | 9  | 18 | TG   | 15 | 9  |
| 282134 | 49 | 632193 | 632212 | 2 | 10 | 20 | CA   | 19 | 4  |

|        |    |        |        |   |    |    |      |    |    |
|--------|----|--------|--------|---|----|----|------|----|----|
| 282136 | 49 | 634031 | 634066 | 2 | 18 | 36 | AC   | 9  | 10 |
| 282137 | 49 | 634387 | 634418 | 2 | 16 | 32 | GT   | 11 | 7  |
| 282138 | 49 | 634494 | 634531 | 2 | 19 | 38 | AC   | 11 | 16 |
| 282140 | 49 | 635798 | 635841 | 2 | 22 | 44 | TG   | 10 | 7  |
| 282142 | 49 | 639307 | 639318 | 2 | 6  | 12 | GA   | 24 | 3  |
| 282143 | 49 | 640498 | 640515 | 2 | 9  | 18 | TG   | 25 | 4  |
| 282144 | 49 | 642750 | 642765 | 2 | 8  | 16 | TG   | 25 | 3  |
| 282146 | 49 | 643125 | 643144 | 2 | 10 | 20 | TG   | 27 | 4  |
| 282148 | 49 | 643999 | 644012 | 2 | 7  | 14 | AG   | 16 | 3  |
| 282149 | 49 | 644015 | 644030 | 2 | 8  | 16 | AG   | 18 | 7  |
| 282159 | 49 | 645989 | 646006 | 2 | 9  | 18 | TC   | 16 | 6  |
| 282162 | 49 | 646584 | 646607 | 3 | 8  | 24 | TCT  | 12 | 4  |
| 282163 | 49 | 647393 | 647416 | 2 | 12 | 24 | AG   | 13 | 6  |
| 282164 | 49 | 647528 | 647548 | 3 | 7  | 21 | GAG  | 26 | 4  |
| 282169 | 49 | 652581 | 652604 | 2 | 12 | 24 | AC   | 22 | 5  |
| 282172 | 49 | 654426 | 654447 | 2 | 11 | 22 | AC   | 13 | 5  |
| 282176 | 49 | 655887 | 655904 | 2 | 9  | 18 | TG   | 15 | 5  |
| 282177 | 49 | 656027 | 656052 | 2 | 13 | 26 | GT   | 20 | 9  |
| 282178 | 49 | 658219 | 658240 | 2 | 11 | 22 | TG   | 13 | 14 |
| 282182 | 49 | 661209 | 661220 | 2 | 6  | 12 | CA   | 21 | 3  |
| 282184 | 49 | 663105 | 663122 | 2 | 9  | 18 | GT   | 20 | 7  |
| 282185 | 49 | 663124 | 663135 | 2 | 6  | 12 | TG   | 22 | 8  |
| 282186 | 49 | 663400 | 663417 | 2 | 9  | 18 | GT   | 14 | 11 |
| 282188 | 49 | 664810 | 664831 | 2 | 11 | 22 | GT   | 15 | 9  |
| 282190 | 49 | 665350 | 665373 | 2 | 12 | 24 | GT   | 16 | 7  |
| 282191 | 49 | 665440 | 665469 | 2 | 15 | 30 | GT   | 10 | 7  |
| 282195 | 49 | 668791 | 668804 | 2 | 7  | 14 | TG   | 18 | 4  |
| 282196 | 49 | 668957 | 668968 | 2 | 6  | 12 | GT   | 25 | 4  |
| 282197 | 49 | 669075 | 669096 | 2 | 11 | 22 | AC   | 13 | 5  |
| 282198 | 49 | 669227 | 669254 | 2 | 14 | 28 | CA   | 26 | 7  |
| 282200 | 49 | 671078 | 671097 | 2 | 10 | 20 | CA   | 14 | 4  |
| 282201 | 49 | 671316 | 671337 | 2 | 11 | 22 | AG   | 20 | 6  |
| 282205 | 49 | 671679 | 671714 | 2 | 18 | 36 | TG   | 7  | 7  |
| 282206 | 49 | 671846 | 671861 | 2 | 8  | 16 | CT   | 34 | 6  |
| 282207 | 49 | 671981 | 671998 | 2 | 9  | 18 | AC   | 18 | 5  |
| 282208 | 49 | 672067 | 672132 | 2 | 33 | 66 | AC   | 9  | 16 |
| 282209 | 49 | 672240 | 672265 | 2 | 13 | 26 | TG   | 13 | 8  |
| 282210 | 49 | 674418 | 674441 | 2 | 12 | 24 | GT   | 19 | 6  |
| 282213 | 49 | 676756 | 676785 | 2 | 15 | 30 | CA   | 8  | 6  |
| 282221 | 49 | 682482 | 682503 | 2 | 11 | 22 | GT   | 23 | 9  |
| 282223 | 49 | 682635 | 682664 | 2 | 15 | 30 | GT   | 15 | 12 |
| 282225 | 49 | 682764 | 682793 | 2 | 15 | 30 | TG   | 7  | 8  |
| 282230 | 49 | 685738 | 685753 | 4 | 4  | 16 | ATTG | 22 | 4  |
| 282233 | 49 | 686787 | 686812 | 2 | 13 | 26 | CA   | 10 | 6  |
| 282237 | 49 | 690181 | 690198 | 2 | 9  | 18 | CA   | 20 | 5  |
| 282238 | 49 | 690420 | 690435 | 4 | 4  | 16 | TCCT | 25 | 3  |
| 282240 | 49 | 693937 | 693956 | 2 | 10 | 20 | CA   | 10 | 13 |
| 282244 | 49 | 694994 | 695017 | 2 | 12 | 24 | TG   | 20 | 8  |
| 282248 | 49 | 697570 | 697597 | 2 | 14 | 28 | GA   | 12 | 5  |
| 282252 | 49 | 698432 | 698457 | 2 | 13 | 26 | TG   | 7  | 9  |
| 282253 | 49 | 698554 | 698569 | 2 | 8  | 16 | GT   | 19 | 5  |

|        |    |        |        |   |    |    |      |    |    |
|--------|----|--------|--------|---|----|----|------|----|----|
| 282254 | 49 | 699217 | 699228 | 2 | 6  | 12 | CT   | 24 | 5  |
| 282255 | 49 | 700611 | 700642 | 2 | 16 | 32 | CA   | 14 | 14 |
| 282258 | 49 | 700949 | 700982 | 2 | 17 | 34 | GT   | 20 | 9  |
| 282259 | 49 | 701053 | 701074 | 2 | 11 | 22 | CA   | 13 | 6  |
| 282264 | 49 | 705493 | 705506 | 2 | 7  | 14 | CA   | 19 | 5  |
| 282265 | 49 | 705661 | 705684 | 2 | 12 | 24 | CT   | 6  | 5  |
| 282266 | 49 | 705924 | 705947 | 2 | 12 | 24 | GT   | 18 | 6  |
| 282272 | 49 | 709726 | 709771 | 2 | 23 | 46 | CA   | 7  | 9  |
| 282273 | 49 | 709836 | 709849 | 2 | 7  | 14 | CA   | 6  | 4  |
| 282281 | 49 | 713680 | 713707 | 2 | 14 | 28 | GT   | 23 | 8  |
| 282282 | 49 | 715015 | 715028 | 2 | 7  | 14 | CA   | 17 | 3  |
| 282283 | 49 | 715159 | 715192 | 2 | 17 | 34 | GT   | 12 | 8  |
| 282288 | 49 | 716304 | 716321 | 2 | 9  | 18 | AC   | 30 | 3  |
| 282291 | 49 | 718162 | 718189 | 2 | 14 | 28 | TG   | 13 | 9  |
| 282303 | 49 | 731902 | 731937 | 2 | 18 | 36 | CA   | 11 | 12 |
| 282307 | 49 | 738890 | 738921 | 2 | 16 | 32 | CA   | 18 | 10 |
| 282310 | 49 | 744845 | 744859 | 3 | 5  | 15 | CCT  | 23 | 3  |
| 282313 | 49 | 745356 | 745377 | 2 | 11 | 22 | CA   | 13 | 6  |
| 282325 | 49 | 752398 | 752415 | 2 | 9  | 18 | TG   | 17 | 9  |
| 282327 | 49 | 754802 | 754813 | 2 | 6  | 12 | GT   | 27 | 7  |
| 282328 | 49 | 754928 | 754957 | 2 | 15 | 30 | TG   | 12 | 8  |
| 282335 | 49 | 763984 | 764011 | 2 | 14 | 28 | GT   | 11 | 16 |
| 282336 | 49 | 764187 | 764210 | 2 | 12 | 24 | TG   | 14 | 15 |
| 282337 | 49 | 764700 | 764721 | 2 | 11 | 22 | TG   | 14 | 7  |
| 282338 | 49 | 764866 | 764895 | 2 | 15 | 30 | TG   | 16 | 14 |
| 282340 | 49 | 769156 | 769175 | 2 | 10 | 20 | AC   | 13 | 6  |
| 282348 | 49 | 780260 | 780275 | 2 | 8  | 16 | AG   | 22 | 5  |
| 282364 | 49 | 803095 | 803116 | 2 | 11 | 22 | CA   | 18 | 10 |
| 282365 | 49 | 803284 | 803299 | 4 | 4  | 16 | CTGA | 21 | 3  |
| 282373 | 49 | 815664 | 815678 | 3 | 5  | 15 | TGT  | 20 | 4  |
| 282377 | 49 | 819291 | 819308 | 3 | 6  | 18 | TCC  | 22 | 6  |
| 282378 | 49 | 820041 | 820060 | 2 | 10 | 20 | CA   | 25 | 5  |
| 282391 | 49 | 832005 | 832024 | 2 | 10 | 20 | AC   | 23 | 8  |
| 282393 | 49 | 834047 | 834070 | 3 | 8  | 24 | GAG  | 20 | 7  |
| 282394 | 49 | 834351 | 834380 | 2 | 15 | 30 | GT   | 22 | 15 |
| 282395 | 49 | 836538 | 836549 | 2 | 6  | 12 | CA   | 24 | 3  |
| 282400 | 49 | 845760 | 845779 | 2 | 10 | 20 | GT   | 19 | 12 |
| 282409 | 49 | 850345 | 850372 | 2 | 14 | 28 | TG   | 20 | 9  |
| 282422 | 49 | 859155 | 859178 | 2 | 12 | 24 | TG   | 16 | 6  |
| 282424 | 49 | 859272 | 859307 | 2 | 18 | 36 | CA   | 14 | 10 |
| 282426 | 49 | 859833 | 859858 | 2 | 13 | 26 | CT   | 18 | 4  |
| 282427 | 49 | 860111 | 860125 | 3 | 5  | 15 | TTA  | 15 | 3  |
| 282432 | 49 | 868676 | 868701 | 2 | 13 | 26 | AC   | 17 | 6  |
| 282435 | 49 | 870387 | 870426 | 2 | 20 | 40 | TG   | 6  | 7  |
| 282436 | 49 | 870508 | 870525 | 2 | 9  | 18 | CT   | 11 | 3  |
| 282437 | 49 | 870527 | 870540 | 2 | 7  | 14 | TC   | 19 | 4  |
| 282438 | 49 | 871872 | 871887 | 2 | 8  | 16 | GA   | 24 | 4  |
| 282445 | 49 | 875484 | 875507 | 2 | 12 | 24 | AC   | 14 | 4  |
| 282448 | 49 | 877639 | 877658 | 2 | 10 | 20 | CA   | 17 | 5  |
| 282454 | 49 | 885175 | 885194 | 2 | 10 | 20 | AC   | 14 | 5  |
| 282455 | 49 | 886779 | 886790 | 2 | 6  | 12 | GT   | 16 | 3  |



|        |    |         |         |   |    |    |      |    |    |
|--------|----|---------|---------|---|----|----|------|----|----|
| 282461 | 49 | 892869  | 892912  | 2 | 22 | 44 | TG   | 17 | 12 |
| 282465 | 49 | 897845  | 897876  | 4 | 8  | 32 | ATAG | 14 | 11 |
| 282471 | 49 | 926919  | 926938  | 2 | 10 | 20 | CA   | 17 | 9  |
| 282473 | 49 | 933698  | 933715  | 2 | 9  | 18 | AC   | 19 | 8  |
| 282478 | 49 | 939458  | 939471  | 2 | 7  | 14 | AG   | 29 | 3  |
| 282481 | 49 | 944554  | 944575  | 2 | 11 | 22 | CA   | 17 | 8  |
| 282489 | 49 | 950929  | 950940  | 2 | 6  | 12 | TG   | 24 | 3  |
| 282491 | 49 | 951086  | 951101  | 2 | 8  | 16 | AC   | 12 | 3  |
| 282493 | 49 | 953172  | 953187  | 4 | 4  | 16 | TCTT | 11 | 5  |
| 282497 | 49 | 962343  | 962364  | 2 | 11 | 22 | CA   | 25 | 8  |
| 282500 | 49 | 972069  | 972080  | 2 | 6  | 12 | GT   | 22 | 9  |
| 282504 | 49 | 978064  | 978097  | 2 | 17 | 34 | AC   | 9  | 7  |
| 282506 | 49 | 981139  | 981152  | 2 | 7  | 14 | GT   | 11 | 5  |
| 282515 | 49 | 993425  | 993436  | 2 | 6  | 12 | TG   | 23 | 3  |
| 282521 | 49 | 1015839 | 1015853 | 3 | 5  | 15 | TCT  | 22 | 3  |
| 282524 | 49 | 1019748 | 1019767 | 4 | 5  | 20 | GAAT | 24 | 7  |
| 282532 | 49 | 1035637 | 1035656 | 2 | 10 | 20 | AG   | 29 | 4  |
| 282536 | 49 | 1038252 | 1038266 | 3 | 5  | 15 | GTT  | 24 | 10 |
| 282537 | 49 | 1043432 | 1043447 | 2 | 8  | 16 | CA   | 13 | 3  |
| 282538 | 49 | 1045192 | 1045207 | 4 | 4  | 16 | AACT | 8  | 4  |
| 282544 | 49 | 1064993 | 1065004 | 2 | 6  | 12 | TA   | 17 | 3  |
| 282551 | 49 | 1086214 | 1086231 | 2 | 9  | 18 | GT   | 14 | 4  |
| 282554 | 49 | 1086556 | 1086603 | 2 | 24 | 48 | AC   | 6  | 7  |
| 282555 | 49 | 1088501 | 1088542 | 2 | 21 | 42 | TG   | 9  | 11 |
| 282564 | 49 | 1098228 | 1098245 | 2 | 9  | 18 | CA   | 16 | 5  |
| 282571 | 49 | 1104442 | 1104483 | 3 | 14 | 42 | AAT  | 8  | 7  |
| 282576 | 49 | 1106787 | 1106802 | 4 | 4  | 16 | ATTT | 14 | 5  |
| 282577 | 49 | 1107324 | 1107338 | 3 | 5  | 15 | AAT  | 25 | 4  |
| 282578 | 49 | 1108478 | 1108495 | 3 | 6  | 18 | CAG  | 18 | 3  |
| 282579 | 49 | 1109795 | 1109818 | 3 | 8  | 24 | CAG  | 21 | 7  |
| 282591 | 49 | 1156124 | 1156155 | 2 | 16 | 32 | AC   | 12 | 4  |
| 282595 | 49 | 1161850 | 1161877 | 2 | 14 | 28 | TG   | 12 | 5  |
| 282597 | 49 | 1167379 | 1167404 | 2 | 13 | 26 | TG   | 21 | 7  |
| 282598 | 49 | 1170954 | 1170989 | 2 | 18 | 36 | TG   | 14 | 9  |
| 282608 | 49 | 1177407 | 1177434 | 4 | 7  | 28 | CTTT | 18 | 7  |
| 282610 | 49 | 1178526 | 1178541 | 2 | 8  | 16 | GT   | 21 | 5  |
| 282613 | 49 | 1180701 | 1180730 | 2 | 15 | 30 | CA   | 18 | 12 |
| 282614 | 49 | 1181105 | 1181144 | 2 | 20 | 40 | GT   | 18 | 12 |
| 282615 | 49 | 1181274 | 1181289 | 2 | 8  | 16 | TG   | 22 | 3  |
| 282618 | 49 | 1185104 | 1185127 | 4 | 6  | 24 | TATC | 24 | 4  |
| 282624 | 49 | 1190548 | 1190562 | 3 | 5  | 15 | CCT  | 24 | 3  |
| 282627 | 49 | 1203499 | 1203514 | 2 | 8  | 16 | CA   | 15 | 10 |
| 282629 | 49 | 1209103 | 1209117 | 3 | 5  | 15 | CCA  | 12 | 4  |
| 282631 | 49 | 1209982 | 1210001 | 2 | 10 | 20 | GT   | 12 | 10 |
| 282634 | 49 | 1215579 | 1215614 | 4 | 9  | 36 | TTGG | 24 | 5  |
| 282635 | 49 | 1215814 | 1215829 | 4 | 4  | 16 | TGGT | 17 | 4  |
| 282637 | 49 | 1216958 | 1216989 | 4 | 8  | 32 | ATGG | 24 | 5  |
| 282638 | 49 | 1217473 | 1217488 | 2 | 8  | 16 | GT   | 14 | 9  |
| 282640 | 49 | 1223113 | 1223127 | 3 | 5  | 15 | GGC  | 20 | 6  |
| 282642 | 49 | 1223672 | 1223698 | 3 | 9  | 27 | CCT  | 11 | 4  |
| 282649 | 49 | 1229751 | 1229766 | 2 | 8  | 16 | AC   | 19 | 8  |

|        |    |         |         |   |    |    |      |    |    |
|--------|----|---------|---------|---|----|----|------|----|----|
| 282650 | 49 | 1239051 | 1239070 | 2 | 10 | 20 | TG   | 18 | 10 |
| 282651 | 49 | 1239072 | 1239085 | 2 | 7  | 14 | GT   | 14 | 7  |
| 282653 | 49 | 1245996 | 1246013 | 2 | 9  | 18 | TG   | 11 | 5  |
| 282656 | 49 | 1271646 | 1271665 | 2 | 10 | 20 | CA   | 15 | 10 |
| 282661 | 49 | 1291253 | 1291274 | 2 | 11 | 22 | GT   | 20 | 6  |
| 282667 | 49 | 1308007 | 1308026 | 2 | 10 | 20 | CA   | 25 | 5  |
| 282668 | 49 | 1308925 | 1308952 | 4 | 7  | 28 | GGAT | 18 | 7  |
| 282673 | 49 | 1317328 | 1317367 | 4 | 10 | 40 | ATAC | 14 | 6  |
| 282677 | 49 | 1325558 | 1325583 | 2 | 13 | 26 | CA   | 15 | 8  |
| 282679 | 49 | 1327808 | 1327837 | 2 | 15 | 30 | CA   | 14 | 10 |
| 282692 | 49 | 1363541 | 1363560 | 2 | 10 | 20 | CA   | 12 | 6  |
| 282696 | 49 | 1378348 | 1378361 | 2 | 7  | 14 | TG   | 27 | 3  |
| 282698 | 49 | 1379677 | 1379703 | 3 | 9  | 27 | TGA  | 24 | 4  |
| 282706 | 49 | 1400567 | 1400590 | 2 | 12 | 24 | GT   | 20 | 10 |
| 282734 | 49 | 1491738 | 1491755 | 3 | 6  | 18 | GAG  | 36 | 3  |
| 282735 | 49 | 1502502 | 1502525 | 2 | 12 | 24 | AC   | 18 | 10 |
| 282740 | 49 | 1528292 | 1528307 | 2 | 8  | 16 | AC   | 25 | 4  |
| 282743 | 49 | 1530632 | 1530643 | 2 | 6  | 12 | AC   | 27 | 3  |
| 282746 | 49 | 1531989 | 1532003 | 3 | 5  | 15 | AGG  | 24 | 3  |
| 282749 | 49 | 1533162 | 1533183 | 2 | 11 | 22 | AC   | 20 | 8  |
| 282758 | 49 | 1562715 | 1562740 | 2 | 13 | 26 | GT   | 12 | 8  |
| 282759 | 49 | 1563981 | 1563998 | 2 | 9  | 18 | AC   | 20 | 9  |
| 282764 | 49 | 1566252 | 1566278 | 3 | 9  | 27 | TGA  | 12 | 3  |
| 282766 | 49 | 1566351 | 1566377 | 3 | 9  | 27 | TGA  | 19 | 3  |
| 282767 | 49 | 1566495 | 1566512 | 3 | 6  | 18 | AGA  | 12 | 12 |
| 282776 | 49 | 1589694 | 1589713 | 2 | 10 | 20 | AG   | 15 | 6  |
| 282777 | 49 | 1592193 | 1592204 | 2 | 6  | 12 | CA   | 28 | 7  |
| 282781 | 49 | 1599783 | 1599798 | 4 | 4  | 16 | TGGT | 28 | 3  |
| 282784 | 49 | 1604990 | 1605016 | 3 | 9  | 27 | GTT  | 11 | 9  |
| 282787 | 49 | 1607561 | 1607574 | 2 | 7  | 14 | TG   | 21 | 4  |
| 282789 | 49 | 1610896 | 1610917 | 2 | 11 | 22 | TG   | 8  | 8  |
| 282790 | 49 | 1617536 | 1617559 | 2 | 12 | 24 | TG   | 17 | 9  |
| 282792 | 49 | 1623566 | 1623595 | 3 | 10 | 30 | TCC  | 24 | 9  |
| 282793 | 49 | 1624208 | 1624249 | 2 | 21 | 42 | TG   | 7  | 12 |
| 282799 | 49 | 1640722 | 1640736 | 3 | 5  | 15 | AGG  | 28 | 3  |
| 282801 | 49 | 1645001 | 1645012 | 2 | 6  | 12 | TG   | 32 | 3  |
| 282804 | 49 | 1662098 | 1662111 | 2 | 7  | 14 | AT   | 13 | 8  |
| 282805 | 49 | 1667322 | 1667335 | 2 | 7  | 14 | CA   | 12 | 3  |
| 282818 | 49 | 1697789 | 1697822 | 2 | 17 | 34 | CA   | 11 | 15 |
| 282820 | 49 | 1699959 | 1699974 | 2 | 8  | 16 | GT   | 21 | 4  |
| 282823 | 49 | 1704134 | 1704151 | 2 | 9  | 18 | TC   | 10 | 5  |
| 282825 | 49 | 1714053 | 1714100 | 4 | 12 | 48 | CATT | 16 | 11 |
| 282830 | 49 | 1714374 | 1714389 | 4 | 4  | 16 | TCAG | 29 | 3  |
| 282832 | 49 | 1716750 | 1716765 | 2 | 8  | 16 | TG   | 21 | 3  |
| 282839 | 49 | 1750032 | 1750052 | 3 | 7  | 21 | TTA  | 20 | 3  |
| 282845 | 49 | 1766646 | 1766657 | 2 | 6  | 12 | TG   | 27 | 4  |
| 282847 | 49 | 1778113 | 1778132 | 2 | 10 | 20 | AC   | 19 | 7  |
| 282850 | 49 | 1784580 | 1784609 | 2 | 15 | 30 | TG   | 21 | 9  |
| 282869 | 49 | 1845147 | 1845162 | 4 | 4  | 16 | CAAA | 15 | 4  |
| 282876 | 49 | 1868908 | 1868935 | 2 | 14 | 28 | CA   | 16 | 12 |
| 282880 | 49 | 1880143 | 1880162 | 2 | 10 | 20 | TG   | 18 | 8  |

|        |    |         |         |   |    |    |      |    |    |
|--------|----|---------|---------|---|----|----|------|----|----|
| 282890 | 49 | 1905780 | 1905811 | 2 | 16 | 32 | GT   | 25 | 13 |
| 282891 | 49 | 1909001 | 1909015 | 3 | 5  | 15 | GCA  | 26 | 7  |
| 282895 | 49 | 1914374 | 1914388 | 3 | 5  | 15 | TGC  | 23 | 3  |
| 282905 | 49 | 1937215 | 1937247 | 3 | 11 | 33 | CCT  | 18 | 7  |
| 282907 | 49 | 1942276 | 1942307 | 2 | 16 | 32 | CA   | 14 | 11 |
| 282913 | 49 | 1943168 | 1943197 | 3 | 10 | 30 | AGA  | 17 | 9  |
| 282914 | 49 | 1944340 | 1944360 | 3 | 7  | 21 | TAA  | 7  | 5  |
| 282915 | 49 | 1957058 | 1957071 | 2 | 7  | 14 | AC   | 29 | 7  |
| 282917 | 49 | 1963975 | 1963992 | 3 | 6  | 18 | TCC  | 21 | 4  |
| 282921 | 49 | 1983618 | 1983633 | 4 | 4  | 16 | TAAA | 9  | 4  |
| 282924 | 49 | 1988102 | 1988115 | 2 | 7  | 14 | TG   | 22 | 10 |
| 282925 | 49 | 1988118 | 1988131 | 2 | 7  | 14 | TG   | 18 | 8  |
| 282926 | 49 | 2007917 | 2007928 | 2 | 6  | 12 | GT   | 12 | 5  |
| 282927 | 49 | 2023151 | 2023164 | 2 | 7  | 14 | TG   | 30 | 5  |
| 282937 | 49 | 2057664 | 2057678 | 3 | 5  | 15 | GAG  | 19 | 6  |
| 282962 | 49 | 2127403 | 2127418 | 4 | 4  | 16 | CTTT | 22 | 6  |
| 282965 | 49 | 2129435 | 2129454 | 4 | 5  | 20 | GGTT | 21 | 8  |
| 282966 | 49 | 2131856 | 2131869 | 2 | 7  | 14 | AT   | 22 | 3  |
| 282967 | 49 | 2133521 | 2133574 | 3 | 18 | 54 | GTA  | 6  | 6  |
| 282968 | 49 | 2141899 | 2141920 | 2 | 11 | 22 | CA   | 14 | 4  |
| 282971 | 49 | 2148071 | 2148108 | 2 | 19 | 38 | TG   | 15 | 7  |
| 282973 | 49 | 2151085 | 2151102 | 3 | 6  | 18 | CTG  | 28 | 6  |
| 282974 | 49 | 2151127 | 2151150 | 3 | 8  | 24 | GAG  | 17 | 3  |
| 282997 | 49 | 2161198 | 2161219 | 2 | 11 | 22 | GT   | 15 | 7  |
| 282998 | 49 | 2161280 | 2161297 | 2 | 9  | 18 | AC   | 10 | 5  |
| 283000 | 49 | 2161957 | 2161976 | 2 | 10 | 20 | AC   | 20 | 7  |
| 283001 | 49 | 2163108 | 2163139 | 2 | 16 | 32 | GT   | 8  | 9  |
| 283005 | 49 | 2165160 | 2165189 | 2 | 15 | 30 | CA   | 10 | 7  |
| 283008 | 49 | 2168070 | 2168087 | 2 | 9  | 18 | TG   | 8  | 4  |
| 283009 | 49 | 2168090 | 2168105 | 2 | 8  | 16 | TG   | 8  | 4  |
| 283011 | 49 | 2168290 | 2168305 | 2 | 8  | 16 | TG   | 22 | 7  |
| 283013 | 49 | 2171451 | 2171466 | 2 | 8  | 16 | CA   | 12 | 6  |
| 283014 | 49 | 2172264 | 2172291 | 2 | 14 | 28 | AC   | 9  | 8  |
| 283022 | 49 | 2176038 | 2176075 | 2 | 19 | 38 | CA   | 9  | 13 |
| 283024 | 49 | 2177876 | 2177907 | 2 | 16 | 32 | TG   | 11 | 3  |
| 283026 | 49 | 2178026 | 2178037 | 2 | 6  | 12 | TG   | 17 | 9  |
| 283027 | 49 | 2178040 | 2178057 | 2 | 9  | 18 | TG   | 10 | 5  |
| 283029 | 49 | 2178634 | 2178661 | 2 | 14 | 28 | GT   | 16 | 11 |
| 283042 | 49 | 2205253 | 2205276 | 2 | 12 | 24 | CA   | 22 | 13 |
| 283043 | 49 | 2205344 | 2205361 | 3 | 6  | 18 | TGC  | 21 | 5  |
| 283057 | 49 | 2222199 | 2222213 | 3 | 5  | 15 | AGG  | 25 | 3  |
| 283060 | 49 | 2222485 | 2222504 | 2 | 10 | 20 | CT   | 19 | 6  |
| 283065 | 49 | 2230721 | 2230732 | 2 | 6  | 12 | GT   | 17 | 4  |
| 283067 | 49 | 2231084 | 2231101 | 2 | 9  | 18 | CA   | 22 | 4  |
| 283069 | 49 | 2233103 | 2233124 | 2 | 11 | 22 | AG   | 18 | 5  |
| 283073 | 49 | 2236530 | 2236557 | 2 | 14 | 28 | CA   | 11 | 9  |
| 283079 | 49 | 2243048 | 2243083 | 2 | 18 | 36 | AC   | 18 | 9  |
| 283082 | 49 | 2246721 | 2246748 | 2 | 14 | 28 | TG   | 20 | 10 |
| 283085 | 49 | 2247037 | 2247064 | 2 | 14 | 28 | CT   | 10 | 6  |
| 283087 | 49 | 2247306 | 2247317 | 2 | 6  | 12 | AT   | 19 | 6  |
| 283088 | 49 | 2248476 | 2248487 | 2 | 6  | 12 | CA   | 22 | 3  |

|        |    |         |         |   |    |    |      |    |    |
|--------|----|---------|---------|---|----|----|------|----|----|
| 283090 | 49 | 2254048 | 2254063 | 2 | 8  | 16 | TG   | 13 | 10 |
| 283091 | 49 | 2254119 | 2254144 | 2 | 13 | 26 | TG   | 15 | 8  |
| 283093 | 49 | 2255558 | 2255581 | 2 | 12 | 24 | TG   | 11 | 7  |
| 283094 | 49 | 2255696 | 2255721 | 2 | 13 | 26 | GT   | 16 | 7  |
| 283095 | 49 | 2257855 | 2257872 | 3 | 6  | 18 | AAC  | 30 | 4  |
| 283096 | 49 | 2263337 | 2263356 | 2 | 10 | 20 | AC   | 15 | 6  |
| 283097 | 49 | 2264946 | 2264987 | 3 | 14 | 42 | ATG  | 24 | 9  |
| 283114 | 49 | 2300560 | 2300577 | 2 | 9  | 18 | CA   | 30 | 4  |
| 283119 | 49 | 2303829 | 2303846 | 2 | 9  | 18 | GT   | 18 | 5  |
| 283121 | 49 | 2305528 | 2305541 | 2 | 7  | 14 | GA   | 17 | 4  |
| 283132 | 49 | 2317416 | 2317430 | 3 | 5  | 15 | TCT  | 23 | 4  |
| 283133 | 49 | 2325304 | 2325324 | 3 | 7  | 21 | GAG  | 24 | 4  |
| 283135 | 49 | 2327693 | 2327708 | 2 | 8  | 16 | TG   | 23 | 5  |
| 283138 | 49 | 2329985 | 2330005 | 3 | 7  | 21 | CAT  | 27 | 5  |
| 283141 | 49 | 2337864 | 2337883 | 2 | 10 | 20 | AC   | 20 | 9  |
| 283143 | 49 | 2343759 | 2343770 | 2 | 6  | 12 | TC   | 16 | 4  |
| 283146 | 49 | 2345715 | 2345738 | 2 | 12 | 24 | CA   | 14 | 7  |
| 283147 | 49 | 2345865 | 2345892 | 2 | 14 | 28 | TG   | 21 | 7  |
| 283151 | 49 | 2357130 | 2357150 | 3 | 7  | 21 | TGC  | 25 | 4  |
| 283154 | 49 | 2361408 | 2361431 | 3 | 8  | 24 | CAA  | 17 | 7  |
| 283156 | 49 | 2362315 | 2362342 | 2 | 14 | 28 | AC   | 23 | 5  |
| 283157 | 49 | 2366913 | 2366926 | 2 | 7  | 14 | AG   | 21 | 7  |
| 283164 | 49 | 2385027 | 2385052 | 2 | 13 | 26 | AC   | 19 | 11 |
| 283167 | 49 | 2389347 | 2389372 | 2 | 13 | 26 | TG   | 9  | 6  |
| 283168 | 49 | 2390188 | 2390209 | 2 | 11 | 22 | GT   | 16 | 10 |
| 283170 | 49 | 2390602 | 2390619 | 2 | 9  | 18 | TG   | 25 | 5  |
| 283176 | 49 | 2395420 | 2395437 | 2 | 9  | 18 | AC   | 16 | 5  |
| 283177 | 49 | 2396138 | 2396173 | 2 | 18 | 36 | CA   | 14 | 9  |
| 283188 | 49 | 2412354 | 2412369 | 2 | 8  | 16 | CA   | 18 | 7  |
| 283189 | 49 | 2415363 | 2415376 | 2 | 7  | 14 | GT   | 28 | 3  |
| 283190 | 49 | 2415456 | 2415505 | 2 | 25 | 50 | AC   | 16 | 16 |
| 283192 | 49 | 2418242 | 2418261 | 2 | 10 | 20 | AC   | 12 | 4  |
| 283193 | 49 | 2421677 | 2421700 | 2 | 12 | 24 | AC   | 12 | 6  |
| 283196 | 49 | 2427851 | 2427874 | 2 | 12 | 24 | GT   | 12 | 5  |
| 283197 | 49 | 2428023 | 2428056 | 2 | 17 | 34 | CA   | 9  | 7  |
| 283198 | 49 | 2428773 | 2428788 | 2 | 8  | 16 | CA   | 19 | 6  |
| 283199 | 49 | 2428918 | 2428931 | 2 | 7  | 14 | TC   | 35 | 3  |
| 283200 | 49 | 2430779 | 2430804 | 2 | 13 | 26 | CA   | 14 | 11 |
| 283208 | 49 | 2443408 | 2443437 | 2 | 15 | 30 | AC   | 12 | 8  |
| 283209 | 49 | 2443584 | 2443603 | 2 | 10 | 20 | GT   | 12 | 7  |
| 283212 | 49 | 2449348 | 2449365 | 3 | 6  | 18 | ATT  | 28 | 4  |
| 283213 | 49 | 2454804 | 2454817 | 2 | 7  | 14 | GT   | 12 | 8  |
| 283214 | 49 | 2457097 | 2457124 | 2 | 14 | 28 | CA   | 15 | 6  |
| 283215 | 49 | 2457288 | 2457319 | 2 | 16 | 32 | CA   | 9  | 6  |
| 283216 | 49 | 2458230 | 2458241 | 2 | 6  | 12 | GT   | 19 | 14 |
| 283219 | 49 | 2459350 | 2459363 | 2 | 7  | 14 | TG   | 8  | 5  |
| 283220 | 49 | 2459884 | 2459897 | 2 | 7  | 14 | TG   | 25 | 6  |
| 283221 | 49 | 2461229 | 2461243 | 3 | 5  | 15 | AAC  | 17 | 3  |
| 283223 | 49 | 2462101 | 2462116 | 4 | 4  | 16 | TTTC | 20 | 3  |
| 283226 | 49 | 2464790 | 2464811 | 2 | 11 | 22 | TG   | 16 | 8  |
| 283228 | 49 | 2466661 | 2466687 | 3 | 9  | 27 | CTG  | 25 | 10 |

|        |    |         |         |   |    |    |      |    |    |
|--------|----|---------|---------|---|----|----|------|----|----|
| 283230 | 49 | 2468145 | 2468158 | 2 | 7  | 14 | AT   | 19 | 12 |
| 283231 | 49 | 2470276 | 2470293 | 2 | 9  | 18 | TC   | 18 | 9  |
| 283232 | 49 | 2471363 | 2471380 | 2 | 9  | 18 | AC   | 19 | 5  |
| 283233 | 49 | 2473911 | 2473928 | 2 | 9  | 18 | CT   | 19 | 10 |
| 283236 | 49 | 2476144 | 2476157 | 2 | 7  | 14 | CA   | 19 | 7  |
| 283241 | 49 | 2479808 | 2479829 | 2 | 11 | 22 | AC   | 22 | 9  |
| 283243 | 49 | 2482381 | 2482408 | 2 | 14 | 28 | TG   | 20 | 12 |
| 283244 | 49 | 2482494 | 2482529 | 2 | 18 | 36 | GT   | 12 | 13 |
| 283246 | 49 | 2486892 | 2486907 | 4 | 4  | 16 | TTTG | 16 | 6  |
| 283248 | 49 | 2491900 | 2491911 | 2 | 6  | 12 | GT   | 21 | 4  |
| 283249 | 49 | 2494524 | 2494557 | 2 | 17 | 34 | CA   | 12 | 7  |
| 283250 | 49 | 2496030 | 2496051 | 2 | 11 | 22 | CA   | 19 | 10 |
| 283251 | 49 | 2496822 | 2496859 | 2 | 19 | 38 | TG   | 8  | 10 |
| 283260 | 49 | 2513472 | 2513497 | 2 | 13 | 26 | TG   | 10 | 10 |
| 283261 | 49 | 2513692 | 2513715 | 2 | 12 | 24 | CA   | 13 | 13 |
| 283262 | 49 | 2513834 | 2513861 | 2 | 14 | 28 | CA   | 10 | 12 |
| 283264 | 49 | 2517230 | 2517243 | 2 | 7  | 14 | TG   | 20 | 3  |
| 283267 | 49 | 2517822 | 2517843 | 2 | 11 | 22 | GT   | 20 | 7  |
| 283272 | 49 | 2527830 | 2527857 | 2 | 14 | 28 | TG   | 15 | 11 |
| 283282 | 49 | 2536397 | 2536424 | 2 | 14 | 28 | AC   | 22 | 10 |
| 283284 | 49 | 2541450 | 2541473 | 2 | 12 | 24 | AC   | 17 | 11 |
| 283286 | 49 | 2542959 | 2542994 | 4 | 9  | 36 | TATC | 24 | 10 |
| 283290 | 49 | 2545949 | 2545974 | 2 | 13 | 26 | AC   | 23 | 6  |
| 283294 | 49 | 2550146 | 2550157 | 2 | 6  | 12 | AC   | 18 | 15 |
| 283296 | 49 | 2550445 | 2550460 | 2 | 8  | 16 | AG   | 6  | 8  |
| 283297 | 49 | 2550595 | 2550606 | 2 | 6  | 12 | GC   | 25 | 7  |
| 283298 | 49 | 2550744 | 2550763 | 4 | 5  | 20 | ATTG | 29 | 3  |
| 283299 | 49 | 2552913 | 2552938 | 2 | 13 | 26 | AC   | 16 | 9  |
| 283304 | 49 | 2565489 | 2565512 | 2 | 12 | 24 | CA   | 18 | 11 |
| 283310 | 49 | 2577000 | 2577013 | 2 | 7  | 14 | GT   | 24 | 3  |
| 283311 | 49 | 2577149 | 2577168 | 2 | 10 | 20 | AC   | 23 | 9  |
| 283314 | 49 | 2582650 | 2582673 | 2 | 12 | 24 | GT   | 14 | 6  |
| 283323 | 49 | 2597353 | 2597382 | 2 | 15 | 30 | TC   | 7  | 9  |
| 283327 | 49 | 2606366 | 2606393 | 2 | 14 | 28 | GT   | 12 | 9  |
| 283331 | 49 | 2619841 | 2619870 | 2 | 15 | 30 | CA   | 10 | 4  |
| 283333 | 49 | 2621809 | 2621830 | 2 | 11 | 22 | TG   | 22 | 5  |
| 283334 | 49 | 2621931 | 2621946 | 2 | 8  | 16 | TG   | 10 | 7  |
| 283335 | 49 | 2622191 | 2622206 | 2 | 8  | 16 | TA   | 10 | 4  |
| 283338 | 49 | 2626320 | 2626343 | 2 | 12 | 24 | GT   | 28 | 9  |
| 283339 | 49 | 2628984 | 2629027 | 2 | 22 | 44 | AC   | 7  | 9  |
| 283346 | 49 | 2647161 | 2647196 | 2 | 18 | 36 | GT   | 16 | 7  |
| 283352 | 49 | 2661853 | 2661888 | 4 | 9  | 36 | CCAT | 21 | 11 |
| 283353 | 49 | 2664156 | 2664167 | 2 | 6  | 12 | TG   | 19 | 3  |
| 283354 | 49 | 2664771 | 2664788 | 3 | 6  | 18 | CAG  | 35 | 4  |
| 283355 | 49 | 2664879 | 2664896 | 2 | 9  | 18 | TG   | 28 | 4  |
| 283357 | 49 | 2669014 | 2669041 | 2 | 14 | 28 | TG   | 15 | 10 |
| 283358 | 49 | 2669168 | 2669181 | 2 | 7  | 14 | GT   | 30 | 7  |
| 283359 | 49 | 2670176 | 2670193 | 2 | 9  | 18 | AT   | 24 | 8  |
| 283361 | 49 | 2678226 | 2678253 | 2 | 14 | 28 | TG   | 20 | 7  |
| 283363 | 49 | 2678711 | 2678742 | 2 | 16 | 32 | TC   | 6  | 10 |
| 283367 | 49 | 2685323 | 2685344 | 2 | 11 | 22 | AC   | 17 | 6  |

|        |    |         |         |   |    |    |      |    |    |
|--------|----|---------|---------|---|----|----|------|----|----|
| 283369 | 49 | 2690815 | 2690838 | 2 | 12 | 24 | GT   | 17 | 11 |
| 283371 | 49 | 2691547 | 2691562 | 2 | 8  | 16 | GT   | 13 | 14 |
| 283372 | 49 | 2691563 | 2691576 | 2 | 7  | 14 | GA   | 7  | 9  |
| 283378 | 49 | 2704208 | 2704222 | 3 | 5  | 15 | TAA  | 9  | 4  |
| 283379 | 49 | 2706071 | 2706100 | 2 | 15 | 30 | CA   | 7  | 6  |
| 283382 | 49 | 2710463 | 2710478 | 2 | 8  | 16 | GT   | 18 | 3  |
| 283385 | 49 | 2714060 | 2714083 | 4 | 6  | 24 | GATG | 18 | 3  |
| 283389 | 49 | 2725188 | 2725207 | 2 | 10 | 20 | AC   | 23 | 5  |
| 283393 | 49 | 2729325 | 2729346 | 2 | 11 | 22 | AC   | 14 | 6  |
| 283410 | 49 | 2769732 | 2769751 | 2 | 10 | 20 | CA   | 8  | 9  |
| 283415 | 49 | 2774808 | 2774829 | 2 | 11 | 22 | CA   | 14 | 12 |
| 283424 | 49 | 2811414 | 2811435 | 2 | 11 | 22 | GT   | 6  | 3  |
| 283435 | 49 | 2835397 | 2835420 | 2 | 12 | 24 | CA   | 16 | 6  |
| 283440 | 49 | 2842959 | 2842974 | 2 | 8  | 16 | AC   | 21 | 5  |
| 283441 | 49 | 2845564 | 2845593 | 2 | 15 | 30 | AC   | 12 | 8  |
| 283447 | 49 | 2852553 | 2852567 | 3 | 5  | 15 | CAG  | 25 | 3  |
| 283449 | 49 | 2863085 | 2863114 | 3 | 10 | 30 | TAA  | 10 | 4  |
| 283450 | 49 | 2868817 | 2868831 | 3 | 5  | 15 | CAG  | 31 | 3  |
| 283453 | 49 | 2873154 | 2873165 | 2 | 6  | 12 | AT   | 11 | 3  |
| 283455 | 49 | 2874198 | 2874215 | 2 | 9  | 18 | AC   | 22 | 10 |
| 283456 | 49 | 2874335 | 2874348 | 2 | 7  | 14 | GT   | 16 | 11 |
| 283460 | 49 | 2881395 | 2881430 | 3 | 12 | 36 | AAT  | 8  | 5  |
| 283465 | 49 | 2885877 | 2885888 | 2 | 6  | 12 | AC   | 16 | 4  |
| 283468 | 49 | 2888446 | 2888461 | 2 | 8  | 16 | AT   | 12 | 4  |
| 283477 | 49 | 2901039 | 2901054 | 2 | 8  | 16 | TC   | 27 | 6  |
| 283479 | 49 | 2904826 | 2904841 | 4 | 4  | 16 | TGTC | 30 | 3  |
| 283489 | 49 | 2932391 | 2932414 | 2 | 12 | 24 | GT   | 9  | 13 |
| 283494 | 49 | 2938166 | 2938185 | 2 | 10 | 20 | AC   | 8  | 6  |
| 283498 | 49 | 2958791 | 2958808 | 3 | 6  | 18 | CAG  | 25 | 3  |
| 283504 | 49 | 2965815 | 2965830 | 2 | 8  | 16 | CT   | 33 | 4  |
| 283505 | 49 | 2966674 | 2966687 | 2 | 7  | 14 | GT   | 26 | 5  |
| 283508 | 49 | 2973879 | 2973900 | 2 | 11 | 22 | GT   | 20 | 8  |
| 283509 | 49 | 2974027 | 2974056 | 2 | 15 | 30 | CA   | 22 | 5  |
| 283512 | 49 | 2977551 | 2977566 | 2 | 8  | 16 | TG   | 20 | 7  |
| 283514 | 49 | 2982137 | 2982156 | 2 | 10 | 20 | GT   | 28 | 6  |
| 283517 | 49 | 3001242 | 3001257 | 2 | 8  | 16 | TG   | 19 | 8  |
| 283522 | 49 | 3003557 | 3003572 | 2 | 8  | 16 | TG   | 24 | 7  |
| 283526 | 49 | 3012051 | 3012064 | 2 | 7  | 14 | GT   | 30 | 4  |
| 283527 | 49 | 3015140 | 3015163 | 2 | 12 | 24 | TG   | 17 | 3  |
| 283537 | 49 | 3040683 | 3040694 | 2 | 6  | 12 | CA   | 16 | 6  |
| 283538 | 49 | 3043421 | 3043432 | 2 | 6  | 12 | AC   | 30 | 6  |
| 283544 | 49 | 3058122 | 3058139 | 3 | 6  | 18 | CTT  | 31 | 3  |
| 283546 | 49 | 3061992 | 3062017 | 2 | 13 | 26 | TG   | 7  | 11 |
| 283548 | 49 | 3070017 | 3070028 | 2 | 6  | 12 | TG   | 8  | 4  |
| 283552 | 49 | 3076979 | 3076994 | 4 | 4  | 16 | AAAT | 21 | 4  |
| 283553 | 49 | 3077343 | 3077368 | 2 | 13 | 26 | TG   | 17 | 9  |
| 283555 | 49 | 3077746 | 3077761 | 2 | 8  | 16 | TG   | 25 | 15 |
| 283562 | 49 | 3093689 | 3093700 | 2 | 6  | 12 | TG   | 18 | 10 |
| 283564 | 49 | 3097413 | 3097424 | 2 | 6  | 12 | GT   | 17 | 8  |
| 283565 | 49 | 3097426 | 3097437 | 2 | 6  | 12 | TG   | 21 | 8  |
| 283566 | 49 | 3097829 | 3097855 | 3 | 9  | 27 | GAT  | 23 | 6  |

|        |    |         |         |   |    |    |      |    |    |
|--------|----|---------|---------|---|----|----|------|----|----|
| 283570 | 49 | 3100200 | 3100219 | 2 | 10 | 20 | GT   | 19 | 6  |
| 283577 | 49 | 3118552 | 3118567 | 2 | 8  | 16 | AC   | 23 | 3  |
| 283583 | 49 | 3125841 | 3125864 | 4 | 6  | 24 | ATTG | 14 | 3  |
| 283585 | 49 | 3129595 | 3129608 | 2 | 7  | 14 | TG   | 19 | 5  |
| 283596 | 49 | 3156904 | 3156919 | 2 | 8  | 16 | GT   | 13 | 6  |
| 283602 | 49 | 3163798 | 3163809 | 2 | 6  | 12 | CA   | 25 | 9  |
| 283605 | 49 | 3167889 | 3167904 | 2 | 8  | 16 | TG   | 25 | 3  |
| 283606 | 49 | 3177082 | 3177097 | 4 | 4  | 16 | GGAT | 26 | 3  |
| 283609 | 49 | 3181906 | 3181931 | 2 | 13 | 26 | TG   | 11 | 5  |
| 283612 | 49 | 3187596 | 3187633 | 2 | 19 | 38 | AC   | 8  | 13 |
| 283613 | 49 | 3192382 | 3192407 | 2 | 13 | 26 | TG   | 7  | 7  |
| 283614 | 49 | 3193443 | 3193456 | 2 | 7  | 14 | AC   | 15 | 3  |
| 283616 | 49 | 3198959 | 3198970 | 2 | 6  | 12 | CA   | 20 | 5  |
| 283617 | 49 | 3202104 | 3202125 | 2 | 11 | 22 | TG   | 12 | 4  |
| 283620 | 49 | 3208115 | 3208132 | 2 | 9  | 18 | GT   | 14 | 11 |
| 283623 | 49 | 3225953 | 3225982 | 2 | 15 | 30 | TG   | 8  | 13 |
| 283624 | 49 | 3230687 | 3230712 | 2 | 13 | 26 | CA   | 7  | 7  |
| 283626 | 49 | 3232832 | 3232851 | 2 | 10 | 20 | AC   | 19 | 6  |
| 283628 | 49 | 3241015 | 3241030 | 4 | 4  | 16 | TGAT | 28 | 3  |
| 283629 | 49 | 3247314 | 3247367 | 2 | 27 | 54 | GT   | 6  | 6  |
| 283637 | 49 | 3273568 | 3273579 | 2 | 6  | 12 | TA   | 16 | 6  |
| 283641 | 49 | 3280772 | 3280789 | 3 | 6  | 18 | AAG  | 21 | 12 |
| 283645 | 49 | 3283456 | 3283475 | 2 | 10 | 20 | CA   | 27 | 8  |
| 283646 | 49 | 3284010 | 3284030 | 3 | 7  | 21 | ATT  | 20 | 3  |
| 283647 | 49 | 3291058 | 3291081 | 4 | 6  | 24 | TCCA | 26 | 4  |
| 283653 | 49 | 3310249 | 3310264 | 4 | 4  | 16 | AAGA | 15 | 9  |
| 283654 | 49 | 3310798 | 3310811 | 2 | 7  | 14 | CA   | 30 | 5  |
| 283656 | 49 | 3320077 | 3320100 | 4 | 6  | 24 | TCTG | 10 | 10 |
| 283660 | 49 | 3322774 | 3322789 | 4 | 4  | 16 | TGAA | 30 | 7  |
| 283662 | 49 | 3325642 | 3325655 | 2 | 7  | 14 | AC   | 19 | 6  |
| 283663 | 49 | 3327425 | 3327438 | 2 | 7  | 14 | TA   | 18 | 12 |
| 283665 | 49 | 3329948 | 3329962 | 3 | 5  | 15 | ATA  | 12 | 4  |
| 283666 | 49 | 3347404 | 3347421 | 2 | 9  | 18 | AC   | 25 | 12 |
| 283667 | 49 | 3348963 | 3348976 | 2 | 7  | 14 | AG   | 25 | 4  |
| 283675 | 49 | 3368399 | 3368418 | 2 | 10 | 20 | GT   | 23 | 6  |
| 283678 | 49 | 3384288 | 3384301 | 2 | 7  | 14 | AT   | 20 | 4  |
| 283681 | 49 | 3391319 | 3391332 | 2 | 7  | 14 | GT   | 22 | 4  |
| 283682 | 49 | 3391485 | 3391508 | 2 | 12 | 24 | AC   | 9  | 9  |
| 283686 | 49 | 3396385 | 3396399 | 3 | 5  | 15 | TGT  | 28 | 4  |
| 283697 | 49 | 3437676 | 3437687 | 2 | 6  | 12 | AT   | 17 | 3  |
| 283698 | 49 | 3439263 | 3439298 | 2 | 18 | 36 | GT   | 7  | 8  |
| 283702 | 49 | 3444924 | 3444938 | 3 | 5  | 15 | GCT  | 32 | 4  |
| 283705 | 49 | 3448558 | 3448585 | 2 | 14 | 28 | CA   | 9  | 8  |
| 283707 | 49 | 3451380 | 3451395 | 2 | 8  | 16 | GT   | 24 | 8  |
| 283708 | 49 | 3458339 | 3458356 | 2 | 9  | 18 | CA   | 21 | 9  |
| 283709 | 49 | 3458572 | 3458631 | 3 | 20 | 60 | AAC  | 6  | 7  |
| 283711 | 49 | 3467839 | 3467858 | 4 | 5  | 20 | TTAG | 24 | 3  |
| 283716 | 49 | 3473713 | 3473730 | 2 | 9  | 18 | GA   | 19 | 5  |
| 283719 | 49 | 3475694 | 3475727 | 2 | 17 | 34 | GA   | 13 | 8  |
| 283721 | 49 | 3481975 | 3482008 | 2 | 17 | 34 | GT   | 21 | 8  |
| 283734 | 49 | 3513056 | 3513083 | 2 | 14 | 28 | TG   | 15 | 14 |

|        |    |         |         |   |    |    |      |    |    |
|--------|----|---------|---------|---|----|----|------|----|----|
| 283742 | 49 | 3520706 | 3520717 | 2 | 6  | 12 | GT   | 7  | 6  |
| 283744 | 49 | 3524737 | 3524748 | 2 | 6  | 12 | GT   | 11 | 6  |
| 283745 | 49 | 3524751 | 3524762 | 2 | 6  | 12 | GT   | 10 | 8  |
| 283746 | 49 | 3528619 | 3528654 | 4 | 9  | 36 | AAAG | 21 | 11 |
| 283749 | 49 | 3541094 | 3541109 | 2 | 8  | 16 | AC   | 28 | 7  |
| 283755 | 49 | 3543757 | 3543780 | 2 | 12 | 24 | TG   | 16 | 8  |
| 283762 | 49 | 3556058 | 3556073 | 2 | 8  | 16 | TG   | 19 | 10 |
| 283763 | 49 | 3556240 | 3556263 | 2 | 12 | 24 | TG   | 10 | 9  |
| 283764 | 49 | 3559125 | 3559140 | 4 | 4  | 16 | TTTC | 26 | 3  |
| 283773 | 49 | 3583970 | 3583993 | 2 | 12 | 24 | TG   | 19 | 9  |
| 283776 | 49 | 3597676 | 3597693 | 3 | 6  | 18 | TAA  | 10 | 3  |
| 283787 | 49 | 3620533 | 3620548 | 4 | 4  | 16 | GCAG | 24 | 4  |
| 283792 | 49 | 3647021 | 3647054 | 2 | 17 | 34 | AC   | 8  | 10 |
| 283797 | 49 | 3657205 | 3657252 | 3 | 16 | 48 | TCT  | 18 | 9  |
| 283800 | 49 | 3661890 | 3661913 | 4 | 6  | 24 | ATTC | 19 | 7  |
| 283803 | 49 | 3666269 | 3666289 | 3 | 7  | 21 | CAT  | 6  | 6  |
| 283829 | 49 | 3690886 | 3690921 | 4 | 9  | 36 | GTAT | 13 | 10 |
| 283832 | 49 | 3699034 | 3699069 | 2 | 18 | 36 | AC   | 10 | 10 |
| 283833 | 49 | 3699691 | 3699710 | 4 | 5  | 20 | TTTG | 24 | 3  |
| 283844 | 49 | 3745837 | 3745862 | 2 | 13 | 26 | CA   | 13 | 10 |
| 283845 | 49 | 3746003 | 3746024 | 2 | 11 | 22 | CA   | 18 | 5  |
| 283846 | 49 | 3750350 | 3750361 | 2 | 6  | 12 | CT   | 23 | 3  |
| 283848 | 49 | 3755718 | 3755729 | 2 | 6  | 12 | TG   | 25 | 3  |
| 283849 | 49 | 3756696 | 3756711 | 4 | 4  | 16 | TTTG | 24 | 3  |
| 283850 | 49 | 3758213 | 3758224 | 2 | 6  | 12 | GT   | 23 | 3  |
| 283855 | 49 | 3787143 | 3787164 | 2 | 11 | 22 | GT   | 22 | 8  |
| 283875 | 49 | 3842921 | 3842972 | 4 | 13 | 52 | TCTT | 19 | 10 |
| 283907 | 49 | 3953128 | 3953141 | 2 | 7  | 14 | GT   | 6  | 3  |
| 283910 | 49 | 3961216 | 3961243 | 2 | 14 | 28 | GT   | 9  | 8  |
| 283915 | 49 | 3970432 | 3970451 | 2 | 10 | 20 | TG   | 13 | 8  |
| 283920 | 49 | 3985855 | 3985870 | 2 | 8  | 16 | CT   | 7  | 4  |
| 283942 | 49 | 4022267 | 4022284 | 2 | 9  | 18 | AC   | 15 | 6  |
| 283943 | 49 | 4022287 | 4022302 | 2 | 8  | 16 | AC   | 15 | 5  |
| 283951 | 49 | 4025963 | 4025980 | 2 | 9  | 18 | CA   | 18 | 4  |
| 283959 | 49 | 4051474 | 4051485 | 2 | 6  | 12 | GT   | 17 | 4  |
| 283962 | 49 | 4057297 | 4057320 | 2 | 12 | 24 | TG   | 17 | 11 |
| 283969 | 49 | 4073948 | 4073963 | 2 | 8  | 16 | AC   | 17 | 14 |
| 283976 | 49 | 4087930 | 4087950 | 3 | 7  | 21 | ATA  | 14 | 4  |
| 283982 | 49 | 4094533 | 4094544 | 2 | 6  | 12 | AC   | 19 | 3  |
| 283984 | 49 | 4096138 | 4096163 | 2 | 13 | 26 | TG   | 21 | 11 |
| 283988 | 49 | 4097187 | 4097213 | 3 | 9  | 27 | GGA  | 10 | 9  |
| 283989 | 49 | 4097547 | 4097600 | 2 | 27 | 54 | CA   | 8  | 9  |
| 283995 | 49 | 4101194 | 4101211 | 3 | 6  | 18 | CAA  | 18 | 4  |
| 284001 | 49 | 4106373 | 4106390 | 3 | 6  | 18 | TCC  | 20 | 9  |
| 284003 | 49 | 4110034 | 4110093 | 3 | 20 | 60 | AGA  | 13 | 15 |
| 284006 | 49 | 4110936 | 4110989 | 2 | 27 | 54 | GT   | 6  | 9  |
| 284008 | 49 | 4111931 | 4111944 | 2 | 7  | 14 | CA   | 19 | 9  |
| 284009 | 49 | 4111946 | 4111961 | 2 | 8  | 16 | AC   | 14 | 7  |
| 284010 | 49 | 4112121 | 4112166 | 2 | 23 | 46 | CA   | 7  | 10 |
| 284011 | 49 | 4112329 | 4112380 | 2 | 26 | 52 | GT   | 6  | 6  |
| 284012 | 49 | 4113008 | 4113022 | 3 | 5  | 15 | GCG  | 31 | 11 |



|        |    |         |         |   |    |    |      |    |    |
|--------|----|---------|---------|---|----|----|------|----|----|
| 284017 | 49 | 4114790 | 4114825 | 2 | 18 | 36 | GT   | 6  | 7  |
| 284019 | 49 | 4114945 | 4114972 | 2 | 14 | 28 | CA   | 8  | 9  |
| 284022 | 49 | 4115551 | 4115566 | 2 | 8  | 16 | AC   | 10 | 10 |
| 284023 | 49 | 4115621 | 4115642 | 2 | 11 | 22 | AC   | 18 | 9  |
| 284024 | 49 | 4116806 | 4116851 | 2 | 23 | 46 | AC   | 13 | 15 |
| 284025 | 49 | 4117452 | 4117481 | 2 | 15 | 30 | CA   | 13 | 9  |
| 284027 | 49 | 4118944 | 4118959 | 2 | 8  | 16 | AC   | 8  | 7  |
| 284028 | 49 | 4119042 | 4119074 | 3 | 11 | 33 | ATG  | 19 | 10 |
| 284033 | 49 | 4121222 | 4121267 | 2 | 23 | 46 | CA   | 6  | 9  |
| 284034 | 49 | 4122039 | 4122074 | 3 | 12 | 36 | CAT  | 6  | 5  |
| 284035 | 49 | 4122221 | 4122248 | 2 | 14 | 28 | AC   | 12 | 14 |
| 284046 | 49 | 4125259 | 4125278 | 2 | 10 | 20 | CT   | 6  | 8  |
| 284049 | 49 | 4126521 | 4126544 | 2 | 12 | 24 | AG   | 17 | 7  |
| 284050 | 49 | 4126636 | 4126661 | 2 | 13 | 26 | AC   | 7  | 7  |
| 284052 | 49 | 4128804 | 4128827 | 3 | 8  | 24 | AGG  | 10 | 4  |
| 284053 | 49 | 4128966 | 4128989 | 2 | 12 | 24 | GT   | 6  | 7  |
| 284055 | 49 | 4130898 | 4130915 | 3 | 6  | 18 | GAA  | 29 | 3  |
| 284057 | 49 | 4143093 | 4143110 | 2 | 9  | 18 | GA   | 29 | 4  |
| 284058 | 49 | 4143205 | 4143228 | 3 | 8  | 24 | AGG  | 8  | 8  |
| 284060 | 49 | 4144106 | 4144123 | 3 | 6  | 18 | CTT  | 31 | 3  |
| 284061 | 49 | 4144385 | 4144396 | 2 | 6  | 12 | AT   | 14 | 6  |
| 284062 | 49 | 4145209 | 4145232 | 2 | 12 | 24 | AG   | 13 | 14 |
| 284065 | 49 | 4155099 | 4155140 | 2 | 21 | 42 | TG   | 12 | 17 |
| 284066 | 49 | 4155370 | 4155381 | 2 | 6  | 12 | AC   | 19 | 7  |
| 284068 | 49 | 4155661 | 4155678 | 2 | 9  | 18 | AC   | 29 | 3  |
| 284071 | 49 | 4159926 | 4159943 | 2 | 9  | 18 | CA   | 20 | 6  |
| 284074 | 49 | 4164647 | 4164664 | 2 | 9  | 18 | CA   | 19 | 8  |
| 284075 | 49 | 4167540 | 4167557 | 3 | 6  | 18 | GAG  | 27 | 7  |
| 284081 | 49 | 4171253 | 4171274 | 2 | 11 | 22 | GT   | 19 | 11 |
| 284087 | 49 | 4201560 | 4201577 | 2 | 9  | 18 | CA   | 18 | 5  |
| 284089 | 49 | 4203756 | 4203793 | 2 | 19 | 38 | TG   | 7  | 11 |
| 284092 | 49 | 4210938 | 4210959 | 2 | 11 | 22 | AC   | 25 | 6  |
| 284094 | 49 | 4213170 | 4213193 | 3 | 8  | 24 | GAA  | 24 | 4  |
| 284096 | 49 | 4217939 | 4217959 | 3 | 7  | 21 | AAG  | 21 | 4  |
| 284099 | 49 | 4243852 | 4243865 | 2 | 7  | 14 | GT   | 21 | 4  |
| 284103 | 49 | 4260145 | 4260160 | 2 | 8  | 16 | CA   | 22 | 8  |
| 284108 | 49 | 4269823 | 4269843 | 3 | 7  | 21 | TGA  | 7  | 6  |
| 284109 | 49 | 4269923 | 4269937 | 3 | 5  | 15 | TCA  | 24 | 5  |
| 284110 | 49 | 4269986 | 4270017 | 2 | 16 | 32 | TC   | 11 | 12 |
| 284113 | 49 | 4270796 | 4270821 | 2 | 13 | 26 | CA   | 16 | 6  |
| 284114 | 49 | 4272417 | 4272432 | 2 | 8  | 16 | CA   | 13 | 13 |
| 284115 | 49 | 4272436 | 4272449 | 2 | 7  | 14 | AC   | 10 | 11 |
| 284116 | 49 | 4274844 | 4274855 | 2 | 6  | 12 | AC   | 22 | 6  |
| 284117 | 49 | 4275012 | 4275029 | 2 | 9  | 18 | CA   | 15 | 3  |
| 284121 | 49 | 4280897 | 4280914 | 2 | 9  | 18 | CA   | 17 | 7  |
| 284122 | 49 | 4284890 | 4284905 | 2 | 8  | 16 | CA   | 14 | 3  |
| 284125 | 49 | 4285542 | 4285565 | 4 | 6  | 24 | TTGA | 34 | 3  |
| 284126 | 49 | 4286287 | 4286298 | 2 | 6  | 12 | AC   | 24 | 3  |
| 284133 | 49 | 4317508 | 4317527 | 2 | 10 | 20 | GT   | 12 | 11 |
| 284138 | 49 | 4322591 | 4322610 | 2 | 10 | 20 | GT   | 18 | 16 |
| 284139 | 49 | 4327350 | 4327369 | 2 | 10 | 20 | AC   | 22 | 7  |

|        |    |         |         |   |    |    |      |    |    |
|--------|----|---------|---------|---|----|----|------|----|----|
| 284140 | 49 | 4329031 | 4329046 | 4 | 4  | 16 | CAGT | 29 | 6  |
| 284149 | 49 | 4356091 | 4356112 | 2 | 11 | 22 | GT   | 15 | 12 |
| 284151 | 49 | 4359079 | 4359092 | 2 | 7  | 14 | TG   | 19 | 3  |
| 284152 | 49 | 4359242 | 4359253 | 2 | 6  | 12 | CA   | 21 | 3  |
| 284155 | 49 | 4365456 | 4365469 | 2 | 7  | 14 | GT   | 26 | 6  |
| 284156 | 49 | 4369126 | 4369159 | 2 | 17 | 34 | AG   | 16 | 14 |
| 284157 | 49 | 4369201 | 4369218 | 2 | 9  | 18 | AG   | 22 | 5  |
| 284159 | 49 | 4386114 | 4386127 | 2 | 7  | 14 | TG   | 19 | 3  |
| 284164 | 49 | 4395794 | 4395805 | 2 | 6  | 12 | GT   | 11 | 7  |
| 284165 | 49 | 4396001 | 4396044 | 2 | 22 | 44 | GT   | 10 | 8  |
| 284166 | 49 | 4396831 | 4396844 | 2 | 7  | 14 | AC   | 28 | 7  |
| 284169 | 49 | 4408834 | 4408869 | 2 | 18 | 36 | AC   | 7  | 6  |
| 284182 | 50 | 25608   | 25645   | 2 | 19 | 38 | AC   | 9  | 11 |
| 284183 | 50 | 32146   | 32161   | 2 | 8  | 16 | TC   | 26 | 4  |
| 284184 | 50 | 35307   | 35324   | 3 | 6  | 18 | CAG  | 14 | 4  |
| 284185 | 50 | 40708   | 40735   | 2 | 14 | 28 | TG   | 8  | 10 |
| 284186 | 50 | 44092   | 44127   | 2 | 18 | 36 | TG   | 17 | 9  |
| 284188 | 50 | 49737   | 49760   | 2 | 12 | 24 | AC   | 22 | 9  |
| 284191 | 50 | 56344   | 56364   | 3 | 7  | 21 | TGT  | 25 | 3  |
| 284192 | 50 | 56829   | 56867   | 3 | 13 | 39 | CAT  | 9  | 8  |
| 284194 | 50 | 57701   | 57715   | 3 | 5  | 15 | TGC  | 24 | 6  |
| 284200 | 50 | 65064   | 65081   | 3 | 6  | 18 | GCT  | 21 | 4  |
| 284203 | 50 | 68549   | 68560   | 2 | 6  | 12 | GT   | 26 | 3  |
| 284204 | 50 | 73400   | 73419   | 2 | 10 | 20 | AC   | 20 | 5  |
| 284218 | 50 | 94646   | 94675   | 2 | 15 | 30 | AC   | 15 | 18 |
| 284224 | 50 | 100489  | 100502  | 2 | 7  | 14 | GT   | 14 | 10 |
| 284226 | 50 | 100791  | 100810  | 2 | 10 | 20 | TG   | 12 | 14 |
| 284227 | 50 | 101690  | 101707  | 2 | 9  | 18 | AC   | 15 | 4  |
| 284234 | 50 | 110750  | 110765  | 2 | 8  | 16 | AC   | 24 | 10 |
| 284235 | 50 | 110882  | 110902  | 3 | 7  | 21 | GGT  | 12 | 3  |
| 284237 | 50 | 111783  | 111812  | 3 | 10 | 30 | GGA  | 17 | 6  |
| 284239 | 50 | 115631  | 115648  | 2 | 9  | 18 | AC   | 23 | 6  |
| 284241 | 50 | 117916  | 117947  | 2 | 16 | 32 | AC   | 19 | 10 |
| 284243 | 50 | 130454  | 130473  | 4 | 5  | 20 | GTTT | 22 | 5  |
| 284244 | 50 | 133414  | 133431  | 2 | 9  | 18 | TG   | 14 | 4  |
| 284247 | 50 | 148963  | 148978  | 4 | 4  | 16 | ATTT | 16 | 8  |
| 284270 | 50 | 160247  | 160294  | 2 | 24 | 48 | CA   | 7  | 10 |
| 284275 | 50 | 166384  | 166404  | 3 | 7  | 21 | GCT  | 20 | 8  |
| 284276 | 50 | 166612  | 166626  | 3 | 5  | 15 | CTT  | 17 | 8  |
| 284277 | 50 | 167461  | 167486  | 2 | 13 | 26 | AC   | 6  | 5  |
| 284279 | 50 | 169753  | 169770  | 2 | 9  | 18 | AG   | 22 | 3  |
| 284285 | 50 | 182646  | 182659  | 2 | 7  | 14 | CT   | 14 | 4  |
| 284287 | 50 | 200052  | 200066  | 3 | 5  | 15 | TTC  | 14 | 3  |
| 284304 | 50 | 220457  | 220468  | 2 | 6  | 12 | CT   | 25 | 3  |
| 284314 | 50 | 244004  | 244019  | 2 | 8  | 16 | CA   | 28 | 4  |
| 284315 | 50 | 244402  | 244421  | 2 | 10 | 20 | AG   | 25 | 4  |
| 284316 | 50 | 245608  | 245637  | 2 | 15 | 30 | CA   | 19 | 14 |
| 284321 | 50 | 257694  | 257709  | 4 | 4  | 16 | TGTC | 29 | 3  |
| 284322 | 50 | 258001  | 258052  | 4 | 13 | 52 | GCCA | 14 | 7  |
| 284324 | 50 | 265523  | 265536  | 2 | 7  | 14 | AG   | 26 | 4  |
| 284325 | 50 | 265538  | 265553  | 2 | 8  | 16 | AG   | 18 | 3  |

|        |    |        |        |   |    |    |      |    |    |
|--------|----|--------|--------|---|----|----|------|----|----|
| 284326 | 50 | 267017 | 267038 | 2 | 11 | 22 | TG   | 16 | 5  |
| 284327 | 50 | 267097 | 267128 | 2 | 16 | 32 | GT   | 7  | 6  |
| 284329 | 50 | 267934 | 267947 | 2 | 7  | 14 | TC   | 23 | 8  |
| 284331 | 50 | 269831 | 269864 | 2 | 17 | 34 | TG   | 15 | 10 |
| 284335 | 50 | 271599 | 271626 | 2 | 14 | 28 | CA   | 11 | 9  |
| 284345 | 50 | 282876 | 282887 | 2 | 6  | 12 | TC   | 27 | 4  |
| 284347 | 50 | 285754 | 285793 | 2 | 20 | 40 | AC   | 11 | 8  |
| 284349 | 50 | 287188 | 287199 | 2 | 6  | 12 | GT   | 10 | 5  |
| 284350 | 50 | 287201 | 287218 | 2 | 9  | 18 | TG   | 12 | 6  |
| 284351 | 50 | 287314 | 287343 | 3 | 10 | 30 | TGA  | 17 | 7  |
| 284356 | 50 | 297793 | 297806 | 2 | 7  | 14 | AC   | 16 | 7  |
| 284357 | 50 | 303728 | 303751 | 2 | 12 | 24 | TG   | 22 | 7  |
| 284361 | 50 | 306338 | 306361 | 2 | 12 | 24 | GT   | 17 | 6  |
| 284363 | 50 | 308905 | 308920 | 2 | 8  | 16 | GT   | 16 | 5  |
| 284364 | 50 | 309908 | 309927 | 2 | 10 | 20 | TG   | 20 | 8  |
| 284367 | 50 | 315727 | 315742 | 2 | 8  | 16 | TG   | 23 | 3  |
| 284368 | 50 | 326940 | 326959 | 2 | 10 | 20 | AG   | 25 | 10 |
| 284370 | 50 | 330108 | 330119 | 2 | 6  | 12 | AT   | 14 | 5  |
| 284373 | 50 | 330342 | 330359 | 2 | 9  | 18 | GA   | 7  | 6  |
| 284374 | 50 | 330465 | 330478 | 2 | 7  | 14 | GT   | 16 | 4  |
| 284375 | 50 | 332661 | 332676 | 4 | 4  | 16 | AAAC | 13 | 3  |
| 284377 | 50 | 333880 | 333907 | 2 | 14 | 28 | CT   | 18 | 8  |
| 284381 | 50 | 338633 | 338648 | 2 | 8  | 16 | AC   | 27 | 6  |
| 284384 | 50 | 347364 | 347375 | 2 | 6  | 12 | CA   | 23 | 4  |
| 284387 | 50 | 350707 | 350722 | 2 | 8  | 16 | TG   | 15 | 3  |
| 284389 | 50 | 350795 | 350810 | 2 | 8  | 16 | CA   | 32 | 3  |
| 284390 | 50 | 352584 | 352613 | 2 | 15 | 30 | CT   | 8  | 10 |
| 284391 | 50 | 355021 | 355060 | 2 | 20 | 40 | GT   | 8  | 9  |
| 284393 | 50 | 355465 | 355488 | 2 | 12 | 24 | AC   | 11 | 11 |
| 284400 | 50 | 364811 | 364826 | 2 | 8  | 16 | GT   | 14 | 6  |
| 284401 | 50 | 368017 | 368028 | 2 | 6  | 12 | GT   | 23 | 5  |
| 284402 | 50 | 368031 | 368044 | 2 | 7  | 14 | GT   | 10 | 5  |
| 284403 | 50 | 368182 | 368195 | 2 | 7  | 14 | AC   | 25 | 6  |
| 284406 | 50 | 369257 | 369270 | 2 | 7  | 14 | CT   | 6  | 4  |
| 284407 | 50 | 370320 | 370339 | 2 | 10 | 20 | TG   | 19 | 4  |
| 284408 | 50 | 373436 | 373455 | 2 | 10 | 20 | CT   | 20 | 7  |
| 284410 | 50 | 377427 | 377440 | 2 | 7  | 14 | AG   | 22 | 3  |
| 284416 | 50 | 394416 | 394448 | 3 | 11 | 33 | TCC  | 7  | 5  |
| 284418 | 50 | 397741 | 397758 | 2 | 9  | 18 | GA   | 19 | 5  |
| 284420 | 50 | 408399 | 408410 | 2 | 6  | 12 | GT   | 15 | 4  |
| 284436 | 50 | 438027 | 438047 | 3 | 7  | 21 | TGC  | 28 | 8  |
| 284437 | 50 | 439707 | 439718 | 2 | 6  | 12 | CA   | 13 | 8  |
| 284438 | 50 | 439720 | 439733 | 2 | 7  | 14 | AC   | 13 | 7  |
| 284441 | 50 | 442816 | 442845 | 3 | 10 | 30 | CAG  | 27 | 11 |
| 284450 | 50 | 461222 | 461235 | 2 | 7  | 14 | TG   | 24 | 4  |
| 284454 | 50 | 464874 | 464899 | 2 | 13 | 26 | AC   | 17 | 4  |
| 284463 | 50 | 492686 | 492697 | 2 | 6  | 12 | CA   | 17 | 6  |
| 284470 | 50 | 500522 | 500533 | 2 | 6  | 12 | CT   | 29 | 3  |
| 284482 | 50 | 520817 | 520844 | 4 | 7  | 28 | AATG | 25 | 4  |
| 284484 | 50 | 522545 | 522566 | 2 | 11 | 22 | AC   | 10 | 7  |
| 284488 | 50 | 537050 | 537077 | 2 | 14 | 28 | TG   | 17 | 9  |

|        |    |        |        |   |    |    |      |    |    |
|--------|----|--------|--------|---|----|----|------|----|----|
| 284490 | 50 | 541991 | 542020 | 2 | 15 | 30 | AC   | 17 | 5  |
| 284495 | 50 | 557056 | 557069 | 2 | 7  | 14 | AC   | 26 | 8  |
| 284497 | 50 | 563677 | 563700 | 4 | 6  | 24 | ATTT | 23 | 4  |
| 284502 | 50 | 572080 | 572106 | 3 | 9  | 27 | TCT  | 27 | 11 |
| 284509 | 50 | 606284 | 606295 | 2 | 6  | 12 | CT   | 26 | 3  |
| 284531 | 50 | 628525 | 628540 | 4 | 4  | 16 | ATTA | 21 | 3  |
| 284532 | 50 | 630006 | 630023 | 2 | 9  | 18 | AC   | 21 | 7  |
| 284533 | 50 | 630127 | 630144 | 2 | 9  | 18 | CA   | 27 | 4  |
| 284537 | 50 | 636109 | 636132 | 2 | 12 | 24 | AC   | 19 | 13 |
| 284543 | 50 | 643117 | 643136 | 4 | 5  | 20 | TGTT | 22 | 4  |
| 284551 | 50 | 653606 | 653629 | 2 | 12 | 24 | GT   | 12 | 7  |
| 284554 | 50 | 656504 | 656525 | 2 | 11 | 22 | CA   | 13 | 6  |
| 284555 | 50 | 658496 | 658509 | 2 | 7  | 14 | CT   | 24 | 4  |
| 284557 | 50 | 660928 | 660943 | 2 | 8  | 16 | CT   | 17 | 4  |
| 284559 | 50 | 661589 | 661602 | 2 | 7  | 14 | AC   | 15 | 3  |
| 284565 | 50 | 665522 | 665547 | 2 | 13 | 26 | AC   | 14 | 8  |
| 284566 | 50 | 666512 | 666533 | 2 | 11 | 22 | GT   | 24 | 7  |
| 284568 | 50 | 668397 | 668412 | 2 | 8  | 16 | GT   | 20 | 5  |
| 284569 | 50 | 670527 | 670541 | 3 | 5  | 15 | GGA  | 25 | 5  |
| 284570 | 50 | 670643 | 670680 | 2 | 19 | 38 | TG   | 13 | 10 |
| 284572 | 50 | 673262 | 673277 | 2 | 8  | 16 | CA   | 21 | 4  |
| 284576 | 50 | 678821 | 678848 | 2 | 14 | 28 | TG   | 10 | 4  |
| 284577 | 50 | 679664 | 679699 | 2 | 18 | 36 | AC   | 14 | 12 |
| 284578 | 50 | 679734 | 679759 | 2 | 13 | 26 | AC   | 17 | 8  |
| 284581 | 50 | 682040 | 682087 | 2 | 24 | 48 | CA   | 8  | 8  |
| 284582 | 50 | 683131 | 683150 | 4 | 5  | 20 | CATC | 25 | 4  |
| 284585 | 50 | 686416 | 686435 | 4 | 5  | 20 | AATA | 13 | 3  |
| 284592 | 50 | 695413 | 695432 | 2 | 10 | 20 | TG   | 25 | 4  |
| 284599 | 50 | 704807 | 704822 | 2 | 8  | 16 | GT   | 13 | 8  |
| 284600 | 50 | 705192 | 705215 | 2 | 12 | 24 | TC   | 12 | 8  |
| 284604 | 50 | 708818 | 708835 | 2 | 9  | 18 | GT   | 27 | 11 |
| 284607 | 50 | 722837 | 722856 | 2 | 10 | 20 | GT   | 22 | 5  |
| 284616 | 50 | 729562 | 729585 | 2 | 12 | 24 | CA   | 13 | 11 |
| 284617 | 50 | 730428 | 730443 | 2 | 8  | 16 | CT   | 22 | 5  |
| 284620 | 50 | 733878 | 733889 | 2 | 6  | 12 | GT   | 28 | 4  |
| 284624 | 50 | 746120 | 746135 | 2 | 8  | 16 | TG   | 17 | 3  |
| 284625 | 50 | 746164 | 746191 | 2 | 14 | 28 | TG   | 8  | 8  |
| 284627 | 50 | 749352 | 749366 | 3 | 5  | 15 | CAG  | 27 | 5  |
| 284630 | 50 | 755855 | 755866 | 2 | 6  | 12 | TG   | 29 | 3  |
| 284633 | 50 | 758618 | 758629 | 2 | 6  | 12 | TC   | 31 | 3  |
| 284635 | 50 | 764315 | 764326 | 2 | 6  | 12 | AC   | 32 | 4  |
| 284636 | 50 | 765623 | 765640 | 3 | 6  | 18 | CAC  | 27 | 3  |
| 284638 | 50 | 770155 | 770168 | 2 | 7  | 14 | TG   | 27 | 6  |
| 284639 | 50 | 770392 | 770405 | 2 | 7  | 14 | TG   | 15 | 15 |
| 284649 | 50 | 791417 | 791476 | 4 | 15 | 60 | AGAT | 10 | 10 |
| 284652 | 50 | 795086 | 795109 | 4 | 6  | 24 | ATTG | 27 | 8  |
| 284653 | 50 | 796188 | 796201 | 2 | 7  | 14 | GA   | 27 | 4  |
| 284655 | 50 | 799179 | 799206 | 2 | 14 | 28 | GT   | 7  | 6  |
| 284656 | 50 | 799245 | 799260 | 2 | 8  | 16 | GT   | 19 | 4  |
| 284658 | 50 | 806685 | 806710 | 2 | 13 | 26 | TG   | 13 | 11 |
| 284660 | 50 | 809573 | 809587 | 3 | 5  | 15 | CTG  | 32 | 3  |

|        |    |         |         |   |    |    |      |    |    |
|--------|----|---------|---------|---|----|----|------|----|----|
| 284663 | 50 | 811769  | 811782  | 2 | 7  | 14 | CA   | 14 | 5  |
| 284665 | 50 | 814814  | 814839  | 2 | 13 | 26 | GT   | 16 | 17 |
| 284671 | 50 | 827063  | 827077  | 3 | 5  | 15 | TGG  | 31 | 3  |
| 284673 | 50 | 829343  | 829354  | 2 | 6  | 12 | TC   | 17 | 4  |
| 284684 | 50 | 868940  | 868957  | 2 | 9  | 18 | TG   | 21 | 5  |
| 284692 | 50 | 879956  | 879993  | 2 | 19 | 38 | AC   | 11 | 9  |
| 284696 | 50 | 885071  | 885090  | 2 | 10 | 20 | GT   | 17 | 5  |
| 284698 | 50 | 889012  | 889033  | 2 | 11 | 22 | CA   | 14 | 5  |
| 284702 | 50 | 891749  | 891784  | 2 | 18 | 36 | TG   | 13 | 10 |
| 284703 | 50 | 893369  | 893386  | 2 | 9  | 18 | TG   | 22 | 5  |
| 284707 | 50 | 898545  | 898574  | 2 | 15 | 30 | AC   | 10 | 11 |
| 284708 | 50 | 899640  | 899651  | 2 | 6  | 12 | AC   | 30 | 3  |
| 284709 | 50 | 899787  | 899802  | 2 | 8  | 16 | CA   | 22 | 5  |
| 284714 | 50 | 901831  | 901842  | 2 | 6  | 12 | GA   | 30 | 3  |
| 284715 | 50 | 901935  | 901966  | 2 | 16 | 32 | CA   | 17 | 10 |
| 284729 | 50 | 940723  | 940754  | 2 | 16 | 32 | AC   | 12 | 5  |
| 284730 | 50 | 944687  | 944730  | 2 | 22 | 44 | CA   | 17 | 13 |
| 284732 | 50 | 945609  | 945654  | 2 | 23 | 46 | TG   | 10 | 6  |
| 284733 | 50 | 946193  | 946212  | 2 | 10 | 20 | AC   | 26 | 9  |
| 284735 | 50 | 948507  | 948522  | 2 | 8  | 16 | CA   | 18 | 8  |
| 284738 | 50 | 949523  | 949534  | 2 | 6  | 12 | CA   | 26 | 9  |
| 284739 | 50 | 951592  | 951605  | 2 | 7  | 14 | TA   | 20 | 6  |
| 284740 | 50 | 951718  | 951735  | 2 | 9  | 18 | GT   | 27 | 14 |
| 284745 | 50 | 954752  | 954767  | 4 | 4  | 16 | TTTA | 30 | 3  |
| 284747 | 50 | 956631  | 956650  | 2 | 10 | 20 | GT   | 18 | 12 |
| 284748 | 50 | 956925  | 956951  | 3 | 9  | 27 | GCA  | 29 | 14 |
| 284749 | 50 | 958108  | 958147  | 2 | 20 | 40 | CT   | 9  | 5  |
| 284755 | 50 | 970546  | 970559  | 2 | 7  | 14 | CA   | 25 | 7  |
| 284760 | 50 | 974255  | 974284  | 2 | 15 | 30 | GT   | 13 | 9  |
| 284762 | 50 | 977034  | 977047  | 2 | 7  | 14 | AT   | 19 | 7  |
| 284770 | 50 | 989251  | 989264  | 2 | 7  | 14 | GA   | 16 | 5  |
| 284771 | 50 | 989704  | 989729  | 2 | 13 | 26 | AC   | 14 | 6  |
| 284785 | 50 | 1019569 | 1019604 | 4 | 9  | 36 | TATC | 10 | 10 |
| 284786 | 50 | 1020224 | 1020241 | 3 | 6  | 18 | GCA  | 23 | 5  |
| 284787 | 50 | 1020541 | 1020580 | 2 | 20 | 40 | TG   | 8  | 8  |
| 284788 | 50 | 1023692 | 1023703 | 2 | 6  | 12 | TA   | 12 | 3  |
| 284799 | 50 | 1044357 | 1044380 | 4 | 6  | 24 | CAGT | 26 | 3  |
| 284801 | 50 | 1058295 | 1058314 | 2 | 10 | 20 | AC   | 10 | 8  |
| 284810 | 50 | 1088207 | 1088224 | 2 | 9  | 18 | GT   | 7  | 5  |
| 284812 | 50 | 1090483 | 1090497 | 3 | 5  | 15 | ATG  | 29 | 3  |
| 284813 | 50 | 1096216 | 1096243 | 2 | 14 | 28 | GT   | 16 | 5  |
| 284818 | 50 | 1109819 | 1109832 | 2 | 7  | 14 | CT   | 17 | 3  |
| 284819 | 50 | 1110146 | 1110171 | 2 | 13 | 26 | TG   | 7  | 8  |
| 284821 | 50 | 1110891 | 1110914 | 2 | 12 | 24 | TG   | 22 | 14 |
| 284824 | 50 | 1116875 | 1116886 | 2 | 6  | 12 | TG   | 22 | 5  |
| 284830 | 50 | 1131318 | 1131341 | 4 | 6  | 24 | AAAC | 26 | 4  |
| 284835 | 50 | 1135663 | 1135686 | 4 | 6  | 24 | ATCC | 20 | 8  |
| 284836 | 50 | 1135794 | 1135823 | 2 | 15 | 30 | GA   | 9  | 7  |
| 284837 | 50 | 1139487 | 1139532 | 2 | 23 | 46 | TG   | 9  | 9  |
| 284838 | 50 | 1140586 | 1140603 | 2 | 9  | 18 | GT   | 23 | 6  |
| 284840 | 50 | 1142902 | 1142935 | 2 | 17 | 34 | TG   | 9  | 7  |

|        |    |         |         |   |    |    |      |    |    |
|--------|----|---------|---------|---|----|----|------|----|----|
| 284845 | 50 | 1148065 | 1148078 | 2 | 7  | 14 | GA   | 16 | 4  |
| 284851 | 50 | 1157419 | 1157451 | 3 | 11 | 33 | GCT  | 29 | 8  |
| 284854 | 50 | 1162382 | 1162409 | 2 | 14 | 28 | CT   | 8  | 3  |
| 284861 | 50 | 1178158 | 1178181 | 3 | 8  | 24 | AGG  | 26 | 4  |
| 284869 | 50 | 1214196 | 1214211 | 2 | 8  | 16 | CA   | 15 | 8  |
| 284874 | 50 | 1237820 | 1237851 | 4 | 8  | 32 | ATAA | 8  | 5  |
| 284877 | 50 | 1244937 | 1244948 | 2 | 6  | 12 | GT   | 21 | 5  |
| 284879 | 50 | 1246131 | 1246146 | 2 | 8  | 16 | GT   | 10 | 3  |
| 284882 | 50 | 1255291 | 1255328 | 2 | 19 | 38 | CA   | 16 | 10 |
| 284884 | 50 | 1257178 | 1257189 | 2 | 6  | 12 | CG   | 9  | 9  |
| 284885 | 50 | 1257190 | 1257203 | 2 | 7  | 14 | CA   | 7  | 9  |
| 284888 | 50 | 1265566 | 1265577 | 2 | 6  | 12 | GA   | 24 | 6  |
| 284889 | 50 | 1266832 | 1266867 | 2 | 18 | 36 | TC   | 11 | 8  |
| 284891 | 50 | 1269775 | 1269792 | 2 | 9  | 18 | GT   | 20 | 12 |
| 284893 | 50 | 1273021 | 1273038 | 2 | 9  | 18 | TG   | 20 | 5  |
| 284897 | 50 | 1274661 | 1274672 | 2 | 6  | 12 | CA   | 11 | 7  |
| 284913 | 50 | 1302328 | 1302343 | 4 | 4  | 16 | TTAT | 17 | 4  |
| 284914 | 50 | 1305101 | 1305124 | 2 | 12 | 24 | AC   | 13 | 9  |
| 284920 | 50 | 1310878 | 1310895 | 2 | 9  | 18 | CA   | 20 | 9  |
| 284921 | 50 | 1312263 | 1312280 | 3 | 6  | 18 | GCA  | 24 | 9  |
| 284929 | 50 | 1349557 | 1349586 | 2 | 15 | 30 | CA   | 11 | 10 |
| 284937 | 50 | 1358880 | 1358895 | 2 | 8  | 16 | AC   | 9  | 3  |
| 284939 | 50 | 1362981 | 1362996 | 2 | 8  | 16 | CA   | 16 | 7  |
| 284940 | 50 | 1365508 | 1365523 | 2 | 8  | 16 | GT   | 26 | 3  |
| 284941 | 50 | 1366917 | 1366928 | 2 | 6  | 12 | CA   | 29 | 3  |
| 284945 | 50 | 1378946 | 1378963 | 2 | 9  | 18 | CA   | 26 | 5  |
| 284946 | 50 | 1382992 | 1383012 | 3 | 7  | 21 | CCT  | 25 | 9  |
| 284947 | 50 | 1383909 | 1383922 | 2 | 7  | 14 | AC   | 27 | 4  |
| 284948 | 50 | 1384111 | 1384154 | 2 | 22 | 44 | AC   | 11 | 9  |
| 284951 | 50 | 1389702 | 1389746 | 3 | 15 | 45 | AGA  | 22 | 16 |
| 284952 | 50 | 1389960 | 1389975 | 2 | 8  | 16 | TC   | 24 | 8  |
| 284953 | 50 | 1394213 | 1394228 | 4 | 4  | 16 | AACC | 26 | 3  |
| 284954 | 50 | 1394332 | 1394347 | 4 | 4  | 16 | CAAC | 26 | 6  |
| 284965 | 50 | 1426746 | 1426785 | 2 | 20 | 40 | GT   | 7  | 8  |
| 284970 | 50 | 1436868 | 1436897 | 2 | 15 | 30 | AG   | 11 | 11 |
| 284971 | 50 | 1438833 | 1438848 | 2 | 8  | 16 | AC   | 20 | 4  |
| 284973 | 50 | 1453543 | 1453572 | 2 | 15 | 30 | CA   | 10 | 6  |
| 284980 | 50 | 1481412 | 1481429 | 2 | 9  | 18 | AC   | 12 | 7  |
| 284981 | 50 | 1481431 | 1481444 | 2 | 7  | 14 | AC   | 14 | 9  |
| 284983 | 50 | 1482936 | 1482959 | 3 | 8  | 24 | TCT  | 7  | 5  |
| 284996 | 50 | 1498545 | 1498576 | 2 | 16 | 32 | AC   | 13 | 8  |
| 284998 | 50 | 1508729 | 1508760 | 2 | 16 | 32 | AC   | 6  | 4  |
| 284999 | 50 | 1509565 | 1509582 | 2 | 9  | 18 | AC   | 28 | 6  |
| 285001 | 50 | 1516214 | 1516233 | 2 | 10 | 20 | TG   | 13 | 10 |
| 285012 | 50 | 1535749 | 1535770 | 2 | 11 | 22 | AC   | 16 | 4  |
| 285015 | 50 | 1536444 | 1536463 | 2 | 10 | 20 | TG   | 24 | 10 |
| 285020 | 50 | 1547080 | 1547091 | 2 | 6  | 12 | GT   | 19 | 3  |
| 285025 | 50 | 1555434 | 1555451 | 2 | 9  | 18 | TG   | 17 | 19 |
| 285031 | 50 | 1574228 | 1574245 | 3 | 6  | 18 | GTG  | 27 | 4  |
| 285035 | 50 | 1579120 | 1579141 | 2 | 11 | 22 | CA   | 12 | 5  |
| 285038 | 50 | 1588560 | 1588589 | 2 | 15 | 30 | AC   | 8  | 11 |

|        |    |         |         |   |    |    |      |    |    |
|--------|----|---------|---------|---|----|----|------|----|----|
| 285047 | 50 | 1632787 | 1632818 | 4 | 8  | 32 | TTTC | 25 | 10 |
| 285059 | 50 | 1674707 | 1674738 | 2 | 16 | 32 | GT   | 9  | 6  |
| 285062 | 50 | 1675894 | 1675917 | 3 | 8  | 24 | AGG  | 9  | 5  |
| 285068 | 50 | 1689779 | 1689794 | 4 | 4  | 16 | AAGA | 12 | 5  |
| 285069 | 50 | 1694756 | 1694773 | 2 | 9  | 18 | GT   | 17 | 6  |
| 285070 | 50 | 1694774 | 1694789 | 2 | 8  | 16 | GA   | 17 | 7  |
| 285071 | 50 | 1696177 | 1696210 | 2 | 17 | 34 | GT   | 15 | 7  |
| 285081 | 50 | 1731144 | 1731167 | 2 | 12 | 24 | AC   | 15 | 9  |
| 285094 | 50 | 1779753 | 1779780 | 2 | 14 | 28 | CA   | 15 | 10 |
| 285095 | 50 | 1782759 | 1782780 | 2 | 11 | 22 | AC   | 21 | 4  |
| 285100 | 50 | 1800443 | 1800462 | 2 | 10 | 20 | CT   | 21 | 4  |
| 285106 | 50 | 1825944 | 1825959 | 2 | 8  | 16 | AC   | 18 | 3  |
| 285107 | 50 | 1828391 | 1828402 | 2 | 6  | 12 | AC   | 25 | 4  |
| 285110 | 50 | 1834626 | 1834653 | 2 | 14 | 28 | CA   | 10 | 6  |
| 285112 | 50 | 1836158 | 1836178 | 3 | 7  | 21 | GCA  | 26 | 7  |
| 285119 | 50 | 1842593 | 1842607 | 3 | 5  | 15 | CCT  | 19 | 4  |
| 285128 | 50 | 1890315 | 1890342 | 4 | 7  | 28 | ATTC | 16 | 7  |
| 285137 | 50 | 1903933 | 1903946 | 2 | 7  | 14 | TG   | 6  | 5  |
| 285141 | 50 | 1911057 | 1911072 | 2 | 8  | 16 | CT   | 28 | 4  |
| 285145 | 50 | 1930110 | 1930137 | 2 | 14 | 28 | GT   | 20 | 6  |
| 285146 | 50 | 1933106 | 1933119 | 2 | 7  | 14 | CT   | 12 | 3  |
| 285147 | 50 | 1933120 | 1933131 | 2 | 6  | 12 | CA   | 13 | 3  |
| 285150 | 50 | 1936993 | 1937012 | 2 | 10 | 20 | CA   | 13 | 11 |
| 285151 | 50 | 1938208 | 1938221 | 2 | 7  | 14 | GT   | 32 | 3  |
| 285153 | 50 | 1946069 | 1946094 | 2 | 13 | 26 | GA   | 14 | 11 |
| 285158 | 50 | 1957613 | 1957636 | 2 | 12 | 24 | AC   | 18 | 7  |
| 285163 | 50 | 1965007 | 1965034 | 2 | 14 | 28 | CA   | 10 | 8  |
| 285168 | 50 | 1989342 | 1989357 | 4 | 4  | 16 | ATTT | 16 | 3  |
| 285169 | 50 | 1992235 | 1992258 | 3 | 8  | 24 | ATG  | 16 | 6  |
| 285174 | 50 | 1995458 | 1995475 | 2 | 9  | 18 | TG   | 21 | 7  |
| 285180 | 50 | 2000170 | 2000190 | 3 | 7  | 21 | GGA  | 16 | 6  |
| 285183 | 50 | 2010137 | 2010150 | 2 | 7  | 14 | GT   | 28 | 3  |
| 285185 | 50 | 2011726 | 2011745 | 2 | 10 | 20 | CA   | 13 | 4  |
| 285188 | 50 | 2018363 | 2018376 | 2 | 7  | 14 | AC   | 24 | 5  |
| 285193 | 50 | 2029197 | 2029216 | 2 | 10 | 20 | AC   | 14 | 4  |
| 285194 | 50 | 2033148 | 2033161 | 2 | 7  | 14 | AC   | 28 | 3  |
| 285199 | 50 | 2035844 | 2035877 | 2 | 17 | 34 | TG   | 10 | 10 |
| 285202 | 50 | 2036719 | 2036739 | 3 | 7  | 21 | TGC  | 10 | 3  |
| 285205 | 50 | 2038912 | 2038931 | 2 | 10 | 20 | AT   | 7  | 7  |
| 285213 | 50 | 2045845 | 2045856 | 2 | 6  | 12 | AC   | 26 | 4  |
| 285217 | 50 | 2048593 | 2048604 | 2 | 6  | 12 | CA   | 16 | 4  |
| 285219 | 50 | 2052020 | 2052035 | 2 | 8  | 16 | TG   | 12 | 4  |
| 285221 | 50 | 2056235 | 2056276 | 2 | 21 | 42 | TG   | 14 | 9  |
| 285224 | 50 | 2062045 | 2062059 | 3 | 5  | 15 | CTC  | 22 | 4  |
| 285226 | 50 | 2063300 | 2063321 | 2 | 11 | 22 | AC   | 23 | 12 |
| 285228 | 50 | 2064331 | 2064352 | 2 | 11 | 22 | TG   | 22 | 4  |
| 285230 | 50 | 2067925 | 2067972 | 2 | 24 | 48 | TG   | 7  | 8  |
| 285232 | 50 | 2070412 | 2070437 | 2 | 13 | 26 | CA   | 17 | 8  |
| 285234 | 50 | 2071776 | 2071805 | 3 | 10 | 30 | GAG  | 22 | 11 |
| 285235 | 50 | 2072137 | 2072156 | 2 | 10 | 20 | CA   | 19 | 9  |
| 285239 | 50 | 2079248 | 2079263 | 2 | 8  | 16 | TG   | 18 | 3  |

|        |    |         |         |   |    |    |      |    |    |
|--------|----|---------|---------|---|----|----|------|----|----|
| 285252 | 50 | 2100221 | 2100236 | 2 | 8  | 16 | TG   | 11 | 3  |
| 285255 | 50 | 2100556 | 2100587 | 2 | 16 | 32 | CA   | 8  | 7  |
| 285267 | 50 | 2115794 | 2115807 | 2 | 7  | 14 | CA   | 23 | 4  |
| 285272 | 50 | 2117948 | 2117961 | 2 | 7  | 14 | CA   | 17 | 3  |
| 285278 | 50 | 2128850 | 2128877 | 2 | 14 | 28 | AC   | 18 | 7  |
| 285279 | 50 | 2130126 | 2130145 | 2 | 10 | 20 | CA   | 23 | 5  |
| 285280 | 50 | 2134688 | 2134699 | 2 | 6  | 12 | CA   | 21 | 4  |
| 285288 | 50 | 2141445 | 2141462 | 3 | 6  | 18 | TCA  | 17 | 3  |
| 285290 | 50 | 2144929 | 2144956 | 2 | 14 | 28 | TC   | 6  | 6  |
| 285296 | 50 | 2147971 | 2148038 | 4 | 17 | 68 | GATT | 22 | 10 |
| 285308 | 50 | 2193681 | 2193692 | 2 | 6  | 12 | TG   | 18 | 3  |
| 285318 | 50 | 2218826 | 2218840 | 3 | 5  | 15 | CTT  | 15 | 3  |
| 285320 | 50 | 2220385 | 2220408 | 2 | 12 | 24 | CA   | 16 | 7  |
| 285321 | 50 | 2221175 | 2221208 | 2 | 17 | 34 | TG   | 19 | 10 |
| 285323 | 50 | 2222620 | 2222651 | 2 | 16 | 32 | AC   | 13 | 10 |
| 285331 | 50 | 2241576 | 2241603 | 4 | 7  | 28 | TCAG | 7  | 3  |
| 285332 | 50 | 2242293 | 2242325 | 3 | 11 | 33 | CCT  | 19 | 11 |
| 285333 | 50 | 2243871 | 2243892 | 2 | 11 | 22 | TG   | 29 | 4  |
| 285337 | 50 | 2246265 | 2246276 | 2 | 6  | 12 | AT   | 21 | 4  |
| 285346 | 50 | 2259365 | 2259382 | 2 | 9  | 18 | GT   | 19 | 12 |
| 285349 | 50 | 2269152 | 2269169 | 2 | 9  | 18 | CA   | 18 | 9  |
| 285353 | 50 | 2280229 | 2280242 | 2 | 7  | 14 | CA   | 15 | 6  |
| 285357 | 50 | 2280770 | 2280791 | 2 | 11 | 22 | AG   | 14 | 4  |
| 285362 | 50 | 2292447 | 2292462 | 2 | 8  | 16 | TG   | 12 | 6  |
| 285366 | 50 | 2293560 | 2293573 | 2 | 7  | 14 | CA   | 21 | 10 |
| 285367 | 50 | 2293728 | 2293757 | 2 | 15 | 30 | AC   | 14 | 9  |
| 285368 | 50 | 2293984 | 2293995 | 2 | 6  | 12 | TC   | 19 | 9  |
| 285371 | 50 | 2298480 | 2298494 | 3 | 5  | 15 | CCT  | 28 | 4  |
| 285373 | 50 | 2299368 | 2299389 | 2 | 11 | 22 | TC   | 20 | 7  |
| 285374 | 50 | 2300069 | 2300102 | 2 | 17 | 34 | GT   | 11 | 17 |
| 285376 | 50 | 2300408 | 2300425 | 2 | 9  | 18 | TG   | 23 | 4  |
| 285377 | 50 | 2300427 | 2300438 | 2 | 6  | 12 | GT   | 22 | 5  |
| 285378 | 50 | 2302419 | 2302448 | 2 | 15 | 30 | TG   | 17 | 8  |
| 285391 | 50 | 2325455 | 2325494 | 2 | 20 | 40 | CA   | 21 | 9  |
| 285406 | 50 | 2357319 | 2357334 | 2 | 8  | 16 | AG   | 27 | 4  |
| 285414 | 50 | 2380943 | 2380960 | 2 | 9  | 18 | TG   | 8  | 3  |
| 285417 | 50 | 2387465 | 2387482 | 2 | 9  | 18 | TG   | 28 | 7  |
| 285418 | 50 | 2387817 | 2387834 | 3 | 6  | 18 | CAG  | 25 | 5  |
| 285422 | 50 | 2392858 | 2392878 | 3 | 7  | 21 | CCT  | 23 | 3  |
| 285425 | 50 | 2394116 | 2394129 | 2 | 7  | 14 | AC   | 30 | 3  |
| 285427 | 50 | 2396779 | 2396802 | 2 | 12 | 24 | CA   | 25 | 9  |
| 285429 | 50 | 2405789 | 2405808 | 2 | 10 | 20 | GT   | 12 | 13 |
| 285432 | 50 | 2409828 | 2409847 | 2 | 10 | 20 | GA   | 28 | 5  |
| 285434 | 50 | 2412437 | 2412456 | 2 | 10 | 20 | AC   | 22 | 7  |
| 285436 | 50 | 2414776 | 2414805 | 2 | 15 | 30 | AC   | 8  | 12 |
| 285437 | 50 | 2416324 | 2416347 | 3 | 8  | 24 | AAG  | 27 | 8  |
| 285438 | 50 | 2418022 | 2418035 | 2 | 7  | 14 | CA   | 25 | 5  |
| 285439 | 50 | 2419665 | 2419678 | 2 | 7  | 14 | TG   | 21 | 9  |
| 285445 | 50 | 2437481 | 2437498 | 2 | 9  | 18 | GT   | 20 | 7  |
| 285449 | 50 | 2447521 | 2447532 | 2 | 6  | 12 | TG   | 11 | 5  |
| 285450 | 50 | 2447535 | 2447548 | 2 | 7  | 14 | TG   | 17 | 8  |



|        |    |         |         |   |    |    |      |    |    |
|--------|----|---------|---------|---|----|----|------|----|----|
| 285452 | 50 | 2449629 | 2449643 | 3 | 5  | 15 | GGT  | 6  | 4  |
| 285453 | 50 | 2449925 | 2449956 | 2 | 16 | 32 | GT   | 7  | 9  |
| 285454 | 50 | 2450102 | 2450113 | 2 | 6  | 12 | TG   | 28 | 6  |
| 285455 | 50 | 2451702 | 2451725 | 3 | 8  | 24 | GAG  | 20 | 6  |
| 285457 | 50 | 2453590 | 2453610 | 3 | 7  | 21 | GAG  | 16 | 5  |
| 285462 | 50 | 2460552 | 2460573 | 2 | 11 | 22 | CA   | 20 | 5  |
| 285467 | 50 | 2465327 | 2465350 | 2 | 12 | 24 | TC   | 16 | 4  |
| 285468 | 50 | 2466454 | 2466469 | 2 | 8  | 16 | CA   | 10 | 3  |
| 285477 | 50 | 2474948 | 2474971 | 2 | 12 | 24 | GT   | 16 | 7  |
| 285482 | 50 | 2478381 | 2478410 | 2 | 15 | 30 | CA   | 7  | 6  |
| 285490 | 50 | 2498110 | 2498121 | 2 | 6  | 12 | AG   | 20 | 8  |
| 285491 | 50 | 2498123 | 2498140 | 2 | 9  | 18 | GA   | 12 | 4  |
| 285493 | 50 | 2499474 | 2499521 | 2 | 24 | 48 | CA   | 9  | 11 |
| 285512 | 50 | 2521406 | 2521439 | 2 | 17 | 34 | TC   | 23 | 9  |
| 285513 | 50 | 2521500 | 2521525 | 2 | 13 | 26 | CA   | 21 | 4  |
| 285518 | 50 | 2532432 | 2532443 | 2 | 6  | 12 | AT   | 14 | 3  |
| 285522 | 50 | 2537764 | 2537791 | 2 | 14 | 28 | TG   | 16 | 11 |
| 285527 | 50 | 2547902 | 2547913 | 2 | 6  | 12 | TG   | 24 | 3  |
| 285532 | 50 | 2549925 | 2549940 | 2 | 8  | 16 | TG   | 25 | 3  |
| 285542 | 50 | 2563650 | 2563661 | 2 | 6  | 12 | CA   | 18 | 3  |
| 285543 | 50 | 2564565 | 2564580 | 2 | 8  | 16 | AC   | 14 | 5  |
| 285544 | 50 | 2565158 | 2565177 | 2 | 10 | 20 | GT   | 19 | 6  |
| 285551 | 50 | 2575853 | 2575867 | 3 | 5  | 15 | TGC  | 32 | 4  |
| 285553 | 50 | 2577579 | 2577594 | 4 | 4  | 16 | TGTT | 31 | 3  |
| 285568 | 50 | 2616207 | 2616226 | 2 | 10 | 20 | TG   | 21 | 6  |
| 285573 | 50 | 2622764 | 2622805 | 2 | 21 | 42 | AG   | 21 | 17 |
| 285574 | 50 | 2623431 | 2623460 | 2 | 15 | 30 | GT   | 11 | 15 |
| 285576 | 50 | 2625710 | 2625737 | 2 | 14 | 28 | GT   | 7  | 8  |
| 285577 | 50 | 2625920 | 2625957 | 2 | 19 | 38 | AC   | 7  | 11 |
| 285578 | 50 | 2626096 | 2626111 | 4 | 4  | 16 | ATTT | 24 | 9  |
| 285580 | 50 | 2628135 | 2628152 | 2 | 9  | 18 | TG   | 17 | 5  |
| 285583 | 50 | 2633178 | 2633191 | 2 | 7  | 14 | GT   | 10 | 3  |
| 285587 | 50 | 2638612 | 2638625 | 2 | 7  | 14 | AC   | 20 | 4  |
| 285592 | 50 | 2649864 | 2649879 | 2 | 8  | 16 | AC   | 24 | 8  |
| 285615 | 50 | 2695743 | 2695756 | 2 | 7  | 14 | AC   | 16 | 5  |
| 285622 | 50 | 2703214 | 2703249 | 2 | 18 | 36 | TG   | 15 | 7  |
| 285625 | 50 | 2704290 | 2704311 | 2 | 11 | 22 | AC   | 9  | 9  |
| 285631 | 50 | 2714976 | 2714995 | 2 | 10 | 20 | AC   | 19 | 7  |
| 285655 | 50 | 2750811 | 2750825 | 3 | 5  | 15 | CCA  | 10 | 8  |
| 285659 | 50 | 2768890 | 2768913 | 2 | 12 | 24 | AC   | 21 | 7  |
| 285662 | 50 | 2769847 | 2769866 | 2 | 10 | 20 | TC   | 13 | 5  |
| 285668 | 50 | 2776527 | 2776538 | 2 | 6  | 12 | AC   | 12 | 11 |
| 285676 | 50 | 2790031 | 2790050 | 2 | 10 | 20 | AC   | 25 | 7  |
| 285681 | 50 | 2795546 | 2795559 | 2 | 7  | 14 | AC   | 16 | 10 |
| 285685 | 50 | 2818693 | 2818718 | 2 | 13 | 26 | TC   | 14 | 7  |
| 285686 | 50 | 2820034 | 2820057 | 4 | 6  | 24 | TTGT | 27 | 3  |
| 285691 | 50 | 2832323 | 2832346 | 2 | 12 | 24 | TC   | 11 | 3  |
| 285694 | 50 | 2835603 | 2835638 | 2 | 18 | 36 | GT   | 9  | 9  |
| 285695 | 50 | 2842678 | 2842689 | 2 | 6  | 12 | CA   | 21 | 8  |
| 285705 | 50 | 2854355 | 2854388 | 2 | 17 | 34 | GA   | 11 | 7  |
| 285711 | 50 | 2883134 | 2883148 | 3 | 5  | 15 | CCT  | 22 | 3  |

|        |    |         |         |   |    |    |      |    |    |
|--------|----|---------|---------|---|----|----|------|----|----|
| 285716 | 50 | 2895541 | 2895554 | 2 | 7  | 14 | TG   | 27 | 4  |
| 285724 | 50 | 2943496 | 2943509 | 2 | 7  | 14 | TG   | 22 | 3  |
| 285727 | 50 | 2948306 | 2948323 | 2 | 9  | 18 | TG   | 8  | 8  |
| 285731 | 50 | 2952841 | 2952866 | 2 | 13 | 26 | GT   | 8  | 11 |
| 285742 | 50 | 2977386 | 2977407 | 2 | 11 | 22 | TG   | 18 | 9  |
| 285743 | 50 | 2977532 | 2977545 | 2 | 7  | 14 | CA   | 17 | 4  |
| 285746 | 50 | 2984991 | 2985012 | 2 | 11 | 22 | GT   | 19 | 8  |
| 285765 | 50 | 3035832 | 3035855 | 2 | 12 | 24 | TC   | 26 | 4  |
| 285771 | 50 | 3056277 | 3056294 | 3 | 6  | 18 | CTC  | 27 | 4  |
| 285773 | 50 | 3058348 | 3058363 | 4 | 4  | 16 | GATG | 28 | 3  |
| 285782 | 50 | 3093859 | 3093878 | 2 | 10 | 20 | TG   | 28 | 4  |
| 285783 | 50 | 3099202 | 3099235 | 2 | 17 | 34 | TG   | 19 | 7  |
| 285785 | 50 | 3117410 | 3117427 | 2 | 9  | 18 | GT   | 29 | 5  |
| 285786 | 50 | 3121404 | 3121415 | 2 | 6  | 12 | CA   | 11 | 10 |
| 285787 | 50 | 3121417 | 3121430 | 2 | 7  | 14 | AC   | 9  | 8  |
| 285788 | 50 | 3124137 | 3124164 | 2 | 14 | 28 | AC   | 10 | 7  |
| 285792 | 50 | 3133684 | 3133695 | 2 | 6  | 12 | CA   | 9  | 5  |
| 285793 | 50 | 3133707 | 3133720 | 2 | 7  | 14 | AC   | 11 | 3  |
| 285797 | 50 | 3141451 | 3141462 | 2 | 6  | 12 | CA   | 24 | 6  |
| 285798 | 50 | 3141465 | 3141476 | 2 | 6  | 12 | CA   | 24 | 5  |
| 285809 | 50 | 3157927 | 3157956 | 2 | 15 | 30 | CA   | 14 | 11 |
| 285811 | 50 | 3169475 | 3169502 | 2 | 14 | 28 | TG   | 13 | 8  |
| 285812 | 50 | 3170499 | 3170513 | 3 | 5  | 15 | CAG  | 6  | 4  |
| 285813 | 50 | 3170518 | 3170535 | 3 | 6  | 18 | AGC  | 7  | 4  |
| 285814 | 50 | 3171005 | 3171020 | 2 | 8  | 16 | TC   | 16 | 4  |
| 285815 | 50 | 3171154 | 3171193 | 2 | 20 | 40 | AC   | 11 | 12 |
| 285816 | 50 | 3176213 | 3176242 | 2 | 15 | 30 | TG   | 18 | 14 |
| 285820 | 50 | 3179803 | 3179816 | 2 | 7  | 14 | CA   | 31 | 4  |
| 285825 | 50 | 3184491 | 3184522 | 2 | 16 | 32 | TG   | 16 | 25 |
| 285832 | 50 | 3185125 | 3185145 | 3 | 7  | 21 | TTA  | 12 | 9  |
| 285834 | 50 | 3185340 | 3185354 | 3 | 5  | 15 | AGC  | 19 | 4  |
| 285850 | 50 | 3212642 | 3212655 | 2 | 7  | 14 | TA   | 22 | 3  |
| 285853 | 50 | 3222607 | 3222622 | 2 | 8  | 16 | TG   | 18 | 10 |
| 285871 | 50 | 3259954 | 3259983 | 3 | 10 | 30 | CAA  | 11 | 7  |
| 285872 | 50 | 3266557 | 3266584 | 2 | 14 | 28 | CA   | 6  | 4  |
| 285875 | 50 | 3271075 | 3271096 | 2 | 11 | 22 | GT   | 25 | 5  |
| 285878 | 50 | 3273586 | 3273609 | 2 | 12 | 24 | CA   | 15 | 9  |
| 285879 | 50 | 3281460 | 3281483 | 3 | 8  | 24 | ACT  | 28 | 8  |
| 285881 | 50 | 3289049 | 3289066 | 2 | 9  | 18 | CT   | 25 | 8  |
| 285884 | 50 | 3292884 | 3292916 | 3 | 11 | 33 | GCA  | 25 | 4  |
| 285888 | 50 | 3299040 | 3299067 | 2 | 14 | 28 | TG   | 20 | 10 |
| 285893 | 50 | 3312952 | 3312975 | 2 | 12 | 24 | CA   | 19 | 8  |
| 285904 | 50 | 3342470 | 3342491 | 2 | 11 | 22 | TG   | 14 | 12 |
| 285905 | 50 | 3344689 | 3344712 | 2 | 12 | 24 | CA   | 18 | 11 |
| 285911 | 50 | 3359794 | 3359805 | 2 | 6  | 12 | CA   | 29 | 5  |
| 285912 | 50 | 3361719 | 3361738 | 2 | 10 | 20 | AC   | 23 | 6  |
| 285914 | 50 | 3365908 | 3365931 | 3 | 8  | 24 | AGT  | 28 | 6  |
| 285917 | 50 | 3371872 | 3371892 | 3 | 7  | 21 | CAG  | 26 | 3  |
| 285923 | 50 | 3383873 | 3383888 | 2 | 8  | 16 | CA   | 22 | 3  |
| 285926 | 50 | 3396314 | 3396340 | 3 | 9  | 27 | CTC  | 25 | 3  |
| 285929 | 50 | 3401612 | 3401623 | 2 | 6  | 12 | AC   | 26 | 5  |

|        |    |         |         |   |    |    |      |    |    |
|--------|----|---------|---------|---|----|----|------|----|----|
| 285931 | 50 | 3409026 | 3409045 | 2 | 10 | 20 | CA   | 21 | 8  |
| 285932 | 50 | 3412000 | 3412013 | 2 | 7  | 14 | CA   | 30 | 3  |
| 285933 | 50 | 3412119 | 3412148 | 2 | 15 | 30 | CA   | 12 | 8  |
| 285934 | 50 | 3412332 | 3412357 | 2 | 13 | 26 | GT   | 8  | 5  |
| 285941 | 50 | 3427838 | 3427849 | 2 | 6  | 12 | AG   | 10 | 4  |
| 285942 | 50 | 3430947 | 3430960 | 2 | 7  | 14 | TG   | 17 | 3  |
| 285969 | 50 | 3489041 | 3489060 | 2 | 10 | 20 | TG   | 8  | 11 |
| 285975 | 50 | 3530632 | 3530649 | 2 | 9  | 18 | AC   | 18 | 3  |
| 285979 | 50 | 3538151 | 3538180 | 3 | 10 | 30 | AGC  | 22 | 6  |
| 285983 | 50 | 3543793 | 3543812 | 2 | 10 | 20 | GT   | 13 | 13 |
| 285984 | 50 | 3545989 | 3546008 | 2 | 10 | 20 | CT   | 24 | 4  |
| 285986 | 50 | 3548011 | 3548040 | 2 | 15 | 30 | AC   | 17 | 15 |
| 285989 | 50 | 3562499 | 3562514 | 2 | 8  | 16 | CA   | 27 | 4  |
| 285993 | 50 | 3575605 | 3575620 | 4 | 4  | 16 | TTTG | 20 | 3  |
| 285995 | 50 | 3577114 | 3577127 | 2 | 7  | 14 | AC   | 19 | 3  |
| 285998 | 50 | 3590134 | 3590145 | 2 | 6  | 12 | TA   | 27 | 3  |
| 285999 | 50 | 3590623 | 3590646 | 4 | 6  | 24 | AAAG | 24 | 5  |
| 286001 | 50 | 3591864 | 3591893 | 2 | 15 | 30 | GT   | 8  | 7  |
| 286002 | 50 | 3592173 | 3592192 | 4 | 5  | 20 | TATC | 21 | 3  |
| 286003 | 50 | 3592550 | 3592565 | 2 | 8  | 16 | CA   | 7  | 3  |
| 286005 | 50 | 3593131 | 3593160 | 2 | 15 | 30 | TG   | 16 | 8  |
| 286015 | 50 | 3632108 | 3632149 | 3 | 14 | 42 | GAG  | 16 | 10 |
| 286024 | 50 | 3637436 | 3637455 | 2 | 10 | 20 | GT   | 21 | 7  |
| 286025 | 50 | 3639786 | 3639805 | 2 | 10 | 20 | TC   | 22 | 19 |
| 286031 | 50 | 3650756 | 3650769 | 2 | 7  | 14 | AC   | 14 | 3  |
| 286032 | 50 | 3650986 | 3651001 | 2 | 8  | 16 | AG   | 22 | 4  |
| 286046 | 50 | 3681990 | 3682007 | 2 | 9  | 18 | AC   | 27 | 7  |
| 286054 | 51 | 24454   | 24481   | 2 | 14 | 28 | CA   | 12 | 11 |
| 286064 | 51 | 39377   | 39396   | 2 | 10 | 20 | CA   | 15 | 8  |
| 286066 | 51 | 39777   | 39798   | 2 | 11 | 22 | CA   | 16 | 11 |
| 286067 | 51 | 40083   | 40100   | 2 | 9  | 18 | GT   | 22 | 4  |
| 286072 | 51 | 52646   | 52669   | 3 | 8  | 24 | CCT  | 26 | 5  |
| 286084 | 51 | 60166   | 60177   | 2 | 6  | 12 | AC   | 15 | 5  |
| 286091 | 51 | 65101   | 65128   | 2 | 14 | 28 | AC   | 13 | 8  |
| 286093 | 51 | 71010   | 71027   | 2 | 9  | 18 | AC   | 27 | 3  |
| 286095 | 51 | 72515   | 72532   | 3 | 6  | 18 | CAG  | 32 | 5  |
| 286096 | 51 | 72833   | 72856   | 4 | 6  | 24 | TCAC | 20 | 6  |
| 286099 | 51 | 74243   | 74266   | 3 | 8  | 24 | ATA  | 13 | 3  |
| 286103 | 51 | 84247   | 84270   | 2 | 12 | 24 | TC   | 26 | 7  |
| 286104 | 51 | 84913   | 84930   | 2 | 9  | 18 | AC   | 17 | 10 |
| 286105 | 51 | 85201   | 85224   | 2 | 12 | 24 | AC   | 13 | 9  |
| 286106 | 51 | 85272   | 85295   | 2 | 12 | 24 | AG   | 13 | 4  |
| 286107 | 51 | 85585   | 85602   | 3 | 6  | 18 | TGT  | 27 | 4  |
| 286110 | 51 | 91085   | 91100   | 2 | 8  | 16 | GT   | 12 | 6  |
| 286114 | 51 | 101214  | 101237  | 4 | 6  | 24 | AGGA | 21 | 3  |
| 286118 | 51 | 103261  | 103290  | 2 | 15 | 30 | TG   | 11 | 4  |
| 286119 | 51 | 105034  | 105063  | 2 | 15 | 30 | CA   | 18 | 10 |
| 286126 | 51 | 143359  | 143382  | 3 | 8  | 24 | TCA  | 8  | 5  |
| 286128 | 51 | 143523  | 143558  | 3 | 12 | 36 | TAT  | 12 | 4  |
| 286134 | 51 | 176017  | 176043  | 3 | 9  | 27 | TCC  | 19 | 5  |
| 286135 | 51 | 183532  | 183545  | 2 | 7  | 14 | TG   | 27 | 3  |

|        |    |        |        |   |    |    |      |    |    |
|--------|----|--------|--------|---|----|----|------|----|----|
| 286141 | 51 | 205386 | 205418 | 3 | 11 | 33 | AAC  | 26 | 13 |
| 286147 | 51 | 221132 | 221167 | 2 | 18 | 36 | GA   | 11 | 10 |
| 286149 | 51 | 226241 | 226254 | 2 | 7  | 14 | AC   | 23 | 11 |
| 286150 | 51 | 233442 | 233457 | 4 | 4  | 16 | TTTA | 32 | 3  |
| 286151 | 51 | 234274 | 234288 | 3 | 5  | 15 | TTG  | 31 | 3  |
| 286160 | 51 | 246856 | 246887 | 2 | 16 | 32 | GT   | 13 | 8  |
| 286161 | 51 | 253558 | 253575 | 3 | 6  | 18 | AAC  | 21 | 4  |
| 286169 | 51 | 267300 | 267311 | 2 | 6  | 12 | GT   | 27 | 5  |
| 286170 | 51 | 268227 | 268258 | 4 | 8  | 32 | AGAA | 16 | 8  |
| 286171 | 51 | 268995 | 269008 | 2 | 7  | 14 | GT   | 26 | 10 |
| 286174 | 51 | 273624 | 273637 | 2 | 7  | 14 | TG   | 29 | 3  |
| 286179 | 51 | 281456 | 281477 | 2 | 11 | 22 | CT   | 19 | 4  |
| 286183 | 51 | 285895 | 285912 | 2 | 9  | 18 | GT   | 25 | 4  |
| 286187 | 51 | 296646 | 296663 | 2 | 9  | 18 | AT   | 18 | 4  |
| 286194 | 51 | 310243 | 310264 | 2 | 11 | 22 | CA   | 16 | 8  |
| 286196 | 51 | 322411 | 322422 | 2 | 6  | 12 | AC   | 29 | 3  |
| 286198 | 51 | 330465 | 330478 | 2 | 7  | 14 | GT   | 30 | 5  |
| 286199 | 51 | 342603 | 342620 | 2 | 9  | 18 | CA   | 24 | 3  |
| 286200 | 51 | 343815 | 343844 | 2 | 15 | 30 | CA   | 6  | 3  |
| 286215 | 51 | 372349 | 372364 | 2 | 8  | 16 | AT   | 28 | 10 |
| 286220 | 51 | 378645 | 378658 | 2 | 7  | 14 | AG   | 39 | 3  |
| 286221 | 51 | 382972 | 382991 | 2 | 10 | 20 | CA   | 21 | 3  |
| 286225 | 51 | 385476 | 385507 | 2 | 16 | 32 | AC   | 15 | 11 |
| 286231 | 51 | 391436 | 391457 | 2 | 11 | 22 | AG   | 21 | 3  |
| 286233 | 51 | 392193 | 392210 | 2 | 9  | 18 | TC   | 13 | 3  |
| 286236 | 51 | 395938 | 395959 | 2 | 11 | 22 | CA   | 19 | 8  |
| 286244 | 51 | 406412 | 406431 | 4 | 5  | 20 | CTAT | 27 | 4  |
| 286246 | 51 | 415484 | 415545 | 2 | 31 | 62 | TG   | 9  | 11 |
| 286253 | 51 | 431929 | 431950 | 2 | 11 | 22 | CA   | 13 | 6  |
| 286259 | 51 | 441033 | 441048 | 2 | 8  | 16 | CT   | 21 | 4  |
| 286261 | 51 | 442137 | 442186 | 2 | 25 | 50 | TG   | 11 | 12 |
| 286266 | 51 | 457051 | 457068 | 2 | 9  | 18 | CT   | 7  | 3  |
| 286271 | 51 | 469860 | 469877 | 3 | 6  | 18 | TTG  | 11 | 9  |
| 286279 | 51 | 496334 | 496351 | 2 | 9  | 18 | AC   | 17 | 13 |
| 286280 | 51 | 496673 | 496692 | 2 | 10 | 20 | CA   | 16 | 5  |
| 286281 | 51 | 497915 | 497928 | 2 | 7  | 14 | AC   | 24 | 4  |
| 286288 | 51 | 513209 | 513220 | 2 | 6  | 12 | CA   | 31 | 3  |
| 286295 | 51 | 524616 | 524627 | 2 | 6  | 12 | AT   | 15 | 4  |
| 286310 | 51 | 540651 | 540665 | 3 | 5  | 15 | CCT  | 25 | 3  |
| 286313 | 51 | 547365 | 547390 | 2 | 13 | 26 | CA   | 8  | 5  |
| 286317 | 51 | 554765 | 554779 | 3 | 5  | 15 | CAG  | 25 | 3  |
| 286325 | 51 | 568062 | 568103 | 3 | 14 | 42 | GAG  | 10 | 7  |
| 286328 | 51 | 576665 | 576682 | 2 | 9  | 18 | AC   | 20 | 7  |
| 286329 | 51 | 577703 | 577720 | 2 | 9  | 18 | GT   | 20 | 8  |
| 286330 | 51 | 578549 | 578562 | 2 | 7  | 14 | AG   | 23 | 9  |
| 286332 | 51 | 582858 | 582883 | 2 | 13 | 26 | CA   | 15 | 9  |
| 286335 | 51 | 588966 | 588977 | 2 | 6  | 12 | AT   | 16 | 12 |
| 286338 | 51 | 595733 | 595744 | 2 | 6  | 12 | CA   | 31 | 5  |
| 286339 | 51 | 601904 | 601931 | 2 | 14 | 28 | GT   | 19 | 15 |
| 286343 | 51 | 616077 | 616104 | 2 | 14 | 28 | CA   | 15 | 7  |
| 286352 | 51 | 651520 | 651546 | 3 | 9  | 27 | CCA  | 16 | 5  |

|        |    |        |        |   |    |    |      |    |    |
|--------|----|--------|--------|---|----|----|------|----|----|
| 286359 | 51 | 669214 | 669241 | 2 | 14 | 28 | TG   | 11 | 8  |
| 286368 | 51 | 678571 | 678586 | 4 | 4  | 16 | TTTA | 24 | 4  |
| 286371 | 51 | 681332 | 681353 | 2 | 11 | 22 | TG   | 20 | 6  |
| 286374 | 51 | 683828 | 683857 | 2 | 15 | 30 | TC   | 19 | 11 |
| 286378 | 51 | 691978 | 691991 | 2 | 7  | 14 | TG   | 19 | 3  |
| 286379 | 51 | 703848 | 703861 | 2 | 7  | 14 | AC   | 19 | 5  |
| 286385 | 51 | 721780 | 721795 | 2 | 8  | 16 | TG   | 14 | 4  |
| 286390 | 51 | 728289 | 728320 | 2 | 16 | 32 | CA   | 12 | 7  |
| 286391 | 51 | 729038 | 729055 | 2 | 9  | 18 | TG   | 17 | 4  |
| 286392 | 51 | 729711 | 729730 | 2 | 10 | 20 | AC   | 28 | 8  |
| 286395 | 51 | 733196 | 733209 | 2 | 7  | 14 | TC   | 24 | 3  |
| 286396 | 51 | 735721 | 735736 | 2 | 8  | 16 | GT   | 22 | 10 |
| 286397 | 51 | 737800 | 737817 | 2 | 9  | 18 | AC   | 34 | 3  |
| 286399 | 51 | 740699 | 740716 | 3 | 6  | 18 | ATA  | 7  | 5  |
| 286400 | 51 | 741504 | 741527 | 3 | 8  | 24 | CCT  | 12 | 7  |
| 286401 | 51 | 745827 | 745850 | 2 | 12 | 24 | CA   | 18 | 11 |
| 286405 | 51 | 759363 | 759374 | 2 | 6  | 12 | TG   | 23 | 5  |
| 286407 | 51 | 759870 | 759893 | 3 | 8  | 24 | GAT  | 27 | 7  |
| 286408 | 51 | 760910 | 760927 | 2 | 9  | 18 | AC   | 20 | 5  |
| 286413 | 51 | 766255 | 766278 | 2 | 12 | 24 | GT   | 19 | 7  |
| 286415 | 51 | 768276 | 768287 | 2 | 6  | 12 | GA   | 28 | 3  |
| 286417 | 51 | 771852 | 771867 | 2 | 8  | 16 | TC   | 21 | 6  |
| 286421 | 51 | 776764 | 776789 | 2 | 13 | 26 | AC   | 11 | 9  |
| 286427 | 51 | 785645 | 785668 | 2 | 12 | 24 | AC   | 17 | 10 |
| 286432 | 51 | 790154 | 790167 | 2 | 7  | 14 | GT   | 22 | 5  |
| 286433 | 51 | 790385 | 790408 | 2 | 12 | 24 | CA   | 9  | 8  |
| 286435 | 51 | 792740 | 792771 | 2 | 16 | 32 | TG   | 7  | 6  |
| 286439 | 51 | 806912 | 806937 | 2 | 13 | 26 | CA   | 25 | 10 |
| 286441 | 51 | 807336 | 807361 | 2 | 13 | 26 | CA   | 13 | 12 |
| 286449 | 51 | 823508 | 823535 | 2 | 14 | 28 | TG   | 11 | 11 |
| 286452 | 51 | 833019 | 833032 | 2 | 7  | 14 | AG   | 25 | 6  |
| 286453 | 51 | 833185 | 833216 | 2 | 16 | 32 | TG   | 7  | 8  |
| 286459 | 51 | 841028 | 841043 | 2 | 8  | 16 | GA   | 21 | 4  |
| 286460 | 51 | 842904 | 842923 | 4 | 5  | 20 | TTCA | 26 | 4  |
| 286461 | 51 | 844396 | 844409 | 2 | 7  | 14 | CA   | 24 | 4  |
| 286476 | 51 | 857827 | 857838 | 2 | 6  | 12 | GT   | 16 | 4  |
| 286480 | 51 | 861698 | 861731 | 2 | 17 | 34 | TG   | 20 | 11 |
| 286482 | 51 | 865423 | 865442 | 2 | 10 | 20 | GT   | 15 | 8  |
| 286485 | 51 | 869086 | 869101 | 2 | 8  | 16 | TG   | 28 | 6  |
| 286486 | 51 | 869220 | 869235 | 2 | 8  | 16 | CA   | 25 | 6  |
| 286487 | 51 | 871457 | 871472 | 2 | 8  | 16 | CA   | 20 | 8  |
| 286488 | 51 | 872017 | 872030 | 2 | 7  | 14 | GT   | 29 | 4  |
| 286493 | 51 | 875147 | 875161 | 3 | 5  | 15 | CGG  | 36 | 7  |
| 286500 | 51 | 887609 | 887642 | 2 | 17 | 34 | AC   | 15 | 16 |
| 286502 | 51 | 890596 | 890627 | 2 | 16 | 32 | CA   | 15 | 6  |
| 286507 | 51 | 915518 | 915577 | 2 | 30 | 60 | AC   | 8  | 12 |
| 286510 | 51 | 922316 | 922333 | 2 | 9  | 18 | AC   | 14 | 5  |
| 286511 | 51 | 922334 | 922345 | 2 | 6  | 12 | CA   | 18 | 8  |
| 286516 | 51 | 934717 | 934732 | 2 | 8  | 16 | TG   | 23 | 4  |
| 286528 | 51 | 954242 | 954265 | 4 | 6  | 24 | TATC | 21 | 9  |
| 286532 | 51 | 956661 | 956682 | 2 | 11 | 22 | GT   | 11 | 6  |

|        |    |         |         |   |    |    |      |    |    |
|--------|----|---------|---------|---|----|----|------|----|----|
| 286534 | 51 | 959800  | 959815  | 2 | 8  | 16 | AC   | 22 | 5  |
| 286535 | 51 | 960028  | 960041  | 2 | 7  | 14 | GA   | 30 | 8  |
| 286536 | 51 | 960539  | 960550  | 2 | 6  | 12 | AC   | 32 | 4  |
| 286540 | 51 | 968069  | 968110  | 2 | 21 | 42 | CA   | 13 | 7  |
| 286541 | 51 | 974031  | 974054  | 2 | 12 | 24 | CA   | 22 | 6  |
| 286553 | 51 | 1000129 | 1000142 | 2 | 7  | 14 | CA   | 15 | 5  |
| 286560 | 51 | 1027822 | 1027835 | 2 | 7  | 14 | GT   | 27 | 5  |
| 286563 | 51 | 1049841 | 1049870 | 3 | 10 | 30 | GAG  | 17 | 4  |
| 286566 | 51 | 1055304 | 1055333 | 3 | 10 | 30 | GCA  | 18 | 7  |
| 286567 | 51 | 1063125 | 1063154 | 2 | 15 | 30 | CA   | 15 | 6  |
| 286572 | 51 | 1089445 | 1089468 | 4 | 6  | 24 | CTGT | 29 | 5  |
| 286574 | 51 | 1095151 | 1095190 | 4 | 10 | 40 | AGAT | 9  | 7  |
| 286584 | 51 | 1117222 | 1117237 | 4 | 4  | 16 | CTGT | 38 | 3  |
| 286587 | 51 | 1121155 | 1121172 | 2 | 9  | 18 | AG   | 24 | 5  |
| 286588 | 51 | 1122882 | 1122902 | 3 | 7  | 21 | GTT  | 23 | 4  |
| 286591 | 51 | 1128264 | 1128287 | 4 | 6  | 24 | TGTC | 14 | 6  |
| 286593 | 51 | 1138254 | 1138269 | 2 | 8  | 16 | GT   | 29 | 4  |
| 286595 | 51 | 1138448 | 1138479 | 2 | 16 | 32 | CA   | 20 | 7  |
| 286597 | 51 | 1139693 | 1139716 | 3 | 8  | 24 | TTC  | 16 | 19 |
| 286598 | 51 | 1140397 | 1140440 | 4 | 11 | 44 | TAGA | 20 | 11 |
| 286609 | 51 | 1218007 | 1218028 | 2 | 11 | 22 | CA   | 26 | 6  |
| 286610 | 51 | 1221634 | 1221666 | 3 | 11 | 33 | TAC  | 27 | 6  |
| 286611 | 51 | 1225185 | 1225210 | 2 | 13 | 26 | AC   | 12 | 8  |
| 286612 | 51 | 1225406 | 1225419 | 2 | 7  | 14 | AC   | 20 | 6  |
| 286624 | 51 | 1246572 | 1246595 | 3 | 8  | 24 | CTC  | 24 | 3  |
| 286631 | 51 | 1259180 | 1259195 | 4 | 4  | 16 | TTTG | 20 | 3  |
| 286633 | 51 | 1261103 | 1261126 | 2 | 12 | 24 | GT   | 19 | 12 |
| 286634 | 51 | 1268286 | 1268309 | 2 | 12 | 24 | GT   | 8  | 8  |
| 286636 | 51 | 1270667 | 1270682 | 2 | 8  | 16 | TG   | 18 | 7  |
| 286638 | 51 | 1271032 | 1271045 | 2 | 7  | 14 | TG   | 23 | 7  |
| 286639 | 51 | 1274705 | 1274716 | 2 | 6  | 12 | GT   | 27 | 3  |
| 286641 | 51 | 1274982 | 1274993 | 2 | 6  | 12 | TG   | 22 | 5  |
| 286649 | 51 | 1292142 | 1292153 | 2 | 6  | 12 | TC   | 37 | 3  |
| 286650 | 51 | 1294619 | 1294652 | 2 | 17 | 34 | GT   | 16 | 11 |
| 286651 | 51 | 1302205 | 1302231 | 3 | 9  | 27 | CCT  | 21 | 7  |
| 286667 | 51 | 1335263 | 1335288 | 2 | 13 | 26 | TG   | 20 | 4  |
| 286673 | 51 | 1343573 | 1343600 | 2 | 14 | 28 | AC   | 15 | 9  |
| 286675 | 51 | 1362943 | 1362957 | 3 | 5  | 15 | TGT  | 22 | 4  |
| 286679 | 51 | 1370899 | 1370912 | 2 | 7  | 14 | CA   | 24 | 3  |
| 286680 | 51 | 1371539 | 1371562 | 2 | 12 | 24 | TG   | 24 | 6  |
| 286685 | 51 | 1391775 | 1391788 | 2 | 7  | 14 | CA   | 20 | 7  |
| 286686 | 51 | 1391891 | 1391918 | 2 | 14 | 28 | AC   | 15 | 6  |
| 286688 | 51 | 1398462 | 1398505 | 2 | 22 | 44 | CA   | 11 | 9  |
| 286689 | 51 | 1400759 | 1400782 | 3 | 8  | 24 | GTG  | 28 | 3  |
| 286692 | 51 | 1401626 | 1401653 | 2 | 14 | 28 | AC   | 6  | 7  |
| 286694 | 51 | 1404909 | 1404930 | 2 | 11 | 22 | CA   | 15 | 18 |
| 286695 | 51 | 1407462 | 1407481 | 4 | 5  | 20 | TGTC | 29 | 3  |
| 286697 | 51 | 1418326 | 1418337 | 2 | 6  | 12 | CA   | 6  | 4  |
| 286701 | 51 | 1426715 | 1426736 | 2 | 11 | 22 | AC   | 6  | 6  |
| 286703 | 51 | 1426818 | 1426841 | 2 | 12 | 24 | TG   | 16 | 9  |
| 286704 | 51 | 1429550 | 1429563 | 2 | 7  | 14 | AC   | 27 | 4  |

|        |    |         |         |   |    |    |      |    |    |
|--------|----|---------|---------|---|----|----|------|----|----|
| 286711 | 51 | 1452123 | 1452140 | 2 | 9  | 18 | TC   | 7  | 8  |
| 286712 | 51 | 1457673 | 1457686 | 2 | 7  | 14 | CA   | 19 | 7  |
| 286713 | 51 | 1457995 | 1458010 | 2 | 8  | 16 | AC   | 24 | 5  |
| 286716 | 51 | 1464493 | 1464512 | 2 | 10 | 20 | AG   | 20 | 6  |
| 286718 | 51 | 1466106 | 1466138 | 3 | 11 | 33 | CAA  | 22 | 8  |
| 286719 | 51 | 1466703 | 1466717 | 3 | 5  | 15 | TGA  | 27 | 7  |
| 286725 | 51 | 1480104 | 1480131 | 2 | 14 | 28 | TG   | 8  | 8  |
| 286729 | 51 | 1483416 | 1483459 | 2 | 22 | 44 | CA   | 9  | 8  |
| 286730 | 51 | 1483606 | 1483623 | 2 | 9  | 18 | CA   | 19 | 6  |
| 286731 | 51 | 1485070 | 1485081 | 2 | 6  | 12 | GA   | 26 | 3  |
| 286734 | 51 | 1497815 | 1497832 | 2 | 9  | 18 | TG   | 13 | 8  |
| 286735 | 51 | 1497835 | 1497850 | 2 | 8  | 16 | TG   | 19 | 8  |
| 286736 | 51 | 1500539 | 1500554 | 4 | 4  | 16 | GCGT | 27 | 10 |
| 286745 | 51 | 1531275 | 1531289 | 3 | 5  | 15 | TTA  | 16 | 3  |
| 286752 | 51 | 1554149 | 1554166 | 3 | 6  | 18 | TTC  | 18 | 3  |
| 286753 | 51 | 1554765 | 1554776 | 2 | 6  | 12 | TG   | 24 | 7  |
| 286758 | 51 | 1569221 | 1569236 | 4 | 4  | 16 | TCCA | 20 | 4  |
| 286760 | 51 | 1579847 | 1579876 | 3 | 10 | 30 | AGG  | 21 | 8  |
| 286781 | 51 | 1627670 | 1627687 | 2 | 9  | 18 | CT   | 18 | 4  |
| 286788 | 51 | 1639336 | 1639371 | 2 | 18 | 36 | CA   | 12 | 8  |
| 286789 | 51 | 1645150 | 1645171 | 2 | 11 | 22 | TG   | 22 | 6  |
| 286792 | 51 | 1650291 | 1650310 | 2 | 10 | 20 | AC   | 13 | 12 |
| 286796 | 51 | 1679066 | 1679081 | 2 | 8  | 16 | AC   | 26 | 8  |
| 286798 | 51 | 1685972 | 1685985 | 2 | 7  | 14 | CA   | 23 | 3  |
| 286810 | 51 | 1729091 | 1729108 | 2 | 9  | 18 | AC   | 18 | 9  |
| 286811 | 51 | 1730200 | 1730215 | 2 | 8  | 16 | TG   | 29 | 3  |
| 286819 | 51 | 1746535 | 1746548 | 2 | 7  | 14 | CA   | 18 | 4  |
| 286820 | 51 | 1748143 | 1748166 | 2 | 12 | 24 | GT   | 7  | 7  |
| 286821 | 51 | 1749258 | 1749289 | 2 | 16 | 32 | AC   | 12 | 7  |
| 286823 | 51 | 1751800 | 1751815 | 2 | 8  | 16 | AG   | 21 | 3  |
| 286827 | 51 | 1753950 | 1753975 | 2 | 13 | 26 | TG   | 14 | 4  |
| 286831 | 51 | 1758410 | 1758423 | 2 | 7  | 14 | CT   | 17 | 4  |
| 286832 | 51 | 1758468 | 1758525 | 2 | 29 | 58 | CA   | 6  | 6  |
| 286839 | 51 | 1765527 | 1765541 | 3 | 5  | 15 | CCT  | 13 | 5  |
| 286840 | 51 | 1765775 | 1765807 | 3 | 11 | 33 | AAC  | 21 | 10 |
| 286841 | 51 | 1768447 | 1768476 | 2 | 15 | 30 | CA   | 13 | 8  |
| 286842 | 51 | 1769392 | 1769413 | 2 | 11 | 22 | AC   | 14 | 9  |
| 286843 | 51 | 1773854 | 1773877 | 2 | 12 | 24 | TG   | 12 | 8  |
| 286844 | 51 | 1774098 | 1774129 | 2 | 16 | 32 | GT   | 14 | 9  |
| 286853 | 51 | 1783967 | 1783992 | 2 | 13 | 26 | CA   | 11 | 6  |
| 286854 | 51 | 1784090 | 1784161 | 4 | 18 | 72 | TCTA | 20 | 11 |
| 286857 | 51 | 1789855 | 1789886 | 2 | 16 | 32 | AG   | 18 | 8  |
| 286862 | 51 | 1792843 | 1792870 | 2 | 14 | 28 | TG   | 9  | 7  |
| 286864 | 51 | 1795317 | 1795336 | 2 | 10 | 20 | CA   | 12 | 12 |
| 286865 | 51 | 1795338 | 1795351 | 2 | 7  | 14 | AC   | 16 | 14 |
| 286868 | 51 | 1797435 | 1797478 | 2 | 22 | 44 | CA   | 14 | 12 |
| 286870 | 51 | 1799934 | 1799953 | 2 | 10 | 20 | AC   | 23 | 4  |
| 286872 | 51 | 1800715 | 1800750 | 2 | 18 | 36 | CA   | 18 | 12 |
| 286874 | 51 | 1801098 | 1801127 | 2 | 15 | 30 | GT   | 8  | 8  |
| 286875 | 51 | 1801245 | 1801274 | 2 | 15 | 30 | TG   | 13 | 14 |
| 286877 | 51 | 1801593 | 1801612 | 2 | 10 | 20 | TC   | 25 | 8  |

|        |    |         |         |   |    |    |      |    |    |
|--------|----|---------|---------|---|----|----|------|----|----|
| 286881 | 51 | 1807869 | 1807888 | 2 | 10 | 20 | AC   | 24 | 5  |
| 286883 | 51 | 1808157 | 1808168 | 2 | 6  | 12 | AC   | 22 | 3  |
| 286884 | 51 | 1809789 | 1809821 | 3 | 11 | 33 | GAG  | 17 | 6  |
| 286889 | 51 | 1814597 | 1814612 | 2 | 8  | 16 | CA   | 20 | 5  |
| 286891 | 51 | 1825479 | 1825492 | 2 | 7  | 14 | AC   | 27 | 7  |
| 286898 | 51 | 1828307 | 1828324 | 2 | 9  | 18 | GA   | 24 | 3  |
| 286904 | 51 | 1838090 | 1838133 | 2 | 22 | 44 | CA   | 8  | 10 |
| 286905 | 51 | 1840631 | 1840642 | 2 | 6  | 12 | AC   | 22 | 3  |
| 286907 | 51 | 1848465 | 1848496 | 4 | 8  | 32 | CACG | 8  | 11 |
| 286928 | 51 | 1867156 | 1867175 | 2 | 10 | 20 | AC   | 18 | 13 |
| 286929 | 51 | 1870507 | 1870524 | 2 | 9  | 18 | GT   | 17 | 19 |
| 286930 | 51 | 1870558 | 1870569 | 2 | 6  | 12 | GT   | 20 | 3  |
| 286936 | 51 | 1878222 | 1878233 | 2 | 6  | 12 | CA   | 21 | 10 |
| 286937 | 51 | 1878652 | 1878665 | 2 | 7  | 14 | GT   | 19 | 4  |
| 286940 | 51 | 1884056 | 1884099 | 2 | 22 | 44 | CA   | 11 | 10 |
| 286943 | 51 | 1886632 | 1886671 | 4 | 10 | 40 | TACA | 29 | 8  |
| 286945 | 51 | 1887183 | 1887204 | 2 | 11 | 22 | AC   | 24 | 8  |
| 286946 | 51 | 1888173 | 1888190 | 2 | 9  | 18 | GT   | 28 | 4  |
| 286953 | 51 | 1906742 | 1906756 | 3 | 5  | 15 | GCA  | 16 | 6  |
| 286954 | 51 | 1907644 | 1907677 | 2 | 17 | 34 | TG   | 15 | 7  |
| 286955 | 51 | 1907753 | 1907779 | 3 | 9  | 27 | CAT  | 30 | 4  |
| 286960 | 51 | 1913107 | 1913146 | 2 | 20 | 40 | AC   | 8  | 12 |
| 286965 | 51 | 1916256 | 1916267 | 2 | 6  | 12 | GT   | 24 | 3  |
| 286972 | 51 | 1918826 | 1918855 | 2 | 15 | 30 | CA   | 14 | 8  |
| 286974 | 51 | 1919104 | 1919123 | 2 | 10 | 20 | TG   | 7  | 5  |
| 286987 | 51 | 1929935 | 1929976 | 2 | 21 | 42 | TC   | 9  | 6  |
| 286990 | 51 | 1936831 | 1936870 | 2 | 20 | 40 | CT   | 10 | 5  |
| 286991 | 51 | 1938921 | 1938936 | 2 | 8  | 16 | TG   | 21 | 4  |
| 286992 | 51 | 1939203 | 1939228 | 2 | 13 | 26 | AC   | 9  | 10 |
| 286994 | 51 | 1943130 | 1943149 | 2 | 10 | 20 | AC   | 15 | 14 |
| 286995 | 51 | 1944016 | 1944051 | 2 | 18 | 36 | GT   | 7  | 10 |
| 287021 | 51 | 1989560 | 1989579 | 2 | 10 | 20 | GA   | 20 | 5  |
| 287022 | 51 | 1989919 | 1989930 | 2 | 6  | 12 | GT   | 17 | 4  |
| 287025 | 51 | 2001099 | 2001136 | 2 | 19 | 38 | GT   | 16 | 10 |
| 287026 | 51 | 2001174 | 2001209 | 2 | 18 | 36 | TG   | 18 | 11 |
| 287031 | 51 | 2020755 | 2020786 | 2 | 16 | 32 | GT   | 16 | 13 |
| 287032 | 51 | 2022483 | 2022506 | 2 | 12 | 24 | TG   | 13 | 6  |
| 287034 | 51 | 2027462 | 2027476 | 3 | 5  | 15 | ATT  | 21 | 5  |
| 287038 | 51 | 2039081 | 2039094 | 2 | 7  | 14 | CA   | 21 | 7  |
| 287040 | 51 | 2043434 | 2043465 | 2 | 16 | 32 | TG   | 11 | 10 |
| 287045 | 51 | 2047902 | 2047923 | 2 | 11 | 22 | GT   | 10 | 5  |
| 287047 | 51 | 2050780 | 2050811 | 2 | 16 | 32 | TG   | 11 | 10 |
| 287048 | 51 | 2052433 | 2052452 | 2 | 10 | 20 | CA   | 28 | 7  |
| 287049 | 51 | 2054976 | 2054989 | 2 | 7  | 14 | AC   | 30 | 3  |
| 287052 | 51 | 2058575 | 2058588 | 2 | 7  | 14 | TG   | 20 | 4  |
| 287053 | 51 | 2059734 | 2059747 | 2 | 7  | 14 | AC   | 23 | 3  |
| 287054 | 51 | 2061397 | 2061410 | 2 | 7  | 14 | CA   | 8  | 5  |
| 287056 | 51 | 2062947 | 2062958 | 2 | 6  | 12 | CA   | 19 | 3  |
| 287057 | 51 | 2063375 | 2063406 | 2 | 16 | 32 | TG   | 23 | 9  |
| 287060 | 51 | 2068836 | 2068855 | 2 | 10 | 20 | AC   | 20 | 12 |
| 287061 | 51 | 2069663 | 2069678 | 2 | 8  | 16 | GT   | 28 | 4  |



|        |    |         |         |   |    |    |      |    |    |
|--------|----|---------|---------|---|----|----|------|----|----|
| 287065 | 51 | 2073955 | 2073974 | 2 | 10 | 20 | AG   | 25 | 7  |
| 287068 | 51 | 2078187 | 2078202 | 2 | 8  | 16 | CT   | 16 | 3  |
| 287071 | 51 | 2079597 | 2079618 | 2 | 11 | 22 | GT   | 10 | 4  |
| 287073 | 51 | 2086422 | 2086441 | 2 | 10 | 20 | TG   | 13 | 7  |
| 287083 | 51 | 2114034 | 2114053 | 2 | 10 | 20 | AC   | 10 | 8  |
| 287084 | 51 | 2114163 | 2114200 | 2 | 19 | 38 | AC   | 8  | 8  |
| 287085 | 51 | 2116318 | 2116332 | 3 | 5  | 15 | TTC  | 15 | 6  |
| 287095 | 51 | 2138305 | 2138316 | 2 | 6  | 12 | CT   | 28 | 3  |
| 287097 | 51 | 2145712 | 2145729 | 2 | 9  | 18 | GT   | 17 | 10 |
| 287099 | 51 | 2145938 | 2145949 | 2 | 6  | 12 | TG   | 17 | 6  |
| 287100 | 51 | 2147701 | 2147716 | 2 | 8  | 16 | TG   | 18 | 4  |
| 287102 | 51 | 2149829 | 2149840 | 2 | 6  | 12 | TG   | 31 | 3  |
| 287103 | 51 | 2150130 | 2150159 | 2 | 15 | 30 | GT   | 7  | 6  |
| 287104 | 51 | 2151054 | 2151083 | 2 | 15 | 30 | TG   | 14 | 9  |
| 287109 | 51 | 2154846 | 2154867 | 2 | 11 | 22 | TG   | 15 | 9  |
| 287121 | 51 | 2197027 | 2197038 | 2 | 6  | 12 | CA   | 19 | 3  |
| 287123 | 51 | 2205579 | 2205590 | 2 | 6  | 12 | AC   | 24 | 7  |
| 287124 | 51 | 2206236 | 2206255 | 2 | 10 | 20 | TG   | 21 | 6  |
| 287126 | 51 | 2209585 | 2209598 | 2 | 7  | 14 | TC   | 27 | 3  |
| 287127 | 51 | 2214649 | 2214662 | 2 | 7  | 14 | TG   | 34 | 4  |
| 287136 | 51 | 2230908 | 2230923 | 4 | 4  | 16 | AAAG | 24 | 4  |
| 287139 | 51 | 2240738 | 2240757 | 2 | 10 | 20 | TG   | 16 | 11 |
| 287140 | 51 | 2243528 | 2243545 | 2 | 9  | 18 | TG   | 23 | 6  |
| 287144 | 51 | 2249693 | 2249722 | 2 | 15 | 30 | TG   | 10 | 9  |
| 287148 | 51 | 2258550 | 2258589 | 2 | 20 | 40 | TG   | 6  | 8  |
| 287151 | 51 | 2262300 | 2262321 | 2 | 11 | 22 | AC   | 6  | 8  |
| 287155 | 51 | 2269734 | 2269753 | 4 | 5  | 20 | ATAG | 23 | 4  |
| 287159 | 51 | 2273091 | 2273102 | 2 | 6  | 12 | GT   | 23 | 7  |
| 287160 | 51 | 2273105 | 2273122 | 2 | 9  | 18 | GT   | 20 | 8  |
| 287166 | 51 | 2279379 | 2279408 | 2 | 15 | 30 | CA   | 7  | 8  |
| 287176 | 51 | 2284792 | 2284824 | 3 | 11 | 33 | CAA  | 17 | 10 |
| 287181 | 51 | 2286159 | 2286176 | 2 | 9  | 18 | CT   | 21 | 11 |
| 287184 | 51 | 2291899 | 2291916 | 3 | 6  | 18 | GAG  | 29 | 4  |
| 287186 | 51 | 2292746 | 2292759 | 2 | 7  | 14 | GA   | 16 | 4  |
| 287191 | 51 | 2298214 | 2298229 | 2 | 8  | 16 | TG   | 22 | 7  |
| 287192 | 51 | 2298346 | 2298359 | 2 | 7  | 14 | GA   | 28 | 4  |
| 287196 | 51 | 2304158 | 2304171 | 2 | 7  | 14 | TG   | 24 | 9  |
| 287197 | 51 | 2306675 | 2306692 | 2 | 9  | 18 | TG   | 20 | 6  |
| 287201 | 51 | 2311322 | 2311339 | 2 | 9  | 18 | AC   | 8  | 11 |
| 287202 | 51 | 2312972 | 2312989 | 3 | 6  | 18 | TTG  | 20 | 5  |
| 287204 | 51 | 2314627 | 2314658 | 2 | 16 | 32 | TG   | 10 | 8  |
| 287207 | 51 | 2318519 | 2318536 | 2 | 9  | 18 | AC   | 12 | 13 |
| 287215 | 51 | 2346373 | 2346396 | 2 | 12 | 24 | TG   | 10 | 6  |
| 287237 | 51 | 2385023 | 2385052 | 2 | 15 | 30 | CA   | 14 | 9  |
| 287241 | 51 | 2404412 | 2404432 | 3 | 7  | 21 | AGA  | 21 | 6  |
| 287243 | 51 | 2405641 | 2405667 | 3 | 9  | 27 | AAT  | 10 | 5  |
| 287248 | 51 | 2425227 | 2425250 | 3 | 8  | 24 | GAA  | 28 | 6  |
| 287249 | 51 | 2429064 | 2429079 | 2 | 8  | 16 | AG   | 24 | 4  |
| 287259 | 51 | 2437977 | 2437994 | 3 | 6  | 18 | CCT  | 23 | 6  |
| 287260 | 51 | 2438787 | 2438802 | 2 | 8  | 16 | CT   | 15 | 3  |
| 287262 | 51 | 2439112 | 2439123 | 2 | 6  | 12 | AG   | 10 | 3  |

|        |    |         |         |   |    |    |      |    |    |
|--------|----|---------|---------|---|----|----|------|----|----|
| 287264 | 51 | 2445585 | 2445600 | 2 | 8  | 16 | AC   | 12 | 6  |
| 287265 | 51 | 2445803 | 2445816 | 2 | 7  | 14 | CT   | 27 | 3  |
| 287268 | 51 | 2453070 | 2453093 | 3 | 8  | 24 | AGA  | 25 | 4  |
| 287270 | 51 | 2469169 | 2469189 | 3 | 7  | 21 | AGA  | 25 | 20 |
| 287276 | 51 | 2485692 | 2485709 | 3 | 6  | 18 | TCC  | 31 | 8  |
| 287279 | 51 | 2492170 | 2492196 | 3 | 9  | 27 | GAA  | 25 | 9  |
| 287282 | 51 | 2507338 | 2507355 | 3 | 6  | 18 | TCT  | 28 | 8  |
| 287284 | 51 | 2517644 | 2517670 | 3 | 9  | 27 | TCC  | 13 | 4  |
| 287286 | 51 | 2519737 | 2519774 | 2 | 19 | 38 | AC   | 10 | 12 |
| 287287 | 51 | 2522626 | 2522643 | 3 | 6  | 18 | AAC  | 20 | 4  |
| 287288 | 51 | 2524197 | 2524214 | 3 | 6  | 18 | TCT  | 20 | 4  |
| 287289 | 51 | 2524541 | 2524561 | 3 | 7  | 21 | TCT  | 27 | 5  |
| 287293 | 51 | 2530626 | 2530647 | 2 | 11 | 22 | GT   | 17 | 7  |
| 287294 | 51 | 2531391 | 2531414 | 2 | 12 | 24 | TG   | 20 | 6  |
| 287295 | 51 | 2531601 | 2531614 | 2 | 7  | 14 | CA   | 23 | 6  |
| 287296 | 51 | 2534260 | 2534277 | 3 | 6  | 18 | GAG  | 34 | 4  |
| 287300 | 51 | 2543174 | 2543200 | 3 | 9  | 27 | AGA  | 23 | 4  |
| 287302 | 51 | 2554777 | 2554791 | 3 | 5  | 15 | AGG  | 32 | 5  |
| 287303 | 51 | 2555657 | 2555695 | 3 | 13 | 39 | CAA  | 17 | 16 |
| 287310 | 51 | 2561609 | 2561628 | 2 | 10 | 20 | CT   | 21 | 5  |
| 287311 | 51 | 2562668 | 2562687 | 4 | 5  | 20 | TTGT | 23 | 3  |
| 287317 | 51 | 2576048 | 2576059 | 2 | 6  | 12 | GT   | 20 | 8  |
| 287321 | 51 | 2581786 | 2581800 | 3 | 5  | 15 | TCC  | 11 | 4  |
| 287322 | 51 | 2581932 | 2581946 | 3 | 5  | 15 | TCC  | 16 | 5  |
| 287323 | 51 | 2582435 | 2582455 | 3 | 7  | 21 | CCT  | 20 | 9  |
| 287324 | 51 | 2586451 | 2586464 | 2 | 7  | 14 | AT   | 14 | 4  |
| 287325 | 51 | 2587092 | 2587111 | 2 | 10 | 20 | GT   | 21 | 13 |
| 287326 | 51 | 2589003 | 2589032 | 2 | 15 | 30 | CA   | 16 | 13 |
| 287327 | 51 | 2590247 | 2590264 | 2 | 9  | 18 | GT   | 16 | 7  |
| 287329 | 51 | 2593319 | 2593333 | 3 | 5  | 15 | GCT  | 30 | 5  |
| 287330 | 51 | 2594693 | 2594710 | 3 | 6  | 18 | CTT  | 15 | 6  |
| 287333 | 51 | 2610071 | 2610103 | 3 | 11 | 33 | CCT  | 26 | 13 |
| 287336 | 51 | 2614644 | 2614681 | 2 | 19 | 38 | CA   | 19 | 9  |
| 287341 | 51 | 2625061 | 2625081 | 3 | 7  | 21 | GAG  | 19 | 8  |
| 287342 | 51 | 2625244 | 2625265 | 2 | 11 | 22 | CA   | 15 | 15 |
| 287345 | 51 | 2629395 | 2629406 | 2 | 6  | 12 | AT   | 24 | 3  |
| 287348 | 51 | 2633521 | 2633532 | 2 | 6  | 12 | GA   | 12 | 6  |
| 287350 | 51 | 2635647 | 2635660 | 2 | 7  | 14 | AT   | 8  | 9  |
| 287353 | 51 | 2642447 | 2642470 | 2 | 12 | 24 | TC   | 25 | 6  |
| 287362 | 51 | 2651371 | 2651384 | 2 | 7  | 14 | AC   | 21 | 18 |
| 287366 | 51 | 2656244 | 2656276 | 3 | 11 | 33 | CCT  | 12 | 6  |
| 287367 | 51 | 2656683 | 2656706 | 4 | 6  | 24 | TCGC | 8  | 4  |
| 287368 | 51 | 2660059 | 2660070 | 2 | 6  | 12 | AT   | 30 | 3  |
| 287369 | 51 | 2661908 | 2661935 | 2 | 14 | 28 | CA   | 19 | 14 |
| 287371 | 51 | 2666428 | 2666448 | 3 | 7  | 21 | AGG  | 21 | 7  |
| 287372 | 51 | 2668017 | 2668034 | 3 | 6  | 18 | CTG  | 20 | 7  |
| 287378 | 51 | 2678822 | 2678833 | 2 | 6  | 12 | TG   | 33 | 4  |
| 287388 | 51 | 2694257 | 2694282 | 2 | 13 | 26 | AC   | 9  | 6  |
| 287395 | 51 | 2700292 | 2700315 | 2 | 12 | 24 | AC   | 16 | 14 |
| 287401 | 51 | 2705340 | 2705353 | 2 | 7  | 14 | GT   | 22 | 10 |
| 287405 | 51 | 2719055 | 2719070 | 4 | 4  | 16 | AAAT | 19 | 4  |

|        |    |         |         |   |    |    |      |    |    |
|--------|----|---------|---------|---|----|----|------|----|----|
| 287409 | 51 | 2731685 | 2731704 | 4 | 5  | 20 | TTTA | 23 | 3  |
| 287416 | 51 | 2750869 | 2750896 | 2 | 14 | 28 | CA   | 13 | 15 |
| 287431 | 51 | 2766517 | 2766540 | 3 | 8  | 24 | TCT  | 12 | 7  |
| 287432 | 51 | 2766638 | 2766655 | 3 | 6  | 18 | CCT  | 17 | 13 |
| 287435 | 51 | 2772278 | 2772295 | 3 | 6  | 18 | GAA  | 33 | 6  |
| 287439 | 51 | 2774412 | 2774425 | 2 | 7  | 14 | AG   | 19 | 3  |
| 287443 | 51 | 2779076 | 2779103 | 2 | 14 | 28 | AC   | 17 | 9  |
| 287444 | 51 | 2783085 | 2783096 | 2 | 6  | 12 | TG   | 25 | 3  |
| 287445 | 51 | 2784596 | 2784617 | 2 | 11 | 22 | TG   | 12 | 11 |
| 287449 | 51 | 2793092 | 2793107 | 4 | 4  | 16 | CAGA | 28 | 6  |
| 287452 | 51 | 2798331 | 2798342 | 2 | 6  | 12 | CA   | 22 | 5  |
| 287455 | 51 | 2801944 | 2801964 | 3 | 7  | 21 | CCA  | 33 | 8  |
| 287463 | 51 | 2815200 | 2815219 | 2 | 10 | 20 | TG   | 18 | 3  |
| 287466 | 51 | 2816713 | 2816730 | 2 | 9  | 18 | TG   | 16 | 10 |
| 287469 | 51 | 2818158 | 2818169 | 2 | 6  | 12 | TG   | 25 | 9  |
| 287482 | 51 | 2834416 | 2834436 | 3 | 7  | 21 | AGG  | 21 | 4  |
| 287485 | 51 | 2842422 | 2842442 | 3 | 7  | 21 | TAT  | 8  | 3  |
| 287486 | 51 | 2847050 | 2847075 | 2 | 13 | 26 | TG   | 21 | 17 |
| 287490 | 51 | 2855866 | 2855880 | 3 | 5  | 15 | CAT  | 18 | 4  |
| 287493 | 51 | 2864811 | 2864822 | 2 | 6  | 12 | AG   | 27 | 3  |
| 287495 | 51 | 2868123 | 2868143 | 3 | 7  | 21 | CCT  | 24 | 8  |
| 287497 | 51 | 2869441 | 2869455 | 3 | 5  | 15 | TAA  | 23 | 15 |
| 287498 | 51 | 2869730 | 2869750 | 3 | 7  | 21 | TGT  | 29 | 7  |
| 287501 | 51 | 2870688 | 2870705 | 3 | 6  | 18 | AAC  | 11 | 4  |
| 287505 | 51 | 2881709 | 2881736 | 2 | 14 | 28 | GT   | 9  | 7  |
| 287510 | 51 | 2889533 | 2889559 | 3 | 9  | 27 | CTT  | 29 | 7  |
| 287511 | 51 | 2889848 | 2889869 | 2 | 11 | 22 | CA   | 19 | 10 |
| 287512 | 51 | 2890418 | 2890435 | 2 | 9  | 18 | CA   | 21 | 6  |
| 287513 | 51 | 2892590 | 2892616 | 3 | 9  | 27 | GCT  | 17 | 12 |
| 287515 | 51 | 2894330 | 2894351 | 2 | 11 | 22 | AG   | 9  | 7  |
| 287517 | 51 | 2898915 | 2898950 | 2 | 18 | 36 | CA   | 12 | 11 |
| 287519 | 51 | 2899727 | 2899741 | 3 | 5  | 15 | GGT  | 16 | 8  |
| 287520 | 51 | 2899826 | 2899843 | 3 | 6  | 18 | AGG  | 10 | 5  |
| 287522 | 51 | 2900783 | 2900815 | 3 | 11 | 33 | TCT  | 13 | 14 |
| 287524 | 51 | 2903927 | 2903947 | 3 | 7  | 21 | CCT  | 20 | 5  |
| 287526 | 51 | 2905791 | 2905808 | 3 | 6  | 18 | CCT  | 20 | 3  |
| 287529 | 51 | 2909763 | 2909777 | 3 | 5  | 15 | CGG  | 20 | 5  |
| 287530 | 51 | 2909882 | 2909911 | 2 | 15 | 30 | TG   | 12 | 8  |
| 287534 | 51 | 2915129 | 2915144 | 4 | 4  | 16 | AAAC | 24 | 3  |
| 287538 | 51 | 2917863 | 2917878 | 2 | 8  | 16 | GT   | 30 | 4  |
| 287540 | 51 | 2921941 | 2921955 | 3 | 5  | 15 | TCT  | 29 | 6  |
| 287543 | 51 | 2922953 | 2922967 | 3 | 5  | 15 | CCG  | 21 | 6  |
| 287560 | 51 | 2946029 | 2946046 | 3 | 6  | 18 | TAA  | 22 | 5  |
| 287562 | 51 | 2947919 | 2947934 | 4 | 4  | 16 | TTTG | 33 | 3  |
| 287564 | 51 | 2956345 | 2956360 | 2 | 8  | 16 | TC   | 23 | 5  |
| 287565 | 51 | 2957828 | 2957855 | 2 | 14 | 28 | CA   | 19 | 9  |
| 287566 | 51 | 2961974 | 2962001 | 4 | 7  | 28 | CTGC | 22 | 4  |
| 287574 | 51 | 2972892 | 2972907 | 2 | 8  | 16 | TG   | 19 | 6  |
| 287576 | 51 | 2973783 | 2973803 | 3 | 7  | 21 | CTT  | 28 | 7  |
| 287578 | 51 | 2977399 | 2977434 | 2 | 18 | 36 | AG   | 17 | 17 |
| 287589 | 51 | 2987890 | 2987903 | 2 | 7  | 14 | GT   | 18 | 7  |

|        |    |         |         |   |    |    |      |    |    |
|--------|----|---------|---------|---|----|----|------|----|----|
| 287597 | 51 | 3001595 | 3001608 | 2 | 7  | 14 | TG   | 13 | 8  |
| 287599 | 51 | 3003275 | 3003288 | 2 | 7  | 14 | CA   | 24 | 9  |
| 287602 | 51 | 3004156 | 3004195 | 2 | 20 | 40 | GT   | 17 | 7  |
| 287605 | 51 | 3004774 | 3004800 | 3 | 9  | 27 | CTC  | 17 | 4  |
| 287608 | 51 | 3006237 | 3006254 | 2 | 9  | 18 | TC   | 16 | 4  |
| 287609 | 51 | 3006505 | 3006530 | 2 | 13 | 26 | CT   | 14 | 6  |
| 287619 | 51 | 3008581 | 3008610 | 2 | 15 | 30 | AC   | 16 | 9  |
| 287621 | 51 | 3012380 | 3012430 | 3 | 17 | 51 | AGA  | 18 | 12 |
| 287622 | 51 | 3012926 | 3012949 | 2 | 12 | 24 | TG   | 22 | 6  |
| 287624 | 51 | 3014669 | 3014694 | 2 | 13 | 26 | AC   | 15 | 9  |
| 287633 | 51 | 3029316 | 3029333 | 3 | 6  | 18 | CCT  | 13 | 5  |
| 287635 | 51 | 3029806 | 3029826 | 3 | 7  | 21 | CTC  | 17 | 4  |
| 287636 | 51 | 3030024 | 3030035 | 2 | 6  | 12 | GA   | 17 | 10 |
| 287639 | 51 | 3033142 | 3033162 | 3 | 7  | 21 | CCT  | 13 | 5  |
| 287647 | 51 | 3039428 | 3039443 | 4 | 4  | 16 | TCCC | 16 | 8  |
| 287657 | 51 | 3050040 | 3050051 | 2 | 6  | 12 | TC   | 29 | 4  |
| 287658 | 51 | 3050532 | 3050552 | 3 | 7  | 21 | TCT  | 18 | 5  |
| 287659 | 51 | 3052300 | 3052333 | 2 | 17 | 34 | GT   | 15 | 7  |
| 287662 | 51 | 3060066 | 3060085 | 2 | 10 | 20 | AC   | 24 | 7  |
| 287664 | 51 | 3065137 | 3065152 | 2 | 8  | 16 | AG   | 19 | 4  |
| 287665 | 51 | 3065696 | 3065731 | 2 | 18 | 36 | CA   | 24 | 16 |
| 287666 | 51 | 3067731 | 3067757 | 3 | 9  | 27 | AAG  | 16 | 4  |
| 287667 | 51 | 3071144 | 3071167 | 2 | 12 | 24 | GA   | 11 | 5  |
| 287671 | 51 | 3077779 | 3077794 | 2 | 8  | 16 | TA   | 18 | 12 |
| 287672 | 51 | 3078112 | 3078131 | 2 | 10 | 20 | TC   | 8  | 3  |
| 287673 | 51 | 3079836 | 3079855 | 2 | 10 | 20 | GT   | 10 | 7  |
| 287675 | 51 | 3080461 | 3080478 | 3 | 6  | 18 | ACC  | 11 | 3  |
| 287677 | 51 | 3081153 | 3081188 | 3 | 12 | 36 | TCC  | 20 | 5  |
| 287680 | 51 | 3083310 | 3083335 | 2 | 13 | 26 | TG   | 23 | 11 |
| 287681 | 51 | 3083509 | 3083520 | 2 | 6  | 12 | CA   | 21 | 4  |
| 287682 | 51 | 3083558 | 3083573 | 4 | 4  | 16 | ATTT | 25 | 9  |
| 287683 | 51 | 3085200 | 3085231 | 4 | 8  | 32 | AGCA | 20 | 6  |
| 287684 | 51 | 3086707 | 3086724 | 2 | 9  | 18 | CT   | 25 | 5  |
| 287686 | 51 | 3087356 | 3087383 | 2 | 14 | 28 | AC   | 7  | 8  |
| 287687 | 51 | 3088647 | 3088661 | 3 | 5  | 15 | GCG  | 14 | 9  |
| 287696 | 51 | 3091876 | 3091919 | 2 | 22 | 44 | TG   | 16 | 18 |
| 287697 | 51 | 3092736 | 3092783 | 2 | 24 | 48 | AC   | 13 | 18 |
| 287703 | 51 | 3099366 | 3099397 | 2 | 16 | 32 | AC   | 15 | 9  |
| 287705 | 51 | 3100612 | 3100631 | 2 | 10 | 20 | CA   | 11 | 6  |
| 287707 | 51 | 3104836 | 3104851 | 2 | 8  | 16 | GT   | 12 | 4  |
| 287713 | 51 | 3111728 | 3111745 | 3 | 6  | 18 | GCC  | 28 | 16 |
| 287718 | 51 | 3120532 | 3120545 | 2 | 7  | 14 | AC   | 23 | 6  |
| 287722 | 51 | 3130498 | 3130521 | 2 | 12 | 24 | AC   | 22 | 9  |
| 287727 | 51 | 3136159 | 3136174 | 4 | 4  | 16 | AATA | 14 | 5  |
| 287728 | 51 | 3136805 | 3136816 | 2 | 6  | 12 | AT   | 9  | 3  |
| 287729 | 51 | 3137235 | 3137258 | 2 | 12 | 24 | GT   | 21 | 10 |
| 287732 | 51 | 3140284 | 3140307 | 2 | 12 | 24 | TG   | 11 | 9  |
| 287733 | 51 | 3140568 | 3140587 | 2 | 10 | 20 | AC   | 24 | 11 |
| 287736 | 51 | 3144216 | 3144233 | 3 | 6  | 18 | CTG  | 27 | 6  |
| 287738 | 51 | 3147063 | 3147082 | 2 | 10 | 20 | GT   | 26 | 8  |
| 287739 | 51 | 3147337 | 3147356 | 2 | 10 | 20 | AC   | 17 | 5  |

|        |    |         |         |   |    |    |      |    |    |
|--------|----|---------|---------|---|----|----|------|----|----|
| 287742 | 51 | 3157768 | 3157785 | 3 | 6  | 18 | AGG  | 13 | 5  |
| 287746 | 51 | 3158123 | 3158144 | 2 | 11 | 22 | GT   | 9  | 4  |
| 287747 | 51 | 3158197 | 3158208 | 2 | 6  | 12 | AC   | 15 | 4  |
| 287748 | 51 | 3158211 | 3158222 | 2 | 6  | 12 | AC   | 15 | 4  |
| 287750 | 51 | 3158394 | 3158414 | 3 | 7  | 21 | CTC  | 14 | 3  |
| 287753 | 51 | 3159311 | 3159326 | 2 | 8  | 16 | TG   | 21 | 4  |
| 287754 | 51 | 3159538 | 3159555 | 2 | 9  | 18 | GT   | 23 | 3  |
| 287763 | 51 | 3170373 | 3170390 | 3 | 6  | 18 | TGC  | 13 | 7  |
| 287764 | 51 | 3171738 | 3171751 | 2 | 7  | 14 | TG   | 16 | 7  |
| 287766 | 51 | 3172397 | 3172411 | 3 | 5  | 15 | CGG  | 26 | 8  |
| 287767 | 51 | 3172677 | 3172697 | 3 | 7  | 21 | TGC  | 20 | 3  |
| 287769 | 51 | 3172874 | 3172903 | 2 | 15 | 30 | AC   | 7  | 7  |
| 287771 | 51 | 3173903 | 3173918 | 4 | 4  | 16 | GGCT | 26 | 3  |
| 287773 | 51 | 3175619 | 3175644 | 2 | 13 | 26 | GT   | 13 | 11 |
| 287777 | 51 | 3178600 | 3178617 | 2 | 9  | 18 | AC   | 9  | 7  |
| 287780 | 51 | 3180628 | 3180657 | 2 | 15 | 30 | CA   | 11 | 12 |
| 287782 | 51 | 3181017 | 3181032 | 2 | 8  | 16 | TA   | 21 | 10 |
| 287785 | 51 | 3182202 | 3182223 | 2 | 11 | 22 | TG   | 15 | 8  |
| 287787 | 51 | 3182560 | 3182574 | 3 | 5  | 15 | AAT  | 18 | 5  |
| 287794 | 51 | 3187648 | 3187675 | 2 | 14 | 28 | GT   | 12 | 9  |
| 287798 | 51 | 3191698 | 3191724 | 3 | 9  | 27 | TGG  | 28 | 9  |
| 287800 | 51 | 3192039 | 3192066 | 2 | 14 | 28 | GT   | 16 | 14 |
| 287808 | 51 | 3198871 | 3198888 | 3 | 6  | 18 | AAG  | 20 | 5  |
| 287811 | 51 | 3203775 | 3203792 | 2 | 9  | 18 | GA   | 21 | 4  |
| 287816 | 51 | 3204541 | 3204552 | 2 | 6  | 12 | GT   | 22 | 4  |
| 287817 | 51 | 3204579 | 3204608 | 2 | 15 | 30 | AC   | 24 | 8  |
| 287818 | 51 | 3204861 | 3204881 | 3 | 7  | 21 | AGA  | 20 | 11 |
| 287831 | 51 | 3211631 | 3211651 | 3 | 7  | 21 | GGA  | 19 | 7  |
| 287832 | 51 | 3212077 | 3212090 | 2 | 7  | 14 | TG   | 15 | 3  |
| 287836 | 51 | 3212517 | 3212549 | 3 | 11 | 33 | TCT  | 7  | 6  |
| 287839 | 51 | 3214872 | 3214895 | 4 | 6  | 24 | TTTG | 27 | 6  |
| 287840 | 51 | 3215597 | 3215620 | 3 | 8  | 24 | CCT  | 15 | 7  |
| 287847 | 51 | 3223683 | 3223697 | 3 | 5  | 15 | CAG  | 31 | 5  |
| 287850 | 51 | 3226224 | 3226243 | 2 | 10 | 20 | AC   | 16 | 8  |
| 287853 | 51 | 3227881 | 3227896 | 2 | 8  | 16 | TC   | 14 | 6  |
| 287855 | 51 | 3230168 | 3230179 | 2 | 6  | 12 | GA   | 12 | 8  |
| 287858 | 51 | 3235548 | 3235567 | 2 | 10 | 20 | AC   | 23 | 13 |
| 287862 | 51 | 3240400 | 3240417 | 2 | 9  | 18 | TG   | 24 | 8  |
| 287865 | 51 | 3242566 | 3242583 | 2 | 9  | 18 | TG   | 10 | 14 |
| 287876 | 51 | 3252515 | 3252532 | 3 | 6  | 18 | GGT  | 6  | 3  |
| 287878 | 51 | 3256853 | 3256868 | 2 | 8  | 16 | AC   | 21 | 3  |
| 287881 | 51 | 3258754 | 3258769 | 2 | 8  | 16 | CA   | 28 | 8  |
| 287882 | 51 | 3259671 | 3259686 | 2 | 8  | 16 | GT   | 11 | 13 |
| 287892 | 51 | 3267526 | 3267540 | 3 | 5  | 15 | CGC  | 17 | 8  |
| 287897 | 51 | 3275500 | 3275525 | 2 | 13 | 26 | TG   | 15 | 14 |
| 287901 | 51 | 3281493 | 3281504 | 2 | 6  | 12 | CT   | 24 | 8  |
| 287907 | 51 | 3287582 | 3287607 | 2 | 13 | 26 | GT   | 8  | 11 |
| 287925 | 51 | 3302841 | 3302854 | 2 | 7  | 14 | TC   | 26 | 3  |
| 287926 | 51 | 3302981 | 3303004 | 2 | 12 | 24 | CA   | 17 | 9  |
| 287927 | 51 | 3303397 | 3303422 | 2 | 13 | 26 | GT   | 17 | 11 |
| 287932 | 51 | 3311994 | 3312005 | 2 | 6  | 12 | AG   | 26 | 3  |

|        |    |         |         |   |    |    |      |    |    |
|--------|----|---------|---------|---|----|----|------|----|----|
| 287933 | 51 | 3313044 | 3313064 | 3 | 7  | 21 | CTT  | 14 | 6  |
| 287937 | 51 | 3313390 | 3313419 | 2 | 15 | 30 | TG   | 13 | 8  |
| 287942 | 51 | 3314942 | 3314971 | 2 | 15 | 30 | GA   | 10 | 9  |
| 287945 | 51 | 3315575 | 3315600 | 2 | 13 | 26 | GT   | 15 | 7  |
| 287946 | 51 | 3315653 | 3315668 | 2 | 8  | 16 | TG   | 27 | 7  |
| 287947 | 51 | 3316297 | 3316310 | 2 | 7  | 14 | CT   | 14 | 9  |
| 287948 | 51 | 3316536 | 3316561 | 2 | 13 | 26 | GT   | 14 | 5  |
| 287949 | 51 | 3316964 | 3316989 | 2 | 13 | 26 | TG   | 11 | 9  |
| 287950 | 51 | 3318051 | 3318064 | 2 | 7  | 14 | AT   | 14 | 3  |
| 287951 | 51 | 3318796 | 3318809 | 2 | 7  | 14 | GT   | 15 | 11 |
| 287957 | 51 | 3328707 | 3328724 | 3 | 6  | 18 | CCT  | 21 | 6  |
| 287959 | 51 | 3330379 | 3330396 | 3 | 6  | 18 | GAA  | 19 | 7  |
| 287966 | 51 | 3335362 | 3335377 | 2 | 8  | 16 | TG   | 15 | 6  |
| 287967 | 51 | 3335424 | 3335457 | 2 | 17 | 34 | CA   | 15 | 9  |
| 287969 | 51 | 3342462 | 3342475 | 2 | 7  | 14 | CA   | 24 | 14 |
| 287973 | 51 | 3348888 | 3348911 | 3 | 8  | 24 | TGG  | 23 | 11 |
| 287976 | 51 | 3350853 | 3350882 | 2 | 15 | 30 | CA   | 9  | 9  |
| 287978 | 51 | 3351591 | 3351602 | 2 | 6  | 12 | AC   | 28 | 3  |
| 287980 | 51 | 3354538 | 3354553 | 2 | 8  | 16 | CA   | 25 | 8  |
| 287986 | 51 | 3355194 | 3355232 | 3 | 13 | 39 | AAG  | 20 | 6  |
| 287990 | 51 | 3355572 | 3355592 | 3 | 7  | 21 | CCT  | 7  | 5  |
| 287991 | 51 | 3355833 | 3355856 | 3 | 8  | 24 | CCT  | 21 | 4  |
| 287993 | 51 | 3356765 | 3356788 | 2 | 12 | 24 | TG   | 12 | 13 |
| 287996 | 51 | 3357261 | 3357274 | 2 | 7  | 14 | AC   | 11 | 4  |
| 287997 | 51 | 3357708 | 3357721 | 2 | 7  | 14 | GT   | 17 | 5  |
| 287999 | 51 | 3358529 | 3358544 | 4 | 4  | 16 | AAAG | 9  | 6  |
| 288000 | 51 | 3359337 | 3359360 | 3 | 8  | 24 | CCT  | 24 | 10 |
| 288001 | 51 | 3359421 | 3359444 | 2 | 12 | 24 | CA   | 12 | 6  |
| 288002 | 51 | 3362748 | 3362761 | 2 | 7  | 14 | AC   | 19 | 5  |
| 288004 | 51 | 3363244 | 3363261 | 3 | 6  | 18 | GCT  | 21 | 9  |
| 288006 | 51 | 3364095 | 3364118 | 3 | 8  | 24 | CCT  | 27 | 7  |
| 288007 | 51 | 3364451 | 3364474 | 2 | 12 | 24 | GT   | 25 | 9  |
| 288010 | 51 | 3366734 | 3366789 | 2 | 28 | 56 | CA   | 15 | 14 |
| 288012 | 51 | 3367454 | 3367469 | 4 | 4  | 16 | TTTA | 23 | 7  |
| 288013 | 51 | 3367961 | 3367976 | 2 | 8  | 16 | TC   | 20 | 5  |
| 288023 | 51 | 3373184 | 3373201 | 2 | 9  | 18 | CA   | 16 | 20 |
| 288024 | 51 | 3374414 | 3374429 | 2 | 8  | 16 | TC   | 10 | 3  |
| 288028 | 51 | 3377782 | 3377811 | 3 | 10 | 30 | CCT  | 19 | 4  |
| 288031 | 51 | 3378790 | 3378805 | 2 | 8  | 16 | CT   | 19 | 4  |
| 288032 | 51 | 3379546 | 3379571 | 2 | 13 | 26 | CA   | 9  | 8  |
| 288044 | 51 | 3382363 | 3382386 | 4 | 6  | 24 | AACA | 22 | 7  |
| 288049 | 51 | 3387370 | 3387384 | 3 | 5  | 15 | TCC  | 22 | 4  |
| 288052 | 51 | 3388846 | 3388860 | 3 | 5  | 15 | TTC  | 16 | 3  |
| 288058 | 51 | 3390350 | 3390377 | 2 | 14 | 28 | CA   | 24 | 13 |
| 288059 | 51 | 3392020 | 3392040 | 3 | 7  | 21 | CTT  | 24 | 15 |
| 288065 | 51 | 3395490 | 3395511 | 2 | 11 | 22 | GT   | 14 | 11 |
| 288066 | 51 | 3395678 | 3395691 | 2 | 7  | 14 | GT   | 7  | 7  |
| 288067 | 51 | 3395694 | 3395707 | 2 | 7  | 14 | GT   | 10 | 11 |
| 288068 | 51 | 3395867 | 3395896 | 2 | 15 | 30 | CA   | 6  | 8  |
| 288070 | 51 | 3396767 | 3396780 | 2 | 7  | 14 | AC   | 10 | 4  |
| 288080 | 51 | 3404203 | 3404232 | 3 | 10 | 30 | TCC  | 23 | 9  |

|        |    |         |         |   |    |    |      |    |    |
|--------|----|---------|---------|---|----|----|------|----|----|
| 288081 | 51 | 3404651 | 3404674 | 3 | 8  | 24 | CTC  | 12 | 5  |
| 288086 | 51 | 3408822 | 3408837 | 2 | 8  | 16 | TC   | 24 | 4  |
| 288088 | 51 | 3409940 | 3409955 | 2 | 8  | 16 | AC   | 21 | 9  |
| 288090 | 51 | 3411305 | 3411319 | 3 | 5  | 15 | GGA  | 21 | 6  |
| 288102 | 51 | 3420284 | 3420295 | 2 | 6  | 12 | TC   | 16 | 3  |
| 288106 | 51 | 3424292 | 3424303 | 2 | 6  | 12 | CT   | 23 | 4  |
| 288109 | 51 | 3425241 | 3425264 | 2 | 12 | 24 | TG   | 20 | 9  |
| 288115 | 51 | 3426703 | 3426722 | 2 | 10 | 20 | CA   | 11 | 6  |
| 288154 | 51 | 3454254 | 3454274 | 3 | 7  | 21 | AAG  | 23 | 4  |
| 288162 | 51 | 3464492 | 3464503 | 2 | 6  | 12 | GT   | 28 | 7  |
| 288165 | 51 | 3478366 | 3478389 | 3 | 8  | 24 | CCT  | 16 | 8  |
| 288168 | 51 | 3478994 | 3479014 | 3 | 7  | 21 | CTC  | 16 | 11 |
| 288178 | 51 | 3493514 | 3493529 | 2 | 8  | 16 | CT   | 23 | 3  |
| 288180 | 51 | 3502479 | 3502496 | 3 | 6  | 18 | GCT  | 19 | 3  |
| 288183 | 51 | 3510563 | 3510580 | 2 | 9  | 18 | AG   | 30 | 9  |
| 288186 | 51 | 3515234 | 3515257 | 2 | 12 | 24 | GT   | 22 | 12 |
| 288187 | 51 | 3529882 | 3529903 | 2 | 11 | 22 | AC   | 26 | 10 |
| 288191 | 51 | 3550552 | 3550563 | 2 | 6  | 12 | GT   | 23 | 3  |
| 288196 | 51 | 3562732 | 3562761 | 2 | 15 | 30 | CA   | 11 | 9  |
| 288198 | 51 | 3571160 | 3571171 | 2 | 6  | 12 | AT   | 6  | 3  |
| 288202 | 51 | 3583104 | 3583125 | 2 | 11 | 22 | CA   | 11 | 9  |
| 288206 | 51 | 3589437 | 3589472 | 3 | 12 | 36 | AGA  | 12 | 10 |
| 288207 | 51 | 3591703 | 3591730 | 2 | 14 | 28 | AC   | 16 | 12 |
| 288212 | 51 | 3610631 | 3610658 | 2 | 14 | 28 | CA   | 14 | 9  |
| 288215 | 51 | 3619628 | 3619651 | 2 | 12 | 24 | AC   | 22 | 11 |
| 288216 | 51 | 3620389 | 3620432 | 2 | 22 | 44 | TG   | 6  | 8  |
| 288220 | 51 | 3625208 | 3625228 | 3 | 7  | 21 | GGA  | 24 | 8  |
| 288221 | 51 | 3631844 | 3631867 | 2 | 12 | 24 | CA   | 17 | 7  |
| 288223 | 51 | 3639618 | 3639631 | 2 | 7  | 14 | CT   | 24 | 4  |
| 288224 | 51 | 3639958 | 3639996 | 3 | 13 | 39 | AGA  | 18 | 9  |
| 288226 | 51 | 3643586 | 3643601 | 4 | 4  | 16 | TCAA | 36 | 4  |
| 288231 | 52 | 10132   | 10163   | 2 | 16 | 32 | GT   | 15 | 11 |
| 288232 | 52 | 10195   | 10230   | 2 | 18 | 36 | TG   | 15 | 10 |
| 288233 | 52 | 10298   | 10315   | 2 | 9  | 18 | TG   | 18 | 3  |
| 288235 | 52 | 10432   | 10447   | 2 | 8  | 16 | TG   | 10 | 3  |
| 288236 | 52 | 10549   | 10564   | 2 | 8  | 16 | TG   | 12 | 5  |
| 288239 | 52 | 11293   | 11330   | 2 | 19 | 38 | TG   | 11 | 14 |
| 288246 | 52 | 31220   | 31233   | 2 | 7  | 14 | TG   | 24 | 3  |
| 288247 | 52 | 34334   | 34369   | 2 | 18 | 36 | AC   | 6  | 6  |
| 288248 | 52 | 35108   | 35135   | 2 | 14 | 28 | AC   | 11 | 12 |
| 288255 | 52 | 38344   | 38365   | 2 | 11 | 22 | TG   | 15 | 7  |
| 288256 | 52 | 38501   | 38516   | 2 | 8  | 16 | CT   | 28 | 8  |
| 288261 | 52 | 43095   | 43112   | 2 | 9  | 18 | GT   | 17 | 6  |
| 288262 | 52 | 44307   | 44330   | 2 | 12 | 24 | AC   | 14 | 8  |
| 288268 | 52 | 51588   | 51617   | 2 | 15 | 30 | AC   | 16 | 7  |
| 288270 | 52 | 53599   | 53618   | 2 | 10 | 20 | TG   | 22 | 4  |
| 288272 | 52 | 53827   | 53848   | 2 | 11 | 22 | TG   | 21 | 10 |
| 288278 | 52 | 60981   | 60994   | 2 | 7  | 14 | TG   | 19 | 4  |
| 288279 | 52 | 62705   | 62718   | 2 | 7  | 14 | TG   | 16 | 5  |
| 288280 | 52 | 63122   | 63139   | 2 | 9  | 18 | GT   | 17 | 10 |
| 288284 | 52 | 68893   | 68904   | 2 | 6  | 12 | CG   | 12 | 15 |

|        |    |        |        |   |    |    |     |    |    |
|--------|----|--------|--------|---|----|----|-----|----|----|
| 288285 | 52 | 68905  | 68922  | 2 | 9  | 18 | CA  | 8  | 10 |
| 288287 | 52 | 73607  | 73628  | 2 | 11 | 22 | TG  | 20 | 7  |
| 288289 | 52 | 75158  | 75191  | 2 | 17 | 34 | TG  | 13 | 11 |
| 288296 | 52 | 83439  | 83452  | 2 | 7  | 14 | GT  | 23 | 3  |
| 288299 | 52 | 86379  | 86420  | 2 | 21 | 42 | GA  | 10 | 6  |
| 288300 | 52 | 87390  | 87404  | 3 | 5  | 15 | TTA | 14 | 11 |
| 288301 | 52 | 88789  | 88806  | 3 | 6  | 18 | TGC | 19 | 5  |
| 288302 | 52 | 89419  | 89444  | 2 | 13 | 26 | GT  | 16 | 9  |
| 288308 | 52 | 93457  | 93496  | 2 | 20 | 40 | GT  | 10 | 9  |
| 288310 | 52 | 95580  | 95595  | 2 | 8  | 16 | GT  | 27 | 7  |
| 288319 | 52 | 101793 | 101807 | 3 | 5  | 15 | CCT | 23 | 3  |
| 288322 | 52 | 105119 | 105136 | 2 | 9  | 18 | TG  | 23 | 4  |
| 288323 | 52 | 106699 | 106712 | 2 | 7  | 14 | GT  | 19 | 9  |
| 288325 | 52 | 107162 | 107201 | 2 | 20 | 40 | TG  | 14 | 13 |
| 288327 | 52 | 108301 | 108316 | 2 | 8  | 16 | GT  | 20 | 6  |
| 288328 | 52 | 108714 | 108731 | 2 | 9  | 18 | CT  | 7  | 4  |
| 288329 | 52 | 109543 | 109566 | 2 | 12 | 24 | AC  | 19 | 5  |
| 288333 | 52 | 113975 | 113992 | 2 | 9  | 18 | CA  | 27 | 13 |
| 288346 | 52 | 122470 | 122483 | 2 | 7  | 14 | CA  | 27 | 4  |
| 288349 | 52 | 123880 | 123893 | 2 | 7  | 14 | TG  | 32 | 4  |
| 288350 | 52 | 124218 | 124253 | 2 | 18 | 36 | TG  | 10 | 9  |
| 288352 | 52 | 124791 | 124808 | 3 | 6  | 18 | GCA | 24 | 8  |
| 288353 | 52 | 127617 | 127652 | 2 | 18 | 36 | CA  | 6  | 6  |
| 288355 | 52 | 128898 | 128915 | 2 | 9  | 18 | AC  | 23 | 4  |
| 288357 | 52 | 132419 | 132434 | 2 | 8  | 16 | CA  | 17 | 4  |
| 288359 | 52 | 132616 | 132627 | 2 | 6  | 12 | AC  | 10 | 5  |
| 288360 | 52 | 132629 | 132640 | 2 | 6  | 12 | CA  | 14 | 5  |
| 288361 | 52 | 132803 | 132814 | 2 | 6  | 12 | GT  | 19 | 3  |
| 288362 | 52 | 137356 | 137367 | 2 | 6  | 12 | AC  | 21 | 3  |
| 288363 | 52 | 137636 | 137651 | 2 | 8  | 16 | AC  | 15 | 3  |
| 288366 | 52 | 140174 | 140195 | 2 | 11 | 22 | TG  | 16 | 5  |
| 288367 | 52 | 140816 | 140855 | 2 | 20 | 40 | TG  | 9  | 10 |
| 288370 | 52 | 147425 | 147442 | 2 | 9  | 18 | CA  | 11 | 4  |
| 288374 | 52 | 153380 | 153409 | 2 | 15 | 30 | TG  | 9  | 5  |
| 288379 | 52 | 156048 | 156099 | 2 | 26 | 52 | AC  | 16 | 12 |
| 288386 | 52 | 161182 | 161193 | 2 | 6  | 12 | CT  | 6  | 4  |
| 288387 | 52 | 161199 | 161210 | 2 | 6  | 12 | CT  | 9  | 3  |
| 288393 | 52 | 162988 | 163009 | 2 | 11 | 22 | AC  | 22 | 11 |
| 288396 | 52 | 164724 | 164741 | 3 | 6  | 18 | TGC | 9  | 4  |
| 288398 | 52 | 165194 | 165217 | 2 | 12 | 24 | CT  | 10 | 6  |
| 288404 | 52 | 168525 | 168545 | 3 | 7  | 21 | GAG | 21 | 7  |
| 288409 | 52 | 169593 | 169613 | 3 | 7  | 21 | ATT | 14 | 8  |
| 288414 | 52 | 171880 | 171905 | 2 | 13 | 26 | TC  | 7  | 5  |
| 288418 | 52 | 172204 | 172223 | 2 | 10 | 20 | AC  | 13 | 9  |
| 288420 | 52 | 175509 | 175522 | 2 | 7  | 14 | GT  | 12 | 9  |
| 288423 | 52 | 176670 | 176683 | 2 | 7  | 14 | GA  | 24 | 5  |
| 288429 | 52 | 185227 | 185246 | 2 | 10 | 20 | AC  | 10 | 6  |
| 288430 | 52 | 185248 | 185261 | 2 | 7  | 14 | CA  | 6  | 6  |
| 288431 | 52 | 185409 | 185422 | 2 | 7  | 14 | GT  | 20 | 5  |
| 288432 | 52 | 185941 | 185958 | 2 | 9  | 18 | AC  | 32 | 4  |
| 288435 | 52 | 188745 | 188770 | 2 | 13 | 26 | TG  | 14 | 7  |



|        |    |        |        |   |    |    |      |    |    |
|--------|----|--------|--------|---|----|----|------|----|----|
| 288438 | 52 | 194067 | 194088 | 2 | 11 | 22 | AC   | 18 | 4  |
| 288439 | 52 | 194190 | 194201 | 2 | 6  | 12 | CA   | 32 | 3  |
| 288441 | 52 | 197404 | 197423 | 2 | 10 | 20 | TG   | 8  | 3  |
| 288443 | 52 | 202868 | 202887 | 2 | 10 | 20 | GT   | 17 | 10 |
| 288445 | 52 | 202991 | 203018 | 2 | 14 | 28 | TG   | 16 | 7  |
| 288446 | 52 | 204767 | 204782 | 2 | 8  | 16 | GT   | 20 | 8  |
| 288447 | 52 | 209948 | 209969 | 2 | 11 | 22 | TG   | 25 | 5  |
| 288452 | 52 | 222348 | 222365 | 2 | 9  | 18 | CA   | 15 | 8  |
| 288453 | 52 | 223672 | 223725 | 2 | 27 | 54 | TG   | 6  | 8  |
| 288454 | 52 | 224065 | 224088 | 2 | 12 | 24 | TG   | 9  | 11 |
| 288458 | 52 | 231389 | 231400 | 2 | 6  | 12 | CT   | 25 | 3  |
| 288459 | 52 | 233375 | 233388 | 2 | 7  | 14 | CA   | 25 | 5  |
| 288463 | 52 | 247625 | 247662 | 2 | 19 | 38 | CA   | 7  | 8  |
| 288464 | 52 | 249520 | 249533 | 2 | 7  | 14 | TG   | 27 | 5  |
| 288465 | 52 | 250174 | 250191 | 2 | 9  | 18 | CA   | 18 | 5  |
| 288472 | 52 | 259400 | 259432 | 3 | 11 | 33 | GGA  | 25 | 7  |
| 288473 | 52 | 259708 | 259731 | 2 | 12 | 24 | GT   | 24 | 8  |
| 288474 | 52 | 262572 | 262605 | 2 | 17 | 34 | GT   | 6  | 7  |
| 288477 | 52 | 268589 | 268612 | 2 | 12 | 24 | CA   | 18 | 8  |
| 288480 | 52 | 269717 | 269744 | 2 | 14 | 28 | CT   | 17 | 8  |
| 288484 | 52 | 280836 | 280877 | 2 | 21 | 42 | TG   | 14 | 8  |
| 288485 | 52 | 281019 | 281040 | 2 | 11 | 22 | AG   | 10 | 8  |
| 288488 | 52 | 285917 | 285928 | 2 | 6  | 12 | TG   | 29 | 3  |
| 288489 | 52 | 286205 | 286230 | 2 | 13 | 26 | TG   | 25 | 7  |
| 288490 | 52 | 286880 | 286897 | 2 | 9  | 18 | TG   | 18 | 6  |
| 288492 | 52 | 289640 | 289655 | 2 | 8  | 16 | TG   | 21 | 7  |
| 288503 | 52 | 305126 | 305146 | 3 | 7  | 21 | AAG  | 19 | 3  |
| 288504 | 52 | 305356 | 305385 | 2 | 15 | 30 | AG   | 11 | 7  |
| 288505 | 52 | 307739 | 307776 | 2 | 19 | 38 | GT   | 12 | 12 |
| 288507 | 52 | 311506 | 311519 | 2 | 7  | 14 | CA   | 23 | 5  |
| 288508 | 52 | 311823 | 311840 | 2 | 9  | 18 | GT   | 19 | 8  |
| 288512 | 52 | 318285 | 318305 | 3 | 7  | 21 | CCT  | 19 | 7  |
| 288513 | 52 | 319389 | 319406 | 2 | 9  | 18 | TG   | 24 | 7  |
| 288515 | 52 | 320791 | 320810 | 2 | 10 | 20 | GT   | 17 | 12 |
| 288516 | 52 | 322847 | 322864 | 3 | 6  | 18 | GAA  | 16 | 4  |
| 288518 | 52 | 326634 | 326645 | 2 | 6  | 12 | TC   | 17 | 3  |
| 288520 | 52 | 337259 | 337274 | 4 | 4  | 16 | AGGT | 26 | 6  |
| 288521 | 52 | 340059 | 340070 | 2 | 6  | 12 | CA   | 29 | 6  |
| 288522 | 52 | 340339 | 340352 | 2 | 7  | 14 | CA   | 18 | 3  |
| 288538 | 52 | 399510 | 399523 | 2 | 7  | 14 | TC   | 28 | 4  |
| 288546 | 52 | 407769 | 407790 | 2 | 11 | 22 | CA   | 9  | 7  |
| 288555 | 52 | 416881 | 416894 | 2 | 7  | 14 | TG   | 22 | 7  |
| 288556 | 52 | 417927 | 417942 | 4 | 4  | 16 | AGAC | 20 | 3  |
| 288557 | 52 | 420831 | 420852 | 2 | 11 | 22 | CA   | 20 | 11 |
| 288558 | 52 | 426477 | 426492 | 4 | 4  | 16 | TTTA | 22 | 10 |
| 288559 | 52 | 426963 | 426983 | 3 | 7  | 21 | GCA  | 19 | 7  |
| 288562 | 52 | 427569 | 427604 | 2 | 18 | 36 | TG   | 9  | 11 |
| 288563 | 52 | 430188 | 430223 | 2 | 18 | 36 | TG   | 29 | 3  |
| 288566 | 52 | 434082 | 434093 | 2 | 6  | 12 | AG   | 21 | 4  |
| 288567 | 52 | 436070 | 436097 | 2 | 14 | 28 | TG   | 17 | 9  |
| 288568 | 52 | 436365 | 436382 | 3 | 6  | 18 | CTC  | 14 | 7  |

|        |    |        |        |   |    |    |      |    |    |
|--------|----|--------|--------|---|----|----|------|----|----|
| 288569 | 52 | 437536 | 437553 | 2 | 9  | 18 | GT   | 24 | 3  |
| 288571 | 52 | 437765 | 437786 | 2 | 11 | 22 | GT   | 11 | 9  |
| 288572 | 52 | 437902 | 437923 | 2 | 11 | 22 | GT   | 18 | 7  |
| 288576 | 52 | 439303 | 439320 | 3 | 6  | 18 | GAG  | 21 | 5  |
| 288579 | 52 | 441628 | 441683 | 2 | 28 | 56 | TG   | 7  | 8  |
| 288581 | 52 | 442198 | 442221 | 2 | 12 | 24 | GT   | 22 | 7  |
| 288589 | 52 | 450772 | 450785 | 2 | 7  | 14 | CA   | 15 | 8  |
| 288594 | 52 | 455445 | 455468 | 2 | 12 | 24 | TG   | 16 | 6  |
| 288595 | 52 | 458801 | 458814 | 2 | 7  | 14 | GT   | 16 | 3  |
| 288603 | 52 | 460485 | 460512 | 4 | 7  | 28 | CATC | 14 | 5  |
| 288612 | 52 | 463567 | 463588 | 2 | 11 | 22 | TG   | 15 | 5  |
| 288615 | 52 | 463921 | 463972 | 4 | 13 | 52 | ATAG | 12 | 11 |
| 288626 | 52 | 473534 | 473599 | 2 | 33 | 66 | CA   | 8  | 7  |
| 288627 | 52 | 473794 | 473815 | 2 | 11 | 22 | TG   | 23 | 6  |
| 288628 | 52 | 473983 | 474008 | 2 | 13 | 26 | AG   | 13 | 3  |
| 288630 | 52 | 474749 | 474770 | 2 | 11 | 22 | GA   | 10 | 5  |
| 288632 | 52 | 476016 | 476030 | 3 | 5  | 15 | TTA  | 10 | 4  |
| 288638 | 52 | 479455 | 479466 | 2 | 6  | 12 | CT   | 31 | 3  |
| 288640 | 52 | 485208 | 485219 | 2 | 6  | 12 | CA   | 25 | 3  |
| 288642 | 52 | 488530 | 488547 | 3 | 6  | 18 | AGC  | 24 | 4  |
| 288643 | 52 | 490404 | 490415 | 2 | 6  | 12 | TG   | 31 | 3  |
| 288645 | 52 | 491222 | 491242 | 3 | 7  | 21 | ACC  | 11 | 3  |
| 288647 | 52 | 491766 | 491799 | 2 | 17 | 34 | GT   | 13 | 8  |
| 288650 | 52 | 493972 | 493993 | 2 | 11 | 22 | AC   | 8  | 4  |
| 288652 | 52 | 496563 | 496576 | 2 | 7  | 14 | GT   | 25 | 4  |
| 288653 | 52 | 497756 | 497779 | 2 | 12 | 24 | TC   | 14 | 4  |
| 288660 | 52 | 500273 | 500308 | 2 | 18 | 36 | AC   | 15 | 10 |
| 288662 | 52 | 500988 | 501031 | 2 | 22 | 44 | CA   | 8  | 7  |
| 288663 | 52 | 503622 | 503639 | 2 | 9  | 18 | AC   | 14 | 4  |
| 288666 | 52 | 506201 | 506238 | 2 | 19 | 38 | TG   | 12 | 8  |
| 288668 | 52 | 509921 | 509958 | 2 | 19 | 38 | TG   | 9  | 6  |
| 288674 | 52 | 522681 | 522710 | 2 | 15 | 30 | GT   | 17 | 11 |
| 288680 | 52 | 525018 | 525039 | 2 | 11 | 22 | TG   | 23 | 9  |
| 288684 | 52 | 526368 | 526383 | 2 | 8  | 16 | TG   | 16 | 5  |
| 288685 | 52 | 526473 | 526490 | 2 | 9  | 18 | GT   | 14 | 4  |
| 288688 | 52 | 526928 | 526939 | 2 | 6  | 12 | TC   | 21 | 3  |
| 288690 | 52 | 529448 | 529461 | 2 | 7  | 14 | CT   | 28 | 3  |
| 288702 | 52 | 573389 | 573400 | 2 | 6  | 12 | GA   | 22 | 5  |
| 288716 | 52 | 601963 | 601980 | 2 | 9  | 18 | TC   | 30 | 8  |
| 288717 | 52 | 608336 | 608353 | 2 | 9  | 18 | TC   | 26 | 4  |
| 288724 | 52 | 619263 | 619289 | 3 | 9  | 27 | ACT  | 22 | 4  |
| 288728 | 52 | 622497 | 622508 | 2 | 6  | 12 | TA   | 18 | 3  |
| 288729 | 52 | 623214 | 623233 | 2 | 10 | 20 | AC   | 22 | 4  |
| 288730 | 52 | 623362 | 623387 | 2 | 13 | 26 | CA   | 25 | 4  |
| 288731 | 52 | 623547 | 623560 | 2 | 7  | 14 | AC   | 19 | 4  |
| 288735 | 52 | 623805 | 623838 | 2 | 17 | 34 | AC   | 7  | 8  |
| 288738 | 52 | 627613 | 627638 | 2 | 13 | 26 | AC   | 13 | 10 |
| 288741 | 52 | 630039 | 630066 | 2 | 14 | 28 | TG   | 7  | 6  |
| 288743 | 52 | 630811 | 630828 | 2 | 9  | 18 | GT   | 22 | 4  |
| 288748 | 52 | 636253 | 636284 | 2 | 16 | 32 | AC   | 11 | 12 |
| 288750 | 52 | 638074 | 638089 | 2 | 8  | 16 | GT   | 15 | 3  |

|        |    |        |        |   |    |    |      |    |    |
|--------|----|--------|--------|---|----|----|------|----|----|
| 288754 | 52 | 640727 | 640754 | 2 | 14 | 28 | TG   | 12 | 9  |
| 288755 | 52 | 640977 | 640988 | 2 | 6  | 12 | TA   | 15 | 3  |
| 288758 | 52 | 642747 | 642774 | 2 | 14 | 28 | GT   | 8  | 7  |
| 288759 | 52 | 643552 | 643571 | 2 | 10 | 20 | AC   | 21 | 4  |
| 288761 | 52 | 647283 | 647297 | 3 | 5  | 15 | TCC  | 16 | 6  |
| 288766 | 52 | 652174 | 652207 | 2 | 17 | 34 | CA   | 12 | 13 |
| 288768 | 52 | 652359 | 652380 | 2 | 11 | 22 | CA   | 18 | 8  |
| 288769 | 52 | 652629 | 652650 | 2 | 11 | 22 | AC   | 17 | 14 |
| 288773 | 52 | 660829 | 660846 | 2 | 9  | 18 | TG   | 24 | 11 |
| 288774 | 52 | 661769 | 661804 | 4 | 9  | 36 | TATC | 17 | 11 |
| 288775 | 52 | 668330 | 668344 | 3 | 5  | 15 | GCC  | 22 | 3  |
| 288776 | 52 | 669316 | 669349 | 2 | 17 | 34 | TG   | 12 | 7  |
| 288785 | 52 | 696126 | 696137 | 2 | 6  | 12 | TG   | 32 | 4  |
| 288786 | 52 | 699212 | 699231 | 2 | 10 | 20 | TG   | 10 | 3  |
| 288788 | 52 | 701786 | 701799 | 2 | 7  | 14 | TG   | 24 | 8  |
| 288789 | 52 | 701800 | 701813 | 2 | 7  | 14 | GT   | 18 | 5  |
| 288792 | 52 | 709904 | 709915 | 2 | 6  | 12 | GT   | 25 | 8  |
| 288802 | 52 | 722765 | 722780 | 2 | 8  | 16 | AG   | 25 | 8  |
| 288803 | 52 | 722911 | 722936 | 2 | 13 | 26 | GT   | 10 | 6  |
| 288805 | 52 | 723147 | 723161 | 3 | 5  | 15 | CTC  | 15 | 3  |
| 288808 | 52 | 726308 | 726327 | 2 | 10 | 20 | AC   | 19 | 5  |
| 288810 | 52 | 730701 | 730730 | 3 | 10 | 30 | CTC  | 16 | 5  |
| 288811 | 52 | 730964 | 730984 | 3 | 7  | 21 | TGC  | 31 | 3  |
| 288813 | 52 | 733189 | 733200 | 2 | 6  | 12 | CA   | 20 | 3  |
| 288816 | 52 | 736530 | 736541 | 2 | 6  | 12 | TC   | 25 | 3  |
| 288817 | 52 | 738847 | 738864 | 2 | 9  | 18 | GT   | 17 | 9  |
| 288819 | 52 | 741772 | 741795 | 2 | 12 | 24 | GT   | 15 | 5  |
| 288820 | 52 | 742045 | 742065 | 3 | 7  | 21 | CCT  | 18 | 5  |
| 288822 | 52 | 742862 | 742873 | 2 | 6  | 12 | CA   | 9  | 14 |
| 288824 | 52 | 743027 | 743058 | 2 | 16 | 32 | CA   | 13 | 11 |
| 288825 | 52 | 743245 | 743268 | 2 | 12 | 24 | AC   | 18 | 11 |
| 288831 | 52 | 748095 | 748128 | 2 | 17 | 34 | CA   | 19 | 10 |
| 288835 | 52 | 752126 | 752143 | 2 | 9  | 18 | AC   | 21 | 5  |
| 288836 | 52 | 752240 | 752255 | 2 | 8  | 16 | AC   | 14 | 3  |
| 288837 | 52 | 752687 | 752702 | 2 | 8  | 16 | GT   | 27 | 5  |
| 288838 | 52 | 759100 | 759117 | 2 | 9  | 18 | GT   | 29 | 5  |
| 288840 | 52 | 759273 | 759284 | 2 | 6  | 12 | AC   | 24 | 8  |
| 288843 | 52 | 759940 | 759955 | 2 | 8  | 16 | CA   | 25 | 3  |
| 288847 | 52 | 762678 | 762705 | 2 | 14 | 28 | TG   | 17 | 8  |
| 288848 | 52 | 762812 | 762839 | 2 | 14 | 28 | AC   | 11 | 7  |
| 288850 | 52 | 763068 | 763091 | 2 | 12 | 24 | CA   | 19 | 8  |
| 288851 | 52 | 763407 | 763422 | 2 | 8  | 16 | CA   | 18 | 10 |
| 288852 | 52 | 763620 | 763653 | 2 | 17 | 34 | CA   | 15 | 16 |
| 288853 | 52 | 763728 | 763753 | 2 | 13 | 26 | GT   | 19 | 10 |
| 288855 | 52 | 765897 | 765918 | 2 | 11 | 22 | CA   | 10 | 3  |
| 288856 | 52 | 766044 | 766061 | 2 | 9  | 18 | CT   | 21 | 6  |
| 288857 | 52 | 766192 | 766221 | 2 | 15 | 30 | AG   | 13 | 5  |
| 288858 | 52 | 772252 | 772267 | 2 | 8  | 16 | AC   | 17 | 4  |
| 288859 | 52 | 772460 | 772481 | 2 | 11 | 22 | CA   | 18 | 5  |
| 288860 | 52 | 773874 | 773887 | 2 | 7  | 14 | CA   | 28 | 4  |
| 288864 | 52 | 775265 | 775276 | 2 | 6  | 12 | GT   | 12 | 3  |

|        |    |        |        |   |    |    |      |    |    |
|--------|----|--------|--------|---|----|----|------|----|----|
| 288866 | 52 | 775826 | 775865 | 2 | 20 | 40 | GT   | 10 | 11 |
| 288869 | 52 | 776915 | 776930 | 2 | 8  | 16 | CT   | 17 | 5  |
| 288874 | 52 | 783687 | 783704 | 2 | 9  | 18 | TG   | 22 | 4  |
| 288875 | 52 | 784144 | 784161 | 2 | 9  | 18 | TG   | 27 | 3  |
| 288876 | 52 | 784434 | 784465 | 2 | 16 | 32 | TG   | 10 | 10 |
| 288877 | 52 | 785791 | 785810 | 2 | 10 | 20 | CA   | 21 | 9  |
| 288878 | 52 | 786125 | 786140 | 4 | 4  | 16 | AAAG | 19 | 3  |
| 288880 | 52 | 786697 | 786717 | 3 | 7  | 21 | TCT  | 26 | 6  |
| 288883 | 52 | 786829 | 786855 | 3 | 9  | 27 | AGC  | 21 | 12 |
| 288884 | 52 | 787069 | 787090 | 2 | 11 | 22 | GT   | 11 | 12 |
| 288887 | 52 | 787142 | 787167 | 2 | 13 | 26 | TG   | 9  | 5  |
| 288888 | 52 | 787281 | 787294 | 2 | 7  | 14 | CT   | 15 | 13 |
| 288891 | 52 | 787489 | 787510 | 2 | 11 | 22 | CT   | 11 | 3  |
| 288892 | 52 | 787811 | 787834 | 2 | 12 | 24 | AC   | 17 | 10 |
| 288894 | 52 | 790739 | 790754 | 2 | 8  | 16 | CA   | 16 | 5  |
| 288895 | 52 | 791070 | 791083 | 2 | 7  | 14 | TG   | 20 | 3  |
| 288899 | 52 | 797016 | 797027 | 2 | 6  | 12 | AC   | 17 | 3  |
| 288900 | 52 | 797647 | 797660 | 2 | 7  | 14 | CA   | 28 | 5  |
| 288907 | 52 | 816498 | 816523 | 2 | 13 | 26 | AC   | 23 | 9  |
| 288909 | 52 | 817609 | 817624 | 2 | 8  | 16 | CA   | 23 | 5  |
| 288915 | 52 | 825163 | 825183 | 3 | 7  | 21 | CCT  | 15 | 8  |
| 288916 | 52 | 825304 | 825330 | 3 | 9  | 27 | TCC  | 13 | 5  |
| 288917 | 52 | 825995 | 826006 | 2 | 6  | 12 | TC   | 22 | 5  |
| 288919 | 52 | 829022 | 829039 | 2 | 9  | 18 | CA   | 24 | 4  |
| 288921 | 52 | 829270 | 829281 | 2 | 6  | 12 | GC   | 32 | 7  |
| 288925 | 52 | 833896 | 833911 | 2 | 8  | 16 | AG   | 22 | 7  |
| 288928 | 52 | 834934 | 834949 | 2 | 8  | 16 | AC   | 26 | 7  |
| 288930 | 52 | 837138 | 837159 | 2 | 11 | 22 | CA   | 21 | 9  |
| 288932 | 52 | 839711 | 839752 | 2 | 21 | 42 | GA   | 8  | 7  |
| 288934 | 52 | 843208 | 843223 | 2 | 8  | 16 | AC   | 6  | 3  |
| 288940 | 52 | 850011 | 850028 | 2 | 9  | 18 | TG   | 23 | 4  |
| 288942 | 52 | 856390 | 856401 | 2 | 6  | 12 | AC   | 31 | 3  |
| 288948 | 52 | 869962 | 869979 | 3 | 6  | 18 | AGC  | 26 | 6  |
| 288951 | 52 | 871699 | 871714 | 2 | 8  | 16 | AC   | 18 | 6  |
| 288953 | 52 | 875925 | 875938 | 2 | 7  | 14 | GT   | 22 | 3  |
| 288959 | 52 | 883188 | 883203 | 4 | 4  | 16 | GAAA | 6  | 5  |
| 288960 | 52 | 883352 | 883369 | 2 | 9  | 18 | CA   | 23 | 6  |
| 288963 | 52 | 892142 | 892173 | 2 | 16 | 32 | AC   | 20 | 7  |
| 288969 | 52 | 897067 | 897108 | 2 | 21 | 42 | AC   | 16 | 9  |
| 288972 | 52 | 897639 | 897659 | 3 | 7  | 21 | TTC  | 28 | 7  |
| 288973 | 52 | 897863 | 897882 | 2 | 10 | 20 | GA   | 13 | 13 |
| 288974 | 52 | 897919 | 897930 | 2 | 6  | 12 | AC   | 23 | 3  |
| 288976 | 52 | 909695 | 909712 | 2 | 9  | 18 | GT   | 25 | 6  |
| 288981 | 52 | 922574 | 922587 | 2 | 7  | 14 | GA   | 27 | 4  |
| 288987 | 52 | 933636 | 933649 | 2 | 7  | 14 | CA   | 28 | 4  |
| 288988 | 52 | 933824 | 933847 | 2 | 12 | 24 | AC   | 21 | 4  |
| 288989 | 52 | 934570 | 934595 | 2 | 13 | 26 | AC   | 11 | 5  |
| 288990 | 52 | 934822 | 934839 | 2 | 9  | 18 | CA   | 8  | 6  |
| 288991 | 52 | 935713 | 935726 | 2 | 7  | 14 | TG   | 25 | 6  |
| 288992 | 52 | 935846 | 935877 | 2 | 16 | 32 | CA   | 20 | 5  |
| 289004 | 52 | 958923 | 958960 | 2 | 19 | 38 | GT   | 11 | 14 |

|        |    |         |         |   |    |    |      |    |    |
|--------|----|---------|---------|---|----|----|------|----|----|
| 289009 | 52 | 976305  | 976332  | 2 | 14 | 28 | AC   | 15 | 10 |
| 289011 | 52 | 980139  | 980162  | 2 | 12 | 24 | CA   | 17 | 6  |
| 289018 | 52 | 990346  | 990359  | 2 | 7  | 14 | CT   | 19 | 7  |
| 289019 | 52 | 990399  | 990425  | 3 | 9  | 27 | CCT  | 15 | 4  |
| 289029 | 52 | 1020691 | 1020706 | 2 | 8  | 16 | AG   | 22 | 3  |
| 289034 | 52 | 1034653 | 1034666 | 2 | 7  | 14 | GT   | 26 | 3  |
| 289035 | 52 | 1038395 | 1038424 | 2 | 15 | 30 | CA   | 19 | 9  |
| 289036 | 52 | 1040641 | 1040670 | 2 | 15 | 30 | CA   | 16 | 8  |
| 289037 | 52 | 1044027 | 1044042 | 4 | 4  | 16 | ACAA | 29 | 5  |
| 289038 | 52 | 1045594 | 1045644 | 3 | 17 | 51 | TCT  | 18 | 9  |
| 289051 | 52 | 1065785 | 1065804 | 4 | 5  | 20 | TTTG | 20 | 4  |
| 289059 | 52 | 1097594 | 1097605 | 2 | 6  | 12 | AC   | 14 | 4  |
| 289061 | 52 | 1113343 | 1113374 | 2 | 16 | 32 | TG   | 18 | 12 |
| 289062 | 52 | 1113866 | 1113880 | 3 | 5  | 15 | CCA  | 22 | 4  |
| 289063 | 52 | 1114072 | 1114095 | 4 | 6  | 24 | TGTA | 25 | 6  |
| 289070 | 52 | 1115435 | 1115449 | 3 | 5  | 15 | TTG  | 24 | 6  |
| 289085 | 52 | 1162414 | 1162431 | 2 | 9  | 18 | GT   | 18 | 7  |
| 289086 | 52 | 1162433 | 1162450 | 2 | 9  | 18 | TG   | 23 | 7  |
| 289088 | 52 | 1166451 | 1166488 | 2 | 19 | 38 | GT   | 9  | 8  |
| 289091 | 52 | 1168375 | 1168398 | 2 | 12 | 24 | AC   | 13 | 6  |
| 289096 | 52 | 1172213 | 1172224 | 2 | 6  | 12 | TG   | 18 | 4  |
| 289098 | 52 | 1174960 | 1174987 | 2 | 14 | 28 | GT   | 17 | 7  |
| 289110 | 52 | 1195830 | 1195859 | 3 | 10 | 30 | TGC  | 31 | 10 |
| 289111 | 52 | 1198716 | 1198731 | 2 | 8  | 16 | AG   | 12 | 6  |
| 289112 | 52 | 1198734 | 1198749 | 2 | 8  | 16 | AG   | 9  | 7  |
| 289131 | 52 | 1244415 | 1244434 | 2 | 10 | 20 | AC   | 18 | 11 |
| 289132 | 52 | 1244436 | 1244447 | 2 | 6  | 12 | CA   | 21 | 10 |
| 289134 | 52 | 1249814 | 1249835 | 2 | 11 | 22 | AC   | 12 | 12 |
| 289137 | 52 | 1261697 | 1261716 | 2 | 10 | 20 | GT   | 15 | 12 |
| 289148 | 52 | 1301966 | 1301977 | 2 | 6  | 12 | CA   | 28 | 4  |
| 289150 | 52 | 1302230 | 1302243 | 2 | 7  | 14 | CA   | 12 | 7  |
| 289151 | 52 | 1302262 | 1302273 | 2 | 6  | 12 | CA   | 14 | 3  |
| 289163 | 52 | 1351496 | 1351509 | 2 | 7  | 14 | TA   | 8  | 4  |
| 289165 | 52 | 1357372 | 1357387 | 2 | 8  | 16 | GT   | 21 | 6  |
| 289170 | 52 | 1361570 | 1361581 | 2 | 6  | 12 | CA   | 28 | 4  |
| 289173 | 52 | 1362584 | 1362611 | 4 | 7  | 28 | AAGT | 11 | 4  |
| 289176 | 52 | 1371887 | 1371907 | 3 | 7  | 21 | GTA  | 22 | 6  |
| 289182 | 52 | 1374017 | 1374030 | 2 | 7  | 14 | TG   | 8  | 3  |
| 289183 | 52 | 1374167 | 1374184 | 2 | 9  | 18 | CA   | 22 | 10 |
| 289190 | 52 | 1395909 | 1395929 | 3 | 7  | 21 | GAG  | 20 | 3  |
| 289191 | 52 | 1397532 | 1397543 | 2 | 6  | 12 | GT   | 24 | 3  |
| 289194 | 52 | 1402710 | 1402731 | 2 | 11 | 22 | CA   | 10 | 8  |
| 289199 | 52 | 1408689 | 1408700 | 2 | 6  | 12 | TG   | 25 | 3  |
| 289203 | 52 | 1418455 | 1418504 | 2 | 25 | 50 | TG   | 6  | 4  |
| 289204 | 52 | 1426228 | 1426253 | 2 | 13 | 26 | CA   | 23 | 5  |
| 289205 | 52 | 1431228 | 1431245 | 2 | 9  | 18 | AC   | 21 | 8  |
| 289209 | 52 | 1443691 | 1443722 | 2 | 16 | 32 | TG   | 12 | 7  |
| 289212 | 52 | 1447296 | 1447317 | 2 | 11 | 22 | CA   | 21 | 5  |
| 289214 | 52 | 1449817 | 1449834 | 2 | 9  | 18 | CA   | 15 | 4  |
| 289219 | 52 | 1451466 | 1451480 | 3 | 5  | 15 | GGA  | 27 | 4  |
| 289224 | 52 | 1461389 | 1461408 | 2 | 10 | 20 | AC   | 17 | 8  |

|        |    |         |         |   |    |    |      |    |    |
|--------|----|---------|---------|---|----|----|------|----|----|
| 289233 | 52 | 1478021 | 1478036 | 2 | 8  | 16 | TG   | 13 | 6  |
| 289235 | 52 | 1480055 | 1480082 | 2 | 14 | 28 | CA   | 9  | 9  |
| 289236 | 52 | 1482064 | 1482087 | 3 | 8  | 24 | CAA  | 19 | 10 |
| 289237 | 52 | 1483364 | 1483378 | 3 | 5  | 15 | ATT  | 19 | 4  |
| 289238 | 52 | 1485319 | 1485334 | 4 | 4  | 16 | GGAG | 11 | 3  |
| 289239 | 52 | 1485730 | 1485743 | 2 | 7  | 14 | CA   | 20 | 3  |
| 289240 | 52 | 1485770 | 1485793 | 2 | 12 | 24 | CA   | 13 | 7  |
| 289241 | 52 | 1489120 | 1489133 | 2 | 7  | 14 | CA   | 26 | 5  |
| 289243 | 52 | 1490812 | 1490827 | 2 | 8  | 16 | GT   | 16 | 11 |
| 289245 | 52 | 1495273 | 1495288 | 2 | 8  | 16 | TG   | 22 | 5  |
| 289254 | 52 | 1517929 | 1517952 | 3 | 8  | 24 | GAG  | 28 | 5  |
| 289256 | 52 | 1518788 | 1518805 | 3 | 6  | 18 | CCT  | 18 | 4  |
| 289270 | 52 | 1547202 | 1547217 | 4 | 4  | 16 | GGAG | 19 | 3  |
| 289272 | 52 | 1549377 | 1549388 | 2 | 6  | 12 | TG   | 27 | 3  |
| 289273 | 52 | 1550174 | 1550191 | 3 | 6  | 18 | AAG  | 17 | 9  |
| 289281 | 52 | 1557248 | 1557268 | 3 | 7  | 21 | CTC  | 20 | 8  |
| 289283 | 52 | 1557736 | 1557753 | 2 | 9  | 18 | TA   | 18 | 4  |
| 289285 | 52 | 1559502 | 1559517 | 2 | 8  | 16 | GA   | 27 | 3  |
| 289295 | 52 | 1581544 | 1581573 | 3 | 10 | 30 | TAA  | 10 | 6  |
| 289301 | 52 | 1589409 | 1589424 | 2 | 8  | 16 | GT   | 17 | 8  |
| 289302 | 52 | 1589426 | 1589439 | 2 | 7  | 14 | TG   | 18 | 6  |
| 289305 | 52 | 1590765 | 1590782 | 3 | 6  | 18 | GGA  | 22 | 3  |
| 289306 | 52 | 1592092 | 1592111 | 2 | 10 | 20 | AG   | 25 | 7  |
| 289307 | 52 | 1592651 | 1592682 | 2 | 16 | 32 | TG   | 14 | 16 |
| 289309 | 52 | 1592865 | 1592888 | 3 | 8  | 24 | GAG  | 14 | 6  |
| 289310 | 52 | 1593113 | 1593128 | 2 | 8  | 16 | CA   | 22 | 17 |
| 289311 | 52 | 1593131 | 1593144 | 2 | 7  | 14 | CA   | 25 | 21 |
| 289314 | 52 | 1593887 | 1593908 | 2 | 11 | 22 | CA   | 21 | 8  |
| 289316 | 52 | 1594318 | 1594333 | 4 | 4  | 16 | TTTG | 21 | 4  |
| 289317 | 52 | 1595108 | 1595131 | 4 | 6  | 24 | TGTT | 18 | 4  |
| 289318 | 52 | 1598462 | 1598477 | 2 | 8  | 16 | CA   | 21 | 6  |
| 289319 | 52 | 1598915 | 1598928 | 2 | 7  | 14 | GT   | 29 | 4  |
| 289320 | 52 | 1599078 | 1599119 | 2 | 21 | 42 | TG   | 9  | 9  |
| 289324 | 52 | 1610608 | 1610619 | 2 | 6  | 12 | TG   | 19 | 6  |
| 289327 | 52 | 1613667 | 1613692 | 2 | 13 | 26 | AC   | 24 | 5  |
| 289328 | 52 | 1615175 | 1615186 | 2 | 6  | 12 | TA   | 22 | 5  |
| 289330 | 52 | 1617837 | 1617854 | 2 | 9  | 18 | TG   | 28 | 3  |
| 289335 | 52 | 1623578 | 1623603 | 2 | 13 | 26 | CA   | 6  | 7  |
| 289336 | 52 | 1624265 | 1624280 | 2 | 8  | 16 | CA   | 26 | 7  |
| 289339 | 52 | 1627636 | 1627649 | 2 | 7  | 14 | GA   | 19 | 3  |
| 289340 | 52 | 1629715 | 1629742 | 2 | 14 | 28 | GT   | 12 | 6  |
| 289343 | 52 | 1630707 | 1630722 | 2 | 8  | 16 | CT   | 22 | 4  |
| 289344 | 52 | 1631102 | 1631117 | 2 | 8  | 16 | AC   | 20 | 6  |
| 289345 | 52 | 1631398 | 1631409 | 2 | 6  | 12 | GT   | 21 | 4  |
| 289346 | 52 | 1632704 | 1632725 | 2 | 11 | 22 | TG   | 21 | 8  |
| 289348 | 52 | 1636349 | 1636382 | 2 | 17 | 34 | CA   | 18 | 8  |
| 289349 | 52 | 1637971 | 1637986 | 2 | 8  | 16 | GT   | 24 | 3  |
| 289356 | 52 | 1646725 | 1646736 | 2 | 6  | 12 | TG   | 22 | 7  |
| 289358 | 52 | 1648861 | 1648880 | 2 | 10 | 20 | AC   | 20 | 5  |
| 289360 | 52 | 1654707 | 1654739 | 3 | 11 | 33 | CTC  | 23 | 5  |
| 289370 | 52 | 1661698 | 1661709 | 2 | 6  | 12 | AG   | 22 | 3  |

|        |    |         |         |   |    |    |      |    |    |
|--------|----|---------|---------|---|----|----|------|----|----|
| 289373 | 52 | 1662656 | 1662679 | 2 | 12 | 24 | CA   | 11 | 9  |
| 289378 | 52 | 1670357 | 1670410 | 3 | 18 | 54 | GAA  | 13 | 11 |
| 289379 | 52 | 1670795 | 1670812 | 3 | 6  | 18 | CTC  | 25 | 4  |
| 289469 | 52 | 1892088 | 1892115 | 2 | 14 | 28 | TG   | 6  | 4  |
| 289470 | 52 | 1892274 | 1892285 | 2 | 6  | 12 | CA   | 30 | 4  |
| 289471 | 52 | 1892511 | 1892564 | 2 | 27 | 54 | TG   | 6  | 10 |
| 289477 | 52 | 1899585 | 1899614 | 2 | 15 | 30 | GT   | 12 | 9  |
| 289482 | 52 | 1916314 | 1916329 | 2 | 8  | 16 | CA   | 23 | 4  |
| 289484 | 52 | 1920228 | 1920241 | 2 | 7  | 14 | TG   | 13 | 4  |
| 289488 | 52 | 1926811 | 1926824 | 2 | 7  | 14 | AC   | 23 | 4  |
| 289494 | 52 | 1931669 | 1931680 | 2 | 6  | 12 | TG   | 15 | 4  |
| 289499 | 52 | 1937621 | 1937648 | 2 | 14 | 28 | GT   | 14 | 13 |
| 289504 | 52 | 1951299 | 1951318 | 2 | 10 | 20 | TG   | 18 | 6  |
| 289505 | 52 | 1951527 | 1951540 | 2 | 7  | 14 | AC   | 21 | 5  |
| 289513 | 52 | 1957307 | 1957320 | 2 | 7  | 14 | CA   | 26 | 3  |
| 289514 | 52 | 1958207 | 1958224 | 2 | 9  | 18 | CA   | 27 | 3  |
| 289517 | 52 | 1959092 | 1959127 | 2 | 18 | 36 | TG   | 15 | 8  |
| 289519 | 52 | 1959294 | 1959313 | 2 | 10 | 20 | GA   | 19 | 4  |
| 289520 | 52 | 1960096 | 1960109 | 2 | 7  | 14 | CA   | 26 | 3  |
| 289521 | 52 | 1960520 | 1960535 | 2 | 8  | 16 | AG   | 28 | 5  |
| 289525 | 52 | 1963028 | 1963043 | 2 | 8  | 16 | TG   | 25 | 3  |
| 289526 | 52 | 1964021 | 1964042 | 2 | 11 | 22 | GT   | 16 | 6  |
| 289528 | 52 | 1964188 | 1964201 | 2 | 7  | 14 | AC   | 25 | 4  |
| 289529 | 52 | 1964207 | 1964222 | 2 | 8  | 16 | CA   | 20 | 3  |
| 289541 | 52 | 1976768 | 1976779 | 2 | 6  | 12 | CA   | 20 | 3  |
| 289544 | 52 | 1977598 | 1977619 | 2 | 11 | 22 | AC   | 20 | 11 |
| 289545 | 52 | 1978177 | 1978188 | 2 | 6  | 12 | TG   | 29 | 3  |
| 289546 | 52 | 1980264 | 1980275 | 2 | 6  | 12 | AC   | 24 | 3  |
| 289547 | 52 | 1982541 | 1982570 | 2 | 15 | 30 | AC   | 13 | 8  |
| 289550 | 52 | 1986008 | 1986025 | 2 | 9  | 18 | AG   | 30 | 3  |
| 289552 | 52 | 1989707 | 1989720 | 2 | 7  | 14 | TG   | 18 | 4  |
| 289554 | 52 | 1994351 | 1994374 | 2 | 12 | 24 | TG   | 11 | 6  |
| 289556 | 52 | 1995091 | 1995112 | 2 | 11 | 22 | TG   | 21 | 5  |
| 289557 | 52 | 1995482 | 1995493 | 2 | 6  | 12 | TG   | 24 | 9  |
| 289558 | 52 | 1995560 | 1995571 | 2 | 6  | 12 | TG   | 29 | 5  |
| 289565 | 52 | 2003532 | 2003547 | 2 | 8  | 16 | TG   | 23 | 7  |
| 289572 | 52 | 2009590 | 2009615 | 2 | 13 | 26 | GT   | 10 | 14 |
| 289573 | 52 | 2009747 | 2009768 | 2 | 11 | 22 | TC   | 20 | 5  |
| 289576 | 52 | 2011527 | 2011556 | 2 | 15 | 30 | AC   | 17 | 11 |
| 289578 | 52 | 2016042 | 2016065 | 2 | 12 | 24 | TG   | 21 | 9  |
| 289579 | 52 | 2016162 | 2016209 | 2 | 24 | 48 | CA   | 11 | 12 |
| 289580 | 52 | 2016303 | 2016320 | 2 | 9  | 18 | AC   | 14 | 6  |
| 289581 | 52 | 2017409 | 2017423 | 3 | 5  | 15 | CAG  | 21 | 6  |
| 289583 | 52 | 2017838 | 2017855 | 3 | 6  | 18 | GAG  | 22 | 7  |
| 289587 | 52 | 2020768 | 2020787 | 2 | 10 | 20 | CA   | 20 | 10 |
| 289588 | 52 | 2022482 | 2022499 | 2 | 9  | 18 | TG   | 29 | 3  |
| 289590 | 52 | 2024786 | 2024811 | 2 | 13 | 26 | GT   | 18 | 8  |
| 289591 | 52 | 2025004 | 2025043 | 2 | 20 | 40 | AC   | 7  | 8  |
| 289592 | 52 | 2027004 | 2027035 | 4 | 8  | 32 | TTCT | 26 | 13 |
| 289594 | 52 | 2028815 | 2028838 | 2 | 12 | 24 | AG   | 21 | 3  |
| 289597 | 52 | 2032316 | 2032337 | 2 | 11 | 22 | AG   | 17 | 3  |

|        |    |         |         |   |    |    |      |    |    |
|--------|----|---------|---------|---|----|----|------|----|----|
| 289598 | 52 | 2034159 | 2034204 | 2 | 23 | 46 | CA   | 6  | 7  |
| 289603 | 52 | 2038836 | 2038851 | 2 | 8  | 16 | AC   | 19 | 7  |
| 289608 | 52 | 2062216 | 2062235 | 2 | 10 | 20 | TG   | 17 | 17 |
| 289609 | 52 | 2062236 | 2062247 | 2 | 6  | 12 | CG   | 18 | 20 |
| 289611 | 52 | 2062590 | 2062617 | 2 | 14 | 28 | GT   | 19 | 12 |
| 289612 | 52 | 2062766 | 2062785 | 2 | 10 | 20 | TG   | 6  | 5  |
| 289617 | 52 | 2071328 | 2071342 | 3 | 5  | 15 | CTG  | 32 | 4  |
| 289619 | 52 | 2073993 | 2074024 | 2 | 16 | 32 | TG   | 14 | 12 |
| 289625 | 52 | 2090198 | 2090233 | 2 | 18 | 36 | GT   | 8  | 8  |
| 289631 | 52 | 2097650 | 2097665 | 2 | 8  | 16 | TC   | 25 | 3  |
| 289635 | 52 | 2104796 | 2104821 | 2 | 13 | 26 | AC   | 27 | 10 |
| 289638 | 52 | 2111527 | 2111546 | 2 | 10 | 20 | CA   | 26 | 14 |
| 289643 | 52 | 2119405 | 2119434 | 3 | 10 | 30 | CTC  | 11 | 7  |
| 289649 | 52 | 2138615 | 2138630 | 4 | 4  | 16 | TTTG | 16 | 9  |
| 289652 | 52 | 2143442 | 2143463 | 2 | 11 | 22 | AC   | 16 | 4  |
| 289653 | 52 | 2146835 | 2146866 | 4 | 8  | 32 | ACTG | 12 | 4  |
| 289655 | 52 | 2149236 | 2149279 | 4 | 11 | 44 | TGAT | 18 | 8  |
| 289658 | 52 | 2154980 | 2154991 | 2 | 6  | 12 | GA   | 20 | 4  |
| 289659 | 52 | 2156875 | 2156892 | 3 | 6  | 18 | TGA  | 27 | 5  |
| 289665 | 52 | 2172888 | 2172925 | 2 | 19 | 38 | AG   | 7  | 12 |
| 289666 | 52 | 2173033 | 2173070 | 2 | 19 | 38 | GT   | 24 | 19 |
| 289673 | 52 | 2179844 | 2179855 | 2 | 6  | 12 | TG   | 7  | 5  |
| 289675 | 52 | 2182683 | 2182696 | 2 | 7  | 14 | CT   | 16 | 4  |
| 289677 | 52 | 2186722 | 2186737 | 2 | 8  | 16 | AC   | 22 | 4  |
| 289682 | 52 | 2200712 | 2200727 | 2 | 8  | 16 | GT   | 19 | 10 |
| 289685 | 52 | 2207259 | 2207286 | 2 | 14 | 28 | GT   | 13 | 13 |
| 289690 | 52 | 2218266 | 2218293 | 2 | 14 | 28 | GA   | 15 | 4  |
| 289692 | 52 | 2221771 | 2221790 | 2 | 10 | 20 | GT   | 15 | 8  |
| 289693 | 52 | 2221946 | 2221959 | 2 | 7  | 14 | GT   | 24 | 10 |
| 289697 | 52 | 2227117 | 2227136 | 2 | 10 | 20 | AC   | 18 | 7  |
| 289698 | 52 | 2227290 | 2227321 | 2 | 16 | 32 | GT   | 12 | 6  |
| 289712 | 52 | 2256285 | 2256298 | 2 | 7  | 14 | CA   | 13 | 5  |
| 289713 | 52 | 2256301 | 2256314 | 2 | 7  | 14 | CA   | 14 | 6  |
| 289714 | 52 | 2256851 | 2256865 | 3 | 5  | 15 | AAT  | 17 | 4  |
| 289722 | 52 | 2275252 | 2275277 | 2 | 13 | 26 | CA   | 23 | 12 |
| 289727 | 52 | 2291243 | 2291256 | 2 | 7  | 14 | TG   | 21 | 4  |
| 289730 | 52 | 2295323 | 2295340 | 2 | 9  | 18 | CA   | 20 | 8  |
| 289732 | 52 | 2296293 | 2296320 | 4 | 7  | 28 | TAAA | 7  | 4  |
| 289735 | 52 | 2306995 | 2307012 | 2 | 9  | 18 | CA   | 25 | 6  |
| 289736 | 52 | 2308465 | 2308482 | 2 | 9  | 18 | AC   | 20 | 5  |
| 289737 | 52 | 2310603 | 2310616 | 2 | 7  | 14 | CA   | 21 | 6  |
| 289738 | 52 | 2310619 | 2310636 | 2 | 9  | 18 | CA   | 21 | 5  |
| 289741 | 52 | 2317338 | 2317355 | 2 | 9  | 18 | AG   | 21 | 4  |
| 289742 | 52 | 2317439 | 2317454 | 2 | 8  | 16 | TC   | 8  | 4  |
| 289744 | 52 | 2317492 | 2317503 | 2 | 6  | 12 | CT   | 14 | 6  |
| 289745 | 52 | 2317948 | 2317973 | 2 | 13 | 26 | GT   | 10 | 8  |
| 289746 | 52 | 2317998 | 2318011 | 2 | 7  | 14 | GT   | 23 | 5  |
| 289751 | 52 | 2319886 | 2319901 | 2 | 8  | 16 | TG   | 25 | 4  |
| 289755 | 52 | 2322010 | 2322025 | 4 | 4  | 16 | TGTA | 23 | 3  |
| 289757 | 52 | 2329868 | 2329885 | 2 | 9  | 18 | AC   | 26 | 7  |
| 289758 | 52 | 2331562 | 2331579 | 2 | 9  | 18 | TG   | 26 | 4  |



|        |    |         |         |   |    |    |      |    |    |
|--------|----|---------|---------|---|----|----|------|----|----|
| 289759 | 52 | 2331797 | 2331810 | 2 | 7  | 14 | AC   | 30 | 5  |
| 289763 | 52 | 2334494 | 2334523 | 2 | 15 | 30 | AC   | 18 | 7  |
| 289769 | 52 | 2350506 | 2350517 | 2 | 6  | 12 | TG   | 20 | 3  |
| 289770 | 52 | 2350736 | 2350755 | 2 | 10 | 20 | TG   | 23 | 5  |
| 289771 | 52 | 2355586 | 2355615 | 2 | 15 | 30 | GT   | 11 | 8  |
| 289774 | 52 | 2366084 | 2366095 | 2 | 6  | 12 | CA   | 21 | 3  |
| 289782 | 52 | 2382197 | 2382211 | 3 | 5  | 15 | GTT  | 19 | 10 |
| 289786 | 52 | 2392776 | 2392801 | 2 | 13 | 26 | TC   | 24 | 4  |
| 289789 | 52 | 2400304 | 2400359 | 2 | 28 | 56 | TG   | 8  | 8  |
| 289790 | 52 | 2401457 | 2401470 | 2 | 7  | 14 | CA   | 30 | 4  |
| 289791 | 52 | 2402728 | 2402777 | 2 | 25 | 50 | GT   | 14 | 9  |
| 289793 | 52 | 2404812 | 2404827 | 2 | 8  | 16 | TG   | 23 | 5  |
| 289799 | 52 | 2409264 | 2409291 | 2 | 14 | 28 | GT   | 22 | 8  |
| 289804 | 52 | 2412244 | 2412255 | 2 | 6  | 12 | GA   | 27 | 6  |
| 289805 | 52 | 2412256 | 2412271 | 2 | 8  | 16 | CA   | 27 | 9  |
| 289806 | 52 | 2412391 | 2412404 | 2 | 7  | 14 | TG   | 24 | 7  |
| 289807 | 52 | 2415453 | 2415470 | 2 | 9  | 18 | TG   | 26 | 4  |
| 289813 | 52 | 2421823 | 2421842 | 2 | 10 | 20 | CT   | 10 | 5  |
| 289814 | 52 | 2422111 | 2422156 | 2 | 23 | 46 | TG   | 15 | 13 |
| 289815 | 52 | 2423560 | 2423573 | 2 | 7  | 14 | AC   | 6  | 3  |
| 289818 | 52 | 2423893 | 2423916 | 2 | 12 | 24 | TG   | 17 | 13 |
| 289822 | 52 | 2426627 | 2426640 | 2 | 7  | 14 | GT   | 25 | 3  |
| 289823 | 52 | 2426764 | 2426795 | 2 | 16 | 32 | CA   | 10 | 11 |
| 289825 | 52 | 2434500 | 2434519 | 4 | 5  | 20 | GCAG | 18 | 6  |
| 289826 | 52 | 2435314 | 2435328 | 3 | 5  | 15 | GGT  | 24 | 3  |
| 289827 | 52 | 2435525 | 2435538 | 2 | 7  | 14 | CA   | 25 | 5  |
| 289828 | 52 | 2435707 | 2435727 | 3 | 7  | 21 | AGC  | 10 | 5  |
| 289836 | 52 | 2439449 | 2439472 | 3 | 8  | 24 | GCA  | 28 | 6  |
| 289837 | 52 | 2440972 | 2440987 | 4 | 4  | 16 | AAAC | 13 | 4  |
| 289839 | 52 | 2441876 | 2441893 | 3 | 6  | 18 | CAG  | 27 | 5  |
| 289840 | 52 | 2442096 | 2442109 | 2 | 7  | 14 | GT   | 22 | 3  |
| 289841 | 52 | 2443664 | 2443697 | 2 | 17 | 34 | CT   | 14 | 6  |
| 289848 | 52 | 2450929 | 2450946 | 2 | 9  | 18 | GT   | 28 | 6  |
| 289850 | 52 | 2459468 | 2459491 | 2 | 12 | 24 | TG   | 14 | 6  |
| 289851 | 52 | 2459629 | 2459652 | 2 | 12 | 24 | TG   | 11 | 9  |
| 289857 | 52 | 2460968 | 2461017 | 2 | 25 | 50 | GT   | 13 | 15 |
| 289863 | 52 | 2467498 | 2467509 | 2 | 6  | 12 | TG   | 20 | 3  |
| 289864 | 52 | 2467511 | 2467528 | 2 | 9  | 18 | GT   | 15 | 4  |
| 289868 | 52 | 2469817 | 2469834 | 2 | 9  | 18 | TG   | 14 | 4  |
| 289869 | 52 | 2469870 | 2469881 | 2 | 6  | 12 | TG   | 24 | 3  |
| 289870 | 52 | 2470311 | 2470328 | 2 | 9  | 18 | TC   | 15 | 13 |
| 289871 | 52 | 2470329 | 2470348 | 2 | 10 | 20 | AC   | 16 | 12 |
| 289875 | 52 | 2471556 | 2471575 | 4 | 5  | 20 | TCTG | 20 | 4  |
| 289882 | 52 | 2475208 | 2475245 | 2 | 19 | 38 | GT   | 11 | 8  |
| 289885 | 52 | 2479512 | 2479525 | 2 | 7  | 14 | GT   | 30 | 5  |
| 289889 | 52 | 2483121 | 2483140 | 4 | 5  | 20 | AGGC | 17 | 4  |
| 289890 | 52 | 2488425 | 2488438 | 2 | 7  | 14 | CT   | 24 | 5  |
| 289894 | 52 | 2503405 | 2503424 | 2 | 10 | 20 | GA   | 17 | 5  |
| 289897 | 52 | 2508038 | 2508059 | 2 | 11 | 22 | GT   | 14 | 4  |
| 289899 | 52 | 2510174 | 2510187 | 2 | 7  | 14 | GT   | 24 | 5  |
| 289905 | 52 | 2517187 | 2517214 | 2 | 14 | 28 | GT   | 16 | 9  |

|        |    |         |         |   |    |    |      |    |    |
|--------|----|---------|---------|---|----|----|------|----|----|
| 289907 | 52 | 2517627 | 2517652 | 2 | 13 | 26 | AC   | 6  | 10 |
| 289911 | 52 | 2526134 | 2526160 | 3 | 9  | 27 | AAG  | 18 | 12 |
| 289912 | 52 | 2527579 | 2527600 | 2 | 11 | 22 | CA   | 19 | 6  |
| 289914 | 52 | 2531715 | 2531726 | 2 | 6  | 12 | CA   | 17 | 9  |
| 289916 | 52 | 2533746 | 2533763 | 2 | 9  | 18 | TG   | 21 | 8  |
| 289917 | 52 | 2536739 | 2536760 | 2 | 11 | 22 | CA   | 13 | 5  |
| 289919 | 52 | 2539663 | 2539678 | 2 | 8  | 16 | CT   | 22 | 7  |
| 289922 | 52 | 2547570 | 2547593 | 2 | 12 | 24 | AG   | 21 | 4  |
| 289923 | 52 | 2548644 | 2548671 | 2 | 14 | 28 | TG   | 21 | 6  |
| 289930 | 52 | 2556476 | 2556493 | 2 | 9  | 18 | GT   | 19 | 9  |
| 289934 | 52 | 2560550 | 2560571 | 2 | 11 | 22 | TG   | 21 | 7  |
| 289936 | 52 | 2561605 | 2561622 | 2 | 9  | 18 | GT   | 17 | 6  |
| 289939 | 52 | 2563535 | 2563546 | 2 | 6  | 12 | TG   | 16 | 7  |
| 289941 | 52 | 2566043 | 2566072 | 2 | 15 | 30 | TC   | 9  | 7  |
| 289945 | 52 | 2567817 | 2567834 | 2 | 9  | 18 | CT   | 10 | 9  |
| 289947 | 52 | 2567863 | 2567876 | 2 | 7  | 14 | CA   | 14 | 8  |
| 289948 | 52 | 2568035 | 2568056 | 2 | 11 | 22 | TG   | 17 | 10 |
| 289954 | 52 | 2568758 | 2568775 | 2 | 9  | 18 | AC   | 22 | 7  |
| 289955 | 52 | 2571183 | 2571202 | 2 | 10 | 20 | CA   | 17 | 17 |
| 289956 | 52 | 2571776 | 2571801 | 2 | 13 | 26 | CA   | 28 | 9  |
| 289957 | 52 | 2573413 | 2573426 | 2 | 7  | 14 | GT   | 24 | 6  |
| 289958 | 52 | 2574547 | 2574566 | 2 | 10 | 20 | TG   | 21 | 8  |
| 289959 | 52 | 2574609 | 2574622 | 2 | 7  | 14 | AC   | 21 | 4  |
| 289960 | 52 | 2575592 | 2575613 | 2 | 11 | 22 | GT   | 24 | 9  |
| 289963 | 52 | 2579917 | 2579934 | 2 | 9  | 18 | AC   | 26 | 5  |
| 289967 | 52 | 2582573 | 2582600 | 2 | 14 | 28 | CA   | 15 | 11 |
| 289968 | 52 | 2583659 | 2583674 | 2 | 8  | 16 | GT   | 11 | 9  |
| 289969 | 52 | 2583676 | 2583687 | 2 | 6  | 12 | TG   | 13 | 14 |
| 289973 | 52 | 2590884 | 2590895 | 2 | 6  | 12 | GT   | 28 | 4  |
| 289974 | 52 | 2591044 | 2591075 | 2 | 16 | 32 | TG   | 18 | 11 |
| 289976 | 52 | 2595080 | 2595115 | 2 | 18 | 36 | GT   | 8  | 9  |
| 289985 | 52 | 2599207 | 2599230 | 4 | 6  | 24 | AACA | 21 | 4  |
| 289986 | 52 | 2599628 | 2599643 | 2 | 8  | 16 | CA   | 22 | 9  |
| 289989 | 52 | 2601596 | 2601617 | 2 | 11 | 22 | GA   | 20 | 5  |
| 289990 | 52 | 2609333 | 2609364 | 2 | 16 | 32 | AC   | 12 | 10 |
| 289992 | 52 | 2614795 | 2614806 | 2 | 6  | 12 | TG   | 36 | 3  |
| 289993 | 52 | 2617206 | 2617235 | 2 | 15 | 30 | GT   | 9  | 7  |
| 289994 | 52 | 2618790 | 2618807 | 2 | 9  | 18 | CA   | 21 | 4  |
| 289999 | 52 | 2625068 | 2625091 | 2 | 12 | 24 | CA   | 14 | 12 |
| 290003 | 52 | 2627908 | 2627919 | 2 | 6  | 12 | TA   | 20 | 4  |
| 290004 | 52 | 2628385 | 2628408 | 3 | 8  | 24 | CTT  | 18 | 6  |
| 290005 | 52 | 2628619 | 2628648 | 2 | 15 | 30 | GT   | 14 | 11 |
| 290007 | 52 | 2630626 | 2630641 | 2 | 8  | 16 | TC   | 23 | 7  |
| 290008 | 52 | 2630786 | 2630805 | 4 | 5  | 20 | GCGT | 7  | 4  |
| 290009 | 52 | 2631047 | 2631060 | 2 | 7  | 14 | GT   | 32 | 16 |
| 290020 | 52 | 2664319 | 2664330 | 2 | 6  | 12 | TG   | 11 | 8  |
| 290026 | 52 | 2673929 | 2673946 | 3 | 6  | 18 | TGA  | 26 | 4  |
| 290031 | 52 | 2681198 | 2681231 | 2 | 17 | 34 | CA   | 6  | 7  |
| 290038 | 52 | 2712326 | 2712359 | 2 | 17 | 34 | AG   | 10 | 12 |
| 290045 | 52 | 2751569 | 2751586 | 2 | 9  | 18 | GT   | 17 | 18 |
| 290046 | 52 | 2751747 | 2751782 | 2 | 18 | 36 | CA   | 16 | 10 |

|        |    |         |         |   |    |    |      |    |    |
|--------|----|---------|---------|---|----|----|------|----|----|
| 290048 | 52 | 2751958 | 2751987 | 2 | 15 | 30 | TG   | 16 | 13 |
| 290051 | 52 | 2758863 | 2758886 | 4 | 6  | 24 | CTTC | 30 | 6  |
| 290052 | 52 | 2758928 | 2758939 | 2 | 6  | 12 | CA   | 19 | 4  |
| 290053 | 52 | 2759280 | 2759343 | 4 | 16 | 64 | TCTA | 22 | 19 |
| 290056 | 52 | 2763667 | 2763694 | 2 | 14 | 28 | GT   | 21 | 9  |
| 290058 | 52 | 2770287 | 2770318 | 2 | 16 | 32 | CA   | 16 | 9  |
| 290060 | 52 | 2770790 | 2770805 | 2 | 8  | 16 | AG   | 14 | 3  |
| 290061 | 52 | 2770892 | 2770907 | 2 | 8  | 16 | CA   | 30 | 3  |
| 290065 | 52 | 2775495 | 2775514 | 2 | 10 | 20 | AC   | 14 | 8  |
| 290066 | 52 | 2775620 | 2775649 | 2 | 15 | 30 | AC   | 12 | 9  |
| 290067 | 52 | 2775865 | 2775900 | 2 | 18 | 36 | TC   | 14 | 8  |
| 290068 | 52 | 2776429 | 2776444 | 2 | 8  | 16 | GT   | 16 | 7  |
| 290069 | 52 | 2776671 | 2776684 | 2 | 7  | 14 | CA   | 22 | 3  |
| 290072 | 52 | 2777189 | 2777204 | 2 | 8  | 16 | TG   | 16 | 8  |
| 290073 | 52 | 2777338 | 2777369 | 2 | 16 | 32 | GT   | 10 | 10 |
| 290076 | 52 | 2777882 | 2777897 | 2 | 8  | 16 | AC   | 23 | 4  |
| 290077 | 52 | 2779401 | 2779414 | 2 | 7  | 14 | TC   | 15 | 4  |
| 290082 | 52 | 2781469 | 2781484 | 4 | 4  | 16 | AAAT | 19 | 5  |
| 290083 | 52 | 2781507 | 2781520 | 2 | 7  | 14 | AC   | 22 | 3  |
| 290087 | 52 | 2789833 | 2789844 | 2 | 6  | 12 | TG   | 31 | 3  |
| 290089 | 52 | 2790637 | 2790664 | 2 | 14 | 28 | GT   | 16 | 12 |
| 290090 | 52 | 2791110 | 2791129 | 4 | 5  | 20 | AAAT | 16 | 7  |
| 290092 | 52 | 2794822 | 2794839 | 2 | 9  | 18 | TC   | 22 | 5  |
| 290095 | 52 | 2800654 | 2800671 | 3 | 6  | 18 | TTA  | 25 | 4  |
| 290099 | 52 | 2806814 | 2806833 | 2 | 10 | 20 | GA   | 22 | 4  |
| 290100 | 52 | 2806904 | 2806919 | 2 | 8  | 16 | GT   | 20 | 5  |
| 290104 | 52 | 2813373 | 2813388 | 4 | 4  | 16 | AGAA | 29 | 3  |
| 290105 | 52 | 2814328 | 2814363 | 2 | 18 | 36 | TG   | 6  | 7  |
| 290107 | 52 | 2814966 | 2814989 | 2 | 12 | 24 | TG   | 15 | 7  |
| 290109 | 52 | 2816238 | 2816283 | 2 | 23 | 46 | TC   | 10 | 11 |
| 290110 | 52 | 2816312 | 2816335 | 2 | 12 | 24 | TG   | 16 | 7  |
| 290112 | 52 | 2819171 | 2819182 | 2 | 6  | 12 | TG   | 11 | 3  |
| 290113 | 52 | 2819195 | 2819210 | 2 | 8  | 16 | TG   | 11 | 4  |
| 290114 | 52 | 2819212 | 2819225 | 2 | 7  | 14 | GT   | 26 | 3  |
| 290115 | 52 | 2819349 | 2819360 | 2 | 6  | 12 | CG   | 34 | 4  |
| 290116 | 52 | 2819568 | 2819588 | 3 | 7  | 21 | GCA  | 26 | 10 |
| 290118 | 52 | 2819950 | 2819961 | 2 | 6  | 12 | CT   | 27 | 4  |
| 290119 | 52 | 2824857 | 2824874 | 2 | 9  | 18 | CA   | 20 | 10 |
| 290120 | 52 | 2833697 | 2833722 | 2 | 13 | 26 | CA   | 21 | 13 |
| 290121 | 52 | 2834163 | 2834183 | 3 | 7  | 21 | GAG  | 20 | 3  |
| 290123 | 52 | 2837622 | 2837635 | 2 | 7  | 14 | CA   | 24 | 4  |
| 290124 | 52 | 2837671 | 2837682 | 2 | 6  | 12 | CA   | 26 | 3  |
| 290127 | 52 | 2840129 | 2840146 | 2 | 9  | 18 | TG   | 15 | 4  |
| 290129 | 52 | 2846423 | 2846462 | 2 | 20 | 40 | GT   | 9  | 8  |
| 290130 | 52 | 2846484 | 2846501 | 2 | 9  | 18 | AC   | 10 | 6  |
| 290133 | 52 | 2848084 | 2848099 | 4 | 4  | 16 | ATTT | 23 | 3  |
| 290139 | 52 | 2861021 | 2861034 | 2 | 7  | 14 | CA   | 21 | 7  |
| 290141 | 52 | 2864654 | 2864689 | 2 | 18 | 36 | GT   | 8  | 8  |
| 290143 | 52 | 2870276 | 2870291 | 4 | 4  | 16 | CCTC | 17 | 3  |
| 290145 | 52 | 2870866 | 2870893 | 2 | 14 | 28 | GT   | 15 | 16 |
| 290154 | 52 | 2877237 | 2877268 | 4 | 8  | 32 | TATT | 13 | 4  |

|        |    |         |         |   |    |    |      |    |    |
|--------|----|---------|---------|---|----|----|------|----|----|
| 290161 | 52 | 2884154 | 2884171 | 3 | 6  | 18 | CCG  | 23 | 7  |
| 290164 | 52 | 2887000 | 2887021 | 2 | 11 | 22 | CA   | 20 | 10 |
| 290170 | 52 | 2899263 | 2899284 | 2 | 11 | 22 | GT   | 14 | 11 |
| 290174 | 52 | 2904948 | 2904963 | 4 | 4  | 16 | ATAG | 16 | 3  |
| 290180 | 52 | 2910035 | 2910064 | 2 | 15 | 30 | TG   | 15 | 10 |
| 290181 | 52 | 2912400 | 2912419 | 2 | 10 | 20 | AC   | 21 | 10 |
| 290183 | 52 | 2913000 | 2913020 | 3 | 7  | 21 | GAG  | 17 | 5  |
| 290187 | 52 | 2927789 | 2927822 | 2 | 17 | 34 | TG   | 14 | 8  |
| 290189 | 52 | 2928132 | 2928152 | 3 | 7  | 21 | CCT  | 23 | 3  |
| 290190 | 52 | 2930030 | 2930083 | 2 | 27 | 54 | TG   | 7  | 8  |
| 290217 | 52 | 2969778 | 2969791 | 2 | 7  | 14 | GT   | 29 | 6  |
| 290250 | 52 | 3070773 | 3070786 | 2 | 7  | 14 | GT   | 22 | 3  |
| 290253 | 52 | 3085400 | 3085417 | 3 | 6  | 18 | CTG  | 26 | 5  |
| 290257 | 52 | 3099223 | 3099238 | 2 | 8  | 16 | GT   | 21 | 4  |
| 290258 | 52 | 3100910 | 3100941 | 2 | 16 | 32 | AC   | 14 | 12 |
| 290270 | 52 | 3119324 | 3119341 | 2 | 9  | 18 | AC   | 27 | 8  |
| 290275 | 52 | 3126167 | 3126190 | 3 | 8  | 24 | GAA  | 16 | 7  |
| 290277 | 52 | 3126430 | 3126453 | 2 | 12 | 24 | GT   | 21 | 7  |
| 290278 | 52 | 3126610 | 3126635 | 2 | 13 | 26 | TG   | 11 | 9  |
| 290279 | 52 | 3127121 | 3127132 | 2 | 6  | 12 | AG   | 22 | 7  |
| 290280 | 52 | 3127167 | 3127182 | 2 | 8  | 16 | TG   | 22 | 8  |
| 290281 | 52 | 3127184 | 3127195 | 2 | 6  | 12 | GT   | 24 | 9  |
| 290291 | 52 | 3136766 | 3136779 | 2 | 7  | 14 | TG   | 26 | 3  |
| 290292 | 52 | 3136883 | 3136902 | 2 | 10 | 20 | GT   | 21 | 9  |
| 290301 | 52 | 3158439 | 3158452 | 2 | 7  | 14 | TG   | 30 | 9  |
| 290303 | 52 | 3162501 | 3162548 | 4 | 12 | 48 | GATG | 21 | 10 |
| 290321 | 52 | 3200580 | 3200599 | 2 | 10 | 20 | AC   | 15 | 8  |
| 290322 | 52 | 3204620 | 3204643 | 2 | 12 | 24 | TG   | 17 | 4  |
| 290327 | 52 | 3214792 | 3214803 | 2 | 6  | 12 | TC   | 14 | 3  |
| 290352 | 52 | 3323446 | 3323465 | 2 | 10 | 20 | TG   | 10 | 5  |
| 290369 | 52 | 3378080 | 3378103 | 2 | 12 | 24 | TG   | 17 | 9  |
| 290373 | 52 | 3400305 | 3400332 | 2 | 14 | 28 | AG   | 14 | 9  |
| 290376 | 52 | 3405928 | 3405955 | 2 | 14 | 28 | AG   | 14 | 5  |
| 290385 | 52 | 3447709 | 3447726 | 2 | 9  | 18 | TG   | 16 | 4  |
| 290400 | 52 | 3485388 | 3485399 | 2 | 6  | 12 | AT   | 19 | 5  |
| 290401 | 52 | 3489194 | 3489225 | 2 | 16 | 32 | GT   | 9  | 5  |
| 290419 | 52 | 3534264 | 3534277 | 2 | 7  | 14 | AT   | 21 | 4  |
| 290435 | 53 | 41876   | 41897   | 2 | 11 | 22 | AC   | 20 | 5  |
| 290448 | 53 | 77219   | 77232   | 2 | 7  | 14 | CA   | 26 | 4  |
| 290458 | 53 | 93022   | 93041   | 2 | 10 | 20 | TG   | 28 | 3  |
| 290470 | 53 | 154827  | 154858  | 2 | 16 | 32 | TC   | 7  | 6  |
| 290473 | 53 | 164647  | 164662  | 2 | 8  | 16 | GT   | 25 | 5  |
| 290482 | 53 | 204319  | 204336  | 2 | 9  | 18 | AC   | 20 | 6  |
| 290485 | 53 | 213253  | 213280  | 2 | 14 | 28 | GT   | 9  | 7  |
| 290491 | 53 | 235576  | 235599  | 4 | 6  | 24 | ACAG | 28 | 3  |
| 290516 | 53 | 245755  | 245806  | 2 | 26 | 52 | TG   | 6  | 9  |
| 290517 | 53 | 248647  | 248674  | 2 | 14 | 28 | CA   | 16 | 5  |
| 290519 | 53 | 250299  | 250322  | 4 | 6  | 24 | ATAG | 35 | 3  |
| 290524 | 53 | 253263  | 253288  | 2 | 13 | 26 | CA   | 8  | 3  |
| 290526 | 53 | 258160  | 258187  | 2 | 14 | 28 | AC   | 6  | 4  |
| 290535 | 53 | 281407  | 281422  | 2 | 8  | 16 | TG   | 23 | 3  |

|        |    |        |        |   |    |    |      |    |    |
|--------|----|--------|--------|---|----|----|------|----|----|
| 290536 | 53 | 286724 | 286735 | 2 | 6  | 12 | GA   | 33 | 4  |
| 290544 | 53 | 302695 | 302714 | 4 | 5  | 20 | TCTG | 20 | 3  |
| 290545 | 53 | 302794 | 302809 | 2 | 8  | 16 | TG   | 31 | 3  |
| 290546 | 53 | 303001 | 303048 | 2 | 24 | 48 | TG   | 11 | 17 |
| 290551 | 53 | 309908 | 309933 | 2 | 13 | 26 | TG   | 9  | 7  |
| 290552 | 53 | 311550 | 311561 | 2 | 6  | 12 | AC   | 27 | 3  |
| 290554 | 53 | 335323 | 335348 | 2 | 13 | 26 | AC   | 20 | 4  |
| 290559 | 53 | 344638 | 344655 | 2 | 9  | 18 | CA   | 24 | 4  |
| 290563 | 53 | 355303 | 355314 | 2 | 6  | 12 | TG   | 28 | 3  |
| 290581 | 53 | 401350 | 401363 | 2 | 7  | 14 | GT   | 16 | 4  |
| 290586 | 53 | 408366 | 408395 | 2 | 15 | 30 | AC   | 15 | 6  |
| 290590 | 53 | 419525 | 419560 | 3 | 12 | 36 | AAC  | 20 | 5  |
| 290643 | 53 | 523263 | 523290 | 4 | 7  | 28 | GTGA | 22 | 3  |
| 290644 | 53 | 524285 | 524328 | 2 | 22 | 44 | CA   | 14 | 9  |
| 290648 | 53 | 528221 | 528232 | 2 | 6  | 12 | AC   | 24 | 3  |
| 290664 | 53 | 585626 | 585639 | 2 | 7  | 14 | CA   | 29 | 4  |
| 290675 | 53 | 608954 | 608985 | 2 | 16 | 32 | AC   | 10 | 5  |
| 290680 | 53 | 627525 | 627538 | 2 | 7  | 14 | AG   | 19 | 3  |
| 290688 | 53 | 634271 | 634298 | 4 | 7  | 28 | ATTG | 22 | 4  |
| 290689 | 53 | 634402 | 634417 | 2 | 8  | 16 | TG   | 26 | 4  |
| 290706 | 53 | 656191 | 656214 | 2 | 12 | 24 | AC   | 20 | 5  |
| 290716 | 53 | 671281 | 671298 | 2 | 9  | 18 | TG   | 25 | 3  |
| 290719 | 53 | 675222 | 675249 | 2 | 14 | 28 | GT   | 11 | 9  |
| 290733 | 53 | 695859 | 695878 | 2 | 10 | 20 | CA   | 10 | 7  |
| 290738 | 53 | 710472 | 710499 | 2 | 14 | 28 | GT   | 13 | 10 |
| 290743 | 53 | 729569 | 729583 | 3 | 5  | 15 | TAA  | 32 | 3  |
| 290744 | 53 | 730225 | 730262 | 2 | 19 | 38 | AG   | 8  | 9  |
| 290749 | 53 | 750759 | 750774 | 2 | 8  | 16 | TG   | 19 | 3  |
| 290752 | 53 | 768049 | 768076 | 2 | 14 | 28 | TG   | 11 | 7  |
| 290757 | 53 | 781577 | 781598 | 2 | 11 | 22 | TC   | 16 | 5  |
| 290760 | 53 | 789399 | 789425 | 3 | 9  | 27 | CAC  | 18 | 4  |
| 290768 | 53 | 809985 | 810012 | 2 | 14 | 28 | AC   | 11 | 11 |
| 290782 | 53 | 851429 | 851454 | 2 | 13 | 26 | TG   | 27 | 6  |
| 290786 | 53 | 856569 | 856592 | 2 | 12 | 24 | AC   | 9  | 4  |
| 290788 | 53 | 859531 | 859558 | 2 | 14 | 28 | AC   | 10 | 9  |
| 290790 | 53 | 866256 | 866281 | 2 | 13 | 26 | CA   | 14 | 6  |
| 290791 | 53 | 867155 | 867170 | 2 | 8  | 16 | GT   | 17 | 3  |
| 290797 | 53 | 869959 | 869982 | 4 | 6  | 24 | AAAT | 16 | 6  |
| 290800 | 53 | 874859 | 874874 | 2 | 8  | 16 | TA   | 12 | 3  |
| 290801 | 53 | 878810 | 878837 | 4 | 7  | 28 | AAAG | 14 | 6  |
| 290802 | 53 | 879363 | 879388 | 2 | 13 | 26 | TG   | 25 | 6  |
| 290803 | 53 | 881738 | 881767 | 2 | 15 | 30 | TG   | 10 | 8  |
| 290812 | 53 | 896214 | 896257 | 4 | 11 | 44 | TATC | 9  | 6  |
| 290813 | 53 | 904145 | 904156 | 2 | 6  | 12 | AC   | 27 | 3  |
| 290814 | 53 | 907121 | 907180 | 4 | 15 | 60 | ATAG | 26 | 19 |
| 290819 | 53 | 931985 | 931996 | 2 | 6  | 12 | AG   | 22 | 4  |
| 290820 | 53 | 932185 | 932206 | 2 | 11 | 22 | GT   | 13 | 8  |
| 290824 | 53 | 939360 | 939375 | 4 | 4  | 16 | TAGA | 14 | 3  |
| 290826 | 53 | 943188 | 943233 | 2 | 23 | 46 | AC   | 10 | 14 |
| 290827 | 53 | 958172 | 958185 | 2 | 7  | 14 | CA   | 31 | 6  |
| 290830 | 53 | 966097 | 966114 | 3 | 6  | 18 | TGT  | 22 | 3  |

|        |    |         |         |   |    |    |      |    |    |
|--------|----|---------|---------|---|----|----|------|----|----|
| 290834 | 53 | 971956  | 971987  | 2 | 16 | 32 | AC   | 10 | 9  |
| 290835 | 53 | 972486  | 972509  | 3 | 8  | 24 | AAC  | 10 | 9  |
| 290840 | 53 | 982606  | 982629  | 2 | 12 | 24 | AC   | 23 | 6  |
| 290841 | 53 | 984438  | 984459  | 2 | 11 | 22 | TG   | 14 | 4  |
| 290870 | 53 | 993582  | 993593  | 2 | 6  | 12 | TA   | 17 | 6  |
| 290874 | 53 | 1002867 | 1002898 | 4 | 8  | 32 | ATGA | 21 | 5  |
| 290879 | 53 | 1013597 | 1013618 | 2 | 11 | 22 | CA   | 18 | 19 |
| 290880 | 53 | 1015376 | 1015387 | 2 | 6  | 12 | CA   | 27 | 3  |
| 290881 | 53 | 1015418 | 1015433 | 2 | 8  | 16 | CA   | 14 | 3  |
| 290883 | 53 | 1015658 | 1015693 | 2 | 18 | 36 | AC   | 8  | 12 |
| 290885 | 53 | 1017604 | 1017639 | 2 | 18 | 36 | CT   | 10 | 6  |
| 290886 | 53 | 1017672 | 1017683 | 2 | 6  | 12 | CA   | 13 | 4  |
| 290887 | 53 | 1017685 | 1017702 | 2 | 9  | 18 | AC   | 14 | 6  |
| 290889 | 53 | 1018142 | 1018175 | 2 | 17 | 34 | TG   | 9  | 6  |
| 290892 | 53 | 1021690 | 1021705 | 2 | 8  | 16 | CA   | 22 | 6  |
| 290894 | 53 | 1028245 | 1028264 | 2 | 10 | 20 | CA   | 12 | 9  |
| 290897 | 53 | 1029109 | 1029132 | 2 | 12 | 24 | AC   | 14 | 6  |
| 290899 | 53 | 1032163 | 1032184 | 2 | 11 | 22 | TG   | 22 | 5  |
| 290903 | 53 | 1033084 | 1033097 | 2 | 7  | 14 | TG   | 21 | 4  |
| 290915 | 53 | 1040841 | 1040872 | 2 | 16 | 32 | GT   | 16 | 13 |
| 290919 | 53 | 1056622 | 1056677 | 4 | 14 | 56 | TTGA | 23 | 9  |
| 290933 | 53 | 1094312 | 1094331 | 2 | 10 | 20 | GT   | 8  | 6  |
| 290934 | 53 | 1095082 | 1095095 | 2 | 7  | 14 | GT   | 23 | 4  |
| 290937 | 53 | 1095749 | 1095762 | 2 | 7  | 14 | GT   | 33 | 3  |
| 290955 | 53 | 1137165 | 1137190 | 2 | 13 | 26 | GT   | 9  | 9  |
| 290956 | 53 | 1140080 | 1140135 | 2 | 28 | 56 | AC   | 8  | 13 |
| 290959 | 53 | 1147779 | 1147796 | 3 | 6  | 18 | ACA  | 12 | 4  |
| 290962 | 53 | 1150825 | 1150842 | 2 | 9  | 18 | TG   | 28 | 7  |
| 290963 | 53 | 1152768 | 1152805 | 2 | 19 | 38 | CA   | 16 | 14 |
| 290964 | 53 | 1153109 | 1153128 | 2 | 10 | 20 | GT   | 20 | 4  |
| 290970 | 53 | 1171674 | 1171693 | 2 | 10 | 20 | CA   | 15 | 11 |
| 290971 | 53 | 1175021 | 1175036 | 4 | 4  | 16 | AGAA | 21 | 4  |
| 290972 | 53 | 1177403 | 1177420 | 2 | 9  | 18 | GT   | 11 | 3  |
| 290973 | 53 | 1177422 | 1177433 | 2 | 6  | 12 | TG   | 11 | 4  |
| 290976 | 53 | 1178021 | 1178038 | 2 | 9  | 18 | CA   | 18 | 16 |
| 290978 | 53 | 1178339 | 1178374 | 2 | 18 | 36 | AC   | 8  | 7  |
| 290986 | 53 | 1198876 | 1198897 | 2 | 11 | 22 | AC   | 17 | 7  |
| 290989 | 53 | 1202554 | 1202575 | 2 | 11 | 22 | CA   | 17 | 8  |
| 290995 | 53 | 1205036 | 1205073 | 2 | 19 | 38 | CT   | 10 | 7  |
| 290997 | 53 | 1211331 | 1211350 | 2 | 10 | 20 | GT   | 18 | 13 |
| 291001 | 53 | 1220738 | 1220753 | 2 | 8  | 16 | GT   | 25 | 4  |
| 291003 | 53 | 1228995 | 1229006 | 2 | 6  | 12 | TG   | 14 | 3  |
| 291004 | 53 | 1231812 | 1231823 | 2 | 6  | 12 | CA   | 16 | 4  |
| 291005 | 53 | 1235154 | 1235183 | 2 | 15 | 30 | CA   | 6  | 7  |
| 291009 | 53 | 1243333 | 1243350 | 2 | 9  | 18 | AC   | 9  | 8  |
| 291011 | 53 | 1248609 | 1248624 | 2 | 8  | 16 | TG   | 27 | 7  |
| 291017 | 53 | 1255469 | 1255496 | 4 | 7  | 28 | AAAT | 18 | 6  |
| 291018 | 53 | 1256155 | 1256174 | 2 | 10 | 20 | GT   | 20 | 5  |
| 291024 | 53 | 1259328 | 1259343 | 4 | 4  | 16 | ATGG | 11 | 3  |
| 291033 | 53 | 1266075 | 1266136 | 2 | 31 | 62 | TG   | 8  | 8  |
| 291039 | 53 | 1271914 | 1271946 | 3 | 11 | 33 | ATT  | 13 | 7  |

|        |    |         |         |   |    |    |      |    |    |
|--------|----|---------|---------|---|----|----|------|----|----|
| 291042 | 53 | 1276564 | 1276587 | 2 | 12 | 24 | TG   | 16 | 6  |
| 291043 | 53 | 1276882 | 1276899 | 2 | 9  | 18 | TG   | 22 | 8  |
| 291044 | 53 | 1280904 | 1280918 | 3 | 5  | 15 | GTA  | 29 | 3  |
| 291045 | 53 | 1284373 | 1284394 | 2 | 11 | 22 | TG   | 21 | 8  |
| 291050 | 53 | 1298991 | 1299018 | 2 | 14 | 28 | TG   | 15 | 7  |
| 291051 | 53 | 1300912 | 1300927 | 2 | 8  | 16 | CA   | 28 | 3  |
| 291054 | 53 | 1303910 | 1303931 | 2 | 11 | 22 | GT   | 26 | 5  |
| 291055 | 53 | 1304197 | 1304212 | 2 | 8  | 16 | AC   | 23 | 9  |
| 291058 | 53 | 1306955 | 1306996 | 2 | 21 | 42 | TG   | 16 | 11 |
| 291066 | 53 | 1329198 | 1329227 | 2 | 15 | 30 | GT   | 6  | 7  |
| 291070 | 53 | 1340610 | 1340633 | 2 | 12 | 24 | AC   | 22 | 18 |
| 291071 | 53 | 1341712 | 1341723 | 2 | 6  | 12 | TG   | 23 | 3  |
| 291074 | 53 | 1351041 | 1351068 | 2 | 14 | 28 | GT   | 24 | 7  |
| 291077 | 53 | 1353559 | 1353592 | 2 | 17 | 34 | TG   | 14 | 9  |
| 291080 | 53 | 1355595 | 1355612 | 2 | 9  | 18 | GA   | 22 | 3  |
| 291081 | 53 | 1355659 | 1355682 | 2 | 12 | 24 | GT   | 12 | 9  |
| 291083 | 53 | 1357354 | 1357373 | 2 | 10 | 20 | GT   | 19 | 4  |
| 291085 | 53 | 1359281 | 1359300 | 2 | 10 | 20 | GA   | 10 | 8  |
| 291090 | 53 | 1365232 | 1365247 | 2 | 8  | 16 | TG   | 23 | 5  |
| 291093 | 53 | 1370051 | 1370082 | 2 | 16 | 32 | GT   | 8  | 9  |
| 291094 | 53 | 1370490 | 1370515 | 2 | 13 | 26 | AG   | 8  | 4  |
| 291097 | 53 | 1373505 | 1373520 | 4 | 4  | 16 | AAAT | 34 | 3  |
| 291098 | 53 | 1374683 | 1374712 | 2 | 15 | 30 | GT   | 13 | 11 |
| 291099 | 53 | 1376918 | 1376932 | 3 | 5  | 15 | ATT  | 21 | 6  |
| 291100 | 53 | 1376933 | 1376947 | 3 | 5  | 15 | GTT  | 11 | 3  |
| 291101 | 53 | 1378621 | 1378642 | 2 | 11 | 22 | CA   | 16 | 6  |
| 291114 | 53 | 1386715 | 1386752 | 2 | 19 | 38 | AC   | 8  | 11 |
| 291118 | 53 | 1391584 | 1391597 | 2 | 7  | 14 | AC   | 23 | 7  |
| 291119 | 53 | 1392600 | 1392619 | 2 | 10 | 20 | AC   | 16 | 4  |
| 291121 | 53 | 1398504 | 1398521 | 2 | 9  | 18 | TG   | 13 | 5  |
| 291128 | 53 | 1433302 | 1433329 | 4 | 7  | 28 | TCTA | 19 | 5  |
| 291145 | 53 | 1454414 | 1454433 | 2 | 10 | 20 | TC   | 14 | 5  |
| 291149 | 53 | 1467377 | 1467420 | 2 | 22 | 44 | CA   | 11 | 9  |
| 291157 | 53 | 1477279 | 1477294 | 4 | 4  | 16 | TGAT | 31 | 4  |
| 291158 | 53 | 1478248 | 1478259 | 2 | 6  | 12 | AC   | 28 | 5  |
| 291161 | 53 | 1491009 | 1491024 | 2 | 8  | 16 | CA   | 23 | 6  |
| 291162 | 53 | 1494340 | 1494379 | 2 | 20 | 40 | CA   | 12 | 12 |
| 291164 | 53 | 1494777 | 1494792 | 2 | 8  | 16 | CA   | 16 | 6  |
| 291181 | 53 | 1522017 | 1522040 | 2 | 12 | 24 | AC   | 19 | 7  |
| 291184 | 53 | 1523823 | 1523838 | 2 | 8  | 16 | AC   | 22 | 3  |
| 291186 | 53 | 1525090 | 1525117 | 4 | 7  | 28 | ACAG | 30 | 3  |
| 291187 | 53 | 1525572 | 1525591 | 2 | 10 | 20 | CA   | 14 | 4  |
| 291197 | 53 | 1543062 | 1543079 | 3 | 6  | 18 | TTG  | 32 | 3  |
| 291201 | 53 | 1551609 | 1551626 | 2 | 9  | 18 | CA   | 24 | 7  |
| 291203 | 53 | 1558908 | 1558929 | 2 | 11 | 22 | GT   | 16 | 6  |
| 291220 | 53 | 1586415 | 1586441 | 3 | 9  | 27 | GGA  | 9  | 4  |
| 291225 | 53 | 1614547 | 1614561 | 3 | 5  | 15 | AGC  | 34 | 5  |
| 291233 | 53 | 1642734 | 1642753 | 2 | 10 | 20 | TG   | 12 | 8  |
| 291238 | 53 | 1651408 | 1651425 | 2 | 9  | 18 | CA   | 16 | 5  |
| 291239 | 53 | 1652801 | 1652812 | 2 | 6  | 12 | TG   | 17 | 5  |
| 291248 | 53 | 1676495 | 1676530 | 2 | 18 | 36 | CA   | 9  | 9  |

|        |    |         |         |   |    |    |      |    |    |
|--------|----|---------|---------|---|----|----|------|----|----|
| 291257 | 53 | 1708305 | 1708320 | 2 | 8  | 16 | AC   | 16 | 6  |
| 291258 | 53 | 1709695 | 1709712 | 3 | 6  | 18 | ATT  | 21 | 9  |
| 291277 | 53 | 1755455 | 1755488 | 2 | 17 | 34 | AC   | 13 | 6  |
| 291280 | 53 | 1761594 | 1761625 | 2 | 16 | 32 | TG   | 10 | 11 |
| 291285 | 53 | 1769664 | 1769677 | 2 | 7  | 14 | GT   | 21 | 4  |
| 291290 | 53 | 1777982 | 1777993 | 2 | 6  | 12 | TC   | 31 | 3  |
| 291292 | 53 | 1778029 | 1778056 | 2 | 14 | 28 | CA   | 15 | 7  |
| 291295 | 53 | 1796665 | 1796678 | 2 | 7  | 14 | TG   | 19 | 5  |
| 291296 | 53 | 1799127 | 1799148 | 2 | 11 | 22 | CA   | 21 | 5  |
| 291302 | 53 | 1809069 | 1809122 | 2 | 27 | 54 | TC   | 13 | 7  |
| 291306 | 53 | 1819789 | 1819804 | 2 | 8  | 16 | AC   | 11 | 6  |
| 291307 | 53 | 1819994 | 1820011 | 2 | 9  | 18 | GA   | 18 | 4  |
| 291310 | 53 | 1822084 | 1822095 | 2 | 6  | 12 | TG   | 26 | 3  |
| 291324 | 53 | 1849777 | 1849828 | 2 | 26 | 52 | TG   | 8  | 10 |
| 291332 | 53 | 1873149 | 1873172 | 2 | 12 | 24 | AT   | 14 | 3  |
| 291333 | 53 | 1874721 | 1874748 | 2 | 14 | 28 | TG   | 12 | 6  |
| 291334 | 53 | 1874906 | 1874931 | 2 | 13 | 26 | CA   | 18 | 7  |
| 291335 | 53 | 1875009 | 1875036 | 2 | 14 | 28 | TG   | 14 | 5  |
| 291337 | 53 | 1875088 | 1875101 | 2 | 7  | 14 | TG   | 17 | 4  |
| 291341 | 53 | 1880423 | 1880462 | 2 | 20 | 40 | AG   | 12 | 11 |
| 291342 | 53 | 1885178 | 1885197 | 2 | 10 | 20 | CA   | 18 | 6  |
| 291348 | 53 | 1894451 | 1894470 | 4 | 5  | 20 | AAAT | 18 | 4  |
| 291385 | 53 | 1958410 | 1958442 | 3 | 11 | 33 | AAT  | 8  | 10 |
| 291401 | 53 | 1985931 | 1985942 | 2 | 6  | 12 | GT   | 11 | 3  |
| 291404 | 53 | 1999925 | 1999950 | 2 | 13 | 26 | GT   | 11 | 12 |
| 291405 | 53 | 2006946 | 2006969 | 4 | 6  | 24 | TCTA | 12 | 5  |
| 291406 | 53 | 2007039 | 2007052 | 2 | 7  | 14 | TG   | 18 | 3  |
| 291411 | 53 | 2034421 | 2034432 | 2 | 6  | 12 | CT   | 29 | 4  |
| 291416 | 53 | 2042161 | 2042180 | 4 | 5  | 20 | TAGC | 26 | 4  |
| 291419 | 53 | 2069585 | 2069610 | 2 | 13 | 26 | TG   | 11 | 5  |
| 291423 | 53 | 2073129 | 2073149 | 3 | 7  | 21 | GAT  | 26 | 4  |
| 291428 | 53 | 2085415 | 2085464 | 2 | 25 | 50 | AG   | 7  | 8  |
| 291429 | 53 | 2085726 | 2085749 | 2 | 12 | 24 | TG   | 11 | 10 |
| 291437 | 53 | 2102549 | 2102564 | 2 | 8  | 16 | GA   | 22 | 6  |
| 291438 | 53 | 2111229 | 2111244 | 4 | 4  | 16 | TTTA | 28 | 4  |
| 291450 | 53 | 2137949 | 2137960 | 2 | 6  | 12 | GT   | 23 | 6  |
| 291451 | 53 | 2137962 | 2137973 | 2 | 6  | 12 | TG   | 23 | 5  |
| 291452 | 53 | 2138052 | 2138063 | 2 | 6  | 12 | GT   | 19 | 4  |
| 291454 | 53 | 2142572 | 2142593 | 2 | 11 | 22 | TC   | 12 | 7  |
| 291456 | 53 | 2143771 | 2143794 | 4 | 6  | 24 | AATC | 23 | 4  |
| 291458 | 53 | 2145248 | 2145285 | 2 | 19 | 38 | AG   | 13 | 11 |
| 291460 | 53 | 2153299 | 2153310 | 2 | 6  | 12 | GT   | 20 | 10 |
| 291463 | 53 | 2157127 | 2157154 | 4 | 7  | 28 | TGGA | 21 | 8  |
| 291466 | 53 | 2160983 | 2160994 | 2 | 6  | 12 | CT   | 8  | 8  |
| 291477 | 53 | 2190781 | 2190798 | 2 | 9  | 18 | AG   | 7  | 3  |
| 291478 | 53 | 2191525 | 2191538 | 2 | 7  | 14 | GT   | 24 | 6  |
| 291493 | 53 | 2198845 | 2198858 | 2 | 7  | 14 | AG   | 29 | 3  |
| 291496 | 53 | 2199058 | 2199071 | 2 | 7  | 14 | CA   | 12 | 7  |
| 291500 | 53 | 2205720 | 2205740 | 3 | 7  | 21 | TTA  | 18 | 4  |
| 291504 | 53 | 2213404 | 2213449 | 2 | 23 | 46 | CA   | 7  | 7  |
| 291509 | 53 | 2224681 | 2224696 | 2 | 8  | 16 | TA   | 16 | 5  |



|        |    |         |         |   |    |    |      |    |    |
|--------|----|---------|---------|---|----|----|------|----|----|
| 291515 | 53 | 2238697 | 2238732 | 2 | 18 | 36 | GT   | 6  | 7  |
| 291525 | 53 | 2261141 | 2261164 | 2 | 12 | 24 | TG   | 18 | 7  |
| 291526 | 53 | 2261372 | 2261403 | 2 | 16 | 32 | AC   | 19 | 7  |
| 291533 | 53 | 2266564 | 2266575 | 2 | 6  | 12 | TA   | 10 | 3  |
| 291535 | 53 | 2270544 | 2270558 | 3 | 5  | 15 | GCA  | 32 | 3  |
| 291543 | 53 | 2275384 | 2275401 | 2 | 9  | 18 | CA   | 16 | 11 |
| 291545 | 53 | 2276811 | 2276854 | 2 | 22 | 44 | GT   | 18 | 12 |
| 291547 | 53 | 2283311 | 2283336 | 2 | 13 | 26 | AC   | 19 | 6  |
| 291552 | 53 | 2295634 | 2295661 | 2 | 14 | 28 | GT   | 19 | 11 |
| 291561 | 53 | 2318541 | 2318556 | 4 | 4  | 16 | TGGA | 23 | 5  |
| 291567 | 53 | 2328644 | 2328663 | 2 | 10 | 20 | AC   | 9  | 11 |
| 291568 | 53 | 2332235 | 2332256 | 2 | 11 | 22 | AC   | 21 | 5  |
| 291576 | 53 | 2346421 | 2346464 | 4 | 11 | 44 | TGTT | 22 | 7  |
| 291577 | 53 | 2349845 | 2349874 | 2 | 15 | 30 | TG   | 12 | 9  |
| 291578 | 53 | 2350446 | 2350465 | 2 | 10 | 20 | TG   | 20 | 8  |
| 291579 | 53 | 2350623 | 2350640 | 2 | 9  | 18 | AC   | 23 | 6  |
| 291583 | 53 | 2354360 | 2354385 | 2 | 13 | 26 | AG   | 7  | 4  |
| 291594 | 53 | 2360144 | 2360155 | 2 | 6  | 12 | CA   | 23 | 5  |
| 291595 | 53 | 2360289 | 2360300 | 2 | 6  | 12 | CA   | 23 | 4  |
| 291599 | 53 | 2363671 | 2363686 | 2 | 8  | 16 | GT   | 15 | 8  |
| 291602 | 53 | 2368040 | 2368063 | 2 | 12 | 24 | AC   | 18 | 11 |
| 291611 | 53 | 2372718 | 2372738 | 3 | 7  | 21 | ATA  | 11 | 4  |
| 291616 | 53 | 2374786 | 2374803 | 2 | 9  | 18 | TG   | 11 | 11 |
| 291617 | 53 | 2375944 | 2375976 | 3 | 11 | 33 | ATA  | 9  | 6  |
| 291619 | 53 | 2376924 | 2376957 | 2 | 17 | 34 | TG   | 10 | 10 |
| 291622 | 53 | 2377578 | 2377599 | 2 | 11 | 22 | TG   | 21 | 7  |
| 291623 | 53 | 2378550 | 2378567 | 2 | 9  | 18 | GT   | 25 | 8  |
| 291624 | 53 | 2382101 | 2382115 | 3 | 5  | 15 | GAG  | 22 | 3  |
| 291627 | 53 | 2385813 | 2385826 | 2 | 7  | 14 | TG   | 19 | 8  |
| 291632 | 53 | 2387186 | 2387207 | 2 | 11 | 22 | GT   | 15 | 8  |
| 291633 | 53 | 2388115 | 2388170 | 2 | 28 | 56 | GT   | 10 | 13 |
| 291637 | 53 | 2390755 | 2390774 | 2 | 10 | 20 | TG   | 20 | 7  |
| 291643 | 53 | 2395787 | 2395806 | 2 | 10 | 20 | TG   | 24 | 7  |
| 291646 | 53 | 2397287 | 2397318 | 2 | 16 | 32 | AG   | 14 | 10 |
| 291655 | 53 | 2415634 | 2415645 | 2 | 6  | 12 | GT   | 27 | 7  |
| 291656 | 53 | 2415865 | 2415908 | 2 | 22 | 44 | GT   | 17 | 11 |
| 291657 | 53 | 2417331 | 2417354 | 4 | 6  | 24 | ACAG | 10 | 3  |
| 291658 | 53 | 2417530 | 2417541 | 2 | 6  | 12 | CA   | 20 | 6  |
| 291659 | 53 | 2417543 | 2417558 | 2 | 8  | 16 | AG   | 19 | 3  |
| 291660 | 53 | 2417748 | 2417791 | 2 | 22 | 44 | GA   | 7  | 10 |
| 291667 | 53 | 2428962 | 2429001 | 2 | 20 | 40 | AC   | 7  | 9  |
| 291676 | 53 | 2441851 | 2441882 | 2 | 16 | 32 | TG   | 25 | 10 |
| 291678 | 53 | 2442136 | 2442161 | 2 | 13 | 26 | CA   | 18 | 14 |
| 291681 | 53 | 2447558 | 2447585 | 2 | 14 | 28 | CA   | 16 | 5  |
| 291683 | 53 | 2450773 | 2450792 | 2 | 10 | 20 | TG   | 17 | 5  |
| 291685 | 53 | 2452438 | 2452461 | 2 | 12 | 24 | GT   | 9  | 9  |
| 291686 | 53 | 2455273 | 2455286 | 2 | 7  | 14 | CA   | 28 | 4  |
| 291687 | 53 | 2455925 | 2455950 | 2 | 13 | 26 | CA   | 9  | 9  |
| 291689 | 53 | 2456412 | 2456435 | 2 | 12 | 24 | GT   | 11 | 6  |
| 291692 | 53 | 2461498 | 2461513 | 2 | 8  | 16 | AC   | 17 | 4  |
| 291693 | 53 | 2461769 | 2461782 | 2 | 7  | 14 | CA   | 19 | 4  |

|        |    |         |         |   |    |    |      |    |    |
|--------|----|---------|---------|---|----|----|------|----|----|
| 291711 | 53 | 2475584 | 2475623 | 4 | 10 | 40 | TTGT | 13 | 8  |
| 291715 | 53 | 2482705 | 2482718 | 2 | 7  | 14 | GT   | 28 | 5  |
| 291717 | 53 | 2483321 | 2483338 | 2 | 9  | 18 | TG   | 21 | 12 |
| 291718 | 53 | 2484014 | 2484037 | 3 | 8  | 24 | TTA  | 7  | 9  |
| 291719 | 53 | 2484377 | 2484394 | 2 | 9  | 18 | CA   | 16 | 13 |
| 291724 | 53 | 2485678 | 2485699 | 2 | 11 | 22 | GT   | 10 | 9  |
| 291728 | 53 | 2497197 | 2497212 | 4 | 4  | 16 | GTGC | 29 | 10 |
| 291729 | 53 | 2498249 | 2498272 | 2 | 12 | 24 | AC   | 20 | 7  |
| 291730 | 53 | 2501468 | 2501491 | 2 | 12 | 24 | GA   | 21 | 9  |
| 291731 | 53 | 2503625 | 2503658 | 2 | 17 | 34 | TG   | 15 | 10 |
| 291733 | 53 | 2508552 | 2508577 | 2 | 13 | 26 | CA   | 16 | 9  |
| 291736 | 53 | 2514853 | 2514868 | 2 | 8  | 16 | TG   | 19 | 13 |
| 291742 | 53 | 2537284 | 2537307 | 2 | 12 | 24 | CA   | 19 | 10 |
| 291743 | 53 | 2541188 | 2541215 | 2 | 14 | 28 | AC   | 10 | 9  |
| 291748 | 53 | 2548930 | 2548947 | 2 | 9  | 18 | AC   | 21 | 6  |
| 291751 | 53 | 2551796 | 2551819 | 2 | 12 | 24 | CA   | 15 | 8  |
| 291754 | 53 | 2553121 | 2553148 | 2 | 14 | 28 | CA   | 10 | 8  |
| 291756 | 53 | 2558038 | 2558065 | 4 | 7  | 28 | GATG | 11 | 6  |
| 291759 | 53 | 2560742 | 2560761 | 2 | 10 | 20 | GT   | 23 | 14 |
| 291760 | 53 | 2561102 | 2561121 | 2 | 10 | 20 | AC   | 18 | 9  |
| 291761 | 53 | 2561185 | 2561204 | 2 | 10 | 20 | TG   | 23 | 7  |
| 291762 | 53 | 2562728 | 2562751 | 2 | 12 | 24 | CA   | 11 | 6  |
| 291764 | 53 | 2565433 | 2565444 | 2 | 6  | 12 | AC   | 26 | 3  |
| 291769 | 53 | 2572042 | 2572055 | 2 | 7  | 14 | AC   | 26 | 3  |
| 291771 | 53 | 2573316 | 2573341 | 2 | 13 | 26 | TG   | 13 | 9  |
| 291773 | 53 | 2580927 | 2580948 | 2 | 11 | 22 | GT   | 9  | 7  |
| 291775 | 53 | 2583505 | 2583534 | 2 | 15 | 30 | AC   | 16 | 9  |
| 291776 | 53 | 2584004 | 2584017 | 2 | 7  | 14 | AC   | 27 | 3  |
| 291785 | 53 | 2603486 | 2603517 | 4 | 8  | 32 | GGAT | 18 | 4  |
| 291787 | 53 | 2611219 | 2611246 | 2 | 14 | 28 | GT   | 8  | 5  |
| 291788 | 53 | 2611347 | 2611364 | 2 | 9  | 18 | TG   | 11 | 14 |
| 291792 | 53 | 2619577 | 2619604 | 2 | 14 | 28 | TG   | 13 | 11 |
| 291793 | 53 | 2622601 | 2622621 | 3 | 7  | 21 | ATG  | 24 | 8  |
| 291796 | 53 | 2625790 | 2625815 | 2 | 13 | 26 | TG   | 22 | 9  |
| 291800 | 53 | 2633782 | 2633795 | 2 | 7  | 14 | GT   | 22 | 3  |
| 291818 | 53 | 2672266 | 2672293 | 2 | 14 | 28 | CA   | 21 | 8  |
| 291820 | 53 | 2698543 | 2698558 | 2 | 8  | 16 | TG   | 17 | 10 |
| 291823 | 53 | 2707736 | 2707761 | 2 | 13 | 26 | TG   | 18 | 9  |
| 291825 | 53 | 2710900 | 2710939 | 2 | 20 | 40 | GT   | 10 | 9  |
| 291827 | 53 | 2711466 | 2711499 | 2 | 17 | 34 | CA   | 7  | 11 |
| 291828 | 53 | 2712433 | 2712460 | 2 | 14 | 28 | TG   | 17 | 12 |
| 291832 | 53 | 2717853 | 2717876 | 2 | 12 | 24 | AC   | 9  | 9  |
| 291833 | 53 | 2718021 | 2718064 | 2 | 22 | 44 | CA   | 8  | 8  |
| 291845 | 53 | 2733500 | 2733519 | 2 | 10 | 20 | GT   | 7  | 7  |
| 291846 | 53 | 2733521 | 2733536 | 2 | 8  | 16 | TG   | 6  | 5  |
| 291859 | 53 | 2770184 | 2770223 | 4 | 10 | 40 | AACC | 29 | 3  |
| 291861 | 53 | 2772106 | 2772150 | 3 | 15 | 45 | ACT  | 15 | 7  |
| 291889 | 53 | 2875534 | 2875547 | 2 | 7  | 14 | GT   | 26 | 4  |
| 291906 | 53 | 2954045 | 2954080 | 2 | 18 | 36 | AC   | 8  | 8  |
| 291938 | 53 | 3006915 | 3006938 | 2 | 12 | 24 | TG   | 22 | 4  |
| 291940 | 53 | 3012855 | 3012892 | 2 | 19 | 38 | TG   | 13 | 10 |

|        |    |         |         |   |    |    |      |    |    |
|--------|----|---------|---------|---|----|----|------|----|----|
| 291944 | 53 | 3017000 | 3017017 | 2 | 9  | 18 | TG   | 25 | 8  |
| 291951 | 53 | 3027252 | 3027271 | 2 | 10 | 20 | CT   | 16 | 6  |
| 291958 | 53 | 3041057 | 3041072 | 4 | 4  | 16 | TCTG | 25 | 3  |
| 291960 | 53 | 3044652 | 3044673 | 2 | 11 | 22 | CA   | 6  | 3  |
| 291961 | 53 | 3046381 | 3046413 | 3 | 11 | 33 | AAC  | 25 | 6  |
| 291963 | 53 | 3048401 | 3048418 | 2 | 9  | 18 | TG   | 24 | 6  |
| 291969 | 53 | 3061959 | 3061976 | 2 | 9  | 18 | TG   | 11 | 6  |
| 292017 | 53 | 3193793 | 3193824 | 2 | 16 | 32 | TG   | 28 | 17 |
| 292020 | 53 | 3203259 | 3203282 | 2 | 12 | 24 | AC   | 30 | 15 |
| 292024 | 53 | 3205951 | 3205966 | 2 | 8  | 16 | GT   | 27 | 6  |
| 292025 | 53 | 3207845 | 3207856 | 2 | 6  | 12 | TG   | 24 | 3  |
| 292033 | 53 | 3228351 | 3228388 | 2 | 19 | 38 | TG   | 8  | 9  |
| 292041 | 53 | 3240510 | 3240521 | 2 | 6  | 12 | AC   | 21 | 5  |
| 292042 | 53 | 3241266 | 3241293 | 4 | 7  | 28 | TATC | 14 | 7  |
| 292047 | 53 | 3258532 | 3258547 | 2 | 8  | 16 | GT   | 20 | 7  |
| 292052 | 53 | 3264136 | 3264187 | 2 | 26 | 52 | GT   | 8  | 12 |
| 292053 | 53 | 3264815 | 3264842 | 2 | 14 | 28 | CA   | 16 | 4  |
| 292068 | 53 | 3281541 | 3281552 | 2 | 6  | 12 | AT   | 10 | 3  |
| 292080 | 53 | 3318393 | 3318436 | 2 | 22 | 44 | TG   | 6  | 10 |
| 292081 | 53 | 3318958 | 3319001 | 4 | 11 | 44 | TGTC | 27 | 11 |
| 292083 | 53 | 3321370 | 3321393 | 2 | 12 | 24 | TG   | 13 | 11 |
| 292088 | 53 | 3331379 | 3331402 | 4 | 6  | 24 | TGTA | 12 | 4  |
| 292090 | 53 | 3337233 | 3337260 | 2 | 14 | 28 | TG   | 11 | 5  |
| 292092 | 53 | 3337914 | 3337927 | 2 | 7  | 14 | GT   | 32 | 3  |
| 292095 | 53 | 3340295 | 3340310 | 2 | 8  | 16 | AC   | 24 | 4  |
| 292096 | 53 | 3345515 | 3345526 | 2 | 6  | 12 | TG   | 30 | 3  |
| 292097 | 53 | 3345624 | 3345641 | 2 | 9  | 18 | TG   | 15 | 14 |
| 292099 | 53 | 3347132 | 3347143 | 2 | 6  | 12 | AC   | 28 | 3  |
| 292100 | 53 | 3347918 | 3347931 | 2 | 7  | 14 | TC   | 30 | 3  |
| 292103 | 53 | 3348190 | 3348209 | 2 | 10 | 20 | TG   | 21 | 4  |
| 292104 | 53 | 3348305 | 3348324 | 2 | 10 | 20 | CA   | 26 | 3  |
| 292109 | 53 | 3350299 | 3350322 | 2 | 12 | 24 | AC   | 21 | 12 |
| 292114 | 53 | 3355425 | 3355442 | 2 | 9  | 18 | CA   | 26 | 7  |
| 292118 | 53 | 3359155 | 3359166 | 2 | 6  | 12 | GA   | 24 | 3  |
| 292119 | 53 | 3359318 | 3359337 | 2 | 10 | 20 | GA   | 13 | 6  |
| 292120 | 53 | 3361936 | 3361947 | 2 | 6  | 12 | TG   | 25 | 3  |
| 292121 | 53 | 3362087 | 3362108 | 2 | 11 | 22 | GT   | 6  | 5  |
| 292122 | 53 | 3362196 | 3362227 | 2 | 16 | 32 | GT   | 12 | 9  |
| 292130 | 53 | 3371110 | 3371125 | 2 | 8  | 16 | GT   | 20 | 5  |
| 292131 | 53 | 3372470 | 3372505 | 2 | 18 | 36 | TG   | 8  | 8  |
| 292142 | 53 | 3376890 | 3376903 | 2 | 7  | 14 | AC   | 14 | 6  |
| 292147 | 53 | 3382577 | 3382592 | 2 | 8  | 16 | TG   | 22 | 8  |
| 292155 | 53 | 3388372 | 3388399 | 2 | 14 | 28 | AC   | 15 | 9  |
| 292156 | 53 | 3389389 | 3389412 | 2 | 12 | 24 | AC   | 17 | 10 |
| 292157 | 53 | 3391408 | 3391423 | 2 | 8  | 16 | CA   | 16 | 8  |
| 292158 | 53 | 3391950 | 3391961 | 2 | 6  | 12 | CA   | 9  | 4  |
| 292159 | 53 | 3391964 | 3391977 | 2 | 7  | 14 | CA   | 13 | 8  |
| 292160 | 53 | 3393472 | 3393489 | 3 | 6  | 18 | TGC  | 22 | 7  |
| 292161 | 53 | 3394764 | 3394805 | 2 | 21 | 42 | AC   | 7  | 9  |
| 292162 | 53 | 3396522 | 3396555 | 2 | 17 | 34 | CA   | 19 | 7  |
| 292175 | 53 | 3408379 | 3408410 | 2 | 16 | 32 | TG   | 9  | 10 |

|        |    |         |         |   |    |    |      |    |    |
|--------|----|---------|---------|---|----|----|------|----|----|
| 292177 | 53 | 3408467 | 3408480 | 2 | 7  | 14 | TG   | 10 | 4  |
| 292178 | 53 | 3410879 | 3410910 | 2 | 16 | 32 | TG   | 11 | 8  |
| 292195 | 53 | 3458844 | 3458873 | 2 | 15 | 30 | TG   | 10 | 7  |
| 292196 | 53 | 3458911 | 3458934 | 2 | 12 | 24 | TG   | 14 | 5  |
| 292197 | 53 | 3459018 | 3459031 | 2 | 7  | 14 | TG   | 19 | 3  |
| 292232 | 54 | 19683   | 19706   | 4 | 6  | 24 | ATCA | 30 | 8  |
| 292233 | 54 | 24054   | 24068   | 3 | 5  | 15 | AAC  | 28 | 3  |
| 292234 | 54 | 26484   | 26498   | 3 | 5  | 15 | TTG  | 15 | 5  |
| 292235 | 54 | 29172   | 29191   | 2 | 10 | 20 | CA   | 24 | 9  |
| 292243 | 54 | 46805   | 46818   | 2 | 7  | 14 | CT   | 18 | 9  |
| 292245 | 54 | 54144   | 54163   | 2 | 10 | 20 | GT   | 20 | 14 |
| 292247 | 54 | 65284   | 65307   | 3 | 8  | 24 | GAT  | 26 | 4  |
| 292248 | 54 | 65907   | 65928   | 2 | 11 | 22 | CA   | 11 | 10 |
| 292250 | 54 | 66181   | 66200   | 2 | 10 | 20 | GT   | 15 | 12 |
| 292251 | 54 | 66863   | 66874   | 2 | 6  | 12 | AC   | 21 | 6  |
| 292252 | 54 | 68347   | 68362   | 2 | 8  | 16 | TG   | 16 | 6  |
| 292253 | 54 | 72605   | 72638   | 2 | 17 | 34 | GT   | 10 | 12 |
| 292254 | 54 | 72718   | 72751   | 2 | 17 | 34 | GT   | 13 | 8  |
| 292255 | 54 | 73412   | 73426   | 3 | 5  | 15 | GTT  | 14 | 4  |
| 292256 | 54 | 75401   | 75426   | 2 | 13 | 26 | TG   | 19 | 9  |
| 292259 | 54 | 89652   | 89681   | 2 | 15 | 30 | TG   | 17 | 6  |
| 292260 | 54 | 90503   | 90528   | 2 | 13 | 26 | TG   | 12 | 16 |
| 292262 | 54 | 93797   | 93834   | 2 | 19 | 38 | CA   | 10 | 13 |
| 292264 | 54 | 94180   | 94193   | 2 | 7  | 14 | GT   | 8  | 5  |
| 292265 | 54 | 94397   | 94446   | 2 | 25 | 50 | TG   | 8  | 13 |
| 292266 | 54 | 94720   | 94747   | 2 | 14 | 28 | TG   | 17 | 12 |
| 292274 | 54 | 104966  | 104977  | 2 | 6  | 12 | CA   | 20 | 5  |
| 292275 | 54 | 106085  | 106099  | 3 | 5  | 15 | TTC  | 9  | 3  |
| 292277 | 54 | 106467  | 106480  | 2 | 7  | 14 | TA   | 9  | 3  |
| 292278 | 54 | 107541  | 107606  | 3 | 22 | 66 | TCT  | 9  | 13 |
| 292283 | 54 | 116434  | 116445  | 2 | 6  | 12 | GT   | 33 | 4  |
| 292284 | 54 | 116530  | 116543  | 2 | 7  | 14 | AC   | 22 | 8  |
| 292286 | 54 | 118312  | 118323  | 2 | 6  | 12 | AC   | 27 | 12 |
| 292291 | 54 | 129398  | 129417  | 2 | 10 | 20 | CA   | 18 | 14 |
| 292292 | 54 | 130775  | 130788  | 2 | 7  | 14 | GT   | 22 | 11 |
| 292293 | 54 | 130926  | 130941  | 2 | 8  | 16 | GT   | 19 | 14 |
| 292296 | 54 | 133008  | 133035  | 2 | 14 | 28 | CA   | 14 | 7  |
| 292297 | 54 | 133189  | 133214  | 2 | 13 | 26 | TG   | 18 | 11 |
| 292298 | 54 | 133386  | 133433  | 2 | 24 | 48 | TG   | 7  | 6  |
| 292307 | 54 | 143709  | 143722  | 2 | 7  | 14 | AC   | 23 | 7  |
| 292308 | 54 | 144967  | 144996  | 2 | 15 | 30 | AC   | 6  | 8  |
| 292309 | 54 | 146430  | 146444  | 3 | 5  | 15 | TGA  | 34 | 3  |
| 292310 | 54 | 146707  | 146730  | 2 | 12 | 24 | CA   | 11 | 11 |
| 292316 | 54 | 149600  | 149625  | 2 | 13 | 26 | GT   | 17 | 18 |
| 292317 | 54 | 149814  | 149851  | 2 | 19 | 38 | AC   | 9  | 10 |
| 292318 | 54 | 150930  | 150963  | 2 | 17 | 34 | AC   | 12 | 10 |
| 292319 | 54 | 151122  | 151145  | 2 | 12 | 24 | GT   | 22 | 11 |
| 292325 | 54 | 154124  | 154147  | 4 | 6  | 24 | TTTA | 22 | 4  |
| 292327 | 54 | 155399  | 155438  | 2 | 20 | 40 | GT   | 8  | 11 |
| 292328 | 54 | 155905  | 155918  | 2 | 7  | 14 | GT   | 27 | 6  |
| 292332 | 54 | 159668  | 159681  | 2 | 7  | 14 | TG   | 7  | 11 |

|        |    |        |        |   |    |    |      |    |    |
|--------|----|--------|--------|---|----|----|------|----|----|
| 292333 | 54 | 160991 | 161004 | 2 | 7  | 14 | GT   | 20 | 9  |
| 292335 | 54 | 162670 | 162681 | 2 | 6  | 12 | TG   | 23 | 9  |
| 292336 | 54 | 162853 | 162876 | 2 | 12 | 24 | GT   | 19 | 10 |
| 292337 | 54 | 162932 | 162951 | 2 | 10 | 20 | TG   | 12 | 8  |
| 292339 | 54 | 163931 | 163942 | 2 | 6  | 12 | TG   | 30 | 4  |
| 292340 | 54 | 164032 | 164055 | 2 | 12 | 24 | AC   | 9  | 8  |
| 292341 | 54 | 167829 | 167846 | 2 | 9  | 18 | AC   | 13 | 6  |
| 292344 | 54 | 170321 | 170338 | 3 | 6  | 18 | GCA  | 23 | 9  |
| 292346 | 54 | 173690 | 173705 | 2 | 8  | 16 | TG   | 19 | 5  |
| 292347 | 54 | 174032 | 174046 | 3 | 5  | 15 | AAT  | 32 | 3  |
| 292348 | 54 | 175641 | 175664 | 2 | 12 | 24 | CA   | 9  | 6  |
| 292349 | 54 | 175822 | 175851 | 2 | 15 | 30 | AC   | 15 | 18 |
| 292353 | 54 | 178448 | 178475 | 2 | 14 | 28 | AC   | 15 | 12 |
| 292354 | 54 | 178590 | 178619 | 2 | 15 | 30 | TG   | 20 | 13 |
| 292356 | 54 | 181708 | 181725 | 3 | 6  | 18 | AAT  | 19 | 6  |
| 292357 | 54 | 200217 | 200237 | 3 | 7  | 21 | GAT  | 10 | 4  |
| 292364 | 54 | 209058 | 209085 | 2 | 14 | 28 | TC   | 13 | 11 |
| 292368 | 54 | 210691 | 210724 | 2 | 17 | 34 | CA   | 13 | 9  |
| 292372 | 54 | 214580 | 214607 | 2 | 14 | 28 | GT   | 6  | 9  |
| 292383 | 54 | 218161 | 218190 | 2 | 15 | 30 | CA   | 8  | 10 |
| 292385 | 54 | 221080 | 221113 | 2 | 17 | 34 | TC   | 12 | 12 |
| 292388 | 54 | 224702 | 224713 | 2 | 6  | 12 | AT   | 20 | 11 |
| 292389 | 54 | 224809 | 224836 | 2 | 14 | 28 | AC   | 10 | 15 |
| 292394 | 54 | 226745 | 226768 | 2 | 12 | 24 | AC   | 22 | 12 |
| 292395 | 54 | 228520 | 228531 | 2 | 6  | 12 | CA   | 31 | 3  |
| 292397 | 54 | 230728 | 230772 | 3 | 15 | 45 | TCT  | 13 | 8  |
| 292401 | 54 | 231314 | 231329 | 2 | 8  | 16 | TG   | 21 | 6  |
| 292402 | 54 | 231364 | 231395 | 2 | 16 | 32 | CA   | 13 | 11 |
| 292403 | 54 | 231978 | 231995 | 2 | 9  | 18 | CT   | 19 | 4  |
| 292404 | 54 | 233977 | 234004 | 2 | 14 | 28 | GT   | 13 | 10 |
| 292405 | 54 | 234092 | 234111 | 2 | 10 | 20 | TG   | 18 | 4  |
| 292406 | 54 | 234154 | 234175 | 2 | 11 | 22 | GT   | 16 | 11 |
| 292409 | 54 | 236899 | 236912 | 2 | 7  | 14 | GT   | 22 | 4  |
| 292410 | 54 | 237034 | 237065 | 2 | 16 | 32 | TG   | 11 | 10 |
| 292411 | 54 | 239063 | 239090 | 4 | 7  | 28 | GATT | 28 | 7  |
| 292418 | 54 | 239870 | 239891 | 2 | 11 | 22 | CA   | 12 | 10 |
| 292423 | 54 | 241454 | 241495 | 2 | 21 | 42 | TG   | 6  | 10 |
| 292431 | 54 | 245349 | 245374 | 2 | 13 | 26 | GT   | 18 | 8  |
| 292436 | 54 | 247018 | 247071 | 3 | 18 | 54 | AGA  | 6  | 9  |
| 292440 | 54 | 249382 | 249396 | 3 | 5  | 15 | CCT  | 19 | 3  |
| 292443 | 54 | 249979 | 250004 | 2 | 13 | 26 | AC   | 15 | 10 |
| 292444 | 54 | 250107 | 250158 | 4 | 13 | 52 | CTTT | 20 | 13 |
| 292445 | 54 | 251217 | 251242 | 2 | 13 | 26 | GT   | 8  | 8  |
| 292447 | 54 | 253303 | 253344 | 2 | 21 | 42 | GT   | 7  | 9  |
| 292448 | 54 | 253422 | 253433 | 2 | 6  | 12 | TG   | 22 | 7  |
| 292449 | 54 | 254844 | 254875 | 2 | 16 | 32 | GT   | 22 | 9  |
| 292451 | 54 | 255094 | 255121 | 2 | 14 | 28 | AC   | 17 | 15 |
| 292452 | 54 | 255213 | 255238 | 2 | 13 | 26 | GT   | 18 | 10 |
| 292453 | 54 | 255292 | 255309 | 2 | 9  | 18 | GT   | 18 | 4  |
| 292454 | 54 | 256472 | 256519 | 2 | 24 | 48 | AC   | 16 | 12 |
| 292455 | 54 | 256677 | 256704 | 2 | 14 | 28 | TG   | 7  | 8  |

|        |    |        |        |   |    |    |      |    |    |
|--------|----|--------|--------|---|----|----|------|----|----|
| 292457 | 54 | 258240 | 258253 | 2 | 7  | 14 | TG   | 23 | 7  |
| 292460 | 54 | 260417 | 260428 | 2 | 6  | 12 | CA   | 26 | 3  |
| 292461 | 54 | 260697 | 260716 | 4 | 5  | 20 | ATAG | 11 | 5  |
| 292462 | 54 | 263431 | 263463 | 3 | 11 | 33 | TCT  | 19 | 9  |
| 292465 | 54 | 264490 | 264501 | 2 | 6  | 12 | TA   | 24 | 7  |
| 292467 | 54 | 265975 | 265998 | 3 | 8  | 24 | AGA  | 28 | 9  |
| 292470 | 54 | 268474 | 268499 | 2 | 13 | 26 | TG   | 15 | 7  |
| 292476 | 54 | 274279 | 274302 | 3 | 8  | 24 | GAT  | 26 | 7  |
| 292479 | 54 | 274711 | 274744 | 2 | 17 | 34 | GT   | 12 | 13 |
| 292480 | 54 | 275488 | 275505 | 2 | 9  | 18 | CA   | 6  | 9  |
| 292485 | 54 | 277641 | 277684 | 2 | 22 | 44 | AC   | 11 | 15 |
| 292490 | 54 | 279972 | 279986 | 3 | 5  | 15 | GAG  | 27 | 4  |
| 292491 | 54 | 280840 | 280854 | 3 | 5  | 15 | CTT  | 30 | 3  |
| 292492 | 54 | 280963 | 280974 | 2 | 6  | 12 | TC   | 30 | 4  |
| 292496 | 54 | 281444 | 281495 | 2 | 26 | 52 | GT   | 15 | 10 |
| 292497 | 54 | 281535 | 281550 | 2 | 8  | 16 | GT   | 21 | 5  |
| 292498 | 54 | 281640 | 281671 | 2 | 16 | 32 | TG   | 9  | 14 |
| 292501 | 54 | 282932 | 282970 | 3 | 13 | 39 | GAG  | 7  | 7  |
| 292507 | 54 | 284786 | 284845 | 2 | 30 | 60 | GT   | 9  | 11 |
| 292509 | 54 | 287820 | 287833 | 2 | 7  | 14 | GT   | 11 | 8  |
| 292512 | 54 | 289148 | 289198 | 3 | 17 | 51 | TCT  | 9  | 10 |
| 292515 | 54 | 293754 | 293777 | 2 | 12 | 24 | TA   | 7  | 6  |
| 292516 | 54 | 294004 | 294015 | 2 | 6  | 12 | AC   | 17 | 7  |
| 292517 | 54 | 294041 | 294072 | 2 | 16 | 32 | AC   | 17 | 11 |
| 292519 | 54 | 295523 | 295542 | 2 | 10 | 20 | AC   | 7  | 3  |
| 292520 | 54 | 296409 | 296446 | 2 | 19 | 38 | TG   | 6  | 9  |
| 292528 | 54 | 304760 | 304771 | 2 | 6  | 12 | GT   | 27 | 3  |
| 292530 | 54 | 306357 | 306374 | 3 | 6  | 18 | CCT  | 24 | 13 |
| 292531 | 54 | 306543 | 306557 | 3 | 5  | 15 | CCT  | 20 | 9  |
| 292537 | 54 | 310146 | 310169 | 2 | 12 | 24 | CA   | 27 | 4  |
| 292538 | 54 | 310223 | 310248 | 2 | 13 | 26 | GT   | 16 | 12 |
| 292539 | 54 | 310384 | 310399 | 2 | 8  | 16 | CA   | 14 | 15 |
| 292540 | 54 | 310509 | 310524 | 4 | 4  | 16 | TTTA | 26 | 4  |
| 292545 | 54 | 316892 | 316921 | 3 | 10 | 30 | GGA  | 19 | 7  |
| 292546 | 54 | 316951 | 316984 | 2 | 17 | 34 | GT   | 18 | 11 |
| 292548 | 54 | 318870 | 318895 | 2 | 13 | 26 | TG   | 22 | 8  |
| 292561 | 54 | 319432 | 319457 | 2 | 13 | 26 | AC   | 7  | 10 |
| 292563 | 54 | 323315 | 323332 | 2 | 9  | 18 | AC   | 16 | 9  |
| 292564 | 54 | 324554 | 324573 | 2 | 10 | 20 | GT   | 18 | 10 |
| 292565 | 54 | 326229 | 326252 | 3 | 8  | 24 | AGG  | 18 | 8  |
| 292566 | 54 | 327707 | 327724 | 2 | 9  | 18 | CA   | 12 | 8  |
| 292568 | 54 | 327787 | 327813 | 3 | 9  | 27 | CCT  | 12 | 6  |
| 292569 | 54 | 327898 | 327929 | 2 | 16 | 32 | CT   | 14 | 9  |
| 292570 | 54 | 329852 | 329875 | 2 | 12 | 24 | AC   | 14 | 7  |
| 292571 | 54 | 330030 | 330053 | 2 | 12 | 24 | CA   | 22 | 12 |
| 292573 | 54 | 330185 | 330210 | 2 | 13 | 26 | CA   | 19 | 16 |
| 292575 | 54 | 331803 | 331830 | 2 | 14 | 28 | AC   | 15 | 10 |
| 292578 | 54 | 335630 | 335641 | 2 | 6  | 12 | AC   | 28 | 3  |
| 292580 | 54 | 335809 | 335834 | 2 | 13 | 26 | GT   | 17 | 4  |
| 292581 | 54 | 335956 | 335971 | 2 | 8  | 16 | AC   | 19 | 7  |
| 292582 | 54 | 335973 | 335984 | 2 | 6  | 12 | CA   | 22 | 8  |

|        |    |        |        |   |    |    |      |    |    |
|--------|----|--------|--------|---|----|----|------|----|----|
| 292583 | 54 | 338240 | 338265 | 2 | 13 | 26 | GT   | 15 | 9  |
| 292586 | 54 | 339059 | 339086 | 2 | 14 | 28 | GT   | 11 | 7  |
| 292587 | 54 | 341228 | 341257 | 2 | 15 | 30 | CA   | 17 | 7  |
| 292590 | 54 | 341444 | 341473 | 2 | 15 | 30 | TG   | 12 | 11 |
| 292591 | 54 | 342680 | 342691 | 2 | 6  | 12 | CA   | 21 | 4  |
| 292592 | 54 | 342721 | 342754 | 2 | 17 | 34 | AC   | 12 | 11 |
| 292596 | 54 | 354805 | 354850 | 2 | 23 | 46 | TG   | 9  | 10 |
| 292598 | 54 | 358442 | 358457 | 2 | 8  | 16 | AT   | 9  | 5  |
| 292606 | 54 | 377368 | 377385 | 2 | 9  | 18 | AC   | 20 | 10 |
| 292609 | 54 | 381288 | 381299 | 2 | 6  | 12 | GT   | 19 | 11 |
| 292610 | 54 | 381300 | 381313 | 2 | 7  | 14 | GC   | 18 | 11 |
| 292611 | 54 | 382700 | 382715 | 4 | 4  | 16 | GACA | 34 | 4  |
| 292615 | 54 | 400811 | 400822 | 2 | 6  | 12 | TG   | 23 | 8  |
| 292625 | 54 | 419513 | 419548 | 2 | 18 | 36 | GT   | 8  | 7  |
| 292626 | 54 | 421955 | 421984 | 2 | 15 | 30 | GT   | 16 | 8  |
| 292627 | 54 | 422088 | 422113 | 2 | 13 | 26 | AG   | 18 | 6  |
| 292628 | 54 | 422222 | 422251 | 2 | 15 | 30 | CA   | 17 | 13 |
| 292630 | 54 | 423800 | 423817 | 2 | 9  | 18 | AT   | 22 | 16 |
| 292631 | 54 | 424019 | 424038 | 2 | 10 | 20 | TG   | 23 | 9  |
| 292632 | 54 | 428352 | 428367 | 2 | 8  | 16 | GT   | 10 | 10 |
| 292633 | 54 | 428369 | 428384 | 2 | 8  | 16 | TG   | 13 | 13 |
| 292645 | 54 | 431758 | 431777 | 2 | 10 | 20 | GT   | 8  | 4  |
| 292646 | 54 | 431902 | 431919 | 2 | 9  | 18 | CA   | 31 | 3  |
| 292647 | 54 | 431971 | 432014 | 2 | 22 | 44 | AC   | 13 | 14 |
| 292648 | 54 | 432085 | 432106 | 2 | 11 | 22 | AC   | 14 | 11 |
| 292649 | 54 | 432184 | 432203 | 2 | 10 | 20 | AC   | 21 | 9  |
| 292651 | 54 | 434520 | 434537 | 2 | 9  | 18 | AC   | 24 | 10 |
| 292652 | 54 | 434617 | 434636 | 2 | 10 | 20 | CA   | 17 | 8  |
| 292654 | 54 | 434816 | 434833 | 2 | 9  | 18 | TG   | 19 | 7  |
| 292655 | 54 | 434875 | 434898 | 2 | 12 | 24 | GT   | 18 | 11 |
| 292657 | 54 | 438305 | 438330 | 2 | 13 | 26 | TG   | 12 | 7  |
| 292658 | 54 | 440307 | 440330 | 2 | 12 | 24 | GT   | 19 | 9  |
| 292659 | 54 | 440391 | 440410 | 2 | 10 | 20 | TG   | 9  | 10 |
| 292660 | 54 | 440706 | 440723 | 2 | 9  | 18 | CT   | 19 | 6  |
| 292663 | 54 | 442450 | 442477 | 2 | 14 | 28 | CA   | 11 | 12 |
| 292664 | 54 | 445524 | 445541 | 2 | 9  | 18 | AG   | 16 | 7  |
| 292666 | 54 | 449284 | 449315 | 2 | 16 | 32 | AC   | 13 | 13 |
| 292667 | 54 | 449667 | 449696 | 2 | 15 | 30 | CA   | 9  | 9  |
| 292669 | 54 | 449782 | 449797 | 2 | 8  | 16 | AC   | 10 | 9  |
| 292673 | 54 | 450412 | 450432 | 3 | 7  | 21 | CCT  | 6  | 5  |
| 292675 | 54 | 453034 | 453047 | 2 | 7  | 14 | AC   | 27 | 8  |
| 292676 | 54 | 453225 | 453258 | 2 | 17 | 34 | CA   | 9  | 8  |
| 292679 | 54 | 458213 | 458254 | 2 | 21 | 42 | AC   | 9  | 9  |
| 292681 | 54 | 458475 | 458489 | 3 | 5  | 15 | TCT  | 20 | 3  |
| 292682 | 54 | 458714 | 458727 | 2 | 7  | 14 | AC   | 18 | 6  |
| 292683 | 54 | 458758 | 458779 | 2 | 11 | 22 | AC   | 19 | 9  |
| 292694 | 54 | 509580 | 509603 | 3 | 8  | 24 | TAA  | 10 | 12 |
| 292702 | 54 | 535267 | 535290 | 4 | 6  | 24 | TTAT | 20 | 4  |
| 292704 | 54 | 539756 | 539769 | 2 | 7  | 14 | TG   | 15 | 9  |
| 292705 | 54 | 540946 | 540961 | 2 | 8  | 16 | AC   | 24 | 3  |
| 292707 | 54 | 545256 | 545273 | 2 | 9  | 18 | GT   | 19 | 6  |

|        |    |         |         |   |    |    |      |    |    |
|--------|----|---------|---------|---|----|----|------|----|----|
| 292710 | 54 | 558520  | 558533  | 2 | 7  | 14 | AT   | 25 | 12 |
| 292714 | 54 | 566026  | 566041  | 2 | 8  | 16 | GT   | 16 | 9  |
| 292734 | 54 | 573493  | 573506  | 2 | 7  | 14 | CT   | 13 | 3  |
| 292751 | 54 | 615482  | 615497  | 2 | 8  | 16 | CA   | 22 | 7  |
| 292754 | 54 | 623066  | 623103  | 2 | 19 | 38 | TG   | 11 | 7  |
| 292755 | 54 | 623240  | 623263  | 2 | 12 | 24 | GT   | 17 | 11 |
| 292763 | 54 | 627637  | 627651  | 3 | 5  | 15 | CGG  | 25 | 3  |
| 292765 | 54 | 628592  | 628621  | 2 | 15 | 30 | TG   | 16 | 11 |
| 292767 | 54 | 632006  | 632023  | 2 | 9  | 18 | CA   | 18 | 8  |
| 292768 | 54 | 632774  | 632793  | 2 | 10 | 20 | CA   | 16 | 6  |
| 292770 | 54 | 639431  | 639450  | 2 | 10 | 20 | GT   | 15 | 4  |
| 292781 | 54 | 656059  | 656070  | 2 | 6  | 12 | AC   | 29 | 4  |
| 292783 | 54 | 666824  | 666841  | 2 | 9  | 18 | CA   | 9  | 3  |
| 292784 | 54 | 669267  | 669294  | 2 | 14 | 28 | AC   | 18 | 6  |
| 292786 | 54 | 673610  | 673627  | 2 | 9  | 18 | AC   | 12 | 5  |
| 292789 | 54 | 686669  | 686688  | 2 | 10 | 20 | TG   | 28 | 5  |
| 292792 | 54 | 698018  | 698041  | 2 | 12 | 24 | TG   | 17 | 8  |
| 292795 | 54 | 705062  | 705081  | 4 | 5  | 20 | AAAT | 26 | 3  |
| 292803 | 54 | 724156  | 724175  | 2 | 10 | 20 | AC   | 12 | 8  |
| 292808 | 54 | 745331  | 745348  | 2 | 9  | 18 | CA   | 16 | 11 |
| 292809 | 54 | 745351  | 745362  | 2 | 6  | 12 | CA   | 20 | 8  |
| 292812 | 54 | 747625  | 747636  | 2 | 6  | 12 | TC   | 28 | 5  |
| 292820 | 54 | 765125  | 765158  | 2 | 17 | 34 | TG   | 13 | 9  |
| 292826 | 54 | 770581  | 770594  | 2 | 7  | 14 | GT   | 21 | 3  |
| 292828 | 54 | 773512  | 773535  | 2 | 12 | 24 | TG   | 16 | 6  |
| 292841 | 54 | 795986  | 795997  | 2 | 6  | 12 | AC   | 25 | 4  |
| 292843 | 54 | 806962  | 806975  | 2 | 7  | 14 | CA   | 14 | 7  |
| 292845 | 54 | 818125  | 818176  | 2 | 26 | 52 | GT   | 12 | 10 |
| 292846 | 54 | 820737  | 820750  | 2 | 7  | 14 | TG   | 23 | 3  |
| 292847 | 54 | 821385  | 821396  | 2 | 6  | 12 | TG   | 20 | 3  |
| 292848 | 54 | 822058  | 822075  | 2 | 9  | 18 | AC   | 22 | 5  |
| 292855 | 54 | 837567  | 837594  | 2 | 14 | 28 | CA   | 17 | 12 |
| 292857 | 54 | 855614  | 855627  | 2 | 7  | 14 | GT   | 26 | 3  |
| 292859 | 54 | 860314  | 860327  | 2 | 7  | 14 | TG   | 30 | 3  |
| 292868 | 54 | 889857  | 889876  | 2 | 10 | 20 | GT   | 22 | 6  |
| 292869 | 54 | 890088  | 890105  | 2 | 9  | 18 | AG   | 22 | 7  |
| 292876 | 54 | 924367  | 924390  | 2 | 12 | 24 | CA   | 17 | 7  |
| 292887 | 54 | 934572  | 934585  | 2 | 7  | 14 | CA   | 23 | 3  |
| 292888 | 54 | 935010  | 935025  | 2 | 8  | 16 | CA   | 19 | 3  |
| 292894 | 54 | 946960  | 946985  | 2 | 13 | 26 | CA   | 22 | 8  |
| 292895 | 54 | 947790  | 947809  | 2 | 10 | 20 | TC   | 25 | 11 |
| 292903 | 54 | 964107  | 964122  | 2 | 8  | 16 | AC   | 23 | 5  |
| 292918 | 54 | 1000998 | 1001033 | 2 | 18 | 36 | AC   | 8  | 8  |
| 292924 | 54 | 1016919 | 1016950 | 4 | 8  | 32 | TATC | 21 | 8  |
| 292925 | 54 | 1017881 | 1017895 | 3 | 5  | 15 | GAG  | 33 | 4  |
| 292928 | 54 | 1023415 | 1023438 | 2 | 12 | 24 | AT   | 16 | 6  |
| 292929 | 54 | 1023685 | 1023696 | 2 | 6  | 12 | AC   | 14 | 4  |
| 292931 | 54 | 1026005 | 1026022 | 3 | 6  | 18 | CAC  | 27 | 6  |
| 292939 | 54 | 1040322 | 1040363 | 2 | 21 | 42 | AC   | 12 | 8  |
| 292941 | 54 | 1045120 | 1045131 | 2 | 6  | 12 | CA   | 22 | 3  |
| 292942 | 54 | 1047648 | 1047662 | 3 | 5  | 15 | AAC  | 13 | 6  |



|        |    |         |         |   |    |    |      |    |    |
|--------|----|---------|---------|---|----|----|------|----|----|
| 292944 | 54 | 1052285 | 1052296 | 2 | 6  | 12 | GT   | 8  | 4  |
| 292951 | 54 | 1070127 | 1070140 | 2 | 7  | 14 | GT   | 13 | 6  |
| 292952 | 54 | 1070142 | 1070155 | 2 | 7  | 14 | TG   | 21 | 9  |
| 292955 | 54 | 1079130 | 1079141 | 2 | 6  | 12 | AT   | 18 | 4  |
| 292956 | 54 | 1081017 | 1081040 | 4 | 6  | 24 | TTAC | 24 | 3  |
| 292959 | 54 | 1083021 | 1083032 | 2 | 6  | 12 | AC   | 12 | 5  |
| 292968 | 54 | 1093420 | 1093431 | 2 | 6  | 12 | AT   | 13 | 4  |
| 292970 | 54 | 1095144 | 1095161 | 2 | 9  | 18 | GT   | 21 | 9  |
| 292974 | 54 | 1100981 | 1101012 | 2 | 16 | 32 | AC   | 14 | 12 |
| 292977 | 54 | 1105349 | 1105366 | 2 | 9  | 18 | TG   | 26 | 6  |
| 292979 | 54 | 1106139 | 1106159 | 3 | 7  | 21 | CCA  | 24 | 11 |
| 292981 | 54 | 1106859 | 1106890 | 2 | 16 | 32 | CT   | 8  | 9  |
| 292983 | 54 | 1107176 | 1107187 | 2 | 6  | 12 | CA   | 17 | 6  |
| 292986 | 54 | 1108643 | 1108658 | 2 | 8  | 16 | GA   | 18 | 9  |
| 292993 | 54 | 1124848 | 1124895 | 4 | 12 | 48 | GATA | 11 | 7  |
| 292995 | 54 | 1133192 | 1133215 | 4 | 6  | 24 | AGAT | 18 | 8  |
| 292996 | 54 | 1141713 | 1141756 | 2 | 22 | 44 | CA   | 8  | 10 |
| 293000 | 54 | 1150637 | 1150650 | 2 | 7  | 14 | TA   | 15 | 3  |
| 293003 | 54 | 1169990 | 1170007 | 2 | 9  | 18 | AT   | 6  | 4  |
| 293012 | 54 | 1210650 | 1210669 | 2 | 10 | 20 | TG   | 18 | 6  |
| 293013 | 54 | 1212745 | 1212762 | 2 | 9  | 18 | GT   | 20 | 11 |
| 293020 | 54 | 1230074 | 1230089 | 4 | 4  | 16 | ATAA | 14 | 7  |
| 293022 | 54 | 1233284 | 1233313 | 2 | 15 | 30 | AC   | 13 | 10 |
| 293026 | 54 | 1241966 | 1241993 | 2 | 14 | 28 | TG   | 15 | 17 |
| 293030 | 54 | 1255554 | 1255589 | 2 | 18 | 36 | GT   | 7  | 9  |
| 293031 | 54 | 1255685 | 1255700 | 2 | 8  | 16 | TG   | 26 | 8  |
| 293032 | 54 | 1256062 | 1256075 | 2 | 7  | 14 | TG   | 25 | 5  |
| 293033 | 54 | 1256548 | 1256567 | 2 | 10 | 20 | AC   | 15 | 9  |
| 293034 | 54 | 1260864 | 1260877 | 2 | 7  | 14 | GT   | 23 | 3  |
| 293035 | 54 | 1260883 | 1260896 | 2 | 7  | 14 | TG   | 21 | 4  |
| 293044 | 54 | 1279063 | 1279076 | 2 | 7  | 14 | GT   | 31 | 4  |
| 293058 | 54 | 1314138 | 1314155 | 2 | 9  | 18 | GT   | 19 | 5  |
| 293063 | 54 | 1333551 | 1333564 | 2 | 7  | 14 | CA   | 7  | 6  |
| 293064 | 54 | 1334712 | 1334723 | 2 | 6  | 12 | CA   | 26 | 8  |
| 293066 | 54 | 1342771 | 1342788 | 2 | 9  | 18 | CA   | 15 | 7  |
| 293067 | 54 | 1342790 | 1342803 | 2 | 7  | 14 | AC   | 9  | 7  |
| 293072 | 54 | 1347683 | 1347702 | 4 | 5  | 20 | GGAT | 30 | 4  |
| 293073 | 54 | 1347767 | 1347780 | 2 | 7  | 14 | CA   | 16 | 16 |
| 293074 | 54 | 1347783 | 1347794 | 2 | 6  | 12 | CA   | 14 | 14 |
| 293080 | 54 | 1351070 | 1351084 | 3 | 5  | 15 | CCT  | 18 | 3  |
| 293081 | 54 | 1352562 | 1352579 | 3 | 6  | 18 | AGC  | 27 | 8  |
| 293105 | 54 | 1364919 | 1364940 | 2 | 11 | 22 | GT   | 21 | 11 |
| 293106 | 54 | 1365059 | 1365074 | 2 | 8  | 16 | GT   | 17 | 7  |
| 293109 | 54 | 1365905 | 1365936 | 2 | 16 | 32 | TG   | 8  | 11 |
| 293111 | 54 | 1369659 | 1369682 | 2 | 12 | 24 | AC   | 19 | 13 |
| 293112 | 54 | 1370057 | 1370088 | 2 | 16 | 32 | CA   | 22 | 10 |
| 293115 | 54 | 1371292 | 1371303 | 2 | 6  | 12 | AC   | 23 | 6  |
| 293116 | 54 | 1371305 | 1371318 | 2 | 7  | 14 | CA   | 22 | 3  |
| 293121 | 54 | 1373339 | 1373352 | 2 | 7  | 14 | CA   | 27 | 9  |
| 293124 | 54 | 1374678 | 1374691 | 2 | 7  | 14 | TG   | 22 | 10 |
| 293126 | 54 | 1376218 | 1376231 | 2 | 7  | 14 | AC   | 25 | 4  |

|        |    |         |         |   |    |    |      |    |    |
|--------|----|---------|---------|---|----|----|------|----|----|
| 293127 | 54 | 1376352 | 1376405 | 2 | 27 | 54 | CA   | 6  | 11 |
| 293131 | 54 | 1381918 | 1381949 | 2 | 16 | 32 | AC   | 11 | 9  |
| 293136 | 54 | 1382572 | 1382613 | 2 | 21 | 42 | AC   | 8  | 9  |
| 293142 | 54 | 1388815 | 1388842 | 2 | 14 | 28 | AG   | 18 | 6  |
| 293143 | 54 | 1388947 | 1388960 | 2 | 7  | 14 | AC   | 22 | 3  |
| 293145 | 54 | 1395626 | 1395647 | 2 | 11 | 22 | CA   | 16 | 9  |
| 293150 | 54 | 1400598 | 1400613 | 4 | 4  | 16 | AAAC | 26 | 4  |
| 293152 | 54 | 1410306 | 1410326 | 3 | 7  | 21 | CAA  | 29 | 3  |
| 293154 | 54 | 1419019 | 1419054 | 2 | 18 | 36 | GT   | 18 | 7  |
| 293160 | 54 | 1423359 | 1423384 | 2 | 13 | 26 | GT   | 6  | 6  |
| 293163 | 54 | 1426674 | 1426691 | 2 | 9  | 18 | GT   | 15 | 4  |
| 293164 | 54 | 1428392 | 1428429 | 2 | 19 | 38 | AC   | 8  | 9  |
| 293168 | 54 | 1452634 | 1452653 | 2 | 10 | 20 | AG   | 22 | 5  |
| 293169 | 54 | 1453394 | 1453409 | 4 | 4  | 16 | AAAC | 25 | 4  |
| 293170 | 54 | 1454715 | 1454726 | 2 | 6  | 12 | TG   | 23 | 3  |
| 293173 | 54 | 1470828 | 1470853 | 2 | 13 | 26 | AC   | 18 | 7  |
| 293182 | 54 | 1490872 | 1490895 | 4 | 6  | 24 | TGGA | 27 | 24 |
| 293183 | 54 | 1496505 | 1496520 | 2 | 8  | 16 | GT   | 28 | 7  |
| 293189 | 54 | 1510318 | 1510339 | 2 | 11 | 22 | CA   | 19 | 15 |
| 293190 | 54 | 1510439 | 1510458 | 2 | 10 | 20 | TG   | 14 | 10 |
| 293191 | 54 | 1513640 | 1513677 | 2 | 19 | 38 | AC   | 7  | 7  |
| 293197 | 54 | 1528099 | 1528152 | 2 | 27 | 54 | GT   | 14 | 12 |
| 293199 | 54 | 1529642 | 1529685 | 4 | 11 | 44 | TAGA | 18 | 7  |
| 293200 | 54 | 1529768 | 1529787 | 2 | 10 | 20 | TG   | 15 | 7  |
| 293207 | 54 | 1539438 | 1539451 | 2 | 7  | 14 | TG   | 14 | 3  |
| 293208 | 54 | 1539675 | 1539686 | 2 | 6  | 12 | TA   | 24 | 3  |
| 293209 | 54 | 1540777 | 1540790 | 2 | 7  | 14 | CA   | 21 | 3  |
| 293215 | 54 | 1547150 | 1547179 | 2 | 15 | 30 | TG   | 14 | 10 |
| 293226 | 54 | 1557873 | 1557888 | 4 | 4  | 16 | TCTT | 24 | 4  |
| 293227 | 54 | 1561228 | 1561253 | 2 | 13 | 26 | AC   | 8  | 6  |
| 293231 | 54 | 1573731 | 1573746 | 2 | 8  | 16 | AC   | 14 | 5  |
| 293232 | 54 | 1575000 | 1575015 | 2 | 8  | 16 | TG   | 18 | 4  |
| 293233 | 54 | 1576384 | 1576441 | 2 | 29 | 58 | CA   | 8  | 11 |
| 293242 | 54 | 1586762 | 1586776 | 3 | 5  | 15 | CTA  | 13 | 10 |
| 293245 | 54 | 1593591 | 1593611 | 3 | 7  | 21 | CCT  | 27 | 6  |
| 293248 | 54 | 1609368 | 1609379 | 2 | 6  | 12 | CA   | 23 | 3  |
| 293251 | 54 | 1613622 | 1613635 | 2 | 7  | 14 | TG   | 31 | 3  |
| 293254 | 54 | 1624259 | 1624270 | 2 | 6  | 12 | AT   | 18 | 4  |
| 293262 | 54 | 1634095 | 1634110 | 4 | 4  | 16 | GATT | 28 | 3  |
| 293263 | 54 | 1637480 | 1637493 | 2 | 7  | 14 | AG   | 28 | 4  |
| 293265 | 54 | 1648763 | 1648788 | 2 | 13 | 26 | GT   | 14 | 7  |
| 293268 | 54 | 1651824 | 1651845 | 2 | 11 | 22 | TC   | 15 | 7  |
| 293269 | 54 | 1653513 | 1653538 | 2 | 13 | 26 | CA   | 9  | 8  |
| 293280 | 54 | 1680988 | 1681007 | 2 | 10 | 20 | GT   | 14 | 7  |
| 293288 | 54 | 1696712 | 1696733 | 2 | 11 | 22 | TG   | 15 | 4  |
| 293299 | 54 | 1725308 | 1725331 | 2 | 12 | 24 | CA   | 7  | 7  |
| 293300 | 54 | 1730403 | 1730414 | 2 | 6  | 12 | GT   | 26 | 6  |
| 293304 | 54 | 1737160 | 1737173 | 2 | 7  | 14 | AG   | 22 | 8  |
| 293305 | 54 | 1737395 | 1737416 | 2 | 11 | 22 | TG   | 20 | 9  |
| 293306 | 54 | 1737555 | 1737566 | 2 | 6  | 12 | GT   | 27 | 6  |
| 293307 | 54 | 1741070 | 1741085 | 2 | 8  | 16 | TG   | 16 | 4  |

|        |    |         |         |   |    |    |      |    |    |
|--------|----|---------|---------|---|----|----|------|----|----|
| 293308 | 54 | 1745799 | 1745832 | 2 | 17 | 34 | CA   | 8  | 9  |
| 293309 | 54 | 1747966 | 1748017 | 2 | 26 | 52 | AC   | 11 | 11 |
| 293310 | 54 | 1748783 | 1748804 | 2 | 11 | 22 | CA   | 26 | 14 |
| 293312 | 54 | 1754965 | 1754982 | 2 | 9  | 18 | TG   | 19 | 3  |
| 293313 | 54 | 1762414 | 1762443 | 2 | 15 | 30 | CA   | 15 | 6  |
| 293314 | 54 | 1764294 | 1764305 | 2 | 6  | 12 | CA   | 29 | 8  |
| 293315 | 54 | 1764462 | 1764475 | 2 | 7  | 14 | GT   | 28 | 3  |
| 293316 | 54 | 1764656 | 1764675 | 2 | 10 | 20 | AC   | 13 | 10 |
| 293317 | 54 | 1764798 | 1764825 | 2 | 14 | 28 | GT   | 18 | 15 |
| 293319 | 54 | 1768993 | 1769012 | 2 | 10 | 20 | GT   | 14 | 8  |
| 293323 | 54 | 1771656 | 1771669 | 2 | 7  | 14 | GA   | 16 | 4  |
| 293329 | 54 | 1776182 | 1776195 | 2 | 7  | 14 | AC   | 24 | 6  |
| 293331 | 54 | 1780047 | 1780062 | 4 | 4  | 16 | TTTG | 21 | 5  |
| 293334 | 54 | 1785118 | 1785138 | 3 | 7  | 21 | ATT  | 21 | 11 |
| 293339 | 54 | 1794504 | 1794515 | 2 | 6  | 12 | CT   | 20 | 3  |
| 293342 | 54 | 1801705 | 1801718 | 2 | 7  | 14 | AC   | 18 | 12 |
| 293343 | 54 | 1801721 | 1801732 | 2 | 6  | 12 | AC   | 20 | 13 |
| 293344 | 54 | 1802686 | 1802701 | 2 | 8  | 16 | AG   | 26 | 5  |
| 293345 | 54 | 1805534 | 1805571 | 2 | 19 | 38 | CA   | 7  | 10 |
| 293350 | 54 | 1813699 | 1813710 | 2 | 6  | 12 | TA   | 15 | 6  |
| 293353 | 54 | 1817006 | 1817027 | 2 | 11 | 22 | CT   | 12 | 9  |
| 293355 | 54 | 1818833 | 1818848 | 2 | 8  | 16 | CA   | 20 | 7  |
| 293356 | 54 | 1818944 | 1818965 | 2 | 11 | 22 | CA   | 25 | 8  |
| 293357 | 54 | 1829985 | 1830000 | 2 | 8  | 16 | TG   | 13 | 13 |
| 293362 | 54 | 1830604 | 1830623 | 2 | 10 | 20 | TG   | 19 | 7  |
| 293363 | 54 | 1830733 | 1830748 | 2 | 8  | 16 | TG   | 15 | 8  |
| 293364 | 54 | 1830750 | 1830761 | 2 | 6  | 12 | GT   | 19 | 10 |
| 293365 | 54 | 1833976 | 1833993 | 3 | 6  | 18 | ATT  | 17 | 10 |
| 293367 | 54 | 1834948 | 1834967 | 2 | 10 | 20 | TG   | 29 | 7  |
| 293377 | 54 | 1845068 | 1845093 | 2 | 13 | 26 | GT   | 16 | 19 |
| 293381 | 54 | 1852801 | 1852812 | 2 | 6  | 12 | TA   | 10 | 7  |
| 293382 | 54 | 1855275 | 1855304 | 2 | 15 | 30 | CA   | 18 | 9  |
| 293390 | 54 | 1866519 | 1866532 | 2 | 7  | 14 | TG   | 28 | 4  |
| 293393 | 54 | 1868568 | 1868603 | 2 | 18 | 36 | GT   | 12 | 12 |
| 293401 | 54 | 1877345 | 1877358 | 2 | 7  | 14 | AC   | 25 | 3  |
| 293404 | 54 | 1881418 | 1881431 | 2 | 7  | 14 | TG   | 20 | 5  |
| 293410 | 54 | 1892701 | 1892724 | 2 | 12 | 24 | GT   | 18 | 11 |
| 293411 | 54 | 1893567 | 1893596 | 2 | 15 | 30 | GT   | 13 | 8  |
| 293415 | 54 | 1909568 | 1909583 | 2 | 8  | 16 | TC   | 11 | 4  |
| 293416 | 54 | 1909992 | 1910023 | 2 | 16 | 32 | AC   | 9  | 9  |
| 293417 | 54 | 1910276 | 1910293 | 2 | 9  | 18 | TG   | 25 | 6  |
| 293430 | 54 | 1918070 | 1918081 | 2 | 6  | 12 | CA   | 20 | 4  |
| 293435 | 54 | 1922807 | 1922822 | 2 | 8  | 16 | TG   | 15 | 4  |
| 293436 | 54 | 1927814 | 1927831 | 3 | 6  | 18 | TCT  | 7  | 3  |
| 293437 | 54 | 1927834 | 1927848 | 3 | 5  | 15 | TTC  | 24 | 9  |
| 293443 | 54 | 1933615 | 1933644 | 2 | 15 | 30 | AC   | 18 | 19 |
| 293444 | 54 | 1939709 | 1939728 | 4 | 5  | 20 | GGCA | 32 | 5  |
| 293446 | 54 | 1941363 | 1941395 | 3 | 11 | 33 | AAC  | 18 | 15 |
| 293447 | 54 | 1943907 | 1943920 | 2 | 7  | 14 | CT   | 24 | 10 |
| 293448 | 54 | 1944547 | 1944562 | 4 | 4  | 16 | TTTA | 14 | 7  |
| 293454 | 54 | 1956774 | 1956811 | 2 | 19 | 38 | CA   | 10 | 15 |

|        |    |         |         |   |    |    |      |    |    |
|--------|----|---------|---------|---|----|----|------|----|----|
| 293455 | 54 | 1957046 | 1957077 | 2 | 16 | 32 | CA   | 21 | 20 |
| 293459 | 54 | 1959021 | 1959036 | 4 | 4  | 16 | TGGA | 28 | 5  |
| 293467 | 54 | 1983937 | 1983956 | 2 | 10 | 20 | CA   | 13 | 8  |
| 293469 | 54 | 1984126 | 1984155 | 2 | 15 | 30 | TG   | 11 | 12 |
| 293479 | 54 | 1994993 | 1995020 | 2 | 14 | 28 | GT   | 14 | 7  |
| 293485 | 54 | 1999206 | 1999249 | 2 | 22 | 44 | CA   | 6  | 9  |
| 293493 | 54 | 2003810 | 2003839 | 2 | 15 | 30 | GT   | 7  | 11 |
| 293494 | 54 | 2004212 | 2004239 | 2 | 14 | 28 | AC   | 17 | 9  |
| 293501 | 54 | 2010501 | 2010533 | 3 | 11 | 33 | TCT  | 12 | 6  |
| 293503 | 54 | 2013861 | 2013902 | 2 | 21 | 42 | AC   | 8  | 8  |
| 293504 | 54 | 2013937 | 2013950 | 2 | 7  | 14 | CA   | 10 | 6  |
| 293506 | 54 | 2021537 | 2021564 | 2 | 14 | 28 | AC   | 10 | 10 |
| 293507 | 54 | 2022381 | 2022392 | 2 | 6  | 12 | AC   | 16 | 9  |
| 293508 | 54 | 2022394 | 2022409 | 2 | 8  | 16 | CA   | 17 | 10 |
| 293509 | 54 | 2022559 | 2022588 | 2 | 15 | 30 | AC   | 16 | 7  |
| 293511 | 54 | 2025453 | 2025468 | 4 | 4  | 16 | AAAT | 14 | 4  |
| 293514 | 54 | 2032701 | 2032718 | 2 | 9  | 18 | AT   | 18 | 5  |
| 293515 | 54 | 2036304 | 2036361 | 2 | 29 | 58 | AC   | 7  | 8  |
| 293517 | 54 | 2038216 | 2038227 | 2 | 6  | 12 | AC   | 20 | 14 |
| 293519 | 54 | 2044399 | 2044434 | 3 | 12 | 36 | TTA  | 9  | 7  |
| 293526 | 54 | 2050236 | 2050261 | 2 | 13 | 26 | GT   | 20 | 7  |
| 293532 | 54 | 2072062 | 2072077 | 2 | 8  | 16 | AC   | 18 | 10 |
| 293533 | 54 | 2072207 | 2072220 | 2 | 7  | 14 | CA   | 25 | 7  |
| 293541 | 54 | 2080980 | 2081005 | 2 | 13 | 26 | CA   | 11 | 11 |
| 293545 | 54 | 2083649 | 2083666 | 2 | 9  | 18 | TG   | 11 | 15 |
| 293547 | 54 | 2083942 | 2083957 | 2 | 8  | 16 | GA   | 22 | 11 |
| 293555 | 54 | 2088382 | 2088401 | 2 | 10 | 20 | CA   | 22 | 6  |
| 293556 | 54 | 2088498 | 2088523 | 2 | 13 | 26 | TG   | 15 | 4  |
| 293559 | 54 | 2096162 | 2096201 | 2 | 20 | 40 | CA   | 6  | 9  |
| 293560 | 54 | 2097800 | 2097823 | 2 | 12 | 24 | TG   | 17 | 9  |
| 293561 | 54 | 2097898 | 2097917 | 2 | 10 | 20 | TG   | 23 | 10 |
| 293562 | 54 | 2097969 | 2097980 | 2 | 6  | 12 | CA   | 31 | 3  |
| 293578 | 54 | 2104938 | 2104949 | 2 | 6  | 12 | GA   | 22 | 6  |
| 293579 | 54 | 2104952 | 2104967 | 2 | 8  | 16 | GA   | 23 | 6  |
| 293588 | 54 | 2115396 | 2115415 | 4 | 5  | 20 | TTTG | 13 | 6  |
| 293592 | 54 | 2118348 | 2118359 | 2 | 6  | 12 | TA   | 18 | 5  |
| 293594 | 54 | 2119039 | 2119082 | 2 | 22 | 44 | CA   | 8  | 10 |
| 293595 | 54 | 2119469 | 2119498 | 2 | 15 | 30 | CA   | 21 | 12 |
| 293596 | 54 | 2119578 | 2119611 | 2 | 17 | 34 | CA   | 7  | 11 |
| 293597 | 54 | 2119692 | 2119707 | 2 | 8  | 16 | AC   | 15 | 11 |
| 293599 | 54 | 2121109 | 2121126 | 2 | 9  | 18 | AC   | 15 | 7  |
| 293601 | 54 | 2123845 | 2123880 | 2 | 18 | 36 | GT   | 14 | 10 |
| 293602 | 54 | 2124015 | 2124030 | 2 | 8  | 16 | TG   | 7  | 6  |
| 293607 | 54 | 2128043 | 2128074 | 2 | 16 | 32 | GT   | 24 | 13 |
| 293617 | 54 | 2135712 | 2135745 | 2 | 17 | 34 | AC   | 9  | 10 |
| 293621 | 54 | 2137867 | 2137894 | 2 | 14 | 28 | GT   | 11 | 13 |
| 293623 | 54 | 2140199 | 2140210 | 2 | 6  | 12 | CA   | 25 | 4  |
| 293628 | 54 | 2145410 | 2145443 | 2 | 17 | 34 | TG   | 12 | 11 |
| 293629 | 54 | 2145612 | 2145647 | 2 | 18 | 36 | TG   | 10 | 13 |
| 293630 | 54 | 2146366 | 2146393 | 2 | 14 | 28 | TG   | 15 | 9  |
| 293631 | 54 | 2147154 | 2147167 | 2 | 7  | 14 | TG   | 31 | 5  |

|        |    |         |         |   |    |    |      |    |    |
|--------|----|---------|---------|---|----|----|------|----|----|
| 293637 | 54 | 2150298 | 2150309 | 2 | 6  | 12 | TC   | 27 | 4  |
| 293646 | 54 | 2156953 | 2156998 | 2 | 23 | 46 | CA   | 10 | 11 |
| 293647 | 54 | 2157139 | 2157156 | 2 | 9  | 18 | AC   | 13 | 4  |
| 293648 | 54 | 2157179 | 2157194 | 2 | 8  | 16 | AC   | 20 | 5  |
| 293652 | 54 | 2159036 | 2159057 | 2 | 11 | 22 | CA   | 25 | 6  |
| 293654 | 54 | 2163251 | 2163282 | 2 | 16 | 32 | TG   | 19 | 7  |
| 293659 | 54 | 2165968 | 2166001 | 2 | 17 | 34 | TG   | 7  | 7  |
| 293660 | 54 | 2166783 | 2166838 | 2 | 28 | 56 | TG   | 16 | 14 |
| 293662 | 54 | 2167972 | 2167983 | 2 | 6  | 12 | GT   | 24 | 5  |
| 293663 | 54 | 2168029 | 2168060 | 2 | 16 | 32 | GT   | 22 | 7  |
| 293664 | 54 | 2168524 | 2168543 | 2 | 10 | 20 | GT   | 19 | 11 |
| 293665 | 54 | 2169726 | 2169739 | 2 | 7  | 14 | GT   | 25 | 3  |
| 293667 | 54 | 2172389 | 2172400 | 2 | 6  | 12 | CA   | 27 | 6  |
| 293668 | 54 | 2172970 | 2172995 | 2 | 13 | 26 | TC   | 18 | 15 |
| 293671 | 54 | 2174831 | 2174846 | 2 | 8  | 16 | GT   | 17 | 17 |
| 293673 | 54 | 2175018 | 2175037 | 2 | 10 | 20 | TG   | 21 | 10 |
| 293683 | 54 | 2192273 | 2192304 | 2 | 16 | 32 | AC   | 8  | 10 |
| 293687 | 54 | 2194399 | 2194414 | 2 | 8  | 16 | CA   | 25 | 3  |
| 293688 | 54 | 2194695 | 2194708 | 2 | 7  | 14 | AC   | 24 | 5  |
| 293693 | 54 | 2199501 | 2199524 | 2 | 12 | 24 | TG   | 19 | 11 |
| 293694 | 54 | 2199578 | 2199591 | 2 | 7  | 14 | GT   | 14 | 7  |
| 293697 | 54 | 2206593 | 2206616 | 4 | 6  | 24 | TTAT | 25 | 3  |
| 293699 | 54 | 2208508 | 2208527 | 2 | 10 | 20 | GT   | 11 | 14 |
| 293701 | 54 | 2208659 | 2208676 | 2 | 9  | 18 | GT   | 19 | 4  |
| 293703 | 54 | 2210303 | 2210322 | 4 | 5  | 20 | ATCA | 23 | 5  |
| 293716 | 54 | 2233951 | 2233965 | 3 | 5  | 15 | TTG  | 26 | 3  |
| 293722 | 54 | 2241919 | 2241930 | 2 | 6  | 12 | AT   | 17 | 8  |
| 293723 | 54 | 2246258 | 2246291 | 2 | 17 | 34 | TG   | 20 | 10 |
| 293725 | 54 | 2258301 | 2258312 | 2 | 6  | 12 | AT   | 21 | 5  |
| 293731 | 54 | 2279571 | 2279606 | 2 | 18 | 36 | GT   | 18 | 11 |
| 293737 | 54 | 2294061 | 2294080 | 2 | 10 | 20 | TG   | 22 | 11 |
| 293738 | 54 | 2294750 | 2294789 | 2 | 20 | 40 | TG   | 8  | 10 |
| 293745 | 54 | 2310161 | 2310174 | 2 | 7  | 14 | TA   | 22 | 6  |
| 293746 | 54 | 2310506 | 2310519 | 2 | 7  | 14 | CA   | 27 | 3  |
| 293748 | 54 | 2314367 | 2314380 | 2 | 7  | 14 | CA   | 20 | 7  |
| 293754 | 54 | 2327566 | 2327607 | 3 | 14 | 42 | TTC  | 15 | 10 |
| 293759 | 54 | 2338682 | 2338699 | 2 | 9  | 18 | CA   | 16 | 13 |
| 293763 | 54 | 2343198 | 2343217 | 2 | 10 | 20 | AC   | 21 | 10 |
| 293770 | 54 | 2351952 | 2351973 | 2 | 11 | 22 | GT   | 18 | 6  |
| 293771 | 54 | 2352500 | 2352527 | 4 | 7  | 28 | CCAT | 27 | 6  |
| 293773 | 54 | 2355896 | 2355915 | 2 | 10 | 20 | GT   | 22 | 6  |
| 293779 | 54 | 2363202 | 2363219 | 2 | 9  | 18 | CA   | 26 | 10 |
| 293782 | 54 | 2372844 | 2372870 | 3 | 9  | 27 | CTC  | 15 | 8  |
| 293783 | 54 | 2373390 | 2373419 | 2 | 15 | 30 | AC   | 7  | 10 |
| 293784 | 54 | 2373556 | 2373569 | 2 | 7  | 14 | CA   | 26 | 9  |
| 293785 | 54 | 2379115 | 2379162 | 2 | 24 | 48 | AC   | 9  | 10 |
| 293787 | 54 | 2381932 | 2381959 | 2 | 14 | 28 | CA   | 26 | 14 |
| 293788 | 54 | 2382712 | 2382723 | 2 | 6  | 12 | AT   | 20 | 6  |
| 293800 | 54 | 2398223 | 2398260 | 2 | 19 | 38 | GT   | 7  | 8  |
| 293803 | 54 | 2410455 | 2410468 | 2 | 7  | 14 | AG   | 10 | 3  |
| 293812 | 54 | 2432317 | 2432334 | 3 | 6  | 18 | AAC  | 12 | 3  |

|        |    |         |         |   |    |    |      |    |    |
|--------|----|---------|---------|---|----|----|------|----|----|
| 293814 | 54 | 2433612 | 2433637 | 2 | 13 | 26 | TG   | 12 | 10 |
| 293816 | 54 | 2434791 | 2434822 | 2 | 16 | 32 | AC   | 6  | 7  |
| 293821 | 54 | 2447502 | 2447515 | 2 | 7  | 14 | GT   | 27 | 6  |
| 293822 | 54 | 2448127 | 2448144 | 2 | 9  | 18 | TG   | 15 | 8  |
| 293823 | 54 | 2452926 | 2452953 | 2 | 14 | 28 | TG   | 9  | 15 |
| 293824 | 54 | 2454992 | 2455019 | 2 | 14 | 28 | TG   | 19 | 13 |
| 293827 | 54 | 2461730 | 2461749 | 4 | 5  | 20 | AGAA | 30 | 7  |
| 293831 | 54 | 2465396 | 2465427 | 2 | 16 | 32 | AC   | 10 | 13 |
| 293845 | 54 | 2483469 | 2483486 | 2 | 9  | 18 | AC   | 23 | 6  |
| 293852 | 54 | 2489467 | 2489481 | 3 | 5  | 15 | GAG  | 29 | 5  |
| 293862 | 54 | 2504919 | 2504936 | 2 | 9  | 18 | TG   | 14 | 8  |
| 293867 | 54 | 2514214 | 2514237 | 4 | 6  | 24 | GATG | 23 | 7  |
| 293870 | 54 | 2525607 | 2525626 | 2 | 10 | 20 | GA   | 20 | 5  |
| 293872 | 54 | 2526957 | 2526968 | 2 | 6  | 12 | AT   | 22 | 3  |
| 293877 | 54 | 2535446 | 2535467 | 2 | 11 | 22 | TG   | 18 | 12 |
| 293886 | 54 | 2570442 | 2570459 | 3 | 6  | 18 | CTG  | 26 | 5  |
| 293889 | 54 | 2577253 | 2577284 | 2 | 16 | 32 | GT   | 19 | 9  |
| 293890 | 54 | 2579312 | 2579326 | 3 | 5  | 15 | TGC  | 33 | 3  |
| 293897 | 54 | 2607517 | 2607532 | 4 | 4  | 16 | TTTA | 27 | 3  |
| 293902 | 54 | 2616495 | 2616516 | 2 | 11 | 22 | TG   | 22 | 7  |
| 293905 | 54 | 2623358 | 2623379 | 2 | 11 | 22 | AC   | 20 | 7  |
| 293907 | 54 | 2633230 | 2633244 | 3 | 5  | 15 | ATA  | 23 | 3  |
| 293919 | 54 | 2646464 | 2646483 | 2 | 10 | 20 | GT   | 29 | 12 |
| 293920 | 54 | 2649241 | 2649288 | 2 | 24 | 48 | AC   | 21 | 14 |
| 293922 | 54 | 2651813 | 2651828 | 2 | 8  | 16 | CT   | 19 | 3  |
| 293926 | 54 | 2657724 | 2657747 | 4 | 6  | 24 | GTTT | 20 | 7  |
| 293933 | 54 | 2668313 | 2668330 | 2 | 9  | 18 | TG   | 16 | 6  |
| 293943 | 54 | 2699180 | 2699191 | 2 | 6  | 12 | GT   | 22 | 5  |
| 293952 | 54 | 2731824 | 2731837 | 2 | 7  | 14 | TA   | 16 | 12 |
| 293955 | 54 | 2735934 | 2735949 | 2 | 8  | 16 | AC   | 25 | 4  |
| 293983 | 54 | 2795308 | 2795325 | 2 | 9  | 18 | AC   | 25 | 6  |
| 293986 | 54 | 2800100 | 2800117 | 2 | 9  | 18 | GA   | 21 | 3  |
| 293991 | 54 | 2803385 | 2803414 | 2 | 15 | 30 | AC   | 15 | 12 |
| 293992 | 54 | 2804365 | 2804380 | 2 | 8  | 16 | TG   | 19 | 9  |
| 293995 | 54 | 2809221 | 2809250 | 2 | 15 | 30 | AC   | 11 | 14 |
| 294005 | 54 | 2826024 | 2826041 | 2 | 9  | 18 | CT   | 16 | 4  |
| 294008 | 54 | 2831388 | 2831405 | 2 | 9  | 18 | AT   | 24 | 15 |
| 294009 | 54 | 2837451 | 2837496 | 2 | 23 | 46 | AC   | 8  | 5  |
| 294010 | 54 | 2838420 | 2838431 | 2 | 6  | 12 | AT   | 25 | 9  |
| 294012 | 54 | 2847051 | 2847068 | 2 | 9  | 18 | AC   | 7  | 7  |
| 294015 | 54 | 2852427 | 2852486 | 2 | 30 | 60 | AC   | 6  | 10 |
| 294022 | 54 | 2865440 | 2865467 | 2 | 14 | 28 | GT   | 13 | 10 |
| 294026 | 54 | 2870996 | 2871041 | 2 | 23 | 46 | GT   | 8  | 10 |
| 294033 | 54 | 2876574 | 2876588 | 3 | 5  | 15 | CTG  | 11 | 5  |
| 294037 | 54 | 2879387 | 2879438 | 2 | 26 | 52 | GT   | 17 | 14 |
| 294038 | 54 | 2880248 | 2880265 | 2 | 9  | 18 | CT   | 16 | 3  |
| 294039 | 54 | 2880540 | 2880585 | 2 | 23 | 46 | CA   | 9  | 11 |
| 294042 | 54 | 2884992 | 2885017 | 2 | 13 | 26 | CA   | 12 | 15 |
| 294047 | 54 | 2890521 | 2890532 | 2 | 6  | 12 | TA   | 16 | 6  |
| 294048 | 54 | 2890533 | 2890544 | 2 | 6  | 12 | TG   | 15 | 7  |
| 294053 | 54 | 2898177 | 2898192 | 2 | 8  | 16 | CA   | 22 | 6  |

|        |    |         |         |   |    |    |      |    |    |
|--------|----|---------|---------|---|----|----|------|----|----|
| 294068 | 54 | 2941279 | 2941300 | 2 | 11 | 22 | TC   | 6  | 7  |
| 294077 | 54 | 2946942 | 2946967 | 2 | 13 | 26 | AC   | 11 | 13 |
| 294081 | 54 | 2952671 | 2952710 | 2 | 20 | 40 | GT   | 11 | 8  |
| 294086 | 54 | 2965940 | 2965951 | 2 | 6  | 12 | CT   | 25 | 4  |
| 294091 | 54 | 2984780 | 2984807 | 2 | 14 | 28 | CA   | 18 | 7  |
| 294092 | 54 | 2985325 | 2985344 | 2 | 10 | 20 | TG   | 24 | 12 |
| 294093 | 54 | 2994746 | 2994760 | 3 | 5  | 15 | TCT  | 19 | 9  |
| 294095 | 54 | 2998007 | 2998027 | 3 | 7  | 21 | CTC  | 29 | 6  |
| 294096 | 54 | 3003156 | 3003171 | 4 | 4  | 16 | TTTA | 9  | 5  |
| 294098 | 54 | 3007223 | 3007252 | 2 | 15 | 30 | GT   | 22 | 14 |
| 294101 | 54 | 3009227 | 3009246 | 2 | 10 | 20 | AC   | 15 | 10 |
| 294115 | 54 | 3041550 | 3041563 | 2 | 7  | 14 | CA   | 8  | 5  |
| 294116 | 54 | 3041900 | 3041911 | 2 | 6  | 12 | AC   | 21 | 3  |
| 294117 | 54 | 3043337 | 3043354 | 2 | 9  | 18 | GT   | 22 | 3  |
| 294120 | 54 | 3046891 | 3046914 | 2 | 12 | 24 | TG   | 15 | 10 |
| 294133 | 54 | 3066642 | 3066657 | 2 | 8  | 16 | CT   | 24 | 4  |
| 294137 | 54 | 3078628 | 3078643 | 2 | 8  | 16 | CA   | 27 | 5  |
| 294138 | 54 | 3080569 | 3080602 | 2 | 17 | 34 | TC   | 7  | 5  |
| 294140 | 54 | 3083073 | 3083102 | 2 | 15 | 30 | CA   | 9  | 8  |
| 294141 | 54 | 3083916 | 3083929 | 2 | 7  | 14 | AC   | 16 | 5  |
| 294142 | 54 | 3084059 | 3084076 | 2 | 9  | 18 | AC   | 13 | 5  |
| 294151 | 54 | 3095523 | 3095540 | 2 | 9  | 18 | CA   | 10 | 9  |
| 294153 | 54 | 3098800 | 3098813 | 2 | 7  | 14 | TG   | 26 | 3  |
| 294155 | 54 | 3099462 | 3099483 | 2 | 11 | 22 | GT   | 17 | 11 |
| 294159 | 54 | 3110986 | 3111029 | 2 | 22 | 44 | GT   | 10 | 10 |
| 294160 | 54 | 3111179 | 3111196 | 2 | 9  | 18 | AC   | 25 | 6  |
| 294161 | 54 | 3112072 | 3112089 | 2 | 9  | 18 | CT   | 29 | 5  |
| 294163 | 54 | 3112280 | 3112297 | 2 | 9  | 18 | GA   | 25 | 4  |
| 294174 | 54 | 3120781 | 3120792 | 2 | 6  | 12 | AC   | 12 | 5  |
| 294185 | 54 | 3133475 | 3133498 | 2 | 12 | 24 | CA   | 16 | 7  |
| 294186 | 54 | 3133617 | 3133642 | 2 | 13 | 26 | AC   | 14 | 6  |
| 294187 | 54 | 3133743 | 3133756 | 2 | 7  | 14 | GT   | 18 | 8  |
| 294188 | 54 | 3134640 | 3134653 | 2 | 7  | 14 | AG   | 17 | 4  |
| 294193 | 54 | 3137477 | 3137512 | 3 | 12 | 36 | GAA  | 15 | 11 |
| 294198 | 54 | 3140742 | 3140767 | 2 | 13 | 26 | AC   | 8  | 10 |
| 294207 | 54 | 3153205 | 3153220 | 2 | 8  | 16 | CA   | 16 | 6  |
| 294210 | 54 | 3157438 | 3157451 | 2 | 7  | 14 | TG   | 20 | 6  |
| 294212 | 54 | 3161514 | 3161541 | 2 | 14 | 28 | TG   | 22 | 15 |
| 294218 | 54 | 3166026 | 3166049 | 2 | 12 | 24 | GT   | 7  | 5  |
| 294226 | 54 | 3169752 | 3169791 | 2 | 20 | 40 | GT   | 9  | 8  |
| 294227 | 54 | 3170038 | 3170051 | 2 | 7  | 14 | TG   | 12 | 4  |
| 294231 | 54 | 3171533 | 3171548 | 2 | 8  | 16 | AC   | 20 | 10 |
| 294238 | 54 | 3175191 | 3175204 | 2 | 7  | 14 | GT   | 14 | 3  |
| 294240 | 54 | 3178198 | 3178209 | 2 | 6  | 12 | CA   | 29 | 4  |
| 294244 | 54 | 3187068 | 3187085 | 2 | 9  | 18 | CA   | 21 | 5  |
| 294249 | 54 | 3191928 | 3191947 | 2 | 10 | 20 | CA   | 15 | 4  |
| 294255 | 54 | 3200794 | 3200807 | 2 | 7  | 14 | CA   | 20 | 3  |
| 294259 | 54 | 3212934 | 3212953 | 4 | 5  | 20 | CAGA | 23 | 5  |
| 294260 | 54 | 3212956 | 3212971 | 4 | 4  | 16 | GACA | 25 | 9  |
| 294261 | 54 | 3214777 | 3214806 | 2 | 15 | 30 | GT   | 18 | 7  |
| 294263 | 54 | 3217405 | 3217422 | 3 | 6  | 18 | ATC  | 21 | 8  |

|        |    |         |         |   |    |    |      |    |    |
|--------|----|---------|---------|---|----|----|------|----|----|
| 294264 | 54 | 3222793 | 3222810 | 2 | 9  | 18 | CA   | 22 | 7  |
| 294265 | 54 | 3223139 | 3223150 | 2 | 6  | 12 | AT   | 18 | 4  |
| 294266 | 54 | 3224399 | 3224434 | 3 | 12 | 36 | AAT  | 8  | 9  |
| 294271 | 54 | 3255987 | 3256002 | 2 | 8  | 16 | TC   | 11 | 6  |
| 294273 | 54 | 3261554 | 3261583 | 2 | 15 | 30 | CA   | 21 | 9  |
| 294274 | 54 | 3261689 | 3261728 | 2 | 20 | 40 | CA   | 8  | 11 |
| 294284 | 54 | 3290792 | 3290825 | 2 | 17 | 34 | CA   | 16 | 13 |
| 294285 | 54 | 3292175 | 3292192 | 2 | 9  | 18 | TG   | 16 | 7  |
| 294287 | 54 | 3294146 | 3294159 | 2 | 7  | 14 | TG   | 19 | 4  |
| 294294 | 54 | 3308132 | 3308147 | 4 | 4  | 16 | ATAA | 25 | 3  |
| 294296 | 54 | 3309268 | 3309307 | 4 | 10 | 40 | TTTC | 8  | 9  |
| 294300 | 54 | 3311001 | 3311034 | 2 | 17 | 34 | CA   | 9  | 10 |
| 294307 | 54 | 3316570 | 3316581 | 2 | 6  | 12 | CA   | 28 | 3  |
| 294308 | 54 | 3317121 | 3317136 | 2 | 8  | 16 | CT   | 16 | 10 |
| 294309 | 54 | 3317137 | 3317156 | 2 | 10 | 20 | CA   | 16 | 10 |
| 294310 | 54 | 3317275 | 3317298 | 2 | 12 | 24 | GT   | 9  | 9  |
| 294311 | 54 | 3317370 | 3317387 | 2 | 9  | 18 | GT   | 17 | 6  |
| 294315 | 54 | 3320436 | 3320463 | 2 | 14 | 28 | GT   | 7  | 7  |
| 294316 | 54 | 3321084 | 3321111 | 2 | 14 | 28 | TG   | 9  | 11 |
| 294317 | 54 | 3322719 | 3322740 | 2 | 11 | 22 | GT   | 15 | 9  |
| 294318 | 54 | 3323153 | 3323164 | 2 | 6  | 12 | AC   | 27 | 12 |
| 294319 | 54 | 3324351 | 3324401 | 3 | 17 | 51 | CTT  | 17 | 12 |
| 294322 | 54 | 3324819 | 3324845 | 3 | 9  | 27 | AGA  | 17 | 7  |
| 294323 | 54 | 3325033 | 3325054 | 2 | 11 | 22 | CA   | 15 | 9  |
| 294326 | 54 | 3326203 | 3326222 | 2 | 10 | 20 | TG   | 22 | 11 |
| 294327 | 54 | 3326385 | 3326400 | 2 | 8  | 16 | GT   | 10 | 7  |
| 294331 | 54 | 3327291 | 3327311 | 3 | 7  | 21 | GGA  | 29 | 3  |
| 294336 | 54 | 3328488 | 3328503 | 2 | 8  | 16 | TG   | 18 | 3  |
| 294337 | 54 | 3329041 | 3329084 | 2 | 22 | 44 | AC   | 9  | 8  |
| 294338 | 54 | 3329280 | 3329293 | 2 | 7  | 14 | AT   | 12 | 6  |
| 294339 | 54 | 3329418 | 3329447 | 2 | 15 | 30 | TG   | 14 | 11 |
| 294340 | 54 | 3329495 | 3329514 | 4 | 5  | 20 | CTGT | 18 | 3  |
| 294341 | 54 | 3329605 | 3329620 | 2 | 8  | 16 | CA   | 26 | 6  |
| 294343 | 54 | 3330516 | 3330549 | 2 | 17 | 34 | CA   | 10 | 11 |
| 294344 | 54 | 3330571 | 3330596 | 2 | 13 | 26 | AG   | 13 | 5  |
| 294346 | 54 | 3330730 | 3330755 | 2 | 13 | 26 | AG   | 10 | 7  |
| 294347 | 54 | 3331364 | 3331395 | 2 | 16 | 32 | AC   | 10 | 7  |
| 294348 | 54 | 3331459 | 3331474 | 2 | 8  | 16 | CT   | 19 | 4  |
| 294350 | 54 | 3331611 | 3331624 | 2 | 7  | 14 | TC   | 21 | 3  |
| 294352 | 54 | 3331720 | 3331749 | 2 | 15 | 30 | TG   | 14 | 9  |
| 294353 | 54 | 3331931 | 3331946 | 2 | 8  | 16 | TG   | 22 | 6  |
| 294355 | 54 | 3333362 | 3333399 | 2 | 19 | 38 | GT   | 13 | 8  |
| 294367 | 54 | 3343519 | 3343544 | 2 | 13 | 26 | CA   | 12 | 11 |
| 294372 | 54 | 3343947 | 3343978 | 2 | 16 | 32 | TG   | 17 | 10 |
| 294373 | 54 | 3344151 | 3344162 | 2 | 6  | 12 | CA   | 15 | 3  |
| 294375 | 54 | 3345567 | 3345590 | 2 | 12 | 24 | TG   | 20 | 8  |
| 294376 | 54 | 3345751 | 3345796 | 2 | 23 | 46 | GA   | 7  | 8  |
| 294377 | 54 | 3346447 | 3346474 | 2 | 14 | 28 | TG   | 14 | 6  |
| 294380 | 54 | 3346678 | 3346689 | 2 | 6  | 12 | AC   | 22 | 10 |
| 294402 | 54 | 3371547 | 3371558 | 2 | 6  | 12 | GT   | 24 | 7  |
| 294406 | 54 | 3372025 | 3372044 | 2 | 10 | 20 | GT   | 10 | 5  |



|        |    |         |         |   |    |    |      |    |    |
|--------|----|---------|---------|---|----|----|------|----|----|
| 294413 | 54 | 3375948 | 3375965 | 2 | 9  | 18 | CA   | 19 | 10 |
| 294414 | 54 | 3375968 | 3375979 | 2 | 6  | 12 | CA   | 15 | 6  |
| 294417 | 54 | 3376315 | 3376352 | 2 | 19 | 38 | GT   | 12 | 8  |
| 294419 | 54 | 3377750 | 3377779 | 2 | 15 | 30 | CA   | 11 | 9  |
| 294422 | 54 | 3378353 | 3378372 | 2 | 10 | 20 | CA   | 11 | 4  |
| 294438 | 54 | 3394524 | 3394539 | 4 | 4  | 16 | TTTA | 9  | 3  |
| 294441 | 54 | 3397393 | 3397410 | 2 | 9  | 18 | CA   | 11 | 4  |
| 294447 | 54 | 3410072 | 3410083 | 2 | 6  | 12 | TG   | 31 | 4  |
| 294448 | 54 | 3411537 | 3411554 | 2 | 9  | 18 | GT   | 23 | 3  |
| 294454 | 54 | 3417031 | 3417048 | 3 | 6  | 18 | GCA  | 10 | 6  |
| 294456 | 54 | 3419574 | 3419589 | 4 | 4  | 16 | AAAT | 16 | 5  |
| 294457 | 54 | 3422354 | 3422375 | 2 | 11 | 22 | AC   | 18 | 12 |
| 294460 | 54 | 3427515 | 3427534 | 2 | 10 | 20 | TG   | 11 | 8  |
| 294467 | 54 | 3428754 | 3428771 | 2 | 9  | 18 | TG   | 22 | 8  |
| 294470 | 54 | 3432538 | 3432551 | 2 | 7  | 14 | AC   | 15 | 4  |
| 294478 | 54 | 3448610 | 3448623 | 2 | 7  | 14 | TG   | 26 | 6  |
| 294501 | 55 | 55167   | 55182   | 2 | 8  | 16 | TA   | 16 | 3  |
| 294512 | 55 | 111319  | 111334  | 2 | 8  | 16 | GA   | 22 | 7  |
| 294514 | 55 | 113719  | 113738  | 4 | 5  | 20 | TTTA | 14 | 3  |
| 294515 | 55 | 114204  | 114218  | 3 | 5  | 15 | CTT  | 15 | 8  |
| 294516 | 55 | 117689  | 117702  | 2 | 7  | 14 | TG   | 16 | 7  |
| 294517 | 55 | 117882  | 117893  | 2 | 6  | 12 | AC   | 21 | 3  |
| 294520 | 55 | 121124  | 121150  | 3 | 9  | 27 | GAG  | 24 | 4  |
| 294527 | 55 | 149761  | 149776  | 4 | 4  | 16 | CTGC | 28 | 5  |
| 294531 | 55 | 157432  | 157459  | 2 | 14 | 28 | CA   | 9  | 5  |
| 294543 | 55 | 176176  | 176193  | 2 | 9  | 18 | CA   | 13 | 9  |
| 294544 | 55 | 176196  | 176207  | 2 | 6  | 12 | CA   | 17 | 8  |
| 294547 | 55 | 180992  | 181005  | 2 | 7  | 14 | AT   | 10 | 6  |
| 294550 | 55 | 195091  | 195105  | 3 | 5  | 15 | GGC  | 20 | 3  |
| 294551 | 55 | 204173  | 204190  | 2 | 9  | 18 | AT   | 18 | 7  |
| 294552 | 55 | 208073  | 208120  | 4 | 12 | 48 | TATC | 11 | 9  |
| 294553 | 55 | 208375  | 208390  | 2 | 8  | 16 | GT   | 23 | 6  |
| 294554 | 55 | 210710  | 210742  | 3 | 11 | 33 | TGA  | 20 | 13 |
| 294556 | 55 | 218773  | 218798  | 2 | 13 | 26 | GT   | 17 | 6  |
| 294565 | 55 | 248900  | 248913  | 2 | 7  | 14 | AC   | 32 | 4  |
| 294566 | 55 | 250363  | 250392  | 2 | 15 | 30 | AC   | 6  | 8  |
| 294572 | 55 | 252401  | 252430  | 2 | 15 | 30 | GT   | 9  | 12 |
| 294577 | 55 | 265019  | 265036  | 2 | 9  | 18 | GT   | 20 | 4  |
| 294591 | 55 | 322752  | 322769  | 2 | 9  | 18 | GT   | 6  | 9  |
| 294595 | 55 | 332652  | 332687  | 2 | 18 | 36 | GT   | 15 | 8  |
| 294596 | 55 | 333021  | 333032  | 2 | 6  | 12 | AC   | 22 | 8  |
| 294597 | 55 | 333403  | 333422  | 2 | 10 | 20 | TG   | 16 | 6  |
| 294619 | 55 | 367717  | 367728  | 2 | 6  | 12 | GT   | 15 | 4  |
| 294624 | 55 | 369384  | 369398  | 3 | 5  | 15 | GGT  | 7  | 3  |
| 294630 | 55 | 383212  | 383243  | 2 | 16 | 32 | AC   | 10 | 8  |
| 294631 | 55 | 383377  | 383388  | 2 | 6  | 12 | GA   | 23 | 3  |
| 294637 | 55 | 398857  | 398886  | 2 | 15 | 30 | GT   | 9  | 8  |
| 294638 | 55 | 399052  | 399069  | 3 | 6  | 18 | TGC  | 33 | 3  |
| 294645 | 55 | 400624  | 400645  | 2 | 11 | 22 | TG   | 7  | 4  |
| 294646 | 55 | 405689  | 405718  | 2 | 15 | 30 | CA   | 13 | 16 |
| 294652 | 55 | 422225  | 422254  | 2 | 15 | 30 | TG   | 16 | 12 |

|        |    |        |        |   |    |    |      |    |    |
|--------|----|--------|--------|---|----|----|------|----|----|
| 294654 | 55 | 426121 | 426134 | 2 | 7  | 14 | AC   | 24 | 4  |
| 294659 | 55 | 432683 | 432712 | 2 | 15 | 30 | CA   | 18 | 9  |
| 294662 | 55 | 435504 | 435517 | 2 | 7  | 14 | TC   | 16 | 3  |
| 294663 | 55 | 435626 | 435653 | 4 | 7  | 28 | TCAC | 28 | 6  |
| 294669 | 55 | 441132 | 441152 | 3 | 7  | 21 | GAG  | 25 | 4  |
| 294678 | 55 | 463386 | 463397 | 2 | 6  | 12 | TG   | 18 | 8  |
| 294681 | 55 | 478059 | 478074 | 2 | 8  | 16 | GT   | 19 | 5  |
| 294683 | 55 | 486335 | 486370 | 2 | 18 | 36 | AC   | 10 | 13 |
| 294690 | 55 | 497957 | 497972 | 2 | 8  | 16 | GT   | 23 | 4  |
| 294692 | 55 | 501921 | 501936 | 2 | 8  | 16 | AC   | 23 | 5  |
| 294698 | 55 | 511285 | 511298 | 2 | 7  | 14 | TA   | 15 | 3  |
| 294699 | 55 | 512842 | 512881 | 2 | 20 | 40 | CT   | 12 | 10 |
| 294701 | 55 | 525217 | 525230 | 2 | 7  | 14 | CA   | 25 | 3  |
| 294702 | 55 | 525431 | 525464 | 2 | 17 | 34 | AC   | 17 | 6  |
| 294703 | 55 | 527520 | 527531 | 2 | 6  | 12 | GT   | 25 | 6  |
| 294704 | 55 | 527534 | 527545 | 2 | 6  | 12 | GT   | 15 | 6  |
| 294706 | 55 | 546684 | 546715 | 2 | 16 | 32 | AG   | 9  | 7  |
| 294708 | 55 | 554992 | 555007 | 4 | 4  | 16 | AAAT | 35 | 3  |
| 294724 | 55 | 575811 | 575844 | 2 | 17 | 34 | GT   | 10 | 10 |
| 294726 | 55 | 577403 | 577432 | 2 | 15 | 30 | TG   | 9  | 10 |
| 294728 | 55 | 594277 | 594294 | 2 | 9  | 18 | CA   | 24 | 5  |
| 294729 | 55 | 595514 | 595529 | 4 | 4  | 16 | AAAC | 20 | 11 |
| 294730 | 55 | 596191 | 596206 | 2 | 8  | 16 | AC   | 19 | 4  |
| 294731 | 55 | 601163 | 601218 | 4 | 14 | 56 | TCTA | 16 | 13 |
| 294755 | 55 | 651190 | 651205 | 2 | 8  | 16 | GT   | 18 | 13 |
| 294756 | 55 | 651208 | 651219 | 2 | 6  | 12 | GT   | 21 | 13 |
| 294764 | 55 | 661180 | 661195 | 2 | 8  | 16 | CA   | 20 | 5  |
| 294766 | 55 | 662197 | 662220 | 3 | 8  | 24 | GAG  | 16 | 3  |
| 294768 | 55 | 668870 | 668885 | 2 | 8  | 16 | CA   | 25 | 3  |
| 294778 | 55 | 694115 | 694126 | 2 | 6  | 12 | GT   | 22 | 5  |
| 294780 | 55 | 694492 | 694513 | 2 | 11 | 22 | TG   | 15 | 9  |
| 294783 | 55 | 702363 | 702378 | 2 | 8  | 16 | AC   | 24 | 3  |
| 294784 | 55 | 706873 | 706892 | 2 | 10 | 20 | CA   | 20 | 5  |
| 294786 | 55 | 707331 | 707352 | 2 | 11 | 22 | TG   | 15 | 7  |
| 294787 | 55 | 707657 | 707672 | 2 | 8  | 16 | CA   | 21 | 7  |
| 294789 | 55 | 710709 | 710726 | 3 | 6  | 18 | TGT  | 26 | 9  |
| 294792 | 55 | 718266 | 718291 | 2 | 13 | 26 | GA   | 10 | 9  |
| 294793 | 55 | 719097 | 719118 | 2 | 11 | 22 | GT   | 7  | 8  |
| 294797 | 55 | 721664 | 721677 | 2 | 7  | 14 | GA   | 8  | 4  |
| 294798 | 55 | 721831 | 721848 | 3 | 6  | 18 | AAT  | 26 | 4  |
| 294803 | 55 | 736653 | 736674 | 2 | 11 | 22 | GT   | 23 | 4  |
| 294804 | 55 | 743352 | 743369 | 3 | 6  | 18 | AAC  | 25 | 4  |
| 294808 | 55 | 770598 | 770609 | 2 | 6  | 12 | GT   | 27 | 3  |
| 294811 | 55 | 775826 | 775843 | 2 | 9  | 18 | CA   | 18 | 10 |
| 294813 | 55 | 777668 | 777679 | 2 | 6  | 12 | AC   | 27 | 3  |
| 294815 | 55 | 778251 | 778264 | 2 | 7  | 14 | CT   | 9  | 5  |
| 294822 | 55 | 784399 | 784410 | 2 | 6  | 12 | GT   | 30 | 3  |
| 294823 | 55 | 791498 | 791511 | 2 | 7  | 14 | GT   | 31 | 3  |
| 294825 | 55 | 798554 | 798574 | 3 | 7  | 21 | TTG  | 11 | 5  |
| 294826 | 55 | 799633 | 799646 | 2 | 7  | 14 | CA   | 19 | 6  |
| 294828 | 55 | 802208 | 802219 | 2 | 6  | 12 | GT   | 24 | 5  |

|        |    |         |         |   |    |    |      |    |    |
|--------|----|---------|---------|---|----|----|------|----|----|
| 294831 | 55 | 816830  | 816843  | 2 | 7  | 14 | TG   | 28 | 3  |
| 294832 | 55 | 817097  | 817123  | 3 | 9  | 27 | TTG  | 16 | 8  |
| 294840 | 55 | 863740  | 863754  | 3 | 5  | 15 | AAC  | 19 | 5  |
| 294855 | 55 | 887970  | 887981  | 2 | 6  | 12 | CT   | 14 | 3  |
| 294860 | 55 | 903738  | 903761  | 3 | 8  | 24 | TAT  | 8  | 4  |
| 294866 | 55 | 915734  | 915747  | 2 | 7  | 14 | CA   | 21 | 7  |
| 294874 | 55 | 940872  | 940883  | 2 | 6  | 12 | CA   | 19 | 3  |
| 294884 | 55 | 970699  | 970714  | 4 | 4  | 16 | ATTT | 25 | 4  |
| 294886 | 55 | 973668  | 973679  | 2 | 6  | 12 | TA   | 13 | 4  |
| 294911 | 55 | 1055482 | 1055499 | 2 | 9  | 18 | GT   | 19 | 4  |
| 294918 | 55 | 1083716 | 1083729 | 2 | 7  | 14 | TA   | 16 | 3  |
| 294921 | 55 | 1086375 | 1086410 | 3 | 12 | 36 | GTA  | 17 | 8  |
| 294926 | 55 | 1088272 | 1088287 | 2 | 8  | 16 | CA   | 20 | 3  |
| 294928 | 55 | 1088845 | 1088870 | 2 | 13 | 26 | CA   | 9  | 8  |
| 294931 | 55 | 1091711 | 1091728 | 3 | 6  | 18 | TCC  | 24 | 4  |
| 294937 | 55 | 1095973 | 1095988 | 2 | 8  | 16 | AC   | 28 | 6  |
| 294942 | 55 | 1112275 | 1112290 | 4 | 4  | 16 | ATTT | 9  | 3  |
| 294944 | 55 | 1115275 | 1115310 | 2 | 18 | 36 | AC   | 10 | 12 |
| 294947 | 55 | 1118412 | 1118439 | 4 | 7  | 28 | TGTA | 22 | 6  |
| 294948 | 55 | 1119027 | 1119044 | 2 | 9  | 18 | TG   | 15 | 5  |
| 294952 | 55 | 1127910 | 1127949 | 4 | 10 | 40 | AATC | 18 | 7  |
| 294954 | 55 | 1141125 | 1141148 | 4 | 6  | 24 | AAAT | 12 | 5  |
| 294960 | 55 | 1151494 | 1151519 | 2 | 13 | 26 | AG   | 21 | 10 |
| 294973 | 55 | 1186295 | 1186312 | 3 | 6  | 18 | TTG  | 8  | 3  |
| 294980 | 55 | 1195402 | 1195437 | 3 | 12 | 36 | ATC  | 21 | 7  |
| 294981 | 55 | 1196671 | 1196694 | 4 | 6  | 24 | TTTG | 26 | 7  |
| 294986 | 55 | 1205629 | 1205642 | 2 | 7  | 14 | CT   | 24 | 4  |
| 294987 | 55 | 1206791 | 1206806 | 2 | 8  | 16 | AC   | 15 | 19 |
| 294991 | 55 | 1211355 | 1211382 | 2 | 14 | 28 | AC   | 15 | 7  |
| 294993 | 55 | 1215107 | 1215118 | 2 | 6  | 12 | CT   | 17 | 3  |
| 294996 | 55 | 1221791 | 1221822 | 2 | 16 | 32 | TG   | 11 | 11 |
| 295005 | 55 | 1226446 | 1226497 | 4 | 13 | 52 | GATA | 7  | 9  |
| 295006 | 55 | 1227885 | 1227900 | 2 | 8  | 16 | TG   | 19 | 4  |
| 295009 | 55 | 1234191 | 1234238 | 4 | 12 | 48 | TGAA | 21 | 5  |
| 295010 | 55 | 1240452 | 1240478 | 3 | 9  | 27 | CCT  | 23 | 6  |
| 295011 | 55 | 1240706 | 1240753 | 2 | 24 | 48 | TG   | 6  | 10 |
| 295020 | 55 | 1258053 | 1258070 | 2 | 9  | 18 | TC   | 23 | 7  |
| 295021 | 55 | 1262049 | 1262068 | 2 | 10 | 20 | CT   | 16 | 4  |
| 295022 | 55 | 1262269 | 1262300 | 2 | 16 | 32 | CA   | 16 | 13 |
| 295025 | 55 | 1264043 | 1264063 | 3 | 7  | 21 | ATA  | 18 | 8  |
| 295030 | 55 | 1267684 | 1267701 | 3 | 6  | 18 | TTA  | 16 | 3  |
| 295038 | 55 | 1286151 | 1286182 | 4 | 8  | 32 | ATTT | 13 | 8  |
| 295040 | 55 | 1287522 | 1287537 | 2 | 8  | 16 | GT   | 19 | 9  |
| 295046 | 55 | 1290247 | 1290268 | 2 | 11 | 22 | TG   | 18 | 11 |
| 295052 | 55 | 1328452 | 1328475 | 4 | 6  | 24 | TTTA | 20 | 6  |
| 295053 | 55 | 1334767 | 1334786 | 4 | 5  | 20 | AAAC | 18 | 3  |
| 295054 | 55 | 1340754 | 1340783 | 3 | 10 | 30 | TGA  | 18 | 6  |
| 295058 | 55 | 1342859 | 1342882 | 2 | 12 | 24 | AC   | 8  | 4  |
| 295066 | 55 | 1353376 | 1353391 | 4 | 4  | 16 | GCAG | 19 | 4  |
| 295069 | 55 | 1359453 | 1359486 | 2 | 17 | 34 | TG   | 11 | 9  |
| 295073 | 55 | 1375609 | 1375634 | 2 | 13 | 26 | AC   | 12 | 5  |

|        |    |         |         |   |    |    |      |    |    |
|--------|----|---------|---------|---|----|----|------|----|----|
| 295074 | 55 | 1378907 | 1378924 | 2 | 9  | 18 | TA   | 16 | 7  |
| 295078 | 55 | 1385942 | 1385957 | 2 | 8  | 16 | AT   | 20 | 6  |
| 295082 | 55 | 1394276 | 1394295 | 2 | 10 | 20 | CA   | 6  | 5  |
| 295085 | 55 | 1403039 | 1403054 | 4 | 4  | 16 | AAAT | 23 | 5  |
| 295091 | 55 | 1413281 | 1413302 | 2 | 11 | 22 | AC   | 13 | 4  |
| 295093 | 55 | 1428119 | 1428130 | 2 | 6  | 12 | TC   | 20 | 5  |
| 295094 | 55 | 1428153 | 1428178 | 2 | 13 | 26 | AC   | 9  | 4  |
| 295102 | 55 | 1447758 | 1447773 | 4 | 4  | 16 | AAAC | 30 | 3  |
| 295109 | 55 | 1471098 | 1471113 | 2 | 8  | 16 | TG   | 13 | 6  |
| 295122 | 55 | 1489310 | 1489337 | 2 | 14 | 28 | CA   | 16 | 9  |
| 295130 | 55 | 1501353 | 1501372 | 4 | 5  | 20 | TTTA | 27 | 5  |
| 295131 | 55 | 1502723 | 1502737 | 3 | 5  | 15 | AAG  | 20 | 3  |
| 295137 | 55 | 1509687 | 1509702 | 2 | 8  | 16 | AC   | 16 | 8  |
| 295138 | 55 | 1509705 | 1509718 | 2 | 7  | 14 | AC   | 17 | 8  |
| 295139 | 55 | 1511997 | 1512014 | 2 | 9  | 18 | AT   | 20 | 13 |
| 295143 | 55 | 1513745 | 1513764 | 4 | 5  | 20 | ACAA | 25 | 8  |
| 295156 | 55 | 1542956 | 1542989 | 2 | 17 | 34 | AG   | 11 | 10 |
| 295160 | 55 | 1558198 | 1558219 | 2 | 11 | 22 | CA   | 18 | 8  |
| 295164 | 55 | 1567482 | 1567493 | 2 | 6  | 12 | AC   | 30 | 3  |
| 295166 | 55 | 1569417 | 1569438 | 2 | 11 | 22 | GT   | 17 | 9  |
| 295180 | 55 | 1586839 | 1586858 | 4 | 5  | 20 | TATT | 7  | 4  |
| 295188 | 55 | 1594086 | 1594097 | 2 | 6  | 12 | AT   | 6  | 3  |
| 295189 | 55 | 1594817 | 1594836 | 2 | 10 | 20 | TC   | 28 | 5  |
| 295191 | 55 | 1608568 | 1608588 | 3 | 7  | 21 | TTA  | 32 | 3  |
| 295192 | 55 | 1608756 | 1608787 | 2 | 16 | 32 | AC   | 12 | 6  |
| 295193 | 55 | 1610186 | 1610209 | 2 | 12 | 24 | CA   | 29 | 9  |
| 295201 | 55 | 1616669 | 1616683 | 3 | 5  | 15 | ATA  | 18 | 5  |
| 295207 | 55 | 1638703 | 1638717 | 3 | 5  | 15 | TAT  | 22 | 3  |
| 295218 | 55 | 1664728 | 1664747 | 4 | 5  | 20 | AAAT | 25 | 4  |
| 295223 | 55 | 1669629 | 1669644 | 2 | 8  | 16 | AT   | 10 | 5  |
| 295253 | 55 | 1730939 | 1730953 | 3 | 5  | 15 | CAG  | 24 | 6  |
| 295255 | 55 | 1734936 | 1734951 | 2 | 8  | 16 | GA   | 22 | 10 |
| 295256 | 55 | 1744007 | 1744021 | 3 | 5  | 15 | TTC  | 27 | 3  |
| 295258 | 55 | 1751132 | 1751161 | 2 | 15 | 30 | AC   | 11 | 6  |
| 295261 | 55 | 1754052 | 1754072 | 3 | 7  | 21 | AAT  | 7  | 5  |
| 295262 | 55 | 1764600 | 1764631 | 2 | 16 | 32 | CT   | 20 | 10 |
| 295268 | 55 | 1778665 | 1778680 | 2 | 8  | 16 | GT   | 26 | 8  |
| 295270 | 55 | 1782165 | 1782176 | 2 | 6  | 12 | GT   | 26 | 11 |
| 295272 | 55 | 1787088 | 1787111 | 4 | 6  | 24 | TTTG | 23 | 4  |
| 295309 | 55 | 1861632 | 1861667 | 4 | 9  | 36 | TCCA | 15 | 6  |
| 295325 | 55 | 1909360 | 1909387 | 4 | 7  | 28 | GTTG | 22 | 7  |
| 295330 | 55 | 1913394 | 1913427 | 2 | 17 | 34 | AC   | 17 | 11 |
| 295332 | 55 | 1916547 | 1916574 | 4 | 7  | 28 | TGTC | 7  | 4  |
| 295336 | 55 | 1938705 | 1938720 | 4 | 4  | 16 | ATTT | 13 | 3  |
| 295339 | 55 | 1944044 | 1944063 | 2 | 10 | 20 | TG   | 16 | 10 |
| 295341 | 55 | 1947372 | 1947387 | 2 | 8  | 16 | TG   | 28 | 4  |
| 295345 | 55 | 1958298 | 1958333 | 2 | 18 | 36 | AC   | 16 | 12 |
| 295352 | 55 | 1965001 | 1965014 | 2 | 7  | 14 | AG   | 15 | 3  |
| 295355 | 55 | 1972934 | 1972959 | 2 | 13 | 26 | GT   | 18 | 11 |
| 295356 | 55 | 1973395 | 1973420 | 2 | 13 | 26 | GA   | 17 | 9  |
| 295359 | 55 | 1982119 | 1982133 | 3 | 5  | 15 | ATA  | 26 | 4  |

|        |    |         |         |   |    |    |      |    |    |
|--------|----|---------|---------|---|----|----|------|----|----|
| 295371 | 55 | 1997898 | 1997913 | 2 | 8  | 16 | AT   | 16 | 6  |
| 295378 | 55 | 2011444 | 2011459 | 2 | 8  | 16 | TG   | 22 | 12 |
| 295390 | 55 | 2035978 | 2035995 | 3 | 6  | 18 | TCA  | 31 | 4  |
| 295395 | 55 | 2047260 | 2047293 | 2 | 17 | 34 | AC   | 6  | 9  |
| 295399 | 55 | 2050270 | 2050297 | 2 | 14 | 28 | AG   | 11 | 9  |
| 295401 | 55 | 2054076 | 2054127 | 2 | 26 | 52 | GT   | 8  | 9  |
| 295408 | 55 | 2063644 | 2063657 | 2 | 7  | 14 | AC   | 23 | 8  |
| 295417 | 55 | 2071827 | 2071850 | 2 | 12 | 24 | AC   | 19 | 6  |
| 295419 | 55 | 2074622 | 2074635 | 2 | 7  | 14 | CA   | 23 | 4  |
| 295422 | 55 | 2080342 | 2080369 | 2 | 14 | 28 | TG   | 12 | 12 |
| 295427 | 55 | 2091003 | 2091020 | 2 | 9  | 18 | AG   | 19 | 3  |
| 295429 | 55 | 2092275 | 2092294 | 2 | 10 | 20 | TC   | 22 | 5  |
| 295431 | 55 | 2099753 | 2099774 | 2 | 11 | 22 | CA   | 21 | 8  |
| 295451 | 55 | 2130732 | 2130745 | 2 | 7  | 14 | AT   | 30 | 3  |
| 295465 | 55 | 2180973 | 2181011 | 3 | 13 | 39 | AGT  | 22 | 9  |
| 295467 | 55 | 2182696 | 2182734 | 3 | 13 | 39 | AAG  | 22 | 17 |
| 295476 | 55 | 2200057 | 2200084 | 2 | 14 | 28 | GT   | 10 | 11 |
| 295478 | 55 | 2202140 | 2202151 | 2 | 6  | 12 | TG   | 29 | 3  |
| 295479 | 55 | 2204016 | 2204043 | 4 | 7  | 28 | ATGG | 29 | 3  |
| 295485 | 55 | 2220778 | 2220823 | 2 | 23 | 46 | TG   | 9  | 10 |
| 295486 | 55 | 2225959 | 2225974 | 2 | 8  | 16 | CA   | 20 | 8  |
| 295492 | 55 | 2236962 | 2236979 | 3 | 6  | 18 | ATT  | 20 | 4  |
| 295495 | 55 | 2245151 | 2245178 | 2 | 14 | 28 | AC   | 16 | 10 |
| 295496 | 55 | 2245458 | 2245487 | 2 | 15 | 30 | AC   | 15 | 12 |
| 295502 | 55 | 2283768 | 2283788 | 3 | 7  | 21 | GCT  | 24 | 11 |
| 295505 | 55 | 2286056 | 2286101 | 2 | 23 | 46 | TG   | 13 | 10 |
| 295506 | 55 | 2287826 | 2287841 | 4 | 4  | 16 | AAAT | 19 | 3  |
| 295508 | 55 | 2293025 | 2293068 | 2 | 22 | 44 | TG   | 7  | 10 |
| 295510 | 55 | 2298139 | 2298158 | 2 | 10 | 20 | GA   | 15 | 3  |
| 295511 | 55 | 2300441 | 2300452 | 2 | 6  | 12 | CA   | 13 | 3  |
| 295512 | 55 | 2300455 | 2300468 | 2 | 7  | 14 | CA   | 8  | 4  |
| 295516 | 55 | 2312168 | 2312203 | 3 | 12 | 36 | AAT  | 9  | 7  |
| 295517 | 55 | 2314451 | 2314482 | 2 | 16 | 32 | CA   | 11 | 7  |
| 295535 | 55 | 2349038 | 2349064 | 3 | 9  | 27 | GAT  | 7  | 3  |
| 295542 | 55 | 2356094 | 2356109 | 4 | 4  | 16 | TGGA | 18 | 4  |
| 295544 | 55 | 2364304 | 2364339 | 4 | 9  | 36 | GAAA | 14 | 6  |
| 295556 | 55 | 2393740 | 2393773 | 2 | 17 | 34 | GT   | 7  | 7  |
| 295557 | 55 | 2396165 | 2396180 | 4 | 4  | 16 | TGAA | 34 | 3  |
| 295559 | 55 | 2396686 | 2396711 | 2 | 13 | 26 | AC   | 18 | 7  |
| 295561 | 55 | 2400900 | 2400915 | 4 | 4  | 16 | CCTC | 16 | 4  |
| 295568 | 55 | 2404827 | 2404842 | 2 | 8  | 16 | TG   | 24 | 5  |
| 295570 | 55 | 2406124 | 2406138 | 3 | 5  | 15 | TAC  | 22 | 3  |
| 295572 | 55 | 2407312 | 2407323 | 2 | 6  | 12 | GT   | 29 | 4  |
| 295578 | 55 | 2432106 | 2432137 | 2 | 16 | 32 | AC   | 6  | 8  |
| 295579 | 55 | 2432320 | 2432359 | 2 | 20 | 40 | CA   | 17 | 14 |
| 295580 | 55 | 2432412 | 2432425 | 2 | 7  | 14 | CA   | 28 | 6  |
| 295581 | 55 | 2432607 | 2432620 | 2 | 7  | 14 | GT   | 28 | 8  |
| 295604 | 55 | 2466059 | 2466078 | 2 | 10 | 20 | TG   | 9  | 5  |
| 295605 | 55 | 2470028 | 2470054 | 3 | 9  | 27 | CAC  | 18 | 7  |
| 295609 | 55 | 2482166 | 2482179 | 2 | 7  | 14 | GT   | 21 | 4  |
| 295610 | 55 | 2482354 | 2482379 | 2 | 13 | 26 | CA   | 12 | 7  |

|        |    |         |         |   |    |    |      |    |    |
|--------|----|---------|---------|---|----|----|------|----|----|
| 295614 | 55 | 2487946 | 2487961 | 2 | 8  | 16 | TG   | 28 | 7  |
| 295623 | 55 | 2501132 | 2501147 | 2 | 8  | 16 | GT   | 18 | 4  |
| 295627 | 55 | 2506369 | 2506384 | 2 | 8  | 16 | CA   | 11 | 5  |
| 295630 | 55 | 2506937 | 2506972 | 2 | 18 | 36 | AC   | 12 | 11 |
| 295634 | 55 | 2513390 | 2513415 | 2 | 13 | 26 | CT   | 10 | 5  |
| 295640 | 55 | 2523367 | 2523378 | 2 | 6  | 12 | GT   | 21 | 3  |
| 295641 | 55 | 2523380 | 2523393 | 2 | 7  | 14 | TG   | 20 | 3  |
| 295647 | 55 | 2527243 | 2527257 | 3 | 5  | 15 | TCC  | 22 | 3  |
| 295649 | 55 | 2530633 | 2530646 | 2 | 7  | 14 | AG   | 29 | 3  |
| 295651 | 55 | 2531663 | 2531682 | 2 | 10 | 20 | GT   | 12 | 12 |
| 295652 | 55 | 2532040 | 2532055 | 4 | 4  | 16 | TCTG | 17 | 3  |
| 295653 | 55 | 2532138 | 2532171 | 2 | 17 | 34 | CA   | 10 | 8  |
| 295654 | 55 | 2533667 | 2533704 | 2 | 19 | 38 | AC   | 9  | 7  |
| 295655 | 55 | 2536360 | 2536371 | 2 | 6  | 12 | CA   | 31 | 10 |
| 295659 | 55 | 2537630 | 2537657 | 2 | 14 | 28 | CA   | 10 | 11 |
| 295660 | 55 | 2537748 | 2537791 | 2 | 22 | 44 | TG   | 14 | 11 |
| 295661 | 55 | 2539317 | 2539328 | 2 | 6  | 12 | GT   | 22 | 5  |
| 295662 | 55 | 2539331 | 2539342 | 2 | 6  | 12 | GT   | 22 | 6  |
| 295664 | 55 | 2540207 | 2540246 | 2 | 20 | 40 | CA   | 7  | 8  |
| 295665 | 55 | 2541084 | 2541099 | 2 | 8  | 16 | TG   | 16 | 9  |
| 295666 | 55 | 2541105 | 2541120 | 2 | 8  | 16 | GT   | 10 | 5  |
| 295669 | 55 | 2543726 | 2543737 | 2 | 6  | 12 | AT   | 23 | 5  |
| 295670 | 55 | 2544145 | 2544210 | 2 | 33 | 66 | CA   | 8  | 11 |
| 295671 | 55 | 2546120 | 2546143 | 2 | 12 | 24 | TG   | 13 | 11 |
| 295673 | 55 | 2548586 | 2548603 | 2 | 9  | 18 | GT   | 19 | 7  |
| 295676 | 55 | 2552964 | 2552997 | 2 | 17 | 34 | GT   | 14 | 14 |
| 295677 | 55 | 2554600 | 2554623 | 2 | 12 | 24 | GT   | 17 | 13 |
| 295678 | 55 | 2554755 | 2554796 | 2 | 21 | 42 | CA   | 9  | 12 |
| 295681 | 55 | 2556076 | 2556093 | 2 | 9  | 18 | TG   | 7  | 4  |
| 295683 | 55 | 2559841 | 2559870 | 2 | 15 | 30 | TG   | 16 | 11 |
| 295684 | 55 | 2560117 | 2560154 | 2 | 19 | 38 | AC   | 11 | 12 |
| 295685 | 55 | 2560367 | 2560400 | 2 | 17 | 34 | CA   | 13 | 14 |
| 295687 | 55 | 2563169 | 2563192 | 2 | 12 | 24 | TG   | 9  | 5  |
| 295695 | 55 | 2574626 | 2574663 | 2 | 19 | 38 | TG   | 10 | 9  |
| 295696 | 55 | 2575162 | 2575197 | 2 | 18 | 36 | CA   | 8  | 13 |
| 295697 | 55 | 2575321 | 2575334 | 2 | 7  | 14 | CA   | 26 | 9  |
| 295701 | 55 | 2576037 | 2576050 | 2 | 7  | 14 | CT   | 18 | 4  |
| 295702 | 55 | 2576195 | 2576210 | 4 | 4  | 16 | GGAG | 8  | 3  |
| 295706 | 55 | 2576466 | 2576485 | 2 | 10 | 20 | GT   | 20 | 7  |
| 295707 | 55 | 2576742 | 2576753 | 2 | 6  | 12 | GT   | 21 | 3  |
| 295708 | 55 | 2576775 | 2576789 | 3 | 5  | 15 | AAC  | 24 | 3  |
| 295711 | 55 | 2577424 | 2577437 | 2 | 7  | 14 | CA   | 24 | 3  |
| 295715 | 55 | 2581320 | 2581339 | 2 | 10 | 20 | GT   | 18 | 6  |
| 295716 | 55 | 2581430 | 2581449 | 2 | 10 | 20 | GT   | 29 | 11 |
| 295727 | 55 | 2586749 | 2586768 | 2 | 10 | 20 | TG   | 17 | 14 |
| 295728 | 55 | 2586770 | 2586787 | 2 | 9  | 18 | GT   | 21 | 18 |
| 295731 | 55 | 2594161 | 2594174 | 2 | 7  | 14 | GA   | 12 | 11 |
| 295734 | 55 | 2594472 | 2594485 | 2 | 7  | 14 | GT   | 8  | 9  |
| 295736 | 55 | 2596335 | 2596354 | 2 | 10 | 20 | GT   | 26 | 6  |
| 295737 | 55 | 2596833 | 2596850 | 2 | 9  | 18 | GT   | 13 | 7  |
| 295740 | 55 | 2600744 | 2600755 | 2 | 6  | 12 | GT   | 24 | 5  |

|        |    |         |         |   |    |    |      |    |    |
|--------|----|---------|---------|---|----|----|------|----|----|
| 295742 | 55 | 2603863 | 2603886 | 2 | 12 | 24 | CA   | 7  | 7  |
| 295743 | 55 | 2604141 | 2604162 | 2 | 11 | 22 | TG   | 22 | 8  |
| 295762 | 55 | 2643819 | 2643852 | 2 | 17 | 34 | CA   | 15 | 11 |
| 295773 | 55 | 2661119 | 2661138 | 2 | 10 | 20 | AG   | 16 | 4  |
| 295775 | 55 | 2664713 | 2664726 | 2 | 7  | 14 | AC   | 19 | 3  |
| 295778 | 55 | 2667191 | 2667214 | 2 | 12 | 24 | CA   | 8  | 7  |
| 295788 | 55 | 2677452 | 2677465 | 2 | 7  | 14 | TG   | 14 | 6  |
| 295790 | 55 | 2679055 | 2679090 | 2 | 18 | 36 | AC   | 15 | 13 |
| 295795 | 55 | 2684297 | 2684318 | 2 | 11 | 22 | TG   | 10 | 9  |
| 295796 | 55 | 2687872 | 2687889 | 2 | 9  | 18 | AC   | 24 | 6  |
| 295799 | 55 | 2688584 | 2688597 | 2 | 7  | 14 | TC   | 8  | 4  |
| 295806 | 55 | 2693826 | 2693847 | 2 | 11 | 22 | GT   | 23 | 7  |
| 295823 | 55 | 2704968 | 2704981 | 2 | 7  | 14 | AC   | 27 | 7  |
| 295825 | 55 | 2708291 | 2708316 | 2 | 13 | 26 | AC   | 12 | 13 |
| 295833 | 55 | 2711714 | 2711743 | 2 | 15 | 30 | TG   | 19 | 11 |
| 295834 | 55 | 2711816 | 2711827 | 2 | 6  | 12 | CG   | 15 | 5  |
| 295836 | 55 | 2714360 | 2714383 | 4 | 6  | 24 | AAAG | 19 | 6  |
| 295841 | 55 | 2717042 | 2717065 | 2 | 12 | 24 | CA   | 18 | 8  |
| 295843 | 55 | 2718959 | 2718976 | 2 | 9  | 18 | AC   | 13 | 9  |
| 295846 | 55 | 2720566 | 2720585 | 2 | 10 | 20 | TG   | 20 | 8  |
| 295849 | 55 | 2722263 | 2722278 | 2 | 8  | 16 | GT   | 18 | 12 |
| 295851 | 55 | 2726280 | 2726333 | 2 | 27 | 54 | AC   | 11 | 13 |
| 295857 | 55 | 2739918 | 2739939 | 2 | 11 | 22 | GT   | 17 | 10 |
| 295858 | 55 | 2740135 | 2740158 | 2 | 12 | 24 | CA   | 19 | 10 |
| 295861 | 55 | 2747626 | 2747652 | 3 | 9  | 27 | TGA  | 29 | 7  |
| 295862 | 55 | 2750461 | 2750498 | 2 | 19 | 38 | AC   | 6  | 6  |
| 295863 | 55 | 2751848 | 2751863 | 2 | 8  | 16 | AT   | 6  | 3  |
| 295864 | 55 | 2752500 | 2752513 | 2 | 7  | 14 | CA   | 17 | 11 |
| 295865 | 55 | 2752515 | 2752526 | 2 | 6  | 12 | AC   | 11 | 10 |
| 295867 | 55 | 2756974 | 2756995 | 2 | 11 | 22 | GT   | 23 | 10 |
| 295871 | 55 | 2761262 | 2761277 | 2 | 8  | 16 | CA   | 19 | 7  |
| 295872 | 55 | 2761410 | 2761425 | 2 | 8  | 16 | AC   | 25 | 3  |
| 295875 | 55 | 2764926 | 2764949 | 2 | 12 | 24 | GT   | 21 | 5  |
| 295877 | 55 | 2778039 | 2778060 | 2 | 11 | 22 | TC   | 16 | 7  |
| 295886 | 55 | 2792551 | 2792594 | 2 | 22 | 44 | GA   | 9  | 9  |
| 295887 | 55 | 2794736 | 2794755 | 2 | 10 | 20 | TC   | 17 | 4  |
| 295888 | 55 | 2797186 | 2797209 | 2 | 12 | 24 | AG   | 26 | 9  |
| 295889 | 55 | 2806772 | 2806787 | 2 | 8  | 16 | CA   | 22 | 3  |
| 295893 | 55 | 2811668 | 2811687 | 2 | 10 | 20 | AC   | 23 | 6  |
| 295895 | 55 | 2813901 | 2813922 | 2 | 11 | 22 | TG   | 16 | 11 |
| 295896 | 55 | 2814081 | 2814102 | 2 | 11 | 22 | CA   | 14 | 5  |
| 295902 | 55 | 2828476 | 2828497 | 2 | 11 | 22 | AC   | 8  | 9  |
| 295905 | 55 | 2835192 | 2835223 | 2 | 16 | 32 | AC   | 7  | 4  |
| 295914 | 55 | 2848935 | 2848952 | 2 | 9  | 18 | TG   | 20 | 5  |
| 295918 | 55 | 2850071 | 2850082 | 2 | 6  | 12 | AT   | 6  | 3  |
| 295929 | 55 | 2859541 | 2859574 | 2 | 17 | 34 | CA   | 7  | 6  |
| 295934 | 55 | 2861537 | 2861548 | 2 | 6  | 12 | CT   | 19 | 4  |
| 295936 | 55 | 2861610 | 2861639 | 2 | 15 | 30 | GT   | 9  | 11 |
| 295938 | 55 | 2861848 | 2861887 | 4 | 10 | 40 | AGAA | 8  | 7  |
| 295939 | 55 | 2862251 | 2862265 | 3 | 5  | 15 | ATT  | 20 | 4  |
| 295945 | 55 | 2872670 | 2872683 | 2 | 7  | 14 | GT   | 29 | 4  |

|        |    |         |         |   |    |    |     |    |    |
|--------|----|---------|---------|---|----|----|-----|----|----|
| 295947 | 55 | 2874927 | 2874944 | 2 | 9  | 18 | TG  | 20 | 4  |
| 295951 | 55 | 2878356 | 2878387 | 2 | 16 | 32 | AC  | 17 | 9  |
| 295952 | 55 | 2878635 | 2878648 | 2 | 7  | 14 | GT  | 20 | 6  |
| 295956 | 55 | 2879993 | 2880016 | 2 | 12 | 24 | GT  | 6  | 5  |
| 295959 | 55 | 2884177 | 2884194 | 2 | 9  | 18 | CA  | 18 | 6  |
| 295960 | 55 | 2884295 | 2884310 | 2 | 8  | 16 | GT  | 19 | 11 |
| 295962 | 55 | 2884985 | 2885026 | 2 | 21 | 42 | CA  | 6  | 9  |
| 295965 | 55 | 2887883 | 2887916 | 2 | 17 | 34 | GT  | 17 | 13 |
| 295967 | 55 | 2892040 | 2892075 | 2 | 18 | 36 | TG  | 9  | 11 |
| 295980 | 55 | 2923917 | 2923946 | 2 | 15 | 30 | GT  | 10 | 11 |
| 295983 | 55 | 2925444 | 2925459 | 2 | 8  | 16 | CA  | 14 | 5  |
| 295987 | 55 | 2925810 | 2925831 | 2 | 11 | 22 | TG  | 10 | 5  |
| 295989 | 55 | 2927110 | 2927135 | 2 | 13 | 26 | TG  | 8  | 6  |
| 295993 | 55 | 2929386 | 2929409 | 2 | 12 | 24 | GT  | 20 | 9  |
| 295996 | 55 | 2930805 | 2930840 | 2 | 18 | 36 | TG  | 11 | 9  |
| 296001 | 55 | 2943942 | 2943955 | 2 | 7  | 14 | GT  | 20 | 3  |
| 296002 | 55 | 2946060 | 2946077 | 3 | 6  | 18 | TAC | 23 | 3  |
| 296003 | 55 | 2947390 | 2947407 | 2 | 9  | 18 | AC  | 23 | 6  |
| 296011 | 55 | 2951331 | 2951344 | 2 | 7  | 14 | GT  | 26 | 3  |
| 296026 | 55 | 2965824 | 2965857 | 2 | 17 | 34 | AC  | 8  | 8  |
| 296034 | 55 | 2983290 | 2983307 | 3 | 6  | 18 | AAT | 20 | 13 |
| 296039 | 55 | 2992527 | 2992544 | 2 | 9  | 18 | TG  | 21 | 3  |
| 296040 | 55 | 2992753 | 2992780 | 2 | 14 | 28 | CA  | 14 | 12 |
| 296041 | 55 | 2992913 | 2992930 | 2 | 9  | 18 | AC  | 7  | 3  |
| 296047 | 55 | 2995802 | 2995819 | 2 | 9  | 18 | AC  | 20 | 10 |
| 296058 | 55 | 3005818 | 3005859 | 2 | 21 | 42 | TG  | 8  | 6  |
| 296059 | 55 | 3005985 | 3006040 | 2 | 28 | 56 | GT  | 8  | 10 |
| 296061 | 55 | 3008610 | 3008623 | 2 | 7  | 14 | CA  | 15 | 4  |
| 296068 | 55 | 3017007 | 3017034 | 2 | 14 | 28 | AC  | 17 | 6  |
| 296075 | 55 | 3028441 | 3028458 | 2 | 9  | 18 | CA  | 9  | 3  |
| 296085 | 55 | 3039984 | 3039999 | 2 | 8  | 16 | CA  | 29 | 5  |
| 296086 | 55 | 3040085 | 3040110 | 2 | 13 | 26 | CA  | 19 | 9  |
| 296088 | 55 | 3045153 | 3045184 | 2 | 16 | 32 | TG  | 13 | 8  |
| 296089 | 55 | 3045339 | 3045354 | 2 | 8  | 16 | GT  | 18 | 3  |
| 296090 | 55 | 3045449 | 3045470 | 2 | 11 | 22 | TG  | 7  | 9  |
| 296095 | 55 | 3050954 | 3050975 | 2 | 11 | 22 | GT  | 12 | 12 |
| 296104 | 55 | 3062646 | 3062677 | 2 | 16 | 32 | AC  | 14 | 8  |
| 296108 | 55 | 3076721 | 3076765 | 3 | 15 | 45 | ATG | 7  | 5  |
| 296109 | 55 | 3076835 | 3076882 | 3 | 16 | 48 | AGT | 14 | 6  |
| 296112 | 55 | 3078951 | 3078968 | 3 | 6  | 18 | ATA | 14 | 6  |
| 296114 | 55 | 3079880 | 3079891 | 2 | 6  | 12 | CA  | 31 | 4  |
| 296120 | 55 | 3082266 | 3082287 | 2 | 11 | 22 | AC  | 15 | 6  |
| 296122 | 55 | 3082423 | 3082444 | 2 | 11 | 22 | TG  | 14 | 9  |
| 296127 | 55 | 3088215 | 3088242 | 2 | 14 | 28 | GT  | 11 | 7  |
| 296133 | 55 | 3098224 | 3098253 | 2 | 15 | 30 | CA  | 7  | 7  |
| 296136 | 55 | 3103256 | 3103277 | 2 | 11 | 22 | AC  | 26 | 9  |
| 296140 | 55 | 3113710 | 3113727 | 2 | 9  | 18 | AC  | 21 | 8  |
| 296141 | 55 | 3116243 | 3116260 | 3 | 6  | 18 | ACA | 18 | 4  |
| 296143 | 55 | 3118372 | 3118399 | 2 | 14 | 28 | TG  | 15 | 10 |
| 296144 | 55 | 3118509 | 3118528 | 2 | 10 | 20 | AC  | 14 | 8  |
| 296147 | 55 | 3121185 | 3121198 | 2 | 7  | 14 | TA  | 21 | 6  |



|        |    |         |         |   |    |    |      |    |    |
|--------|----|---------|---------|---|----|----|------|----|----|
| 296148 | 55 | 3121400 | 3121415 | 2 | 8  | 16 | CA   | 21 | 4  |
| 296152 | 55 | 3126608 | 3126631 | 2 | 12 | 24 | GT   | 13 | 7  |
| 296157 | 55 | 3135350 | 3135367 | 2 | 9  | 18 | AG   | 17 | 4  |
| 296171 | 55 | 3147971 | 3147988 | 2 | 9  | 18 | GT   | 13 | 5  |
| 296176 | 55 | 3155782 | 3155811 | 2 | 15 | 30 | AC   | 11 | 6  |
| 296177 | 55 | 3157166 | 3157189 | 4 | 6  | 24 | AAAT | 13 | 4  |
| 296178 | 55 | 3159346 | 3159373 | 2 | 14 | 28 | TG   | 11 | 8  |
| 296186 | 55 | 3168520 | 3168535 | 2 | 8  | 16 | AC   | 10 | 4  |
| 296187 | 55 | 3168537 | 3168552 | 2 | 8  | 16 | CA   | 10 | 6  |
| 296190 | 55 | 3171497 | 3171512 | 4 | 4  | 16 | AAAT | 8  | 3  |
| 296200 | 55 | 3182620 | 3182633 | 2 | 7  | 14 | CA   | 24 | 3  |
| 296201 | 55 | 3182853 | 3182878 | 2 | 13 | 26 | GT   | 18 | 11 |
| 296213 | 55 | 3196200 | 3196215 | 2 | 8  | 16 | TG   | 17 | 3  |
| 296218 | 55 | 3201300 | 3201333 | 2 | 17 | 34 | CA   | 22 | 8  |
| 296219 | 55 | 3201620 | 3201641 | 2 | 11 | 22 | GT   | 17 | 8  |
| 296223 | 55 | 3202237 | 3202248 | 2 | 6  | 12 | CA   | 27 | 3  |
| 296229 | 55 | 3205100 | 3205133 | 2 | 17 | 34 | CA   | 23 | 10 |
| 296235 | 55 | 3215976 | 3216015 | 2 | 20 | 40 | TG   | 13 | 13 |
| 296262 | 56 | 53595   | 53618   | 2 | 12 | 24 | TG   | 15 | 10 |
| 296263 | 56 | 53835   | 53864   | 2 | 15 | 30 | AC   | 8  | 8  |
| 296264 | 56 | 54862   | 54889   | 2 | 14 | 28 | CA   | 16 | 10 |
| 296265 | 56 | 55622   | 55642   | 3 | 7  | 21 | CCT  | 29 | 3  |
| 296266 | 56 | 55962   | 55977   | 2 | 8  | 16 | GT   | 20 | 8  |
| 296268 | 56 | 57512   | 57529   | 2 | 9  | 18 | AC   | 18 | 5  |
| 296271 | 56 | 58607   | 58632   | 2 | 13 | 26 | CA   | 17 | 7  |
| 296273 | 56 | 63020   | 63037   | 2 | 9  | 18 | CA   | 20 | 3  |
| 296274 | 56 | 63248   | 63263   | 2 | 8  | 16 | TG   | 15 | 6  |
| 296275 | 56 | 63346   | 63369   | 2 | 12 | 24 | TG   | 14 | 10 |
| 296280 | 56 | 68475   | 68506   | 2 | 16 | 32 | AC   | 12 | 6  |
| 296284 | 56 | 71569   | 71596   | 2 | 14 | 28 | GT   | 20 | 12 |
| 296296 | 56 | 84525   | 84576   | 4 | 13 | 52 | AAAG | 11 | 10 |
| 296297 | 56 | 85014   | 85025   | 2 | 6  | 12 | AC   | 27 | 4  |
| 296308 | 56 | 134842  | 134857  | 2 | 8  | 16 | AC   | 11 | 5  |
| 296316 | 56 | 146801  | 146824  | 3 | 8  | 24 | CCT  | 19 | 5  |
| 296317 | 56 | 146861  | 146884  | 2 | 12 | 24 | AC   | 23 | 7  |
| 296320 | 56 | 148132  | 148158  | 3 | 9  | 27 | GGA  | 20 | 4  |
| 296324 | 56 | 154513  | 154544  | 2 | 16 | 32 | TG   | 9  | 11 |
| 296330 | 56 | 162271  | 162310  | 4 | 10 | 40 | CATT | 24 | 14 |
| 296335 | 56 | 167862  | 167919  | 2 | 29 | 58 | TG   | 7  | 9  |
| 296336 | 56 | 170215  | 170228  | 2 | 7  | 14 | AC   | 28 | 3  |
| 296337 | 56 | 170326  | 170337  | 2 | 6  | 12 | AC   | 26 | 3  |
| 296338 | 56 | 172392  | 172415  | 2 | 12 | 24 | AC   | 10 | 11 |
| 296341 | 56 | 179060  | 179085  | 2 | 13 | 26 | TG   | 13 | 8  |
| 296342 | 56 | 179446  | 179467  | 2 | 11 | 22 | GT   | 9  | 9  |
| 296346 | 56 | 180422  | 180461  | 4 | 10 | 40 | GTGC | 20 | 27 |
| 296355 | 56 | 194027  | 194050  | 4 | 6  | 24 | AGAT | 23 | 6  |
| 296356 | 56 | 199434  | 199449  | 4 | 4  | 16 | ATAC | 24 | 7  |
| 296357 | 56 | 199554  | 199567  | 2 | 7  | 14 | TG   | 23 | 3  |
| 296360 | 56 | 206300  | 206313  | 2 | 7  | 14 | AC   | 10 | 4  |
| 296361 | 56 | 208614  | 208633  | 2 | 10 | 20 | TG   | 8  | 3  |
| 296365 | 56 | 213312  | 213332  | 3 | 7  | 21 | AAT  | 9  | 3  |

|        |    |        |        |   |    |    |      |    |    |
|--------|----|--------|--------|---|----|----|------|----|----|
| 296369 | 56 | 215545 | 215559 | 3 | 5  | 15 | ATC  | 27 | 3  |
| 296370 | 56 | 215561 | 215575 | 3 | 5  | 15 | TCA  | 25 | 3  |
| 296372 | 56 | 221033 | 221044 | 2 | 6  | 12 | TG   | 22 | 4  |
| 296379 | 56 | 256424 | 256437 | 2 | 7  | 14 | TG   | 21 | 3  |
| 296380 | 56 | 265109 | 265138 | 3 | 10 | 30 | GAG  | 25 | 3  |
| 296381 | 56 | 265301 | 265326 | 2 | 13 | 26 | CA   | 8  | 3  |
| 296385 | 56 | 265681 | 265694 | 2 | 7  | 14 | GT   | 11 | 3  |
| 296387 | 56 | 265784 | 265803 | 2 | 10 | 20 | TC   | 23 | 3  |
| 296388 | 56 | 265834 | 265853 | 2 | 10 | 20 | GT   | 15 | 5  |
| 296392 | 56 | 270305 | 270338 | 2 | 17 | 34 | TG   | 19 | 9  |
| 296395 | 56 | 284728 | 284747 | 2 | 10 | 20 | GT   | 16 | 8  |
| 296396 | 56 | 301307 | 301345 | 3 | 13 | 39 | CAT  | 22 | 8  |
| 296399 | 56 | 303691 | 303714 | 2 | 12 | 24 | CA   | 18 | 9  |
| 296405 | 56 | 313300 | 313320 | 3 | 7  | 21 | TGG  | 22 | 4  |
| 296407 | 56 | 316625 | 316651 | 3 | 9  | 27 | GAT  | 15 | 13 |
| 296409 | 56 | 317507 | 317520 | 2 | 7  | 14 | CA   | 29 | 4  |
| 296422 | 56 | 374473 | 374502 | 2 | 15 | 30 | TG   | 10 | 11 |
| 296423 | 56 | 380810 | 380831 | 2 | 11 | 22 | GT   | 13 | 9  |
| 296426 | 56 | 384504 | 384517 | 2 | 7  | 14 | AC   | 16 | 6  |
| 296433 | 56 | 390941 | 390960 | 4 | 5  | 20 | TTTG | 8  | 3  |
| 296434 | 56 | 391189 | 391218 | 2 | 15 | 30 | TG   | 9  | 7  |
| 296438 | 56 | 391713 | 391727 | 3 | 5  | 15 | CGG  | 17 | 4  |
| 296439 | 56 | 391791 | 391805 | 3 | 5  | 15 | TGG  | 20 | 5  |
| 296445 | 56 | 396384 | 396397 | 2 | 7  | 14 | CA   | 32 | 3  |
| 296448 | 56 | 396603 | 396614 | 2 | 6  | 12 | AC   | 17 | 8  |
| 296450 | 56 | 396749 | 396764 | 2 | 8  | 16 | TG   | 25 | 8  |
| 296451 | 56 | 396985 | 396998 | 2 | 7  | 14 | CA   | 23 | 3  |
| 296453 | 56 | 399717 | 399744 | 2 | 14 | 28 | TG   | 15 | 9  |
| 296457 | 56 | 403762 | 403773 | 2 | 6  | 12 | TG   | 18 | 4  |
| 296458 | 56 | 403905 | 403922 | 3 | 6  | 18 | GTG  | 26 | 3  |
| 296462 | 56 | 421441 | 421458 | 2 | 9  | 18 | AG   | 25 | 3  |
| 296465 | 56 | 428408 | 428427 | 2 | 10 | 20 | TG   | 18 | 8  |
| 296466 | 56 | 429090 | 429109 | 2 | 10 | 20 | AC   | 22 | 4  |
| 296469 | 56 | 431854 | 431881 | 2 | 14 | 28 | AC   | 8  | 7  |
| 296470 | 56 | 433235 | 433256 | 2 | 11 | 22 | CA   | 23 | 5  |
| 296472 | 56 | 435007 | 435020 | 2 | 7  | 14 | CA   | 27 | 10 |
| 296473 | 56 | 435945 | 435959 | 3 | 5  | 15 | AAC  | 15 | 13 |
| 296478 | 56 | 452154 | 452171 | 2 | 9  | 18 | TG   | 19 | 9  |
| 296480 | 56 | 455439 | 455462 | 4 | 6  | 24 | TATC | 14 | 4  |
| 296481 | 56 | 456074 | 456099 | 2 | 13 | 26 | CA   | 13 | 5  |
| 296484 | 56 | 458315 | 458366 | 2 | 26 | 52 | GT   | 10 | 10 |
| 296491 | 56 | 467313 | 467327 | 3 | 5  | 15 | GCC  | 21 | 8  |
| 296492 | 56 | 467328 | 467342 | 3 | 5  | 15 | GTT  | 20 | 5  |
| 296500 | 56 | 510066 | 510105 | 2 | 20 | 40 | TG   | 6  | 7  |
| 296501 | 56 | 518324 | 518337 | 2 | 7  | 14 | TG   | 10 | 11 |
| 296503 | 56 | 520543 | 520568 | 2 | 13 | 26 | GT   | 20 | 7  |
| 296506 | 56 | 528213 | 528230 | 2 | 9  | 18 | AC   | 7  | 6  |
| 296523 | 56 | 570076 | 570103 | 2 | 14 | 28 | TG   | 13 | 10 |
| 296530 | 56 | 579828 | 579879 | 2 | 26 | 52 | CT   | 8  | 10 |
| 296532 | 56 | 581165 | 581182 | 2 | 9  | 18 | CA   | 18 | 4  |
| 296533 | 56 | 585588 | 585611 | 2 | 12 | 24 | AC   | 14 | 12 |

|        |    |         |         |   |    |    |      |    |    |
|--------|----|---------|---------|---|----|----|------|----|----|
| 296535 | 56 | 588565  | 588588  | 2 | 12 | 24 | AC   | 17 | 11 |
| 296546 | 56 | 604695  | 604721  | 3 | 9  | 27 | ATG  | 27 | 4  |
| 296547 | 56 | 606217  | 606237  | 3 | 7  | 21 | CTG  | 19 | 9  |
| 296548 | 56 | 606373  | 606398  | 2 | 13 | 26 | CA   | 21 | 12 |
| 296553 | 56 | 616591  | 616611  | 3 | 7  | 21 | AGC  | 27 | 6  |
| 296566 | 56 | 642685  | 642698  | 2 | 7  | 14 | TG   | 27 | 4  |
| 296567 | 56 | 649812  | 649823  | 2 | 6  | 12 | TG   | 18 | 3  |
| 296580 | 56 | 670969  | 670986  | 2 | 9  | 18 | AC   | 21 | 7  |
| 296581 | 56 | 673559  | 673576  | 3 | 6  | 18 | ACT  | 13 | 4  |
| 296588 | 56 | 707409  | 707428  | 2 | 10 | 20 | AT   | 11 | 6  |
| 296589 | 56 | 710722  | 710747  | 2 | 13 | 26 | CA   | 8  | 5  |
| 296590 | 56 | 711360  | 711385  | 2 | 13 | 26 | AC   | 10 | 11 |
| 296593 | 56 | 712173  | 712190  | 3 | 6  | 18 | CCT  | 17 | 3  |
| 296596 | 56 | 717763  | 717788  | 2 | 13 | 26 | CA   | 11 | 10 |
| 296600 | 56 | 722331  | 722360  | 2 | 15 | 30 | AG   | 7  | 5  |
| 296602 | 56 | 723217  | 723237  | 3 | 7  | 21 | TGC  | 23 | 6  |
| 296603 | 56 | 723278  | 723301  | 3 | 8  | 24 | GCT  | 22 | 5  |
| 296604 | 56 | 726243  | 726274  | 4 | 8  | 32 | ATGG | 28 | 8  |
| 296606 | 56 | 741257  | 741280  | 2 | 12 | 24 | GT   | 18 | 6  |
| 296623 | 56 | 758807  | 758818  | 2 | 6  | 12 | AG   | 25 | 4  |
| 296624 | 56 | 758820  | 758833  | 2 | 7  | 14 | GA   | 21 | 7  |
| 296625 | 56 | 776631  | 776662  | 4 | 8  | 32 | TATG | 17 | 8  |
| 296638 | 56 | 814693  | 814712  | 2 | 10 | 20 | TG   | 16 | 8  |
| 296647 | 56 | 867329  | 867344  | 4 | 4  | 16 | GTTT | 32 | 4  |
| 296652 | 56 | 882849  | 882866  | 3 | 6  | 18 | CAG  | 21 | 4  |
| 296655 | 56 | 885579  | 885608  | 3 | 10 | 30 | GAG  | 14 | 6  |
| 296660 | 56 | 914110  | 914123  | 2 | 7  | 14 | AC   | 27 | 3  |
| 296665 | 56 | 924089  | 924103  | 3 | 5  | 15 | CCA  | 7  | 3  |
| 296672 | 56 | 942128  | 942147  | 4 | 5  | 20 | GACA | 26 | 9  |
| 296674 | 56 | 944578  | 944592  | 3 | 5  | 15 | AAC  | 19 | 5  |
| 296678 | 56 | 946250  | 946263  | 2 | 7  | 14 | TG   | 29 | 5  |
| 296679 | 56 | 946371  | 946384  | 2 | 7  | 14 | AC   | 7  | 5  |
| 296686 | 56 | 946619  | 946632  | 2 | 7  | 14 | AC   | 21 | 6  |
| 296687 | 56 | 946741  | 946762  | 2 | 11 | 22 | GT   | 20 | 10 |
| 296689 | 56 | 954789  | 954808  | 2 | 10 | 20 | CA   | 17 | 9  |
| 296695 | 56 | 968716  | 968739  | 2 | 12 | 24 | AC   | 14 | 5  |
| 296696 | 56 | 969860  | 969871  | 2 | 6  | 12 | GT   | 30 | 5  |
| 296700 | 56 | 972214  | 972231  | 2 | 9  | 18 | TG   | 16 | 6  |
| 296702 | 56 | 972837  | 972848  | 2 | 6  | 12 | GT   | 29 | 4  |
| 296704 | 56 | 973979  | 974010  | 2 | 16 | 32 | GT   | 13 | 8  |
| 296705 | 56 | 974126  | 974145  | 2 | 10 | 20 | CA   | 21 | 6  |
| 296709 | 56 | 978170  | 978181  | 2 | 6  | 12 | CA   | 29 | 9  |
| 296711 | 56 | 984814  | 984847  | 2 | 17 | 34 | TG   | 18 | 6  |
| 296715 | 56 | 993683  | 993694  | 2 | 6  | 12 | GT   | 7  | 8  |
| 296716 | 56 | 993910  | 993927  | 2 | 9  | 18 | TG   | 8  | 5  |
| 296717 | 56 | 995763  | 995778  | 2 | 8  | 16 | TC   | 21 | 4  |
| 296727 | 56 | 1027723 | 1027740 | 2 | 9  | 18 | TA   | 20 | 8  |
| 296728 | 56 | 1029938 | 1029967 | 2 | 15 | 30 | CA   | 8  | 10 |
| 296737 | 56 | 1036368 | 1036379 | 2 | 6  | 12 | AC   | 16 | 3  |
| 296750 | 56 | 1061333 | 1061360 | 2 | 14 | 28 | TG   | 24 | 8  |
| 296751 | 56 | 1068649 | 1068664 | 2 | 8  | 16 | AC   | 25 | 3  |

|        |    |         |         |   |    |    |      |    |    |
|--------|----|---------|---------|---|----|----|------|----|----|
| 296756 | 56 | 1070353 | 1070376 | 2 | 12 | 24 | CA   | 18 | 10 |
| 296765 | 56 | 1083538 | 1083555 | 2 | 9  | 18 | AC   | 16 | 6  |
| 296766 | 56 | 1084766 | 1084787 | 2 | 11 | 22 | AC   | 11 | 10 |
| 296770 | 56 | 1090159 | 1090180 | 2 | 11 | 22 | TG   | 15 | 9  |
| 296771 | 56 | 1090556 | 1090569 | 2 | 7  | 14 | GA   | 31 | 3  |
| 296772 | 56 | 1090655 | 1090670 | 2 | 8  | 16 | TG   | 22 | 3  |
| 296774 | 56 | 1095857 | 1095874 | 3 | 6  | 18 | AAG  | 24 | 3  |
| 296775 | 56 | 1098220 | 1098233 | 2 | 7  | 14 | TA   | 24 | 5  |
| 296786 | 56 | 1110989 | 1111000 | 2 | 6  | 12 | TG   | 30 | 5  |
| 296788 | 56 | 1115222 | 1115235 | 2 | 7  | 14 | TA   | 11 | 4  |
| 296791 | 56 | 1116641 | 1116652 | 2 | 6  | 12 | GT   | 22 | 3  |
| 296792 | 56 | 1117643 | 1117660 | 2 | 9  | 18 | TG   | 11 | 10 |
| 296793 | 56 | 1117834 | 1117867 | 2 | 17 | 34 | CA   | 13 | 9  |
| 296796 | 56 | 1132720 | 1132757 | 2 | 19 | 38 | CA   | 16 | 11 |
| 296797 | 56 | 1143879 | 1143900 | 2 | 11 | 22 | CA   | 18 | 15 |
| 296799 | 56 | 1145565 | 1145576 | 2 | 6  | 12 | TA   | 9  | 10 |
| 296800 | 56 | 1153433 | 1153446 | 2 | 7  | 14 | CA   | 25 | 3  |
| 296807 | 56 | 1170665 | 1170684 | 2 | 10 | 20 | GT   | 22 | 6  |
| 296809 | 56 | 1179920 | 1179935 | 2 | 8  | 16 | AC   | 16 | 3  |
| 296810 | 56 | 1186400 | 1186411 | 2 | 6  | 12 | TG   | 16 | 5  |
| 296819 | 56 | 1194723 | 1194740 | 3 | 6  | 18 | CAG  | 22 | 5  |
| 296824 | 56 | 1209656 | 1209671 | 2 | 8  | 16 | CA   | 8  | 4  |
| 296827 | 56 | 1220419 | 1220434 | 4 | 4  | 16 | CTTT | 15 | 7  |
| 296828 | 56 | 1220554 | 1220573 | 4 | 5  | 20 | AAAC | 21 | 4  |
| 296833 | 56 | 1224555 | 1224569 | 3 | 5  | 15 | TTG  | 22 | 4  |
| 296841 | 56 | 1231354 | 1231379 | 2 | 13 | 26 | GT   | 6  | 6  |
| 296842 | 56 | 1236127 | 1236138 | 2 | 6  | 12 | TG   | 16 | 4  |
| 296845 | 56 | 1237589 | 1237600 | 2 | 6  | 12 | AC   | 19 | 4  |
| 296849 | 56 | 1243968 | 1243997 | 2 | 15 | 30 | AC   | 19 | 7  |
| 296851 | 56 | 1246999 | 1247020 | 2 | 11 | 22 | AC   | 15 | 10 |
| 296860 | 56 | 1262057 | 1262078 | 2 | 11 | 22 | AC   | 17 | 6  |
| 296861 | 56 | 1264966 | 1264983 | 2 | 9  | 18 | AC   | 18 | 4  |
| 296862 | 56 | 1265111 | 1265122 | 2 | 6  | 12 | CA   | 11 | 3  |
| 296863 | 56 | 1265337 | 1265352 | 2 | 8  | 16 | GA   | 22 | 4  |
| 296865 | 56 | 1272309 | 1272322 | 2 | 7  | 14 | CT   | 24 | 3  |
| 296867 | 56 | 1276183 | 1276202 | 2 | 10 | 20 | AC   | 18 | 5  |
| 296872 | 56 | 1291525 | 1291558 | 2 | 17 | 34 | CA   | 13 | 11 |
| 296880 | 56 | 1335294 | 1335323 | 3 | 10 | 30 | AAT  | 16 | 4  |
| 296886 | 56 | 1347384 | 1347399 | 2 | 8  | 16 | TG   | 19 | 3  |
| 296892 | 56 | 1354987 | 1355010 | 2 | 12 | 24 | GT   | 16 | 15 |
| 296897 | 56 | 1378529 | 1378546 | 2 | 9  | 18 | CA   | 25 | 7  |
| 296898 | 56 | 1378669 | 1378698 | 2 | 15 | 30 | TG   | 19 | 9  |
| 296907 | 56 | 1382543 | 1382560 | 2 | 9  | 18 | GT   | 15 | 11 |
| 296913 | 56 | 1395516 | 1395529 | 2 | 7  | 14 | TG   | 18 | 5  |
| 296919 | 56 | 1400940 | 1400951 | 2 | 6  | 12 | AC   | 19 | 4  |
| 296920 | 56 | 1403245 | 1403260 | 2 | 8  | 16 | AC   | 8  | 5  |
| 296924 | 56 | 1412736 | 1412751 | 2 | 8  | 16 | TC   | 15 | 3  |
| 296928 | 56 | 1425232 | 1425277 | 2 | 23 | 46 | GA   | 11 | 5  |
| 296956 | 56 | 1480812 | 1480837 | 2 | 13 | 26 | AC   | 17 | 10 |
| 296957 | 56 | 1485960 | 1485983 | 2 | 12 | 24 | TC   | 11 | 10 |
| 296960 | 56 | 1487353 | 1487376 | 2 | 12 | 24 | TG   | 17 | 7  |

|        |    |         |         |   |    |    |      |    |    |
|--------|----|---------|---------|---|----|----|------|----|----|
| 296963 | 56 | 1487932 | 1487947 | 2 | 8  | 16 | TG   | 24 | 5  |
| 296967 | 56 | 1494363 | 1494386 | 3 | 8  | 24 | CAG  | 25 | 4  |
| 296970 | 56 | 1495157 | 1495170 | 2 | 7  | 14 | CT   | 16 | 4  |
| 296971 | 56 | 1495172 | 1495187 | 2 | 8  | 16 | TC   | 14 | 4  |
| 296973 | 56 | 1495276 | 1495302 | 3 | 9  | 27 | GCA  | 19 | 3  |
| 296978 | 56 | 1496432 | 1496463 | 4 | 8  | 32 | TTCT | 25 | 9  |
| 296982 | 56 | 1498194 | 1498205 | 2 | 6  | 12 | CT   | 26 | 3  |
| 296991 | 56 | 1509005 | 1509028 | 2 | 12 | 24 | AC   | 22 | 11 |
| 296993 | 56 | 1512630 | 1512647 | 2 | 9  | 18 | AC   | 27 | 11 |
| 296999 | 56 | 1520183 | 1520196 | 2 | 7  | 14 | AC   | 25 | 4  |
| 297000 | 56 | 1525234 | 1525259 | 2 | 13 | 26 | TG   | 17 | 7  |
| 297002 | 56 | 1530497 | 1530508 | 2 | 6  | 12 | TG   | 19 | 8  |
| 297004 | 56 | 1530705 | 1530718 | 2 | 7  | 14 | GT   | 8  | 10 |
| 297015 | 56 | 1548350 | 1548361 | 2 | 6  | 12 | AC   | 32 | 4  |
| 297031 | 56 | 1581968 | 1581991 | 2 | 12 | 24 | GT   | 18 | 6  |
| 297032 | 56 | 1583884 | 1583901 | 2 | 9  | 18 | GT   | 23 | 9  |
| 297048 | 56 | 1655496 | 1655515 | 2 | 10 | 20 | AC   | 28 | 3  |
| 297049 | 56 | 1662749 | 1662782 | 2 | 17 | 34 | AC   | 16 | 11 |
| 297058 | 56 | 1683446 | 1683465 | 2 | 10 | 20 | CA   | 18 | 12 |
| 297059 | 56 | 1684346 | 1684375 | 2 | 15 | 30 | TG   | 7  | 8  |
| 297060 | 56 | 1684828 | 1684843 | 4 | 4  | 16 | TATT | 22 | 8  |
| 297064 | 56 | 1691182 | 1691199 | 2 | 9  | 18 | TG   | 7  | 4  |
| 297072 | 56 | 1711141 | 1711162 | 2 | 11 | 22 | CA   | 16 | 7  |
| 297083 | 56 | 1738752 | 1738767 | 4 | 4  | 16 | GGAT | 23 | 3  |
| 297086 | 56 | 1750922 | 1750947 | 2 | 13 | 26 | AC   | 23 | 10 |
| 297087 | 56 | 1751250 | 1751263 | 2 | 7  | 14 | AC   | 22 | 9  |
| 297094 | 56 | 1759876 | 1759905 | 2 | 15 | 30 | AC   | 16 | 10 |
| 297095 | 56 | 1760096 | 1760107 | 2 | 6  | 12 | TG   | 25 | 6  |
| 297104 | 56 | 1779545 | 1779560 | 2 | 8  | 16 | CA   | 22 | 14 |
| 297108 | 56 | 1784835 | 1784848 | 2 | 7  | 14 | GT   | 22 | 6  |
| 297109 | 56 | 1788094 | 1788123 | 2 | 15 | 30 | CA   | 13 | 12 |
| 297110 | 56 | 1788483 | 1788504 | 2 | 11 | 22 | CA   | 26 | 9  |
| 297112 | 56 | 1790708 | 1790729 | 2 | 11 | 22 | AC   | 14 | 14 |
| 297115 | 56 | 1795145 | 1795168 | 2 | 12 | 24 | GT   | 15 | 6  |
| 297121 | 56 | 1804004 | 1804017 | 2 | 7  | 14 | CA   | 17 | 5  |
| 297122 | 56 | 1804241 | 1804258 | 2 | 9  | 18 | AC   | 15 | 6  |
| 297124 | 56 | 1805062 | 1805089 | 4 | 7  | 28 | TCTT | 29 | 5  |
| 297130 | 56 | 1822226 | 1822246 | 3 | 7  | 21 | TTG  | 23 | 4  |
| 297137 | 56 | 1832121 | 1832136 | 2 | 8  | 16 | CA   | 29 | 6  |
| 297140 | 56 | 1841567 | 1841596 | 2 | 15 | 30 | TC   | 12 | 7  |
| 297142 | 56 | 1848574 | 1848595 | 2 | 11 | 22 | AC   | 20 | 7  |
| 297143 | 56 | 1851075 | 1851090 | 2 | 8  | 16 | GA   | 30 | 3  |
| 297145 | 56 | 1852519 | 1852532 | 2 | 7  | 14 | TA   | 19 | 9  |
| 297146 | 56 | 1853833 | 1853848 | 4 | 4  | 16 | GGAG | 12 | 3  |
| 297149 | 56 | 1855593 | 1855626 | 2 | 17 | 34 | CT   | 6  | 8  |
| 297150 | 56 | 1855747 | 1855773 | 3 | 9  | 27 | TGT  | 10 | 5  |
| 297158 | 56 | 1863619 | 1863644 | 2 | 13 | 26 | AC   | 18 | 5  |
| 297178 | 56 | 1920098 | 1920112 | 3 | 5  | 15 | AGG  | 22 | 4  |
| 297179 | 56 | 1925015 | 1925028 | 2 | 7  | 14 | CA   | 24 | 3  |
| 297182 | 56 | 1930397 | 1930414 | 2 | 9  | 18 | CA   | 19 | 7  |
| 297185 | 56 | 1948689 | 1948704 | 2 | 8  | 16 | TG   | 14 | 9  |

|        |    |         |         |   |    |    |      |    |    |
|--------|----|---------|---------|---|----|----|------|----|----|
| 297186 | 56 | 1955906 | 1955937 | 2 | 16 | 32 | CT   | 13 | 10 |
| 297190 | 56 | 1959458 | 1959481 | 3 | 8  | 24 | AAC  | 7  | 5  |
| 297194 | 56 | 1971084 | 1971105 | 2 | 11 | 22 | TG   | 13 | 12 |
| 297204 | 56 | 1990167 | 1990180 | 2 | 7  | 14 | AC   | 28 | 4  |
| 297206 | 56 | 1990376 | 1990387 | 2 | 6  | 12 | AC   | 27 | 6  |
| 297208 | 56 | 1993624 | 1993635 | 2 | 6  | 12 | TG   | 23 | 3  |
| 297218 | 56 | 2004445 | 2004460 | 2 | 8  | 16 | GT   | 7  | 3  |
| 297222 | 56 | 2018621 | 2018636 | 2 | 8  | 16 | AC   | 24 | 5  |
| 297223 | 56 | 2019477 | 2019506 | 2 | 15 | 30 | TG   | 12 | 7  |
| 297224 | 56 | 2022390 | 2022401 | 2 | 6  | 12 | TC   | 25 | 4  |
| 297226 | 56 | 2024311 | 2024344 | 2 | 17 | 34 | TG   | 17 | 14 |
| 297228 | 56 | 2029765 | 2029779 | 3 | 5  | 15 | GCT  | 23 | 5  |
| 297231 | 56 | 2035883 | 2035898 | 2 | 8  | 16 | TG   | 23 | 6  |
| 297233 | 56 | 2040487 | 2040498 | 2 | 6  | 12 | TG   | 26 | 3  |
| 297234 | 56 | 2044238 | 2044252 | 3 | 5  | 15 | CAG  | 17 | 4  |
| 297245 | 56 | 2063667 | 2063692 | 2 | 13 | 26 | AC   | 15 | 8  |
| 297252 | 56 | 2072363 | 2072388 | 2 | 13 | 26 | AC   | 7  | 5  |
| 297257 | 56 | 2094987 | 2095013 | 3 | 9  | 27 | CAG  | 24 | 10 |
| 297261 | 56 | 2107144 | 2107171 | 2 | 14 | 28 | AC   | 13 | 11 |
| 297266 | 56 | 2113005 | 2113026 | 2 | 11 | 22 | TG   | 25 | 4  |
| 297267 | 56 | 2113841 | 2113852 | 2 | 6  | 12 | GA   | 18 | 6  |
| 297276 | 56 | 2123348 | 2123361 | 2 | 7  | 14 | AC   | 19 | 3  |
| 297283 | 56 | 2139411 | 2139422 | 2 | 6  | 12 | TC   | 18 | 4  |
| 297284 | 56 | 2139538 | 2139561 | 2 | 12 | 24 | CA   | 10 | 6  |
| 297286 | 56 | 2141064 | 2141078 | 3 | 5  | 15 | CCT  | 28 | 4  |
| 297288 | 56 | 2145502 | 2145513 | 2 | 6  | 12 | GT   | 29 | 4  |
| 297289 | 56 | 2147478 | 2147491 | 2 | 7  | 14 | GT   | 27 | 5  |
| 297291 | 56 | 2148952 | 2148981 | 2 | 15 | 30 | TG   | 11 | 13 |
| 297298 | 56 | 2159043 | 2159054 | 2 | 6  | 12 | CT   | 24 | 3  |
| 297299 | 56 | 2161165 | 2161190 | 2 | 13 | 26 | TG   | 6  | 7  |
| 297300 | 56 | 2163162 | 2163185 | 3 | 8  | 24 | GGA  | 18 | 8  |
| 297302 | 56 | 2165525 | 2165556 | 2 | 16 | 32 | TG   | 10 | 8  |
| 297303 | 56 | 2167812 | 2167835 | 2 | 12 | 24 | AC   | 18 | 7  |
| 297308 | 56 | 2174084 | 2174107 | 2 | 12 | 24 | AC   | 12 | 8  |
| 297309 | 56 | 2174766 | 2174779 | 2 | 7  | 14 | CA   | 25 | 5  |
| 297310 | 56 | 2178812 | 2178838 | 3 | 9  | 27 | GGA  | 21 | 5  |
| 297311 | 56 | 2181078 | 2181125 | 2 | 24 | 48 | GT   | 11 | 8  |
| 297313 | 56 | 2185684 | 2185719 | 2 | 18 | 36 | TG   | 20 | 12 |
| 297317 | 56 | 2190314 | 2190331 | 2 | 9  | 18 | AC   | 24 | 9  |
| 297319 | 56 | 2194147 | 2194164 | 2 | 9  | 18 | CA   | 22 | 7  |
| 297320 | 56 | 2195056 | 2195073 | 3 | 6  | 18 | ATT  | 11 | 4  |
| 297322 | 56 | 2203400 | 2203441 | 2 | 21 | 42 | CA   | 12 | 9  |
| 297328 | 56 | 2237344 | 2237373 | 3 | 10 | 30 | TAC  | 22 | 6  |
| 297329 | 56 | 2247507 | 2247542 | 2 | 18 | 36 | AC   | 7  | 7  |
| 297331 | 56 | 2256044 | 2256065 | 2 | 11 | 22 | CA   | 26 | 6  |
| 297340 | 56 | 2288668 | 2288683 | 2 | 8  | 16 | CA   | 12 | 8  |
| 297341 | 56 | 2289823 | 2289834 | 2 | 6  | 12 | AC   | 31 | 3  |
| 297342 | 56 | 2296625 | 2296684 | 2 | 30 | 60 | AC   | 10 | 11 |
| 297344 | 56 | 2306248 | 2306265 | 3 | 6  | 18 | CAG  | 27 | 5  |
| 297346 | 56 | 2310549 | 2310564 | 4 | 4  | 16 | TCCC | 8  | 3  |
| 297357 | 56 | 2328944 | 2328985 | 2 | 21 | 42 | CA   | 10 | 9  |

|        |    |         |         |   |    |    |      |    |    |
|--------|----|---------|---------|---|----|----|------|----|----|
| 297358 | 56 | 2329083 | 2329100 | 2 | 9  | 18 | GT   | 18 | 5  |
| 297360 | 56 | 2331625 | 2331646 | 2 | 11 | 22 | TC   | 19 | 6  |
| 297361 | 56 | 2334230 | 2334253 | 3 | 8  | 24 | GAG  | 27 | 8  |
| 297362 | 56 | 2334322 | 2334333 | 2 | 6  | 12 | CT   | 21 | 10 |
| 297366 | 56 | 2345994 | 2346027 | 2 | 17 | 34 | AC   | 15 | 18 |
| 297367 | 56 | 2346198 | 2346225 | 2 | 14 | 28 | AC   | 14 | 14 |
| 297368 | 56 | 2346356 | 2346370 | 3 | 5  | 15 | TTG  | 23 | 5  |
| 297369 | 56 | 2347718 | 2347735 | 3 | 6  | 18 | ATT  | 19 | 4  |
| 297372 | 56 | 2350276 | 2350290 | 3 | 5  | 15 | AGC  | 28 | 4  |
| 297385 | 56 | 2382867 | 2382886 | 4 | 5  | 20 | GCAG | 19 | 3  |
| 297394 | 56 | 2399690 | 2399705 | 2 | 8  | 16 | CA   | 21 | 5  |
| 297400 | 56 | 2416620 | 2416637 | 2 | 9  | 18 | AC   | 21 | 8  |
| 297406 | 56 | 2428975 | 2428996 | 2 | 11 | 22 | TG   | 24 | 3  |
| 297411 | 56 | 2438459 | 2438514 | 2 | 28 | 56 | CA   | 18 | 4  |
| 297413 | 56 | 2444702 | 2444713 | 2 | 6  | 12 | CA   | 10 | 3  |
| 297431 | 56 | 2488109 | 2488124 | 4 | 4  | 16 | TCTG | 17 | 7  |
| 297432 | 56 | 2488793 | 2488804 | 2 | 6  | 12 | TG   | 22 | 5  |
| 297433 | 56 | 2489935 | 2489958 | 2 | 12 | 24 | GT   | 15 | 7  |
| 297445 | 56 | 2523175 | 2523198 | 3 | 8  | 24 | TTG  | 21 | 4  |
| 297447 | 56 | 2527770 | 2527781 | 2 | 6  | 12 | AT   | 24 | 3  |
| 297448 | 56 | 2528215 | 2528242 | 2 | 14 | 28 | AG   | 6  | 7  |
| 297452 | 56 | 2534252 | 2534269 | 3 | 6  | 18 | TAC  | 23 | 4  |
| 297484 | 56 | 2607641 | 2607676 | 2 | 18 | 36 | TG   | 6  | 11 |
| 297503 | 56 | 2649924 | 2649937 | 2 | 7  | 14 | AC   | 30 | 4  |
| 297504 | 56 | 2654452 | 2654493 | 2 | 21 | 42 | TC   | 8  | 7  |
| 297505 | 56 | 2654662 | 2654673 | 2 | 6  | 12 | AC   | 19 | 3  |
| 297524 | 56 | 2679050 | 2679065 | 2 | 8  | 16 | CA   | 27 | 4  |
| 297537 | 56 | 2709530 | 2709553 | 4 | 6  | 24 | GCCT | 21 | 4  |
| 297539 | 56 | 2711837 | 2711848 | 2 | 6  | 12 | AT   | 10 | 7  |
| 297541 | 56 | 2714390 | 2714409 | 4 | 5  | 20 | CAAT | 26 | 3  |
| 297544 | 56 | 2721813 | 2721836 | 2 | 12 | 24 | GT   | 15 | 10 |
| 297545 | 56 | 2721917 | 2721940 | 2 | 12 | 24 | CA   | 14 | 8  |
| 297552 | 56 | 2723151 | 2723171 | 3 | 7  | 21 | GGA  | 18 | 4  |
| 297555 | 56 | 2731154 | 2731177 | 2 | 12 | 24 | CT   | 6  | 4  |
| 297565 | 56 | 2776142 | 2776155 | 2 | 7  | 14 | AG   | 24 | 4  |
| 297572 | 56 | 2816646 | 2816660 | 3 | 5  | 15 | TGC  | 31 | 3  |
| 297576 | 56 | 2823754 | 2823767 | 2 | 7  | 14 | AC   | 33 | 6  |
| 297582 | 56 | 2834269 | 2834295 | 3 | 9  | 27 | CCT  | 16 | 4  |
| 297590 | 56 | 2848332 | 2848349 | 2 | 9  | 18 | AC   | 25 | 5  |
| 297596 | 56 | 2857976 | 2857987 | 2 | 6  | 12 | TC   | 24 | 4  |
| 297601 | 56 | 2864979 | 2864990 | 2 | 6  | 12 | CA   | 17 | 9  |
| 297603 | 56 | 2866338 | 2866369 | 2 | 16 | 32 | TG   | 10 | 12 |
| 297606 | 56 | 2875597 | 2875610 | 2 | 7  | 14 | TA   | 8  | 3  |
| 297607 | 56 | 2879109 | 2879120 | 2 | 6  | 12 | GT   | 23 | 4  |
| 297612 | 56 | 2883349 | 2883364 | 2 | 8  | 16 | AC   | 18 | 4  |
| 297614 | 56 | 2887024 | 2887051 | 2 | 14 | 28 | CA   | 13 | 10 |
| 297615 | 56 | 2888417 | 2888444 | 2 | 14 | 28 | CA   | 14 | 7  |
| 297616 | 56 | 2889628 | 2889647 | 4 | 5  | 20 | ACAG | 28 | 8  |
| 297620 | 56 | 2892352 | 2892366 | 3 | 5  | 15 | CCT  | 9  | 3  |
| 297624 | 56 | 2897452 | 2897469 | 2 | 9  | 18 | AG   | 8  | 11 |
| 297625 | 56 | 2897881 | 2897918 | 2 | 19 | 38 | CA   | 9  | 6  |

|        |    |         |         |   |    |    |      |    |    |
|--------|----|---------|---------|---|----|----|------|----|----|
| 297626 | 56 | 2898088 | 2898099 | 2 | 6  | 12 | CA   | 20 | 4  |
| 297630 | 56 | 2914378 | 2914391 | 2 | 7  | 14 | TC   | 30 | 3  |
| 297636 | 56 | 2927299 | 2927319 | 3 | 7  | 21 | TGT  | 15 | 5  |
| 297638 | 56 | 2933956 | 2933969 | 2 | 7  | 14 | AC   | 22 | 5  |
| 297642 | 56 | 2941425 | 2941452 | 2 | 14 | 28 | AC   | 23 | 11 |
| 297657 | 56 | 2977867 | 2977880 | 2 | 7  | 14 | AC   | 19 | 6  |
| 297658 | 56 | 2977883 | 2977894 | 2 | 6  | 12 | AC   | 21 | 4  |
| 297661 | 56 | 2988776 | 2988817 | 2 | 21 | 42 | AC   | 17 | 12 |
| 297673 | 56 | 3018778 | 3018825 | 4 | 12 | 48 | GATA | 14 | 10 |
| 297675 | 56 | 3025162 | 3025183 | 2 | 11 | 22 | AC   | 24 | 5  |
| 297676 | 56 | 3033402 | 3033417 | 2 | 8  | 16 | AC   | 22 | 8  |
| 297679 | 56 | 3044158 | 3044185 | 4 | 7  | 28 | TAGA | 16 | 5  |
| 297683 | 56 | 3057596 | 3057609 | 2 | 7  | 14 | GT   | 17 | 4  |
| 297684 | 56 | 3061168 | 3061181 | 2 | 7  | 14 | AC   | 27 | 3  |
| 297690 | 56 | 3090328 | 3090343 | 2 | 8  | 16 | GA   | 24 | 3  |
| 297700 | 56 | 3117149 | 3117176 | 2 | 14 | 28 | CA   | 24 | 5  |
| 297703 | 56 | 3120797 | 3120820 | 2 | 12 | 24 | GA   | 13 | 12 |
| 297706 | 56 | 3130179 | 3130200 | 2 | 11 | 22 | AC   | 19 | 7  |
| 297708 | 56 | 3140753 | 3140774 | 2 | 11 | 22 | GT   | 11 | 10 |
| 297711 | 56 | 3142569 | 3142580 | 2 | 6  | 12 | AC   | 15 | 11 |
| 297715 | 56 | 3150872 | 3150892 | 3 | 7  | 21 | TAG  | 35 | 4  |
| 297716 | 56 | 3153836 | 3153853 | 2 | 9  | 18 | CA   | 17 | 9  |
| 297717 | 56 | 3154142 | 3154159 | 2 | 9  | 18 | TG   | 16 | 4  |
| 297719 | 56 | 3154657 | 3154682 | 2 | 13 | 26 | TG   | 27 | 13 |
| 297720 | 56 | 3160853 | 3160867 | 3 | 5  | 15 | AAC  | 23 | 3  |
| 297729 | 57 | 15817   | 15830   | 2 | 7  | 14 | AC   | 19 | 4  |
| 297742 | 57 | 53518   | 53545   | 2 | 14 | 28 | CA   | 7  | 7  |
| 297748 | 57 | 82852   | 82869   | 3 | 6  | 18 | TTA  | 7  | 4  |
| 297756 | 57 | 109313  | 109340  | 2 | 14 | 28 | CA   | 7  | 5  |
| 297762 | 57 | 115780  | 115823  | 4 | 11 | 44 | TAGA | 12 | 7  |
| 297771 | 57 | 139200  | 139213  | 2 | 7  | 14 | TC   | 26 | 3  |
| 297786 | 57 | 181183  | 181194  | 2 | 6  | 12 | AC   | 29 | 4  |
| 297795 | 57 | 207540  | 207557  | 2 | 9  | 18 | TA   | 10 | 5  |
| 297798 | 57 | 208540  | 208591  | 4 | 13 | 52 | GATT | 16 | 7  |
| 297813 | 57 | 258144  | 258179  | 4 | 9  | 36 | ATAG | 17 | 8  |
| 297820 | 57 | 284802  | 284821  | 2 | 10 | 20 | GT   | 21 | 9  |
| 297824 | 57 | 293445  | 293462  | 2 | 9  | 18 | GT   | 28 | 5  |
| 297826 | 57 | 300279  | 300292  | 2 | 7  | 14 | TG   | 27 | 3  |
| 297835 | 57 | 337175  | 337206  | 2 | 16 | 32 | TG   | 9  | 8  |
| 297839 | 57 | 354620  | 354659  | 2 | 20 | 40 | TG   | 6  | 6  |
| 297842 | 57 | 367100  | 367117  | 2 | 9  | 18 | AC   | 20 | 3  |
| 297856 | 57 | 396898  | 396935  | 2 | 19 | 38 | TG   | 15 | 8  |
| 297857 | 57 | 398486  | 398505  | 4 | 5  | 20 | TTTC | 18 | 3  |
| 297862 | 57 | 431904  | 431931  | 2 | 14 | 28 | GT   | 9  | 7  |
| 297863 | 57 | 442557  | 442592  | 2 | 18 | 36 | GT   | 11 | 3  |
| 297882 | 57 | 491628  | 491654  | 3 | 9  | 27 | TCC  | 22 | 4  |
| 297883 | 57 | 491980  | 492035  | 4 | 14 | 56 | CTTT | 9  | 10 |
| 297894 | 57 | 512172  | 512189  | 2 | 9  | 18 | TA   | 11 | 3  |
| 297899 | 57 | 524540  | 524555  | 2 | 8  | 16 | AT   | 9  | 10 |
| 297900 | 57 | 525395  | 525422  | 2 | 14 | 28 | TG   | 6  | 4  |
| 297904 | 57 | 538266  | 538281  | 4 | 4  | 16 | GCAC | 23 | 3  |



|        |    |         |         |   |    |    |      |    |    |
|--------|----|---------|---------|---|----|----|------|----|----|
| 297911 | 57 | 546009  | 546034  | 2 | 13 | 26 | TG   | 15 | 7  |
| 297912 | 57 | 546099  | 546114  | 2 | 8  | 16 | TG   | 22 | 6  |
| 297917 | 57 | 554342  | 554367  | 2 | 13 | 26 | TG   | 10 | 4  |
| 297935 | 57 | 602797  | 602838  | 2 | 21 | 42 | AC   | 12 | 9  |
| 297954 | 57 | 649563  | 649586  | 2 | 12 | 24 | TG   | 10 | 7  |
| 297958 | 57 | 651980  | 652009  | 2 | 15 | 30 | TG   | 6  | 4  |
| 297960 | 57 | 665342  | 665369  | 2 | 14 | 28 | TG   | 8  | 5  |
| 297976 | 57 | 708732  | 708757  | 2 | 13 | 26 | CT   | 12 | 13 |
| 297992 | 57 | 759119  | 759166  | 2 | 24 | 48 | TG   | 8  | 9  |
| 297993 | 57 | 759250  | 759267  | 2 | 9  | 18 | GT   | 12 | 5  |
| 297995 | 57 | 764590  | 764605  | 2 | 8  | 16 | TG   | 20 | 4  |
| 298002 | 57 | 801748  | 801777  | 2 | 15 | 30 | AC   | 12 | 11 |
| 298013 | 57 | 832408  | 832433  | 2 | 13 | 26 | AC   | 13 | 6  |
| 298016 | 57 | 836318  | 836329  | 2 | 6  | 12 | CA   | 20 | 4  |
| 298017 | 57 | 836712  | 836731  | 2 | 10 | 20 | GT   | 19 | 8  |
| 298019 | 57 | 839369  | 839394  | 2 | 13 | 26 | AC   | 19 | 4  |
| 298041 | 57 | 905303  | 905320  | 3 | 6  | 18 | TGC  | 27 | 3  |
| 298062 | 57 | 940025  | 940054  | 2 | 15 | 30 | AC   | 9  | 6  |
| 298063 | 57 | 940156  | 940175  | 2 | 10 | 20 | CA   | 7  | 3  |
| 298065 | 57 | 940211  | 940228  | 2 | 9  | 18 | AC   | 13 | 4  |
| 298074 | 57 | 942498  | 942535  | 2 | 19 | 38 | AC   | 11 | 8  |
| 298082 | 57 | 946832  | 946843  | 2 | 6  | 12 | CA   | 22 | 3  |
| 298102 | 57 | 974392  | 974415  | 2 | 12 | 24 | CA   | 21 | 7  |
| 298104 | 57 | 975657  | 975678  | 2 | 11 | 22 | CA   | 17 | 3  |
| 298105 | 57 | 979634  | 979645  | 2 | 6  | 12 | CA   | 32 | 3  |
| 298113 | 57 | 981038  | 981065  | 2 | 14 | 28 | GT   | 7  | 9  |
| 298114 | 57 | 981265  | 981280  | 2 | 8  | 16 | CA   | 25 | 3  |
| 298117 | 57 | 986496  | 986543  | 4 | 12 | 48 | AAGA | 12 | 5  |
| 298120 | 57 | 989569  | 989586  | 2 | 9  | 18 | GT   | 11 | 8  |
| 298122 | 57 | 989625  | 989642  | 2 | 9  | 18 | GT   | 9  | 4  |
| 298127 | 57 | 1000315 | 1000328 | 2 | 7  | 14 | CA   | 19 | 3  |
| 298129 | 57 | 1000546 | 1000563 | 2 | 9  | 18 | AC   | 24 | 5  |
| 298136 | 57 | 1010597 | 1010610 | 2 | 7  | 14 | CA   | 26 | 3  |
| 298144 | 57 | 1024330 | 1024353 | 4 | 6  | 24 | GTGA | 29 | 3  |
| 298174 | 57 | 1047899 | 1047922 | 2 | 12 | 24 | TG   | 15 | 4  |
| 298175 | 57 | 1053967 | 1053981 | 3 | 5  | 15 | AAT  | 9  | 3  |
| 298184 | 57 | 1081098 | 1081115 | 3 | 6  | 18 | GAG  | 22 | 4  |
| 298189 | 57 | 1115266 | 1115281 | 4 | 4  | 16 | TTGG | 32 | 5  |
| 298192 | 57 | 1127029 | 1127058 | 3 | 10 | 30 | CTC  | 20 | 7  |
| 298220 | 57 | 1184294 | 1184337 | 2 | 22 | 44 | GT   | 7  | 6  |
| 298223 | 57 | 1187107 | 1187154 | 3 | 16 | 48 | TTA  | 16 | 9  |
| 298226 | 57 | 1205454 | 1205492 | 3 | 13 | 39 | TTA  | 17 | 4  |
| 298227 | 57 | 1210499 | 1210518 | 2 | 10 | 20 | GT   | 19 | 6  |
| 298229 | 57 | 1215654 | 1215679 | 2 | 13 | 26 | GA   | 12 | 4  |
| 298235 | 57 | 1226696 | 1226735 | 2 | 20 | 40 | GA   | 12 | 11 |
| 298238 | 57 | 1232668 | 1232693 | 2 | 13 | 26 | AC   | 8  | 7  |
| 298239 | 57 | 1233154 | 1233185 | 2 | 16 | 32 | AC   | 13 | 8  |
| 298243 | 57 | 1241117 | 1241140 | 2 | 12 | 24 | TC   | 15 | 8  |
| 298246 | 57 | 1249395 | 1249408 | 2 | 7  | 14 | AT   | 16 | 3  |
| 298262 | 57 | 1283000 | 1283011 | 2 | 6  | 12 | TG   | 15 | 4  |
| 298268 | 57 | 1294733 | 1294756 | 3 | 8  | 24 | CTC  | 21 | 5  |

|        |    |         |         |   |    |    |      |    |    |
|--------|----|---------|---------|---|----|----|------|----|----|
| 298274 | 57 | 1297204 | 1297217 | 2 | 7  | 14 | TG   | 15 | 3  |
| 298275 | 57 | 1297624 | 1297679 | 4 | 14 | 56 | AGAT | 11 | 8  |
| 298278 | 57 | 1302005 | 1302032 | 4 | 7  | 28 | ATGG | 29 | 4  |
| 298281 | 57 | 1307422 | 1307437 | 2 | 8  | 16 | TG   | 24 | 3  |
| 298283 | 57 | 1311815 | 1311846 | 2 | 16 | 32 | CA   | 12 | 5  |
| 298289 | 57 | 1326987 | 1327006 | 2 | 10 | 20 | GT   | 17 | 10 |
| 298295 | 57 | 1344563 | 1344594 | 4 | 8  | 32 | ATCC | 21 | 4  |
| 298297 | 57 | 1348388 | 1348435 | 4 | 12 | 48 | AAAG | 13 | 7  |
| 298321 | 57 | 1386673 | 1386744 | 4 | 18 | 72 | GAAA | 16 | 7  |
| 298323 | 57 | 1394164 | 1394189 | 2 | 13 | 26 | AC   | 23 | 6  |
| 298324 | 57 | 1394453 | 1394484 | 2 | 16 | 32 | AC   | 14 | 9  |
| 298325 | 57 | 1395905 | 1395956 | 2 | 26 | 52 | TG   | 12 | 12 |
| 298331 | 57 | 1400771 | 1400788 | 2 | 9  | 18 | CA   | 8  | 5  |
| 298336 | 57 | 1405868 | 1405901 | 2 | 17 | 34 | TG   | 8  | 5  |
| 298342 | 57 | 1422217 | 1422228 | 2 | 6  | 12 | CA   | 26 | 3  |
| 298344 | 57 | 1425978 | 1426001 | 4 | 6  | 24 | TAAA | 10 | 3  |
| 298349 | 57 | 1439095 | 1439118 | 4 | 6  | 24 | AAAC | 20 | 3  |
| 298351 | 57 | 1450569 | 1450596 | 4 | 7  | 28 | AGAT | 13 | 10 |
| 298358 | 57 | 1463047 | 1463058 | 2 | 6  | 12 | AC   | 10 | 5  |
| 298363 | 57 | 1483748 | 1483767 | 4 | 5  | 20 | GATG | 19 | 3  |
| 298368 | 57 | 1496945 | 1496960 | 4 | 4  | 16 | TGAG | 6  | 4  |
| 298371 | 57 | 1510443 | 1510462 | 2 | 10 | 20 | CA   | 20 | 4  |
| 298375 | 57 | 1517000 | 1517015 | 2 | 8  | 16 | GT   | 23 | 5  |
| 298383 | 57 | 1534932 | 1534965 | 2 | 17 | 34 | CA   | 13 | 10 |
| 298384 | 57 | 1535359 | 1535390 | 4 | 8  | 32 | TTGA | 22 | 4  |
| 298395 | 57 | 1557602 | 1557622 | 3 | 7  | 21 | GGT  | 31 | 3  |
| 298398 | 57 | 1565001 | 1565022 | 2 | 11 | 22 | TG   | 18 | 5  |
| 298401 | 57 | 1572909 | 1572930 | 2 | 11 | 22 | CA   | 13 | 4  |
| 298404 | 57 | 1588856 | 1588873 | 3 | 6  | 18 | TAT  | 17 | 6  |
| 298417 | 57 | 1627094 | 1627113 | 4 | 5  | 20 | AGAC | 31 | 4  |
| 298419 | 57 | 1643402 | 1643419 | 2 | 9  | 18 | GT   | 24 | 4  |
| 298425 | 57 | 1655500 | 1655545 | 2 | 23 | 46 | CT   | 13 | 7  |
| 298426 | 57 | 1663795 | 1663820 | 2 | 13 | 26 | GA   | 9  | 4  |
| 298428 | 57 | 1680796 | 1680807 | 2 | 6  | 12 | TG   | 18 | 3  |
| 298431 | 57 | 1686604 | 1686621 | 2 | 9  | 18 | CA   | 20 | 4  |
| 298441 | 57 | 1704681 | 1704704 | 3 | 8  | 24 | TGA  | 21 | 3  |
| 298489 | 57 | 1817807 | 1817821 | 3 | 5  | 15 | GCA  | 34 | 3  |
| 298493 | 57 | 1829921 | 1829944 | 2 | 12 | 24 | GT   | 12 | 9  |
| 298500 | 57 | 1859866 | 1859898 | 3 | 11 | 33 | GGA  | 23 | 4  |
| 298504 | 57 | 1880297 | 1880356 | 3 | 20 | 60 | TCT  | 9  | 10 |
| 298510 | 57 | 1892295 | 1892320 | 2 | 13 | 26 | GT   | 12 | 7  |
| 298511 | 57 | 1897399 | 1897420 | 2 | 11 | 22 | TG   | 14 | 8  |
| 298520 | 57 | 1911100 | 1911120 | 3 | 7  | 21 | TGT  | 26 | 10 |
| 298521 | 57 | 1912411 | 1912434 | 2 | 12 | 24 | TG   | 15 | 6  |
| 298526 | 57 | 1944756 | 1944783 | 2 | 14 | 28 | GT   | 15 | 9  |
| 298534 | 57 | 1983900 | 1983919 | 2 | 10 | 20 | GT   | 16 | 3  |
| 298538 | 57 | 2000597 | 2000642 | 2 | 23 | 46 | TG   | 12 | 8  |
| 298539 | 57 | 2007018 | 2007038 | 3 | 7  | 21 | CTA  | 20 | 5  |
| 298543 | 57 | 2014872 | 2014889 | 2 | 9  | 18 | GT   | 23 | 4  |
| 298547 | 57 | 2029603 | 2029614 | 2 | 6  | 12 | GT   | 22 | 4  |
| 298548 | 57 | 2031112 | 2031151 | 4 | 10 | 40 | TCCA | 22 | 6  |

|        |    |         |         |   |    |    |      |    |    |
|--------|----|---------|---------|---|----|----|------|----|----|
| 298549 | 57 | 2032600 | 2032635 | 2 | 18 | 36 | GT   | 15 | 7  |
| 298550 | 57 | 2035466 | 2035492 | 3 | 9  | 27 | TAA  | 17 | 3  |
| 298565 | 57 | 2068603 | 2068616 | 2 | 7  | 14 | GT   | 26 | 4  |
| 298566 | 57 | 2070415 | 2070436 | 2 | 11 | 22 | TG   | 22 | 6  |
| 298567 | 57 | 2072605 | 2072616 | 2 | 6  | 12 | GT   | 24 | 3  |
| 298568 | 57 | 2073800 | 2073814 | 3 | 5  | 15 | AGC  | 28 | 3  |
| 298573 | 57 | 2088208 | 2088245 | 2 | 19 | 38 | AC   | 12 | 13 |
| 298578 | 57 | 2094626 | 2094641 | 2 | 8  | 16 | GA   | 26 | 8  |
| 298580 | 57 | 2110472 | 2110515 | 2 | 22 | 44 | GT   | 6  | 8  |
| 298582 | 57 | 2115128 | 2115153 | 2 | 13 | 26 | CA   | 18 | 13 |
| 298584 | 57 | 2119003 | 2119030 | 2 | 14 | 28 | TG   | 20 | 12 |
| 298586 | 57 | 2125577 | 2125602 | 2 | 13 | 26 | GT   | 22 | 7  |
| 298591 | 57 | 2127846 | 2127859 | 2 | 7  | 14 | CT   | 26 | 5  |
| 298592 | 57 | 2127861 | 2127874 | 2 | 7  | 14 | TC   | 26 | 3  |
| 298596 | 57 | 2128337 | 2128360 | 2 | 12 | 24 | GT   | 14 | 11 |
| 298597 | 57 | 2133222 | 2133249 | 2 | 14 | 28 | TC   | 17 | 11 |
| 298598 | 57 | 2133429 | 2133460 | 2 | 16 | 32 | CA   | 10 | 9  |
| 298601 | 57 | 2138606 | 2138619 | 2 | 7  | 14 | CA   | 10 | 10 |
| 298603 | 57 | 2141742 | 2141769 | 2 | 14 | 28 | CA   | 9  | 5  |
| 298615 | 57 | 2149756 | 2149775 | 4 | 5  | 20 | AGAC | 21 | 4  |
| 298616 | 57 | 2152900 | 2152913 | 2 | 7  | 14 | TG   | 28 | 3  |
| 298619 | 57 | 2154672 | 2154683 | 2 | 6  | 12 | GT   | 23 | 4  |
| 298620 | 57 | 2154878 | 2154933 | 4 | 14 | 56 | AATC | 16 | 12 |
| 298642 | 57 | 2185559 | 2185582 | 3 | 8  | 24 | CTG  | 26 | 5  |
| 298647 | 57 | 2206198 | 2206209 | 2 | 6  | 12 | AC   | 23 | 8  |
| 298649 | 57 | 2209602 | 2209621 | 2 | 10 | 20 | CA   | 10 | 12 |
| 298656 | 57 | 2222814 | 2222831 | 2 | 9  | 18 | TG   | 9  | 5  |
| 298670 | 57 | 2255209 | 2255252 | 4 | 11 | 44 | ACCA | 29 | 10 |
| 298672 | 57 | 2256340 | 2256379 | 2 | 20 | 40 | GT   | 6  | 7  |
| 298676 | 57 | 2286975 | 2287010 | 2 | 18 | 36 | CA   | 13 | 8  |
| 298677 | 57 | 2287211 | 2287230 | 2 | 10 | 20 | AC   | 17 | 7  |
| 298678 | 57 | 2288437 | 2288462 | 2 | 13 | 26 | GT   | 19 | 10 |
| 298690 | 57 | 2307232 | 2307257 | 2 | 13 | 26 | AC   | 16 | 6  |
| 298693 | 57 | 2309846 | 2309871 | 2 | 13 | 26 | CA   | 12 | 7  |
| 298699 | 57 | 2331838 | 2331869 | 2 | 16 | 32 | AC   | 14 | 14 |
| 298701 | 57 | 2334922 | 2334951 | 2 | 15 | 30 | AC   | 6  | 7  |
| 298708 | 57 | 2348632 | 2348675 | 2 | 22 | 44 | GT   | 8  | 7  |
| 298725 | 57 | 2394492 | 2394506 | 3 | 5  | 15 | AAT  | 14 | 4  |
| 298741 | 57 | 2439425 | 2439446 | 2 | 11 | 22 | CA   | 8  | 5  |
| 298744 | 57 | 2455585 | 2455604 | 4 | 5  | 20 | GCAC | 23 | 8  |
| 298745 | 57 | 2457807 | 2457850 | 4 | 11 | 44 | CAAT | 21 | 8  |
| 298750 | 57 | 2482427 | 2482446 | 2 | 10 | 20 | CA   | 24 | 8  |
| 298763 | 57 | 2518615 | 2518644 | 2 | 15 | 30 | CT   | 7  | 9  |
| 298764 | 57 | 2520369 | 2520392 | 2 | 12 | 24 | TG   | 12 | 5  |
| 298765 | 57 | 2520498 | 2520517 | 2 | 10 | 20 | GT   | 14 | 3  |
| 298770 | 57 | 2530463 | 2530508 | 2 | 23 | 46 | TG   | 16 | 11 |
| 298779 | 57 | 2552192 | 2552211 | 2 | 10 | 20 | AC   | 22 | 4  |
| 298780 | 57 | 2556192 | 2556207 | 2 | 8  | 16 | TG   | 20 | 5  |
| 298781 | 57 | 2556393 | 2556420 | 2 | 14 | 28 | GT   | 14 | 7  |
| 298783 | 57 | 2558357 | 2558380 | 2 | 12 | 24 | AG   | 14 | 8  |
| 298789 | 57 | 2567194 | 2567209 | 2 | 8  | 16 | CA   | 23 | 3  |

|        |    |         |         |   |    |    |      |    |    |
|--------|----|---------|---------|---|----|----|------|----|----|
| 298791 | 57 | 2570374 | 2570419 | 2 | 23 | 46 | TG   | 11 | 10 |
| 298792 | 57 | 2571708 | 2571739 | 2 | 16 | 32 | CA   | 13 | 11 |
| 298795 | 57 | 2578635 | 2578652 | 3 | 6  | 18 | TGT  | 28 | 4  |
| 298799 | 57 | 2588311 | 2588326 | 2 | 8  | 16 | GT   | 25 | 4  |
| 298801 | 57 | 2597200 | 2597247 | 3 | 16 | 48 | AAT  | 6  | 5  |
| 298803 | 57 | 2604244 | 2604259 | 4 | 4  | 16 | TTTG | 17 | 4  |
| 298810 | 57 | 2628801 | 2628826 | 2 | 13 | 26 | CA   | 17 | 4  |
| 298814 | 57 | 2642796 | 2642823 | 2 | 14 | 28 | AC   | 11 | 6  |
| 298818 | 57 | 2655522 | 2655537 | 2 | 8  | 16 | TG   | 25 | 5  |
| 298823 | 57 | 2672529 | 2672558 | 2 | 15 | 30 | AC   | 12 | 6  |
| 298825 | 57 | 2680854 | 2680873 | 2 | 10 | 20 | GT   | 18 | 5  |
| 298827 | 57 | 2687128 | 2687171 | 2 | 22 | 44 | AC   | 8  | 12 |
| 298834 | 57 | 2701800 | 2701835 | 2 | 18 | 36 | GT   | 17 | 14 |
| 298847 | 57 | 2760689 | 2760706 | 2 | 9  | 18 | AC   | 23 | 3  |
| 298852 | 57 | 2764694 | 2764708 | 3 | 5  | 15 | GGA  | 18 | 3  |
| 298859 | 57 | 2782741 | 2782754 | 2 | 7  | 14 | TG   | 10 | 3  |
| 298860 | 57 | 2787210 | 2787223 | 2 | 7  | 14 | GT   | 9  | 7  |
| 298863 | 57 | 2788747 | 2788758 | 2 | 6  | 12 | GT   | 26 | 12 |
| 298869 | 57 | 2800498 | 2800509 | 2 | 6  | 12 | TG   | 24 | 3  |
| 298870 | 57 | 2804485 | 2804504 | 2 | 10 | 20 | TG   | 19 | 6  |
| 298878 | 57 | 2813117 | 2813162 | 2 | 23 | 46 | GT   | 12 | 7  |
| 298884 | 57 | 2815177 | 2815220 | 2 | 22 | 44 | CA   | 11 | 6  |
| 298889 | 57 | 2821418 | 2821429 | 2 | 6  | 12 | AC   | 24 | 4  |
| 298890 | 57 | 2822442 | 2822459 | 2 | 9  | 18 | AC   | 28 | 3  |
| 298891 | 57 | 2823036 | 2823055 | 4 | 5  | 20 | TATC | 24 | 6  |
| 298893 | 57 | 2826546 | 2826563 | 2 | 9  | 18 | AT   | 29 | 5  |
| 298897 | 57 | 2833848 | 2833871 | 2 | 12 | 24 | TG   | 14 | 7  |
| 298899 | 57 | 2835601 | 2835616 | 2 | 8  | 16 | AC   | 24 | 5  |
| 298900 | 57 | 2835730 | 2835769 | 2 | 20 | 40 | AC   | 12 | 9  |
| 298901 | 57 | 2836501 | 2836518 | 3 | 6  | 18 | AAT  | 26 | 3  |
| 298904 | 57 | 2851822 | 2851833 | 2 | 6  | 12 | CA   | 28 | 3  |
| 298907 | 57 | 2861008 | 2861031 | 2 | 12 | 24 | CA   | 14 | 10 |
| 298917 | 57 | 2869169 | 2869182 | 2 | 7  | 14 | CA   | 13 | 4  |
| 298927 | 57 | 2876589 | 2876600 | 2 | 6  | 12 | GA   | 25 | 4  |
| 298929 | 57 | 2877796 | 2877831 | 2 | 18 | 36 | CA   | 10 | 11 |
| 298930 | 57 | 2877993 | 2878004 | 2 | 6  | 12 | TG   | 28 | 3  |
| 298931 | 57 | 2878095 | 2878108 | 2 | 7  | 14 | AC   | 28 | 4  |
| 298935 | 57 | 2881557 | 2881576 | 2 | 10 | 20 | TG   | 7  | 4  |
| 298938 | 57 | 2882138 | 2882161 | 2 | 12 | 24 | TG   | 18 | 8  |
| 298952 | 57 | 2924688 | 2924701 | 2 | 7  | 14 | TA   | 9  | 4  |
| 298953 | 57 | 2924702 | 2924713 | 2 | 6  | 12 | CA   | 11 | 4  |
| 298954 | 57 | 2925827 | 2925852 | 2 | 13 | 26 | AC   | 21 | 7  |
| 298963 | 57 | 2947414 | 2947443 | 2 | 15 | 30 | GT   | 13 | 8  |
| 298968 | 57 | 2955082 | 2955119 | 2 | 19 | 38 | AC   | 8  | 9  |
| 298970 | 57 | 2962465 | 2962500 | 4 | 9  | 36 | TCTG | 17 | 7  |
| 298981 | 57 | 2999441 | 2999454 | 2 | 7  | 14 | TA   | 13 | 3  |
| 298985 | 57 | 3008892 | 3008909 | 2 | 9  | 18 | CA   | 8  | 5  |
| 298990 | 57 | 3016673 | 3016688 | 2 | 8  | 16 | AG   | 27 | 4  |
| 298991 | 57 | 3022408 | 3022419 | 2 | 6  | 12 | CA   | 26 | 3  |
| 298994 | 57 | 3034221 | 3034232 | 2 | 6  | 12 | AC   | 20 | 3  |
| 298997 | 57 | 3048208 | 3048239 | 2 | 16 | 32 | TC   | 16 | 8  |

|        |    |         |         |   |    |    |      |    |    |
|--------|----|---------|---------|---|----|----|------|----|----|
| 298999 | 57 | 3053047 | 3053061 | 3 | 5  | 15 | GAT  | 26 | 3  |
| 299001 | 57 | 3056600 | 3056641 | 2 | 21 | 42 | AC   | 6  | 9  |
| 299002 | 57 | 3057266 | 3057277 | 2 | 6  | 12 | CA   | 18 | 3  |
| 299008 | 57 | 3073176 | 3073197 | 2 | 11 | 22 | AC   | 12 | 11 |
| 299009 | 57 | 3083623 | 3083654 | 2 | 16 | 32 | GT   | 15 | 4  |
| 299010 | 57 | 3083759 | 3083798 | 2 | 20 | 40 | CA   | 12 | 11 |
| 299023 | 58 | 2247    | 2272    | 2 | 13 | 26 | CA   | 7  | 6  |
| 299028 | 58 | 17224   | 17241   | 2 | 9  | 18 | AC   | 27 | 7  |
| 299030 | 58 | 18282   | 18317   | 3 | 12 | 36 | CCT  | 11 | 8  |
| 299031 | 58 | 18515   | 18540   | 2 | 13 | 26 | AC   | 11 | 8  |
| 299033 | 58 | 21139   | 21159   | 3 | 7  | 21 | AAG  | 10 | 6  |
| 299034 | 58 | 21486   | 21527   | 2 | 21 | 42 | AG   | 13 | 10 |
| 299038 | 58 | 22822   | 22841   | 2 | 10 | 20 | AC   | 20 | 11 |
| 299042 | 58 | 24433   | 24452   | 2 | 10 | 20 | CT   | 16 | 3  |
| 299044 | 58 | 25912   | 25925   | 2 | 7  | 14 | GA   | 9  | 3  |
| 299047 | 58 | 26737   | 26750   | 2 | 7  | 14 | GT   | 22 | 8  |
| 299048 | 58 | 27123   | 27137   | 3 | 5  | 15 | CCT  | 11 | 3  |
| 299050 | 58 | 29497   | 29518   | 2 | 11 | 22 | AC   | 20 | 3  |
| 299053 | 58 | 33816   | 33833   | 3 | 6  | 18 | CAG  | 28 | 4  |
| 299054 | 58 | 34611   | 34634   | 3 | 8  | 24 | AAT  | 21 | 17 |
| 299056 | 58 | 37779   | 37798   | 2 | 10 | 20 | CT   | 18 | 9  |
| 299057 | 58 | 37910   | 37942   | 3 | 11 | 33 | CCT  | 7  | 8  |
| 299062 | 58 | 43179   | 43196   | 2 | 9  | 18 | TC   | 14 | 8  |
| 299064 | 58 | 44405   | 44416   | 2 | 6  | 12 | CA   | 27 | 6  |
| 299065 | 58 | 44419   | 44430   | 2 | 6  | 12 | CA   | 27 | 4  |
| 299071 | 58 | 47522   | 47539   | 2 | 9  | 18 | TG   | 11 | 7  |
| 299074 | 58 | 52308   | 52321   | 2 | 7  | 14 | CA   | 21 | 12 |
| 299075 | 58 | 53215   | 53230   | 2 | 8  | 16 | TC   | 19 | 6  |
| 299076 | 58 | 53234   | 53247   | 2 | 7  | 14 | CT   | 21 | 4  |
| 299078 | 58 | 53923   | 53944   | 2 | 11 | 22 | GT   | 11 | 6  |
| 299079 | 58 | 54290   | 54304   | 3 | 5  | 15 | GGT  | 8  | 3  |
| 299088 | 58 | 59214   | 59233   | 2 | 10 | 20 | CA   | 11 | 5  |
| 299090 | 58 | 61268   | 61283   | 2 | 8  | 16 | TG   | 19 | 9  |
| 299091 | 58 | 61286   | 61299   | 2 | 7  | 14 | TG   | 19 | 7  |
| 299092 | 58 | 63020   | 63039   | 2 | 10 | 20 | TG   | 14 | 10 |
| 299094 | 58 | 64736   | 64753   | 3 | 6  | 18 | TCC  | 26 | 3  |
| 299097 | 58 | 67975   | 67994   | 2 | 10 | 20 | TC   | 26 | 4  |
| 299100 | 58 | 78466   | 78485   | 2 | 10 | 20 | GA   | 14 | 12 |
| 299103 | 58 | 80913   | 80936   | 2 | 12 | 24 | TG   | 21 | 5  |
| 299105 | 58 | 87047   | 87064   | 2 | 9  | 18 | TG   | 23 | 4  |
| 299107 | 58 | 87373   | 87394   | 2 | 11 | 22 | CA   | 25 | 11 |
| 299113 | 58 | 93290   | 93313   | 2 | 12 | 24 | TC   | 21 | 7  |
| 299114 | 58 | 93912   | 93927   | 2 | 8  | 16 | AG   | 23 | 6  |
| 299115 | 58 | 96388   | 96411   | 2 | 12 | 24 | CA   | 15 | 7  |
| 299117 | 58 | 96737   | 96754   | 2 | 9  | 18 | CA   | 15 | 6  |
| 299118 | 58 | 98040   | 98061   | 2 | 11 | 22 | AC   | 19 | 9  |
| 299119 | 58 | 98280   | 98301   | 2 | 11 | 22 | AC   | 13 | 5  |
| 299120 | 58 | 98358   | 98373   | 4 | 4  | 16 | CACT | 17 | 6  |
| 299121 | 58 | 98503   | 98534   | 2 | 16 | 32 | CA   | 13 | 6  |
| 299124 | 58 | 99687   | 99698   | 2 | 6  | 12 | AG   | 20 | 3  |
| 299125 | 58 | 100065  | 100098  | 2 | 17 | 34 | TG   | 12 | 13 |

|        |    |        |        |   |    |    |      |    |    |
|--------|----|--------|--------|---|----|----|------|----|----|
| 299126 | 58 | 100155 | 100178 | 2 | 12 | 24 | GT   | 16 | 7  |
| 299127 | 58 | 100255 | 100290 | 2 | 18 | 36 | GT   | 14 | 22 |
| 299128 | 58 | 100572 | 100587 | 2 | 8  | 16 | TC   | 27 | 9  |
| 299129 | 58 | 100690 | 100704 | 3 | 5  | 15 | TCC  | 22 | 4  |
| 299133 | 58 | 101068 | 101091 | 2 | 12 | 24 | AC   | 17 | 9  |
| 299135 | 58 | 101846 | 101869 | 4 | 6  | 24 | GACA | 19 | 5  |
| 299137 | 58 | 103964 | 103977 | 2 | 7  | 14 | AC   | 21 | 7  |
| 299139 | 58 | 106350 | 106382 | 3 | 11 | 33 | CTC  | 13 | 9  |
| 299144 | 58 | 113330 | 113353 | 4 | 6  | 24 | CTCC | 10 | 4  |
| 299145 | 58 | 115261 | 115288 | 2 | 14 | 28 | CT   | 17 | 8  |
| 299146 | 58 | 116368 | 116397 | 2 | 15 | 30 | AC   | 13 | 8  |
| 299147 | 58 | 116468 | 116493 | 2 | 13 | 26 | CA   | 15 | 7  |
| 299151 | 58 | 122439 | 122452 | 2 | 7  | 14 | GT   | 18 | 8  |
| 299153 | 58 | 123464 | 123490 | 3 | 9  | 27 | TCC  | 6  | 3  |
| 299154 | 58 | 124277 | 124310 | 2 | 17 | 34 | GT   | 9  | 10 |
| 299155 | 58 | 125161 | 125184 | 2 | 12 | 24 | TG   | 15 | 4  |
| 299156 | 58 | 125480 | 125513 | 2 | 17 | 34 | TG   | 11 | 10 |
| 299157 | 58 | 125722 | 125739 | 3 | 6  | 18 | TGG  | 8  | 7  |
| 299158 | 58 | 125938 | 125957 | 2 | 10 | 20 | GT   | 15 | 12 |
| 299159 | 58 | 126187 | 126204 | 2 | 9  | 18 | CA   | 19 | 14 |
| 299160 | 58 | 126648 | 126661 | 2 | 7  | 14 | TG   | 23 | 10 |
| 299162 | 58 | 129116 | 129149 | 2 | 17 | 34 | GA   | 7  | 8  |
| 299165 | 58 | 133241 | 133260 | 2 | 10 | 20 | CA   | 17 | 16 |
| 299167 | 58 | 137386 | 137417 | 2 | 16 | 32 | TG   | 13 | 7  |
| 299172 | 58 | 143779 | 143814 | 2 | 18 | 36 | AC   | 7  | 7  |
| 299175 | 58 | 150531 | 150546 | 2 | 8  | 16 | TA   | 12 | 4  |
| 299176 | 58 | 150758 | 150783 | 2 | 13 | 26 | GA   | 23 | 9  |
| 299183 | 58 | 153841 | 153884 | 2 | 22 | 44 | TG   | 15 | 10 |
| 299184 | 58 | 156557 | 156568 | 2 | 6  | 12 | AC   | 30 | 3  |
| 299185 | 58 | 158634 | 158659 | 2 | 13 | 26 | GA   | 14 | 5  |
| 299192 | 58 | 163185 | 163198 | 2 | 7  | 14 | CT   | 13 | 9  |
| 299193 | 58 | 163517 | 163534 | 2 | 9  | 18 | TC   | 25 | 3  |
| 299196 | 58 | 167338 | 167363 | 2 | 13 | 26 | AC   | 18 | 7  |
| 299197 | 58 | 173510 | 173525 | 2 | 8  | 16 | CA   | 21 | 5  |
| 299198 | 58 | 173558 | 173593 | 2 | 18 | 36 | TG   | 9  | 7  |
| 299201 | 58 | 178795 | 178806 | 2 | 6  | 12 | TA   | 13 | 4  |
| 299206 | 58 | 182723 | 182736 | 2 | 7  | 14 | AG   | 26 | 4  |
| 299207 | 58 | 184243 | 184262 | 2 | 10 | 20 | GA   | 19 | 6  |
| 299210 | 58 | 187382 | 187407 | 2 | 13 | 26 | CA   | 14 | 13 |
| 299212 | 58 | 190340 | 190359 | 2 | 10 | 20 | GA   | 18 | 6  |
| 299214 | 58 | 196146 | 196169 | 3 | 8  | 24 | GAG  | 20 | 5  |
| 299217 | 58 | 203802 | 203823 | 2 | 11 | 22 | TG   | 8  | 8  |
| 299220 | 58 | 207804 | 207817 | 2 | 7  | 14 | TG   | 28 | 3  |
| 299224 | 58 | 212202 | 212231 | 2 | 15 | 30 | CA   | 10 | 11 |
| 299228 | 58 | 223674 | 223699 | 2 | 13 | 26 | GT   | 15 | 13 |
| 299232 | 58 | 234278 | 234298 | 3 | 7  | 21 | CAC  | 18 | 10 |
| 299238 | 58 | 243122 | 243153 | 2 | 16 | 32 | GT   | 18 | 10 |
| 299241 | 58 | 245217 | 245230 | 2 | 7  | 14 | AC   | 17 | 3  |
| 299252 | 58 | 263968 | 263989 | 2 | 11 | 22 | AC   | 13 | 10 |
| 299254 | 58 | 265207 | 265218 | 2 | 6  | 12 | AC   | 29 | 3  |
| 299259 | 58 | 273808 | 273841 | 2 | 17 | 34 | CA   | 16 | 11 |

|        |    |        |        |   |    |    |      |    |    |
|--------|----|--------|--------|---|----|----|------|----|----|
| 299263 | 58 | 278996 | 279019 | 2 | 12 | 24 | CA   | 13 | 9  |
| 299264 | 58 | 279095 | 279136 | 3 | 14 | 42 | GGA  | 12 | 11 |
| 299268 | 58 | 288268 | 288283 | 4 | 4  | 16 | GGAG | 6  | 3  |
| 299269 | 58 | 288472 | 288489 | 3 | 6  | 18 | AAG  | 28 | 9  |
| 299270 | 58 | 288926 | 288939 | 2 | 7  | 14 | TC   | 24 | 3  |
| 299271 | 58 | 289279 | 289314 | 2 | 18 | 36 | AC   | 12 | 15 |
| 299272 | 58 | 289914 | 289939 | 2 | 13 | 26 | GT   | 11 | 6  |
| 299273 | 58 | 290565 | 290579 | 3 | 5  | 15 | AGG  | 14 | 5  |
| 299277 | 58 | 295580 | 295593 | 2 | 7  | 14 | TG   | 21 | 11 |
| 299278 | 58 | 298369 | 298380 | 2 | 6  | 12 | TG   | 22 | 12 |
| 299279 | 58 | 300647 | 300670 | 2 | 12 | 24 | AC   | 15 | 14 |
| 299290 | 58 | 311177 | 311188 | 2 | 6  | 12 | AC   | 17 | 13 |
| 299291 | 58 | 311190 | 311205 | 2 | 8  | 16 | CA   | 19 | 8  |
| 299292 | 58 | 311427 | 311442 | 2 | 8  | 16 | TA   | 21 | 5  |
| 299301 | 58 | 333052 | 333071 | 4 | 5  | 20 | ATAA | 25 | 3  |
| 299303 | 58 | 334782 | 334819 | 2 | 19 | 38 | TG   | 11 | 9  |
| 299305 | 58 | 335976 | 335995 | 2 | 10 | 20 | GT   | 18 | 9  |
| 299306 | 58 | 336499 | 336516 | 3 | 6  | 18 | CAT  | 19 | 5  |
| 299308 | 58 | 337075 | 337086 | 2 | 6  | 12 | TC   | 15 | 7  |
| 299310 | 58 | 338515 | 338534 | 2 | 10 | 20 | TC   | 19 | 5  |
| 299312 | 58 | 339115 | 339136 | 2 | 11 | 22 | CA   | 19 | 15 |
| 299314 | 58 | 339984 | 340013 | 3 | 10 | 30 | TCT  | 23 | 7  |
| 299318 | 58 | 344343 | 344368 | 2 | 13 | 26 | GT   | 13 | 12 |
| 299319 | 58 | 344528 | 344543 | 2 | 8  | 16 | AC   | 22 | 8  |
| 299320 | 58 | 344582 | 344601 | 2 | 10 | 20 | AG   | 19 | 8  |
| 299322 | 58 | 344797 | 344811 | 3 | 5  | 15 | GCT  | 21 | 4  |
| 299323 | 58 | 348544 | 348561 | 3 | 6  | 18 | GAA  | 29 | 9  |
| 299325 | 58 | 351358 | 351375 | 3 | 6  | 18 | GGA  | 11 | 9  |
| 299326 | 58 | 351377 | 351394 | 3 | 6  | 18 | GAG  | 10 | 7  |
| 299329 | 58 | 354087 | 354112 | 2 | 13 | 26 | TG   | 15 | 11 |
| 299334 | 58 | 359648 | 359669 | 2 | 11 | 22 | TG   | 16 | 10 |
| 299336 | 58 | 361140 | 361169 | 3 | 10 | 30 | CCT  | 14 | 8  |
| 299337 | 58 | 361670 | 361687 | 3 | 6  | 18 | AGA  | 9  | 5  |
| 299338 | 58 | 362192 | 362211 | 2 | 10 | 20 | GT   | 8  | 10 |
| 299345 | 58 | 365416 | 365445 | 2 | 15 | 30 | AC   | 16 | 12 |
| 299346 | 58 | 368303 | 368317 | 3 | 5  | 15 | ATG  | 22 | 3  |
| 299348 | 58 | 370052 | 370063 | 2 | 6  | 12 | CT   | 30 | 3  |
| 299349 | 58 | 372132 | 372181 | 2 | 25 | 50 | AC   | 9  | 10 |
| 299350 | 58 | 372293 | 372316 | 3 | 8  | 24 | GCT  | 27 | 3  |
| 299352 | 58 | 374795 | 374816 | 2 | 11 | 22 | CT   | 23 | 5  |
| 299355 | 58 | 379254 | 379283 | 2 | 15 | 30 | TG   | 6  | 6  |
| 299358 | 58 | 381832 | 381846 | 3 | 5  | 15 | CTC  | 28 | 7  |
| 299359 | 58 | 381898 | 381921 | 3 | 8  | 24 | GGA  | 23 | 7  |
| 299363 | 58 | 384280 | 384297 | 2 | 9  | 18 | CA   | 12 | 7  |
| 299364 | 58 | 385393 | 385416 | 2 | 12 | 24 | CA   | 17 | 15 |
| 299365 | 58 | 386835 | 386848 | 2 | 7  | 14 | CA   | 22 | 5  |
| 299369 | 58 | 394979 | 394996 | 3 | 6  | 18 | TTC  | 18 | 4  |
| 299373 | 58 | 408058 | 408072 | 3 | 5  | 15 | TGC  | 26 | 3  |
| 299375 | 58 | 411147 | 411176 | 3 | 10 | 30 | AGA  | 16 | 4  |
| 299376 | 58 | 412295 | 412308 | 2 | 7  | 14 | GT   | 29 | 7  |
| 299378 | 58 | 421345 | 421359 | 3 | 5  | 15 | ACA  | 29 | 3  |

|        |    |        |        |   |    |    |      |    |    |
|--------|----|--------|--------|---|----|----|------|----|----|
| 299380 | 58 | 424717 | 424736 | 4 | 5  | 20 | TTTA | 17 | 6  |
| 299382 | 58 | 432139 | 432152 | 2 | 7  | 14 | AT   | 6  | 3  |
| 299383 | 58 | 434408 | 434431 | 2 | 12 | 24 | CA   | 16 | 14 |
| 299384 | 58 | 441612 | 441625 | 2 | 7  | 14 | CT   | 24 | 3  |
| 299385 | 58 | 441726 | 441745 | 4 | 5  | 20 | AAAT | 22 | 5  |
| 299386 | 58 | 450739 | 450766 | 2 | 14 | 28 | GT   | 12 | 9  |
| 299390 | 58 | 454759 | 454773 | 3 | 5  | 15 | CAT  | 24 | 4  |
| 299392 | 58 | 456867 | 456880 | 2 | 7  | 14 | TG   | 25 | 3  |
| 299393 | 58 | 457412 | 457427 | 2 | 8  | 16 | GA   | 20 | 8  |
| 299395 | 58 | 458296 | 458311 | 4 | 4  | 16 | TTTG | 19 | 3  |
| 299397 | 58 | 459237 | 459250 | 2 | 7  | 14 | AC   | 31 | 5  |
| 299398 | 58 | 461159 | 461179 | 3 | 7  | 21 | CCA  | 22 | 5  |
| 299399 | 58 | 461393 | 461412 | 2 | 10 | 20 | GT   | 17 | 6  |
| 299400 | 58 | 461479 | 461506 | 2 | 14 | 28 | CA   | 14 | 9  |
| 299408 | 58 | 462502 | 462533 | 2 | 16 | 32 | GT   | 15 | 7  |
| 299412 | 58 | 465886 | 465905 | 2 | 10 | 20 | TG   | 18 | 19 |
| 299413 | 58 | 466152 | 466167 | 2 | 8  | 16 | TG   | 27 | 3  |
| 299415 | 58 | 467967 | 467990 | 4 | 6  | 24 | ATTT | 16 | 4  |
| 299416 | 58 | 468374 | 468394 | 3 | 7  | 21 | GAG  | 11 | 6  |
| 299417 | 58 | 470539 | 470576 | 2 | 19 | 38 | AC   | 12 | 10 |
| 299422 | 58 | 476665 | 476694 | 3 | 10 | 30 | CAA  | 19 | 13 |
| 299423 | 58 | 477068 | 477099 | 4 | 8  | 32 | ATTC | 21 | 18 |
| 299424 | 58 | 477414 | 477428 | 3 | 5  | 15 | AAG  | 21 | 5  |
| 299426 | 58 | 479202 | 479215 | 2 | 7  | 14 | AT   | 16 | 5  |
| 299428 | 58 | 487032 | 487051 | 2 | 10 | 20 | AC   | 14 | 4  |
| 299434 | 58 | 493137 | 493150 | 2 | 7  | 14 | AG   | 26 | 5  |
| 299437 | 58 | 498407 | 498420 | 2 | 7  | 14 | TG   | 27 | 6  |
| 299440 | 58 | 506123 | 506154 | 2 | 16 | 32 | GT   | 6  | 8  |
| 299442 | 58 | 506733 | 506746 | 2 | 7  | 14 | GT   | 8  | 5  |
| 299444 | 58 | 513257 | 513270 | 2 | 7  | 14 | AC   | 20 | 7  |
| 299447 | 58 | 521881 | 521892 | 2 | 6  | 12 | TC   | 20 | 4  |
| 299448 | 58 | 521923 | 521949 | 3 | 9  | 27 | TCT  | 9  | 7  |
| 299450 | 58 | 522108 | 522127 | 4 | 5  | 20 | TTTA | 12 | 9  |
| 299452 | 58 | 523019 | 523034 | 4 | 4  | 16 | AAAT | 23 | 3  |
| 299455 | 58 | 535120 | 535149 | 2 | 15 | 30 | AC   | 14 | 9  |
| 299457 | 58 | 540931 | 540946 | 2 | 8  | 16 | TG   | 29 | 5  |
| 299461 | 58 | 557802 | 557819 | 2 | 9  | 18 | AG   | 17 | 12 |
| 299462 | 58 | 561212 | 561235 | 4 | 6  | 24 | AATG | 26 | 6  |
| 299463 | 58 | 563783 | 563797 | 3 | 5  | 15 | CAG  | 33 | 3  |
| 299464 | 58 | 564084 | 564104 | 3 | 7  | 21 | AGA  | 12 | 4  |
| 299465 | 58 | 564810 | 564842 | 3 | 11 | 33 | TAA  | 12 | 7  |
| 299470 | 58 | 574268 | 574293 | 2 | 13 | 26 | TG   | 16 | 12 |
| 299472 | 58 | 581792 | 581806 | 3 | 5  | 15 | GAT  | 23 | 3  |
| 299476 | 58 | 596426 | 596453 | 2 | 14 | 28 | AC   | 18 | 18 |
| 299477 | 58 | 597461 | 597472 | 2 | 6  | 12 | CT   | 26 | 4  |
| 299480 | 58 | 613056 | 613073 | 2 | 9  | 18 | TG   | 19 | 4  |
| 299481 | 58 | 616717 | 616734 | 3 | 6  | 18 | AGG  | 30 | 7  |
| 299482 | 58 | 622444 | 622464 | 3 | 7  | 21 | TCT  | 22 | 3  |
| 299485 | 58 | 624684 | 624719 | 2 | 18 | 36 | AC   | 17 | 9  |
| 299486 | 58 | 625519 | 625542 | 2 | 12 | 24 | AC   | 12 | 9  |
| 299490 | 58 | 637033 | 637047 | 3 | 5  | 15 | CAA  | 25 | 3  |



|        |    |        |        |   |    |    |      |    |    |
|--------|----|--------|--------|---|----|----|------|----|----|
| 299492 | 58 | 638947 | 638978 | 2 | 16 | 32 | TG   | 7  | 9  |
| 299494 | 58 | 639571 | 639585 | 3 | 5  | 15 | CCT  | 27 | 3  |
| 299497 | 58 | 642924 | 642939 | 4 | 4  | 16 | AATA | 18 | 9  |
| 299500 | 58 | 643571 | 643585 | 3 | 5  | 15 | TGC  | 33 | 7  |
| 299501 | 58 | 646139 | 646154 | 4 | 4  | 16 | CCTG | 19 | 3  |
| 299502 | 58 | 646399 | 646416 | 3 | 6  | 18 | GCT  | 29 | 12 |
| 299503 | 58 | 646628 | 646645 | 3 | 6  | 18 | CTC  | 15 | 3  |
| 299506 | 58 | 649140 | 649199 | 2 | 30 | 60 | GT   | 7  | 10 |
| 299510 | 58 | 656071 | 656096 | 2 | 13 | 26 | CA   | 17 | 12 |
| 299519 | 58 | 662660 | 662673 | 2 | 7  | 14 | GA   | 34 | 4  |
| 299524 | 58 | 673664 | 673701 | 2 | 19 | 38 | CA   | 13 | 13 |
| 299525 | 58 | 674175 | 674202 | 4 | 7  | 28 | AGGA | 23 | 3  |
| 299526 | 58 | 674784 | 674809 | 2 | 13 | 26 | GT   | 21 | 8  |
| 299532 | 58 | 680556 | 680570 | 3 | 5  | 15 | GCA  | 29 | 6  |
| 299534 | 58 | 683722 | 683747 | 2 | 13 | 26 | GT   | 16 | 6  |
| 299535 | 58 | 686211 | 686240 | 2 | 15 | 30 | GT   | 19 | 13 |
| 299536 | 58 | 686912 | 686935 | 3 | 8  | 24 | TCC  | 16 | 5  |
| 299537 | 58 | 689155 | 689206 | 2 | 26 | 52 | TG   | 9  | 10 |
| 299540 | 58 | 690592 | 690615 | 2 | 12 | 24 | GT   | 14 | 15 |
| 299541 | 58 | 691514 | 691535 | 2 | 11 | 22 | GT   | 22 | 5  |
| 299542 | 58 | 692681 | 692698 | 2 | 9  | 18 | AG   | 17 | 3  |
| 299544 | 58 | 696629 | 696664 | 2 | 18 | 36 | AC   | 12 | 15 |
| 299547 | 58 | 697447 | 697472 | 2 | 13 | 26 | TG   | 12 | 8  |
| 299550 | 58 | 704493 | 704506 | 2 | 7  | 14 | GT   | 18 | 5  |
| 299551 | 58 | 706484 | 706504 | 3 | 7  | 21 | CTC  | 25 | 6  |
| 299554 | 58 | 709980 | 709991 | 2 | 6  | 12 | AC   | 25 | 3  |
| 299556 | 58 | 712462 | 712475 | 2 | 7  | 14 | CT   | 23 | 7  |
| 299558 | 58 | 714256 | 714269 | 2 | 7  | 14 | AC   | 32 | 4  |
| 299559 | 58 | 714773 | 714798 | 2 | 13 | 26 | GT   | 17 | 6  |
| 299560 | 58 | 718523 | 718534 | 2 | 6  | 12 | CA   | 30 | 10 |
| 299561 | 58 | 719481 | 719508 | 2 | 14 | 28 | AC   | 10 | 9  |
| 299562 | 58 | 719964 | 719999 | 2 | 18 | 36 | TG   | 13 | 9  |
| 299563 | 58 | 722096 | 722111 | 2 | 8  | 16 | CA   | 13 | 13 |
| 299564 | 58 | 723147 | 723160 | 2 | 7  | 14 | TG   | 23 | 10 |
| 299565 | 58 | 723279 | 723293 | 3 | 5  | 15 | AAC  | 24 | 3  |
| 299566 | 58 | 723355 | 723372 | 2 | 9  | 18 | AC   | 18 | 5  |
| 299568 | 58 | 729292 | 729309 | 3 | 6  | 18 | TCC  | 28 | 3  |
| 299570 | 58 | 729838 | 729853 | 4 | 4  | 16 | GGAC | 25 | 4  |
| 299571 | 58 | 730055 | 730068 | 2 | 7  | 14 | CT   | 23 | 4  |
| 299572 | 58 | 730209 | 730226 | 2 | 9  | 18 | AG   | 23 | 5  |
| 299574 | 58 | 731275 | 731302 | 2 | 14 | 28 | CA   | 18 | 11 |
| 299575 | 58 | 731695 | 731706 | 2 | 6  | 12 | GT   | 21 | 3  |
| 299576 | 58 | 732431 | 732444 | 2 | 7  | 14 | GT   | 14 | 9  |
| 299577 | 58 | 732864 | 732881 | 2 | 9  | 18 | TG   | 25 | 24 |
| 299578 | 58 | 733008 | 733022 | 3 | 5  | 15 | TCC  | 29 | 4  |
| 299580 | 58 | 733671 | 733686 | 2 | 8  | 16 | GT   | 22 | 8  |
| 299581 | 58 | 735186 | 735199 | 2 | 7  | 14 | AT   | 23 | 7  |
| 299582 | 58 | 735657 | 735674 | 3 | 6  | 18 | GAG  | 23 | 4  |
| 299583 | 58 | 736362 | 736377 | 2 | 8  | 16 | AC   | 33 | 4  |
| 299586 | 58 | 738598 | 738609 | 2 | 6  | 12 | CT   | 29 | 4  |
| 299587 | 58 | 738687 | 738702 | 4 | 4  | 16 | GGCC | 25 | 5  |

|        |    |        |        |   |    |    |      |    |    |
|--------|----|--------|--------|---|----|----|------|----|----|
| 299591 | 58 | 744068 | 744091 | 4 | 6  | 24 | TCCT | 17 | 4  |
| 299592 | 58 | 744423 | 744434 | 2 | 6  | 12 | TG   | 22 | 6  |
| 299593 | 58 | 744533 | 744544 | 2 | 6  | 12 | AC   | 24 | 3  |
| 299594 | 58 | 746168 | 746183 | 2 | 8  | 16 | CA   | 23 | 8  |
| 299595 | 58 | 746379 | 746396 | 2 | 9  | 18 | GT   | 25 | 11 |
| 299596 | 58 | 748892 | 748905 | 2 | 7  | 14 | AG   | 34 | 3  |
| 299597 | 58 | 749080 | 749113 | 2 | 17 | 34 | AC   | 29 | 8  |
| 299598 | 58 | 750178 | 750189 | 2 | 6  | 12 | GA   | 30 | 3  |
| 299599 | 58 | 751855 | 751868 | 2 | 7  | 14 | GT   | 24 | 5  |
| 299601 | 58 | 762555 | 762575 | 3 | 7  | 21 | TTA  | 9  | 6  |
| 299604 | 58 | 763284 | 763301 | 2 | 9  | 18 | TG   | 20 | 11 |
| 299605 | 58 | 763303 | 763314 | 2 | 6  | 12 | GT   | 18 | 11 |
| 299606 | 58 | 763492 | 763513 | 2 | 11 | 22 | TG   | 15 | 6  |
| 299607 | 58 | 763831 | 763851 | 3 | 7  | 21 | ACA  | 26 | 7  |
| 299608 | 58 | 764106 | 764135 | 2 | 15 | 30 | GT   | 8  | 11 |
| 299609 | 58 | 765325 | 765342 | 2 | 9  | 18 | GT   | 27 | 7  |
| 299610 | 58 | 765491 | 765506 | 2 | 8  | 16 | AC   | 16 | 8  |
| 299611 | 58 | 765510 | 765523 | 2 | 7  | 14 | CA   | 10 | 6  |
| 299612 | 58 | 766784 | 766822 | 3 | 13 | 39 | AAG  | 24 | 15 |
| 299614 | 58 | 767045 | 767060 | 2 | 8  | 16 | AC   | 27 | 3  |
| 299615 | 58 | 767173 | 767208 | 4 | 9  | 36 | TCAT | 29 | 7  |
| 299616 | 58 | 768120 | 768143 | 2 | 12 | 24 | AC   | 20 | 10 |
| 299617 | 58 | 768361 | 768396 | 2 | 18 | 36 | AC   | 15 | 10 |
| 299625 | 58 | 772895 | 772912 | 2 | 9  | 18 | TG   | 19 | 7  |
| 299626 | 58 | 773107 | 773120 | 2 | 7  | 14 | GT   | 21 | 4  |
| 299629 | 58 | 777650 | 777673 | 2 | 12 | 24 | GT   | 22 | 7  |
| 299630 | 58 | 777792 | 777817 | 2 | 13 | 26 | CA   | 9  | 6  |
| 299632 | 58 | 777954 | 777975 | 2 | 11 | 22 | AC   | 13 | 8  |
| 299633 | 58 | 778062 | 778077 | 2 | 8  | 16 | TG   | 16 | 4  |
| 299634 | 58 | 778207 | 778218 | 2 | 6  | 12 | CA   | 11 | 6  |
| 299635 | 58 | 778221 | 778232 | 2 | 6  | 12 | CA   | 18 | 14 |
| 299637 | 58 | 779067 | 779082 | 2 | 8  | 16 | CA   | 15 | 3  |
| 299638 | 58 | 779114 | 779131 | 3 | 6  | 18 | CCA  | 34 | 4  |
| 299640 | 58 | 779850 | 779861 | 2 | 6  | 12 | AC   | 29 | 5  |
| 299641 | 58 | 780569 | 780595 | 3 | 9  | 27 | AAG  | 11 | 5  |
| 299643 | 58 | 781109 | 781123 | 3 | 5  | 15 | CTG  | 17 | 3  |
| 299644 | 58 | 781166 | 781183 | 3 | 6  | 18 | TCC  | 18 | 4  |
| 299645 | 58 | 781248 | 781259 | 2 | 6  | 12 | AC   | 18 | 7  |
| 299646 | 58 | 781262 | 781277 | 2 | 8  | 16 | AC   | 12 | 5  |
| 299647 | 58 | 782407 | 782422 | 2 | 8  | 16 | GA   | 22 | 6  |
| 299648 | 58 | 783044 | 783055 | 2 | 6  | 12 | AC   | 22 | 7  |
| 299649 | 58 | 783244 | 783259 | 2 | 8  | 16 | CA   | 17 | 3  |
| 299652 | 58 | 784962 | 784976 | 3 | 5  | 15 | GGA  | 17 | 7  |
| 299653 | 58 | 785732 | 785743 | 2 | 6  | 12 | AC   | 26 | 3  |
| 299654 | 58 | 785929 | 785950 | 2 | 11 | 22 | CA   | 12 | 4  |
| 299656 | 58 | 787520 | 787551 | 2 | 16 | 32 | TG   | 15 | 10 |
| 299657 | 58 | 787681 | 787708 | 2 | 14 | 28 | GT   | 6  | 5  |
| 299658 | 58 | 787731 | 787758 | 2 | 14 | 28 | GT   | 6  | 4  |
| 299659 | 58 | 788165 | 788190 | 2 | 13 | 26 | GT   | 13 | 8  |
| 299662 | 58 | 788492 | 788517 | 2 | 13 | 26 | GT   | 18 | 10 |
| 299663 | 58 | 788720 | 788745 | 2 | 13 | 26 | TG   | 18 | 7  |

|        |    |        |        |   |    |    |      |    |    |
|--------|----|--------|--------|---|----|----|------|----|----|
| 299664 | 58 | 788827 | 788856 | 2 | 15 | 30 | TG   | 11 | 7  |
| 299665 | 58 | 789268 | 789299 | 2 | 16 | 32 | AC   | 17 | 11 |
| 299667 | 58 | 792184 | 792209 | 2 | 13 | 26 | TG   | 13 | 11 |
| 299669 | 58 | 792813 | 792840 | 2 | 14 | 28 | GT   | 14 | 8  |
| 299670 | 58 | 792989 | 793006 | 3 | 6  | 18 | GAG  | 13 | 4  |
| 299671 | 58 | 793578 | 793607 | 2 | 15 | 30 | TG   | 21 | 13 |
| 299672 | 58 | 793803 | 793824 | 2 | 11 | 22 | AC   | 14 | 6  |
| 299673 | 58 | 793862 | 793873 | 2 | 6  | 12 | CA   | 27 | 5  |
| 299674 | 58 | 793962 | 793987 | 2 | 13 | 26 | CA   | 20 | 10 |
| 299676 | 58 | 794226 | 794249 | 2 | 12 | 24 | CA   | 6  | 8  |
| 299677 | 58 | 794407 | 794420 | 2 | 7  | 14 | GT   | 16 | 5  |
| 299679 | 58 | 795425 | 795450 | 2 | 13 | 26 | CA   | 19 | 10 |
| 299680 | 58 | 795709 | 795730 | 2 | 11 | 22 | CT   | 28 | 5  |
| 299681 | 58 | 796059 | 796088 | 2 | 15 | 30 | AC   | 11 | 11 |
| 299683 | 58 | 798120 | 798161 | 2 | 21 | 42 | CA   | 9  | 12 |
| 299684 | 58 | 798458 | 798475 | 3 | 6  | 18 | GAA  | 20 | 6  |
| 299687 | 58 | 800207 | 800224 | 2 | 9  | 18 | TG   | 22 | 5  |
| 299688 | 58 | 801298 | 801324 | 3 | 9  | 27 | AAC  | 25 | 7  |
| 299689 | 58 | 802811 | 802830 | 2 | 10 | 20 | AC   | 20 | 9  |
| 299691 | 58 | 804412 | 804449 | 2 | 19 | 38 | GT   | 9  | 6  |
| 299692 | 58 | 804586 | 804631 | 2 | 23 | 46 | AC   | 10 | 10 |
| 299696 | 58 | 807650 | 807673 | 2 | 12 | 24 | GT   | 12 | 8  |
| 299697 | 58 | 809747 | 809758 | 2 | 6  | 12 | CA   | 31 | 6  |
| 299698 | 58 | 811284 | 811311 | 2 | 14 | 28 | GT   | 12 | 8  |
| 299704 | 58 | 816858 | 816869 | 2 | 6  | 12 | GA   | 25 | 17 |
| 299707 | 58 | 817621 | 817641 | 3 | 7  | 21 | GGA  | 21 | 10 |
| 299716 | 58 | 819413 | 819428 | 4 | 4  | 16 | CATC | 28 | 4  |
| 299717 | 58 | 819631 | 819648 | 3 | 6  | 18 | AGA  | 20 | 8  |
| 299719 | 58 | 821142 | 821157 | 2 | 8  | 16 | GT   | 23 | 5  |
| 299723 | 58 | 826433 | 826462 | 3 | 10 | 30 | GCT  | 27 | 6  |
| 299725 | 58 | 830215 | 830234 | 2 | 10 | 20 | AC   | 18 | 3  |
| 299737 | 58 | 832048 | 832069 | 2 | 11 | 22 | AC   | 7  | 5  |
| 299740 | 58 | 832295 | 832318 | 2 | 12 | 24 | CA   | 16 | 8  |
| 299741 | 58 | 833869 | 833892 | 2 | 12 | 24 | CA   | 19 | 8  |
| 299745 | 58 | 835020 | 835059 | 2 | 20 | 40 | GA   | 7  | 5  |
| 299748 | 58 | 839170 | 839191 | 2 | 11 | 22 | CA   | 22 | 8  |
| 299750 | 58 | 841770 | 841797 | 2 | 14 | 28 | TG   | 13 | 12 |
| 299752 | 58 | 841967 | 841982 | 2 | 8  | 16 | AC   | 20 | 8  |
| 299753 | 58 | 842516 | 842527 | 2 | 6  | 12 | GT   | 25 | 6  |
| 299756 | 58 | 849830 | 849844 | 3 | 5  | 15 | CTC  | 26 | 3  |
| 299757 | 58 | 850658 | 850675 | 2 | 9  | 18 | AG   | 30 | 8  |
| 299759 | 58 | 853774 | 853789 | 2 | 8  | 16 | AC   | 11 | 13 |
| 299761 | 58 | 858999 | 859032 | 2 | 17 | 34 | AC   | 12 | 8  |
| 299765 | 58 | 863745 | 863764 | 2 | 10 | 20 | TC   | 13 | 5  |
| 299772 | 58 | 894849 | 894876 | 2 | 14 | 28 | GT   | 16 | 10 |
| 299773 | 58 | 896137 | 896152 | 4 | 4  | 16 | AAAT | 25 | 5  |
| 299775 | 58 | 901274 | 901291 | 2 | 9  | 18 | AC   | 21 | 14 |
| 299778 | 58 | 908503 | 908520 | 2 | 9  | 18 | TG   | 18 | 10 |
| 299779 | 58 | 908618 | 908633 | 2 | 8  | 16 | TG   | 21 | 7  |
| 299783 | 58 | 913484 | 913495 | 2 | 6  | 12 | TG   | 21 | 3  |
| 299784 | 58 | 914945 | 914965 | 3 | 7  | 21 | TGA  | 18 | 8  |

|        |    |         |         |   |    |    |      |    |    |
|--------|----|---------|---------|---|----|----|------|----|----|
| 299790 | 58 | 931170  | 931195  | 2 | 13 | 26 | GT   | 13 | 12 |
| 299800 | 58 | 953471  | 953488  | 3 | 6  | 18 | CTC  | 9  | 4  |
| 299801 | 58 | 953629  | 953648  | 2 | 10 | 20 | GT   | 22 | 7  |
| 299803 | 58 | 953744  | 953757  | 2 | 7  | 14 | GT   | 25 | 6  |
| 299809 | 58 | 957904  | 957915  | 2 | 6  | 12 | TG   | 29 | 7  |
| 299810 | 58 | 958724  | 958743  | 2 | 10 | 20 | GT   | 13 | 10 |
| 299817 | 58 | 965643  | 965658  | 2 | 8  | 16 | TG   | 24 | 5  |
| 299821 | 58 | 968789  | 968826  | 2 | 19 | 38 | CA   | 8  | 12 |
| 299822 | 58 | 969000  | 969053  | 2 | 27 | 54 | TG   | 6  | 10 |
| 299823 | 58 | 969639  | 969670  | 2 | 16 | 32 | GT   | 11 | 10 |
| 299825 | 58 | 971637  | 971676  | 2 | 20 | 40 | TG   | 7  | 14 |
| 299829 | 58 | 974974  | 974987  | 2 | 7  | 14 | TG   | 14 | 10 |
| 299830 | 58 | 975126  | 975159  | 2 | 17 | 34 | GT   | 10 | 11 |
| 299831 | 58 | 975209  | 975238  | 2 | 15 | 30 | GT   | 11 | 8  |
| 299833 | 58 | 977850  | 977875  | 2 | 13 | 26 | AC   | 12 | 9  |
| 299835 | 58 | 978043  | 978082  | 2 | 20 | 40 | AC   | 19 | 19 |
| 299838 | 58 | 983333  | 983344  | 2 | 6  | 12 | GT   | 13 | 7  |
| 299839 | 58 | 983347  | 983360  | 2 | 7  | 14 | GT   | 13 | 6  |
| 299842 | 58 | 984529  | 984540  | 2 | 6  | 12 | AT   | 35 | 3  |
| 299852 | 58 | 996167  | 996190  | 4 | 6  | 24 | TATC | 24 | 5  |
| 299854 | 58 | 997693  | 997725  | 3 | 11 | 33 | AAT  | 6  | 5  |
| 299857 | 58 | 1008964 | 1008989 | 2 | 13 | 26 | GT   | 23 | 15 |
| 299864 | 58 | 1020882 | 1020899 | 3 | 6  | 18 | TCC  | 19 | 9  |
| 299866 | 58 | 1022321 | 1022350 | 2 | 15 | 30 | TG   | 18 | 13 |
| 299869 | 58 | 1022743 | 1022770 | 2 | 14 | 28 | TG   | 15 | 10 |
| 299871 | 58 | 1023548 | 1023563 | 2 | 8  | 16 | CT   | 12 | 4  |
| 299872 | 58 | 1024457 | 1024480 | 2 | 12 | 24 | TG   | 19 | 4  |
| 299884 | 58 | 1033059 | 1033076 | 2 | 9  | 18 | AC   | 24 | 5  |
| 299887 | 58 | 1033665 | 1033676 | 2 | 6  | 12 | GA   | 12 | 5  |
| 299891 | 58 | 1034337 | 1034350 | 2 | 7  | 14 | CT   | 18 | 10 |
| 299892 | 58 | 1034351 | 1034368 | 2 | 9  | 18 | CA   | 18 | 9  |
| 299893 | 58 | 1034631 | 1034654 | 2 | 12 | 24 | TG   | 15 | 8  |
| 299895 | 58 | 1035345 | 1035360 | 2 | 8  | 16 | TG   | 21 | 4  |
| 299898 | 58 | 1040877 | 1040908 | 2 | 16 | 32 | GT   | 12 | 11 |
| 299899 | 58 | 1041080 | 1041093 | 2 | 7  | 14 | GT   | 22 | 4  |
| 299900 | 58 | 1041258 | 1041279 | 2 | 11 | 22 | GT   | 17 | 5  |
| 299901 | 58 | 1043564 | 1043591 | 2 | 14 | 28 | GT   | 13 | 11 |
| 299902 | 58 | 1043703 | 1043734 | 2 | 16 | 32 | TG   | 13 | 10 |
| 299903 | 58 | 1043892 | 1043915 | 2 | 12 | 24 | AC   | 10 | 7  |
| 299904 | 58 | 1044958 | 1044975 | 2 | 9  | 18 | CA   | 28 | 7  |
| 299907 | 58 | 1045890 | 1045919 | 2 | 15 | 30 | CA   | 11 | 11 |
| 299909 | 58 | 1048824 | 1048859 | 2 | 18 | 36 | AC   | 15 | 5  |
| 299911 | 58 | 1049913 | 1049924 | 2 | 6  | 12 | AT   | 25 | 6  |
| 299912 | 58 | 1051292 | 1051315 | 2 | 12 | 24 | TG   | 11 | 12 |
| 299913 | 58 | 1053795 | 1053830 | 2 | 18 | 36 | TG   | 8  | 6  |
| 299916 | 58 | 1056653 | 1056690 | 2 | 19 | 38 | TC   | 14 | 13 |
| 299917 | 58 | 1057067 | 1057086 | 2 | 10 | 20 | AC   | 23 | 6  |
| 299918 | 58 | 1057414 | 1057437 | 2 | 12 | 24 | CT   | 22 | 7  |
| 299920 | 58 | 1061026 | 1061053 | 2 | 14 | 28 | GT   | 17 | 12 |
| 299921 | 58 | 1062321 | 1062346 | 2 | 13 | 26 | TG   | 10 | 10 |
| 299925 | 58 | 1067129 | 1067152 | 2 | 12 | 24 | GA   | 19 | 9  |

|        |    |         |         |   |    |    |     |    |    |
|--------|----|---------|---------|---|----|----|-----|----|----|
| 299926 | 58 | 1067361 | 1067378 | 3 | 6  | 18 | GGT | 21 | 5  |
| 299927 | 58 | 1067881 | 1067898 | 2 | 9  | 18 | CA  | 26 | 5  |
| 299932 | 58 | 1069852 | 1069869 | 2 | 9  | 18 | TG  | 27 | 5  |
| 299933 | 58 | 1069912 | 1069931 | 2 | 10 | 20 | TG  | 17 | 16 |
| 299934 | 58 | 1069933 | 1069946 | 2 | 7  | 14 | GT  | 11 | 10 |
| 299935 | 58 | 1070111 | 1070136 | 2 | 13 | 26 | TG  | 14 | 10 |
| 299938 | 58 | 1070897 | 1070910 | 2 | 7  | 14 | AC  | 14 | 12 |
| 299939 | 58 | 1073378 | 1073425 | 2 | 24 | 48 | AC  | 13 | 10 |
| 299940 | 58 | 1073863 | 1073876 | 2 | 7  | 14 | TA  | 21 | 8  |
| 299942 | 58 | 1079034 | 1079057 | 2 | 12 | 24 | CA  | 19 | 9  |
| 299946 | 58 | 1082683 | 1082700 | 3 | 6  | 18 | GGA | 21 | 11 |
| 299948 | 58 | 1082934 | 1082947 | 2 | 7  | 14 | CT  | 15 | 7  |
| 299951 | 58 | 1088271 | 1088296 | 2 | 13 | 26 | CT  | 22 | 6  |
| 299952 | 58 | 1088566 | 1088591 | 2 | 13 | 26 | TG  | 12 | 11 |
| 299953 | 58 | 1090888 | 1090935 | 2 | 24 | 48 | CA  | 15 | 11 |
| 299956 | 58 | 1093590 | 1093607 | 3 | 6  | 18 | GAG | 19 | 5  |
| 299957 | 58 | 1093747 | 1093770 | 2 | 12 | 24 | AC  | 11 | 8  |
| 299958 | 58 | 1093920 | 1093935 | 2 | 8  | 16 | TG  | 20 | 9  |
| 299959 | 58 | 1094039 | 1094058 | 2 | 10 | 20 | TG  | 17 | 6  |
| 299960 | 58 | 1094338 | 1094359 | 2 | 11 | 22 | CA  | 15 | 8  |
| 299963 | 58 | 1096307 | 1096320 | 2 | 7  | 14 | GT  | 16 | 12 |
| 299966 | 58 | 1099157 | 1099176 | 2 | 10 | 20 | CA  | 24 | 12 |
| 299968 | 58 | 1099654 | 1099679 | 2 | 13 | 26 | TG  | 14 | 11 |
| 299969 | 58 | 1099866 | 1099899 | 2 | 17 | 34 | AC  | 8  | 7  |
| 299971 | 58 | 1102158 | 1102171 | 2 | 7  | 14 | AC  | 26 | 5  |
| 299972 | 58 | 1102342 | 1102371 | 2 | 15 | 30 | CA  | 18 | 13 |
| 299973 | 58 | 1102646 | 1102663 | 2 | 9  | 18 | TA  | 9  | 9  |
| 299974 | 58 | 1104453 | 1104478 | 2 | 13 | 26 | CA  | 20 | 6  |
| 299975 | 58 | 1104775 | 1104792 | 2 | 9  | 18 | AC  | 18 | 6  |
| 299976 | 58 | 1105001 | 1105022 | 2 | 11 | 22 | AG  | 22 | 9  |
| 299977 | 58 | 1105163 | 1105180 | 3 | 6  | 18 | GAG | 20 | 4  |
| 299978 | 58 | 1105481 | 1105498 | 2 | 9  | 18 | TC  | 32 | 4  |
| 299980 | 58 | 1105890 | 1105913 | 2 | 12 | 24 | CA  | 17 | 5  |
| 299984 | 58 | 1110512 | 1110535 | 3 | 8  | 24 | TCC | 21 | 6  |
| 299990 | 58 | 1115314 | 1115337 | 2 | 12 | 24 | GA  | 14 | 6  |
| 299993 | 58 | 1118388 | 1118405 | 3 | 6  | 18 | GAG | 22 | 4  |
| 299994 | 58 | 1118582 | 1118597 | 2 | 8  | 16 | CT  | 15 | 9  |
| 299996 | 58 | 1119393 | 1119404 | 2 | 6  | 12 | CA  | 15 | 9  |
| 299997 | 58 | 1119406 | 1119417 | 2 | 6  | 12 | CA  | 17 | 9  |
| 299998 | 58 | 1121590 | 1121619 | 2 | 15 | 30 | TG  | 16 | 12 |
| 299999 | 58 | 1124424 | 1124457 | 2 | 17 | 34 | GT  | 7  | 9  |
| 300008 | 58 | 1129721 | 1129744 | 2 | 12 | 24 | CA  | 14 | 4  |
| 300009 | 58 | 1131466 | 1131489 | 3 | 8  | 24 | CTC | 14 | 7  |
| 300010 | 58 | 1131730 | 1131749 | 2 | 10 | 20 | TC  | 23 | 4  |
| 300014 | 58 | 1136871 | 1136888 | 3 | 6  | 18 | TGA | 29 | 5  |
| 300020 | 58 | 1138370 | 1138409 | 2 | 20 | 40 | AC  | 11 | 12 |
| 300021 | 58 | 1139922 | 1139933 | 2 | 6  | 12 | TG  | 21 | 7  |
| 300022 | 58 | 1139935 | 1139952 | 2 | 9  | 18 | GT  | 25 | 8  |
| 300023 | 58 | 1140084 | 1140095 | 2 | 6  | 12 | CT  | 30 | 3  |
| 300027 | 58 | 1148229 | 1148248 | 2 | 10 | 20 | GT  | 16 | 4  |
| 300033 | 58 | 1150601 | 1150646 | 2 | 23 | 46 | AC  | 8  | 8  |

|        |    |         |         |   |    |    |      |    |    |
|--------|----|---------|---------|---|----|----|------|----|----|
| 300034 | 58 | 1151014 | 1151029 | 2 | 8  | 16 | TA   | 14 | 7  |
| 300035 | 58 | 1153987 | 1154026 | 2 | 20 | 40 | GT   | 13 | 11 |
| 300036 | 58 | 1155158 | 1155187 | 2 | 15 | 30 | TG   | 26 | 9  |
| 300037 | 58 | 1155761 | 1155774 | 2 | 7  | 14 | AC   | 19 | 11 |
| 300038 | 58 | 1156021 | 1156041 | 3 | 7  | 21 | GGA  | 9  | 7  |
| 300044 | 58 | 1164462 | 1164479 | 2 | 9  | 18 | GT   | 20 | 12 |
| 300045 | 58 | 1165585 | 1165596 | 2 | 6  | 12 | CA   | 13 | 3  |
| 300049 | 58 | 1167519 | 1167536 | 2 | 9  | 18 | TG   | 11 | 11 |
| 300051 | 58 | 1169417 | 1169436 | 2 | 10 | 20 | CT   | 18 | 3  |
| 300054 | 58 | 1180954 | 1180974 | 3 | 7  | 21 | CAG  | 26 | 6  |
| 300064 | 58 | 1185151 | 1185164 | 2 | 7  | 14 | TA   | 12 | 8  |
| 300066 | 58 | 1187822 | 1187841 | 2 | 10 | 20 | GT   | 16 | 7  |
| 300067 | 58 | 1191901 | 1191924 | 3 | 8  | 24 | GTT  | 22 | 7  |
| 300079 | 58 | 1199395 | 1199414 | 4 | 5  | 20 | AAAT | 26 | 5  |
| 300080 | 58 | 1202160 | 1202171 | 2 | 6  | 12 | AC   | 25 | 4  |
| 300081 | 58 | 1210294 | 1210317 | 4 | 6  | 24 | GTTA | 20 | 3  |
| 300082 | 58 | 1210812 | 1210838 | 3 | 9  | 27 | AGA  | 13 | 7  |
| 300089 | 58 | 1228846 | 1228875 | 2 | 15 | 30 | AC   | 15 | 14 |
| 300090 | 58 | 1229436 | 1229447 | 2 | 6  | 12 | AC   | 30 | 3  |
| 300101 | 58 | 1250306 | 1250321 | 2 | 8  | 16 | TG   | 19 | 10 |
| 300105 | 58 | 1260536 | 1260563 | 2 | 14 | 28 | TG   | 25 | 10 |
| 300106 | 58 | 1260595 | 1260608 | 2 | 7  | 14 | AC   | 29 | 3  |
| 300107 | 58 | 1260942 | 1260979 | 2 | 19 | 38 | TG   | 10 | 9  |
| 300112 | 58 | 1266896 | 1266915 | 2 | 10 | 20 | TC   | 21 | 3  |
| 300113 | 58 | 1268987 | 1269004 | 3 | 6  | 18 | AAC  | 22 | 3  |
| 300117 | 58 | 1274350 | 1274383 | 2 | 17 | 34 | AC   | 8  | 7  |
| 300119 | 58 | 1276364 | 1276377 | 2 | 7  | 14 | CT   | 26 | 7  |
| 300121 | 58 | 1279752 | 1279767 | 2 | 8  | 16 | TG   | 25 | 5  |
| 300123 | 58 | 1283696 | 1283722 | 3 | 9  | 27 | GGA  | 11 | 4  |
| 300127 | 58 | 1284647 | 1284658 | 2 | 6  | 12 | GA   | 24 | 6  |
| 300131 | 58 | 1290257 | 1290274 | 2 | 9  | 18 | AG   | 22 | 8  |
| 300132 | 58 | 1290403 | 1290434 | 2 | 16 | 32 | AC   | 11 | 7  |
| 300133 | 58 | 1290566 | 1290583 | 3 | 6  | 18 | TCT  | 20 | 9  |
| 300139 | 58 | 1292771 | 1292792 | 2 | 11 | 22 | CA   | 9  | 8  |
| 300141 | 58 | 1294385 | 1294402 | 2 | 9  | 18 | AT   | 11 | 5  |
| 300144 | 58 | 1294713 | 1294738 | 2 | 13 | 26 | TG   | 6  | 4  |
| 300146 | 58 | 1295890 | 1295928 | 3 | 13 | 39 | GAG  | 22 | 8  |
| 300147 | 58 | 1297260 | 1297277 | 2 | 9  | 18 | GT   | 16 | 6  |
| 300153 | 58 | 1301786 | 1301813 | 2 | 14 | 28 | TG   | 17 | 9  |
| 300154 | 58 | 1303761 | 1303775 | 3 | 5  | 15 | GAT  | 18 | 6  |
| 300156 | 58 | 1305312 | 1305333 | 2 | 11 | 22 | TG   | 25 | 7  |
| 300161 | 58 | 1308925 | 1308958 | 2 | 17 | 34 | CT   | 14 | 8  |
| 300165 | 58 | 1309364 | 1309375 | 2 | 6  | 12 | CA   | 14 | 3  |
| 300166 | 58 | 1309843 | 1309862 | 2 | 10 | 20 | GT   | 6  | 9  |
| 300171 | 58 | 1314356 | 1314367 | 2 | 6  | 12 | TC   | 28 | 3  |
| 300172 | 58 | 1314709 | 1314726 | 3 | 6  | 18 | CAG  | 26 | 3  |
| 300174 | 58 | 1317414 | 1317431 | 2 | 9  | 18 | TG   | 25 | 4  |
| 300176 | 58 | 1319765 | 1319776 | 2 | 6  | 12 | GT   | 22 | 4  |
| 300178 | 58 | 1325474 | 1325499 | 2 | 13 | 26 | GT   | 20 | 7  |
| 300179 | 58 | 1325670 | 1325703 | 2 | 17 | 34 | TG   | 12 | 8  |
| 300180 | 58 | 1326758 | 1326769 | 2 | 6  | 12 | GA   | 27 | 5  |

|        |    |         |         |   |    |    |     |    |    |
|--------|----|---------|---------|---|----|----|-----|----|----|
| 300181 | 58 | 1326946 | 1326969 | 2 | 12 | 24 | TC  | 16 | 7  |
| 300182 | 58 | 1327319 | 1327350 | 2 | 16 | 32 | TG  | 13 | 9  |
| 300187 | 58 | 1333308 | 1333321 | 2 | 7  | 14 | TG  | 23 | 5  |
| 300188 | 58 | 1333742 | 1333769 | 2 | 14 | 28 | GT  | 11 | 8  |
| 300189 | 58 | 1333860 | 1333871 | 2 | 6  | 12 | CA  | 29 | 5  |
| 300190 | 58 | 1334259 | 1334282 | 3 | 8  | 24 | GAT | 16 | 6  |
| 300193 | 58 | 1335726 | 1335761 | 3 | 12 | 36 | CCT | 8  | 7  |
| 300196 | 58 | 1338451 | 1338470 | 2 | 10 | 20 | AG  | 19 | 14 |
| 300197 | 58 | 1338834 | 1338853 | 2 | 10 | 20 | GT  | 18 | 4  |
| 300198 | 58 | 1339199 | 1339230 | 2 | 16 | 32 | AC  | 8  | 11 |
| 300199 | 58 | 1339550 | 1339569 | 2 | 10 | 20 | CA  | 14 | 5  |
| 300201 | 58 | 1346902 | 1346931 | 2 | 15 | 30 | GT  | 9  | 7  |
| 300203 | 58 | 1348922 | 1348936 | 3 | 5  | 15 | CTC | 27 | 5  |
| 300207 | 58 | 1352560 | 1352571 | 2 | 6  | 12 | GA  | 25 | 4  |
| 300214 | 58 | 1355177 | 1355188 | 2 | 6  | 12 | AC  | 22 | 3  |
| 300216 | 58 | 1356525 | 1356538 | 2 | 7  | 14 | TG  | 22 | 7  |
| 300217 | 58 | 1356540 | 1356553 | 2 | 7  | 14 | GT  | 10 | 3  |
| 300219 | 58 | 1357758 | 1357775 | 3 | 6  | 18 | TTA | 23 | 6  |
| 300221 | 58 | 1359032 | 1359073 | 3 | 14 | 42 | TCA | 23 | 8  |
| 300226 | 58 | 1368125 | 1368138 | 2 | 7  | 14 | TG  | 12 | 5  |
| 300228 | 58 | 1373014 | 1373031 | 2 | 9  | 18 | GA  | 18 | 4  |
| 300232 | 58 | 1376829 | 1376848 | 2 | 10 | 20 | TG  | 19 | 8  |
| 300235 | 58 | 1382493 | 1382522 | 2 | 15 | 30 | GT  | 10 | 6  |
| 300236 | 58 | 1382606 | 1382625 | 2 | 10 | 20 | AC  | 18 | 14 |
| 300238 | 58 | 1385211 | 1385236 | 2 | 13 | 26 | TG  | 9  | 10 |
| 300239 | 58 | 1385386 | 1385417 | 2 | 16 | 32 | GT  | 17 | 9  |
| 300242 | 58 | 1390268 | 1390287 | 2 | 10 | 20 | TC  | 24 | 13 |
| 300243 | 58 | 1390574 | 1390603 | 2 | 15 | 30 | AC  | 14 | 10 |
| 300244 | 58 | 1393147 | 1393167 | 3 | 7  | 21 | AGG | 34 | 8  |
| 300253 | 58 | 1395991 | 1396010 | 2 | 10 | 20 | GT  | 7  | 6  |
| 300256 | 58 | 1400875 | 1400892 | 2 | 9  | 18 | AG  | 18 | 3  |
| 300257 | 58 | 1401077 | 1401092 | 2 | 8  | 16 | GT  | 23 | 5  |
| 300259 | 58 | 1401410 | 1401427 | 2 | 9  | 18 | GT  | 22 | 3  |
| 300261 | 58 | 1402690 | 1402710 | 3 | 7  | 21 | GCT | 18 | 4  |
| 300263 | 58 | 1406413 | 1406432 | 2 | 10 | 20 | GT  | 22 | 7  |
| 300265 | 58 | 1408939 | 1408952 | 2 | 7  | 14 | TG  | 26 | 3  |
| 300270 | 58 | 1413639 | 1413660 | 2 | 11 | 22 | CA  | 14 | 6  |
| 300272 | 58 | 1419000 | 1419027 | 2 | 14 | 28 | GT  | 7  | 7  |
| 300276 | 58 | 1423438 | 1423455 | 2 | 9  | 18 | AC  | 15 | 4  |
| 300277 | 58 | 1426573 | 1426604 | 2 | 16 | 32 | GT  | 11 | 11 |
| 300279 | 58 | 1426982 | 1426996 | 3 | 5  | 15 | GAG | 29 | 4  |
| 300281 | 58 | 1430431 | 1430444 | 2 | 7  | 14 | GT  | 25 | 5  |
| 300282 | 58 | 1430930 | 1430943 | 2 | 7  | 14 | TG  | 24 | 4  |
| 300284 | 58 | 1431513 | 1431534 | 2 | 11 | 22 | AC  | 17 | 5  |
| 300288 | 58 | 1433092 | 1433111 | 2 | 10 | 20 | GT  | 17 | 8  |
| 300298 | 58 | 1441524 | 1441541 | 3 | 6  | 18 | CTC | 23 | 3  |
| 300299 | 58 | 1442359 | 1442378 | 2 | 10 | 20 | GT  | 28 | 6  |
| 300302 | 58 | 1444055 | 1444072 | 2 | 9  | 18 | TG  | 17 | 6  |
| 300304 | 58 | 1444215 | 1444264 | 2 | 25 | 50 | AC  | 7  | 9  |
| 300306 | 58 | 1447564 | 1447577 | 2 | 7  | 14 | AG  | 18 | 5  |
| 300311 | 58 | 1448219 | 1448244 | 2 | 13 | 26 | CT  | 18 | 6  |

|        |    |         |         |   |    |    |      |    |    |
|--------|----|---------|---------|---|----|----|------|----|----|
| 300312 | 58 | 1450711 | 1450736 | 2 | 13 | 26 | GT   | 14 | 13 |
| 300313 | 58 | 1451606 | 1451625 | 2 | 10 | 20 | GT   | 18 | 9  |
| 300314 | 58 | 1452487 | 1452524 | 2 | 19 | 38 | TG   | 7  | 9  |
| 300315 | 58 | 1453516 | 1453527 | 2 | 6  | 12 | CA   | 23 | 6  |
| 300317 | 58 | 1455557 | 1455588 | 2 | 16 | 32 | TG   | 14 | 12 |
| 300318 | 58 | 1456038 | 1456067 | 2 | 15 | 30 | TG   | 17 | 14 |
| 300325 | 58 | 1463088 | 1463105 | 2 | 9  | 18 | CA   | 24 | 6  |
| 300326 | 58 | 1463350 | 1463367 | 2 | 9  | 18 | GT   | 24 | 6  |
| 300334 | 58 | 1468901 | 1468915 | 3 | 5  | 15 | GAG  | 18 | 9  |
| 300335 | 58 | 1469188 | 1469215 | 2 | 14 | 28 | AC   | 16 | 8  |
| 300338 | 58 | 1473785 | 1473798 | 2 | 7  | 14 | TG   | 21 | 5  |
| 300339 | 58 | 1478654 | 1478683 | 2 | 15 | 30 | AC   | 10 | 13 |
| 300342 | 58 | 1483691 | 1483726 | 4 | 9  | 36 | AGGA | 23 | 10 |
| 300346 | 58 | 1486605 | 1486619 | 3 | 5  | 15 | TCT  | 14 | 4  |
| 300347 | 58 | 1486721 | 1486748 | 2 | 14 | 28 | TG   | 21 | 14 |
| 300349 | 58 | 1486895 | 1486914 | 2 | 10 | 20 | TG   | 16 | 9  |
| 300362 | 58 | 1495446 | 1495465 | 2 | 10 | 20 | GA   | 22 | 8  |
| 300365 | 58 | 1501746 | 1501759 | 2 | 7  | 14 | TC   | 25 | 9  |
| 300367 | 58 | 1502766 | 1502785 | 2 | 10 | 20 | AC   | 24 | 11 |
| 300372 | 58 | 1505337 | 1505352 | 2 | 8  | 16 | AC   | 22 | 3  |
| 300376 | 58 | 1509272 | 1509291 | 4 | 5  | 20 | TTCA | 26 | 7  |
| 300382 | 58 | 1512993 | 1513006 | 2 | 7  | 14 | GT   | 21 | 4  |
| 300383 | 58 | 1513983 | 1513994 | 2 | 6  | 12 | CT   | 20 | 5  |
| 300385 | 58 | 1516656 | 1516671 | 2 | 8  | 16 | AG   | 17 | 8  |
| 300388 | 58 | 1520391 | 1520404 | 2 | 7  | 14 | AG   | 23 | 3  |
| 300389 | 58 | 1520599 | 1520616 | 2 | 9  | 18 | AG   | 22 | 8  |
| 300394 | 58 | 1526920 | 1526939 | 2 | 10 | 20 | CA   | 19 | 11 |
| 300395 | 58 | 1528481 | 1528496 | 2 | 8  | 16 | GA   | 26 | 3  |
| 300400 | 58 | 1530441 | 1530452 | 2 | 6  | 12 | GA   | 31 | 4  |
| 300401 | 58 | 1531849 | 1531864 | 2 | 8  | 16 | CT   | 25 | 5  |
| 300403 | 58 | 1535649 | 1535670 | 2 | 11 | 22 | CA   | 19 | 8  |
| 300407 | 58 | 1541212 | 1541235 | 2 | 12 | 24 | CA   | 13 | 13 |
| 300409 | 58 | 1542308 | 1542319 | 2 | 6  | 12 | TC   | 29 | 3  |
| 300412 | 58 | 1543903 | 1543938 | 2 | 18 | 36 | AC   | 12 | 4  |
| 300413 | 58 | 1543984 | 1543999 | 4 | 4  | 16 | TCCA | 23 | 4  |
| 300414 | 58 | 1544090 | 1544127 | 2 | 19 | 38 | GT   | 12 | 13 |
| 300415 | 58 | 1544235 | 1544248 | 2 | 7  | 14 | AC   | 18 | 6  |
| 300417 | 58 | 1546987 | 1546998 | 2 | 6  | 12 | CA   | 33 | 3  |
| 300419 | 58 | 1550114 | 1550139 | 2 | 13 | 26 | AC   | 16 | 15 |
| 300420 | 58 | 1550282 | 1550309 | 2 | 14 | 28 | CA   | 17 | 10 |
| 300421 | 58 | 1553634 | 1553649 | 2 | 8  | 16 | TC   | 25 | 5  |
| 300422 | 58 | 1553794 | 1553827 | 2 | 17 | 34 | AC   | 7  | 8  |
| 300423 | 58 | 1555084 | 1555095 | 2 | 6  | 12 | GT   | 17 | 3  |
| 300424 | 58 | 1555132 | 1555147 | 2 | 8  | 16 | TC   | 25 | 5  |
| 300425 | 58 | 1555226 | 1555241 | 2 | 8  | 16 | GA   | 17 | 6  |
| 300426 | 58 | 1555984 | 1556001 | 2 | 9  | 18 | CA   | 12 | 6  |
| 300427 | 58 | 1557796 | 1557823 | 2 | 14 | 28 | CA   | 18 | 13 |
| 300431 | 58 | 1561679 | 1561698 | 2 | 10 | 20 | GA   | 7  | 4  |
| 300434 | 58 | 1570825 | 1570842 | 2 | 9  | 18 | AC   | 21 | 7  |
| 300438 | 58 | 1573836 | 1573853 | 2 | 9  | 18 | TG   | 23 | 5  |
| 300439 | 58 | 1574048 | 1574059 | 2 | 6  | 12 | CA   | 26 | 3  |



|        |    |         |         |   |    |    |      |    |    |
|--------|----|---------|---------|---|----|----|------|----|----|
| 300441 | 58 | 1574498 | 1574545 | 2 | 24 | 48 | AC   | 10 | 7  |
| 300449 | 58 | 1577859 | 1577880 | 2 | 11 | 22 | AG   | 11 | 5  |
| 300451 | 58 | 1578413 | 1578426 | 2 | 7  | 14 | CT   | 15 | 6  |
| 300452 | 58 | 1578977 | 1579012 | 2 | 18 | 36 | CA   | 9  | 9  |
| 300453 | 58 | 1581389 | 1581412 | 2 | 12 | 24 | TC   | 16 | 7  |
| 300457 | 58 | 1584478 | 1584501 | 2 | 12 | 24 | GT   | 11 | 11 |
| 300463 | 58 | 1587399 | 1587436 | 2 | 19 | 38 | AC   | 7  | 9  |
| 300464 | 58 | 1587611 | 1587636 | 2 | 13 | 26 | AC   | 15 | 9  |
| 300468 | 58 | 1589676 | 1589699 | 2 | 12 | 24 | CA   | 14 | 8  |
| 300469 | 58 | 1592110 | 1592121 | 2 | 6  | 12 | GT   | 27 | 3  |
| 300471 | 58 | 1592323 | 1592352 | 2 | 15 | 30 | AC   | 12 | 7  |
| 300472 | 58 | 1594346 | 1594361 | 2 | 8  | 16 | TG   | 22 | 6  |
| 300478 | 58 | 1602079 | 1602094 | 2 | 8  | 16 | TA   | 16 | 12 |
| 300481 | 58 | 1603749 | 1603776 | 2 | 14 | 28 | CA   | 16 | 10 |
| 300484 | 58 | 1605263 | 1605286 | 2 | 12 | 24 | AC   | 14 | 16 |
| 300485 | 58 | 1606018 | 1606033 | 2 | 8  | 16 | TG   | 23 | 7  |
| 300486 | 58 | 1607160 | 1607171 | 2 | 6  | 12 | CT   | 34 | 3  |
| 300487 | 58 | 1607396 | 1607409 | 2 | 7  | 14 | TC   | 22 | 8  |
| 300492 | 58 | 1611208 | 1611245 | 2 | 19 | 38 | CA   | 9  | 11 |
| 300496 | 58 | 1612122 | 1612161 | 2 | 20 | 40 | TG   | 12 | 9  |
| 300497 | 58 | 1612574 | 1612603 | 2 | 15 | 30 | TG   | 16 | 11 |
| 300498 | 58 | 1613345 | 1613368 | 2 | 12 | 24 | CA   | 15 | 9  |
| 300500 | 58 | 1616048 | 1616085 | 2 | 19 | 38 | AC   | 14 | 14 |
| 300501 | 58 | 1616442 | 1616465 | 2 | 12 | 24 | TG   | 25 | 8  |
| 300502 | 58 | 1616728 | 1616755 | 2 | 14 | 28 | CA   | 12 | 8  |
| 300503 | 58 | 1617033 | 1617046 | 2 | 7  | 14 | GT   | 22 | 7  |
| 300506 | 58 | 1618220 | 1618239 | 2 | 10 | 20 | CA   | 24 | 6  |
| 300507 | 58 | 1618307 | 1618332 | 2 | 13 | 26 | AC   | 23 | 10 |
| 300514 | 58 | 1627093 | 1627108 | 2 | 8  | 16 | AG   | 19 | 8  |
| 300516 | 58 | 1627445 | 1627484 | 2 | 20 | 40 | CA   | 8  | 8  |
| 300519 | 58 | 1631053 | 1631072 | 2 | 10 | 20 | AC   | 8  | 4  |
| 300520 | 58 | 1631126 | 1631145 | 2 | 10 | 20 | AC   | 7  | 5  |
| 300522 | 58 | 1631295 | 1631340 | 2 | 23 | 46 | AC   | 8  | 9  |
| 300523 | 58 | 1631832 | 1631851 | 2 | 10 | 20 | GT   | 15 | 9  |
| 300525 | 58 | 1633096 | 1633109 | 2 | 7  | 14 | AC   | 18 | 5  |
| 300527 | 58 | 1635577 | 1635616 | 2 | 20 | 40 | AC   | 8  | 9  |
| 300528 | 58 | 1635675 | 1635690 | 2 | 8  | 16 | CA   | 26 | 12 |
| 300531 | 58 | 1637727 | 1637758 | 2 | 16 | 32 | GT   | 14 | 10 |
| 300534 | 58 | 1638493 | 1638520 | 2 | 14 | 28 | AC   | 22 | 9  |
| 300538 | 58 | 1639750 | 1639773 | 2 | 12 | 24 | CA   | 21 | 6  |
| 300541 | 58 | 1640126 | 1640159 | 2 | 17 | 34 | CA   | 15 | 9  |
| 300555 | 58 | 1658532 | 1658547 | 4 | 4  | 16 | TTAA | 29 | 10 |
| 300556 | 58 | 1659471 | 1659490 | 2 | 10 | 20 | CA   | 11 | 10 |
| 300557 | 58 | 1659675 | 1659702 | 2 | 14 | 28 | TG   | 20 | 13 |
| 300558 | 58 | 1661496 | 1661521 | 2 | 13 | 26 | GT   | 16 | 9  |
| 300559 | 58 | 1661696 | 1661709 | 2 | 7  | 14 | TG   | 24 | 4  |
| 300560 | 58 | 1661875 | 1661890 | 2 | 8  | 16 | AC   | 20 | 8  |
| 300561 | 58 | 1661892 | 1661905 | 2 | 7  | 14 | CA   | 16 | 9  |
| 300566 | 58 | 1665288 | 1665315 | 2 | 14 | 28 | AC   | 9  | 9  |
| 300570 | 58 | 1668272 | 1668293 | 2 | 11 | 22 | TG   | 9  | 9  |
| 300572 | 58 | 1668583 | 1668608 | 2 | 13 | 26 | AC   | 11 | 7  |

|        |    |         |         |   |    |    |      |    |    |
|--------|----|---------|---------|---|----|----|------|----|----|
| 300574 | 58 | 1670995 | 1671018 | 2 | 12 | 24 | CA   | 24 | 12 |
| 300577 | 58 | 1672930 | 1672950 | 3 | 7  | 21 | CTC  | 6  | 4  |
| 300578 | 58 | 1673142 | 1673157 | 2 | 8  | 16 | GA   | 25 | 4  |
| 300581 | 58 | 1676167 | 1676181 | 3 | 5  | 15 | CAT  | 31 | 4  |
| 300582 | 58 | 1676399 | 1676420 | 2 | 11 | 22 | TG   | 17 | 7  |
| 300583 | 58 | 1676792 | 1676841 | 2 | 25 | 50 | AC   | 12 | 13 |
| 300585 | 58 | 1677603 | 1677622 | 2 | 10 | 20 | AC   | 11 | 8  |
| 300586 | 58 | 1677815 | 1677850 | 4 | 9  | 36 | TGCC | 29 | 7  |
| 300587 | 58 | 1677910 | 1677933 | 3 | 8  | 24 | CTG  | 25 | 9  |
| 300590 | 58 | 1678533 | 1678556 | 3 | 8  | 24 | CCT  | 22 | 5  |
| 300596 | 58 | 1681961 | 1681978 | 2 | 9  | 18 | GT   | 21 | 8  |
| 300599 | 58 | 1683815 | 1683846 | 2 | 16 | 32 | AC   | 22 | 15 |
| 300601 | 58 | 1684014 | 1684033 | 2 | 10 | 20 | AC   | 22 | 13 |
| 300602 | 58 | 1685937 | 1685960 | 2 | 12 | 24 | CA   | 22 | 15 |
| 300609 | 58 | 1692787 | 1692804 | 2 | 9  | 18 | CA   | 11 | 8  |
| 300614 | 58 | 1706169 | 1706180 | 2 | 6  | 12 | AC   | 28 | 9  |
| 300621 | 58 | 1719169 | 1719180 | 2 | 6  | 12 | AC   | 12 | 5  |
| 300622 | 58 | 1723862 | 1723894 | 3 | 11 | 33 | TAT  | 11 | 3  |
| 300624 | 58 | 1726490 | 1726525 | 3 | 12 | 36 | ATT  | 16 | 11 |
| 300625 | 58 | 1729423 | 1729436 | 2 | 7  | 14 | AG   | 27 | 3  |
| 300626 | 58 | 1730209 | 1730220 | 2 | 6  | 12 | TA   | 16 | 4  |
| 300627 | 58 | 1731001 | 1731012 | 2 | 6  | 12 | CA   | 21 | 6  |
| 300631 | 58 | 1733780 | 1733807 | 2 | 14 | 28 | CA   | 27 | 8  |
| 300632 | 58 | 1735364 | 1735383 | 2 | 10 | 20 | CA   | 18 | 4  |
| 300634 | 58 | 1740147 | 1740167 | 3 | 7  | 21 | GCA  | 32 | 5  |
| 300644 | 58 | 1766533 | 1766544 | 2 | 6  | 12 | AC   | 22 | 3  |
| 300646 | 58 | 1772405 | 1772422 | 2 | 9  | 18 | AG   | 14 | 5  |
| 300647 | 58 | 1772497 | 1772522 | 2 | 13 | 26 | AG   | 18 | 8  |
| 300648 | 58 | 1772731 | 1772752 | 2 | 11 | 22 | AC   | 23 | 11 |
| 300650 | 58 | 1779502 | 1779513 | 2 | 6  | 12 | AC   | 21 | 3  |
| 300652 | 58 | 1780498 | 1780513 | 4 | 4  | 16 | GCAC | 23 | 8  |
| 300653 | 58 | 1780806 | 1780829 | 2 | 12 | 24 | TG   | 13 | 6  |
| 300654 | 58 | 1784570 | 1784585 | 2 | 8  | 16 | TG   | 25 | 3  |
| 300655 | 58 | 1787095 | 1787109 | 3 | 5  | 15 | CAG  | 21 | 4  |
| 300656 | 58 | 1787111 | 1787128 | 3 | 6  | 18 | GGA  | 23 | 6  |
| 300657 | 58 | 1787650 | 1787661 | 2 | 6  | 12 | AC   | 28 | 3  |
| 300659 | 58 | 1795760 | 1795774 | 3 | 5  | 15 | TAT  | 26 | 7  |
| 300661 | 58 | 1800097 | 1800120 | 3 | 8  | 24 | GGA  | 15 | 6  |
| 300666 | 58 | 1814243 | 1814258 | 4 | 4  | 16 | ATTT | 15 | 6  |
| 300672 | 58 | 1824438 | 1824457 | 2 | 10 | 20 | TG   | 23 | 3  |
| 300673 | 58 | 1828979 | 1828992 | 2 | 7  | 14 | GA   | 17 | 4  |
| 300678 | 58 | 1830631 | 1830664 | 2 | 17 | 34 | CA   | 12 | 10 |
| 300683 | 58 | 1839026 | 1839043 | 2 | 9  | 18 | TG   | 25 | 3  |
| 300690 | 58 | 1843295 | 1843312 | 2 | 9  | 18 | GT   | 19 | 11 |
| 300691 | 58 | 1843573 | 1843588 | 2 | 8  | 16 | AC   | 25 | 9  |
| 300693 | 58 | 1843799 | 1843814 | 4 | 4  | 16 | AACA | 26 | 4  |
| 300694 | 58 | 1844017 | 1844044 | 2 | 14 | 28 | TG   | 13 | 7  |
| 300695 | 58 | 1845701 | 1845724 | 2 | 12 | 24 | TG   | 17 | 10 |
| 300700 | 58 | 1848776 | 1848807 | 2 | 16 | 32 | TC   | 10 | 8  |
| 300701 | 58 | 1848973 | 1848996 | 2 | 12 | 24 | AC   | 12 | 9  |
| 300703 | 58 | 1850138 | 1850151 | 2 | 7  | 14 | GT   | 15 | 9  |

|        |    |         |         |   |    |    |      |    |    |
|--------|----|---------|---------|---|----|----|------|----|----|
| 300704 | 58 | 1851052 | 1851071 | 2 | 10 | 20 | AC   | 24 | 8  |
| 300706 | 58 | 1853045 | 1853066 | 2 | 11 | 22 | GT   | 17 | 12 |
| 300707 | 58 | 1853220 | 1853243 | 2 | 12 | 24 | AC   | 14 | 10 |
| 300708 | 58 | 1855764 | 1855778 | 3 | 5  | 15 | CAC  | 30 | 5  |
| 300710 | 58 | 1856620 | 1856649 | 2 | 15 | 30 | TG   | 12 | 7  |
| 300711 | 58 | 1857071 | 1857084 | 2 | 7  | 14 | TG   | 15 | 5  |
| 300712 | 58 | 1858638 | 1858681 | 2 | 22 | 44 | AC   | 8  | 8  |
| 300713 | 58 | 1859383 | 1859396 | 2 | 7  | 14 | GT   | 24 | 4  |
| 300715 | 58 | 1860466 | 1860487 | 2 | 11 | 22 | AC   | 16 | 9  |
| 300716 | 58 | 1860530 | 1860543 | 2 | 7  | 14 | GT   | 25 | 3  |
| 300717 | 58 | 1861795 | 1861830 | 2 | 18 | 36 | TG   | 21 | 12 |
| 300718 | 58 | 1862076 | 1862113 | 2 | 19 | 38 | CA   | 16 | 9  |
| 300719 | 58 | 1862243 | 1862276 | 2 | 17 | 34 | CA   | 19 | 20 |
| 300724 | 58 | 1865925 | 1865940 | 2 | 8  | 16 | CT   | 13 | 4  |
| 300725 | 58 | 1866586 | 1866647 | 2 | 31 | 62 | TG   | 7  | 9  |
| 300731 | 58 | 1868904 | 1868935 | 2 | 16 | 32 | CA   | 9  | 4  |
| 300732 | 58 | 1868984 | 1869011 | 2 | 14 | 28 | CA   | 11 | 9  |
| 300742 | 58 | 1878689 | 1878708 | 2 | 10 | 20 | TG   | 14 | 12 |
| 300743 | 58 | 1878740 | 1878753 | 2 | 7  | 14 | GT   | 22 | 3  |
| 300745 | 58 | 1879661 | 1879702 | 2 | 21 | 42 | TG   | 10 | 14 |
| 300746 | 58 | 1879820 | 1879837 | 2 | 9  | 18 | TG   | 24 | 9  |
| 300747 | 58 | 1881554 | 1881575 | 2 | 11 | 22 | TG   | 21 | 11 |
| 300752 | 58 | 1884327 | 1884350 | 2 | 12 | 24 | TG   | 9  | 13 |
| 300753 | 58 | 1884703 | 1884729 | 3 | 9  | 27 | CTC  | 10 | 6  |
| 300759 | 58 | 1887042 | 1887059 | 2 | 9  | 18 | TG   | 7  | 10 |
| 300762 | 58 | 1890608 | 1890623 | 2 | 8  | 16 | TG   | 9  | 9  |
| 300768 | 58 | 1901198 | 1901215 | 2 | 9  | 18 | TG   | 24 | 6  |
| 300776 | 58 | 1908151 | 1908166 | 4 | 4  | 16 | GTGC | 18 | 10 |
| 300779 | 58 | 1913736 | 1913755 | 2 | 10 | 20 | CA   | 19 | 6  |
| 300780 | 58 | 1926504 | 1926539 | 2 | 18 | 36 | CA   | 9  | 7  |
| 300781 | 58 | 1928091 | 1928104 | 2 | 7  | 14 | GT   | 21 | 4  |
| 300782 | 58 | 1935349 | 1935362 | 2 | 7  | 14 | CA   | 23 | 6  |
| 300786 | 58 | 1947765 | 1947794 | 2 | 15 | 30 | CA   | 9  | 7  |
| 300788 | 58 | 1952608 | 1952641 | 2 | 17 | 34 | TG   | 7  | 9  |
| 300789 | 58 | 1960684 | 1960701 | 2 | 9  | 18 | GA   | 15 | 6  |
| 300791 | 58 | 1971414 | 1971439 | 2 | 13 | 26 | CA   | 14 | 11 |
| 300793 | 58 | 1973697 | 1973716 | 4 | 5  | 20 | GGCA | 23 | 4  |
| 300794 | 58 | 1978215 | 1978238 | 2 | 12 | 24 | GT   | 7  | 4  |
| 300803 | 58 | 1996426 | 1996455 | 3 | 10 | 30 | GAG  | 12 | 6  |
| 300804 | 58 | 1999578 | 1999591 | 2 | 7  | 14 | GT   | 23 | 4  |
| 300805 | 58 | 1999852 | 1999863 | 2 | 6  | 12 | GA   | 16 | 5  |
| 300806 | 58 | 2000440 | 2000451 | 2 | 6  | 12 | TA   | 24 | 4  |
| 300808 | 58 | 2005088 | 2005101 | 2 | 7  | 14 | TG   | 17 | 7  |
| 300809 | 58 | 2007996 | 2008007 | 2 | 6  | 12 | AG   | 19 | 4  |
| 300811 | 58 | 2009384 | 2009397 | 2 | 7  | 14 | TG   | 17 | 4  |
| 300812 | 58 | 2009558 | 2009577 | 2 | 10 | 20 | GT   | 10 | 10 |
| 300814 | 58 | 2009964 | 2009975 | 2 | 6  | 12 | TG   | 24 | 7  |
| 300815 | 58 | 2010011 | 2010024 | 2 | 7  | 14 | GA   | 26 | 4  |
| 300818 | 58 | 2013649 | 2013666 | 2 | 9  | 18 | CA   | 24 | 6  |
| 300819 | 58 | 2013900 | 2013914 | 3 | 5  | 15 | AGG  | 17 | 4  |
| 300822 | 58 | 2015667 | 2015700 | 2 | 17 | 34 | TG   | 10 | 10 |

|        |    |         |         |   |    |    |      |    |    |
|--------|----|---------|---------|---|----|----|------|----|----|
| 300824 | 58 | 2016998 | 2017011 | 2 | 7  | 14 | GT   | 29 | 3  |
| 300825 | 58 | 2018135 | 2018180 | 2 | 23 | 46 | TG   | 9  | 8  |
| 300828 | 58 | 2025529 | 2025540 | 2 | 6  | 12 | CA   | 18 | 3  |
| 300829 | 58 | 2032712 | 2032723 | 2 | 6  | 12 | CT   | 27 | 3  |
| 300830 | 58 | 2033211 | 2033236 | 2 | 13 | 26 | CA   | 22 | 8  |
| 300832 | 58 | 2038528 | 2038541 | 2 | 7  | 14 | TG   | 17 | 11 |
| 300833 | 58 | 2038542 | 2038553 | 2 | 6  | 12 | AG   | 25 | 12 |
| 300834 | 58 | 2043130 | 2043141 | 2 | 6  | 12 | TG   | 12 | 10 |
| 300836 | 58 | 2048504 | 2048515 | 2 | 6  | 12 | TG   | 23 | 4  |
| 300840 | 58 | 2053258 | 2053273 | 2 | 8  | 16 | GT   | 22 | 5  |
| 300843 | 58 | 2063813 | 2063828 | 2 | 8  | 16 | CT   | 11 | 6  |
| 300844 | 58 | 2064016 | 2064037 | 2 | 11 | 22 | TG   | 20 | 11 |
| 300847 | 58 | 2067000 | 2067026 | 3 | 9  | 27 | CTC  | 16 | 6  |
| 300849 | 58 | 2077494 | 2077507 | 2 | 7  | 14 | AG   | 26 | 4  |
| 300851 | 58 | 2080977 | 2080990 | 2 | 7  | 14 | GA   | 18 | 6  |
| 300861 | 58 | 2107742 | 2107765 | 3 | 8  | 24 | CAA  | 24 | 5  |
| 300863 | 58 | 2111101 | 2111126 | 2 | 13 | 26 | TG   | 9  | 8  |
| 300866 | 58 | 2116680 | 2116694 | 3 | 5  | 15 | GGA  | 15 | 7  |
| 300867 | 58 | 2116791 | 2116818 | 2 | 14 | 28 | CA   | 18 | 10 |
| 300875 | 58 | 2118338 | 2118363 | 2 | 13 | 26 | CA   | 12 | 10 |
| 300879 | 58 | 2119525 | 2119550 | 2 | 13 | 26 | GT   | 9  | 12 |
| 300884 | 58 | 2126085 | 2126120 | 2 | 18 | 36 | GT   | 9  | 9  |
| 300888 | 58 | 2130357 | 2130372 | 2 | 8  | 16 | TG   | 26 | 4  |
| 300894 | 58 | 2133164 | 2133189 | 2 | 13 | 26 | TC   | 14 | 7  |
| 300896 | 58 | 2144196 | 2144209 | 2 | 7  | 14 | CA   | 27 | 4  |
| 300899 | 58 | 2146195 | 2146212 | 2 | 9  | 18 | TG   | 11 | 14 |
| 300900 | 58 | 2146235 | 2146252 | 2 | 9  | 18 | AG   | 14 | 7  |
| 300901 | 58 | 2147031 | 2147064 | 2 | 17 | 34 | CA   | 18 | 19 |
| 300904 | 58 | 2147888 | 2147917 | 2 | 15 | 30 | CA   | 17 | 14 |
| 300909 | 58 | 2152540 | 2152563 | 2 | 12 | 24 | AC   | 14 | 14 |
| 300914 | 58 | 2153579 | 2153608 | 3 | 10 | 30 | AAC  | 19 | 3  |
| 300919 | 58 | 2163968 | 2163985 | 2 | 9  | 18 | CT   | 13 | 9  |
| 300925 | 58 | 2167022 | 2167039 | 3 | 6  | 18 | AGA  | 16 | 5  |
| 300929 | 58 | 2170502 | 2170517 | 2 | 8  | 16 | TG   | 16 | 3  |
| 300931 | 58 | 2170608 | 2170625 | 2 | 9  | 18 | AG   | 8  | 6  |
| 300932 | 58 | 2173832 | 2173845 | 2 | 7  | 14 | CA   | 24 | 4  |
| 300936 | 58 | 2178217 | 2178232 | 2 | 8  | 16 | CA   | 17 | 5  |
| 300942 | 58 | 2188885 | 2188906 | 2 | 11 | 22 | AC   | 23 | 5  |
| 300943 | 58 | 2192823 | 2192852 | 2 | 15 | 30 | CA   | 25 | 12 |
| 300946 | 58 | 2195556 | 2195579 | 2 | 12 | 24 | GT   | 19 | 14 |
| 300951 | 58 | 2208313 | 2208324 | 2 | 6  | 12 | TG   | 16 | 3  |
| 300956 | 58 | 2215773 | 2215822 | 2 | 25 | 50 | TG   | 8  | 10 |
| 300961 | 58 | 2226206 | 2226239 | 2 | 17 | 34 | GT   | 7  | 5  |
| 300965 | 58 | 2233408 | 2233423 | 4 | 4  | 16 | CGAA | 24 | 3  |
| 300974 | 58 | 2246948 | 2246979 | 2 | 16 | 32 | TG   | 22 | 16 |
| 300976 | 58 | 2247433 | 2247452 | 2 | 10 | 20 | TG   | 24 | 7  |
| 300981 | 58 | 2262730 | 2262743 | 2 | 7  | 14 | CT   | 19 | 6  |
| 300991 | 58 | 2279241 | 2279262 | 2 | 11 | 22 | AG   | 23 | 7  |
| 300993 | 58 | 2279505 | 2279516 | 2 | 6  | 12 | GA   | 21 | 3  |
| 300996 | 58 | 2287431 | 2287444 | 2 | 7  | 14 | CA   | 13 | 12 |
| 300999 | 58 | 2291710 | 2291741 | 2 | 16 | 32 | CA   | 16 | 13 |

|        |    |         |         |   |    |    |      |    |    |
|--------|----|---------|---------|---|----|----|------|----|----|
| 301003 | 58 | 2302267 | 2302286 | 4 | 5  | 20 | TTAT | 19 | 4  |
| 301006 | 58 | 2306849 | 2306862 | 2 | 7  | 14 | CT   | 30 | 4  |
| 301019 | 58 | 2348692 | 2348713 | 2 | 11 | 22 | TG   | 22 | 8  |
| 301020 | 58 | 2362418 | 2362441 | 2 | 12 | 24 | AC   | 18 | 13 |
| 301021 | 58 | 2363115 | 2363134 | 2 | 10 | 20 | AC   | 14 | 10 |
| 301035 | 58 | 2393458 | 2393481 | 3 | 8  | 24 | ATG  | 26 | 4  |
| 301049 | 58 | 2418831 | 2418845 | 3 | 5  | 15 | AGC  | 34 | 3  |
| 301054 | 58 | 2426355 | 2426368 | 2 | 7  | 14 | AT   | 11 | 10 |
| 301056 | 58 | 2437897 | 2437908 | 2 | 6  | 12 | TA   | 11 | 3  |
| 301059 | 58 | 2444998 | 2445009 | 2 | 6  | 12 | CA   | 24 | 4  |
| 301088 | 58 | 2500732 | 2500753 | 2 | 11 | 22 | CA   | 13 | 8  |
| 301090 | 58 | 2501608 | 2501623 | 4 | 4  | 16 | CCCT | 7  | 3  |
| 301091 | 58 | 2501949 | 2501960 | 2 | 6  | 12 | TC   | 16 | 3  |
| 301094 | 58 | 2502591 | 2502605 | 3 | 5  | 15 | GAG  | 27 | 3  |
| 301095 | 58 | 2502682 | 2502697 | 2 | 8  | 16 | TG   | 25 | 9  |
| 301096 | 58 | 2502946 | 2502960 | 3 | 5  | 15 | CAC  | 22 | 3  |
| 301100 | 58 | 2504395 | 2504440 | 2 | 23 | 46 | GA   | 12 | 9  |
| 301102 | 58 | 2505016 | 2505039 | 4 | 6  | 24 | ATCT | 12 | 6  |
| 301105 | 58 | 2508280 | 2508331 | 2 | 26 | 52 | CA   | 7  | 9  |
| 301106 | 58 | 2509130 | 2509153 | 2 | 12 | 24 | CA   | 10 | 11 |
| 301108 | 58 | 2510902 | 2510913 | 2 | 6  | 12 | GA   | 23 | 5  |
| 301109 | 58 | 2511544 | 2511581 | 2 | 19 | 38 | CA   | 11 | 12 |
| 301112 | 58 | 2512378 | 2512407 | 2 | 15 | 30 | GT   | 9  | 6  |
| 301114 | 58 | 2513787 | 2513806 | 2 | 10 | 20 | GT   | 16 | 4  |
| 301118 | 58 | 2520798 | 2520809 | 2 | 6  | 12 | TC   | 26 | 3  |
| 301122 | 58 | 2522936 | 2522959 | 2 | 12 | 24 | CA   | 21 | 9  |
| 301123 | 58 | 2523250 | 2523269 | 2 | 10 | 20 | TG   | 23 | 6  |
| 301124 | 58 | 2525153 | 2525186 | 2 | 17 | 34 | CA   | 12 | 13 |
| 301128 | 58 | 2529078 | 2529103 | 2 | 13 | 26 | GT   | 10 | 8  |
| 301129 | 58 | 2529335 | 2529360 | 2 | 13 | 26 | CT   | 14 | 6  |
| 301131 | 58 | 2537880 | 2537893 | 2 | 7  | 14 | AC   | 26 | 3  |
| 301148 | 58 | 2564692 | 2564707 | 2 | 8  | 16 | TA   | 11 | 3  |
| 301150 | 58 | 2570538 | 2570571 | 2 | 17 | 34 | CA   | 6  | 5  |
| 301151 | 58 | 2573729 | 2573740 | 2 | 6  | 12 | AC   | 33 | 3  |
| 301161 | 58 | 2611234 | 2611251 | 2 | 9  | 18 | GT   | 24 | 15 |
| 301165 | 58 | 2621625 | 2621658 | 2 | 17 | 34 | GA   | 9  | 9  |
| 301169 | 58 | 2625276 | 2625296 | 3 | 7  | 21 | TGT  | 24 | 4  |
| 301170 | 58 | 2625463 | 2625496 | 2 | 17 | 34 | AC   | 8  | 7  |
| 301172 | 58 | 2626568 | 2626607 | 2 | 20 | 40 | TG   | 13 | 11 |
| 301173 | 58 | 2628099 | 2628112 | 2 | 7  | 14 | CT   | 23 | 4  |
| 301174 | 58 | 2630340 | 2630355 | 4 | 4  | 16 | TATT | 24 | 3  |
| 301193 | 58 | 2675873 | 2675892 | 2 | 10 | 20 | AT   | 9  | 9  |
| 301195 | 58 | 2684477 | 2684492 | 2 | 8  | 16 | CA   | 12 | 4  |
| 301202 | 58 | 2690932 | 2690945 | 2 | 7  | 14 | CA   | 20 | 11 |
| 301203 | 58 | 2696554 | 2696589 | 4 | 9  | 36 | AAAG | 12 | 8  |
| 301208 | 58 | 2700564 | 2700581 | 2 | 9  | 18 | CA   | 22 | 8  |
| 301209 | 58 | 2707052 | 2707089 | 2 | 19 | 38 | AC   | 6  | 7  |
| 301211 | 58 | 2708073 | 2708088 | 2 | 8  | 16 | GT   | 22 | 6  |
| 301217 | 58 | 2720905 | 2720940 | 2 | 18 | 36 | GT   | 12 | 15 |
| 301227 | 58 | 2743285 | 2743304 | 2 | 10 | 20 | CA   | 11 | 10 |
| 301230 | 58 | 2747970 | 2747983 | 2 | 7  | 14 | GT   | 21 | 4  |

|        |    |         |         |   |    |    |      |    |    |
|--------|----|---------|---------|---|----|----|------|----|----|
| 301235 | 58 | 2757622 | 2757635 | 2 | 7  | 14 | AC   | 20 | 6  |
| 301236 | 58 | 2757692 | 2757731 | 2 | 20 | 40 | AC   | 9  | 15 |
| 301253 | 58 | 2780903 | 2780917 | 3 | 5  | 15 | CCG  | 9  | 8  |
| 301255 | 58 | 2781687 | 2781698 | 2 | 6  | 12 | CA   | 14 | 3  |
| 301256 | 58 | 2782240 | 2782259 | 2 | 10 | 20 | TG   | 18 | 6  |
| 301257 | 58 | 2782551 | 2782564 | 2 | 7  | 14 | TC   | 19 | 3  |
| 301262 | 58 | 2786877 | 2786904 | 2 | 14 | 28 | GT   | 11 | 11 |
| 301265 | 58 | 2792028 | 2792041 | 2 | 7  | 14 | GT   | 28 | 3  |
| 301270 | 58 | 2800406 | 2800417 | 2 | 6  | 12 | CA   | 24 | 6  |
| 301274 | 58 | 2805282 | 2805337 | 2 | 28 | 56 | GT   | 15 | 12 |
| 301275 | 58 | 2808149 | 2808170 | 2 | 11 | 22 | GT   | 23 | 9  |
| 301279 | 58 | 2820200 | 2820223 | 2 | 12 | 24 | CA   | 16 | 9  |
| 301280 | 58 | 2823051 | 2823074 | 2 | 12 | 24 | GT   | 9  | 10 |
| 301282 | 58 | 2823625 | 2823646 | 2 | 11 | 22 | AG   | 18 | 7  |
| 301289 | 58 | 2840442 | 2840469 | 2 | 14 | 28 | TG   | 17 | 7  |
| 301297 | 58 | 2854933 | 2854952 | 2 | 10 | 20 | TG   | 19 | 8  |
| 301298 | 58 | 2858517 | 2858532 | 2 | 8  | 16 | GA   | 19 | 3  |
| 301299 | 58 | 2859815 | 2859828 | 2 | 7  | 14 | CA   | 12 | 5  |
| 301303 | 58 | 2865184 | 2865215 | 2 | 16 | 32 | TG   | 19 | 5  |
| 301307 | 58 | 2877273 | 2877298 | 2 | 13 | 26 | AC   | 15 | 12 |
| 301308 | 58 | 2878055 | 2878081 | 3 | 9  | 27 | TAA  | 6  | 4  |
| 301310 | 58 | 2886915 | 2886932 | 3 | 6  | 18 | TTG  | 25 | 3  |
| 301313 | 58 | 2896019 | 2896050 | 2 | 16 | 32 | TG   | 10 | 11 |
| 301325 | 58 | 2912378 | 2912399 | 2 | 11 | 22 | CA   | 8  | 8  |
| 301328 | 58 | 2912710 | 2912743 | 2 | 17 | 34 | TG   | 7  | 9  |
| 301329 | 58 | 2912820 | 2912837 | 2 | 9  | 18 | TG   | 6  | 6  |
| 301331 | 58 | 2918458 | 2918477 | 2 | 10 | 20 | CA   | 20 | 13 |
| 301332 | 58 | 2920737 | 2920764 | 2 | 14 | 28 | TG   | 13 | 10 |
| 301351 | 58 | 2954718 | 2954749 | 2 | 16 | 32 | TG   | 11 | 11 |
| 301352 | 58 | 2958605 | 2958618 | 2 | 7  | 14 | TG   | 25 | 3  |
| 301357 | 58 | 2967062 | 2967081 | 2 | 10 | 20 | AC   | 21 | 18 |
| 301358 | 58 | 2967385 | 2967410 | 2 | 13 | 26 | AC   | 21 | 12 |
| 301361 | 58 | 2969365 | 2969392 | 2 | 14 | 28 | GT   | 11 | 9  |
| 301362 | 58 | 2969584 | 2969607 | 2 | 12 | 24 | TG   | 21 | 14 |
| 301366 | 58 | 2973585 | 2973600 | 2 | 8  | 16 | GA   | 30 | 3  |
| 301367 | 58 | 2974264 | 2974275 | 2 | 6  | 12 | CA   | 20 | 4  |
| 301373 | 58 | 2986274 | 2986287 | 2 | 7  | 14 | GA   | 28 | 4  |
| 301382 | 58 | 3028452 | 3028466 | 3 | 5  | 15 | GGC  | 29 | 7  |
| 301383 | 58 | 3028715 | 3028728 | 2 | 7  | 14 | AC   | 23 | 3  |
| 301384 | 58 | 3028976 | 3028993 | 3 | 6  | 18 | GGT  | 25 | 5  |
| 301386 | 58 | 3032161 | 3032178 | 2 | 9  | 18 | GT   | 12 | 7  |
| 301391 | 58 | 3036767 | 3036784 | 2 | 9  | 18 | AC   | 11 | 10 |
| 301392 | 58 | 3038221 | 3038232 | 2 | 6  | 12 | TG   | 12 | 9  |
| 301398 | 58 | 3041054 | 3041079 | 2 | 13 | 26 | AC   | 15 | 7  |
| 301399 | 58 | 3042282 | 3042301 | 2 | 10 | 20 | TG   | 19 | 5  |
| 301402 | 58 | 3043491 | 3043510 | 2 | 10 | 20 | CA   | 11 | 9  |
| 301403 | 58 | 3043512 | 3043525 | 2 | 7  | 14 | AC   | 11 | 8  |
| 301404 | 58 | 3043732 | 3043749 | 2 | 9  | 18 | GT   | 7  | 9  |
| 301410 | 58 | 3047529 | 3047554 | 2 | 13 | 26 | AC   | 10 | 13 |
| 301421 | 58 | 3055213 | 3055232 | 4 | 5  | 20 | CATC | 29 | 3  |
| 301425 | 58 | 3062469 | 3062492 | 2 | 12 | 24 | TG   | 18 | 6  |

|        |    |         |         |   |    |    |      |    |    |
|--------|----|---------|---------|---|----|----|------|----|----|
| 301428 | 58 | 3070593 | 3070606 | 2 | 7  | 14 | AC   | 31 | 5  |
| 301430 | 58 | 3073274 | 3073289 | 4 | 4  | 16 | AAAT | 24 | 3  |
| 301433 | 58 | 3078292 | 3078307 | 4 | 4  | 16 | AGCG | 23 | 5  |
| 301435 | 58 | 3080463 | 3080484 | 2 | 11 | 22 | TG   | 18 | 13 |
| 301438 | 58 | 3084237 | 3084256 | 4 | 5  | 20 | TTTA | 22 | 4  |
| 301447 | 59 | 9923    | 9960    | 2 | 19 | 38 | AC   | 11 | 10 |
| 301456 | 59 | 18724   | 18735   | 2 | 6  | 12 | GT   | 27 | 5  |
| 301458 | 59 | 21664   | 21681   | 2 | 9  | 18 | TG   | 19 | 10 |
| 301460 | 59 | 24095   | 24106   | 2 | 6  | 12 | AC   | 34 | 6  |
| 301463 | 59 | 34534   | 34553   | 2 | 10 | 20 | TG   | 16 | 4  |
| 301464 | 59 | 34917   | 34937   | 3 | 7  | 21 | TTG  | 24 | 5  |
| 301466 | 59 | 35673   | 35708   | 2 | 18 | 36 | TG   | 7  | 8  |
| 301467 | 59 | 36146   | 36167   | 2 | 11 | 22 | AC   | 15 | 6  |
| 301470 | 59 | 49331   | 49348   | 2 | 9  | 18 | TG   | 16 | 6  |
| 301472 | 59 | 50378   | 50389   | 2 | 6  | 12 | GT   | 23 | 4  |
| 301473 | 59 | 50413   | 50424   | 2 | 6  | 12 | TG   | 22 | 4  |
| 301475 | 59 | 50579   | 50600   | 2 | 11 | 22 | TG   | 17 | 9  |
| 301480 | 59 | 54128   | 54155   | 2 | 14 | 28 | TG   | 12 | 5  |
| 301502 | 59 | 106274  | 106313  | 4 | 10 | 40 | TATG | 13 | 5  |
| 301509 | 59 | 122019  | 122032  | 2 | 7  | 14 | AC   | 21 | 3  |
| 301510 | 59 | 122260  | 122273  | 2 | 7  | 14 | AT   | 9  | 3  |
| 301511 | 59 | 128147  | 128170  | 2 | 12 | 24 | AC   | 19 | 4  |
| 301513 | 59 | 130598  | 130611  | 2 | 7  | 14 | TC   | 21 | 4  |
| 301514 | 59 | 130614  | 130629  | 2 | 8  | 16 | TC   | 26 | 7  |
| 301516 | 59 | 135410  | 135427  | 3 | 6  | 18 | GGA  | 24 | 4  |
| 301517 | 59 | 135550  | 135565  | 2 | 8  | 16 | CA   | 24 | 7  |
| 301520 | 59 | 139971  | 139986  | 2 | 8  | 16 | GT   | 20 | 18 |
| 301521 | 59 | 139991  | 140006  | 2 | 8  | 16 | GT   | 14 | 10 |
| 301525 | 59 | 142916  | 142933  | 2 | 9  | 18 | TG   | 28 | 6  |
| 301526 | 59 | 142994  | 143005  | 2 | 6  | 12 | GA   | 17 | 4  |
| 301529 | 59 | 144348  | 144361  | 2 | 7  | 14 | CA   | 28 | 7  |
| 301531 | 59 | 146602  | 146631  | 2 | 15 | 30 | CA   | 11 | 7  |
| 301537 | 59 | 150762  | 150777  | 2 | 8  | 16 | AC   | 25 | 6  |
| 301538 | 59 | 152993  | 153006  | 2 | 7  | 14 | AC   | 14 | 3  |
| 301539 | 59 | 155197  | 155223  | 3 | 9  | 27 | TTC  | 25 | 4  |
| 301540 | 59 | 155313  | 155326  | 2 | 7  | 14 | GT   | 19 | 6  |
| 301547 | 59 | 164395  | 164430  | 2 | 18 | 36 | CA   | 17 | 13 |
| 301549 | 59 | 165889  | 165918  | 2 | 15 | 30 | AC   | 13 | 10 |
| 301550 | 59 | 171240  | 171283  | 2 | 22 | 44 | AC   | 7  | 8  |
| 301552 | 59 | 172893  | 172920  | 2 | 14 | 28 | TG   | 14 | 11 |
| 301553 | 59 | 173043  | 173076  | 2 | 17 | 34 | TG   | 13 | 9  |
| 301561 | 59 | 206659  | 206676  | 2 | 9  | 18 | GT   | 17 | 4  |
| 301566 | 59 | 222918  | 222931  | 2 | 7  | 14 | CA   | 21 | 6  |
| 301567 | 59 | 222932  | 222945  | 2 | 7  | 14 | AC   | 11 | 3  |
| 301570 | 59 | 232144  | 232159  | 2 | 8  | 16 | GT   | 21 | 4  |
| 301580 | 59 | 246700  | 246715  | 2 | 8  | 16 | CA   | 21 | 3  |
| 301581 | 59 | 249118  | 249153  | 2 | 18 | 36 | GT   | 11 | 9  |
| 301605 | 59 | 268130  | 268155  | 2 | 13 | 26 | TC   | 21 | 5  |
| 301606 | 59 | 270517  | 270534  | 2 | 9  | 18 | TG   | 15 | 9  |
| 301616 | 59 | 279764  | 279779  | 2 | 8  | 16 | AG   | 12 | 8  |
| 301645 | 59 | 337458  | 337477  | 2 | 10 | 20 | TG   | 23 | 5  |

|        |    |        |        |   |    |    |      |    |    |
|--------|----|--------|--------|---|----|----|------|----|----|
| 301655 | 59 | 374155 | 374169 | 3 | 5  | 15 | CTG  | 17 | 4  |
| 301656 | 59 | 376604 | 376623 | 4 | 5  | 20 | GATG | 19 | 8  |
| 301657 | 59 | 379441 | 379456 | 2 | 8  | 16 | CA   | 21 | 5  |
| 301672 | 59 | 397997 | 398026 | 3 | 10 | 30 | TTC  | 19 | 8  |
| 301673 | 59 | 402566 | 402580 | 3 | 5  | 15 | TGA  | 26 | 4  |
| 301675 | 59 | 403404 | 403427 | 2 | 12 | 24 | TG   | 13 | 14 |
| 301676 | 59 | 403464 | 403479 | 2 | 8  | 16 | AG   | 20 | 3  |
| 301680 | 59 | 411726 | 411749 | 2 | 12 | 24 | AC   | 21 | 5  |
| 301690 | 59 | 428503 | 428514 | 2 | 6  | 12 | GT   | 15 | 4  |
| 301692 | 59 | 434017 | 434030 | 2 | 7  | 14 | GT   | 22 | 3  |
| 301696 | 59 | 439290 | 439313 | 2 | 12 | 24 | GT   | 17 | 7  |
| 301701 | 59 | 442167 | 442182 | 4 | 4  | 16 | TTTA | 21 | 9  |
| 301706 | 59 | 445503 | 445517 | 3 | 5  | 15 | TCC  | 22 | 3  |
| 301728 | 59 | 507294 | 507315 | 2 | 11 | 22 | TG   | 15 | 6  |
| 301741 | 59 | 552501 | 552528 | 2 | 14 | 28 | CA   | 9  | 11 |
| 301754 | 59 | 560904 | 560919 | 4 | 4  | 16 | AAAT | 24 | 3  |
| 301756 | 59 | 563681 | 563696 | 2 | 8  | 16 | CA   | 23 | 5  |
| 301757 | 59 | 568600 | 568613 | 2 | 7  | 14 | AC   | 17 | 6  |
| 301758 | 59 | 569437 | 569452 | 2 | 8  | 16 | TG   | 17 | 5  |
| 301759 | 59 | 570506 | 570523 | 2 | 9  | 18 | TG   | 19 | 4  |
| 301760 | 59 | 571760 | 571793 | 2 | 17 | 34 | CA   | 8  | 10 |
| 301766 | 59 | 580254 | 580273 | 4 | 5  | 20 | GCCA | 22 | 3  |
| 301774 | 59 | 594240 | 594255 | 2 | 8  | 16 | CA   | 23 | 7  |
| 301776 | 59 | 595381 | 595398 | 3 | 6  | 18 | GGT  | 12 | 3  |
| 301782 | 59 | 598066 | 598101 | 4 | 9  | 36 | CCAT | 20 | 5  |
| 301784 | 59 | 601954 | 601977 | 3 | 8  | 24 | ATA  | 16 | 5  |
| 301787 | 59 | 606104 | 606117 | 2 | 7  | 14 | CA   | 19 | 7  |
| 301788 | 59 | 610930 | 610945 | 2 | 8  | 16 | GT   | 27 | 3  |
| 301793 | 59 | 629768 | 629779 | 2 | 6  | 12 | AT   | 17 | 3  |
| 301794 | 59 | 631388 | 631408 | 3 | 7  | 21 | ATA  | 22 | 4  |
| 301801 | 59 | 644842 | 644885 | 2 | 22 | 44 | GT   | 8  | 10 |
| 301806 | 59 | 655426 | 655445 | 2 | 10 | 20 | CA   | 15 | 5  |
| 301809 | 59 | 658859 | 658870 | 2 | 6  | 12 | CA   | 27 | 7  |
| 301810 | 59 | 659780 | 659797 | 2 | 9  | 18 | AC   | 27 | 3  |
| 301811 | 59 | 663229 | 663240 | 2 | 6  | 12 | AC   | 23 | 4  |
| 301812 | 59 | 663319 | 663340 | 2 | 11 | 22 | AC   | 23 | 4  |
| 301818 | 59 | 675289 | 675304 | 2 | 8  | 16 | AG   | 28 | 3  |
| 301823 | 59 | 696536 | 696569 | 2 | 17 | 34 | GT   | 11 | 5  |
| 301828 | 59 | 709922 | 709951 | 3 | 10 | 30 | CCT  | 21 | 7  |
| 301838 | 59 | 744086 | 744117 | 2 | 16 | 32 | AC   | 8  | 8  |
| 301839 | 59 | 744199 | 744210 | 2 | 6  | 12 | CA   | 17 | 3  |
| 301840 | 59 | 744217 | 744228 | 2 | 6  | 12 | CA   | 25 | 4  |
| 301841 | 59 | 747756 | 747775 | 2 | 10 | 20 | CT   | 11 | 6  |
| 301846 | 59 | 749043 | 749066 | 2 | 12 | 24 | CA   | 15 | 3  |
| 301852 | 59 | 765139 | 765160 | 2 | 11 | 22 | GT   | 10 | 4  |
| 301853 | 59 | 772267 | 772282 | 2 | 8  | 16 | TG   | 17 | 5  |
| 301854 | 59 | 772351 | 772362 | 2 | 6  | 12 | AG   | 26 | 5  |
| 301855 | 59 | 772848 | 772865 | 2 | 9  | 18 | TG   | 21 | 7  |
| 301865 | 59 | 789172 | 789187 | 2 | 8  | 16 | GT   | 16 | 11 |
| 301875 | 59 | 814423 | 814436 | 2 | 7  | 14 | TG   | 24 | 5  |
| 301881 | 59 | 820571 | 820582 | 2 | 6  | 12 | CT   | 34 | 3  |



|        |    |         |         |   |    |    |      |    |    |
|--------|----|---------|---------|---|----|----|------|----|----|
| 301884 | 59 | 833529  | 833544  | 2 | 8  | 16 | TG   | 27 | 4  |
| 301886 | 59 | 838093  | 838122  | 3 | 10 | 30 | TTA  | 18 | 5  |
| 301892 | 59 | 861522  | 861535  | 2 | 7  | 14 | GT   | 14 | 11 |
| 301897 | 59 | 866053  | 866076  | 2 | 12 | 24 | GT   | 9  | 8  |
| 301898 | 59 | 871979  | 872000  | 2 | 11 | 22 | CA   | 14 | 8  |
| 301905 | 59 | 889358  | 889371  | 2 | 7  | 14 | TG   | 28 | 3  |
| 301907 | 59 | 892574  | 892593  | 2 | 10 | 20 | TG   | 24 | 4  |
| 301909 | 59 | 894309  | 894332  | 2 | 12 | 24 | CA   | 12 | 7  |
| 301913 | 59 | 897385  | 897396  | 2 | 6  | 12 | AG   | 20 | 6  |
| 301914 | 59 | 897399  | 897412  | 2 | 7  | 14 | AG   | 28 | 12 |
| 301915 | 59 | 897582  | 897595  | 2 | 7  | 14 | CA   | 25 | 5  |
| 301916 | 59 | 897665  | 897686  | 2 | 11 | 22 | TG   | 25 | 9  |
| 301917 | 59 | 897852  | 897895  | 2 | 22 | 44 | AC   | 11 | 10 |
| 301925 | 59 | 906439  | 906452  | 2 | 7  | 14 | TG   | 22 | 4  |
| 301929 | 59 | 913973  | 913984  | 2 | 6  | 12 | CA   | 21 | 4  |
| 301936 | 59 | 930596  | 930609  | 2 | 7  | 14 | AT   | 13 | 4  |
| 301966 | 59 | 1003793 | 1003804 | 2 | 6  | 12 | GT   | 24 | 3  |
| 301999 | 59 | 1085859 | 1085878 | 4 | 5  | 20 | ATAA | 10 | 3  |
| 302000 | 59 | 1085879 | 1085894 | 4 | 4  | 16 | ACAA | 10 | 4  |
| 302007 | 59 | 1101164 | 1101175 | 2 | 6  | 12 | CA   | 23 | 5  |
| 302008 | 59 | 1101641 | 1101656 | 2 | 8  | 16 | AC   | 16 | 6  |
| 302010 | 59 | 1114476 | 1114487 | 2 | 6  | 12 | AG   | 17 | 3  |
| 302022 | 59 | 1144795 | 1144828 | 2 | 17 | 34 | GT   | 16 | 9  |
| 302027 | 59 | 1158091 | 1158118 | 2 | 14 | 28 | CT   | 11 | 10 |
| 302028 | 59 | 1160054 | 1160065 | 2 | 6  | 12 | TG   | 23 | 5  |
| 302029 | 59 | 1160068 | 1160079 | 2 | 6  | 12 | TG   | 22 | 4  |
| 302033 | 59 | 1163006 | 1163026 | 3 | 7  | 21 | AGG  | 23 | 3  |
| 302044 | 59 | 1186057 | 1186074 | 2 | 9  | 18 | CA   | 23 | 8  |
| 302045 | 59 | 1186264 | 1186281 | 2 | 9  | 18 | TG   | 25 | 4  |
| 302067 | 59 | 1231930 | 1231945 | 4 | 4  | 16 | AAAT | 14 | 3  |
| 302068 | 59 | 1232285 | 1232296 | 2 | 6  | 12 | GT   | 26 | 4  |
| 302069 | 59 | 1232504 | 1232525 | 2 | 11 | 22 | CA   | 15 | 7  |
| 302070 | 59 | 1233768 | 1233803 | 4 | 9  | 36 | TGTC | 14 | 7  |
| 302074 | 59 | 1242652 | 1242669 | 2 | 9  | 18 | TC   | 14 | 7  |
| 302086 | 59 | 1269023 | 1269042 | 2 | 10 | 20 | GT   | 16 | 7  |
| 302093 | 59 | 1290762 | 1290773 | 2 | 6  | 12 | AT   | 11 | 3  |
| 302094 | 59 | 1301627 | 1301650 | 3 | 8  | 24 | TCC  | 14 | 4  |
| 302095 | 59 | 1313044 | 1313061 | 2 | 9  | 18 | TG   | 20 | 9  |
| 302104 | 59 | 1326538 | 1326551 | 2 | 7  | 14 | TA   | 26 | 3  |
| 302114 | 59 | 1333068 | 1333081 | 2 | 7  | 14 | TG   | 20 | 4  |
| 302115 | 59 | 1333281 | 1333294 | 2 | 7  | 14 | AC   | 25 | 4  |
| 302120 | 59 | 1343346 | 1343379 | 2 | 17 | 34 | GT   | 8  | 7  |
| 302133 | 59 | 1358088 | 1358103 | 4 | 4  | 16 | AAAG | 7  | 8  |
| 302135 | 59 | 1359131 | 1359156 | 2 | 13 | 26 | CA   | 7  | 7  |
| 302142 | 59 | 1376300 | 1376335 | 2 | 18 | 36 | TG   | 19 | 8  |
| 302144 | 59 | 1378307 | 1378326 | 2 | 10 | 20 | TG   | 18 | 6  |
| 302145 | 59 | 1378922 | 1378937 | 2 | 8  | 16 | GA   | 18 | 6  |
| 302146 | 59 | 1380375 | 1380394 | 4 | 5  | 20 | TTTG | 24 | 6  |
| 302158 | 59 | 1402427 | 1402448 | 2 | 11 | 22 | AC   | 15 | 14 |
| 302160 | 59 | 1404764 | 1404783 | 2 | 10 | 20 | AC   | 18 | 6  |
| 302161 | 59 | 1405589 | 1405604 | 2 | 8  | 16 | CA   | 22 | 11 |

|        |    |         |         |   |    |    |      |    |    |
|--------|----|---------|---------|---|----|----|------|----|----|
| 302170 | 59 | 1415680 | 1415701 | 2 | 11 | 22 | GT   | 13 | 9  |
| 302176 | 59 | 1433265 | 1433286 | 2 | 11 | 22 | TC   | 13 | 13 |
| 302178 | 59 | 1436311 | 1436322 | 2 | 6  | 12 | TG   | 25 | 6  |
| 302194 | 59 | 1454895 | 1454909 | 3 | 5  | 15 | TGT  | 21 | 9  |
| 302199 | 59 | 1459798 | 1459819 | 2 | 11 | 22 | CA   | 13 | 12 |
| 302204 | 59 | 1465604 | 1465617 | 2 | 7  | 14 | CA   | 6  | 6  |
| 302207 | 59 | 1466058 | 1466081 | 2 | 12 | 24 | AC   | 6  | 4  |
| 302211 | 59 | 1471116 | 1471130 | 3 | 5  | 15 | GAG  | 18 | 4  |
| 302212 | 59 | 1471174 | 1471191 | 3 | 6  | 18 | GGT  | 19 | 4  |
| 302215 | 59 | 1475367 | 1475382 | 4 | 4  | 16 | TTTA | 22 | 7  |
| 302217 | 59 | 1478829 | 1478848 | 4 | 5  | 20 | TGTA | 20 | 4  |
| 302219 | 59 | 1482703 | 1482716 | 2 | 7  | 14 | AC   | 30 | 4  |
| 302231 | 59 | 1508826 | 1508841 | 2 | 8  | 16 | TG   | 24 | 5  |
| 302232 | 59 | 1509042 | 1509053 | 2 | 6  | 12 | CA   | 12 | 10 |
| 302234 | 59 | 1511864 | 1511879 | 2 | 8  | 16 | CA   | 15 | 9  |
| 302237 | 59 | 1514507 | 1514522 | 2 | 8  | 16 | TG   | 22 | 3  |
| 302252 | 59 | 1543663 | 1543700 | 2 | 19 | 38 | AC   | 11 | 10 |
| 302255 | 59 | 1546369 | 1546404 | 2 | 18 | 36 | AC   | 9  | 10 |
| 302256 | 59 | 1546555 | 1546578 | 3 | 8  | 24 | GCT  | 16 | 3  |
| 302257 | 59 | 1546843 | 1546857 | 3 | 5  | 15 | TAA  | 21 | 3  |
| 302261 | 59 | 1548431 | 1548460 | 2 | 15 | 30 | AC   | 12 | 11 |
| 302264 | 59 | 1549133 | 1549164 | 2 | 16 | 32 | GT   | 18 | 9  |
| 302273 | 59 | 1552381 | 1552392 | 2 | 6  | 12 | CA   | 30 | 4  |
| 302276 | 59 | 1557074 | 1557089 | 2 | 8  | 16 | CA   | 16 | 6  |
| 302277 | 59 | 1557092 | 1557103 | 2 | 6  | 12 | CA   | 15 | 7  |
| 302279 | 59 | 1559122 | 1559143 | 2 | 11 | 22 | AC   | 16 | 11 |
| 302291 | 59 | 1589235 | 1589249 | 3 | 5  | 15 | ATA  | 21 | 3  |
| 302299 | 59 | 1600515 | 1600566 | 4 | 13 | 52 | CATA | 9  | 7  |
| 302300 | 59 | 1601425 | 1601464 | 2 | 20 | 40 | AC   | 6  | 9  |
| 302319 | 59 | 1638711 | 1638726 | 4 | 4  | 16 | AAAT | 22 | 4  |
| 302321 | 59 | 1642679 | 1642696 | 2 | 9  | 18 | AC   | 14 | 4  |
| 302322 | 59 | 1642698 | 1642715 | 2 | 9  | 18 | CA   | 21 | 5  |
| 302344 | 59 | 1689140 | 1689151 | 2 | 6  | 12 | AT   | 22 | 10 |
| 302347 | 59 | 1693537 | 1693548 | 2 | 6  | 12 | AT   | 12 | 3  |
| 302348 | 59 | 1696404 | 1696415 | 2 | 6  | 12 | TG   | 18 | 3  |
| 302353 | 59 | 1701991 | 1702006 | 4 | 4  | 16 | GCAG | 25 | 5  |
| 302358 | 59 | 1717116 | 1717137 | 2 | 11 | 22 | GA   | 16 | 5  |
| 302371 | 59 | 1748225 | 1748236 | 2 | 6  | 12 | AC   | 12 | 5  |
| 302374 | 59 | 1749305 | 1749332 | 2 | 14 | 28 | CA   | 17 | 11 |
| 302375 | 59 | 1749355 | 1749370 | 2 | 8  | 16 | CA   | 26 | 3  |
| 302377 | 59 | 1754375 | 1754436 | 2 | 31 | 62 | AC   | 7  | 9  |
| 302384 | 59 | 1775030 | 1775043 | 2 | 7  | 14 | GT   | 19 | 6  |
| 302385 | 59 | 1775046 | 1775059 | 2 | 7  | 14 | GT   | 21 | 4  |
| 302400 | 59 | 1805696 | 1805711 | 4 | 4  | 16 | TCCT | 32 | 3  |
| 302404 | 59 | 1816004 | 1816017 | 2 | 7  | 14 | CT   | 8  | 3  |
| 302408 | 59 | 1818985 | 1818998 | 2 | 7  | 14 | AC   | 20 | 7  |
| 302409 | 59 | 1819063 | 1819074 | 2 | 6  | 12 | CA   | 18 | 6  |
| 302415 | 59 | 1831388 | 1831405 | 2 | 9  | 18 | AG   | 16 | 5  |
| 302418 | 59 | 1851425 | 1851452 | 2 | 14 | 28 | GT   | 13 | 19 |
| 302427 | 59 | 1900356 | 1900373 | 3 | 6  | 18 | TTA  | 16 | 3  |
| 302429 | 59 | 1916699 | 1916718 | 2 | 10 | 20 | AC   | 18 | 4  |

|        |    |         |         |   |    |    |      |    |    |
|--------|----|---------|---------|---|----|----|------|----|----|
| 302436 | 59 | 1941312 | 1941341 | 3 | 10 | 30 | GGA  | 20 | 6  |
| 302440 | 59 | 1942305 | 1942322 | 2 | 9  | 18 | GT   | 12 | 8  |
| 302446 | 59 | 1944972 | 1944987 | 2 | 8  | 16 | GT   | 25 | 5  |
| 302450 | 59 | 1958183 | 1958206 | 2 | 12 | 24 | GT   | 13 | 12 |
| 302460 | 59 | 1985542 | 1985567 | 2 | 13 | 26 | CA   | 17 | 6  |
| 302467 | 59 | 1996553 | 1996568 | 2 | 8  | 16 | TG   | 27 | 12 |
| 302471 | 59 | 2006409 | 2006422 | 2 | 7  | 14 | TG   | 14 | 4  |
| 302481 | 59 | 2061481 | 2061500 | 2 | 10 | 20 | AC   | 22 | 4  |
| 302482 | 59 | 2062528 | 2062543 | 2 | 8  | 16 | TC   | 28 | 3  |
| 302490 | 59 | 2070907 | 2070934 | 2 | 14 | 28 | AC   | 13 | 10 |
| 302493 | 59 | 2078828 | 2078849 | 2 | 11 | 22 | AC   | 13 | 13 |
| 302495 | 59 | 2089333 | 2089348 | 2 | 8  | 16 | AC   | 30 | 3  |
| 302499 | 59 | 2104635 | 2104662 | 4 | 7  | 28 | GGTA | 26 | 8  |
| 302504 | 59 | 2121602 | 2121619 | 3 | 6  | 18 | TGC  | 21 | 4  |
| 302505 | 59 | 2124990 | 2125015 | 2 | 13 | 26 | AC   | 16 | 5  |
| 302506 | 59 | 2125119 | 2125138 | 2 | 10 | 20 | AC   | 14 | 6  |
| 302510 | 59 | 2130735 | 2130764 | 3 | 10 | 30 | TAA  | 14 | 5  |
| 302513 | 59 | 2139023 | 2139048 | 2 | 13 | 26 | TG   | 21 | 9  |
| 302521 | 59 | 2146718 | 2146737 | 2 | 10 | 20 | AC   | 23 | 6  |
| 302526 | 59 | 2151016 | 2151035 | 2 | 10 | 20 | GT   | 19 | 7  |
| 302537 | 59 | 2162015 | 2162040 | 2 | 13 | 26 | AC   | 14 | 6  |
| 302549 | 59 | 2176848 | 2176863 | 2 | 8  | 16 | TG   | 24 | 7  |
| 302553 | 59 | 2182626 | 2182643 | 2 | 9  | 18 | CT   | 27 | 3  |
| 302554 | 59 | 2184491 | 2184530 | 2 | 20 | 40 | TG   | 14 | 9  |
| 302555 | 59 | 2191894 | 2191908 | 3 | 5  | 15 | AAC  | 18 | 3  |
| 302557 | 59 | 2196966 | 2196981 | 2 | 8  | 16 | TG   | 26 | 3  |
| 302566 | 59 | 2232765 | 2232788 | 2 | 12 | 24 | CA   | 12 | 9  |
| 302572 | 59 | 2257551 | 2257568 | 2 | 9  | 18 | AC   | 22 | 6  |
| 302579 | 59 | 2260900 | 2260920 | 3 | 7  | 21 | TCT  | 12 | 3  |
| 302582 | 59 | 2262180 | 2262209 | 2 | 15 | 30 | CA   | 15 | 8  |
| 302584 | 59 | 2265718 | 2265741 | 2 | 12 | 24 | TG   | 18 | 8  |
| 302587 | 59 | 2267224 | 2267235 | 2 | 6  | 12 | AT   | 23 | 7  |
| 302599 | 59 | 2279471 | 2279490 | 2 | 10 | 20 | GT   | 15 | 4  |
| 302605 | 59 | 2308966 | 2308987 | 2 | 11 | 22 | TG   | 22 | 5  |
| 302606 | 59 | 2309399 | 2309414 | 2 | 8  | 16 | AC   | 26 | 9  |
| 302626 | 59 | 2359415 | 2359442 | 4 | 7  | 28 | TCCA | 28 | 5  |
| 302631 | 59 | 2364825 | 2364842 | 2 | 9  | 18 | TA   | 15 | 3  |
| 302632 | 59 | 2369247 | 2369262 | 2 | 8  | 16 | TC   | 26 | 5  |
| 302633 | 59 | 2370012 | 2370035 | 3 | 8  | 24 | CTG  | 23 | 4  |
| 302640 | 59 | 2371407 | 2371434 | 4 | 7  | 28 | AAGA | 17 | 6  |
| 302651 | 59 | 2404520 | 2404531 | 2 | 6  | 12 | TG   | 25 | 6  |
| 302658 | 59 | 2414974 | 2414985 | 2 | 6  | 12 | AT   | 13 | 3  |
| 302676 | 59 | 2447118 | 2447137 | 4 | 5  | 20 | AGAT | 16 | 3  |
| 302677 | 59 | 2448023 | 2448052 | 2 | 15 | 30 | CA   | 13 | 10 |
| 302678 | 59 | 2452829 | 2452854 | 2 | 13 | 26 | GT   | 9  | 8  |
| 302682 | 59 | 2465084 | 2465099 | 4 | 4  | 16 | TACA | 18 | 6  |
| 302685 | 59 | 2477723 | 2477734 | 2 | 6  | 12 | CT   | 24 | 3  |
| 302689 | 59 | 2497019 | 2497040 | 2 | 11 | 22 | CA   | 20 | 8  |
| 302692 | 59 | 2511236 | 2511247 | 2 | 6  | 12 | CA   | 25 | 10 |
| 302698 | 59 | 2526120 | 2526135 | 4 | 4  | 16 | ATTC | 28 | 4  |
| 302700 | 59 | 2540859 | 2540876 | 3 | 6  | 18 | GAA  | 32 | 5  |

|        |    |         |         |   |    |    |      |    |    |
|--------|----|---------|---------|---|----|----|------|----|----|
| 302706 | 59 | 2552236 | 2552251 | 2 | 8  | 16 | CA   | 25 | 3  |
| 302711 | 59 | 2571378 | 2571393 | 4 | 4  | 16 | AAAT | 21 | 3  |
| 302718 | 59 | 2597536 | 2597591 | 2 | 28 | 56 | CA   | 6  | 8  |
| 302719 | 59 | 2598789 | 2598822 | 2 | 17 | 34 | AC   | 8  | 8  |
| 302720 | 59 | 2600441 | 2600460 | 2 | 10 | 20 | CT   | 9  | 5  |
| 302724 | 59 | 2605727 | 2605740 | 2 | 7  | 14 | TG   | 22 | 5  |
| 302729 | 59 | 2612182 | 2612207 | 2 | 13 | 26 | TG   | 19 | 10 |
| 302730 | 59 | 2612860 | 2612873 | 2 | 7  | 14 | AC   | 22 | 6  |
| 302739 | 59 | 2620231 | 2620266 | 3 | 12 | 36 | CCT  | 11 | 8  |
| 302741 | 59 | 2624357 | 2624384 | 2 | 14 | 28 | AC   | 8  | 12 |
| 302742 | 59 | 2624572 | 2624605 | 2 | 17 | 34 | TG   | 13 | 9  |
| 302745 | 59 | 2625352 | 2625363 | 2 | 6  | 12 | GT   | 11 | 6  |
| 302746 | 59 | 2625365 | 2625384 | 2 | 10 | 20 | TG   | 12 | 8  |
| 302748 | 59 | 2626967 | 2626984 | 2 | 9  | 18 | GT   | 23 | 3  |
| 302750 | 59 | 2630471 | 2630508 | 2 | 19 | 38 | AC   | 8  | 7  |
| 302754 | 59 | 2634285 | 2634324 | 4 | 10 | 40 | CTTT | 17 | 8  |
| 302755 | 59 | 2634916 | 2634933 | 2 | 9  | 18 | TG   | 24 | 4  |
| 302761 | 59 | 2647121 | 2647154 | 2 | 17 | 34 | GT   | 15 | 6  |
| 302763 | 59 | 2649573 | 2649620 | 2 | 24 | 48 | AC   | 13 | 7  |
| 302764 | 59 | 2651405 | 2651444 | 4 | 10 | 40 | TTTC | 21 | 6  |
| 302767 | 59 | 2657159 | 2657190 | 2 | 16 | 32 | TG   | 15 | 9  |
| 302772 | 59 | 2658475 | 2658500 | 2 | 13 | 26 | CA   | 12 | 9  |
| 302777 | 59 | 2664033 | 2664056 | 2 | 12 | 24 | GA   | 13 | 6  |
| 302786 | 59 | 2666022 | 2666035 | 2 | 7  | 14 | AC   | 26 | 3  |
| 302789 | 59 | 2668804 | 2668825 | 2 | 11 | 22 | CA   | 18 | 4  |
| 302790 | 59 | 2668948 | 2668981 | 2 | 17 | 34 | GT   | 11 | 8  |
| 302793 | 59 | 2673854 | 2673883 | 2 | 15 | 30 | GT   | 19 | 9  |
| 302794 | 59 | 2673956 | 2673985 | 2 | 15 | 30 | TG   | 9  | 4  |
| 302797 | 59 | 2675899 | 2675924 | 2 | 13 | 26 | TC   | 18 | 6  |
| 302798 | 59 | 2677749 | 2677768 | 4 | 5  | 20 | AATG | 29 | 3  |
| 302802 | 59 | 2686672 | 2686687 | 4 | 4  | 16 | AAAC | 17 | 3  |
| 302807 | 59 | 2693202 | 2693213 | 2 | 6  | 12 | CA   | 12 | 3  |
| 302808 | 59 | 2693411 | 2693442 | 2 | 16 | 32 | GA   | 6  | 7  |
| 302809 | 59 | 2693615 | 2693628 | 2 | 7  | 14 | GA   | 27 | 5  |
| 302811 | 59 | 2698780 | 2698795 | 2 | 8  | 16 | CA   | 26 | 3  |
| 302812 | 59 | 2708168 | 2708201 | 2 | 17 | 34 | CA   | 6  | 9  |
| 302814 | 59 | 2712815 | 2712838 | 2 | 12 | 24 | CA   | 14 | 4  |
| 302815 | 59 | 2716437 | 2716466 | 2 | 15 | 30 | CA   | 8  | 5  |
| 302816 | 59 | 2716660 | 2716695 | 2 | 18 | 36 | GT   | 16 | 14 |
| 302817 | 59 | 2716925 | 2716950 | 2 | 13 | 26 | GT   | 11 | 8  |
| 302818 | 59 | 2717116 | 2717157 | 2 | 21 | 42 | AC   | 9  | 7  |
| 302819 | 59 | 2717282 | 2717307 | 2 | 13 | 26 | AC   | 16 | 4  |
| 302820 | 59 | 2719256 | 2719269 | 2 | 7  | 14 | CA   | 28 | 6  |
| 302821 | 59 | 2719381 | 2719394 | 2 | 7  | 14 | TG   | 28 | 3  |
| 302825 | 59 | 2719795 | 2719808 | 2 | 7  | 14 | AC   | 20 | 3  |
| 302828 | 59 | 2725758 | 2725769 | 2 | 6  | 12 | GT   | 19 | 7  |
| 302829 | 59 | 2725887 | 2725900 | 2 | 7  | 14 | AC   | 14 | 7  |
| 302830 | 59 | 2725901 | 2725914 | 2 | 7  | 14 | AT   | 23 | 8  |
| 302831 | 59 | 2725976 | 2725993 | 2 | 9  | 18 | CA   | 23 | 5  |
| 302832 | 59 | 2726157 | 2726168 | 2 | 6  | 12 | CA   | 27 | 3  |
| 302833 | 59 | 2728321 | 2728346 | 2 | 13 | 26 | CA   | 19 | 10 |

|        |    |         |         |   |    |    |     |    |    |
|--------|----|---------|---------|---|----|----|-----|----|----|
| 302834 | 59 | 2728519 | 2728548 | 2 | 15 | 30 | TG  | 7  | 7  |
| 302838 | 59 | 2732038 | 2732051 | 2 | 7  | 14 | TG  | 21 | 8  |
| 302840 | 59 | 2734634 | 2734649 | 2 | 8  | 16 | TC  | 11 | 4  |
| 302848 | 59 | 2743772 | 2743795 | 2 | 12 | 24 | CA  | 12 | 7  |
| 302849 | 59 | 2744075 | 2744100 | 2 | 13 | 26 | CA  | 14 | 12 |
| 302852 | 59 | 2747891 | 2747910 | 2 | 10 | 20 | TG  | 16 | 4  |
| 302854 | 59 | 2748496 | 2748523 | 2 | 14 | 28 | TC  | 11 | 10 |
| 302857 | 59 | 2753788 | 2753811 | 2 | 12 | 24 | GT  | 15 | 14 |
| 302858 | 59 | 2756226 | 2756239 | 2 | 7  | 14 | CA  | 25 | 4  |
| 302870 | 59 | 2763697 | 2763708 | 2 | 6  | 12 | CA  | 20 | 6  |
| 302871 | 59 | 2765915 | 2765968 | 2 | 27 | 54 | TG  | 8  | 10 |
| 302872 | 59 | 2766180 | 2766199 | 2 | 10 | 20 | AC  | 10 | 6  |
| 302875 | 59 | 2769464 | 2769475 | 2 | 6  | 12 | GT  | 30 | 5  |
| 302876 | 59 | 2771783 | 2771806 | 2 | 12 | 24 | GT  | 17 | 11 |
| 302877 | 59 | 2774978 | 2774993 | 2 | 8  | 16 | AC  | 19 | 3  |
| 302882 | 59 | 2790157 | 2790180 | 3 | 8  | 24 | CCT | 22 | 3  |
| 302883 | 59 | 2790246 | 2790285 | 2 | 20 | 40 | CA  | 7  | 9  |
| 302909 | 59 | 2821537 | 2821562 | 2 | 13 | 26 | GT  | 6  | 3  |
| 302911 | 59 | 2834060 | 2834085 | 2 | 13 | 26 | CA  | 10 | 9  |
| 302914 | 59 | 2834950 | 2834963 | 2 | 7  | 14 | AC  | 19 | 3  |
| 302915 | 59 | 2839808 | 2839823 | 2 | 8  | 16 | TG  | 24 | 3  |
| 302919 | 59 | 2845154 | 2845181 | 2 | 14 | 28 | TG  | 22 | 13 |
| 302920 | 59 | 2845671 | 2845688 | 2 | 9  | 18 | TG  | 25 | 4  |
| 302923 | 59 | 2854147 | 2854160 | 2 | 7  | 14 | AC  | 7  | 5  |
| 302924 | 59 | 2854189 | 2854206 | 2 | 9  | 18 | AC  | 8  | 6  |
| 302925 | 59 | 2854270 | 2854297 | 2 | 14 | 28 | CA  | 17 | 8  |
| 302926 | 59 | 2859964 | 2859995 | 2 | 16 | 32 | CA  | 11 | 7  |
| 302927 | 59 | 2860093 | 2860110 | 2 | 9  | 18 | CA  | 18 | 5  |
| 302929 | 59 | 2860197 | 2860214 | 2 | 9  | 18 | AC  | 14 | 8  |
| 302935 | 59 | 2862655 | 2862668 | 2 | 7  | 14 | GT  | 22 | 4  |
| 302936 | 59 | 2862817 | 2862852 | 2 | 18 | 36 | TG  | 19 | 13 |
| 302937 | 59 | 2863158 | 2863171 | 2 | 7  | 14 | TG  | 18 | 6  |
| 302941 | 59 | 2866832 | 2866845 | 2 | 7  | 14 | AC  | 22 | 9  |
| 302949 | 59 | 2879162 | 2879179 | 2 | 9  | 18 | TG  | 19 | 7  |
| 302952 | 59 | 2881619 | 2881639 | 3 | 7  | 21 | CTG | 28 | 9  |
| 302956 | 59 | 2885098 | 2885109 | 2 | 6  | 12 | CT  | 26 | 3  |
| 302957 | 59 | 2885250 | 2885263 | 2 | 7  | 14 | AC  | 16 | 3  |
| 302961 | 59 | 2900848 | 2900873 | 2 | 13 | 26 | TG  | 8  | 7  |
| 302963 | 59 | 2904400 | 2904413 | 2 | 7  | 14 | CA  | 17 | 3  |
| 302968 | 59 | 2910066 | 2910085 | 2 | 10 | 20 | AG  | 13 | 6  |
| 302970 | 59 | 2911249 | 2911282 | 2 | 17 | 34 | CA  | 14 | 8  |
| 302975 | 59 | 2918333 | 2918346 | 2 | 7  | 14 | TG  | 16 | 6  |
| 302976 | 59 | 2918349 | 2918362 | 2 | 7  | 14 | TG  | 11 | 6  |
| 302978 | 59 | 2919298 | 2919315 | 2 | 9  | 18 | AC  | 12 | 11 |
| 302980 | 59 | 2922277 | 2922308 | 2 | 16 | 32 | CA  | 14 | 11 |
| 302982 | 59 | 2923179 | 2923192 | 2 | 7  | 14 | AC  | 19 | 3  |
| 302989 | 59 | 2925233 | 2925252 | 2 | 10 | 20 | GA  | 15 | 5  |
| 302990 | 59 | 2925740 | 2925757 | 2 | 9  | 18 | GT  | 9  | 4  |
| 302993 | 59 | 2926141 | 2926158 | 2 | 9  | 18 | CA  | 15 | 5  |
| 302995 | 59 | 2927250 | 2927279 | 2 | 15 | 30 | AC  | 12 | 9  |
| 302999 | 59 | 2929380 | 2929407 | 2 | 14 | 28 | TG  | 10 | 9  |

|        |    |         |         |   |    |    |      |    |    |
|--------|----|---------|---------|---|----|----|------|----|----|
| 303003 | 59 | 2931763 | 2931776 | 2 | 7  | 14 | TG   | 12 | 3  |
| 303005 | 59 | 2931997 | 2932018 | 2 | 11 | 22 | GT   | 18 | 11 |
| 303009 | 59 | 2936660 | 2936677 | 2 | 9  | 18 | TC   | 13 | 3  |
| 303012 | 59 | 2939477 | 2939488 | 2 | 6  | 12 | CA   | 14 | 3  |
| 303014 | 59 | 2939955 | 2939970 | 2 | 8  | 16 | AC   | 15 | 9  |
| 303017 | 59 | 2940292 | 2940315 | 2 | 12 | 24 | CA   | 14 | 8  |
| 303019 | 59 | 2940890 | 2940937 | 2 | 24 | 48 | CT   | 6  | 5  |
| 303020 | 59 | 2942437 | 2942454 | 3 | 6  | 18 | TGT  | 20 | 6  |
| 303032 | 59 | 2954520 | 2954533 | 2 | 7  | 14 | AC   | 15 | 4  |
| 303033 | 59 | 2954642 | 2954703 | 2 | 31 | 62 | AC   | 7  | 8  |
| 303034 | 59 | 2954991 | 2955014 | 4 | 6  | 24 | GATA | 30 | 3  |
| 303035 | 59 | 2955043 | 2955060 | 2 | 9  | 18 | CA   | 22 | 4  |
| 303036 | 59 | 2955203 | 2955220 | 2 | 9  | 18 | TG   | 24 | 3  |
| 303037 | 59 | 2955391 | 2955418 | 2 | 14 | 28 | TG   | 19 | 4  |
| 303041 | 59 | 2957910 | 2957949 | 2 | 20 | 40 | CA   | 9  | 8  |
| 303042 | 59 | 2957997 | 2958012 | 2 | 8  | 16 | AC   | 26 | 7  |
| 303045 | 59 | 2961765 | 2961776 | 2 | 6  | 12 | AG   | 33 | 3  |
| 303047 | 59 | 2963369 | 2963414 | 2 | 23 | 46 | CA   | 16 | 9  |
| 303052 | 59 | 2969466 | 2969477 | 2 | 6  | 12 | GT   | 19 | 3  |
| 303053 | 59 | 2969714 | 2969725 | 2 | 6  | 12 | TG   | 27 | 3  |
| 303054 | 59 | 2970204 | 2970217 | 2 | 7  | 14 | CA   | 27 | 4  |
| 303058 | 59 | 2975364 | 2975381 | 2 | 9  | 18 | TG   | 21 | 5  |
| 303060 | 59 | 2976338 | 2976351 | 2 | 7  | 14 | AC   | 21 | 6  |
| 303061 | 59 | 2976470 | 2976481 | 2 | 6  | 12 | CA   | 25 | 7  |
| 303062 | 59 | 2978863 | 2978882 | 2 | 10 | 20 | AG   | 25 | 8  |
| 303065 | 59 | 2981168 | 2981197 | 2 | 15 | 30 | AC   | 14 | 16 |
| 303069 | 59 | 2984487 | 2984500 | 2 | 7  | 14 | GT   | 21 | 5  |
| 303070 | 59 | 2987026 | 2987037 | 2 | 6  | 12 | TG   | 29 | 3  |
| 303074 | 59 | 2988691 | 2988710 | 2 | 10 | 20 | CT   | 14 | 5  |
| 303081 | 59 | 2992255 | 2992266 | 2 | 6  | 12 | AT   | 23 | 3  |
| 303082 | 59 | 2992684 | 2992699 | 2 | 8  | 16 | TG   | 16 | 13 |
| 303092 | 59 | 3008974 | 3008985 | 2 | 6  | 12 | AC   | 17 | 4  |
| 303097 | 60 | 4922    | 4951    | 2 | 15 | 30 | CT   | 6  | 6  |
| 303098 | 60 | 8526    | 8601    | 4 | 19 | 76 | GATA | 10 | 7  |
| 303101 | 60 | 12407   | 12436   | 2 | 15 | 30 | GT   | 22 | 14 |
| 303102 | 60 | 20537   | 20548   | 2 | 6  | 12 | AT   | 16 | 3  |
| 303109 | 60 | 37391   | 37438   | 3 | 16 | 48 | TAA  | 17 | 11 |
| 303120 | 60 | 48232   | 48267   | 4 | 9  | 36 | TCTA | 11 | 5  |
| 303122 | 60 | 58232   | 58249   | 2 | 9  | 18 | AC   | 20 | 4  |
| 303123 | 60 | 58310   | 58335   | 2 | 13 | 26 | CA   | 6  | 7  |
| 303125 | 60 | 58444   | 58471   | 2 | 14 | 28 | AC   | 10 | 12 |
| 303129 | 60 | 65071   | 65114   | 2 | 22 | 44 | TG   | 10 | 8  |
| 303135 | 60 | 68958   | 68973   | 2 | 8  | 16 | GT   | 23 | 3  |
| 303140 | 60 | 77143   | 77160   | 3 | 6  | 18 | AAT  | 29 | 4  |
| 303153 | 60 | 128830  | 128849  | 2 | 10 | 20 | AC   | 21 | 4  |
| 303157 | 60 | 151087  | 151108  | 2 | 11 | 22 | AC   | 13 | 8  |
| 303160 | 60 | 154421  | 154460  | 2 | 20 | 40 | GT   | 20 | 14 |
| 303165 | 60 | 162380  | 162391  | 2 | 6  | 12 | TG   | 7  | 3  |
| 303169 | 60 | 173140  | 173193  | 2 | 27 | 54 | TG   | 6  | 10 |
| 303172 | 60 | 181238  | 181252  | 3 | 5  | 15 | CTG  | 23 | 5  |
| 303183 | 60 | 210751  | 210766  | 2 | 8  | 16 | AC   | 18 | 7  |

|        |    |        |        |   |    |    |      |    |    |
|--------|----|--------|--------|---|----|----|------|----|----|
| 303186 | 60 | 226825 | 226840 | 2 | 8  | 16 | GA   | 16 | 5  |
| 303192 | 60 | 251021 | 251032 | 2 | 6  | 12 | TG   | 16 | 4  |
| 303194 | 60 | 251372 | 251405 | 2 | 17 | 34 | CA   | 12 | 17 |
| 303200 | 60 | 269189 | 269220 | 2 | 16 | 32 | GT   | 14 | 15 |
| 303211 | 60 | 298898 | 298913 | 2 | 8  | 16 | AC   | 15 | 5  |
| 303215 | 60 | 303433 | 303458 | 2 | 13 | 26 | TG   | 9  | 13 |
| 303222 | 60 | 316582 | 316593 | 2 | 6  | 12 | AT   | 6  | 3  |
| 303228 | 60 | 343226 | 343240 | 3 | 5  | 15 | AAT  | 24 | 4  |
| 303238 | 60 | 366994 | 367014 | 3 | 7  | 21 | GTA  | 10 | 6  |
| 303241 | 60 | 375993 | 376008 | 4 | 4  | 16 | ATAC | 16 | 3  |
| 303244 | 60 | 384984 | 385007 | 4 | 6  | 24 | ACAA | 13 | 4  |
| 303254 | 60 | 403207 | 403248 | 2 | 21 | 42 | TG   | 14 | 10 |
| 303264 | 60 | 413388 | 413401 | 2 | 7  | 14 | CA   | 26 | 6  |
| 303265 | 60 | 413994 | 414023 | 2 | 15 | 30 | CA   | 15 | 10 |
| 303266 | 60 | 415729 | 415780 | 4 | 13 | 52 | TCTA | 14 | 10 |
| 303267 | 60 | 418274 | 418299 | 2 | 13 | 26 | GA   | 6  | 4  |
| 303269 | 60 | 424952 | 424967 | 2 | 8  | 16 | AC   | 16 | 8  |
| 303270 | 60 | 425364 | 425383 | 2 | 10 | 20 | CA   | 23 | 7  |
| 303271 | 60 | 426237 | 426286 | 2 | 25 | 50 | TG   | 7  | 12 |
| 303273 | 60 | 428309 | 428320 | 2 | 6  | 12 | TA   | 12 | 5  |
| 303278 | 60 | 446023 | 446046 | 2 | 12 | 24 | CA   | 15 | 12 |
| 303283 | 60 | 449452 | 449473 | 2 | 11 | 22 | AC   | 26 | 4  |
| 303287 | 60 | 458570 | 458589 | 2 | 10 | 20 | GT   | 10 | 7  |
| 303292 | 60 | 468226 | 468259 | 2 | 17 | 34 | CA   | 6  | 9  |
| 303295 | 60 | 477394 | 477433 | 2 | 20 | 40 | AC   | 9  | 13 |
| 303302 | 60 | 495700 | 495731 | 2 | 16 | 32 | CA   | 9  | 10 |
| 303303 | 60 | 498184 | 498223 | 2 | 20 | 40 | TG   | 9  | 8  |
| 303305 | 60 | 500531 | 500590 | 4 | 15 | 60 | ACAT | 8  | 11 |
| 303308 | 60 | 506389 | 506428 | 4 | 10 | 40 | TGGA | 17 | 7  |
| 303310 | 60 | 506835 | 506854 | 2 | 10 | 20 | AT   | 12 | 10 |
| 303312 | 60 | 509450 | 509469 | 2 | 10 | 20 | CA   | 12 | 11 |
| 303313 | 60 | 509496 | 509507 | 2 | 6  | 12 | CA   | 22 | 6  |
| 303314 | 60 | 511277 | 511294 | 2 | 9  | 18 | CA   | 12 | 8  |
| 303327 | 60 | 531256 | 531303 | 4 | 12 | 48 | ATGG | 25 | 14 |
| 303328 | 60 | 532003 | 532024 | 2 | 11 | 22 | CA   | 24 | 9  |
| 303332 | 60 | 545741 | 545764 | 2 | 12 | 24 | AC   | 13 | 11 |
| 303333 | 60 | 547388 | 547420 | 3 | 11 | 33 | TCA  | 17 | 7  |
| 303341 | 60 | 564201 | 564214 | 2 | 7  | 14 | TG   | 23 | 5  |
| 303342 | 60 | 569602 | 569631 | 2 | 15 | 30 | AC   | 9  | 4  |
| 303343 | 60 | 572449 | 572462 | 2 | 7  | 14 | CA   | 20 | 3  |
| 303344 | 60 | 572808 | 572851 | 2 | 22 | 44 | AC   | 8  | 8  |
| 303345 | 60 | 575476 | 575493 | 3 | 6  | 18 | ACC  | 12 | 3  |
| 303346 | 60 | 579919 | 579932 | 2 | 7  | 14 | TA   | 13 | 5  |
| 303347 | 60 | 580072 | 580086 | 3 | 5  | 15 | ATT  | 21 | 4  |
| 303348 | 60 | 581956 | 581971 | 4 | 4  | 16 | TCTG | 11 | 4  |
| 303351 | 60 | 586276 | 586305 | 2 | 15 | 30 | AC   | 12 | 8  |
| 303354 | 60 | 589954 | 589967 | 2 | 7  | 14 | GA   | 14 | 7  |
| 303355 | 60 | 591176 | 591191 | 2 | 8  | 16 | GA   | 33 | 3  |
| 303357 | 60 | 594855 | 594876 | 2 | 11 | 22 | AC   | 7  | 3  |
| 303362 | 60 | 595808 | 595835 | 2 | 14 | 28 | GT   | 20 | 14 |
| 303363 | 60 | 597074 | 597105 | 2 | 16 | 32 | GT   | 11 | 10 |

|        |    |         |         |   |    |    |      |    |    |
|--------|----|---------|---------|---|----|----|------|----|----|
| 303369 | 60 | 604938  | 604957  | 2 | 10 | 20 | AC   | 19 | 9  |
| 303371 | 60 | 608946  | 608963  | 3 | 6  | 18 | AAT  | 16 | 6  |
| 303372 | 60 | 609523  | 609555  | 3 | 11 | 33 | CAT  | 20 | 6  |
| 303373 | 60 | 609666  | 609695  | 3 | 10 | 30 | AGT  | 16 | 3  |
| 303374 | 60 | 613949  | 613968  | 2 | 10 | 20 | GT   | 21 | 15 |
| 303375 | 60 | 615951  | 615970  | 2 | 10 | 20 | TG   | 17 | 9  |
| 303380 | 60 | 622935  | 622950  | 4 | 4  | 16 | TGAA | 28 | 4  |
| 303395 | 60 | 670195  | 670206  | 2 | 6  | 12 | GT   | 15 | 5  |
| 303400 | 60 | 670762  | 670776  | 3 | 5  | 15 | TTG  | 21 | 3  |
| 303401 | 60 | 672957  | 672978  | 2 | 11 | 22 | CA   | 27 | 4  |
| 303406 | 60 | 676649  | 676676  | 2 | 14 | 28 | AC   | 16 | 11 |
| 303408 | 60 | 685160  | 685173  | 2 | 7  | 14 | TC   | 21 | 3  |
| 303416 | 60 | 707419  | 707446  | 2 | 14 | 28 | CA   | 20 | 6  |
| 303425 | 60 | 721205  | 721226  | 2 | 11 | 22 | TG   | 20 | 10 |
| 303437 | 60 | 755316  | 755339  | 2 | 12 | 24 | GT   | 21 | 6  |
| 303439 | 60 | 758502  | 758525  | 2 | 12 | 24 | CA   | 19 | 3  |
| 303446 | 60 | 768465  | 768476  | 2 | 6  | 12 | GT   | 12 | 3  |
| 303450 | 60 | 772237  | 772252  | 2 | 8  | 16 | GT   | 15 | 11 |
| 303467 | 60 | 856811  | 856834  | 4 | 6  | 24 | GTTA | 25 | 7  |
| 303478 | 60 | 868709  | 868740  | 2 | 16 | 32 | CA   | 15 | 12 |
| 303479 | 60 | 868899  | 868914  | 2 | 8  | 16 | AC   | 27 | 6  |
| 303484 | 60 | 883410  | 883433  | 3 | 8  | 24 | TAT  | 24 | 4  |
| 303489 | 60 | 890169  | 890202  | 2 | 17 | 34 | AC   | 13 | 11 |
| 303493 | 60 | 898398  | 898411  | 2 | 7  | 14 | CT   | 30 | 3  |
| 303498 | 60 | 905642  | 905665  | 2 | 12 | 24 | CA   | 23 | 9  |
| 303503 | 60 | 916515  | 916526  | 2 | 6  | 12 | GT   | 22 | 3  |
| 303508 | 60 | 931551  | 931566  | 2 | 8  | 16 | GT   | 17 | 7  |
| 303511 | 60 | 933001  | 933018  | 2 | 9  | 18 | AC   | 20 | 5  |
| 303514 | 60 | 939956  | 939973  | 2 | 9  | 18 | GT   | 21 | 6  |
| 303515 | 60 | 943805  | 943820  | 4 | 4  | 16 | GACA | 36 | 3  |
| 303517 | 60 | 944895  | 944908  | 2 | 7  | 14 | GT   | 18 | 4  |
| 303521 | 60 | 947851  | 947874  | 2 | 12 | 24 | CA   | 16 | 12 |
| 303527 | 60 | 966182  | 966196  | 3 | 5  | 15 | TGA  | 24 | 3  |
| 303530 | 60 | 980669  | 980695  | 3 | 9  | 27 | AAT  | 6  | 5  |
| 303534 | 60 | 985350  | 985361  | 2 | 6  | 12 | AC   | 18 | 4  |
| 303535 | 60 | 985364  | 985381  | 2 | 9  | 18 | AC   | 26 | 8  |
| 303539 | 60 | 987939  | 987950  | 2 | 6  | 12 | AC   | 29 | 4  |
| 303540 | 60 | 988876  | 988902  | 3 | 9  | 27 | TGA  | 25 | 5  |
| 303543 | 60 | 991119  | 991144  | 2 | 13 | 26 | GA   | 7  | 4  |
| 303547 | 60 | 1006538 | 1006559 | 2 | 11 | 22 | GT   | 22 | 3  |
| 303550 | 60 | 1011713 | 1011724 | 2 | 6  | 12 | CG   | 16 | 18 |
| 303552 | 60 | 1013630 | 1013669 | 2 | 20 | 40 | GT   | 10 | 9  |
| 303557 | 60 | 1017606 | 1017635 | 2 | 15 | 30 | CA   | 10 | 6  |
| 303565 | 60 | 1028418 | 1028447 | 2 | 15 | 30 | CA   | 10 | 7  |
| 303566 | 60 | 1031377 | 1031396 | 2 | 10 | 20 | TG   | 12 | 5  |
| 303567 | 60 | 1033579 | 1033592 | 2 | 7  | 14 | TG   | 30 | 4  |
| 303570 | 60 | 1048991 | 1049018 | 2 | 14 | 28 | AC   | 19 | 6  |
| 303577 | 60 | 1064347 | 1064364 | 2 | 9  | 18 | CA   | 18 | 5  |
| 303580 | 60 | 1067719 | 1067730 | 2 | 6  | 12 | TG   | 24 | 8  |
| 303586 | 60 | 1072211 | 1072260 | 2 | 25 | 50 | CA   | 6  | 8  |
| 303587 | 60 | 1072536 | 1072565 | 2 | 15 | 30 | CA   | 21 | 7  |



|        |    |         |         |   |    |    |      |    |    |
|--------|----|---------|---------|---|----|----|------|----|----|
| 303593 | 60 | 1075363 | 1075388 | 2 | 13 | 26 | AC   | 18 | 4  |
| 303598 | 60 | 1079213 | 1079224 | 2 | 6  | 12 | GT   | 28 | 9  |
| 303600 | 60 | 1080770 | 1080793 | 2 | 12 | 24 | AC   | 15 | 10 |
| 303601 | 60 | 1082270 | 1082293 | 3 | 8  | 24 | GAG  | 22 | 5  |
| 303602 | 60 | 1085571 | 1085594 | 2 | 12 | 24 | GT   | 9  | 4  |
| 303608 | 60 | 1092604 | 1092621 | 2 | 9  | 18 | CA   | 30 | 5  |
| 303621 | 60 | 1125704 | 1125715 | 2 | 6  | 12 | AT   | 23 | 6  |
| 303629 | 60 | 1139604 | 1139618 | 3 | 5  | 15 | TCT  | 26 | 6  |
| 303630 | 60 | 1140335 | 1140352 | 2 | 9  | 18 | AC   | 20 | 5  |
| 303631 | 60 | 1141879 | 1141906 | 4 | 7  | 28 | TCAA | 20 | 8  |
| 303638 | 60 | 1159598 | 1159621 | 2 | 12 | 24 | CA   | 14 | 4  |
| 303639 | 60 | 1166661 | 1166684 | 4 | 6  | 24 | TATC | 23 | 11 |
| 303640 | 60 | 1175897 | 1175920 | 2 | 12 | 24 | AC   | 14 | 4  |
| 303648 | 60 | 1191463 | 1191486 | 3 | 8  | 24 | ATC  | 13 | 3  |
| 303650 | 60 | 1192572 | 1192607 | 2 | 18 | 36 | TG   | 7  | 8  |
| 303652 | 60 | 1192772 | 1192787 | 4 | 4  | 16 | CACG | 22 | 8  |
| 303653 | 60 | 1195233 | 1195270 | 2 | 19 | 38 | CA   | 15 | 11 |
| 303655 | 60 | 1197751 | 1197762 | 2 | 6  | 12 | CA   | 18 | 3  |
| 303658 | 60 | 1203858 | 1203877 | 4 | 5  | 20 | GATG | 26 | 5  |
| 303660 | 60 | 1207226 | 1207259 | 2 | 17 | 34 | TG   | 8  | 9  |
| 303662 | 60 | 1210764 | 1210793 | 2 | 15 | 30 | TG   | 16 | 8  |
| 303664 | 60 | 1217409 | 1217426 | 2 | 9  | 18 | GT   | 7  | 3  |
| 303665 | 60 | 1219310 | 1219330 | 3 | 7  | 21 | CTG  | 25 | 6  |
| 303666 | 60 | 1219386 | 1219406 | 3 | 7  | 21 | TGC  | 30 | 3  |
| 303667 | 60 | 1222249 | 1222264 | 4 | 4  | 16 | TTGC | 34 | 3  |
| 303670 | 60 | 1243480 | 1243495 | 2 | 8  | 16 | AG   | 22 | 3  |
| 303676 | 60 | 1247710 | 1247733 | 2 | 12 | 24 | GT   | 22 | 6  |
| 303679 | 60 | 1251573 | 1251596 | 3 | 8  | 24 | GCA  | 24 | 7  |
| 303699 | 60 | 1286682 | 1286708 | 3 | 9  | 27 | ATT  | 17 | 10 |
| 303700 | 60 | 1291476 | 1291499 | 2 | 12 | 24 | TG   | 12 | 9  |
| 303703 | 60 | 1303966 | 1303995 | 2 | 15 | 30 | AC   | 6  | 6  |
| 303705 | 60 | 1308993 | 1309014 | 2 | 11 | 22 | GT   | 12 | 10 |
| 303710 | 60 | 1320522 | 1320545 | 4 | 6  | 24 | ATCC | 24 | 3  |
| 303711 | 60 | 1322065 | 1322098 | 2 | 17 | 34 | AC   | 12 | 8  |
| 303712 | 60 | 1322321 | 1322332 | 2 | 6  | 12 | AG   | 29 | 5  |
| 303713 | 60 | 1324540 | 1324557 | 2 | 9  | 18 | TG   | 26 | 4  |
| 303715 | 60 | 1328109 | 1328144 | 2 | 18 | 36 | TG   | 14 | 8  |
| 303726 | 60 | 1349028 | 1349045 | 2 | 9  | 18 | GA   | 15 | 3  |
| 303737 | 60 | 1391014 | 1391039 | 2 | 13 | 26 | TG   | 15 | 7  |
| 303738 | 60 | 1394603 | 1394622 | 4 | 5  | 20 | ATTT | 15 | 3  |
| 303743 | 60 | 1399761 | 1399780 | 2 | 10 | 20 | AG   | 19 | 5  |
| 303744 | 60 | 1400256 | 1400269 | 2 | 7  | 14 | AT   | 20 | 3  |
| 303750 | 60 | 1408796 | 1408813 | 2 | 9  | 18 | TG   | 19 | 8  |
| 303753 | 60 | 1410846 | 1410881 | 4 | 9  | 36 | TGAA | 34 | 9  |
| 303768 | 60 | 1441148 | 1441168 | 3 | 7  | 21 | TTA  | 10 | 6  |
| 303775 | 60 | 1474037 | 1474050 | 2 | 7  | 14 | CA   | 9  | 16 |
| 303776 | 60 | 1474053 | 1474068 | 2 | 8  | 16 | CA   | 6  | 12 |
| 303777 | 60 | 1501954 | 1502025 | 3 | 24 | 72 | GAA  | 14 | 16 |
| 303778 | 60 | 1514650 | 1514677 | 2 | 14 | 28 | CA   | 25 | 24 |
| 303781 | 60 | 1519269 | 1519288 | 2 | 10 | 20 | GT   | 8  | 9  |
| 303784 | 60 | 1521369 | 1521396 | 4 | 7  | 28 | TGTC | 20 | 7  |

|        |    |         |         |   |    |    |      |    |    |
|--------|----|---------|---------|---|----|----|------|----|----|
| 303791 | 60 | 1530942 | 1530957 | 2 | 8  | 16 | AT   | 13 | 3  |
| 303796 | 60 | 1537808 | 1537834 | 3 | 9  | 27 | ACA  | 21 | 4  |
| 303797 | 60 | 1549367 | 1549398 | 4 | 8  | 32 | ATGG | 21 | 8  |
| 303798 | 60 | 1551983 | 1552003 | 3 | 7  | 21 | ACA  | 24 | 4  |
| 303800 | 60 | 1558039 | 1558084 | 2 | 23 | 46 | TG   | 12 | 10 |
| 303802 | 60 | 1560081 | 1560104 | 4 | 6  | 24 | TAGA | 21 | 7  |
| 303805 | 60 | 1578852 | 1578865 | 2 | 7  | 14 | GT   | 18 | 4  |
| 303806 | 60 | 1579000 | 1579021 | 2 | 11 | 22 | GT   | 14 | 10 |
| 303808 | 60 | 1580707 | 1580721 | 3 | 5  | 15 | TCA  | 29 | 3  |
| 303809 | 60 | 1582775 | 1582796 | 2 | 11 | 22 | TG   | 16 | 14 |
| 303810 | 60 | 1583005 | 1583036 | 2 | 16 | 32 | TG   | 9  | 6  |
| 303812 | 60 | 1592645 | 1592678 | 2 | 17 | 34 | TG   | 11 | 13 |
| 303818 | 60 | 1605026 | 1605037 | 2 | 6  | 12 | TG   | 27 | 6  |
| 303832 | 60 | 1669504 | 1669531 | 4 | 7  | 28 | GTGC | 17 | 13 |
| 303836 | 60 | 1671928 | 1671943 | 2 | 8  | 16 | TG   | 22 | 3  |
| 303842 | 60 | 1683087 | 1683130 | 2 | 22 | 44 | GT   | 12 | 13 |
| 303846 | 60 | 1698471 | 1698484 | 2 | 7  | 14 | CA   | 25 | 7  |
| 303849 | 60 | 1701889 | 1701910 | 2 | 11 | 22 | GA   | 9  | 4  |
| 303861 | 60 | 1737502 | 1737525 | 4 | 6  | 24 | ACAG | 17 | 4  |
| 303862 | 60 | 1740288 | 1740311 | 3 | 8  | 24 | TTA  | 7  | 3  |
| 303867 | 60 | 1762026 | 1762055 | 2 | 15 | 30 | AC   | 13 | 9  |
| 303870 | 60 | 1764176 | 1764213 | 2 | 19 | 38 | AC   | 7  | 7  |
| 303871 | 60 | 1768438 | 1768463 | 2 | 13 | 26 | CA   | 16 | 5  |
| 303872 | 60 | 1768752 | 1768769 | 2 | 9  | 18 | AC   | 23 | 8  |
| 303883 | 60 | 1784481 | 1784500 | 2 | 10 | 20 | GT   | 21 | 4  |
| 303895 | 60 | 1805779 | 1805810 | 2 | 16 | 32 | AG   | 11 | 9  |
| 303896 | 60 | 1805979 | 1805998 | 2 | 10 | 20 | TG   | 23 | 3  |
| 303908 | 60 | 1814609 | 1814632 | 2 | 12 | 24 | GA   | 10 | 9  |
| 303909 | 60 | 1817068 | 1817091 | 2 | 12 | 24 | GT   | 12 | 6  |
| 303911 | 60 | 1821240 | 1821261 | 2 | 11 | 22 | GT   | 11 | 11 |
| 303914 | 60 | 1827599 | 1827640 | 2 | 21 | 42 | TG   | 13 | 14 |
| 303917 | 60 | 1830403 | 1830438 | 2 | 18 | 36 | TG   | 6  | 5  |
| 303918 | 60 | 1834012 | 1834035 | 2 | 12 | 24 | TG   | 14 | 4  |
| 303919 | 60 | 1838930 | 1838941 | 2 | 6  | 12 | AG   | 31 | 4  |
| 303924 | 60 | 1841634 | 1841653 | 2 | 10 | 20 | GT   | 15 | 9  |
| 303927 | 60 | 1846665 | 1846694 | 2 | 15 | 30 | TG   | 6  | 6  |
| 303933 | 60 | 1856563 | 1856610 | 2 | 24 | 48 | AC   | 10 | 11 |
| 303945 | 60 | 1887757 | 1887772 | 4 | 4  | 16 | AAAT | 9  | 3  |
| 303952 | 60 | 1901393 | 1901407 | 3 | 5  | 15 | AAC  | 20 | 5  |
| 303954 | 60 | 1902743 | 1902762 | 2 | 10 | 20 | CA   | 18 | 3  |
| 303955 | 60 | 1905430 | 1905445 | 2 | 8  | 16 | TG   | 17 | 4  |
| 303962 | 60 | 1919093 | 1919112 | 2 | 10 | 20 | GT   | 20 | 3  |
| 303974 | 60 | 1944975 | 1945010 | 2 | 18 | 36 | TG   | 10 | 10 |
| 303981 | 60 | 1951685 | 1951706 | 2 | 11 | 22 | GT   | 9  | 9  |
| 303985 | 60 | 1953611 | 1953634 | 3 | 8  | 24 | CTC  | 16 | 3  |
| 303990 | 60 | 1960724 | 1960741 | 2 | 9  | 18 | AC   | 19 | 7  |
| 303993 | 60 | 1961052 | 1961067 | 2 | 8  | 16 | GA   | 17 | 4  |
| 303996 | 60 | 1961662 | 1961679 | 2 | 9  | 18 | TG   | 21 | 8  |
| 303999 | 60 | 1966233 | 1966246 | 2 | 7  | 14 | AC   | 28 | 3  |
| 304000 | 60 | 1966345 | 1966356 | 2 | 6  | 12 | AC   | 23 | 3  |
| 304001 | 60 | 1968496 | 1968511 | 2 | 8  | 16 | TG   | 23 | 7  |

|        |    |         |         |   |    |    |      |    |    |
|--------|----|---------|---------|---|----|----|------|----|----|
| 304002 | 60 | 1968678 | 1968691 | 2 | 7  | 14 | GT   | 19 | 4  |
| 304005 | 60 | 1970928 | 1970949 | 2 | 11 | 22 | AC   | 20 | 10 |
| 304006 | 60 | 1973150 | 1973185 | 2 | 18 | 36 | GT   | 10 | 6  |
| 304010 | 60 | 1973522 | 1973533 | 2 | 6  | 12 | GT   | 24 | 3  |
| 304011 | 60 | 1976248 | 1976271 | 3 | 8  | 24 | AAC  | 26 | 4  |
| 304014 | 60 | 1985835 | 1985850 | 4 | 4  | 16 | AGGG | 9  | 3  |
| 304016 | 60 | 1987769 | 1987784 | 2 | 8  | 16 | AC   | 16 | 12 |
| 304017 | 60 | 1990497 | 1990516 | 2 | 10 | 20 | TC   | 21 | 8  |
| 304018 | 60 | 1991889 | 1991920 | 2 | 16 | 32 | AC   | 13 | 13 |
| 304019 | 60 | 1992869 | 1992890 | 2 | 11 | 22 | AC   | 21 | 6  |
| 304022 | 60 | 1998052 | 1998075 | 2 | 12 | 24 | GT   | 18 | 4  |
| 304025 | 60 | 2000575 | 2000590 | 2 | 8  | 16 | GT   | 25 | 3  |
| 304026 | 60 | 2002391 | 2002408 | 2 | 9  | 18 | AC   | 13 | 5  |
| 304027 | 60 | 2002498 | 2002525 | 2 | 14 | 28 | AC   | 17 | 9  |
| 304028 | 60 | 2006506 | 2006535 | 2 | 15 | 30 | AC   | 13 | 10 |
| 304032 | 60 | 2028421 | 2028460 | 2 | 20 | 40 | TG   | 12 | 12 |
| 304041 | 60 | 2047574 | 2047595 | 2 | 11 | 22 | CA   | 11 | 7  |
| 304042 | 60 | 2047642 | 2047661 | 2 | 10 | 20 | TG   | 16 | 8  |
| 304045 | 60 | 2058424 | 2058437 | 2 | 7  | 14 | TC   | 29 | 5  |
| 304046 | 60 | 2059163 | 2059174 | 2 | 6  | 12 | AC   | 25 | 4  |
| 304049 | 60 | 2061452 | 2061473 | 2 | 11 | 22 | AC   | 20 | 6  |
| 304067 | 60 | 2116131 | 2116154 | 4 | 6  | 24 | GTAG | 31 | 3  |
| 304073 | 60 | 2122119 | 2122158 | 2 | 20 | 40 | TG   | 7  | 7  |
| 304078 | 60 | 2126093 | 2126114 | 2 | 11 | 22 | AC   | 15 | 8  |
| 304082 | 60 | 2130195 | 2130208 | 2 | 7  | 14 | AC   | 26 | 5  |
| 304083 | 60 | 2131164 | 2131177 | 2 | 7  | 14 | AT   | 6  | 4  |
| 304093 | 60 | 2151513 | 2151540 | 2 | 14 | 28 | TG   | 23 | 8  |
| 304100 | 60 | 2160579 | 2160616 | 2 | 19 | 38 | GT   | 11 | 10 |
| 304102 | 60 | 2160886 | 2160915 | 2 | 15 | 30 | GT   | 6  | 7  |
| 304106 | 60 | 2166573 | 2166600 | 2 | 14 | 28 | CA   | 13 | 4  |
| 304109 | 60 | 2170400 | 2170425 | 2 | 13 | 26 | CA   | 16 | 6  |
| 304114 | 60 | 2179992 | 2180042 | 3 | 17 | 51 | GAA  | 8  | 6  |
| 304118 | 60 | 2180391 | 2180432 | 3 | 14 | 42 | AAG  | 17 | 5  |
| 304119 | 60 | 2191703 | 2191726 | 2 | 12 | 24 | TG   | 20 | 6  |
| 304125 | 60 | 2202046 | 2202059 | 2 | 7  | 14 | AC   | 26 | 4  |
| 304130 | 60 | 2215839 | 2215874 | 2 | 18 | 36 | TG   | 15 | 8  |
| 304133 | 60 | 2220443 | 2220476 | 2 | 17 | 34 | AC   | 8  | 4  |
| 304134 | 60 | 2231235 | 2231256 | 2 | 11 | 22 | TG   | 10 | 5  |
| 304135 | 60 | 2234656 | 2234705 | 2 | 25 | 50 | AC   | 9  | 6  |
| 304142 | 60 | 2239071 | 2239098 | 2 | 14 | 28 | AC   | 6  | 4  |
| 304151 | 60 | 2267537 | 2267570 | 2 | 17 | 34 | CA   | 10 | 5  |
| 304153 | 60 | 2271505 | 2271522 | 2 | 9  | 18 | CA   | 22 | 8  |
| 304158 | 60 | 2286292 | 2286321 | 2 | 15 | 30 | TG   | 13 | 7  |
| 304164 | 60 | 2304279 | 2304305 | 3 | 9  | 27 | AAC  | 25 | 3  |
| 304184 | 60 | 2334133 | 2334144 | 2 | 6  | 12 | AC   | 21 | 4  |
| 304190 | 60 | 2349375 | 2349388 | 2 | 7  | 14 | AC   | 34 | 3  |
| 304191 | 60 | 2349605 | 2349616 | 2 | 6  | 12 | GT   | 12 | 4  |
| 304196 | 60 | 2368363 | 2368376 | 2 | 7  | 14 | CT   | 9  | 4  |
| 304197 | 60 | 2368378 | 2368393 | 2 | 8  | 16 | CT   | 10 | 3  |
| 304209 | 60 | 2399356 | 2399367 | 2 | 6  | 12 | GT   | 28 | 4  |
| 304212 | 60 | 2409568 | 2409579 | 2 | 6  | 12 | TG   | 31 | 3  |

|        |    |         |         |   |    |    |      |    |    |
|--------|----|---------|---------|---|----|----|------|----|----|
| 304213 | 60 | 2415717 | 2415734 | 2 | 9  | 18 | TG   | 26 | 4  |
| 304218 | 60 | 2428016 | 2428035 | 2 | 10 | 20 | AT   | 9  | 5  |
| 304232 | 60 | 2473966 | 2473991 | 2 | 13 | 26 | GT   | 11 | 4  |
| 304239 | 60 | 2483060 | 2483075 | 2 | 8  | 16 | TG   | 28 | 3  |
| 304241 | 60 | 2484696 | 2484715 | 2 | 10 | 20 | GT   | 14 | 4  |
| 304249 | 60 | 2494803 | 2494864 | 2 | 31 | 62 | TG   | 6  | 8  |
| 304253 | 60 | 2501011 | 2501046 | 2 | 18 | 36 | TG   | 7  | 4  |
| 304259 | 60 | 2517712 | 2517743 | 2 | 16 | 32 | CT   | 15 | 4  |
| 304267 | 60 | 2530712 | 2530725 | 2 | 7  | 14 | GT   | 26 | 3  |
| 304300 | 60 | 2612680 | 2612729 | 2 | 25 | 50 | AG   | 12 | 5  |
| 304304 | 60 | 2617792 | 2617819 | 2 | 14 | 28 | TG   | 12 | 6  |
| 304327 | 60 | 2644399 | 2644437 | 3 | 13 | 39 | ACA  | 18 | 4  |
| 304334 | 60 | 2665188 | 2665211 | 3 | 8  | 24 | TCA  | 18 | 3  |
| 304336 | 60 | 2668567 | 2668596 | 2 | 15 | 30 | TG   | 11 | 8  |
| 304340 | 60 | 2671031 | 2671054 | 2 | 12 | 24 | AC   | 17 | 5  |
| 304348 | 60 | 2682162 | 2682183 | 2 | 11 | 22 | TG   | 11 | 5  |
| 304349 | 60 | 2682971 | 2682986 | 4 | 4  | 16 | TGTC | 31 | 3  |
| 304350 | 60 | 2683652 | 2683689 | 2 | 19 | 38 | TC   | 16 | 5  |
| 304355 | 60 | 2701451 | 2701490 | 4 | 10 | 40 | ATGT | 8  | 3  |
| 304358 | 60 | 2703521 | 2703541 | 3 | 7  | 21 | AGA  | 11 | 6  |
| 304364 | 60 | 2708275 | 2708296 | 2 | 11 | 22 | TG   | 16 | 5  |
| 304365 | 60 | 2708419 | 2708446 | 2 | 14 | 28 | AC   | 12 | 5  |
| 304369 | 60 | 2710378 | 2710401 | 2 | 12 | 24 | GT   | 17 | 5  |
| 304372 | 60 | 2723927 | 2723950 | 2 | 12 | 24 | AC   | 7  | 8  |
| 304373 | 60 | 2725183 | 2725206 | 2 | 12 | 24 | TG   | 25 | 5  |
| 304375 | 60 | 2729653 | 2729676 | 2 | 12 | 24 | GT   | 23 | 3  |
| 304384 | 60 | 2747236 | 2747253 | 2 | 9  | 18 | GT   | 18 | 3  |
| 304394 | 60 | 2755034 | 2755067 | 2 | 17 | 34 | TG   | 9  | 8  |
| 304396 | 60 | 2759560 | 2759601 | 2 | 21 | 42 | GT   | 13 | 7  |
| 304401 | 60 | 2796093 | 2796114 | 2 | 11 | 22 | TC   | 8  | 4  |
| 304403 | 60 | 2796185 | 2796212 | 2 | 14 | 28 | TC   | 7  | 6  |
| 304405 | 60 | 2796831 | 2796854 | 4 | 6  | 24 | TATT | 28 | 5  |
| 304412 | 60 | 2822133 | 2822150 | 2 | 9  | 18 | TG   | 7  | 3  |
| 304413 | 60 | 2828571 | 2828616 | 2 | 23 | 46 | GT   | 10 | 9  |
| 304415 | 60 | 2829211 | 2829228 | 2 | 9  | 18 | GT   | 20 | 3  |
| 304416 | 60 | 2830417 | 2830458 | 2 | 21 | 42 | CA   | 11 | 8  |
| 304418 | 60 | 2830716 | 2830735 | 2 | 10 | 20 | GT   | 13 | 3  |
| 304419 | 60 | 2831019 | 2831046 | 2 | 14 | 28 | AC   | 15 | 6  |
| 304420 | 60 | 2831330 | 2831351 | 2 | 11 | 22 | AC   | 15 | 4  |
| 304432 | 60 | 2842159 | 2842178 | 2 | 10 | 20 | AG   | 8  | 5  |
| 304437 | 60 | 2849404 | 2849439 | 4 | 9  | 36 | AAAC | 16 | 3  |
| 304444 | 60 | 2859919 | 2859952 | 2 | 17 | 34 | GT   | 13 | 6  |
| 304454 | 60 | 2872762 | 2872779 | 2 | 9  | 18 | AC   | 18 | 4  |
| 304456 | 60 | 2877438 | 2877465 | 2 | 14 | 28 | TG   | 10 | 5  |
| 304470 | 60 | 2926059 | 2926082 | 2 | 12 | 24 | TA   | 9  | 4  |
| 304474 | 60 | 2932537 | 2932590 | 2 | 27 | 54 | CA   | 7  | 7  |
| 304476 | 60 | 2934152 | 2934175 | 2 | 12 | 24 | GT   | 7  | 7  |
| 304478 | 60 | 2936228 | 2936247 | 2 | 10 | 20 | TC   | 19 | 4  |
| 304493 | 60 | 2951453 | 2951486 | 2 | 17 | 34 | AC   | 15 | 10 |
| 304498 | 60 | 2962192 | 2962206 | 3 | 5  | 15 | GTT  | 22 | 4  |
| 304500 | 60 | 2967453 | 2967484 | 2 | 16 | 32 | GT   | 10 | 3  |

|        |    |        |        |   |    |    |      |    |    |
|--------|----|--------|--------|---|----|----|------|----|----|
| 304509 | 61 | 9149   | 9180   | 4 | 8  | 32 | AATA | 11 | 3  |
| 304520 | 61 | 38020  | 38035  | 4 | 4  | 16 | ATCC | 22 | 4  |
| 304536 | 61 | 67923  | 67974  | 4 | 13 | 52 | TCTA | 12 | 8  |
| 304539 | 61 | 86610  | 86631  | 2 | 11 | 22 | TA   | 9  | 4  |
| 304548 | 61 | 112037 | 112056 | 2 | 10 | 20 | GT   | 24 | 5  |
| 304592 | 61 | 236156 | 236181 | 2 | 13 | 26 | AC   | 14 | 6  |
| 304593 | 61 | 236869 | 236894 | 2 | 13 | 26 | CA   | 8  | 7  |
| 304606 | 61 | 275536 | 275555 | 4 | 5  | 20 | AAAT | 19 | 5  |
| 304611 | 61 | 294906 | 294917 | 2 | 6  | 12 | AC   | 18 | 5  |
| 304614 | 61 | 299597 | 299626 | 2 | 15 | 30 | CT   | 10 | 4  |
| 304618 | 61 | 304398 | 304412 | 3 | 5  | 15 | AGC  | 15 | 4  |
| 304621 | 61 | 316178 | 316215 | 2 | 19 | 38 | GT   | 9  | 5  |
| 304622 | 61 | 317691 | 317712 | 2 | 11 | 22 | TG   | 19 | 5  |
| 304629 | 61 | 340040 | 340071 | 2 | 16 | 32 | AC   | 7  | 5  |
| 304633 | 61 | 360549 | 360584 | 3 | 12 | 36 | TAA  | 8  | 7  |
| 304640 | 61 | 380383 | 380394 | 2 | 6  | 12 | AT   | 17 | 4  |
| 304644 | 61 | 411825 | 411848 | 4 | 6  | 24 | GATT | 16 | 4  |
| 304645 | 61 | 425604 | 425639 | 4 | 9  | 36 | TAGA | 8  | 5  |
| 304646 | 61 | 429021 | 429048 | 2 | 14 | 28 | GT   | 12 | 8  |
| 304647 | 61 | 429491 | 429520 | 3 | 10 | 30 | TAA  | 10 | 4  |
| 304666 | 61 | 476849 | 476864 | 2 | 8  | 16 | AC   | 6  | 4  |
| 304672 | 61 | 514760 | 514779 | 2 | 10 | 20 | AC   | 24 | 3  |
| 304682 | 61 | 542155 | 542193 | 3 | 13 | 39 | TAG  | 19 | 12 |
| 304689 | 61 | 560183 | 560196 | 2 | 7  | 14 | GA   | 15 | 4  |
| 304694 | 61 | 567446 | 567471 | 2 | 13 | 26 | TG   | 10 | 7  |
| 304701 | 61 | 584455 | 584468 | 2 | 7  | 14 | TA   | 11 | 3  |
| 304704 | 61 | 591590 | 591625 | 2 | 18 | 36 | GT   | 6  | 3  |
| 304706 | 61 | 594324 | 594341 | 3 | 6  | 18 | CAG  | 26 | 4  |
| 304707 | 61 | 598529 | 598550 | 2 | 11 | 22 | AC   | 10 | 4  |
| 304708 | 61 | 599416 | 599431 | 4 | 4  | 16 | TGAA | 23 | 3  |
| 304713 | 61 | 612852 | 612883 | 4 | 8  | 32 | GAAA | 15 | 8  |
| 304715 | 61 | 613413 | 613427 | 3 | 5  | 15 | AGC  | 15 | 3  |
| 304716 | 61 | 614918 | 614955 | 2 | 19 | 38 | CT   | 11 | 4  |
| 304724 | 61 | 638574 | 638603 | 2 | 15 | 30 | AC   | 9  | 7  |
| 304727 | 61 | 644778 | 644809 | 2 | 16 | 32 | TG   | 9  | 11 |
| 304730 | 61 | 646665 | 646696 | 4 | 8  | 32 | TCTT | 13 | 5  |
| 304733 | 61 | 656551 | 656578 | 2 | 14 | 28 | CA   | 20 | 4  |
| 304735 | 61 | 666839 | 666864 | 2 | 13 | 26 | GA   | 19 | 3  |
| 304742 | 61 | 700242 | 700263 | 2 | 11 | 22 | GT   | 14 | 5  |
| 304744 | 61 | 711155 | 711172 | 2 | 9  | 18 | GT   | 19 | 3  |
| 304757 | 61 | 753109 | 753122 | 2 | 7  | 14 | TG   | 26 | 4  |
| 304770 | 61 | 782482 | 782514 | 3 | 11 | 33 | TGT  | 17 | 7  |
| 304771 | 61 | 786554 | 786575 | 2 | 11 | 22 | TG   | 19 | 5  |
| 304775 | 61 | 796828 | 796863 | 3 | 12 | 36 | ATT  | 13 | 4  |
| 304781 | 61 | 818885 | 818912 | 2 | 14 | 28 | CA   | 6  | 8  |
| 304804 | 61 | 860077 | 860110 | 2 | 17 | 34 | CA   | 7  | 8  |
| 304828 | 61 | 935111 | 935128 | 2 | 9  | 18 | AC   | 15 | 4  |
| 304832 | 61 | 943589 | 943615 | 3 | 9  | 27 | TAT  | 6  | 3  |
| 304854 | 61 | 978152 | 978163 | 2 | 6  | 12 | AC   | 29 | 3  |
| 304855 | 61 | 978621 | 978650 | 2 | 15 | 30 | CA   | 6  | 6  |
| 304857 | 61 | 982414 | 982437 | 2 | 12 | 24 | AG   | 13 | 4  |

|        |    |         |         |   |    |    |      |    |    |
|--------|----|---------|---------|---|----|----|------|----|----|
| 304868 | 61 | 1015844 | 1015857 | 2 | 7  | 14 | AC   | 15 | 3  |
| 304872 | 61 | 1020601 | 1020614 | 2 | 7  | 14 | TG   | 15 | 3  |
| 304873 | 61 | 1020737 | 1020748 | 2 | 6  | 12 | TG   | 14 | 4  |
| 304874 | 61 | 1020873 | 1020890 | 3 | 6  | 18 | GAT  | 22 | 3  |
| 304887 | 61 | 1056679 | 1056704 | 2 | 13 | 26 | AC   | 9  | 5  |
| 304913 | 61 | 1156252 | 1156291 | 4 | 10 | 40 | ACAT | 9  | 5  |
| 304916 | 61 | 1165097 | 1165144 | 2 | 24 | 48 | TC   | 10 | 4  |
| 304925 | 61 | 1194679 | 1194698 | 2 | 10 | 20 | GT   | 18 | 7  |
| 304935 | 61 | 1207869 | 1207920 | 4 | 13 | 52 | AGAT | 11 | 10 |
| 304937 | 61 | 1216457 | 1216492 | 2 | 18 | 36 | CA   | 15 | 6  |
| 304949 | 61 | 1244086 | 1244109 | 3 | 8  | 24 | GCT  | 25 | 3  |
| 304950 | 61 | 1244692 | 1244727 | 2 | 18 | 36 | GT   | 16 | 6  |
| 304952 | 61 | 1255185 | 1255206 | 2 | 11 | 22 | AC   | 10 | 3  |
| 304953 | 61 | 1255772 | 1255825 | 2 | 27 | 54 | TG   | 12 | 9  |
| 304961 | 61 | 1285064 | 1285081 | 2 | 9  | 18 | GT   | 9  | 5  |
| 304965 | 61 | 1295453 | 1295480 | 2 | 14 | 28 | TG   | 20 | 6  |
| 304972 | 61 | 1309878 | 1309889 | 2 | 6  | 12 | TG   | 6  | 3  |
| 304994 | 61 | 1380413 | 1380432 | 4 | 5  | 20 | TTTA | 16 | 8  |
| 305024 | 61 | 1479729 | 1479756 | 2 | 14 | 28 | GT   | 6  | 5  |
| 305066 | 61 | 1579417 | 1579432 | 2 | 8  | 16 | AC   | 23 | 3  |
| 305069 | 61 | 1584081 | 1584120 | 2 | 20 | 40 | AC   | 10 | 5  |
| 305074 | 61 | 1591610 | 1591635 | 2 | 13 | 26 | AC   | 23 | 17 |
| 305079 | 61 | 1609566 | 1609607 | 3 | 14 | 42 | ATT  | 18 | 9  |
| 305086 | 61 | 1619804 | 1619815 | 2 | 6  | 12 | TG   | 17 | 5  |
| 305090 | 61 | 1621819 | 1621856 | 2 | 19 | 38 | CA   | 14 | 7  |
| 305091 | 61 | 1622099 | 1622118 | 2 | 10 | 20 | TC   | 15 | 3  |
| 305093 | 61 | 1627635 | 1627666 | 4 | 8  | 32 | ATCA | 18 | 3  |
| 305101 | 61 | 1650443 | 1650457 | 3 | 5  | 15 | GTT  | 8  | 4  |
| 305103 | 61 | 1658820 | 1658837 | 2 | 9  | 18 | TG   | 23 | 4  |
| 305116 | 61 | 1676762 | 1676803 | 2 | 21 | 42 | AC   | 8  | 8  |
| 305119 | 61 | 1694241 | 1694262 | 2 | 11 | 22 | AC   | 20 | 5  |
| 305123 | 61 | 1694777 | 1694804 | 2 | 14 | 28 | GT   | 7  | 4  |
| 305125 | 61 | 1696826 | 1696869 | 4 | 11 | 44 | TTCT | 8  | 8  |
| 305126 | 61 | 1697455 | 1697475 | 3 | 7  | 21 | GAT  | 20 | 3  |
| 305138 | 61 | 1728486 | 1728497 | 2 | 6  | 12 | TA   | 23 | 3  |
| 305139 | 61 | 1729303 | 1729338 | 2 | 18 | 36 | CA   | 15 | 12 |
| 305145 | 61 | 1755675 | 1755690 | 2 | 8  | 16 | CA   | 27 | 4  |
| 305146 | 61 | 1755923 | 1755962 | 2 | 20 | 40 | CA   | 11 | 10 |
| 305148 | 61 | 1763654 | 1763689 | 4 | 9  | 36 | GATT | 23 | 5  |
| 305151 | 61 | 1780038 | 1780061 | 2 | 12 | 24 | CA   | 9  | 8  |
| 305159 | 61 | 1813186 | 1813201 | 4 | 4  | 16 | AGCT | 24 | 3  |
| 305160 | 61 | 1817893 | 1817920 | 4 | 7  | 28 | TCTG | 20 | 3  |
| 305161 | 61 | 1823713 | 1823724 | 2 | 6  | 12 | GT   | 18 | 6  |
| 305163 | 61 | 1826338 | 1826349 | 2 | 6  | 12 | TG   | 21 | 5  |
| 305164 | 61 | 1826350 | 1826361 | 2 | 6  | 12 | TA   | 17 | 4  |
| 305165 | 61 | 1856771 | 1856786 | 2 | 8  | 16 | TG   | 10 | 8  |
| 305178 | 61 | 1886166 | 1886193 | 2 | 14 | 28 | TG   | 7  | 6  |
| 305180 | 61 | 1888433 | 1888454 | 2 | 11 | 22 | TG   | 20 | 16 |
| 305181 | 61 | 1890162 | 1890185 | 4 | 6  | 24 | GGAT | 17 | 9  |
| 305182 | 61 | 1890949 | 1890964 | 4 | 4  | 16 | TTTC | 28 | 3  |
| 305194 | 61 | 1934480 | 1934493 | 2 | 7  | 14 | TG   | 22 | 6  |

|        |    |         |         |   |    |    |      |    |    |
|--------|----|---------|---------|---|----|----|------|----|----|
| 305204 | 61 | 1978322 | 1978349 | 2 | 14 | 28 | AC   | 16 | 8  |
| 305205 | 61 | 1980037 | 1980068 | 4 | 8  | 32 | TCTT | 22 | 4  |
| 305206 | 61 | 1987683 | 1987696 | 2 | 7  | 14 | AC   | 18 | 3  |
| 305215 | 61 | 2013666 | 2013685 | 2 | 10 | 20 | TG   | 12 | 11 |
| 305224 | 61 | 2041692 | 2041711 | 4 | 5  | 20 | GACA | 27 | 6  |
| 305226 | 61 | 2047600 | 2047611 | 2 | 6  | 12 | TG   | 6  | 3  |
| 305230 | 61 | 2052094 | 2052107 | 2 | 7  | 14 | GT   | 26 | 5  |
| 305234 | 61 | 2059179 | 2059198 | 2 | 10 | 20 | GT   | 26 | 7  |
| 305239 | 61 | 2068880 | 2068895 | 4 | 4  | 16 | ATTT | 20 | 4  |
| 305244 | 61 | 2090841 | 2090862 | 2 | 11 | 22 | TC   | 11 | 7  |
| 305257 | 61 | 2137902 | 2137937 | 4 | 9  | 36 | TGTA | 11 | 7  |
| 305258 | 61 | 2139566 | 2139579 | 2 | 7  | 14 | TG   | 21 | 3  |
| 305271 | 61 | 2152991 | 2153010 | 2 | 10 | 20 | CA   | 11 | 4  |
| 305275 | 61 | 2160322 | 2160339 | 3 | 6  | 18 | AAC  | 20 | 3  |
| 305276 | 61 | 2160976 | 2160987 | 2 | 6  | 12 | GT   | 20 | 3  |
| 305277 | 61 | 2164682 | 2164697 | 4 | 4  | 16 | TCTG | 23 | 6  |
| 305282 | 61 | 2180922 | 2180953 | 4 | 8  | 32 | AGAT | 13 | 8  |
| 305287 | 61 | 2189971 | 2189984 | 2 | 7  | 14 | GT   | 17 | 5  |
| 305288 | 61 | 2190053 | 2190076 | 2 | 12 | 24 | GT   | 9  | 6  |
| 305291 | 61 | 2210057 | 2210084 | 4 | 7  | 28 | GTCT | 14 | 8  |
| 305292 | 61 | 2210260 | 2210285 | 2 | 13 | 26 | CA   | 13 | 6  |
| 305293 | 61 | 2210319 | 2210338 | 2 | 10 | 20 | AC   | 10 | 3  |
| 305295 | 61 | 2211880 | 2211897 | 2 | 9  | 18 | TG   | 23 | 4  |
| 305296 | 61 | 2213895 | 2213918 | 2 | 12 | 24 | TG   | 19 | 5  |
| 305299 | 61 | 2218993 | 2219004 | 2 | 6  | 12 | GA   | 24 | 5  |
| 305301 | 61 | 2222888 | 2222903 | 2 | 8  | 16 | GT   | 9  | 3  |
| 305302 | 61 | 2223015 | 2223042 | 4 | 7  | 28 | TGAC | 25 | 5  |
| 305303 | 61 | 2233792 | 2233821 | 2 | 15 | 30 | TG   | 11 | 8  |
| 305305 | 61 | 2238650 | 2238664 | 3 | 5  | 15 | CAG  | 19 | 5  |
| 305306 | 61 | 2241360 | 2241375 | 2 | 8  | 16 | TG   | 27 | 5  |
| 305312 | 61 | 2262969 | 2263002 | 2 | 17 | 34 | AC   | 14 | 6  |
| 305314 | 61 | 2264839 | 2264856 | 3 | 6  | 18 | TTG  | 25 | 4  |
| 305315 | 61 | 2266163 | 2266182 | 2 | 10 | 20 | CA   | 9  | 4  |
| 305322 | 61 | 2276401 | 2276428 | 2 | 14 | 28 | AC   | 7  | 5  |
| 305323 | 61 | 2276728 | 2276745 | 2 | 9  | 18 | TG   | 21 | 4  |
| 305324 | 61 | 2277430 | 2277469 | 4 | 10 | 40 | CATC | 24 | 6  |
| 305327 | 61 | 2295394 | 2295415 | 2 | 11 | 22 | TG   | 10 | 10 |
| 305329 | 61 | 2300673 | 2300690 | 3 | 6  | 18 | AGC  | 23 | 4  |
| 305331 | 61 | 2304756 | 2304777 | 2 | 11 | 22 | CA   | 16 | 12 |
| 305333 | 61 | 2307186 | 2307203 | 3 | 6  | 18 | AAC  | 19 | 8  |
| 305341 | 61 | 2318161 | 2318178 | 2 | 9  | 18 | AC   | 26 | 6  |
| 305344 | 61 | 2339455 | 2339482 | 4 | 7  | 28 | ACAG | 24 | 8  |
| 305347 | 61 | 2351814 | 2351873 | 4 | 15 | 60 | TGTA | 6  | 6  |
| 305357 | 61 | 2384876 | 2384907 | 4 | 8  | 32 | TCTG | 23 | 7  |
| 305358 | 61 | 2385819 | 2385882 | 4 | 16 | 64 | CTTT | 14 | 9  |
| 305373 | 61 | 2431702 | 2431713 | 2 | 6  | 12 | AT   | 19 | 6  |
| 305375 | 61 | 2446431 | 2446456 | 2 | 13 | 26 | GT   | 18 | 13 |
| 305378 | 61 | 2457058 | 2457077 | 2 | 10 | 20 | AG   | 14 | 4  |
| 305380 | 61 | 2459559 | 2459574 | 2 | 8  | 16 | GT   | 19 | 4  |
| 305387 | 61 | 2483117 | 2483136 | 4 | 5  | 20 | CCAT | 29 | 6  |
| 305391 | 61 | 2495101 | 2495116 | 2 | 8  | 16 | TA   | 20 | 6  |

|        |    |         |         |   |    |    |      |    |    |
|--------|----|---------|---------|---|----|----|------|----|----|
| 305394 | 61 | 2512297 | 2512314 | 2 | 9  | 18 | AC   | 13 | 5  |
| 305402 | 61 | 2531822 | 2531837 | 2 | 8  | 16 | TG   | 28 | 6  |
| 305410 | 61 | 2571576 | 2571608 | 3 | 11 | 33 | TTA  | 17 | 10 |
| 305428 | 61 | 2617554 | 2617567 | 2 | 7  | 14 | GT   | 28 | 3  |
| 305432 | 61 | 2640309 | 2640324 | 2 | 8  | 16 | CA   | 10 | 4  |
| 305436 | 61 | 2647716 | 2647739 | 4 | 6  | 24 | AAAT | 17 | 3  |
| 305469 | 61 | 2717281 | 2717296 | 4 | 4  | 16 | AGAC | 25 | 7  |
| 305482 | 61 | 2736486 | 2736512 | 3 | 9  | 27 | CAG  | 19 | 7  |
| 305483 | 61 | 2740532 | 2740551 | 2 | 10 | 20 | GT   | 25 | 10 |
| 305492 | 61 | 2760926 | 2760941 | 4 | 4  | 16 | CTAT | 23 | 3  |
| 305500 | 61 | 2775680 | 2775694 | 3 | 5  | 15 | CAG  | 17 | 8  |
| 305501 | 61 | 2775696 | 2775710 | 3 | 5  | 15 | AGC  | 9  | 3  |
| 305503 | 61 | 2781958 | 2781969 | 2 | 6  | 12 | TG   | 24 | 3  |
| 305509 | 61 | 2794195 | 2794234 | 2 | 20 | 40 | AC   | 9  | 10 |
| 305511 | 61 | 2800359 | 2800388 | 2 | 15 | 30 | AC   | 17 | 11 |
| 305513 | 61 | 2801185 | 2801196 | 2 | 6  | 12 | CA   | 18 | 6  |
| 305515 | 61 | 2805569 | 2805580 | 2 | 6  | 12 | AC   | 24 | 3  |
| 305541 | 61 | 2860617 | 2860632 | 4 | 4  | 16 | AATT | 18 | 3  |
| 305549 | 61 | 2893233 | 2893250 | 3 | 6  | 18 | AAG  | 17 | 5  |
| 305552 | 61 | 2897776 | 2897789 | 2 | 7  | 14 | TG   | 21 | 4  |
| 305562 | 61 | 2921670 | 2921715 | 2 | 23 | 46 | AC   | 12 | 14 |
| 305577 | 61 | 2956395 | 2956434 | 2 | 20 | 40 | GA   | 9  | 8  |
| 305581 | 61 | 2959119 | 2959150 | 2 | 16 | 32 | AC   | 8  | 10 |
| 305582 | 61 | 2963106 | 2963135 | 2 | 15 | 30 | CA   | 7  | 3  |
| 305585 | 61 | 2971117 | 2971134 | 3 | 6  | 18 | AAC  | 20 | 4  |
| 305590 | 61 | 2981769 | 2981784 | 2 | 8  | 16 | TG   | 29 | 5  |
| 305592 | 61 | 2988758 | 2988785 | 4 | 7  | 28 | GGAA | 24 | 7  |
| 305593 | 61 | 2989887 | 2989918 | 4 | 8  | 32 | CAGA | 26 | 9  |
| 305594 | 61 | 2991072 | 2991125 | 3 | 18 | 54 | TCT  | 14 | 13 |
| 305597 | 61 | 2996993 | 2997004 | 2 | 6  | 12 | TG   | 8  | 3  |
| 305607 | 61 | 3037715 | 3037730 | 2 | 8  | 16 | AG   | 26 | 4  |
| 305608 | 61 | 3038286 | 3038319 | 2 | 17 | 34 | GT   | 14 | 7  |
| 305634 | 61 | 3094165 | 3094188 | 2 | 12 | 24 | AG   | 8  | 5  |
| 305641 | 61 | 3113022 | 3113037 | 2 | 8  | 16 | TG   | 18 | 3  |
| 305658 | 61 | 3145861 | 3145886 | 2 | 13 | 26 | TG   | 16 | 7  |
| 305659 | 61 | 3146655 | 3146682 | 4 | 7  | 28 | ATGG | 28 | 5  |
| 305663 | 61 | 3157411 | 3157438 | 2 | 14 | 28 | TG   | 6  | 9  |
| 305689 | 61 | 3210621 | 3210644 | 4 | 6  | 24 | ACAG | 19 | 3  |
| 305690 | 61 | 3215501 | 3215524 | 2 | 12 | 24 | GT   | 11 | 17 |
| 305701 | 61 | 3258967 | 3259044 | 3 | 26 | 78 | AAG  | 7  | 8  |
| 305703 | 61 | 3264106 | 3264117 | 2 | 6  | 12 | CA   | 7  | 4  |
| 305704 | 61 | 3268848 | 3268862 | 3 | 5  | 15 | GAA  | 28 | 5  |
| 305708 | 61 | 3282948 | 3282968 | 3 | 7  | 21 | TGT  | 22 | 3  |
| 305711 | 61 | 3283446 | 3283469 | 2 | 12 | 24 | TC   | 12 | 6  |
| 305722 | 61 | 3304499 | 3304530 | 2 | 16 | 32 | TC   | 9  | 6  |
| 305723 | 61 | 3309640 | 3309673 | 2 | 17 | 34 | AC   | 14 | 11 |
| 305727 | 61 | 3321005 | 3321022 | 2 | 9  | 18 | AC   | 11 | 5  |
| 305728 | 61 | 3321024 | 3321043 | 2 | 10 | 20 | CA   | 16 | 5  |
| 305740 | 61 | 3338616 | 3338631 | 4 | 4  | 16 | CTGT | 25 | 3  |
| 305741 | 61 | 3347964 | 3348023 | 4 | 15 | 60 | ATAG | 7  | 5  |
| 305744 | 61 | 3348166 | 3348225 | 4 | 15 | 60 | AGAT | 7  | 7  |



|        |    |         |         |   |    |    |      |    |    |
|--------|----|---------|---------|---|----|----|------|----|----|
| 305745 | 61 | 3352202 | 3352227 | 2 | 13 | 26 | AC   | 14 | 5  |
| 305753 | 61 | 3386613 | 3386627 | 3 | 5  | 15 | GTT  | 25 | 3  |
| 305756 | 61 | 3387877 | 3387906 | 3 | 10 | 30 | TGT  | 26 | 13 |
| 305757 | 61 | 3388095 | 3388109 | 3 | 5  | 15 | AGC  | 28 | 3  |
| 305760 | 61 | 3397295 | 3397314 | 4 | 5  | 20 | AAAT | 17 | 6  |
| 305762 | 61 | 3401705 | 3401720 | 4 | 4  | 16 | AAAT | 22 | 3  |
| 305763 | 61 | 3405158 | 3405179 | 2 | 11 | 22 | TG   | 17 | 6  |
| 305778 | 61 | 3441657 | 3441672 | 2 | 8  | 16 | GT   | 14 | 4  |
| 305786 | 61 | 3451263 | 3451310 | 2 | 24 | 48 | AC   | 12 | 12 |
| 305787 | 61 | 3457615 | 3457630 | 2 | 8  | 16 | CT   | 17 | 4  |
| 305789 | 61 | 3460777 | 3460815 | 3 | 13 | 39 | TAA  | 11 | 3  |
| 305790 | 61 | 3461772 | 3461799 | 2 | 14 | 28 | TC   | 9  | 4  |
| 305791 | 61 | 3464216 | 3464243 | 2 | 14 | 28 | AC   | 12 | 9  |
| 305794 | 61 | 3475147 | 3475158 | 2 | 6  | 12 | CT   | 25 | 3  |
| 305796 | 61 | 3483124 | 3483155 | 2 | 16 | 32 | GA   | 13 | 5  |
| 305805 | 61 | 3492978 | 3492991 | 2 | 7  | 14 | AG   | 27 | 3  |
| 305819 | 61 | 3519988 | 3520001 | 2 | 7  | 14 | CA   | 21 | 7  |
| 305821 | 61 | 3521451 | 3521472 | 2 | 11 | 22 | TG   | 14 | 6  |
| 305823 | 61 | 3526368 | 3526379 | 2 | 6  | 12 | CA   | 17 | 4  |
| 305824 | 61 | 3527113 | 3527170 | 2 | 29 | 58 | TG   | 8  | 8  |
| 305828 | 61 | 3536386 | 3536401 | 4 | 4  | 16 | GATG | 24 | 3  |
| 305836 | 61 | 3549288 | 3549333 | 2 | 23 | 46 | GT   | 7  | 8  |
| 305838 | 61 | 3550613 | 3550628 | 4 | 4  | 16 | TTTG | 25 | 4  |
| 305844 | 61 | 3559913 | 3559926 | 2 | 7  | 14 | TG   | 28 | 3  |
| 305845 | 61 | 3560067 | 3560124 | 2 | 29 | 58 | AC   | 13 | 11 |
| 305848 | 61 | 3579549 | 3579566 | 2 | 9  | 18 | TG   | 25 | 4  |
| 305850 | 61 | 3583155 | 3583168 | 2 | 7  | 14 | CA   | 15 | 3  |
| 305851 | 61 | 3588669 | 3588740 | 4 | 18 | 72 | AATG | 19 | 9  |
| 305852 | 61 | 3592535 | 3592546 | 2 | 6  | 12 | CA   | 30 | 3  |
| 305853 | 61 | 3593422 | 3593447 | 2 | 13 | 26 | GT   | 9  | 9  |
| 305857 | 61 | 3606646 | 3606665 | 2 | 10 | 20 | TG   | 17 | 8  |
| 305861 | 61 | 3612196 | 3612231 | 3 | 12 | 36 | TTG  | 21 | 15 |
| 305863 | 61 | 3619824 | 3619837 | 2 | 7  | 14 | GT   | 29 | 6  |
| 305872 | 61 | 3626149 | 3626163 | 3 | 5  | 15 | TAA  | 20 | 3  |
| 305874 | 61 | 3636916 | 3636959 | 2 | 22 | 44 | AC   | 17 | 9  |
| 305877 | 61 | 3651407 | 3651433 | 3 | 9  | 27 | TCC  | 9  | 6  |
| 305904 | 61 | 3692415 | 3692432 | 2 | 9  | 18 | TG   | 20 | 9  |
| 305905 | 61 | 3693966 | 3693981 | 2 | 8  | 16 | GA   | 16 | 4  |
| 305907 | 61 | 3702714 | 3702743 | 2 | 15 | 30 | CA   | 7  | 7  |
| 305909 | 61 | 3707708 | 3707735 | 2 | 14 | 28 | TG   | 8  | 8  |
| 305910 | 61 | 3708714 | 3708733 | 2 | 10 | 20 | CA   | 11 | 5  |
| 305911 | 61 | 3708735 | 3708748 | 2 | 7  | 14 | AC   | 12 | 7  |
| 305914 | 61 | 3711232 | 3711269 | 2 | 19 | 38 | AC   | 9  | 9  |
| 305927 | 61 | 3736727 | 3736746 | 2 | 10 | 20 | CA   | 14 | 9  |
| 305943 | 61 | 3757270 | 3757283 | 2 | 7  | 14 | AC   | 26 | 5  |
| 305950 | 61 | 3762103 | 3762126 | 4 | 6  | 24 | TTGT | 33 | 3  |
| 305958 | 61 | 3783176 | 3783191 | 2 | 8  | 16 | TG   | 20 | 5  |
| 305963 | 61 | 3800486 | 3800509 | 3 | 8  | 24 | CAG  | 28 | 7  |
| 305967 | 61 | 3829915 | 3829938 | 3 | 8  | 24 | ATT  | 10 | 5  |
| 305972 | 61 | 3831703 | 3831718 | 4 | 4  | 16 | GATA | 23 | 3  |
| 305978 | 61 | 3839105 | 3839118 | 2 | 7  | 14 | AT   | 20 | 5  |

|        |    |         |         |   |    |    |      |    |    |
|--------|----|---------|---------|---|----|----|------|----|----|
| 305979 | 61 | 3841737 | 3841750 | 2 | 7  | 14 | TG   | 23 | 4  |
| 305980 | 61 | 3850470 | 3850513 | 2 | 22 | 44 | TG   | 12 | 13 |
| 305981 | 61 | 3852407 | 3852436 | 3 | 10 | 30 | TAC  | 25 | 4  |
| 306002 | 61 | 3945982 | 3946009 | 2 | 14 | 28 | AC   | 6  | 4  |
| 306004 | 61 | 3955471 | 3955518 | 4 | 12 | 48 | TACA | 18 | 11 |
| 306007 | 61 | 3973509 | 3973536 | 2 | 14 | 28 | TG   | 8  | 6  |
| 306009 | 61 | 3975280 | 3975321 | 2 | 21 | 42 | CA   | 11 | 10 |
| 306010 | 61 | 3975763 | 3975778 | 2 | 8  | 16 | CT   | 17 | 3  |
| 306016 | 61 | 3978618 | 3978639 | 2 | 11 | 22 | TG   | 15 | 3  |
| 306022 | 61 | 3983290 | 3983329 | 4 | 10 | 40 | AGAT | 20 | 10 |
| 306023 | 61 | 3983939 | 3983954 | 2 | 8  | 16 | GA   | 26 | 3  |
| 306031 | 61 | 4008663 | 4008694 | 2 | 16 | 32 | AC   | 9  | 5  |
| 306037 | 61 | 4025110 | 4025133 | 3 | 8  | 24 | ATT  | 6  | 3  |
| 306038 | 61 | 4025852 | 4025871 | 2 | 10 | 20 | CA   | 20 | 8  |
| 306043 | 61 | 4038341 | 4038368 | 2 | 14 | 28 | GT   | 19 | 6  |
| 306055 | 61 | 4071285 | 4071320 | 2 | 18 | 36 | GT   | 7  | 6  |
| 306056 | 61 | 4074802 | 4074813 | 2 | 6  | 12 | TC   | 15 | 4  |
| 306059 | 61 | 4087174 | 4087201 | 2 | 14 | 28 | TG   | 9  | 7  |
| 306061 | 61 | 4087976 | 4088002 | 3 | 9  | 27 | TTA  | 11 | 4  |
| 306068 | 61 | 4117427 | 4117440 | 2 | 7  | 14 | GT   | 23 | 3  |
| 306071 | 61 | 4120968 | 4120983 | 2 | 8  | 16 | CA   | 11 | 6  |
| 306074 | 62 | 14570   | 14593   | 2 | 12 | 24 | TG   | 20 | 11 |
| 306080 | 62 | 25327   | 25346   | 2 | 10 | 20 | AC   | 23 | 5  |
| 306081 | 62 | 25536   | 25557   | 2 | 11 | 22 | CA   | 13 | 5  |
| 306082 | 62 | 26501   | 26518   | 2 | 9  | 18 | AC   | 22 | 3  |
| 306083 | 62 | 30081   | 30094   | 2 | 7  | 14 | GA   | 29 | 4  |
| 306085 | 62 | 33011   | 33034   | 2 | 12 | 24 | AC   | 16 | 6  |
| 306086 | 62 | 35292   | 35303   | 2 | 6  | 12 | GA   | 23 | 3  |
| 306087 | 62 | 35858   | 35878   | 3 | 7  | 21 | GAG  | 20 | 4  |
| 306092 | 62 | 38400   | 38420   | 3 | 7  | 21 | AGG  | 27 | 3  |
| 306094 | 62 | 40913   | 40932   | 2 | 10 | 20 | GA   | 25 | 4  |
| 306100 | 62 | 48730   | 48761   | 2 | 16 | 32 | GT   | 13 | 12 |
| 306105 | 62 | 56427   | 56452   | 2 | 13 | 26 | AC   | 15 | 8  |
| 306108 | 62 | 61202   | 61223   | 2 | 11 | 22 | AC   | 24 | 7  |
| 306135 | 62 | 113249  | 113270  | 2 | 11 | 22 | AC   | 9  | 8  |
| 306136 | 62 | 120757  | 120774  | 3 | 6  | 18 | CAT  | 10 | 3  |
| 306140 | 62 | 134300  | 134367  | 4 | 17 | 68 | ATGT | 11 | 8  |
| 306142 | 62 | 136886  | 136917  | 2 | 16 | 32 | CA   | 14 | 13 |
| 306147 | 62 | 147271  | 147296  | 2 | 13 | 26 | TG   | 17 | 13 |
| 306149 | 62 | 149836  | 149865  | 2 | 15 | 30 | TG   | 10 | 12 |
| 306150 | 62 | 149905  | 149922  | 2 | 9  | 18 | GT   | 23 | 3  |
| 306151 | 62 | 153093  | 153107  | 3 | 5  | 15 | ATT  | 23 | 5  |
| 306152 | 62 | 153578  | 153589  | 2 | 6  | 12 | AC   | 26 | 5  |
| 306157 | 62 | 159091  | 159104  | 2 | 7  | 14 | CA   | 19 | 11 |
| 306160 | 62 | 159815  | 159838  | 2 | 12 | 24 | CA   | 15 | 7  |
| 306165 | 62 | 168951  | 168965  | 3 | 5  | 15 | ACC  | 21 | 4  |
| 306166 | 62 | 169245  | 169258  | 2 | 7  | 14 | TC   | 28 | 3  |
| 306171 | 62 | 175565  | 175582  | 2 | 9  | 18 | CT   | 12 | 4  |
| 306176 | 62 | 177760  | 177783  | 2 | 12 | 24 | GT   | 8  | 11 |
| 306181 | 62 | 185358  | 185379  | 2 | 11 | 22 | AC   | 7  | 8  |
| 306187 | 62 | 195028  | 195043  | 2 | 8  | 16 | GT   | 17 | 3  |

|        |    |        |        |   |    |    |      |    |    |
|--------|----|--------|--------|---|----|----|------|----|----|
| 306191 | 62 | 196595 | 196609 | 3 | 5  | 15 | TGC  | 32 | 4  |
| 306193 | 62 | 199417 | 199460 | 2 | 22 | 44 | GT   | 20 | 7  |
| 306194 | 62 | 201040 | 201051 | 2 | 6  | 12 | TG   | 24 | 5  |
| 306197 | 62 | 205594 | 205615 | 2 | 11 | 22 | AG   | 17 | 10 |
| 306198 | 62 | 206392 | 206415 | 2 | 12 | 24 | GT   | 12 | 5  |
| 306206 | 62 | 224478 | 224493 | 2 | 8  | 16 | AC   | 21 | 6  |
| 306212 | 62 | 250777 | 250792 | 4 | 4  | 16 | AAAG | 14 | 6  |
| 306215 | 62 | 258492 | 258511 | 2 | 10 | 20 | TG   | 15 | 8  |
| 306218 | 62 | 258907 | 258924 | 2 | 9  | 18 | TG   | 15 | 4  |
| 306219 | 62 | 258950 | 258991 | 2 | 21 | 42 | TG   | 10 | 12 |
| 306225 | 62 | 264226 | 264245 | 2 | 10 | 20 | GA   | 23 | 5  |
| 306227 | 62 | 269629 | 269650 | 2 | 11 | 22 | AC   | 22 | 6  |
| 306228 | 62 | 269894 | 269923 | 2 | 15 | 30 | TG   | 12 | 7  |
| 306236 | 62 | 274501 | 274512 | 2 | 6  | 12 | AC   | 29 | 5  |
| 306252 | 62 | 281957 | 281977 | 3 | 7  | 21 | GCA  | 26 | 15 |
| 306253 | 62 | 282084 | 282116 | 3 | 11 | 33 | GAT  | 18 | 7  |
| 306256 | 62 | 282651 | 282670 | 2 | 10 | 20 | GT   | 22 | 11 |
| 306261 | 62 | 284054 | 284071 | 2 | 9  | 18 | TG   | 9  | 13 |
| 306268 | 62 | 290864 | 290877 | 2 | 7  | 14 | TG   | 9  | 3  |
| 306277 | 62 | 293915 | 293929 | 3 | 5  | 15 | GCA  | 37 | 4  |
| 306288 | 62 | 301047 | 301060 | 2 | 7  | 14 | CT   | 10 | 3  |
| 306295 | 62 | 307910 | 307925 | 4 | 4  | 16 | TGGC | 28 | 3  |
| 306297 | 62 | 308345 | 308366 | 2 | 11 | 22 | TG   | 11 | 6  |
| 306303 | 62 | 319274 | 319305 | 4 | 8  | 32 | CAGA | 26 | 5  |
| 306308 | 62 | 324897 | 324910 | 2 | 7  | 14 | CA   | 8  | 4  |
| 306309 | 62 | 325202 | 325223 | 2 | 11 | 22 | GA   | 17 | 3  |
| 306310 | 62 | 327267 | 327294 | 2 | 14 | 28 | CA   | 12 | 8  |
| 306322 | 62 | 339691 | 339724 | 2 | 17 | 34 | GT   | 13 | 9  |
| 306323 | 62 | 343832 | 343855 | 4 | 6  | 24 | TTTG | 19 | 4  |
| 306329 | 62 | 352920 | 352955 | 2 | 18 | 36 | GA   | 8  | 14 |
| 306333 | 62 | 357223 | 357244 | 2 | 11 | 22 | CA   | 25 | 9  |
| 306334 | 62 | 357410 | 357433 | 2 | 12 | 24 | GT   | 28 | 10 |
| 306336 | 62 | 360525 | 360550 | 2 | 13 | 26 | AG   | 12 | 7  |
| 306344 | 62 | 377860 | 377875 | 2 | 8  | 16 | TA   | 15 | 4  |
| 306349 | 62 | 384814 | 384829 | 4 | 4  | 16 | TATG | 7  | 4  |
| 306350 | 62 | 384884 | 384911 | 2 | 14 | 28 | TC   | 10 | 7  |
| 306353 | 62 | 388775 | 388788 | 2 | 7  | 14 | CT   | 28 | 7  |
| 306362 | 62 | 414935 | 414946 | 2 | 6  | 12 | GA   | 15 | 4  |
| 306383 | 62 | 465749 | 465764 | 2 | 8  | 16 | GT   | 16 | 5  |
| 306390 | 62 | 485933 | 485952 | 2 | 10 | 20 | GT   | 25 | 4  |
| 306391 | 62 | 486558 | 486579 | 2 | 11 | 22 | TG   | 15 | 11 |
| 306393 | 62 | 490182 | 490199 | 2 | 9  | 18 | CA   | 23 | 6  |
| 306395 | 62 | 491422 | 491437 | 2 | 8  | 16 | AC   | 18 | 5  |
| 306396 | 62 | 491788 | 491799 | 2 | 6  | 12 | AT   | 14 | 3  |
| 306401 | 62 | 503370 | 503381 | 2 | 6  | 12 | CA   | 30 | 8  |
| 306406 | 62 | 517781 | 517795 | 3 | 5  | 15 | TAT  | 19 | 3  |
| 306407 | 62 | 525291 | 525304 | 2 | 7  | 14 | AT   | 26 | 14 |
| 306411 | 62 | 543581 | 543614 | 2 | 17 | 34 | GT   | 10 | 10 |
| 306412 | 62 | 544617 | 544638 | 2 | 11 | 22 | AC   | 27 | 9  |
| 306414 | 62 | 545505 | 545524 | 4 | 5  | 20 | TCTT | 21 | 5  |
| 306425 | 62 | 563142 | 563153 | 2 | 6  | 12 | AG   | 19 | 6  |

|        |    |        |        |   |    |    |      |    |    |
|--------|----|--------|--------|---|----|----|------|----|----|
| 306427 | 62 | 564000 | 564027 | 2 | 14 | 28 | TG   | 14 | 15 |
| 306428 | 62 | 564467 | 564484 | 2 | 9  | 18 | CA   | 17 | 7  |
| 306429 | 62 | 564997 | 565020 | 2 | 12 | 24 | GA   | 19 | 7  |
| 306432 | 62 | 565420 | 565447 | 4 | 7  | 28 | CCAG | 23 | 6  |
| 306438 | 62 | 571666 | 571680 | 3 | 5  | 15 | CAG  | 13 | 4  |
| 306439 | 62 | 571870 | 571891 | 2 | 11 | 22 | TG   | 13 | 8  |
| 306440 | 62 | 571925 | 571942 | 3 | 6  | 18 | GCA  | 22 | 12 |
| 306444 | 62 | 586356 | 586371 | 2 | 8  | 16 | GT   | 18 | 5  |
| 306445 | 62 | 586660 | 586677 | 2 | 9  | 18 | GT   | 15 | 6  |
| 306446 | 62 | 586849 | 586860 | 2 | 6  | 12 | TG   | 17 | 3  |
| 306447 | 62 | 589088 | 589113 | 2 | 13 | 26 | CA   | 17 | 13 |
| 306449 | 62 | 589760 | 589785 | 2 | 13 | 26 | CA   | 19 | 7  |
| 306450 | 62 | 589899 | 589914 | 2 | 8  | 16 | AG   | 14 | 7  |
| 306455 | 62 | 593927 | 593940 | 2 | 7  | 14 | TG   | 8  | 12 |
| 306469 | 62 | 607166 | 607183 | 2 | 9  | 18 | TG   | 26 | 4  |
| 306470 | 62 | 607277 | 607304 | 2 | 14 | 28 | CA   | 12 | 9  |
| 306479 | 62 | 613348 | 613367 | 2 | 10 | 20 | TG   | 18 | 15 |
| 306481 | 62 | 616178 | 616189 | 2 | 6  | 12 | GT   | 18 | 3  |
| 306482 | 62 | 616358 | 616375 | 2 | 9  | 18 | GT   | 21 | 11 |
| 306483 | 62 | 617225 | 617269 | 3 | 15 | 45 | GGA  | 20 | 8  |
| 306485 | 62 | 618664 | 618675 | 2 | 6  | 12 | CA   | 26 | 4  |
| 306487 | 62 | 619029 | 619060 | 2 | 16 | 32 | TG   | 19 | 7  |
| 306488 | 62 | 623566 | 623585 | 2 | 10 | 20 | CA   | 7  | 6  |
| 306489 | 62 | 625267 | 625282 | 2 | 8  | 16 | TC   | 22 | 3  |
| 306491 | 62 | 626875 | 626900 | 2 | 13 | 26 | GT   | 17 | 12 |
| 306493 | 62 | 630690 | 630701 | 2 | 6  | 12 | AC   | 27 | 6  |
| 306495 | 62 | 633489 | 633512 | 2 | 12 | 24 | TG   | 21 | 8  |
| 306497 | 62 | 634522 | 634545 | 3 | 8  | 24 | GGA  | 7  | 4  |
| 306498 | 62 | 636438 | 636459 | 2 | 11 | 22 | GA   | 18 | 5  |
| 306500 | 62 | 640113 | 640130 | 2 | 9  | 18 | GA   | 27 | 10 |
| 306502 | 62 | 641578 | 641591 | 2 | 7  | 14 | TG   | 24 | 10 |
| 306503 | 62 | 641595 | 641606 | 2 | 6  | 12 | GT   | 26 | 9  |
| 306508 | 62 | 642343 | 642354 | 2 | 6  | 12 | GT   | 23 | 5  |
| 306511 | 62 | 644163 | 644210 | 2 | 24 | 48 | CA   | 12 | 14 |
| 306514 | 62 | 646512 | 646523 | 2 | 6  | 12 | CA   | 24 | 7  |
| 306519 | 62 | 650874 | 650885 | 2 | 6  | 12 | GT   | 6  | 4  |
| 306524 | 62 | 653704 | 653739 | 2 | 18 | 36 | AG   | 19 | 10 |
| 306525 | 62 | 654745 | 654762 | 3 | 6  | 18 | GCT  | 16 | 4  |
| 306527 | 62 | 656627 | 656646 | 2 | 10 | 20 | AC   | 17 | 3  |
| 306530 | 62 | 663370 | 663397 | 2 | 14 | 28 | CA   | 8  | 10 |
| 306537 | 62 | 672687 | 672702 | 2 | 8  | 16 | CA   | 26 | 7  |
| 306538 | 62 | 674907 | 674922 | 2 | 8  | 16 | CT   | 27 | 5  |
| 306544 | 62 | 685005 | 685022 | 3 | 6  | 18 | GGA  | 22 | 9  |
| 306545 | 62 | 687484 | 687501 | 2 | 9  | 18 | TG   | 25 | 6  |
| 306547 | 62 | 687645 | 687658 | 2 | 7  | 14 | GT   | 14 | 5  |
| 306552 | 62 | 698880 | 698891 | 2 | 6  | 12 | TG   | 31 | 3  |
| 306553 | 62 | 700711 | 700731 | 3 | 7  | 21 | TTG  | 22 | 6  |
| 306557 | 62 | 713027 | 713042 | 2 | 8  | 16 | AC   | 25 | 4  |
| 306562 | 62 | 723587 | 723602 | 2 | 8  | 16 | AC   | 18 | 7  |
| 306563 | 62 | 725313 | 725330 | 2 | 9  | 18 | TG   | 29 | 5  |
| 306570 | 62 | 733568 | 733593 | 2 | 13 | 26 | AC   | 13 | 10 |

|        |    |         |         |   |    |    |      |    |    |
|--------|----|---------|---------|---|----|----|------|----|----|
| 306573 | 62 | 738921  | 738934  | 2 | 7  | 14 | AC   | 24 | 6  |
| 306574 | 62 | 739005  | 739020  | 2 | 8  | 16 | AG   | 20 | 3  |
| 306575 | 62 | 739514  | 739561  | 4 | 12 | 48 | TAGA | 9  | 8  |
| 306576 | 62 | 740890  | 740915  | 2 | 13 | 26 | TG   | 17 | 11 |
| 306579 | 62 | 743482  | 743493  | 2 | 6  | 12 | TG   | 23 | 16 |
| 306580 | 62 | 744344  | 744357  | 2 | 7  | 14 | TG   | 14 | 9  |
| 306583 | 62 | 745873  | 745884  | 2 | 6  | 12 | GT   | 23 | 4  |
| 306585 | 62 | 759917  | 759932  | 4 | 4  | 16 | GCAG | 29 | 5  |
| 306587 | 62 | 760490  | 760525  | 2 | 18 | 36 | GT   | 25 | 13 |
| 306594 | 62 | 764416  | 764431  | 2 | 8  | 16 | CT   | 10 | 8  |
| 306595 | 62 | 768773  | 768790  | 3 | 6  | 18 | CTT  | 11 | 6  |
| 306601 | 62 | 783381  | 783406  | 2 | 13 | 26 | CA   | 12 | 10 |
| 306603 | 62 | 791415  | 791428  | 2 | 7  | 14 | GA   | 24 | 6  |
| 306606 | 62 | 806935  | 806958  | 3 | 8  | 24 | GCT  | 19 | 10 |
| 306612 | 62 | 812474  | 812491  | 2 | 9  | 18 | TG   | 25 | 6  |
| 306613 | 62 | 813473  | 813502  | 2 | 15 | 30 | AC   | 9  | 10 |
| 306615 | 62 | 818559  | 818578  | 2 | 10 | 20 | GT   | 21 | 5  |
| 306616 | 62 | 819315  | 819330  | 2 | 8  | 16 | GT   | 13 | 9  |
| 306627 | 62 | 832902  | 832919  | 2 | 9  | 18 | AC   | 28 | 11 |
| 306628 | 62 | 833253  | 833270  | 2 | 9  | 18 | TC   | 15 | 10 |
| 306629 | 62 | 834916  | 834939  | 2 | 12 | 24 | CA   | 11 | 8  |
| 306640 | 62 | 843674  | 843689  | 2 | 8  | 16 | TC   | 22 | 3  |
| 306645 | 62 | 850409  | 850428  | 2 | 10 | 20 | TG   | 25 | 3  |
| 306648 | 62 | 851083  | 851110  | 2 | 14 | 28 | CA   | 15 | 10 |
| 306650 | 62 | 852480  | 852511  | 2 | 16 | 32 | CA   | 17 | 10 |
| 306651 | 62 | 853750  | 853787  | 2 | 19 | 38 | GT   | 10 | 8  |
| 306655 | 62 | 861738  | 861781  | 4 | 11 | 44 | GATA | 18 | 10 |
| 306656 | 62 | 863103  | 863118  | 2 | 8  | 16 | TA   | 15 | 6  |
| 306658 | 62 | 865235  | 865270  | 4 | 9  | 36 | TTCA | 24 | 7  |
| 306661 | 62 | 867794  | 867817  | 2 | 12 | 24 | CT   | 7  | 4  |
| 306670 | 62 | 876585  | 876600  | 2 | 8  | 16 | CA   | 28 | 12 |
| 306672 | 62 | 879738  | 879797  | 2 | 30 | 60 | CA   | 12 | 12 |
| 306673 | 62 | 880451  | 880462  | 2 | 6  | 12 | CA   | 26 | 15 |
| 306674 | 62 | 880464  | 880475  | 2 | 6  | 12 | AC   | 9  | 8  |
| 306675 | 62 | 880566  | 880583  | 2 | 9  | 18 | TG   | 11 | 10 |
| 306676 | 62 | 882371  | 882388  | 3 | 6  | 18 | ATA  | 12 | 4  |
| 306685 | 62 | 893989  | 894022  | 2 | 17 | 34 | CA   | 13 | 12 |
| 306687 | 62 | 896392  | 896413  | 2 | 11 | 22 | TG   | 12 | 11 |
| 306689 | 62 | 900367  | 900382  | 2 | 8  | 16 | TC   | 21 | 5  |
| 306691 | 62 | 904385  | 904399  | 3 | 5  | 15 | GCT  | 22 | 7  |
| 306698 | 62 | 921229  | 921240  | 2 | 6  | 12 | AG   | 29 | 4  |
| 306709 | 62 | 938951  | 938970  | 2 | 10 | 20 | GT   | 22 | 4  |
| 306715 | 62 | 948401  | 948416  | 4 | 4  | 16 | GGGA | 6  | 3  |
| 306716 | 62 | 949217  | 949236  | 2 | 10 | 20 | CA   | 22 | 8  |
| 306721 | 62 | 956716  | 956739  | 2 | 12 | 24 | AC   | 18 | 11 |
| 306722 | 62 | 957252  | 957267  | 2 | 8  | 16 | AC   | 25 | 3  |
| 306723 | 62 | 958942  | 958953  | 2 | 6  | 12 | CA   | 34 | 5  |
| 306744 | 62 | 984281  | 984296  | 2 | 8  | 16 | GT   | 19 | 3  |
| 306757 | 62 | 1012620 | 1012637 | 3 | 6  | 18 | TTG  | 12 | 3  |
| 306759 | 62 | 1013922 | 1013947 | 2 | 13 | 26 | GA   | 7  | 9  |
| 306775 | 62 | 1035255 | 1035268 | 2 | 7  | 14 | AG   | 20 | 4  |

|        |    |         |         |   |    |    |      |    |    |
|--------|----|---------|---------|---|----|----|------|----|----|
| 306777 | 62 | 1036984 | 1037025 | 2 | 21 | 42 | TG   | 15 | 13 |
| 306784 | 62 | 1057671 | 1057700 | 2 | 15 | 30 | GT   | 12 | 6  |
| 306787 | 62 | 1060266 | 1060285 | 2 | 10 | 20 | AC   | 19 | 7  |
| 306789 | 62 | 1060895 | 1060906 | 2 | 6  | 12 | CA   | 24 | 4  |
| 306791 | 62 | 1063180 | 1063200 | 3 | 7  | 21 | CAC  | 21 | 3  |
| 306792 | 62 | 1063591 | 1063606 | 2 | 8  | 16 | CT   | 20 | 4  |
| 306793 | 62 | 1065565 | 1065604 | 2 | 20 | 40 | CA   | 8  | 13 |
| 306795 | 62 | 1066061 | 1066084 | 2 | 12 | 24 | CT   | 9  | 7  |
| 306800 | 62 | 1073551 | 1073572 | 2 | 11 | 22 | CA   | 12 | 4  |
| 306801 | 62 | 1074136 | 1074155 | 2 | 10 | 20 | TG   | 26 | 6  |
| 306803 | 62 | 1076709 | 1076726 | 2 | 9  | 18 | CA   | 19 | 5  |
| 306812 | 62 | 1086128 | 1086142 | 3 | 5  | 15 | CCA  | 23 | 3  |
| 306813 | 62 | 1086214 | 1086231 | 2 | 9  | 18 | TC   | 21 | 4  |
| 306821 | 62 | 1090441 | 1090454 | 2 | 7  | 14 | TG   | 17 | 6  |
| 306824 | 62 | 1091379 | 1091390 | 2 | 6  | 12 | TG   | 25 | 5  |
| 306828 | 62 | 1092567 | 1092586 | 2 | 10 | 20 | GT   | 8  | 5  |
| 306830 | 62 | 1097060 | 1097075 | 2 | 8  | 16 | AG   | 7  | 3  |
| 306832 | 62 | 1097563 | 1097602 | 4 | 10 | 40 | CTAT | 15 | 11 |
| 306834 | 62 | 1098429 | 1098452 | 2 | 12 | 24 | GT   | 11 | 7  |
| 306837 | 62 | 1100244 | 1100281 | 2 | 19 | 38 | CA   | 15 | 7  |
| 306840 | 62 | 1102135 | 1102160 | 2 | 13 | 26 | GT   | 17 | 8  |
| 306842 | 62 | 1103835 | 1103854 | 4 | 5  | 20 | ATTT | 32 | 10 |
| 306843 | 62 | 1104044 | 1104071 | 2 | 14 | 28 | AC   | 13 | 6  |
| 306848 | 62 | 1107812 | 1107827 | 2 | 8  | 16 | GT   | 23 | 5  |
| 306852 | 62 | 1110997 | 1111010 | 2 | 7  | 14 | AG   | 22 | 4  |
| 306858 | 62 | 1116406 | 1116421 | 4 | 4  | 16 | CAGT | 36 | 4  |
| 306861 | 62 | 1121481 | 1121498 | 3 | 6  | 18 | CCA  | 16 | 3  |
| 306863 | 62 | 1123714 | 1123733 | 2 | 10 | 20 | AC   | 7  | 7  |
| 306868 | 62 | 1129165 | 1129176 | 2 | 6  | 12 | AC   | 24 | 6  |
| 306887 | 62 | 1181118 | 1181139 | 2 | 11 | 22 | GA   | 16 | 5  |
| 306888 | 62 | 1182776 | 1182833 | 2 | 29 | 58 | CA   | 7  | 7  |
| 306889 | 62 | 1182935 | 1182948 | 2 | 7  | 14 | CA   | 24 | 5  |
| 306890 | 62 | 1183318 | 1183331 | 2 | 7  | 14 | GT   | 34 | 4  |
| 306893 | 62 | 1184382 | 1184407 | 2 | 13 | 26 | GA   | 20 | 6  |
| 306895 | 62 | 1187190 | 1187203 | 2 | 7  | 14 | AT   | 24 | 4  |
| 306899 | 62 | 1190485 | 1190504 | 2 | 10 | 20 | GT   | 9  | 9  |
| 306906 | 62 | 1207253 | 1207270 | 3 | 6  | 18 | AAT  | 26 | 5  |
| 306907 | 62 | 1207731 | 1207744 | 2 | 7  | 14 | CA   | 9  | 3  |
| 306915 | 62 | 1221611 | 1221626 | 4 | 4  | 16 | CTAG | 32 | 3  |
| 306916 | 62 | 1222722 | 1222736 | 3 | 5  | 15 | CCT  | 18 | 4  |
| 306918 | 62 | 1224602 | 1224621 | 2 | 10 | 20 | TG   | 19 | 6  |
| 306919 | 62 | 1228039 | 1228054 | 2 | 8  | 16 | AC   | 21 | 7  |
| 306925 | 62 | 1236148 | 1236171 | 2 | 12 | 24 | GT   | 7  | 7  |
| 306932 | 62 | 1242170 | 1242181 | 2 | 6  | 12 | AC   | 26 | 4  |
| 306933 | 62 | 1242494 | 1242521 | 2 | 14 | 28 | GT   | 13 | 13 |
| 306937 | 62 | 1247180 | 1247197 | 2 | 9  | 18 | AC   | 16 | 9  |
| 306939 | 62 | 1249456 | 1249476 | 3 | 7  | 21 | TCC  | 22 | 6  |
| 306943 | 62 | 1252737 | 1252754 | 2 | 9  | 18 | CT   | 22 | 4  |
| 306947 | 62 | 1263568 | 1263581 | 2 | 7  | 14 | AT   | 7  | 9  |
| 306948 | 62 | 1268294 | 1268305 | 2 | 6  | 12 | AG   | 15 | 7  |
| 306950 | 62 | 1268787 | 1268801 | 3 | 5  | 15 | AAT  | 17 | 4  |

|        |    |         |         |   |    |    |      |    |    |
|--------|----|---------|---------|---|----|----|------|----|----|
| 306951 | 62 | 1269642 | 1269665 | 4 | 6  | 24 | TTTA | 6  | 5  |
| 306953 | 62 | 1270934 | 1270949 | 4 | 4  | 16 | TTTC | 24 | 4  |
| 306960 | 62 | 1275385 | 1275399 | 3 | 5  | 15 | ATA  | 15 | 6  |
| 306961 | 62 | 1275486 | 1275501 | 2 | 8  | 16 | TG   | 17 | 10 |
| 306962 | 62 | 1275600 | 1275625 | 2 | 13 | 26 | GT   | 14 | 11 |
| 306964 | 62 | 1275792 | 1275803 | 2 | 6  | 12 | AT   | 17 | 3  |
| 306973 | 62 | 1287398 | 1287411 | 2 | 7  | 14 | AC   | 25 | 9  |
| 306984 | 62 | 1305773 | 1305792 | 2 | 10 | 20 | CT   | 15 | 5  |
| 306986 | 62 | 1308558 | 1308579 | 2 | 11 | 22 | GT   | 23 | 10 |
| 306989 | 62 | 1314086 | 1314099 | 2 | 7  | 14 | TC   | 25 | 3  |
| 306990 | 62 | 1315684 | 1315701 | 2 | 9  | 18 | TG   | 17 | 3  |
| 306994 | 62 | 1330758 | 1330771 | 2 | 7  | 14 | CA   | 21 | 6  |
| 306998 | 62 | 1343381 | 1343398 | 2 | 9  | 18 | TG   | 20 | 5  |
| 307000 | 62 | 1347147 | 1347162 | 4 | 4  | 16 | TTTC | 20 | 5  |
| 307002 | 62 | 1349497 | 1349517 | 3 | 7  | 21 | CCT  | 24 | 5  |
| 307003 | 62 | 1349597 | 1349626 | 2 | 15 | 30 | CA   | 10 | 6  |
| 307005 | 62 | 1352200 | 1352227 | 2 | 14 | 28 | TC   | 11 | 9  |
| 307007 | 62 | 1357515 | 1357532 | 2 | 9  | 18 | TA   | 13 | 6  |
| 307009 | 62 | 1360091 | 1360108 | 3 | 6  | 18 | TTA  | 14 | 4  |
| 307013 | 62 | 1373587 | 1373610 | 4 | 6  | 24 | TACT | 19 | 4  |
| 307016 | 62 | 1378372 | 1378399 | 2 | 14 | 28 | TG   | 14 | 11 |
| 307018 | 62 | 1384574 | 1384587 | 2 | 7  | 14 | AC   | 25 | 4  |
| 307032 | 62 | 1429050 | 1429071 | 2 | 11 | 22 | CA   | 23 | 6  |
| 307033 | 62 | 1432261 | 1432286 | 2 | 13 | 26 | TG   | 16 | 4  |
| 307041 | 62 | 1444345 | 1444362 | 3 | 6  | 18 | AGC  | 29 | 5  |
| 307045 | 62 | 1446664 | 1446687 | 3 | 8  | 24 | GAG  | 22 | 6  |
| 307055 | 62 | 1456192 | 1456207 | 4 | 4  | 16 | ATCC | 30 | 3  |
| 307059 | 62 | 1473208 | 1473219 | 2 | 6  | 12 | TG   | 14 | 4  |
| 307061 | 62 | 1475779 | 1475794 | 2 | 8  | 16 | AC   | 23 | 10 |
| 307062 | 62 | 1475796 | 1475811 | 2 | 8  | 16 | CA   | 22 | 7  |
| 307067 | 62 | 1484349 | 1484374 | 2 | 13 | 26 | GT   | 17 | 6  |
| 307071 | 62 | 1492682 | 1492709 | 4 | 7  | 28 | TTCA | 24 | 3  |
| 307073 | 62 | 1496261 | 1496292 | 2 | 16 | 32 | CA   | 15 | 12 |
| 307101 | 62 | 1554435 | 1554464 | 2 | 15 | 30 | TC   | 8  | 9  |
| 307102 | 62 | 1556620 | 1556633 | 2 | 7  | 14 | AC   | 25 | 3  |
| 307104 | 62 | 1561035 | 1561046 | 2 | 6  | 12 | AC   | 28 | 3  |
| 307108 | 62 | 1567024 | 1567035 | 2 | 6  | 12 | AT   | 22 | 4  |
| 307110 | 62 | 1571836 | 1571847 | 2 | 6  | 12 | TG   | 12 | 3  |
| 307125 | 62 | 1631018 | 1631049 | 4 | 8  | 32 | TGGA | 30 | 3  |
| 307132 | 62 | 1656635 | 1656646 | 2 | 6  | 12 | GA   | 18 | 4  |
| 307133 | 62 | 1660107 | 1660124 | 2 | 9  | 18 | GT   | 23 | 3  |
| 307142 | 62 | 1690733 | 1690744 | 2 | 6  | 12 | AT   | 9  | 6  |
| 307144 | 62 | 1694290 | 1694321 | 4 | 8  | 32 | GGAT | 24 | 5  |
| 307153 | 62 | 1708766 | 1708807 | 2 | 21 | 42 | TG   | 8  | 9  |
| 307158 | 62 | 1713968 | 1713983 | 2 | 8  | 16 | AC   | 18 | 4  |
| 307168 | 62 | 1758219 | 1758230 | 2 | 6  | 12 | TG   | 25 | 3  |
| 307172 | 62 | 1768669 | 1768680 | 2 | 6  | 12 | AC   | 27 | 5  |
| 307174 | 62 | 1774263 | 1774306 | 2 | 22 | 44 | GT   | 8  | 11 |
| 307176 | 62 | 1778820 | 1778843 | 4 | 6  | 24 | TTAT | 23 | 6  |
| 307193 | 62 | 1821137 | 1821158 | 2 | 11 | 22 | AT   | 7  | 6  |
| 307201 | 62 | 1836730 | 1836745 | 4 | 4  | 16 | AAAT | 19 | 6  |

|        |    |         |         |   |    |    |      |    |    |
|--------|----|---------|---------|---|----|----|------|----|----|
| 307207 | 62 | 1859427 | 1859442 | 2 | 8  | 16 | CA   | 27 | 5  |
| 307208 | 62 | 1859467 | 1859482 | 2 | 8  | 16 | GA   | 17 | 7  |
| 307209 | 62 | 1859483 | 1859496 | 2 | 7  | 14 | CA   | 20 | 6  |
| 307212 | 62 | 1860591 | 1860623 | 3 | 11 | 33 | CAG  | 31 | 7  |
| 307219 | 62 | 1871265 | 1871285 | 3 | 7  | 21 | TCC  | 19 | 3  |
| 307220 | 62 | 1871634 | 1871655 | 2 | 11 | 22 | GT   | 16 | 8  |
| 307224 | 62 | 1875553 | 1875578 | 2 | 13 | 26 | GT   | 16 | 7  |
| 307227 | 62 | 1885814 | 1885835 | 2 | 11 | 22 | AC   | 19 | 7  |
| 307230 | 62 | 1888041 | 1888054 | 2 | 7  | 14 | GT   | 20 | 4  |
| 307231 | 62 | 1888056 | 1888071 | 2 | 8  | 16 | TG   | 17 | 6  |
| 307232 | 62 | 1888866 | 1888877 | 2 | 6  | 12 | TG   | 29 | 3  |
| 307241 | 62 | 1908973 | 1908990 | 2 | 9  | 18 | AC   | 15 | 7  |
| 307248 | 62 | 1936567 | 1936592 | 2 | 13 | 26 | AC   | 8  | 7  |
| 307251 | 62 | 1940522 | 1940545 | 4 | 6  | 24 | TGGA | 26 | 3  |
| 307256 | 62 | 1948078 | 1948105 | 2 | 14 | 28 | TG   | 7  | 7  |
| 307258 | 62 | 1956527 | 1956546 | 4 | 5  | 20 | TAAA | 7  | 3  |
| 307263 | 62 | 1983864 | 1983877 | 2 | 7  | 14 | AT   | 13 | 11 |
| 307264 | 62 | 1984599 | 1984622 | 2 | 12 | 24 | AG   | 27 | 9  |
| 307266 | 62 | 1985728 | 1985753 | 2 | 13 | 26 | CT   | 7  | 9  |
| 307269 | 62 | 1989263 | 1989296 | 2 | 17 | 34 | GT   | 9  | 11 |
| 307271 | 62 | 1990113 | 1990133 | 3 | 7  | 21 | TGC  | 20 | 9  |
| 307273 | 62 | 1993542 | 1993556 | 3 | 5  | 15 | TGT  | 23 | 3  |
| 307275 | 62 | 1998702 | 1998737 | 2 | 18 | 36 | CA   | 15 | 15 |
| 307276 | 62 | 1999123 | 1999138 | 2 | 8  | 16 | AG   | 26 | 8  |
| 307279 | 62 | 2022445 | 2022458 | 2 | 7  | 14 | CA   | 17 | 9  |
| 307281 | 62 | 2028051 | 2028086 | 4 | 9  | 36 | CTAT | 22 | 12 |
| 307283 | 62 | 2035129 | 2035160 | 4 | 8  | 32 | GTGA | 18 | 5  |
| 307287 | 62 | 2042232 | 2042287 | 4 | 14 | 56 | AATA | 13 | 9  |
| 307298 | 62 | 2081883 | 2081898 | 4 | 4  | 16 | TTTG | 35 | 3  |
| 307300 | 62 | 2088744 | 2088785 | 2 | 21 | 42 | TG   | 12 | 12 |
| 307301 | 62 | 2091418 | 2091431 | 2 | 7  | 14 | AT   | 13 | 5  |
| 307306 | 62 | 2101702 | 2101731 | 3 | 10 | 30 | TAA  | 15 | 3  |
| 307307 | 62 | 2103447 | 2103464 | 3 | 6  | 18 | CTT  | 19 | 4  |
| 307316 | 62 | 2126908 | 2126935 | 4 | 7  | 28 | TCTG | 18 | 4  |
| 307325 | 62 | 2143575 | 2143596 | 2 | 11 | 22 | AC   | 7  | 3  |
| 307328 | 62 | 2152700 | 2152721 | 2 | 11 | 22 | TG   | 24 | 11 |
| 307330 | 62 | 2160019 | 2160044 | 2 | 13 | 26 | TG   | 11 | 9  |
| 307331 | 62 | 2161719 | 2161734 | 4 | 4  | 16 | ACTC | 30 | 3  |
| 307333 | 62 | 2167251 | 2167268 | 2 | 9  | 18 | TG   | 10 | 7  |
| 307341 | 62 | 2182296 | 2182317 | 2 | 11 | 22 | TG   | 22 | 11 |
| 307348 | 62 | 2209050 | 2209091 | 3 | 14 | 42 | AAC  | 11 | 12 |
| 307350 | 62 | 2210703 | 2210718 | 4 | 4  | 16 | TTTA | 21 | 6  |
| 307352 | 62 | 2213064 | 2213075 | 2 | 6  | 12 | TG   | 17 | 8  |
| 307367 | 62 | 2295777 | 2295790 | 2 | 7  | 14 | AC   | 25 | 6  |
| 307372 | 62 | 2299687 | 2299728 | 2 | 21 | 42 | AC   | 6  | 11 |
| 307374 | 62 | 2301252 | 2301265 | 2 | 7  | 14 | GC   | 14 | 19 |
| 307392 | 62 | 2325749 | 2325764 | 2 | 8  | 16 | CA   | 13 | 12 |
| 307393 | 62 | 2325855 | 2325868 | 2 | 7  | 14 | AC   | 17 | 3  |
| 307396 | 62 | 2332444 | 2332455 | 2 | 6  | 12 | AC   | 25 | 4  |
| 307400 | 62 | 2343550 | 2343576 | 3 | 9  | 27 | TAC  | 25 | 6  |
| 307401 | 62 | 2343609 | 2343642 | 2 | 17 | 34 | TG   | 6  | 8  |



|        |    |         |         |   |    |    |      |    |    |
|--------|----|---------|---------|---|----|----|------|----|----|
| 307417 | 62 | 2377530 | 2377553 | 3 | 8  | 24 | AAC  | 12 | 7  |
| 307418 | 62 | 2378738 | 2378765 | 2 | 14 | 28 | AC   | 13 | 7  |
| 307425 | 62 | 2398116 | 2398141 | 2 | 13 | 26 | TG   | 15 | 12 |
| 307431 | 62 | 2421618 | 2421643 | 2 | 13 | 26 | GT   | 26 | 3  |
| 307435 | 62 | 2430342 | 2430373 | 2 | 16 | 32 | TG   | 14 | 8  |
| 307437 | 62 | 2436252 | 2436299 | 2 | 24 | 48 | AC   | 8  | 9  |
| 307438 | 62 | 2436386 | 2436403 | 2 | 9  | 18 | AC   | 15 | 5  |
| 307452 | 62 | 2454468 | 2454489 | 2 | 11 | 22 | TG   | 17 | 11 |
| 307471 | 62 | 2497677 | 2497692 | 2 | 8  | 16 | AC   | 25 | 4  |
| 307472 | 62 | 2501185 | 2501210 | 2 | 13 | 26 | AC   | 18 | 6  |
| 307477 | 62 | 2511752 | 2511763 | 2 | 6  | 12 | AC   | 10 | 3  |
| 307478 | 62 | 2511861 | 2511874 | 2 | 7  | 14 | CA   | 19 | 3  |
| 307482 | 62 | 2516625 | 2516668 | 2 | 22 | 44 | AC   | 9  | 9  |
| 307487 | 62 | 2523036 | 2523069 | 2 | 17 | 34 | GT   | 8  | 12 |
| 307488 | 62 | 2525065 | 2525092 | 2 | 14 | 28 | AC   | 8  | 6  |
| 307498 | 62 | 2532796 | 2532839 | 2 | 22 | 44 | CA   | 9  | 10 |
| 307499 | 62 | 2534380 | 2534391 | 2 | 6  | 12 | TG   | 31 | 3  |
| 307500 | 62 | 2536095 | 2536110 | 4 | 4  | 16 | TTTG | 20 | 3  |
| 307504 | 62 | 2538969 | 2538988 | 2 | 10 | 20 | GT   | 18 | 6  |
| 307514 | 62 | 2551444 | 2551473 | 2 | 15 | 30 | AC   | 13 | 10 |
| 307517 | 62 | 2563918 | 2563933 | 2 | 8  | 16 | TG   | 17 | 8  |
| 307523 | 62 | 2601730 | 2601744 | 3 | 5  | 15 | CAC  | 11 | 4  |
| 307524 | 62 | 2602218 | 2602237 | 2 | 10 | 20 | AC   | 6  | 8  |
| 307529 | 62 | 2609547 | 2609570 | 4 | 6  | 24 | GCGT | 10 | 11 |
| 307536 | 62 | 2623002 | 2623045 | 2 | 22 | 44 | CA   | 7  | 9  |
| 307537 | 62 | 2628198 | 2628219 | 2 | 11 | 22 | CA   | 17 | 3  |
| 307538 | 62 | 2629532 | 2629559 | 2 | 14 | 28 | AC   | 14 | 5  |
| 307542 | 62 | 2635466 | 2635485 | 4 | 5  | 20 | AAAC | 8  | 4  |
| 307571 | 62 | 2739456 | 2739469 | 2 | 7  | 14 | GT   | 16 | 3  |
| 307578 | 62 | 2778746 | 2778787 | 2 | 21 | 42 | TG   | 7  | 8  |
| 307583 | 63 | 5167    | 5182    | 4 | 4  | 16 | AAAT | 24 | 4  |
| 307585 | 63 | 17933   | 17948   | 2 | 8  | 16 | TG   | 26 | 4  |
| 307589 | 63 | 19719   | 19732   | 2 | 7  | 14 | TA   | 12 | 4  |
| 307594 | 63 | 25716   | 25733   | 2 | 9  | 18 | CA   | 20 | 3  |
| 307598 | 63 | 35574   | 35591   | 2 | 9  | 18 | AC   | 17 | 6  |
| 307608 | 63 | 56759   | 56776   | 2 | 9  | 18 | AC   | 28 | 4  |
| 307614 | 63 | 66238   | 66261   | 2 | 12 | 24 | TG   | 15 | 4  |
| 307618 | 63 | 68386   | 68417   | 2 | 16 | 32 | CA   | 8  | 7  |
| 307634 | 63 | 110538  | 110569  | 2 | 16 | 32 | GT   | 10 | 8  |
| 307644 | 63 | 130273  | 130300  | 4 | 7  | 28 | TGGA | 29 | 3  |
| 307645 | 63 | 130694  | 130725  | 2 | 16 | 32 | AC   | 11 | 4  |
| 307654 | 63 | 140722  | 140761  | 4 | 10 | 40 | ATGA | 19 | 7  |
| 307661 | 63 | 147674  | 147701  | 2 | 14 | 28 | GT   | 13 | 8  |
| 307662 | 63 | 148376  | 148395  | 2 | 10 | 20 | GT   | 9  | 3  |
| 307673 | 63 | 154704  | 154717  | 2 | 7  | 14 | AC   | 23 | 6  |
| 307683 | 63 | 160254  | 160280  | 3 | 9  | 27 | GCA  | 23 | 6  |
| 307684 | 63 | 161208  | 161231  | 3 | 8  | 24 | GCT  | 19 | 4  |
| 307685 | 63 | 163188  | 163221  | 2 | 17 | 34 | AC   | 8  | 10 |
| 307686 | 63 | 163940  | 163972  | 3 | 11 | 33 | TGT  | 21 | 3  |
| 307701 | 63 | 209329  | 209384  | 2 | 28 | 56 | TG   | 8  | 14 |
| 307704 | 63 | 213962  | 213985  | 4 | 6  | 24 | ACAG | 22 | 4  |

|        |    |        |        |   |    |    |      |    |    |
|--------|----|--------|--------|---|----|----|------|----|----|
| 307710 | 63 | 227964 | 227987 | 2 | 12 | 24 | TG   | 13 | 7  |
| 307712 | 63 | 229499 | 229532 | 2 | 17 | 34 | TG   | 13 | 6  |
| 307716 | 63 | 236652 | 236679 | 4 | 7  | 28 | AGAT | 14 | 8  |
| 307723 | 63 | 254682 | 254697 | 4 | 4  | 16 | TTTG | 22 | 6  |
| 307724 | 63 | 259440 | 259471 | 4 | 8  | 32 | AAAC | 31 | 7  |
| 307730 | 63 | 279920 | 279949 | 2 | 15 | 30 | AC   | 10 | 3  |
| 307742 | 63 | 306439 | 306462 | 2 | 12 | 24 | CA   | 13 | 11 |
| 307746 | 63 | 313379 | 313406 | 2 | 14 | 28 | AC   | 16 | 10 |
| 307748 | 63 | 314590 | 314621 | 2 | 16 | 32 | AC   | 13 | 13 |
| 307752 | 63 | 322328 | 322351 | 4 | 6  | 24 | TTTC | 28 | 12 |
| 307755 | 63 | 340444 | 340473 | 2 | 15 | 30 | AC   | 17 | 10 |
| 307765 | 63 | 350542 | 350575 | 2 | 17 | 34 | AC   | 13 | 12 |
| 307767 | 63 | 351151 | 351174 | 2 | 12 | 24 | CA   | 14 | 10 |
| 307769 | 63 | 355652 | 355673 | 2 | 11 | 22 | GT   | 9  | 7  |
| 307776 | 63 | 365053 | 365070 | 2 | 9  | 18 | TG   | 13 | 3  |
| 307786 | 63 | 403110 | 403137 | 4 | 7  | 28 | TTTG | 19 | 4  |
| 307788 | 63 | 409517 | 409531 | 3 | 5  | 15 | TGC  | 27 | 4  |
| 307789 | 63 | 414275 | 414298 | 4 | 6  | 24 | TCTT | 26 | 3  |
| 307792 | 63 | 418585 | 418612 | 2 | 14 | 28 | AC   | 18 | 6  |
| 307793 | 63 | 421633 | 421664 | 2 | 16 | 32 | CA   | 13 | 8  |
| 307796 | 63 | 425126 | 425149 | 4 | 6  | 24 | ACAG | 12 | 13 |
| 307803 | 63 | 441500 | 441519 | 2 | 10 | 20 | GA   | 21 | 4  |
| 307811 | 63 | 453649 | 453664 | 2 | 8  | 16 | AC   | 20 | 3  |
| 307814 | 63 | 466737 | 466748 | 2 | 6  | 12 | CA   | 17 | 4  |
| 307815 | 63 | 467077 | 467096 | 2 | 10 | 20 | AT   | 15 | 10 |
| 307832 | 63 | 499802 | 499822 | 3 | 7  | 21 | TCT  | 16 | 10 |
| 307833 | 63 | 504021 | 504062 | 3 | 14 | 42 | AGA  | 14 | 10 |
| 307834 | 63 | 510187 | 510204 | 3 | 6  | 18 | CTG  | 22 | 4  |
| 307841 | 63 | 544256 | 544287 | 2 | 16 | 32 | CA   | 17 | 6  |
| 307842 | 63 | 546028 | 546053 | 2 | 13 | 26 | AC   | 22 | 8  |
| 307843 | 63 | 547624 | 547657 | 2 | 17 | 34 | TG   | 6  | 7  |
| 307845 | 63 | 557145 | 557170 | 2 | 13 | 26 | GT   | 23 | 5  |
| 307846 | 63 | 558351 | 558370 | 2 | 10 | 20 | TG   | 10 | 8  |
| 307852 | 63 | 580796 | 580822 | 3 | 9  | 27 | TAG  | 18 | 7  |
| 307869 | 63 | 610803 | 610838 | 2 | 18 | 36 | AC   | 15 | 10 |
| 307871 | 63 | 641069 | 641088 | 2 | 10 | 20 | CA   | 9  | 3  |
| 307874 | 63 | 642184 | 642201 | 3 | 6  | 18 | TTG  | 12 | 4  |
| 307876 | 63 | 642805 | 642816 | 2 | 6  | 12 | GT   | 29 | 3  |
| 307877 | 63 | 643042 | 643065 | 2 | 12 | 24 | GA   | 17 | 8  |
| 307878 | 63 | 643112 | 643125 | 2 | 7  | 14 | GA   | 12 | 3  |
| 307884 | 63 | 645775 | 645800 | 2 | 13 | 26 | TG   | 6  | 6  |
| 307885 | 63 | 645902 | 645933 | 2 | 16 | 32 | GT   | 7  | 8  |
| 307886 | 63 | 648981 | 648996 | 2 | 8  | 16 | CT   | 24 | 5  |
| 307888 | 63 | 665679 | 665698 | 2 | 10 | 20 | GT   | 15 | 3  |
| 307891 | 63 | 681050 | 681067 | 2 | 9  | 18 | TG   | 11 | 3  |
| 307897 | 63 | 695556 | 695575 | 2 | 10 | 20 | GT   | 15 | 8  |
| 307903 | 63 | 704285 | 704305 | 3 | 7  | 21 | GCT  | 24 | 5  |
| 307907 | 63 | 705505 | 705530 | 2 | 13 | 26 | TG   | 19 | 18 |
| 307908 | 63 | 705687 | 705716 | 2 | 15 | 30 | AC   | 20 | 11 |
| 307911 | 63 | 710781 | 710802 | 2 | 11 | 22 | TG   | 16 | 13 |
| 307912 | 63 | 710971 | 711004 | 2 | 17 | 34 | TG   | 8  | 9  |

|        |    |         |         |   |    |    |      |    |    |
|--------|----|---------|---------|---|----|----|------|----|----|
| 307914 | 63 | 711178  | 711227  | 2 | 25 | 50 | GT   | 6  | 11 |
| 307920 | 63 | 723462  | 723506  | 3 | 15 | 45 | TCA  | 24 | 7  |
| 307926 | 63 | 726350  | 726363  | 2 | 7  | 14 | TC   | 6  | 9  |
| 307936 | 63 | 732392  | 732424  | 3 | 11 | 33 | GGA  | 15 | 7  |
| 307937 | 63 | 732834  | 732853  | 4 | 5  | 20 | TTTG | 6  | 6  |
| 307942 | 63 | 741475  | 741489  | 3 | 5  | 15 | CCG  | 34 | 5  |
| 307943 | 63 | 743730  | 743769  | 4 | 10 | 40 | TGAA | 25 | 5  |
| 307945 | 63 | 756558  | 756589  | 2 | 16 | 32 | AC   | 15 | 13 |
| 307948 | 63 | 770945  | 770962  | 3 | 6  | 18 | AGC  | 28 | 6  |
| 307950 | 63 | 783811  | 783846  | 2 | 18 | 36 | TG   | 14 | 11 |
| 307956 | 63 | 792108  | 792131  | 2 | 12 | 24 | CA   | 13 | 10 |
| 307958 | 63 | 797802  | 797821  | 4 | 5  | 20 | TTTA | 19 | 3  |
| 307960 | 63 | 799259  | 799273  | 3 | 5  | 15 | GGA  | 25 | 3  |
| 307961 | 63 | 799936  | 799985  | 2 | 25 | 50 | GT   | 7  | 9  |
| 307963 | 63 | 810303  | 810326  | 4 | 6  | 24 | TATC | 7  | 6  |
| 307968 | 63 | 820076  | 820093  | 2 | 9  | 18 | AG   | 6  | 3  |
| 307972 | 63 | 829922  | 829957  | 2 | 18 | 36 | GT   | 11 | 11 |
| 307986 | 63 | 873713  | 873726  | 2 | 7  | 14 | TG   | 29 | 6  |
| 307992 | 63 | 903495  | 903540  | 2 | 23 | 46 | TG   | 6  | 9  |
| 307993 | 63 | 904685  | 904698  | 2 | 7  | 14 | AC   | 17 | 4  |
| 307994 | 63 | 905603  | 905618  | 2 | 8  | 16 | AG   | 28 | 5  |
| 307999 | 63 | 916325  | 916370  | 2 | 23 | 46 | AC   | 6  | 6  |
| 308002 | 63 | 920726  | 920743  | 2 | 9  | 18 | TG   | 19 | 3  |
| 308005 | 63 | 921598  | 921625  | 2 | 14 | 28 | AC   | 10 | 7  |
| 308007 | 63 | 923697  | 923716  | 2 | 10 | 20 | GT   | 19 | 6  |
| 308010 | 63 | 927773  | 927794  | 2 | 11 | 22 | AC   | 20 | 6  |
| 308034 | 63 | 954068  | 954103  | 3 | 12 | 36 | ATA  | 11 | 5  |
| 308041 | 63 | 963787  | 963798  | 2 | 6  | 12 | AG   | 18 | 4  |
| 308042 | 63 | 964918  | 964941  | 3 | 8  | 24 | TCT  | 26 | 7  |
| 308043 | 63 | 966351  | 966384  | 2 | 17 | 34 | TG   | 17 | 8  |
| 308044 | 63 | 967322  | 967333  | 2 | 6  | 12 | TG   | 18 | 7  |
| 308045 | 63 | 967339  | 967354  | 2 | 8  | 16 | GT   | 19 | 9  |
| 308046 | 63 | 967501  | 967526  | 2 | 13 | 26 | CA   | 16 | 14 |
| 308052 | 63 | 974974  | 975009  | 2 | 18 | 36 | AC   | 6  | 9  |
| 308057 | 63 | 977623  | 977648  | 2 | 13 | 26 | GT   | 8  | 5  |
| 308067 | 63 | 983842  | 983877  | 2 | 18 | 36 | AC   | 9  | 7  |
| 308076 | 63 | 996753  | 996786  | 2 | 17 | 34 | GT   | 11 | 6  |
| 308083 | 63 | 1011886 | 1011921 | 3 | 12 | 36 | CAG  | 23 | 13 |
| 308084 | 63 | 1013471 | 1013512 | 3 | 14 | 42 | CAT  | 19 | 11 |
| 308086 | 63 | 1017243 | 1017270 | 2 | 14 | 28 | TG   | 10 | 5  |
| 308087 | 63 | 1017957 | 1017970 | 2 | 7  | 14 | TG   | 24 | 7  |
| 308088 | 63 | 1018777 | 1018809 | 3 | 11 | 33 | ATG  | 28 | 4  |
| 308101 | 63 | 1038463 | 1038492 | 2 | 15 | 30 | CA   | 13 | 10 |
| 308107 | 63 | 1049939 | 1049966 | 2 | 14 | 28 | GT   | 22 | 8  |
| 308108 | 63 | 1052865 | 1052898 | 2 | 17 | 34 | GT   | 7  | 13 |
| 308111 | 63 | 1056022 | 1056033 | 2 | 6  | 12 | AT   | 23 | 3  |
| 308114 | 63 | 1059210 | 1059235 | 2 | 13 | 26 | AC   | 19 | 6  |
| 308117 | 63 | 1062447 | 1062462 | 2 | 8  | 16 | CA   | 23 | 4  |
| 308118 | 63 | 1064071 | 1064085 | 3 | 5  | 15 | CCT  | 14 | 6  |
| 308119 | 63 | 1070240 | 1070263 | 3 | 8  | 24 | ATC  | 27 | 10 |
| 308121 | 63 | 1076270 | 1076283 | 2 | 7  | 14 | AC   | 17 | 3  |

|        |    |         |         |   |    |    |      |    |    |
|--------|----|---------|---------|---|----|----|------|----|----|
| 308122 | 63 | 1076404 | 1076423 | 2 | 10 | 20 | AC   | 9  | 5  |
| 308128 | 63 | 1094671 | 1094694 | 2 | 12 | 24 | CA   | 18 | 9  |
| 308130 | 63 | 1099222 | 1099237 | 4 | 4  | 16 | TCCC | 17 | 3  |
| 308132 | 63 | 1110473 | 1110484 | 2 | 6  | 12 | AC   | 24 | 4  |
| 308133 | 63 | 1110485 | 1110496 | 2 | 6  | 12 | CA   | 25 | 5  |
| 308135 | 63 | 1113591 | 1113622 | 4 | 8  | 32 | AAAG | 22 | 6  |
| 308136 | 63 | 1126507 | 1126536 | 2 | 15 | 30 | GT   | 8  | 10 |
| 308145 | 63 | 1143643 | 1143687 | 3 | 15 | 45 | TCA  | 27 | 14 |
| 308147 | 63 | 1167311 | 1167358 | 2 | 24 | 48 | CA   | 7  | 7  |
| 308148 | 63 | 1170286 | 1170301 | 2 | 8  | 16 | AC   | 31 | 10 |
| 308150 | 63 | 1174507 | 1174521 | 3 | 5  | 15 | ACA  | 35 | 3  |
| 308160 | 63 | 1208448 | 1208463 | 2 | 8  | 16 | AC   | 12 | 11 |
| 308163 | 63 | 1220232 | 1220259 | 2 | 14 | 28 | GT   | 12 | 8  |
| 308165 | 63 | 1229946 | 1229973 | 2 | 14 | 28 | GT   | 14 | 8  |
| 308166 | 63 | 1235093 | 1235116 | 2 | 12 | 24 | CA   | 8  | 7  |
| 308173 | 63 | 1265135 | 1265162 | 2 | 14 | 28 | CA   | 16 | 10 |
| 308179 | 63 | 1280982 | 1281001 | 4 | 5  | 20 | GCTC | 22 | 7  |
| 308190 | 63 | 1327898 | 1327913 | 4 | 4  | 16 | TCAT | 10 | 3  |
| 308196 | 63 | 1399036 | 1399059 | 2 | 12 | 24 | AC   | 23 | 4  |
| 308197 | 63 | 1400164 | 1400183 | 4 | 5  | 20 | ACAG | 22 | 4  |
| 308201 | 63 | 1409819 | 1409838 | 4 | 5  | 20 | CGGT | 32 | 3  |
| 308204 | 63 | 1410882 | 1410897 | 4 | 4  | 16 | GTCT | 24 | 5  |
| 308209 | 63 | 1430688 | 1430708 | 3 | 7  | 21 | CAG  | 18 | 10 |
| 308210 | 63 | 1432864 | 1432885 | 2 | 11 | 22 | CA   | 19 | 12 |
| 308211 | 63 | 1435466 | 1435503 | 2 | 19 | 38 | CA   | 6  | 10 |
| 308212 | 63 | 1435992 | 1436011 | 2 | 10 | 20 | AC   | 11 | 10 |
| 308213 | 63 | 1436115 | 1436130 | 2 | 8  | 16 | TG   | 21 | 3  |
| 308214 | 63 | 1443918 | 1443929 | 2 | 6  | 12 | TG   | 32 | 4  |
| 308215 | 63 | 1444007 | 1444024 | 3 | 6  | 18 | CCT  | 10 | 7  |
| 308219 | 63 | 1444817 | 1444840 | 4 | 6  | 24 | AAAG | 26 | 6  |
| 308221 | 63 | 1445623 | 1445637 | 3 | 5  | 15 | TGG  | 9  | 4  |
| 308222 | 63 | 1446065 | 1446092 | 2 | 14 | 28 | CA   | 11 | 13 |
| 308223 | 63 | 1446274 | 1446307 | 2 | 17 | 34 | GT   | 8  | 12 |
| 308224 | 63 | 1446445 | 1446478 | 2 | 17 | 34 | GT   | 13 | 10 |
| 308231 | 63 | 1458760 | 1458783 | 2 | 12 | 24 | GT   | 6  | 7  |
| 308236 | 63 | 1463221 | 1463256 | 3 | 12 | 36 | TCC  | 19 | 14 |
| 308237 | 63 | 1463717 | 1463743 | 3 | 9  | 27 | CCT  | 14 | 12 |
| 308238 | 63 | 1471207 | 1471222 | 4 | 4  | 16 | ATCA | 27 | 3  |
| 308242 | 63 | 1485908 | 1485935 | 2 | 14 | 28 | GT   | 12 | 7  |
| 308244 | 63 | 1488132 | 1488145 | 2 | 7  | 14 | AC   | 28 | 3  |
| 308245 | 63 | 1493417 | 1493431 | 3 | 5  | 15 | AGA  | 15 | 6  |
| 308247 | 63 | 1493759 | 1493774 | 2 | 8  | 16 | AC   | 19 | 5  |
| 308248 | 63 | 1500655 | 1500674 | 2 | 10 | 20 | AC   | 13 | 4  |
| 308249 | 63 | 1502180 | 1502203 | 2 | 12 | 24 | TG   | 23 | 4  |
| 308250 | 63 | 1503700 | 1503715 | 2 | 8  | 16 | GT   | 31 | 4  |
| 308251 | 63 | 1511671 | 1511686 | 2 | 8  | 16 | GT   | 27 | 6  |
| 308257 | 63 | 1532638 | 1532667 | 2 | 15 | 30 | AC   | 11 | 9  |
| 308261 | 63 | 1538487 | 1538501 | 3 | 5  | 15 | GAC  | 35 | 5  |
| 308265 | 63 | 1547824 | 1547843 | 4 | 5  | 20 | ATCT | 17 | 8  |
| 308266 | 63 | 1551997 | 1552012 | 2 | 8  | 16 | GT   | 21 | 12 |
| 308267 | 63 | 1553267 | 1553278 | 2 | 6  | 12 | CA   | 24 | 3  |

|        |    |         |         |   |    |    |      |    |    |
|--------|----|---------|---------|---|----|----|------|----|----|
| 308268 | 63 | 1561544 | 1561567 | 2 | 12 | 24 | GT   | 13 | 13 |
| 308270 | 63 | 1567841 | 1567852 | 2 | 6  | 12 | CA   | 22 | 3  |
| 308284 | 63 | 1607014 | 1607031 | 3 | 6  | 18 | ATA  | 23 | 4  |
| 308290 | 63 | 1626410 | 1626429 | 2 | 10 | 20 | GA   | 27 | 5  |
| 308291 | 63 | 1626733 | 1626758 | 2 | 13 | 26 | AC   | 8  | 5  |
| 308302 | 63 | 1643798 | 1643821 | 4 | 6  | 24 | AAAG | 29 | 3  |
| 308303 | 63 | 1644125 | 1644148 | 3 | 8  | 24 | GGA  | 21 | 6  |
| 308312 | 63 | 1669342 | 1669357 | 2 | 8  | 16 | CA   | 31 | 4  |
| 308314 | 63 | 1687246 | 1687271 | 2 | 13 | 26 | CA   | 13 | 12 |
| 308315 | 63 | 1691981 | 1692012 | 4 | 8  | 32 | AAAC | 21 | 18 |
| 308316 | 63 | 1692638 | 1692665 | 4 | 7  | 28 | GAAA | 25 | 8  |
| 308317 | 63 | 1692820 | 1692851 | 2 | 16 | 32 | CA   | 20 | 10 |
| 308320 | 63 | 1717783 | 1717840 | 2 | 29 | 58 | AC   | 16 | 12 |
| 308325 | 63 | 1727547 | 1727562 | 4 | 4  | 16 | AATC | 29 | 3  |
| 308327 | 63 | 1735740 | 1735773 | 2 | 17 | 34 | CA   | 17 | 9  |
| 308334 | 63 | 1766893 | 1766910 | 2 | 9  | 18 | CA   | 17 | 5  |
| 308337 | 63 | 1777212 | 1777237 | 2 | 13 | 26 | TG   | 13 | 14 |
| 308339 | 63 | 1787646 | 1787671 | 2 | 13 | 26 | GT   | 16 | 10 |
| 308341 | 63 | 1792383 | 1792424 | 3 | 14 | 42 | CAT  | 26 | 14 |
| 308343 | 63 | 1796684 | 1796713 | 2 | 15 | 30 | AC   | 16 | 6  |
| 308354 | 63 | 1811805 | 1811819 | 3 | 5  | 15 | CAG  | 35 | 3  |
| 308356 | 63 | 1814916 | 1814936 | 3 | 7  | 21 | AGC  | 27 | 6  |
| 308357 | 63 | 1817865 | 1817882 | 3 | 6  | 18 | CTG  | 34 | 3  |
| 308360 | 63 | 1827210 | 1827245 | 2 | 18 | 36 | GT   | 16 | 14 |
| 308362 | 63 | 1827572 | 1827605 | 2 | 17 | 34 | AC   | 19 | 12 |
| 308364 | 63 | 1831585 | 1831602 | 2 | 9  | 18 | AC   | 18 | 6  |
| 308371 | 63 | 1840711 | 1840722 | 2 | 6  | 12 | GA   | 7  | 4  |
| 308373 | 63 | 1845066 | 1845105 | 4 | 10 | 40 | ATGT | 18 | 11 |
| 308374 | 63 | 1850349 | 1850380 | 4 | 8  | 32 | TTGA | 29 | 12 |
| 308375 | 63 | 1856520 | 1856547 | 2 | 14 | 28 | GT   | 11 | 10 |
| 308377 | 63 | 1862483 | 1862500 | 3 | 6  | 18 | GCT  | 14 | 3  |
| 308378 | 63 | 1864741 | 1864760 | 2 | 10 | 20 | TC   | 15 | 11 |
| 308379 | 63 | 1865872 | 1865901 | 2 | 15 | 30 | TG   | 22 | 20 |
| 308391 | 63 | 1906974 | 1906993 | 2 | 10 | 20 | GA   | 24 | 4  |
| 308393 | 63 | 1933874 | 1933885 | 2 | 6  | 12 | AC   | 26 | 9  |
| 308394 | 63 | 1937302 | 1937319 | 3 | 6  | 18 | CTC  | 31 | 5  |
| 308395 | 63 | 1938438 | 1938451 | 2 | 7  | 14 | TG   | 24 | 3  |
| 308397 | 63 | 1944568 | 1944619 | 2 | 26 | 52 | CA   | 7  | 11 |
| 308413 | 63 | 1969615 | 1969638 | 2 | 12 | 24 | AC   | 14 | 9  |
| 308414 | 63 | 1970126 | 1970161 | 3 | 12 | 36 | CTC  | 23 | 8  |
| 308425 | 63 | 1990844 | 1990861 | 3 | 6  | 18 | ATA  | 18 | 7  |
| 308427 | 63 | 1992628 | 1992673 | 2 | 23 | 46 | TG   | 11 | 17 |
| 308437 | 63 | 2031400 | 2031433 | 2 | 17 | 34 | CA   | 11 | 14 |
| 308438 | 63 | 2032057 | 2032071 | 3 | 5  | 15 | ATA  | 14 | 3  |
| 308454 | 63 | 2049174 | 2049193 | 2 | 10 | 20 | GT   | 15 | 8  |
| 308479 | 63 | 2095516 | 2095527 | 2 | 6  | 12 | GT   | 22 | 3  |
| 308483 | 63 | 2113586 | 2113607 | 2 | 11 | 22 | CA   | 18 | 7  |
| 308484 | 63 | 2114507 | 2114518 | 2 | 6  | 12 | TG   | 28 | 4  |
| 308489 | 63 | 2133625 | 2133644 | 2 | 10 | 20 | CA   | 11 | 3  |
| 308500 | 63 | 2177619 | 2177639 | 3 | 7  | 21 | ATT  | 6  | 5  |
| 308508 | 63 | 2204189 | 2204238 | 2 | 25 | 50 | CA   | 8  | 11 |

|        |    |         |         |   |    |    |      |    |    |
|--------|----|---------|---------|---|----|----|------|----|----|
| 308514 | 63 | 2219957 | 2219978 | 2 | 11 | 22 | CA   | 25 | 5  |
| 308515 | 63 | 2220794 | 2220843 | 2 | 25 | 50 | CA   | 12 | 13 |
| 308516 | 63 | 2228756 | 2228767 | 2 | 6  | 12 | TG   | 29 | 3  |
| 308521 | 63 | 2235021 | 2235036 | 2 | 8  | 16 | GT   | 24 | 4  |
| 308524 | 63 | 2241190 | 2241203 | 2 | 7  | 14 | GT   | 27 | 3  |
| 308526 | 63 | 2253075 | 2253096 | 2 | 11 | 22 | GT   | 19 | 5  |
| 308527 | 63 | 2253159 | 2253178 | 2 | 10 | 20 | GT   | 15 | 12 |
| 308529 | 63 | 2254513 | 2254538 | 2 | 13 | 26 | TG   | 14 | 13 |
| 308530 | 63 | 2257452 | 2257481 | 2 | 15 | 30 | TG   | 6  | 8  |
| 308533 | 63 | 2259741 | 2259764 | 3 | 8  | 24 | AAG  | 30 | 7  |
| 308534 | 63 | 2261233 | 2261248 | 2 | 8  | 16 | GT   | 20 | 15 |
| 308536 | 63 | 2262879 | 2262890 | 2 | 6  | 12 | AC   | 29 | 6  |
| 308538 | 63 | 2264455 | 2264478 | 4 | 6  | 24 | TTCA | 36 | 3  |
| 308539 | 63 | 2265342 | 2265355 | 2 | 7  | 14 | TG   | 16 | 6  |
| 308541 | 63 | 2267091 | 2267124 | 2 | 17 | 34 | GT   | 10 | 5  |
| 308546 | 63 | 2274998 | 2275031 | 2 | 17 | 34 | TG   | 7  | 6  |
| 308554 | 63 | 2286565 | 2286586 | 2 | 11 | 22 | CT   | 12 | 8  |
| 308555 | 63 | 2288310 | 2288321 | 2 | 6  | 12 | AC   | 32 | 5  |
| 308556 | 63 | 2288848 | 2288861 | 2 | 7  | 14 | GT   | 18 | 7  |
| 308557 | 63 | 2289010 | 2289033 | 2 | 12 | 24 | GT   | 16 | 13 |
| 308558 | 63 | 2289204 | 2289221 | 2 | 9  | 18 | CA   | 9  | 10 |
| 308560 | 63 | 2293543 | 2293566 | 2 | 12 | 24 | TG   | 7  | 5  |
| 308563 | 63 | 2298973 | 2299006 | 2 | 17 | 34 | GT   | 20 | 14 |
| 308564 | 63 | 2307736 | 2307756 | 3 | 7  | 21 | GCA  | 10 | 9  |
| 308566 | 63 | 2312610 | 2312627 | 2 | 9  | 18 | GA   | 26 | 8  |
| 308567 | 63 | 2312970 | 2313008 | 3 | 13 | 39 | TCT  | 23 | 18 |
| 308570 | 63 | 2318137 | 2318162 | 2 | 13 | 26 | GT   | 18 | 9  |
| 308571 | 63 | 2318325 | 2318342 | 2 | 9  | 18 | GT   | 23 | 11 |
| 308572 | 63 | 2319793 | 2319816 | 2 | 12 | 24 | CA   | 13 | 11 |
| 308573 | 63 | 2320946 | 2320957 | 2 | 6  | 12 | AG   | 27 | 4  |
| 308575 | 63 | 2325013 | 2325046 | 2 | 17 | 34 | GT   | 8  | 10 |
| 308576 | 63 | 2325120 | 2325135 | 2 | 8  | 16 | GT   | 21 | 3  |
| 308577 | 63 | 2325179 | 2325232 | 2 | 27 | 54 | AC   | 8  | 7  |
| 308580 | 63 | 2327319 | 2327346 | 2 | 14 | 28 | CA   | 21 | 12 |
| 308581 | 63 | 2327486 | 2327507 | 2 | 11 | 22 | CA   | 15 | 5  |
| 308582 | 63 | 2327538 | 2327555 | 2 | 9  | 18 | CA   | 18 | 4  |
| 308583 | 63 | 2328099 | 2328132 | 2 | 17 | 34 | GT   | 14 | 10 |
| 308584 | 63 | 2330023 | 2330056 | 2 | 17 | 34 | CA   | 10 | 8  |
| 308585 | 63 | 2330147 | 2330180 | 2 | 17 | 34 | GT   | 12 | 5  |
| 308588 | 63 | 2333665 | 2333682 | 2 | 9  | 18 | CA   | 15 | 3  |
| 308591 | 63 | 2333850 | 2333871 | 2 | 11 | 22 | CA   | 14 | 6  |
| 308592 | 63 | 2333988 | 2334011 | 2 | 12 | 24 | GT   | 19 | 9  |
| 308595 | 63 | 2336626 | 2336655 | 2 | 15 | 30 | GT   | 13 | 13 |
| 308597 | 63 | 2340558 | 2340611 | 3 | 18 | 54 | CTT  | 26 | 15 |
| 308598 | 63 | 2341530 | 2341547 | 2 | 9  | 18 | GT   | 14 | 4  |
| 308600 | 63 | 2342386 | 2342425 | 2 | 20 | 40 | CA   | 8  | 9  |
| 308602 | 63 | 2344638 | 2344673 | 4 | 9  | 36 | ATCA | 17 | 13 |
| 308605 | 63 | 2349907 | 2349922 | 4 | 4  | 16 | GTCT | 33 | 6  |
| 308607 | 63 | 2350404 | 2350433 | 2 | 15 | 30 | TG   | 18 | 12 |
| 308608 | 63 | 2350593 | 2350620 | 2 | 14 | 28 | AC   | 9  | 8  |
| 308611 | 63 | 2359667 | 2359702 | 4 | 9  | 36 | GGAA | 16 | 9  |

|        |    |         |         |   |    |    |      |    |    |
|--------|----|---------|---------|---|----|----|------|----|----|
| 308612 | 63 | 2360205 | 2360230 | 2 | 13 | 26 | GT   | 13 | 8  |
| 308615 | 63 | 2363043 | 2363072 | 3 | 10 | 30 | GAG  | 18 | 6  |
| 308616 | 63 | 2365571 | 2365582 | 2 | 6  | 12 | TG   | 21 | 4  |
| 308620 | 63 | 2372848 | 2372865 | 2 | 9  | 18 | GA   | 19 | 4  |
| 308622 | 63 | 2372940 | 2372955 | 2 | 8  | 16 | CA   | 6  | 3  |
| 308623 | 63 | 2374136 | 2374151 | 4 | 4  | 16 | TTGT | 28 | 4  |
| 308624 | 63 | 2374530 | 2374544 | 3 | 5  | 15 | CTG  | 31 | 3  |
| 308625 | 63 | 2376322 | 2376354 | 3 | 11 | 33 | GGA  | 6  | 8  |
| 308626 | 63 | 2377534 | 2377571 | 2 | 19 | 38 | CA   | 11 | 10 |
| 308627 | 63 | 2377615 | 2377662 | 2 | 24 | 48 | TG   | 9  | 9  |
| 308628 | 63 | 2377763 | 2377778 | 2 | 8  | 16 | GT   | 15 | 6  |
| 308629 | 63 | 2377983 | 2378006 | 2 | 12 | 24 | CA   | 11 | 7  |
| 308630 | 63 | 2378181 | 2378210 | 2 | 15 | 30 | TG   | 13 | 13 |
| 308631 | 63 | 2378308 | 2378319 | 2 | 6  | 12 | TG   | 10 | 11 |
| 308632 | 63 | 2378321 | 2378334 | 2 | 7  | 14 | GT   | 9  | 9  |
| 308633 | 63 | 2378907 | 2378924 | 2 | 9  | 18 | CA   | 17 | 10 |
| 308634 | 63 | 2378980 | 2378995 | 2 | 8  | 16 | AC   | 31 | 6  |
| 308636 | 63 | 2379298 | 2379325 | 2 | 14 | 28 | GT   | 13 | 9  |
| 308637 | 63 | 2379355 | 2379380 | 2 | 13 | 26 | TG   | 21 | 12 |
| 308639 | 63 | 2379781 | 2379806 | 2 | 13 | 26 | GT   | 16 | 9  |
| 308643 | 63 | 2384587 | 2384616 | 2 | 15 | 30 | CA   | 6  | 7  |
| 308647 | 63 | 2387999 | 2388014 | 2 | 8  | 16 | CA   | 19 | 15 |
| 308650 | 63 | 2389058 | 2389073 | 2 | 8  | 16 | GT   | 16 | 8  |
| 308651 | 63 | 2389076 | 2389087 | 2 | 6  | 12 | GT   | 8  | 5  |
| 308655 | 63 | 2391580 | 2391606 | 3 | 9  | 27 | TTC  | 11 | 10 |
| 308660 | 63 | 2391940 | 2391961 | 2 | 11 | 22 | GT   | 26 | 20 |
| 308664 | 63 | 2393013 | 2393036 | 2 | 12 | 24 | TG   | 10 | 9  |
| 308665 | 63 | 2393506 | 2393545 | 2 | 20 | 40 | GT   | 7  | 8  |
| 308666 | 63 | 2394301 | 2394327 | 3 | 9  | 27 | CTC  | 7  | 7  |
| 308670 | 63 | 2398293 | 2398306 | 2 | 7  | 14 | CA   | 28 | 3  |
| 308672 | 63 | 2402099 | 2402122 | 4 | 6  | 24 | GTCT | 7  | 8  |
| 308675 | 63 | 2403017 | 2403038 | 2 | 11 | 22 | TG   | 12 | 8  |
| 308676 | 63 | 2403285 | 2403298 | 2 | 7  | 14 | AC   | 24 | 10 |
| 308677 | 63 | 2403301 | 2403314 | 2 | 7  | 14 | AC   | 24 | 9  |
| 308682 | 63 | 2407524 | 2407538 | 3 | 5  | 15 | CTC  | 14 | 4  |
| 308684 | 63 | 2409963 | 2410028 | 2 | 33 | 66 | CA   | 9  | 15 |
| 308685 | 63 | 2411386 | 2411403 | 2 | 9  | 18 | GT   | 10 | 4  |
| 308687 | 63 | 2413374 | 2413385 | 2 | 6  | 12 | TG   | 19 | 9  |
| 308688 | 63 | 2413454 | 2413495 | 2 | 21 | 42 | TG   | 6  | 8  |
| 308690 | 63 | 2414949 | 2414981 | 3 | 11 | 33 | TCC  | 10 | 9  |
| 308691 | 63 | 2415082 | 2415096 | 3 | 5  | 15 | CTG  | 20 | 7  |
| 308693 | 63 | 2416711 | 2416731 | 3 | 7  | 21 | GGA  | 16 | 3  |
| 308695 | 63 | 2417864 | 2417889 | 2 | 13 | 26 | TC   | 11 | 9  |
| 308700 | 63 | 2418601 | 2418618 | 2 | 9  | 18 | GT   | 18 | 7  |
| 308703 | 63 | 2420667 | 2420704 | 2 | 19 | 38 | GT   | 13 | 15 |
| 308704 | 63 | 2420846 | 2420877 | 2 | 16 | 32 | TG   | 17 | 17 |
| 308706 | 63 | 2421251 | 2421278 | 2 | 14 | 28 | TG   | 12 | 12 |
| 308707 | 63 | 2421389 | 2421410 | 2 | 11 | 22 | TG   | 19 | 14 |
| 308708 | 63 | 2421684 | 2421711 | 2 | 14 | 28 | TC   | 8  | 9  |
| 308709 | 63 | 2422700 | 2422723 | 3 | 8  | 24 | TCC  | 36 | 7  |
| 308710 | 63 | 2424041 | 2424061 | 3 | 7  | 21 | CCT  | 28 | 4  |

|        |    |         |         |   |    |    |     |    |    |
|--------|----|---------|---------|---|----|----|-----|----|----|
| 308712 | 63 | 2426613 | 2426654 | 2 | 21 | 42 | GT  | 7  | 8  |
| 308716 | 63 | 2434200 | 2434221 | 2 | 11 | 22 | CA  | 17 | 7  |
| 308718 | 63 | 2434666 | 2434699 | 2 | 17 | 34 | AC  | 15 | 15 |
| 308719 | 63 | 2434893 | 2434916 | 2 | 12 | 24 | AC  | 17 | 8  |
| 308723 | 63 | 2443057 | 2443082 | 2 | 13 | 26 | GT  | 12 | 6  |
| 308725 | 63 | 2443309 | 2443342 | 2 | 17 | 34 | TG  | 9  | 5  |
| 308726 | 63 | 2445122 | 2445133 | 2 | 6  | 12 | GT  | 7  | 9  |
| 308740 | 63 | 2449640 | 2449655 | 2 | 8  | 16 | TG  | 7  | 6  |
| 308741 | 63 | 2449819 | 2449832 | 2 | 7  | 14 | GT  | 16 | 13 |
| 308742 | 63 | 2450132 | 2450152 | 3 | 7  | 21 | GAG | 13 | 10 |
| 308743 | 63 | 2450304 | 2450323 | 2 | 10 | 20 | GT  | 15 | 7  |
| 308744 | 63 | 2452156 | 2452173 | 2 | 9  | 18 | CA  | 19 | 11 |
| 308753 | 63 | 2457497 | 2457530 | 2 | 17 | 34 | TG  | 12 | 14 |
| 308755 | 63 | 2460555 | 2460576 | 2 | 11 | 22 | CA  | 12 | 9  |
| 308756 | 63 | 2460664 | 2460683 | 2 | 10 | 20 | AC  | 17 | 14 |
| 308757 | 63 | 2460795 | 2460832 | 2 | 19 | 38 | TG  | 8  | 14 |
| 308758 | 63 | 2461823 | 2461858 | 2 | 18 | 36 | CA  | 15 | 11 |
| 308760 | 63 | 2462619 | 2462632 | 2 | 7  | 14 | GT  | 9  | 5  |
| 308761 | 63 | 2464516 | 2464539 | 2 | 12 | 24 | CA  | 14 | 11 |
| 308762 | 63 | 2465937 | 2465968 | 2 | 16 | 32 | TG  | 20 | 13 |
| 308764 | 63 | 2467841 | 2467856 | 2 | 8  | 16 | AG  | 15 | 3  |
| 308765 | 63 | 2468084 | 2468095 | 2 | 6  | 12 | AC  | 24 | 5  |
| 308766 | 63 | 2469897 | 2469911 | 3 | 5  | 15 | TTC | 23 | 3  |
| 308769 | 63 | 2470194 | 2470215 | 2 | 11 | 22 | CT  | 12 | 3  |
| 308771 | 63 | 2473076 | 2473091 | 2 | 8  | 16 | AC  | 15 | 10 |
| 308772 | 63 | 2474357 | 2474372 | 2 | 8  | 16 | TG  | 23 | 5  |
| 308778 | 63 | 2481553 | 2481566 | 2 | 7  | 14 | AC  | 9  | 7  |
| 308780 | 63 | 2481728 | 2481751 | 2 | 12 | 24 | AC  | 12 | 10 |
| 308781 | 63 | 2481786 | 2481813 | 2 | 14 | 28 | AC  | 9  | 11 |
| 308783 | 63 | 2482258 | 2482275 | 2 | 9  | 18 | GT  | 9  | 11 |
| 308784 | 63 | 2482452 | 2482475 | 2 | 12 | 24 | CA  | 6  | 6  |
| 308786 | 63 | 2484611 | 2484622 | 2 | 6  | 12 | CA  | 17 | 14 |
| 308787 | 63 | 2484625 | 2484640 | 2 | 8  | 16 | CA  | 13 | 9  |
| 308790 | 63 | 2489683 | 2489708 | 2 | 13 | 26 | TG  | 6  | 10 |
| 308793 | 63 | 2490056 | 2490073 | 2 | 9  | 18 | TG  | 6  | 7  |
| 308794 | 63 | 2493338 | 2493371 | 2 | 17 | 34 | AC  | 17 | 8  |
| 308798 | 63 | 2493985 | 2494014 | 2 | 15 | 30 | TG  | 12 | 11 |
| 308799 | 63 | 2494139 | 2494206 | 2 | 34 | 68 | TG  | 6  | 6  |
| 308800 | 63 | 2494901 | 2494914 | 2 | 7  | 14 | TG  | 15 | 6  |
| 308802 | 63 | 2496422 | 2496447 | 2 | 13 | 26 | TG  | 9  | 13 |
| 308803 | 63 | 2496572 | 2496599 | 2 | 14 | 28 | GT  | 8  | 11 |
| 308804 | 63 | 2496777 | 2496794 | 2 | 9  | 18 | CA  | 18 | 10 |
| 308805 | 63 | 2496953 | 2497006 | 2 | 27 | 54 | CA  | 10 | 10 |
| 308813 | 63 | 2498384 | 2498417 | 2 | 17 | 34 | CA  | 9  | 8  |
| 308817 | 63 | 2498727 | 2498758 | 2 | 16 | 32 | TG  | 10 | 12 |
| 308818 | 63 | 2499198 | 2499209 | 2 | 6  | 12 | CA  | 26 | 3  |
| 308819 | 63 | 2500717 | 2500752 | 2 | 18 | 36 | TG  | 17 | 12 |
| 308820 | 63 | 2503401 | 2503432 | 2 | 16 | 32 | GT  | 10 | 9  |
| 308821 | 63 | 2507526 | 2507579 | 3 | 18 | 54 | AGA | 14 | 6  |
| 308823 | 63 | 2510959 | 2511006 | 2 | 24 | 48 | CA  | 9  | 12 |
| 308824 | 63 | 2511819 | 2511836 | 2 | 9  | 18 | CT  | 21 | 3  |



|        |    |         |         |   |    |    |      |    |    |
|--------|----|---------|---------|---|----|----|------|----|----|
| 308825 | 63 | 2512008 | 2512022 | 3 | 5  | 15 | TCC  | 29 | 6  |
| 308827 | 63 | 2521310 | 2521335 | 2 | 13 | 26 | AC   | 15 | 9  |
| 308829 | 63 | 2525050 | 2525065 | 2 | 8  | 16 | CA   | 23 | 13 |
| 308831 | 63 | 2525238 | 2525263 | 2 | 13 | 26 | GT   | 8  | 11 |
| 308833 | 63 | 2525590 | 2525627 | 2 | 19 | 38 | TG   | 15 | 12 |
| 308838 | 63 | 2527246 | 2527259 | 2 | 7  | 14 | TG   | 11 | 10 |
| 308840 | 63 | 2527423 | 2527458 | 3 | 12 | 36 | TTC  | 18 | 5  |
| 308841 | 63 | 2527594 | 2527650 | 3 | 19 | 57 | TCT  | 7  | 8  |
| 308843 | 63 | 2531252 | 2531266 | 3 | 5  | 15 | TCT  | 21 | 5  |
| 308845 | 63 | 2535562 | 2535589 | 2 | 14 | 28 | GT   | 8  | 10 |
| 308848 | 63 | 2537559 | 2537586 | 2 | 14 | 28 | TG   | 11 | 12 |
| 308859 | 63 | 2541370 | 2541409 | 2 | 20 | 40 | CA   | 14 | 13 |
| 308863 | 63 | 2544908 | 2544925 | 2 | 9  | 18 | GT   | 19 | 6  |
| 308864 | 63 | 2545068 | 2545107 | 2 | 20 | 40 | TG   | 6  | 9  |
| 308865 | 63 | 2545521 | 2545553 | 3 | 11 | 33 | GAG  | 7  | 8  |
| 308875 | 63 | 2552601 | 2552636 | 2 | 18 | 36 | GT   | 6  | 7  |
| 308876 | 63 | 2552801 | 2552814 | 2 | 7  | 14 | GA   | 7  | 8  |
| 308881 | 63 | 2555353 | 2555384 | 2 | 16 | 32 | GT   | 13 | 10 |
| 308882 | 63 | 2555549 | 2555570 | 2 | 11 | 22 | AC   | 22 | 10 |
| 308884 | 63 | 2562427 | 2562470 | 2 | 22 | 44 | GT   | 6  | 7  |
| 308888 | 63 | 2563366 | 2563381 | 2 | 8  | 16 | AC   | 18 | 4  |
| 308889 | 63 | 2563431 | 2563454 | 3 | 8  | 24 | ACA  | 15 | 3  |
| 308891 | 63 | 2566301 | 2566324 | 3 | 8  | 24 | AGA  | 30 | 5  |
| 308892 | 63 | 2566922 | 2566953 | 2 | 16 | 32 | CA   | 17 | 12 |
| 308893 | 63 | 2567001 | 2567030 | 2 | 15 | 30 | AC   | 7  | 8  |
| 308894 | 63 | 2572492 | 2572527 | 2 | 18 | 36 | TG   | 6  | 7  |
| 308896 | 63 | 2575067 | 2575082 | 2 | 8  | 16 | TC   | 19 | 4  |
| 308899 | 63 | 2579840 | 2579851 | 2 | 6  | 12 | CA   | 29 | 4  |
| 308900 | 63 | 2580382 | 2580403 | 2 | 11 | 22 | AC   | 14 | 6  |
| 308913 | 63 | 2635680 | 2635699 | 2 | 10 | 20 | CA   | 19 | 11 |
| 308915 | 63 | 2657647 | 2657674 | 2 | 14 | 28 | CA   | 8  | 5  |
| 308926 | 64 | 30375   | 30398   | 4 | 6  | 24 | TTTA | 19 | 3  |
| 308932 | 64 | 38289   | 38339   | 3 | 17 | 51 | TCT  | 15 | 17 |
| 308937 | 64 | 68714   | 68749   | 2 | 18 | 36 | TG   | 14 | 5  |
| 308940 | 64 | 85916   | 85941   | 2 | 13 | 26 | CA   | 21 | 7  |
| 308949 | 64 | 100190  | 100210  | 3 | 7  | 21 | TGC  | 28 | 6  |
| 308950 | 64 | 100497  | 100510  | 2 | 7  | 14 | TG   | 21 | 5  |
| 308970 | 64 | 131685  | 131708  | 2 | 12 | 24 | GT   | 11 | 4  |
| 309003 | 64 | 238887  | 238898  | 2 | 6  | 12 | TG   | 26 | 4  |
| 309008 | 64 | 257997  | 258020  | 2 | 12 | 24 | TG   | 18 | 3  |
| 309017 | 64 | 291913  | 291939  | 3 | 9  | 27 | CTT  | 20 | 7  |
| 309024 | 64 | 303916  | 303931  | 2 | 8  | 16 | TA   | 12 | 3  |
| 309025 | 64 | 305744  | 305767  | 2 | 12 | 24 | GT   | 14 | 4  |
| 309037 | 64 | 321773  | 321794  | 2 | 11 | 22 | CT   | 19 | 4  |
| 309038 | 64 | 321840  | 321861  | 2 | 11 | 22 | AC   | 17 | 8  |
| 309040 | 64 | 328346  | 328365  | 2 | 10 | 20 | TA   | 9  | 4  |
| 309053 | 64 | 374710  | 374743  | 2 | 17 | 34 | GT   | 8  | 5  |
| 309055 | 64 | 375527  | 375560  | 2 | 17 | 34 | GT   | 13 | 9  |
| 309056 | 64 | 378405  | 378424  | 2 | 10 | 20 | CA   | 17 | 6  |
| 309058 | 64 | 379996  | 380013  | 2 | 9  | 18 | AC   | 19 | 4  |
| 309061 | 64 | 399800  | 399839  | 4 | 10 | 40 | ATCT | 12 | 3  |

|        |    |        |        |   |    |    |      |    |    |
|--------|----|--------|--------|---|----|----|------|----|----|
| 309066 | 64 | 406064 | 406081 | 2 | 9  | 18 | CA   | 9  | 5  |
| 309067 | 64 | 406543 | 406557 | 3 | 5  | 15 | CCT  | 24 | 4  |
| 309070 | 64 | 407076 | 407091 | 2 | 8  | 16 | AT   | 7  | 4  |
| 309081 | 64 | 437955 | 437968 | 2 | 7  | 14 | CA   | 22 | 3  |
| 309089 | 64 | 445564 | 445583 | 2 | 10 | 20 | TG   | 11 | 3  |
| 309103 | 64 | 477813 | 477844 | 2 | 16 | 32 | TG   | 13 | 7  |
| 309126 | 64 | 517658 | 517673 | 4 | 4  | 16 | TTAT | 29 | 3  |
| 309139 | 64 | 550862 | 550879 | 2 | 9  | 18 | GT   | 8  | 4  |
| 309145 | 64 | 560343 | 560366 | 4 | 6  | 24 | AAAT | 30 | 3  |
| 309153 | 64 | 590431 | 590446 | 2 | 8  | 16 | CA   | 20 | 5  |
| 309154 | 64 | 590560 | 590579 | 4 | 5  | 20 | TTTC | 16 | 7  |
| 309158 | 64 | 594656 | 594691 | 4 | 9  | 36 | ATCT | 15 | 12 |
| 309160 | 64 | 602923 | 602938 | 2 | 8  | 16 | AC   | 9  | 10 |
| 309161 | 64 | 602940 | 602953 | 2 | 7  | 14 | CA   | 12 | 11 |
| 309166 | 64 | 616972 | 616983 | 2 | 6  | 12 | AG   | 23 | 3  |
| 309167 | 64 | 620028 | 620057 | 2 | 15 | 30 | AC   | 17 | 11 |
| 309170 | 64 | 620662 | 620705 | 2 | 22 | 44 | AC   | 8  | 11 |
| 309175 | 64 | 635525 | 635556 | 2 | 16 | 32 | AC   | 10 | 13 |
| 309182 | 64 | 655070 | 655109 | 2 | 20 | 40 | GT   | 12 | 8  |
| 309183 | 64 | 655139 | 655152 | 2 | 7  | 14 | TG   | 21 | 5  |
| 309189 | 64 | 675713 | 675732 | 4 | 5  | 20 | TTTG | 17 | 3  |
| 309191 | 64 | 677440 | 677459 | 4 | 5  | 20 | ATCC | 14 | 5  |
| 309193 | 64 | 685118 | 685149 | 2 | 16 | 32 | TG   | 10 | 13 |
| 309216 | 64 | 704800 | 704811 | 2 | 6  | 12 | AC   | 11 | 3  |
| 309223 | 64 | 710710 | 710729 | 2 | 10 | 20 | TG   | 19 | 10 |
| 309225 | 64 | 710827 | 710840 | 2 | 7  | 14 | TG   | 8  | 6  |
| 309229 | 64 | 711029 | 711046 | 2 | 9  | 18 | GT   | 18 | 4  |
| 309235 | 64 | 722566 | 722599 | 2 | 17 | 34 | AC   | 18 | 10 |
| 309240 | 64 | 727072 | 727087 | 2 | 8  | 16 | AC   | 20 | 6  |
| 309241 | 64 | 727243 | 727268 | 2 | 13 | 26 | GT   | 17 | 8  |
| 309247 | 64 | 735223 | 735234 | 2 | 6  | 12 | AC   | 8  | 4  |
| 309248 | 64 | 735237 | 735252 | 2 | 8  | 16 | GT   | 30 | 9  |
| 309249 | 64 | 736246 | 736263 | 2 | 9  | 18 | CA   | 27 | 6  |
| 309257 | 64 | 740211 | 740246 | 2 | 18 | 36 | GT   | 6  | 7  |
| 309264 | 64 | 745025 | 745044 | 2 | 10 | 20 | TG   | 20 | 12 |
| 309267 | 64 | 748029 | 748054 | 2 | 13 | 26 | CA   | 11 | 9  |
| 309268 | 64 | 750387 | 750402 | 2 | 8  | 16 | TG   | 20 | 8  |
| 309271 | 64 | 753461 | 753494 | 2 | 17 | 34 | CT   | 11 | 9  |
| 309272 | 64 | 753688 | 753725 | 2 | 19 | 38 | TG   | 8  | 10 |
| 309276 | 64 | 755222 | 755233 | 2 | 6  | 12 | CT   | 18 | 3  |
| 309284 | 64 | 762476 | 762523 | 2 | 24 | 48 | GT   | 7  | 8  |
| 309285 | 64 | 763200 | 763223 | 2 | 12 | 24 | TG   | 21 | 11 |
| 309286 | 64 | 763323 | 763338 | 2 | 8  | 16 | TG   | 22 | 7  |
| 309288 | 64 | 764523 | 764556 | 2 | 17 | 34 | GT   | 9  | 9  |
| 309293 | 64 | 769661 | 769674 | 2 | 7  | 14 | TC   | 21 | 4  |
| 309294 | 64 | 776775 | 776790 | 2 | 8  | 16 | AC   | 24 | 6  |
| 309305 | 64 | 796751 | 796770 | 2 | 10 | 20 | TG   | 21 | 10 |
| 309311 | 64 | 809480 | 809491 | 2 | 6  | 12 | GT   | 20 | 8  |
| 309312 | 64 | 811097 | 811116 | 2 | 10 | 20 | CT   | 24 | 4  |
| 309317 | 64 | 817114 | 817125 | 2 | 6  | 12 | TG   | 13 | 9  |
| 309318 | 64 | 817127 | 817140 | 2 | 7  | 14 | GT   | 15 | 9  |

|        |    |         |         |   |    |    |      |    |    |
|--------|----|---------|---------|---|----|----|------|----|----|
| 309325 | 64 | 837295  | 837312  | 3 | 6  | 18 | TTG  | 18 | 3  |
| 309326 | 64 | 845552  | 845563  | 2 | 6  | 12 | AC   | 31 | 3  |
| 309328 | 64 | 851708  | 851741  | 2 | 17 | 34 | GT   | 6  | 7  |
| 309329 | 64 | 851854  | 851871  | 2 | 9  | 18 | TG   | 21 | 4  |
| 309335 | 64 | 881267  | 881282  | 4 | 4  | 16 | AATC | 27 | 3  |
| 309337 | 64 | 886365  | 886386  | 2 | 11 | 22 | AC   | 8  | 3  |
| 309342 | 64 | 890555  | 890568  | 2 | 7  | 14 | CT   | 19 | 3  |
| 309343 | 64 | 892547  | 892562  | 2 | 8  | 16 | GT   | 13 | 3  |
| 309344 | 64 | 892600  | 892635  | 2 | 18 | 36 | TG   | 11 | 10 |
| 309358 | 64 | 928974  | 929015  | 2 | 21 | 42 | TG   | 8  | 12 |
| 309370 | 64 | 942916  | 942963  | 4 | 12 | 48 | TATC | 6  | 5  |
| 309371 | 64 | 943321  | 943338  | 2 | 9  | 18 | AC   | 24 | 8  |
| 309372 | 64 | 943497  | 943518  | 2 | 11 | 22 | AC   | 25 | 7  |
| 309374 | 64 | 945602  | 945625  | 4 | 6  | 24 | CTGT | 21 | 8  |
| 309375 | 64 | 946408  | 946427  | 2 | 10 | 20 | TG   | 17 | 6  |
| 309376 | 64 | 946640  | 946661  | 2 | 11 | 22 | AC   | 22 | 6  |
| 309378 | 64 | 949091  | 949112  | 2 | 11 | 22 | CA   | 14 | 5  |
| 309390 | 64 | 959548  | 959567  | 2 | 10 | 20 | CA   | 15 | 12 |
| 309393 | 64 | 966568  | 966583  | 4 | 4  | 16 | CCAT | 18 | 3  |
| 309397 | 64 | 974883  | 974900  | 2 | 9  | 18 | CA   | 30 | 8  |
| 309398 | 64 | 974998  | 975017  | 2 | 10 | 20 | GT   | 10 | 5  |
| 309400 | 64 | 975145  | 975156  | 2 | 6  | 12 | CG   | 25 | 10 |
| 309422 | 64 | 1023633 | 1023662 | 2 | 15 | 30 | AC   | 11 | 5  |
| 309423 | 64 | 1025085 | 1025118 | 2 | 17 | 34 | AC   | 12 | 8  |
| 309427 | 64 | 1025300 | 1025311 | 2 | 6  | 12 | AC   | 11 | 3  |
| 309431 | 64 | 1031636 | 1031657 | 2 | 11 | 22 | CA   | 16 | 8  |
| 309432 | 64 | 1035063 | 1035086 | 2 | 12 | 24 | CA   | 12 | 7  |
| 309443 | 64 | 1062068 | 1062101 | 2 | 17 | 34 | GT   | 12 | 12 |
| 309444 | 64 | 1062269 | 1062280 | 2 | 6  | 12 | AC   | 14 | 13 |
| 309466 | 64 | 1126367 | 1126382 | 2 | 8  | 16 | GT   | 17 | 4  |
| 309472 | 64 | 1154246 | 1154261 | 2 | 8  | 16 | CA   | 24 | 5  |
| 309473 | 64 | 1154263 | 1154274 | 2 | 6  | 12 | AC   | 23 | 5  |
| 309474 | 64 | 1155074 | 1155085 | 2 | 6  | 12 | AG   | 20 | 3  |
| 309476 | 64 | 1157364 | 1157407 | 2 | 22 | 44 | CA   | 16 | 17 |
| 309477 | 64 | 1157559 | 1157602 | 4 | 11 | 44 | GAAA | 22 | 11 |
| 309481 | 64 | 1162642 | 1162671 | 2 | 15 | 30 | TG   | 6  | 9  |
| 309482 | 64 | 1163611 | 1163646 | 2 | 18 | 36 | TG   | 12 | 13 |
| 309488 | 64 | 1179901 | 1179918 | 3 | 6  | 18 | ATT  | 15 | 3  |
| 309491 | 64 | 1183779 | 1183812 | 2 | 17 | 34 | GT   | 13 | 9  |
| 309506 | 64 | 1223308 | 1223337 | 2 | 15 | 30 | CA   | 15 | 12 |
| 309509 | 64 | 1227690 | 1227725 | 2 | 18 | 36 | AC   | 18 | 8  |
| 309514 | 64 | 1232348 | 1232363 | 2 | 8  | 16 | AC   | 22 | 10 |
| 309520 | 64 | 1242891 | 1242906 | 4 | 4  | 16 | TATT | 24 | 3  |
| 309522 | 64 | 1244044 | 1244065 | 2 | 11 | 22 | GT   | 23 | 13 |
| 309528 | 64 | 1267022 | 1267035 | 2 | 7  | 14 | CA   | 20 | 3  |
| 309529 | 64 | 1267529 | 1267543 | 3 | 5  | 15 | CTG  | 26 | 3  |
| 309532 | 64 | 1288494 | 1288529 | 2 | 18 | 36 | CA   | 17 | 14 |
| 309534 | 64 | 1289262 | 1289273 | 2 | 6  | 12 | CA   | 25 | 7  |
| 309535 | 64 | 1289495 | 1289516 | 2 | 11 | 22 | AC   | 13 | 8  |
| 309536 | 64 | 1295588 | 1295603 | 2 | 8  | 16 | AC   | 26 | 3  |
| 309542 | 64 | 1298954 | 1298969 | 4 | 4  | 16 | GTGC | 25 | 8  |

|        |    |         |         |   |    |    |      |    |    |
|--------|----|---------|---------|---|----|----|------|----|----|
| 309543 | 64 | 1299102 | 1299123 | 2 | 11 | 22 | GT   | 24 | 12 |
| 309547 | 64 | 1307317 | 1307342 | 2 | 13 | 26 | AC   | 18 | 13 |
| 309548 | 64 | 1307630 | 1307643 | 2 | 7  | 14 | CA   | 21 | 4  |
| 309549 | 64 | 1308165 | 1308194 | 2 | 15 | 30 | TG   | 15 | 9  |
| 309550 | 64 | 1308691 | 1308706 | 4 | 4  | 16 | TCAT | 26 | 3  |
| 309551 | 64 | 1310030 | 1310045 | 2 | 8  | 16 | TG   | 19 | 7  |
| 309556 | 64 | 1325699 | 1325714 | 2 | 8  | 16 | GT   | 20 | 4  |
| 309558 | 64 | 1328746 | 1328766 | 3 | 7  | 21 | ATT  | 11 | 7  |
| 309559 | 64 | 1330803 | 1330848 | 2 | 23 | 46 | AC   | 7  | 9  |
| 309574 | 64 | 1376600 | 1376641 | 2 | 21 | 42 | AC   | 8  | 9  |
| 309576 | 64 | 1377384 | 1377405 | 2 | 11 | 22 | CA   | 20 | 9  |
| 309578 | 64 | 1381450 | 1381463 | 2 | 7  | 14 | TG   | 27 | 7  |
| 309581 | 64 | 1382668 | 1382689 | 2 | 11 | 22 | TC   | 26 | 4  |
| 309594 | 64 | 1420272 | 1420283 | 2 | 6  | 12 | CA   | 31 | 3  |
| 309595 | 64 | 1420446 | 1420465 | 2 | 10 | 20 | TG   | 15 | 15 |
| 309597 | 64 | 1422913 | 1422946 | 2 | 17 | 34 | CA   | 9  | 10 |
| 309599 | 64 | 1426210 | 1426227 | 2 | 9  | 18 | TG   | 21 | 4  |
| 309606 | 64 | 1445190 | 1445204 | 3 | 5  | 15 | GCT  | 30 | 3  |
| 309607 | 64 | 1448976 | 1449001 | 2 | 13 | 26 | GT   | 16 | 4  |
| 309611 | 64 | 1468522 | 1468539 | 2 | 9  | 18 | GT   | 13 | 7  |
| 309612 | 64 | 1472316 | 1472337 | 2 | 11 | 22 | CT   | 11 | 5  |
| 309615 | 64 | 1476898 | 1476935 | 2 | 19 | 38 | AC   | 16 | 12 |
| 309641 | 64 | 1542797 | 1542818 | 2 | 11 | 22 | TG   | 12 | 7  |
| 309642 | 64 | 1546723 | 1546742 | 2 | 10 | 20 | GT   | 15 | 4  |
| 309647 | 64 | 1554696 | 1554713 | 3 | 6  | 18 | GAG  | 27 | 10 |
| 309648 | 64 | 1554999 | 1555022 | 3 | 8  | 24 | TTC  | 22 | 5  |
| 309649 | 64 | 1556095 | 1556118 | 3 | 8  | 24 | TTC  | 13 | 14 |
| 309653 | 64 | 1567076 | 1567091 | 4 | 4  | 16 | TTTA | 14 | 4  |
| 309654 | 64 | 1567976 | 1567999 | 2 | 12 | 24 | TG   | 9  | 9  |
| 309662 | 64 | 1590637 | 1590648 | 2 | 6  | 12 | GT   | 31 | 6  |
| 309663 | 64 | 1591546 | 1591563 | 2 | 9  | 18 | CA   | 17 | 4  |
| 309664 | 64 | 1592717 | 1592732 | 2 | 8  | 16 | GT   | 15 | 4  |
| 309665 | 64 | 1595508 | 1595519 | 2 | 6  | 12 | TG   | 11 | 3  |
| 309668 | 64 | 1607814 | 1607825 | 2 | 6  | 12 | AC   | 27 | 4  |
| 309669 | 64 | 1614817 | 1614836 | 2 | 10 | 20 | TG   | 25 | 6  |
| 309670 | 64 | 1622030 | 1622049 | 2 | 10 | 20 | TG   | 23 | 7  |
| 309673 | 64 | 1630665 | 1630684 | 4 | 5  | 20 | AAAT | 10 | 5  |
| 309674 | 64 | 1634783 | 1634797 | 3 | 5  | 15 | AAT  | 6  | 7  |
| 309678 | 64 | 1648958 | 1648973 | 4 | 4  | 16 | GTTG | 25 | 6  |
| 309692 | 64 | 1694428 | 1694463 | 2 | 18 | 36 | AC   | 6  | 11 |
| 309695 | 64 | 1695193 | 1695210 | 3 | 6  | 18 | GCA  | 26 | 9  |
| 309696 | 64 | 1696782 | 1696807 | 2 | 13 | 26 | GA   | 21 | 8  |
| 309697 | 64 | 1706649 | 1706682 | 2 | 17 | 34 | TG   | 20 | 6  |
| 309699 | 64 | 1711501 | 1711534 | 2 | 17 | 34 | AG   | 7  | 9  |
| 309700 | 64 | 1711819 | 1711834 | 2 | 8  | 16 | GT   | 22 | 6  |
| 309701 | 64 | 1715936 | 1715957 | 2 | 11 | 22 | AC   | 23 | 10 |
| 309705 | 64 | 1721854 | 1721881 | 2 | 14 | 28 | AC   | 15 | 7  |
| 309707 | 64 | 1725303 | 1725316 | 2 | 7  | 14 | TG   | 25 | 8  |
| 309708 | 64 | 1732077 | 1732106 | 2 | 15 | 30 | TG   | 14 | 9  |
| 309709 | 64 | 1732356 | 1732367 | 2 | 6  | 12 | TG   | 21 | 5  |
| 309710 | 64 | 1734105 | 1734125 | 3 | 7  | 21 | CAG  | 28 | 8  |

|        |    |         |         |   |    |    |      |    |    |
|--------|----|---------|---------|---|----|----|------|----|----|
| 309711 | 64 | 1734312 | 1734339 | 2 | 14 | 28 | TG   | 22 | 14 |
| 309712 | 64 | 1736129 | 1736140 | 2 | 6  | 12 | CA   | 19 | 13 |
| 309714 | 64 | 1741952 | 1741977 | 2 | 13 | 26 | TG   | 20 | 11 |
| 309717 | 64 | 1747188 | 1747203 | 2 | 8  | 16 | AC   | 24 | 11 |
| 309723 | 64 | 1757014 | 1757025 | 2 | 6  | 12 | GT   | 11 | 4  |
| 309724 | 64 | 1759268 | 1759283 | 2 | 8  | 16 | TG   | 18 | 12 |
| 309725 | 64 | 1761243 | 1761254 | 2 | 6  | 12 | TC   | 31 | 3  |
| 309731 | 64 | 1768708 | 1768735 | 2 | 14 | 28 | TG   | 10 | 11 |
| 309735 | 64 | 1772477 | 1772512 | 2 | 18 | 36 | TG   | 15 | 10 |
| 309740 | 64 | 1780021 | 1780036 | 2 | 8  | 16 | TG   | 19 | 7  |
| 309743 | 64 | 1783418 | 1783432 | 3 | 5  | 15 | CGT  | 19 | 8  |
| 309744 | 64 | 1784465 | 1784478 | 2 | 7  | 14 | TA   | 22 | 14 |
| 309747 | 64 | 1792603 | 1792638 | 3 | 12 | 36 | TTA  | 21 | 9  |
| 309750 | 64 | 1796355 | 1796382 | 2 | 14 | 28 | GT   | 13 | 11 |
| 309754 | 64 | 1803277 | 1803290 | 2 | 7  | 14 | CA   | 31 | 3  |
| 309756 | 64 | 1810086 | 1810101 | 2 | 8  | 16 | TG   | 26 | 6  |
| 309762 | 64 | 1825702 | 1825723 | 2 | 11 | 22 | GT   | 21 | 6  |
| 309763 | 64 | 1827867 | 1827900 | 2 | 17 | 34 | GT   | 8  | 6  |
| 309768 | 64 | 1834259 | 1834272 | 2 | 7  | 14 | CA   | 15 | 3  |
| 309770 | 64 | 1836739 | 1836766 | 4 | 7  | 28 | AGAA | 27 | 4  |
| 309773 | 64 | 1838469 | 1838492 | 2 | 12 | 24 | CA   | 17 | 9  |
| 309774 | 64 | 1838592 | 1838621 | 2 | 15 | 30 | AC   | 17 | 13 |
| 309779 | 64 | 1849024 | 1849041 | 2 | 9  | 18 | TG   | 19 | 4  |
| 309781 | 64 | 1850427 | 1850456 | 2 | 15 | 30 | AC   | 19 | 7  |
| 309782 | 64 | 1850654 | 1850669 | 2 | 8  | 16 | TG   | 14 | 10 |
| 309785 | 64 | 1853564 | 1853581 | 2 | 9  | 18 | TG   | 7  | 7  |
| 309793 | 64 | 1860402 | 1860423 | 2 | 11 | 22 | GT   | 12 | 6  |
| 309794 | 64 | 1860532 | 1860551 | 2 | 10 | 20 | CA   | 18 | 8  |
| 309795 | 64 | 1860730 | 1860745 | 2 | 8  | 16 | GT   | 21 | 4  |
| 309796 | 64 | 1867081 | 1867112 | 4 | 8  | 32 | ATCC | 25 | 9  |
| 309797 | 64 | 1867377 | 1867390 | 2 | 7  | 14 | AC   | 17 | 5  |
| 309798 | 64 | 1867544 | 1867575 | 2 | 16 | 32 | GT   | 9  | 6  |
| 309799 | 64 | 1867762 | 1867813 | 2 | 26 | 52 | GT   | 6  | 8  |
| 309800 | 64 | 1875576 | 1875589 | 2 | 7  | 14 | GT   | 6  | 4  |
| 309801 | 64 | 1875591 | 1875608 | 2 | 9  | 18 | TG   | 13 | 6  |
| 309807 | 64 | 1878002 | 1878029 | 2 | 14 | 28 | TG   | 13 | 7  |
| 309815 | 64 | 1880696 | 1880709 | 2 | 7  | 14 | AC   | 13 | 4  |
| 309817 | 64 | 1882616 | 1882637 | 2 | 11 | 22 | AC   | 23 | 7  |
| 309818 | 64 | 1882745 | 1882760 | 2 | 8  | 16 | TG   | 23 | 10 |
| 309819 | 64 | 1883450 | 1883465 | 4 | 4  | 16 | GTTT | 23 | 8  |
| 309824 | 64 | 1891076 | 1891089 | 2 | 7  | 14 | CA   | 22 | 3  |
| 309825 | 64 | 1891181 | 1891206 | 2 | 13 | 26 | GT   | 14 | 6  |
| 309826 | 64 | 1891290 | 1891311 | 2 | 11 | 22 | TG   | 18 | 7  |
| 309828 | 64 | 1891536 | 1891565 | 3 | 10 | 30 | ATC  | 20 | 5  |
| 309831 | 64 | 1894633 | 1894654 | 2 | 11 | 22 | GT   | 17 | 4  |
| 309834 | 64 | 1896533 | 1896574 | 2 | 21 | 42 | GT   | 8  | 8  |
| 309837 | 64 | 1898930 | 1898947 | 2 | 9  | 18 | TC   | 15 | 5  |
| 309844 | 64 | 1911676 | 1911709 | 2 | 17 | 34 | AC   | 12 | 10 |
| 309849 | 64 | 1919550 | 1919567 | 3 | 6  | 18 | AAG  | 28 | 3  |
| 309861 | 64 | 1940329 | 1940350 | 2 | 11 | 22 | AC   | 22 | 8  |
| 309865 | 64 | 1951006 | 1951041 | 2 | 18 | 36 | AC   | 6  | 5  |

|        |    |         |         |   |    |    |      |    |    |
|--------|----|---------|---------|---|----|----|------|----|----|
| 309867 | 64 | 1955214 | 1955231 | 3 | 6  | 18 | GAG  | 27 | 3  |
| 309872 | 64 | 1960111 | 1960138 | 2 | 14 | 28 | CA   | 8  | 4  |
| 309873 | 64 | 1960264 | 1960283 | 4 | 5  | 20 | CACG | 12 | 10 |
| 309875 | 64 | 1961907 | 1961927 | 3 | 7  | 21 | GGA  | 26 | 3  |
| 309879 | 64 | 1978911 | 1978922 | 2 | 6  | 12 | AT   | 27 | 7  |
| 309906 | 64 | 2030297 | 2030308 | 2 | 6  | 12 | AG   | 22 | 4  |
| 309912 | 64 | 2037321 | 2037336 | 2 | 8  | 16 | TG   | 21 | 7  |
| 309914 | 64 | 2040207 | 2040242 | 2 | 18 | 36 | TG   | 8  | 7  |
| 309915 | 64 | 2040351 | 2040376 | 2 | 13 | 26 | TG   | 16 | 8  |
| 309918 | 64 | 2044661 | 2044680 | 2 | 10 | 20 | TG   | 14 | 7  |
| 309919 | 64 | 2044729 | 2044744 | 2 | 8  | 16 | GT   | 19 | 3  |
| 309921 | 64 | 2044812 | 2044831 | 2 | 10 | 20 | TG   | 7  | 3  |
| 309927 | 64 | 2047869 | 2047880 | 2 | 6  | 12 | GT   | 14 | 3  |
| 309928 | 64 | 2051143 | 2051158 | 2 | 8  | 16 | AT   | 10 | 9  |
| 309929 | 64 | 2051159 | 2051172 | 2 | 7  | 14 | AC   | 11 | 10 |
| 309931 | 64 | 2053223 | 2053262 | 2 | 20 | 40 | TG   | 10 | 11 |
| 309932 | 64 | 2054183 | 2054209 | 3 | 9  | 27 | AGG  | 24 | 9  |
| 309934 | 64 | 2054458 | 2054479 | 2 | 11 | 22 | TC   | 16 | 6  |
| 309935 | 64 | 2057399 | 2057410 | 2 | 6  | 12 | TG   | 19 | 8  |
| 309936 | 64 | 2057743 | 2057754 | 2 | 6  | 12 | CA   | 8  | 3  |
| 309940 | 64 | 2058001 | 2058056 | 4 | 14 | 56 | AAAG | 12 | 6  |
| 309943 | 64 | 2059667 | 2059680 | 2 | 7  | 14 | TG   | 12 | 3  |
| 309945 | 64 | 2060199 | 2060225 | 3 | 9  | 27 | TGA  | 18 | 5  |
| 309952 | 64 | 2072689 | 2072726 | 2 | 19 | 38 | GT   | 14 | 9  |
| 309955 | 64 | 2075874 | 2075887 | 2 | 7  | 14 | GT   | 14 | 12 |
| 309956 | 64 | 2076248 | 2076263 | 2 | 8  | 16 | CA   | 21 | 7  |
| 309958 | 64 | 2081718 | 2081741 | 2 | 12 | 24 | GA   | 16 | 9  |
| 309960 | 64 | 2081874 | 2081905 | 2 | 16 | 32 | TG   | 16 | 7  |
| 309961 | 64 | 2081961 | 2081994 | 2 | 17 | 34 | TG   | 10 | 7  |
| 309966 | 64 | 2087237 | 2087258 | 2 | 11 | 22 | TG   | 13 | 11 |
| 309967 | 64 | 2087372 | 2087399 | 2 | 14 | 28 | GT   | 15 | 9  |
| 309969 | 64 | 2087681 | 2087706 | 2 | 13 | 26 | GT   | 20 | 8  |
| 309973 | 64 | 2094923 | 2094938 | 2 | 8  | 16 | TG   | 16 | 7  |
| 309975 | 64 | 2096748 | 2096767 | 2 | 10 | 20 | TC   | 16 | 4  |
| 309980 | 64 | 2100873 | 2100898 | 2 | 13 | 26 | TG   | 12 | 5  |
| 309982 | 64 | 2101077 | 2101094 | 2 | 9  | 18 | GT   | 15 | 3  |
| 309983 | 64 | 2101334 | 2101353 | 2 | 10 | 20 | AC   | 17 | 10 |
| 309992 | 64 | 2106748 | 2106767 | 2 | 10 | 20 | AC   | 20 | 8  |
| 309994 | 64 | 2106844 | 2106855 | 2 | 6  | 12 | CA   | 15 | 3  |
| 310002 | 64 | 2111045 | 2111068 | 4 | 6  | 24 | TCTG | 16 | 6  |
| 310006 | 64 | 2114304 | 2114319 | 2 | 8  | 16 | TG   | 23 | 3  |
| 310007 | 64 | 2118713 | 2118744 | 2 | 16 | 32 | TG   | 23 | 8  |
| 310023 | 64 | 2123325 | 2123338 | 2 | 7  | 14 | CA   | 7  | 10 |
| 310027 | 64 | 2127120 | 2127149 | 2 | 15 | 30 | GT   | 9  | 10 |
| 310029 | 64 | 2130448 | 2130479 | 2 | 16 | 32 | GA   | 13 | 8  |
| 310030 | 64 | 2131040 | 2131063 | 2 | 12 | 24 | TG   | 13 | 6  |
| 310032 | 64 | 2131213 | 2131228 | 2 | 8  | 16 | CA   | 14 | 5  |
| 310041 | 64 | 2135223 | 2135250 | 2 | 14 | 28 | AC   | 15 | 13 |
| 310044 | 64 | 2138535 | 2138572 | 2 | 19 | 38 | CA   | 9  | 8  |
| 310060 | 64 | 2147378 | 2147403 | 2 | 13 | 26 | AC   | 19 | 7  |
| 310061 | 64 | 2148282 | 2148297 | 2 | 8  | 16 | AC   | 13 | 4  |

|        |    |         |         |   |    |    |      |    |    |
|--------|----|---------|---------|---|----|----|------|----|----|
| 310062 | 64 | 2148387 | 2148406 | 2 | 10 | 20 | CA   | 16 | 3  |
| 310066 | 64 | 2151701 | 2151722 | 2 | 11 | 22 | CA   | 15 | 7  |
| 310069 | 64 | 2152203 | 2152234 | 2 | 16 | 32 | CA   | 9  | 10 |
| 310070 | 64 | 2152692 | 2152711 | 2 | 10 | 20 | TG   | 14 | 9  |
| 310071 | 64 | 2153351 | 2153362 | 2 | 6  | 12 | TC   | 23 | 4  |
| 310075 | 64 | 2158132 | 2158143 | 2 | 6  | 12 | TG   | 21 | 3  |
| 310078 | 64 | 2159584 | 2159603 | 2 | 10 | 20 | AC   | 12 | 9  |
| 310089 | 64 | 2166703 | 2166750 | 3 | 16 | 48 | TTG  | 11 | 9  |
| 310108 | 64 | 2178970 | 2178985 | 2 | 8  | 16 | GT   | 24 | 8  |
| 310109 | 64 | 2180223 | 2180252 | 2 | 15 | 30 | CA   | 8  | 7  |
| 310110 | 64 | 2181519 | 2181545 | 3 | 9  | 27 | GGA  | 29 | 3  |
| 310114 | 64 | 2183856 | 2183879 | 3 | 8  | 24 | GCT  | 25 | 8  |
| 310115 | 64 | 2184893 | 2184916 | 2 | 12 | 24 | CT   | 24 | 6  |
| 310120 | 64 | 2190163 | 2190180 | 2 | 9  | 18 | TG   | 21 | 9  |
| 310121 | 64 | 2190345 | 2190368 | 2 | 12 | 24 | CA   | 18 | 13 |
| 310122 | 64 | 2195623 | 2195634 | 2 | 6  | 12 | AC   | 30 | 3  |
| 310124 | 64 | 2195821 | 2195844 | 2 | 12 | 24 | AC   | 18 | 10 |
| 310125 | 64 | 2198503 | 2198522 | 2 | 10 | 20 | AC   | 15 | 4  |
| 310132 | 64 | 2201277 | 2201302 | 2 | 13 | 26 | CA   | 8  | 6  |
| 310134 | 64 | 2205395 | 2205416 | 2 | 11 | 22 | GT   | 19 | 10 |
| 310137 | 64 | 2205553 | 2205580 | 2 | 14 | 28 | AC   | 9  | 8  |
| 310140 | 64 | 2207249 | 2207266 | 2 | 9  | 18 | GT   | 21 | 11 |
| 310141 | 64 | 2207413 | 2207434 | 2 | 11 | 22 | GT   | 15 | 7  |
| 310142 | 64 | 2207484 | 2207497 | 2 | 7  | 14 | AG   | 20 | 3  |
| 310156 | 64 | 2220673 | 2220690 | 3 | 6  | 18 | GCT  | 23 | 4  |
| 310163 | 64 | 2232087 | 2232116 | 2 | 15 | 30 | GA   | 15 | 11 |
| 310164 | 64 | 2232471 | 2232506 | 2 | 18 | 36 | CA   | 11 | 16 |
| 310166 | 64 | 2234562 | 2234581 | 4 | 5  | 20 | TTTG | 23 | 10 |
| 310167 | 64 | 2235727 | 2235772 | 2 | 23 | 46 | CT   | 7  | 7  |
| 310207 | 64 | 2258302 | 2258321 | 4 | 5  | 20 | TCCA | 19 | 5  |
| 310208 | 64 | 2259922 | 2259939 | 2 | 9  | 18 | AG   | 17 | 4  |
| 310224 | 64 | 2279607 | 2279618 | 2 | 6  | 12 | GA   | 18 | 3  |
| 310234 | 64 | 2286942 | 2286961 | 2 | 10 | 20 | CA   | 16 | 7  |
| 310237 | 64 | 2291541 | 2291576 | 2 | 18 | 36 | GT   | 9  | 11 |
| 310244 | 64 | 2293945 | 2293960 | 4 | 4  | 16 | GACA | 27 | 3  |
| 310245 | 64 | 2294501 | 2294512 | 2 | 6  | 12 | AC   | 16 | 4  |
| 310246 | 64 | 2294651 | 2294698 | 4 | 12 | 48 | AAAG | 11 | 8  |
| 310251 | 64 | 2297777 | 2297810 | 2 | 17 | 34 | GT   | 17 | 13 |
| 310253 | 64 | 2298592 | 2298606 | 3 | 5  | 15 | TGG  | 21 | 3  |
| 310254 | 64 | 2298723 | 2298756 | 2 | 17 | 34 | AC   | 16 | 6  |
| 310255 | 64 | 2299705 | 2299737 | 3 | 11 | 33 | TAT  | 10 | 5  |
| 310260 | 64 | 2302534 | 2302555 | 2 | 11 | 22 | AC   | 13 | 5  |
| 310262 | 64 | 2304195 | 2304206 | 2 | 6  | 12 | AC   | 6  | 6  |
| 310263 | 64 | 2304209 | 2304224 | 2 | 8  | 16 | AC   | 10 | 6  |
| 310267 | 64 | 2306848 | 2306865 | 3 | 6  | 18 | GCC  | 25 | 3  |
| 310284 | 64 | 2314475 | 2314504 | 3 | 10 | 30 | GAG  | 13 | 4  |
| 310285 | 64 | 2314768 | 2314781 | 2 | 7  | 14 | AC   | 21 | 5  |
| 310297 | 64 | 2319454 | 2319465 | 2 | 6  | 12 | AC   | 12 | 4  |
| 310298 | 64 | 2319467 | 2319480 | 2 | 7  | 14 | CA   | 16 | 7  |
| 310300 | 64 | 2320286 | 2320301 | 2 | 8  | 16 | TA   | 16 | 7  |
| 310301 | 64 | 2321589 | 2321616 | 2 | 14 | 28 | GT   | 19 | 5  |

|        |    |         |         |   |    |    |      |    |    |
|--------|----|---------|---------|---|----|----|------|----|----|
| 310302 | 64 | 2322234 | 2322247 | 2 | 7  | 14 | GT   | 19 | 3  |
| 310314 | 64 | 2325897 | 2325936 | 2 | 20 | 40 | AC   | 10 | 12 |
| 310320 | 64 | 2327439 | 2327458 | 4 | 5  | 20 | AGAC | 20 | 4  |
| 310325 | 64 | 2329076 | 2329099 | 3 | 8  | 24 | AGG  | 8  | 5  |
| 310326 | 64 | 2331353 | 2331376 | 2 | 12 | 24 | AC   | 14 | 12 |
| 310328 | 64 | 2332410 | 2332431 | 2 | 11 | 22 | GA   | 8  | 10 |
| 310330 | 64 | 2334347 | 2334366 | 4 | 5  | 20 | AAAC | 15 | 7  |
| 310331 | 64 | 2335011 | 2335034 | 3 | 8  | 24 | TCC  | 25 | 6  |
| 310333 | 64 | 2338381 | 2338420 | 2 | 20 | 40 | CA   | 6  | 8  |
| 310336 | 64 | 2339465 | 2339496 | 2 | 16 | 32 | TG   | 9  | 8  |
| 310341 | 64 | 2339981 | 2339994 | 2 | 7  | 14 | CA   | 20 | 9  |
| 310345 | 64 | 2342155 | 2342180 | 2 | 13 | 26 | AC   | 12 | 9  |
| 310350 | 64 | 2344454 | 2344481 | 2 | 14 | 28 | GT   | 11 | 4  |
| 310358 | 64 | 2348255 | 2348278 | 2 | 12 | 24 | CA   | 18 | 7  |
| 310359 | 64 | 2349972 | 2350003 | 2 | 16 | 32 | AC   | 17 | 9  |
| 310369 | 64 | 2352611 | 2352630 | 2 | 10 | 20 | CT   | 22 | 3  |
| 310370 | 64 | 2352694 | 2352719 | 2 | 13 | 26 | GT   | 18 | 4  |
| 310377 | 64 | 2356505 | 2356522 | 2 | 9  | 18 | CA   | 11 | 11 |
| 310378 | 64 | 2356524 | 2356537 | 2 | 7  | 14 | AC   | 11 | 11 |
| 310379 | 64 | 2356602 | 2356622 | 3 | 7  | 21 | GAG  | 14 | 5  |
| 310396 | 64 | 2370051 | 2370076 | 2 | 13 | 26 | GT   | 12 | 11 |
| 310399 | 64 | 2371775 | 2371826 | 2 | 26 | 52 | CA   | 7  | 13 |
| 310400 | 64 | 2373096 | 2373119 | 2 | 12 | 24 | TG   | 16 | 15 |
| 310403 | 64 | 2373765 | 2373778 | 2 | 7  | 14 | GT   | 21 | 8  |
| 310404 | 64 | 2373875 | 2373894 | 4 | 5  | 20 | GCGT | 27 | 6  |
| 310416 | 64 | 2386128 | 2386139 | 2 | 6  | 12 | CT   | 23 | 3  |
| 310418 | 64 | 2387183 | 2387230 | 2 | 24 | 48 | CT   | 6  | 5  |
| 310420 | 64 | 2390215 | 2390229 | 3 | 5  | 15 | ATT  | 23 | 5  |
| 310437 | 64 | 2416713 | 2416738 | 2 | 13 | 26 | TG   | 8  | 8  |
| 310441 | 64 | 2422233 | 2422260 | 4 | 7  | 28 | AAAG | 11 | 11 |
| 310443 | 64 | 2428684 | 2428733 | 2 | 25 | 50 | TG   | 8  | 12 |
| 310445 | 64 | 2429263 | 2429286 | 3 | 8  | 24 | ACA  | 18 | 3  |
| 310448 | 64 | 2431230 | 2431245 | 2 | 8  | 16 | TG   | 22 | 10 |
| 310449 | 64 | 2432060 | 2432079 | 4 | 5  | 20 | AAAC | 30 | 6  |
| 310455 | 64 | 2435939 | 2435966 | 2 | 14 | 28 | TG   | 6  | 4  |
| 310469 | 64 | 2443307 | 2443318 | 2 | 6  | 12 | TG   | 30 | 10 |
| 310470 | 64 | 2443466 | 2443483 | 2 | 9  | 18 | AC   | 17 | 5  |
| 310482 | 64 | 2461360 | 2461387 | 4 | 7  | 28 | CATC | 18 | 6  |
| 310483 | 64 | 2462126 | 2462164 | 3 | 13 | 39 | AAC  | 9  | 7  |
| 310501 | 64 | 2493370 | 2493397 | 2 | 14 | 28 | TG   | 14 | 5  |
| 310502 | 64 | 2497310 | 2497329 | 4 | 5  | 20 | ATTT | 18 | 4  |
| 310509 | 64 | 2507319 | 2507342 | 2 | 12 | 24 | CA   | 20 | 8  |
| 310512 | 64 | 2509594 | 2509625 | 2 | 16 | 32 | CA   | 19 | 13 |
| 310513 | 64 | 2509823 | 2509850 | 2 | 14 | 28 | GT   | 12 | 5  |
| 310514 | 64 | 2509946 | 2509983 | 2 | 19 | 38 | GT   | 11 | 7  |
| 310522 | 64 | 2534853 | 2534874 | 2 | 11 | 22 | GT   | 16 | 4  |
| 310535 | 64 | 2558667 | 2558698 | 2 | 16 | 32 | GT   | 12 | 8  |
| 310536 | 64 | 2559402 | 2559415 | 2 | 7  | 14 | TA   | 20 | 8  |
| 310538 | 64 | 2564488 | 2564515 | 4 | 7  | 28 | TCCA | 18 | 3  |
| 310539 | 64 | 2566330 | 2566345 | 2 | 8  | 16 | TG   | 16 | 5  |
| 310541 | 64 | 2568425 | 2568448 | 3 | 8  | 24 | TCT  | 20 | 5  |



|        |    |         |         |   |    |    |      |    |    |
|--------|----|---------|---------|---|----|----|------|----|----|
| 310549 | 64 | 2574692 | 2574705 | 2 | 7  | 14 | TG   | 25 | 4  |
| 310551 | 64 | 2580322 | 2580335 | 2 | 7  | 14 | CA   | 16 | 11 |
| 310552 | 64 | 2584431 | 2584462 | 2 | 16 | 32 | TG   | 13 | 12 |
| 310553 | 64 | 2584601 | 2584616 | 2 | 8  | 16 | GT   | 17 | 8  |
| 310557 | 64 | 2596452 | 2596485 | 2 | 17 | 34 | TG   | 7  | 10 |
| 310559 | 64 | 2603747 | 2603772 | 2 | 13 | 26 | TG   | 14 | 16 |
| 310562 | 64 | 2605111 | 2605136 | 2 | 13 | 26 | GT   | 6  | 5  |
| 310566 | 64 | 2605220 | 2605239 | 2 | 10 | 20 | TG   | 6  | 3  |
| 310567 | 64 | 2608027 | 2608054 | 2 | 14 | 28 | TG   | 16 | 11 |
| 310568 | 64 | 2610684 | 2610705 | 2 | 11 | 22 | GT   | 17 | 9  |
| 310570 | 64 | 2620850 | 2620869 | 2 | 10 | 20 | AT   | 6  | 3  |
| 310574 | 64 | 2624342 | 2624391 | 2 | 25 | 50 | TG   | 11 | 11 |
| 310580 | 64 | 2634676 | 2634687 | 2 | 6  | 12 | AG   | 22 | 3  |
| 310584 | 64 | 2639768 | 2639795 | 2 | 14 | 28 | GT   | 17 | 14 |
| 310587 | 64 | 2653250 | 2653279 | 3 | 10 | 30 | TGA  | 17 | 3  |
| 310591 | 64 | 2661036 | 2661049 | 2 | 7  | 14 | TG   | 19 | 6  |
| 310599 | 64 | 2671687 | 2671714 | 2 | 14 | 28 | TG   | 10 | 5  |
| 310605 | 64 | 2680139 | 2680160 | 2 | 11 | 22 | AG   | 23 | 4  |
| 310608 | 64 | 2682685 | 2682706 | 2 | 11 | 22 | GT   | 24 | 6  |
| 310609 | 64 | 2683727 | 2683760 | 2 | 17 | 34 | AC   | 16 | 7  |
| 310630 | 64 | 2701876 | 2701899 | 2 | 12 | 24 | AG   | 10 | 8  |
| 310635 | 64 | 2705196 | 2705219 | 2 | 12 | 24 | TG   | 24 | 4  |
| 310636 | 64 | 2705386 | 2705399 | 2 | 7  | 14 | GT   | 22 | 4  |
| 310640 | 64 | 2713441 | 2713466 | 2 | 13 | 26 | TG   | 16 | 3  |
| 310641 | 64 | 2714532 | 2714567 | 2 | 18 | 36 | AC   | 10 | 5  |
| 310642 | 64 | 2714680 | 2714691 | 2 | 6  | 12 | CA   | 28 | 5  |
| 310643 | 64 | 2715880 | 2715895 | 4 | 4  | 16 | TGGT | 27 | 4  |
| 310645 | 64 | 2721180 | 2721207 | 2 | 14 | 28 | CA   | 17 | 10 |
| 310647 | 64 | 2728313 | 2728358 | 2 | 23 | 46 | AC   | 10 | 9  |
| 310652 | 64 | 2735661 | 2735674 | 2 | 7  | 14 | GT   | 18 | 3  |
| 310653 | 64 | 2735864 | 2735887 | 2 | 12 | 24 | TC   | 20 | 7  |
| 310655 | 64 | 2736935 | 2736950 | 2 | 8  | 16 | AC   | 24 | 6  |
| 310657 | 64 | 2737813 | 2737832 | 2 | 10 | 20 | GT   | 12 | 5  |
| 310661 | 64 | 2740296 | 2740317 | 2 | 11 | 22 | GT   | 21 | 4  |
| 310663 | 64 | 2741931 | 2741950 | 2 | 10 | 20 | CA   | 19 | 12 |
| 310666 | 64 | 2743346 | 2743369 | 3 | 8  | 24 | CTG  | 25 | 5  |
| 310668 | 64 | 2743554 | 2743573 | 2 | 10 | 20 | GT   | 12 | 14 |
| 310669 | 64 | 2743574 | 2743585 | 2 | 6  | 12 | GC   | 19 | 17 |
| 310671 | 64 | 2744274 | 2744291 | 2 | 9  | 18 | AC   | 14 | 5  |
| 310673 | 64 | 2749842 | 2749855 | 2 | 7  | 14 | CT   | 24 | 4  |
| 310677 | 64 | 2750459 | 2750490 | 2 | 16 | 32 | CA   | 14 | 8  |
| 310680 | 64 | 2763690 | 2763705 | 2 | 8  | 16 | TG   | 27 | 6  |
| 310683 | 64 | 2771979 | 2772008 | 2 | 15 | 30 | TG   | 9  | 10 |
| 310690 | 64 | 2787328 | 2787390 | 3 | 21 | 63 | TCT  | 10 | 15 |
| 310692 | 64 | 2788480 | 2788493 | 2 | 7  | 14 | CA   | 24 | 3  |
| 310694 | 64 | 2796204 | 2796239 | 2 | 18 | 36 | AC   | 7  | 5  |
| 310696 | 64 | 2806251 | 2806266 | 2 | 8  | 16 | AC   | 18 | 9  |
| 310697 | 64 | 2806268 | 2806283 | 2 | 8  | 16 | CA   | 19 | 10 |
| 310702 | 64 | 2814135 | 2814164 | 3 | 10 | 30 | TAA  | 7  | 6  |
| 310705 | 64 | 2830273 | 2830326 | 2 | 27 | 54 | AC   | 6  | 8  |
| 310719 | 64 | 2859128 | 2859143 | 2 | 8  | 16 | TG   | 24 | 5  |

|        |    |         |         |   |    |    |      |    |    |
|--------|----|---------|---------|---|----|----|------|----|----|
| 310731 | 64 | 2892628 | 2892639 | 2 | 6  | 12 | TG   | 15 | 3  |
| 310736 | 64 | 2900325 | 2900346 | 2 | 11 | 22 | TA   | 16 | 7  |
| 310738 | 64 | 2933089 | 2933103 | 3 | 5  | 15 | TTC  | 24 | 3  |
| 310739 | 64 | 2933172 | 2933186 | 3 | 5  | 15 | TTA  | 18 | 4  |
| 310742 | 64 | 2940322 | 2940337 | 2 | 8  | 16 | AC   | 18 | 4  |
| 310746 | 64 | 2952174 | 2952197 | 2 | 12 | 24 | TC   | 20 | 4  |
| 310787 | 65 | 73781   | 73800   | 2 | 10 | 20 | GT   | 23 | 8  |
| 310789 | 65 | 75028   | 75041   | 2 | 7  | 14 | CA   | 18 | 11 |
| 310804 | 65 | 117295  | 117320  | 2 | 13 | 26 | TG   | 9  | 6  |
| 310806 | 65 | 118091  | 118110  | 2 | 10 | 20 | TG   | 19 | 5  |
| 310810 | 65 | 124041  | 124052  | 2 | 6  | 12 | AC   | 22 | 6  |
| 310811 | 65 | 135438  | 135455  | 2 | 9  | 18 | AC   | 17 | 11 |
| 310814 | 65 | 137088  | 137123  | 2 | 18 | 36 | CA   | 11 | 12 |
| 310816 | 65 | 149187  | 149216  | 2 | 15 | 30 | CA   | 12 | 8  |
| 310821 | 65 | 159734  | 159747  | 2 | 7  | 14 | AC   | 26 | 5  |
| 310825 | 65 | 165475  | 165500  | 2 | 13 | 26 | AC   | 12 | 6  |
| 310829 | 65 | 170841  | 170864  | 2 | 12 | 24 | TG   | 17 | 14 |
| 310831 | 65 | 174964  | 174989  | 2 | 13 | 26 | CA   | 17 | 16 |
| 310832 | 65 | 175151  | 175171  | 3 | 7  | 21 | CTC  | 24 | 4  |
| 310836 | 65 | 177237  | 177266  | 2 | 15 | 30 | CA   | 20 | 9  |
| 310838 | 65 | 179410  | 179429  | 2 | 10 | 20 | CA   | 26 | 12 |
| 310839 | 65 | 179621  | 179636  | 2 | 8  | 16 | CA   | 20 | 14 |
| 310846 | 65 | 188738  | 188779  | 2 | 21 | 42 | CA   | 9  | 10 |
| 310847 | 65 | 188872  | 188887  | 2 | 8  | 16 | CA   | 21 | 5  |
| 310848 | 65 | 189013  | 189028  | 2 | 8  | 16 | TG   | 13 | 13 |
| 310851 | 65 | 191572  | 191583  | 2 | 6  | 12 | GT   | 22 | 8  |
| 310852 | 65 | 191648  | 191659  | 2 | 6  | 12 | AG   | 36 | 4  |
| 310854 | 65 | 193451  | 193477  | 3 | 9  | 27 | GAT  | 16 | 10 |
| 310857 | 65 | 195583  | 195610  | 2 | 14 | 28 | GT   | 10 | 7  |
| 310858 | 65 | 195736  | 195761  | 2 | 13 | 26 | CA   | 17 | 11 |
| 310859 | 65 | 195871  | 195884  | 2 | 7  | 14 | TG   | 24 | 8  |
| 310870 | 65 | 218978  | 218993  | 4 | 4  | 16 | AATC | 29 | 3  |
| 310872 | 65 | 222086  | 222097  | 2 | 6  | 12 | AC   | 25 | 12 |
| 310875 | 65 | 226506  | 226521  | 2 | 8  | 16 | CA   | 6  | 5  |
| 310876 | 65 | 226524  | 226537  | 2 | 7  | 14 | CA   | 7  | 6  |
| 310877 | 65 | 226604  | 226633  | 2 | 15 | 30 | AC   | 6  | 7  |
| 310880 | 65 | 232095  | 232126  | 2 | 16 | 32 | TG   | 12 | 7  |
| 310881 | 65 | 233406  | 233433  | 2 | 14 | 28 | TG   | 13 | 7  |
| 310882 | 65 | 233560  | 233609  | 2 | 25 | 50 | GT   | 16 | 14 |
| 310883 | 65 | 233816  | 233845  | 2 | 15 | 30 | AC   | 7  | 9  |
| 310884 | 65 | 234412  | 234431  | 2 | 10 | 20 | TC   | 21 | 6  |
| 310886 | 65 | 236991  | 237004  | 2 | 7  | 14 | CA   | 16 | 4  |
| 310888 | 65 | 237672  | 237699  | 2 | 14 | 28 | TG   | 11 | 12 |
| 310892 | 65 | 242281  | 242308  | 2 | 14 | 28 | TG   | 12 | 7  |
| 310894 | 65 | 250764  | 250793  | 2 | 15 | 30 | GA   | 17 | 11 |
| 310897 | 65 | 257325  | 257342  | 3 | 6  | 18 | TTC  | 9  | 3  |
| 310898 | 65 | 258468  | 258495  | 2 | 14 | 28 | CA   | 12 | 6  |
| 310899 | 65 | 259193  | 259208  | 2 | 8  | 16 | CA   | 18 | 12 |
| 310900 | 65 | 260643  | 260660  | 3 | 6  | 18 | TCC  | 23 | 3  |
| 310905 | 65 | 267161  | 267182  | 2 | 11 | 22 | TG   | 17 | 11 |
| 310908 | 65 | 275696  | 275721  | 2 | 13 | 26 | CA   | 24 | 14 |

|        |    |        |        |   |    |    |     |    |    |
|--------|----|--------|--------|---|----|----|-----|----|----|
| 310909 | 65 | 286069 | 286080 | 2 | 6  | 12 | CA  | 29 | 3  |
| 310910 | 65 | 287677 | 287696 | 2 | 10 | 20 | TC  | 10 | 6  |
| 310915 | 65 | 295212 | 295273 | 2 | 31 | 62 | AC  | 11 | 16 |
| 310925 | 65 | 301055 | 301072 | 2 | 9  | 18 | TG  | 15 | 6  |
| 310929 | 65 | 308545 | 308572 | 2 | 14 | 28 | CT  | 22 | 10 |
| 310939 | 65 | 324277 | 324292 | 2 | 8  | 16 | CA  | 23 | 4  |
| 310940 | 65 | 324499 | 324519 | 3 | 7  | 21 | GCT | 28 | 10 |
| 310941 | 65 | 328470 | 328519 | 2 | 25 | 50 | TG  | 13 | 12 |
| 310942 | 65 | 335601 | 335630 | 2 | 15 | 30 | TG  | 9  | 5  |
| 310943 | 65 | 336269 | 336288 | 2 | 10 | 20 | AC  | 13 | 3  |
| 310953 | 65 | 341685 | 341705 | 3 | 7  | 21 | GGA | 6  | 5  |
| 310959 | 65 | 346349 | 346380 | 2 | 16 | 32 | TG  | 13 | 9  |
| 310960 | 65 | 346486 | 346521 | 2 | 18 | 36 | AC  | 17 | 12 |
| 310961 | 65 | 346594 | 346623 | 2 | 15 | 30 | CA  | 12 | 8  |
| 310967 | 65 | 360876 | 360893 | 2 | 9  | 18 | CA  | 26 | 9  |
| 310968 | 65 | 361127 | 361147 | 3 | 7  | 21 | GAG | 22 | 4  |
| 310971 | 65 | 363572 | 363597 | 2 | 13 | 26 | GT  | 11 | 9  |
| 310972 | 65 | 363922 | 363935 | 2 | 7  | 14 | TG  | 8  | 9  |
| 310976 | 65 | 367743 | 367764 | 2 | 11 | 22 | GT  | 10 | 9  |
| 310978 | 65 | 373540 | 373573 | 2 | 17 | 34 | TG  | 19 | 6  |
| 310984 | 65 | 390709 | 390736 | 2 | 14 | 28 | TG  | 18 | 10 |
| 310985 | 65 | 390828 | 390855 | 2 | 14 | 28 | GT  | 20 | 16 |
| 310993 | 65 | 401349 | 401384 | 2 | 18 | 36 | CA  | 14 | 14 |
| 310994 | 65 | 404023 | 404042 | 2 | 10 | 20 | AC  | 20 | 9  |
| 310995 | 65 | 408751 | 408772 | 2 | 11 | 22 | AC  | 25 | 3  |
| 310996 | 65 | 408917 | 408954 | 2 | 19 | 38 | GT  | 8  | 6  |
| 311001 | 65 | 413496 | 413510 | 3 | 5  | 15 | AGA | 8  | 3  |
| 311002 | 65 | 413619 | 413640 | 2 | 11 | 22 | GT  | 21 | 15 |
| 311004 | 65 | 414314 | 414334 | 3 | 7  | 21 | CAG | 14 | 4  |
| 311012 | 65 | 421191 | 421204 | 2 | 7  | 14 | CA  | 24 | 3  |
| 311015 | 65 | 424398 | 424412 | 3 | 5  | 15 | TCC | 29 | 5  |
| 311017 | 65 | 426847 | 426892 | 2 | 23 | 46 | TC  | 13 | 11 |
| 311018 | 65 | 426934 | 426967 | 2 | 17 | 34 | TG  | 8  | 6  |
| 311020 | 65 | 427403 | 427417 | 3 | 5  | 15 | GCT | 31 | 4  |
| 311024 | 65 | 429654 | 429671 | 2 | 9  | 18 | GA  | 24 | 5  |
| 311025 | 65 | 431259 | 431276 | 2 | 9  | 18 | GT  | 13 | 5  |
| 311033 | 65 | 444551 | 444564 | 2 | 7  | 14 | TG  | 11 | 9  |
| 311035 | 65 | 449505 | 449520 | 2 | 8  | 16 | TG  | 22 | 6  |
| 311050 | 65 | 463796 | 463817 | 2 | 11 | 22 | CA  | 21 | 15 |
| 311051 | 65 | 467850 | 467863 | 2 | 7  | 14 | CA  | 27 | 4  |
| 311052 | 65 | 469743 | 469754 | 2 | 6  | 12 | AC  | 19 | 4  |
| 311053 | 65 | 469903 | 469924 | 2 | 11 | 22 | GT  | 12 | 6  |
| 311054 | 65 | 470113 | 470152 | 2 | 20 | 40 | CA  | 9  | 11 |
| 311061 | 65 | 498708 | 498731 | 3 | 8  | 24 | GCT | 27 | 8  |
| 311064 | 65 | 505732 | 505749 | 3 | 6  | 18 | TCA | 31 | 3  |
| 311067 | 65 | 512600 | 512633 | 2 | 17 | 34 | GT  | 12 | 10 |
| 311069 | 65 | 513262 | 513277 | 2 | 8  | 16 | TG  | 29 | 4  |
| 311070 | 65 | 513776 | 513793 | 3 | 6  | 18 | GCT | 23 | 4  |
| 311071 | 65 | 518566 | 518577 | 2 | 6  | 12 | AC  | 17 | 5  |
| 311073 | 65 | 534807 | 534821 | 3 | 5  | 15 | GAG | 26 | 6  |
| 311075 | 65 | 535072 | 535083 | 2 | 6  | 12 | AC  | 25 | 4  |

|        |    |        |        |   |    |    |      |    |    |
|--------|----|--------|--------|---|----|----|------|----|----|
| 311076 | 65 | 535134 | 535149 | 2 | 8  | 16 | CA   | 25 | 10 |
| 311077 | 65 | 535580 | 535609 | 2 | 15 | 30 | GT   | 10 | 10 |
| 311078 | 65 | 535748 | 535765 | 2 | 9  | 18 | TG   | 16 | 9  |
| 311079 | 65 | 537603 | 537624 | 2 | 11 | 22 | GT   | 7  | 9  |
| 311081 | 65 | 539695 | 539734 | 4 | 10 | 40 | AAGG | 18 | 6  |
| 311086 | 65 | 548627 | 548642 | 4 | 4  | 16 | AAAT | 21 | 3  |
| 311088 | 65 | 553012 | 553029 | 2 | 9  | 18 | TG   | 15 | 4  |
| 311096 | 65 | 584893 | 584938 | 2 | 23 | 46 | AC   | 10 | 12 |
| 311099 | 65 | 590463 | 590478 | 4 | 4  | 16 | CTTT | 19 | 3  |
| 311105 | 65 | 601501 | 601516 | 4 | 4  | 16 | AGAT | 10 | 3  |
| 311110 | 65 | 615649 | 615664 | 2 | 8  | 16 | TG   | 19 | 3  |
| 311112 | 65 | 620644 | 620673 | 3 | 10 | 30 | TTA  | 9  | 4  |
| 311115 | 65 | 623292 | 623309 | 3 | 6  | 18 | TGG  | 32 | 3  |
| 311116 | 65 | 624055 | 624086 | 4 | 8  | 32 | ATCT | 25 | 8  |
| 311118 | 65 | 632487 | 632519 | 3 | 11 | 33 | ACA  | 23 | 7  |
| 311131 | 65 | 686634 | 686657 | 2 | 12 | 24 | CA   | 13 | 10 |
| 311132 | 65 | 687309 | 687335 | 3 | 9  | 27 | CTG  | 24 | 8  |
| 311139 | 65 | 704989 | 705036 | 4 | 12 | 48 | GATA | 14 | 15 |
| 311143 | 65 | 711532 | 711565 | 2 | 17 | 34 | AC   | 21 | 13 |
| 311145 | 65 | 712617 | 712640 | 4 | 6  | 24 | AAAG | 11 | 6  |
| 311147 | 65 | 717308 | 717323 | 2 | 8  | 16 | AC   | 8  | 6  |
| 311149 | 65 | 718036 | 718053 | 3 | 6  | 18 | GCT  | 18 | 6  |
| 311152 | 65 | 722539 | 722566 | 2 | 14 | 28 | AC   | 13 | 9  |
| 311161 | 65 | 732015 | 732026 | 2 | 6  | 12 | CA   | 31 | 5  |
| 311163 | 65 | 732225 | 732258 | 2 | 17 | 34 | AC   | 17 | 9  |
| 311164 | 65 | 732455 | 732468 | 2 | 7  | 14 | AC   | 25 | 8  |
| 311169 | 65 | 738584 | 738599 | 2 | 8  | 16 | CA   | 13 | 3  |
| 311170 | 65 | 740183 | 740198 | 2 | 8  | 16 | AC   | 13 | 4  |
| 311181 | 65 | 761593 | 761610 | 2 | 9  | 18 | GT   | 24 | 3  |
| 311182 | 65 | 761734 | 761757 | 2 | 12 | 24 | GT   | 11 | 5  |
| 311189 | 65 | 770679 | 770696 | 3 | 6  | 18 | AAC  | 31 | 6  |
| 311191 | 65 | 772718 | 772741 | 3 | 8  | 24 | GGA  | 24 | 7  |
| 311195 | 65 | 775897 | 775914 | 2 | 9  | 18 | AC   | 19 | 5  |
| 311196 | 65 | 775940 | 775961 | 2 | 11 | 22 | CA   | 15 | 8  |
| 311197 | 65 | 779026 | 779055 | 3 | 10 | 30 | CTC  | 10 | 4  |
| 311198 | 65 | 779133 | 779153 | 3 | 7  | 21 | CCT  | 17 | 4  |
| 311199 | 65 | 779333 | 779354 | 2 | 11 | 22 | AC   | 22 | 5  |
| 311201 | 65 | 779508 | 779543 | 2 | 18 | 36 | GT   | 9  | 12 |
| 311204 | 65 | 782124 | 782137 | 2 | 7  | 14 | AC   | 15 | 3  |
| 311205 | 65 | 784385 | 784410 | 2 | 13 | 26 | TG   | 15 | 7  |
| 311215 | 65 | 802447 | 802466 | 2 | 10 | 20 | CA   | 27 | 6  |
| 311216 | 65 | 802671 | 802704 | 2 | 17 | 34 | CA   | 22 | 10 |
| 311224 | 65 | 812218 | 812243 | 2 | 13 | 26 | CA   | 19 | 14 |
| 311226 | 65 | 813978 | 813989 | 2 | 6  | 12 | CA   | 22 | 7  |
| 311232 | 65 | 816859 | 816886 | 2 | 14 | 28 | TG   | 19 | 10 |
| 311234 | 65 | 817447 | 817460 | 2 | 7  | 14 | GT   | 9  | 3  |
| 311235 | 65 | 817536 | 817551 | 4 | 4  | 16 | AGAA | 19 | 5  |
| 311237 | 65 | 817909 | 817924 | 2 | 8  | 16 | CA   | 11 | 3  |
| 311247 | 65 | 823799 | 823828 | 2 | 15 | 30 | TG   | 18 | 14 |
| 311248 | 65 | 824009 | 824020 | 2 | 6  | 12 | CA   | 20 | 8  |
| 311249 | 65 | 824022 | 824037 | 2 | 8  | 16 | AC   | 20 | 8  |

|        |    |        |        |   |    |    |      |    |    |
|--------|----|--------|--------|---|----|----|------|----|----|
| 311251 | 65 | 825576 | 825595 | 4 | 5  | 20 | AAAG | 9  | 5  |
| 311253 | 65 | 825907 | 825932 | 2 | 13 | 26 | CA   | 11 | 10 |
| 311254 | 65 | 827656 | 827683 | 2 | 14 | 28 | GT   | 15 | 6  |
| 311255 | 65 | 827825 | 827836 | 2 | 6  | 12 | TC   | 18 | 3  |
| 311259 | 65 | 828458 | 828487 | 3 | 10 | 30 | TCT  | 13 | 11 |
| 311260 | 65 | 829958 | 829975 | 2 | 9  | 18 | TG   | 22 | 14 |
| 311261 | 65 | 830968 | 830991 | 4 | 6  | 24 | TTTA | 27 | 4  |
| 311262 | 65 | 831224 | 831283 | 3 | 20 | 60 | GAA  | 20 | 13 |
| 311263 | 65 | 831602 | 831617 | 2 | 8  | 16 | AC   | 14 | 7  |
| 311265 | 65 | 832870 | 832899 | 2 | 15 | 30 | AC   | 13 | 6  |
| 311267 | 65 | 837407 | 837434 | 2 | 14 | 28 | TG   | 16 | 13 |
| 311268 | 65 | 840793 | 840810 | 2 | 9  | 18 | AC   | 20 | 10 |
| 311270 | 65 | 846662 | 846673 | 2 | 6  | 12 | AG   | 14 | 4  |
| 311272 | 65 | 847942 | 847953 | 2 | 6  | 12 | GT   | 25 | 4  |
| 311273 | 65 | 849410 | 849435 | 2 | 13 | 26 | CA   | 22 | 8  |
| 311274 | 65 | 850767 | 850781 | 3 | 5  | 15 | TAA  | 30 | 4  |
| 311279 | 65 | 868477 | 868494 | 3 | 6  | 18 | CAG  | 25 | 12 |
| 311282 | 65 | 877959 | 877980 | 2 | 11 | 22 | AC   | 24 | 13 |
| 311284 | 65 | 882804 | 882821 | 2 | 9  | 18 | CA   | 24 | 13 |
| 311285 | 65 | 885438 | 885449 | 2 | 6  | 12 | GT   | 23 | 3  |
| 311290 | 65 | 897335 | 897346 | 2 | 6  | 12 | AT   | 34 | 3  |
| 311293 | 65 | 901025 | 901036 | 2 | 6  | 12 | TG   | 22 | 5  |
| 311294 | 65 | 902224 | 902239 | 4 | 4  | 16 | AAAT | 10 | 9  |
| 311297 | 65 | 911229 | 911254 | 2 | 13 | 26 | TG   | 23 | 13 |
| 311298 | 65 | 911556 | 911573 | 2 | 9  | 18 | TG   | 19 | 14 |
| 311301 | 65 | 914328 | 914351 | 2 | 12 | 24 | GT   | 20 | 8  |
| 311303 | 65 | 922556 | 922569 | 2 | 7  | 14 | AC   | 9  | 12 |
| 311308 | 65 | 928543 | 928568 | 2 | 13 | 26 | AC   | 11 | 8  |
| 311309 | 65 | 929372 | 929399 | 2 | 14 | 28 | AC   | 16 | 15 |
| 311311 | 65 | 932049 | 932064 | 2 | 8  | 16 | CA   | 16 | 6  |
| 311313 | 65 | 933625 | 933650 | 2 | 13 | 26 | GT   | 18 | 13 |
| 311317 | 65 | 937602 | 937617 | 4 | 4  | 16 | AGGG | 15 | 3  |
| 311318 | 65 | 937645 | 937658 | 2 | 7  | 14 | GT   | 19 | 5  |
| 311319 | 65 | 937816 | 937841 | 2 | 13 | 26 | CA   | 15 | 13 |
| 311320 | 65 | 938104 | 938118 | 3 | 5  | 15 | GAG  | 27 | 4  |
| 311321 | 65 | 938180 | 938199 | 2 | 10 | 20 | CA   | 19 | 11 |
| 311322 | 65 | 938470 | 938485 | 2 | 8  | 16 | GT   | 21 | 10 |
| 311323 | 65 | 938676 | 938689 | 2 | 7  | 14 | AC   | 18 | 10 |
| 311325 | 65 | 940161 | 940180 | 2 | 10 | 20 | AC   | 9  | 14 |
| 311328 | 65 | 942987 | 942998 | 2 | 6  | 12 | CA   | 29 | 5  |
| 311329 | 65 | 943721 | 943732 | 2 | 6  | 12 | AC   | 25 | 3  |
| 311330 | 65 | 943915 | 943926 | 2 | 6  | 12 | CA   | 17 | 16 |
| 311331 | 65 | 943928 | 943943 | 2 | 8  | 16 | AC   | 19 | 18 |
| 311332 | 65 | 945397 | 945414 | 2 | 9  | 18 | CA   | 22 | 7  |
| 311335 | 65 | 949742 | 949763 | 2 | 11 | 22 | AC   | 10 | 10 |
| 311337 | 65 | 950747 | 950761 | 3 | 5  | 15 | GGA  | 8  | 4  |
| 311338 | 65 | 951550 | 951561 | 2 | 6  | 12 | CA   | 18 | 5  |
| 311341 | 65 | 952233 | 952247 | 3 | 5  | 15 | AAG  | 6  | 3  |
| 311342 | 65 | 953896 | 953907 | 2 | 6  | 12 | TG   | 31 | 3  |
| 311345 | 65 | 963141 | 963155 | 3 | 5  | 15 | TAA  | 14 | 3  |
| 311346 | 65 | 963874 | 963899 | 2 | 13 | 26 | TG   | 19 | 7  |

|        |    |         |         |   |    |    |      |    |    |
|--------|----|---------|---------|---|----|----|------|----|----|
| 311348 | 65 | 967529  | 967552  | 2 | 12 | 24 | AC   | 6  | 7  |
| 311349 | 65 | 971897  | 971929  | 3 | 11 | 33 | GAG  | 20 | 9  |
| 311352 | 65 | 982873  | 982886  | 2 | 7  | 14 | GT   | 29 | 3  |
| 311353 | 65 | 982923  | 982944  | 2 | 11 | 22 | CA   | 21 | 9  |
| 311359 | 65 | 1004343 | 1004362 | 4 | 5  | 20 | AAAC | 7  | 3  |
| 311363 | 65 | 1007420 | 1007435 | 2 | 8  | 16 | TC   | 20 | 3  |
| 311364 | 65 | 1007519 | 1007550 | 2 | 16 | 32 | AC   | 9  | 9  |
| 311372 | 65 | 1013043 | 1013074 | 2 | 16 | 32 | TG   | 18 | 6  |
| 311373 | 65 | 1013452 | 1013475 | 3 | 8  | 24 | CTC  | 21 | 4  |
| 311376 | 65 | 1023327 | 1023350 | 2 | 12 | 24 | AG   | 20 | 7  |
| 311388 | 65 | 1032921 | 1032952 | 2 | 16 | 32 | TG   | 16 | 10 |
| 311394 | 65 | 1038949 | 1038964 | 4 | 4  | 16 | AATA | 19 | 3  |
| 311396 | 65 | 1039820 | 1039839 | 2 | 10 | 20 | GT   | 13 | 7  |
| 311397 | 65 | 1040498 | 1040509 | 2 | 6  | 12 | GT   | 23 | 3  |
| 311398 | 65 | 1041996 | 1042013 | 2 | 9  | 18 | TG   | 16 | 5  |
| 311400 | 65 | 1042212 | 1042225 | 2 | 7  | 14 | TG   | 22 | 4  |
| 311407 | 65 | 1048471 | 1048486 | 2 | 8  | 16 | AC   | 23 | 3  |
| 311409 | 65 | 1053855 | 1053882 | 2 | 14 | 28 | TG   | 7  | 8  |
| 311411 | 65 | 1056604 | 1056631 | 2 | 14 | 28 | CA   | 9  | 11 |
| 311413 | 65 | 1061391 | 1061410 | 2 | 10 | 20 | AC   | 25 | 5  |
| 311414 | 65 | 1061741 | 1061756 | 2 | 8  | 16 | GA   | 20 | 3  |
| 311418 | 65 | 1063303 | 1063330 | 2 | 14 | 28 | GT   | 16 | 8  |
| 311420 | 65 | 1063683 | 1063708 | 2 | 13 | 26 | AC   | 16 | 11 |
| 311421 | 65 | 1064476 | 1064517 | 2 | 21 | 42 | GA   | 6  | 7  |
| 311428 | 65 | 1072911 | 1072934 | 2 | 12 | 24 | TG   | 15 | 9  |
| 311431 | 65 | 1078503 | 1078532 | 2 | 15 | 30 | AC   | 16 | 11 |
| 311432 | 65 | 1078940 | 1078969 | 2 | 15 | 30 | TG   | 15 | 13 |
| 311434 | 65 | 1082027 | 1082044 | 2 | 9  | 18 | CA   | 24 | 5  |
| 311439 | 65 | 1097122 | 1097136 | 3 | 5  | 15 | TTG  | 22 | 3  |
| 311441 | 65 | 1100986 | 1101015 | 2 | 15 | 30 | TG   | 10 | 5  |
| 311446 | 65 | 1109609 | 1109624 | 2 | 8  | 16 | AC   | 18 | 4  |
| 311449 | 65 | 1123365 | 1123380 | 2 | 8  | 16 | TG   | 30 | 3  |
| 311454 | 65 | 1136839 | 1136850 | 2 | 6  | 12 | CA   | 29 | 5  |
| 311458 | 65 | 1150014 | 1150039 | 2 | 13 | 26 | CA   | 15 | 6  |
| 311465 | 65 | 1166660 | 1166679 | 2 | 10 | 20 | AC   | 11 | 12 |
| 311467 | 65 | 1181847 | 1181864 | 2 | 9  | 18 | AC   | 15 | 5  |
| 311468 | 65 | 1185365 | 1185382 | 3 | 6  | 18 | AGA  | 12 | 8  |
| 311473 | 65 | 1192667 | 1192684 | 3 | 6  | 18 | ATT  | 19 | 3  |
| 311474 | 65 | 1192851 | 1192868 | 2 | 9  | 18 | AC   | 19 | 5  |
| 311476 | 65 | 1196613 | 1196633 | 3 | 7  | 21 | GAG  | 18 | 5  |
| 311478 | 65 | 1196816 | 1196837 | 2 | 11 | 22 | CT   | 19 | 5  |
| 311481 | 65 | 1198698 | 1198729 | 2 | 16 | 32 | AC   | 20 | 11 |
| 311482 | 65 | 1198912 | 1198943 | 2 | 16 | 32 | GT   | 14 | 9  |
| 311484 | 65 | 1201394 | 1201409 | 2 | 8  | 16 | GT   | 16 | 9  |
| 311486 | 65 | 1204044 | 1204059 | 2 | 8  | 16 | AC   | 27 | 8  |
| 311487 | 65 | 1205862 | 1205879 | 2 | 9  | 18 | AC   | 10 | 4  |
| 311491 | 65 | 1211026 | 1211039 | 2 | 7  | 14 | TG   | 28 | 3  |
| 311492 | 65 | 1212928 | 1212939 | 2 | 6  | 12 | AC   | 32 | 6  |
| 311494 | 65 | 1216503 | 1216526 | 3 | 8  | 24 | GGA  | 20 | 7  |
| 311495 | 65 | 1216703 | 1216717 | 3 | 5  | 15 | AGC  | 26 | 3  |
| 311499 | 65 | 1222213 | 1222227 | 3 | 5  | 15 | CAC  | 14 | 6  |

|        |    |         |         |   |    |    |      |    |    |
|--------|----|---------|---------|---|----|----|------|----|----|
| 311500 | 65 | 1224044 | 1224087 | 2 | 22 | 44 | GT   | 8  | 10 |
| 311502 | 65 | 1225275 | 1225306 | 2 | 16 | 32 | AC   | 6  | 5  |
| 311515 | 65 | 1256534 | 1256557 | 2 | 12 | 24 | TG   | 11 | 5  |
| 311523 | 65 | 1275539 | 1275562 | 3 | 8  | 24 | TTA  | 16 | 6  |
| 311524 | 65 | 1280034 | 1280047 | 2 | 7  | 14 | GT   | 11 | 4  |
| 311525 | 65 | 1288527 | 1288538 | 2 | 6  | 12 | GT   | 26 | 3  |
| 311526 | 65 | 1289201 | 1289228 | 4 | 7  | 28 | ATTT | 19 | 8  |
| 311529 | 65 | 1298244 | 1298293 | 2 | 25 | 50 | CA   | 11 | 13 |
| 311531 | 65 | 1301348 | 1301363 | 2 | 8  | 16 | CT   | 23 | 5  |
| 311534 | 65 | 1304576 | 1304605 | 2 | 15 | 30 | AC   | 20 | 7  |
| 311535 | 65 | 1306896 | 1306907 | 2 | 6  | 12 | TC   | 7  | 3  |
| 311539 | 65 | 1314403 | 1314424 | 2 | 11 | 22 | CA   | 16 | 6  |
| 311541 | 65 | 1314569 | 1314584 | 2 | 8  | 16 | AC   | 21 | 6  |
| 311544 | 65 | 1317170 | 1317181 | 2 | 6  | 12 | AC   | 23 | 3  |
| 311545 | 65 | 1317315 | 1317328 | 2 | 7  | 14 | CA   | 11 | 9  |
| 311546 | 65 | 1317331 | 1317348 | 2 | 9  | 18 | CA   | 15 | 11 |
| 311547 | 65 | 1319271 | 1319294 | 3 | 8  | 24 | CCT  | 25 | 4  |
| 311548 | 65 | 1320193 | 1320216 | 2 | 12 | 24 | AC   | 12 | 10 |
| 311553 | 65 | 1328271 | 1328297 | 3 | 9  | 27 | CTC  | 7  | 6  |
| 311555 | 65 | 1328628 | 1328645 | 2 | 9  | 18 | CA   | 18 | 9  |
| 311556 | 65 | 1330778 | 1330793 | 4 | 4  | 16 | GTCT | 27 | 3  |
| 311558 | 65 | 1333488 | 1333517 | 2 | 15 | 30 | GA   | 12 | 6  |
| 311559 | 65 | 1333551 | 1333578 | 2 | 14 | 28 | AG   | 10 | 10 |
| 311560 | 65 | 1333815 | 1333834 | 2 | 10 | 20 | GT   | 21 | 6  |
| 311562 | 65 | 1335218 | 1335233 | 2 | 8  | 16 | CA   | 19 | 8  |
| 311568 | 65 | 1348122 | 1348139 | 2 | 9  | 18 | TG   | 21 | 3  |
| 311572 | 65 | 1353858 | 1353871 | 2 | 7  | 14 | AT   | 21 | 6  |
| 311584 | 65 | 1368208 | 1368229 | 2 | 11 | 22 | GT   | 14 | 7  |
| 311587 | 65 | 1371981 | 1372026 | 2 | 23 | 46 | AC   | 10 | 11 |
| 311588 | 65 | 1372159 | 1372172 | 2 | 7  | 14 | GT   | 15 | 10 |
| 311601 | 65 | 1409529 | 1409564 | 4 | 9  | 36 | ATTC | 11 | 7  |
| 311611 | 65 | 1467902 | 1467921 | 4 | 5  | 20 | AAAG | 26 | 6  |
| 311612 | 65 | 1469493 | 1469504 | 2 | 6  | 12 | AC   | 16 | 3  |
| 311639 | 65 | 1524533 | 1524552 | 2 | 10 | 20 | TG   | 19 | 9  |
| 311640 | 65 | 1532473 | 1532504 | 2 | 16 | 32 | GT   | 9  | 10 |
| 311643 | 65 | 1534075 | 1534104 | 3 | 10 | 30 | TAT  | 9  | 4  |
| 311644 | 65 | 1534178 | 1534197 | 4 | 5  | 20 | TTTG | 19 | 5  |
| 311667 | 65 | 1576061 | 1576072 | 2 | 6  | 12 | TC   | 39 | 3  |
| 311677 | 65 | 1591243 | 1591258 | 2 | 8  | 16 | TG   | 11 | 13 |
| 311701 | 65 | 1631135 | 1631154 | 4 | 5  | 20 | GATG | 12 | 4  |
| 311707 | 65 | 1633622 | 1633657 | 2 | 18 | 36 | GT   | 11 | 14 |
| 311718 | 65 | 1647686 | 1647735 | 2 | 25 | 50 | CA   | 8  | 7  |
| 311727 | 65 | 1666341 | 1666356 | 2 | 8  | 16 | TG   | 13 | 4  |
| 311729 | 65 | 1673483 | 1673498 | 2 | 8  | 16 | CA   | 22 | 7  |
| 311732 | 65 | 1678806 | 1678829 | 2 | 12 | 24 | TG   | 21 | 8  |
| 311737 | 65 | 1690036 | 1690050 | 3 | 5  | 15 | CAA  | 11 | 7  |
| 311739 | 65 | 1692605 | 1692628 | 2 | 12 | 24 | CA   | 19 | 5  |
| 311741 | 65 | 1696637 | 1696648 | 2 | 6  | 12 | TG   | 20 | 4  |
| 311743 | 65 | 1700935 | 1700966 | 2 | 16 | 32 | GT   | 12 | 6  |
| 311745 | 65 | 1705085 | 1705098 | 2 | 7  | 14 | AC   | 27 | 5  |
| 311747 | 65 | 1707865 | 1707878 | 2 | 7  | 14 | GT   | 29 | 6  |

|        |    |         |         |   |    |    |      |    |    |
|--------|----|---------|---------|---|----|----|------|----|----|
| 311748 | 65 | 1709426 | 1709449 | 3 | 8  | 24 | AGA  | 15 | 9  |
| 311751 | 65 | 1719899 | 1719918 | 4 | 5  | 20 | CCAT | 22 | 3  |
| 311752 | 65 | 1720898 | 1720929 | 4 | 8  | 32 | AACA | 17 | 8  |
| 311754 | 65 | 1723169 | 1723188 | 4 | 5  | 20 | TATG | 13 | 6  |
| 311755 | 65 | 1727876 | 1727919 | 4 | 11 | 44 | ATAG | 11 | 12 |
| 311761 | 65 | 1733266 | 1733281 | 2 | 8  | 16 | CA   | 22 | 4  |
| 311769 | 65 | 1752251 | 1752274 | 2 | 12 | 24 | TG   | 18 | 8  |
| 311771 | 65 | 1758603 | 1758616 | 2 | 7  | 14 | CA   | 14 | 8  |
| 311772 | 65 | 1761435 | 1761458 | 4 | 6  | 24 | CAAA | 19 | 4  |
| 311778 | 65 | 1771605 | 1771622 | 2 | 9  | 18 | TG   | 6  | 7  |
| 311790 | 65 | 1787229 | 1787256 | 2 | 14 | 28 | TC   | 8  | 9  |
| 311792 | 65 | 1789179 | 1789206 | 2 | 14 | 28 | AC   | 13 | 8  |
| 311793 | 65 | 1795266 | 1795285 | 2 | 10 | 20 | TG   | 13 | 8  |
| 311796 | 65 | 1800407 | 1800424 | 3 | 6  | 18 | TTC  | 23 | 4  |
| 311801 | 65 | 1832834 | 1832873 | 2 | 20 | 40 | AC   | 6  | 6  |
| 311802 | 65 | 1833426 | 1833469 | 4 | 11 | 44 | TTCT | 20 | 11 |
| 311809 | 65 | 1845612 | 1845641 | 2 | 15 | 30 | CA   | 8  | 10 |
| 311810 | 65 | 1845886 | 1845901 | 2 | 8  | 16 | TA   | 20 | 6  |
| 311814 | 65 | 1852599 | 1852610 | 2 | 6  | 12 | TG   | 27 | 3  |
| 311818 | 65 | 1859545 | 1859574 | 2 | 15 | 30 | GT   | 22 | 9  |
| 311819 | 65 | 1860006 | 1860019 | 2 | 7  | 14 | TC   | 20 | 14 |
| 311821 | 65 | 1860691 | 1860702 | 2 | 6  | 12 | CA   | 33 | 3  |
| 311822 | 65 | 1860884 | 1860895 | 2 | 6  | 12 | CA   | 17 | 3  |
| 311823 | 65 | 1860948 | 1860965 | 2 | 9  | 18 | CA   | 20 | 18 |
| 311824 | 65 | 1863815 | 1863840 | 2 | 13 | 26 | AC   | 10 | 11 |
| 311827 | 65 | 1868087 | 1868112 | 2 | 13 | 26 | GT   | 15 | 5  |
| 311833 | 65 | 1885782 | 1885805 | 4 | 6  | 24 | AGAA | 24 | 8  |
| 311839 | 65 | 1893133 | 1893158 | 2 | 13 | 26 | TG   | 14 | 11 |
| 311841 | 65 | 1893699 | 1893718 | 4 | 5  | 20 | AAAT | 30 | 3  |
| 311846 | 65 | 1901941 | 1901968 | 2 | 14 | 28 | AC   | 6  | 6  |
| 311847 | 65 | 1912435 | 1912458 | 4 | 6  | 24 | GATG | 26 | 5  |
| 311850 | 65 | 1918513 | 1918534 | 2 | 11 | 22 | CA   | 11 | 9  |
| 311852 | 65 | 1923757 | 1923774 | 2 | 9  | 18 | CA   | 21 | 9  |
| 311853 | 65 | 1923957 | 1923976 | 2 | 10 | 20 | CA   | 21 | 7  |
| 311854 | 65 | 1924105 | 1924136 | 2 | 16 | 32 | TG   | 7  | 11 |
| 311857 | 65 | 1924388 | 1924399 | 2 | 6  | 12 | CA   | 22 | 6  |
| 311858 | 65 | 1926494 | 1926509 | 4 | 4  | 16 | TTAT | 17 | 3  |
| 311862 | 65 | 1933040 | 1933067 | 2 | 14 | 28 | TG   | 17 | 5  |
| 311863 | 65 | 1935097 | 1935152 | 4 | 14 | 56 | TCTA | 15 | 11 |
| 311865 | 65 | 1936310 | 1936341 | 2 | 16 | 32 | CA   | 11 | 10 |
| 311878 | 65 | 1947835 | 1947862 | 2 | 14 | 28 | AC   | 11 | 11 |
| 311882 | 65 | 1963979 | 1963994 | 2 | 8  | 16 | TG   | 15 | 10 |
| 311892 | 65 | 1973739 | 1973762 | 3 | 8  | 24 | AAC  | 24 | 10 |
| 311894 | 65 | 1976416 | 1976431 | 4 | 4  | 16 | TTTG | 28 | 6  |
| 311916 | 65 | 2006426 | 2006439 | 2 | 7  | 14 | CA   | 24 | 6  |
| 311919 | 65 | 2009941 | 2009964 | 2 | 12 | 24 | CA   | 20 | 7  |
| 311924 | 65 | 2017921 | 2017938 | 2 | 9  | 18 | AG   | 17 | 5  |
| 311930 | 65 | 2025825 | 2025840 | 2 | 8  | 16 | GT   | 27 | 10 |
| 311940 | 65 | 2039935 | 2039948 | 2 | 7  | 14 | TA   | 12 | 9  |
| 311947 | 65 | 2045553 | 2045568 | 2 | 8  | 16 | AT   | 13 | 7  |
| 311948 | 65 | 2045733 | 2045752 | 4 | 5  | 20 | AAAC | 27 | 3  |



|        |    |         |         |   |    |    |      |    |    |
|--------|----|---------|---------|---|----|----|------|----|----|
| 311967 | 65 | 2081931 | 2081984 | 2 | 27 | 54 | CA   | 6  | 8  |
| 311973 | 65 | 2090655 | 2090682 | 4 | 7  | 28 | AAAC | 23 | 8  |
| 311977 | 65 | 2095358 | 2095373 | 4 | 4  | 16 | TTTA | 7  | 3  |
| 311981 | 65 | 2097770 | 2097787 | 3 | 6  | 18 | AAG  | 12 | 6  |
| 311983 | 65 | 2105007 | 2105062 | 4 | 14 | 56 | ATCA | 21 | 9  |
| 311992 | 65 | 2140443 | 2140466 | 2 | 12 | 24 | CA   | 12 | 15 |
| 311994 | 65 | 2143863 | 2143878 | 2 | 8  | 16 | TG   | 26 | 3  |
| 312002 | 65 | 2164928 | 2164957 | 3 | 10 | 30 | AAT  | 15 | 5  |
| 312007 | 65 | 2183301 | 2183312 | 2 | 6  | 12 | AT   | 10 | 4  |
| 312011 | 65 | 2187407 | 2187424 | 2 | 9  | 18 | CA   | 19 | 5  |
| 312012 | 65 | 2189836 | 2189855 | 2 | 10 | 20 | TG   | 12 | 8  |
| 312020 | 65 | 2224240 | 2224253 | 2 | 7  | 14 | GA   | 8  | 4  |
| 312030 | 65 | 2229379 | 2229390 | 2 | 6  | 12 | AC   | 20 | 4  |
| 312043 | 65 | 2293952 | 2293965 | 2 | 7  | 14 | TG   | 20 | 6  |
| 312044 | 65 | 2294635 | 2294658 | 2 | 12 | 24 | TG   | 16 | 6  |
| 312045 | 65 | 2297929 | 2297973 | 3 | 15 | 45 | TCA  | 17 | 10 |
| 312048 | 65 | 2305069 | 2305096 | 2 | 14 | 28 | AC   | 7  | 9  |
| 312056 | 65 | 2317517 | 2317550 | 2 | 17 | 34 | AC   | 9  | 7  |
| 312059 | 65 | 2317993 | 2318030 | 2 | 19 | 38 | AC   | 14 | 17 |
| 312061 | 65 | 2319154 | 2319173 | 2 | 10 | 20 | TG   | 12 | 6  |
| 312062 | 65 | 2319243 | 2319264 | 2 | 11 | 22 | GT   | 15 | 18 |
| 312063 | 65 | 2319371 | 2319384 | 2 | 7  | 14 | GT   | 16 | 6  |
| 312064 | 65 | 2319441 | 2319468 | 2 | 14 | 28 | TG   | 23 | 10 |
| 312065 | 65 | 2320097 | 2320120 | 3 | 8  | 24 | TCC  | 25 | 9  |
| 312071 | 65 | 2332026 | 2332055 | 2 | 15 | 30 | GT   | 13 | 20 |
| 312074 | 65 | 2336396 | 2336415 | 2 | 10 | 20 | AC   | 10 | 7  |
| 312079 | 65 | 2341664 | 2341697 | 2 | 17 | 34 | CA   | 9  | 12 |
| 312081 | 65 | 2349161 | 2349184 | 2 | 12 | 24 | CA   | 12 | 14 |
| 312082 | 65 | 2349230 | 2349247 | 2 | 9  | 18 | CA   | 19 | 8  |
| 312083 | 65 | 2353390 | 2353403 | 2 | 7  | 14 | TC   | 16 | 8  |
| 312084 | 65 | 2353454 | 2353467 | 2 | 7  | 14 | CT   | 14 | 3  |
| 312086 | 65 | 2355730 | 2355745 | 4 | 4  | 16 | ATAG | 20 | 3  |
| 312091 | 65 | 2359891 | 2359910 | 4 | 5  | 20 | AAAC | 19 | 8  |
| 312100 | 65 | 2369418 | 2369445 | 2 | 14 | 28 | GT   | 13 | 6  |
| 312104 | 65 | 2378544 | 2378561 | 2 | 9  | 18 | TC   | 21 | 5  |
| 312107 | 65 | 2379555 | 2379566 | 2 | 6  | 12 | CA   | 27 | 4  |
| 312109 | 65 | 2389277 | 2389303 | 3 | 9  | 27 | CAG  | 29 | 6  |
| 312112 | 65 | 2391588 | 2391643 | 2 | 28 | 56 | CA   | 11 | 9  |
| 312113 | 65 | 2393625 | 2393636 | 2 | 6  | 12 | CA   | 14 | 7  |
| 312115 | 65 | 2397155 | 2397176 | 2 | 11 | 22 | AT   | 7  | 7  |
| 312118 | 65 | 2406619 | 2406656 | 2 | 19 | 38 | AC   | 8  | 11 |
| 312119 | 65 | 2406788 | 2406799 | 2 | 6  | 12 | GT   | 21 | 4  |
| 312127 | 65 | 2413643 | 2413670 | 2 | 14 | 28 | GT   | 11 | 10 |
| 312129 | 65 | 2416627 | 2416642 | 4 | 4  | 16 | AATG | 23 | 3  |
| 312130 | 65 | 2417713 | 2417736 | 2 | 12 | 24 | GT   | 14 | 10 |
| 312131 | 65 | 2420997 | 2421014 | 2 | 9  | 18 | AT   | 15 | 5  |
| 312134 | 65 | 2424694 | 2424725 | 2 | 16 | 32 | TG   | 14 | 9  |
| 312140 | 65 | 2429253 | 2429272 | 2 | 10 | 20 | AT   | 9  | 8  |
| 312141 | 65 | 2430183 | 2430196 | 2 | 7  | 14 | AC   | 13 | 4  |
| 312143 | 65 | 2434793 | 2434808 | 4 | 4  | 16 | AAAC | 26 | 5  |
| 312145 | 65 | 2440889 | 2440908 | 2 | 10 | 20 | AC   | 11 | 4  |

|        |    |         |         |   |    |    |      |    |    |
|--------|----|---------|---------|---|----|----|------|----|----|
| 312151 | 65 | 2455539 | 2455566 | 4 | 7  | 28 | AAAC | 24 | 7  |
| 312153 | 65 | 2457777 | 2457791 | 3 | 5  | 15 | ATC  | 27 | 4  |
| 312161 | 65 | 2474419 | 2474440 | 2 | 11 | 22 | CA   | 21 | 9  |
| 312163 | 65 | 2484455 | 2484478 | 4 | 6  | 24 | TTCT | 21 | 4  |
| 312164 | 65 | 2485177 | 2485196 | 2 | 10 | 20 | TG   | 9  | 7  |
| 312170 | 65 | 2492394 | 2492407 | 2 | 7  | 14 | CA   | 18 | 4  |
| 312171 | 65 | 2492409 | 2492424 | 2 | 8  | 16 | AC   | 16 | 3  |
| 312175 | 65 | 2502306 | 2502327 | 2 | 11 | 22 | CA   | 19 | 15 |
| 312180 | 65 | 2508217 | 2508236 | 2 | 10 | 20 | TC   | 19 | 4  |
| 312181 | 65 | 2511400 | 2511413 | 2 | 7  | 14 | AC   | 24 | 10 |
| 312201 | 65 | 2549379 | 2549410 | 2 | 16 | 32 | GT   | 8  | 10 |
| 312211 | 65 | 2573119 | 2573140 | 2 | 11 | 22 | TC   | 12 | 6  |
| 312215 | 65 | 2586031 | 2586066 | 2 | 18 | 36 | GA   | 10 | 7  |
| 312217 | 65 | 2591407 | 2591428 | 2 | 11 | 22 | CA   | 25 | 5  |
| 312218 | 65 | 2592253 | 2592264 | 2 | 6  | 12 | TG   | 26 | 3  |
| 312233 | 65 | 2614369 | 2614386 | 2 | 9  | 18 | CT   | 16 | 3  |
| 312238 | 65 | 2623503 | 2623524 | 2 | 11 | 22 | AC   | 15 | 4  |
| 312243 | 65 | 2631025 | 2631096 | 4 | 18 | 72 | TATC | 17 | 13 |
| 312246 | 65 | 2633650 | 2633673 | 2 | 12 | 24 | TC   | 9  | 7  |
| 312251 | 66 | 29553   | 29578   | 2 | 13 | 26 | GT   | 14 | 10 |
| 312277 | 66 | 103942  | 103955  | 2 | 7  | 14 | AC   | 21 | 3  |
| 312282 | 66 | 121150  | 121163  | 2 | 7  | 14 | AC   | 11 | 5  |
| 312283 | 66 | 121165  | 121182  | 2 | 9  | 18 | CA   | 19 | 7  |
| 312287 | 66 | 122653  | 122676  | 4 | 6  | 24 | ATTC | 28 | 5  |
| 312298 | 66 | 143677  | 143700  | 3 | 8  | 24 | AGA  | 15 | 4  |
| 312299 | 66 | 143952  | 143965  | 2 | 7  | 14 | CT   | 27 | 6  |
| 312303 | 66 | 145754  | 145767  | 2 | 7  | 14 | AT   | 17 | 9  |
| 312307 | 66 | 147052  | 147071  | 2 | 10 | 20 | GA   | 12 | 4  |
| 312314 | 66 | 163663  | 163680  | 2 | 9  | 18 | TG   | 17 | 9  |
| 312320 | 66 | 174203  | 174222  | 2 | 10 | 20 | AT   | 8  | 10 |
| 312322 | 66 | 175960  | 175975  | 4 | 4  | 16 | CAAC | 29 | 3  |
| 312330 | 66 | 181425  | 181456  | 2 | 16 | 32 | GT   | 12 | 10 |
| 312339 | 66 | 188963  | 188986  | 4 | 6  | 24 | AGAC | 13 | 8  |
| 312340 | 66 | 189189  | 189216  | 2 | 14 | 28 | AC   | 11 | 10 |
| 312344 | 66 | 195502  | 195521  | 2 | 10 | 20 | AC   | 21 | 5  |
| 312351 | 66 | 202041  | 202055  | 3 | 5  | 15 | GAG  | 13 | 3  |
| 312361 | 66 | 207998  | 208012  | 3 | 5  | 15 | TGG  | 15 | 7  |
| 312362 | 66 | 208200  | 208217  | 3 | 6  | 18 | GCT  | 31 | 3  |
| 312364 | 66 | 209054  | 209069  | 4 | 4  | 16 | TTAT | 25 | 3  |
| 312367 | 66 | 226393  | 226412  | 2 | 10 | 20 | AC   | 26 | 5  |
| 312369 | 66 | 235502  | 235513  | 2 | 6  | 12 | CA   | 19 | 6  |
| 312370 | 66 | 235519  | 235534  | 2 | 8  | 16 | AC   | 10 | 4  |
| 312371 | 66 | 238474  | 238493  | 2 | 10 | 20 | CT   | 17 | 6  |
| 312382 | 66 | 244751  | 244766  | 2 | 8  | 16 | GT   | 20 | 7  |
| 312383 | 66 | 244790  | 244805  | 2 | 8  | 16 | TG   | 14 | 10 |
| 312384 | 66 | 246346  | 246371  | 2 | 13 | 26 | AC   | 17 | 9  |
| 312387 | 66 | 246722  | 246742  | 3 | 7  | 21 | CCT  | 10 | 4  |
| 312389 | 66 | 246861  | 246875  | 3 | 5  | 15 | TCC  | 18 | 3  |
| 312392 | 66 | 250129  | 250146  | 2 | 9  | 18 | CA   | 20 | 5  |
| 312393 | 66 | 250474  | 250497  | 4 | 6  | 24 | AAAG | 12 | 8  |
| 312395 | 66 | 251760  | 251771  | 2 | 6  | 12 | CA   | 23 | 4  |

|        |    |        |        |   |    |    |      |    |    |
|--------|----|--------|--------|---|----|----|------|----|----|
| 312396 | 66 | 251833 | 251854 | 2 | 11 | 22 | GT   | 15 | 4  |
| 312401 | 66 | 257333 | 257356 | 2 | 12 | 24 | AC   | 15 | 14 |
| 312403 | 66 | 258065 | 258088 | 2 | 12 | 24 | TG   | 14 | 12 |
| 312408 | 66 | 261214 | 261245 | 2 | 16 | 32 | GT   | 12 | 7  |
| 312413 | 66 | 262391 | 262402 | 2 | 6  | 12 | GA   | 25 | 3  |
| 312416 | 66 | 269521 | 269544 | 2 | 12 | 24 | CA   | 7  | 4  |
| 312420 | 66 | 282125 | 282138 | 2 | 7  | 14 | CA   | 22 | 8  |
| 312422 | 66 | 282496 | 282519 | 2 | 12 | 24 | AC   | 16 | 11 |
| 312423 | 66 | 285886 | 285897 | 2 | 6  | 12 | AC   | 23 | 3  |
| 312425 | 66 | 287933 | 287944 | 2 | 6  | 12 | GT   | 27 | 3  |
| 312426 | 66 | 290373 | 290384 | 2 | 6  | 12 | CA   | 31 | 4  |
| 312428 | 66 | 291864 | 291893 | 3 | 10 | 30 | CAA  | 27 | 5  |
| 312430 | 66 | 294877 | 294898 | 2 | 11 | 22 | CA   | 18 | 6  |
| 312432 | 66 | 301221 | 301242 | 2 | 11 | 22 | AC   | 17 | 12 |
| 312435 | 66 | 302334 | 302361 | 2 | 14 | 28 | GT   | 13 | 9  |
| 312440 | 66 | 321231 | 321260 | 2 | 15 | 30 | GT   | 11 | 11 |
| 312443 | 66 | 328059 | 328088 | 3 | 10 | 30 | GAG  | 16 | 5  |
| 312444 | 66 | 328119 | 328136 | 2 | 9  | 18 | TG   | 18 | 8  |
| 312449 | 66 | 335755 | 335772 | 2 | 9  | 18 | TC   | 20 | 4  |
| 312451 | 66 | 337208 | 337243 | 2 | 18 | 36 | CA   | 14 | 7  |
| 312452 | 66 | 337337 | 337348 | 2 | 6  | 12 | AC   | 25 | 3  |
| 312453 | 66 | 337429 | 337458 | 2 | 15 | 30 | GT   | 12 | 6  |
| 312457 | 66 | 341968 | 341985 | 2 | 9  | 18 | GT   | 13 | 4  |
| 312461 | 66 | 345032 | 345049 | 2 | 9  | 18 | GT   | 14 | 6  |
| 312471 | 66 | 351085 | 351100 | 2 | 8  | 16 | CT   | 22 | 6  |
| 312476 | 66 | 359136 | 359157 | 2 | 11 | 22 | GT   | 16 | 5  |
| 312484 | 66 | 369141 | 369156 | 4 | 4  | 16 | AGGG | 9  | 3  |
| 312485 | 66 | 369324 | 369349 | 2 | 13 | 26 | AC   | 22 | 9  |
| 312486 | 66 | 385608 | 385619 | 2 | 6  | 12 | TG   | 14 | 5  |
| 312487 | 66 | 385622 | 385639 | 2 | 9  | 18 | TG   | 23 | 9  |
| 312494 | 66 | 389143 | 389154 | 2 | 6  | 12 | GT   | 19 | 3  |
| 312496 | 66 | 392643 | 392664 | 2 | 11 | 22 | GA   | 23 | 7  |
| 312497 | 66 | 394300 | 394329 | 2 | 15 | 30 | CT   | 10 | 7  |
| 312504 | 66 | 404834 | 404860 | 3 | 9  | 27 | TCC  | 28 | 6  |
| 312507 | 66 | 408254 | 408269 | 2 | 8  | 16 | AC   | 25 | 7  |
| 312513 | 66 | 416197 | 416211 | 3 | 5  | 15 | ATG  | 22 | 3  |
| 312518 | 66 | 433460 | 433471 | 2 | 6  | 12 | CA   | 33 | 3  |
| 312519 | 66 | 433497 | 433520 | 2 | 12 | 24 | TG   | 25 | 3  |
| 312520 | 66 | 435277 | 435304 | 2 | 14 | 28 | GT   | 6  | 5  |
| 312530 | 66 | 445759 | 445810 | 2 | 26 | 52 | GT   | 10 | 12 |
| 312531 | 66 | 446201 | 446216 | 2 | 8  | 16 | AC   | 15 | 13 |
| 312532 | 66 | 446218 | 446235 | 2 | 9  | 18 | CA   | 7  | 7  |
| 312534 | 66 | 455480 | 455491 | 2 | 6  | 12 | GT   | 22 | 4  |
| 312536 | 66 | 459942 | 459953 | 2 | 6  | 12 | TG   | 35 | 4  |
| 312538 | 66 | 463772 | 463797 | 2 | 13 | 26 | TG   | 13 | 6  |
| 312541 | 66 | 467083 | 467112 | 3 | 10 | 30 | TGA  | 26 | 11 |
| 312545 | 66 | 482833 | 482854 | 2 | 11 | 22 | AT   | 8  | 7  |
| 312552 | 66 | 516297 | 516332 | 2 | 18 | 36 | TG   | 8  | 9  |
| 312559 | 66 | 543265 | 543292 | 4 | 7  | 28 | TAAA | 13 | 6  |
| 312562 | 66 | 546627 | 546640 | 2 | 7  | 14 | GT   | 13 | 3  |
| 312566 | 66 | 554261 | 554282 | 2 | 11 | 22 | CA   | 17 | 6  |

|        |    |        |        |   |    |    |      |    |    |
|--------|----|--------|--------|---|----|----|------|----|----|
| 312570 | 66 | 556412 | 556441 | 2 | 15 | 30 | GT   | 16 | 12 |
| 312576 | 66 | 569725 | 569742 | 3 | 6  | 18 | CCT  | 12 | 3  |
| 312577 | 66 | 572700 | 572721 | 2 | 11 | 22 | AG   | 14 | 4  |
| 312578 | 66 | 572775 | 572786 | 2 | 6  | 12 | AG   | 9  | 3  |
| 312579 | 66 | 572788 | 572799 | 2 | 6  | 12 | GA   | 9  | 4  |
| 312583 | 66 | 577874 | 577901 | 2 | 14 | 28 | CA   | 10 | 4  |
| 312585 | 66 | 580707 | 580738 | 2 | 16 | 32 | GT   | 21 | 11 |
| 312586 | 66 | 582160 | 582175 | 2 | 8  | 16 | AC   | 21 | 6  |
| 312587 | 66 | 585096 | 585113 | 3 | 6  | 18 | ATG  | 25 | 5  |
| 312589 | 66 | 587948 | 587961 | 2 | 7  | 14 | CT   | 14 | 5  |
| 312591 | 66 | 589763 | 589780 | 2 | 9  | 18 | TC   | 14 | 6  |
| 312597 | 66 | 606766 | 606781 | 2 | 8  | 16 | GT   | 26 | 4  |
| 312605 | 66 | 619839 | 619866 | 2 | 14 | 28 | GA   | 9  | 5  |
| 312606 | 66 | 619981 | 620008 | 4 | 7  | 28 | TATT | 16 | 3  |
| 312618 | 66 | 649377 | 649398 | 2 | 11 | 22 | TG   | 24 | 6  |
| 312631 | 66 | 673829 | 673844 | 2 | 8  | 16 | CA   | 20 | 4  |
| 312632 | 66 | 674627 | 674640 | 2 | 7  | 14 | TG   | 25 | 4  |
| 312637 | 66 | 699781 | 699796 | 2 | 8  | 16 | AC   | 16 | 3  |
| 312640 | 66 | 706725 | 706742 | 2 | 9  | 18 | TA   | 14 | 7  |
| 312643 | 66 | 710448 | 710471 | 2 | 12 | 24 | GA   | 18 | 9  |
| 312644 | 66 | 710713 | 710744 | 2 | 16 | 32 | AC   | 14 | 14 |
| 312649 | 66 | 722068 | 722093 | 2 | 13 | 26 | AG   | 12 | 6  |
| 312658 | 66 | 734117 | 734132 | 2 | 8  | 16 | TC   | 21 | 7  |
| 312660 | 66 | 737143 | 737162 | 4 | 5  | 20 | TCTA | 11 | 11 |
| 312672 | 66 | 758266 | 758291 | 2 | 13 | 26 | CA   | 14 | 12 |
| 312681 | 66 | 769545 | 769556 | 2 | 6  | 12 | AT   | 13 | 11 |
| 312682 | 66 | 771657 | 771686 | 2 | 15 | 30 | AC   | 21 | 11 |
| 312685 | 66 | 779740 | 779759 | 2 | 10 | 20 | GT   | 25 | 3  |
| 312686 | 66 | 787605 | 787626 | 2 | 11 | 22 | TG   | 28 | 3  |
| 312696 | 66 | 801652 | 801669 | 3 | 6  | 18 | GGA  | 17 | 5  |
| 312697 | 66 | 801670 | 801684 | 3 | 5  | 15 | GGT  | 10 | 5  |
| 312702 | 66 | 818136 | 818149 | 2 | 7  | 14 | GT   | 23 | 5  |
| 312707 | 66 | 825344 | 825371 | 2 | 14 | 28 | AC   | 27 | 10 |
| 312708 | 66 | 825980 | 826009 | 2 | 15 | 30 | GT   | 16 | 11 |
| 312717 | 66 | 843725 | 843746 | 2 | 11 | 22 | TG   | 21 | 5  |
| 312719 | 66 | 843966 | 844007 | 2 | 21 | 42 | AC   | 11 | 12 |
| 312724 | 66 | 848953 | 848972 | 2 | 10 | 20 | TG   | 18 | 9  |
| 312727 | 66 | 850703 | 850718 | 4 | 4  | 16 | TTTA | 26 | 4  |
| 312732 | 66 | 854565 | 854588 | 2 | 12 | 24 | CT   | 16 | 15 |
| 312741 | 66 | 864948 | 864983 | 2 | 18 | 36 | CA   | 8  | 9  |
| 312744 | 66 | 868403 | 868420 | 3 | 6  | 18 | TAC  | 16 | 11 |
| 312749 | 66 | 875342 | 875356 | 3 | 5  | 15 | AAT  | 13 | 4  |
| 312755 | 66 | 891608 | 891649 | 2 | 21 | 42 | AC   | 8  | 11 |
| 312758 | 66 | 896474 | 896485 | 2 | 6  | 12 | CA   | 27 | 4  |
| 312778 | 66 | 918788 | 918805 | 2 | 9  | 18 | AC   | 10 | 9  |
| 312784 | 66 | 919742 | 919761 | 4 | 5  | 20 | TTTA | 7  | 3  |
| 312791 | 66 | 921115 | 921129 | 3 | 5  | 15 | ATT  | 23 | 6  |
| 312795 | 66 | 926954 | 926969 | 4 | 4  | 16 | GGGA | 6  | 3  |
| 312798 | 66 | 930037 | 930050 | 2 | 7  | 14 | AT   | 19 | 12 |
| 312803 | 66 | 931576 | 931599 | 2 | 12 | 24 | GT   | 23 | 5  |
| 312815 | 66 | 939585 | 939618 | 2 | 17 | 34 | CA   | 8  | 9  |

|        |    |         |         |   |    |    |      |    |    |
|--------|----|---------|---------|---|----|----|------|----|----|
| 312817 | 66 | 941314  | 941341  | 2 | 14 | 28 | CA   | 20 | 14 |
| 312819 | 66 | 943610  | 943635  | 2 | 13 | 26 | CT   | 20 | 6  |
| 312821 | 66 | 944977  | 944998  | 2 | 11 | 22 | GT   | 16 | 12 |
| 312822 | 66 | 945513  | 945548  | 2 | 18 | 36 | AC   | 9  | 6  |
| 312832 | 66 | 950988  | 950999  | 2 | 6  | 12 | AC   | 15 | 5  |
| 312833 | 66 | 951001  | 951012  | 2 | 6  | 12 | AC   | 8  | 4  |
| 312835 | 66 | 953205  | 953230  | 2 | 13 | 26 | GT   | 17 | 9  |
| 312836 | 66 | 953575  | 953592  | 2 | 9  | 18 | CT   | 10 | 5  |
| 312842 | 66 | 953928  | 953951  | 3 | 8  | 24 | GAG  | 13 | 4  |
| 312843 | 66 | 954579  | 954602  | 2 | 12 | 24 | GT   | 12 | 9  |
| 312850 | 66 | 955720  | 955739  | 2 | 10 | 20 | CT   | 13 | 6  |
| 312858 | 66 | 959877  | 959900  | 2 | 12 | 24 | AG   | 18 | 5  |
| 312864 | 66 | 961825  | 961838  | 2 | 7  | 14 | CA   | 13 | 5  |
| 312865 | 66 | 961899  | 961924  | 2 | 13 | 26 | TG   | 20 | 10 |
| 312867 | 66 | 963001  | 963012  | 2 | 6  | 12 | TC   | 19 | 4  |
| 312869 | 66 | 964393  | 964428  | 2 | 18 | 36 | TG   | 17 | 7  |
| 312870 | 66 | 965226  | 965243  | 2 | 9  | 18 | CA   | 23 | 4  |
| 312875 | 66 | 969721  | 969732  | 2 | 6  | 12 | TG   | 30 | 3  |
| 312877 | 66 | 970899  | 970916  | 3 | 6  | 18 | CAA  | 11 | 3  |
| 312879 | 66 | 972302  | 972319  | 3 | 6  | 18 | ACC  | 12 | 4  |
| 312881 | 66 | 974317  | 974360  | 2 | 22 | 44 | GT   | 6  | 5  |
| 312885 | 66 | 975379  | 975402  | 2 | 12 | 24 | GT   | 14 | 5  |
| 312886 | 66 | 975831  | 975862  | 2 | 16 | 32 | CA   | 14 | 7  |
| 312888 | 66 | 978450  | 978489  | 2 | 20 | 40 | AC   | 20 | 8  |
| 312889 | 66 | 978685  | 978700  | 2 | 8  | 16 | CA   | 28 | 3  |
| 312890 | 66 | 978992  | 979003  | 2 | 6  | 12 | TG   | 23 | 5  |
| 312891 | 66 | 979198  | 979233  | 2 | 18 | 36 | TG   | 11 | 5  |
| 312892 | 66 | 981472  | 981499  | 2 | 14 | 28 | AC   | 12 | 10 |
| 312894 | 66 | 981858  | 981877  | 4 | 5  | 20 | AGCC | 16 | 6  |
| 312895 | 66 | 982558  | 982571  | 2 | 7  | 14 | TC   | 30 | 6  |
| 312897 | 66 | 983868  | 983893  | 2 | 13 | 26 | GT   | 12 | 10 |
| 312900 | 66 | 984767  | 984802  | 3 | 12 | 36 | GAG  | 25 | 3  |
| 312901 | 66 | 985351  | 985366  | 2 | 8  | 16 | TG   | 13 | 9  |
| 312902 | 66 | 985369  | 985386  | 2 | 9  | 18 | TG   | 15 | 12 |
| 312906 | 66 | 988886  | 988903  | 2 | 9  | 18 | CA   | 13 | 4  |
| 312907 | 66 | 989345  | 989366  | 2 | 11 | 22 | AG   | 21 | 6  |
| 312910 | 66 | 990286  | 990305  | 2 | 10 | 20 | GT   | 17 | 4  |
| 312911 | 66 | 990500  | 990517  | 2 | 9  | 18 | CA   | 18 | 3  |
| 312913 | 66 | 990910  | 990925  | 2 | 8  | 16 | TG   | 17 | 10 |
| 312914 | 66 | 991102  | 991131  | 2 | 15 | 30 | TG   | 12 | 11 |
| 312916 | 66 | 991697  | 991722  | 2 | 13 | 26 | TG   | 20 | 13 |
| 312921 | 66 | 995661  | 995676  | 4 | 4  | 16 | GAGG | 25 | 3  |
| 312925 | 66 | 998520  | 998535  | 2 | 8  | 16 | CA   | 20 | 4  |
| 312926 | 66 | 998588  | 998605  | 2 | 9  | 18 | AC   | 18 | 9  |
| 312927 | 66 | 999875  | 999910  | 2 | 18 | 36 | GT   | 19 | 13 |
| 312929 | 66 | 1001556 | 1001571 | 2 | 8  | 16 | TG   | 15 | 7  |
| 312939 | 66 | 1026309 | 1026340 | 2 | 16 | 32 | TG   | 16 | 13 |
| 312941 | 66 | 1026498 | 1026511 | 2 | 7  | 14 | CA   | 15 | 5  |
| 312947 | 66 | 1029188 | 1029203 | 2 | 8  | 16 | TC   | 14 | 3  |
| 312951 | 66 | 1030506 | 1030521 | 2 | 8  | 16 | GT   | 25 | 11 |
| 312952 | 66 | 1030523 | 1030538 | 2 | 8  | 16 | TG   | 16 | 7  |

|        |    |         |         |   |    |    |      |    |    |
|--------|----|---------|---------|---|----|----|------|----|----|
| 312971 | 66 | 1055107 | 1055124 | 2 | 9  | 18 | AT   | 11 | 3  |
| 312972 | 66 | 1055873 | 1055904 | 2 | 16 | 32 | CA   | 13 | 10 |
| 312973 | 66 | 1056449 | 1056464 | 4 | 4  | 16 | AAAT | 25 | 8  |
| 312981 | 66 | 1062627 | 1062654 | 2 | 14 | 28 | GT   | 17 | 8  |
| 312987 | 66 | 1068140 | 1068159 | 2 | 10 | 20 | AC   | 8  | 9  |
| 312999 | 66 | 1077253 | 1077276 | 2 | 12 | 24 | CT   | 16 | 7  |
| 313000 | 66 | 1077489 | 1077514 | 2 | 13 | 26 | TG   | 11 | 6  |
| 313001 | 66 | 1077562 | 1077579 | 2 | 9  | 18 | AC   | 18 | 7  |
| 313002 | 66 | 1077631 | 1077644 | 2 | 7  | 14 | CA   | 22 | 6  |
| 313009 | 66 | 1086498 | 1086527 | 2 | 15 | 30 | GT   | 6  | 6  |
| 313010 | 66 | 1086896 | 1086911 | 2 | 8  | 16 | GT   | 24 | 6  |
| 313019 | 66 | 1097250 | 1097267 | 2 | 9  | 18 | GA   | 22 | 4  |
| 313026 | 66 | 1107425 | 1107440 | 2 | 8  | 16 | AC   | 22 | 3  |
| 313027 | 66 | 1109759 | 1109780 | 2 | 11 | 22 | AC   | 17 | 8  |
| 313030 | 66 | 1112978 | 1112993 | 4 | 4  | 16 | TTTA | 16 | 6  |
| 313035 | 66 | 1114747 | 1114770 | 3 | 8  | 24 | ACA  | 13 | 3  |
| 313045 | 66 | 1132925 | 1132940 | 4 | 4  | 16 | AAAG | 21 | 4  |
| 313048 | 66 | 1136755 | 1136778 | 4 | 6  | 24 | ATCT | 7  | 4  |
| 313051 | 66 | 1140079 | 1140104 | 2 | 13 | 26 | TG   | 25 | 7  |
| 313058 | 66 | 1151981 | 1151996 | 2 | 8  | 16 | CA   | 18 | 5  |
| 313086 | 66 | 1190750 | 1190775 | 2 | 13 | 26 | CA   | 13 | 10 |
| 313090 | 66 | 1197742 | 1197777 | 2 | 18 | 36 | CA   | 9  | 11 |
| 313097 | 66 | 1217286 | 1217303 | 3 | 6  | 18 | CCA  | 24 | 3  |
| 313102 | 66 | 1224398 | 1224423 | 2 | 13 | 26 | AC   | 10 | 8  |
| 313104 | 66 | 1229368 | 1229379 | 2 | 6  | 12 | AT   | 16 | 5  |
| 313107 | 66 | 1234382 | 1234399 | 2 | 9  | 18 | CA   | 27 | 3  |
| 313114 | 66 | 1240434 | 1240451 | 3 | 6  | 18 | ACA  | 24 | 3  |
| 313118 | 66 | 1244283 | 1244316 | 2 | 17 | 34 | AC   | 22 | 12 |
| 313120 | 66 | 1245117 | 1245134 | 2 | 9  | 18 | TG   | 8  | 3  |
| 313121 | 66 | 1246307 | 1246340 | 2 | 17 | 34 | TG   | 9  | 9  |
| 313124 | 66 | 1253476 | 1253497 | 2 | 11 | 22 | CA   | 17 | 7  |
| 313127 | 66 | 1256091 | 1256110 | 2 | 10 | 20 | AC   | 20 | 3  |
| 313130 | 66 | 1259410 | 1259427 | 2 | 9  | 18 | CA   | 16 | 13 |
| 313144 | 66 | 1273889 | 1273904 | 2 | 8  | 16 | TC   | 15 | 4  |
| 313145 | 66 | 1273909 | 1273924 | 2 | 8  | 16 | TC   | 17 | 6  |
| 313146 | 66 | 1274111 | 1274140 | 2 | 15 | 30 | TG   | 22 | 11 |
| 313162 | 66 | 1293047 | 1293078 | 2 | 16 | 32 | GT   | 7  | 7  |
| 313177 | 66 | 1308837 | 1308857 | 3 | 7  | 21 | AGC  | 29 | 4  |
| 313179 | 66 | 1310958 | 1310972 | 3 | 5  | 15 | GGA  | 8  | 3  |
| 313182 | 66 | 1314712 | 1314727 | 2 | 8  | 16 | GA   | 30 | 5  |
| 313187 | 66 | 1318387 | 1318431 | 3 | 15 | 45 | GAA  | 9  | 9  |
| 313189 | 66 | 1329070 | 1329084 | 3 | 5  | 15 | AAT  | 18 | 3  |
| 313201 | 66 | 1340674 | 1340701 | 2 | 14 | 28 | TG   | 6  | 6  |
| 313207 | 66 | 1355194 | 1355207 | 2 | 7  | 14 | GT   | 23 | 3  |
| 313214 | 66 | 1363378 | 1363389 | 2 | 6  | 12 | TC   | 13 | 4  |
| 313245 | 66 | 1413289 | 1413300 | 2 | 6  | 12 | AT   | 20 | 4  |
| 313275 | 66 | 1449183 | 1449198 | 2 | 8  | 16 | TA   | 7  | 5  |
| 313283 | 66 | 1455227 | 1455248 | 2 | 11 | 22 | TG   | 10 | 7  |
| 313289 | 66 | 1463755 | 1463776 | 2 | 11 | 22 | GT   | 15 | 7  |
| 313298 | 66 | 1475969 | 1475988 | 4 | 5  | 20 | TAGC | 31 | 8  |
| 313304 | 66 | 1486463 | 1486480 | 3 | 6  | 18 | AGA  | 26 | 4  |

|        |    |         |         |   |    |    |      |    |    |
|--------|----|---------|---------|---|----|----|------|----|----|
| 313308 | 66 | 1487467 | 1487480 | 2 | 7  | 14 | TG   | 21 | 5  |
| 313312 | 66 | 1490281 | 1490302 | 2 | 11 | 22 | AC   | 16 | 5  |
| 313319 | 66 | 1499135 | 1499152 | 3 | 6  | 18 | GAG  | 20 | 6  |
| 313320 | 66 | 1501606 | 1501645 | 2 | 20 | 40 | CA   | 14 | 15 |
| 313322 | 66 | 1501825 | 1501856 | 2 | 16 | 32 | GT   | 12 | 7  |
| 313330 | 66 | 1511076 | 1511096 | 3 | 7  | 21 | CCT  | 14 | 7  |
| 313341 | 66 | 1542679 | 1542702 | 2 | 12 | 24 | GT   | 22 | 11 |
| 313342 | 66 | 1547399 | 1547414 | 4 | 4  | 16 | CTTT | 27 | 5  |
| 313344 | 66 | 1551546 | 1551561 | 2 | 8  | 16 | AC   | 26 | 3  |
| 313346 | 66 | 1555075 | 1555092 | 2 | 9  | 18 | TC   | 20 | 16 |
| 313348 | 66 | 1561830 | 1561849 | 2 | 10 | 20 | AC   | 13 | 10 |
| 313349 | 66 | 1562170 | 1562197 | 2 | 14 | 28 | CA   | 14 | 8  |
| 313351 | 66 | 1562694 | 1562719 | 2 | 13 | 26 | GT   | 8  | 7  |
| 313354 | 66 | 1572249 | 1572272 | 2 | 12 | 24 | GT   | 25 | 4  |
| 313355 | 66 | 1573237 | 1573250 | 2 | 7  | 14 | AC   | 19 | 3  |
| 313356 | 66 | 1573421 | 1573438 | 2 | 9  | 18 | CA   | 9  | 9  |
| 313367 | 66 | 1589466 | 1589489 | 2 | 12 | 24 | AC   | 13 | 12 |
| 313374 | 66 | 1596066 | 1596079 | 2 | 7  | 14 | TG   | 21 | 5  |
| 313378 | 66 | 1612823 | 1612836 | 2 | 7  | 14 | CT   | 19 | 7  |
| 313388 | 66 | 1623389 | 1623402 | 2 | 7  | 14 | CA   | 11 | 5  |
| 313395 | 66 | 1636919 | 1636966 | 2 | 24 | 48 | CA   | 8  | 8  |
| 313398 | 66 | 1637162 | 1637199 | 2 | 19 | 38 | GT   | 17 | 8  |
| 313408 | 66 | 1666901 | 1666920 | 2 | 10 | 20 | GT   | 16 | 14 |
| 313409 | 66 | 1669572 | 1669591 | 2 | 10 | 20 | GT   | 26 | 11 |
| 313410 | 66 | 1669698 | 1669729 | 2 | 16 | 32 | GT   | 17 | 14 |
| 313414 | 66 | 1674640 | 1674651 | 2 | 6  | 12 | AC   | 27 | 3  |
| 313424 | 66 | 1685482 | 1685495 | 2 | 7  | 14 | CA   | 28 | 7  |
| 313426 | 66 | 1687980 | 1688013 | 2 | 17 | 34 | TG   | 13 | 11 |
| 313428 | 66 | 1688553 | 1688574 | 2 | 11 | 22 | TG   | 17 | 8  |
| 313430 | 66 | 1689079 | 1689094 | 2 | 8  | 16 | GT   | 17 | 3  |
| 313435 | 66 | 1702776 | 1702796 | 3 | 7  | 21 | CTT  | 24 | 9  |
| 313439 | 66 | 1705615 | 1705636 | 2 | 11 | 22 | CA   | 16 | 13 |
| 313453 | 66 | 1714817 | 1714854 | 2 | 19 | 38 | TG   | 8  | 11 |
| 313458 | 66 | 1718572 | 1718585 | 2 | 7  | 14 | AC   | 14 | 3  |
| 313459 | 66 | 1720634 | 1720651 | 2 | 9  | 18 | CA   | 10 | 6  |
| 313461 | 66 | 1721079 | 1721100 | 2 | 11 | 22 | TG   | 17 | 11 |
| 313465 | 66 | 1726566 | 1726577 | 2 | 6  | 12 | AC   | 23 | 6  |
| 313466 | 66 | 1726701 | 1726714 | 2 | 7  | 14 | AC   | 21 | 9  |
| 313467 | 66 | 1727171 | 1727204 | 2 | 17 | 34 | AC   | 14 | 8  |
| 313473 | 66 | 1733206 | 1733235 | 2 | 15 | 30 | AC   | 16 | 7  |
| 313475 | 66 | 1742056 | 1742079 | 2 | 12 | 24 | TG   | 12 | 9  |
| 313476 | 66 | 1742221 | 1742234 | 2 | 7  | 14 | CA   | 19 | 10 |
| 313479 | 66 | 1746164 | 1746179 | 2 | 8  | 16 | GT   | 17 | 13 |
| 313481 | 66 | 1746539 | 1746550 | 2 | 6  | 12 | TG   | 11 | 4  |
| 313484 | 66 | 1750549 | 1750572 | 2 | 12 | 24 | CT   | 24 | 7  |
| 313486 | 66 | 1755770 | 1755787 | 2 | 9  | 18 | AC   | 20 | 11 |
| 313488 | 66 | 1760214 | 1760225 | 2 | 6  | 12 | AG   | 27 | 3  |
| 313489 | 66 | 1760506 | 1760533 | 4 | 7  | 28 | GTTG | 27 | 8  |
| 313494 | 66 | 1766352 | 1766375 | 2 | 12 | 24 | AC   | 12 | 5  |
| 313497 | 66 | 1769383 | 1769397 | 3 | 5  | 15 | AGA  | 18 | 3  |
| 313499 | 66 | 1770068 | 1770099 | 4 | 8  | 32 | TTAT | 10 | 8  |

|        |    |         |         |   |    |    |      |    |    |
|--------|----|---------|---------|---|----|----|------|----|----|
| 313500 | 66 | 1770505 | 1770518 | 2 | 7  | 14 | AT   | 9  | 5  |
| 313501 | 66 | 1770711 | 1770728 | 3 | 6  | 18 | CTT  | 16 | 8  |
| 313502 | 66 | 1772154 | 1772169 | 2 | 8  | 16 | CA   | 26 | 5  |
| 313504 | 66 | 1776151 | 1776162 | 2 | 6  | 12 | AC   | 31 | 6  |
| 313507 | 66 | 1778583 | 1778604 | 2 | 11 | 22 | CT   | 15 | 5  |
| 313509 | 66 | 1780920 | 1780949 | 2 | 15 | 30 | AC   | 17 | 9  |
| 313512 | 66 | 1786048 | 1786067 | 2 | 10 | 20 | TC   | 17 | 5  |
| 313514 | 66 | 1799201 | 1799222 | 2 | 11 | 22 | CA   | 17 | 18 |
| 313517 | 66 | 1800370 | 1800405 | 2 | 18 | 36 | TG   | 11 | 12 |
| 313521 | 66 | 1805799 | 1805814 | 4 | 4  | 16 | AAAT | 22 | 6  |
| 313522 | 66 | 1806183 | 1806203 | 3 | 7  | 21 | GGA  | 28 | 3  |
| 313524 | 66 | 1807465 | 1807478 | 2 | 7  | 14 | AC   | 21 | 5  |
| 313526 | 66 | 1812866 | 1812883 | 2 | 9  | 18 | AC   | 15 | 8  |
| 313528 | 66 | 1817136 | 1817147 | 2 | 6  | 12 | AC   | 23 | 3  |
| 313533 | 66 | 1820886 | 1820897 | 2 | 6  | 12 | GA   | 14 | 4  |
| 313534 | 66 | 1820899 | 1820914 | 2 | 8  | 16 | AG   | 14 | 6  |
| 313539 | 66 | 1827697 | 1827712 | 4 | 4  | 16 | AAAC | 26 | 6  |
| 313541 | 66 | 1828266 | 1828299 | 2 | 17 | 34 | AC   | 14 | 17 |
| 313548 | 66 | 1844562 | 1844577 | 2 | 8  | 16 | GA   | 26 | 4  |
| 313549 | 66 | 1849719 | 1849730 | 2 | 6  | 12 | TC   | 32 | 3  |
| 313551 | 66 | 1854493 | 1854510 | 2 | 9  | 18 | GT   | 20 | 6  |
| 313557 | 66 | 1881723 | 1881736 | 2 | 7  | 14 | TG   | 32 | 7  |
| 313567 | 66 | 1892968 | 1892983 | 4 | 4  | 16 | ATAA | 21 | 5  |
| 313571 | 66 | 1907278 | 1907297 | 4 | 5  | 20 | TTAT | 35 | 3  |
| 313578 | 66 | 1921063 | 1921076 | 2 | 7  | 14 | CA   | 14 | 11 |
| 313579 | 66 | 1921476 | 1921491 | 2 | 8  | 16 | AC   | 16 | 6  |
| 313582 | 66 | 1924886 | 1924899 | 2 | 7  | 14 | AT   | 21 | 4  |
| 313588 | 66 | 1934276 | 1934301 | 2 | 13 | 26 | GT   | 9  | 12 |
| 313592 | 66 | 1936421 | 1936446 | 2 | 13 | 26 | TG   | 11 | 12 |
| 313596 | 66 | 1943563 | 1943583 | 3 | 7  | 21 | CAT  | 27 | 7  |
| 313598 | 66 | 1948640 | 1948659 | 2 | 10 | 20 | CA   | 13 | 3  |
| 313599 | 66 | 1951180 | 1951197 | 3 | 6  | 18 | TCC  | 25 | 4  |
| 313603 | 66 | 1960900 | 1960915 | 2 | 8  | 16 | TG   | 26 | 4  |
| 313613 | 66 | 1969200 | 1969215 | 2 | 8  | 16 | AC   | 10 | 6  |
| 313618 | 66 | 1971757 | 1971768 | 2 | 6  | 12 | CA   | 17 | 3  |
| 313619 | 66 | 1971978 | 1972005 | 2 | 14 | 28 | GT   | 17 | 12 |
| 313620 | 66 | 1972400 | 1972423 | 2 | 12 | 24 | AC   | 22 | 8  |
| 313621 | 66 | 1972598 | 1972615 | 2 | 9  | 18 | AC   | 8  | 10 |
| 313623 | 66 | 1972792 | 1972819 | 2 | 14 | 28 | AC   | 14 | 7  |
| 313624 | 66 | 1974849 | 1974868 | 2 | 10 | 20 | TG   | 14 | 9  |
| 313626 | 66 | 1976859 | 1976876 | 2 | 9  | 18 | CA   | 26 | 3  |
| 313627 | 66 | 1977035 | 1977072 | 2 | 19 | 38 | CA   | 10 | 11 |
| 313630 | 66 | 1982342 | 1982365 | 2 | 12 | 24 | TG   | 17 | 5  |
| 313631 | 66 | 1983026 | 1983057 | 2 | 16 | 32 | AC   | 16 | 13 |
| 313645 | 66 | 2002923 | 2002938 | 2 | 8  | 16 | CA   | 16 | 8  |
| 313649 | 66 | 2011314 | 2011345 | 2 | 16 | 32 | AC   | 9  | 7  |
| 313651 | 66 | 2012213 | 2012240 | 4 | 7  | 28 | ACAA | 19 | 5  |
| 313657 | 66 | 2019911 | 2019932 | 2 | 11 | 22 | AG   | 13 | 5  |
| 313669 | 66 | 2048615 | 2048628 | 2 | 7  | 14 | CA   | 36 | 3  |
| 313674 | 66 | 2052877 | 2052891 | 3 | 5  | 15 | AGA  | 23 | 3  |
| 313678 | 66 | 2061051 | 2061064 | 2 | 7  | 14 | GT   | 22 | 3  |



|        |    |         |         |   |    |    |      |    |    |
|--------|----|---------|---------|---|----|----|------|----|----|
| 313680 | 66 | 2063132 | 2063155 | 2 | 12 | 24 | CA   | 17 | 7  |
| 313682 | 66 | 2073226 | 2073245 | 2 | 10 | 20 | CA   | 9  | 7  |
| 313683 | 66 | 2073478 | 2073489 | 2 | 6  | 12 | GT   | 23 | 4  |
| 313684 | 66 | 2073515 | 2073534 | 2 | 10 | 20 | TG   | 14 | 7  |
| 313688 | 66 | 2076623 | 2076634 | 2 | 6  | 12 | TG   | 11 | 9  |
| 313689 | 66 | 2077093 | 2077104 | 2 | 6  | 12 | GT   | 11 | 3  |
| 313696 | 66 | 2080889 | 2080902 | 2 | 7  | 14 | AC   | 20 | 3  |
| 313698 | 66 | 2081384 | 2081397 | 2 | 7  | 14 | AT   | 12 | 6  |
| 313699 | 66 | 2083320 | 2083341 | 2 | 11 | 22 | AC   | 14 | 6  |
| 313702 | 66 | 2085870 | 2085901 | 2 | 16 | 32 | CA   | 15 | 6  |
| 313706 | 66 | 2087522 | 2087533 | 2 | 6  | 12 | TC   | 18 | 3  |
| 313707 | 66 | 2087579 | 2087600 | 2 | 11 | 22 | TG   | 19 | 9  |
| 313708 | 66 | 2089171 | 2089184 | 2 | 7  | 14 | GT   | 15 | 6  |
| 313709 | 66 | 2089274 | 2089291 | 2 | 9  | 18 | AC   | 15 | 3  |
| 313710 | 66 | 2089357 | 2089380 | 2 | 12 | 24 | GT   | 26 | 6  |
| 313711 | 66 | 2090802 | 2090813 | 2 | 6  | 12 | GT   | 33 | 5  |
| 313712 | 66 | 2090814 | 2090827 | 2 | 7  | 14 | GA   | 30 | 5  |
| 313714 | 66 | 2094129 | 2094148 | 2 | 10 | 20 | TG   | 13 | 8  |
| 313717 | 66 | 2095682 | 2095703 | 2 | 11 | 22 | CA   | 21 | 7  |
| 313722 | 66 | 2097553 | 2097564 | 2 | 6  | 12 | AC   | 25 | 4  |
| 313723 | 66 | 2097757 | 2097768 | 2 | 6  | 12 | CA   | 28 | 4  |
| 313724 | 66 | 2098128 | 2098145 | 2 | 9  | 18 | GT   | 10 | 9  |
| 313725 | 66 | 2098337 | 2098354 | 2 | 9  | 18 | TG   | 14 | 10 |
| 313726 | 66 | 2098358 | 2098371 | 2 | 7  | 14 | GT   | 17 | 13 |
| 313727 | 66 | 2098537 | 2098600 | 2 | 32 | 64 | CA   | 10 | 13 |
| 313728 | 66 | 2098685 | 2098700 | 2 | 8  | 16 | GT   | 25 | 3  |
| 313729 | 66 | 2099749 | 2099780 | 2 | 16 | 32 | CA   | 15 | 9  |
| 313732 | 66 | 2101736 | 2101747 | 2 | 6  | 12 | AC   | 26 | 4  |
| 313733 | 66 | 2101872 | 2101897 | 2 | 13 | 26 | AC   | 17 | 8  |
| 313734 | 66 | 2102914 | 2102935 | 2 | 11 | 22 | GT   | 17 | 6  |
| 313736 | 66 | 2105220 | 2105245 | 2 | 13 | 26 | GT   | 12 | 10 |
| 313739 | 66 | 2116483 | 2116514 | 2 | 16 | 32 | TG   | 12 | 11 |
| 313740 | 66 | 2117010 | 2117043 | 2 | 17 | 34 | AC   | 7  | 7  |
| 313748 | 66 | 2123559 | 2123576 | 3 | 6  | 18 | TGA  | 26 | 9  |
| 313749 | 66 | 2123685 | 2123704 | 2 | 10 | 20 | CA   | 14 | 13 |
| 313750 | 66 | 2123848 | 2123867 | 2 | 10 | 20 | CA   | 24 | 10 |
| 313754 | 66 | 2125933 | 2125948 | 2 | 8  | 16 | AG   | 24 | 5  |
| 313755 | 66 | 2126069 | 2126102 | 2 | 17 | 34 | CA   | 14 | 11 |
| 313757 | 66 | 2126997 | 2127012 | 4 | 4  | 16 | CCCT | 18 | 4  |
| 313761 | 66 | 2128818 | 2128831 | 2 | 7  | 14 | TG   | 25 | 3  |
| 313764 | 66 | 2130523 | 2130534 | 2 | 6  | 12 | AC   | 19 | 4  |
| 313765 | 66 | 2131445 | 2131474 | 2 | 15 | 30 | AG   | 11 | 7  |
| 313766 | 66 | 2131882 | 2131899 | 2 | 9  | 18 | AC   | 21 | 6  |
| 313768 | 66 | 2133281 | 2133296 | 2 | 8  | 16 | AG   | 9  | 3  |
| 313769 | 66 | 2133421 | 2133444 | 3 | 8  | 24 | AAG  | 28 | 5  |
| 313774 | 66 | 2136611 | 2136646 | 2 | 18 | 36 | GT   | 10 | 11 |
| 313778 | 66 | 2141278 | 2141293 | 2 | 8  | 16 | CA   | 28 | 5  |
| 313781 | 66 | 2143267 | 2143282 | 2 | 8  | 16 | AC   | 26 | 8  |
| 313782 | 66 | 2143461 | 2143476 | 2 | 8  | 16 | AC   | 20 | 8  |
| 313784 | 66 | 2143702 | 2143715 | 2 | 7  | 14 | GA   | 8  | 3  |
| 313794 | 66 | 2150706 | 2150725 | 4 | 5  | 20 | GGAG | 8  | 3  |

|        |    |         |         |   |    |    |      |    |    |
|--------|----|---------|---------|---|----|----|------|----|----|
| 313795 | 66 | 2151281 | 2151292 | 2 | 6  | 12 | TC   | 30 | 3  |
| 313796 | 66 | 2152411 | 2152464 | 2 | 27 | 54 | TG   | 6  | 7  |
| 313799 | 66 | 2157679 | 2157693 | 3 | 5  | 15 | ATA  | 21 | 3  |
| 313800 | 66 | 2159586 | 2159623 | 2 | 19 | 38 | TG   | 9  | 7  |
| 313801 | 66 | 2159854 | 2159871 | 2 | 9  | 18 | AC   | 19 | 4  |
| 313803 | 66 | 2161514 | 2161533 | 2 | 10 | 20 | GT   | 13 | 5  |
| 313805 | 66 | 2161724 | 2161755 | 2 | 16 | 32 | TG   | 13 | 12 |
| 313806 | 66 | 2161879 | 2161914 | 2 | 18 | 36 | AC   | 10 | 9  |
| 313807 | 66 | 2162025 | 2162042 | 2 | 9  | 18 | GT   | 11 | 10 |
| 313808 | 66 | 2162279 | 2162296 | 2 | 9  | 18 | AC   | 12 | 11 |
| 313821 | 66 | 2184139 | 2184160 | 2 | 11 | 22 | CA   | 9  | 7  |
| 313822 | 66 | 2186407 | 2186421 | 3 | 5  | 15 | CGG  | 28 | 8  |
| 313830 | 66 | 2192319 | 2192330 | 2 | 6  | 12 | TG   | 20 | 5  |
| 313831 | 66 | 2192353 | 2192372 | 2 | 10 | 20 | CA   | 18 | 10 |
| 313832 | 66 | 2192419 | 2192439 | 3 | 7  | 21 | GCT  | 19 | 4  |
| 313835 | 66 | 2195243 | 2195260 | 2 | 9  | 18 | AC   | 17 | 3  |
| 313839 | 66 | 2200654 | 2200665 | 2 | 6  | 12 | TG   | 16 | 3  |
| 313841 | 66 | 2209073 | 2209090 | 2 | 9  | 18 | AC   | 11 | 10 |
| 313843 | 66 | 2211011 | 2211026 | 2 | 8  | 16 | TG   | 29 | 7  |
| 313851 | 66 | 2233843 | 2233854 | 2 | 6  | 12 | TG   | 11 | 5  |
| 313859 | 66 | 2256002 | 2256013 | 2 | 6  | 12 | CA   | 20 | 3  |
| 313860 | 66 | 2256145 | 2256166 | 2 | 11 | 22 | CT   | 15 | 8  |
| 313864 | 66 | 2263339 | 2263402 | 4 | 16 | 64 | GATA | 18 | 16 |
| 313865 | 66 | 2263729 | 2263761 | 3 | 11 | 33 | GCT  | 15 | 13 |
| 313873 | 66 | 2270353 | 2270378 | 2 | 13 | 26 | TG   | 18 | 7  |
| 313883 | 66 | 2279568 | 2279595 | 4 | 7  | 28 | GATG | 19 | 14 |
| 313888 | 66 | 2289356 | 2289375 | 2 | 10 | 20 | CA   | 23 | 8  |
| 313889 | 66 | 2293152 | 2293169 | 2 | 9  | 18 | GT   | 20 | 7  |
| 313891 | 66 | 2306569 | 2306580 | 2 | 6  | 12 | TG   | 31 | 7  |
| 313892 | 66 | 2306583 | 2306594 | 2 | 6  | 12 | TG   | 28 | 6  |
| 313893 | 66 | 2312665 | 2312679 | 3 | 5  | 15 | CAA  | 25 | 4  |
| 313894 | 66 | 2316286 | 2316301 | 2 | 8  | 16 | CA   | 23 | 9  |
| 313897 | 66 | 2321584 | 2321595 | 2 | 6  | 12 | AC   | 29 | 3  |
| 313900 | 66 | 2327317 | 2327344 | 2 | 14 | 28 | AC   | 17 | 9  |
| 313902 | 66 | 2332618 | 2332633 | 2 | 8  | 16 | CA   | 23 | 5  |
| 313907 | 66 | 2341738 | 2341763 | 2 | 13 | 26 | AC   | 6  | 8  |
| 313913 | 66 | 2357266 | 2357315 | 2 | 25 | 50 | TG   | 6  | 9  |
| 313917 | 66 | 2361293 | 2361308 | 2 | 8  | 16 | AC   | 15 | 3  |
| 313918 | 66 | 2361438 | 2361451 | 2 | 7  | 14 | GT   | 25 | 3  |
| 313919 | 66 | 2361826 | 2361858 | 3 | 11 | 33 | AAG  | 21 | 6  |
| 313925 | 66 | 2369393 | 2369404 | 2 | 6  | 12 | TG   | 27 | 6  |
| 313927 | 66 | 2372867 | 2372896 | 2 | 15 | 30 | TG   | 16 | 13 |
| 313929 | 66 | 2377839 | 2377862 | 3 | 8  | 24 | AGC  | 25 | 7  |
| 313939 | 66 | 2399809 | 2399826 | 2 | 9  | 18 | AC   | 26 | 5  |
| 313941 | 66 | 2400676 | 2400687 | 2 | 6  | 12 | CA   | 22 | 9  |
| 313942 | 66 | 2400785 | 2400804 | 4 | 5  | 20 | ACAA | 26 | 3  |
| 313948 | 66 | 2414017 | 2414056 | 2 | 20 | 40 | AC   | 18 | 17 |
| 313957 | 66 | 2432277 | 2432291 | 3 | 5  | 15 | ACA  | 22 | 3  |
| 313961 | 66 | 2441981 | 2442004 | 2 | 12 | 24 | TG   | 12 | 7  |
| 313964 | 66 | 2449105 | 2449124 | 2 | 10 | 20 | TG   | 22 | 6  |
| 313971 | 66 | 2453888 | 2453917 | 2 | 15 | 30 | GT   | 19 | 12 |

|        |    |         |         |   |    |    |      |    |    |
|--------|----|---------|---------|---|----|----|------|----|----|
| 313972 | 66 | 2455515 | 2455542 | 4 | 7  | 28 | TCTA | 16 | 5  |
| 313973 | 66 | 2455874 | 2455887 | 2 | 7  | 14 | AC   | 30 | 5  |
| 313978 | 66 | 2460336 | 2460367 | 2 | 16 | 32 | CA   | 16 | 9  |
| 313980 | 66 | 2461545 | 2461556 | 2 | 6  | 12 | CA   | 30 | 3  |
| 313983 | 66 | 2466700 | 2466731 | 2 | 16 | 32 | AC   | 12 | 9  |
| 313984 | 66 | 2469970 | 2469983 | 2 | 7  | 14 | GA   | 27 | 3  |
| 313986 | 66 | 2474129 | 2474152 | 2 | 12 | 24 | CA   | 12 | 8  |
| 313987 | 66 | 2476507 | 2476521 | 3 | 5  | 15 | TGA  | 25 | 5  |
| 313988 | 66 | 2481986 | 2482001 | 2 | 8  | 16 | TG   | 22 | 10 |
| 313992 | 66 | 2486267 | 2486296 | 2 | 15 | 30 | AC   | 9  | 7  |
| 313998 | 66 | 2491859 | 2491886 | 2 | 14 | 28 | AC   | 25 | 7  |
| 314002 | 66 | 2497481 | 2497514 | 2 | 17 | 34 | AC   | 15 | 11 |
| 314003 | 66 | 2500730 | 2500745 | 4 | 4  | 16 | CTCC | 17 | 3  |
| 314015 | 66 | 2521508 | 2521535 | 2 | 14 | 28 | AC   | 8  | 9  |
| 314016 | 66 | 2521976 | 2521993 | 2 | 9  | 18 | TG   | 21 | 11 |
| 314018 | 66 | 2522113 | 2522136 | 2 | 12 | 24 | TG   | 8  | 5  |
| 314024 | 66 | 2529355 | 2529378 | 3 | 8  | 24 | TCC  | 14 | 4  |
| 314036 | 66 | 2535688 | 2535707 | 4 | 5  | 20 | TTTG | 29 | 3  |
| 314037 | 66 | 2542125 | 2542144 | 4 | 5  | 20 | AATA | 25 | 5  |
| 314039 | 66 | 2545654 | 2545669 | 2 | 8  | 16 | CA   | 19 | 5  |
| 314042 | 66 | 2550630 | 2550651 | 2 | 11 | 22 | TG   | 14 | 9  |
| 314043 | 66 | 2553173 | 2553184 | 2 | 6  | 12 | CA   | 31 | 3  |
| 314047 | 66 | 2564642 | 2564653 | 2 | 6  | 12 | GT   | 26 | 3  |
| 314054 | 66 | 2568829 | 2568856 | 2 | 14 | 28 | AC   | 14 | 12 |
| 314059 | 66 | 2571850 | 2571869 | 2 | 10 | 20 | CA   | 15 | 5  |
| 314060 | 66 | 2572775 | 2572808 | 2 | 17 | 34 | GT   | 11 | 14 |
| 314067 | 66 | 2581457 | 2581472 | 4 | 4  | 16 | TTTG | 6  | 5  |
| 314068 | 66 | 2587237 | 2587252 | 4 | 4  | 16 | TCTG | 27 | 4  |
| 314082 | 66 | 2613430 | 2613459 | 2 | 15 | 30 | TG   | 17 | 7  |
| 314083 | 66 | 2614919 | 2614944 | 2 | 13 | 26 | AC   | 12 | 7  |
| 314089 | 67 | 10714   | 10733   | 4 | 5  | 20 | TTTA | 21 | 8  |
| 314096 | 67 | 24773   | 24792   | 4 | 5  | 20 | CTAA | 22 | 3  |
| 314098 | 67 | 28371   | 28388   | 2 | 9  | 18 | AC   | 20 | 9  |
| 314106 | 67 | 41816   | 41831   | 2 | 8  | 16 | AC   | 13 | 6  |
| 314109 | 67 | 46836   | 46847   | 2 | 6  | 12 | GT   | 20 | 8  |
| 314121 | 67 | 66725   | 66744   | 2 | 10 | 20 | AC   | 21 | 14 |
| 314122 | 67 | 66746   | 66757   | 2 | 6  | 12 | CA   | 21 | 11 |
| 314123 | 67 | 67780   | 67793   | 2 | 7  | 14 | AC   | 15 | 3  |
| 314126 | 67 | 71046   | 71059   | 2 | 7  | 14 | TG   | 13 | 3  |
| 314140 | 67 | 92706   | 92717   | 2 | 6  | 12 | CA   | 32 | 7  |
| 314145 | 67 | 107796  | 107817  | 2 | 11 | 22 | AC   | 15 | 7  |
| 314150 | 67 | 117351  | 117384  | 2 | 17 | 34 | GT   | 10 | 9  |
| 314152 | 67 | 122523  | 122540  | 2 | 9  | 18 | GT   | 17 | 6  |
| 314153 | 67 | 125026  | 125085  | 4 | 15 | 60 | ATCA | 28 | 17 |
| 314163 | 67 | 136826  | 136839  | 2 | 7  | 14 | AT   | 13 | 3  |
| 314165 | 67 | 137990  | 138015  | 2 | 13 | 26 | CT   | 7  | 7  |
| 314166 | 67 | 138269  | 138290  | 2 | 11 | 22 | AC   | 23 | 6  |
| 314167 | 67 | 140444  | 140457  | 2 | 7  | 14 | AC   | 22 | 4  |
| 314168 | 67 | 142490  | 142541  | 2 | 26 | 52 | CA   | 14 | 15 |
| 314169 | 67 | 142759  | 142782  | 2 | 12 | 24 | TG   | 23 | 8  |
| 314170 | 67 | 142980  | 142993  | 2 | 7  | 14 | GT   | 26 | 6  |

|        |    |        |        |   |    |    |      |    |    |
|--------|----|--------|--------|---|----|----|------|----|----|
| 314173 | 67 | 152701 | 152732 | 4 | 8  | 32 | GTAT | 16 | 3  |
| 314176 | 67 | 160649 | 160660 | 2 | 6  | 12 | AC   | 20 | 5  |
| 314178 | 67 | 164459 | 164476 | 2 | 9  | 18 | TG   | 25 | 8  |
| 314179 | 67 | 164589 | 164602 | 2 | 7  | 14 | TG   | 27 | 3  |
| 314180 | 67 | 164762 | 164779 | 2 | 9  | 18 | AC   | 18 | 10 |
| 314184 | 67 | 170974 | 170985 | 2 | 6  | 12 | AC   | 25 | 3  |
| 314185 | 67 | 173279 | 173298 | 2 | 10 | 20 | TC   | 7  | 3  |
| 314187 | 67 | 180965 | 180986 | 2 | 11 | 22 | TG   | 16 | 13 |
| 314190 | 67 | 182182 | 182215 | 2 | 17 | 34 | AC   | 17 | 6  |
| 314192 | 67 | 182321 | 182336 | 2 | 8  | 16 | TG   | 17 | 6  |
| 314195 | 67 | 182486 | 182511 | 2 | 13 | 26 | CA   | 9  | 5  |
| 314196 | 67 | 182547 | 182576 | 2 | 15 | 30 | AC   | 7  | 8  |
| 314197 | 67 | 182686 | 182703 | 2 | 9  | 18 | CA   | 24 | 3  |
| 314198 | 67 | 185181 | 185196 | 2 | 8  | 16 | TG   | 21 | 3  |
| 314199 | 67 | 185320 | 185345 | 2 | 13 | 26 | TG   | 17 | 7  |
| 314204 | 67 | 190188 | 190223 | 2 | 18 | 36 | AC   | 7  | 5  |
| 314206 | 67 | 194798 | 194827 | 2 | 15 | 30 | TG   | 14 | 9  |
| 314209 | 67 | 201518 | 201537 | 2 | 10 | 20 | AC   | 21 | 8  |
| 314211 | 67 | 206344 | 206361 | 2 | 9  | 18 | AC   | 11 | 6  |
| 314212 | 67 | 206547 | 206564 | 2 | 9  | 18 | AC   | 22 | 7  |
| 314213 | 67 | 208480 | 208495 | 2 | 8  | 16 | TG   | 31 | 6  |
| 314214 | 67 | 211706 | 211743 | 2 | 19 | 38 | TG   | 12 | 7  |
| 314215 | 67 | 215204 | 215215 | 2 | 6  | 12 | CA   | 33 | 4  |
| 314218 | 67 | 221396 | 221417 | 2 | 11 | 22 | GT   | 21 | 5  |
| 314233 | 67 | 236753 | 236780 | 2 | 14 | 28 | TG   | 11 | 7  |
| 314235 | 67 | 237166 | 237199 | 2 | 17 | 34 | AC   | 8  | 7  |
| 314236 | 67 | 237270 | 237281 | 2 | 6  | 12 | AC   | 28 | 3  |
| 314237 | 67 | 237435 | 237452 | 2 | 9  | 18 | GT   | 25 | 3  |
| 314241 | 67 | 245274 | 245307 | 2 | 17 | 34 | CA   | 7  | 7  |
| 314244 | 67 | 246117 | 246140 | 2 | 12 | 24 | AC   | 10 | 10 |
| 314245 | 67 | 247949 | 247960 | 2 | 6  | 12 | GT   | 22 | 6  |
| 314247 | 67 | 250226 | 250241 | 2 | 8  | 16 | CA   | 25 | 4  |
| 314248 | 67 | 250243 | 250256 | 2 | 7  | 14 | AC   | 27 | 5  |
| 314249 | 67 | 254976 | 254993 | 2 | 9  | 18 | GT   | 13 | 6  |
| 314251 | 67 | 255186 | 255215 | 2 | 15 | 30 | CA   | 6  | 11 |
| 314252 | 67 | 257402 | 257423 | 2 | 11 | 22 | CT   | 19 | 4  |
| 314253 | 67 | 257514 | 257539 | 2 | 13 | 26 | CA   | 15 | 4  |
| 314257 | 67 | 258181 | 258208 | 2 | 14 | 28 | AC   | 21 | 10 |
| 314260 | 67 | 261229 | 261286 | 2 | 29 | 58 | GT   | 7  | 9  |
| 314265 | 67 | 263015 | 263036 | 2 | 11 | 22 | GT   | 10 | 8  |
| 314266 | 67 | 263721 | 263744 | 2 | 12 | 24 | TG   | 12 | 9  |
| 314267 | 67 | 264043 | 264056 | 2 | 7  | 14 | GT   | 22 | 6  |
| 314270 | 67 | 264888 | 264919 | 2 | 16 | 32 | AC   | 11 | 10 |
| 314271 | 67 | 265919 | 265938 | 2 | 10 | 20 | CT   | 19 | 8  |
| 314273 | 67 | 268728 | 268739 | 2 | 6  | 12 | GT   | 20 | 5  |
| 314274 | 67 | 268741 | 268752 | 2 | 6  | 12 | TG   | 16 | 3  |
| 314275 | 67 | 268949 | 268996 | 2 | 24 | 48 | GT   | 6  | 8  |
| 314277 | 67 | 273068 | 273091 | 3 | 8  | 24 | CCG  | 31 | 9  |
| 314279 | 67 | 273383 | 273402 | 2 | 10 | 20 | GT   | 20 | 4  |
| 314280 | 67 | 273512 | 273535 | 2 | 12 | 24 | CA   | 17 | 10 |
| 314281 | 67 | 274325 | 274352 | 2 | 14 | 28 | AC   | 14 | 9  |

|        |    |        |        |   |    |    |      |    |    |
|--------|----|--------|--------|---|----|----|------|----|----|
| 314284 | 67 | 276869 | 276902 | 2 | 17 | 34 | GT   | 13 | 6  |
| 314285 | 67 | 277023 | 277044 | 2 | 11 | 22 | CA   | 8  | 10 |
| 314286 | 67 | 277083 | 277112 | 2 | 15 | 30 | AC   | 11 | 7  |
| 314287 | 67 | 280791 | 280830 | 2 | 20 | 40 | TG   | 6  | 8  |
| 314290 | 67 | 282734 | 282755 | 2 | 11 | 22 | AC   | 23 | 8  |
| 314291 | 67 | 284788 | 284805 | 3 | 6  | 18 | TGC  | 33 | 4  |
| 314293 | 67 | 285803 | 285834 | 2 | 16 | 32 | GT   | 18 | 14 |
| 314294 | 67 | 285965 | 285992 | 2 | 14 | 28 | AC   | 6  | 9  |
| 314295 | 67 | 286649 | 286684 | 2 | 18 | 36 | TG   | 9  | 10 |
| 314296 | 67 | 288353 | 288370 | 2 | 9  | 18 | TC   | 19 | 4  |
| 314298 | 67 | 291590 | 291615 | 2 | 13 | 26 | CA   | 14 | 13 |
| 314299 | 67 | 292916 | 292927 | 2 | 6  | 12 | AG   | 33 | 3  |
| 314302 | 67 | 295148 | 295177 | 2 | 15 | 30 | GT   | 17 | 8  |
| 314304 | 67 | 315106 | 315129 | 2 | 12 | 24 | CA   | 12 | 19 |
| 314311 | 67 | 333060 | 333079 | 2 | 10 | 20 | CA   | 24 | 4  |
| 314313 | 67 | 336706 | 336717 | 2 | 6  | 12 | GT   | 35 | 3  |
| 314321 | 67 | 352200 | 352215 | 4 | 4  | 16 | GAGC | 15 | 4  |
| 314324 | 67 | 352993 | 353025 | 3 | 11 | 33 | GAT  | 19 | 6  |
| 314325 | 67 | 353602 | 353633 | 2 | 16 | 32 | TG   | 11 | 15 |
| 314327 | 67 | 355353 | 355378 | 2 | 13 | 26 | GT   | 18 | 6  |
| 314329 | 67 | 355549 | 355568 | 2 | 10 | 20 | TG   | 20 | 12 |
| 314330 | 67 | 356801 | 356836 | 4 | 9  | 36 | AAGA | 19 | 11 |
| 314335 | 67 | 363234 | 363253 | 2 | 10 | 20 | GA   | 7  | 3  |
| 314336 | 67 | 363504 | 363515 | 2 | 6  | 12 | GA   | 18 | 4  |
| 314337 | 67 | 363517 | 363534 | 2 | 9  | 18 | AG   | 15 | 3  |
| 314341 | 67 | 366968 | 366985 | 3 | 6  | 18 | AGC  | 24 | 3  |
| 314342 | 67 | 367790 | 367805 | 2 | 8  | 16 | GT   | 25 | 9  |
| 314351 | 67 | 372755 | 372790 | 2 | 18 | 36 | AG   | 8  | 8  |
| 314352 | 67 | 374723 | 374748 | 2 | 13 | 26 | AC   | 20 | 10 |
| 314353 | 67 | 375181 | 375210 | 3 | 10 | 30 | TTG  | 18 | 7  |
| 314354 | 67 | 375249 | 375278 | 2 | 15 | 30 | CA   | 14 | 8  |
| 314355 | 67 | 375470 | 375507 | 2 | 19 | 38 | CA   | 10 | 10 |
| 314356 | 67 | 376912 | 376937 | 2 | 13 | 26 | CA   | 6  | 8  |
| 314357 | 67 | 378057 | 378078 | 2 | 11 | 22 | CA   | 8  | 4  |
| 314358 | 67 | 378480 | 378523 | 2 | 22 | 44 | AC   | 7  | 11 |
| 314371 | 67 | 396606 | 396627 | 2 | 11 | 22 | CA   | 22 | 7  |
| 314376 | 67 | 402035 | 402054 | 2 | 10 | 20 | TG   | 23 | 8  |
| 314378 | 67 | 409073 | 409086 | 2 | 7  | 14 | GT   | 31 | 4  |
| 314382 | 67 | 417190 | 417209 | 2 | 10 | 20 | GT   | 6  | 10 |
| 314384 | 67 | 420225 | 420240 | 2 | 8  | 16 | AC   | 23 | 5  |
| 314389 | 67 | 431422 | 431443 | 2 | 11 | 22 | TG   | 18 | 3  |
| 314390 | 67 | 431598 | 431629 | 2 | 16 | 32 | CA   | 19 | 12 |
| 314400 | 67 | 447269 | 447292 | 4 | 6  | 24 | TGGA | 21 | 3  |
| 314406 | 67 | 455337 | 455380 | 2 | 22 | 44 | TG   | 8  | 10 |
| 314408 | 67 | 459899 | 459914 | 2 | 8  | 16 | TG   | 23 | 5  |
| 314414 | 67 | 462864 | 462883 | 4 | 5  | 20 | CTGT | 30 | 3  |
| 314415 | 67 | 463289 | 463308 | 2 | 10 | 20 | TG   | 19 | 6  |
| 314416 | 67 | 464844 | 464857 | 2 | 7  | 14 | CA   | 24 | 15 |
| 314418 | 67 | 466274 | 466291 | 2 | 9  | 18 | TG   | 27 | 4  |
| 314419 | 67 | 466429 | 466448 | 2 | 10 | 20 | CA   | 10 | 5  |
| 314420 | 67 | 467422 | 467447 | 2 | 13 | 26 | TG   | 16 | 4  |

|        |    |        |        |   |    |    |     |    |    |
|--------|----|--------|--------|---|----|----|-----|----|----|
| 314431 | 67 | 494401 | 494422 | 2 | 11 | 22 | GT  | 26 | 8  |
| 314437 | 67 | 501191 | 501202 | 2 | 6  | 12 | AT  | 18 | 3  |
| 314438 | 67 | 503727 | 503748 | 2 | 11 | 22 | AC  | 21 | 6  |
| 314440 | 67 | 508227 | 508248 | 2 | 11 | 22 | AC  | 12 | 5  |
| 314448 | 67 | 529701 | 529726 | 2 | 13 | 26 | AC  | 14 | 12 |
| 314454 | 67 | 540730 | 540749 | 2 | 10 | 20 | AC  | 19 | 7  |
| 314456 | 67 | 544408 | 544421 | 2 | 7  | 14 | GT  | 19 | 9  |
| 314457 | 67 | 549402 | 549415 | 2 | 7  | 14 | CA  | 24 | 5  |
| 314458 | 67 | 549576 | 549591 | 2 | 8  | 16 | CA  | 19 | 3  |
| 314460 | 67 | 552954 | 552975 | 2 | 11 | 22 | AC  | 20 | 8  |
| 314461 | 67 | 555994 | 556005 | 2 | 6  | 12 | AC  | 32 | 4  |
| 314463 | 67 | 556655 | 556670 | 2 | 8  | 16 | CA  | 20 | 9  |
| 314464 | 67 | 558708 | 558721 | 2 | 7  | 14 | CA  | 24 | 5  |
| 314465 | 67 | 559037 | 559062 | 2 | 13 | 26 | TC  | 7  | 3  |
| 314466 | 67 | 562941 | 562954 | 2 | 7  | 14 | GT  | 18 | 9  |
| 314471 | 67 | 564320 | 564331 | 2 | 6  | 12 | GT  | 14 | 6  |
| 314475 | 67 | 569302 | 569323 | 2 | 11 | 22 | GT  | 17 | 6  |
| 314476 | 67 | 572233 | 572246 | 2 | 7  | 14 | AC  | 16 | 6  |
| 314477 | 67 | 572375 | 572394 | 2 | 10 | 20 | TC  | 14 | 10 |
| 314478 | 67 | 572395 | 572412 | 2 | 9  | 18 | AC  | 19 | 12 |
| 314479 | 67 | 572686 | 572703 | 2 | 9  | 18 | TG  | 25 | 9  |
| 314480 | 67 | 572816 | 572837 | 2 | 11 | 22 | GT  | 21 | 7  |
| 314481 | 67 | 575494 | 575507 | 2 | 7  | 14 | TG  | 24 | 9  |
| 314483 | 67 | 575973 | 575984 | 2 | 6  | 12 | CA  | 33 | 3  |
| 314485 | 67 | 579045 | 579068 | 2 | 12 | 24 | TG  | 6  | 7  |
| 314492 | 67 | 582107 | 582118 | 2 | 6  | 12 | AG  | 7  | 6  |
| 314493 | 67 | 582246 | 582263 | 2 | 9  | 18 | AG  | 17 | 11 |
| 314495 | 67 | 582677 | 582700 | 2 | 12 | 24 | CA  | 21 | 12 |
| 314496 | 67 | 583884 | 583923 | 2 | 20 | 40 | TG  | 20 | 6  |
| 314498 | 67 | 585711 | 585731 | 3 | 7  | 21 | CTC | 32 | 4  |
| 314499 | 67 | 586141 | 586167 | 3 | 9  | 27 | CCT | 10 | 3  |
| 314501 | 67 | 587579 | 587594 | 2 | 8  | 16 | AC  | 20 | 5  |
| 314502 | 67 | 587785 | 587802 | 2 | 9  | 18 | AC  | 15 | 5  |
| 314503 | 67 | 588063 | 588086 | 3 | 8  | 24 | AGG | 8  | 5  |
| 314506 | 67 | 588307 | 588340 | 2 | 17 | 34 | GT  | 13 | 9  |
| 314507 | 67 | 588422 | 588437 | 2 | 8  | 16 | TG  | 22 | 10 |
| 314510 | 67 | 589530 | 589555 | 2 | 13 | 26 | GA  | 19 | 6  |
| 314515 | 67 | 590519 | 590540 | 2 | 11 | 22 | AC  | 19 | 6  |
| 314519 | 67 | 598096 | 598119 | 2 | 12 | 24 | GT  | 14 | 10 |
| 314520 | 67 | 598273 | 598308 | 2 | 18 | 36 | CA  | 22 | 13 |
| 314521 | 67 | 598405 | 598422 | 2 | 9  | 18 | TG  | 21 | 10 |
| 314523 | 67 | 598763 | 598774 | 2 | 6  | 12 | AC  | 31 | 4  |
| 314525 | 67 | 599256 | 599287 | 2 | 16 | 32 | CA  | 11 | 6  |
| 314527 | 67 | 603994 | 604007 | 2 | 7  | 14 | CA  | 25 | 4  |
| 314528 | 67 | 604213 | 604230 | 3 | 6  | 18 | GAG | 13 | 7  |
| 314529 | 67 | 604320 | 604337 | 2 | 9  | 18 | TG  | 27 | 3  |
| 314530 | 67 | 604686 | 604709 | 2 | 12 | 24 | GT  | 11 | 3  |
| 314531 | 67 | 604761 | 604780 | 2 | 10 | 20 | GT  | 18 | 4  |
| 314533 | 67 | 607278 | 607321 | 2 | 22 | 44 | TG  | 11 | 7  |
| 314534 | 67 | 607434 | 607449 | 2 | 8  | 16 | CA  | 14 | 6  |
| 314535 | 67 | 607452 | 607469 | 2 | 9  | 18 | CA  | 15 | 6  |

|        |    |        |        |   |    |    |      |    |    |
|--------|----|--------|--------|---|----|----|------|----|----|
| 314536 | 67 | 607623 | 607636 | 2 | 7  | 14 | CA   | 26 | 5  |
| 314542 | 67 | 617923 | 617942 | 2 | 10 | 20 | AC   | 19 | 5  |
| 314548 | 67 | 636653 | 636684 | 2 | 16 | 32 | CA   | 9  | 11 |
| 314553 | 67 | 650090 | 650165 | 4 | 19 | 76 | ATAG | 18 | 12 |
| 314555 | 67 | 657833 | 657868 | 2 | 18 | 36 | AC   | 17 | 10 |
| 314563 | 67 | 665111 | 665124 | 2 | 7  | 14 | GT   | 21 | 5  |
| 314564 | 67 | 665361 | 665390 | 2 | 15 | 30 | CA   | 16 | 8  |
| 314566 | 67 | 675873 | 675892 | 2 | 10 | 20 | GT   | 20 | 8  |
| 314569 | 67 | 689211 | 689224 | 2 | 7  | 14 | GT   | 16 | 10 |
| 314570 | 67 | 689227 | 689240 | 2 | 7  | 14 | GT   | 20 | 13 |
| 314590 | 67 | 734141 | 734184 | 2 | 22 | 44 | AC   | 6  | 7  |
| 314595 | 67 | 749632 | 749665 | 2 | 17 | 34 | AC   | 12 | 8  |
| 314598 | 67 | 750613 | 750628 | 2 | 8  | 16 | TG   | 7  | 8  |
| 314599 | 67 | 750630 | 750647 | 2 | 9  | 18 | GT   | 12 | 10 |
| 314601 | 67 | 753482 | 753508 | 3 | 9  | 27 | TTA  | 25 | 3  |
| 314611 | 67 | 783095 | 783144 | 2 | 25 | 50 | GT   | 17 | 17 |
| 314617 | 67 | 800079 | 800105 | 3 | 9  | 27 | ACA  | 24 | 6  |
| 314621 | 67 | 805754 | 805773 | 2 | 10 | 20 | CA   | 26 | 6  |
| 314626 | 67 | 816447 | 816464 | 3 | 6  | 18 | TTA  | 7  | 3  |
| 314629 | 67 | 833020 | 833039 | 4 | 5  | 20 | ATCC | 27 | 8  |
| 314631 | 67 | 834112 | 834141 | 2 | 15 | 30 | TC   | 15 | 9  |
| 314638 | 67 | 839277 | 839294 | 3 | 6  | 18 | TTG  | 19 | 4  |
| 314639 | 67 | 840300 | 840341 | 2 | 21 | 42 | TG   | 10 | 9  |
| 314640 | 67 | 840472 | 840485 | 2 | 7  | 14 | TG   | 22 | 3  |
| 314641 | 67 | 840503 | 840514 | 2 | 6  | 12 | TG   | 17 | 3  |
| 314642 | 67 | 840644 | 840683 | 2 | 20 | 40 | AC   | 13 | 15 |
| 314643 | 67 | 840790 | 840804 | 3 | 5  | 15 | GAG  | 17 | 4  |
| 314644 | 67 | 840806 | 840823 | 3 | 6  | 18 | AGG  | 20 | 3  |
| 314645 | 67 | 842979 | 843000 | 2 | 11 | 22 | GT   | 9  | 7  |
| 314650 | 67 | 849787 | 849812 | 2 | 13 | 26 | CA   | 17 | 9  |
| 314651 | 67 | 851558 | 851571 | 2 | 7  | 14 | TA   | 11 | 4  |
| 314658 | 67 | 861553 | 861592 | 2 | 20 | 40 | TG   | 11 | 10 |
| 314663 | 67 | 876359 | 876386 | 2 | 14 | 28 | GT   | 11 | 8  |
| 314664 | 67 | 876469 | 876490 | 2 | 11 | 22 | TG   | 20 | 6  |
| 314665 | 67 | 879297 | 879332 | 2 | 18 | 36 | GT   | 14 | 6  |
| 314669 | 67 | 896748 | 896767 | 2 | 10 | 20 | GT   | 10 | 6  |
| 314671 | 67 | 897153 | 897174 | 2 | 11 | 22 | TG   | 11 | 9  |
| 314673 | 67 | 897439 | 897456 | 3 | 6  | 18 | CTC  | 22 | 3  |
| 314677 | 67 | 897937 | 897954 | 2 | 9  | 18 | AC   | 15 | 8  |
| 314678 | 67 | 899359 | 899388 | 2 | 15 | 30 | AC   | 11 | 14 |
| 314679 | 67 | 904244 | 904263 | 4 | 5  | 20 | AGAT | 26 | 5  |
| 314680 | 67 | 909534 | 909561 | 2 | 14 | 28 | TG   | 14 | 5  |
| 314681 | 67 | 918938 | 918951 | 2 | 7  | 14 | AC   | 20 | 5  |
| 314683 | 67 | 923607 | 923628 | 2 | 11 | 22 | AC   | 26 | 9  |
| 314684 | 67 | 923751 | 923768 | 2 | 9  | 18 | TG   | 23 | 5  |
| 314685 | 67 | 924027 | 924038 | 2 | 6  | 12 | CA   | 26 | 8  |
| 314686 | 67 | 928403 | 928424 | 2 | 11 | 22 | TG   | 24 | 7  |
| 314687 | 67 | 930604 | 930631 | 2 | 14 | 28 | AC   | 21 | 7  |
| 314690 | 67 | 931523 | 931562 | 4 | 10 | 40 | ATCT | 25 | 13 |
| 314692 | 67 | 936548 | 936577 | 2 | 15 | 30 | CA   | 20 | 17 |
| 314694 | 67 | 943018 | 943041 | 2 | 12 | 24 | CA   | 10 | 5  |

|        |    |         |         |   |    |    |      |    |    |
|--------|----|---------|---------|---|----|----|------|----|----|
| 314695 | 67 | 943158  | 943197  | 2 | 20 | 40 | AC   | 12 | 10 |
| 314696 | 67 | 943375  | 943402  | 2 | 14 | 28 | TG   | 19 | 7  |
| 314702 | 67 | 946309  | 946324  | 2 | 8  | 16 | TG   | 24 | 4  |
| 314704 | 67 | 946493  | 946522  | 2 | 15 | 30 | AC   | 20 | 8  |
| 314705 | 67 | 946948  | 946963  | 2 | 8  | 16 | TG   | 18 | 6  |
| 314707 | 67 | 947327  | 947348  | 2 | 11 | 22 | GT   | 17 | 4  |
| 314710 | 67 | 947595  | 947616  | 2 | 11 | 22 | TG   | 22 | 11 |
| 314711 | 67 | 947803  | 947822  | 2 | 10 | 20 | GT   | 27 | 7  |
| 314712 | 67 | 947984  | 947997  | 2 | 7  | 14 | TG   | 20 | 4  |
| 314713 | 67 | 949714  | 949743  | 2 | 15 | 30 | AC   | 25 | 12 |
| 314715 | 67 | 950220  | 950231  | 2 | 6  | 12 | AG   | 17 | 5  |
| 314717 | 67 | 952360  | 952379  | 2 | 10 | 20 | CA   | 9  | 10 |
| 314719 | 67 | 953830  | 953861  | 2 | 16 | 32 | AG   | 12 | 10 |
| 314721 | 67 | 955671  | 955694  | 2 | 12 | 24 | CA   | 9  | 11 |
| 314723 | 67 | 957597  | 957624  | 2 | 14 | 28 | CA   | 13 | 7  |
| 314725 | 67 | 961952  | 961975  | 2 | 12 | 24 | TG   | 11 | 7  |
| 314728 | 67 | 964411  | 964448  | 2 | 19 | 38 | CA   | 6  | 7  |
| 314731 | 67 | 967600  | 967623  | 2 | 12 | 24 | GT   | 7  | 8  |
| 314732 | 67 | 967857  | 967882  | 2 | 13 | 26 | TG   | 10 | 8  |
| 314734 | 67 | 968389  | 968416  | 2 | 14 | 28 | GT   | 11 | 11 |
| 314738 | 67 | 972023  | 972060  | 2 | 19 | 38 | CA   | 9  | 8  |
| 314739 | 67 | 973437  | 973470  | 2 | 17 | 34 | TG   | 12 | 9  |
| 314741 | 67 | 977653  | 977682  | 2 | 15 | 30 | AC   | 18 | 12 |
| 314748 | 67 | 980596  | 980613  | 2 | 9  | 18 | TG   | 19 | 5  |
| 314751 | 67 | 983932  | 983955  | 2 | 12 | 24 | AC   | 14 | 6  |
| 314753 | 67 | 984135  | 984158  | 2 | 12 | 24 | AC   | 15 | 12 |
| 314754 | 67 | 987362  | 987395  | 2 | 17 | 34 | TG   | 18 | 8  |
| 314758 | 67 | 991198  | 991213  | 2 | 8  | 16 | GT   | 18 | 4  |
| 314760 | 67 | 996237  | 996256  | 4 | 5  | 20 | TCTT | 15 | 6  |
| 314761 | 67 | 996257  | 996270  | 2 | 7  | 14 | TC   | 15 | 7  |
| 314763 | 67 | 1001036 | 1001073 | 2 | 19 | 38 | AC   | 7  | 7  |
| 314764 | 67 | 1001547 | 1001574 | 4 | 7  | 28 | TCAA | 19 | 4  |
| 314770 | 67 | 1008509 | 1008536 | 2 | 14 | 28 | TG   | 16 | 8  |
| 314772 | 67 | 1009090 | 1009103 | 2 | 7  | 14 | AG   | 18 | 8  |
| 314773 | 67 | 1009212 | 1009249 | 2 | 19 | 38 | TG   | 6  | 7  |
| 314774 | 67 | 1009427 | 1009446 | 2 | 10 | 20 | TG   | 20 | 9  |
| 314775 | 67 | 1009491 | 1009516 | 2 | 13 | 26 | GT   | 7  | 10 |
| 314778 | 67 | 1012109 | 1012132 | 3 | 8  | 24 | GAG  | 17 | 5  |
| 314779 | 67 | 1012444 | 1012461 | 2 | 9  | 18 | CA   | 14 | 5  |
| 314780 | 67 | 1012581 | 1012622 | 2 | 21 | 42 | AC   | 6  | 8  |
| 314785 | 67 | 1019459 | 1019473 | 3 | 5  | 15 | TTG  | 20 | 3  |
| 314794 | 67 | 1024845 | 1024876 | 4 | 8  | 32 | TTTG | 15 | 5  |
| 314796 | 67 | 1029230 | 1029243 | 2 | 7  | 14 | AC   | 31 | 3  |
| 314799 | 67 | 1031321 | 1031342 | 2 | 11 | 22 | TG   | 16 | 8  |
| 314801 | 67 | 1031632 | 1031657 | 2 | 13 | 26 | TG   | 15 | 10 |
| 314803 | 67 | 1034903 | 1034922 | 4 | 5  | 20 | GTTG | 24 | 7  |
| 314807 | 67 | 1050861 | 1050892 | 2 | 16 | 32 | GT   | 7  | 8  |
| 314810 | 67 | 1056454 | 1056481 | 2 | 14 | 28 | CA   | 14 | 12 |
| 314813 | 67 | 1059796 | 1059821 | 2 | 13 | 26 | CA   | 10 | 10 |
| 314819 | 67 | 1078575 | 1078600 | 2 | 13 | 26 | TG   | 16 | 10 |
| 314821 | 67 | 1082139 | 1082159 | 3 | 7  | 21 | CTG  | 25 | 6  |



|        |    |         |         |   |    |    |      |    |    |
|--------|----|---------|---------|---|----|----|------|----|----|
| 314825 | 67 | 1084678 | 1084725 | 3 | 16 | 48 | CAT  | 18 | 8  |
| 314833 | 67 | 1089330 | 1089349 | 2 | 10 | 20 | CA   | 16 | 9  |
| 314834 | 67 | 1090584 | 1090597 | 2 | 7  | 14 | GT   | 29 | 5  |
| 314838 | 67 | 1094490 | 1094505 | 2 | 8  | 16 | TG   | 26 | 7  |
| 314839 | 67 | 1094593 | 1094612 | 2 | 10 | 20 | AC   | 30 | 4  |
| 314841 | 67 | 1094751 | 1094802 | 2 | 26 | 52 | GT   | 8  | 8  |
| 314848 | 67 | 1101409 | 1101420 | 2 | 6  | 12 | AC   | 20 | 3  |
| 314853 | 67 | 1121769 | 1121798 | 2 | 15 | 30 | CA   | 27 | 14 |
| 314854 | 67 | 1122212 | 1122235 | 2 | 12 | 24 | GT   | 25 | 11 |
| 314858 | 67 | 1124607 | 1124622 | 2 | 8  | 16 | GA   | 21 | 4  |
| 314860 | 67 | 1124734 | 1124763 | 2 | 15 | 30 | AG   | 8  | 5  |
| 314862 | 67 | 1125505 | 1125519 | 3 | 5  | 15 | CCA  | 16 | 4  |
| 314872 | 67 | 1150569 | 1150588 | 4 | 5  | 20 | AATC | 23 | 3  |
| 314892 | 67 | 1180177 | 1180210 | 2 | 17 | 34 | CA   | 9  | 11 |
| 314893 | 67 | 1180508 | 1180541 | 2 | 17 | 34 | CA   | 14 | 15 |
| 314894 | 67 | 1181407 | 1181436 | 2 | 15 | 30 | GT   | 15 | 12 |
| 314896 | 67 | 1185105 | 1185125 | 3 | 7  | 21 | TTA  | 13 | 3  |
| 314900 | 67 | 1214798 | 1214813 | 4 | 4  | 16 | TTTG | 22 | 3  |
| 314902 | 67 | 1229180 | 1229191 | 2 | 6  | 12 | CA   | 28 | 3  |
| 314903 | 67 | 1234393 | 1234406 | 2 | 7  | 14 | TG   | 29 | 6  |
| 314908 | 67 | 1249648 | 1249665 | 3 | 6  | 18 | ATA  | 17 | 3  |
| 314914 | 67 | 1272938 | 1272957 | 4 | 5  | 20 | TATT | 6  | 8  |
| 314925 | 67 | 1301358 | 1301387 | 2 | 15 | 30 | CA   | 14 | 9  |
| 314931 | 67 | 1323513 | 1323538 | 2 | 13 | 26 | TC   | 22 | 6  |
| 314932 | 67 | 1339357 | 1339368 | 2 | 6  | 12 | CA   | 32 | 5  |
| 314936 | 67 | 1350411 | 1350422 | 2 | 6  | 12 | TA   | 8  | 7  |
| 314937 | 67 | 1350639 | 1350672 | 2 | 17 | 34 | CA   | 13 | 9  |
| 314942 | 67 | 1360976 | 1360995 | 2 | 10 | 20 | CA   | 22 | 13 |
| 314948 | 67 | 1379272 | 1379307 | 3 | 12 | 36 | ACA  | 22 | 6  |
| 314950 | 67 | 1380753 | 1380768 | 2 | 8  | 16 | GT   | 17 | 4  |
| 314955 | 67 | 1387533 | 1387556 | 4 | 6  | 24 | TATC | 18 | 9  |
| 314959 | 67 | 1401133 | 1401150 | 2 | 9  | 18 | TG   | 23 | 12 |
| 314960 | 67 | 1402703 | 1402724 | 2 | 11 | 22 | GT   | 15 | 14 |
| 314963 | 67 | 1404947 | 1404968 | 2 | 11 | 22 | CA   | 18 | 11 |
| 314964 | 67 | 1408384 | 1408398 | 3 | 5  | 15 | GCT  | 18 | 11 |
| 314965 | 67 | 1410234 | 1410249 | 4 | 4  | 16 | AAAT | 12 | 3  |
| 314975 | 67 | 1432150 | 1432165 | 2 | 8  | 16 | TG   | 20 | 7  |
| 314978 | 67 | 1450954 | 1450991 | 2 | 19 | 38 | AC   | 8  | 10 |
| 314980 | 67 | 1459923 | 1459949 | 3 | 9  | 27 | CTG  | 35 | 16 |
| 314986 | 67 | 1474628 | 1474645 | 2 | 9  | 18 | CA   | 19 | 11 |
| 314990 | 67 | 1485570 | 1485583 | 2 | 7  | 14 | TG   | 26 | 8  |
| 314994 | 67 | 1508679 | 1508696 | 2 | 9  | 18 | TA   | 8  | 3  |
| 314997 | 67 | 1515171 | 1515197 | 3 | 9  | 27 | ATC  | 28 | 6  |
| 315002 | 67 | 1525810 | 1525827 | 2 | 9  | 18 | TA   | 6  | 4  |
| 315014 | 67 | 1544514 | 1544553 | 2 | 20 | 40 | TG   | 11 | 10 |
| 315022 | 67 | 1581416 | 1581439 | 2 | 12 | 24 | AC   | 16 | 13 |
| 315024 | 67 | 1596794 | 1596809 | 2 | 8  | 16 | TG   | 7  | 5  |
| 315030 | 67 | 1616821 | 1616836 | 4 | 4  | 16 | TTTC | 6  | 8  |
| 315033 | 67 | 1630640 | 1630651 | 2 | 6  | 12 | AG   | 25 | 4  |
| 315035 | 67 | 1636466 | 1636489 | 2 | 12 | 24 | CT   | 10 | 6  |
| 315037 | 67 | 1650169 | 1650194 | 2 | 13 | 26 | CA   | 13 | 5  |

|        |    |         |         |   |    |    |      |    |    |
|--------|----|---------|---------|---|----|----|------|----|----|
| 315038 | 67 | 1650866 | 1650879 | 2 | 7  | 14 | TA   | 15 | 3  |
| 315039 | 67 | 1656061 | 1656072 | 2 | 6  | 12 | CA   | 18 | 3  |
| 315041 | 67 | 1657230 | 1657259 | 2 | 15 | 30 | GT   | 8  | 7  |
| 315043 | 67 | 1659787 | 1659814 | 2 | 14 | 28 | AC   | 13 | 4  |
| 315044 | 67 | 1667274 | 1667291 | 2 | 9  | 18 | CA   | 23 | 5  |
| 315045 | 67 | 1667501 | 1667514 | 2 | 7  | 14 | CA   | 21 | 3  |
| 315046 | 67 | 1673433 | 1673464 | 2 | 16 | 32 | TG   | 11 | 6  |
| 315047 | 67 | 1676547 | 1676562 | 2 | 8  | 16 | TG   | 23 | 6  |
| 315052 | 67 | 1694206 | 1694231 | 2 | 13 | 26 | GT   | 18 | 5  |
| 315054 | 67 | 1702055 | 1702076 | 2 | 11 | 22 | AC   | 15 | 5  |
| 315057 | 67 | 1704241 | 1704256 | 4 | 4  | 16 | CAAA | 26 | 3  |
| 315058 | 67 | 1708637 | 1708676 | 4 | 10 | 40 | TTCT | 22 | 4  |
| 315060 | 67 | 1714815 | 1714826 | 2 | 6  | 12 | CA   | 26 | 3  |
| 315074 | 67 | 1769964 | 1770007 | 2 | 22 | 44 | CA   | 10 | 9  |
| 315078 | 67 | 1785241 | 1785254 | 2 | 7  | 14 | GA   | 28 | 5  |
| 315091 | 67 | 1799559 | 1799576 | 2 | 9  | 18 | AC   | 6  | 4  |
| 315096 | 67 | 1806551 | 1806566 | 2 | 8  | 16 | AG   | 13 | 3  |
| 315106 | 67 | 1821575 | 1821596 | 2 | 11 | 22 | AC   | 17 | 7  |
| 315112 | 67 | 1839383 | 1839402 | 2 | 10 | 20 | GT   | 8  | 9  |
| 315121 | 67 | 1851702 | 1851716 | 3 | 5  | 15 | ATG  | 31 | 5  |
| 315122 | 67 | 1853377 | 1853427 | 3 | 17 | 51 | ATG  | 24 | 9  |
| 315123 | 67 | 1855233 | 1855252 | 2 | 10 | 20 | CA   | 15 | 10 |
| 315137 | 67 | 1904210 | 1904221 | 2 | 6  | 12 | CA   | 20 | 4  |
| 315144 | 67 | 1922728 | 1922753 | 2 | 13 | 26 | AC   | 12 | 10 |
| 315151 | 67 | 1942811 | 1942850 | 2 | 20 | 40 | AC   | 8  | 10 |
| 315172 | 67 | 1998039 | 1998058 | 4 | 5  | 20 | ATAC | 19 | 5  |
| 315174 | 67 | 2004367 | 2004378 | 2 | 6  | 12 | AT   | 19 | 7  |
| 315181 | 67 | 2049014 | 2049027 | 2 | 7  | 14 | CA   | 9  | 9  |
| 315182 | 67 | 2049038 | 2049049 | 2 | 6  | 12 | CA   | 9  | 5  |
| 315184 | 67 | 2061395 | 2061408 | 2 | 7  | 14 | AC   | 13 | 3  |
| 315189 | 67 | 2081577 | 2081596 | 4 | 5  | 20 | TTTA | 24 | 3  |
| 315190 | 67 | 2082800 | 2082817 | 3 | 6  | 18 | ACA  | 17 | 5  |
| 315207 | 67 | 2122358 | 2122381 | 2 | 12 | 24 | CA   | 14 | 13 |
| 315210 | 67 | 2130765 | 2130796 | 4 | 8  | 32 | TTAT | 31 | 7  |
| 315227 | 67 | 2186806 | 2186847 | 2 | 21 | 42 | TG   | 12 | 11 |
| 315228 | 67 | 2190903 | 2190930 | 4 | 7  | 28 | GATT | 28 | 7  |
| 315230 | 67 | 2195690 | 2195703 | 2 | 7  | 14 | AC   | 27 | 4  |
| 315238 | 67 | 2216315 | 2216342 | 4 | 7  | 28 | CAAT | 20 | 4  |
| 315243 | 67 | 2222213 | 2222236 | 2 | 12 | 24 | GT   | 11 | 7  |
| 315246 | 67 | 2232103 | 2232114 | 2 | 6  | 12 | AT   | 34 | 3  |
| 315247 | 67 | 2235650 | 2235687 | 2 | 19 | 38 | TG   | 8  | 7  |
| 315248 | 67 | 2235972 | 2235987 | 4 | 4  | 16 | CTGC | 29 | 3  |
| 315254 | 67 | 2254569 | 2254592 | 3 | 8  | 24 | TTG  | 22 | 6  |
| 315262 | 67 | 2284929 | 2284948 | 4 | 5  | 20 | AAAT | 17 | 5  |
| 315272 | 67 | 2317808 | 2317821 | 2 | 7  | 14 | CA   | 30 | 5  |
| 315280 | 67 | 2336749 | 2336800 | 4 | 13 | 52 | AAGA | 7  | 7  |
| 315282 | 67 | 2343822 | 2343833 | 2 | 6  | 12 | CA   | 19 | 3  |
| 315290 | 67 | 2381836 | 2381853 | 2 | 9  | 18 | GT   | 20 | 5  |
| 315292 | 67 | 2385467 | 2385480 | 2 | 7  | 14 | TA   | 17 | 6  |
| 315293 | 67 | 2385481 | 2385498 | 2 | 9  | 18 | TG   | 13 | 5  |
| 315298 | 67 | 2396553 | 2396572 | 2 | 10 | 20 | TC   | 17 | 8  |

|        |    |         |         |   |    |    |      |    |    |
|--------|----|---------|---------|---|----|----|------|----|----|
| 315306 | 67 | 2418818 | 2418833 | 2 | 8  | 16 | TA   | 9  | 6  |
| 315307 | 67 | 2419367 | 2419388 | 2 | 11 | 22 | AG   | 17 | 7  |
| 315310 | 67 | 2420048 | 2420077 | 2 | 15 | 30 | GT   | 11 | 5  |
| 315315 | 67 | 2442876 | 2442907 | 4 | 8  | 32 | TAGA | 24 | 5  |
| 315321 | 67 | 2457756 | 2457771 | 2 | 8  | 16 | CA   | 26 | 3  |
| 315323 | 67 | 2466639 | 2466664 | 2 | 13 | 26 | CA   | 13 | 4  |
| 315327 | 67 | 2471205 | 2471234 | 2 | 15 | 30 | TA   | 7  | 8  |
| 315336 | 67 | 2489485 | 2489516 | 2 | 16 | 32 | CT   | 13 | 7  |
| 315339 | 67 | 2497481 | 2497510 | 2 | 15 | 30 | CA   | 11 | 10 |
| 315341 | 67 | 2506461 | 2506496 | 2 | 18 | 36 | CA   | 7  | 8  |
| 315342 | 67 | 2506691 | 2506720 | 2 | 15 | 30 | AC   | 12 | 9  |
| 315345 | 67 | 2515192 | 2515205 | 2 | 7  | 14 | CA   | 13 | 4  |
| 315348 | 67 | 2530258 | 2530273 | 4 | 4  | 16 | CATC | 25 | 4  |
| 315349 | 67 | 2538782 | 2538795 | 2 | 7  | 14 | TA   | 17 | 6  |
| 315350 | 67 | 2551660 | 2551691 | 4 | 8  | 32 | TATG | 15 | 5  |
| 315356 | 67 | 2599678 | 2599691 | 2 | 7  | 14 | CT   | 11 | 7  |
| 315357 | 67 | 2599692 | 2599709 | 2 | 9  | 18 | AT   | 10 | 7  |
| 315362 | 67 | 2607623 | 2607649 | 3 | 9  | 27 | ATC  | 11 | 3  |
| 315375 | 67 | 2640182 | 2640219 | 2 | 19 | 38 | CA   | 15 | 9  |
| 315394 | 67 | 2701890 | 2701905 | 2 | 8  | 16 | CT   | 10 | 3  |
| 315395 | 67 | 2704250 | 2704265 | 4 | 4  | 16 | TTAT | 15 | 3  |
| 315397 | 67 | 2709624 | 2709643 | 2 | 10 | 20 | AT   | 10 | 4  |
| 315399 | 67 | 2715155 | 2715170 | 2 | 8  | 16 | AC   | 22 | 3  |
| 315414 | 67 | 2752261 | 2752281 | 3 | 7  | 21 | AAT  | 16 | 8  |
| 315417 | 67 | 2762290 | 2762319 | 2 | 15 | 30 | TG   | 12 | 12 |
| 315418 | 67 | 2763281 | 2763294 | 2 | 7  | 14 | TG   | 18 | 3  |
| 315419 | 67 | 2763380 | 2763393 | 2 | 7  | 14 | CT   | 15 | 5  |
| 315427 | 67 | 2769363 | 2769390 | 2 | 14 | 28 | TG   | 14 | 9  |
| 315445 | 67 | 2829128 | 2829142 | 3 | 5  | 15 | GAG  | 12 | 3  |
| 315454 | 67 | 2865867 | 2865886 | 4 | 5  | 20 | TACA | 7  | 5  |
| 315455 | 67 | 2867843 | 2867860 | 2 | 9  | 18 | CA   | 18 | 4  |
| 315461 | 67 | 2894436 | 2894471 | 2 | 18 | 36 | AC   | 16 | 11 |
| 315479 | 67 | 2934542 | 2934559 | 3 | 6  | 18 | AAC  | 21 | 3  |
| 315484 | 67 | 2936758 | 2936789 | 2 | 16 | 32 | TG   | 18 | 9  |
| 315485 | 67 | 2944190 | 2944241 | 2 | 26 | 52 | TG   | 8  | 7  |
| 315526 | 67 | 3001624 | 3001647 | 4 | 6  | 24 | ATCC | 22 | 9  |
| 315527 | 67 | 3003356 | 3003371 | 4 | 4  | 16 | TGAG | 13 | 3  |
| 315530 | 67 | 3014478 | 3014489 | 2 | 6  | 12 | AC   | 20 | 6  |
| 315532 | 67 | 3017385 | 3017412 | 2 | 14 | 28 | TG   | 14 | 5  |
| 315537 | 67 | 3023375 | 3023418 | 2 | 22 | 44 | AC   | 10 | 10 |
| 315538 | 67 | 3024517 | 3024536 | 2 | 10 | 20 | TG   | 19 | 5  |
| 315539 | 67 | 3025083 | 3025114 | 2 | 16 | 32 | CA   | 13 | 6  |
| 315540 | 67 | 3027967 | 3028004 | 2 | 19 | 38 | GT   | 7  | 10 |
| 315542 | 67 | 3033444 | 3033461 | 3 | 6  | 18 | CAG  | 18 | 5  |
| 315548 | 67 | 3066230 | 3066255 | 2 | 13 | 26 | AC   | 16 | 6  |
| 315553 | 67 | 3081045 | 3081062 | 3 | 6  | 18 | ATT  | 17 | 4  |
| 315561 | 67 | 3088269 | 3088280 | 2 | 6  | 12 | CA   | 6  | 4  |
| 315567 | 67 | 3095301 | 3095352 | 4 | 13 | 52 | CAAT | 19 | 10 |
| 315569 | 67 | 3102387 | 3102402 | 2 | 8  | 16 | GT   | 30 | 7  |
| 315574 | 67 | 3108379 | 3108398 | 4 | 5  | 20 | GTCA | 22 | 18 |
| 315589 | 67 | 3127798 | 3127827 | 2 | 15 | 30 | GT   | 7  | 8  |

|        |    |         |         |   |    |    |      |    |    |
|--------|----|---------|---------|---|----|----|------|----|----|
| 315592 | 67 | 3133431 | 3133444 | 2 | 7  | 14 | TA   | 13 | 3  |
| 315601 | 67 | 3138561 | 3138576 | 2 | 8  | 16 | GT   | 15 | 3  |
| 315602 | 67 | 3138660 | 3138675 | 2 | 8  | 16 | AC   | 7  | 3  |
| 315606 | 67 | 3144066 | 3144097 | 2 | 16 | 32 | AC   | 14 | 3  |
| 315607 | 67 | 3144538 | 3144555 | 2 | 9  | 18 | CA   | 8  | 6  |
| 315624 | 67 | 3168723 | 3168746 | 2 | 12 | 24 | TG   | 18 | 4  |
| 315646 | 67 | 3253661 | 3253680 | 2 | 10 | 20 | GT   | 20 | 5  |
| 315657 | 67 | 3293755 | 3293768 | 2 | 7  | 14 | TC   | 29 | 4  |
| 315668 | 67 | 3323884 | 3323895 | 2 | 6  | 12 | AC   | 23 | 7  |
| 315669 | 67 | 3330203 | 3330250 | 4 | 12 | 48 | AGAC | 20 | 7  |
| 315670 | 67 | 3332037 | 3332058 | 2 | 11 | 22 | AC   | 22 | 10 |
| 315686 | 67 | 3382929 | 3382948 | 2 | 10 | 20 | AC   | 18 | 6  |
| 315692 | 67 | 3395482 | 3395505 | 4 | 6  | 24 | TGGT | 18 | 3  |
| 315694 | 67 | 3400273 | 3400296 | 2 | 12 | 24 | AC   | 9  | 8  |
| 315695 | 67 | 3401114 | 3401133 | 4 | 5  | 20 | CCAT | 16 | 3  |
| 315697 | 67 | 3409586 | 3409609 | 2 | 12 | 24 | GT   | 10 | 7  |
| 315706 | 67 | 3436392 | 3436409 | 2 | 9  | 18 | CT   | 17 | 4  |
| 315709 | 67 | 3438013 | 3438038 | 2 | 13 | 26 | CA   | 18 | 6  |
| 315731 | 67 | 3497456 | 3497469 | 2 | 7  | 14 | CA   | 23 | 3  |
| 315734 | 67 | 3508388 | 3508399 | 2 | 6  | 12 | GT   | 24 | 4  |
| 315755 | 67 | 3557248 | 3557263 | 4 | 4  | 16 | TGTC | 30 | 5  |
| 315756 | 67 | 3557328 | 3557339 | 2 | 6  | 12 | TG   | 21 | 3  |
| 315757 | 67 | 3557343 | 3557356 | 2 | 7  | 14 | GT   | 21 | 3  |
| 315770 | 67 | 3583285 | 3583298 | 2 | 7  | 14 | AT   | 11 | 3  |
| 315776 | 67 | 3606497 | 3606511 | 3 | 5  | 15 | GGC  | 14 | 6  |
| 315787 | 67 | 3622848 | 3622873 | 2 | 13 | 26 | GT   | 12 | 5  |
| 315797 | 67 | 3655109 | 3655120 | 2 | 6  | 12 | CA   | 28 | 4  |
| 315801 | 67 | 3660948 | 3660979 | 4 | 8  | 32 | TGGA | 23 | 7  |
| 315804 | 67 | 3681546 | 3681579 | 2 | 17 | 34 | AC   | 21 | 10 |
| 315811 | 67 | 3704599 | 3704620 | 2 | 11 | 22 | AC   | 20 | 5  |
| 315818 | 67 | 3714457 | 3714500 | 4 | 11 | 44 | TATC | 16 | 8  |
| 315820 | 67 | 3716314 | 3716333 | 4 | 5  | 20 | AAAT | 26 | 6  |
| 315822 | 67 | 3719914 | 3719941 | 4 | 7  | 28 | GATG | 22 | 4  |
| 315824 | 67 | 3720300 | 3720331 | 2 | 16 | 32 | CA   | 10 | 9  |
| 315829 | 67 | 3720555 | 3720566 | 2 | 6  | 12 | CA   | 27 | 3  |
| 315833 | 67 | 3725435 | 3725454 | 2 | 10 | 20 | CA   | 18 | 4  |
| 315841 | 67 | 3759734 | 3759749 | 4 | 4  | 16 | TTTA | 24 | 3  |
| 315854 | 67 | 3787580 | 3787606 | 3 | 9  | 27 | TAG  | 17 | 7  |
| 315857 | 67 | 3817675 | 3817690 | 4 | 4  | 16 | AAAT | 13 | 4  |
| 315863 | 67 | 3839767 | 3839796 | 2 | 15 | 30 | CA   | 23 | 9  |
| 315864 | 67 | 3840937 | 3840952 | 2 | 8  | 16 | AC   | 23 | 8  |
| 315865 | 67 | 3846737 | 3846758 | 2 | 11 | 22 | AC   | 13 | 6  |
| 315871 | 67 | 3881178 | 3881201 | 2 | 12 | 24 | AC   | 16 | 6  |
| 315878 | 67 | 3888649 | 3888663 | 3 | 5  | 15 | ATC  | 28 | 4  |
| 315880 | 67 | 3894200 | 3894217 | 2 | 9  | 18 | AC   | 16 | 6  |
| 315886 | 67 | 3909413 | 3909430 | 2 | 9  | 18 | GT   | 23 | 4  |
| 315891 | 67 | 3927054 | 3927073 | 2 | 10 | 20 | CA   | 17 | 4  |
| 315893 | 67 | 3931478 | 3931503 | 2 | 13 | 26 | GT   | 17 | 4  |
| 315899 | 67 | 3946093 | 3946118 | 2 | 13 | 26 | GT   | 22 | 7  |
| 315902 | 67 | 3951543 | 3951586 | 2 | 22 | 44 | AC   | 8  | 11 |
| 315907 | 67 | 3956848 | 3956859 | 2 | 6  | 12 | GT   | 13 | 11 |

|        |    |         |         |   |    |    |      |    |    |
|--------|----|---------|---------|---|----|----|------|----|----|
| 315908 | 67 | 3956959 | 3956970 | 2 | 6  | 12 | CA   | 23 | 5  |
| 315911 | 67 | 3957858 | 3957883 | 2 | 13 | 26 | AC   | 15 | 6  |
| 315913 | 67 | 3958247 | 3958266 | 2 | 10 | 20 | CA   | 16 | 4  |
| 315916 | 67 | 3968361 | 3968412 | 2 | 26 | 52 | TG   | 9  | 11 |
| 315928 | 67 | 4003016 | 4003031 | 2 | 8  | 16 | TG   | 19 | 4  |
| 315942 | 67 | 4023761 | 4023776 | 2 | 8  | 16 | TC   | 15 | 3  |
| 315944 | 67 | 4024206 | 4024231 | 2 | 13 | 26 | TG   | 13 | 7  |
| 315945 | 67 | 4025082 | 4025107 | 2 | 13 | 26 | GT   | 12 | 6  |
| 315957 | 67 | 4041410 | 4041427 | 2 | 9  | 18 | GT   | 14 | 10 |
| 315958 | 67 | 4041565 | 4041584 | 2 | 10 | 20 | GT   | 14 | 5  |
| 315959 | 67 | 4044148 | 4044161 | 2 | 7  | 14 | TG   | 13 | 3  |
| 315960 | 67 | 4048987 | 4049010 | 2 | 12 | 24 | AC   | 24 | 6  |
| 315976 | 67 | 4078453 | 4078466 | 2 | 7  | 14 | TA   | 14 | 7  |
| 315982 | 67 | 4089749 | 4089762 | 2 | 7  | 14 | CT   | 13 | 5  |
| 315983 | 67 | 4089763 | 4089776 | 2 | 7  | 14 | CA   | 13 | 3  |
| 315998 | 67 | 4114011 | 4114028 | 2 | 9  | 18 | AC   | 19 | 8  |
| 315999 | 67 | 4114185 | 4114218 | 2 | 17 | 34 | AC   | 6  | 8  |
| 316000 | 67 | 4118792 | 4118827 | 4 | 9  | 36 | TTGA | 21 | 8  |
| 316003 | 67 | 4122859 | 4122886 | 2 | 14 | 28 | CA   | 14 | 5  |
| 316005 | 67 | 4125087 | 4125110 | 2 | 12 | 24 | AC   | 20 | 8  |
| 316006 | 67 | 4126834 | 4126861 | 2 | 14 | 28 | TG   | 19 | 8  |
| 316023 | 67 | 4145769 | 4145788 | 2 | 10 | 20 | GT   | 21 | 6  |
| 316024 | 67 | 4146630 | 4146679 | 2 | 25 | 50 | GT   | 7  | 10 |
| 316027 | 67 | 4154387 | 4154401 | 3 | 5  | 15 | TCT  | 29 | 5  |
| 316044 | 67 | 4174308 | 4174334 | 3 | 9  | 27 | GAG  | 21 | 4  |
| 316051 | 67 | 4188725 | 4188736 | 2 | 6  | 12 | AC   | 28 | 4  |
| 316052 | 67 | 4189499 | 4189542 | 4 | 11 | 44 | ATAG | 7  | 5  |
| 316053 | 67 | 4194553 | 4194608 | 4 | 14 | 56 | AGAT | 15 | 12 |
| 316059 | 67 | 4201234 | 4201253 | 4 | 5  | 20 | TTTA | 9  | 4  |
| 316067 | 67 | 4221087 | 4221107 | 3 | 7  | 21 | TTG  | 18 | 4  |
| 316070 | 67 | 4233994 | 4234027 | 2 | 17 | 34 | AC   | 6  | 6  |
| 316075 | 67 | 4242895 | 4242918 | 2 | 12 | 24 | CA   | 14 | 8  |
| 316076 | 67 | 4243201 | 4243224 | 2 | 12 | 24 | GT   | 17 | 11 |
| 316078 | 67 | 4244762 | 4244776 | 3 | 5  | 15 | CAA  | 23 | 4  |
| 316080 | 67 | 4253125 | 4253158 | 2 | 17 | 34 | GT   | 18 | 10 |
| 316085 | 67 | 4262373 | 4262404 | 4 | 8  | 32 | ATCT | 17 | 7  |
| 316088 | 67 | 4277770 | 4277785 | 2 | 8  | 16 | GT   | 15 | 4  |
| 316094 | 67 | 4281738 | 4281757 | 4 | 5  | 20 | TAAA | 16 | 3  |
| 316098 | 67 | 4288104 | 4288121 | 3 | 6  | 18 | GGA  | 18 | 7  |
| 316109 | 67 | 4300221 | 4300238 | 3 | 6  | 18 | ATT  | 16 | 3  |
| 316110 | 67 | 4303932 | 4303963 | 2 | 16 | 32 | TG   | 9  | 10 |
| 316112 | 67 | 4307683 | 4307706 | 4 | 6  | 24 | AGAC | 21 | 5  |
| 316118 | 67 | 4308177 | 4308188 | 2 | 6  | 12 | CA   | 12 | 3  |
| 316121 | 67 | 4308312 | 4308329 | 2 | 9  | 18 | AC   | 8  | 3  |
| 316122 | 67 | 4308359 | 4308376 | 2 | 9  | 18 | CA   | 15 | 4  |
| 316123 | 67 | 4315500 | 4315513 | 2 | 7  | 14 | TG   | 21 | 4  |
| 316126 | 67 | 4315974 | 4315999 | 2 | 13 | 26 | TG   | 11 | 6  |
| 316130 | 67 | 4323460 | 4323489 | 2 | 15 | 30 | TG   | 6  | 5  |
| 316131 | 67 | 4327030 | 4327059 | 2 | 15 | 30 | CA   | 13 | 6  |
| 316132 | 67 | 4328100 | 4328111 | 2 | 6  | 12 | GT   | 24 | 4  |
| 316133 | 67 | 4328388 | 4328399 | 2 | 6  | 12 | AC   | 33 | 4  |

|        |    |         |         |   |    |    |      |    |    |
|--------|----|---------|---------|---|----|----|------|----|----|
| 316134 | 67 | 4330763 | 4330778 | 2 | 8  | 16 | TG   | 27 | 5  |
| 316143 | 67 | 4340454 | 4340467 | 2 | 7  | 14 | TA   | 10 | 4  |
| 316156 | 67 | 4377753 | 4377788 | 2 | 18 | 36 | CA   | 11 | 11 |
| 316157 | 67 | 4378060 | 4378093 | 2 | 17 | 34 | CT   | 6  | 5  |
| 316160 | 67 | 4382439 | 4382470 | 2 | 16 | 32 | GT   | 16 | 14 |
| 316161 | 67 | 4383227 | 4383242 | 2 | 8  | 16 | TG   | 22 | 3  |
| 316162 | 67 | 4383990 | 4384005 | 4 | 4  | 16 | TGAT | 30 | 4  |
| 316163 | 67 | 4384029 | 4384048 | 4 | 5  | 20 | TTGA | 23 | 4  |
| 316168 | 67 | 4397723 | 4397742 | 2 | 10 | 20 | TG   | 18 | 6  |
| 316169 | 67 | 4398740 | 4398755 | 2 | 8  | 16 | GT   | 12 | 8  |
| 316175 | 67 | 4405446 | 4405469 | 4 | 6  | 24 | AAAG | 25 | 5  |
| 316180 | 67 | 4411871 | 4411900 | 2 | 15 | 30 | CA   | 17 | 7  |
| 316197 | 67 | 4438119 | 4438158 | 2 | 20 | 40 | TC   | 12 | 7  |
| 316218 | 67 | 4458333 | 4458358 | 2 | 13 | 26 | AC   | 12 | 5  |
| 316242 | 67 | 4507312 | 4507329 | 3 | 6  | 18 | AAT  | 17 | 6  |
| 316260 | 67 | 4544649 | 4544662 | 2 | 7  | 14 | AC   | 25 | 3  |
| 316264 | 67 | 4547681 | 4547728 | 2 | 24 | 48 | AC   | 8  | 8  |
| 316268 | 67 | 4555946 | 4555963 | 3 | 6  | 18 | GAG  | 26 | 3  |
| 316272 | 67 | 4560652 | 4560671 | 2 | 10 | 20 | CA   | 13 | 4  |
| 316275 | 67 | 4578876 | 4578905 | 2 | 15 | 30 | AC   | 16 | 7  |
| 316292 | 67 | 4630181 | 4630208 | 4 | 7  | 28 | TCTG | 13 | 3  |
| 316302 | 67 | 4665674 | 4665688 | 3 | 5  | 15 | GAG  | 15 | 5  |
| 316303 | 67 | 4665692 | 4665706 | 3 | 5  | 15 | GAG  | 17 | 3  |
| 316305 | 67 | 4672565 | 4672591 | 3 | 9  | 27 | CCT  | 19 | 4  |
| 316306 | 67 | 4673870 | 4673887 | 3 | 6  | 18 | TCT  | 20 | 3  |
| 316314 | 67 | 4707100 | 4707111 | 2 | 6  | 12 | AC   | 18 | 3  |
| 316318 | 67 | 4717831 | 4717858 | 2 | 14 | 28 | CA   | 10 | 4  |
| 316328 | 67 | 4744661 | 4744682 | 2 | 11 | 22 | AC   | 17 | 3  |
| 316337 | 67 | 4753201 | 4753228 | 4 | 7  | 28 | GACA | 24 | 4  |
| 316338 | 67 | 4754150 | 4754169 | 2 | 10 | 20 | CA   | 17 | 3  |
| 316350 | 67 | 4768801 | 4768828 | 2 | 14 | 28 | AC   | 15 | 5  |
| 316351 | 67 | 4770336 | 4770351 | 4 | 4  | 16 | CTTG | 29 | 3  |
| 316354 | 67 | 4787801 | 4787826 | 2 | 13 | 26 | AC   | 11 | 3  |
| 316356 | 67 | 4788699 | 4788726 | 2 | 14 | 28 | CA   | 15 | 6  |
| 316363 | 67 | 4821231 | 4821262 | 2 | 16 | 32 | CA   | 9  | 6  |
| 316368 | 67 | 4844193 | 4844204 | 2 | 6  | 12 | AC   | 23 | 3  |
| 316387 | 67 | 4909865 | 4909891 | 3 | 9  | 27 | GTA  | 23 | 3  |
| 316391 | 67 | 4932818 | 4932829 | 2 | 6  | 12 | AT   | 30 | 3  |
| 316393 | 67 | 4942356 | 4942395 | 2 | 20 | 40 | TC   | 9  | 7  |
| 316399 | 67 | 4967903 | 4967930 | 4 | 7  | 28 | AATA | 7  | 3  |
| 316405 | 67 | 4979045 | 4979066 | 2 | 11 | 22 | TG   | 19 | 5  |
| 316407 | 67 | 4981940 | 4981953 | 2 | 7  | 14 | AT   | 13 | 3  |
| 316411 | 67 | 4985749 | 4985769 | 3 | 7  | 21 | ATG  | 23 | 5  |
| 316424 | 67 | 5005869 | 5005894 | 2 | 13 | 26 | TG   | 18 | 4  |
| 316435 | 67 | 5015358 | 5015369 | 2 | 6  | 12 | AC   | 17 | 4  |
| 316436 | 67 | 5015500 | 5015511 | 2 | 6  | 12 | TG   | 27 | 3  |
| 316442 | 67 | 5021830 | 5021855 | 2 | 13 | 26 | AC   | 18 | 6  |
| 316450 | 67 | 5027152 | 5027181 | 2 | 15 | 30 | CA   | 6  | 6  |
| 316453 | 67 | 5027406 | 5027421 | 2 | 8  | 16 | CT   | 8  | 3  |
| 316454 | 67 | 5029233 | 5029260 | 2 | 14 | 28 | CA   | 21 | 7  |
| 316457 | 67 | 5033396 | 5033425 | 2 | 15 | 30 | CA   | 12 | 7  |

|        |    |         |         |   |    |    |      |    |    |
|--------|----|---------|---------|---|----|----|------|----|----|
| 316465 | 67 | 5039770 | 5039785 | 4 | 4  | 16 | ACAG | 15 | 3  |
| 316477 | 67 | 5053861 | 5053898 | 2 | 19 | 38 | AC   | 6  | 8  |
| 316478 | 67 | 5055509 | 5055546 | 2 | 19 | 38 | AC   | 6  | 4  |
| 316487 | 67 | 5070277 | 5070302 | 2 | 13 | 26 | CT   | 12 | 3  |
| 316496 | 67 | 5076912 | 5076969 | 2 | 29 | 58 | AC   | 6  | 8  |
| 316499 | 67 | 5079948 | 5079969 | 2 | 11 | 22 | CA   | 11 | 6  |
| 316503 | 67 | 5082204 | 5082227 | 2 | 12 | 24 | CA   | 10 | 5  |
| 316536 | 67 | 5147229 | 5147240 | 2 | 6  | 12 | AG   | 28 | 3  |
| 316559 | 67 | 5239959 | 5239998 | 4 | 10 | 40 | TATC | 8  | 5  |
| 316608 | 67 | 5403517 | 5403531 | 3 | 5  | 15 | GGA  | 32 | 4  |
| 316609 | 67 | 5412043 | 5412054 | 2 | 6  | 12 | CT   | 37 | 3  |
| 316613 | 67 | 5422759 | 5422780 | 2 | 11 | 22 | AC   | 23 | 4  |
| 316616 | 67 | 5444193 | 5444272 | 4 | 20 | 80 | TCTA | 12 | 10 |
| 316620 | 67 | 5458943 | 5459014 | 4 | 18 | 72 | AGAT | 17 | 8  |
| 316627 | 67 | 5467555 | 5467582 | 4 | 7  | 28 | TGAT | 23 | 3  |
| 316632 | 67 | 5485609 | 5485656 | 3 | 16 | 48 | GAA  | 15 | 8  |
| 316645 | 67 | 5521308 | 5521355 | 4 | 12 | 48 | AATA | 10 | 4  |
| 316649 | 67 | 5539355 | 5539378 | 2 | 12 | 24 | TG   | 13 | 7  |
| 316652 | 68 | 5587    | 5598    | 2 | 6  | 12 | TA   | 23 | 3  |
| 316656 | 68 | 13567   | 13588   | 2 | 11 | 22 | CA   | 14 | 7  |
| 316657 | 68 | 15076   | 15105   | 3 | 10 | 30 | AAT  | 7  | 4  |
| 316662 | 68 | 29923   | 29937   | 3 | 5  | 15 | TTG  | 29 | 3  |
| 316671 | 68 | 67074   | 67133   | 4 | 15 | 60 | GATA | 13 | 10 |
| 316676 | 68 | 79156   | 79183   | 2 | 14 | 28 | TG   | 16 | 10 |
| 316687 | 68 | 82343   | 82374   | 2 | 16 | 32 | AC   | 12 | 8  |
| 316689 | 68 | 86400   | 86453   | 2 | 27 | 54 | GA   | 9  | 13 |
| 316693 | 68 | 93868   | 93899   | 2 | 16 | 32 | GT   | 10 | 9  |
| 316698 | 68 | 99999   | 100016  | 2 | 9  | 18 | AG   | 17 | 5  |
| 316699 | 68 | 100268  | 100285  | 2 | 9  | 18 | TG   | 19 | 8  |
| 316705 | 68 | 107469  | 107490  | 2 | 11 | 22 | GT   | 10 | 3  |
| 316709 | 68 | 113609  | 113620  | 2 | 6  | 12 | AC   | 33 | 4  |
| 316712 | 68 | 117988  | 118027  | 2 | 20 | 40 | CT   | 6  | 6  |
| 316717 | 68 | 118561  | 118576  | 2 | 8  | 16 | AC   | 19 | 7  |
| 316719 | 68 | 119521  | 119554  | 2 | 17 | 34 | AC   | 18 | 10 |
| 316720 | 68 | 119682  | 119713  | 2 | 16 | 32 | TG   | 13 | 7  |
| 316722 | 68 | 121522  | 121533  | 2 | 6  | 12 | GA   | 24 | 11 |
| 316723 | 68 | 121711  | 121724  | 2 | 7  | 14 | TG   | 9  | 10 |
| 316724 | 68 | 122008  | 122033  | 2 | 13 | 26 | AG   | 18 | 9  |
| 316732 | 68 | 126099  | 126114  | 2 | 8  | 16 | CA   | 13 | 4  |
| 316733 | 68 | 127470  | 127487  | 2 | 9  | 18 | GT   | 19 | 5  |
| 316735 | 68 | 127669  | 127688  | 2 | 10 | 20 | GT   | 15 | 10 |
| 316737 | 68 | 127870  | 127881  | 2 | 6  | 12 | TG   | 28 | 6  |
| 316744 | 68 | 131187  | 131216  | 2 | 15 | 30 | TG   | 20 | 9  |
| 316745 | 68 | 131696  | 131715  | 2 | 10 | 20 | TG   | 17 | 10 |
| 316747 | 68 | 131816  | 131831  | 2 | 8  | 16 | GT   | 15 | 7  |
| 316750 | 68 | 132686  | 132701  | 4 | 4  | 16 | GGAG | 21 | 4  |
| 316751 | 68 | 132729  | 132752  | 4 | 6  | 24 | CTGA | 25 | 6  |
| 316753 | 68 | 133572  | 133587  | 2 | 8  | 16 | AC   | 20 | 3  |
| 316755 | 68 | 135015  | 135038  | 2 | 12 | 24 | AG   | 13 | 4  |
| 316757 | 68 | 138826  | 138845  | 4 | 5  | 20 | TGTC | 14 | 4  |
| 316764 | 68 | 154173  | 154196  | 4 | 6  | 24 | CACG | 24 | 13 |

|        |    |        |        |   |    |    |      |    |    |
|--------|----|--------|--------|---|----|----|------|----|----|
| 316766 | 68 | 154806 | 154827 | 2 | 11 | 22 | GT   | 19 | 8  |
| 316767 | 68 | 154924 | 154935 | 2 | 6  | 12 | TG   | 23 | 3  |
| 316774 | 68 | 157598 | 157623 | 2 | 13 | 26 | TG   | 15 | 7  |
| 316775 | 68 | 161608 | 161655 | 2 | 24 | 48 | AC   | 9  | 6  |
| 316783 | 68 | 172889 | 172902 | 2 | 7  | 14 | TC   | 17 | 3  |
| 316785 | 68 | 175086 | 175107 | 2 | 11 | 22 | TG   | 21 | 11 |
| 316788 | 68 | 177709 | 177722 | 2 | 7  | 14 | CA   | 13 | 6  |
| 316789 | 68 | 177861 | 177908 | 2 | 24 | 48 | GT   | 8  | 7  |
| 316790 | 68 | 177935 | 177966 | 2 | 16 | 32 | TG   | 6  | 6  |
| 316791 | 68 | 178079 | 178090 | 2 | 6  | 12 | AG   | 17 | 3  |
| 316792 | 68 | 178094 | 178109 | 2 | 8  | 16 | GA   | 13 | 4  |
| 316793 | 68 | 178254 | 178275 | 2 | 11 | 22 | TG   | 8  | 4  |
| 316795 | 68 | 180937 | 180968 | 4 | 8  | 32 | AACA | 16 | 4  |
| 316797 | 68 | 188334 | 188348 | 3 | 5  | 15 | AGG  | 24 | 4  |
| 316798 | 68 | 190046 | 190057 | 2 | 6  | 12 | AG   | 24 | 8  |
| 316799 | 68 | 190227 | 190248 | 2 | 11 | 22 | GT   | 11 | 6  |
| 316801 | 68 | 193135 | 193148 | 2 | 7  | 14 | GT   | 29 | 3  |
| 316802 | 68 | 194084 | 194097 | 2 | 7  | 14 | CA   | 23 | 9  |
| 316804 | 68 | 195328 | 195347 | 2 | 10 | 20 | TG   | 25 | 7  |
| 316805 | 68 | 195414 | 195433 | 2 | 10 | 20 | AC   | 17 | 8  |
| 316806 | 68 | 195581 | 195598 | 2 | 9  | 18 | TC   | 24 | 4  |
| 316807 | 68 | 197268 | 197297 | 2 | 15 | 30 | CT   | 17 | 7  |
| 316811 | 68 | 205449 | 205462 | 2 | 7  | 14 | AC   | 35 | 3  |
| 316816 | 68 | 207414 | 207427 | 2 | 7  | 14 | AC   | 15 | 3  |
| 316817 | 68 | 207675 | 207702 | 2 | 14 | 28 | TG   | 15 | 12 |
| 316818 | 68 | 207799 | 207836 | 2 | 19 | 38 | TG   | 11 | 10 |
| 316822 | 68 | 211547 | 211568 | 2 | 11 | 22 | TG   | 8  | 9  |
| 316823 | 68 | 213005 | 213024 | 2 | 10 | 20 | CA   | 7  | 5  |
| 316825 | 68 | 213792 | 213813 | 2 | 11 | 22 | AC   | 12 | 5  |
| 316830 | 68 | 218748 | 218771 | 2 | 12 | 24 | TA   | 15 | 7  |
| 316832 | 68 | 220402 | 220421 | 2 | 10 | 20 | TG   | 23 | 4  |
| 316833 | 68 | 220555 | 220576 | 2 | 11 | 22 | CA   | 6  | 5  |
| 316840 | 68 | 232573 | 232584 | 2 | 6  | 12 | TG   | 10 | 5  |
| 316841 | 68 | 232775 | 232792 | 2 | 9  | 18 | CA   | 26 | 5  |
| 316852 | 68 | 252290 | 252343 | 2 | 27 | 54 | GT   | 8  | 10 |
| 316853 | 68 | 253842 | 253889 | 4 | 12 | 48 | AGAT | 21 | 6  |
| 316855 | 68 | 256169 | 256219 | 3 | 17 | 51 | TAT  | 14 | 11 |
| 316859 | 68 | 257485 | 257496 | 2 | 6  | 12 | TG   | 18 | 5  |
| 316860 | 68 | 257498 | 257509 | 2 | 6  | 12 | GT   | 21 | 10 |
| 316862 | 68 | 257774 | 257803 | 2 | 15 | 30 | AC   | 16 | 5  |
| 316868 | 68 | 262507 | 262534 | 2 | 14 | 28 | CA   | 18 | 5  |
| 316877 | 68 | 266022 | 266045 | 2 | 12 | 24 | CA   | 12 | 5  |
| 316884 | 68 | 274925 | 274950 | 2 | 13 | 26 | CA   | 12 | 5  |
| 316885 | 68 | 275112 | 275127 | 2 | 8  | 16 | TG   | 18 | 9  |
| 316888 | 68 | 275538 | 275549 | 2 | 6  | 12 | GT   | 24 | 4  |
| 316895 | 68 | 278744 | 278767 | 2 | 12 | 24 | CA   | 20 | 9  |
| 316898 | 68 | 282474 | 282485 | 2 | 6  | 12 | TG   | 25 | 3  |
| 316899 | 68 | 282600 | 282617 | 2 | 9  | 18 | AC   | 31 | 8  |
| 316902 | 68 | 289317 | 289332 | 2 | 8  | 16 | CA   | 18 | 8  |
| 316904 | 68 | 290863 | 290876 | 2 | 7  | 14 | CT   | 25 | 3  |
| 316906 | 68 | 293628 | 293653 | 2 | 13 | 26 | AC   | 10 | 5  |



|        |    |        |        |   |    |    |      |    |    |
|--------|----|--------|--------|---|----|----|------|----|----|
| 316911 | 68 | 296470 | 296509 | 2 | 20 | 40 | AC   | 11 | 8  |
| 316913 | 68 | 296783 | 296802 | 2 | 10 | 20 | GT   | 22 | 7  |
| 316918 | 68 | 301281 | 301294 | 2 | 7  | 14 | TG   | 22 | 4  |
| 316921 | 68 | 307280 | 307293 | 2 | 7  | 14 | CA   | 20 | 3  |
| 316922 | 68 | 310313 | 310324 | 2 | 6  | 12 | GT   | 24 | 4  |
| 316923 | 68 | 310466 | 310487 | 2 | 11 | 22 | AC   | 19 | 5  |
| 316924 | 68 | 310593 | 310610 | 2 | 9  | 18 | AC   | 19 | 3  |
| 316925 | 68 | 313024 | 313055 | 2 | 16 | 32 | GT   | 6  | 7  |
| 316926 | 68 | 313254 | 313271 | 2 | 9  | 18 | CA   | 25 | 6  |
| 316929 | 68 | 316629 | 316646 | 2 | 9  | 18 | CA   | 22 | 4  |
| 316933 | 68 | 319317 | 319346 | 2 | 15 | 30 | CA   | 19 | 10 |
| 316942 | 68 | 333116 | 333133 | 2 | 9  | 18 | AC   | 22 | 6  |
| 316948 | 68 | 338664 | 338683 | 2 | 10 | 20 | AC   | 28 | 6  |
| 316950 | 68 | 340538 | 340559 | 2 | 11 | 22 | CA   | 25 | 13 |
| 316951 | 68 | 341543 | 341560 | 2 | 9  | 18 | CA   | 17 | 5  |
| 316954 | 68 | 345006 | 345019 | 2 | 7  | 14 | TC   | 18 | 3  |
| 316964 | 68 | 352900 | 352941 | 2 | 21 | 42 | GT   | 9  | 8  |
| 316975 | 68 | 359618 | 359629 | 2 | 6  | 12 | AC   | 16 | 5  |
| 316980 | 68 | 367705 | 367720 | 2 | 8  | 16 | CA   | 29 | 4  |
| 316983 | 68 | 379543 | 379554 | 2 | 6  | 12 | AT   | 20 | 5  |
| 316984 | 68 | 380959 | 380976 | 2 | 9  | 18 | TG   | 17 | 5  |
| 316985 | 68 | 381099 | 381116 | 2 | 9  | 18 | TG   | 11 | 6  |
| 316987 | 68 | 382706 | 382731 | 2 | 13 | 26 | TG   | 11 | 4  |
| 316995 | 68 | 389405 | 389420 | 4 | 4  | 16 | TTCT | 28 | 3  |
| 316998 | 68 | 392459 | 392492 | 2 | 17 | 34 | TG   | 10 | 8  |
| 316999 | 68 | 392710 | 392735 | 2 | 13 | 26 | AC   | 15 | 4  |
| 317000 | 68 | 393738 | 393753 | 2 | 8  | 16 | GT   | 27 | 3  |
| 317001 | 68 | 393870 | 393887 | 2 | 9  | 18 | GT   | 17 | 4  |
| 317003 | 68 | 394122 | 394136 | 3 | 5  | 15 | TTG  | 21 | 4  |
| 317004 | 68 | 395337 | 395384 | 2 | 24 | 48 | CA   | 14 | 13 |
| 317005 | 68 | 395471 | 395488 | 2 | 9  | 18 | AC   | 15 | 7  |
| 317006 | 68 | 397499 | 397526 | 4 | 7  | 28 | TGGA | 17 | 4  |
| 317011 | 68 | 413903 | 413916 | 2 | 7  | 14 | CA   | 26 | 3  |
| 317013 | 68 | 424152 | 424171 | 4 | 5  | 20 | AGAA | 21 | 4  |
| 317014 | 68 | 425529 | 425544 | 2 | 8  | 16 | CA   | 26 | 4  |
| 317015 | 68 | 427107 | 427132 | 2 | 13 | 26 | CT   | 16 | 6  |
| 317019 | 68 | 433044 | 433085 | 2 | 21 | 42 | TG   | 6  | 6  |
| 317020 | 68 | 434244 | 434267 | 2 | 12 | 24 | AC   | 15 | 9  |
| 317021 | 68 | 436496 | 436522 | 3 | 9  | 27 | TGC  | 27 | 8  |
| 317022 | 68 | 442458 | 442471 | 2 | 7  | 14 | TC   | 15 | 5  |
| 317027 | 68 | 448958 | 448977 | 2 | 10 | 20 | TC   | 18 | 6  |
| 317029 | 68 | 449139 | 449154 | 2 | 8  | 16 | GA   | 11 | 4  |
| 317031 | 68 | 451743 | 451754 | 2 | 6  | 12 | TG   | 26 | 3  |
| 317032 | 68 | 453199 | 453224 | 2 | 13 | 26 | TG   | 11 | 7  |
| 317036 | 68 | 460887 | 460906 | 2 | 10 | 20 | CA   | 23 | 4  |
| 317039 | 68 | 461480 | 461497 | 2 | 9  | 18 | CA   | 20 | 6  |
| 317042 | 68 | 463476 | 463491 | 2 | 8  | 16 | TC   | 24 | 4  |
| 317043 | 68 | 465016 | 465043 | 2 | 14 | 28 | GA   | 23 | 9  |
| 317044 | 68 | 465125 | 465138 | 2 | 7  | 14 | TG   | 22 | 3  |
| 317047 | 68 | 465347 | 465360 | 2 | 7  | 14 | AG   | 8  | 6  |
| 317050 | 68 | 466749 | 466766 | 2 | 9  | 18 | CA   | 20 | 7  |

|        |    |        |        |   |    |    |      |    |    |
|--------|----|--------|--------|---|----|----|------|----|----|
| 317051 | 68 | 472783 | 472802 | 2 | 10 | 20 | AC   | 22 | 5  |
| 317052 | 68 | 472989 | 473004 | 2 | 8  | 16 | CA   | 25 | 3  |
| 317056 | 68 | 487953 | 487966 | 2 | 7  | 14 | TG   | 23 | 6  |
| 317057 | 68 | 488090 | 488109 | 2 | 10 | 20 | TG   | 16 | 4  |
| 317065 | 68 | 503315 | 503350 | 2 | 18 | 36 | CA   | 7  | 7  |
| 317067 | 68 | 504704 | 504745 | 2 | 21 | 42 | TG   | 8  | 11 |
| 317073 | 68 | 523108 | 523121 | 2 | 7  | 14 | AC   | 27 | 4  |
| 317074 | 68 | 525658 | 525683 | 2 | 13 | 26 | TG   | 10 | 5  |
| 317076 | 68 | 528384 | 528439 | 2 | 28 | 56 | AC   | 9  | 9  |
| 317081 | 68 | 544603 | 544614 | 2 | 6  | 12 | GT   | 26 | 4  |
| 317084 | 68 | 552756 | 552787 | 2 | 16 | 32 | CA   | 9  | 8  |
| 317085 | 68 | 553412 | 553462 | 3 | 17 | 51 | TGA  | 17 | 8  |
| 317087 | 68 | 558792 | 558825 | 2 | 17 | 34 | AC   | 9  | 5  |
| 317088 | 68 | 558970 | 558989 | 2 | 10 | 20 | CA   | 15 | 10 |
| 317092 | 68 | 560918 | 560933 | 2 | 8  | 16 | AC   | 24 | 3  |
| 317093 | 68 | 562414 | 562425 | 2 | 6  | 12 | AG   | 28 | 3  |
| 317097 | 68 | 565648 | 565661 | 2 | 7  | 14 | TC   | 21 | 4  |
| 317100 | 68 | 569460 | 569479 | 2 | 10 | 20 | TG   | 14 | 7  |
| 317101 | 68 | 569598 | 569613 | 2 | 8  | 16 | AC   | 16 | 3  |
| 317105 | 68 | 570293 | 570336 | 2 | 22 | 44 | CA   | 11 | 9  |
| 317108 | 68 | 579251 | 579278 | 2 | 14 | 28 | GT   | 16 | 7  |
| 317109 | 68 | 579521 | 579538 | 2 | 9  | 18 | TC   | 23 | 5  |
| 317110 | 68 | 581418 | 581441 | 3 | 8  | 24 | CTG  | 25 | 7  |
| 317113 | 68 | 591318 | 591339 | 2 | 11 | 22 | AG   | 21 | 7  |
| 317121 | 68 | 604609 | 604624 | 2 | 8  | 16 | GA   | 27 | 6  |
| 317125 | 68 | 617012 | 617029 | 2 | 9  | 18 | AC   | 10 | 8  |
| 317128 | 68 | 618250 | 618267 | 3 | 6  | 18 | GCA  | 25 | 4  |
| 317130 | 68 | 623672 | 623716 | 3 | 15 | 45 | ATG  | 13 | 6  |
| 317131 | 68 | 625343 | 625374 | 2 | 16 | 32 | TG   | 10 | 8  |
| 317132 | 68 | 626308 | 626343 | 4 | 9  | 36 | GAAA | 28 | 11 |
| 317134 | 68 | 635165 | 635190 | 2 | 13 | 26 | TG   | 15 | 6  |
| 317137 | 68 | 640306 | 640319 | 2 | 7  | 14 | CT   | 16 | 4  |
| 317139 | 68 | 642712 | 642729 | 2 | 9  | 18 | CA   | 15 | 12 |
| 317141 | 68 | 644407 | 644424 | 2 | 9  | 18 | GT   | 16 | 4  |
| 317142 | 68 | 644428 | 644439 | 2 | 6  | 12 | TG   | 20 | 3  |
| 317149 | 68 | 656930 | 656951 | 2 | 11 | 22 | AC   | 9  | 10 |
| 317150 | 68 | 657128 | 657147 | 2 | 10 | 20 | AC   | 16 | 7  |
| 317152 | 68 | 662726 | 662747 | 2 | 11 | 22 | GT   | 21 | 5  |
| 317154 | 68 | 668296 | 668329 | 2 | 17 | 34 | AC   | 13 | 11 |
| 317155 | 68 | 668374 | 668391 | 2 | 9  | 18 | GA   | 8  | 3  |
| 317157 | 68 | 669114 | 669151 | 2 | 19 | 38 | TG   | 6  | 9  |
| 317159 | 68 | 671034 | 671055 | 2 | 11 | 22 | TG   | 7  | 11 |
| 317160 | 68 | 671332 | 671345 | 2 | 7  | 14 | GT   | 24 | 4  |
| 317161 | 68 | 672160 | 672191 | 2 | 16 | 32 | AC   | 7  | 4  |
| 317165 | 68 | 675973 | 675986 | 2 | 7  | 14 | TG   | 23 | 6  |
| 317177 | 68 | 690544 | 690569 | 2 | 13 | 26 | AC   | 19 | 7  |
| 317179 | 68 | 693556 | 693581 | 2 | 13 | 26 | AG   | 15 | 3  |
| 317183 | 68 | 699911 | 699922 | 2 | 6  | 12 | CA   | 29 | 4  |
| 317185 | 68 | 706765 | 706794 | 2 | 15 | 30 | AC   | 12 | 10 |
| 317190 | 68 | 720778 | 720825 | 4 | 12 | 48 | TGAT | 24 | 7  |
| 317193 | 68 | 726417 | 726456 | 2 | 20 | 40 | TG   | 13 | 8  |

|        |    |         |         |   |    |    |      |    |    |
|--------|----|---------|---------|---|----|----|------|----|----|
| 317201 | 68 | 740542  | 740569  | 2 | 14 | 28 | AC   | 15 | 8  |
| 317215 | 68 | 761953  | 761968  | 2 | 8  | 16 | CA   | 23 | 3  |
| 317219 | 68 | 763673  | 763687  | 3 | 5  | 15 | GTT  | 21 | 6  |
| 317221 | 68 | 765964  | 765981  | 2 | 9  | 18 | TC   | 18 | 3  |
| 317222 | 68 | 766252  | 766265  | 2 | 7  | 14 | CT   | 21 | 3  |
| 317226 | 68 | 770086  | 770103  | 2 | 9  | 18 | TG   | 10 | 9  |
| 317231 | 68 | 771579  | 771593  | 3 | 5  | 15 | AGA  | 20 | 3  |
| 317234 | 68 | 772762  | 772777  | 4 | 4  | 16 | TTTA | 24 | 3  |
| 317236 | 68 | 773149  | 773182  | 2 | 17 | 34 | GA   | 7  | 10 |
| 317240 | 68 | 774068  | 774088  | 3 | 7  | 21 | AAG  | 19 | 6  |
| 317244 | 68 | 775523  | 775554  | 2 | 16 | 32 | CA   | 16 | 13 |
| 317245 | 68 | 776833  | 776853  | 3 | 7  | 21 | TTA  | 18 | 3  |
| 317249 | 68 | 780700  | 780729  | 3 | 10 | 30 | TCA  | 22 | 7  |
| 317252 | 68 | 781105  | 781132  | 4 | 7  | 28 | CTGT | 28 | 3  |
| 317253 | 68 | 781200  | 781211  | 2 | 6  | 12 | CT   | 20 | 4  |
| 317272 | 68 | 785966  | 785985  | 4 | 5  | 20 | AGGG | 16 | 7  |
| 317273 | 68 | 786159  | 786174  | 4 | 4  | 16 | TTTG | 14 | 5  |
| 317275 | 68 | 787381  | 787402  | 2 | 11 | 22 | AG   | 7  | 6  |
| 317280 | 68 | 791153  | 791206  | 3 | 18 | 54 | GAA  | 10 | 9  |
| 317296 | 68 | 804358  | 804373  | 2 | 8  | 16 | AC   | 17 | 3  |
| 317297 | 68 | 806859  | 806882  | 2 | 12 | 24 | CA   | 9  | 6  |
| 317298 | 68 | 812259  | 812286  | 2 | 14 | 28 | GT   | 22 | 12 |
| 317299 | 68 | 813871  | 813894  | 2 | 12 | 24 | AC   | 20 | 6  |
| 317300 | 68 | 816720  | 816731  | 2 | 6  | 12 | TG   | 30 | 5  |
| 317305 | 68 | 832651  | 832684  | 2 | 17 | 34 | CA   | 10 | 7  |
| 317306 | 68 | 832923  | 832944  | 2 | 11 | 22 | GT   | 26 | 6  |
| 317307 | 68 | 834122  | 834139  | 2 | 9  | 18 | TA   | 6  | 4  |
| 317323 | 68 | 894692  | 894711  | 2 | 10 | 20 | CA   | 16 | 6  |
| 317326 | 68 | 911661  | 911676  | 4 | 4  | 16 | CTCC | 17 | 3  |
| 317329 | 68 | 929973  | 929990  | 3 | 6  | 18 | AGG  | 21 | 3  |
| 317334 | 68 | 951256  | 951271  | 2 | 8  | 16 | AC   | 18 | 5  |
| 317342 | 68 | 967103  | 967118  | 4 | 4  | 16 | CCAA | 11 | 4  |
| 317345 | 68 | 971136  | 971163  | 2 | 14 | 28 | AC   | 8  | 7  |
| 317347 | 68 | 976770  | 976785  | 2 | 8  | 16 | AC   | 23 | 4  |
| 317355 | 68 | 999025  | 999058  | 2 | 17 | 34 | CT   | 7  | 6  |
| 317360 | 68 | 1022929 | 1022962 | 2 | 17 | 34 | TG   | 16 | 9  |
| 317361 | 68 | 1026893 | 1026934 | 2 | 21 | 42 | AC   | 7  | 8  |
| 317362 | 68 | 1027094 | 1027105 | 2 | 6  | 12 | AT   | 15 | 3  |
| 317365 | 68 | 1035145 | 1035166 | 2 | 11 | 22 | AC   | 17 | 8  |
| 317372 | 68 | 1066630 | 1066643 | 2 | 7  | 14 | AC   | 16 | 3  |
| 317374 | 68 | 1073387 | 1073410 | 2 | 12 | 24 | TG   | 7  | 7  |
| 317382 | 68 | 1100631 | 1100652 | 2 | 11 | 22 | AG   | 7  | 7  |
| 317383 | 68 | 1100678 | 1100695 | 3 | 6  | 18 | TCC  | 18 | 4  |
| 317387 | 68 | 1104563 | 1104574 | 2 | 6  | 12 | CA   | 28 | 4  |
| 317388 | 68 | 1104822 | 1104835 | 2 | 7  | 14 | TG   | 23 | 4  |
| 317389 | 68 | 1105401 | 1105430 | 2 | 15 | 30 | AC   | 11 | 16 |
| 317390 | 68 | 1105639 | 1105666 | 2 | 14 | 28 | CA   | 20 | 7  |
| 317391 | 68 | 1106959 | 1106982 | 2 | 12 | 24 | TG   | 10 | 11 |
| 317393 | 68 | 1108965 | 1108985 | 3 | 7  | 21 | GGT  | 27 | 4  |
| 317415 | 68 | 1195454 | 1195469 | 4 | 4  | 16 | CTAG | 22 | 3  |
| 317416 | 68 | 1197884 | 1197907 | 2 | 12 | 24 | CT   | 14 | 6  |

|        |    |         |         |   |    |    |      |    |    |
|--------|----|---------|---------|---|----|----|------|----|----|
| 317419 | 68 | 1209920 | 1209943 | 3 | 8  | 24 | TCC  | 12 | 4  |
| 317422 | 68 | 1211218 | 1211235 | 2 | 9  | 18 | CA   | 18 | 3  |
| 317426 | 68 | 1217655 | 1217678 | 2 | 12 | 24 | CA   | 11 | 6  |
| 317433 | 68 | 1237583 | 1237594 | 2 | 6  | 12 | AT   | 16 | 6  |
| 317437 | 68 | 1252498 | 1252515 | 3 | 6  | 18 | CCT  | 29 | 5  |
| 317438 | 68 | 1255082 | 1255097 | 2 | 8  | 16 | TG   | 18 | 4  |
| 317464 | 68 | 1305723 | 1305748 | 2 | 13 | 26 | TG   | 11 | 11 |
| 317476 | 68 | 1334236 | 1334255 | 2 | 10 | 20 | TG   | 9  | 5  |
| 317478 | 68 | 1337631 | 1337644 | 2 | 7  | 14 | TC   | 16 | 5  |
| 317482 | 68 | 1343311 | 1343324 | 2 | 7  | 14 | TG   | 26 | 4  |
| 317487 | 68 | 1356953 | 1356976 | 2 | 12 | 24 | GA   | 14 | 12 |
| 317489 | 68 | 1357321 | 1357348 | 2 | 14 | 28 | GT   | 8  | 8  |
| 317491 | 68 | 1360090 | 1360104 | 3 | 5  | 15 | CAC  | 20 | 3  |
| 317499 | 68 | 1363629 | 1363656 | 2 | 14 | 28 | TG   | 13 | 6  |
| 317500 | 68 | 1364067 | 1364104 | 2 | 19 | 38 | TG   | 15 | 15 |
| 317502 | 68 | 1364330 | 1364341 | 2 | 6  | 12 | GT   | 28 | 6  |
| 317503 | 68 | 1364551 | 1364574 | 4 | 6  | 24 | AGTC | 22 | 4  |
| 317504 | 68 | 1365207 | 1365233 | 3 | 9  | 27 | TGC  | 20 | 4  |
| 317507 | 68 | 1366353 | 1366370 | 2 | 9  | 18 | TG   | 13 | 4  |
| 317508 | 68 | 1369817 | 1369828 | 2 | 6  | 12 | TG   | 21 | 4  |
| 317510 | 68 | 1372590 | 1372609 | 2 | 10 | 20 | TG   | 22 | 7  |
| 317513 | 68 | 1374150 | 1374164 | 3 | 5  | 15 | CTC  | 17 | 5  |
| 317515 | 68 | 1375422 | 1375435 | 2 | 7  | 14 | AC   | 23 | 3  |
| 317517 | 68 | 1378068 | 1378079 | 2 | 6  | 12 | GT   | 20 | 5  |
| 317519 | 68 | 1379274 | 1379301 | 2 | 14 | 28 | TG   | 15 | 6  |
| 317520 | 68 | 1379660 | 1379673 | 2 | 7  | 14 | CA   | 21 | 3  |
| 317522 | 68 | 1382651 | 1382664 | 2 | 7  | 14 | CA   | 22 | 6  |
| 317523 | 68 | 1383060 | 1383071 | 2 | 6  | 12 | AC   | 18 | 3  |
| 317525 | 68 | 1385937 | 1385950 | 2 | 7  | 14 | GT   | 22 | 3  |
| 317529 | 68 | 1388804 | 1388833 | 2 | 15 | 30 | TG   | 14 | 10 |
| 317532 | 68 | 1391981 | 1392016 | 4 | 9  | 36 | TCTA | 17 | 6  |
| 317533 | 68 | 1392338 | 1392357 | 2 | 10 | 20 | GT   | 21 | 4  |
| 317539 | 68 | 1400170 | 1400193 | 3 | 8  | 24 | CCT  | 7  | 5  |
| 317542 | 68 | 1401382 | 1401397 | 2 | 8  | 16 | GT   | 18 | 6  |
| 317549 | 68 | 1404921 | 1404936 | 4 | 4  | 16 | TGCC | 16 | 3  |
| 317552 | 68 | 1412586 | 1412613 | 2 | 14 | 28 | TC   | 14 | 10 |
| 317554 | 68 | 1418694 | 1418707 | 2 | 7  | 14 | TA   | 20 | 17 |
| 317555 | 68 | 1418928 | 1418943 | 2 | 8  | 16 | GT   | 21 | 7  |
| 317556 | 68 | 1418945 | 1418958 | 2 | 7  | 14 | TG   | 22 | 4  |
| 317558 | 68 | 1421154 | 1421167 | 2 | 7  | 14 | GT   | 23 | 7  |
| 317565 | 68 | 1427075 | 1427088 | 2 | 7  | 14 | GA   | 15 | 4  |
| 317566 | 68 | 1427092 | 1427107 | 2 | 8  | 16 | GA   | 14 | 3  |
| 317567 | 68 | 1429011 | 1429022 | 2 | 6  | 12 | GA   | 11 | 4  |
| 317575 | 68 | 1433494 | 1433531 | 2 | 19 | 38 | TG   | 10 | 10 |
| 317576 | 68 | 1435669 | 1435682 | 2 | 7  | 14 | GT   | 25 | 6  |
| 317579 | 68 | 1438231 | 1438264 | 2 | 17 | 34 | TG   | 14 | 8  |
| 317591 | 68 | 1449427 | 1449442 | 2 | 8  | 16 | CT   | 22 | 3  |
| 317592 | 68 | 1449711 | 1449736 | 2 | 13 | 26 | TG   | 20 | 9  |
| 317598 | 68 | 1453518 | 1453529 | 2 | 6  | 12 | AC   | 30 | 4  |
| 317599 | 68 | 1453679 | 1453698 | 2 | 10 | 20 | CA   | 21 | 6  |
| 317604 | 68 | 1460950 | 1460961 | 2 | 6  | 12 | GT   | 21 | 4  |

|        |    |         |         |   |    |    |      |    |    |
|--------|----|---------|---------|---|----|----|------|----|----|
| 317609 | 68 | 1470232 | 1470243 | 2 | 6  | 12 | CA   | 29 | 3  |
| 317611 | 68 | 1473782 | 1473797 | 2 | 8  | 16 | CT   | 21 | 7  |
| 317612 | 68 | 1473799 | 1473812 | 2 | 7  | 14 | TC   | 25 | 6  |
| 317613 | 68 | 1474034 | 1474063 | 2 | 15 | 30 | AC   | 6  | 8  |
| 317614 | 68 | 1478349 | 1478378 | 2 | 15 | 30 | TC   | 12 | 7  |
| 317619 | 68 | 1485266 | 1485309 | 2 | 22 | 44 | CA   | 10 | 9  |
| 317620 | 68 | 1485338 | 1485369 | 2 | 16 | 32 | CA   | 11 | 6  |
| 317621 | 68 | 1486351 | 1486380 | 2 | 15 | 30 | CA   | 11 | 6  |
| 317625 | 68 | 1490182 | 1490195 | 2 | 7  | 14 | AC   | 26 | 3  |
| 317627 | 68 | 1495200 | 1495217 | 2 | 9  | 18 | CA   | 23 | 5  |
| 317628 | 68 | 1504465 | 1504482 | 2 | 9  | 18 | AC   | 13 | 12 |
| 317633 | 68 | 1516840 | 1516883 | 4 | 11 | 44 | TAGA | 14 | 6  |
| 317634 | 68 | 1519071 | 1519090 | 2 | 10 | 20 | TG   | 21 | 6  |
| 317645 | 68 | 1546102 | 1546143 | 2 | 21 | 42 | AC   | 8  | 7  |
| 317657 | 68 | 1554565 | 1554586 | 2 | 11 | 22 | AC   | 15 | 8  |
| 317661 | 68 | 1558951 | 1558966 | 2 | 8  | 16 | CA   | 25 | 5  |
| 317662 | 68 | 1559105 | 1559120 | 2 | 8  | 16 | TG   | 16 | 10 |
| 317663 | 68 | 1560032 | 1560047 | 2 | 8  | 16 | CA   | 10 | 5  |
| 317679 | 68 | 1603782 | 1603803 | 2 | 11 | 22 | AC   | 22 | 4  |
| 317686 | 68 | 1612834 | 1612847 | 2 | 7  | 14 | CT   | 11 | 3  |
| 317687 | 68 | 1616298 | 1616331 | 2 | 17 | 34 | GT   | 8  | 7  |
| 317688 | 68 | 1619530 | 1619561 | 4 | 8  | 32 | TATC | 11 | 5  |
| 317690 | 68 | 1627946 | 1627979 | 2 | 17 | 34 | TG   | 17 | 7  |
| 317692 | 68 | 1636339 | 1636352 | 2 | 7  | 14 | GT   | 16 | 4  |
| 317711 | 68 | 1692566 | 1692595 | 3 | 10 | 30 | ATC  | 9  | 5  |
| 317712 | 68 | 1695763 | 1695786 | 3 | 8  | 24 | GAG  | 27 | 5  |
| 317717 | 68 | 1710515 | 1710538 | 2 | 12 | 24 | GT   | 16 | 11 |
| 317718 | 68 | 1711937 | 1711966 | 2 | 15 | 30 | AC   | 21 | 10 |
| 317719 | 68 | 1713426 | 1713437 | 2 | 6  | 12 | AC   | 30 | 3  |
| 317720 | 68 | 1714783 | 1714820 | 2 | 19 | 38 | CA   | 20 | 9  |
| 317723 | 68 | 1720449 | 1720466 | 2 | 9  | 18 | TG   | 18 | 8  |
| 317725 | 68 | 1722436 | 1722463 | 2 | 14 | 28 | GT   | 13 | 9  |
| 317728 | 68 | 1724678 | 1724691 | 2 | 7  | 14 | CT   | 21 | 4  |
| 317736 | 68 | 1728279 | 1728294 | 2 | 8  | 16 | CA   | 23 | 6  |
| 317737 | 68 | 1731164 | 1731189 | 2 | 13 | 26 | TG   | 13 | 7  |
| 317741 | 68 | 1733010 | 1733039 | 2 | 15 | 30 | AC   | 21 | 5  |
| 317742 | 68 | 1734391 | 1734411 | 3 | 7  | 21 | AAG  | 30 | 3  |
| 317743 | 68 | 1735713 | 1735730 | 2 | 9  | 18 | AC   | 13 | 8  |
| 317748 | 68 | 1736223 | 1736240 | 2 | 9  | 18 | GT   | 22 | 5  |
| 317754 | 68 | 1748899 | 1748924 | 2 | 13 | 26 | TG   | 26 | 7  |
| 317758 | 68 | 1756140 | 1756159 | 2 | 10 | 20 | TG   | 10 | 10 |
| 317759 | 68 | 1759397 | 1759418 | 2 | 11 | 22 | GT   | 21 | 9  |
| 317760 | 68 | 1759489 | 1759504 | 2 | 8  | 16 | GT   | 15 | 6  |
| 317763 | 68 | 1761685 | 1761700 | 2 | 8  | 16 | TG   | 24 | 4  |
| 317766 | 68 | 1764296 | 1764309 | 2 | 7  | 14 | GT   | 24 | 3  |
| 317767 | 68 | 1765265 | 1765276 | 2 | 6  | 12 | GT   | 24 | 14 |
| 317772 | 68 | 1766498 | 1766509 | 2 | 6  | 12 | GA   | 25 | 3  |
| 317776 | 68 | 1768944 | 1768963 | 2 | 10 | 20 | TC   | 17 | 5  |
| 317778 | 68 | 1769381 | 1769404 | 2 | 12 | 24 | AC   | 16 | 11 |
| 317779 | 68 | 1769556 | 1769567 | 2 | 6  | 12 | AC   | 16 | 9  |
| 317780 | 68 | 1769687 | 1769716 | 2 | 15 | 30 | CA   | 11 | 7  |

|        |    |         |         |   |    |    |     |    |    |
|--------|----|---------|---------|---|----|----|-----|----|----|
| 317785 | 68 | 1770063 | 1770078 | 2 | 8  | 16 | CA  | 23 | 5  |
| 317786 | 68 | 1770240 | 1770275 | 2 | 18 | 36 | GT  | 15 | 7  |
| 317787 | 68 | 1770956 | 1770987 | 2 | 16 | 32 | TG  | 11 | 6  |
| 317788 | 68 | 1771191 | 1771228 | 2 | 19 | 38 | TG  | 9  | 9  |
| 317792 | 68 | 1773214 | 1773225 | 2 | 6  | 12 | GT  | 12 | 3  |
| 317793 | 68 | 1773374 | 1773423 | 2 | 25 | 50 | CT  | 6  | 6  |
| 317795 | 68 | 1773793 | 1773830 | 2 | 19 | 38 | TG  | 12 | 12 |
| 317796 | 68 | 1774085 | 1774096 | 2 | 6  | 12 | TG  | 29 | 4  |
| 317798 | 68 | 1774255 | 1774268 | 2 | 7  | 14 | CA  | 21 | 3  |
| 317799 | 68 | 1774404 | 1774421 | 2 | 9  | 18 | AC  | 24 | 3  |
| 317800 | 68 | 1774586 | 1774607 | 2 | 11 | 22 | TG  | 14 | 5  |
| 317801 | 68 | 1775662 | 1775687 | 2 | 13 | 26 | TG  | 19 | 7  |
| 317804 | 68 | 1777235 | 1777252 | 2 | 9  | 18 | GT  | 26 | 4  |
| 317806 | 68 | 1780443 | 1780462 | 2 | 10 | 20 | CA  | 11 | 6  |
| 317807 | 68 | 1780604 | 1780619 | 2 | 8  | 16 | GT  | 24 | 3  |
| 317814 | 68 | 1784562 | 1784613 | 2 | 26 | 52 | TG  | 7  | 9  |
| 317815 | 68 | 1786269 | 1786312 | 2 | 22 | 44 | AC  | 8  | 8  |
| 317816 | 68 | 1786485 | 1786512 | 2 | 14 | 28 | AC  | 12 | 7  |
| 317818 | 68 | 1788655 | 1788676 | 2 | 11 | 22 | AC  | 15 | 7  |
| 317820 | 68 | 1789374 | 1789393 | 2 | 10 | 20 | GT  | 9  | 5  |
| 317822 | 68 | 1789500 | 1789517 | 2 | 9  | 18 | CA  | 19 | 5  |
| 317835 | 68 | 1794675 | 1794696 | 2 | 11 | 22 | CT  | 17 | 7  |
| 317837 | 68 | 1796052 | 1796079 | 2 | 14 | 28 | TG  | 9  | 8  |
| 317838 | 68 | 1798522 | 1798547 | 2 | 13 | 26 | AG  | 24 | 5  |
| 317845 | 68 | 1803360 | 1803389 | 2 | 15 | 30 | CA  | 6  | 5  |
| 317846 | 68 | 1803836 | 1803851 | 2 | 8  | 16 | CA  | 13 | 11 |
| 317847 | 68 | 1803937 | 1803962 | 2 | 13 | 26 | CA  | 6  | 4  |
| 317849 | 68 | 1805561 | 1805580 | 2 | 10 | 20 | GT  | 23 | 3  |
| 317850 | 68 | 1805692 | 1805711 | 2 | 10 | 20 | GT  | 20 | 7  |
| 317851 | 68 | 1806233 | 1806250 | 2 | 9  | 18 | CT  | 25 | 7  |
| 317852 | 68 | 1806852 | 1806875 | 2 | 12 | 24 | TG  | 23 | 7  |
| 317853 | 68 | 1807174 | 1807191 | 2 | 9  | 18 | CT  | 17 | 3  |
| 317857 | 68 | 1808157 | 1808188 | 2 | 16 | 32 | AC  | 14 | 7  |
| 317859 | 68 | 1810695 | 1810712 | 3 | 6  | 18 | TCC | 19 | 3  |
| 317860 | 68 | 1811731 | 1811746 | 2 | 8  | 16 | AT  | 8  | 3  |
| 317861 | 68 | 1814325 | 1814356 | 2 | 16 | 32 | TG  | 7  | 7  |
| 317862 | 68 | 1814565 | 1814588 | 2 | 12 | 24 | CA  | 19 | 7  |
| 317863 | 68 | 1815360 | 1815373 | 2 | 7  | 14 | GT  | 18 | 3  |
| 317865 | 68 | 1816347 | 1816368 | 2 | 11 | 22 | GT  | 16 | 5  |
| 317868 | 68 | 1818050 | 1818067 | 2 | 9  | 18 | AC  | 15 | 3  |
| 317869 | 68 | 1818817 | 1818828 | 2 | 6  | 12 | TG  | 26 | 3  |
| 317870 | 68 | 1819076 | 1819091 | 2 | 8  | 16 | CA  | 17 | 3  |
| 317872 | 68 | 1819371 | 1819396 | 2 | 13 | 26 | AC  | 18 | 6  |
| 317873 | 68 | 1819982 | 1820005 | 2 | 12 | 24 | TG  | 16 | 7  |
| 317874 | 68 | 1820439 | 1820460 | 2 | 11 | 22 | TG  | 26 | 8  |
| 317875 | 68 | 1820577 | 1820594 | 2 | 9  | 18 | TG  | 23 | 5  |
| 317877 | 68 | 1821343 | 1821358 | 2 | 8  | 16 | CA  | 28 | 3  |
| 317878 | 68 | 1821688 | 1821701 | 2 | 7  | 14 | GT  | 27 | 3  |
| 317882 | 68 | 1824347 | 1824376 | 2 | 15 | 30 | GT  | 8  | 7  |
| 317890 | 68 | 1827831 | 1827846 | 2 | 8  | 16 | CA  | 25 | 8  |
| 317893 | 68 | 1828465 | 1828498 | 2 | 17 | 34 | TG  | 7  | 10 |

|        |    |         |         |   |    |    |      |    |    |
|--------|----|---------|---------|---|----|----|------|----|----|
| 317894 | 68 | 1828629 | 1828642 | 2 | 7  | 14 | TG   | 7  | 8  |
| 317895 | 68 | 1828644 | 1828661 | 2 | 9  | 18 | GT   | 8  | 6  |
| 317918 | 68 | 1842915 | 1842932 | 2 | 9  | 18 | GT   | 19 | 3  |
| 317919 | 68 | 1844886 | 1844897 | 2 | 6  | 12 | TG   | 8  | 9  |
| 317920 | 68 | 1845128 | 1845151 | 2 | 12 | 24 | TG   | 17 | 8  |
| 317922 | 68 | 1848858 | 1848879 | 2 | 11 | 22 | AG   | 14 | 4  |
| 317924 | 68 | 1849131 | 1849148 | 2 | 9  | 18 | TC   | 22 | 9  |
| 317925 | 68 | 1850461 | 1850474 | 2 | 7  | 14 | TG   | 17 | 4  |
| 317927 | 68 | 1850649 | 1850672 | 2 | 12 | 24 | AC   | 26 | 11 |
| 317928 | 68 | 1850823 | 1850834 | 2 | 6  | 12 | CA   | 27 | 6  |
| 317929 | 68 | 1850991 | 1851016 | 2 | 13 | 26 | AC   | 16 | 8  |
| 317932 | 68 | 1853458 | 1853477 | 2 | 10 | 20 | TG   | 10 | 5  |
| 317933 | 68 | 1854039 | 1854064 | 2 | 13 | 26 | AG   | 22 | 3  |
| 317936 | 68 | 1854348 | 1854387 | 2 | 20 | 40 | TG   | 22 | 12 |
| 317938 | 68 | 1855290 | 1855303 | 2 | 7  | 14 | AC   | 21 | 4  |
| 317939 | 68 | 1855483 | 1855504 | 2 | 11 | 22 | GT   | 19 | 6  |
| 317942 | 68 | 1856351 | 1856378 | 2 | 14 | 28 | AC   | 16 | 8  |
| 317943 | 68 | 1856955 | 1856986 | 2 | 16 | 32 | TG   | 9  | 9  |
| 317944 | 68 | 1857133 | 1857144 | 2 | 6  | 12 | CA   | 17 | 4  |
| 317949 | 68 | 1860041 | 1860054 | 2 | 7  | 14 | CA   | 27 | 4  |
| 317952 | 68 | 1862461 | 1862502 | 2 | 21 | 42 | TG   | 7  | 9  |
| 317953 | 68 | 1862730 | 1862749 | 2 | 10 | 20 | GT   | 13 | 5  |
| 317958 | 68 | 1864046 | 1864075 | 2 | 15 | 30 | CA   | 7  | 8  |
| 317964 | 68 | 1865310 | 1865321 | 2 | 6  | 12 | CA   | 7  | 3  |
| 317966 | 68 | 1866624 | 1866637 | 2 | 7  | 14 | TG   | 21 | 4  |
| 317967 | 68 | 1866694 | 1866705 | 2 | 6  | 12 | GT   | 29 | 11 |
| 317968 | 68 | 1867168 | 1867195 | 2 | 14 | 28 | GT   | 27 | 8  |
| 317969 | 68 | 1867387 | 1867406 | 2 | 10 | 20 | CA   | 16 | 9  |
| 317972 | 68 | 1869408 | 1869423 | 2 | 8  | 16 | GT   | 10 | 10 |
| 317981 | 68 | 1873733 | 1873752 | 2 | 10 | 20 | AC   | 18 | 9  |
| 317982 | 68 | 1875775 | 1875794 | 2 | 10 | 20 | TG   | 12 | 6  |
| 317983 | 68 | 1875985 | 1876016 | 4 | 8  | 32 | TCAC | 32 | 6  |
| 317985 | 68 | 1876700 | 1876737 | 2 | 19 | 38 | CA   | 13 | 13 |
| 317987 | 68 | 1877608 | 1877629 | 2 | 11 | 22 | AC   | 12 | 7  |
| 317992 | 68 | 1883855 | 1883890 | 2 | 18 | 36 | CT   | 8  | 5  |
| 317993 | 68 | 1884118 | 1884147 | 2 | 15 | 30 | CA   | 11 | 8  |
| 318005 | 68 | 1890067 | 1890086 | 2 | 10 | 20 | TG   | 20 | 9  |
| 318006 | 68 | 1890179 | 1890190 | 2 | 6  | 12 | TG   | 26 | 3  |
| 318007 | 68 | 1890294 | 1890309 | 2 | 8  | 16 | AC   | 18 | 5  |
| 318009 | 68 | 1891176 | 1891195 | 4 | 5  | 20 | ATGT | 30 | 3  |
| 318010 | 68 | 1893215 | 1893242 | 2 | 14 | 28 | TG   | 13 | 6  |
| 318011 | 68 | 1893375 | 1893390 | 4 | 4  | 16 | GACA | 21 | 4  |
| 318012 | 68 | 1893524 | 1893555 | 2 | 16 | 32 | GT   | 9  | 11 |
| 318014 | 68 | 1893778 | 1893799 | 2 | 11 | 22 | CA   | 19 | 8  |
| 318018 | 68 | 1895450 | 1895481 | 2 | 16 | 32 | GT   | 19 | 9  |
| 318020 | 68 | 1895711 | 1895732 | 2 | 11 | 22 | TG   | 13 | 9  |
| 318021 | 68 | 1895764 | 1895789 | 2 | 13 | 26 | GA   | 17 | 3  |
| 318023 | 68 | 1897800 | 1897811 | 2 | 6  | 12 | GA   | 16 | 5  |
| 318024 | 68 | 1897838 | 1897851 | 2 | 7  | 14 | GT   | 11 | 5  |
| 318026 | 68 | 1898325 | 1898342 | 2 | 9  | 18 | CT   | 24 | 4  |
| 318027 | 68 | 1898526 | 1898555 | 2 | 15 | 30 | GT   | 22 | 11 |

|        |    |         |         |   |    |    |      |    |    |
|--------|----|---------|---------|---|----|----|------|----|----|
| 318028 | 68 | 1899079 | 1899098 | 2 | 10 | 20 | CT   | 27 | 3  |
| 318033 | 68 | 1901722 | 1901735 | 2 | 7  | 14 | GT   | 29 | 3  |
| 318034 | 68 | 1901788 | 1901801 | 2 | 7  | 14 | TG   | 21 | 3  |
| 318038 | 68 | 1904915 | 1904934 | 2 | 10 | 20 | TG   | 25 | 4  |
| 318054 | 68 | 1919460 | 1919481 | 2 | 11 | 22 | CT   | 18 | 4  |
| 318055 | 68 | 1919659 | 1919670 | 2 | 6  | 12 | CA   | 15 | 5  |
| 318057 | 68 | 1920367 | 1920396 | 2 | 15 | 30 | GT   | 17 | 10 |
| 318058 | 68 | 1920621 | 1920642 | 2 | 11 | 22 | CA   | 11 | 9  |
| 318059 | 68 | 1920759 | 1920776 | 3 | 6  | 18 | CTC  | 20 | 5  |
| 318060 | 68 | 1921255 | 1921275 | 3 | 7  | 21 | GAG  | 8  | 3  |
| 318061 | 68 | 1921664 | 1921675 | 2 | 6  | 12 | TG   | 25 | 3  |
| 318066 | 68 | 1923119 | 1923144 | 2 | 13 | 26 | GT   | 19 | 4  |
| 318071 | 68 | 1928905 | 1928916 | 2 | 6  | 12 | CA   | 20 | 4  |
| 318081 | 68 | 1934624 | 1934639 | 2 | 8  | 16 | AC   | 23 | 5  |
| 318100 | 68 | 1960759 | 1960772 | 2 | 7  | 14 | AC   | 21 | 3  |
| 318101 | 68 | 1961275 | 1961286 | 2 | 6  | 12 | GT   | 21 | 6  |
| 318102 | 68 | 1961287 | 1961298 | 2 | 6  | 12 | GA   | 21 | 6  |
| 318103 | 68 | 1962087 | 1962118 | 4 | 8  | 32 | AGAA | 19 | 9  |
| 318115 | 68 | 1990144 | 1990165 | 2 | 11 | 22 | TG   | 18 | 9  |
| 318121 | 68 | 1997862 | 1997891 | 2 | 15 | 30 | AC   | 14 | 6  |
| 318122 | 68 | 2001379 | 2001400 | 2 | 11 | 22 | CT   | 10 | 10 |
| 318123 | 68 | 2002720 | 2002731 | 2 | 6  | 12 | TG   | 29 | 5  |
| 318124 | 68 | 2002864 | 2002879 | 2 | 8  | 16 | TC   | 22 | 3  |
| 318128 | 68 | 2012140 | 2012159 | 2 | 10 | 20 | TG   | 17 | 6  |
| 318130 | 68 | 2015891 | 2015906 | 2 | 8  | 16 | TG   | 18 | 5  |
| 318133 | 68 | 2016455 | 2016466 | 2 | 6  | 12 | TG   | 23 | 4  |
| 318136 | 68 | 2020364 | 2020375 | 2 | 6  | 12 | GT   | 26 | 5  |
| 318137 | 68 | 2021136 | 2021151 | 2 | 8  | 16 | TG   | 22 | 5  |
| 318141 | 68 | 2024133 | 2024154 | 2 | 11 | 22 | AG   | 17 | 6  |
| 318142 | 68 | 2025706 | 2025721 | 2 | 8  | 16 | AG   | 23 | 4  |
| 318143 | 68 | 2026124 | 2026137 | 2 | 7  | 14 | CA   | 26 | 4  |
| 318144 | 68 | 2026515 | 2026530 | 4 | 4  | 16 | GGCA | 30 | 5  |
| 318146 | 68 | 2028618 | 2028649 | 2 | 16 | 32 | GT   | 15 | 11 |
| 318152 | 68 | 2029992 | 2030012 | 3 | 7  | 21 | TGG  | 31 | 3  |
| 318153 | 68 | 2030682 | 2030695 | 2 | 7  | 14 | CA   | 19 | 8  |
| 318155 | 68 | 2037926 | 2037941 | 2 | 8  | 16 | AC   | 27 | 4  |
| 318160 | 68 | 2041873 | 2041892 | 2 | 10 | 20 | CA   | 23 | 12 |
| 318163 | 68 | 2046033 | 2046046 | 2 | 7  | 14 | CA   | 14 | 5  |
| 318164 | 68 | 2046049 | 2046060 | 2 | 6  | 12 | CT   | 12 | 6  |
| 318165 | 68 | 2046164 | 2046185 | 2 | 11 | 22 | TG   | 7  | 7  |
| 318166 | 68 | 2046334 | 2046363 | 2 | 15 | 30 | CA   | 8  | 11 |
| 318171 | 68 | 2049452 | 2049469 | 3 | 6  | 18 | AAT  | 12 | 4  |
| 318175 | 68 | 2050448 | 2050463 | 2 | 8  | 16 | TC   | 16 | 10 |
| 318176 | 68 | 2050464 | 2050481 | 2 | 9  | 18 | AC   | 14 | 9  |
| 318178 | 68 | 2051753 | 2051778 | 2 | 13 | 26 | AC   | 18 | 4  |
| 318183 | 68 | 2055292 | 2055333 | 2 | 21 | 42 | AC   | 9  | 11 |
| 318191 | 68 | 2067013 | 2067046 | 2 | 17 | 34 | CA   | 12 | 8  |
| 318192 | 68 | 2070183 | 2070194 | 2 | 6  | 12 | CA   | 21 | 4  |
| 318194 | 68 | 2070934 | 2070957 | 2 | 12 | 24 | GT   | 19 | 4  |
| 318196 | 68 | 2073468 | 2073491 | 2 | 12 | 24 | CA   | 22 | 5  |
| 318200 | 68 | 2082505 | 2082520 | 4 | 4  | 16 | TTTG | 21 | 9  |



|        |    |         |         |   |    |    |      |    |    |
|--------|----|---------|---------|---|----|----|------|----|----|
| 318205 | 68 | 2089670 | 2089685 | 2 | 8  | 16 | CA   | 17 | 3  |
| 318218 | 68 | 2104651 | 2104674 | 3 | 8  | 24 | CAG  | 25 | 5  |
| 318231 | 68 | 2151288 | 2151305 | 3 | 6  | 18 | TGT  | 24 | 6  |
| 318233 | 68 | 2162731 | 2162745 | 3 | 5  | 15 | AAT  | 13 | 5  |
| 318253 | 68 | 2230391 | 2230418 | 4 | 7  | 28 | GACA | 19 | 9  |
| 318254 | 68 | 2231151 | 2231165 | 3 | 5  | 15 | AGT  | 34 | 3  |
| 318255 | 68 | 2232733 | 2232748 | 2 | 8  | 16 | AG   | 15 | 8  |
| 318258 | 68 | 2236121 | 2236134 | 2 | 7  | 14 | CA   | 13 | 6  |
| 318260 | 68 | 2238458 | 2238481 | 2 | 12 | 24 | GT   | 8  | 4  |
| 318264 | 68 | 2241587 | 2241618 | 2 | 16 | 32 | GT   | 15 | 4  |
| 318265 | 68 | 2242255 | 2242268 | 2 | 7  | 14 | AC   | 20 | 12 |
| 318267 | 68 | 2252058 | 2252089 | 2 | 16 | 32 | TG   | 18 | 6  |
| 318270 | 68 | 2256993 | 2257018 | 2 | 13 | 26 | AC   | 9  | 7  |
| 318271 | 68 | 2259313 | 2259346 | 2 | 17 | 34 | TG   | 10 | 10 |
| 318272 | 68 | 2262897 | 2262914 | 2 | 9  | 18 | TG   | 17 | 12 |
| 318275 | 68 | 2265011 | 2265040 | 2 | 15 | 30 | TG   | 14 | 9  |
| 318279 | 68 | 2271517 | 2271532 | 2 | 8  | 16 | GT   | 16 | 4  |
| 318280 | 68 | 2278102 | 2278115 | 2 | 7  | 14 | TG   | 23 | 4  |
| 318281 | 68 | 2282259 | 2282286 | 2 | 14 | 28 | GT   | 15 | 6  |
| 318282 | 68 | 2283672 | 2283683 | 2 | 6  | 12 | GT   | 21 | 5  |
| 318287 | 68 | 2296307 | 2296322 | 2 | 8  | 16 | CA   | 16 | 10 |
| 318289 | 68 | 2300091 | 2300104 | 2 | 7  | 14 | AT   | 18 | 5  |
| 318290 | 68 | 2302586 | 2302615 | 2 | 15 | 30 | CA   | 19 | 7  |
| 318291 | 68 | 2304101 | 2304148 | 3 | 16 | 48 | TTG  | 22 | 10 |
| 318294 | 68 | 2313474 | 2313485 | 2 | 6  | 12 | GT   | 33 | 4  |
| 318296 | 68 | 2321892 | 2321903 | 2 | 6  | 12 | TG   | 30 | 3  |
| 318299 | 68 | 2334869 | 2334900 | 4 | 8  | 32 | TTGA | 29 | 9  |
| 318302 | 68 | 2347591 | 2347606 | 2 | 8  | 16 | TC   | 22 | 11 |
| 318303 | 68 | 2347607 | 2347624 | 2 | 9  | 18 | AC   | 25 | 9  |
| 318304 | 68 | 2350340 | 2350359 | 2 | 10 | 20 | CA   | 8  | 5  |
| 318313 | 68 | 2355201 | 2355212 | 2 | 6  | 12 | TC   | 24 | 3  |
| 318314 | 68 | 2357155 | 2357176 | 2 | 11 | 22 | CA   | 10 | 8  |
| 318318 | 68 | 2357361 | 2357378 | 2 | 9  | 18 | AG   | 14 | 10 |
| 318329 | 68 | 2380514 | 2380525 | 2 | 6  | 12 | AC   | 20 | 3  |
| 318330 | 68 | 2380865 | 2380876 | 2 | 6  | 12 | AT   | 17 | 3  |
| 318345 | 68 | 2404776 | 2404793 | 2 | 9  | 18 | GT   | 23 | 6  |
| 318349 | 68 | 2410715 | 2410728 | 2 | 7  | 14 | AC   | 25 | 3  |
| 318354 | 68 | 2412707 | 2412748 | 2 | 21 | 42 | CA   | 11 | 9  |
| 318355 | 68 | 2417063 | 2417078 | 2 | 8  | 16 | TG   | 33 | 4  |
| 318357 | 68 | 2421211 | 2421234 | 3 | 8  | 24 | ATC  | 23 | 11 |
| 318358 | 68 | 2422399 | 2422428 | 2 | 15 | 30 | AC   | 16 | 11 |
| 318372 | 68 | 2472185 | 2472210 | 2 | 13 | 26 | CA   | 8  | 8  |
| 318375 | 68 | 2479468 | 2479493 | 2 | 13 | 26 | CA   | 12 | 8  |
| 318376 | 68 | 2480635 | 2480652 | 2 | 9  | 18 | TG   | 14 | 4  |
| 318384 | 68 | 2506341 | 2506362 | 2 | 11 | 22 | TG   | 19 | 9  |
| 318387 | 68 | 2523558 | 2523583 | 2 | 13 | 26 | GT   | 9  | 8  |
| 318401 | 69 | 5619    | 5636    | 2 | 9  | 18 | GT   | 18 | 5  |
| 318403 | 69 | 12026   | 12043   | 3 | 6  | 18 | ATT  | 20 | 5  |
| 318405 | 69 | 15093   | 15106   | 2 | 7  | 14 | GT   | 14 | 10 |
| 318409 | 69 | 20268   | 20305   | 2 | 19 | 38 | GT   | 11 | 9  |
| 318419 | 69 | 36607   | 36630   | 2 | 12 | 24 | GT   | 18 | 12 |

|        |    |        |        |   |    |    |      |    |    |
|--------|----|--------|--------|---|----|----|------|----|----|
| 318420 | 69 | 36880  | 36897  | 2 | 9  | 18 | CA   | 26 | 5  |
| 318421 | 69 | 40594  | 40608  | 3 | 5  | 15 | TTC  | 23 | 4  |
| 318422 | 69 | 41909  | 41950  | 2 | 21 | 42 | TG   | 10 | 9  |
| 318428 | 69 | 49231  | 49244  | 2 | 7  | 14 | GT   | 24 | 3  |
| 318429 | 69 | 50909  | 50920  | 2 | 6  | 12 | AC   | 7  | 4  |
| 318433 | 69 | 52813  | 52834  | 2 | 11 | 22 | GT   | 23 | 5  |
| 318435 | 69 | 57976  | 57993  | 2 | 9  | 18 | GT   | 16 | 9  |
| 318441 | 69 | 66541  | 66588  | 3 | 16 | 48 | AGG  | 6  | 5  |
| 318442 | 69 | 67235  | 67264  | 2 | 15 | 30 | CA   | 18 | 11 |
| 318447 | 69 | 76397  | 76418  | 2 | 11 | 22 | AC   | 31 | 4  |
| 318448 | 69 | 76548  | 76611  | 2 | 32 | 64 | GT   | 7  | 11 |
| 318451 | 69 | 80386  | 80399  | 2 | 7  | 14 | TG   | 17 | 4  |
| 318452 | 69 | 80617  | 80628  | 2 | 6  | 12 | GT   | 17 | 5  |
| 318454 | 69 | 84034  | 84047  | 2 | 7  | 14 | AT   | 21 | 3  |
| 318455 | 69 | 91513  | 91528  | 2 | 8  | 16 | CT   | 21 | 3  |
| 318457 | 69 | 101850 | 101863 | 2 | 7  | 14 | TG   | 28 | 3  |
| 318459 | 69 | 107413 | 107426 | 2 | 7  | 14 | TG   | 23 | 5  |
| 318460 | 69 | 108190 | 108204 | 3 | 5  | 15 | AAG  | 16 | 5  |
| 318462 | 69 | 115145 | 115188 | 2 | 22 | 44 | GT   | 13 | 13 |
| 318463 | 69 | 115330 | 115345 | 2 | 8  | 16 | AC   | 16 | 5  |
| 318465 | 69 | 126495 | 126510 | 2 | 8  | 16 | GA   | 32 | 3  |
| 318474 | 69 | 140456 | 140467 | 2 | 6  | 12 | CA   | 33 | 4  |
| 318475 | 69 | 146932 | 146945 | 2 | 7  | 14 | CA   | 30 | 3  |
| 318476 | 69 | 147112 | 147129 | 3 | 6  | 18 | GGC  | 19 | 13 |
| 318481 | 69 | 157005 | 157016 | 2 | 6  | 12 | AC   | 32 | 4  |
| 318484 | 69 | 161760 | 161793 | 2 | 17 | 34 | GT   | 9  | 10 |
| 318486 | 69 | 170339 | 170350 | 2 | 6  | 12 | CA   | 22 | 4  |
| 318490 | 69 | 182002 | 182016 | 3 | 5  | 15 | GAA  | 8  | 4  |
| 318491 | 69 | 182492 | 182511 | 4 | 5  | 20 | TTTA | 20 | 3  |
| 318495 | 69 | 184090 | 184109 | 2 | 10 | 20 | GT   | 19 | 5  |
| 318496 | 69 | 187938 | 187951 | 2 | 7  | 14 | TG   | 23 | 5  |
| 318505 | 69 | 206404 | 206421 | 2 | 9  | 18 | AC   | 17 | 8  |
| 318511 | 69 | 220073 | 220088 | 4 | 4  | 16 | TTTA | 17 | 5  |
| 318512 | 69 | 224602 | 224615 | 2 | 7  | 14 | CA   | 29 | 5  |
| 318513 | 69 | 224688 | 224725 | 2 | 19 | 38 | GT   | 8  | 5  |
| 318519 | 69 | 253184 | 253201 | 2 | 9  | 18 | GT   | 12 | 9  |
| 318520 | 69 | 259704 | 259733 | 3 | 10 | 30 | ATA  | 18 | 9  |
| 318533 | 69 | 284183 | 284202 | 2 | 10 | 20 | CA   | 21 | 6  |
| 318534 | 69 | 284830 | 284851 | 2 | 11 | 22 | CA   | 13 | 16 |
| 318537 | 69 | 286027 | 286042 | 4 | 4  | 16 | TGTA | 19 | 5  |
| 318541 | 69 | 294948 | 294975 | 2 | 14 | 28 | GT   | 23 | 11 |
| 318546 | 69 | 300484 | 300501 | 2 | 9  | 18 | GT   | 12 | 5  |
| 318547 | 69 | 303544 | 303573 | 2 | 15 | 30 | AC   | 18 | 10 |
| 318548 | 69 | 303725 | 303750 | 2 | 13 | 26 | TG   | 27 | 6  |
| 318552 | 69 | 319164 | 319177 | 2 | 7  | 14 | TG   | 10 | 5  |
| 318555 | 69 | 322601 | 322618 | 2 | 9  | 18 | GT   | 16 | 8  |
| 318557 | 69 | 322934 | 322961 | 2 | 14 | 28 | GT   | 18 | 8  |
| 318562 | 69 | 340329 | 340360 | 2 | 16 | 32 | CA   | 19 | 10 |
| 318565 | 69 | 348106 | 348125 | 4 | 5  | 20 | CTAT | 21 | 15 |
| 318566 | 69 | 349144 | 349179 | 2 | 18 | 36 | TG   | 7  | 7  |
| 318567 | 69 | 349239 | 349278 | 2 | 20 | 40 | AC   | 6  | 9  |

|        |    |        |        |   |    |    |      |    |    |
|--------|----|--------|--------|---|----|----|------|----|----|
| 318569 | 69 | 354127 | 354156 | 2 | 15 | 30 | CA   | 18 | 8  |
| 318575 | 69 | 366788 | 366817 | 2 | 15 | 30 | GT   | 21 | 10 |
| 318576 | 69 | 373171 | 373184 | 2 | 7  | 14 | TG   | 14 | 7  |
| 318577 | 69 | 373819 | 373846 | 2 | 14 | 28 | CA   | 13 | 7  |
| 318580 | 69 | 378172 | 378185 | 2 | 7  | 14 | AG   | 17 | 9  |
| 318581 | 69 | 378188 | 378205 | 2 | 9  | 18 | GT   | 18 | 10 |
| 318583 | 69 | 381982 | 381995 | 2 | 7  | 14 | CA   | 21 | 4  |
| 318584 | 69 | 382085 | 382118 | 2 | 17 | 34 | CA   | 7  | 9  |
| 318587 | 69 | 383607 | 383628 | 2 | 11 | 22 | AC   | 17 | 8  |
| 318589 | 69 | 383706 | 383729 | 2 | 12 | 24 | GT   | 12 | 10 |
| 318591 | 69 | 383867 | 383894 | 2 | 14 | 28 | TG   | 13 | 13 |
| 318592 | 69 | 384994 | 385009 | 2 | 8  | 16 | GT   | 23 | 4  |
| 318600 | 69 | 391268 | 391297 | 2 | 15 | 30 | CA   | 16 | 8  |
| 318601 | 69 | 391436 | 391473 | 2 | 19 | 38 | AC   | 9  | 7  |
| 318604 | 69 | 399121 | 399141 | 3 | 7  | 21 | AGG  | 21 | 5  |
| 318609 | 69 | 414845 | 414858 | 2 | 7  | 14 | CA   | 16 | 8  |
| 318615 | 69 | 438048 | 438087 | 2 | 20 | 40 | TG   | 7  | 10 |
| 318619 | 69 | 472874 | 472901 | 2 | 14 | 28 | AC   | 8  | 7  |
| 318626 | 69 | 506743 | 506760 | 3 | 6  | 18 | TAT  | 19 | 5  |
| 318633 | 69 | 514035 | 514050 | 4 | 4  | 16 | TTTG | 19 | 4  |
| 318634 | 69 | 525504 | 525525 | 2 | 11 | 22 | AC   | 14 | 7  |
| 318635 | 69 | 525689 | 525728 | 2 | 20 | 40 | GT   | 19 | 10 |
| 318642 | 69 | 529201 | 529232 | 2 | 16 | 32 | TG   | 15 | 11 |
| 318644 | 69 | 532219 | 532239 | 3 | 7  | 21 | TCT  | 24 | 5  |
| 318646 | 69 | 536159 | 536170 | 2 | 6  | 12 | CA   | 29 | 3  |
| 318650 | 69 | 548351 | 548366 | 2 | 8  | 16 | AC   | 19 | 4  |
| 318654 | 69 | 566150 | 566173 | 4 | 6  | 24 | AGAA | 15 | 3  |
| 318659 | 69 | 578530 | 578579 | 2 | 25 | 50 | AC   | 7  | 10 |
| 318661 | 69 | 582736 | 582759 | 4 | 6  | 24 | AAAG | 21 | 5  |
| 318662 | 69 | 583633 | 583650 | 2 | 9  | 18 | GT   | 23 | 7  |
| 318663 | 69 | 583802 | 583817 | 2 | 8  | 16 | CA   | 27 | 10 |
| 318666 | 69 | 587333 | 587346 | 2 | 7  | 14 | TC   | 29 | 6  |
| 318669 | 69 | 604196 | 604253 | 2 | 29 | 58 | AC   | 6  | 10 |
| 318673 | 69 | 608271 | 608284 | 2 | 7  | 14 | AC   | 18 | 12 |
| 318674 | 69 | 608287 | 608300 | 2 | 7  | 14 | AC   | 15 | 10 |
| 318675 | 69 | 608474 | 608507 | 2 | 17 | 34 | GT   | 17 | 7  |
| 318678 | 69 | 610414 | 610428 | 3 | 5  | 15 | CTG  | 27 | 3  |
| 318684 | 69 | 623331 | 623356 | 2 | 13 | 26 | AC   | 12 | 6  |
| 318685 | 69 | 623517 | 623530 | 2 | 7  | 14 | TG   | 19 | 4  |
| 318686 | 69 | 623598 | 623613 | 4 | 4  | 16 | ACTG | 25 | 3  |
| 318692 | 69 | 628634 | 628661 | 2 | 14 | 28 | GT   | 12 | 9  |
| 318695 | 69 | 635045 | 635056 | 2 | 6  | 12 | TG   | 20 | 3  |
| 318696 | 69 | 637935 | 637954 | 2 | 10 | 20 | AC   | 13 | 9  |
| 318697 | 69 | 638479 | 638492 | 2 | 7  | 14 | TG   | 28 | 4  |
| 318699 | 69 | 642379 | 642412 | 2 | 17 | 34 | TG   | 20 | 9  |
| 318703 | 69 | 648213 | 648227 | 3 | 5  | 15 | CCT  | 20 | 4  |
| 318705 | 69 | 651393 | 651410 | 2 | 9  | 18 | CA   | 26 | 3  |
| 318706 | 69 | 652801 | 652812 | 2 | 6  | 12 | GT   | 20 | 9  |
| 318707 | 69 | 652815 | 652830 | 2 | 8  | 16 | GT   | 21 | 11 |
| 318710 | 69 | 662301 | 662315 | 3 | 5  | 15 | TGC  | 23 | 3  |
| 318715 | 69 | 671491 | 671517 | 3 | 9  | 27 | TAA  | 15 | 7  |

|        |    |        |        |   |    |    |      |    |    |
|--------|----|--------|--------|---|----|----|------|----|----|
| 318716 | 69 | 671715 | 671734 | 2 | 10 | 20 | TG   | 12 | 10 |
| 318720 | 69 | 677546 | 677573 | 2 | 14 | 28 | AC   | 8  | 8  |
| 318723 | 69 | 679604 | 679621 | 2 | 9  | 18 | CA   | 23 | 6  |
| 318724 | 69 | 679783 | 679796 | 2 | 7  | 14 | TG   | 22 | 3  |
| 318730 | 69 | 692469 | 692492 | 2 | 12 | 24 | TG   | 18 | 8  |
| 318731 | 69 | 692606 | 692627 | 2 | 11 | 22 | TG   | 18 | 10 |
| 318732 | 69 | 692815 | 692840 | 2 | 13 | 26 | AG   | 12 | 9  |
| 318733 | 69 | 692926 | 692939 | 2 | 7  | 14 | AG   | 18 | 4  |
| 318734 | 69 | 693958 | 693977 | 2 | 10 | 20 | AG   | 15 | 6  |
| 318735 | 69 | 694058 | 694077 | 2 | 10 | 20 | GT   | 19 | 11 |
| 318739 | 69 | 696937 | 696950 | 2 | 7  | 14 | AC   | 19 | 5  |
| 318746 | 69 | 701613 | 701644 | 2 | 16 | 32 | TG   | 16 | 8  |
| 318752 | 69 | 703341 | 703354 | 2 | 7  | 14 | CA   | 17 | 9  |
| 318758 | 69 | 706255 | 706266 | 2 | 6  | 12 | AG   | 15 | 4  |
| 318759 | 69 | 706267 | 706286 | 2 | 10 | 20 | GA   | 8  | 5  |
| 318761 | 69 | 706712 | 706739 | 2 | 14 | 28 | AC   | 13 | 10 |
| 318765 | 69 | 716335 | 716352 | 2 | 9  | 18 | TG   | 18 | 8  |
| 318769 | 69 | 719268 | 719293 | 2 | 13 | 26 | CA   | 18 | 5  |
| 318770 | 69 | 719495 | 719524 | 2 | 15 | 30 | AC   | 11 | 11 |
| 318771 | 69 | 723126 | 723137 | 2 | 6  | 12 | CA   | 22 | 8  |
| 318772 | 69 | 723210 | 723224 | 3 | 5  | 15 | GGT  | 15 | 10 |
| 318785 | 69 | 741791 | 741814 | 2 | 12 | 24 | CA   | 13 | 10 |
| 318786 | 69 | 744634 | 744655 | 2 | 11 | 22 | AC   | 18 | 9  |
| 318787 | 69 | 745864 | 745884 | 3 | 7  | 21 | ACA  | 20 | 4  |
| 318789 | 69 | 748443 | 748454 | 2 | 6  | 12 | AC   | 18 | 7  |
| 318791 | 69 | 749547 | 749566 | 2 | 10 | 20 | TG   | 14 | 6  |
| 318793 | 69 | 753424 | 753441 | 2 | 9  | 18 | AC   | 9  | 10 |
| 318796 | 69 | 755578 | 755613 | 2 | 18 | 36 | CA   | 12 | 14 |
| 318798 | 69 | 762470 | 762503 | 2 | 17 | 34 | GT   | 14 | 9  |
| 318800 | 69 | 773934 | 773965 | 2 | 16 | 32 | TG   | 11 | 7  |
| 318801 | 69 | 774051 | 774084 | 2 | 17 | 34 | TG   | 17 | 8  |
| 318803 | 69 | 778262 | 778287 | 2 | 13 | 26 | AC   | 19 | 7  |
| 318807 | 69 | 781868 | 781881 | 2 | 7  | 14 | GT   | 18 | 3  |
| 318813 | 69 | 784274 | 784291 | 2 | 9  | 18 | TG   | 20 | 9  |
| 318814 | 69 | 784364 | 784381 | 2 | 9  | 18 | TG   | 21 | 5  |
| 318818 | 69 | 787132 | 787155 | 2 | 12 | 24 | TG   | 21 | 9  |
| 318820 | 69 | 787463 | 787486 | 2 | 12 | 24 | TG   | 11 | 17 |
| 318824 | 69 | 796726 | 796749 | 2 | 12 | 24 | CA   | 19 | 12 |
| 318825 | 69 | 798048 | 798079 | 2 | 16 | 32 | CA   | 11 | 9  |
| 318826 | 69 | 798401 | 798415 | 3 | 5  | 15 | TTA  | 14 | 4  |
| 318827 | 69 | 798861 | 798872 | 2 | 6  | 12 | TG   | 29 | 3  |
| 318828 | 69 | 799197 | 799214 | 2 | 9  | 18 | AC   | 14 | 4  |
| 318829 | 69 | 801375 | 801398 | 2 | 12 | 24 | CA   | 20 | 9  |
| 318830 | 69 | 801566 | 801593 | 2 | 14 | 28 | GT   | 11 | 13 |
| 318831 | 69 | 804225 | 804254 | 2 | 15 | 30 | GT   | 20 | 13 |
| 318833 | 69 | 808927 | 808942 | 4 | 4  | 16 | TAAC | 19 | 3  |
| 318835 | 69 | 818733 | 818750 | 3 | 6  | 18 | GCA  | 23 | 3  |
| 318847 | 69 | 859110 | 859133 | 3 | 8  | 24 | TAC  | 18 | 5  |
| 318849 | 69 | 859765 | 859776 | 2 | 6  | 12 | AG   | 26 | 4  |
| 318855 | 69 | 866573 | 866588 | 2 | 8  | 16 | TA   | 14 | 4  |
| 318856 | 69 | 866590 | 866603 | 2 | 7  | 14 | AT   | 14 | 6  |

|        |    |         |         |   |    |    |      |    |    |
|--------|----|---------|---------|---|----|----|------|----|----|
| 318857 | 69 | 867270  | 867297  | 2 | 14 | 28 | TG   | 11 | 15 |
| 318858 | 69 | 867355  | 867382  | 2 | 14 | 28 | TG   | 7  | 7  |
| 318860 | 69 | 874482  | 874501  | 2 | 10 | 20 | GT   | 16 | 6  |
| 318862 | 69 | 879579  | 879592  | 2 | 7  | 14 | TG   | 22 | 3  |
| 318864 | 69 | 884041  | 884052  | 2 | 6  | 12 | TG   | 18 | 9  |
| 318870 | 69 | 888262  | 888281  | 2 | 10 | 20 | TG   | 17 | 4  |
| 318885 | 69 | 908581  | 908598  | 2 | 9  | 18 | CA   | 18 | 7  |
| 318886 | 69 | 909962  | 909987  | 2 | 13 | 26 | AC   | 16 | 5  |
| 318895 | 69 | 918763  | 918774  | 2 | 6  | 12 | AT   | 9  | 3  |
| 318897 | 69 | 922641  | 922656  | 2 | 8  | 16 | TG   | 22 | 4  |
| 318903 | 69 | 935337  | 935364  | 2 | 14 | 28 | GA   | 18 | 8  |
| 318906 | 69 | 941075  | 941092  | 2 | 9  | 18 | GT   | 26 | 6  |
| 318912 | 69 | 947992  | 948035  | 2 | 22 | 44 | AC   | 10 | 11 |
| 318915 | 69 | 954592  | 954603  | 2 | 6  | 12 | CA   | 23 | 10 |
| 318916 | 69 | 954766  | 954783  | 2 | 9  | 18 | GT   | 27 | 4  |
| 318919 | 69 | 957813  | 957828  | 2 | 8  | 16 | TA   | 20 | 4  |
| 318921 | 69 | 960025  | 960042  | 3 | 6  | 18 | ATT  | 17 | 3  |
| 318922 | 69 | 961413  | 961434  | 2 | 11 | 22 | CA   | 16 | 5  |
| 318925 | 69 | 962876  | 962911  | 2 | 18 | 36 | TG   | 12 | 9  |
| 318927 | 69 | 964855  | 964896  | 2 | 21 | 42 | AC   | 14 | 17 |
| 318935 | 69 | 971822  | 971835  | 2 | 7  | 14 | GT   | 9  | 4  |
| 318954 | 69 | 988575  | 988589  | 3 | 5  | 15 | CAG  | 25 | 6  |
| 318955 | 69 | 990451  | 990482  | 2 | 16 | 32 | AG   | 8  | 7  |
| 318959 | 69 | 995988  | 996019  | 2 | 16 | 32 | GT   | 6  | 9  |
| 318961 | 69 | 997840  | 997859  | 2 | 10 | 20 | TG   | 24 | 5  |
| 318963 | 69 | 998597  | 998620  | 2 | 12 | 24 | CA   | 25 | 10 |
| 318966 | 69 | 1001254 | 1001287 | 2 | 17 | 34 | AC   | 18 | 11 |
| 318970 | 69 | 1006157 | 1006180 | 2 | 12 | 24 | AC   | 13 | 7  |
| 318977 | 69 | 1020503 | 1020518 | 4 | 4  | 16 | TTTA | 21 | 4  |
| 318978 | 69 | 1021835 | 1021848 | 2 | 7  | 14 | GT   | 20 | 3  |
| 318980 | 69 | 1023246 | 1023267 | 2 | 11 | 22 | AC   | 17 | 8  |
| 318981 | 69 | 1023369 | 1023394 | 2 | 13 | 26 | GT   | 12 | 7  |
| 318982 | 69 | 1025146 | 1025167 | 2 | 11 | 22 | AC   | 19 | 6  |
| 318985 | 69 | 1029378 | 1029389 | 2 | 6  | 12 | AC   | 14 | 5  |
| 318986 | 69 | 1029392 | 1029409 | 2 | 9  | 18 | AC   | 19 | 6  |
| 318987 | 69 | 1030913 | 1030942 | 3 | 10 | 30 | GAA  | 18 | 9  |
| 318989 | 69 | 1031808 | 1031839 | 2 | 16 | 32 | TG   | 19 | 10 |
| 318990 | 69 | 1037115 | 1037132 | 2 | 9  | 18 | CA   | 26 | 10 |
| 318991 | 69 | 1037214 | 1037231 | 2 | 9  | 18 | TC   | 23 | 5  |
| 318992 | 69 | 1037265 | 1037288 | 2 | 12 | 24 | TG   | 15 | 13 |
| 318994 | 69 | 1039820 | 1039831 | 2 | 6  | 12 | CA   | 18 | 3  |
| 318995 | 69 | 1039846 | 1039859 | 2 | 7  | 14 | CA   | 8  | 5  |
| 318996 | 69 | 1039862 | 1039877 | 2 | 8  | 16 | CA   | 9  | 3  |
| 318997 | 69 | 1044846 | 1044873 | 2 | 14 | 28 | AC   | 14 | 11 |
| 318999 | 69 | 1050596 | 1050610 | 3 | 5  | 15 | GAT  | 20 | 5  |
| 319002 | 69 | 1062174 | 1062193 | 2 | 10 | 20 | TG   | 11 | 6  |
| 319006 | 69 | 1082256 | 1082267 | 2 | 6  | 12 | GT   | 16 | 10 |
| 319012 | 69 | 1089685 | 1089728 | 4 | 11 | 44 | TTCT | 29 | 12 |
| 319013 | 69 | 1097251 | 1097262 | 2 | 6  | 12 | AT   | 24 | 4  |
| 319015 | 69 | 1099922 | 1099935 | 2 | 7  | 14 | AG   | 33 | 3  |
| 319016 | 69 | 1107509 | 1107544 | 4 | 9  | 36 | GATA | 12 | 11 |

|        |    |         |         |   |    |    |      |    |    |
|--------|----|---------|---------|---|----|----|------|----|----|
| 319018 | 69 | 1124269 | 1124288 | 2 | 10 | 20 | AG   | 13 | 11 |
| 319022 | 69 | 1153077 | 1153090 | 2 | 7  | 14 | GA   | 23 | 5  |
| 319023 | 69 | 1160724 | 1160738 | 3 | 5  | 15 | CCA  | 23 | 3  |
| 319027 | 69 | 1173388 | 1173429 | 2 | 21 | 42 | TG   | 6  | 8  |
| 319029 | 69 | 1178886 | 1178899 | 2 | 7  | 14 | TG   | 15 | 7  |
| 319032 | 69 | 1182463 | 1182486 | 2 | 12 | 24 | CA   | 20 | 11 |
| 319035 | 69 | 1188682 | 1188702 | 3 | 7  | 21 | GAG  | 6  | 5  |
| 319038 | 69 | 1193566 | 1193589 | 3 | 8  | 24 | GCA  | 20 | 6  |
| 319041 | 69 | 1201949 | 1201966 | 2 | 9  | 18 | GT   | 16 | 8  |
| 319043 | 69 | 1207246 | 1207265 | 2 | 10 | 20 | AG   | 15 | 3  |
| 319045 | 69 | 1207863 | 1207882 | 4 | 5  | 20 | TCCT | 31 | 5  |
| 319046 | 69 | 1214383 | 1214400 | 2 | 9  | 18 | TG   | 23 | 4  |
| 319048 | 69 | 1217143 | 1217174 | 2 | 16 | 32 | AC   | 8  | 10 |
| 319054 | 69 | 1220473 | 1220484 | 2 | 6  | 12 | AT   | 26 | 7  |
| 319055 | 69 | 1220939 | 1220968 | 2 | 15 | 30 | CA   | 13 | 12 |
| 319057 | 69 | 1221395 | 1221406 | 2 | 6  | 12 | TA   | 20 | 3  |
| 319058 | 69 | 1224022 | 1224033 | 2 | 6  | 12 | TG   | 24 | 3  |
| 319059 | 69 | 1224120 | 1224151 | 2 | 16 | 32 | AC   | 10 | 8  |
| 319061 | 69 | 1225838 | 1225870 | 3 | 11 | 33 | CCT  | 15 | 7  |
| 319071 | 69 | 1236991 | 1237010 | 2 | 10 | 20 | TG   | 15 | 5  |
| 319073 | 69 | 1237610 | 1237624 | 3 | 5  | 15 | ATG  | 18 | 8  |
| 319074 | 69 | 1237626 | 1237643 | 3 | 6  | 18 | TGA  | 24 | 8  |
| 319084 | 69 | 1260996 | 1261023 | 2 | 14 | 28 | GT   | 14 | 6  |
| 319090 | 69 | 1266267 | 1266290 | 3 | 8  | 24 | TAC  | 16 | 12 |
| 319091 | 69 | 1271656 | 1271679 | 3 | 8  | 24 | TCC  | 23 | 4  |
| 319094 | 69 | 1280027 | 1280038 | 2 | 6  | 12 | AC   | 23 | 3  |
| 319097 | 69 | 1285521 | 1285540 | 2 | 10 | 20 | CA   | 8  | 4  |
| 319100 | 69 | 1288001 | 1288024 | 2 | 12 | 24 | CA   | 14 | 10 |
| 319101 | 69 | 1291401 | 1291432 | 2 | 16 | 32 | TG   | 11 | 7  |
| 319105 | 69 | 1295378 | 1295393 | 2 | 8  | 16 | CA   | 23 | 6  |
| 319106 | 69 | 1296749 | 1296764 | 2 | 8  | 16 | TG   | 13 | 3  |
| 319116 | 69 | 1306573 | 1306594 | 2 | 11 | 22 | GA   | 17 | 9  |
| 319118 | 69 | 1316681 | 1316696 | 4 | 4  | 16 | GGTT | 23 | 4  |
| 319120 | 69 | 1318627 | 1318654 | 4 | 7  | 28 | TGAT | 29 | 10 |
| 319121 | 69 | 1321259 | 1321270 | 2 | 6  | 12 | AC   | 12 | 8  |
| 319122 | 69 | 1321519 | 1321560 | 3 | 14 | 42 | GAT  | 26 | 15 |
| 319128 | 69 | 1340982 | 1340996 | 3 | 5  | 15 | CAC  | 19 | 3  |
| 319129 | 69 | 1342377 | 1342390 | 2 | 7  | 14 | AG   | 27 | 4  |
| 319132 | 69 | 1346567 | 1346584 | 2 | 9  | 18 | CT   | 18 | 13 |
| 319138 | 69 | 1360085 | 1360100 | 2 | 8  | 16 | CA   | 32 | 4  |
| 319140 | 69 | 1364161 | 1364196 | 2 | 18 | 36 | TG   | 10 | 16 |
| 319143 | 69 | 1370138 | 1370167 | 2 | 15 | 30 | GT   | 26 | 9  |
| 319144 | 69 | 1370269 | 1370290 | 2 | 11 | 22 | AC   | 19 | 10 |
| 319145 | 69 | 1370473 | 1370500 | 2 | 14 | 28 | CT   | 9  | 4  |
| 319148 | 69 | 1380273 | 1380286 | 2 | 7  | 14 | CA   | 8  | 4  |
| 319149 | 69 | 1380447 | 1380464 | 2 | 9  | 18 | GT   | 18 | 8  |
| 319153 | 69 | 1381418 | 1381450 | 3 | 11 | 33 | CCT  | 15 | 8  |
| 319159 | 69 | 1384505 | 1384525 | 3 | 7  | 21 | TCA  | 24 | 3  |
| 319161 | 69 | 1385304 | 1385315 | 2 | 6  | 12 | TC   | 15 | 8  |
| 319164 | 69 | 1385358 | 1385387 | 2 | 15 | 30 | AC   | 10 | 12 |
| 319168 | 69 | 1387694 | 1387721 | 2 | 14 | 28 | GT   | 17 | 9  |

|        |    |         |         |   |    |    |      |    |    |
|--------|----|---------|---------|---|----|----|------|----|----|
| 319172 | 69 | 1389470 | 1389491 | 2 | 11 | 22 | TG   | 20 | 10 |
| 319177 | 69 | 1396157 | 1396178 | 2 | 11 | 22 | GT   | 11 | 10 |
| 319178 | 69 | 1396237 | 1396272 | 2 | 18 | 36 | CA   | 6  | 8  |
| 319179 | 69 | 1396402 | 1396425 | 3 | 8  | 24 | GCA  | 17 | 4  |
| 319180 | 69 | 1398277 | 1398336 | 4 | 15 | 60 | TTTC | 14 | 8  |
| 319185 | 69 | 1407653 | 1407672 | 2 | 10 | 20 | CA   | 25 | 5  |
| 319186 | 69 | 1407886 | 1407903 | 2 | 9  | 18 | AC   | 18 | 6  |
| 319192 | 69 | 1421199 | 1421210 | 2 | 6  | 12 | TC   | 9  | 6  |
| 319193 | 69 | 1424785 | 1424796 | 2 | 6  | 12 | CA   | 24 | 3  |
| 319194 | 69 | 1428654 | 1428665 | 2 | 6  | 12 | GT   | 18 | 10 |
| 319195 | 69 | 1428667 | 1428680 | 2 | 7  | 14 | TG   | 17 | 9  |
| 319198 | 69 | 1429533 | 1429562 | 2 | 15 | 30 | TG   | 10 | 7  |
| 319199 | 69 | 1429654 | 1429680 | 3 | 9  | 27 | AGA  | 8  | 4  |
| 319202 | 69 | 1430309 | 1430324 | 4 | 4  | 16 | GACA | 28 | 5  |
| 319203 | 69 | 1430437 | 1430458 | 2 | 11 | 22 | AC   | 14 | 14 |
| 319205 | 69 | 1431488 | 1431525 | 2 | 19 | 38 | TG   | 15 | 9  |
| 319208 | 69 | 1432876 | 1432903 | 2 | 14 | 28 | TG   | 17 | 7  |
| 319219 | 69 | 1441645 | 1441660 | 2 | 8  | 16 | GA   | 30 | 7  |
| 319220 | 69 | 1445216 | 1445257 | 2 | 21 | 42 | GA   | 14 | 10 |
| 319225 | 69 | 1449816 | 1449837 | 2 | 11 | 22 | AC   | 18 | 7  |
| 319227 | 69 | 1450210 | 1450225 | 2 | 8  | 16 | GT   | 18 | 7  |
| 319228 | 69 | 1451355 | 1451366 | 2 | 6  | 12 | GT   | 21 | 4  |
| 319229 | 69 | 1451473 | 1451488 | 2 | 8  | 16 | GT   | 20 | 10 |
| 319230 | 69 | 1452063 | 1452088 | 2 | 13 | 26 | GT   | 9  | 6  |
| 319231 | 69 | 1452815 | 1452838 | 2 | 12 | 24 | TG   | 19 | 14 |
| 319232 | 69 | 1452914 | 1452931 | 2 | 9  | 18 | AC   | 21 | 5  |
| 319235 | 69 | 1455542 | 1455555 | 2 | 7  | 14 | GT   | 21 | 9  |
| 319237 | 69 | 1456736 | 1456759 | 2 | 12 | 24 | CA   | 6  | 8  |
| 319240 | 69 | 1462258 | 1462279 | 2 | 11 | 22 | CA   | 21 | 8  |
| 319241 | 69 | 1463220 | 1463231 | 2 | 6  | 12 | GA   | 22 | 4  |
| 319243 | 69 | 1464601 | 1464612 | 2 | 6  | 12 | TG   | 23 | 5  |
| 319245 | 69 | 1467942 | 1468001 | 2 | 30 | 60 | CA   | 14 | 10 |
| 319247 | 69 | 1468251 | 1468274 | 2 | 12 | 24 | TG   | 18 | 11 |
| 319251 | 69 | 1472132 | 1472145 | 2 | 7  | 14 | TG   | 25 | 6  |
| 319252 | 69 | 1473085 | 1473108 | 2 | 12 | 24 | GT   | 12 | 6  |
| 319267 | 69 | 1503402 | 1503415 | 2 | 7  | 14 | TG   | 23 | 7  |
| 319269 | 69 | 1509209 | 1509236 | 2 | 14 | 28 | AC   | 8  | 4  |
| 319276 | 69 | 1516966 | 1517013 | 4 | 12 | 48 | ATAG | 17 | 11 |
| 319279 | 69 | 1519847 | 1519861 | 3 | 5  | 15 | AGC  | 17 | 8  |
| 319280 | 69 | 1519933 | 1519950 | 3 | 6  | 18 | GAG  | 31 | 4  |
| 319295 | 69 | 1551180 | 1551207 | 2 | 14 | 28 | AC   | 10 | 9  |
| 319300 | 69 | 1572864 | 1572908 | 3 | 15 | 45 | ATG  | 23 | 7  |
| 319302 | 69 | 1574882 | 1574929 | 4 | 12 | 48 | TTGA | 23 | 9  |
| 319312 | 69 | 1581752 | 1581771 | 2 | 10 | 20 | CA   | 7  | 8  |
| 319321 | 69 | 1585214 | 1585225 | 2 | 6  | 12 | TA   | 12 | 8  |
| 319322 | 69 | 1585310 | 1585333 | 2 | 12 | 24 | AC   | 15 | 9  |
| 319323 | 69 | 1587109 | 1587132 | 2 | 12 | 24 | AG   | 7  | 6  |
| 319329 | 69 | 1591556 | 1591583 | 4 | 7  | 28 | TGAT | 29 | 5  |
| 319332 | 69 | 1594427 | 1594442 | 2 | 8  | 16 | AC   | 23 | 20 |
| 319333 | 69 | 1594443 | 1594458 | 4 | 4  | 16 | GCAC | 21 | 15 |
| 319334 | 69 | 1597662 | 1597685 | 3 | 8  | 24 | TGT  | 27 | 7  |

|        |    |         |         |   |    |    |      |    |    |
|--------|----|---------|---------|---|----|----|------|----|----|
| 319335 | 69 | 1604351 | 1604368 | 3 | 6  | 18 | TCT  | 28 | 5  |
| 319345 | 69 | 1618823 | 1618836 | 2 | 7  | 14 | GT   | 8  | 4  |
| 319347 | 69 | 1620628 | 1620639 | 2 | 6  | 12 | TG   | 24 | 4  |
| 319348 | 69 | 1621067 | 1621087 | 3 | 7  | 21 | AGA  | 32 | 3  |
| 319354 | 69 | 1631096 | 1631143 | 2 | 24 | 48 | TG   | 15 | 13 |
| 319357 | 69 | 1637504 | 1637519 | 2 | 8  | 16 | CT   | 18 | 4  |
| 319359 | 69 | 1638471 | 1638527 | 3 | 19 | 57 | TTC  | 13 | 11 |
| 319361 | 69 | 1650026 | 1650037 | 2 | 6  | 12 | CA   | 24 | 3  |
| 319362 | 69 | 1650532 | 1650546 | 3 | 5  | 15 | AGC  | 31 | 4  |
| 319363 | 69 | 1651194 | 1651219 | 2 | 13 | 26 | GT   | 20 | 14 |
| 319365 | 69 | 1652254 | 1652267 | 2 | 7  | 14 | GT   | 15 | 5  |
| 319368 | 69 | 1659508 | 1659523 | 2 | 8  | 16 | TG   | 21 | 11 |
| 319375 | 69 | 1672136 | 1672162 | 3 | 9  | 27 | ATG  | 30 | 10 |
| 319381 | 69 | 1677790 | 1677823 | 2 | 17 | 34 | GT   | 6  | 11 |
| 319385 | 69 | 1680610 | 1680627 | 2 | 9  | 18 | TG   | 12 | 8  |
| 319392 | 69 | 1692295 | 1692320 | 2 | 13 | 26 | GT   | 25 | 7  |
| 319398 | 69 | 1698520 | 1698535 | 4 | 4  | 16 | AGAC | 21 | 3  |
| 319400 | 69 | 1700093 | 1700132 | 2 | 20 | 40 | GT   | 11 | 14 |
| 319404 | 69 | 1705228 | 1705245 | 3 | 6  | 18 | CCT  | 17 | 5  |
| 319405 | 69 | 1708457 | 1708482 | 2 | 13 | 26 | TG   | 22 | 13 |
| 319406 | 69 | 1708652 | 1708681 | 2 | 15 | 30 | GT   | 10 | 7  |
| 319418 | 69 | 1755382 | 1755399 | 2 | 9  | 18 | CA   | 19 | 9  |
| 319419 | 69 | 1756499 | 1756510 | 2 | 6  | 12 | AT   | 26 | 5  |
| 319425 | 69 | 1769693 | 1769716 | 2 | 12 | 24 | TG   | 22 | 12 |
| 319426 | 69 | 1771751 | 1771782 | 2 | 16 | 32 | AC   | 6  | 7  |
| 319428 | 69 | 1776975 | 1777020 | 2 | 23 | 46 | TG   | 8  | 9  |
| 319432 | 69 | 1781042 | 1781057 | 2 | 8  | 16 | CA   | 10 | 7  |
| 319437 | 69 | 1784506 | 1784526 | 3 | 7  | 21 | AGA  | 16 | 3  |
| 319440 | 69 | 1795739 | 1795770 | 2 | 16 | 32 | TG   | 10 | 11 |
| 319444 | 69 | 1800248 | 1800275 | 2 | 14 | 28 | GT   | 10 | 9  |
| 319447 | 69 | 1812710 | 1812723 | 2 | 7  | 14 | AC   | 23 | 3  |
| 319452 | 69 | 1821373 | 1821396 | 2 | 12 | 24 | AC   | 11 | 6  |
| 319455 | 69 | 1845643 | 1845656 | 2 | 7  | 14 | CA   | 20 | 4  |
| 319456 | 69 | 1845833 | 1845844 | 2 | 6  | 12 | CA   | 18 | 6  |
| 319457 | 69 | 1847612 | 1847631 | 2 | 10 | 20 | CA   | 10 | 7  |
| 319471 | 69 | 1876956 | 1876971 | 4 | 4  | 16 | CTAT | 20 | 4  |
| 319478 | 69 | 1898946 | 1898972 | 3 | 9  | 27 | ACT  | 24 | 8  |
| 319479 | 69 | 1899028 | 1899043 | 2 | 8  | 16 | AC   | 10 | 4  |
| 319484 | 69 | 1911071 | 1911085 | 3 | 5  | 15 | GCT  | 25 | 7  |
| 319486 | 69 | 1913781 | 1913798 | 2 | 9  | 18 | CA   | 11 | 7  |
| 319493 | 69 | 1924914 | 1924947 | 2 | 17 | 34 | TG   | 7  | 6  |
| 319498 | 69 | 1948644 | 1948665 | 2 | 11 | 22 | CA   | 11 | 9  |
| 319511 | 69 | 1977371 | 1977390 | 2 | 10 | 20 | CA   | 15 | 10 |
| 319522 | 69 | 1994741 | 1994752 | 2 | 6  | 12 | AC   | 31 | 3  |
| 319525 | 69 | 2001941 | 2001958 | 2 | 9  | 18 | AG   | 24 | 3  |
| 319528 | 69 | 2006969 | 2006984 | 2 | 8  | 16 | TG   | 29 | 4  |
| 319534 | 69 | 2016854 | 2016869 | 2 | 8  | 16 | CA   | 18 | 4  |
| 319535 | 69 | 2017001 | 2017028 | 2 | 14 | 28 | AC   | 8  | 8  |
| 319540 | 69 | 2032489 | 2032508 | 4 | 5  | 20 | CAGT | 18 | 3  |
| 319544 | 69 | 2032750 | 2032773 | 3 | 8  | 24 | CCT  | 13 | 6  |
| 319545 | 69 | 2032890 | 2032904 | 3 | 5  | 15 | AAG  | 10 | 5  |



|        |    |         |         |   |    |    |      |    |    |
|--------|----|---------|---------|---|----|----|------|----|----|
| 319546 | 69 | 2033190 | 2033207 | 2 | 9  | 18 | GT   | 18 | 13 |
| 319547 | 69 | 2033378 | 2033395 | 2 | 9  | 18 | CA   | 15 | 11 |
| 319548 | 69 | 2033479 | 2033502 | 2 | 12 | 24 | GT   | 11 | 7  |
| 319551 | 69 | 2034972 | 2035003 | 2 | 16 | 32 | TG   | 6  | 8  |
| 319553 | 69 | 2041141 | 2041158 | 2 | 9  | 18 | GT   | 20 | 6  |
| 319561 | 69 | 2056803 | 2056826 | 2 | 12 | 24 | AC   | 22 | 7  |
| 319562 | 69 | 2056971 | 2056992 | 2 | 11 | 22 | TG   | 13 | 6  |
| 319565 | 69 | 2066229 | 2066244 | 2 | 8  | 16 | CA   | 22 | 6  |
| 319567 | 69 | 2068186 | 2068197 | 2 | 6  | 12 | TA   | 13 | 3  |
| 319568 | 69 | 2071930 | 2071943 | 2 | 7  | 14 | GA   | 21 | 5  |
| 319569 | 69 | 2071993 | 2072010 | 2 | 9  | 18 | GA   | 15 | 4  |
| 319570 | 69 | 2073092 | 2073112 | 3 | 7  | 21 | TTC  | 22 | 5  |
| 319571 | 69 | 2074383 | 2074402 | 2 | 10 | 20 | CA   | 19 | 6  |
| 319572 | 69 | 2074576 | 2074589 | 2 | 7  | 14 | CT   | 19 | 3  |
| 319576 | 69 | 2078862 | 2078873 | 2 | 6  | 12 | GT   | 22 | 6  |
| 319577 | 69 | 2078875 | 2078886 | 2 | 6  | 12 | TG   | 14 | 3  |
| 319578 | 69 | 2078992 | 2079017 | 2 | 13 | 26 | GT   | 13 | 6  |
| 319583 | 69 | 2088156 | 2088177 | 2 | 11 | 22 | GT   | 15 | 8  |
| 319584 | 69 | 2088349 | 2088360 | 2 | 6  | 12 | AC   | 25 | 6  |
| 319585 | 69 | 2088364 | 2088375 | 2 | 6  | 12 | CA   | 27 | 7  |
| 319590 | 69 | 2096337 | 2096374 | 2 | 19 | 38 | AC   | 7  | 9  |
| 319598 | 69 | 2110507 | 2110526 | 4 | 5  | 20 | TTCT | 24 | 5  |
| 319601 | 69 | 2126444 | 2126464 | 3 | 7  | 21 | CAG  | 28 | 7  |
| 319602 | 69 | 2126700 | 2126719 | 2 | 10 | 20 | TG   | 24 | 7  |
| 319608 | 69 | 2133193 | 2133216 | 2 | 12 | 24 | AC   | 15 | 7  |
| 319611 | 69 | 2137001 | 2137024 | 2 | 12 | 24 | GT   | 11 | 9  |
| 319613 | 69 | 2149027 | 2149040 | 2 | 7  | 14 | TC   | 30 | 3  |
| 319619 | 69 | 2167419 | 2167432 | 2 | 7  | 14 | TG   | 24 | 6  |
| 319626 | 69 | 2184223 | 2184234 | 2 | 6  | 12 | CA   | 16 | 4  |
| 319633 | 69 | 2198554 | 2198573 | 2 | 10 | 20 | GT   | 6  | 8  |
| 319646 | 69 | 2215502 | 2215517 | 2 | 8  | 16 | GT   | 21 | 9  |
| 319647 | 69 | 2216839 | 2216854 | 4 | 4  | 16 | CCAA | 32 | 3  |
| 319655 | 69 | 2254174 | 2254187 | 2 | 7  | 14 | TA   | 15 | 5  |
| 319659 | 69 | 2267496 | 2267519 | 2 | 12 | 24 | CA   | 11 | 5  |
| 319664 | 69 | 2279202 | 2279215 | 2 | 7  | 14 | GT   | 19 | 10 |
| 319666 | 69 | 2282320 | 2282351 | 2 | 16 | 32 | TG   | 12 | 13 |
| 319667 | 69 | 2283899 | 2283922 | 2 | 12 | 24 | AC   | 29 | 8  |
| 319669 | 69 | 2287061 | 2287078 | 2 | 9  | 18 | CT   | 22 | 4  |
| 319671 | 69 | 2293217 | 2293238 | 2 | 11 | 22 | CA   | 11 | 8  |
| 319676 | 69 | 2319234 | 2319260 | 3 | 9  | 27 | ATT  | 9  | 4  |
| 319677 | 69 | 2326936 | 2326953 | 2 | 9  | 18 | GT   | 14 | 5  |
| 319679 | 69 | 2331806 | 2331820 | 3 | 5  | 15 | TTA  | 8  | 6  |
| 319696 | 69 | 2404017 | 2404036 | 2 | 10 | 20 | GA   | 20 | 4  |
| 319720 | 69 | 2463295 | 2463310 | 2 | 8  | 16 | AC   | 20 | 5  |
| 319723 | 69 | 2470176 | 2470191 | 2 | 8  | 16 | GT   | 25 | 3  |
| 319724 | 69 | 2470742 | 2470765 | 2 | 12 | 24 | AC   | 15 | 6  |
| 319763 | 69 | 2540634 | 2540649 | 4 | 4  | 16 | TCTG | 30 | 4  |
| 319767 | 69 | 2544937 | 2544972 | 2 | 18 | 36 | TG   | 6  | 7  |
| 319780 | 69 | 2562359 | 2562388 | 2 | 15 | 30 | AC   | 29 | 6  |
| 319794 | 69 | 2585563 | 2585580 | 2 | 9  | 18 | AG   | 22 | 6  |
| 319807 | 69 | 2608723 | 2608742 | 2 | 10 | 20 | AC   | 17 | 8  |

|        |    |         |         |   |    |    |      |    |    |
|--------|----|---------|---------|---|----|----|------|----|----|
| 319812 | 69 | 2613476 | 2613497 | 2 | 11 | 22 | TG   | 17 | 11 |
| 319816 | 69 | 2615371 | 2615388 | 2 | 9  | 18 | GT   | 6  | 4  |
| 319817 | 69 | 2615487 | 2615502 | 2 | 8  | 16 | TG   | 24 | 8  |
| 319823 | 69 | 2621152 | 2621181 | 2 | 15 | 30 | TG   | 19 | 10 |
| 319825 | 69 | 2621477 | 2621496 | 2 | 10 | 20 | GT   | 19 | 5  |
| 319835 | 69 | 2632935 | 2632954 | 2 | 10 | 20 | GT   | 22 | 9  |
| 319848 | 69 | 2655080 | 2655101 | 2 | 11 | 22 | AG   | 17 | 12 |
| 319883 | 69 | 2747261 | 2747280 | 4 | 5  | 20 | AAAT | 20 | 3  |
| 319891 | 69 | 2771470 | 2771499 | 2 | 15 | 30 | TC   | 16 | 5  |
| 319895 | 69 | 2802974 | 2802987 | 2 | 7  | 14 | CA   | 21 | 3  |
| 319898 | 69 | 2817740 | 2817753 | 2 | 7  | 14 | AC   | 23 | 3  |
| 319909 | 69 | 2849721 | 2849732 | 2 | 6  | 12 | GA   | 20 | 6  |
| 319910 | 69 | 2851510 | 2851541 | 2 | 16 | 32 | AC   | 11 | 8  |
| 319912 | 69 | 2852132 | 2852147 | 2 | 8  | 16 | GT   | 15 | 3  |
| 319920 | 69 | 2869462 | 2869519 | 2 | 29 | 58 | GT   | 9  | 10 |
| 319922 | 69 | 2875700 | 2875727 | 2 | 14 | 28 | GT   | 7  | 4  |
| 319928 | 69 | 2885531 | 2885546 | 4 | 4  | 16 | CTAT | 28 | 9  |
| 319931 | 69 | 2895056 | 2895075 | 4 | 5  | 20 | TTAG | 9  | 3  |
| 319934 | 69 | 2896751 | 2896766 | 4 | 4  | 16 | AAAC | 12 | 10 |
| 319936 | 69 | 2897526 | 2897555 | 3 | 10 | 30 | TCT  | 15 | 16 |
| 319940 | 69 | 2899613 | 2899640 | 2 | 14 | 28 | AC   | 9  | 11 |
| 319949 | 69 | 2911176 | 2911202 | 3 | 9  | 27 | AGC  | 15 | 4  |
| 319950 | 69 | 2912334 | 2912348 | 3 | 5  | 15 | AAC  | 29 | 4  |
| 319956 | 69 | 2926766 | 2926789 | 3 | 8  | 24 | CAG  | 23 | 6  |
| 319958 | 69 | 2928134 | 2928155 | 2 | 11 | 22 | TG   | 19 | 8  |
| 319964 | 69 | 2949180 | 2949219 | 4 | 10 | 40 | ATTT | 21 | 5  |
| 319965 | 69 | 2952729 | 2952758 | 2 | 15 | 30 | GT   | 18 | 9  |
| 319967 | 69 | 2963043 | 2963054 | 2 | 6  | 12 | GT   | 13 | 3  |
| 319973 | 69 | 2971882 | 2971902 | 3 | 7  | 21 | GGT  | 31 | 4  |
| 320002 | 69 | 3053116 | 3053127 | 2 | 6  | 12 | TG   | 28 | 4  |
| 320006 | 69 | 3058514 | 3058540 | 3 | 9  | 27 | TCT  | 24 | 6  |
| 320008 | 69 | 3061741 | 3061755 | 3 | 5  | 15 | TTC  | 14 | 6  |
| 320016 | 69 | 3071349 | 3071360 | 2 | 6  | 12 | AC   | 25 | 5  |
| 320021 | 69 | 3075573 | 3075592 | 2 | 10 | 20 | TC   | 20 | 3  |
| 320023 | 69 | 3080009 | 3080030 | 2 | 11 | 22 | TG   | 16 | 8  |
| 320024 | 69 | 3080413 | 3080440 | 4 | 7  | 28 | TGGT | 22 | 4  |
| 320034 | 69 | 3108016 | 3108027 | 2 | 6  | 12 | GT   | 11 | 3  |
| 320038 | 69 | 3113813 | 3113838 | 2 | 13 | 26 | CT   | 19 | 4  |
| 320045 | 69 | 3130675 | 3130692 | 2 | 9  | 18 | AC   | 24 | 5  |
| 320049 | 69 | 3140302 | 3140337 | 3 | 12 | 36 | CTC  | 22 | 5  |
| 320052 | 69 | 3151816 | 3151827 | 2 | 6  | 12 | AT   | 28 | 4  |
| 320058 | 69 | 3166269 | 3166284 | 4 | 4  | 16 | AAAG | 13 | 3  |
| 320062 | 69 | 3169843 | 3169868 | 2 | 13 | 26 | AC   | 22 | 11 |
| 320070 | 69 | 3188939 | 3188956 | 2 | 9  | 18 | GA   | 18 | 6  |
| 320073 | 69 | 3194029 | 3194042 | 2 | 7  | 14 | AG   | 9  | 4  |
| 320075 | 69 | 3209335 | 3209352 | 2 | 9  | 18 | TG   | 24 | 11 |
| 320076 | 69 | 3213368 | 3213394 | 3 | 9  | 27 | CTT  | 28 | 3  |
| 320077 | 69 | 3217843 | 3217858 | 2 | 8  | 16 | CA   | 18 | 4  |
| 320078 | 69 | 3219739 | 3219754 | 2 | 8  | 16 | TC   | 21 | 3  |
| 320082 | 69 | 3227570 | 3227601 | 4 | 8  | 32 | CCTT | 20 | 6  |
| 320092 | 69 | 3245215 | 3245234 | 2 | 10 | 20 | CA   | 18 | 8  |

|        |    |         |         |   |    |    |      |    |    |
|--------|----|---------|---------|---|----|----|------|----|----|
| 320093 | 69 | 3245236 | 3245251 | 2 | 8  | 16 | AC   | 15 | 4  |
| 320094 | 69 | 3251334 | 3251353 | 4 | 5  | 20 | TCTG | 26 | 9  |
| 320096 | 69 | 3252559 | 3252615 | 3 | 19 | 57 | CTT  | 12 | 10 |
| 320100 | 69 | 3256759 | 3256796 | 2 | 19 | 38 | CA   | 8  | 8  |
| 320109 | 69 | 3279039 | 3279064 | 2 | 13 | 26 | TG   | 6  | 7  |
| 320114 | 69 | 3282823 | 3282848 | 2 | 13 | 26 | GT   | 22 | 11 |
| 320118 | 69 | 3291351 | 3291366 | 2 | 8  | 16 | AC   | 22 | 5  |
| 320124 | 69 | 3296732 | 3296755 | 2 | 12 | 24 | CT   | 23 | 4  |
| 320125 | 69 | 3296776 | 3296793 | 2 | 9  | 18 | CT   | 20 | 7  |
| 320129 | 69 | 3303420 | 3303431 | 2 | 6  | 12 | TG   | 20 | 8  |
| 320130 | 69 | 3304884 | 3304901 | 2 | 9  | 18 | CA   | 22 | 6  |
| 320138 | 69 | 3315371 | 3315408 | 2 | 19 | 38 | CA   | 9  | 7  |
| 320144 | 69 | 3317412 | 3317435 | 2 | 12 | 24 | TG   | 10 | 10 |
| 320145 | 69 | 3319544 | 3319563 | 4 | 5  | 20 | ATTT | 14 | 10 |
| 320146 | 69 | 3320363 | 3320390 | 2 | 14 | 28 | CA   | 14 | 5  |
| 320149 | 69 | 3324410 | 3324433 | 2 | 12 | 24 | TG   | 10 | 6  |
| 320150 | 69 | 3324703 | 3324718 | 2 | 8  | 16 | CA   | 20 | 5  |
| 320151 | 69 | 3324886 | 3324903 | 2 | 9  | 18 | GT   | 11 | 7  |
| 320153 | 69 | 3325619 | 3325652 | 2 | 17 | 34 | CA   | 14 | 14 |
| 320157 | 69 | 3328126 | 3328169 | 2 | 22 | 44 | CA   | 13 | 11 |
| 320165 | 69 | 3342812 | 3342835 | 2 | 12 | 24 | CA   | 13 | 6  |
| 320173 | 69 | 3345927 | 3345947 | 3 | 7  | 21 | TCC  | 12 | 3  |
| 320177 | 69 | 3347126 | 3347139 | 2 | 7  | 14 | GT   | 17 | 8  |
| 320178 | 69 | 3347388 | 3347415 | 2 | 14 | 28 | GT   | 15 | 8  |
| 320180 | 69 | 3349671 | 3349716 | 2 | 23 | 46 | TG   | 6  | 5  |
| 320183 | 69 | 3351068 | 3351097 | 2 | 15 | 30 | GT   | 10 | 10 |
| 320187 | 69 | 3352945 | 3352958 | 2 | 7  | 14 | TG   | 19 | 8  |
| 320188 | 69 | 3352961 | 3352974 | 2 | 7  | 14 | TG   | 15 | 7  |
| 320189 | 69 | 3353079 | 3353104 | 2 | 13 | 26 | CA   | 13 | 9  |
| 320190 | 69 | 3354430 | 3354443 | 2 | 7  | 14 | CA   | 22 | 4  |
| 320196 | 69 | 3365004 | 3365039 | 3 | 12 | 36 | AGG  | 12 | 6  |
| 320201 | 69 | 3372653 | 3372668 | 2 | 8  | 16 | GA   | 7  | 6  |
| 320204 | 69 | 3377034 | 3377063 | 2 | 15 | 30 | CA   | 14 | 8  |
| 320210 | 69 | 3380614 | 3380625 | 2 | 6  | 12 | CA   | 28 | 4  |
| 320213 | 69 | 3382465 | 3382496 | 2 | 16 | 32 | AC   | 10 | 10 |
| 320215 | 69 | 3388299 | 3388325 | 3 | 9  | 27 | CCT  | 14 | 5  |
| 320216 | 69 | 3388913 | 3388932 | 4 | 5  | 20 | CAGA | 22 | 3  |
| 320218 | 69 | 3393345 | 3393374 | 2 | 15 | 30 | AC   | 11 | 5  |
| 320220 | 69 | 3394101 | 3394112 | 2 | 6  | 12 | AC   | 17 | 10 |
| 320221 | 69 | 3394113 | 3394124 | 2 | 6  | 12 | AT   | 16 | 10 |
| 320222 | 69 | 3394422 | 3394445 | 4 | 6  | 24 | GTCT | 26 | 3  |
| 320228 | 69 | 3409213 | 3409232 | 4 | 5  | 20 | ATGT | 19 | 8  |
| 320233 | 69 | 3413806 | 3413825 | 2 | 10 | 20 | CA   | 20 | 6  |
| 320235 | 69 | 3415955 | 3415968 | 2 | 7  | 14 | GT   | 20 | 4  |
| 320236 | 69 | 3415969 | 3415982 | 2 | 7  | 14 | TG   | 20 | 3  |
| 320239 | 69 | 3417720 | 3417737 | 2 | 9  | 18 | TG   | 18 | 4  |
| 320241 | 69 | 3418623 | 3418636 | 2 | 7  | 14 | AC   | 23 | 4  |
| 320243 | 69 | 3422776 | 3422819 | 2 | 22 | 44 | TG   | 8  | 9  |
| 320246 | 69 | 3437562 | 3437577 | 2 | 8  | 16 | TC   | 19 | 4  |
| 320248 | 69 | 3440673 | 3440686 | 2 | 7  | 14 | AC   | 25 | 3  |
| 320249 | 69 | 3440848 | 3440869 | 2 | 11 | 22 | GA   | 18 | 9  |

|        |    |         |         |   |    |    |      |    |    |
|--------|----|---------|---------|---|----|----|------|----|----|
| 320263 | 69 | 3462802 | 3462815 | 2 | 7  | 14 | TG   | 17 | 6  |
| 320269 | 69 | 3485523 | 3485538 | 2 | 8  | 16 | GA   | 8  | 3  |
| 320285 | 69 | 3528339 | 3528354 | 2 | 8  | 16 | AC   | 16 | 5  |
| 320286 | 69 | 3537721 | 3537746 | 2 | 13 | 26 | CA   | 19 | 8  |
| 320292 | 69 | 3574657 | 3574672 | 2 | 8  | 16 | AC   | 24 | 3  |
| 320295 | 69 | 3588957 | 3588968 | 2 | 6  | 12 | TA   | 20 | 3  |
| 320302 | 69 | 3605588 | 3605607 | 4 | 5  | 20 | TAAT | 15 | 3  |
| 320303 | 69 | 3608460 | 3608481 | 2 | 11 | 22 | TG   | 15 | 9  |
| 320304 | 69 | 3608592 | 3608603 | 2 | 6  | 12 | CA   | 26 | 4  |
| 320305 | 69 | 3608714 | 3608731 | 2 | 9  | 18 | CA   | 24 | 3  |
| 320311 | 69 | 3616469 | 3616500 | 2 | 16 | 32 | AC   | 16 | 12 |
| 320312 | 69 | 3617119 | 3617172 | 3 | 18 | 54 | AGA  | 12 | 12 |
| 320315 | 69 | 3620799 | 3620818 | 2 | 10 | 20 | AC   | 12 | 6  |
| 320317 | 69 | 3626735 | 3626758 | 2 | 12 | 24 | TG   | 24 | 10 |
| 320335 | 69 | 3666581 | 3666602 | 2 | 11 | 22 | GT   | 16 | 6  |
| 320338 | 69 | 3674455 | 3674478 | 3 | 8  | 24 | CAT  | 22 | 4  |
| 320339 | 69 | 3690638 | 3690677 | 2 | 20 | 40 | CT   | 8  | 7  |
| 320347 | 69 | 3712056 | 3712073 | 2 | 9  | 18 | AC   | 21 | 12 |
| 320350 | 69 | 3729710 | 3729729 | 4 | 5  | 20 | TTTA | 8  | 4  |
| 320360 | 69 | 3743803 | 3743832 | 2 | 15 | 30 | GT   | 12 | 13 |
| 320368 | 69 | 3771567 | 3771600 | 2 | 17 | 34 | CA   | 10 | 11 |
| 320371 | 69 | 3774517 | 3774534 | 3 | 6  | 18 | GTA  | 16 | 7  |
| 320373 | 69 | 3788854 | 3788877 | 2 | 12 | 24 | TG   | 19 | 11 |
| 320381 | 69 | 3794864 | 3794895 | 2 | 16 | 32 | TG   | 10 | 8  |
| 320387 | 69 | 3805263 | 3805280 | 2 | 9  | 18 | CA   | 21 | 7  |
| 320389 | 69 | 3809640 | 3809657 | 3 | 6  | 18 | AAT  | 9  | 9  |
| 320390 | 69 | 3810057 | 3810082 | 2 | 13 | 26 | CA   | 17 | 10 |
| 320391 | 69 | 3812182 | 3812213 | 2 | 16 | 32 | CA   | 14 | 9  |
| 320394 | 69 | 3814127 | 3814138 | 2 | 6  | 12 | TC   | 21 | 4  |
| 320395 | 69 | 3814198 | 3814217 | 2 | 10 | 20 | CA   | 22 | 6  |
| 320397 | 69 | 3816495 | 3816512 | 2 | 9  | 18 | TG   | 11 | 6  |
| 320399 | 69 | 3816960 | 3816975 | 2 | 8  | 16 | GT   | 19 | 8  |
| 320400 | 69 | 3817052 | 3817073 | 2 | 11 | 22 | TG   | 12 | 11 |
| 320402 | 69 | 3823897 | 3823914 | 2 | 9  | 18 | TC   | 21 | 6  |
| 320406 | 69 | 3828674 | 3828707 | 2 | 17 | 34 | CA   | 21 | 13 |
| 320407 | 69 | 3831431 | 3831450 | 2 | 10 | 20 | AC   | 16 | 6  |
| 320411 | 69 | 3833673 | 3833686 | 2 | 7  | 14 | AC   | 8  | 8  |
| 320412 | 69 | 3833839 | 3833872 | 2 | 17 | 34 | AC   | 7  | 4  |
| 320419 | 69 | 3853266 | 3853291 | 2 | 13 | 26 | CA   | 20 | 11 |
| 320420 | 69 | 3854622 | 3854633 | 2 | 6  | 12 | TG   | 18 | 3  |
| 320424 | 69 | 3855518 | 3855545 | 2 | 14 | 28 | TC   | 12 | 11 |
| 320425 | 69 | 3856983 | 3857008 | 2 | 13 | 26 | GT   | 21 | 13 |
| 320435 | 69 | 3873126 | 3873139 | 2 | 7  | 14 | TC   | 29 | 3  |
| 320436 | 69 | 3873220 | 3873235 | 2 | 8  | 16 | TG   | 23 | 5  |
| 320441 | 69 | 3881630 | 3881655 | 2 | 13 | 26 | AC   | 9  | 6  |
| 320442 | 69 | 3881928 | 3881943 | 2 | 8  | 16 | GT   | 21 | 5  |
| 320443 | 69 | 3883640 | 3883663 | 2 | 12 | 24 | AC   | 16 | 8  |
| 320444 | 69 | 3883765 | 3883782 | 2 | 9  | 18 | AC   | 22 | 7  |
| 320447 | 69 | 3886777 | 3886788 | 2 | 6  | 12 | AT   | 27 | 3  |
| 320448 | 69 | 3887449 | 3887462 | 2 | 7  | 14 | CT   | 21 | 3  |
| 320449 | 69 | 3889820 | 3889849 | 2 | 15 | 30 | AC   | 11 | 8  |

|        |    |         |         |   |    |    |      |    |    |
|--------|----|---------|---------|---|----|----|------|----|----|
| 320450 | 69 | 3890209 | 3890241 | 3 | 11 | 33 | CTT  | 19 | 10 |
| 320453 | 69 | 3891458 | 3891485 | 2 | 14 | 28 | GT   | 14 | 5  |
| 320459 | 69 | 3892583 | 3892604 | 2 | 11 | 22 | TC   | 7  | 4  |
| 320466 | 69 | 3900558 | 3900583 | 2 | 13 | 26 | CA   | 8  | 8  |
| 320467 | 69 | 3903423 | 3903438 | 2 | 8  | 16 | AC   | 17 | 4  |
| 320475 | 69 | 3922398 | 3922419 | 2 | 11 | 22 | AC   | 23 | 3  |
| 320476 | 69 | 3922544 | 3922559 | 2 | 8  | 16 | TG   | 24 | 11 |
| 320477 | 69 | 3923968 | 3923985 | 3 | 6  | 18 | ATA  | 18 | 3  |
| 320478 | 69 | 3925159 | 3925170 | 2 | 6  | 12 | AT   | 27 | 4  |
| 320479 | 69 | 3931665 | 3931678 | 2 | 7  | 14 | TC   | 25 | 3  |
| 320480 | 69 | 3932406 | 3932419 | 2 | 7  | 14 | CA   | 23 | 3  |
| 320482 | 69 | 3932785 | 3932802 | 3 | 6  | 18 | CTG  | 20 | 5  |
| 320486 | 69 | 3933885 | 3933912 | 2 | 14 | 28 | CA   | 25 | 7  |
| 320495 | 69 | 3950579 | 3950598 | 2 | 10 | 20 | GT   | 15 | 13 |
| 320499 | 69 | 3991116 | 3991127 | 2 | 6  | 12 | TG   | 20 | 5  |
| 320500 | 69 | 3993896 | 3993919 | 2 | 12 | 24 | TG   | 8  | 10 |
| 320506 | 69 | 4010132 | 4010147 | 2 | 8  | 16 | TA   | 17 | 3  |
| 320521 | 69 | 4053192 | 4053215 | 2 | 12 | 24 | GT   | 16 | 9  |
| 320523 | 69 | 4060769 | 4060784 | 2 | 8  | 16 | AC   | 23 | 5  |
| 320535 | 69 | 4096208 | 4096225 | 2 | 9  | 18 | CA   | 14 | 10 |
| 320551 | 69 | 4138823 | 4138844 | 2 | 11 | 22 | AC   | 17 | 9  |
| 320557 | 69 | 4144822 | 4144842 | 3 | 7  | 21 | CTG  | 28 | 4  |
| 320558 | 69 | 4149063 | 4149098 | 4 | 9  | 36 | AAAC | 12 | 7  |
| 320564 | 69 | 4157368 | 4157381 | 2 | 7  | 14 | AC   | 23 | 5  |
| 320565 | 69 | 4157383 | 4157398 | 2 | 8  | 16 | CA   | 17 | 5  |
| 320566 | 69 | 4157531 | 4157556 | 2 | 13 | 26 | AC   | 14 | 7  |
| 320569 | 69 | 4178591 | 4178624 | 2 | 17 | 34 | CT   | 14 | 10 |
| 320570 | 69 | 4181971 | 4182022 | 2 | 26 | 52 | TG   | 8  | 11 |
| 320584 | 69 | 4211721 | 4211748 | 2 | 14 | 28 | AC   | 15 | 14 |
| 320588 | 69 | 4227237 | 4227258 | 2 | 11 | 22 | GT   | 8  | 5  |
| 320591 | 69 | 4231616 | 4231639 | 2 | 12 | 24 | GT   | 12 | 10 |
| 320594 | 69 | 4231745 | 4231774 | 2 | 15 | 30 | CA   | 17 | 10 |
| 320595 | 69 | 4234817 | 4234838 | 2 | 11 | 22 | GT   | 25 | 5  |
| 320599 | 69 | 4244311 | 4244324 | 2 | 7  | 14 | TA   | 10 | 3  |
| 320608 | 69 | 4282069 | 4282082 | 2 | 7  | 14 | TG   | 17 | 4  |
| 320610 | 69 | 4283303 | 4283334 | 4 | 8  | 32 | AATA | 6  | 4  |
| 320618 | 69 | 4303117 | 4303136 | 2 | 10 | 20 | CA   | 17 | 9  |
| 320625 | 69 | 4317354 | 4317380 | 3 | 9  | 27 | ACT  | 6  | 10 |
| 320632 | 69 | 4332111 | 4332126 | 2 | 8  | 16 | TG   | 17 | 3  |
| 320638 | 69 | 4357413 | 4357436 | 4 | 6  | 24 | TTCT | 17 | 7  |
| 320640 | 69 | 4357885 | 4357896 | 2 | 6  | 12 | CA   | 22 | 10 |
| 320643 | 69 | 4360244 | 4360275 | 2 | 16 | 32 | GT   | 7  | 10 |
| 320644 | 69 | 4364075 | 4364124 | 2 | 25 | 50 | TG   | 7  | 9  |
| 320650 | 69 | 4378421 | 4378444 | 2 | 12 | 24 | GT   | 14 | 6  |
| 320651 | 69 | 4379421 | 4379444 | 4 | 6  | 24 | AAAT | 21 | 10 |
| 320652 | 69 | 4379695 | 4379722 | 2 | 14 | 28 | AC   | 8  | 6  |
| 320653 | 69 | 4384435 | 4384449 | 3 | 5  | 15 | TGA  | 30 | 3  |
| 320655 | 69 | 4389442 | 4389505 | 4 | 16 | 64 | ATCA | 6  | 7  |
| 320656 | 69 | 4391011 | 4391034 | 2 | 12 | 24 | GT   | 19 | 7  |
| 320659 | 69 | 4394659 | 4394672 | 2 | 7  | 14 | CA   | 21 | 3  |
| 320661 | 69 | 4399847 | 4399906 | 2 | 30 | 60 | AC   | 6  | 9  |

|        |    |         |         |   |    |    |      |    |    |
|--------|----|---------|---------|---|----|----|------|----|----|
| 320665 | 69 | 4408713 | 4408738 | 2 | 13 | 26 | GT   | 12 | 5  |
| 320668 | 69 | 4414402 | 4414429 | 2 | 14 | 28 | GT   | 18 | 7  |
| 320669 | 69 | 4415937 | 4415954 | 2 | 9  | 18 | CA   | 23 | 11 |
| 320670 | 69 | 4417361 | 4417390 | 2 | 15 | 30 | TG   | 11 | 8  |
| 320677 | 69 | 4439625 | 4439646 | 2 | 11 | 22 | TG   | 13 | 4  |
| 320682 | 69 | 4446663 | 4446678 | 2 | 8  | 16 | CA   | 34 | 15 |
| 320693 | 69 | 4478216 | 4478233 | 3 | 6  | 18 | TAA  | 32 | 3  |
| 320708 | 69 | 4514368 | 4514383 | 2 | 8  | 16 | TG   | 26 | 4  |
| 320714 | 69 | 4519825 | 4519842 | 3 | 6  | 18 | GAG  | 20 | 3  |
| 320716 | 69 | 4535553 | 4535568 | 4 | 4  | 16 | ATGG | 23 | 5  |
| 320718 | 69 | 4545835 | 4545870 | 4 | 9  | 36 | TATG | 17 | 4  |
| 320720 | 69 | 4548611 | 4548631 | 3 | 7  | 21 | GGA  | 24 | 5  |
| 320721 | 69 | 4548787 | 4548806 | 2 | 10 | 20 | GT   | 27 | 7  |
| 320724 | 69 | 4572082 | 4572111 | 2 | 15 | 30 | GT   | 17 | 4  |
| 320740 | 69 | 4617266 | 4617292 | 3 | 9  | 27 | CAG  | 27 | 4  |
| 320796 | 70 | 50768   | 50779   | 2 | 6  | 12 | TG   | 8  | 4  |
| 320801 | 70 | 56222   | 56233   | 2 | 6  | 12 | GA   | 14 | 3  |
| 320802 | 70 | 56238   | 56249   | 2 | 6  | 12 | GA   | 15 | 4  |
| 320803 | 70 | 56290   | 56307   | 2 | 9  | 18 | GA   | 15 | 7  |
| 320809 | 70 | 92060   | 92073   | 2 | 7  | 14 | TG   | 26 | 4  |
| 320814 | 70 | 109398  | 109423  | 2 | 13 | 26 | GT   | 15 | 13 |
| 320818 | 70 | 114154  | 114174  | 3 | 7  | 21 | CTT  | 32 | 3  |
| 320822 | 70 | 118758  | 118772  | 3 | 5  | 15 | CTG  | 24 | 4  |
| 320829 | 70 | 127009  | 127040  | 2 | 16 | 32 | GT   | 13 | 7  |
| 320834 | 70 | 133109  | 133128  | 2 | 10 | 20 | GT   | 25 | 8  |
| 320838 | 70 | 140286  | 140311  | 2 | 13 | 26 | GT   | 23 | 10 |
| 320845 | 70 | 162136  | 162175  | 2 | 20 | 40 | TC   | 6  | 6  |
| 320855 | 70 | 190191  | 190204  | 2 | 7  | 14 | CA   | 28 | 3  |
| 320857 | 70 | 202641  | 202674  | 2 | 17 | 34 | TG   | 7  | 8  |
| 320859 | 70 | 202939  | 202964  | 2 | 13 | 26 | TG   | 15 | 7  |
| 320860 | 70 | 203362  | 203387  | 2 | 13 | 26 | CA   | 16 | 7  |
| 320862 | 70 | 208550  | 208569  | 2 | 10 | 20 | CA   | 11 | 6  |
| 320868 | 70 | 223017  | 223032  | 2 | 8  | 16 | GT   | 21 | 8  |
| 320875 | 70 | 235414  | 235461  | 4 | 12 | 48 | GGAT | 24 | 7  |
| 320876 | 70 | 236187  | 236204  | 2 | 9  | 18 | GT   | 25 | 4  |
| 320881 | 70 | 249836  | 249867  | 2 | 16 | 32 | AC   | 10 | 10 |
| 320883 | 70 | 256634  | 256647  | 2 | 7  | 14 | AG   | 26 | 5  |
| 320888 | 70 | 260842  | 260856  | 3 | 5  | 15 | AAT  | 15 | 4  |
| 320893 | 70 | 271475  | 271492  | 2 | 9  | 18 | TG   | 16 | 7  |
| 320894 | 70 | 271863  | 271876  | 2 | 7  | 14 | CA   | 20 | 4  |
| 320897 | 70 | 280913  | 280938  | 2 | 13 | 26 | AC   | 22 | 6  |
| 320904 | 70 | 293617  | 293658  | 2 | 21 | 42 | GT   | 9  | 8  |
| 320915 | 70 | 313538  | 313563  | 2 | 13 | 26 | CT   | 16 | 12 |
| 320918 | 70 | 314499  | 314522  | 2 | 12 | 24 | GT   | 22 | 9  |
| 320921 | 70 | 319320  | 319347  | 4 | 7  | 28 | AAAC | 18 | 7  |
| 320922 | 70 | 319400  | 319411  | 2 | 6  | 12 | AC   | 19 | 4  |
| 320925 | 70 | 321176  | 321190  | 3 | 5  | 15 | TTG  | 24 | 5  |
| 320932 | 70 | 336799  | 336816  | 2 | 9  | 18 | TC   | 17 | 4  |
| 320944 | 70 | 372701  | 372726  | 2 | 13 | 26 | CA   | 25 | 7  |
| 320946 | 70 | 373061  | 373082  | 2 | 11 | 22 | CT   | 19 | 7  |
| 320947 | 70 | 376643  | 376666  | 2 | 12 | 24 | CA   | 19 | 10 |

|        |    |        |        |   |    |    |      |    |    |
|--------|----|--------|--------|---|----|----|------|----|----|
| 320951 | 70 | 384086 | 384097 | 2 | 6  | 12 | AC   | 15 | 5  |
| 320952 | 70 | 384100 | 384117 | 2 | 9  | 18 | AC   | 19 | 7  |
| 320957 | 70 | 388474 | 388488 | 3 | 5  | 15 | CCA  | 16 | 3  |
| 320967 | 70 | 405537 | 405560 | 4 | 6  | 24 | GGAT | 24 | 5  |
| 320983 | 70 | 415851 | 415874 | 3 | 8  | 24 | AGC  | 29 | 10 |
| 320984 | 70 | 416067 | 416084 | 2 | 9  | 18 | CA   | 15 | 7  |
| 320991 | 70 | 421831 | 421856 | 2 | 13 | 26 | GT   | 14 | 7  |
| 320992 | 70 | 422222 | 422255 | 2 | 17 | 34 | TC   | 11 | 10 |
| 320996 | 70 | 429556 | 429579 | 2 | 12 | 24 | AC   | 12 | 4  |
| 320999 | 70 | 430226 | 430241 | 2 | 8  | 16 | TG   | 26 | 5  |
| 321000 | 70 | 430354 | 430367 | 2 | 7  | 14 | TG   | 30 | 3  |
| 321001 | 70 | 433377 | 433404 | 2 | 14 | 28 | GT   | 15 | 8  |
| 321002 | 70 | 433523 | 433544 | 2 | 11 | 22 | CA   | 15 | 8  |
| 321003 | 70 | 433987 | 434002 | 2 | 8  | 16 | CA   | 21 | 3  |
| 321004 | 70 | 435147 | 435168 | 2 | 11 | 22 | GT   | 12 | 8  |
| 321005 | 70 | 437294 | 437307 | 2 | 7  | 14 | CA   | 20 | 3  |
| 321006 | 70 | 437597 | 437616 | 2 | 10 | 20 | TG   | 17 | 6  |
| 321007 | 70 | 437815 | 437836 | 2 | 11 | 22 | TG   | 7  | 7  |
| 321011 | 70 | 438644 | 438681 | 2 | 19 | 38 | CT   | 8  | 9  |
| 321014 | 70 | 440596 | 440611 | 2 | 8  | 16 | AG   | 20 | 5  |
| 321017 | 70 | 447214 | 447239 | 2 | 13 | 26 | AC   | 15 | 5  |
| 321018 | 70 | 450382 | 450399 | 2 | 9  | 18 | GT   | 19 | 5  |
| 321019 | 70 | 450400 | 450411 | 2 | 6  | 12 | GA   | 23 | 6  |
| 321020 | 70 | 450448 | 450467 | 4 | 5  | 20 | GATA | 26 | 5  |
| 321023 | 70 | 454437 | 454456 | 2 | 10 | 20 | TG   | 9  | 4  |
| 321029 | 70 | 463201 | 463224 | 2 | 12 | 24 | GT   | 19 | 14 |
| 321030 | 70 | 463394 | 463405 | 2 | 6  | 12 | CA   | 26 | 3  |
| 321032 | 70 | 466256 | 466283 | 2 | 14 | 28 | CA   | 23 | 14 |
| 321035 | 70 | 472212 | 472227 | 2 | 8  | 16 | AC   | 29 | 4  |
| 321037 | 70 | 473251 | 473276 | 2 | 13 | 26 | TG   | 14 | 8  |
| 321038 | 70 | 473439 | 473450 | 2 | 6  | 12 | GT   | 18 | 3  |
| 321039 | 70 | 473468 | 473481 | 2 | 7  | 14 | CT   | 21 | 3  |
| 321042 | 70 | 476623 | 476634 | 2 | 6  | 12 | TG   | 24 | 3  |
| 321044 | 70 | 477698 | 477715 | 2 | 9  | 18 | AC   | 19 | 5  |
| 321047 | 70 | 478544 | 478569 | 2 | 13 | 26 | CA   | 10 | 6  |
| 321054 | 70 | 485566 | 485579 | 2 | 7  | 14 | TG   | 24 | 3  |
| 321057 | 70 | 488512 | 488525 | 2 | 7  | 14 | CA   | 22 | 6  |
| 321058 | 70 | 488577 | 488594 | 2 | 9  | 18 | TG   | 19 | 8  |
| 321061 | 70 | 489182 | 489211 | 2 | 15 | 30 | CA   | 14 | 5  |
| 321062 | 70 | 489357 | 489404 | 2 | 24 | 48 | AC   | 7  | 7  |
| 321063 | 70 | 489766 | 489781 | 2 | 8  | 16 | TG   | 27 | 3  |
| 321070 | 70 | 500901 | 500936 | 2 | 18 | 36 | TG   | 16 | 8  |
| 321071 | 70 | 501099 | 501134 | 2 | 18 | 36 | TG   | 6  | 8  |
| 321074 | 70 | 504838 | 504887 | 2 | 25 | 50 | GT   | 8  | 10 |
| 321079 | 70 | 510178 | 510219 | 2 | 21 | 42 | CA   | 13 | 9  |
| 321081 | 70 | 511248 | 511273 | 2 | 13 | 26 | CA   | 15 | 8  |
| 321085 | 70 | 513613 | 513630 | 3 | 6  | 18 | AAC  | 27 | 7  |
| 321086 | 70 | 513667 | 513690 | 4 | 6  | 24 | AAAG | 22 | 9  |
| 321092 | 70 | 515902 | 515925 | 2 | 12 | 24 | CT   | 22 | 6  |
| 321094 | 70 | 517501 | 517522 | 2 | 11 | 22 | AC   | 16 | 11 |
| 321096 | 70 | 519854 | 519871 | 2 | 9  | 18 | CT   | 13 | 5  |

|        |    |         |         |   |    |    |      |    |    |
|--------|----|---------|---------|---|----|----|------|----|----|
| 321117 | 70 | 569394  | 569407  | 2 | 7  | 14 | AT   | 32 | 5  |
| 321119 | 70 | 573672  | 573699  | 4 | 7  | 28 | ACAA | 32 | 4  |
| 321124 | 70 | 598449  | 598464  | 2 | 8  | 16 | GA   | 21 | 3  |
| 321139 | 70 | 635247  | 635274  | 4 | 7  | 28 | TGTT | 22 | 5  |
| 321145 | 70 | 637982  | 638001  | 2 | 10 | 20 | TG   | 14 | 7  |
| 321148 | 70 | 643429  | 643446  | 2 | 9  | 18 | CT   | 19 | 4  |
| 321152 | 70 | 657391  | 657402  | 2 | 6  | 12 | AC   | 28 | 6  |
| 321167 | 70 | 680013  | 680026  | 2 | 7  | 14 | CA   | 9  | 8  |
| 321169 | 70 | 680712  | 680731  | 2 | 10 | 20 | CT   | 20 | 7  |
| 321173 | 70 | 681404  | 681417  | 2 | 7  | 14 | GT   | 22 | 7  |
| 321174 | 70 | 681657  | 681672  | 4 | 4  | 16 | ATCT | 25 | 8  |
| 321184 | 70 | 714987  | 715001  | 3 | 5  | 15 | ATT  | 23 | 5  |
| 321188 | 70 | 728127  | 728154  | 2 | 14 | 28 | CA   | 25 | 14 |
| 321204 | 70 | 777405  | 777418  | 2 | 7  | 14 | TC   | 27 | 3  |
| 321213 | 70 | 803487  | 803522  | 2 | 18 | 36 | TG   | 17 | 9  |
| 321233 | 70 | 855118  | 855131  | 2 | 7  | 14 | TA   | 24 | 3  |
| 321234 | 70 | 855676  | 855697  | 2 | 11 | 22 | GT   | 9  | 11 |
| 321239 | 70 | 873133  | 873146  | 2 | 7  | 14 | TG   | 31 | 4  |
| 321247 | 70 | 885872  | 885893  | 2 | 11 | 22 | TG   | 22 | 8  |
| 321250 | 70 | 888337  | 888354  | 3 | 6  | 18 | CAG  | 28 | 4  |
| 321254 | 70 | 898969  | 899002  | 2 | 17 | 34 | GT   | 12 | 7  |
| 321255 | 70 | 899316  | 899353  | 2 | 19 | 38 | TG   | 13 | 9  |
| 321256 | 70 | 900182  | 900199  | 2 | 9  | 18 | CA   | 16 | 11 |
| 321271 | 70 | 907203  | 907214  | 2 | 6  | 12 | GA   | 25 | 3  |
| 321281 | 70 | 922301  | 922332  | 2 | 16 | 32 | AG   | 6  | 6  |
| 321284 | 70 | 926306  | 926319  | 2 | 7  | 14 | CA   | 26 | 3  |
| 321286 | 70 | 933226  | 933239  | 2 | 7  | 14 | GT   | 30 | 4  |
| 321296 | 70 | 968513  | 968536  | 2 | 12 | 24 | AC   | 14 | 8  |
| 321297 | 70 | 980640  | 980651  | 2 | 6  | 12 | CA   | 26 | 3  |
| 321307 | 70 | 997834  | 997859  | 2 | 13 | 26 | TG   | 17 | 9  |
| 321308 | 70 | 998632  | 998646  | 3 | 5  | 15 | GCA  | 17 | 3  |
| 321313 | 70 | 1003104 | 1003129 | 2 | 13 | 26 | GT   | 14 | 11 |
| 321319 | 70 | 1020146 | 1020179 | 2 | 17 | 34 | GT   | 11 | 8  |
| 321320 | 70 | 1020365 | 1020376 | 2 | 6  | 12 | GT   | 22 | 4  |
| 321321 | 70 | 1023509 | 1023526 | 3 | 6  | 18 | AAC  | 32 | 4  |
| 321324 | 70 | 1030024 | 1030038 | 3 | 5  | 15 | AAG  | 8  | 5  |
| 321330 | 70 | 1032094 | 1032114 | 3 | 7  | 21 | TCT  | 10 | 3  |
| 321331 | 70 | 1032176 | 1032191 | 4 | 4  | 16 | TTTC | 6  | 3  |
| 321332 | 70 | 1032274 | 1032297 | 2 | 12 | 24 | AC   | 15 | 9  |
| 321333 | 70 | 1033873 | 1033888 | 2 | 8  | 16 | GT   | 25 | 3  |
| 321334 | 70 | 1036606 | 1036619 | 2 | 7  | 14 | TG   | 12 | 4  |
| 321336 | 70 | 1041647 | 1041664 | 3 | 6  | 18 | TGG  | 24 | 7  |
| 321340 | 70 | 1048988 | 1048999 | 2 | 6  | 12 | TG   | 8  | 3  |
| 321345 | 70 | 1058699 | 1058713 | 3 | 5  | 15 | GAT  | 26 | 4  |
| 321346 | 70 | 1059921 | 1059958 | 2 | 19 | 38 | AC   | 11 | 9  |
| 321347 | 70 | 1061777 | 1061810 | 2 | 17 | 34 | CA   | 14 | 10 |
| 321348 | 70 | 1061994 | 1062017 | 3 | 8  | 24 | TTG  | 20 | 8  |
| 321361 | 70 | 1077789 | 1077828 | 2 | 20 | 40 | GA   | 7  | 9  |
| 321367 | 70 | 1087919 | 1087932 | 2 | 7  | 14 | TG   | 29 | 4  |
| 321369 | 70 | 1095228 | 1095253 | 2 | 13 | 26 | GT   | 12 | 10 |
| 321372 | 70 | 1103934 | 1103954 | 3 | 7  | 21 | TAT  | 11 | 4  |



|        |    |         |         |   |    |    |      |    |    |
|--------|----|---------|---------|---|----|----|------|----|----|
| 321374 | 70 | 1107831 | 1107846 | 2 | 8  | 16 | AC   | 14 | 5  |
| 321377 | 70 | 1115174 | 1115188 | 3 | 5  | 15 | ATG  | 15 | 8  |
| 321380 | 70 | 1125172 | 1125189 | 2 | 9  | 18 | TG   | 23 | 11 |
| 321381 | 70 | 1126732 | 1126757 | 2 | 13 | 26 | GT   | 23 | 8  |
| 321382 | 70 | 1126904 | 1126923 | 2 | 10 | 20 | CA   | 19 | 6  |
| 321384 | 70 | 1134239 | 1134256 | 2 | 9  | 18 | TG   | 18 | 6  |
| 321387 | 70 | 1139592 | 1139607 | 2 | 8  | 16 | CT   | 9  | 5  |
| 321394 | 70 | 1146157 | 1146170 | 2 | 7  | 14 | CA   | 24 | 3  |
| 321397 | 70 | 1148752 | 1148767 | 4 | 4  | 16 | GTCT | 23 | 5  |
| 321408 | 70 | 1163839 | 1163850 | 2 | 6  | 12 | AC   | 18 | 6  |
| 321415 | 70 | 1180961 | 1180974 | 2 | 7  | 14 | AT   | 22 | 5  |
| 321418 | 70 | 1191769 | 1191782 | 2 | 7  | 14 | TG   | 28 | 4  |
| 321420 | 70 | 1192405 | 1192420 | 2 | 8  | 16 | GT   | 24 | 4  |
| 321421 | 70 | 1194837 | 1194850 | 2 | 7  | 14 | TG   | 12 | 7  |
| 321437 | 70 | 1219375 | 1219402 | 4 | 7  | 28 | CAGA | 30 | 6  |
| 321444 | 70 | 1236927 | 1236942 | 2 | 8  | 16 | AC   | 16 | 5  |
| 321445 | 70 | 1236945 | 1236958 | 2 | 7  | 14 | AC   | 18 | 7  |
| 321446 | 70 | 1237942 | 1237956 | 3 | 5  | 15 | TCC  | 32 | 3  |
| 321450 | 70 | 1247659 | 1247670 | 2 | 6  | 12 | GT   | 27 | 3  |
| 321453 | 70 | 1257372 | 1257391 | 2 | 10 | 20 | CA   | 20 | 8  |
| 321458 | 70 | 1265297 | 1265334 | 2 | 19 | 38 | GT   | 12 | 10 |
| 321461 | 70 | 1276857 | 1276874 | 2 | 9  | 18 | TC   | 22 | 3  |
| 321464 | 70 | 1291706 | 1291717 | 2 | 6  | 12 | AC   | 15 | 9  |
| 321465 | 70 | 1293217 | 1293240 | 3 | 8  | 24 | ATT  | 9  | 7  |
| 321467 | 70 | 1299451 | 1299471 | 3 | 7  | 21 | GGA  | 21 | 3  |
| 321468 | 70 | 1307605 | 1307624 | 2 | 10 | 20 | AC   | 16 | 6  |
| 321469 | 70 | 1308167 | 1308192 | 2 | 13 | 26 | CT   | 9  | 4  |
| 321476 | 70 | 1326092 | 1326121 | 2 | 15 | 30 | GT   | 8  | 5  |
| 321479 | 70 | 1328431 | 1328442 | 2 | 6  | 12 | GT   | 14 | 8  |
| 321480 | 70 | 1328445 | 1328458 | 2 | 7  | 14 | GT   | 8  | 3  |
| 321484 | 70 | 1341025 | 1341045 | 3 | 7  | 21 | CCA  | 16 | 4  |
| 321486 | 70 | 1341194 | 1341213 | 4 | 5  | 20 | TGGA | 15 | 4  |
| 321487 | 70 | 1341370 | 1341393 | 4 | 6  | 24 | CTTT | 20 | 7  |
| 321499 | 70 | 1369674 | 1369687 | 2 | 7  | 14 | TG   | 21 | 16 |
| 321502 | 70 | 1375098 | 1375117 | 2 | 10 | 20 | GT   | 14 | 4  |
| 321507 | 70 | 1392456 | 1392469 | 2 | 7  | 14 | AC   | 24 | 4  |
| 321514 | 70 | 1415432 | 1415459 | 2 | 14 | 28 | CA   | 18 | 6  |
| 321519 | 70 | 1430312 | 1430325 | 2 | 7  | 14 | CT   | 27 | 5  |
| 321520 | 70 | 1435065 | 1435090 | 2 | 13 | 26 | CA   | 7  | 9  |
| 321521 | 70 | 1437379 | 1437402 | 2 | 12 | 24 | GT   | 11 | 8  |
| 321529 | 70 | 1462740 | 1462755 | 2 | 8  | 16 | GT   | 28 | 5  |
| 321535 | 70 | 1482785 | 1482818 | 2 | 17 | 34 | CA   | 11 | 7  |
| 321536 | 70 | 1485637 | 1485660 | 2 | 12 | 24 | CA   | 9  | 8  |
| 321537 | 70 | 1487316 | 1487333 | 2 | 9  | 18 | TA   | 6  | 6  |
| 321541 | 70 | 1493966 | 1493985 | 2 | 10 | 20 | TG   | 9  | 5  |
| 321544 | 70 | 1501632 | 1501653 | 2 | 11 | 22 | TG   | 15 | 6  |
| 321554 | 70 | 1516232 | 1516255 | 3 | 8  | 24 | TTA  | 11 | 3  |
| 321556 | 70 | 1522411 | 1522424 | 2 | 7  | 14 | AC   | 28 | 7  |
| 321562 | 70 | 1538512 | 1538529 | 2 | 9  | 18 | TG   | 16 | 8  |
| 321564 | 70 | 1551633 | 1551660 | 4 | 7  | 28 | AGAA | 13 | 10 |
| 321574 | 70 | 1575384 | 1575401 | 3 | 6  | 18 | CTT  | 28 | 3  |

|        |    |         |         |   |    |    |      |    |    |
|--------|----|---------|---------|---|----|----|------|----|----|
| 321576 | 70 | 1583117 | 1583130 | 2 | 7  | 14 | AC   | 30 | 4  |
| 321577 | 70 | 1589208 | 1589219 | 2 | 6  | 12 | AC   | 24 | 3  |
| 321581 | 70 | 1611456 | 1611467 | 2 | 6  | 12 | AG   | 25 | 4  |
| 321582 | 70 | 1616003 | 1616032 | 3 | 10 | 30 | AGA  | 29 | 4  |
| 321583 | 70 | 1617386 | 1617401 | 4 | 4  | 16 | AAAC | 31 | 7  |
| 321584 | 70 | 1622056 | 1622076 | 3 | 7  | 21 | AGC  | 29 | 4  |
| 321586 | 70 | 1626568 | 1626583 | 4 | 4  | 16 | AGCT | 25 | 9  |
| 321587 | 70 | 1627589 | 1627603 | 3 | 5  | 15 | CCT  | 20 | 7  |
| 321590 | 70 | 1631909 | 1631922 | 2 | 7  | 14 | TG   | 26 | 3  |
| 321598 | 70 | 1648250 | 1648267 | 3 | 6  | 18 | GAA  | 15 | 10 |
| 321611 | 70 | 1681828 | 1681857 | 2 | 15 | 30 | AC   | 17 | 6  |
| 321612 | 70 | 1683213 | 1683224 | 2 | 6  | 12 | GA   | 18 | 3  |
| 321613 | 70 | 1683226 | 1683237 | 2 | 6  | 12 | AG   | 17 | 3  |
| 321614 | 70 | 1684111 | 1684136 | 2 | 13 | 26 | GT   | 13 | 8  |
| 321616 | 70 | 1685943 | 1685962 | 2 | 10 | 20 | GT   | 17 | 7  |
| 321625 | 70 | 1698394 | 1698413 | 2 | 10 | 20 | CA   | 17 | 7  |
| 321638 | 70 | 1717825 | 1717850 | 2 | 13 | 26 | AC   | 12 | 4  |
| 321655 | 70 | 1759670 | 1759687 | 3 | 6  | 18 | GTT  | 16 | 3  |
| 321658 | 70 | 1770958 | 1770978 | 3 | 7  | 21 | CTT  | 25 | 6  |
| 321660 | 70 | 1775986 | 1776009 | 2 | 12 | 24 | AC   | 8  | 6  |
| 321677 | 70 | 1829981 | 1830006 | 2 | 13 | 26 | GT   | 8  | 7  |
| 321678 | 70 | 1830530 | 1830550 | 3 | 7  | 21 | GAG  | 28 | 5  |
| 321679 | 70 | 1833338 | 1833351 | 2 | 7  | 14 | TG   | 13 | 7  |
| 321681 | 70 | 1833706 | 1833723 | 2 | 9  | 18 | TG   | 22 | 6  |
| 321683 | 70 | 1840305 | 1840320 | 2 | 8  | 16 | AC   | 23 | 8  |
| 321685 | 70 | 1842430 | 1842449 | 2 | 10 | 20 | CT   | 8  | 7  |
| 321698 | 70 | 1853922 | 1853937 | 2 | 8  | 16 | GT   | 17 | 3  |
| 321704 | 70 | 1864761 | 1864784 | 2 | 12 | 24 | GT   | 16 | 4  |
| 321705 | 70 | 1864875 | 1864886 | 2 | 6  | 12 | TG   | 16 | 4  |
| 321706 | 70 | 1864889 | 1864902 | 2 | 7  | 14 | TG   | 16 | 4  |
| 321713 | 70 | 1877094 | 1877131 | 2 | 19 | 38 | GT   | 21 | 6  |
| 321716 | 70 | 1878603 | 1878622 | 2 | 10 | 20 | CA   | 12 | 6  |
| 321727 | 70 | 1894681 | 1894692 | 2 | 6  | 12 | CA   | 31 | 6  |
| 321740 | 70 | 1983754 | 1983767 | 2 | 7  | 14 | TA   | 11 | 3  |
| 321759 | 70 | 2062739 | 2062752 | 2 | 7  | 14 | GT   | 24 | 5  |
| 321767 | 70 | 2089143 | 2089154 | 2 | 6  | 12 | TA   | 16 | 4  |
| 321772 | 70 | 2117498 | 2117511 | 2 | 7  | 14 | TG   | 30 | 3  |
| 321776 | 70 | 2139485 | 2139516 | 2 | 16 | 32 | TG   | 13 | 7  |
| 321793 | 70 | 2172296 | 2172311 | 4 | 4  | 16 | AAAT | 15 | 3  |
| 321823 | 70 | 2283341 | 2283356 | 4 | 4  | 16 | ATGG | 16 | 3  |
| 321824 | 70 | 2284280 | 2284299 | 2 | 10 | 20 | AG   | 18 | 4  |
| 321825 | 70 | 2286420 | 2286443 | 2 | 12 | 24 | AC   | 24 | 5  |
| 321866 | 70 | 2416570 | 2416637 | 4 | 17 | 68 | AGAT | 8  | 11 |
| 321871 | 70 | 2471447 | 2471478 | 2 | 16 | 32 | TG   | 6  | 3  |
| 321891 | 71 | 35553   | 35585   | 3 | 11 | 33 | CAT  | 26 | 5  |
| 321903 | 71 | 49046   | 49061   | 4 | 4  | 16 | AAAC | 34 | 4  |
| 321904 | 71 | 52924   | 52937   | 2 | 7  | 14 | TG   | 24 | 5  |
| 321908 | 71 | 69702   | 69731   | 2 | 15 | 30 | AC   | 18 | 9  |
| 321910 | 71 | 83415   | 83450   | 4 | 9  | 36 | ATGA | 23 | 5  |
| 321911 | 71 | 86686   | 86701   | 2 | 8  | 16 | TG   | 11 | 5  |
| 321912 | 71 | 94658   | 94673   | 2 | 8  | 16 | CA   | 19 | 4  |

|        |    |        |        |   |    |    |      |    |    |
|--------|----|--------|--------|---|----|----|------|----|----|
| 321916 | 71 | 103647 | 103674 | 2 | 14 | 28 | TG   | 24 | 17 |
| 321923 | 71 | 111930 | 111947 | 3 | 6  | 18 | GAG  | 23 | 6  |
| 321924 | 71 | 112223 | 112250 | 2 | 14 | 28 | GT   | 9  | 9  |
| 321928 | 71 | 115824 | 115837 | 2 | 7  | 14 | TC   | 25 | 3  |
| 321929 | 71 | 118212 | 118227 | 2 | 8  | 16 | TG   | 14 | 6  |
| 321935 | 71 | 141644 | 141675 | 4 | 8  | 32 | AGAT | 28 | 4  |
| 321945 | 71 | 161544 | 161561 | 3 | 6  | 18 | TTA  | 23 | 3  |
| 321946 | 71 | 163361 | 163418 | 2 | 29 | 58 | TC   | 11 | 9  |
| 321949 | 71 | 169450 | 169465 | 2 | 8  | 16 | AG   | 13 | 4  |
| 321954 | 71 | 173020 | 173031 | 2 | 6  | 12 | AC   | 16 | 3  |
| 321956 | 71 | 175658 | 175671 | 2 | 7  | 14 | CA   | 22 | 10 |
| 321957 | 71 | 175674 | 175691 | 2 | 9  | 18 | CA   | 22 | 12 |
| 321959 | 71 | 177862 | 177889 | 2 | 14 | 28 | TG   | 25 | 9  |
| 321960 | 71 | 182368 | 182381 | 2 | 7  | 14 | AC   | 30 | 4  |
| 321963 | 71 | 187068 | 187093 | 2 | 13 | 26 | TC   | 25 | 13 |
| 321964 | 71 | 187607 | 187621 | 3 | 5  | 15 | CTC  | 21 | 3  |
| 321968 | 71 | 195900 | 195914 | 3 | 5  | 15 | CTG  | 33 | 4  |
| 321971 | 71 | 201903 | 201917 | 3 | 5  | 15 | AGG  | 21 | 4  |
| 321975 | 71 | 220882 | 220919 | 2 | 19 | 38 | TG   | 7  | 11 |
| 321977 | 71 | 242014 | 242041 | 2 | 14 | 28 | CA   | 9  | 8  |
| 321985 | 71 | 263146 | 263165 | 2 | 10 | 20 | TA   | 8  | 4  |
| 321992 | 71 | 271971 | 271988 | 3 | 6  | 18 | GGA  | 21 | 4  |
| 321995 | 71 | 275907 | 275920 | 2 | 7  | 14 | GT   | 21 | 4  |
| 321997 | 71 | 282394 | 282421 | 2 | 14 | 28 | CA   | 15 | 15 |
| 321998 | 71 | 285858 | 285885 | 2 | 14 | 28 | TG   | 23 | 7  |
| 322002 | 71 | 291581 | 291602 | 2 | 11 | 22 | AC   | 20 | 6  |
| 322006 | 71 | 301043 | 301057 | 3 | 5  | 15 | AGC  | 7  | 3  |
| 322008 | 71 | 301463 | 301486 | 2 | 12 | 24 | CA   | 15 | 7  |
| 322009 | 71 | 301552 | 301575 | 2 | 12 | 24 | CA   | 22 | 11 |
| 322010 | 71 | 302421 | 302446 | 2 | 13 | 26 | AC   | 7  | 7  |
| 322011 | 71 | 304179 | 304202 | 2 | 12 | 24 | TG   | 21 | 10 |
| 322015 | 71 | 315541 | 315552 | 2 | 6  | 12 | AC   | 28 | 5  |
| 322016 | 71 | 315672 | 315713 | 2 | 21 | 42 | GT   | 14 | 10 |
| 322017 | 71 | 317169 | 317186 | 3 | 6  | 18 | GAT  | 31 | 3  |
| 322018 | 71 | 317274 | 317295 | 2 | 11 | 22 | CA   | 18 | 9  |
| 322019 | 71 | 321156 | 321187 | 4 | 8  | 32 | GATA | 11 | 8  |
| 322022 | 71 | 324104 | 324131 | 4 | 7  | 28 | GATA | 11 | 7  |
| 322023 | 71 | 325190 | 325205 | 2 | 8  | 16 | AC   | 25 | 12 |
| 322027 | 71 | 339503 | 339522 | 2 | 10 | 20 | TG   | 14 | 5  |
| 322029 | 71 | 341839 | 341856 | 3 | 6  | 18 | CAA  | 24 | 5  |
| 322032 | 71 | 344324 | 344347 | 2 | 12 | 24 | GT   | 19 | 11 |
| 322036 | 71 | 347000 | 347015 | 2 | 8  | 16 | GT   | 22 | 6  |
| 322039 | 71 | 354371 | 354386 | 2 | 8  | 16 | AC   | 25 | 6  |
| 322041 | 71 | 355750 | 355801 | 4 | 13 | 52 | TCTA | 19 | 10 |
| 322043 | 71 | 357139 | 357170 | 2 | 16 | 32 | CA   | 8  | 10 |
| 322045 | 71 | 359550 | 359561 | 2 | 6  | 12 | GT   | 19 | 3  |
| 322046 | 71 | 359726 | 359739 | 2 | 7  | 14 | CT   | 16 | 3  |
| 322051 | 71 | 368217 | 368230 | 2 | 7  | 14 | AC   | 10 | 5  |
| 322052 | 71 | 368235 | 368250 | 2 | 8  | 16 | AC   | 8  | 4  |
| 322053 | 71 | 370675 | 370686 | 2 | 6  | 12 | GT   | 18 | 3  |
| 322054 | 71 | 371310 | 371325 | 2 | 8  | 16 | GT   | 24 | 8  |

|        |    |        |        |   |    |    |     |    |    |
|--------|----|--------|--------|---|----|----|-----|----|----|
| 322055 | 71 | 371441 | 371466 | 2 | 13 | 26 | TG  | 11 | 10 |
| 322060 | 71 | 371681 | 371696 | 2 | 8  | 16 | CT  | 8  | 7  |
| 322061 | 71 | 373567 | 373582 | 2 | 8  | 16 | GA  | 14 | 6  |
| 322062 | 71 | 373922 | 373933 | 2 | 6  | 12 | GT  | 27 | 3  |
| 322063 | 71 | 374055 | 374075 | 3 | 7  | 21 | CTC | 27 | 3  |
| 322064 | 71 | 377201 | 377216 | 2 | 8  | 16 | TG  | 24 | 3  |
| 322078 | 71 | 386486 | 386501 | 2 | 8  | 16 | CA  | 27 | 8  |
| 322079 | 71 | 386700 | 386727 | 2 | 14 | 28 | CA  | 19 | 8  |
| 322080 | 71 | 386821 | 386842 | 2 | 11 | 22 | AC  | 18 | 7  |
| 322083 | 71 | 391727 | 391738 | 2 | 6  | 12 | CA  | 15 | 9  |
| 322085 | 71 | 392874 | 392905 | 2 | 16 | 32 | GT  | 17 | 10 |
| 322086 | 71 | 393037 | 393050 | 2 | 7  | 14 | TA  | 22 | 3  |
| 322087 | 71 | 393098 | 393113 | 2 | 8  | 16 | TG  | 22 | 9  |
| 322088 | 71 | 393172 | 393203 | 2 | 16 | 32 | TG  | 14 | 12 |
| 322091 | 71 | 397870 | 397881 | 2 | 6  | 12 | CT  | 17 | 7  |
| 322092 | 71 | 398162 | 398195 | 2 | 17 | 34 | TG  | 9  | 9  |
| 322093 | 71 | 402822 | 402839 | 3 | 6  | 18 | CAA | 20 | 4  |
| 322096 | 71 | 403341 | 403358 | 2 | 9  | 18 | AC  | 19 | 4  |
| 322101 | 71 | 410970 | 410985 | 2 | 8  | 16 | AG  | 18 | 5  |
| 322103 | 71 | 414457 | 414476 | 2 | 10 | 20 | TC  | 20 | 5  |
| 322107 | 71 | 424328 | 424349 | 2 | 11 | 22 | CA  | 17 | 5  |
| 322108 | 71 | 425516 | 425537 | 2 | 11 | 22 | CA  | 20 | 10 |
| 322110 | 71 | 427847 | 427858 | 2 | 6  | 12 | CA  | 13 | 5  |
| 322113 | 71 | 430561 | 430575 | 3 | 5  | 15 | CCG | 23 | 3  |
| 322115 | 71 | 433433 | 433448 | 2 | 8  | 16 | TG  | 17 | 12 |
| 322117 | 71 | 434997 | 435014 | 2 | 9  | 18 | AC  | 22 | 19 |
| 322118 | 71 | 435192 | 435209 | 2 | 9  | 18 | CA  | 14 | 11 |
| 322119 | 71 | 437099 | 437120 | 2 | 11 | 22 | AC  | 7  | 5  |
| 322122 | 71 | 441366 | 441381 | 2 | 8  | 16 | TA  | 19 | 4  |
| 322132 | 71 | 451571 | 451590 | 2 | 10 | 20 | TG  | 17 | 10 |
| 322135 | 71 | 455037 | 455066 | 2 | 15 | 30 | CA  | 17 | 8  |
| 322136 | 71 | 455458 | 455471 | 2 | 7  | 14 | CA  | 25 | 5  |
| 322144 | 71 | 456724 | 456755 | 2 | 16 | 32 | TG  | 11 | 7  |
| 322145 | 71 | 456782 | 456797 | 2 | 8  | 16 | TG  | 18 | 6  |
| 322146 | 71 | 456964 | 456991 | 2 | 14 | 28 | TG  | 15 | 6  |
| 322150 | 71 | 462751 | 462776 | 2 | 13 | 26 | GT  | 11 | 10 |
| 322156 | 71 | 466382 | 466399 | 2 | 9  | 18 | TG  | 18 | 3  |
| 322161 | 71 | 470663 | 470674 | 2 | 6  | 12 | TG  | 21 | 3  |
| 322162 | 71 | 472479 | 472493 | 3 | 5  | 15 | CTC | 23 | 3  |
| 322164 | 71 | 475664 | 475703 | 2 | 20 | 40 | TG  | 13 | 15 |
| 322166 | 71 | 477228 | 477251 | 3 | 8  | 24 | GAG | 13 | 7  |
| 322167 | 71 | 477341 | 477358 | 2 | 9  | 18 | GA  | 15 | 6  |
| 322171 | 71 | 485206 | 485231 | 2 | 13 | 26 | CA  | 22 | 14 |
| 322178 | 71 | 495766 | 495803 | 2 | 19 | 38 | AC  | 16 | 10 |
| 322180 | 71 | 497408 | 497425 | 2 | 9  | 18 | CA  | 28 | 10 |
| 322183 | 71 | 500882 | 500907 | 2 | 13 | 26 | AC  | 8  | 7  |
| 322184 | 71 | 501030 | 501065 | 2 | 18 | 36 | TG  | 8  | 12 |
| 322187 | 71 | 502237 | 502252 | 2 | 8  | 16 | TG  | 28 | 6  |
| 322191 | 71 | 510590 | 510621 | 2 | 16 | 32 | CT  | 20 | 8  |
| 322196 | 71 | 516037 | 516050 | 2 | 7  | 14 | GT  | 13 | 3  |
| 322197 | 71 | 516052 | 516063 | 2 | 6  | 12 | TG  | 17 | 4  |

|        |    |        |        |   |    |    |      |    |    |
|--------|----|--------|--------|---|----|----|------|----|----|
| 322198 | 71 | 516215 | 516226 | 2 | 6  | 12 | GT   | 23 | 6  |
| 322199 | 71 | 521417 | 521436 | 2 | 10 | 20 | CA   | 20 | 11 |
| 322200 | 71 | 522069 | 522080 | 2 | 6  | 12 | CA   | 15 | 4  |
| 322202 | 71 | 522301 | 522314 | 2 | 7  | 14 | CA   | 6  | 6  |
| 322204 | 71 | 522360 | 522371 | 2 | 6  | 12 | AC   | 22 | 8  |
| 322206 | 71 | 522924 | 522943 | 2 | 10 | 20 | GT   | 18 | 4  |
| 322207 | 71 | 525628 | 525643 | 2 | 8  | 16 | TG   | 17 | 5  |
| 322212 | 71 | 542864 | 542883 | 4 | 5  | 20 | TTTA | 21 | 6  |
| 322215 | 71 | 551777 | 551788 | 2 | 6  | 12 | TG   | 21 | 4  |
| 322218 | 71 | 559838 | 559855 | 2 | 9  | 18 | TG   | 14 | 5  |
| 322220 | 71 | 561885 | 561905 | 3 | 7  | 21 | AGG  | 19 | 8  |
| 322221 | 71 | 562021 | 562040 | 2 | 10 | 20 | CA   | 26 | 4  |
| 322222 | 71 | 562883 | 562912 | 2 | 15 | 30 | CA   | 15 | 7  |
| 322225 | 71 | 570934 | 570957 | 3 | 8  | 24 | GAG  | 18 | 3  |
| 322228 | 71 | 578965 | 578976 | 2 | 6  | 12 | AC   | 31 | 8  |
| 322232 | 71 | 586587 | 586607 | 3 | 7  | 21 | GCA  | 27 | 9  |
| 322237 | 71 | 591550 | 591561 | 2 | 6  | 12 | TA   | 24 | 4  |
| 322238 | 71 | 593317 | 593332 | 4 | 4  | 16 | TTAT | 22 | 3  |
| 322241 | 71 | 596695 | 596710 | 4 | 4  | 16 | AACA | 24 | 3  |
| 322242 | 71 | 603988 | 603999 | 2 | 6  | 12 | TG   | 35 | 3  |
| 322245 | 71 | 607151 | 607166 | 2 | 8  | 16 | TC   | 16 | 4  |
| 322251 | 71 | 614884 | 614897 | 2 | 7  | 14 | AT   | 16 | 8  |
| 322253 | 71 | 618092 | 618109 | 2 | 9  | 18 | CA   | 24 | 9  |
| 322255 | 71 | 621325 | 621346 | 2 | 11 | 22 | AC   | 19 | 12 |
| 322261 | 71 | 624758 | 624777 | 4 | 5  | 20 | TTGT | 23 | 8  |
| 322265 | 71 | 631429 | 631454 | 2 | 13 | 26 | TG   | 19 | 7  |
| 322269 | 71 | 638821 | 638860 | 2 | 20 | 40 | TG   | 13 | 11 |
| 322270 | 71 | 639874 | 639887 | 2 | 7  | 14 | AT   | 28 | 4  |
| 322272 | 71 | 650425 | 650438 | 2 | 7  | 14 | AT   | 12 | 13 |
| 322275 | 71 | 654572 | 654595 | 2 | 12 | 24 | CA   | 22 | 10 |
| 322276 | 71 | 654777 | 654804 | 2 | 14 | 28 | TG   | 17 | 9  |
| 322279 | 71 | 656998 | 657012 | 3 | 5  | 15 | AGC  | 26 | 6  |
| 322280 | 71 | 657267 | 657300 | 2 | 17 | 34 | GT   | 15 | 7  |
| 322282 | 71 | 659692 | 659723 | 2 | 16 | 32 | GT   | 26 | 12 |
| 322284 | 71 | 661256 | 661271 | 2 | 8  | 16 | AC   | 26 | 4  |
| 322289 | 71 | 664214 | 664239 | 2 | 13 | 26 | AC   | 9  | 8  |
| 322301 | 71 | 674053 | 674074 | 2 | 11 | 22 | TG   | 17 | 10 |
| 322302 | 71 | 674178 | 674201 | 2 | 12 | 24 | CA   | 16 | 18 |
| 322307 | 71 | 677802 | 677861 | 4 | 15 | 60 | GAAA | 12 | 10 |
| 322310 | 71 | 680908 | 680927 | 2 | 10 | 20 | CT   | 20 | 5  |
| 322311 | 71 | 681334 | 681353 | 2 | 10 | 20 | CA   | 17 | 4  |
| 322315 | 71 | 682451 | 682468 | 3 | 6  | 18 | AGG  | 19 | 5  |
| 322326 | 71 | 704829 | 704844 | 2 | 8  | 16 | TG   | 21 | 5  |
| 322332 | 71 | 710832 | 710843 | 2 | 6  | 12 | AT   | 24 | 3  |
| 322344 | 71 | 722752 | 722765 | 2 | 7  | 14 | CT   | 22 | 3  |
| 322345 | 71 | 723450 | 723469 | 2 | 10 | 20 | AC   | 25 | 4  |
| 322348 | 71 | 725659 | 725670 | 2 | 6  | 12 | AC   | 19 | 4  |
| 322351 | 71 | 729684 | 729701 | 2 | 9  | 18 | AC   | 13 | 5  |
| 322352 | 71 | 731528 | 731543 | 2 | 8  | 16 | CA   | 27 | 9  |
| 322362 | 71 | 742697 | 742720 | 2 | 12 | 24 | TG   | 11 | 5  |
| 322364 | 71 | 743694 | 743713 | 2 | 10 | 20 | CA   | 10 | 7  |

|        |    |         |         |   |    |    |      |    |    |
|--------|----|---------|---------|---|----|----|------|----|----|
| 322366 | 71 | 745328  | 745355  | 2 | 14 | 28 | CA   | 28 | 9  |
| 322367 | 71 | 749568  | 749603  | 2 | 18 | 36 | TG   | 8  | 7  |
| 322384 | 71 | 764486  | 764503  | 2 | 9  | 18 | CA   | 25 | 8  |
| 322394 | 71 | 772512  | 772525  | 2 | 7  | 14 | CA   | 22 | 5  |
| 322397 | 71 | 773714  | 773727  | 2 | 7  | 14 | TG   | 20 | 7  |
| 322398 | 71 | 773729  | 773746  | 2 | 9  | 18 | GT   | 20 | 7  |
| 322414 | 71 | 793073  | 793108  | 2 | 18 | 36 | TG   | 10 | 8  |
| 322459 | 71 | 850804  | 850827  | 2 | 12 | 24 | CA   | 12 | 15 |
| 322475 | 71 | 882543  | 882558  | 4 | 4  | 16 | ATAG | 11 | 3  |
| 322476 | 71 | 883778  | 883805  | 2 | 14 | 28 | TC   | 12 | 8  |
| 322480 | 71 | 890342  | 890361  | 2 | 10 | 20 | CT   | 21 | 7  |
| 322495 | 71 | 907077  | 907097  | 3 | 7  | 21 | AGC  | 9  | 3  |
| 322497 | 71 | 908685  | 908699  | 3 | 5  | 15 | CAT  | 28 | 3  |
| 322501 | 71 | 914119  | 914138  | 2 | 10 | 20 | TG   | 16 | 7  |
| 322516 | 71 | 942855  | 942882  | 2 | 14 | 28 | AC   | 13 | 4  |
| 322521 | 71 | 953876  | 953891  | 2 | 8  | 16 | TC   | 30 | 3  |
| 322522 | 71 | 954985  | 955018  | 2 | 17 | 34 | TG   | 7  | 7  |
| 322523 | 71 | 958002  | 958021  | 4 | 5  | 20 | TTTA | 12 | 5  |
| 322525 | 71 | 958619  | 958632  | 2 | 7  | 14 | CA   | 20 | 4  |
| 322528 | 71 | 959689  | 959706  | 3 | 6  | 18 | TTC  | 6  | 7  |
| 322529 | 71 | 960993  | 961016  | 2 | 12 | 24 | GT   | 16 | 8  |
| 322556 | 71 | 997938  | 997975  | 2 | 19 | 38 | GA   | 14 | 7  |
| 322558 | 71 | 1000413 | 1000464 | 4 | 13 | 52 | ATCT | 16 | 11 |
| 322573 | 71 | 1023940 | 1023967 | 2 | 14 | 28 | TG   | 13 | 5  |
| 322589 | 71 | 1043456 | 1043469 | 2 | 7  | 14 | CA   | 32 | 5  |
| 322596 | 71 | 1052013 | 1052030 | 2 | 9  | 18 | CA   | 30 | 4  |
| 322597 | 71 | 1052674 | 1052689 | 2 | 8  | 16 | AT   | 11 | 6  |
| 322611 | 71 | 1064644 | 1064657 | 2 | 7  | 14 | TA   | 11 | 7  |
| 322618 | 71 | 1078465 | 1078488 | 2 | 12 | 24 | AG   | 12 | 6  |
| 322621 | 71 | 1080767 | 1080792 | 2 | 13 | 26 | CA   | 24 | 7  |
| 322626 | 71 | 1085220 | 1085265 | 2 | 23 | 46 | AG   | 18 | 11 |
| 322629 | 71 | 1087016 | 1087035 | 2 | 10 | 20 | TG   | 20 | 8  |
| 322642 | 71 | 1098719 | 1098744 | 2 | 13 | 26 | CA   | 21 | 5  |
| 322649 | 71 | 1103836 | 1103849 | 2 | 7  | 14 | CT   | 18 | 6  |
| 322664 | 71 | 1121149 | 1121160 | 2 | 6  | 12 | TG   | 12 | 5  |
| 322665 | 71 | 1121179 | 1121192 | 2 | 7  | 14 | AC   | 13 | 3  |
| 322666 | 71 | 1122851 | 1122862 | 2 | 6  | 12 | TG   | 30 | 3  |
| 322669 | 71 | 1124947 | 1124966 | 4 | 5  | 20 | CTGT | 16 | 5  |
| 322676 | 71 | 1137125 | 1137138 | 2 | 7  | 14 | CA   | 25 | 3  |
| 322681 | 71 | 1144581 | 1144602 | 2 | 11 | 22 | TG   | 12 | 5  |
| 322683 | 71 | 1149149 | 1149168 | 4 | 5  | 20 | GAAG | 26 | 3  |
| 322685 | 71 | 1151925 | 1151956 | 4 | 8  | 32 | TCTA | 26 | 9  |
| 322689 | 71 | 1164836 | 1164867 | 2 | 16 | 32 | TG   | 24 | 16 |
| 322690 | 71 | 1167606 | 1167637 | 2 | 16 | 32 | AC   | 22 | 7  |
| 322692 | 71 | 1173216 | 1173227 | 2 | 6  | 12 | AC   | 25 | 6  |
| 322710 | 71 | 1191236 | 1191247 | 2 | 6  | 12 | TC   | 15 | 4  |
| 322711 | 71 | 1191250 | 1191267 | 2 | 9  | 18 | TC   | 15 | 4  |
| 322715 | 71 | 1197660 | 1197703 | 4 | 11 | 44 | TATC | 7  | 9  |
| 322719 | 71 | 1210035 | 1210076 | 2 | 21 | 42 | GT   | 14 | 11 |
| 322727 | 71 | 1232427 | 1232446 | 2 | 10 | 20 | CA   | 7  | 5  |
| 322730 | 71 | 1234287 | 1234307 | 3 | 7  | 21 | TGC  | 31 | 6  |

|        |    |         |         |   |    |    |      |    |    |
|--------|----|---------|---------|---|----|----|------|----|----|
| 322736 | 71 | 1240173 | 1240188 | 2 | 8  | 16 | AT   | 25 | 3  |
| 322746 | 71 | 1279036 | 1279051 | 4 | 4  | 16 | TATC | 29 | 3  |
| 322747 | 71 | 1279052 | 1279067 | 4 | 4  | 16 | TAGC | 18 | 3  |
| 322753 | 71 | 1290395 | 1290422 | 2 | 14 | 28 | GT   | 7  | 7  |
| 322754 | 71 | 1302342 | 1302357 | 2 | 8  | 16 | CA   | 17 | 6  |
| 322755 | 71 | 1306156 | 1306219 | 4 | 16 | 64 | TAGA | 13 | 8  |
| 322756 | 71 | 1307466 | 1307480 | 3 | 5  | 15 | GCA  | 27 | 6  |
| 322757 | 71 | 1308724 | 1308747 | 4 | 6  | 24 | TTCA | 23 | 3  |
| 322762 | 71 | 1329235 | 1329248 | 2 | 7  | 14 | AG   | 29 | 3  |
| 322763 | 71 | 1330390 | 1330431 | 3 | 14 | 42 | GAA  | 6  | 8  |
| 322764 | 71 | 1331256 | 1331269 | 2 | 7  | 14 | GT   | 27 | 3  |
| 322766 | 71 | 1333635 | 1333658 | 2 | 12 | 24 | AC   | 22 | 12 |
| 322769 | 71 | 1334135 | 1334154 | 2 | 10 | 20 | TG   | 13 | 7  |
| 322770 | 71 | 1334318 | 1334345 | 2 | 14 | 28 | GT   | 11 | 8  |
| 322771 | 71 | 1334873 | 1334898 | 2 | 13 | 26 | CA   | 14 | 8  |
| 322772 | 71 | 1337335 | 1337358 | 2 | 12 | 24 | GT   | 8  | 8  |
| 322777 | 71 | 1344396 | 1344435 | 2 | 20 | 40 | AC   | 8  | 9  |
| 322779 | 71 | 1346830 | 1346847 | 2 | 9  | 18 | AC   | 22 | 5  |
| 322780 | 71 | 1347033 | 1347046 | 2 | 7  | 14 | CA   | 16 | 15 |
| 322781 | 71 | 1351806 | 1351823 | 2 | 9  | 18 | AC   | 14 | 11 |
| 322782 | 71 | 1354511 | 1354530 | 2 | 10 | 20 | CA   | 14 | 9  |
| 322784 | 71 | 1354716 | 1354727 | 2 | 6  | 12 | CA   | 15 | 10 |
| 322787 | 71 | 1363993 | 1364012 | 2 | 10 | 20 | AC   | 12 | 8  |
| 322793 | 71 | 1372082 | 1372095 | 2 | 7  | 14 | AT   | 15 | 11 |
| 322794 | 71 | 1375967 | 1375978 | 2 | 6  | 12 | TA   | 20 | 5  |
| 322802 | 71 | 1385950 | 1385967 | 2 | 9  | 18 | TG   | 18 | 11 |
| 322807 | 71 | 1388901 | 1388926 | 2 | 13 | 26 | GT   | 18 | 9  |
| 322808 | 71 | 1389016 | 1389037 | 2 | 11 | 22 | TG   | 20 | 7  |
| 322809 | 71 | 1389218 | 1389237 | 2 | 10 | 20 | GT   | 21 | 7  |
| 322813 | 71 | 1390219 | 1390234 | 4 | 4  | 16 | AAAG | 25 | 6  |
| 322822 | 71 | 1398312 | 1398325 | 2 | 7  | 14 | CT   | 21 | 3  |
| 322827 | 71 | 1411594 | 1411647 | 2 | 27 | 54 | GT   | 7  | 10 |
| 322829 | 71 | 1412494 | 1412507 | 2 | 7  | 14 | GT   | 21 | 8  |
| 322830 | 71 | 1416637 | 1416652 | 4 | 4  | 16 | TCCG | 18 | 5  |
| 322831 | 71 | 1417028 | 1417059 | 2 | 16 | 32 | AC   | 7  | 7  |
| 322832 | 71 | 1417516 | 1417535 | 2 | 10 | 20 | TG   | 29 | 8  |
| 322836 | 71 | 1423488 | 1423502 | 3 | 5  | 15 | TCC  | 18 | 8  |
| 322840 | 71 | 1427568 | 1427589 | 2 | 11 | 22 | GT   | 10 | 15 |
| 322841 | 71 | 1428189 | 1428208 | 2 | 10 | 20 | CA   | 12 | 8  |
| 322844 | 71 | 1435532 | 1435543 | 2 | 6  | 12 | AC   | 24 | 8  |
| 322845 | 71 | 1435695 | 1435708 | 2 | 7  | 14 | AC   | 22 | 3  |
| 322848 | 71 | 1435965 | 1435982 | 2 | 9  | 18 | GT   | 13 | 8  |
| 322854 | 71 | 1437319 | 1437336 | 2 | 9  | 18 | CA   | 26 | 5  |
| 322858 | 71 | 1449548 | 1449569 | 2 | 11 | 22 | AC   | 21 | 8  |
| 322861 | 71 | 1455195 | 1455220 | 2 | 13 | 26 | GT   | 26 | 11 |
| 322862 | 71 | 1460180 | 1460209 | 2 | 15 | 30 | GT   | 12 | 10 |
| 322863 | 71 | 1460250 | 1460261 | 2 | 6  | 12 | TA   | 18 | 6  |
| 322864 | 71 | 1460362 | 1460379 | 2 | 9  | 18 | CA   | 28 | 5  |
| 322865 | 71 | 1460663 | 1460696 | 2 | 17 | 34 | GT   | 6  | 9  |
| 322867 | 71 | 1460843 | 1460870 | 2 | 14 | 28 | CA   | 17 | 4  |
| 322870 | 71 | 1464812 | 1464862 | 3 | 17 | 51 | TAA  | 12 | 10 |

|        |    |         |         |   |    |    |      |    |    |
|--------|----|---------|---------|---|----|----|------|----|----|
| 322873 | 71 | 1465442 | 1465459 | 2 | 9  | 18 | GT   | 17 | 3  |
| 322877 | 71 | 1476861 | 1476898 | 2 | 19 | 38 | GT   | 12 | 14 |
| 322878 | 71 | 1477248 | 1477265 | 3 | 6  | 18 | GAG  | 26 | 5  |
| 322884 | 71 | 1493194 | 1493237 | 4 | 11 | 44 | TTTC | 8  | 9  |
| 322887 | 71 | 1496444 | 1496457 | 2 | 7  | 14 | AC   | 20 | 3  |
| 322888 | 71 | 1496467 | 1496478 | 2 | 6  | 12 | CA   | 12 | 4  |
| 322889 | 71 | 1498057 | 1498076 | 2 | 10 | 20 | GT   | 26 | 9  |
| 322895 | 71 | 1512433 | 1512456 | 4 | 6  | 24 | TTTA | 17 | 4  |
| 322898 | 71 | 1514886 | 1514900 | 3 | 5  | 15 | ATG  | 25 | 4  |
| 322904 | 71 | 1525583 | 1525598 | 2 | 8  | 16 | AT   | 7  | 3  |
| 322907 | 71 | 1528342 | 1528353 | 2 | 6  | 12 | AC   | 23 | 8  |
| 322908 | 71 | 1529358 | 1529369 | 2 | 6  | 12 | TG   | 20 | 3  |
| 322911 | 71 | 1535079 | 1535104 | 2 | 13 | 26 | GT   | 6  | 5  |
| 322913 | 71 | 1540064 | 1540075 | 2 | 6  | 12 | TG   | 30 | 4  |
| 322914 | 71 | 1543421 | 1543446 | 2 | 13 | 26 | CA   | 7  | 11 |
| 322920 | 71 | 1553345 | 1553372 | 2 | 14 | 28 | CA   | 20 | 4  |
| 322921 | 71 | 1559236 | 1559255 | 2 | 10 | 20 | CA   | 16 | 11 |
| 322930 | 71 | 1575485 | 1575520 | 2 | 18 | 36 | AC   | 12 | 10 |
| 322932 | 71 | 1577033 | 1577044 | 2 | 6  | 12 | AG   | 23 | 3  |
| 322941 | 71 | 1588311 | 1588340 | 2 | 15 | 30 | GT   | 23 | 10 |
| 322942 | 71 | 1602556 | 1602581 | 2 | 13 | 26 | AC   | 19 | 9  |
| 322949 | 71 | 1613383 | 1613400 | 3 | 6  | 18 | GGA  | 19 | 3  |
| 322950 | 71 | 1613652 | 1613675 | 2 | 12 | 24 | AG   | 11 | 7  |
| 322952 | 71 | 1614551 | 1614594 | 2 | 22 | 44 | AC   | 7  | 8  |
| 322956 | 71 | 1615042 | 1615069 | 2 | 14 | 28 | AC   | 13 | 7  |
| 322958 | 71 | 1615194 | 1615211 | 2 | 9  | 18 | AG   | 22 | 3  |
| 322965 | 71 | 1621046 | 1621059 | 2 | 7  | 14 | CA   | 31 | 3  |
| 322967 | 71 | 1624001 | 1624020 | 2 | 10 | 20 | AC   | 22 | 9  |
| 322968 | 71 | 1624238 | 1624253 | 2 | 8  | 16 | GT   | 10 | 3  |
| 322970 | 71 | 1626844 | 1626861 | 3 | 6  | 18 | CCT  | 26 | 3  |
| 322972 | 71 | 1627761 | 1627786 | 2 | 13 | 26 | AC   | 10 | 9  |
| 322973 | 71 | 1628117 | 1628146 | 2 | 15 | 30 | CA   | 7  | 11 |
| 322979 | 71 | 1639478 | 1639499 | 2 | 11 | 22 | TG   | 13 | 3  |
| 322982 | 71 | 1645351 | 1645376 | 2 | 13 | 26 | CA   | 10 | 6  |
| 322985 | 71 | 1653181 | 1653196 | 4 | 4  | 16 | GTGA | 22 | 7  |
| 322989 | 71 | 1658766 | 1658786 | 3 | 7  | 21 | TTG  | 21 | 5  |
| 322991 | 71 | 1659462 | 1659481 | 2 | 10 | 20 | AG   | 21 | 7  |
| 322994 | 71 | 1662666 | 1662679 | 2 | 7  | 14 | GT   | 23 | 7  |
| 322995 | 71 | 1662726 | 1662737 | 2 | 6  | 12 | AC   | 27 | 3  |
| 322996 | 71 | 1664472 | 1664499 | 2 | 14 | 28 | AC   | 15 | 10 |
| 322998 | 71 | 1665308 | 1665337 | 2 | 15 | 30 | AC   | 10 | 9  |
| 322999 | 71 | 1667328 | 1667341 | 2 | 7  | 14 | GT   | 25 | 5  |
| 323000 | 71 | 1667343 | 1667356 | 2 | 7  | 14 | TG   | 25 | 6  |
| 323001 | 71 | 1667753 | 1667766 | 2 | 7  | 14 | TG   | 23 | 3  |
| 323002 | 71 | 1667841 | 1667864 | 2 | 12 | 24 | TG   | 13 | 6  |
| 323006 | 71 | 1676510 | 1676536 | 3 | 9  | 27 | TTC  | 30 | 5  |
| 323007 | 71 | 1676862 | 1676877 | 2 | 8  | 16 | CA   | 18 | 8  |
| 323008 | 71 | 1676970 | 1676987 | 3 | 6  | 18 | TGT  | 23 | 5  |
| 323009 | 71 | 1677021 | 1677074 | 2 | 27 | 54 | AC   | 9  | 13 |
| 323011 | 71 | 1679239 | 1679253 | 3 | 5  | 15 | CTG  | 15 | 3  |
| 323017 | 71 | 1695460 | 1695471 | 2 | 6  | 12 | AT   | 28 | 3  |



|        |    |         |         |   |    |    |      |    |    |
|--------|----|---------|---------|---|----|----|------|----|----|
| 323018 | 71 | 1700711 | 1700734 | 2 | 12 | 24 | CA   | 12 | 10 |
| 323019 | 71 | 1701161 | 1701172 | 2 | 6  | 12 | TC   | 33 | 3  |
| 323026 | 71 | 1714117 | 1714160 | 2 | 22 | 44 | TG   | 10 | 12 |
| 323027 | 71 | 1718121 | 1718140 | 2 | 10 | 20 | AC   | 27 | 6  |
| 323030 | 71 | 1725746 | 1725769 | 2 | 12 | 24 | GT   | 8  | 8  |
| 323031 | 71 | 1731307 | 1731318 | 2 | 6  | 12 | GT   | 23 | 3  |
| 323032 | 71 | 1738429 | 1738444 | 2 | 8  | 16 | AG   | 27 | 3  |
| 323033 | 71 | 1741346 | 1741369 | 3 | 8  | 24 | CAT  | 16 | 9  |
| 323038 | 71 | 1747979 | 1747998 | 4 | 5  | 20 | AAAT | 12 | 6  |
| 323039 | 71 | 1749390 | 1749417 | 2 | 14 | 28 | CA   | 11 | 5  |
| 323046 | 71 | 1755104 | 1755121 | 2 | 9  | 18 | AC   | 8  | 3  |
| 323051 | 71 | 1763559 | 1763574 | 2 | 8  | 16 | CA   | 20 | 7  |
| 323053 | 71 | 1770350 | 1770373 | 2 | 12 | 24 | CA   | 15 | 8  |
| 323054 | 71 | 1777489 | 1777508 | 2 | 10 | 20 | CA   | 19 | 5  |
| 323057 | 71 | 1780043 | 1780056 | 2 | 7  | 14 | CA   | 19 | 3  |
| 323060 | 71 | 1791450 | 1791463 | 2 | 7  | 14 | GT   | 25 | 12 |
| 323065 | 71 | 1796587 | 1796606 | 2 | 10 | 20 | GT   | 24 | 5  |
| 323066 | 71 | 1797932 | 1797945 | 2 | 7  | 14 | GT   | 17 | 6  |
| 323067 | 71 | 1805448 | 1805465 | 2 | 9  | 18 | GT   | 17 | 7  |
| 323071 | 71 | 1809434 | 1809453 | 2 | 10 | 20 | TG   | 25 | 8  |
| 323074 | 71 | 1813433 | 1813464 | 2 | 16 | 32 | AC   | 17 | 13 |
| 323091 | 71 | 1855260 | 1855283 | 3 | 8  | 24 | TCC  | 10 | 3  |
| 323092 | 71 | 1856374 | 1856385 | 2 | 6  | 12 | AC   | 16 | 3  |
| 323093 | 71 | 1856477 | 1856503 | 3 | 9  | 27 | CCT  | 13 | 8  |
| 323094 | 71 | 1857926 | 1857965 | 2 | 20 | 40 | GT   | 8  | 12 |
| 323098 | 71 | 1860622 | 1860661 | 2 | 20 | 40 | TG   | 7  | 11 |
| 323101 | 71 | 1861101 | 1861118 | 3 | 6  | 18 | AGA  | 28 | 3  |
| 323104 | 71 | 1864644 | 1864655 | 2 | 6  | 12 | AC   | 22 | 7  |
| 323106 | 71 | 1865374 | 1865394 | 3 | 7  | 21 | CTC  | 24 | 6  |
| 323108 | 71 | 1868583 | 1868600 | 3 | 6  | 18 | AAC  | 26 | 4  |
| 323111 | 71 | 1875369 | 1875380 | 2 | 6  | 12 | CA   | 15 | 5  |
| 323112 | 71 | 1875382 | 1875395 | 2 | 7  | 14 | AC   | 20 | 4  |
| 323113 | 71 | 1875594 | 1875607 | 2 | 7  | 14 | GA   | 28 | 3  |
| 323114 | 71 | 1875808 | 1875823 | 2 | 8  | 16 | GT   | 27 | 5  |
| 323115 | 71 | 1876118 | 1876143 | 2 | 13 | 26 | CA   | 11 | 12 |
| 323116 | 71 | 1876884 | 1876895 | 2 | 6  | 12 | AG   | 7  | 5  |
| 323118 | 71 | 1889916 | 1889930 | 3 | 5  | 15 | TCC  | 16 | 6  |
| 323123 | 71 | 1890800 | 1890813 | 2 | 7  | 14 | AG   | 18 | 3  |
| 323127 | 71 | 1905395 | 1905406 | 2 | 6  | 12 | GT   | 32 | 4  |
| 323128 | 71 | 1906996 | 1907023 | 2 | 14 | 28 | TG   | 12 | 11 |
| 323133 | 71 | 1907999 | 1908012 | 2 | 7  | 14 | TG   | 27 | 3  |
| 323134 | 71 | 1908389 | 1908402 | 2 | 7  | 14 | GT   | 21 | 6  |
| 323135 | 71 | 1908565 | 1908604 | 2 | 20 | 40 | GT   | 16 | 8  |
| 323139 | 71 | 1913677 | 1913706 | 2 | 15 | 30 | CT   | 13 | 7  |
| 323140 | 71 | 1915041 | 1915058 | 2 | 9  | 18 | GT   | 25 | 5  |
| 323142 | 71 | 1918443 | 1918454 | 2 | 6  | 12 | TG   | 18 | 3  |
| 323144 | 71 | 1923094 | 1923107 | 2 | 7  | 14 | CA   | 14 | 7  |
| 323146 | 71 | 1923344 | 1923369 | 2 | 13 | 26 | TG   | 13 | 3  |
| 323147 | 71 | 1923550 | 1923583 | 2 | 17 | 34 | CA   | 14 | 5  |
| 323148 | 71 | 1925863 | 1925882 | 4 | 5  | 20 | ATTT | 29 | 3  |
| 323149 | 71 | 1926452 | 1926465 | 2 | 7  | 14 | TG   | 22 | 3  |

|        |    |         |         |   |    |    |      |    |    |
|--------|----|---------|---------|---|----|----|------|----|----|
| 323151 | 71 | 1934257 | 1934274 | 3 | 6  | 18 | TTC  | 32 | 3  |
| 323156 | 71 | 1935583 | 1935618 | 2 | 18 | 36 | GT   | 10 | 8  |
| 323160 | 71 | 1940854 | 1940886 | 3 | 11 | 33 | GGA  | 13 | 7  |
| 323161 | 71 | 1944484 | 1944498 | 3 | 5  | 15 | TCG  | 30 | 3  |
| 323166 | 71 | 1956547 | 1956562 | 4 | 4  | 16 | ATTA | 8  | 3  |
| 323167 | 71 | 1956672 | 1956695 | 3 | 8  | 24 | GAG  | 14 | 6  |
| 323168 | 71 | 1957111 | 1957130 | 2 | 10 | 20 | TG   | 19 | 11 |
| 323169 | 71 | 1959539 | 1959550 | 2 | 6  | 12 | AG   | 30 | 3  |
| 323180 | 71 | 1982520 | 1982575 | 2 | 28 | 56 | AC   | 11 | 10 |
| 323190 | 71 | 2001621 | 2001648 | 2 | 14 | 28 | GT   | 22 | 7  |
| 323192 | 71 | 2002178 | 2002203 | 2 | 13 | 26 | GT   | 10 | 7  |
| 323196 | 71 | 2004045 | 2004056 | 2 | 6  | 12 | TC   | 31 | 3  |
| 323211 | 71 | 2011167 | 2011180 | 2 | 7  | 14 | CA   | 20 | 4  |
| 323213 | 71 | 2011327 | 2011344 | 2 | 9  | 18 | AC   | 19 | 5  |
| 323215 | 71 | 2011541 | 2011562 | 2 | 11 | 22 | AC   | 13 | 14 |
| 323216 | 71 | 2011675 | 2011708 | 2 | 17 | 34 | AC   | 10 | 10 |
| 323217 | 71 | 2016894 | 2016925 | 2 | 16 | 32 | GT   | 10 | 5  |
| 323220 | 71 | 2025465 | 2025486 | 2 | 11 | 22 | TG   | 11 | 8  |
| 323222 | 71 | 2025733 | 2025746 | 2 | 7  | 14 | CA   | 17 | 4  |
| 323224 | 71 | 2026887 | 2026906 | 2 | 10 | 20 | CT   | 20 | 4  |
| 323225 | 71 | 2026929 | 2026954 | 2 | 13 | 26 | CT   | 12 | 5  |
| 323230 | 71 | 2034515 | 2034536 | 2 | 11 | 22 | TG   | 11 | 6  |
| 323233 | 71 | 2036784 | 2036821 | 2 | 19 | 38 | AC   | 10 | 6  |
| 323234 | 71 | 2037242 | 2037257 | 2 | 8  | 16 | GT   | 20 | 5  |
| 323236 | 71 | 2040175 | 2040204 | 2 | 15 | 30 | TG   | 7  | 7  |
| 323238 | 71 | 2041047 | 2041074 | 2 | 14 | 28 | GA   | 7  | 4  |
| 323239 | 71 | 2041357 | 2041376 | 2 | 10 | 20 | AC   | 18 | 5  |
| 323240 | 71 | 2041687 | 2041704 | 2 | 9  | 18 | GT   | 21 | 9  |
| 323241 | 71 | 2041806 | 2041821 | 2 | 8  | 16 | TG   | 21 | 3  |
| 323242 | 71 | 2041922 | 2041945 | 2 | 12 | 24 | TG   | 21 | 9  |
| 323243 | 71 | 2043903 | 2043916 | 2 | 7  | 14 | TG   | 28 | 3  |
| 323257 | 71 | 2061082 | 2061103 | 2 | 11 | 22 | TG   | 23 | 10 |
| 323258 | 71 | 2061329 | 2061346 | 2 | 9  | 18 | AG   | 28 | 5  |
| 323262 | 71 | 2064019 | 2064030 | 2 | 6  | 12 | GA   | 28 | 3  |
| 323264 | 71 | 2066041 | 2066066 | 2 | 13 | 26 | GA   | 11 | 10 |
| 323271 | 71 | 2068419 | 2068452 | 2 | 17 | 34 | AC   | 11 | 9  |
| 323276 | 71 | 2072352 | 2072369 | 2 | 9  | 18 | AC   | 18 | 8  |
| 323277 | 71 | 2072392 | 2072407 | 2 | 8  | 16 | AC   | 25 | 5  |
| 323280 | 71 | 2072924 | 2072939 | 2 | 8  | 16 | AC   | 27 | 7  |
| 323291 | 71 | 2092499 | 2092542 | 4 | 11 | 44 | TAGA | 17 | 13 |
| 323292 | 71 | 2093790 | 2093813 | 2 | 12 | 24 | GT   | 10 | 8  |
| 323298 | 71 | 2101266 | 2101295 | 2 | 15 | 30 | TG   | 20 | 8  |
| 323300 | 71 | 2103633 | 2103654 | 2 | 11 | 22 | GT   | 7  | 6  |
| 323307 | 71 | 2115374 | 2115385 | 2 | 6  | 12 | AC   | 8  | 3  |
| 323312 | 71 | 2129379 | 2129400 | 2 | 11 | 22 | TG   | 14 | 3  |
| 323316 | 71 | 2134190 | 2134247 | 2 | 29 | 58 | GT   | 9  | 8  |
| 323317 | 71 | 2134300 | 2134321 | 2 | 11 | 22 | GT   | 19 | 9  |
| 323321 | 71 | 2139601 | 2139612 | 2 | 6  | 12 | CA   | 23 | 4  |
| 323323 | 71 | 2143826 | 2143857 | 2 | 16 | 32 | GT   | 7  | 7  |
| 323330 | 71 | 2159486 | 2159505 | 2 | 10 | 20 | GA   | 27 | 3  |
| 323331 | 71 | 2160319 | 2160336 | 2 | 9  | 18 | AC   | 22 | 3  |

|        |    |         |         |   |    |    |      |    |    |
|--------|----|---------|---------|---|----|----|------|----|----|
| 323332 | 71 | 2160503 | 2160514 | 2 | 6  | 12 | TG   | 12 | 5  |
| 323334 | 71 | 2166328 | 2166353 | 2 | 13 | 26 | AT   | 7  | 6  |
| 323335 | 71 | 2169760 | 2169773 | 2 | 7  | 14 | CA   | 29 | 3  |
| 323337 | 71 | 2174327 | 2174338 | 2 | 6  | 12 | GA   | 30 | 4  |
| 323338 | 71 | 2174340 | 2174351 | 2 | 6  | 12 | AG   | 30 | 4  |
| 323340 | 71 | 2177787 | 2177804 | 2 | 9  | 18 | TG   | 17 | 7  |
| 323341 | 71 | 2178019 | 2178036 | 2 | 9  | 18 | GT   | 20 | 5  |
| 323342 | 71 | 2178228 | 2178241 | 2 | 7  | 14 | TG   | 22 | 4  |
| 323347 | 71 | 2179609 | 2179630 | 2 | 11 | 22 | CA   | 14 | 13 |
| 323349 | 71 | 2184053 | 2184076 | 2 | 12 | 24 | CT   | 20 | 5  |
| 323351 | 71 | 2185728 | 2185739 | 2 | 6  | 12 | AC   | 28 | 5  |
| 323354 | 71 | 2186266 | 2186281 | 2 | 8  | 16 | AC   | 17 | 5  |
| 323355 | 71 | 2186839 | 2186866 | 2 | 14 | 28 | CT   | 13 | 6  |
| 323361 | 71 | 2188271 | 2188292 | 2 | 11 | 22 | GT   | 21 | 12 |
| 323363 | 71 | 2189803 | 2189824 | 2 | 11 | 22 | TC   | 13 | 4  |
| 323364 | 71 | 2193029 | 2193080 | 2 | 26 | 52 | GT   | 6  | 9  |
| 323365 | 71 | 2193123 | 2193146 | 2 | 12 | 24 | AG   | 16 | 4  |
| 323371 | 71 | 2204023 | 2204038 | 2 | 8  | 16 | TG   | 15 | 3  |
| 323372 | 71 | 2204366 | 2204379 | 2 | 7  | 14 | AC   | 26 | 3  |
| 323376 | 71 | 2207431 | 2207454 | 2 | 12 | 24 | GT   | 20 | 6  |
| 323377 | 71 | 2207777 | 2207792 | 2 | 8  | 16 | GT   | 16 | 7  |
| 323378 | 71 | 2207796 | 2207807 | 2 | 6  | 12 | TG   | 15 | 7  |
| 323380 | 71 | 2207950 | 2207963 | 2 | 7  | 14 | TC   | 28 | 4  |
| 323395 | 71 | 2245508 | 2245523 | 2 | 8  | 16 | GT   | 20 | 3  |
| 323402 | 71 | 2251764 | 2251781 | 2 | 9  | 18 | TG   | 21 | 9  |
| 323405 | 71 | 2259619 | 2259650 | 2 | 16 | 32 | TG   | 22 | 10 |
| 323406 | 71 | 2260802 | 2260813 | 2 | 6  | 12 | AG   | 10 | 7  |
| 323408 | 71 | 2261082 | 2261108 | 3 | 9  | 27 | TTC  | 13 | 8  |
| 323410 | 71 | 2262194 | 2262205 | 2 | 6  | 12 | AC   | 24 | 4  |
| 323417 | 71 | 2275169 | 2275200 | 4 | 8  | 32 | ACAG | 19 | 6  |
| 323418 | 71 | 2277179 | 2277194 | 4 | 4  | 16 | TTGT | 13 | 6  |
| 323419 | 71 | 2278895 | 2278926 | 2 | 16 | 32 | TG   | 10 | 8  |
| 323421 | 71 | 2283099 | 2283134 | 2 | 18 | 36 | CA   | 9  | 5  |
| 323424 | 71 | 2284033 | 2284044 | 2 | 6  | 12 | CA   | 20 | 7  |
| 323439 | 71 | 2325491 | 2325502 | 2 | 6  | 12 | TG   | 28 | 4  |
| 323440 | 71 | 2330140 | 2330159 | 2 | 10 | 20 | CA   | 20 | 6  |
| 323452 | 71 | 2346114 | 2346145 | 2 | 16 | 32 | GT   | 14 | 13 |
| 323456 | 71 | 2348776 | 2348795 | 2 | 10 | 20 | TG   | 6  | 5  |
| 323458 | 71 | 2349166 | 2349185 | 2 | 10 | 20 | CA   | 27 | 9  |
| 323460 | 71 | 2351841 | 2351882 | 3 | 14 | 42 | CAT  | 24 | 11 |
| 323476 | 71 | 2363156 | 2363179 | 2 | 12 | 24 | TG   | 16 | 12 |
| 323478 | 71 | 2365533 | 2365548 | 4 | 4  | 16 | TTTG | 6  | 7  |
| 323479 | 71 | 2367382 | 2367393 | 2 | 6  | 12 | TG   | 25 | 3  |
| 323481 | 71 | 2369854 | 2369883 | 2 | 15 | 30 | AC   | 6  | 7  |
| 323489 | 71 | 2400349 | 2400382 | 2 | 17 | 34 | CA   | 14 | 13 |
| 323492 | 71 | 2401645 | 2401662 | 2 | 9  | 18 | CA   | 20 | 5  |
| 323495 | 71 | 2402592 | 2402621 | 2 | 15 | 30 | GT   | 17 | 11 |
| 323499 | 71 | 2407973 | 2407992 | 2 | 10 | 20 | TG   | 12 | 8  |
| 323513 | 71 | 2416391 | 2416428 | 2 | 19 | 38 | TG   | 10 | 7  |
| 323517 | 71 | 2421783 | 2421800 | 2 | 9  | 18 | AC   | 16 | 6  |
| 323519 | 71 | 2425410 | 2425423 | 2 | 7  | 14 | TG   | 20 | 9  |

|        |    |         |         |   |    |    |      |    |    |
|--------|----|---------|---------|---|----|----|------|----|----|
| 323527 | 71 | 2433118 | 2433137 | 2 | 10 | 20 | GA   | 17 | 3  |
| 323528 | 71 | 2433520 | 2433535 | 2 | 8  | 16 | GT   | 15 | 14 |
| 323530 | 71 | 2435606 | 2435617 | 2 | 6  | 12 | CT   | 28 | 3  |
| 323531 | 71 | 2437973 | 2437984 | 2 | 6  | 12 | TC   | 13 | 4  |
| 323534 | 71 | 2438446 | 2438461 | 2 | 8  | 16 | GT   | 23 | 4  |
| 323536 | 71 | 2440925 | 2440940 | 2 | 8  | 16 | AC   | 12 | 4  |
| 323538 | 71 | 2441261 | 2441286 | 2 | 13 | 26 | GT   | 8  | 6  |
| 323539 | 71 | 2445558 | 2445587 | 2 | 15 | 30 | AC   | 11 | 12 |
| 323540 | 71 | 2448004 | 2448035 | 2 | 16 | 32 | TG   | 12 | 10 |
| 323543 | 71 | 2451188 | 2451207 | 2 | 10 | 20 | TG   | 19 | 4  |
| 323544 | 71 | 2458401 | 2458412 | 2 | 6  | 12 | AC   | 28 | 3  |
| 323545 | 71 | 2459784 | 2459795 | 2 | 6  | 12 | TG   | 14 | 4  |
| 323546 | 71 | 2460171 | 2460188 | 2 | 9  | 18 | TG   | 16 | 10 |
| 323547 | 71 | 2460666 | 2460703 | 2 | 19 | 38 | CA   | 7  | 6  |
| 323549 | 71 | 2462601 | 2462648 | 2 | 24 | 48 | TG   | 11 | 13 |
| 323550 | 71 | 2463662 | 2463677 | 2 | 8  | 16 | TG   | 20 | 13 |
| 323552 | 71 | 2465339 | 2465352 | 2 | 7  | 14 | AC   | 27 | 4  |
| 323553 | 71 | 2467639 | 2467662 | 2 | 12 | 24 | GT   | 18 | 10 |
| 323555 | 71 | 2468128 | 2468153 | 2 | 13 | 26 | GT   | 6  | 5  |
| 323556 | 71 | 2469136 | 2469169 | 2 | 17 | 34 | TG   | 13 | 10 |
| 323557 | 71 | 2469772 | 2469789 | 2 | 9  | 18 | CT   | 15 | 4  |
| 323559 | 71 | 2472220 | 2472249 | 2 | 15 | 30 | TG   | 15 | 9  |
| 323560 | 71 | 2473776 | 2473795 | 4 | 5  | 20 | CAGG | 29 | 3  |
| 323572 | 71 | 2490660 | 2490677 | 2 | 9  | 18 | CT   | 20 | 3  |
| 323573 | 71 | 2493443 | 2493466 | 3 | 8  | 24 | AGG  | 16 | 5  |
| 323574 | 71 | 2493819 | 2493844 | 2 | 13 | 26 | GT   | 14 | 10 |
| 323575 | 71 | 2497476 | 2497491 | 2 | 8  | 16 | TC   | 28 | 4  |
| 323579 | 72 | 7279    | 7300    | 2 | 11 | 22 | GA   | 7  | 5  |
| 323593 | 72 | 44009   | 44032   | 4 | 6  | 24 | ATGG | 25 | 4  |
| 323610 | 72 | 83716   | 83729   | 2 | 7  | 14 | AC   | 13 | 9  |
| 323611 | 72 | 91811   | 91826   | 2 | 8  | 16 | GT   | 18 | 3  |
| 323622 | 72 | 112486  | 112501  | 4 | 4  | 16 | CTAA | 28 | 6  |
| 323623 | 72 | 116528  | 116541  | 2 | 7  | 14 | GT   | 29 | 8  |
| 323635 | 72 | 138731  | 138748  | 2 | 9  | 18 | GT   | 24 | 3  |
| 323641 | 72 | 148693  | 148708  | 4 | 4  | 16 | TTAT | 21 | 7  |
| 323645 | 72 | 151860  | 151893  | 2 | 17 | 34 | AC   | 10 | 9  |
| 323647 | 72 | 159388  | 159399  | 2 | 6  | 12 | CA   | 31 | 4  |
| 323656 | 72 | 168137  | 168148  | 2 | 6  | 12 | CA   | 21 | 4  |
| 323657 | 72 | 168586  | 168597  | 2 | 6  | 12 | TC   | 20 | 3  |
| 323661 | 72 | 177405  | 177426  | 2 | 11 | 22 | AC   | 13 | 8  |
| 323663 | 72 | 181372  | 181395  | 2 | 12 | 24 | TG   | 21 | 10 |
| 323664 | 72 | 181774  | 181809  | 2 | 18 | 36 | TG   | 16 | 8  |
| 323665 | 72 | 181974  | 181995  | 2 | 11 | 22 | AC   | 17 | 6  |
| 323666 | 72 | 183931  | 183950  | 2 | 10 | 20 | TC   | 20 | 4  |
| 323667 | 72 | 185448  | 185461  | 2 | 7  | 14 | TG   | 22 | 3  |
| 323669 | 72 | 187705  | 187716  | 2 | 6  | 12 | TG   | 21 | 6  |
| 323674 | 72 | 188890  | 188901  | 2 | 6  | 12 | CA   | 24 | 4  |
| 323687 | 72 | 206985  | 206996  | 2 | 6  | 12 | CA   | 7  | 3  |
| 323693 | 72 | 215703  | 215758  | 4 | 14 | 56 | TATC | 11 | 5  |
| 323694 | 72 | 217177  | 217214  | 2 | 19 | 38 | CA   | 7  | 6  |
| 323695 | 72 | 217256  | 217283  | 2 | 14 | 28 | CA   | 13 | 5  |

|        |    |        |        |   |    |    |      |    |    |
|--------|----|--------|--------|---|----|----|------|----|----|
| 323696 | 72 | 217399 | 217430 | 2 | 16 | 32 | CA   | 10 | 11 |
| 323706 | 72 | 237648 | 237663 | 2 | 8  | 16 | TG   | 20 | 3  |
| 323710 | 72 | 250979 | 250996 | 2 | 9  | 18 | CA   | 21 | 4  |
| 323717 | 72 | 269090 | 269128 | 3 | 13 | 39 | AAT  | 13 | 11 |
| 323720 | 72 | 283529 | 283542 | 2 | 7  | 14 | CA   | 24 | 5  |
| 323721 | 72 | 283628 | 283645 | 3 | 6  | 18 | TCC  | 19 | 4  |
| 323722 | 72 | 287505 | 287520 | 4 | 4  | 16 | ATTT | 19 | 5  |
| 323724 | 72 | 296675 | 296688 | 2 | 7  | 14 | AC   | 15 | 3  |
| 323726 | 72 | 299960 | 300001 | 2 | 21 | 42 | CA   | 10 | 10 |
| 323728 | 72 | 302331 | 302344 | 2 | 7  | 14 | GT   | 22 | 3  |
| 323729 | 72 | 302526 | 302559 | 2 | 17 | 34 | CA   | 9  | 9  |
| 323749 | 72 | 344983 | 345000 | 2 | 9  | 18 | AC   | 15 | 13 |
| 323760 | 72 | 357506 | 357527 | 2 | 11 | 22 | CA   | 18 | 14 |
| 323762 | 72 | 359159 | 359173 | 3 | 5  | 15 | CTT  | 28 | 3  |
| 323764 | 72 | 359768 | 359787 | 2 | 10 | 20 | AG   | 11 | 6  |
| 323786 | 72 | 402138 | 402158 | 3 | 7  | 21 | CAT  | 12 | 8  |
| 323787 | 72 | 402266 | 402283 | 3 | 6  | 18 | TCA  | 23 | 4  |
| 323788 | 72 | 402391 | 402414 | 3 | 8  | 24 | AGC  | 23 | 5  |
| 323789 | 72 | 402448 | 402475 | 2 | 14 | 28 | CA   | 19 | 7  |
| 323790 | 72 | 403262 | 403277 | 2 | 8  | 16 | CA   | 19 | 11 |
| 323796 | 72 | 423874 | 423905 | 2 | 16 | 32 | AC   | 12 | 6  |
| 323799 | 72 | 427957 | 427974 | 3 | 6  | 18 | CCA  | 18 | 3  |
| 323801 | 72 | 435007 | 435028 | 2 | 11 | 22 | GT   | 17 | 8  |
| 323804 | 72 | 437664 | 437683 | 2 | 10 | 20 | CA   | 9  | 3  |
| 323809 | 72 | 442222 | 442242 | 3 | 7  | 21 | CCT  | 24 | 6  |
| 323813 | 72 | 454114 | 454131 | 2 | 9  | 18 | TA   | 12 | 5  |
| 323815 | 72 | 457486 | 457506 | 3 | 7  | 21 | GCT  | 14 | 4  |
| 323818 | 72 | 459106 | 459177 | 4 | 18 | 72 | AGAT | 11 | 8  |
| 323823 | 72 | 477332 | 477355 | 4 | 6  | 24 | GAAT | 27 | 5  |
| 323834 | 72 | 514748 | 514771 | 4 | 6  | 24 | TTTG | 20 | 5  |
| 323843 | 72 | 543944 | 543961 | 2 | 9  | 18 | TG   | 21 | 7  |
| 323844 | 72 | 545598 | 545609 | 2 | 6  | 12 | TC   | 25 | 4  |
| 323847 | 72 | 554674 | 554694 | 3 | 7  | 21 | CAT  | 11 | 8  |
| 323848 | 72 | 554816 | 554830 | 3 | 5  | 15 | TTA  | 7  | 3  |
| 323850 | 72 | 556396 | 556427 | 2 | 16 | 32 | AC   | 17 | 13 |
| 323859 | 72 | 566998 | 567029 | 2 | 16 | 32 | GT   | 18 | 14 |
| 323860 | 72 | 570590 | 570613 | 2 | 12 | 24 | AC   | 20 | 8  |
| 323863 | 72 | 574334 | 574349 | 4 | 4  | 16 | AAAC | 26 | 4  |
| 323865 | 72 | 579870 | 579887 | 2 | 9  | 18 | TG   | 7  | 8  |
| 323866 | 72 | 579888 | 579903 | 2 | 8  | 16 | TA   | 7  | 7  |
| 323867 | 72 | 580297 | 580320 | 2 | 12 | 24 | GT   | 23 | 9  |
| 323870 | 72 | 590144 | 590155 | 2 | 6  | 12 | TA   | 13 | 7  |
| 323871 | 72 | 594566 | 594589 | 2 | 12 | 24 | AC   | 21 | 14 |
| 323873 | 72 | 609486 | 609499 | 2 | 7  | 14 | GA   | 20 | 3  |
| 323876 | 72 | 622773 | 622784 | 2 | 6  | 12 | GT   | 31 | 6  |
| 323878 | 72 | 631076 | 631099 | 2 | 12 | 24 | AC   | 15 | 6  |
| 323882 | 72 | 634141 | 634152 | 2 | 6  | 12 | TG   | 19 | 4  |
| 323895 | 72 | 671610 | 671625 | 2 | 8  | 16 | CT   | 23 | 3  |
| 323896 | 72 | 674769 | 674810 | 2 | 21 | 42 | CA   | 7  | 6  |
| 323897 | 72 | 679451 | 679466 | 4 | 4  | 16 | AAAT | 24 | 3  |
| 323898 | 72 | 684125 | 684144 | 2 | 10 | 20 | CA   | 20 | 10 |

|        |    |         |         |   |    |    |      |    |    |
|--------|----|---------|---------|---|----|----|------|----|----|
| 323900 | 72 | 692088  | 692105  | 2 | 9  | 18 | GT   | 22 | 7  |
| 323906 | 72 | 702826  | 702837  | 2 | 6  | 12 | CT   | 24 | 5  |
| 323907 | 72 | 708713  | 708740  | 2 | 14 | 28 | GT   | 15 | 8  |
| 323914 | 72 | 749639  | 749664  | 2 | 13 | 26 | AC   | 17 | 9  |
| 323920 | 72 | 766376  | 766389  | 2 | 7  | 14 | AG   | 19 | 3  |
| 323926 | 72 | 782337  | 782350  | 2 | 7  | 14 | AG   | 11 | 4  |
| 323931 | 72 | 800512  | 800523  | 2 | 6  | 12 | TA   | 29 | 5  |
| 323936 | 72 | 814210  | 814223  | 2 | 7  | 14 | AC   | 24 | 5  |
| 323942 | 72 | 829751  | 829768  | 2 | 9  | 18 | TG   | 23 | 3  |
| 323943 | 72 | 833266  | 833281  | 2 | 8  | 16 | AC   | 14 | 7  |
| 323951 | 72 | 844907  | 844928  | 2 | 11 | 22 | GT   | 12 | 9  |
| 323955 | 72 | 854800  | 854829  | 2 | 15 | 30 | TG   | 10 | 8  |
| 323958 | 72 | 855325  | 855344  | 2 | 10 | 20 | TG   | 18 | 3  |
| 323960 | 72 | 867670  | 867683  | 2 | 7  | 14 | CA   | 23 | 5  |
| 323964 | 72 | 868537  | 868568  | 2 | 16 | 32 | GT   | 20 | 5  |
| 323966 | 72 | 872913  | 872934  | 2 | 11 | 22 | TC   | 15 | 3  |
| 323980 | 72 | 892168  | 892179  | 2 | 6  | 12 | TC   | 33 | 3  |
| 323982 | 72 | 895615  | 895626  | 2 | 6  | 12 | AC   | 27 | 3  |
| 323983 | 72 | 899587  | 899604  | 2 | 9  | 18 | CA   | 24 | 5  |
| 323985 | 72 | 904305  | 904316  | 2 | 6  | 12 | TG   | 32 | 3  |
| 323986 | 72 | 904548  | 904579  | 2 | 16 | 32 | CA   | 9  | 6  |
| 323989 | 72 | 912312  | 912323  | 2 | 6  | 12 | AC   | 20 | 9  |
| 323994 | 72 | 923727  | 923746  | 2 | 10 | 20 | AC   | 9  | 5  |
| 323995 | 72 | 927029  | 927040  | 2 | 6  | 12 | AC   | 24 | 5  |
| 323996 | 72 | 927516  | 927533  | 2 | 9  | 18 | CA   | 34 | 4  |
| 324002 | 72 | 947808  | 947821  | 2 | 7  | 14 | GT   | 13 | 3  |
| 324004 | 72 | 956988  | 956999  | 2 | 6  | 12 | AC   | 10 | 6  |
| 324005 | 72 | 957002  | 957017  | 2 | 8  | 16 | AC   | 8  | 4  |
| 324011 | 72 | 970659  | 970674  | 2 | 8  | 16 | TG   | 13 | 4  |
| 324014 | 72 | 973398  | 973429  | 2 | 16 | 32 | AC   | 16 | 12 |
| 324025 | 72 | 1000404 | 1000429 | 2 | 13 | 26 | GT   | 17 | 8  |
| 324031 | 72 | 1012007 | 1012022 | 4 | 4  | 16 | TTTA | 24 | 3  |
| 324033 | 72 | 1022979 | 1022993 | 3 | 5  | 15 | TAA  | 12 | 5  |
| 324034 | 72 | 1027921 | 1027941 | 3 | 7  | 21 | TCC  | 21 | 3  |
| 324035 | 72 | 1028646 | 1028667 | 2 | 11 | 22 | CA   | 10 | 8  |
| 324037 | 72 | 1034072 | 1034087 | 2 | 8  | 16 | GT   | 27 | 9  |
| 324038 | 72 | 1035389 | 1035410 | 2 | 11 | 22 | GT   | 17 | 9  |
| 324042 | 72 | 1060978 | 1060997 | 4 | 5  | 20 | CAGA | 29 | 4  |
| 324044 | 72 | 1064151 | 1064168 | 2 | 9  | 18 | CT   | 23 | 3  |
| 324046 | 72 | 1065284 | 1065309 | 2 | 13 | 26 | GT   | 10 | 10 |
| 324048 | 72 | 1069659 | 1069676 | 2 | 9  | 18 | GT   | 12 | 12 |
| 324053 | 72 | 1078083 | 1078108 | 2 | 13 | 26 | AC   | 12 | 11 |
| 324058 | 72 | 1088890 | 1088913 | 2 | 12 | 24 | TG   | 21 | 15 |
| 324064 | 72 | 1106781 | 1106794 | 2 | 7  | 14 | TG   | 18 | 4  |
| 324066 | 72 | 1111681 | 1111706 | 2 | 13 | 26 | CA   | 9  | 6  |
| 324068 | 72 | 1118211 | 1118246 | 2 | 18 | 36 | CA   | 12 | 6  |
| 324072 | 72 | 1124015 | 1124056 | 2 | 21 | 42 | GT   | 6  | 9  |
| 324078 | 72 | 1129237 | 1129264 | 2 | 14 | 28 | GT   | 16 | 7  |
| 324081 | 72 | 1132326 | 1132343 | 3 | 6  | 18 | ATT  | 25 | 4  |
| 324082 | 72 | 1134138 | 1134158 | 3 | 7  | 21 | AAC  | 8  | 6  |
| 324083 | 72 | 1134794 | 1134814 | 3 | 7  | 21 | TTG  | 26 | 8  |

|        |    |         |         |   |    |    |      |    |    |
|--------|----|---------|---------|---|----|----|------|----|----|
| 324084 | 72 | 1135215 | 1135246 | 4 | 8  | 32 | TCTA | 19 | 14 |
| 324085 | 72 | 1145269 | 1145286 | 2 | 9  | 18 | TG   | 20 | 4  |
| 324091 | 72 | 1177708 | 1177723 | 2 | 8  | 16 | GT   | 23 | 3  |
| 324095 | 72 | 1183375 | 1183388 | 2 | 7  | 14 | TC   | 13 | 4  |
| 324109 | 72 | 1202130 | 1202165 | 2 | 18 | 36 | TG   | 9  | 11 |
| 324116 | 72 | 1210082 | 1210095 | 2 | 7  | 14 | CT   | 22 | 3  |
| 324117 | 72 | 1211628 | 1211642 | 3 | 5  | 15 | ATA  | 22 | 3  |
| 324138 | 72 | 1266381 | 1266394 | 2 | 7  | 14 | GT   | 15 | 3  |
| 324140 | 72 | 1267735 | 1267748 | 2 | 7  | 14 | TG   | 21 | 4  |
| 324141 | 72 | 1267980 | 1268019 | 2 | 20 | 40 | GT   | 7  | 7  |
| 324142 | 72 | 1272319 | 1272334 | 2 | 8  | 16 | CT   | 22 | 5  |
| 324143 | 72 | 1272530 | 1272563 | 2 | 17 | 34 | TG   | 12 | 8  |
| 324144 | 72 | 1273067 | 1273096 | 2 | 15 | 30 | CA   | 6  | 8  |
| 324152 | 72 | 1287636 | 1287665 | 2 | 15 | 30 | AC   | 17 | 6  |
| 324153 | 72 | 1289872 | 1289887 | 2 | 8  | 16 | TG   | 24 | 3  |
| 324156 | 72 | 1301153 | 1301198 | 2 | 23 | 46 | AC   | 11 | 12 |
| 324159 | 72 | 1308941 | 1308958 | 2 | 9  | 18 | CA   | 25 | 4  |
| 324160 | 72 | 1310862 | 1310877 | 4 | 4  | 16 | CATT | 33 | 4  |
| 324161 | 72 | 1315025 | 1315054 | 2 | 15 | 30 | GT   | 11 | 5  |
| 324164 | 72 | 1326772 | 1326793 | 2 | 11 | 22 | TG   | 6  | 9  |
| 324165 | 72 | 1327096 | 1327131 | 2 | 18 | 36 | CT   | 14 | 10 |
| 324173 | 72 | 1336372 | 1336395 | 3 | 8  | 24 | CTG  | 18 | 3  |
| 324174 | 72 | 1341830 | 1341843 | 2 | 7  | 14 | AC   | 17 | 3  |
| 324179 | 72 | 1344231 | 1344252 | 2 | 11 | 22 | AC   | 18 | 8  |
| 324180 | 72 | 1345611 | 1345628 | 2 | 9  | 18 | CT   | 23 | 3  |
| 324183 | 72 | 1349008 | 1349031 | 3 | 8  | 24 | AAT  | 6  | 3  |
| 324195 | 72 | 1364006 | 1364027 | 2 | 11 | 22 | GT   | 22 | 11 |
| 324207 | 72 | 1390536 | 1390551 | 2 | 8  | 16 | TA   | 7  | 6  |
| 324217 | 72 | 1420090 | 1420117 | 2 | 14 | 28 | CA   | 19 | 10 |
| 324218 | 72 | 1421248 | 1421263 | 2 | 8  | 16 | CT   | 29 | 4  |
| 324220 | 72 | 1424003 | 1424034 | 2 | 16 | 32 | GT   | 13 | 6  |
| 324222 | 72 | 1433737 | 1433764 | 2 | 14 | 28 | AC   | 16 | 7  |
| 324224 | 72 | 1434021 | 1434036 | 4 | 4  | 16 | AGAC | 10 | 3  |
| 324229 | 72 | 1435178 | 1435204 | 3 | 9  | 27 | TCT  | 20 | 14 |
| 324231 | 72 | 1435465 | 1435480 | 4 | 4  | 16 | GTCA | 26 | 3  |
| 324232 | 72 | 1435917 | 1435942 | 2 | 13 | 26 | TG   | 12 | 11 |
| 324234 | 72 | 1436470 | 1436485 | 2 | 8  | 16 | TG   | 12 | 5  |
| 324235 | 72 | 1437070 | 1437115 | 2 | 23 | 46 | GT   | 14 | 12 |
| 324236 | 72 | 1443533 | 1443570 | 2 | 19 | 38 | GT   | 6  | 9  |
| 324237 | 72 | 1444335 | 1444348 | 2 | 7  | 14 | CA   | 31 | 3  |
| 324241 | 72 | 1446843 | 1446870 | 2 | 14 | 28 | AC   | 7  | 7  |
| 324245 | 72 | 1456696 | 1456709 | 2 | 7  | 14 | GT   | 18 | 6  |
| 324247 | 72 | 1464927 | 1464942 | 4 | 4  | 16 | TTAT | 29 | 3  |
| 324248 | 72 | 1465209 | 1465226 | 2 | 9  | 18 | AG   | 18 | 4  |
| 324251 | 72 | 1470275 | 1470300 | 2 | 13 | 26 | GT   | 12 | 7  |
| 324261 | 72 | 1473890 | 1473909 | 2 | 10 | 20 | AC   | 19 | 9  |
| 324266 | 72 | 1478323 | 1478344 | 2 | 11 | 22 | CA   | 20 | 4  |
| 324267 | 72 | 1481465 | 1481484 | 2 | 10 | 20 | CA   | 26 | 5  |
| 324271 | 72 | 1499218 | 1499241 | 2 | 12 | 24 | GT   | 9  | 14 |
| 324273 | 72 | 1501305 | 1501318 | 2 | 7  | 14 | TG   | 19 | 4  |
| 324274 | 72 | 1501397 | 1501440 | 2 | 22 | 44 | AC   | 11 | 11 |

|        |    |         |         |   |    |    |      |    |    |
|--------|----|---------|---------|---|----|----|------|----|----|
| 324277 | 72 | 1514130 | 1514165 | 2 | 18 | 36 | GT   | 13 | 15 |
| 324307 | 72 | 1623259 | 1623282 | 2 | 12 | 24 | TG   | 12 | 8  |
| 324314 | 72 | 1638433 | 1638444 | 2 | 6  | 12 | GT   | 26 | 4  |
| 324316 | 72 | 1640119 | 1640134 | 2 | 8  | 16 | AC   | 18 | 8  |
| 324319 | 72 | 1662364 | 1662405 | 2 | 21 | 42 | AC   | 13 | 17 |
| 324329 | 72 | 1699367 | 1699378 | 2 | 6  | 12 | TG   | 24 | 4  |
| 324335 | 72 | 1707038 | 1707051 | 2 | 7  | 14 | GT   | 25 | 6  |
| 324336 | 72 | 1722171 | 1722188 | 2 | 9  | 18 | CA   | 21 | 8  |
| 324339 | 72 | 1723916 | 1723943 | 2 | 14 | 28 | CA   | 16 | 10 |
| 324352 | 72 | 1738359 | 1738372 | 2 | 7  | 14 | CA   | 21 | 6  |
| 324353 | 72 | 1738660 | 1738680 | 3 | 7  | 21 | AGC  | 24 | 4  |
| 324354 | 72 | 1738918 | 1738941 | 2 | 12 | 24 | CA   | 16 | 6  |
| 324356 | 72 | 1740599 | 1740661 | 3 | 21 | 63 | TCT  | 9  | 10 |
| 324361 | 72 | 1749585 | 1749598 | 2 | 7  | 14 | TG   | 14 | 4  |
| 324368 | 72 | 1757323 | 1757354 | 2 | 16 | 32 | TC   | 10 | 7  |
| 324370 | 72 | 1769491 | 1769502 | 2 | 6  | 12 | AC   | 26 | 3  |
| 324373 | 72 | 1773864 | 1773909 | 2 | 23 | 46 | AC   | 6  | 8  |
| 324374 | 72 | 1778992 | 1779009 | 2 | 9  | 18 | CA   | 23 | 9  |
| 324375 | 72 | 1779010 | 1779025 | 2 | 8  | 16 | CT   | 27 | 11 |
| 324382 | 72 | 1791246 | 1791273 | 2 | 14 | 28 | CA   | 9  | 10 |
| 324386 | 72 | 1801563 | 1801578 | 2 | 8  | 16 | AT   | 13 | 4  |
| 324388 | 72 | 1809542 | 1809573 | 2 | 16 | 32 | TG   | 18 | 12 |
| 324389 | 72 | 1818139 | 1818154 | 2 | 8  | 16 | GT   | 26 | 7  |
| 324390 | 72 | 1818194 | 1818207 | 2 | 7  | 14 | TG   | 27 | 4  |
| 324398 | 72 | 1827429 | 1827444 | 2 | 8  | 16 | GT   | 11 | 6  |
| 324399 | 72 | 1827445 | 1827462 | 2 | 9  | 18 | GA   | 17 | 10 |
| 324405 | 72 | 1844815 | 1844830 | 4 | 4  | 16 | CAAA | 32 | 3  |
| 324411 | 72 | 1859620 | 1859643 | 3 | 8  | 24 | ATC  | 28 | 11 |
| 324412 | 72 | 1878037 | 1878056 | 4 | 5  | 20 | ATTT | 22 | 4  |
| 324416 | 72 | 1894240 | 1894254 | 3 | 5  | 15 | AGG  | 21 | 5  |
| 324417 | 72 | 1894966 | 1894987 | 2 | 11 | 22 | CA   | 26 | 12 |
| 324418 | 72 | 1896676 | 1896689 | 2 | 7  | 14 | AC   | 9  | 7  |
| 324422 | 72 | 1914726 | 1914752 | 3 | 9  | 27 | ATT  | 11 | 4  |
| 324424 | 72 | 1922275 | 1922286 | 2 | 6  | 12 | GT   | 20 | 3  |
| 324426 | 72 | 1928667 | 1928682 | 2 | 8  | 16 | AC   | 21 | 6  |
| 324429 | 72 | 1941770 | 1941781 | 2 | 6  | 12 | GT   | 7  | 8  |
| 324433 | 72 | 1962766 | 1962803 | 2 | 19 | 38 | AC   | 10 | 12 |
| 324434 | 72 | 1975081 | 1975098 | 3 | 6  | 18 | CAC  | 26 | 3  |
| 324435 | 72 | 1977089 | 1977120 | 2 | 16 | 32 | AC   | 14 | 13 |
| 324443 | 72 | 1992356 | 1992376 | 3 | 7  | 21 | AAC  | 31 | 4  |
| 324445 | 72 | 1993579 | 1993608 | 2 | 15 | 30 | AC   | 16 | 10 |
| 324446 | 72 | 1999407 | 1999438 | 2 | 16 | 32 | AC   | 17 | 10 |
| 324451 | 72 | 2009919 | 2009930 | 2 | 6  | 12 | TG   | 22 | 3  |
| 324452 | 72 | 2012203 | 2012238 | 2 | 18 | 36 | CA   | 8  | 9  |
| 324454 | 72 | 2015786 | 2015797 | 2 | 6  | 12 | TG   | 28 | 4  |
| 324455 | 72 | 2021514 | 2021525 | 2 | 6  | 12 | CT   | 15 | 3  |
| 324456 | 72 | 2022295 | 2022332 | 2 | 19 | 38 | AC   | 14 | 12 |
| 324458 | 72 | 2022633 | 2022648 | 2 | 8  | 16 | AC   | 11 | 4  |
| 324460 | 72 | 2027297 | 2027348 | 2 | 26 | 52 | AC   | 13 | 10 |
| 324462 | 72 | 2032638 | 2032659 | 2 | 11 | 22 | CT   | 13 | 5  |
| 324463 | 72 | 2032977 | 2032998 | 2 | 11 | 22 | AC   | 19 | 10 |



|        |    |         |         |   |    |    |      |    |    |
|--------|----|---------|---------|---|----|----|------|----|----|
| 324468 | 72 | 2039666 | 2039677 | 2 | 6  | 12 | CA   | 24 | 4  |
| 324469 | 72 | 2039873 | 2039890 | 2 | 9  | 18 | TG   | 28 | 3  |
| 324470 | 72 | 2040160 | 2040177 | 2 | 9  | 18 | AT   | 18 | 13 |
| 324477 | 72 | 2058577 | 2058597 | 3 | 7  | 21 | CAC  | 21 | 4  |
| 324480 | 72 | 2061758 | 2061771 | 2 | 7  | 14 | AC   | 16 | 8  |
| 324481 | 72 | 2067217 | 2067237 | 3 | 7  | 21 | AAT  | 29 | 9  |
| 324482 | 72 | 2068833 | 2068850 | 2 | 9  | 18 | AC   | 13 | 9  |
| 324484 | 72 | 2073852 | 2073881 | 2 | 15 | 30 | CA   | 13 | 13 |
| 324485 | 72 | 2074013 | 2074038 | 2 | 13 | 26 | CA   | 17 | 17 |
| 324487 | 72 | 2077321 | 2077338 | 2 | 9  | 18 | CA   | 21 | 9  |
| 324489 | 72 | 2084248 | 2084273 | 2 | 13 | 26 | AC   | 15 | 13 |
| 324503 | 72 | 2106589 | 2106606 | 3 | 6  | 18 | CTG  | 18 | 8  |
| 324504 | 72 | 2107661 | 2107692 | 2 | 16 | 32 | TG   | 10 | 11 |
| 324505 | 72 | 2108359 | 2108412 | 2 | 27 | 54 | TG   | 12 | 14 |
| 324509 | 72 | 2113756 | 2113783 | 2 | 14 | 28 | TG   | 6  | 9  |
| 324510 | 72 | 2116141 | 2116166 | 2 | 13 | 26 | CA   | 16 | 15 |
| 324511 | 72 | 2116407 | 2116426 | 2 | 10 | 20 | GT   | 15 | 12 |
| 324513 | 72 | 2118957 | 2118982 | 2 | 13 | 26 | CA   | 17 | 16 |
| 324514 | 72 | 2119583 | 2119596 | 2 | 7  | 14 | AC   | 17 | 7  |
| 324515 | 72 | 2119829 | 2119848 | 2 | 10 | 20 | GT   | 21 | 7  |
| 324516 | 72 | 2119849 | 2119860 | 2 | 6  | 12 | GA   | 23 | 7  |
| 324517 | 72 | 2120612 | 2120641 | 2 | 15 | 30 | TG   | 8  | 7  |
| 324518 | 72 | 2121599 | 2121612 | 2 | 7  | 14 | GT   | 27 | 5  |
| 324521 | 72 | 2123140 | 2123165 | 2 | 13 | 26 | CA   | 15 | 17 |
| 324522 | 72 | 2123202 | 2123213 | 2 | 6  | 12 | CA   | 18 | 6  |
| 324527 | 72 | 2133521 | 2133554 | 2 | 17 | 34 | CA   | 8  | 9  |
| 324532 | 72 | 2137508 | 2137529 | 2 | 11 | 22 | GT   | 8  | 7  |
| 324533 | 72 | 2139998 | 2140021 | 4 | 6  | 24 | TATT | 13 | 9  |
| 324535 | 72 | 2140989 | 2141004 | 4 | 4  | 16 | AAAT | 25 | 3  |
| 324539 | 72 | 2143192 | 2143203 | 2 | 6  | 12 | CA   | 24 | 3  |
| 324547 | 72 | 2155908 | 2155927 | 2 | 10 | 20 | TC   | 21 | 11 |
| 324549 | 72 | 2155988 | 2156011 | 2 | 12 | 24 | AC   | 12 | 11 |
| 324550 | 72 | 2157129 | 2157142 | 2 | 7  | 14 | AC   | 7  | 3  |
| 324553 | 72 | 2159151 | 2159184 | 2 | 17 | 34 | GT   | 18 | 8  |
| 324560 | 72 | 2168012 | 2168045 | 2 | 17 | 34 | AC   | 13 | 12 |
| 324561 | 72 | 2168180 | 2168201 | 2 | 11 | 22 | AC   | 15 | 17 |
| 324563 | 72 | 2168588 | 2168599 | 2 | 6  | 12 | TG   | 29 | 5  |
| 324564 | 72 | 2168640 | 2168663 | 2 | 12 | 24 | GT   | 18 | 7  |
| 324565 | 72 | 2168688 | 2168699 | 2 | 6  | 12 | AG   | 27 | 4  |
| 324569 | 72 | 2176778 | 2176795 | 2 | 9  | 18 | GT   | 10 | 11 |
| 324581 | 72 | 2192461 | 2192472 | 2 | 6  | 12 | AT   | 14 | 4  |
| 324584 | 72 | 2196165 | 2196186 | 2 | 11 | 22 | TG   | 6  | 7  |
| 324596 | 72 | 2207651 | 2207678 | 2 | 14 | 28 | AC   | 18 | 7  |
| 324598 | 72 | 2208163 | 2208178 | 2 | 8  | 16 | AC   | 10 | 3  |
| 324599 | 72 | 2208377 | 2208394 | 2 | 9  | 18 | TG   | 15 | 6  |
| 324602 | 72 | 2215256 | 2215267 | 2 | 6  | 12 | CA   | 20 | 10 |
| 324603 | 72 | 2215270 | 2215285 | 2 | 8  | 16 | CA   | 15 | 8  |
| 324604 | 72 | 2218518 | 2218535 | 2 | 9  | 18 | GA   | 22 | 5  |
| 324605 | 72 | 2218573 | 2218586 | 2 | 7  | 14 | TG   | 16 | 10 |
| 324607 | 72 | 2219652 | 2219683 | 2 | 16 | 32 | GT   | 18 | 15 |
| 324608 | 72 | 2220384 | 2220407 | 2 | 12 | 24 | AC   | 16 | 6  |

|        |    |         |         |   |    |    |      |    |    |
|--------|----|---------|---------|---|----|----|------|----|----|
| 324609 | 72 | 2222616 | 2222633 | 2 | 9  | 18 | CA   | 13 | 18 |
| 324610 | 72 | 2224828 | 2224839 | 2 | 6  | 12 | CA   | 15 | 3  |
| 324616 | 72 | 2237465 | 2237484 | 4 | 5  | 20 | TTTA | 16 | 8  |
| 324617 | 72 | 2238789 | 2238802 | 2 | 7  | 14 | GA   | 26 | 5  |
| 324618 | 72 | 2240346 | 2240361 | 4 | 4  | 16 | CTCC | 11 | 4  |
| 324619 | 72 | 2240362 | 2240373 | 2 | 6  | 12 | CT   | 17 | 5  |
| 324622 | 72 | 2244497 | 2244520 | 4 | 6  | 24 | AGGC | 32 | 4  |
| 324628 | 72 | 2266463 | 2266474 | 2 | 6  | 12 | AC   | 21 | 3  |
| 324630 | 72 | 2273367 | 2273398 | 2 | 16 | 32 | CA   | 18 | 19 |
| 324637 | 72 | 2291361 | 2291378 | 2 | 9  | 18 | CA   | 37 | 4  |
| 324646 | 72 | 2314933 | 2314966 | 2 | 17 | 34 | AG   | 11 | 8  |
| 324647 | 72 | 2315524 | 2315544 | 3 | 7  | 21 | CTT  | 24 | 4  |
| 324653 | 72 | 2334667 | 2334686 | 2 | 10 | 20 | CA   | 11 | 6  |
| 324656 | 72 | 2340361 | 2340381 | 3 | 7  | 21 | AAC  | 24 | 7  |
| 324657 | 72 | 2340983 | 2341000 | 2 | 9  | 18 | CT   | 18 | 9  |
| 324660 | 72 | 2346577 | 2346594 | 2 | 9  | 18 | GA   | 11 | 3  |
| 324661 | 72 | 2349811 | 2349830 | 2 | 10 | 20 | AC   | 15 | 11 |
| 324664 | 72 | 2356086 | 2356112 | 3 | 9  | 27 | TCT  | 24 | 10 |
| 324666 | 72 | 2359358 | 2359375 | 2 | 9  | 18 | AC   | 12 | 12 |
| 324667 | 72 | 2359913 | 2359924 | 2 | 6  | 12 | GT   | 20 | 16 |
| 324669 | 72 | 2362824 | 2362863 | 2 | 20 | 40 | TG   | 14 | 7  |
| 324674 | 72 | 2378231 | 2378242 | 2 | 6  | 12 | GT   | 6  | 3  |
| 324677 | 72 | 2393365 | 2393406 | 2 | 21 | 42 | AC   | 8  | 7  |
| 324678 | 72 | 2397345 | 2397360 | 2 | 8  | 16 | AG   | 18 | 4  |
| 324686 | 72 | 2418927 | 2418946 | 2 | 10 | 20 | CA   | 6  | 4  |
| 324700 | 73 | 34793   | 34822   | 2 | 15 | 30 | AC   | 17 | 16 |
| 324712 | 73 | 110432  | 110449  | 2 | 9  | 18 | GT   | 17 | 8  |
| 324715 | 73 | 114883  | 114910  | 2 | 14 | 28 | CA   | 6  | 9  |
| 324717 | 73 | 115290  | 115315  | 2 | 13 | 26 | TG   | 8  | 8  |
| 324727 | 73 | 130243  | 130258  | 2 | 8  | 16 | AC   | 27 | 8  |
| 324730 | 73 | 132671  | 132686  | 2 | 8  | 16 | AC   | 25 | 9  |
| 324731 | 73 | 139228  | 139245  | 2 | 9  | 18 | TG   | 26 | 8  |
| 324738 | 73 | 147203  | 147214  | 2 | 6  | 12 | TC   | 21 | 3  |
| 324739 | 73 | 147519  | 147533  | 3 | 5  | 15 | TTG  | 23 | 3  |
| 324740 | 73 | 148390  | 148411  | 2 | 11 | 22 | TC   | 19 | 6  |
| 324741 | 73 | 149744  | 149759  | 2 | 8  | 16 | GT   | 29 | 11 |
| 324742 | 73 | 150683  | 150706  | 2 | 12 | 24 | GT   | 13 | 13 |
| 324743 | 73 | 153233  | 153256  | 3 | 8  | 24 | GAG  | 17 | 4  |
| 324744 | 73 | 153675  | 153708  | 2 | 17 | 34 | AC   | 11 | 12 |
| 324746 | 73 | 157715  | 157732  | 2 | 9  | 18 | AC   | 27 | 8  |
| 324752 | 73 | 185707  | 185730  | 2 | 12 | 24 | CA   | 19 | 11 |
| 324754 | 73 | 192075  | 192090  | 2 | 8  | 16 | TA   | 18 | 7  |
| 324755 | 73 | 197398  | 197415  | 2 | 9  | 18 | GT   | 7  | 3  |
| 324758 | 73 | 208939  | 208968  | 2 | 15 | 30 | AC   | 18 | 15 |
| 324760 | 73 | 215381  | 215408  | 2 | 14 | 28 | GT   | 23 | 8  |
| 324762 | 73 | 217298  | 217325  | 2 | 14 | 28 | GT   | 9  | 12 |
| 324765 | 73 | 222889  | 222900  | 2 | 6  | 12 | TG   | 20 | 4  |
| 324766 | 73 | 223155  | 223176  | 2 | 11 | 22 | GA   | 21 | 15 |
| 324771 | 73 | 232572  | 232609  | 2 | 19 | 38 | GT   | 18 | 13 |
| 324779 | 73 | 238150  | 238161  | 2 | 6  | 12 | CA   | 22 | 3  |
| 324782 | 73 | 240682  | 240705  | 3 | 8  | 24 | TCA  | 24 | 14 |

|        |    |        |        |   |    |    |      |    |    |
|--------|----|--------|--------|---|----|----|------|----|----|
| 324783 | 73 | 240855 | 240876 | 2 | 11 | 22 | AC   | 25 | 10 |
| 324784 | 73 | 241976 | 242017 | 3 | 14 | 42 | TCA  | 28 | 15 |
| 324785 | 73 | 243289 | 243309 | 3 | 7  | 21 | AGC  | 28 | 3  |
| 324791 | 73 | 245717 | 245742 | 2 | 13 | 26 | TG   | 21 | 14 |
| 324795 | 73 | 247168 | 247181 | 2 | 7  | 14 | AG   | 26 | 11 |
| 324799 | 73 | 248647 | 248666 | 2 | 10 | 20 | GA   | 20 | 12 |
| 324800 | 73 | 249341 | 249368 | 4 | 7  | 28 | GACA | 23 | 13 |
| 324803 | 73 | 251642 | 251655 | 2 | 7  | 14 | GA   | 24 | 8  |
| 324804 | 73 | 255927 | 255940 | 2 | 7  | 14 | AC   | 30 | 5  |
| 324806 | 73 | 270343 | 270358 | 2 | 8  | 16 | TC   | 19 | 3  |
| 324807 | 73 | 272905 | 272934 | 2 | 15 | 30 | CA   | 18 | 6  |
| 324808 | 73 | 275928 | 275957 | 2 | 15 | 30 | CA   | 11 | 13 |
| 324810 | 73 | 282160 | 282180 | 3 | 7  | 21 | TGC  | 27 | 11 |
| 324811 | 73 | 287208 | 287223 | 2 | 8  | 16 | GT   | 18 | 9  |
| 324814 | 73 | 290759 | 290782 | 2 | 12 | 24 | TG   | 17 | 8  |
| 324819 | 73 | 303159 | 303172 | 2 | 7  | 14 | AG   | 21 | 5  |
| 324822 | 73 | 303713 | 303742 | 2 | 15 | 30 | AC   | 11 | 11 |
| 324825 | 73 | 305416 | 305429 | 2 | 7  | 14 | GA   | 22 | 3  |
| 324827 | 73 | 308026 | 308049 | 2 | 12 | 24 | CA   | 17 | 11 |
| 324829 | 73 | 320940 | 320957 | 2 | 9  | 18 | TG   | 18 | 6  |
| 324836 | 73 | 326714 | 326725 | 2 | 6  | 12 | CA   | 21 | 9  |
| 324840 | 73 | 332391 | 332404 | 2 | 7  | 14 | TG   | 6  | 6  |
| 324841 | 73 | 332449 | 332496 | 2 | 24 | 48 | TG   | 7  | 7  |
| 324842 | 73 | 332836 | 332853 | 3 | 6  | 18 | AGG  | 30 | 6  |
| 324846 | 73 | 339124 | 339149 | 2 | 13 | 26 | GT   | 18 | 18 |
| 324847 | 73 | 339310 | 339327 | 2 | 9  | 18 | CA   | 17 | 5  |
| 324849 | 73 | 347266 | 347285 | 2 | 10 | 20 | TC   | 25 | 6  |
| 324850 | 73 | 353718 | 353753 | 2 | 18 | 36 | TG   | 9  | 11 |
| 324851 | 73 | 356325 | 356352 | 2 | 14 | 28 | CA   | 14 | 8  |
| 324852 | 73 | 359813 | 359830 | 2 | 9  | 18 | CA   | 15 | 7  |
| 324864 | 73 | 401872 | 401885 | 2 | 7  | 14 | CT   | 21 | 3  |
| 324878 | 73 | 424405 | 424418 | 2 | 7  | 14 | AC   | 12 | 4  |
| 324882 | 73 | 429504 | 429519 | 2 | 8  | 16 | TG   | 22 | 8  |
| 324884 | 73 | 436454 | 436483 | 2 | 15 | 30 | AC   | 21 | 11 |
| 324887 | 73 | 440708 | 440737 | 2 | 15 | 30 | CA   | 13 | 7  |
| 324892 | 73 | 450744 | 450782 | 3 | 13 | 39 | TTA  | 12 | 8  |
| 324894 | 73 | 454282 | 454309 | 4 | 7  | 28 | TCTT | 20 | 6  |
| 324895 | 73 | 455075 | 455088 | 2 | 7  | 14 | CT   | 26 | 4  |
| 324896 | 73 | 461464 | 461478 | 3 | 5  | 15 | GTT  | 30 | 3  |
| 324897 | 73 | 476179 | 476206 | 4 | 7  | 28 | TATC | 30 | 11 |
| 324900 | 73 | 480004 | 480019 | 4 | 4  | 16 | ATCC | 25 | 8  |
| 324901 | 73 | 484679 | 484716 | 2 | 19 | 38 | GT   | 22 | 12 |
| 324902 | 73 | 485209 | 485242 | 2 | 17 | 34 | AC   | 8  | 7  |
| 324903 | 73 | 486481 | 486504 | 2 | 12 | 24 | TG   | 17 | 9  |
| 324906 | 73 | 491054 | 491071 | 2 | 9  | 18 | GT   | 23 | 3  |
| 324907 | 73 | 498939 | 498960 | 2 | 11 | 22 | GT   | 15 | 10 |
| 324910 | 73 | 503510 | 503524 | 3 | 5  | 15 | AAT  | 20 | 4  |
| 324911 | 73 | 507394 | 507425 | 4 | 8  | 32 | GTCA | 16 | 8  |
| 324913 | 73 | 511903 | 511930 | 2 | 14 | 28 | TG   | 14 | 12 |
| 324916 | 73 | 518818 | 518833 | 4 | 4  | 16 | ATTT | 27 | 6  |
| 324918 | 73 | 521407 | 521430 | 3 | 8  | 24 | ATC  | 13 | 8  |

|        |    |         |         |   |    |    |      |    |    |
|--------|----|---------|---------|---|----|----|------|----|----|
| 324919 | 73 | 535555  | 535576  | 2 | 11 | 22 | GT   | 13 | 7  |
| 324920 | 73 | 539158  | 539181  | 3 | 8  | 24 | AAC  | 11 | 6  |
| 324929 | 73 | 578270  | 578293  | 4 | 6  | 24 | AATA | 16 | 3  |
| 324935 | 73 | 598898  | 598929  | 2 | 16 | 32 | AC   | 15 | 10 |
| 324936 | 73 | 599758  | 599781  | 2 | 12 | 24 | TG   | 21 | 8  |
| 324938 | 73 | 608921  | 608938  | 2 | 9  | 18 | CT   | 19 | 13 |
| 324944 | 73 | 618167  | 618186  | 4 | 5  | 20 | AAAG | 8  | 3  |
| 324947 | 73 | 636928  | 636941  | 2 | 7  | 14 | TG   | 19 | 4  |
| 324955 | 73 | 644798  | 644817  | 4 | 5  | 20 | TCTG | 24 | 5  |
| 324964 | 73 | 671158  | 671187  | 2 | 15 | 30 | GA   | 17 | 11 |
| 324967 | 73 | 680906  | 680923  | 3 | 6  | 18 | TTA  | 15 | 5  |
| 324974 | 73 | 706471  | 706486  | 4 | 4  | 16 | TGTT | 21 | 3  |
| 324976 | 73 | 714705  | 714728  | 2 | 12 | 24 | GT   | 19 | 8  |
| 324977 | 73 | 714833  | 714866  | 2 | 17 | 34 | GA   | 8  | 8  |
| 324980 | 73 | 723365  | 723378  | 2 | 7  | 14 | GT   | 18 | 4  |
| 324983 | 73 | 723884  | 723895  | 2 | 6  | 12 | AT   | 26 | 6  |
| 324988 | 73 | 749985  | 749998  | 2 | 7  | 14 | TG   | 20 | 3  |
| 324990 | 73 | 751620  | 751641  | 2 | 11 | 22 | TG   | 23 | 8  |
| 324991 | 73 | 751845  | 751884  | 4 | 10 | 40 | TCTT | 22 | 12 |
| 324996 | 73 | 793837  | 793852  | 4 | 4  | 16 | ACCA | 21 | 3  |
| 324999 | 73 | 799081  | 799104  | 2 | 12 | 24 | TG   | 19 | 12 |
| 325003 | 73 | 813016  | 813029  | 2 | 7  | 14 | GT   | 16 | 8  |
| 325006 | 73 | 828236  | 828271  | 2 | 18 | 36 | GT   | 9  | 9  |
| 325009 | 73 | 840941  | 840970  | 2 | 15 | 30 | CA   | 7  | 10 |
| 325014 | 73 | 843637  | 843650  | 2 | 7  | 14 | TG   | 22 | 6  |
| 325016 | 73 | 850803  | 850820  | 2 | 9  | 18 | CT   | 20 | 5  |
| 325018 | 73 | 861209  | 861220  | 2 | 6  | 12 | AC   | 21 | 5  |
| 325021 | 73 | 866922  | 866935  | 2 | 7  | 14 | AC   | 22 | 7  |
| 325028 | 73 | 900008  | 900025  | 2 | 9  | 18 | CA   | 16 | 6  |
| 325034 | 73 | 946082  | 946105  | 2 | 12 | 24 | CA   | 18 | 14 |
| 325037 | 73 | 963713  | 963739  | 3 | 9  | 27 | ATG  | 22 | 9  |
| 325053 | 73 | 986519  | 986572  | 3 | 18 | 54 | CTT  | 17 | 11 |
| 325055 | 73 | 989650  | 989665  | 4 | 4  | 16 | ATTT | 29 | 3  |
| 325056 | 73 | 991146  | 991166  | 3 | 7  | 21 | CCT  | 13 | 4  |
| 325058 | 73 | 996854  | 996907  | 2 | 27 | 54 | CA   | 14 | 10 |
| 325064 | 73 | 1014524 | 1014549 | 2 | 13 | 26 | CA   | 18 | 8  |
| 325069 | 73 | 1041665 | 1041682 | 2 | 9  | 18 | AC   | 16 | 7  |
| 325074 | 73 | 1054131 | 1054160 | 2 | 15 | 30 | CA   | 10 | 7  |
| 325087 | 73 | 1088207 | 1088244 | 2 | 19 | 38 | AC   | 15 | 15 |
| 325088 | 73 | 1088558 | 1088581 | 2 | 12 | 24 | GT   | 14 | 13 |
| 325089 | 73 | 1089811 | 1089838 | 2 | 14 | 28 | AC   | 11 | 11 |
| 325092 | 73 | 1090373 | 1090412 | 2 | 20 | 40 | AC   | 11 | 11 |
| 325095 | 73 | 1093130 | 1093161 | 2 | 16 | 32 | AC   | 15 | 11 |
| 325096 | 73 | 1093349 | 1093370 | 2 | 11 | 22 | CA   | 9  | 10 |
| 325099 | 73 | 1094528 | 1094559 | 2 | 16 | 32 | AC   | 14 | 16 |
| 325108 | 73 | 1100652 | 1100663 | 2 | 6  | 12 | CA   | 30 | 10 |
| 325115 | 73 | 1111632 | 1111653 | 2 | 11 | 22 | TG   | 21 | 12 |
| 325116 | 73 | 1111709 | 1111732 | 2 | 12 | 24 | GT   | 16 | 5  |
| 325123 | 73 | 1119255 | 1119266 | 2 | 6  | 12 | TG   | 27 | 3  |
| 325124 | 73 | 1121275 | 1121302 | 2 | 14 | 28 | CA   | 17 | 10 |
| 325125 | 73 | 1122628 | 1122639 | 2 | 6  | 12 | TC   | 35 | 3  |

|        |    |         |         |   |    |    |      |    |    |
|--------|----|---------|---------|---|----|----|------|----|----|
| 325126 | 73 | 1126752 | 1126779 | 2 | 14 | 28 | AC   | 18 | 11 |
| 325128 | 73 | 1128205 | 1128219 | 3 | 5  | 15 | CTC  | 29 | 15 |
| 325129 | 73 | 1128220 | 1128234 | 3 | 5  | 15 | CTT  | 23 | 8  |
| 325131 | 73 | 1129623 | 1129672 | 2 | 25 | 50 | TG   | 6  | 9  |
| 325139 | 73 | 1133375 | 1133404 | 3 | 10 | 30 | AGA  | 28 | 14 |
| 325146 | 73 | 1140388 | 1140405 | 2 | 9  | 18 | TG   | 15 | 13 |
| 325150 | 73 | 1157745 | 1157764 | 2 | 10 | 20 | CA   | 20 | 5  |
| 325151 | 73 | 1157934 | 1157965 | 2 | 16 | 32 | AC   | 13 | 18 |
| 325152 | 73 | 1158247 | 1158266 | 2 | 10 | 20 | TG   | 19 | 5  |
| 325158 | 73 | 1177424 | 1177471 | 2 | 24 | 48 | AC   | 9  | 10 |
| 325163 | 73 | 1185772 | 1185787 | 2 | 8  | 16 | TA   | 16 | 9  |
| 325164 | 73 | 1189126 | 1189153 | 2 | 14 | 28 | GT   | 12 | 12 |
| 325165 | 73 | 1189443 | 1189472 | 2 | 15 | 30 | AC   | 8  | 6  |
| 325167 | 73 | 1190066 | 1190089 | 4 | 6  | 24 | GGAT | 28 | 4  |
| 325168 | 73 | 1191625 | 1191640 | 2 | 8  | 16 | TG   | 17 | 10 |
| 325176 | 73 | 1195465 | 1195494 | 2 | 15 | 30 | GT   | 10 | 12 |
| 325177 | 73 | 1195785 | 1195802 | 2 | 9  | 18 | CT   | 21 | 7  |
| 325179 | 73 | 1197282 | 1197293 | 2 | 6  | 12 | GT   | 36 | 3  |
| 325181 | 73 | 1198736 | 1198755 | 2 | 10 | 20 | AC   | 15 | 12 |
| 325186 | 73 | 1202424 | 1202435 | 2 | 6  | 12 | TC   | 21 | 4  |
| 325191 | 73 | 1207814 | 1207831 | 2 | 9  | 18 | AC   | 15 | 8  |
| 325194 | 73 | 1210877 | 1210900 | 3 | 8  | 24 | TTC  | 30 | 11 |
| 325195 | 73 | 1211459 | 1211473 | 3 | 5  | 15 | TTA  | 6  | 3  |
| 325196 | 73 | 1211877 | 1211904 | 2 | 14 | 28 | AC   | 6  | 8  |
| 325199 | 73 | 1219704 | 1219715 | 2 | 6  | 12 | GT   | 7  | 8  |
| 325200 | 73 | 1220108 | 1220137 | 2 | 15 | 30 | TG   | 9  | 11 |
| 325201 | 73 | 1220332 | 1220353 | 2 | 11 | 22 | CA   | 22 | 10 |
| 325202 | 73 | 1220534 | 1220557 | 2 | 12 | 24 | TG   | 13 | 12 |
| 325203 | 73 | 1220763 | 1220782 | 2 | 10 | 20 | AC   | 20 | 12 |
| 325205 | 73 | 1227665 | 1227694 | 2 | 15 | 30 | GT   | 17 | 12 |
| 325207 | 73 | 1228938 | 1228955 | 3 | 6  | 18 | CAT  | 28 | 8  |
| 325208 | 73 | 1230164 | 1230179 | 2 | 8  | 16 | AC   | 28 | 4  |
| 325210 | 73 | 1232000 | 1232025 | 2 | 13 | 26 | TG   | 9  | 10 |
| 325211 | 73 | 1238248 | 1238263 | 4 | 4  | 16 | TCAT | 24 | 3  |
| 325213 | 73 | 1255168 | 1255182 | 3 | 5  | 15 | TTG  | 29 | 3  |
| 325214 | 73 | 1256689 | 1256700 | 2 | 6  | 12 | AC   | 18 | 3  |
| 325217 | 73 | 1265295 | 1265315 | 3 | 7  | 21 | TCC  | 15 | 4  |
| 325218 | 73 | 1265672 | 1265683 | 2 | 6  | 12 | TG   | 29 | 3  |
| 325219 | 73 | 1265774 | 1265801 | 2 | 14 | 28 | TG   | 18 | 12 |
| 325220 | 73 | 1265955 | 1265976 | 2 | 11 | 22 | GT   | 15 | 15 |
| 325222 | 73 | 1268865 | 1268876 | 2 | 6  | 12 | TG   | 19 | 3  |
| 325223 | 73 | 1270057 | 1270072 | 2 | 8  | 16 | CA   | 7  | 6  |
| 325232 | 73 | 1271014 | 1271039 | 2 | 13 | 26 | TG   | 10 | 10 |
| 325237 | 73 | 1271345 | 1271360 | 2 | 8  | 16 | CA   | 21 | 8  |
| 325239 | 73 | 1275037 | 1275054 | 2 | 9  | 18 | GT   | 24 | 4  |
| 325241 | 73 | 1277803 | 1277840 | 2 | 19 | 38 | TG   | 9  | 10 |
| 325243 | 73 | 1284205 | 1284222 | 2 | 9  | 18 | CA   | 21 | 7  |
| 325244 | 73 | 1284436 | 1284457 | 2 | 11 | 22 | AC   | 17 | 10 |
| 325245 | 73 | 1286915 | 1286942 | 2 | 14 | 28 | CA   | 15 | 15 |
| 325246 | 73 | 1287868 | 1287879 | 2 | 6  | 12 | AC   | 36 | 3  |
| 325247 | 73 | 1288846 | 1288891 | 2 | 23 | 46 | CA   | 6  | 8  |

|        |    |         |         |   |    |    |      |    |    |
|--------|----|---------|---------|---|----|----|------|----|----|
| 325249 | 73 | 1290577 | 1290604 | 2 | 14 | 28 | CA   | 7  | 10 |
| 325258 | 73 | 1309612 | 1309627 | 2 | 8  | 16 | TA   | 12 | 5  |
| 325260 | 73 | 1311600 | 1311621 | 2 | 11 | 22 | AC   | 17 | 7  |
| 325262 | 73 | 1311997 | 1312018 | 2 | 11 | 22 | GT   | 18 | 13 |
| 325263 | 73 | 1314801 | 1314821 | 3 | 7  | 21 | TAC  | 22 | 6  |
| 325264 | 73 | 1315375 | 1315422 | 2 | 24 | 48 | TG   | 13 | 14 |
| 325267 | 73 | 1315932 | 1315947 | 4 | 4  | 16 | TTTG | 21 | 3  |
| 325271 | 73 | 1329725 | 1329736 | 2 | 6  | 12 | AT   | 23 | 4  |
| 325273 | 73 | 1332826 | 1332837 | 2 | 6  | 12 | TG   | 20 | 10 |
| 325277 | 73 | 1340809 | 1340824 | 2 | 8  | 16 | TG   | 16 | 9  |
| 325283 | 73 | 1342980 | 1343003 | 2 | 12 | 24 | CA   | 9  | 4  |
| 325289 | 73 | 1343370 | 1343393 | 2 | 12 | 24 | CA   | 7  | 9  |
| 325293 | 73 | 1344004 | 1344025 | 2 | 11 | 22 | GT   | 23 | 6  |
| 325294 | 73 | 1344068 | 1344081 | 2 | 7  | 14 | GT   | 20 | 8  |
| 325297 | 73 | 1349147 | 1349164 | 3 | 6  | 18 | GCT  | 24 | 15 |
| 325301 | 73 | 1353558 | 1353585 | 2 | 14 | 28 | TG   | 12 | 11 |
| 325302 | 73 | 1353979 | 1354024 | 2 | 23 | 46 | GT   | 12 | 8  |
| 325318 | 73 | 1361722 | 1361739 | 2 | 9  | 18 | GT   | 11 | 3  |
| 325322 | 73 | 1364661 | 1364704 | 2 | 22 | 44 | GT   | 13 | 15 |
| 325325 | 73 | 1367743 | 1367768 | 2 | 13 | 26 | CA   | 11 | 11 |
| 325326 | 73 | 1368113 | 1368140 | 2 | 14 | 28 | TG   | 22 | 9  |
| 325327 | 73 | 1368212 | 1368229 | 2 | 9  | 18 | CA   | 22 | 7  |
| 325328 | 73 | 1368306 | 1368329 | 3 | 8  | 24 | CAT  | 27 | 8  |
| 325331 | 73 | 1368756 | 1368785 | 2 | 15 | 30 | GT   | 11 | 9  |
| 325334 | 73 | 1370417 | 1370428 | 2 | 6  | 12 | TG   | 10 | 10 |
| 325335 | 73 | 1375852 | 1375893 | 2 | 21 | 42 | GT   | 20 | 12 |
| 325336 | 73 | 1379309 | 1379326 | 2 | 9  | 18 | GT   | 11 | 9  |
| 325338 | 73 | 1379470 | 1379497 | 2 | 14 | 28 | CA   | 19 | 12 |
| 325340 | 73 | 1380264 | 1380290 | 3 | 9  | 27 | GGA  | 12 | 5  |
| 325341 | 73 | 1380730 | 1380751 | 2 | 11 | 22 | GT   | 15 | 8  |
| 325343 | 73 | 1380908 | 1380947 | 2 | 20 | 40 | TG   | 6  | 9  |
| 325345 | 73 | 1381727 | 1381754 | 2 | 14 | 28 | GT   | 13 | 15 |
| 325346 | 73 | 1383120 | 1383155 | 2 | 18 | 36 | CA   | 9  | 10 |
| 325347 | 73 | 1383258 | 1383296 | 3 | 13 | 39 | GGA  | 14 | 15 |
| 325349 | 73 | 1384513 | 1384526 | 2 | 7  | 14 | TG   | 26 | 3  |
| 325350 | 73 | 1384557 | 1384568 | 2 | 6  | 12 | GT   | 28 | 4  |
| 325351 | 73 | 1385637 | 1385674 | 2 | 19 | 38 | AC   | 11 | 11 |
| 325352 | 73 | 1385769 | 1385790 | 2 | 11 | 22 | CA   | 28 | 6  |
| 325353 | 73 | 1386853 | 1386872 | 2 | 10 | 20 | AC   | 27 | 10 |
| 325354 | 73 | 1386949 | 1386964 | 2 | 8  | 16 | CA   | 20 | 3  |
| 325357 | 73 | 1387315 | 1387352 | 2 | 19 | 38 | CA   | 10 | 10 |
| 325358 | 73 | 1387849 | 1387875 | 3 | 9  | 27 | GAG  | 11 | 7  |
| 325361 | 73 | 1390259 | 1390270 | 2 | 6  | 12 | CA   | 32 | 10 |
| 325362 | 73 | 1390763 | 1390778 | 2 | 8  | 16 | AG   | 26 | 3  |
| 325363 | 73 | 1391833 | 1391850 | 3 | 6  | 18 | CAA  | 21 | 3  |
| 325366 | 73 | 1394465 | 1394484 | 2 | 10 | 20 | CT   | 11 | 6  |
| 325367 | 73 | 1394809 | 1394832 | 3 | 8  | 24 | CCT  | 22 | 9  |
| 325370 | 73 | 1396856 | 1396873 | 2 | 9  | 18 | GT   | 16 | 22 |
| 325372 | 73 | 1400419 | 1400482 | 2 | 32 | 64 | GT   | 11 | 16 |
| 325388 | 73 | 1408248 | 1408261 | 2 | 7  | 14 | AG   | 20 | 4  |
| 325389 | 73 | 1408658 | 1408672 | 3 | 5  | 15 | CCT  | 23 | 4  |

|        |    |         |         |   |    |    |     |    |    |
|--------|----|---------|---------|---|----|----|-----|----|----|
| 325390 | 73 | 1409656 | 1409688 | 3 | 11 | 33 | TCC | 25 | 14 |
| 325395 | 73 | 1412030 | 1412053 | 2 | 12 | 24 | AC  | 15 | 5  |
| 325399 | 73 | 1418257 | 1418277 | 3 | 7  | 21 | TCT | 22 | 8  |
| 325402 | 73 | 1418483 | 1418500 | 3 | 6  | 18 | TCT | 18 | 4  |
| 325405 | 73 | 1419603 | 1419630 | 2 | 14 | 28 | AC  | 15 | 14 |
| 325406 | 73 | 1419788 | 1419825 | 2 | 19 | 38 | TG  | 16 | 14 |
| 325407 | 73 | 1421474 | 1421499 | 2 | 13 | 26 | TG  | 13 | 11 |
| 325408 | 73 | 1421534 | 1421553 | 2 | 10 | 20 | GT  | 16 | 5  |
| 325413 | 73 | 1423844 | 1423859 | 2 | 8  | 16 | AC  | 12 | 7  |
| 325414 | 73 | 1425189 | 1425208 | 2 | 10 | 20 | GT  | 12 | 12 |
| 325416 | 73 | 1429043 | 1429063 | 3 | 7  | 21 | CTT | 31 | 6  |
| 325417 | 73 | 1429777 | 1429798 | 2 | 11 | 22 | AC  | 19 | 6  |
| 325420 | 73 | 1432555 | 1432569 | 3 | 5  | 15 | GGA | 25 | 4  |
| 325421 | 73 | 1435546 | 1435567 | 2 | 11 | 22 | GT  | 17 | 13 |
| 325422 | 73 | 1435686 | 1435709 | 2 | 12 | 24 | GT  | 15 | 9  |
| 325424 | 73 | 1437402 | 1437427 | 2 | 13 | 26 | AC  | 18 | 11 |
| 325431 | 73 | 1446831 | 1446848 | 2 | 9  | 18 | GA  | 24 | 4  |
| 325432 | 73 | 1449632 | 1449677 | 2 | 23 | 46 | TG  | 7  | 10 |
| 325434 | 73 | 1450513 | 1450534 | 2 | 11 | 22 | CA  | 20 | 9  |
| 325435 | 73 | 1450706 | 1450729 | 2 | 12 | 24 | TG  | 15 | 6  |
| 325437 | 73 | 1451185 | 1451200 | 2 | 8  | 16 | CA  | 26 | 9  |
| 325439 | 73 | 1456429 | 1456452 | 2 | 12 | 24 | TG  | 9  | 4  |
| 325441 | 73 | 1459762 | 1459787 | 2 | 13 | 26 | CA  | 19 | 10 |
| 325443 | 73 | 1462003 | 1462058 | 2 | 28 | 56 | AC  | 8  | 10 |
| 325444 | 73 | 1462174 | 1462193 | 2 | 10 | 20 | AC  | 11 | 11 |
| 325446 | 73 | 1462350 | 1462377 | 2 | 14 | 28 | AC  | 12 | 12 |
| 325452 | 73 | 1464353 | 1464366 | 2 | 7  | 14 | AC  | 22 | 9  |
| 325453 | 73 | 1464545 | 1464566 | 2 | 11 | 22 | AT  | 10 | 4  |
| 325454 | 73 | 1464866 | 1464877 | 2 | 6  | 12 | TG  | 23 | 4  |
| 325455 | 73 | 1465882 | 1465911 | 2 | 15 | 30 | TG  | 14 | 11 |
| 325458 | 73 | 1467614 | 1467659 | 2 | 23 | 46 | AC  | 12 | 14 |
| 325459 | 73 | 1468811 | 1468834 | 2 | 12 | 24 | GT  | 14 | 9  |
| 325464 | 73 | 1476917 | 1476934 | 2 | 9  | 18 | TC  | 22 | 7  |
| 325467 | 73 | 1478938 | 1478955 | 2 | 9  | 18 | AC  | 19 | 5  |
| 325471 | 73 | 1481563 | 1481598 | 2 | 18 | 36 | AC  | 8  | 10 |
| 325472 | 73 | 1481771 | 1481790 | 2 | 10 | 20 | TG  | 21 | 8  |
| 325473 | 73 | 1481830 | 1481843 | 2 | 7  | 14 | GT  | 17 | 3  |
| 325479 | 73 | 1482622 | 1482645 | 2 | 12 | 24 | TG  | 27 | 9  |
| 325480 | 73 | 1483553 | 1483572 | 2 | 10 | 20 | CA  | 12 | 5  |
| 325481 | 73 | 1485028 | 1485047 | 2 | 10 | 20 | GT  | 21 | 8  |
| 325485 | 73 | 1488990 | 1489007 | 2 | 9  | 18 | GA  | 23 | 5  |
| 325486 | 73 | 1489226 | 1489237 | 2 | 6  | 12 | AG  | 25 | 3  |
| 325490 | 73 | 1491300 | 1491323 | 3 | 8  | 24 | GAG | 11 | 8  |
| 325491 | 73 | 1491735 | 1491749 | 3 | 5  | 15 | TGC | 23 | 3  |
| 325492 | 73 | 1492956 | 1492973 | 2 | 9  | 18 | TG  | 19 | 6  |
| 325493 | 73 | 1492975 | 1492990 | 2 | 8  | 16 | GT  | 14 | 6  |
| 325494 | 73 | 1493058 | 1493079 | 2 | 11 | 22 | GT  | 10 | 4  |
| 325500 | 73 | 1496829 | 1496850 | 2 | 11 | 22 | AC  | 12 | 6  |
| 325501 | 73 | 1497914 | 1497941 | 2 | 14 | 28 | TG  | 10 | 9  |
| 325503 | 73 | 1498227 | 1498242 | 2 | 8  | 16 | GT  | 24 | 3  |
| 325504 | 73 | 1498401 | 1498418 | 2 | 9  | 18 | GT  | 18 | 13 |

|        |    |         |         |   |    |    |      |    |    |
|--------|----|---------|---------|---|----|----|------|----|----|
| 325509 | 73 | 1501239 | 1501250 | 2 | 6  | 12 | GT   | 27 | 4  |
| 325511 | 73 | 1502706 | 1502723 | 2 | 9  | 18 | GT   | 27 | 6  |
| 325512 | 73 | 1502799 | 1502818 | 2 | 10 | 20 | CA   | 20 | 7  |
| 325516 | 73 | 1506164 | 1506183 | 2 | 10 | 20 | AC   | 13 | 11 |
| 325520 | 73 | 1507096 | 1507125 | 2 | 15 | 30 | GT   | 13 | 9  |
| 325523 | 73 | 1509752 | 1509791 | 2 | 20 | 40 | AC   | 8  | 9  |
| 325526 | 73 | 1511028 | 1511051 | 2 | 12 | 24 | AC   | 19 | 10 |
| 325527 | 73 | 1511475 | 1511490 | 2 | 8  | 16 | GA   | 20 | 4  |
| 325529 | 73 | 1513654 | 1513673 | 2 | 10 | 20 | TG   | 14 | 9  |
| 325530 | 73 | 1513953 | 1513964 | 2 | 6  | 12 | GT   | 10 | 9  |
| 325531 | 73 | 1514371 | 1514390 | 2 | 10 | 20 | TG   | 22 | 15 |
| 325532 | 73 | 1514481 | 1514496 | 2 | 8  | 16 | GA   | 12 | 6  |
| 325534 | 73 | 1515894 | 1515929 | 2 | 18 | 36 | GT   | 13 | 14 |
| 325535 | 73 | 1516054 | 1516074 | 3 | 7  | 21 | AGG  | 22 | 5  |
| 325537 | 73 | 1520319 | 1520338 | 2 | 10 | 20 | GA   | 28 | 3  |
| 325538 | 73 | 1520440 | 1520469 | 2 | 15 | 30 | CA   | 18 | 11 |
| 325539 | 73 | 1520930 | 1520949 | 2 | 10 | 20 | TG   | 19 | 12 |
| 325543 | 73 | 1522015 | 1522040 | 2 | 13 | 26 | TG   | 13 | 6  |
| 325544 | 73 | 1523234 | 1523254 | 3 | 7  | 21 | AGG  | 26 | 5  |
| 325548 | 73 | 1526486 | 1526497 | 2 | 6  | 12 | TG   | 15 | 3  |
| 325549 | 73 | 1526669 | 1526684 | 2 | 8  | 16 | AC   | 17 | 4  |
| 325550 | 73 | 1526769 | 1526782 | 2 | 7  | 14 | AC   | 26 | 4  |
| 325551 | 73 | 1526860 | 1526871 | 2 | 6  | 12 | TG   | 22 | 3  |
| 325552 | 73 | 1528135 | 1528148 | 2 | 7  | 14 | GT   | 28 | 7  |
| 325553 | 73 | 1530043 | 1530062 | 2 | 10 | 20 | CA   | 10 | 4  |
| 325554 | 73 | 1530285 | 1530302 | 2 | 9  | 18 | AC   | 13 | 11 |
| 325555 | 73 | 1530414 | 1530441 | 2 | 14 | 28 | CA   | 13 | 7  |
| 325564 | 73 | 1536482 | 1536515 | 2 | 17 | 34 | GT   | 7  | 10 |
| 325565 | 73 | 1536685 | 1536734 | 2 | 25 | 50 | TG   | 13 | 15 |
| 325568 | 73 | 1537249 | 1537264 | 2 | 8  | 16 | CA   | 17 | 11 |
| 325569 | 73 | 1537266 | 1537277 | 2 | 6  | 12 | AC   | 16 | 8  |
| 325570 | 73 | 1539004 | 1539035 | 4 | 8  | 32 | TTTC | 22 | 6  |
| 325571 | 73 | 1539689 | 1539714 | 2 | 13 | 26 | GT   | 9  | 7  |
| 325574 | 73 | 1540448 | 1540467 | 2 | 10 | 20 | GT   | 14 | 14 |
| 325575 | 73 | 1540524 | 1540549 | 2 | 13 | 26 | AC   | 8  | 5  |
| 325582 | 73 | 1547483 | 1547508 | 2 | 13 | 26 | AC   | 10 | 10 |
| 325583 | 73 | 1548712 | 1548765 | 2 | 27 | 54 | AC   | 6  | 9  |
| 325584 | 73 | 1550667 | 1550681 | 3 | 5  | 15 | AGA  | 6  | 3  |
| 325585 | 73 | 1550682 | 1550696 | 3 | 5  | 15 | AGG  | 25 | 9  |
| 325587 | 73 | 1551520 | 1551533 | 2 | 7  | 14 | AC   | 20 | 6  |
| 325590 | 73 | 1552835 | 1552860 | 2 | 13 | 26 | CA   | 9  | 7  |
| 325591 | 73 | 1553014 | 1553025 | 2 | 6  | 12 | GT   | 21 | 4  |
| 325594 | 73 | 1554383 | 1554398 | 2 | 8  | 16 | CA   | 25 | 6  |
| 325595 | 73 | 1554481 | 1554510 | 2 | 15 | 30 | AC   | 16 | 10 |
| 325596 | 73 | 1556155 | 1556180 | 2 | 13 | 26 | AC   | 12 | 10 |
| 325597 | 73 | 1556260 | 1556295 | 2 | 18 | 36 | CA   | 16 | 8  |
| 325598 | 73 | 1556428 | 1556443 | 2 | 8  | 16 | AC   | 12 | 3  |
| 325599 | 73 | 1556483 | 1556500 | 2 | 9  | 18 | TG   | 12 | 11 |
| 325604 | 73 | 1559145 | 1559166 | 2 | 11 | 22 | TG   | 15 | 6  |
| 325605 | 73 | 1559567 | 1559582 | 2 | 8  | 16 | GT   | 17 | 15 |
| 325606 | 73 | 1559588 | 1559603 | 2 | 8  | 16 | TG   | 20 | 16 |



|        |    |         |         |   |    |    |     |    |    |
|--------|----|---------|---------|---|----|----|-----|----|----|
| 325607 | 73 | 1559763 | 1559776 | 2 | 7  | 14 | GT  | 20 | 16 |
| 325608 | 73 | 1559781 | 1559796 | 2 | 8  | 16 | TG  | 16 | 14 |
| 325610 | 73 | 1564822 | 1564853 | 2 | 16 | 32 | TG  | 12 | 8  |
| 325611 | 73 | 1564983 | 1565012 | 2 | 15 | 30 | AC  | 16 | 12 |
| 325612 | 73 | 1565155 | 1565170 | 2 | 8  | 16 | CA  | 26 | 6  |
| 325614 | 73 | 1569594 | 1569627 | 2 | 17 | 34 | TG  | 10 | 10 |
| 325615 | 73 | 1569701 | 1569732 | 2 | 16 | 32 | CA  | 17 | 12 |
| 325616 | 73 | 1570003 | 1570022 | 2 | 10 | 20 | GT  | 20 | 17 |
| 325617 | 73 | 1570193 | 1570204 | 2 | 6  | 12 | CA  | 18 | 11 |
| 325619 | 73 | 1572705 | 1572748 | 2 | 22 | 44 | CA  | 9  | 11 |
| 325620 | 73 | 1572897 | 1572920 | 2 | 12 | 24 | TG  | 22 | 11 |
| 325621 | 73 | 1576168 | 1576206 | 3 | 13 | 39 | CTC | 10 | 9  |
| 325622 | 73 | 1576392 | 1576409 | 3 | 6  | 18 | CAT | 21 | 5  |
| 325627 | 73 | 1577867 | 1577892 | 2 | 13 | 26 | TG  | 8  | 8  |
| 325628 | 73 | 1577991 | 1578018 | 2 | 14 | 28 | TC  | 13 | 8  |
| 325629 | 73 | 1578134 | 1578163 | 2 | 15 | 30 | GT  | 12 | 11 |
| 325630 | 73 | 1578303 | 1578342 | 2 | 20 | 40 | GT  | 13 | 13 |
| 325637 | 73 | 1579521 | 1579550 | 2 | 15 | 30 | TG  | 13 | 10 |
| 325638 | 73 | 1579723 | 1579750 | 2 | 14 | 28 | TG  | 10 | 14 |
| 325640 | 73 | 1580193 | 1580208 | 2 | 8  | 16 | CT  | 15 | 4  |
| 325641 | 73 | 1581260 | 1581275 | 2 | 8  | 16 | AG  | 27 | 4  |
| 325644 | 73 | 1582508 | 1582531 | 2 | 12 | 24 | GT  | 23 | 10 |
| 325645 | 73 | 1582684 | 1582709 | 2 | 13 | 26 | TG  | 15 | 13 |
| 325649 | 73 | 1585474 | 1585521 | 2 | 24 | 48 | GT  | 9  | 14 |
| 325650 | 73 | 1585689 | 1585748 | 2 | 30 | 60 | CA  | 9  | 13 |
| 325651 | 73 | 1585898 | 1585937 | 2 | 20 | 40 | CA  | 12 | 14 |
| 325653 | 73 | 1586310 | 1586339 | 2 | 15 | 30 | AC  | 8  | 10 |
| 325655 | 73 | 1587663 | 1587690 | 2 | 14 | 28 | CA  | 8  | 9  |
| 325661 | 73 | 1590874 | 1590899 | 2 | 13 | 26 | CA  | 15 | 9  |
| 325662 | 73 | 1592586 | 1592597 | 2 | 6  | 12 | AC  | 25 | 9  |
| 325663 | 73 | 1593233 | 1593244 | 2 | 6  | 12 | GT  | 12 | 6  |
| 325664 | 73 | 1594474 | 1594511 | 2 | 19 | 38 | AC  | 6  | 6  |
| 325667 | 73 | 1596106 | 1596133 | 2 | 14 | 28 | AC  | 8  | 8  |
| 325668 | 73 | 1596307 | 1596340 | 2 | 17 | 34 | CA  | 8  | 9  |
| 325671 | 73 | 1596864 | 1596883 | 2 | 10 | 20 | TG  | 26 | 15 |
| 325672 | 73 | 1599566 | 1599585 | 2 | 10 | 20 | GT  | 12 | 7  |
| 325674 | 73 | 1600119 | 1600132 | 2 | 7  | 14 | TC  | 12 | 4  |
| 325676 | 73 | 1602198 | 1602225 | 2 | 14 | 28 | AC  | 8  | 7  |
| 325678 | 73 | 1602384 | 1602411 | 2 | 14 | 28 | CA  | 19 | 13 |
| 325681 | 73 | 1602753 | 1602764 | 2 | 6  | 12 | CA  | 11 | 8  |
| 325682 | 73 | 1603897 | 1603910 | 2 | 7  | 14 | CA  | 7  | 6  |
| 325686 | 73 | 1604348 | 1604361 | 2 | 7  | 14 | AC  | 19 | 4  |
| 325692 | 73 | 1607363 | 1607378 | 2 | 8  | 16 | CA  | 25 | 7  |
| 325694 | 73 | 1607491 | 1607508 | 2 | 9  | 18 | GT  | 11 | 7  |
| 325698 | 73 | 1610361 | 1610386 | 2 | 13 | 26 | TG  | 8  | 6  |
| 325699 | 73 | 1610514 | 1610543 | 2 | 15 | 30 | CA  | 9  | 9  |
| 325700 | 73 | 1611208 | 1611253 | 2 | 23 | 46 | TG  | 19 | 10 |
| 325703 | 73 | 1613574 | 1613593 | 2 | 10 | 20 | TG  | 6  | 9  |
| 325704 | 73 | 1613703 | 1613738 | 2 | 18 | 36 | GT  | 9  | 9  |
| 325708 | 73 | 1614376 | 1614399 | 2 | 12 | 24 | CA  | 7  | 6  |
| 325718 | 73 | 1624638 | 1624659 | 2 | 11 | 22 | AC  | 19 | 8  |

|        |    |         |         |   |    |    |      |    |    |
|--------|----|---------|---------|---|----|----|------|----|----|
| 325721 | 73 | 1627668 | 1627689 | 2 | 11 | 22 | CA   | 17 | 7  |
| 325724 | 73 | 1631294 | 1631319 | 2 | 13 | 26 | GT   | 7  | 6  |
| 325728 | 73 | 1632353 | 1632378 | 2 | 13 | 26 | GT   | 20 | 9  |
| 325732 | 73 | 1633397 | 1633410 | 2 | 7  | 14 | GT   | 11 | 8  |
| 325734 | 73 | 1633579 | 1633590 | 2 | 6  | 12 | GT   | 16 | 4  |
| 325735 | 73 | 1633617 | 1633634 | 2 | 9  | 18 | GT   | 18 | 10 |
| 325738 | 73 | 1635197 | 1635222 | 2 | 13 | 26 | CA   | 11 | 10 |
| 325739 | 73 | 1635383 | 1635414 | 2 | 16 | 32 | TG   | 7  | 5  |
| 325740 | 73 | 1636115 | 1636142 | 2 | 14 | 28 | GT   | 17 | 11 |
| 325746 | 73 | 1641632 | 1641659 | 2 | 14 | 28 | TG   | 10 | 10 |
| 325747 | 73 | 1642894 | 1642911 | 2 | 9  | 18 | AG   | 16 | 7  |
| 325751 | 73 | 1643337 | 1643356 | 2 | 10 | 20 | CA   | 12 | 7  |
| 325756 | 73 | 1646211 | 1646225 | 3 | 5  | 15 | AGG  | 15 | 6  |
| 325757 | 73 | 1646228 | 1646245 | 3 | 6  | 18 | GAG  | 16 | 4  |
| 325759 | 73 | 1647577 | 1647604 | 4 | 7  | 28 | CTTT | 13 | 11 |
| 325761 | 73 | 1648517 | 1648528 | 2 | 6  | 12 | CA   | 15 | 7  |
| 325762 | 73 | 1648936 | 1648965 | 2 | 15 | 30 | CA   | 6  | 5  |
| 325763 | 73 | 1649126 | 1649153 | 2 | 14 | 28 | CA   | 15 | 11 |
| 325764 | 73 | 1649311 | 1649364 | 2 | 27 | 54 | CA   | 6  | 10 |
| 325766 | 73 | 1653039 | 1653056 | 2 | 9  | 18 | AC   | 13 | 5  |
| 325772 | 73 | 1654604 | 1654639 | 2 | 18 | 36 | CA   | 10 | 14 |
| 325773 | 73 | 1657079 | 1657114 | 3 | 12 | 36 | GAG  | 20 | 4  |
| 325774 | 73 | 1657248 | 1657271 | 2 | 12 | 24 | TG   | 11 | 12 |
| 325781 | 73 | 1660900 | 1660913 | 2 | 7  | 14 | AC   | 11 | 6  |
| 325782 | 73 | 1660917 | 1660932 | 2 | 8  | 16 | CA   | 13 | 7  |
| 325783 | 73 | 1660957 | 1660970 | 2 | 7  | 14 | AC   | 13 | 3  |
| 325784 | 73 | 1661052 | 1661093 | 2 | 21 | 42 | AC   | 12 | 15 |
| 325787 | 73 | 1662270 | 1662287 | 3 | 6  | 18 | CTC  | 24 | 4  |
| 325789 | 73 | 1663214 | 1663227 | 2 | 7  | 14 | CT   | 13 | 7  |
| 325790 | 73 | 1664183 | 1664204 | 2 | 11 | 22 | TG   | 17 | 9  |
| 325792 | 73 | 1666450 | 1666469 | 2 | 10 | 20 | AC   | 18 | 5  |
| 325793 | 73 | 1666640 | 1666697 | 2 | 29 | 58 | AC   | 6  | 8  |
| 325794 | 73 | 1667045 | 1667084 | 2 | 20 | 40 | CA   | 14 | 13 |
| 325795 | 73 | 1667227 | 1667242 | 2 | 8  | 16 | TG   | 13 | 4  |
| 325797 | 73 | 1667317 | 1667338 | 2 | 11 | 22 | GT   | 18 | 9  |
| 325798 | 73 | 1667457 | 1667476 | 2 | 10 | 20 | TG   | 11 | 8  |
| 325804 | 73 | 1670275 | 1670310 | 2 | 18 | 36 | AC   | 8  | 11 |
| 325810 | 73 | 1670802 | 1670815 | 2 | 7  | 14 | AC   | 16 | 4  |
| 325812 | 73 | 1673007 | 1673026 | 2 | 10 | 20 | AG   | 12 | 8  |
| 325814 | 73 | 1676124 | 1676139 | 2 | 8  | 16 | AC   | 22 | 5  |
| 325815 | 73 | 1679535 | 1679548 | 2 | 7  | 14 | AG   | 29 | 3  |
| 325816 | 73 | 1682374 | 1682387 | 2 | 7  | 14 | CT   | 19 | 4  |
| 325822 | 73 | 1684627 | 1684656 | 2 | 15 | 30 | TG   | 10 | 9  |
| 325823 | 73 | 1685027 | 1685038 | 2 | 6  | 12 | TG   | 14 | 3  |
| 325825 | 73 | 1686797 | 1686822 | 2 | 13 | 26 | CA   | 10 | 8  |
| 325826 | 73 | 1690177 | 1690196 | 2 | 10 | 20 | CA   | 21 | 5  |
| 325828 | 73 | 1690633 | 1690648 | 2 | 8  | 16 | AC   | 10 | 9  |
| 325830 | 73 | 1691700 | 1691711 | 2 | 6  | 12 | AC   | 29 | 5  |
| 325831 | 73 | 1691924 | 1691941 | 2 | 9  | 18 | AC   | 17 | 5  |
| 325832 | 73 | 1693314 | 1693339 | 2 | 13 | 26 | CA   | 13 | 12 |
| 325833 | 73 | 1693560 | 1693579 | 2 | 10 | 20 | CA   | 15 | 3  |

|        |    |         |         |   |    |    |      |    |    |
|--------|----|---------|---------|---|----|----|------|----|----|
| 325834 | 73 | 1694180 | 1694205 | 2 | 13 | 26 | CA   | 22 | 13 |
| 325837 | 73 | 1695634 | 1695651 | 2 | 9  | 18 | TG   | 20 | 6  |
| 325838 | 73 | 1695788 | 1695805 | 2 | 9  | 18 | AC   | 11 | 8  |
| 325839 | 73 | 1695946 | 1695975 | 3 | 10 | 30 | CTT  | 14 | 11 |
| 325844 | 73 | 1697988 | 1698017 | 2 | 15 | 30 | AC   | 10 | 7  |
| 325845 | 73 | 1698392 | 1698409 | 3 | 6  | 18 | TTC  | 12 | 4  |
| 325847 | 73 | 1699639 | 1699650 | 2 | 6  | 12 | AC   | 17 | 4  |
| 325848 | 73 | 1699681 | 1699708 | 2 | 14 | 28 | AC   | 19 | 6  |
| 325849 | 73 | 1699774 | 1699789 | 2 | 8  | 16 | AC   | 22 | 6  |
| 325851 | 73 | 1699938 | 1699957 | 2 | 10 | 20 | CA   | 16 | 3  |
| 325852 | 73 | 1700130 | 1700151 | 2 | 11 | 22 | CA   | 12 | 15 |
| 325855 | 73 | 1701379 | 1701400 | 2 | 11 | 22 | TG   | 17 | 8  |
| 325856 | 73 | 1703521 | 1703540 | 2 | 10 | 20 | CA   | 22 | 7  |
| 325860 | 73 | 1704300 | 1704319 | 4 | 5  | 20 | TTTA | 15 | 5  |
| 325863 | 73 | 1708140 | 1708172 | 3 | 11 | 33 | TCT  | 21 | 10 |
| 325865 | 73 | 1709338 | 1709359 | 2 | 11 | 22 | GT   | 6  | 9  |
| 325866 | 73 | 1709518 | 1709553 | 2 | 18 | 36 | GT   | 13 | 12 |
| 325867 | 73 | 1709643 | 1709666 | 3 | 8  | 24 | GAA  | 21 | 5  |
| 325868 | 73 | 1710435 | 1710450 | 2 | 8  | 16 | GT   | 20 | 8  |
| 325869 | 73 | 1710597 | 1710616 | 2 | 10 | 20 | AC   | 18 | 10 |
| 325870 | 73 | 1710791 | 1710802 | 2 | 6  | 12 | AG   | 25 | 7  |
| 325871 | 73 | 1711008 | 1711031 | 2 | 12 | 24 | AC   | 14 | 5  |
| 325873 | 73 | 1711088 | 1711105 | 2 | 9  | 18 | AC   | 7  | 9  |
| 325874 | 73 | 1711192 | 1711217 | 2 | 13 | 26 | CA   | 12 | 7  |
| 325877 | 73 | 1712355 | 1712406 | 2 | 26 | 52 | GT   | 7  | 7  |
| 325881 | 73 | 1713639 | 1713652 | 2 | 7  | 14 | AC   | 25 | 4  |
| 325882 | 73 | 1714119 | 1714132 | 2 | 7  | 14 | GT   | 26 | 6  |
| 325887 | 73 | 1717180 | 1717199 | 2 | 10 | 20 | AC   | 20 | 5  |
| 325891 | 73 | 1719677 | 1719700 | 3 | 8  | 24 | GGA  | 26 | 9  |
| 325895 | 73 | 1724643 | 1724654 | 2 | 6  | 12 | CA   | 32 | 8  |
| 325897 | 73 | 1725535 | 1725566 | 2 | 16 | 32 | AC   | 11 | 9  |
| 325900 | 73 | 1727542 | 1727565 | 2 | 12 | 24 | TG   | 20 | 10 |
| 325901 | 73 | 1727733 | 1727764 | 2 | 16 | 32 | AC   | 7  | 7  |
| 325902 | 73 | 1727909 | 1727928 | 2 | 10 | 20 | CA   | 20 | 15 |
| 325904 | 73 | 1734234 | 1734251 | 3 | 6  | 18 | TTC  | 24 | 12 |
| 325907 | 73 | 1737781 | 1737808 | 2 | 14 | 28 | GT   | 23 | 22 |
| 325911 | 73 | 1761263 | 1761282 | 2 | 10 | 20 | GT   | 18 | 5  |
| 325917 | 73 | 1768800 | 1768811 | 2 | 6  | 12 | TG   | 13 | 14 |
| 325920 | 73 | 1812997 | 1813028 | 2 | 16 | 32 | TG   | 15 | 14 |
| 325923 | 73 | 1815489 | 1815509 | 3 | 7  | 21 | CAT  | 28 | 3  |
| 325933 | 73 | 1852141 | 1852156 | 2 | 8  | 16 | TC   | 22 | 5  |
| 325938 | 73 | 1861112 | 1861125 | 2 | 7  | 14 | AC   | 18 | 3  |
| 325954 | 73 | 1909282 | 1909305 | 2 | 12 | 24 | AC   | 15 | 9  |
| 325955 | 73 | 1909440 | 1909469 | 2 | 15 | 30 | AC   | 14 | 13 |
| 325956 | 73 | 1909812 | 1909827 | 2 | 8  | 16 | AT   | 12 | 6  |
| 325957 | 73 | 1910553 | 1910572 | 4 | 5  | 20 | AATG | 24 | 5  |
| 325958 | 73 | 1918371 | 1918386 | 4 | 4  | 16 | TCTG | 22 | 3  |
| 325965 | 73 | 1924263 | 1924276 | 2 | 7  | 14 | TC   | 32 | 5  |
| 325966 | 73 | 1926992 | 1927013 | 2 | 11 | 22 | TG   | 6  | 7  |
| 325968 | 73 | 1934339 | 1934352 | 2 | 7  | 14 | CA   | 19 | 13 |
| 325975 | 73 | 1966235 | 1966264 | 2 | 15 | 30 | CA   | 11 | 8  |

|        |    |         |         |   |    |    |      |    |    |
|--------|----|---------|---------|---|----|----|------|----|----|
| 325977 | 73 | 1967224 | 1967268 | 3 | 15 | 45 | GCA  | 26 | 15 |
| 325978 | 73 | 1969597 | 1969617 | 3 | 7  | 21 | GGC  | 22 | 11 |
| 325983 | 73 | 1974920 | 1974941 | 2 | 11 | 22 | TG   | 21 | 12 |
| 325988 | 73 | 1981446 | 1981465 | 4 | 5  | 20 | AAAC | 11 | 10 |
| 325996 | 73 | 1989167 | 1989196 | 3 | 10 | 30 | AGA  | 30 | 6  |
| 326003 | 73 | 2005516 | 2005529 | 2 | 7  | 14 | GT   | 25 | 3  |
| 326004 | 73 | 2006894 | 2006913 | 2 | 10 | 20 | AC   | 22 | 11 |
| 326006 | 73 | 2020768 | 2020781 | 2 | 7  | 14 | CA   | 18 | 9  |
| 326008 | 73 | 2026748 | 2026767 | 2 | 10 | 20 | AC   | 12 | 16 |
| 326012 | 73 | 2031794 | 2031815 | 2 | 11 | 22 | TG   | 6  | 3  |
| 326014 | 73 | 2041535 | 2041549 | 3 | 5  | 15 | TGC  | 30 | 13 |
| 326018 | 73 | 2047670 | 2047697 | 2 | 14 | 28 | GT   | 15 | 12 |
| 326024 | 73 | 2056299 | 2056318 | 2 | 10 | 20 | CA   | 17 | 12 |
| 326027 | 73 | 2059852 | 2059875 | 3 | 8  | 24 | CTC  | 28 | 7  |
| 326032 | 73 | 2065578 | 2065591 | 2 | 7  | 14 | CA   | 20 | 4  |
| 326045 | 73 | 2098831 | 2098848 | 3 | 6  | 18 | TGC  | 27 | 4  |
| 326053 | 73 | 2110765 | 2110784 | 2 | 10 | 20 | GT   | 20 | 6  |
| 326068 | 73 | 2153966 | 2153977 | 2 | 6  | 12 | AT   | 24 | 6  |
| 326069 | 73 | 2157742 | 2157769 | 2 | 14 | 28 | TG   | 11 | 14 |
| 326071 | 73 | 2161704 | 2161723 | 2 | 10 | 20 | AC   | 16 | 5  |
| 326077 | 73 | 2168137 | 2168154 | 3 | 6  | 18 | CTT  | 23 | 5  |
| 326080 | 73 | 2174203 | 2174220 | 2 | 9  | 18 | AT   | 13 | 5  |
| 326082 | 73 | 2180091 | 2180116 | 2 | 13 | 26 | AC   | 21 | 8  |
| 326083 | 73 | 2183647 | 2183672 | 2 | 13 | 26 | CA   | 12 | 7  |
| 326084 | 73 | 2187603 | 2187632 | 2 | 15 | 30 | CA   | 12 | 10 |
| 326085 | 73 | 2193532 | 2193553 | 2 | 11 | 22 | CA   | 15 | 9  |
| 326088 | 73 | 2201861 | 2201884 | 3 | 8  | 24 | GAG  | 26 | 8  |
| 326089 | 73 | 2202303 | 2202318 | 4 | 4  | 16 | TTTG | 6  | 4  |
| 326091 | 73 | 2203108 | 2203122 | 3 | 5  | 15 | GCT  | 25 | 3  |
| 326093 | 73 | 2209159 | 2209176 | 2 | 9  | 18 | AG   | 7  | 5  |
| 326095 | 73 | 2212989 | 2213003 | 3 | 5  | 15 | CCA  | 20 | 6  |
| 326105 | 73 | 2222655 | 2222672 | 3 | 6  | 18 | CCT  | 27 | 4  |
| 326106 | 73 | 2223876 | 2223907 | 2 | 16 | 32 | TG   | 12 | 11 |
| 326124 | 74 | 15612   | 15625   | 2 | 7  | 14 | TG   | 21 | 3  |
| 326127 | 74 | 22393   | 22426   | 2 | 17 | 34 | CA   | 9  | 4  |
| 326128 | 74 | 23595   | 23614   | 4 | 5  | 20 | AAGA | 15 | 3  |
| 326130 | 74 | 31227   | 31238   | 2 | 6  | 12 | GT   | 17 | 5  |
| 326132 | 74 | 31914   | 31929   | 4 | 4  | 16 | AAAC | 19 | 6  |
| 326133 | 74 | 36532   | 36559   | 2 | 14 | 28 | CA   | 7  | 7  |
| 326158 | 74 | 67442   | 67457   | 4 | 4  | 16 | TTTC | 12 | 6  |
| 326162 | 74 | 68698   | 68749   | 4 | 13 | 52 | AAAG | 15 | 6  |
| 326164 | 74 | 69293   | 69306   | 2 | 7  | 14 | GT   | 13 | 4  |
| 326165 | 74 | 70032   | 70049   | 2 | 9  | 18 | AC   | 12 | 9  |
| 326166 | 74 | 70342   | 70361   | 4 | 5  | 20 | AAAT | 24 | 5  |
| 326167 | 74 | 70668   | 70701   | 2 | 17 | 34 | CA   | 14 | 10 |
| 326168 | 74 | 71413   | 71440   | 2 | 14 | 28 | AC   | 15 | 10 |
| 326175 | 74 | 73247   | 73260   | 2 | 7  | 14 | CT   | 22 | 4  |
| 326177 | 74 | 74789   | 74820   | 4 | 8  | 32 | TATC | 18 | 10 |
| 326178 | 74 | 77320   | 77339   | 2 | 10 | 20 | CA   | 11 | 7  |
| 326179 | 74 | 77340   | 77351   | 2 | 6  | 12 | AC   | 13 | 6  |
| 326180 | 74 | 77974   | 77995   | 2 | 11 | 22 | AG   | 17 | 4  |

|        |    |        |        |   |    |    |      |    |    |
|--------|----|--------|--------|---|----|----|------|----|----|
| 326184 | 74 | 79708  | 79731  | 2 | 12 | 24 | CA   | 16 | 7  |
| 326193 | 74 | 92854  | 92871  | 2 | 9  | 18 | CA   | 15 | 7  |
| 326194 | 74 | 93404  | 93423  | 4 | 5  | 20 | TGAG | 28 | 4  |
| 326215 | 74 | 117851 | 117868 | 2 | 9  | 18 | AC   | 20 | 5  |
| 326219 | 74 | 125005 | 125024 | 2 | 10 | 20 | GT   | 19 | 10 |
| 326224 | 74 | 129800 | 129814 | 3 | 5  | 15 | CAG  | 26 | 6  |
| 326227 | 74 | 132655 | 132690 | 2 | 18 | 36 | AC   | 10 | 9  |
| 326228 | 74 | 138905 | 138930 | 2 | 13 | 26 | CA   | 15 | 12 |
| 326229 | 74 | 139949 | 139980 | 4 | 8  | 32 | GAAA | 10 | 4  |
| 326232 | 74 | 148061 | 148076 | 2 | 8  | 16 | AT   | 27 | 4  |
| 326234 | 74 | 149302 | 149327 | 2 | 13 | 26 | TG   | 9  | 8  |
| 326248 | 74 | 178199 | 178213 | 3 | 5  | 15 | TGC  | 17 | 4  |
| 326251 | 74 | 182241 | 182268 | 2 | 14 | 28 | CA   | 18 | 8  |
| 326260 | 74 | 191900 | 191917 | 3 | 6  | 18 | AGC  | 24 | 3  |
| 326265 | 74 | 195571 | 195586 | 2 | 8  | 16 | CA   | 9  | 6  |
| 326285 | 74 | 237022 | 237036 | 3 | 5  | 15 | CAC  | 25 | 4  |
| 326289 | 74 | 248495 | 248526 | 2 | 16 | 32 | AC   | 25 | 11 |
| 326291 | 74 | 252258 | 252279 | 2 | 11 | 22 | CA   | 8  | 6  |
| 326292 | 74 | 252582 | 252599 | 2 | 9  | 18 | TG   | 21 | 8  |
| 326293 | 74 | 253205 | 253244 | 2 | 20 | 40 | GT   | 6  | 8  |
| 326302 | 74 | 268003 | 268018 | 2 | 8  | 16 | AC   | 16 | 5  |
| 326313 | 74 | 287411 | 287430 | 2 | 10 | 20 | TG   | 7  | 10 |
| 326323 | 74 | 300838 | 300863 | 2 | 13 | 26 | AC   | 13 | 6  |
| 326327 | 74 | 311238 | 311281 | 2 | 22 | 44 | AC   | 11 | 12 |
| 326330 | 74 | 319866 | 319881 | 4 | 4  | 16 | AGAC | 15 | 3  |
| 326331 | 74 | 321551 | 321586 | 3 | 12 | 36 | TCT  | 14 | 11 |
| 326333 | 74 | 330636 | 330655 | 4 | 5  | 20 | AAAT | 23 | 3  |
| 326334 | 74 | 332503 | 332524 | 2 | 11 | 22 | CT   | 22 | 6  |
| 326364 | 74 | 393280 | 393293 | 2 | 7  | 14 | CT   | 30 | 6  |
| 326367 | 74 | 395347 | 395372 | 2 | 13 | 26 | CA   | 11 | 9  |
| 326377 | 74 | 408615 | 408638 | 3 | 8  | 24 | TGC  | 26 | 11 |
| 326382 | 74 | 435559 | 435574 | 4 | 4  | 16 | TTTA | 22 | 3  |
| 326385 | 74 | 440329 | 440340 | 2 | 6  | 12 | AC   | 23 | 3  |
| 326386 | 74 | 442092 | 442127 | 2 | 18 | 36 | AC   | 6  | 7  |
| 326387 | 74 | 442664 | 442675 | 2 | 6  | 12 | TG   | 20 | 3  |
| 326390 | 74 | 450173 | 450192 | 2 | 10 | 20 | CA   | 27 | 6  |
| 326391 | 74 | 450411 | 450425 | 3 | 5  | 15 | CAG  | 29 | 3  |
| 326392 | 74 | 451949 | 451990 | 2 | 21 | 42 | GT   | 11 | 10 |
| 326401 | 74 | 468876 | 468893 | 3 | 6  | 18 | TCC  | 18 | 4  |
| 326402 | 74 | 475285 | 475298 | 2 | 7  | 14 | AT   | 14 | 13 |
| 326403 | 74 | 475773 | 475788 | 2 | 8  | 16 | CA   | 20 | 3  |
| 326404 | 74 | 476943 | 476956 | 2 | 7  | 14 | AC   | 7  | 6  |
| 326405 | 74 | 479616 | 479633 | 2 | 9  | 18 | GA   | 23 | 8  |
| 326407 | 74 | 482445 | 482456 | 2 | 6  | 12 | GT   | 23 | 4  |
| 326411 | 74 | 488183 | 488197 | 3 | 5  | 15 | TTG  | 26 | 3  |
| 326415 | 74 | 490468 | 490483 | 2 | 8  | 16 | AC   | 24 | 4  |
| 326418 | 74 | 493738 | 493751 | 2 | 7  | 14 | CA   | 30 | 3  |
| 326419 | 74 | 494610 | 494641 | 2 | 16 | 32 | AC   | 16 | 5  |
| 326420 | 74 | 502799 | 502822 | 2 | 12 | 24 | GT   | 17 | 11 |
| 326424 | 74 | 517651 | 517676 | 2 | 13 | 26 | GT   | 19 | 5  |
| 326429 | 74 | 528183 | 528202 | 2 | 10 | 20 | GA   | 14 | 5  |

|        |    |        |        |   |    |    |      |    |    |
|--------|----|--------|--------|---|----|----|------|----|----|
| 326430 | 74 | 539506 | 539529 | 3 | 8  | 24 | TGC  | 31 | 3  |
| 326440 | 74 | 563358 | 563373 | 4 | 4  | 16 | ATAG | 27 | 10 |
| 326445 | 74 | 580847 | 580886 | 2 | 20 | 40 | CA   | 11 | 8  |
| 326452 | 74 | 599017 | 599031 | 3 | 5  | 15 | TAA  | 28 | 3  |
| 326454 | 74 | 609214 | 609228 | 3 | 5  | 15 | CAC  | 19 | 5  |
| 326455 | 74 | 609232 | 609249 | 3 | 6  | 18 | CAC  | 23 | 5  |
| 326458 | 74 | 623584 | 623604 | 3 | 7  | 21 | TAA  | 15 | 4  |
| 326461 | 74 | 631365 | 631376 | 2 | 6  | 12 | CT   | 20 | 10 |
| 326462 | 74 | 631552 | 631566 | 3 | 5  | 15 | TTC  | 29 | 4  |
| 326465 | 74 | 638400 | 638435 | 2 | 18 | 36 | TC   | 8  | 8  |
| 326466 | 74 | 638635 | 638654 | 2 | 10 | 20 | GA   | 15 | 4  |
| 326468 | 74 | 639832 | 639855 | 2 | 12 | 24 | AC   | 23 | 14 |
| 326469 | 74 | 640500 | 640517 | 2 | 9  | 18 | GT   | 18 | 5  |
| 326470 | 74 | 642848 | 642871 | 3 | 8  | 24 | ATT  | 29 | 4  |
| 326471 | 74 | 642956 | 642967 | 2 | 6  | 12 | AC   | 17 | 3  |
| 326475 | 74 | 647365 | 647379 | 3 | 5  | 15 | ATG  | 27 | 3  |
| 326479 | 74 | 656390 | 656416 | 3 | 9  | 27 | GAT  | 28 | 4  |
| 326491 | 74 | 695336 | 695357 | 2 | 11 | 22 | GT   | 15 | 4  |
| 326497 | 74 | 708666 | 708687 | 2 | 11 | 22 | TG   | 16 | 8  |
| 326504 | 74 | 719085 | 719112 | 4 | 7  | 28 | CTGT | 19 | 7  |
| 326513 | 74 | 741362 | 741375 | 2 | 7  | 14 | GT   | 21 | 5  |
| 326521 | 74 | 756378 | 756401 | 2 | 12 | 24 | CA   | 14 | 19 |
| 326532 | 74 | 787175 | 787190 | 2 | 8  | 16 | AG   | 20 | 3  |
| 326542 | 74 | 806413 | 806424 | 2 | 6  | 12 | TG   | 28 | 5  |
| 326546 | 74 | 807351 | 807368 | 2 | 9  | 18 | GT   | 14 | 4  |
| 326548 | 74 | 809367 | 809390 | 2 | 12 | 24 | CT   | 20 | 5  |
| 326550 | 74 | 820270 | 820301 | 2 | 16 | 32 | GA   | 11 | 4  |
| 326559 | 74 | 831744 | 831770 | 3 | 9  | 27 | AAG  | 18 | 5  |
| 326561 | 74 | 832386 | 832406 | 3 | 7  | 21 | AAT  | 6  | 3  |
| 326564 | 74 | 833504 | 833519 | 2 | 8  | 16 | TC   | 7  | 4  |
| 326566 | 74 | 835920 | 835941 | 2 | 11 | 22 | CT   | 16 | 9  |
| 326567 | 74 | 836377 | 836390 | 2 | 7  | 14 | GA   | 19 | 9  |
| 326572 | 74 | 839154 | 839171 | 3 | 6  | 18 | GGA  | 24 | 5  |
| 326575 | 74 | 840266 | 840277 | 2 | 6  | 12 | GA   | 11 | 5  |
| 326577 | 74 | 841542 | 841565 | 2 | 12 | 24 | CA   | 9  | 8  |
| 326578 | 74 | 841877 | 841896 | 2 | 10 | 20 | TG   | 20 | 7  |
| 326579 | 74 | 842036 | 842071 | 2 | 18 | 36 | AC   | 9  | 7  |
| 326580 | 74 | 842387 | 842398 | 2 | 6  | 12 | GT   | 31 | 6  |
| 326585 | 74 | 845734 | 845751 | 2 | 9  | 18 | AC   | 10 | 5  |
| 326588 | 74 | 846000 | 846011 | 2 | 6  | 12 | TG   | 17 | 8  |
| 326590 | 74 | 849102 | 849121 | 2 | 10 | 20 | AC   | 17 | 7  |
| 326600 | 74 | 857734 | 857771 | 2 | 19 | 38 | AC   | 10 | 9  |
| 326601 | 74 | 858944 | 858979 | 3 | 12 | 36 | GGA  | 14 | 4  |
| 326602 | 74 | 859550 | 859565 | 2 | 8  | 16 | AC   | 20 | 9  |
| 326604 | 74 | 861382 | 861397 | 2 | 8  | 16 | AC   | 24 | 4  |
| 326606 | 74 | 861786 | 861819 | 2 | 17 | 34 | AC   | 15 | 9  |
| 326611 | 74 | 865583 | 865602 | 2 | 10 | 20 | TG   | 9  | 7  |
| 326619 | 74 | 879338 | 879381 | 2 | 22 | 44 | TG   | 17 | 10 |
| 326621 | 74 | 884435 | 884464 | 2 | 15 | 30 | GA   | 11 | 7  |
| 326622 | 74 | 895528 | 895542 | 3 | 5  | 15 | GGA  | 25 | 5  |
| 326623 | 74 | 897327 | 897346 | 2 | 10 | 20 | CA   | 21 | 7  |

|        |    |         |         |   |    |    |      |    |    |
|--------|----|---------|---------|---|----|----|------|----|----|
| 326624 | 74 | 902226  | 902241  | 2 | 8  | 16 | GT   | 20 | 3  |
| 326628 | 74 | 903530  | 903553  | 2 | 12 | 24 | CA   | 19 | 10 |
| 326629 | 74 | 903688  | 903727  | 2 | 20 | 40 | CA   | 8  | 10 |
| 326632 | 74 | 906465  | 906500  | 2 | 18 | 36 | AC   | 15 | 11 |
| 326638 | 74 | 911528  | 911553  | 2 | 13 | 26 | CA   | 7  | 5  |
| 326640 | 74 | 912804  | 912821  | 3 | 6  | 18 | GTG  | 27 | 4  |
| 326643 | 74 | 921587  | 921600  | 2 | 7  | 14 | GA   | 26 | 3  |
| 326656 | 74 | 936392  | 936415  | 2 | 12 | 24 | TG   | 14 | 11 |
| 326658 | 74 | 943155  | 943168  | 2 | 7  | 14 | TG   | 17 | 4  |
| 326665 | 74 | 952480  | 952491  | 2 | 6  | 12 | GT   | 25 | 3  |
| 326674 | 74 | 964147  | 964166  | 2 | 10 | 20 | TC   | 18 | 7  |
| 326675 | 74 | 965925  | 965938  | 2 | 7  | 14 | AC   | 17 | 9  |
| 326676 | 74 | 966879  | 966894  | 2 | 8  | 16 | TG   | 23 | 6  |
| 326677 | 74 | 966984  | 966997  | 2 | 7  | 14 | GT   | 17 | 7  |
| 326679 | 74 | 968870  | 968883  | 2 | 7  | 14 | CT   | 24 | 3  |
| 326680 | 74 | 969220  | 969231  | 2 | 6  | 12 | AT   | 8  | 3  |
| 326690 | 74 | 979612  | 979625  | 2 | 7  | 14 | AC   | 23 | 6  |
| 326693 | 74 | 984618  | 984635  | 2 | 9  | 18 | CT   | 23 | 4  |
| 326703 | 74 | 1002028 | 1002045 | 2 | 9  | 18 | GA   | 12 | 4  |
| 326706 | 74 | 1003321 | 1003336 | 4 | 4  | 16 | ATAC | 32 | 3  |
| 326707 | 74 | 1004727 | 1004746 | 2 | 10 | 20 | CA   | 30 | 4  |
| 326709 | 74 | 1008136 | 1008159 | 2 | 12 | 24 | AC   | 19 | 7  |
| 326713 | 74 | 1014993 | 1015006 | 2 | 7  | 14 | TA   | 15 | 3  |
| 326714 | 74 | 1015552 | 1015567 | 2 | 8  | 16 | GA   | 22 | 3  |
| 326720 | 74 | 1020980 | 1020999 | 2 | 10 | 20 | CA   | 20 | 7  |
| 326721 | 74 | 1026285 | 1026302 | 3 | 6  | 18 | GAA  | 16 | 3  |
| 326723 | 74 | 1026521 | 1026540 | 2 | 10 | 20 | CA   | 21 | 4  |
| 326729 | 74 | 1036754 | 1036795 | 2 | 21 | 42 | AC   | 14 | 11 |
| 326731 | 74 | 1041531 | 1041548 | 2 | 9  | 18 | AC   | 13 | 4  |
| 326733 | 74 | 1045882 | 1045907 | 2 | 13 | 26 | AC   | 14 | 3  |
| 326734 | 74 | 1046173 | 1046196 | 2 | 12 | 24 | AC   | 6  | 5  |
| 326736 | 74 | 1047019 | 1047032 | 2 | 7  | 14 | AC   | 27 | 3  |
| 326746 | 74 | 1066219 | 1066246 | 2 | 14 | 28 | AC   | 10 | 7  |
| 326749 | 74 | 1069126 | 1069143 | 2 | 9  | 18 | AG   | 19 | 3  |
| 326755 | 74 | 1072483 | 1072506 | 2 | 12 | 24 | GA   | 18 | 6  |
| 326762 | 74 | 1082884 | 1082905 | 2 | 11 | 22 | TC   | 17 | 5  |
| 326764 | 74 | 1086921 | 1086948 | 4 | 7  | 28 | CATA | 19 | 12 |
| 326772 | 74 | 1117137 | 1117158 | 2 | 11 | 22 | CA   | 17 | 5  |
| 326774 | 74 | 1118005 | 1118024 | 2 | 10 | 20 | AC   | 9  | 10 |
| 326775 | 74 | 1119503 | 1119520 | 3 | 6  | 18 | CAG  | 22 | 3  |
| 326777 | 74 | 1119630 | 1119645 | 2 | 8  | 16 | AC   | 13 | 8  |
| 326779 | 74 | 1120744 | 1120759 | 4 | 4  | 16 | AAAT | 24 | 3  |
| 326780 | 74 | 1125564 | 1125593 | 2 | 15 | 30 | AC   | 15 | 11 |
| 326796 | 74 | 1179182 | 1179199 | 3 | 6  | 18 | ACT  | 22 | 3  |
| 326797 | 74 | 1179870 | 1179881 | 2 | 6  | 12 | GT   | 34 | 3  |
| 326799 | 74 | 1191510 | 1191537 | 2 | 14 | 28 | CA   | 9  | 10 |
| 326804 | 74 | 1196688 | 1196709 | 2 | 11 | 22 | AG   | 14 | 4  |
| 326808 | 74 | 1224213 | 1224234 | 2 | 11 | 22 | CA   | 12 | 8  |
| 326810 | 74 | 1228389 | 1228406 | 2 | 9  | 18 | CT   | 19 | 5  |
| 326826 | 74 | 1262388 | 1262419 | 2 | 16 | 32 | CA   | 7  | 7  |
| 326828 | 74 | 1267699 | 1267712 | 2 | 7  | 14 | GA   | 15 | 3  |

|        |    |         |         |   |    |    |      |    |    |
|--------|----|---------|---------|---|----|----|------|----|----|
| 326834 | 74 | 1282405 | 1282450 | 2 | 23 | 46 | AC   | 10 | 9  |
| 326839 | 74 | 1305008 | 1305031 | 2 | 12 | 24 | GT   | 13 | 9  |
| 326843 | 74 | 1313819 | 1313830 | 2 | 6  | 12 | GA   | 24 | 3  |
| 326844 | 74 | 1313956 | 1313976 | 3 | 7  | 21 | CCT  | 27 | 6  |
| 326850 | 74 | 1322010 | 1322025 | 2 | 8  | 16 | TC   | 13 | 3  |
| 326855 | 74 | 1335620 | 1335631 | 2 | 6  | 12 | GT   | 14 | 6  |
| 326858 | 74 | 1339424 | 1339455 | 2 | 16 | 32 | CA   | 10 | 9  |
| 326859 | 74 | 1339640 | 1339651 | 2 | 6  | 12 | CA   | 25 | 6  |
| 326860 | 74 | 1339773 | 1339786 | 2 | 7  | 14 | AC   | 21 | 14 |
| 326863 | 74 | 1346845 | 1346862 | 2 | 9  | 18 | TG   | 24 | 5  |
| 326866 | 74 | 1348802 | 1348825 | 4 | 6  | 24 | TGTC | 21 | 8  |
| 326871 | 74 | 1367029 | 1367074 | 2 | 23 | 46 | CA   | 6  | 8  |
| 326876 | 74 | 1377331 | 1377346 | 2 | 8  | 16 | AC   | 21 | 3  |
| 326878 | 74 | 1381483 | 1381494 | 2 | 6  | 12 | GA   | 24 | 3  |
| 326880 | 74 | 1393226 | 1393259 | 2 | 17 | 34 | AC   | 11 | 8  |
| 326887 | 74 | 1407917 | 1407932 | 2 | 8  | 16 | GT   | 22 | 4  |
| 326896 | 74 | 1452173 | 1452188 | 4 | 4  | 16 | CATA | 26 | 3  |
| 326897 | 74 | 1452969 | 1452982 | 2 | 7  | 14 | CA   | 19 | 3  |
| 326901 | 74 | 1464527 | 1464556 | 2 | 15 | 30 | GT   | 13 | 9  |
| 326904 | 74 | 1470368 | 1470405 | 2 | 19 | 38 | AC   | 11 | 9  |
| 326912 | 74 | 1478633 | 1478644 | 2 | 6  | 12 | AG   | 23 | 3  |
| 326916 | 74 | 1482509 | 1482538 | 2 | 15 | 30 | CA   | 12 | 7  |
| 326925 | 74 | 1493541 | 1493596 | 2 | 28 | 56 | CA   | 12 | 12 |
| 326930 | 74 | 1518579 | 1518626 | 4 | 12 | 48 | TATC | 14 | 6  |
| 326931 | 74 | 1520366 | 1520409 | 2 | 22 | 44 | CA   | 7  | 12 |
| 326933 | 74 | 1527031 | 1527052 | 2 | 11 | 22 | AC   | 7  | 3  |
| 326937 | 74 | 1533249 | 1533270 | 2 | 11 | 22 | AC   | 13 | 12 |
| 326940 | 74 | 1535174 | 1535185 | 2 | 6  | 12 | CT   | 11 | 3  |
| 326944 | 74 | 1536302 | 1536321 | 2 | 10 | 20 | CA   | 19 | 5  |
| 326946 | 74 | 1537109 | 1537124 | 2 | 8  | 16 | CT   | 6  | 6  |
| 326947 | 74 | 1537125 | 1537142 | 2 | 9  | 18 | CA   | 10 | 11 |
| 326959 | 74 | 1563022 | 1563033 | 2 | 6  | 12 | AC   | 17 | 3  |
| 326964 | 74 | 1576654 | 1576681 | 2 | 14 | 28 | TG   | 9  | 7  |
| 326972 | 74 | 1605089 | 1605120 | 2 | 16 | 32 | CA   | 14 | 9  |
| 326974 | 74 | 1605821 | 1605834 | 2 | 7  | 14 | CA   | 22 | 3  |
| 326978 | 74 | 1611130 | 1611145 | 2 | 8  | 16 | AC   | 19 | 3  |
| 326981 | 74 | 1622782 | 1622815 | 2 | 17 | 34 | TG   | 11 | 9  |
| 326985 | 74 | 1628397 | 1628412 | 4 | 4  | 16 | ATCT | 14 | 8  |
| 326987 | 74 | 1629756 | 1629770 | 3 | 5  | 15 | CAG  | 29 | 3  |
| 326989 | 74 | 1630340 | 1630354 | 3 | 5  | 15 | GCA  | 19 | 4  |
| 326991 | 74 | 1634497 | 1634514 | 3 | 6  | 18 | GAG  | 24 | 7  |
| 326992 | 74 | 1636175 | 1636192 | 2 | 9  | 18 | CA   | 23 | 8  |
| 326994 | 74 | 1636370 | 1636403 | 2 | 17 | 34 | CA   | 7  | 8  |
| 326996 | 74 | 1640946 | 1640957 | 2 | 6  | 12 | TG   | 36 | 5  |
| 326998 | 74 | 1641775 | 1641786 | 2 | 6  | 12 | TG   | 20 | 8  |
| 327001 | 74 | 1655997 | 1656011 | 3 | 5  | 15 | GAT  | 28 | 4  |
| 327002 | 74 | 1663611 | 1663642 | 2 | 16 | 32 | GT   | 13 | 11 |
| 327003 | 74 | 1663814 | 1663833 | 2 | 10 | 20 | CA   | 11 | 10 |
| 327004 | 74 | 1664154 | 1664173 | 2 | 10 | 20 | AC   | 25 | 10 |
| 327005 | 74 | 1664237 | 1664248 | 2 | 6  | 12 | AG   | 24 | 3  |
| 327007 | 74 | 1666635 | 1666648 | 2 | 7  | 14 | TG   | 25 | 6  |



|        |    |         |         |   |    |    |      |    |    |
|--------|----|---------|---------|---|----|----|------|----|----|
| 327008 | 74 | 1667696 | 1667719 | 2 | 12 | 24 | AC   | 13 | 7  |
| 327010 | 74 | 1670813 | 1670826 | 2 | 7  | 14 | GT   | 24 | 7  |
| 327012 | 74 | 1672174 | 1672195 | 2 | 11 | 22 | CA   | 13 | 7  |
| 327014 | 74 | 1673194 | 1673220 | 3 | 9  | 27 | TCC  | 11 | 5  |
| 327016 | 74 | 1675036 | 1675057 | 2 | 11 | 22 | CA   | 13 | 13 |
| 327017 | 74 | 1675946 | 1675967 | 2 | 11 | 22 | AC   | 17 | 10 |
| 327034 | 74 | 1695443 | 1695458 | 4 | 4  | 16 | ACAA | 18 | 5  |
| 327036 | 74 | 1699399 | 1699414 | 2 | 8  | 16 | AC   | 24 | 10 |
| 327037 | 74 | 1701349 | 1701364 | 2 | 8  | 16 | GA   | 28 | 7  |
| 327044 | 74 | 1745891 | 1745908 | 2 | 9  | 18 | CA   | 21 | 6  |
| 327055 | 74 | 1776278 | 1776291 | 2 | 7  | 14 | GT   | 22 | 7  |
| 327057 | 74 | 1778038 | 1778067 | 2 | 15 | 30 | GT   | 22 | 13 |
| 327058 | 74 | 1778617 | 1778638 | 2 | 11 | 22 | TG   | 15 | 9  |
| 327059 | 74 | 1781213 | 1781242 | 2 | 15 | 30 | CA   | 11 | 10 |
| 327061 | 74 | 1784936 | 1784961 | 2 | 13 | 26 | GT   | 15 | 10 |
| 327063 | 74 | 1788247 | 1788276 | 2 | 15 | 30 | GT   | 6  | 4  |
| 327065 | 74 | 1790244 | 1790255 | 2 | 6  | 12 | TA   | 19 | 6  |
| 327077 | 74 | 1804594 | 1804611 | 3 | 6  | 18 | GAG  | 21 | 4  |
| 327081 | 74 | 1808291 | 1808318 | 4 | 7  | 28 | TTTC | 28 | 9  |
| 327084 | 74 | 1817159 | 1817186 | 2 | 14 | 28 | TG   | 17 | 7  |
| 327087 | 74 | 1830021 | 1830036 | 4 | 4  | 16 | TTAT | 9  | 3  |
| 327093 | 74 | 1836795 | 1836808 | 2 | 7  | 14 | TG   | 25 | 9  |
| 327095 | 74 | 1846022 | 1846039 | 2 | 9  | 18 | TC   | 18 | 3  |
| 327098 | 74 | 1850476 | 1850531 | 2 | 28 | 56 | AC   | 7  | 6  |
| 327102 | 74 | 1854842 | 1854861 | 2 | 10 | 20 | AG   | 23 | 5  |
| 327113 | 74 | 1874059 | 1874074 | 2 | 8  | 16 | GT   | 18 | 8  |
| 327116 | 74 | 1874641 | 1874656 | 2 | 8  | 16 | CA   | 21 | 10 |
| 327120 | 74 | 1884047 | 1884061 | 3 | 5  | 15 | AAC  | 25 | 4  |
| 327124 | 74 | 1884775 | 1884798 | 2 | 12 | 24 | GA   | 25 | 11 |
| 327125 | 74 | 1885555 | 1885602 | 4 | 12 | 48 | ATCT | 10 | 11 |
| 327127 | 74 | 1889722 | 1889745 | 2 | 12 | 24 | TG   | 9  | 5  |
| 327130 | 74 | 1890739 | 1890774 | 2 | 18 | 36 | GT   | 13 | 9  |
| 327131 | 74 | 1891140 | 1891161 | 2 | 11 | 22 | TG   | 17 | 6  |
| 327135 | 74 | 1897955 | 1897970 | 2 | 8  | 16 | AC   | 20 | 6  |
| 327148 | 74 | 1918481 | 1918494 | 2 | 7  | 14 | AC   | 26 | 4  |
| 327153 | 74 | 1926804 | 1926817 | 2 | 7  | 14 | AC   | 14 | 12 |
| 327154 | 74 | 1926820 | 1926835 | 2 | 8  | 16 | AC   | 12 | 10 |
| 327156 | 74 | 1929579 | 1929622 | 2 | 22 | 44 | TG   | 14 | 10 |
| 327157 | 74 | 1930037 | 1930074 | 2 | 19 | 38 | GT   | 9  | 9  |
| 327158 | 74 | 1930149 | 1930166 | 2 | 9  | 18 | TG   | 16 | 4  |
| 327163 | 74 | 1939122 | 1939135 | 2 | 7  | 14 | GA   | 8  | 5  |
| 327164 | 74 | 1939358 | 1939373 | 4 | 4  | 16 | TATT | 18 | 3  |
| 327165 | 74 | 1940233 | 1940262 | 2 | 15 | 30 | CT   | 13 | 10 |
| 327170 | 74 | 1941188 | 1941203 | 2 | 8  | 16 | GT   | 15 | 9  |
| 327174 | 74 | 1943141 | 1943174 | 2 | 17 | 34 | AC   | 13 | 9  |
| 327175 | 74 | 1943484 | 1943499 | 2 | 8  | 16 | CA   | 18 | 3  |
| 327184 | 74 | 1953369 | 1953392 | 3 | 8  | 24 | CCT  | 22 | 4  |
| 327185 | 74 | 1953659 | 1953670 | 2 | 6  | 12 | AC   | 25 | 7  |
| 327186 | 74 | 1953816 | 1953837 | 2 | 11 | 22 | CA   | 10 | 5  |
| 327191 | 74 | 1963834 | 1963851 | 2 | 9  | 18 | TC   | 22 | 7  |
| 327192 | 74 | 1966531 | 1966548 | 2 | 9  | 18 | AC   | 26 | 4  |

|        |    |         |         |   |    |    |      |    |    |
|--------|----|---------|---------|---|----|----|------|----|----|
| 327201 | 74 | 1976123 | 1976140 | 2 | 9  | 18 | AC   | 28 | 7  |
| 327220 | 74 | 2012218 | 2012229 | 2 | 6  | 12 | CT   | 27 | 3  |
| 327221 | 74 | 2012516 | 2012530 | 3 | 5  | 15 | CAG  | 24 | 4  |
| 327225 | 74 | 2013744 | 2013775 | 2 | 16 | 32 | GT   | 15 | 10 |
| 327226 | 74 | 2017270 | 2017283 | 2 | 7  | 14 | GT   | 22 | 3  |
| 327227 | 74 | 2017285 | 2017300 | 2 | 8  | 16 | TG   | 24 | 3  |
| 327228 | 74 | 2017821 | 2017854 | 2 | 17 | 34 | GT   | 9  | 9  |
| 327235 | 74 | 2020556 | 2020573 | 2 | 9  | 18 | GA   | 14 | 4  |
| 327236 | 74 | 2020789 | 2020806 | 3 | 6  | 18 | TTC  | 24 | 11 |
| 327253 | 74 | 2055025 | 2055036 | 2 | 6  | 12 | AT   | 13 | 3  |
| 327254 | 74 | 2055229 | 2055256 | 2 | 14 | 28 | CA   | 15 | 13 |
| 327255 | 74 | 2056116 | 2056129 | 2 | 7  | 14 | TG   | 32 | 3  |
| 327264 | 74 | 2068053 | 2068070 | 2 | 9  | 18 | CA   | 21 | 7  |
| 327265 | 74 | 2068072 | 2068085 | 2 | 7  | 14 | AC   | 23 | 8  |
| 327268 | 74 | 2070556 | 2070579 | 2 | 12 | 24 | GT   | 25 | 6  |
| 327273 | 74 | 2072978 | 2072997 | 2 | 10 | 20 | AC   | 8  | 4  |
| 327284 | 74 | 2096116 | 2096130 | 3 | 5  | 15 | CTC  | 24 | 11 |
| 327286 | 74 | 2100009 | 2100054 | 2 | 23 | 46 | TG   | 7  | 6  |
| 327291 | 74 | 2118089 | 2118103 | 3 | 5  | 15 | AAC  | 21 | 14 |
| 327293 | 74 | 2135081 | 2135094 | 2 | 7  | 14 | GT   | 27 | 4  |
| 327299 | 74 | 2160242 | 2160261 | 4 | 5  | 20 | AAAC | 22 | 3  |
| 327306 | 74 | 2184183 | 2184198 | 2 | 8  | 16 | CA   | 14 | 4  |
| 327322 | 75 | 61639   | 61656   | 2 | 9  | 18 | CA   | 18 | 6  |
| 327323 | 75 | 61825   | 61852   | 2 | 14 | 28 | AC   | 7  | 6  |
| 327327 | 75 | 77387   | 77418   | 4 | 8  | 32 | TTTA | 11 | 8  |
| 327328 | 75 | 81616   | 81645   | 3 | 10 | 30 | ATC  | 27 | 5  |
| 327330 | 75 | 93221   | 93242   | 2 | 11 | 22 | TG   | 13 | 13 |
| 327335 | 75 | 119651  | 119678  | 2 | 14 | 28 | TG   | 13 | 11 |
| 327337 | 75 | 124066  | 124089  | 2 | 12 | 24 | AC   | 15 | 5  |
| 327341 | 75 | 142860  | 142893  | 2 | 17 | 34 | TG   | 8  | 10 |
| 327343 | 75 | 143150  | 143171  | 2 | 11 | 22 | GT   | 21 | 7  |
| 327353 | 75 | 174875  | 174889  | 3 | 5  | 15 | AGC  | 17 | 5  |
| 327354 | 75 | 175357  | 175370  | 2 | 7  | 14 | TC   | 19 | 6  |
| 327358 | 75 | 180639  | 180652  | 2 | 7  | 14 | AC   | 28 | 3  |
| 327359 | 75 | 181297  | 181320  | 2 | 12 | 24 | TG   | 17 | 12 |
| 327362 | 75 | 190808  | 190822  | 3 | 5  | 15 | AAT  | 8  | 6  |
| 327364 | 75 | 197533  | 197546  | 2 | 7  | 14 | CA   | 24 | 5  |
| 327368 | 75 | 208107  | 208126  | 4 | 5  | 20 | ATAA | 26 | 4  |
| 327370 | 75 | 209286  | 209303  | 2 | 9  | 18 | AC   | 21 | 7  |
| 327371 | 75 | 211115  | 211136  | 2 | 11 | 22 | GT   | 16 | 6  |
| 327372 | 75 | 211932  | 211949  | 2 | 9  | 18 | TG   | 15 | 10 |
| 327373 | 75 | 212078  | 212089  | 2 | 6  | 12 | GA   | 16 | 6  |
| 327374 | 75 | 212290  | 212331  | 2 | 21 | 42 | CA   | 6  | 7  |
| 327383 | 75 | 232426  | 232453  | 2 | 14 | 28 | GT   | 8  | 5  |
| 327384 | 75 | 233171  | 233182  | 2 | 6  | 12 | AG   | 26 | 3  |
| 327387 | 75 | 255508  | 255523  | 2 | 8  | 16 | TG   | 13 | 6  |
| 327390 | 75 | 267727  | 267746  | 2 | 10 | 20 | TG   | 19 | 7  |
| 327391 | 75 | 270778  | 270797  | 2 | 10 | 20 | CA   | 18 | 4  |
| 327405 | 75 | 307333  | 307356  | 3 | 8  | 24 | AGA  | 16 | 3  |
| 327408 | 75 | 308251  | 308262  | 2 | 6  | 12 | CA   | 12 | 8  |
| 327411 | 75 | 311333  | 311348  | 2 | 8  | 16 | CA   | 26 | 5  |

|        |    |        |        |   |    |    |      |    |    |
|--------|----|--------|--------|---|----|----|------|----|----|
| 327416 | 75 | 328860 | 328873 | 2 | 7  | 14 | AG   | 25 | 7  |
| 327419 | 75 | 336106 | 336125 | 2 | 10 | 20 | CA   | 15 | 5  |
| 327421 | 75 | 337828 | 337839 | 2 | 6  | 12 | TC   | 20 | 3  |
| 327437 | 75 | 355674 | 355697 | 4 | 6  | 24 | CCAT | 20 | 3  |
| 327439 | 75 | 363691 | 363726 | 3 | 12 | 36 | GAA  | 17 | 9  |
| 327445 | 75 | 389072 | 389083 | 2 | 6  | 12 | AG   | 23 | 3  |
| 327446 | 75 | 396975 | 396986 | 2 | 6  | 12 | CA   | 27 | 3  |
| 327454 | 75 | 412422 | 412433 | 2 | 6  | 12 | AC   | 26 | 4  |
| 327463 | 75 | 442992 | 443005 | 2 | 7  | 14 | TG   | 21 | 3  |
| 327464 | 75 | 443010 | 443023 | 2 | 7  | 14 | TG   | 20 | 4  |
| 327467 | 75 | 448554 | 448571 | 2 | 9  | 18 | TG   | 23 | 5  |
| 327480 | 75 | 477053 | 477094 | 2 | 21 | 42 | AC   | 19 | 12 |
| 327496 | 75 | 522390 | 522409 | 4 | 5  | 20 | TTTA | 16 | 3  |
| 327498 | 75 | 523606 | 523620 | 3 | 5  | 15 | TCC  | 21 | 4  |
| 327499 | 75 | 526209 | 526222 | 2 | 7  | 14 | CA   | 27 | 5  |
| 327501 | 75 | 540455 | 540466 | 2 | 6  | 12 | TC   | 27 | 5  |
| 327509 | 75 | 562243 | 562274 | 2 | 16 | 32 | TG   | 8  | 8  |
| 327517 | 75 | 579664 | 579689 | 2 | 13 | 26 | CA   | 10 | 14 |
| 327527 | 75 | 602053 | 602072 | 4 | 5  | 20 | GATA | 7  | 3  |
| 327528 | 75 | 602073 | 602092 | 4 | 5  | 20 | AATA | 9  | 5  |
| 327529 | 75 | 603544 | 603575 | 2 | 16 | 32 | TC   | 13 | 8  |
| 327530 | 75 | 607756 | 607789 | 2 | 17 | 34 | GT   | 9  | 8  |
| 327531 | 75 | 608256 | 608276 | 3 | 7  | 21 | AAG  | 19 | 9  |
| 327539 | 75 | 625786 | 625801 | 2 | 8  | 16 | CA   | 25 | 4  |
| 327541 | 75 | 629897 | 629926 | 2 | 15 | 30 | CA   | 10 | 7  |
| 327549 | 75 | 638521 | 638538 | 3 | 6  | 18 | GCA  | 24 | 6  |
| 327555 | 75 | 640224 | 640239 | 2 | 8  | 16 | AT   | 11 | 3  |
| 327563 | 75 | 651456 | 651475 | 2 | 10 | 20 | AG   | 24 | 4  |
| 327568 | 75 | 664041 | 664072 | 2 | 16 | 32 | GT   | 9  | 10 |
| 327571 | 75 | 668326 | 668337 | 2 | 6  | 12 | TG   | 25 | 10 |
| 327577 | 75 | 682374 | 682393 | 4 | 5  | 20 | TATT | 30 | 5  |
| 327589 | 75 | 694691 | 694720 | 2 | 15 | 30 | GT   | 19 | 8  |
| 327590 | 75 | 696995 | 697021 | 3 | 9  | 27 | CCT  | 7  | 6  |
| 327593 | 75 | 701531 | 701574 | 2 | 22 | 44 | GT   | 10 | 12 |
| 327594 | 75 | 705545 | 705571 | 3 | 9  | 27 | CCT  | 22 | 6  |
| 327596 | 75 | 708877 | 708904 | 4 | 7  | 28 | TTTG | 21 | 7  |
| 327605 | 75 | 713903 | 713922 | 2 | 10 | 20 | GT   | 25 | 4  |
| 327606 | 75 | 713968 | 713989 | 2 | 11 | 22 | CA   | 29 | 6  |
| 327607 | 75 | 715466 | 715487 | 2 | 11 | 22 | GT   | 18 | 12 |
| 327609 | 75 | 716553 | 716566 | 2 | 7  | 14 | TG   | 15 | 4  |
| 327619 | 75 | 717622 | 717645 | 4 | 6  | 24 | TTTG | 29 | 4  |
| 327620 | 75 | 726558 | 726573 | 2 | 8  | 16 | TC   | 9  | 4  |
| 327622 | 75 | 727402 | 727413 | 2 | 6  | 12 | TG   | 24 | 5  |
| 327626 | 75 | 733402 | 733427 | 2 | 13 | 26 | CA   | 18 | 7  |
| 327627 | 75 | 733449 | 733482 | 2 | 17 | 34 | CT   | 12 | 7  |
| 327628 | 75 | 733653 | 733672 | 2 | 10 | 20 | TG   | 15 | 7  |
| 327630 | 75 | 738492 | 738503 | 2 | 6  | 12 | CA   | 22 | 7  |
| 327632 | 75 | 744212 | 744241 | 2 | 15 | 30 | CA   | 18 | 7  |
| 327636 | 75 | 745760 | 745775 | 2 | 8  | 16 | TG   | 16 | 5  |
| 327638 | 75 | 748547 | 748564 | 2 | 9  | 18 | GT   | 21 | 6  |
| 327639 | 75 | 748827 | 748850 | 2 | 12 | 24 | AC   | 23 | 8  |

|        |    |         |         |   |    |    |      |    |    |
|--------|----|---------|---------|---|----|----|------|----|----|
| 327640 | 75 | 750243  | 750262  | 2 | 10 | 20 | TC   | 12 | 4  |
| 327643 | 75 | 750478  | 750493  | 2 | 8  | 16 | AC   | 18 | 4  |
| 327648 | 75 | 754046  | 754065  | 2 | 10 | 20 | CT   | 25 | 9  |
| 327649 | 75 | 754312  | 754343  | 4 | 8  | 32 | TCTG | 31 | 5  |
| 327650 | 75 | 754694  | 754721  | 2 | 14 | 28 | CA   | 10 | 13 |
| 327652 | 75 | 757445  | 757458  | 2 | 7  | 14 | AC   | 23 | 6  |
| 327653 | 75 | 757614  | 757645  | 2 | 16 | 32 | CA   | 14 | 13 |
| 327654 | 75 | 757819  | 757846  | 2 | 14 | 28 | AG   | 21 | 6  |
| 327655 | 75 | 757936  | 757971  | 2 | 18 | 36 | TG   | 14 | 10 |
| 327656 | 75 | 758070  | 758093  | 2 | 12 | 24 | GT   | 19 | 12 |
| 327660 | 75 | 759410  | 759429  | 2 | 10 | 20 | TG   | 8  | 8  |
| 327661 | 75 | 759617  | 759640  | 2 | 12 | 24 | AC   | 21 | 8  |
| 327662 | 75 | 759821  | 759840  | 2 | 10 | 20 | AC   | 20 | 12 |
| 327663 | 75 | 759979  | 760004  | 2 | 13 | 26 | CA   | 13 | 9  |
| 327664 | 75 | 760136  | 760151  | 2 | 8  | 16 | AG   | 13 | 7  |
| 327671 | 75 | 779072  | 779097  | 2 | 13 | 26 | CA   | 15 | 7  |
| 327672 | 75 | 779211  | 779226  | 2 | 8  | 16 | CA   | 19 | 11 |
| 327673 | 75 | 779339  | 779370  | 2 | 16 | 32 | GT   | 12 | 10 |
| 327674 | 75 | 779483  | 779500  | 3 | 6  | 18 | AGA  | 17 | 3  |
| 327677 | 75 | 780971  | 780994  | 2 | 12 | 24 | GT   | 10 | 8  |
| 327678 | 75 | 781347  | 781374  | 2 | 14 | 28 | TG   | 14 | 15 |
| 327681 | 75 | 783312  | 783329  | 2 | 9  | 18 | GT   | 23 | 6  |
| 327682 | 75 | 784194  | 784225  | 2 | 16 | 32 | CA   | 12 | 13 |
| 327685 | 75 | 786171  | 786200  | 2 | 15 | 30 | TG   | 21 | 8  |
| 327686 | 75 | 789726  | 789743  | 2 | 9  | 18 | TG   | 21 | 3  |
| 327693 | 75 | 817265  | 817282  | 2 | 9  | 18 | TC   | 15 | 6  |
| 327700 | 75 | 833094  | 833111  | 3 | 6  | 18 | TTA  | 29 | 8  |
| 327706 | 75 | 857100  | 857121  | 2 | 11 | 22 | TG   | 15 | 6  |
| 327707 | 75 | 857160  | 857183  | 2 | 12 | 24 | GT   | 14 | 7  |
| 327708 | 75 | 857327  | 857354  | 2 | 14 | 28 | TG   | 19 | 11 |
| 327720 | 75 | 888491  | 888506  | 4 | 4  | 16 | TTTA | 13 | 9  |
| 327723 | 75 | 900807  | 900821  | 3 | 5  | 15 | TCA  | 31 | 3  |
| 327728 | 75 | 926114  | 926143  | 2 | 15 | 30 | TG   | 24 | 11 |
| 327738 | 75 | 959528  | 959543  | 2 | 8  | 16 | TG   | 28 | 4  |
| 327739 | 75 | 964143  | 964154  | 2 | 6  | 12 | GT   | 23 | 3  |
| 327740 | 75 | 968265  | 968276  | 2 | 6  | 12 | CA   | 32 | 5  |
| 327741 | 75 | 980060  | 980093  | 2 | 17 | 34 | GT   | 16 | 10 |
| 327748 | 75 | 998413  | 998432  | 4 | 5  | 20 | TTTG | 20 | 5  |
| 327749 | 75 | 999840  | 999863  | 3 | 8  | 24 | TTG  | 29 | 8  |
| 327751 | 75 | 1001802 | 1001813 | 2 | 6  | 12 | CA   | 26 | 4  |
| 327758 | 75 | 1014964 | 1014995 | 2 | 16 | 32 | TG   | 8  | 11 |
| 327761 | 75 | 1021416 | 1021429 | 2 | 7  | 14 | AT   | 14 | 7  |
| 327763 | 75 | 1022221 | 1022246 | 2 | 13 | 26 | GT   | 19 | 7  |
| 327766 | 75 | 1022566 | 1022589 | 3 | 8  | 24 | TCT  | 11 | 7  |
| 327775 | 75 | 1032262 | 1032283 | 2 | 11 | 22 | AC   | 21 | 11 |
| 327787 | 75 | 1067993 | 1068034 | 2 | 21 | 42 | CA   | 6  | 5  |
| 327810 | 75 | 1113929 | 1113946 | 3 | 6  | 18 | AAC  | 29 | 3  |
| 327812 | 75 | 1115632 | 1115651 | 4 | 5  | 20 | GACA | 28 | 4  |
| 327814 | 75 | 1115849 | 1115869 | 3 | 7  | 21 | CAT  | 26 | 10 |
| 327816 | 75 | 1117271 | 1117292 | 2 | 11 | 22 | TG   | 18 | 5  |
| 327818 | 75 | 1117578 | 1117599 | 2 | 11 | 22 | CA   | 31 | 16 |

|        |    |         |         |   |    |    |      |    |    |
|--------|----|---------|---------|---|----|----|------|----|----|
| 327826 | 75 | 1144968 | 1144979 | 2 | 6  | 12 | AG   | 14 | 7  |
| 327827 | 75 | 1145501 | 1145520 | 2 | 10 | 20 | CT   | 8  | 5  |
| 327832 | 75 | 1157501 | 1157512 | 2 | 6  | 12 | CT   | 23 | 6  |
| 327836 | 75 | 1165312 | 1165327 | 4 | 4  | 16 | ATAG | 14 | 7  |
| 327837 | 75 | 1165354 | 1165373 | 2 | 10 | 20 | GT   | 17 | 8  |
| 327838 | 75 | 1165402 | 1165422 | 3 | 7  | 21 | GAT  | 12 | 9  |
| 327839 | 75 | 1168909 | 1168922 | 2 | 7  | 14 | CA   | 6  | 4  |
| 327841 | 75 | 1177562 | 1177582 | 3 | 7  | 21 | TCC  | 7  | 4  |
| 327842 | 75 | 1178186 | 1178203 | 2 | 9  | 18 | TG   | 16 | 8  |
| 327844 | 75 | 1179759 | 1179778 | 2 | 10 | 20 | GT   | 9  | 6  |
| 327845 | 75 | 1179847 | 1179884 | 2 | 19 | 38 | CA   | 12 | 11 |
| 327847 | 75 | 1185730 | 1185747 | 2 | 9  | 18 | CA   | 17 | 7  |
| 327851 | 75 | 1189024 | 1189057 | 2 | 17 | 34 | CA   | 13 | 6  |
| 327866 | 75 | 1222190 | 1222213 | 4 | 6  | 24 | TTTG | 24 | 6  |
| 327875 | 75 | 1234565 | 1234592 | 4 | 7  | 28 | TGAA | 21 | 4  |
| 327876 | 75 | 1236325 | 1236348 | 4 | 6  | 24 | ATGA | 26 | 5  |
| 327877 | 75 | 1245246 | 1245260 | 3 | 5  | 15 | AAC  | 28 | 3  |
| 327888 | 75 | 1269856 | 1269871 | 2 | 8  | 16 | AC   | 19 | 3  |
| 327890 | 75 | 1271535 | 1271568 | 2 | 17 | 34 | CT   | 14 | 9  |
| 327897 | 75 | 1295020 | 1295051 | 2 | 16 | 32 | GT   | 13 | 14 |
| 327899 | 75 | 1295315 | 1295336 | 2 | 11 | 22 | CT   | 15 | 7  |
| 327902 | 75 | 1311254 | 1311293 | 2 | 20 | 40 | CA   | 13 | 9  |
| 327903 | 75 | 1317318 | 1317343 | 2 | 13 | 26 | AG   | 16 | 8  |
| 327911 | 75 | 1333108 | 1333177 | 2 | 35 | 70 | TC   | 12 | 10 |
| 327919 | 75 | 1345578 | 1345591 | 2 | 7  | 14 | AC   | 19 | 5  |
| 327920 | 75 | 1345722 | 1345737 | 2 | 8  | 16 | AC   | 27 | 12 |
| 327922 | 75 | 1347277 | 1347302 | 2 | 13 | 26 | CA   | 21 | 8  |
| 327926 | 75 | 1367299 | 1367316 | 3 | 6  | 18 | CCT  | 14 | 8  |
| 327927 | 75 | 1367415 | 1367438 | 3 | 8  | 24 | GAG  | 20 | 3  |
| 327928 | 75 | 1367533 | 1367550 | 3 | 6  | 18 | CTT  | 24 | 11 |
| 327929 | 75 | 1367689 | 1367716 | 2 | 14 | 28 | TG   | 12 | 9  |
| 327930 | 75 | 1368120 | 1368133 | 2 | 7  | 14 | GA   | 18 | 7  |
| 327933 | 75 | 1378622 | 1378641 | 2 | 10 | 20 | CA   | 20 | 6  |
| 327937 | 75 | 1386843 | 1386862 | 2 | 10 | 20 | AG   | 18 | 4  |
| 327940 | 75 | 1393685 | 1393708 | 4 | 6  | 24 | TATT | 17 | 3  |
| 327943 | 75 | 1395444 | 1395457 | 2 | 7  | 14 | TG   | 24 | 5  |
| 327948 | 75 | 1410356 | 1410370 | 3 | 5  | 15 | CCT  | 12 | 6  |
| 327952 | 75 | 1432692 | 1432713 | 2 | 11 | 22 | AG   | 24 | 3  |
| 327953 | 75 | 1433308 | 1433351 | 2 | 22 | 44 | GT   | 13 | 15 |
| 327957 | 75 | 1449064 | 1449084 | 3 | 7  | 21 | CTC  | 12 | 6  |
| 327959 | 75 | 1457136 | 1457156 | 3 | 7  | 21 | TGC  | 16 | 5  |
| 327979 | 75 | 1508256 | 1508297 | 3 | 14 | 42 | CAG  | 20 | 7  |
| 327985 | 75 | 1525837 | 1525851 | 3 | 5  | 15 | TTG  | 18 | 8  |
| 327988 | 75 | 1527501 | 1527526 | 2 | 13 | 26 | CA   | 12 | 12 |
| 327992 | 75 | 1538888 | 1538907 | 4 | 5  | 20 | GAAA | 31 | 5  |
| 327994 | 75 | 1545998 | 1546013 | 2 | 8  | 16 | TC   | 23 | 7  |
| 327995 | 75 | 1549353 | 1549370 | 3 | 6  | 18 | CTG  | 11 | 3  |
| 327997 | 75 | 1549871 | 1549903 | 3 | 11 | 33 | AGG  | 17 | 8  |
| 327999 | 75 | 1555584 | 1555604 | 3 | 7  | 21 | CAC  | 23 | 8  |
| 328002 | 75 | 1559274 | 1559287 | 2 | 7  | 14 | TG   | 23 | 4  |
| 328003 | 75 | 1562554 | 1562573 | 2 | 10 | 20 | GT   | 25 | 6  |

|        |    |         |         |   |    |    |      |    |    |
|--------|----|---------|---------|---|----|----|------|----|----|
| 328006 | 75 | 1565077 | 1565100 | 2 | 12 | 24 | AC   | 9  | 10 |
| 328007 | 75 | 1567523 | 1567543 | 3 | 7  | 21 | TCC  | 21 | 5  |
| 328013 | 75 | 1582859 | 1582898 | 2 | 20 | 40 | CA   | 7  | 8  |
| 328015 | 75 | 1591065 | 1591092 | 4 | 7  | 28 | GATG | 9  | 6  |
| 328021 | 75 | 1605704 | 1605721 | 2 | 9  | 18 | TG   | 20 | 4  |
| 328028 | 75 | 1631078 | 1631109 | 2 | 16 | 32 | TG   | 11 | 7  |
| 328030 | 75 | 1634481 | 1634508 | 2 | 14 | 28 | AC   | 16 | 8  |
| 328032 | 75 | 1635346 | 1635381 | 2 | 18 | 36 | GT   | 10 | 7  |
| 328033 | 75 | 1637695 | 1637720 | 2 | 13 | 26 | CA   | 22 | 12 |
| 328036 | 75 | 1640441 | 1640462 | 2 | 11 | 22 | TG   | 24 | 15 |
| 328037 | 75 | 1640519 | 1640536 | 2 | 9  | 18 | TG   | 24 | 4  |
| 328041 | 75 | 1645198 | 1645223 | 2 | 13 | 26 | AC   | 14 | 7  |
| 328043 | 75 | 1647109 | 1647138 | 2 | 15 | 30 | GT   | 10 | 11 |
| 328046 | 75 | 1652040 | 1652055 | 2 | 8  | 16 | CA   | 18 | 5  |
| 328047 | 75 | 1653924 | 1653943 | 4 | 5  | 20 | TGTT | 11 | 6  |
| 328048 | 75 | 1654425 | 1654440 | 2 | 8  | 16 | CT   | 16 | 8  |
| 328056 | 75 | 1656575 | 1656602 | 2 | 14 | 28 | AC   | 17 | 6  |
| 328060 | 75 | 1660554 | 1660571 | 3 | 6  | 18 | TTC  | 11 | 5  |
| 328062 | 75 | 1661046 | 1661059 | 2 | 7  | 14 | CT   | 23 | 4  |
| 328063 | 75 | 1661288 | 1661307 | 2 | 10 | 20 | AG   | 17 | 5  |
| 328064 | 75 | 1664035 | 1664070 | 2 | 18 | 36 | GT   | 6  | 9  |
| 328066 | 75 | 1664814 | 1664827 | 2 | 7  | 14 | TG   | 21 | 12 |
| 328067 | 75 | 1664830 | 1664843 | 2 | 7  | 14 | TG   | 18 | 11 |
| 328068 | 75 | 1664974 | 1664997 | 2 | 12 | 24 | AC   | 17 | 5  |
| 328073 | 75 | 1667130 | 1667159 | 3 | 10 | 30 | TGC  | 14 | 4  |
| 328074 | 75 | 1667373 | 1667396 | 3 | 8  | 24 | CTC  | 15 | 9  |
| 328081 | 75 | 1671253 | 1671268 | 2 | 8  | 16 | GT   | 20 | 7  |
| 328082 | 75 | 1672782 | 1672803 | 2 | 11 | 22 | TG   | 20 | 11 |
| 328083 | 75 | 1673569 | 1673588 | 2 | 10 | 20 | GT   | 24 | 16 |
| 328086 | 75 | 1685789 | 1685806 | 3 | 6  | 18 | CAG  | 31 | 5  |
| 328089 | 75 | 1692393 | 1692422 | 3 | 10 | 30 | TCC  | 17 | 11 |
| 328090 | 75 | 1694656 | 1694675 | 2 | 10 | 20 | CA   | 21 | 10 |
| 328093 | 75 | 1702997 | 1703012 | 4 | 4  | 16 | AAAG | 29 | 4  |
| 328095 | 75 | 1705438 | 1705467 | 2 | 15 | 30 | CA   | 12 | 8  |
| 328097 | 75 | 1711135 | 1711166 | 2 | 16 | 32 | TG   | 15 | 11 |
| 328099 | 75 | 1714519 | 1714550 | 2 | 16 | 32 | CA   | 10 | 8  |
| 328100 | 75 | 1715962 | 1715999 | 2 | 19 | 38 | CA   | 18 | 11 |
| 328101 | 75 | 1717255 | 1717268 | 2 | 7  | 14 | GT   | 25 | 5  |
| 328113 | 75 | 1734653 | 1734672 | 2 | 10 | 20 | AC   | 23 | 12 |
| 328114 | 75 | 1735799 | 1735810 | 2 | 6  | 12 | AC   | 29 | 4  |
| 328115 | 75 | 1738063 | 1738086 | 2 | 12 | 24 | TG   | 12 | 8  |
| 328117 | 75 | 1744373 | 1744394 | 2 | 11 | 22 | GA   | 19 | 6  |
| 328118 | 75 | 1744518 | 1744533 | 4 | 4  | 16 | AGGG | 8  | 7  |
| 328122 | 75 | 1761417 | 1761431 | 3 | 5  | 15 | CCT  | 6  | 5  |
| 328125 | 75 | 1778349 | 1778384 | 2 | 18 | 36 | CA   | 12 | 13 |
| 328127 | 75 | 1784209 | 1784238 | 3 | 10 | 30 | CAT  | 13 | 12 |
| 328129 | 75 | 1787037 | 1787080 | 2 | 22 | 44 | TG   | 12 | 12 |
| 328133 | 75 | 1790205 | 1790218 | 2 | 7  | 14 | CT   | 21 | 12 |
| 328134 | 75 | 1790219 | 1790230 | 2 | 6  | 12 | GT   | 23 | 12 |
| 328142 | 75 | 1801643 | 1801662 | 4 | 5  | 20 | CAAA | 28 | 12 |
| 328145 | 75 | 1810516 | 1810545 | 2 | 15 | 30 | AC   | 8  | 6  |

|        |    |         |         |   |    |    |      |    |    |
|--------|----|---------|---------|---|----|----|------|----|----|
| 328146 | 75 | 1811187 | 1811212 | 2 | 13 | 26 | TG   | 12 | 14 |
| 328147 | 75 | 1814105 | 1814126 | 2 | 11 | 22 | AC   | 11 | 7  |
| 328157 | 75 | 1830944 | 1830965 | 2 | 11 | 22 | AC   | 12 | 12 |
| 328159 | 75 | 1833778 | 1833789 | 2 | 6  | 12 | TC   | 28 | 4  |
| 328161 | 75 | 1839025 | 1839054 | 2 | 15 | 30 | CA   | 11 | 11 |
| 328172 | 75 | 1869619 | 1869650 | 2 | 16 | 32 | AC   | 15 | 9  |
| 328177 | 75 | 1873410 | 1873429 | 2 | 10 | 20 | GT   | 10 | 9  |
| 328188 | 75 | 1885780 | 1885794 | 3 | 5  | 15 | CTC  | 27 | 4  |
| 328189 | 75 | 1887458 | 1887473 | 2 | 8  | 16 | TG   | 23 | 6  |
| 328190 | 75 | 1887475 | 1887486 | 2 | 6  | 12 | TG   | 21 | 4  |
| 328191 | 75 | 1887684 | 1887715 | 2 | 16 | 32 | GT   | 19 | 14 |
| 328192 | 75 | 1889768 | 1889795 | 2 | 14 | 28 | CA   | 6  | 5  |
| 328193 | 75 | 1892387 | 1892404 | 2 | 9  | 18 | CA   | 27 | 10 |
| 328195 | 75 | 1897632 | 1897661 | 2 | 15 | 30 | TG   | 19 | 13 |
| 328197 | 75 | 1901469 | 1901502 | 2 | 17 | 34 | TG   | 17 | 13 |
| 328203 | 75 | 1907737 | 1907770 | 2 | 17 | 34 | CA   | 12 | 8  |
| 328204 | 75 | 1908548 | 1908585 | 2 | 19 | 38 | AC   | 13 | 11 |
| 328205 | 75 | 1926195 | 1926216 | 2 | 11 | 22 | AC   | 12 | 11 |
| 328206 | 75 | 1930166 | 1930180 | 3 | 5  | 15 | GAT  | 24 | 4  |
| 328208 | 75 | 1935151 | 1935200 | 2 | 25 | 50 | AG   | 17 | 13 |
| 328211 | 75 | 1940317 | 1940344 | 2 | 14 | 28 | AC   | 11 | 12 |
| 328221 | 75 | 1957133 | 1957147 | 3 | 5  | 15 | AAG  | 31 | 9  |
| 328222 | 75 | 1957291 | 1957311 | 3 | 7  | 21 | AGA  | 27 | 11 |
| 328225 | 75 | 1959904 | 1959924 | 3 | 7  | 21 | GAG  | 9  | 4  |
| 328227 | 75 | 1961387 | 1961408 | 2 | 11 | 22 | AC   | 13 | 10 |
| 328228 | 75 | 1961575 | 1961598 | 2 | 12 | 24 | CA   | 15 | 14 |
| 328229 | 75 | 1964494 | 1964509 | 2 | 8  | 16 | AG   | 21 | 3  |
| 328230 | 75 | 1964878 | 1964923 | 2 | 23 | 46 | CA   | 16 | 14 |
| 328232 | 75 | 1966889 | 1966918 | 2 | 15 | 30 | TG   | 12 | 8  |
| 328234 | 75 | 1969012 | 1969027 | 2 | 8  | 16 | TG   | 24 | 11 |
| 328235 | 75 | 1969951 | 1969988 | 2 | 19 | 38 | TG   | 9  | 12 |
| 328238 | 75 | 1971542 | 1971569 | 2 | 14 | 28 | AC   | 15 | 14 |
| 328242 | 75 | 1974209 | 1974230 | 2 | 11 | 22 | TG   | 17 | 15 |
| 328244 | 75 | 1976077 | 1976104 | 2 | 14 | 28 | CA   | 10 | 8  |
| 328246 | 75 | 1985819 | 1985833 | 3 | 5  | 15 | GAG  | 27 | 3  |
| 328252 | 75 | 1993743 | 1993768 | 2 | 13 | 26 | AC   | 14 | 10 |
| 328253 | 75 | 1993873 | 1993890 | 2 | 9  | 18 | CA   | 19 | 11 |
| 328254 | 75 | 1994726 | 1994761 | 2 | 18 | 36 | CA   | 11 | 11 |
| 328257 | 75 | 1995629 | 1995640 | 2 | 6  | 12 | AC   | 20 | 5  |
| 328258 | 75 | 1996041 | 1996060 | 2 | 10 | 20 | GT   | 29 | 7  |
| 328262 | 75 | 1996341 | 1996360 | 2 | 10 | 20 | GA   | 15 | 6  |
| 328265 | 75 | 1996818 | 1996843 | 2 | 13 | 26 | CA   | 10 | 6  |
| 328266 | 75 | 1996935 | 1996958 | 2 | 12 | 24 | TC   | 12 | 7  |
| 328267 | 75 | 1996994 | 1997025 | 2 | 16 | 32 | CA   | 7  | 8  |
| 328272 | 75 | 2008366 | 2008383 | 2 | 9  | 18 | AC   | 17 | 13 |
| 328276 | 75 | 2013884 | 2013899 | 4 | 4  | 16 | GGAA | 24 | 4  |
| 328277 | 75 | 2015489 | 2015510 | 2 | 11 | 22 | TG   | 20 | 8  |
| 328278 | 75 | 2017964 | 2017997 | 2 | 17 | 34 | CA   | 9  | 7  |
| 328283 | 75 | 2026884 | 2026895 | 2 | 6  | 12 | CA   | 25 | 4  |
| 328284 | 75 | 2027006 | 2027019 | 2 | 7  | 14 | CA   | 24 | 3  |
| 328285 | 75 | 2027895 | 2027910 | 2 | 8  | 16 | AC   | 22 | 8  |

|        |    |         |         |   |    |    |      |    |    |
|--------|----|---------|---------|---|----|----|------|----|----|
| 328286 | 75 | 2027936 | 2027973 | 2 | 19 | 38 | CA   | 12 | 9  |
| 328287 | 75 | 2029672 | 2029709 | 2 | 19 | 38 | AC   | 21 | 18 |
| 328289 | 75 | 2034027 | 2034038 | 2 | 6  | 12 | CT   | 13 | 4  |
| 328299 | 75 | 2045326 | 2045346 | 3 | 7  | 21 | TGC  | 24 | 7  |
| 328302 | 75 | 2048607 | 2048632 | 2 | 13 | 26 | CA   | 13 | 8  |
| 328303 | 75 | 2048800 | 2048827 | 2 | 14 | 28 | CA   | 14 | 6  |
| 328307 | 75 | 2051005 | 2051032 | 2 | 14 | 28 | AC   | 10 | 5  |
| 328312 | 75 | 2053644 | 2053663 | 4 | 5  | 20 | TTTA | 14 | 5  |
| 328313 | 75 | 2054644 | 2054679 | 3 | 12 | 36 | AGG  | 13 | 7  |
| 328315 | 75 | 2060198 | 2060231 | 2 | 17 | 34 | AC   | 12 | 9  |
| 328316 | 75 | 2063589 | 2063612 | 3 | 8  | 24 | AAT  | 11 | 5  |
| 328317 | 75 | 2064215 | 2064248 | 2 | 17 | 34 | GT   | 12 | 7  |
| 328322 | 75 | 2071757 | 2071772 | 4 | 4  | 16 | AGAC | 25 | 3  |
| 328326 | 75 | 2076196 | 2076213 | 3 | 6  | 18 | CTT  | 23 | 4  |
| 328328 | 75 | 2076596 | 2076617 | 2 | 11 | 22 | AC   | 28 | 12 |
| 328333 | 75 | 2094877 | 2094903 | 3 | 9  | 27 | GGA  | 17 | 4  |
| 328335 | 75 | 2097214 | 2097231 | 2 | 9  | 18 | AC   | 21 | 6  |
| 328336 | 75 | 2107517 | 2107546 | 2 | 15 | 30 | CA   | 10 | 10 |
| 328343 | 75 | 2128703 | 2128728 | 2 | 13 | 26 | TG   | 10 | 7  |
| 328351 | 75 | 2139443 | 2139468 | 2 | 13 | 26 | TG   | 9  | 8  |
| 328352 | 75 | 2147989 | 2148018 | 2 | 15 | 30 | GT   | 22 | 14 |
| 328356 | 75 | 2153010 | 2153021 | 2 | 6  | 12 | TG   | 20 | 4  |
| 328361 | 76 | 11440   | 11457   | 2 | 9  | 18 | TC   | 23 | 9  |
| 328365 | 76 | 21678   | 21707   | 2 | 15 | 30 | AC   | 10 | 7  |
| 328366 | 76 | 26382   | 26407   | 2 | 13 | 26 | GT   | 9  | 7  |
| 328367 | 76 | 30544   | 30555   | 2 | 6  | 12 | CA   | 20 | 3  |
| 328369 | 76 | 32684   | 32695   | 2 | 6  | 12 | CA   | 24 | 3  |
| 328373 | 76 | 41437   | 41460   | 2 | 12 | 24 | AC   | 12 | 5  |
| 328374 | 76 | 41765   | 41782   | 3 | 6  | 18 | GAT  | 27 | 3  |
| 328377 | 76 | 42920   | 42943   | 2 | 12 | 24 | GT   | 18 | 3  |
| 328378 | 76 | 47913   | 47932   | 4 | 5  | 20 | GTAC | 27 | 4  |
| 328381 | 76 | 54323   | 54348   | 2 | 13 | 26 | CA   | 16 | 5  |
| 328382 | 76 | 56158   | 56175   | 2 | 9  | 18 | AC   | 29 | 9  |
| 328387 | 76 | 62249   | 62272   | 3 | 8  | 24 | AGG  | 25 | 5  |
| 328392 | 76 | 67342   | 67377   | 4 | 9  | 36 | TTCT | 30 | 7  |
| 328393 | 76 | 68280   | 68305   | 2 | 13 | 26 | AC   | 11 | 9  |
| 328403 | 76 | 90532   | 90547   | 2 | 8  | 16 | TC   | 13 | 14 |
| 328411 | 76 | 100041  | 100055  | 3 | 5  | 15 | CTC  | 23 | 3  |
| 328414 | 76 | 110895  | 110932  | 2 | 19 | 38 | GT   | 15 | 8  |
| 328419 | 76 | 122883  | 122910  | 2 | 14 | 28 | TG   | 14 | 10 |
| 328424 | 76 | 127298  | 127321  | 3 | 8  | 24 | TTC  | 33 | 4  |
| 328426 | 76 | 129017  | 129044  | 2 | 14 | 28 | AC   | 19 | 8  |
| 328431 | 76 | 137561  | 137576  | 2 | 8  | 16 | TG   | 17 | 4  |
| 328433 | 76 | 139960  | 139971  | 2 | 6  | 12 | AC   | 15 | 15 |
| 328434 | 76 | 139973  | 139992  | 2 | 10 | 20 | CA   | 18 | 16 |
| 328437 | 76 | 145440  | 145477  | 2 | 19 | 38 | AC   | 11 | 8  |
| 328440 | 76 | 149218  | 149241  | 2 | 12 | 24 | AC   | 17 | 7  |
| 328442 | 76 | 152794  | 152823  | 2 | 15 | 30 | TG   | 13 | 12 |
| 328445 | 76 | 153683  | 153696  | 2 | 7  | 14 | GT   | 21 | 3  |
| 328451 | 76 | 166691  | 166738  | 3 | 16 | 48 | ATT  | 10 | 10 |
| 328452 | 76 | 168972  | 168989  | 2 | 9  | 18 | CA   | 20 | 4  |



|        |    |        |        |   |    |    |      |    |    |
|--------|----|--------|--------|---|----|----|------|----|----|
| 328455 | 76 | 169679 | 169710 | 2 | 16 | 32 | AC   | 11 | 10 |
| 328456 | 76 | 170082 | 170093 | 2 | 6  | 12 | GT   | 33 | 4  |
| 328458 | 76 | 172069 | 172110 | 2 | 21 | 42 | CA   | 7  | 8  |
| 328460 | 76 | 174273 | 174288 | 2 | 8  | 16 | GT   | 12 | 9  |
| 328462 | 76 | 177879 | 177902 | 2 | 12 | 24 | AC   | 6  | 7  |
| 328465 | 76 | 179231 | 179242 | 2 | 6  | 12 | TG   | 19 | 12 |
| 328466 | 76 | 179243 | 179254 | 2 | 6  | 12 | CG   | 11 | 8  |
| 328467 | 76 | 179365 | 179403 | 3 | 13 | 39 | CTT  | 14 | 11 |
| 328469 | 76 | 180982 | 180997 | 2 | 8  | 16 | GA   | 18 | 4  |
| 328471 | 76 | 181101 | 181140 | 2 | 20 | 40 | GT   | 10 | 8  |
| 328482 | 76 | 207251 | 207276 | 2 | 13 | 26 | AC   | 20 | 11 |
| 328483 | 76 | 210164 | 210193 | 2 | 15 | 30 | GT   | 11 | 10 |
| 328485 | 76 | 215158 | 215203 | 2 | 23 | 46 | AC   | 10 | 6  |
| 328486 | 76 | 217599 | 217616 | 2 | 9  | 18 | CA   | 13 | 4  |
| 328487 | 76 | 222800 | 222833 | 2 | 17 | 34 | AC   | 9  | 11 |
| 328492 | 76 | 231939 | 231968 | 2 | 15 | 30 | CA   | 21 | 10 |
| 328495 | 76 | 235865 | 235888 | 3 | 8  | 24 | TCC  | 16 | 5  |
| 328496 | 76 | 236080 | 236127 | 3 | 16 | 48 | GGA  | 8  | 7  |
| 328503 | 76 | 237497 | 237540 | 2 | 22 | 44 | CA   | 12 | 10 |
| 328508 | 76 | 240643 | 240680 | 2 | 19 | 38 | AC   | 11 | 10 |
| 328509 | 76 | 241595 | 241606 | 2 | 6  | 12 | CA   | 28 | 4  |
| 328517 | 76 | 247893 | 247910 | 2 | 9  | 18 | TG   | 12 | 9  |
| 328519 | 76 | 259932 | 259970 | 3 | 13 | 39 | TGT  | 29 | 11 |
| 328521 | 76 | 261389 | 261403 | 3 | 5  | 15 | CAG  | 30 | 5  |
| 328523 | 76 | 264654 | 264677 | 2 | 12 | 24 | TG   | 20 | 7  |
| 328527 | 76 | 275012 | 275032 | 3 | 7  | 21 | GGA  | 22 | 8  |
| 328531 | 76 | 278075 | 278095 | 3 | 7  | 21 | CAT  | 20 | 4  |
| 328532 | 76 | 278715 | 278734 | 2 | 10 | 20 | CA   | 20 | 6  |
| 328533 | 76 | 279605 | 279628 | 2 | 12 | 24 | AC   | 6  | 3  |
| 328535 | 76 | 280964 | 280983 | 2 | 10 | 20 | CA   | 15 | 14 |
| 328536 | 76 | 281142 | 281163 | 2 | 11 | 22 | AC   | 12 | 6  |
| 328538 | 76 | 281334 | 281359 | 2 | 13 | 26 | GT   | 13 | 8  |
| 328544 | 76 | 295027 | 295050 | 3 | 8  | 24 | TTA  | 12 | 4  |
| 328545 | 76 | 299217 | 299232 | 4 | 4  | 16 | TATC | 21 | 3  |
| 328548 | 76 | 306151 | 306192 | 2 | 21 | 42 | AC   | 9  | 8  |
| 328549 | 76 | 308498 | 308523 | 2 | 13 | 26 | TG   | 14 | 5  |
| 328550 | 76 | 309110 | 309141 | 2 | 16 | 32 | TG   | 8  | 8  |
| 328555 | 76 | 313633 | 313666 | 2 | 17 | 34 | CA   | 8  | 8  |
| 328568 | 76 | 329478 | 329492 | 3 | 5  | 15 | CCT  | 30 | 3  |
| 328572 | 76 | 337061 | 337104 | 2 | 22 | 44 | CA   | 9  | 9  |
| 328576 | 76 | 353121 | 353134 | 2 | 7  | 14 | AC   | 24 | 3  |
| 328583 | 76 | 363055 | 363070 | 2 | 8  | 16 | CA   | 22 | 4  |
| 328585 | 76 | 363646 | 363672 | 3 | 9  | 27 | CCT  | 10 | 7  |
| 328587 | 76 | 367892 | 367915 | 2 | 12 | 24 | AC   | 7  | 8  |
| 328588 | 76 | 369219 | 369250 | 2 | 16 | 32 | GT   | 11 | 13 |
| 328589 | 76 | 373594 | 373617 | 2 | 12 | 24 | GT   | 18 | 9  |
| 328591 | 76 | 384421 | 384456 | 2 | 18 | 36 | CA   | 7  | 10 |
| 328592 | 76 | 385243 | 385268 | 2 | 13 | 26 | AC   | 18 | 9  |
| 328593 | 76 | 385416 | 385445 | 2 | 15 | 30 | TG   | 15 | 6  |
| 328598 | 76 | 391287 | 391302 | 2 | 8  | 16 | CA   | 24 | 16 |
| 328601 | 76 | 393356 | 393385 | 2 | 15 | 30 | AC   | 14 | 7  |

|        |    |        |        |   |    |    |      |    |    |
|--------|----|--------|--------|---|----|----|------|----|----|
| 328602 | 76 | 393669 | 393688 | 2 | 10 | 20 | CA   | 14 | 11 |
| 328603 | 76 | 393846 | 393873 | 2 | 14 | 28 | AC   | 15 | 11 |
| 328606 | 76 | 394523 | 394542 | 2 | 10 | 20 | GT   | 8  | 6  |
| 328611 | 76 | 394902 | 394917 | 2 | 8  | 16 | TG   | 12 | 7  |
| 328613 | 76 | 397725 | 397750 | 2 | 13 | 26 | TG   | 14 | 7  |
| 328614 | 76 | 397775 | 397794 | 2 | 10 | 20 | TG   | 21 | 3  |
| 328617 | 76 | 400518 | 400545 | 2 | 14 | 28 | CA   | 19 | 9  |
| 328619 | 76 | 403579 | 403599 | 3 | 7  | 21 | ATA  | 15 | 4  |
| 328621 | 76 | 408940 | 408959 | 4 | 5  | 20 | GACA | 27 | 5  |
| 328626 | 76 | 421475 | 421495 | 3 | 7  | 21 | ATA  | 13 | 7  |
| 328627 | 76 | 421587 | 421604 | 3 | 6  | 18 | AAC  | 14 | 9  |
| 328628 | 76 | 422074 | 422105 | 2 | 16 | 32 | TG   | 13 | 11 |
| 328634 | 76 | 431649 | 431680 | 2 | 16 | 32 | GT   | 14 | 8  |
| 328635 | 76 | 431793 | 431806 | 2 | 7  | 14 | TG   | 14 | 5  |
| 328640 | 76 | 448440 | 448475 | 2 | 18 | 36 | AC   | 10 | 11 |
| 328641 | 76 | 452140 | 452155 | 4 | 4  | 16 | TAGA | 7  | 4  |
| 328646 | 76 | 454979 | 455010 | 2 | 16 | 32 | CA   | 13 | 14 |
| 328651 | 76 | 478087 | 478104 | 3 | 6  | 18 | ATA  | 18 | 9  |
| 328657 | 76 | 482964 | 482999 | 2 | 18 | 36 | CA   | 12 | 8  |
| 328660 | 76 | 499982 | 499995 | 2 | 7  | 14 | AG   | 26 | 3  |
| 328668 | 76 | 529545 | 529572 | 2 | 14 | 28 | GT   | 17 | 9  |
| 328674 | 76 | 535274 | 535288 | 3 | 5  | 15 | GCA  | 22 | 3  |
| 328692 | 76 | 550180 | 550221 | 2 | 21 | 42 | CA   | 6  | 8  |
| 328693 | 76 | 550844 | 550867 | 2 | 12 | 24 | CA   | 23 | 12 |
| 328696 | 76 | 558909 | 558922 | 2 | 7  | 14 | AC   | 17 | 3  |
| 328697 | 76 | 560998 | 561035 | 2 | 19 | 38 | AC   | 17 | 11 |
| 328698 | 76 | 562831 | 562842 | 2 | 6  | 12 | TG   | 27 | 5  |
| 328699 | 76 | 570550 | 570569 | 4 | 5  | 20 | GTTA | 13 | 3  |
| 328701 | 76 | 582810 | 582824 | 3 | 5  | 15 | TAA  | 22 | 3  |
| 328702 | 76 | 585488 | 585515 | 2 | 14 | 28 | TG   | 14 | 13 |
| 328705 | 76 | 589902 | 589949 | 4 | 12 | 48 | CAGA | 19 | 9  |
| 328706 | 76 | 593837 | 593862 | 2 | 13 | 26 | CA   | 16 | 18 |
| 328708 | 76 | 594037 | 594050 | 2 | 7  | 14 | AG   | 16 | 3  |
| 328709 | 76 | 594126 | 594143 | 3 | 6  | 18 | CCT  | 9  | 6  |
| 328710 | 76 | 594324 | 594379 | 2 | 28 | 56 | GT   | 6  | 8  |
| 328712 | 76 | 596689 | 596702 | 2 | 7  | 14 | AC   | 29 | 5  |
| 328713 | 76 | 596907 | 596938 | 2 | 16 | 32 | AC   | 14 | 9  |
| 328714 | 76 | 605858 | 605903 | 2 | 23 | 46 | AC   | 7  | 7  |
| 328715 | 76 | 614599 | 614622 | 2 | 12 | 24 | AC   | 16 | 10 |
| 328716 | 76 | 615004 | 615051 | 2 | 24 | 48 | CA   | 11 | 15 |
| 328720 | 76 | 630916 | 630943 | 4 | 7  | 28 | ACTG | 36 | 5  |
| 328721 | 76 | 636242 | 636256 | 3 | 5  | 15 | TCC  | 24 | 3  |
| 328727 | 76 | 649626 | 649637 | 2 | 6  | 12 | CT   | 12 | 5  |
| 328735 | 76 | 678192 | 678205 | 2 | 7  | 14 | CA   | 27 | 4  |
| 328742 | 76 | 708605 | 708646 | 2 | 21 | 42 | CA   | 11 | 13 |
| 328749 | 76 | 730789 | 730822 | 2 | 17 | 34 | CA   | 15 | 14 |
| 328751 | 76 | 737663 | 737694 | 2 | 16 | 32 | CA   | 18 | 8  |
| 328753 | 76 | 747319 | 747338 | 4 | 5  | 20 | TGGT | 8  | 7  |
| 328755 | 76 | 757302 | 757319 | 2 | 9  | 18 | GT   | 28 | 4  |
| 328756 | 76 | 769539 | 769565 | 3 | 9  | 27 | AGG  | 13 | 7  |
| 328758 | 76 | 771482 | 771509 | 4 | 7  | 28 | GGAT | 23 | 7  |

|        |    |         |         |   |    |    |      |    |    |
|--------|----|---------|---------|---|----|----|------|----|----|
| 328760 | 76 | 782925  | 782944  | 2 | 10 | 20 | GT   | 19 | 11 |
| 328762 | 76 | 784843  | 784878  | 2 | 18 | 36 | CA   | 6  | 7  |
| 328768 | 76 | 811656  | 811675  | 4 | 5  | 20 | CCGA | 22 | 12 |
| 328770 | 76 | 815438  | 815481  | 2 | 22 | 44 | GT   | 6  | 8  |
| 328771 | 76 | 815839  | 815876  | 2 | 19 | 38 | CA   | 15 | 10 |
| 328772 | 76 | 816274  | 816289  | 4 | 4  | 16 | GGAC | 33 | 3  |
| 328774 | 76 | 818425  | 818439  | 3 | 5  | 15 | GAG  | 8  | 5  |
| 328776 | 76 | 821824  | 821859  | 2 | 18 | 36 | CA   | 8  | 9  |
| 328777 | 76 | 825649  | 825663  | 3 | 5  | 15 | AGG  | 7  | 4  |
| 328781 | 76 | 827447  | 827461  | 3 | 5  | 15 | AGG  | 7  | 4  |
| 328789 | 76 | 837701  | 837718  | 3 | 6  | 18 | GCT  | 27 | 4  |
| 328790 | 76 | 838995  | 839036  | 2 | 21 | 42 | GT   | 10 | 12 |
| 328791 | 76 | 840376  | 840391  | 2 | 8  | 16 | GT   | 15 | 17 |
| 328793 | 76 | 840812  | 840823  | 2 | 6  | 12 | GC   | 17 | 10 |
| 328810 | 76 | 878908  | 878928  | 3 | 7  | 21 | GGC  | 29 | 8  |
| 328811 | 76 | 878929  | 878943  | 3 | 5  | 15 | AGC  | 18 | 4  |
| 328813 | 76 | 880585  | 880598  | 2 | 7  | 14 | AT   | 12 | 7  |
| 328818 | 76 | 893264  | 893284  | 3 | 7  | 21 | GAG  | 15 | 7  |
| 328822 | 76 | 919766  | 919815  | 2 | 25 | 50 | AC   | 6  | 10 |
| 328823 | 76 | 926545  | 926566  | 2 | 11 | 22 | GT   | 23 | 8  |
| 328835 | 76 | 957570  | 957605  | 2 | 18 | 36 | AC   | 17 | 14 |
| 328842 | 76 | 971171  | 971188  | 3 | 6  | 18 | CAT  | 28 | 9  |
| 328846 | 76 | 974315  | 974338  | 2 | 12 | 24 | AC   | 15 | 17 |
| 328855 | 76 | 995006  | 995021  | 2 | 8  | 16 | GT   | 15 | 4  |
| 328857 | 76 | 995140  | 995163  | 2 | 12 | 24 | GT   | 16 | 12 |
| 328858 | 76 | 995295  | 995320  | 2 | 13 | 26 | AC   | 8  | 5  |
| 328859 | 76 | 995363  | 995392  | 2 | 15 | 30 | CA   | 16 | 12 |
| 328863 | 76 | 999323  | 999338  | 2 | 8  | 16 | GA   | 8  | 6  |
| 328864 | 76 | 999433  | 999466  | 2 | 17 | 34 | CA   | 16 | 9  |
| 328865 | 76 | 1001552 | 1001573 | 2 | 11 | 22 | GT   | 25 | 7  |
| 328867 | 76 | 1002618 | 1002635 | 2 | 9  | 18 | TG   | 14 | 4  |
| 328868 | 76 | 1003787 | 1003824 | 2 | 19 | 38 | CA   | 13 | 11 |
| 328869 | 76 | 1004078 | 1004095 | 3 | 6  | 18 | GAG  | 27 | 4  |
| 328870 | 76 | 1006916 | 1006927 | 2 | 6  | 12 | AC   | 26 | 3  |
| 328876 | 76 | 1007789 | 1007802 | 2 | 7  | 14 | GT   | 6  | 3  |
| 328878 | 76 | 1007884 | 1007903 | 2 | 10 | 20 | AC   | 15 | 7  |
| 328881 | 76 | 1008292 | 1008309 | 2 | 9  | 18 | GA   | 14 | 8  |
| 328885 | 76 | 1011124 | 1011147 | 2 | 12 | 24 | GT   | 18 | 13 |
| 328886 | 76 | 1011184 | 1011197 | 2 | 7  | 14 | TG   | 19 | 3  |
| 328887 | 76 | 1011454 | 1011469 | 4 | 4  | 16 | GCTC | 26 | 3  |
| 328914 | 76 | 1026917 | 1026936 | 2 | 10 | 20 | TG   | 14 | 9  |
| 328915 | 76 | 1026979 | 1027008 | 3 | 10 | 30 | AGA  | 8  | 6  |
| 328916 | 76 | 1027069 | 1027104 | 2 | 18 | 36 | GT   | 8  | 7  |
| 328923 | 76 | 1029848 | 1029862 | 3 | 5  | 15 | TTC  | 25 | 5  |
| 328924 | 76 | 1035244 | 1035267 | 3 | 8  | 24 | TCA  | 24 | 11 |
| 328925 | 76 | 1035391 | 1035414 | 2 | 12 | 24 | TG   | 13 | 10 |
| 328934 | 76 | 1037058 | 1037079 | 2 | 11 | 22 | TG   | 12 | 3  |
| 328936 | 76 | 1037237 | 1037262 | 2 | 13 | 26 | TG   | 13 | 9  |
| 328939 | 76 | 1040477 | 1040504 | 2 | 14 | 28 | TG   | 18 | 9  |
| 328943 | 76 | 1044953 | 1044974 | 2 | 11 | 22 | CT   | 15 | 4  |
| 328957 | 76 | 1072123 | 1072164 | 2 | 21 | 42 | GT   | 10 | 14 |

|        |    |         |         |   |    |    |      |    |    |
|--------|----|---------|---------|---|----|----|------|----|----|
| 328965 | 76 | 1072939 | 1072953 | 3 | 5  | 15 | TGA  | 27 | 3  |
| 328971 | 76 | 1080963 | 1080980 | 2 | 9  | 18 | TG   | 12 | 16 |
| 328975 | 76 | 1081253 | 1081296 | 2 | 22 | 44 | CA   | 8  | 8  |
| 328976 | 76 | 1082506 | 1082537 | 4 | 8  | 32 | CAGA | 26 | 11 |
| 328978 | 76 | 1087582 | 1087593 | 2 | 6  | 12 | CA   | 20 | 4  |
| 328980 | 76 | 1088138 | 1088155 | 2 | 9  | 18 | TG   | 17 | 6  |
| 328985 | 76 | 1092005 | 1092036 | 2 | 16 | 32 | AC   | 22 | 11 |
| 328988 | 76 | 1099407 | 1099448 | 2 | 21 | 42 | GT   | 7  | 9  |
| 328997 | 76 | 1101287 | 1101316 | 2 | 15 | 30 | GT   | 16 | 9  |
| 329000 | 76 | 1106896 | 1106933 | 2 | 19 | 38 | TG   | 7  | 6  |
| 329012 | 76 | 1122654 | 1122679 | 2 | 13 | 26 | GT   | 11 | 10 |
| 329013 | 76 | 1132051 | 1132062 | 2 | 6  | 12 | AT   | 21 | 4  |
| 329016 | 76 | 1134392 | 1134403 | 2 | 6  | 12 | TG   | 7  | 5  |
| 329017 | 76 | 1134429 | 1134462 | 2 | 17 | 34 | AC   | 9  | 9  |
| 329018 | 76 | 1134555 | 1134572 | 2 | 9  | 18 | AC   | 11 | 10 |
| 329021 | 76 | 1134794 | 1134827 | 2 | 17 | 34 | AC   | 9  | 7  |
| 329023 | 76 | 1134932 | 1134943 | 2 | 6  | 12 | GT   | 16 | 7  |
| 329025 | 76 | 1135969 | 1135994 | 2 | 13 | 26 | GT   | 11 | 11 |
| 329028 | 76 | 1136265 | 1136280 | 2 | 8  | 16 | TG   | 9  | 6  |
| 329040 | 76 | 1138468 | 1138487 | 2 | 10 | 20 | AC   | 8  | 6  |
| 329048 | 76 | 1143076 | 1143099 | 2 | 12 | 24 | GT   | 25 | 9  |
| 329049 | 76 | 1143674 | 1143689 | 2 | 8  | 16 | AC   | 24 | 6  |
| 329052 | 76 | 1149259 | 1149276 | 3 | 6  | 18 | CTG  | 9  | 3  |
| 329054 | 76 | 1149762 | 1149789 | 2 | 14 | 28 | AC   | 19 | 5  |
| 329055 | 76 | 1150658 | 1150699 | 2 | 21 | 42 | TG   | 8  | 8  |
| 329061 | 76 | 1151868 | 1151889 | 2 | 11 | 22 | CT   | 25 | 9  |
| 329062 | 76 | 1153211 | 1153244 | 2 | 17 | 34 | GT   | 7  | 10 |
| 329064 | 76 | 1153492 | 1153535 | 2 | 22 | 44 | TG   | 11 | 11 |
| 329065 | 76 | 1154027 | 1154048 | 2 | 11 | 22 | GT   | 11 | 8  |
| 329067 | 76 | 1158716 | 1158763 | 3 | 16 | 48 | AAG  | 20 | 15 |
| 329069 | 76 | 1159134 | 1159145 | 2 | 6  | 12 | CA   | 21 | 7  |
| 329070 | 76 | 1159705 | 1159725 | 3 | 7  | 21 | TTA  | 17 | 7  |
| 329081 | 76 | 1164922 | 1164947 | 2 | 13 | 26 | GT   | 7  | 8  |
| 329086 | 76 | 1170457 | 1170498 | 2 | 21 | 42 | TG   | 8  | 12 |
| 329091 | 76 | 1183417 | 1183440 | 2 | 12 | 24 | AC   | 9  | 6  |
| 329094 | 76 | 1186928 | 1186961 | 2 | 17 | 34 | CA   | 10 | 9  |
| 329095 | 76 | 1187537 | 1187556 | 2 | 10 | 20 | AC   | 19 | 10 |
| 329101 | 76 | 1192125 | 1192150 | 2 | 13 | 26 | CA   | 14 | 7  |
| 329102 | 76 | 1192386 | 1192433 | 2 | 24 | 48 | CA   | 11 | 11 |
| 329104 | 76 | 1199011 | 1199024 | 2 | 7  | 14 | AC   | 29 | 7  |
| 329106 | 76 | 1202805 | 1202832 | 2 | 14 | 28 | GT   | 16 | 13 |
| 329107 | 76 | 1202959 | 1202982 | 2 | 12 | 24 | TG   | 8  | 11 |
| 329110 | 76 | 1204750 | 1204764 | 3 | 5  | 15 | CTG  | 28 | 5  |
| 329117 | 76 | 1208802 | 1208825 | 2 | 12 | 24 | AC   | 7  | 7  |
| 329118 | 76 | 1208910 | 1208921 | 2 | 6  | 12 | AC   | 6  | 4  |
| 329124 | 76 | 1212941 | 1212958 | 3 | 6  | 18 | GCT  | 29 | 4  |
| 329125 | 76 | 1213114 | 1213129 | 2 | 8  | 16 | CA   | 20 | 12 |
| 329128 | 76 | 1215411 | 1215432 | 2 | 11 | 22 | CA   | 11 | 10 |
| 329138 | 76 | 1216201 | 1216222 | 2 | 11 | 22 | GT   | 23 | 8  |
| 329146 | 76 | 1218160 | 1218195 | 2 | 18 | 36 | AC   | 10 | 12 |
| 329149 | 76 | 1219305 | 1219326 | 2 | 11 | 22 | GT   | 15 | 8  |

|        |    |         |         |   |    |    |      |    |    |
|--------|----|---------|---------|---|----|----|------|----|----|
| 329150 | 76 | 1219426 | 1219446 | 3 | 7  | 21 | CTG  | 20 | 5  |
| 329151 | 76 | 1219969 | 1219986 | 2 | 9  | 18 | GT   | 12 | 12 |
| 329161 | 76 | 1236265 | 1236288 | 2 | 12 | 24 | GT   | 15 | 10 |
| 329165 | 76 | 1237516 | 1237551 | 2 | 18 | 36 | AC   | 9  | 9  |
| 329166 | 76 | 1239108 | 1239139 | 2 | 16 | 32 | AC   | 14 | 8  |
| 329167 | 76 | 1239276 | 1239301 | 2 | 13 | 26 | GT   | 14 | 10 |
| 329171 | 76 | 1242114 | 1242141 | 2 | 14 | 28 | CA   | 7  | 7  |
| 329173 | 76 | 1245312 | 1245344 | 3 | 11 | 33 | CTC  | 16 | 10 |
| 329174 | 76 | 1245387 | 1245416 | 3 | 10 | 30 | GAG  | 16 | 4  |
| 329179 | 76 | 1247260 | 1247281 | 2 | 11 | 22 | AC   | 20 | 9  |
| 329180 | 76 | 1251070 | 1251089 | 2 | 10 | 20 | CA   | 16 | 6  |
| 329181 | 76 | 1251119 | 1251146 | 2 | 14 | 28 | GT   | 19 | 10 |
| 329182 | 76 | 1251305 | 1251336 | 2 | 16 | 32 | GT   | 12 | 10 |
| 329183 | 76 | 1252908 | 1252947 | 2 | 20 | 40 | CA   | 11 | 10 |
| 329184 | 76 | 1253055 | 1253066 | 2 | 6  | 12 | AC   | 24 | 3  |
| 329189 | 76 | 1254906 | 1254927 | 2 | 11 | 22 | AC   | 14 | 8  |
| 329190 | 76 | 1256155 | 1256193 | 3 | 13 | 39 | GCA  | 25 | 12 |
| 329191 | 76 | 1256399 | 1256410 | 2 | 6  | 12 | AG   | 29 | 6  |
| 329198 | 76 | 1259327 | 1259344 | 2 | 9  | 18 | CA   | 9  | 5  |
| 329200 | 76 | 1262868 | 1262903 | 3 | 12 | 36 | CCT  | 15 | 9  |
| 329204 | 76 | 1264550 | 1264579 | 2 | 15 | 30 | GT   | 15 | 19 |
| 329214 | 76 | 1272572 | 1272591 | 2 | 10 | 20 | CT   | 20 | 7  |
| 329216 | 76 | 1273065 | 1273080 | 2 | 8  | 16 | AC   | 20 | 3  |
| 329218 | 76 | 1274508 | 1274527 | 4 | 5  | 20 | TGTC | 21 | 5  |
| 329220 | 76 | 1275465 | 1275478 | 2 | 7  | 14 | GA   | 16 | 4  |
| 329228 | 76 | 1281608 | 1281629 | 2 | 11 | 22 | GT   | 9  | 9  |
| 329229 | 76 | 1281864 | 1281895 | 2 | 16 | 32 | GT   | 7  | 9  |
| 329230 | 76 | 1283437 | 1283451 | 3 | 5  | 15 | AAG  | 30 | 9  |
| 329231 | 76 | 1285771 | 1285827 | 3 | 19 | 57 | TCT  | 11 | 12 |
| 329248 | 76 | 1297513 | 1297550 | 2 | 19 | 38 | GT   | 7  | 11 |
| 329260 | 76 | 1305050 | 1305083 | 2 | 17 | 34 | TG   | 15 | 13 |
| 329265 | 76 | 1307908 | 1307943 | 2 | 18 | 36 | CA   | 12 | 13 |
| 329266 | 76 | 1308099 | 1308116 | 3 | 6  | 18 | CTT  | 8  | 5  |
| 329267 | 76 | 1309638 | 1309673 | 2 | 18 | 36 | AC   | 11 | 7  |
| 329268 | 76 | 1309718 | 1309749 | 2 | 16 | 32 | TG   | 8  | 8  |
| 329272 | 76 | 1312615 | 1312644 | 2 | 15 | 30 | TG   | 13 | 5  |
| 329273 | 76 | 1313612 | 1313626 | 3 | 5  | 15 | CCT  | 16 | 3  |
| 329274 | 76 | 1314143 | 1314158 | 2 | 8  | 16 | AC   | 19 | 10 |
| 329276 | 76 | 1314323 | 1314338 | 2 | 8  | 16 | AG   | 18 | 10 |
| 329277 | 76 | 1315445 | 1315460 | 2 | 8  | 16 | AC   | 14 | 6  |
| 329278 | 76 | 1315494 | 1315507 | 2 | 7  | 14 | AC   | 18 | 10 |
| 329279 | 76 | 1318776 | 1318813 | 2 | 19 | 38 | AC   | 9  | 9  |
| 329286 | 76 | 1323197 | 1323228 | 2 | 16 | 32 | TG   | 6  | 10 |
| 329288 | 76 | 1324955 | 1324966 | 2 | 6  | 12 | AG   | 21 | 7  |
| 329296 | 76 | 1328177 | 1328200 | 4 | 6  | 24 | CCAT | 19 | 6  |
| 329297 | 76 | 1328387 | 1328420 | 2 | 17 | 34 | AC   | 13 | 14 |
| 329298 | 76 | 1329556 | 1329585 | 3 | 10 | 30 | CCT  | 14 | 6  |
| 329299 | 76 | 1329757 | 1329792 | 3 | 12 | 36 | AGA  | 17 | 6  |
| 329303 | 76 | 1330583 | 1330598 | 4 | 4  | 16 | GCTA | 29 | 4  |
| 329304 | 76 | 1330791 | 1330822 | 4 | 8  | 32 | TCTT | 10 | 7  |
| 329306 | 76 | 1331850 | 1331875 | 2 | 13 | 26 | TG   | 17 | 12 |

|        |    |         |         |   |    |    |      |    |    |
|--------|----|---------|---------|---|----|----|------|----|----|
| 329307 | 76 | 1332001 | 1332024 | 2 | 12 | 24 | CA   | 13 | 10 |
| 329313 | 76 | 1333736 | 1333777 | 2 | 21 | 42 | GT   | 10 | 12 |
| 329314 | 76 | 1333888 | 1333913 | 2 | 13 | 26 | AC   | 19 | 17 |
| 329315 | 76 | 1334064 | 1334101 | 2 | 19 | 38 | AC   | 15 | 12 |
| 329317 | 76 | 1335776 | 1335787 | 2 | 6  | 12 | GA   | 33 | 3  |
| 329326 | 76 | 1350982 | 1351035 | 2 | 27 | 54 | AC   | 7  | 10 |
| 329329 | 76 | 1352015 | 1352058 | 2 | 22 | 44 | TG   | 19 | 20 |
| 329330 | 76 | 1352202 | 1352241 | 2 | 20 | 40 | CA   | 8  | 10 |
| 329332 | 76 | 1354247 | 1354278 | 2 | 16 | 32 | CA   | 10 | 10 |
| 329336 | 76 | 1356186 | 1356217 | 2 | 16 | 32 | GT   | 6  | 6  |
| 329353 | 76 | 1367890 | 1367929 | 2 | 20 | 40 | GT   | 18 | 12 |
| 329355 | 76 | 1370172 | 1370205 | 2 | 17 | 34 | GT   | 12 | 14 |
| 329357 | 76 | 1380314 | 1380337 | 3 | 8  | 24 | TGA  | 23 | 5  |
| 329358 | 76 | 1381606 | 1381629 | 3 | 8  | 24 | TGA  | 30 | 10 |
| 329360 | 76 | 1386705 | 1386725 | 3 | 7  | 21 | ATT  | 16 | 3  |
| 329395 | 76 | 1415763 | 1415812 | 2 | 25 | 50 | GT   | 6  | 8  |
| 329397 | 76 | 1418626 | 1418681 | 2 | 28 | 56 | GT   | 8  | 10 |
| 329398 | 76 | 1418867 | 1418890 | 2 | 12 | 24 | TG   | 15 | 10 |
| 329399 | 76 | 1419054 | 1419083 | 2 | 15 | 30 | CA   | 21 | 9  |
| 329402 | 76 | 1419478 | 1419495 | 2 | 9  | 18 | GT   | 21 | 11 |
| 329441 | 76 | 1470336 | 1470359 | 3 | 8  | 24 | TAT  | 19 | 4  |
| 329445 | 76 | 1482858 | 1482875 | 2 | 9  | 18 | GT   | 15 | 8  |
| 329446 | 76 | 1482974 | 1483011 | 2 | 19 | 38 | GT   | 17 | 12 |
| 329450 | 76 | 1501745 | 1501770 | 2 | 13 | 26 | AC   | 15 | 10 |
| 329466 | 76 | 1538486 | 1538501 | 2 | 8  | 16 | TG   | 17 | 4  |
| 329467 | 76 | 1540741 | 1540756 | 2 | 8  | 16 | TC   | 22 | 4  |
| 329471 | 76 | 1558825 | 1558876 | 4 | 13 | 52 | GATA | 13 | 9  |
| 329473 | 76 | 1567708 | 1567740 | 3 | 11 | 33 | GAT  | 24 | 7  |
| 329474 | 76 | 1568181 | 1568192 | 2 | 6  | 12 | CA   | 24 | 3  |
| 329475 | 76 | 1568312 | 1568349 | 2 | 19 | 38 | CA   | 10 | 8  |
| 329476 | 76 | 1568516 | 1568551 | 2 | 18 | 36 | AC   | 6  | 7  |
| 329477 | 76 | 1569087 | 1569114 | 2 | 14 | 28 | TG   | 15 | 8  |
| 329478 | 76 | 1577794 | 1577821 | 2 | 14 | 28 | AC   | 20 | 6  |
| 329479 | 76 | 1577978 | 1578003 | 2 | 13 | 26 | AC   | 12 | 13 |
| 329480 | 76 | 1578055 | 1578084 | 2 | 15 | 30 | CA   | 13 | 10 |
| 329481 | 76 | 1578179 | 1578190 | 2 | 6  | 12 | GT   | 11 | 6  |
| 329482 | 76 | 1578192 | 1578205 | 2 | 7  | 14 | TG   | 11 | 6  |
| 329483 | 76 | 1578353 | 1578378 | 2 | 13 | 26 | GT   | 19 | 7  |
| 329487 | 76 | 1582062 | 1582091 | 2 | 15 | 30 | CA   | 10 | 7  |
| 329489 | 76 | 1584710 | 1584725 | 2 | 8  | 16 | GT   | 22 | 11 |
| 329490 | 76 | 1584727 | 1584740 | 2 | 7  | 14 | TG   | 25 | 9  |
| 329492 | 76 | 1586294 | 1586315 | 2 | 11 | 22 | TG   | 27 | 9  |
| 329493 | 76 | 1588891 | 1588924 | 2 | 17 | 34 | CA   | 9  | 11 |
| 329502 | 76 | 1596328 | 1596355 | 2 | 14 | 28 | GT   | 12 | 5  |
| 329503 | 76 | 1596469 | 1596480 | 2 | 6  | 12 | TG   | 16 | 3  |
| 329506 | 76 | 1597410 | 1597429 | 2 | 10 | 20 | TG   | 9  | 11 |
| 329507 | 76 | 1598331 | 1598350 | 2 | 10 | 20 | AC   | 22 | 9  |
| 329508 | 76 | 1599464 | 1599481 | 3 | 6  | 18 | TGT  | 27 | 6  |
| 329509 | 76 | 1599987 | 1600010 | 3 | 8  | 24 | TGA  | 31 | 8  |
| 329512 | 76 | 1604562 | 1604576 | 3 | 5  | 15 | CCT  | 10 | 3  |
| 329513 | 76 | 1605265 | 1605282 | 3 | 6  | 18 | GGA  | 26 | 3  |

|        |    |         |         |   |    |    |      |    |    |
|--------|----|---------|---------|---|----|----|------|----|----|
| 329514 | 76 | 1607504 | 1607539 | 2 | 18 | 36 | CA   | 17 | 11 |
| 329517 | 76 | 1613055 | 1613082 | 2 | 14 | 28 | TG   | 7  | 8  |
| 329518 | 76 | 1613191 | 1613214 | 4 | 6  | 24 | TTTG | 27 | 7  |
| 329519 | 76 | 1614512 | 1614535 | 2 | 12 | 24 | AC   | 17 | 7  |
| 329520 | 76 | 1614626 | 1614645 | 2 | 10 | 20 | TG   | 6  | 11 |
| 329522 | 76 | 1614756 | 1614785 | 2 | 15 | 30 | TG   | 7  | 9  |
| 329524 | 76 | 1617196 | 1617239 | 4 | 11 | 44 | GTTT | 21 | 4  |
| 329527 | 76 | 1619468 | 1619488 | 3 | 7  | 21 | TGA  | 24 | 6  |
| 329529 | 76 | 1629659 | 1629706 | 2 | 24 | 48 | GT   | 13 | 13 |
| 329531 | 76 | 1638066 | 1638086 | 3 | 7  | 21 | AGA  | 28 | 3  |
| 329534 | 76 | 1649922 | 1649936 | 3 | 5  | 15 | CCT  | 20 | 3  |
| 329538 | 76 | 1657208 | 1657222 | 3 | 5  | 15 | TGC  | 16 | 3  |
| 329539 | 76 | 1668081 | 1668110 | 2 | 15 | 30 | AC   | 11 | 14 |
| 329541 | 76 | 1670319 | 1670336 | 3 | 6  | 18 | CAG  | 20 | 4  |
| 329551 | 76 | 1679093 | 1679106 | 2 | 7  | 14 | AG   | 28 | 3  |
| 329552 | 76 | 1679831 | 1679846 | 4 | 4  | 16 | AGAA | 17 | 9  |
| 329553 | 76 | 1679847 | 1679862 | 4 | 4  | 16 | ACAA | 19 | 11 |
| 329555 | 76 | 1680350 | 1680361 | 2 | 6  | 12 | AG   | 24 | 7  |
| 329556 | 76 | 1680743 | 1680772 | 2 | 15 | 30 | CA   | 19 | 10 |
| 329557 | 76 | 1680923 | 1680934 | 2 | 6  | 12 | AC   | 9  | 11 |
| 329558 | 76 | 1680939 | 1680950 | 2 | 6  | 12 | AC   | 9  | 11 |
| 329563 | 76 | 1686231 | 1686256 | 2 | 13 | 26 | GT   | 9  | 10 |
| 329564 | 76 | 1686859 | 1686874 | 2 | 8  | 16 | GA   | 21 | 4  |
| 329568 | 76 | 1687508 | 1687527 | 2 | 10 | 20 | CA   | 12 | 14 |
| 329569 | 76 | 1687547 | 1687567 | 3 | 7  | 21 | TGA  | 21 | 3  |
| 329572 | 76 | 1690761 | 1690802 | 2 | 21 | 42 | GT   | 8  | 10 |
| 329575 | 76 | 1691734 | 1691751 | 2 | 9  | 18 | TG   | 20 | 8  |
| 329577 | 76 | 1693111 | 1693150 | 2 | 20 | 40 | GT   | 6  | 9  |
| 329578 | 76 | 1693266 | 1693293 | 4 | 7  | 28 | TTTG | 10 | 9  |
| 329580 | 76 | 1695237 | 1695251 | 3 | 5  | 15 | CAT  | 18 | 5  |
| 329582 | 76 | 1697400 | 1697417 | 2 | 9  | 18 | CA   | 10 | 7  |
| 329584 | 76 | 1697745 | 1697768 | 4 | 6  | 24 | CGCA | 7  | 9  |
| 329585 | 76 | 1697902 | 1697929 | 4 | 7  | 28 | ATCA | 22 | 5  |
| 329593 | 76 | 1698681 | 1698720 | 2 | 20 | 40 | AG   | 11 | 12 |
| 329599 | 76 | 1704502 | 1704527 | 2 | 13 | 26 | TG   | 12 | 12 |
| 329602 | 76 | 1706311 | 1706370 | 2 | 30 | 60 | CA   | 9  | 10 |
| 329610 | 76 | 1712125 | 1712152 | 2 | 14 | 28 | GA   | 11 | 3  |
| 329611 | 76 | 1713762 | 1713777 | 2 | 8  | 16 | GT   | 19 | 8  |
| 329614 | 76 | 1715900 | 1715919 | 2 | 10 | 20 | AC   | 20 | 13 |
| 329615 | 76 | 1719827 | 1719838 | 2 | 6  | 12 | AT   | 18 | 5  |
| 329616 | 76 | 1721725 | 1721740 | 4 | 4  | 16 | CTGT | 24 | 3  |
| 329617 | 76 | 1722154 | 1722183 | 2 | 15 | 30 | AC   | 13 | 12 |
| 329619 | 76 | 1727122 | 1727147 | 2 | 13 | 26 | GT   | 21 | 8  |
| 329620 | 76 | 1727276 | 1727291 | 2 | 8  | 16 | TG   | 23 | 4  |
| 329621 | 76 | 1727859 | 1727878 | 2 | 10 | 20 | CA   | 25 | 15 |
| 329622 | 76 | 1730652 | 1730679 | 2 | 14 | 28 | AC   | 15 | 16 |
| 329623 | 76 | 1731944 | 1731981 | 2 | 19 | 38 | CA   | 7  | 8  |
| 329629 | 76 | 1738323 | 1738334 | 2 | 6  | 12 | CA   | 30 | 4  |
| 329649 | 76 | 1808616 | 1808637 | 2 | 11 | 22 | AC   | 16 | 17 |
| 329652 | 76 | 1813482 | 1813513 | 4 | 8  | 32 | TATG | 25 | 9  |
| 329655 | 76 | 1830241 | 1830264 | 3 | 8  | 24 | CTC  | 23 | 3  |

|        |    |         |         |   |    |    |      |    |    |
|--------|----|---------|---------|---|----|----|------|----|----|
| 329659 | 76 | 1843296 | 1843335 | 2 | 20 | 40 | TG   | 23 | 10 |
| 329660 | 76 | 1844452 | 1844465 | 2 | 7  | 14 | CT   | 13 | 3  |
| 329663 | 76 | 1847025 | 1847039 | 3 | 5  | 15 | TTG  | 23 | 6  |
| 329665 | 76 | 1851051 | 1851086 | 2 | 18 | 36 | TG   | 7  | 7  |
| 329666 | 76 | 1852356 | 1852369 | 2 | 7  | 14 | GT   | 26 | 8  |
| 329672 | 76 | 1884080 | 1884103 | 3 | 8  | 24 | TTA  | 11 | 7  |
| 329673 | 76 | 1884326 | 1884363 | 2 | 19 | 38 | AC   | 7  | 8  |
| 329674 | 76 | 1884424 | 1884438 | 3 | 5  | 15 | TGA  | 27 | 3  |
| 329680 | 76 | 1899417 | 1899458 | 2 | 21 | 42 | CA   | 6  | 11 |
| 329681 | 76 | 1900942 | 1900961 | 4 | 5  | 20 | TGTT | 26 | 3  |
| 329703 | 76 | 1942823 | 1942842 | 2 | 10 | 20 | TG   | 21 | 8  |
| 329705 | 76 | 1944075 | 1944096 | 2 | 11 | 22 | GT   | 24 | 9  |
| 329707 | 76 | 1946034 | 1946049 | 2 | 8  | 16 | CT   | 19 | 9  |
| 329709 | 76 | 1946568 | 1946588 | 3 | 7  | 21 | AAG  | 28 | 4  |
| 329719 | 76 | 1952012 | 1952039 | 2 | 14 | 28 | AC   | 16 | 18 |
| 329720 | 76 | 1952700 | 1952713 | 2 | 7  | 14 | TC   | 12 | 15 |
| 329730 | 76 | 1967865 | 1967890 | 2 | 13 | 26 | GT   | 17 | 5  |
| 329737 | 76 | 1978412 | 1978455 | 4 | 11 | 44 | ATCC | 18 | 14 |
| 329738 | 76 | 1982159 | 1982179 | 3 | 7  | 21 | CTG  | 28 | 3  |
| 329743 | 76 | 1992636 | 1992647 | 2 | 6  | 12 | TG   | 28 | 9  |
| 329760 | 76 | 2031797 | 2031826 | 3 | 10 | 30 | TGA  | 17 | 6  |
| 329762 | 76 | 2046583 | 2046604 | 2 | 11 | 22 | AC   | 7  | 4  |
| 329770 | 76 | 2057880 | 2057913 | 2 | 17 | 34 | AC   | 13 | 7  |
| 329787 | 77 | 6669    | 6684    | 4 | 4  | 16 | GACA | 33 | 3  |
| 329807 | 77 | 48664   | 48690   | 3 | 9  | 27 | TGA  | 29 | 5  |
| 329814 | 77 | 53686   | 53701   | 2 | 8  | 16 | AC   | 16 | 3  |
| 329819 | 77 | 63597   | 63632   | 4 | 9  | 36 | CTGT | 26 | 6  |
| 329822 | 77 | 65607   | 65638   | 2 | 16 | 32 | TC   | 12 | 5  |
| 329824 | 77 | 67462   | 67493   | 4 | 8  | 32 | TTTG | 11 | 11 |
| 329826 | 77 | 68167   | 68188   | 2 | 11 | 22 | CA   | 6  | 6  |
| 329828 | 77 | 68684   | 68719   | 2 | 18 | 36 | TG   | 11 | 7  |
| 329830 | 77 | 71280   | 71299   | 2 | 10 | 20 | TG   | 16 | 4  |
| 329831 | 77 | 71671   | 71690   | 2 | 10 | 20 | TG   | 22 | 3  |
| 329833 | 77 | 79409   | 79441   | 3 | 11 | 33 | AGA  | 21 | 4  |
| 329834 | 77 | 79698   | 79713   | 2 | 8  | 16 | TG   | 12 | 5  |
| 329838 | 77 | 79944   | 79959   | 2 | 8  | 16 | TG   | 12 | 6  |
| 329839 | 77 | 84212   | 84245   | 2 | 17 | 34 | GT   | 10 | 7  |
| 329842 | 77 | 85777   | 85798   | 2 | 11 | 22 | TG   | 20 | 4  |
| 329843 | 77 | 85942   | 85967   | 2 | 13 | 26 | CA   | 21 | 4  |
| 329844 | 77 | 86122   | 86137   | 2 | 8  | 16 | CA   | 13 | 3  |
| 329845 | 77 | 86141   | 86152   | 2 | 6  | 12 | AC   | 21 | 3  |
| 329846 | 77 | 86243   | 86274   | 2 | 16 | 32 | TG   | 13 | 9  |
| 329847 | 77 | 88212   | 88233   | 2 | 11 | 22 | GT   | 11 | 6  |
| 329853 | 77 | 103353  | 103400  | 2 | 24 | 48 | AC   | 10 | 12 |
| 329861 | 77 | 112974  | 112993  | 4 | 5  | 20 | TCTG | 28 | 3  |
| 329864 | 77 | 115990  | 116005  | 2 | 8  | 16 | GT   | 19 | 4  |
| 329865 | 77 | 119695  | 119722  | 2 | 14 | 28 | GT   | 13 | 5  |
| 329866 | 77 | 119841  | 119852  | 2 | 6  | 12 | AC   | 27 | 6  |
| 329871 | 77 | 122407  | 122440  | 2 | 17 | 34 | AC   | 8  | 9  |
| 329872 | 77 | 124595  | 124615  | 3 | 7  | 21 | TGC  | 29 | 4  |
| 329889 | 77 | 132895  | 132922  | 2 | 14 | 28 | CA   | 6  | 5  |



|        |    |        |        |   |    |    |      |    |    |
|--------|----|--------|--------|---|----|----|------|----|----|
| 329890 | 77 | 133534 | 133557 | 2 | 12 | 24 | CA   | 21 | 9  |
| 329893 | 77 | 133855 | 133884 | 2 | 15 | 30 | GT   | 9  | 5  |
| 329900 | 77 | 136387 | 136416 | 2 | 15 | 30 | GT   | 8  | 13 |
| 329901 | 77 | 136662 | 136701 | 2 | 20 | 40 | CA   | 11 | 8  |
| 329902 | 77 | 137553 | 137572 | 4 | 5  | 20 | AAGA | 17 | 6  |
| 329907 | 77 | 144508 | 144535 | 2 | 14 | 28 | GT   | 14 | 7  |
| 329911 | 77 | 145937 | 145954 | 3 | 6  | 18 | GAG  | 19 | 3  |
| 329913 | 77 | 146016 | 146037 | 2 | 11 | 22 | AC   | 7  | 7  |
| 329919 | 77 | 146632 | 146667 | 2 | 18 | 36 | CA   | 18 | 11 |
| 329925 | 77 | 150406 | 150437 | 2 | 16 | 32 | TG   | 7  | 6  |
| 329927 | 77 | 156911 | 156922 | 2 | 6  | 12 | AG   | 26 | 5  |
| 329932 | 77 | 164147 | 164168 | 2 | 11 | 22 | AC   | 21 | 6  |
| 329939 | 77 | 168928 | 168949 | 2 | 11 | 22 | GT   | 19 | 8  |
| 329940 | 77 | 171565 | 171616 | 2 | 26 | 52 | CA   | 6  | 7  |
| 329941 | 77 | 171659 | 171692 | 2 | 17 | 34 | TG   | 11 | 13 |
| 329942 | 77 | 176006 | 176039 | 2 | 17 | 34 | CA   | 10 | 7  |
| 329943 | 77 | 176069 | 176084 | 2 | 8  | 16 | TG   | 22 | 3  |
| 329944 | 77 | 176898 | 176919 | 2 | 11 | 22 | TC   | 21 | 4  |
| 329945 | 77 | 177465 | 177508 | 2 | 22 | 44 | TG   | 9  | 10 |
| 329949 | 77 | 179157 | 179210 | 2 | 27 | 54 | CA   | 9  | 10 |
| 329968 | 77 | 184637 | 184666 | 3 | 10 | 30 | CAT  | 32 | 4  |
| 329972 | 77 | 188403 | 188424 | 2 | 11 | 22 | AC   | 16 | 9  |
| 329975 | 77 | 192284 | 192304 | 3 | 7  | 21 | TCA  | 24 | 4  |
| 329976 | 77 | 192486 | 192513 | 2 | 14 | 28 | CA   | 10 | 7  |
| 329978 | 77 | 193034 | 193083 | 2 | 25 | 50 | GT   | 19 | 9  |
| 329980 | 77 | 193201 | 193226 | 2 | 13 | 26 | CA   | 18 | 7  |
| 329982 | 77 | 200621 | 200658 | 2 | 19 | 38 | TG   | 19 | 9  |
| 329983 | 77 | 201229 | 201242 | 2 | 7  | 14 | GT   | 14 | 9  |
| 329984 | 77 | 201408 | 201428 | 3 | 7  | 21 | TGA  | 27 | 4  |
| 329988 | 77 | 210908 | 210945 | 2 | 19 | 38 | AC   | 14 | 9  |
| 329989 | 77 | 211687 | 211710 | 3 | 8  | 24 | GAG  | 21 | 3  |
| 329990 | 77 | 212543 | 212558 | 2 | 8  | 16 | AC   | 26 | 6  |
| 329991 | 77 | 212706 | 212739 | 2 | 17 | 34 | AC   | 18 | 12 |
| 330009 | 77 | 214943 | 214966 | 2 | 12 | 24 | TG   | 13 | 7  |
| 330017 | 77 | 220663 | 220680 | 3 | 6  | 18 | ACA  | 28 | 3  |
| 330019 | 77 | 224867 | 224882 | 4 | 4  | 16 | GTCT | 27 | 3  |
| 330020 | 77 | 225018 | 225045 | 2 | 14 | 28 | TG   | 21 | 9  |
| 330022 | 77 | 225800 | 225820 | 3 | 7  | 21 | TGA  | 21 | 3  |
| 330023 | 77 | 227319 | 227342 | 2 | 12 | 24 | CA   | 17 | 10 |
| 330026 | 77 | 227973 | 228002 | 2 | 15 | 30 | TG   | 9  | 7  |
| 330028 | 77 | 228840 | 228863 | 2 | 12 | 24 | TG   | 7  | 5  |
| 330029 | 77 | 230343 | 230354 | 2 | 6  | 12 | GA   | 29 | 4  |
| 330039 | 77 | 234048 | 234073 | 2 | 13 | 26 | TG   | 23 | 9  |
| 330040 | 77 | 234277 | 234302 | 2 | 13 | 26 | TG   | 27 | 12 |
| 330041 | 77 | 234434 | 234445 | 2 | 6  | 12 | AC   | 33 | 3  |
| 330042 | 77 | 234997 | 235040 | 2 | 22 | 44 | CA   | 10 | 7  |
| 330043 | 77 | 236446 | 236463 | 2 | 9  | 18 | TG   | 8  | 3  |
| 330044 | 77 | 236547 | 236564 | 2 | 9  | 18 | GT   | 18 | 10 |
| 330046 | 77 | 237526 | 237539 | 2 | 7  | 14 | GT   | 27 | 4  |
| 330050 | 77 | 240650 | 240669 | 4 | 5  | 20 | ATCT | 20 | 4  |
| 330051 | 77 | 241179 | 241190 | 2 | 6  | 12 | TA   | 25 | 3  |

|        |    |        |        |   |    |    |      |    |    |
|--------|----|--------|--------|---|----|----|------|----|----|
| 330056 | 77 | 248640 | 248665 | 2 | 13 | 26 | GT   | 17 | 9  |
| 330065 | 77 | 274437 | 274460 | 2 | 12 | 24 | CA   | 26 | 8  |
| 330066 | 77 | 275758 | 275769 | 2 | 6  | 12 | CA   | 16 | 3  |
| 330068 | 77 | 278051 | 278084 | 2 | 17 | 34 | GT   | 9  | 13 |
| 330070 | 77 | 278959 | 278972 | 2 | 7  | 14 | AG   | 30 | 4  |
| 330074 | 77 | 279257 | 279274 | 2 | 9  | 18 | GT   | 8  | 4  |
| 330075 | 77 | 279512 | 279531 | 2 | 10 | 20 | GA   | 19 | 6  |
| 330076 | 77 | 279567 | 279596 | 2 | 15 | 30 | AC   | 13 | 11 |
| 330077 | 77 | 279728 | 279761 | 2 | 17 | 34 | CA   | 17 | 8  |
| 330081 | 77 | 288553 | 288592 | 2 | 20 | 40 | TG   | 9  | 9  |
| 330082 | 77 | 288675 | 288686 | 2 | 6  | 12 | AC   | 15 | 3  |
| 330083 | 77 | 288759 | 288794 | 2 | 18 | 36 | TG   | 12 | 11 |
| 330089 | 77 | 291580 | 291609 | 2 | 15 | 30 | TG   | 17 | 5  |
| 330095 | 77 | 298002 | 298035 | 2 | 17 | 34 | AC   | 11 | 4  |
| 330099 | 77 | 300473 | 300492 | 2 | 10 | 20 | TG   | 13 | 8  |
| 330103 | 77 | 302428 | 302457 | 2 | 15 | 30 | CA   | 18 | 10 |
| 330104 | 77 | 302618 | 302629 | 2 | 6  | 12 | AC   | 23 | 4  |
| 330105 | 77 | 302800 | 302831 | 2 | 16 | 32 | AC   | 19 | 9  |
| 330106 | 77 | 303024 | 303050 | 3 | 9  | 27 | AAT  | 18 | 4  |
| 330108 | 77 | 304046 | 304079 | 2 | 17 | 34 | TG   | 10 | 12 |
| 330109 | 77 | 306031 | 306054 | 4 | 6  | 24 | TCAA | 24 | 3  |
| 330110 | 77 | 307207 | 307236 | 3 | 10 | 30 | GGA  | 21 | 4  |
| 330111 | 77 | 307983 | 307996 | 2 | 7  | 14 | GT   | 14 | 4  |
| 330112 | 77 | 308077 | 308088 | 2 | 6  | 12 | GT   | 25 | 3  |
| 330113 | 77 | 308432 | 308473 | 2 | 21 | 42 | CA   | 9  | 10 |
| 330114 | 77 | 308657 | 308671 | 3 | 5  | 15 | TCT  | 24 | 5  |
| 330118 | 77 | 311874 | 311911 | 2 | 19 | 38 | GT   | 10 | 12 |
| 330119 | 77 | 311987 | 312020 | 2 | 17 | 34 | CA   | 7  | 11 |
| 330120 | 77 | 317542 | 317565 | 2 | 12 | 24 | TG   | 24 | 6  |
| 330126 | 77 | 321870 | 321895 | 2 | 13 | 26 | CA   | 13 | 4  |
| 330128 | 77 | 322043 | 322056 | 2 | 7  | 14 | AC   | 19 | 5  |
| 330145 | 77 | 324816 | 324839 | 2 | 12 | 24 | AC   | 14 | 6  |
| 330146 | 77 | 325388 | 325419 | 2 | 16 | 32 | CA   | 10 | 8  |
| 330150 | 77 | 326197 | 326229 | 3 | 11 | 33 | CTC  | 20 | 6  |
| 330151 | 77 | 326630 | 326657 | 2 | 14 | 28 | AC   | 10 | 11 |
| 330153 | 77 | 326932 | 326963 | 2 | 16 | 32 | AC   | 9  | 12 |
| 330156 | 77 | 328188 | 328215 | 2 | 14 | 28 | CA   | 20 | 8  |
| 330157 | 77 | 329471 | 329512 | 2 | 21 | 42 | CA   | 7  | 11 |
| 330160 | 77 | 329940 | 329963 | 4 | 6  | 24 | GACA | 19 | 6  |
| 330161 | 77 | 330340 | 330384 | 3 | 15 | 45 | GAA  | 11 | 5  |
| 330162 | 77 | 330407 | 330434 | 2 | 14 | 28 | AC   | 12 | 6  |
| 330164 | 77 | 333844 | 333875 | 2 | 16 | 32 | CA   | 13 | 9  |
| 330168 | 77 | 343263 | 343274 | 2 | 6  | 12 | GC   | 13 | 3  |
| 330170 | 77 | 343732 | 343751 | 4 | 5  | 20 | CTGT | 25 | 7  |
| 330172 | 77 | 345879 | 345896 | 2 | 9  | 18 | AG   | 22 | 4  |
| 330173 | 77 | 346639 | 346652 | 2 | 7  | 14 | CA   | 24 | 8  |
| 330176 | 77 | 350922 | 350935 | 2 | 7  | 14 | GT   | 14 | 3  |
| 330177 | 77 | 354910 | 354927 | 2 | 9  | 18 | AC   | 16 | 9  |
| 330180 | 77 | 358887 | 358901 | 3 | 5  | 15 | CTG  | 29 | 3  |
| 330181 | 77 | 360690 | 360737 | 3 | 16 | 48 | CTT  | 24 | 10 |
| 330182 | 77 | 361186 | 361207 | 2 | 11 | 22 | GT   | 14 | 11 |

|        |    |        |        |   |    |    |      |    |    |
|--------|----|--------|--------|---|----|----|------|----|----|
| 330183 | 77 | 361773 | 361790 | 2 | 9  | 18 | CA   | 31 | 9  |
| 330184 | 77 | 363449 | 363460 | 2 | 6  | 12 | GT   | 17 | 8  |
| 330185 | 77 | 368449 | 368474 | 2 | 13 | 26 | GT   | 20 | 6  |
| 330186 | 77 | 369733 | 369750 | 2 | 9  | 18 | GT   | 23 | 8  |
| 330189 | 77 | 372806 | 372837 | 2 | 16 | 32 | GT   | 6  | 5  |
| 330192 | 77 | 373766 | 373797 | 2 | 16 | 32 | AC   | 14 | 11 |
| 330194 | 77 | 383164 | 383191 | 2 | 14 | 28 | AC   | 15 | 4  |
| 330199 | 77 | 384868 | 384905 | 2 | 19 | 38 | TG   | 14 | 11 |
| 330202 | 77 | 388875 | 388906 | 2 | 16 | 32 | GT   | 14 | 11 |
| 330205 | 77 | 391408 | 391425 | 3 | 6  | 18 | ATC  | 27 | 3  |
| 330216 | 77 | 394924 | 394943 | 4 | 5  | 20 | TGAT | 35 | 4  |
| 330218 | 77 | 401819 | 401851 | 3 | 11 | 33 | AGA  | 20 | 7  |
| 330220 | 77 | 406601 | 406615 | 3 | 5  | 15 | CTC  | 29 | 3  |
| 330222 | 77 | 408760 | 408774 | 3 | 5  | 15 | CAT  | 28 | 4  |
| 330225 | 77 | 409929 | 409967 | 3 | 13 | 39 | GAA  | 26 | 10 |
| 330226 | 77 | 410493 | 410524 | 2 | 16 | 32 | AC   | 11 | 9  |
| 330228 | 77 | 410796 | 410825 | 2 | 15 | 30 | GT   | 8  | 10 |
| 330229 | 77 | 411566 | 411607 | 2 | 21 | 42 | AC   | 6  | 9  |
| 330230 | 77 | 411646 | 411669 | 3 | 8  | 24 | CTC  | 17 | 4  |
| 330231 | 77 | 412037 | 412072 | 3 | 12 | 36 | CCT  | 11 | 8  |
| 330233 | 77 | 412686 | 412703 | 2 | 9  | 18 | TG   | 10 | 8  |
| 330234 | 77 | 413336 | 413351 | 2 | 8  | 16 | TG   | 22 | 4  |
| 330237 | 77 | 416207 | 416228 | 2 | 11 | 22 | AC   | 13 | 7  |
| 330238 | 77 | 416268 | 416289 | 2 | 11 | 22 | CA   | 14 | 5  |
| 330239 | 77 | 416494 | 416545 | 2 | 26 | 52 | GT   | 10 | 11 |
| 330240 | 77 | 416846 | 416857 | 2 | 6  | 12 | CA   | 24 | 5  |
| 330243 | 77 | 420109 | 420148 | 2 | 20 | 40 | AC   | 10 | 7  |
| 330244 | 77 | 420309 | 420350 | 2 | 21 | 42 | TG   | 8  | 11 |
| 330246 | 77 | 421450 | 421467 | 3 | 6  | 18 | TTC  | 20 | 4  |
| 330249 | 77 | 422293 | 422316 | 2 | 12 | 24 | TG   | 7  | 6  |
| 330257 | 77 | 430466 | 430487 | 2 | 11 | 22 | CA   | 18 | 5  |
| 330260 | 77 | 459150 | 459185 | 2 | 18 | 36 | TG   | 11 | 7  |
| 330267 | 77 | 460091 | 460138 | 2 | 24 | 48 | AC   | 11 | 11 |
| 330268 | 77 | 460232 | 460255 | 2 | 12 | 24 | GT   | 14 | 8  |
| 330269 | 77 | 460425 | 460466 | 2 | 21 | 42 | CA   | 7  | 8  |
| 330270 | 77 | 460488 | 460511 | 3 | 8  | 24 | AAT  | 9  | 3  |
| 330271 | 77 | 461191 | 461202 | 2 | 6  | 12 | AC   | 22 | 8  |
| 330272 | 77 | 461205 | 461220 | 2 | 8  | 16 | AC   | 22 | 5  |
| 330273 | 77 | 461377 | 461404 | 2 | 14 | 28 | CA   | 13 | 12 |
| 330276 | 77 | 464351 | 464380 | 2 | 15 | 30 | CA   | 10 | 8  |
| 330279 | 77 | 465418 | 465469 | 2 | 26 | 52 | GT   | 9  | 12 |
| 330280 | 77 | 466174 | 466209 | 2 | 18 | 36 | TG   | 8  | 5  |
| 330291 | 77 | 472850 | 472873 | 3 | 8  | 24 | AAG  | 25 | 7  |
| 330292 | 77 | 473270 | 473287 | 2 | 9  | 18 | AC   | 16 | 8  |
| 330294 | 77 | 483677 | 483688 | 2 | 6  | 12 | AC   | 20 | 3  |
| 330305 | 77 | 497995 | 498038 | 2 | 22 | 44 | GT   | 7  | 12 |
| 330308 | 77 | 500450 | 500475 | 2 | 13 | 26 | TG   | 11 | 8  |
| 330315 | 77 | 509915 | 509929 | 3 | 5  | 15 | CAG  | 24 | 3  |
| 330318 | 77 | 513838 | 513867 | 2 | 15 | 30 | AC   | 16 | 10 |
| 330319 | 77 | 515737 | 515756 | 2 | 10 | 20 | GT   | 20 | 9  |
| 330321 | 77 | 516400 | 516421 | 2 | 11 | 22 | GT   | 19 | 11 |

|        |    |        |        |   |    |    |      |    |    |
|--------|----|--------|--------|---|----|----|------|----|----|
| 330323 | 77 | 518230 | 518274 | 3 | 15 | 45 | AAG  | 18 | 11 |
| 330367 | 77 | 561586 | 561631 | 2 | 23 | 46 | AC   | 9  | 11 |
| 330369 | 77 | 562685 | 562714 | 2 | 15 | 30 | TG   | 8  | 10 |
| 330370 | 77 | 562795 | 562815 | 3 | 7  | 21 | CAT  | 11 | 3  |
| 330375 | 77 | 566192 | 566239 | 2 | 24 | 48 | AC   | 9  | 9  |
| 330381 | 77 | 568011 | 568032 | 2 | 11 | 22 | CA   | 13 | 10 |
| 330382 | 77 | 568175 | 568222 | 3 | 16 | 48 | AGA  | 19 | 9  |
| 330384 | 77 | 569558 | 569575 | 3 | 6  | 18 | CGC  | 22 | 13 |
| 330386 | 77 | 572321 | 572334 | 2 | 7  | 14 | CA   | 19 | 10 |
| 330387 | 77 | 572673 | 572690 | 2 | 9  | 18 | CA   | 13 | 12 |
| 330391 | 77 | 583835 | 583862 | 2 | 14 | 28 | AC   | 13 | 10 |
| 330392 | 77 | 584865 | 584892 | 2 | 14 | 28 | CA   | 16 | 8  |
| 330393 | 77 | 584970 | 584997 | 2 | 14 | 28 | TG   | 12 | 6  |
| 330401 | 77 | 590780 | 590819 | 2 | 20 | 40 | CA   | 13 | 10 |
| 330404 | 77 | 592265 | 592288 | 3 | 8  | 24 | TCC  | 19 | 4  |
| 330405 | 77 | 592608 | 592651 | 2 | 22 | 44 | CA   | 6  | 7  |
| 330406 | 77 | 593511 | 593536 | 2 | 13 | 26 | AC   | 17 | 9  |
| 330407 | 77 | 593564 | 593581 | 2 | 9  | 18 | TG   | 18 | 3  |
| 330409 | 77 | 593718 | 593745 | 2 | 14 | 28 | GT   | 13 | 10 |
| 330411 | 77 | 594431 | 594466 | 2 | 18 | 36 | AC   | 10 | 10 |
| 330413 | 77 | 595154 | 595173 | 2 | 10 | 20 | GT   | 17 | 3  |
| 330414 | 77 | 595246 | 595293 | 2 | 24 | 48 | AC   | 11 | 10 |
| 330415 | 77 | 596505 | 596528 | 2 | 12 | 24 | AC   | 15 | 8  |
| 330447 | 77 | 609946 | 609963 | 3 | 6  | 18 | CTC  | 19 | 4  |
| 330448 | 77 | 610402 | 610421 | 4 | 5  | 20 | CTGT | 16 | 5  |
| 330452 | 77 | 624724 | 624737 | 2 | 7  | 14 | TC   | 21 | 11 |
| 330453 | 77 | 624769 | 624798 | 3 | 10 | 30 | TCC  | 12 | 5  |
| 330456 | 77 | 625735 | 625772 | 2 | 19 | 38 | GT   | 19 | 11 |
| 330457 | 77 | 626266 | 626295 | 2 | 15 | 30 | TG   | 7  | 7  |
| 330458 | 77 | 626516 | 626527 | 2 | 6  | 12 | GT   | 21 | 7  |
| 330459 | 77 | 628225 | 628266 | 2 | 21 | 42 | GT   | 8  | 10 |
| 330472 | 77 | 633230 | 633267 | 2 | 19 | 38 | CA   | 7  | 10 |
| 330473 | 77 | 633391 | 633442 | 2 | 26 | 52 | TG   | 6  | 9  |
| 330474 | 77 | 635967 | 635992 | 2 | 13 | 26 | CA   | 18 | 14 |
| 330475 | 77 | 637736 | 637756 | 3 | 7  | 21 | CTG  | 10 | 3  |
| 330484 | 77 | 642883 | 642906 | 4 | 6  | 24 | GTCA | 23 | 6  |
| 330485 | 77 | 643466 | 643481 | 4 | 4  | 16 | CTGT | 26 | 4  |
| 330486 | 77 | 643700 | 643761 | 2 | 31 | 62 | GT   | 9  | 11 |
| 330490 | 77 | 647473 | 647490 | 2 | 9  | 18 | GT   | 13 | 10 |
| 330493 | 77 | 650583 | 650630 | 4 | 12 | 48 | CAAA | 21 | 8  |
| 330495 | 77 | 654531 | 654557 | 3 | 9  | 27 | GGA  | 6  | 7  |
| 330496 | 77 | 656534 | 656571 | 2 | 19 | 38 | AC   | 15 | 9  |
| 330498 | 77 | 660179 | 660190 | 2 | 6  | 12 | CA   | 16 | 4  |
| 330499 | 77 | 660960 | 660974 | 3 | 5  | 15 | CCT  | 24 | 4  |
| 330503 | 77 | 663990 | 664029 | 2 | 20 | 40 | CA   | 12 | 8  |
| 330506 | 77 | 676764 | 676781 | 2 | 9  | 18 | GT   | 29 | 6  |
| 330507 | 77 | 677291 | 677302 | 2 | 6  | 12 | AC   | 22 | 5  |
| 330508 | 77 | 678662 | 678688 | 3 | 9  | 27 | GAG  | 22 | 6  |
| 330510 | 77 | 679836 | 679875 | 2 | 20 | 40 | AC   | 7  | 9  |
| 330515 | 77 | 690373 | 690398 | 2 | 13 | 26 | GT   | 7  | 9  |
| 330523 | 77 | 707560 | 707579 | 2 | 10 | 20 | AC   | 15 | 8  |

|        |    |        |        |   |    |    |      |    |    |
|--------|----|--------|--------|---|----|----|------|----|----|
| 330524 | 77 | 707661 | 707676 | 2 | 8  | 16 | TG   | 6  | 7  |
| 330526 | 77 | 711811 | 711822 | 2 | 6  | 12 | GT   | 12 | 12 |
| 330527 | 77 | 711825 | 711838 | 2 | 7  | 14 | GT   | 7  | 9  |
| 330528 | 77 | 712605 | 712622 | 3 | 6  | 18 | AGA  | 25 | 4  |
| 330529 | 77 | 712772 | 712792 | 3 | 7  | 21 | TGA  | 28 | 5  |
| 330530 | 77 | 714540 | 714567 | 2 | 14 | 28 | CA   | 18 | 7  |
| 330531 | 77 | 717623 | 717634 | 2 | 6  | 12 | GT   | 30 | 9  |
| 330532 | 77 | 727486 | 727505 | 2 | 10 | 20 | TG   | 15 | 13 |
| 330548 | 77 | 742656 | 742689 | 2 | 17 | 34 | GT   | 11 | 7  |
| 330553 | 77 | 746088 | 746133 | 2 | 23 | 46 | GT   | 10 | 12 |
| 330564 | 77 | 750636 | 750673 | 2 | 19 | 38 | TG   | 15 | 13 |
| 330574 | 77 | 762532 | 762583 | 2 | 26 | 52 | GT   | 8  | 11 |
| 330575 | 77 | 765345 | 765390 | 2 | 23 | 46 | CA   | 10 | 8  |
| 330581 | 77 | 769423 | 769440 | 2 | 9  | 18 | AC   | 9  | 7  |
| 330582 | 77 | 769610 | 769621 | 2 | 6  | 12 | AC   | 23 | 3  |
| 330583 | 77 | 770034 | 770047 | 2 | 7  | 14 | CA   | 12 | 5  |
| 330588 | 77 | 770582 | 770593 | 2 | 6  | 12 | CA   | 14 | 12 |
| 330589 | 77 | 770652 | 770679 | 2 | 14 | 28 | TG   | 16 | 14 |
| 330593 | 77 | 782909 | 782926 | 3 | 6  | 18 | CTT  | 16 | 6  |
| 330595 | 77 | 784541 | 784556 | 4 | 4  | 16 | GTGC | 19 | 16 |
| 330596 | 77 | 784557 | 784576 | 2 | 10 | 20 | GT   | 14 | 13 |
| 330597 | 77 | 784667 | 784690 | 2 | 12 | 24 | CA   | 19 | 10 |
| 330598 | 77 | 784735 | 784750 | 2 | 8  | 16 | AC   | 15 | 8  |
| 330599 | 77 | 784753 | 784766 | 2 | 7  | 14 | AC   | 13 | 7  |
| 330600 | 77 | 786575 | 786610 | 4 | 9  | 36 | TGAA | 26 | 8  |
| 330601 | 77 | 786773 | 786814 | 2 | 21 | 42 | AC   | 8  | 10 |
| 330603 | 77 | 788523 | 788540 | 2 | 9  | 18 | AC   | 14 | 8  |
| 330604 | 77 | 788580 | 788607 | 2 | 14 | 28 | TG   | 13 | 9  |
| 330605 | 77 | 789495 | 789518 | 2 | 12 | 24 | CT   | 16 | 8  |
| 330606 | 77 | 789706 | 789721 | 2 | 8  | 16 | AC   | 19 | 3  |
| 330611 | 77 | 791131 | 791148 | 2 | 9  | 18 | TG   | 11 | 12 |
| 330617 | 77 | 797307 | 797318 | 2 | 6  | 12 | TC   | 24 | 3  |
| 330618 | 77 | 798197 | 798228 | 2 | 16 | 32 | GT   | 14 | 14 |
| 330625 | 77 | 800272 | 800315 | 4 | 11 | 44 | ATTG | 30 | 10 |
| 330628 | 77 | 802646 | 802663 | 3 | 6  | 18 | TCC  | 15 | 4  |
| 330630 | 77 | 803565 | 803582 | 2 | 9  | 18 | GT   | 17 | 9  |
| 330636 | 77 | 810170 | 810195 | 2 | 13 | 26 | AC   | 13 | 7  |
| 330637 | 77 | 810365 | 810400 | 3 | 12 | 36 | GAT  | 22 | 6  |
| 330640 | 77 | 810669 | 810690 | 2 | 11 | 22 | AC   | 10 | 7  |
| 330642 | 77 | 812712 | 812723 | 2 | 6  | 12 | CA   | 26 | 6  |
| 330660 | 77 | 818699 | 818731 | 3 | 11 | 33 | TCA  | 25 | 11 |
| 330663 | 77 | 833722 | 833745 | 4 | 6  | 24 | TGGA | 21 | 3  |
| 330670 | 77 | 839467 | 839482 | 2 | 8  | 16 | AC   | 23 | 3  |
| 330680 | 77 | 867164 | 867195 | 2 | 16 | 32 | CA   | 6  | 6  |
| 330681 | 77 | 869589 | 869618 | 3 | 10 | 30 | CTC  | 11 | 5  |
| 330688 | 77 | 876474 | 876500 | 3 | 9  | 27 | GAT  | 20 | 4  |
| 330691 | 77 | 878013 | 878039 | 3 | 9  | 27 | GTT  | 16 | 6  |
| 330692 | 77 | 878354 | 878369 | 4 | 4  | 16 | TTTA | 6  | 9  |
| 330693 | 77 | 878406 | 878429 | 2 | 12 | 24 | TG   | 9  | 7  |
| 330702 | 77 | 893048 | 893099 | 4 | 13 | 52 | CTTT | 9  | 5  |
| 330703 | 77 | 896291 | 896306 | 2 | 8  | 16 | CA   | 9  | 3  |

|        |    |        |        |   |    |    |     |    |    |
|--------|----|--------|--------|---|----|----|-----|----|----|
| 330714 | 77 | 901411 | 901436 | 2 | 13 | 26 | GT  | 7  | 12 |
| 330730 | 77 | 917359 | 917376 | 3 | 6  | 18 | CTT | 19 | 3  |
| 330731 | 77 | 919202 | 919225 | 2 | 12 | 24 | GT  | 15 | 7  |
| 330736 | 77 | 921888 | 921899 | 2 | 6  | 12 | CT  | 11 | 12 |
| 330737 | 77 | 921902 | 921913 | 2 | 6  | 12 | CT  | 10 | 9  |
| 330738 | 77 | 922061 | 922114 | 2 | 27 | 54 | AC  | 11 | 11 |
| 330739 | 77 | 922216 | 922251 | 2 | 18 | 36 | CA  | 7  | 6  |
| 330740 | 77 | 923184 | 923195 | 2 | 6  | 12 | TA  | 23 | 4  |
| 330741 | 77 | 924030 | 924077 | 2 | 24 | 48 | TG  | 9  | 7  |
| 330742 | 77 | 924221 | 924252 | 2 | 16 | 32 | TG  | 11 | 6  |
| 330743 | 77 | 925596 | 925621 | 2 | 13 | 26 | GT  | 18 | 8  |
| 330746 | 77 | 926201 | 926220 | 2 | 10 | 20 | GT  | 22 | 9  |
| 330751 | 77 | 926666 | 926707 | 2 | 21 | 42 | AC  | 8  | 9  |
| 330753 | 77 | 926830 | 926855 | 2 | 13 | 26 | GT  | 13 | 12 |
| 330764 | 77 | 929877 | 929912 | 3 | 12 | 36 | ATC | 22 | 6  |
| 330765 | 77 | 930478 | 930507 | 2 | 15 | 30 | TG  | 13 | 9  |
| 330771 | 77 | 933512 | 933535 | 2 | 12 | 24 | CA  | 16 | 6  |
| 330781 | 77 | 935656 | 935667 | 2 | 6  | 12 | TG  | 12 | 4  |
| 330785 | 77 | 936191 | 936218 | 2 | 14 | 28 | GT  | 20 | 9  |
| 330791 | 77 | 938351 | 938374 | 2 | 12 | 24 | AC  | 20 | 10 |
| 330796 | 77 | 939261 | 939276 | 2 | 8  | 16 | AC  | 23 | 4  |
| 330797 | 77 | 939374 | 939387 | 2 | 7  | 14 | CA  | 8  | 9  |
| 330798 | 77 | 939390 | 939407 | 2 | 9  | 18 | CA  | 8  | 10 |
| 330805 | 77 | 943659 | 943690 | 2 | 16 | 32 | CA  | 14 | 7  |
| 330806 | 77 | 943805 | 943818 | 2 | 7  | 14 | AC  | 14 | 4  |
| 330807 | 77 | 943821 | 943832 | 2 | 6  | 12 | AC  | 14 | 3  |
| 330808 | 77 | 943996 | 944007 | 2 | 6  | 12 | GT  | 23 | 3  |
| 330810 | 77 | 944168 | 944193 | 2 | 13 | 26 | GT  | 18 | 4  |
| 330811 | 77 | 944235 | 944252 | 2 | 9  | 18 | TG  | 22 | 3  |
| 330812 | 77 | 944907 | 944928 | 2 | 11 | 22 | CA  | 14 | 7  |
| 330813 | 77 | 945157 | 945184 | 2 | 14 | 28 | AC  | 10 | 4  |
| 330814 | 77 | 945961 | 945988 | 2 | 14 | 28 | AC  | 16 | 12 |
| 330817 | 77 | 947325 | 947344 | 2 | 10 | 20 | CA  | 14 | 8  |
| 330819 | 77 | 947575 | 947602 | 2 | 14 | 28 | GT  | 13 | 7  |
| 330821 | 77 | 951024 | 951051 | 2 | 14 | 28 | AC  | 18 | 11 |
| 330828 | 77 | 953103 | 953118 | 2 | 8  | 16 | AC  | 28 | 13 |
| 330837 | 77 | 958388 | 958413 | 2 | 13 | 26 | GT  | 13 | 8  |
| 330839 | 77 | 959165 | 959188 | 2 | 12 | 24 | GT  | 20 | 14 |
| 330840 | 77 | 959339 | 959352 | 2 | 7  | 14 | CA  | 9  | 3  |
| 330841 | 77 | 959369 | 959380 | 2 | 6  | 12 | CA  | 7  | 4  |
| 330843 | 77 | 959505 | 959526 | 2 | 11 | 22 | GT  | 21 | 7  |
| 330844 | 77 | 959644 | 959669 | 2 | 13 | 26 | GT  | 18 | 10 |
| 330847 | 77 | 959944 | 959961 | 2 | 9  | 18 | TG  | 12 | 9  |
| 330848 | 77 | 960056 | 960097 | 2 | 21 | 42 | CA  | 11 | 13 |
| 330849 | 77 | 960581 | 960595 | 3 | 5  | 15 | AAT | 26 | 3  |
| 330850 | 77 | 961016 | 961049 | 2 | 17 | 34 | GT  | 9  | 10 |
| 330851 | 77 | 961433 | 961448 | 2 | 8  | 16 | TG  | 21 | 3  |
| 330852 | 77 | 961473 | 961498 | 2 | 13 | 26 | GT  | 21 | 10 |
| 330869 | 77 | 969164 | 969205 | 2 | 21 | 42 | GT  | 8  | 9  |
| 330870 | 77 | 969571 | 969600 | 2 | 15 | 30 | CA  | 9  | 6  |
| 330873 | 77 | 970171 | 970194 | 2 | 12 | 24 | TG  | 9  | 5  |

|        |    |         |         |   |    |    |      |    |    |
|--------|----|---------|---------|---|----|----|------|----|----|
| 330874 | 77 | 970310  | 970371  | 2 | 31 | 62 | AC   | 8  | 12 |
| 330879 | 77 | 977713  | 977748  | 2 | 18 | 36 | TG   | 13 | 9  |
| 330880 | 77 | 977860  | 977873  | 2 | 7  | 14 | GT   | 26 | 4  |
| 330883 | 77 | 979743  | 979770  | 2 | 14 | 28 | TG   | 20 | 5  |
| 330884 | 77 | 979904  | 979917  | 2 | 7  | 14 | TG   | 22 | 5  |
| 330885 | 77 | 979963  | 979996  | 2 | 17 | 34 | GT   | 9  | 7  |
| 330886 | 77 | 980102  | 980119  | 2 | 9  | 18 | GT   | 15 | 3  |
| 330888 | 77 | 980279  | 980304  | 2 | 13 | 26 | GT   | 8  | 8  |
| 330890 | 77 | 981115  | 981165  | 3 | 17 | 51 | AGA  | 12 | 11 |
| 330900 | 77 | 982598  | 982629  | 4 | 8  | 32 | CAGA | 23 | 8  |
| 330901 | 77 | 982784  | 982804  | 3 | 7  | 21 | CTC  | 17 | 3  |
| 330902 | 77 | 983204  | 983224  | 3 | 7  | 21 | AGA  | 31 | 4  |
| 330907 | 77 | 984280  | 984291  | 2 | 6  | 12 | AC   | 27 | 7  |
| 330908 | 77 | 987003  | 987034  | 2 | 16 | 32 | CA   | 19 | 9  |
| 330909 | 77 | 987110  | 987137  | 2 | 14 | 28 | TG   | 19 | 7  |
| 330910 | 77 | 987252  | 987269  | 2 | 9  | 18 | GT   | 16 | 8  |
| 330911 | 77 | 987325  | 987346  | 2 | 11 | 22 | GT   | 9  | 4  |
| 330912 | 77 | 988526  | 988553  | 4 | 7  | 28 | AATC | 28 | 5  |
| 330914 | 77 | 990416  | 990439  | 3 | 8  | 24 | GCA  | 24 | 7  |
| 330917 | 77 | 992426  | 992458  | 3 | 11 | 33 | GAA  | 12 | 10 |
| 330920 | 77 | 996958  | 996975  | 3 | 6  | 18 | GAA  | 17 | 5  |
| 330924 | 77 | 1000442 | 1000475 | 2 | 17 | 34 | GT   | 9  | 8  |
| 330929 | 77 | 1014229 | 1014256 | 2 | 14 | 28 | TG   | 11 | 14 |
| 330931 | 77 | 1016489 | 1016502 | 2 | 7  | 14 | GT   | 17 | 11 |
| 330932 | 77 | 1018206 | 1018232 | 3 | 9  | 27 | AGG  | 26 | 8  |
| 330933 | 77 | 1018619 | 1018648 | 3 | 10 | 30 | CAT  | 23 | 6  |
| 330934 | 77 | 1020168 | 1020194 | 3 | 9  | 27 | TCT  | 25 | 15 |
| 330940 | 77 | 1025747 | 1025761 | 3 | 5  | 15 | AAT  | 11 | 3  |
| 330941 | 77 | 1026437 | 1026468 | 2 | 16 | 32 | GT   | 13 | 17 |
| 330945 | 77 | 1027863 | 1027888 | 2 | 13 | 26 | AC   | 14 | 5  |
| 330946 | 77 | 1027971 | 1027990 | 2 | 10 | 20 | CA   | 16 | 9  |
| 330948 | 77 | 1031413 | 1031434 | 2 | 11 | 22 | AC   | 18 | 5  |
| 330949 | 77 | 1047504 | 1047518 | 3 | 5  | 15 | GCC  | 31 | 4  |
| 330950 | 77 | 1047610 | 1047633 | 2 | 12 | 24 | CA   | 16 | 12 |
| 330951 | 77 | 1047810 | 1047829 | 2 | 10 | 20 | GT   | 18 | 8  |
| 330955 | 77 | 1048431 | 1048458 | 2 | 14 | 28 | TG   | 12 | 5  |
| 330957 | 77 | 1056765 | 1056790 | 2 | 13 | 26 | GT   | 16 | 6  |
| 330958 | 77 | 1061154 | 1061165 | 2 | 6  | 12 | TC   | 27 | 3  |
| 330959 | 77 | 1061415 | 1061432 | 2 | 9  | 18 | TG   | 19 | 9  |
| 330960 | 77 | 1062563 | 1062580 | 3 | 6  | 18 | GAG  | 21 | 4  |
| 330961 | 77 | 1063664 | 1063685 | 2 | 11 | 22 | AC   | 23 | 11 |
| 330965 | 77 | 1067129 | 1067152 | 2 | 12 | 24 | AC   | 12 | 6  |
| 330968 | 77 | 1067756 | 1067789 | 2 | 17 | 34 | TG   | 15 | 8  |
| 330970 | 77 | 1069257 | 1069286 | 2 | 15 | 30 | GT   | 14 | 11 |
| 330975 | 77 | 1071296 | 1071323 | 2 | 14 | 28 | CA   | 22 | 6  |
| 330976 | 77 | 1071499 | 1071526 | 2 | 14 | 28 | TG   | 23 | 8  |
| 330977 | 77 | 1071694 | 1071721 | 2 | 14 | 28 | GT   | 25 | 13 |
| 331038 | 77 | 1126060 | 1126081 | 2 | 11 | 22 | CA   | 28 | 7  |
| 331041 | 77 | 1128896 | 1128931 | 2 | 18 | 36 | CA   | 9  | 11 |
| 331045 | 77 | 1130209 | 1130258 | 2 | 25 | 50 | TG   | 6  | 8  |
| 331050 | 77 | 1131704 | 1131721 | 3 | 6  | 18 | TGT  | 28 | 3  |

|        |    |         |         |   |    |    |      |    |    |
|--------|----|---------|---------|---|----|----|------|----|----|
| 331051 | 77 | 1132662 | 1132691 | 2 | 15 | 30 | CT   | 6  | 6  |
| 331054 | 77 | 1132896 | 1132915 | 2 | 10 | 20 | TG   | 15 | 7  |
| 331057 | 77 | 1134211 | 1134238 | 2 | 14 | 28 | AC   | 13 | 9  |
| 331058 | 77 | 1134260 | 1134287 | 2 | 14 | 28 | TG   | 10 | 10 |
| 331061 | 77 | 1135579 | 1135614 | 3 | 12 | 36 | GAG  | 11 | 5  |
| 331062 | 77 | 1138301 | 1138314 | 2 | 7  | 14 | TG   | 32 | 8  |
| 331064 | 77 | 1139640 | 1139673 | 2 | 17 | 34 | GT   | 14 | 10 |
| 331065 | 77 | 1139789 | 1139818 | 2 | 15 | 30 | TG   | 16 | 6  |
| 331066 | 77 | 1140975 | 1141022 | 2 | 24 | 48 | CA   | 7  | 10 |
| 331067 | 77 | 1143177 | 1143206 | 2 | 15 | 30 | TG   | 12 | 7  |
| 331072 | 77 | 1145619 | 1145636 | 3 | 6  | 18 | AGA  | 20 | 3  |
| 331075 | 77 | 1147899 | 1147920 | 2 | 11 | 22 | AC   | 12 | 8  |
| 331083 | 77 | 1149164 | 1149177 | 2 | 7  | 14 | CA   | 10 | 3  |
| 331084 | 77 | 1149203 | 1149230 | 4 | 7  | 28 | TCCT | 15 | 5  |
| 331088 | 77 | 1150480 | 1150509 | 2 | 15 | 30 | GT   | 12 | 11 |
| 331096 | 77 | 1151699 | 1151716 | 2 | 9  | 18 | TG   | 19 | 6  |
| 331097 | 77 | 1152396 | 1152419 | 2 | 12 | 24 | CA   | 17 | 10 |
| 331098 | 77 | 1152446 | 1152471 | 2 | 13 | 26 | TG   | 17 | 7  |
| 331099 | 77 | 1153509 | 1153530 | 2 | 11 | 22 | AC   | 14 | 3  |
| 331104 | 77 | 1153918 | 1153939 | 2 | 11 | 22 | AC   | 23 | 4  |
| 331114 | 77 | 1155856 | 1155885 | 2 | 15 | 30 | CA   | 6  | 7  |
| 331121 | 77 | 1158904 | 1158945 | 2 | 21 | 42 | TG   | 6  | 7  |
| 331127 | 77 | 1163256 | 1163273 | 2 | 9  | 18 | GT   | 7  | 8  |
| 331130 | 77 | 1163883 | 1163904 | 2 | 11 | 22 | TG   | 15 | 13 |
| 331134 | 77 | 1174244 | 1174258 | 3 | 5  | 15 | AGA  | 19 | 3  |
| 331135 | 77 | 1181362 | 1181375 | 2 | 7  | 14 | TG   | 23 | 4  |
| 331137 | 77 | 1185373 | 1185394 | 2 | 11 | 22 | GT   | 20 | 13 |
| 331139 | 77 | 1188403 | 1188420 | 2 | 9  | 18 | CT   | 25 | 3  |
| 331152 | 77 | 1216375 | 1216404 | 2 | 15 | 30 | AC   | 11 | 8  |
| 331156 | 77 | 1228819 | 1228832 | 2 | 7  | 14 | AC   | 18 | 5  |
| 331157 | 77 | 1228835 | 1228848 | 2 | 7  | 14 | AC   | 20 | 4  |
| 331158 | 77 | 1229080 | 1229109 | 2 | 15 | 30 | AC   | 14 | 11 |
| 331164 | 77 | 1235285 | 1235316 | 2 | 16 | 32 | CA   | 8  | 8  |
| 331165 | 77 | 1235444 | 1235491 | 2 | 24 | 48 | AC   | 9  | 11 |
| 331166 | 77 | 1236821 | 1236835 | 3 | 5  | 15 | ATG  | 12 | 9  |
| 331167 | 77 | 1236838 | 1236852 | 3 | 5  | 15 | GAT  | 25 | 11 |
| 331169 | 77 | 1237435 | 1237470 | 2 | 18 | 36 | GT   | 6  | 9  |
| 331170 | 77 | 1238655 | 1238678 | 4 | 6  | 24 | ATCA | 17 | 11 |
| 331171 | 77 | 1239292 | 1239313 | 2 | 11 | 22 | AC   | 10 | 13 |
| 331173 | 77 | 1239454 | 1239487 | 2 | 17 | 34 | CA   | 13 | 11 |
| 331178 | 77 | 1247073 | 1247096 | 2 | 12 | 24 | CA   | 10 | 3  |
| 331180 | 77 | 1247342 | 1247356 | 3 | 5  | 15 | GAG  | 28 | 3  |
| 331183 | 77 | 1251646 | 1251681 | 3 | 12 | 36 | GAG  | 16 | 11 |
| 331188 | 77 | 1254598 | 1254630 | 3 | 11 | 33 | TCC  | 7  | 3  |
| 331213 | 77 | 1266749 | 1266762 | 2 | 7  | 14 | CT   | 19 | 8  |
| 331214 | 77 | 1266869 | 1266882 | 2 | 7  | 14 | GA   | 23 | 4  |
| 331221 | 77 | 1267901 | 1267916 | 2 | 8  | 16 | GT   | 9  | 3  |
| 331222 | 77 | 1268245 | 1268268 | 3 | 8  | 24 | TCT  | 24 | 4  |
| 331228 | 77 | 1276119 | 1276136 | 2 | 9  | 18 | GT   | 21 | 17 |
| 331230 | 77 | 1276830 | 1276855 | 2 | 13 | 26 | AC   | 13 | 9  |
| 331234 | 77 | 1279674 | 1279695 | 2 | 11 | 22 | CT   | 19 | 10 |



|        |    |         |         |   |    |    |      |    |    |
|--------|----|---------|---------|---|----|----|------|----|----|
| 331237 | 77 | 1279963 | 1279998 | 2 | 18 | 36 | TG   | 9  | 10 |
| 331238 | 77 | 1280053 | 1280085 | 3 | 11 | 33 | GAA  | 17 | 8  |
| 331241 | 77 | 1280341 | 1280364 | 3 | 8  | 24 | AAG  | 15 | 3  |
| 331242 | 77 | 1280690 | 1280711 | 2 | 11 | 22 | GT   | 17 | 3  |
| 331244 | 77 | 1281527 | 1281556 | 2 | 15 | 30 | GT   | 12 | 11 |
| 331245 | 77 | 1281839 | 1281856 | 3 | 6  | 18 | GAG  | 6  | 3  |
| 331247 | 77 | 1283238 | 1283271 | 2 | 17 | 34 | CA   | 9  | 6  |
| 331248 | 77 | 1283953 | 1283966 | 2 | 7  | 14 | TC   | 14 | 11 |
| 331249 | 77 | 1283967 | 1283984 | 2 | 9  | 18 | AC   | 13 | 11 |
| 331251 | 77 | 1285231 | 1285246 | 4 | 4  | 16 | TTCC | 22 | 6  |
| 331253 | 77 | 1287114 | 1287141 | 2 | 14 | 28 | CA   | 12 | 4  |
| 331254 | 77 | 1289968 | 1290003 | 3 | 12 | 36 | GGA  | 19 | 14 |
| 331255 | 77 | 1290078 | 1290092 | 3 | 5  | 15 | AGG  | 19 | 4  |
| 331258 | 77 | 1291775 | 1291802 | 2 | 14 | 28 | GA   | 10 | 4  |
| 331262 | 77 | 1293510 | 1293533 | 2 | 12 | 24 | CA   | 20 | 9  |
| 331263 | 77 | 1293567 | 1293588 | 2 | 11 | 22 | AC   | 15 | 11 |
| 331264 | 77 | 1293779 | 1293798 | 2 | 10 | 20 | TG   | 14 | 4  |
| 331265 | 77 | 1293947 | 1293970 | 2 | 12 | 24 | CA   | 15 | 11 |
| 331266 | 77 | 1295334 | 1295347 | 2 | 7  | 14 | AG   | 24 | 3  |
| 331267 | 77 | 1295397 | 1295424 | 2 | 14 | 28 | GT   | 16 | 13 |
| 331279 | 77 | 1298557 | 1298600 | 2 | 22 | 44 | TG   | 11 | 9  |
| 331280 | 77 | 1298654 | 1298681 | 2 | 14 | 28 | AC   | 9  | 10 |
| 331296 | 77 | 1304414 | 1304451 | 2 | 19 | 38 | GT   | 14 | 13 |
| 331300 | 77 | 1304749 | 1304766 | 2 | 9  | 18 | TG   | 8  | 12 |
| 331301 | 77 | 1304878 | 1304923 | 2 | 23 | 46 | AC   | 15 | 12 |
| 331302 | 77 | 1304966 | 1304997 | 2 | 16 | 32 | CA   | 24 | 10 |
| 331305 | 77 | 1306123 | 1306156 | 2 | 17 | 34 | AC   | 12 | 11 |
| 331307 | 77 | 1307524 | 1307539 | 2 | 8  | 16 | GT   | 17 | 10 |
| 331308 | 77 | 1308564 | 1308597 | 2 | 17 | 34 | TG   | 10 | 7  |
| 331312 | 77 | 1309143 | 1309202 | 3 | 20 | 60 | CTT  | 13 | 13 |
| 331313 | 77 | 1309514 | 1309549 | 2 | 18 | 36 | AC   | 9  | 10 |
| 331314 | 77 | 1309743 | 1309757 | 3 | 5  | 15 | CTT  | 25 | 6  |
| 331329 | 77 | 1314853 | 1314882 | 2 | 15 | 30 | GA   | 8  | 12 |
| 331330 | 77 | 1315713 | 1315728 | 2 | 8  | 16 | TC   | 7  | 4  |
| 331331 | 77 | 1315874 | 1315891 | 2 | 9  | 18 | CT   | 23 | 9  |
| 331332 | 77 | 1316046 | 1316075 | 2 | 15 | 30 | TG   | 11 | 10 |
| 331337 | 77 | 1321256 | 1321293 | 2 | 19 | 38 | GT   | 14 | 8  |
| 331338 | 77 | 1321487 | 1321512 | 2 | 13 | 26 | AC   | 12 | 10 |
| 331340 | 77 | 1321859 | 1321900 | 2 | 21 | 42 | TG   | 14 | 15 |
| 331341 | 77 | 1322032 | 1322061 | 2 | 15 | 30 | GT   | 9  | 7  |
| 331345 | 77 | 1324616 | 1324678 | 3 | 21 | 63 | AAG  | 13 | 10 |
| 331346 | 77 | 1324806 | 1324851 | 2 | 23 | 46 | GT   | 8  | 10 |
| 331351 | 77 | 1325698 | 1325733 | 2 | 18 | 36 | GT   | 8  | 10 |
| 331355 | 77 | 1326095 | 1326118 | 2 | 12 | 24 | AC   | 22 | 8  |
| 331358 | 77 | 1327492 | 1327506 | 3 | 5  | 15 | CTT  | 16 | 3  |
| 331361 | 77 | 1327893 | 1327914 | 2 | 11 | 22 | GA   | 18 | 3  |
| 331364 | 77 | 1329253 | 1329266 | 2 | 7  | 14 | CA   | 11 | 8  |
| 331366 | 77 | 1330206 | 1330235 | 2 | 15 | 30 | CA   | 7  | 9  |
| 331367 | 77 | 1330309 | 1330320 | 2 | 6  | 12 | AC   | 24 | 13 |
| 331368 | 77 | 1330511 | 1330538 | 2 | 14 | 28 | GT   | 16 | 11 |
| 331369 | 77 | 1330730 | 1330767 | 2 | 19 | 38 | GT   | 11 | 8  |

|        |    |         |         |   |    |    |      |    |    |
|--------|----|---------|---------|---|----|----|------|----|----|
| 331370 | 77 | 1330904 | 1330919 | 2 | 8  | 16 | TG   | 13 | 9  |
| 331372 | 77 | 1332300 | 1332321 | 2 | 11 | 22 | TG   | 22 | 8  |
| 331373 | 77 | 1332351 | 1332382 | 2 | 16 | 32 | AC   | 14 | 7  |
| 331374 | 77 | 1333444 | 1333489 | 2 | 23 | 46 | TG   | 13 | 10 |
| 331375 | 77 | 1333620 | 1333639 | 2 | 10 | 20 | CA   | 19 | 5  |
| 331378 | 77 | 1333938 | 1333955 | 2 | 9  | 18 | GT   | 13 | 10 |
| 331380 | 77 | 1334156 | 1334177 | 2 | 11 | 22 | GT   | 18 | 13 |
| 331388 | 77 | 1337990 | 1338025 | 2 | 18 | 36 | AC   | 6  | 9  |
| 331396 | 77 | 1339640 | 1339651 | 2 | 6  | 12 | CT   | 17 | 3  |
| 331399 | 77 | 1340195 | 1340226 | 2 | 16 | 32 | AC   | 9  | 10 |
| 331401 | 77 | 1341005 | 1341018 | 2 | 7  | 14 | AC   | 23 | 5  |
| 331403 | 77 | 1341743 | 1341763 | 3 | 7  | 21 | GTT  | 24 | 3  |
| 331404 | 77 | 1342705 | 1342728 | 2 | 12 | 24 | GA   | 10 | 6  |
| 331410 | 77 | 1344820 | 1344857 | 2 | 19 | 38 | AC   | 10 | 12 |
| 331411 | 77 | 1344974 | 1344988 | 3 | 5  | 15 | GCG  | 18 | 4  |
| 331412 | 77 | 1345769 | 1345804 | 2 | 18 | 36 | AC   | 14 | 12 |
| 331414 | 77 | 1346021 | 1346032 | 2 | 6  | 12 | GA   | 24 | 4  |
| 331415 | 77 | 1346150 | 1346183 | 2 | 17 | 34 | AC   | 14 | 8  |
| 331421 | 77 | 1347911 | 1347936 | 2 | 13 | 26 | CA   | 9  | 11 |
| 331427 | 77 | 1348886 | 1348901 | 2 | 8  | 16 | TC   | 25 | 3  |
| 331428 | 77 | 1348956 | 1348983 | 2 | 14 | 28 | CA   | 17 | 11 |
| 331429 | 77 | 1349143 | 1349168 | 2 | 13 | 26 | TG   | 16 | 13 |
| 331430 | 77 | 1349499 | 1349512 | 2 | 7  | 14 | CT   | 18 | 3  |
| 331431 | 77 | 1349713 | 1349752 | 2 | 20 | 40 | GT   | 6  | 10 |
| 331433 | 77 | 1351062 | 1351085 | 2 | 12 | 24 | CA   | 6  | 7  |
| 331434 | 77 | 1351315 | 1351348 | 2 | 17 | 34 | GT   | 22 | 9  |
| 331435 | 77 | 1352532 | 1352557 | 2 | 13 | 26 | CA   | 9  | 11 |
| 331437 | 77 | 1352887 | 1352916 | 2 | 15 | 30 | CA   | 7  | 11 |
| 331438 | 77 | 1353634 | 1353663 | 2 | 15 | 30 | AC   | 9  | 10 |
| 331439 | 77 | 1353841 | 1353854 | 2 | 7  | 14 | AC   | 13 | 7  |
| 331440 | 77 | 1354993 | 1355006 | 2 | 7  | 14 | GT   | 14 | 9  |
| 331441 | 77 | 1355133 | 1355148 | 4 | 4  | 16 | TTTA | 21 | 5  |
| 331442 | 77 | 1355209 | 1355242 | 2 | 17 | 34 | AC   | 10 | 6  |
| 331444 | 77 | 1355417 | 1355430 | 2 | 7  | 14 | CA   | 8  | 8  |
| 331445 | 77 | 1355552 | 1355583 | 2 | 16 | 32 | AC   | 14 | 7  |
| 331446 | 77 | 1356165 | 1356180 | 2 | 8  | 16 | TG   | 18 | 6  |
| 331452 | 77 | 1356564 | 1356575 | 2 | 6  | 12 | AC   | 18 | 3  |
| 331456 | 77 | 1357197 | 1357212 | 2 | 8  | 16 | AG   | 12 | 4  |
| 331457 | 77 | 1357290 | 1357307 | 2 | 9  | 18 | AG   | 12 | 5  |
| 331458 | 77 | 1357331 | 1357344 | 2 | 7  | 14 | TC   | 16 | 4  |
| 331465 | 77 | 1358354 | 1358395 | 2 | 21 | 42 | AC   | 6  | 7  |
| 331466 | 77 | 1358594 | 1358614 | 3 | 7  | 21 | GAG  | 21 | 8  |
| 331467 | 77 | 1359014 | 1359037 | 2 | 12 | 24 | GT   | 11 | 4  |
| 331477 | 77 | 1361593 | 1361616 | 4 | 6  | 24 | TCAA | 26 | 7  |
| 331484 | 77 | 1363140 | 1363165 | 2 | 13 | 26 | CA   | 10 | 8  |
| 331488 | 77 | 1363493 | 1363507 | 3 | 5  | 15 | TCT  | 27 | 9  |
| 331490 | 77 | 1363952 | 1363969 | 2 | 9  | 18 | GT   | 20 | 16 |
| 331498 | 77 | 1367362 | 1367381 | 4 | 5  | 20 | GAAG | 21 | 3  |
| 331500 | 77 | 1369542 | 1369555 | 2 | 7  | 14 | CA   | 29 | 3  |
| 331501 | 77 | 1371229 | 1371242 | 2 | 7  | 14 | AC   | 14 | 14 |
| 331502 | 77 | 1371244 | 1371257 | 2 | 7  | 14 | CA   | 15 | 14 |

|        |    |         |         |   |    |    |      |    |    |
|--------|----|---------|---------|---|----|----|------|----|----|
| 331505 | 77 | 1372632 | 1372643 | 2 | 6  | 12 | CA   | 18 | 8  |
| 331506 | 77 | 1372666 | 1372691 | 2 | 13 | 26 | GT   | 6  | 8  |
| 331507 | 77 | 1372754 | 1372779 | 2 | 13 | 26 | CA   | 13 | 11 |
| 331508 | 77 | 1372834 | 1372865 | 2 | 16 | 32 | GT   | 15 | 9  |
| 331510 | 77 | 1372975 | 1372986 | 2 | 6  | 12 | TG   | 21 | 3  |
| 331511 | 77 | 1373021 | 1373048 | 2 | 14 | 28 | TG   | 11 | 10 |
| 331517 | 77 | 1382650 | 1382673 | 2 | 12 | 24 | AC   | 24 | 9  |
| 331518 | 77 | 1383862 | 1383895 | 2 | 17 | 34 | CA   | 9  | 10 |
| 331521 | 77 | 1384688 | 1384723 | 2 | 18 | 36 | GT   | 12 | 8  |
| 331522 | 77 | 1384872 | 1384907 | 2 | 18 | 36 | GT   | 13 | 10 |
| 331524 | 77 | 1385071 | 1385084 | 2 | 7  | 14 | CA   | 18 | 9  |
| 331525 | 77 | 1385208 | 1385239 | 2 | 16 | 32 | AC   | 11 | 14 |
| 331532 | 77 | 1386155 | 1386174 | 2 | 10 | 20 | TG   | 12 | 4  |
| 331535 | 77 | 1387081 | 1387124 | 2 | 22 | 44 | AC   | 14 | 13 |
| 331536 | 77 | 1387230 | 1387259 | 2 | 15 | 30 | CA   | 20 | 10 |
| 331538 | 77 | 1387404 | 1387421 | 2 | 9  | 18 | AC   | 20 | 6  |
| 331546 | 77 | 1390820 | 1390867 | 2 | 24 | 48 | TG   | 8  | 9  |
| 331550 | 77 | 1392860 | 1392899 | 2 | 20 | 40 | CA   | 10 | 7  |
| 331554 | 77 | 1394012 | 1394045 | 2 | 17 | 34 | AC   | 6  | 7  |
| 331556 | 77 | 1394302 | 1394325 | 2 | 12 | 24 | GT   | 11 | 6  |
| 331559 | 77 | 1395820 | 1395843 | 4 | 6  | 24 | AAGA | 19 | 5  |
| 331562 | 77 | 1396111 | 1396136 | 2 | 13 | 26 | AC   | 7  | 8  |
| 331564 | 77 | 1398202 | 1398231 | 3 | 10 | 30 | CCT  | 10 | 6  |
| 331567 | 77 | 1399521 | 1399542 | 2 | 11 | 22 | TG   | 13 | 6  |
| 331568 | 77 | 1399612 | 1399627 | 2 | 8  | 16 | CA   | 18 | 5  |
| 331570 | 77 | 1399887 | 1399916 | 3 | 10 | 30 | CAT  | 26 | 8  |
| 331576 | 77 | 1401015 | 1401030 | 2 | 8  | 16 | CT   | 27 | 4  |
| 331578 | 77 | 1403179 | 1403200 | 2 | 11 | 22 | CA   | 11 | 13 |
| 331581 | 77 | 1403474 | 1403491 | 2 | 9  | 18 | GT   | 19 | 5  |
| 331582 | 77 | 1403518 | 1403539 | 2 | 11 | 22 | TG   | 13 | 14 |
| 331583 | 77 | 1403746 | 1403779 | 2 | 17 | 34 | GT   | 7  | 10 |
| 331585 | 77 | 1404074 | 1404095 | 2 | 11 | 22 | AC   | 14 | 9  |
| 331598 | 77 | 1409383 | 1409408 | 2 | 13 | 26 | AC   | 12 | 13 |
| 331599 | 77 | 1409599 | 1409624 | 2 | 13 | 26 | CA   | 13 | 13 |
| 331600 | 77 | 1409701 | 1409730 | 2 | 15 | 30 | GT   | 18 | 9  |
| 331602 | 77 | 1409843 | 1409864 | 2 | 11 | 22 | CA   | 11 | 8  |
| 331603 | 77 | 1410388 | 1410405 | 2 | 9  | 18 | TG   | 13 | 12 |
| 331607 | 77 | 1411909 | 1411932 | 2 | 12 | 24 | GT   | 20 | 6  |
| 331610 | 77 | 1413434 | 1413454 | 3 | 7  | 21 | GAT  | 22 | 4  |
| 331612 | 77 | 1413666 | 1413685 | 2 | 10 | 20 | CA   | 11 | 7  |
| 331613 | 77 | 1413807 | 1413834 | 2 | 14 | 28 | CA   | 11 | 9  |
| 331614 | 77 | 1413925 | 1413938 | 2 | 7  | 14 | AC   | 15 | 5  |
| 331615 | 77 | 1413972 | 1413985 | 2 | 7  | 14 | AC   | 13 | 7  |
| 331616 | 77 | 1414337 | 1414362 | 2 | 13 | 26 | CA   | 13 | 13 |
| 331617 | 77 | 1414894 | 1414919 | 2 | 13 | 26 | AC   | 8  | 9  |
| 331618 | 77 | 1415146 | 1415184 | 3 | 13 | 39 | AGA  | 20 | 11 |
| 331619 | 77 | 1418152 | 1418185 | 2 | 17 | 34 | AC   | 12 | 8  |
| 331620 | 77 | 1418230 | 1418251 | 2 | 11 | 22 | AC   | 16 | 5  |
| 331621 | 77 | 1418316 | 1418337 | 2 | 11 | 22 | AC   | 19 | 10 |
| 331622 | 77 | 1418402 | 1418431 | 2 | 15 | 30 | AC   | 13 | 9  |
| 331625 | 77 | 1418785 | 1418800 | 2 | 8  | 16 | AC   | 15 | 10 |

|        |    |         |         |   |    |    |     |    |    |
|--------|----|---------|---------|---|----|----|-----|----|----|
| 331626 | 77 | 1418825 | 1418850 | 2 | 13 | 26 | CA  | 13 | 10 |
| 331627 | 77 | 1418946 | 1418977 | 2 | 16 | 32 | AC  | 14 | 13 |
| 331630 | 77 | 1420088 | 1420131 | 2 | 22 | 44 | AC  | 13 | 16 |
| 331632 | 77 | 1421438 | 1421463 | 2 | 13 | 26 | CA  | 10 | 8  |
| 331638 | 77 | 1423583 | 1423618 | 2 | 18 | 36 | GT  | 8  | 11 |
| 331647 | 77 | 1424153 | 1424184 | 2 | 16 | 32 | AC  | 19 | 14 |
| 331648 | 77 | 1424211 | 1424224 | 2 | 7  | 14 | CA  | 12 | 3  |
| 331652 | 77 | 1426680 | 1426713 | 2 | 17 | 34 | GT  | 9  | 9  |
| 331661 | 77 | 1432117 | 1432140 | 2 | 12 | 24 | CA  | 16 | 7  |
| 331662 | 77 | 1432254 | 1432273 | 2 | 10 | 20 | GT  | 26 | 6  |
| 331663 | 77 | 1432316 | 1432343 | 2 | 14 | 28 | GT  | 16 | 7  |
| 331664 | 77 | 1433296 | 1433319 | 2 | 12 | 24 | TG  | 11 | 9  |
| 331666 | 77 | 1433616 | 1433631 | 2 | 8  | 16 | AC  | 21 | 13 |
| 331667 | 77 | 1433633 | 1433644 | 2 | 6  | 12 | CA  | 20 | 10 |
| 331668 | 77 | 1433903 | 1433914 | 2 | 6  | 12 | GA  | 22 | 11 |
| 331669 | 77 | 1434194 | 1434217 | 2 | 12 | 24 | AC  | 13 | 15 |
| 331670 | 77 | 1434334 | 1434361 | 2 | 14 | 28 | CA  | 12 | 12 |
| 331674 | 77 | 1435258 | 1435273 | 2 | 8  | 16 | GT  | 12 | 9  |
| 331675 | 77 | 1436233 | 1436268 | 2 | 18 | 36 | AC  | 19 | 9  |
| 331676 | 77 | 1436301 | 1436354 | 2 | 27 | 54 | GT  | 10 | 7  |
| 331677 | 77 | 1436557 | 1436582 | 2 | 13 | 26 | CA  | 18 | 9  |
| 331684 | 77 | 1440029 | 1440054 | 2 | 13 | 26 | CT  | 11 | 9  |
| 331692 | 77 | 1442532 | 1442563 | 2 | 16 | 32 | TG  | 14 | 10 |
| 331693 | 77 | 1442649 | 1442676 | 2 | 14 | 28 | AC  | 11 | 9  |
| 331695 | 77 | 1442788 | 1442813 | 2 | 13 | 26 | TG  | 10 | 8  |
| 331697 | 77 | 1448022 | 1448037 | 2 | 8  | 16 | AC  | 22 | 7  |
| 331698 | 77 | 1448154 | 1448171 | 3 | 6  | 18 | CTC | 25 | 3  |
| 331701 | 77 | 1448564 | 1448581 | 2 | 9  | 18 | TG  | 15 | 7  |
| 331704 | 77 | 1454049 | 1454080 | 2 | 16 | 32 | AC  | 6  | 9  |
| 331705 | 77 | 1454183 | 1454196 | 2 | 7  | 14 | CA  | 16 | 3  |
| 331706 | 77 | 1454225 | 1454258 | 2 | 17 | 34 | CA  | 7  | 6  |
| 331707 | 77 | 1454348 | 1454381 | 2 | 17 | 34 | AC  | 11 | 13 |
| 331709 | 77 | 1454632 | 1454667 | 2 | 18 | 36 | GT  | 12 | 10 |
| 331715 | 77 | 1456138 | 1456158 | 3 | 7  | 21 | AGA | 25 | 5  |
| 331716 | 77 | 1457397 | 1457432 | 2 | 18 | 36 | AC  | 10 | 10 |
| 331717 | 77 | 1458690 | 1458722 | 3 | 11 | 33 | CAG | 27 | 8  |
| 331721 | 77 | 1459978 | 1460013 | 3 | 12 | 36 | CTG | 24 | 11 |
| 331723 | 77 | 1460212 | 1460227 | 2 | 8  | 16 | AC  | 18 | 3  |
| 331726 | 77 | 1460636 | 1460673 | 2 | 19 | 38 | GT  | 13 | 12 |
| 331729 | 77 | 1460824 | 1460839 | 2 | 8  | 16 | GT  | 8  | 9  |
| 331739 | 77 | 1463218 | 1463247 | 2 | 15 | 30 | GT  | 12 | 12 |
| 331740 | 77 | 1463307 | 1463324 | 3 | 6  | 18 | GAG | 18 | 6  |
| 331746 | 77 | 1463799 | 1463825 | 3 | 9  | 27 | AGG | 13 | 9  |
| 331747 | 77 | 1464961 | 1464998 | 2 | 19 | 38 | AC  | 11 | 9  |
| 331748 | 77 | 1465116 | 1465147 | 2 | 16 | 32 | AC  | 13 | 18 |
| 331759 | 77 | 1467756 | 1467779 | 3 | 8  | 24 | AAC | 27 | 7  |
| 331760 | 77 | 1468322 | 1468349 | 2 | 14 | 28 | TG  | 11 | 8  |
| 331764 | 77 | 1470057 | 1470086 | 2 | 15 | 30 | GT  | 15 | 10 |
| 331765 | 77 | 1470175 | 1470202 | 2 | 14 | 28 | CA  | 11 | 10 |
| 331767 | 77 | 1470877 | 1470914 | 2 | 19 | 38 | AC  | 6  | 6  |
| 331768 | 77 | 1471746 | 1471777 | 2 | 16 | 32 | GT  | 11 | 11 |

|        |    |         |         |   |    |    |      |    |    |
|--------|----|---------|---------|---|----|----|------|----|----|
| 331769 | 77 | 1471900 | 1471920 | 3 | 7  | 21 | AGG  | 24 | 6  |
| 331771 | 77 | 1475637 | 1475664 | 4 | 7  | 28 | CCAT | 29 | 7  |
| 331773 | 77 | 1478404 | 1478427 | 2 | 12 | 24 | CA   | 18 | 11 |
| 331774 | 77 | 1479776 | 1479805 | 2 | 15 | 30 | AC   | 12 | 7  |
| 331780 | 77 | 1480546 | 1480567 | 2 | 11 | 22 | GT   | 17 | 9  |
| 331783 | 77 | 1480760 | 1480779 | 2 | 10 | 20 | CT   | 12 | 8  |
| 331786 | 77 | 1482933 | 1482948 | 2 | 8  | 16 | GT   | 20 | 8  |
| 331789 | 77 | 1484297 | 1484323 | 3 | 9  | 27 | CTT  | 15 | 7  |
| 331790 | 77 | 1484582 | 1484599 | 3 | 6  | 18 | TCT  | 13 | 8  |
| 331794 | 77 | 1485090 | 1485139 | 2 | 25 | 50 | GA   | 8  | 9  |
| 331795 | 77 | 1485705 | 1485730 | 2 | 13 | 26 | AC   | 13 | 9  |
| 331797 | 77 | 1488179 | 1488216 | 2 | 19 | 38 | GT   | 7  | 9  |
| 331798 | 77 | 1488329 | 1488374 | 2 | 23 | 46 | GT   | 7  | 9  |
| 331802 | 77 | 1489188 | 1489211 | 2 | 12 | 24 | CA   | 16 | 8  |
| 331803 | 77 | 1489561 | 1489604 | 2 | 22 | 44 | AC   | 6  | 10 |
| 331804 | 77 | 1490155 | 1490180 | 2 | 13 | 26 | TG   | 22 | 11 |
| 331808 | 77 | 1497898 | 1497919 | 2 | 11 | 22 | AC   | 15 | 4  |
| 331812 | 77 | 1502288 | 1502317 | 2 | 15 | 30 | GT   | 12 | 9  |
| 331813 | 77 | 1502391 | 1502424 | 2 | 17 | 34 | GT   | 14 | 8  |
| 331815 | 77 | 1502599 | 1502636 | 2 | 19 | 38 | CA   | 16 | 17 |
| 331818 | 77 | 1515007 | 1515024 | 2 | 9  | 18 | TG   | 11 | 9  |
| 331819 | 77 | 1515218 | 1515232 | 3 | 5  | 15 | GCT  | 25 | 4  |
| 331821 | 77 | 1516156 | 1516191 | 2 | 18 | 36 | CA   | 7  | 7  |
| 331829 | 77 | 1516867 | 1516888 | 2 | 11 | 22 | CA   | 10 | 13 |
| 331830 | 77 | 1517527 | 1517538 | 2 | 6  | 12 | GT   | 28 | 9  |
| 331831 | 77 | 1517583 | 1517606 | 2 | 12 | 24 | TG   | 19 | 10 |
| 331834 | 77 | 1521051 | 1521078 | 2 | 14 | 28 | GT   | 11 | 8  |
| 331836 | 77 | 1521510 | 1521525 | 2 | 8  | 16 | GT   | 27 | 7  |
| 331838 | 77 | 1526865 | 1526884 | 4 | 5  | 20 | GGAG | 12 | 4  |
| 331844 | 77 | 1530719 | 1530733 | 3 | 5  | 15 | TGT  | 10 | 4  |
| 331845 | 77 | 1531089 | 1531102 | 2 | 7  | 14 | CT   | 23 | 3  |
| 331846 | 77 | 1531367 | 1531392 | 2 | 13 | 26 | AC   | 10 | 8  |
| 331854 | 77 | 1535704 | 1535736 | 3 | 11 | 33 | GGA  | 7  | 6  |
| 331855 | 77 | 1536287 | 1536300 | 2 | 7  | 14 | CT   | 22 | 8  |
| 331856 | 77 | 1537365 | 1537376 | 2 | 6  | 12 | TG   | 17 | 5  |
| 331857 | 77 | 1537379 | 1537392 | 2 | 7  | 14 | TG   | 17 | 4  |
| 331858 | 77 | 1537481 | 1537496 | 2 | 8  | 16 | GT   | 19 | 5  |
| 331861 | 77 | 1539665 | 1539682 | 3 | 6  | 18 | TGT  | 31 | 3  |
| 331864 | 77 | 1542867 | 1542896 | 3 | 10 | 30 | CCT  | 19 | 6  |
| 331865 | 77 | 1543300 | 1543317 | 2 | 9  | 18 | GT   | 17 | 5  |
| 331866 | 77 | 1543659 | 1543672 | 2 | 7  | 14 | AG   | 23 | 5  |
| 331867 | 77 | 1543745 | 1543768 | 2 | 12 | 24 | AC   | 11 | 14 |
| 331872 | 77 | 1545112 | 1545139 | 2 | 14 | 28 | AC   | 16 | 9  |
| 331873 | 77 | 1545239 | 1545254 | 2 | 8  | 16 | GT   | 17 | 10 |
| 331874 | 77 | 1547006 | 1547021 | 2 | 8  | 16 | GT   | 13 | 7  |
| 331875 | 77 | 1547023 | 1547034 | 2 | 6  | 12 | TG   | 15 | 5  |
| 331877 | 77 | 1549736 | 1549768 | 3 | 11 | 33 | TCA  | 12 | 17 |
| 331882 | 77 | 1551024 | 1551039 | 2 | 8  | 16 | CT   | 19 | 9  |
| 331883 | 77 | 1551688 | 1551713 | 2 | 13 | 26 | GT   | 9  | 9  |
| 331884 | 77 | 1551768 | 1551781 | 2 | 7  | 14 | GA   | 18 | 7  |
| 331886 | 77 | 1554761 | 1554780 | 2 | 10 | 20 | AG   | 19 | 7  |

|        |    |         |         |   |    |    |      |    |    |
|--------|----|---------|---------|---|----|----|------|----|----|
| 331887 | 77 | 1555070 | 1555105 | 2 | 18 | 36 | GT   | 12 | 13 |
| 331888 | 77 | 1555202 | 1555221 | 2 | 10 | 20 | GT   | 7  | 10 |
| 331896 | 77 | 1557881 | 1557918 | 2 | 19 | 38 | TG   | 12 | 9  |
| 331903 | 77 | 1558652 | 1558679 | 2 | 14 | 28 | CA   | 13 | 11 |
| 331905 | 77 | 1559592 | 1559625 | 2 | 17 | 34 | AC   | 7  | 9  |
| 331941 | 77 | 1574917 | 1574944 | 2 | 14 | 28 | AC   | 19 | 10 |
| 331952 | 77 | 1576461 | 1576490 | 2 | 15 | 30 | CA   | 19 | 14 |
| 331953 | 77 | 1576614 | 1576629 | 2 | 8  | 16 | GT   | 10 | 9  |
| 331954 | 77 | 1576631 | 1576646 | 2 | 8  | 16 | TG   | 15 | 11 |
| 331955 | 77 | 1578052 | 1578079 | 2 | 14 | 28 | AC   | 13 | 14 |
| 331958 | 77 | 1581303 | 1581317 | 3 | 5  | 15 | CTC  | 13 | 4  |
| 331960 | 77 | 1581445 | 1581464 | 2 | 10 | 20 | GT   | 19 | 9  |
| 331961 | 77 | 1581617 | 1581656 | 2 | 20 | 40 | CA   | 9  | 12 |
| 331962 | 77 | 1581904 | 1581923 | 4 | 5  | 20 | AGAA | 7  | 7  |
| 331964 | 77 | 1585027 | 1585044 | 3 | 6  | 18 | AGA  | 23 | 5  |
| 331965 | 77 | 1586109 | 1586126 | 2 | 9  | 18 | AC   | 14 | 9  |
| 331966 | 77 | 1586258 | 1586287 | 2 | 15 | 30 | TG   | 12 | 8  |
| 331967 | 77 | 1586438 | 1586481 | 2 | 22 | 44 | GT   | 12 | 11 |
| 331968 | 77 | 1586618 | 1586649 | 2 | 16 | 32 | TG   | 15 | 12 |
| 331969 | 77 | 1588357 | 1588384 | 2 | 14 | 28 | TG   | 23 | 6  |
| 331970 | 77 | 1588605 | 1588634 | 2 | 15 | 30 | AC   | 17 | 16 |
| 331971 | 77 | 1588708 | 1588733 | 2 | 13 | 26 | CA   | 14 | 12 |
| 331975 | 77 | 1589265 | 1589282 | 2 | 9  | 18 | GT   | 17 | 6  |
| 331976 | 77 | 1589321 | 1589332 | 2 | 6  | 12 | GT   | 26 | 5  |
| 331979 | 77 | 1590076 | 1590087 | 2 | 6  | 12 | CA   | 14 | 6  |
| 331980 | 77 | 1590090 | 1590107 | 2 | 9  | 18 | CA   | 12 | 5  |
| 331992 | 77 | 1591068 | 1591079 | 2 | 6  | 12 | AC   | 11 | 7  |
| 332001 | 77 | 1593015 | 1593032 | 2 | 9  | 18 | AC   | 16 | 9  |
| 332002 | 77 | 1593182 | 1593207 | 2 | 13 | 26 | AC   | 14 | 16 |
| 332004 | 77 | 1593530 | 1593544 | 3 | 5  | 15 | CTC  | 10 | 5  |
| 332005 | 77 | 1593709 | 1593748 | 2 | 20 | 40 | AC   | 11 | 9  |
| 332006 | 77 | 1594455 | 1594474 | 4 | 5  | 20 | TCTG | 22 | 3  |
| 332007 | 77 | 1596012 | 1596029 | 2 | 9  | 18 | AC   | 8  | 11 |
| 332008 | 77 | 1596211 | 1596222 | 2 | 6  | 12 | AC   | 9  | 8  |
| 332011 | 77 | 1596422 | 1596457 | 2 | 18 | 36 | CA   | 9  | 11 |
| 332013 | 77 | 1596806 | 1596853 | 2 | 24 | 48 | TG   | 6  | 9  |
| 332023 | 77 | 1599493 | 1599512 | 2 | 10 | 20 | TG   | 15 | 4  |
| 332024 | 77 | 1601423 | 1601474 | 4 | 13 | 52 | AGAA | 15 | 18 |
| 332025 | 77 | 1602545 | 1602594 | 2 | 25 | 50 | GT   | 12 | 19 |
| 332029 | 77 | 1602948 | 1603005 | 2 | 29 | 58 | CA   | 8  | 13 |
| 332031 | 77 | 1605565 | 1605576 | 2 | 6  | 12 | GC   | 6  | 7  |
| 332041 | 77 | 1609093 | 1609113 | 3 | 7  | 21 | CTT  | 18 | 6  |
| 332049 | 77 | 1610610 | 1610621 | 2 | 6  | 12 | AC   | 13 | 3  |
| 332052 | 77 | 1610878 | 1610893 | 2 | 8  | 16 | CA   | 19 | 9  |
| 332053 | 77 | 1611862 | 1611909 | 2 | 24 | 48 | GT   | 9  | 11 |
| 332054 | 77 | 1612014 | 1612027 | 2 | 7  | 14 | CT   | 17 | 5  |
| 332055 | 77 | 1612070 | 1612103 | 2 | 17 | 34 | AC   | 19 | 8  |
| 332064 | 77 | 1615593 | 1615608 | 2 | 8  | 16 | AC   | 19 | 4  |
| 332067 | 77 | 1616106 | 1616135 | 2 | 15 | 30 | AC   | 10 | 4  |
| 332071 | 77 | 1616635 | 1616652 | 2 | 9  | 18 | GT   | 13 | 9  |
| 332074 | 77 | 1618335 | 1618349 | 3 | 5  | 15 | TCT  | 23 | 4  |

|        |    |         |         |   |    |    |      |    |    |
|--------|----|---------|---------|---|----|----|------|----|----|
| 332076 | 77 | 1618539 | 1618552 | 2 | 7  | 14 | TG   | 9  | 5  |
| 332079 | 77 | 1618904 | 1618921 | 2 | 9  | 18 | GT   | 6  | 8  |
| 332080 | 77 | 1619003 | 1619024 | 2 | 11 | 22 | GT   | 14 | 9  |
| 332081 | 77 | 1619583 | 1619610 | 2 | 14 | 28 | AC   | 14 | 10 |
| 332082 | 77 | 1620624 | 1620651 | 2 | 14 | 28 | GT   | 14 | 10 |
| 332083 | 77 | 1621703 | 1621724 | 2 | 11 | 22 | AC   | 15 | 8  |
| 332084 | 77 | 1621947 | 1621972 | 2 | 13 | 26 | CA   | 13 | 14 |
| 332090 | 77 | 1623496 | 1623521 | 2 | 13 | 26 | AC   | 9  | 10 |
| 332095 | 77 | 1625098 | 1625125 | 2 | 14 | 28 | CA   | 18 | 12 |
| 332096 | 77 | 1625320 | 1625341 | 2 | 11 | 22 | AC   | 18 | 13 |
| 332097 | 77 | 1625388 | 1625415 | 2 | 14 | 28 | GT   | 15 | 10 |
| 332098 | 77 | 1625643 | 1625662 | 2 | 10 | 20 | TG   | 10 | 11 |
| 332100 | 77 | 1625795 | 1625808 | 2 | 7  | 14 | GT   | 15 | 7  |
| 332101 | 77 | 1625864 | 1625897 | 2 | 17 | 34 | TG   | 13 | 7  |
| 332104 | 77 | 1628289 | 1628315 | 3 | 9  | 27 | GAA  | 22 | 9  |
| 332106 | 77 | 1629320 | 1629353 | 2 | 17 | 34 | TG   | 7  | 9  |
| 332121 | 77 | 1633113 | 1633130 | 3 | 6  | 18 | CCT  | 27 | 6  |
| 332123 | 77 | 1633634 | 1633654 | 3 | 7  | 21 | AGA  | 27 | 4  |
| 332126 | 77 | 1640802 | 1640841 | 4 | 10 | 40 | ACAG | 23 | 9  |
| 332133 | 77 | 1645553 | 1645570 | 2 | 9  | 18 | AC   | 9  | 6  |
| 332134 | 77 | 1645702 | 1645723 | 2 | 11 | 22 | CA   | 18 | 16 |
| 332136 | 77 | 1647019 | 1647052 | 2 | 17 | 34 | TG   | 15 | 15 |
| 332137 | 77 | 1647955 | 1647984 | 2 | 15 | 30 | TG   | 8  | 9  |
| 332138 | 77 | 1648083 | 1648100 | 2 | 9  | 18 | AC   | 15 | 7  |
| 332139 | 77 | 1648143 | 1648164 | 2 | 11 | 22 | AC   | 16 | 8  |
| 332145 | 77 | 1649878 | 1649903 | 2 | 13 | 26 | GT   | 9  | 9  |
| 332149 | 77 | 1652616 | 1652663 | 2 | 24 | 48 | AC   | 6  | 10 |
| 332150 | 77 | 1652779 | 1652812 | 2 | 17 | 34 | AC   | 10 | 7  |
| 332176 | 77 | 1675397 | 1675432 | 3 | 12 | 36 | ATT  | 10 | 10 |
| 332178 | 77 | 1676926 | 1676955 | 2 | 15 | 30 | GT   | 15 | 13 |
| 332180 | 77 | 1678151 | 1678166 | 2 | 8  | 16 | CA   | 9  | 4  |
| 332181 | 77 | 1679085 | 1679100 | 4 | 4  | 16 | AGAA | 26 | 5  |
| 332182 | 77 | 1681362 | 1681391 | 2 | 15 | 30 | TG   | 17 | 11 |
| 332183 | 77 | 1681532 | 1681561 | 2 | 15 | 30 | CA   | 16 | 10 |
| 332186 | 77 | 1687833 | 1687860 | 2 | 14 | 28 | AC   | 10 | 15 |
| 332187 | 77 | 1688095 | 1688108 | 2 | 7  | 14 | AG   | 17 | 5  |
| 332192 | 77 | 1698350 | 1698367 | 2 | 9  | 18 | GT   | 23 | 9  |
| 332193 | 77 | 1698546 | 1698565 | 2 | 10 | 20 | AC   | 15 | 11 |
| 332194 | 77 | 1702127 | 1702158 | 2 | 16 | 32 | GT   | 7  | 11 |
| 332200 | 77 | 1702529 | 1702552 | 2 | 12 | 24 | TG   | 9  | 12 |
| 332203 | 77 | 1702901 | 1702918 | 2 | 9  | 18 | AG   | 30 | 3  |
| 332206 | 77 | 1705933 | 1705960 | 2 | 14 | 28 | GT   | 9  | 11 |
| 332207 | 77 | 1707601 | 1707621 | 3 | 7  | 21 | AAG  | 16 | 4  |
| 332208 | 77 | 1709014 | 1709027 | 2 | 7  | 14 | AC   | 18 | 15 |
| 332209 | 77 | 1709030 | 1709047 | 2 | 9  | 18 | AC   | 15 | 15 |
| 332210 | 77 | 1709219 | 1709252 | 2 | 17 | 34 | GT   | 11 | 9  |
| 332211 | 77 | 1709439 | 1709454 | 2 | 8  | 16 | TG   | 11 | 7  |
| 332213 | 77 | 1711232 | 1711265 | 2 | 17 | 34 | AC   | 8  | 10 |
| 332214 | 77 | 1711365 | 1711398 | 2 | 17 | 34 | AC   | 16 | 15 |
| 332220 | 77 | 1714354 | 1714383 | 2 | 15 | 30 | GT   | 6  | 7  |
| 332221 | 77 | 1714450 | 1714463 | 2 | 7  | 14 | CA   | 27 | 3  |

|        |    |         |         |   |    |    |      |    |    |
|--------|----|---------|---------|---|----|----|------|----|----|
| 332224 | 77 | 1717164 | 1717195 | 2 | 16 | 32 | TG   | 15 | 12 |
| 332232 | 77 | 1723567 | 1723580 | 2 | 7  | 14 | CA   | 19 | 4  |
| 332238 | 77 | 1725352 | 1725371 | 2 | 10 | 20 | GA   | 15 | 4  |
| 332242 | 77 | 1725779 | 1725802 | 2 | 12 | 24 | AC   | 14 | 12 |
| 332243 | 77 | 1725915 | 1725948 | 2 | 17 | 34 | AC   | 16 | 15 |
| 332245 | 77 | 1728420 | 1728431 | 2 | 6  | 12 | CT   | 33 | 3  |
| 332246 | 77 | 1731012 | 1731027 | 2 | 8  | 16 | AC   | 22 | 11 |
| 332248 | 77 | 1731554 | 1731577 | 3 | 8  | 24 | GAA  | 7  | 9  |
| 332251 | 77 | 1736169 | 1736180 | 2 | 6  | 12 | AG   | 26 | 3  |
| 332253 | 77 | 1736895 | 1736909 | 3 | 5  | 15 | GGA  | 9  | 7  |
| 332255 | 77 | 1738128 | 1738147 | 2 | 10 | 20 | CA   | 23 | 8  |
| 332257 | 77 | 1747757 | 1747772 | 4 | 4  | 16 | TCCA | 22 | 3  |
| 332260 | 77 | 1752596 | 1752615 | 2 | 10 | 20 | TG   | 10 | 14 |
| 332263 | 77 | 1762059 | 1762082 | 3 | 8  | 24 | GGA  | 23 | 3  |
| 332264 | 77 | 1763619 | 1763630 | 2 | 6  | 12 | GA   | 14 | 3  |
| 332271 | 77 | 1766754 | 1766787 | 2 | 17 | 34 | GT   | 21 | 14 |
| 332273 | 77 | 1770821 | 1770846 | 2 | 13 | 26 | AC   | 10 | 4  |
| 332288 | 77 | 1774165 | 1774209 | 3 | 15 | 45 | AGA  | 18 | 8  |
| 332290 | 77 | 1774523 | 1774550 | 2 | 14 | 28 | AC   | 12 | 10 |
| 332298 | 77 | 1777213 | 1777230 | 2 | 9  | 18 | CA   | 9  | 10 |
| 332300 | 77 | 1777326 | 1777345 | 2 | 10 | 20 | TG   | 15 | 12 |
| 332304 | 77 | 1778883 | 1778898 | 2 | 8  | 16 | AC   | 25 | 11 |
| 332307 | 77 | 1780419 | 1780434 | 4 | 4  | 16 | AGAA | 23 | 3  |
| 332310 | 77 | 1797914 | 1797935 | 2 | 11 | 22 | AC   | 27 | 14 |
| 332313 | 77 | 1799372 | 1799395 | 2 | 12 | 24 | GT   | 18 | 14 |
| 332315 | 77 | 1800169 | 1800184 | 2 | 8  | 16 | TC   | 17 | 4  |
| 332316 | 77 | 1801763 | 1801825 | 3 | 21 | 63 | GAA  | 13 | 14 |
| 332317 | 77 | 1808693 | 1808708 | 4 | 4  | 16 | TAGC | 31 | 4  |
| 332319 | 77 | 1817239 | 1817250 | 2 | 6  | 12 | TA   | 13 | 6  |
| 332320 | 77 | 1817584 | 1817599 | 2 | 8  | 16 | TA   | 21 | 8  |
| 332322 | 77 | 1822645 | 1822662 | 2 | 9  | 18 | GT   | 24 | 4  |
| 332323 | 77 | 1822713 | 1822727 | 3 | 5  | 15 | ACA  | 26 | 3  |
| 332325 | 77 | 1824143 | 1824157 | 3 | 5  | 15 | GCT  | 10 | 5  |
| 332328 | 77 | 1824318 | 1824337 | 2 | 10 | 20 | CA   | 13 | 11 |
| 332329 | 77 | 1825763 | 1825792 | 2 | 15 | 30 | TG   | 12 | 16 |
| 332330 | 77 | 1827188 | 1827219 | 2 | 16 | 32 | CA   | 17 | 15 |
| 332333 | 77 | 1828815 | 1828860 | 2 | 23 | 46 | TG   | 11 | 9  |
| 332335 | 77 | 1830606 | 1830625 | 2 | 10 | 20 | AG   | 17 | 5  |
| 332342 | 77 | 1835609 | 1835640 | 2 | 16 | 32 | AC   | 10 | 8  |
| 332344 | 77 | 1837462 | 1837485 | 2 | 12 | 24 | TG   | 25 | 11 |
| 332345 | 77 | 1837665 | 1837704 | 2 | 20 | 40 | CA   | 6  | 10 |
| 332346 | 77 | 1838427 | 1838450 | 3 | 8  | 24 | GAG  | 10 | 7  |
| 332347 | 77 | 1839740 | 1839765 | 2 | 13 | 26 | CA   | 11 | 12 |
| 332349 | 77 | 1844279 | 1844299 | 3 | 7  | 21 | CAT  | 23 | 5  |
| 332350 | 77 | 1844864 | 1844879 | 4 | 4  | 16 | GTTT | 11 | 6  |
| 332351 | 77 | 1847412 | 1847439 | 4 | 7  | 28 | CTGC | 12 | 14 |
| 332352 | 77 | 1848127 | 1848156 | 2 | 15 | 30 | CA   | 11 | 5  |
| 332353 | 77 | 1848886 | 1848900 | 3 | 5  | 15 | TCC  | 24 | 4  |
| 332357 | 77 | 1863703 | 1863736 | 2 | 17 | 34 | CA   | 10 | 11 |
| 332358 | 77 | 1868359 | 1868370 | 2 | 6  | 12 | AG   | 32 | 3  |
| 332359 | 77 | 1871429 | 1871452 | 3 | 8  | 24 | TTA  | 19 | 4  |



|        |    |         |         |   |    |    |      |    |    |
|--------|----|---------|---------|---|----|----|------|----|----|
| 332365 | 77 | 1883486 | 1883523 | 2 | 19 | 38 | GT   | 8  | 9  |
| 332369 | 77 | 1887384 | 1887411 | 2 | 14 | 28 | TG   | 20 | 7  |
| 332370 | 77 | 1888868 | 1888887 | 2 | 10 | 20 | GT   | 20 | 6  |
| 332372 | 77 | 1891893 | 1891914 | 2 | 11 | 22 | GT   | 19 | 10 |
| 332373 | 77 | 1892535 | 1892552 | 2 | 9  | 18 | GT   | 12 | 13 |
| 332375 | 77 | 1895328 | 1895349 | 2 | 11 | 22 | GT   | 24 | 10 |
| 332379 | 77 | 1900145 | 1900174 | 3 | 10 | 30 | CCT  | 26 | 5  |
| 332384 | 77 | 1913495 | 1913512 | 2 | 9  | 18 | CA   | 21 | 10 |
| 332385 | 77 | 1913819 | 1913834 | 2 | 8  | 16 | CA   | 23 | 8  |
| 332391 | 77 | 1924981 | 1924998 | 2 | 9  | 18 | TC   | 24 | 4  |
| 332397 | 77 | 1930988 | 1931011 | 3 | 8  | 24 | CCT  | 16 | 7  |
| 332406 | 77 | 1945630 | 1945650 | 3 | 7  | 21 | CTT  | 14 | 6  |
| 332407 | 77 | 1948829 | 1948852 | 2 | 12 | 24 | GT   | 15 | 11 |
| 332428 | 77 | 2002187 | 2002198 | 2 | 6  | 12 | AC   | 7  | 3  |
| 332438 | 77 | 2027755 | 2027786 | 2 | 16 | 32 | GT   | 8  | 7  |
| 332444 | 78 | 19085   | 19112   | 4 | 7  | 28 | ATGT | 19 | 11 |
| 332451 | 78 | 39657   | 39684   | 2 | 14 | 28 | CT   | 12 | 6  |
| 332455 | 78 | 51533   | 51544   | 2 | 6  | 12 | CG   | 22 | 8  |
| 332456 | 78 | 51844   | 51883   | 2 | 20 | 40 | AC   | 9  | 10 |
| 332465 | 78 | 66705   | 66740   | 2 | 18 | 36 | AC   | 18 | 7  |
| 332467 | 78 | 68385   | 68410   | 2 | 13 | 26 | CA   | 17 | 5  |
| 332470 | 78 | 69852   | 69867   | 2 | 8  | 16 | GT   | 19 | 9  |
| 332471 | 78 | 69869   | 69880   | 2 | 6  | 12 | TG   | 25 | 10 |
| 332472 | 78 | 71256   | 71275   | 2 | 10 | 20 | AC   | 12 | 9  |
| 332474 | 78 | 78821   | 78852   | 2 | 16 | 32 | CA   | 6  | 7  |
| 332475 | 78 | 80938   | 80963   | 2 | 13 | 26 | GT   | 10 | 12 |
| 332482 | 78 | 96386   | 96401   | 2 | 8  | 16 | TG   | 28 | 3  |
| 332484 | 78 | 96629   | 96644   | 2 | 8  | 16 | GT   | 19 | 7  |
| 332488 | 78 | 98747   | 98766   | 2 | 10 | 20 | CA   | 8  | 6  |
| 332495 | 78 | 105324  | 105337  | 2 | 7  | 14 | TG   | 25 | 8  |
| 332498 | 78 | 109407  | 109446  | 4 | 10 | 40 | TGAT | 29 | 8  |
| 332500 | 78 | 110990  | 111021  | 4 | 8  | 32 | TAGA | 9  | 4  |
| 332502 | 78 | 112319  | 112370  | 2 | 26 | 52 | CA   | 6  | 9  |
| 332511 | 78 | 122762  | 122783  | 2 | 11 | 22 | TG   | 9  | 8  |
| 332512 | 78 | 123088  | 123105  | 2 | 9  | 18 | TG   | 28 | 8  |
| 332518 | 78 | 128318  | 128351  | 2 | 17 | 34 | TG   | 20 | 11 |
| 332524 | 78 | 137285  | 137314  | 2 | 15 | 30 | CA   | 6  | 9  |
| 332529 | 78 | 139651  | 139666  | 4 | 4  | 16 | GAGG | 23 | 3  |
| 332531 | 78 | 140134  | 140161  | 4 | 7  | 28 | GAAG | 25 | 4  |
| 332532 | 78 | 141032  | 141057  | 2 | 13 | 26 | TG   | 11 | 8  |
| 332534 | 78 | 141630  | 141657  | 2 | 14 | 28 | AC   | 19 | 7  |
| 332540 | 78 | 143609  | 143628  | 2 | 10 | 20 | TG   | 15 | 10 |
| 332544 | 78 | 152619  | 152648  | 2 | 15 | 30 | GT   | 22 | 13 |
| 332546 | 78 | 155492  | 155507  | 4 | 4  | 16 | CTGT | 28 | 4  |
| 332556 | 78 | 162256  | 162279  | 2 | 12 | 24 | TG   | 7  | 3  |
| 332557 | 78 | 162437  | 162460  | 2 | 12 | 24 | CA   | 10 | 10 |
| 332563 | 78 | 168508  | 168531  | 2 | 12 | 24 | AC   | 14 | 7  |
| 332566 | 78 | 175615  | 175628  | 2 | 7  | 14 | TG   | 14 | 3  |
| 332567 | 78 | 175788  | 175815  | 2 | 14 | 28 | TG   | 14 | 15 |
| 332568 | 78 | 175913  | 175926  | 2 | 7  | 14 | CA   | 22 | 6  |
| 332569 | 78 | 176029  | 176044  | 4 | 4  | 16 | TGTA | 16 | 13 |

|        |    |        |        |   |    |    |     |    |    |
|--------|----|--------|--------|---|----|----|-----|----|----|
| 332570 | 78 | 176045 | 176058 | 2 | 7  | 14 | TG  | 15 | 11 |
| 332572 | 78 | 179367 | 179380 | 2 | 7  | 14 | AC  | 27 | 4  |
| 332574 | 78 | 180150 | 180171 | 2 | 11 | 22 | TG  | 19 | 5  |
| 332578 | 78 | 180852 | 180873 | 2 | 11 | 22 | GA  | 19 | 4  |
| 332582 | 78 | 187166 | 187185 | 2 | 10 | 20 | CA  | 30 | 8  |
| 332583 | 78 | 187320 | 187345 | 2 | 13 | 26 | CA  | 18 | 9  |
| 332584 | 78 | 187674 | 187693 | 2 | 10 | 20 | TG  | 9  | 9  |
| 332585 | 78 | 187804 | 187818 | 3 | 5  | 15 | TGC | 27 | 4  |
| 332589 | 78 | 189170 | 189193 | 2 | 12 | 24 | TG  | 26 | 11 |
| 332590 | 78 | 189302 | 189327 | 2 | 13 | 26 | AC  | 12 | 8  |
| 332591 | 78 | 189510 | 189527 | 2 | 9  | 18 | TG  | 18 | 3  |
| 332593 | 78 | 189638 | 189653 | 2 | 8  | 16 | GT  | 15 | 8  |
| 332594 | 78 | 189654 | 189665 | 2 | 6  | 12 | GA  | 12 | 5  |
| 332595 | 78 | 189750 | 189781 | 2 | 16 | 32 | GT  | 10 | 7  |
| 332598 | 78 | 192964 | 192981 | 2 | 9  | 18 | GT  | 31 | 5  |
| 332600 | 78 | 195914 | 195947 | 2 | 17 | 34 | CA  | 10 | 7  |
| 332602 | 78 | 199511 | 199536 | 2 | 13 | 26 | TG  | 17 | 9  |
| 332604 | 78 | 200089 | 200112 | 2 | 12 | 24 | GT  | 19 | 11 |
| 332605 | 78 | 201605 | 201618 | 2 | 7  | 14 | GT  | 22 | 5  |
| 332606 | 78 | 201619 | 201634 | 2 | 8  | 16 | GA  | 24 | 6  |
| 332607 | 78 | 201746 | 201775 | 2 | 15 | 30 | TG  | 7  | 8  |
| 332608 | 78 | 201933 | 201968 | 2 | 18 | 36 | GT  | 13 | 12 |
| 332615 | 78 | 209893 | 209916 | 2 | 12 | 24 | TG  | 7  | 9  |
| 332618 | 78 | 212496 | 212523 | 2 | 14 | 28 | GT  | 11 | 9  |
| 332619 | 78 | 212718 | 212751 | 2 | 17 | 34 | CA  | 16 | 9  |
| 332620 | 78 | 212819 | 212840 | 2 | 11 | 22 | TG  | 22 | 9  |
| 332624 | 78 | 215065 | 215090 | 2 | 13 | 26 | CA  | 19 | 12 |
| 332626 | 78 | 217518 | 217545 | 2 | 14 | 28 | CA  | 14 | 8  |
| 332633 | 78 | 220921 | 220936 | 2 | 8  | 16 | GT  | 24 | 3  |
| 332634 | 78 | 221156 | 221175 | 2 | 10 | 20 | CA  | 12 | 6  |
| 332636 | 78 | 222085 | 222114 | 3 | 10 | 30 | CTC | 16 | 4  |
| 332638 | 78 | 224901 | 224918 | 2 | 9  | 18 | TG  | 22 | 8  |
| 332640 | 78 | 226467 | 226504 | 2 | 19 | 38 | TG  | 7  | 6  |
| 332642 | 78 | 226659 | 226674 | 2 | 8  | 16 | AG  | 18 | 4  |
| 332656 | 78 | 240850 | 240865 | 2 | 8  | 16 | AC  | 20 | 4  |
| 332658 | 78 | 243852 | 243869 | 2 | 9  | 18 | CA  | 23 | 3  |
| 332659 | 78 | 244221 | 244238 | 2 | 9  | 18 | TC  | 25 | 5  |
| 332660 | 78 | 246034 | 246063 | 2 | 15 | 30 | GT  | 26 | 12 |
| 332661 | 78 | 246342 | 246357 | 2 | 8  | 16 | AC  | 21 | 6  |
| 332668 | 78 | 248802 | 248831 | 2 | 15 | 30 | GT  | 8  | 8  |
| 332669 | 78 | 248965 | 248980 | 2 | 8  | 16 | TC  | 19 | 6  |
| 332670 | 78 | 249223 | 249238 | 2 | 8  | 16 | TG  | 23 | 4  |
| 332671 | 78 | 249338 | 249383 | 2 | 23 | 46 | GT  | 9  | 11 |
| 332673 | 78 | 252489 | 252500 | 2 | 6  | 12 | CT  | 18 | 4  |
| 332678 | 78 | 254515 | 254536 | 2 | 11 | 22 | GT  | 17 | 4  |
| 332679 | 78 | 254593 | 254606 | 2 | 7  | 14 | GT  | 23 | 6  |
| 332687 | 78 | 257683 | 257708 | 2 | 13 | 26 | GT  | 17 | 6  |
| 332690 | 78 | 258386 | 258403 | 2 | 9  | 18 | CA  | 15 | 5  |
| 332697 | 78 | 261299 | 261318 | 2 | 10 | 20 | TG  | 15 | 12 |
| 332700 | 78 | 263045 | 263078 | 2 | 17 | 34 | TG  | 14 | 14 |
| 332701 | 78 | 263249 | 263260 | 2 | 6  | 12 | TG  | 16 | 5  |

|        |    |        |        |   |    |    |      |    |    |
|--------|----|--------|--------|---|----|----|------|----|----|
| 332702 | 78 | 263492 | 263515 | 2 | 12 | 24 | TG   | 25 | 5  |
| 332703 | 78 | 263702 | 263715 | 2 | 7  | 14 | CT   | 31 | 3  |
| 332705 | 78 | 265176 | 265191 | 2 | 8  | 16 | GA   | 6  | 6  |
| 332710 | 78 | 267149 | 267188 | 2 | 20 | 40 | TG   | 14 | 11 |
| 332711 | 78 | 267375 | 267392 | 3 | 6  | 18 | TAA  | 22 | 4  |
| 332714 | 78 | 268119 | 268152 | 2 | 17 | 34 | GT   | 8  | 8  |
| 332715 | 78 | 268313 | 268328 | 2 | 8  | 16 | TG   | 16 | 9  |
| 332716 | 78 | 268458 | 268475 | 2 | 9  | 18 | TG   | 19 | 4  |
| 332717 | 78 | 268670 | 268705 | 2 | 18 | 36 | AC   | 7  | 8  |
| 332719 | 78 | 268866 | 268877 | 2 | 6  | 12 | CA   | 18 | 7  |
| 332720 | 78 | 270473 | 270484 | 2 | 6  | 12 | TG   | 17 | 6  |
| 332721 | 78 | 270941 | 270970 | 2 | 15 | 30 | CA   | 17 | 11 |
| 332723 | 78 | 271948 | 271979 | 2 | 16 | 32 | TG   | 13 | 9  |
| 332724 | 78 | 272090 | 272107 | 2 | 9  | 18 | CA   | 17 | 8  |
| 332725 | 78 | 272194 | 272249 | 2 | 28 | 56 | TG   | 8  | 10 |
| 332726 | 78 | 272368 | 272381 | 2 | 7  | 14 | GA   | 19 | 4  |
| 332727 | 78 | 272970 | 272991 | 2 | 11 | 22 | GT   | 13 | 5  |
| 332728 | 78 | 273396 | 273419 | 2 | 12 | 24 | GT   | 10 | 6  |
| 332729 | 78 | 273506 | 273523 | 2 | 9  | 18 | TG   | 18 | 4  |
| 332734 | 78 | 276304 | 276327 | 2 | 12 | 24 | CT   | 12 | 8  |
| 332736 | 78 | 277551 | 277570 | 2 | 10 | 20 | TG   | 6  | 6  |
| 332737 | 78 | 280122 | 280135 | 2 | 7  | 14 | TG   | 28 | 3  |
| 332738 | 78 | 281032 | 281043 | 2 | 6  | 12 | GA   | 26 | 3  |
| 332740 | 78 | 283266 | 283279 | 2 | 7  | 14 | TG   | 14 | 3  |
| 332741 | 78 | 283375 | 283406 | 2 | 16 | 32 | CA   | 14 | 11 |
| 332744 | 78 | 291187 | 291214 | 2 | 14 | 28 | CA   | 12 | 13 |
| 332745 | 78 | 291533 | 291548 | 2 | 8  | 16 | AC   | 12 | 8  |
| 332747 | 78 | 292382 | 292393 | 2 | 6  | 12 | TG   | 20 | 5  |
| 332750 | 78 | 296776 | 296795 | 2 | 10 | 20 | GA   | 12 | 3  |
| 332762 | 78 | 303086 | 303107 | 2 | 11 | 22 | TG   | 21 | 8  |
| 332764 | 78 | 304169 | 304186 | 2 | 9  | 18 | CA   | 22 | 4  |
| 332765 | 78 | 304364 | 304387 | 4 | 6  | 24 | TTGG | 20 | 5  |
| 332768 | 78 | 307337 | 307352 | 2 | 8  | 16 | GT   | 19 | 5  |
| 332770 | 78 | 308733 | 308752 | 2 | 10 | 20 | AC   | 10 | 6  |
| 332774 | 78 | 309098 | 309123 | 2 | 13 | 26 | TG   | 8  | 4  |
| 332777 | 78 | 309363 | 309414 | 2 | 26 | 52 | TG   | 6  | 8  |
| 332778 | 78 | 309678 | 309691 | 2 | 7  | 14 | TC   | 23 | 4  |
| 332779 | 78 | 310277 | 310292 | 2 | 8  | 16 | AC   | 22 | 5  |
| 332781 | 78 | 312077 | 312094 | 3 | 6  | 18 | AGG  | 20 | 7  |
| 332782 | 78 | 312359 | 312384 | 2 | 13 | 26 | TG   | 20 | 10 |
| 332784 | 78 | 312779 | 312812 | 2 | 17 | 34 | CA   | 11 | 11 |
| 332788 | 78 | 313147 | 313182 | 2 | 18 | 36 | CA   | 14 | 10 |
| 332789 | 78 | 313486 | 313511 | 2 | 13 | 26 | AC   | 14 | 9  |
| 332794 | 78 | 316510 | 316547 | 2 | 19 | 38 | AC   | 6  | 8  |
| 332797 | 78 | 318048 | 318077 | 2 | 15 | 30 | TG   | 8  | 4  |
| 332802 | 78 | 319414 | 319435 | 2 | 11 | 22 | GT   | 11 | 12 |
| 332803 | 78 | 319520 | 319545 | 2 | 13 | 26 | AC   | 20 | 8  |
| 332804 | 78 | 323399 | 323414 | 2 | 8  | 16 | GT   | 23 | 7  |
| 332806 | 78 | 324248 | 324261 | 2 | 7  | 14 | CA   | 14 | 13 |
| 332808 | 78 | 326886 | 326897 | 2 | 6  | 12 | AC   | 22 | 3  |
| 332810 | 78 | 332081 | 332094 | 2 | 7  | 14 | CA   | 18 | 6  |

|        |    |        |        |   |    |    |      |    |    |
|--------|----|--------|--------|---|----|----|------|----|----|
| 332813 | 78 | 334063 | 334084 | 2 | 11 | 22 | AC   | 18 | 3  |
| 332814 | 78 | 334183 | 334198 | 2 | 8  | 16 | AG   | 17 | 6  |
| 332815 | 78 | 334200 | 334213 | 2 | 7  | 14 | GA   | 21 | 6  |
| 332818 | 78 | 336195 | 336210 | 2 | 8  | 16 | TG   | 19 | 7  |
| 332819 | 78 | 337040 | 337051 | 2 | 6  | 12 | CA   | 20 | 9  |
| 332825 | 78 | 342874 | 342893 | 2 | 10 | 20 | GT   | 10 | 3  |
| 332826 | 78 | 344858 | 344877 | 2 | 10 | 20 | GA   | 20 | 8  |
| 332827 | 78 | 345721 | 345754 | 2 | 17 | 34 | GT   | 17 | 11 |
| 332836 | 78 | 360076 | 360089 | 2 | 7  | 14 | GT   | 11 | 6  |
| 332841 | 78 | 373399 | 373430 | 4 | 8  | 32 | GTGC | 17 | 9  |
| 332844 | 78 | 378784 | 378797 | 2 | 7  | 14 | AG   | 9  | 3  |
| 332845 | 78 | 378800 | 378813 | 2 | 7  | 14 | AG   | 19 | 5  |
| 332846 | 78 | 378816 | 378827 | 2 | 6  | 12 | AG   | 10 | 3  |
| 332849 | 78 | 380862 | 380875 | 2 | 7  | 14 | CA   | 31 | 5  |
| 332850 | 78 | 383492 | 383527 | 2 | 18 | 36 | TG   | 10 | 12 |
| 332855 | 78 | 386296 | 386313 | 2 | 9  | 18 | TG   | 21 | 8  |
| 332857 | 78 | 387166 | 387187 | 2 | 11 | 22 | TG   | 14 | 5  |
| 332858 | 78 | 387401 | 387412 | 2 | 6  | 12 | TG   | 27 | 6  |
| 332863 | 78 | 394774 | 394793 | 2 | 10 | 20 | AC   | 18 | 9  |
| 332866 | 78 | 398254 | 398279 | 2 | 13 | 26 | TG   | 14 | 9  |
| 332875 | 78 | 407719 | 407736 | 2 | 9  | 18 | TC   | 19 | 4  |
| 332886 | 78 | 420709 | 420724 | 2 | 8  | 16 | GT   | 27 | 5  |
| 332896 | 78 | 431825 | 431842 | 2 | 9  | 18 | AC   | 14 | 7  |
| 332897 | 78 | 431938 | 431955 | 2 | 9  | 18 | AC   | 18 | 3  |
| 332904 | 78 | 443943 | 443956 | 2 | 7  | 14 | TG   | 17 | 3  |
| 332905 | 78 | 444210 | 444241 | 2 | 16 | 32 | CT   | 8  | 8  |
| 332907 | 78 | 449689 | 449720 | 2 | 16 | 32 | TG   | 8  | 6  |
| 332926 | 78 | 479817 | 479828 | 2 | 6  | 12 | AC   | 24 | 5  |
| 332932 | 78 | 495494 | 495553 | 4 | 15 | 60 | TATG | 16 | 10 |
| 332949 | 78 | 508582 | 508599 | 2 | 9  | 18 | CT   | 11 | 3  |
| 332958 | 78 | 526208 | 526229 | 2 | 11 | 22 | CA   | 15 | 8  |
| 332964 | 78 | 529709 | 529730 | 2 | 11 | 22 | CA   | 6  | 3  |
| 332968 | 78 | 532589 | 532600 | 2 | 6  | 12 | GT   | 18 | 3  |
| 332970 | 78 | 532874 | 532887 | 2 | 7  | 14 | GT   | 24 | 7  |
| 332972 | 78 | 533038 | 533061 | 2 | 12 | 24 | AC   | 17 | 12 |
| 332975 | 78 | 536161 | 536175 | 3 | 5  | 15 | GCA  | 23 | 3  |
| 332986 | 78 | 549171 | 549188 | 2 | 9  | 18 | GT   | 12 | 6  |
| 332999 | 78 | 572212 | 572235 | 2 | 12 | 24 | TG   | 26 | 6  |
| 333000 | 78 | 572274 | 572287 | 2 | 7  | 14 | GA   | 29 | 5  |
| 333005 | 78 | 573194 | 573209 | 2 | 8  | 16 | GT   | 23 | 3  |
| 333012 | 78 | 581950 | 581973 | 4 | 6  | 24 | TGAT | 32 | 6  |
| 333014 | 78 | 582342 | 582361 | 2 | 10 | 20 | TG   | 23 | 6  |
| 333020 | 78 | 594481 | 594500 | 2 | 10 | 20 | TG   | 19 | 10 |
| 333021 | 78 | 594502 | 594513 | 2 | 6  | 12 | GT   | 17 | 10 |
| 333024 | 78 | 599461 | 599472 | 2 | 6  | 12 | AC   | 21 | 4  |
| 333030 | 78 | 603287 | 603306 | 2 | 10 | 20 | GT   | 15 | 5  |
| 333032 | 78 | 603433 | 603444 | 2 | 6  | 12 | TG   | 28 | 4  |
| 333033 | 78 | 603847 | 603861 | 3 | 5  | 15 | TTG  | 23 | 6  |
| 333040 | 78 | 630427 | 630438 | 2 | 6  | 12 | TG   | 24 | 3  |
| 333043 | 78 | 632566 | 632577 | 2 | 6  | 12 | AC   | 25 | 3  |
| 333045 | 78 | 633428 | 633442 | 3 | 5  | 15 | ACA  | 20 | 3  |

|        |    |        |        |   |    |    |      |    |    |
|--------|----|--------|--------|---|----|----|------|----|----|
| 333048 | 78 | 636443 | 636474 | 2 | 16 | 32 | CA   | 8  | 7  |
| 333052 | 78 | 640878 | 640889 | 2 | 6  | 12 | GT   | 30 | 3  |
| 333067 | 78 | 656597 | 656616 | 4 | 5  | 20 | TTAT | 18 | 4  |
| 333069 | 78 | 662703 | 662738 | 2 | 18 | 36 | GT   | 15 | 13 |
| 333073 | 78 | 666741 | 666756 | 2 | 8  | 16 | AG   | 19 | 6  |
| 333083 | 78 | 671960 | 672019 | 2 | 30 | 60 | AC   | 15 | 13 |
| 333086 | 78 | 673331 | 673350 | 2 | 10 | 20 | AC   | 19 | 7  |
| 333100 | 78 | 690772 | 690801 | 2 | 15 | 30 | CA   | 18 | 9  |
| 333101 | 78 | 691444 | 691463 | 4 | 5  | 20 | TTCC | 16 | 4  |
| 333102 | 78 | 694154 | 694171 | 2 | 9  | 18 | TG   | 15 | 11 |
| 333106 | 78 | 696818 | 696839 | 2 | 11 | 22 | AC   | 12 | 12 |
| 333108 | 78 | 697324 | 697335 | 2 | 6  | 12 | TG   | 23 | 8  |
| 333117 | 78 | 708537 | 708566 | 2 | 15 | 30 | TG   | 12 | 11 |
| 333120 | 78 | 708856 | 708879 | 2 | 12 | 24 | CA   | 20 | 10 |
| 333122 | 78 | 709855 | 709868 | 2 | 7  | 14 | CA   | 23 | 5  |
| 333124 | 78 | 710445 | 710456 | 2 | 6  | 12 | CT   | 18 | 3  |
| 333128 | 78 | 716877 | 716894 | 2 | 9  | 18 | TC   | 13 | 8  |
| 333130 | 78 | 717166 | 717179 | 2 | 7  | 14 | GT   | 15 | 5  |
| 333136 | 78 | 722202 | 722215 | 2 | 7  | 14 | GT   | 26 | 3  |
| 333137 | 78 | 723223 | 723256 | 2 | 17 | 34 | GT   | 13 | 6  |
| 333139 | 78 | 725504 | 725533 | 2 | 15 | 30 | GA   | 15 | 8  |
| 333148 | 78 | 760652 | 760665 | 2 | 7  | 14 | GT   | 20 | 3  |
| 333149 | 78 | 761543 | 761558 | 2 | 8  | 16 | GT   | 22 | 4  |
| 333157 | 78 | 773331 | 773358 | 2 | 14 | 28 | GA   | 17 | 8  |
| 333158 | 78 | 773608 | 773631 | 2 | 12 | 24 | TG   | 15 | 4  |
| 333160 | 78 | 776262 | 776295 | 2 | 17 | 34 | TG   | 13 | 14 |
| 333166 | 78 | 802280 | 802297 | 2 | 9  | 18 | GT   | 16 | 6  |
| 333177 | 78 | 825304 | 825323 | 2 | 10 | 20 | GT   | 22 | 8  |
| 333179 | 78 | 828299 | 828318 | 4 | 5  | 20 | CCAT | 35 | 5  |
| 333186 | 78 | 853425 | 853444 | 4 | 5  | 20 | ATGA | 27 | 6  |
| 333190 | 78 | 870070 | 870081 | 2 | 6  | 12 | TG   | 18 | 3  |
| 333192 | 78 | 872384 | 872398 | 3 | 5  | 15 | ATT  | 18 | 3  |
| 333195 | 78 | 893478 | 893498 | 3 | 7  | 21 | CTG  | 29 | 4  |
| 333197 | 78 | 897394 | 897413 | 2 | 10 | 20 | TC   | 21 | 7  |
| 333198 | 78 | 903499 | 903518 | 4 | 5  | 20 | AAAC | 25 | 4  |
| 333199 | 78 | 904123 | 904142 | 2 | 10 | 20 | GT   | 22 | 8  |
| 333201 | 78 | 911780 | 911795 | 2 | 8  | 16 | TC   | 21 | 3  |
| 333208 | 78 | 917712 | 917751 | 2 | 20 | 40 | TG   | 8  | 8  |
| 333211 | 78 | 921073 | 921088 | 2 | 8  | 16 | AC   | 15 | 4  |
| 333212 | 78 | 921116 | 921133 | 2 | 9  | 18 | GT   | 20 | 5  |
| 333213 | 78 | 921243 | 921254 | 2 | 6  | 12 | TG   | 22 | 3  |
| 333214 | 78 | 923252 | 923279 | 2 | 14 | 28 | AC   | 17 | 15 |
| 333216 | 78 | 924334 | 924349 | 4 | 4  | 16 | TTAA | 18 | 4  |
| 333218 | 78 | 927816 | 927831 | 2 | 8  | 16 | TG   | 19 | 4  |
| 333221 | 78 | 931670 | 931693 | 2 | 12 | 24 | GT   | 13 | 8  |
| 333222 | 78 | 933290 | 933307 | 3 | 6  | 18 | TTC  | 23 | 3  |
| 333225 | 78 | 936374 | 936393 | 2 | 10 | 20 | AC   | 13 | 8  |
| 333227 | 78 | 941247 | 941268 | 2 | 11 | 22 | CA   | 18 | 7  |
| 333229 | 78 | 943822 | 943841 | 2 | 10 | 20 | CA   | 20 | 8  |
| 333230 | 78 | 943843 | 943858 | 2 | 8  | 16 | AC   | 14 | 8  |
| 333231 | 78 | 944044 | 944061 | 2 | 9  | 18 | CA   | 11 | 5  |

|        |    |         |         |   |    |    |      |    |    |
|--------|----|---------|---------|---|----|----|------|----|----|
| 333234 | 78 | 949639  | 949662  | 2 | 12 | 24 | CT   | 16 | 11 |
| 333236 | 78 | 950402  | 950415  | 2 | 7  | 14 | CT   | 24 | 3  |
| 333238 | 78 | 950642  | 950657  | 2 | 8  | 16 | GT   | 21 | 7  |
| 333242 | 78 | 952690  | 952707  | 2 | 9  | 18 | GT   | 20 | 5  |
| 333246 | 78 | 958348  | 958365  | 2 | 9  | 18 | AG   | 11 | 4  |
| 333247 | 78 | 960259  | 960272  | 2 | 7  | 14 | GT   | 20 | 9  |
| 333248 | 78 | 960418  | 960449  | 2 | 16 | 32 | TG   | 13 | 8  |
| 333253 | 78 | 967155  | 967166  | 2 | 6  | 12 | CA   | 22 | 4  |
| 333260 | 78 | 981314  | 981339  | 2 | 13 | 26 | AC   | 15 | 11 |
| 333265 | 78 | 986772  | 986787  | 2 | 8  | 16 | CT   | 15 | 8  |
| 333267 | 78 | 987007  | 987038  | 2 | 16 | 32 | GT   | 16 | 15 |
| 333268 | 78 | 988309  | 988326  | 3 | 6  | 18 | TAC  | 27 | 3  |
| 333269 | 78 | 990172  | 990210  | 3 | 13 | 39 | AAT  | 9  | 8  |
| 333275 | 78 | 1006506 | 1006521 | 4 | 4  | 16 | CCTT | 12 | 3  |
| 333276 | 78 | 1006651 | 1006682 | 2 | 16 | 32 | GT   | 9  | 4  |
| 333279 | 78 | 1011324 | 1011335 | 2 | 6  | 12 | TG   | 26 | 4  |
| 333282 | 78 | 1014250 | 1014263 | 2 | 7  | 14 | AC   | 20 | 3  |
| 333284 | 78 | 1016995 | 1017050 | 2 | 28 | 56 | CA   | 6  | 7  |
| 333285 | 78 | 1018508 | 1018553 | 2 | 23 | 46 | TG   | 11 | 15 |
| 333286 | 78 | 1018733 | 1018758 | 2 | 13 | 26 | TG   | 16 | 13 |
| 333288 | 78 | 1021952 | 1021971 | 2 | 10 | 20 | AC   | 14 | 4  |
| 333298 | 78 | 1036257 | 1036282 | 2 | 13 | 26 | AC   | 14 | 8  |
| 333302 | 78 | 1036963 | 1036978 | 4 | 4  | 16 | TCCA | 27 | 3  |
| 333303 | 78 | 1036979 | 1036994 | 4 | 4  | 16 | TACA | 27 | 4  |
| 333306 | 78 | 1038748 | 1038785 | 2 | 19 | 38 | CA   | 9  | 9  |
| 333307 | 78 | 1040594 | 1040609 | 2 | 8  | 16 | TG   | 26 | 3  |
| 333311 | 78 | 1045778 | 1045797 | 2 | 10 | 20 | CA   | 14 | 7  |
| 333312 | 78 | 1045907 | 1045918 | 2 | 6  | 12 | AC   | 24 | 4  |
| 333315 | 78 | 1057578 | 1057605 | 2 | 14 | 28 | TG   | 20 | 10 |
| 333316 | 78 | 1058374 | 1058385 | 2 | 6  | 12 | TG   | 24 | 6  |
| 333320 | 78 | 1067798 | 1067811 | 2 | 7  | 14 | AC   | 20 | 4  |
| 333326 | 78 | 1084012 | 1084043 | 2 | 16 | 32 | CA   | 6  | 7  |
| 333329 | 78 | 1089922 | 1089948 | 3 | 9  | 27 | AAG  | 18 | 6  |
| 333333 | 78 | 1102323 | 1102358 | 4 | 9  | 36 | GGCA | 25 | 9  |
| 333334 | 78 | 1102758 | 1102813 | 4 | 14 | 56 | ATAG | 17 | 8  |
| 333336 | 78 | 1103556 | 1103579 | 3 | 8  | 24 | GAG  | 18 | 4  |
| 333339 | 78 | 1106076 | 1106123 | 4 | 12 | 48 | TCTT | 17 | 12 |
| 333341 | 78 | 1106990 | 1107003 | 2 | 7  | 14 | AT   | 22 | 4  |
| 333347 | 78 | 1113906 | 1113923 | 2 | 9  | 18 | AC   | 27 | 5  |
| 333359 | 78 | 1119419 | 1119442 | 4 | 6  | 24 | AAAT | 13 | 4  |
| 333367 | 78 | 1132276 | 1132289 | 2 | 7  | 14 | GT   | 23 | 4  |
| 333371 | 78 | 1132676 | 1132703 | 2 | 14 | 28 | TG   | 11 | 11 |
| 333372 | 78 | 1134882 | 1134901 | 2 | 10 | 20 | CA   | 24 | 3  |
| 333373 | 78 | 1136148 | 1136161 | 2 | 7  | 14 | CA   | 26 | 3  |
| 333389 | 78 | 1183990 | 1184007 | 3 | 6  | 18 | TGG  | 21 | 4  |
| 333400 | 78 | 1189707 | 1189732 | 2 | 13 | 26 | TG   | 9  | 4  |
| 333403 | 78 | 1192458 | 1192489 | 2 | 16 | 32 | CA   | 22 | 7  |
| 333404 | 78 | 1193327 | 1193340 | 2 | 7  | 14 | AT   | 13 | 3  |
| 333408 | 78 | 1200534 | 1200575 | 3 | 14 | 42 | GCT  | 24 | 13 |
| 333409 | 78 | 1212304 | 1212319 | 2 | 8  | 16 | CA   | 21 | 8  |
| 333410 | 78 | 1216724 | 1216756 | 3 | 11 | 33 | GTT  | 9  | 7  |

|        |    |         |         |   |    |    |      |    |    |
|--------|----|---------|---------|---|----|----|------|----|----|
| 333414 | 78 | 1223021 | 1223040 | 2 | 10 | 20 | AC   | 16 | 9  |
| 333420 | 78 | 1229529 | 1229548 | 2 | 10 | 20 | TG   | 22 | 4  |
| 333421 | 78 | 1234212 | 1234223 | 2 | 6  | 12 | TC   | 20 | 3  |
| 333423 | 78 | 1236328 | 1236345 | 2 | 9  | 18 | TG   | 18 | 3  |
| 333424 | 78 | 1238033 | 1238048 | 2 | 8  | 16 | CA   | 16 | 3  |
| 333429 | 78 | 1244604 | 1244617 | 2 | 7  | 14 | GT   | 12 | 3  |
| 333432 | 78 | 1244815 | 1244830 | 2 | 8  | 16 | GT   | 18 | 3  |
| 333435 | 78 | 1249198 | 1249219 | 2 | 11 | 22 | AC   | 20 | 7  |
| 333437 | 78 | 1249712 | 1249737 | 2 | 13 | 26 | GT   | 12 | 8  |
| 333438 | 78 | 1249851 | 1249864 | 2 | 7  | 14 | CA   | 12 | 5  |
| 333443 | 78 | 1258522 | 1258549 | 2 | 14 | 28 | CA   | 14 | 9  |
| 333449 | 78 | 1266155 | 1266172 | 3 | 6  | 18 | ATG  | 13 | 3  |
| 333450 | 78 | 1266320 | 1266339 | 2 | 10 | 20 | AC   | 8  | 8  |
| 333455 | 78 | 1283814 | 1283831 | 3 | 6  | 18 | CCG  | 12 | 8  |
| 333457 | 78 | 1286477 | 1286488 | 2 | 6  | 12 | CA   | 22 | 4  |
| 333458 | 78 | 1287538 | 1287552 | 3 | 5  | 15 | CCG  | 18 | 10 |
| 333461 | 78 | 1287787 | 1287801 | 3 | 5  | 15 | CCG  | 22 | 3  |
| 333466 | 78 | 1297599 | 1297616 | 3 | 6  | 18 | CTT  | 24 | 6  |
| 333467 | 78 | 1297862 | 1297915 | 2 | 27 | 54 | TG   | 11 | 13 |
| 333472 | 78 | 1305124 | 1305153 | 2 | 15 | 30 | CA   | 17 | 4  |
| 333473 | 78 | 1315862 | 1315877 | 2 | 8  | 16 | TG   | 27 | 4  |
| 333476 | 78 | 1317276 | 1317303 | 2 | 14 | 28 | GT   | 12 | 8  |
| 333477 | 78 | 1318643 | 1318670 | 2 | 14 | 28 | TG   | 20 | 7  |
| 333478 | 78 | 1321062 | 1321093 | 2 | 16 | 32 | GT   | 10 | 10 |
| 333479 | 78 | 1328507 | 1328532 | 2 | 13 | 26 | CA   | 9  | 6  |
| 333487 | 78 | 1339813 | 1339834 | 2 | 11 | 22 | TC   | 20 | 7  |
| 333500 | 78 | 1364418 | 1364437 | 2 | 10 | 20 | AC   | 20 | 6  |
| 333501 | 78 | 1377849 | 1377872 | 3 | 8  | 24 | GCT  | 29 | 8  |
| 333502 | 78 | 1378555 | 1378590 | 2 | 18 | 36 | AC   | 16 | 10 |
| 333503 | 78 | 1386484 | 1386503 | 2 | 10 | 20 | AC   | 25 | 3  |
| 333505 | 78 | 1392329 | 1392360 | 4 | 8  | 32 | TATC | 8  | 4  |
| 333507 | 78 | 1395452 | 1395471 | 2 | 10 | 20 | CA   | 12 | 4  |
| 333510 | 78 | 1397063 | 1397086 | 2 | 12 | 24 | TC   | 11 | 7  |
| 333515 | 78 | 1409326 | 1409351 | 2 | 13 | 26 | GA   | 18 | 6  |
| 333516 | 78 | 1411806 | 1411821 | 2 | 8  | 16 | GT   | 17 | 3  |
| 333518 | 78 | 1415264 | 1415290 | 3 | 9  | 27 | TCC  | 27 | 5  |
| 333528 | 78 | 1428180 | 1428205 | 2 | 13 | 26 | TG   | 16 | 14 |
| 333530 | 78 | 1433123 | 1433136 | 2 | 7  | 14 | CA   | 20 | 6  |
| 333540 | 78 | 1451665 | 1451690 | 2 | 13 | 26 | CT   | 7  | 7  |
| 333550 | 78 | 1471344 | 1471375 | 2 | 16 | 32 | GT   | 21 | 8  |
| 333551 | 78 | 1473758 | 1473779 | 2 | 11 | 22 | GT   | 16 | 6  |
| 333560 | 78 | 1495116 | 1495137 | 2 | 11 | 22 | GT   | 20 | 6  |
| 333561 | 78 | 1500428 | 1500463 | 2 | 18 | 36 | TG   | 19 | 8  |
| 333571 | 78 | 1509535 | 1509560 | 2 | 13 | 26 | AC   | 12 | 10 |
| 333573 | 78 | 1518133 | 1518146 | 2 | 7  | 14 | GT   | 23 | 6  |
| 333576 | 78 | 1525451 | 1525482 | 4 | 8  | 32 | ACTC | 13 | 7  |
| 333578 | 78 | 1528998 | 1529013 | 2 | 8  | 16 | AC   | 22 | 3  |
| 333579 | 78 | 1529599 | 1529622 | 2 | 12 | 24 | TG   | 7  | 9  |
| 333581 | 78 | 1529780 | 1529806 | 3 | 9  | 27 | AAT  | 10 | 4  |
| 333582 | 78 | 1530674 | 1530697 | 2 | 12 | 24 | TG   | 15 | 9  |
| 333584 | 78 | 1533947 | 1533960 | 2 | 7  | 14 | TG   | 20 | 8  |

|        |    |         |         |   |    |    |      |    |    |
|--------|----|---------|---------|---|----|----|------|----|----|
| 333585 | 78 | 1537358 | 1537377 | 2 | 10 | 20 | GT   | 21 | 3  |
| 333588 | 78 | 1543671 | 1543698 | 2 | 14 | 28 | AC   | 19 | 11 |
| 333591 | 78 | 1557541 | 1557556 | 2 | 8  | 16 | TC   | 12 | 4  |
| 333592 | 78 | 1557804 | 1557819 | 2 | 8  | 16 | AC   | 10 | 3  |
| 333598 | 78 | 1566798 | 1566811 | 2 | 7  | 14 | CA   | 22 | 8  |
| 333599 | 78 | 1567241 | 1567254 | 2 | 7  | 14 | AC   | 11 | 5  |
| 333600 | 78 | 1567257 | 1567274 | 2 | 9  | 18 | AC   | 12 | 6  |
| 333608 | 78 | 1570377 | 1570391 | 3 | 5  | 15 | GAG  | 32 | 3  |
| 333610 | 78 | 1572593 | 1572612 | 2 | 10 | 20 | CA   | 11 | 4  |
| 333611 | 78 | 1573242 | 1573273 | 4 | 8  | 32 | ATCT | 11 | 13 |
| 333622 | 78 | 1626442 | 1626463 | 2 | 11 | 22 | TG   | 20 | 7  |
| 333624 | 78 | 1652794 | 1652809 | 2 | 8  | 16 | AC   | 17 | 6  |
| 333629 | 78 | 1655255 | 1655278 | 2 | 12 | 24 | CA   | 15 | 7  |
| 333633 | 78 | 1665881 | 1665900 | 2 | 10 | 20 | AC   | 21 | 8  |
| 333634 | 78 | 1669036 | 1669047 | 2 | 6  | 12 | TC   | 22 | 4  |
| 333635 | 78 | 1669048 | 1669061 | 2 | 7  | 14 | AC   | 21 | 5  |
| 333638 | 78 | 1671225 | 1671236 | 2 | 6  | 12 | GT   | 19 | 3  |
| 333641 | 78 | 1673858 | 1673879 | 2 | 11 | 22 | AC   | 8  | 6  |
| 333645 | 78 | 1684701 | 1684736 | 2 | 18 | 36 | TG   | 10 | 8  |
| 333646 | 78 | 1685283 | 1685306 | 4 | 6  | 24 | CTTT | 25 | 4  |
| 333648 | 78 | 1697426 | 1697445 | 4 | 5  | 20 | AAAC | 15 | 3  |
| 333652 | 78 | 1705291 | 1705306 | 2 | 8  | 16 | AC   | 25 | 5  |
| 333653 | 78 | 1705395 | 1705412 | 2 | 9  | 18 | AC   | 20 | 4  |
| 333654 | 78 | 1705620 | 1705649 | 2 | 15 | 30 | TG   | 13 | 8  |
| 333655 | 78 | 1706727 | 1706738 | 2 | 6  | 12 | CA   | 26 | 5  |
| 333656 | 78 | 1716598 | 1716633 | 2 | 18 | 36 | TG   | 17 | 6  |
| 333658 | 78 | 1718074 | 1718093 | 2 | 10 | 20 | TG   | 17 | 9  |
| 333659 | 78 | 1718515 | 1718528 | 2 | 7  | 14 | CT   | 26 | 3  |
| 333660 | 78 | 1718575 | 1718600 | 2 | 13 | 26 | CA   | 17 | 15 |
| 333662 | 78 | 1721076 | 1721105 | 2 | 15 | 30 | TG   | 8  | 7  |
| 333665 | 78 | 1727324 | 1727339 | 2 | 8  | 16 | GT   | 23 | 4  |
| 333666 | 78 | 1727467 | 1727484 | 2 | 9  | 18 | GT   | 22 | 5  |
| 333668 | 78 | 1728617 | 1728638 | 2 | 11 | 22 | GT   | 8  | 6  |
| 333670 | 78 | 1732483 | 1732496 | 2 | 7  | 14 | AT   | 26 | 5  |
| 333672 | 78 | 1732772 | 1732783 | 2 | 6  | 12 | TG   | 27 | 5  |
| 333674 | 78 | 1736866 | 1736883 | 2 | 9  | 18 | CA   | 24 | 7  |
| 333677 | 78 | 1741590 | 1741607 | 2 | 9  | 18 | CA   | 19 | 8  |
| 333685 | 78 | 1748667 | 1748680 | 2 | 7  | 14 | AC   | 24 | 6  |
| 333686 | 78 | 1749067 | 1749078 | 2 | 6  | 12 | AC   | 28 | 5  |
| 333690 | 78 | 1751596 | 1751621 | 2 | 13 | 26 | TG   | 8  | 7  |
| 333692 | 78 | 1751770 | 1751783 | 2 | 7  | 14 | AC   | 26 | 3  |
| 333693 | 78 | 1754506 | 1754533 | 2 | 14 | 28 | AC   | 13 | 10 |
| 333695 | 78 | 1760309 | 1760334 | 2 | 13 | 26 | CA   | 12 | 8  |
| 333696 | 78 | 1762302 | 1762315 | 2 | 7  | 14 | GT   | 17 | 3  |
| 333697 | 78 | 1766680 | 1766695 | 2 | 8  | 16 | CA   | 18 | 8  |
| 333701 | 78 | 1769338 | 1769371 | 2 | 17 | 34 | GT   | 13 | 9  |
| 333702 | 78 | 1770551 | 1770566 | 2 | 8  | 16 | GT   | 33 | 12 |
| 333710 | 78 | 1782998 | 1783025 | 2 | 14 | 28 | GT   | 9  | 7  |
| 333718 | 78 | 1793276 | 1793290 | 3 | 5  | 15 | AAT  | 8  | 3  |
| 333719 | 78 | 1793433 | 1793452 | 2 | 10 | 20 | CA   | 18 | 8  |
| 333720 | 78 | 1794671 | 1794688 | 3 | 6  | 18 | ATG  | 34 | 3  |



|        |    |         |         |   |    |    |      |    |    |
|--------|----|---------|---------|---|----|----|------|----|----|
| 333725 | 78 | 1799546 | 1799583 | 2 | 19 | 38 | AC   | 6  | 10 |
| 333729 | 78 | 1812068 | 1812083 | 2 | 8  | 16 | TG   | 20 | 9  |
| 333730 | 78 | 1812086 | 1812097 | 2 | 6  | 12 | TG   | 22 | 7  |
| 333735 | 78 | 1833025 | 1833042 | 2 | 9  | 18 | AC   | 18 | 4  |
| 333757 | 78 | 1867701 | 1867712 | 2 | 6  | 12 | TG   | 25 | 4  |
| 333759 | 78 | 1868858 | 1868873 | 2 | 8  | 16 | AT   | 6  | 7  |
| 333760 | 78 | 1868977 | 1868997 | 3 | 7  | 21 | CAA  | 15 | 4  |
| 333767 | 78 | 1876744 | 1876757 | 2 | 7  | 14 | CA   | 20 | 5  |
| 333768 | 78 | 1877830 | 1877859 | 2 | 15 | 30 | GT   | 10 | 9  |
| 333770 | 78 | 1878015 | 1878048 | 2 | 17 | 34 | AC   | 17 | 11 |
| 333772 | 78 | 1887686 | 1887749 | 2 | 32 | 64 | CA   | 6  | 8  |
| 333775 | 78 | 1888304 | 1888323 | 2 | 10 | 20 | GT   | 21 | 11 |
| 333777 | 78 | 1900286 | 1900303 | 2 | 9  | 18 | AC   | 17 | 4  |
| 333779 | 78 | 1903519 | 1903550 | 2 | 16 | 32 | CA   | 9  | 7  |
| 333786 | 78 | 1914444 | 1914459 | 2 | 8  | 16 | GA   | 8  | 5  |
| 333798 | 78 | 1951373 | 1951388 | 4 | 4  | 16 | TCTG | 24 | 3  |
| 333806 | 78 | 1980725 | 1980744 | 2 | 10 | 20 | CA   | 17 | 3  |
| 333807 | 78 | 1983887 | 1983914 | 2 | 14 | 28 | TG   | 19 | 18 |
| 333819 | 78 | 2005307 | 2005330 | 3 | 8  | 24 | TGT  | 18 | 7  |
| 333820 | 79 | 1305    | 1324    | 4 | 5  | 20 | TCCA | 18 | 5  |
| 333821 | 79 | 3213    | 3236    | 2 | 12 | 24 | AC   | 16 | 8  |
| 333822 | 79 | 3357    | 3390    | 2 | 17 | 34 | TG   | 22 | 17 |
| 333825 | 79 | 14613   | 14648   | 2 | 18 | 36 | GT   | 10 | 15 |
| 333827 | 79 | 16747   | 16776   | 2 | 15 | 30 | TG   | 8  | 9  |
| 333828 | 79 | 20938   | 20961   | 2 | 12 | 24 | TG   | 11 | 11 |
| 333832 | 79 | 28732   | 28743   | 2 | 6  | 12 | AT   | 27 | 4  |
| 333833 | 79 | 38068   | 38079   | 2 | 6  | 12 | CA   | 28 | 4  |
| 333835 | 79 | 42876   | 42903   | 2 | 14 | 28 | AC   | 17 | 9  |
| 333836 | 79 | 43292   | 43307   | 2 | 8  | 16 | TC   | 19 | 3  |
| 333837 | 79 | 44430   | 44455   | 2 | 13 | 26 | AC   | 17 | 14 |
| 333839 | 79 | 45403   | 45414   | 2 | 6  | 12 | CT   | 20 | 4  |
| 333842 | 79 | 46139   | 46152   | 2 | 7  | 14 | CT   | 25 | 4  |
| 333844 | 79 | 46924   | 46945   | 2 | 11 | 22 | CT   | 10 | 5  |
| 333846 | 79 | 48887   | 48902   | 2 | 8  | 16 | CT   | 23 | 4  |
| 333858 | 79 | 75844   | 75865   | 2 | 11 | 22 | AG   | 17 | 8  |
| 333863 | 79 | 83024   | 83041   | 3 | 6  | 18 | AAC  | 22 | 5  |
| 333870 | 79 | 102592  | 102631  | 2 | 20 | 40 | GT   | 10 | 12 |
| 333874 | 79 | 105800  | 105813  | 2 | 7  | 14 | TC   | 16 | 3  |
| 333875 | 79 | 109450  | 109495  | 2 | 23 | 46 | TG   | 8  | 7  |
| 333876 | 79 | 116779  | 116790  | 2 | 6  | 12 | TG   | 30 | 3  |
| 333893 | 79 | 172316  | 172355  | 2 | 20 | 40 | TG   | 15 | 12 |
| 333899 | 79 | 181611  | 181631  | 3 | 7  | 21 | GAT  | 29 | 7  |
| 333900 | 79 | 181792  | 181817  | 2 | 13 | 26 | TG   | 10 | 9  |
| 333901 | 79 | 182159  | 182180  | 2 | 11 | 22 | CA   | 22 | 6  |
| 333902 | 79 | 182890  | 182919  | 2 | 15 | 30 | GT   | 8  | 7  |
| 333910 | 79 | 197709  | 197720  | 2 | 6  | 12 | GT   | 23 | 3  |
| 333916 | 79 | 211054  | 211079  | 2 | 13 | 26 | AC   | 20 | 10 |
| 333918 | 79 | 215991  | 216006  | 2 | 8  | 16 | TG   | 23 | 10 |
| 333919 | 79 | 216217  | 216230  | 2 | 7  | 14 | CA   | 30 | 5  |
| 333920 | 79 | 216555  | 216574  | 2 | 10 | 20 | CA   | 28 | 7  |
| 333921 | 79 | 217711  | 217726  | 2 | 8  | 16 | CT   | 19 | 3  |

|        |    |        |        |   |    |    |      |    |    |
|--------|----|--------|--------|---|----|----|------|----|----|
| 333924 | 79 | 220007 | 220020 | 2 | 7  | 14 | TG   | 17 | 4  |
| 333938 | 79 | 231749 | 231766 | 3 | 6  | 18 | CTC  | 22 | 6  |
| 333939 | 79 | 231943 | 231978 | 2 | 18 | 36 | GT   | 13 | 13 |
| 333944 | 79 | 235817 | 235848 | 2 | 16 | 32 | AC   | 19 | 10 |
| 333946 | 79 | 238861 | 238872 | 2 | 6  | 12 | TG   | 18 | 3  |
| 333954 | 79 | 262580 | 262593 | 2 | 7  | 14 | TG   | 29 | 6  |
| 333961 | 79 | 282359 | 282373 | 3 | 5  | 15 | AAC  | 25 | 4  |
| 333963 | 79 | 290290 | 290311 | 2 | 11 | 22 | GT   | 12 | 12 |
| 333964 | 79 | 298321 | 298340 | 2 | 10 | 20 | AC   | 21 | 4  |
| 333966 | 79 | 306877 | 306888 | 2 | 6  | 12 | AC   | 16 | 3  |
| 333968 | 79 | 319135 | 319154 | 2 | 10 | 20 | CA   | 19 | 6  |
| 333971 | 79 | 325199 | 325226 | 4 | 7  | 28 | AAAG | 14 | 9  |
| 333973 | 79 | 326691 | 326706 | 2 | 8  | 16 | AG   | 32 | 7  |
| 333976 | 79 | 327319 | 327332 | 2 | 7  | 14 | TG   | 17 | 5  |
| 333981 | 79 | 334691 | 334720 | 2 | 15 | 30 | GT   | 10 | 13 |
| 333985 | 79 | 339478 | 339493 | 2 | 8  | 16 | TG   | 16 | 4  |
| 333987 | 79 | 345157 | 345170 | 2 | 7  | 14 | GT   | 34 | 4  |
| 333990 | 79 | 347035 | 347050 | 4 | 4  | 16 | AAAG | 19 | 11 |
| 333991 | 79 | 347845 | 347859 | 3 | 5  | 15 | GCT  | 29 | 3  |
| 333992 | 79 | 350619 | 350634 | 4 | 4  | 16 | AAAC | 30 | 5  |
| 333995 | 79 | 368255 | 368272 | 2 | 9  | 18 | GT   | 24 | 6  |
| 334003 | 79 | 386359 | 386386 | 2 | 14 | 28 | CA   | 10 | 9  |
| 334004 | 79 | 388314 | 388351 | 2 | 19 | 38 | TG   | 17 | 11 |
| 334005 | 79 | 395589 | 395618 | 2 | 15 | 30 | TG   | 23 | 6  |
| 334007 | 79 | 399609 | 399620 | 2 | 6  | 12 | CA   | 27 | 3  |
| 334009 | 79 | 404664 | 404723 | 4 | 15 | 60 | GATA | 15 | 13 |
| 334012 | 79 | 409027 | 409056 | 2 | 15 | 30 | GT   | 9  | 7  |
| 334016 | 79 | 410636 | 410663 | 2 | 14 | 28 | TC   | 22 | 8  |
| 334026 | 79 | 416376 | 416397 | 2 | 11 | 22 | TG   | 14 | 7  |
| 334027 | 79 | 417731 | 417750 | 2 | 10 | 20 | GT   | 9  | 3  |
| 334033 | 79 | 436517 | 436532 | 4 | 4  | 16 | AATT | 11 | 4  |
| 334039 | 79 | 438810 | 438825 | 2 | 8  | 16 | AC   | 15 | 5  |
| 334059 | 79 | 459324 | 459351 | 2 | 14 | 28 | GT   | 13 | 11 |
| 334060 | 79 | 459561 | 459590 | 2 | 15 | 30 | GT   | 12 | 8  |
| 334066 | 79 | 472718 | 472729 | 2 | 6  | 12 | CT   | 27 | 3  |
| 334076 | 79 | 485168 | 485181 | 2 | 7  | 14 | GT   | 25 | 3  |
| 334080 | 79 | 491363 | 491376 | 2 | 7  | 14 | CA   | 22 | 12 |
| 334083 | 79 | 496176 | 496211 | 2 | 18 | 36 | CA   | 6  | 11 |
| 334085 | 79 | 497235 | 497264 | 3 | 10 | 30 | CTG  | 20 | 14 |
| 334089 | 79 | 499511 | 499544 | 2 | 17 | 34 | GA   | 13 | 12 |
| 334092 | 79 | 500701 | 500720 | 4 | 5  | 20 | TTTC | 9  | 9  |
| 334097 | 79 | 504714 | 504725 | 2 | 6  | 12 | CA   | 17 | 4  |
| 334098 | 79 | 504963 | 504984 | 2 | 11 | 22 | TG   | 18 | 5  |
| 334100 | 79 | 510940 | 510953 | 2 | 7  | 14 | TG   | 17 | 3  |
| 334103 | 79 | 511176 | 511191 | 2 | 8  | 16 | TG   | 7  | 3  |
| 334104 | 79 | 512960 | 512991 | 2 | 16 | 32 | AC   | 9  | 8  |
| 334106 | 79 | 513418 | 513457 | 2 | 20 | 40 | TG   | 9  | 12 |
| 334107 | 79 | 514144 | 514157 | 2 | 7  | 14 | GT   | 23 | 6  |
| 334110 | 79 | 515829 | 515852 | 2 | 12 | 24 | TC   | 12 | 7  |
| 334114 | 79 | 518803 | 518820 | 2 | 9  | 18 | TC   | 15 | 3  |
| 334116 | 79 | 519087 | 519116 | 2 | 15 | 30 | CT   | 7  | 5  |

|        |    |        |        |   |    |    |      |    |    |
|--------|----|--------|--------|---|----|----|------|----|----|
| 334117 | 79 | 519188 | 519215 | 2 | 14 | 28 | CA   | 10 | 9  |
| 334125 | 79 | 530857 | 530886 | 2 | 15 | 30 | TG   | 14 | 7  |
| 334127 | 79 | 531292 | 531307 | 2 | 8  | 16 | GT   | 25 | 4  |
| 334128 | 79 | 531430 | 531449 | 2 | 10 | 20 | CA   | 18 | 7  |
| 334129 | 79 | 531812 | 531825 | 2 | 7  | 14 | GT   | 28 | 5  |
| 334131 | 79 | 533853 | 533872 | 2 | 10 | 20 | TG   | 14 | 12 |
| 334134 | 79 | 534336 | 534347 | 2 | 6  | 12 | GT   | 14 | 5  |
| 334140 | 79 | 542615 | 542629 | 3 | 5  | 15 | TCC  | 27 | 4  |
| 334141 | 79 | 549891 | 549904 | 2 | 7  | 14 | TG   | 28 | 3  |
| 334144 | 79 | 555494 | 555511 | 2 | 9  | 18 | CA   | 26 | 6  |
| 334146 | 79 | 555925 | 555942 | 2 | 9  | 18 | TG   | 25 | 5  |
| 334147 | 79 | 561055 | 561070 | 2 | 8  | 16 | AC   | 25 | 5  |
| 334148 | 79 | 561219 | 561238 | 2 | 10 | 20 | GT   | 23 | 4  |
| 334160 | 79 | 571387 | 571400 | 2 | 7  | 14 | GT   | 17 | 4  |
| 334161 | 79 | 571403 | 571416 | 2 | 7  | 14 | GT   | 18 | 7  |
| 334162 | 79 | 571619 | 571632 | 2 | 7  | 14 | TG   | 22 | 10 |
| 334164 | 79 | 575414 | 575429 | 2 | 8  | 16 | TG   | 25 | 5  |
| 334175 | 79 | 591807 | 591828 | 2 | 11 | 22 | AT   | 6  | 3  |
| 334176 | 79 | 597968 | 597995 | 2 | 14 | 28 | CT   | 14 | 10 |
| 334178 | 79 | 601264 | 601279 | 4 | 4  | 16 | CCAC | 18 | 3  |
| 334180 | 79 | 603776 | 603793 | 2 | 9  | 18 | GT   | 16 | 6  |
| 334181 | 79 | 603921 | 603952 | 2 | 16 | 32 | AC   | 12 | 6  |
| 334184 | 79 | 607494 | 607517 | 2 | 12 | 24 | TG   | 15 | 7  |
| 334185 | 79 | 607559 | 607578 | 2 | 10 | 20 | GT   | 23 | 5  |
| 334188 | 79 | 619554 | 619565 | 2 | 6  | 12 | GT   | 28 | 4  |
| 334189 | 79 | 621511 | 621534 | 3 | 8  | 24 | CTT  | 20 | 13 |
| 334190 | 79 | 622029 | 622042 | 2 | 7  | 14 | TG   | 26 | 5  |
| 334193 | 79 | 623381 | 623420 | 2 | 20 | 40 | GT   | 9  | 8  |
| 334196 | 79 | 626336 | 626347 | 2 | 6  | 12 | GT   | 9  | 6  |
| 334197 | 79 | 626584 | 626595 | 2 | 6  | 12 | AC   | 25 | 5  |
| 334200 | 79 | 628066 | 628095 | 2 | 15 | 30 | CA   | 10 | 6  |
| 334202 | 79 | 628966 | 628995 | 2 | 15 | 30 | GT   | 16 | 6  |
| 334208 | 79 | 631144 | 631165 | 2 | 11 | 22 | CA   | 13 | 13 |
| 334212 | 79 | 635921 | 635962 | 2 | 21 | 42 | CA   | 19 | 11 |
| 334215 | 79 | 653005 | 653018 | 2 | 7  | 14 | CT   | 12 | 5  |
| 334219 | 79 | 654563 | 654610 | 2 | 24 | 48 | CA   | 12 | 10 |
| 334224 | 79 | 658998 | 659013 | 2 | 8  | 16 | AC   | 19 | 4  |
| 334226 | 79 | 660199 | 660210 | 2 | 6  | 12 | CA   | 27 | 3  |
| 334227 | 79 | 660939 | 660962 | 2 | 12 | 24 | CT   | 14 | 10 |
| 334228 | 79 | 661005 | 661018 | 2 | 7  | 14 | CA   | 18 | 3  |
| 334229 | 79 | 661020 | 661035 | 2 | 8  | 16 | AC   | 22 | 6  |
| 334232 | 79 | 661441 | 661464 | 2 | 12 | 24 | GT   | 11 | 8  |
| 334234 | 79 | 664038 | 664071 | 2 | 17 | 34 | TG   | 11 | 9  |
| 334239 | 79 | 667838 | 667865 | 2 | 14 | 28 | AC   | 11 | 6  |
| 334241 | 79 | 671072 | 671085 | 2 | 7  | 14 | CT   | 26 | 4  |
| 334242 | 79 | 674441 | 674452 | 2 | 6  | 12 | GC   | 26 | 5  |
| 334243 | 79 | 674510 | 674521 | 2 | 6  | 12 | CA   | 26 | 3  |
| 334245 | 79 | 675046 | 675057 | 2 | 6  | 12 | AC   | 23 | 3  |
| 334247 | 79 | 677021 | 677042 | 2 | 11 | 22 | CA   | 13 | 10 |
| 334248 | 79 | 679241 | 679264 | 4 | 6  | 24 | CAAT | 28 | 7  |
| 334256 | 79 | 687404 | 687417 | 2 | 7  | 14 | AG   | 22 | 4  |

|        |    |         |         |   |    |    |      |    |    |
|--------|----|---------|---------|---|----|----|------|----|----|
| 334257 | 79 | 691858  | 691873  | 2 | 8  | 16 | TC   | 18 | 7  |
| 334263 | 79 | 721616  | 721633  | 2 | 9  | 18 | CA   | 20 | 7  |
| 334264 | 79 | 726617  | 726634  | 2 | 9  | 18 | CA   | 23 | 5  |
| 334269 | 79 | 744539  | 744556  | 2 | 9  | 18 | GT   | 30 | 4  |
| 334275 | 79 | 765394  | 765407  | 2 | 7  | 14 | AC   | 25 | 7  |
| 334278 | 79 | 773002  | 773017  | 2 | 8  | 16 | GT   | 8  | 4  |
| 334280 | 79 | 773478  | 773495  | 3 | 6  | 18 | GCG  | 23 | 5  |
| 334281 | 79 | 773561  | 773578  | 3 | 6  | 18 | CAG  | 26 | 5  |
| 334284 | 79 | 789796  | 789815  | 2 | 10 | 20 | AG   | 15 | 10 |
| 334287 | 79 | 797439  | 797468  | 2 | 15 | 30 | GT   | 16 | 11 |
| 334288 | 79 | 803152  | 803173  | 2 | 11 | 22 | TG   | 6  | 9  |
| 334292 | 79 | 812464  | 812483  | 2 | 10 | 20 | AT   | 9  | 8  |
| 334302 | 79 | 823551  | 823586  | 4 | 9  | 36 | CATA | 19 | 12 |
| 334304 | 79 | 827330  | 827349  | 2 | 10 | 20 | AC   | 14 | 4  |
| 334305 | 79 | 827516  | 827535  | 2 | 10 | 20 | AC   | 17 | 12 |
| 334313 | 79 | 832876  | 832893  | 2 | 9  | 18 | AG   | 24 | 6  |
| 334317 | 79 | 835076  | 835093  | 2 | 9  | 18 | TG   | 28 | 4  |
| 334326 | 79 | 852947  | 852988  | 2 | 21 | 42 | AC   | 7  | 6  |
| 334327 | 79 | 853014  | 853041  | 2 | 14 | 28 | CA   | 9  | 9  |
| 334330 | 79 | 853457  | 853482  | 2 | 13 | 26 | GT   | 13 | 9  |
| 334333 | 79 | 855841  | 855860  | 2 | 10 | 20 | GT   | 17 | 4  |
| 334342 | 79 | 864404  | 864415  | 2 | 6  | 12 | AC   | 30 | 4  |
| 334344 | 79 | 872420  | 872433  | 2 | 7  | 14 | AG   | 15 | 6  |
| 334357 | 79 | 919244  | 919257  | 2 | 7  | 14 | AT   | 8  | 4  |
| 334360 | 79 | 935951  | 935971  | 3 | 7  | 21 | GAA  | 25 | 3  |
| 334366 | 79 | 942995  | 943012  | 3 | 6  | 18 | CAC  | 28 | 3  |
| 334368 | 79 | 947266  | 947281  | 2 | 8  | 16 | CA   | 24 | 4  |
| 334374 | 79 | 954101  | 954112  | 2 | 6  | 12 | GT   | 18 | 6  |
| 334375 | 79 | 954205  | 954216  | 2 | 6  | 12 | GA   | 8  | 4  |
| 334380 | 79 | 955535  | 955558  | 3 | 8  | 24 | ATG  | 19 | 6  |
| 334381 | 79 | 955599  | 955614  | 2 | 8  | 16 | AC   | 18 | 3  |
| 334384 | 79 | 965302  | 965317  | 2 | 8  | 16 | AC   | 24 | 12 |
| 334407 | 79 | 1002003 | 1002020 | 3 | 6  | 18 | TCT  | 15 | 10 |
| 334421 | 79 | 1025657 | 1025670 | 2 | 7  | 14 | TG   | 29 | 4  |
| 334425 | 79 | 1032571 | 1032604 | 2 | 17 | 34 | AC   | 8  | 10 |
| 334428 | 79 | 1035526 | 1035543 | 3 | 6  | 18 | GCA  | 15 | 3  |
| 334429 | 79 | 1036882 | 1036897 | 2 | 8  | 16 | GT   | 21 | 5  |
| 334430 | 79 | 1037346 | 1037377 | 2 | 16 | 32 | GA   | 16 | 10 |
| 334432 | 79 | 1038639 | 1038656 | 2 | 9  | 18 | GA   | 18 | 4  |
| 334433 | 79 | 1040350 | 1040385 | 2 | 18 | 36 | AC   | 19 | 6  |
| 334440 | 79 | 1050309 | 1050329 | 3 | 7  | 21 | GGA  | 19 | 3  |
| 334444 | 79 | 1051860 | 1051883 | 2 | 12 | 24 | TC   | 11 | 4  |
| 334445 | 79 | 1052141 | 1052154 | 2 | 7  | 14 | CT   | 16 | 4  |
| 334448 | 79 | 1052973 | 1053020 | 4 | 12 | 48 | CTTT | 15 | 5  |
| 334456 | 79 | 1054541 | 1054562 | 2 | 11 | 22 | GA   | 20 | 5  |
| 334463 | 79 | 1055876 | 1055897 | 2 | 11 | 22 | CA   | 25 | 6  |
| 334464 | 79 | 1056287 | 1056302 | 2 | 8  | 16 | AC   | 12 | 6  |
| 334466 | 79 | 1056695 | 1056736 | 2 | 21 | 42 | TG   | 14 | 9  |
| 334467 | 79 | 1056782 | 1056802 | 3 | 7  | 21 | GAA  | 14 | 10 |
| 334469 | 79 | 1057076 | 1057097 | 2 | 11 | 22 | AC   | 7  | 6  |
| 334471 | 79 | 1057120 | 1057137 | 2 | 9  | 18 | GA   | 14 | 9  |

|        |    |         |         |   |    |    |      |    |    |
|--------|----|---------|---------|---|----|----|------|----|----|
| 334473 | 79 | 1057305 | 1057328 | 2 | 12 | 24 | GT   | 13 | 7  |
| 334474 | 79 | 1057763 | 1057774 | 2 | 6  | 12 | AG   | 21 | 3  |
| 334479 | 79 | 1058342 | 1058361 | 2 | 10 | 20 | TC   | 10 | 3  |
| 334480 | 79 | 1058541 | 1058552 | 2 | 6  | 12 | GT   | 20 | 4  |
| 334481 | 79 | 1058647 | 1058662 | 2 | 8  | 16 | AG   | 22 | 5  |
| 334483 | 79 | 1059106 | 1059123 | 3 | 6  | 18 | ATG  | 27 | 12 |
| 334488 | 79 | 1070902 | 1070913 | 2 | 6  | 12 | TG   | 7  | 5  |
| 334501 | 79 | 1125590 | 1125609 | 4 | 5  | 20 | TCTT | 30 | 3  |
| 334516 | 79 | 1176123 | 1176142 | 2 | 10 | 20 | TG   | 17 | 11 |
| 334517 | 79 | 1176352 | 1176365 | 2 | 7  | 14 | AG   | 9  | 3  |
| 334522 | 79 | 1193706 | 1193719 | 2 | 7  | 14 | TG   | 21 | 4  |
| 334523 | 79 | 1194034 | 1194057 | 2 | 12 | 24 | AC   | 18 | 8  |
| 334524 | 79 | 1195039 | 1195058 | 2 | 10 | 20 | CA   | 15 | 7  |
| 334529 | 79 | 1212063 | 1212080 | 3 | 6  | 18 | CAA  | 17 | 3  |
| 334542 | 79 | 1225499 | 1225512 | 2 | 7  | 14 | TC   | 15 | 11 |
| 334544 | 79 | 1226225 | 1226236 | 2 | 6  | 12 | AG   | 14 | 4  |
| 334549 | 79 | 1239595 | 1239614 | 2 | 10 | 20 | GT   | 15 | 4  |
| 334555 | 79 | 1246831 | 1246856 | 2 | 13 | 26 | CA   | 12 | 7  |
| 334566 | 79 | 1285199 | 1285213 | 3 | 5  | 15 | GAG  | 26 | 6  |
| 334570 | 79 | 1292007 | 1292054 | 4 | 12 | 48 | TTCA | 28 | 8  |
| 334571 | 79 | 1294326 | 1294341 | 2 | 8  | 16 | TG   | 10 | 6  |
| 334583 | 79 | 1330468 | 1330500 | 3 | 11 | 33 | GAT  | 16 | 8  |
| 334584 | 79 | 1330614 | 1330635 | 2 | 11 | 22 | CA   | 24 | 15 |
| 334586 | 79 | 1335126 | 1335137 | 2 | 6  | 12 | TG   | 17 | 4  |
| 334594 | 79 | 1340258 | 1340271 | 2 | 7  | 14 | AG   | 18 | 3  |
| 334600 | 79 | 1346408 | 1346431 | 2 | 12 | 24 | TG   | 9  | 6  |
| 334602 | 79 | 1358366 | 1358395 | 2 | 15 | 30 | CA   | 15 | 8  |
| 334609 | 79 | 1428320 | 1428343 | 2 | 12 | 24 | TG   | 9  | 9  |
| 334610 | 79 | 1440670 | 1440685 | 4 | 4  | 16 | AAAT | 21 | 4  |
| 334621 | 79 | 1461532 | 1461570 | 3 | 13 | 39 | CTT  | 26 | 4  |
| 334631 | 79 | 1503145 | 1503168 | 2 | 12 | 24 | CA   | 26 | 5  |
| 334638 | 79 | 1512810 | 1512825 | 2 | 8  | 16 | GA   | 22 | 5  |
| 334641 | 79 | 1516951 | 1516964 | 2 | 7  | 14 | TC   | 8  | 5  |
| 334642 | 79 | 1518825 | 1518838 | 2 | 7  | 14 | TG   | 18 | 4  |
| 334643 | 79 | 1518967 | 1518978 | 2 | 6  | 12 | CT   | 19 | 4  |
| 334644 | 79 | 1527013 | 1527024 | 2 | 6  | 12 | GT   | 30 | 3  |
| 334645 | 79 | 1535413 | 1535427 | 3 | 5  | 15 | TAT  | 14 | 6  |
| 334650 | 79 | 1542703 | 1542718 | 4 | 4  | 16 | TCCG | 29 | 3  |
| 334656 | 79 | 1551011 | 1551028 | 2 | 9  | 18 | TG   | 19 | 3  |
| 334659 | 79 | 1553746 | 1553759 | 2 | 7  | 14 | TG   | 13 | 4  |
| 334661 | 79 | 1554861 | 1554875 | 3 | 5  | 15 | GAG  | 12 | 5  |
| 334670 | 79 | 1570178 | 1570189 | 2 | 6  | 12 | TC   | 28 | 3  |
| 334679 | 79 | 1588084 | 1588098 | 3 | 5  | 15 | CAG  | 26 | 4  |
| 334681 | 79 | 1590116 | 1590130 | 3 | 5  | 15 | AGC  | 34 | 3  |
| 334686 | 79 | 1601206 | 1601221 | 4 | 4  | 16 | AGAC | 21 | 5  |
| 334688 | 79 | 1606443 | 1606470 | 4 | 7  | 28 | TTCT | 29 | 6  |
| 334690 | 79 | 1607744 | 1607763 | 2 | 10 | 20 | TG   | 17 | 10 |
| 334691 | 79 | 1607947 | 1607976 | 2 | 15 | 30 | AC   | 6  | 10 |
| 334692 | 79 | 1608165 | 1608192 | 2 | 14 | 28 | AC   | 7  | 6  |
| 334699 | 79 | 1626429 | 1626454 | 2 | 13 | 26 | CA   | 19 | 9  |
| 334700 | 79 | 1626634 | 1626648 | 3 | 5  | 15 | CAC  | 33 | 10 |

|        |    |         |         |   |    |    |      |    |    |
|--------|----|---------|---------|---|----|----|------|----|----|
| 334702 | 79 | 1627029 | 1627060 | 4 | 8  | 32 | ACAT | 27 | 12 |
| 334703 | 79 | 1627418 | 1627429 | 2 | 6  | 12 | CT   | 20 | 3  |
| 334704 | 79 | 1627455 | 1627514 | 3 | 20 | 60 | TCT  | 16 | 9  |
| 334708 | 79 | 1628453 | 1628472 | 2 | 10 | 20 | AG   | 16 | 9  |
| 334710 | 79 | 1628590 | 1628603 | 2 | 7  | 14 | AC   | 9  | 9  |
| 334718 | 79 | 1631094 | 1631115 | 2 | 11 | 22 | CA   | 6  | 7  |
| 334722 | 79 | 1639421 | 1639442 | 2 | 11 | 22 | CA   | 23 | 7  |
| 334723 | 79 | 1639466 | 1639481 | 2 | 8  | 16 | CA   | 18 | 4  |
| 334732 | 79 | 1664973 | 1665008 | 2 | 18 | 36 | TG   | 12 | 13 |
| 334736 | 79 | 1678025 | 1678039 | 3 | 5  | 15 | CAT  | 25 | 3  |
| 334748 | 79 | 1733559 | 1733578 | 2 | 10 | 20 | AC   | 24 | 4  |
| 334749 | 79 | 1734963 | 1734980 | 2 | 9  | 18 | TG   | 26 | 3  |
| 334750 | 79 | 1735056 | 1735089 | 2 | 17 | 34 | AC   | 17 | 11 |
| 334753 | 79 | 1744336 | 1744347 | 2 | 6  | 12 | AC   | 28 | 3  |
| 334763 | 79 | 1790555 | 1790568 | 2 | 7  | 14 | GA   | 24 | 4  |
| 334764 | 79 | 1793686 | 1793701 | 2 | 8  | 16 | AC   | 19 | 6  |
| 334772 | 79 | 1813471 | 1813498 | 2 | 14 | 28 | AC   | 23 | 8  |
| 334781 | 79 | 1832743 | 1832760 | 2 | 9  | 18 | GT   | 24 | 5  |
| 334782 | 79 | 1833178 | 1833191 | 2 | 7  | 14 | GT   | 23 | 5  |
| 334783 | 79 | 1833486 | 1833505 | 4 | 5  | 20 | TTTG | 23 | 3  |
| 334784 | 79 | 1838887 | 1838904 | 3 | 6  | 18 | AAC  | 21 | 7  |
| 334787 | 79 | 1841362 | 1841387 | 2 | 13 | 26 | AC   | 12 | 8  |
| 334789 | 79 | 1844643 | 1844654 | 2 | 6  | 12 | CA   | 31 | 4  |
| 334795 | 79 | 1854751 | 1854766 | 4 | 4  | 16 | ATTT | 6  | 3  |
| 334806 | 79 | 1887017 | 1887034 | 2 | 9  | 18 | CT   | 16 | 4  |
| 334810 | 79 | 1893146 | 1893157 | 2 | 6  | 12 | TG   | 28 | 5  |
| 334813 | 79 | 1897359 | 1897382 | 2 | 12 | 24 | CA   | 21 | 16 |
| 334815 | 79 | 1899644 | 1899671 | 2 | 14 | 28 | AC   | 14 | 6  |
| 334823 | 79 | 1913953 | 1913970 | 3 | 6  | 18 | GCA  | 14 | 4  |
| 334829 | 79 | 1921182 | 1921217 | 2 | 18 | 36 | AG   | 17 | 13 |
| 334838 | 79 | 1946578 | 1946598 | 3 | 7  | 21 | GAA  | 16 | 7  |
| 334840 | 79 | 1951373 | 1951416 | 2 | 22 | 44 | CT   | 11 | 11 |
| 334847 | 80 | 6987    | 7022    | 2 | 18 | 36 | AC   | 11 | 9  |
| 334848 | 80 | 8283    | 8300    | 2 | 9  | 18 | TG   | 17 | 4  |
| 334849 | 80 | 12092   | 12106   | 3 | 5  | 15 | AGA  | 26 | 6  |
| 334861 | 80 | 17572   | 17595   | 2 | 12 | 24 | AC   | 19 | 8  |
| 334864 | 80 | 19229   | 19284   | 2 | 28 | 56 | CA   | 15 | 12 |
| 334865 | 80 | 19941   | 19958   | 3 | 6  | 18 | CCG  | 7  | 5  |
| 334868 | 80 | 23485   | 23514   | 2 | 15 | 30 | TG   | 15 | 12 |
| 334875 | 80 | 42630   | 42657   | 2 | 14 | 28 | GT   | 19 | 9  |
| 334876 | 80 | 42832   | 42845   | 2 | 7  | 14 | GT   | 21 | 14 |
| 334879 | 80 | 48316   | 48341   | 2 | 13 | 26 | CA   | 18 | 8  |
| 334880 | 80 | 48490   | 48511   | 2 | 11 | 22 | TG   | 16 | 8  |
| 334881 | 80 | 48654   | 48695   | 2 | 21 | 42 | AC   | 6  | 9  |
| 334887 | 80 | 51380   | 51399   | 2 | 10 | 20 | CT   | 24 | 3  |
| 334890 | 80 | 69147   | 69164   | 3 | 6  | 18 | GGC  | 26 | 3  |
| 334891 | 80 | 71460   | 71483   | 4 | 6  | 24 | AACA | 25 | 3  |
| 334892 | 80 | 73422   | 73433   | 2 | 6  | 12 | AG   | 21 | 3  |
| 334893 | 80 | 73565   | 73588   | 2 | 12 | 24 | AC   | 21 | 7  |
| 334894 | 80 | 74540   | 74577   | 2 | 19 | 38 | AC   | 10 | 13 |
| 334895 | 80 | 74676   | 74689   | 2 | 7  | 14 | AC   | 18 | 5  |

|        |    |        |        |   |    |    |      |    |    |
|--------|----|--------|--------|---|----|----|------|----|----|
| 334897 | 80 | 78707  | 78746  | 2 | 20 | 40 | AC   | 6  | 9  |
| 334899 | 80 | 81112  | 81133  | 2 | 11 | 22 | GT   | 17 | 11 |
| 334900 | 80 | 81188  | 81205  | 2 | 9  | 18 | AC   | 17 | 6  |
| 334901 | 80 | 82612  | 82627  | 2 | 8  | 16 | TG   | 12 | 12 |
| 334908 | 80 | 87464  | 87481  | 3 | 6  | 18 | TCC  | 26 | 8  |
| 334909 | 80 | 87532  | 87553  | 2 | 11 | 22 | TG   | 22 | 6  |
| 334910 | 80 | 87620  | 87635  | 2 | 8  | 16 | AC   | 8  | 8  |
| 334915 | 80 | 95395  | 95432  | 2 | 19 | 38 | CA   | 19 | 16 |
| 334916 | 80 | 95482  | 95503  | 2 | 11 | 22 | TG   | 13 | 11 |
| 334918 | 80 | 98992  | 99007  | 4 | 4  | 16 | CTTT | 21 | 3  |
| 334921 | 80 | 107906 | 107933 | 2 | 14 | 28 | AC   | 10 | 11 |
| 334932 | 80 | 139544 | 139557 | 2 | 7  | 14 | AG   | 29 | 6  |
| 334947 | 80 | 146945 | 146984 | 2 | 20 | 40 | TG   | 8  | 13 |
| 334948 | 80 | 148167 | 148212 | 2 | 23 | 46 | AC   | 8  | 9  |
| 334951 | 80 | 159448 | 159479 | 4 | 8  | 32 | TTCA | 8  | 3  |
| 334955 | 80 | 162462 | 162475 | 2 | 7  | 14 | GT   | 12 | 6  |
| 334956 | 80 | 162477 | 162494 | 2 | 9  | 18 | TG   | 13 | 6  |
| 334958 | 80 | 162545 | 162584 | 2 | 20 | 40 | TG   | 6  | 5  |
| 334960 | 80 | 172398 | 172421 | 3 | 8  | 24 | GCA  | 26 | 3  |
| 334962 | 80 | 177397 | 177434 | 2 | 19 | 38 | CA   | 7  | 6  |
| 334963 | 80 | 177503 | 177526 | 2 | 12 | 24 | GT   | 14 | 9  |
| 334965 | 80 | 179779 | 179793 | 3 | 5  | 15 | AGG  | 15 | 11 |
| 334966 | 80 | 179796 | 179810 | 3 | 5  | 15 | GAG  | 14 | 13 |
| 334968 | 80 | 180773 | 180796 | 2 | 12 | 24 | GT   | 20 | 16 |
| 334969 | 80 | 180858 | 180877 | 2 | 10 | 20 | CA   | 13 | 14 |
| 334970 | 80 | 180984 | 181039 | 2 | 28 | 56 | AC   | 8  | 11 |
| 334988 | 80 | 184841 | 184884 | 2 | 22 | 44 | GT   | 6  | 10 |
| 334992 | 80 | 188971 | 188982 | 2 | 6  | 12 | GT   | 18 | 9  |
| 334993 | 80 | 189346 | 189371 | 2 | 13 | 26 | TG   | 18 | 12 |
| 334996 | 80 | 193745 | 193770 | 2 | 13 | 26 | CA   | 10 | 10 |
| 334997 | 80 | 196612 | 196632 | 3 | 7  | 21 | GAG  | 15 | 3  |
| 335008 | 80 | 211774 | 211809 | 2 | 18 | 36 | CA   | 17 | 12 |
| 335015 | 80 | 213794 | 213813 | 4 | 5  | 20 | TTTA | 12 | 8  |
| 335016 | 80 | 214021 | 214036 | 4 | 4  | 16 | ACAG | 14 | 7  |
| 335020 | 80 | 219691 | 219712 | 2 | 11 | 22 | GT   | 15 | 6  |
| 335023 | 80 | 223860 | 223889 | 2 | 15 | 30 | GT   | 16 | 10 |
| 335028 | 80 | 228597 | 228614 | 3 | 6  | 18 | TCT  | 21 | 3  |
| 335032 | 80 | 228914 | 228943 | 2 | 15 | 30 | TG   | 7  | 7  |
| 335035 | 80 | 233545 | 233580 | 2 | 18 | 36 | GT   | 19 | 10 |
| 335036 | 80 | 233636 | 233663 | 2 | 14 | 28 | TG   | 8  | 11 |
| 335037 | 80 | 233733 | 233762 | 2 | 15 | 30 | AC   | 13 | 12 |
| 335039 | 80 | 236019 | 236038 | 2 | 10 | 20 | TG   | 15 | 12 |
| 335046 | 80 | 236819 | 236838 | 4 | 5  | 20 | GGAA | 26 | 3  |
| 335049 | 80 | 238464 | 238497 | 2 | 17 | 34 | CA   | 9  | 8  |
| 335054 | 80 | 239639 | 239680 | 2 | 21 | 42 | AC   | 9  | 15 |
| 335060 | 80 | 245467 | 245492 | 2 | 13 | 26 | GT   | 16 | 9  |
| 335064 | 80 | 247400 | 247411 | 2 | 6  | 12 | GT   | 28 | 4  |
| 335066 | 80 | 247572 | 247593 | 2 | 11 | 22 | AC   | 12 | 9  |
| 335067 | 80 | 247631 | 247644 | 2 | 7  | 14 | CA   | 20 | 6  |
| 335068 | 80 | 247646 | 247657 | 2 | 6  | 12 | AC   | 21 | 7  |
| 335069 | 80 | 247761 | 247788 | 2 | 14 | 28 | CA   | 13 | 10 |

|        |    |        |        |   |    |    |      |    |    |
|--------|----|--------|--------|---|----|----|------|----|----|
| 335071 | 80 | 249731 | 249760 | 2 | 15 | 30 | GT   | 22 | 12 |
| 335072 | 80 | 251523 | 251552 | 2 | 15 | 30 | AC   | 12 | 13 |
| 335074 | 80 | 251611 | 251622 | 2 | 6  | 12 | AC   | 18 | 5  |
| 335075 | 80 | 251799 | 251838 | 2 | 20 | 40 | AC   | 12 | 8  |
| 335078 | 80 | 253863 | 253904 | 2 | 21 | 42 | AC   | 7  | 10 |
| 335079 | 80 | 253991 | 254016 | 2 | 13 | 26 | TG   | 6  | 6  |
| 335081 | 80 | 256406 | 256429 | 2 | 12 | 24 | GT   | 14 | 8  |
| 335082 | 80 | 256544 | 256559 | 2 | 8  | 16 | CA   | 13 | 12 |
| 335086 | 80 | 256744 | 256764 | 3 | 7  | 21 | TCC  | 16 | 10 |
| 335087 | 80 | 257228 | 257242 | 3 | 5  | 15 | AGA  | 24 | 3  |
| 335091 | 80 | 263030 | 263053 | 3 | 8  | 24 | CAT  | 25 | 7  |
| 335105 | 80 | 269981 | 270004 | 2 | 12 | 24 | TG   | 13 | 7  |
| 335106 | 80 | 270062 | 270085 | 2 | 12 | 24 | AC   | 13 | 7  |
| 335107 | 80 | 270174 | 270211 | 2 | 19 | 38 | CA   | 15 | 11 |
| 335109 | 80 | 272684 | 272701 | 3 | 6  | 18 | AGG  | 23 | 8  |
| 335116 | 80 | 274390 | 274423 | 2 | 17 | 34 | TG   | 13 | 11 |
| 335120 | 80 | 275970 | 275990 | 3 | 7  | 21 | TCC  | 13 | 12 |
| 335121 | 80 | 277874 | 277903 | 3 | 10 | 30 | GAT  | 26 | 5  |
| 335124 | 80 | 281755 | 281800 | 2 | 23 | 46 | TG   | 12 | 13 |
| 335127 | 80 | 287335 | 287376 | 2 | 21 | 42 | GT   | 8  | 9  |
| 335128 | 80 | 291525 | 291548 | 2 | 12 | 24 | TG   | 8  | 9  |
| 335136 | 80 | 296412 | 296449 | 2 | 19 | 38 | AC   | 6  | 7  |
| 335138 | 80 | 296578 | 296621 | 2 | 22 | 44 | CA   | 16 | 14 |
| 335140 | 80 | 304741 | 304766 | 2 | 13 | 26 | TG   | 23 | 8  |
| 335141 | 80 | 304964 | 304993 | 2 | 15 | 30 | TG   | 11 | 12 |
| 335142 | 80 | 307518 | 307557 | 2 | 20 | 40 | CA   | 6  | 10 |
| 335143 | 80 | 307638 | 307653 | 2 | 8  | 16 | CT   | 22 | 4  |
| 335146 | 80 | 313191 | 313210 | 2 | 10 | 20 | AC   | 23 | 14 |
| 335150 | 80 | 314791 | 314830 | 2 | 20 | 40 | GT   | 15 | 13 |
| 335151 | 80 | 316355 | 316378 | 2 | 12 | 24 | TG   | 15 | 6  |
| 335152 | 80 | 316437 | 316448 | 2 | 6  | 12 | AC   | 18 | 12 |
| 335153 | 80 | 316451 | 316468 | 2 | 9  | 18 | AC   | 18 | 14 |
| 335155 | 80 | 316831 | 316856 | 2 | 13 | 26 | TG   | 10 | 10 |
| 335157 | 80 | 318886 | 318899 | 2 | 7  | 14 | CA   | 13 | 9  |
| 335160 | 80 | 324976 | 325007 | 2 | 16 | 32 | GT   | 12 | 8  |
| 335161 | 80 | 326164 | 326183 | 4 | 5  | 20 | AAGA | 24 | 3  |
| 335162 | 80 | 328929 | 328960 | 2 | 16 | 32 | AC   | 12 | 14 |
| 335164 | 80 | 331542 | 331553 | 2 | 6  | 12 | CA   | 24 | 3  |
| 335168 | 80 | 336975 | 337014 | 2 | 20 | 40 | GT   | 6  | 8  |
| 335174 | 80 | 342982 | 343003 | 2 | 11 | 22 | GA   | 20 | 19 |
| 335183 | 80 | 350246 | 350279 | 2 | 17 | 34 | TG   | 8  | 8  |
| 335184 | 80 | 350341 | 350352 | 2 | 6  | 12 | GT   | 16 | 6  |
| 335185 | 80 | 350354 | 350365 | 2 | 6  | 12 | TG   | 18 | 6  |
| 335186 | 80 | 350429 | 350464 | 2 | 18 | 36 | CA   | 12 | 5  |
| 335190 | 80 | 351856 | 351879 | 2 | 12 | 24 | CA   | 14 | 12 |
| 335197 | 80 | 363960 | 363991 | 2 | 16 | 32 | CA   | 16 | 16 |
| 335199 | 80 | 365344 | 365369 | 2 | 13 | 26 | AC   | 16 | 8  |
| 335201 | 80 | 369970 | 369999 | 3 | 10 | 30 | CTT  | 20 | 17 |
| 335202 | 80 | 372069 | 372080 | 2 | 6  | 12 | GT   | 21 | 5  |
| 335207 | 80 | 375878 | 375905 | 2 | 14 | 28 | CA   | 20 | 5  |
| 335209 | 80 | 382312 | 382323 | 2 | 6  | 12 | GT   | 17 | 4  |



|        |    |        |        |   |    |    |      |    |    |
|--------|----|--------|--------|---|----|----|------|----|----|
| 335213 | 80 | 382661 | 382686 | 2 | 13 | 26 | CA   | 10 | 12 |
| 335214 | 80 | 382886 | 382917 | 2 | 16 | 32 | TG   | 14 | 12 |
| 335216 | 80 | 391160 | 391181 | 2 | 11 | 22 | GT   | 18 | 5  |
| 335222 | 80 | 394064 | 394111 | 2 | 24 | 48 | GT   | 7  | 11 |
| 335227 | 80 | 396074 | 396101 | 2 | 14 | 28 | TC   | 12 | 8  |
| 335229 | 80 | 397724 | 397751 | 4 | 7  | 28 | TCAG | 19 | 5  |
| 335230 | 80 | 397827 | 397876 | 2 | 25 | 50 | GT   | 15 | 15 |
| 335233 | 80 | 405179 | 405204 | 2 | 13 | 26 | AC   | 17 | 7  |
| 335234 | 80 | 405538 | 405593 | 2 | 28 | 56 | GT   | 12 | 11 |
| 335235 | 80 | 405678 | 405699 | 2 | 11 | 22 | CA   | 11 | 6  |
| 335237 | 80 | 405753 | 405808 | 2 | 28 | 56 | AC   | 10 | 12 |
| 335238 | 80 | 405933 | 405948 | 2 | 8  | 16 | AC   | 6  | 3  |
| 335243 | 80 | 408387 | 408406 | 2 | 10 | 20 | TG   | 7  | 8  |
| 335244 | 80 | 408482 | 408495 | 2 | 7  | 14 | CA   | 11 | 8  |
| 335245 | 80 | 408629 | 408646 | 2 | 9  | 18 | AC   | 18 | 13 |
| 335246 | 80 | 408679 | 408693 | 3 | 5  | 15 | AAG  | 24 | 3  |
| 335248 | 80 | 416008 | 416031 | 2 | 12 | 24 | TG   | 15 | 7  |
| 335250 | 80 | 417545 | 417578 | 2 | 17 | 34 | TG   | 8  | 13 |
| 335251 | 80 | 418859 | 418882 | 4 | 6  | 24 | AAGG | 24 | 4  |
| 335252 | 80 | 419028 | 419051 | 2 | 12 | 24 | AC   | 6  | 8  |
| 335262 | 80 | 420551 | 420586 | 2 | 18 | 36 | TG   | 6  | 8  |
| 335266 | 80 | 421763 | 421812 | 2 | 25 | 50 | CA   | 7  | 8  |
| 335268 | 80 | 423008 | 423019 | 2 | 6  | 12 | GA   | 21 | 8  |
| 335274 | 80 | 424685 | 424732 | 2 | 24 | 48 | AC   | 9  | 11 |
| 335275 | 80 | 424816 | 424839 | 3 | 8  | 24 | TTC  | 16 | 8  |
| 335279 | 80 | 427798 | 427843 | 2 | 23 | 46 | AC   | 8  | 7  |
| 335280 | 80 | 428032 | 428051 | 2 | 10 | 20 | TC   | 20 | 5  |
| 335281 | 80 | 430040 | 430071 | 2 | 16 | 32 | GT   | 18 | 10 |
| 335290 | 80 | 436939 | 436953 | 3 | 5  | 15 | AAG  | 26 | 6  |
| 335292 | 80 | 438806 | 438843 | 2 | 19 | 38 | AC   | 12 | 13 |
| 335294 | 80 | 438984 | 439011 | 2 | 14 | 28 | GT   | 7  | 10 |
| 335301 | 80 | 442337 | 442348 | 2 | 6  | 12 | CA   | 33 | 7  |
| 335308 | 80 | 447259 | 447279 | 3 | 7  | 21 | GAG  | 22 | 8  |
| 335313 | 80 | 448707 | 448720 | 2 | 7  | 14 | CA   | 21 | 9  |
| 335320 | 80 | 454270 | 454289 | 2 | 10 | 20 | AC   | 12 | 18 |
| 335321 | 80 | 454291 | 454302 | 2 | 6  | 12 | CA   | 10 | 17 |
| 335322 | 80 | 454426 | 454441 | 2 | 8  | 16 | AC   | 20 | 9  |
| 335323 | 80 | 454499 | 454532 | 2 | 17 | 34 | TG   | 12 | 8  |
| 335325 | 80 | 457828 | 457875 | 2 | 24 | 48 | AC   | 19 | 11 |
| 335326 | 80 | 469000 | 469017 | 2 | 9  | 18 | CA   | 13 | 7  |
| 335328 | 80 | 470770 | 470790 | 3 | 7  | 21 | GAA  | 30 | 5  |
| 335329 | 80 | 472277 | 472288 | 2 | 6  | 12 | CA   | 29 | 3  |
| 335331 | 80 | 473027 | 473047 | 3 | 7  | 21 | AGA  | 27 | 10 |
| 335332 | 80 | 473617 | 473656 | 2 | 20 | 40 | AC   | 8  | 9  |
| 335333 | 80 | 473775 | 473836 | 2 | 31 | 62 | TG   | 10 | 12 |
| 335334 | 80 | 474998 | 475027 | 2 | 15 | 30 | TG   | 28 | 17 |
| 335335 | 80 | 475171 | 475204 | 2 | 17 | 34 | CA   | 20 | 16 |
| 335336 | 80 | 477360 | 477377 | 2 | 9  | 18 | GT   | 24 | 6  |
| 335339 | 80 | 478038 | 478065 | 2 | 14 | 28 | AC   | 20 | 13 |
| 335340 | 80 | 478208 | 478227 | 2 | 10 | 20 | TG   | 24 | 13 |
| 335341 | 80 | 478348 | 478371 | 2 | 12 | 24 | CA   | 16 | 8  |

|        |    |        |        |   |    |    |      |    |    |
|--------|----|--------|--------|---|----|----|------|----|----|
| 335342 | 80 | 478541 | 478570 | 2 | 15 | 30 | GT   | 10 | 11 |
| 335348 | 80 | 484157 | 484178 | 2 | 11 | 22 | GT   | 21 | 13 |
| 335351 | 80 | 484475 | 484486 | 2 | 6  | 12 | TG   | 32 | 3  |
| 335354 | 80 | 500008 | 500025 | 2 | 9  | 18 | AC   | 28 | 8  |
| 335356 | 80 | 500914 | 500933 | 2 | 10 | 20 | CA   | 11 | 4  |
| 335357 | 80 | 501203 | 501232 | 2 | 15 | 30 | GT   | 6  | 5  |
| 335358 | 80 | 501445 | 501474 | 2 | 15 | 30 | AC   | 10 | 11 |
| 335361 | 80 | 503434 | 503469 | 2 | 18 | 36 | AC   | 8  | 8  |
| 335362 | 80 | 503649 | 503672 | 2 | 12 | 24 | TG   | 17 | 12 |
| 335374 | 80 | 516160 | 516175 | 2 | 8  | 16 | AT   | 18 | 5  |
| 335402 | 80 | 557205 | 557224 | 2 | 10 | 20 | TG   | 15 | 9  |
| 335407 | 80 | 565708 | 565725 | 2 | 9  | 18 | CA   | 25 | 8  |
| 335410 | 80 | 571617 | 571631 | 3 | 5  | 15 | AAC  | 21 | 3  |
| 335417 | 80 | 573707 | 573724 | 2 | 9  | 18 | GT   | 21 | 4  |
| 335418 | 80 | 573788 | 573807 | 2 | 10 | 20 | GT   | 14 | 3  |
| 335419 | 80 | 573836 | 573865 | 2 | 15 | 30 | TG   | 13 | 6  |
| 335420 | 80 | 573957 | 573972 | 2 | 8  | 16 | GT   | 15 | 9  |
| 335423 | 80 | 574619 | 574648 | 2 | 15 | 30 | TG   | 13 | 10 |
| 335424 | 80 | 574830 | 574851 | 2 | 11 | 22 | AC   | 14 | 7  |
| 335425 | 80 | 574963 | 574978 | 2 | 8  | 16 | GT   | 15 | 9  |
| 335426 | 80 | 575165 | 575186 | 2 | 11 | 22 | TG   | 11 | 12 |
| 335428 | 80 | 579765 | 579800 | 2 | 18 | 36 | CA   | 15 | 10 |
| 335430 | 80 | 580240 | 580269 | 2 | 15 | 30 | GT   | 15 | 10 |
| 335431 | 80 | 580395 | 580406 | 2 | 6  | 12 | GA   | 23 | 11 |
| 335434 | 80 | 581291 | 581322 | 2 | 16 | 32 | TG   | 15 | 9  |
| 335438 | 80 | 586253 | 586285 | 3 | 11 | 33 | CTT  | 19 | 10 |
| 335440 | 80 | 590334 | 590357 | 2 | 12 | 24 | GT   | 23 | 8  |
| 335442 | 80 | 595825 | 595858 | 2 | 17 | 34 | CA   | 7  | 7  |
| 335450 | 80 | 601440 | 601461 | 2 | 11 | 22 | GT   | 7  | 8  |
| 335451 | 80 | 601609 | 601642 | 2 | 17 | 34 | TG   | 9  | 10 |
| 335453 | 80 | 601851 | 601886 | 2 | 18 | 36 | GT   | 10 | 8  |
| 335454 | 80 | 606068 | 606079 | 2 | 6  | 12 | GA   | 34 | 3  |
| 335456 | 80 | 612695 | 612746 | 4 | 13 | 52 | ATCC | 9  | 7  |
| 335464 | 80 | 631632 | 631643 | 2 | 6  | 12 | TG   | 19 | 4  |
| 335465 | 80 | 635967 | 635982 | 2 | 8  | 16 | AG   | 20 | 3  |
| 335471 | 80 | 639551 | 639565 | 3 | 5  | 15 | ATG  | 30 | 7  |
| 335473 | 80 | 641253 | 641284 | 2 | 16 | 32 | CA   | 13 | 9  |
| 335475 | 80 | 642752 | 642771 | 2 | 10 | 20 | AC   | 17 | 8  |
| 335477 | 80 | 643698 | 643715 | 2 | 9  | 18 | GT   | 17 | 13 |
| 335479 | 80 | 648190 | 648219 | 2 | 15 | 30 | CA   | 23 | 15 |
| 335483 | 80 | 657186 | 657209 | 2 | 12 | 24 | GT   | 11 | 13 |
| 335486 | 80 | 660620 | 660634 | 3 | 5  | 15 | CCT  | 23 | 5  |
| 335488 | 80 | 663535 | 663556 | 2 | 11 | 22 | CA   | 11 | 7  |
| 335489 | 80 | 663844 | 663863 | 2 | 10 | 20 | AC   | 14 | 16 |
| 335492 | 80 | 671629 | 671642 | 2 | 7  | 14 | TG   | 33 | 4  |
| 335495 | 80 | 681001 | 681030 | 2 | 15 | 30 | TG   | 18 | 10 |
| 335496 | 80 | 682079 | 682094 | 2 | 8  | 16 | GA   | 25 | 4  |
| 335497 | 80 | 683899 | 683926 | 4 | 7  | 28 | GTCT | 26 | 4  |
| 335499 | 80 | 686927 | 686952 | 2 | 13 | 26 | GT   | 20 | 11 |
| 335504 | 80 | 692129 | 692156 | 2 | 14 | 28 | CA   | 8  | 11 |
| 335505 | 80 | 692304 | 692325 | 2 | 11 | 22 | TG   | 11 | 12 |

|        |    |        |        |   |    |    |      |    |    |
|--------|----|--------|--------|---|----|----|------|----|----|
| 335510 | 80 | 701930 | 701947 | 2 | 9  | 18 | CA   | 8  | 9  |
| 335512 | 80 | 702324 | 702338 | 3 | 5  | 15 | TTG  | 31 | 3  |
| 335513 | 80 | 702864 | 702881 | 3 | 6  | 18 | TCC  | 23 | 4  |
| 335520 | 80 | 718462 | 718515 | 3 | 18 | 54 | ACA  | 14 | 14 |
| 335521 | 80 | 719286 | 719297 | 2 | 6  | 12 | GT   | 25 | 11 |
| 335523 | 80 | 720399 | 720426 | 2 | 14 | 28 | CA   | 15 | 9  |
| 335524 | 80 | 721188 | 721231 | 2 | 22 | 44 | GT   | 8  | 9  |
| 335527 | 80 | 730514 | 730535 | 2 | 11 | 22 | AC   | 12 | 14 |
| 335530 | 80 | 734134 | 734157 | 3 | 8  | 24 | CTT  | 20 | 6  |
| 335534 | 80 | 737036 | 737055 | 2 | 10 | 20 | TG   | 9  | 6  |
| 335544 | 80 | 739283 | 739298 | 2 | 8  | 16 | GT   | 22 | 11 |
| 335546 | 80 | 740101 | 740122 | 2 | 11 | 22 | GT   | 14 | 11 |
| 335547 | 80 | 740871 | 740894 | 2 | 12 | 24 | GT   | 20 | 12 |
| 335548 | 80 | 744869 | 744884 | 4 | 4  | 16 | AGAT | 23 | 5  |
| 335551 | 80 | 751734 | 751754 | 3 | 7  | 21 | CTT  | 13 | 6  |
| 335553 | 80 | 754603 | 754620 | 3 | 6  | 18 | AGC  | 22 | 4  |
| 335554 | 80 | 755862 | 755885 | 2 | 12 | 24 | AC   | 17 | 11 |
| 335557 | 80 | 757000 | 757017 | 2 | 9  | 18 | AC   | 14 | 13 |
| 335558 | 80 | 758298 | 758313 | 2 | 8  | 16 | AC   | 16 | 10 |
| 335559 | 80 | 758316 | 758329 | 2 | 7  | 14 | AC   | 24 | 12 |
| 335562 | 80 | 761512 | 761563 | 2 | 26 | 52 | GT   | 8  | 11 |
| 335565 | 80 | 766933 | 766962 | 2 | 15 | 30 | CA   | 20 | 15 |
| 335566 | 80 | 767131 | 767148 | 2 | 9  | 18 | CA   | 16 | 19 |
| 335567 | 80 | 767236 | 767251 | 2 | 8  | 16 | CA   | 15 | 9  |
| 335568 | 80 | 767294 | 767319 | 2 | 13 | 26 | AC   | 15 | 8  |
| 335569 | 80 | 767686 | 767709 | 2 | 12 | 24 | GT   | 12 | 7  |
| 335577 | 80 | 770197 | 770224 | 2 | 14 | 28 | TG   | 7  | 11 |
| 335584 | 80 | 777807 | 777832 | 2 | 13 | 26 | TG   | 7  | 9  |
| 335588 | 80 | 779750 | 779782 | 3 | 11 | 33 | GAG  | 18 | 13 |
| 335590 | 80 | 782733 | 782748 | 2 | 8  | 16 | GT   | 22 | 9  |
| 335592 | 80 | 786091 | 786108 | 2 | 9  | 18 | TG   | 24 | 15 |
| 335595 | 80 | 787134 | 787165 | 2 | 16 | 32 | CA   | 7  | 8  |
| 335602 | 80 | 791653 | 791678 | 2 | 13 | 26 | AC   | 18 | 7  |
| 335604 | 80 | 793291 | 793302 | 2 | 6  | 12 | CA   | 25 | 3  |
| 335610 | 80 | 793862 | 793893 | 2 | 16 | 32 | GT   | 6  | 10 |
| 335611 | 80 | 795039 | 795058 | 2 | 10 | 20 | AC   | 19 | 9  |
| 335616 | 80 | 797390 | 797407 | 3 | 6  | 18 | CTT  | 22 | 5  |
| 335624 | 80 | 801667 | 801684 | 3 | 6  | 18 | GCT  | 28 | 9  |
| 335625 | 80 | 801823 | 801848 | 2 | 13 | 26 | CA   | 14 | 11 |
| 335627 | 80 | 802074 | 802119 | 2 | 23 | 46 | AC   | 13 | 13 |
| 335630 | 80 | 804107 | 804122 | 2 | 8  | 16 | GT   | 17 | 12 |
| 335631 | 80 | 804125 | 804136 | 2 | 6  | 12 | GT   | 13 | 11 |
| 335633 | 80 | 806204 | 806231 | 2 | 14 | 28 | TG   | 14 | 21 |
| 335635 | 80 | 806370 | 806411 | 2 | 21 | 42 | TG   | 13 | 15 |
| 335638 | 80 | 808295 | 808332 | 2 | 19 | 38 | AC   | 6  | 9  |
| 335639 | 80 | 809367 | 809410 | 2 | 22 | 44 | AC   | 9  | 12 |
| 335646 | 80 | 814956 | 814971 | 4 | 4  | 16 | AACC | 23 | 3  |
| 335651 | 80 | 818568 | 818591 | 2 | 12 | 24 | TG   | 18 | 12 |
| 335652 | 80 | 820473 | 820498 | 2 | 13 | 26 | AC   | 21 | 6  |
| 335654 | 80 | 823879 | 823900 | 2 | 11 | 22 | AC   | 11 | 3  |
| 335655 | 80 | 825950 | 825991 | 2 | 21 | 42 | CA   | 10 | 14 |

|        |    |        |        |   |    |    |      |    |    |
|--------|----|--------|--------|---|----|----|------|----|----|
| 335657 | 80 | 826127 | 826140 | 2 | 7  | 14 | CA   | 12 | 9  |
| 335663 | 80 | 835460 | 835483 | 2 | 12 | 24 | CA   | 13 | 9  |
| 335665 | 80 | 837084 | 837095 | 2 | 6  | 12 | TG   | 24 | 3  |
| 335668 | 80 | 840817 | 840828 | 2 | 6  | 12 | CT   | 19 | 3  |
| 335669 | 80 | 841060 | 841091 | 2 | 16 | 32 | TG   | 19 | 14 |
| 335670 | 80 | 842490 | 842517 | 2 | 14 | 28 | CA   | 7  | 9  |
| 335680 | 80 | 844090 | 844113 | 2 | 12 | 24 | GT   | 10 | 10 |
| 335684 | 80 | 846685 | 846702 | 2 | 9  | 18 | CA   | 29 | 7  |
| 335685 | 80 | 848186 | 848237 | 2 | 26 | 52 | AC   | 6  | 7  |
| 335686 | 80 | 848296 | 848310 | 3 | 5  | 15 | GAG  | 24 | 3  |
| 335687 | 80 | 850169 | 850182 | 2 | 7  | 14 | AC   | 30 | 7  |
| 335689 | 80 | 851445 | 851472 | 4 | 7  | 28 | GAAA | 22 | 3  |
| 335690 | 80 | 852772 | 852793 | 2 | 11 | 22 | CA   | 16 | 5  |
| 335694 | 80 | 854601 | 854632 | 2 | 16 | 32 | CA   | 10 | 9  |
| 335698 | 80 | 858079 | 858102 | 4 | 6  | 24 | CGGT | 30 | 17 |
| 335699 | 80 | 859165 | 859178 | 2 | 7  | 14 | AC   | 23 | 13 |
| 335700 | 80 | 861764 | 861779 | 2 | 8  | 16 | GT   | 26 | 5  |
| 335712 | 80 | 872097 | 872112 | 2 | 8  | 16 | TG   | 26 | 11 |
| 335713 | 80 | 874262 | 874291 | 2 | 15 | 30 | TG   | 14 | 9  |
| 335714 | 80 | 874386 | 874407 | 2 | 11 | 22 | TG   | 22 | 6  |
| 335715 | 80 | 874457 | 874484 | 2 | 14 | 28 | AC   | 12 | 6  |
| 335717 | 80 | 876958 | 876973 | 4 | 4  | 16 | CATC | 12 | 3  |
| 335720 | 80 | 877103 | 877130 | 2 | 14 | 28 | GT   | 8  | 8  |
| 335721 | 80 | 877213 | 877234 | 2 | 11 | 22 | AC   | 19 | 9  |
| 335724 | 80 | 881480 | 881507 | 2 | 14 | 28 | GT   | 22 | 7  |
| 335726 | 80 | 881688 | 881709 | 2 | 11 | 22 | GT   | 13 | 15 |
| 335727 | 80 | 881751 | 881778 | 2 | 14 | 28 | GT   | 6  | 6  |
| 335728 | 80 | 886595 | 886624 | 3 | 10 | 30 | TCC  | 24 | 3  |
| 335729 | 80 | 887079 | 887114 | 2 | 18 | 36 | TG   | 12 | 12 |
| 335731 | 80 | 888066 | 888079 | 2 | 7  | 14 | AC   | 27 | 4  |
| 335732 | 80 | 888446 | 888467 | 2 | 11 | 22 | GT   | 13 | 7  |
| 335734 | 80 | 888570 | 888593 | 2 | 12 | 24 | AC   | 15 | 11 |
| 335736 | 80 | 896388 | 896419 | 2 | 16 | 32 | AC   | 20 | 10 |
| 335737 | 80 | 903190 | 903217 | 2 | 14 | 28 | GT   | 14 | 14 |
| 335739 | 80 | 904971 | 904984 | 2 | 7  | 14 | TC   | 27 | 5  |
| 335740 | 80 | 905875 | 905898 | 2 | 12 | 24 | TG   | 19 | 18 |
| 335742 | 80 | 912185 | 912198 | 2 | 7  | 14 | CA   | 14 | 7  |
| 335743 | 80 | 913010 | 913021 | 2 | 6  | 12 | GT   | 21 | 4  |
| 335744 | 80 | 913594 | 913605 | 2 | 6  | 12 | TG   | 23 | 3  |
| 335745 | 80 | 913633 | 913666 | 2 | 17 | 34 | GT   | 14 | 10 |
| 335746 | 80 | 914682 | 914699 | 3 | 6  | 18 | CTC  | 26 | 8  |
| 335747 | 80 | 915515 | 915526 | 2 | 6  | 12 | GT   | 9  | 3  |
| 335749 | 80 | 918627 | 918650 | 3 | 8  | 24 | ACA  | 21 | 7  |
| 335750 | 80 | 920349 | 920360 | 2 | 6  | 12 | TG   | 34 | 5  |
| 335751 | 80 | 922768 | 922785 | 2 | 9  | 18 | CA   | 16 | 4  |
| 335753 | 80 | 924062 | 924095 | 2 | 17 | 34 | TG   | 19 | 9  |
| 335755 | 80 | 929802 | 929849 | 2 | 24 | 48 | AC   | 8  | 8  |
| 335759 | 80 | 932049 | 932074 | 2 | 13 | 26 | TG   | 16 | 12 |
| 335760 | 80 | 933138 | 933153 | 2 | 8  | 16 | GT   | 27 | 3  |
| 335768 | 80 | 937567 | 937586 | 4 | 5  | 20 | AAAC | 16 | 7  |
| 335769 | 80 | 939638 | 939655 | 3 | 6  | 18 | CCT  | 21 | 5  |

|        |    |         |         |   |    |    |      |    |    |
|--------|----|---------|---------|---|----|----|------|----|----|
| 335771 | 80 | 944352  | 944365  | 2 | 7  | 14 | GT   | 26 | 5  |
| 335772 | 80 | 950976  | 951009  | 2 | 17 | 34 | TG   | 14 | 10 |
| 335776 | 80 | 954149  | 954163  | 3 | 5  | 15 | GCT  | 28 | 3  |
| 335783 | 80 | 973004  | 973017  | 2 | 7  | 14 | TA   | 24 | 4  |
| 335784 | 80 | 974183  | 974198  | 2 | 8  | 16 | TG   | 24 | 9  |
| 335787 | 80 | 976879  | 976890  | 2 | 6  | 12 | CA   | 21 | 12 |
| 335792 | 80 | 978181  | 978222  | 2 | 21 | 42 | AC   | 20 | 15 |
| 335793 | 80 | 978316  | 978339  | 2 | 12 | 24 | CA   | 16 | 16 |
| 335794 | 80 | 978505  | 978518  | 2 | 7  | 14 | AC   | 21 | 3  |
| 335795 | 80 | 979714  | 979739  | 2 | 13 | 26 | GT   | 12 | 7  |
| 335796 | 80 | 980501  | 980516  | 4 | 4  | 16 | TGTT | 30 | 4  |
| 335800 | 80 | 984020  | 984035  | 4 | 4  | 16 | GACT | 28 | 7  |
| 335804 | 80 | 995179  | 995196  | 3 | 6  | 18 | CCT  | 17 | 10 |
| 335809 | 80 | 1010113 | 1010136 | 2 | 12 | 24 | TG   | 17 | 12 |
| 335810 | 80 | 1010244 | 1010258 | 3 | 5  | 15 | ACG  | 23 | 4  |
| 335811 | 80 | 1010362 | 1010393 | 2 | 16 | 32 | CA   | 15 | 8  |
| 335812 | 80 | 1010509 | 1010566 | 2 | 29 | 58 | TG   | 12 | 12 |
| 335814 | 80 | 1013589 | 1013614 | 2 | 13 | 26 | AC   | 22 | 13 |
| 335815 | 80 | 1013857 | 1013868 | 2 | 6  | 12 | AG   | 27 | 3  |
| 335816 | 80 | 1015213 | 1015227 | 3 | 5  | 15 | TGT  | 31 | 3  |
| 335818 | 80 | 1017389 | 1017412 | 2 | 12 | 24 | GT   | 20 | 8  |
| 335819 | 80 | 1017462 | 1017476 | 3 | 5  | 15 | TCA  | 24 | 3  |
| 335822 | 80 | 1019535 | 1019550 | 2 | 8  | 16 | TG   | 15 | 6  |
| 335823 | 80 | 1020030 | 1020051 | 2 | 11 | 22 | CA   | 11 | 5  |
| 335824 | 80 | 1020187 | 1020206 | 2 | 10 | 20 | CA   | 7  | 7  |
| 335825 | 80 | 1021498 | 1021527 | 2 | 15 | 30 | GT   | 8  | 10 |
| 335827 | 80 | 1021899 | 1021910 | 2 | 6  | 12 | AT   | 22 | 4  |
| 335828 | 80 | 1023203 | 1023222 | 2 | 10 | 20 | CA   | 20 | 11 |
| 335829 | 80 | 1023325 | 1023344 | 2 | 10 | 20 | GT   | 14 | 13 |
| 335830 | 80 | 1025060 | 1025081 | 2 | 11 | 22 | AC   | 15 | 7  |
| 335833 | 80 | 1026585 | 1026606 | 2 | 11 | 22 | AC   | 12 | 7  |
| 335834 | 80 | 1031071 | 1031091 | 3 | 7  | 21 | TGC  | 26 | 9  |
| 335835 | 80 | 1031318 | 1031333 | 4 | 4  | 16 | ATTT | 26 | 3  |
| 335836 | 80 | 1031775 | 1031786 | 2 | 6  | 12 | TG   | 11 | 4  |
| 335838 | 80 | 1032508 | 1032531 | 2 | 12 | 24 | AC   | 18 | 15 |
| 335841 | 80 | 1037659 | 1037682 | 2 | 12 | 24 | CT   | 12 | 5  |
| 335847 | 80 | 1040636 | 1040653 | 3 | 6  | 18 | ACA  | 8  | 3  |
| 335848 | 80 | 1041285 | 1041304 | 2 | 10 | 20 | GA   | 17 | 8  |
| 335858 | 80 | 1043504 | 1043531 | 4 | 7  | 28 | TGAC | 22 | 3  |
| 335859 | 80 | 1044259 | 1044274 | 4 | 4  | 16 | ATCG | 27 | 4  |
| 335864 | 80 | 1065659 | 1065691 | 3 | 11 | 33 | GGA  | 8  | 6  |
| 335867 | 80 | 1065881 | 1065916 | 4 | 9  | 36 | TGTT | 10 | 4  |
| 335870 | 80 | 1066279 | 1066304 | 2 | 13 | 26 | AC   | 7  | 3  |
| 335877 | 80 | 1067326 | 1067339 | 2 | 7  | 14 | GA   | 10 | 5  |
| 335881 | 80 | 1070963 | 1070984 | 2 | 11 | 22 | GT   | 18 | 6  |
| 335883 | 80 | 1073572 | 1073589 | 2 | 9  | 18 | AC   | 21 | 5  |
| 335884 | 80 | 1073614 | 1073625 | 2 | 6  | 12 | AC   | 31 | 4  |
| 335886 | 80 | 1073722 | 1073743 | 2 | 11 | 22 | AC   | 22 | 6  |
| 335889 | 80 | 1075138 | 1075167 | 3 | 10 | 30 | GGA  | 16 | 7  |
| 335890 | 80 | 1075248 | 1075287 | 2 | 20 | 40 | GT   | 12 | 12 |
| 335897 | 80 | 1078836 | 1078863 | 2 | 14 | 28 | AC   | 13 | 12 |

|        |    |         |         |   |    |    |      |    |    |
|--------|----|---------|---------|---|----|----|------|----|----|
| 335898 | 80 | 1079069 | 1079104 | 2 | 18 | 36 | GA   | 6  | 7  |
| 335903 | 80 | 1080438 | 1080451 | 2 | 7  | 14 | AC   | 30 | 6  |
| 335905 | 80 | 1080710 | 1080724 | 3 | 5  | 15 | GGT  | 29 | 5  |
| 335907 | 80 | 1083767 | 1083784 | 2 | 9  | 18 | GT   | 22 | 8  |
| 335911 | 80 | 1085168 | 1085185 | 3 | 6  | 18 | CCT  | 15 | 5  |
| 335914 | 80 | 1085582 | 1085619 | 2 | 19 | 38 | TG   | 19 | 9  |
| 335915 | 80 | 1085784 | 1085799 | 4 | 4  | 16 | GCTC | 19 | 4  |
| 335924 | 80 | 1089650 | 1089681 | 2 | 16 | 32 | CA   | 11 | 11 |
| 335927 | 80 | 1090013 | 1090042 | 2 | 15 | 30 | TG   | 10 | 10 |
| 335931 | 80 | 1095578 | 1095604 | 3 | 9  | 27 | GGA  | 10 | 6  |
| 335932 | 80 | 1095912 | 1095931 | 4 | 5  | 20 | TTTA | 18 | 4  |
| 335936 | 80 | 1097072 | 1097087 | 4 | 4  | 16 | ACAG | 23 | 4  |
| 335945 | 80 | 1105777 | 1105806 | 3 | 10 | 30 | GGA  | 6  | 5  |
| 335950 | 80 | 1109928 | 1109949 | 2 | 11 | 22 | GT   | 18 | 8  |
| 335952 | 80 | 1109989 | 1110004 | 2 | 8  | 16 | AC   | 25 | 5  |
| 335955 | 80 | 1112583 | 1112608 | 2 | 13 | 26 | GT   | 7  | 5  |
| 335956 | 80 | 1112734 | 1112753 | 4 | 5  | 20 | AGGC | 21 | 4  |
| 335957 | 80 | 1117481 | 1117512 | 2 | 16 | 32 | TG   | 13 | 9  |
| 335961 | 80 | 1121253 | 1121270 | 3 | 6  | 18 | GCC  | 25 | 4  |
| 335962 | 80 | 1121291 | 1121322 | 2 | 16 | 32 | AC   | 10 | 9  |
| 335969 | 80 | 1124380 | 1124399 | 2 | 10 | 20 | TG   | 10 | 8  |
| 335976 | 80 | 1126546 | 1126559 | 2 | 7  | 14 | TG   | 15 | 9  |
| 335977 | 80 | 1126562 | 1126573 | 2 | 6  | 12 | TG   | 15 | 7  |
| 335978 | 80 | 1126638 | 1126665 | 2 | 14 | 28 | AC   | 12 | 12 |
| 335979 | 80 | 1136962 | 1136977 | 2 | 8  | 16 | GT   | 19 | 3  |
| 335980 | 80 | 1138591 | 1138634 | 2 | 22 | 44 | CA   | 10 | 10 |
| 335986 | 80 | 1139568 | 1139597 | 2 | 15 | 30 | GT   | 8  | 8  |
| 335987 | 80 | 1139724 | 1139761 | 2 | 19 | 38 | GT   | 9  | 6  |
| 335988 | 80 | 1139870 | 1139883 | 2 | 7  | 14 | TG   | 11 | 10 |
| 335989 | 80 | 1139949 | 1139980 | 2 | 16 | 32 | AC   | 10 | 9  |
| 335991 | 80 | 1141688 | 1141703 | 4 | 4  | 16 | AAAT | 30 | 4  |
| 335997 | 80 | 1149903 | 1149929 | 3 | 9  | 27 | CTT  | 28 | 7  |
| 335998 | 80 | 1151530 | 1151561 | 2 | 16 | 32 | CA   | 7  | 6  |
| 335999 | 80 | 1151620 | 1151641 | 2 | 11 | 22 | CA   | 19 | 11 |
| 336001 | 80 | 1152066 | 1152116 | 3 | 17 | 51 | GAA  | 9  | 7  |
| 336013 | 80 | 1159970 | 1159997 | 2 | 14 | 28 | GA   | 9  | 5  |
| 336017 | 80 | 1164020 | 1164061 | 2 | 21 | 42 | TG   | 22 | 11 |
| 336018 | 80 | 1164418 | 1164439 | 2 | 11 | 22 | CA   | 25 | 8  |
| 336020 | 80 | 1165185 | 1165196 | 2 | 6  | 12 | TG   | 24 | 3  |
| 336023 | 80 | 1165865 | 1165880 | 2 | 8  | 16 | TG   | 6  | 9  |
| 336025 | 80 | 1167038 | 1167077 | 2 | 20 | 40 | CA   | 7  | 9  |
| 336026 | 80 | 1167184 | 1167215 | 2 | 16 | 32 | CA   | 16 | 11 |
| 336028 | 80 | 1167420 | 1167449 | 2 | 15 | 30 | CA   | 14 | 9  |
| 336029 | 80 | 1167596 | 1167619 | 2 | 12 | 24 | AC   | 7  | 9  |
| 336031 | 80 | 1168458 | 1168489 | 2 | 16 | 32 | AC   | 14 | 10 |
| 336032 | 80 | 1169001 | 1169030 | 2 | 15 | 30 | TG   | 17 | 12 |
| 336033 | 80 | 1169189 | 1169222 | 2 | 17 | 34 | AC   | 8  | 8  |
| 336036 | 80 | 1170329 | 1170342 | 2 | 7  | 14 | AT   | 20 | 9  |
| 336037 | 80 | 1170726 | 1170755 | 3 | 10 | 30 | GAG  | 17 | 7  |
| 336044 | 80 | 1175887 | 1175926 | 2 | 20 | 40 | TG   | 8  | 13 |
| 336046 | 80 | 1177860 | 1177873 | 2 | 7  | 14 | TG   | 19 | 9  |

|        |    |         |         |   |    |    |      |    |    |
|--------|----|---------|---------|---|----|----|------|----|----|
| 336047 | 80 | 1178343 | 1178381 | 3 | 13 | 39 | GAG  | 10 | 9  |
| 336049 | 80 | 1180335 | 1180356 | 2 | 11 | 22 | CT   | 18 | 3  |
| 336050 | 80 | 1180620 | 1180647 | 2 | 14 | 28 | GT   | 12 | 8  |
| 336051 | 80 | 1180858 | 1180877 | 2 | 10 | 20 | GT   | 19 | 10 |
| 336053 | 80 | 1182936 | 1182947 | 2 | 6  | 12 | TG   | 31 | 3  |
| 336054 | 80 | 1183279 | 1183296 | 2 | 9  | 18 | GT   | 22 | 6  |
| 336056 | 80 | 1183454 | 1183471 | 3 | 6  | 18 | AAG  | 10 | 5  |
| 336058 | 80 | 1184998 | 1185015 | 2 | 9  | 18 | TG   | 22 | 7  |
| 336060 | 80 | 1186647 | 1186680 | 2 | 17 | 34 | CT   | 15 | 5  |
| 336061 | 80 | 1186937 | 1186954 | 2 | 9  | 18 | TG   | 13 | 7  |
| 336062 | 80 | 1186975 | 1186998 | 2 | 12 | 24 | GT   | 13 | 8  |
| 336063 | 80 | 1187202 | 1187237 | 2 | 18 | 36 | CA   | 13 | 10 |
| 336065 | 80 | 1187427 | 1187454 | 4 | 7  | 28 | CCGT | 29 | 12 |
| 336066 | 80 | 1187544 | 1187557 | 2 | 7  | 14 | AC   | 33 | 3  |
| 336073 | 80 | 1193196 | 1193225 | 2 | 15 | 30 | AC   | 10 | 9  |
| 336074 | 80 | 1193437 | 1193478 | 2 | 21 | 42 | CA   | 13 | 13 |
| 336075 | 80 | 1193582 | 1193597 | 2 | 8  | 16 | AC   | 16 | 5  |
| 336076 | 80 | 1193617 | 1193634 | 2 | 9  | 18 | AC   | 11 | 5  |
| 336078 | 80 | 1193789 | 1193820 | 2 | 16 | 32 | AC   | 7  | 4  |
| 336079 | 80 | 1193851 | 1193862 | 2 | 6  | 12 | GA   | 22 | 3  |
| 336080 | 80 | 1194000 | 1194047 | 2 | 24 | 48 | CA   | 6  | 11 |
| 336086 | 80 | 1196206 | 1196219 | 2 | 7  | 14 | AC   | 11 | 4  |
| 336087 | 80 | 1197310 | 1197337 | 2 | 14 | 28 | TG   | 16 | 12 |
| 336091 | 80 | 1202177 | 1202190 | 2 | 7  | 14 | AT   | 20 | 14 |
| 336092 | 80 | 1202578 | 1202609 | 2 | 16 | 32 | TG   | 13 | 12 |
| 336093 | 80 | 1204668 | 1204681 | 2 | 7  | 14 | TG   | 26 | 5  |
| 336095 | 80 | 1206841 | 1206864 | 3 | 8  | 24 | GGT  | 15 | 3  |
| 336096 | 80 | 1207377 | 1207408 | 2 | 16 | 32 | CA   | 6  | 6  |
| 336098 | 80 | 1208684 | 1208715 | 2 | 16 | 32 | CA   | 18 | 9  |
| 336099 | 80 | 1208941 | 1208958 | 3 | 6  | 18 | CCA  | 8  | 4  |
| 336100 | 80 | 1209261 | 1209287 | 3 | 9  | 27 | CTC  | 16 | 4  |
| 336102 | 80 | 1210150 | 1210167 | 3 | 6  | 18 | GGA  | 20 | 3  |
| 336103 | 80 | 1210392 | 1210407 | 2 | 8  | 16 | CA   | 21 | 6  |
| 336104 | 80 | 1210767 | 1210793 | 3 | 9  | 27 | GGA  | 23 | 6  |
| 336105 | 80 | 1210892 | 1210915 | 3 | 8  | 24 | AGG  | 16 | 4  |
| 336106 | 80 | 1211834 | 1211853 | 4 | 5  | 20 | GATC | 27 | 4  |
| 336107 | 80 | 1212327 | 1212350 | 2 | 12 | 24 | CA   | 16 | 9  |
| 336108 | 80 | 1212558 | 1212581 | 3 | 8  | 24 | GAG  | 25 | 8  |
| 336112 | 80 | 1212853 | 1212864 | 2 | 6  | 12 | TC   | 11 | 4  |
| 336117 | 80 | 1215120 | 1215134 | 3 | 5  | 15 | CTC  | 24 | 8  |
| 336118 | 80 | 1218355 | 1218372 | 3 | 6  | 18 | GGA  | 11 | 6  |
| 336120 | 80 | 1219214 | 1219225 | 2 | 6  | 12 | CA   | 21 | 3  |
| 336128 | 80 | 1222779 | 1222804 | 2 | 13 | 26 | AC   | 16 | 13 |
| 336129 | 80 | 1222852 | 1222863 | 2 | 6  | 12 | CA   | 25 | 4  |
| 336130 | 80 | 1222954 | 1222971 | 2 | 9  | 18 | AC   | 21 | 13 |
| 336131 | 80 | 1222973 | 1222988 | 2 | 8  | 16 | CA   | 14 | 7  |
| 336136 | 80 | 1226647 | 1226670 | 2 | 12 | 24 | GT   | 16 | 8  |
| 336137 | 80 | 1226814 | 1226837 | 2 | 12 | 24 | TC   | 14 | 13 |
| 336140 | 80 | 1228746 | 1228783 | 2 | 19 | 38 | TG   | 14 | 8  |
| 336141 | 80 | 1230647 | 1230667 | 3 | 7  | 21 | CCT  | 16 | 7  |
| 336142 | 80 | 1230869 | 1230896 | 2 | 14 | 28 | TC   | 11 | 5  |

|        |    |         |         |   |    |    |      |    |    |
|--------|----|---------|---------|---|----|----|------|----|----|
| 336146 | 80 | 1231913 | 1231930 | 3 | 6  | 18 | AGG  | 18 | 3  |
| 336149 | 80 | 1234815 | 1234842 | 2 | 14 | 28 | TG   | 7  | 8  |
| 336152 | 80 | 1235583 | 1235610 | 2 | 14 | 28 | TG   | 9  | 5  |
| 336160 | 80 | 1239359 | 1239379 | 3 | 7  | 21 | TCT  | 14 | 6  |
| 336161 | 80 | 1239584 | 1239604 | 3 | 7  | 21 | CTC  | 8  | 6  |
| 336163 | 80 | 1239770 | 1239787 | 3 | 6  | 18 | CGG  | 28 | 7  |
| 336164 | 80 | 1239882 | 1239901 | 2 | 10 | 20 | TG   | 18 | 6  |
| 336169 | 80 | 1242835 | 1242860 | 2 | 13 | 26 | CA   | 10 | 13 |
| 336170 | 80 | 1243060 | 1243077 | 2 | 9  | 18 | TG   | 24 | 5  |
| 336172 | 80 | 1243240 | 1243259 | 2 | 10 | 20 | GT   | 9  | 8  |
| 336173 | 80 | 1243286 | 1243313 | 2 | 14 | 28 | GT   | 14 | 8  |
| 336176 | 80 | 1243643 | 1243660 | 2 | 9  | 18 | CA   | 22 | 6  |
| 336178 | 80 | 1245630 | 1245655 | 2 | 13 | 26 | AC   | 22 | 9  |
| 336179 | 80 | 1245774 | 1245793 | 2 | 10 | 20 | TC   | 24 | 5  |
| 336181 | 80 | 1248543 | 1248560 | 2 | 9  | 18 | AT   | 13 | 6  |
| 336182 | 80 | 1248759 | 1248778 | 2 | 10 | 20 | TG   | 19 | 9  |
| 336188 | 80 | 1249532 | 1249547 | 2 | 8  | 16 | TG   | 14 | 4  |
| 336189 | 80 | 1249629 | 1249654 | 2 | 13 | 26 | TG   | 21 | 5  |
| 336193 | 80 | 1253573 | 1253590 | 2 | 9  | 18 | AT   | 12 | 5  |
| 336194 | 80 | 1253781 | 1253810 | 2 | 15 | 30 | AC   | 11 | 6  |
| 336196 | 80 | 1255339 | 1255356 | 2 | 9  | 18 | CT   | 27 | 6  |
| 336199 | 80 | 1255866 | 1255885 | 2 | 10 | 20 | GT   | 26 | 5  |
| 336202 | 80 | 1258403 | 1258418 | 2 | 8  | 16 | TG   | 22 | 12 |
| 336203 | 80 | 1258556 | 1258585 | 3 | 10 | 30 | GAG  | 16 | 7  |
| 336205 | 80 | 1258888 | 1258911 | 2 | 12 | 24 | TG   | 15 | 7  |
| 336208 | 80 | 1259682 | 1259696 | 3 | 5  | 15 | GAG  | 20 | 7  |
| 336212 | 80 | 1265160 | 1265186 | 3 | 9  | 27 | AGA  | 14 | 6  |
| 336213 | 80 | 1267151 | 1267172 | 2 | 11 | 22 | TC   | 14 | 8  |
| 336214 | 80 | 1269137 | 1269150 | 2 | 7  | 14 | AC   | 9  | 5  |
| 336215 | 80 | 1269963 | 1269986 | 2 | 12 | 24 | GT   | 18 | 8  |
| 336216 | 80 | 1273361 | 1273388 | 2 | 14 | 28 | CA   | 27 | 11 |
| 336217 | 80 | 1273489 | 1273502 | 2 | 7  | 14 | AC   | 16 | 6  |
| 336221 | 80 | 1276505 | 1276518 | 2 | 7  | 14 | CA   | 16 | 4  |
| 336222 | 80 | 1276712 | 1276726 | 3 | 5  | 15 | TCC  | 23 | 3  |
| 336224 | 80 | 1277070 | 1277087 | 3 | 6  | 18 | GCT  | 16 | 5  |
| 336229 | 80 | 1277879 | 1277908 | 3 | 10 | 30 | GAG  | 17 | 8  |
| 336234 | 80 | 1278315 | 1278348 | 2 | 17 | 34 | GT   | 11 | 10 |
| 336235 | 80 | 1278707 | 1278730 | 2 | 12 | 24 | AC   | 15 | 16 |
| 336236 | 80 | 1278935 | 1278962 | 2 | 14 | 28 | GT   | 13 | 14 |
| 336240 | 80 | 1280462 | 1280473 | 2 | 6  | 12 | CT   | 21 | 3  |
| 336242 | 80 | 1281690 | 1281711 | 2 | 11 | 22 | GT   | 18 | 10 |
| 336243 | 80 | 1281854 | 1281875 | 2 | 11 | 22 | GT   | 26 | 10 |
| 336244 | 80 | 1281941 | 1281966 | 2 | 13 | 26 | CA   | 19 | 10 |
| 336248 | 80 | 1282509 | 1282544 | 2 | 18 | 36 | TG   | 7  | 8  |
| 336249 | 80 | 1282570 | 1282583 | 2 | 7  | 14 | GT   | 13 | 3  |
| 336251 | 80 | 1283145 | 1283158 | 2 | 7  | 14 | GT   | 25 | 3  |
| 336252 | 80 | 1283368 | 1283385 | 3 | 6  | 18 | GCA  | 15 | 5  |
| 336255 | 80 | 1284154 | 1284179 | 2 | 13 | 26 | TG   | 10 | 7  |
| 336265 | 80 | 1285949 | 1285972 | 2 | 12 | 24 | TC   | 12 | 7  |
| 336267 | 80 | 1286709 | 1286741 | 3 | 11 | 33 | GAG  | 20 | 6  |
| 336270 | 80 | 1289006 | 1289033 | 4 | 7  | 28 | TGTT | 22 | 6  |



|        |    |         |         |   |    |    |      |    |    |
|--------|----|---------|---------|---|----|----|------|----|----|
| 336271 | 80 | 1290312 | 1290325 | 2 | 7  | 14 | TG   | 17 | 5  |
| 336272 | 80 | 1290350 | 1290361 | 2 | 6  | 12 | TG   | 17 | 3  |
| 336275 | 80 | 1290682 | 1290703 | 2 | 11 | 22 | AG   | 8  | 5  |
| 336277 | 80 | 1290923 | 1290952 | 2 | 15 | 30 | GA   | 20 | 7  |
| 336279 | 80 | 1292373 | 1292388 | 2 | 8  | 16 | TG   | 23 | 4  |
| 336280 | 80 | 1292480 | 1292500 | 3 | 7  | 21 | GAG  | 21 | 3  |
| 336282 | 80 | 1295700 | 1295723 | 2 | 12 | 24 | GT   | 15 | 8  |
| 336283 | 80 | 1296795 | 1296820 | 2 | 13 | 26 | AC   | 20 | 11 |
| 336284 | 80 | 1296983 | 1297010 | 2 | 14 | 28 | GT   | 8  | 8  |
| 336286 | 80 | 1297184 | 1297211 | 2 | 14 | 28 | TG   | 15 | 10 |
| 336293 | 80 | 1302522 | 1302535 | 2 | 7  | 14 | CA   | 23 | 8  |
| 336300 | 80 | 1309318 | 1309333 | 2 | 8  | 16 | TG   | 19 | 7  |
| 336303 | 80 | 1310358 | 1310375 | 2 | 9  | 18 | TG   | 15 | 7  |
| 336305 | 80 | 1313074 | 1313107 | 2 | 17 | 34 | TG   | 15 | 10 |
| 336306 | 80 | 1314747 | 1314776 | 2 | 15 | 30 | CA   | 13 | 12 |
| 336307 | 80 | 1316931 | 1316942 | 2 | 6  | 12 | AG   | 22 | 4  |
| 336308 | 80 | 1318178 | 1318193 | 2 | 8  | 16 | TG   | 15 | 9  |
| 336311 | 80 | 1318952 | 1318981 | 3 | 10 | 30 | CCT  | 17 | 4  |
| 336312 | 80 | 1320306 | 1320333 | 2 | 14 | 28 | TG   | 16 | 11 |
| 336313 | 80 | 1320457 | 1320488 | 2 | 16 | 32 | AC   | 6  | 10 |
| 336316 | 80 | 1321564 | 1321577 | 2 | 7  | 14 | TC   | 14 | 7  |
| 336318 | 80 | 1323073 | 1323086 | 2 | 7  | 14 | GT   | 15 | 3  |
| 336319 | 80 | 1325377 | 1325396 | 2 | 10 | 20 | TG   | 22 | 11 |
| 336322 | 80 | 1329297 | 1329318 | 2 | 11 | 22 | GA   | 19 | 9  |
| 336327 | 80 | 1332044 | 1332063 | 2 | 10 | 20 | CA   | 21 | 7  |
| 336328 | 80 | 1332861 | 1332886 | 2 | 13 | 26 | AC   | 11 | 10 |
| 336331 | 80 | 1336441 | 1336452 | 2 | 6  | 12 | CA   | 28 | 6  |
| 336332 | 80 | 1339085 | 1339108 | 3 | 8  | 24 | GGA  | 23 | 6  |
| 336333 | 80 | 1341777 | 1341796 | 2 | 10 | 20 | TG   | 7  | 10 |
| 336334 | 80 | 1341934 | 1341965 | 2 | 16 | 32 | TG   | 18 | 9  |
| 336335 | 80 | 1343899 | 1343924 | 2 | 13 | 26 | AC   | 17 | 8  |
| 336336 | 80 | 1344105 | 1344124 | 2 | 10 | 20 | TG   | 19 | 7  |
| 336341 | 80 | 1349102 | 1349139 | 2 | 19 | 38 | GT   | 10 | 8  |
| 336342 | 80 | 1349528 | 1349555 | 2 | 14 | 28 | CA   | 17 | 7  |
| 336343 | 80 | 1350056 | 1350073 | 2 | 9  | 18 | CA   | 21 | 9  |
| 336344 | 80 | 1350470 | 1350505 | 2 | 18 | 36 | AC   | 15 | 13 |
| 336352 | 80 | 1357840 | 1357875 | 2 | 18 | 36 | AC   | 6  | 8  |
| 336357 | 80 | 1366813 | 1366846 | 2 | 17 | 34 | CA   | 11 | 12 |
| 336358 | 80 | 1367853 | 1367900 | 2 | 24 | 48 | AC   | 8  | 7  |
| 336362 | 80 | 1370500 | 1370515 | 4 | 4  | 16 | CTCG | 25 | 6  |
| 336366 | 80 | 1371087 | 1371112 | 2 | 13 | 26 | TG   | 20 | 11 |
| 336372 | 80 | 1381399 | 1381410 | 2 | 6  | 12 | TG   | 11 | 10 |
| 336373 | 80 | 1381414 | 1381425 | 2 | 6  | 12 | GT   | 14 | 14 |
| 336377 | 80 | 1392878 | 1392897 | 2 | 10 | 20 | CA   | 9  | 9  |
| 336378 | 80 | 1393409 | 1393428 | 2 | 10 | 20 | AC   | 15 | 4  |
| 336380 | 80 | 1393507 | 1393534 | 2 | 14 | 28 | CA   | 13 | 8  |
| 336382 | 80 | 1395066 | 1395077 | 2 | 6  | 12 | AT   | 15 | 7  |
| 336384 | 80 | 1396261 | 1396281 | 3 | 7  | 21 | GCT  | 23 | 3  |
| 336386 | 80 | 1398091 | 1398102 | 2 | 6  | 12 | TG   | 28 | 3  |
| 336392 | 80 | 1403673 | 1403698 | 2 | 13 | 26 | AC   | 13 | 9  |
| 336394 | 80 | 1406030 | 1406050 | 3 | 7  | 21 | GGA  | 22 | 3  |

|        |    |         |         |   |    |    |      |    |    |
|--------|----|---------|---------|---|----|----|------|----|----|
| 336395 | 80 | 1407783 | 1407796 | 2 | 7  | 14 | TG   | 16 | 11 |
| 336401 | 80 | 1416447 | 1416458 | 2 | 6  | 12 | GT   | 9  | 5  |
| 336406 | 80 | 1424194 | 1424217 | 3 | 8  | 24 | GAG  | 13 | 5  |
| 336407 | 80 | 1424321 | 1424334 | 2 | 7  | 14 | CA   | 25 | 3  |
| 336413 | 80 | 1430638 | 1430695 | 2 | 29 | 58 | AC   | 6  | 9  |
| 336419 | 80 | 1436091 | 1436104 | 2 | 7  | 14 | AC   | 12 | 6  |
| 336420 | 80 | 1436107 | 1436122 | 2 | 8  | 16 | AC   | 14 | 4  |
| 336422 | 80 | 1438472 | 1438495 | 2 | 12 | 24 | TG   | 17 | 11 |
| 336424 | 80 | 1439125 | 1439145 | 3 | 7  | 21 | AGA  | 17 | 10 |
| 336431 | 80 | 1467390 | 1467413 | 2 | 12 | 24 | CA   | 20 | 11 |
| 336432 | 80 | 1469455 | 1469476 | 2 | 11 | 22 | AG   | 24 | 5  |
| 336433 | 80 | 1471262 | 1471301 | 2 | 20 | 40 | AC   | 12 | 9  |
| 336434 | 80 | 1471454 | 1471467 | 2 | 7  | 14 | CA   | 8  | 4  |
| 336440 | 80 | 1478308 | 1478319 | 2 | 6  | 12 | GT   | 26 | 8  |
| 336441 | 80 | 1478459 | 1478484 | 2 | 13 | 26 | CA   | 24 | 10 |
| 336442 | 80 | 1478722 | 1478747 | 2 | 13 | 26 | AC   | 18 | 6  |
| 336444 | 80 | 1480065 | 1480086 | 2 | 11 | 22 | CA   | 14 | 8  |
| 336446 | 80 | 1483796 | 1483825 | 2 | 15 | 30 | AC   | 12 | 14 |
| 336447 | 80 | 1484025 | 1484050 | 2 | 13 | 26 | GA   | 21 | 8  |
| 336449 | 80 | 1490918 | 1490933 | 2 | 8  | 16 | GT   | 17 | 6  |
| 336450 | 80 | 1491731 | 1491746 | 4 | 4  | 16 | ATGG | 24 | 7  |
| 336451 | 80 | 1493325 | 1493348 | 2 | 12 | 24 | AC   | 13 | 12 |
| 336455 | 80 | 1495846 | 1495861 | 2 | 8  | 16 | AC   | 19 | 4  |
| 336456 | 80 | 1496106 | 1496133 | 2 | 14 | 28 | CA   | 14 | 10 |
| 336457 | 80 | 1496263 | 1496286 | 2 | 12 | 24 | CA   | 10 | 8  |
| 336458 | 80 | 1496433 | 1496484 | 2 | 26 | 52 | CA   | 11 | 13 |
| 336461 | 80 | 1498159 | 1498174 | 2 | 8  | 16 | CT   | 10 | 3  |
| 336462 | 80 | 1500066 | 1500099 | 2 | 17 | 34 | AC   | 11 | 10 |
| 336463 | 80 | 1500275 | 1500294 | 2 | 10 | 20 | GT   | 17 | 7  |
| 336465 | 80 | 1503952 | 1503983 | 2 | 16 | 32 | CA   | 10 | 8  |
| 336474 | 80 | 1508607 | 1508636 | 2 | 15 | 30 | GT   | 15 | 6  |
| 336475 | 80 | 1509047 | 1509058 | 2 | 6  | 12 | GT   | 20 | 3  |
| 336479 | 80 | 1511776 | 1511815 | 2 | 20 | 40 | TG   | 8  | 5  |
| 336491 | 80 | 1521120 | 1521141 | 2 | 11 | 22 | CA   | 16 | 5  |
| 336495 | 80 | 1531302 | 1531323 | 2 | 11 | 22 | AC   | 16 | 6  |
| 336496 | 80 | 1533400 | 1533423 | 2 | 12 | 24 | AG   | 24 | 7  |
| 336502 | 80 | 1543156 | 1543173 | 2 | 9  | 18 | AG   | 9  | 11 |
| 336503 | 80 | 1543299 | 1543332 | 2 | 17 | 34 | GT   | 8  | 9  |
| 336504 | 80 | 1545105 | 1545122 | 2 | 9  | 18 | AC   | 21 | 3  |
| 336506 | 80 | 1547052 | 1547075 | 2 | 12 | 24 | CA   | 18 | 10 |
| 336507 | 80 | 1547735 | 1547746 | 2 | 6  | 12 | TG   | 15 | 9  |
| 336518 | 80 | 1557139 | 1557168 | 2 | 15 | 30 | TG   | 12 | 12 |
| 336522 | 80 | 1563059 | 1563078 | 2 | 10 | 20 | TG   | 22 | 7  |
| 336525 | 80 | 1564989 | 1565044 | 2 | 28 | 56 | CA   | 13 | 11 |
| 336530 | 80 | 1565811 | 1565834 | 2 | 12 | 24 | CA   | 20 | 5  |
| 336531 | 80 | 1566660 | 1566691 | 2 | 16 | 32 | CA   | 10 | 6  |
| 336532 | 80 | 1568143 | 1568176 | 2 | 17 | 34 | CA   | 8  | 9  |
| 336535 | 80 | 1577727 | 1577750 | 2 | 12 | 24 | AC   | 13 | 8  |
| 336540 | 80 | 1584623 | 1584646 | 2 | 12 | 24 | CA   | 18 | 17 |
| 336542 | 80 | 1586292 | 1586305 | 2 | 7  | 14 | GT   | 20 | 6  |
| 336547 | 80 | 1590457 | 1590470 | 2 | 7  | 14 | AC   | 18 | 16 |

|        |    |         |         |   |    |    |      |    |    |
|--------|----|---------|---------|---|----|----|------|----|----|
| 336557 | 80 | 1598357 | 1598380 | 2 | 12 | 24 | TG   | 25 | 11 |
| 336560 | 80 | 1609234 | 1609257 | 2 | 12 | 24 | AC   | 18 | 9  |
| 336561 | 80 | 1609541 | 1609562 | 2 | 11 | 22 | CT   | 19 | 10 |
| 336562 | 80 | 1611201 | 1611221 | 3 | 7  | 21 | CTG  | 29 | 10 |
| 336570 | 80 | 1616517 | 1616536 | 2 | 10 | 20 | GT   | 18 | 7  |
| 336587 | 80 | 1630645 | 1630690 | 2 | 23 | 46 | TG   | 7  | 9  |
| 336588 | 80 | 1632074 | 1632101 | 2 | 14 | 28 | GT   | 9  | 7  |
| 336590 | 80 | 1633157 | 1633184 | 2 | 14 | 28 | AC   | 10 | 10 |
| 336591 | 80 | 1633318 | 1633335 | 2 | 9  | 18 | CT   | 19 | 5  |
| 336592 | 80 | 1633456 | 1633479 | 3 | 8  | 24 | AGA  | 8  | 3  |
| 336595 | 80 | 1634325 | 1634336 | 2 | 6  | 12 | AG   | 22 | 4  |
| 336598 | 80 | 1635089 | 1635104 | 2 | 8  | 16 | AC   | 17 | 8  |
| 336599 | 80 | 1635107 | 1635124 | 2 | 9  | 18 | AC   | 17 | 10 |
| 336603 | 80 | 1638434 | 1638451 | 2 | 9  | 18 | CA   | 20 | 6  |
| 336608 | 80 | 1641351 | 1641380 | 2 | 15 | 30 | AC   | 10 | 12 |
| 336609 | 80 | 1641679 | 1641690 | 2 | 6  | 12 | GT   | 21 | 5  |
| 336612 | 80 | 1646607 | 1646618 | 2 | 6  | 12 | GT   | 28 | 6  |
| 336614 | 80 | 1652054 | 1652067 | 2 | 7  | 14 | AG   | 20 | 3  |
| 336616 | 80 | 1653737 | 1653760 | 2 | 12 | 24 | GT   | 11 | 8  |
| 336617 | 80 | 1653952 | 1653975 | 2 | 12 | 24 | TG   | 22 | 9  |
| 336618 | 80 | 1654548 | 1654561 | 2 | 7  | 14 | TC   | 30 | 3  |
| 336619 | 80 | 1657738 | 1657749 | 2 | 6  | 12 | AT   | 24 | 4  |
| 336623 | 80 | 1663625 | 1663656 | 4 | 8  | 32 | GCTG | 27 | 11 |
| 336627 | 80 | 1667870 | 1667885 | 2 | 8  | 16 | TG   | 21 | 6  |
| 336628 | 80 | 1668175 | 1668192 | 3 | 6  | 18 | TTC  | 19 | 6  |
| 336631 | 80 | 1670300 | 1670327 | 2 | 14 | 28 | AC   | 14 | 8  |
| 336640 | 80 | 1674136 | 1674171 | 2 | 18 | 36 | AC   | 12 | 14 |
| 336641 | 80 | 1674279 | 1674308 | 2 | 15 | 30 | AC   | 12 | 5  |
| 336644 | 80 | 1675596 | 1675611 | 2 | 8  | 16 | CT   | 20 | 4  |
| 336645 | 80 | 1676609 | 1676632 | 2 | 12 | 24 | TG   | 17 | 4  |
| 336646 | 80 | 1676696 | 1676713 | 3 | 6  | 18 | GCA  | 25 | 9  |
| 336652 | 80 | 1678781 | 1678792 | 2 | 6  | 12 | GT   | 18 | 5  |
| 336653 | 80 | 1678858 | 1678877 | 2 | 10 | 20 | TG   | 22 | 7  |
| 336655 | 80 | 1679692 | 1679705 | 2 | 7  | 14 | CA   | 23 | 10 |
| 336656 | 80 | 1679848 | 1679873 | 2 | 13 | 26 | CA   | 21 | 9  |
| 336659 | 80 | 1680477 | 1680506 | 2 | 15 | 30 | CA   | 13 | 9  |
| 336661 | 80 | 1683497 | 1683517 | 3 | 7  | 21 | GAG  | 26 | 15 |
| 336662 | 80 | 1683929 | 1683940 | 2 | 6  | 12 | TG   | 27 | 3  |
| 336665 | 80 | 1684626 | 1684646 | 3 | 7  | 21 | GCT  | 30 | 5  |
| 336667 | 80 | 1684907 | 1684924 | 2 | 9  | 18 | CT   | 23 | 7  |
| 336668 | 80 | 1686121 | 1686146 | 2 | 13 | 26 | CA   | 23 | 12 |
| 336671 | 80 | 1687081 | 1687098 | 3 | 6  | 18 | TTC  | 20 | 5  |
| 336675 | 80 | 1693870 | 1693891 | 2 | 11 | 22 | AC   | 15 | 6  |
| 336676 | 80 | 1693921 | 1693944 | 2 | 12 | 24 | GT   | 19 | 7  |
| 336677 | 80 | 1694294 | 1694335 | 2 | 21 | 42 | AC   | 13 | 10 |
| 336679 | 80 | 1695397 | 1695420 | 2 | 12 | 24 | CA   | 15 | 14 |
| 336680 | 80 | 1695566 | 1695591 | 2 | 13 | 26 | GT   | 12 | 7  |
| 336683 | 80 | 1695956 | 1695967 | 2 | 6  | 12 | AC   | 12 | 9  |
| 336684 | 80 | 1695970 | 1695987 | 2 | 9  | 18 | AC   | 13 | 11 |
| 336685 | 80 | 1696875 | 1696898 | 3 | 8  | 24 | AGA  | 15 | 5  |
| 336687 | 80 | 1697606 | 1697621 | 2 | 8  | 16 | AG   | 9  | 3  |

|        |    |         |         |   |    |    |      |    |    |
|--------|----|---------|---------|---|----|----|------|----|----|
| 336691 | 80 | 1697924 | 1697957 | 2 | 17 | 34 | GT   | 9  | 11 |
| 336693 | 80 | 1698771 | 1698802 | 2 | 16 | 32 | CA   | 10 | 10 |
| 336694 | 80 | 1699038 | 1699059 | 2 | 11 | 22 | CA   | 14 | 12 |
| 336698 | 80 | 1702523 | 1702552 | 2 | 15 | 30 | CA   | 9  | 10 |
| 336701 | 80 | 1705309 | 1705328 | 4 | 5  | 20 | GGGA | 10 | 6  |
| 336703 | 80 | 1707357 | 1707371 | 3 | 5  | 15 | TTC  | 27 | 9  |
| 336704 | 80 | 1708847 | 1708874 | 2 | 14 | 28 | GT   | 16 | 7  |
| 336705 | 80 | 1711430 | 1711453 | 2 | 12 | 24 | GT   | 7  | 5  |
| 336706 | 80 | 1711530 | 1711551 | 2 | 11 | 22 | CT   | 21 | 5  |
| 336712 | 80 | 1716363 | 1716386 | 3 | 8  | 24 | CCT  | 12 | 5  |
| 336713 | 80 | 1716549 | 1716580 | 2 | 16 | 32 | AC   | 14 | 11 |
| 336714 | 80 | 1716970 | 1716991 | 2 | 11 | 22 | GT   | 7  | 7  |
| 336715 | 80 | 1717083 | 1717102 | 2 | 10 | 20 | TG   | 15 | 11 |
| 336716 | 80 | 1717934 | 1717951 | 2 | 9  | 18 | AG   | 28 | 3  |
| 336719 | 80 | 1719112 | 1719131 | 2 | 10 | 20 | CA   | 13 | 11 |
| 336723 | 80 | 1719551 | 1719574 | 2 | 12 | 24 | AC   | 18 | 4  |
| 336724 | 80 | 1719833 | 1719850 | 2 | 9  | 18 | AG   | 28 | 7  |
| 336725 | 80 | 1719961 | 1719982 | 2 | 11 | 22 | TG   | 13 | 14 |
| 336730 | 80 | 1722003 | 1722023 | 3 | 7  | 21 | AGA  | 19 | 7  |
| 336731 | 80 | 1722127 | 1722140 | 2 | 7  | 14 | GA   | 24 | 7  |
| 336732 | 80 | 1722280 | 1722311 | 2 | 16 | 32 | GT   | 15 | 7  |
| 336733 | 80 | 1722482 | 1722499 | 3 | 6  | 18 | TGG  | 23 | 6  |
| 336734 | 80 | 1724012 | 1724039 | 2 | 14 | 28 | AC   | 18 | 12 |
| 336737 | 80 | 1724853 | 1724870 | 3 | 6  | 18 | GAA  | 16 | 7  |
| 336739 | 80 | 1725070 | 1725095 | 2 | 13 | 26 | GT   | 15 | 6  |
| 336740 | 80 | 1725426 | 1725447 | 2 | 11 | 22 | GT   | 12 | 8  |
| 336749 | 80 | 1728694 | 1728711 | 2 | 9  | 18 | GT   | 10 | 11 |
| 336750 | 80 | 1730883 | 1730900 | 2 | 9  | 18 | GT   | 16 | 11 |
| 336751 | 80 | 1731069 | 1731100 | 2 | 16 | 32 | AC   | 11 | 11 |
| 336754 | 80 | 1731494 | 1731521 | 2 | 14 | 28 | AC   | 13 | 6  |
| 336756 | 80 | 1732899 | 1732912 | 2 | 7  | 14 | GT   | 29 | 6  |
| 336758 | 80 | 1736943 | 1736972 | 2 | 15 | 30 | GT   | 14 | 5  |
| 336762 | 80 | 1739596 | 1739609 | 2 | 7  | 14 | GT   | 11 | 7  |
| 336765 | 80 | 1743001 | 1743014 | 2 | 7  | 14 | GT   | 26 | 13 |
| 336766 | 80 | 1743234 | 1743254 | 3 | 7  | 21 | TCT  | 21 | 3  |
| 336769 | 80 | 1744438 | 1744479 | 2 | 21 | 42 | CA   | 13 | 12 |
| 336770 | 80 | 1744832 | 1744852 | 3 | 7  | 21 | GGA  | 15 | 5  |
| 336773 | 80 | 1748198 | 1748227 | 2 | 15 | 30 | AG   | 7  | 7  |
| 336781 | 80 | 1753999 | 1754026 | 2 | 14 | 28 | TC   | 10 | 4  |
| 336788 | 80 | 1755228 | 1755247 | 2 | 10 | 20 | CA   | 18 | 8  |
| 336791 | 80 | 1757091 | 1757102 | 2 | 6  | 12 | AC   | 21 | 10 |
| 336792 | 80 | 1757479 | 1757496 | 3 | 6  | 18 | TCC  | 15 | 7  |
| 336793 | 80 | 1757662 | 1757687 | 2 | 13 | 26 | TG   | 18 | 11 |
| 336795 | 80 | 1758828 | 1758839 | 2 | 6  | 12 | AC   | 14 | 5  |
| 336798 | 80 | 1766147 | 1766166 | 2 | 10 | 20 | CA   | 7  | 5  |
| 336799 | 80 | 1766168 | 1766179 | 2 | 6  | 12 | AC   | 9  | 4  |
| 336800 | 80 | 1766350 | 1766363 | 2 | 7  | 14 | AC   | 19 | 5  |
| 336804 | 80 | 1766711 | 1766734 | 2 | 12 | 24 | CA   | 14 | 7  |
| 336808 | 80 | 1766999 | 1767022 | 2 | 12 | 24 | TG   | 12 | 12 |
| 336809 | 80 | 1767174 | 1767203 | 2 | 15 | 30 | CA   | 13 | 11 |
| 336811 | 80 | 1767355 | 1767376 | 2 | 11 | 22 | TG   | 10 | 10 |

|        |    |         |         |   |    |    |      |    |    |
|--------|----|---------|---------|---|----|----|------|----|----|
| 336814 | 80 | 1768550 | 1768569 | 2 | 10 | 20 | AC   | 14 | 4  |
| 336817 | 80 | 1770227 | 1770252 | 2 | 13 | 26 | TG   | 18 | 9  |
| 336819 | 80 | 1772844 | 1772863 | 2 | 10 | 20 | TG   | 8  | 7  |
| 336824 | 80 | 1775213 | 1775230 | 2 | 9  | 18 | AG   | 18 | 4  |
| 336825 | 80 | 1775374 | 1775385 | 2 | 6  | 12 | GT   | 16 | 4  |
| 336826 | 80 | 1776023 | 1776049 | 3 | 9  | 27 | TGT  | 21 | 6  |
| 336827 | 80 | 1776298 | 1776309 | 2 | 6  | 12 | GT   | 19 | 8  |
| 336829 | 80 | 1781398 | 1781419 | 2 | 11 | 22 | AC   | 19 | 6  |
| 336830 | 80 | 1781717 | 1781731 | 3 | 5  | 15 | GGT  | 13 | 5  |
| 336834 | 80 | 1784467 | 1784490 | 2 | 12 | 24 | AC   | 9  | 6  |
| 336838 | 80 | 1789946 | 1789978 | 3 | 11 | 33 | AGG  | 14 | 5  |
| 336845 | 80 | 1792371 | 1792400 | 2 | 15 | 30 | AC   | 10 | 13 |
| 336846 | 80 | 1792716 | 1792751 | 4 | 9  | 36 | TCTT | 26 | 9  |
| 336851 | 80 | 1795720 | 1795741 | 2 | 11 | 22 | GT   | 17 | 15 |
| 336852 | 80 | 1797975 | 1798008 | 2 | 17 | 34 | CA   | 16 | 9  |
| 336857 | 80 | 1801691 | 1801716 | 2 | 13 | 26 | GT   | 17 | 13 |
| 336858 | 80 | 1801841 | 1801870 | 2 | 15 | 30 | AC   | 11 | 7  |
| 336859 | 80 | 1801985 | 1802012 | 2 | 14 | 28 | CA   | 20 | 8  |
| 336860 | 80 | 1803381 | 1803410 | 2 | 15 | 30 | GT   | 12 | 7  |
| 336863 | 80 | 1808209 | 1808242 | 2 | 17 | 34 | TG   | 14 | 11 |
| 336864 | 80 | 1808341 | 1808362 | 2 | 11 | 22 | TG   | 20 | 12 |
| 336865 | 80 | 1810080 | 1810105 | 2 | 13 | 26 | CA   | 17 | 14 |
| 336868 | 80 | 1810602 | 1810613 | 2 | 6  | 12 | AC   | 27 | 7  |
| 336870 | 80 | 1812045 | 1812056 | 2 | 6  | 12 | TG   | 21 | 7  |
| 336873 | 80 | 1813796 | 1813810 | 3 | 5  | 15 | GCA  | 29 | 7  |
| 336877 | 80 | 1818634 | 1818657 | 2 | 12 | 24 | GT   | 20 | 14 |
| 336878 | 80 | 1818826 | 1818849 | 2 | 12 | 24 | CA   | 15 | 4  |
| 336881 | 80 | 1826981 | 1827010 | 2 | 15 | 30 | GT   | 11 | 10 |
| 336885 | 80 | 1829751 | 1829776 | 2 | 13 | 26 | AC   | 14 | 7  |
| 336887 | 80 | 1831630 | 1831671 | 2 | 21 | 42 | GT   | 7  | 9  |
| 336895 | 80 | 1833848 | 1833875 | 2 | 14 | 28 | TG   | 10 | 11 |
| 336897 | 80 | 1834339 | 1834374 | 2 | 18 | 36 | TC   | 8  | 7  |
| 336901 | 80 | 1835453 | 1835476 | 3 | 8  | 24 | AAG  | 19 | 10 |
| 336905 | 80 | 1836708 | 1836723 | 2 | 8  | 16 | AT   | 7  | 3  |
| 336908 | 80 | 1837056 | 1837079 | 3 | 8  | 24 | CTG  | 20 | 4  |
| 336909 | 80 | 1837120 | 1837137 | 3 | 6  | 18 | GAT  | 25 | 6  |
| 336910 | 80 | 1837243 | 1837257 | 3 | 5  | 15 | TTG  | 24 | 6  |
| 336914 | 80 | 1838551 | 1838568 | 2 | 9  | 18 | AC   | 10 | 4  |
| 336916 | 80 | 1838840 | 1838865 | 2 | 13 | 26 | CA   | 10 | 10 |
| 336918 | 80 | 1839251 | 1839278 | 2 | 14 | 28 | CA   | 16 | 3  |
| 336919 | 80 | 1839442 | 1839507 | 2 | 33 | 66 | GT   | 8  | 10 |
| 336924 | 80 | 1840270 | 1840283 | 2 | 7  | 14 | GT   | 17 | 3  |
| 336925 | 80 | 1840473 | 1840488 | 4 | 4  | 16 | CTCC | 18 | 5  |
| 336929 | 80 | 1842203 | 1842220 | 3 | 6  | 18 | TAA  | 8  | 3  |
| 336931 | 80 | 1843501 | 1843521 | 3 | 7  | 21 | TCT  | 19 | 7  |
| 336932 | 80 | 1843583 | 1843612 | 3 | 10 | 30 | GCA  | 26 | 8  |
| 336937 | 80 | 1845934 | 1845948 | 3 | 5  | 15 | AAG  | 20 | 5  |
| 336939 | 80 | 1846142 | 1846179 | 2 | 19 | 38 | GT   | 14 | 10 |
| 336940 | 80 | 1846464 | 1846487 | 2 | 12 | 24 | GT   | 17 | 11 |
| 336942 | 80 | 1847028 | 1847053 | 2 | 13 | 26 | GT   | 15 | 10 |
| 336943 | 80 | 1847093 | 1847122 | 3 | 10 | 30 | AGA  | 15 | 6  |

|        |    |         |         |   |    |    |      |    |    |
|--------|----|---------|---------|---|----|----|------|----|----|
| 336947 | 80 | 1847833 | 1847856 | 3 | 8  | 24 | TTC  | 21 | 6  |
| 336949 | 80 | 1848172 | 1848192 | 3 | 7  | 21 | TCC  | 23 | 3  |
| 336950 | 80 | 1848316 | 1848339 | 4 | 6  | 24 | TCCA | 27 | 5  |
| 336957 | 80 | 1848845 | 1848871 | 3 | 9  | 27 | TCA  | 15 | 9  |
| 336960 | 80 | 1849502 | 1849531 | 3 | 10 | 30 | GCT  | 24 | 10 |
| 336963 | 80 | 1850898 | 1850918 | 3 | 7  | 21 | CCT  | 11 | 6  |
| 336970 | 80 | 1852368 | 1852387 | 2 | 10 | 20 | TC   | 15 | 8  |
| 336971 | 80 | 1852672 | 1852697 | 2 | 13 | 26 | TC   | 11 | 8  |
| 336973 | 80 | 1855242 | 1855253 | 2 | 6  | 12 | AT   | 18 | 4  |
| 336979 | 80 | 1859306 | 1859327 | 2 | 11 | 22 | CA   | 12 | 9  |
| 336986 | 80 | 1866397 | 1866416 | 2 | 10 | 20 | TG   | 13 | 5  |
| 336991 | 80 | 1869418 | 1869443 | 2 | 13 | 26 | TC   | 9  | 9  |
| 336992 | 80 | 1869474 | 1869485 | 2 | 6  | 12 | AG   | 12 | 5  |
| 336994 | 80 | 1869809 | 1869830 | 2 | 11 | 22 | TG   | 16 | 11 |
| 336995 | 80 | 1871571 | 1871584 | 2 | 7  | 14 | GA   | 20 | 5  |
| 336998 | 80 | 1873570 | 1873587 | 3 | 6  | 18 | CCA  | 13 | 7  |
| 337000 | 80 | 1876252 | 1876290 | 3 | 13 | 39 | CTC  | 14 | 7  |
| 337001 | 80 | 1877565 | 1877588 | 2 | 12 | 24 | GT   | 13 | 13 |
| 337004 | 80 | 1878018 | 1878031 | 2 | 7  | 14 | AC   | 15 | 4  |
| 337006 | 80 | 1881040 | 1881057 | 2 | 9  | 18 | CA   | 14 | 3  |
| 337007 | 80 | 1881203 | 1881220 | 2 | 9  | 18 | AC   | 16 | 6  |
| 337008 | 80 | 1881249 | 1881266 | 2 | 9  | 18 | AC   | 13 | 6  |
| 337009 | 80 | 1881437 | 1881454 | 2 | 9  | 18 | AC   | 18 | 7  |
| 337026 | 80 | 1894778 | 1894791 | 2 | 7  | 14 | TC   | 22 | 7  |
| 337032 | 80 | 1900393 | 1900412 | 2 | 10 | 20 | AC   | 16 | 3  |
| 337033 | 80 | 1900437 | 1900456 | 2 | 10 | 20 | CA   | 11 | 3  |
| 337038 | 80 | 1905265 | 1905294 | 2 | 15 | 30 | CA   | 16 | 10 |
| 337039 | 80 | 1907083 | 1907096 | 2 | 7  | 14 | CA   | 9  | 8  |
| 337042 | 80 | 1909008 | 1909027 | 2 | 10 | 20 | GT   | 15 | 8  |
| 337044 | 80 | 1909132 | 1909151 | 2 | 10 | 20 | CA   | 17 | 5  |
| 337045 | 80 | 1909325 | 1909350 | 2 | 13 | 26 | GA   | 7  | 7  |
| 337051 | 80 | 1910468 | 1910483 | 2 | 8  | 16 | CA   | 13 | 6  |
| 337054 | 80 | 1912124 | 1912139 | 2 | 8  | 16 | AC   | 21 | 7  |
| 337055 | 80 | 1912250 | 1912285 | 2 | 18 | 36 | CA   | 12 | 6  |
| 337056 | 80 | 1912348 | 1912361 | 2 | 7  | 14 | CA   | 15 | 5  |
| 337058 | 80 | 1912515 | 1912540 | 2 | 13 | 26 | CA   | 9  | 8  |
| 337060 | 80 | 1915281 | 1915312 | 2 | 16 | 32 | TG   | 15 | 10 |
| 337065 | 80 | 1919199 | 1919210 | 2 | 6  | 12 | AG   | 35 | 3  |
| 337066 | 80 | 1919364 | 1919387 | 2 | 12 | 24 | CA   | 17 | 6  |
| 337072 | 80 | 1928014 | 1928031 | 3 | 6  | 18 | AGC  | 22 | 5  |
| 337074 | 80 | 1930099 | 1930116 | 2 | 9  | 18 | AC   | 21 | 6  |
| 337084 | 80 | 1944460 | 1944480 | 3 | 7  | 21 | TGC  | 27 | 3  |
| 337088 | 80 | 1946816 | 1946839 | 2 | 12 | 24 | TG   | 17 | 11 |
| 337090 | 80 | 1949446 | 1949471 | 2 | 13 | 26 | AC   | 16 | 11 |
| 337097 | 81 | 23942   | 23961   | 2 | 10 | 20 | AG   | 21 | 6  |
| 337102 | 81 | 25974   | 25989   | 2 | 8  | 16 | CA   | 13 | 3  |
| 337108 | 81 | 47273   | 47300   | 2 | 14 | 28 | GT   | 19 | 12 |
| 337109 | 81 | 47450   | 47471   | 2 | 11 | 22 | AC   | 8  | 9  |
| 337111 | 81 | 50691   | 50708   | 2 | 9  | 18 | AC   | 29 | 10 |
| 337115 | 81 | 52729   | 52744   | 2 | 8  | 16 | CT   | 17 | 3  |
| 337118 | 81 | 57522   | 57533   | 2 | 6  | 12 | AC   | 24 | 5  |

|        |    |        |        |   |    |    |      |    |    |
|--------|----|--------|--------|---|----|----|------|----|----|
| 337119 | 81 | 58861  | 58918  | 2 | 29 | 58 | GT   | 11 | 13 |
| 337122 | 81 | 59944  | 59987  | 2 | 22 | 44 | AC   | 6  | 7  |
| 337125 | 81 | 61074  | 61093  | 4 | 5  | 20 | CATC | 29 | 3  |
| 337130 | 81 | 67264  | 67279  | 2 | 8  | 16 | CA   | 20 | 3  |
| 337131 | 81 | 68259  | 68294  | 3 | 12 | 36 | TTA  | 6  | 5  |
| 337132 | 81 | 72450  | 72463  | 2 | 7  | 14 | GT   | 16 | 3  |
| 337133 | 81 | 78060  | 78071  | 2 | 6  | 12 | AC   | 24 | 5  |
| 337134 | 81 | 79006  | 79025  | 2 | 10 | 20 | TG   | 16 | 6  |
| 337136 | 81 | 80905  | 80926  | 2 | 11 | 22 | AC   | 23 | 8  |
| 337137 | 81 | 81532  | 81555  | 2 | 12 | 24 | TG   | 16 | 6  |
| 337139 | 81 | 83864  | 83883  | 2 | 10 | 20 | TG   | 22 | 4  |
| 337141 | 81 | 87125  | 87140  | 2 | 8  | 16 | GT   | 16 | 6  |
| 337146 | 81 | 92801  | 92822  | 2 | 11 | 22 | CT   | 21 | 7  |
| 337147 | 81 | 104698 | 104737 | 2 | 20 | 40 | GT   | 16 | 13 |
| 337148 | 81 | 104823 | 104838 | 2 | 8  | 16 | AC   | 29 | 4  |
| 337149 | 81 | 105003 | 105024 | 2 | 11 | 22 | GT   | 13 | 11 |
| 337150 | 81 | 105418 | 105438 | 3 | 7  | 21 | CTC  | 23 | 4  |
| 337151 | 81 | 105634 | 105645 | 2 | 6  | 12 | AG   | 20 | 4  |
| 337156 | 81 | 109236 | 109303 | 4 | 17 | 68 | TTTC | 16 | 11 |
| 337158 | 81 | 110653 | 110666 | 2 | 7  | 14 | AC   | 26 | 5  |
| 337168 | 81 | 116507 | 116521 | 3 | 5  | 15 | TTA  | 17 | 6  |
| 337171 | 81 | 121727 | 121760 | 2 | 17 | 34 | GT   | 11 | 10 |
| 337176 | 81 | 136288 | 136313 | 2 | 13 | 26 | TG   | 8  | 6  |
| 337177 | 81 | 140448 | 140459 | 2 | 6  | 12 | GT   | 21 | 3  |
| 337182 | 81 | 144580 | 144631 | 2 | 26 | 52 | TG   | 7  | 9  |
| 337184 | 81 | 149170 | 149197 | 2 | 14 | 28 | AC   | 17 | 9  |
| 337185 | 81 | 156455 | 156478 | 2 | 12 | 24 | TC   | 12 | 6  |
| 337186 | 81 | 158448 | 158459 | 2 | 6  | 12 | TC   | 15 | 4  |
| 337187 | 81 | 160766 | 160777 | 2 | 6  | 12 | CA   | 25 | 3  |
| 337192 | 81 | 170331 | 170344 | 2 | 7  | 14 | GT   | 27 | 5  |
| 337193 | 81 | 170957 | 170972 | 2 | 8  | 16 | AG   | 21 | 5  |
| 337194 | 81 | 173357 | 173372 | 4 | 4  | 16 | TCCA | 32 | 4  |
| 337198 | 81 | 178480 | 178497 | 3 | 6  | 18 | GAG  | 20 | 4  |
| 337200 | 81 | 180681 | 180694 | 2 | 7  | 14 | AG   | 24 | 3  |
| 337201 | 81 | 184506 | 184519 | 2 | 7  | 14 | GT   | 26 | 3  |
| 337204 | 81 | 187870 | 187887 | 3 | 6  | 18 | TAA  | 20 | 5  |
| 337209 | 81 | 191067 | 191088 | 2 | 11 | 22 | TG   | 8  | 7  |
| 337210 | 81 | 194838 | 194851 | 2 | 7  | 14 | AC   | 22 | 4  |
| 337213 | 81 | 197385 | 197408 | 2 | 12 | 24 | AC   | 19 | 7  |
| 337216 | 81 | 200219 | 200230 | 2 | 6  | 12 | GT   | 31 | 3  |
| 337219 | 81 | 200688 | 200715 | 2 | 14 | 28 | TG   | 18 | 6  |
| 337220 | 81 | 201133 | 201150 | 2 | 9  | 18 | TG   | 25 | 3  |
| 337221 | 81 | 201287 | 201302 | 2 | 8  | 16 | GA   | 23 | 5  |
| 337225 | 81 | 206850 | 206879 | 2 | 15 | 30 | GT   | 15 | 11 |
| 337226 | 81 | 208364 | 208385 | 2 | 11 | 22 | TG   | 21 | 9  |
| 337229 | 81 | 210488 | 210513 | 2 | 13 | 26 | CA   | 21 | 9  |
| 337232 | 81 | 210705 | 210744 | 2 | 20 | 40 | TG   | 7  | 8  |
| 337235 | 81 | 214001 | 214044 | 2 | 22 | 44 | TG   | 8  | 8  |
| 337237 | 81 | 216254 | 216275 | 2 | 11 | 22 | CA   | 25 | 8  |
| 337239 | 81 | 218114 | 218125 | 2 | 6  | 12 | GT   | 13 | 5  |
| 337240 | 81 | 218776 | 218795 | 2 | 10 | 20 | AC   | 28 | 4  |

|        |    |        |        |   |    |    |      |    |    |
|--------|----|--------|--------|---|----|----|------|----|----|
| 337241 | 81 | 218913 | 218928 | 2 | 8  | 16 | AC   | 21 | 4  |
| 337242 | 81 | 219075 | 219092 | 2 | 9  | 18 | GT   | 27 | 9  |
| 337243 | 81 | 220324 | 220361 | 2 | 19 | 38 | TG   | 13 | 12 |
| 337246 | 81 | 220684 | 220705 | 2 | 11 | 22 | GT   | 10 | 6  |
| 337250 | 81 | 225400 | 225421 | 2 | 11 | 22 | TG   | 19 | 7  |
| 337251 | 81 | 226865 | 226876 | 2 | 6  | 12 | TG   | 17 | 4  |
| 337252 | 81 | 227179 | 227190 | 2 | 6  | 12 | TG   | 28 | 7  |
| 337254 | 81 | 227352 | 227385 | 2 | 17 | 34 | GT   | 8  | 6  |
| 337257 | 81 | 228271 | 228282 | 2 | 6  | 12 | CA   | 20 | 3  |
| 337259 | 81 | 229491 | 229504 | 2 | 7  | 14 | TG   | 31 | 3  |
| 337260 | 81 | 230908 | 230933 | 2 | 13 | 26 | TG   | 10 | 9  |
| 337262 | 81 | 231832 | 231849 | 2 | 9  | 18 | TG   | 15 | 6  |
| 337264 | 81 | 238963 | 238978 | 2 | 8  | 16 | TG   | 25 | 3  |
| 337270 | 81 | 246407 | 246426 | 2 | 10 | 20 | AC   | 10 | 6  |
| 337273 | 81 | 250808 | 250823 | 2 | 8  | 16 | GT   | 27 | 4  |
| 337276 | 81 | 254201 | 254240 | 2 | 20 | 40 | TG   | 9  | 6  |
| 337278 | 81 | 259022 | 259033 | 2 | 6  | 12 | GT   | 21 | 9  |
| 337283 | 81 | 266905 | 266918 | 2 | 7  | 14 | CA   | 29 | 4  |
| 337284 | 81 | 267227 | 267270 | 4 | 11 | 44 | TTTC | 8  | 9  |
| 337285 | 81 | 267672 | 267687 | 4 | 4  | 16 | TTTA | 9  | 4  |
| 337288 | 81 | 271643 | 271656 | 2 | 7  | 14 | CA   | 11 | 4  |
| 337289 | 81 | 271779 | 271824 | 2 | 23 | 46 | AG   | 9  | 7  |
| 337291 | 81 | 272195 | 272208 | 2 | 7  | 14 | AC   | 12 | 3  |
| 337293 | 81 | 272516 | 272543 | 2 | 14 | 28 | AG   | 7  | 6  |
| 337295 | 81 | 274178 | 274209 | 2 | 16 | 32 | TG   | 17 | 6  |
| 337297 | 81 | 276566 | 276591 | 2 | 13 | 26 | CT   | 24 | 12 |
| 337302 | 81 | 277154 | 277175 | 2 | 11 | 22 | CT   | 20 | 8  |
| 337303 | 81 | 277245 | 277256 | 2 | 6  | 12 | CT   | 21 | 3  |
| 337311 | 81 | 287273 | 287296 | 2 | 12 | 24 | AC   | 19 | 5  |
| 337316 | 81 | 288679 | 288716 | 2 | 19 | 38 | GT   | 9  | 6  |
| 337317 | 81 | 288948 | 288983 | 2 | 18 | 36 | TG   | 13 | 12 |
| 337319 | 81 | 289266 | 289285 | 2 | 10 | 20 | GT   | 15 | 9  |
| 337320 | 81 | 289754 | 289775 | 2 | 11 | 22 | AC   | 16 | 14 |
| 337321 | 81 | 290125 | 290142 | 2 | 9  | 18 | TG   | 21 | 6  |
| 337322 | 81 | 290352 | 290372 | 3 | 7  | 21 | GGT  | 8  | 5  |
| 337323 | 81 | 291351 | 291364 | 2 | 7  | 14 | AG   | 23 | 3  |
| 337325 | 81 | 293078 | 293123 | 2 | 23 | 46 | CA   | 6  | 7  |
| 337326 | 81 | 293358 | 293371 | 2 | 7  | 14 | CA   | 23 | 4  |
| 337327 | 81 | 293374 | 293385 | 2 | 6  | 12 | CA   | 20 | 3  |
| 337328 | 81 | 293692 | 293725 | 2 | 17 | 34 | GT   | 14 | 5  |
| 337329 | 81 | 294094 | 294135 | 2 | 21 | 42 | GT   | 9  | 8  |
| 337333 | 81 | 296775 | 296792 | 2 | 9  | 18 | GT   | 14 | 7  |
| 337334 | 81 | 296911 | 296928 | 2 | 9  | 18 | CA   | 14 | 7  |
| 337337 | 81 | 297241 | 297268 | 2 | 14 | 28 | GT   | 8  | 8  |
| 337338 | 81 | 297385 | 297410 | 2 | 13 | 26 | CT   | 11 | 7  |
| 337339 | 81 | 297458 | 297483 | 2 | 13 | 26 | TG   | 16 | 8  |
| 337340 | 81 | 297635 | 297656 | 2 | 11 | 22 | CA   | 15 | 7  |
| 337341 | 81 | 297785 | 297806 | 2 | 11 | 22 | TG   | 21 | 5  |
| 337343 | 81 | 300869 | 300898 | 2 | 15 | 30 | TG   | 9  | 6  |
| 337344 | 81 | 300967 | 300982 | 2 | 8  | 16 | TG   | 16 | 4  |
| 337345 | 81 | 301278 | 301299 | 2 | 11 | 22 | GT   | 20 | 9  |



|        |    |        |        |   |    |    |     |    |    |
|--------|----|--------|--------|---|----|----|-----|----|----|
| 337346 | 81 | 302426 | 302445 | 2 | 10 | 20 | TG  | 22 | 8  |
| 337347 | 81 | 302747 | 302768 | 2 | 11 | 22 | TG  | 10 | 6  |
| 337349 | 81 | 303920 | 303939 | 2 | 10 | 20 | CT  | 25 | 4  |
| 337350 | 81 | 305173 | 305196 | 2 | 12 | 24 | TG  | 18 | 10 |
| 337352 | 81 | 305459 | 305470 | 2 | 6  | 12 | AC  | 19 | 5  |
| 337353 | 81 | 305535 | 305548 | 2 | 7  | 14 | CA  | 14 | 4  |
| 337354 | 81 | 307873 | 307888 | 2 | 8  | 16 | GT  | 22 | 6  |
| 337356 | 81 | 308665 | 308720 | 2 | 28 | 56 | TC  | 9  | 7  |
| 337361 | 81 | 311940 | 311957 | 2 | 9  | 18 | CA  | 12 | 14 |
| 337362 | 81 | 312524 | 312535 | 2 | 6  | 12 | TG  | 21 | 7  |
| 337363 | 81 | 312541 | 312552 | 2 | 6  | 12 | GT  | 19 | 8  |
| 337365 | 81 | 316562 | 316575 | 2 | 7  | 14 | TG  | 24 | 6  |
| 337367 | 81 | 316825 | 316850 | 2 | 13 | 26 | GT  | 16 | 10 |
| 337368 | 81 | 318821 | 318836 | 2 | 8  | 16 | TG  | 25 | 13 |
| 337370 | 81 | 319067 | 319080 | 2 | 7  | 14 | TG  | 19 | 13 |
| 337372 | 81 | 320947 | 320974 | 2 | 14 | 28 | GT  | 15 | 11 |
| 337373 | 81 | 321216 | 321241 | 2 | 13 | 26 | GT  | 13 | 13 |
| 337374 | 81 | 321509 | 321528 | 2 | 10 | 20 | GT  | 23 | 6  |
| 337375 | 81 | 321693 | 321704 | 2 | 6  | 12 | AC  | 19 | 3  |
| 337376 | 81 | 321743 | 321758 | 2 | 8  | 16 | CA  | 16 | 3  |
| 337380 | 81 | 322657 | 322672 | 2 | 8  | 16 | TG  | 15 | 7  |
| 337382 | 81 | 324283 | 324296 | 2 | 7  | 14 | CA  | 19 | 7  |
| 337384 | 81 | 324736 | 324747 | 2 | 6  | 12 | GA  | 21 | 3  |
| 337385 | 81 | 324839 | 324854 | 2 | 8  | 16 | TG  | 16 | 6  |
| 337386 | 81 | 325671 | 325690 | 2 | 10 | 20 | GT  | 17 | 6  |
| 337388 | 81 | 326333 | 326358 | 2 | 13 | 26 | CA  | 24 | 5  |
| 337391 | 81 | 328063 | 328096 | 2 | 17 | 34 | GT  | 14 | 14 |
| 337394 | 81 | 329098 | 329115 | 2 | 9  | 18 | GT  | 10 | 6  |
| 337399 | 81 | 334550 | 334577 | 2 | 14 | 28 | AC  | 22 | 12 |
| 337400 | 81 | 334803 | 334828 | 2 | 13 | 26 | CA  | 11 | 5  |
| 337401 | 81 | 335170 | 335197 | 2 | 14 | 28 | CA  | 6  | 7  |
| 337402 | 81 | 337441 | 337454 | 2 | 7  | 14 | AG  | 21 | 3  |
| 337403 | 81 | 340004 | 340037 | 2 | 17 | 34 | TG  | 14 | 11 |
| 337406 | 81 | 340338 | 340375 | 2 | 19 | 38 | CA  | 6  | 9  |
| 337408 | 81 | 341907 | 341920 | 2 | 7  | 14 | GA  | 20 | 3  |
| 337409 | 81 | 341949 | 341990 | 2 | 21 | 42 | GT  | 8  | 11 |
| 337419 | 81 | 344366 | 344387 | 2 | 11 | 22 | CT  | 6  | 3  |
| 337422 | 81 | 344542 | 344577 | 2 | 18 | 36 | CA  | 7  | 7  |
| 337424 | 81 | 345430 | 345453 | 3 | 8  | 24 | CAG | 27 | 6  |
| 337426 | 81 | 351505 | 351518 | 2 | 7  | 14 | AC  | 26 | 3  |
| 337427 | 81 | 352498 | 352529 | 2 | 16 | 32 | CA  | 8  | 7  |
| 337438 | 81 | 364007 | 364034 | 2 | 14 | 28 | TG  | 15 | 8  |
| 337439 | 81 | 365844 | 365861 | 2 | 9  | 18 | TC  | 27 | 3  |
| 337442 | 81 | 369041 | 369058 | 3 | 6  | 18 | CTC | 8  | 4  |
| 337468 | 81 | 395696 | 395731 | 3 | 12 | 36 | AGG | 23 | 5  |
| 337470 | 81 | 400165 | 400186 | 2 | 11 | 22 | GA  | 18 | 3  |
| 337471 | 81 | 401072 | 401095 | 2 | 12 | 24 | GT  | 19 | 14 |
| 337472 | 81 | 401681 | 401696 | 2 | 8  | 16 | GT  | 25 | 3  |
| 337473 | 81 | 401784 | 401813 | 2 | 15 | 30 | TG  | 21 | 11 |
| 337474 | 81 | 402154 | 402167 | 2 | 7  | 14 | GT  | 14 | 8  |
| 337476 | 81 | 402417 | 402438 | 2 | 11 | 22 | CA  | 20 | 8  |

|        |    |        |        |   |    |    |     |    |    |
|--------|----|--------|--------|---|----|----|-----|----|----|
| 337477 | 81 | 409595 | 409608 | 2 | 7  | 14 | TG  | 23 | 4  |
| 337481 | 81 | 413139 | 413158 | 2 | 10 | 20 | GT  | 7  | 7  |
| 337483 | 81 | 415153 | 415188 | 2 | 18 | 36 | AC  | 6  | 9  |
| 337484 | 81 | 416113 | 416146 | 2 | 17 | 34 | TG  | 13 | 16 |
| 337487 | 81 | 425530 | 425553 | 2 | 12 | 24 | GT  | 25 | 5  |
| 337488 | 81 | 425693 | 425724 | 2 | 16 | 32 | CA  | 11 | 12 |
| 337492 | 81 | 426428 | 426443 | 2 | 8  | 16 | CT  | 19 | 4  |
| 337493 | 81 | 426445 | 426456 | 2 | 6  | 12 | TC  | 18 | 3  |
| 337494 | 81 | 428147 | 428160 | 2 | 7  | 14 | TG  | 21 | 9  |
| 337498 | 81 | 438708 | 438725 | 3 | 6  | 18 | CAG | 10 | 3  |
| 337499 | 81 | 438986 | 439009 | 2 | 12 | 24 | GA  | 11 | 9  |
| 337500 | 81 | 439214 | 439229 | 2 | 8  | 16 | GT  | 20 | 8  |
| 337501 | 81 | 439230 | 439241 | 2 | 6  | 12 | GC  | 20 | 7  |
| 337503 | 81 | 439454 | 439471 | 2 | 9  | 18 | GT  | 7  | 5  |
| 337504 | 81 | 439900 | 439929 | 2 | 15 | 30 | CA  | 14 | 10 |
| 337506 | 81 | 440084 | 440103 | 2 | 10 | 20 | AC  | 19 | 11 |
| 337507 | 81 | 440328 | 440387 | 3 | 20 | 60 | CTT | 18 | 11 |
| 337508 | 81 | 440474 | 440488 | 3 | 5  | 15 | CCT | 22 | 4  |
| 337509 | 81 | 441686 | 441711 | 2 | 13 | 26 | CA  | 17 | 7  |
| 337510 | 81 | 441849 | 441864 | 2 | 8  | 16 | TG  | 7  | 6  |
| 337511 | 81 | 442397 | 442414 | 2 | 9  | 18 | CA  | 14 | 5  |
| 337513 | 81 | 446225 | 446248 | 2 | 12 | 24 | CA  | 21 | 6  |
| 337514 | 81 | 449010 | 449021 | 2 | 6  | 12 | CA  | 26 | 5  |
| 337515 | 81 | 449275 | 449286 | 2 | 6  | 12 | GC  | 27 | 5  |
| 337516 | 81 | 449432 | 449451 | 2 | 10 | 20 | AC  | 21 | 10 |
| 337519 | 81 | 451271 | 451282 | 2 | 6  | 12 | GT  | 23 | 5  |
| 337520 | 81 | 452752 | 452767 | 2 | 8  | 16 | TG  | 22 | 3  |
| 337521 | 81 | 455951 | 455966 | 2 | 8  | 16 | TA  | 6  | 6  |
| 337523 | 81 | 457100 | 457117 | 2 | 9  | 18 | CT  | 22 | 4  |
| 337524 | 81 | 457693 | 457710 | 3 | 6  | 18 | TCC | 21 | 7  |
| 337525 | 81 | 457847 | 457860 | 2 | 7  | 14 | CA  | 29 | 9  |
| 337526 | 81 | 458162 | 458185 | 3 | 8  | 24 | TAA | 9  | 8  |
| 337528 | 81 | 458578 | 458589 | 2 | 6  | 12 | AC  | 22 | 6  |
| 337529 | 81 | 459168 | 459185 | 3 | 6  | 18 | CTC | 12 | 5  |
| 337530 | 81 | 460318 | 460332 | 3 | 5  | 15 | CTC | 10 | 4  |
| 337531 | 81 | 460751 | 460770 | 2 | 10 | 20 | GT  | 22 | 14 |
| 337532 | 81 | 462188 | 462215 | 2 | 14 | 28 | GT  | 10 | 11 |
| 337533 | 81 | 463242 | 463255 | 2 | 7  | 14 | TG  | 17 | 4  |
| 337538 | 81 | 463607 | 463644 | 2 | 19 | 38 | CA  | 10 | 11 |
| 337539 | 81 | 463778 | 463805 | 2 | 14 | 28 | TG  | 18 | 9  |
| 337541 | 81 | 465484 | 465501 | 2 | 9  | 18 | GT  | 16 | 13 |
| 337545 | 81 | 468798 | 468809 | 2 | 6  | 12 | TG  | 22 | 3  |
| 337548 | 81 | 471565 | 471594 | 2 | 15 | 30 | TG  | 10 | 9  |
| 337549 | 81 | 472391 | 472402 | 2 | 6  | 12 | GT  | 21 | 4  |
| 337551 | 81 | 474801 | 474814 | 2 | 7  | 14 | TC  | 17 | 3  |
| 337552 | 81 | 475610 | 475651 | 2 | 21 | 42 | GT  | 19 | 12 |
| 337553 | 81 | 475799 | 475852 | 2 | 27 | 54 | GT  | 8  | 7  |
| 337554 | 81 | 476000 | 476015 | 2 | 8  | 16 | GT  | 24 | 4  |
| 337555 | 81 | 480008 | 480037 | 2 | 15 | 30 | CA  | 19 | 12 |
| 337560 | 81 | 487854 | 487867 | 2 | 7  | 14 | GT  | 22 | 3  |
| 337561 | 81 | 487941 | 487954 | 2 | 7  | 14 | TC  | 25 | 3  |

|        |    |        |        |   |    |    |      |    |    |
|--------|----|--------|--------|---|----|----|------|----|----|
| 337569 | 81 | 498256 | 498269 | 2 | 7  | 14 | TG   | 26 | 3  |
| 337572 | 81 | 500858 | 500884 | 3 | 9  | 27 | TCC  | 18 | 3  |
| 337574 | 81 | 501311 | 501336 | 2 | 13 | 26 | GT   | 15 | 7  |
| 337576 | 81 | 502512 | 502531 | 2 | 10 | 20 | TG   | 23 | 5  |
| 337578 | 81 | 502982 | 503017 | 2 | 18 | 36 | TG   | 13 | 9  |
| 337582 | 81 | 509364 | 509387 | 2 | 12 | 24 | TG   | 21 | 5  |
| 337590 | 81 | 523079 | 523128 | 2 | 25 | 50 | TG   | 9  | 10 |
| 337592 | 81 | 529194 | 529245 | 2 | 26 | 52 | TG   | 7  | 8  |
| 337595 | 81 | 529433 | 529458 | 2 | 13 | 26 | TC   | 17 | 10 |
| 337596 | 81 | 531299 | 531312 | 2 | 7  | 14 | TG   | 15 | 3  |
| 337597 | 81 | 531396 | 531411 | 2 | 8  | 16 | TG   | 18 | 3  |
| 337600 | 81 | 532337 | 532352 | 2 | 8  | 16 | AC   | 27 | 3  |
| 337601 | 81 | 532529 | 532556 | 2 | 14 | 28 | CA   | 17 | 9  |
| 337606 | 81 | 536772 | 536789 | 2 | 9  | 18 | CA   | 19 | 13 |
| 337611 | 81 | 538168 | 538201 | 2 | 17 | 34 | CA   | 9  | 8  |
| 337617 | 81 | 539158 | 539177 | 2 | 10 | 20 | AC   | 20 | 8  |
| 337619 | 81 | 540242 | 540283 | 2 | 21 | 42 | CA   | 15 | 15 |
| 337625 | 81 | 544865 | 544894 | 2 | 15 | 30 | CA   | 7  | 7  |
| 337626 | 81 | 547826 | 547840 | 3 | 5  | 15 | CTC  | 7  | 3  |
| 337627 | 81 | 548384 | 548423 | 2 | 20 | 40 | GA   | 9  | 9  |
| 337628 | 81 | 548864 | 548875 | 2 | 6  | 12 | TC   | 17 | 3  |
| 337633 | 81 | 550930 | 550955 | 2 | 13 | 26 | TG   | 16 | 7  |
| 337634 | 81 | 551302 | 551319 | 2 | 9  | 18 | CA   | 15 | 5  |
| 337636 | 81 | 559575 | 559596 | 2 | 11 | 22 | AC   | 18 | 6  |
| 337640 | 81 | 571371 | 571394 | 2 | 12 | 24 | TG   | 15 | 4  |
| 337642 | 81 | 572262 | 572281 | 2 | 10 | 20 | TG   | 23 | 6  |
| 337646 | 81 | 582206 | 582235 | 2 | 15 | 30 | GT   | 13 | 8  |
| 337652 | 81 | 585939 | 585960 | 2 | 11 | 22 | TG   | 19 | 5  |
| 337653 | 81 | 586137 | 586168 | 4 | 8  | 32 | ATAG | 23 | 4  |
| 337654 | 81 | 586460 | 586477 | 2 | 9  | 18 | GT   | 19 | 7  |
| 337658 | 81 | 589054 | 589069 | 2 | 8  | 16 | TC   | 24 | 8  |
| 337660 | 81 | 593601 | 593620 | 4 | 5  | 20 | GTAT | 26 | 4  |
| 337661 | 81 | 594013 | 594030 | 2 | 9  | 18 | TG   | 20 | 6  |
| 337663 | 81 | 594942 | 594963 | 2 | 11 | 22 | AC   | 17 | 7  |
| 337665 | 81 | 598537 | 598564 | 2 | 14 | 28 | TG   | 8  | 5  |
| 337668 | 81 | 606579 | 606604 | 2 | 13 | 26 | GT   | 13 | 15 |
| 337669 | 81 | 606740 | 606771 | 2 | 16 | 32 | CA   | 14 | 12 |
| 337673 | 81 | 607651 | 607668 | 3 | 6  | 18 | GAG  | 21 | 5  |
| 337674 | 81 | 610611 | 610644 | 2 | 17 | 34 | AC   | 7  | 6  |
| 337675 | 81 | 610715 | 610728 | 2 | 7  | 14 | AC   | 19 | 4  |
| 337676 | 81 | 610804 | 610825 | 2 | 11 | 22 | CA   | 12 | 9  |
| 337678 | 81 | 613145 | 613159 | 3 | 5  | 15 | CCT  | 15 | 4  |
| 337683 | 81 | 617975 | 617998 | 2 | 12 | 24 | CA   | 13 | 7  |
| 337686 | 81 | 621342 | 621353 | 2 | 6  | 12 | AT   | 6  | 4  |
| 337687 | 81 | 621355 | 621366 | 2 | 6  | 12 | TA   | 10 | 3  |
| 337688 | 81 | 621422 | 621437 | 2 | 8  | 16 | CA   | 16 | 8  |
| 337689 | 81 | 621951 | 621966 | 2 | 8  | 16 | CA   | 28 | 5  |
| 337690 | 81 | 623339 | 623353 | 3 | 5  | 15 | ACA  | 22 | 4  |
| 337692 | 81 | 627298 | 627331 | 2 | 17 | 34 | TG   | 9  | 8  |
| 337695 | 81 | 628416 | 628431 | 2 | 8  | 16 | CA   | 11 | 7  |
| 337701 | 81 | 631031 | 631052 | 2 | 11 | 22 | CA   | 9  | 9  |

|        |    |        |        |   |    |    |     |    |    |
|--------|----|--------|--------|---|----|----|-----|----|----|
| 337702 | 81 | 631115 | 631126 | 2 | 6  | 12 | AC  | 27 | 7  |
| 337708 | 81 | 638974 | 638991 | 2 | 9  | 18 | TG  | 21 | 8  |
| 337709 | 81 | 639104 | 639115 | 2 | 6  | 12 | AC  | 27 | 3  |
| 337710 | 81 | 639782 | 639793 | 2 | 6  | 12 | CA  | 26 | 3  |
| 337712 | 81 | 646984 | 647009 | 2 | 13 | 26 | CA  | 20 | 7  |
| 337715 | 81 | 648166 | 648181 | 2 | 8  | 16 | TG  | 15 | 18 |
| 337716 | 81 | 648183 | 648198 | 2 | 8  | 16 | GT  | 17 | 17 |
| 337717 | 81 | 648379 | 648412 | 2 | 17 | 34 | TG  | 12 | 12 |
| 337718 | 81 | 649011 | 649034 | 2 | 12 | 24 | CT  | 18 | 6  |
| 337719 | 81 | 651740 | 651759 | 2 | 10 | 20 | CA  | 17 | 13 |
| 337721 | 81 | 651996 | 652023 | 2 | 14 | 28 | CA  | 12 | 11 |
| 337722 | 81 | 652722 | 652737 | 2 | 8  | 16 | AC  | 21 | 4  |
| 337724 | 81 | 653875 | 653904 | 2 | 15 | 30 | AC  | 13 | 7  |
| 337726 | 81 | 657035 | 657046 | 2 | 6  | 12 | TG  | 23 | 5  |
| 337727 | 81 | 657048 | 657059 | 2 | 6  | 12 | GT  | 26 | 4  |
| 337729 | 81 | 662078 | 662103 | 2 | 13 | 26 | TG  | 15 | 8  |
| 337734 | 81 | 665460 | 665487 | 2 | 14 | 28 | CA  | 16 | 9  |
| 337739 | 81 | 671662 | 671693 | 2 | 16 | 32 | CA  | 7  | 6  |
| 337745 | 81 | 688311 | 688330 | 2 | 10 | 20 | AC  | 13 | 5  |
| 337747 | 81 | 689843 | 689858 | 2 | 8  | 16 | GT  | 26 | 5  |
| 337752 | 81 | 691211 | 691222 | 2 | 6  | 12 | TG  | 25 | 3  |
| 337762 | 81 | 706408 | 706421 | 2 | 7  | 14 | CT  | 13 | 4  |
| 337763 | 81 | 706422 | 706441 | 2 | 10 | 20 | CA  | 17 | 8  |
| 337764 | 81 | 706551 | 706578 | 2 | 14 | 28 | CA  | 19 | 8  |
| 337775 | 81 | 719712 | 719735 | 2 | 12 | 24 | AG  | 19 | 14 |
| 337779 | 81 | 722137 | 722152 | 2 | 8  | 16 | CA  | 18 | 13 |
| 337780 | 81 | 722261 | 722278 | 2 | 9  | 18 | TG  | 13 | 6  |
| 337781 | 81 | 722628 | 722643 | 2 | 8  | 16 | CA  | 19 | 7  |
| 337782 | 81 | 722788 | 722807 | 2 | 10 | 20 | GT  | 15 | 6  |
| 337783 | 81 | 726248 | 726267 | 2 | 10 | 20 | AC  | 17 | 4  |
| 337784 | 81 | 726353 | 726368 | 2 | 8  | 16 | TG  | 17 | 6  |
| 337788 | 81 | 729014 | 729043 | 2 | 15 | 30 | TG  | 7  | 5  |
| 337791 | 81 | 734863 | 734882 | 2 | 10 | 20 | CA  | 9  | 3  |
| 337796 | 81 | 744325 | 744358 | 2 | 17 | 34 | TG  | 14 | 11 |
| 337803 | 81 | 748854 | 748867 | 2 | 7  | 14 | AC  | 28 | 3  |
| 337804 | 81 | 750940 | 750951 | 2 | 6  | 12 | TG  | 23 | 14 |
| 337805 | 81 | 750954 | 750969 | 2 | 8  | 16 | TG  | 24 | 9  |
| 337807 | 81 | 752038 | 752075 | 2 | 19 | 38 | AC  | 7  | 6  |
| 337811 | 81 | 755071 | 755082 | 2 | 6  | 12 | CT  | 21 | 4  |
| 337812 | 81 | 755360 | 755383 | 3 | 8  | 24 | AGG | 18 | 8  |
| 337814 | 81 | 756500 | 756527 | 2 | 14 | 28 | TG  | 18 | 18 |
| 337815 | 81 | 758344 | 758361 | 2 | 9  | 18 | TG  | 12 | 7  |
| 337816 | 81 | 758460 | 758477 | 2 | 9  | 18 | TG  | 9  | 5  |
| 337817 | 81 | 759175 | 759198 | 3 | 8  | 24 | TTG | 22 | 5  |
| 337822 | 81 | 771011 | 771022 | 2 | 6  | 12 | TC  | 26 | 3  |
| 337824 | 81 | 772307 | 772318 | 2 | 6  | 12 | CA  | 14 | 4  |
| 337825 | 81 | 772488 | 772501 | 2 | 7  | 14 | GT  | 19 | 11 |
| 337827 | 81 | 773995 | 774046 | 2 | 26 | 52 | GT  | 6  | 10 |
| 337828 | 81 | 774164 | 774179 | 2 | 8  | 16 | GT  | 6  | 5  |
| 337830 | 81 | 774396 | 774413 | 2 | 9  | 18 | TG  | 24 | 9  |
| 337838 | 81 | 786347 | 786361 | 3 | 5  | 15 | ATT | 24 | 3  |

|        |    |        |        |   |    |    |      |    |    |
|--------|----|--------|--------|---|----|----|------|----|----|
| 337839 | 81 | 789047 | 789060 | 2 | 7  | 14 | GA   | 29 | 3  |
| 337848 | 81 | 805434 | 805457 | 3 | 8  | 24 | GAG  | 14 | 6  |
| 337850 | 81 | 806185 | 806210 | 2 | 13 | 26 | AG   | 17 | 3  |
| 337851 | 81 | 806430 | 806443 | 2 | 7  | 14 | GT   | 24 | 3  |
| 337856 | 81 | 807096 | 807117 | 2 | 11 | 22 | CA   | 19 | 4  |
| 337859 | 81 | 807392 | 807423 | 2 | 16 | 32 | AC   | 7  | 4  |
| 337862 | 81 | 813485 | 813506 | 2 | 11 | 22 | CA   | 17 | 11 |
| 337863 | 81 | 813626 | 813637 | 2 | 6  | 12 | CA   | 21 | 3  |
| 337867 | 81 | 813923 | 813946 | 2 | 12 | 24 | CA   | 22 | 14 |
| 337869 | 81 | 814263 | 814284 | 2 | 11 | 22 | CA   | 17 | 8  |
| 337870 | 81 | 814405 | 814418 | 2 | 7  | 14 | CA   | 27 | 3  |
| 337871 | 81 | 814420 | 814433 | 2 | 7  | 14 | AC   | 24 | 4  |
| 337872 | 81 | 814600 | 814623 | 2 | 12 | 24 | CT   | 13 | 5  |
| 337876 | 81 | 818485 | 818518 | 2 | 17 | 34 | GA   | 7  | 7  |
| 337879 | 81 | 822565 | 822576 | 2 | 6  | 12 | CT   | 9  | 3  |
| 337880 | 81 | 823880 | 823897 | 2 | 9  | 18 | AG   | 11 | 3  |
| 337881 | 81 | 824182 | 824201 | 2 | 10 | 20 | TG   | 16 | 8  |
| 337888 | 81 | 831119 | 831148 | 2 | 15 | 30 | AC   | 22 | 12 |
| 337890 | 81 | 831613 | 831624 | 2 | 6  | 12 | TG   | 21 | 3  |
| 337899 | 81 | 841915 | 841936 | 2 | 11 | 22 | GT   | 10 | 6  |
| 337900 | 81 | 843515 | 843526 | 2 | 6  | 12 | CA   | 27 | 3  |
| 337903 | 81 | 844997 | 845008 | 2 | 6  | 12 | GT   | 23 | 6  |
| 337910 | 81 | 852249 | 852272 | 2 | 12 | 24 | CA   | 8  | 5  |
| 337916 | 81 | 855277 | 855296 | 2 | 10 | 20 | AC   | 19 | 4  |
| 337927 | 81 | 867847 | 867874 | 2 | 14 | 28 | AC   | 17 | 8  |
| 337929 | 81 | 867992 | 868019 | 2 | 14 | 28 | CA   | 13 | 9  |
| 337939 | 81 | 873391 | 873410 | 2 | 10 | 20 | GT   | 22 | 5  |
| 337945 | 81 | 874240 | 874255 | 2 | 8  | 16 | CA   | 17 | 8  |
| 337949 | 81 | 876480 | 876495 | 2 | 8  | 16 | GT   | 25 | 3  |
| 337953 | 81 | 881158 | 881171 | 2 | 7  | 14 | GT   | 20 | 3  |
| 337957 | 81 | 886734 | 886753 | 2 | 10 | 20 | AG   | 14 | 6  |
| 337958 | 81 | 886856 | 886877 | 2 | 11 | 22 | TG   | 13 | 5  |
| 337959 | 81 | 887126 | 887161 | 2 | 18 | 36 | TG   | 17 | 9  |
| 337961 | 81 | 889143 | 889156 | 2 | 7  | 14 | GT   | 19 | 4  |
| 337962 | 81 | 889399 | 889410 | 2 | 6  | 12 | TG   | 26 | 4  |
| 337966 | 81 | 893337 | 893364 | 2 | 14 | 28 | AC   | 11 | 11 |
| 337971 | 81 | 899948 | 899975 | 2 | 14 | 28 | CA   | 12 | 7  |
| 337975 | 81 | 900326 | 900343 | 2 | 9  | 18 | AC   | 12 | 7  |
| 337976 | 81 | 900533 | 900562 | 2 | 15 | 30 | GT   | 15 | 7  |
| 337978 | 81 | 903118 | 903141 | 2 | 12 | 24 | AC   | 16 | 12 |
| 337981 | 81 | 904348 | 904383 | 2 | 18 | 36 | TG   | 6  | 10 |
| 337992 | 81 | 910450 | 910467 | 2 | 9  | 18 | CA   | 17 | 11 |
| 337993 | 81 | 910970 | 911001 | 2 | 16 | 32 | CA   | 17 | 10 |
| 337994 | 81 | 911168 | 911185 | 2 | 9  | 18 | AC   | 21 | 7  |
| 338005 | 81 | 928897 | 928912 | 2 | 8  | 16 | GT   | 27 | 5  |
| 338008 | 81 | 936276 | 936297 | 2 | 11 | 22 | GT   | 20 | 6  |
| 338011 | 81 | 940943 | 940958 | 2 | 8  | 16 | AT   | 19 | 3  |
| 338021 | 81 | 964153 | 964167 | 3 | 5  | 15 | CTC  | 30 | 3  |
| 338026 | 81 | 970048 | 970065 | 3 | 6  | 18 | GCT  | 27 | 5  |
| 338027 | 81 | 970345 | 970359 | 3 | 5  | 15 | ACA  | 26 | 4  |
| 338035 | 81 | 983781 | 983800 | 4 | 5  | 20 | AGTG | 29 | 6  |

|        |    |         |         |   |    |    |      |    |    |
|--------|----|---------|---------|---|----|----|------|----|----|
| 338053 | 81 | 1057686 | 1057706 | 3 | 7  | 21 | CCT  | 19 | 9  |
| 338054 | 81 | 1061720 | 1061731 | 2 | 6  | 12 | TG   | 27 | 4  |
| 338055 | 81 | 1064967 | 1064981 | 3 | 5  | 15 | CAT  | 27 | 3  |
| 338061 | 81 | 1076796 | 1076813 | 2 | 9  | 18 | TG   | 16 | 13 |
| 338062 | 81 | 1077016 | 1077033 | 2 | 9  | 18 | GA   | 21 | 16 |
| 338063 | 81 | 1077234 | 1077247 | 2 | 7  | 14 | GA   | 11 | 3  |
| 338068 | 81 | 1079120 | 1079131 | 2 | 6  | 12 | CT   | 33 | 3  |
| 338070 | 81 | 1082066 | 1082083 | 2 | 9  | 18 | TA   | 14 | 10 |
| 338071 | 81 | 1086605 | 1086618 | 2 | 7  | 14 | TG   | 10 | 3  |
| 338075 | 81 | 1094949 | 1094966 | 2 | 9  | 18 | TG   | 29 | 7  |
| 338079 | 81 | 1099922 | 1099957 | 2 | 18 | 36 | GT   | 17 | 10 |
| 338081 | 81 | 1102723 | 1102740 | 2 | 9  | 18 | GT   | 18 | 9  |
| 338082 | 81 | 1104208 | 1104219 | 2 | 6  | 12 | TG   | 26 | 3  |
| 338083 | 81 | 1104400 | 1104423 | 3 | 8  | 24 | GGA  | 12 | 10 |
| 338088 | 81 | 1118172 | 1118189 | 3 | 6  | 18 | TGA  | 25 | 4  |
| 338089 | 81 | 1118436 | 1118463 | 2 | 14 | 28 | CA   | 13 | 6  |
| 338090 | 81 | 1120691 | 1120705 | 3 | 5  | 15 | GAG  | 32 | 3  |
| 338099 | 81 | 1138195 | 1138218 | 2 | 12 | 24 | GT   | 20 | 15 |
| 338101 | 81 | 1141848 | 1141863 | 2 | 8  | 16 | AC   | 27 | 10 |
| 338102 | 81 | 1146106 | 1146127 | 2 | 11 | 22 | GA   | 17 | 7  |
| 338105 | 81 | 1149321 | 1149338 | 2 | 9  | 18 | AC   | 17 | 3  |
| 338107 | 81 | 1151300 | 1151327 | 2 | 14 | 28 | GT   | 13 | 11 |
| 338108 | 81 | 1155483 | 1155496 | 2 | 7  | 14 | AC   | 28 | 3  |
| 338113 | 81 | 1166292 | 1166303 | 2 | 6  | 12 | AC   | 23 | 5  |
| 338114 | 81 | 1166305 | 1166320 | 2 | 8  | 16 | CA   | 23 | 4  |
| 338117 | 81 | 1171021 | 1171036 | 2 | 8  | 16 | CT   | 30 | 3  |
| 338124 | 81 | 1184398 | 1184417 | 4 | 5  | 20 | CACG | 28 | 19 |
| 338139 | 81 | 1205808 | 1205831 | 2 | 12 | 24 | TC   | 20 | 10 |
| 338141 | 81 | 1206526 | 1206541 | 2 | 8  | 16 | GT   | 15 | 4  |
| 338143 | 81 | 1206680 | 1206693 | 2 | 7  | 14 | AC   | 23 | 6  |
| 338145 | 81 | 1210100 | 1210125 | 2 | 13 | 26 | CA   | 11 | 5  |
| 338146 | 81 | 1212293 | 1212312 | 4 | 5  | 20 | TTTG | 15 | 3  |
| 338147 | 81 | 1213817 | 1213832 | 2 | 8  | 16 | GT   | 24 | 7  |
| 338156 | 81 | 1229001 | 1229028 | 4 | 7  | 28 | AAGA | 12 | 10 |
| 338160 | 81 | 1230380 | 1230409 | 2 | 15 | 30 | GT   | 19 | 10 |
| 338161 | 81 | 1230880 | 1230897 | 3 | 6  | 18 | CAG  | 18 | 4  |
| 338164 | 81 | 1241366 | 1241403 | 2 | 19 | 38 | GT   | 11 | 8  |
| 338169 | 81 | 1255968 | 1256001 | 2 | 17 | 34 | AC   | 13 | 14 |
| 338170 | 81 | 1257978 | 1258009 | 2 | 16 | 32 | TG   | 17 | 6  |
| 338172 | 81 | 1262370 | 1262393 | 2 | 12 | 24 | AC   | 16 | 5  |
| 338179 | 81 | 1268702 | 1268723 | 2 | 11 | 22 | TG   | 8  | 4  |
| 338180 | 81 | 1272670 | 1272683 | 2 | 7  | 14 | CA   | 27 | 4  |
| 338181 | 81 | 1282069 | 1282108 | 2 | 20 | 40 | TG   | 10 | 10 |
| 338185 | 81 | 1284830 | 1284847 | 2 | 9  | 18 | AT   | 18 | 4  |
| 338202 | 81 | 1303405 | 1303431 | 3 | 9  | 27 | CCT  | 13 | 6  |
| 338203 | 81 | 1304003 | 1304016 | 2 | 7  | 14 | CA   | 26 | 5  |
| 338204 | 81 | 1307249 | 1307272 | 2 | 12 | 24 | AC   | 17 | 5  |
| 338205 | 81 | 1310150 | 1310163 | 2 | 7  | 14 | TG   | 22 | 4  |
| 338210 | 81 | 1314311 | 1314325 | 3 | 5  | 15 | GAG  | 28 | 4  |
| 338212 | 81 | 1324702 | 1324749 | 2 | 24 | 48 | AC   | 16 | 14 |
| 338219 | 81 | 1330972 | 1330991 | 2 | 10 | 20 | AC   | 26 | 10 |

|        |    |         |         |   |    |    |      |    |    |
|--------|----|---------|---------|---|----|----|------|----|----|
| 338229 | 81 | 1343627 | 1343640 | 2 | 7  | 14 | CA   | 11 | 8  |
| 338233 | 81 | 1356668 | 1356681 | 2 | 7  | 14 | CT   | 13 | 3  |
| 338234 | 81 | 1356927 | 1356953 | 3 | 9  | 27 | GAG  | 25 | 8  |
| 338236 | 81 | 1357945 | 1357968 | 2 | 12 | 24 | TG   | 16 | 7  |
| 338238 | 81 | 1362397 | 1362417 | 3 | 7  | 21 | TCC  | 26 | 5  |
| 338240 | 81 | 1371276 | 1371331 | 2 | 28 | 56 | TG   | 12 | 12 |
| 338242 | 81 | 1371893 | 1371906 | 2 | 7  | 14 | GT   | 29 | 3  |
| 338251 | 81 | 1380529 | 1380554 | 2 | 13 | 26 | GT   | 14 | 5  |
| 338252 | 81 | 1382997 | 1383018 | 2 | 11 | 22 | CA   | 20 | 7  |
| 338255 | 81 | 1389907 | 1389930 | 2 | 12 | 24 | TG   | 17 | 6  |
| 338257 | 81 | 1392821 | 1392844 | 4 | 6  | 24 | ACAG | 28 | 8  |
| 338258 | 81 | 1398999 | 1399020 | 2 | 11 | 22 | TC   | 20 | 7  |
| 338262 | 81 | 1404353 | 1404388 | 2 | 18 | 36 | GA   | 6  | 6  |
| 338265 | 81 | 1405290 | 1405316 | 3 | 9  | 27 | GGA  | 7  | 4  |
| 338266 | 81 | 1406097 | 1406110 | 2 | 7  | 14 | TG   | 17 | 6  |
| 338270 | 81 | 1410850 | 1410869 | 2 | 10 | 20 | AC   | 18 | 3  |
| 338275 | 81 | 1415058 | 1415077 | 2 | 10 | 20 | GT   | 12 | 13 |
| 338276 | 81 | 1419007 | 1419058 | 2 | 26 | 52 | TG   | 8  | 8  |
| 338277 | 81 | 1421288 | 1421305 | 2 | 9  | 18 | TG   | 16 | 8  |
| 338278 | 81 | 1425426 | 1425439 | 2 | 7  | 14 | TG   | 23 | 5  |
| 338279 | 81 | 1426518 | 1426539 | 2 | 11 | 22 | GT   | 8  | 8  |
| 338291 | 81 | 1444677 | 1444688 | 2 | 6  | 12 | CG   | 14 | 8  |
| 338292 | 81 | 1444689 | 1444700 | 2 | 6  | 12 | TG   | 10 | 6  |
| 338299 | 81 | 1448721 | 1448732 | 2 | 6  | 12 | TG   | 23 | 4  |
| 338301 | 81 | 1448855 | 1448866 | 2 | 6  | 12 | GT   | 25 | 5  |
| 338303 | 81 | 1449667 | 1449678 | 2 | 6  | 12 | GT   | 23 | 6  |
| 338306 | 81 | 1452318 | 1452347 | 3 | 10 | 30 | GCA  | 22 | 9  |
| 338310 | 81 | 1458735 | 1458758 | 2 | 12 | 24 | GT   | 7  | 12 |
| 338312 | 81 | 1465077 | 1465088 | 2 | 6  | 12 | GT   | 18 | 3  |
| 338313 | 81 | 1465093 | 1465108 | 2 | 8  | 16 | TG   | 16 | 4  |
| 338315 | 81 | 1469412 | 1469435 | 2 | 12 | 24 | CA   | 23 | 6  |
| 338316 | 81 | 1469550 | 1469561 | 2 | 6  | 12 | TG   | 16 | 8  |
| 338317 | 81 | 1470186 | 1470197 | 2 | 6  | 12 | CA   | 22 | 3  |
| 338323 | 81 | 1474304 | 1474321 | 2 | 9  | 18 | TG   | 21 | 3  |
| 338329 | 81 | 1483217 | 1483228 | 2 | 6  | 12 | GT   | 27 | 4  |
| 338330 | 81 | 1483626 | 1483641 | 4 | 4  | 16 | GCCT | 30 | 3  |
| 338331 | 81 | 1493316 | 1493337 | 2 | 11 | 22 | AC   | 11 | 11 |
| 338332 | 81 | 1494122 | 1494147 | 2 | 13 | 26 | AC   | 16 | 8  |
| 338333 | 81 | 1494321 | 1494340 | 2 | 10 | 20 | CA   | 17 | 10 |
| 338334 | 81 | 1495249 | 1495263 | 3 | 5  | 15 | CAG  | 19 | 5  |
| 338337 | 81 | 1497801 | 1497828 | 4 | 7  | 28 | TAGA | 11 | 10 |
| 338341 | 81 | 1518082 | 1518101 | 4 | 5  | 20 | AAAT | 19 | 5  |
| 338345 | 81 | 1522241 | 1522254 | 2 | 7  | 14 | CT   | 12 | 3  |
| 338348 | 81 | 1531587 | 1531600 | 2 | 7  | 14 | CA   | 19 | 7  |
| 338349 | 81 | 1531653 | 1531686 | 2 | 17 | 34 | AC   | 8  | 10 |
| 338352 | 81 | 1540712 | 1540727 | 2 | 8  | 16 | GT   | 28 | 4  |
| 338353 | 81 | 1541117 | 1541130 | 2 | 7  | 14 | CA   | 31 | 3  |
| 338358 | 81 | 1545348 | 1545373 | 2 | 13 | 26 | GT   | 6  | 7  |
| 338371 | 81 | 1554884 | 1554895 | 2 | 6  | 12 | GT   | 15 | 16 |
| 338372 | 81 | 1554897 | 1554912 | 2 | 8  | 16 | TG   | 16 | 16 |
| 338374 | 81 | 1555385 | 1555396 | 2 | 6  | 12 | CA   | 11 | 3  |

|        |    |         |         |   |    |    |      |    |    |
|--------|----|---------|---------|---|----|----|------|----|----|
| 338376 | 81 | 1555463 | 1555482 | 2 | 10 | 20 | CA   | 13 | 4  |
| 338379 | 81 | 1556047 | 1556062 | 2 | 8  | 16 | CA   | 21 | 7  |
| 338383 | 81 | 1558702 | 1558735 | 2 | 17 | 34 | GT   | 12 | 10 |
| 338385 | 81 | 1560587 | 1560598 | 2 | 6  | 12 | AT   | 16 | 6  |
| 338397 | 81 | 1563121 | 1563162 | 3 | 14 | 42 | TCT  | 8  | 8  |
| 338403 | 81 | 1571155 | 1571168 | 2 | 7  | 14 | GA   | 9  | 3  |
| 338418 | 81 | 1584458 | 1584475 | 2 | 9  | 18 | GT   | 21 | 5  |
| 338421 | 81 | 1585060 | 1585073 | 2 | 7  | 14 | AC   | 22 | 7  |
| 338445 | 81 | 1623602 | 1623613 | 2 | 6  | 12 | TA   | 21 | 3  |
| 338446 | 81 | 1624317 | 1624328 | 2 | 6  | 12 | AC   | 16 | 3  |
| 338456 | 81 | 1637894 | 1637921 | 2 | 14 | 28 | CA   | 13 | 6  |
| 338475 | 81 | 1693464 | 1693479 | 2 | 8  | 16 | CT   | 14 | 11 |
| 338476 | 81 | 1693677 | 1693698 | 2 | 11 | 22 | GA   | 17 | 19 |
| 338480 | 81 | 1707649 | 1707672 | 4 | 6  | 24 | AAAC | 21 | 5  |
| 338481 | 81 | 1708211 | 1708225 | 3 | 5  | 15 | TGC  | 24 | 5  |
| 338482 | 81 | 1708568 | 1708579 | 2 | 6  | 12 | TG   | 10 | 3  |
| 338484 | 81 | 1712262 | 1712279 | 2 | 9  | 18 | GT   | 19 | 10 |
| 338485 | 81 | 1716157 | 1716172 | 2 | 8  | 16 | CT   | 29 | 5  |
| 338492 | 81 | 1722775 | 1722786 | 2 | 6  | 12 | TG   | 16 | 3  |
| 338493 | 81 | 1724162 | 1724181 | 2 | 10 | 20 | AG   | 20 | 9  |
| 338510 | 81 | 1751003 | 1751038 | 2 | 18 | 36 | GA   | 7  | 7  |
| 338534 | 81 | 1772001 | 1772018 | 2 | 9  | 18 | GT   | 14 | 4  |
| 338535 | 81 | 1772247 | 1772278 | 2 | 16 | 32 | TC   | 13 | 6  |
| 338539 | 81 | 1774917 | 1774942 | 2 | 13 | 26 | CA   | 13 | 5  |
| 338540 | 81 | 1775321 | 1775336 | 2 | 8  | 16 | CT   | 30 | 5  |
| 338541 | 81 | 1775407 | 1775438 | 2 | 16 | 32 | TG   | 19 | 8  |
| 338544 | 81 | 1777720 | 1777737 | 3 | 6  | 18 | GCA  | 26 | 4  |
| 338551 | 81 | 1798172 | 1798189 | 3 | 6  | 18 | AGC  | 24 | 10 |
| 338561 | 81 | 1835805 | 1835825 | 3 | 7  | 21 | GCA  | 19 | 4  |
| 338565 | 81 | 1836821 | 1836840 | 4 | 5  | 20 | AAAT | 11 | 10 |
| 338578 | 81 | 1900607 | 1900628 | 2 | 11 | 22 | AG   | 22 | 6  |
| 338580 | 81 | 1914310 | 1914324 | 3 | 5  | 15 | AAC  | 15 | 3  |
| 338607 | 82 | 59562   | 59588   | 3 | 9  | 27 | CTC  | 24 | 4  |
| 338610 | 82 | 86280   | 86294   | 3 | 5  | 15 | AGG  | 28 | 3  |
| 338617 | 82 | 99265   | 99276   | 2 | 6  | 12 | TG   | 23 | 3  |
| 338622 | 82 | 124240  | 124259  | 4 | 5  | 20 | ACAG | 26 | 3  |
| 338625 | 82 | 126088  | 126123  | 2 | 18 | 36 | AC   | 6  | 5  |
| 338635 | 82 | 158396  | 158409  | 2 | 7  | 14 | TG   | 21 | 4  |
| 338639 | 82 | 168401  | 168436  | 2 | 18 | 36 | CA   | 6  | 6  |
| 338641 | 82 | 176440  | 176455  | 2 | 8  | 16 | CA   | 24 | 5  |
| 338652 | 82 | 191606  | 191617  | 2 | 6  | 12 | GT   | 22 | 5  |
| 338665 | 82 | 234220  | 234239  | 2 | 10 | 20 | GT   | 20 | 3  |
| 338666 | 82 | 237393  | 237408  | 2 | 8  | 16 | TG   | 28 | 4  |
| 338715 | 82 | 368541  | 368570  | 3 | 10 | 30 | TTA  | 6  | 3  |
| 338718 | 82 | 372149  | 372166  | 2 | 9  | 18 | CT   | 14 | 3  |
| 338719 | 82 | 372730  | 372755  | 2 | 13 | 26 | AC   | 19 | 5  |
| 338744 | 82 | 457198  | 457257  | 4 | 15 | 60 | CAAT | 23 | 11 |
| 338752 | 82 | 495090  | 495119  | 2 | 15 | 30 | TG   | 11 | 4  |
| 338756 | 82 | 511509  | 511538  | 3 | 10 | 30 | TAC  | 9  | 7  |
| 338767 | 82 | 537717  | 537750  | 2 | 17 | 34 | CA   | 20 | 5  |
| 338792 | 82 | 607013  | 607027  | 3 | 5  | 15 | CAG  | 30 | 3  |



|        |    |         |         |   |    |    |      |    |    |
|--------|----|---------|---------|---|----|----|------|----|----|
| 338798 | 82 | 615926  | 615961  | 4 | 9  | 36 | TATC | 12 | 5  |
| 338817 | 82 | 653765  | 653778  | 2 | 7  | 14 | CA   | 17 | 7  |
| 338837 | 82 | 669649  | 669664  | 4 | 4  | 16 | AAAT | 13 | 5  |
| 338844 | 82 | 693885  | 693905  | 3 | 7  | 21 | CTG  | 17 | 4  |
| 338846 | 82 | 700249  | 700264  | 4 | 4  | 16 | GTGA | 22 | 3  |
| 338853 | 82 | 715055  | 715066  | 2 | 6  | 12 | GT   | 23 | 5  |
| 338855 | 82 | 718399  | 718426  | 4 | 7  | 28 | ATGG | 24 | 6  |
| 338858 | 82 | 720277  | 720296  | 2 | 10 | 20 | GT   | 26 | 5  |
| 338871 | 82 | 730230  | 730289  | 4 | 15 | 60 | TGTA | 18 | 6  |
| 338874 | 82 | 732489  | 732532  | 4 | 11 | 44 | AGAA | 21 | 9  |
| 338907 | 82 | 803729  | 803750  | 2 | 11 | 22 | GA   | 27 | 3  |
| 338912 | 82 | 807712  | 807743  | 4 | 8  | 32 | ATGG | 21 | 9  |
| 338913 | 82 | 808255  | 808268  | 2 | 7  | 14 | AC   | 28 | 5  |
| 338915 | 82 | 828839  | 828872  | 2 | 17 | 34 | TG   | 8  | 6  |
| 338924 | 82 | 847078  | 847103  | 2 | 13 | 26 | TG   | 20 | 6  |
| 338925 | 82 | 847451  | 847478  | 2 | 14 | 28 | TG   | 9  | 7  |
| 338927 | 82 | 851325  | 851358  | 2 | 17 | 34 | CA   | 8  | 9  |
| 338929 | 82 | 854291  | 854318  | 2 | 14 | 28 | AC   | 15 | 5  |
| 338931 | 82 | 866535  | 866564  | 2 | 15 | 30 | CA   | 14 | 6  |
| 338938 | 82 | 880772  | 880799  | 4 | 7  | 28 | GTCT | 19 | 5  |
| 338943 | 82 | 896926  | 896943  | 2 | 9  | 18 | AC   | 12 | 3  |
| 338945 | 82 | 921227  | 921246  | 4 | 5  | 20 | TTTA | 15 | 5  |
| 338947 | 82 | 921358  | 921396  | 3 | 13 | 39 | GAA  | 13 | 8  |
| 338974 | 82 | 953849  | 953868  | 4 | 5  | 20 | GTCT | 30 | 5  |
| 338984 | 82 | 980784  | 980815  | 2 | 16 | 32 | AC   | 14 | 8  |
| 338987 | 82 | 984716  | 984727  | 2 | 6  | 12 | GT   | 24 | 4  |
| 338990 | 82 | 1004589 | 1004630 | 2 | 21 | 42 | AC   | 6  | 5  |
| 338992 | 82 | 1013365 | 1013394 | 2 | 15 | 30 | TG   | 23 | 5  |
| 339002 | 82 | 1044949 | 1044980 | 4 | 8  | 32 | ATGG | 25 | 5  |
| 339009 | 82 | 1068704 | 1068729 | 2 | 13 | 26 | GT   | 20 | 10 |
| 339014 | 82 | 1074599 | 1074616 | 3 | 6  | 18 | TTA  | 21 | 3  |
| 339015 | 82 | 1074827 | 1074838 | 2 | 6  | 12 | GT   | 20 | 3  |
| 339023 | 82 | 1092089 | 1092103 | 3 | 5  | 15 | GAG  | 17 | 3  |
| 339028 | 82 | 1100955 | 1100969 | 3 | 5  | 15 | TGT  | 32 | 3  |
| 339032 | 82 | 1113169 | 1113186 | 2 | 9  | 18 | AT   | 15 | 3  |
| 339048 | 82 | 1178405 | 1178420 | 4 | 4  | 16 | AAAT | 8  | 5  |
| 339057 | 82 | 1190755 | 1190770 | 2 | 8  | 16 | TG   | 20 | 4  |
| 339063 | 82 | 1208145 | 1208160 | 4 | 4  | 16 | CAAA | 27 | 3  |
| 339068 | 82 | 1216930 | 1216943 | 2 | 7  | 14 | TA   | 24 | 3  |
| 339074 | 82 | 1245485 | 1245508 | 2 | 12 | 24 | GT   | 13 | 8  |
| 339075 | 82 | 1245559 | 1245570 | 2 | 6  | 12 | GT   | 26 | 5  |
| 339077 | 82 | 1246328 | 1246357 | 2 | 15 | 30 | CT   | 12 | 9  |
| 339078 | 82 | 1247847 | 1247862 | 2 | 8  | 16 | CA   | 21 | 5  |
| 339101 | 82 | 1305499 | 1305534 | 4 | 9  | 36 | CAAT | 23 | 6  |
| 339102 | 82 | 1310089 | 1310116 | 2 | 14 | 28 | GT   | 16 | 3  |
| 339104 | 82 | 1317826 | 1317841 | 4 | 4  | 16 | ATGG | 25 | 4  |
| 339105 | 82 | 1320051 | 1320076 | 2 | 13 | 26 | TG   | 12 | 5  |
| 339115 | 82 | 1339064 | 1339081 | 3 | 6  | 18 | AAT  | 22 | 3  |
| 339119 | 82 | 1346735 | 1346758 | 3 | 8  | 24 | CTC  | 23 | 3  |
| 339121 | 82 | 1356741 | 1356754 | 2 | 7  | 14 | CT   | 22 | 3  |
| 339124 | 82 | 1357605 | 1357619 | 3 | 5  | 15 | TCT  | 21 | 5  |

|        |    |         |         |   |    |    |      |    |    |
|--------|----|---------|---------|---|----|----|------|----|----|
| 339125 | 82 | 1357620 | 1357637 | 3 | 6  | 18 | GCT  | 25 | 7  |
| 339127 | 82 | 1359993 | 1360024 | 2 | 16 | 32 | GT   | 6  | 6  |
| 339130 | 82 | 1360336 | 1360350 | 3 | 5  | 15 | TGA  | 18 | 5  |
| 339147 | 82 | 1381781 | 1381798 | 3 | 6  | 18 | GTT  | 29 | 3  |
| 339149 | 82 | 1383795 | 1383808 | 2 | 7  | 14 | CA   | 14 | 5  |
| 339150 | 82 | 1383811 | 1383826 | 2 | 8  | 16 | CA   | 16 | 5  |
| 339152 | 82 | 1387718 | 1387737 | 2 | 10 | 20 | CA   | 16 | 5  |
| 339153 | 82 | 1387826 | 1387847 | 2 | 11 | 22 | CA   | 18 | 6  |
| 339156 | 82 | 1393889 | 1393906 | 2 | 9  | 18 | AG   | 19 | 3  |
| 339162 | 82 | 1400848 | 1400859 | 2 | 6  | 12 | AC   | 18 | 4  |
| 339168 | 82 | 1413588 | 1413609 | 2 | 11 | 22 | TG   | 10 | 10 |
| 339182 | 82 | 1430025 | 1430069 | 3 | 15 | 45 | TGA  | 22 | 8  |
| 339189 | 82 | 1441009 | 1441024 | 2 | 8  | 16 | GT   | 23 | 4  |
| 339195 | 82 | 1449032 | 1449059 | 2 | 14 | 28 | AC   | 13 | 5  |
| 339204 | 82 | 1463561 | 1463598 | 2 | 19 | 38 | CT   | 7  | 5  |
| 339208 | 82 | 1464964 | 1464997 | 2 | 17 | 34 | AC   | 10 | 4  |
| 339220 | 82 | 1471219 | 1471244 | 2 | 13 | 26 | CA   | 17 | 5  |
| 339225 | 82 | 1474573 | 1474592 | 2 | 10 | 20 | CA   | 11 | 5  |
| 339230 | 82 | 1478111 | 1478132 | 2 | 11 | 22 | AC   | 19 | 5  |
| 339237 | 82 | 1484790 | 1484813 | 2 | 12 | 24 | CA   | 19 | 5  |
| 339238 | 82 | 1487220 | 1487243 | 2 | 12 | 24 | CA   | 21 | 6  |
| 339239 | 82 | 1487370 | 1487393 | 2 | 12 | 24 | CA   | 11 | 4  |
| 339248 | 82 | 1498136 | 1498151 | 2 | 8  | 16 | TG   | 22 | 3  |
| 339258 | 82 | 1518815 | 1518830 | 2 | 8  | 16 | GT   | 26 | 6  |
| 339310 | 82 | 1588066 | 1588085 | 2 | 10 | 20 | AG   | 19 | 3  |
| 339319 | 82 | 1596628 | 1596641 | 2 | 7  | 14 | TG   | 23 | 4  |
| 339320 | 82 | 1596643 | 1596660 | 2 | 9  | 18 | GT   | 17 | 3  |
| 339321 | 82 | 1600875 | 1600894 | 2 | 10 | 20 | CA   | 17 | 6  |
| 339323 | 82 | 1601159 | 1601176 | 2 | 9  | 18 | TA   | 8  | 3  |
| 339325 | 82 | 1603003 | 1603026 | 2 | 12 | 24 | TG   | 19 | 5  |
| 339326 | 82 | 1603920 | 1603945 | 2 | 13 | 26 | TG   | 15 | 3  |
| 339329 | 82 | 1609128 | 1609151 | 2 | 12 | 24 | GT   | 26 | 5  |
| 339330 | 82 | 1610786 | 1610821 | 2 | 18 | 36 | AC   | 6  | 5  |
| 339331 | 82 | 1611378 | 1611413 | 4 | 9  | 36 | AGAT | 13 | 5  |
| 339332 | 82 | 1611646 | 1611675 | 2 | 15 | 30 | TG   | 7  | 6  |
| 339335 | 82 | 1614028 | 1614041 | 2 | 7  | 14 | TG   | 24 | 3  |
| 339336 | 82 | 1614069 | 1614080 | 2 | 6  | 12 | GT   | 23 | 3  |
| 339342 | 82 | 1623289 | 1623322 | 2 | 17 | 34 | AC   | 10 | 6  |
| 339345 | 82 | 1624712 | 1624725 | 2 | 7  | 14 | TG   | 22 | 3  |
| 339348 | 82 | 1625921 | 1625934 | 2 | 7  | 14 | AC   | 18 | 3  |
| 339349 | 82 | 1625958 | 1625973 | 2 | 8  | 16 | CA   | 22 | 6  |
| 339353 | 82 | 1630960 | 1630971 | 2 | 6  | 12 | GT   | 26 | 4  |
| 339355 | 82 | 1633378 | 1633398 | 3 | 7  | 21 | GAA  | 19 | 3  |
| 339360 | 82 | 1647487 | 1647500 | 2 | 7  | 14 | TG   | 24 | 4  |
| 339362 | 82 | 1648599 | 1648620 | 2 | 11 | 22 | TG   | 11 | 3  |
| 339367 | 82 | 1654838 | 1654863 | 2 | 13 | 26 | CA   | 14 | 13 |
| 339368 | 82 | 1658706 | 1658757 | 2 | 26 | 52 | AC   | 7  | 8  |
| 339369 | 82 | 1661992 | 1662015 | 3 | 8  | 24 | ATC  | 25 | 7  |
| 339375 | 82 | 1666950 | 1666973 | 3 | 8  | 24 | TTA  | 14 | 8  |
| 339378 | 82 | 1669905 | 1669936 | 2 | 16 | 32 | GT   | 16 | 4  |
| 339381 | 82 | 1680523 | 1680550 | 2 | 14 | 28 | AC   | 14 | 9  |

|        |    |         |         |   |    |    |      |    |    |
|--------|----|---------|---------|---|----|----|------|----|----|
| 339383 | 82 | 1680986 | 1681017 | 2 | 16 | 32 | AC   | 13 | 4  |
| 339385 | 82 | 1684050 | 1684089 | 2 | 20 | 40 | TG   | 12 | 6  |
| 339386 | 82 | 1684277 | 1684294 | 2 | 9  | 18 | GT   | 25 | 3  |
| 339389 | 82 | 1692859 | 1692878 | 4 | 5  | 20 | ATCC | 29 | 4  |
| 339390 | 82 | 1699402 | 1699459 | 2 | 29 | 58 | CA   | 7  | 11 |
| 339415 | 82 | 1717490 | 1717511 | 2 | 11 | 22 | CA   | 14 | 6  |
| 339421 | 82 | 1725653 | 1725716 | 2 | 32 | 64 | AG   | 7  | 7  |
| 339438 | 82 | 1744380 | 1744391 | 2 | 6  | 12 | TC   | 11 | 3  |
| 339440 | 82 | 1745749 | 1745766 | 3 | 6  | 18 | TCC  | 18 | 3  |
| 339459 | 82 | 1771183 | 1771220 | 2 | 19 | 38 | AC   | 11 | 10 |
| 339462 | 82 | 1773005 | 1773028 | 2 | 12 | 24 | TG   | 6  | 4  |
| 339487 | 82 | 1810909 | 1810936 | 2 | 14 | 28 | CA   | 14 | 5  |
| 339500 | 82 | 1839810 | 1839841 | 2 | 16 | 32 | GT   | 15 | 7  |
| 339517 | 82 | 1896184 | 1896207 | 3 | 8  | 24 | TTA  | 8  | 3  |
| 339532 | 82 | 1940167 | 1940178 | 2 | 6  | 12 | GT   | 15 | 3  |
| 339565 | 82 | 2000343 | 2000376 | 2 | 17 | 34 | AC   | 15 | 6  |
| 339566 | 82 | 2003299 | 2003342 | 4 | 11 | 44 | GTGC | 27 | 9  |
| 339567 | 82 | 2003831 | 2003858 | 2 | 14 | 28 | AC   | 13 | 4  |
| 339585 | 82 | 2046568 | 2046595 | 2 | 14 | 28 | CA   | 13 | 5  |
| 339594 | 82 | 2060073 | 2060100 | 2 | 14 | 28 | AC   | 11 | 8  |
| 339596 | 82 | 2063363 | 2063418 | 4 | 14 | 56 | ATCT | 14 | 9  |
| 339597 | 82 | 2066723 | 2066754 | 2 | 16 | 32 | CT   | 7  | 7  |
| 339618 | 82 | 2101281 | 2101314 | 2 | 17 | 34 | GT   | 13 | 7  |
| 339624 | 82 | 2109867 | 2109878 | 2 | 6  | 12 | AC   | 23 | 3  |
| 339635 | 82 | 2146464 | 2146481 | 2 | 9  | 18 | AC   | 19 | 7  |
| 339642 | 82 | 2162038 | 2162057 | 2 | 10 | 20 | TG   | 17 | 5  |
| 339650 | 82 | 2197876 | 2197891 | 2 | 8  | 16 | CA   | 20 | 3  |
| 339652 | 82 | 2199932 | 2199965 | 2 | 17 | 34 | AG   | 14 | 7  |
| 339655 | 82 | 2218257 | 2218270 | 2 | 7  | 14 | GT   | 18 | 4  |
| 339665 | 82 | 2252876 | 2252913 | 2 | 19 | 38 | CA   | 11 | 10 |
| 339666 | 82 | 2254141 | 2254154 | 2 | 7  | 14 | AC   | 23 | 5  |
| 339671 | 82 | 2259335 | 2259394 | 4 | 15 | 60 | ATCT | 12 | 10 |
| 339673 | 82 | 2259878 | 2259893 | 2 | 8  | 16 | AT   | 6  | 5  |
| 339689 | 82 | 2278724 | 2278735 | 2 | 6  | 12 | TG   | 21 | 5  |
| 339692 | 82 | 2282997 | 2283010 | 2 | 7  | 14 | TG   | 23 | 7  |
| 339698 | 82 | 2300501 | 2300544 | 4 | 11 | 44 | GATT | 27 | 9  |
| 339703 | 82 | 2313041 | 2313056 | 2 | 8  | 16 | AT   | 14 | 5  |
| 339706 | 82 | 2315740 | 2315763 | 4 | 6  | 24 | TGAA | 25 | 3  |
| 339709 | 82 | 2318885 | 2318900 | 2 | 8  | 16 | CA   | 25 | 5  |
| 339710 | 82 | 2318981 | 2319000 | 2 | 10 | 20 | AC   | 28 | 3  |
| 339712 | 82 | 2321880 | 2321893 | 2 | 7  | 14 | GT   | 25 | 7  |
| 339713 | 82 | 2322234 | 2322247 | 2 | 7  | 14 | CA   | 18 | 5  |
| 339722 | 82 | 2348945 | 2348964 | 4 | 5  | 20 | GACA | 26 | 4  |
| 339726 | 82 | 2353641 | 2353658 | 2 | 9  | 18 | TG   | 25 | 4  |
| 339730 | 82 | 2365969 | 2365982 | 2 | 7  | 14 | AC   | 21 | 7  |
| 339731 | 82 | 2366040 | 2366077 | 2 | 19 | 38 | TG   | 17 | 8  |
| 339734 | 82 | 2381498 | 2381531 | 2 | 17 | 34 | AC   | 9  | 4  |
| 339736 | 82 | 2389910 | 2389959 | 2 | 25 | 50 | AC   | 12 | 10 |
| 339747 | 82 | 2412169 | 2412182 | 2 | 7  | 14 | CA   | 22 | 5  |
| 339748 | 82 | 2414250 | 2414267 | 2 | 9  | 18 | AC   | 24 | 3  |
| 339751 | 83 | 4735    | 4748    | 2 | 7  | 14 | AT   | 18 | 5  |

|        |    |        |        |   |    |    |      |    |    |
|--------|----|--------|--------|---|----|----|------|----|----|
| 339752 | 83 | 4749   | 4762   | 2 | 7  | 14 | GT   | 19 | 3  |
| 339763 | 83 | 36291  | 36328  | 2 | 19 | 38 | GT   | 10 | 9  |
| 339770 | 83 | 41060  | 41097  | 2 | 19 | 38 | CA   | 18 | 17 |
| 339773 | 83 | 45782  | 45796  | 3 | 5  | 15 | CAT  | 7  | 3  |
| 339778 | 83 | 49019  | 49030  | 2 | 6  | 12 | CA   | 7  | 7  |
| 339781 | 83 | 49425  | 49442  | 2 | 9  | 18 | CA   | 7  | 8  |
| 339782 | 83 | 49491  | 49522  | 2 | 16 | 32 | TG   | 6  | 10 |
| 339791 | 83 | 58664  | 58691  | 2 | 14 | 28 | GT   | 16 | 9  |
| 339792 | 83 | 61559  | 61594  | 2 | 18 | 36 | TG   | 11 | 6  |
| 339793 | 83 | 62440  | 62471  | 2 | 16 | 32 | CA   | 20 | 16 |
| 339794 | 83 | 62581  | 62598  | 2 | 9  | 18 | GT   | 19 | 10 |
| 339795 | 83 | 62749  | 62762  | 2 | 7  | 14 | AC   | 24 | 3  |
| 339796 | 83 | 62765  | 62776  | 2 | 6  | 12 | AC   | 26 | 3  |
| 339797 | 83 | 64346  | 64369  | 2 | 12 | 24 | AC   | 14 | 5  |
| 339814 | 83 | 87209  | 87220  | 2 | 6  | 12 | AC   | 23 | 6  |
| 339816 | 83 | 89096  | 89111  | 2 | 8  | 16 | TG   | 8  | 9  |
| 339828 | 83 | 103691 | 103716 | 2 | 13 | 26 | GT   | 14 | 9  |
| 339829 | 83 | 103808 | 103821 | 2 | 7  | 14 | AC   | 22 | 4  |
| 339830 | 83 | 103824 | 103837 | 2 | 7  | 14 | AC   | 19 | 5  |
| 339832 | 83 | 113653 | 113686 | 2 | 17 | 34 | TG   | 8  | 7  |
| 339833 | 83 | 113838 | 113877 | 4 | 10 | 40 | CTGT | 22 | 8  |
| 339836 | 83 | 120482 | 120509 | 2 | 14 | 28 | TG   | 17 | 10 |
| 339842 | 83 | 125448 | 125463 | 2 | 8  | 16 | AC   | 24 | 3  |
| 339843 | 83 | 126111 | 126146 | 2 | 18 | 36 | GT   | 11 | 8  |
| 339854 | 83 | 130296 | 130322 | 3 | 9  | 27 | TCA  | 27 | 9  |
| 339859 | 83 | 132004 | 132033 | 2 | 15 | 30 | TG   | 18 | 6  |
| 339864 | 83 | 133460 | 133493 | 2 | 17 | 34 | TG   | 13 | 10 |
| 339865 | 83 | 133628 | 133657 | 2 | 15 | 30 | CA   | 16 | 11 |
| 339869 | 83 | 141536 | 141551 | 2 | 8  | 16 | TA   | 19 | 6  |
| 339880 | 83 | 190541 | 190560 | 4 | 5  | 20 | TTAG | 25 | 5  |
| 339882 | 83 | 210924 | 210951 | 4 | 7  | 28 | TATC | 8  | 5  |
| 339889 | 83 | 229109 | 229124 | 4 | 4  | 16 | AATA | 33 | 3  |
| 339896 | 83 | 255191 | 255218 | 2 | 14 | 28 | GT   | 20 | 12 |
| 339905 | 83 | 329213 | 329250 | 2 | 19 | 38 | TG   | 7  | 7  |
| 339906 | 83 | 332922 | 332936 | 3 | 5  | 15 | CCT  | 14 | 3  |
| 339920 | 83 | 338497 | 338532 | 2 | 18 | 36 | AC   | 7  | 6  |
| 339922 | 83 | 338650 | 338663 | 2 | 7  | 14 | CA   | 11 | 4  |
| 339927 | 83 | 340972 | 340995 | 2 | 12 | 24 | GT   | 19 | 8  |
| 339933 | 83 | 346258 | 346283 | 2 | 13 | 26 | TG   | 13 | 11 |
| 339934 | 83 | 347807 | 347818 | 2 | 6  | 12 | CA   | 26 | 3  |
| 339935 | 83 | 348582 | 348602 | 3 | 7  | 21 | GAG  | 15 | 3  |
| 339936 | 83 | 348657 | 348678 | 2 | 11 | 22 | GT   | 7  | 4  |
| 339937 | 83 | 350989 | 351018 | 2 | 15 | 30 | TG   | 14 | 7  |
| 339939 | 83 | 354080 | 354106 | 3 | 9  | 27 | TCA  | 24 | 6  |
| 339941 | 83 | 357888 | 357902 | 3 | 5  | 15 | CCT  | 27 | 3  |
| 339946 | 83 | 364618 | 364645 | 2 | 14 | 28 | CA   | 6  | 10 |
| 339947 | 83 | 366782 | 366797 | 2 | 8  | 16 | AC   | 32 | 5  |
| 339952 | 83 | 375499 | 375530 | 2 | 16 | 32 | CA   | 6  | 8  |
| 339953 | 83 | 375679 | 375718 | 2 | 20 | 40 | CA   | 11 | 16 |
| 339954 | 83 | 375853 | 375892 | 2 | 20 | 40 | AC   | 9  | 8  |
| 339957 | 83 | 380101 | 380136 | 2 | 18 | 36 | TG   | 9  | 9  |

|        |    |        |        |   |    |    |      |    |    |
|--------|----|--------|--------|---|----|----|------|----|----|
| 339958 | 83 | 380323 | 380354 | 4 | 8  | 32 | AGGA | 22 | 8  |
| 339966 | 83 | 384610 | 384627 | 2 | 9  | 18 | AC   | 7  | 4  |
| 339971 | 83 | 386021 | 386053 | 3 | 11 | 33 | GAA  | 21 | 11 |
| 339974 | 83 | 386453 | 386470 | 2 | 9  | 18 | TG   | 9  | 6  |
| 339976 | 83 | 388121 | 388154 | 2 | 17 | 34 | TG   | 7  | 8  |
| 339977 | 83 | 388246 | 388259 | 2 | 7  | 14 | TG   | 11 | 12 |
| 339978 | 83 | 388261 | 388272 | 2 | 6  | 12 | GT   | 14 | 15 |
| 339979 | 83 | 388938 | 388971 | 2 | 17 | 34 | GT   | 7  | 8  |
| 339984 | 83 | 390166 | 390181 | 2 | 8  | 16 | GT   | 6  | 4  |
| 339986 | 83 | 390284 | 390301 | 2 | 9  | 18 | AC   | 20 | 10 |
| 339987 | 83 | 400008 | 400019 | 2 | 6  | 12 | AG   | 32 | 5  |
| 339989 | 83 | 402673 | 402699 | 3 | 9  | 27 | GGA  | 8  | 3  |
| 339993 | 83 | 405305 | 405328 | 2 | 12 | 24 | GT   | 19 | 10 |
| 339995 | 83 | 405873 | 405894 | 2 | 11 | 22 | AC   | 22 | 7  |
| 340005 | 83 | 408644 | 408659 | 2 | 8  | 16 | GA   | 27 | 3  |
| 340019 | 83 | 422181 | 422195 | 3 | 5  | 15 | CTC  | 26 | 5  |
| 340020 | 83 | 423426 | 423455 | 2 | 15 | 30 | TG   | 12 | 7  |
| 340030 | 83 | 428638 | 428655 | 3 | 6  | 18 | GGA  | 19 | 3  |
| 340031 | 83 | 428722 | 428759 | 2 | 19 | 38 | AC   | 13 | 10 |
| 340035 | 83 | 430849 | 430874 | 2 | 13 | 26 | AG   | 15 | 6  |
| 340037 | 83 | 434476 | 434515 | 2 | 20 | 40 | CA   | 6  | 7  |
| 340038 | 83 | 434550 | 434579 | 2 | 15 | 30 | TG   | 9  | 8  |
| 340039 | 83 | 435391 | 435414 | 3 | 8  | 24 | AAT  | 23 | 6  |
| 340044 | 83 | 436880 | 436905 | 2 | 13 | 26 | GT   | 15 | 8  |
| 340045 | 83 | 437233 | 437244 | 2 | 6  | 12 | GT   | 19 | 7  |
| 340046 | 83 | 437246 | 437259 | 2 | 7  | 14 | TG   | 19 | 6  |
| 340047 | 83 | 437305 | 437318 | 2 | 7  | 14 | TG   | 22 | 6  |
| 340050 | 83 | 444485 | 444514 | 3 | 10 | 30 | AGA  | 22 | 8  |
| 340051 | 83 | 444649 | 444675 | 3 | 9  | 27 | TGA  | 16 | 3  |
| 340057 | 83 | 447507 | 447536 | 2 | 15 | 30 | AC   | 7  | 8  |
| 340058 | 83 | 447858 | 447895 | 2 | 19 | 38 | GT   | 12 | 9  |
| 340069 | 83 | 455891 | 455922 | 2 | 16 | 32 | AC   | 7  | 9  |
| 340070 | 83 | 455948 | 455973 | 2 | 13 | 26 | AC   | 11 | 6  |
| 340071 | 83 | 456143 | 456190 | 2 | 24 | 48 | CA   | 7  | 9  |
| 340072 | 83 | 456317 | 456340 | 2 | 12 | 24 | CA   | 23 | 5  |
| 340074 | 83 | 461591 | 461617 | 3 | 9  | 27 | CTC  | 15 | 10 |
| 340078 | 83 | 465426 | 465447 | 2 | 11 | 22 | CA   | 19 | 7  |
| 340079 | 83 | 465476 | 465531 | 2 | 28 | 56 | TG   | 8  | 8  |
| 340080 | 83 | 467171 | 467206 | 3 | 12 | 36 | CAT  | 26 | 6  |
| 340081 | 83 | 468295 | 468340 | 2 | 23 | 46 | CA   | 11 | 11 |
| 340090 | 83 | 471985 | 471996 | 2 | 6  | 12 | CA   | 9  | 5  |
| 340098 | 83 | 473454 | 473487 | 2 | 17 | 34 | TG   | 10 | 11 |
| 340099 | 83 | 474930 | 474949 | 4 | 5  | 20 | CGAC | 22 | 4  |
| 340103 | 83 | 475153 | 475168 | 2 | 8  | 16 | CT   | 8  | 8  |
| 340104 | 83 | 475369 | 475386 | 3 | 6  | 18 | GAG  | 25 | 3  |
| 340107 | 83 | 477852 | 477879 | 2 | 14 | 28 | TG   | 7  | 8  |
| 340110 | 83 | 480250 | 480279 | 2 | 15 | 30 | AC   | 11 | 8  |
| 340114 | 83 | 484146 | 484163 | 2 | 9  | 18 | CT   | 17 | 16 |
| 340115 | 83 | 487373 | 487400 | 2 | 14 | 28 | GT   | 19 | 12 |
| 340117 | 83 | 488751 | 488765 | 3 | 5  | 15 | ATC  | 28 | 3  |
| 340123 | 83 | 495289 | 495318 | 2 | 15 | 30 | GT   | 17 | 13 |

|        |    |        |        |   |    |    |      |    |    |
|--------|----|--------|--------|---|----|----|------|----|----|
| 340132 | 83 | 507462 | 507481 | 2 | 10 | 20 | AC   | 22 | 8  |
| 340137 | 83 | 508283 | 508312 | 2 | 15 | 30 | GT   | 22 | 8  |
| 340141 | 83 | 512309 | 512332 | 3 | 8  | 24 | TGA  | 26 | 4  |
| 340144 | 83 | 513347 | 513372 | 2 | 13 | 26 | CA   | 11 | 12 |
| 340149 | 83 | 516980 | 517027 | 2 | 24 | 48 | TG   | 6  | 9  |
| 340150 | 83 | 518077 | 518106 | 2 | 15 | 30 | TG   | 13 | 13 |
| 340153 | 83 | 519257 | 519280 | 2 | 12 | 24 | AC   | 15 | 6  |
| 340154 | 83 | 520562 | 520607 | 2 | 23 | 46 | TG   | 7  | 11 |
| 340167 | 83 | 524360 | 524393 | 2 | 17 | 34 | CA   | 13 | 7  |
| 340168 | 83 | 524534 | 524557 | 2 | 12 | 24 | GT   | 18 | 6  |
| 340174 | 83 | 526725 | 526764 | 2 | 20 | 40 | GT   | 12 | 13 |
| 340180 | 83 | 528480 | 528517 | 2 | 19 | 38 | GT   | 11 | 12 |
| 340181 | 83 | 529589 | 529632 | 2 | 22 | 44 | TG   | 6  | 8  |
| 340182 | 83 | 531379 | 531414 | 2 | 18 | 36 | AC   | 14 | 14 |
| 340196 | 83 | 538337 | 538378 | 3 | 14 | 42 | TCT  | 19 | 6  |
| 340197 | 83 | 538531 | 538552 | 2 | 11 | 22 | TG   | 12 | 16 |
| 340199 | 83 | 538662 | 538685 | 2 | 12 | 24 | TG   | 7  | 10 |
| 340206 | 83 | 545359 | 545388 | 3 | 10 | 30 | AGG  | 21 | 9  |
| 340210 | 83 | 564071 | 564090 | 2 | 10 | 20 | GT   | 17 | 14 |
| 340212 | 83 | 565494 | 565509 | 2 | 8  | 16 | GT   | 24 | 11 |
| 340214 | 83 | 571710 | 571736 | 3 | 9  | 27 | CAA  | 6  | 7  |
| 340216 | 83 | 571829 | 571846 | 3 | 6  | 18 | TTG  | 12 | 4  |
| 340220 | 83 | 573652 | 573691 | 2 | 20 | 40 | AC   | 10 | 9  |
| 340237 | 83 | 604176 | 604193 | 2 | 9  | 18 | AC   | 28 | 4  |
| 340238 | 83 | 608454 | 608469 | 2 | 8  | 16 | GT   | 18 | 9  |
| 340239 | 83 | 608588 | 608615 | 2 | 14 | 28 | GT   | 15 | 6  |
| 340240 | 83 | 609411 | 609428 | 2 | 9  | 18 | GT   | 22 | 11 |
| 340243 | 83 | 612393 | 612426 | 2 | 17 | 34 | AC   | 12 | 11 |
| 340247 | 83 | 616907 | 616930 | 4 | 6  | 24 | GTTT | 18 | 3  |
| 340250 | 83 | 618121 | 618158 | 2 | 19 | 38 | TG   | 18 | 10 |
| 340273 | 83 | 642863 | 642892 | 2 | 15 | 30 | GT   | 11 | 7  |
| 340274 | 83 | 643002 | 643031 | 2 | 15 | 30 | AC   | 17 | 7  |
| 340278 | 83 | 644145 | 644158 | 2 | 7  | 14 | CA   | 10 | 16 |
| 340279 | 83 | 644161 | 644178 | 2 | 9  | 18 | CA   | 13 | 17 |
| 340291 | 83 | 646392 | 646407 | 2 | 8  | 16 | TG   | 13 | 6  |
| 340305 | 83 | 648514 | 648537 | 4 | 6  | 24 | CAGA | 6  | 7  |
| 340306 | 83 | 648722 | 648739 | 2 | 9  | 18 | AC   | 9  | 9  |
| 340329 | 83 | 657803 | 657828 | 2 | 13 | 26 | GA   | 26 | 6  |
| 340345 | 83 | 670088 | 670119 | 2 | 16 | 32 | AG   | 22 | 13 |
| 340349 | 83 | 674589 | 674612 | 2 | 12 | 24 | AC   | 21 | 9  |
| 340354 | 83 | 678990 | 679009 | 2 | 10 | 20 | TG   | 21 | 8  |
| 340355 | 83 | 679166 | 679191 | 2 | 13 | 26 | TG   | 12 | 11 |
| 340358 | 83 | 682926 | 682943 | 2 | 9  | 18 | AC   | 13 | 9  |
| 340363 | 83 | 688615 | 688654 | 2 | 20 | 40 | GT   | 8  | 12 |
| 340364 | 83 | 689861 | 689882 | 2 | 11 | 22 | GT   | 14 | 8  |
| 340365 | 83 | 691498 | 691521 | 3 | 8  | 24 | TGA  | 24 | 6  |
| 340372 | 83 | 715008 | 715037 | 3 | 10 | 30 | TCT  | 21 | 6  |
| 340380 | 83 | 727672 | 727695 | 3 | 8  | 24 | GGA  | 26 | 5  |
| 340382 | 83 | 729362 | 729377 | 2 | 8  | 16 | TG   | 25 | 4  |
| 340383 | 83 | 729561 | 729590 | 3 | 10 | 30 | GAT  | 28 | 6  |
| 340386 | 83 | 730822 | 730843 | 2 | 11 | 22 | GT   | 19 | 6  |

|        |    |        |        |   |    |    |      |    |    |
|--------|----|--------|--------|---|----|----|------|----|----|
| 340389 | 83 | 739449 | 739462 | 2 | 7  | 14 | TG   | 28 | 4  |
| 340392 | 83 | 740326 | 740343 | 2 | 9  | 18 | AC   | 18 | 8  |
| 340393 | 83 | 742344 | 742377 | 2 | 17 | 34 | CA   | 17 | 14 |
| 340394 | 83 | 743106 | 743155 | 2 | 25 | 50 | CA   | 8  | 10 |
| 340395 | 83 | 744785 | 744808 | 2 | 12 | 24 | TG   | 18 | 13 |
| 340396 | 83 | 744950 | 744975 | 2 | 13 | 26 | TG   | 14 | 9  |
| 340397 | 83 | 745348 | 745381 | 2 | 17 | 34 | GT   | 15 | 12 |
| 340399 | 83 | 746075 | 746101 | 3 | 9  | 27 | TCT  | 6  | 5  |
| 340400 | 83 | 747004 | 747037 | 2 | 17 | 34 | CA   | 12 | 12 |
| 340401 | 83 | 747558 | 747581 | 3 | 8  | 24 | GAG  | 23 | 3  |
| 340403 | 83 | 752011 | 752024 | 2 | 7  | 14 | TA   | 11 | 4  |
| 340404 | 83 | 753712 | 753749 | 2 | 19 | 38 | TG   | 10 | 14 |
| 340406 | 83 | 753990 | 754025 | 2 | 18 | 36 | TG   | 10 | 11 |
| 340408 | 83 | 754078 | 754095 | 2 | 9  | 18 | GT   | 8  | 3  |
| 340413 | 83 | 757740 | 757769 | 2 | 15 | 30 | AC   | 9  | 10 |
| 340414 | 83 | 757847 | 757862 | 2 | 8  | 16 | CA   | 7  | 6  |
| 340417 | 83 | 760896 | 760941 | 2 | 23 | 46 | GT   | 8  | 7  |
| 340418 | 83 | 762110 | 762145 | 2 | 18 | 36 | TG   | 8  | 7  |
| 340420 | 83 | 763789 | 763804 | 2 | 8  | 16 | GA   | 18 | 5  |
| 340421 | 83 | 764004 | 764021 | 3 | 6  | 18 | AGG  | 28 | 12 |
| 340434 | 83 | 765601 | 765614 | 2 | 7  | 14 | CA   | 9  | 5  |
| 340435 | 83 | 765617 | 765630 | 2 | 7  | 14 | CA   | 8  | 4  |
| 340436 | 83 | 767071 | 767112 | 2 | 21 | 42 | TG   | 11 | 9  |
| 340437 | 83 | 768006 | 768035 | 3 | 10 | 30 | AGG  | 28 | 8  |
| 340438 | 83 | 768566 | 768595 | 2 | 15 | 30 | GT   | 16 | 13 |
| 340442 | 83 | 770970 | 771009 | 2 | 20 | 40 | AC   | 8  | 10 |
| 340445 | 83 | 771254 | 771283 | 2 | 15 | 30 | GT   | 6  | 11 |
| 340446 | 83 | 771881 | 771910 | 2 | 15 | 30 | AC   | 13 | 9  |
| 340447 | 83 | 772207 | 772232 | 2 | 13 | 26 | GT   | 18 | 5  |
| 340450 | 83 | 772742 | 772768 | 3 | 9  | 27 | GAG  | 13 | 8  |
| 340454 | 83 | 775708 | 775727 | 2 | 10 | 20 | AC   | 11 | 8  |
| 340457 | 83 | 776096 | 776121 | 2 | 13 | 26 | CA   | 11 | 9  |
| 340458 | 83 | 776178 | 776189 | 2 | 6  | 12 | GA   | 27 | 3  |
| 340459 | 83 | 776223 | 776242 | 2 | 10 | 20 | TG   | 24 | 9  |
| 340460 | 83 | 776387 | 776410 | 4 | 6  | 24 | TGTT | 23 | 3  |
| 340461 | 83 | 776811 | 776828 | 2 | 9  | 18 | GT   | 25 | 7  |
| 340466 | 83 | 777391 | 777420 | 2 | 15 | 30 | CA   | 8  | 8  |
| 340467 | 83 | 777569 | 777592 | 2 | 12 | 24 | AC   | 14 | 9  |
| 340468 | 83 | 777747 | 777778 | 2 | 16 | 32 | TG   | 12 | 17 |
| 340469 | 83 | 777916 | 777951 | 2 | 18 | 36 | AC   | 14 | 16 |
| 340471 | 83 | 778220 | 778251 | 2 | 16 | 32 | TG   | 11 | 13 |
| 340473 | 83 | 778416 | 778437 | 2 | 11 | 22 | GT   | 14 | 11 |
| 340474 | 83 | 778599 | 778614 | 2 | 8  | 16 | GT   | 20 | 13 |
| 340479 | 83 | 779964 | 779990 | 3 | 9  | 27 | TCC  | 22 | 6  |
| 340480 | 83 | 780833 | 780848 | 2 | 8  | 16 | AC   | 20 | 6  |
| 340482 | 83 | 781290 | 781303 | 2 | 7  | 14 | CA   | 9  | 6  |
| 340485 | 83 | 783309 | 783335 | 3 | 9  | 27 | GAG  | 29 | 8  |
| 340487 | 83 | 783922 | 783936 | 3 | 5  | 15 | GGA  | 32 | 6  |
| 340490 | 83 | 788325 | 788362 | 2 | 19 | 38 | AC   | 8  | 9  |
| 340491 | 83 | 789866 | 789886 | 3 | 7  | 21 | ATG  | 25 | 7  |
| 340492 | 83 | 790514 | 790533 | 4 | 5  | 20 | CAGA | 27 | 14 |

|        |    |        |        |   |    |    |     |    |    |
|--------|----|--------|--------|---|----|----|-----|----|----|
| 340495 | 83 | 791699 | 791713 | 3 | 5  | 15 | TCC | 24 | 6  |
| 340496 | 83 | 792168 | 792230 | 3 | 21 | 63 | TCT | 13 | 14 |
| 340497 | 83 | 793362 | 793388 | 3 | 9  | 27 | CTC | 22 | 4  |
| 340498 | 83 | 793522 | 793542 | 3 | 7  | 21 | TCC | 25 | 3  |
| 340499 | 83 | 794368 | 794394 | 3 | 9  | 27 | AAT | 6  | 4  |
| 340500 | 83 | 796316 | 796333 | 2 | 9  | 18 | GT  | 21 | 10 |
| 340501 | 83 | 796388 | 796399 | 2 | 6  | 12 | AC  | 22 | 9  |
| 340505 | 83 | 801179 | 801214 | 2 | 18 | 36 | GT  | 17 | 17 |
| 340506 | 83 | 801615 | 801634 | 2 | 10 | 20 | CA  | 16 | 7  |
| 340508 | 83 | 803368 | 803413 | 2 | 23 | 46 | GT  | 11 | 11 |
| 340509 | 83 | 804960 | 805011 | 2 | 26 | 52 | CA  | 10 | 11 |
| 340510 | 83 | 806497 | 806517 | 3 | 7  | 21 | TCT | 31 | 6  |
| 340530 | 83 | 815402 | 815429 | 2 | 14 | 28 | GT  | 10 | 4  |
| 340531 | 83 | 819257 | 819296 | 2 | 20 | 40 | AC  | 9  | 16 |
| 340532 | 83 | 819442 | 819495 | 3 | 18 | 54 | CTT | 17 | 15 |
| 340535 | 83 | 824653 | 824678 | 2 | 13 | 26 | CA  | 21 | 9  |
| 340537 | 83 | 827146 | 827185 | 2 | 20 | 40 | TG  | 9  | 12 |
| 340538 | 83 | 828017 | 828036 | 2 | 10 | 20 | AG  | 21 | 8  |
| 340542 | 83 | 835054 | 835075 | 2 | 11 | 22 | GT  | 13 | 10 |
| 340543 | 83 | 835779 | 835796 | 3 | 6  | 18 | TCC | 10 | 7  |
| 340553 | 83 | 837528 | 837542 | 3 | 5  | 15 | GAA | 8  | 7  |
| 340555 | 83 | 837739 | 837774 | 2 | 18 | 36 | CA  | 7  | 9  |
| 340556 | 83 | 837983 | 837994 | 2 | 6  | 12 | AC  | 27 | 3  |
| 340557 | 83 | 838334 | 838369 | 2 | 18 | 36 | TG  | 14 | 8  |
| 340568 | 83 | 842179 | 842208 | 3 | 10 | 30 | GAA | 21 | 4  |
| 340569 | 83 | 843136 | 843171 | 2 | 18 | 36 | CA  | 7  | 7  |
| 340571 | 83 | 844469 | 844498 | 2 | 15 | 30 | AC  | 8  | 6  |
| 340573 | 83 | 844800 | 844821 | 2 | 11 | 22 | TG  | 22 | 10 |
| 340574 | 83 | 845355 | 845376 | 2 | 11 | 22 | TG  | 15 | 8  |
| 340578 | 83 | 847432 | 847449 | 3 | 6  | 18 | TTC | 19 | 4  |
| 340579 | 83 | 847758 | 847781 | 2 | 12 | 24 | TG  | 23 | 6  |
| 340580 | 83 | 850069 | 850082 | 2 | 7  | 14 | TG  | 25 | 4  |
| 340581 | 83 | 850173 | 850186 | 2 | 7  | 14 | TG  | 27 | 3  |
| 340582 | 83 | 850309 | 850338 | 2 | 15 | 30 | GT  | 8  | 8  |
| 340583 | 83 | 850919 | 850981 | 3 | 21 | 63 | CTT | 14 | 14 |
| 340584 | 83 | 851364 | 851408 | 3 | 15 | 45 | AGA | 12 | 13 |
| 340587 | 83 | 853009 | 853052 | 2 | 22 | 44 | CA  | 7  | 9  |
| 340590 | 83 | 854129 | 854156 | 2 | 14 | 28 | GT  | 15 | 6  |
| 340592 | 83 | 855724 | 855759 | 2 | 18 | 36 | TG  | 16 | 16 |
| 340593 | 83 | 855807 | 855828 | 2 | 11 | 22 | TG  | 19 | 8  |
| 340594 | 83 | 855885 | 855904 | 2 | 10 | 20 | TG  | 27 | 8  |
| 340595 | 83 | 856455 | 856470 | 2 | 8  | 16 | CA  | 23 | 8  |
| 340596 | 83 | 857311 | 857342 | 2 | 16 | 32 | GT  | 14 | 8  |
| 340601 | 83 | 859537 | 859566 | 2 | 15 | 30 | TG  | 14 | 7  |
| 340602 | 83 | 859600 | 859623 | 3 | 8  | 24 | AAG | 21 | 11 |
| 340603 | 83 | 860664 | 860689 | 2 | 13 | 26 | AC  | 12 | 14 |
| 340604 | 83 | 860784 | 860817 | 2 | 17 | 34 | AC  | 11 | 13 |
| 340605 | 83 | 860859 | 860872 | 2 | 7  | 14 | AC  | 18 | 7  |
| 340606 | 83 | 860877 | 860890 | 2 | 7  | 14 | AC  | 21 | 7  |
| 340612 | 83 | 861715 | 861742 | 2 | 14 | 28 | TG  | 15 | 7  |
| 340634 | 83 | 869489 | 869503 | 3 | 5  | 15 | CTC | 17 | 4  |



|        |    |         |         |   |    |    |      |    |    |
|--------|----|---------|---------|---|----|----|------|----|----|
| 340636 | 83 | 869909  | 869952  | 4 | 11 | 44 | TATC | 16 | 7  |
| 340637 | 83 | 870913  | 870938  | 2 | 13 | 26 | TG   | 20 | 14 |
| 340638 | 83 | 871025  | 871050  | 2 | 13 | 26 | AC   | 9  | 4  |
| 340639 | 83 | 871703  | 871718  | 2 | 8  | 16 | TG   | 22 | 5  |
| 340640 | 83 | 871776  | 871799  | 2 | 12 | 24 | TG   | 12 | 14 |
| 340656 | 83 | 874294  | 874317  | 3 | 8  | 24 | AGA  | 11 | 3  |
| 340667 | 83 | 878921  | 878936  | 2 | 8  | 16 | GT   | 10 | 5  |
| 340670 | 83 | 879065  | 879088  | 2 | 12 | 24 | CA   | 13 | 19 |
| 340673 | 83 | 879316  | 879341  | 2 | 13 | 26 | CT   | 9  | 13 |
| 340676 | 83 | 881644  | 881655  | 2 | 6  | 12 | CA   | 26 | 4  |
| 340677 | 83 | 881815  | 881848  | 2 | 17 | 34 | CA   | 8  | 9  |
| 340698 | 83 | 886412  | 886443  | 2 | 16 | 32 | GT   | 6  | 8  |
| 340711 | 83 | 890162  | 890201  | 2 | 20 | 40 | TG   | 9  | 12 |
| 340712 | 83 | 890616  | 890636  | 3 | 7  | 21 | GCA  | 21 | 4  |
| 340713 | 83 | 891715  | 891746  | 2 | 16 | 32 | TG   | 9  | 11 |
| 340714 | 83 | 891792  | 891806  | 3 | 5  | 15 | AGC  | 26 | 3  |
| 340715 | 83 | 891872  | 891905  | 2 | 17 | 34 | GT   | 16 | 10 |
| 340718 | 83 | 894232  | 894271  | 2 | 20 | 40 | TG   | 9  | 11 |
| 340728 | 83 | 904302  | 904343  | 3 | 14 | 42 | CCT  | 17 | 8  |
| 340729 | 83 | 907633  | 907672  | 4 | 10 | 40 | ATCA | 22 | 10 |
| 340730 | 83 | 909047  | 909058  | 2 | 6  | 12 | GT   | 19 | 3  |
| 340731 | 83 | 909071  | 909082  | 2 | 6  | 12 | GT   | 21 | 6  |
| 340737 | 83 | 927202  | 927221  | 2 | 10 | 20 | GT   | 22 | 5  |
| 340738 | 83 | 927273  | 927284  | 2 | 6  | 12 | TG   | 25 | 3  |
| 340744 | 83 | 943315  | 943329  | 3 | 5  | 15 | GTT  | 30 | 3  |
| 340747 | 83 | 949526  | 949549  | 4 | 6  | 24 | AAAC | 25 | 4  |
| 340752 | 83 | 958366  | 958401  | 4 | 9  | 36 | AGAT | 20 | 13 |
| 340753 | 83 | 958824  | 958873  | 2 | 25 | 50 | AC   | 14 | 18 |
| 340754 | 83 | 960508  | 960549  | 2 | 21 | 42 | AC   | 19 | 16 |
| 340755 | 83 | 961657  | 961668  | 2 | 6  | 12 | AC   | 15 | 15 |
| 340756 | 83 | 961670  | 961681  | 2 | 6  | 12 | CA   | 13 | 11 |
| 340759 | 83 | 962857  | 962886  | 2 | 15 | 30 | TG   | 10 | 7  |
| 340767 | 83 | 969502  | 969529  | 2 | 14 | 28 | TG   | 9  | 13 |
| 340768 | 83 | 970152  | 970163  | 2 | 6  | 12 | AC   | 25 | 7  |
| 340782 | 83 | 976999  | 977025  | 3 | 9  | 27 | TGA  | 8  | 6  |
| 340783 | 83 | 978219  | 978233  | 3 | 5  | 15 | GCT  | 29 | 3  |
| 340787 | 83 | 979592  | 979621  | 3 | 10 | 30 | TCT  | 17 | 17 |
| 340788 | 83 | 979958  | 980019  | 2 | 31 | 62 | CA   | 6  | 8  |
| 340789 | 83 | 980494  | 980511  | 2 | 9  | 18 | TA   | 9  | 4  |
| 340791 | 83 | 980538  | 980549  | 2 | 6  | 12 | TA   | 18 | 4  |
| 340823 | 83 | 1000644 | 1000671 | 2 | 14 | 28 | CA   | 16 | 5  |
| 340824 | 83 | 1002139 | 1002162 | 3 | 8  | 24 | TCC  | 16 | 4  |
| 340825 | 83 | 1007743 | 1007758 | 2 | 8  | 16 | AC   | 25 | 6  |
| 340828 | 83 | 1011697 | 1011732 | 2 | 18 | 36 | GT   | 7  | 9  |
| 340832 | 83 | 1020038 | 1020063 | 2 | 13 | 26 | CA   | 17 | 12 |
| 340836 | 83 | 1026216 | 1026239 | 3 | 8  | 24 | TCT  | 18 | 5  |
| 340837 | 83 | 1026778 | 1026792 | 3 | 5  | 15 | GAA  | 12 | 10 |
| 340838 | 83 | 1027528 | 1027557 | 2 | 15 | 30 | GT   | 16 | 14 |
| 340839 | 83 | 1027700 | 1027717 | 3 | 6  | 18 | GGA  | 14 | 11 |
| 340840 | 83 | 1028046 | 1028069 | 2 | 12 | 24 | TG   | 23 | 6  |
| 340847 | 83 | 1028861 | 1028886 | 2 | 13 | 26 | TG   | 20 | 5  |

|        |    |         |         |   |    |    |      |    |    |
|--------|----|---------|---------|---|----|----|------|----|----|
| 340855 | 83 | 1031229 | 1031254 | 2 | 13 | 26 | GT   | 17 | 9  |
| 340856 | 83 | 1032000 | 1032011 | 2 | 6  | 12 | AG   | 16 | 12 |
| 340857 | 83 | 1032664 | 1032701 | 2 | 19 | 38 | GT   | 16 | 14 |
| 340859 | 83 | 1033494 | 1033517 | 3 | 8  | 24 | AGA  | 10 | 9  |
| 340860 | 83 | 1033841 | 1033878 | 2 | 19 | 38 | CA   | 18 | 10 |
| 340861 | 83 | 1034501 | 1034534 | 2 | 17 | 34 | AC   | 13 | 14 |
| 340863 | 83 | 1037855 | 1037866 | 2 | 6  | 12 | AG   | 28 | 7  |
| 340865 | 83 | 1039637 | 1039648 | 2 | 6  | 12 | AG   | 10 | 3  |
| 340866 | 83 | 1039704 | 1039733 | 2 | 15 | 30 | TG   | 11 | 10 |
| 340867 | 83 | 1042996 | 1043035 | 2 | 20 | 40 | AC   | 8  | 12 |
| 340869 | 83 | 1048944 | 1048977 | 2 | 17 | 34 | CA   | 12 | 11 |
| 340879 | 83 | 1061349 | 1061372 | 2 | 12 | 24 | AC   | 14 | 11 |
| 340882 | 83 | 1067865 | 1067886 | 2 | 11 | 22 | AC   | 11 | 7  |
| 340883 | 83 | 1067918 | 1067939 | 2 | 11 | 22 | GT   | 12 | 8  |
| 340887 | 83 | 1069434 | 1069451 | 3 | 6  | 18 | ATT  | 13 | 7  |
| 340888 | 83 | 1071106 | 1071126 | 3 | 7  | 21 | GAG  | 9  | 3  |
| 340889 | 83 | 1072162 | 1072179 | 2 | 9  | 18 | CA   | 13 | 12 |
| 340890 | 83 | 1073472 | 1073527 | 2 | 28 | 56 | TG   | 9  | 9  |
| 340892 | 83 | 1073682 | 1073701 | 2 | 10 | 20 | TG   | 11 | 13 |
| 340893 | 83 | 1073817 | 1073856 | 2 | 20 | 40 | TG   | 17 | 15 |
| 340897 | 83 | 1079027 | 1079059 | 3 | 11 | 33 | GAG  | 16 | 9  |
| 340898 | 83 | 1080895 | 1080918 | 3 | 8  | 24 | GGA  | 10 | 7  |
| 340900 | 83 | 1081663 | 1081682 | 4 | 5  | 20 | CATT | 14 | 7  |
| 340901 | 83 | 1081725 | 1081748 | 3 | 8  | 24 | GAG  | 22 | 13 |
| 340902 | 83 | 1081864 | 1081884 | 3 | 7  | 21 | GGA  | 15 | 7  |
| 340904 | 83 | 1082829 | 1082872 | 4 | 11 | 44 | ATCC | 10 | 7  |
| 340905 | 83 | 1082940 | 1082955 | 2 | 8  | 16 | CT   | 21 | 14 |
| 340908 | 83 | 1088483 | 1088496 | 2 | 7  | 14 | TG   | 10 | 5  |
| 340922 | 83 | 1102153 | 1102170 | 3 | 6  | 18 | GGA  | 30 | 3  |
| 340927 | 83 | 1112816 | 1112848 | 3 | 11 | 33 | TGA  | 16 | 9  |
| 340933 | 83 | 1114826 | 1114859 | 2 | 17 | 34 | TG   | 10 | 7  |
| 340934 | 83 | 1114977 | 1115008 | 2 | 16 | 32 | AC   | 16 | 11 |
| 340935 | 83 | 1115386 | 1115415 | 2 | 15 | 30 | TG   | 21 | 13 |
| 340945 | 83 | 1125872 | 1125889 | 2 | 9  | 18 | AG   | 20 | 9  |
| 340956 | 83 | 1132532 | 1132543 | 2 | 6  | 12 | TC   | 30 | 3  |
| 340957 | 83 | 1135298 | 1135321 | 2 | 12 | 24 | GT   | 13 | 8  |
| 340959 | 83 | 1139387 | 1139414 | 2 | 14 | 28 | GT   | 13 | 11 |
| 340973 | 83 | 1145752 | 1145787 | 2 | 18 | 36 | AC   | 7  | 8  |
| 341000 | 83 | 1161117 | 1161136 | 2 | 10 | 20 | AC   | 9  | 5  |
| 341002 | 83 | 1161239 | 1161264 | 2 | 13 | 26 | GT   | 19 | 6  |
| 341004 | 83 | 1164272 | 1164293 | 2 | 11 | 22 | AC   | 25 | 8  |
| 341005 | 83 | 1164338 | 1164359 | 2 | 11 | 22 | GT   | 26 | 11 |
| 341008 | 83 | 1167814 | 1167839 | 2 | 13 | 26 | GT   | 19 | 6  |
| 341020 | 83 | 1175720 | 1175739 | 2 | 10 | 20 | AC   | 6  | 5  |
| 341025 | 83 | 1180485 | 1180516 | 2 | 16 | 32 | GT   | 7  | 10 |
| 341028 | 83 | 1181679 | 1181714 | 2 | 18 | 36 | GT   | 7  | 8  |
| 341029 | 83 | 1181823 | 1181854 | 2 | 16 | 32 | TG   | 8  | 11 |
| 341030 | 83 | 1181969 | 1182006 | 2 | 19 | 38 | GT   | 7  | 11 |
| 341031 | 83 | 1182462 | 1182499 | 2 | 19 | 38 | CA   | 8  | 10 |
| 341039 | 83 | 1188639 | 1188654 | 2 | 8  | 16 | TG   | 14 | 12 |
| 341040 | 83 | 1188857 | 1188874 | 2 | 9  | 18 | AC   | 13 | 6  |

|        |    |         |         |   |    |    |      |    |    |
|--------|----|---------|---------|---|----|----|------|----|----|
| 341045 | 83 | 1196409 | 1196429 | 3 | 7  | 21 | AGA  | 19 | 7  |
| 341049 | 83 | 1201033 | 1201080 | 2 | 24 | 48 | GT   | 8  | 13 |
| 341050 | 83 | 1201212 | 1201243 | 2 | 16 | 32 | GT   | 17 | 10 |
| 341051 | 83 | 1201280 | 1201297 | 2 | 9  | 18 | TG   | 17 | 4  |
| 341052 | 83 | 1202242 | 1202269 | 2 | 14 | 28 | TG   | 16 | 13 |
| 341053 | 83 | 1202414 | 1202437 | 2 | 12 | 24 | GT   | 12 | 8  |
| 341057 | 83 | 1206189 | 1206209 | 3 | 7  | 21 | TCT  | 19 | 5  |
| 341058 | 83 | 1206315 | 1206338 | 2 | 12 | 24 | CA   | 14 | 12 |
| 341060 | 83 | 1207625 | 1207648 | 2 | 12 | 24 | GT   | 16 | 10 |
| 341063 | 83 | 1208142 | 1208155 | 2 | 7  | 14 | GA   | 31 | 3  |
| 341065 | 83 | 1210894 | 1210913 | 2 | 10 | 20 | AC   | 19 | 5  |
| 341066 | 83 | 1211501 | 1211526 | 2 | 13 | 26 | CA   | 16 | 10 |
| 341067 | 83 | 1211557 | 1211576 | 2 | 10 | 20 | CA   | 21 | 6  |
| 341068 | 83 | 1211761 | 1211798 | 2 | 19 | 38 | GT   | 9  | 9  |
| 341069 | 83 | 1216001 | 1216024 | 2 | 12 | 24 | AC   | 17 | 7  |
| 341070 | 83 | 1217154 | 1217171 | 2 | 9  | 18 | AG   | 16 | 3  |
| 341071 | 83 | 1217457 | 1217480 | 3 | 8  | 24 | CTT  | 29 | 9  |
| 341081 | 83 | 1222901 | 1222921 | 3 | 7  | 21 | CCT  | 23 | 5  |
| 341083 | 83 | 1223200 | 1223223 | 2 | 12 | 24 | CA   | 7  | 8  |
| 341084 | 83 | 1223256 | 1223267 | 2 | 6  | 12 | AC   | 28 | 3  |
| 341085 | 83 | 1223330 | 1223399 | 2 | 35 | 70 | AC   | 8  | 11 |
| 341087 | 83 | 1223850 | 1223912 | 3 | 21 | 63 | CTT  | 16 | 12 |
| 341088 | 83 | 1225347 | 1225374 | 2 | 14 | 28 | TG   | 6  | 11 |
| 341093 | 83 | 1226558 | 1226575 | 2 | 9  | 18 | CT   | 9  | 8  |
| 341096 | 83 | 1227330 | 1227341 | 2 | 6  | 12 | GT   | 16 | 13 |
| 341110 | 83 | 1240830 | 1240845 | 4 | 4  | 16 | ACGG | 12 | 5  |
| 341111 | 83 | 1240881 | 1240920 | 2 | 20 | 40 | CT   | 9  | 10 |
| 341114 | 83 | 1241454 | 1241469 | 2 | 8  | 16 | GT   | 6  | 4  |
| 341115 | 83 | 1241536 | 1241561 | 2 | 13 | 26 | AG   | 6  | 7  |
| 341120 | 83 | 1242549 | 1242570 | 2 | 11 | 22 | CA   | 13 | 8  |
| 341132 | 83 | 1244039 | 1244065 | 3 | 9  | 27 | GAA  | 24 | 18 |
| 341137 | 83 | 1248166 | 1248195 | 2 | 15 | 30 | TG   | 7  | 6  |
| 341138 | 83 | 1248311 | 1248334 | 3 | 8  | 24 | GAG  | 21 | 6  |
| 341139 | 83 | 1248775 | 1248789 | 3 | 5  | 15 | ATT  | 20 | 8  |
| 341140 | 83 | 1248971 | 1248982 | 2 | 6  | 12 | TG   | 23 | 3  |
| 341146 | 83 | 1252397 | 1252448 | 4 | 13 | 52 | TCTT | 13 | 12 |
| 341151 | 83 | 1260844 | 1260867 | 3 | 8  | 24 | CCT  | 14 | 4  |
| 341154 | 83 | 1264294 | 1264315 | 2 | 11 | 22 | AC   | 17 | 9  |
| 341157 | 83 | 1269384 | 1269398 | 3 | 5  | 15 | CAG  | 27 | 4  |
| 341159 | 83 | 1269623 | 1269637 | 3 | 5  | 15 | AGG  | 20 | 3  |
| 341160 | 83 | 1269792 | 1269813 | 2 | 11 | 22 | AC   | 34 | 8  |
| 341165 | 83 | 1273415 | 1273441 | 3 | 9  | 27 | CCT  | 13 | 4  |
| 341166 | 83 | 1273610 | 1273625 | 4 | 4  | 16 | CATC | 20 | 4  |
| 341168 | 83 | 1274156 | 1274176 | 3 | 7  | 21 | TCT  | 11 | 4  |
| 341170 | 83 | 1274634 | 1274648 | 3 | 5  | 15 | GCT  | 23 | 6  |
| 341173 | 83 | 1279183 | 1279204 | 2 | 11 | 22 | AC   | 24 | 16 |
| 341174 | 83 | 1279311 | 1279332 | 2 | 11 | 22 | TG   | 22 | 6  |
| 341175 | 83 | 1279881 | 1279912 | 2 | 16 | 32 | TG   | 16 | 13 |
| 341177 | 83 | 1284174 | 1284209 | 4 | 9  | 36 | TTCC | 24 | 7  |
| 341179 | 83 | 1284572 | 1284599 | 2 | 14 | 28 | CA   | 19 | 12 |
| 341182 | 83 | 1287961 | 1288008 | 3 | 16 | 48 | AAG  | 14 | 15 |

|        |    |         |         |   |    |    |      |    |    |
|--------|----|---------|---------|---|----|----|------|----|----|
| 341184 | 83 | 1288779 | 1288830 | 2 | 26 | 52 | GT   | 8  | 11 |
| 341185 | 83 | 1288946 | 1288985 | 2 | 20 | 40 | AC   | 14 | 14 |
| 341189 | 83 | 1290316 | 1290349 | 2 | 17 | 34 | GT   | 19 | 14 |
| 341191 | 83 | 1291984 | 1292015 | 2 | 16 | 32 | TG   | 24 | 12 |
| 341195 | 83 | 1294357 | 1294380 | 3 | 8  | 24 | TCA  | 29 | 8  |
| 341201 | 83 | 1300173 | 1300192 | 2 | 10 | 20 | TC   | 12 | 4  |
| 341203 | 83 | 1301594 | 1301607 | 2 | 7  | 14 | TC   | 15 | 4  |
| 341204 | 83 | 1301887 | 1301928 | 2 | 21 | 42 | TG   | 7  | 9  |
| 341209 | 83 | 1306102 | 1306121 | 4 | 5  | 20 | TTTA | 18 | 6  |
| 341214 | 83 | 1311203 | 1311222 | 2 | 10 | 20 | AC   | 24 | 6  |
| 341216 | 83 | 1311405 | 1311422 | 2 | 9  | 18 | AC   | 12 | 11 |
| 341218 | 83 | 1312912 | 1312945 | 2 | 17 | 34 | AC   | 8  | 8  |
| 341239 | 83 | 1414857 | 1414876 | 4 | 5  | 20 | AAGG | 6  | 4  |
| 341240 | 83 | 1414880 | 1414899 | 4 | 5  | 20 | GAAG | 11 | 9  |
| 341242 | 83 | 1415622 | 1415643 | 2 | 11 | 22 | TG   | 23 | 12 |
| 341243 | 83 | 1416893 | 1416913 | 3 | 7  | 21 | CCT  | 22 | 3  |
| 341245 | 83 | 1420620 | 1420641 | 2 | 11 | 22 | GT   | 14 | 13 |
| 341247 | 83 | 1423603 | 1423620 | 2 | 9  | 18 | CT   | 18 | 5  |
| 341251 | 83 | 1426291 | 1426302 | 2 | 6  | 12 | AT   | 8  | 5  |
| 341254 | 83 | 1430343 | 1430368 | 2 | 13 | 26 | GT   | 8  | 4  |
| 341264 | 83 | 1435343 | 1435360 | 2 | 9  | 18 | AC   | 11 | 8  |
| 341267 | 83 | 1439026 | 1439037 | 2 | 6  | 12 | AC   | 21 | 5  |
| 341272 | 83 | 1441906 | 1441919 | 2 | 7  | 14 | AG   | 20 | 3  |
| 341273 | 83 | 1442130 | 1442141 | 2 | 6  | 12 | CT   | 22 | 3  |
| 341281 | 83 | 1458388 | 1458431 | 2 | 22 | 44 | CA   | 16 | 13 |
| 341283 | 83 | 1464907 | 1464920 | 2 | 7  | 14 | CA   | 16 | 12 |
| 341284 | 83 | 1464925 | 1464936 | 2 | 6  | 12 | CA   | 16 | 12 |
| 341286 | 83 | 1471535 | 1471550 | 4 | 4  | 16 | TTTC | 30 | 3  |
| 341293 | 83 | 1476615 | 1476630 | 2 | 8  | 16 | GT   | 19 | 7  |
| 341294 | 83 | 1476743 | 1476756 | 2 | 7  | 14 | TG   | 19 | 11 |
| 341295 | 83 | 1477524 | 1477555 | 2 | 16 | 32 | AC   | 11 | 9  |
| 341306 | 83 | 1486999 | 1487019 | 3 | 7  | 21 | GGA  | 25 | 16 |
| 341313 | 83 | 1488312 | 1488331 | 2 | 10 | 20 | GT   | 18 | 7  |
| 341314 | 83 | 1488443 | 1488462 | 2 | 10 | 20 | TG   | 13 | 6  |
| 341315 | 83 | 1490476 | 1490497 | 2 | 11 | 22 | GT   | 12 | 9  |
| 341319 | 83 | 1497499 | 1497518 | 2 | 10 | 20 | TG   | 24 | 7  |
| 341322 | 83 | 1497755 | 1497770 | 2 | 8  | 16 | AC   | 20 | 4  |
| 341323 | 83 | 1497857 | 1497874 | 2 | 9  | 18 | GT   | 26 | 12 |
| 341324 | 83 | 1499786 | 1499809 | 2 | 12 | 24 | TG   | 13 | 8  |
| 341325 | 83 | 1499951 | 1499982 | 2 | 16 | 32 | AC   | 15 | 10 |
| 341326 | 83 | 1500046 | 1500057 | 2 | 6  | 12 | GA   | 22 | 3  |
| 341327 | 83 | 1500864 | 1500885 | 2 | 11 | 22 | TG   | 22 | 6  |
| 341328 | 83 | 1500981 | 1501002 | 2 | 11 | 22 | TG   | 13 | 10 |
| 341329 | 83 | 1503465 | 1503492 | 2 | 14 | 28 | TC   | 15 | 5  |
| 341331 | 83 | 1506026 | 1506049 | 2 | 12 | 24 | AC   | 11 | 8  |
| 341332 | 83 | 1506172 | 1506199 | 2 | 14 | 28 | GT   | 18 | 11 |
| 341346 | 83 | 1514299 | 1514320 | 2 | 11 | 22 | TG   | 24 | 10 |
| 341349 | 83 | 1515817 | 1515842 | 2 | 13 | 26 | AC   | 10 | 8  |
| 341350 | 83 | 1518940 | 1518955 | 2 | 8  | 16 | GA   | 29 | 8  |
| 341353 | 83 | 1523264 | 1523278 | 3 | 5  | 15 | CTC  | 23 | 5  |
| 341355 | 83 | 1523545 | 1523570 | 2 | 13 | 26 | TG   | 26 | 12 |

|        |    |         |         |   |    |    |     |    |    |
|--------|----|---------|---------|---|----|----|-----|----|----|
| 341356 | 83 | 1525418 | 1525431 | 2 | 7  | 14 | AG  | 22 | 6  |
| 341361 | 83 | 1528114 | 1528151 | 2 | 19 | 38 | AC  | 11 | 5  |
| 341364 | 83 | 1529356 | 1529373 | 2 | 9  | 18 | GA  | 8  | 12 |
| 341370 | 83 | 1534508 | 1534547 | 2 | 20 | 40 | AC  | 7  | 9  |
| 341375 | 83 | 1536756 | 1536770 | 3 | 5  | 15 | CTG | 28 | 3  |
| 341379 | 83 | 1542737 | 1542762 | 2 | 13 | 26 | AC  | 16 | 12 |
| 341380 | 83 | 1543961 | 1543978 | 3 | 6  | 18 | CTC | 30 | 4  |
| 341381 | 83 | 1546428 | 1546455 | 2 | 14 | 28 | TG  | 15 | 14 |
| 341386 | 83 | 1546789 | 1546810 | 2 | 11 | 22 | CA  | 16 | 10 |
| 341390 | 83 | 1555116 | 1555159 | 2 | 22 | 44 | GT  | 12 | 14 |
| 341391 | 83 | 1555291 | 1555310 | 2 | 10 | 20 | GT  | 8  | 10 |
| 341392 | 83 | 1555345 | 1555364 | 2 | 10 | 20 | TG  | 16 | 8  |
| 341393 | 83 | 1555506 | 1555517 | 2 | 6  | 12 | GT  | 17 | 19 |
| 341394 | 83 | 1555520 | 1555537 | 2 | 9  | 18 | GT  | 13 | 14 |
| 341399 | 83 | 1559930 | 1559961 | 2 | 16 | 32 | CA  | 23 | 13 |
| 341401 | 83 | 1562152 | 1562165 | 2 | 7  | 14 | TA  | 12 | 5  |
| 341406 | 83 | 1569499 | 1569532 | 2 | 17 | 34 | TG  | 20 | 15 |
| 341410 | 83 | 1576145 | 1576172 | 2 | 14 | 28 | TG  | 19 | 10 |
| 341412 | 83 | 1576802 | 1576821 | 2 | 10 | 20 | TG  | 18 | 12 |
| 341419 | 83 | 1578377 | 1578391 | 3 | 5  | 15 | AGA | 24 | 4  |
| 341423 | 83 | 1579745 | 1579772 | 2 | 14 | 28 | AC  | 13 | 8  |
| 341424 | 83 | 1579840 | 1579871 | 2 | 16 | 32 | AC  | 14 | 13 |
| 341425 | 83 | 1579984 | 1580011 | 2 | 14 | 28 | GT  | 16 | 14 |
| 341426 | 83 | 1580182 | 1580233 | 2 | 26 | 52 | GT  | 10 | 12 |
| 341427 | 83 | 1580910 | 1580925 | 2 | 8  | 16 | CA  | 13 | 13 |
| 341429 | 83 | 1581104 | 1581131 | 2 | 14 | 28 | CA  | 10 | 9  |
| 341430 | 83 | 1583294 | 1583308 | 3 | 5  | 15 | GAG | 16 | 6  |
| 341431 | 83 | 1584463 | 1584498 | 2 | 18 | 36 | CA  | 7  | 9  |
| 341433 | 83 | 1590262 | 1590275 | 2 | 7  | 14 | GT  | 26 | 5  |
| 341434 | 83 | 1590343 | 1590364 | 2 | 11 | 22 | GT  | 21 | 7  |
| 341438 | 83 | 1591807 | 1591818 | 2 | 6  | 12 | CA  | 11 | 13 |
| 341440 | 83 | 1591935 | 1591956 | 2 | 11 | 22 | TG  | 16 | 8  |
| 341443 | 83 | 1593334 | 1593349 | 2 | 8  | 16 | AG  | 21 | 3  |
| 341446 | 83 | 1595073 | 1595086 | 2 | 7  | 14 | TC  | 24 | 8  |
| 341447 | 83 | 1595200 | 1595229 | 2 | 15 | 30 | AC  | 12 | 6  |
| 341448 | 83 | 1595302 | 1595313 | 2 | 6  | 12 | TG  | 22 | 3  |
| 341454 | 83 | 1600547 | 1600568 | 2 | 11 | 22 | CA  | 6  | 6  |
| 341455 | 83 | 1604226 | 1604255 | 3 | 10 | 30 | CTC | 19 | 6  |
| 341456 | 83 | 1605940 | 1605959 | 2 | 10 | 20 | TG  | 27 | 9  |
| 341457 | 83 | 1606442 | 1606473 | 2 | 16 | 32 | GT  | 17 | 9  |
| 341463 | 83 | 1613423 | 1613452 | 2 | 15 | 30 | GT  | 28 | 12 |
| 341465 | 83 | 1615753 | 1615778 | 2 | 13 | 26 | TG  | 13 | 13 |
| 341467 | 83 | 1617278 | 1617292 | 3 | 5  | 15 | GAT | 28 | 3  |
| 341468 | 83 | 1618261 | 1618272 | 2 | 6  | 12 | GT  | 24 | 12 |
| 341469 | 83 | 1620476 | 1620505 | 2 | 15 | 30 | TG  | 17 | 17 |
| 341471 | 83 | 1620672 | 1620697 | 2 | 13 | 26 | TG  | 17 | 6  |
| 341472 | 83 | 1627041 | 1627060 | 2 | 10 | 20 | GT  | 20 | 11 |
| 341475 | 83 | 1633326 | 1633339 | 2 | 7  | 14 | TC  | 18 | 6  |
| 341476 | 83 | 1633513 | 1633524 | 2 | 6  | 12 | CT  | 22 | 6  |
| 341483 | 83 | 1634219 | 1634232 | 2 | 7  | 14 | GT  | 13 | 10 |
| 341484 | 83 | 1634234 | 1634245 | 2 | 6  | 12 | TG  | 8  | 12 |

|        |    |         |         |   |    |    |      |    |    |
|--------|----|---------|---------|---|----|----|------|----|----|
| 341487 | 83 | 1637257 | 1637274 | 3 | 6  | 18 | CCT  | 10 | 6  |
| 341491 | 83 | 1643182 | 1643229 | 2 | 24 | 48 | TG   | 13 | 13 |
| 341492 | 83 | 1645286 | 1645321 | 2 | 18 | 36 | TG   | 7  | 9  |
| 341497 | 83 | 1649249 | 1649268 | 2 | 10 | 20 | GT   | 10 | 9  |
| 341501 | 83 | 1650253 | 1650264 | 2 | 6  | 12 | AG   | 29 | 3  |
| 341505 | 83 | 1663376 | 1663387 | 2 | 6  | 12 | TG   | 21 | 7  |
| 341509 | 83 | 1668323 | 1668342 | 2 | 10 | 20 | TG   | 19 | 19 |
| 341510 | 83 | 1674536 | 1674549 | 2 | 7  | 14 | CA   | 20 | 10 |
| 341512 | 83 | 1675019 | 1675042 | 2 | 12 | 24 | TG   | 19 | 7  |
| 341521 | 83 | 1677265 | 1677288 | 2 | 12 | 24 | TG   | 9  | 12 |
| 341522 | 83 | 1677388 | 1677419 | 2 | 16 | 32 | CA   | 8  | 7  |
| 341525 | 83 | 1678214 | 1678239 | 2 | 13 | 26 | CA   | 11 | 13 |
| 341526 | 83 | 1678290 | 1678301 | 2 | 6  | 12 | AC   | 19 | 3  |
| 341529 | 83 | 1683741 | 1683754 | 2 | 7  | 14 | TG   | 12 | 9  |
| 341530 | 83 | 1683757 | 1683772 | 2 | 8  | 16 | TG   | 18 | 13 |
| 341531 | 83 | 1684717 | 1684728 | 2 | 6  | 12 | AG   | 18 | 11 |
| 341532 | 83 | 1684871 | 1684882 | 2 | 6  | 12 | TC   | 13 | 3  |
| 341533 | 83 | 1685005 | 1685052 | 4 | 12 | 48 | CTAT | 16 | 16 |
| 341534 | 83 | 1687160 | 1687177 | 2 | 9  | 18 | CA   | 14 | 8  |
| 341535 | 83 | 1687336 | 1687359 | 2 | 12 | 24 | CA   | 15 | 13 |
| 341536 | 83 | 1687481 | 1687508 | 2 | 14 | 28 | CA   | 9  | 12 |
| 341537 | 83 | 1688495 | 1688522 | 2 | 14 | 28 | CA   | 9  | 11 |
| 341538 | 83 | 1695398 | 1695413 | 2 | 8  | 16 | TC   | 22 | 3  |
| 341540 | 83 | 1696127 | 1696148 | 2 | 11 | 22 | TG   | 22 | 6  |
| 341541 | 83 | 1696261 | 1696282 | 2 | 11 | 22 | TG   | 8  | 9  |
| 341554 | 83 | 1704019 | 1704040 | 2 | 11 | 22 | CA   | 7  | 8  |
| 341555 | 83 | 1704161 | 1704198 | 2 | 19 | 38 | AC   | 17 | 12 |
| 341556 | 83 | 1704286 | 1704303 | 2 | 9  | 18 | AC   | 13 | 12 |
| 341557 | 83 | 1704646 | 1704666 | 3 | 7  | 21 | TGC  | 33 | 5  |
| 341558 | 83 | 1705407 | 1705421 | 3 | 5  | 15 | CAG  | 23 | 3  |
| 341559 | 83 | 1706453 | 1706467 | 3 | 5  | 15 | CTG  | 33 | 11 |
| 341564 | 83 | 1713024 | 1713043 | 2 | 10 | 20 | CA   | 11 | 14 |
| 341566 | 83 | 1713206 | 1713225 | 2 | 10 | 20 | AC   | 13 | 18 |
| 341568 | 83 | 1713390 | 1713423 | 2 | 17 | 34 | TG   | 9  | 13 |
| 341569 | 83 | 1715020 | 1715043 | 2 | 12 | 24 | GT   | 19 | 9  |
| 341573 | 83 | 1725887 | 1725916 | 2 | 15 | 30 | AC   | 11 | 7  |
| 341574 | 83 | 1727221 | 1727258 | 2 | 19 | 38 | GT   | 7  | 8  |
| 341576 | 83 | 1731579 | 1731596 | 2 | 9  | 18 | TG   | 22 | 8  |
| 341583 | 83 | 1736712 | 1736726 | 3 | 5  | 15 | CTG  | 28 | 9  |
| 341584 | 83 | 1737720 | 1737763 | 2 | 22 | 44 | AC   | 9  | 13 |
| 341585 | 83 | 1743299 | 1743328 | 3 | 10 | 30 | GAG  | 11 | 10 |
| 341586 | 83 | 1743546 | 1743571 | 2 | 13 | 26 | TG   | 22 | 12 |
| 341589 | 83 | 1745401 | 1745428 | 2 | 14 | 28 | AC   | 19 | 7  |
| 341592 | 83 | 1748065 | 1748096 | 2 | 16 | 32 | TG   | 11 | 9  |
| 341593 | 83 | 1751827 | 1751844 | 2 | 9  | 18 | TG   | 24 | 14 |
| 341594 | 83 | 1752048 | 1752081 | 2 | 17 | 34 | GT   | 10 | 12 |
| 341595 | 83 | 1753381 | 1753406 | 2 | 13 | 26 | TG   | 21 | 10 |
| 341599 | 83 | 1754640 | 1754667 | 2 | 14 | 28 | AC   | 18 | 14 |
| 341601 | 83 | 1758278 | 1758295 | 2 | 9  | 18 | AC   | 8  | 10 |
| 341610 | 83 | 1758994 | 1759005 | 2 | 6  | 12 | GA   | 26 | 9  |
| 341612 | 83 | 1764583 | 1764603 | 3 | 7  | 21 | GAT  | 32 | 5  |

|        |    |         |         |   |    |    |      |    |    |
|--------|----|---------|---------|---|----|----|------|----|----|
| 341616 | 83 | 1767137 | 1767150 | 2 | 7  | 14 | GT   | 19 | 4  |
| 341627 | 83 | 1771034 | 1771075 | 2 | 21 | 42 | CA   | 11 | 11 |
| 341628 | 83 | 1771551 | 1771584 | 2 | 17 | 34 | GT   | 7  | 8  |
| 341629 | 83 | 1774308 | 1774333 | 2 | 13 | 26 | TG   | 10 | 11 |
| 341631 | 83 | 1774471 | 1774484 | 2 | 7  | 14 | GT   | 16 | 7  |
| 341632 | 83 | 1774664 | 1774699 | 2 | 18 | 36 | GT   | 7  | 7  |
| 341633 | 83 | 1774721 | 1774736 | 2 | 8  | 16 | TG   | 22 | 5  |
| 341638 | 83 | 1776627 | 1776652 | 2 | 13 | 26 | AC   | 20 | 16 |
| 341643 | 83 | 1779053 | 1779070 | 3 | 6  | 18 | AGG  | 21 | 9  |
| 341646 | 83 | 1781742 | 1781762 | 3 | 7  | 21 | TAA  | 24 | 9  |
| 341649 | 83 | 1784510 | 1784543 | 2 | 17 | 34 | TG   | 6  | 7  |
| 341650 | 83 | 1784609 | 1784628 | 2 | 10 | 20 | GT   | 20 | 6  |
| 341651 | 83 | 1784686 | 1784713 | 2 | 14 | 28 | TG   | 12 | 10 |
| 341652 | 83 | 1784890 | 1784917 | 2 | 14 | 28 | AC   | 13 | 12 |
| 341653 | 83 | 1789218 | 1789275 | 2 | 29 | 58 | CA   | 13 | 13 |
| 341656 | 83 | 1801819 | 1801852 | 2 | 17 | 34 | CA   | 20 | 10 |
| 341660 | 83 | 1805971 | 1806006 | 4 | 9  | 36 | TATC | 22 | 12 |
| 341661 | 83 | 1806752 | 1806763 | 2 | 6  | 12 | TA   | 26 | 4  |
| 341662 | 83 | 1806951 | 1806977 | 3 | 9  | 27 | AAG  | 16 | 11 |
| 341663 | 83 | 1807230 | 1807253 | 4 | 6  | 24 | GGAT | 21 | 3  |
| 341664 | 83 | 1807996 | 1808010 | 3 | 5  | 15 | GCA  | 29 | 4  |
| 341665 | 83 | 1808188 | 1808201 | 2 | 7  | 14 | GT   | 13 | 12 |
| 341666 | 83 | 1808396 | 1808413 | 2 | 9  | 18 | GT   | 9  | 7  |
| 341667 | 83 | 1812963 | 1812976 | 2 | 7  | 14 | CA   | 15 | 9  |
| 341670 | 83 | 1814867 | 1814896 | 2 | 15 | 30 | TG   | 6  | 7  |
| 341671 | 83 | 1816381 | 1816406 | 2 | 13 | 26 | AC   | 16 | 23 |
| 341676 | 83 | 1828095 | 1828106 | 2 | 6  | 12 | CA   | 19 | 17 |
| 341677 | 83 | 1828108 | 1828125 | 2 | 9  | 18 | AC   | 19 | 20 |
| 341678 | 83 | 1828260 | 1828275 | 4 | 4  | 16 | CTCC | 16 | 6  |
| 341679 | 83 | 1829179 | 1829234 | 2 | 28 | 56 | CA   | 9  | 16 |
| 341680 | 83 | 1830988 | 1830999 | 2 | 6  | 12 | GT   | 21 | 3  |
| 341682 | 83 | 1833397 | 1833434 | 2 | 19 | 38 | GT   | 8  | 9  |
| 341683 | 83 | 1833465 | 1833480 | 2 | 8  | 16 | CA   | 14 | 11 |
| 341684 | 83 | 1833569 | 1833600 | 2 | 16 | 32 | CA   | 11 | 12 |
| 341685 | 83 | 1833748 | 1833767 | 2 | 10 | 20 | CA   | 16 | 18 |
| 341686 | 83 | 1833881 | 1833908 | 2 | 14 | 28 | CA   | 13 | 12 |
| 341687 | 83 | 1835577 | 1835609 | 3 | 11 | 33 | TCA  | 30 | 14 |
| 341696 | 83 | 1839831 | 1839856 | 2 | 13 | 26 | CA   | 12 | 14 |
| 341699 | 83 | 1843299 | 1843316 | 3 | 6  | 18 | AAT  | 25 | 9  |
| 341700 | 83 | 1845946 | 1845981 | 3 | 12 | 36 | GAG  | 11 | 7  |
| 341706 | 83 | 1855555 | 1855576 | 2 | 11 | 22 | GT   | 22 | 15 |
| 341707 | 83 | 1857444 | 1857455 | 2 | 6  | 12 | AG   | 31 | 3  |
| 341708 | 83 | 1858890 | 1858907 | 2 | 9  | 18 | TG   | 15 | 15 |
| 341709 | 83 | 1858910 | 1858921 | 2 | 6  | 12 | TG   | 16 | 15 |
| 341715 | 83 | 1868803 | 1868838 | 2 | 18 | 36 | TG   | 12 | 10 |
| 341716 | 83 | 1870161 | 1870200 | 2 | 20 | 40 | AC   | 13 | 14 |
| 341719 | 83 | 1876624 | 1876665 | 2 | 21 | 42 | CA   | 11 | 16 |
| 341723 | 84 | 5805    | 5818    | 2 | 7  | 14 | CA   | 20 | 3  |
| 341726 | 84 | 11788   | 11827   | 4 | 10 | 40 | ATCA | 30 | 4  |
| 341731 | 84 | 19101   | 19122   | 2 | 11 | 22 | GT   | 11 | 5  |
| 341732 | 84 | 19196   | 19215   | 2 | 10 | 20 | TG   | 12 | 6  |

|        |    |        |        |   |    |    |      |    |    |
|--------|----|--------|--------|---|----|----|------|----|----|
| 341745 | 84 | 41257  | 41304  | 4 | 12 | 48 | AGAA | 16 | 6  |
| 341753 | 84 | 45665  | 45680  | 2 | 8  | 16 | AC   | 9  | 8  |
| 341766 | 84 | 58965  | 58990  | 2 | 13 | 26 | TG   | 8  | 6  |
| 341771 | 84 | 61672  | 61691  | 2 | 10 | 20 | GT   | 13 | 4  |
| 341772 | 84 | 63816  | 63847  | 2 | 16 | 32 | AC   | 13 | 7  |
| 341777 | 84 | 65888  | 65905  | 2 | 9  | 18 | TG   | 25 | 5  |
| 341779 | 84 | 66798  | 66835  | 2 | 19 | 38 | CA   | 8  | 8  |
| 341780 | 84 | 67582  | 67607  | 2 | 13 | 26 | GT   | 9  | 4  |
| 341799 | 84 | 94075  | 94088  | 2 | 7  | 14 | TG   | 22 | 3  |
| 341800 | 84 | 96405  | 96420  | 2 | 8  | 16 | CA   | 26 | 3  |
| 341801 | 84 | 97702  | 97731  | 2 | 15 | 30 | AC   | 17 | 6  |
| 341804 | 84 | 106000 | 106035 | 2 | 18 | 36 | CA   | 18 | 7  |
| 341805 | 84 | 106057 | 106074 | 2 | 9  | 18 | AC   | 11 | 4  |
| 341806 | 84 | 106254 | 106265 | 2 | 6  | 12 | TC   | 26 | 3  |
| 341825 | 84 | 130095 | 130124 | 3 | 10 | 30 | TGA  | 27 | 12 |
| 341828 | 84 | 134458 | 134475 | 2 | 9  | 18 | CA   | 23 | 4  |
| 341833 | 84 | 142469 | 142484 | 4 | 4  | 16 | ACAG | 23 | 3  |
| 341838 | 84 | 151077 | 151090 | 2 | 7  | 14 | GT   | 15 | 5  |
| 341840 | 84 | 155481 | 155524 | 4 | 11 | 44 | CTAC | 7  | 6  |
| 341847 | 84 | 186095 | 186118 | 2 | 12 | 24 | CA   | 14 | 5  |
| 341851 | 84 | 189204 | 189225 | 2 | 11 | 22 | TG   | 6  | 9  |
| 341855 | 84 | 198782 | 198819 | 2 | 19 | 38 | TG   | 10 | 8  |
| 341856 | 84 | 201661 | 201684 | 4 | 6  | 24 | CAGT | 30 | 3  |
| 341857 | 84 | 203191 | 203208 | 2 | 9  | 18 | AC   | 10 | 3  |
| 341859 | 84 | 205904 | 205918 | 3 | 5  | 15 | ATA  | 20 | 4  |
| 341860 | 84 | 205955 | 205968 | 2 | 7  | 14 | AG   | 7  | 4  |
| 341862 | 84 | 206091 | 206102 | 2 | 6  | 12 | AC   | 22 | 3  |
| 341863 | 84 | 213183 | 213202 | 4 | 5  | 20 | TCTG | 21 | 5  |
| 341864 | 84 | 213710 | 213723 | 2 | 7  | 14 | GT   | 22 | 3  |
| 341865 | 84 | 217473 | 217496 | 4 | 6  | 24 | GATG | 19 | 6  |
| 341867 | 84 | 222300 | 222319 | 4 | 5  | 20 | TTTG | 23 | 4  |
| 341871 | 84 | 228885 | 228906 | 2 | 11 | 22 | CA   | 21 | 8  |
| 341875 | 84 | 239924 | 239945 | 2 | 11 | 22 | CA   | 9  | 6  |
| 341892 | 84 | 310323 | 310334 | 2 | 6  | 12 | GT   | 30 | 3  |
| 341899 | 84 | 328441 | 328464 | 4 | 6  | 24 | ATTG | 16 | 3  |
| 341902 | 84 | 331411 | 331426 | 2 | 8  | 16 | AT   | 22 | 6  |
| 341908 | 84 | 339821 | 339832 | 2 | 6  | 12 | GT   | 31 | 3  |
| 341911 | 84 | 357239 | 357250 | 2 | 6  | 12 | GT   | 25 | 6  |
| 341913 | 84 | 361960 | 362007 | 2 | 24 | 48 | CA   | 7  | 10 |
| 341926 | 84 | 383748 | 383791 | 4 | 11 | 44 | ATCA | 27 | 7  |
| 341934 | 84 | 414954 | 414987 | 2 | 17 | 34 | AC   | 7  | 12 |
| 341935 | 84 | 420046 | 420089 | 2 | 22 | 44 | CA   | 14 | 12 |
| 341938 | 84 | 425522 | 425573 | 4 | 13 | 52 | AGAA | 10 | 5  |
| 341939 | 84 | 426748 | 426771 | 2 | 12 | 24 | TG   | 12 | 4  |
| 341941 | 84 | 455493 | 455536 | 4 | 11 | 44 | TCAA | 21 | 6  |
| 341942 | 84 | 462107 | 462124 | 2 | 9  | 18 | TG   | 12 | 3  |
| 341943 | 84 | 462210 | 462233 | 2 | 12 | 24 | TG   | 15 | 8  |
| 341944 | 84 | 462295 | 462308 | 2 | 7  | 14 | TG   | 17 | 4  |
| 341945 | 84 | 462310 | 462323 | 2 | 7  | 14 | GT   | 16 | 6  |
| 341950 | 84 | 474417 | 474436 | 2 | 10 | 20 | TC   | 18 | 10 |
| 341956 | 84 | 498006 | 498025 | 4 | 5  | 20 | TCCT | 25 | 8  |



|        |    |         |         |   |    |    |      |    |    |
|--------|----|---------|---------|---|----|----|------|----|----|
| 341958 | 84 | 501862  | 501907  | 2 | 23 | 46 | CA   | 12 | 11 |
| 341964 | 84 | 519621  | 519638  | 2 | 9  | 18 | CA   | 23 | 11 |
| 341968 | 84 | 530562  | 530575  | 2 | 7  | 14 | TG   | 24 | 4  |
| 341971 | 84 | 533759  | 533778  | 2 | 10 | 20 | AC   | 10 | 12 |
| 341975 | 84 | 550739  | 550790  | 4 | 13 | 52 | AGAT | 25 | 6  |
| 341982 | 84 | 573558  | 573584  | 3 | 9  | 27 | TCC  | 18 | 3  |
| 341983 | 84 | 586195  | 586236  | 2 | 21 | 42 | TG   | 13 | 13 |
| 341986 | 84 | 586544  | 586575  | 2 | 16 | 32 | TG   | 16 | 14 |
| 341989 | 84 | 593211  | 593243  | 3 | 11 | 33 | CAG  | 23 | 9  |
| 341992 | 84 | 599915  | 599934  | 2 | 10 | 20 | CA   | 28 | 5  |
| 341997 | 84 | 618237  | 618250  | 2 | 7  | 14 | TG   | 32 | 8  |
| 342005 | 84 | 647906  | 647917  | 2 | 6  | 12 | TG   | 31 | 3  |
| 342006 | 84 | 651877  | 651888  | 2 | 6  | 12 | TG   | 18 | 5  |
| 342024 | 84 | 671039  | 671074  | 3 | 12 | 36 | GAT  | 7  | 4  |
| 342028 | 84 | 675869  | 675884  | 4 | 4  | 16 | AAAC | 25 | 4  |
| 342029 | 84 | 677384  | 677422  | 3 | 13 | 39 | TAC  | 24 | 10 |
| 342033 | 84 | 681566  | 681581  | 2 | 8  | 16 | AC   | 23 | 4  |
| 342038 | 84 | 695230  | 695249  | 4 | 5  | 20 | ATTT | 9  | 6  |
| 342039 | 84 | 695957  | 695974  | 3 | 6  | 18 | GAT  | 11 | 9  |
| 342052 | 84 | 706062  | 706089  | 2 | 14 | 28 | TG   | 10 | 5  |
| 342062 | 84 | 751902  | 751915  | 2 | 7  | 14 | TG   | 17 | 4  |
| 342063 | 84 | 751916  | 751929  | 2 | 7  | 14 | TA   | 17 | 3  |
| 342064 | 84 | 754837  | 754884  | 2 | 24 | 48 | AC   | 10 | 12 |
| 342069 | 84 | 762685  | 762724  | 4 | 10 | 40 | TGAT | 18 | 11 |
| 342070 | 84 | 765081  | 765100  | 4 | 5  | 20 | TTAT | 21 | 4  |
| 342071 | 84 | 765406  | 765444  | 3 | 13 | 39 | TAA  | 11 | 7  |
| 342079 | 84 | 798473  | 798490  | 3 | 6  | 18 | AGA  | 23 | 3  |
| 342097 | 84 | 849164  | 849183  | 2 | 10 | 20 | CA   | 14 | 7  |
| 342104 | 84 | 866378  | 866397  | 2 | 10 | 20 | TA   | 10 | 6  |
| 342112 | 84 | 901852  | 901887  | 2 | 18 | 36 | TG   | 10 | 10 |
| 342115 | 84 | 905244  | 905263  | 4 | 5  | 20 | TCTG | 36 | 3  |
| 342120 | 84 | 924069  | 924084  | 4 | 4  | 16 | AAAC | 19 | 9  |
| 342123 | 84 | 939197  | 939220  | 4 | 6  | 24 | AAAC | 14 | 3  |
| 342128 | 84 | 942889  | 942903  | 3 | 5  | 15 | CAG  | 27 | 9  |
| 342132 | 84 | 964976  | 965011  | 2 | 18 | 36 | TG   | 13 | 11 |
| 342137 | 84 | 981112  | 981127  | 4 | 4  | 16 | TTTA | 18 | 4  |
| 342143 | 84 | 1004181 | 1004207 | 3 | 9  | 27 | TAG  | 11 | 5  |
| 342150 | 84 | 1015105 | 1015118 | 2 | 7  | 14 | TG   | 12 | 3  |
| 342151 | 84 | 1015120 | 1015139 | 2 | 10 | 20 | GT   | 20 | 7  |
| 342165 | 84 | 1039208 | 1039219 | 2 | 6  | 12 | CT   | 26 | 4  |
| 342180 | 84 | 1074193 | 1074210 | 2 | 9  | 18 | CA   | 17 | 5  |
| 342182 | 84 | 1074382 | 1074405 | 2 | 12 | 24 | CA   | 9  | 9  |
| 342186 | 84 | 1080442 | 1080459 | 2 | 9  | 18 | TG   | 18 | 9  |
| 342189 | 84 | 1100947 | 1100984 | 2 | 19 | 38 | CA   | 13 | 13 |
| 342193 | 84 | 1109406 | 1109443 | 2 | 19 | 38 | TG   | 8  | 6  |
| 342206 | 84 | 1141771 | 1141800 | 2 | 15 | 30 | AC   | 12 | 9  |
| 342209 | 84 | 1148782 | 1148813 | 2 | 16 | 32 | AC   | 9  | 8  |
| 342215 | 84 | 1154395 | 1154412 | 2 | 9  | 18 | CA   | 27 | 6  |
| 342231 | 84 | 1176342 | 1176359 | 2 | 9  | 18 | TA   | 7  | 3  |
| 342233 | 84 | 1185409 | 1185440 | 2 | 16 | 32 | AC   | 13 | 4  |
| 342234 | 84 | 1190368 | 1190385 | 3 | 6  | 18 | TAT  | 21 | 3  |

|        |    |         |         |   |    |    |      |    |    |
|--------|----|---------|---------|---|----|----|------|----|----|
| 342235 | 84 | 1196711 | 1196730 | 2 | 10 | 20 | AT   | 6  | 6  |
| 342237 | 84 | 1199139 | 1199168 | 2 | 15 | 30 | CA   | 18 | 10 |
| 342240 | 84 | 1202232 | 1202257 | 2 | 13 | 26 | CA   | 12 | 11 |
| 342241 | 84 | 1205099 | 1205112 | 2 | 7  | 14 | GT   | 26 | 4  |
| 342246 | 84 | 1215093 | 1215138 | 2 | 23 | 46 | AC   | 7  | 8  |
| 342247 | 84 | 1215776 | 1215802 | 3 | 9  | 27 | CAT  | 19 | 6  |
| 342258 | 84 | 1264121 | 1264146 | 2 | 13 | 26 | CA   | 17 | 13 |
| 342262 | 84 | 1273808 | 1273825 | 2 | 9  | 18 | CA   | 19 | 16 |
| 342281 | 84 | 1339568 | 1339591 | 4 | 6  | 24 | GGCA | 36 | 12 |
| 342290 | 84 | 1358168 | 1358187 | 4 | 5  | 20 | TTTC | 18 | 7  |
| 342291 | 84 | 1358531 | 1358545 | 3 | 5  | 15 | TAT  | 13 | 4  |
| 342299 | 84 | 1377746 | 1377761 | 4 | 4  | 16 | AAAC | 8  | 3  |
| 342311 | 84 | 1439879 | 1439908 | 2 | 15 | 30 | TG   | 19 | 8  |
| 342312 | 84 | 1445641 | 1445660 | 4 | 5  | 20 | TGTC | 26 | 3  |
| 342327 | 84 | 1481870 | 1481885 | 4 | 4  | 16 | GACA | 23 | 5  |
| 342329 | 84 | 1487406 | 1487429 | 3 | 8  | 24 | TTC  | 7  | 8  |
| 342331 | 84 | 1489220 | 1489259 | 2 | 20 | 40 | GT   | 8  | 8  |
| 342334 | 84 | 1490846 | 1490861 | 2 | 8  | 16 | AC   | 13 | 6  |
| 342358 | 84 | 1554893 | 1554920 | 2 | 14 | 28 | TG   | 20 | 5  |
| 342360 | 84 | 1564907 | 1564920 | 2 | 7  | 14 | TC   | 29 | 3  |
| 342362 | 84 | 1565572 | 1565589 | 2 | 9  | 18 | GA   | 22 | 4  |
| 342374 | 84 | 1606298 | 1606323 | 2 | 13 | 26 | CT   | 10 | 5  |
| 342378 | 84 | 1611358 | 1611378 | 3 | 7  | 21 | GAA  | 20 | 5  |
| 342380 | 84 | 1612290 | 1612303 | 2 | 7  | 14 | GC   | 30 | 4  |
| 342383 | 84 | 1615935 | 1615954 | 2 | 10 | 20 | GT   | 12 | 7  |
| 342384 | 84 | 1619520 | 1619541 | 2 | 11 | 22 | TC   | 15 | 5  |
| 342385 | 84 | 1621176 | 1621189 | 2 | 7  | 14 | CA   | 18 | 11 |
| 342408 | 84 | 1665053 | 1665090 | 2 | 19 | 38 | CA   | 13 | 11 |
| 342410 | 84 | 1665217 | 1665240 | 2 | 12 | 24 | CA   | 18 | 9  |
| 342412 | 84 | 1666279 | 1666306 | 4 | 7  | 28 | TCCT | 20 | 3  |
| 342440 | 84 | 1736747 | 1736770 | 2 | 12 | 24 | AC   | 20 | 8  |
| 342452 | 84 | 1769005 | 1769056 | 4 | 13 | 52 | AGAA | 10 | 10 |
| 342454 | 84 | 1772441 | 1772504 | 4 | 16 | 64 | GTAT | 15 | 11 |
| 342457 | 84 | 1777289 | 1777303 | 3 | 5  | 15 | TTA  | 18 | 6  |
| 342471 | 84 | 1814384 | 1814401 | 3 | 6  | 18 | TAT  | 23 | 3  |
| 342476 | 84 | 1828140 | 1828169 | 2 | 15 | 30 | GT   | 9  | 10 |
| 342479 | 84 | 1837026 | 1837063 | 2 | 19 | 38 | TG   | 6  | 6  |
| 342480 | 84 | 1837191 | 1837222 | 2 | 16 | 32 | CA   | 17 | 5  |
| 342485 | 84 | 1857440 | 1857472 | 3 | 11 | 33 | ACA  | 7  | 4  |
| 342488 | 84 | 1866164 | 1866175 | 2 | 6  | 12 | AT   | 25 | 4  |
| 342492 | 84 | 1871871 | 1871888 | 2 | 9  | 18 | TA   | 12 | 7  |
| 342500 | 85 | 56677   | 56698   | 2 | 11 | 22 | GT   | 16 | 8  |
| 342504 | 85 | 64934   | 64953   | 2 | 10 | 20 | TG   | 22 | 5  |
| 342505 | 85 | 65149   | 65184   | 2 | 18 | 36 | AC   | 14 | 14 |
| 342516 | 85 | 69021   | 69044   | 4 | 6  | 24 | AAAT | 22 | 5  |
| 342517 | 85 | 72842   | 72867   | 2 | 13 | 26 | TC   | 21 | 5  |
| 342519 | 85 | 75365   | 75402   | 2 | 19 | 38 | TG   | 14 | 8  |
| 342523 | 85 | 81287   | 81300   | 2 | 7  | 14 | TC   | 13 | 3  |
| 342527 | 85 | 88920   | 88935   | 2 | 8  | 16 | CA   | 23 | 4  |
| 342529 | 85 | 90276   | 90313   | 2 | 19 | 38 | AC   | 6  | 9  |
| 342531 | 85 | 92900   | 92917   | 3 | 6  | 18 | TCT  | 15 | 3  |

|        |    |        |        |   |    |    |      |    |    |
|--------|----|--------|--------|---|----|----|------|----|----|
| 342540 | 85 | 99749  | 99766  | 2 | 9  | 18 | TG   | 14 | 4  |
| 342545 | 85 | 107410 | 107433 | 2 | 12 | 24 | TG   | 7  | 5  |
| 342550 | 85 | 117045 | 117066 | 2 | 11 | 22 | GT   | 26 | 8  |
| 342557 | 85 | 123508 | 123533 | 2 | 13 | 26 | GT   | 15 | 4  |
| 342568 | 85 | 150546 | 150572 | 3 | 9  | 27 | ACA  | 21 | 6  |
| 342570 | 85 | 152328 | 152371 | 4 | 11 | 44 | AGAT | 14 | 13 |
| 342580 | 85 | 174094 | 174127 | 2 | 17 | 34 | GT   | 6  | 6  |
| 342603 | 85 | 234742 | 234765 | 4 | 6  | 24 | CTGT | 8  | 4  |
| 342605 | 85 | 236872 | 236895 | 3 | 8  | 24 | TAA  | 11 | 3  |
| 342609 | 85 | 261031 | 261046 | 2 | 8  | 16 | AC   | 29 | 3  |
| 342613 | 85 | 281221 | 281236 | 2 | 8  | 16 | TG   | 24 | 6  |
| 342614 | 85 | 281841 | 281855 | 3 | 5  | 15 | CTT  | 18 | 3  |
| 342618 | 85 | 284390 | 284413 | 3 | 8  | 24 | ATT  | 26 | 4  |
| 342623 | 85 | 295990 | 296001 | 2 | 6  | 12 | TG   | 28 | 3  |
| 342624 | 85 | 296083 | 296114 | 4 | 8  | 32 | TATC | 11 | 11 |
| 342636 | 85 | 333258 | 333289 | 4 | 8  | 32 | TCTA | 23 | 10 |
| 342638 | 85 | 334957 | 334968 | 2 | 6  | 12 | GA   | 26 | 4  |
| 342644 | 85 | 344488 | 344507 | 4 | 5  | 20 | CATC | 27 | 3  |
| 342659 | 85 | 388818 | 388855 | 2 | 19 | 38 | CA   | 7  | 6  |
| 342664 | 85 | 427008 | 427028 | 3 | 7  | 21 | TGT  | 31 | 3  |
| 342673 | 85 | 450726 | 450755 | 2 | 15 | 30 | CA   | 12 | 9  |
| 342682 | 85 | 462132 | 462159 | 4 | 7  | 28 | GGCA | 23 | 14 |
| 342689 | 85 | 463772 | 463791 | 2 | 10 | 20 | GT   | 21 | 13 |
| 342691 | 85 | 463899 | 463922 | 3 | 8  | 24 | TCT  | 15 | 7  |
| 342699 | 85 | 466629 | 466650 | 2 | 11 | 22 | CT   | 14 | 4  |
| 342704 | 85 | 467619 | 467642 | 4 | 6  | 24 | GCGT | 22 | 13 |
| 342706 | 85 | 469907 | 469951 | 3 | 15 | 45 | AAG  | 22 | 9  |
| 342708 | 85 | 470608 | 470634 | 3 | 9  | 27 | TGC  | 22 | 5  |
| 342713 | 85 | 475814 | 475833 | 2 | 10 | 20 | AG   | 19 | 9  |
| 342729 | 85 | 503103 | 503114 | 2 | 6  | 12 | GT   | 11 | 3  |
| 342730 | 85 | 503697 | 503708 | 2 | 6  | 12 | TG   | 21 | 4  |
| 342732 | 85 | 504831 | 504842 | 2 | 6  | 12 | TG   | 16 | 8  |
| 342735 | 85 | 514392 | 514403 | 2 | 6  | 12 | GT   | 14 | 3  |
| 342752 | 85 | 597737 | 597762 | 2 | 13 | 26 | CA   | 15 | 4  |
| 342754 | 85 | 604120 | 604149 | 2 | 15 | 30 | GT   | 16 | 13 |
| 342755 | 85 | 604594 | 604617 | 2 | 12 | 24 | CA   | 12 | 7  |
| 342759 | 85 | 616916 | 616949 | 2 | 17 | 34 | AC   | 15 | 7  |
| 342760 | 85 | 621314 | 621343 | 2 | 15 | 30 | AC   | 19 | 13 |
| 342765 | 85 | 639957 | 639972 | 2 | 8  | 16 | GT   | 10 | 9  |
| 342768 | 85 | 647329 | 647343 | 3 | 5  | 15 | TCG  | 23 | 5  |
| 342769 | 85 | 647344 | 647358 | 3 | 5  | 15 | TCC  | 25 | 5  |
| 342773 | 85 | 654508 | 654521 | 2 | 7  | 14 | AC   | 6  | 7  |
| 342777 | 85 | 663579 | 663600 | 2 | 11 | 22 | TC   | 18 | 6  |
| 342778 | 85 | 666277 | 666316 | 4 | 10 | 40 | GTGA | 9  | 8  |
| 342786 | 85 | 678722 | 678761 | 2 | 20 | 40 | GT   | 11 | 9  |
| 342790 | 85 | 686436 | 686463 | 2 | 14 | 28 | AG   | 6  | 5  |
| 342791 | 85 | 687440 | 687467 | 2 | 14 | 28 | CT   | 14 | 5  |
| 342792 | 85 | 691507 | 691532 | 2 | 13 | 26 | GT   | 16 | 7  |
| 342797 | 85 | 698804 | 698843 | 4 | 10 | 40 | AATA | 10 | 6  |
| 342805 | 85 | 707614 | 707631 | 2 | 9  | 18 | GT   | 13 | 5  |
| 342811 | 85 | 714797 | 714808 | 2 | 6  | 12 | CA   | 19 | 9  |

|        |    |        |        |   |    |    |      |    |    |
|--------|----|--------|--------|---|----|----|------|----|----|
| 342813 | 85 | 725990 | 726010 | 3 | 7  | 21 | GCA  | 26 | 5  |
| 342817 | 85 | 730195 | 730226 | 4 | 8  | 32 | AACT | 12 | 9  |
| 342822 | 85 | 745732 | 745749 | 2 | 9  | 18 | AC   | 11 | 9  |
| 342823 | 85 | 746242 | 746257 | 4 | 4  | 16 | TAGC | 14 | 3  |
| 342825 | 85 | 751204 | 751217 | 2 | 7  | 14 | TG   | 30 | 3  |
| 342829 | 85 | 761681 | 761694 | 2 | 7  | 14 | AC   | 26 | 4  |
| 342864 | 85 | 798173 | 798184 | 2 | 6  | 12 | GT   | 21 | 4  |
| 342865 | 85 | 798216 | 798255 | 2 | 20 | 40 | TG   | 9  | 9  |
| 342877 | 85 | 812822 | 812841 | 4 | 5  | 20 | TCTG | 30 | 3  |
| 342878 | 85 | 812951 | 812964 | 2 | 7  | 14 | CA   | 25 | 4  |
| 342881 | 85 | 818053 | 818086 | 2 | 17 | 34 | TG   | 15 | 11 |
| 342882 | 85 | 818180 | 818193 | 2 | 7  | 14 | GT   | 21 | 3  |
| 342886 | 85 | 818983 | 818994 | 2 | 6  | 12 | TG   | 20 | 5  |
| 342893 | 85 | 826400 | 826415 | 2 | 8  | 16 | CA   | 21 | 3  |
| 342899 | 85 | 846708 | 846739 | 2 | 16 | 32 | GT   | 8  | 8  |
| 342900 | 85 | 848172 | 848195 | 4 | 6  | 24 | CCAT | 14 | 4  |
| 342901 | 85 | 849691 | 849746 | 2 | 28 | 56 | GT   | 6  | 7  |
| 342911 | 85 | 857278 | 857293 | 2 | 8  | 16 | CA   | 22 | 6  |
| 342914 | 85 | 861227 | 861260 | 2 | 17 | 34 | GT   | 8  | 3  |
| 342915 | 85 | 862012 | 862041 | 3 | 10 | 30 | AGG  | 11 | 5  |
| 342916 | 85 | 863261 | 863280 | 2 | 10 | 20 | TG   | 23 | 3  |
| 342917 | 85 | 863312 | 863327 | 2 | 8  | 16 | TG   | 18 | 8  |
| 342918 | 85 | 867155 | 867220 | 2 | 33 | 66 | TG   | 6  | 7  |
| 342927 | 85 | 874572 | 874583 | 2 | 6  | 12 | AG   | 11 | 3  |
| 342937 | 85 | 875905 | 875916 | 2 | 6  | 12 | CA   | 29 | 4  |
| 342946 | 85 | 880724 | 880739 | 2 | 8  | 16 | CA   | 12 | 14 |
| 342947 | 85 | 881522 | 881549 | 2 | 14 | 28 | GT   | 13 | 9  |
| 342949 | 85 | 883755 | 883780 | 2 | 13 | 26 | CA   | 14 | 9  |
| 342960 | 85 | 896837 | 896874 | 2 | 19 | 38 | CA   | 11 | 10 |
| 342965 | 85 | 903562 | 903587 | 2 | 13 | 26 | TG   | 23 | 6  |
| 342970 | 85 | 908581 | 908606 | 2 | 13 | 26 | TG   | 15 | 9  |
| 342972 | 85 | 911900 | 911929 | 2 | 15 | 30 | TG   | 11 | 9  |
| 342974 | 85 | 912881 | 912898 | 2 | 9  | 18 | TC   | 16 | 5  |
| 342977 | 85 | 914360 | 914373 | 2 | 7  | 14 | AC   | 26 | 3  |
| 342979 | 85 | 916378 | 916401 | 2 | 12 | 24 | TG   | 17 | 3  |
| 342981 | 85 | 916661 | 916674 | 2 | 7  | 14 | CA   | 28 | 3  |
| 342982 | 85 | 918181 | 918210 | 2 | 15 | 30 | AC   | 7  | 6  |
| 342983 | 85 | 920168 | 920179 | 2 | 6  | 12 | CA   | 32 | 7  |
| 342985 | 85 | 920749 | 920760 | 2 | 6  | 12 | TG   | 15 | 8  |
| 342991 | 85 | 925500 | 925511 | 2 | 6  | 12 | GT   | 22 | 7  |
| 342992 | 85 | 925891 | 925914 | 3 | 8  | 24 | TTC  | 19 | 6  |
| 342993 | 85 | 926832 | 926859 | 2 | 14 | 28 | TG   | 8  | 7  |
| 342996 | 85 | 929950 | 929975 | 2 | 13 | 26 | GT   | 18 | 5  |
| 342998 | 85 | 934952 | 934983 | 2 | 16 | 32 | TG   | 9  | 3  |
| 343000 | 85 | 936600 | 936621 | 2 | 11 | 22 | TG   | 19 | 4  |
| 343007 | 85 | 942704 | 942733 | 2 | 15 | 30 | TG   | 15 | 10 |
| 343008 | 85 | 944132 | 944143 | 2 | 6  | 12 | AC   | 14 | 6  |
| 343017 | 85 | 948440 | 948463 | 2 | 12 | 24 | AC   | 10 | 8  |
| 343018 | 85 | 948766 | 948777 | 2 | 6  | 12 | TG   | 22 | 5  |
| 343019 | 85 | 952220 | 952249 | 2 | 15 | 30 | AC   | 9  | 6  |
| 343020 | 85 | 953821 | 953844 | 2 | 12 | 24 | CA   | 12 | 8  |

|        |    |         |         |   |    |    |      |    |    |
|--------|----|---------|---------|---|----|----|------|----|----|
| 343022 | 85 | 955378  | 955407  | 2 | 15 | 30 | TG   | 12 | 6  |
| 343023 | 85 | 956191  | 956206  | 2 | 8  | 16 | CT   | 28 | 4  |
| 343031 | 85 | 960101  | 960116  | 2 | 8  | 16 | TC   | 13 | 5  |
| 343035 | 85 | 961342  | 961361  | 2 | 10 | 20 | CA   | 21 | 5  |
| 343040 | 85 | 973352  | 973367  | 4 | 4  | 16 | TTTC | 20 | 4  |
| 343049 | 85 | 985671  | 985690  | 4 | 5  | 20 | CTTT | 22 | 4  |
| 343050 | 85 | 985915  | 985934  | 2 | 10 | 20 | GT   | 10 | 9  |
| 343057 | 85 | 989823  | 989838  | 2 | 8  | 16 | GT   | 18 | 8  |
| 343058 | 85 | 990010  | 990041  | 2 | 16 | 32 | CA   | 9  | 8  |
| 343060 | 85 | 991617  | 991630  | 2 | 7  | 14 | AC   | 21 | 4  |
| 343061 | 85 | 991859  | 991900  | 2 | 21 | 42 | TG   | 14 | 12 |
| 343065 | 85 | 998290  | 998307  | 2 | 9  | 18 | TG   | 11 | 7  |
| 343066 | 85 | 999200  | 999214  | 3 | 5  | 15 | GTG  | 25 | 3  |
| 343067 | 85 | 999387  | 999412  | 2 | 13 | 26 | CA   | 17 | 12 |
| 343079 | 85 | 1014423 | 1014460 | 2 | 19 | 38 | GT   | 8  | 8  |
| 343080 | 85 | 1015328 | 1015343 | 2 | 8  | 16 | TG   | 24 | 10 |
| 343083 | 85 | 1028373 | 1028392 | 4 | 5  | 20 | CTTT | 29 | 3  |
| 343092 | 85 | 1060237 | 1060264 | 2 | 14 | 28 | AC   | 21 | 16 |
| 343093 | 85 | 1060481 | 1060522 | 2 | 21 | 42 | CT   | 7  | 8  |
| 343096 | 85 | 1060976 | 1060997 | 2 | 11 | 22 | TG   | 23 | 7  |
| 343097 | 85 | 1061160 | 1061195 | 2 | 18 | 36 | CA   | 7  | 9  |
| 343098 | 85 | 1063954 | 1063983 | 2 | 15 | 30 | GT   | 22 | 15 |
| 343100 | 85 | 1065221 | 1065236 | 4 | 4  | 16 | TTTG | 26 | 3  |
| 343104 | 85 | 1066935 | 1066948 | 2 | 7  | 14 | AC   | 23 | 7  |
| 343105 | 85 | 1066950 | 1066967 | 2 | 9  | 18 | CA   | 19 | 7  |
| 343107 | 85 | 1068795 | 1068806 | 2 | 6  | 12 | TC   | 22 | 3  |
| 343108 | 85 | 1069329 | 1069342 | 2 | 7  | 14 | TG   | 22 | 3  |
| 343112 | 85 | 1072398 | 1072429 | 2 | 16 | 32 | GT   | 15 | 11 |
| 343114 | 85 | 1074384 | 1074395 | 2 | 6  | 12 | GT   | 30 | 4  |
| 343123 | 85 | 1091588 | 1091613 | 2 | 13 | 26 | GT   | 14 | 8  |
| 343126 | 85 | 1103026 | 1103049 | 4 | 6  | 24 | AATG | 20 | 3  |
| 343128 | 85 | 1111154 | 1111213 | 4 | 15 | 60 | CATC | 24 | 19 |
| 343129 | 85 | 1111731 | 1111760 | 3 | 10 | 30 | CTC  | 12 | 6  |
| 343130 | 85 | 1111912 | 1111933 | 2 | 11 | 22 | TG   | 23 | 3  |
| 343133 | 85 | 1131450 | 1131465 | 2 | 8  | 16 | TG   | 11 | 3  |
| 343134 | 85 | 1131468 | 1131481 | 2 | 7  | 14 | TG   | 10 | 4  |
| 343136 | 85 | 1137521 | 1137554 | 2 | 17 | 34 | CA   | 6  | 6  |
| 343140 | 85 | 1146217 | 1146234 | 2 | 9  | 18 | CA   | 19 | 7  |
| 343148 | 85 | 1174278 | 1174311 | 2 | 17 | 34 | TG   | 13 | 11 |
| 343152 | 85 | 1179416 | 1179447 | 2 | 16 | 32 | AC   | 13 | 10 |
| 343157 | 85 | 1184838 | 1184863 | 2 | 13 | 26 | GA   | 14 | 6  |
| 343164 | 85 | 1198480 | 1198497 | 2 | 9  | 18 | CA   | 6  | 9  |
| 343168 | 85 | 1199383 | 1199420 | 2 | 19 | 38 | TG   | 8  | 12 |
| 343170 | 85 | 1206702 | 1206713 | 2 | 6  | 12 | AT   | 19 | 5  |
| 343172 | 85 | 1217371 | 1217396 | 2 | 13 | 26 | GA   | 7  | 3  |
| 343174 | 85 | 1223395 | 1223412 | 3 | 6  | 18 | TGT  | 25 | 5  |
| 343176 | 85 | 1225702 | 1225717 | 4 | 4  | 16 | AAAT | 19 | 8  |
| 343178 | 85 | 1231791 | 1231854 | 4 | 16 | 64 | TTCT | 16 | 8  |
| 343179 | 85 | 1232094 | 1232109 | 2 | 8  | 16 | CA   | 21 | 10 |
| 343185 | 85 | 1243709 | 1243732 | 4 | 6  | 24 | TATC | 34 | 4  |
| 343186 | 85 | 1246696 | 1246717 | 2 | 11 | 22 | GT   | 19 | 4  |

|        |    |         |         |   |    |    |      |    |    |
|--------|----|---------|---------|---|----|----|------|----|----|
| 343187 | 85 | 1247450 | 1247473 | 2 | 12 | 24 | CA   | 24 | 6  |
| 343195 | 85 | 1260554 | 1260575 | 2 | 11 | 22 | TG   | 27 | 8  |
| 343206 | 85 | 1275509 | 1275528 | 4 | 5  | 20 | GAGG | 10 | 3  |
| 343207 | 85 | 1275925 | 1275976 | 2 | 26 | 52 | GT   | 14 | 13 |
| 343208 | 85 | 1276084 | 1276103 | 2 | 10 | 20 | AC   | 17 | 8  |
| 343213 | 85 | 1283950 | 1283967 | 3 | 6  | 18 | AAG  | 21 | 5  |
| 343215 | 85 | 1285555 | 1285572 | 2 | 9  | 18 | AT   | 10 | 5  |
| 343220 | 85 | 1288610 | 1288637 | 2 | 14 | 28 | CA   | 15 | 6  |
| 343228 | 85 | 1307873 | 1307900 | 2 | 14 | 28 | AC   | 15 | 15 |
| 343229 | 85 | 1311541 | 1311560 | 2 | 10 | 20 | CA   | 24 | 10 |
| 343230 | 85 | 1312674 | 1312687 | 2 | 7  | 14 | AC   | 25 | 3  |
| 343231 | 85 | 1313426 | 1313455 | 2 | 15 | 30 | CA   | 19 | 10 |
| 343239 | 85 | 1320842 | 1320865 | 2 | 12 | 24 | CA   | 22 | 15 |
| 343241 | 85 | 1322869 | 1322883 | 3 | 5  | 15 | CAC  | 27 | 5  |
| 343247 | 85 | 1326652 | 1326681 | 2 | 15 | 30 | AC   | 16 | 12 |
| 343248 | 85 | 1328345 | 1328377 | 3 | 11 | 33 | GGA  | 12 | 8  |
| 343250 | 85 | 1328557 | 1328582 | 2 | 13 | 26 | CA   | 15 | 6  |
| 343251 | 85 | 1329091 | 1329102 | 2 | 6  | 12 | TG   | 13 | 7  |
| 343258 | 85 | 1341319 | 1341332 | 2 | 7  | 14 | TG   | 20 | 8  |
| 343261 | 85 | 1348354 | 1348365 | 2 | 6  | 12 | TG   | 20 | 3  |
| 343265 | 85 | 1350676 | 1350701 | 2 | 13 | 26 | AC   | 7  | 9  |
| 343266 | 85 | 1353185 | 1353206 | 2 | 11 | 22 | TG   | 17 | 4  |
| 343271 | 85 | 1372439 | 1372452 | 2 | 7  | 14 | GT   | 15 | 8  |
| 343272 | 85 | 1373425 | 1373446 | 2 | 11 | 22 | AC   | 11 | 12 |
| 343280 | 85 | 1398464 | 1398503 | 4 | 10 | 40 | CATC | 22 | 4  |
| 343287 | 85 | 1444881 | 1444906 | 2 | 13 | 26 | AC   | 12 | 9  |
| 343299 | 85 | 1458779 | 1458790 | 2 | 6  | 12 | TG   | 26 | 6  |
| 343301 | 85 | 1463134 | 1463149 | 4 | 4  | 16 | CGCC | 28 | 3  |
| 343302 | 85 | 1463150 | 1463165 | 4 | 4  | 16 | TGCC | 23 | 4  |
| 343303 | 85 | 1464940 | 1464951 | 2 | 6  | 12 | TG   | 18 | 4  |
| 343315 | 85 | 1502221 | 1502254 | 2 | 17 | 34 | TG   | 6  | 4  |
| 343320 | 85 | 1525156 | 1525189 | 2 | 17 | 34 | AC   | 8  | 11 |
| 343331 | 85 | 1567506 | 1567521 | 4 | 4  | 16 | TGCA | 33 | 3  |
| 343333 | 85 | 1572145 | 1572178 | 2 | 17 | 34 | TG   | 8  | 8  |
| 343334 | 85 | 1572333 | 1572348 | 2 | 8  | 16 | AG   | 22 | 3  |
| 343335 | 85 | 1574915 | 1574932 | 2 | 9  | 18 | CA   | 23 | 7  |
| 343336 | 85 | 1575771 | 1575786 | 4 | 4  | 16 | AAAT | 10 | 5  |
| 343338 | 85 | 1577218 | 1577229 | 2 | 6  | 12 | GA   | 17 | 8  |
| 343341 | 85 | 1584104 | 1584115 | 2 | 6  | 12 | AC   | 23 | 3  |
| 343343 | 85 | 1588794 | 1588809 | 4 | 4  | 16 | ATTT | 24 | 3  |
| 343349 | 85 | 1606837 | 1606862 | 2 | 13 | 26 | GT   | 8  | 9  |
| 343350 | 85 | 1611552 | 1611563 | 2 | 6  | 12 | AC   | 28 | 3  |
| 343353 | 85 | 1617194 | 1617241 | 4 | 12 | 48 | TTCC | 22 | 7  |
| 343354 | 85 | 1621638 | 1621673 | 2 | 18 | 36 | AC   | 10 | 7  |
| 343356 | 85 | 1627169 | 1627192 | 2 | 12 | 24 | AC   | 15 | 5  |
| 343361 | 85 | 1640008 | 1640035 | 4 | 7  | 28 | GTTA | 22 | 6  |
| 343363 | 85 | 1646365 | 1646384 | 2 | 10 | 20 | TG   | 17 | 8  |
| 343373 | 85 | 1677526 | 1677561 | 4 | 9  | 36 | AAAG | 19 | 5  |
| 343377 | 85 | 1697568 | 1697601 | 2 | 17 | 34 | CA   | 16 | 14 |
| 343392 | 85 | 1748189 | 1748206 | 2 | 9  | 18 | CA   | 15 | 6  |
| 343394 | 85 | 1762546 | 1762557 | 2 | 6  | 12 | GA   | 25 | 3  |

|        |    |         |         |   |    |    |     |    |    |
|--------|----|---------|---------|---|----|----|-----|----|----|
| 343398 | 85 | 1766597 | 1766622 | 2 | 13 | 26 | CA  | 16 | 5  |
| 343401 | 85 | 1770192 | 1770209 | 2 | 9  | 18 | TG  | 23 | 5  |
| 343402 | 85 | 1770881 | 1770901 | 3 | 7  | 21 | CAT | 30 | 3  |
| 343403 | 85 | 1772229 | 1772272 | 2 | 22 | 44 | CA  | 16 | 11 |
| 343428 | 85 | 1824482 | 1824496 | 3 | 5  | 15 | TAT | 28 | 4  |
| 343437 | 85 | 1841582 | 1841597 | 2 | 8  | 16 | CT  | 10 | 6  |
| 343441 | 85 | 1849050 | 1849061 | 2 | 6  | 12 | TG  | 29 | 3  |
| 343449 | 85 | 1864727 | 1864766 | 2 | 20 | 40 | TG  | 13 | 12 |
| 343453 | 85 | 1871503 | 1871526 | 2 | 12 | 24 | TG  | 25 | 9  |
| 343454 | 85 | 1871597 | 1871630 | 2 | 17 | 34 | CA  | 8  | 9  |
| 343456 | 85 | 1872502 | 1872515 | 2 | 7  | 14 | GT  | 13 | 9  |
| 343459 | 85 | 1877505 | 1877530 | 2 | 13 | 26 | GT  | 15 | 7  |
| 343462 | 85 | 1878945 | 1878974 | 2 | 15 | 30 | CA  | 22 | 13 |
| 343465 | 85 | 1881629 | 1881666 | 2 | 19 | 38 | TG  | 10 | 10 |
| 343466 | 85 | 1881822 | 1881833 | 2 | 6  | 12 | GT  | 13 | 6  |
| 343467 | 85 | 1881836 | 1881851 | 2 | 8  | 16 | GT  | 23 | 5  |
| 343468 | 85 | 1882156 | 1882193 | 2 | 19 | 38 | TG  | 11 | 7  |
| 343469 | 85 | 1882285 | 1882318 | 2 | 17 | 34 | AC  | 13 | 8  |
| 343473 | 85 | 1883204 | 1883225 | 2 | 11 | 22 | TG  | 11 | 8  |
| 343475 | 85 | 1884006 | 1884021 | 2 | 8  | 16 | AC  | 18 | 4  |
| 343476 | 85 | 1884134 | 1884165 | 2 | 16 | 32 | AC  | 22 | 10 |
| 343480 | 85 | 1887255 | 1887270 | 2 | 8  | 16 | GT  | 20 | 11 |
| 343482 | 85 | 1888031 | 1888060 | 2 | 15 | 30 | GT  | 15 | 4  |
| 343483 | 85 | 1888683 | 1888696 | 2 | 7  | 14 | AC  | 27 | 7  |
| 343484 | 85 | 1890010 | 1890036 | 3 | 9  | 27 | AAT | 13 | 5  |
| 343485 | 85 | 1890949 | 1890966 | 2 | 9  | 18 | AC  | 11 | 6  |
| 343486 | 85 | 1891059 | 1891100 | 2 | 21 | 42 | CA  | 8  | 6  |
| 343488 | 85 | 1891765 | 1891794 | 2 | 15 | 30 | AC  | 17 | 7  |
| 343495 | 85 | 1903421 | 1903454 | 2 | 17 | 34 | CA  | 7  | 8  |
| 343496 | 85 | 1903475 | 1903498 | 3 | 8  | 24 | CCT | 7  | 3  |
| 343497 | 85 | 1903722 | 1903743 | 2 | 11 | 22 | TG  | 17 | 8  |
| 343498 | 85 | 1906945 | 1906966 | 2 | 11 | 22 | AC  | 11 | 10 |
| 343501 | 85 | 1907110 | 1907135 | 2 | 13 | 26 | TC  | 17 | 5  |
| 343502 | 85 | 1907467 | 1907510 | 2 | 22 | 44 | CA  | 7  | 7  |
| 343505 | 85 | 1911583 | 1911620 | 2 | 19 | 38 | AC  | 12 | 9  |
| 343507 | 85 | 1913175 | 1913198 | 2 | 12 | 24 | CA  | 21 | 11 |
| 343508 | 85 | 1914937 | 1914964 | 2 | 14 | 28 | GT  | 14 | 12 |
| 343513 | 85 | 1918531 | 1918548 | 2 | 9  | 18 | AC  | 16 | 7  |
| 343516 | 85 | 1919557 | 1919572 | 2 | 8  | 16 | CA  | 6  | 7  |
| 343518 | 85 | 1920091 | 1920117 | 3 | 9  | 27 | CAT | 25 | 5  |
| 343537 | 85 | 1931648 | 1931686 | 3 | 13 | 39 | AGA | 16 | 8  |
| 343539 | 85 | 1933557 | 1933586 | 3 | 10 | 30 | CCT | 15 | 4  |
| 343545 | 85 | 1934730 | 1934753 | 2 | 12 | 24 | CA  | 14 | 10 |
| 343546 | 85 | 1934823 | 1934836 | 2 | 7  | 14 | AG  | 19 | 4  |
| 343549 | 85 | 1938133 | 1938158 | 2 | 13 | 26 | CA  | 13 | 13 |
| 343551 | 85 | 1948767 | 1948784 | 3 | 6  | 18 | ACA | 31 | 6  |
| 343553 | 85 | 1955163 | 1955192 | 2 | 15 | 30 | TG  | 14 | 9  |
| 343571 | 85 | 1966005 | 1966022 | 3 | 6  | 18 | CCT | 15 | 14 |
| 343573 | 85 | 1976577 | 1976596 | 2 | 10 | 20 | GT  | 15 | 6  |
| 343584 | 85 | 1996784 | 1996804 | 3 | 7  | 21 | TCT | 26 | 5  |
| 343590 | 85 | 2006509 | 2006541 | 3 | 11 | 33 | TCA | 25 | 8  |

|        |    |         |         |   |    |    |      |    |    |
|--------|----|---------|---------|---|----|----|------|----|----|
| 343599 | 85 | 2020590 | 2020617 | 4 | 7  | 28 | AGAC | 21 | 6  |
| 343609 | 85 | 2023478 | 2023507 | 2 | 15 | 30 | GT   | 10 | 9  |
| 343611 | 85 | 2023752 | 2023781 | 3 | 10 | 30 | CAT  | 22 | 5  |
| 343612 | 85 | 2024102 | 2024123 | 2 | 11 | 22 | AC   | 13 | 16 |
| 343613 | 85 | 2024788 | 2024803 | 4 | 4  | 16 | CAGG | 14 | 9  |
| 343625 | 85 | 2045762 | 2045783 | 2 | 11 | 22 | TG   | 13 | 10 |
| 343627 | 85 | 2046833 | 2046865 | 3 | 11 | 33 | TAT  | 7  | 6  |
| 343632 | 85 | 2062088 | 2062117 | 2 | 15 | 30 | CA   | 6  | 4  |
| 343655 | 85 | 2104678 | 2104709 | 2 | 16 | 32 | AC   | 16 | 9  |
| 343660 | 85 | 2107808 | 2107833 | 2 | 13 | 26 | TG   | 9  | 6  |
| 343661 | 85 | 2107975 | 2108002 | 2 | 14 | 28 | AC   | 19 | 6  |
| 343663 | 85 | 2109047 | 2109080 | 2 | 17 | 34 | AC   | 11 | 9  |
| 343665 | 85 | 2111034 | 2111067 | 2 | 17 | 34 | GT   | 12 | 11 |
| 343667 | 85 | 2111310 | 2111323 | 2 | 7  | 14 | GT   | 11 | 3  |
| 343668 | 85 | 2111430 | 2111447 | 2 | 9  | 18 | TG   | 18 | 7  |
| 343671 | 85 | 2112476 | 2112497 | 2 | 11 | 22 | TG   | 11 | 4  |
| 343673 | 85 | 2112604 | 2112637 | 2 | 17 | 34 | TG   | 13 | 9  |
| 343674 | 85 | 2112751 | 2112776 | 2 | 13 | 26 | GT   | 9  | 6  |
| 343675 | 85 | 2112843 | 2112882 | 2 | 20 | 40 | GT   | 9  | 9  |
| 343677 | 85 | 2114446 | 2114477 | 2 | 16 | 32 | TG   | 20 | 11 |
| 343679 | 85 | 2118324 | 2118339 | 2 | 8  | 16 | CA   | 15 | 4  |
| 343680 | 85 | 2118344 | 2118359 | 2 | 8  | 16 | CA   | 20 | 5  |
| 343681 | 85 | 2119048 | 2119099 | 2 | 26 | 52 | GT   | 9  | 8  |
| 343682 | 85 | 2121849 | 2121870 | 2 | 11 | 22 | GT   | 24 | 10 |
| 343683 | 85 | 2123295 | 2123339 | 3 | 15 | 45 | TTC  | 17 | 7  |
| 343687 | 85 | 2125199 | 2125256 | 2 | 29 | 58 | AC   | 8  | 7  |
| 343692 | 85 | 2127928 | 2127949 | 2 | 11 | 22 | AC   | 19 | 7  |
| 343693 | 85 | 2129188 | 2129203 | 2 | 8  | 16 | GT   | 18 | 3  |
| 343694 | 85 | 2129226 | 2129241 | 2 | 8  | 16 | TG   | 18 | 5  |
| 343699 | 85 | 2133673 | 2133708 | 2 | 18 | 36 | TG   | 8  | 9  |
| 343709 | 85 | 2139233 | 2139248 | 2 | 8  | 16 | GT   | 19 | 6  |
| 343710 | 85 | 2139283 | 2139300 | 2 | 9  | 18 | AC   | 19 | 9  |
| 343711 | 85 | 2139957 | 2139998 | 3 | 14 | 42 | AAG  | 18 | 14 |
| 343718 | 85 | 2142097 | 2142144 | 3 | 16 | 48 | GCT  | 16 | 10 |
| 343722 | 85 | 2142741 | 2142770 | 3 | 10 | 30 | AGA  | 20 | 5  |
| 343723 | 85 | 2143259 | 2143290 | 2 | 16 | 32 | CA   | 6  | 8  |
| 343724 | 85 | 2143412 | 2143463 | 4 | 13 | 52 | GATA | 11 | 12 |
| 343725 | 85 | 2144195 | 2144226 | 4 | 8  | 32 | TATT | 13 | 13 |
| 343731 | 85 | 2148911 | 2148954 | 2 | 22 | 44 | GT   | 7  | 8  |
| 343736 | 85 | 2155445 | 2155474 | 3 | 10 | 30 | ATC  | 6  | 6  |
| 343746 | 85 | 2167894 | 2167923 | 2 | 15 | 30 | GT   | 21 | 13 |
| 343747 | 85 | 2168040 | 2168063 | 2 | 12 | 24 | AC   | 15 | 10 |
| 343751 | 85 | 2168788 | 2168823 | 2 | 18 | 36 | CA   | 10 | 13 |
| 343752 | 85 | 2175259 | 2175282 | 4 | 6  | 24 | AATC | 37 | 11 |
| 343753 | 85 | 2176328 | 2176351 | 2 | 12 | 24 | AC   | 14 | 7  |
| 343754 | 85 | 2176852 | 2176869 | 3 | 6  | 18 | TGG  | 27 | 7  |
| 343755 | 85 | 2178722 | 2178741 | 2 | 10 | 20 | AC   | 18 | 7  |
| 343756 | 85 | 2179133 | 2179165 | 3 | 11 | 33 | ATA  | 6  | 7  |
| 343767 | 85 | 2187680 | 2187700 | 3 | 7  | 21 | GGA  | 8  | 3  |
| 343769 | 85 | 2190192 | 2190230 | 3 | 13 | 39 | TGA  | 30 | 11 |
| 343773 | 85 | 2191754 | 2191783 | 3 | 10 | 30 | CCT  | 8  | 8  |



|        |    |         |         |   |    |    |      |    |    |
|--------|----|---------|---------|---|----|----|------|----|----|
| 343775 | 85 | 2196068 | 2196089 | 2 | 11 | 22 | GA   | 20 | 6  |
| 343776 | 85 | 2196627 | 2196642 | 2 | 8  | 16 | GT   | 24 | 10 |
| 343780 | 85 | 2197959 | 2197984 | 2 | 13 | 26 | TG   | 15 | 10 |
| 343782 | 85 | 2200335 | 2200358 | 2 | 12 | 24 | GT   | 22 | 6  |
| 343786 | 85 | 2206654 | 2206669 | 2 | 8  | 16 | CA   | 20 | 3  |
| 343787 | 85 | 2209581 | 2209596 | 2 | 8  | 16 | CA   | 17 | 5  |
| 343795 | 85 | 2211377 | 2211398 | 2 | 11 | 22 | CA   | 19 | 11 |
| 343803 | 85 | 2213221 | 2213247 | 3 | 9  | 27 | CTG  | 20 | 5  |
| 343807 | 85 | 2216728 | 2216748 | 3 | 7  | 21 | TGC  | 25 | 5  |
| 343815 | 85 | 2256572 | 2256597 | 2 | 13 | 26 | AC   | 9  | 5  |
| 343817 | 85 | 2258557 | 2258588 | 2 | 16 | 32 | TG   | 12 | 9  |
| 343819 | 85 | 2259538 | 2259567 | 2 | 15 | 30 | TG   | 8  | 10 |
| 343821 | 85 | 2260347 | 2260370 | 2 | 12 | 24 | AC   | 16 | 6  |
| 343822 | 85 | 2260393 | 2260438 | 2 | 23 | 46 | GT   | 11 | 6  |
| 343823 | 85 | 2260786 | 2260833 | 2 | 24 | 48 | GT   | 10 | 8  |
| 343829 | 85 | 2262071 | 2262106 | 2 | 18 | 36 | AC   | 12 | 12 |
| 343834 | 85 | 2263584 | 2263597 | 2 | 7  | 14 | CA   | 9  | 4  |
| 343842 | 85 | 2271699 | 2271710 | 2 | 6  | 12 | AC   | 21 | 3  |
| 343849 | 85 | 2273550 | 2273577 | 2 | 14 | 28 | AC   | 9  | 7  |
| 343852 | 85 | 2277768 | 2277803 | 2 | 18 | 36 | CT   | 8  | 7  |
| 343855 | 85 | 2282474 | 2282509 | 2 | 18 | 36 | TG   | 12 | 11 |
| 343856 | 85 | 2282626 | 2282641 | 2 | 8  | 16 | GT   | 14 | 5  |
| 343857 | 85 | 2282873 | 2282896 | 2 | 12 | 24 | AC   | 19 | 13 |
| 343858 | 85 | 2285129 | 2285140 | 2 | 6  | 12 | GT   | 26 | 6  |
| 343859 | 85 | 2285657 | 2285696 | 2 | 20 | 40 | TG   | 12 | 17 |
| 343865 | 85 | 2301617 | 2301646 | 2 | 15 | 30 | CA   | 12 | 9  |
| 343869 | 85 | 2302593 | 2302619 | 3 | 9  | 27 | TCC  | 15 | 6  |
| 343879 | 85 | 2312830 | 2312847 | 2 | 9  | 18 | GT   | 19 | 4  |
| 343881 | 85 | 2313329 | 2313350 | 2 | 11 | 22 | TG   | 24 | 9  |
| 343885 | 85 | 2314159 | 2314174 | 2 | 8  | 16 | GT   | 9  | 8  |
| 343887 | 85 | 2317574 | 2317594 | 3 | 7  | 21 | CTT  | 29 | 5  |
| 343892 | 85 | 2321523 | 2321536 | 2 | 7  | 14 | AC   | 30 | 5  |
| 343893 | 85 | 2321727 | 2321748 | 2 | 11 | 22 | GT   | 22 | 7  |
| 343915 | 85 | 2341859 | 2341898 | 2 | 20 | 40 | AC   | 7  | 6  |
| 343916 | 85 | 2347135 | 2347186 | 4 | 13 | 52 | AAGG | 23 | 7  |
| 343920 | 85 | 2348152 | 2348165 | 2 | 7  | 14 | AC   | 11 | 5  |
| 343921 | 85 | 2348169 | 2348180 | 2 | 6  | 12 | CA   | 19 | 8  |
| 343933 | 85 | 2356914 | 2356933 | 2 | 10 | 20 | AC   | 22 | 11 |
| 343934 | 85 | 2357727 | 2357792 | 3 | 22 | 66 | CTT  | 6  | 9  |
| 343945 | 85 | 2359821 | 2359836 | 2 | 8  | 16 | GT   | 20 | 4  |
| 343946 | 85 | 2360012 | 2360039 | 2 | 14 | 28 | AC   | 8  | 4  |
| 343949 | 85 | 2362195 | 2362212 | 3 | 6  | 18 | TGT  | 14 | 3  |
| 343953 | 85 | 2367776 | 2367789 | 2 | 7  | 14 | TG   | 15 | 7  |
| 343955 | 85 | 2367913 | 2367938 | 2 | 13 | 26 | AC   | 10 | 4  |
| 343956 | 85 | 2367988 | 2368011 | 2 | 12 | 24 | AC   | 15 | 4  |
| 343957 | 85 | 2368579 | 2368602 | 3 | 8  | 24 | GAG  | 32 | 4  |
| 343958 | 85 | 2369173 | 2369196 | 2 | 12 | 24 | GT   | 18 | 8  |
| 343961 | 85 | 2373014 | 2373051 | 2 | 19 | 38 | CA   | 9  | 5  |
| 343964 | 85 | 2374153 | 2374166 | 2 | 7  | 14 | AC   | 27 | 4  |
| 343967 | 85 | 2374695 | 2374720 | 2 | 13 | 26 | AC   | 18 | 9  |
| 343968 | 85 | 2375620 | 2375673 | 3 | 18 | 54 | TTC  | 21 | 10 |

|        |    |        |        |   |    |    |      |    |    |
|--------|----|--------|--------|---|----|----|------|----|----|
| 343980 | 86 | 8669   | 8689   | 3 | 7  | 21 | TTC  | 27 | 7  |
| 343984 | 86 | 12275  | 12290  | 2 | 8  | 16 | TG   | 22 | 9  |
| 343990 | 86 | 23911  | 23922  | 2 | 6  | 12 | CG   | 21 | 16 |
| 343991 | 86 | 24099  | 24119  | 3 | 7  | 21 | GCT  | 23 | 6  |
| 343993 | 86 | 26075  | 26092  | 2 | 9  | 18 | AG   | 14 | 5  |
| 344007 | 86 | 38767  | 38784  | 2 | 9  | 18 | AC   | 13 | 7  |
| 344020 | 86 | 59993  | 60010  | 3 | 6  | 18 | ATT  | 15 | 4  |
| 344021 | 86 | 60086  | 60124  | 3 | 13 | 39 | GAT  | 6  | 5  |
| 344022 | 86 | 60925  | 60948  | 2 | 12 | 24 | GT   | 16 | 7  |
| 344023 | 86 | 61044  | 61071  | 2 | 14 | 28 | GT   | 14 | 8  |
| 344025 | 86 | 63522  | 63539  | 2 | 9  | 18 | GT   | 27 | 7  |
| 344027 | 86 | 67237  | 67251  | 3 | 5  | 15 | TGC  | 25 | 4  |
| 344029 | 86 | 69934  | 69973  | 4 | 10 | 40 | ATCT | 14 | 14 |
| 344030 | 86 | 72488  | 72503  | 2 | 8  | 16 | AC   | 16 | 5  |
| 344037 | 86 | 92935  | 92952  | 3 | 6  | 18 | GAA  | 31 | 4  |
| 344039 | 86 | 96182  | 96226  | 3 | 15 | 45 | GAA  | 28 | 14 |
| 344042 | 86 | 103680 | 103703 | 4 | 6  | 24 | CAGT | 20 | 4  |
| 344045 | 86 | 110880 | 110895 | 2 | 8  | 16 | CA   | 23 | 9  |
| 344048 | 86 | 116940 | 116957 | 2 | 9  | 18 | GT   | 26 | 27 |
| 344051 | 86 | 125544 | 125558 | 3 | 5  | 15 | ACA  | 29 | 3  |
| 344053 | 86 | 129212 | 129241 | 2 | 15 | 30 | TG   | 10 | 11 |
| 344056 | 86 | 133694 | 133705 | 2 | 6  | 12 | GA   | 21 | 3  |
| 344060 | 86 | 138661 | 138680 | 4 | 5  | 20 | AAAT | 32 | 3  |
| 344061 | 86 | 143068 | 143079 | 2 | 6  | 12 | TA   | 13 | 4  |
| 344063 | 86 | 163185 | 163198 | 2 | 7  | 14 | GA   | 22 | 4  |
| 344064 | 86 | 163232 | 163247 | 2 | 8  | 16 | AG   | 17 | 4  |
| 344065 | 86 | 163376 | 163399 | 2 | 12 | 24 | AC   | 19 | 3  |
| 344068 | 86 | 164268 | 164287 | 2 | 10 | 20 | TG   | 14 | 6  |
| 344069 | 86 | 171253 | 171273 | 3 | 7  | 21 | CTC  | 15 | 3  |
| 344071 | 86 | 172120 | 172134 | 3 | 5  | 15 | TGT  | 24 | 4  |
| 344072 | 86 | 172518 | 172537 | 2 | 10 | 20 | TG   | 17 | 5  |
| 344074 | 86 | 177268 | 177305 | 2 | 19 | 38 | TG   | 26 | 17 |
| 344075 | 86 | 182636 | 182661 | 2 | 13 | 26 | GT   | 11 | 5  |
| 344076 | 86 | 183670 | 183684 | 3 | 5  | 15 | CTC  | 26 | 3  |
| 344079 | 86 | 185064 | 185096 | 3 | 11 | 33 | TCT  | 8  | 7  |
| 344110 | 86 | 230331 | 230356 | 2 | 13 | 26 | CA   | 13 | 10 |
| 344111 | 86 | 232867 | 232902 | 2 | 18 | 36 | CA   | 6  | 8  |
| 344113 | 86 | 248173 | 248188 | 2 | 8  | 16 | AT   | 20 | 3  |
| 344114 | 86 | 249799 | 249816 | 2 | 9  | 18 | CA   | 13 | 5  |
| 344115 | 86 | 252473 | 252484 | 2 | 6  | 12 | CA   | 28 | 3  |
| 344119 | 86 | 266289 | 266336 | 2 | 24 | 48 | CA   | 6  | 8  |
| 344121 | 86 | 270574 | 270621 | 2 | 24 | 48 | TG   | 10 | 9  |
| 344123 | 86 | 276244 | 276258 | 3 | 5  | 15 | TTG  | 14 | 4  |
| 344124 | 86 | 276692 | 276707 | 2 | 8  | 16 | CA   | 22 | 8  |
| 344125 | 86 | 277947 | 277964 | 2 | 9  | 18 | CA   | 18 | 15 |
| 344126 | 86 | 277966 | 277977 | 2 | 6  | 12 | AC   | 18 | 11 |
| 344135 | 86 | 285252 | 285281 | 2 | 15 | 30 | GT   | 9  | 8  |
| 344136 | 86 | 287484 | 287499 | 2 | 8  | 16 | TG   | 30 | 6  |
| 344137 | 86 | 289642 | 289671 | 2 | 15 | 30 | GT   | 10 | 6  |
| 344138 | 86 | 292477 | 292491 | 3 | 5  | 15 | CCG  | 26 | 22 |
| 344140 | 86 | 303305 | 303328 | 3 | 8  | 24 | TTC  | 25 | 5  |

|        |    |        |        |   |    |    |      |    |    |
|--------|----|--------|--------|---|----|----|------|----|----|
| 344141 | 86 | 303808 | 303833 | 2 | 13 | 26 | CA   | 17 | 6  |
| 344142 | 86 | 304089 | 304108 | 2 | 10 | 20 | TG   | 20 | 8  |
| 344143 | 86 | 307817 | 307878 | 2 | 31 | 62 | GT   | 11 | 12 |
| 344150 | 86 | 316498 | 316518 | 3 | 7  | 21 | CTT  | 26 | 6  |
| 344152 | 86 | 317782 | 317797 | 2 | 8  | 16 | GT   | 22 | 8  |
| 344153 | 86 | 317800 | 317813 | 2 | 7  | 14 | GT   | 24 | 11 |
| 344159 | 86 | 320189 | 320200 | 2 | 6  | 12 | AG   | 24 | 4  |
| 344160 | 86 | 321239 | 321253 | 3 | 5  | 15 | GCT  | 23 | 7  |
| 344161 | 86 | 321467 | 321490 | 3 | 8  | 24 | TCT  | 27 | 7  |
| 344162 | 86 | 324689 | 324720 | 2 | 16 | 32 | TG   | 8  | 6  |
| 344164 | 86 | 329370 | 329397 | 2 | 14 | 28 | GT   | 9  | 7  |
| 344165 | 86 | 333565 | 333576 | 2 | 6  | 12 | TG   | 23 | 5  |
| 344168 | 86 | 356833 | 356874 | 2 | 21 | 42 | TG   | 9  | 8  |
| 344171 | 86 | 358468 | 358488 | 3 | 7  | 21 | CTC  | 29 | 5  |
| 344172 | 86 | 359810 | 359845 | 2 | 18 | 36 | AC   | 8  | 11 |
| 344175 | 86 | 359891 | 359902 | 2 | 6  | 12 | AC   | 11 | 4  |
| 344176 | 86 | 360784 | 360807 | 3 | 8  | 24 | GCT  | 26 | 11 |
| 344177 | 86 | 362883 | 362894 | 2 | 6  | 12 | CA   | 19 | 3  |
| 344178 | 86 | 363680 | 363691 | 2 | 6  | 12 | AC   | 13 | 9  |
| 344179 | 86 | 363925 | 363958 | 2 | 17 | 34 | CA   | 10 | 14 |
| 344181 | 86 | 364807 | 364838 | 2 | 16 | 32 | TG   | 10 | 7  |
| 344182 | 86 | 365029 | 365040 | 2 | 6  | 12 | CA   | 30 | 5  |
| 344186 | 86 | 370820 | 370839 | 2 | 10 | 20 | AC   | 19 | 12 |
| 344188 | 86 | 371447 | 371464 | 3 | 6  | 18 | TCT  | 22 | 5  |
| 344190 | 86 | 385691 | 385714 | 2 | 12 | 24 | CA   | 25 | 10 |
| 344191 | 86 | 385905 | 385932 | 2 | 14 | 28 | GT   | 15 | 9  |
| 344195 | 86 | 388645 | 388684 | 4 | 10 | 40 | TAGA | 18 | 17 |
| 344196 | 86 | 390277 | 390288 | 2 | 6  | 12 | TA   | 6  | 10 |
| 344198 | 86 | 390828 | 390869 | 2 | 21 | 42 | TG   | 15 | 14 |
| 344200 | 86 | 401101 | 401114 | 2 | 7  | 14 | GT   | 29 | 3  |
| 344203 | 86 | 403184 | 403207 | 3 | 8  | 24 | ATT  | 8  | 6  |
| 344205 | 86 | 411589 | 411618 | 3 | 10 | 30 | GAG  | 12 | 8  |
| 344208 | 86 | 414371 | 414400 | 2 | 15 | 30 | TG   | 13 | 8  |
| 344215 | 86 | 439973 | 440010 | 2 | 19 | 38 | GT   | 6  | 8  |
| 344218 | 86 | 443940 | 443955 | 2 | 8  | 16 | GA   | 8  | 10 |
| 344226 | 86 | 458078 | 458109 | 2 | 16 | 32 | AC   | 18 | 10 |
| 344227 | 86 | 460597 | 460628 | 4 | 8  | 32 | ACAG | 26 | 8  |
| 344230 | 86 | 472480 | 472497 | 3 | 6  | 18 | AGC  | 27 | 5  |
| 344231 | 86 | 473096 | 473119 | 4 | 6  | 24 | CTGT | 26 | 10 |
| 344232 | 86 | 475301 | 475330 | 3 | 10 | 30 | TCT  | 21 | 4  |
| 344233 | 86 | 475910 | 475925 | 2 | 8  | 16 | TG   | 23 | 4  |
| 344241 | 86 | 490154 | 490167 | 2 | 7  | 14 | AT   | 18 | 19 |
| 344242 | 86 | 493820 | 493834 | 3 | 5  | 15 | CCA  | 8  | 8  |
| 344247 | 86 | 510770 | 510784 | 3 | 5  | 15 | TGT  | 22 | 3  |
| 344259 | 86 | 542621 | 542640 | 4 | 5  | 20 | ATCT | 14 | 10 |
| 344264 | 86 | 547547 | 547564 | 3 | 6  | 18 | GCC  | 34 | 4  |
| 344265 | 86 | 548061 | 548078 | 2 | 9  | 18 | AC   | 26 | 11 |
| 344271 | 86 | 552802 | 552817 | 2 | 8  | 16 | AG   | 22 | 7  |
| 344275 | 86 | 553241 | 553284 | 2 | 22 | 44 | GT   | 10 | 12 |
| 344280 | 86 | 556720 | 556734 | 3 | 5  | 15 | CTT  | 23 | 3  |
| 344281 | 86 | 558760 | 558785 | 2 | 13 | 26 | AC   | 21 | 10 |

|        |    |         |         |   |    |    |      |    |    |
|--------|----|---------|---------|---|----|----|------|----|----|
| 344282 | 86 | 559088  | 559099  | 2 | 6  | 12 | GT   | 27 | 3  |
| 344283 | 86 | 559820  | 559841  | 2 | 11 | 22 | GT   | 21 | 6  |
| 344289 | 86 | 569966  | 570003  | 2 | 19 | 38 | AC   | 9  | 11 |
| 344293 | 86 | 577902  | 577917  | 4 | 4  | 16 | TTCC | 14 | 5  |
| 344295 | 86 | 578995  | 579018  | 3 | 8  | 24 | TTC  | 29 | 9  |
| 344300 | 86 | 627342  | 627353  | 2 | 6  | 12 | CT   | 27 | 6  |
| 344305 | 86 | 642411  | 642425  | 3 | 5  | 15 | TAA  | 9  | 3  |
| 344308 | 86 | 661209  | 661224  | 2 | 8  | 16 | CA   | 36 | 3  |
| 344316 | 86 | 671330  | 671345  | 4 | 4  | 16 | TTTG | 25 | 3  |
| 344322 | 86 | 690698  | 690709  | 2 | 6  | 12 | CA   | 20 | 4  |
| 344330 | 86 | 737927  | 737960  | 2 | 17 | 34 | GT   | 13 | 6  |
| 344333 | 86 | 741998  | 742013  | 2 | 8  | 16 | AC   | 7  | 3  |
| 344340 | 86 | 763818  | 763837  | 2 | 10 | 20 | CA   | 23 | 8  |
| 344341 | 86 | 764434  | 764445  | 2 | 6  | 12 | CA   | 29 | 3  |
| 344347 | 86 | 778658  | 778687  | 2 | 15 | 30 | CA   | 7  | 9  |
| 344351 | 86 | 792498  | 792513  | 4 | 4  | 16 | CATA | 23 | 4  |
| 344354 | 86 | 795811  | 795824  | 2 | 7  | 14 | AC   | 22 | 3  |
| 344355 | 86 | 803371  | 803385  | 3 | 5  | 15 | GGA  | 26 | 3  |
| 344372 | 86 | 856491  | 856502  | 2 | 6  | 12 | TG   | 26 | 3  |
| 344386 | 86 | 886698  | 886733  | 2 | 18 | 36 | TC   | 12 | 5  |
| 344388 | 86 | 887323  | 887342  | 4 | 5  | 20 | TGTC | 32 | 4  |
| 344390 | 86 | 894316  | 894341  | 2 | 13 | 26 | AC   | 10 | 4  |
| 344392 | 86 | 896426  | 896437  | 2 | 6  | 12 | TA   | 10 | 3  |
| 344396 | 86 | 908155  | 908178  | 4 | 6  | 24 | AATC | 14 | 3  |
| 344401 | 86 | 919365  | 919376  | 2 | 6  | 12 | GT   | 27 | 4  |
| 344413 | 86 | 946007  | 946022  | 2 | 8  | 16 | TG   | 18 | 5  |
| 344419 | 86 | 973070  | 973123  | 2 | 27 | 54 | TG   | 8  | 9  |
| 344424 | 86 | 978783  | 978818  | 2 | 18 | 36 | TG   | 8  | 7  |
| 344445 | 86 | 1035238 | 1035281 | 2 | 22 | 44 | CA   | 10 | 10 |
| 344478 | 86 | 1113379 | 1113444 | 2 | 33 | 66 | AC   | 6  | 7  |
| 344479 | 86 | 1123986 | 1124009 | 2 | 12 | 24 | TG   | 14 | 5  |
| 344488 | 86 | 1137204 | 1137215 | 2 | 6  | 12 | AT   | 12 | 3  |
| 344490 | 86 | 1147394 | 1147408 | 3 | 5  | 15 | TAT  | 25 | 3  |
| 344491 | 86 | 1148183 | 1148210 | 2 | 14 | 28 | TG   | 17 | 5  |
| 344515 | 86 | 1197978 | 1198015 | 2 | 19 | 38 | TG   | 17 | 6  |
| 344532 | 86 | 1249089 | 1249114 | 2 | 13 | 26 | CA   | 14 | 5  |
| 344537 | 86 | 1263733 | 1263746 | 2 | 7  | 14 | AC   | 29 | 3  |
| 344538 | 86 | 1264210 | 1264224 | 3 | 5  | 15 | ATT  | 15 | 3  |
| 344541 | 86 | 1268698 | 1268717 | 4 | 5  | 20 | TGAG | 16 | 5  |
| 344562 | 86 | 1329536 | 1329563 | 2 | 14 | 28 | TG   | 14 | 8  |
| 344563 | 86 | 1337889 | 1337900 | 2 | 6  | 12 | GT   | 17 | 6  |
| 344565 | 86 | 1343073 | 1343102 | 2 | 15 | 30 | TG   | 8  | 5  |
| 344567 | 86 | 1347527 | 1347554 | 2 | 14 | 28 | AC   | 16 | 6  |
| 344574 | 86 | 1352402 | 1352419 | 2 | 9  | 18 | TA   | 16 | 4  |
| 344575 | 86 | 1358867 | 1358906 | 2 | 20 | 40 | AC   | 9  | 7  |
| 344577 | 86 | 1365980 | 1366005 | 2 | 13 | 26 | AC   | 18 | 5  |
| 344580 | 86 | 1369356 | 1369385 | 3 | 10 | 30 | AAC  | 30 | 5  |
| 344599 | 86 | 1418685 | 1418726 | 3 | 14 | 42 | TTA  | 6  | 5  |
| 344601 | 86 | 1423878 | 1423897 | 2 | 10 | 20 | TG   | 9  | 9  |
| 344604 | 86 | 1427310 | 1427345 | 2 | 18 | 36 | GT   | 8  | 5  |
| 344606 | 86 | 1434189 | 1434208 | 2 | 10 | 20 | AC   | 19 | 6  |

|        |    |         |         |   |    |    |      |    |    |
|--------|----|---------|---------|---|----|----|------|----|----|
| 344610 | 86 | 1439237 | 1439270 | 2 | 17 | 34 | TG   | 12 | 9  |
| 344612 | 86 | 1451570 | 1451581 | 2 | 6  | 12 | TA   | 15 | 6  |
| 344615 | 86 | 1457382 | 1457421 | 2 | 20 | 40 | CA   | 10 | 10 |
| 344631 | 86 | 1508430 | 1508449 | 2 | 10 | 20 | AT   | 6  | 3  |
| 344634 | 86 | 1511272 | 1511291 | 2 | 10 | 20 | GT   | 22 | 5  |
| 344640 | 86 | 1515867 | 1515894 | 2 | 14 | 28 | TG   | 12 | 9  |
| 344642 | 86 | 1516065 | 1516094 | 3 | 10 | 30 | GCA  | 20 | 3  |
| 344649 | 86 | 1533262 | 1533311 | 2 | 25 | 50 | GT   | 8  | 7  |
| 344650 | 86 | 1533579 | 1533608 | 2 | 15 | 30 | AC   | 11 | 5  |
| 344664 | 86 | 1559894 | 1559919 | 2 | 13 | 26 | TC   | 14 | 3  |
| 344665 | 86 | 1562581 | 1562610 | 2 | 15 | 30 | CA   | 14 | 6  |
| 344666 | 86 | 1562692 | 1562705 | 2 | 7  | 14 | CA   | 11 | 6  |
| 344667 | 86 | 1562708 | 1562725 | 2 | 9  | 18 | CA   | 9  | 6  |
| 344670 | 86 | 1581835 | 1581870 | 2 | 18 | 36 | CT   | 7  | 3  |
| 344672 | 86 | 1594993 | 1595018 | 2 | 13 | 26 | CT   | 8  | 6  |
| 344675 | 86 | 1603503 | 1603514 | 2 | 6  | 12 | TG   | 21 | 3  |
| 344687 | 86 | 1630264 | 1630295 | 4 | 8  | 32 | TTCT | 24 | 5  |
| 344706 | 86 | 1659265 | 1659276 | 2 | 6  | 12 | CA   | 19 | 3  |
| 344712 | 86 | 1682647 | 1682680 | 2 | 17 | 34 | CT   | 6  | 3  |
| 344724 | 86 | 1692660 | 1692674 | 3 | 5  | 15 | AAT  | 14 | 3  |
| 344732 | 86 | 1733731 | 1733786 | 2 | 28 | 56 | GT   | 7  | 7  |
| 344746 | 86 | 1759410 | 1759421 | 2 | 6  | 12 | CT   | 26 | 3  |
| 344753 | 86 | 1762735 | 1762766 | 2 | 16 | 32 | GT   | 13 | 8  |
| 344758 | 86 | 1786825 | 1786836 | 2 | 6  | 12 | CT   | 12 | 3  |
| 344762 | 86 | 1793932 | 1793955 | 3 | 8  | 24 | CTT  | 24 | 11 |
| 344768 | 86 | 1800781 | 1800820 | 4 | 10 | 40 | GTAT | 21 | 6  |
| 344775 | 86 | 1821176 | 1821189 | 2 | 7  | 14 | AT   | 6  | 6  |
| 344779 | 86 | 1839129 | 1839194 | 3 | 22 | 66 | ACA  | 10 | 9  |
| 344783 | 86 | 1842196 | 1842215 | 4 | 5  | 20 | GTAT | 6  | 3  |
| 344784 | 86 | 1844249 | 1844278 | 2 | 15 | 30 | AC   | 8  | 12 |
| 344786 | 86 | 1849831 | 1849851 | 3 | 7  | 21 | TTC  | 19 | 4  |
| 344789 | 86 | 1853126 | 1853151 | 2 | 13 | 26 | AC   | 17 | 4  |
| 344793 | 86 | 1860725 | 1860738 | 2 | 7  | 14 | TA   | 11 | 4  |
| 344797 | 86 | 1869478 | 1869493 | 2 | 8  | 16 | TG   | 18 | 4  |
| 344799 | 86 | 1875368 | 1875383 | 2 | 8  | 16 | GT   | 27 | 9  |
| 344802 | 86 | 1877334 | 1877367 | 2 | 17 | 34 | AC   | 9  | 11 |
| 344807 | 86 | 1886465 | 1886490 | 2 | 13 | 26 | TG   | 24 | 9  |
| 344808 | 86 | 1886808 | 1886839 | 2 | 16 | 32 | TG   | 16 | 10 |
| 344810 | 86 | 1893087 | 1893098 | 2 | 6  | 12 | GT   | 12 | 4  |
| 344815 | 86 | 1910000 | 1910019 | 2 | 10 | 20 | TG   | 19 | 4  |
| 344817 | 86 | 1911894 | 1911933 | 2 | 20 | 40 | AC   | 6  | 9  |
| 344828 | 86 | 1926614 | 1926627 | 2 | 7  | 14 | CA   | 27 | 7  |
| 344831 | 86 | 1934981 | 1935006 | 2 | 13 | 26 | TG   | 13 | 7  |
| 344840 | 86 | 1946515 | 1946542 | 2 | 14 | 28 | AC   | 18 | 7  |
| 344841 | 86 | 1946756 | 1946771 | 4 | 4  | 16 | CTTC | 33 | 3  |
| 344842 | 86 | 1947032 | 1947047 | 2 | 8  | 16 | GT   | 25 | 4  |
| 344846 | 86 | 1949829 | 1949856 | 2 | 14 | 28 | AC   | 7  | 6  |
| 344849 | 86 | 1958639 | 1958664 | 2 | 13 | 26 | CA   | 22 | 9  |
| 344850 | 86 | 1961322 | 1961355 | 2 | 17 | 34 | CA   | 14 | 11 |
| 344851 | 86 | 1961542 | 1961555 | 2 | 7  | 14 | GA   | 25 | 3  |
| 344854 | 86 | 1961662 | 1961685 | 2 | 12 | 24 | CA   | 21 | 8  |

|        |    |         |         |   |    |    |      |    |    |
|--------|----|---------|---------|---|----|----|------|----|----|
| 344855 | 86 | 1964309 | 1964326 | 3 | 6  | 18 | ACA  | 23 | 6  |
| 344856 | 86 | 1966375 | 1966390 | 2 | 8  | 16 | AC   | 29 | 3  |
| 344857 | 86 | 1968034 | 1968055 | 2 | 11 | 22 | CA   | 22 | 15 |
| 344858 | 86 | 1968143 | 1968168 | 2 | 13 | 26 | GT   | 19 | 8  |
| 344864 | 86 | 1982406 | 1982437 | 2 | 16 | 32 | GT   | 17 | 12 |
| 344865 | 86 | 1988947 | 1988962 | 2 | 8  | 16 | TA   | 12 | 11 |
| 344877 | 86 | 2002058 | 2002085 | 2 | 14 | 28 | TG   | 8  | 6  |
| 344879 | 86 | 2004617 | 2004632 | 2 | 8  | 16 | GT   | 22 | 4  |
| 344882 | 86 | 2007633 | 2007644 | 2 | 6  | 12 | TG   | 13 | 3  |
| 344892 | 86 | 2009188 | 2009208 | 3 | 7  | 21 | ATC  | 25 | 6  |
| 344895 | 86 | 2014550 | 2014585 | 2 | 18 | 36 | TG   | 14 | 17 |
| 344905 | 86 | 2030757 | 2030788 | 2 | 16 | 32 | TG   | 15 | 4  |
| 344906 | 86 | 2030938 | 2030957 | 2 | 10 | 20 | TG   | 20 | 7  |
| 344910 | 86 | 2036936 | 2036979 | 2 | 22 | 44 | TG   | 11 | 8  |
| 344911 | 86 | 2038568 | 2038593 | 2 | 13 | 26 | TG   | 10 | 11 |
| 344914 | 86 | 2041706 | 2041717 | 2 | 6  | 12 | CA   | 28 | 3  |
| 344916 | 86 | 2042926 | 2042961 | 4 | 9  | 36 | TTCT | 8  | 8  |
| 344922 | 86 | 2045176 | 2045203 | 2 | 14 | 28 | GT   | 14 | 10 |
| 344923 | 86 | 2045338 | 2045349 | 2 | 6  | 12 | CT   | 33 | 4  |
| 344929 | 86 | 2058592 | 2058607 | 2 | 8  | 16 | CT   | 16 | 4  |
| 344930 | 86 | 2058609 | 2058620 | 2 | 6  | 12 | TC   | 14 | 3  |
| 344931 | 86 | 2058788 | 2058803 | 2 | 8  | 16 | AT   | 14 | 4  |
| 344932 | 86 | 2060383 | 2060404 | 2 | 11 | 22 | CA   | 21 | 11 |
| 344942 | 86 | 2074503 | 2074514 | 2 | 6  | 12 | CA   | 25 | 3  |
| 344947 | 86 | 2080803 | 2080824 | 2 | 11 | 22 | TG   | 25 | 4  |
| 344948 | 86 | 2084401 | 2084420 | 2 | 10 | 20 | AC   | 27 | 3  |
| 344956 | 86 | 2117527 | 2117574 | 4 | 12 | 48 | TTCT | 7  | 9  |
| 344957 | 86 | 2127811 | 2127838 | 4 | 7  | 28 | TTTA | 25 | 7  |
| 344960 | 86 | 2130574 | 2130603 | 2 | 15 | 30 | CA   | 11 | 14 |
| 344962 | 86 | 2134141 | 2134164 | 2 | 12 | 24 | CA   | 18 | 6  |
| 344964 | 86 | 2135887 | 2135924 | 2 | 19 | 38 | GT   | 12 | 10 |
| 344979 | 86 | 2158743 | 2158760 | 2 | 9  | 18 | GT   | 26 | 5  |
| 344980 | 86 | 2158863 | 2158882 | 2 | 10 | 20 | AC   | 21 | 5  |
| 344982 | 86 | 2169053 | 2169067 | 3 | 5  | 15 | ACA  | 21 | 3  |
| 344984 | 86 | 2170619 | 2170652 | 2 | 17 | 34 | TG   | 14 | 9  |
| 344988 | 86 | 2171037 | 2171048 | 2 | 6  | 12 | CA   | 17 | 7  |
| 344991 | 86 | 2180794 | 2180809 | 4 | 4  | 16 | ATTT | 24 | 11 |
| 344995 | 86 | 2184014 | 2184027 | 2 | 7  | 14 | AC   | 23 | 3  |
| 344997 | 86 | 2185102 | 2185121 | 2 | 10 | 20 | AC   | 12 | 11 |
| 345003 | 86 | 2201194 | 2201213 | 2 | 10 | 20 | GT   | 15 | 7  |
| 345004 | 86 | 2202221 | 2202232 | 2 | 6  | 12 | GT   | 6  | 6  |
| 345005 | 86 | 2204409 | 2204420 | 2 | 6  | 12 | AG   | 27 | 4  |
| 345008 | 86 | 2205507 | 2205536 | 2 | 15 | 30 | GA   | 11 | 4  |
| 345009 | 86 | 2206066 | 2206077 | 2 | 6  | 12 | AC   | 17 | 4  |
| 345010 | 86 | 2206083 | 2206094 | 2 | 6  | 12 | CA   | 15 | 3  |
| 345017 | 86 | 2222085 | 2222114 | 2 | 15 | 30 | GT   | 17 | 11 |
| 345031 | 86 | 2247824 | 2247871 | 4 | 12 | 48 | ATCT | 17 | 10 |
| 345032 | 86 | 2249248 | 2249265 | 2 | 9  | 18 | CT   | 12 | 3  |
| 345035 | 86 | 2249521 | 2249534 | 2 | 7  | 14 | TG   | 15 | 10 |
| 345045 | 86 | 2264302 | 2264319 | 2 | 9  | 18 | AC   | 22 | 5  |
| 345055 | 86 | 2274372 | 2274403 | 2 | 16 | 32 | GT   | 7  | 6  |

|        |    |         |         |   |    |    |      |    |    |
|--------|----|---------|---------|---|----|----|------|----|----|
| 345061 | 86 | 2278400 | 2278417 | 2 | 9  | 18 | AC   | 17 | 9  |
| 345065 | 86 | 2281358 | 2281369 | 2 | 6  | 12 | TG   | 30 | 3  |
| 345072 | 86 | 2288820 | 2288843 | 2 | 12 | 24 | TG   | 12 | 13 |
| 345082 | 86 | 2300814 | 2300843 | 2 | 15 | 30 | AC   | 8  | 7  |
| 345087 | 86 | 2301216 | 2301247 | 2 | 16 | 32 | GT   | 10 | 11 |
| 345105 | 86 | 2327837 | 2327852 | 4 | 4  | 16 | AAAT | 18 | 7  |
| 345108 | 86 | 2330240 | 2330255 | 2 | 8  | 16 | CA   | 18 | 4  |
| 345109 | 86 | 2330377 | 2330420 | 2 | 22 | 44 | TG   | 6  | 9  |
| 345112 | 86 | 2331022 | 2331053 | 4 | 8  | 32 | GATG | 22 | 4  |
| 345116 | 86 | 2338117 | 2338130 | 2 | 7  | 14 | CT   | 18 | 6  |
| 345117 | 86 | 2338244 | 2338267 | 2 | 12 | 24 | AC   | 20 | 9  |
| 345118 | 86 | 2339483 | 2339494 | 2 | 6  | 12 | AC   | 12 | 5  |
| 345121 | 86 | 2341179 | 2341210 | 2 | 16 | 32 | TG   | 20 | 11 |
| 345122 | 86 | 2341423 | 2341438 | 4 | 4  | 16 | TTTA | 23 | 3  |
| 345136 | 86 | 2355763 | 2355782 | 2 | 10 | 20 | CA   | 8  | 10 |
| 345145 | 86 | 2363080 | 2363091 | 2 | 6  | 12 | GT   | 18 | 5  |
| 345147 | 86 | 2363326 | 2363361 | 2 | 18 | 36 | AC   | 9  | 12 |
| 345149 | 86 | 2363843 | 2363870 | 4 | 7  | 28 | ATAA | 20 | 6  |
| 345159 | 86 | 2377917 | 2377932 | 2 | 8  | 16 | TG   | 10 | 6  |
| 345162 | 86 | 2381264 | 2381295 | 2 | 16 | 32 | GA   | 12 | 7  |
| 345165 | 86 | 2383442 | 2383455 | 2 | 7  | 14 | GA   | 28 | 3  |
| 345167 | 86 | 2386786 | 2386803 | 2 | 9  | 18 | CA   | 8  | 8  |
| 345168 | 86 | 2386806 | 2386821 | 2 | 8  | 16 | CA   | 7  | 7  |
| 345175 | 86 | 2395251 | 2395270 | 2 | 10 | 20 | AC   | 22 | 6  |
| 345176 | 86 | 2398827 | 2398846 | 4 | 5  | 20 | TTTG | 31 | 8  |
| 345180 | 86 | 2407457 | 2407472 | 4 | 4  | 16 | ATTT | 23 | 5  |
| 345187 | 86 | 2411006 | 2411027 | 2 | 11 | 22 | CT   | 9  | 5  |
| 345191 | 86 | 2416005 | 2416020 | 4 | 4  | 16 | AAAC | 27 | 4  |
| 345194 | 86 | 2425718 | 2425739 | 2 | 11 | 22 | CA   | 20 | 12 |
| 345199 | 86 | 2432647 | 2432678 | 2 | 16 | 32 | TG   | 21 | 13 |
| 345200 | 86 | 2432787 | 2432810 | 3 | 8  | 24 | TTG  | 20 | 5  |
| 345210 | 86 | 2442466 | 2442481 | 4 | 4  | 16 | TTTA | 21 | 6  |
| 345212 | 86 | 2443316 | 2443345 | 2 | 15 | 30 | TG   | 11 | 6  |
| 345213 | 86 | 2448594 | 2448651 | 2 | 29 | 58 | CA   | 12 | 10 |
| 345227 | 86 | 2462784 | 2462803 | 2 | 10 | 20 | CA   | 14 | 5  |
| 345231 | 86 | 2470922 | 2470937 | 2 | 8  | 16 | CA   | 22 | 3  |
| 345233 | 86 | 2473574 | 2473591 | 2 | 9  | 18 | GT   | 16 | 7  |
| 345236 | 86 | 2473790 | 2473807 | 2 | 9  | 18 | TC   | 17 | 4  |
| 345249 | 86 | 2495807 | 2495824 | 3 | 6  | 18 | TCT  | 20 | 4  |
| 345252 | 86 | 2500014 | 2500025 | 2 | 6  | 12 | GT   | 23 | 7  |
| 345263 | 86 | 2508940 | 2508955 | 2 | 8  | 16 | TG   | 22 | 14 |
| 345264 | 86 | 2508956 | 2508975 | 4 | 5  | 20 | CGTG | 25 | 15 |
| 345266 | 86 | 2511750 | 2511763 | 2 | 7  | 14 | CA   | 22 | 3  |
| 345269 | 86 | 2515012 | 2515031 | 2 | 10 | 20 | AG   | 27 | 5  |
| 345271 | 86 | 2517018 | 2517029 | 2 | 6  | 12 | CA   | 28 | 3  |
| 345274 | 86 | 2522035 | 2522048 | 2 | 7  | 14 | GT   | 23 | 4  |
| 345281 | 86 | 2531078 | 2531125 | 2 | 24 | 48 | AC   | 7  | 9  |
| 345283 | 86 | 2532377 | 2532390 | 2 | 7  | 14 | TA   | 16 | 6  |
| 345286 | 86 | 2534578 | 2534593 | 4 | 4  | 16 | AAAT | 24 | 4  |
| 345288 | 86 | 2537021 | 2537050 | 2 | 15 | 30 | CA   | 9  | 9  |
| 345289 | 86 | 2537259 | 2537288 | 2 | 15 | 30 | TG   | 12 | 11 |

|        |    |         |         |   |    |    |      |    |    |
|--------|----|---------|---------|---|----|----|------|----|----|
| 345290 | 86 | 2537577 | 2537592 | 2 | 8  | 16 | AC   | 19 | 4  |
| 345291 | 86 | 2537594 | 2537605 | 2 | 6  | 12 | CA   | 24 | 6  |
| 345293 | 86 | 2538009 | 2538022 | 2 | 7  | 14 | AC   | 19 | 5  |
| 345295 | 86 | 2538411 | 2538428 | 3 | 6  | 18 | CCA  | 11 | 4  |
| 345306 | 86 | 2544190 | 2544231 | 2 | 21 | 42 | TG   | 17 | 14 |
| 345307 | 86 | 2544686 | 2544700 | 3 | 5  | 15 | ACA  | 29 | 5  |
| 345311 | 86 | 2546838 | 2546861 | 3 | 8  | 24 | TCT  | 26 | 4  |
| 345316 | 86 | 2550654 | 2550699 | 2 | 23 | 46 | CA   | 7  | 9  |
| 345322 | 86 | 2574878 | 2574891 | 2 | 7  | 14 | CA   | 26 | 4  |
| 345336 | 86 | 2594125 | 2594136 | 2 | 6  | 12 | GA   | 30 | 3  |
| 345337 | 86 | 2596562 | 2596585 | 2 | 12 | 24 | AC   | 19 | 7  |
| 345345 | 86 | 2599329 | 2599348 | 2 | 10 | 20 | TC   | 30 | 4  |
| 345354 | 86 | 2638299 | 2638314 | 4 | 4  | 16 | ATTT | 13 | 12 |
| 345358 | 86 | 2679743 | 2679762 | 2 | 10 | 20 | CA   | 14 | 9  |
| 345371 | 86 | 2692136 | 2692183 | 2 | 24 | 48 | CA   | 8  | 6  |
| 345375 | 86 | 2698184 | 2698207 | 2 | 12 | 24 | GT   | 23 | 8  |
| 345376 | 86 | 2698355 | 2698370 | 2 | 8  | 16 | TG   | 18 | 6  |
| 345377 | 86 | 2698373 | 2698386 | 2 | 7  | 14 | TG   | 19 | 4  |
| 345379 | 86 | 2698674 | 2698694 | 3 | 7  | 21 | CAC  | 34 | 4  |
| 345393 | 86 | 2709872 | 2709895 | 2 | 12 | 24 | CA   | 14 | 6  |
| 345395 | 86 | 2710409 | 2710434 | 2 | 13 | 26 | TG   | 12 | 4  |
| 345398 | 86 | 2711452 | 2711471 | 2 | 10 | 20 | TG   | 20 | 6  |
| 345404 | 86 | 2714920 | 2714933 | 2 | 7  | 14 | GT   | 23 | 7  |
| 345411 | 86 | 2721639 | 2721652 | 2 | 7  | 14 | AC   | 30 | 5  |
| 345419 | 86 | 2731871 | 2731886 | 2 | 8  | 16 | TG   | 14 | 12 |
| 345423 | 86 | 2732461 | 2732474 | 2 | 7  | 14 | CT   | 6  | 4  |
| 345424 | 86 | 2732475 | 2732494 | 2 | 10 | 20 | CA   | 8  | 5  |
| 345425 | 86 | 2732648 | 2732675 | 2 | 14 | 28 | TG   | 16 | 7  |
| 345429 | 87 | 8382    | 8405    | 4 | 6  | 24 | TTTG | 17 | 6  |
| 345431 | 87 | 13892   | 13907   | 4 | 4  | 16 | TCTA | 18 | 11 |
| 345438 | 87 | 26401   | 26421   | 3 | 7  | 21 | CAC  | 20 | 3  |
| 345443 | 87 | 34270   | 34285   | 2 | 8  | 16 | AC   | 22 | 6  |
| 345446 | 87 | 35380   | 35397   | 2 | 9  | 18 | TG   | 22 | 5  |
| 345450 | 87 | 39290   | 39313   | 2 | 12 | 24 | CA   | 16 | 4  |
| 345452 | 87 | 43147   | 43176   | 2 | 15 | 30 | TG   | 16 | 6  |
| 345453 | 87 | 43292   | 43317   | 2 | 13 | 26 | AC   | 10 | 6  |
| 345455 | 87 | 43577   | 43590   | 2 | 7  | 14 | CA   | 23 | 3  |
| 345459 | 87 | 45564   | 45585   | 2 | 11 | 22 | CA   | 13 | 3  |
| 345465 | 87 | 48432   | 48457   | 2 | 13 | 26 | TG   | 15 | 5  |
| 345468 | 87 | 50441   | 50474   | 2 | 17 | 34 | TG   | 14 | 9  |
| 345491 | 87 | 87233   | 87260   | 2 | 14 | 28 | CA   | 19 | 14 |
| 345492 | 87 | 87359   | 87370   | 2 | 6  | 12 | CA   | 18 | 10 |
| 345495 | 87 | 90674   | 90693   | 4 | 5  | 20 | TCTT | 16 | 4  |
| 345499 | 87 | 100277  | 100312  | 2 | 18 | 36 | CA   | 8  | 10 |
| 345502 | 87 | 105138  | 105159  | 2 | 11 | 22 | GT   | 12 | 5  |
| 345503 | 87 | 105193  | 105210  | 2 | 9  | 18 | TG   | 22 | 10 |
| 345506 | 87 | 110606  | 110639  | 2 | 17 | 34 | AC   | 8  | 5  |
| 345510 | 87 | 116623  | 116636  | 2 | 7  | 14 | GT   | 15 | 10 |
| 345516 | 87 | 121827  | 121844  | 2 | 9  | 18 | AC   | 26 | 5  |
| 345524 | 87 | 132887  | 132916  | 2 | 15 | 30 | CA   | 13 | 10 |
| 345528 | 87 | 134134  | 134157  | 2 | 12 | 24 | AC   | 17 | 7  |



|        |    |        |        |   |    |    |      |    |    |
|--------|----|--------|--------|---|----|----|------|----|----|
| 345530 | 87 | 138361 | 138376 | 2 | 8  | 16 | AC   | 22 | 8  |
| 345531 | 87 | 138379 | 138394 | 2 | 8  | 16 | TA   | 10 | 5  |
| 345532 | 87 | 138580 | 138605 | 2 | 13 | 26 | GT   | 16 | 3  |
| 345533 | 87 | 138805 | 138840 | 2 | 18 | 36 | GT   | 13 | 12 |
| 345534 | 87 | 139699 | 139718 | 4 | 5  | 20 | TCAA | 18 | 4  |
| 345539 | 87 | 149715 | 149730 | 2 | 8  | 16 | TG   | 23 | 5  |
| 345540 | 87 | 151729 | 151762 | 2 | 17 | 34 | TG   | 12 | 17 |
| 345542 | 87 | 154274 | 154291 | 2 | 9  | 18 | TG   | 8  | 11 |
| 345544 | 87 | 155038 | 155049 | 2 | 6  | 12 | GT   | 7  | 4  |
| 345546 | 87 | 162912 | 162935 | 3 | 8  | 24 | AGC  | 27 | 8  |
| 345549 | 87 | 167717 | 167744 | 2 | 14 | 28 | AC   | 15 | 10 |
| 345554 | 87 | 173571 | 173584 | 2 | 7  | 14 | TA   | 15 | 3  |
| 345555 | 87 | 177297 | 177328 | 2 | 16 | 32 | GT   | 8  | 7  |
| 345556 | 87 | 177574 | 177605 | 2 | 16 | 32 | AC   | 13 | 10 |
| 345558 | 87 | 180332 | 180351 | 2 | 10 | 20 | AC   | 24 | 7  |
| 345559 | 87 | 180699 | 180730 | 2 | 16 | 32 | AC   | 10 | 9  |
| 345561 | 87 | 183205 | 183228 | 2 | 12 | 24 | AC   | 14 | 7  |
| 345573 | 87 | 201931 | 201972 | 2 | 21 | 42 | AC   | 11 | 11 |
| 345580 | 87 | 210021 | 210044 | 3 | 8  | 24 | GAG  | 19 | 7  |
| 345581 | 87 | 210191 | 210214 | 2 | 12 | 24 | AC   | 18 | 9  |
| 345586 | 87 | 210576 | 210587 | 2 | 6  | 12 | CG   | 16 | 4  |
| 345587 | 87 | 210588 | 210599 | 2 | 6  | 12 | CA   | 16 | 3  |
| 345588 | 87 | 213778 | 213795 | 3 | 6  | 18 | CCT  | 12 | 3  |
| 345593 | 87 | 224043 | 224064 | 2 | 11 | 22 | GT   | 19 | 6  |
| 345595 | 87 | 226620 | 226673 | 2 | 27 | 54 | CA   | 10 | 11 |
| 345600 | 87 | 229240 | 229257 | 2 | 9  | 18 | TC   | 21 | 3  |
| 345601 | 87 | 230332 | 230345 | 2 | 7  | 14 | GT   | 17 | 3  |
| 345606 | 87 | 236515 | 236530 | 2 | 8  | 16 | GT   | 28 | 4  |
| 345607 | 87 | 238099 | 238110 | 2 | 6  | 12 | AC   | 28 | 3  |
| 345617 | 87 | 242830 | 242857 | 2 | 14 | 28 | GT   | 13 | 13 |
| 345619 | 87 | 251404 | 251419 | 2 | 8  | 16 | AC   | 14 | 4  |
| 345620 | 87 | 251481 | 251494 | 2 | 7  | 14 | AC   | 10 | 5  |
| 345628 | 87 | 253176 | 253203 | 2 | 14 | 28 | TG   | 18 | 9  |
| 345640 | 87 | 260006 | 260021 | 2 | 8  | 16 | CA   | 12 | 8  |
| 345646 | 87 | 271306 | 271321 | 4 | 4  | 16 | TTTA | 24 | 3  |
| 345647 | 87 | 271431 | 271458 | 2 | 14 | 28 | CA   | 17 | 10 |
| 345656 | 87 | 273141 | 273176 | 2 | 18 | 36 | AC   | 19 | 12 |
| 345657 | 87 | 273230 | 273247 | 2 | 9  | 18 | CA   | 22 | 6  |
| 345659 | 87 | 274753 | 274780 | 2 | 14 | 28 | CA   | 17 | 12 |
| 345660 | 87 | 275071 | 275102 | 2 | 16 | 32 | AC   | 11 | 6  |
| 345661 | 87 | 275248 | 275275 | 2 | 14 | 28 | TG   | 17 | 6  |
| 345662 | 87 | 275475 | 275514 | 2 | 20 | 40 | AC   | 6  | 8  |
| 345663 | 87 | 275782 | 275811 | 2 | 15 | 30 | AC   | 6  | 9  |
| 345665 | 87 | 278621 | 278641 | 3 | 7  | 21 | TCC  | 26 | 4  |
| 345667 | 87 | 280263 | 280276 | 2 | 7  | 14 | AC   | 22 | 5  |
| 345669 | 87 | 281655 | 281676 | 2 | 11 | 22 | GT   | 17 | 12 |
| 345672 | 87 | 281966 | 281981 | 2 | 8  | 16 | CA   | 20 | 10 |
| 345673 | 87 | 284508 | 284555 | 4 | 12 | 48 | ATGA | 26 | 6  |
| 345679 | 87 | 302829 | 302840 | 2 | 6  | 12 | GT   | 16 | 6  |
| 345680 | 87 | 302843 | 302858 | 2 | 8  | 16 | GT   | 15 | 7  |
| 345681 | 87 | 303069 | 303080 | 2 | 6  | 12 | TG   | 17 | 4  |

|        |    |        |        |   |    |    |      |    |    |
|--------|----|--------|--------|---|----|----|------|----|----|
| 345693 | 87 | 318755 | 318782 | 2 | 14 | 28 | TG   | 7  | 7  |
| 345694 | 87 | 318936 | 318961 | 2 | 13 | 26 | GT   | 7  | 6  |
| 345695 | 87 | 320266 | 320289 | 3 | 8  | 24 | GCA  | 21 | 4  |
| 345696 | 87 | 320875 | 320910 | 3 | 12 | 36 | CAG  | 28 | 9  |
| 345704 | 87 | 327905 | 327930 | 2 | 13 | 26 | TG   | 18 | 8  |
| 345720 | 87 | 330214 | 330231 | 3 | 6  | 18 | TGA  | 8  | 4  |
| 345733 | 87 | 333355 | 333374 | 2 | 10 | 20 | GT   | 15 | 11 |
| 345735 | 87 | 337074 | 337125 | 2 | 26 | 52 | TG   | 10 | 10 |
| 345763 | 87 | 340988 | 341027 | 2 | 20 | 40 | CA   | 12 | 6  |
| 345764 | 87 | 341940 | 341965 | 2 | 13 | 26 | AC   | 18 | 7  |
| 345765 | 87 | 342048 | 342067 | 2 | 10 | 20 | AG   | 25 | 5  |
| 345766 | 87 | 343178 | 343193 | 2 | 8  | 16 | GT   | 6  | 9  |
| 345769 | 87 | 343369 | 343394 | 2 | 13 | 26 | TG   | 10 | 8  |
| 345770 | 87 | 343499 | 343522 | 2 | 12 | 24 | CA   | 12 | 9  |
| 345771 | 87 | 343601 | 343642 | 2 | 21 | 42 | GT   | 15 | 13 |
| 345785 | 87 | 350141 | 350164 | 2 | 12 | 24 | GT   | 15 | 8  |
| 345786 | 87 | 350281 | 350296 | 2 | 8  | 16 | TG   | 19 | 8  |
| 345790 | 87 | 354009 | 354040 | 2 | 16 | 32 | TG   | 19 | 10 |
| 345791 | 87 | 354154 | 354193 | 2 | 20 | 40 | GT   | 10 | 9  |
| 345794 | 87 | 355266 | 355285 | 4 | 5  | 20 | TTTC | 15 | 6  |
| 345795 | 87 | 358213 | 358228 | 2 | 8  | 16 | TG   | 15 | 9  |
| 345796 | 87 | 358358 | 358385 | 2 | 14 | 28 | GT   | 17 | 9  |
| 345797 | 87 | 358537 | 358562 | 2 | 13 | 26 | AC   | 20 | 13 |
| 345798 | 87 | 360359 | 360392 | 2 | 17 | 34 | GT   | 12 | 6  |
| 345802 | 87 | 362950 | 362983 | 2 | 17 | 34 | GT   | 8  | 12 |
| 345803 | 87 | 363567 | 363592 | 2 | 13 | 26 | AC   | 12 | 9  |
| 345805 | 87 | 367076 | 367087 | 2 | 6  | 12 | TG   | 18 | 4  |
| 345806 | 87 | 367458 | 367477 | 4 | 5  | 20 | AGAA | 16 | 7  |
| 345813 | 87 | 368755 | 368775 | 3 | 7  | 21 | CCT  | 24 | 4  |
| 345828 | 87 | 372622 | 372653 | 2 | 16 | 32 | TG   | 19 | 6  |
| 345829 | 87 | 373905 | 373934 | 2 | 15 | 30 | CA   | 14 | 9  |
| 345830 | 87 | 373972 | 373987 | 2 | 8  | 16 | GT   | 16 | 9  |
| 345831 | 87 | 374086 | 374109 | 2 | 12 | 24 | GT   | 12 | 15 |
| 345832 | 87 | 374175 | 374186 | 2 | 6  | 12 | AC   | 24 | 4  |
| 345833 | 87 | 375864 | 375903 | 2 | 20 | 40 | TG   | 9  | 9  |
| 345834 | 87 | 376003 | 376030 | 2 | 14 | 28 | GT   | 17 | 11 |
| 345844 | 87 | 387159 | 387178 | 2 | 10 | 20 | CA   | 23 | 9  |
| 345847 | 87 | 387859 | 387876 | 2 | 9  | 18 | TG   | 22 | 13 |
| 345848 | 87 | 388649 | 388692 | 4 | 11 | 44 | TTCT | 12 | 8  |
| 345854 | 87 | 390417 | 390446 | 2 | 15 | 30 | TG   | 8  | 6  |
| 345855 | 87 | 391247 | 391278 | 2 | 16 | 32 | TG   | 17 | 8  |
| 345856 | 87 | 391496 | 391509 | 2 | 7  | 14 | GT   | 23 | 3  |
| 345858 | 87 | 391595 | 391626 | 2 | 16 | 32 | CA   | 12 | 18 |
| 345859 | 87 | 393354 | 393377 | 3 | 8  | 24 | CCT  | 10 | 5  |
| 345867 | 87 | 398358 | 398373 | 2 | 8  | 16 | AG   | 27 | 6  |
| 345882 | 87 | 411454 | 411489 | 2 | 18 | 36 | GT   | 12 | 13 |
| 345883 | 87 | 411623 | 411662 | 2 | 20 | 40 | TG   | 7  | 7  |
| 345885 | 87 | 413366 | 413397 | 2 | 16 | 32 | GT   | 14 | 9  |
| 345888 | 87 | 413568 | 413603 | 2 | 18 | 36 | GT   | 9  | 14 |
| 345890 | 87 | 416854 | 416879 | 2 | 13 | 26 | GT   | 14 | 8  |
| 345891 | 87 | 417151 | 417182 | 2 | 16 | 32 | TG   | 17 | 10 |

|        |    |        |        |   |    |    |      |    |    |
|--------|----|--------|--------|---|----|----|------|----|----|
| 345892 | 87 | 417238 | 417275 | 2 | 19 | 38 | GT   | 12 | 11 |
| 345893 | 87 | 423463 | 423476 | 2 | 7  | 14 | TC   | 25 | 3  |
| 345894 | 87 | 424396 | 424422 | 3 | 9  | 27 | AAG  | 17 | 6  |
| 345895 | 87 | 424835 | 424874 | 2 | 20 | 40 | CA   | 7  | 5  |
| 345896 | 87 | 426946 | 426975 | 2 | 15 | 30 | TG   | 16 | 12 |
| 345918 | 87 | 436500 | 436527 | 2 | 14 | 28 | TG   | 9  | 6  |
| 345919 | 87 | 436577 | 436602 | 2 | 13 | 26 | GT   | 12 | 7  |
| 345925 | 87 | 439925 | 439966 | 2 | 21 | 42 | TG   | 9  | 12 |
| 345926 | 87 | 440412 | 440425 | 2 | 7  | 14 | GT   | 31 | 4  |
| 345927 | 87 | 440791 | 440814 | 2 | 12 | 24 | TG   | 8  | 6  |
| 345929 | 87 | 441043 | 441062 | 2 | 10 | 20 | GT   | 17 | 8  |
| 345931 | 87 | 447008 | 447041 | 2 | 17 | 34 | AC   | 16 | 11 |
| 345939 | 87 | 467195 | 467240 | 2 | 23 | 46 | GT   | 6  | 11 |
| 345940 | 87 | 467287 | 467302 | 2 | 8  | 16 | AC   | 22 | 6  |
| 345944 | 87 | 469721 | 469750 | 2 | 15 | 30 | GT   | 15 | 11 |
| 345948 | 87 | 470624 | 470661 | 2 | 19 | 38 | AC   | 17 | 12 |
| 345951 | 87 | 474495 | 474530 | 4 | 9  | 36 | ATCA | 12 | 6  |
| 345956 | 87 | 484610 | 484631 | 2 | 11 | 22 | AC   | 15 | 10 |
| 345963 | 87 | 488903 | 488918 | 2 | 8  | 16 | AC   | 13 | 6  |
| 345964 | 87 | 488991 | 489022 | 2 | 16 | 32 | TG   | 12 | 13 |
| 345966 | 87 | 490636 | 490663 | 2 | 14 | 28 | AC   | 17 | 10 |
| 345967 | 87 | 490872 | 490886 | 3 | 5  | 15 | GAG  | 22 | 9  |
| 345968 | 87 | 491133 | 491162 | 3 | 10 | 30 | AGA  | 12 | 8  |
| 345969 | 87 | 491442 | 491477 | 2 | 18 | 36 | AC   | 18 | 17 |
| 345971 | 87 | 492417 | 492442 | 2 | 13 | 26 | TG   | 20 | 12 |
| 345972 | 87 | 492606 | 492643 | 2 | 19 | 38 | GT   | 10 | 12 |
| 345973 | 87 | 492771 | 492784 | 2 | 7  | 14 | AC   | 13 | 12 |
| 345979 | 87 | 498921 | 498944 | 2 | 12 | 24 | GT   | 19 | 7  |
| 345987 | 87 | 500985 | 501020 | 2 | 18 | 36 | CA   | 10 | 12 |
| 345989 | 87 | 502797 | 502824 | 2 | 14 | 28 | CA   | 18 | 8  |
| 345990 | 87 | 504440 | 504477 | 2 | 19 | 38 | AC   | 18 | 15 |
| 345991 | 87 | 504799 | 504812 | 2 | 7  | 14 | CA   | 22 | 3  |
| 345992 | 87 | 505312 | 505337 | 2 | 13 | 26 | GT   | 11 | 9  |
| 345993 | 87 | 506869 | 506904 | 3 | 12 | 36 | GAG  | 13 | 8  |
| 345994 | 87 | 509285 | 509320 | 2 | 18 | 36 | CA   | 10 | 10 |
| 345997 | 87 | 512070 | 512099 | 2 | 15 | 30 | AC   | 12 | 5  |
| 345998 | 87 | 512247 | 512282 | 2 | 18 | 36 | CA   | 8  | 6  |
| 345999 | 87 | 512388 | 512413 | 2 | 13 | 26 | AC   | 10 | 6  |
| 346004 | 87 | 516038 | 516061 | 4 | 6  | 24 | CTGA | 28 | 3  |
| 346005 | 87 | 516425 | 516482 | 2 | 29 | 58 | CA   | 10 | 16 |
| 346006 | 87 | 516610 | 516637 | 2 | 14 | 28 | CA   | 21 | 14 |
| 346013 | 87 | 523656 | 523673 | 3 | 6  | 18 | TCT  | 28 | 4  |
| 346014 | 87 | 523735 | 523762 | 2 | 14 | 28 | TG   | 14 | 7  |
| 346017 | 87 | 528112 | 528143 | 2 | 16 | 32 | AC   | 14 | 8  |
| 346020 | 87 | 530187 | 530210 | 3 | 8  | 24 | GAT  | 21 | 18 |
| 346033 | 87 | 540551 | 540572 | 2 | 11 | 22 | CA   | 12 | 4  |
| 346039 | 87 | 551465 | 551508 | 2 | 22 | 44 | AC   | 20 | 15 |
| 346043 | 87 | 554634 | 554653 | 4 | 5  | 20 | TCCT | 13 | 3  |
| 346045 | 87 | 555422 | 555447 | 2 | 13 | 26 | GT   | 12 | 10 |
| 346046 | 87 | 555677 | 555692 | 2 | 8  | 16 | TC   | 22 | 12 |
| 346047 | 87 | 555882 | 555895 | 2 | 7  | 14 | TC   | 27 | 3  |

|        |    |        |        |   |    |    |      |    |    |
|--------|----|--------|--------|---|----|----|------|----|----|
| 346048 | 87 | 555972 | 556001 | 2 | 15 | 30 | CA   | 15 | 12 |
| 346049 | 87 | 556201 | 556232 | 2 | 16 | 32 | AC   | 7  | 8  |
| 346054 | 87 | 562525 | 562548 | 2 | 12 | 24 | GT   | 14 | 13 |
| 346055 | 87 | 563966 | 563979 | 2 | 7  | 14 | GT   | 27 | 4  |
| 346057 | 87 | 567964 | 567979 | 2 | 8  | 16 | AG   | 26 | 4  |
| 346059 | 87 | 570131 | 570146 | 2 | 8  | 16 | CA   | 25 | 7  |
| 346060 | 87 | 570884 | 570913 | 2 | 15 | 30 | AC   | 14 | 10 |
| 346064 | 87 | 574211 | 574224 | 2 | 7  | 14 | TG   | 22 | 4  |
| 346065 | 87 | 574315 | 574346 | 2 | 16 | 32 | TG   | 6  | 6  |
| 346069 | 87 | 586629 | 586654 | 2 | 13 | 26 | CA   | 8  | 10 |
| 346071 | 87 | 586902 | 586935 | 2 | 17 | 34 | GT   | 13 | 10 |
| 346073 | 87 | 588086 | 588129 | 4 | 11 | 44 | ATCT | 17 | 8  |
| 346074 | 87 | 588244 | 588273 | 2 | 15 | 30 | GT   | 18 | 12 |
| 346076 | 87 | 588879 | 588910 | 2 | 16 | 32 | AC   | 13 | 7  |
| 346077 | 87 | 591163 | 591182 | 2 | 10 | 20 | GT   | 14 | 5  |
| 346081 | 87 | 593572 | 593633 | 2 | 31 | 62 | AC   | 6  | 8  |
| 346091 | 87 | 594374 | 594387 | 2 | 7  | 14 | TG   | 20 | 4  |
| 346092 | 87 | 594448 | 594477 | 2 | 15 | 30 | CA   | 20 | 15 |
| 346093 | 87 | 594568 | 594607 | 2 | 20 | 40 | AC   | 10 | 10 |
| 346095 | 87 | 594803 | 594838 | 2 | 18 | 36 | AC   | 6  | 7  |
| 346098 | 87 | 597306 | 597321 | 2 | 8  | 16 | GT   | 20 | 8  |
| 346099 | 87 | 597446 | 597459 | 2 | 7  | 14 | GT   | 25 | 8  |
| 346101 | 87 | 605994 | 606009 | 4 | 4  | 16 | TGTC | 28 | 4  |
| 346105 | 87 | 614176 | 614227 | 4 | 13 | 52 | TTGA | 27 | 19 |
| 346106 | 87 | 625060 | 625073 | 2 | 7  | 14 | TA   | 10 | 3  |
| 346107 | 87 | 625244 | 625297 | 3 | 18 | 54 | GAA  | 9  | 11 |
| 346108 | 87 | 626642 | 626667 | 2 | 13 | 26 | AC   | 20 | 7  |
| 346109 | 87 | 630377 | 630398 | 2 | 11 | 22 | GT   | 17 | 8  |
| 346110 | 87 | 630575 | 630596 | 2 | 11 | 22 | AC   | 11 | 12 |
| 346111 | 87 | 630660 | 630679 | 2 | 10 | 20 | TC   | 11 | 3  |
| 346112 | 87 | 630740 | 630755 | 2 | 8  | 16 | AC   | 18 | 5  |
| 346118 | 87 | 637609 | 637628 | 2 | 10 | 20 | GT   | 8  | 4  |
| 346121 | 87 | 638454 | 638481 | 2 | 14 | 28 | TG   | 13 | 5  |
| 346123 | 87 | 638601 | 638622 | 2 | 11 | 22 | AG   | 20 | 7  |
| 346124 | 87 | 645290 | 645305 | 4 | 4  | 16 | CTGT | 12 | 5  |
| 346128 | 87 | 653932 | 653991 | 4 | 15 | 60 | TTCT | 23 | 13 |
| 346130 | 87 | 657388 | 657415 | 2 | 14 | 28 | CA   | 8  | 5  |
| 346132 | 87 | 661675 | 661696 | 2 | 11 | 22 | GA   | 17 | 7  |
| 346133 | 87 | 661879 | 661894 | 2 | 8  | 16 | TG   | 6  | 6  |
| 346134 | 87 | 661941 | 661958 | 2 | 9  | 18 | TG   | 20 | 7  |
| 346135 | 87 | 661994 | 662020 | 3 | 9  | 27 | TCC  | 17 | 14 |
| 346136 | 87 | 662190 | 662211 | 2 | 11 | 22 | GT   | 21 | 13 |
| 346139 | 87 | 677005 | 677044 | 2 | 20 | 40 | CA   | 11 | 15 |
| 346140 | 87 | 677157 | 677184 | 2 | 14 | 28 | GT   | 20 | 16 |
| 346155 | 87 | 712535 | 712558 | 2 | 12 | 24 | GT   | 19 | 13 |
| 346157 | 87 | 714476 | 714497 | 2 | 11 | 22 | TG   | 20 | 15 |
| 346158 | 87 | 716816 | 716851 | 2 | 18 | 36 | AC   | 9  | 9  |
| 346160 | 87 | 719077 | 719088 | 2 | 6  | 12 | TG   | 22 | 14 |
| 346161 | 87 | 721820 | 721841 | 2 | 11 | 22 | CA   | 16 | 16 |
| 346162 | 87 | 726802 | 726823 | 2 | 11 | 22 | GT   | 17 | 10 |
| 346164 | 87 | 731504 | 731518 | 3 | 5  | 15 | GAA  | 25 | 4  |

|        |    |        |        |   |    |    |      |    |    |
|--------|----|--------|--------|---|----|----|------|----|----|
| 346165 | 87 | 731881 | 731900 | 2 | 10 | 20 | CA   | 19 | 16 |
| 346166 | 87 | 731938 | 731949 | 2 | 6  | 12 | GT   | 15 | 9  |
| 346167 | 87 | 731951 | 731962 | 2 | 6  | 12 | TG   | 20 | 13 |
| 346168 | 87 | 732110 | 732123 | 2 | 7  | 14 | GT   | 27 | 4  |
| 346169 | 87 | 732165 | 732192 | 2 | 14 | 28 | AC   | 28 | 10 |
| 346171 | 87 | 732525 | 732542 | 2 | 9  | 18 | AC   | 28 | 10 |
| 346172 | 87 | 732580 | 732591 | 2 | 6  | 12 | CA   | 30 | 7  |
| 346180 | 87 | 741741 | 741768 | 2 | 14 | 28 | CT   | 14 | 7  |
| 346181 | 87 | 743140 | 743159 | 2 | 10 | 20 | CA   | 14 | 5  |
| 346183 | 87 | 743426 | 743453 | 2 | 14 | 28 | GT   | 13 | 12 |
| 346184 | 87 | 748736 | 748763 | 2 | 14 | 28 | TG   | 19 | 8  |
| 346187 | 87 | 752374 | 752391 | 2 | 9  | 18 | GT   | 24 | 12 |
| 346188 | 87 | 752524 | 752539 | 2 | 8  | 16 | GT   | 13 | 16 |
| 346194 | 87 | 757191 | 757206 | 4 | 4  | 16 | TCCA | 23 | 4  |
| 346195 | 87 | 757750 | 757785 | 2 | 18 | 36 | TG   | 11 | 13 |
| 346196 | 87 | 757847 | 757866 | 2 | 10 | 20 | GT   | 20 | 9  |
| 346199 | 87 | 772292 | 772329 | 2 | 19 | 38 | GT   | 14 | 20 |
| 346205 | 87 | 779672 | 779685 | 2 | 7  | 14 | GT   | 21 | 4  |
| 346206 | 87 | 779808 | 779823 | 2 | 8  | 16 | AG   | 26 | 4  |
| 346210 | 87 | 786781 | 786806 | 2 | 13 | 26 | TG   | 13 | 8  |
| 346213 | 87 | 800026 | 800053 | 2 | 14 | 28 | GT   | 15 | 13 |
| 346214 | 87 | 800174 | 800191 | 2 | 9  | 18 | GT   | 19 | 6  |
| 346215 | 87 | 800236 | 800261 | 2 | 13 | 26 | TG   | 24 | 15 |
| 346222 | 87 | 804016 | 804061 | 2 | 23 | 46 | GT   | 13 | 14 |
| 346223 | 87 | 817203 | 817222 | 2 | 10 | 20 | TG   | 23 | 12 |
| 346224 | 87 | 818211 | 818228 | 2 | 9  | 18 | GT   | 23 | 11 |
| 346225 | 87 | 818405 | 818426 | 2 | 11 | 22 | GT   | 18 | 11 |
| 346226 | 87 | 820058 | 820071 | 2 | 7  | 14 | AC   | 19 | 5  |
| 346228 | 87 | 822130 | 822143 | 2 | 7  | 14 | AC   | 13 | 10 |
| 346229 | 87 | 822971 | 822982 | 2 | 6  | 12 | AC   | 28 | 7  |
| 346233 | 87 | 836684 | 836703 | 2 | 10 | 20 | TG   | 24 | 11 |
| 346234 | 87 | 838275 | 838289 | 3 | 5  | 15 | GAA  | 33 | 4  |
| 346235 | 87 | 841854 | 841881 | 2 | 14 | 28 | CA   | 18 | 12 |
| 346237 | 87 | 842046 | 842059 | 2 | 7  | 14 | AC   | 24 | 6  |
| 346243 | 87 | 843544 | 843561 | 2 | 9  | 18 | GT   | 14 | 11 |
| 346246 | 87 | 847747 | 847766 | 2 | 10 | 20 | GT   | 14 | 10 |
| 346247 | 87 | 851067 | 851086 | 2 | 10 | 20 | TG   | 21 | 11 |
| 346254 | 87 | 869146 | 869159 | 2 | 7  | 14 | TA   | 15 | 5  |
| 346255 | 87 | 869187 | 869226 | 2 | 20 | 40 | TG   | 15 | 15 |
| 346256 | 87 | 869363 | 869394 | 2 | 16 | 32 | CA   | 11 | 13 |
| 346257 | 87 | 869657 | 869676 | 2 | 10 | 20 | GT   | 14 | 7  |
| 346264 | 87 | 873259 | 873294 | 3 | 12 | 36 | AAT  | 20 | 12 |
| 346265 | 87 | 876469 | 876488 | 2 | 10 | 20 | GT   | 24 | 6  |
| 346267 | 87 | 881544 | 881559 | 2 | 8  | 16 | TG   | 28 | 6  |
| 346268 | 87 | 881695 | 881716 | 2 | 11 | 22 | GT   | 28 | 10 |
| 346270 | 87 | 881818 | 881841 | 2 | 12 | 24 | GT   | 12 | 9  |
| 346272 | 87 | 882897 | 882918 | 2 | 11 | 22 | AC   | 13 | 13 |
| 346273 | 87 | 883154 | 883189 | 2 | 18 | 36 | CA   | 11 | 9  |
| 346276 | 87 | 883486 | 883500 | 3 | 5  | 15 | TCT  | 11 | 4  |
| 346278 | 87 | 884238 | 884249 | 2 | 6  | 12 | GA   | 13 | 5  |
| 346280 | 87 | 885967 | 885990 | 2 | 12 | 24 | AC   | 7  | 12 |

|        |    |         |         |   |    |    |      |    |    |
|--------|----|---------|---------|---|----|----|------|----|----|
| 346282 | 87 | 888557  | 888570  | 2 | 7  | 14 | GA   | 29 | 6  |
| 346283 | 87 | 888865  | 888886  | 2 | 11 | 22 | CA   | 18 | 8  |
| 346284 | 87 | 889141  | 889164  | 2 | 12 | 24 | CA   | 7  | 12 |
| 346285 | 87 | 889523  | 889552  | 2 | 15 | 30 | TG   | 14 | 6  |
| 346286 | 87 | 896056  | 896083  | 2 | 14 | 28 | TG   | 17 | 14 |
| 346287 | 87 | 896311  | 896324  | 2 | 7  | 14 | GT   | 19 | 4  |
| 346288 | 87 | 896507  | 896520  | 2 | 7  | 14 | GA   | 27 | 3  |
| 346289 | 87 | 897032  | 897049  | 3 | 6  | 18 | TAA  | 18 | 5  |
| 346290 | 87 | 898295  | 898334  | 2 | 20 | 40 | TG   | 16 | 17 |
| 346291 | 87 | 898647  | 898678  | 2 | 16 | 32 | GT   | 9  | 10 |
| 346292 | 87 | 898808  | 898831  | 2 | 12 | 24 | TG   | 13 | 13 |
| 346295 | 87 | 901814  | 901845  | 2 | 16 | 32 | GT   | 15 | 11 |
| 346296 | 87 | 906284  | 906299  | 4 | 4  | 16 | TTTG | 20 | 3  |
| 346297 | 87 | 912633  | 912650  | 3 | 6  | 18 | AGC  | 32 | 7  |
| 346300 | 87 | 918794  | 918817  | 2 | 12 | 24 | TG   | 12 | 9  |
| 346302 | 87 | 919129  | 919148  | 2 | 10 | 20 | CA   | 30 | 7  |
| 346303 | 87 | 921252  | 921293  | 2 | 21 | 42 | CA   | 6  | 8  |
| 346304 | 87 | 921429  | 921454  | 2 | 13 | 26 | AC   | 22 | 11 |
| 346305 | 87 | 925184  | 925223  | 2 | 20 | 40 | AC   | 8  | 8  |
| 346308 | 87 | 938686  | 938719  | 2 | 17 | 34 | GT   | 7  | 9  |
| 346316 | 87 | 948801  | 948820  | 2 | 10 | 20 | GT   | 20 | 17 |
| 346317 | 87 | 950717  | 950728  | 2 | 6  | 12 | TG   | 23 | 16 |
| 346318 | 87 | 950731  | 950744  | 2 | 7  | 14 | TG   | 20 | 10 |
| 346319 | 87 | 951349  | 951380  | 2 | 16 | 32 | AC   | 17 | 11 |
| 346322 | 87 | 951770  | 951793  | 2 | 12 | 24 | AC   | 18 | 10 |
| 346324 | 87 | 964471  | 964503  | 3 | 11 | 33 | TGA  | 23 | 12 |
| 346325 | 87 | 964803  | 964826  | 4 | 6  | 24 | GAGG | 7  | 5  |
| 346326 | 87 | 966198  | 966213  | 2 | 8  | 16 | GT   | 19 | 7  |
| 346328 | 87 | 970202  | 970222  | 3 | 7  | 21 | AGA  | 20 | 9  |
| 346344 | 87 | 989620  | 989637  | 2 | 9  | 18 | GT   | 18 | 4  |
| 346346 | 87 | 992352  | 992369  | 2 | 9  | 18 | GT   | 28 | 6  |
| 346347 | 87 | 992544  | 992561  | 2 | 9  | 18 | TG   | 12 | 13 |
| 346348 | 87 | 992600  | 992629  | 2 | 15 | 30 | TG   | 14 | 11 |
| 346349 | 87 | 992722  | 992775  | 2 | 27 | 54 | CA   | 9  | 10 |
| 346356 | 87 | 997262  | 997299  | 2 | 19 | 38 | CA   | 6  | 7  |
| 346357 | 87 | 997415  | 997444  | 2 | 15 | 30 | AC   | 9  | 11 |
| 346358 | 87 | 1003380 | 1003395 | 4 | 4  | 16 | GATG | 25 | 4  |
| 346360 | 87 | 1010797 | 1010814 | 3 | 6  | 18 | TGT  | 20 | 11 |
| 346366 | 87 | 1013158 | 1013177 | 2 | 10 | 20 | AC   | 20 | 13 |
| 346367 | 87 | 1019759 | 1019778 | 2 | 10 | 20 | TC   | 17 | 10 |
| 346368 | 87 | 1019933 | 1019956 | 2 | 12 | 24 | TG   | 24 | 12 |
| 346369 | 87 | 1020910 | 1020951 | 2 | 21 | 42 | GT   | 6  | 6  |
| 346370 | 87 | 1023832 | 1023855 | 3 | 8  | 24 | CCT  | 7  | 7  |
| 346371 | 87 | 1028016 | 1028059 | 2 | 22 | 44 | AC   | 8  | 9  |
| 346372 | 87 | 1028685 | 1028710 | 2 | 13 | 26 | AC   | 16 | 11 |
| 346374 | 87 | 1035695 | 1035714 | 2 | 10 | 20 | GT   | 26 | 12 |
| 346375 | 87 | 1036951 | 1036970 | 2 | 10 | 20 | AC   | 20 | 12 |
| 346377 | 87 | 1040613 | 1040644 | 2 | 16 | 32 | TG   | 14 | 7  |
| 346385 | 87 | 1056258 | 1056278 | 3 | 7  | 21 | GCT  | 30 | 4  |
| 346388 | 87 | 1061457 | 1061468 | 2 | 6  | 12 | AC   | 31 | 9  |
| 346392 | 87 | 1077988 | 1078014 | 3 | 9  | 27 | CTG  | 29 | 7  |

|        |    |         |         |   |    |    |      |    |    |
|--------|----|---------|---------|---|----|----|------|----|----|
| 346393 | 87 | 1079702 | 1079721 | 2 | 10 | 20 | AC   | 20 | 10 |
| 346402 | 87 | 1092370 | 1092389 | 4 | 5  | 20 | GTCT | 31 | 6  |
| 346403 | 87 | 1093421 | 1093435 | 3 | 5  | 15 | TAA  | 9  | 4  |
| 346405 | 87 | 1093894 | 1093909 | 2 | 8  | 16 | AT   | 15 | 6  |
| 346411 | 87 | 1104045 | 1104064 | 2 | 10 | 20 | GT   | 15 | 7  |
| 346416 | 87 | 1116468 | 1116482 | 3 | 5  | 15 | CAG  | 30 | 4  |
| 346418 | 87 | 1120681 | 1120698 | 3 | 6  | 18 | TAT  | 23 | 3  |
| 346424 | 87 | 1124628 | 1124651 | 2 | 12 | 24 | AG   | 25 | 7  |
| 346426 | 87 | 1124944 | 1124955 | 2 | 6  | 12 | CA   | 22 | 14 |
| 346427 | 87 | 1128784 | 1128799 | 2 | 8  | 16 | GT   | 25 | 9  |
| 346430 | 87 | 1136281 | 1136295 | 3 | 5  | 15 | AGC  | 29 | 3  |
| 346435 | 87 | 1153965 | 1153992 | 2 | 14 | 28 | GT   | 15 | 8  |
| 346439 | 87 | 1156587 | 1156604 | 2 | 9  | 18 | GT   | 10 | 4  |
| 346440 | 87 | 1171425 | 1171442 | 2 | 9  | 18 | GA   | 30 | 8  |
| 346441 | 87 | 1174252 | 1174263 | 2 | 6  | 12 | AC   | 30 | 3  |
| 346443 | 87 | 1176364 | 1176383 | 2 | 10 | 20 | GT   | 17 | 9  |
| 346446 | 87 | 1182341 | 1182366 | 2 | 13 | 26 | CA   | 13 | 9  |
| 346452 | 87 | 1190674 | 1190709 | 2 | 18 | 36 | GT   | 9  | 9  |
| 346456 | 87 | 1198411 | 1198434 | 3 | 8  | 24 | CTT  | 17 | 11 |
| 346459 | 87 | 1200836 | 1200857 | 2 | 11 | 22 | CA   | 18 | 7  |
| 346460 | 87 | 1203673 | 1203696 | 3 | 8  | 24 | GGA  | 26 | 5  |
| 346461 | 87 | 1203725 | 1203756 | 2 | 16 | 32 | AC   | 13 | 12 |
| 346463 | 87 | 1208094 | 1208127 | 2 | 17 | 34 | CA   | 6  | 7  |
| 346464 | 87 | 1208251 | 1208276 | 2 | 13 | 26 | AC   | 11 | 10 |
| 346466 | 87 | 1211151 | 1211168 | 2 | 9  | 18 | CA   | 18 | 12 |
| 346467 | 87 | 1211935 | 1211958 | 2 | 12 | 24 | AC   | 19 | 6  |
| 346468 | 87 | 1212304 | 1212321 | 2 | 9  | 18 | GT   | 16 | 6  |
| 346475 | 87 | 1220031 | 1220056 | 2 | 13 | 26 | CA   | 8  | 8  |
| 346485 | 87 | 1224735 | 1224748 | 2 | 7  | 14 | CT   | 16 | 3  |
| 346487 | 87 | 1226158 | 1226189 | 2 | 16 | 32 | AC   | 7  | 8  |
| 346488 | 87 | 1227388 | 1227415 | 2 | 14 | 28 | TG   | 13 | 5  |
| 346491 | 87 | 1230239 | 1230266 | 4 | 7  | 28 | GACA | 29 | 6  |
| 346493 | 87 | 1231588 | 1231613 | 2 | 13 | 26 | GT   | 20 | 17 |
| 346494 | 87 | 1231815 | 1231832 | 2 | 9  | 18 | AC   | 13 | 6  |
| 346495 | 87 | 1232623 | 1232637 | 3 | 5  | 15 | CAA  | 38 | 5  |
| 346499 | 87 | 1249134 | 1249165 | 2 | 16 | 32 | AC   | 9  | 10 |
| 346510 | 87 | 1252622 | 1252659 | 2 | 19 | 38 | AC   | 6  | 7  |
| 346511 | 87 | 1252801 | 1252838 | 2 | 19 | 38 | AC   | 10 | 11 |
| 346512 | 87 | 1252921 | 1252958 | 2 | 19 | 38 | GT   | 13 | 8  |
| 346513 | 87 | 1253008 | 1253029 | 2 | 11 | 22 | GT   | 20 | 7  |
| 346514 | 87 | 1253505 | 1253536 | 2 | 16 | 32 | CA   | 19 | 12 |
| 346517 | 87 | 1256808 | 1256825 | 2 | 9  | 18 | CA   | 18 | 7  |
| 346519 | 87 | 1265740 | 1265779 | 2 | 20 | 40 | GT   | 21 | 10 |
| 346520 | 87 | 1268375 | 1268395 | 3 | 7  | 21 | TGC  | 29 | 5  |
| 346521 | 87 | 1270184 | 1270213 | 2 | 15 | 30 | CA   | 17 | 9  |
| 346523 | 87 | 1271936 | 1271969 | 2 | 17 | 34 | CA   | 17 | 8  |
| 346526 | 87 | 1274287 | 1274308 | 2 | 11 | 22 | CA   | 25 | 6  |
| 346527 | 87 | 1275511 | 1275542 | 2 | 16 | 32 | TG   | 13 | 10 |
| 346531 | 87 | 1278124 | 1278139 | 4 | 4  | 16 | AAAG | 18 | 5  |
| 346535 | 87 | 1281050 | 1281081 | 2 | 16 | 32 | GT   | 24 | 10 |
| 346541 | 87 | 1284076 | 1284113 | 2 | 19 | 38 | CA   | 10 | 9  |

|        |    |         |         |   |    |    |      |    |    |
|--------|----|---------|---------|---|----|----|------|----|----|
| 346543 | 87 | 1286774 | 1286787 | 2 | 7  | 14 | GT   | 21 | 4  |
| 346545 | 87 | 1287524 | 1287541 | 3 | 6  | 18 | GCT  | 24 | 5  |
| 346546 | 87 | 1287776 | 1287796 | 3 | 7  | 21 | CTC  | 9  | 3  |
| 346548 | 87 | 1287895 | 1287910 | 2 | 8  | 16 | AT   | 11 | 11 |
| 346550 | 87 | 1290441 | 1290470 | 2 | 15 | 30 | CA   | 13 | 9  |
| 346553 | 87 | 1297677 | 1297716 | 2 | 20 | 40 | TG   | 8  | 9  |
| 346567 | 87 | 1348225 | 1348239 | 3 | 5  | 15 | CAG  | 34 | 4  |
| 346571 | 87 | 1358879 | 1358892 | 2 | 7  | 14 | CT   | 28 | 3  |
| 346572 | 87 | 1365881 | 1365898 | 2 | 9  | 18 | TG   | 17 | 8  |
| 346573 | 87 | 1371282 | 1371317 | 2 | 18 | 36 | AC   | 11 | 12 |
| 346577 | 87 | 1380782 | 1380793 | 2 | 6  | 12 | TG   | 25 | 3  |
| 346578 | 87 | 1382137 | 1382174 | 2 | 19 | 38 | TG   | 19 | 11 |
| 346579 | 87 | 1382579 | 1382596 | 2 | 9  | 18 | CA   | 24 | 11 |
| 346580 | 87 | 1382692 | 1382707 | 2 | 8  | 16 | GT   | 14 | 8  |
| 346584 | 87 | 1384398 | 1384409 | 2 | 6  | 12 | TG   | 28 | 5  |
| 346587 | 87 | 1396894 | 1396907 | 2 | 7  | 14 | TG   | 20 | 3  |
| 346592 | 87 | 1415506 | 1415523 | 3 | 6  | 18 | CTG  | 29 | 3  |
| 346595 | 87 | 1419691 | 1419702 | 2 | 6  | 12 | AC   | 26 | 3  |
| 346598 | 87 | 1434093 | 1434122 | 2 | 15 | 30 | GT   | 9  | 9  |
| 346600 | 87 | 1435518 | 1435537 | 2 | 10 | 20 | CA   | 15 | 9  |
| 346601 | 87 | 1435871 | 1435882 | 2 | 6  | 12 | CA   | 21 | 3  |
| 346602 | 87 | 1440159 | 1440182 | 3 | 8  | 24 | GAG  | 13 | 7  |
| 346603 | 87 | 1441605 | 1441628 | 2 | 12 | 24 | TG   | 11 | 11 |
| 346604 | 87 | 1441697 | 1441722 | 2 | 13 | 26 | AC   | 16 | 8  |
| 346607 | 87 | 1448274 | 1448313 | 2 | 20 | 40 | AC   | 15 | 13 |
| 346608 | 87 | 1454947 | 1454979 | 3 | 11 | 33 | AGG  | 23 | 7  |
| 346609 | 87 | 1458851 | 1458862 | 2 | 6  | 12 | AC   | 20 | 4  |
| 346614 | 87 | 1478649 | 1478669 | 3 | 7  | 21 | AAC  | 19 | 4  |
| 346615 | 87 | 1482939 | 1482956 | 2 | 9  | 18 | CA   | 16 | 7  |
| 346634 | 87 | 1553073 | 1553088 | 2 | 8  | 16 | AC   | 24 | 4  |
| 346638 | 87 | 1573975 | 1573996 | 2 | 11 | 22 | TG   | 16 | 6  |
| 346645 | 87 | 1592895 | 1592915 | 3 | 7  | 21 | TCC  | 15 | 11 |
| 346650 | 87 | 1601457 | 1601476 | 4 | 5  | 20 | TCTT | 30 | 6  |
| 346651 | 87 | 1604027 | 1604050 | 3 | 8  | 24 | AGG  | 25 | 5  |
| 346667 | 87 | 1641635 | 1641664 | 3 | 10 | 30 | CAT  | 21 | 5  |
| 346670 | 87 | 1646078 | 1646092 | 3 | 5  | 15 | ATT  | 16 | 5  |
| 346672 | 87 | 1654639 | 1654656 | 2 | 9  | 18 | AC   | 29 | 11 |
| 346673 | 87 | 1658558 | 1658573 | 4 | 4  | 16 | TGTT | 14 | 4  |
| 346674 | 87 | 1665564 | 1665579 | 4 | 4  | 16 | CCAT | 25 | 9  |
| 346683 | 87 | 1680445 | 1680480 | 3 | 12 | 36 | CTC  | 15 | 6  |
| 346684 | 87 | 1684421 | 1684458 | 2 | 19 | 38 | GT   | 14 | 15 |
| 346687 | 87 | 1694005 | 1694018 | 2 | 7  | 14 | GA   | 9  | 6  |
| 346690 | 87 | 1702640 | 1702657 | 3 | 6  | 18 | CCT  | 23 | 5  |
| 346692 | 87 | 1706987 | 1706998 | 2 | 6  | 12 | GT   | 26 | 3  |
| 346694 | 87 | 1709154 | 1709177 | 2 | 12 | 24 | GT   | 23 | 8  |
| 346697 | 87 | 1712893 | 1712938 | 2 | 23 | 46 | AC   | 9  | 11 |
| 346718 | 87 | 1739431 | 1739446 | 2 | 8  | 16 | TG   | 22 | 7  |
| 346723 | 87 | 1749286 | 1749323 | 2 | 19 | 38 | TG   | 10 | 9  |
| 346724 | 87 | 1749541 | 1749561 | 3 | 7  | 21 | TTC  | 17 | 12 |
| 346729 | 88 | 16314   | 16337   | 2 | 12 | 24 | CA   | 13 | 6  |
| 346734 | 88 | 29249   | 29264   | 4 | 4  | 16 | TGAA | 25 | 3  |



|        |    |        |        |   |    |    |      |    |    |
|--------|----|--------|--------|---|----|----|------|----|----|
| 346744 | 88 | 68012  | 68025  | 2 | 7  | 14 | AC   | 29 | 5  |
| 346752 | 88 | 94351  | 94378  | 2 | 14 | 28 | GT   | 15 | 11 |
| 346753 | 88 | 95495  | 95515  | 3 | 7  | 21 | GTA  | 21 | 5  |
| 346764 | 88 | 118731 | 118748 | 3 | 6  | 18 | CAT  | 28 | 4  |
| 346767 | 88 | 125293 | 125312 | 2 | 10 | 20 | TG   | 17 | 7  |
| 346769 | 88 | 128793 | 128806 | 2 | 7  | 14 | CA   | 21 | 9  |
| 346774 | 88 | 142681 | 142696 | 2 | 8  | 16 | GT   | 19 | 3  |
| 346775 | 88 | 145469 | 145516 | 2 | 24 | 48 | GT   | 6  | 9  |
| 346778 | 88 | 147073 | 147086 | 2 | 7  | 14 | GT   | 15 | 3  |
| 346782 | 88 | 152749 | 152762 | 2 | 7  | 14 | TG   | 24 | 5  |
| 346783 | 88 | 153523 | 153566 | 2 | 22 | 44 | CA   | 9  | 9  |
| 346789 | 88 | 157471 | 157506 | 2 | 18 | 36 | GT   | 9  | 11 |
| 346792 | 88 | 159795 | 159814 | 2 | 10 | 20 | TG   | 24 | 13 |
| 346798 | 88 | 189218 | 189231 | 2 | 7  | 14 | CT   | 23 | 4  |
| 346800 | 88 | 190425 | 190448 | 2 | 12 | 24 | CA   | 14 | 13 |
| 346801 | 88 | 192277 | 192292 | 2 | 8  | 16 | AC   | 21 | 5  |
| 346815 | 88 | 211625 | 211644 | 2 | 10 | 20 | TG   | 19 | 6  |
| 346816 | 88 | 212055 | 212068 | 2 | 7  | 14 | GA   | 25 | 3  |
| 346818 | 88 | 220996 | 221009 | 2 | 7  | 14 | CA   | 22 | 7  |
| 346819 | 88 | 225645 | 225680 | 4 | 9  | 36 | TCTA | 19 | 10 |
| 346825 | 88 | 246019 | 246038 | 2 | 10 | 20 | AC   | 16 | 9  |
| 346831 | 88 | 265510 | 265525 | 4 | 4  | 16 | TTTA | 21 | 3  |
| 346839 | 88 | 293715 | 293740 | 2 | 13 | 26 | CA   | 23 | 13 |
| 346840 | 88 | 296407 | 296444 | 2 | 19 | 38 | TG   | 14 | 11 |
| 346841 | 88 | 302170 | 302185 | 2 | 8  | 16 | CA   | 21 | 4  |
| 346842 | 88 | 302333 | 302346 | 2 | 7  | 14 | TG   | 15 | 11 |
| 346843 | 88 | 303446 | 303461 | 2 | 8  | 16 | AC   | 12 | 9  |
| 346845 | 88 | 321988 | 322011 | 2 | 12 | 24 | TG   | 18 | 7  |
| 346849 | 88 | 323300 | 323317 | 2 | 9  | 18 | GT   | 22 | 9  |
| 346855 | 88 | 328793 | 328804 | 2 | 6  | 12 | TG   | 24 | 3  |
| 346857 | 88 | 334313 | 334340 | 2 | 14 | 28 | TG   | 20 | 8  |
| 346858 | 88 | 337253 | 337278 | 2 | 13 | 26 | CA   | 16 | 4  |
| 346862 | 88 | 348582 | 348597 | 2 | 8  | 16 | CT   | 20 | 8  |
| 346866 | 88 | 357480 | 357495 | 2 | 8  | 16 | GT   | 22 | 4  |
| 346867 | 88 | 359057 | 359074 | 2 | 9  | 18 | AC   | 19 | 5  |
| 346871 | 88 | 364038 | 364059 | 2 | 11 | 22 | CT   | 12 | 10 |
| 346876 | 88 | 377726 | 377743 | 2 | 9  | 18 | TG   | 25 | 4  |
| 346883 | 88 | 394661 | 394678 | 2 | 9  | 18 | TG   | 22 | 12 |
| 346887 | 88 | 405417 | 405434 | 2 | 9  | 18 | CA   | 22 | 4  |
| 346889 | 88 | 405688 | 405709 | 2 | 11 | 22 | GA   | 23 | 11 |
| 346891 | 88 | 409126 | 409155 | 2 | 15 | 30 | AC   | 17 | 8  |
| 346894 | 88 | 409524 | 409549 | 2 | 13 | 26 | AG   | 17 | 8  |
| 346895 | 88 | 410075 | 410090 | 2 | 8  | 16 | TC   | 25 | 3  |
| 346908 | 88 | 424944 | 424971 | 2 | 14 | 28 | GT   | 14 | 8  |
| 346910 | 88 | 434163 | 434194 | 2 | 16 | 32 | TG   | 7  | 10 |
| 346912 | 88 | 435413 | 435426 | 2 | 7  | 14 | AC   | 24 | 6  |
| 346916 | 88 | 440251 | 440302 | 4 | 13 | 52 | TGAT | 18 | 7  |
| 346917 | 88 | 446143 | 446154 | 2 | 6  | 12 | AG   | 30 | 3  |
| 346924 | 88 | 450740 | 450754 | 3 | 5  | 15 | GAA  | 22 | 4  |
| 346925 | 88 | 451321 | 451338 | 3 | 6  | 18 | GAG  | 21 | 3  |
| 346931 | 88 | 472199 | 472214 | 4 | 4  | 16 | AAAT | 14 | 10 |

|        |    |        |        |   |    |    |      |    |    |
|--------|----|--------|--------|---|----|----|------|----|----|
| 346933 | 88 | 477175 | 477196 | 2 | 11 | 22 | AC   | 10 | 6  |
| 346937 | 88 | 483838 | 483871 | 2 | 17 | 34 | TG   | 12 | 8  |
| 346942 | 88 | 486394 | 486415 | 2 | 11 | 22 | TC   | 26 | 7  |
| 346950 | 88 | 511395 | 511422 | 2 | 14 | 28 | CA   | 22 | 7  |
| 346954 | 88 | 515887 | 515898 | 2 | 6  | 12 | TG   | 15 | 10 |
| 346955 | 88 | 515901 | 515916 | 4 | 4  | 16 | TGTC | 19 | 9  |
| 346960 | 88 | 523934 | 523945 | 2 | 6  | 12 | TC   | 28 | 3  |
| 346964 | 88 | 525037 | 525052 | 4 | 4  | 16 | TTTG | 24 | 3  |
| 346969 | 88 | 534475 | 534504 | 3 | 10 | 30 | TGT  | 17 | 5  |
| 346971 | 88 | 534805 | 534822 | 3 | 6  | 18 | TGC  | 28 | 5  |
| 346972 | 88 | 535451 | 535474 | 3 | 8  | 24 | CTG  | 21 | 5  |
| 346977 | 88 | 561745 | 561770 | 2 | 13 | 26 | GT   | 8  | 11 |
| 346986 | 88 | 572505 | 572516 | 2 | 6  | 12 | GT   | 21 | 6  |
| 346987 | 88 | 572519 | 572530 | 2 | 6  | 12 | GT   | 23 | 5  |
| 346989 | 88 | 582497 | 582522 | 2 | 13 | 26 | AC   | 12 | 9  |
| 346993 | 88 | 596158 | 596171 | 2 | 7  | 14 | CT   | 16 | 4  |
| 346996 | 88 | 598517 | 598544 | 2 | 14 | 28 | CA   | 15 | 14 |
| 347001 | 88 | 600582 | 600601 | 4 | 5  | 20 | AGGA | 23 | 4  |
| 347004 | 88 | 603970 | 603990 | 3 | 7  | 21 | TTG  | 18 | 3  |
| 347005 | 88 | 605819 | 605851 | 3 | 11 | 33 | TTA  | 14 | 9  |
| 347006 | 88 | 606130 | 606149 | 2 | 10 | 20 | TG   | 15 | 13 |
| 347009 | 88 | 609688 | 609701 | 2 | 7  | 14 | GT   | 11 | 5  |
| 347013 | 88 | 614463 | 614484 | 2 | 11 | 22 | TG   | 18 | 15 |
| 347020 | 88 | 628063 | 628074 | 2 | 6  | 12 | CA   | 21 | 8  |
| 347021 | 88 | 630975 | 631008 | 2 | 17 | 34 | TG   | 11 | 12 |
| 347024 | 88 | 635346 | 635381 | 4 | 9  | 36 | CGCA | 21 | 25 |
| 347029 | 88 | 638468 | 638495 | 4 | 7  | 28 | TGTA | 21 | 7  |
| 347030 | 88 | 638596 | 638613 | 2 | 9  | 18 | GT   | 12 | 8  |
| 347032 | 88 | 640328 | 640357 | 2 | 15 | 30 | TG   | 17 | 14 |
| 347033 | 88 | 640525 | 640542 | 2 | 9  | 18 | CA   | 14 | 14 |
| 347035 | 88 | 642838 | 642885 | 2 | 24 | 48 | TG   | 10 | 14 |
| 347036 | 88 | 643005 | 643016 | 2 | 6  | 12 | GT   | 15 | 5  |
| 347040 | 88 | 647760 | 647777 | 2 | 9  | 18 | TG   | 11 | 5  |
| 347042 | 88 | 656480 | 656493 | 2 | 7  | 14 | AG   | 24 | 8  |
| 347048 | 88 | 665993 | 666006 | 2 | 7  | 14 | GT   | 11 | 5  |
| 347049 | 88 | 666570 | 666599 | 2 | 15 | 30 | TG   | 13 | 10 |
| 347053 | 88 | 678500 | 678531 | 4 | 8  | 32 | AGAT | 21 | 11 |
| 347055 | 88 | 684462 | 684473 | 2 | 6  | 12 | AC   | 29 | 3  |
| 347058 | 88 | 692860 | 692891 | 2 | 16 | 32 | GT   | 8  | 10 |
| 347060 | 88 | 700027 | 700068 | 3 | 14 | 42 | ATC  | 12 | 11 |
| 347066 | 88 | 712267 | 712296 | 2 | 15 | 30 | GT   | 12 | 7  |
| 347074 | 88 | 727938 | 727953 | 2 | 8  | 16 | CA   | 26 | 4  |
| 347075 | 88 | 728068 | 728083 | 4 | 4  | 16 | TTAT | 15 | 4  |
| 347082 | 88 | 741241 | 741258 | 3 | 6  | 18 | GCA  | 22 | 3  |
| 347083 | 88 | 743758 | 743771 | 2 | 7  | 14 | GT   | 36 | 3  |
| 347085 | 88 | 745535 | 745556 | 2 | 11 | 22 | GT   | 11 | 9  |
| 347088 | 88 | 748659 | 748676 | 2 | 9  | 18 | TG   | 18 | 9  |
| 347091 | 88 | 757877 | 757898 | 2 | 11 | 22 | TG   | 19 | 14 |
| 347092 | 88 | 758018 | 758043 | 2 | 13 | 26 | TG   | 12 | 10 |
| 347094 | 88 | 758323 | 758336 | 2 | 7  | 14 | TC   | 15 | 3  |
| 347096 | 88 | 759426 | 759475 | 2 | 25 | 50 | TG   | 10 | 13 |

|        |    |        |        |   |    |    |     |    |    |
|--------|----|--------|--------|---|----|----|-----|----|----|
| 347097 | 88 | 759650 | 759675 | 2 | 13 | 26 | AC  | 7  | 6  |
| 347098 | 88 | 759769 | 759784 | 2 | 8  | 16 | CA  | 23 | 9  |
| 347103 | 88 | 762250 | 762273 | 2 | 12 | 24 | GT  | 15 | 8  |
| 347104 | 88 | 767363 | 767376 | 2 | 7  | 14 | CT  | 25 | 3  |
| 347109 | 88 | 770076 | 770097 | 2 | 11 | 22 | TG  | 23 | 5  |
| 347110 | 88 | 770242 | 770253 | 2 | 6  | 12 | AC  | 29 | 3  |
| 347111 | 88 | 770256 | 770267 | 2 | 6  | 12 | AC  | 30 | 6  |
| 347117 | 88 | 786569 | 786590 | 2 | 11 | 22 | CA  | 22 | 6  |
| 347118 | 88 | 786901 | 786922 | 2 | 11 | 22 | GA  | 21 | 4  |
| 347119 | 88 | 787167 | 787204 | 2 | 19 | 38 | TG  | 13 | 9  |
| 347123 | 88 | 798335 | 798356 | 2 | 11 | 22 | GT  | 11 | 10 |
| 347124 | 88 | 798478 | 798491 | 2 | 7  | 14 | AC  | 30 | 4  |
| 347125 | 88 | 798779 | 798812 | 2 | 17 | 34 | GT  | 12 | 7  |
| 347128 | 88 | 801900 | 801914 | 3 | 5  | 15 | CAA | 10 | 4  |
| 347129 | 88 | 804705 | 804732 | 2 | 14 | 28 | TG  | 9  | 10 |
| 347133 | 88 | 807029 | 807040 | 2 | 6  | 12 | GT  | 14 | 6  |
| 347134 | 88 | 807416 | 807431 | 2 | 8  | 16 | CA  | 14 | 12 |
| 347135 | 88 | 807698 | 807709 | 2 | 6  | 12 | AC  | 22 | 8  |
| 347136 | 88 | 807711 | 807724 | 2 | 7  | 14 | CA  | 18 | 7  |
| 347138 | 88 | 818122 | 818135 | 2 | 7  | 14 | TG  | 20 | 3  |
| 347139 | 88 | 818138 | 818151 | 2 | 7  | 14 | TG  | 19 | 3  |
| 347140 | 88 | 818326 | 818343 | 2 | 9  | 18 | GT  | 15 | 12 |
| 347142 | 88 | 820197 | 820218 | 2 | 11 | 22 | GT  | 10 | 11 |
| 347143 | 88 | 820281 | 820307 | 3 | 9  | 27 | GGA | 8  | 6  |
| 347146 | 88 | 821171 | 821204 | 2 | 17 | 34 | TG  | 9  | 10 |
| 347148 | 88 | 833963 | 834002 | 2 | 20 | 40 | GT  | 15 | 13 |
| 347149 | 88 | 834600 | 834611 | 2 | 6  | 12 | AC  | 22 | 3  |
| 347151 | 88 | 835118 | 835141 | 2 | 12 | 24 | TG  | 13 | 3  |
| 347154 | 88 | 835192 | 835211 | 2 | 10 | 20 | TG  | 9  | 11 |
| 347156 | 88 | 835385 | 835396 | 2 | 6  | 12 | GT  | 15 | 5  |
| 347159 | 88 | 835830 | 835845 | 2 | 8  | 16 | GT  | 19 | 5  |
| 347169 | 88 | 856723 | 856748 | 2 | 13 | 26 | CT  | 12 | 11 |
| 347171 | 88 | 861195 | 861208 | 2 | 7  | 14 | CA  | 14 | 7  |
| 347173 | 88 | 867325 | 867350 | 2 | 13 | 26 | GA  | 11 | 12 |
| 347175 | 88 | 870570 | 870601 | 2 | 16 | 32 | TG  | 15 | 9  |
| 347177 | 88 | 871910 | 871921 | 2 | 6  | 12 | CT  | 20 | 7  |
| 347178 | 88 | 871922 | 871935 | 2 | 7  | 14 | CA  | 21 | 6  |
| 347179 | 88 | 872692 | 872709 | 2 | 9  | 18 | TG  | 26 | 5  |
| 347181 | 88 | 875372 | 875389 | 2 | 9  | 18 | CA  | 18 | 7  |
| 347184 | 88 | 887392 | 887415 | 2 | 12 | 24 | GT  | 19 | 9  |
| 347199 | 88 | 918595 | 918630 | 2 | 18 | 36 | GA  | 6  | 6  |
| 347202 | 88 | 920392 | 920433 | 3 | 14 | 42 | TCT | 19 | 11 |
| 347206 | 88 | 920812 | 920845 | 2 | 17 | 34 | CA  | 13 | 11 |
| 347215 | 88 | 924414 | 924441 | 2 | 14 | 28 | CA  | 13 | 11 |
| 347216 | 88 | 924819 | 924852 | 2 | 17 | 34 | GT  | 8  | 13 |
| 347221 | 88 | 927520 | 927555 | 2 | 18 | 36 | CA  | 7  | 10 |
| 347222 | 88 | 927693 | 927720 | 2 | 14 | 28 | GT  | 11 | 6  |
| 347226 | 88 | 930488 | 930519 | 2 | 16 | 32 | CA  | 12 | 12 |
| 347235 | 88 | 941042 | 941065 | 2 | 12 | 24 | GT  | 7  | 5  |
| 347237 | 88 | 942054 | 942069 | 2 | 8  | 16 | TG  | 18 | 7  |
| 347241 | 88 | 944253 | 944264 | 2 | 6  | 12 | TG  | 27 | 5  |

|        |    |         |         |   |    |    |      |    |    |
|--------|----|---------|---------|---|----|----|------|----|----|
| 347248 | 88 | 946262  | 946279  | 2 | 9  | 18 | GT   | 8  | 3  |
| 347250 | 88 | 946547  | 946576  | 2 | 15 | 30 | CT   | 10 | 8  |
| 347251 | 88 | 946819  | 946833  | 3 | 5  | 15 | CTC  | 24 | 4  |
| 347254 | 88 | 948736  | 948757  | 2 | 11 | 22 | CA   | 14 | 5  |
| 347258 | 88 | 953165  | 953180  | 2 | 8  | 16 | CA   | 32 | 8  |
| 347259 | 88 | 953292  | 953317  | 2 | 13 | 26 | TG   | 13 | 9  |
| 347264 | 88 | 961584  | 961597  | 2 | 7  | 14 | AC   | 15 | 7  |
| 347265 | 88 | 961599  | 961616  | 2 | 9  | 18 | CA   | 15 | 8  |
| 347266 | 88 | 965268  | 965279  | 2 | 6  | 12 | TG   | 25 | 4  |
| 347274 | 88 | 975105  | 975138  | 2 | 17 | 34 | CA   | 8  | 6  |
| 347275 | 88 | 975409  | 975434  | 2 | 13 | 26 | AC   | 17 | 7  |
| 347276 | 88 | 975597  | 975608  | 2 | 6  | 12 | TG   | 24 | 4  |
| 347287 | 88 | 987146  | 987159  | 2 | 7  | 14 | CA   | 25 | 3  |
| 347289 | 88 | 996168  | 996185  | 2 | 9  | 18 | AC   | 13 | 9  |
| 347291 | 88 | 996271  | 996306  | 2 | 18 | 36 | AC   | 22 | 10 |
| 347292 | 88 | 999105  | 999134  | 2 | 15 | 30 | AC   | 10 | 7  |
| 347293 | 88 | 999260  | 999271  | 2 | 6  | 12 | GT   | 6  | 4  |
| 347296 | 88 | 1006275 | 1006292 | 2 | 9  | 18 | AC   | 21 | 8  |
| 347298 | 88 | 1006445 | 1006456 | 2 | 6  | 12 | GA   | 23 | 3  |
| 347300 | 88 | 1008115 | 1008136 | 2 | 11 | 22 | GT   | 12 | 11 |
| 347302 | 88 | 1008303 | 1008326 | 2 | 12 | 24 | TG   | 20 | 11 |
| 347304 | 88 | 1012430 | 1012445 | 2 | 8  | 16 | GT   | 28 | 4  |
| 347308 | 88 | 1015886 | 1015923 | 2 | 19 | 38 | AC   | 20 | 11 |
| 347312 | 88 | 1020001 | 1020012 | 2 | 6  | 12 | TG   | 34 | 3  |
| 347315 | 88 | 1031115 | 1031128 | 2 | 7  | 14 | GT   | 20 | 3  |
| 347316 | 88 | 1031257 | 1031296 | 4 | 10 | 40 | ATCA | 22 | 12 |
| 347318 | 88 | 1035237 | 1035260 | 3 | 8  | 24 | TTA  | 19 | 4  |
| 347327 | 88 | 1055207 | 1055240 | 2 | 17 | 34 | CA   | 7  | 9  |
| 347329 | 88 | 1055622 | 1055655 | 2 | 17 | 34 | GT   | 9  | 9  |
| 347332 | 88 | 1064500 | 1064533 | 2 | 17 | 34 | CA   | 10 | 10 |
| 347334 | 88 | 1068008 | 1068027 | 2 | 10 | 20 | AC   | 15 | 5  |
| 347335 | 88 | 1068235 | 1068282 | 2 | 24 | 48 | TG   | 7  | 7  |
| 347340 | 88 | 1073699 | 1073710 | 2 | 6  | 12 | AC   | 34 | 3  |
| 347342 | 88 | 1077541 | 1077566 | 2 | 13 | 26 | TG   | 18 | 7  |
| 347352 | 88 | 1092706 | 1092747 | 2 | 21 | 42 | GT   | 8  | 8  |
| 347355 | 88 | 1095203 | 1095222 | 2 | 10 | 20 | TG   | 10 | 6  |
| 347367 | 88 | 1105139 | 1105172 | 2 | 17 | 34 | GT   | 12 | 7  |
| 347387 | 88 | 1125590 | 1125609 | 2 | 10 | 20 | GA   | 8  | 5  |
| 347388 | 88 | 1125829 | 1125858 | 2 | 15 | 30 | GT   | 8  | 9  |
| 347389 | 88 | 1127261 | 1127288 | 2 | 14 | 28 | TG   | 10 | 11 |
| 347398 | 88 | 1128659 | 1128676 | 2 | 9  | 18 | AC   | 18 | 8  |
| 347399 | 88 | 1128678 | 1128691 | 2 | 7  | 14 | CA   | 20 | 9  |
| 347401 | 88 | 1130249 | 1130278 | 2 | 15 | 30 | TG   | 13 | 9  |
| 347403 | 88 | 1130375 | 1130428 | 2 | 27 | 54 | GT   | 9  | 10 |
| 347411 | 88 | 1143171 | 1143206 | 2 | 18 | 36 | GT   | 14 | 11 |
| 347414 | 88 | 1144574 | 1144589 | 2 | 8  | 16 | TG   | 11 | 3  |
| 347416 | 88 | 1145230 | 1145255 | 2 | 13 | 26 | AC   | 18 | 5  |
| 347418 | 88 | 1151642 | 1151655 | 2 | 7  | 14 | CT   | 15 | 3  |
| 347419 | 88 | 1151930 | 1151949 | 2 | 10 | 20 | CA   | 25 | 6  |
| 347421 | 88 | 1152794 | 1152817 | 4 | 6  | 24 | TATT | 11 | 4  |
| 347423 | 88 | 1158369 | 1158426 | 2 | 29 | 58 | TG   | 8  | 12 |

|        |    |         |         |   |    |    |      |    |    |
|--------|----|---------|---------|---|----|----|------|----|----|
| 347425 | 88 | 1160500 | 1160535 | 2 | 18 | 36 | GT   | 17 | 11 |
| 347426 | 88 | 1164664 | 1164691 | 4 | 7  | 28 | GATG | 14 | 3  |
| 347427 | 88 | 1165575 | 1165606 | 2 | 16 | 32 | TG   | 10 | 6  |
| 347431 | 88 | 1167661 | 1167690 | 3 | 10 | 30 | AAC  | 22 | 7  |
| 347432 | 88 | 1169426 | 1169455 | 2 | 15 | 30 | TG   | 10 | 5  |
| 347439 | 88 | 1189752 | 1189769 | 2 | 9  | 18 | CA   | 17 | 5  |
| 347440 | 88 | 1189894 | 1189911 | 2 | 9  | 18 | CA   | 16 | 5  |
| 347442 | 88 | 1194028 | 1194065 | 2 | 19 | 38 | AC   | 12 | 7  |
| 347443 | 88 | 1198348 | 1198359 | 2 | 6  | 12 | TA   | 10 | 4  |
| 347455 | 88 | 1227998 | 1228025 | 4 | 7  | 28 | TATT | 22 | 16 |
| 347464 | 88 | 1241374 | 1241387 | 2 | 7  | 14 | TA   | 11 | 3  |
| 347470 | 88 | 1255681 | 1255710 | 2 | 15 | 30 | CA   | 6  | 7  |
| 347476 | 88 | 1261570 | 1261584 | 3 | 5  | 15 | TTG  | 26 | 3  |
| 347480 | 88 | 1265299 | 1265338 | 2 | 20 | 40 | GT   | 6  | 8  |
| 347486 | 88 | 1266118 | 1266133 | 2 | 8  | 16 | CA   | 27 | 5  |
| 347490 | 88 | 1273808 | 1273819 | 2 | 6  | 12 | AC   | 15 | 4  |
| 347492 | 88 | 1274270 | 1274281 | 2 | 6  | 12 | TG   | 26 | 3  |
| 347494 | 88 | 1274600 | 1274639 | 2 | 20 | 40 | TC   | 11 | 13 |
| 347496 | 88 | 1277388 | 1277425 | 2 | 19 | 38 | CA   | 17 | 10 |
| 347502 | 88 | 1286363 | 1286384 | 2 | 11 | 22 | AC   | 23 | 4  |
| 347513 | 88 | 1300113 | 1300130 | 2 | 9  | 18 | CA   | 10 | 7  |
| 347540 | 88 | 1321893 | 1321920 | 2 | 14 | 28 | AC   | 18 | 7  |
| 347545 | 88 | 1332240 | 1332259 | 2 | 10 | 20 | CA   | 20 | 12 |
| 347547 | 88 | 1336927 | 1336958 | 2 | 16 | 32 | AC   | 18 | 10 |
| 347548 | 88 | 1336987 | 1337002 | 2 | 8  | 16 | AG   | 18 | 3  |
| 347552 | 88 | 1339748 | 1339761 | 2 | 7  | 14 | GT   | 22 | 3  |
| 347553 | 88 | 1339852 | 1339869 | 2 | 9  | 18 | GT   | 19 | 6  |
| 347554 | 88 | 1340364 | 1340375 | 2 | 6  | 12 | AC   | 24 | 3  |
| 347556 | 88 | 1344744 | 1344761 | 2 | 9  | 18 | AG   | 16 | 8  |
| 347560 | 88 | 1349580 | 1349599 | 4 | 5  | 20 | TTTG | 9  | 4  |
| 347561 | 88 | 1354517 | 1354532 | 2 | 8  | 16 | CA   | 26 | 5  |
| 347567 | 88 | 1355970 | 1355981 | 2 | 6  | 12 | TC   | 14 | 6  |
| 347571 | 88 | 1363650 | 1363671 | 2 | 11 | 22 | CA   | 12 | 4  |
| 347573 | 88 | 1364900 | 1364935 | 2 | 18 | 36 | GA   | 9  | 6  |
| 347574 | 88 | 1368826 | 1368843 | 2 | 9  | 18 | AC   | 17 | 5  |
| 347577 | 88 | 1370446 | 1370463 | 3 | 6  | 18 | AGA  | 27 | 7  |
| 347578 | 88 | 1372549 | 1372564 | 2 | 8  | 16 | GT   | 25 | 13 |
| 347580 | 88 | 1375179 | 1375206 | 2 | 14 | 28 | GT   | 20 | 12 |
| 347583 | 88 | 1378862 | 1378885 | 3 | 8  | 24 | TTG  | 24 | 7  |
| 347585 | 88 | 1382990 | 1383013 | 3 | 8  | 24 | TGC  | 19 | 6  |
| 347595 | 88 | 1389043 | 1389054 | 2 | 6  | 12 | GT   | 15 | 5  |
| 347597 | 88 | 1389436 | 1389473 | 2 | 19 | 38 | GA   | 7  | 8  |
| 347599 | 88 | 1391073 | 1391096 | 2 | 12 | 24 | CA   | 15 | 5  |
| 347602 | 88 | 1412134 | 1412149 | 2 | 8  | 16 | TC   | 11 | 6  |
| 347603 | 88 | 1412961 | 1412974 | 2 | 7  | 14 | CA   | 22 | 5  |
| 347605 | 88 | 1414952 | 1414965 | 2 | 7  | 14 | TG   | 7  | 5  |
| 347608 | 88 | 1420876 | 1420915 | 2 | 20 | 40 | CA   | 6  | 7  |
| 347610 | 88 | 1421610 | 1421623 | 2 | 7  | 14 | CA   | 18 | 8  |
| 347611 | 88 | 1421625 | 1421640 | 2 | 8  | 16 | CA   | 19 | 9  |
| 347612 | 88 | 1421790 | 1421805 | 2 | 8  | 16 | TG   | 23 | 7  |
| 347614 | 88 | 1424067 | 1424088 | 2 | 11 | 22 | CA   | 12 | 13 |

|        |    |         |         |   |    |    |      |    |    |
|--------|----|---------|---------|---|----|----|------|----|----|
| 347617 | 88 | 1426898 | 1426939 | 2 | 21 | 42 | CA   | 15 | 10 |
| 347619 | 88 | 1429442 | 1429457 | 2 | 8  | 16 | TG   | 20 | 4  |
| 347620 | 88 | 1430334 | 1430385 | 4 | 13 | 52 | TTTC | 10 | 7  |
| 347623 | 88 | 1431256 | 1431267 | 2 | 6  | 12 | CA   | 27 | 4  |
| 347624 | 88 | 1448114 | 1448131 | 2 | 9  | 18 | TG   | 20 | 4  |
| 347626 | 88 | 1449694 | 1449705 | 2 | 6  | 12 | CA   | 23 | 5  |
| 347627 | 88 | 1450567 | 1450578 | 2 | 6  | 12 | TG   | 24 | 10 |
| 347638 | 88 | 1481558 | 1481597 | 4 | 10 | 40 | ATCT | 19 | 10 |
| 347639 | 88 | 1484382 | 1484423 | 2 | 21 | 42 | GT   | 10 | 11 |
| 347641 | 88 | 1488110 | 1488147 | 2 | 19 | 38 | CA   | 18 | 23 |
| 347642 | 88 | 1491532 | 1491569 | 2 | 19 | 38 | CA   | 10 | 11 |
| 347645 | 88 | 1499405 | 1499428 | 2 | 12 | 24 | TG   | 13 | 6  |
| 347651 | 88 | 1510419 | 1510451 | 3 | 11 | 33 | GAA  | 24 | 9  |
| 347659 | 88 | 1521680 | 1521723 | 2 | 22 | 44 | AC   | 9  | 7  |
| 347665 | 88 | 1524676 | 1524693 | 2 | 9  | 18 | GT   | 17 | 7  |
| 347666 | 88 | 1524789 | 1524804 | 4 | 4  | 16 | GAGG | 12 | 3  |
| 347668 | 88 | 1526948 | 1526963 | 4 | 4  | 16 | ACAA | 27 | 3  |
| 347670 | 88 | 1531884 | 1531901 | 2 | 9  | 18 | GT   | 8  | 3  |
| 347671 | 88 | 1532045 | 1532072 | 4 | 7  | 28 | CTGA | 28 | 6  |
| 347674 | 88 | 1536526 | 1536545 | 2 | 10 | 20 | GT   | 15 | 12 |
| 347677 | 88 | 1537075 | 1537090 | 2 | 8  | 16 | TG   | 19 | 5  |
| 347678 | 88 | 1537347 | 1537362 | 2 | 8  | 16 | TG   | 21 | 5  |
| 347687 | 88 | 1543319 | 1543348 | 2 | 15 | 30 | CA   | 12 | 11 |
| 347695 | 88 | 1567670 | 1567691 | 2 | 11 | 22 | AC   | 15 | 8  |
| 347702 | 88 | 1575706 | 1575717 | 2 | 6  | 12 | CT   | 36 | 3  |
| 347703 | 88 | 1576306 | 1576337 | 2 | 16 | 32 | TG   | 25 | 13 |
| 347704 | 88 | 1576858 | 1576933 | 2 | 38 | 76 | TG   | 9  | 14 |
| 347710 | 88 | 1588227 | 1588252 | 2 | 13 | 26 | GT   | 17 | 9  |
| 347712 | 88 | 1589467 | 1589484 | 2 | 9  | 18 | TG   | 24 | 8  |
| 347714 | 88 | 1592580 | 1592593 | 2 | 7  | 14 | TA   | 22 | 4  |
| 347721 | 88 | 1598852 | 1598917 | 3 | 22 | 66 | AGA  | 9  | 10 |
| 347722 | 88 | 1599062 | 1599089 | 2 | 14 | 28 | TC   | 20 | 7  |
| 347729 | 88 | 1602881 | 1602908 | 4 | 7  | 28 | TGGA | 20 | 4  |
| 347730 | 88 | 1606275 | 1606292 | 2 | 9  | 18 | CT   | 17 | 4  |
| 347732 | 88 | 1607243 | 1607262 | 2 | 10 | 20 | TG   | 15 | 7  |
| 347734 | 88 | 1612424 | 1612453 | 2 | 15 | 30 | GT   | 23 | 9  |
| 347735 | 88 | 1612571 | 1612600 | 2 | 15 | 30 | AC   | 22 | 12 |
| 347737 | 88 | 1623290 | 1623307 | 3 | 6  | 18 | ATT  | 19 | 6  |
| 347738 | 88 | 1623882 | 1623901 | 2 | 10 | 20 | AC   | 19 | 18 |
| 347742 | 88 | 1625548 | 1625593 | 2 | 23 | 46 | AC   | 11 | 11 |
| 347743 | 88 | 1627013 | 1627028 | 2 | 8  | 16 | CA   | 9  | 5  |
| 347744 | 88 | 1627367 | 1627402 | 2 | 18 | 36 | TG   | 6  | 5  |
| 347745 | 88 | 1627753 | 1627766 | 2 | 7  | 14 | TG   | 24 | 5  |
| 347748 | 88 | 1630705 | 1630718 | 2 | 7  | 14 | GT   | 22 | 5  |
| 347751 | 88 | 1632229 | 1632248 | 2 | 10 | 20 | GT   | 11 | 5  |
| 347754 | 88 | 1633157 | 1633178 | 2 | 11 | 22 | GT   | 17 | 8  |
| 347756 | 88 | 1633407 | 1633430 | 2 | 12 | 24 | TG   | 20 | 7  |
| 347760 | 88 | 1635055 | 1635110 | 2 | 28 | 56 | CA   | 15 | 15 |
| 347761 | 88 | 1636980 | 1637007 | 2 | 14 | 28 | AC   | 18 | 5  |
| 347762 | 88 | 1637382 | 1637413 | 2 | 16 | 32 | AC   | 11 | 10 |
| 347763 | 88 | 1637569 | 1637590 | 2 | 11 | 22 | TG   | 16 | 5  |

|        |    |         |         |   |    |    |      |    |    |
|--------|----|---------|---------|---|----|----|------|----|----|
| 347766 | 88 | 1642713 | 1642732 | 2 | 10 | 20 | AC   | 30 | 5  |
| 347767 | 88 | 1643678 | 1643699 | 2 | 11 | 22 | AC   | 14 | 6  |
| 347771 | 88 | 1644068 | 1644085 | 2 | 9  | 18 | TC   | 16 | 4  |
| 347775 | 88 | 1651630 | 1651647 | 2 | 9  | 18 | GA   | 23 | 5  |
| 347776 | 88 | 1651783 | 1651800 | 2 | 9  | 18 | CA   | 20 | 17 |
| 347777 | 88 | 1652406 | 1652417 | 2 | 6  | 12 | CA   | 28 | 3  |
| 347786 | 88 | 1660129 | 1660162 | 2 | 17 | 34 | TG   | 10 | 11 |
| 347788 | 88 | 1661982 | 1661997 | 2 | 8  | 16 | CA   | 25 | 4  |
| 347790 | 88 | 1663662 | 1663675 | 2 | 7  | 14 | AC   | 21 | 3  |
| 347798 | 88 | 1666235 | 1666260 | 2 | 13 | 26 | GT   | 16 | 9  |
| 347799 | 88 | 1666877 | 1666896 | 2 | 10 | 20 | GT   | 15 | 3  |
| 347800 | 88 | 1667305 | 1667330 | 2 | 13 | 26 | AC   | 17 | 8  |
| 347801 | 88 | 1672141 | 1672154 | 2 | 7  | 14 | AC   | 28 | 6  |
| 347802 | 88 | 1672266 | 1672277 | 2 | 6  | 12 | GA   | 22 | 4  |
| 347803 | 88 | 1674926 | 1674943 | 2 | 9  | 18 | TA   | 13 | 7  |
| 347806 | 88 | 1677704 | 1677733 | 3 | 10 | 30 | ATG  | 17 | 7  |
| 347811 | 88 | 1685557 | 1685572 | 4 | 4  | 16 | AAAC | 32 | 6  |
| 347812 | 88 | 1698125 | 1698152 | 2 | 14 | 28 | TG   | 10 | 11 |
| 347825 | 89 | 20314   | 20329   | 4 | 4  | 16 | TTTA | 16 | 5  |
| 347827 | 89 | 27599   | 27612   | 2 | 7  | 14 | CA   | 10 | 5  |
| 347829 | 89 | 34860   | 34879   | 4 | 5  | 20 | TATC | 13 | 9  |
| 347835 | 89 | 57261   | 57274   | 2 | 7  | 14 | GT   | 24 | 5  |
| 347838 | 89 | 62164   | 62187   | 3 | 8  | 24 | TCC  | 16 | 4  |
| 347839 | 89 | 62726   | 62759   | 2 | 17 | 34 | GT   | 10 | 12 |
| 347844 | 89 | 77023   | 77076   | 2 | 27 | 54 | AC   | 6  | 7  |
| 347847 | 89 | 95653   | 95678   | 2 | 13 | 26 | GT   | 19 | 4  |
| 347848 | 89 | 98968   | 98997   | 2 | 15 | 30 | AC   | 12 | 8  |
| 347849 | 89 | 102755  | 102784  | 3 | 10 | 30 | CCT  | 11 | 3  |
| 347850 | 89 | 102915  | 102944  | 2 | 15 | 30 | CA   | 16 | 8  |
| 347855 | 89 | 126933  | 126954  | 2 | 11 | 22 | TG   | 16 | 14 |
| 347856 | 89 | 130055  | 130075  | 3 | 7  | 21 | TCA  | 26 | 4  |
| 347857 | 89 | 130136  | 130153  | 2 | 9  | 18 | CA   | 19 | 7  |
| 347858 | 89 | 130250  | 130277  | 2 | 14 | 28 | GT   | 16 | 6  |
| 347861 | 89 | 138647  | 138668  | 2 | 11 | 22 | CA   | 13 | 9  |
| 347863 | 89 | 141877  | 141892  | 4 | 4  | 16 | GACA | 18 | 4  |
| 347864 | 89 | 141962  | 141979  | 3 | 6  | 18 | GCA  | 25 | 3  |
| 347865 | 89 | 142264  | 142279  | 2 | 8  | 16 | AC   | 20 | 10 |
| 347866 | 89 | 143382  | 143421  | 2 | 20 | 40 | AC   | 8  | 7  |
| 347870 | 89 | 154470  | 154513  | 2 | 22 | 44 | CT   | 6  | 8  |
| 347872 | 89 | 166609  | 166640  | 2 | 16 | 32 | CA   | 10 | 8  |
| 347874 | 89 | 175389  | 175403  | 3 | 5  | 15 | TGA  | 23 | 4  |
| 347875 | 89 | 176465  | 176478  | 2 | 7  | 14 | GA   | 21 | 7  |
| 347878 | 89 | 197031  | 197054  | 2 | 12 | 24 | CA   | 20 | 6  |
| 347886 | 89 | 219770  | 219789  | 2 | 10 | 20 | AC   | 16 | 12 |
| 347889 | 89 | 234679  | 234708  | 2 | 15 | 30 | AC   | 18 | 7  |
| 347890 | 89 | 234845  | 234876  | 2 | 16 | 32 | GT   | 15 | 6  |
| 347891 | 89 | 235056  | 235082  | 3 | 9  | 27 | TTG  | 17 | 11 |
| 347894 | 89 | 237899  | 237922  | 3 | 8  | 24 | GAG  | 22 | 3  |
| 347897 | 89 | 244220  | 244239  | 2 | 10 | 20 | AC   | 12 | 6  |
| 347900 | 89 | 252311  | 252325  | 3 | 5  | 15 | AGC  | 18 | 3  |
| 347904 | 89 | 255464  | 255481  | 2 | 9  | 18 | CA   | 15 | 16 |

|        |    |        |        |   |    |    |      |    |    |
|--------|----|--------|--------|---|----|----|------|----|----|
| 347921 | 89 | 280224 | 280239 | 2 | 8  | 16 | TC   | 8  | 9  |
| 347926 | 89 | 295298 | 295313 | 2 | 8  | 16 | AG   | 25 | 6  |
| 347928 | 89 | 299677 | 299688 | 2 | 6  | 12 | GT   | 29 | 4  |
| 347930 | 89 | 304822 | 304835 | 2 | 7  | 14 | CT   | 22 | 3  |
| 347932 | 89 | 305802 | 305864 | 3 | 21 | 63 | CTT  | 19 | 15 |
| 347934 | 89 | 310371 | 310392 | 2 | 11 | 22 | GT   | 16 | 20 |
| 347935 | 89 | 310665 | 310692 | 2 | 14 | 28 | GT   | 14 | 11 |
| 347939 | 89 | 317314 | 317337 | 2 | 12 | 24 | GT   | 14 | 11 |
| 347940 | 89 | 320852 | 320875 | 2 | 12 | 24 | GT   | 25 | 4  |
| 347941 | 89 | 321352 | 321369 | 3 | 6  | 18 | TTG  | 17 | 8  |
| 347945 | 89 | 323762 | 323785 | 2 | 12 | 24 | AC   | 22 | 13 |
| 347950 | 89 | 341128 | 341145 | 2 | 9  | 18 | AG   | 21 | 4  |
| 347952 | 89 | 341856 | 341879 | 2 | 12 | 24 | AC   | 10 | 6  |
| 347953 | 89 | 342164 | 342184 | 3 | 7  | 21 | TCT  | 24 | 4  |
| 347955 | 89 | 344825 | 344852 | 4 | 7  | 28 | TTTG | 24 | 5  |
| 347956 | 89 | 345701 | 345716 | 2 | 8  | 16 | AG   | 22 | 11 |
| 347958 | 89 | 348674 | 348694 | 3 | 7  | 21 | GCT  | 19 | 3  |
| 347964 | 89 | 368941 | 368952 | 2 | 6  | 12 | TG   | 27 | 4  |
| 347968 | 89 | 373490 | 373529 | 2 | 20 | 40 | GT   | 9  | 9  |
| 347969 | 89 | 373649 | 373684 | 2 | 18 | 36 | AC   | 20 | 10 |
| 347978 | 89 | 391205 | 391219 | 3 | 5  | 15 | TAT  | 14 | 8  |
| 347979 | 89 | 391223 | 391237 | 3 | 5  | 15 | TAT  | 8  | 4  |
| 347983 | 89 | 396476 | 396501 | 2 | 13 | 26 | TG   | 15 | 14 |
| 347994 | 89 | 431103 | 431126 | 2 | 12 | 24 | CA   | 13 | 8  |
| 347996 | 89 | 434053 | 434072 | 2 | 10 | 20 | GT   | 26 | 3  |
| 347997 | 89 | 437398 | 437429 | 2 | 16 | 32 | GT   | 10 | 8  |
| 347998 | 89 | 437816 | 437837 | 2 | 11 | 22 | GT   | 20 | 7  |
| 348011 | 89 | 474784 | 474805 | 2 | 11 | 22 | TG   | 18 | 11 |
| 348012 | 89 | 476810 | 476841 | 4 | 8  | 32 | TGGA | 19 | 7  |
| 348014 | 89 | 477542 | 477561 | 2 | 10 | 20 | CA   | 18 | 4  |
| 348017 | 89 | 496710 | 496723 | 2 | 7  | 14 | TG   | 34 | 5  |
| 348018 | 89 | 498746 | 498761 | 4 | 4  | 16 | GGAG | 6  | 6  |
| 348019 | 89 | 500579 | 500593 | 3 | 5  | 15 | TCC  | 20 | 6  |
| 348021 | 89 | 505747 | 505782 | 2 | 18 | 36 | CA   | 21 | 15 |
| 348022 | 89 | 508156 | 508169 | 2 | 7  | 14 | GT   | 14 | 5  |
| 348028 | 89 | 509728 | 509743 | 2 | 8  | 16 | GT   | 15 | 3  |
| 348029 | 89 | 509790 | 509805 | 2 | 8  | 16 | TG   | 22 | 3  |
| 348034 | 89 | 533234 | 533271 | 2 | 19 | 38 | AC   | 6  | 6  |
| 348036 | 89 | 534477 | 534490 | 2 | 7  | 14 | CA   | 27 | 7  |
| 348043 | 89 | 544453 | 544468 | 2 | 8  | 16 | AG   | 10 | 8  |
| 348044 | 89 | 546769 | 546798 | 3 | 10 | 30 | GGA  | 16 | 7  |
| 348045 | 89 | 547473 | 547487 | 3 | 5  | 15 | GGA  | 22 | 3  |
| 348046 | 89 | 549043 | 549056 | 2 | 7  | 14 | AC   | 27 | 6  |
| 348053 | 89 | 561570 | 561590 | 3 | 7  | 21 | ATT  | 17 | 6  |
| 348055 | 89 | 563502 | 563521 | 2 | 10 | 20 | CA   | 8  | 5  |
| 348056 | 89 | 563523 | 563534 | 2 | 6  | 12 | AC   | 11 | 7  |
| 348057 | 89 | 563922 | 563942 | 3 | 7  | 21 | AGG  | 21 | 6  |
| 348063 | 89 | 572121 | 572141 | 3 | 7  | 21 | TCC  | 20 | 6  |
| 348068 | 89 | 582274 | 582293 | 2 | 10 | 20 | AT   | 22 | 6  |
| 348069 | 89 | 584558 | 584579 | 2 | 11 | 22 | AC   | 10 | 7  |
| 348072 | 89 | 596156 | 596195 | 2 | 20 | 40 | AC   | 7  | 8  |



|        |    |        |        |   |    |    |      |    |    |
|--------|----|--------|--------|---|----|----|------|----|----|
| 348074 | 89 | 603310 | 603342 | 3 | 11 | 33 | CCT  | 26 | 8  |
| 348079 | 89 | 629720 | 629733 | 2 | 7  | 14 | CA   | 19 | 3  |
| 348084 | 89 | 631724 | 631747 | 3 | 8  | 24 | AGA  | 24 | 9  |
| 348087 | 89 | 634416 | 634431 | 2 | 8  | 16 | TC   | 23 | 4  |
| 348089 | 89 | 638490 | 638511 | 2 | 11 | 22 | CA   | 27 | 6  |
| 348090 | 89 | 638709 | 638748 | 2 | 20 | 40 | CA   | 19 | 9  |
| 348091 | 89 | 639696 | 639725 | 2 | 15 | 30 | CA   | 23 | 13 |
| 348092 | 89 | 640060 | 640085 | 2 | 13 | 26 | TG   | 15 | 14 |
| 348094 | 89 | 641683 | 641696 | 2 | 7  | 14 | AC   | 22 | 11 |
| 348096 | 89 | 644030 | 644041 | 2 | 6  | 12 | CA   | 29 | 3  |
| 348098 | 89 | 647498 | 647531 | 2 | 17 | 34 | TG   | 15 | 8  |
| 348099 | 89 | 647617 | 647628 | 2 | 6  | 12 | AC   | 19 | 4  |
| 348102 | 89 | 650641 | 650658 | 2 | 9  | 18 | CA   | 25 | 8  |
| 348104 | 89 | 654631 | 654654 | 2 | 12 | 24 | AG   | 17 | 3  |
| 348112 | 89 | 663864 | 663883 | 4 | 5  | 20 | TATT | 27 | 6  |
| 348113 | 89 | 665308 | 665321 | 2 | 7  | 14 | TG   | 17 | 3  |
| 348114 | 89 | 665837 | 665848 | 2 | 6  | 12 | TG   | 25 | 4  |
| 348116 | 89 | 671714 | 671733 | 2 | 10 | 20 | GT   | 12 | 5  |
| 348117 | 89 | 674256 | 674267 | 2 | 6  | 12 | CA   | 21 | 7  |
| 348122 | 89 | 684100 | 684115 | 2 | 8  | 16 | AC   | 17 | 8  |
| 348123 | 89 | 684311 | 684332 | 2 | 11 | 22 | AC   | 28 | 6  |
| 348131 | 89 | 698291 | 698314 | 2 | 12 | 24 | TG   | 9  | 9  |
| 348136 | 89 | 701709 | 701728 | 4 | 5  | 20 | CTTT | 22 | 7  |
| 348140 | 89 | 709311 | 709322 | 2 | 6  | 12 | TG   | 24 | 6  |
| 348142 | 89 | 712756 | 712767 | 2 | 6  | 12 | AC   | 21 | 10 |
| 348143 | 89 | 712976 | 712995 | 2 | 10 | 20 | AC   | 26 | 5  |
| 348144 | 89 | 713301 | 713334 | 2 | 17 | 34 | AC   | 6  | 5  |
| 348146 | 89 | 715124 | 715137 | 2 | 7  | 14 | GT   | 25 | 6  |
| 348148 | 89 | 715411 | 715428 | 2 | 9  | 18 | GA   | 16 | 4  |
| 348153 | 89 | 717210 | 717235 | 2 | 13 | 26 | CA   | 9  | 6  |
| 348154 | 89 | 717317 | 717350 | 2 | 17 | 34 | TG   | 13 | 6  |
| 348155 | 89 | 722110 | 722127 | 2 | 9  | 18 | GT   | 23 | 7  |
| 348158 | 89 | 725770 | 725783 | 2 | 7  | 14 | GT   | 30 | 4  |
| 348159 | 89 | 726595 | 726614 | 2 | 10 | 20 | AG   | 14 | 6  |
| 348161 | 89 | 727396 | 727411 | 2 | 8  | 16 | GT   | 22 | 8  |
| 348165 | 89 | 732777 | 732792 | 2 | 8  | 16 | TG   | 20 | 7  |
| 348166 | 89 | 732953 | 732978 | 2 | 13 | 26 | TG   | 10 | 9  |
| 348167 | 89 | 735895 | 735910 | 2 | 8  | 16 | TC   | 28 | 3  |
| 348169 | 89 | 739563 | 739580 | 2 | 9  | 18 | AC   | 17 | 6  |
| 348174 | 89 | 747441 | 747454 | 2 | 7  | 14 | CA   | 26 | 8  |
| 348175 | 89 | 747598 | 747617 | 2 | 10 | 20 | CA   | 23 | 15 |
| 348176 | 89 | 747813 | 747838 | 2 | 13 | 26 | GT   | 12 | 8  |
| 348177 | 89 | 748376 | 748396 | 3 | 7  | 21 | TCC  | 14 | 4  |
| 348179 | 89 | 752412 | 752423 | 2 | 6  | 12 | GA   | 20 | 4  |
| 348180 | 89 | 752966 | 752977 | 2 | 6  | 12 | GT   | 30 | 4  |
| 348182 | 89 | 754641 | 754670 | 2 | 15 | 30 | TG   | 7  | 5  |
| 348184 | 89 | 757973 | 758004 | 2 | 16 | 32 | GT   | 10 | 7  |
| 348185 | 89 | 758099 | 758124 | 2 | 13 | 26 | CA   | 10 | 12 |
| 348188 | 89 | 760935 | 760950 | 2 | 8  | 16 | CA   | 24 | 16 |
| 348195 | 89 | 762051 | 762070 | 2 | 10 | 20 | TG   | 11 | 8  |
| 348208 | 89 | 765100 | 765131 | 2 | 16 | 32 | TG   | 16 | 12 |

|        |    |        |        |   |    |    |      |    |    |
|--------|----|--------|--------|---|----|----|------|----|----|
| 348209 | 89 | 765258 | 765289 | 2 | 16 | 32 | TG   | 10 | 10 |
| 348211 | 89 | 765539 | 765562 | 2 | 12 | 24 | CA   | 17 | 8  |
| 348212 | 89 | 765613 | 765634 | 2 | 11 | 22 | GT   | 17 | 9  |
| 348215 | 89 | 769284 | 769315 | 2 | 16 | 32 | CA   | 6  | 10 |
| 348216 | 89 | 769423 | 769438 | 2 | 8  | 16 | AC   | 8  | 4  |
| 348217 | 89 | 769748 | 769769 | 2 | 11 | 22 | GT   | 22 | 15 |
| 348218 | 89 | 771222 | 771237 | 2 | 8  | 16 | AG   | 9  | 3  |
| 348219 | 89 | 771667 | 771682 | 2 | 8  | 16 | AG   | 19 | 6  |
| 348220 | 89 | 771881 | 771894 | 2 | 7  | 14 | TG   | 20 | 8  |
| 348224 | 89 | 775696 | 775729 | 2 | 17 | 34 | TG   | 8  | 11 |
| 348226 | 89 | 775864 | 775881 | 2 | 9  | 18 | GT   | 11 | 5  |
| 348228 | 89 | 775977 | 776006 | 2 | 15 | 30 | GT   | 19 | 11 |
| 348229 | 89 | 777574 | 777597 | 2 | 12 | 24 | TG   | 14 | 11 |
| 348230 | 89 | 779489 | 779516 | 2 | 14 | 28 | GT   | 13 | 13 |
| 348231 | 89 | 779636 | 779653 | 2 | 9  | 18 | GT   | 18 | 7  |
| 348232 | 89 | 781361 | 781400 | 2 | 20 | 40 | TG   | 6  | 7  |
| 348234 | 89 | 782231 | 782244 | 2 | 7  | 14 | CT   | 32 | 7  |
| 348235 | 89 | 782250 | 782261 | 2 | 6  | 12 | TC   | 25 | 3  |
| 348238 | 89 | 784405 | 784432 | 2 | 14 | 28 | AC   | 14 | 9  |
| 348241 | 89 | 786557 | 786584 | 2 | 14 | 28 | TG   | 18 | 8  |
| 348245 | 89 | 788120 | 788133 | 2 | 7  | 14 | TG   | 21 | 3  |
| 348246 | 89 | 788294 | 788319 | 2 | 13 | 26 | TG   | 13 | 11 |
| 348247 | 89 | 791990 | 792003 | 2 | 7  | 14 | CA   | 17 | 12 |
| 348248 | 89 | 792110 | 792121 | 2 | 6  | 12 | AG   | 16 | 3  |
| 348252 | 89 | 794595 | 794606 | 2 | 6  | 12 | AC   | 21 | 3  |
| 348253 | 89 | 795654 | 795693 | 2 | 20 | 40 | TG   | 7  | 11 |
| 348255 | 89 | 795970 | 795987 | 2 | 9  | 18 | CA   | 9  | 4  |
| 348257 | 89 | 797618 | 797639 | 2 | 11 | 22 | GT   | 13 | 9  |
| 348258 | 89 | 797832 | 797861 | 2 | 15 | 30 | GT   | 11 | 10 |
| 348260 | 89 | 798278 | 798291 | 2 | 7  | 14 | TG   | 18 | 3  |
| 348261 | 89 | 798769 | 798786 | 2 | 9  | 18 | TC   | 20 | 9  |
| 348263 | 89 | 801953 | 801980 | 2 | 14 | 28 | AC   | 14 | 8  |
| 348265 | 89 | 803238 | 803253 | 2 | 8  | 16 | TG   | 22 | 5  |
| 348267 | 89 | 803725 | 803738 | 2 | 7  | 14 | GT   | 24 | 7  |
| 348268 | 89 | 805935 | 805946 | 2 | 6  | 12 | AC   | 22 | 3  |
| 348270 | 89 | 806908 | 806925 | 2 | 9  | 18 | CA   | 19 | 4  |
| 348272 | 89 | 811729 | 811740 | 2 | 6  | 12 | GA   | 26 | 3  |
| 348275 | 89 | 827191 | 827206 | 2 | 8  | 16 | GT   | 21 | 3  |
| 348276 | 89 | 832737 | 832760 | 2 | 12 | 24 | GT   | 6  | 4  |
| 348279 | 89 | 837329 | 837342 | 2 | 7  | 14 | CA   | 9  | 3  |
| 348282 | 89 | 844235 | 844252 | 2 | 9  | 18 | GT   | 21 | 9  |
| 348287 | 89 | 849804 | 849843 | 2 | 20 | 40 | TG   | 7  | 7  |
| 348290 | 89 | 855970 | 855985 | 4 | 4  | 16 | GTCT | 21 | 4  |
| 348293 | 89 | 859349 | 859376 | 2 | 14 | 28 | CA   | 12 | 10 |
| 348297 | 89 | 859750 | 859775 | 2 | 13 | 26 | AC   | 11 | 6  |
| 348298 | 89 | 859852 | 859877 | 2 | 13 | 26 | CA   | 11 | 6  |
| 348299 | 89 | 859998 | 860025 | 2 | 14 | 28 | TG   | 14 | 10 |
| 348300 | 89 | 862440 | 862455 | 2 | 8  | 16 | CA   | 22 | 4  |
| 348308 | 89 | 871072 | 871117 | 2 | 23 | 46 | GT   | 6  | 7  |
| 348309 | 89 | 871161 | 871172 | 2 | 6  | 12 | GA   | 20 | 3  |
| 348320 | 89 | 885403 | 885420 | 2 | 9  | 18 | TG   | 15 | 8  |

|        |    |         |         |   |    |    |      |    |    |
|--------|----|---------|---------|---|----|----|------|----|----|
| 348321 | 89 | 886597  | 886612  | 4 | 4  | 16 | GGTG | 7  | 5  |
| 348324 | 89 | 890798  | 890809  | 2 | 6  | 12 | AC   | 17 | 5  |
| 348325 | 89 | 893035  | 893048  | 2 | 7  | 14 | TG   | 20 | 4  |
| 348326 | 89 | 893071  | 893088  | 2 | 9  | 18 | TG   | 13 | 6  |
| 348327 | 89 | 893246  | 893259  | 2 | 7  | 14 | CA   | 21 | 3  |
| 348329 | 89 | 894533  | 894556  | 2 | 12 | 24 | TG   | 22 | 12 |
| 348330 | 89 | 897042  | 897057  | 2 | 8  | 16 | TG   | 16 | 4  |
| 348331 | 89 | 899315  | 899330  | 2 | 8  | 16 | TG   | 15 | 11 |
| 348332 | 89 | 899495  | 899512  | 2 | 9  | 18 | AC   | 16 | 7  |
| 348335 | 89 | 902886  | 902905  | 2 | 10 | 20 | AC   | 27 | 9  |
| 348336 | 89 | 909952  | 909979  | 2 | 14 | 28 | AC   | 11 | 12 |
| 348340 | 89 | 914059  | 914078  | 2 | 10 | 20 | TG   | 23 | 11 |
| 348345 | 89 | 917492  | 917523  | 2 | 16 | 32 | GT   | 20 | 12 |
| 348348 | 89 | 932043  | 932054  | 2 | 6  | 12 | GT   | 22 | 4  |
| 348351 | 89 | 935116  | 935139  | 2 | 12 | 24 | CA   | 12 | 7  |
| 348353 | 89 | 944148  | 944171  | 4 | 6  | 24 | TGTC | 31 | 5  |
| 348356 | 89 | 948153  | 948170  | 2 | 9  | 18 | CT   | 22 | 6  |
| 348358 | 89 | 951171  | 951186  | 2 | 8  | 16 | AC   | 17 | 4  |
| 348364 | 89 | 968563  | 968576  | 2 | 7  | 14 | AG   | 16 | 3  |
| 348368 | 89 | 972455  | 972486  | 2 | 16 | 32 | TG   | 12 | 13 |
| 348371 | 89 | 982824  | 982867  | 4 | 11 | 44 | ACAT | 16 | 7  |
| 348379 | 89 | 1013183 | 1013206 | 4 | 6  | 24 | AGAA | 24 | 4  |
| 348380 | 89 | 1017258 | 1017269 | 2 | 6  | 12 | GT   | 17 | 4  |
| 348382 | 89 | 1019178 | 1019189 | 2 | 6  | 12 | TG   | 33 | 3  |
| 348390 | 89 | 1038058 | 1038071 | 2 | 7  | 14 | AC   | 19 | 9  |
| 348392 | 89 | 1038658 | 1038669 | 2 | 6  | 12 | CA   | 28 | 4  |
| 348393 | 89 | 1041442 | 1041467 | 2 | 13 | 26 | CT   | 19 | 6  |
| 348394 | 89 | 1041578 | 1041591 | 2 | 7  | 14 | CA   | 11 | 4  |
| 348395 | 89 | 1041666 | 1041679 | 2 | 7  | 14 | GT   | 26 | 5  |
| 348396 | 89 | 1041939 | 1041962 | 3 | 8  | 24 | AGC  | 31 | 4  |
| 348401 | 89 | 1043754 | 1043777 | 2 | 12 | 24 | CA   | 6  | 6  |
| 348402 | 89 | 1044247 | 1044262 | 2 | 8  | 16 | CA   | 20 | 3  |
| 348404 | 89 | 1046307 | 1046318 | 2 | 6  | 12 | CA   | 23 | 3  |
| 348408 | 89 | 1052233 | 1052246 | 2 | 7  | 14 | CA   | 25 | 4  |
| 348409 | 89 | 1052405 | 1052420 | 2 | 8  | 16 | TG   | 19 | 3  |
| 348410 | 89 | 1052556 | 1052571 | 2 | 8  | 16 | TG   | 16 | 4  |
| 348412 | 89 | 1052718 | 1052737 | 2 | 10 | 20 | CA   | 14 | 9  |
| 348414 | 89 | 1052943 | 1052966 | 2 | 12 | 24 | TG   | 18 | 8  |
| 348417 | 89 | 1058152 | 1058165 | 2 | 7  | 14 | CA   | 24 | 4  |
| 348419 | 89 | 1060266 | 1060283 | 3 | 6  | 18 | AAC  | 18 | 4  |
| 348420 | 89 | 1060316 | 1060355 | 2 | 20 | 40 | TG   | 10 | 11 |
| 348426 | 89 | 1061245 | 1061258 | 2 | 7  | 14 | AC   | 27 | 5  |
| 348427 | 89 | 1061518 | 1061545 | 2 | 14 | 28 | TC   | 22 | 9  |
| 348430 | 89 | 1062421 | 1062444 | 2 | 12 | 24 | AC   | 24 | 5  |
| 348432 | 89 | 1066735 | 1066750 | 2 | 8  | 16 | CA   | 15 | 4  |
| 348435 | 89 | 1067135 | 1067156 | 2 | 11 | 22 | TG   | 6  | 6  |
| 348438 | 89 | 1067723 | 1067738 | 2 | 8  | 16 | CA   | 6  | 4  |
| 348441 | 89 | 1068516 | 1068551 | 2 | 18 | 36 | AC   | 6  | 7  |
| 348442 | 89 | 1068679 | 1068702 | 2 | 12 | 24 | TG   | 17 | 6  |
| 348445 | 89 | 1069926 | 1069937 | 2 | 6  | 12 | TG   | 29 | 4  |
| 348456 | 89 | 1085407 | 1085434 | 2 | 14 | 28 | AC   | 14 | 5  |

|        |    |         |         |   |    |    |      |    |    |
|--------|----|---------|---------|---|----|----|------|----|----|
| 348459 | 89 | 1086451 | 1086468 | 2 | 9  | 18 | AC   | 26 | 6  |
| 348460 | 89 | 1087877 | 1087888 | 2 | 6  | 12 | CA   | 31 | 5  |
| 348461 | 89 | 1091655 | 1091696 | 2 | 21 | 42 | GT   | 9  | 12 |
| 348462 | 89 | 1093707 | 1093724 | 2 | 9  | 18 | CA   | 17 | 10 |
| 348463 | 89 | 1093869 | 1093902 | 2 | 17 | 34 | GT   | 18 | 11 |
| 348465 | 89 | 1094171 | 1094182 | 2 | 6  | 12 | CA   | 25 | 4  |
| 348466 | 89 | 1094901 | 1094918 | 2 | 9  | 18 | TG   | 26 | 4  |
| 348468 | 89 | 1095167 | 1095184 | 2 | 9  | 18 | TG   | 23 | 10 |
| 348470 | 89 | 1096889 | 1096932 | 2 | 22 | 44 | AC   | 7  | 11 |
| 348471 | 89 | 1097058 | 1097071 | 2 | 7  | 14 | CA   | 30 | 3  |
| 348472 | 89 | 1097332 | 1097361 | 2 | 15 | 30 | TG   | 9  | 15 |
| 348480 | 89 | 1104783 | 1104816 | 2 | 17 | 34 | AC   | 6  | 8  |
| 348488 | 89 | 1113801 | 1113814 | 2 | 7  | 14 | CA   | 26 | 3  |
| 348498 | 89 | 1133490 | 1133517 | 2 | 14 | 28 | AC   | 17 | 7  |
| 348499 | 89 | 1134055 | 1134088 | 2 | 17 | 34 | TG   | 11 | 5  |
| 348500 | 89 | 1135185 | 1135204 | 2 | 10 | 20 | CA   | 22 | 9  |
| 348502 | 89 | 1141683 | 1141710 | 2 | 14 | 28 | TG   | 19 | 10 |
| 348503 | 89 | 1147499 | 1147519 | 3 | 7  | 21 | TGG  | 8  | 5  |
| 348505 | 89 | 1151693 | 1151704 | 2 | 6  | 12 | TG   | 8  | 4  |
| 348511 | 89 | 1155319 | 1155334 | 4 | 4  | 16 | ATTT | 25 | 9  |
| 348512 | 89 | 1155465 | 1155510 | 2 | 23 | 46 | AC   | 9  | 12 |
| 348513 | 89 | 1156166 | 1156183 | 2 | 9  | 18 | TC   | 20 | 5  |
| 348514 | 89 | 1157549 | 1157582 | 2 | 17 | 34 | CA   | 7  | 10 |
| 348521 | 89 | 1158768 | 1158791 | 2 | 12 | 24 | CA   | 14 | 5  |
| 348524 | 89 | 1164186 | 1164201 | 2 | 8  | 16 | CA   | 23 | 14 |
| 348530 | 89 | 1176232 | 1176261 | 2 | 15 | 30 | AC   | 17 | 11 |
| 348558 | 89 | 1213277 | 1213294 | 3 | 6  | 18 | CAA  | 20 | 6  |
| 348561 | 89 | 1215070 | 1215083 | 2 | 7  | 14 | GT   | 23 | 5  |
| 348564 | 89 | 1219945 | 1219960 | 2 | 8  | 16 | GA   | 14 | 3  |
| 348565 | 89 | 1220041 | 1220056 | 2 | 8  | 16 | GA   | 18 | 7  |
| 348568 | 89 | 1221652 | 1221663 | 2 | 6  | 12 | TG   | 24 | 3  |
| 348570 | 89 | 1223131 | 1223150 | 4 | 5  | 20 | TAAA | 21 | 5  |
| 348571 | 89 | 1224525 | 1224548 | 4 | 6  | 24 | CCAT | 29 | 8  |
| 348574 | 89 | 1228583 | 1228598 | 2 | 8  | 16 | TG   | 13 | 5  |
| 348575 | 89 | 1228782 | 1228819 | 2 | 19 | 38 | TG   | 9  | 10 |
| 348585 | 89 | 1242636 | 1242647 | 2 | 6  | 12 | CA   | 18 | 4  |
| 348588 | 89 | 1243217 | 1243236 | 2 | 10 | 20 | CA   | 19 | 14 |
| 348589 | 89 | 1243735 | 1243752 | 2 | 9  | 18 | AC   | 17 | 5  |
| 348592 | 89 | 1245726 | 1245741 | 2 | 8  | 16 | CT   | 31 | 5  |
| 348593 | 89 | 1246317 | 1246332 | 2 | 8  | 16 | CA   | 27 | 10 |
| 348594 | 89 | 1246654 | 1246685 | 2 | 16 | 32 | TG   | 16 | 10 |
| 348596 | 89 | 1247317 | 1247336 | 2 | 10 | 20 | TG   | 21 | 6  |
| 348597 | 89 | 1248114 | 1248125 | 2 | 6  | 12 | AC   | 20 | 6  |
| 348598 | 89 | 1249964 | 1249981 | 2 | 9  | 18 | GT   | 22 | 11 |
| 348599 | 89 | 1251315 | 1251334 | 4 | 5  | 20 | ATCA | 25 | 6  |
| 348600 | 89 | 1252112 | 1252137 | 2 | 13 | 26 | CA   | 13 | 6  |
| 348601 | 89 | 1253800 | 1253841 | 2 | 21 | 42 | TG   | 12 | 12 |
| 348618 | 89 | 1283495 | 1283514 | 2 | 10 | 20 | AC   | 25 | 5  |
| 348619 | 89 | 1283629 | 1283642 | 2 | 7  | 14 | GT   | 29 | 12 |
| 348623 | 89 | 1287950 | 1287973 | 2 | 12 | 24 | AG   | 20 | 6  |
| 348626 | 89 | 1289477 | 1289492 | 2 | 8  | 16 | CA   | 24 | 12 |

|        |    |         |         |   |    |    |      |    |    |
|--------|----|---------|---------|---|----|----|------|----|----|
| 348636 | 89 | 1295753 | 1295768 | 2 | 8  | 16 | GT   | 16 | 3  |
| 348637 | 89 | 1295797 | 1295808 | 2 | 6  | 12 | AC   | 11 | 8  |
| 348641 | 89 | 1300966 | 1300981 | 2 | 8  | 16 | CA   | 19 | 13 |
| 348644 | 89 | 1303970 | 1304003 | 2 | 17 | 34 | TG   | 7  | 10 |
| 348649 | 89 | 1308715 | 1308732 | 2 | 9  | 18 | CA   | 19 | 10 |
| 348650 | 89 | 1308899 | 1308918 | 2 | 10 | 20 | CA   | 6  | 10 |
| 348652 | 89 | 1309146 | 1309169 | 2 | 12 | 24 | TG   | 12 | 3  |
| 348654 | 89 | 1310284 | 1310305 | 2 | 11 | 22 | CA   | 10 | 6  |
| 348657 | 89 | 1314172 | 1314215 | 2 | 22 | 44 | AC   | 13 | 14 |
| 348660 | 89 | 1317330 | 1317343 | 2 | 7  | 14 | GT   | 33 | 3  |
| 348662 | 89 | 1318356 | 1318389 | 2 | 17 | 34 | GT   | 12 | 9  |
| 348668 | 89 | 1323562 | 1323576 | 3 | 5  | 15 | CCA  | 10 | 9  |
| 348671 | 89 | 1327460 | 1327477 | 2 | 9  | 18 | AC   | 23 | 11 |
| 348674 | 89 | 1330443 | 1330456 | 2 | 7  | 14 | AC   | 22 | 5  |
| 348675 | 89 | 1330619 | 1330632 | 2 | 7  | 14 | TC   | 16 | 10 |
| 348682 | 89 | 1347670 | 1347699 | 2 | 15 | 30 | CA   | 11 | 7  |
| 348683 | 89 | 1347900 | 1347915 | 2 | 8  | 16 | CA   | 22 | 3  |
| 348684 | 89 | 1348808 | 1348835 | 2 | 14 | 28 | AC   | 12 | 11 |
| 348686 | 89 | 1350530 | 1350559 | 2 | 15 | 30 | CA   | 19 | 13 |
| 348688 | 89 | 1353459 | 1353476 | 2 | 9  | 18 | GT   | 23 | 16 |
| 348692 | 89 | 1354550 | 1354567 | 2 | 9  | 18 | GT   | 21 | 9  |
| 348693 | 89 | 1354848 | 1354875 | 2 | 14 | 28 | TG   | 23 | 5  |
| 348699 | 89 | 1367645 | 1367666 | 2 | 11 | 22 | TG   | 21 | 8  |
| 348700 | 89 | 1367900 | 1367915 | 2 | 8  | 16 | GT   | 23 | 8  |
| 348703 | 89 | 1369263 | 1369278 | 2 | 8  | 16 | TG   | 29 | 5  |
| 348711 | 89 | 1379902 | 1379919 | 2 | 9  | 18 | CA   | 23 | 5  |
| 348715 | 89 | 1385037 | 1385072 | 2 | 18 | 36 | TG   | 7  | 8  |
| 348716 | 89 | 1385387 | 1385404 | 2 | 9  | 18 | GA   | 27 | 4  |
| 348718 | 89 | 1386184 | 1386211 | 2 | 14 | 28 | TG   | 15 | 7  |
| 348721 | 89 | 1389497 | 1389510 | 2 | 7  | 14 | GA   | 12 | 4  |
| 348722 | 89 | 1389627 | 1389646 | 2 | 10 | 20 | AC   | 10 | 7  |
| 348725 | 89 | 1393116 | 1393127 | 2 | 6  | 12 | CA   | 23 | 5  |
| 348726 | 89 | 1393129 | 1393140 | 2 | 6  | 12 | AC   | 26 | 3  |
| 348727 | 89 | 1393490 | 1393509 | 2 | 10 | 20 | CA   | 25 | 4  |
| 348728 | 89 | 1393671 | 1393698 | 2 | 14 | 28 | TG   | 21 | 13 |
| 348729 | 89 | 1393855 | 1393868 | 2 | 7  | 14 | CA   | 19 | 4  |
| 348732 | 89 | 1394235 | 1394252 | 2 | 9  | 18 | TG   | 18 | 3  |
| 348735 | 89 | 1395721 | 1395738 | 2 | 9  | 18 | TG   | 20 | 6  |
| 348736 | 89 | 1395792 | 1395807 | 2 | 8  | 16 | GT   | 14 | 7  |
| 348737 | 89 | 1395956 | 1395969 | 2 | 7  | 14 | AC   | 19 | 5  |
| 348738 | 89 | 1395972 | 1395985 | 2 | 7  | 14 | AC   | 15 | 3  |
| 348739 | 89 | 1396107 | 1396128 | 2 | 11 | 22 | TG   | 8  | 6  |
| 348741 | 89 | 1396588 | 1396601 | 2 | 7  | 14 | GT   | 27 | 4  |
| 348745 | 89 | 1399967 | 1399990 | 4 | 6  | 24 | GAGG | 6  | 5  |
| 348750 | 89 | 1402945 | 1402958 | 2 | 7  | 14 | AC   | 15 | 6  |
| 348751 | 89 | 1403102 | 1403119 | 2 | 9  | 18 | CA   | 14 | 6  |
| 348755 | 89 | 1403613 | 1403644 | 2 | 16 | 32 | GT   | 13 | 12 |
| 348756 | 89 | 1403813 | 1403836 | 2 | 12 | 24 | TG   | 21 | 6  |
| 348757 | 89 | 1405594 | 1405617 | 2 | 12 | 24 | TG   | 20 | 8  |
| 348761 | 89 | 1413819 | 1413832 | 2 | 7  | 14 | GT   | 26 | 3  |
| 348762 | 89 | 1413983 | 1413998 | 2 | 8  | 16 | AC   | 34 | 4  |

|        |    |         |         |   |    |    |      |    |    |
|--------|----|---------|---------|---|----|----|------|----|----|
| 348764 | 89 | 1414254 | 1414271 | 2 | 9  | 18 | GT   | 18 | 3  |
| 348765 | 89 | 1414604 | 1414619 | 2 | 8  | 16 | AC   | 16 | 3  |
| 348769 | 89 | 1417467 | 1417484 | 2 | 9  | 18 | TG   | 28 | 16 |
| 348773 | 89 | 1420007 | 1420034 | 2 | 14 | 28 | GT   | 15 | 3  |
| 348774 | 89 | 1420251 | 1420264 | 2 | 7  | 14 | AC   | 23 | 6  |
| 348778 | 89 | 1423246 | 1423261 | 2 | 8  | 16 | CA   | 23 | 5  |
| 348779 | 89 | 1423493 | 1423510 | 2 | 9  | 18 | AC   | 19 | 4  |
| 348780 | 89 | 1423847 | 1423872 | 2 | 13 | 26 | AC   | 20 | 13 |
| 348782 | 89 | 1424261 | 1424274 | 2 | 7  | 14 | CA   | 20 | 6  |
| 348783 | 89 | 1424409 | 1424428 | 4 | 5  | 20 | CACG | 24 | 18 |
| 348785 | 89 | 1426952 | 1426967 | 2 | 8  | 16 | CA   | 22 | 9  |
| 348790 | 89 | 1433415 | 1433466 | 4 | 13 | 52 | GAAA | 17 | 7  |
| 348792 | 89 | 1440439 | 1440474 | 2 | 18 | 36 | GT   | 17 | 10 |
| 348793 | 89 | 1440723 | 1440736 | 2 | 7  | 14 | AC   | 19 | 7  |
| 348794 | 89 | 1440853 | 1440874 | 2 | 11 | 22 | TG   | 19 | 12 |
| 348795 | 89 | 1441013 | 1441024 | 2 | 6  | 12 | CA   | 29 | 3  |
| 348796 | 89 | 1441053 | 1441072 | 2 | 10 | 20 | GT   | 20 | 11 |
| 348799 | 89 | 1442112 | 1442123 | 2 | 6  | 12 | AC   | 25 | 7  |
| 348802 | 89 | 1442766 | 1442785 | 2 | 10 | 20 | AC   | 15 | 7  |
| 348804 | 89 | 1445853 | 1445866 | 2 | 7  | 14 | AC   | 19 | 10 |
| 348810 | 89 | 1447427 | 1447440 | 2 | 7  | 14 | AC   | 23 | 4  |
| 348811 | 89 | 1447534 | 1447547 | 2 | 7  | 14 | TG   | 22 | 6  |
| 348812 | 89 | 1447548 | 1447563 | 2 | 8  | 16 | AG   | 18 | 7  |
| 348813 | 89 | 1451461 | 1451478 | 2 | 9  | 18 | GT   | 13 | 4  |
| 348815 | 89 | 1451926 | 1451941 | 2 | 8  | 16 | TG   | 6  | 4  |
| 348816 | 89 | 1452068 | 1452103 | 2 | 18 | 36 | TG   | 14 | 13 |
| 348817 | 89 | 1452220 | 1452243 | 2 | 12 | 24 | CA   | 25 | 9  |
| 348818 | 89 | 1452366 | 1452383 | 2 | 9  | 18 | GT   | 27 | 4  |
| 348819 | 89 | 1452655 | 1452668 | 2 | 7  | 14 | AC   | 24 | 4  |
| 348820 | 89 | 1452865 | 1452894 | 2 | 15 | 30 | TG   | 15 | 9  |
| 348822 | 89 | 1453074 | 1453091 | 2 | 9  | 18 | AG   | 15 | 6  |
| 348826 | 89 | 1456895 | 1456918 | 2 | 12 | 24 | CA   | 22 | 10 |
| 348837 | 89 | 1469273 | 1469290 | 2 | 9  | 18 | AG   | 19 | 5  |
| 348839 | 89 | 1470241 | 1470264 | 2 | 12 | 24 | CA   | 19 | 11 |
| 348841 | 89 | 1472435 | 1472454 | 2 | 10 | 20 | GT   | 12 | 7  |
| 348842 | 89 | 1472892 | 1472919 | 2 | 14 | 28 | GT   | 22 | 8  |
| 348847 | 89 | 1474391 | 1474412 | 2 | 11 | 22 | TG   | 11 | 10 |
| 348848 | 89 | 1474797 | 1474814 | 2 | 9  | 18 | TG   | 18 | 8  |
| 348849 | 89 | 1474999 | 1475020 | 2 | 11 | 22 | TG   | 19 | 6  |
| 348850 | 89 | 1475180 | 1475207 | 2 | 14 | 28 | TG   | 14 | 6  |
| 348851 | 89 | 1476073 | 1476096 | 2 | 12 | 24 | AC   | 14 | 5  |
| 348858 | 89 | 1481868 | 1481885 | 2 | 9  | 18 | TG   | 28 | 8  |
| 348861 | 89 | 1482680 | 1482697 | 2 | 9  | 18 | GT   | 18 | 8  |
| 348862 | 89 | 1483171 | 1483194 | 2 | 12 | 24 | TG   | 13 | 8  |
| 348863 | 89 | 1483324 | 1483345 | 2 | 11 | 22 | GT   | 17 | 8  |
| 348864 | 89 | 1483526 | 1483539 | 2 | 7  | 14 | GT   | 24 | 14 |
| 348865 | 89 | 1483987 | 1484000 | 2 | 7  | 14 | AC   | 14 | 7  |
| 348866 | 89 | 1484413 | 1484444 | 2 | 16 | 32 | TG   | 22 | 13 |
| 348868 | 89 | 1484858 | 1484875 | 3 | 6  | 18 | AGG  | 24 | 6  |
| 348869 | 89 | 1485403 | 1485422 | 2 | 10 | 20 | AG   | 15 | 6  |
| 348874 | 89 | 1490865 | 1490880 | 2 | 8  | 16 | GT   | 26 | 7  |

|        |    |         |         |   |    |    |    |    |    |
|--------|----|---------|---------|---|----|----|----|----|----|
| 348875 | 89 | 1491080 | 1491091 | 2 | 6  | 12 | GT | 25 | 9  |
| 348877 | 89 | 1491525 | 1491540 | 2 | 8  | 16 | AC | 18 | 7  |
| 348878 | 89 | 1492932 | 1492947 | 2 | 8  | 16 | CA | 29 | 5  |
| 348879 | 89 | 1493096 | 1493107 | 2 | 6  | 12 | CT | 15 | 5  |
| 348880 | 89 | 1493543 | 1493558 | 2 | 8  | 16 | TG | 22 | 8  |
| 348881 | 89 | 1494028 | 1494039 | 2 | 6  | 12 | GA | 12 | 3  |
| 348883 | 89 | 1495439 | 1495464 | 2 | 13 | 26 | CA | 16 | 6  |
| 348886 | 89 | 1497418 | 1497435 | 2 | 9  | 18 | AC | 17 | 7  |
| 348887 | 89 | 1498889 | 1498910 | 2 | 11 | 22 | CA | 22 | 4  |
| 348888 | 89 | 1499282 | 1499297 | 2 | 8  | 16 | AC | 15 | 4  |
| 348889 | 89 | 1499396 | 1499413 | 2 | 9  | 18 | GA | 19 | 5  |
| 348891 | 89 | 1499517 | 1499530 | 2 | 7  | 14 | TG | 16 | 3  |
| 348897 | 89 | 1502841 | 1502860 | 2 | 10 | 20 | CA | 18 | 6  |
| 348898 | 89 | 1502943 | 1502966 | 2 | 12 | 24 | TG | 16 | 8  |
| 348899 | 89 | 1503184 | 1503197 | 2 | 7  | 14 | AC | 26 | 3  |
| 348900 | 89 | 1505985 | 1506002 | 2 | 9  | 18 | TG | 14 | 6  |
| 348901 | 89 | 1506302 | 1506319 | 2 | 9  | 18 | AC | 17 | 5  |
| 348905 | 89 | 1507990 | 1508007 | 2 | 9  | 18 | TC | 11 | 7  |
| 348908 | 89 | 1508896 | 1508919 | 2 | 12 | 24 | CT | 12 | 12 |
| 348912 | 89 | 1509339 | 1509354 | 2 | 8  | 16 | AC | 10 | 11 |
| 348913 | 89 | 1509356 | 1509375 | 2 | 10 | 20 | CA | 11 | 13 |
| 348936 | 89 | 1517682 | 1517713 | 2 | 16 | 32 | AC | 15 | 9  |
| 348938 | 89 | 1518208 | 1518229 | 2 | 11 | 22 | TC | 21 | 5  |
| 348940 | 89 | 1518656 | 1518679 | 2 | 12 | 24 | AC | 20 | 10 |
| 348941 | 89 | 1518887 | 1518900 | 2 | 7  | 14 | CA | 19 | 3  |
| 348945 | 89 | 1523107 | 1523138 | 2 | 16 | 32 | CA | 22 | 14 |
| 348947 | 89 | 1523466 | 1523483 | 2 | 9  | 18 | AC | 16 | 4  |
| 348952 | 89 | 1525065 | 1525076 | 2 | 6  | 12 | GT | 20 | 3  |
| 348953 | 89 | 1525250 | 1525275 | 2 | 13 | 26 | GT | 18 | 6  |
| 348956 | 89 | 1526018 | 1526043 | 2 | 13 | 26 | CA | 17 | 10 |
| 348957 | 89 | 1526152 | 1526173 | 2 | 11 | 22 | AC | 17 | 6  |
| 348963 | 89 | 1529894 | 1529905 | 2 | 6  | 12 | AC | 22 | 4  |
| 348964 | 89 | 1529942 | 1529957 | 2 | 8  | 16 | AC | 17 | 14 |
| 348966 | 89 | 1530433 | 1530446 | 2 | 7  | 14 | CT | 21 | 3  |
| 348967 | 89 | 1531860 | 1531877 | 2 | 9  | 18 | GT | 11 | 10 |
| 348968 | 89 | 1531980 | 1531997 | 2 | 9  | 18 | AC | 13 | 8  |
| 348969 | 89 | 1532067 | 1532084 | 2 | 9  | 18 | AC | 19 | 4  |
| 348970 | 89 | 1532250 | 1532281 | 2 | 16 | 32 | CA | 15 | 10 |
| 348971 | 89 | 1532484 | 1532521 | 2 | 19 | 38 | TG | 9  | 11 |
| 348975 | 89 | 1534578 | 1534599 | 2 | 11 | 22 | CA | 16 | 11 |
| 348976 | 89 | 1534738 | 1534755 | 2 | 9  | 18 | GT | 21 | 5  |
| 348979 | 89 | 1535310 | 1535327 | 2 | 9  | 18 | AC | 14 | 12 |
| 348980 | 89 | 1535395 | 1535410 | 2 | 8  | 16 | CA | 17 | 8  |
| 348985 | 89 | 1535746 | 1535775 | 2 | 15 | 30 | AC | 10 | 7  |
| 348988 | 89 | 1537327 | 1537344 | 2 | 9  | 18 | AC | 23 | 4  |
| 348990 | 89 | 1539445 | 1539460 | 2 | 8  | 16 | AC | 24 | 6  |
| 348992 | 89 | 1539680 | 1539691 | 2 | 6  | 12 | CA | 22 | 4  |
| 348994 | 89 | 1542831 | 1542854 | 2 | 12 | 24 | CA | 11 | 8  |
| 348995 | 89 | 1543147 | 1543160 | 2 | 7  | 14 | TC | 21 | 3  |
| 348996 | 89 | 1543406 | 1543437 | 2 | 16 | 32 | GT | 6  | 6  |
| 348998 | 89 | 1544321 | 1544342 | 2 | 11 | 22 | AC | 18 | 7  |

|        |    |         |         |   |    |    |      |    |    |
|--------|----|---------|---------|---|----|----|------|----|----|
| 349000 | 89 | 1545160 | 1545177 | 3 | 6  | 18 | TTC  | 23 | 7  |
| 349007 | 89 | 1549526 | 1549555 | 2 | 15 | 30 | AC   | 20 | 8  |
| 349009 | 89 | 1550239 | 1550254 | 2 | 8  | 16 | GT   | 20 | 7  |
| 349015 | 89 | 1554039 | 1554062 | 2 | 12 | 24 | GT   | 19 | 9  |
| 349016 | 89 | 1555388 | 1555405 | 2 | 9  | 18 | CA   | 15 | 11 |
| 349017 | 89 | 1555407 | 1555422 | 2 | 8  | 16 | AC   | 15 | 10 |
| 349019 | 89 | 1555838 | 1555883 | 2 | 23 | 46 | GT   | 8  | 10 |
| 349020 | 89 | 1556396 | 1556415 | 2 | 10 | 20 | GT   | 23 | 4  |
| 349022 | 89 | 1558315 | 1558329 | 3 | 5  | 15 | GGA  | 17 | 3  |
| 349023 | 89 | 1559733 | 1559753 | 3 | 7  | 21 | TCC  | 18 | 3  |
| 349026 | 89 | 1560135 | 1560162 | 2 | 14 | 28 | CA   | 11 | 14 |
| 349027 | 89 | 1561305 | 1561316 | 2 | 6  | 12 | TC   | 15 | 6  |
| 349035 | 89 | 1563043 | 1563062 | 2 | 10 | 20 | GT   | 16 | 5  |
| 349036 | 89 | 1563252 | 1563269 | 2 | 9  | 18 | GT   | 25 | 8  |
| 349040 | 89 | 1565753 | 1565764 | 2 | 6  | 12 | AG   | 25 | 3  |
| 349044 | 89 | 1566491 | 1566514 | 2 | 12 | 24 | AC   | 16 | 5  |
| 349045 | 89 | 1566924 | 1566953 | 2 | 15 | 30 | GT   | 13 | 7  |
| 349046 | 89 | 1567075 | 1567104 | 3 | 10 | 30 | TCC  | 27 | 10 |
| 349047 | 89 | 1567280 | 1567309 | 2 | 15 | 30 | CA   | 19 | 6  |
| 349052 | 89 | 1574350 | 1574365 | 2 | 8  | 16 | AC   | 29 | 4  |
| 349055 | 89 | 1589627 | 1589670 | 2 | 22 | 44 | AC   | 22 | 18 |
| 349057 | 89 | 1591533 | 1591550 | 2 | 9  | 18 | GT   | 19 | 9  |
| 349061 | 89 | 1594522 | 1594535 | 2 | 7  | 14 | CT   | 13 | 7  |
| 349062 | 89 | 1594589 | 1594602 | 2 | 7  | 14 | AC   | 10 | 4  |
| 349063 | 89 | 1594604 | 1594617 | 2 | 7  | 14 | CA   | 17 | 9  |
| 349064 | 89 | 1594621 | 1594634 | 2 | 7  | 14 | AC   | 11 | 6  |
| 349078 | 89 | 1622517 | 1622552 | 2 | 18 | 36 | GT   | 14 | 8  |
| 349094 | 90 | 8574    | 8603    | 2 | 15 | 30 | AC   | 19 | 16 |
| 349096 | 90 | 10839   | 10858   | 2 | 10 | 20 | CT   | 20 | 5  |
| 349097 | 90 | 11061   | 11080   | 2 | 10 | 20 | TG   | 23 | 9  |
| 349098 | 90 | 14672   | 14695   | 2 | 12 | 24 | TG   | 20 | 6  |
| 349100 | 90 | 20758   | 20769   | 2 | 6  | 12 | GT   | 21 | 6  |
| 349101 | 90 | 20820   | 20841   | 2 | 11 | 22 | GT   | 17 | 6  |
| 349109 | 90 | 25234   | 25249   | 4 | 4  | 16 | ATTT | 19 | 3  |
| 349110 | 90 | 25255   | 25270   | 4 | 4  | 16 | TTTG | 30 | 3  |
| 349112 | 90 | 32433   | 32450   | 2 | 9  | 18 | TG   | 25 | 5  |
| 349113 | 90 | 34120   | 34137   | 2 | 9  | 18 | TG   | 11 | 3  |
| 349115 | 90 | 35959   | 35976   | 2 | 9  | 18 | TC   | 23 | 4  |
| 349117 | 90 | 39814   | 39857   | 2 | 22 | 44 | GA   | 6  | 8  |
| 349118 | 90 | 39940   | 39955   | 2 | 8  | 16 | TG   | 9  | 4  |
| 349121 | 90 | 42863   | 42874   | 2 | 6  | 12 | TG   | 19 | 4  |
| 349122 | 90 | 45799   | 45810   | 2 | 6  | 12 | CA   | 18 | 5  |
| 349126 | 90 | 57108   | 57121   | 2 | 7  | 14 | GT   | 32 | 3  |
| 349128 | 90 | 60410   | 60429   | 4 | 5  | 20 | TTTC | 29 | 4  |
| 349131 | 90 | 65057   | 65074   | 2 | 9  | 18 | GT   | 24 | 7  |
| 349133 | 90 | 67044   | 67061   | 2 | 9  | 18 | GT   | 20 | 5  |
| 349136 | 90 | 69437   | 69454   | 2 | 9  | 18 | TG   | 27 | 4  |
| 349139 | 90 | 72102   | 72113   | 2 | 6  | 12 | GT   | 27 | 3  |
| 349140 | 90 | 72392   | 72409   | 2 | 9  | 18 | GT   | 19 | 9  |
| 349145 | 90 | 77452   | 77467   | 2 | 8  | 16 | AG   | 27 | 4  |
| 349151 | 90 | 86223   | 86254   | 2 | 16 | 32 | GT   | 11 | 6  |



|        |    |        |        |   |    |    |      |    |    |
|--------|----|--------|--------|---|----|----|------|----|----|
| 349152 | 90 | 86373  | 86394  | 2 | 11 | 22 | TG   | 16 | 3  |
| 349156 | 90 | 105173 | 105184 | 2 | 6  | 12 | GA   | 25 | 4  |
| 349157 | 90 | 105431 | 105456 | 2 | 13 | 26 | AC   | 22 | 13 |
| 349164 | 90 | 138029 | 138064 | 2 | 18 | 36 | GA   | 12 | 9  |
| 349165 | 90 | 138632 | 138665 | 2 | 17 | 34 | TG   | 6  | 8  |
| 349166 | 90 | 138823 | 138842 | 2 | 10 | 20 | CA   | 23 | 4  |
| 349167 | 90 | 141384 | 141397 | 2 | 7  | 14 | TG   | 25 | 5  |
| 349168 | 90 | 141969 | 141988 | 2 | 10 | 20 | CA   | 25 | 5  |
| 349169 | 90 | 142653 | 142668 | 2 | 8  | 16 | GT   | 23 | 9  |
| 349170 | 90 | 143877 | 143890 | 2 | 7  | 14 | AC   | 25 | 4  |
| 349171 | 90 | 144316 | 144345 | 3 | 10 | 30 | GCA  | 31 | 8  |
| 349180 | 90 | 148656 | 148713 | 2 | 29 | 58 | CA   | 6  | 10 |
| 349186 | 90 | 154964 | 155014 | 3 | 17 | 51 | CAT  | 24 | 7  |
| 349187 | 90 | 155143 | 155154 | 2 | 6  | 12 | AT   | 15 | 6  |
| 349188 | 90 | 155203 | 155216 | 2 | 7  | 14 | GT   | 23 | 5  |
| 349199 | 90 | 174624 | 174647 | 2 | 12 | 24 | GT   | 15 | 9  |
| 349201 | 90 | 174871 | 174882 | 2 | 6  | 12 | AC   | 26 | 3  |
| 349203 | 90 | 176215 | 176250 | 2 | 18 | 36 | TC   | 7  | 8  |
| 349207 | 90 | 179464 | 179485 | 2 | 11 | 22 | GT   | 15 | 7  |
| 349212 | 90 | 186015 | 186036 | 2 | 11 | 22 | CT   | 20 | 7  |
| 349213 | 90 | 187061 | 187081 | 3 | 7  | 21 | TCC  | 22 | 3  |
| 349215 | 90 | 189557 | 189574 | 2 | 9  | 18 | TG   | 21 | 4  |
| 349216 | 90 | 189967 | 190000 | 2 | 17 | 34 | GT   | 7  | 6  |
| 349218 | 90 | 190158 | 190177 | 2 | 10 | 20 | TG   | 17 | 10 |
| 349219 | 90 | 190896 | 190917 | 2 | 11 | 22 | GT   | 14 | 10 |
| 349220 | 90 | 191015 | 191038 | 2 | 12 | 24 | AC   | 17 | 11 |
| 349224 | 90 | 194621 | 194652 | 2 | 16 | 32 | TG   | 21 | 7  |
| 349235 | 90 | 199005 | 199026 | 2 | 11 | 22 | TG   | 15 | 8  |
| 349237 | 90 | 201340 | 201367 | 4 | 7  | 28 | CTTT | 11 | 11 |
| 349239 | 90 | 202274 | 202303 | 2 | 15 | 30 | CA   | 12 | 8  |
| 349240 | 90 | 203154 | 203171 | 2 | 9  | 18 | GT   | 23 | 6  |
| 349245 | 90 | 207451 | 207468 | 2 | 9  | 18 | GT   | 22 | 5  |
| 349247 | 90 | 207765 | 207782 | 2 | 9  | 18 | TG   | 21 | 9  |
| 349260 | 90 | 219820 | 219847 | 2 | 14 | 28 | CA   | 16 | 9  |
| 349262 | 90 | 221470 | 221493 | 2 | 12 | 24 | AC   | 13 | 15 |
| 349263 | 90 | 221661 | 221672 | 2 | 6  | 12 | CA   | 18 | 15 |
| 349265 | 90 | 222480 | 222503 | 2 | 12 | 24 | GA   | 19 | 4  |
| 349270 | 90 | 225772 | 225789 | 2 | 9  | 18 | AC   | 19 | 6  |
| 349271 | 90 | 228446 | 228460 | 3 | 5  | 15 | GGA  | 30 | 3  |
| 349273 | 90 | 230400 | 230429 | 2 | 15 | 30 | GT   | 21 | 12 |
| 349274 | 90 | 230688 | 230703 | 4 | 4  | 16 | CAAA | 34 | 5  |
| 349279 | 90 | 233699 | 233712 | 2 | 7  | 14 | AC   | 23 | 5  |
| 349281 | 90 | 237396 | 237415 | 2 | 10 | 20 | AC   | 14 | 5  |
| 349292 | 90 | 257363 | 257394 | 2 | 16 | 32 | AC   | 16 | 8  |
| 349293 | 90 | 258634 | 258657 | 2 | 12 | 24 | GT   | 11 | 3  |
| 349296 | 90 | 260220 | 260233 | 2 | 7  | 14 | CA   | 27 | 3  |
| 349301 | 90 | 268961 | 269004 | 4 | 11 | 44 | AGAT | 17 | 7  |
| 349303 | 90 | 274090 | 274115 | 2 | 13 | 26 | CA   | 16 | 9  |
| 349305 | 90 | 274685 | 274708 | 2 | 12 | 24 | GT   | 19 | 4  |
| 349313 | 90 | 296330 | 296347 | 2 | 9  | 18 | TG   | 14 | 12 |
| 349314 | 90 | 296898 | 296909 | 2 | 6  | 12 | TG   | 31 | 3  |

|        |    |        |        |   |    |    |      |    |    |
|--------|----|--------|--------|---|----|----|------|----|----|
| 349321 | 90 | 313318 | 313355 | 2 | 19 | 38 | TG   | 16 | 14 |
| 349325 | 90 | 324055 | 324078 | 4 | 6  | 24 | GGAT | 27 | 4  |
| 349331 | 90 | 332784 | 332805 | 2 | 11 | 22 | TG   | 12 | 7  |
| 349335 | 90 | 345241 | 345262 | 2 | 11 | 22 | GT   | 12 | 3  |
| 349339 | 90 | 346952 | 346963 | 2 | 6  | 12 | TG   | 16 | 10 |
| 349340 | 90 | 346967 | 346982 | 2 | 8  | 16 | GT   | 25 | 13 |
| 349343 | 90 | 347916 | 347931 | 4 | 4  | 16 | CACG | 22 | 5  |
| 349344 | 90 | 347932 | 347949 | 2 | 9  | 18 | CA   | 16 | 5  |
| 349345 | 90 | 353469 | 353488 | 2 | 10 | 20 | CA   | 23 | 3  |
| 349347 | 90 | 363264 | 363287 | 2 | 12 | 24 | CA   | 11 | 6  |
| 349350 | 90 | 367773 | 367814 | 2 | 21 | 42 | TG   | 11 | 9  |
| 349353 | 90 | 369459 | 369472 | 2 | 7  | 14 | CA   | 14 | 5  |
| 349359 | 90 | 377356 | 377367 | 2 | 6  | 12 | TC   | 15 | 3  |
| 349360 | 90 | 377610 | 377625 | 2 | 8  | 16 | GT   | 20 | 6  |
| 349368 | 90 | 384591 | 384612 | 2 | 11 | 22 | GT   | 18 | 8  |
| 349374 | 90 | 388201 | 388220 | 4 | 5  | 20 | TCTG | 29 | 4  |
| 349375 | 90 | 388765 | 388784 | 4 | 5  | 20 | AGAA | 34 | 4  |
| 349378 | 90 | 392758 | 392769 | 2 | 6  | 12 | CA   | 29 | 5  |
| 349379 | 90 | 392881 | 392902 | 2 | 11 | 22 | TG   | 17 | 4  |
| 349380 | 90 | 393202 | 393229 | 2 | 14 | 28 | AC   | 12 | 9  |
| 349381 | 90 | 394735 | 394746 | 2 | 6  | 12 | GT   | 27 | 7  |
| 349383 | 90 | 397119 | 397134 | 2 | 8  | 16 | CA   | 25 | 4  |
| 349384 | 90 | 398405 | 398426 | 2 | 11 | 22 | TG   | 21 | 7  |
| 349386 | 90 | 398923 | 398942 | 2 | 10 | 20 | TG   | 17 | 11 |
| 349392 | 90 | 406692 | 406713 | 2 | 11 | 22 | GT   | 16 | 5  |
| 349393 | 90 | 410035 | 410056 | 2 | 11 | 22 | AC   | 18 | 5  |
| 349395 | 90 | 417617 | 417634 | 2 | 9  | 18 | GT   | 26 | 7  |
| 349396 | 90 | 417805 | 417846 | 2 | 21 | 42 | AC   | 15 | 13 |
| 349400 | 90 | 424841 | 424868 | 2 | 14 | 28 | TG   | 15 | 5  |
| 349403 | 90 | 426991 | 427008 | 2 | 9  | 18 | GT   | 13 | 8  |
| 349404 | 90 | 427422 | 427435 | 2 | 7  | 14 | CA   | 18 | 6  |
| 349406 | 90 | 428272 | 428289 | 2 | 9  | 18 | AC   | 7  | 5  |
| 349408 | 90 | 433404 | 433421 | 2 | 9  | 18 | TC   | 18 | 3  |
| 349409 | 90 | 433632 | 433679 | 4 | 12 | 48 | GGAT | 10 | 7  |
| 349413 | 90 | 440485 | 440496 | 2 | 6  | 12 | GT   | 22 | 5  |
| 349419 | 90 | 444801 | 444816 | 2 | 8  | 16 | AG   | 12 | 3  |
| 349422 | 90 | 452035 | 452056 | 2 | 11 | 22 | GT   | 10 | 10 |
| 349424 | 90 | 457520 | 457541 | 2 | 11 | 22 | AG   | 20 | 12 |
| 349425 | 90 | 457658 | 457669 | 2 | 6  | 12 | AC   | 27 | 9  |
| 349426 | 90 | 457672 | 457683 | 2 | 6  | 12 | AC   | 21 | 6  |
| 349427 | 90 | 457842 | 457853 | 2 | 6  | 12 | GT   | 31 | 3  |
| 349428 | 90 | 458037 | 458048 | 2 | 6  | 12 | GT   | 29 | 4  |
| 349432 | 90 | 469528 | 469545 | 2 | 9  | 18 | GT   | 28 | 5  |
| 349433 | 90 | 469675 | 469704 | 2 | 15 | 30 | TG   | 22 | 7  |
| 349435 | 90 | 472416 | 472451 | 2 | 18 | 36 | AC   | 8  | 6  |
| 349437 | 90 | 472667 | 472696 | 2 | 15 | 30 | TG   | 16 | 8  |
| 349441 | 90 | 474952 | 474983 | 2 | 16 | 32 | TG   | 6  | 10 |
| 349442 | 90 | 475114 | 475147 | 2 | 17 | 34 | TG   | 17 | 10 |
| 349443 | 90 | 475274 | 475329 | 2 | 28 | 56 | AC   | 8  | 12 |
| 349444 | 90 | 477884 | 477905 | 2 | 11 | 22 | CA   | 15 | 17 |
| 349448 | 90 | 479367 | 479384 | 2 | 9  | 18 | TG   | 25 | 8  |

|        |    |        |        |   |    |    |      |    |    |
|--------|----|--------|--------|---|----|----|------|----|----|
| 349449 | 90 | 481332 | 481345 | 2 | 7  | 14 | TG   | 25 | 5  |
| 349450 | 90 | 481347 | 481358 | 2 | 6  | 12 | GT   | 17 | 4  |
| 349451 | 90 | 481760 | 481773 | 2 | 7  | 14 | GT   | 14 | 12 |
| 349452 | 90 | 481874 | 481887 | 2 | 7  | 14 | CA   | 25 | 7  |
| 349454 | 90 | 483267 | 483302 | 2 | 18 | 36 | TG   | 10 | 10 |
| 349455 | 90 | 483452 | 483471 | 2 | 10 | 20 | CT   | 14 | 4  |
| 349456 | 90 | 483504 | 483519 | 2 | 8  | 16 | CT   | 12 | 3  |
| 349457 | 90 | 483975 | 483988 | 2 | 7  | 14 | AC   | 23 | 3  |
| 349458 | 90 | 485905 | 485924 | 4 | 5  | 20 | GATG | 20 | 3  |
| 349462 | 90 | 495917 | 495932 | 2 | 8  | 16 | CA   | 20 | 13 |
| 349464 | 90 | 496484 | 496499 | 2 | 8  | 16 | CA   | 15 | 10 |
| 349476 | 90 | 502871 | 502884 | 2 | 7  | 14 | GT   | 24 | 5  |
| 349477 | 90 | 503000 | 503027 | 4 | 7  | 28 | ATCT | 17 | 14 |
| 349478 | 90 | 504775 | 504802 | 2 | 14 | 28 | CA   | 11 | 12 |
| 349479 | 90 | 506494 | 506521 | 2 | 14 | 28 | TG   | 9  | 6  |
| 349480 | 90 | 508486 | 508511 | 2 | 13 | 26 | TG   | 18 | 6  |
| 349482 | 90 | 508597 | 508624 | 2 | 14 | 28 | GT   | 14 | 11 |
| 349494 | 90 | 524597 | 524618 | 2 | 11 | 22 | AC   | 25 | 13 |
| 349495 | 90 | 525258 | 525277 | 2 | 10 | 20 | CA   | 22 | 10 |
| 349496 | 90 | 525798 | 525809 | 2 | 6  | 12 | CA   | 27 | 5  |
| 349497 | 90 | 528746 | 528759 | 2 | 7  | 14 | TG   | 15 | 9  |
| 349499 | 90 | 533369 | 533386 | 2 | 9  | 18 | AC   | 22 | 4  |
| 349500 | 90 | 535874 | 535897 | 4 | 6  | 24 | TGGA | 24 | 5  |
| 349502 | 90 | 536598 | 536627 | 2 | 15 | 30 | AC   | 10 | 10 |
| 349503 | 90 | 539988 | 540007 | 2 | 10 | 20 | TA   | 9  | 10 |
| 349509 | 90 | 548860 | 548873 | 2 | 7  | 14 | TG   | 34 | 3  |
| 349511 | 90 | 550632 | 550667 | 2 | 18 | 36 | GT   | 10 | 10 |
| 349512 | 90 | 551692 | 551715 | 2 | 12 | 24 | GT   | 11 | 10 |
| 349515 | 90 | 558893 | 558924 | 2 | 16 | 32 | CA   | 8  | 11 |
| 349520 | 90 | 569708 | 569735 | 2 | 14 | 28 | CA   | 20 | 9  |
| 349525 | 90 | 573650 | 573673 | 2 | 12 | 24 | AG   | 7  | 8  |
| 349526 | 90 | 573768 | 573795 | 2 | 14 | 28 | GT   | 8  | 8  |
| 349528 | 90 | 576671 | 576710 | 2 | 20 | 40 | AC   | 8  | 8  |
| 349529 | 90 | 576835 | 576846 | 2 | 6  | 12 | CA   | 8  | 5  |
| 349530 | 90 | 577020 | 577031 | 2 | 6  | 12 | AC   | 28 | 7  |
| 349531 | 90 | 577227 | 577248 | 2 | 11 | 22 | AC   | 17 | 14 |
| 349532 | 90 | 580760 | 580771 | 2 | 6  | 12 | CA   | 28 | 4  |
| 349533 | 90 | 580918 | 580933 | 2 | 8  | 16 | CA   | 23 | 5  |
| 349534 | 90 | 581052 | 581073 | 2 | 11 | 22 | TG   | 24 | 4  |
| 349535 | 90 | 582918 | 582949 | 2 | 16 | 32 | AC   | 13 | 11 |
| 349536 | 90 | 583217 | 583236 | 2 | 10 | 20 | TG   | 20 | 11 |
| 349538 | 90 | 584294 | 584343 | 2 | 25 | 50 | TG   | 9  | 13 |
| 349542 | 90 | 587949 | 587968 | 2 | 10 | 20 | AG   | 14 | 6  |
| 349543 | 90 | 588342 | 588369 | 4 | 7  | 28 | TGGA | 12 | 4  |
| 349544 | 90 | 588492 | 588507 | 4 | 4  | 16 | TAGA | 8  | 3  |
| 349557 | 90 | 597252 | 597273 | 2 | 11 | 22 | AC   | 14 | 7  |
| 349560 | 90 | 602287 | 602304 | 2 | 9  | 18 | TG   | 20 | 12 |
| 349563 | 90 | 604798 | 604817 | 2 | 10 | 20 | AC   | 17 | 8  |
| 349564 | 90 | 604819 | 604834 | 2 | 8  | 16 | CA   | 15 | 8  |
| 349566 | 90 | 604959 | 604974 | 2 | 8  | 16 | TC   | 17 | 3  |
| 349568 | 90 | 605689 | 605744 | 2 | 28 | 56 | TG   | 11 | 10 |

|        |    |        |        |   |    |    |      |    |    |
|--------|----|--------|--------|---|----|----|------|----|----|
| 349573 | 90 | 609887 | 609922 | 2 | 18 | 36 | GT   | 10 | 6  |
| 349574 | 90 | 612337 | 612350 | 2 | 7  | 14 | AC   | 21 | 4  |
| 349575 | 90 | 614440 | 614467 | 2 | 14 | 28 | CA   | 6  | 5  |
| 349579 | 90 | 615298 | 615331 | 2 | 17 | 34 | CA   | 7  | 8  |
| 349580 | 90 | 615546 | 615557 | 2 | 6  | 12 | GA   | 25 | 3  |
| 349581 | 90 | 615668 | 615687 | 2 | 10 | 20 | CA   | 23 | 5  |
| 349584 | 90 | 619079 | 619094 | 2 | 8  | 16 | CA   | 19 | 13 |
| 349585 | 90 | 619167 | 619180 | 2 | 7  | 14 | CA   | 25 | 11 |
| 349593 | 90 | 632440 | 632467 | 2 | 14 | 28 | TG   | 7  | 9  |
| 349599 | 90 | 633180 | 633203 | 2 | 12 | 24 | TG   | 19 | 7  |
| 349600 | 90 | 634511 | 634528 | 2 | 9  | 18 | TC   | 15 | 6  |
| 349602 | 90 | 635816 | 635848 | 3 | 11 | 33 | AGG  | 13 | 5  |
| 349603 | 90 | 640046 | 640071 | 2 | 13 | 26 | GT   | 17 | 4  |
| 349606 | 90 | 645948 | 645977 | 2 | 15 | 30 | CA   | 18 | 9  |
| 349607 | 90 | 646089 | 646120 | 2 | 16 | 32 | TG   | 10 | 6  |
| 349609 | 90 | 646897 | 646912 | 2 | 8  | 16 | AC   | 21 | 7  |
| 349611 | 90 | 648002 | 648035 | 2 | 17 | 34 | CA   | 13 | 9  |
| 349612 | 90 | 649558 | 649571 | 2 | 7  | 14 | CA   | 28 | 3  |
| 349613 | 90 | 649695 | 649708 | 2 | 7  | 14 | TG   | 31 | 3  |
| 349614 | 90 | 649811 | 649824 | 2 | 7  | 14 | AC   | 25 | 3  |
| 349615 | 90 | 649917 | 649932 | 2 | 8  | 16 | AC   | 24 | 3  |
| 349616 | 90 | 650045 | 650064 | 2 | 10 | 20 | CA   | 17 | 5  |
| 349617 | 90 | 650207 | 650228 | 2 | 11 | 22 | TG   | 20 | 11 |
| 349620 | 90 | 654640 | 654651 | 2 | 6  | 12 | AC   | 27 | 3  |
| 349622 | 90 | 658521 | 658544 | 2 | 12 | 24 | GT   | 17 | 15 |
| 349624 | 90 | 664427 | 664454 | 2 | 14 | 28 | TC   | 19 | 6  |
| 349627 | 90 | 676414 | 676453 | 2 | 20 | 40 | GT   | 15 | 13 |
| 349637 | 90 | 683830 | 683857 | 4 | 7  | 28 | TCTG | 15 | 12 |
| 349640 | 90 | 687213 | 687238 | 2 | 13 | 26 | GT   | 12 | 11 |
| 349642 | 90 | 687673 | 687718 | 2 | 23 | 46 | CA   | 9  | 10 |
| 349643 | 90 | 689742 | 689755 | 2 | 7  | 14 | TG   | 24 | 9  |
| 349645 | 90 | 693968 | 694003 | 2 | 18 | 36 | TG   | 10 | 9  |
| 349648 | 90 | 694677 | 694688 | 2 | 6  | 12 | GA   | 33 | 3  |
| 349651 | 90 | 696932 | 696943 | 2 | 6  | 12 | TC   | 22 | 3  |
| 349652 | 90 | 697208 | 697225 | 3 | 6  | 18 | ATG  | 27 | 3  |
| 349654 | 90 | 699952 | 699977 | 2 | 13 | 26 | AC   | 19 | 6  |
| 349659 | 90 | 717370 | 717389 | 2 | 10 | 20 | AC   | 20 | 16 |
| 349662 | 90 | 721771 | 721794 | 2 | 12 | 24 | AC   | 18 | 10 |
| 349669 | 90 | 732313 | 732352 | 2 | 20 | 40 | TG   | 7  | 9  |
| 349670 | 90 | 732519 | 732546 | 4 | 7  | 28 | CTTC | 13 | 5  |
| 349672 | 90 | 732972 | 732985 | 2 | 7  | 14 | CA   | 27 | 6  |
| 349674 | 90 | 738366 | 738389 | 2 | 12 | 24 | AC   | 18 | 11 |
| 349678 | 90 | 744798 | 744815 | 2 | 9  | 18 | TG   | 23 | 4  |
| 349679 | 90 | 747798 | 747813 | 2 | 8  | 16 | AC   | 21 | 4  |
| 349680 | 90 | 747915 | 747936 | 2 | 11 | 22 | AC   | 20 | 7  |
| 349682 | 90 | 750485 | 750496 | 2 | 6  | 12 | AC   | 31 | 6  |
| 349683 | 90 | 750568 | 750587 | 2 | 10 | 20 | AC   | 27 | 5  |
| 349684 | 90 | 750913 | 750928 | 4 | 4  | 16 | ATCC | 28 | 3  |
| 349686 | 90 | 754425 | 754452 | 2 | 14 | 28 | CA   | 15 | 7  |
| 349693 | 90 | 768318 | 768329 | 2 | 6  | 12 | AG   | 25 | 4  |
| 349698 | 90 | 777164 | 777195 | 2 | 16 | 32 | AC   | 15 | 6  |

|        |    |        |        |   |    |    |      |    |    |
|--------|----|--------|--------|---|----|----|------|----|----|
| 349699 | 90 | 778310 | 778325 | 4 | 4  | 16 | TGGA | 24 | 3  |
| 349705 | 90 | 790498 | 790543 | 2 | 23 | 46 | GA   | 12 | 11 |
| 349706 | 90 | 792361 | 792374 | 2 | 7  | 14 | AC   | 28 | 3  |
| 349707 | 90 | 792487 | 792504 | 2 | 9  | 18 | CA   | 19 | 4  |
| 349712 | 90 | 797228 | 797248 | 3 | 7  | 21 | GTA  | 7  | 3  |
| 349714 | 90 | 797631 | 797668 | 2 | 19 | 38 | GT   | 7  | 8  |
| 349720 | 90 | 804828 | 804841 | 2 | 7  | 14 | AC   | 9  | 3  |
| 349724 | 90 | 810599 | 810616 | 2 | 9  | 18 | AG   | 9  | 4  |
| 349729 | 90 | 816565 | 816582 | 2 | 9  | 18 | GT   | 23 | 8  |
| 349731 | 90 | 817908 | 817933 | 2 | 13 | 26 | GT   | 14 | 7  |
| 349734 | 90 | 821543 | 821554 | 2 | 6  | 12 | CA   | 20 | 3  |
| 349737 | 90 | 822777 | 822800 | 2 | 12 | 24 | AC   | 9  | 8  |
| 349749 | 90 | 836629 | 836648 | 4 | 5  | 20 | TTTG | 21 | 5  |
| 349750 | 90 | 838905 | 838924 | 2 | 10 | 20 | AG   | 19 | 6  |
| 349751 | 90 | 839968 | 839983 | 2 | 8  | 16 | CA   | 18 | 8  |
| 349752 | 90 | 840325 | 840340 | 2 | 8  | 16 | AC   | 21 | 6  |
| 349753 | 90 | 840486 | 840499 | 2 | 7  | 14 | TC   | 23 | 3  |
| 349755 | 90 | 848866 | 848883 | 2 | 9  | 18 | AC   | 16 | 4  |
| 349756 | 90 | 848992 | 849005 | 2 | 7  | 14 | AC   | 16 | 4  |
| 349757 | 90 | 849007 | 849022 | 2 | 8  | 16 | CA   | 18 | 9  |
| 349759 | 90 | 850931 | 850950 | 2 | 10 | 20 | TG   | 27 | 7  |
| 349760 | 90 | 850951 | 850962 | 2 | 6  | 12 | AG   | 29 | 8  |
| 349762 | 90 | 853813 | 853824 | 2 | 6  | 12 | GT   | 32 | 4  |
| 349768 | 90 | 860280 | 860321 | 3 | 14 | 42 | ATA  | 10 | 9  |
| 349769 | 90 | 872090 | 872105 | 2 | 8  | 16 | AC   | 23 | 4  |
| 349770 | 90 | 879785 | 879798 | 2 | 7  | 14 | TG   | 22 | 5  |
| 349774 | 90 | 885226 | 885257 | 2 | 16 | 32 | AC   | 14 | 9  |
| 349778 | 90 | 887038 | 887055 | 3 | 6  | 18 | TCA  | 23 | 6  |
| 349784 | 90 | 893352 | 893375 | 2 | 12 | 24 | GT   | 17 | 5  |
| 349793 | 90 | 910289 | 910326 | 2 | 19 | 38 | GT   | 8  | 7  |
| 349803 | 90 | 930896 | 930931 | 2 | 18 | 36 | TG   | 13 | 12 |
| 349806 | 90 | 935187 | 935210 | 2 | 12 | 24 | TG   | 11 | 7  |
| 349807 | 90 | 935379 | 935424 | 2 | 23 | 46 | GT   | 11 | 10 |
| 349809 | 90 | 939047 | 939070 | 2 | 12 | 24 | TG   | 9  | 10 |
| 349812 | 90 | 940902 | 940931 | 2 | 15 | 30 | GT   | 15 | 13 |
| 349813 | 90 | 943905 | 943938 | 2 | 17 | 34 | TG   | 12 | 10 |
| 349814 | 90 | 944056 | 944081 | 2 | 13 | 26 | GA   | 16 | 5  |
| 349815 | 90 | 944519 | 944538 | 2 | 10 | 20 | AC   | 13 | 6  |
| 349819 | 90 | 945657 | 945680 | 2 | 12 | 24 | TG   | 13 | 7  |
| 349820 | 90 | 945774 | 945797 | 2 | 12 | 24 | GT   | 15 | 10 |
| 349821 | 90 | 947620 | 947641 | 2 | 11 | 22 | CT   | 6  | 4  |
| 349822 | 90 | 951045 | 951064 | 2 | 10 | 20 | TG   | 20 | 7  |
| 349823 | 90 | 951152 | 951183 | 2 | 16 | 32 | TC   | 12 | 10 |
| 349825 | 90 | 951321 | 951336 | 2 | 8  | 16 | CA   | 8  | 7  |
| 349826 | 90 | 951570 | 951595 | 2 | 13 | 26 | GT   | 15 | 6  |
| 349827 | 90 | 952482 | 952497 | 2 | 8  | 16 | AC   | 19 | 3  |
| 349829 | 90 | 952797 | 952820 | 2 | 12 | 24 | CA   | 21 | 8  |
| 349830 | 90 | 953910 | 953923 | 2 | 7  | 14 | TG   | 29 | 3  |
| 349834 | 90 | 958423 | 958436 | 2 | 7  | 14 | AC   | 26 | 5  |
| 349837 | 90 | 964537 | 964551 | 3 | 5  | 15 | TCC  | 10 | 3  |
| 349838 | 90 | 964560 | 964574 | 3 | 5  | 15 | CTG  | 26 | 6  |

|        |    |         |         |   |    |    |      |    |    |
|--------|----|---------|---------|---|----|----|------|----|----|
| 349841 | 90 | 967425  | 967438  | 2 | 7  | 14 | CT   | 24 | 3  |
| 349843 | 90 | 969499  | 969528  | 2 | 15 | 30 | AC   | 8  | 8  |
| 349844 | 90 | 969609  | 969660  | 2 | 26 | 52 | CA   | 13 | 7  |
| 349846 | 90 | 969863  | 969888  | 2 | 13 | 26 | CA   | 8  | 7  |
| 349849 | 90 | 971561  | 971578  | 2 | 9  | 18 | TG   | 24 | 8  |
| 349852 | 90 | 976438  | 976449  | 2 | 6  | 12 | GT   | 21 | 6  |
| 349853 | 90 | 980994  | 981007  | 2 | 7  | 14 | TG   | 25 | 6  |
| 349854 | 90 | 981945  | 981984  | 2 | 20 | 40 | AC   | 8  | 8  |
| 349856 | 90 | 987278  | 987299  | 2 | 11 | 22 | CA   | 17 | 10 |
| 349860 | 90 | 990742  | 990753  | 2 | 6  | 12 | AC   | 27 | 4  |
| 349862 | 90 | 992521  | 992548  | 2 | 14 | 28 | AC   | 25 | 11 |
| 349863 | 90 | 992626  | 992637  | 2 | 6  | 12 | CA   | 19 | 3  |
| 349865 | 90 | 993621  | 993634  | 2 | 7  | 14 | TC   | 25 | 3  |
| 349868 | 90 | 994980  | 995003  | 2 | 12 | 24 | CA   | 21 | 8  |
| 349869 | 90 | 996846  | 996857  | 2 | 6  | 12 | TG   | 27 | 5  |
| 349871 | 90 | 1006867 | 1006912 | 2 | 23 | 46 | GT   | 10 | 9  |
| 349872 | 90 | 1007057 | 1007116 | 2 | 30 | 60 | CA   | 6  | 8  |
| 349876 | 90 | 1009080 | 1009093 | 2 | 7  | 14 | GT   | 28 | 3  |
| 349880 | 90 | 1015270 | 1015305 | 4 | 9  | 36 | CTGT | 18 | 7  |
| 349882 | 90 | 1016126 | 1016141 | 2 | 8  | 16 | CA   | 14 | 4  |
| 349883 | 90 | 1023862 | 1023875 | 2 | 7  | 14 | AC   | 15 | 7  |
| 349887 | 90 | 1030436 | 1030487 | 4 | 13 | 52 | TATC | 19 | 13 |
| 349889 | 90 | 1032385 | 1032414 | 2 | 15 | 30 | CA   | 17 | 8  |
| 349891 | 90 | 1034778 | 1034791 | 2 | 7  | 14 | GT   | 29 | 3  |
| 349894 | 90 | 1039067 | 1039086 | 4 | 5  | 20 | AAAG | 12 | 4  |
| 349895 | 90 | 1039185 | 1039204 | 2 | 10 | 20 | AG   | 13 | 6  |
| 349896 | 90 | 1043050 | 1043069 | 2 | 10 | 20 | AG   | 18 | 6  |
| 349897 | 90 | 1047462 | 1047497 | 4 | 9  | 36 | ATAG | 6  | 8  |
| 349900 | 90 | 1056559 | 1056570 | 2 | 6  | 12 | CT   | 24 | 3  |
| 349906 | 90 | 1064958 | 1064971 | 2 | 7  | 14 | AG   | 29 | 6  |
| 349907 | 90 | 1065529 | 1065548 | 2 | 10 | 20 | GT   | 25 | 7  |
| 349909 | 90 | 1069289 | 1069316 | 2 | 14 | 28 | AC   | 18 | 8  |
| 349912 | 90 | 1071222 | 1071235 | 2 | 7  | 14 | CA   | 27 | 10 |
| 349928 | 90 | 1090380 | 1090395 | 2 | 8  | 16 | TG   | 23 | 5  |
| 349929 | 90 | 1092871 | 1092882 | 2 | 6  | 12 | CA   | 35 | 4  |
| 349931 | 90 | 1096051 | 1096078 | 2 | 14 | 28 | CT   | 12 | 10 |
| 349933 | 90 | 1100968 | 1101017 | 2 | 25 | 50 | CA   | 6  | 7  |
| 349935 | 90 | 1103043 | 1103062 | 4 | 5  | 20 | GAAA | 24 | 5  |
| 349937 | 90 | 1104592 | 1104607 | 4 | 4  | 16 | TGTT | 28 | 4  |
| 349945 | 90 | 1126058 | 1126081 | 2 | 12 | 24 | TG   | 12 | 7  |
| 349946 | 90 | 1127164 | 1127183 | 2 | 10 | 20 | TG   | 12 | 5  |
| 349949 | 90 | 1134528 | 1134549 | 2 | 11 | 22 | GA   | 15 | 7  |
| 349951 | 90 | 1141100 | 1141119 | 2 | 10 | 20 | GT   | 15 | 5  |
| 349952 | 90 | 1142230 | 1142241 | 2 | 6  | 12 | TG   | 24 | 4  |
| 349953 | 90 | 1142529 | 1142560 | 2 | 16 | 32 | GT   | 23 | 8  |
| 349954 | 90 | 1143920 | 1143933 | 2 | 7  | 14 | TG   | 20 | 4  |
| 349956 | 90 | 1144907 | 1144924 | 2 | 9  | 18 | TG   | 24 | 5  |
| 349957 | 90 | 1147947 | 1147972 | 2 | 13 | 26 | GT   | 18 | 9  |
| 349959 | 90 | 1148033 | 1148048 | 2 | 8  | 16 | CT   | 15 | 3  |
| 349960 | 90 | 1148050 | 1148061 | 2 | 6  | 12 | TC   | 6  | 4  |
| 349961 | 90 | 1149086 | 1149112 | 3 | 9  | 27 | TCA  | 32 | 9  |

|        |    |         |         |   |    |    |      |    |    |
|--------|----|---------|---------|---|----|----|------|----|----|
| 349962 | 90 | 1149278 | 1149297 | 2 | 10 | 20 | TG   | 21 | 4  |
| 349970 | 90 | 1165952 | 1165985 | 2 | 17 | 34 | CA   | 13 | 12 |
| 349973 | 90 | 1169332 | 1169353 | 2 | 11 | 22 | TG   | 18 | 6  |
| 349974 | 90 | 1169500 | 1169529 | 2 | 15 | 30 | AC   | 6  | 6  |
| 349975 | 90 | 1171896 | 1171919 | 2 | 12 | 24 | TG   | 17 | 9  |
| 349978 | 90 | 1174353 | 1174370 | 2 | 9  | 18 | AC   | 28 | 3  |
| 349983 | 90 | 1188580 | 1188591 | 2 | 6  | 12 | CT   | 21 | 4  |
| 349985 | 90 | 1194271 | 1194290 | 2 | 10 | 20 | AC   | 14 | 13 |
| 349994 | 90 | 1205436 | 1205462 | 3 | 9  | 27 | GGA  | 13 | 3  |
| 349995 | 90 | 1205912 | 1205929 | 3 | 6  | 18 | CTC  | 23 | 5  |
| 349998 | 90 | 1208137 | 1208154 | 2 | 9  | 18 | TG   | 19 | 7  |
| 350001 | 90 | 1211338 | 1211355 | 2 | 9  | 18 | GT   | 24 | 4  |
| 350005 | 90 | 1218854 | 1218871 | 3 | 6  | 18 | ACA  | 18 | 6  |
| 350006 | 90 | 1220319 | 1220350 | 2 | 16 | 32 | CA   | 17 | 9  |
| 350008 | 90 | 1226311 | 1226356 | 2 | 23 | 46 | CA   | 9  | 9  |
| 350015 | 90 | 1233545 | 1233556 | 2 | 6  | 12 | CA   | 31 | 7  |
| 350016 | 90 | 1237931 | 1237960 | 2 | 15 | 30 | CA   | 7  | 6  |
| 350019 | 90 | 1245335 | 1245360 | 2 | 13 | 26 | CA   | 7  | 7  |
| 350020 | 90 | 1245480 | 1245493 | 2 | 7  | 14 | CA   | 25 | 3  |
| 350021 | 90 | 1246149 | 1246162 | 2 | 7  | 14 | AC   | 24 | 4  |
| 350025 | 90 | 1251818 | 1251841 | 2 | 12 | 24 | CA   | 19 | 5  |
| 350029 | 90 | 1254549 | 1254582 | 2 | 17 | 34 | GT   | 11 | 10 |
| 350031 | 90 | 1265141 | 1265172 | 2 | 16 | 32 | CA   | 11 | 13 |
| 350032 | 90 | 1266997 | 1267022 | 2 | 13 | 26 | AC   | 21 | 5  |
| 350035 | 90 | 1272854 | 1272869 | 4 | 4  | 16 | ATCC | 30 | 3  |
| 350040 | 90 | 1279770 | 1279799 | 3 | 10 | 30 | GAG  | 17 | 7  |
| 350050 | 90 | 1297387 | 1297408 | 2 | 11 | 22 | TG   | 15 | 7  |
| 350051 | 90 | 1298492 | 1298525 | 2 | 17 | 34 | TG   | 17 | 5  |
| 350055 | 90 | 1303283 | 1303308 | 2 | 13 | 26 | CA   | 13 | 10 |
| 350057 | 90 | 1305313 | 1305350 | 2 | 19 | 38 | AC   | 8  | 8  |
| 350063 | 90 | 1314320 | 1314375 | 2 | 28 | 56 | TG   | 8  | 10 |
| 350065 | 90 | 1315212 | 1315237 | 2 | 13 | 26 | GT   | 11 | 9  |
| 350067 | 90 | 1316010 | 1316025 | 2 | 8  | 16 | CT   | 15 | 5  |
| 350071 | 90 | 1320642 | 1320657 | 2 | 8  | 16 | CA   | 23 | 4  |
| 350074 | 90 | 1322751 | 1322772 | 2 | 11 | 22 | CA   | 17 | 12 |
| 350076 | 90 | 1326824 | 1326839 | 4 | 4  | 16 | TCAC | 7  | 3  |
| 350080 | 90 | 1340097 | 1340114 | 2 | 9  | 18 | GT   | 21 | 6  |
| 350083 | 90 | 1342861 | 1342874 | 2 | 7  | 14 | CA   | 21 | 5  |
| 350087 | 90 | 1345139 | 1345150 | 2 | 6  | 12 | GT   | 25 | 4  |
| 350088 | 90 | 1345173 | 1345196 | 2 | 12 | 24 | TG   | 20 | 9  |
| 350099 | 90 | 1368105 | 1368116 | 2 | 6  | 12 | TG   | 24 | 5  |
| 350100 | 90 | 1368220 | 1368233 | 2 | 7  | 14 | GT   | 28 | 5  |
| 350101 | 90 | 1368983 | 1369008 | 2 | 13 | 26 | TG   | 22 | 8  |
| 350102 | 90 | 1370121 | 1370170 | 2 | 25 | 50 | TG   | 8  | 10 |
| 350104 | 90 | 1371924 | 1371971 | 2 | 24 | 48 | AC   | 8  | 8  |
| 350105 | 90 | 1372842 | 1372883 | 3 | 14 | 42 | CTT  | 24 | 10 |
| 350107 | 90 | 1377149 | 1377160 | 2 | 6  | 12 | TG   | 25 | 3  |
| 350108 | 90 | 1377227 | 1377248 | 2 | 11 | 22 | TG   | 22 | 8  |
| 350112 | 90 | 1381398 | 1381417 | 2 | 10 | 20 | AC   | 25 | 3  |
| 350127 | 90 | 1398404 | 1398415 | 2 | 6  | 12 | CA   | 17 | 15 |
| 350129 | 90 | 1401066 | 1401083 | 2 | 9  | 18 | CT   | 22 | 11 |

|        |    |         |         |   |    |    |      |    |    |
|--------|----|---------|---------|---|----|----|------|----|----|
| 350134 | 90 | 1405579 | 1405606 | 2 | 14 | 28 | CA   | 14 | 13 |
| 350136 | 90 | 1406109 | 1406126 | 2 | 9  | 18 | TG   | 25 | 10 |
| 350137 | 90 | 1406324 | 1406355 | 2 | 16 | 32 | TG   | 9  | 9  |
| 350139 | 90 | 1412431 | 1412448 | 2 | 9  | 18 | TG   | 17 | 7  |
| 350140 | 90 | 1414884 | 1414919 | 2 | 18 | 36 | TG   | 15 | 12 |
| 350143 | 90 | 1428161 | 1428174 | 2 | 7  | 14 | GT   | 21 | 4  |
| 350145 | 90 | 1431388 | 1431407 | 2 | 10 | 20 | GT   | 18 | 7  |
| 350148 | 90 | 1438931 | 1438960 | 2 | 15 | 30 | AC   | 11 | 13 |
| 350150 | 90 | 1439025 | 1439042 | 2 | 9  | 18 | AC   | 8  | 9  |
| 350151 | 90 | 1439178 | 1439189 | 2 | 6  | 12 | AG   | 20 | 9  |
| 350152 | 90 | 1439190 | 1439209 | 2 | 10 | 20 | AC   | 17 | 7  |
| 350158 | 90 | 1447018 | 1447035 | 2 | 9  | 18 | AC   | 22 | 9  |
| 350165 | 90 | 1466864 | 1466881 | 2 | 9  | 18 | GT   | 19 | 4  |
| 350166 | 90 | 1471342 | 1471353 | 2 | 6  | 12 | AG   | 30 | 3  |
| 350180 | 90 | 1483272 | 1483295 | 2 | 12 | 24 | TG   | 20 | 12 |
| 350181 | 90 | 1484655 | 1484686 | 2 | 16 | 32 | CA   | 15 | 10 |
| 350182 | 90 | 1484997 | 1485026 | 2 | 15 | 30 | CA   | 12 | 11 |
| 350188 | 90 | 1508755 | 1508786 | 2 | 16 | 32 | CA   | 21 | 7  |
| 350190 | 90 | 1509746 | 1509761 | 4 | 4  | 16 | GATG | 29 | 4  |
| 350196 | 90 | 1521821 | 1521846 | 2 | 13 | 26 | TG   | 13 | 11 |
| 350197 | 90 | 1522840 | 1522855 | 2 | 8  | 16 | AC   | 11 | 7  |
| 350199 | 90 | 1523170 | 1523193 | 2 | 12 | 24 | GT   | 10 | 3  |
| 350200 | 90 | 1523351 | 1523364 | 2 | 7  | 14 | CA   | 31 | 3  |
| 350202 | 90 | 1534419 | 1534442 | 3 | 8  | 24 | ACA  | 29 | 7  |
| 350213 | 90 | 1548308 | 1548325 | 2 | 9  | 18 | TC   | 20 | 6  |
| 350220 | 90 | 1559407 | 1559428 | 2 | 11 | 22 | TA   | 14 | 9  |
| 350225 | 90 | 1564086 | 1564115 | 2 | 15 | 30 | TG   | 18 | 10 |
| 350226 | 90 | 1564561 | 1564592 | 2 | 16 | 32 | GT   | 6  | 7  |
| 350227 | 90 | 1565278 | 1565297 | 2 | 10 | 20 | GT   | 11 | 5  |
| 350231 | 90 | 1569594 | 1569605 | 2 | 6  | 12 | AC   | 23 | 4  |
| 350232 | 90 | 1569832 | 1569845 | 2 | 7  | 14 | CT   | 24 | 6  |
| 350234 | 90 | 1570886 | 1570913 | 4 | 7  | 28 | CATA | 7  | 5  |
| 350237 | 90 | 1572963 | 1572976 | 2 | 7  | 14 | AC   | 20 | 4  |
| 350238 | 90 | 1573019 | 1573032 | 2 | 7  | 14 | CA   | 23 | 3  |
| 350240 | 90 | 1574736 | 1574791 | 2 | 28 | 56 | TG   | 11 | 12 |
| 350242 | 90 | 1580047 | 1580060 | 2 | 7  | 14 | CA   | 34 | 4  |
| 350244 | 90 | 1591856 | 1591871 | 4 | 4  | 16 | AAAT | 14 | 7  |
| 350245 | 90 | 1592713 | 1592742 | 2 | 15 | 30 | GT   | 11 | 4  |
| 350250 | 90 | 1595077 | 1595100 | 2 | 12 | 24 | CA   | 13 | 8  |
| 350254 | 90 | 1597024 | 1597045 | 2 | 11 | 22 | TG   | 15 | 10 |
| 350256 | 90 | 1599105 | 1599116 | 2 | 6  | 12 | AC   | 19 | 5  |
| 350257 | 90 | 1599118 | 1599131 | 2 | 7  | 14 | CA   | 21 | 4  |
| 350258 | 90 | 1600381 | 1600414 | 2 | 17 | 34 | TG   | 22 | 7  |
| 350264 | 90 | 1604546 | 1604565 | 2 | 10 | 20 | AC   | 13 | 6  |
| 350268 | 90 | 1610931 | 1610956 | 2 | 13 | 26 | AC   | 17 | 9  |
| 350272 | 90 | 1611781 | 1611792 | 2 | 6  | 12 | AT   | 26 | 3  |
| 350274 | 90 | 1613932 | 1613965 | 2 | 17 | 34 | GT   | 14 | 12 |
| 350278 | 90 | 1619310 | 1619323 | 2 | 7  | 14 | TG   | 28 | 4  |
| 350279 | 90 | 1619717 | 1619732 | 4 | 4  | 16 | CTCC | 19 | 3  |
| 350280 | 90 | 1620719 | 1620750 | 4 | 8  | 32 | TTAT | 9  | 4  |
| 350281 | 90 | 1621502 | 1621519 | 2 | 9  | 18 | AC   | 24 | 8  |



|        |    |         |         |   |    |    |      |    |    |
|--------|----|---------|---------|---|----|----|------|----|----|
| 350282 | 90 | 1623399 | 1623416 | 3 | 6  | 18 | TTA  | 25 | 7  |
| 350289 | 90 | 1637656 | 1637671 | 4 | 4  | 16 | ATTT | 30 | 3  |
| 350290 | 90 | 1637797 | 1637812 | 2 | 8  | 16 | TG   | 17 | 3  |
| 350292 | 90 | 1638488 | 1638507 | 2 | 10 | 20 | AC   | 12 | 4  |
| 350302 | 91 | 24534   | 24549   | 4 | 4  | 16 | TTTG | 30 | 3  |
| 350303 | 91 | 27067   | 27082   | 2 | 8  | 16 | CT   | 26 | 7  |
| 350305 | 91 | 29588   | 29611   | 2 | 12 | 24 | CA   | 11 | 6  |
| 350307 | 91 | 31841   | 31856   | 4 | 4  | 16 | AAAT | 19 | 9  |
| 350309 | 91 | 35107   | 35150   | 2 | 22 | 44 | TG   | 9  | 8  |
| 350313 | 91 | 37854   | 37883   | 2 | 15 | 30 | TG   | 8  | 7  |
| 350316 | 91 | 42008   | 42041   | 2 | 17 | 34 | TG   | 7  | 7  |
| 350319 | 91 | 46097   | 46110   | 2 | 7  | 14 | CA   | 20 | 4  |
| 350320 | 91 | 46137   | 46156   | 2 | 10 | 20 | CA   | 13 | 6  |
| 350324 | 91 | 57364   | 57387   | 2 | 12 | 24 | TG   | 17 | 11 |
| 350325 | 91 | 57662   | 57695   | 2 | 17 | 34 | AC   | 7  | 7  |
| 350326 | 91 | 65750   | 65767   | 2 | 9  | 18 | CA   | 26 | 6  |
| 350329 | 91 | 69646   | 69669   | 2 | 12 | 24 | GT   | 15 | 13 |
| 350330 | 91 | 69760   | 69785   | 2 | 13 | 26 | TG   | 12 | 7  |
| 350335 | 91 | 79690   | 79713   | 2 | 12 | 24 | TG   | 9  | 8  |
| 350340 | 91 | 92009   | 92022   | 2 | 7  | 14 | AC   | 26 | 5  |
| 350345 | 91 | 96586   | 96597   | 2 | 6  | 12 | AC   | 17 | 3  |
| 350364 | 91 | 113953  | 113976  | 4 | 6  | 24 | TTTG | 28 | 6  |
| 350367 | 91 | 117209  | 117232  | 4 | 6  | 24 | ATAC | 16 | 6  |
| 350372 | 91 | 127453  | 127472  | 2 | 10 | 20 | CA   | 25 | 9  |
| 350378 | 91 | 136012  | 136023  | 2 | 6  | 12 | GT   | 8  | 10 |
| 350381 | 91 | 138123  | 138140  | 2 | 9  | 18 | GT   | 16 | 6  |
| 350386 | 91 | 151358  | 151381  | 3 | 8  | 24 | GGA  | 20 | 4  |
| 350390 | 91 | 153961  | 153978  | 2 | 9  | 18 | GT   | 18 | 6  |
| 350391 | 91 | 159929  | 159942  | 2 | 7  | 14 | CT   | 22 | 5  |
| 350392 | 91 | 159945  | 159956  | 2 | 6  | 12 | CT   | 22 | 4  |
| 350399 | 91 | 178306  | 178323  | 2 | 9  | 18 | CA   | 17 | 8  |
| 350400 | 91 | 178326  | 178343  | 2 | 9  | 18 | CA   | 22 | 14 |
| 350402 | 91 | 180643  | 180654  | 2 | 6  | 12 | CT   | 30 | 5  |
| 350403 | 91 | 181258  | 181277  | 4 | 5  | 20 | AGGA | 22 | 6  |
| 350404 | 91 | 183971  | 184004  | 2 | 17 | 34 | GT   | 7  | 10 |
| 350405 | 91 | 185095  | 185114  | 2 | 10 | 20 | GA   | 29 | 8  |
| 350407 | 91 | 188359  | 188388  | 2 | 15 | 30 | CA   | 22 | 9  |
| 350408 | 91 | 188627  | 188656  | 2 | 15 | 30 | GT   | 19 | 9  |
| 350413 | 91 | 195937  | 195960  | 3 | 8  | 24 | CTC  | 21 | 3  |
| 350415 | 91 | 197874  | 197905  | 2 | 16 | 32 | GT   | 17 | 8  |
| 350419 | 91 | 198459  | 198485  | 3 | 9  | 27 | TCA  | 27 | 7  |
| 350424 | 91 | 219165  | 219204  | 2 | 20 | 40 | CA   | 8  | 8  |
| 350426 | 91 | 225498  | 225509  | 2 | 6  | 12 | GT   | 15 | 4  |
| 350433 | 91 | 238683  | 238698  | 2 | 8  | 16 | AC   | 16 | 5  |
| 350434 | 91 | 238701  | 238712  | 2 | 6  | 12 | AC   | 21 | 5  |
| 350442 | 91 | 251669  | 251686  | 2 | 9  | 18 | AC   | 16 | 4  |
| 350446 | 91 | 272726  | 272739  | 2 | 7  | 14 | TG   | 25 | 4  |
| 350450 | 91 | 282794  | 282807  | 2 | 7  | 14 | TG   | 30 | 6  |
| 350457 | 91 | 298462  | 298517  | 2 | 28 | 56 | GT   | 11 | 10 |
| 350458 | 91 | 298622  | 298657  | 3 | 12 | 36 | CAA  | 25 | 9  |
| 350460 | 91 | 299584  | 299595  | 2 | 6  | 12 | TG   | 20 | 3  |

|        |    |        |        |   |    |    |      |    |    |
|--------|----|--------|--------|---|----|----|------|----|----|
| 350463 | 91 | 323267 | 323280 | 2 | 7  | 14 | AG   | 29 | 4  |
| 350469 | 91 | 329316 | 329339 | 4 | 6  | 24 | ATAG | 29 | 5  |
| 350473 | 91 | 333375 | 333394 | 2 | 10 | 20 | CA   | 17 | 6  |
| 350474 | 91 | 333501 | 333540 | 2 | 20 | 40 | GA   | 7  | 9  |
| 350476 | 91 | 336074 | 336093 | 2 | 10 | 20 | TG   | 20 | 6  |
| 350477 | 91 | 336952 | 336969 | 2 | 9  | 18 | TG   | 18 | 5  |
| 350479 | 91 | 337157 | 337190 | 2 | 17 | 34 | GT   | 11 | 16 |
| 350486 | 91 | 343756 | 343781 | 2 | 13 | 26 | TG   | 17 | 9  |
| 350488 | 91 | 349310 | 349337 | 2 | 14 | 28 | AC   | 17 | 5  |
| 350493 | 91 | 363624 | 363649 | 2 | 13 | 26 | AC   | 12 | 10 |
| 350495 | 91 | 363902 | 363919 | 2 | 9  | 18 | AG   | 19 | 3  |
| 350496 | 91 | 364075 | 364092 | 2 | 9  | 18 | AC   | 24 | 7  |
| 350498 | 91 | 367181 | 367204 | 3 | 8  | 24 | GTT  | 20 | 9  |
| 350504 | 91 | 372033 | 372080 | 2 | 24 | 48 | GT   | 12 | 12 |
| 350506 | 91 | 375299 | 375312 | 2 | 7  | 14 | CA   | 18 | 4  |
| 350508 | 91 | 379440 | 379459 | 4 | 5  | 20 | GAAA | 30 | 3  |
| 350509 | 91 | 381977 | 381998 | 2 | 11 | 22 | CA   | 24 | 7  |
| 350511 | 91 | 382370 | 382401 | 2 | 16 | 32 | AG   | 14 | 8  |
| 350515 | 91 | 386706 | 386738 | 3 | 11 | 33 | AGG  | 17 | 7  |
| 350519 | 91 | 391182 | 391202 | 3 | 7  | 21 | TGC  | 25 | 6  |
| 350527 | 91 | 404874 | 404891 | 3 | 6  | 18 | CAA  | 24 | 4  |
| 350529 | 91 | 406956 | 407013 | 2 | 29 | 58 | CA   | 20 | 11 |
| 350530 | 91 | 408936 | 408957 | 2 | 11 | 22 | CA   | 22 | 7  |
| 350537 | 91 | 423076 | 423103 | 2 | 14 | 28 | CA   | 10 | 5  |
| 350538 | 91 | 424693 | 424706 | 2 | 7  | 14 | GA   | 30 | 3  |
| 350540 | 91 | 427148 | 427167 | 2 | 10 | 20 | GT   | 18 | 4  |
| 350542 | 91 | 430457 | 430506 | 2 | 25 | 50 | TG   | 7  | 8  |
| 350544 | 91 | 435287 | 435310 | 2 | 12 | 24 | TG   | 14 | 14 |
| 350549 | 91 | 435865 | 435876 | 2 | 6  | 12 | TG   | 24 | 3  |
| 350552 | 91 | 439164 | 439199 | 2 | 18 | 36 | GA   | 14 | 12 |
| 350553 | 91 | 441594 | 441609 | 2 | 8  | 16 | AC   | 29 | 4  |
| 350556 | 91 | 446535 | 446556 | 2 | 11 | 22 | TG   | 20 | 5  |
| 350557 | 91 | 446732 | 446765 | 2 | 17 | 34 | TG   | 15 | 7  |
| 350559 | 91 | 446970 | 446987 | 2 | 9  | 18 | TG   | 10 | 3  |
| 350560 | 91 | 450454 | 450473 | 2 | 10 | 20 | CA   | 19 | 9  |
| 350569 | 91 | 459322 | 459349 | 2 | 14 | 28 | TG   | 21 | 14 |
| 350570 | 91 | 460015 | 460038 | 3 | 8  | 24 | GAG  | 22 | 3  |
| 350571 | 91 | 461177 | 461194 | 2 | 9  | 18 | GT   | 29 | 3  |
| 350575 | 91 | 465316 | 465341 | 2 | 13 | 26 | AC   | 6  | 4  |
| 350581 | 91 | 482606 | 482645 | 2 | 20 | 40 | CA   | 13 | 11 |
| 350583 | 91 | 485202 | 485215 | 2 | 7  | 14 | AG   | 21 | 3  |
| 350584 | 91 | 485342 | 485385 | 2 | 22 | 44 | AG   | 7  | 7  |
| 350589 | 91 | 491760 | 491781 | 2 | 11 | 22 | GA   | 14 | 8  |
| 350593 | 91 | 496296 | 496307 | 2 | 6  | 12 | TG   | 33 | 3  |
| 350594 | 91 | 496722 | 496751 | 2 | 15 | 30 | AG   | 18 | 5  |
| 350595 | 91 | 497102 | 497115 | 2 | 7  | 14 | CA   | 20 | 5  |
| 350598 | 91 | 500117 | 500138 | 2 | 11 | 22 | CA   | 21 | 8  |
| 350605 | 91 | 514598 | 514613 | 2 | 8  | 16 | GT   | 21 | 9  |
| 350606 | 91 | 516154 | 516209 | 2 | 28 | 56 | CA   | 8  | 9  |
| 350613 | 91 | 524803 | 524818 | 4 | 4  | 16 | GAAA | 24 | 4  |
| 350619 | 91 | 529629 | 529642 | 2 | 7  | 14 | AC   | 23 | 4  |

|        |    |        |        |   |    |    |     |    |    |
|--------|----|--------|--------|---|----|----|-----|----|----|
| 350620 | 91 | 529783 | 529798 | 2 | 8  | 16 | CT  | 19 | 8  |
| 350622 | 91 | 536359 | 536374 | 2 | 8  | 16 | GT  | 25 | 8  |
| 350623 | 91 | 536482 | 536507 | 2 | 13 | 26 | TG  | 9  | 9  |
| 350626 | 91 | 537182 | 537203 | 2 | 11 | 22 | GT  | 21 | 11 |
| 350627 | 91 | 538645 | 538664 | 2 | 10 | 20 | AC  | 16 | 7  |
| 350635 | 91 | 551239 | 551266 | 2 | 14 | 28 | AC  | 20 | 10 |
| 350637 | 91 | 555426 | 555437 | 2 | 6  | 12 | CA  | 10 | 4  |
| 350640 | 91 | 556337 | 556368 | 2 | 16 | 32 | CA  | 8  | 9  |
| 350641 | 91 | 558805 | 558820 | 2 | 8  | 16 | AC  | 25 | 5  |
| 350643 | 91 | 561236 | 561251 | 2 | 8  | 16 | TC  | 16 | 8  |
| 350644 | 91 | 563644 | 563665 | 2 | 11 | 22 | GT  | 11 | 12 |
| 350662 | 91 | 614830 | 614845 | 2 | 8  | 16 | AC  | 9  | 4  |
| 350664 | 91 | 629334 | 629347 | 2 | 7  | 14 | CA  | 32 | 3  |
| 350666 | 91 | 635709 | 635728 | 2 | 10 | 20 | CA  | 20 | 6  |
| 350674 | 91 | 641618 | 641639 | 2 | 11 | 22 | TG  | 15 | 15 |
| 350676 | 91 | 641980 | 642007 | 2 | 14 | 28 | GT  | 19 | 11 |
| 350681 | 91 | 645878 | 645897 | 2 | 10 | 20 | TG  | 21 | 13 |
| 350686 | 91 | 652108 | 652119 | 2 | 6  | 12 | CA  | 23 | 3  |
| 350689 | 91 | 653372 | 653395 | 3 | 8  | 24 | GAG | 21 | 5  |
| 350691 | 91 | 655613 | 655634 | 2 | 11 | 22 | TG  | 6  | 8  |
| 350704 | 91 | 667757 | 667778 | 2 | 11 | 22 | GA  | 10 | 5  |
| 350718 | 91 | 685773 | 685784 | 2 | 6  | 12 | GT  | 26 | 6  |
| 350719 | 91 | 685787 | 685798 | 2 | 6  | 12 | GT  | 26 | 5  |
| 350722 | 91 | 688202 | 688215 | 2 | 7  | 14 | TA  | 8  | 4  |
| 350723 | 91 | 693916 | 693955 | 2 | 20 | 40 | GT  | 11 | 12 |
| 350724 | 91 | 694070 | 694085 | 2 | 8  | 16 | CA  | 16 | 6  |
| 350726 | 91 | 701040 | 701061 | 2 | 11 | 22 | TG  | 18 | 8  |
| 350729 | 91 | 710835 | 710848 | 2 | 7  | 14 | GT  | 24 | 3  |
| 350737 | 91 | 730761 | 730776 | 2 | 8  | 16 | AG  | 28 | 9  |
| 350740 | 91 | 739028 | 739053 | 2 | 13 | 26 | AC  | 18 | 6  |
| 350743 | 91 | 746367 | 746380 | 2 | 7  | 14 | AC  | 23 | 7  |
| 350744 | 91 | 747679 | 747702 | 2 | 12 | 24 | TG  | 16 | 15 |
| 350748 | 91 | 755778 | 755797 | 2 | 10 | 20 | CA  | 23 | 17 |
| 350749 | 91 | 756697 | 756711 | 3 | 5  | 15 | GAG | 28 | 3  |
| 350754 | 91 | 778214 | 778231 | 3 | 6  | 18 | TTA | 19 | 3  |
| 350759 | 91 | 794019 | 794044 | 2 | 13 | 26 | CA  | 20 | 6  |
| 350764 | 91 | 813798 | 813812 | 3 | 5  | 15 | AAT | 34 | 3  |
| 350766 | 91 | 815935 | 815948 | 2 | 7  | 14 | CA  | 24 | 3  |
| 350770 | 91 | 835204 | 835221 | 2 | 9  | 18 | TG  | 23 | 3  |
| 350771 | 91 | 836487 | 836526 | 2 | 20 | 40 | AC  | 12 | 10 |
| 350773 | 91 | 837722 | 837743 | 2 | 11 | 22 | CA  | 8  | 14 |
| 350776 | 91 | 838087 | 838100 | 2 | 7  | 14 | AC  | 19 | 5  |
| 350778 | 91 | 840174 | 840193 | 2 | 10 | 20 | CA  | 17 | 10 |
| 350779 | 91 | 840662 | 840679 | 3 | 6  | 18 | CTT | 19 | 15 |
| 350781 | 91 | 842344 | 842355 | 2 | 6  | 12 | CA  | 9  | 9  |
| 350787 | 91 | 844017 | 844032 | 2 | 8  | 16 | AC  | 20 | 7  |
| 350788 | 91 | 844391 | 844402 | 2 | 6  | 12 | AC  | 24 | 3  |
| 350789 | 91 | 849663 | 849704 | 3 | 14 | 42 | AGA | 12 | 11 |
| 350795 | 91 | 864264 | 864278 | 3 | 5  | 15 | GGC | 17 | 3  |
| 350804 | 91 | 868980 | 869007 | 2 | 14 | 28 | GT  | 8  | 8  |
| 350805 | 91 | 869328 | 869349 | 2 | 11 | 22 | GT  | 21 | 10 |

|        |    |         |         |   |    |    |      |    |    |
|--------|----|---------|---------|---|----|----|------|----|----|
| 350807 | 91 | 878495  | 878508  | 2 | 7  | 14 | CA   | 19 | 12 |
| 350813 | 91 | 889644  | 889661  | 2 | 9  | 18 | CA   | 28 | 13 |
| 350819 | 91 | 900977  | 900992  | 2 | 8  | 16 | TG   | 26 | 5  |
| 350821 | 91 | 909084  | 909134  | 3 | 17 | 51 | TCT  | 11 | 13 |
| 350827 | 91 | 919227  | 919260  | 2 | 17 | 34 | TG   | 16 | 9  |
| 350828 | 91 | 919456  | 919511  | 2 | 28 | 56 | TG   | 11 | 13 |
| 350831 | 91 | 928251  | 928265  | 3 | 5  | 15 | AAT  | 9  | 6  |
| 350832 | 91 | 928982  | 929003  | 2 | 11 | 22 | TG   | 21 | 6  |
| 350834 | 91 | 935426  | 935467  | 3 | 14 | 42 | GCT  | 30 | 7  |
| 350835 | 91 | 935695  | 935712  | 2 | 9  | 18 | GT   | 19 | 6  |
| 350836 | 91 | 936903  | 936926  | 2 | 12 | 24 | TG   | 19 | 7  |
| 350841 | 91 | 941886  | 941909  | 2 | 12 | 24 | TA   | 12 | 8  |
| 350847 | 91 | 946787  | 946800  | 2 | 7  | 14 | AC   | 29 | 3  |
| 350848 | 91 | 949687  | 949710  | 2 | 12 | 24 | TG   | 22 | 12 |
| 350850 | 91 | 953443  | 953484  | 2 | 21 | 42 | AC   | 8  | 9  |
| 350852 | 91 | 956940  | 956953  | 2 | 7  | 14 | GT   | 23 | 6  |
| 350854 | 91 | 960461  | 960536  | 4 | 19 | 76 | GATA | 14 | 13 |
| 350867 | 91 | 985709  | 985750  | 2 | 21 | 42 | CA   | 12 | 11 |
| 350868 | 91 | 986126  | 986161  | 2 | 18 | 36 | TG   | 16 | 5  |
| 350869 | 91 | 986684  | 986713  | 3 | 10 | 30 | TCT  | 30 | 4  |
| 350871 | 91 | 991998  | 992009  | 2 | 6  | 12 | TG   | 28 | 3  |
| 350872 | 91 | 992178  | 992213  | 2 | 18 | 36 | AG   | 9  | 7  |
| 350874 | 91 | 994627  | 994652  | 2 | 13 | 26 | TC   | 8  | 10 |
| 350875 | 91 | 994809  | 994822  | 2 | 7  | 14 | TG   | 12 | 11 |
| 350876 | 91 | 994825  | 994838  | 2 | 7  | 14 | TG   | 14 | 12 |
| 350877 | 91 | 999000  | 999035  | 2 | 18 | 36 | GT   | 13 | 8  |
| 350878 | 91 | 1005555 | 1005578 | 3 | 8  | 24 | TCT  | 25 | 6  |
| 350879 | 91 | 1006687 | 1006710 | 2 | 12 | 24 | TG   | 22 | 16 |
| 350880 | 91 | 1007277 | 1007294 | 2 | 9  | 18 | CA   | 21 | 13 |
| 350882 | 91 | 1009339 | 1009350 | 2 | 6  | 12 | TA   | 8  | 3  |
| 350884 | 91 | 1013422 | 1013439 | 2 | 9  | 18 | AC   | 15 | 5  |
| 350885 | 91 | 1013496 | 1013521 | 2 | 13 | 26 | AC   | 23 | 11 |
| 350894 | 91 | 1017781 | 1017822 | 2 | 21 | 42 | AC   | 10 | 11 |
| 350895 | 91 | 1018078 | 1018111 | 2 | 17 | 34 | GA   | 10 | 9  |
| 350896 | 91 | 1018178 | 1018193 | 2 | 8  | 16 | GT   | 21 | 5  |
| 350898 | 91 | 1018348 | 1018365 | 2 | 9  | 18 | TG   | 6  | 5  |
| 350906 | 91 | 1025675 | 1025694 | 2 | 10 | 20 | CT   | 16 | 6  |
| 350910 | 91 | 1027073 | 1027084 | 2 | 6  | 12 | TG   | 18 | 5  |
| 350913 | 91 | 1028504 | 1028533 | 2 | 15 | 30 | TG   | 10 | 10 |
| 350918 | 91 | 1033914 | 1033925 | 2 | 6  | 12 | TG   | 12 | 3  |
| 350921 | 91 | 1034273 | 1034328 | 4 | 14 | 56 | TTTC | 7  | 7  |
| 350922 | 91 | 1034735 | 1034746 | 2 | 6  | 12 | TC   | 25 | 3  |
| 350925 | 91 | 1035646 | 1035663 | 3 | 6  | 18 | CTT  | 23 | 4  |
| 350926 | 91 | 1037571 | 1037586 | 2 | 8  | 16 | TG   | 21 | 11 |
| 350929 | 91 | 1039365 | 1039388 | 4 | 6  | 24 | AGAC | 26 | 3  |
| 350930 | 91 | 1042206 | 1042225 | 2 | 10 | 20 | TG   | 16 | 3  |
| 350931 | 91 | 1047882 | 1047917 | 3 | 12 | 36 | ATG  | 19 | 9  |
| 350933 | 91 | 1052427 | 1052438 | 2 | 6  | 12 | AC   | 18 | 8  |
| 350937 | 91 | 1055441 | 1055482 | 2 | 21 | 42 | TG   | 9  | 11 |
| 350939 | 91 | 1055646 | 1055663 | 2 | 9  | 18 | TC   | 10 | 5  |
| 350940 | 91 | 1055665 | 1055678 | 2 | 7  | 14 | CT   | 10 | 7  |

|        |    |         |         |   |    |    |      |    |    |
|--------|----|---------|---------|---|----|----|------|----|----|
| 350943 | 91 | 1056336 | 1056356 | 3 | 7  | 21 | AAT  | 10 | 8  |
| 350954 | 91 | 1073904 | 1073923 | 4 | 5  | 20 | TACA | 27 | 6  |
| 350959 | 91 | 1078250 | 1078265 | 4 | 4  | 16 | AAAC | 20 | 3  |
| 350965 | 91 | 1084670 | 1084685 | 4 | 4  | 16 | GTAT | 21 | 5  |
| 350966 | 91 | 1085875 | 1085894 | 2 | 10 | 20 | GT   | 17 | 6  |
| 350972 | 91 | 1101930 | 1101971 | 2 | 21 | 42 | CA   | 7  | 8  |
| 350974 | 91 | 1102091 | 1102106 | 2 | 8  | 16 | AC   | 32 | 3  |
| 350979 | 91 | 1110204 | 1110231 | 4 | 7  | 28 | TGTC | 27 | 4  |
| 350981 | 91 | 1112331 | 1112354 | 4 | 6  | 24 | TTTG | 20 | 5  |
| 350987 | 91 | 1128150 | 1128161 | 2 | 6  | 12 | TC   | 23 | 3  |
| 350988 | 91 | 1128162 | 1128175 | 2 | 7  | 14 | AC   | 21 | 5  |
| 350993 | 91 | 1140768 | 1140788 | 3 | 7  | 21 | TGT  | 16 | 3  |
| 351000 | 91 | 1170508 | 1170531 | 2 | 12 | 24 | TG   | 8  | 5  |
| 351003 | 91 | 1173785 | 1173806 | 2 | 11 | 22 | AC   | 12 | 6  |
| 351007 | 91 | 1181425 | 1181454 | 2 | 15 | 30 | TG   | 8  | 7  |
| 351008 | 91 | 1183386 | 1183405 | 2 | 10 | 20 | TG   | 27 | 4  |
| 351010 | 91 | 1184114 | 1184141 | 2 | 14 | 28 | GT   | 7  | 7  |
| 351011 | 91 | 1184288 | 1184317 | 2 | 15 | 30 | AC   | 9  | 6  |
| 351013 | 91 | 1187359 | 1187406 | 2 | 24 | 48 | AC   | 18 | 12 |
| 351014 | 91 | 1188216 | 1188227 | 2 | 6  | 12 | CA   | 25 | 3  |
| 351015 | 91 | 1188556 | 1188571 | 2 | 8  | 16 | AC   | 19 | 6  |
| 351017 | 91 | 1189546 | 1189581 | 4 | 9  | 36 | ACTG | 26 | 4  |
| 351019 | 91 | 1189795 | 1189810 | 2 | 8  | 16 | CA   | 24 | 7  |
| 351021 | 91 | 1191811 | 1191848 | 2 | 19 | 38 | TG   | 7  | 8  |
| 351023 | 91 | 1196037 | 1196054 | 2 | 9  | 18 | CA   | 16 | 5  |
| 351027 | 91 | 1198485 | 1198514 | 2 | 15 | 30 | AC   | 13 | 7  |
| 351028 | 91 | 1199650 | 1199664 | 3 | 5  | 15 | CGC  | 28 | 9  |
| 351029 | 91 | 1199665 | 1199679 | 3 | 5  | 15 | TGC  | 23 | 8  |
| 351030 | 91 | 1200691 | 1200706 | 2 | 8  | 16 | GT   | 14 | 5  |
| 351032 | 91 | 1212984 | 1213035 | 2 | 26 | 52 | AC   | 14 | 14 |
| 351033 | 91 | 1214240 | 1214275 | 2 | 18 | 36 | AC   | 12 | 8  |
| 351038 | 91 | 1226355 | 1226366 | 2 | 6  | 12 | AC   | 28 | 3  |
| 351051 | 91 | 1260516 | 1260535 | 2 | 10 | 20 | GT   | 22 | 9  |
| 351057 | 91 | 1272909 | 1272926 | 2 | 9  | 18 | AT   | 16 | 14 |
| 351058 | 91 | 1273066 | 1273087 | 2 | 11 | 22 | AC   | 21 | 10 |
| 351059 | 91 | 1273149 | 1273178 | 2 | 15 | 30 | TG   | 27 | 7  |
| 351064 | 91 | 1301262 | 1301279 | 2 | 9  | 18 | AC   | 8  | 3  |
| 351080 | 91 | 1345387 | 1345402 | 2 | 8  | 16 | GA   | 14 | 7  |
| 351081 | 91 | 1345405 | 1345420 | 2 | 8  | 16 | GA   | 12 | 3  |
| 351085 | 91 | 1348127 | 1348166 | 2 | 20 | 40 | TG   | 6  | 7  |
| 351086 | 91 | 1350282 | 1350293 | 2 | 6  | 12 | AC   | 14 | 3  |
| 351089 | 91 | 1357837 | 1357852 | 4 | 4  | 16 | ACAG | 17 | 6  |
| 351092 | 91 | 1367092 | 1367119 | 4 | 7  | 28 | ATCC | 15 | 4  |
| 351094 | 91 | 1374626 | 1374651 | 2 | 13 | 26 | AC   | 11 | 6  |
| 351103 | 91 | 1398318 | 1398333 | 2 | 8  | 16 | GT   | 10 | 3  |
| 351112 | 91 | 1424470 | 1424489 | 4 | 5  | 20 | AATG | 14 | 12 |
| 351113 | 91 | 1424490 | 1424505 | 4 | 4  | 16 | AATT | 14 | 11 |
| 351116 | 91 | 1427798 | 1427813 | 4 | 4  | 16 | TGTC | 24 | 3  |
| 351117 | 91 | 1428630 | 1428647 | 3 | 6  | 18 | TAC  | 28 | 4  |
| 351120 | 91 | 1434962 | 1434976 | 3 | 5  | 15 | CAG  | 26 | 4  |
| 351123 | 91 | 1439920 | 1439947 | 2 | 14 | 28 | TG   | 27 | 8  |

|        |    |         |         |   |    |    |      |    |    |
|--------|----|---------|---------|---|----|----|------|----|----|
| 351125 | 91 | 1443343 | 1443358 | 4 | 4  | 16 | GACT | 38 | 3  |
| 351127 | 91 | 1453902 | 1453915 | 2 | 7  | 14 | GT   | 15 | 6  |
| 351128 | 91 | 1453989 | 1454008 | 2 | 10 | 20 | AC   | 16 | 7  |
| 351135 | 91 | 1462341 | 1462360 | 2 | 10 | 20 | CA   | 10 | 11 |
| 351148 | 91 | 1485291 | 1485302 | 2 | 6  | 12 | GT   | 30 | 3  |
| 351149 | 91 | 1485442 | 1485457 | 2 | 8  | 16 | TG   | 20 | 4  |
| 351153 | 91 | 1491135 | 1491168 | 2 | 17 | 34 | AC   | 9  | 12 |
| 351154 | 91 | 1491368 | 1491391 | 2 | 12 | 24 | AC   | 12 | 9  |
| 351156 | 91 | 1493238 | 1493265 | 2 | 14 | 28 | CA   | 11 | 7  |
| 351158 | 91 | 1494478 | 1494525 | 2 | 24 | 48 | TG   | 6  | 11 |
| 351160 | 91 | 1496795 | 1496822 | 2 | 14 | 28 | AC   | 10 | 6  |
| 351161 | 91 | 1500898 | 1500937 | 2 | 20 | 40 | TG   | 15 | 12 |
| 351172 | 91 | 1526200 | 1526211 | 2 | 6  | 12 | GT   | 12 | 3  |
| 351173 | 91 | 1527137 | 1527152 | 2 | 8  | 16 | GT   | 7  | 10 |
| 351176 | 91 | 1530888 | 1530901 | 2 | 7  | 14 | CA   | 22 | 12 |
| 351177 | 91 | 1531040 | 1531051 | 2 | 6  | 12 | AG   | 21 | 6  |
| 351181 | 91 | 1532311 | 1532325 | 3 | 5  | 15 | CTG  | 31 | 3  |
| 351186 | 91 | 1537835 | 1537854 | 2 | 10 | 20 | CA   | 20 | 5  |
| 351187 | 91 | 1538103 | 1538130 | 2 | 14 | 28 | CA   | 16 | 7  |
| 351188 | 91 | 1538335 | 1538354 | 2 | 10 | 20 | TG   | 14 | 6  |
| 351190 | 91 | 1546258 | 1546269 | 2 | 6  | 12 | GT   | 24 | 7  |
| 351192 | 91 | 1553277 | 1553296 | 2 | 10 | 20 | AC   | 11 | 7  |
| 351193 | 91 | 1553773 | 1553788 | 2 | 8  | 16 | AC   | 17 | 10 |
| 351199 | 91 | 1560304 | 1560331 | 2 | 14 | 28 | AC   | 19 | 7  |
| 351203 | 91 | 1576338 | 1576349 | 2 | 6  | 12 | AC   | 25 | 3  |
| 351206 | 91 | 1578142 | 1578153 | 2 | 6  | 12 | CA   | 33 | 3  |
| 351208 | 91 | 1579365 | 1579406 | 2 | 21 | 42 | GT   | 13 | 10 |
| 351209 | 91 | 1579485 | 1579510 | 2 | 13 | 26 | GT   | 18 | 10 |
| 351210 | 91 | 1580991 | 1581018 | 2 | 14 | 28 | CA   | 20 | 10 |
| 351222 | 91 | 1587246 | 1587269 | 2 | 12 | 24 | GT   | 12 | 8  |
| 351224 | 91 | 1587466 | 1587483 | 2 | 9  | 18 | CA   | 12 | 9  |
| 351228 | 91 | 1592283 | 1592296 | 2 | 7  | 14 | AC   | 12 | 3  |
| 351229 | 91 | 1598234 | 1598255 | 2 | 11 | 22 | GT   | 11 | 6  |
| 351232 | 91 | 1598920 | 1598933 | 2 | 7  | 14 | AC   | 24 | 9  |
| 351234 | 91 | 1600211 | 1600226 | 2 | 8  | 16 | AT   | 16 | 6  |
| 351236 | 91 | 1600907 | 1600921 | 3 | 5  | 15 | GCT  | 20 | 3  |
| 351237 | 91 | 1601459 | 1601490 | 2 | 16 | 32 | GT   | 17 | 10 |
| 351239 | 91 | 1602038 | 1602057 | 2 | 10 | 20 | AG   | 19 | 14 |
| 351244 | 91 | 1610172 | 1610183 | 2 | 6  | 12 | CA   | 24 | 5  |
| 351247 | 91 | 1610928 | 1610943 | 2 | 8  | 16 | GT   | 11 | 4  |
| 351249 | 91 | 1615583 | 1615600 | 2 | 9  | 18 | AC   | 29 | 4  |
| 351255 | 91 | 1620723 | 1620754 | 2 | 16 | 32 | CA   | 7  | 11 |
| 351257 | 91 | 1621852 | 1621866 | 3 | 5  | 15 | GGA  | 22 | 6  |
| 351264 | 91 | 1623384 | 1623409 | 2 | 13 | 26 | TG   | 10 | 14 |
| 351265 | 91 | 1624411 | 1624424 | 2 | 7  | 14 | GT   | 6  | 6  |
| 351267 | 91 | 1626046 | 1626057 | 2 | 6  | 12 | GT   | 30 | 4  |
| 351268 | 91 | 1626084 | 1626095 | 2 | 6  | 12 | TG   | 24 | 3  |
| 351272 | 92 | 12303   | 12316   | 2 | 7  | 14 | AC   | 18 | 4  |
| 351278 | 92 | 20006   | 20025   | 2 | 10 | 20 | CA   | 16 | 6  |
| 351279 | 92 | 25348   | 25365   | 2 | 9  | 18 | TG   | 16 | 7  |
| 351284 | 92 | 28466   | 28489   | 3 | 8  | 24 | TTG  | 13 | 9  |

|        |    |        |        |   |    |    |      |    |    |
|--------|----|--------|--------|---|----|----|------|----|----|
| 351290 | 92 | 36808  | 36823  | 2 | 8  | 16 | AC   | 20 | 8  |
| 351295 | 92 | 43640  | 43681  | 2 | 21 | 42 | GT   | 6  | 7  |
| 351296 | 92 | 43965  | 43988  | 4 | 6  | 24 | ATGG | 29 | 3  |
| 351302 | 92 | 55637  | 55664  | 2 | 14 | 28 | CA   | 15 | 8  |
| 351304 | 92 | 56012  | 56033  | 2 | 11 | 22 | TG   | 19 | 8  |
| 351305 | 92 | 56140  | 56179  | 2 | 20 | 40 | TG   | 10 | 10 |
| 351307 | 92 | 60232  | 60267  | 2 | 18 | 36 | GT   | 10 | 13 |
| 351308 | 92 | 66024  | 66039  | 2 | 8  | 16 | TG   | 18 | 3  |
| 351310 | 92 | 66144  | 66165  | 2 | 11 | 22 | GA   | 11 | 3  |
| 351311 | 92 | 66237  | 66252  | 4 | 4  | 16 | CAAA | 15 | 3  |
| 351321 | 92 | 94080  | 94103  | 2 | 12 | 24 | CA   | 15 | 5  |
| 351325 | 92 | 102962 | 102985 | 2 | 12 | 24 | AC   | 20 | 9  |
| 351326 | 92 | 105317 | 105328 | 2 | 6  | 12 | TG   | 19 | 4  |
| 351343 | 92 | 140639 | 140666 | 2 | 14 | 28 | CA   | 19 | 5  |
| 351361 | 92 | 185525 | 185542 | 2 | 9  | 18 | AC   | 13 | 3  |
| 351369 | 92 | 196379 | 196398 | 2 | 10 | 20 | GT   | 27 | 7  |
| 351370 | 92 | 196559 | 196578 | 2 | 10 | 20 | CA   | 26 | 4  |
| 351371 | 92 | 197177 | 197212 | 2 | 18 | 36 | TG   | 14 | 10 |
| 351375 | 92 | 203285 | 203316 | 2 | 16 | 32 | TG   | 6  | 7  |
| 351379 | 92 | 223662 | 223675 | 2 | 7  | 14 | AC   | 30 | 3  |
| 351387 | 92 | 241778 | 241797 | 4 | 5  | 20 | AAAT | 9  | 7  |
| 351388 | 92 | 246422 | 246442 | 3 | 7  | 21 | TGT  | 20 | 3  |
| 351392 | 92 | 263278 | 263293 | 2 | 8  | 16 | CA   | 8  | 4  |
| 351396 | 92 | 277060 | 277071 | 2 | 6  | 12 | AC   | 23 | 5  |
| 351397 | 92 | 277368 | 277383 | 4 | 4  | 16 | TTTA | 28 | 3  |
| 351403 | 92 | 281278 | 281319 | 2 | 21 | 42 | GT   | 11 | 9  |
| 351406 | 92 | 285418 | 285435 | 2 | 9  | 18 | CA   | 24 | 10 |
| 351407 | 92 | 286488 | 286501 | 2 | 7  | 14 | AC   | 23 | 3  |
| 351408 | 92 | 287731 | 287750 | 2 | 10 | 20 | CA   | 20 | 7  |
| 351415 | 92 | 304818 | 304835 | 3 | 6  | 18 | CTG  | 21 | 6  |
| 351425 | 92 | 313349 | 313402 | 2 | 27 | 54 | CA   | 11 | 11 |
| 351427 | 92 | 320999 | 321034 | 2 | 18 | 36 | TG   | 15 | 10 |
| 351434 | 92 | 335480 | 335491 | 2 | 6  | 12 | TA   | 26 | 3  |
| 351437 | 92 | 336272 | 336303 | 4 | 8  | 32 | TCTG | 15 | 11 |
| 351441 | 92 | 355505 | 355525 | 3 | 7  | 21 | CCT  | 20 | 3  |
| 351446 | 92 | 361317 | 361330 | 2 | 7  | 14 | TG   | 21 | 3  |
| 351454 | 92 | 372511 | 372524 | 2 | 7  | 14 | AC   | 7  | 3  |
| 351455 | 92 | 372527 | 372542 | 2 | 8  | 16 | AC   | 13 | 6  |
| 351456 | 92 | 372616 | 372643 | 2 | 14 | 28 | AC   | 8  | 5  |
| 351457 | 92 | 372717 | 372730 | 2 | 7  | 14 | AC   | 21 | 12 |
| 351458 | 92 | 376280 | 376291 | 2 | 6  | 12 | TG   | 17 | 11 |
| 351460 | 92 | 385351 | 385362 | 2 | 6  | 12 | AC   | 33 | 6  |
| 351468 | 92 | 403741 | 403760 | 2 | 10 | 20 | TG   | 16 | 14 |
| 351470 | 92 | 404548 | 404581 | 2 | 17 | 34 | AC   | 11 | 9  |
| 351471 | 92 | 404705 | 404718 | 2 | 7  | 14 | TC   | 19 | 15 |
| 351472 | 92 | 404719 | 404730 | 2 | 6  | 12 | AC   | 16 | 15 |
| 351473 | 92 | 404817 | 404828 | 2 | 6  | 12 | TG   | 20 | 4  |
| 351477 | 92 | 411190 | 411215 | 2 | 13 | 26 | CA   | 22 | 8  |
| 351478 | 92 | 415990 | 416015 | 2 | 13 | 26 | CA   | 19 | 8  |
| 351485 | 92 | 420599 | 420618 | 4 | 5  | 20 | AAAC | 17 | 4  |
| 351486 | 92 | 422012 | 422035 | 2 | 12 | 24 | TG   | 13 | 4  |

|        |    |         |         |   |    |    |      |    |    |
|--------|----|---------|---------|---|----|----|------|----|----|
| 351491 | 92 | 436068  | 436079  | 2 | 6  | 12 | AC   | 26 | 9  |
| 351493 | 92 | 446269  | 446294  | 2 | 13 | 26 | TG   | 10 | 7  |
| 351496 | 92 | 457220  | 457240  | 3 | 7  | 21 | AAT  | 17 | 4  |
| 351498 | 92 | 464901  | 464916  | 2 | 8  | 16 | AT   | 24 | 10 |
| 351502 | 92 | 469406  | 469420  | 3 | 5  | 15 | ATG  | 26 | 3  |
| 351504 | 92 | 469487  | 469500  | 2 | 7  | 14 | TC   | 23 | 3  |
| 351507 | 92 | 471733  | 471760  | 2 | 14 | 28 | AC   | 14 | 8  |
| 351508 | 92 | 473009  | 473034  | 2 | 13 | 26 | TG   | 9  | 7  |
| 351526 | 92 | 548861  | 548884  | 3 | 8  | 24 | TAC  | 19 | 4  |
| 351532 | 92 | 559538  | 559557  | 4 | 5  | 20 | ACAG | 25 | 7  |
| 351537 | 92 | 570567  | 570624  | 2 | 29 | 58 | AC   | 7  | 9  |
| 351554 | 92 | 619362  | 619391  | 2 | 15 | 30 | GT   | 10 | 12 |
| 351557 | 92 | 622147  | 622162  | 2 | 8  | 16 | AC   | 10 | 4  |
| 351563 | 92 | 636408  | 636419  | 2 | 6  | 12 | AC   | 17 | 3  |
| 351564 | 92 | 636422  | 636435  | 2 | 7  | 14 | AC   | 18 | 3  |
| 351567 | 92 | 637584  | 637595  | 2 | 6  | 12 | AC   | 22 | 4  |
| 351581 | 92 | 663694  | 663713  | 4 | 5  | 20 | ATGG | 27 | 3  |
| 351588 | 92 | 677733  | 677750  | 2 | 9  | 18 | CA   | 6  | 6  |
| 351601 | 92 | 709226  | 709251  | 2 | 13 | 26 | CA   | 15 | 5  |
| 351603 | 92 | 719720  | 719755  | 2 | 18 | 36 | CA   | 10 | 11 |
| 351604 | 92 | 721166  | 721185  | 4 | 5  | 20 | CATC | 30 | 4  |
| 351608 | 92 | 731414  | 731433  | 2 | 10 | 20 | AC   | 16 | 4  |
| 351610 | 92 | 733844  | 733859  | 4 | 4  | 16 | TGTC | 25 | 3  |
| 351615 | 92 | 739901  | 739928  | 2 | 14 | 28 | TG   | 15 | 8  |
| 351619 | 92 | 742576  | 742607  | 4 | 8  | 32 | AATG | 25 | 15 |
| 351623 | 92 | 742949  | 742975  | 3 | 9  | 27 | TAA  | 12 | 3  |
| 351632 | 92 | 752839  | 752850  | 2 | 6  | 12 | AC   | 18 | 6  |
| 351634 | 92 | 760211  | 760250  | 2 | 20 | 40 | GT   | 9  | 9  |
| 351650 | 92 | 799977  | 799988  | 2 | 6  | 12 | AC   | 17 | 3  |
| 351651 | 92 | 799989  | 800000  | 2 | 6  | 12 | GA   | 15 | 3  |
| 351659 | 92 | 819930  | 819957  | 2 | 14 | 28 | GT   | 16 | 10 |
| 351676 | 92 | 845721  | 845736  | 4 | 4  | 16 | AATA | 27 | 7  |
| 351677 | 92 | 845967  | 845990  | 2 | 12 | 24 | AG   | 6  | 3  |
| 351681 | 92 | 851718  | 851733  | 4 | 4  | 16 | TTTG | 19 | 4  |
| 351708 | 92 | 886105  | 886122  | 2 | 9  | 18 | AC   | 20 | 6  |
| 351710 | 92 | 887405  | 887425  | 3 | 7  | 21 | CAG  | 22 | 5  |
| 351711 | 92 | 888777  | 888798  | 2 | 11 | 22 | TG   | 18 | 4  |
| 351712 | 92 | 888880  | 888893  | 2 | 7  | 14 | TG   | 27 | 3  |
| 351718 | 92 | 896001  | 896014  | 2 | 7  | 14 | CA   | 32 | 3  |
| 351719 | 92 | 896223  | 896244  | 2 | 11 | 22 | AC   | 25 | 3  |
| 351722 | 92 | 906241  | 906280  | 2 | 20 | 40 | TG   | 11 | 6  |
| 351729 | 92 | 914789  | 914824  | 2 | 18 | 36 | TG   | 11 | 9  |
| 351730 | 92 | 916444  | 916457  | 2 | 7  | 14 | AC   | 30 | 3  |
| 351766 | 92 | 978256  | 978276  | 3 | 7  | 21 | AAC  | 22 | 3  |
| 351782 | 92 | 1007292 | 1007305 | 2 | 7  | 14 | CA   | 11 | 3  |
| 351784 | 92 | 1007524 | 1007567 | 2 | 22 | 44 | AC   | 7  | 6  |
| 351785 | 92 | 1007717 | 1007728 | 2 | 6  | 12 | AC   | 29 | 3  |
| 351787 | 92 | 1008474 | 1008493 | 2 | 10 | 20 | TG   | 17 | 3  |
| 351791 | 92 | 1016546 | 1016577 | 2 | 16 | 32 | GT   | 8  | 4  |
| 351802 | 92 | 1061059 | 1061073 | 3 | 5  | 15 | ATA  | 14 | 3  |
| 351805 | 92 | 1064991 | 1065006 | 2 | 8  | 16 | GT   | 29 | 3  |



|        |    |         |         |   |    |    |      |    |    |
|--------|----|---------|---------|---|----|----|------|----|----|
| 351806 | 92 | 1067118 | 1067143 | 2 | 13 | 26 | TG   | 15 | 8  |
| 351808 | 92 | 1067287 | 1067306 | 2 | 10 | 20 | CA   | 12 | 5  |
| 351809 | 92 | 1067473 | 1067510 | 2 | 19 | 38 | TG   | 11 | 7  |
| 351812 | 92 | 1077064 | 1077105 | 2 | 21 | 42 | CA   | 7  | 6  |
| 351814 | 92 | 1078235 | 1078256 | 2 | 11 | 22 | TG   | 18 | 9  |
| 351816 | 92 | 1079562 | 1079593 | 2 | 16 | 32 | TG   | 10 | 8  |
| 351818 | 92 | 1087446 | 1087465 | 2 | 10 | 20 | CA   | 18 | 7  |
| 351824 | 92 | 1097829 | 1097852 | 2 | 12 | 24 | AC   | 15 | 4  |
| 351827 | 92 | 1103797 | 1103820 | 2 | 12 | 24 | GT   | 12 | 4  |
| 351829 | 92 | 1104256 | 1104285 | 2 | 15 | 30 | TG   | 7  | 8  |
| 351832 | 92 | 1106326 | 1106371 | 2 | 23 | 46 | TG   | 9  | 8  |
| 351840 | 92 | 1121355 | 1121366 | 2 | 6  | 12 | TG   | 26 | 3  |
| 351844 | 92 | 1123239 | 1123260 | 2 | 11 | 22 | GT   | 18 | 5  |
| 351852 | 92 | 1125019 | 1125040 | 2 | 11 | 22 | GT   | 7  | 3  |
| 351856 | 92 | 1125611 | 1125634 | 2 | 12 | 24 | AC   | 13 | 14 |
| 351858 | 92 | 1127847 | 1127858 | 2 | 6  | 12 | CA   | 25 | 3  |
| 351866 | 92 | 1128145 | 1128186 | 2 | 21 | 42 | AC   | 7  | 7  |
| 351868 | 92 | 1132681 | 1132702 | 2 | 11 | 22 | CA   | 16 | 6  |
| 351869 | 92 | 1134888 | 1134933 | 2 | 23 | 46 | AC   | 9  | 7  |
| 351882 | 92 | 1160558 | 1160581 | 4 | 6  | 24 | CACG | 13 | 4  |
| 351883 | 92 | 1162075 | 1162092 | 2 | 9  | 18 | GT   | 15 | 3  |
| 351885 | 92 | 1165276 | 1165287 | 2 | 6  | 12 | CA   | 31 | 3  |
| 351886 | 92 | 1167880 | 1167907 | 2 | 14 | 28 | CA   | 13 | 7  |
| 351894 | 92 | 1193728 | 1193759 | 2 | 16 | 32 | TC   | 11 | 10 |
| 351896 | 92 | 1194854 | 1194880 | 3 | 9  | 27 | ATA  | 16 | 11 |
| 351899 | 92 | 1196659 | 1196692 | 2 | 17 | 34 | CA   | 9  | 8  |
| 351915 | 92 | 1249769 | 1249784 | 4 | 4  | 16 | TGCC | 24 | 4  |
| 351922 | 92 | 1272697 | 1272710 | 2 | 7  | 14 | CA   | 22 | 3  |
| 351928 | 92 | 1286026 | 1286045 | 2 | 10 | 20 | GT   | 23 | 3  |
| 351933 | 92 | 1288020 | 1288043 | 2 | 12 | 24 | AC   | 14 | 9  |
| 351936 | 92 | 1290418 | 1290443 | 2 | 13 | 26 | TG   | 11 | 6  |
| 351939 | 92 | 1304348 | 1304373 | 2 | 13 | 26 | TC   | 19 | 10 |
| 351942 | 92 | 1308159 | 1308186 | 4 | 7  | 28 | ACAG | 21 | 3  |
| 351966 | 92 | 1345550 | 1345577 | 4 | 7  | 28 | ATTG | 21 | 4  |
| 351968 | 92 | 1348275 | 1348314 | 2 | 20 | 40 | GT   | 13 | 10 |
| 351970 | 92 | 1352088 | 1352119 | 2 | 16 | 32 | TG   | 16 | 8  |
| 351972 | 92 | 1352397 | 1352412 | 2 | 8  | 16 | AC   | 13 | 5  |
| 351973 | 92 | 1354007 | 1354030 | 2 | 12 | 24 | TG   | 13 | 5  |
| 351982 | 92 | 1384282 | 1384297 | 2 | 8  | 16 | AC   | 18 | 5  |
| 351983 | 92 | 1388573 | 1388602 | 2 | 15 | 30 | AC   | 10 | 10 |
| 351985 | 92 | 1388759 | 1388796 | 2 | 19 | 38 | GA   | 13 | 9  |
| 351988 | 92 | 1392604 | 1392637 | 2 | 17 | 34 | AC   | 17 | 6  |
| 351994 | 92 | 1394391 | 1394420 | 2 | 15 | 30 | CA   | 13 | 12 |
| 352000 | 92 | 1400247 | 1400266 | 2 | 10 | 20 | GT   | 23 | 7  |
| 352001 | 92 | 1400416 | 1400435 | 2 | 10 | 20 | CT   | 14 | 7  |
| 352002 | 92 | 1400480 | 1400491 | 2 | 6  | 12 | CA   | 22 | 4  |
| 352013 | 92 | 1412458 | 1412469 | 2 | 6  | 12 | CA   | 24 | 4  |
| 352015 | 92 | 1419911 | 1419962 | 2 | 26 | 52 | GT   | 6  | 7  |
| 352016 | 92 | 1424242 | 1424273 | 2 | 16 | 32 | AC   | 13 | 9  |
| 352035 | 93 | 14800   | 14815   | 2 | 8  | 16 | GT   | 9  | 13 |
| 352038 | 93 | 22449   | 22468   | 2 | 10 | 20 | AC   | 18 | 10 |

|        |    |        |        |   |    |    |      |    |    |
|--------|----|--------|--------|---|----|----|------|----|----|
| 352044 | 93 | 33930  | 33945  | 2 | 8  | 16 | CA   | 21 | 12 |
| 352047 | 93 | 37129  | 37154  | 2 | 13 | 26 | AC   | 16 | 12 |
| 352049 | 93 | 44410  | 44424  | 3 | 5  | 15 | TAT  | 12 | 4  |
| 352050 | 93 | 44425  | 44439  | 3 | 5  | 15 | TGT  | 12 | 4  |
| 352054 | 93 | 59892  | 59907  | 4 | 4  | 16 | TTTC | 26 | 3  |
| 352056 | 93 | 63199  | 63228  | 2 | 15 | 30 | CA   | 7  | 10 |
| 352063 | 93 | 68248  | 68275  | 2 | 14 | 28 | TG   | 14 | 10 |
| 352064 | 93 | 77125  | 77168  | 2 | 22 | 44 | AC   | 9  | 9  |
| 352067 | 93 | 82976  | 83014  | 3 | 13 | 39 | AAC  | 20 | 9  |
| 352068 | 93 | 84376  | 84395  | 2 | 10 | 20 | TC   | 12 | 6  |
| 352071 | 93 | 90982  | 91009  | 2 | 14 | 28 | CA   | 20 | 6  |
| 352074 | 93 | 115520 | 115541 | 2 | 11 | 22 | AC   | 23 | 8  |
| 352076 | 93 | 119957 | 119996 | 2 | 20 | 40 | AC   | 11 | 15 |
| 352077 | 93 | 121050 | 121061 | 2 | 6  | 12 | CT   | 22 | 3  |
| 352078 | 93 | 121064 | 121078 | 3 | 5  | 15 | TTC  | 25 | 3  |
| 352079 | 93 | 122722 | 122733 | 2 | 6  | 12 | CT   | 17 | 4  |
| 352084 | 93 | 143158 | 143169 | 2 | 6  | 12 | TG   | 21 | 3  |
| 352085 | 93 | 146345 | 146365 | 3 | 7  | 21 | TGC  | 22 | 4  |
| 352089 | 93 | 156356 | 156367 | 2 | 6  | 12 | TG   | 28 | 3  |
| 352090 | 93 | 159091 | 159132 | 2 | 21 | 42 | AC   | 16 | 12 |
| 352091 | 93 | 159254 | 159287 | 2 | 17 | 34 | CA   | 6  | 7  |
| 352093 | 93 | 160670 | 160708 | 3 | 13 | 39 | CAT  | 21 | 9  |
| 352100 | 93 | 184383 | 184410 | 2 | 14 | 28 | AC   | 24 | 13 |
| 352103 | 93 | 188604 | 188619 | 4 | 4  | 16 | GTTG | 29 | 5  |
| 352106 | 93 | 193835 | 193866 | 2 | 16 | 32 | TG   | 18 | 10 |
| 352107 | 93 | 195621 | 195638 | 2 | 9  | 18 | TC   | 19 | 7  |
| 352108 | 93 | 195845 | 195868 | 2 | 12 | 24 | CA   | 15 | 9  |
| 352111 | 93 | 196103 | 196130 | 2 | 14 | 28 | CA   | 21 | 8  |
| 352112 | 93 | 196311 | 196334 | 2 | 12 | 24 | TG   | 22 | 11 |
| 352114 | 93 | 198526 | 198553 | 4 | 7  | 28 | GAAA | 25 | 10 |
| 352116 | 93 | 199710 | 199731 | 2 | 11 | 22 | AG   | 13 | 5  |
| 352118 | 93 | 200548 | 200575 | 2 | 14 | 28 | CA   | 9  | 5  |
| 352121 | 93 | 201450 | 201477 | 2 | 14 | 28 | GT   | 14 | 9  |
| 352124 | 93 | 205325 | 205339 | 3 | 5  | 15 | TGC  | 19 | 3  |
| 352126 | 93 | 214395 | 214408 | 2 | 7  | 14 | GT   | 28 | 3  |
| 352129 | 93 | 215519 | 215546 | 2 | 14 | 28 | TG   | 8  | 9  |
| 352133 | 93 | 218183 | 218200 | 3 | 6  | 18 | CAG  | 24 | 3  |
| 352135 | 93 | 224229 | 224250 | 2 | 11 | 22 | TC   | 14 | 4  |
| 352136 | 93 | 225749 | 225763 | 3 | 5  | 15 | GGA  | 23 | 7  |
| 352145 | 93 | 243869 | 243882 | 2 | 7  | 14 | CA   | 27 | 4  |
| 352146 | 93 | 244101 | 244130 | 3 | 10 | 30 | TCC  | 16 | 7  |
| 352148 | 93 | 245534 | 245547 | 2 | 7  | 14 | AC   | 12 | 4  |
| 352149 | 93 | 246166 | 246195 | 3 | 10 | 30 | GGA  | 16 | 8  |
| 352151 | 93 | 262646 | 262660 | 3 | 5  | 15 | AAT  | 6  | 6  |
| 352154 | 93 | 270687 | 270728 | 2 | 21 | 42 | GT   | 15 | 11 |
| 352155 | 93 | 274058 | 274097 | 4 | 10 | 40 | TAAG | 25 | 9  |
| 352159 | 93 | 286111 | 286126 | 4 | 4  | 16 | TAGA | 25 | 3  |
| 352160 | 93 | 289323 | 289334 | 2 | 6  | 12 | AC   | 21 | 4  |
| 352161 | 93 | 290679 | 290700 | 2 | 11 | 22 | AC   | 18 | 6  |
| 352164 | 93 | 292901 | 292916 | 4 | 4  | 16 | AAGG | 30 | 3  |
| 352165 | 93 | 293086 | 293103 | 2 | 9  | 18 | TG   | 22 | 5  |

|        |    |        |        |   |    |    |      |    |    |
|--------|----|--------|--------|---|----|----|------|----|----|
| 352168 | 93 | 296281 | 296296 | 2 | 8  | 16 | AC   | 23 | 4  |
| 352173 | 93 | 300499 | 300516 | 3 | 6  | 18 | GCA  | 21 | 3  |
| 352175 | 93 | 301214 | 301243 | 2 | 15 | 30 | GT   | 18 | 9  |
| 352176 | 93 | 301631 | 301651 | 3 | 7  | 21 | GCT  | 27 | 4  |
| 352177 | 93 | 301742 | 301756 | 3 | 5  | 15 | CAA  | 24 | 8  |
| 352178 | 93 | 302098 | 302115 | 3 | 6  | 18 | TTG  | 24 | 3  |
| 352181 | 93 | 320113 | 320126 | 2 | 7  | 14 | TC   | 21 | 4  |
| 352182 | 93 | 320684 | 320701 | 2 | 9  | 18 | AC   | 8  | 3  |
| 352184 | 93 | 322973 | 323000 | 4 | 7  | 28 | CTAT | 21 | 7  |
| 352196 | 93 | 332962 | 332983 | 2 | 11 | 22 | TG   | 18 | 7  |
| 352200 | 93 | 346827 | 346862 | 2 | 18 | 36 | TG   | 16 | 11 |
| 352201 | 93 | 347287 | 347310 | 3 | 8  | 24 | CAG  | 30 | 5  |
| 352202 | 93 | 349542 | 349557 | 2 | 8  | 16 | AC   | 25 | 3  |
| 352206 | 93 | 375145 | 375156 | 2 | 6  | 12 | AT   | 17 | 4  |
| 352208 | 93 | 377833 | 377854 | 2 | 11 | 22 | TG   | 11 | 8  |
| 352210 | 93 | 378171 | 378192 | 2 | 11 | 22 | TG   | 10 | 9  |
| 352215 | 93 | 392876 | 392902 | 3 | 9  | 27 | GCA  | 17 | 12 |
| 352216 | 93 | 394555 | 394570 | 2 | 8  | 16 | GT   | 19 | 9  |
| 352217 | 93 | 394798 | 394815 | 2 | 9  | 18 | CA   | 11 | 12 |
| 352218 | 93 | 397177 | 397214 | 2 | 19 | 38 | CA   | 27 | 16 |
| 352219 | 93 | 399502 | 399525 | 2 | 12 | 24 | AC   | 8  | 7  |
| 352220 | 93 | 401624 | 401659 | 2 | 18 | 36 | TG   | 18 | 8  |
| 352222 | 93 | 406362 | 406377 | 2 | 8  | 16 | GT   | 25 | 9  |
| 352224 | 93 | 411463 | 411483 | 3 | 7  | 21 | AAC  | 26 | 5  |
| 352228 | 93 | 434098 | 434117 | 4 | 5  | 20 | AAAC | 16 | 5  |
| 352229 | 93 | 438365 | 438394 | 2 | 15 | 30 | AC   | 22 | 9  |
| 352232 | 93 | 441652 | 441667 | 2 | 8  | 16 | AC   | 26 | 8  |
| 352239 | 93 | 449586 | 449601 | 2 | 8  | 16 | CA   | 21 | 6  |
| 352244 | 93 | 453457 | 453470 | 2 | 7  | 14 | AG   | 28 | 4  |
| 352245 | 93 | 454578 | 454591 | 2 | 7  | 14 | CA   | 12 | 9  |
| 352246 | 93 | 454594 | 454609 | 2 | 8  | 16 | CA   | 13 | 10 |
| 352247 | 93 | 454776 | 454799 | 2 | 12 | 24 | AC   | 17 | 6  |
| 352250 | 93 | 459064 | 459078 | 3 | 5  | 15 | AGC  | 35 | 4  |
| 352251 | 93 | 462558 | 462569 | 2 | 6  | 12 | GA   | 33 | 3  |
| 352253 | 93 | 467002 | 467015 | 2 | 7  | 14 | TG   | 27 | 5  |
| 352254 | 93 | 469637 | 469654 | 2 | 9  | 18 | GT   | 16 | 7  |
| 352257 | 93 | 482755 | 482774 | 2 | 10 | 20 | GT   | 16 | 4  |
| 352263 | 93 | 519599 | 519613 | 3 | 5  | 15 | TGC  | 30 | 6  |
| 352269 | 93 | 526208 | 526239 | 2 | 16 | 32 | AC   | 12 | 12 |
| 352271 | 93 | 529907 | 529928 | 2 | 11 | 22 | TC   | 21 | 6  |
| 352273 | 93 | 534806 | 534819 | 2 | 7  | 14 | AG   | 23 | 3  |
| 352281 | 93 | 555125 | 555144 | 2 | 10 | 20 | GT   | 7  | 5  |
| 352282 | 93 | 555327 | 555352 | 2 | 13 | 26 | CA   | 13 | 7  |
| 352283 | 93 | 556935 | 556955 | 3 | 7  | 21 | CAA  | 16 | 10 |
| 352287 | 93 | 570329 | 570340 | 2 | 6  | 12 | AT   | 17 | 3  |
| 352288 | 93 | 571035 | 571060 | 2 | 13 | 26 | TC   | 11 | 5  |
| 352289 | 93 | 575981 | 576012 | 4 | 8  | 32 | AGAA | 13 | 8  |
| 352301 | 93 | 600447 | 600461 | 3 | 5  | 15 | AAG  | 7  | 3  |
| 352302 | 93 | 601208 | 601229 | 2 | 11 | 22 | GT   | 22 | 15 |
| 352304 | 93 | 604460 | 604477 | 3 | 6  | 18 | CTT  | 21 | 4  |
| 352308 | 93 | 610981 | 611000 | 2 | 10 | 20 | AC   | 20 | 5  |

|        |    |         |         |   |    |    |      |    |    |
|--------|----|---------|---------|---|----|----|------|----|----|
| 352309 | 93 | 612904  | 612919  | 2 | 8  | 16 | CA   | 19 | 4  |
| 352310 | 93 | 612959  | 612992  | 2 | 17 | 34 | GT   | 13 | 12 |
| 352311 | 93 | 614984  | 615007  | 2 | 12 | 24 | GT   | 24 | 8  |
| 352312 | 93 | 616659  | 616686  | 2 | 14 | 28 | GT   | 8  | 6  |
| 352336 | 93 | 671482  | 671513  | 2 | 16 | 32 | CA   | 7  | 8  |
| 352340 | 93 | 673282  | 673297  | 4 | 4  | 16 | GAAA | 28 | 4  |
| 352345 | 93 | 687087  | 687107  | 3 | 7  | 21 | AGC  | 34 | 5  |
| 352350 | 93 | 701707  | 701736  | 2 | 15 | 30 | GT   | 17 | 14 |
| 352354 | 93 | 712952  | 712995  | 2 | 22 | 44 | TC   | 7  | 11 |
| 352357 | 93 | 723214  | 723225  | 2 | 6  | 12 | GT   | 8  | 4  |
| 352358 | 93 | 726361  | 726376  | 4 | 4  | 16 | TTGT | 25 | 5  |
| 352362 | 93 | 737243  | 737254  | 2 | 6  | 12 | CA   | 27 | 4  |
| 352365 | 93 | 744358  | 744371  | 2 | 7  | 14 | CA   | 25 | 5  |
| 352366 | 93 | 748851  | 748870  | 2 | 10 | 20 | AC   | 23 | 4  |
| 352367 | 93 | 752237  | 752260  | 2 | 12 | 24 | TG   | 13 | 12 |
| 352371 | 93 | 757576  | 757593  | 3 | 6  | 18 | AAT  | 19 | 7  |
| 352380 | 93 | 785104  | 785125  | 2 | 11 | 22 | TG   | 19 | 11 |
| 352381 | 93 | 785353  | 785372  | 2 | 10 | 20 | GT   | 12 | 6  |
| 352383 | 93 | 787373  | 787396  | 2 | 12 | 24 | CA   | 19 | 13 |
| 352386 | 93 | 791604  | 791617  | 2 | 7  | 14 | GT   | 28 | 3  |
| 352390 | 93 | 798710  | 798721  | 2 | 6  | 12 | CA   | 26 | 5  |
| 352392 | 93 | 804464  | 804491  | 2 | 14 | 28 | CA   | 10 | 11 |
| 352396 | 93 | 819268  | 819285  | 2 | 9  | 18 | CA   | 19 | 10 |
| 352398 | 93 | 821504  | 821529  | 2 | 13 | 26 | GT   | 11 | 9  |
| 352411 | 93 | 827847  | 827866  | 2 | 10 | 20 | CA   | 14 | 5  |
| 352413 | 93 | 827990  | 828013  | 2 | 12 | 24 | AC   | 10 | 9  |
| 352414 | 93 | 829812  | 829823  | 2 | 6  | 12 | AC   | 21 | 4  |
| 352417 | 93 | 831530  | 831557  | 2 | 14 | 28 | GT   | 10 | 15 |
| 352419 | 93 | 837663  | 837696  | 2 | 17 | 34 | GT   | 14 | 10 |
| 352420 | 93 | 838011  | 838034  | 2 | 12 | 24 | CA   | 23 | 11 |
| 352421 | 93 | 839968  | 839985  | 3 | 6  | 18 | CTT  | 18 | 3  |
| 352422 | 93 | 840100  | 840120  | 3 | 7  | 21 | TCT  | 23 | 4  |
| 352427 | 93 | 848719  | 848736  | 2 | 9  | 18 | TG   | 18 | 9  |
| 352428 | 93 | 849009  | 849022  | 2 | 7  | 14 | TG   | 24 | 8  |
| 352429 | 93 | 851213  | 851252  | 2 | 20 | 40 | GT   | 9  | 12 |
| 352438 | 93 | 886294  | 886307  | 2 | 7  | 14 | GT   | 15 | 4  |
| 352443 | 93 | 900108  | 900131  | 2 | 12 | 24 | TG   | 7  | 8  |
| 352450 | 93 | 927959  | 927982  | 2 | 12 | 24 | AG   | 22 | 7  |
| 352454 | 93 | 933720  | 933749  | 3 | 10 | 30 | CAG  | 19 | 11 |
| 352460 | 93 | 948981  | 948996  | 2 | 8  | 16 | AC   | 18 | 5  |
| 352461 | 93 | 953627  | 953642  | 4 | 4  | 16 | AATG | 32 | 4  |
| 352462 | 93 | 954605  | 954618  | 2 | 7  | 14 | AC   | 14 | 3  |
| 352466 | 93 | 969925  | 969945  | 3 | 7  | 21 | GAG  | 25 | 3  |
| 352468 | 93 | 976658  | 976673  | 4 | 4  | 16 | TTTC | 21 | 8  |
| 352477 | 93 | 999501  | 999530  | 2 | 15 | 30 | AC   | 9  | 7  |
| 352491 | 93 | 1015905 | 1015934 | 2 | 15 | 30 | GA   | 15 | 8  |
| 352493 | 93 | 1020252 | 1020269 | 2 | 9  | 18 | AG   | 19 | 5  |
| 352499 | 93 | 1026847 | 1026866 | 2 | 10 | 20 | TC   | 13 | 3  |
| 352502 | 93 | 1036128 | 1036143 | 2 | 8  | 16 | AC   | 23 | 8  |
| 352503 | 93 | 1036348 | 1036363 | 2 | 8  | 16 | TG   | 21 | 3  |
| 352513 | 93 | 1051155 | 1051184 | 2 | 15 | 30 | TC   | 10 | 9  |

|        |    |         |         |   |    |    |      |    |    |
|--------|----|---------|---------|---|----|----|------|----|----|
| 352514 | 93 | 1052060 | 1052077 | 3 | 6  | 18 | CCT  | 19 | 6  |
| 352516 | 93 | 1052607 | 1052626 | 2 | 10 | 20 | CA   | 17 | 11 |
| 352517 | 93 | 1052899 | 1052944 | 2 | 23 | 46 | TC   | 8  | 10 |
| 352518 | 93 | 1053166 | 1053185 | 2 | 10 | 20 | GT   | 15 | 5  |
| 352519 | 93 | 1053386 | 1053406 | 3 | 7  | 21 | GGA  | 26 | 11 |
| 352524 | 93 | 1061733 | 1061756 | 2 | 12 | 24 | AC   | 10 | 7  |
| 352528 | 93 | 1072479 | 1072510 | 2 | 16 | 32 | AC   | 19 | 12 |
| 352529 | 93 | 1078073 | 1078088 | 2 | 8  | 16 | AT   | 23 | 4  |
| 352533 | 93 | 1083392 | 1083412 | 3 | 7  | 21 | CTG  | 30 | 9  |
| 352539 | 93 | 1088821 | 1088832 | 2 | 6  | 12 | GA   | 28 | 3  |
| 352540 | 93 | 1088907 | 1088944 | 2 | 19 | 38 | TG   | 14 | 9  |
| 352541 | 93 | 1089065 | 1089078 | 2 | 7  | 14 | TG   | 26 | 4  |
| 352544 | 93 | 1091171 | 1091198 | 2 | 14 | 28 | GT   | 11 | 8  |
| 352550 | 93 | 1108944 | 1108957 | 2 | 7  | 14 | TG   | 28 | 3  |
| 352552 | 93 | 1115302 | 1115319 | 2 | 9  | 18 | TG   | 8  | 9  |
| 352564 | 93 | 1139363 | 1139376 | 2 | 7  | 14 | AC   | 21 | 11 |
| 352565 | 93 | 1139378 | 1139391 | 2 | 7  | 14 | CA   | 21 | 11 |
| 352567 | 93 | 1139556 | 1139583 | 2 | 14 | 28 | CA   | 19 | 19 |
| 352569 | 93 | 1148147 | 1148170 | 2 | 12 | 24 | GT   | 18 | 8  |
| 352573 | 93 | 1159610 | 1159621 | 2 | 6  | 12 | TG   | 25 | 3  |
| 352574 | 93 | 1164079 | 1164090 | 2 | 6  | 12 | AT   | 16 | 5  |
| 352589 | 93 | 1177859 | 1177886 | 4 | 7  | 28 | TGAA | 23 | 6  |
| 352591 | 93 | 1182320 | 1182335 | 2 | 8  | 16 | CA   | 21 | 6  |
| 352593 | 93 | 1183870 | 1183885 | 4 | 4  | 16 | CAAA | 26 | 3  |
| 352594 | 93 | 1195002 | 1195031 | 2 | 15 | 30 | TG   | 13 | 8  |
| 352597 | 93 | 1197867 | 1197884 | 3 | 6  | 18 | TTG  | 22 | 4  |
| 352599 | 93 | 1208270 | 1208287 | 2 | 9  | 18 | TG   | 17 | 6  |
| 352601 | 93 | 1209951 | 1209980 | 2 | 15 | 30 | TG   | 13 | 9  |
| 352605 | 93 | 1212589 | 1212602 | 2 | 7  | 14 | GT   | 28 | 3  |
| 352616 | 93 | 1226272 | 1226287 | 2 | 8  | 16 | GT   | 22 | 3  |
| 352617 | 93 | 1228033 | 1228068 | 2 | 18 | 36 | CA   | 12 | 10 |
| 352618 | 93 | 1231078 | 1231107 | 2 | 15 | 30 | AC   | 11 | 9  |
| 352621 | 93 | 1236041 | 1236062 | 2 | 11 | 22 | AC   | 17 | 7  |
| 352625 | 93 | 1240890 | 1240901 | 2 | 6  | 12 | CA   | 12 | 5  |
| 352636 | 93 | 1262142 | 1262153 | 2 | 6  | 12 | CT   | 22 | 3  |
| 352646 | 93 | 1274610 | 1274625 | 2 | 8  | 16 | TC   | 9  | 6  |
| 352654 | 93 | 1292747 | 1292774 | 4 | 7  | 28 | AAAC | 19 | 8  |
| 352663 | 93 | 1307813 | 1307836 | 2 | 12 | 24 | AC   | 25 | 6  |
| 352666 | 93 | 1308431 | 1308452 | 2 | 11 | 22 | TG   | 20 | 11 |
| 352670 | 93 | 1310922 | 1310961 | 2 | 20 | 40 | AC   | 6  | 9  |
| 352673 | 93 | 1315839 | 1315854 | 4 | 4  | 16 | GAGC | 21 | 4  |
| 352679 | 93 | 1322586 | 1322601 | 2 | 8  | 16 | AC   | 27 | 5  |
| 352684 | 93 | 1334853 | 1334872 | 4 | 5  | 20 | TTTA | 9  | 7  |
| 352704 | 93 | 1355971 | 1356012 | 2 | 21 | 42 | AC   | 12 | 11 |
| 352714 | 93 | 1365860 | 1365903 | 2 | 22 | 44 | AG   | 16 | 7  |
| 352715 | 93 | 1365957 | 1365976 | 2 | 10 | 20 | TG   | 17 | 7  |
| 352716 | 93 | 1370003 | 1370017 | 3 | 5  | 15 | AAC  | 18 | 8  |
| 352742 | 93 | 1400376 | 1400390 | 3 | 5  | 15 | TGT  | 27 | 4  |
| 352745 | 93 | 1403657 | 1403674 | 2 | 9  | 18 | CA   | 24 | 5  |
| 352746 | 93 | 1404651 | 1404676 | 2 | 13 | 26 | CT   | 13 | 9  |
| 352756 | 93 | 1414884 | 1414905 | 2 | 11 | 22 | CA   | 15 | 9  |

|        |    |        |        |   |    |    |      |    |    |
|--------|----|--------|--------|---|----|----|------|----|----|
| 352762 | 94 | 15876  | 15895  | 4 | 5  | 20 | TCTG | 28 | 6  |
| 352784 | 94 | 80109  | 80126  | 3 | 6  | 18 | CCT  | 16 | 7  |
| 352785 | 94 | 82223  | 82246  | 3 | 8  | 24 | TCC  | 22 | 8  |
| 352790 | 94 | 88536  | 88550  | 3 | 5  | 15 | TTC  | 16 | 3  |
| 352791 | 94 | 93350  | 93379  | 2 | 15 | 30 | AC   | 10 | 9  |
| 352797 | 94 | 113100 | 113119 | 4 | 5  | 20 | ATTT | 14 | 3  |
| 352814 | 94 | 158614 | 158628 | 3 | 5  | 15 | CCT  | 13 | 4  |
| 352815 | 94 | 158854 | 158883 | 3 | 10 | 30 | AGG  | 13 | 9  |
| 352817 | 94 | 167472 | 167483 | 2 | 6  | 12 | TC   | 16 | 8  |
| 352819 | 94 | 168527 | 168541 | 3 | 5  | 15 | TAA  | 11 | 5  |
| 352821 | 94 | 173411 | 173426 | 4 | 4  | 16 | TAGC | 17 | 3  |
| 352827 | 94 | 185853 | 185880 | 2 | 14 | 28 | AC   | 12 | 12 |
| 352828 | 94 | 187574 | 187615 | 2 | 21 | 42 | AC   | 15 | 18 |
| 352834 | 94 | 214203 | 214228 | 2 | 13 | 26 | AC   | 20 | 9  |
| 352837 | 94 | 223173 | 223188 | 4 | 4  | 16 | TAGA | 26 | 4  |
| 352838 | 94 | 223847 | 223864 | 2 | 9  | 18 | AC   | 27 | 4  |
| 352840 | 94 | 224958 | 224977 | 4 | 5  | 20 | CTGC | 32 | 6  |
| 352848 | 94 | 238911 | 238924 | 2 | 7  | 14 | AC   | 22 | 9  |
| 352856 | 94 | 259598 | 259621 | 4 | 6  | 24 | TATT | 29 | 4  |
| 352858 | 94 | 264704 | 264717 | 2 | 7  | 14 | GA   | 14 | 5  |
| 352862 | 94 | 272653 | 272679 | 3 | 9  | 27 | GAG  | 25 | 7  |
| 352865 | 94 | 275941 | 275958 | 3 | 6  | 18 | AAC  | 23 | 4  |
| 352866 | 94 | 276983 | 277000 | 3 | 6  | 18 | TTG  | 29 | 4  |
| 352867 | 94 | 279470 | 279481 | 2 | 6  | 12 | AC   | 23 | 3  |
| 352874 | 94 | 285796 | 285816 | 3 | 7  | 21 | AGC  | 25 | 4  |
| 352876 | 94 | 289856 | 289873 | 2 | 9  | 18 | CT   | 28 | 3  |
| 352879 | 94 | 296975 | 296988 | 2 | 7  | 14 | CA   | 20 | 4  |
| 352880 | 94 | 297042 | 297056 | 3 | 5  | 15 | GGA  | 18 | 7  |
| 352881 | 94 | 297211 | 297226 | 4 | 4  | 16 | AAAG | 10 | 6  |
| 352885 | 94 | 300393 | 300408 | 4 | 4  | 16 | AAAT | 29 | 7  |
| 352888 | 94 | 307892 | 307931 | 2 | 20 | 40 | TC   | 6  | 10 |
| 352889 | 94 | 308010 | 308037 | 2 | 14 | 28 | TG   | 10 | 12 |
| 352890 | 94 | 308141 | 308156 | 2 | 8  | 16 | TG   | 21 | 6  |
| 352893 | 94 | 320041 | 320055 | 3 | 5  | 15 | CCT  | 16 | 7  |
| 352894 | 94 | 320724 | 320735 | 2 | 6  | 12 | TG   | 16 | 4  |
| 352896 | 94 | 325704 | 325719 | 2 | 8  | 16 | AC   | 16 | 3  |
| 352900 | 94 | 339254 | 339268 | 3 | 5  | 15 | CCT  | 21 | 4  |
| 352909 | 94 | 367620 | 367649 | 2 | 15 | 30 | TG   | 13 | 11 |
| 352910 | 94 | 367750 | 367767 | 2 | 9  | 18 | CA   | 20 | 6  |
| 352911 | 94 | 367916 | 367953 | 2 | 19 | 38 | AC   | 13 | 10 |
| 352912 | 94 | 368106 | 368121 | 2 | 8  | 16 | CA   | 26 | 6  |
| 352913 | 94 | 369818 | 369839 | 2 | 11 | 22 | GT   | 15 | 8  |
| 352915 | 94 | 372923 | 372940 | 2 | 9  | 18 | TG   | 16 | 10 |
| 352916 | 94 | 373926 | 373946 | 3 | 7  | 21 | TGC  | 17 | 5  |
| 352919 | 94 | 376799 | 376826 | 2 | 14 | 28 | GT   | 14 | 5  |
| 352923 | 94 | 384680 | 384691 | 2 | 6  | 12 | GT   | 23 | 4  |
| 352929 | 94 | 395776 | 395787 | 2 | 6  | 12 | TG   | 22 | 4  |
| 352934 | 94 | 404188 | 404201 | 2 | 7  | 14 | GA   | 20 | 3  |
| 352935 | 94 | 404440 | 404461 | 2 | 11 | 22 | AC   | 9  | 6  |
| 352936 | 94 | 406279 | 406298 | 2 | 10 | 20 | AC   | 21 | 8  |
| 352938 | 94 | 409375 | 409432 | 2 | 29 | 58 | TG   | 7  | 12 |

|        |    |        |        |   |    |    |      |    |    |
|--------|----|--------|--------|---|----|----|------|----|----|
| 352939 | 94 | 411048 | 411062 | 3 | 5  | 15 | TTG  | 17 | 3  |
| 352951 | 94 | 427154 | 427169 | 2 | 8  | 16 | AC   | 28 | 4  |
| 352952 | 94 | 427984 | 428005 | 2 | 11 | 22 | AC   | 16 | 10 |
| 352954 | 94 | 432960 | 432981 | 2 | 11 | 22 | GA   | 19 | 5  |
| 352955 | 94 | 436151 | 436174 | 3 | 8  | 24 | ATC  | 31 | 9  |
| 352957 | 94 | 439887 | 439902 | 2 | 8  | 16 | AG   | 26 | 3  |
| 352963 | 94 | 445725 | 445746 | 2 | 11 | 22 | AC   | 11 | 11 |
| 352971 | 94 | 457721 | 457744 | 3 | 8  | 24 | CAA  | 25 | 5  |
| 352972 | 94 | 460410 | 460429 | 2 | 10 | 20 | AG   | 19 | 3  |
| 352973 | 94 | 460479 | 460500 | 2 | 11 | 22 | CA   | 14 | 4  |
| 352974 | 94 | 463022 | 463037 | 2 | 8  | 16 | CA   | 24 | 5  |
| 352979 | 94 | 474936 | 474955 | 4 | 5  | 20 | TATT | 23 | 3  |
| 352988 | 94 | 503140 | 503155 | 4 | 4  | 16 | CTTT | 7  | 5  |
| 352995 | 94 | 511409 | 511428 | 4 | 5  | 20 | TTTA | 22 | 3  |
| 352997 | 94 | 515418 | 515459 | 2 | 21 | 42 | GT   | 7  | 10 |
| 353000 | 94 | 537782 | 537797 | 2 | 8  | 16 | TA   | 14 | 5  |
| 353003 | 94 | 540963 | 540974 | 2 | 6  | 12 | TG   | 24 | 7  |
| 353005 | 94 | 545297 | 545326 | 2 | 15 | 30 | AC   | 10 | 12 |
| 353008 | 94 | 548473 | 548487 | 3 | 5  | 15 | GAG  | 16 | 5  |
| 353013 | 94 | 549597 | 549616 | 4 | 5  | 20 | TTTA | 15 | 4  |
| 353015 | 94 | 556971 | 556982 | 2 | 6  | 12 | GA   | 17 | 4  |
| 353016 | 94 | 558537 | 558556 | 2 | 10 | 20 | CA   | 9  | 6  |
| 353018 | 94 | 567560 | 567595 | 2 | 18 | 36 | AC   | 14 | 12 |
| 353020 | 94 | 570014 | 570027 | 2 | 7  | 14 | GA   | 23 | 6  |
| 353021 | 94 | 574276 | 574287 | 2 | 6  | 12 | TG   | 16 | 5  |
| 353022 | 94 | 574655 | 574668 | 2 | 7  | 14 | CA   | 19 | 10 |
| 353024 | 94 | 583480 | 583517 | 2 | 19 | 38 | GT   | 7  | 9  |
| 353026 | 94 | 584137 | 584162 | 2 | 13 | 26 | GT   | 8  | 9  |
| 353032 | 94 | 594853 | 594868 | 2 | 8  | 16 | AC   | 11 | 6  |
| 353036 | 94 | 598698 | 598727 | 3 | 10 | 30 | GGA  | 25 | 6  |
| 353039 | 94 | 605792 | 605821 | 2 | 15 | 30 | AC   | 17 | 7  |
| 353040 | 94 | 606121 | 606134 | 2 | 7  | 14 | GT   | 14 | 7  |
| 353041 | 94 | 606137 | 606148 | 2 | 6  | 12 | GT   | 8  | 6  |
| 353047 | 94 | 623247 | 623272 | 2 | 13 | 26 | TG   | 20 | 7  |
| 353048 | 94 | 628961 | 628978 | 2 | 9  | 18 | TG   | 19 | 4  |
| 353049 | 94 | 629335 | 629352 | 2 | 9  | 18 | CA   | 23 | 4  |
| 353052 | 94 | 631475 | 631488 | 2 | 7  | 14 | GT   | 16 | 6  |
| 353055 | 94 | 633576 | 633595 | 2 | 10 | 20 | GT   | 10 | 9  |
| 353064 | 94 | 653895 | 653916 | 2 | 11 | 22 | GT   | 23 | 7  |
| 353071 | 94 | 673880 | 673909 | 2 | 15 | 30 | TG   | 10 | 11 |
| 353072 | 94 | 677482 | 677495 | 2 | 7  | 14 | TA   | 17 | 4  |
| 353075 | 94 | 684335 | 684358 | 2 | 12 | 24 | GT   | 21 | 7  |
| 353081 | 94 | 702937 | 702952 | 2 | 8  | 16 | AC   | 21 | 4  |
| 353083 | 94 | 710318 | 710335 | 2 | 9  | 18 | CA   | 22 | 14 |
| 353084 | 94 | 716011 | 716022 | 2 | 6  | 12 | TG   | 25 | 3  |
| 353085 | 94 | 723155 | 723170 | 2 | 8  | 16 | AG   | 26 | 6  |
| 353091 | 94 | 743244 | 743263 | 4 | 5  | 20 | ATTC | 21 | 4  |
| 353093 | 94 | 749051 | 749066 | 4 | 4  | 16 | AGCT | 25 | 4  |
| 353095 | 94 | 759681 | 759700 | 2 | 10 | 20 | GT   | 17 | 9  |
| 353099 | 94 | 764102 | 764123 | 2 | 11 | 22 | GT   | 13 | 7  |
| 353101 | 94 | 764496 | 764517 | 2 | 11 | 22 | TG   | 17 | 12 |

|        |    |        |        |   |    |    |      |    |    |
|--------|----|--------|--------|---|----|----|------|----|----|
| 353102 | 94 | 764718 | 764733 | 2 | 8  | 16 | CA   | 19 | 7  |
| 353105 | 94 | 769680 | 769691 | 2 | 6  | 12 | TG   | 25 | 3  |
| 353106 | 94 | 769889 | 769922 | 2 | 17 | 34 | TG   | 9  | 10 |
| 353107 | 94 | 775490 | 775529 | 2 | 20 | 40 | AC   | 9  | 10 |
| 353108 | 94 | 777839 | 777860 | 2 | 11 | 22 | AC   | 17 | 12 |
| 353110 | 94 | 780157 | 780200 | 2 | 22 | 44 | AC   | 9  | 8  |
| 353111 | 94 | 782538 | 782555 | 2 | 9  | 18 | GT   | 25 | 4  |
| 353113 | 94 | 788332 | 788355 | 2 | 12 | 24 | CA   | 7  | 6  |
| 353118 | 94 | 794009 | 794024 | 4 | 4  | 16 | GTGC | 29 | 6  |
| 353121 | 94 | 795469 | 795492 | 2 | 12 | 24 | AG   | 10 | 12 |
| 353123 | 94 | 795700 | 795723 | 2 | 12 | 24 | TG   | 7  | 8  |
| 353127 | 94 | 798165 | 798202 | 2 | 19 | 38 | TG   | 18 | 15 |
| 353128 | 94 | 798352 | 798385 | 2 | 17 | 34 | CA   | 11 | 11 |
| 353135 | 94 | 800427 | 800448 | 2 | 11 | 22 | CA   | 6  | 6  |
| 353136 | 94 | 801031 | 801066 | 3 | 12 | 36 | TCT  | 9  | 9  |
| 353137 | 94 | 801193 | 801216 | 3 | 8  | 24 | TCT  | 12 | 7  |
| 353142 | 94 | 807789 | 807818 | 2 | 15 | 30 | TC   | 15 | 5  |
| 353143 | 94 | 807915 | 807928 | 2 | 7  | 14 | AC   | 16 | 8  |
| 353144 | 94 | 807982 | 808001 | 2 | 10 | 20 | CA   | 21 | 5  |
| 353149 | 94 | 811536 | 811547 | 2 | 6  | 12 | CA   | 28 | 8  |
| 353150 | 94 | 811704 | 811721 | 2 | 9  | 18 | TG   | 14 | 10 |
| 353153 | 94 | 813785 | 813802 | 2 | 9  | 18 | CT   | 8  | 6  |
| 353154 | 94 | 814046 | 814061 | 2 | 8  | 16 | TG   | 18 | 5  |
| 353155 | 94 | 814066 | 814079 | 2 | 7  | 14 | TG   | 18 | 3  |
| 353156 | 94 | 814137 | 814160 | 2 | 12 | 24 | GT   | 14 | 8  |
| 353170 | 94 | 825506 | 825521 | 2 | 8  | 16 | TG   | 24 | 6  |
| 353172 | 94 | 826380 | 826405 | 2 | 13 | 26 | TG   | 23 | 8  |
| 353173 | 94 | 829021 | 829042 | 2 | 11 | 22 | TG   | 18 | 10 |
| 353174 | 94 | 829282 | 829295 | 2 | 7  | 14 | GT   | 26 | 8  |
| 353176 | 94 | 832564 | 832589 | 2 | 13 | 26 | CA   | 15 | 4  |
| 353177 | 94 | 832628 | 832641 | 2 | 7  | 14 | TC   | 14 | 10 |
| 353178 | 94 | 832850 | 832867 | 3 | 6  | 18 | GAG  | 24 | 7  |
| 353180 | 94 | 834845 | 834870 | 2 | 13 | 26 | CT   | 13 | 8  |
| 353181 | 94 | 835233 | 835252 | 2 | 10 | 20 | TG   | 19 | 7  |
| 353182 | 94 | 835286 | 835305 | 2 | 10 | 20 | GT   | 22 | 5  |
| 353186 | 94 | 837441 | 837456 | 2 | 8  | 16 | TG   | 11 | 6  |
| 353187 | 94 | 837676 | 837701 | 2 | 13 | 26 | TG   | 21 | 8  |
| 353188 | 94 | 837849 | 837868 | 2 | 10 | 20 | CA   | 23 | 14 |
| 353189 | 94 | 838230 | 838255 | 2 | 13 | 26 | CA   | 14 | 10 |
| 353192 | 94 | 840618 | 840639 | 2 | 11 | 22 | TG   | 27 | 13 |
| 353193 | 94 | 840743 | 840756 | 2 | 7  | 14 | GT   | 23 | 8  |
| 353194 | 94 | 840941 | 840972 | 2 | 16 | 32 | TG   | 8  | 4  |
| 353195 | 94 | 841111 | 841132 | 2 | 11 | 22 | AC   | 17 | 6  |
| 353198 | 94 | 843827 | 843852 | 2 | 13 | 26 | AG   | 16 | 8  |
| 353199 | 94 | 843909 | 843928 | 2 | 10 | 20 | AC   | 9  | 8  |
| 353200 | 94 | 844044 | 844059 | 2 | 8  | 16 | AC   | 12 | 10 |
| 353201 | 94 | 844062 | 844079 | 2 | 9  | 18 | AC   | 14 | 10 |
| 353205 | 94 | 844420 | 844453 | 2 | 17 | 34 | TG   | 11 | 13 |
| 353206 | 94 | 844621 | 844640 | 2 | 10 | 20 | GT   | 17 | 9  |
| 353207 | 94 | 845968 | 845987 | 2 | 10 | 20 | TG   | 23 | 7  |
| 353208 | 94 | 847781 | 847802 | 2 | 11 | 22 | GT   | 13 | 7  |



|        |    |        |        |   |    |    |      |    |    |
|--------|----|--------|--------|---|----|----|------|----|----|
| 353209 | 94 | 847835 | 847848 | 2 | 7  | 14 | TG   | 20 | 4  |
| 353210 | 94 | 847945 | 847958 | 2 | 7  | 14 | AG   | 32 | 3  |
| 353211 | 94 | 847999 | 848022 | 2 | 12 | 24 | GT   | 22 | 6  |
| 353214 | 94 | 850030 | 850053 | 3 | 8  | 24 | GGA  | 7  | 3  |
| 353215 | 94 | 850183 | 850194 | 2 | 6  | 12 | GT   | 23 | 6  |
| 353216 | 94 | 850330 | 850347 | 2 | 9  | 18 | GT   | 25 | 5  |
| 353217 | 94 | 851269 | 851284 | 2 | 8  | 16 | CA   | 13 | 4  |
| 353218 | 94 | 851631 | 851652 | 2 | 11 | 22 | CA   | 18 | 5  |
| 353219 | 94 | 851717 | 851730 | 2 | 7  | 14 | AC   | 27 | 7  |
| 353220 | 94 | 855254 | 855271 | 2 | 9  | 18 | GT   | 18 | 6  |
| 353223 | 94 | 855563 | 855622 | 4 | 15 | 60 | ATCT | 9  | 6  |
| 353225 | 94 | 855847 | 855868 | 2 | 11 | 22 | TG   | 21 | 3  |
| 353226 | 94 | 855992 | 856019 | 2 | 14 | 28 | AC   | 16 | 7  |
| 353227 | 94 | 856108 | 856119 | 2 | 6  | 12 | CT   | 21 | 4  |
| 353228 | 94 | 856122 | 856135 | 2 | 7  | 14 | CA   | 22 | 5  |
| 353232 | 94 | 857033 | 857060 | 2 | 14 | 28 | TG   | 14 | 6  |
| 353244 | 94 | 861055 | 861072 | 2 | 9  | 18 | CT   | 16 | 11 |
| 353245 | 94 | 861073 | 861090 | 2 | 9  | 18 | CA   | 15 | 10 |
| 353246 | 94 | 861285 | 861305 | 3 | 7  | 21 | AGG  | 28 | 5  |
| 353250 | 94 | 863493 | 863520 | 2 | 14 | 28 | CA   | 6  | 5  |
| 353252 | 94 | 864902 | 864915 | 2 | 7  | 14 | TA   | 17 | 12 |
| 353253 | 94 | 865692 | 865711 | 2 | 10 | 20 | TG   | 6  | 5  |
| 353255 | 94 | 866862 | 866891 | 3 | 10 | 30 | TCT  | 23 | 17 |
| 353259 | 94 | 869951 | 869976 | 2 | 13 | 26 | CA   | 6  | 8  |
| 353260 | 94 | 870086 | 870113 | 2 | 14 | 28 | AC   | 7  | 8  |
| 353263 | 94 | 873855 | 873881 | 3 | 9  | 27 | AAC  | 16 | 5  |
| 353265 | 94 | 875652 | 875669 | 2 | 9  | 18 | CT   | 18 | 4  |
| 353270 | 94 | 879980 | 880003 | 2 | 12 | 24 | GT   | 6  | 8  |
| 353276 | 94 | 887683 | 887704 | 2 | 11 | 22 | GT   | 26 | 4  |
| 353278 | 94 | 887891 | 887944 | 2 | 27 | 54 | GA   | 9  | 8  |
| 353279 | 94 | 888075 | 888088 | 2 | 7  | 14 | CA   | 20 | 4  |
| 353282 | 94 | 888443 | 888468 | 2 | 13 | 26 | AC   | 11 | 10 |
| 353283 | 94 | 888722 | 888737 | 2 | 8  | 16 | GT   | 9  | 6  |
| 353284 | 94 | 888866 | 888885 | 2 | 10 | 20 | AC   | 14 | 12 |
| 353287 | 94 | 890916 | 890945 | 2 | 15 | 30 | CA   | 9  | 10 |
| 353288 | 94 | 891207 | 891244 | 2 | 19 | 38 | CA   | 19 | 9  |
| 353289 | 94 | 891581 | 891592 | 2 | 6  | 12 | AC   | 22 | 12 |
| 353290 | 94 | 891596 | 891609 | 2 | 7  | 14 | CA   | 23 | 11 |
| 353291 | 94 | 892473 | 892486 | 2 | 7  | 14 | GA   | 27 | 4  |
| 353292 | 94 | 892624 | 892637 | 2 | 7  | 14 | AC   | 27 | 4  |
| 353293 | 94 | 892995 | 893012 | 2 | 9  | 18 | TG   | 17 | 3  |
| 353296 | 94 | 898806 | 898819 | 2 | 7  | 14 | GT   | 30 | 3  |
| 353297 | 94 | 899043 | 899058 | 4 | 4  | 16 | GTGC | 21 | 6  |
| 353303 | 94 | 899578 | 899599 | 2 | 11 | 22 | CA   | 13 | 11 |
| 353304 | 94 | 899876 | 899903 | 2 | 14 | 28 | CT   | 16 | 9  |
| 353305 | 94 | 903463 | 903484 | 2 | 11 | 22 | TG   | 17 | 8  |
| 353310 | 94 | 906100 | 906117 | 2 | 9  | 18 | CA   | 9  | 7  |
| 353315 | 94 | 907465 | 907486 | 2 | 11 | 22 | AC   | 9  | 7  |
| 353319 | 94 | 910394 | 910408 | 3 | 5  | 15 | TAT  | 7  | 4  |
| 353323 | 94 | 911611 | 911628 | 3 | 6  | 18 | CTC  | 12 | 3  |
| 353328 | 94 | 914363 | 914390 | 4 | 7  | 28 | TGTC | 19 | 8  |

|        |    |         |         |   |    |    |      |    |    |
|--------|----|---------|---------|---|----|----|------|----|----|
| 353333 | 94 | 917529  | 917543  | 3 | 5  | 15 | CAA  | 30 | 3  |
| 353334 | 94 | 917652  | 917665  | 2 | 7  | 14 | AC   | 12 | 13 |
| 353338 | 94 | 922657  | 922674  | 3 | 6  | 18 | ATG  | 18 | 5  |
| 353340 | 94 | 926720  | 926747  | 2 | 14 | 28 | CA   | 10 | 8  |
| 353343 | 94 | 928229  | 928249  | 3 | 7  | 21 | GAG  | 18 | 7  |
| 353345 | 94 | 930244  | 930271  | 2 | 14 | 28 | TG   | 8  | 4  |
| 353346 | 94 | 930418  | 930433  | 2 | 8  | 16 | GT   | 9  | 9  |
| 353348 | 94 | 931010  | 931027  | 2 | 9  | 18 | GT   | 8  | 5  |
| 353349 | 94 | 931051  | 931076  | 2 | 13 | 26 | AG   | 10 | 7  |
| 353350 | 94 | 931366  | 931383  | 2 | 9  | 18 | AC   | 25 | 10 |
| 353352 | 94 | 934404  | 934423  | 2 | 10 | 20 | AC   | 16 | 6  |
| 353357 | 94 | 935869  | 935904  | 4 | 9  | 36 | AAGA | 19 | 13 |
| 353358 | 94 | 937747  | 937790  | 2 | 22 | 44 | TG   | 9  | 10 |
| 353368 | 94 | 945045  | 945062  | 3 | 6  | 18 | ATT  | 14 | 5  |
| 353377 | 94 | 949421  | 949456  | 2 | 18 | 36 | CA   | 9  | 6  |
| 353385 | 94 | 955002  | 955025  | 4 | 6  | 24 | ACAG | 22 | 3  |
| 353386 | 94 | 955092  | 955112  | 3 | 7  | 21 | GGA  | 26 | 4  |
| 353388 | 94 | 955598  | 955617  | 2 | 10 | 20 | TG   | 19 | 5  |
| 353390 | 94 | 959339  | 959370  | 2 | 16 | 32 | AC   | 20 | 14 |
| 353391 | 94 | 959564  | 959577  | 2 | 7  | 14 | GA   | 17 | 5  |
| 353392 | 94 | 962077  | 962090  | 2 | 7  | 14 | AC   | 25 | 5  |
| 353393 | 94 | 962266  | 962283  | 2 | 9  | 18 | CA   | 15 | 3  |
| 353394 | 94 | 963340  | 963363  | 4 | 6  | 24 | CAGC | 18 | 4  |
| 353395 | 94 | 963590  | 963610  | 3 | 7  | 21 | GCT  | 21 | 4  |
| 353397 | 94 | 964784  | 964807  | 2 | 12 | 24 | AC   | 11 | 7  |
| 353399 | 94 | 965753  | 965778  | 2 | 13 | 26 | GT   | 10 | 10 |
| 353401 | 94 | 967443  | 967458  | 2 | 8  | 16 | AC   | 19 | 5  |
| 353402 | 94 | 967690  | 967709  | 2 | 10 | 20 | TG   | 16 | 5  |
| 353403 | 94 | 970424  | 970457  | 2 | 17 | 34 | AC   | 22 | 13 |
| 353404 | 94 | 970546  | 970559  | 2 | 7  | 14 | CA   | 25 | 4  |
| 353407 | 94 | 972604  | 972631  | 2 | 14 | 28 | CA   | 23 | 10 |
| 353412 | 94 | 978075  | 978094  | 2 | 10 | 20 | GT   | 17 | 21 |
| 353416 | 94 | 978807  | 978844  | 2 | 19 | 38 | TC   | 8  | 6  |
| 353419 | 94 | 980154  | 980177  | 2 | 12 | 24 | AC   | 16 | 12 |
| 353421 | 94 | 980354  | 980373  | 2 | 10 | 20 | CA   | 11 | 10 |
| 353422 | 94 | 980525  | 980554  | 2 | 15 | 30 | AC   | 13 | 8  |
| 353425 | 94 | 982871  | 982884  | 2 | 7  | 14 | GT   | 19 | 7  |
| 353427 | 94 | 983391  | 983408  | 2 | 9  | 18 | TG   | 20 | 9  |
| 353430 | 94 | 987623  | 987638  | 2 | 8  | 16 | AC   | 12 | 6  |
| 353433 | 94 | 987945  | 987958  | 2 | 7  | 14 | TG   | 26 | 10 |
| 353434 | 94 | 987960  | 987971  | 2 | 6  | 12 | GT   | 16 | 10 |
| 353435 | 94 | 988081  | 988108  | 2 | 14 | 28 | AC   | 19 | 8  |
| 353436 | 94 | 988297  | 988318  | 2 | 11 | 22 | CA   | 12 | 6  |
| 353437 | 94 | 990092  | 990105  | 2 | 7  | 14 | CT   | 25 | 9  |
| 353438 | 94 | 990373  | 990388  | 2 | 8  | 16 | GT   | 22 | 6  |
| 353445 | 94 | 992406  | 992429  | 2 | 12 | 24 | AC   | 15 | 9  |
| 353454 | 94 | 1000250 | 1000279 | 2 | 15 | 30 | TG   | 17 | 5  |
| 353455 | 94 | 1004443 | 1004468 | 2 | 13 | 26 | GT   | 18 | 14 |
| 353456 | 94 | 1004645 | 1004660 | 2 | 8  | 16 | GT   | 24 | 8  |
| 353457 | 94 | 1004663 | 1004674 | 2 | 6  | 12 | GT   | 20 | 6  |
| 353458 | 94 | 1005000 | 1005021 | 2 | 11 | 22 | GT   | 18 | 11 |

|        |    |         |         |   |    |    |      |    |    |
|--------|----|---------|---------|---|----|----|------|----|----|
| 353462 | 94 | 1008064 | 1008084 | 3 | 7  | 21 | ATT  | 25 | 3  |
| 353463 | 94 | 1008177 | 1008196 | 2 | 10 | 20 | CA   | 18 | 11 |
| 353464 | 94 | 1008777 | 1008792 | 2 | 8  | 16 | TG   | 25 | 3  |
| 353467 | 94 | 1009174 | 1009203 | 2 | 15 | 30 | AC   | 8  | 8  |
| 353468 | 94 | 1011996 | 1012027 | 2 | 16 | 32 | GT   | 9  | 8  |
| 353479 | 94 | 1020743 | 1020756 | 2 | 7  | 14 | CT   | 19 | 3  |
| 353481 | 94 | 1021050 | 1021067 | 3 | 6  | 18 | GTT  | 15 | 4  |
| 353482 | 94 | 1021176 | 1021190 | 3 | 5  | 15 | GAG  | 23 | 6  |
| 353483 | 94 | 1022170 | 1022201 | 2 | 16 | 32 | CA   | 10 | 7  |
| 353484 | 94 | 1023704 | 1023723 | 2 | 10 | 20 | AC   | 10 | 8  |
| 353493 | 94 | 1050647 | 1050676 | 2 | 15 | 30 | CT   | 9  | 5  |
| 353512 | 94 | 1107468 | 1107487 | 2 | 10 | 20 | GA   | 15 | 5  |
| 353518 | 94 | 1134184 | 1134205 | 2 | 11 | 22 | TG   | 26 | 7  |
| 353523 | 94 | 1149466 | 1149503 | 2 | 19 | 38 | AC   | 10 | 12 |
| 353524 | 94 | 1151439 | 1151450 | 2 | 6  | 12 | CA   | 30 | 3  |
| 353527 | 94 | 1157491 | 1157504 | 2 | 7  | 14 | CT   | 25 | 3  |
| 353528 | 94 | 1158253 | 1158268 | 2 | 8  | 16 | TG   | 21 | 3  |
| 353535 | 94 | 1169150 | 1169183 | 2 | 17 | 34 | TG   | 16 | 12 |
| 353536 | 94 | 1170882 | 1170893 | 2 | 6  | 12 | GA   | 29 | 4  |
| 353537 | 94 | 1172022 | 1172054 | 3 | 11 | 33 | CTT  | 23 | 8  |
| 353538 | 94 | 1173021 | 1173050 | 2 | 15 | 30 | TG   | 16 | 8  |
| 353543 | 94 | 1177820 | 1177873 | 2 | 27 | 54 | CA   | 6  | 9  |
| 353544 | 94 | 1177979 | 1178006 | 2 | 14 | 28 | GT   | 9  | 10 |
| 353546 | 94 | 1179343 | 1179372 | 2 | 15 | 30 | AC   | 16 | 8  |
| 353550 | 94 | 1185653 | 1185694 | 2 | 21 | 42 | GT   | 15 | 10 |
| 353556 | 94 | 1204630 | 1204641 | 2 | 6  | 12 | AC   | 21 | 3  |
| 353558 | 94 | 1204973 | 1204992 | 2 | 10 | 20 | GA   | 16 | 6  |
| 353559 | 94 | 1205093 | 1205118 | 2 | 13 | 26 | TG   | 8  | 10 |
| 353561 | 94 | 1211409 | 1211426 | 2 | 9  | 18 | GT   | 11 | 11 |
| 353562 | 94 | 1211429 | 1211446 | 2 | 9  | 18 | GT   | 11 | 11 |
| 353564 | 94 | 1211567 | 1211594 | 2 | 14 | 28 | TG   | 11 | 11 |
| 353568 | 94 | 1211876 | 1211899 | 4 | 6  | 24 | TTTC | 28 | 3  |
| 353573 | 94 | 1227124 | 1227147 | 2 | 12 | 24 | GT   | 13 | 9  |
| 353583 | 94 | 1234036 | 1234051 | 2 | 8  | 16 | AG   | 22 | 6  |
| 353587 | 94 | 1250344 | 1250361 | 2 | 9  | 18 | GA   | 12 | 5  |
| 353597 | 94 | 1270084 | 1270121 | 2 | 19 | 38 | TG   | 6  | 8  |
| 353601 | 94 | 1270299 | 1270314 | 2 | 8  | 16 | TG   | 26 | 3  |
| 353608 | 94 | 1279874 | 1279887 | 2 | 7  | 14 | TG   | 24 | 7  |
| 353611 | 94 | 1285417 | 1285436 | 2 | 10 | 20 | GA   | 19 | 3  |
| 353622 | 94 | 1313518 | 1313529 | 2 | 6  | 12 | GT   | 26 | 3  |
| 353624 | 94 | 1314230 | 1314245 | 2 | 8  | 16 | TG   | 26 | 4  |
| 353627 | 94 | 1315498 | 1315521 | 2 | 12 | 24 | CA   | 14 | 6  |
| 353629 | 94 | 1315801 | 1315824 | 2 | 12 | 24 | AC   | 18 | 5  |
| 353630 | 94 | 1319207 | 1319220 | 2 | 7  | 14 | AC   | 20 | 3  |
| 353633 | 94 | 1321185 | 1321216 | 2 | 16 | 32 | AC   | 18 | 9  |
| 353638 | 94 | 1324916 | 1324927 | 2 | 6  | 12 | TG   | 32 | 3  |
| 353639 | 94 | 1326505 | 1326542 | 2 | 19 | 38 | TG   | 7  | 8  |
| 353640 | 94 | 1326665 | 1326698 | 2 | 17 | 34 | AC   | 11 | 8  |
| 353641 | 94 | 1326818 | 1326833 | 2 | 8  | 16 | CA   | 26 | 13 |
| 353643 | 94 | 1327857 | 1327872 | 2 | 8  | 16 | AC   | 16 | 3  |
| 353650 | 94 | 1351954 | 1351989 | 4 | 9  | 36 | ATGT | 13 | 4  |

|        |    |         |         |   |    |    |      |    |    |
|--------|----|---------|---------|---|----|----|------|----|----|
| 353654 | 94 | 1356302 | 1356363 | 2 | 31 | 62 | GT   | 6  | 9  |
| 353662 | 94 | 1382535 | 1382560 | 2 | 13 | 26 | TG   | 15 | 8  |
| 353673 | 95 | 27352   | 27385   | 2 | 17 | 34 | TG   | 10 | 7  |
| 353676 | 95 | 28726   | 28743   | 2 | 9  | 18 | GA   | 17 | 6  |
| 353677 | 95 | 28813   | 28834   | 2 | 11 | 22 | AG   | 15 | 8  |
| 353681 | 95 | 35367   | 35398   | 2 | 16 | 32 | AC   | 14 | 11 |
| 353685 | 95 | 49310   | 49325   | 2 | 8  | 16 | CA   | 13 | 11 |
| 353692 | 95 | 54378   | 54389   | 2 | 6  | 12 | AG   | 18 | 3  |
| 353703 | 95 | 73668   | 73685   | 2 | 9  | 18 | TG   | 17 | 6  |
| 353704 | 95 | 84115   | 84130   | 2 | 8  | 16 | CA   | 19 | 4  |
| 353706 | 95 | 87975   | 87998   | 2 | 12 | 24 | CA   | 13 | 10 |
| 353708 | 95 | 88453   | 88476   | 3 | 8  | 24 | TCA  | 29 | 8  |
| 353710 | 95 | 93591   | 93606   | 4 | 4  | 16 | AAAT | 32 | 5  |
| 353713 | 95 | 100611  | 100622  | 2 | 6  | 12 | TG   | 32 | 5  |
| 353714 | 95 | 102220  | 102239  | 2 | 10 | 20 | AC   | 17 | 5  |
| 353715 | 95 | 105238  | 105253  | 4 | 4  | 16 | CAAC | 10 | 6  |
| 353717 | 95 | 105289  | 105304  | 4 | 4  | 16 | ACCA | 10 | 5  |
| 353720 | 95 | 111145  | 111160  | 4 | 4  | 16 | TTCA | 12 | 4  |
| 353721 | 95 | 112605  | 112625  | 3 | 7  | 21 | CCT  | 23 | 6  |
| 353722 | 95 | 112796  | 112811  | 2 | 8  | 16 | GT   | 34 | 4  |
| 353726 | 95 | 115555  | 115569  | 3 | 5  | 15 | GGT  | 10 | 4  |
| 353727 | 95 | 122117  | 122128  | 2 | 6  | 12 | AT   | 23 | 4  |
| 353728 | 95 | 122723  | 122750  | 2 | 14 | 28 | AC   | 14 | 16 |
| 353733 | 95 | 125035  | 125049  | 3 | 5  | 15 | ACA  | 19 | 4  |
| 353734 | 95 | 126354  | 126371  | 2 | 9  | 18 | AC   | 27 | 11 |
| 353735 | 95 | 132128  | 132145  | 3 | 6  | 18 | ACA  | 21 | 4  |
| 353738 | 95 | 137935  | 137954  | 2 | 10 | 20 | CT   | 23 | 5  |
| 353739 | 95 | 138317  | 138340  | 2 | 12 | 24 | CA   | 16 | 8  |
| 353741 | 95 | 141055  | 141074  | 2 | 10 | 20 | TG   | 21 | 12 |
| 353742 | 95 | 141171  | 141184  | 2 | 7  | 14 | GT   | 21 | 3  |
| 353743 | 95 | 141245  | 141260  | 2 | 8  | 16 | TG   | 21 | 4  |
| 353744 | 95 | 141379  | 141390  | 2 | 6  | 12 | GT   | 19 | 6  |
| 353746 | 95 | 142712  | 142737  | 2 | 13 | 26 | AC   | 6  | 9  |
| 353751 | 95 | 145149  | 145182  | 2 | 17 | 34 | CA   | 22 | 11 |
| 353759 | 95 | 149473  | 149490  | 2 | 9  | 18 | CA   | 20 | 7  |
| 353762 | 95 | 149785  | 149806  | 2 | 11 | 22 | CT   | 11 | 10 |
| 353763 | 95 | 150006  | 150037  | 2 | 16 | 32 | GT   | 22 | 10 |
| 353764 | 95 | 150093  | 150122  | 2 | 15 | 30 | AC   | 18 | 4  |
| 353765 | 95 | 150257  | 150282  | 2 | 13 | 26 | GT   | 9  | 7  |
| 353766 | 95 | 150457  | 150480  | 2 | 12 | 24 | GT   | 22 | 9  |
| 353768 | 95 | 153871  | 153890  | 4 | 5  | 20 | CTTC | 25 | 3  |
| 353770 | 95 | 155328  | 155351  | 2 | 12 | 24 | AC   | 18 | 5  |
| 353771 | 95 | 155435  | 155450  | 2 | 8  | 16 | AC   | 22 | 3  |
| 353772 | 95 | 155502  | 155519  | 2 | 9  | 18 | TC   | 17 | 8  |
| 353773 | 95 | 155543  | 155576  | 2 | 17 | 34 | AC   | 9  | 8  |
| 353774 | 95 | 155708  | 155747  | 2 | 20 | 40 | TG   | 7  | 7  |
| 353776 | 95 | 155901  | 155926  | 2 | 13 | 26 | CA   | 6  | 6  |
| 353777 | 95 | 155967  | 155980  | 2 | 7  | 14 | AC   | 20 | 3  |
| 353778 | 95 | 156088  | 156111  | 2 | 12 | 24 | CA   | 20 | 8  |
| 353779 | 95 | 157416  | 157453  | 2 | 19 | 38 | CA   | 13 | 9  |
| 353780 | 95 | 157598  | 157609  | 2 | 6  | 12 | GT   | 19 | 4  |

|        |    |        |        |   |    |    |      |    |    |
|--------|----|--------|--------|---|----|----|------|----|----|
| 353781 | 95 | 157613 | 157628 | 2 | 8  | 16 | GT   | 22 | 3  |
| 353782 | 95 | 158981 | 159012 | 2 | 16 | 32 | AC   | 20 | 8  |
| 353783 | 95 | 159195 | 159220 | 2 | 13 | 26 | TG   | 18 | 6  |
| 353784 | 95 | 160285 | 160316 | 2 | 16 | 32 | CA   | 10 | 8  |
| 353785 | 95 | 160537 | 160556 | 2 | 10 | 20 | GT   | 22 | 15 |
| 353786 | 95 | 160639 | 160676 | 2 | 19 | 38 | CA   | 6  | 9  |
| 353787 | 95 | 160861 | 160902 | 2 | 21 | 42 | AC   | 14 | 15 |
| 353788 | 95 | 162312 | 162325 | 2 | 7  | 14 | TG   | 25 | 8  |
| 353789 | 95 | 162353 | 162368 | 2 | 8  | 16 | GT   | 21 | 6  |
| 353793 | 95 | 162916 | 162927 | 2 | 6  | 12 | GT   | 30 | 6  |
| 353802 | 95 | 166829 | 166855 | 3 | 9  | 27 | AAT  | 10 | 4  |
| 353803 | 95 | 166976 | 167015 | 2 | 20 | 40 | GT   | 15 | 13 |
| 353806 | 95 | 167444 | 167479 | 3 | 12 | 36 | AAG  | 25 | 8  |
| 353807 | 95 | 167905 | 167922 | 3 | 6  | 18 | AGA  | 33 | 3  |
| 353808 | 95 | 168273 | 168286 | 2 | 7  | 14 | CA   | 24 | 3  |
| 353809 | 95 | 168427 | 168454 | 2 | 14 | 28 | CA   | 17 | 10 |
| 353810 | 95 | 169303 | 169322 | 2 | 10 | 20 | AC   | 24 | 5  |
| 353812 | 95 | 171694 | 171721 | 2 | 14 | 28 | TG   | 14 | 9  |
| 353813 | 95 | 171878 | 171907 | 2 | 15 | 30 | CA   | 15 | 8  |
| 353821 | 95 | 176378 | 176403 | 2 | 13 | 26 | TG   | 8  | 4  |
| 353822 | 95 | 176568 | 176593 | 2 | 13 | 26 | TG   | 16 | 10 |
| 353829 | 95 | 182178 | 182191 | 2 | 7  | 14 | AC   | 28 | 12 |
| 353830 | 95 | 185056 | 185071 | 2 | 8  | 16 | TG   | 21 | 12 |
| 353831 | 95 | 185212 | 185233 | 2 | 11 | 22 | GT   | 19 | 10 |
| 353832 | 95 | 186225 | 186262 | 2 | 19 | 38 | AC   | 9  | 11 |
| 353834 | 95 | 186602 | 186613 | 2 | 6  | 12 | GT   | 12 | 5  |
| 353835 | 95 | 186714 | 186737 | 2 | 12 | 24 | GA   | 17 | 11 |
| 353836 | 95 | 186837 | 186856 | 2 | 10 | 20 | CT   | 20 | 9  |
| 353837 | 95 | 187071 | 187086 | 2 | 8  | 16 | AC   | 18 | 4  |
| 353838 | 95 | 188765 | 188814 | 2 | 25 | 50 | CA   | 10 | 9  |
| 353845 | 95 | 195158 | 195173 | 2 | 8  | 16 | TG   | 8  | 7  |
| 353847 | 95 | 195315 | 195328 | 2 | 7  | 14 | GT   | 19 | 5  |
| 353848 | 95 | 195366 | 195379 | 2 | 7  | 14 | AG   | 13 | 4  |
| 353849 | 95 | 196741 | 196758 | 2 | 9  | 18 | GA   | 14 | 4  |
| 353850 | 95 | 196872 | 196885 | 2 | 7  | 14 | AC   | 14 | 4  |
| 353851 | 95 | 196929 | 196964 | 2 | 18 | 36 | CA   | 6  | 5  |
| 353855 | 95 | 198154 | 198167 | 2 | 7  | 14 | AC   | 24 | 4  |
| 353859 | 95 | 199183 | 199208 | 2 | 13 | 26 | CA   | 15 | 5  |
| 353862 | 95 | 200112 | 200127 | 2 | 8  | 16 | CA   | 8  | 7  |
| 353863 | 95 | 200273 | 200298 | 2 | 13 | 26 | CA   | 8  | 8  |
| 353867 | 95 | 200908 | 200943 | 2 | 18 | 36 | TG   | 10 | 8  |
| 353869 | 95 | 203079 | 203090 | 2 | 6  | 12 | AC   | 28 | 3  |
| 353870 | 95 | 203570 | 203613 | 2 | 22 | 44 | CA   | 10 | 15 |
| 353871 | 95 | 207270 | 207291 | 2 | 11 | 22 | CA   | 19 | 7  |
| 353872 | 95 | 207333 | 207370 | 2 | 19 | 38 | CA   | 17 | 22 |
| 353873 | 95 | 207548 | 207573 | 2 | 13 | 26 | AC   | 7  | 9  |
| 353875 | 95 | 207685 | 207728 | 2 | 22 | 44 | TG   | 6  | 6  |
| 353876 | 95 | 207839 | 207890 | 4 | 13 | 52 | TCTA | 6  | 10 |
| 353877 | 95 | 209151 | 209164 | 2 | 7  | 14 | AC   | 19 | 7  |
| 353880 | 95 | 211782 | 211815 | 2 | 17 | 34 | CT   | 19 | 14 |
| 353881 | 95 | 211958 | 211997 | 2 | 20 | 40 | CA   | 8  | 7  |

|        |    |        |        |   |    |    |      |    |    |
|--------|----|--------|--------|---|----|----|------|----|----|
| 353882 | 95 | 212092 | 212107 | 2 | 8  | 16 | AC   | 18 | 3  |
| 353883 | 95 | 212171 | 212208 | 2 | 19 | 38 | AC   | 11 | 9  |
| 353885 | 95 | 212467 | 212500 | 2 | 17 | 34 | GT   | 15 | 15 |
| 353886 | 95 | 212663 | 212682 | 2 | 10 | 20 | GT   | 15 | 15 |
| 353890 | 95 | 213148 | 213159 | 2 | 6  | 12 | TG   | 29 | 5  |
| 353894 | 95 | 215829 | 215848 | 2 | 10 | 20 | GT   | 18 | 4  |
| 353895 | 95 | 215880 | 215897 | 2 | 9  | 18 | GT   | 18 | 3  |
| 353896 | 95 | 217249 | 217272 | 3 | 8  | 24 | CCT  | 16 | 4  |
| 353897 | 95 | 218092 | 218106 | 3 | 5  | 15 | ATT  | 15 | 3  |
| 353898 | 95 | 220344 | 220371 | 2 | 14 | 28 | GT   | 8  | 3  |
| 353899 | 95 | 220613 | 220640 | 2 | 14 | 28 | TG   | 18 | 6  |
| 353900 | 95 | 220731 | 220746 | 2 | 8  | 16 | GT   | 21 | 3  |
| 353901 | 95 | 220960 | 220977 | 2 | 9  | 18 | GT   | 29 | 7  |
| 353902 | 95 | 224908 | 224949 | 2 | 21 | 42 | AC   | 11 | 11 |
| 353903 | 95 | 225015 | 225046 | 2 | 16 | 32 | AC   | 11 | 12 |
| 353904 | 95 | 225264 | 225275 | 2 | 6  | 12 | AC   | 27 | 3  |
| 353906 | 95 | 226287 | 226336 | 2 | 25 | 50 | CA   | 6  | 9  |
| 353907 | 95 | 226406 | 226423 | 2 | 9  | 18 | CA   | 13 | 7  |
| 353908 | 95 | 226484 | 226515 | 2 | 16 | 32 | CA   | 8  | 6  |
| 353909 | 95 | 227003 | 227018 | 4 | 4  | 16 | TATT | 26 | 7  |
| 353912 | 95 | 229199 | 229230 | 2 | 16 | 32 | CA   | 15 | 16 |
| 353917 | 95 | 229688 | 229705 | 2 | 9  | 18 | AC   | 24 | 7  |
| 353919 | 95 | 231076 | 231095 | 2 | 10 | 20 | TG   | 18 | 4  |
| 353920 | 95 | 231134 | 231169 | 2 | 18 | 36 | TG   | 11 | 7  |
| 353921 | 95 | 233102 | 233113 | 2 | 6  | 12 | GT   | 25 | 4  |
| 353928 | 95 | 234413 | 234430 | 2 | 9  | 18 | TG   | 18 | 3  |
| 353938 | 95 | 238988 | 239005 | 3 | 6  | 18 | CCT  | 19 | 4  |
| 353940 | 95 | 240610 | 240624 | 3 | 5  | 15 | TAA  | 11 | 5  |
| 353944 | 95 | 241086 | 241105 | 2 | 10 | 20 | TC   | 14 | 7  |
| 353949 | 95 | 241417 | 241434 | 2 | 9  | 18 | GT   | 9  | 6  |
| 353950 | 95 | 242227 | 242244 | 2 | 9  | 18 | CA   | 18 | 11 |
| 353951 | 95 | 242560 | 242573 | 2 | 7  | 14 | TG   | 23 | 12 |
| 353952 | 95 | 242623 | 242636 | 2 | 7  | 14 | TG   | 29 | 3  |
| 353954 | 95 | 243704 | 243719 | 2 | 8  | 16 | TG   | 25 | 15 |
| 353955 | 95 | 248697 | 248718 | 2 | 11 | 22 | AC   | 22 | 11 |
| 353957 | 95 | 248938 | 248949 | 2 | 6  | 12 | TG   | 11 | 3  |
| 353958 | 95 | 249114 | 249131 | 2 | 9  | 18 | CA   | 15 | 3  |
| 353960 | 95 | 249251 | 249268 | 2 | 9  | 18 | CA   | 17 | 6  |
| 353961 | 95 | 249340 | 249366 | 3 | 9  | 27 | TGA  | 15 | 4  |
| 353963 | 95 | 249606 | 249633 | 4 | 7  | 28 | TTAT | 12 | 8  |
| 353966 | 95 | 250949 | 250978 | 2 | 15 | 30 | CA   | 6  | 8  |
| 353967 | 95 | 251092 | 251109 | 2 | 9  | 18 | CA   | 8  | 5  |
| 353968 | 95 | 251264 | 251287 | 2 | 12 | 24 | AC   | 18 | 7  |
| 353969 | 95 | 251345 | 251360 | 2 | 8  | 16 | GT   | 22 | 4  |
| 353970 | 95 | 251547 | 251588 | 2 | 21 | 42 | TG   | 10 | 6  |
| 353971 | 95 | 251704 | 251721 | 2 | 9  | 18 | CA   | 18 | 9  |
| 353972 | 95 | 253023 | 253040 | 2 | 9  | 18 | GT   | 14 | 3  |
| 353974 | 95 | 253216 | 253237 | 2 | 11 | 22 | AC   | 13 | 5  |
| 353979 | 95 | 254834 | 254853 | 4 | 5  | 20 | ACAA | 28 | 3  |
| 353980 | 95 | 255718 | 255739 | 2 | 11 | 22 | TG   | 24 | 6  |
| 353981 | 95 | 257723 | 257746 | 3 | 8  | 24 | GTG  | 6  | 3  |

|        |    |        |        |   |    |    |      |    |    |
|--------|----|--------|--------|---|----|----|------|----|----|
| 353987 | 95 | 261023 | 261044 | 2 | 11 | 22 | TG   | 13 | 11 |
| 353989 | 95 | 261248 | 261265 | 2 | 9  | 18 | AC   | 25 | 3  |
| 353990 | 95 | 261450 | 261469 | 2 | 10 | 20 | GT   | 16 | 5  |
| 353992 | 95 | 262435 | 262454 | 2 | 10 | 20 | TC   | 20 | 4  |
| 353993 | 95 | 262538 | 262571 | 2 | 17 | 34 | AC   | 11 | 12 |
| 353994 | 95 | 262643 | 262663 | 3 | 7  | 21 | CCT  | 11 | 7  |
| 353995 | 95 | 262723 | 262738 | 2 | 8  | 16 | CT   | 17 | 5  |
| 353996 | 95 | 262825 | 262839 | 3 | 5  | 15 | TCA  | 17 | 3  |
| 353998 | 95 | 263026 | 263043 | 3 | 6  | 18 | AAG  | 18 | 9  |
| 353999 | 95 | 263147 | 263166 | 2 | 10 | 20 | TG   | 12 | 16 |
| 354000 | 95 | 263224 | 263247 | 3 | 8  | 24 | CCT  | 16 | 3  |
| 354002 | 95 | 263589 | 263608 | 2 | 10 | 20 | TG   | 15 | 6  |
| 354003 | 95 | 263856 | 263867 | 2 | 6  | 12 | TG   | 18 | 3  |
| 354005 | 95 | 264503 | 264516 | 2 | 7  | 14 | TG   | 7  | 4  |
| 354006 | 95 | 264635 | 264666 | 2 | 16 | 32 | CA   | 6  | 9  |
| 354007 | 95 | 264695 | 264714 | 2 | 10 | 20 | CA   | 7  | 6  |
| 354011 | 95 | 265299 | 265324 | 2 | 13 | 26 | CA   | 7  | 8  |
| 354012 | 95 | 266261 | 266282 | 2 | 11 | 22 | AC   | 15 | 16 |
| 354017 | 95 | 267037 | 267054 | 2 | 9  | 18 | CA   | 20 | 11 |
| 354019 | 95 | 268404 | 268421 | 3 | 6  | 18 | GAG  | 15 | 5  |
| 354020 | 95 | 268477 | 268522 | 2 | 23 | 46 | AC   | 8  | 12 |
| 354022 | 95 | 268839 | 268866 | 2 | 14 | 28 | CA   | 8  | 12 |
| 354029 | 95 | 270534 | 270557 | 2 | 12 | 24 | CA   | 15 | 12 |
| 354030 | 95 | 271853 | 271868 | 2 | 8  | 16 | GT   | 9  | 12 |
| 354032 | 95 | 272165 | 272184 | 2 | 10 | 20 | GT   | 27 | 15 |
| 354033 | 95 | 272226 | 272243 | 2 | 9  | 18 | GT   | 22 | 4  |
| 354036 | 95 | 272450 | 272475 | 2 | 13 | 26 | CA   | 17 | 10 |
| 354037 | 95 | 272533 | 272550 | 2 | 9  | 18 | AC   | 18 | 6  |
| 354042 | 95 | 273838 | 273855 | 3 | 6  | 18 | AGA  | 19 | 6  |
| 354050 | 95 | 275995 | 276024 | 2 | 15 | 30 | AC   | 10 | 11 |
| 354051 | 95 | 277520 | 277561 | 2 | 21 | 42 | AC   | 8  | 9  |
| 354052 | 95 | 277663 | 277686 | 2 | 12 | 24 | CA   | 17 | 15 |
| 354055 | 95 | 280192 | 280209 | 2 | 9  | 18 | AC   | 18 | 9  |
| 354056 | 95 | 280258 | 280269 | 2 | 6  | 12 | AC   | 21 | 9  |
| 354057 | 95 | 280380 | 280415 | 2 | 18 | 36 | CA   | 15 | 10 |
| 354058 | 95 | 280555 | 280586 | 2 | 16 | 32 | CA   | 16 | 16 |
| 354062 | 95 | 282706 | 282733 | 2 | 14 | 28 | CA   | 18 | 22 |
| 354063 | 95 | 285059 | 285094 | 2 | 18 | 36 | AC   | 15 | 13 |
| 354064 | 95 | 285362 | 285394 | 3 | 11 | 33 | CCT  | 11 | 11 |
| 354065 | 95 | 286156 | 286181 | 2 | 13 | 26 | CA   | 22 | 20 |
| 354066 | 95 | 286555 | 286574 | 4 | 5  | 20 | AAAG | 8  | 3  |
| 354068 | 95 | 288451 | 288477 | 3 | 9  | 27 | GAG  | 23 | 7  |
| 354069 | 95 | 288673 | 288686 | 2 | 7  | 14 | CA   | 17 | 9  |
| 354073 | 95 | 293627 | 293644 | 2 | 9  | 18 | CA   | 21 | 8  |
| 354074 | 95 | 293712 | 293729 | 2 | 9  | 18 | GA   | 22 | 5  |
| 354075 | 95 | 293812 | 293827 | 4 | 4  | 16 | GAGC | 29 | 9  |
| 354076 | 95 | 295625 | 295640 | 2 | 8  | 16 | CA   | 19 | 4  |
| 354077 | 95 | 295730 | 295762 | 3 | 11 | 33 | CTC  | 12 | 12 |
| 354079 | 95 | 296059 | 296073 | 3 | 5  | 15 | TTC  | 8  | 6  |
| 354082 | 95 | 299277 | 299300 | 2 | 12 | 24 | GT   | 27 | 22 |
| 354083 | 95 | 299427 | 299450 | 2 | 12 | 24 | CA   | 6  | 6  |

|        |    |        |        |   |    |    |      |    |    |
|--------|----|--------|--------|---|----|----|------|----|----|
| 354088 | 95 | 302694 | 302721 | 2 | 14 | 28 | CA   | 13 | 6  |
| 354090 | 95 | 305695 | 305709 | 3 | 5  | 15 | CTC  | 19 | 11 |
| 354091 | 95 | 306604 | 306619 | 2 | 8  | 16 | GT   | 16 | 4  |
| 354092 | 95 | 308833 | 308856 | 2 | 12 | 24 | CA   | 13 | 15 |
| 354111 | 95 | 310556 | 310591 | 3 | 12 | 36 | CAA  | 14 | 6  |
| 354113 | 95 | 312099 | 312128 | 2 | 15 | 30 | AC   | 14 | 9  |
| 354114 | 95 | 312502 | 312527 | 2 | 13 | 26 | TG   | 18 | 9  |
| 354115 | 95 | 316653 | 316664 | 2 | 6  | 12 | AC   | 21 | 7  |
| 354122 | 95 | 327912 | 327923 | 2 | 6  | 12 | TG   | 30 | 4  |
| 354126 | 95 | 334541 | 334568 | 2 | 14 | 28 | AC   | 15 | 9  |
| 354137 | 95 | 342587 | 342618 | 2 | 16 | 32 | AC   | 16 | 11 |
| 354138 | 95 | 342752 | 342783 | 2 | 16 | 32 | GT   | 20 | 7  |
| 354139 | 95 | 342944 | 342971 | 2 | 14 | 28 | GA   | 10 | 5  |
| 354142 | 95 | 343719 | 343756 | 2 | 19 | 38 | AC   | 11 | 10 |
| 354143 | 95 | 344581 | 344612 | 4 | 8  | 32 | TCTA | 27 | 13 |
| 354148 | 95 | 353976 | 353993 | 2 | 9  | 18 | GT   | 24 | 3  |
| 354152 | 95 | 360684 | 360695 | 2 | 6  | 12 | GT   | 23 | 4  |
| 354153 | 95 | 360967 | 360990 | 4 | 6  | 24 | GCTG | 21 | 5  |
| 354154 | 95 | 367996 | 368031 | 2 | 18 | 36 | CT   | 10 | 9  |
| 354161 | 95 | 368722 | 368749 | 2 | 14 | 28 | AC   | 6  | 5  |
| 354162 | 95 | 371410 | 371421 | 2 | 6  | 12 | CA   | 18 | 5  |
| 354163 | 95 | 371585 | 371596 | 2 | 6  | 12 | CA   | 23 | 3  |
| 354164 | 95 | 371762 | 371775 | 2 | 7  | 14 | AC   | 23 | 4  |
| 354166 | 95 | 371920 | 371931 | 2 | 6  | 12 | CA   | 23 | 3  |
| 354167 | 95 | 372565 | 372614 | 2 | 25 | 50 | GT   | 15 | 19 |
| 354168 | 95 | 372984 | 373003 | 2 | 10 | 20 | AC   | 20 | 6  |
| 354171 | 95 | 375116 | 375137 | 2 | 11 | 22 | AC   | 18 | 7  |
| 354172 | 95 | 376733 | 376780 | 2 | 24 | 48 | AC   | 17 | 14 |
| 354173 | 95 | 380004 | 380023 | 2 | 10 | 20 | CT   | 22 | 7  |
| 354177 | 95 | 393740 | 393757 | 2 | 9  | 18 | CA   | 19 | 9  |
| 354182 | 95 | 412942 | 412965 | 3 | 8  | 24 | TAT  | 19 | 10 |
| 354185 | 95 | 420865 | 420880 | 4 | 4  | 16 | AAAC | 33 | 4  |
| 354203 | 95 | 466684 | 466709 | 2 | 13 | 26 | CA   | 19 | 10 |
| 354206 | 95 | 474285 | 474299 | 3 | 5  | 15 | TTG  | 32 | 3  |
| 354210 | 95 | 480648 | 480677 | 2 | 15 | 30 | AC   | 8  | 12 |
| 354211 | 95 | 481045 | 481068 | 3 | 8  | 24 | ATC  | 18 | 10 |
| 354214 | 95 | 486003 | 486023 | 3 | 7  | 21 | GAG  | 11 | 10 |
| 354215 | 95 | 486479 | 486494 | 2 | 8  | 16 | TC   | 26 | 14 |
| 354216 | 95 | 486495 | 486508 | 2 | 7  | 14 | AC   | 27 | 13 |
| 354217 | 95 | 486745 | 486762 | 3 | 6  | 18 | AGA  | 9  | 6  |
| 354218 | 95 | 487118 | 487141 | 3 | 8  | 24 | CTC  | 25 | 5  |
| 354222 | 95 | 490764 | 490781 | 3 | 6  | 18 | TCT  | 26 | 7  |
| 354223 | 95 | 491412 | 491465 | 3 | 18 | 54 | AAG  | 20 | 19 |
| 354224 | 95 | 493787 | 493802 | 2 | 8  | 16 | AC   | 25 | 9  |
| 354230 | 95 | 504035 | 504046 | 2 | 6  | 12 | AG   | 30 | 3  |
| 354232 | 95 | 506327 | 506350 | 3 | 8  | 24 | AAG  | 21 | 6  |
| 354233 | 95 | 508284 | 508297 | 2 | 7  | 14 | CA   | 21 | 12 |
| 354236 | 95 | 508573 | 508586 | 2 | 7  | 14 | CT   | 19 | 4  |
| 354237 | 95 | 509633 | 509647 | 3 | 5  | 15 | GTG  | 17 | 3  |
| 354243 | 95 | 518131 | 518152 | 2 | 11 | 22 | AT   | 12 | 10 |
| 354244 | 95 | 520697 | 520720 | 2 | 12 | 24 | AC   | 20 | 10 |



|        |    |        |        |   |    |    |      |    |    |
|--------|----|--------|--------|---|----|----|------|----|----|
| 354246 | 95 | 520928 | 520939 | 2 | 6  | 12 | CA   | 20 | 4  |
| 354252 | 95 | 533860 | 533873 | 2 | 7  | 14 | AC   | 30 | 3  |
| 354257 | 95 | 551918 | 551938 | 3 | 7  | 21 | AGA  | 18 | 6  |
| 354261 | 95 | 568455 | 568482 | 2 | 14 | 28 | TG   | 21 | 17 |
| 354262 | 95 | 569972 | 570003 | 2 | 16 | 32 | AC   | 13 | 7  |
| 354273 | 95 | 585651 | 585678 | 2 | 14 | 28 | GT   | 14 | 8  |
| 354276 | 95 | 597457 | 597476 | 2 | 10 | 20 | AC   | 13 | 8  |
| 354278 | 95 | 605388 | 605403 | 2 | 8  | 16 | AG   | 18 | 13 |
| 354280 | 95 | 615850 | 615864 | 3 | 5  | 15 | GAA  | 18 | 5  |
| 354281 | 95 | 616099 | 616125 | 3 | 9  | 27 | GAA  | 18 | 12 |
| 354283 | 95 | 629512 | 629527 | 4 | 4  | 16 | CATC | 31 | 3  |
| 354285 | 95 | 631793 | 631816 | 3 | 8  | 24 | TCC  | 17 | 8  |
| 354286 | 95 | 631972 | 631998 | 3 | 9  | 27 | GCT  | 23 | 12 |
| 354291 | 95 | 641846 | 641859 | 2 | 7  | 14 | TG   | 23 | 3  |
| 354292 | 95 | 643536 | 643556 | 3 | 7  | 21 | GCA  | 11 | 3  |
| 354294 | 95 | 645931 | 645948 | 2 | 9  | 18 | CA   | 23 | 15 |
| 354296 | 95 | 646118 | 646153 | 2 | 18 | 36 | TG   | 7  | 8  |
| 354297 | 95 | 646314 | 646331 | 3 | 6  | 18 | TGA  | 17 | 3  |
| 354299 | 95 | 654480 | 654501 | 2 | 11 | 22 | TG   | 26 | 6  |
| 354300 | 95 | 655854 | 655865 | 2 | 6  | 12 | CA   | 21 | 3  |
| 354306 | 95 | 660957 | 660976 | 2 | 10 | 20 | TG   | 7  | 3  |
| 354309 | 95 | 662093 | 662164 | 4 | 18 | 72 | AGAA | 16 | 11 |
| 354314 | 95 | 666991 | 667004 | 2 | 7  | 14 | CT   | 13 | 4  |
| 354315 | 95 | 667041 | 667060 | 2 | 10 | 20 | CA   | 7  | 4  |
| 354321 | 95 | 667790 | 667813 | 2 | 12 | 24 | CA   | 16 | 5  |
| 354327 | 95 | 680889 | 680906 | 2 | 9  | 18 | CA   | 15 | 6  |
| 354336 | 95 | 710047 | 710090 | 4 | 11 | 44 | CTAT | 22 | 14 |
| 354337 | 95 | 710112 | 710127 | 4 | 4  | 16 | CTAA | 22 | 6  |
| 354340 | 95 | 719774 | 719789 | 4 | 4  | 16 | CTAG | 25 | 3  |
| 354341 | 95 | 721883 | 721900 | 2 | 9  | 18 | CA   | 16 | 8  |
| 354343 | 95 | 722775 | 722789 | 3 | 5  | 15 | TTC  | 7  | 3  |
| 354348 | 95 | 723467 | 723482 | 2 | 8  | 16 | CT   | 19 | 3  |
| 354351 | 95 | 725534 | 725549 | 2 | 8  | 16 | AC   | 23 | 5  |
| 354352 | 95 | 725575 | 725600 | 2 | 13 | 26 | GT   | 13 | 3  |
| 354353 | 95 | 725783 | 725806 | 2 | 12 | 24 | TG   | 16 | 6  |
| 354354 | 95 | 726365 | 726390 | 2 | 13 | 26 | TG   | 10 | 3  |
| 354359 | 95 | 727951 | 727978 | 2 | 14 | 28 | GT   | 8  | 9  |
| 354360 | 95 | 728059 | 728078 | 2 | 10 | 20 | GT   | 22 | 8  |
| 354361 | 95 | 728261 | 728286 | 2 | 13 | 26 | TG   | 10 | 7  |
| 354362 | 95 | 728425 | 728452 | 2 | 14 | 28 | AC   | 9  | 5  |
| 354366 | 95 | 735404 | 735423 | 2 | 10 | 20 | GT   | 23 | 13 |
| 354370 | 95 | 737315 | 737328 | 2 | 7  | 14 | GT   | 12 | 7  |
| 354371 | 95 | 737330 | 737341 | 2 | 6  | 12 | TG   | 8  | 8  |
| 354372 | 95 | 738704 | 738715 | 2 | 6  | 12 | AC   | 8  | 6  |
| 354375 | 95 | 739054 | 739081 | 2 | 14 | 28 | AC   | 10 | 6  |
| 354378 | 95 | 741607 | 741621 | 3 | 5  | 15 | CCT  | 28 | 3  |
| 354380 | 95 | 741776 | 741799 | 2 | 12 | 24 | GT   | 15 | 5  |
| 354383 | 95 | 743967 | 743996 | 2 | 15 | 30 | TG   | 18 | 10 |
| 354386 | 95 | 746483 | 746504 | 2 | 11 | 22 | CA   | 27 | 5  |
| 354387 | 95 | 746565 | 746588 | 3 | 8  | 24 | CCA  | 9  | 5  |
| 354391 | 95 | 748284 | 748307 | 2 | 12 | 24 | AC   | 17 | 5  |

|        |    |        |        |   |    |    |     |    |    |
|--------|----|--------|--------|---|----|----|-----|----|----|
| 354393 | 95 | 751916 | 751929 | 2 | 7  | 14 | AC  | 6  | 6  |
| 354395 | 95 | 752096 | 752121 | 2 | 13 | 26 | GT  | 6  | 6  |
| 354403 | 95 | 756512 | 756523 | 2 | 6  | 12 | CA  | 32 | 3  |
| 354406 | 95 | 764698 | 764725 | 2 | 14 | 28 | GT  | 14 | 8  |
| 354409 | 95 | 770633 | 770656 | 2 | 12 | 24 | TA  | 13 | 11 |
| 354411 | 95 | 771185 | 771204 | 2 | 10 | 20 | TG  | 16 | 5  |
| 354413 | 95 | 778269 | 778282 | 2 | 7  | 14 | AG  | 24 | 5  |
| 354415 | 95 | 783734 | 783753 | 2 | 10 | 20 | TG  | 16 | 8  |
| 354420 | 95 | 786960 | 786973 | 2 | 7  | 14 | GA  | 10 | 5  |
| 354423 | 95 | 787414 | 787467 | 2 | 27 | 54 | TG  | 6  | 9  |
| 354424 | 95 | 788385 | 788414 | 2 | 15 | 30 | TG  | 9  | 5  |
| 354425 | 95 | 789486 | 789499 | 2 | 7  | 14 | AC  | 23 | 5  |
| 354426 | 95 | 789712 | 789735 | 3 | 8  | 24 | GCA | 21 | 12 |
| 354428 | 95 | 792159 | 792170 | 2 | 6  | 12 | TC  | 19 | 9  |
| 354429 | 95 | 792173 | 792184 | 2 | 6  | 12 | TC  | 23 | 9  |
| 354434 | 95 | 796889 | 796916 | 2 | 14 | 28 | GT  | 13 | 8  |
| 354435 | 95 | 796983 | 797000 | 2 | 9  | 18 | TG  | 27 | 4  |
| 354436 | 95 | 797442 | 797455 | 2 | 7  | 14 | CT  | 19 | 5  |
| 354437 | 95 | 797497 | 797514 | 3 | 6  | 18 | CAG | 22 | 5  |
| 354438 | 95 | 798405 | 798426 | 2 | 11 | 22 | AC  | 17 | 6  |
| 354443 | 95 | 800605 | 800622 | 3 | 6  | 18 | CTC | 26 | 5  |
| 354446 | 95 | 805297 | 805326 | 2 | 15 | 30 | CA  | 9  | 9  |
| 354447 | 95 | 805494 | 805513 | 2 | 10 | 20 | CA  | 19 | 11 |
| 354449 | 95 | 806097 | 806117 | 3 | 7  | 21 | CTC | 10 | 5  |
| 354450 | 95 | 812247 | 812266 | 2 | 10 | 20 | TC  | 12 | 8  |
| 354457 | 95 | 827531 | 827542 | 2 | 6  | 12 | AT  | 10 | 5  |
| 354460 | 95 | 827951 | 827974 | 2 | 12 | 24 | CA  | 15 | 6  |
| 354462 | 95 | 828204 | 828215 | 2 | 6  | 12 | CA  | 28 | 3  |
| 354474 | 95 | 847007 | 847022 | 2 | 8  | 16 | AG  | 27 | 4  |
| 354475 | 95 | 847074 | 847095 | 2 | 11 | 22 | CT  | 19 | 8  |
| 354476 | 95 | 847297 | 847330 | 2 | 17 | 34 | GT  | 17 | 12 |
| 354477 | 95 | 848327 | 848348 | 2 | 11 | 22 | AC  | 26 | 5  |
| 354478 | 95 | 868042 | 868063 | 2 | 11 | 22 | AC  | 31 | 4  |
| 354479 | 95 | 872260 | 872283 | 3 | 8  | 24 | TGC | 28 | 8  |
| 354480 | 95 | 874992 | 875021 | 2 | 15 | 30 | TG  | 19 | 12 |
| 354481 | 95 | 876474 | 876489 | 2 | 8  | 16 | TG  | 31 | 3  |
| 354482 | 95 | 876764 | 876777 | 2 | 7  | 14 | TG  | 19 | 8  |
| 354483 | 95 | 876781 | 876792 | 2 | 6  | 12 | GT  | 20 | 7  |
| 354484 | 95 | 879023 | 879038 | 2 | 8  | 16 | TG  | 10 | 3  |
| 354486 | 95 | 880641 | 880670 | 2 | 15 | 30 | AC  | 13 | 10 |
| 354488 | 95 | 882840 | 882859 | 2 | 10 | 20 | TC  | 15 | 6  |
| 354489 | 95 | 882986 | 883001 | 2 | 8  | 16 | TG  | 22 | 9  |
| 354490 | 95 | 883205 | 883228 | 2 | 12 | 24 | GT  | 19 | 10 |
| 354491 | 95 | 884565 | 884584 | 2 | 10 | 20 | TG  | 18 | 9  |
| 354492 | 95 | 884976 | 885001 | 2 | 13 | 26 | TG  | 11 | 13 |
| 354494 | 95 | 885262 | 885305 | 2 | 22 | 44 | GT  | 9  | 10 |
| 354500 | 95 | 886178 | 886193 | 2 | 8  | 16 | TG  | 6  | 4  |
| 354501 | 95 | 886316 | 886347 | 2 | 16 | 32 | TG  | 23 | 14 |
| 354503 | 95 | 889967 | 890000 | 2 | 17 | 34 | CA  | 10 | 11 |
| 354506 | 95 | 891760 | 891773 | 2 | 7  | 14 | TC  | 18 | 12 |
| 354507 | 95 | 892467 | 892480 | 2 | 7  | 14 | GA  | 20 | 3  |

|        |    |         |         |   |    |    |      |    |    |
|--------|----|---------|---------|---|----|----|------|----|----|
| 354513 | 95 | 896236  | 896255  | 2 | 10 | 20 | TG   | 18 | 13 |
| 354515 | 95 | 897229  | 897250  | 2 | 11 | 22 | GT   | 15 | 13 |
| 354518 | 95 | 901468  | 901483  | 2 | 8  | 16 | TC   | 13 | 4  |
| 354521 | 95 | 902454  | 902467  | 2 | 7  | 14 | CA   | 21 | 5  |
| 354525 | 95 | 911825  | 911844  | 4 | 5  | 20 | AACC | 24 | 4  |
| 354526 | 95 | 912383  | 912408  | 2 | 13 | 26 | CA   | 15 | 11 |
| 354527 | 95 | 912474  | 912501  | 2 | 14 | 28 | AC   | 9  | 7  |
| 354528 | 95 | 912630  | 912645  | 2 | 8  | 16 | CA   | 22 | 13 |
| 354530 | 95 | 915170  | 915187  | 2 | 9  | 18 | TG   | 27 | 7  |
| 354533 | 95 | 918755  | 918778  | 2 | 12 | 24 | AC   | 14 | 11 |
| 354534 | 95 | 920304  | 920321  | 3 | 6  | 18 | TGA  | 26 | 3  |
| 354535 | 95 | 920660  | 920691  | 2 | 16 | 32 | TG   | 13 | 13 |
| 354540 | 95 | 927601  | 927628  | 4 | 7  | 28 | TTTC | 14 | 7  |
| 354541 | 95 | 927840  | 927851  | 2 | 6  | 12 | TG   | 19 | 8  |
| 354542 | 95 | 927855  | 927868  | 2 | 7  | 14 | GT   | 22 | 11 |
| 354544 | 95 | 943071  | 943102  | 2 | 16 | 32 | AC   | 7  | 3  |
| 354546 | 95 | 945449  | 945476  | 2 | 14 | 28 | CA   | 19 | 13 |
| 354547 | 95 | 948552  | 948571  | 2 | 10 | 20 | CA   | 22 | 10 |
| 354548 | 95 | 948770  | 948803  | 2 | 17 | 34 | GT   | 10 | 11 |
| 354551 | 95 | 949304  | 949315  | 2 | 6  | 12 | TC   | 25 | 5  |
| 354552 | 95 | 950885  | 950896  | 2 | 6  | 12 | CA   | 28 | 4  |
| 354555 | 95 | 956068  | 956100  | 3 | 11 | 33 | CTC  | 21 | 8  |
| 354558 | 95 | 960024  | 960041  | 2 | 9  | 18 | CT   | 15 | 3  |
| 354561 | 95 | 960130  | 960145  | 2 | 8  | 16 | TA   | 16 | 6  |
| 354562 | 95 | 961560  | 961579  | 2 | 10 | 20 | GT   | 9  | 5  |
| 354563 | 95 | 962320  | 962349  | 2 | 15 | 30 | TG   | 10 | 8  |
| 354565 | 95 | 963852  | 963871  | 2 | 10 | 20 | CA   | 23 | 4  |
| 354572 | 95 | 968422  | 968447  | 2 | 13 | 26 | TG   | 10 | 12 |
| 354574 | 95 | 968921  | 968946  | 2 | 13 | 26 | AC   | 17 | 11 |
| 354575 | 95 | 969522  | 969559  | 2 | 19 | 38 | TG   | 10 | 12 |
| 354576 | 95 | 969733  | 969772  | 2 | 20 | 40 | GT   | 16 | 17 |
| 354584 | 95 | 973745  | 973800  | 4 | 14 | 56 | GATA | 25 | 18 |
| 354585 | 95 | 974686  | 974709  | 2 | 12 | 24 | TG   | 23 | 12 |
| 354586 | 95 | 976060  | 976093  | 2 | 17 | 34 | CA   | 6  | 5  |
| 354587 | 95 | 976186  | 976213  | 2 | 14 | 28 | GT   | 12 | 9  |
| 354589 | 95 | 979340  | 979354  | 3 | 5  | 15 | TCT  | 19 | 6  |
| 354591 | 95 | 987712  | 987729  | 2 | 9  | 18 | GT   | 26 | 10 |
| 354594 | 95 | 995690  | 995703  | 2 | 7  | 14 | CA   | 25 | 16 |
| 354600 | 95 | 1002901 | 1002926 | 2 | 13 | 26 | CA   | 18 | 10 |
| 354602 | 95 | 1003103 | 1003120 | 2 | 9  | 18 | CA   | 6  | 5  |
| 354606 | 95 | 1003429 | 1003442 | 2 | 7  | 14 | TG   | 8  | 6  |
| 354607 | 95 | 1003485 | 1003500 | 2 | 8  | 16 | GT   | 7  | 4  |
| 354608 | 95 | 1005208 | 1005231 | 2 | 12 | 24 | GA   | 11 | 5  |
| 354611 | 95 | 1005662 | 1005703 | 3 | 14 | 42 | TGA  | 7  | 6  |
| 354616 | 95 | 1010759 | 1010778 | 2 | 10 | 20 | CA   | 24 | 6  |
| 354617 | 95 | 1010834 | 1010847 | 2 | 7  | 14 | CA   | 19 | 5  |
| 354619 | 95 | 1010953 | 1010980 | 2 | 14 | 28 | TG   | 7  | 5  |
| 354624 | 95 | 1016606 | 1016629 | 2 | 12 | 24 | AG   | 10 | 7  |
| 354626 | 95 | 1018479 | 1018492 | 2 | 7  | 14 | AC   | 16 | 8  |
| 354627 | 95 | 1019005 | 1019036 | 2 | 16 | 32 | TG   | 17 | 10 |
| 354628 | 95 | 1019274 | 1019307 | 2 | 17 | 34 | TG   | 16 | 14 |

|        |    |         |         |   |    |    |      |    |    |
|--------|----|---------|---------|---|----|----|------|----|----|
| 354631 | 95 | 1025665 | 1025688 | 2 | 12 | 24 | GT   | 15 | 7  |
| 354633 | 95 | 1028950 | 1028973 | 2 | 12 | 24 | TG   | 27 | 7  |
| 354634 | 95 | 1031360 | 1031401 | 2 | 21 | 42 | CA   | 8  | 8  |
| 354635 | 95 | 1031596 | 1031613 | 2 | 9  | 18 | AC   | 25 | 6  |
| 354645 | 95 | 1043728 | 1043745 | 3 | 6  | 18 | AGA  | 27 | 4  |
| 354646 | 95 | 1043961 | 1043980 | 2 | 10 | 20 | GT   | 13 | 7  |
| 354654 | 95 | 1059588 | 1059611 | 2 | 12 | 24 | GT   | 15 | 11 |
| 354655 | 95 | 1061479 | 1061498 | 2 | 10 | 20 | GT   | 18 | 4  |
| 354658 | 95 | 1063441 | 1063466 | 2 | 13 | 26 | AC   | 10 | 6  |
| 354662 | 95 | 1072245 | 1072288 | 4 | 11 | 44 | TTGG | 20 | 11 |
| 354665 | 95 | 1085087 | 1085142 | 2 | 28 | 56 | AC   | 8  | 9  |
| 354671 | 95 | 1092452 | 1092465 | 2 | 7  | 14 | TA   | 12 | 5  |
| 354672 | 95 | 1092935 | 1092962 | 2 | 14 | 28 | CA   | 8  | 7  |
| 354678 | 95 | 1100451 | 1100465 | 3 | 5  | 15 | TCC  | 23 | 3  |
| 354682 | 95 | 1108589 | 1108620 | 2 | 16 | 32 | GT   | 8  | 8  |
| 354684 | 95 | 1111006 | 1111017 | 2 | 6  | 12 | GT   | 23 | 5  |
| 354685 | 95 | 1111151 | 1111182 | 2 | 16 | 32 | TG   | 19 | 15 |
| 354686 | 95 | 1111537 | 1111550 | 2 | 7  | 14 | TG   | 19 | 6  |
| 354689 | 95 | 1114986 | 1115017 | 2 | 16 | 32 | AC   | 23 | 8  |
| 354691 | 95 | 1115266 | 1115293 | 2 | 14 | 28 | GT   | 13 | 11 |
| 354696 | 95 | 1122512 | 1122529 | 2 | 9  | 18 | CA   | 15 | 8  |
| 354710 | 95 | 1138178 | 1138195 | 2 | 9  | 18 | GT   | 26 | 5  |
| 354712 | 95 | 1144140 | 1144155 | 2 | 8  | 16 | AC   | 25 | 5  |
| 354713 | 95 | 1148812 | 1148823 | 2 | 6  | 12 | TG   | 27 | 3  |
| 354714 | 95 | 1150844 | 1150857 | 2 | 7  | 14 | TC   | 28 | 4  |
| 354715 | 95 | 1151693 | 1151716 | 3 | 8  | 24 | ATT  | 13 | 3  |
| 354720 | 95 | 1161523 | 1161560 | 2 | 19 | 38 | CA   | 12 | 15 |
| 354721 | 95 | 1161694 | 1161721 | 2 | 14 | 28 | CA   | 10 | 4  |
| 354726 | 95 | 1163146 | 1163163 | 3 | 6  | 18 | GCC  | 25 | 8  |
| 354729 | 95 | 1165156 | 1165173 | 2 | 9  | 18 | AC   | 27 | 5  |
| 354731 | 95 | 1165380 | 1165393 | 2 | 7  | 14 | TG   | 20 | 5  |
| 354732 | 95 | 1165768 | 1165782 | 3 | 5  | 15 | GGA  | 23 | 7  |
| 354733 | 95 | 1168894 | 1168911 | 3 | 6  | 18 | GCC  | 25 | 12 |
| 354734 | 95 | 1169705 | 1169718 | 2 | 7  | 14 | AT   | 6  | 4  |
| 354735 | 95 | 1172474 | 1172513 | 2 | 20 | 40 | TG   | 17 | 9  |
| 354736 | 95 | 1176640 | 1176675 | 3 | 12 | 36 | AGG  | 16 | 8  |
| 354739 | 95 | 1179296 | 1179310 | 3 | 5  | 15 | GGT  | 22 | 8  |
| 354740 | 95 | 1179865 | 1179908 | 2 | 22 | 44 | AC   | 7  | 7  |
| 354746 | 95 | 1199177 | 1199208 | 4 | 8  | 32 | GGAT | 13 | 6  |
| 354752 | 95 | 1209585 | 1209602 | 3 | 6  | 18 | TTA  | 25 | 5  |
| 354753 | 95 | 1210943 | 1210956 | 2 | 7  | 14 | GT   | 15 | 11 |
| 354754 | 95 | 1212884 | 1212901 | 3 | 6  | 18 | ATT  | 21 | 5  |
| 354760 | 95 | 1230296 | 1230313 | 3 | 6  | 18 | CTC  | 14 | 3  |
| 354761 | 95 | 1230436 | 1230459 | 3 | 8  | 24 | CCT  | 24 | 8  |
| 354762 | 95 | 1230735 | 1230754 | 2 | 10 | 20 | CA   | 18 | 12 |
| 354765 | 95 | 1240530 | 1240563 | 2 | 17 | 34 | GT   | 8  | 9  |
| 354767 | 95 | 1244132 | 1244146 | 3 | 5  | 15 | GGA  | 16 | 9  |
| 354768 | 95 | 1244475 | 1244495 | 3 | 7  | 21 | CTC  | 14 | 5  |
| 354769 | 95 | 1246641 | 1246658 | 2 | 9  | 18 | AC   | 6  | 7  |
| 354770 | 95 | 1246830 | 1246865 | 2 | 18 | 36 | CA   | 16 | 8  |
| 354771 | 95 | 1247526 | 1247537 | 2 | 6  | 12 | GT   | 22 | 4  |

|        |    |         |         |   |    |    |      |    |    |
|--------|----|---------|---------|---|----|----|------|----|----|
| 354784 | 95 | 1267632 | 1267652 | 3 | 7  | 21 | CTG  | 26 | 6  |
| 354786 | 95 | 1271505 | 1271528 | 2 | 12 | 24 | GT   | 17 | 8  |
| 354792 | 95 | 1275869 | 1275884 | 2 | 8  | 16 | TG   | 14 | 10 |
| 354794 | 95 | 1286240 | 1286257 | 2 | 9  | 18 | GT   | 15 | 11 |
| 354801 | 95 | 1292967 | 1292978 | 2 | 6  | 12 | CT   | 10 | 4  |
| 354802 | 95 | 1292981 | 1292992 | 2 | 6  | 12 | CT   | 17 | 6  |
| 354805 | 95 | 1296434 | 1296451 | 3 | 6  | 18 | CAG  | 16 | 3  |
| 354808 | 95 | 1298449 | 1298468 | 2 | 10 | 20 | TG   | 20 | 12 |
| 354816 | 95 | 1317480 | 1317495 | 2 | 8  | 16 | CT   | 12 | 3  |
| 354823 | 96 | 8682    | 8697    | 2 | 8  | 16 | GT   | 29 | 5  |
| 354831 | 96 | 24072   | 24085   | 2 | 7  | 14 | CA   | 20 | 4  |
| 354834 | 96 | 25337   | 25352   | 2 | 8  | 16 | CA   | 21 | 3  |
| 354837 | 96 | 26900   | 26914   | 3 | 5  | 15 | CTG  | 20 | 3  |
| 354838 | 96 | 26934   | 26951   | 2 | 9  | 18 | TG   | 21 | 4  |
| 354839 | 96 | 28347   | 28366   | 2 | 10 | 20 | GA   | 7  | 8  |
| 354840 | 96 | 28588   | 28629   | 2 | 21 | 42 | AC   | 7  | 11 |
| 354843 | 96 | 29571   | 29585   | 3 | 5  | 15 | CAG  | 27 | 3  |
| 354844 | 96 | 31785   | 31804   | 2 | 10 | 20 | TG   | 18 | 5  |
| 354848 | 96 | 36852   | 36881   | 2 | 15 | 30 | AC   | 8  | 9  |
| 354849 | 96 | 39203   | 39216   | 2 | 7  | 14 | TG   | 33 | 4  |
| 354853 | 96 | 45266   | 45298   | 3 | 11 | 33 | AAG  | 23 | 9  |
| 354857 | 96 | 52918   | 52941   | 3 | 8  | 24 | GGA  | 18 | 6  |
| 354861 | 96 | 58075   | 58086   | 2 | 6  | 12 | GT   | 25 | 4  |
| 354864 | 96 | 61497   | 61522   | 2 | 13 | 26 | TG   | 15 | 13 |
| 354865 | 96 | 63241   | 63260   | 2 | 10 | 20 | CA   | 15 | 7  |
| 354866 | 96 | 63731   | 63752   | 2 | 11 | 22 | GT   | 9  | 5  |
| 354867 | 96 | 64276   | 64302   | 3 | 9  | 27 | CTG  | 24 | 7  |
| 354874 | 96 | 98416   | 98435   | 2 | 10 | 20 | GT   | 14 | 7  |
| 354875 | 96 | 104742  | 104769  | 4 | 7  | 28 | AGAT | 11 | 7  |
| 354878 | 96 | 112752  | 112785  | 2 | 17 | 34 | AC   | 12 | 9  |
| 354882 | 96 | 127062  | 127085  | 2 | 12 | 24 | TG   | 19 | 8  |
| 354901 | 96 | 160278  | 160297  | 2 | 10 | 20 | CA   | 20 | 10 |
| 354902 | 96 | 160420  | 160447  | 2 | 14 | 28 | GT   | 17 | 8  |
| 354903 | 96 | 160563  | 160590  | 2 | 14 | 28 | AC   | 11 | 10 |
| 354908 | 96 | 161569  | 161582  | 2 | 7  | 14 | CT   | 31 | 4  |
| 354911 | 96 | 165451  | 165466  | 2 | 8  | 16 | CA   | 15 | 14 |
| 354912 | 96 | 167324  | 167363  | 2 | 20 | 40 | GT   | 7  | 6  |
| 354913 | 96 | 167404  | 167427  | 3 | 8  | 24 | GGA  | 18 | 6  |
| 354914 | 96 | 167550  | 167573  | 2 | 12 | 24 | TG   | 7  | 10 |
| 354915 | 96 | 167770  | 167785  | 2 | 8  | 16 | AC   | 19 | 6  |
| 354917 | 96 | 171899  | 171918  | 2 | 10 | 20 | TG   | 21 | 6  |
| 354918 | 96 | 172400  | 172421  | 2 | 11 | 22 | TG   | 15 | 5  |
| 354919 | 96 | 173185  | 173218  | 2 | 17 | 34 | AC   | 13 | 13 |
| 354921 | 96 | 176347  | 176372  | 2 | 13 | 26 | AC   | 21 | 12 |
| 354929 | 96 | 202600  | 202615  | 2 | 8  | 16 | GT   | 19 | 3  |
| 354933 | 96 | 206457  | 206470  | 2 | 7  | 14 | CA   | 14 | 14 |
| 354935 | 96 | 211621  | 211644  | 2 | 12 | 24 | GT   | 20 | 7  |
| 354939 | 96 | 224353  | 224368  | 2 | 8  | 16 | AT   | 17 | 3  |
| 354941 | 96 | 225469  | 225496  | 2 | 14 | 28 | CT   | 19 | 7  |
| 354952 | 96 | 262819  | 262834  | 2 | 8  | 16 | TA   | 14 | 4  |
| 354960 | 96 | 280245  | 280268  | 2 | 12 | 24 | AC   | 17 | 7  |

|        |    |        |        |   |    |    |      |    |    |
|--------|----|--------|--------|---|----|----|------|----|----|
| 354966 | 96 | 292885 | 292908 | 2 | 12 | 24 | AC   | 16 | 15 |
| 354970 | 96 | 298249 | 298264 | 4 | 4  | 16 | TGGA | 35 | 3  |
| 354974 | 96 | 322196 | 322210 | 3 | 5  | 15 | GTT  | 32 | 4  |
| 354975 | 96 | 323070 | 323093 | 2 | 12 | 24 | GT   | 17 | 5  |
| 354977 | 96 | 330814 | 330831 | 2 | 9  | 18 | TG   | 24 | 3  |
| 354982 | 96 | 345957 | 345990 | 2 | 17 | 34 | CA   | 12 | 8  |
| 354983 | 96 | 348553 | 348564 | 2 | 6  | 12 | CA   | 19 | 5  |
| 354984 | 96 | 348569 | 348584 | 2 | 8  | 16 | CA   | 23 | 9  |
| 354986 | 96 | 353207 | 353226 | 2 | 10 | 20 | CA   | 24 | 8  |
| 354994 | 96 | 369058 | 369083 | 2 | 13 | 26 | AC   | 9  | 8  |
| 355002 | 96 | 381068 | 381105 | 2 | 19 | 38 | TG   | 8  | 7  |
| 355004 | 96 | 383242 | 383261 | 2 | 10 | 20 | GT   | 21 | 3  |
| 355006 | 96 | 389259 | 389278 | 2 | 10 | 20 | TG   | 25 | 9  |
| 355008 | 96 | 392481 | 392496 | 2 | 8  | 16 | CA   | 28 | 7  |
| 355009 | 96 | 392888 | 392899 | 2 | 6  | 12 | GT   | 23 | 4  |
| 355014 | 96 | 401351 | 401366 | 2 | 8  | 16 | TG   | 17 | 13 |
| 355015 | 96 | 401579 | 401604 | 2 | 13 | 26 | AC   | 14 | 8  |
| 355016 | 96 | 402252 | 402275 | 2 | 12 | 24 | CA   | 14 | 10 |
| 355022 | 96 | 413235 | 413246 | 2 | 6  | 12 | GT   | 6  | 5  |
| 355027 | 96 | 429702 | 429717 | 2 | 8  | 16 | GT   | 23 | 3  |
| 355028 | 96 | 429756 | 429771 | 2 | 8  | 16 | GT   | 18 | 4  |
| 355029 | 96 | 432808 | 432821 | 2 | 7  | 14 | CA   | 26 | 3  |
| 355031 | 96 | 434929 | 434948 | 2 | 10 | 20 | TG   | 22 | 12 |
| 355032 | 96 | 435719 | 435736 | 3 | 6  | 18 | CAA  | 22 | 5  |
| 355043 | 96 | 451605 | 451631 | 3 | 9  | 27 | CCT  | 22 | 6  |
| 355044 | 96 | 456472 | 456489 | 3 | 6  | 18 | TAG  | 9  | 5  |
| 355059 | 96 | 477635 | 477652 | 2 | 9  | 18 | CA   | 19 | 4  |
| 355068 | 96 | 503078 | 503095 | 2 | 9  | 18 | AC   | 11 | 4  |
| 355085 | 96 | 526081 | 526110 | 2 | 15 | 30 | AC   | 12 | 6  |
| 355088 | 96 | 527958 | 527973 | 2 | 8  | 16 | CA   | 19 | 6  |
| 355089 | 96 | 528620 | 528635 | 2 | 8  | 16 | AC   | 25 | 7  |
| 355093 | 96 | 532133 | 532156 | 2 | 12 | 24 | GT   | 6  | 8  |
| 355100 | 96 | 538643 | 538668 | 2 | 13 | 26 | CA   | 18 | 7  |
| 355101 | 96 | 539527 | 539541 | 3 | 5  | 15 | GGA  | 13 | 6  |
| 355104 | 96 | 540333 | 540356 | 3 | 8  | 24 | CTC  | 20 | 6  |
| 355105 | 96 | 541170 | 541189 | 2 | 10 | 20 | AG   | 19 | 6  |
| 355111 | 96 | 555121 | 555138 | 2 | 9  | 18 | GT   | 14 | 10 |
| 355119 | 96 | 562880 | 562899 | 2 | 10 | 20 | CA   | 6  | 6  |
| 355123 | 96 | 564270 | 564285 | 2 | 8  | 16 | CT   | 17 | 6  |
| 355125 | 96 | 567071 | 567096 | 2 | 13 | 26 | GT   | 14 | 9  |
| 355126 | 96 | 570201 | 570222 | 2 | 11 | 22 | CA   | 18 | 3  |
| 355128 | 96 | 573852 | 573879 | 2 | 14 | 28 | TG   | 14 | 10 |
| 355136 | 96 | 582571 | 582606 | 2 | 18 | 36 | AG   | 12 | 7  |
| 355140 | 96 | 587429 | 587442 | 2 | 7  | 14 | CA   | 27 | 3  |
| 355143 | 96 | 589249 | 589276 | 4 | 7  | 28 | ACAT | 12 | 6  |
| 355144 | 96 | 594122 | 594135 | 2 | 7  | 14 | GT   | 20 | 5  |
| 355145 | 96 | 594139 | 594150 | 2 | 6  | 12 | TG   | 18 | 6  |
| 355148 | 96 | 598749 | 598760 | 2 | 6  | 12 | CT   | 24 | 3  |
| 355150 | 96 | 599242 | 599263 | 2 | 11 | 22 | GT   | 16 | 11 |
| 355159 | 96 | 612703 | 612722 | 4 | 5  | 20 | ATTC | 11 | 3  |
| 355160 | 96 | 614454 | 614469 | 4 | 4  | 16 | TTTG | 16 | 5  |

|        |    |        |        |   |    |    |      |    |    |
|--------|----|--------|--------|---|----|----|------|----|----|
| 355168 | 96 | 624685 | 624696 | 2 | 6  | 12 | CT   | 28 | 4  |
| 355175 | 96 | 626665 | 626678 | 2 | 7  | 14 | TG   | 31 | 3  |
| 355179 | 96 | 635326 | 635349 | 4 | 6  | 24 | ATCT | 21 | 5  |
| 355187 | 96 | 648926 | 648941 | 2 | 8  | 16 | CA   | 30 | 11 |
| 355188 | 96 | 653282 | 653323 | 2 | 21 | 42 | AC   | 11 | 14 |
| 355195 | 96 | 665031 | 665044 | 2 | 7  | 14 | AC   | 28 | 6  |
| 355196 | 96 | 665046 | 665059 | 2 | 7  | 14 | CA   | 22 | 5  |
| 355201 | 96 | 669519 | 669536 | 2 | 9  | 18 | GT   | 9  | 6  |
| 355207 | 96 | 697303 | 697326 | 3 | 8  | 24 | AAC  | 20 | 10 |
| 355214 | 96 | 710116 | 710133 | 3 | 6  | 18 | TAT  | 20 | 3  |
| 355215 | 96 | 713107 | 713126 | 4 | 5  | 20 | ATTT | 18 | 4  |
| 355218 | 96 | 730256 | 730271 | 4 | 4  | 16 | ATAA | 24 | 4  |
| 355221 | 96 | 746891 | 746916 | 2 | 13 | 26 | CA   | 18 | 7  |
| 355225 | 96 | 752499 | 752522 | 2 | 12 | 24 | GT   | 16 | 10 |
| 355232 | 96 | 758806 | 758835 | 2 | 15 | 30 | AC   | 9  | 6  |
| 355234 | 96 | 761593 | 761608 | 4 | 4  | 16 | TATG | 14 | 4  |
| 355235 | 96 | 762928 | 762960 | 3 | 11 | 33 | CCT  | 23 | 5  |
| 355238 | 96 | 763473 | 763486 | 2 | 7  | 14 | TG   | 23 | 3  |
| 355239 | 96 | 766229 | 766270 | 3 | 14 | 42 | ATT  | 7  | 6  |
| 355240 | 96 | 766831 | 766856 | 2 | 13 | 26 | CA   | 10 | 7  |
| 355241 | 96 | 766906 | 766925 | 2 | 10 | 20 | AC   | 15 | 5  |
| 355242 | 96 | 767024 | 767041 | 2 | 9  | 18 | GT   | 25 | 3  |
| 355243 | 96 | 767143 | 767180 | 2 | 19 | 38 | GT   | 10 | 8  |
| 355250 | 96 | 775286 | 775307 | 2 | 11 | 22 | GT   | 14 | 7  |
| 355251 | 96 | 775891 | 775905 | 3 | 5  | 15 | CAT  | 24 | 3  |
| 355252 | 96 | 778462 | 778479 | 3 | 6  | 18 | GCA  | 18 | 5  |
| 355254 | 96 | 782749 | 782764 | 2 | 8  | 16 | AC   | 19 | 7  |
| 355258 | 96 | 786236 | 786255 | 2 | 10 | 20 | AC   | 22 | 5  |
| 355259 | 96 | 786569 | 786600 | 2 | 16 | 32 | GT   | 15 | 12 |
| 355261 | 96 | 787545 | 787566 | 2 | 11 | 22 | TG   | 23 | 12 |
| 355263 | 96 | 789927 | 789944 | 2 | 9  | 18 | GT   | 24 | 7  |
| 355277 | 96 | 819596 | 819611 | 2 | 8  | 16 | TG   | 18 | 18 |
| 355278 | 96 | 821905 | 821926 | 2 | 11 | 22 | CT   | 10 | 9  |
| 355280 | 96 | 822233 | 822250 | 2 | 9  | 18 | CA   | 10 | 13 |
| 355285 | 96 | 844378 | 844397 | 2 | 10 | 20 | TG   | 12 | 6  |
| 355293 | 96 | 855712 | 855731 | 2 | 10 | 20 | TG   | 7  | 6  |
| 355294 | 96 | 856989 | 857014 | 2 | 13 | 26 | TG   | 12 | 8  |
| 355299 | 96 | 871272 | 871295 | 4 | 6  | 24 | AAAC | 8  | 5  |
| 355300 | 96 | 872175 | 872208 | 2 | 17 | 34 | CA   | 23 | 11 |
| 355309 | 96 | 888771 | 888794 | 2 | 12 | 24 | CA   | 6  | 10 |
| 355311 | 96 | 888966 | 888991 | 2 | 13 | 26 | CA   | 19 | 8  |
| 355332 | 96 | 927283 | 927310 | 2 | 14 | 28 | AC   | 6  | 6  |
| 355335 | 96 | 927664 | 927679 | 4 | 4  | 16 | GGAG | 18 | 3  |
| 355342 | 96 | 933728 | 933745 | 2 | 9  | 18 | AC   | 21 | 11 |
| 355343 | 96 | 935189 | 935202 | 2 | 7  | 14 | TG   | 25 | 7  |
| 355347 | 96 | 940801 | 940826 | 2 | 13 | 26 | CA   | 7  | 8  |
| 355349 | 96 | 942411 | 942436 | 2 | 13 | 26 | GT   | 14 | 15 |
| 355350 | 96 | 942780 | 942797 | 2 | 9  | 18 | TG   | 12 | 8  |
| 355354 | 96 | 953958 | 953975 | 2 | 9  | 18 | AC   | 18 | 7  |
| 355360 | 96 | 963859 | 963872 | 2 | 7  | 14 | CA   | 6  | 3  |
| 355363 | 96 | 965547 | 965567 | 3 | 7  | 21 | ATC  | 13 | 6  |

|        |    |         |         |   |    |    |      |    |    |
|--------|----|---------|---------|---|----|----|------|----|----|
| 355364 | 96 | 966551  | 966566  | 4 | 4  | 16 | TTCC | 22 | 7  |
| 355365 | 96 | 966789  | 966804  | 4 | 4  | 16 | AAAG | 30 | 12 |
| 355366 | 96 | 967955  | 967970  | 2 | 8  | 16 | CA   | 16 | 5  |
| 355367 | 96 | 967972  | 967983  | 2 | 6  | 12 | AC   | 19 | 4  |
| 355368 | 96 | 968084  | 968107  | 2 | 12 | 24 | CA   | 23 | 6  |
| 355369 | 96 | 968452  | 968463  | 2 | 6  | 12 | GT   | 16 | 4  |
| 355371 | 96 | 968591  | 968612  | 2 | 11 | 22 | AC   | 7  | 9  |
| 355376 | 96 | 980661  | 980672  | 2 | 6  | 12 | CA   | 22 | 11 |
| 355379 | 96 | 984121  | 984148  | 2 | 14 | 28 | AC   | 10 | 7  |
| 355385 | 96 | 990039  | 990056  | 2 | 9  | 18 | GT   | 18 | 3  |
| 355388 | 96 | 993980  | 994011  | 2 | 16 | 32 | AC   | 16 | 11 |
| 355392 | 96 | 997296  | 997319  | 2 | 12 | 24 | AC   | 19 | 8  |
| 355393 | 96 | 997365  | 997376  | 2 | 6  | 12 | CA   | 24 | 5  |
| 355394 | 96 | 998776  | 998797  | 2 | 11 | 22 | TG   | 20 | 5  |
| 355399 | 96 | 1002863 | 1002882 | 2 | 10 | 20 | AC   | 16 | 12 |
| 355401 | 96 | 1004720 | 1004731 | 2 | 6  | 12 | CA   | 23 | 3  |
| 355416 | 96 | 1011593 | 1011610 | 2 | 9  | 18 | GT   | 22 | 8  |
| 355425 | 96 | 1023280 | 1023305 | 2 | 13 | 26 | GT   | 22 | 6  |
| 355432 | 96 | 1029988 | 1029999 | 2 | 6  | 12 | GT   | 6  | 5  |
| 355440 | 96 | 1045649 | 1045664 | 2 | 8  | 16 | TG   | 25 | 8  |
| 355443 | 96 | 1051506 | 1051521 | 2 | 8  | 16 | GA   | 22 | 5  |
| 355447 | 96 | 1056698 | 1056709 | 2 | 6  | 12 | AC   | 25 | 3  |
| 355455 | 96 | 1069004 | 1069019 | 4 | 4  | 16 | TATT | 23 | 3  |
| 355460 | 96 | 1076425 | 1076446 | 2 | 11 | 22 | AC   | 19 | 12 |
| 355468 | 96 | 1086943 | 1086958 | 2 | 8  | 16 | CT   | 22 | 4  |
| 355469 | 96 | 1086960 | 1086973 | 2 | 7  | 14 | TC   | 14 | 3  |
| 355470 | 96 | 1087227 | 1087248 | 2 | 11 | 22 | CA   | 16 | 11 |
| 355488 | 96 | 1115461 | 1115478 | 2 | 9  | 18 | CA   | 7  | 6  |
| 355490 | 96 | 1118074 | 1118095 | 2 | 11 | 22 | TG   | 17 | 6  |
| 355493 | 96 | 1124711 | 1124740 | 2 | 15 | 30 | TG   | 9  | 7  |
| 355494 | 96 | 1125300 | 1125331 | 4 | 8  | 32 | AGAA | 20 | 13 |
| 355497 | 96 | 1129082 | 1129103 | 2 | 11 | 22 | CA   | 21 | 12 |
| 355498 | 96 | 1129264 | 1129287 | 2 | 12 | 24 | CA   | 23 | 7  |
| 355519 | 96 | 1164180 | 1164191 | 2 | 6  | 12 | AT   | 23 | 8  |
| 355530 | 96 | 1175379 | 1175396 | 2 | 9  | 18 | AC   | 11 | 5  |
| 355532 | 96 | 1177144 | 1177159 | 2 | 8  | 16 | AC   | 19 | 6  |
| 355540 | 96 | 1193553 | 1193584 | 4 | 8  | 32 | TATT | 23 | 9  |
| 355544 | 96 | 1202649 | 1202660 | 2 | 6  | 12 | AT   | 17 | 9  |
| 355549 | 96 | 1216583 | 1216602 | 4 | 5  | 20 | AAAC | 24 | 3  |
| 355552 | 96 | 1219141 | 1219166 | 2 | 13 | 26 | GT   | 18 | 10 |
| 355555 | 96 | 1224023 | 1224058 | 4 | 9  | 36 | TTTG | 10 | 10 |
| 355570 | 96 | 1242973 | 1243000 | 2 | 14 | 28 | AC   | 21 | 10 |
| 355573 | 96 | 1246335 | 1246349 | 3 | 5  | 15 | GGC  | 19 | 4  |
| 355578 | 96 | 1257723 | 1257736 | 2 | 7  | 14 | AC   | 25 | 8  |
| 355579 | 96 | 1258132 | 1258167 | 2 | 18 | 36 | GT   | 10 | 11 |
| 355585 | 96 | 1268622 | 1268635 | 2 | 7  | 14 | AT   | 8  | 4  |
| 355587 | 96 | 1280457 | 1280474 | 2 | 9  | 18 | AC   | 13 | 8  |
| 355592 | 96 | 1299408 | 1299427 | 4 | 5  | 20 | ATAA | 21 | 4  |
| 355601 | 96 | 1319562 | 1319585 | 4 | 6  | 24 | TAGA | 19 | 7  |
| 355608 | 97 | 12223   | 12250   | 2 | 14 | 28 | GT   | 11 | 9  |
| 355613 | 97 | 14000   | 14029   | 2 | 15 | 30 | TG   | 16 | 10 |



|        |    |        |        |   |    |    |     |    |    |
|--------|----|--------|--------|---|----|----|-----|----|----|
| 355614 | 97 | 14092  | 14127  | 3 | 12 | 36 | CAT | 16 | 8  |
| 355615 | 97 | 14275  | 14298  | 2 | 12 | 24 | GT  | 11 | 4  |
| 355616 | 97 | 16700  | 16715  | 2 | 8  | 16 | TG  | 16 | 7  |
| 355618 | 97 | 17939  | 17976  | 2 | 19 | 38 | GT  | 19 | 18 |
| 355620 | 97 | 19884  | 19901  | 2 | 9  | 18 | TG  | 16 | 5  |
| 355621 | 97 | 21300  | 21313  | 2 | 7  | 14 | GT  | 17 | 12 |
| 355622 | 97 | 22970  | 22985  | 2 | 8  | 16 | AG  | 27 | 5  |
| 355623 | 97 | 24881  | 24904  | 2 | 12 | 24 | CA  | 15 | 14 |
| 355624 | 97 | 25025  | 25056  | 2 | 16 | 32 | CA  | 13 | 10 |
| 355625 | 97 | 27040  | 27054  | 3 | 5  | 15 | TTG | 26 | 3  |
| 355626 | 97 | 27321  | 27352  | 2 | 16 | 32 | TG  | 21 | 12 |
| 355629 | 97 | 30984  | 31009  | 2 | 13 | 26 | CA  | 19 | 9  |
| 355630 | 97 | 31176  | 31189  | 2 | 7  | 14 | TG  | 31 | 6  |
| 355632 | 97 | 42138  | 42153  | 2 | 8  | 16 | TG  | 18 | 4  |
| 355633 | 97 | 43823  | 43838  | 2 | 8  | 16 | TC  | 15 | 5  |
| 355635 | 97 | 43939  | 43976  | 2 | 19 | 38 | TG  | 17 | 11 |
| 355636 | 97 | 44743  | 44756  | 2 | 7  | 14 | CA  | 16 | 4  |
| 355638 | 97 | 48698  | 48718  | 3 | 7  | 21 | TTG | 23 | 11 |
| 355645 | 97 | 57425  | 57438  | 2 | 7  | 14 | TC  | 19 | 4  |
| 355657 | 97 | 65244  | 65270  | 3 | 9  | 27 | ACA | 24 | 7  |
| 355658 | 97 | 65442  | 65477  | 2 | 18 | 36 | CA  | 8  | 7  |
| 355661 | 97 | 70695  | 70712  | 2 | 9  | 18 | CA  | 12 | 9  |
| 355662 | 97 | 70975  | 70992  | 2 | 9  | 18 | CA  | 13 | 10 |
| 355663 | 97 | 70993  | 71004  | 2 | 6  | 12 | TA  | 16 | 14 |
| 355664 | 97 | 78698  | 78737  | 2 | 20 | 40 | TG  | 9  | 9  |
| 355666 | 97 | 83992  | 84019  | 2 | 14 | 28 | CA  | 6  | 9  |
| 355668 | 97 | 88522  | 88545  | 2 | 12 | 24 | CA  | 17 | 7  |
| 355669 | 97 | 88681  | 88702  | 2 | 11 | 22 | GA  | 16 | 6  |
| 355674 | 97 | 89753  | 89778  | 2 | 13 | 26 | GT  | 8  | 9  |
| 355675 | 97 | 93220  | 93233  | 2 | 7  | 14 | AC  | 23 | 7  |
| 355676 | 97 | 93393  | 93422  | 2 | 15 | 30 | TG  | 18 | 10 |
| 355677 | 97 | 93667  | 93693  | 3 | 9  | 27 | GGA | 23 | 5  |
| 355678 | 97 | 93741  | 93754  | 2 | 7  | 14 | GA  | 23 | 5  |
| 355682 | 97 | 96632  | 96649  | 2 | 9  | 18 | AG  | 22 | 11 |
| 355683 | 97 | 96941  | 96956  | 2 | 8  | 16 | TG  | 15 | 5  |
| 355684 | 97 | 98438  | 98453  | 2 | 8  | 16 | CA  | 25 | 8  |
| 355685 | 97 | 99410  | 99431  | 2 | 11 | 22 | GA  | 25 | 4  |
| 355687 | 97 | 103447 | 103466 | 2 | 10 | 20 | TG  | 23 | 8  |
| 355690 | 97 | 108313 | 108342 | 2 | 15 | 30 | AC  | 7  | 10 |
| 355691 | 97 | 108522 | 108545 | 2 | 12 | 24 | TG  | 16 | 12 |
| 355692 | 97 | 108759 | 108784 | 2 | 13 | 26 | AC  | 11 | 12 |
| 355696 | 97 | 114593 | 114624 | 2 | 16 | 32 | CA  | 11 | 9  |
| 355698 | 97 | 116164 | 116177 | 2 | 7  | 14 | GT  | 24 | 4  |
| 355702 | 97 | 122950 | 122961 | 2 | 6  | 12 | GA  | 15 | 5  |
| 355706 | 97 | 136620 | 136635 | 2 | 8  | 16 | CA  | 20 | 3  |
| 355708 | 97 | 138285 | 138314 | 3 | 10 | 30 | GGA | 27 | 5  |
| 355711 | 97 | 143976 | 143995 | 2 | 10 | 20 | TG  | 14 | 6  |
| 355713 | 97 | 149603 | 149620 | 3 | 6  | 18 | CCG | 19 | 11 |
| 355715 | 97 | 153627 | 153653 | 3 | 9  | 27 | AAT | 18 | 5  |
| 355716 | 97 | 154893 | 154908 | 2 | 8  | 16 | GT  | 17 | 8  |
| 355717 | 97 | 154910 | 154923 | 2 | 7  | 14 | TG  | 18 | 10 |

|        |    |        |        |   |    |    |      |    |    |
|--------|----|--------|--------|---|----|----|------|----|----|
| 355718 | 97 | 157066 | 157085 | 2 | 10 | 20 | GA   | 16 | 5  |
| 355720 | 97 | 159350 | 159364 | 3 | 5  | 15 | GCT  | 20 | 3  |
| 355729 | 97 | 178321 | 178344 | 2 | 12 | 24 | TG   | 19 | 10 |
| 355731 | 97 | 179410 | 179427 | 2 | 9  | 18 | AC   | 22 | 15 |
| 355734 | 97 | 187744 | 187758 | 3 | 5  | 15 | CTG  | 27 | 5  |
| 355735 | 97 | 188174 | 188187 | 2 | 7  | 14 | AT   | 10 | 4  |
| 355736 | 97 | 188895 | 188908 | 2 | 7  | 14 | AT   | 18 | 9  |
| 355741 | 97 | 195374 | 195385 | 2 | 6  | 12 | CA   | 21 | 12 |
| 355748 | 97 | 216177 | 216191 | 3 | 5  | 15 | GAG  | 23 | 4  |
| 355750 | 97 | 216654 | 216668 | 3 | 5  | 15 | AGC  | 10 | 3  |
| 355751 | 97 | 219006 | 219021 | 2 | 8  | 16 | GT   | 17 | 8  |
| 355755 | 97 | 229631 | 229646 | 2 | 8  | 16 | AC   | 29 | 6  |
| 355760 | 97 | 232459 | 232476 | 3 | 6  | 18 | GCA  | 26 | 12 |
| 355762 | 97 | 233580 | 233593 | 2 | 7  | 14 | AG   | 17 | 4  |
| 355763 | 97 | 234444 | 234458 | 3 | 5  | 15 | GCG  | 27 | 8  |
| 355768 | 97 | 240381 | 240392 | 2 | 6  | 12 | CA   | 37 | 3  |
| 355770 | 97 | 243606 | 243641 | 2 | 18 | 36 | TG   | 17 | 12 |
| 355771 | 97 | 250676 | 250687 | 2 | 6  | 12 | CA   | 26 | 7  |
| 355772 | 97 | 250689 | 250706 | 2 | 9  | 18 | AC   | 19 | 8  |
| 355773 | 97 | 251667 | 251688 | 2 | 11 | 22 | AG   | 17 | 4  |
| 355774 | 97 | 251858 | 251885 | 2 | 14 | 28 | AC   | 6  | 6  |
| 355779 | 97 | 255830 | 255849 | 2 | 10 | 20 | AC   | 14 | 6  |
| 355780 | 97 | 256095 | 256118 | 2 | 12 | 24 | AC   | 17 | 8  |
| 355788 | 97 | 260413 | 260450 | 2 | 19 | 38 | AC   | 9  | 8  |
| 355791 | 97 | 264010 | 264033 | 4 | 6  | 24 | CAGG | 29 | 8  |
| 355793 | 97 | 266360 | 266375 | 2 | 8  | 16 | GT   | 12 | 12 |
| 355795 | 97 | 266578 | 266593 | 2 | 8  | 16 | CA   | 27 | 3  |
| 355797 | 97 | 271720 | 271745 | 2 | 13 | 26 | GA   | 15 | 7  |
| 355803 | 97 | 275551 | 275566 | 2 | 8  | 16 | GT   | 21 | 12 |
| 355804 | 97 | 276658 | 276669 | 2 | 6  | 12 | TG   | 32 | 3  |
| 355816 | 97 | 285063 | 285078 | 2 | 8  | 16 | AG   | 20 | 6  |
| 355818 | 97 | 285280 | 285293 | 2 | 7  | 14 | TG   | 19 | 7  |
| 355820 | 97 | 290545 | 290574 | 2 | 15 | 30 | TG   | 19 | 8  |
| 355821 | 97 | 291040 | 291069 | 2 | 15 | 30 | CA   | 15 | 11 |
| 355824 | 97 | 296539 | 296556 | 2 | 9  | 18 | TC   | 22 | 6  |
| 355826 | 97 | 297034 | 297051 | 2 | 9  | 18 | AG   | 20 | 6  |
| 355827 | 97 | 297126 | 297146 | 3 | 7  | 21 | TTC  | 18 | 3  |
| 355829 | 97 | 300885 | 300904 | 2 | 10 | 20 | TG   | 23 | 3  |
| 355843 | 97 | 322068 | 322079 | 2 | 6  | 12 | CA   | 30 | 3  |
| 355844 | 97 | 323087 | 323108 | 2 | 11 | 22 | GT   | 17 | 7  |
| 355853 | 97 | 333324 | 333344 | 3 | 7  | 21 | CCT  | 11 | 5  |
| 355854 | 97 | 333495 | 333510 | 2 | 8  | 16 | GT   | 16 | 5  |
| 355855 | 97 | 342231 | 342246 | 2 | 8  | 16 | GT   | 19 | 6  |
| 355856 | 97 | 342822 | 342836 | 3 | 5  | 15 | GCA  | 31 | 4  |
| 355859 | 97 | 348559 | 348594 | 3 | 12 | 36 | GAG  | 22 | 12 |
| 355863 | 97 | 350197 | 350217 | 3 | 7  | 21 | TGT  | 24 | 7  |
| 355869 | 97 | 356195 | 356212 | 3 | 6  | 18 | GGA  | 15 | 7  |
| 355871 | 97 | 359296 | 359322 | 3 | 9  | 27 | CCT  | 18 | 5  |
| 355872 | 97 | 360531 | 360560 | 2 | 15 | 30 | GT   | 11 | 6  |
| 355875 | 97 | 361100 | 361133 | 2 | 17 | 34 | TG   | 23 | 9  |
| 355876 | 97 | 361208 | 361223 | 2 | 8  | 16 | GT   | 21 | 7  |

|        |    |        |        |   |    |    |      |    |    |
|--------|----|--------|--------|---|----|----|------|----|----|
| 355877 | 97 | 361853 | 361868 | 2 | 8  | 16 | GT   | 14 | 6  |
| 355878 | 97 | 362210 | 362221 | 2 | 6  | 12 | CA   | 17 | 3  |
| 355879 | 97 | 364439 | 364468 | 2 | 15 | 30 | CA   | 19 | 12 |
| 355883 | 97 | 369260 | 369287 | 2 | 14 | 28 | GT   | 18 | 9  |
| 355885 | 97 | 370530 | 370556 | 3 | 9  | 27 | TCC  | 16 | 4  |
| 355886 | 97 | 370692 | 370709 | 3 | 6  | 18 | TGT  | 22 | 6  |
| 355887 | 97 | 370961 | 370984 | 2 | 12 | 24 | AC   | 24 | 8  |
| 355888 | 97 | 371027 | 371048 | 2 | 11 | 22 | CA   | 11 | 8  |
| 355896 | 97 | 376074 | 376097 | 4 | 6  | 24 | TTTG | 14 | 3  |
| 355897 | 97 | 377363 | 377386 | 2 | 12 | 24 | GT   | 25 | 8  |
| 355899 | 97 | 379601 | 379628 | 2 | 14 | 28 | AC   | 22 | 6  |
| 355903 | 97 | 390040 | 390051 | 2 | 6  | 12 | GA   | 30 | 3  |
| 355907 | 97 | 394958 | 394978 | 3 | 7  | 21 | AGG  | 13 | 4  |
| 355909 | 97 | 396615 | 396628 | 2 | 7  | 14 | AT   | 22 | 7  |
| 355911 | 97 | 410788 | 410814 | 3 | 9  | 27 | GGA  | 21 | 7  |
| 355914 | 97 | 419696 | 419752 | 3 | 19 | 57 | TTC  | 15 | 13 |
| 355915 | 97 | 420123 | 420144 | 2 | 11 | 22 | TG   | 15 | 13 |
| 355917 | 97 | 420457 | 420470 | 2 | 7  | 14 | TG   | 17 | 7  |
| 355918 | 97 | 420473 | 420484 | 2 | 6  | 12 | TG   | 16 | 6  |
| 355919 | 97 | 421915 | 421936 | 2 | 11 | 22 | AC   | 16 | 7  |
| 355921 | 97 | 422034 | 422061 | 2 | 14 | 28 | CA   | 22 | 12 |
| 355924 | 97 | 433824 | 433838 | 3 | 5  | 15 | TAT  | 25 | 7  |
| 355925 | 97 | 433955 | 433966 | 2 | 6  | 12 | TG   | 17 | 3  |
| 355929 | 97 | 434921 | 434946 | 2 | 13 | 26 | GT   | 11 | 10 |
| 355930 | 97 | 436689 | 436708 | 2 | 10 | 20 | AC   | 20 | 6  |
| 355934 | 97 | 445390 | 445403 | 2 | 7  | 14 | GT   | 8  | 4  |
| 355935 | 97 | 445404 | 445417 | 2 | 7  | 14 | GA   | 18 | 11 |
| 355938 | 97 | 448199 | 448236 | 2 | 19 | 38 | GT   | 12 | 12 |
| 355939 | 97 | 451038 | 451061 | 2 | 12 | 24 | TG   | 12 | 11 |
| 355943 | 97 | 452491 | 452520 | 3 | 10 | 30 | GCT  | 30 | 10 |
| 355949 | 97 | 457729 | 457749 | 3 | 7  | 21 | CAT  | 18 | 4  |
| 355950 | 97 | 458233 | 458268 | 3 | 12 | 36 | TCC  | 8  | 6  |
| 355952 | 97 | 461576 | 461602 | 3 | 9  | 27 | TGA  | 16 | 11 |
| 355955 | 97 | 465150 | 465173 | 3 | 8  | 24 | TCC  | 19 | 3  |
| 355961 | 97 | 468407 | 468424 | 2 | 9  | 18 | TC   | 19 | 5  |
| 355967 | 97 | 473811 | 473826 | 4 | 4  | 16 | TTTG | 14 | 8  |
| 355968 | 97 | 474251 | 474274 | 2 | 12 | 24 | AC   | 11 | 15 |
| 355969 | 97 | 474480 | 474491 | 2 | 6  | 12 | GT   | 20 | 3  |
| 355971 | 97 | 477680 | 477693 | 2 | 7  | 14 | AC   | 18 | 5  |
| 355973 | 97 | 483360 | 483371 | 2 | 6  | 12 | GT   | 28 | 4  |
| 355974 | 97 | 483408 | 483421 | 2 | 7  | 14 | GT   | 7  | 3  |
| 355979 | 97 | 508250 | 508282 | 3 | 11 | 33 | GAG  | 22 | 5  |
| 355980 | 97 | 510349 | 510382 | 2 | 17 | 34 | AC   | 15 | 10 |
| 355981 | 97 | 510453 | 510474 | 2 | 11 | 22 | GT   | 9  | 8  |
| 355982 | 97 | 511719 | 511742 | 3 | 8  | 24 | GAA  | 17 | 4  |
| 355983 | 97 | 511824 | 511847 | 3 | 8  | 24 | TCC  | 33 | 3  |
| 355993 | 97 | 524716 | 524733 | 2 | 9  | 18 | TC   | 20 | 4  |
| 355995 | 97 | 526458 | 526485 | 2 | 14 | 28 | GT   | 21 | 6  |
| 355996 | 97 | 531603 | 531624 | 2 | 11 | 22 | CA   | 25 | 8  |
| 355997 | 97 | 532796 | 532819 | 2 | 12 | 24 | TG   | 20 | 12 |
| 355998 | 97 | 533703 | 533724 | 2 | 11 | 22 | GT   | 23 | 8  |

|        |    |        |        |   |    |    |      |    |    |
|--------|----|--------|--------|---|----|----|------|----|----|
| 355999 | 97 | 537614 | 537637 | 4 | 6  | 24 | GAAA | 9  | 4  |
| 356003 | 97 | 544479 | 544508 | 2 | 15 | 30 | AC   | 20 | 13 |
| 356004 | 97 | 547891 | 547929 | 3 | 13 | 39 | AGG  | 19 | 7  |
| 356005 | 97 | 548409 | 548430 | 2 | 11 | 22 | CA   | 13 | 8  |
| 356009 | 97 | 563150 | 563171 | 2 | 11 | 22 | CA   | 28 | 8  |
| 356016 | 97 | 581772 | 581787 | 4 | 4  | 16 | GTCT | 29 | 3  |
| 356019 | 97 | 601762 | 601782 | 3 | 7  | 21 | GCA  | 26 | 8  |
| 356021 | 97 | 603418 | 603433 | 2 | 8  | 16 | AC   | 16 | 5  |
| 356022 | 97 | 603647 | 603666 | 2 | 10 | 20 | AC   | 23 | 10 |
| 356025 | 97 | 604316 | 604351 | 3 | 12 | 36 | CTG  | 25 | 10 |
| 356028 | 97 | 606303 | 606326 | 2 | 12 | 24 | TG   | 13 | 12 |
| 356031 | 97 | 611399 | 611416 | 3 | 6  | 18 | GAG  | 24 | 6  |
| 356032 | 97 | 611420 | 611434 | 3 | 5  | 15 | GAG  | 25 | 4  |
| 356034 | 97 | 613011 | 613022 | 2 | 6  | 12 | CA   | 34 | 4  |
| 356035 | 97 | 613705 | 613736 | 2 | 16 | 32 | AC   | 19 | 11 |
| 356043 | 97 | 628968 | 628985 | 2 | 9  | 18 | TG   | 31 | 3  |
| 356045 | 97 | 633266 | 633289 | 4 | 6  | 24 | TTTG | 27 | 8  |
| 356050 | 97 | 639769 | 639783 | 3 | 5  | 15 | TAT  | 27 | 4  |
| 356051 | 97 | 639828 | 639857 | 3 | 10 | 30 | CAG  | 17 | 6  |
| 356053 | 97 | 640198 | 640218 | 3 | 7  | 21 | CTC  | 9  | 4  |
| 356054 | 97 | 640598 | 640609 | 2 | 6  | 12 | CA   | 28 | 5  |
| 356055 | 97 | 651561 | 651593 | 3 | 11 | 33 | GCA  | 26 | 9  |
| 356061 | 97 | 685763 | 685774 | 2 | 6  | 12 | TG   | 27 | 3  |
| 356062 | 97 | 690374 | 690385 | 2 | 6  | 12 | AC   | 19 | 4  |
| 356064 | 97 | 691526 | 691549 | 3 | 8  | 24 | AAT  | 28 | 5  |
| 356071 | 97 | 699575 | 699596 | 2 | 11 | 22 | AC   | 22 | 6  |
| 356072 | 97 | 699782 | 699805 | 2 | 12 | 24 | AC   | 21 | 12 |
| 356076 | 97 | 714969 | 714992 | 2 | 12 | 24 | TG   | 13 | 14 |
| 356077 | 97 | 717123 | 717144 | 2 | 11 | 22 | AC   | 19 | 8  |
| 356078 | 97 | 717612 | 717626 | 3 | 5  | 15 | AGA  | 35 | 3  |
| 356081 | 97 | 722369 | 722400 | 2 | 16 | 32 | AC   | 10 | 8  |
| 356082 | 97 | 723549 | 723569 | 3 | 7  | 21 | ATG  | 17 | 3  |
| 356111 | 97 | 782127 | 782150 | 2 | 12 | 24 | GA   | 16 | 6  |
| 356120 | 97 | 794568 | 794581 | 2 | 7  | 14 | GA   | 31 | 3  |
| 356126 | 97 | 808330 | 808341 | 2 | 6  | 12 | AC   | 22 | 3  |
| 356137 | 97 | 823514 | 823543 | 2 | 15 | 30 | TG   | 8  | 9  |
| 356139 | 97 | 823582 | 823603 | 2 | 11 | 22 | AG   | 15 | 5  |
| 356145 | 97 | 834784 | 834813 | 2 | 15 | 30 | CA   | 14 | 16 |
| 356150 | 97 | 847376 | 847401 | 2 | 13 | 26 | TG   | 18 | 8  |
| 356152 | 97 | 852328 | 852353 | 2 | 13 | 26 | AC   | 17 | 11 |
| 356154 | 97 | 855880 | 855897 | 3 | 6  | 18 | TAC  | 18 | 3  |
| 356158 | 97 | 874088 | 874101 | 2 | 7  | 14 | TG   | 23 | 4  |
| 356163 | 97 | 885056 | 885093 | 2 | 19 | 38 | AC   | 9  | 11 |
| 356168 | 97 | 896105 | 896116 | 2 | 6  | 12 | TA   | 15 | 10 |
| 356172 | 97 | 902234 | 902249 | 2 | 8  | 16 | TG   | 25 | 4  |
| 356173 | 97 | 905766 | 905779 | 2 | 7  | 14 | CA   | 22 | 3  |
| 356175 | 97 | 910417 | 910436 | 2 | 10 | 20 | GT   | 13 | 7  |
| 356179 | 97 | 914474 | 914493 | 4 | 5  | 20 | ATTT | 6  | 7  |
| 356189 | 97 | 930956 | 930989 | 2 | 17 | 34 | AC   | 12 | 8  |
| 356190 | 97 | 931054 | 931069 | 2 | 8  | 16 | GT   | 8  | 3  |
| 356195 | 97 | 939713 | 939732 | 2 | 10 | 20 | TG   | 17 | 6  |

|        |    |         |         |   |    |    |      |    |    |
|--------|----|---------|---------|---|----|----|------|----|----|
| 356196 | 97 | 940286  | 940317  | 2 | 16 | 32 | CA   | 14 | 10 |
| 356198 | 97 | 941228  | 941243  | 2 | 8  | 16 | CT   | 21 | 4  |
| 356206 | 97 | 958026  | 958069  | 2 | 22 | 44 | CA   | 7  | 9  |
| 356209 | 97 | 961829  | 961852  | 2 | 12 | 24 | CA   | 16 | 11 |
| 356210 | 97 | 961948  | 961969  | 2 | 11 | 22 | CA   | 14 | 7  |
| 356227 | 97 | 1026961 | 1026975 | 3 | 5  | 15 | TTG  | 19 | 3  |
| 356231 | 97 | 1034339 | 1034356 | 2 | 9  | 18 | AC   | 15 | 6  |
| 356232 | 97 | 1034358 | 1034369 | 2 | 6  | 12 | CA   | 16 | 7  |
| 356234 | 97 | 1037264 | 1037283 | 2 | 10 | 20 | AC   | 21 | 3  |
| 356235 | 97 | 1037598 | 1037631 | 2 | 17 | 34 | GT   | 9  | 8  |
| 356236 | 97 | 1040068 | 1040079 | 2 | 6  | 12 | CT   | 20 | 3  |
| 356242 | 97 | 1051099 | 1051134 | 2 | 18 | 36 | TG   | 12 | 9  |
| 356245 | 97 | 1061198 | 1061221 | 4 | 6  | 24 | CTTT | 28 | 3  |
| 356247 | 97 | 1065229 | 1065240 | 2 | 6  | 12 | CA   | 26 | 4  |
| 356248 | 97 | 1065242 | 1065255 | 2 | 7  | 14 | AC   | 28 | 4  |
| 356250 | 97 | 1067090 | 1067103 | 2 | 7  | 14 | TG   | 30 | 4  |
| 356252 | 97 | 1069701 | 1069721 | 3 | 7  | 21 | GAA  | 21 | 3  |
| 356267 | 97 | 1087605 | 1087638 | 2 | 17 | 34 | CA   | 9  | 5  |
| 356277 | 97 | 1105309 | 1105332 | 2 | 12 | 24 | TG   | 16 | 7  |
| 356279 | 97 | 1110391 | 1110406 | 2 | 8  | 16 | TC   | 29 | 3  |
| 356289 | 97 | 1124211 | 1124236 | 2 | 13 | 26 | TG   | 12 | 12 |
| 356297 | 97 | 1139172 | 1139193 | 2 | 11 | 22 | GT   | 10 | 6  |
| 356302 | 97 | 1139467 | 1139492 | 2 | 13 | 26 | AC   | 17 | 6  |
| 356305 | 97 | 1139832 | 1139849 | 2 | 9  | 18 | AG   | 20 | 10 |
| 356325 | 97 | 1169849 | 1169868 | 2 | 10 | 20 | AC   | 17 | 10 |
| 356334 | 97 | 1173220 | 1173279 | 4 | 15 | 60 | ATCA | 22 | 9  |
| 356337 | 97 | 1176421 | 1176464 | 2 | 22 | 44 | CA   | 7  | 9  |
| 356339 | 97 | 1178612 | 1178625 | 2 | 7  | 14 | GT   | 28 | 5  |
| 356340 | 97 | 1178865 | 1178886 | 2 | 11 | 22 | GT   | 10 | 7  |
| 356346 | 97 | 1188996 | 1189031 | 2 | 18 | 36 | AC   | 7  | 9  |
| 356348 | 97 | 1189145 | 1189156 | 2 | 6  | 12 | GT   | 22 | 8  |
| 356352 | 97 | 1191542 | 1191559 | 2 | 9  | 18 | TG   | 29 | 5  |
| 356357 | 97 | 1205180 | 1205191 | 2 | 6  | 12 | CA   | 28 | 5  |
| 356364 | 97 | 1215466 | 1215481 | 2 | 8  | 16 | TG   | 25 | 15 |
| 356365 | 97 | 1215483 | 1215496 | 2 | 7  | 14 | GT   | 24 | 13 |
| 356367 | 97 | 1218145 | 1218165 | 3 | 7  | 21 | ACA  | 23 | 3  |
| 356369 | 97 | 1221357 | 1221371 | 3 | 5  | 15 | TAC  | 24 | 3  |
| 356370 | 97 | 1221393 | 1221422 | 2 | 15 | 30 | CA   | 7  | 6  |
| 356376 | 97 | 1227437 | 1227452 | 4 | 4  | 16 | AAAC | 28 | 4  |
| 356377 | 97 | 1231396 | 1231447 | 2 | 26 | 52 | TC   | 9  | 12 |
| 356379 | 97 | 1231603 | 1231630 | 2 | 14 | 28 | CA   | 10 | 7  |
| 356380 | 97 | 1232034 | 1232049 | 2 | 8  | 16 | GT   | 20 | 9  |
| 356388 | 97 | 1247468 | 1247483 | 4 | 4  | 16 | AAAT | 11 | 6  |
| 356390 | 97 | 1248331 | 1248382 | 2 | 26 | 52 | AC   | 7  | 8  |
| 356394 | 97 | 1252762 | 1252801 | 2 | 20 | 40 | AC   | 14 | 10 |
| 356396 | 97 | 1254712 | 1254727 | 2 | 8  | 16 | TG   | 18 | 4  |
| 356397 | 97 | 1257925 | 1257950 | 2 | 13 | 26 | GT   | 11 | 9  |
| 356404 | 97 | 1272119 | 1272134 | 2 | 8  | 16 | CA   | 25 | 4  |
| 356406 | 97 | 1272454 | 1272489 | 2 | 18 | 36 | TG   | 10 | 11 |
| 356407 | 97 | 1273200 | 1273231 | 2 | 16 | 32 | CA   | 10 | 6  |
| 356420 | 97 | 1311157 | 1311170 | 2 | 7  | 14 | AC   | 13 | 6  |

|        |    |         |         |   |    |    |      |    |    |
|--------|----|---------|---------|---|----|----|------|----|----|
| 356421 | 97 | 1311921 | 1311938 | 2 | 9  | 18 | TG   | 9  | 6  |
| 356425 | 97 | 1313079 | 1313093 | 3 | 5  | 15 | TCA  | 30 | 5  |
| 356427 | 97 | 1317939 | 1317950 | 2 | 6  | 12 | GT   | 29 | 6  |
| 356428 | 97 | 1320479 | 1320490 | 2 | 6  | 12 | TG   | 21 | 4  |
| 356436 | 97 | 1327673 | 1327696 | 4 | 6  | 24 | CGCA | 32 | 10 |
| 356445 | 97 | 1338062 | 1338121 | 4 | 15 | 60 | GAAA | 11 | 9  |
| 356450 | 97 | 1343733 | 1343744 | 2 | 6  | 12 | TG   | 24 | 7  |
| 356455 | 97 | 1362840 | 1362877 | 2 | 19 | 38 | AC   | 11 | 7  |
| 356456 | 97 | 1363063 | 1363076 | 2 | 7  | 14 | CA   | 10 | 3  |
| 356457 | 97 | 1363084 | 1363095 | 2 | 6  | 12 | AC   | 10 | 4  |
| 356458 | 97 | 1363098 | 1363111 | 2 | 7  | 14 | AC   | 12 | 6  |
| 356459 | 97 | 1364102 | 1364115 | 2 | 7  | 14 | TG   | 18 | 3  |
| 356460 | 97 | 1364873 | 1364896 | 2 | 12 | 24 | TG   | 13 | 9  |
| 356467 | 97 | 1372526 | 1372546 | 3 | 7  | 21 | AAC  | 6  | 8  |
| 356472 | 97 | 1374382 | 1374403 | 2 | 11 | 22 | AC   | 26 | 5  |
| 356474 | 97 | 1374817 | 1374836 | 2 | 10 | 20 | AC   | 19 | 10 |
| 356475 | 97 | 1374890 | 1374909 | 2 | 10 | 20 | GT   | 15 | 6  |
| 356476 | 97 | 1375544 | 1375569 | 2 | 13 | 26 | GT   | 14 | 12 |
| 356477 | 97 | 1376049 | 1376070 | 2 | 11 | 22 | AC   | 18 | 7  |
| 356478 | 97 | 1376109 | 1376124 | 2 | 8  | 16 | AC   | 17 | 3  |
| 356482 | 97 | 1379784 | 1379799 | 2 | 8  | 16 | AC   | 21 | 5  |
| 356485 | 97 | 1383964 | 1384003 | 2 | 20 | 40 | TG   | 9  | 12 |
| 356490 | 97 | 1388345 | 1388378 | 2 | 17 | 34 | TG   | 10 | 15 |
| 356491 | 97 | 1388774 | 1388813 | 2 | 20 | 40 | CA   | 13 | 14 |
| 356494 | 97 | 1393999 | 1394010 | 2 | 6  | 12 | CT   | 21 | 4  |
| 356495 | 97 | 1396283 | 1396310 | 2 | 14 | 28 | TG   | 13 | 8  |
| 356496 | 97 | 1400272 | 1400283 | 2 | 6  | 12 | GT   | 29 | 6  |
| 356505 | 97 | 1405914 | 1405935 | 2 | 11 | 22 | TG   | 8  | 8  |
| 356509 | 97 | 1406745 | 1406764 | 2 | 10 | 20 | AG   | 20 | 12 |
| 356510 | 97 | 1407228 | 1407281 | 2 | 27 | 54 | GT   | 7  | 4  |
| 356515 | 97 | 1413214 | 1413231 | 2 | 9  | 18 | AC   | 18 | 6  |
| 356516 | 97 | 1418065 | 1418102 | 2 | 19 | 38 | GT   | 17 | 10 |
| 356520 | 97 | 1421074 | 1421106 | 3 | 11 | 33 | TTC  | 7  | 5  |
| 356522 | 97 | 1423029 | 1423052 | 2 | 12 | 24 | TG   | 7  | 6  |
| 356529 | 97 | 1432248 | 1432262 | 3 | 5  | 15 | TTG  | 26 | 3  |
| 356530 | 97 | 1432672 | 1432691 | 2 | 10 | 20 | GT   | 22 | 11 |
| 356545 | 97 | 1439338 | 1439379 | 3 | 14 | 42 | TGA  | 21 | 8  |
| 356550 | 97 | 1443088 | 1443111 | 2 | 12 | 24 | CA   | 10 | 8  |
| 356571 | 97 | 1483347 | 1483362 | 2 | 8  | 16 | CA   | 19 | 8  |
| 356576 | 97 | 1494744 | 1494765 | 2 | 11 | 22 | CT   | 19 | 7  |
| 356577 | 97 | 1496361 | 1496384 | 3 | 8  | 24 | GGA  | 19 | 4  |
| 356582 | 97 | 1502422 | 1502441 | 4 | 5  | 20 | TTTG | 10 | 3  |
| 356583 | 97 | 1505459 | 1505488 | 2 | 15 | 30 | TG   | 12 | 12 |
| 356584 | 97 | 1509537 | 1509560 | 4 | 6  | 24 | TTGT | 21 | 3  |
| 356585 | 97 | 1510606 | 1510625 | 2 | 10 | 20 | GT   | 13 | 8  |
| 356612 | 97 | 1542302 | 1542315 | 2 | 7  | 14 | AC   | 17 | 6  |
| 356617 | 97 | 1553517 | 1553531 | 3 | 5  | 15 | TGC  | 22 | 5  |
| 356621 | 97 | 1569515 | 1569536 | 2 | 11 | 22 | CA   | 18 | 5  |
| 356646 | 97 | 1623996 | 1624025 | 2 | 15 | 30 | TG   | 19 | 12 |
| 356655 | 97 | 1639093 | 1639108 | 2 | 8  | 16 | CA   | 25 | 6  |
| 356658 | 97 | 1640292 | 1640315 | 3 | 8  | 24 | TTA  | 16 | 4  |

|        |    |         |         |   |    |    |      |    |    |
|--------|----|---------|---------|---|----|----|------|----|----|
| 356660 | 97 | 1646148 | 1646183 | 4 | 9  | 36 | TTAT | 9  | 4  |
| 356665 | 97 | 1647113 | 1647130 | 2 | 9  | 18 | TG   | 10 | 10 |
| 356667 | 97 | 1649531 | 1649572 | 2 | 21 | 42 | CA   | 16 | 13 |
| 356669 | 97 | 1649692 | 1649715 | 2 | 12 | 24 | CA   | 14 | 11 |
| 356670 | 97 | 1650077 | 1650106 | 3 | 10 | 30 | GAG  | 21 | 6  |
| 356673 | 97 | 1651752 | 1651773 | 2 | 11 | 22 | CA   | 18 | 14 |
| 356674 | 97 | 1651894 | 1651919 | 2 | 13 | 26 | AC   | 19 | 16 |
| 356675 | 97 | 1652721 | 1652756 | 2 | 18 | 36 | AC   | 16 | 16 |
| 356676 | 97 | 1653039 | 1653066 | 2 | 14 | 28 | AC   | 12 | 9  |
| 356677 | 97 | 1653175 | 1653190 | 2 | 8  | 16 | TG   | 19 | 9  |
| 356678 | 97 | 1653688 | 1653707 | 2 | 10 | 20 | TG   | 9  | 12 |
| 356679 | 97 | 1653876 | 1653911 | 2 | 18 | 36 | TG   | 17 | 16 |
| 356681 | 97 | 1655591 | 1655605 | 3 | 5  | 15 | GCT  | 22 | 3  |
| 356688 | 97 | 1660981 | 1660995 | 3 | 5  | 15 | ATA  | 24 | 4  |
| 356689 | 97 | 1663952 | 1663969 | 2 | 9  | 18 | GT   | 21 | 8  |
| 356695 | 97 | 1671637 | 1671651 | 3 | 5  | 15 | TGG  | 24 | 6  |
| 356703 | 97 | 1697322 | 1697353 | 4 | 8  | 32 | ATCA | 22 | 8  |
| 356705 | 97 | 1701494 | 1701517 | 2 | 12 | 24 | TG   | 23 | 10 |
| 356713 | 97 | 1726247 | 1726260 | 2 | 7  | 14 | GA   | 27 | 3  |
| 356715 | 97 | 1729117 | 1729136 | 4 | 5  | 20 | GACA | 23 | 4  |
| 356716 | 97 | 1729302 | 1729323 | 2 | 11 | 22 | GT   | 20 | 13 |
| 356717 | 97 | 1733925 | 1733944 | 2 | 10 | 20 | AC   | 11 | 5  |
| 356723 | 97 | 1762359 | 1762402 | 2 | 22 | 44 | CA   | 11 | 8  |
| 356731 | 97 | 1768864 | 1768881 | 3 | 6  | 18 | ACC  | 20 | 3  |
| 356733 | 97 | 1769763 | 1769774 | 2 | 6  | 12 | TG   | 21 | 5  |
| 356734 | 97 | 1769918 | 1769939 | 2 | 11 | 22 | CA   | 23 | 8  |
| 356735 | 97 | 1770253 | 1770272 | 4 | 5  | 20 | AGAC | 24 | 3  |
| 356736 | 97 | 1770565 | 1770616 | 2 | 26 | 52 | AC   | 9  | 10 |
| 356739 | 97 | 1774564 | 1774577 | 2 | 7  | 14 | TG   | 15 | 7  |
| 356740 | 97 | 1775437 | 1775480 | 2 | 22 | 44 | AC   | 11 | 14 |
| 356747 | 97 | 1777781 | 1777792 | 2 | 6  | 12 | GT   | 20 | 5  |
| 356750 | 97 | 1779742 | 1779763 | 2 | 11 | 22 | TG   | 17 | 15 |
| 356752 | 97 | 1784813 | 1784842 | 2 | 15 | 30 | GT   | 10 | 10 |
| 356754 | 97 | 1788495 | 1788514 | 2 | 10 | 20 | TG   | 24 | 14 |
| 356756 | 97 | 1793137 | 1793151 | 3 | 5  | 15 | CCT  | 21 | 3  |
| 356757 | 97 | 1796555 | 1796574 | 2 | 10 | 20 | AC   | 18 | 14 |
| 356761 | 97 | 1805290 | 1805303 | 2 | 7  | 14 | TA   | 26 | 6  |
| 356762 | 97 | 1808776 | 1808801 | 2 | 13 | 26 | AC   | 7  | 5  |
| 356763 | 97 | 1808969 | 1808986 | 2 | 9  | 18 | TG   | 18 | 8  |
| 356765 | 97 | 1821933 | 1821944 | 2 | 6  | 12 | AC   | 14 | 4  |
| 356769 | 97 | 1823051 | 1823072 | 2 | 11 | 22 | TG   | 15 | 5  |
| 356771 | 97 | 1827027 | 1827046 | 4 | 5  | 20 | ATGG | 23 | 4  |
| 356774 | 97 | 1830593 | 1830620 | 2 | 14 | 28 | AC   | 11 | 14 |
| 356782 | 97 | 1862302 | 1862317 | 2 | 8  | 16 | AC   | 16 | 5  |
| 356789 | 97 | 1876400 | 1876437 | 2 | 19 | 38 | TG   | 15 | 8  |
| 356790 | 97 | 1877990 | 1878005 | 2 | 8  | 16 | CA   | 25 | 9  |
| 356791 | 97 | 1879301 | 1879312 | 2 | 6  | 12 | AT   | 30 | 3  |
| 356792 | 97 | 1879634 | 1879647 | 2 | 7  | 14 | TG   | 20 | 5  |
| 356793 | 97 | 1882272 | 1882287 | 4 | 4  | 16 | AGAC | 28 | 5  |
| 356794 | 97 | 1886557 | 1886584 | 2 | 14 | 28 | AC   | 8  | 7  |
| 356803 | 97 | 1903548 | 1903559 | 2 | 6  | 12 | AT   | 12 | 4  |

|        |    |         |         |   |    |    |      |    |    |
|--------|----|---------|---------|---|----|----|------|----|----|
| 356807 | 97 | 1916842 | 1916857 | 2 | 8  | 16 | CA   | 17 | 13 |
| 356809 | 97 | 1923211 | 1923230 | 2 | 10 | 20 | GT   | 21 | 8  |
| 356810 | 97 | 1923872 | 1923901 | 2 | 15 | 30 | CA   | 8  | 10 |
| 356812 | 97 | 1925140 | 1925151 | 2 | 6  | 12 | CA   | 23 | 3  |
| 356815 | 97 | 1929886 | 1929903 | 3 | 6  | 18 | TGG  | 24 | 4  |
| 356828 | 97 | 1952075 | 1952092 | 2 | 9  | 18 | AC   | 19 | 8  |
| 356829 | 97 | 1952286 | 1952315 | 2 | 15 | 30 | GT   | 8  | 8  |
| 356839 | 97 | 2004892 | 2004907 | 2 | 8  | 16 | TG   | 20 | 15 |
| 356841 | 97 | 2005039 | 2005056 | 2 | 9  | 18 | AC   | 11 | 4  |
| 356842 | 97 | 2009432 | 2009459 | 2 | 14 | 28 | TG   | 22 | 8  |
| 356843 | 97 | 2013613 | 2013628 | 4 | 4  | 16 | GCCA | 29 | 3  |
| 356844 | 97 | 2013676 | 2013695 | 2 | 10 | 20 | GT   | 29 | 7  |
| 356845 | 97 | 2014111 | 2014130 | 2 | 10 | 20 | GA   | 18 | 6  |
| 356852 | 97 | 2030957 | 2030968 | 2 | 6  | 12 | AC   | 21 | 5  |
| 356855 | 97 | 2034729 | 2034778 | 2 | 25 | 50 | AC   | 17 | 13 |
| 356856 | 97 | 2036876 | 2036897 | 2 | 11 | 22 | AC   | 21 | 9  |
| 356857 | 97 | 2038155 | 2038170 | 2 | 8  | 16 | AC   | 28 | 3  |
| 356860 | 97 | 2044145 | 2044158 | 2 | 7  | 14 | AG   | 29 | 3  |
| 356865 | 97 | 2050007 | 2050034 | 2 | 14 | 28 | CT   | 6  | 9  |
| 356871 | 97 | 2056915 | 2056946 | 2 | 16 | 32 | GT   | 19 | 8  |
| 356875 | 97 | 2061264 | 2061279 | 2 | 8  | 16 | CA   | 28 | 7  |
| 356880 | 98 | 2390    | 2401    | 2 | 6  | 12 | GT   | 17 | 3  |
| 356892 | 98 | 21440   | 21453   | 2 | 7  | 14 | GT   | 11 | 5  |
| 356893 | 98 | 24952   | 24975   | 3 | 8  | 24 | ATA  | 12 | 4  |
| 356906 | 98 | 75418   | 75450   | 3 | 11 | 33 | AAG  | 27 | 7  |
| 356907 | 98 | 77779   | 77826   | 2 | 24 | 48 | TG   | 6  | 8  |
| 356908 | 98 | 78493   | 78512   | 2 | 10 | 20 | GT   | 22 | 7  |
| 356910 | 98 | 81054   | 81071   | 3 | 6  | 18 | GAG  | 10 | 4  |
| 356912 | 98 | 88620   | 88631   | 2 | 6  | 12 | GT   | 7  | 5  |
| 356918 | 98 | 93263   | 93286   | 2 | 12 | 24 | AC   | 24 | 6  |
| 356920 | 98 | 95287   | 95304   | 3 | 6  | 18 | GAA  | 28 | 3  |
| 356931 | 98 | 98431   | 98474   | 2 | 22 | 44 | AC   | 10 | 10 |
| 356932 | 98 | 99878   | 99901   | 4 | 6  | 24 | AGAC | 18 | 8  |
| 356934 | 98 | 102633  | 102668  | 2 | 18 | 36 | AC   | 6  | 6  |
| 356936 | 98 | 105065  | 105096  | 2 | 16 | 32 | GA   | 23 | 15 |
| 356937 | 98 | 107790  | 107823  | 2 | 17 | 34 | TG   | 10 | 8  |
| 356938 | 98 | 110833  | 110852  | 4 | 5  | 20 | CAAT | 33 | 3  |
| 356942 | 98 | 113595  | 113634  | 2 | 20 | 40 | AC   | 8  | 10 |
| 356944 | 98 | 115847  | 115878  | 2 | 16 | 32 | CA   | 12 | 10 |
| 356945 | 98 | 116629  | 116654  | 2 | 13 | 26 | TG   | 10 | 7  |
| 356946 | 98 | 116747  | 116782  | 2 | 18 | 36 | CA   | 9  | 10 |
| 356947 | 98 | 118711  | 118724  | 2 | 7  | 14 | CA   | 10 | 7  |
| 356949 | 98 | 119003  | 119056  | 3 | 18 | 54 | TCT  | 10 | 12 |
| 356954 | 98 | 126243  | 126276  | 2 | 17 | 34 | GT   | 15 | 5  |
| 356956 | 98 | 130976  | 131003  | 2 | 14 | 28 | CA   | 18 | 13 |
| 356957 | 98 | 132174  | 132213  | 4 | 10 | 40 | AGAT | 24 | 13 |
| 356958 | 98 | 133112  | 133123  | 2 | 6  | 12 | GT   | 15 | 6  |
| 356966 | 98 | 138442  | 138457  | 4 | 4  | 16 | TGAT | 16 | 6  |
| 356968 | 98 | 141184  | 141197  | 2 | 7  | 14 | GT   | 24 | 3  |
| 356973 | 98 | 156433  | 156448  | 4 | 4  | 16 | ATTT | 17 | 3  |
| 356975 | 98 | 160070  | 160081  | 2 | 6  | 12 | GT   | 28 | 7  |



|        |    |        |        |   |    |    |      |    |    |
|--------|----|--------|--------|---|----|----|------|----|----|
| 356976 | 98 | 160539 | 160568 | 2 | 15 | 30 | CA   | 15 | 17 |
| 356977 | 98 | 160628 | 160649 | 2 | 11 | 22 | CA   | 11 | 7  |
| 356978 | 98 | 161968 | 161987 | 4 | 5  | 20 | TTTG | 14 | 3  |
| 356980 | 98 | 166682 | 166735 | 2 | 27 | 54 | CA   | 7  | 7  |
| 356982 | 98 | 166849 | 166862 | 2 | 7  | 14 | GT   | 10 | 13 |
| 356986 | 98 | 173815 | 173842 | 2 | 14 | 28 | AC   | 14 | 6  |
| 356987 | 98 | 174539 | 174562 | 2 | 12 | 24 | AC   | 8  | 7  |
| 356989 | 98 | 175756 | 175770 | 3 | 5  | 15 | TCC  | 20 | 14 |
| 356994 | 98 | 182829 | 182849 | 3 | 7  | 21 | CAT  | 32 | 6  |
| 356995 | 98 | 182912 | 182947 | 3 | 12 | 36 | TCT  | 26 | 7  |
| 356996 | 98 | 185161 | 185176 | 4 | 4  | 16 | ACTA | 30 | 3  |
| 357002 | 98 | 190768 | 190819 | 2 | 26 | 52 | CA   | 15 | 16 |
| 357005 | 98 | 199416 | 199431 | 2 | 8  | 16 | AC   | 21 | 8  |
| 357012 | 98 | 212388 | 212407 | 4 | 5  | 20 | GCTA | 23 | 5  |
| 357013 | 98 | 213968 | 213983 | 2 | 8  | 16 | AC   | 16 | 3  |
| 357016 | 98 | 219399 | 219450 | 2 | 26 | 52 | GT   | 6  | 7  |
| 357017 | 98 | 219577 | 219612 | 2 | 18 | 36 | AC   | 8  | 9  |
| 357018 | 98 | 219898 | 219921 | 2 | 12 | 24 | TG   | 19 | 9  |
| 357020 | 98 | 222345 | 222384 | 2 | 20 | 40 | AC   | 22 | 12 |
| 357025 | 98 | 222930 | 222945 | 2 | 8  | 16 | TG   | 14 | 8  |
| 357027 | 98 | 223067 | 223100 | 2 | 17 | 34 | GT   | 8  | 11 |
| 357031 | 98 | 229158 | 229183 | 2 | 13 | 26 | GT   | 14 | 9  |
| 357035 | 98 | 234852 | 234885 | 2 | 17 | 34 | GT   | 9  | 8  |
| 357037 | 98 | 235651 | 235682 | 2 | 16 | 32 | AC   | 13 | 9  |
| 357038 | 98 | 235725 | 235750 | 2 | 13 | 26 | CA   | 19 | 8  |
| 357041 | 98 | 238120 | 238146 | 3 | 9  | 27 | TAA  | 19 | 8  |
| 357050 | 98 | 247278 | 247293 | 4 | 4  | 16 | AGAC | 25 | 4  |
| 357054 | 98 | 249825 | 249840 | 2 | 8  | 16 | AC   | 27 | 5  |
| 357060 | 98 | 255391 | 255404 | 2 | 7  | 14 | TG   | 12 | 6  |
| 357061 | 98 | 257652 | 257696 | 3 | 15 | 45 | AAC  | 12 | 7  |
| 357067 | 98 | 262516 | 262553 | 2 | 19 | 38 | GT   | 12 | 13 |
| 357085 | 98 | 295591 | 295608 | 3 | 6  | 18 | GAG  | 12 | 3  |
| 357094 | 98 | 331426 | 331443 | 3 | 6  | 18 | AGC  | 7  | 3  |
| 357096 | 98 | 334470 | 334490 | 3 | 7  | 21 | AGA  | 19 | 3  |
| 357097 | 98 | 334534 | 334554 | 3 | 7  | 21 | GCT  | 16 | 4  |
| 357101 | 98 | 337954 | 337965 | 2 | 6  | 12 | GT   | 18 | 11 |
| 357103 | 98 | 338111 | 338148 | 2 | 19 | 38 | AC   | 8  | 10 |
| 357107 | 98 | 342018 | 342067 | 2 | 25 | 50 | TG   | 9  | 9  |
| 357109 | 98 | 342156 | 342201 | 2 | 23 | 46 | TG   | 7  | 8  |
| 357110 | 98 | 344480 | 344505 | 2 | 13 | 26 | TG   | 11 | 7  |
| 357114 | 98 | 346941 | 346956 | 2 | 8  | 16 | CA   | 17 | 9  |
| 357117 | 98 | 347659 | 347686 | 2 | 14 | 28 | AC   | 7  | 9  |
| 357126 | 98 | 348329 | 348370 | 2 | 21 | 42 | AC   | 11 | 9  |
| 357134 | 98 | 349074 | 349109 | 2 | 18 | 36 | AC   | 23 | 16 |
| 357136 | 98 | 349439 | 349450 | 2 | 6  | 12 | AC   | 20 | 3  |
| 357137 | 98 | 349490 | 349516 | 3 | 9  | 27 | GAT  | 24 | 8  |
| 357138 | 98 | 350611 | 350626 | 2 | 8  | 16 | AC   | 26 | 7  |
| 357139 | 98 | 351156 | 351185 | 2 | 15 | 30 | TG   | 15 | 9  |
| 357140 | 98 | 351535 | 351564 | 2 | 15 | 30 | TG   | 7  | 8  |
| 357141 | 98 | 352286 | 352309 | 2 | 12 | 24 | AC   | 25 | 10 |
| 357142 | 98 | 353207 | 353234 | 2 | 14 | 28 | AC   | 12 | 7  |

|        |    |        |        |   |    |    |      |    |    |
|--------|----|--------|--------|---|----|----|------|----|----|
| 357143 | 98 | 354062 | 354075 | 2 | 7  | 14 | GT   | 20 | 9  |
| 357146 | 98 | 372559 | 372574 | 2 | 8  | 16 | CA   | 14 | 3  |
| 357150 | 98 | 393681 | 393704 | 2 | 12 | 24 | CA   | 22 | 10 |
| 357154 | 98 | 396575 | 396598 | 2 | 12 | 24 | AC   | 22 | 10 |
| 357155 | 98 | 401477 | 401498 | 2 | 11 | 22 | TG   | 23 | 6  |
| 357157 | 98 | 405841 | 405854 | 2 | 7  | 14 | TG   | 33 | 3  |
| 357158 | 98 | 406363 | 406388 | 2 | 13 | 26 | AC   | 26 | 7  |
| 357159 | 98 | 409505 | 409520 | 4 | 4  | 16 | AGAT | 26 | 5  |
| 357167 | 98 | 412954 | 412969 | 2 | 8  | 16 | GT   | 20 | 3  |
| 357168 | 98 | 413360 | 413374 | 3 | 5  | 15 | TCC  | 17 | 7  |
| 357169 | 98 | 416167 | 416180 | 2 | 7  | 14 | TC   | 32 | 4  |
| 357170 | 98 | 425288 | 425305 | 2 | 9  | 18 | TG   | 20 | 3  |
| 357171 | 98 | 425502 | 425533 | 2 | 16 | 32 | TG   | 12 | 5  |
| 357173 | 98 | 427382 | 427397 | 4 | 4  | 16 | AACA | 33 | 3  |
| 357174 | 98 | 427721 | 427738 | 2 | 9  | 18 | GT   | 22 | 9  |
| 357175 | 98 | 430089 | 430108 | 2 | 10 | 20 | AC   | 16 | 7  |
| 357179 | 98 | 431504 | 431547 | 2 | 22 | 44 | AC   | 9  | 8  |
| 357213 | 98 | 466498 | 466527 | 2 | 15 | 30 | AC   | 9  | 10 |
| 357214 | 98 | 467015 | 467040 | 2 | 13 | 26 | AC   | 20 | 9  |
| 357215 | 98 | 467122 | 467171 | 2 | 25 | 50 | TG   | 6  | 5  |
| 357223 | 98 | 475296 | 475311 | 2 | 8  | 16 | CA   | 19 | 11 |
| 357224 | 98 | 475383 | 475396 | 2 | 7  | 14 | TG   | 23 | 4  |
| 357226 | 98 | 476979 | 477014 | 2 | 18 | 36 | CA   | 12 | 11 |
| 357227 | 98 | 477274 | 477291 | 2 | 9  | 18 | CA   | 7  | 4  |
| 357229 | 98 | 484792 | 484803 | 2 | 6  | 12 | TG   | 29 | 3  |
| 357235 | 98 | 494086 | 494115 | 2 | 15 | 30 | CA   | 8  | 12 |
| 357243 | 98 | 496843 | 496868 | 2 | 13 | 26 | TG   | 16 | 8  |
| 357244 | 98 | 496978 | 497007 | 2 | 15 | 30 | CA   | 12 | 9  |
| 357245 | 98 | 497123 | 497156 | 2 | 17 | 34 | CA   | 14 | 13 |
| 357249 | 98 | 498943 | 498956 | 2 | 7  | 14 | TG   | 30 | 3  |
| 357250 | 98 | 499113 | 499134 | 2 | 11 | 22 | TG   | 22 | 10 |
| 357251 | 98 | 499236 | 499251 | 2 | 8  | 16 | AC   | 29 | 5  |
| 357252 | 98 | 499315 | 499360 | 2 | 23 | 46 | GT   | 6  | 7  |
| 357253 | 98 | 499609 | 499644 | 2 | 18 | 36 | GT   | 10 | 15 |
| 357269 | 98 | 503444 | 503469 | 2 | 13 | 26 | GT   | 14 | 7  |
| 357270 | 98 | 503585 | 503610 | 2 | 13 | 26 | CA   | 11 | 7  |
| 357273 | 98 | 504144 | 504165 | 2 | 11 | 22 | CA   | 19 | 13 |
| 357274 | 98 | 504826 | 504845 | 2 | 10 | 20 | AC   | 14 | 6  |
| 357278 | 98 | 505093 | 505126 | 2 | 17 | 34 | TG   | 13 | 9  |
| 357283 | 98 | 506814 | 506831 | 2 | 9  | 18 | TG   | 25 | 11 |
| 357286 | 98 | 507668 | 507685 | 2 | 9  | 18 | CA   | 16 | 12 |
| 357287 | 98 | 507796 | 507811 | 2 | 8  | 16 | TG   | 20 | 4  |
| 357288 | 98 | 511053 | 511086 | 2 | 17 | 34 | TG   | 11 | 11 |
| 357289 | 98 | 511301 | 511326 | 2 | 13 | 26 | TG   | 9  | 7  |
| 357290 | 98 | 511490 | 511515 | 2 | 13 | 26 | CA   | 15 | 10 |
| 357292 | 98 | 512143 | 512172 | 2 | 15 | 30 | CA   | 15 | 17 |
| 357293 | 98 | 512538 | 512553 | 2 | 8  | 16 | GT   | 24 | 3  |
| 357294 | 98 | 514031 | 514058 | 2 | 14 | 28 | TG   | 15 | 9  |
| 357295 | 98 | 514937 | 514990 | 2 | 27 | 54 | AC   | 9  | 10 |
| 357297 | 98 | 516843 | 516854 | 2 | 6  | 12 | AC   | 34 | 3  |
| 357298 | 98 | 516893 | 516906 | 2 | 7  | 14 | GT   | 24 | 8  |

|        |    |        |        |   |    |    |      |    |    |
|--------|----|--------|--------|---|----|----|------|----|----|
| 357299 | 98 | 517237 | 517252 | 2 | 8  | 16 | AC   | 20 | 5  |
| 357300 | 98 | 517388 | 517409 | 2 | 11 | 22 | GT   | 24 | 5  |
| 357301 | 98 | 519195 | 519228 | 2 | 17 | 34 | GT   | 13 | 11 |
| 357302 | 98 | 520627 | 520678 | 2 | 26 | 52 | AC   | 9  | 12 |
| 357305 | 98 | 523103 | 523117 | 3 | 5  | 15 | CCT  | 19 | 4  |
| 357306 | 98 | 523967 | 523996 | 2 | 15 | 30 | TG   | 15 | 9  |
| 357307 | 98 | 524138 | 524155 | 2 | 9  | 18 | AC   | 20 | 9  |
| 357309 | 98 | 526242 | 526280 | 3 | 13 | 39 | AGG  | 14 | 6  |
| 357310 | 98 | 526425 | 526448 | 3 | 8  | 24 | CCT  | 11 | 5  |
| 357311 | 98 | 527158 | 527187 | 2 | 15 | 30 | GT   | 7  | 9  |
| 357316 | 98 | 531050 | 531067 | 2 | 9  | 18 | AC   | 18 | 10 |
| 357317 | 98 | 531371 | 531382 | 2 | 6  | 12 | CA   | 22 | 5  |
| 357318 | 98 | 531686 | 531715 | 3 | 10 | 30 | AGG  | 19 | 3  |
| 357320 | 98 | 534300 | 534335 | 4 | 9  | 36 | TATC | 9  | 5  |
| 357322 | 98 | 538902 | 538935 | 2 | 17 | 34 | AC   | 17 | 12 |
| 357324 | 98 | 544220 | 544255 | 2 | 18 | 36 | AC   | 19 | 15 |
| 357326 | 98 | 545159 | 545170 | 2 | 6  | 12 | TG   | 32 | 4  |
| 357327 | 98 | 545220 | 545233 | 2 | 7  | 14 | GT   | 27 | 3  |
| 357328 | 98 | 545652 | 545667 | 2 | 8  | 16 | AC   | 25 | 4  |
| 357329 | 98 | 546179 | 546200 | 2 | 11 | 22 | AC   | 16 | 9  |
| 357332 | 98 | 549486 | 549507 | 2 | 11 | 22 | GT   | 18 | 6  |
| 357333 | 98 | 552225 | 552252 | 2 | 14 | 28 | AC   | 22 | 11 |
| 357339 | 98 | 553988 | 554027 | 2 | 20 | 40 | GT   | 8  | 6  |
| 357340 | 98 | 555011 | 555038 | 2 | 14 | 28 | CA   | 19 | 9  |
| 357342 | 98 | 556687 | 556734 | 2 | 24 | 48 | CA   | 14 | 12 |
| 357343 | 98 | 560806 | 560831 | 2 | 13 | 26 | CA   | 16 | 11 |
| 357344 | 98 | 561327 | 561344 | 2 | 9  | 18 | GT   | 15 | 3  |
| 357347 | 98 | 562292 | 562317 | 2 | 13 | 26 | AC   | 18 | 7  |
| 357349 | 98 | 563211 | 563234 | 3 | 8  | 24 | CTC  | 30 | 4  |
| 357351 | 98 | 567136 | 567175 | 2 | 20 | 40 | GT   | 8  | 7  |
| 357352 | 98 | 570777 | 570806 | 2 | 15 | 30 | TG   | 17 | 7  |
| 357357 | 98 | 571646 | 571666 | 3 | 7  | 21 | GGA  | 25 | 3  |
| 357359 | 98 | 572543 | 572563 | 3 | 7  | 21 | AAT  | 8  | 5  |
| 357373 | 98 | 577830 | 577859 | 2 | 15 | 30 | AC   | 10 | 6  |
| 357382 | 98 | 580899 | 580912 | 2 | 7  | 14 | GT   | 11 | 4  |
| 357384 | 98 | 581963 | 581992 | 2 | 15 | 30 | GT   | 6  | 8  |
| 357387 | 98 | 583964 | 583991 | 2 | 14 | 28 | AC   | 7  | 7  |
| 357388 | 98 | 584917 | 584948 | 2 | 16 | 32 | AC   | 17 | 8  |
| 357389 | 98 | 587703 | 587724 | 2 | 11 | 22 | TG   | 26 | 15 |
| 357390 | 98 | 587803 | 587824 | 2 | 11 | 22 | AC   | 14 | 9  |
| 357391 | 98 | 587854 | 587867 | 2 | 7  | 14 | GT   | 28 | 5  |
| 357392 | 98 | 587985 | 588004 | 2 | 10 | 20 | GT   | 19 | 13 |
| 357393 | 98 | 588107 | 588118 | 2 | 6  | 12 | CA   | 22 | 6  |
| 357394 | 98 | 588147 | 588202 | 2 | 28 | 56 | AC   | 6  | 8  |
| 357395 | 98 | 588303 | 588328 | 2 | 13 | 26 | TG   | 20 | 10 |
| 357396 | 98 | 590117 | 590176 | 2 | 30 | 60 | AC   | 10 | 8  |
| 357397 | 98 | 590261 | 590282 | 2 | 11 | 22 | CA   | 18 | 6  |
| 357398 | 98 | 591587 | 591608 | 2 | 11 | 22 | GT   | 19 | 7  |
| 357399 | 98 | 592015 | 592036 | 2 | 11 | 22 | TG   | 23 | 9  |
| 357400 | 98 | 592263 | 592278 | 2 | 8  | 16 | GT   | 21 | 7  |
| 357401 | 98 | 592639 | 592654 | 2 | 8  | 16 | AC   | 15 | 11 |

|        |    |        |        |   |    |    |     |    |    |
|--------|----|--------|--------|---|----|----|-----|----|----|
| 357402 | 98 | 592788 | 592827 | 2 | 20 | 40 | CA  | 12 | 10 |
| 357403 | 98 | 593522 | 593541 | 2 | 10 | 20 | AC  | 15 | 9  |
| 357404 | 98 | 593578 | 593591 | 2 | 7  | 14 | TG  | 18 | 11 |
| 357405 | 98 | 593593 | 593604 | 2 | 6  | 12 | GT  | 16 | 11 |
| 357406 | 98 | 593731 | 593752 | 2 | 11 | 22 | TG  | 13 | 9  |
| 357408 | 98 | 597133 | 597159 | 3 | 9  | 27 | ATT | 10 | 7  |
| 357414 | 98 | 605202 | 605213 | 2 | 6  | 12 | GT  | 15 | 5  |
| 357416 | 98 | 605442 | 605463 | 2 | 11 | 22 | GT  | 7  | 7  |
| 357433 | 98 | 613958 | 613975 | 2 | 9  | 18 | CA  | 14 | 10 |
| 357434 | 98 | 613977 | 613992 | 2 | 8  | 16 | AC  | 16 | 12 |
| 357435 | 98 | 614100 | 614111 | 2 | 6  | 12 | GT  | 19 | 11 |
| 357440 | 98 | 615400 | 615441 | 2 | 21 | 42 | TG  | 11 | 8  |
| 357441 | 98 | 616709 | 616732 | 2 | 12 | 24 | GT  | 15 | 7  |
| 357443 | 98 | 617211 | 617240 | 2 | 15 | 30 | AC  | 7  | 4  |
| 357463 | 98 | 624397 | 624442 | 2 | 23 | 46 | AC  | 10 | 9  |
| 357464 | 98 | 625543 | 625556 | 2 | 7  | 14 | AG  | 19 | 4  |
| 357469 | 98 | 628166 | 628177 | 2 | 6  | 12 | GT  | 21 | 4  |
| 357470 | 98 | 629062 | 629087 | 2 | 13 | 26 | AC  | 14 | 8  |
| 357479 | 98 | 629724 | 629743 | 2 | 10 | 20 | GT  | 6  | 4  |
| 357482 | 98 | 631840 | 631881 | 2 | 21 | 42 | TG  | 14 | 12 |
| 357483 | 98 | 632660 | 632673 | 2 | 7  | 14 | GT  | 22 | 13 |
| 357486 | 98 | 636127 | 636148 | 2 | 11 | 22 | GT  | 12 | 4  |
| 357487 | 98 | 636173 | 636184 | 2 | 6  | 12 | GT  | 25 | 3  |
| 357488 | 98 | 636286 | 636321 | 2 | 18 | 36 | AC  | 6  | 9  |
| 357489 | 98 | 636469 | 636496 | 2 | 14 | 28 | AC  | 13 | 5  |
| 357497 | 98 | 637611 | 637656 | 2 | 23 | 46 | GT  | 11 | 9  |
| 357499 | 98 | 638002 | 638019 | 2 | 9  | 18 | AC  | 6  | 6  |
| 357502 | 98 | 641364 | 641393 | 2 | 15 | 30 | CA  | 23 | 9  |
| 357503 | 98 | 641472 | 641497 | 2 | 13 | 26 | AC  | 15 | 9  |
| 357507 | 98 | 645671 | 645698 | 2 | 14 | 28 | CA  | 17 | 10 |
| 357508 | 98 | 645827 | 645838 | 2 | 6  | 12 | CA  | 18 | 3  |
| 357509 | 98 | 645862 | 645882 | 3 | 7  | 21 | CCT | 17 | 3  |
| 357523 | 98 | 651040 | 651069 | 2 | 15 | 30 | TG  | 10 | 6  |
| 357529 | 98 | 681604 | 681636 | 3 | 11 | 33 | CAT | 24 | 6  |
| 357531 | 98 | 685940 | 685959 | 2 | 10 | 20 | GT  | 14 | 6  |
| 357533 | 98 | 686112 | 686135 | 2 | 12 | 24 | TG  | 11 | 10 |
| 357534 | 98 | 686165 | 686190 | 2 | 13 | 26 | CT  | 10 | 10 |
| 357568 | 98 | 710315 | 710341 | 3 | 9  | 27 | TCA | 26 | 15 |
| 357569 | 98 | 712573 | 712599 | 3 | 9  | 27 | GAG | 18 | 5  |
| 357570 | 98 | 712830 | 712841 | 2 | 6  | 12 | AG  | 36 | 4  |
| 357571 | 98 | 713646 | 713661 | 2 | 8  | 16 | TG  | 20 | 5  |
| 357576 | 98 | 714271 | 714304 | 2 | 17 | 34 | AC  | 6  | 5  |
| 357577 | 98 | 714399 | 714430 | 2 | 16 | 32 | AC  | 9  | 8  |
| 357578 | 98 | 715498 | 715517 | 2 | 10 | 20 | AC  | 20 | 6  |
| 357580 | 98 | 715651 | 715666 | 2 | 8  | 16 | CT  | 16 | 8  |
| 357581 | 98 | 718755 | 718766 | 2 | 6  | 12 | AG  | 25 | 3  |
| 357582 | 98 | 719476 | 719499 | 3 | 8  | 24 | GAG | 9  | 4  |
| 357599 | 98 | 739132 | 739152 | 3 | 7  | 21 | GAG | 22 | 4  |
| 357602 | 98 | 742717 | 742770 | 2 | 27 | 54 | TG  | 8  | 10 |
| 357603 | 98 | 743227 | 743270 | 2 | 22 | 44 | TG  | 15 | 12 |
| 357604 | 98 | 744078 | 744109 | 2 | 16 | 32 | AC  | 9  | 7  |

|        |    |        |        |   |    |    |      |    |    |
|--------|----|--------|--------|---|----|----|------|----|----|
| 357606 | 98 | 744511 | 744544 | 2 | 17 | 34 | CA   | 6  | 9  |
| 357607 | 98 | 744650 | 744675 | 2 | 13 | 26 | TG   | 16 | 11 |
| 357608 | 98 | 745483 | 745512 | 2 | 15 | 30 | TG   | 9  | 7  |
| 357609 | 98 | 745570 | 745595 | 2 | 13 | 26 | CA   | 12 | 7  |
| 357610 | 98 | 747874 | 747895 | 2 | 11 | 22 | TG   | 16 | 9  |
| 357612 | 98 | 750717 | 750758 | 2 | 21 | 42 | TG   | 6  | 7  |
| 357613 | 98 | 750936 | 750949 | 2 | 7  | 14 | AC   | 20 | 5  |
| 357614 | 98 | 751410 | 751441 | 2 | 16 | 32 | GT   | 9  | 7  |
| 357615 | 98 | 752766 | 752799 | 2 | 17 | 34 | AC   | 10 | 7  |
| 357617 | 98 | 753478 | 753519 | 2 | 21 | 42 | GT   | 12 | 11 |
| 357621 | 98 | 755103 | 755120 | 2 | 9  | 18 | AC   | 10 | 7  |
| 357622 | 98 | 757566 | 757595 | 2 | 15 | 30 | GT   | 10 | 7  |
| 357624 | 98 | 759791 | 759820 | 2 | 15 | 30 | AC   | 19 | 8  |
| 357625 | 98 | 759998 | 760031 | 2 | 17 | 34 | TG   | 10 | 6  |
| 357627 | 98 | 763636 | 763669 | 2 | 17 | 34 | GT   | 14 | 10 |
| 357632 | 98 | 765677 | 765702 | 2 | 13 | 26 | AC   | 12 | 5  |
| 357636 | 98 | 774280 | 774295 | 4 | 4  | 16 | TTTG | 19 | 9  |
| 357638 | 98 | 780192 | 780211 | 4 | 5  | 20 | AAAC | 28 | 3  |
| 357640 | 98 | 780487 | 780514 | 2 | 14 | 28 | TG   | 13 | 5  |
| 357643 | 98 | 781553 | 781580 | 4 | 7  | 28 | CTGT | 21 | 4  |
| 357645 | 98 | 782257 | 782282 | 2 | 13 | 26 | CA   | 23 | 8  |
| 357653 | 98 | 801180 | 801195 | 4 | 4  | 16 | TGAT | 25 | 3  |
| 357655 | 98 | 802471 | 802498 | 2 | 14 | 28 | GT   | 10 | 4  |
| 357657 | 98 | 803661 | 803676 | 2 | 8  | 16 | CA   | 25 | 5  |
| 357659 | 98 | 804810 | 804831 | 2 | 11 | 22 | TG   | 19 | 6  |
| 357662 | 98 | 810357 | 810374 | 3 | 6  | 18 | TTA  | 13 | 7  |
| 357669 | 98 | 813506 | 813526 | 3 | 7  | 21 | ACA  | 22 | 3  |
| 357678 | 98 | 824090 | 824113 | 2 | 12 | 24 | AC   | 10 | 5  |
| 357688 | 98 | 829423 | 829448 | 2 | 13 | 26 | TG   | 13 | 5  |
| 357691 | 98 | 831725 | 831764 | 2 | 20 | 40 | GT   | 17 | 15 |
| 357711 | 98 | 842753 | 842780 | 4 | 7  | 28 | TTTG | 19 | 10 |
| 357713 | 98 | 844516 | 844530 | 3 | 5  | 15 | ATA  | 14 | 3  |
| 357727 | 98 | 851084 | 851107 | 4 | 6  | 24 | TCTG | 23 | 4  |
| 357730 | 98 | 852080 | 852117 | 2 | 19 | 38 | TG   | 6  | 9  |
| 357731 | 98 | 853334 | 853361 | 4 | 7  | 28 | TGAA | 25 | 3  |
| 357732 | 98 | 854102 | 854141 | 2 | 20 | 40 | CA   | 7  | 7  |
| 357736 | 98 | 859586 | 859611 | 2 | 13 | 26 | TG   | 25 | 10 |
| 357737 | 98 | 859842 | 859885 | 2 | 22 | 44 | CA   | 10 | 6  |
| 357739 | 98 | 861134 | 861153 | 2 | 10 | 20 | TG   | 6  | 6  |
| 357749 | 98 | 873543 | 873568 | 2 | 13 | 26 | GT   | 10 | 6  |
| 357754 | 98 | 874807 | 874826 | 2 | 10 | 20 | GT   | 23 | 8  |
| 357756 | 98 | 877849 | 877884 | 2 | 18 | 36 | AC   | 17 | 11 |
| 357758 | 98 | 878173 | 878208 | 2 | 18 | 36 | CA   | 9  | 12 |
| 357759 | 98 | 878783 | 878800 | 3 | 6  | 18 | ATT  | 7  | 3  |
| 357762 | 98 | 880853 | 880876 | 2 | 12 | 24 | AC   | 11 | 8  |
| 357765 | 98 | 881936 | 881969 | 2 | 17 | 34 | AC   | 16 | 4  |
| 357768 | 98 | 884258 | 884271 | 2 | 7  | 14 | TG   | 16 | 9  |
| 357769 | 98 | 884277 | 884290 | 2 | 7  | 14 | GT   | 7  | 5  |
| 357770 | 98 | 886262 | 886293 | 2 | 16 | 32 | CA   | 15 | 5  |
| 357771 | 98 | 886389 | 886400 | 2 | 6  | 12 | AT   | 8  | 3  |
| 357773 | 98 | 886698 | 886719 | 2 | 11 | 22 | GT   | 7  | 5  |

|        |    |         |         |   |    |    |      |    |    |
|--------|----|---------|---------|---|----|----|------|----|----|
| 357788 | 98 | 913406  | 913420  | 3 | 5  | 15 | GCA  | 27 | 3  |
| 357791 | 98 | 916037  | 916054  | 2 | 9  | 18 | AC   | 21 | 9  |
| 357792 | 98 | 916135  | 916155  | 3 | 7  | 21 | TCC  | 19 | 5  |
| 357794 | 98 | 916680  | 916697  | 3 | 6  | 18 | TCC  | 15 | 4  |
| 357796 | 98 | 917049  | 917084  | 3 | 12 | 36 | TGA  | 32 | 4  |
| 357798 | 98 | 920924  | 920935  | 2 | 6  | 12 | TC   | 12 | 3  |
| 357799 | 98 | 924698  | 924717  | 4 | 5  | 20 | CTGT | 31 | 4  |
| 357800 | 98 | 931532  | 931547  | 2 | 8  | 16 | AC   | 18 | 7  |
| 357805 | 98 | 933734  | 933749  | 4 | 4  | 16 | ATCA | 33 | 3  |
| 357806 | 98 | 938286  | 938312  | 3 | 9  | 27 | CCT  | 27 | 4  |
| 357808 | 98 | 939288  | 939323  | 2 | 18 | 36 | TG   | 13 | 10 |
| 357809 | 98 | 940069  | 940084  | 2 | 8  | 16 | AC   | 7  | 4  |
| 357812 | 98 | 940722  | 940751  | 2 | 15 | 30 | AC   | 13 | 7  |
| 357813 | 98 | 941633  | 941660  | 2 | 14 | 28 | GT   | 17 | 9  |
| 357861 | 98 | 960408  | 960419  | 2 | 6  | 12 | GT   | 27 | 3  |
| 357864 | 98 | 963300  | 963315  | 4 | 4  | 16 | GACA | 21 | 3  |
| 357866 | 98 | 963422  | 963448  | 3 | 9  | 27 | TCC  | 16 | 5  |
| 357867 | 98 | 963549  | 963560  | 2 | 6  | 12 | GT   | 18 | 5  |
| 357868 | 98 | 963563  | 963578  | 2 | 8  | 16 | GT   | 17 | 4  |
| 357870 | 98 | 963786  | 963803  | 2 | 9  | 18 | CA   | 12 | 8  |
| 357871 | 98 | 963936  | 963957  | 2 | 11 | 22 | GT   | 14 | 5  |
| 357873 | 98 | 965178  | 965189  | 2 | 6  | 12 | GT   | 29 | 3  |
| 357875 | 98 | 969839  | 969852  | 2 | 7  | 14 | AC   | 16 | 3  |
| 357878 | 98 | 972951  | 972964  | 2 | 7  | 14 | TG   | 28 | 3  |
| 357879 | 98 | 978017  | 978034  | 2 | 9  | 18 | AC   | 18 | 5  |
| 357880 | 98 | 979268  | 979293  | 2 | 13 | 26 | AC   | 17 | 3  |
| 357882 | 98 | 980639  | 980650  | 2 | 6  | 12 | TG   | 25 | 11 |
| 357883 | 98 | 980652  | 980669  | 2 | 9  | 18 | GT   | 22 | 12 |
| 357884 | 98 | 981456  | 981475  | 2 | 10 | 20 | CA   | 18 | 4  |
| 357892 | 98 | 992284  | 992299  | 2 | 8  | 16 | AC   | 14 | 5  |
| 357894 | 98 | 992336  | 992353  | 2 | 9  | 18 | AC   | 9  | 4  |
| 357897 | 98 | 995529  | 995546  | 3 | 6  | 18 | CAT  | 31 | 3  |
| 357900 | 98 | 996990  | 997017  | 2 | 14 | 28 | CA   | 17 | 9  |
| 357901 | 98 | 997044  | 997079  | 2 | 18 | 36 | TG   | 11 | 8  |
| 357903 | 98 | 998880  | 998893  | 2 | 7  | 14 | TG   | 21 | 10 |
| 357904 | 98 | 998896  | 998907  | 2 | 6  | 12 | TG   | 23 | 8  |
| 357905 | 98 | 999012  | 999041  | 2 | 15 | 30 | AC   | 16 | 11 |
| 357908 | 98 | 999645  | 999702  | 2 | 29 | 58 | CA   | 7  | 8  |
| 357914 | 98 | 1006144 | 1006187 | 2 | 22 | 44 | GT   | 11 | 10 |
| 357915 | 98 | 1006249 | 1006278 | 3 | 10 | 30 | TCA  | 27 | 6  |
| 357917 | 98 | 1008131 | 1008170 | 4 | 10 | 40 | AGAT | 13 | 11 |
| 357918 | 98 | 1008346 | 1008369 | 3 | 8  | 24 | CTC  | 7  | 7  |
| 357919 | 98 | 1009713 | 1009730 | 2 | 9  | 18 | TG   | 15 | 8  |
| 357920 | 98 | 1009762 | 1009799 | 2 | 19 | 38 | CA   | 7  | 5  |
| 357921 | 98 | 1010474 | 1010523 | 2 | 25 | 50 | AC   | 7  | 10 |
| 357922 | 98 | 1018868 | 1018889 | 2 | 11 | 22 | TG   | 18 | 6  |
| 357923 | 98 | 1019041 | 1019078 | 2 | 19 | 38 | AC   | 9  | 7  |
| 357924 | 98 | 1019137 | 1019148 | 2 | 6  | 12 | TG   | 25 | 4  |
| 357932 | 98 | 1021123 | 1021146 | 2 | 12 | 24 | CA   | 10 | 7  |
| 357934 | 98 | 1021324 | 1021363 | 2 | 20 | 40 | GT   | 6  | 8  |
| 357937 | 98 | 1026403 | 1026456 | 2 | 27 | 54 | CA   | 13 | 14 |

|        |    |         |         |   |    |    |      |    |    |
|--------|----|---------|---------|---|----|----|------|----|----|
| 357942 | 98 | 1033359 | 1033376 | 2 | 9  | 18 | GT   | 20 | 8  |
| 357946 | 98 | 1037305 | 1037352 | 2 | 24 | 48 | AC   | 9  | 9  |
| 357947 | 98 | 1037476 | 1037509 | 2 | 17 | 34 | TG   | 8  | 8  |
| 357949 | 98 | 1037665 | 1037690 | 2 | 13 | 26 | CA   | 6  | 7  |
| 357957 | 98 | 1041482 | 1041521 | 2 | 20 | 40 | CA   | 9  | 8  |
| 358008 | 98 | 1054614 | 1054645 | 4 | 8  | 32 | CAAA | 28 | 8  |
| 358011 | 98 | 1055365 | 1055412 | 2 | 24 | 48 | GT   | 8  | 8  |
| 358012 | 98 | 1059477 | 1059506 | 2 | 15 | 30 | TG   | 15 | 11 |
| 358013 | 98 | 1059614 | 1059635 | 2 | 11 | 22 | AC   | 20 | 4  |
| 358018 | 98 | 1061614 | 1061634 | 3 | 7  | 21 | TCC  | 27 | 4  |
| 358022 | 98 | 1063891 | 1063918 | 4 | 7  | 28 | CTGT | 29 | 9  |
| 358028 | 98 | 1064546 | 1064575 | 2 | 15 | 30 | AC   | 14 | 11 |
| 358033 | 98 | 1067191 | 1067228 | 2 | 19 | 38 | GT   | 12 | 9  |
| 358036 | 98 | 1068302 | 1068323 | 2 | 11 | 22 | TA   | 6  | 5  |
| 358037 | 98 | 1068379 | 1068404 | 2 | 13 | 26 | GT   | 9  | 6  |
| 358039 | 98 | 1071923 | 1071958 | 2 | 18 | 36 | TG   | 16 | 8  |
| 358044 | 98 | 1076189 | 1076204 | 2 | 8  | 16 | CA   | 24 | 7  |
| 358046 | 98 | 1081694 | 1081721 | 2 | 14 | 28 | GT   | 18 | 10 |
| 358047 | 98 | 1081989 | 1082008 | 2 | 10 | 20 | AC   | 18 | 5  |
| 358048 | 98 | 1083216 | 1083251 | 2 | 18 | 36 | AC   | 7  | 7  |
| 358050 | 98 | 1083689 | 1083720 | 2 | 16 | 32 | AC   | 14 | 13 |
| 358051 | 98 | 1083870 | 1083902 | 3 | 11 | 33 | TAA  | 7  | 4  |
| 358054 | 98 | 1085208 | 1085223 | 2 | 8  | 16 | CA   | 24 | 4  |
| 358055 | 98 | 1085611 | 1085634 | 2 | 12 | 24 | CA   | 21 | 4  |
| 358056 | 98 | 1085876 | 1085899 | 2 | 12 | 24 | AC   | 16 | 3  |
| 358058 | 98 | 1088629 | 1088652 | 2 | 12 | 24 | AC   | 17 | 8  |
| 358060 | 98 | 1088685 | 1088706 | 2 | 11 | 22 | GT   | 16 | 5  |
| 358061 | 98 | 1090568 | 1090585 | 3 | 6  | 18 | CAT  | 23 | 3  |
| 358063 | 98 | 1091355 | 1091378 | 2 | 12 | 24 | AC   | 22 | 5  |
| 358065 | 98 | 1091732 | 1091759 | 2 | 14 | 28 | AC   | 11 | 10 |
| 358067 | 98 | 1092286 | 1092321 | 4 | 9  | 36 | GGAA | 14 | 7  |
| 358068 | 98 | 1092489 | 1092520 | 2 | 16 | 32 | AC   | 15 | 6  |
| 358069 | 98 | 1093786 | 1093811 | 2 | 13 | 26 | AC   | 17 | 7  |
| 358090 | 98 | 1111811 | 1111848 | 2 | 19 | 38 | AC   | 15 | 7  |
| 358092 | 98 | 1112071 | 1112090 | 2 | 10 | 20 | AC   | 21 | 3  |
| 358093 | 98 | 1112965 | 1112990 | 2 | 13 | 26 | GT   | 15 | 6  |
| 358094 | 98 | 1113140 | 1113177 | 2 | 19 | 38 | AC   | 6  | 7  |
| 358096 | 98 | 1113489 | 1113508 | 2 | 10 | 20 | AC   | 19 | 6  |
| 358097 | 98 | 1113542 | 1113569 | 2 | 14 | 28 | TG   | 8  | 5  |
| 358098 | 98 | 1114166 | 1114183 | 2 | 9  | 18 | TG   | 24 | 5  |
| 358100 | 98 | 1121684 | 1121701 | 2 | 9  | 18 | GT   | 27 | 6  |
| 358103 | 98 | 1124188 | 1124203 | 2 | 8  | 16 | AC   | 12 | 4  |
| 358104 | 98 | 1134416 | 1134433 | 2 | 9  | 18 | GA   | 28 | 3  |
| 358107 | 98 | 1141777 | 1141790 | 2 | 7  | 14 | AT   | 10 | 5  |
| 358115 | 98 | 1145187 | 1145214 | 4 | 7  | 28 | CAGA | 25 | 7  |
| 358116 | 98 | 1145862 | 1145879 | 2 | 9  | 18 | AC   | 10 | 13 |
| 358117 | 98 | 1145915 | 1145926 | 2 | 6  | 12 | TC   | 20 | 3  |
| 358118 | 98 | 1154166 | 1154180 | 3 | 5  | 15 | CTC  | 20 | 4  |
| 358119 | 98 | 1154182 | 1154196 | 3 | 5  | 15 | TCC  | 19 | 3  |
| 358121 | 98 | 1156772 | 1156785 | 2 | 7  | 14 | AC   | 16 | 10 |
| 358122 | 98 | 1156788 | 1156799 | 2 | 6  | 12 | AC   | 19 | 12 |

|        |    |         |         |   |    |    |      |    |    |
|--------|----|---------|---------|---|----|----|------|----|----|
| 358125 | 98 | 1163226 | 1163241 | 2 | 8  | 16 | TG   | 27 | 5  |
| 358126 | 98 | 1164425 | 1164466 | 3 | 14 | 42 | AAT  | 12 | 7  |
| 358131 | 98 | 1169537 | 1169548 | 2 | 6  | 12 | CA   | 21 | 4  |
| 358133 | 98 | 1170061 | 1170084 | 2 | 12 | 24 | TG   | 21 | 12 |
| 358134 | 98 | 1170255 | 1170282 | 2 | 14 | 28 | TG   | 21 | 8  |
| 358136 | 98 | 1171609 | 1171626 | 2 | 9  | 18 | AC   | 24 | 5  |
| 358137 | 98 | 1171801 | 1171826 | 2 | 13 | 26 | AC   | 21 | 4  |
| 358138 | 98 | 1172711 | 1172752 | 2 | 21 | 42 | TG   | 13 | 9  |
| 358139 | 98 | 1172922 | 1172945 | 2 | 12 | 24 | AC   | 14 | 12 |
| 358143 | 98 | 1174705 | 1174720 | 2 | 8  | 16 | GT   | 21 | 5  |
| 358145 | 98 | 1176035 | 1176076 | 3 | 14 | 42 | TTC  | 27 | 18 |
| 358146 | 98 | 1177695 | 1177708 | 2 | 7  | 14 | GA   | 26 | 4  |
| 358149 | 98 | 1179898 | 1179911 | 2 | 7  | 14 | CA   | 20 | 3  |
| 358150 | 98 | 1182873 | 1182918 | 2 | 23 | 46 | GT   | 7  | 10 |
| 358151 | 98 | 1183994 | 1184029 | 2 | 18 | 36 | AC   | 9  | 9  |
| 358153 | 98 | 1185388 | 1185417 | 2 | 15 | 30 | AC   | 12 | 6  |
| 358154 | 98 | 1185801 | 1185824 | 2 | 12 | 24 | AC   | 17 | 7  |
| 358161 | 98 | 1191877 | 1191888 | 2 | 6  | 12 | TA   | 14 | 4  |
| 358164 | 98 | 1198252 | 1198267 | 2 | 8  | 16 | CA   | 18 | 5  |
| 358166 | 98 | 1202516 | 1202535 | 2 | 10 | 20 | GT   | 16 | 8  |
| 358170 | 98 | 1203536 | 1203571 | 3 | 12 | 36 | TCT  | 15 | 6  |
| 358177 | 98 | 1204150 | 1204177 | 2 | 14 | 28 | TG   | 9  | 6  |
| 358180 | 98 | 1204880 | 1204909 | 2 | 15 | 30 | GT   | 15 | 10 |
| 358184 | 98 | 1217930 | 1217963 | 2 | 17 | 34 | AC   | 13 | 8  |
| 358185 | 98 | 1218033 | 1218053 | 3 | 7  | 21 | CCT  | 23 | 3  |
| 358187 | 98 | 1220059 | 1220072 | 2 | 7  | 14 | GT   | 23 | 4  |
| 358188 | 98 | 1222400 | 1222439 | 2 | 20 | 40 | TG   | 7  | 5  |
| 358191 | 98 | 1237416 | 1237441 | 2 | 13 | 26 | GA   | 16 | 9  |
| 358206 | 98 | 1246172 | 1246187 | 2 | 8  | 16 | TC   | 28 | 5  |
| 358207 | 98 | 1248944 | 1248973 | 2 | 15 | 30 | GA   | 10 | 5  |
| 358210 | 98 | 1255709 | 1255736 | 2 | 14 | 28 | CA   | 10 | 5  |
| 358215 | 98 | 1258764 | 1258775 | 2 | 6  | 12 | TG   | 18 | 5  |
| 358216 | 98 | 1258820 | 1258835 | 2 | 8  | 16 | CA   | 27 | 4  |
| 358217 | 98 | 1258928 | 1258943 | 4 | 4  | 16 | ACAG | 29 | 3  |
| 358219 | 98 | 1259160 | 1259183 | 2 | 12 | 24 | TG   | 18 | 6  |
| 358225 | 98 | 1264314 | 1264331 | 2 | 9  | 18 | CA   | 18 | 3  |
| 358226 | 98 | 1265211 | 1265232 | 2 | 11 | 22 | GT   | 23 | 6  |
| 358229 | 98 | 1268789 | 1268818 | 2 | 15 | 30 | CA   | 14 | 10 |
| 358230 | 98 | 1268898 | 1268931 | 2 | 17 | 34 | TG   | 15 | 8  |
| 358231 | 98 | 1272848 | 1272867 | 2 | 10 | 20 | TC   | 16 | 4  |
| 358234 | 98 | 1274703 | 1274742 | 2 | 20 | 40 | CA   | 7  | 8  |
| 358237 | 98 | 1279737 | 1279768 | 4 | 8  | 32 | TATC | 16 | 5  |
| 358239 | 98 | 1284101 | 1284124 | 2 | 12 | 24 | TG   | 16 | 8  |
| 358240 | 98 | 1285303 | 1285316 | 2 | 7  | 14 | AT   | 9  | 6  |
| 358242 | 99 | 45256   | 45295   | 4 | 10 | 40 | ATGA | 25 | 8  |
| 358244 | 99 | 52859   | 52878   | 2 | 10 | 20 | AG   | 20 | 6  |
| 358246 | 99 | 55603   | 55620   | 3 | 6  | 18 | CAG  | 30 | 6  |
| 358248 | 99 | 57803   | 57832   | 2 | 15 | 30 | AC   | 6  | 8  |
| 358249 | 99 | 69553   | 69572   | 2 | 10 | 20 | TG   | 17 | 6  |
| 358255 | 99 | 90102   | 90119   | 3 | 6  | 18 | ATT  | 8  | 3  |
| 358260 | 99 | 104402  | 104413  | 2 | 6  | 12 | CT   | 27 | 3  |



|        |    |        |        |   |    |    |      |    |    |
|--------|----|--------|--------|---|----|----|------|----|----|
| 358262 | 99 | 106482 | 106505 | 2 | 12 | 24 | TG   | 16 | 10 |
| 358265 | 99 | 118282 | 118311 | 2 | 15 | 30 | AC   | 17 | 5  |
| 358267 | 99 | 128340 | 128353 | 2 | 7  | 14 | TG   | 30 | 3  |
| 358275 | 99 | 148058 | 148081 | 4 | 6  | 24 | TGTC | 24 | 4  |
| 358279 | 99 | 159245 | 159256 | 2 | 6  | 12 | TG   | 30 | 3  |
| 358285 | 99 | 179174 | 179200 | 3 | 9  | 27 | GAG  | 19 | 5  |
| 358289 | 99 | 186657 | 186684 | 2 | 14 | 28 | GT   | 14 | 11 |
| 358290 | 99 | 190773 | 190786 | 2 | 7  | 14 | TG   | 20 | 4  |
| 358291 | 99 | 190956 | 190973 | 2 | 9  | 18 | AC   | 23 | 14 |
| 358293 | 99 | 192913 | 192926 | 2 | 7  | 14 | TA   | 20 | 8  |
| 358301 | 99 | 219012 | 219041 | 2 | 15 | 30 | TG   | 13 | 7  |
| 358304 | 99 | 237837 | 237854 | 2 | 9  | 18 | AC   | 17 | 5  |
| 358306 | 99 | 244646 | 244659 | 2 | 7  | 14 | GT   | 9  | 5  |
| 358312 | 99 | 264122 | 264141 | 2 | 10 | 20 | GA   | 11 | 10 |
| 358314 | 99 | 264312 | 264341 | 2 | 15 | 30 | TG   | 13 | 8  |
| 358319 | 99 | 273418 | 273449 | 2 | 16 | 32 | TG   | 7  | 4  |
| 358326 | 99 | 292171 | 292200 | 3 | 10 | 30 | TGC  | 21 | 12 |
| 358327 | 99 | 292454 | 292471 | 3 | 6  | 18 | GGA  | 21 | 4  |
| 358332 | 99 | 309172 | 309191 | 2 | 10 | 20 | GT   | 18 | 10 |
| 358334 | 99 | 316523 | 316534 | 2 | 6  | 12 | AC   | 34 | 3  |
| 358345 | 99 | 348304 | 348317 | 2 | 7  | 14 | GT   | 22 | 4  |
| 358348 | 99 | 352491 | 352516 | 2 | 13 | 26 | GT   | 13 | 8  |
| 358350 | 99 | 354420 | 354441 | 2 | 11 | 22 | TG   | 20 | 6  |
| 358354 | 99 | 360509 | 360534 | 2 | 13 | 26 | TG   | 14 | 10 |
| 358355 | 99 | 361374 | 361413 | 2 | 20 | 40 | AC   | 20 | 8  |
| 358356 | 99 | 361817 | 361844 | 2 | 14 | 28 | CA   | 20 | 11 |
| 358357 | 99 | 363760 | 363771 | 2 | 6  | 12 | TA   | 18 | 7  |
| 358362 | 99 | 378222 | 378253 | 2 | 16 | 32 | TG   | 14 | 12 |
| 358368 | 99 | 409323 | 409340 | 3 | 6  | 18 | CCT  | 15 | 5  |
| 358370 | 99 | 415266 | 415286 | 3 | 7  | 21 | TGT  | 18 | 9  |
| 358373 | 99 | 416197 | 416218 | 2 | 11 | 22 | AG   | 8  | 5  |
| 358379 | 99 | 418114 | 418155 | 2 | 21 | 42 | TG   | 13 | 11 |
| 358385 | 99 | 430910 | 430941 | 2 | 16 | 32 | TG   | 6  | 8  |
| 358386 | 99 | 431516 | 431541 | 2 | 13 | 26 | CA   | 12 | 10 |
| 358387 | 99 | 433247 | 433260 | 2 | 7  | 14 | GT   | 30 | 3  |
| 358395 | 99 | 442571 | 442594 | 2 | 12 | 24 | TG   | 15 | 11 |
| 358396 | 99 | 445435 | 445446 | 2 | 6  | 12 | TC   | 27 | 4  |
| 358397 | 99 | 447453 | 447466 | 2 | 7  | 14 | TG   | 24 | 5  |
| 358399 | 99 | 450087 | 450108 | 2 | 11 | 22 | TG   | 17 | 10 |
| 358402 | 99 | 456992 | 457003 | 2 | 6  | 12 | CA   | 24 | 5  |
| 358408 | 99 | 466671 | 466686 | 4 | 4  | 16 | CCAT | 39 | 3  |
| 358415 | 99 | 472504 | 472559 | 2 | 28 | 56 | TG   | 7  | 6  |
| 358417 | 99 | 473911 | 473930 | 2 | 10 | 20 | GT   | 19 | 7  |
| 358418 | 99 | 474145 | 474160 | 2 | 8  | 16 | CA   | 10 | 8  |
| 358419 | 99 | 474520 | 474533 | 2 | 7  | 14 | TA   | 21 | 4  |
| 358421 | 99 | 477497 | 477514 | 2 | 9  | 18 | GT   | 21 | 5  |
| 358424 | 99 | 481617 | 481628 | 2 | 6  | 12 | TC   | 16 | 5  |
| 358426 | 99 | 482990 | 483001 | 2 | 6  | 12 | CA   | 28 | 3  |
| 358434 | 99 | 507828 | 507841 | 2 | 7  | 14 | GT   | 18 | 7  |
| 358435 | 99 | 509899 | 509930 | 2 | 16 | 32 | TG   | 6  | 7  |
| 358437 | 99 | 511396 | 511419 | 2 | 12 | 24 | TG   | 15 | 4  |

|        |    |         |         |   |    |    |      |    |    |
|--------|----|---------|---------|---|----|----|------|----|----|
| 358439 | 99 | 512166  | 512187  | 2 | 11 | 22 | CA   | 14 | 5  |
| 358440 | 99 | 514604  | 514627  | 2 | 12 | 24 | TG   | 19 | 9  |
| 358447 | 99 | 526777  | 526806  | 2 | 15 | 30 | TG   | 17 | 9  |
| 358448 | 99 | 530780  | 530791  | 2 | 6  | 12 | GT   | 26 | 5  |
| 358452 | 99 | 542221  | 542238  | 3 | 6  | 18 | CCT  | 19 | 4  |
| 358454 | 99 | 543477  | 543488  | 2 | 6  | 12 | CT   | 35 | 3  |
| 358456 | 99 | 544110  | 544124  | 3 | 5  | 15 | GGA  | 19 | 3  |
| 358458 | 99 | 544814  | 544841  | 2 | 14 | 28 | AC   | 24 | 8  |
| 358479 | 99 | 584270  | 584285  | 4 | 4  | 16 | CATC | 29 | 3  |
| 358481 | 99 | 586237  | 586248  | 2 | 6  | 12 | CA   | 15 | 8  |
| 358482 | 99 | 586250  | 586263  | 2 | 7  | 14 | AC   | 20 | 9  |
| 358485 | 99 | 590792  | 590823  | 2 | 16 | 32 | AC   | 6  | 6  |
| 358488 | 99 | 606659  | 606686  | 2 | 14 | 28 | TG   | 9  | 5  |
| 358496 | 99 | 626566  | 626581  | 2 | 8  | 16 | AC   | 19 | 4  |
| 358503 | 99 | 638796  | 638813  | 2 | 9  | 18 | TG   | 23 | 6  |
| 358504 | 99 | 639091  | 639104  | 2 | 7  | 14 | TG   | 28 | 3  |
| 358511 | 99 | 659136  | 659155  | 2 | 10 | 20 | TG   | 21 | 4  |
| 358513 | 99 | 659826  | 659853  | 2 | 14 | 28 | CA   | 22 | 5  |
| 358514 | 99 | 665469  | 665484  | 2 | 8  | 16 | GT   | 24 | 6  |
| 358516 | 99 | 667285  | 667298  | 2 | 7  | 14 | CA   | 30 | 5  |
| 358521 | 99 | 698326  | 698337  | 2 | 6  | 12 | GT   | 26 | 4  |
| 358522 | 99 | 698824  | 698855  | 2 | 16 | 32 | AC   | 6  | 6  |
| 358525 | 99 | 703723  | 703742  | 2 | 10 | 20 | AC   | 18 | 4  |
| 358533 | 99 | 723543  | 723554  | 2 | 6  | 12 | AC   | 18 | 5  |
| 358536 | 99 | 727791  | 727802  | 2 | 6  | 12 | AG   | 32 | 3  |
| 358539 | 99 | 736602  | 736629  | 4 | 7  | 28 | TCAA | 24 | 5  |
| 358540 | 99 | 738098  | 738109  | 2 | 6  | 12 | AG   | 28 | 3  |
| 358541 | 99 | 741484  | 741511  | 2 | 14 | 28 | AC   | 18 | 7  |
| 358544 | 99 | 746288  | 746327  | 2 | 20 | 40 | GT   | 10 | 11 |
| 358549 | 99 | 759684  | 759711  | 2 | 14 | 28 | CA   | 20 | 10 |
| 358556 | 99 | 766422  | 766443  | 2 | 11 | 22 | AC   | 16 | 11 |
| 358557 | 99 | 767690  | 767731  | 2 | 21 | 42 | CA   | 7  | 10 |
| 358559 | 99 | 773130  | 773141  | 2 | 6  | 12 | CA   | 27 | 3  |
| 358561 | 99 | 777366  | 777377  | 2 | 6  | 12 | CT   | 24 | 4  |
| 358562 | 99 | 778869  | 778884  | 2 | 8  | 16 | GA   | 23 | 3  |
| 358566 | 99 | 796572  | 796593  | 2 | 11 | 22 | CA   | 22 | 5  |
| 358567 | 99 | 802071  | 802098  | 2 | 14 | 28 | AC   | 7  | 5  |
| 358569 | 99 | 802984  | 803011  | 2 | 14 | 28 | AC   | 10 | 5  |
| 358576 | 99 | 823754  | 823787  | 2 | 17 | 34 | GT   | 6  | 10 |
| 358577 | 99 | 826909  | 826920  | 2 | 6  | 12 | CA   | 25 | 3  |
| 358578 | 99 | 827851  | 827876  | 2 | 13 | 26 | GT   | 15 | 8  |
| 358579 | 99 | 829911  | 829950  | 2 | 20 | 40 | TG   | 14 | 10 |
| 358582 | 99 | 836466  | 836493  | 2 | 14 | 28 | TG   | 22 | 10 |
| 358593 | 99 | 885415  | 885444  | 2 | 15 | 30 | GT   | 8  | 8  |
| 358595 | 99 | 907041  | 907064  | 3 | 8  | 24 | TTA  | 17 | 7  |
| 358599 | 99 | 927071  | 927094  | 4 | 6  | 24 | CAAA | 26 | 8  |
| 358616 | 99 | 968934  | 968959  | 2 | 13 | 26 | GT   | 21 | 13 |
| 358626 | 99 | 979125  | 979144  | 2 | 10 | 20 | GT   | 11 | 4  |
| 358656 | 99 | 1098376 | 1098407 | 2 | 16 | 32 | TG   | 22 | 10 |
| 358658 | 99 | 1101737 | 1101751 | 3 | 5  | 15 | TTG  | 21 | 3  |
| 358659 | 99 | 1102912 | 1102927 | 2 | 8  | 16 | AG   | 23 | 5  |

|        |     |         |         |   |    |    |      |    |    |
|--------|-----|---------|---------|---|----|----|------|----|----|
| 358663 | 99  | 1112705 | 1112740 | 2 | 18 | 36 | AC   | 11 | 11 |
| 358683 | 99  | 1144348 | 1144362 | 3 | 5  | 15 | GAT  | 21 | 3  |
| 358685 | 99  | 1150713 | 1150733 | 3 | 7  | 21 | TTC  | 22 | 8  |
| 358690 | 99  | 1156387 | 1156402 | 2 | 8  | 16 | CA   | 17 | 8  |
| 358699 | 99  | 1170531 | 1170550 | 2 | 10 | 20 | TG   | 12 | 6  |
| 358701 | 99  | 1173496 | 1173517 | 2 | 11 | 22 | AC   | 10 | 9  |
| 358703 | 99  | 1176648 | 1176665 | 3 | 6  | 18 | CTC  | 22 | 6  |
| 358710 | 99  | 1190615 | 1190648 | 2 | 17 | 34 | TG   | 8  | 10 |
| 358721 | 99  | 1214476 | 1214499 | 2 | 12 | 24 | GT   | 12 | 7  |
| 358724 | 99  | 1218741 | 1218752 | 2 | 6  | 12 | CA   | 21 | 5  |
| 358725 | 99  | 1220637 | 1220666 | 2 | 15 | 30 | TG   | 8  | 5  |
| 358729 | 99  | 1227314 | 1227343 | 3 | 10 | 30 | TGT  | 24 | 6  |
| 358731 | 99  | 1230748 | 1230765 | 2 | 9  | 18 | TG   | 22 | 5  |
| 358732 | 99  | 1231420 | 1231439 | 2 | 10 | 20 | AG   | 13 | 3  |
| 358733 | 99  | 1232482 | 1232503 | 2 | 11 | 22 | CA   | 17 | 7  |
| 358734 | 99  | 1236024 | 1236035 | 2 | 6  | 12 | GA   | 21 | 4  |
| 358737 | 99  | 1243800 | 1243823 | 2 | 12 | 24 | TG   | 13 | 8  |
| 358762 | 99  | 1248161 | 1248182 | 2 | 11 | 22 | GT   | 6  | 5  |
| 358764 | 99  | 1248410 | 1248439 | 2 | 15 | 30 | AC   | 15 | 7  |
| 358766 | 99  | 1249057 | 1249088 | 2 | 16 | 32 | AC   | 6  | 7  |
| 358767 | 99  | 1249159 | 1249176 | 2 | 9  | 18 | TG   | 10 | 11 |
| 358768 | 99  | 1249419 | 1249458 | 2 | 20 | 40 | TG   | 10 | 7  |
| 358772 | 99  | 1251034 | 1251073 | 2 | 20 | 40 | CA   | 11 | 9  |
| 358808 | 99  | 1275981 | 1276010 | 2 | 15 | 30 | TG   | 11 | 9  |
| 358809 | 99  | 1276156 | 1276191 | 2 | 18 | 36 | AC   | 8  | 11 |
| 358811 | 99  | 1277563 | 1277586 | 2 | 12 | 24 | TG   | 10 | 8  |
| 358812 | 99  | 1278298 | 1278325 | 2 | 14 | 28 | CA   | 7  | 5  |
| 358814 | 99  | 1278657 | 1278677 | 3 | 7  | 21 | CCT  | 19 | 7  |
| 358817 | 99  | 1279219 | 1279240 | 2 | 11 | 22 | CA   | 12 | 10 |
| 358819 | 99  | 1280807 | 1280842 | 2 | 18 | 36 | AC   | 12 | 8  |
| 358820 | 99  | 1281347 | 1281376 | 2 | 15 | 30 | AC   | 17 | 13 |
| 358821 | 99  | 1281442 | 1281453 | 2 | 6  | 12 | GT   | 12 | 4  |
| 358822 | 99  | 1282940 | 1282957 | 2 | 9  | 18 | AC   | 20 | 14 |
| 358825 | 99  | 1283960 | 1283993 | 2 | 17 | 34 | AC   | 11 | 11 |
| 358828 | 99  | 1286496 | 1286531 | 3 | 12 | 36 | GAG  | 10 | 9  |
| 358831 | 99  | 1288181 | 1288208 | 2 | 14 | 28 | GT   | 11 | 8  |
| 358832 | 99  | 1289345 | 1289372 | 4 | 7  | 28 | GTGC | 6  | 8  |
| 358845 | 100 | 4259    | 4288    | 2 | 15 | 30 | AC   | 10 | 11 |
| 358846 | 100 | 19073   | 19090   | 2 | 9  | 18 | TG   | 12 | 3  |
| 358849 | 100 | 35790   | 35819   | 2 | 15 | 30 | GT   | 15 | 16 |
| 358851 | 100 | 39797   | 39816   | 2 | 10 | 20 | GT   | 24 | 16 |
| 358853 | 100 | 39973   | 39986   | 2 | 7  | 14 | GT   | 22 | 5  |
| 358857 | 100 | 44497   | 44514   | 2 | 9  | 18 | GT   | 20 | 11 |
| 358858 | 100 | 44656   | 44667   | 2 | 6  | 12 | TG   | 23 | 6  |
| 358859 | 100 | 45146   | 45161   | 4 | 4  | 16 | CCAG | 21 | 4  |
| 358864 | 100 | 53040   | 53060   | 3 | 7  | 21 | GGA  | 9  | 7  |
| 358867 | 100 | 53563   | 53574   | 2 | 6  | 12 | CA   | 22 | 4  |
| 358872 | 100 | 72036   | 72049   | 2 | 7  | 14 | CT   | 22 | 7  |
| 358873 | 100 | 72176   | 72201   | 2 | 13 | 26 | CT   | 16 | 5  |
| 358876 | 100 | 72545   | 72566   | 2 | 11 | 22 | CA   | 16 | 13 |
| 358877 | 100 | 72691   | 72704   | 2 | 7  | 14 | AC   | 27 | 5  |

|        |     |        |        |   |    |    |      |    |    |
|--------|-----|--------|--------|---|----|----|------|----|----|
| 358882 | 100 | 78218  | 78247  | 3 | 10 | 30 | AAG  | 27 | 9  |
| 358887 | 100 | 85476  | 85513  | 2 | 19 | 38 | AC   | 15 | 6  |
| 358890 | 100 | 88381  | 88392  | 2 | 6  | 12 | AC   | 18 | 9  |
| 358891 | 100 | 89273  | 89284  | 2 | 6  | 12 | TA   | 13 | 3  |
| 358893 | 100 | 92541  | 92558  | 2 | 9  | 18 | GA   | 22 | 5  |
| 358896 | 100 | 98216  | 98249  | 2 | 17 | 34 | AC   | 14 | 9  |
| 358898 | 100 | 100446 | 100460 | 3 | 5  | 15 | CCT  | 15 | 6  |
| 358899 | 100 | 102142 | 102156 | 3 | 5  | 15 | TCC  | 19 | 4  |
| 358901 | 100 | 103801 | 103815 | 3 | 5  | 15 | GGA  | 18 | 9  |
| 358905 | 100 | 106888 | 106899 | 2 | 6  | 12 | AT   | 19 | 6  |
| 358907 | 100 | 107306 | 107325 | 2 | 10 | 20 | GT   | 8  | 7  |
| 358909 | 100 | 108963 | 108986 | 2 | 12 | 24 | TC   | 18 | 4  |
| 358910 | 100 | 110225 | 110239 | 3 | 5  | 15 | CAA  | 21 | 3  |
| 358911 | 100 | 110662 | 110691 | 3 | 10 | 30 | CTT  | 20 | 13 |
| 358917 | 100 | 113910 | 113930 | 3 | 7  | 21 | GCT  | 23 | 5  |
| 358918 | 100 | 114024 | 114041 | 2 | 9  | 18 | GT   | 14 | 9  |
| 358921 | 100 | 114405 | 114418 | 2 | 7  | 14 | AG   | 18 | 3  |
| 358929 | 100 | 123448 | 123463 | 4 | 4  | 16 | AACC | 20 | 4  |
| 358930 | 100 | 123467 | 123482 | 4 | 4  | 16 | CAAC | 22 | 5  |
| 358934 | 100 | 133213 | 133224 | 2 | 6  | 12 | CA   | 18 | 5  |
| 358937 | 100 | 136019 | 136044 | 2 | 13 | 26 | TG   | 25 | 6  |
| 358938 | 100 | 138047 | 138062 | 2 | 8  | 16 | GT   | 19 | 9  |
| 358939 | 100 | 138098 | 138109 | 2 | 6  | 12 | TG   | 10 | 3  |
| 358940 | 100 | 138229 | 138248 | 2 | 10 | 20 | TG   | 19 | 13 |
| 358941 | 100 | 139420 | 139437 | 2 | 9  | 18 | CA   | 20 | 13 |
| 358943 | 100 | 139567 | 139594 | 2 | 14 | 28 | AC   | 13 | 5  |
| 358944 | 100 | 140454 | 140480 | 3 | 9  | 27 | AGC  | 21 | 4  |
| 358951 | 100 | 141993 | 142010 | 2 | 9  | 18 | CA   | 15 | 8  |
| 358952 | 100 | 145213 | 145234 | 2 | 11 | 22 | AC   | 22 | 6  |
| 358956 | 100 | 152855 | 152906 | 2 | 26 | 52 | AC   | 9  | 14 |
| 358962 | 100 | 164580 | 164594 | 3 | 5  | 15 | ACC  | 15 | 7  |
| 358965 | 100 | 185512 | 185539 | 4 | 7  | 28 | CTTT | 33 | 3  |
| 358967 | 100 | 194644 | 194669 | 2 | 13 | 26 | AC   | 11 | 14 |
| 358970 | 100 | 204751 | 204766 | 2 | 8  | 16 | AG   | 28 | 6  |
| 358971 | 100 | 204966 | 204989 | 3 | 8  | 24 | TTC  | 20 | 4  |
| 358973 | 100 | 205328 | 205353 | 2 | 13 | 26 | AC   | 11 | 9  |
| 358975 | 100 | 205531 | 205554 | 3 | 8  | 24 | TCA  | 29 | 4  |
| 358982 | 100 | 220718 | 220737 | 2 | 10 | 20 | TG   | 13 | 5  |
| 358994 | 100 | 223178 | 223198 | 3 | 7  | 21 | ATT  | 14 | 5  |
| 358995 | 100 | 223674 | 223713 | 4 | 10 | 40 | AGAA | 15 | 13 |
| 359002 | 100 | 252904 | 252919 | 4 | 4  | 16 | TAAA | 22 | 3  |
| 359003 | 100 | 254611 | 254632 | 2 | 11 | 22 | GT   | 17 | 7  |
| 359004 | 100 | 254780 | 254807 | 2 | 14 | 28 | CA   | 17 | 8  |
| 359005 | 100 | 257102 | 257125 | 2 | 12 | 24 | GT   | 13 | 13 |
| 359019 | 100 | 284573 | 284594 | 2 | 11 | 22 | CA   | 14 | 8  |
| 359021 | 100 | 288798 | 288811 | 2 | 7  | 14 | CT   | 27 | 3  |
| 359022 | 100 | 289548 | 289563 | 4 | 4  | 16 | AGAT | 29 | 4  |
| 359025 | 100 | 299362 | 299373 | 2 | 6  | 12 | GA   | 27 | 3  |
| 359026 | 100 | 300844 | 300885 | 2 | 21 | 42 | GT   | 7  | 8  |
| 359028 | 100 | 303803 | 303816 | 2 | 7  | 14 | AC   | 22 | 3  |
| 359029 | 100 | 306592 | 306615 | 2 | 12 | 24 | TG   | 20 | 4  |

|        |     |        |        |   |    |    |      |    |    |
|--------|-----|--------|--------|---|----|----|------|----|----|
| 359031 | 100 | 311282 | 311301 | 2 | 10 | 20 | GT   | 25 | 6  |
| 359034 | 100 | 316528 | 316569 | 2 | 21 | 42 | TG   | 17 | 14 |
| 359037 | 100 | 327711 | 327748 | 2 | 19 | 38 | GT   | 7  | 10 |
| 359039 | 100 | 328156 | 328191 | 2 | 18 | 36 | GT   | 15 | 10 |
| 359040 | 100 | 328335 | 328362 | 2 | 14 | 28 | AC   | 7  | 9  |
| 359047 | 100 | 337258 | 337269 | 2 | 6  | 12 | CA   | 23 | 4  |
| 359053 | 100 | 345413 | 345430 | 2 | 9  | 18 | AC   | 21 | 9  |
| 359055 | 100 | 346376 | 346401 | 2 | 13 | 26 | GA   | 22 | 6  |
| 359056 | 100 | 350843 | 350860 | 3 | 6  | 18 | CAG  | 23 | 6  |
| 359061 | 100 | 362875 | 362888 | 2 | 7  | 14 | TC   | 9  | 4  |
| 359069 | 100 | 374622 | 374642 | 3 | 7  | 21 | TCT  | 35 | 3  |
| 359070 | 100 | 375521 | 375538 | 2 | 9  | 18 | TG   | 22 | 6  |
| 359072 | 100 | 380326 | 380345 | 4 | 5  | 20 | TTTA | 22 | 4  |
| 359073 | 100 | 384206 | 384217 | 2 | 6  | 12 | GT   | 24 | 11 |
| 359075 | 100 | 387037 | 387058 | 2 | 11 | 22 | AG   | 13 | 9  |
| 359076 | 100 | 389207 | 389234 | 2 | 14 | 28 | TG   | 16 | 15 |
| 359077 | 100 | 389815 | 389830 | 4 | 4  | 16 | TGGC | 26 | 6  |
| 359079 | 100 | 395523 | 395540 | 2 | 9  | 18 | CA   | 26 | 9  |
| 359080 | 100 | 396535 | 396558 | 2 | 12 | 24 | CT   | 19 | 8  |
| 359081 | 100 | 398456 | 398473 | 2 | 9  | 18 | GT   | 19 | 8  |
| 359082 | 100 | 399607 | 399632 | 2 | 13 | 26 | TG   | 34 | 7  |
| 359084 | 100 | 403662 | 403677 | 2 | 8  | 16 | AC   | 7  | 6  |
| 359087 | 100 | 407771 | 407798 | 2 | 14 | 28 | CA   | 25 | 7  |
| 359088 | 100 | 408077 | 408092 | 2 | 8  | 16 | GT   | 27 | 9  |
| 359089 | 100 | 409751 | 409762 | 2 | 6  | 12 | AT   | 12 | 6  |
| 359091 | 100 | 414955 | 414982 | 2 | 14 | 28 | GT   | 16 | 11 |
| 359092 | 100 | 416411 | 416434 | 2 | 12 | 24 | AC   | 27 | 22 |
| 359094 | 100 | 420977 | 421016 | 2 | 20 | 40 | GT   | 16 | 10 |
| 359095 | 100 | 421316 | 421335 | 2 | 10 | 20 | AG   | 27 | 6  |
| 359096 | 100 | 422906 | 422919 | 2 | 7  | 14 | TG   | 23 | 6  |
| 359098 | 100 | 425241 | 425284 | 2 | 22 | 44 | TG   | 7  | 9  |
| 359099 | 100 | 432663 | 432682 | 2 | 10 | 20 | GT   | 23 | 4  |
| 359101 | 100 | 434706 | 434755 | 2 | 25 | 50 | CA   | 10 | 12 |
| 359102 | 100 | 434930 | 434944 | 3 | 5  | 15 | TGA  | 22 | 4  |
| 359105 | 100 | 439144 | 439185 | 2 | 21 | 42 | AC   | 6  | 9  |
| 359107 | 100 | 443311 | 443328 | 2 | 9  | 18 | TG   | 23 | 8  |
| 359109 | 100 | 446269 | 446302 | 2 | 17 | 34 | AC   | 11 | 8  |
| 359117 | 100 | 462719 | 462738 | 2 | 10 | 20 | CT   | 20 | 6  |
| 359119 | 100 | 463364 | 463379 | 2 | 8  | 16 | AG   | 23 | 3  |
| 359120 | 100 | 463729 | 463742 | 2 | 7  | 14 | TG   | 27 | 7  |
| 359123 | 100 | 466134 | 466149 | 2 | 8  | 16 | AT   | 18 | 6  |
| 359125 | 100 | 472415 | 472434 | 2 | 10 | 20 | TG   | 17 | 9  |
| 359130 | 100 | 480760 | 480775 | 2 | 8  | 16 | CA   | 28 | 4  |
| 359135 | 100 | 492566 | 492581 | 2 | 8  | 16 | AC   | 25 | 7  |
| 359136 | 100 | 495615 | 495630 | 2 | 8  | 16 | AC   | 27 | 3  |
| 359139 | 100 | 500945 | 500956 | 2 | 6  | 12 | GT   | 26 | 9  |
| 359141 | 100 | 503230 | 503255 | 2 | 13 | 26 | CA   | 17 | 10 |
| 359142 | 100 | 504182 | 504195 | 2 | 7  | 14 | TC   | 25 | 15 |
| 359143 | 100 | 504792 | 504803 | 2 | 6  | 12 | CT   | 32 | 3  |
| 359144 | 100 | 506744 | 506758 | 3 | 5  | 15 | ACA  | 17 | 8  |
| 359145 | 100 | 512328 | 512345 | 2 | 9  | 18 | TA   | 10 | 6  |

|        |     |        |        |   |    |    |      |    |    |
|--------|-----|--------|--------|---|----|----|------|----|----|
| 359146 | 100 | 513224 | 513235 | 2 | 6  | 12 | GT   | 23 | 5  |
| 359149 | 100 | 516241 | 516270 | 2 | 15 | 30 | AC   | 10 | 11 |
| 359151 | 100 | 525111 | 525128 | 3 | 6  | 18 | GAG  | 28 | 6  |
| 359152 | 100 | 526646 | 526679 | 2 | 17 | 34 | TG   | 12 | 11 |
| 359155 | 100 | 530936 | 530963 | 2 | 14 | 28 | AC   | 23 | 10 |
| 359160 | 100 | 538703 | 538714 | 2 | 6  | 12 | CA   | 24 | 3  |
| 359167 | 100 | 562010 | 562037 | 2 | 14 | 28 | AC   | 16 | 10 |
| 359168 | 100 | 563315 | 563346 | 2 | 16 | 32 | AC   | 27 | 19 |
| 359170 | 100 | 564276 | 564301 | 2 | 13 | 26 | GT   | 10 | 14 |
| 359173 | 100 | 570014 | 570028 | 3 | 5  | 15 | AAC  | 26 | 4  |
| 359178 | 100 | 587458 | 587497 | 2 | 20 | 40 | AC   | 10 | 10 |
| 359179 | 100 | 587924 | 587945 | 2 | 11 | 22 | AC   | 22 | 11 |
| 359180 | 100 | 588584 | 588601 | 3 | 6  | 18 | GCT  | 21 | 6  |
| 359187 | 100 | 595571 | 595582 | 2 | 6  | 12 | GT   | 29 | 5  |
| 359189 | 100 | 597532 | 597549 | 3 | 6  | 18 | GCT  | 30 | 3  |
| 359191 | 100 | 599848 | 599867 | 4 | 5  | 20 | TGAT | 21 | 8  |
| 359192 | 100 | 607657 | 607690 | 2 | 17 | 34 | CA   | 12 | 13 |
| 359198 | 100 | 614989 | 615018 | 2 | 15 | 30 | CA   | 18 | 11 |
| 359199 | 100 | 615273 | 615286 | 2 | 7  | 14 | CA   | 24 | 3  |
| 359209 | 100 | 625895 | 625918 | 4 | 6  | 24 | AATA | 18 | 5  |
| 359210 | 100 | 632017 | 632030 | 2 | 7  | 14 | GT   | 13 | 11 |
| 359211 | 100 | 632032 | 632049 | 2 | 9  | 18 | TG   | 8  | 8  |
| 359212 | 100 | 634107 | 634128 | 2 | 11 | 22 | GT   | 24 | 7  |
| 359218 | 100 | 644650 | 644679 | 2 | 15 | 30 | CA   | 10 | 8  |
| 359230 | 100 | 661178 | 661207 | 2 | 15 | 30 | GT   | 11 | 6  |
| 359231 | 100 | 661465 | 661482 | 2 | 9  | 18 | GT   | 23 | 9  |
| 359235 | 100 | 669705 | 669744 | 2 | 20 | 40 | TG   | 7  | 7  |
| 359236 | 100 | 669894 | 669909 | 2 | 8  | 16 | AC   | 19 | 4  |
| 359239 | 100 | 675746 | 675781 | 2 | 18 | 36 | AC   | 7  | 10 |
| 359240 | 100 | 678226 | 678241 | 2 | 8  | 16 | AG   | 31 | 13 |
| 359241 | 100 | 679027 | 679038 | 2 | 6  | 12 | CA   | 22 | 9  |
| 359242 | 100 | 679316 | 679331 | 4 | 4  | 16 | TTAT | 29 | 3  |
| 359247 | 100 | 684473 | 684498 | 2 | 13 | 26 | GT   | 23 | 11 |
| 359253 | 100 | 700197 | 700218 | 2 | 11 | 22 | TC   | 13 | 3  |
| 359255 | 100 | 703617 | 703638 | 2 | 11 | 22 | CA   | 22 | 12 |
| 359257 | 100 | 709422 | 709439 | 2 | 9  | 18 | GT   | 15 | 4  |
| 359258 | 100 | 709659 | 709678 | 2 | 10 | 20 | AC   | 15 | 4  |
| 359259 | 100 | 711428 | 711439 | 2 | 6  | 12 | AC   | 23 | 3  |
| 359264 | 100 | 716631 | 716646 | 2 | 8  | 16 | CA   | 10 | 10 |
| 359272 | 100 | 719708 | 719743 | 2 | 18 | 36 | CA   | 13 | 10 |
| 359276 | 100 | 722274 | 722307 | 2 | 17 | 34 | AC   | 19 | 10 |
| 359282 | 100 | 726473 | 726498 | 2 | 13 | 26 | GT   | 14 | 12 |
| 359283 | 100 | 730706 | 730739 | 2 | 17 | 34 | GT   | 13 | 9  |
| 359284 | 100 | 734991 | 735010 | 2 | 10 | 20 | GA   | 26 | 5  |
| 359287 | 100 | 737860 | 737881 | 2 | 11 | 22 | AC   | 13 | 3  |
| 359288 | 100 | 738361 | 738378 | 2 | 9  | 18 | GA   | 28 | 9  |
| 359289 | 100 | 738645 | 738656 | 2 | 6  | 12 | GT   | 22 | 11 |
| 359290 | 100 | 738659 | 738672 | 2 | 7  | 14 | GT   | 17 | 12 |
| 359291 | 100 | 740409 | 740432 | 2 | 12 | 24 | TG   | 9  | 6  |
| 359295 | 100 | 749278 | 749304 | 3 | 9  | 27 | CTC  | 24 | 8  |
| 359297 | 100 | 749583 | 749598 | 2 | 8  | 16 | GA   | 17 | 6  |

|        |     |        |        |   |    |    |      |    |    |
|--------|-----|--------|--------|---|----|----|------|----|----|
| 359302 | 100 | 752143 | 752182 | 2 | 20 | 40 | AC   | 23 | 15 |
| 359303 | 100 | 752280 | 752297 | 2 | 9  | 18 | CA   | 22 | 3  |
| 359304 | 100 | 752431 | 752462 | 2 | 16 | 32 | CA   | 8  | 8  |
| 359305 | 100 | 755581 | 755614 | 2 | 17 | 34 | TG   | 10 | 11 |
| 359307 | 100 | 759196 | 759223 | 2 | 14 | 28 | AC   | 19 | 12 |
| 359308 | 100 | 759481 | 759506 | 2 | 13 | 26 | TG   | 18 | 13 |
| 359310 | 100 | 760634 | 760651 | 2 | 9  | 18 | GA   | 17 | 5  |
| 359311 | 100 | 760891 | 760920 | 2 | 15 | 30 | AC   | 14 | 7  |
| 359315 | 100 | 763308 | 763325 | 2 | 9  | 18 | GT   | 7  | 9  |
| 359317 | 100 | 766515 | 766532 | 2 | 9  | 18 | GT   | 15 | 6  |
| 359320 | 100 | 771648 | 771681 | 2 | 17 | 34 | GT   | 16 | 8  |
| 359321 | 100 | 771911 | 771922 | 2 | 6  | 12 | CT   | 25 | 3  |
| 359324 | 100 | 776921 | 776936 | 2 | 8  | 16 | CA   | 28 | 4  |
| 359338 | 100 | 790575 | 790589 | 3 | 5  | 15 | CTC  | 14 | 4  |
| 359339 | 100 | 790645 | 790660 | 4 | 4  | 16 | GGAG | 25 | 4  |
| 359341 | 100 | 795643 | 795669 | 3 | 9  | 27 | GAA  | 21 | 4  |
| 359344 | 100 | 799563 | 799576 | 2 | 7  | 14 | CA   | 28 | 3  |
| 359347 | 100 | 804953 | 804964 | 2 | 6  | 12 | TG   | 17 | 5  |
| 359353 | 100 | 814214 | 814234 | 3 | 7  | 21 | TCC  | 20 | 7  |
| 359354 | 100 | 814347 | 814370 | 3 | 8  | 24 | GCA  | 28 | 10 |
| 359355 | 100 | 814489 | 814508 | 2 | 10 | 20 | AC   | 15 | 6  |
| 359356 | 100 | 814904 | 814927 | 2 | 12 | 24 | TG   | 13 | 10 |
| 359360 | 100 | 833723 | 833740 | 3 | 6  | 18 | CAT  | 28 | 3  |
| 359361 | 100 | 835183 | 835198 | 2 | 8  | 16 | GT   | 26 | 6  |
| 359366 | 100 | 837023 | 837044 | 2 | 11 | 22 | CA   | 17 | 14 |
| 359367 | 100 | 837457 | 837484 | 4 | 7  | 28 | TGGA | 31 | 9  |
| 359368 | 100 | 840940 | 840977 | 2 | 19 | 38 | GT   | 6  | 8  |
| 359373 | 100 | 843984 | 844031 | 2 | 24 | 48 | AC   | 7  | 10 |
| 359374 | 100 | 846183 | 846215 | 3 | 11 | 33 | CCT  | 18 | 9  |
| 359375 | 100 | 846739 | 846758 | 2 | 10 | 20 | GT   | 10 | 13 |
| 359379 | 100 | 856749 | 856760 | 2 | 6  | 12 | TG   | 20 | 3  |
| 359381 | 100 | 858818 | 858835 | 2 | 9  | 18 | TG   | 15 | 10 |
| 359384 | 100 | 860776 | 860813 | 2 | 19 | 38 | GT   | 12 | 12 |
| 359385 | 100 | 860892 | 860905 | 2 | 7  | 14 | TG   | 22 | 3  |
| 359386 | 100 | 862213 | 862250 | 2 | 19 | 38 | GT   | 8  | 10 |
| 359387 | 100 | 862394 | 862423 | 2 | 15 | 30 | GT   | 13 | 17 |
| 359389 | 100 | 866367 | 866422 | 2 | 28 | 56 | TG   | 9  | 13 |
| 359391 | 100 | 866752 | 866763 | 2 | 6  | 12 | AC   | 21 | 3  |
| 359398 | 100 | 879791 | 879811 | 3 | 7  | 21 | TTC  | 17 | 4  |
| 359400 | 100 | 879983 | 880006 | 2 | 12 | 24 | CA   | 13 | 7  |
| 359401 | 100 | 884230 | 884250 | 3 | 7  | 21 | CAT  | 20 | 12 |
| 359402 | 100 | 884950 | 884995 | 2 | 23 | 46 | AC   | 8  | 10 |
| 359403 | 100 | 885210 | 885225 | 2 | 8  | 16 | AC   | 21 | 11 |
| 359405 | 100 | 887330 | 887367 | 2 | 19 | 38 | CA   | 11 | 12 |
| 359409 | 100 | 890279 | 890314 | 2 | 18 | 36 | GT   | 14 | 9  |
| 359410 | 100 | 890891 | 890910 | 2 | 10 | 20 | GT   | 27 | 6  |
| 359412 | 100 | 895509 | 895520 | 2 | 6  | 12 | CA   | 26 | 4  |
| 359414 | 100 | 904919 | 904946 | 2 | 14 | 28 | TG   | 16 | 8  |
| 359417 | 100 | 907987 | 908000 | 2 | 7  | 14 | AT   | 18 | 10 |
| 359418 | 100 | 909315 | 909340 | 2 | 13 | 26 | GT   | 24 | 12 |
| 359419 | 100 | 909502 | 909513 | 2 | 6  | 12 | GT   | 18 | 9  |

|        |     |         |         |   |    |    |      |    |    |
|--------|-----|---------|---------|---|----|----|------|----|----|
| 359421 | 100 | 916476  | 916493  | 3 | 6  | 18 | TCT  | 21 | 11 |
| 359422 | 100 | 916622  | 916639  | 3 | 6  | 18 | CTG  | 27 | 4  |
| 359425 | 100 | 923229  | 923248  | 2 | 10 | 20 | AC   | 22 | 12 |
| 359427 | 100 | 925775  | 925804  | 2 | 15 | 30 | GT   | 19 | 12 |
| 359429 | 100 | 927929  | 927954  | 2 | 13 | 26 | GA   | 16 | 9  |
| 359430 | 100 | 928512  | 928543  | 2 | 16 | 32 | GT   | 14 | 8  |
| 359431 | 100 | 928655  | 928670  | 2 | 8  | 16 | CA   | 7  | 7  |
| 359432 | 100 | 928673  | 928688  | 2 | 8  | 16 | CA   | 6  | 3  |
| 359436 | 100 | 937041  | 937064  | 2 | 12 | 24 | CA   | 19 | 13 |
| 359439 | 100 | 941786  | 941797  | 2 | 6  | 12 | GT   | 17 | 12 |
| 359440 | 100 | 941800  | 941815  | 2 | 8  | 16 | GT   | 13 | 8  |
| 359441 | 100 | 941920  | 941939  | 4 | 5  | 20 | CAGG | 27 | 14 |
| 359442 | 100 | 943402  | 943423  | 2 | 11 | 22 | TG   | 22 | 7  |
| 359445 | 100 | 947829  | 947850  | 2 | 11 | 22 | CA   | 17 | 5  |
| 359446 | 100 | 948186  | 948213  | 2 | 14 | 28 | TG   | 16 | 15 |
| 359447 | 100 | 949722  | 949742  | 3 | 7  | 21 | CAT  | 23 | 7  |
| 359463 | 100 | 989080  | 989093  | 2 | 7  | 14 | GT   | 15 | 7  |
| 359501 | 100 | 1026469 | 1026506 | 2 | 19 | 38 | TG   | 6  | 10 |
| 359502 | 100 | 1026636 | 1026663 | 2 | 14 | 28 | TG   | 13 | 13 |
| 359504 | 100 | 1028288 | 1028311 | 2 | 12 | 24 | AC   | 19 | 14 |
| 359505 | 100 | 1028903 | 1028916 | 2 | 7  | 14 | GT   | 19 | 5  |
| 359506 | 100 | 1029027 | 1029052 | 2 | 13 | 26 | GT   | 15 | 8  |
| 359507 | 100 | 1029087 | 1029112 | 2 | 13 | 26 | CA   | 13 | 7  |
| 359508 | 100 | 1030160 | 1030180 | 3 | 7  | 21 | ATA  | 25 | 7  |
| 359519 | 100 | 1044979 | 1044998 | 2 | 10 | 20 | CA   | 10 | 10 |
| 359520 | 100 | 1045121 | 1045142 | 2 | 11 | 22 | CA   | 22 | 9  |
| 359523 | 100 | 1049616 | 1049641 | 2 | 13 | 26 | GT   | 6  | 8  |
| 359524 | 100 | 1050796 | 1050821 | 2 | 13 | 26 | AC   | 14 | 12 |
| 359528 | 100 | 1055264 | 1055311 | 2 | 24 | 48 | TG   | 19 | 14 |
| 359529 | 100 | 1057821 | 1057836 | 2 | 8  | 16 | CT   | 20 | 3  |
| 359533 | 100 | 1062468 | 1062487 | 4 | 5  | 20 | GTCA | 25 | 8  |
| 359535 | 100 | 1065677 | 1065710 | 2 | 17 | 34 | CA   | 18 | 18 |
| 359536 | 100 | 1066190 | 1066217 | 2 | 14 | 28 | GT   | 18 | 9  |
| 359537 | 100 | 1068144 | 1068165 | 2 | 11 | 22 | CA   | 11 | 9  |
| 359538 | 100 | 1068303 | 1068320 | 2 | 9  | 18 | AC   | 19 | 10 |
| 359539 | 100 | 1068405 | 1068431 | 3 | 9  | 27 | GCT  | 18 | 11 |
| 359541 | 100 | 1071996 | 1072011 | 2 | 8  | 16 | CA   | 22 | 4  |
| 359545 | 100 | 1072348 | 1072379 | 2 | 16 | 32 | GT   | 17 | 15 |
| 359547 | 100 | 1074530 | 1074549 | 2 | 10 | 20 | CA   | 19 | 8  |
| 359550 | 100 | 1075304 | 1075315 | 2 | 6  | 12 | TG   | 11 | 13 |
| 359562 | 100 | 1080793 | 1080807 | 3 | 5  | 15 | CAG  | 25 | 7  |
| 359563 | 100 | 1081101 | 1081132 | 2 | 16 | 32 | AC   | 10 | 11 |
| 359565 | 100 | 1081945 | 1081968 | 3 | 8  | 24 | TCT  | 23 | 3  |
| 359566 | 100 | 1082188 | 1082221 | 2 | 17 | 34 | GT   | 13 | 12 |
| 359568 | 100 | 1082562 | 1082601 | 2 | 20 | 40 | CA   | 7  | 5  |
| 359569 | 100 | 1082647 | 1082670 | 2 | 12 | 24 | AC   | 10 | 8  |
| 359574 | 100 | 1083480 | 1083531 | 4 | 13 | 52 | ATCT | 16 | 19 |
| 359575 | 100 | 1084635 | 1084662 | 2 | 14 | 28 | GT   | 11 | 9  |
| 359580 | 100 | 1090056 | 1090083 | 2 | 14 | 28 | CA   | 9  | 9  |
| 359581 | 100 | 1090130 | 1090157 | 2 | 14 | 28 | CT   | 9  | 4  |
| 359582 | 100 | 1090187 | 1090202 | 2 | 8  | 16 | TC   | 14 | 3  |



|        |     |         |         |   |    |    |      |    |    |
|--------|-----|---------|---------|---|----|----|------|----|----|
| 359584 | 100 | 1090528 | 1090545 | 2 | 9  | 18 | TG   | 20 | 13 |
| 359585 | 100 | 1090617 | 1090632 | 2 | 8  | 16 | GT   | 23 | 9  |
| 359589 | 100 | 1093930 | 1093949 | 2 | 10 | 20 | AC   | 24 | 7  |
| 359590 | 100 | 1094030 | 1094051 | 2 | 11 | 22 | CA   | 11 | 6  |
| 359591 | 100 | 1095998 | 1096023 | 2 | 13 | 26 | CA   | 11 | 5  |
| 359592 | 100 | 1097774 | 1097793 | 2 | 10 | 20 | CT   | 12 | 3  |
| 359608 | 100 | 1100189 | 1100218 | 2 | 15 | 30 | AC   | 17 | 6  |
| 359611 | 100 | 1102015 | 1102048 | 2 | 17 | 34 | CA   | 17 | 8  |
| 359613 | 100 | 1105384 | 1105399 | 2 | 8  | 16 | GT   | 26 | 5  |
| 359618 | 100 | 1110858 | 1110905 | 2 | 24 | 48 | GT   | 10 | 11 |
| 359620 | 100 | 1112505 | 1112532 | 2 | 14 | 28 | GT   | 23 | 9  |
| 359623 | 100 | 1114408 | 1114423 | 4 | 4  | 16 | GAGC | 25 | 3  |
| 359630 | 100 | 1121037 | 1121058 | 2 | 11 | 22 | CA   | 21 | 9  |
| 359631 | 100 | 1121380 | 1121418 | 3 | 13 | 39 | CTT  | 9  | 5  |
| 359633 | 100 | 1123133 | 1123147 | 3 | 5  | 15 | AGG  | 26 | 6  |
| 359651 | 100 | 1136705 | 1136724 | 2 | 10 | 20 | TG   | 16 | 7  |
| 359652 | 100 | 1137205 | 1137232 | 2 | 14 | 28 | AC   | 12 | 8  |
| 359653 | 100 | 1137813 | 1137834 | 2 | 11 | 22 | CA   | 8  | 5  |
| 359658 | 100 | 1144068 | 1144106 | 3 | 13 | 39 | GGA  | 15 | 6  |
| 359660 | 100 | 1146386 | 1146397 | 2 | 6  | 12 | TG   | 21 | 3  |
| 359661 | 100 | 1146719 | 1146748 | 2 | 15 | 30 | CA   | 15 | 9  |
| 359664 | 100 | 1147753 | 1147764 | 2 | 6  | 12 | AT   | 26 | 3  |
| 359666 | 100 | 1148012 | 1148037 | 2 | 13 | 26 | AC   | 16 | 9  |
| 359668 | 100 | 1148499 | 1148530 | 2 | 16 | 32 | TG   | 9  | 9  |
| 359669 | 100 | 1149276 | 1149311 | 2 | 18 | 36 | GT   | 15 | 16 |
| 359674 | 100 | 1151558 | 1151577 | 2 | 10 | 20 | GT   | 13 | 7  |
| 359677 | 100 | 1152478 | 1152489 | 2 | 6  | 12 | TC   | 21 | 3  |
| 359678 | 100 | 1152655 | 1152684 | 3 | 10 | 30 | CCT  | 16 | 5  |
| 359679 | 100 | 1153089 | 1153116 | 2 | 14 | 28 | CA   | 16 | 10 |
| 359681 | 100 | 1155349 | 1155378 | 2 | 15 | 30 | GT   | 16 | 19 |
| 359683 | 100 | 1157905 | 1157925 | 3 | 7  | 21 | GCT  | 11 | 7  |
| 359684 | 100 | 1158703 | 1158728 | 2 | 13 | 26 | CA   | 10 | 10 |
| 359685 | 100 | 1159231 | 1159258 | 2 | 14 | 28 | CA   | 20 | 11 |
| 359686 | 100 | 1159384 | 1159399 | 2 | 8  | 16 | AC   | 10 | 10 |
| 359690 | 100 | 1161717 | 1161730 | 2 | 7  | 14 | CA   | 7  | 7  |
| 359693 | 100 | 1162937 | 1162954 | 3 | 6  | 18 | GAG  | 9  | 4  |
| 359694 | 100 | 1163215 | 1163230 | 2 | 8  | 16 | AC   | 20 | 10 |
| 359700 | 100 | 1173888 | 1173903 | 4 | 4  | 16 | CCTC | 17 | 3  |
| 359702 | 100 | 1177036 | 1177050 | 3 | 5  | 15 | TCT  | 25 | 3  |
| 359703 | 100 | 1178150 | 1178171 | 2 | 11 | 22 | CA   | 6  | 4  |
| 359704 | 100 | 1179866 | 1179891 | 2 | 13 | 26 | TG   | 17 | 5  |
| 359706 | 100 | 1186208 | 1186227 | 4 | 5  | 20 | ACAA | 26 | 9  |
| 359707 | 100 | 1188773 | 1188792 | 2 | 10 | 20 | GT   | 9  | 4  |
| 359708 | 100 | 1191180 | 1191221 | 2 | 21 | 42 | GT   | 8  | 11 |
| 359709 | 100 | 1192489 | 1192506 | 2 | 9  | 18 | CA   | 10 | 4  |
| 359710 | 100 | 1193584 | 1193597 | 2 | 7  | 14 | AT   | 28 | 4  |
| 359711 | 100 | 1194214 | 1194231 | 3 | 6  | 18 | CCT  | 23 | 4  |
| 359712 | 100 | 1194478 | 1194497 | 2 | 10 | 20 | CA   | 17 | 10 |
| 359713 | 100 | 1194697 | 1194730 | 2 | 17 | 34 | CA   | 10 | 13 |
| 359714 | 100 | 1195018 | 1195043 | 2 | 13 | 26 | TG   | 23 | 9  |
| 359715 | 100 | 1197741 | 1197756 | 2 | 8  | 16 | AC   | 19 | 4  |

|        |     |         |         |   |    |    |      |    |    |
|--------|-----|---------|---------|---|----|----|------|----|----|
| 359716 | 100 | 1198673 | 1198698 | 2 | 13 | 26 | GT   | 15 | 5  |
| 359717 | 100 | 1198881 | 1198902 | 2 | 11 | 22 | CA   | 19 | 12 |
| 359718 | 100 | 1199088 | 1199101 | 2 | 7  | 14 | CA   | 19 | 10 |
| 359719 | 100 | 1199235 | 1199262 | 2 | 14 | 28 | CA   | 11 | 9  |
| 359720 | 100 | 1199505 | 1199530 | 2 | 13 | 26 | CA   | 18 | 11 |
| 359725 | 100 | 1202801 | 1202824 | 3 | 8  | 24 | GAG  | 21 | 4  |
| 359733 | 100 | 1207495 | 1207516 | 2 | 11 | 22 | GT   | 15 | 9  |
| 359734 | 100 | 1208687 | 1208714 | 2 | 14 | 28 | TG   | 7  | 4  |
| 359735 | 100 | 1209576 | 1209589 | 2 | 7  | 14 | AG   | 21 | 5  |
| 359736 | 100 | 1210682 | 1210705 | 2 | 12 | 24 | TG   | 13 | 6  |
| 359746 | 100 | 1220320 | 1220335 | 2 | 8  | 16 | CA   | 15 | 15 |
| 359752 | 100 | 1225779 | 1225792 | 2 | 7  | 14 | GT   | 16 | 6  |
| 359753 | 100 | 1226790 | 1226803 | 2 | 7  | 14 | GT   | 26 | 8  |
| 359754 | 100 | 1226920 | 1226949 | 2 | 15 | 30 | CA   | 19 | 10 |
| 359758 | 100 | 1231694 | 1231709 | 2 | 8  | 16 | GT   | 18 | 17 |
| 359759 | 100 | 1231715 | 1231728 | 2 | 7  | 14 | TG   | 10 | 9  |
| 359763 | 100 | 1232965 | 1232986 | 2 | 11 | 22 | AC   | 7  | 11 |
| 359766 | 100 | 1235219 | 1235246 | 2 | 14 | 28 | GT   | 15 | 10 |
| 359767 | 100 | 1235366 | 1235385 | 2 | 10 | 20 | GT   | 9  | 14 |
| 359769 | 100 | 1235531 | 1235558 | 2 | 14 | 28 | AC   | 16 | 7  |
| 359772 | 100 | 1235761 | 1235778 | 2 | 9  | 18 | CA   | 23 | 9  |
| 359773 | 100 | 1237217 | 1237252 | 2 | 18 | 36 | CA   | 20 | 11 |
| 359776 | 100 | 1239246 | 1239260 | 3 | 5  | 15 | CCT  | 25 | 4  |
| 359779 | 100 | 1239973 | 1240004 | 2 | 16 | 32 | CA   | 11 | 10 |
| 359780 | 100 | 1240038 | 1240051 | 2 | 7  | 14 | AC   | 19 | 6  |
| 359783 | 100 | 1242469 | 1242483 | 3 | 5  | 15 | CCT  | 24 | 6  |
| 359784 | 100 | 1243054 | 1243086 | 3 | 11 | 33 | CTC  | 18 | 7  |
| 359785 | 100 | 1243941 | 1243962 | 2 | 11 | 22 | AC   | 16 | 13 |
| 359792 | 100 | 1248133 | 1248156 | 2 | 12 | 24 | AC   | 21 | 11 |
| 359793 | 100 | 1248313 | 1248352 | 2 | 20 | 40 | CA   | 8  | 11 |
| 359795 | 100 | 1249065 | 1249112 | 3 | 16 | 48 | AGA  | 21 | 13 |
| 359797 | 100 | 1250171 | 1250216 | 2 | 23 | 46 | CA   | 10 | 12 |
| 359800 | 100 | 1252860 | 1252907 | 2 | 24 | 48 | CA   | 6  | 8  |
| 359801 | 100 | 1253001 | 1253028 | 2 | 14 | 28 | AC   | 14 | 12 |
| 359802 | 100 | 1253058 | 1253087 | 2 | 15 | 30 | TG   | 21 | 6  |
| 359805 | 100 | 1253373 | 1253402 | 2 | 15 | 30 | CA   | 11 | 9  |
| 359811 | 100 | 1256958 | 1256987 | 2 | 15 | 30 | GT   | 11 | 10 |
| 359814 | 100 | 1258291 | 1258308 | 3 | 6  | 18 | GAG  | 21 | 10 |
| 359818 | 101 | 10747   | 10768   | 2 | 11 | 22 | TG   | 7  | 9  |
| 359820 | 101 | 27928   | 27954   | 3 | 9  | 27 | TGA  | 14 | 7  |
| 359821 | 101 | 28452   | 28475   | 3 | 8  | 24 | TGA  | 9  | 4  |
| 359824 | 101 | 39962   | 39979   | 3 | 6  | 18 | TCA  | 25 | 7  |
| 359825 | 101 | 42468   | 42499   | 2 | 16 | 32 | CA   | 17 | 14 |
| 359832 | 101 | 45221   | 45262   | 2 | 21 | 42 | AC   | 9  | 12 |
| 359843 | 101 | 78397   | 78420   | 2 | 12 | 24 | CA   | 15 | 12 |
| 359845 | 101 | 80779   | 80814   | 2 | 18 | 36 | GT   | 7  | 9  |
| 359846 | 101 | 83082   | 83145   | 4 | 16 | 64 | AGAA | 9  | 8  |
| 359847 | 101 | 84020   | 84031   | 2 | 6  | 12 | CT   | 34 | 4  |
| 359849 | 101 | 89961   | 89994   | 2 | 17 | 34 | GT   | 17 | 15 |
| 359850 | 101 | 90134   | 90165   | 2 | 16 | 32 | GT   | 12 | 6  |
| 359851 | 101 | 93229   | 93243   | 3 | 5  | 15 | GAC  | 19 | 6  |

|        |     |        |        |   |    |    |      |    |    |
|--------|-----|--------|--------|---|----|----|------|----|----|
| 359855 | 101 | 94914  | 94945  | 2 | 16 | 32 | AC   | 16 | 10 |
| 359860 | 101 | 97126  | 97145  | 2 | 10 | 20 | GT   | 9  | 8  |
| 359861 | 101 | 97214  | 97245  | 2 | 16 | 32 | AC   | 11 | 10 |
| 359863 | 101 | 110894 | 110921 | 2 | 14 | 28 | CA   | 9  | 7  |
| 359864 | 101 | 113984 | 113999 | 2 | 8  | 16 | GT   | 27 | 5  |
| 359866 | 101 | 114375 | 114394 | 2 | 10 | 20 | GT   | 18 | 9  |
| 359869 | 101 | 117045 | 117098 | 2 | 27 | 54 | CA   | 9  | 13 |
| 359870 | 101 | 117270 | 117302 | 3 | 11 | 33 | GGA  | 11 | 6  |
| 359874 | 101 | 131157 | 131172 | 2 | 8  | 16 | GT   | 25 | 6  |
| 359878 | 101 | 147305 | 147338 | 2 | 17 | 34 | GT   | 7  | 6  |
| 359895 | 101 | 151196 | 151247 | 4 | 13 | 52 | TTTC | 16 | 7  |
| 359896 | 101 | 151854 | 151875 | 2 | 11 | 22 | GT   | 15 | 7  |
| 359897 | 101 | 152047 | 152076 | 2 | 15 | 30 | GT   | 9  | 6  |
| 359900 | 101 | 153097 | 153118 | 2 | 11 | 22 | AG   | 13 | 4  |
| 359903 | 101 | 161061 | 161081 | 3 | 7  | 21 | AAC  | 21 | 10 |
| 359905 | 101 | 162031 | 162042 | 2 | 6  | 12 | CA   | 21 | 4  |
| 359906 | 101 | 162045 | 162058 | 2 | 7  | 14 | CA   | 24 | 6  |
| 359910 | 101 | 167173 | 167193 | 3 | 7  | 21 | AGA  | 32 | 4  |
| 359912 | 101 | 167802 | 167834 | 3 | 11 | 33 | CTT  | 24 | 8  |
| 359917 | 101 | 178209 | 178252 | 2 | 22 | 44 | GT   | 9  | 12 |
| 359919 | 101 | 179109 | 179132 | 3 | 8  | 24 | GAG  | 24 | 3  |
| 359920 | 101 | 179723 | 179742 | 2 | 10 | 20 | GT   | 22 | 10 |
| 359922 | 101 | 182916 | 182948 | 3 | 11 | 33 | CAG  | 27 | 8  |
| 359924 | 101 | 183718 | 183731 | 2 | 7  | 14 | CA   | 30 | 3  |
| 359925 | 101 | 183864 | 183875 | 2 | 6  | 12 | GT   | 26 | 5  |
| 359926 | 101 | 185931 | 185984 | 2 | 27 | 54 | TG   | 7  | 9  |
| 359928 | 101 | 187639 | 187668 | 2 | 15 | 30 | CA   | 12 | 8  |
| 359929 | 101 | 190744 | 190763 | 4 | 5  | 20 | AACA | 32 | 3  |
| 359931 | 101 | 201845 | 201876 | 2 | 16 | 32 | AC   | 16 | 9  |
| 359933 | 101 | 204437 | 204464 | 2 | 14 | 28 | AC   | 10 | 13 |
| 359934 | 101 | 205802 | 205843 | 2 | 21 | 42 | GT   | 8  | 8  |
| 359935 | 101 | 206290 | 206319 | 3 | 10 | 30 | GAA  | 20 | 7  |
| 359939 | 101 | 206914 | 206943 | 3 | 10 | 30 | TGA  | 23 | 5  |
| 359940 | 101 | 207318 | 207333 | 2 | 8  | 16 | CA   | 17 | 5  |
| 359944 | 101 | 217020 | 217043 | 3 | 8  | 24 | CCA  | 12 | 4  |
| 359947 | 101 | 226152 | 226181 | 2 | 15 | 30 | CA   | 11 | 8  |
| 359951 | 101 | 238989 | 239006 | 2 | 9  | 18 | CA   | 25 | 4  |
| 359953 | 101 | 245669 | 245700 | 2 | 16 | 32 | AC   | 20 | 6  |
| 359957 | 101 | 246370 | 246387 | 2 | 9  | 18 | AG   | 7  | 4  |
| 359960 | 101 | 247934 | 247971 | 2 | 19 | 38 | TG   | 13 | 13 |
| 359962 | 101 | 248139 | 248168 | 2 | 15 | 30 | CA   | 13 | 12 |
| 359965 | 101 | 249400 | 249421 | 2 | 11 | 22 | AC   | 20 | 7  |
| 359966 | 101 | 250044 | 250059 | 2 | 8  | 16 | CA   | 19 | 5  |
| 359967 | 101 | 250173 | 250192 | 2 | 10 | 20 | CA   | 10 | 3  |
| 359969 | 101 | 251009 | 251020 | 2 | 6  | 12 | AT   | 8  | 4  |
| 359973 | 101 | 255302 | 255327 | 2 | 13 | 26 | AC   | 11 | 13 |
| 359980 | 101 | 268040 | 268057 | 3 | 6  | 18 | TTA  | 26 | 3  |
| 359985 | 101 | 272465 | 272512 | 3 | 16 | 48 | TTC  | 22 | 14 |
| 359986 | 101 | 272649 | 272662 | 2 | 7  | 14 | CT   | 12 | 8  |
| 359994 | 101 | 288295 | 288309 | 3 | 5  | 15 | CTG  | 23 | 4  |
| 359995 | 101 | 293986 | 294005 | 2 | 10 | 20 | CT   | 22 | 4  |

|        |     |        |        |   |    |    |      |    |    |
|--------|-----|--------|--------|---|----|----|------|----|----|
| 359997 | 101 | 298792 | 298823 | 2 | 16 | 32 | CA   | 12 | 10 |
| 359999 | 101 | 302731 | 302745 | 3 | 5  | 15 | TCT  | 28 | 4  |
| 360000 | 101 | 303792 | 303806 | 3 | 5  | 15 | TCC  | 17 | 10 |
| 360002 | 101 | 304353 | 304382 | 2 | 15 | 30 | GT   | 16 | 12 |
| 360004 | 101 | 305362 | 305399 | 2 | 19 | 38 | GT   | 6  | 8  |
| 360018 | 101 | 370564 | 370584 | 3 | 7  | 21 | AGC  | 27 | 6  |
| 360020 | 101 | 376147 | 376166 | 2 | 10 | 20 | AC   | 11 | 5  |
| 360027 | 101 | 395744 | 395765 | 2 | 11 | 22 | CA   | 17 | 10 |
| 360029 | 101 | 398113 | 398124 | 2 | 6  | 12 | TG   | 24 | 10 |
| 360030 | 101 | 398127 | 398144 | 2 | 9  | 18 | TG   | 26 | 11 |
| 360050 | 101 | 425042 | 425055 | 2 | 7  | 14 | CT   | 15 | 4  |
| 360058 | 101 | 443353 | 443384 | 2 | 16 | 32 | TG   | 11 | 7  |
| 360063 | 101 | 450900 | 450917 | 3 | 6  | 18 | GAG  | 31 | 4  |
| 360066 | 101 | 456608 | 456641 | 2 | 17 | 34 | CA   | 17 | 9  |
| 360077 | 101 | 471026 | 471043 | 2 | 9  | 18 | GT   | 22 | 10 |
| 360080 | 101 | 481578 | 481615 | 2 | 19 | 38 | AC   | 10 | 8  |
| 360087 | 101 | 500709 | 500746 | 2 | 19 | 38 | AC   | 6  | 8  |
| 360089 | 101 | 502858 | 502879 | 2 | 11 | 22 | AC   | 14 | 15 |
| 360091 | 101 | 503365 | 503379 | 3 | 5  | 15 | TTC  | 10 | 9  |
| 360093 | 101 | 503697 | 503716 | 4 | 5  | 20 | AAAG | 24 | 3  |
| 360105 | 101 | 529570 | 529585 | 2 | 8  | 16 | TG   | 30 | 6  |
| 360119 | 101 | 556948 | 556967 | 2 | 10 | 20 | CA   | 25 | 7  |
| 360123 | 101 | 563215 | 563230 | 2 | 8  | 16 | GT   | 26 | 5  |
| 360126 | 101 | 566203 | 566217 | 3 | 5  | 15 | ATT  | 12 | 3  |
| 360129 | 101 | 567969 | 567980 | 2 | 6  | 12 | CA   | 31 | 3  |
| 360138 | 101 | 600615 | 600634 | 2 | 10 | 20 | TC   | 27 | 4  |
| 360147 | 101 | 614165 | 614184 | 4 | 5  | 20 | TCTG | 17 | 7  |
| 360154 | 101 | 635469 | 635498 | 2 | 15 | 30 | GT   | 9  | 9  |
| 360155 | 101 | 636659 | 636678 | 2 | 10 | 20 | GT   | 23 | 13 |
| 360156 | 101 | 644363 | 644392 | 2 | 15 | 30 | TG   | 8  | 8  |
| 360165 | 101 | 655456 | 655469 | 2 | 7  | 14 | GT   | 21 | 3  |
| 360166 | 101 | 655731 | 655748 | 3 | 6  | 18 | CTG  | 28 | 7  |
| 360167 | 101 | 655930 | 655943 | 2 | 7  | 14 | AT   | 25 | 6  |
| 360168 | 101 | 657494 | 657508 | 3 | 5  | 15 | AAC  | 20 | 3  |
| 360170 | 101 | 668578 | 668599 | 2 | 11 | 22 | GT   | 7  | 5  |
| 360176 | 101 | 704916 | 704953 | 2 | 19 | 38 | AC   | 8  | 9  |
| 360178 | 101 | 707543 | 707554 | 2 | 6  | 12 | GT   | 27 | 12 |
| 360179 | 101 | 707759 | 707776 | 2 | 9  | 18 | CA   | 11 | 5  |
| 360186 | 101 | 722628 | 722659 | 2 | 16 | 32 | CA   | 8  | 7  |
| 360188 | 101 | 724738 | 724749 | 2 | 6  | 12 | TG   | 20 | 19 |
| 360191 | 101 | 732812 | 732839 | 4 | 7  | 28 | CTGT | 20 | 8  |
| 360193 | 101 | 733481 | 733508 | 4 | 7  | 28 | CTGT | 24 | 4  |
| 360196 | 101 | 735302 | 735322 | 3 | 7  | 21 | TGC  | 27 | 8  |
| 360198 | 101 | 736893 | 736904 | 2 | 6  | 12 | TG   | 27 | 3  |
| 360199 | 101 | 736925 | 736938 | 2 | 7  | 14 | AC   | 27 | 6  |
| 360201 | 101 | 737094 | 737105 | 2 | 6  | 12 | CA   | 23 | 4  |
| 360203 | 101 | 737523 | 737542 | 2 | 10 | 20 | AC   | 13 | 10 |
| 360206 | 101 | 739506 | 739517 | 2 | 6  | 12 | CA   | 27 | 3  |
| 360213 | 101 | 747083 | 747102 | 2 | 10 | 20 | AC   | 20 | 6  |
| 360215 | 101 | 748839 | 748868 | 2 | 15 | 30 | CA   | 16 | 10 |
| 360216 | 101 | 748968 | 749003 | 3 | 12 | 36 | CAG  | 20 | 7  |

|        |     |         |         |   |    |    |      |    |    |
|--------|-----|---------|---------|---|----|----|------|----|----|
| 360220 | 101 | 754073  | 754102  | 2 | 15 | 30 | CT   | 9  | 6  |
| 360225 | 101 | 761367  | 761390  | 2 | 12 | 24 | TG   | 17 | 12 |
| 360242 | 101 | 792276  | 792293  | 2 | 9  | 18 | AC   | 16 | 9  |
| 360244 | 101 | 793758  | 793769  | 2 | 6  | 12 | AC   | 21 | 3  |
| 360245 | 101 | 794872  | 794903  | 2 | 16 | 32 | GT   | 10 | 8  |
| 360248 | 101 | 801461  | 801480  | 2 | 10 | 20 | CA   | 21 | 8  |
| 360255 | 101 | 806304  | 806315  | 2 | 6  | 12 | CA   | 26 | 5  |
| 360263 | 101 | 822519  | 822538  | 2 | 10 | 20 | AG   | 29 | 4  |
| 360264 | 101 | 825380  | 825393  | 2 | 7  | 14 | AC   | 32 | 6  |
| 360265 | 101 | 826234  | 826255  | 2 | 11 | 22 | CA   | 21 | 13 |
| 360267 | 101 | 828882  | 828893  | 2 | 6  | 12 | CA   | 14 | 4  |
| 360276 | 101 | 834534  | 834553  | 2 | 10 | 20 | AC   | 24 | 7  |
| 360281 | 101 | 857841  | 857860  | 4 | 5  | 20 | AAAT | 27 | 5  |
| 360287 | 101 | 870558  | 870593  | 2 | 18 | 36 | GT   | 8  | 9  |
| 360295 | 101 | 879247  | 879278  | 2 | 16 | 32 | CA   | 13 | 14 |
| 360296 | 101 | 879513  | 879536  | 3 | 8  | 24 | GGA  | 18 | 5  |
| 360304 | 101 | 886745  | 886760  | 2 | 8  | 16 | TG   | 21 | 5  |
| 360305 | 101 | 887280  | 887295  | 2 | 8  | 16 | GT   | 12 | 6  |
| 360306 | 101 | 887784  | 887809  | 2 | 13 | 26 | CA   | 21 | 10 |
| 360322 | 101 | 933541  | 933576  | 4 | 9  | 36 | TGGA | 31 | 7  |
| 360324 | 101 | 939506  | 939531  | 2 | 13 | 26 | CA   | 20 | 8  |
| 360325 | 101 | 940580  | 940595  | 2 | 8  | 16 | GT   | 20 | 7  |
| 360326 | 101 | 944457  | 944474  | 3 | 6  | 18 | CTG  | 34 | 7  |
| 360330 | 101 | 951325  | 951336  | 2 | 6  | 12 | AC   | 28 | 4  |
| 360332 | 101 | 963149  | 963220  | 4 | 18 | 72 | GATA | 8  | 11 |
| 360333 | 101 | 965492  | 965527  | 4 | 9  | 36 | TAGA | 18 | 7  |
| 360334 | 101 | 966302  | 966329  | 2 | 14 | 28 | GT   | 14 | 9  |
| 360337 | 101 | 976291  | 976311  | 3 | 7  | 21 | GCT  | 24 | 6  |
| 360338 | 101 | 976660  | 976683  | 2 | 12 | 24 | GT   | 13 | 6  |
| 360348 | 101 | 982784  | 982797  | 2 | 7  | 14 | GA   | 29 | 5  |
| 360355 | 101 | 994758  | 994781  | 2 | 12 | 24 | GT   | 14 | 7  |
| 360360 | 101 | 1005697 | 1005720 | 2 | 12 | 24 | TG   | 11 | 6  |
| 360363 | 101 | 1005822 | 1005847 | 2 | 13 | 26 | AC   | 10 | 5  |
| 360364 | 101 | 1006413 | 1006438 | 2 | 13 | 26 | TG   | 13 | 11 |
| 360365 | 101 | 1007579 | 1007596 | 2 | 9  | 18 | TG   | 21 | 8  |
| 360368 | 101 | 1019388 | 1019405 | 2 | 9  | 18 | TG   | 20 | 4  |
| 360378 | 101 | 1052924 | 1052935 | 2 | 6  | 12 | CA   | 17 | 9  |
| 360379 | 101 | 1052938 | 1052955 | 2 | 9  | 18 | CA   | 11 | 6  |
| 360381 | 101 | 1055612 | 1055641 | 2 | 15 | 30 | CA   | 6  | 4  |
| 360382 | 101 | 1057598 | 1057623 | 2 | 13 | 26 | GT   | 12 | 7  |
| 360383 | 101 | 1057733 | 1057750 | 2 | 9  | 18 | CT   | 14 | 4  |
| 360385 | 101 | 1062366 | 1062391 | 2 | 13 | 26 | GT   | 17 | 11 |
| 360390 | 101 | 1071921 | 1071935 | 3 | 5  | 15 | AGC  | 31 | 3  |
| 360394 | 101 | 1087757 | 1087780 | 2 | 12 | 24 | AG   | 14 | 6  |
| 360396 | 101 | 1089735 | 1089752 | 2 | 9  | 18 | GT   | 20 | 4  |
| 360397 | 101 | 1089874 | 1089911 | 2 | 19 | 38 | CT   | 19 | 12 |
| 360398 | 101 | 1091112 | 1091129 | 2 | 9  | 18 | AC   | 24 | 3  |
| 360403 | 101 | 1104081 | 1104096 | 2 | 8  | 16 | AC   | 6  | 7  |
| 360404 | 101 | 1104246 | 1104265 | 2 | 10 | 20 | TG   | 20 | 6  |
| 360416 | 101 | 1113534 | 1113549 | 4 | 4  | 16 | ACAG | 24 | 5  |
| 360417 | 101 | 1114557 | 1114610 | 2 | 27 | 54 | AC   | 10 | 16 |

|        |     |         |         |   |    |    |      |    |    |
|--------|-----|---------|---------|---|----|----|------|----|----|
| 360419 | 101 | 1115288 | 1115303 | 2 | 8  | 16 | AC   | 8  | 3  |
| 360421 | 101 | 1117139 | 1117154 | 2 | 8  | 16 | GT   | 26 | 7  |
| 360425 | 101 | 1122771 | 1122786 | 2 | 8  | 16 | TG   | 16 | 4  |
| 360427 | 101 | 1131660 | 1131677 | 2 | 9  | 18 | CA   | 16 | 13 |
| 360428 | 101 | 1136934 | 1136965 | 2 | 16 | 32 | TG   | 12 | 9  |
| 360433 | 101 | 1144139 | 1144194 | 4 | 14 | 56 | CTTT | 22 | 9  |
| 360439 | 101 | 1169182 | 1169223 | 2 | 21 | 42 | CA   | 7  | 10 |
| 360442 | 101 | 1180037 | 1180066 | 2 | 15 | 30 | TG   | 14 | 4  |
| 360444 | 101 | 1207546 | 1207577 | 2 | 16 | 32 | AC   | 7  | 9  |
| 360446 | 101 | 1209286 | 1209313 | 2 | 14 | 28 | CA   | 12 | 10 |
| 360448 | 101 | 1212404 | 1212423 | 2 | 10 | 20 | TG   | 8  | 4  |
| 360453 | 101 | 1232120 | 1232139 | 2 | 10 | 20 | CA   | 12 | 8  |
| 360463 | 102 | 21424   | 21453   | 2 | 15 | 30 | AC   | 18 | 10 |
| 360464 | 102 | 21506   | 21521   | 2 | 8  | 16 | AC   | 20 | 7  |
| 360469 | 102 | 30180   | 30199   | 2 | 10 | 20 | TG   | 18 | 4  |
| 360472 | 102 | 36792   | 36803   | 2 | 6  | 12 | TA   | 10 | 3  |
| 360476 | 102 | 48235   | 48250   | 4 | 4  | 16 | AAGG | 23 | 3  |
| 360477 | 102 | 48561   | 48574   | 2 | 7  | 14 | CA   | 6  | 4  |
| 360480 | 102 | 51006   | 51019   | 2 | 7  | 14 | GT   | 18 | 8  |
| 360481 | 102 | 53397   | 53432   | 2 | 18 | 36 | GT   | 15 | 14 |
| 360483 | 102 | 55974   | 55989   | 4 | 4  | 16 | AAAT | 26 | 4  |
| 360484 | 102 | 57022   | 57033   | 2 | 6  | 12 | GT   | 7  | 4  |
| 360485 | 102 | 57993   | 58012   | 2 | 10 | 20 | TG   | 6  | 7  |
| 360489 | 102 | 68082   | 68109   | 2 | 14 | 28 | CA   | 12 | 6  |
| 360490 | 102 | 68234   | 68261   | 2 | 14 | 28 | AC   | 19 | 12 |
| 360495 | 102 | 72881   | 72900   | 2 | 10 | 20 | GT   | 14 | 8  |
| 360499 | 102 | 84079   | 84104   | 2 | 13 | 26 | GT   | 16 | 11 |
| 360502 | 102 | 84500   | 84511   | 2 | 6  | 12 | CA   | 13 | 6  |
| 360503 | 102 | 84534   | 84545   | 2 | 6  | 12 | CT   | 14 | 4  |
| 360507 | 102 | 86428   | 86443   | 4 | 4  | 16 | TTTC | 9  | 4  |
| 360511 | 102 | 95367   | 95388   | 2 | 11 | 22 | AC   | 12 | 10 |
| 360512 | 102 | 95459   | 95486   | 2 | 14 | 28 | CA   | 6  | 4  |
| 360514 | 102 | 98030   | 98047   | 2 | 9  | 18 | TG   | 16 | 8  |
| 360515 | 102 | 98158   | 98183   | 2 | 13 | 26 | CA   | 6  | 6  |
| 360528 | 102 | 114646  | 114660  | 3 | 5  | 15 | GAG  | 7  | 3  |
| 360529 | 102 | 114743  | 114762  | 2 | 10 | 20 | CA   | 16 | 3  |
| 360534 | 102 | 116495  | 116506  | 2 | 6  | 12 | GT   | 28 | 3  |
| 360541 | 102 | 126140  | 126183  | 2 | 22 | 44 | TG   | 9  | 15 |
| 360549 | 102 | 129749  | 129772  | 2 | 12 | 24 | AC   | 23 | 13 |
| 360551 | 102 | 135439  | 135462  | 2 | 12 | 24 | GT   | 16 | 8  |
| 360552 | 102 | 135652  | 135665  | 2 | 7  | 14 | GT   | 19 | 7  |
| 360553 | 102 | 135666  | 135683  | 2 | 9  | 18 | GA   | 13 | 7  |
| 360554 | 102 | 137319  | 137346  | 2 | 14 | 28 | TC   | 12 | 6  |
| 360557 | 102 | 141653  | 141674  | 2 | 11 | 22 | TG   | 21 | 13 |
| 360558 | 102 | 141825  | 141836  | 2 | 6  | 12 | TG   | 37 | 4  |
| 360560 | 102 | 143672  | 143691  | 2 | 10 | 20 | TG   | 12 | 9  |
| 360561 | 102 | 146973  | 146990  | 3 | 6  | 18 | GCT  | 24 | 3  |
| 360562 | 102 | 148515  | 148538  | 3 | 8  | 24 | AGG  | 22 | 3  |
| 360565 | 102 | 152416  | 152437  | 2 | 11 | 22 | TG   | 19 | 9  |
| 360566 | 102 | 152590  | 152607  | 2 | 9  | 18 | TG   | 25 | 6  |
| 360567 | 102 | 152609  | 152622  | 2 | 7  | 14 | GT   | 25 | 7  |

|        |     |        |        |   |    |    |      |    |    |
|--------|-----|--------|--------|---|----|----|------|----|----|
| 360569 | 102 | 156930 | 156941 | 2 | 6  | 12 | CA   | 26 | 6  |
| 360570 | 102 | 158917 | 158940 | 3 | 8  | 24 | TAG  | 15 | 6  |
| 360571 | 102 | 160234 | 160247 | 2 | 7  | 14 | GT   | 19 | 4  |
| 360572 | 102 | 160249 | 160260 | 2 | 6  | 12 | TG   | 18 | 4  |
| 360578 | 102 | 165761 | 165802 | 2 | 21 | 42 | TG   | 6  | 10 |
| 360579 | 102 | 166179 | 166216 | 2 | 19 | 38 | TG   | 14 | 11 |
| 360583 | 102 | 170194 | 170219 | 2 | 13 | 26 | GT   | 27 | 11 |
| 360585 | 102 | 170345 | 170370 | 2 | 13 | 26 | AC   | 11 | 11 |
| 360586 | 102 | 174640 | 174671 | 2 | 16 | 32 | TG   | 12 | 15 |
| 360596 | 102 | 192216 | 192231 | 2 | 8  | 16 | TG   | 13 | 10 |
| 360598 | 102 | 194396 | 194415 | 2 | 10 | 20 | CA   | 9  | 8  |
| 360600 | 102 | 196682 | 196699 | 2 | 9  | 18 | GT   | 16 | 9  |
| 360601 | 102 | 196826 | 196841 | 2 | 8  | 16 | TG   | 28 | 9  |
| 360603 | 102 | 197043 | 197072 | 2 | 15 | 30 | TG   | 7  | 7  |
| 360604 | 102 | 197288 | 197325 | 2 | 19 | 38 | AC   | 14 | 15 |
| 360607 | 102 | 199135 | 199152 | 2 | 9  | 18 | TC   | 6  | 4  |
| 360608 | 102 | 205398 | 205413 | 2 | 8  | 16 | CA   | 17 | 5  |
| 360609 | 102 | 205425 | 205438 | 2 | 7  | 14 | CA   | 7  | 3  |
| 360612 | 102 | 210240 | 210273 | 2 | 17 | 34 | TG   | 13 | 12 |
| 360613 | 102 | 210381 | 210408 | 2 | 14 | 28 | TG   | 6  | 7  |
| 360617 | 102 | 213083 | 213094 | 2 | 6  | 12 | CA   | 23 | 5  |
| 360623 | 102 | 225752 | 225781 | 2 | 15 | 30 | CA   | 6  | 10 |
| 360625 | 102 | 228016 | 228045 | 2 | 15 | 30 | AC   | 12 | 13 |
| 360626 | 102 | 228187 | 228238 | 2 | 26 | 52 | CA   | 11 | 12 |
| 360627 | 102 | 228447 | 228468 | 2 | 11 | 22 | GT   | 11 | 5  |
| 360633 | 102 | 234204 | 234235 | 2 | 16 | 32 | CA   | 13 | 16 |
| 360639 | 102 | 241330 | 241345 | 2 | 8  | 16 | AC   | 17 | 6  |
| 360640 | 102 | 241546 | 241557 | 2 | 6  | 12 | TG   | 16 | 8  |
| 360642 | 102 | 248223 | 248242 | 4 | 5  | 20 | TCCA | 22 | 7  |
| 360644 | 102 | 255327 | 255348 | 2 | 11 | 22 | CA   | 20 | 4  |
| 360655 | 102 | 278462 | 278497 | 2 | 18 | 36 | TG   | 9  | 9  |
| 360660 | 102 | 289695 | 289722 | 2 | 14 | 28 | AC   | 10 | 10 |
| 360662 | 102 | 292124 | 292145 | 2 | 11 | 22 | CA   | 16 | 6  |
| 360665 | 102 | 312427 | 312438 | 2 | 6  | 12 | AC   | 29 | 4  |
| 360675 | 102 | 329307 | 329320 | 2 | 7  | 14 | TC   | 18 | 5  |
| 360678 | 102 | 338439 | 338458 | 2 | 10 | 20 | CA   | 20 | 12 |
| 360679 | 102 | 342511 | 342524 | 2 | 7  | 14 | TG   | 13 | 12 |
| 360682 | 102 | 346423 | 346450 | 2 | 14 | 28 | TG   | 13 | 18 |
| 360694 | 102 | 368292 | 368305 | 2 | 7  | 14 | AC   | 17 | 3  |
| 360697 | 102 | 377191 | 377206 | 2 | 8  | 16 | GT   | 28 | 4  |
| 360700 | 102 | 379754 | 379777 | 2 | 12 | 24 | TG   | 7  | 7  |
| 360707 | 102 | 406811 | 406822 | 2 | 6  | 12 | GT   | 29 | 5  |
| 360708 | 102 | 406963 | 406986 | 3 | 8  | 24 | GGA  | 14 | 11 |
| 360710 | 102 | 407896 | 407909 | 2 | 7  | 14 | AC   | 32 | 6  |
| 360717 | 102 | 420871 | 420902 | 2 | 16 | 32 | GT   | 15 | 16 |
| 360718 | 102 | 428015 | 428032 | 2 | 9  | 18 | AC   | 9  | 6  |
| 360720 | 102 | 431836 | 431863 | 2 | 14 | 28 | GT   | 16 | 9  |
| 360725 | 102 | 434326 | 434353 | 4 | 7  | 28 | AGCC | 25 | 7  |
| 360728 | 102 | 441128 | 441139 | 2 | 6  | 12 | CA   | 30 | 4  |
| 360732 | 102 | 444695 | 444712 | 2 | 9  | 18 | CA   | 22 | 8  |
| 360736 | 102 | 455075 | 455094 | 2 | 10 | 20 | AT   | 20 | 9  |

|        |     |        |        |   |    |    |      |    |    |
|--------|-----|--------|--------|---|----|----|------|----|----|
| 360740 | 102 | 460989 | 461008 | 2 | 10 | 20 | CA   | 22 | 5  |
| 360750 | 102 | 467874 | 467901 | 2 | 14 | 28 | AC   | 12 | 9  |
| 360752 | 102 | 468498 | 468509 | 2 | 6  | 12 | CT   | 23 | 4  |
| 360757 | 102 | 478135 | 478174 | 2 | 20 | 40 | AC   | 8  | 11 |
| 360759 | 102 | 485842 | 485859 | 2 | 9  | 18 | CA   | 16 | 5  |
| 360760 | 102 | 486001 | 486012 | 2 | 6  | 12 | AC   | 25 | 7  |
| 360762 | 102 | 486306 | 486337 | 2 | 16 | 32 | CA   | 12 | 13 |
| 360766 | 102 | 487945 | 487966 | 2 | 11 | 22 | CA   | 11 | 8  |
| 360767 | 102 | 488734 | 488769 | 2 | 18 | 36 | CA   | 17 | 11 |
| 360768 | 102 | 489097 | 489114 | 2 | 9  | 18 | GT   | 20 | 6  |
| 360769 | 102 | 489606 | 489621 | 2 | 8  | 16 | CA   | 12 | 5  |
| 360774 | 102 | 492020 | 492037 | 2 | 9  | 18 | AG   | 17 | 6  |
| 360775 | 102 | 492568 | 492589 | 2 | 11 | 22 | GT   | 16 | 10 |
| 360783 | 102 | 508737 | 508752 | 2 | 8  | 16 | GA   | 14 | 6  |
| 360784 | 102 | 510738 | 510758 | 3 | 7  | 21 | AAG  | 16 | 6  |
| 360785 | 102 | 513069 | 513088 | 2 | 10 | 20 | TG   | 22 | 10 |
| 360787 | 102 | 514813 | 514832 | 2 | 10 | 20 | CA   | 21 | 15 |
| 360788 | 102 | 514915 | 514942 | 2 | 14 | 28 | AC   | 10 | 11 |
| 360789 | 102 | 514994 | 515007 | 2 | 7  | 14 | CA   | 18 | 4  |
| 360795 | 102 | 522831 | 522860 | 2 | 15 | 30 | CA   | 14 | 6  |
| 360796 | 102 | 523863 | 523874 | 2 | 6  | 12 | AC   | 29 | 4  |
| 360799 | 102 | 528129 | 528142 | 2 | 7  | 14 | CT   | 29 | 5  |
| 360802 | 102 | 530050 | 530087 | 2 | 19 | 38 | GT   | 9  | 10 |
| 360803 | 102 | 530230 | 530285 | 2 | 28 | 56 | TG   | 14 | 18 |
| 360805 | 102 | 539039 | 539050 | 2 | 6  | 12 | TG   | 18 | 11 |
| 360806 | 102 | 539052 | 539071 | 2 | 10 | 20 | GT   | 19 | 10 |
| 360809 | 102 | 544390 | 544407 | 2 | 9  | 18 | TC   | 24 | 11 |
| 360813 | 102 | 548803 | 548828 | 2 | 13 | 26 | TG   | 27 | 6  |
| 360817 | 102 | 554130 | 554153 | 2 | 12 | 24 | TG   | 16 | 8  |
| 360820 | 102 | 554692 | 554709 | 2 | 9  | 18 | GT   | 8  | 9  |
| 360821 | 102 | 555306 | 555335 | 2 | 15 | 30 | GT   | 17 | 4  |
| 360822 | 102 | 555376 | 555395 | 2 | 10 | 20 | GT   | 10 | 7  |
| 360827 | 102 | 569423 | 569444 | 2 | 11 | 22 | GT   | 9  | 7  |
| 360830 | 102 | 584577 | 584592 | 4 | 4  | 16 | GAAT | 23 | 17 |
| 360833 | 102 | 588362 | 588403 | 2 | 21 | 42 | GT   | 7  | 11 |
| 360835 | 102 | 589541 | 589552 | 2 | 6  | 12 | CT   | 24 | 3  |
| 360838 | 102 | 590993 | 591030 | 2 | 19 | 38 | CA   | 11 | 9  |
| 360839 | 102 | 591239 | 591270 | 2 | 16 | 32 | CA   | 15 | 11 |
| 360840 | 102 | 593425 | 593440 | 2 | 8  | 16 | AG   | 27 | 8  |
| 360845 | 102 | 599033 | 599054 | 2 | 11 | 22 | TC   | 24 | 7  |
| 360850 | 102 | 614650 | 614682 | 3 | 11 | 33 | TGC  | 19 | 6  |
| 360851 | 102 | 614813 | 614828 | 2 | 8  | 16 | TG   | 20 | 10 |
| 360852 | 102 | 614935 | 614960 | 2 | 13 | 26 | TG   | 10 | 10 |
| 360853 | 102 | 615070 | 615085 | 2 | 8  | 16 | CT   | 22 | 12 |
| 360854 | 102 | 615167 | 615188 | 2 | 11 | 22 | TG   | 13 | 8  |
| 360856 | 102 | 616216 | 616233 | 3 | 6  | 18 | ATA  | 24 | 7  |
| 360860 | 102 | 622070 | 622091 | 2 | 11 | 22 | AC   | 7  | 5  |
| 360870 | 102 | 637944 | 637967 | 2 | 12 | 24 | TG   | 7  | 4  |
| 360871 | 102 | 638022 | 638039 | 2 | 9  | 18 | TC   | 23 | 3  |
| 360872 | 102 | 639853 | 639886 | 2 | 17 | 34 | GT   | 20 | 12 |
| 360876 | 102 | 647341 | 647370 | 2 | 15 | 30 | CA   | 16 | 9  |



|        |     |        |        |   |    |    |      |    |    |
|--------|-----|--------|--------|---|----|----|------|----|----|
| 360878 | 102 | 651427 | 651444 | 2 | 9  | 18 | GA   | 17 | 7  |
| 360879 | 102 | 651681 | 651702 | 2 | 11 | 22 | CA   | 21 | 17 |
| 360881 | 102 | 653516 | 653543 | 2 | 14 | 28 | CA   | 12 | 8  |
| 360882 | 102 | 653875 | 653908 | 2 | 17 | 34 | CA   | 15 | 16 |
| 360883 | 102 | 655132 | 655143 | 2 | 6  | 12 | TC   | 22 | 3  |
| 360884 | 102 | 656717 | 656728 | 2 | 6  | 12 | TG   | 8  | 5  |
| 360885 | 102 | 657194 | 657213 | 2 | 10 | 20 | CA   | 18 | 14 |
| 360886 | 102 | 657345 | 657382 | 2 | 19 | 38 | AC   | 11 | 13 |
| 360890 | 102 | 666557 | 666572 | 4 | 4  | 16 | AAAT | 23 | 3  |
| 360891 | 102 | 666881 | 666892 | 2 | 6  | 12 | TC   | 25 | 3  |
| 360894 | 102 | 667281 | 667314 | 2 | 17 | 34 | TG   | 10 | 8  |
| 360897 | 102 | 671371 | 671382 | 2 | 6  | 12 | CT   | 20 | 5  |
| 360899 | 102 | 679368 | 679399 | 2 | 16 | 32 | TG   | 10 | 14 |
| 360902 | 102 | 688372 | 688411 | 2 | 20 | 40 | TG   | 6  | 10 |
| 360904 | 102 | 689363 | 689383 | 3 | 7  | 21 | TAT  | 10 | 3  |
| 360907 | 102 | 692404 | 692429 | 2 | 13 | 26 | TC   | 9  | 5  |
| 360910 | 102 | 697207 | 697222 | 2 | 8  | 16 | CA   | 20 | 6  |
| 360911 | 102 | 697328 | 697367 | 2 | 20 | 40 | CA   | 6  | 8  |
| 360913 | 102 | 697445 | 697474 | 3 | 10 | 30 | AGG  | 13 | 11 |
| 360916 | 102 | 705148 | 705185 | 2 | 19 | 38 | TG   | 22 | 7  |
| 360919 | 102 | 713638 | 713651 | 2 | 7  | 14 | AC   | 26 | 4  |
| 360921 | 102 | 717055 | 717084 | 2 | 15 | 30 | AC   | 20 | 12 |
| 360922 | 102 | 717174 | 717191 | 3 | 6  | 18 | GAG  | 16 | 5  |
| 360936 | 102 | 731701 | 731716 | 2 | 8  | 16 | CA   | 14 | 6  |
| 360937 | 102 | 731741 | 731772 | 2 | 16 | 32 | CA   | 8  | 10 |
| 360939 | 102 | 732110 | 732133 | 2 | 12 | 24 | GT   | 25 | 8  |
| 360942 | 102 | 735872 | 735883 | 2 | 6  | 12 | TG   | 31 | 4  |
| 360945 | 102 | 738657 | 738668 | 2 | 6  | 12 | TG   | 26 | 8  |
| 360947 | 102 | 746824 | 746849 | 2 | 13 | 26 | CA   | 17 | 9  |
| 360948 | 102 | 747340 | 747359 | 2 | 10 | 20 | AC   | 15 | 10 |
| 360951 | 102 | 750311 | 750328 | 2 | 9  | 18 | AC   | 8  | 3  |
| 360955 | 102 | 754164 | 754177 | 2 | 7  | 14 | TC   | 12 | 8  |
| 360956 | 102 | 754318 | 754341 | 2 | 12 | 24 | TC   | 6  | 4  |
| 360957 | 102 | 754449 | 754472 | 2 | 12 | 24 | CA   | 16 | 18 |
| 360959 | 102 | 756015 | 756050 | 2 | 18 | 36 | TG   | 6  | 8  |
| 360961 | 102 | 756116 | 756130 | 3 | 5  | 15 | TCC  | 19 | 3  |
| 360967 | 102 | 762623 | 762650 | 2 | 14 | 28 | AC   | 10 | 14 |
| 360969 | 102 | 763092 | 763103 | 2 | 6  | 12 | GT   | 26 | 8  |
| 360971 | 102 | 769849 | 769872 | 2 | 12 | 24 | CA   | 16 | 10 |
| 360972 | 102 | 770002 | 770041 | 2 | 20 | 40 | CA   | 12 | 9  |
| 360975 | 102 | 772442 | 772453 | 2 | 6  | 12 | TG   | 18 | 5  |
| 360977 | 102 | 772654 | 772677 | 2 | 12 | 24 | AC   | 16 | 9  |
| 360978 | 102 | 772838 | 772861 | 2 | 12 | 24 | AC   | 18 | 8  |
| 360981 | 102 | 777437 | 777454 | 2 | 9  | 18 | TG   | 31 | 13 |
| 360984 | 102 | 783040 | 783055 | 2 | 8  | 16 | CA   | 21 | 3  |
| 360987 | 102 | 790407 | 790420 | 2 | 7  | 14 | TG   | 27 | 4  |
| 360989 | 102 | 792421 | 792434 | 2 | 7  | 14 | TG   | 17 | 8  |
| 360990 | 102 | 798285 | 798310 | 2 | 13 | 26 | AC   | 13 | 7  |
| 360991 | 102 | 800348 | 800365 | 3 | 6  | 18 | GAG  | 16 | 3  |
| 360992 | 102 | 800743 | 800770 | 4 | 7  | 28 | CCTT | 29 | 8  |
| 360993 | 102 | 800913 | 800938 | 2 | 13 | 26 | AC   | 10 | 8  |

|        |     |        |        |   |    |    |      |    |    |
|--------|-----|--------|--------|---|----|----|------|----|----|
| 360994 | 102 | 800971 | 801000 | 2 | 15 | 30 | CA   | 12 | 10 |
| 360995 | 102 | 801159 | 801170 | 2 | 6  | 12 | CA   | 13 | 3  |
| 360996 | 102 | 801460 | 801491 | 2 | 16 | 32 | GT   | 6  | 7  |
| 360998 | 102 | 802554 | 802573 | 2 | 10 | 20 | CA   | 25 | 7  |
| 361001 | 102 | 806157 | 806176 | 4 | 5  | 20 | AAAT | 29 | 5  |
| 361006 | 102 | 812064 | 812087 | 2 | 12 | 24 | AC   | 19 | 7  |
| 361009 | 102 | 821352 | 821369 | 2 | 9  | 18 | AC   | 22 | 8  |
| 361013 | 102 | 827300 | 827321 | 2 | 11 | 22 | CA   | 20 | 9  |
| 361014 | 102 | 829697 | 829710 | 2 | 7  | 14 | CT   | 24 | 7  |
| 361021 | 102 | 836143 | 836160 | 2 | 9  | 18 | TG   | 16 | 7  |
| 361025 | 102 | 840050 | 840075 | 2 | 13 | 26 | CA   | 13 | 8  |
| 361026 | 102 | 842692 | 842705 | 2 | 7  | 14 | CT   | 19 | 4  |
| 361027 | 102 | 843797 | 843824 | 2 | 14 | 28 | CA   | 15 | 8  |
| 361029 | 102 | 846664 | 846681 | 2 | 9  | 18 | AC   | 21 | 9  |
| 361031 | 102 | 851286 | 851305 | 2 | 10 | 20 | AC   | 18 | 7  |
| 361032 | 102 | 851340 | 851357 | 2 | 9  | 18 | GT   | 26 | 5  |
| 361038 | 102 | 854613 | 854630 | 2 | 9  | 18 | TG   | 28 | 5  |
| 361040 | 102 | 859189 | 859200 | 2 | 6  | 12 | TA   | 23 | 3  |
| 361046 | 102 | 864116 | 864127 | 2 | 6  | 12 | GT   | 23 | 4  |
| 361047 | 102 | 867374 | 867391 | 3 | 6  | 18 | GCA  | 30 | 8  |
| 361048 | 102 | 868863 | 868874 | 2 | 6  | 12 | TC   | 23 | 4  |
| 361050 | 102 | 874961 | 874994 | 2 | 17 | 34 | AC   | 6  | 8  |
| 361051 | 102 | 877316 | 877337 | 2 | 11 | 22 | AC   | 26 | 7  |
| 361052 | 102 | 877951 | 877974 | 4 | 6  | 24 | CTAA | 16 | 4  |
| 361054 | 102 | 880262 | 880285 | 2 | 12 | 24 | TG   | 9  | 10 |
| 361057 | 102 | 883486 | 883506 | 3 | 7  | 21 | CCT  | 22 | 7  |
| 361058 | 102 | 883992 | 884011 | 2 | 10 | 20 | GT   | 16 | 11 |
| 361066 | 102 | 892125 | 892140 | 4 | 4  | 16 | GTCT | 24 | 3  |
| 361067 | 102 | 894183 | 894194 | 2 | 6  | 12 | TG   | 24 | 5  |
| 361071 | 102 | 896969 | 897000 | 2 | 16 | 32 | AC   | 18 | 8  |
| 361072 | 102 | 898574 | 898609 | 2 | 18 | 36 | TG   | 10 | 10 |
| 361074 | 102 | 899586 | 899611 | 2 | 13 | 26 | GT   | 14 | 11 |
| 361076 | 102 | 900196 | 900227 | 2 | 16 | 32 | TG   | 19 | 7  |
| 361079 | 102 | 908196 | 908217 | 2 | 11 | 22 | GT   | 7  | 4  |
| 361080 | 102 | 909535 | 909550 | 2 | 8  | 16 | CA   | 17 | 8  |
| 361093 | 102 | 921776 | 921793 | 2 | 9  | 18 | AC   | 21 | 7  |
| 361094 | 102 | 927807 | 927822 | 4 | 4  | 16 | TTAT | 24 | 7  |
| 361095 | 102 | 929539 | 929564 | 2 | 13 | 26 | TG   | 12 | 14 |
| 361098 | 102 | 935947 | 935960 | 2 | 7  | 14 | TC   | 26 | 3  |
| 361101 | 102 | 937393 | 937416 | 2 | 12 | 24 | AC   | 28 | 8  |
| 361103 | 102 | 938877 | 938897 | 3 | 7  | 21 | ATT  | 7  | 5  |
| 361109 | 102 | 941304 | 941339 | 2 | 18 | 36 | TG   | 8  | 8  |
| 361110 | 102 | 941402 | 941421 | 2 | 10 | 20 | AC   | 25 | 4  |
| 361111 | 102 | 941661 | 941686 | 2 | 13 | 26 | AC   | 7  | 7  |
| 361116 | 102 | 942160 | 942175 | 2 | 8  | 16 | TG   | 9  | 3  |
| 361121 | 102 | 945912 | 945935 | 3 | 8  | 24 | TGA  | 27 | 4  |
| 361124 | 102 | 947364 | 947385 | 2 | 11 | 22 | CA   | 13 | 7  |
| 361131 | 102 | 951866 | 951885 | 2 | 10 | 20 | AC   | 23 | 4  |
| 361134 | 102 | 953728 | 953741 | 2 | 7  | 14 | AC   | 22 | 8  |
| 361135 | 102 | 955101 | 955116 | 4 | 4  | 16 | TGAT | 16 | 5  |
| 361136 | 102 | 956170 | 956184 | 3 | 5  | 15 | GGC  | 25 | 18 |

|        |     |         |         |   |    |    |      |    |    |
|--------|-----|---------|---------|---|----|----|------|----|----|
| 361140 | 102 | 958621  | 958658  | 2 | 19 | 38 | AC   | 11 | 11 |
| 361141 | 102 | 967236  | 967263  | 2 | 14 | 28 | AC   | 16 | 10 |
| 361142 | 102 | 970938  | 970961  | 4 | 6  | 24 | ACCA | 23 | 5  |
| 361143 | 102 | 971023  | 971048  | 2 | 13 | 26 | CA   | 12 | 7  |
| 361145 | 102 | 972988  | 973027  | 4 | 10 | 40 | ATAA | 16 | 4  |
| 361152 | 102 | 975627  | 975658  | 2 | 16 | 32 | AC   | 9  | 8  |
| 361153 | 102 | 975740  | 975767  | 2 | 14 | 28 | CA   | 15 | 8  |
| 361154 | 102 | 976303  | 976324  | 2 | 11 | 22 | AC   | 15 | 7  |
| 361155 | 102 | 976464  | 976487  | 3 | 8  | 24 | GCA  | 23 | 9  |
| 361156 | 102 | 976574  | 976588  | 3 | 5  | 15 | CAG  | 27 | 5  |
| 361158 | 102 | 979434  | 979454  | 3 | 7  | 21 | GAG  | 26 | 14 |
| 361161 | 102 | 982417  | 982436  | 2 | 10 | 20 | GT   | 11 | 3  |
| 361164 | 102 | 984691  | 984710  | 2 | 10 | 20 | TG   | 19 | 10 |
| 361166 | 102 | 984834  | 984859  | 2 | 13 | 26 | GT   | 19 | 11 |
| 361167 | 102 | 984988  | 985013  | 2 | 13 | 26 | TG   | 24 | 6  |
| 361168 | 102 | 985197  | 985214  | 3 | 6  | 18 | GAG  | 20 | 4  |
| 361169 | 102 | 985252  | 985275  | 3 | 8  | 24 | GAG  | 22 | 3  |
| 361170 | 102 | 985434  | 985455  | 2 | 11 | 22 | GT   | 17 | 8  |
| 361177 | 102 | 992633  | 992660  | 2 | 14 | 28 | CA   | 14 | 10 |
| 361182 | 102 | 993421  | 993452  | 4 | 8  | 32 | AAGA | 27 | 5  |
| 361185 | 102 | 996760  | 996773  | 2 | 7  | 14 | AG   | 25 | 3  |
| 361191 | 102 | 1003522 | 1003549 | 2 | 14 | 28 | CA   | 10 | 6  |
| 361192 | 102 | 1004511 | 1004536 | 2 | 13 | 26 | AG   | 14 | 13 |
| 361202 | 102 | 1008540 | 1008561 | 2 | 11 | 22 | GT   | 12 | 10 |
| 361212 | 102 | 1024866 | 1024886 | 3 | 7  | 21 | GAG  | 22 | 3  |
| 361215 | 102 | 1028530 | 1028541 | 2 | 6  | 12 | GT   | 26 | 4  |
| 361217 | 102 | 1031233 | 1031258 | 2 | 13 | 26 | AG   | 12 | 6  |
| 361219 | 102 | 1031555 | 1031594 | 2 | 20 | 40 | CA   | 9  | 11 |
| 361223 | 102 | 1033421 | 1033432 | 2 | 6  | 12 | AT   | 16 | 3  |
| 361225 | 102 | 1033875 | 1033910 | 3 | 12 | 36 | ATC  | 15 | 5  |
| 361228 | 102 | 1035815 | 1035832 | 3 | 6  | 18 | ACA  | 20 | 4  |
| 361231 | 102 | 1039675 | 1039690 | 2 | 8  | 16 | GT   | 16 | 15 |
| 361234 | 102 | 1040053 | 1040076 | 2 | 12 | 24 | GT   | 16 | 10 |
| 361235 | 102 | 1040220 | 1040249 | 2 | 15 | 30 | CA   | 12 | 10 |
| 361236 | 102 | 1040526 | 1040552 | 3 | 9  | 27 | GGA  | 11 | 5  |
| 361242 | 102 | 1047747 | 1047780 | 2 | 17 | 34 | AC   | 12 | 8  |
| 361243 | 102 | 1047892 | 1047905 | 2 | 7  | 14 | AC   | 20 | 3  |
| 361244 | 102 | 1048018 | 1048037 | 2 | 10 | 20 | CA   | 8  | 3  |
| 361245 | 102 | 1048178 | 1048197 | 2 | 10 | 20 | AG   | 12 | 4  |
| 361246 | 102 | 1049314 | 1049327 | 2 | 7  | 14 | AC   | 30 | 10 |
| 361250 | 102 | 1057005 | 1057044 | 2 | 20 | 40 | TG   | 11 | 12 |
| 361251 | 102 | 1058435 | 1058470 | 2 | 18 | 36 | AC   | 9  | 8  |
| 361252 | 102 | 1061023 | 1061044 | 2 | 11 | 22 | GT   | 10 | 12 |
| 361254 | 102 | 1061312 | 1061325 | 2 | 7  | 14 | AG   | 21 | 3  |
| 361255 | 102 | 1061463 | 1061492 | 2 | 15 | 30 | GT   | 11 | 8  |
| 361256 | 102 | 1061521 | 1061534 | 2 | 7  | 14 | GT   | 21 | 10 |
| 361258 | 102 | 1064094 | 1064107 | 2 | 7  | 14 | AC   | 23 | 7  |
| 361259 | 102 | 1064290 | 1064311 | 2 | 11 | 22 | TG   | 10 | 3  |
| 361260 | 102 | 1064741 | 1064754 | 2 | 7  | 14 | AT   | 11 | 8  |
| 361261 | 102 | 1070272 | 1070298 | 3 | 9  | 27 | CCT  | 17 | 8  |
| 361270 | 102 | 1073833 | 1073844 | 2 | 6  | 12 | AC   | 26 | 3  |

|        |     |         |         |   |    |    |      |    |    |
|--------|-----|---------|---------|---|----|----|------|----|----|
| 361273 | 102 | 1075177 | 1075204 | 2 | 14 | 28 | GT   | 15 | 6  |
| 361276 | 102 | 1077082 | 1077101 | 2 | 10 | 20 | CT   | 12 | 6  |
| 361277 | 102 | 1079318 | 1079332 | 3 | 5  | 15 | TGA  | 26 | 11 |
| 361278 | 102 | 1079978 | 1079991 | 2 | 7  | 14 | CT   | 26 | 5  |
| 361280 | 102 | 1081893 | 1081928 | 2 | 18 | 36 | TG   | 12 | 10 |
| 361282 | 102 | 1083394 | 1083443 | 2 | 25 | 50 | GT   | 13 | 9  |
| 361286 | 102 | 1084039 | 1084066 | 4 | 7  | 28 | TCTA | 7  | 9  |
| 361289 | 102 | 1085310 | 1085331 | 2 | 11 | 22 | TG   | 18 | 8  |
| 361290 | 102 | 1085376 | 1085399 | 2 | 12 | 24 | CA   | 6  | 4  |
| 361292 | 102 | 1085561 | 1085576 | 4 | 4  | 16 | CTCG | 17 | 4  |
| 361301 | 102 | 1087554 | 1087569 | 2 | 8  | 16 | CA   | 10 | 10 |
| 361302 | 102 | 1087654 | 1087679 | 2 | 13 | 26 | GT   | 14 | 8  |
| 361304 | 102 | 1087905 | 1087932 | 2 | 14 | 28 | GT   | 9  | 10 |
| 361308 | 102 | 1088614 | 1088631 | 3 | 6  | 18 | TCT  | 17 | 5  |
| 361311 | 102 | 1088920 | 1088953 | 2 | 17 | 34 | TG   | 10 | 13 |
| 361313 | 102 | 1089476 | 1089507 | 2 | 16 | 32 | CA   | 18 | 11 |
| 361314 | 102 | 1089688 | 1089703 | 2 | 8  | 16 | CA   | 15 | 6  |
| 361316 | 102 | 1091159 | 1091182 | 2 | 12 | 24 | GT   | 15 | 12 |
| 361317 | 102 | 1091387 | 1091414 | 2 | 14 | 28 | CT   | 15 | 10 |
| 361318 | 102 | 1092650 | 1092669 | 4 | 5  | 20 | CTCC | 6  | 5  |
| 361320 | 102 | 1092981 | 1093004 | 2 | 12 | 24 | AC   | 11 | 7  |
| 361321 | 102 | 1093077 | 1093106 | 2 | 15 | 30 | AC   | 8  | 10 |
| 361323 | 102 | 1094532 | 1094547 | 2 | 8  | 16 | CT   | 20 | 5  |
| 361325 | 102 | 1096833 | 1096844 | 2 | 6  | 12 | AC   | 23 | 12 |
| 361326 | 102 | 1096972 | 1097011 | 2 | 20 | 40 | AC   | 7  | 8  |
| 361327 | 102 | 1097138 | 1097169 | 2 | 16 | 32 | CA   | 7  | 9  |
| 361328 | 102 | 1097234 | 1097245 | 2 | 6  | 12 | AC   | 20 | 7  |
| 361329 | 102 | 1097248 | 1097261 | 2 | 7  | 14 | AC   | 12 | 5  |
| 361330 | 102 | 1097555 | 1097569 | 3 | 5  | 15 | CTG  | 29 | 4  |
| 361331 | 102 | 1098740 | 1098773 | 2 | 17 | 34 | TG   | 15 | 13 |
| 361339 | 102 | 1101003 | 1101036 | 2 | 17 | 34 | AC   | 7  | 8  |
| 361342 | 102 | 1103242 | 1103280 | 3 | 13 | 39 | TCC  | 17 | 9  |
| 361344 | 102 | 1106138 | 1106197 | 4 | 15 | 60 | GATA | 21 | 20 |
| 361347 | 102 | 1106602 | 1106617 | 2 | 8  | 16 | CT   | 11 | 6  |
| 361348 | 102 | 1107956 | 1107967 | 2 | 6  | 12 | AT   | 23 | 5  |
| 361350 | 102 | 1108397 | 1108422 | 2 | 13 | 26 | TG   | 11 | 12 |
| 361351 | 102 | 1108548 | 1108583 | 2 | 18 | 36 | TG   | 7  | 8  |
| 361352 | 102 | 1108723 | 1108750 | 2 | 14 | 28 | AC   | 13 | 8  |
| 361353 | 102 | 1108910 | 1108927 | 2 | 9  | 18 | CT   | 27 | 5  |
| 361354 | 102 | 1110403 | 1110428 | 2 | 13 | 26 | AC   | 12 | 6  |
| 361355 | 102 | 1110519 | 1110546 | 2 | 14 | 28 | AC   | 8  | 7  |
| 361356 | 102 | 1110697 | 1110716 | 2 | 10 | 20 | GT   | 19 | 10 |
| 361358 | 102 | 1111595 | 1111608 | 2 | 7  | 14 | GA   | 28 | 4  |
| 361359 | 102 | 1111673 | 1111694 | 2 | 11 | 22 | TG   | 14 | 9  |
| 361360 | 102 | 1111772 | 1111789 | 2 | 9  | 18 | AC   | 18 | 12 |
| 361361 | 102 | 1111887 | 1111920 | 2 | 17 | 34 | GT   | 13 | 17 |
| 361363 | 102 | 1112068 | 1112083 | 2 | 8  | 16 | TG   | 14 | 6  |
| 361364 | 102 | 1112177 | 1112204 | 2 | 14 | 28 | CA   | 19 | 9  |
| 361366 | 102 | 1117430 | 1117465 | 2 | 18 | 36 | AC   | 16 | 12 |
| 361367 | 102 | 1117655 | 1117669 | 3 | 5  | 15 | CAG  | 27 | 7  |
| 361368 | 102 | 1117714 | 1117737 | 2 | 12 | 24 | CA   | 21 | 5  |

|        |     |         |         |   |    |    |      |    |    |
|--------|-----|---------|---------|---|----|----|------|----|----|
| 361369 | 102 | 1117927 | 1117960 | 2 | 17 | 34 | AC   | 16 | 7  |
| 361371 | 102 | 1118420 | 1118451 | 2 | 16 | 32 | CT   | 13 | 6  |
| 361379 | 102 | 1120009 | 1120020 | 2 | 6  | 12 | TC   | 14 | 10 |
| 361380 | 102 | 1120021 | 1120038 | 2 | 9  | 18 | CT   | 17 | 10 |
| 361382 | 102 | 1120468 | 1120503 | 2 | 18 | 36 | TG   | 21 | 13 |
| 361383 | 102 | 1120741 | 1120776 | 2 | 18 | 36 | GT   | 8  | 8  |
| 361386 | 102 | 1123001 | 1123021 | 3 | 7  | 21 | TGC  | 17 | 11 |
| 361409 | 102 | 1137679 | 1137700 | 2 | 11 | 22 | GA   | 14 | 5  |
| 361411 | 102 | 1137910 | 1137924 | 3 | 5  | 15 | GAG  | 24 | 12 |
| 361414 | 102 | 1140112 | 1140145 | 2 | 17 | 34 | GA   | 9  | 14 |
| 361416 | 102 | 1142683 | 1142706 | 2 | 12 | 24 | CA   | 14 | 13 |
| 361418 | 102 | 1144561 | 1144594 | 2 | 17 | 34 | GT   | 8  | 10 |
| 361419 | 102 | 1144654 | 1144683 | 2 | 15 | 30 | CA   | 8  | 9  |
| 361420 | 102 | 1144799 | 1144810 | 2 | 6  | 12 | TG   | 20 | 6  |
| 361421 | 102 | 1144813 | 1144826 | 2 | 7  | 14 | TG   | 20 | 8  |
| 361422 | 102 | 1144888 | 1144917 | 2 | 15 | 30 | GT   | 13 | 13 |
| 361423 | 102 | 1153587 | 1153607 | 3 | 7  | 21 | CAG  | 29 | 8  |
| 361424 | 102 | 1156502 | 1156527 | 2 | 13 | 26 | GT   | 16 | 6  |
| 361425 | 102 | 1156713 | 1156730 | 2 | 9  | 18 | GT   | 18 | 13 |
| 361427 | 102 | 1162755 | 1162768 | 2 | 7  | 14 | GT   | 27 | 4  |
| 361428 | 102 | 1163431 | 1163444 | 2 | 7  | 14 | AC   | 33 | 3  |
| 361430 | 102 | 1176946 | 1176957 | 2 | 6  | 12 | CT   | 25 | 5  |
| 361432 | 102 | 1182080 | 1182107 | 2 | 14 | 28 | CT   | 15 | 15 |
| 361433 | 102 | 1182150 | 1182173 | 3 | 8  | 24 | CTC  | 15 | 5  |
| 361440 | 102 | 1183808 | 1183829 | 2 | 11 | 22 | CA   | 6  | 6  |
| 361441 | 102 | 1183934 | 1183957 | 2 | 12 | 24 | CA   | 17 | 11 |
| 361443 | 102 | 1186066 | 1186087 | 2 | 11 | 22 | GT   | 8  | 10 |
| 361444 | 102 | 1189597 | 1189612 | 2 | 8  | 16 | TG   | 14 | 8  |
| 361445 | 102 | 1190038 | 1190057 | 2 | 10 | 20 | TG   | 25 | 8  |
| 361446 | 102 | 1204586 | 1204637 | 4 | 13 | 52 | TATC | 16 | 16 |
| 361447 | 102 | 1220347 | 1220364 | 2 | 9  | 18 | TC   | 19 | 3  |
| 361448 | 102 | 1222971 | 1222992 | 2 | 11 | 22 | TG   | 9  | 4  |
| 361449 | 102 | 1225908 | 1225923 | 4 | 4  | 16 | ATAG | 20 | 7  |
| 361450 | 102 | 1226460 | 1226479 | 2 | 10 | 20 | AC   | 18 | 5  |
| 361456 | 102 | 1244696 | 1244739 | 2 | 22 | 44 | TG   | 6  | 8  |
| 361467 | 103 | 45255   | 45266   | 2 | 6  | 12 | GT   | 18 | 8  |
| 361472 | 103 | 66247   | 66260   | 2 | 7  | 14 | AC   | 30 | 4  |
| 361473 | 103 | 66652   | 66673   | 2 | 11 | 22 | AC   | 28 | 6  |
| 361475 | 103 | 71316   | 71339   | 3 | 8  | 24 | TAT  | 24 | 5  |
| 361478 | 103 | 79978   | 79993   | 2 | 8  | 16 | AC   | 13 | 10 |
| 361488 | 103 | 96149   | 96164   | 4 | 4  | 16 | GGAT | 33 | 6  |
| 361491 | 103 | 99953   | 99980   | 2 | 14 | 28 | GT   | 18 | 8  |
| 361493 | 103 | 102200  | 102227  | 2 | 14 | 28 | TG   | 17 | 8  |
| 361495 | 103 | 113102  | 113123  | 2 | 11 | 22 | TC   | 20 | 6  |
| 361499 | 103 | 124711  | 124738  | 2 | 14 | 28 | AC   | 22 | 14 |
| 361501 | 103 | 132764  | 132785  | 2 | 11 | 22 | TG   | 20 | 8  |
| 361503 | 103 | 146584  | 146595  | 2 | 6  | 12 | AC   | 24 | 4  |
| 361508 | 103 | 154624  | 154661  | 2 | 19 | 38 | AC   | 20 | 11 |
| 361513 | 103 | 175228  | 175255  | 2 | 14 | 28 | CA   | 18 | 6  |
| 361520 | 103 | 198178  | 198195  | 2 | 9  | 18 | AC   | 8  | 10 |
| 361525 | 103 | 209022  | 209039  | 2 | 9  | 18 | TG   | 25 | 9  |

|        |     |        |        |   |    |    |      |    |    |
|--------|-----|--------|--------|---|----|----|------|----|----|
| 361529 | 103 | 220265 | 220290 | 2 | 13 | 26 | TG   | 15 | 9  |
| 361546 | 103 | 256294 | 256319 | 2 | 13 | 26 | GT   | 15 | 13 |
| 361551 | 103 | 264704 | 264723 | 2 | 10 | 20 | GT   | 20 | 7  |
| 361558 | 103 | 280968 | 280983 | 2 | 8  | 16 | GT   | 19 | 10 |
| 361562 | 103 | 293224 | 293245 | 2 | 11 | 22 | TG   | 6  | 7  |
| 361570 | 103 | 331037 | 331050 | 2 | 7  | 14 | GT   | 29 | 4  |
| 361573 | 103 | 333871 | 333884 | 2 | 7  | 14 | AT   | 24 | 3  |
| 361574 | 103 | 338000 | 338015 | 2 | 8  | 16 | AC   | 22 | 3  |
| 361576 | 103 | 340656 | 340685 | 2 | 15 | 30 | CA   | 13 | 10 |
| 361578 | 103 | 344729 | 344740 | 2 | 6  | 12 | GC   | 30 | 6  |
| 361586 | 103 | 375192 | 375209 | 2 | 9  | 18 | TG   | 9  | 9  |
| 361597 | 103 | 392022 | 392049 | 4 | 7  | 28 | TCAG | 30 | 4  |
| 361615 | 103 | 443471 | 443490 | 2 | 10 | 20 | AC   | 28 | 9  |
| 361617 | 103 | 445943 | 445960 | 2 | 9  | 18 | GT   | 21 | 5  |
| 361618 | 103 | 446644 | 446655 | 2 | 6  | 12 | TG   | 24 | 3  |
| 361619 | 103 | 446685 | 446720 | 2 | 18 | 36 | CA   | 14 | 14 |
| 361620 | 103 | 446812 | 446837 | 2 | 13 | 26 | GT   | 21 | 11 |
| 361621 | 103 | 449285 | 449308 | 2 | 12 | 24 | CA   | 17 | 7  |
| 361622 | 103 | 449370 | 449397 | 2 | 14 | 28 | TC   | 7  | 10 |
| 361624 | 103 | 449778 | 449801 | 2 | 12 | 24 | TG   | 26 | 9  |
| 361625 | 103 | 449916 | 449935 | 2 | 10 | 20 | TG   | 8  | 6  |
| 361627 | 103 | 450054 | 450083 | 2 | 15 | 30 | GT   | 12 | 13 |
| 361629 | 103 | 450224 | 450245 | 2 | 11 | 22 | TG   | 20 | 7  |
| 361632 | 103 | 456608 | 456643 | 2 | 18 | 36 | GT   | 6  | 7  |
| 361635 | 103 | 458909 | 458934 | 2 | 13 | 26 | TG   | 14 | 15 |
| 361637 | 103 | 463937 | 463956 | 2 | 10 | 20 | CA   | 20 | 9  |
| 361638 | 103 | 464070 | 464085 | 2 | 8  | 16 | TG   | 14 | 8  |
| 361639 | 103 | 466503 | 466522 | 4 | 5  | 20 | GAAA | 22 | 8  |
| 361640 | 103 | 466759 | 466786 | 2 | 14 | 28 | GT   | 17 | 15 |
| 361641 | 103 | 467962 | 467987 | 2 | 13 | 26 | GT   | 19 | 10 |
| 361642 | 103 | 470141 | 470174 | 2 | 17 | 34 | CA   | 13 | 10 |
| 361644 | 103 | 471785 | 471814 | 2 | 15 | 30 | AC   | 17 | 6  |
| 361645 | 103 | 473806 | 473820 | 3 | 5  | 15 | AGC  | 23 | 4  |
| 361646 | 103 | 475330 | 475357 | 2 | 14 | 28 | CA   | 14 | 11 |
| 361651 | 103 | 481932 | 481947 | 4 | 4  | 16 | ATCC | 31 | 3  |
| 361653 | 103 | 483939 | 483960 | 2 | 11 | 22 | GT   | 26 | 11 |
| 361656 | 103 | 512657 | 512684 | 2 | 14 | 28 | TG   | 6  | 9  |
| 361662 | 103 | 521229 | 521244 | 4 | 4  | 16 | TTTA | 6  | 3  |
| 361688 | 103 | 572641 | 572676 | 2 | 18 | 36 | CA   | 18 | 14 |
| 361690 | 103 | 575448 | 575467 | 2 | 10 | 20 | GT   | 21 | 4  |
| 361691 | 103 | 577335 | 577370 | 2 | 18 | 36 | AC   | 19 | 9  |
| 361692 | 103 | 577595 | 577608 | 2 | 7  | 14 | TG   | 13 | 4  |
| 361698 | 103 | 584761 | 584776 | 4 | 4  | 16 | ATTC | 23 | 4  |
| 361699 | 103 | 585489 | 585514 | 2 | 13 | 26 | AC   | 23 | 7  |
| 361700 | 103 | 585627 | 585672 | 2 | 23 | 46 | CA   | 7  | 7  |
| 361705 | 103 | 586101 | 586120 | 2 | 10 | 20 | TG   | 14 | 8  |
| 361709 | 103 | 590401 | 590424 | 3 | 8  | 24 | ATG  | 18 | 6  |
| 361713 | 103 | 592634 | 592651 | 2 | 9  | 18 | AC   | 22 | 6  |
| 361714 | 103 | 602010 | 602033 | 2 | 12 | 24 | TG   | 13 | 13 |
| 361717 | 103 | 603841 | 603866 | 2 | 13 | 26 | TG   | 9  | 7  |
| 361720 | 103 | 607975 | 607990 | 4 | 4  | 16 | AGGC | 27 | 4  |

|        |     |        |        |   |    |    |      |    |    |
|--------|-----|--------|--------|---|----|----|------|----|----|
| 361722 | 103 | 608557 | 608572 | 2 | 8  | 16 | TG   | 13 | 4  |
| 361725 | 103 | 612511 | 612530 | 2 | 10 | 20 | CA   | 18 | 6  |
| 361727 | 103 | 616561 | 616604 | 4 | 11 | 44 | AGAA | 15 | 14 |
| 361729 | 103 | 618857 | 618886 | 2 | 15 | 30 | AC   | 14 | 9  |
| 361731 | 103 | 622558 | 622575 | 2 | 9  | 18 | CA   | 10 | 9  |
| 361732 | 103 | 622754 | 622797 | 4 | 11 | 44 | AGAC | 10 | 12 |
| 361733 | 103 | 623076 | 623091 | 2 | 8  | 16 | AC   | 18 | 5  |
| 361734 | 103 | 623124 | 623135 | 2 | 6  | 12 | CA   | 27 | 8  |
| 361737 | 103 | 630180 | 630213 | 2 | 17 | 34 | GT   | 9  | 8  |
| 361738 | 103 | 630327 | 630344 | 2 | 9  | 18 | TC   | 17 | 7  |
| 361739 | 103 | 630347 | 630358 | 2 | 6  | 12 | TC   | 21 | 5  |
| 361741 | 103 | 634211 | 634238 | 4 | 7  | 28 | AGAC | 25 | 6  |
| 361742 | 103 | 634569 | 634580 | 2 | 6  | 12 | TG   | 20 | 3  |
| 361743 | 103 | 634614 | 634625 | 2 | 6  | 12 | GT   | 24 | 4  |
| 361744 | 103 | 634931 | 634968 | 2 | 19 | 38 | AC   | 9  | 8  |
| 361748 | 103 | 646109 | 646126 | 2 | 9  | 18 | AC   | 7  | 5  |
| 361749 | 103 | 646426 | 646437 | 2 | 6  | 12 | TG   | 7  | 3  |
| 361755 | 103 | 656831 | 656870 | 2 | 20 | 40 | GT   | 11 | 8  |
| 361758 | 103 | 659544 | 659557 | 2 | 7  | 14 | TA   | 23 | 5  |
| 361759 | 103 | 661417 | 661430 | 2 | 7  | 14 | AC   | 19 | 4  |
| 361760 | 103 | 662075 | 662090 | 2 | 8  | 16 | TA   | 13 | 6  |
| 361761 | 103 | 662732 | 662758 | 3 | 9  | 27 | TGT  | 21 | 4  |
| 361763 | 103 | 662939 | 662966 | 2 | 14 | 28 | CT   | 20 | 5  |
| 361774 | 103 | 670571 | 670582 | 2 | 6  | 12 | AC   | 22 | 6  |
| 361778 | 103 | 675250 | 675263 | 2 | 7  | 14 | AG   | 16 | 3  |
| 361779 | 103 | 675323 | 675370 | 2 | 24 | 48 | TG   | 12 | 12 |
| 361781 | 103 | 678093 | 678108 | 2 | 8  | 16 | GA   | 23 | 3  |
| 361782 | 103 | 682123 | 682148 | 2 | 13 | 26 | CA   | 6  | 6  |
| 361783 | 103 | 682316 | 682337 | 2 | 11 | 22 | AC   | 8  | 4  |
| 361786 | 103 | 688704 | 688721 | 2 | 9  | 18 | CA   | 12 | 7  |
| 361790 | 103 | 692481 | 692496 | 2 | 8  | 16 | GT   | 18 | 5  |
| 361795 | 103 | 698431 | 698464 | 2 | 17 | 34 | AC   | 9  | 10 |
| 361801 | 103 | 700800 | 700845 | 2 | 23 | 46 | CA   | 12 | 12 |
| 361803 | 103 | 704184 | 704213 | 2 | 15 | 30 | GT   | 6  | 5  |
| 361811 | 103 | 705376 | 705395 | 2 | 10 | 20 | TG   | 10 | 7  |
| 361812 | 103 | 708582 | 708621 | 4 | 10 | 40 | AGAC | 18 | 11 |
| 361813 | 103 | 708928 | 708949 | 2 | 11 | 22 | TG   | 8  | 7  |
| 361814 | 103 | 709071 | 709082 | 2 | 6  | 12 | GT   | 29 | 4  |
| 361815 | 103 | 709620 | 709649 | 2 | 15 | 30 | TG   | 8  | 11 |
| 361817 | 103 | 713907 | 713928 | 2 | 11 | 22 | GT   | 22 | 10 |
| 361819 | 103 | 717420 | 717435 | 2 | 8  | 16 | TC   | 23 | 3  |
| 361820 | 103 | 726062 | 726081 | 2 | 10 | 20 | TG   | 25 | 8  |
| 361824 | 103 | 732743 | 732776 | 2 | 17 | 34 | AC   | 12 | 8  |
| 361825 | 103 | 734089 | 734102 | 2 | 7  | 14 | GT   | 30 | 3  |
| 361826 | 103 | 734916 | 734957 | 2 | 21 | 42 | CA   | 6  | 10 |
| 361827 | 103 | 737096 | 737111 | 2 | 8  | 16 | CA   | 28 | 3  |
| 361828 | 103 | 737189 | 737202 | 2 | 7  | 14 | TG   | 25 | 4  |
| 361836 | 103 | 741574 | 741601 | 2 | 14 | 28 | CA   | 14 | 13 |
| 361837 | 103 | 746077 | 746094 | 2 | 9  | 18 | CA   | 18 | 9  |
| 361838 | 103 | 746221 | 746234 | 2 | 7  | 14 | AC   | 31 | 4  |
| 361839 | 103 | 746370 | 746381 | 2 | 6  | 12 | TG   | 36 | 4  |

|        |     |        |        |   |    |    |      |    |    |
|--------|-----|--------|--------|---|----|----|------|----|----|
| 361840 | 103 | 746865 | 746880 | 4 | 4  | 16 | GATT | 26 | 5  |
| 361842 | 103 | 748956 | 748975 | 2 | 10 | 20 | AC   | 7  | 7  |
| 361847 | 103 | 751845 | 751856 | 2 | 6  | 12 | TG   | 29 | 4  |
| 361848 | 103 | 752868 | 752882 | 3 | 5  | 15 | CAG  | 23 | 4  |
| 361859 | 103 | 770462 | 770503 | 2 | 21 | 42 | CT   | 11 | 10 |
| 361864 | 103 | 780197 | 780218 | 2 | 11 | 22 | CA   | 24 | 6  |
| 361867 | 103 | 783913 | 783940 | 2 | 14 | 28 | GA   | 6  | 8  |
| 361869 | 103 | 786158 | 786177 | 2 | 10 | 20 | AC   | 12 | 3  |
| 361874 | 103 | 794815 | 794850 | 2 | 18 | 36 | AC   | 11 | 10 |
| 361879 | 103 | 798533 | 798552 | 2 | 10 | 20 | TG   | 15 | 7  |
| 361881 | 103 | 802468 | 802483 | 4 | 4  | 16 | AAAC | 24 | 6  |
| 361888 | 103 | 808679 | 808698 | 2 | 10 | 20 | AG   | 14 | 11 |
| 361891 | 103 | 809037 | 809072 | 2 | 18 | 36 | CT   | 10 | 10 |
| 361892 | 103 | 809191 | 809202 | 2 | 6  | 12 | GT   | 19 | 3  |
| 361894 | 103 | 809459 | 809474 | 2 | 8  | 16 | AC   | 25 | 8  |
| 361896 | 103 | 811812 | 811827 | 2 | 8  | 16 | AG   | 21 | 3  |
| 361898 | 103 | 812380 | 812397 | 2 | 9  | 18 | AC   | 22 | 10 |
| 361900 | 103 | 816631 | 816642 | 2 | 6  | 12 | CA   | 29 | 4  |
| 361902 | 103 | 818433 | 818500 | 4 | 17 | 68 | AGAT | 17 | 12 |
| 361905 | 103 | 819491 | 819504 | 2 | 7  | 14 | GT   | 15 | 11 |
| 361907 | 103 | 819637 | 819666 | 2 | 15 | 30 | AC   | 13 | 6  |
| 361908 | 103 | 819744 | 819775 | 2 | 16 | 32 | AC   | 8  | 6  |
| 361909 | 103 | 822237 | 822268 | 2 | 16 | 32 | AC   | 10 | 7  |
| 361910 | 103 | 822430 | 822443 | 2 | 7  | 14 | AC   | 27 | 4  |
| 361911 | 103 | 822684 | 822697 | 2 | 7  | 14 | AT   | 22 | 4  |
| 361915 | 103 | 836852 | 836875 | 2 | 12 | 24 | CT   | 9  | 7  |
| 361916 | 103 | 837528 | 837545 | 3 | 6  | 18 | TTG  | 24 | 9  |
| 361920 | 103 | 838668 | 838687 | 2 | 10 | 20 | AG   | 7  | 9  |
| 361921 | 103 | 838689 | 838700 | 2 | 6  | 12 | GA   | 11 | 14 |
| 361922 | 103 | 838886 | 838915 | 3 | 10 | 30 | CCT  | 27 | 6  |
| 361924 | 103 | 840207 | 840226 | 2 | 10 | 20 | GT   | 22 | 4  |
| 361926 | 103 | 840738 | 840749 | 2 | 6  | 12 | TG   | 24 | 3  |
| 361927 | 103 | 842583 | 842596 | 2 | 7  | 14 | CT   | 30 | 3  |
| 361928 | 103 | 842690 | 842731 | 2 | 21 | 42 | TG   | 6  | 8  |
| 361933 | 103 | 846337 | 846368 | 2 | 16 | 32 | CA   | 14 | 9  |
| 361936 | 103 | 846901 | 846932 | 2 | 16 | 32 | GT   | 11 | 12 |
| 361937 | 103 | 850904 | 850921 | 2 | 9  | 18 | CA   | 9  | 6  |
| 361941 | 103 | 852787 | 852812 | 2 | 13 | 26 | CA   | 9  | 6  |
| 361944 | 103 | 857776 | 857791 | 2 | 8  | 16 | TG   | 26 | 3  |
| 361946 | 103 | 859987 | 860000 | 2 | 7  | 14 | AC   | 29 | 3  |
| 361949 | 103 | 861434 | 861447 | 2 | 7  | 14 | AC   | 14 | 4  |
| 361950 | 103 | 861457 | 861470 | 2 | 7  | 14 | CA   | 17 | 3  |
| 361952 | 103 | 863339 | 863350 | 2 | 6  | 12 | TG   | 24 | 4  |
| 361955 | 103 | 863624 | 863641 | 2 | 9  | 18 | CA   | 20 | 7  |
| 361957 | 103 | 863895 | 863912 | 2 | 9  | 18 | GT   | 19 | 6  |
| 361960 | 103 | 867664 | 867679 | 2 | 8  | 16 | GT   | 22 | 17 |
| 361962 | 103 | 868093 | 868104 | 2 | 6  | 12 | AC   | 17 | 5  |
| 361964 | 103 | 868498 | 868515 | 2 | 9  | 18 | CT   | 16 | 3  |
| 361973 | 103 | 877341 | 877364 | 2 | 12 | 24 | TG   | 14 | 9  |
| 361975 | 103 | 878913 | 878926 | 2 | 7  | 14 | AC   | 20 | 5  |
| 361976 | 103 | 879160 | 879173 | 2 | 7  | 14 | TG   | 21 | 5  |



|        |     |         |         |   |    |    |      |    |    |
|--------|-----|---------|---------|---|----|----|------|----|----|
| 361977 | 103 | 879175  | 879188  | 2 | 7  | 14 | GT   | 20 | 6  |
| 361986 | 103 | 892818  | 892833  | 2 | 8  | 16 | CA   | 20 | 5  |
| 361987 | 103 | 893586  | 893597  | 2 | 6  | 12 | CA   | 26 | 3  |
| 362011 | 103 | 909210  | 909241  | 2 | 16 | 32 | GT   | 12 | 5  |
| 362013 | 103 | 914339  | 914354  | 2 | 8  | 16 | TG   | 16 | 6  |
| 362014 | 103 | 915489  | 915512  | 2 | 12 | 24 | CA   | 16 | 8  |
| 362021 | 103 | 919095  | 919122  | 2 | 14 | 28 | TG   | 10 | 8  |
| 362024 | 103 | 919801  | 919834  | 2 | 17 | 34 | TG   | 19 | 12 |
| 362025 | 103 | 921608  | 921623  | 2 | 8  | 16 | GT   | 14 | 4  |
| 362026 | 103 | 921848  | 921859  | 2 | 6  | 12 | TA   | 22 | 3  |
| 362035 | 103 | 954215  | 954244  | 2 | 15 | 30 | TG   | 8  | 6  |
| 362047 | 103 | 978636  | 978671  | 2 | 18 | 36 | AC   | 8  | 9  |
| 362049 | 103 | 981509  | 981536  | 4 | 7  | 28 | TATC | 15 | 5  |
| 362052 | 103 | 988823  | 988838  | 2 | 8  | 16 | TG   | 13 | 3  |
| 362072 | 103 | 1040797 | 1040814 | 2 | 9  | 18 | TA   | 6  | 4  |
| 362085 | 103 | 1055026 | 1055037 | 2 | 6  | 12 | AC   | 22 | 3  |
| 362087 | 103 | 1060483 | 1060538 | 2 | 28 | 56 | CT   | 12 | 11 |
| 362089 | 103 | 1060795 | 1060814 | 2 | 10 | 20 | AC   | 23 | 6  |
| 362092 | 103 | 1066399 | 1066438 | 2 | 20 | 40 | AC   | 10 | 8  |
| 362096 | 103 | 1067304 | 1067315 | 2 | 6  | 12 | CA   | 30 | 3  |
| 362110 | 103 | 1121126 | 1121153 | 4 | 7  | 28 | ATCA | 17 | 4  |
| 362114 | 103 | 1125521 | 1125541 | 3 | 7  | 21 | GTT  | 25 | 7  |
| 362121 | 103 | 1150572 | 1150599 | 2 | 14 | 28 | AC   | 12 | 12 |
| 362122 | 103 | 1152770 | 1152807 | 2 | 19 | 38 | TC   | 16 | 14 |
| 362124 | 103 | 1155883 | 1155906 | 3 | 8  | 24 | TGC  | 21 | 5  |
| 362126 | 103 | 1162707 | 1162720 | 2 | 7  | 14 | AT   | 8  | 6  |
| 362134 | 104 | 11595   | 11610   | 2 | 8  | 16 | TG   | 20 | 9  |
| 362135 | 104 | 15247   | 15270   | 2 | 12 | 24 | AC   | 15 | 6  |
| 362136 | 104 | 15465   | 15476   | 2 | 6  | 12 | AC   | 18 | 3  |
| 362137 | 104 | 16300   | 16317   | 2 | 9  | 18 | AC   | 17 | 5  |
| 362139 | 104 | 19317   | 19328   | 2 | 6  | 12 | CT   | 32 | 4  |
| 362142 | 104 | 28450   | 28473   | 3 | 8  | 24 | TAT  | 18 | 10 |
| 362147 | 104 | 44735   | 44750   | 2 | 8  | 16 | AC   | 22 | 5  |
| 362149 | 104 | 45103   | 45128   | 2 | 13 | 26 | GT   | 23 | 7  |
| 362151 | 104 | 50431   | 50482   | 2 | 26 | 52 | AC   | 11 | 12 |
| 362155 | 104 | 56334   | 56369   | 2 | 18 | 36 | TG   | 11 | 14 |
| 362158 | 104 | 60425   | 60442   | 3 | 6  | 18 | TGC  | 25 | 5  |
| 362164 | 104 | 64123   | 64140   | 2 | 9  | 18 | GT   | 14 | 6  |
| 362165 | 104 | 64962   | 64976   | 3 | 5  | 15 | TTA  | 28 | 4  |
| 362168 | 104 | 68772   | 68805   | 2 | 17 | 34 | TG   | 9  | 13 |
| 362169 | 104 | 68848   | 68861   | 2 | 7  | 14 | TC   | 14 | 3  |
| 362174 | 104 | 71057   | 71092   | 2 | 18 | 36 | AC   | 10 | 5  |
| 362177 | 104 | 73261   | 73284   | 2 | 12 | 24 | AC   | 12 | 11 |
| 362178 | 104 | 73672   | 73689   | 2 | 9  | 18 | TG   | 13 | 13 |
| 362179 | 104 | 75104   | 75117   | 2 | 7  | 14 | AG   | 18 | 4  |
| 362180 | 104 | 75248   | 75279   | 2 | 16 | 32 | TG   | 15 | 16 |
| 362181 | 104 | 75441   | 75466   | 2 | 13 | 26 | CA   | 16 | 9  |
| 362184 | 104 | 78749   | 78764   | 2 | 8  | 16 | TG   | 19 | 7  |
| 362193 | 104 | 85056   | 85073   | 3 | 6  | 18 | TGT  | 12 | 10 |
| 362197 | 104 | 91991   | 92006   | 4 | 4  | 16 | CCTC | 6  | 3  |
| 362201 | 104 | 97946   | 97959   | 2 | 7  | 14 | CA   | 25 | 5  |

|        |     |        |        |   |    |    |      |    |    |
|--------|-----|--------|--------|---|----|----|------|----|----|
| 362205 | 104 | 102132 | 102145 | 2 | 7  | 14 | TG   | 26 | 3  |
| 362207 | 104 | 103779 | 103810 | 2 | 16 | 32 | GT   | 14 | 9  |
| 362208 | 104 | 104098 | 104123 | 2 | 13 | 26 | TG   | 15 | 7  |
| 362209 | 104 | 104741 | 104764 | 2 | 12 | 24 | TG   | 22 | 5  |
| 362210 | 104 | 109630 | 109645 | 2 | 8  | 16 | CT   | 26 | 12 |
| 362214 | 104 | 115101 | 115126 | 2 | 13 | 26 | CA   | 8  | 7  |
| 362215 | 104 | 117172 | 117192 | 3 | 7  | 21 | CTC  | 15 | 12 |
| 362217 | 104 | 120902 | 120916 | 3 | 5  | 15 | CCT  | 9  | 7  |
| 362218 | 104 | 120920 | 120934 | 3 | 5  | 15 | CCT  | 12 | 6  |
| 362220 | 104 | 122475 | 122494 | 2 | 10 | 20 | GA   | 27 | 10 |
| 362221 | 104 | 122845 | 122871 | 3 | 9  | 27 | CCT  | 13 | 7  |
| 362224 | 104 | 126013 | 126033 | 3 | 7  | 21 | CTT  | 25 | 7  |
| 362230 | 104 | 135137 | 135156 | 2 | 10 | 20 | AC   | 18 | 11 |
| 362232 | 104 | 135752 | 135777 | 2 | 13 | 26 | AC   | 23 | 7  |
| 362235 | 104 | 136541 | 136556 | 2 | 8  | 16 | CT   | 22 | 4  |
| 362237 | 104 | 143904 | 143924 | 3 | 7  | 21 | GCA  | 26 | 5  |
| 362238 | 104 | 145839 | 145850 | 2 | 6  | 12 | AC   | 24 | 7  |
| 362239 | 104 | 145852 | 145863 | 2 | 6  | 12 | CA   | 27 | 6  |
| 362240 | 104 | 146022 | 146033 | 2 | 6  | 12 | TC   | 25 | 3  |
| 362242 | 104 | 149794 | 149811 | 3 | 6  | 18 | AGA  | 26 | 3  |
| 362244 | 104 | 150207 | 150236 | 2 | 15 | 30 | TG   | 17 | 7  |
| 362246 | 104 | 152145 | 152168 | 3 | 8  | 24 | ATG  | 29 | 4  |
| 362251 | 104 | 162697 | 162712 | 2 | 8  | 16 | CA   | 18 | 5  |
| 362252 | 104 | 163239 | 163250 | 2 | 6  | 12 | AT   | 21 | 3  |
| 362255 | 104 | 169121 | 169152 | 2 | 16 | 32 | AC   | 19 | 12 |
| 362256 | 104 | 169181 | 169204 | 2 | 12 | 24 | CA   | 16 | 8  |
| 362258 | 104 | 171402 | 171439 | 2 | 19 | 38 | GT   | 14 | 9  |
| 362259 | 104 | 171858 | 171877 | 2 | 10 | 20 | TC   | 23 | 4  |
| 362260 | 104 | 174988 | 175007 | 2 | 10 | 20 | AC   | 14 | 7  |
| 362261 | 104 | 176652 | 176679 | 2 | 14 | 28 | TG   | 20 | 9  |
| 362262 | 104 | 176743 | 176778 | 2 | 18 | 36 | TG   | 15 | 11 |
| 362263 | 104 | 178786 | 178809 | 4 | 6  | 24 | TGTA | 17 | 11 |
| 362265 | 104 | 180602 | 180631 | 2 | 15 | 30 | GT   | 15 | 10 |
| 362271 | 104 | 182394 | 182417 | 3 | 8  | 24 | CCT  | 19 | 6  |
| 362273 | 104 | 186456 | 186471 | 2 | 8  | 16 | GT   | 21 | 6  |
| 362274 | 104 | 186600 | 186614 | 3 | 5  | 15 | CCT  | 27 | 8  |
| 362276 | 104 | 187259 | 187290 | 2 | 16 | 32 | CA   | 19 | 13 |
| 362280 | 104 | 193362 | 193377 | 2 | 8  | 16 | AC   | 20 | 6  |
| 362282 | 104 | 193894 | 193929 | 4 | 9  | 36 | ATGG | 17 | 6  |
| 362283 | 104 | 202331 | 202360 | 3 | 10 | 30 | GAG  | 20 | 7  |
| 362284 | 104 | 203461 | 203490 | 2 | 15 | 30 | TG   | 13 | 8  |
| 362292 | 104 | 210120 | 210139 | 2 | 10 | 20 | TG   | 9  | 7  |
| 362293 | 104 | 210524 | 210543 | 2 | 10 | 20 | TG   | 22 | 7  |
| 362295 | 104 | 214326 | 214340 | 3 | 5  | 15 | AGG  | 29 | 3  |
| 362296 | 104 | 215100 | 215129 | 2 | 15 | 30 | AC   | 12 | 12 |
| 362303 | 104 | 219205 | 219240 | 2 | 18 | 36 | CA   | 8  | 8  |
| 362304 | 104 | 222368 | 222391 | 3 | 8  | 24 | GCT  | 27 | 4  |
| 362305 | 104 | 222912 | 222938 | 3 | 9  | 27 | CAT  | 24 | 3  |
| 362306 | 104 | 223628 | 223661 | 2 | 17 | 34 | GT   | 13 | 6  |
| 362307 | 104 | 225511 | 225522 | 2 | 6  | 12 | TA   | 9  | 4  |
| 362308 | 104 | 225825 | 225838 | 2 | 7  | 14 | GA   | 29 | 7  |

|        |     |        |        |   |    |    |      |    |    |
|--------|-----|--------|--------|---|----|----|------|----|----|
| 362311 | 104 | 228410 | 228445 | 2 | 18 | 36 | CA   | 19 | 10 |
| 362315 | 104 | 242746 | 242767 | 2 | 11 | 22 | AC   | 7  | 7  |
| 362316 | 104 | 243120 | 243135 | 2 | 8  | 16 | TC   | 19 | 3  |
| 362318 | 104 | 246611 | 246622 | 2 | 6  | 12 | TC   | 29 | 6  |
| 362320 | 104 | 251576 | 251591 | 2 | 8  | 16 | AC   | 6  | 5  |
| 362329 | 104 | 265217 | 265228 | 2 | 6  | 12 | AG   | 23 | 4  |
| 362331 | 104 | 267113 | 267128 | 4 | 4  | 16 | CTCG | 26 | 3  |
| 362334 | 104 | 276527 | 276578 | 2 | 26 | 52 | TG   | 8  | 10 |
| 362335 | 104 | 277886 | 277909 | 2 | 12 | 24 | AC   | 13 | 7  |
| 362337 | 104 | 278377 | 278396 | 2 | 10 | 20 | GT   | 14 | 11 |
| 362339 | 104 | 284541 | 284555 | 3 | 5  | 15 | GCA  | 22 | 5  |
| 362340 | 104 | 287661 | 287680 | 2 | 10 | 20 | AC   | 24 | 18 |
| 362342 | 104 | 292008 | 292023 | 2 | 8  | 16 | GA   | 9  | 8  |
| 362343 | 104 | 292293 | 292306 | 2 | 7  | 14 | CA   | 21 | 5  |
| 362346 | 104 | 299196 | 299213 | 2 | 9  | 18 | AC   | 15 | 6  |
| 362348 | 104 | 301573 | 301610 | 2 | 19 | 38 | TG   | 10 | 12 |
| 362350 | 104 | 302322 | 302353 | 2 | 16 | 32 | CA   | 12 | 7  |
| 362357 | 104 | 310690 | 310713 | 2 | 12 | 24 | CA   | 21 | 7  |
| 362358 | 104 | 311695 | 311718 | 3 | 8  | 24 | CTC  | 27 | 10 |
| 362360 | 104 | 311910 | 311933 | 4 | 6  | 24 | AAAG | 21 | 5  |
| 362361 | 104 | 312203 | 312220 | 3 | 6  | 18 | CAC  | 32 | 3  |
| 362365 | 104 | 325149 | 325170 | 2 | 11 | 22 | CA   | 19 | 7  |
| 362367 | 104 | 328591 | 328614 | 2 | 12 | 24 | CA   | 6  | 8  |
| 362368 | 104 | 332014 | 332043 | 3 | 10 | 30 | CCT  | 12 | 4  |
| 362375 | 104 | 343341 | 343367 | 3 | 9  | 27 | AAG  | 26 | 4  |
| 362376 | 104 | 343758 | 343790 | 3 | 11 | 33 | TCT  | 27 | 5  |
| 362378 | 104 | 347911 | 347922 | 2 | 6  | 12 | AC   | 17 | 7  |
| 362379 | 104 | 347925 | 347936 | 2 | 6  | 12 | AC   | 23 | 7  |
| 362380 | 104 | 350640 | 350665 | 2 | 13 | 26 | CA   | 20 | 7  |
| 362381 | 104 | 351020 | 351037 | 2 | 9  | 18 | TG   | 23 | 3  |
| 362383 | 104 | 352258 | 352281 | 2 | 12 | 24 | CA   | 18 | 10 |
| 362387 | 104 | 352805 | 352832 | 2 | 14 | 28 | GT   | 16 | 8  |
| 362390 | 104 | 356770 | 356783 | 2 | 7  | 14 | CT   | 19 | 4  |
| 362391 | 104 | 360237 | 360256 | 2 | 10 | 20 | TG   | 16 | 9  |
| 362393 | 104 | 362658 | 362673 | 2 | 8  | 16 | AG   | 16 | 3  |
| 362394 | 104 | 363133 | 363162 | 2 | 15 | 30 | CA   | 22 | 11 |
| 362398 | 104 | 366037 | 366050 | 2 | 7  | 14 | TC   | 8  | 3  |
| 362399 | 104 | 366387 | 366428 | 2 | 21 | 42 | AG   | 9  | 8  |
| 362401 | 104 | 367053 | 367074 | 2 | 11 | 22 | CA   | 12 | 11 |
| 362408 | 104 | 376737 | 376772 | 2 | 18 | 36 | CA   | 11 | 11 |
| 362411 | 104 | 377977 | 377992 | 2 | 8  | 16 | AC   | 19 | 8  |
| 362422 | 104 | 382202 | 382221 | 2 | 10 | 20 | GT   | 17 | 9  |
| 362428 | 104 | 388558 | 388575 | 2 | 9  | 18 | TG   | 26 | 9  |
| 362429 | 104 | 389410 | 389447 | 2 | 19 | 38 | AC   | 18 | 13 |
| 362431 | 104 | 389829 | 389848 | 2 | 10 | 20 | TG   | 19 | 8  |
| 362432 | 104 | 390032 | 390057 | 2 | 13 | 26 | GT   | 20 | 11 |
| 362433 | 104 | 390155 | 390166 | 2 | 6  | 12 | GT   | 20 | 5  |
| 362434 | 104 | 390196 | 390219 | 2 | 12 | 24 | TG   | 19 | 9  |
| 362436 | 104 | 390535 | 390549 | 3 | 5  | 15 | TCC  | 25 | 6  |
| 362437 | 104 | 391374 | 391388 | 3 | 5  | 15 | CCA  | 24 | 3  |
| 362445 | 104 | 400618 | 400643 | 2 | 13 | 26 | TG   | 16 | 8  |

|        |     |        |        |   |    |    |      |    |    |
|--------|-----|--------|--------|---|----|----|------|----|----|
| 362446 | 104 | 400784 | 400805 | 2 | 11 | 22 | CA   | 21 | 10 |
| 362447 | 104 | 401012 | 401035 | 2 | 12 | 24 | AC   | 12 | 9  |
| 362454 | 104 | 406567 | 406578 | 2 | 6  | 12 | AC   | 17 | 5  |
| 362455 | 104 | 407621 | 407632 | 2 | 6  | 12 | GA   | 34 | 8  |
| 362457 | 104 | 411370 | 411384 | 3 | 5  | 15 | CTT  | 26 | 3  |
| 362459 | 104 | 412894 | 412923 | 2 | 15 | 30 | GT   | 21 | 19 |
| 362466 | 104 | 423707 | 423718 | 2 | 6  | 12 | GA   | 31 | 3  |
| 362467 | 104 | 424739 | 424768 | 2 | 15 | 30 | CA   | 16 | 8  |
| 362468 | 104 | 424868 | 424885 | 2 | 9  | 18 | TG   | 22 | 7  |
| 362469 | 104 | 425601 | 425612 | 2 | 6  | 12 | AC   | 17 | 3  |
| 362470 | 104 | 425649 | 425686 | 2 | 19 | 38 | CA   | 9  | 8  |
| 362472 | 104 | 426304 | 426317 | 2 | 7  | 14 | GT   | 17 | 3  |
| 362473 | 104 | 426365 | 426408 | 2 | 22 | 44 | GT   | 6  | 10 |
| 362474 | 104 | 426717 | 426750 | 2 | 17 | 34 | GT   | 10 | 12 |
| 362478 | 104 | 431985 | 432026 | 2 | 21 | 42 | TG   | 6  | 5  |
| 362485 | 104 | 440052 | 440083 | 4 | 8  | 32 | TGTC | 26 | 8  |
| 362486 | 104 | 440124 | 440143 | 2 | 10 | 20 | AG   | 20 | 10 |
| 362487 | 104 | 440233 | 440272 | 2 | 20 | 40 | CA   | 9  | 14 |
| 362488 | 104 | 440365 | 440386 | 2 | 11 | 22 | AC   | 16 | 15 |
| 362489 | 104 | 440807 | 440826 | 2 | 10 | 20 | GT   | 22 | 6  |
| 362490 | 104 | 441703 | 441722 | 2 | 10 | 20 | AG   | 23 | 8  |
| 362491 | 104 | 444497 | 444524 | 2 | 14 | 28 | AC   | 13 | 7  |
| 362492 | 104 | 445206 | 445227 | 2 | 11 | 22 | CA   | 13 | 8  |
| 362495 | 104 | 446766 | 446785 | 2 | 10 | 20 | GT   | 20 | 8  |
| 362496 | 104 | 451071 | 451096 | 2 | 13 | 26 | TG   | 15 | 17 |
| 362497 | 104 | 451328 | 451343 | 2 | 8  | 16 | GA   | 27 | 4  |
| 362502 | 104 | 454465 | 454476 | 2 | 6  | 12 | TC   | 19 | 3  |
| 362503 | 104 | 454506 | 454553 | 2 | 24 | 48 | GT   | 9  | 10 |
| 362505 | 104 | 454880 | 454901 | 2 | 11 | 22 | CT   | 12 | 6  |
| 362513 | 104 | 464859 | 464874 | 2 | 8  | 16 | TA   | 9  | 10 |
| 362521 | 104 | 471579 | 471596 | 2 | 9  | 18 | CA   | 19 | 4  |
| 362523 | 104 | 476674 | 476689 | 2 | 8  | 16 | AT   | 6  | 3  |
| 362525 | 104 | 477984 | 478011 | 2 | 14 | 28 | TG   | 11 | 11 |
| 362530 | 104 | 484285 | 484299 | 3 | 5  | 15 | TCC  | 29 | 4  |
| 362533 | 104 | 487941 | 487970 | 2 | 15 | 30 | CA   | 6  | 8  |
| 362535 | 104 | 493672 | 493685 | 2 | 7  | 14 | GT   | 23 | 4  |
| 362536 | 104 | 495356 | 495369 | 2 | 7  | 14 | AC   | 20 | 4  |
| 362538 | 104 | 500242 | 500261 | 2 | 10 | 20 | GT   | 17 | 4  |
| 362546 | 104 | 504547 | 504566 | 2 | 10 | 20 | GT   | 9  | 10 |
| 362548 | 104 | 510408 | 510443 | 2 | 18 | 36 | GT   | 10 | 9  |
| 362550 | 104 | 512456 | 512507 | 2 | 26 | 52 | TG   | 15 | 10 |
| 362551 | 104 | 514143 | 514166 | 2 | 12 | 24 | GA   | 13 | 9  |
| 362552 | 104 | 516167 | 516194 | 4 | 7  | 28 | CTTC | 9  | 7  |
| 362555 | 104 | 517610 | 517635 | 2 | 13 | 26 | CA   | 7  | 8  |
| 362558 | 104 | 519268 | 519281 | 2 | 7  | 14 | TG   | 17 | 9  |
| 362559 | 104 | 519282 | 519293 | 2 | 6  | 12 | GT   | 19 | 9  |
| 362561 | 104 | 522056 | 522073 | 2 | 9  | 18 | CA   | 12 | 12 |
| 362562 | 104 | 523388 | 523401 | 2 | 7  | 14 | TG   | 16 | 5  |
| 362564 | 104 | 523574 | 523603 | 2 | 15 | 30 | TG   | 10 | 6  |
| 362566 | 104 | 523764 | 523793 | 2 | 15 | 30 | AC   | 9  | 9  |
| 362567 | 104 | 524291 | 524314 | 2 | 12 | 24 | CA   | 16 | 13 |

|        |     |        |        |   |    |    |      |    |    |
|--------|-----|--------|--------|---|----|----|------|----|----|
| 362572 | 104 | 530297 | 530332 | 2 | 18 | 36 | GT   | 10 | 10 |
| 362573 | 104 | 530372 | 530387 | 4 | 4  | 16 | CCGT | 22 | 6  |
| 362576 | 104 | 531077 | 531094 | 3 | 6  | 18 | AGG  | 21 | 3  |
| 362579 | 104 | 532433 | 532447 | 3 | 5  | 15 | GGT  | 15 | 4  |
| 362590 | 104 | 551034 | 551049 | 4 | 4  | 16 | ATCT | 25 | 3  |
| 362593 | 104 | 554930 | 554947 | 2 | 9  | 18 | AC   | 18 | 8  |
| 362598 | 104 | 558894 | 558913 | 4 | 5  | 20 | AAAG | 18 | 9  |
| 362599 | 104 | 559590 | 559605 | 4 | 4  | 16 | TATT | 22 | 3  |
| 362600 | 104 | 560418 | 560429 | 2 | 6  | 12 | TC   | 21 | 8  |
| 362601 | 104 | 562297 | 562312 | 2 | 8  | 16 | AC   | 27 | 11 |
| 362602 | 104 | 562692 | 562706 | 3 | 5  | 15 | TGA  | 32 | 5  |
| 362603 | 104 | 564245 | 564298 | 2 | 27 | 54 | TG   | 8  | 12 |
| 362606 | 104 | 566405 | 566442 | 2 | 19 | 38 | TG   | 6  | 8  |
| 362607 | 104 | 566545 | 566586 | 2 | 21 | 42 | GT   | 12 | 12 |
| 362609 | 104 | 571478 | 571495 | 2 | 9  | 18 | CA   | 16 | 7  |
| 362618 | 104 | 579460 | 579477 | 3 | 6  | 18 | GCT  | 24 | 7  |
| 362620 | 104 | 582770 | 582783 | 2 | 7  | 14 | AC   | 16 | 3  |
| 362626 | 104 | 592021 | 592034 | 2 | 7  | 14 | CT   | 26 | 10 |
| 362629 | 104 | 597754 | 597768 | 3 | 5  | 15 | CAG  | 16 | 3  |
| 362636 | 104 | 606546 | 606577 | 4 | 8  | 32 | ACAA | 17 | 8  |
| 362641 | 104 | 622312 | 622338 | 3 | 9  | 27 | CCT  | 6  | 4  |
| 362649 | 104 | 628382 | 628397 | 4 | 4  | 16 | ACAG | 28 | 3  |
| 362655 | 104 | 643621 | 643632 | 2 | 6  | 12 | CA   | 23 | 3  |
| 362657 | 104 | 647440 | 647451 | 2 | 6  | 12 | CA   | 34 | 3  |
| 362658 | 104 | 650839 | 650858 | 2 | 10 | 20 | TG   | 23 | 8  |
| 362660 | 104 | 658129 | 658154 | 2 | 13 | 26 | AC   | 15 | 15 |
| 362665 | 104 | 666300 | 666313 | 2 | 7  | 14 | CA   | 26 | 5  |
| 362668 | 104 | 668915 | 668930 | 2 | 8  | 16 | GA   | 29 | 4  |
| 362670 | 104 | 670911 | 670944 | 2 | 17 | 34 | TG   | 18 | 12 |
| 362671 | 104 | 671176 | 671205 | 2 | 15 | 30 | AC   | 23 | 14 |
| 362680 | 104 | 692047 | 692073 | 3 | 9  | 27 | CCT  | 18 | 9  |
| 362684 | 104 | 699601 | 699624 | 2 | 12 | 24 | GT   | 20 | 13 |
| 362692 | 104 | 722818 | 722831 | 2 | 7  | 14 | GT   | 23 | 6  |
| 362693 | 104 | 723297 | 723318 | 2 | 11 | 22 | CA   | 13 | 7  |
| 362697 | 104 | 725014 | 725043 | 3 | 10 | 30 | AGG  | 17 | 7  |
| 362698 | 104 | 725326 | 725347 | 2 | 11 | 22 | CA   | 18 | 7  |
| 362700 | 104 | 734896 | 734915 | 4 | 5  | 20 | TGAT | 22 | 4  |
| 362705 | 104 | 737267 | 737284 | 3 | 6  | 18 | GCT  | 30 | 6  |
| 362709 | 104 | 741989 | 742006 | 2 | 9  | 18 | AC   | 22 | 13 |
| 362710 | 104 | 742789 | 742804 | 4 | 4  | 16 | GCTC | 21 | 4  |
| 362714 | 104 | 749784 | 749804 | 3 | 7  | 21 | AAG  | 30 | 3  |
| 362715 | 104 | 757775 | 757786 | 2 | 6  | 12 | TA   | 20 | 3  |
| 362718 | 104 | 762594 | 762615 | 2 | 11 | 22 | AC   | 25 | 11 |
| 362720 | 104 | 772186 | 772213 | 4 | 7  | 28 | ATAA | 13 | 4  |
| 362722 | 104 | 779690 | 779743 | 2 | 27 | 54 | GT   | 9  | 10 |
| 362723 | 104 | 782678 | 782691 | 2 | 7  | 14 | AG   | 25 | 6  |
| 362728 | 104 | 792074 | 792091 | 2 | 9  | 18 | TG   | 11 | 14 |
| 362730 | 104 | 792266 | 792287 | 2 | 11 | 22 | CA   | 9  | 6  |
| 362731 | 104 | 795007 | 795040 | 2 | 17 | 34 | GT   | 9  | 9  |
| 362733 | 104 | 796386 | 796429 | 2 | 22 | 44 | TG   | 7  | 10 |
| 362740 | 104 | 801775 | 801800 | 2 | 13 | 26 | CA   | 12 | 8  |

|        |     |        |        |   |    |    |      |    |    |
|--------|-----|--------|--------|---|----|----|------|----|----|
| 362741 | 104 | 803583 | 803600 | 3 | 6  | 18 | CCT  | 23 | 4  |
| 362750 | 104 | 812921 | 812947 | 3 | 9  | 27 | GAA  | 29 | 10 |
| 362751 | 104 | 814590 | 814609 | 2 | 10 | 20 | CA   | 20 | 12 |
| 362752 | 104 | 815002 | 815016 | 3 | 5  | 15 | GCC  | 26 | 12 |
| 362754 | 104 | 817503 | 817530 | 2 | 14 | 28 | TG   | 6  | 5  |
| 362757 | 104 | 823331 | 823345 | 3 | 5  | 15 | CTT  | 22 | 3  |
| 362758 | 104 | 825574 | 825591 | 3 | 6  | 18 | TTC  | 30 | 4  |
| 362765 | 104 | 846456 | 846493 | 2 | 19 | 38 | CA   | 6  | 10 |
| 362771 | 104 | 855652 | 855663 | 2 | 6  | 12 | CG   | 24 | 5  |
| 362773 | 104 | 855985 | 856002 | 3 | 6  | 18 | GTT  | 24 | 3  |
| 362779 | 104 | 869623 | 869636 | 2 | 7  | 14 | CA   | 9  | 3  |
| 362780 | 104 | 877316 | 877335 | 2 | 10 | 20 | TG   | 19 | 13 |
| 362782 | 104 | 882304 | 882349 | 2 | 23 | 46 | GT   | 8  | 10 |
| 362787 | 104 | 896695 | 896709 | 3 | 5  | 15 | GGA  | 30 | 14 |
| 362788 | 104 | 897254 | 897279 | 2 | 13 | 26 | CA   | 16 | 14 |
| 362789 | 104 | 898922 | 898975 | 2 | 27 | 54 | TG   | 10 | 11 |
| 362792 | 104 | 903149 | 903190 | 2 | 21 | 42 | AC   | 13 | 10 |
| 362793 | 104 | 905316 | 905357 | 2 | 21 | 42 | GT   | 17 | 14 |
| 362795 | 104 | 906297 | 906320 | 2 | 12 | 24 | CA   | 22 | 10 |
| 362796 | 104 | 909745 | 909766 | 2 | 11 | 22 | GT   | 17 | 6  |
| 362798 | 104 | 912785 | 912810 | 2 | 13 | 26 | TG   | 22 | 9  |
| 362799 | 104 | 912908 | 912919 | 2 | 6  | 12 | CA   | 22 | 3  |
| 362800 | 104 | 913602 | 913643 | 2 | 21 | 42 | GT   | 11 | 10 |
| 362801 | 104 | 914347 | 914380 | 2 | 17 | 34 | GT   | 14 | 8  |
| 362802 | 104 | 914588 | 914619 | 2 | 16 | 32 | AC   | 13 | 9  |
| 362803 | 104 | 923159 | 923178 | 2 | 10 | 20 | GA   | 12 | 11 |
| 362806 | 104 | 925203 | 925224 | 2 | 11 | 22 | AC   | 10 | 6  |
| 362808 | 104 | 926242 | 926271 | 3 | 10 | 30 | GGA  | 25 | 5  |
| 362810 | 104 | 928020 | 928070 | 3 | 17 | 51 | AAG  | 25 | 18 |
| 362811 | 104 | 928540 | 928571 | 2 | 16 | 32 | AC   | 11 | 9  |
| 362812 | 104 | 928794 | 928807 | 2 | 7  | 14 | AC   | 19 | 12 |
| 362813 | 104 | 929607 | 929634 | 4 | 7  | 28 | CCTT | 18 | 4  |
| 362824 | 104 | 935249 | 935268 | 2 | 10 | 20 | GT   | 16 | 12 |
| 362825 | 104 | 935502 | 935515 | 2 | 7  | 14 | TA   | 14 | 4  |
| 362826 | 104 | 937270 | 937297 | 2 | 14 | 28 | GT   | 16 | 8  |
| 362827 | 104 | 938993 | 939020 | 2 | 14 | 28 | AC   | 17 | 13 |
| 362834 | 104 | 949779 | 949818 | 2 | 20 | 40 | GT   | 7  | 11 |
| 362836 | 104 | 949905 | 949934 | 2 | 15 | 30 | GT   | 10 | 5  |
| 362837 | 104 | 950149 | 950164 | 2 | 8  | 16 | GT   | 16 | 3  |
| 362840 | 104 | 955636 | 955647 | 2 | 6  | 12 | AG   | 26 | 3  |
| 362841 | 104 | 955759 | 955782 | 2 | 12 | 24 | AC   | 11 | 13 |
| 362842 | 104 | 956017 | 956031 | 3 | 5  | 15 | TCA  | 22 | 6  |
| 362843 | 104 | 957604 | 957617 | 2 | 7  | 14 | TG   | 13 | 5  |
| 362855 | 104 | 966646 | 966657 | 2 | 6  | 12 | GA   | 30 | 3  |
| 362856 | 104 | 969835 | 969852 | 2 | 9  | 18 | AC   | 23 | 10 |
| 362857 | 104 | 969894 | 969909 | 2 | 8  | 16 | CA   | 14 | 6  |
| 362858 | 104 | 970106 | 970125 | 2 | 10 | 20 | AC   | 21 | 9  |
| 362860 | 104 | 976098 | 976109 | 2 | 6  | 12 | AC   | 32 | 6  |
| 362861 | 104 | 978785 | 978814 | 2 | 15 | 30 | AC   | 12 | 8  |
| 362866 | 104 | 985262 | 985285 | 2 | 12 | 24 | TG   | 26 | 7  |
| 362867 | 104 | 988898 | 988925 | 2 | 14 | 28 | GT   | 13 | 7  |

|        |     |         |         |   |    |    |      |    |    |
|--------|-----|---------|---------|---|----|----|------|----|----|
| 362868 | 104 | 989123  | 989143  | 3 | 7  | 21 | ATC  | 29 | 4  |
| 362870 | 104 | 992716  | 992745  | 2 | 15 | 30 | CA   | 13 | 8  |
| 362881 | 104 | 996743  | 996790  | 2 | 24 | 48 | GT   | 7  | 9  |
| 362882 | 104 | 996978  | 997009  | 2 | 16 | 32 | TG   | 9  | 10 |
| 362887 | 104 | 998194  | 998220  | 3 | 9  | 27 | TCC  | 19 | 9  |
| 362893 | 104 | 1006794 | 1006811 | 2 | 9  | 18 | GT   | 17 | 7  |
| 362896 | 104 | 1007273 | 1007296 | 3 | 8  | 24 | CCT  | 20 | 10 |
| 362901 | 104 | 1009736 | 1009757 | 2 | 11 | 22 | AC   | 8  | 9  |
| 362902 | 104 | 1009874 | 1009891 | 2 | 9  | 18 | TG   | 26 | 13 |
| 362903 | 104 | 1011345 | 1011365 | 3 | 7  | 21 | TTG  | 33 | 5  |
| 362905 | 104 | 1018452 | 1018463 | 2 | 6  | 12 | AC   | 28 | 5  |
| 362906 | 104 | 1020090 | 1020121 | 2 | 16 | 32 | TG   | 12 | 11 |
| 362916 | 104 | 1023347 | 1023361 | 3 | 5  | 15 | TCC  | 14 | 7  |
| 362917 | 104 | 1023485 | 1023522 | 2 | 19 | 38 | TG   | 8  | 11 |
| 362920 | 104 | 1030231 | 1030254 | 2 | 12 | 24 | CA   | 21 | 9  |
| 362921 | 104 | 1030403 | 1030420 | 2 | 9  | 18 | AC   | 20 | 9  |
| 362923 | 104 | 1031850 | 1031861 | 2 | 6  | 12 | CA   | 22 | 5  |
| 362925 | 104 | 1032275 | 1032296 | 2 | 11 | 22 | AC   | 23 | 11 |
| 362930 | 104 | 1044250 | 1044263 | 2 | 7  | 14 | GT   | 34 | 3  |
| 362935 | 104 | 1063600 | 1063623 | 4 | 6  | 24 | GTAT | 18 | 3  |
| 362936 | 104 | 1064058 | 1064081 | 2 | 12 | 24 | TG   | 18 | 3  |
| 362937 | 104 | 1064114 | 1064153 | 2 | 20 | 40 | TG   | 12 | 12 |
| 362939 | 104 | 1068013 | 1068032 | 2 | 10 | 20 | CA   | 13 | 6  |
| 362940 | 104 | 1068199 | 1068230 | 2 | 16 | 32 | GT   | 17 | 14 |
| 362944 | 104 | 1070359 | 1070379 | 3 | 7  | 21 | AGA  | 12 | 6  |
| 362948 | 104 | 1071155 | 1071188 | 2 | 17 | 34 | CA   | 11 | 13 |
| 362953 | 104 | 1074627 | 1074652 | 2 | 13 | 26 | AC   | 18 | 12 |
| 362954 | 104 | 1074719 | 1074734 | 2 | 8  | 16 | TG   | 18 | 10 |
| 362955 | 104 | 1074735 | 1074748 | 2 | 7  | 14 | AG   | 23 | 14 |
| 362956 | 104 | 1074869 | 1074904 | 2 | 18 | 36 | AC   | 11 | 12 |
| 362961 | 104 | 1083553 | 1083582 | 2 | 15 | 30 | TG   | 15 | 9  |
| 362965 | 104 | 1088728 | 1088743 | 2 | 8  | 16 | GA   | 28 | 4  |
| 362967 | 104 | 1089208 | 1089223 | 2 | 8  | 16 | AC   | 8  | 6  |
| 362969 | 104 | 1089415 | 1089426 | 2 | 6  | 12 | GA   | 28 | 3  |
| 362971 | 104 | 1089711 | 1089738 | 2 | 14 | 28 | GT   | 20 | 15 |
| 362972 | 104 | 1089915 | 1089938 | 2 | 12 | 24 | CT   | 19 | 7  |
| 362973 | 104 | 1090132 | 1090143 | 2 | 6  | 12 | GA   | 24 | 17 |
| 362974 | 104 | 1090354 | 1090399 | 2 | 23 | 46 | GA   | 10 | 8  |
| 362977 | 104 | 1106334 | 1106357 | 3 | 8  | 24 | AAT  | 22 | 4  |
| 362988 | 105 | 3551    | 3580    | 2 | 15 | 30 | TG   | 10 | 11 |
| 362989 | 105 | 4381    | 4438    | 2 | 29 | 58 | AC   | 6  | 12 |
| 362991 | 105 | 8101    | 8120    | 2 | 10 | 20 | CA   | 24 | 9  |
| 362992 | 105 | 11190   | 11201   | 2 | 6  | 12 | AG   | 18 | 8  |
| 362994 | 105 | 14389   | 14424   | 2 | 18 | 36 | GT   | 9  | 9  |
| 362995 | 105 | 14807   | 14818   | 2 | 6  | 12 | AC   | 8  | 3  |
| 362999 | 105 | 21499   | 21542   | 2 | 22 | 44 | CA   | 10 | 12 |
| 363000 | 105 | 24851   | 24865   | 3 | 5  | 15 | TCT  | 28 | 4  |
| 363002 | 105 | 25196   | 25213   | 2 | 9  | 18 | AC   | 8  | 8  |
| 363005 | 105 | 26419   | 26430   | 2 | 6  | 12 | GT   | 23 | 3  |
| 363007 | 105 | 26530   | 26551   | 2 | 11 | 22 | CA   | 13 | 16 |
| 363019 | 105 | 30841   | 30879   | 3 | 13 | 39 | CAT  | 17 | 13 |

|        |     |        |        |   |    |    |      |    |    |
|--------|-----|--------|--------|---|----|----|------|----|----|
| 363020 | 105 | 31045  | 31066  | 2 | 11 | 22 | GT   | 13 | 14 |
| 363040 | 105 | 40707  | 40738  | 2 | 16 | 32 | TG   | 10 | 10 |
| 363046 | 105 | 57134  | 57157  | 3 | 8  | 24 | CTC  | 24 | 12 |
| 363047 | 105 | 57723  | 57742  | 2 | 10 | 20 | AG   | 26 | 5  |
| 363050 | 105 | 59641  | 59661  | 3 | 7  | 21 | CTC  | 20 | 13 |
| 363051 | 105 | 59737  | 59784  | 2 | 24 | 48 | TG   | 9  | 11 |
| 363053 | 105 | 62654  | 62668  | 3 | 5  | 15 | AGA  | 30 | 3  |
| 363054 | 105 | 62914  | 62952  | 3 | 13 | 39 | CAT  | 20 | 6  |
| 363064 | 105 | 83610  | 83625  | 4 | 4  | 16 | ACAG | 26 | 6  |
| 363072 | 105 | 101214 | 101233 | 2 | 10 | 20 | CA   | 7  | 8  |
| 363073 | 105 | 106463 | 106484 | 2 | 11 | 22 | GT   | 8  | 12 |
| 363074 | 105 | 107447 | 107461 | 3 | 5  | 15 | ATT  | 9  | 3  |
| 363076 | 105 | 111513 | 111544 | 2 | 16 | 32 | AC   | 6  | 7  |
| 363080 | 105 | 111909 | 111935 | 3 | 9  | 27 | GCT  | 22 | 6  |
| 363086 | 105 | 122175 | 122194 | 2 | 10 | 20 | AC   | 15 | 8  |
| 363090 | 105 | 128433 | 128458 | 2 | 13 | 26 | GT   | 15 | 8  |
| 363094 | 105 | 129601 | 129620 | 2 | 10 | 20 | TC   | 20 | 12 |
| 363095 | 105 | 131709 | 131740 | 2 | 16 | 32 | AC   | 15 | 16 |
| 363096 | 105 | 133111 | 133144 | 2 | 17 | 34 | AC   | 10 | 12 |
| 363104 | 105 | 144854 | 144885 | 2 | 16 | 32 | TG   | 9  | 8  |
| 363105 | 105 | 146375 | 146392 | 3 | 6  | 18 | TGT  | 22 | 5  |
| 363113 | 105 | 152986 | 153009 | 2 | 12 | 24 | TG   | 14 | 8  |
| 363114 | 105 | 155273 | 155312 | 2 | 20 | 40 | TG   | 17 | 15 |
| 363115 | 105 | 163447 | 163482 | 2 | 18 | 36 | CA   | 9  | 10 |
| 363116 | 105 | 163549 | 163576 | 2 | 14 | 28 | CT   | 16 | 10 |
| 363119 | 105 | 165131 | 165162 | 2 | 16 | 32 | GT   | 11 | 15 |
| 363125 | 105 | 166614 | 166645 | 2 | 16 | 32 | AC   | 8  | 8  |
| 363127 | 105 | 167545 | 167558 | 2 | 7  | 14 | AG   | 31 | 6  |
| 363128 | 105 | 170732 | 170751 | 2 | 10 | 20 | GT   | 10 | 8  |
| 363130 | 105 | 171901 | 171918 | 3 | 6  | 18 | GGA  | 21 | 10 |
| 363131 | 105 | 173183 | 173203 | 3 | 7  | 21 | CTC  | 25 | 7  |
| 363132 | 105 | 174942 | 174967 | 2 | 13 | 26 | GT   | 21 | 21 |
| 363134 | 105 | 176341 | 176382 | 2 | 21 | 42 | AC   | 7  | 8  |
| 363137 | 105 | 178289 | 178300 | 2 | 6  | 12 | AC   | 23 | 5  |
| 363138 | 105 | 179093 | 179146 | 2 | 27 | 54 | CA   | 7  | 8  |
| 363144 | 105 | 180260 | 180293 | 2 | 17 | 34 | CA   | 8  | 9  |
| 363146 | 105 | 183631 | 183651 | 3 | 7  | 21 | ATT  | 26 | 15 |
| 363149 | 105 | 186637 | 186674 | 2 | 19 | 38 | CA   | 7  | 9  |
| 363150 | 105 | 187292 | 187323 | 4 | 8  | 32 | CTGT | 19 | 6  |
| 363151 | 105 | 187488 | 187519 | 2 | 16 | 32 | AC   | 15 | 10 |
| 363168 | 105 | 220361 | 220394 | 2 | 17 | 34 | CT   | 20 | 13 |
| 363169 | 105 | 221258 | 221277 | 2 | 10 | 20 | CA   | 19 | 13 |
| 363170 | 105 | 221279 | 221292 | 2 | 7  | 14 | AC   | 20 | 13 |
| 363177 | 105 | 227111 | 227140 | 2 | 15 | 30 | AC   | 14 | 12 |
| 363179 | 105 | 227273 | 227296 | 2 | 12 | 24 | TG   | 23 | 9  |
| 363180 | 105 | 227594 | 227621 | 2 | 14 | 28 | AC   | 12 | 8  |
| 363183 | 105 | 229347 | 229361 | 3 | 5  | 15 | CTC  | 27 | 6  |
| 363184 | 105 | 229426 | 229441 | 2 | 8  | 16 | GT   | 14 | 9  |
| 363185 | 105 | 230374 | 230388 | 3 | 5  | 15 | TGT  | 26 | 5  |
| 363186 | 105 | 231363 | 231382 | 4 | 5  | 20 | TTGA | 21 | 7  |
| 363188 | 105 | 234089 | 234108 | 2 | 10 | 20 | GT   | 11 | 7  |



|        |     |        |        |   |    |    |      |    |    |
|--------|-----|--------|--------|---|----|----|------|----|----|
| 363189 | 105 | 234373 | 234390 | 2 | 9  | 18 | CA   | 7  | 11 |
| 363191 | 105 | 235194 | 235221 | 2 | 14 | 28 | TG   | 8  | 11 |
| 363193 | 105 | 236581 | 236614 | 2 | 17 | 34 | GT   | 8  | 9  |
| 363194 | 105 | 236764 | 236781 | 2 | 9  | 18 | GT   | 14 | 4  |
| 363196 | 105 | 237081 | 237110 | 2 | 15 | 30 | AC   | 23 | 15 |
| 363197 | 105 | 237479 | 237516 | 2 | 19 | 38 | GT   | 20 | 15 |
| 363199 | 105 | 240634 | 240657 | 3 | 8  | 24 | GAG  | 28 | 9  |
| 363200 | 105 | 240706 | 240717 | 2 | 6  | 12 | CA   | 23 | 4  |
| 363206 | 105 | 251424 | 251441 | 3 | 6  | 18 | CAG  | 24 | 4  |
| 363207 | 105 | 255926 | 255951 | 2 | 13 | 26 | CA   | 10 | 8  |
| 363212 | 105 | 256253 | 256264 | 2 | 6  | 12 | GT   | 18 | 3  |
| 363216 | 105 | 259009 | 259026 | 2 | 9  | 18 | GT   | 7  | 10 |
| 363219 | 105 | 263795 | 263814 | 2 | 10 | 20 | GT   | 18 | 9  |
| 363220 | 105 | 264684 | 264721 | 2 | 19 | 38 | TG   | 12 | 14 |
| 363222 | 105 | 267302 | 267313 | 2 | 6  | 12 | AG   | 28 | 4  |
| 363225 | 105 | 268538 | 268573 | 2 | 18 | 36 | CA   | 8  | 7  |
| 363236 | 105 | 273856 | 273881 | 2 | 13 | 26 | AG   | 17 | 10 |
| 363237 | 105 | 273911 | 273938 | 2 | 14 | 28 | CA   | 10 | 13 |
| 363238 | 105 | 274006 | 274017 | 2 | 6  | 12 | TG   | 20 | 3  |
| 363241 | 105 | 275059 | 275072 | 2 | 7  | 14 | CT   | 28 | 3  |
| 363245 | 105 | 281005 | 281028 | 2 | 12 | 24 | TG   | 18 | 4  |
| 363246 | 105 | 283184 | 283217 | 2 | 17 | 34 | GT   | 16 | 11 |
| 363249 | 105 | 285925 | 285974 | 2 | 25 | 50 | CA   | 8  | 12 |
| 363251 | 105 | 286349 | 286362 | 2 | 7  | 14 | AC   | 15 | 7  |
| 363255 | 105 | 286793 | 286836 | 2 | 22 | 44 | TG   | 11 | 9  |
| 363256 | 105 | 287424 | 287435 | 2 | 6  | 12 | TC   | 21 | 7  |
| 363260 | 105 | 287771 | 287816 | 2 | 23 | 46 | CA   | 11 | 12 |
| 363262 | 105 | 289218 | 289233 | 2 | 8  | 16 | AC   | 17 | 9  |
| 363263 | 105 | 289401 | 289416 | 2 | 8  | 16 | AC   | 15 | 8  |
| 363268 | 105 | 289714 | 289725 | 2 | 6  | 12 | GA   | 11 | 3  |
| 363269 | 105 | 289875 | 289900 | 2 | 13 | 26 | GT   | 11 | 7  |
| 363272 | 105 | 290685 | 290700 | 2 | 8  | 16 | AG   | 19 | 4  |
| 363275 | 105 | 291170 | 291217 | 2 | 24 | 48 | TG   | 7  | 7  |
| 363276 | 105 | 291335 | 291350 | 2 | 8  | 16 | GT   | 19 | 5  |
| 363281 | 105 | 292940 | 292977 | 2 | 19 | 38 | GT   | 8  | 12 |
| 363288 | 105 | 295280 | 295300 | 3 | 7  | 21 | CTG  | 28 | 5  |
| 363297 | 105 | 297441 | 297462 | 2 | 11 | 22 | GT   | 22 | 12 |
| 363299 | 105 | 297640 | 297671 | 2 | 16 | 32 | AC   | 6  | 9  |
| 363301 | 105 | 298113 | 298134 | 2 | 11 | 22 | TG   | 16 | 10 |
| 363302 | 105 | 298315 | 298326 | 2 | 6  | 12 | GA   | 15 | 4  |
| 363307 | 105 | 306387 | 306400 | 2 | 7  | 14 | AC   | 13 | 4  |
| 363310 | 105 | 306458 | 306469 | 2 | 6  | 12 | CA   | 8  | 3  |
| 363311 | 105 | 308398 | 308443 | 2 | 23 | 46 | AC   | 8  | 10 |
| 363313 | 105 | 309658 | 309705 | 2 | 24 | 48 | GT   | 11 | 13 |
| 363316 | 105 | 314241 | 314261 | 3 | 7  | 21 | TGA  | 26 | 20 |
| 363318 | 105 | 314576 | 314611 | 2 | 18 | 36 | CA   | 9  | 12 |
| 363326 | 105 | 318590 | 318615 | 2 | 13 | 26 | TG   | 18 | 14 |
| 363327 | 105 | 318761 | 318776 | 2 | 8  | 16 | TG   | 11 | 12 |
| 363370 | 105 | 358290 | 358321 | 2 | 16 | 32 | AC   | 13 | 11 |
| 363371 | 105 | 358419 | 358446 | 4 | 7  | 28 | TCCT | 10 | 7  |
| 363415 | 105 | 379292 | 379317 | 2 | 13 | 26 | TG   | 16 | 5  |

|        |     |        |        |   |    |    |      |    |    |
|--------|-----|--------|--------|---|----|----|------|----|----|
| 363416 | 105 | 379462 | 379477 | 2 | 8  | 16 | CA   | 20 | 16 |
| 363417 | 105 | 380942 | 380977 | 3 | 12 | 36 | TAT  | 16 | 10 |
| 363425 | 105 | 385402 | 385427 | 2 | 13 | 26 | TG   | 10 | 9  |
| 363431 | 105 | 388136 | 388147 | 2 | 6  | 12 | AC   | 21 | 3  |
| 363432 | 105 | 388176 | 388189 | 2 | 7  | 14 | AC   | 25 | 3  |
| 363433 | 105 | 389016 | 389035 | 4 | 5  | 20 | GAAG | 21 | 3  |
| 363434 | 105 | 389061 | 389074 | 2 | 7  | 14 | GA   | 24 | 4  |
| 363435 | 105 | 389196 | 389219 | 2 | 12 | 24 | TG   | 15 | 11 |
| 363436 | 105 | 389290 | 389304 | 3 | 5  | 15 | CTC  | 24 | 4  |
| 363438 | 105 | 392800 | 392821 | 2 | 11 | 22 | AC   | 11 | 11 |
| 363453 | 105 | 395510 | 395537 | 2 | 14 | 28 | AC   | 19 | 12 |
| 363455 | 105 | 396589 | 396620 | 2 | 16 | 32 | GT   | 12 | 11 |
| 363457 | 105 | 396886 | 396909 | 2 | 12 | 24 | TG   | 19 | 14 |
| 363467 | 105 | 399200 | 399235 | 4 | 9  | 36 | CAGT | 16 | 7  |
| 363470 | 105 | 399569 | 399590 | 2 | 11 | 22 | AC   | 23 | 12 |
| 363471 | 105 | 399631 | 399650 | 2 | 10 | 20 | CA   | 18 | 14 |
| 363475 | 105 | 400400 | 400433 | 2 | 17 | 34 | TG   | 13 | 8  |
| 363482 | 105 | 403264 | 403297 | 2 | 17 | 34 | AC   | 13 | 10 |
| 363483 | 105 | 403353 | 403382 | 2 | 15 | 30 | AC   | 17 | 12 |
| 363484 | 105 | 404554 | 404585 | 2 | 16 | 32 | TG   | 20 | 10 |
| 363486 | 105 | 406154 | 406186 | 3 | 11 | 33 | CCT  | 14 | 10 |
| 363489 | 105 | 406318 | 406347 | 2 | 15 | 30 | CA   | 9  | 12 |
| 363493 | 105 | 409886 | 409919 | 2 | 17 | 34 | AC   | 11 | 14 |
| 363495 | 105 | 411269 | 411289 | 3 | 7  | 21 | GAG  | 34 | 9  |
| 363497 | 105 | 411459 | 411488 | 3 | 10 | 30 | GAG  | 13 | 10 |
| 363499 | 105 | 416602 | 416629 | 2 | 14 | 28 | CA   | 13 | 7  |
| 363503 | 105 | 420614 | 420637 | 4 | 6  | 24 | TCTT | 23 | 6  |
| 363524 | 105 | 428206 | 428231 | 2 | 13 | 26 | AC   | 16 | 5  |
| 363525 | 105 | 428278 | 428309 | 2 | 16 | 32 | TG   | 17 | 11 |
| 363527 | 105 | 429864 | 429893 | 2 | 15 | 30 | AC   | 18 | 7  |
| 363528 | 105 | 430444 | 430469 | 2 | 13 | 26 | GT   | 22 | 15 |
| 363529 | 105 | 430665 | 430682 | 2 | 9  | 18 | CT   | 25 | 3  |
| 363530 | 105 | 430767 | 430804 | 2 | 19 | 38 | CA   | 16 | 15 |
| 363534 | 105 | 432324 | 432383 | 3 | 20 | 60 | TCT  | 14 | 12 |
| 363538 | 105 | 432866 | 432883 | 3 | 6  | 18 | ACA  | 38 | 4  |
| 363542 | 105 | 435628 | 435647 | 2 | 10 | 20 | GT   | 19 | 8  |
| 363548 | 105 | 437747 | 437762 | 2 | 8  | 16 | GT   | 7  | 10 |
| 363549 | 105 | 438398 | 438430 | 3 | 11 | 33 | ATC  | 23 | 7  |
| 363557 | 105 | 455193 | 455216 | 3 | 8  | 24 | ATC  | 19 | 5  |
| 363563 | 105 | 461019 | 461039 | 3 | 7  | 21 | TCT  | 21 | 4  |
| 363576 | 105 | 465317 | 465352 | 3 | 12 | 36 | AGG  | 16 | 8  |
| 363577 | 105 | 465464 | 465499 | 3 | 12 | 36 | CTC  | 19 | 6  |
| 363579 | 105 | 466607 | 466624 | 3 | 6  | 18 | GAA  | 20 | 8  |
| 363580 | 105 | 466671 | 466720 | 2 | 25 | 50 | GT   | 10 | 10 |
| 363581 | 105 | 466837 | 466862 | 2 | 13 | 26 | TG   | 8  | 10 |
| 363582 | 105 | 467457 | 467484 | 4 | 7  | 28 | CAGA | 22 | 7  |
| 363587 | 105 | 469246 | 469261 | 2 | 8  | 16 | GT   | 17 | 8  |
| 363595 | 105 | 471209 | 471229 | 3 | 7  | 21 | CCT  | 14 | 4  |
| 363599 | 105 | 473617 | 473643 | 3 | 9  | 27 | AGG  | 17 | 11 |
| 363600 | 105 | 473811 | 473850 | 2 | 20 | 40 | TG   | 14 | 20 |
| 363603 | 105 | 474208 | 474223 | 2 | 8  | 16 | CA   | 24 | 6  |

|        |     |        |        |   |    |    |     |    |    |
|--------|-----|--------|--------|---|----|----|-----|----|----|
| 363604 | 105 | 474315 | 474352 | 2 | 19 | 38 | AC  | 7  | 9  |
| 363608 | 105 | 475863 | 475900 | 2 | 19 | 38 | TG  | 17 | 10 |
| 363609 | 105 | 476748 | 476771 | 2 | 12 | 24 | GT  | 9  | 11 |
| 363610 | 105 | 476853 | 476864 | 2 | 6  | 12 | GT  | 18 | 3  |
| 363617 | 105 | 480782 | 480803 | 2 | 11 | 22 | CT  | 12 | 9  |
| 363621 | 105 | 482031 | 482068 | 2 | 19 | 38 | AC  | 11 | 14 |
| 363622 | 105 | 482170 | 482191 | 2 | 11 | 22 | CA  | 18 | 9  |
| 363626 | 105 | 483217 | 483228 | 2 | 6  | 12 | TG  | 23 | 8  |
| 363634 | 105 | 484620 | 484643 | 3 | 8  | 24 | CTC | 10 | 5  |
| 363635 | 105 | 485162 | 485205 | 2 | 22 | 44 | GT  | 9  | 9  |
| 363639 | 105 | 486216 | 486247 | 2 | 16 | 32 | TG  | 9  | 8  |
| 363640 | 105 | 486634 | 486671 | 2 | 19 | 38 | TG  | 16 | 10 |
| 363641 | 105 | 486791 | 486810 | 2 | 10 | 20 | GT  | 12 | 11 |
| 363643 | 105 | 487053 | 487088 | 3 | 12 | 36 | AGG | 9  | 8  |
| 363644 | 105 | 487265 | 487276 | 2 | 6  | 12 | CA  | 18 | 6  |
| 363645 | 105 | 487397 | 487426 | 2 | 15 | 30 | TG  | 17 | 11 |
| 363647 | 105 | 487603 | 487632 | 2 | 15 | 30 | TG  | 9  | 4  |
| 363649 | 105 | 487742 | 487759 | 3 | 6  | 18 | GGA | 18 | 10 |
| 363653 | 105 | 488499 | 488538 | 2 | 20 | 40 | TG  | 7  | 8  |
| 363654 | 105 | 488615 | 488644 | 2 | 15 | 30 | CA  | 13 | 9  |
| 363655 | 105 | 488764 | 488777 | 2 | 7  | 14 | GT  | 20 | 7  |
| 363657 | 105 | 488956 | 488989 | 2 | 17 | 34 | TG  | 13 | 15 |
| 363658 | 105 | 489363 | 489376 | 2 | 7  | 14 | GT  | 22 | 11 |
| 363659 | 105 | 489404 | 489417 | 2 | 7  | 14 | AC  | 22 | 4  |
| 363660 | 105 | 489809 | 489848 | 2 | 20 | 40 | GT  | 10 | 10 |
| 363661 | 105 | 490094 | 490135 | 3 | 14 | 42 | TCT | 15 | 7  |
| 363662 | 105 | 490172 | 490185 | 2 | 7  | 14 | CT  | 15 | 6  |
| 363673 | 105 | 492543 | 492564 | 2 | 11 | 22 | CA  | 17 | 7  |
| 363679 | 105 | 493157 | 493178 | 2 | 11 | 22 | CA  | 16 | 10 |
| 363681 | 105 | 493749 | 493780 | 2 | 16 | 32 | TG  | 11 | 17 |
| 363695 | 105 | 507582 | 507595 | 2 | 7  | 14 | CA  | 11 | 4  |
| 363697 | 105 | 508202 | 508233 | 2 | 16 | 32 | TG  | 14 | 11 |
| 363698 | 105 | 508298 | 508329 | 2 | 16 | 32 | GT  | 10 | 8  |
| 363699 | 105 | 508404 | 508439 | 2 | 18 | 36 | CA  | 6  | 8  |
| 363703 | 105 | 510889 | 510910 | 2 | 11 | 22 | TG  | 12 | 15 |
| 363705 | 105 | 511122 | 511139 | 2 | 9  | 18 | TG  | 18 | 5  |
| 363712 | 105 | 512589 | 512608 | 2 | 10 | 20 | GT  | 13 | 6  |
| 363713 | 105 | 512661 | 512680 | 2 | 10 | 20 | CA  | 14 | 3  |
| 363715 | 105 | 516104 | 516118 | 3 | 5  | 15 | GAG | 9  | 10 |
| 363721 | 105 | 517428 | 517441 | 2 | 7  | 14 | AC  | 24 | 7  |
| 363722 | 105 | 517536 | 517563 | 2 | 14 | 28 | CA  | 16 | 8  |
| 363724 | 105 | 518262 | 518275 | 2 | 7  | 14 | TG  | 14 | 9  |
| 363727 | 105 | 519688 | 519735 | 2 | 24 | 48 | AC  | 8  | 9  |
| 363733 | 105 | 526471 | 526497 | 3 | 9  | 27 | CCT | 28 | 5  |
| 363737 | 105 | 530996 | 531011 | 2 | 8  | 16 | CT  | 11 | 3  |
| 363738 | 105 | 531054 | 531101 | 2 | 24 | 48 | TG  | 9  | 11 |
| 363739 | 105 | 531182 | 531213 | 2 | 16 | 32 | GT  | 21 | 10 |
| 363750 | 105 | 572210 | 572221 | 2 | 6  | 12 | AC  | 10 | 4  |
| 363756 | 105 | 590814 | 590840 | 3 | 9  | 27 | GCT | 14 | 6  |
| 363761 | 105 | 597145 | 597186 | 2 | 21 | 42 | GT  | 6  | 7  |
| 363767 | 105 | 600270 | 600293 | 3 | 8  | 24 | GAT | 7  | 8  |

|        |     |        |        |   |    |    |      |    |    |
|--------|-----|--------|--------|---|----|----|------|----|----|
| 363771 | 105 | 604097 | 604114 | 3 | 6  | 18 | TCC  | 31 | 4  |
| 363772 | 105 | 608793 | 608830 | 2 | 19 | 38 | TG   | 7  | 7  |
| 363777 | 105 | 614535 | 614578 | 2 | 22 | 44 | GT   | 7  | 9  |
| 363780 | 105 | 617338 | 617365 | 2 | 14 | 28 | CA   | 6  | 7  |
| 363782 | 105 | 618122 | 618169 | 2 | 24 | 48 | TG   | 9  | 8  |
| 363783 | 105 | 621891 | 621904 | 2 | 7  | 14 | TG   | 21 | 8  |
| 363784 | 105 | 622452 | 622467 | 2 | 8  | 16 | TG   | 16 | 6  |
| 363785 | 105 | 624437 | 624476 | 2 | 20 | 40 | CA   | 19 | 10 |
| 363786 | 105 | 625028 | 625051 | 2 | 12 | 24 | GT   | 11 | 13 |
| 363790 | 105 | 631849 | 631876 | 2 | 14 | 28 | TG   | 20 | 7  |
| 363794 | 105 | 638108 | 638129 | 2 | 11 | 22 | AC   | 17 | 18 |
| 363795 | 105 | 638617 | 638646 | 3 | 10 | 30 | ATC  | 28 | 3  |
| 363796 | 105 | 638691 | 638706 | 2 | 8  | 16 | AC   | 25 | 5  |
| 363797 | 105 | 639119 | 639154 | 2 | 18 | 36 | GT   | 8  | 11 |
| 363799 | 105 | 639902 | 639927 | 2 | 13 | 26 | AC   | 20 | 10 |
| 363805 | 105 | 640325 | 640342 | 3 | 6  | 18 | TTA  | 20 | 5  |
| 363806 | 105 | 641166 | 641213 | 2 | 24 | 48 | AC   | 8  | 11 |
| 363807 | 105 | 642860 | 642877 | 2 | 9  | 18 | CT   | 21 | 10 |
| 363809 | 105 | 643617 | 643646 | 2 | 15 | 30 | AC   | 12 | 11 |
| 363810 | 105 | 644999 | 645052 | 2 | 27 | 54 | CA   | 13 | 11 |
| 363811 | 105 | 645154 | 645177 | 2 | 12 | 24 | AC   | 28 | 11 |
| 363812 | 105 | 645318 | 645351 | 2 | 17 | 34 | CA   | 9  | 10 |
| 363813 | 105 | 645870 | 645885 | 2 | 8  | 16 | CA   | 19 | 11 |
| 363815 | 105 | 647474 | 647499 | 2 | 13 | 26 | TG   | 14 | 12 |
| 363818 | 105 | 650185 | 650208 | 2 | 12 | 24 | GT   | 16 | 9  |
| 363819 | 105 | 652346 | 652367 | 2 | 11 | 22 | GT   | 18 | 8  |
| 363823 | 105 | 653050 | 653067 | 2 | 9  | 18 | GT   | 14 | 7  |
| 363826 | 105 | 654449 | 654482 | 2 | 17 | 34 | TG   | 9  | 8  |
| 363827 | 105 | 654516 | 654549 | 2 | 17 | 34 | GT   | 9  | 6  |
| 363830 | 105 | 656322 | 656337 | 2 | 8  | 16 | TG   | 16 | 6  |
| 363832 | 105 | 659071 | 659106 | 2 | 18 | 36 | CA   | 6  | 7  |
| 363833 | 105 | 659193 | 659216 | 2 | 12 | 24 | TG   | 10 | 10 |
| 363834 | 105 | 659477 | 659500 | 3 | 8  | 24 | TTC  | 18 | 6  |
| 363836 | 105 | 661668 | 661705 | 2 | 19 | 38 | AC   | 11 | 10 |
| 363837 | 105 | 661752 | 661781 | 2 | 15 | 30 | GT   | 12 | 9  |
| 363838 | 105 | 662779 | 662796 | 2 | 9  | 18 | GT   | 22 | 11 |
| 363844 | 105 | 664036 | 664083 | 2 | 24 | 48 | TG   | 10 | 11 |
| 363845 | 105 | 664641 | 664688 | 4 | 12 | 48 | AGGA | 24 | 6  |
| 363846 | 105 | 664767 | 664794 | 2 | 14 | 28 | GT   | 9  | 5  |
| 363847 | 105 | 666528 | 666551 | 2 | 12 | 24 | TG   | 15 | 13 |
| 363850 | 105 | 669147 | 669170 | 2 | 12 | 24 | TG   | 22 | 10 |
| 363851 | 105 | 670783 | 670800 | 2 | 9  | 18 | AG   | 25 | 4  |
| 363852 | 105 | 672407 | 672436 | 2 | 15 | 30 | GT   | 11 | 8  |
| 363858 | 105 | 675862 | 675877 | 2 | 8  | 16 | GT   | 8  | 6  |
| 363859 | 105 | 677678 | 677711 | 2 | 17 | 34 | GT   | 15 | 13 |
| 363867 | 105 | 688025 | 688052 | 2 | 14 | 28 | TG   | 7  | 7  |
| 363868 | 105 | 688190 | 688227 | 2 | 19 | 38 | TG   | 9  | 13 |
| 363870 | 105 | 688699 | 688724 | 2 | 13 | 26 | AC   | 13 | 6  |
| 363872 | 105 | 688878 | 688889 | 2 | 6  | 12 | AC   | 25 | 3  |
| 363873 | 105 | 689063 | 689096 | 2 | 17 | 34 | AC   | 13 | 7  |
| 363875 | 105 | 691467 | 691508 | 2 | 21 | 42 | GT   | 15 | 11 |

|        |     |        |        |   |    |    |      |    |    |
|--------|-----|--------|--------|---|----|----|------|----|----|
| 363880 | 105 | 693035 | 693068 | 2 | 17 | 34 | AC   | 14 | 12 |
| 363881 | 105 | 693790 | 693817 | 2 | 14 | 28 | AC   | 6  | 6  |
| 363882 | 105 | 694572 | 694587 | 2 | 8  | 16 | AC   | 20 | 11 |
| 363883 | 105 | 694828 | 694849 | 2 | 11 | 22 | AC   | 26 | 13 |
| 363884 | 105 | 694987 | 694998 | 2 | 6  | 12 | GT   | 23 | 12 |
| 363885 | 105 | 694999 | 695012 | 2 | 7  | 14 | CT   | 21 | 11 |
| 363886 | 105 | 695200 | 695215 | 2 | 8  | 16 | GT   | 24 | 10 |
| 363889 | 105 | 702130 | 702145 | 2 | 8  | 16 | CT   | 23 | 3  |
| 363890 | 105 | 702293 | 702308 | 2 | 8  | 16 | AG   | 28 | 5  |
| 363891 | 105 | 703141 | 703172 | 2 | 16 | 32 | TG   | 9  | 10 |
| 363892 | 105 | 704007 | 704042 | 4 | 9  | 36 | GATG | 28 | 13 |
| 363893 | 105 | 704537 | 704554 | 2 | 9  | 18 | AG   | 21 | 3  |
| 363894 | 105 | 705147 | 705167 | 3 | 7  | 21 | AGG  | 28 | 3  |
| 363897 | 105 | 707855 | 707880 | 2 | 13 | 26 | AC   | 16 | 8  |
| 363905 | 105 | 713091 | 713106 | 2 | 8  | 16 | GT   | 9  | 7  |
| 363907 | 105 | 713187 | 713208 | 2 | 11 | 22 | GT   | 11 | 8  |
| 363908 | 105 | 713282 | 713301 | 2 | 10 | 20 | TG   | 11 | 10 |
| 363910 | 105 | 713341 | 713374 | 2 | 17 | 34 | CA   | 9  | 6  |
| 363911 | 105 | 713478 | 713507 | 2 | 15 | 30 | AC   | 14 | 10 |
| 363913 | 105 | 714225 | 714250 | 2 | 13 | 26 | GT   | 15 | 6  |
| 363914 | 105 | 714357 | 714380 | 2 | 12 | 24 | TG   | 9  | 8  |
| 363915 | 105 | 714543 | 714556 | 2 | 7  | 14 | AC   | 12 | 11 |
| 363917 | 105 | 715496 | 715515 | 2 | 10 | 20 | TG   | 14 | 7  |
| 363918 | 105 | 715639 | 715660 | 2 | 11 | 22 | TG   | 14 | 7  |
| 363919 | 105 | 718009 | 718032 | 2 | 12 | 24 | GT   | 18 | 8  |
| 363921 | 105 | 718811 | 718834 | 2 | 12 | 24 | AC   | 14 | 13 |
| 363922 | 105 | 721369 | 721392 | 2 | 12 | 24 | TG   | 16 | 12 |
| 363923 | 105 | 721494 | 721515 | 2 | 11 | 22 | TG   | 10 | 13 |
| 363926 | 105 | 721959 | 721986 | 2 | 14 | 28 | GT   | 9  | 5  |
| 363930 | 105 | 727574 | 727603 | 2 | 15 | 30 | CA   | 17 | 12 |
| 363931 | 105 | 727795 | 727810 | 2 | 8  | 16 | AG   | 20 | 6  |
| 363932 | 105 | 729586 | 729601 | 4 | 4  | 16 | CAGA | 10 | 4  |
| 363934 | 105 | 729943 | 729958 | 2 | 8  | 16 | GA   | 18 | 3  |
| 363938 | 105 | 730287 | 730310 | 3 | 8  | 24 | TTC  | 18 | 4  |
| 363941 | 105 | 731306 | 731325 | 2 | 10 | 20 | GT   | 10 | 7  |
| 363943 | 105 | 731368 | 731395 | 2 | 14 | 28 | GT   | 8  | 6  |
| 363954 | 105 | 740508 | 740539 | 2 | 16 | 32 | GT   | 6  | 7  |
| 363956 | 105 | 741222 | 741253 | 2 | 16 | 32 | AC   | 13 | 16 |
| 363957 | 105 | 741326 | 741347 | 2 | 11 | 22 | AC   | 9  | 4  |
| 363961 | 105 | 743321 | 743364 | 2 | 22 | 44 | CA   | 8  | 11 |
| 363962 | 105 | 743797 | 743820 | 2 | 12 | 24 | CA   | 15 | 10 |
| 363964 | 105 | 744103 | 744130 | 2 | 14 | 28 | GT   | 17 | 14 |
| 363965 | 105 | 744697 | 744722 | 2 | 13 | 26 | GT   | 9  | 8  |
| 363966 | 105 | 744806 | 744823 | 2 | 9  | 18 | GT   | 18 | 10 |
| 363973 | 105 | 749948 | 749959 | 2 | 6  | 12 | TG   | 9  | 3  |
| 363984 | 105 | 754314 | 754340 | 3 | 9  | 27 | TCA  | 19 | 4  |
| 363986 | 105 | 756736 | 756757 | 2 | 11 | 22 | AC   | 23 | 9  |
| 363987 | 105 | 756861 | 756890 | 2 | 15 | 30 | GT   | 13 | 9  |
| 363988 | 105 | 757811 | 757852 | 2 | 21 | 42 | CA   | 7  | 9  |
| 363998 | 105 | 762279 | 762312 | 2 | 17 | 34 | CA   | 6  | 5  |
| 364003 | 105 | 763809 | 763822 | 2 | 7  | 14 | AG   | 6  | 8  |

|        |     |        |        |   |    |    |      |    |    |
|--------|-----|--------|--------|---|----|----|------|----|----|
| 364005 | 105 | 766471 | 766494 | 2 | 12 | 24 | GT   | 12 | 15 |
| 364006 | 105 | 766618 | 766633 | 2 | 8  | 16 | TC   | 11 | 3  |
| 364007 | 105 | 766682 | 766711 | 2 | 15 | 30 | CA   | 10 | 10 |
| 364009 | 105 | 768803 | 768828 | 2 | 13 | 26 | TG   | 17 | 12 |
| 364010 | 105 | 768994 | 769021 | 2 | 14 | 28 | GT   | 12 | 6  |
| 364016 | 105 | 771825 | 771858 | 2 | 17 | 34 | TG   | 12 | 9  |
| 364023 | 105 | 773641 | 773670 | 2 | 15 | 30 | CA   | 8  | 9  |
| 364036 | 105 | 778522 | 778557 | 2 | 18 | 36 | TG   | 15 | 6  |
| 364037 | 105 | 779642 | 779665 | 2 | 12 | 24 | CA   | 15 | 8  |
| 364038 | 105 | 779797 | 779816 | 2 | 10 | 20 | CA   | 17 | 9  |
| 364048 | 105 | 783927 | 783962 | 2 | 18 | 36 | CA   | 6  | 11 |
| 364052 | 105 | 784196 | 784215 | 2 | 10 | 20 | AC   | 16 | 10 |
| 364053 | 105 | 784281 | 784304 | 2 | 12 | 24 | AC   | 9  | 11 |
| 364056 | 105 | 787834 | 787863 | 3 | 10 | 30 | TGA  | 24 | 4  |
| 364058 | 105 | 789967 | 789988 | 2 | 11 | 22 | CT   | 21 | 4  |
| 364059 | 105 | 790061 | 790090 | 2 | 15 | 30 | TG   | 18 | 13 |
| 364069 | 105 | 792437 | 792482 | 2 | 23 | 46 | AC   | 10 | 11 |
| 364072 | 105 | 794844 | 794855 | 2 | 6  | 12 | CT   | 11 | 3  |
| 364073 | 105 | 796244 | 796277 | 2 | 17 | 34 | GT   | 15 | 8  |
| 364076 | 105 | 797261 | 797302 | 2 | 21 | 42 | GT   | 11 | 10 |
| 364086 | 105 | 798609 | 798646 | 2 | 19 | 38 | AC   | 13 | 11 |
| 364089 | 105 | 799136 | 799157 | 2 | 11 | 22 | CA   | 23 | 13 |
| 364092 | 105 | 799424 | 799449 | 2 | 13 | 26 | TG   | 9  | 10 |
| 364093 | 105 | 799580 | 799603 | 2 | 12 | 24 | AC   | 21 | 15 |
| 364094 | 105 | 801397 | 801426 | 2 | 15 | 30 | GT   | 11 | 6  |
| 364097 | 105 | 805919 | 805942 | 4 | 6  | 24 | AATG | 12 | 3  |
| 364098 | 105 | 806300 | 806331 | 2 | 16 | 32 | AC   | 15 | 15 |
| 364099 | 105 | 806450 | 806475 | 2 | 13 | 26 | TG   | 9  | 8  |
| 364107 | 105 | 811765 | 811782 | 3 | 6  | 18 | ATT  | 8  | 5  |
| 364108 | 105 | 811783 | 811797 | 3 | 5  | 15 | AAT  | 10 | 3  |
| 364109 | 105 | 812005 | 812038 | 2 | 17 | 34 | AC   | 16 | 15 |
| 364127 | 105 | 825311 | 825342 | 2 | 16 | 32 | CA   | 10 | 6  |
| 364129 | 105 | 828113 | 828136 | 2 | 12 | 24 | AC   | 19 | 4  |
| 364130 | 105 | 828773 | 828794 | 2 | 11 | 22 | AC   | 14 | 7  |
| 364133 | 105 | 829922 | 829941 | 2 | 10 | 20 | AC   | 16 | 11 |
| 364134 | 105 | 830124 | 830168 | 3 | 15 | 45 | GAA  | 29 | 11 |
| 364137 | 105 | 830908 | 830945 | 2 | 19 | 38 | AC   | 11 | 10 |
| 364138 | 105 | 832421 | 832438 | 3 | 6  | 18 | GCC  | 18 | 4  |
| 364139 | 105 | 832480 | 832521 | 2 | 21 | 42 | GT   | 6  | 7  |
| 364140 | 105 | 834572 | 834587 | 4 | 4  | 16 | ACAG | 32 | 3  |
| 364141 | 105 | 837045 | 837074 | 2 | 15 | 30 | CA   | 8  | 7  |
| 364143 | 105 | 837432 | 837487 | 2 | 28 | 56 | AC   | 6  | 7  |
| 364160 | 105 | 841784 | 841817 | 2 | 17 | 34 | GT   | 7  | 11 |
| 364162 | 105 | 845389 | 845406 | 2 | 9  | 18 | TG   | 10 | 9  |
| 364164 | 105 | 845440 | 845457 | 2 | 9  | 18 | GT   | 7  | 3  |
| 364165 | 105 | 845556 | 845583 | 2 | 14 | 28 | CA   | 24 | 7  |
| 364167 | 105 | 850914 | 850959 | 2 | 23 | 46 | AC   | 8  | 8  |
| 364168 | 105 | 851810 | 851833 | 2 | 12 | 24 | TG   | 24 | 11 |
| 364170 | 105 | 852073 | 852100 | 2 | 14 | 28 | GT   | 18 | 5  |
| 364172 | 105 | 852765 | 852800 | 2 | 18 | 36 | AC   | 8  | 7  |
| 364173 | 105 | 852857 | 852886 | 2 | 15 | 30 | TG   | 15 | 10 |

|        |     |        |        |   |    |    |     |    |    |
|--------|-----|--------|--------|---|----|----|-----|----|----|
| 364174 | 105 | 853033 | 853050 | 2 | 9  | 18 | CA  | 26 | 7  |
| 364178 | 105 | 854531 | 854562 | 2 | 16 | 32 | AC  | 12 | 14 |
| 364188 | 105 | 859800 | 859827 | 2 | 14 | 28 | CA  | 18 | 5  |
| 364189 | 105 | 859955 | 859990 | 2 | 18 | 36 | AC  | 13 | 17 |
| 364190 | 105 | 860210 | 860245 | 2 | 18 | 36 | CA  | 17 | 10 |
| 364193 | 105 | 860884 | 860901 | 2 | 9  | 18 | CA  | 23 | 3  |
| 364194 | 105 | 861963 | 861974 | 2 | 6  | 12 | GT  | 20 | 4  |
| 364195 | 105 | 862037 | 862054 | 2 | 9  | 18 | TG  | 11 | 9  |
| 364196 | 105 | 862130 | 862155 | 2 | 13 | 26 | CA  | 16 | 9  |
| 364197 | 105 | 862189 | 862208 | 2 | 10 | 20 | GT  | 18 | 10 |
| 364198 | 105 | 862265 | 862280 | 2 | 8  | 16 | TG  | 27 | 3  |
| 364199 | 105 | 862349 | 862360 | 2 | 6  | 12 | CA  | 14 | 6  |
| 364200 | 105 | 862831 | 862850 | 2 | 10 | 20 | AC  | 6  | 6  |
| 364201 | 105 | 864331 | 864356 | 2 | 13 | 26 | GT  | 6  | 6  |
| 364205 | 105 | 866506 | 866526 | 3 | 7  | 21 | CCT | 17 | 4  |
| 364206 | 105 | 867482 | 867519 | 2 | 19 | 38 | GT  | 16 | 13 |
| 364207 | 105 | 868816 | 868836 | 3 | 7  | 21 | CAT | 26 | 7  |
| 364208 | 105 | 869285 | 869320 | 2 | 18 | 36 | CA  | 15 | 8  |
| 364210 | 105 | 869427 | 869446 | 2 | 10 | 20 | CA  | 17 | 9  |
| 364211 | 105 | 869613 | 869630 | 2 | 9  | 18 | GT  | 15 | 6  |
| 364213 | 105 | 870342 | 870373 | 2 | 16 | 32 | CT  | 7  | 11 |
| 364218 | 105 | 873747 | 873774 | 2 | 14 | 28 | AC  | 6  | 9  |
| 364229 | 105 | 876501 | 876516 | 2 | 8  | 16 | AC  | 18 | 9  |
| 364230 | 105 | 876518 | 876531 | 2 | 7  | 14 | CA  | 9  | 5  |
| 364232 | 105 | 878736 | 878769 | 2 | 17 | 34 | AC  | 19 | 8  |
| 364233 | 105 | 878904 | 878925 | 2 | 11 | 22 | CA  | 7  | 6  |
| 364240 | 105 | 879800 | 879825 | 2 | 13 | 26 | TG  | 10 | 13 |
| 364241 | 105 | 879908 | 879934 | 3 | 9  | 27 | TCC | 22 | 12 |
| 364242 | 105 | 880001 | 880021 | 3 | 7  | 21 | GAA | 24 | 3  |
| 364243 | 105 | 881460 | 881495 | 3 | 12 | 36 | ATC | 18 | 15 |
| 364247 | 105 | 882550 | 882567 | 2 | 9  | 18 | GT  | 8  | 10 |
| 364253 | 105 | 883574 | 883599 | 2 | 13 | 26 | TG  | 13 | 14 |
| 364264 | 105 | 888200 | 888226 | 3 | 9  | 27 | GGC | 6  | 3  |
| 364265 | 105 | 888909 | 888936 | 2 | 14 | 28 | AC  | 16 | 6  |
| 364266 | 105 | 889075 | 889100 | 2 | 13 | 26 | AC  | 13 | 6  |
| 364267 | 105 | 889202 | 889231 | 2 | 15 | 30 | CA  | 21 | 12 |
| 364272 | 105 | 901655 | 901668 | 2 | 7  | 14 | AC  | 22 | 7  |
| 364273 | 105 | 901671 | 901682 | 2 | 6  | 12 | AC  | 20 | 6  |
| 364278 | 105 | 902149 | 902168 | 2 | 10 | 20 | TG  | 32 | 5  |
| 364284 | 105 | 912563 | 912606 | 2 | 22 | 44 | GT  | 11 | 10 |
| 364288 | 105 | 913748 | 913789 | 2 | 21 | 42 | AC  | 11 | 6  |
| 364289 | 105 | 915955 | 915986 | 2 | 16 | 32 | GT  | 17 | 10 |
| 364290 | 105 | 916623 | 916637 | 3 | 5  | 15 | GAA | 25 | 4  |
| 364291 | 105 | 916805 | 916816 | 2 | 6  | 12 | CT  | 22 | 10 |
| 364300 | 105 | 921150 | 921171 | 2 | 11 | 22 | AC  | 19 | 6  |
| 364301 | 105 | 921930 | 921959 | 2 | 15 | 30 | TG  | 13 | 10 |
| 364302 | 105 | 922989 | 923012 | 2 | 12 | 24 | CA  | 15 | 11 |
| 364305 | 105 | 925871 | 925908 | 2 | 19 | 38 | GT  | 11 | 10 |
| 364307 | 105 | 926370 | 926393 | 2 | 12 | 24 | AC  | 13 | 8  |
| 364310 | 105 | 927399 | 927424 | 2 | 13 | 26 | AC  | 14 | 9  |
| 364311 | 105 | 927982 | 928025 | 2 | 22 | 44 | TG  | 11 | 12 |

|        |     |         |         |   |    |    |      |    |    |
|--------|-----|---------|---------|---|----|----|------|----|----|
| 364312 | 105 | 935291  | 935320  | 2 | 15 | 30 | GT   | 10 | 4  |
| 364313 | 105 | 935356  | 935379  | 3 | 8  | 24 | CAG  | 25 | 3  |
| 364314 | 105 | 935662  | 935679  | 2 | 9  | 18 | CA   | 27 | 10 |
| 364317 | 105 | 939043  | 939062  | 2 | 10 | 20 | GT   | 21 | 6  |
| 364319 | 105 | 939281  | 939304  | 3 | 8  | 24 | ATG  | 27 | 3  |
| 364321 | 105 | 949857  | 949888  | 2 | 16 | 32 | CA   | 11 | 12 |
| 364323 | 105 | 951927  | 951947  | 3 | 7  | 21 | ACA  | 8  | 3  |
| 364327 | 105 | 952966  | 952983  | 2 | 9  | 18 | AC   | 24 | 3  |
| 364328 | 105 | 953506  | 953519  | 2 | 7  | 14 | TG   | 19 | 4  |
| 364329 | 105 | 953740  | 953761  | 2 | 11 | 22 | CA   | 11 | 9  |
| 364331 | 105 | 954327  | 954370  | 2 | 22 | 44 | TG   | 15 | 8  |
| 364332 | 105 | 954494  | 954517  | 2 | 12 | 24 | CA   | 18 | 8  |
| 364333 | 105 | 958122  | 958177  | 2 | 28 | 56 | TG   | 7  | 8  |
| 364334 | 105 | 959926  | 959937  | 2 | 6  | 12 | CA   | 14 | 5  |
| 364335 | 105 | 960028  | 960055  | 2 | 14 | 28 | CA   | 14 | 5  |
| 364336 | 105 | 960581  | 960604  | 2 | 12 | 24 | TG   | 24 | 7  |
| 364337 | 105 | 960737  | 960776  | 2 | 20 | 40 | AC   | 6  | 6  |
| 364338 | 105 | 963115  | 963134  | 4 | 5  | 20 | GACA | 27 | 3  |
| 364390 | 105 | 982072  | 982119  | 2 | 24 | 48 | TG   | 12 | 13 |
| 364394 | 105 | 984053  | 984078  | 2 | 13 | 26 | AC   | 18 | 7  |
| 364398 | 105 | 988426  | 988437  | 2 | 6  | 12 | GA   | 32 | 4  |
| 364399 | 105 | 988977  | 989010  | 2 | 17 | 34 | TG   | 6  | 9  |
| 364401 | 105 | 989806  | 989833  | 2 | 14 | 28 | AC   | 15 | 10 |
| 364402 | 105 | 991329  | 991342  | 2 | 7  | 14 | CG   | 28 | 10 |
| 364403 | 105 | 991448  | 991481  | 2 | 17 | 34 | CA   | 11 | 10 |
| 364404 | 105 | 991633  | 991664  | 2 | 16 | 32 | GT   | 8  | 10 |
| 364405 | 105 | 991802  | 991827  | 2 | 13 | 26 | CA   | 14 | 7  |
| 364409 | 105 | 992224  | 992241  | 2 | 9  | 18 | CA   | 27 | 5  |
| 364413 | 105 | 994703  | 994717  | 3 | 5  | 15 | TAT  | 6  | 3  |
| 364416 | 105 | 994854  | 994875  | 2 | 11 | 22 | CA   | 13 | 8  |
| 364417 | 105 | 994960  | 994983  | 2 | 12 | 24 | CA   | 15 | 6  |
| 364419 | 105 | 995265  | 995292  | 2 | 14 | 28 | GT   | 27 | 6  |
| 364420 | 105 | 996446  | 996472  | 3 | 9  | 27 | AGG  | 28 | 8  |
| 364421 | 105 | 996723  | 996746  | 2 | 12 | 24 | TG   | 18 | 11 |
| 364423 | 105 | 997032  | 997045  | 2 | 7  | 14 | AC   | 19 | 10 |
| 364428 | 105 | 997978  | 998013  | 2 | 18 | 36 | TG   | 20 | 7  |
| 364442 | 105 | 1004107 | 1004124 | 2 | 9  | 18 | TG   | 20 | 4  |
| 364445 | 105 | 1007517 | 1007530 | 2 | 7  | 14 | TG   | 25 | 12 |
| 364446 | 105 | 1010718 | 1010729 | 2 | 6  | 12 | TG   | 24 | 3  |
| 364447 | 105 | 1010901 | 1010938 | 2 | 19 | 38 | CA   | 10 | 7  |
| 364449 | 105 | 1012014 | 1012031 | 3 | 6  | 18 | TCC  | 22 | 6  |
| 364450 | 105 | 1014216 | 1014227 | 2 | 6  | 12 | CA   | 17 | 4  |
| 364452 | 105 | 1014914 | 1014929 | 4 | 4  | 16 | GTGC | 23 | 7  |
| 364476 | 105 | 1030551 | 1030564 | 2 | 7  | 14 | TG   | 24 | 3  |
| 364479 | 105 | 1030954 | 1030973 | 2 | 10 | 20 | CA   | 23 | 4  |
| 364498 | 105 | 1051499 | 1051530 | 2 | 16 | 32 | GT   | 14 | 10 |
| 364500 | 105 | 1052362 | 1052417 | 2 | 28 | 56 | TG   | 20 | 17 |
| 364501 | 105 | 1053007 | 1053026 | 2 | 10 | 20 | TG   | 19 | 9  |
| 364504 | 105 | 1055370 | 1055396 | 3 | 9  | 27 | TTC  | 6  | 4  |
| 364525 | 105 | 1064450 | 1064477 | 2 | 14 | 28 | TG   | 9  | 11 |
| 364531 | 105 | 1077349 | 1077368 | 2 | 10 | 20 | TG   | 17 | 6  |



|        |     |         |         |   |    |    |      |    |    |
|--------|-----|---------|---------|---|----|----|------|----|----|
| 364532 | 105 | 1077662 | 1077673 | 2 | 6  | 12 | GT   | 29 | 3  |
| 364534 | 105 | 1084927 | 1084944 | 2 | 9  | 18 | TC   | 15 | 4  |
| 364538 | 105 | 1085635 | 1085650 | 2 | 8  | 16 | TG   | 20 | 4  |
| 364540 | 105 | 1087269 | 1087286 | 2 | 9  | 18 | CA   | 22 | 3  |
| 364541 | 105 | 1088652 | 1088679 | 2 | 14 | 28 | CA   | 14 | 6  |
| 364542 | 105 | 1088868 | 1088895 | 2 | 14 | 28 | CA   | 8  | 8  |
| 364543 | 105 | 1089212 | 1089225 | 2 | 7  | 14 | TG   | 21 | 7  |
| 364544 | 105 | 1089440 | 1089455 | 2 | 8  | 16 | GT   | 22 | 4  |
| 364545 | 105 | 1089883 | 1089918 | 4 | 9  | 36 | TCAA | 25 | 6  |
| 364552 | 105 | 1091324 | 1091335 | 2 | 6  | 12 | AT   | 6  | 5  |
| 364553 | 105 | 1091572 | 1091586 | 3 | 5  | 15 | TCC  | 21 | 9  |
| 364554 | 105 | 1091608 | 1091622 | 3 | 5  | 15 | TCC  | 16 | 4  |
| 364555 | 105 | 1092141 | 1092173 | 3 | 11 | 33 | TGA  | 18 | 9  |
| 364559 | 105 | 1111883 | 1111906 | 2 | 12 | 24 | GT   | 7  | 8  |
| 364563 | 105 | 1125745 | 1125768 | 3 | 8  | 24 | GAT  | 10 | 11 |
| 364564 | 105 | 1128375 | 1128389 | 3 | 5  | 15 | AGA  | 25 | 6  |
| 364574 | 105 | 1130978 | 1131021 | 2 | 22 | 44 | GT   | 11 | 8  |
| 364575 | 105 | 1131613 | 1131640 | 2 | 14 | 28 | TG   | 13 | 8  |
| 364576 | 105 | 1131793 | 1131824 | 2 | 16 | 32 | GT   | 9  | 11 |
| 364577 | 105 | 1134671 | 1134714 | 2 | 22 | 44 | AC   | 10 | 14 |
| 364580 | 105 | 1135105 | 1135166 | 2 | 31 | 62 | TG   | 7  | 11 |
| 364581 | 105 | 1135227 | 1135262 | 2 | 18 | 36 | AC   | 9  | 10 |
| 364582 | 105 | 1135326 | 1135355 | 2 | 15 | 30 | TG   | 7  | 6  |
| 364583 | 105 | 1135959 | 1135976 | 2 | 9  | 18 | CA   | 19 | 5  |
| 364584 | 105 | 1136066 | 1136093 | 2 | 14 | 28 | TG   | 17 | 10 |
| 364601 | 105 | 1145914 | 1145925 | 2 | 6  | 12 | CT   | 35 | 3  |
| 364606 | 105 | 1147930 | 1147959 | 2 | 15 | 30 | TG   | 10 | 11 |
| 364613 | 105 | 1150624 | 1150649 | 2 | 13 | 26 | AC   | 18 | 16 |
| 364615 | 105 | 1151121 | 1151154 | 2 | 17 | 34 | TG   | 23 | 23 |
| 364616 | 105 | 1151241 | 1151274 | 2 | 17 | 34 | CA   | 14 | 7  |
| 364617 | 105 | 1151401 | 1151434 | 2 | 17 | 34 | CA   | 16 | 8  |
| 364618 | 105 | 1151563 | 1151590 | 2 | 14 | 28 | TG   | 19 | 6  |
| 364619 | 105 | 1151619 | 1151634 | 2 | 8  | 16 | TG   | 20 | 4  |
| 364620 | 105 | 1151671 | 1151688 | 2 | 9  | 18 | GT   | 13 | 5  |
| 364630 | 105 | 1153574 | 1153607 | 2 | 17 | 34 | TG   | 8  | 9  |
| 364633 | 105 | 1155415 | 1155430 | 4 | 4  | 16 | ATGG | 14 | 4  |
| 364634 | 105 | 1155462 | 1155477 | 4 | 4  | 16 | TTAT | 14 | 4  |
| 364636 | 105 | 1157446 | 1157481 | 2 | 18 | 36 | GT   | 15 | 7  |
| 364637 | 105 | 1157687 | 1157726 | 2 | 20 | 40 | TG   | 11 | 7  |
| 364639 | 105 | 1157902 | 1157943 | 2 | 21 | 42 | TG   | 12 | 8  |
| 364643 | 105 | 1158983 | 1159020 | 2 | 19 | 38 | GT   | 6  | 8  |
| 364644 | 105 | 1159112 | 1159125 | 2 | 7  | 14 | GT   | 25 | 3  |
| 364645 | 105 | 1159201 | 1159218 | 2 | 9  | 18 | AC   | 13 | 12 |
| 364648 | 105 | 1159415 | 1159430 | 2 | 8  | 16 | GT   | 16 | 5  |
| 364650 | 105 | 1160812 | 1160823 | 2 | 6  | 12 | TG   | 17 | 5  |
| 364651 | 105 | 1160825 | 1160838 | 2 | 7  | 14 | TG   | 18 | 6  |
| 364654 | 105 | 1161220 | 1161259 | 2 | 20 | 40 | TG   | 7  | 9  |
| 364662 | 105 | 1169172 | 1169205 | 2 | 17 | 34 | AC   | 13 | 12 |
| 364666 | 105 | 1169479 | 1169530 | 2 | 26 | 52 | AC   | 11 | 12 |
| 364668 | 105 | 1169716 | 1169731 | 2 | 8  | 16 | TG   | 13 | 6  |
| 364669 | 105 | 1169832 | 1169853 | 2 | 11 | 22 | GT   | 15 | 4  |

|        |     |         |         |   |    |    |     |    |    |
|--------|-----|---------|---------|---|----|----|-----|----|----|
| 364674 | 105 | 1170831 | 1170848 | 2 | 9  | 18 | TG  | 6  | 4  |
| 364676 | 105 | 1171026 | 1171045 | 2 | 10 | 20 | CA  | 25 | 6  |
| 364679 | 105 | 1172749 | 1172766 | 2 | 9  | 18 | GT  | 25 | 5  |
| 364688 | 105 | 1176521 | 1176548 | 2 | 14 | 28 | CA  | 10 | 7  |
| 364689 | 105 | 1177277 | 1177316 | 2 | 20 | 40 | AC  | 12 | 13 |
| 364690 | 105 | 1177452 | 1177475 | 2 | 12 | 24 | GT  | 12 | 8  |
| 364691 | 105 | 1177604 | 1177617 | 2 | 7  | 14 | GT  | 22 | 7  |
| 364708 | 105 | 1182685 | 1182720 | 2 | 18 | 36 | AC  | 14 | 12 |
| 364712 | 105 | 1184870 | 1184885 | 2 | 8  | 16 | CA  | 21 | 5  |
| 364713 | 105 | 1184888 | 1184899 | 2 | 6  | 12 | CA  | 23 | 4  |
| 364714 | 105 | 1184953 | 1185008 | 2 | 28 | 56 | TG  | 6  | 10 |
| 364715 | 105 | 1185173 | 1185196 | 2 | 12 | 24 | GT  | 9  | 8  |
| 364716 | 105 | 1188002 | 1188022 | 3 | 7  | 21 | ATG | 25 | 3  |
| 364717 | 105 | 1188286 | 1188309 | 2 | 12 | 24 | TG  | 18 | 9  |
| 364729 | 105 | 1192070 | 1192101 | 2 | 16 | 32 | TG  | 8  | 10 |
| 364734 | 105 | 1195548 | 1195571 | 2 | 12 | 24 | AC  | 10 | 3  |
| 364735 | 105 | 1195708 | 1195731 | 2 | 12 | 24 | TG  | 21 | 3  |
| 364742 | 105 | 1196310 | 1196329 | 2 | 10 | 20 | TG  | 15 | 10 |
| 364744 | 105 | 1196405 | 1196422 | 2 | 9  | 18 | TC  | 18 | 3  |
| 364745 | 105 | 1199661 | 1199688 | 2 | 14 | 28 | AC  | 14 | 10 |
| 364748 | 105 | 1201850 | 1201875 | 2 | 13 | 26 | GT  | 13 | 11 |
| 364749 | 105 | 1202027 | 1202054 | 2 | 14 | 28 | CA  | 7  | 6  |
| 364752 | 105 | 1202419 | 1202458 | 2 | 20 | 40 | TG  | 7  | 9  |
| 364753 | 105 | 1204987 | 1205010 | 2 | 12 | 24 | TG  | 19 | 10 |
| 364754 | 105 | 1205587 | 1205612 | 2 | 13 | 26 | AC  | 9  | 4  |
| 364760 | 105 | 1206934 | 1206969 | 2 | 18 | 36 | CA  | 9  | 7  |
| 364773 | 105 | 1213371 | 1213406 | 2 | 18 | 36 | GT  | 10 | 8  |
| 364788 | 105 | 1215723 | 1215756 | 2 | 17 | 34 | AC  | 10 | 8  |
| 364789 | 105 | 1216942 | 1216967 | 2 | 13 | 26 | AC  | 8  | 10 |
| 364797 | 105 | 1218648 | 1218689 | 2 | 21 | 42 | CA  | 9  | 11 |
| 364801 | 105 | 1219061 | 1219084 | 2 | 12 | 24 | GT  | 18 | 3  |
| 364807 | 105 | 1224567 | 1224590 | 2 | 12 | 24 | TG  | 21 | 11 |
| 364811 | 105 | 1225030 | 1225047 | 2 | 9  | 18 | GT  | 9  | 5  |
| 364812 | 105 | 1226531 | 1226562 | 2 | 16 | 32 | CA  | 10 | 10 |
| 364813 | 105 | 1226688 | 1226701 | 2 | 7  | 14 | GT  | 13 | 3  |
| 364816 | 105 | 1227513 | 1227552 | 2 | 20 | 40 | TG  | 9  | 10 |
| 364817 | 105 | 1227653 | 1227700 | 3 | 16 | 48 | TTG | 16 | 14 |
| 364818 | 105 | 1227867 | 1227888 | 2 | 11 | 22 | CA  | 26 | 4  |
| 364820 | 105 | 1228431 | 1228448 | 2 | 9  | 18 | GT  | 21 | 12 |
| 364823 | 105 | 1232063 | 1232084 | 2 | 11 | 22 | AC  | 13 | 8  |
| 364824 | 105 | 1232609 | 1232622 | 2 | 7  | 14 | AG  | 25 | 3  |
| 364826 | 105 | 1236980 | 1236995 | 2 | 8  | 16 | AC  | 8  | 5  |
| 364828 | 105 | 1237106 | 1237156 | 3 | 17 | 51 | ATA | 10 | 8  |
| 364829 | 105 | 1237823 | 1237836 | 2 | 7  | 14 | GT  | 8  | 7  |
| 364831 | 105 | 1238078 | 1238109 | 2 | 16 | 32 | TG  | 9  | 10 |
| 364832 | 105 | 1238184 | 1238201 | 2 | 9  | 18 | CA  | 19 | 5  |
| 364838 | 105 | 1242254 | 1242283 | 2 | 15 | 30 | AC  | 6  | 8  |
| 364839 | 105 | 1242445 | 1242468 | 2 | 12 | 24 | CA  | 26 | 14 |
| 364840 | 105 | 1245072 | 1245103 | 2 | 16 | 32 | AC  | 16 | 8  |
| 364841 | 105 | 1245221 | 1245242 | 2 | 11 | 22 | GT  | 28 | 7  |
| 364845 | 105 | 1246181 | 1246204 | 2 | 12 | 24 | TG  | 12 | 11 |

|        |     |         |         |   |    |    |      |    |    |
|--------|-----|---------|---------|---|----|----|------|----|----|
| 364847 | 105 | 1247471 | 1247494 | 2 | 12 | 24 | AC   | 9  | 7  |
| 364854 | 105 | 1247703 | 1247760 | 2 | 29 | 58 | AC   | 6  | 8  |
| 364855 | 105 | 1247824 | 1247861 | 2 | 19 | 38 | GT   | 9  | 7  |
| 364856 | 105 | 1247966 | 1247995 | 2 | 15 | 30 | TG   | 18 | 7  |
| 364857 | 105 | 1248107 | 1248130 | 2 | 12 | 24 | TG   | 9  | 8  |
| 364860 | 105 | 1249356 | 1249377 | 2 | 11 | 22 | CA   | 15 | 5  |
| 364862 | 105 | 1249638 | 1249659 | 2 | 11 | 22 | TG   | 7  | 9  |
| 364863 | 105 | 1249795 | 1249820 | 2 | 13 | 26 | AC   | 26 | 9  |
| 364864 | 105 | 1250160 | 1250179 | 2 | 10 | 20 | GT   | 9  | 10 |
| 364865 | 105 | 1250321 | 1250356 | 2 | 18 | 36 | AC   | 9  | 8  |
| 364873 | 105 | 1252477 | 1252490 | 2 | 7  | 14 | AG   | 9  | 3  |
| 364881 | 105 | 1253466 | 1253477 | 2 | 6  | 12 | AG   | 7  | 6  |
| 364882 | 105 | 1253540 | 1253553 | 2 | 7  | 14 | AC   | 14 | 3  |
| 364883 | 105 | 1253639 | 1253660 | 2 | 11 | 22 | GT   | 10 | 5  |
| 364884 | 105 | 1253900 | 1253935 | 2 | 18 | 36 | AC   | 18 | 10 |
| 364890 | 105 | 1255442 | 1255497 | 4 | 14 | 56 | GATA | 12 | 10 |
| 364900 | 105 | 1259322 | 1259353 | 2 | 16 | 32 | GT   | 24 | 9  |
| 364902 | 105 | 1259528 | 1259543 | 2 | 8  | 16 | CA   | 21 | 5  |
| 364904 | 105 | 1261176 | 1261221 | 2 | 23 | 46 | GT   | 13 | 14 |
| 364905 | 105 | 1266446 | 1266457 | 2 | 6  | 12 | AC   | 28 | 3  |
| 364909 | 105 | 1271221 | 1271256 | 2 | 18 | 36 | CA   | 11 | 7  |
| 364910 | 105 | 1272995 | 1273009 | 3 | 5  | 15 | CAT  | 20 | 3  |
| 364911 | 105 | 1275354 | 1275387 | 2 | 17 | 34 | TG   | 14 | 11 |
| 364912 | 105 | 1276991 | 1277016 | 2 | 13 | 26 | CA   | 21 | 9  |
| 364913 | 105 | 1277155 | 1277184 | 2 | 15 | 30 | AC   | 22 | 8  |
| 364915 | 105 | 1278369 | 1278388 | 2 | 10 | 20 | TG   | 16 | 5  |
| 364918 | 105 | 1278587 | 1278614 | 2 | 14 | 28 | AC   | 13 | 9  |
| 364920 | 105 | 1278978 | 1279011 | 2 | 17 | 34 | TG   | 13 | 10 |
| 364922 | 105 | 1280190 | 1280247 | 2 | 29 | 58 | GT   | 6  | 7  |
| 364923 | 105 | 1280331 | 1280344 | 2 | 7  | 14 | CA   | 16 | 12 |
| 364930 | 105 | 1285222 | 1285245 | 2 | 12 | 24 | GT   | 18 | 10 |
| 364933 | 105 | 1289496 | 1289529 | 2 | 17 | 34 | GT   | 12 | 11 |
| 364937 | 105 | 1297386 | 1297412 | 3 | 9  | 27 | GAG  | 13 | 7  |
| 364938 | 105 | 1299606 | 1299635 | 3 | 10 | 30 | TCC  | 17 | 7  |
| 364939 | 105 | 1302462 | 1302511 | 2 | 25 | 50 | TG   | 11 | 7  |
| 364944 | 105 | 1303127 | 1303162 | 2 | 18 | 36 | GT   | 7  | 7  |
| 364958 | 105 | 1315012 | 1315027 | 4 | 4  | 16 | TCTG | 26 | 4  |
| 364959 | 105 | 1315033 | 1315048 | 4 | 4  | 16 | CTGT | 9  | 3  |
| 364968 | 105 | 1322350 | 1322369 | 2 | 10 | 20 | TG   | 23 | 4  |
| 364969 | 105 | 1322499 | 1322518 | 2 | 10 | 20 | CA   | 16 | 10 |
| 364979 | 105 | 1327991 | 1328008 | 2 | 9  | 18 | GT   | 16 | 6  |
| 364980 | 105 | 1328011 | 1328026 | 2 | 8  | 16 | GT   | 15 | 6  |
| 364982 | 105 | 1328159 | 1328198 | 2 | 20 | 40 | TG   | 7  | 12 |
| 364983 | 105 | 1328336 | 1328353 | 2 | 9  | 18 | TG   | 18 | 5  |
| 364985 | 105 | 1331188 | 1331203 | 4 | 4  | 16 | TGAT | 28 | 6  |
| 364987 | 105 | 1331908 | 1331927 | 4 | 5  | 20 | TTTG | 25 | 8  |
| 364992 | 105 | 1332907 | 1332924 | 2 | 9  | 18 | GT   | 24 | 4  |
| 364996 | 105 | 1337678 | 1337709 | 2 | 16 | 32 | CA   | 16 | 10 |
| 364998 | 105 | 1339410 | 1339431 | 2 | 11 | 22 | GT   | 7  | 9  |
| 364999 | 105 | 1340462 | 1340479 | 2 | 9  | 18 | GT   | 18 | 13 |
| 365000 | 105 | 1341412 | 1341427 | 2 | 8  | 16 | GA   | 27 | 5  |

|        |     |         |         |   |    |    |      |    |    |
|--------|-----|---------|---------|---|----|----|------|----|----|
| 365002 | 105 | 1353030 | 1353061 | 2 | 16 | 32 | TG   | 7  | 6  |
| 365006 | 105 | 1353892 | 1353915 | 2 | 12 | 24 | TG   | 11 | 8  |
| 365007 | 105 | 1354028 | 1354049 | 2 | 11 | 22 | CA   | 11 | 8  |
| 365008 | 105 | 1358431 | 1358454 | 2 | 12 | 24 | AC   | 19 | 5  |
| 365009 | 105 | 1358538 | 1358563 | 2 | 13 | 26 | GT   | 24 | 7  |
| 365020 | 105 | 1369932 | 1369953 | 2 | 11 | 22 | GT   | 15 | 7  |
| 365023 | 105 | 1372599 | 1372622 | 2 | 12 | 24 | AG   | 21 | 8  |
| 365024 | 105 | 1372664 | 1372681 | 2 | 9  | 18 | TG   | 18 | 4  |
| 365025 | 105 | 1372841 | 1372868 | 2 | 14 | 28 | CA   | 15 | 6  |
| 365027 | 105 | 1373717 | 1373762 | 2 | 23 | 46 | CA   | 13 | 6  |
| 365028 | 105 | 1374150 | 1374177 | 2 | 14 | 28 | GT   | 20 | 9  |
| 365029 | 105 | 1374205 | 1374216 | 2 | 6  | 12 | GT   | 30 | 3  |
| 365030 | 105 | 1374582 | 1374601 | 2 | 10 | 20 | AC   | 8  | 6  |
| 365031 | 105 | 1374838 | 1374873 | 4 | 9  | 36 | CAGA | 24 | 5  |
| 365033 | 105 | 1375366 | 1375381 | 2 | 8  | 16 | AC   | 22 | 4  |
| 365035 | 105 | 1375674 | 1375685 | 2 | 6  | 12 | GT   | 15 | 3  |
| 365037 | 105 | 1377604 | 1377643 | 2 | 20 | 40 | GA   | 15 | 8  |
| 365038 | 105 | 1377752 | 1377781 | 2 | 15 | 30 | TG   | 11 | 6  |
| 365041 | 105 | 1379037 | 1379054 | 2 | 9  | 18 | TG   | 25 | 4  |
| 365061 | 105 | 1385469 | 1385484 | 2 | 8  | 16 | TG   | 13 | 6  |
| 365071 | 105 | 1399846 | 1399885 | 2 | 20 | 40 | AC   | 9  | 6  |
| 365075 | 105 | 1404532 | 1404555 | 2 | 12 | 24 | TC   | 19 | 5  |
| 365076 | 105 | 1406212 | 1406233 | 2 | 11 | 22 | CA   | 16 | 7  |
| 365082 | 105 | 1411657 | 1411677 | 3 | 7  | 21 | AGG  | 23 | 4  |
| 365083 | 105 | 1412329 | 1412342 | 2 | 7  | 14 | CA   | 24 | 4  |
| 365084 | 105 | 1413950 | 1413985 | 2 | 18 | 36 | CA   | 14 | 8  |
| 365090 | 105 | 1421963 | 1422004 | 2 | 21 | 42 | AC   | 8  | 8  |
| 365092 | 105 | 1423668 | 1423695 | 2 | 14 | 28 | GT   | 17 | 10 |
| 365095 | 105 | 1424450 | 1424467 | 2 | 9  | 18 | GT   | 26 | 6  |
| 365096 | 105 | 1424527 | 1424556 | 2 | 15 | 30 | TG   | 13 | 9  |
| 365097 | 105 | 1425983 | 1426002 | 2 | 10 | 20 | AC   | 19 | 6  |
| 365098 | 105 | 1426610 | 1426625 | 4 | 4  | 16 | TCTG | 32 | 3  |
| 365099 | 105 | 1426878 | 1426917 | 4 | 10 | 40 | GTCT | 24 | 7  |
| 365100 | 105 | 1427533 | 1427552 | 2 | 10 | 20 | TG   | 21 | 4  |
| 365101 | 105 | 1428164 | 1428179 | 2 | 8  | 16 | TG   | 18 | 7  |
| 365104 | 105 | 1431468 | 1431481 | 2 | 7  | 14 | TC   | 29 | 3  |
| 365105 | 105 | 1432100 | 1432123 | 4 | 6  | 24 | TGTC | 25 | 3  |
| 365107 | 105 | 1433483 | 1433496 | 2 | 7  | 14 | AC   | 23 | 3  |
| 365109 | 105 | 1435180 | 1435195 | 2 | 8  | 16 | AC   | 26 | 7  |
| 365112 | 105 | 1438233 | 1438254 | 2 | 11 | 22 | GT   | 25 | 5  |
| 365115 | 105 | 1441200 | 1441215 | 2 | 8  | 16 | AC   | 24 | 6  |
| 365116 | 105 | 1441425 | 1441436 | 2 | 6  | 12 | AC   | 23 | 3  |
| 365117 | 105 | 1442349 | 1442366 | 2 | 9  | 18 | TG   | 22 | 3  |
| 365118 | 105 | 1442627 | 1442650 | 2 | 12 | 24 | CA   | 22 | 6  |
| 365121 | 105 | 1443338 | 1443363 | 2 | 13 | 26 | TG   | 18 | 4  |
| 365122 | 105 | 1443469 | 1443484 | 2 | 8  | 16 | TG   | 19 | 4  |
| 365124 | 105 | 1444774 | 1444788 | 3 | 5  | 15 | ATG  | 20 | 3  |
| 365128 | 105 | 1447132 | 1447147 | 2 | 8  | 16 | AC   | 22 | 5  |
| 365131 | 105 | 1449755 | 1449776 | 2 | 11 | 22 | AC   | 20 | 8  |
| 365132 | 105 | 1450638 | 1450669 | 2 | 16 | 32 | TG   | 10 | 6  |
| 365133 | 105 | 1457211 | 1457236 | 2 | 13 | 26 | CA   | 14 | 8  |

|        |     |         |         |   |    |    |      |    |    |
|--------|-----|---------|---------|---|----|----|------|----|----|
| 365134 | 105 | 1457464 | 1457493 | 3 | 10 | 30 | AGA  | 24 | 7  |
| 365207 | 105 | 1508617 | 1508652 | 2 | 18 | 36 | AC   | 11 | 8  |
| 365208 | 105 | 1508751 | 1508778 | 2 | 14 | 28 | TG   | 16 | 7  |
| 365210 | 105 | 1510105 | 1510158 | 3 | 18 | 54 | AGA  | 10 | 7  |
| 365212 | 105 | 1511941 | 1511960 | 2 | 10 | 20 | TG   | 19 | 4  |
| 365213 | 105 | 1512198 | 1512227 | 2 | 15 | 30 | CA   | 20 | 8  |
| 365216 | 105 | 1515249 | 1515278 | 2 | 15 | 30 | AC   | 12 | 5  |
| 365217 | 105 | 1516412 | 1516443 | 4 | 8  | 32 | CTGT | 24 | 5  |
| 365219 | 105 | 1516653 | 1516672 | 2 | 10 | 20 | AC   | 16 | 4  |
| 365224 | 105 | 1518539 | 1518552 | 2 | 7  | 14 | CA   | 23 | 6  |
| 365231 | 105 | 1524426 | 1524449 | 3 | 8  | 24 | TGA  | 28 | 5  |
| 365232 | 105 | 1525944 | 1525999 | 2 | 28 | 56 | AC   | 8  | 9  |
| 365240 | 105 | 1549436 | 1549447 | 2 | 6  | 12 | CT   | 27 | 3  |
| 365244 | 105 | 1557893 | 1557932 | 2 | 20 | 40 | CT   | 6  | 7  |
| 365247 | 105 | 1559743 | 1559757 | 3 | 5  | 15 | TGT  | 27 | 6  |
| 365251 | 106 | 29366   | 29377   | 2 | 6  | 12 | TG   | 21 | 5  |
| 365252 | 106 | 29599   | 29624   | 2 | 13 | 26 | CA   | 11 | 11 |
| 365268 | 106 | 52787   | 52812   | 2 | 13 | 26 | TG   | 20 | 8  |
| 365269 | 106 | 53313   | 53332   | 2 | 10 | 20 | GA   | 11 | 9  |
| 365273 | 106 | 62289   | 62318   | 2 | 15 | 30 | GT   | 9  | 7  |
| 365274 | 106 | 62499   | 62524   | 2 | 13 | 26 | GT   | 11 | 7  |
| 365277 | 106 | 65543   | 65594   | 2 | 26 | 52 | AC   | 11 | 10 |
| 365279 | 106 | 69601   | 69620   | 2 | 10 | 20 | GT   | 14 | 4  |
| 365280 | 106 | 70761   | 70776   | 2 | 8  | 16 | CA   | 22 | 5  |
| 365283 | 106 | 72588   | 72605   | 2 | 9  | 18 | TG   | 19 | 4  |
| 365288 | 106 | 90930   | 90943   | 2 | 7  | 14 | GT   | 24 | 4  |
| 365289 | 106 | 91067   | 91078   | 2 | 6  | 12 | GA   | 32 | 5  |
| 365294 | 106 | 98168   | 98199   | 2 | 16 | 32 | AC   | 13 | 9  |
| 365297 | 106 | 98664   | 98691   | 2 | 14 | 28 | TG   | 15 | 8  |
| 365305 | 106 | 112815  | 112832  | 2 | 9  | 18 | TG   | 22 | 6  |
| 365306 | 106 | 115478  | 115493  | 4 | 4  | 16 | TCCA | 21 | 3  |
| 365312 | 106 | 119930  | 119951  | 2 | 11 | 22 | AC   | 19 | 3  |
| 365319 | 106 | 133906  | 133925  | 4 | 5  | 20 | ATTT | 9  | 8  |
| 365322 | 106 | 142403  | 142418  | 4 | 4  | 16 | TTTA | 26 | 3  |
| 365323 | 106 | 143074  | 143105  | 2 | 16 | 32 | GT   | 9  | 7  |
| 365324 | 106 | 149655  | 149690  | 2 | 18 | 36 | TG   | 14 | 7  |
| 365328 | 106 | 157543  | 157568  | 2 | 13 | 26 | CT   | 10 | 9  |
| 365335 | 106 | 171802  | 171813  | 2 | 6  | 12 | AT   | 18 | 5  |
| 365339 | 106 | 190904  | 190915  | 2 | 6  | 12 | CA   | 9  | 8  |
| 365344 | 106 | 202715  | 202732  | 2 | 9  | 18 | CA   | 22 | 3  |
| 365346 | 106 | 206016  | 206039  | 3 | 8  | 24 | GAG  | 23 | 4  |
| 365352 | 106 | 217034  | 217057  | 2 | 12 | 24 | GT   | 15 | 8  |
| 365354 | 106 | 224906  | 224923  | 2 | 9  | 18 | GT   | 15 | 7  |
| 365363 | 106 | 227520  | 227539  | 2 | 10 | 20 | CA   | 18 | 5  |
| 365366 | 106 | 230717  | 230732  | 2 | 8  | 16 | AC   | 15 | 6  |
| 365369 | 106 | 233504  | 233527  | 2 | 12 | 24 | AC   | 25 | 6  |
| 365370 | 106 | 233738  | 233783  | 2 | 23 | 46 | AC   | 6  | 8  |
| 365371 | 106 | 233951  | 233982  | 2 | 16 | 32 | AC   | 13 | 9  |
| 365375 | 106 | 245045  | 245068  | 2 | 12 | 24 | TG   | 19 | 4  |
| 365380 | 106 | 252755  | 252772  | 3 | 6  | 18 | CCT  | 25 | 5  |
| 365386 | 106 | 256213  | 256256  | 2 | 22 | 44 | CA   | 10 | 7  |

|        |     |        |        |   |    |    |      |    |    |
|--------|-----|--------|--------|---|----|----|------|----|----|
| 365389 | 106 | 258531 | 258552 | 2 | 11 | 22 | CT   | 18 | 8  |
| 365393 | 106 | 260602 | 260623 | 2 | 11 | 22 | AC   | 17 | 12 |
| 365399 | 106 | 276237 | 276258 | 2 | 11 | 22 | GT   | 24 | 11 |
| 365412 | 106 | 289595 | 289608 | 2 | 7  | 14 | TG   | 21 | 4  |
| 365414 | 106 | 290824 | 290853 | 2 | 15 | 30 | TG   | 11 | 11 |
| 365415 | 106 | 290992 | 291007 | 2 | 8  | 16 | AC   | 17 | 5  |
| 365416 | 106 | 291013 | 291024 | 2 | 6  | 12 | CA   | 17 | 4  |
| 365421 | 106 | 299706 | 299717 | 2 | 6  | 12 | TG   | 23 | 3  |
| 365422 | 106 | 299821 | 299836 | 2 | 8  | 16 | TG   | 17 | 10 |
| 365423 | 106 | 299838 | 299855 | 2 | 9  | 18 | GT   | 23 | 12 |
| 365433 | 106 | 316952 | 316973 | 2 | 11 | 22 | GT   | 19 | 7  |
| 365435 | 106 | 317353 | 317366 | 2 | 7  | 14 | AC   | 20 | 8  |
| 365437 | 106 | 318916 | 318935 | 2 | 10 | 20 | TG   | 15 | 5  |
| 365438 | 106 | 318968 | 318985 | 2 | 9  | 18 | AG   | 20 | 3  |
| 365440 | 106 | 320689 | 320712 | 4 | 6  | 24 | TTCT | 15 | 3  |
| 365448 | 106 | 326338 | 326357 | 2 | 10 | 20 | TG   | 14 | 5  |
| 365449 | 106 | 326715 | 326736 | 2 | 11 | 22 | GT   | 20 | 15 |
| 365452 | 106 | 328764 | 328777 | 2 | 7  | 14 | GA   | 16 | 8  |
| 365454 | 106 | 329531 | 329546 | 4 | 4  | 16 | TTCT | 17 | 3  |
| 365457 | 106 | 330555 | 330598 | 4 | 11 | 44 | AAGA | 17 | 6  |
| 365458 | 106 | 330624 | 330638 | 3 | 5  | 15 | AGC  | 17 | 3  |
| 365462 | 106 | 331618 | 331641 | 2 | 12 | 24 | TG   | 11 | 11 |
| 365465 | 106 | 332374 | 332385 | 2 | 6  | 12 | GA   | 13 | 3  |
| 365466 | 106 | 332730 | 332753 | 2 | 12 | 24 | GT   | 14 | 5  |
| 365467 | 106 | 334354 | 334375 | 2 | 11 | 22 | GT   | 21 | 7  |
| 365468 | 106 | 334675 | 334700 | 2 | 13 | 26 | AC   | 18 | 13 |
| 365477 | 106 | 336940 | 336953 | 2 | 7  | 14 | CA   | 14 | 6  |
| 365478 | 106 | 337090 | 337141 | 2 | 26 | 52 | GT   | 10 | 13 |
| 365482 | 106 | 341557 | 341608 | 2 | 26 | 52 | CA   | 6  | 6  |
| 365483 | 106 | 341633 | 341660 | 2 | 14 | 28 | TG   | 11 | 7  |
| 365484 | 106 | 341828 | 341851 | 2 | 12 | 24 | CA   | 13 | 7  |
| 365485 | 106 | 342118 | 342133 | 2 | 8  | 16 | AG   | 20 | 4  |
| 365486 | 106 | 343414 | 343431 | 3 | 6  | 18 | CAG  | 13 | 4  |
| 365488 | 106 | 343949 | 343969 | 3 | 7  | 21 | TCC  | 12 | 3  |
| 365489 | 106 | 344176 | 344191 | 2 | 8  | 16 | CA   | 15 | 4  |
| 365492 | 106 | 350340 | 350371 | 2 | 16 | 32 | GT   | 11 | 11 |
| 365493 | 106 | 350494 | 350523 | 2 | 15 | 30 | GT   | 16 | 6  |
| 365494 | 106 | 350641 | 350670 | 2 | 15 | 30 | GT   | 8  | 11 |
| 365495 | 106 | 351083 | 351094 | 2 | 6  | 12 | TG   | 22 | 4  |
| 365497 | 106 | 351581 | 351596 | 2 | 8  | 16 | CT   | 14 | 5  |
| 365498 | 106 | 352359 | 352398 | 2 | 20 | 40 | CA   | 7  | 8  |
| 365501 | 106 | 353577 | 353596 | 2 | 10 | 20 | AG   | 17 | 17 |
| 365502 | 106 | 353730 | 353741 | 2 | 6  | 12 | GT   | 26 | 5  |
| 365504 | 106 | 354321 | 354350 | 2 | 15 | 30 | TG   | 12 | 7  |
| 365513 | 106 | 359445 | 359472 | 2 | 14 | 28 | TG   | 6  | 7  |
| 365518 | 106 | 363066 | 363083 | 2 | 9  | 18 | GT   | 24 | 5  |
| 365521 | 106 | 367676 | 367697 | 2 | 11 | 22 | GT   | 22 | 6  |
| 365523 | 106 | 369852 | 369865 | 2 | 7  | 14 | CA   | 23 | 6  |
| 365526 | 106 | 373513 | 373534 | 2 | 11 | 22 | TG   | 25 | 8  |
| 365527 | 106 | 374877 | 374902 | 2 | 13 | 26 | GT   | 11 | 11 |
| 365529 | 106 | 375042 | 375055 | 2 | 7  | 14 | CA   | 27 | 4  |

|        |     |        |        |   |    |    |      |    |    |
|--------|-----|--------|--------|---|----|----|------|----|----|
| 365530 | 106 | 375398 | 375423 | 2 | 13 | 26 | TG   | 11 | 5  |
| 365531 | 106 | 375650 | 375669 | 2 | 10 | 20 | CA   | 9  | 6  |
| 365532 | 106 | 377380 | 377401 | 2 | 11 | 22 | CA   | 6  | 6  |
| 365534 | 106 | 377521 | 377538 | 2 | 9  | 18 | AC   | 19 | 7  |
| 365536 | 106 | 381284 | 381301 | 2 | 9  | 18 | TG   | 20 | 9  |
| 365537 | 106 | 381569 | 381586 | 2 | 9  | 18 | CA   | 24 | 5  |
| 365539 | 106 | 383951 | 383964 | 2 | 7  | 14 | GT   | 7  | 4  |
| 365544 | 106 | 388971 | 388994 | 2 | 12 | 24 | CA   | 6  | 5  |
| 365546 | 106 | 389850 | 389867 | 3 | 6  | 18 | GGA  | 19 | 4  |
| 365549 | 106 | 391653 | 391676 | 3 | 8  | 24 | CAT  | 23 | 4  |
| 365551 | 106 | 393849 | 393868 | 2 | 10 | 20 | CA   | 11 | 10 |
| 365553 | 106 | 394639 | 394650 | 2 | 6  | 12 | CA   | 10 | 3  |
| 365554 | 106 | 395864 | 395881 | 2 | 9  | 18 | AG   | 20 | 7  |
| 365557 | 106 | 396569 | 396582 | 2 | 7  | 14 | AG   | 16 | 3  |
| 365560 | 106 | 403115 | 403138 | 2 | 12 | 24 | TG   | 19 | 9  |
| 365561 | 106 | 407031 | 407058 | 2 | 14 | 28 | TG   | 16 | 8  |
| 365563 | 106 | 412524 | 412545 | 2 | 11 | 22 | CA   | 20 | 4  |
| 365566 | 106 | 415578 | 415599 | 2 | 11 | 22 | GT   | 7  | 9  |
| 365569 | 106 | 415912 | 415943 | 2 | 16 | 32 | AC   | 9  | 9  |
| 365640 | 106 | 535509 | 535534 | 2 | 13 | 26 | GT   | 13 | 13 |
| 365641 | 106 | 535663 | 535704 | 2 | 21 | 42 | AC   | 6  | 6  |
| 365642 | 106 | 535757 | 535812 | 4 | 14 | 56 | ATCT | 11 | 11 |
| 365643 | 106 | 536807 | 536836 | 2 | 15 | 30 | GT   | 9  | 5  |
| 365647 | 106 | 539621 | 539658 | 2 | 19 | 38 | GT   | 11 | 11 |
| 365648 | 106 | 539830 | 539845 | 2 | 8  | 16 | GT   | 11 | 4  |
| 365651 | 106 | 542557 | 542576 | 2 | 10 | 20 | TG   | 18 | 5  |
| 365652 | 106 | 543456 | 543469 | 2 | 7  | 14 | TA   | 13 | 3  |
| 365653 | 106 | 552205 | 552234 | 2 | 15 | 30 | CA   | 10 | 8  |
| 365659 | 106 | 558807 | 558832 | 2 | 13 | 26 | CA   | 23 | 13 |
| 365669 | 106 | 574689 | 574700 | 2 | 6  | 12 | AC   | 24 | 7  |
| 365672 | 106 | 582957 | 582971 | 3 | 5  | 15 | GCA  | 25 | 3  |
| 365674 | 106 | 588750 | 588763 | 2 | 7  | 14 | TG   | 10 | 9  |
| 365675 | 106 | 588869 | 588880 | 2 | 6  | 12 | TG   | 15 | 6  |
| 365676 | 106 | 588883 | 588896 | 2 | 7  | 14 | TG   | 16 | 8  |
| 365677 | 106 | 589153 | 589168 | 2 | 8  | 16 | CT   | 27 | 5  |
| 365678 | 106 | 592011 | 592028 | 2 | 9  | 18 | CA   | 16 | 9  |
| 365682 | 106 | 597842 | 597853 | 2 | 6  | 12 | GT   | 22 | 3  |
| 365684 | 106 | 598116 | 598130 | 3 | 5  | 15 | GGA  | 20 | 3  |
| 365685 | 106 | 598221 | 598232 | 2 | 6  | 12 | AC   | 6  | 4  |
| 365686 | 106 | 600188 | 600213 | 2 | 13 | 26 | TG   | 19 | 9  |
| 365687 | 106 | 600547 | 600606 | 4 | 15 | 60 | AGAA | 23 | 11 |
| 365694 | 106 | 624218 | 624233 | 2 | 8  | 16 | TG   | 26 | 4  |
| 365696 | 106 | 634598 | 634619 | 2 | 11 | 22 | TG   | 8  | 9  |
| 365698 | 106 | 641403 | 641424 | 2 | 11 | 22 | TG   | 18 | 10 |
| 365702 | 106 | 650067 | 650088 | 2 | 11 | 22 | TG   | 14 | 5  |
| 365706 | 106 | 651195 | 651216 | 2 | 11 | 22 | AC   | 12 | 6  |
| 365711 | 106 | 661351 | 661388 | 2 | 19 | 38 | AG   | 10 | 7  |
| 365712 | 106 | 661692 | 661707 | 4 | 4  | 16 | TTTA | 27 | 3  |
| 365714 | 106 | 664138 | 664177 | 2 | 20 | 40 | GT   | 14 | 12 |
| 365716 | 106 | 665130 | 665156 | 3 | 9  | 27 | CCT  | 9  | 5  |
| 365718 | 106 | 667335 | 667348 | 2 | 7  | 14 | TG   | 15 | 6  |

|        |     |        |        |   |    |    |      |    |    |
|--------|-----|--------|--------|---|----|----|------|----|----|
| 365719 | 106 | 668267 | 668282 | 4 | 4  | 16 | TCAA | 31 | 3  |
| 365724 | 106 | 673616 | 673639 | 2 | 12 | 24 | AC   | 12 | 9  |
| 365725 | 106 | 674926 | 674941 | 4 | 4  | 16 | TTGT | 31 | 3  |
| 365727 | 106 | 680892 | 680917 | 2 | 13 | 26 | AC   | 8  | 7  |
| 365740 | 106 | 690102 | 690125 | 4 | 6  | 24 | GAGG | 8  | 3  |
| 365752 | 106 | 699658 | 699671 | 2 | 7  | 14 | CA   | 18 | 3  |
| 365753 | 106 | 699856 | 699871 | 2 | 8  | 16 | AC   | 23 | 6  |
| 365758 | 106 | 703148 | 703167 | 2 | 10 | 20 | GT   | 27 | 10 |
| 365770 | 106 | 726704 | 726723 | 2 | 10 | 20 | AC   | 18 | 4  |
| 365777 | 106 | 746494 | 746513 | 4 | 5  | 20 | TGTT | 23 | 7  |
| 365778 | 106 | 747023 | 747036 | 2 | 7  | 14 | CA   | 20 | 15 |
| 365783 | 106 | 748430 | 748463 | 2 | 17 | 34 | AC   | 16 | 7  |
| 365789 | 106 | 753016 | 753031 | 2 | 8  | 16 | AG   | 19 | 4  |
| 365802 | 106 | 773118 | 773137 | 2 | 10 | 20 | AC   | 22 | 4  |
| 365804 | 106 | 774537 | 774548 | 2 | 6  | 12 | CA   | 12 | 3  |
| 365808 | 106 | 780324 | 780347 | 3 | 8  | 24 | ATA  | 9  | 3  |
| 365818 | 106 | 787402 | 787415 | 2 | 7  | 14 | GT   | 21 | 3  |
| 365821 | 106 | 788919 | 788938 | 2 | 10 | 20 | CA   | 15 | 10 |
| 365824 | 106 | 789818 | 789829 | 2 | 6  | 12 | TG   | 22 | 6  |
| 365828 | 106 | 802347 | 802362 | 2 | 8  | 16 | TG   | 21 | 3  |
| 365829 | 106 | 802489 | 802506 | 2 | 9  | 18 | AC   | 18 | 3  |
| 365830 | 106 | 802602 | 802619 | 2 | 9  | 18 | CT   | 15 | 4  |
| 365832 | 106 | 802779 | 802800 | 2 | 11 | 22 | TG   | 15 | 8  |
| 365833 | 106 | 804517 | 804528 | 2 | 6  | 12 | CA   | 20 | 7  |
| 365835 | 106 | 804898 | 804933 | 2 | 18 | 36 | AG   | 11 | 7  |
| 365836 | 106 | 808570 | 808585 | 2 | 8  | 16 | AG   | 11 | 4  |
| 365837 | 106 | 810930 | 810957 | 2 | 14 | 28 | CA   | 14 | 7  |
| 365842 | 106 | 816920 | 816941 | 2 | 11 | 22 | AC   | 20 | 12 |
| 365843 | 106 | 817047 | 817060 | 2 | 7  | 14 | TG   | 22 | 3  |
| 365844 | 106 | 820719 | 820736 | 2 | 9  | 18 | CA   | 30 | 3  |
| 365845 | 106 | 820985 | 820998 | 2 | 7  | 14 | GT   | 17 | 8  |
| 365846 | 106 | 821269 | 821288 | 4 | 5  | 20 | AAAT | 23 | 4  |
| 365854 | 106 | 843664 | 843677 | 2 | 7  | 14 | TA   | 18 | 6  |
| 365855 | 106 | 844074 | 844093 | 2 | 10 | 20 | CT   | 18 | 3  |
| 365857 | 106 | 853739 | 853768 | 2 | 15 | 30 | TC   | 8  | 6  |
| 365859 | 106 | 855779 | 855793 | 3 | 5  | 15 | TTA  | 16 | 4  |
| 365864 | 106 | 859739 | 859766 | 2 | 14 | 28 | TG   | 10 | 14 |
| 365866 | 106 | 861903 | 861914 | 2 | 6  | 12 | GT   | 19 | 3  |
| 365870 | 106 | 868210 | 868221 | 2 | 6  | 12 | AC   | 21 | 3  |
| 365871 | 106 | 869506 | 869521 | 2 | 8  | 16 | AC   | 25 | 10 |
| 365875 | 106 | 871358 | 871375 | 2 | 9  | 18 | GT   | 20 | 13 |
| 365876 | 106 | 872750 | 872783 | 2 | 17 | 34 | AC   | 10 | 7  |
| 365877 | 106 | 872991 | 873006 | 2 | 8  | 16 | GA   | 15 | 4  |
| 365878 | 106 | 873126 | 873159 | 2 | 17 | 34 | GT   | 6  | 6  |
| 365879 | 106 | 873271 | 873284 | 2 | 7  | 14 | AC   | 20 | 4  |
| 365881 | 106 | 876450 | 876473 | 2 | 12 | 24 | CA   | 14 | 6  |
| 365884 | 106 | 879481 | 879500 | 2 | 10 | 20 | CA   | 17 | 5  |
| 365886 | 106 | 887049 | 887066 | 2 | 9  | 18 | TG   | 30 | 7  |
| 365887 | 106 | 888797 | 888808 | 2 | 6  | 12 | CA   | 26 | 3  |
| 365893 | 106 | 895479 | 895506 | 2 | 14 | 28 | CA   | 16 | 4  |
| 365896 | 106 | 900601 | 900622 | 2 | 11 | 22 | CA   | 16 | 6  |



|        |     |         |         |   |    |    |      |    |    |
|--------|-----|---------|---------|---|----|----|------|----|----|
| 365899 | 106 | 905814  | 905833  | 2 | 10 | 20 | AC   | 10 | 7  |
| 365904 | 106 | 910334  | 910347  | 2 | 7  | 14 | AC   | 29 | 4  |
| 365905 | 106 | 910782  | 910799  | 2 | 9  | 18 | TG   | 17 | 11 |
| 365917 | 106 | 924557  | 924592  | 2 | 18 | 36 | CA   | 12 | 7  |
| 365923 | 106 | 929820  | 929837  | 2 | 9  | 18 | AC   | 27 | 3  |
| 365926 | 106 | 944562  | 944576  | 3 | 5  | 15 | TGA  | 35 | 4  |
| 365929 | 106 | 951018  | 951029  | 2 | 6  | 12 | CT   | 21 | 3  |
| 365932 | 106 | 951774  | 951788  | 3 | 5  | 15 | TTG  | 24 | 6  |
| 365934 | 106 | 951989  | 952015  | 3 | 9  | 27 | TTG  | 25 | 5  |
| 365935 | 106 | 952173  | 952220  | 4 | 12 | 48 | GTTT | 19 | 13 |
| 365940 | 106 | 966334  | 966345  | 2 | 6  | 12 | AC   | 21 | 4  |
| 365946 | 106 | 968774  | 968801  | 2 | 14 | 28 | GT   | 6  | 5  |
| 365949 | 106 | 971683  | 971714  | 2 | 16 | 32 | TG   | 14 | 8  |
| 365950 | 106 | 971782  | 971793  | 2 | 6  | 12 | GT   | 7  | 5  |
| 365951 | 106 | 971923  | 971934  | 2 | 6  | 12 | TG   | 29 | 5  |
| 365956 | 106 | 974528  | 974541  | 2 | 7  | 14 | AC   | 33 | 3  |
| 365958 | 106 | 976031  | 976048  | 2 | 9  | 18 | AG   | 22 | 3  |
| 365961 | 106 | 979706  | 979725  | 2 | 10 | 20 | AC   | 19 | 6  |
| 365964 | 106 | 983578  | 983609  | 2 | 16 | 32 | GA   | 8  | 9  |
| 365967 | 106 | 986871  | 986909  | 3 | 13 | 39 | ATT  | 13 | 7  |
| 365969 | 106 | 993550  | 993570  | 3 | 7  | 21 | GCT  | 26 | 5  |
| 365972 | 106 | 996171  | 996190  | 2 | 10 | 20 | CA   | 26 | 6  |
| 365977 | 106 | 1002783 | 1002796 | 2 | 7  | 14 | AC   | 22 | 4  |
| 365978 | 106 | 1003740 | 1003754 | 3 | 5  | 15 | GGT  | 30 | 7  |
| 365980 | 106 | 1008655 | 1008668 | 2 | 7  | 14 | CA   | 9  | 5  |
| 365986 | 106 | 1019120 | 1019167 | 2 | 24 | 48 | TG   | 7  | 9  |
| 365988 | 106 | 1020683 | 1020694 | 2 | 6  | 12 | GT   | 7  | 3  |
| 365990 | 106 | 1021732 | 1021743 | 2 | 6  | 12 | TG   | 24 | 3  |
| 365992 | 106 | 1023303 | 1023328 | 2 | 13 | 26 | CA   | 13 | 6  |
| 366010 | 106 | 1080895 | 1080910 | 2 | 8  | 16 | GT   | 17 | 10 |
| 366011 | 106 | 1082050 | 1082085 | 2 | 18 | 36 | AC   | 12 | 9  |
| 366016 | 106 | 1094721 | 1094742 | 2 | 11 | 22 | AG   | 23 | 5  |
| 366019 | 106 | 1098538 | 1098559 | 2 | 11 | 22 | GT   | 18 | 6  |
| 366031 | 107 | 13640   | 13655   | 2 | 8  | 16 | TG   | 24 | 5  |
| 366039 | 107 | 20657   | 20694   | 2 | 19 | 38 | AC   | 13 | 5  |
| 366046 | 107 | 49884   | 49916   | 3 | 11 | 33 | AGT  | 9  | 8  |
| 366048 | 107 | 54146   | 54177   | 2 | 16 | 32 | TG   | 7  | 5  |
| 366053 | 107 | 63746   | 63761   | 4 | 4  | 16 | GATG | 25 | 3  |
| 366084 | 107 | 137078  | 137113  | 3 | 12 | 36 | AAT  | 10 | 3  |
| 366097 | 107 | 163784  | 163799  | 2 | 8  | 16 | CA   | 25 | 4  |
| 366118 | 107 | 218335  | 218358  | 3 | 8  | 24 | AAT  | 16 | 4  |
| 366125 | 107 | 225088  | 225099  | 2 | 6  | 12 | TG   | 28 | 4  |
| 366132 | 107 | 245278  | 245322  | 3 | 15 | 45 | TTC  | 12 | 8  |
| 366133 | 107 | 248622  | 248637  | 4 | 4  | 16 | ATTT | 23 | 4  |
| 366152 | 107 | 280789  | 280818  | 2 | 15 | 30 | CA   | 12 | 4  |
| 366154 | 107 | 282158  | 282172  | 3 | 5  | 15 | GGT  | 21 | 4  |
| 366162 | 107 | 297113  | 297126  | 2 | 7  | 14 | TG   | 21 | 5  |
| 366165 | 107 | 315844  | 315870  | 3 | 9  | 27 | TTG  | 12 | 8  |
| 366166 | 107 | 318032  | 318047  | 2 | 8  | 16 | AC   | 17 | 3  |
| 366174 | 107 | 329716  | 329737  | 2 | 11 | 22 | CA   | 24 | 6  |
| 366188 | 107 | 363311  | 363330  | 2 | 10 | 20 | TG   | 24 | 4  |

|        |     |         |         |   |    |    |      |    |    |
|--------|-----|---------|---------|---|----|----|------|----|----|
| 366191 | 107 | 367391  | 367418  | 4 | 7  | 28 | ATAG | 15 | 6  |
| 366192 | 107 | 367602  | 367613  | 2 | 6  | 12 | AT   | 21 | 6  |
| 366200 | 107 | 389049  | 389069  | 3 | 7  | 21 | TCA  | 26 | 5  |
| 366210 | 107 | 428756  | 428813  | 2 | 29 | 58 | TG   | 6  | 9  |
| 366212 | 107 | 433528  | 433563  | 3 | 12 | 36 | GAA  | 11 | 3  |
| 366223 | 107 | 450209  | 450250  | 2 | 21 | 42 | AC   | 8  | 10 |
| 366234 | 107 | 474896  | 474911  | 2 | 8  | 16 | AT   | 23 | 4  |
| 366235 | 107 | 477963  | 477984  | 2 | 11 | 22 | CA   | 17 | 7  |
| 366247 | 107 | 499166  | 499191  | 2 | 13 | 26 | TG   | 14 | 8  |
| 366250 | 107 | 507125  | 507146  | 2 | 11 | 22 | AC   | 25 | 3  |
| 366275 | 107 | 542755  | 542784  | 2 | 15 | 30 | GT   | 19 | 11 |
| 366279 | 107 | 547397  | 547411  | 3 | 5  | 15 | CAA  | 14 | 5  |
| 366286 | 107 | 579671  | 579684  | 2 | 7  | 14 | AC   | 22 | 4  |
| 366292 | 107 | 588782  | 588797  | 2 | 8  | 16 | AC   | 29 | 3  |
| 366294 | 107 | 590740  | 590773  | 2 | 17 | 34 | CA   | 14 | 9  |
| 366295 | 107 | 592050  | 592083  | 2 | 17 | 34 | CA   | 6  | 7  |
| 366296 | 107 | 592491  | 592502  | 2 | 6  | 12 | TG   | 22 | 3  |
| 366300 | 107 | 599541  | 599570  | 2 | 15 | 30 | CA   | 12 | 10 |
| 366302 | 107 | 600575  | 600598  | 4 | 6  | 24 | TATG | 13 | 3  |
| 366304 | 107 | 607607  | 607630  | 4 | 6  | 24 | TATC | 20 | 7  |
| 366325 | 107 | 635513  | 635524  | 2 | 6  | 12 | TG   | 20 | 3  |
| 366326 | 107 | 635793  | 635806  | 2 | 7  | 14 | GT   | 15 | 6  |
| 366331 | 107 | 636761  | 636781  | 3 | 7  | 21 | AAG  | 17 | 3  |
| 366333 | 107 | 637659  | 637670  | 2 | 6  | 12 | TG   | 18 | 4  |
| 366359 | 107 | 677538  | 677559  | 2 | 11 | 22 | GT   | 23 | 5  |
| 366360 | 107 | 677663  | 677686  | 2 | 12 | 24 | AC   | 16 | 14 |
| 366361 | 107 | 678158  | 678178  | 3 | 7  | 21 | GGA  | 19 | 5  |
| 366367 | 107 | 692451  | 692464  | 2 | 7  | 14 | AC   | 21 | 5  |
| 366371 | 107 | 704015  | 704046  | 2 | 16 | 32 | CA   | 23 | 8  |
| 366378 | 107 | 716293  | 716308  | 4 | 4  | 16 | AAAT | 16 | 8  |
| 366383 | 107 | 729770  | 729781  | 2 | 6  | 12 | GT   | 26 | 3  |
| 366385 | 107 | 730487  | 730504  | 3 | 6  | 18 | ATT  | 8  | 3  |
| 366389 | 107 | 734732  | 734763  | 4 | 8  | 32 | ATAG | 22 | 8  |
| 366398 | 107 | 762503  | 762530  | 4 | 7  | 28 | AACC | 25 | 5  |
| 366409 | 107 | 790289  | 790306  | 3 | 6  | 18 | CTG  | 34 | 4  |
| 366421 | 107 | 817752  | 817779  | 2 | 14 | 28 | AC   | 14 | 6  |
| 366435 | 107 | 831718  | 831729  | 2 | 6  | 12 | TG   | 29 | 3  |
| 366439 | 107 | 833605  | 833648  | 2 | 22 | 44 | GA   | 8  | 7  |
| 366447 | 107 | 848572  | 848601  | 2 | 15 | 30 | AC   | 9  | 10 |
| 366448 | 107 | 850240  | 850265  | 2 | 13 | 26 | GT   | 12 | 5  |
| 366465 | 107 | 913279  | 913300  | 2 | 11 | 22 | CA   | 13 | 7  |
| 366466 | 107 | 913342  | 913355  | 2 | 7  | 14 | TG   | 16 | 5  |
| 366476 | 107 | 937621  | 937636  | 4 | 4  | 16 | TTTC | 8  | 5  |
| 366482 | 107 | 952143  | 952154  | 2 | 6  | 12 | AT   | 25 | 4  |
| 366485 | 107 | 962635  | 962662  | 2 | 14 | 28 | CA   | 22 | 11 |
| 366489 | 107 | 972312  | 972329  | 2 | 9  | 18 | TG   | 22 | 4  |
| 366490 | 107 | 972565  | 972579  | 3 | 5  | 15 | AAT  | 19 | 7  |
| 366493 | 107 | 984771  | 984786  | 2 | 8  | 16 | TG   | 31 | 3  |
| 366495 | 107 | 990491  | 990511  | 3 | 7  | 21 | TGC  | 22 | 3  |
| 366502 | 107 | 1001197 | 1001208 | 2 | 6  | 12 | TA   | 19 | 3  |
| 366508 | 107 | 1015515 | 1015544 | 2 | 15 | 30 | AG   | 9  | 7  |

|        |     |         |         |   |    |    |      |    |    |
|--------|-----|---------|---------|---|----|----|------|----|----|
| 366509 | 107 | 1015746 | 1015761 | 2 | 8  | 16 | GA   | 24 | 3  |
| 366514 | 107 | 1022584 | 1022605 | 2 | 11 | 22 | CA   | 12 | 4  |
| 366527 | 107 | 1044493 | 1044540 | 2 | 24 | 48 | AC   | 8  | 9  |
| 366528 | 107 | 1044581 | 1044596 | 4 | 4  | 16 | TTGA | 19 | 4  |
| 366542 | 108 | 31164   | 31191   | 2 | 14 | 28 | GA   | 19 | 3  |
| 366546 | 108 | 40313   | 40332   | 2 | 10 | 20 | AC   | 18 | 5  |
| 366550 | 108 | 58702   | 58716   | 3 | 5  | 15 | CAG  | 25 | 3  |
| 366559 | 108 | 73840   | 73857   | 2 | 9  | 18 | TG   | 20 | 5  |
| 366560 | 108 | 74532   | 74563   | 2 | 16 | 32 | TG   | 8  | 5  |
| 366564 | 108 | 87314   | 87347   | 2 | 17 | 34 | AC   | 11 | 5  |
| 366587 | 108 | 166099  | 166114  | 4 | 4  | 16 | AGAT | 11 | 3  |
| 366594 | 108 | 183960  | 184001  | 2 | 21 | 42 | TG   | 12 | 8  |
| 366599 | 108 | 194516  | 194545  | 2 | 15 | 30 | AC   | 11 | 6  |
| 366607 | 108 | 202254  | 202279  | 2 | 13 | 26 | AC   | 8  | 10 |
| 366609 | 108 | 213464  | 213490  | 3 | 9  | 27 | TCA  | 20 | 6  |
| 366618 | 108 | 226015  | 226030  | 4 | 4  | 16 | AGAC | 25 | 3  |
| 366619 | 108 | 228633  | 228648  | 4 | 4  | 16 | TTGA | 33 | 3  |
| 366622 | 108 | 249905  | 249920  | 2 | 8  | 16 | TC   | 15 | 3  |
| 366623 | 108 | 250912  | 250949  | 2 | 19 | 38 | GT   | 6  | 7  |
| 366624 | 108 | 253590  | 253605  | 2 | 8  | 16 | GT   | 31 | 4  |
| 366633 | 108 | 294930  | 294961  | 4 | 8  | 32 | CAAA | 28 | 5  |
| 366634 | 108 | 296213  | 296236  | 3 | 8  | 24 | TAT  | 9  | 5  |
| 366637 | 108 | 308166  | 308183  | 2 | 9  | 18 | TG   | 13 | 5  |
| 366638 | 108 | 310747  | 310762  | 4 | 4  | 16 | GCAG | 22 | 4  |
| 366642 | 108 | 328904  | 328925  | 2 | 11 | 22 | GT   | 24 | 4  |
| 366651 | 108 | 350704  | 350721  | 3 | 6  | 18 | CAA  | 19 | 6  |
| 366652 | 108 | 357993  | 358007  | 3 | 5  | 15 | ATG  | 25 | 3  |
| 366657 | 108 | 365692  | 365727  | 3 | 12 | 36 | CAG  | 18 | 5  |
| 366658 | 108 | 368822  | 368849  | 2 | 14 | 28 | GT   | 25 | 9  |
| 366659 | 108 | 379727  | 379744  | 2 | 9  | 18 | GT   | 25 | 5  |
| 366660 | 108 | 380819  | 380830  | 2 | 6  | 12 | TG   | 21 | 7  |
| 366661 | 108 | 386707  | 386732  | 2 | 13 | 26 | CA   | 14 | 4  |
| 366662 | 108 | 387255  | 387270  | 2 | 8  | 16 | TA   | 12 | 3  |
| 366668 | 108 | 424043  | 424057  | 3 | 5  | 15 | ATT  | 12 | 4  |
| 366669 | 108 | 427613  | 427645  | 3 | 11 | 33 | ATT  | 6  | 4  |
| 366670 | 108 | 438626  | 438637  | 2 | 6  | 12 | GT   | 16 | 3  |
| 366672 | 108 | 440392  | 440415  | 2 | 12 | 24 | GA   | 13 | 11 |
| 366685 | 108 | 502076  | 502107  | 2 | 16 | 32 | AC   | 16 | 10 |
| 366692 | 108 | 517050  | 517087  | 2 | 19 | 38 | AC   | 8  | 7  |
| 366700 | 108 | 549838  | 549863  | 2 | 13 | 26 | TG   | 8  | 5  |
| 366708 | 108 | 567629  | 567643  | 3 | 5  | 15 | GCT  | 25 | 3  |
| 366719 | 108 | 611485  | 611496  | 2 | 6  | 12 | AC   | 29 | 3  |
| 366721 | 108 | 612165  | 612184  | 4 | 5  | 20 | CTAA | 36 | 4  |
| 366722 | 108 | 612232  | 612251  | 4 | 5  | 20 | GTGA | 24 | 3  |
| 366724 | 108 | 618869  | 618896  | 4 | 7  | 28 | AGAA | 23 | 6  |
| 366732 | 108 | 638797  | 638822  | 2 | 13 | 26 | TG   | 6  | 6  |
| 366741 | 108 | 663554  | 663577  | 4 | 6  | 24 | TCAG | 24 | 5  |
| 366748 | 108 | 675253  | 675272  | 2 | 10 | 20 | GT   | 17 | 4  |
| 366764 | 108 | 734953  | 734970  | 3 | 6  | 18 | TTG  | 16 | 3  |
| 366778 | 108 | 747546  | 747563  | 2 | 9  | 18 | TG   | 26 | 3  |
| 366779 | 108 | 748669  | 748680  | 2 | 6  | 12 | AC   | 27 | 3  |

|        |     |         |         |   |    |    |      |    |    |
|--------|-----|---------|---------|---|----|----|------|----|----|
| 366785 | 108 | 761950  | 761967  | 2 | 9  | 18 | TG   | 8  | 8  |
| 366789 | 108 | 763416  | 763467  | 4 | 13 | 52 | TCTG | 27 | 18 |
| 366790 | 108 | 763951  | 763970  | 4 | 5  | 20 | GAAG | 24 | 7  |
| 366793 | 108 | 773990  | 774035  | 2 | 23 | 46 | CA   | 10 | 11 |
| 366802 | 108 | 810001  | 810032  | 2 | 16 | 32 | GT   | 8  | 9  |
| 366804 | 108 | 823445  | 823458  | 2 | 7  | 14 | GT   | 28 | 4  |
| 366806 | 108 | 827469  | 827490  | 2 | 11 | 22 | GT   | 17 | 14 |
| 366807 | 108 | 831506  | 831529  | 4 | 6  | 24 | TTCC | 25 | 3  |
| 366808 | 108 | 831765  | 831780  | 4 | 4  | 16 | AAAC | 20 | 5  |
| 366809 | 108 | 832825  | 832845  | 3 | 7  | 21 | CCT  | 27 | 3  |
| 366814 | 108 | 843615  | 843652  | 2 | 19 | 38 | TG   | 16 | 7  |
| 366815 | 108 | 849270  | 849283  | 2 | 7  | 14 | AC   | 24 | 5  |
| 366816 | 108 | 849285  | 849296  | 2 | 6  | 12 | CA   | 22 | 5  |
| 366818 | 108 | 851931  | 851946  | 2 | 8  | 16 | CA   | 23 | 5  |
| 366825 | 108 | 872052  | 872071  | 2 | 10 | 20 | CA   | 16 | 4  |
| 366831 | 108 | 875464  | 875479  | 2 | 8  | 16 | AC   | 24 | 4  |
| 366835 | 108 | 883396  | 883407  | 2 | 6  | 12 | GT   | 22 | 7  |
| 366840 | 108 | 890265  | 890284  | 2 | 10 | 20 | GT   | 27 | 3  |
| 366841 | 108 | 895549  | 895564  | 4 | 4  | 16 | CAAG | 22 | 6  |
| 366846 | 108 | 900392  | 900403  | 2 | 6  | 12 | CA   | 16 | 11 |
| 366848 | 108 | 912308  | 912321  | 2 | 7  | 14 | GT   | 26 | 3  |
| 366859 | 108 | 941954  | 941968  | 3 | 5  | 15 | CAG  | 27 | 3  |
| 366861 | 108 | 944402  | 944433  | 2 | 16 | 32 | TG   | 18 | 9  |
| 366864 | 108 | 946972  | 947005  | 2 | 17 | 34 | TG   | 11 | 17 |
| 366876 | 108 | 1002593 | 1002606 | 2 | 7  | 14 | CA   | 27 | 4  |
| 366877 | 108 | 1004226 | 1004245 | 2 | 10 | 20 | TG   | 6  | 7  |
| 366878 | 108 | 1004247 | 1004258 | 2 | 6  | 12 | GT   | 12 | 10 |
| 366888 | 108 | 1021690 | 1021710 | 3 | 7  | 21 | TCT  | 24 | 3  |
| 366889 | 108 | 1023129 | 1023149 | 3 | 7  | 21 | ATC  | 33 | 3  |
| 366890 | 108 | 1024733 | 1024744 | 2 | 6  | 12 | AC   | 31 | 6  |
| 366893 | 108 | 1028626 | 1028645 | 2 | 10 | 20 | TG   | 28 | 11 |
| 366905 | 108 | 1057218 | 1057229 | 2 | 6  | 12 | CA   | 27 | 7  |
| 366913 | 109 | 17980   | 17991   | 2 | 6  | 12 | GT   | 25 | 6  |
| 366924 | 109 | 46761   | 46799   | 3 | 13 | 39 | AAG  | 7  | 10 |
| 366925 | 109 | 47943   | 47954   | 2 | 6  | 12 | TG   | 25 | 5  |
| 366927 | 109 | 64320   | 64334   | 3 | 5  | 15 | AGA  | 17 | 3  |
| 366930 | 109 | 83780   | 83813   | 2 | 17 | 34 | CA   | 16 | 10 |
| 366934 | 109 | 86931   | 86974   | 4 | 11 | 44 | CTGT | 23 | 13 |
| 366938 | 109 | 95527   | 95540   | 2 | 7  | 14 | TG   | 20 | 10 |
| 366940 | 109 | 98591   | 98612   | 2 | 11 | 22 | TG   | 7  | 6  |
| 366941 | 109 | 98810   | 98843   | 2 | 17 | 34 | AC   | 15 | 15 |
| 366943 | 109 | 103518  | 103537  | 2 | 10 | 20 | TC   | 22 | 5  |
| 366944 | 109 | 103658  | 103673  | 2 | 8  | 16 | GT   | 21 | 9  |
| 366945 | 109 | 103993  | 104022  | 2 | 15 | 30 | AC   | 26 | 14 |
| 366947 | 109 | 107150  | 107183  | 2 | 17 | 34 | GT   | 16 | 18 |
| 366949 | 109 | 112377  | 112390  | 2 | 7  | 14 | CT   | 23 | 5  |
| 366953 | 109 | 118854  | 118867  | 2 | 7  | 14 | AC   | 19 | 3  |
| 366954 | 109 | 119210  | 119231  | 2 | 11 | 22 | GT   | 17 | 14 |
| 366969 | 109 | 142357  | 142370  | 2 | 7  | 14 | AC   | 26 | 4  |
| 366971 | 109 | 149958  | 149977  | 4 | 5  | 20 | TTTC | 25 | 3  |
| 366974 | 109 | 157447  | 157464  | 2 | 9  | 18 | AC   | 27 | 8  |

|        |     |        |        |   |    |    |      |    |    |
|--------|-----|--------|--------|---|----|----|------|----|----|
| 366977 | 109 | 163892 | 163911 | 2 | 10 | 20 | GT   | 20 | 11 |
| 366978 | 109 | 165860 | 165883 | 3 | 8  | 24 | CAT  | 23 | 4  |
| 366979 | 109 | 167006 | 167045 | 2 | 20 | 40 | AC   | 9  | 10 |
| 366980 | 109 | 168697 | 168735 | 3 | 13 | 39 | CCT  | 14 | 5  |
| 366983 | 109 | 178536 | 178547 | 2 | 6  | 12 | CA   | 28 | 3  |
| 366985 | 109 | 180107 | 180120 | 2 | 7  | 14 | AC   | 11 | 3  |
| 366986 | 109 | 182203 | 182214 | 2 | 6  | 12 | AT   | 20 | 5  |
| 366991 | 109 | 198253 | 198266 | 2 | 7  | 14 | CA   | 12 | 7  |
| 366992 | 109 | 198268 | 198283 | 2 | 8  | 16 | AC   | 14 | 7  |
| 366994 | 109 | 201014 | 201033 | 2 | 10 | 20 | TG   | 28 | 4  |
| 366995 | 109 | 205594 | 205607 | 2 | 7  | 14 | TC   | 30 | 3  |
| 366998 | 109 | 209134 | 209159 | 2 | 13 | 26 | GT   | 19 | 12 |
| 367002 | 109 | 213973 | 214004 | 2 | 16 | 32 | GT   | 7  | 9  |
| 367005 | 109 | 214876 | 214895 | 2 | 10 | 20 | CA   | 11 | 10 |
| 367006 | 109 | 215139 | 215166 | 2 | 14 | 28 | AC   | 10 | 9  |
| 367008 | 109 | 217736 | 217759 | 2 | 12 | 24 | TG   | 22 | 11 |
| 367010 | 109 | 221332 | 221345 | 2 | 7  | 14 | CA   | 25 | 3  |
| 367013 | 109 | 223597 | 223614 | 3 | 6  | 18 | TCC  | 8  | 9  |
| 367014 | 109 | 223913 | 223936 | 2 | 12 | 24 | TG   | 14 | 9  |
| 367015 | 109 | 227069 | 227082 | 2 | 7  | 14 | AG   | 22 | 5  |
| 367016 | 109 | 227737 | 227756 | 4 | 5  | 20 | TATC | 11 | 4  |
| 367017 | 109 | 228465 | 228484 | 2 | 10 | 20 | AC   | 30 | 6  |
| 367021 | 109 | 263713 | 263726 | 2 | 7  | 14 | AC   | 7  | 4  |
| 367023 | 109 | 286438 | 286451 | 2 | 7  | 14 | AC   | 10 | 13 |
| 367024 | 109 | 286453 | 286466 | 2 | 7  | 14 | CA   | 10 | 10 |
| 367025 | 109 | 287455 | 287482 | 2 | 14 | 28 | CA   | 16 | 7  |
| 367027 | 109 | 293872 | 293907 | 2 | 18 | 36 | CT   | 9  | 6  |
| 367046 | 109 | 306778 | 306801 | 2 | 12 | 24 | CA   | 9  | 8  |
| 367047 | 109 | 306877 | 306892 | 4 | 4  | 16 | CACG | 25 | 8  |
| 367049 | 109 | 309944 | 309965 | 2 | 11 | 22 | GT   | 15 | 8  |
| 367050 | 109 | 310105 | 310138 | 2 | 17 | 34 | GT   | 11 | 11 |
| 367053 | 109 | 316304 | 316325 | 2 | 11 | 22 | GT   | 12 | 7  |
| 367054 | 109 | 318294 | 318335 | 2 | 21 | 42 | GT   | 12 | 8  |
| 367055 | 109 | 318809 | 318844 | 4 | 9  | 36 | GATG | 8  | 6  |
| 367059 | 109 | 322583 | 322600 | 2 | 9  | 18 | AG   | 16 | 4  |
| 367060 | 109 | 322702 | 322719 | 3 | 6  | 18 | CAT  | 22 | 8  |
| 367061 | 109 | 324467 | 324484 | 2 | 9  | 18 | CA   | 18 | 14 |
| 367062 | 109 | 324488 | 324505 | 2 | 9  | 18 | AC   | 10 | 6  |
| 367065 | 109 | 324829 | 324864 | 2 | 18 | 36 | TG   | 7  | 12 |
| 367067 | 109 | 326124 | 326147 | 2 | 12 | 24 | GT   | 16 | 5  |
| 367068 | 109 | 327395 | 327436 | 2 | 21 | 42 | TG   | 12 | 14 |
| 367074 | 109 | 330326 | 330359 | 2 | 17 | 34 | AC   | 6  | 9  |
| 367078 | 109 | 333605 | 333634 | 2 | 15 | 30 | AC   | 20 | 7  |
| 367083 | 109 | 343250 | 343265 | 2 | 8  | 16 | GT   | 17 | 3  |
| 367085 | 109 | 346418 | 346453 | 2 | 18 | 36 | AC   | 6  | 7  |
| 367086 | 109 | 346638 | 346663 | 2 | 13 | 26 | CA   | 17 | 15 |
| 367087 | 109 | 348068 | 348111 | 2 | 22 | 44 | GT   | 11 | 8  |
| 367090 | 109 | 354122 | 354136 | 3 | 5  | 15 | TGT  | 26 | 9  |
| 367096 | 109 | 358219 | 358232 | 2 | 7  | 14 | TG   | 29 | 3  |
| 367099 | 109 | 359166 | 359181 | 4 | 4  | 16 | GAGC | 23 | 3  |
| 367101 | 109 | 359468 | 359509 | 2 | 21 | 42 | CA   | 14 | 10 |

|        |     |        |        |   |    |    |      |    |    |
|--------|-----|--------|--------|---|----|----|------|----|----|
| 367103 | 109 | 360818 | 360843 | 2 | 13 | 26 | AC   | 12 | 9  |
| 367104 | 109 | 361379 | 361408 | 2 | 15 | 30 | TG   | 12 | 13 |
| 367106 | 109 | 361591 | 361602 | 2 | 6  | 12 | GT   | 23 | 4  |
| 367108 | 109 | 362659 | 362670 | 2 | 6  | 12 | CA   | 34 | 5  |
| 367109 | 109 | 363437 | 363448 | 2 | 6  | 12 | GT   | 15 | 3  |
| 367110 | 109 | 363474 | 363503 | 2 | 15 | 30 | GT   | 6  | 7  |
| 367112 | 109 | 363718 | 363750 | 3 | 11 | 33 | CTT  | 20 | 14 |
| 367113 | 109 | 365954 | 365989 | 2 | 18 | 36 | CA   | 8  | 10 |
| 367115 | 109 | 366822 | 366854 | 3 | 11 | 33 | CTC  | 20 | 6  |
| 367116 | 109 | 367466 | 367480 | 3 | 5  | 15 | TTC  | 25 | 9  |
| 367118 | 109 | 371808 | 371835 | 2 | 14 | 28 | AC   | 11 | 6  |
| 367133 | 109 | 378519 | 378540 | 2 | 11 | 22 | TG   | 11 | 13 |
| 367135 | 109 | 379205 | 379218 | 2 | 7  | 14 | CA   | 26 | 3  |
| 367136 | 109 | 379501 | 379536 | 2 | 18 | 36 | GT   | 8  | 11 |
| 367137 | 109 | 381335 | 381362 | 2 | 14 | 28 | TG   | 21 | 12 |
| 367138 | 109 | 384338 | 384349 | 2 | 6  | 12 | AC   | 18 | 10 |
| 367151 | 109 | 388949 | 388984 | 2 | 18 | 36 | CA   | 14 | 17 |
| 367152 | 109 | 389547 | 389574 | 2 | 14 | 28 | TG   | 15 | 9  |
| 367153 | 109 | 391063 | 391096 | 2 | 17 | 34 | TG   | 8  | 8  |
| 367157 | 109 | 393459 | 393482 | 2 | 12 | 24 | GT   | 19 | 7  |
| 367164 | 109 | 399452 | 399471 | 2 | 10 | 20 | TG   | 17 | 5  |
| 367171 | 109 | 430907 | 430928 | 2 | 11 | 22 | TG   | 10 | 4  |
| 367174 | 109 | 441507 | 441524 | 2 | 9  | 18 | TC   | 26 | 5  |
| 367180 | 109 | 452537 | 452558 | 2 | 11 | 22 | CA   | 17 | 8  |
| 367182 | 109 | 454015 | 454040 | 2 | 13 | 26 | GT   | 16 | 9  |
| 367188 | 109 | 457208 | 457243 | 2 | 18 | 36 | GT   | 11 | 10 |
| 367189 | 109 | 458205 | 458228 | 3 | 8  | 24 | GAG  | 18 | 9  |
| 367190 | 109 | 458754 | 458771 | 3 | 6  | 18 | CTG  | 23 | 6  |
| 367192 | 109 | 463083 | 463118 | 2 | 18 | 36 | CA   | 12 | 11 |
| 367193 | 109 | 470521 | 470547 | 3 | 9  | 27 | TGA  | 20 | 6  |
| 367195 | 109 | 471397 | 471412 | 2 | 8  | 16 | GT   | 16 | 10 |
| 367197 | 109 | 471826 | 471849 | 2 | 12 | 24 | TC   | 22 | 12 |
| 367199 | 109 | 475053 | 475076 | 2 | 12 | 24 | GT   | 12 | 10 |
| 367201 | 109 | 476808 | 476825 | 3 | 6  | 18 | ATT  | 18 | 4  |
| 367208 | 109 | 478065 | 478090 | 2 | 13 | 26 | GT   | 19 | 15 |
| 367214 | 109 | 490322 | 490351 | 2 | 15 | 30 | CA   | 19 | 16 |
| 367220 | 109 | 493944 | 493981 | 2 | 19 | 38 | AC   | 8  | 8  |
| 367230 | 109 | 498661 | 498690 | 2 | 15 | 30 | CA   | 7  | 5  |
| 367231 | 109 | 499257 | 499270 | 2 | 7  | 14 | CA   | 26 | 6  |
| 367233 | 109 | 503320 | 503331 | 2 | 6  | 12 | TG   | 26 | 5  |
| 367234 | 109 | 503334 | 503347 | 2 | 7  | 14 | TG   | 25 | 6  |
| 367235 | 109 | 503393 | 503414 | 2 | 11 | 22 | TG   | 16 | 9  |
| 367247 | 109 | 512305 | 512348 | 2 | 22 | 44 | AC   | 6  | 9  |
| 367248 | 109 | 512477 | 512510 | 2 | 17 | 34 | TG   | 8  | 12 |
| 367250 | 109 | 516430 | 516444 | 3 | 5  | 15 | CTC  | 12 | 3  |
| 367255 | 109 | 517717 | 517744 | 2 | 14 | 28 | AC   | 15 | 16 |
| 367260 | 109 | 521444 | 521473 | 3 | 10 | 30 | GGA  | 15 | 8  |
| 367262 | 109 | 523465 | 523492 | 4 | 7  | 28 | TCCT | 18 | 11 |
| 367263 | 109 | 523686 | 523713 | 2 | 14 | 28 | CA   | 8  | 4  |
| 367264 | 109 | 523818 | 523837 | 2 | 10 | 20 | TG   | 28 | 14 |
| 367266 | 109 | 524956 | 524983 | 2 | 14 | 28 | GT   | 14 | 13 |

|        |     |        |        |   |    |    |      |    |    |
|--------|-----|--------|--------|---|----|----|------|----|----|
| 367268 | 109 | 525184 | 525207 | 2 | 12 | 24 | AC   | 7  | 7  |
| 367269 | 109 | 530280 | 530327 | 2 | 24 | 48 | AC   | 13 | 15 |
| 367273 | 109 | 530680 | 530699 | 2 | 10 | 20 | AC   | 9  | 10 |
| 367275 | 109 | 534255 | 534272 | 3 | 6  | 18 | CTC  | 28 | 7  |
| 367281 | 109 | 536078 | 536097 | 2 | 10 | 20 | GT   | 9  | 8  |
| 367284 | 109 | 541059 | 541094 | 2 | 18 | 36 | GT   | 11 | 9  |
| 367285 | 109 | 542229 | 542252 | 3 | 8  | 24 | CCT  | 14 | 3  |
| 367306 | 109 | 555176 | 555193 | 2 | 9  | 18 | GA   | 20 | 6  |
| 367308 | 109 | 556441 | 556456 | 2 | 8  | 16 | GT   | 8  | 10 |
| 367314 | 109 | 556926 | 556939 | 2 | 7  | 14 | GT   | 7  | 5  |
| 367315 | 109 | 556962 | 556975 | 2 | 7  | 14 | GT   | 9  | 6  |
| 367316 | 109 | 557169 | 557188 | 2 | 10 | 20 | AC   | 13 | 13 |
| 367318 | 109 | 562654 | 562683 | 2 | 15 | 30 | TG   | 25 | 17 |
| 367319 | 109 | 562806 | 562837 | 2 | 16 | 32 | TG   | 9  | 13 |
| 367322 | 109 | 564736 | 564762 | 3 | 9  | 27 | AGG  | 22 | 3  |
| 367323 | 109 | 567522 | 567533 | 2 | 6  | 12 | AC   | 23 | 6  |
| 367324 | 109 | 567794 | 567815 | 2 | 11 | 22 | GT   | 12 | 10 |
| 367328 | 109 | 570683 | 570698 | 2 | 8  | 16 | AC   | 16 | 6  |
| 367330 | 109 | 570859 | 570874 | 2 | 8  | 16 | TG   | 15 | 10 |
| 367333 | 109 | 572593 | 572626 | 2 | 17 | 34 | CA   | 14 | 15 |
| 367335 | 109 | 572777 | 572804 | 2 | 14 | 28 | CA   | 15 | 10 |
| 367336 | 109 | 573520 | 573583 | 2 | 32 | 64 | TG   | 8  | 13 |
| 367337 | 109 | 573784 | 573815 | 2 | 16 | 32 | TG   | 14 | 8  |
| 367339 | 109 | 573943 | 573998 | 2 | 28 | 56 | TG   | 6  | 8  |
| 367340 | 109 | 574241 | 574252 | 2 | 6  | 12 | AG   | 27 | 4  |
| 367347 | 109 | 576528 | 576541 | 2 | 7  | 14 | TG   | 8  | 6  |
| 367348 | 109 | 576678 | 576719 | 2 | 21 | 42 | GT   | 11 | 13 |
| 367350 | 109 | 578021 | 578038 | 2 | 9  | 18 | TC   | 28 | 6  |
| 367351 | 109 | 582227 | 582256 | 2 | 15 | 30 | TG   | 11 | 10 |
| 367353 | 109 | 585189 | 585203 | 3 | 5  | 15 | GGA  | 27 | 3  |
| 367354 | 109 | 585477 | 585500 | 3 | 8  | 24 | TCC  | 29 | 6  |
| 367371 | 109 | 612918 | 612947 | 3 | 10 | 30 | GAG  | 17 | 8  |
| 367372 | 109 | 614163 | 614180 | 2 | 9  | 18 | GT   | 25 | 4  |
| 367376 | 109 | 615126 | 615161 | 3 | 12 | 36 | CCT  | 18 | 8  |
| 367381 | 109 | 617394 | 617413 | 2 | 10 | 20 | TG   | 16 | 4  |
| 367382 | 109 | 617460 | 617489 | 2 | 15 | 30 | TG   | 7  | 11 |
| 367383 | 109 | 620486 | 620505 | 2 | 10 | 20 | CA   | 17 | 6  |
| 367384 | 109 | 622469 | 622480 | 2 | 6  | 12 | TG   | 28 | 4  |
| 367392 | 109 | 635243 | 635290 | 3 | 16 | 48 | CTT  | 18 | 13 |
| 367393 | 109 | 636207 | 636224 | 2 | 9  | 18 | TG   | 10 | 15 |
| 367395 | 109 | 636337 | 636350 | 2 | 7  | 14 | GT   | 17 | 7  |
| 367399 | 109 | 637214 | 637235 | 2 | 11 | 22 | TG   | 8  | 6  |
| 367400 | 109 | 638781 | 638808 | 2 | 14 | 28 | AC   | 14 | 8  |
| 367401 | 109 | 638955 | 638980 | 2 | 13 | 26 | TG   | 16 | 10 |
| 367402 | 109 | 639071 | 639090 | 4 | 5  | 20 | CTTT | 24 | 11 |
| 367403 | 109 | 640975 | 641000 | 2 | 13 | 26 | CA   | 11 | 9  |
| 367404 | 109 | 641097 | 641110 | 2 | 7  | 14 | CA   | 14 | 12 |
| 367408 | 109 | 646619 | 646648 | 2 | 15 | 30 | AC   | 19 | 9  |
| 367409 | 109 | 647184 | 647213 | 2 | 15 | 30 | GT   | 19 | 11 |
| 367411 | 109 | 647535 | 647554 | 2 | 10 | 20 | AG   | 24 | 10 |
| 367422 | 109 | 654619 | 654646 | 2 | 14 | 28 | TG   | 11 | 12 |

|        |     |        |        |   |    |    |     |    |    |
|--------|-----|--------|--------|---|----|----|-----|----|----|
| 367423 | 109 | 654799 | 654814 | 2 | 8  | 16 | TG  | 16 | 8  |
| 367427 | 109 | 658465 | 658498 | 2 | 17 | 34 | GT  | 7  | 8  |
| 367428 | 109 | 658569 | 658592 | 2 | 12 | 24 | CA  | 15 | 13 |
| 367429 | 109 | 658774 | 658830 | 3 | 19 | 57 | TCT | 18 | 10 |
| 367430 | 109 | 658959 | 659012 | 2 | 27 | 54 | GT  | 7  | 8  |
| 367435 | 109 | 666336 | 666349 | 2 | 7  | 14 | TG  | 29 | 4  |
| 367438 | 109 | 668200 | 668221 | 2 | 11 | 22 | AG  | 15 | 8  |
| 367439 | 109 | 668593 | 668616 | 3 | 8  | 24 | TCT | 31 | 3  |
| 367441 | 109 | 675549 | 675572 | 2 | 12 | 24 | TG  | 10 | 13 |
| 367445 | 109 | 684801 | 684828 | 2 | 14 | 28 | TG  | 8  | 7  |
| 367447 | 109 | 686421 | 686442 | 2 | 11 | 22 | GT  | 19 | 16 |
| 367451 | 109 | 690443 | 690472 | 3 | 10 | 30 | GAG | 18 | 10 |
| 367452 | 109 | 690576 | 690590 | 3 | 5  | 15 | TGC | 31 | 5  |
| 367453 | 109 | 693218 | 693233 | 2 | 8  | 16 | TG  | 21 | 5  |
| 367454 | 109 | 695834 | 695867 | 2 | 17 | 34 | CA  | 15 | 11 |
| 367456 | 109 | 696458 | 696475 | 2 | 9  | 18 | AG  | 15 | 3  |
| 367471 | 109 | 720663 | 720690 | 2 | 14 | 28 | TG  | 14 | 16 |
| 367474 | 109 | 725401 | 725412 | 2 | 6  | 12 | AT  | 16 | 4  |
| 367475 | 109 | 729855 | 729876 | 2 | 11 | 22 | CA  | 19 | 9  |
| 367476 | 109 | 729904 | 729919 | 2 | 8  | 16 | TG  | 25 | 15 |
| 367477 | 109 | 733851 | 733862 | 2 | 6  | 12 | AG  | 25 | 3  |
| 367482 | 109 | 744927 | 744950 | 3 | 8  | 24 | GAG | 30 | 5  |
| 367483 | 109 | 745374 | 745411 | 2 | 19 | 38 | CA  | 11 | 14 |
| 367484 | 109 | 745558 | 745577 | 2 | 10 | 20 | CA  | 12 | 12 |
| 367485 | 109 | 746412 | 746426 | 3 | 5  | 15 | AGG | 25 | 3  |
| 367495 | 109 | 762039 | 762052 | 2 | 7  | 14 | GA  | 26 | 7  |
| 367497 | 109 | 762421 | 762432 | 2 | 6  | 12 | GT  | 16 | 6  |
| 367505 | 109 | 770395 | 770426 | 2 | 16 | 32 | GT  | 10 | 10 |
| 367506 | 109 | 770578 | 770611 | 2 | 17 | 34 | GT  | 7  | 9  |
| 367507 | 109 | 770662 | 770689 | 2 | 14 | 28 | CA  | 14 | 10 |
| 367512 | 109 | 771265 | 771282 | 2 | 9  | 18 | TG  | 19 | 14 |
| 367513 | 109 | 771355 | 771368 | 2 | 7  | 14 | TC  | 21 | 3  |
| 367516 | 109 | 772532 | 772585 | 2 | 27 | 54 | TG  | 8  | 7  |
| 367517 | 109 | 772744 | 772757 | 2 | 7  | 14 | AC  | 7  | 6  |
| 367523 | 109 | 780524 | 780555 | 2 | 16 | 32 | AC  | 11 | 10 |
| 367536 | 109 | 802889 | 802918 | 2 | 15 | 30 | AC  | 13 | 13 |
| 367537 | 109 | 803031 | 803062 | 2 | 16 | 32 | CA  | 11 | 7  |
| 367538 | 109 | 803192 | 803225 | 2 | 17 | 34 | AC  | 12 | 8  |
| 367539 | 109 | 803258 | 803283 | 2 | 13 | 26 | TG  | 16 | 6  |
| 367543 | 109 | 805211 | 805232 | 2 | 11 | 22 | AC  | 14 | 8  |
| 367549 | 109 | 809959 | 809996 | 2 | 19 | 38 | GT  | 12 | 17 |
| 367574 | 109 | 826710 | 826727 | 2 | 9  | 18 | CA  | 11 | 9  |
| 367575 | 109 | 826854 | 826867 | 2 | 7  | 14 | CA  | 7  | 3  |
| 367576 | 109 | 826895 | 826910 | 2 | 8  | 16 | AC  | 20 | 4  |
| 367577 | 109 | 828826 | 828843 | 2 | 9  | 18 | CA  | 22 | 4  |
| 367578 | 109 | 828999 | 829010 | 2 | 6  | 12 | CA  | 11 | 6  |
| 367579 | 109 | 829013 | 829024 | 2 | 6  | 12 | CA  | 19 | 10 |
| 367581 | 109 | 834506 | 834520 | 3 | 5  | 15 | GAA | 28 | 3  |
| 367583 | 109 | 837472 | 837516 | 3 | 15 | 45 | TCT | 11 | 12 |
| 367584 | 109 | 844302 | 844329 | 2 | 14 | 28 | GT  | 20 | 14 |
| 367585 | 109 | 845011 | 845034 | 2 | 12 | 24 | GT  | 13 | 7  |



|        |     |         |         |   |    |    |      |    |    |
|--------|-----|---------|---------|---|----|----|------|----|----|
| 367586 | 109 | 845209  | 845226  | 2 | 9  | 18 | AC   | 18 | 8  |
| 367587 | 109 | 845229  | 845244  | 2 | 8  | 16 | AC   | 16 | 6  |
| 367590 | 109 | 851494  | 851519  | 2 | 13 | 26 | CA   | 21 | 8  |
| 367591 | 109 | 852977  | 853014  | 2 | 19 | 38 | CA   | 18 | 8  |
| 367592 | 109 | 853658  | 853691  | 2 | 17 | 34 | GT   | 8  | 12 |
| 367595 | 109 | 853984  | 854015  | 2 | 16 | 32 | GT   | 6  | 4  |
| 367604 | 109 | 864778  | 864813  | 2 | 18 | 36 | AC   | 11 | 6  |
| 367607 | 109 | 869866  | 869895  | 2 | 15 | 30 | TG   | 12 | 11 |
| 367608 | 109 | 870026  | 870077  | 2 | 26 | 52 | AC   | 11 | 9  |
| 367610 | 109 | 875923  | 875938  | 2 | 8  | 16 | AC   | 28 | 8  |
| 367614 | 109 | 876444  | 876471  | 2 | 14 | 28 | AC   | 14 | 12 |
| 367615 | 109 | 877178  | 877209  | 2 | 16 | 32 | TG   | 16 | 7  |
| 367626 | 109 | 886900  | 886917  | 2 | 9  | 18 | AC   | 25 | 7  |
| 367627 | 109 | 886947  | 886968  | 2 | 11 | 22 | AC   | 16 | 13 |
| 367628 | 109 | 887077  | 887112  | 2 | 18 | 36 | GT   | 16 | 12 |
| 367635 | 109 | 892237  | 892252  | 2 | 8  | 16 | GT   | 34 | 3  |
| 367639 | 109 | 908063  | 908092  | 2 | 15 | 30 | GT   | 14 | 8  |
| 367641 | 109 | 915976  | 916025  | 2 | 25 | 50 | GT   | 10 | 9  |
| 367642 | 109 | 917816  | 917869  | 2 | 27 | 54 | GT   | 13 | 15 |
| 367645 | 109 | 927382  | 927408  | 3 | 9  | 27 | GAT  | 27 | 5  |
| 367647 | 109 | 933168  | 933193  | 2 | 13 | 26 | GT   | 19 | 22 |
| 367654 | 109 | 941933  | 941962  | 2 | 15 | 30 | GT   | 19 | 12 |
| 367662 | 109 | 965811  | 965828  | 3 | 6  | 18 | AAC  | 10 | 11 |
| 367664 | 109 | 973450  | 973475  | 2 | 13 | 26 | CA   | 21 | 8  |
| 367665 | 109 | 974924  | 974938  | 3 | 5  | 15 | AAG  | 22 | 3  |
| 367669 | 109 | 979438  | 979455  | 2 | 9  | 18 | AC   | 24 | 12 |
| 367670 | 109 | 981111  | 981122  | 2 | 6  | 12 | CA   | 20 | 4  |
| 367673 | 109 | 983486  | 983505  | 2 | 10 | 20 | GT   | 23 | 7  |
| 367674 | 109 | 983673  | 983698  | 2 | 13 | 26 | CA   | 19 | 7  |
| 367675 | 109 | 983846  | 983865  | 2 | 10 | 20 | AC   | 13 | 14 |
| 367677 | 109 | 985025  | 985063  | 3 | 13 | 39 | GAA  | 24 | 12 |
| 367681 | 109 | 989459  | 989488  | 2 | 15 | 30 | CA   | 16 | 7  |
| 367682 | 109 | 993425  | 993448  | 2 | 12 | 24 | CA   | 9  | 6  |
| 367683 | 109 | 994326  | 994345  | 4 | 5  | 20 | AATC | 8  | 4  |
| 367684 | 109 | 994424  | 994471  | 4 | 12 | 48 | TTGA | 15 | 10 |
| 367685 | 109 | 994596  | 994628  | 3 | 11 | 33 | TCA  | 23 | 7  |
| 367690 | 109 | 995924  | 995969  | 2 | 23 | 46 | GT   | 8  | 12 |
| 367691 | 109 | 998220  | 998249  | 3 | 10 | 30 | ACA  | 29 | 8  |
| 367695 | 109 | 1004016 | 1004027 | 2 | 6  | 12 | TC   | 24 | 4  |
| 367702 | 109 | 1009504 | 1009524 | 3 | 7  | 21 | GAG  | 13 | 3  |
| 367703 | 109 | 1011629 | 1011664 | 3 | 12 | 36 | CTC  | 20 | 7  |
| 367706 | 109 | 1015423 | 1015449 | 3 | 9  | 27 | TCC  | 20 | 5  |
| 367707 | 109 | 1015500 | 1015519 | 2 | 10 | 20 | CA   | 26 | 13 |
| 367711 | 109 | 1021929 | 1021942 | 2 | 7  | 14 | TC   | 12 | 3  |
| 367719 | 109 | 1026512 | 1026538 | 3 | 9  | 27 | GCT  | 32 | 5  |
| 367720 | 109 | 1028362 | 1028406 | 3 | 15 | 45 | CTC  | 9  | 7  |
| 367721 | 109 | 1028511 | 1028534 | 3 | 8  | 24 | CCT  | 25 | 9  |
| 367722 | 109 | 1029416 | 1029430 | 3 | 5  | 15 | TAA  | 12 | 5  |
| 367723 | 109 | 1030921 | 1030950 | 2 | 15 | 30 | CA   | 14 | 14 |
| 367725 | 109 | 1037326 | 1037343 | 2 | 9  | 18 | CA   | 25 | 5  |
| 367729 | 110 | 9264    | 9281    | 2 | 9  | 18 | TA   | 6  | 4  |

|        |     |        |        |   |    |    |      |    |    |
|--------|-----|--------|--------|---|----|----|------|----|----|
| 367756 | 110 | 49982  | 50011  | 2 | 15 | 30 | TG   | 13 | 6  |
| 367759 | 110 | 60863  | 60898  | 2 | 18 | 36 | TG   | 9  | 6  |
| 367760 | 110 | 62160  | 62179  | 2 | 10 | 20 | TG   | 18 | 4  |
| 367761 | 110 | 65391  | 65426  | 2 | 18 | 36 | GT   | 18 | 6  |
| 367767 | 110 | 71128  | 71145  | 2 | 9  | 18 | AC   | 14 | 4  |
| 367784 | 110 | 100745 | 100788 | 2 | 22 | 44 | TG   | 9  | 8  |
| 367788 | 110 | 114118 | 114157 | 2 | 20 | 40 | CA   | 10 | 4  |
| 367789 | 110 | 117944 | 117975 | 2 | 16 | 32 | GT   | 19 | 9  |
| 367790 | 110 | 122457 | 122480 | 2 | 12 | 24 | AC   | 15 | 3  |
| 367793 | 110 | 123852 | 123875 | 2 | 12 | 24 | AC   | 24 | 3  |
| 367796 | 110 | 128079 | 128094 | 2 | 8  | 16 | TG   | 21 | 7  |
| 367803 | 110 | 134672 | 134709 | 2 | 19 | 38 | CA   | 9  | 5  |
| 367807 | 110 | 147138 | 147169 | 2 | 16 | 32 | CA   | 14 | 8  |
| 367813 | 110 | 148588 | 148611 | 2 | 12 | 24 | AC   | 8  | 5  |
| 367824 | 110 | 176594 | 176609 | 2 | 8  | 16 | GT   | 10 | 3  |
| 367825 | 110 | 177483 | 177518 | 2 | 18 | 36 | GA   | 8  | 4  |
| 367830 | 110 | 192554 | 192573 | 4 | 5  | 20 | CATT | 32 | 3  |
| 367834 | 110 | 199874 | 199907 | 2 | 17 | 34 | GT   | 12 | 4  |
| 367837 | 110 | 212209 | 212220 | 2 | 6  | 12 | GT   | 21 | 3  |
| 367865 | 110 | 315978 | 316019 | 2 | 21 | 42 | GT   | 6  | 7  |
| 367867 | 110 | 320066 | 320103 | 2 | 19 | 38 | GT   | 7  | 8  |
| 367873 | 110 | 340380 | 340424 | 3 | 15 | 45 | TTG  | 13 | 8  |
| 367874 | 110 | 343675 | 343686 | 2 | 6  | 12 | AC   | 20 | 3  |
| 367877 | 110 | 347044 | 347059 | 2 | 8  | 16 | TG   | 16 | 4  |
| 367878 | 110 | 349607 | 349626 | 2 | 10 | 20 | AT   | 21 | 4  |
| 367879 | 110 | 351380 | 351421 | 3 | 14 | 42 | TAT  | 10 | 7  |
| 367885 | 110 | 366774 | 366811 | 2 | 19 | 38 | AG   | 18 | 8  |
| 367887 | 110 | 371931 | 371962 | 2 | 16 | 32 | TG   | 6  | 5  |
| 367890 | 110 | 377531 | 377542 | 2 | 6  | 12 | CA   | 31 | 3  |
| 367893 | 110 | 379879 | 379890 | 2 | 6  | 12 | AG   | 23 | 3  |
| 367896 | 110 | 381494 | 381505 | 2 | 6  | 12 | CA   | 22 | 4  |
| 367897 | 110 | 383855 | 383882 | 2 | 14 | 28 | TG   | 12 | 5  |
| 367898 | 110 | 383998 | 384027 | 2 | 15 | 30 | GT   | 14 | 8  |
| 367900 | 110 | 389656 | 389667 | 2 | 6  | 12 | GT   | 31 | 3  |
| 367901 | 110 | 391613 | 391626 | 2 | 7  | 14 | GT   | 26 | 3  |
| 367902 | 110 | 391785 | 391812 | 2 | 14 | 28 | CA   | 9  | 8  |
| 367903 | 110 | 391914 | 391941 | 2 | 14 | 28 | GT   | 14 | 6  |
| 367904 | 110 | 393343 | 393358 | 4 | 4  | 16 | GGCA | 32 | 3  |
| 367905 | 110 | 396825 | 396842 | 2 | 9  | 18 | TC   | 28 | 3  |
| 367920 | 110 | 405633 | 405656 | 4 | 6  | 24 | ATCC | 7  | 3  |
| 367921 | 110 | 406806 | 406823 | 3 | 6  | 18 | AGG  | 32 | 5  |
| 367922 | 110 | 408270 | 408285 | 4 | 4  | 16 | GCGT | 25 | 7  |
| 367931 | 110 | 416261 | 416276 | 2 | 8  | 16 | AC   | 24 | 3  |
| 367936 | 110 | 424443 | 424474 | 2 | 16 | 32 | AC   | 8  | 5  |
| 367937 | 110 | 424507 | 424522 | 2 | 8  | 16 | AG   | 14 | 4  |
| 367938 | 110 | 435798 | 435825 | 2 | 14 | 28 | AC   | 16 | 7  |
| 367945 | 110 | 441844 | 441871 | 2 | 14 | 28 | TG   | 12 | 7  |
| 367953 | 110 | 446778 | 446819 | 2 | 21 | 42 | GT   | 9  | 13 |
| 367959 | 110 | 453138 | 453153 | 4 | 4  | 16 | GCAC | 23 | 3  |
| 367967 | 110 | 456343 | 456368 | 2 | 13 | 26 | CA   | 17 | 12 |
| 367968 | 110 | 456647 | 456672 | 2 | 13 | 26 | GT   | 14 | 8  |

|        |     |        |        |   |    |    |      |    |    |
|--------|-----|--------|--------|---|----|----|------|----|----|
| 367969 | 110 | 458217 | 458248 | 2 | 16 | 32 | AC   | 10 | 4  |
| 367971 | 110 | 464377 | 464404 | 2 | 14 | 28 | TC   | 14 | 5  |
| 367976 | 110 | 493326 | 493346 | 3 | 7  | 21 | CAG  | 21 | 4  |
| 367979 | 110 | 497095 | 497122 | 2 | 14 | 28 | CA   | 12 | 8  |
| 367982 | 110 | 510418 | 510438 | 3 | 7  | 21 | AAT  | 13 | 3  |
| 367983 | 110 | 516521 | 516544 | 2 | 12 | 24 | GT   | 15 | 7  |
| 367985 | 110 | 523282 | 523313 | 2 | 16 | 32 | TG   | 27 | 7  |
| 367995 | 110 | 528303 | 528329 | 3 | 9  | 27 | ACA  | 15 | 7  |
| 367999 | 110 | 547475 | 547500 | 2 | 13 | 26 | CA   | 16 | 6  |
| 368000 | 110 | 548970 | 548983 | 2 | 7  | 14 | AC   | 26 | 4  |
| 368002 | 110 | 551410 | 551429 | 2 | 10 | 20 | AC   | 16 | 7  |
| 368003 | 110 | 551743 | 551766 | 2 | 12 | 24 | TG   | 6  | 7  |
| 368011 | 110 | 560672 | 560695 | 2 | 12 | 24 | CA   | 9  | 4  |
| 368019 | 110 | 578725 | 578740 | 2 | 8  | 16 | TG   | 16 | 5  |
| 368022 | 110 | 585270 | 585283 | 2 | 7  | 14 | AG   | 22 | 6  |
| 368023 | 110 | 585287 | 585302 | 2 | 8  | 16 | GT   | 27 | 6  |
| 368024 | 110 | 585740 | 585753 | 2 | 7  | 14 | AT   | 12 | 4  |
| 368026 | 110 | 587042 | 587065 | 2 | 12 | 24 | TG   | 22 | 6  |
| 368032 | 110 | 590575 | 590596 | 2 | 11 | 22 | TG   | 19 | 5  |
| 368033 | 110 | 590906 | 590927 | 2 | 11 | 22 | GT   | 18 | 8  |
| 368036 | 110 | 597722 | 597737 | 2 | 8  | 16 | TG   | 20 | 3  |
| 368039 | 110 | 620304 | 620327 | 2 | 12 | 24 | CA   | 23 | 3  |
| 368040 | 110 | 626213 | 626262 | 2 | 25 | 50 | TG   | 7  | 8  |
| 368041 | 110 | 626390 | 626435 | 2 | 23 | 46 | GT   | 8  | 12 |
| 368043 | 110 | 633006 | 633019 | 2 | 7  | 14 | GA   | 20 | 3  |
| 368049 | 110 | 639580 | 639595 | 2 | 8  | 16 | GA   | 16 | 4  |
| 368052 | 110 | 646366 | 646383 | 2 | 9  | 18 | TG   | 14 | 3  |
| 368057 | 110 | 658802 | 658817 | 2 | 8  | 16 | CA   | 17 | 6  |
| 368067 | 110 | 664900 | 664933 | 2 | 17 | 34 | AC   | 15 | 8  |
| 368068 | 110 | 668454 | 668467 | 2 | 7  | 14 | TG   | 32 | 3  |
| 368069 | 110 | 668562 | 668577 | 2 | 8  | 16 | AC   | 28 | 6  |
| 368070 | 110 | 677666 | 677693 | 2 | 14 | 28 | TG   | 15 | 15 |
| 368083 | 110 | 693339 | 693386 | 4 | 12 | 48 | CTGT | 23 | 10 |
| 368095 | 110 | 710617 | 710656 | 4 | 10 | 40 | TCTA | 24 | 11 |
| 368096 | 110 | 711616 | 711643 | 4 | 7  | 28 | ATAC | 9  | 6  |
| 368099 | 110 | 715959 | 715976 | 2 | 9  | 18 | TG   | 27 | 6  |
| 368107 | 110 | 722497 | 722540 | 2 | 22 | 44 | AC   | 9  | 9  |
| 368110 | 110 | 735413 | 735463 | 3 | 17 | 51 | CTT  | 13 | 12 |
| 368114 | 110 | 737010 | 737021 | 2 | 6  | 12 | CA   | 14 | 3  |
| 368119 | 110 | 742339 | 742370 | 2 | 16 | 32 | TG   | 11 | 9  |
| 368135 | 110 | 780532 | 780545 | 2 | 7  | 14 | GT   | 14 | 5  |
| 368139 | 110 | 785439 | 785488 | 2 | 25 | 50 | GT   | 6  | 8  |
| 368140 | 110 | 790701 | 790715 | 3 | 5  | 15 | CTG  | 25 | 3  |
| 368142 | 110 | 808105 | 808126 | 2 | 11 | 22 | CA   | 16 | 9  |
| 368144 | 110 | 813626 | 813655 | 2 | 15 | 30 | GT   | 14 | 6  |
| 368146 | 110 | 824282 | 824301 | 2 | 10 | 20 | TG   | 21 | 4  |
| 368150 | 110 | 826282 | 826307 | 2 | 13 | 26 | CA   | 7  | 7  |
| 368152 | 110 | 827682 | 827721 | 2 | 20 | 40 | AC   | 12 | 8  |
| 368155 | 110 | 829177 | 829216 | 2 | 20 | 40 | AC   | 8  | 6  |
| 368157 | 110 | 830383 | 830400 | 2 | 9  | 18 | CA   | 17 | 6  |
| 368161 | 110 | 846385 | 846402 | 2 | 9  | 18 | CA   | 22 | 3  |

|        |     |         |         |   |    |    |      |    |    |
|--------|-----|---------|---------|---|----|----|------|----|----|
| 368165 | 110 | 855932  | 855949  | 2 | 9  | 18 | TG   | 19 | 9  |
| 368172 | 110 | 869519  | 869533  | 3 | 5  | 15 | CAT  | 36 | 4  |
| 368182 | 110 | 888302  | 888333  | 4 | 8  | 32 | AGAT | 11 | 8  |
| 368191 | 110 | 924217  | 924244  | 2 | 14 | 28 | GT   | 7  | 13 |
| 368205 | 110 | 941546  | 941577  | 2 | 16 | 32 | AC   | 6  | 7  |
| 368206 | 110 | 942245  | 942259  | 3 | 5  | 15 | TGT  | 31 | 3  |
| 368211 | 110 | 983448  | 983487  | 4 | 10 | 40 | ACAT | 8  | 9  |
| 368214 | 110 | 987392  | 987409  | 3 | 6  | 18 | AGA  | 25 | 7  |
| 368220 | 110 | 997336  | 997350  | 3 | 5  | 15 | TCA  | 15 | 4  |
| 368228 | 110 | 1022534 | 1022551 | 2 | 9  | 18 | AC   | 9  | 4  |
| 368233 | 110 | 1026929 | 1026948 | 4 | 5  | 20 | AAAC | 20 | 3  |
| 368243 | 110 | 1042508 | 1042535 | 2 | 14 | 28 | TG   | 11 | 7  |
| 368253 | 111 | 13495   | 13512   | 2 | 9  | 18 | AC   | 18 | 7  |
| 368254 | 111 | 17913   | 17936   | 2 | 12 | 24 | CA   | 16 | 6  |
| 368255 | 111 | 18030   | 18059   | 2 | 15 | 30 | TG   | 17 | 5  |
| 368270 | 111 | 52090   | 52121   | 2 | 16 | 32 | TG   | 14 | 9  |
| 368271 | 111 | 53968   | 53993   | 2 | 13 | 26 | TG   | 14 | 9  |
| 368272 | 111 | 54119   | 54140   | 2 | 11 | 22 | AC   | 10 | 8  |
| 368277 | 111 | 67394   | 67425   | 4 | 8  | 32 | TATC | 16 | 6  |
| 368278 | 111 | 71454   | 71497   | 4 | 11 | 44 | TATC | 11 | 5  |
| 368279 | 111 | 72551   | 72580   | 2 | 15 | 30 | AC   | 13 | 6  |
| 368286 | 111 | 80482   | 80495   | 2 | 7  | 14 | GT   | 16 | 5  |
| 368308 | 111 | 110708  | 110747  | 4 | 10 | 40 | GAAA | 22 | 7  |
| 368312 | 111 | 127391  | 127417  | 3 | 9  | 27 | TGA  | 31 | 3  |
| 368329 | 111 | 145269  | 145298  | 2 | 15 | 30 | AC   | 14 | 6  |
| 368342 | 111 | 170449  | 170462  | 2 | 7  | 14 | TG   | 23 | 5  |
| 368343 | 111 | 174155  | 174174  | 2 | 10 | 20 | CA   | 16 | 3  |
| 368344 | 111 | 175033  | 175064  | 2 | 16 | 32 | AC   | 12 | 7  |
| 368345 | 111 | 177657  | 177686  | 2 | 15 | 30 | CA   | 12 | 8  |
| 368346 | 111 | 177905  | 177918  | 2 | 7  | 14 | CA   | 25 | 4  |
| 368347 | 111 | 178497  | 178512  | 2 | 8  | 16 | AC   | 19 | 3  |
| 368348 | 111 | 179647  | 179666  | 4 | 5  | 20 | CTGT | 27 | 4  |
| 368350 | 111 | 184823  | 184842  | 2 | 10 | 20 | TG   | 19 | 6  |
| 368351 | 111 | 185740  | 185767  | 2 | 14 | 28 | AG   | 13 | 14 |
| 368354 | 111 | 189403  | 189420  | 2 | 9  | 18 | AC   | 19 | 3  |
| 368371 | 111 | 204689  | 204704  | 2 | 8  | 16 | CA   | 8  | 3  |
| 368375 | 111 | 207505  | 207516  | 2 | 6  | 12 | TG   | 12 | 9  |
| 368384 | 111 | 215097  | 215126  | 2 | 15 | 30 | CA   | 11 | 9  |
| 368385 | 111 | 215519  | 215542  | 4 | 6  | 24 | ATGA | 20 | 4  |
| 368386 | 111 | 222594  | 222633  | 2 | 20 | 40 | GT   | 13 | 8  |
| 368388 | 111 | 225981  | 225998  | 2 | 9  | 18 | TC   | 20 | 6  |
| 368389 | 111 | 225999  | 226014  | 2 | 8  | 16 | AC   | 25 | 7  |
| 368390 | 111 | 228563  | 228580  | 2 | 9  | 18 | TG   | 22 | 3  |
| 368394 | 111 | 230050  | 230065  | 4 | 4  | 16 | TTAT | 23 | 3  |
| 368395 | 111 | 230279  | 230304  | 2 | 13 | 26 | TG   | 22 | 5  |
| 368402 | 111 | 235353  | 235368  | 2 | 8  | 16 | AC   | 25 | 3  |
| 368408 | 111 | 246075  | 246092  | 2 | 9  | 18 | TG   | 19 | 4  |
| 368411 | 111 | 248583  | 248612  | 2 | 15 | 30 | GT   | 14 | 8  |
| 368413 | 111 | 258086  | 258107  | 2 | 11 | 22 | GT   | 18 | 5  |
| 368414 | 111 | 258277  | 258300  | 2 | 12 | 24 | AC   | 22 | 11 |
| 368421 | 111 | 264314  | 264325  | 2 | 6  | 12 | GT   | 16 | 3  |

|        |     |        |        |   |    |    |      |    |    |
|--------|-----|--------|--------|---|----|----|------|----|----|
| 368433 | 111 | 277331 | 277352 | 2 | 11 | 22 | GT   | 17 | 4  |
| 368435 | 111 | 278684 | 278729 | 2 | 23 | 46 | TG   | 8  | 10 |
| 368443 | 111 | 280971 | 280988 | 3 | 6  | 18 | GTT  | 18 | 3  |
| 368447 | 111 | 288942 | 288965 | 2 | 12 | 24 | CA   | 20 | 8  |
| 368463 | 111 | 301415 | 301436 | 2 | 11 | 22 | TG   | 21 | 6  |
| 368465 | 111 | 303056 | 303067 | 2 | 6  | 12 | CA   | 24 | 5  |
| 368466 | 111 | 305631 | 305658 | 2 | 14 | 28 | AC   | 15 | 7  |
| 368468 | 111 | 308929 | 308946 | 3 | 6  | 18 | AGC  | 29 | 5  |
| 368469 | 111 | 312577 | 312592 | 2 | 8  | 16 | TG   | 21 | 4  |
| 368470 | 111 | 312712 | 312733 | 2 | 11 | 22 | TG   | 16 | 3  |
| 368471 | 111 | 313080 | 313109 | 2 | 15 | 30 | GT   | 9  | 8  |
| 368475 | 111 | 320389 | 320410 | 2 | 11 | 22 | GT   | 15 | 3  |
| 368488 | 111 | 328977 | 328988 | 2 | 6  | 12 | CA   | 27 | 3  |
| 368489 | 111 | 329040 | 329053 | 2 | 7  | 14 | GT   | 21 | 7  |
| 368491 | 111 | 331487 | 331525 | 3 | 13 | 39 | GAG  | 19 | 6  |
| 368509 | 111 | 361674 | 361705 | 2 | 16 | 32 | CA   | 8  | 7  |
| 368510 | 111 | 363274 | 363293 | 2 | 10 | 20 | GT   | 23 | 4  |
| 368512 | 111 | 378691 | 378702 | 2 | 6  | 12 | TC   | 28 | 3  |
| 368513 | 111 | 379484 | 379515 | 2 | 16 | 32 | AC   | 26 | 10 |
| 368515 | 111 | 382578 | 382593 | 4 | 4  | 16 | CAGT | 18 | 7  |
| 368520 | 111 | 385076 | 385105 | 2 | 15 | 30 | CA   | 12 | 13 |
| 368521 | 111 | 386038 | 386075 | 2 | 19 | 38 | TG   | 6  | 8  |
| 368522 | 111 | 386708 | 386749 | 2 | 21 | 42 | TG   | 11 | 10 |
| 368523 | 111 | 386886 | 386897 | 2 | 6  | 12 | GT   | 14 | 6  |
| 368528 | 111 | 389092 | 389107 | 2 | 8  | 16 | TG   | 27 | 3  |
| 368529 | 111 | 394537 | 394554 | 2 | 9  | 18 | AC   | 22 | 7  |
| 368534 | 111 | 404164 | 404175 | 2 | 6  | 12 | AC   | 25 | 4  |
| 368535 | 111 | 406506 | 406529 | 2 | 12 | 24 | AC   | 18 | 5  |
| 368539 | 111 | 407326 | 407369 | 2 | 22 | 44 | TG   | 7  | 11 |
| 368540 | 111 | 407453 | 407488 | 2 | 18 | 36 | GT   | 17 | 4  |
| 368541 | 111 | 412322 | 412339 | 2 | 9  | 18 | TG   | 19 | 4  |
| 368543 | 111 | 413394 | 413423 | 2 | 15 | 30 | CA   | 20 | 9  |
| 368545 | 111 | 413670 | 413699 | 3 | 10 | 30 | GAG  | 8  | 6  |
| 368546 | 111 | 413970 | 413983 | 2 | 7  | 14 | CA   | 26 | 3  |
| 368547 | 111 | 414119 | 414132 | 2 | 7  | 14 | AC   | 23 | 5  |
| 368549 | 111 | 414642 | 414661 | 2 | 10 | 20 | AC   | 12 | 6  |
| 368550 | 111 | 416681 | 416704 | 2 | 12 | 24 | AC   | 13 | 7  |
| 368551 | 111 | 419362 | 419403 | 2 | 21 | 42 | TG   | 8  | 9  |
| 368552 | 111 | 421249 | 421264 | 2 | 8  | 16 | TC   | 19 | 4  |
| 368554 | 111 | 428438 | 428455 | 3 | 6  | 18 | TCA  | 26 | 4  |
| 368559 | 111 | 435847 | 435888 | 3 | 14 | 42 | CTC  | 7  | 5  |
| 368569 | 111 | 441393 | 441419 | 3 | 9  | 27 | CCT  | 14 | 4  |
| 368570 | 111 | 443519 | 443542 | 3 | 8  | 24 | ATA  | 14 | 5  |
| 368576 | 111 | 446461 | 446490 | 2 | 15 | 30 | CA   | 15 | 8  |
| 368577 | 111 | 446913 | 446934 | 2 | 11 | 22 | CA   | 10 | 8  |
| 368581 | 111 | 448978 | 449005 | 2 | 14 | 28 | AC   | 8  | 8  |
| 368612 | 111 | 473689 | 473714 | 2 | 13 | 26 | GT   | 19 | 8  |
| 368631 | 111 | 483679 | 483698 | 2 | 10 | 20 | TG   | 8  | 6  |
| 368632 | 111 | 483797 | 483822 | 2 | 13 | 26 | TG   | 17 | 9  |
| 368633 | 111 | 484360 | 484403 | 2 | 22 | 44 | CA   | 21 | 18 |
| 368635 | 111 | 484583 | 484604 | 2 | 11 | 22 | AC   | 6  | 7  |

|        |     |        |        |   |    |    |      |    |    |
|--------|-----|--------|--------|---|----|----|------|----|----|
| 368636 | 111 | 484922 | 484935 | 2 | 7  | 14 | CA   | 22 | 4  |
| 368638 | 111 | 488747 | 488780 | 2 | 17 | 34 | TG   | 21 | 11 |
| 368639 | 111 | 489606 | 489643 | 2 | 19 | 38 | AC   | 13 | 11 |
| 368643 | 111 | 490773 | 490788 | 4 | 4  | 16 | TGGT | 15 | 4  |
| 368662 | 111 | 524093 | 524106 | 2 | 7  | 14 | GA   | 22 | 4  |
| 368664 | 111 | 526407 | 526436 | 2 | 15 | 30 | GT   | 11 | 9  |
| 368665 | 111 | 526528 | 526555 | 2 | 14 | 28 | AC   | 9  | 8  |
| 368666 | 111 | 526594 | 526611 | 3 | 6  | 18 | GGC  | 34 | 3  |
| 368667 | 111 | 526897 | 526936 | 2 | 20 | 40 | AC   | 13 | 14 |
| 368673 | 111 | 533501 | 533515 | 3 | 5  | 15 | TCA  | 29 | 15 |
| 368674 | 111 | 533519 | 533536 | 3 | 6  | 18 | TCT  | 22 | 15 |
| 368677 | 111 | 535183 | 535210 | 2 | 14 | 28 | CA   | 9  | 7  |
| 368681 | 111 | 541788 | 541831 | 2 | 22 | 44 | AC   | 8  | 10 |
| 368686 | 111 | 547626 | 547639 | 2 | 7  | 14 | TG   | 19 | 7  |
| 368687 | 111 | 547681 | 547708 | 2 | 14 | 28 | AC   | 16 | 7  |
| 368689 | 111 | 551694 | 551719 | 2 | 13 | 26 | GT   | 18 | 10 |
| 368696 | 111 | 557694 | 557729 | 3 | 12 | 36 | AGA  | 27 | 9  |
| 368700 | 111 | 560663 | 560686 | 2 | 12 | 24 | TG   | 11 | 8  |
| 368702 | 111 | 565590 | 565611 | 2 | 11 | 22 | CA   | 26 | 4  |
| 368712 | 111 | 567316 | 567327 | 2 | 6  | 12 | TG   | 21 | 10 |
| 368713 | 111 | 567333 | 567344 | 2 | 6  | 12 | GT   | 13 | 7  |
| 368723 | 111 | 583731 | 583764 | 2 | 17 | 34 | AC   | 14 | 8  |
| 368724 | 111 | 584141 | 584186 | 2 | 23 | 46 | TG   | 8  | 12 |
| 368725 | 111 | 584387 | 584402 | 4 | 4  | 16 | TGCG | 25 | 12 |
| 368726 | 111 | 596415 | 596462 | 2 | 24 | 48 | AC   | 15 | 19 |
| 368727 | 111 | 600144 | 600165 | 2 | 11 | 22 | AC   | 17 | 9  |
| 368728 | 111 | 600317 | 600349 | 3 | 11 | 33 | TTA  | 18 | 15 |
| 368729 | 111 | 603612 | 603637 | 2 | 13 | 26 | TG   | 16 | 10 |
| 368730 | 111 | 607067 | 607094 | 2 | 14 | 28 | TG   | 17 | 5  |
| 368731 | 111 | 608693 | 608714 | 2 | 11 | 22 | AC   | 19 | 5  |
| 368732 | 111 | 609302 | 609319 | 3 | 6  | 18 | GAT  | 27 | 4  |
| 368735 | 111 | 616099 | 616128 | 3 | 10 | 30 | TGA  | 23 | 3  |
| 368751 | 111 | 630625 | 630640 | 2 | 8  | 16 | AC   | 13 | 11 |
| 368755 | 111 | 639959 | 639990 | 2 | 16 | 32 | TG   | 10 | 8  |
| 368756 | 111 | 640911 | 640932 | 2 | 11 | 22 | TG   | 23 | 10 |
| 368757 | 111 | 642378 | 642413 | 2 | 18 | 36 | AC   | 19 | 11 |
| 368766 | 111 | 649070 | 649095 | 2 | 13 | 26 | AC   | 19 | 12 |
| 368769 | 111 | 655743 | 655786 | 2 | 22 | 44 | AC   | 11 | 13 |
| 368777 | 111 | 662848 | 662867 | 2 | 10 | 20 | AC   | 22 | 13 |
| 368779 | 111 | 665427 | 665444 | 3 | 6  | 18 | CTG  | 26 | 4  |
| 368780 | 111 | 668134 | 668160 | 3 | 9  | 27 | CTC  | 11 | 5  |
| 368785 | 111 | 675601 | 675627 | 3 | 9  | 27 | GAG  | 26 | 11 |
| 368789 | 111 | 677354 | 677365 | 2 | 6  | 12 | CA   | 7  | 6  |
| 368794 | 111 | 679653 | 679682 | 3 | 10 | 30 | CTG  | 31 | 6  |
| 368804 | 111 | 703857 | 703882 | 2 | 13 | 26 | GT   | 9  | 4  |
| 368806 | 111 | 710734 | 710749 | 2 | 8  | 16 | TG   | 19 | 4  |
| 368809 | 111 | 712867 | 712880 | 2 | 7  | 14 | CT   | 23 | 3  |
| 368810 | 111 | 714056 | 714069 | 2 | 7  | 14 | AC   | 13 | 12 |
| 368811 | 111 | 714380 | 714413 | 2 | 17 | 34 | TG   | 13 | 11 |
| 368812 | 111 | 718160 | 718183 | 2 | 12 | 24 | AC   | 19 | 6  |
| 368814 | 111 | 719779 | 719810 | 2 | 16 | 32 | GT   | 9  | 9  |

|        |     |         |         |   |    |    |      |    |    |
|--------|-----|---------|---------|---|----|----|------|----|----|
| 368830 | 111 | 796900  | 796914  | 3 | 5  | 15 | GGA  | 30 | 4  |
| 368831 | 111 | 799127  | 799148  | 2 | 11 | 22 | GT   | 26 | 11 |
| 368837 | 111 | 805040  | 805077  | 2 | 19 | 38 | CA   | 6  | 7  |
| 368840 | 111 | 809827  | 809860  | 2 | 17 | 34 | TG   | 12 | 12 |
| 368841 | 111 | 811111  | 811122  | 2 | 6  | 12 | AG   | 31 | 3  |
| 368842 | 111 | 812674  | 812697  | 4 | 6  | 24 | TCCT | 11 | 7  |
| 368845 | 111 | 835712  | 835729  | 3 | 6  | 18 | TGA  | 17 | 6  |
| 368846 | 111 | 856908  | 856939  | 2 | 16 | 32 | TG   | 11 | 11 |
| 368847 | 111 | 859446  | 859457  | 2 | 6  | 12 | AT   | 10 | 4  |
| 368853 | 111 | 865612  | 865635  | 2 | 12 | 24 | TG   | 8  | 8  |
| 368858 | 111 | 868416  | 868431  | 2 | 8  | 16 | AC   | 16 | 9  |
| 368859 | 111 | 871954  | 871989  | 4 | 9  | 36 | TAGA | 15 | 9  |
| 368862 | 111 | 886428  | 886443  | 2 | 8  | 16 | TG   | 28 | 9  |
| 368863 | 111 | 887111  | 887132  | 2 | 11 | 22 | AT   | 7  | 4  |
| 368875 | 111 | 898367  | 898388  | 2 | 11 | 22 | GT   | 15 | 9  |
| 368879 | 111 | 906105  | 906119  | 3 | 5  | 15 | TTG  | 21 | 5  |
| 368883 | 111 | 919738  | 919757  | 2 | 10 | 20 | TG   | 20 | 7  |
| 368897 | 111 | 945900  | 945929  | 2 | 15 | 30 | GT   | 6  | 6  |
| 368901 | 111 | 951258  | 951281  | 4 | 6  | 24 | CATC | 26 | 14 |
| 368902 | 111 | 957751  | 957778  | 2 | 14 | 28 | AC   | 10 | 12 |
| 368909 | 111 | 965264  | 965297  | 2 | 17 | 34 | TG   | 13 | 9  |
| 368920 | 111 | 972381  | 972406  | 2 | 13 | 26 | GT   | 15 | 13 |
| 368921 | 111 | 973002  | 973039  | 2 | 19 | 38 | GT   | 10 | 8  |
| 368927 | 111 | 984524  | 984535  | 2 | 6  | 12 | AT   | 20 | 3  |
| 368932 | 111 | 993492  | 993509  | 2 | 9  | 18 | GT   | 15 | 11 |
| 368936 | 111 | 1002741 | 1002760 | 2 | 10 | 20 | GT   | 14 | 9  |
| 368940 | 111 | 1009688 | 1009707 | 2 | 10 | 20 | TG   | 27 | 6  |
| 368953 | 111 | 1015271 | 1015300 | 3 | 10 | 30 | TGA  | 18 | 6  |
| 368954 | 111 | 1017608 | 1017623 | 4 | 4  | 16 | CAGA | 24 | 3  |
| 368956 | 111 | 1020866 | 1020879 | 2 | 7  | 14 | CA   | 6  | 4  |
| 368961 | 111 | 1022403 | 1022435 | 3 | 11 | 33 | AAC  | 10 | 8  |
| 368968 | 111 | 1027296 | 1027313 | 3 | 6  | 18 | TCC  | 22 | 5  |
| 368969 | 111 | 1028481 | 1028534 | 2 | 27 | 54 | CA   | 7  | 12 |
| 368971 | 111 | 1031601 | 1031615 | 3 | 5  | 15 | CTG  | 23 | 5  |
| 368975 | 111 | 1049390 | 1049433 | 4 | 11 | 44 | GAAT | 24 | 11 |
| 368977 | 111 | 1053046 | 1053063 | 2 | 9  | 18 | CA   | 19 | 4  |
| 368979 | 111 | 1054091 | 1054112 | 2 | 11 | 22 | TG   | 23 | 8  |
| 368981 | 111 | 1054318 | 1054353 | 2 | 18 | 36 | GT   | 15 | 7  |
| 368983 | 111 | 1059208 | 1059235 | 4 | 7  | 28 | ACAG | 30 | 10 |
| 368986 | 111 | 1061745 | 1061768 | 3 | 8  | 24 | CCT  | 19 | 8  |
| 368989 | 111 | 1074455 | 1074474 | 4 | 5  | 20 | TCTA | 11 | 9  |
| 368994 | 111 | 1094657 | 1094682 | 2 | 13 | 26 | AC   | 9  | 10 |
| 368996 | 111 | 1094806 | 1094823 | 2 | 9  | 18 | CA   | 17 | 6  |
| 368997 | 111 | 1094877 | 1094904 | 2 | 14 | 28 | TG   | 12 | 16 |
| 369005 | 111 | 1097855 | 1097870 | 2 | 8  | 16 | TG   | 13 | 9  |
| 369007 | 111 | 1098741 | 1098790 | 2 | 25 | 50 | CA   | 10 | 12 |
| 369010 | 111 | 1103453 | 1103494 | 3 | 14 | 42 | TGA  | 13 | 10 |
| 369015 | 111 | 1107353 | 1107367 | 3 | 5  | 15 | CTC  | 24 | 3  |
| 369016 | 111 | 1107424 | 1107439 | 2 | 8  | 16 | AC   | 22 | 4  |
| 369024 | 111 | 1117608 | 1117639 | 2 | 16 | 32 | GT   | 15 | 8  |
| 369026 | 111 | 1118240 | 1118273 | 2 | 17 | 34 | GT   | 8  | 10 |

|        |     |         |         |   |    |    |      |    |    |
|--------|-----|---------|---------|---|----|----|------|----|----|
| 369029 | 111 | 1119709 | 1119735 | 3 | 9  | 27 | CTT  | 13 | 11 |
| 369030 | 111 | 1119823 | 1119860 | 2 | 19 | 38 | GT   | 11 | 9  |
| 369045 | 111 | 1124503 | 1124518 | 4 | 4  | 16 | GACG | 25 | 3  |
| 369046 | 111 | 1124601 | 1124630 | 2 | 15 | 30 | AC   | 23 | 8  |
| 369049 | 111 | 1126738 | 1126758 | 3 | 7  | 21 | ATC  | 26 | 8  |
| 369057 | 111 | 1130469 | 1130484 | 4 | 4  | 16 | ATAA | 24 | 3  |
| 369058 | 111 | 1130819 | 1130850 | 2 | 16 | 32 | GT   | 12 | 12 |
| 369061 | 111 | 1134953 | 1134984 | 2 | 16 | 32 | GT   | 18 | 15 |
| 369082 | 111 | 1191526 | 1191553 | 2 | 14 | 28 | TG   | 7  | 7  |
| 369083 | 111 | 1193026 | 1193065 | 2 | 20 | 40 | TG   | 13 | 8  |
| 369084 | 111 | 1201855 | 1201869 | 3 | 5  | 15 | TCA  | 30 | 10 |
| 369085 | 111 | 1201873 | 1201887 | 3 | 5  | 15 | TCA  | 23 | 9  |
| 369088 | 111 | 1224070 | 1224091 | 2 | 11 | 22 | CA   | 17 | 13 |
| 369092 | 111 | 1230682 | 1230696 | 3 | 5  | 15 | GCA  | 30 | 5  |
| 369095 | 111 | 1235414 | 1235435 | 2 | 11 | 22 | GT   | 9  | 10 |
| 369099 | 111 | 1240728 | 1240767 | 2 | 20 | 40 | GT   | 7  | 10 |
| 369109 | 111 | 1268716 | 1268745 | 2 | 15 | 30 | AC   | 11 | 14 |
| 369110 | 111 | 1268949 | 1268962 | 2 | 7  | 14 | TG   | 21 | 3  |
| 369112 | 111 | 1271536 | 1271550 | 3 | 5  | 15 | GAG  | 15 | 4  |
| 369113 | 111 | 1271621 | 1271652 | 2 | 16 | 32 | GT   | 14 | 16 |
| 369117 | 111 | 1274214 | 1274253 | 2 | 20 | 40 | AC   | 11 | 12 |
| 369118 | 111 | 1280489 | 1280503 | 3 | 5  | 15 | GAG  | 24 | 4  |
| 369123 | 111 | 1282424 | 1282445 | 2 | 11 | 22 | AC   | 19 | 9  |
| 369124 | 111 | 1283852 | 1283885 | 2 | 17 | 34 | CA   | 18 | 7  |
| 369125 | 111 | 1286287 | 1286304 | 2 | 9  | 18 | GT   | 17 | 4  |
| 369129 | 111 | 1296253 | 1296268 | 2 | 8  | 16 | AC   | 24 | 14 |
| 369132 | 111 | 1300194 | 1300239 | 2 | 23 | 46 | GT   | 12 | 15 |
| 369134 | 111 | 1302979 | 1303000 | 2 | 11 | 22 | TG   | 14 | 7  |
| 369138 | 111 | 1304170 | 1304209 | 4 | 10 | 40 | CTTT | 27 | 12 |
| 369139 | 111 | 1311489 | 1311527 | 3 | 13 | 39 | TGA  | 19 | 6  |
| 369141 | 111 | 1313839 | 1313856 | 3 | 6  | 18 | CTC  | 23 | 9  |
| 369143 | 111 | 1314630 | 1314657 | 4 | 7  | 28 | GTCT | 24 | 9  |
| 369149 | 111 | 1320845 | 1320866 | 2 | 11 | 22 | TG   | 21 | 6  |
| 369153 | 111 | 1322618 | 1322629 | 2 | 6  | 12 | AC   | 19 | 5  |
| 369155 | 111 | 1322853 | 1322868 | 2 | 8  | 16 | GT   | 23 | 8  |
| 369157 | 111 | 1325531 | 1325570 | 2 | 20 | 40 | TG   | 16 | 13 |
| 369158 | 111 | 1328334 | 1328361 | 2 | 14 | 28 | AC   | 15 | 8  |
| 369159 | 111 | 1330001 | 1330026 | 2 | 13 | 26 | GT   | 14 | 13 |
| 369160 | 111 | 1331395 | 1331416 | 2 | 11 | 22 | GT   | 19 | 14 |
| 369165 | 111 | 1339130 | 1339141 | 2 | 6  | 12 | AC   | 8  | 4  |
| 369166 | 111 | 1339143 | 1339156 | 2 | 7  | 14 | CA   | 8  | 4  |
| 369177 | 111 | 1355091 | 1355108 | 3 | 6  | 18 | GCC  | 22 | 14 |
| 369179 | 111 | 1359686 | 1359701 | 4 | 4  | 16 | AACC | 19 | 5  |
| 369190 | 111 | 1361604 | 1361618 | 3 | 5  | 15 | TTC  | 24 | 5  |
| 369207 | 111 | 1406614 | 1406645 | 2 | 16 | 32 | TG   | 9  | 13 |
| 369208 | 111 | 1413819 | 1413856 | 2 | 19 | 38 | CA   | 11 | 9  |
| 369220 | 111 | 1445623 | 1445644 | 2 | 11 | 22 | GT   | 14 | 11 |
| 369223 | 111 | 1457615 | 1457626 | 2 | 6  | 12 | GA   | 9  | 3  |
| 369226 | 111 | 1463312 | 1463347 | 2 | 18 | 36 | TG   | 9  | 13 |
| 369236 | 111 | 1478196 | 1478223 | 2 | 14 | 28 | CA   | 18 | 10 |
| 369238 | 111 | 1481818 | 1481867 | 2 | 25 | 50 | GT   | 19 | 13 |



|        |     |         |         |   |    |    |      |    |    |
|--------|-----|---------|---------|---|----|----|------|----|----|
| 369240 | 111 | 1483784 | 1483821 | 2 | 19 | 38 | TG   | 15 | 12 |
| 369241 | 111 | 1483935 | 1483952 | 3 | 6  | 18 | TCC  | 10 | 7  |
| 369244 | 111 | 1492950 | 1492969 | 4 | 5  | 20 | GATT | 20 | 3  |
| 369253 | 111 | 1510013 | 1510032 | 2 | 10 | 20 | AC   | 17 | 8  |
| 369254 | 111 | 1511487 | 1511500 | 2 | 7  | 14 | AG   | 28 | 4  |
| 369264 | 111 | 1519092 | 1519121 | 2 | 15 | 30 | CA   | 10 | 8  |
| 369265 | 111 | 1519230 | 1519257 | 2 | 14 | 28 | GT   | 11 | 11 |
| 369276 | 111 | 1528093 | 1528122 | 2 | 15 | 30 | CA   | 12 | 10 |
| 369278 | 111 | 1529993 | 1530004 | 2 | 6  | 12 | TA   | 16 | 3  |
| 369281 | 111 | 1534573 | 1534626 | 3 | 18 | 54 | GAA  | 10 | 9  |
| 369285 | 111 | 1542061 | 1542081 | 3 | 7  | 21 | CAG  | 22 | 3  |
| 369294 | 111 | 1564007 | 1564026 | 2 | 10 | 20 | AC   | 21 | 5  |
| 369302 | 111 | 1607032 | 1607055 | 2 | 12 | 24 | CA   | 14 | 7  |
| 369304 | 111 | 1613691 | 1613706 | 2 | 8  | 16 | GA   | 18 | 6  |
| 369306 | 111 | 1616000 | 1616014 | 3 | 5  | 15 | CTT  | 29 | 4  |
| 369312 | 111 | 1656346 | 1656405 | 2 | 30 | 60 | AC   | 11 | 16 |
| 369317 | 111 | 1667373 | 1667394 | 2 | 11 | 22 | AC   | 13 | 14 |
| 369318 | 111 | 1668105 | 1668138 | 2 | 17 | 34 | AC   | 15 | 10 |
| 369321 | 111 | 1670346 | 1670359 | 2 | 7  | 14 | GT   | 7  | 3  |
| 369323 | 111 | 1670397 | 1670410 | 2 | 7  | 14 | TG   | 18 | 8  |
| 369324 | 111 | 1671454 | 1671483 | 2 | 15 | 30 | GT   | 8  | 8  |
| 369325 | 111 | 1671638 | 1671667 | 2 | 15 | 30 | CA   | 12 | 12 |
| 369326 | 111 | 1671920 | 1671931 | 2 | 6  | 12 | CA   | 14 | 4  |
| 369335 | 111 | 1699085 | 1699114 | 2 | 15 | 30 | AC   | 12 | 5  |
| 369337 | 111 | 1724407 | 1724450 | 2 | 22 | 44 | GT   | 21 | 8  |
| 369338 | 111 | 1724740 | 1724754 | 3 | 5  | 15 | TAT  | 10 | 3  |
| 369340 | 111 | 1744706 | 1744717 | 2 | 6  | 12 | AC   | 31 | 3  |
| 369341 | 111 | 1746154 | 1746171 | 2 | 9  | 18 | AC   | 20 | 4  |
| 369342 | 111 | 1747389 | 1747403 | 3 | 5  | 15 | CCT  | 33 | 7  |
| 369350 | 111 | 1774563 | 1774586 | 3 | 8  | 24 | TGA  | 28 | 5  |
| 369351 | 111 | 1778798 | 1778817 | 4 | 5  | 20 | AAAT | 7  | 9  |
| 369352 | 111 | 1779332 | 1779355 | 2 | 12 | 24 | GT   | 7  | 12 |
| 369353 | 111 | 1779487 | 1779512 | 2 | 13 | 26 | AC   | 9  | 13 |
| 369358 | 111 | 1782974 | 1783015 | 2 | 21 | 42 | GT   | 11 | 14 |
| 369359 | 111 | 1783363 | 1783378 | 4 | 4  | 16 | TTTC | 20 | 3  |
| 369373 | 111 | 1791506 | 1791520 | 3 | 5  | 15 | TCC  | 24 | 5  |
| 369380 | 111 | 1804681 | 1804713 | 3 | 11 | 33 | CTC  | 10 | 10 |
| 369382 | 111 | 1804787 | 1804801 | 3 | 5  | 15 | TTC  | 20 | 10 |
| 369394 | 111 | 1812358 | 1812377 | 2 | 10 | 20 | GT   | 10 | 6  |
| 369397 | 111 | 1817577 | 1817598 | 2 | 11 | 22 | GA   | 15 | 11 |
| 369402 | 111 | 1818459 | 1818506 | 3 | 16 | 48 | AGA  | 9  | 9  |
| 369404 | 111 | 1819239 | 1819266 | 2 | 14 | 28 | GT   | 14 | 9  |
| 369405 | 111 | 1819358 | 1819375 | 2 | 9  | 18 | AC   | 24 | 17 |
| 369406 | 111 | 1820593 | 1820607 | 3 | 5  | 15 | ATT  | 19 | 3  |
| 369407 | 111 | 1821421 | 1821448 | 2 | 14 | 28 | GT   | 11 | 11 |
| 369419 | 111 | 1826052 | 1826072 | 3 | 7  | 21 | GAG  | 6  | 4  |
| 369422 | 111 | 1831618 | 1831641 | 2 | 12 | 24 | GT   | 23 | 10 |
| 369448 | 111 | 1882860 | 1882883 | 2 | 12 | 24 | AC   | 21 | 12 |
| 369449 | 111 | 1882957 | 1882977 | 3 | 7  | 21 | TGA  | 16 | 4  |
| 369455 | 111 | 1888766 | 1888795 | 3 | 10 | 30 | AGA  | 28 | 14 |
| 369459 | 111 | 1892460 | 1892493 | 2 | 17 | 34 | AC   | 11 | 11 |

|        |     |         |         |   |    |    |      |    |    |
|--------|-----|---------|---------|---|----|----|------|----|----|
| 369463 | 111 | 1896855 | 1896869 | 3 | 5  | 15 | GAG  | 29 | 5  |
| 369466 | 111 | 1898269 | 1898304 | 2 | 18 | 36 | GT   | 11 | 12 |
| 369468 | 111 | 1900594 | 1900611 | 2 | 9  | 18 | TG   | 19 | 9  |
| 369473 | 111 | 1915040 | 1915065 | 2 | 13 | 26 | TG   | 7  | 11 |
| 369475 | 111 | 1916734 | 1916748 | 3 | 5  | 15 | GAT  | 28 | 6  |
| 369476 | 111 | 1917088 | 1917129 | 2 | 21 | 42 | AC   | 12 | 12 |
| 369477 | 111 | 1917650 | 1917683 | 2 | 17 | 34 | AC   | 14 | 18 |
| 369480 | 111 | 1925064 | 1925099 | 2 | 18 | 36 | TG   | 14 | 11 |
| 369491 | 111 | 1939859 | 1939870 | 2 | 6  | 12 | AG   | 24 | 3  |
| 369492 | 111 | 1939891 | 1939912 | 2 | 11 | 22 | AG   | 8  | 3  |
| 369496 | 111 | 1940381 | 1940404 | 2 | 12 | 24 | CA   | 14 | 5  |
| 369506 | 111 | 1951407 | 1951424 | 2 | 9  | 18 | CA   | 9  | 3  |
| 369507 | 111 | 1951585 | 1951608 | 2 | 12 | 24 | AC   | 16 | 11 |
| 369510 | 111 | 1954000 | 1954011 | 2 | 6  | 12 | GT   | 9  | 3  |
| 369512 | 111 | 1960220 | 1960243 | 3 | 8  | 24 | GAG  | 7  | 7  |
| 369523 | 111 | 1975824 | 1975843 | 2 | 10 | 20 | AC   | 18 | 9  |
| 369524 | 111 | 1976502 | 1976513 | 2 | 6  | 12 | TG   | 25 | 7  |
| 369526 | 111 | 1977106 | 1977127 | 2 | 11 | 22 | TG   | 8  | 4  |
| 369528 | 111 | 1977296 | 1977335 | 2 | 20 | 40 | GT   | 25 | 7  |
| 369538 | 111 | 1995959 | 1996000 | 2 | 21 | 42 | CA   | 11 | 11 |
| 369556 | 111 | 2021178 | 2021204 | 3 | 9  | 27 | ATA  | 15 | 9  |
| 369559 | 111 | 2021864 | 2021884 | 3 | 7  | 21 | AAC  | 17 | 5  |
| 369564 | 111 | 2036824 | 2036847 | 4 | 6  | 24 | GTTT | 26 | 3  |
| 369574 | 112 | 92775   | 92788   | 2 | 7  | 14 | CA   | 23 | 3  |
| 369580 | 112 | 109564  | 109583  | 2 | 10 | 20 | TG   | 27 | 5  |
| 369583 | 112 | 117198  | 117212  | 3 | 5  | 15 | TTA  | 31 | 3  |
| 369585 | 112 | 120964  | 120979  | 2 | 8  | 16 | CA   | 10 | 5  |
| 369587 | 112 | 127345  | 127356  | 2 | 6  | 12 | CT   | 15 | 4  |
| 369602 | 112 | 150402  | 150419  | 3 | 6  | 18 | AGA  | 11 | 5  |
| 369603 | 112 | 150981  | 151000  | 2 | 10 | 20 | AC   | 18 | 10 |
| 369604 | 112 | 151131  | 151151  | 3 | 7  | 21 | AGG  | 24 | 5  |
| 369610 | 112 | 152737  | 152756  | 2 | 10 | 20 | CA   | 8  | 7  |
| 369611 | 112 | 153045  | 153060  | 2 | 8  | 16 | CA   | 16 | 12 |
| 369628 | 112 | 156642  | 156659  | 3 | 6  | 18 | CAG  | 22 | 8  |
| 369629 | 112 | 156772  | 156795  | 3 | 8  | 24 | AGA  | 6  | 5  |
| 369631 | 112 | 157551  | 157565  | 3 | 5  | 15 | TGA  | 17 | 10 |
| 369633 | 112 | 157888  | 157917  | 2 | 15 | 30 | GT   | 22 | 12 |
| 369634 | 112 | 158106  | 158123  | 2 | 9  | 18 | AC   | 13 | 13 |
| 369645 | 112 | 165466  | 165477  | 2 | 6  | 12 | AG   | 29 | 5  |
| 369652 | 112 | 173046  | 173085  | 2 | 20 | 40 | GT   | 6  | 7  |
| 369655 | 112 | 178911  | 178936  | 2 | 13 | 26 | AC   | 26 | 8  |
| 369657 | 112 | 180846  | 180875  | 2 | 15 | 30 | CA   | 20 | 15 |
| 369658 | 112 | 180981  | 180996  | 2 | 8  | 16 | AG   | 23 | 6  |
| 369659 | 112 | 181063  | 181078  | 2 | 8  | 16 | AC   | 18 | 9  |
| 369660 | 112 | 181118  | 181133  | 2 | 8  | 16 | GT   | 13 | 4  |
| 369664 | 112 | 181611  | 181631  | 3 | 7  | 21 | CTT  | 9  | 3  |
| 369665 | 112 | 184924  | 184935  | 2 | 6  | 12 | CT   | 14 | 7  |
| 369666 | 112 | 184936  | 184951  | 2 | 8  | 16 | CA   | 11 | 8  |
| 369668 | 112 | 185080  | 185137  | 2 | 29 | 58 | GT   | 6  | 9  |
| 369670 | 112 | 185269  | 185328  | 2 | 30 | 60 | CA   | 7  | 10 |
| 369671 | 112 | 185387  | 185426  | 2 | 20 | 40 | GT   | 13 | 12 |

|        |     |        |        |   |    |    |      |    |    |
|--------|-----|--------|--------|---|----|----|------|----|----|
| 369672 | 112 | 186945 | 186968 | 2 | 12 | 24 | GT   | 10 | 13 |
| 369674 | 112 | 187057 | 187082 | 2 | 13 | 26 | CA   | 21 | 10 |
| 369675 | 112 | 187112 | 187143 | 2 | 16 | 32 | AC   | 13 | 10 |
| 369676 | 112 | 187232 | 187251 | 2 | 10 | 20 | GT   | 14 | 13 |
| 369677 | 112 | 187389 | 187412 | 2 | 12 | 24 | CA   | 11 | 6  |
| 369678 | 112 | 188631 | 188648 | 3 | 6  | 18 | AGG  | 23 | 9  |
| 369680 | 112 | 192058 | 192069 | 2 | 6  | 12 | GA   | 15 | 7  |
| 369681 | 112 | 193525 | 193548 | 2 | 12 | 24 | GA   | 11 | 5  |
| 369682 | 112 | 193686 | 193703 | 3 | 6  | 18 | AGA  | 20 | 3  |
| 369685 | 112 | 203287 | 203322 | 2 | 18 | 36 | TG   | 10 | 11 |
| 369690 | 112 | 204411 | 204426 | 2 | 8  | 16 | GT   | 19 | 11 |
| 369691 | 112 | 204454 | 204479 | 2 | 13 | 26 | GT   | 9  | 4  |
| 369692 | 112 | 204899 | 204914 | 2 | 8  | 16 | GT   | 18 | 10 |
| 369699 | 112 | 215250 | 215273 | 2 | 12 | 24 | GT   | 6  | 7  |
| 369700 | 112 | 215891 | 215912 | 2 | 11 | 22 | AC   | 12 | 11 |
| 369702 | 112 | 216913 | 216930 | 2 | 9  | 18 | AC   | 9  | 6  |
| 369703 | 112 | 218341 | 218358 | 2 | 9  | 18 | CA   | 26 | 9  |
| 369711 | 112 | 222786 | 222799 | 2 | 7  | 14 | TG   | 14 | 7  |
| 369712 | 112 | 223105 | 223126 | 2 | 11 | 22 | TG   | 23 | 18 |
| 369714 | 112 | 223303 | 223332 | 2 | 15 | 30 | CA   | 20 | 15 |
| 369716 | 112 | 225946 | 225960 | 3 | 5  | 15 | GTT  | 23 | 4  |
| 369717 | 112 | 226423 | 226454 | 2 | 16 | 32 | TG   | 17 | 7  |
| 369730 | 112 | 230359 | 230378 | 4 | 5  | 20 | TTTG | 18 | 3  |
| 369732 | 112 | 230657 | 230696 | 4 | 10 | 40 | GAAA | 28 | 9  |
| 369733 | 112 | 232428 | 232451 | 4 | 6  | 24 | GAAG | 22 | 7  |
| 369735 | 112 | 235053 | 235088 | 2 | 18 | 36 | TG   | 11 | 7  |
| 369738 | 112 | 236054 | 236093 | 2 | 20 | 40 | GT   | 6  | 7  |
| 369739 | 112 | 236993 | 237018 | 2 | 13 | 26 | CA   | 25 | 9  |
| 369741 | 112 | 237160 | 237179 | 2 | 10 | 20 | AC   | 20 | 9  |
| 369746 | 112 | 237460 | 237489 | 2 | 15 | 30 | TG   | 8  | 7  |
| 369748 | 112 | 239567 | 239584 | 2 | 9  | 18 | TC   | 27 | 4  |
| 369749 | 112 | 239782 | 239799 | 3 | 6  | 18 | CAG  | 30 | 4  |
| 369751 | 112 | 240533 | 240554 | 2 | 11 | 22 | AC   | 27 | 6  |
| 369752 | 112 | 241595 | 241612 | 2 | 9  | 18 | TG   | 9  | 8  |
| 369756 | 112 | 241884 | 241911 | 2 | 14 | 28 | AC   | 16 | 16 |
| 369763 | 112 | 242759 | 242772 | 2 | 7  | 14 | CA   | 18 | 3  |
| 369764 | 112 | 242870 | 242883 | 2 | 7  | 14 | TG   | 8  | 7  |
| 369766 | 112 | 243652 | 243669 | 3 | 6  | 18 | TCT  | 17 | 9  |
| 369768 | 112 | 246690 | 246719 | 2 | 15 | 30 | CA   | 7  | 9  |
| 369769 | 112 | 246833 | 246870 | 2 | 19 | 38 | GT   | 7  | 8  |
| 369771 | 112 | 250969 | 251002 | 2 | 17 | 34 | GT   | 11 | 11 |
| 369773 | 112 | 253992 | 254011 | 2 | 10 | 20 | CT   | 18 | 4  |
| 369774 | 112 | 254358 | 254381 | 4 | 6  | 24 | TCTT | 21 | 5  |
| 369775 | 112 | 254427 | 254442 | 2 | 8  | 16 | TC   | 27 | 3  |
| 369780 | 112 | 258530 | 258561 | 2 | 16 | 32 | AC   | 23 | 9  |
| 369782 | 112 | 258838 | 258859 | 2 | 11 | 22 | GT   | 21 | 8  |
| 369783 | 112 | 258915 | 258936 | 2 | 11 | 22 | TG   | 24 | 7  |
| 369784 | 112 | 259071 | 259102 | 2 | 16 | 32 | CA   | 12 | 9  |
| 369785 | 112 | 259211 | 259228 | 2 | 9  | 18 | CA   | 18 | 12 |
| 369787 | 112 | 263764 | 263781 | 2 | 9  | 18 | CT   | 16 | 4  |
| 369788 | 112 | 263841 | 263868 | 2 | 14 | 28 | TG   | 15 | 11 |

|        |     |        |        |   |    |    |      |    |    |
|--------|-----|--------|--------|---|----|----|------|----|----|
| 369789 | 112 | 263998 | 264025 | 2 | 14 | 28 | CA   | 9  | 9  |
| 369798 | 112 | 270154 | 270167 | 2 | 7  | 14 | TG   | 15 | 10 |
| 369800 | 112 | 270755 | 270776 | 2 | 11 | 22 | AC   | 19 | 10 |
| 369802 | 112 | 272097 | 272116 | 4 | 5  | 20 | TTTC | 24 | 4  |
| 369804 | 112 | 272665 | 272690 | 2 | 13 | 26 | GT   | 8  | 7  |
| 369805 | 112 | 274927 | 274972 | 2 | 23 | 46 | AC   | 9  | 7  |
| 369806 | 112 | 275125 | 275154 | 2 | 15 | 30 | TG   | 11 | 8  |
| 369807 | 112 | 275230 | 275261 | 2 | 16 | 32 | GT   | 15 | 8  |
| 369808 | 112 | 275303 | 275322 | 2 | 10 | 20 | TG   | 21 | 5  |
| 369810 | 112 | 275531 | 275552 | 2 | 11 | 22 | AC   | 13 | 4  |
| 369815 | 112 | 275988 | 276013 | 2 | 13 | 26 | TG   | 10 | 3  |
| 369816 | 112 | 276112 | 276131 | 2 | 10 | 20 | AT   | 9  | 5  |
| 369818 | 112 | 283044 | 283071 | 2 | 14 | 28 | AC   | 11 | 7  |
| 369819 | 112 | 284233 | 284254 | 2 | 11 | 22 | AT   | 6  | 5  |
| 369820 | 112 | 285659 | 285676 | 2 | 9  | 18 | TC   | 6  | 4  |
| 369826 | 112 | 294765 | 294792 | 2 | 14 | 28 | GT   | 10 | 10 |
| 369827 | 112 | 294903 | 294930 | 2 | 14 | 28 | GT   | 18 | 11 |
| 369830 | 112 | 295244 | 295279 | 2 | 18 | 36 | TG   | 8  | 9  |
| 369831 | 112 | 295319 | 295334 | 2 | 8  | 16 | TG   | 13 | 8  |
| 369832 | 112 | 295438 | 295477 | 2 | 20 | 40 | AC   | 8  | 12 |
| 369834 | 112 | 296762 | 296799 | 2 | 19 | 38 | GT   | 8  | 11 |
| 369835 | 112 | 296942 | 296959 | 2 | 9  | 18 | AC   | 22 | 3  |
| 369836 | 112 | 298207 | 298224 | 2 | 9  | 18 | CA   | 7  | 7  |
| 369837 | 112 | 298263 | 298292 | 2 | 15 | 30 | CA   | 8  | 7  |
| 369838 | 112 | 298386 | 298423 | 2 | 19 | 38 | GT   | 9  | 8  |
| 369857 | 112 | 304922 | 304939 | 3 | 6  | 18 | CAT  | 34 | 3  |
| 369858 | 112 | 306206 | 306237 | 2 | 16 | 32 | CT   | 9  | 6  |
| 369859 | 112 | 306328 | 306359 | 2 | 16 | 32 | CA   | 11 | 6  |
| 369860 | 112 | 306877 | 306897 | 3 | 7  | 21 | CCT  | 13 | 3  |
| 369862 | 112 | 308640 | 308653 | 2 | 7  | 14 | TG   | 22 | 9  |
| 369863 | 112 | 308780 | 308797 | 3 | 6  | 18 | CTC  | 12 | 5  |
| 369877 | 112 | 311496 | 311509 | 2 | 7  | 14 | CA   | 20 | 10 |
| 369878 | 112 | 311541 | 311560 | 2 | 10 | 20 | CA   | 19 | 9  |
| 369879 | 112 | 312722 | 312753 | 2 | 16 | 32 | CA   | 14 | 14 |
| 369880 | 112 | 312899 | 312922 | 2 | 12 | 24 | GT   | 17 | 6  |
| 369881 | 112 | 313013 | 313036 | 2 | 12 | 24 | TG   | 23 | 5  |
| 369882 | 112 | 313075 | 313110 | 2 | 18 | 36 | TG   | 10 | 7  |
| 369885 | 112 | 316915 | 316934 | 2 | 10 | 20 | CA   | 13 | 9  |
| 369886 | 112 | 317012 | 317031 | 2 | 10 | 20 | GT   | 16 | 5  |
| 369887 | 112 | 317135 | 317156 | 2 | 11 | 22 | AC   | 10 | 9  |
| 369890 | 112 | 319135 | 319161 | 3 | 9  | 27 | CTG  | 23 | 4  |
| 369891 | 112 | 319333 | 319348 | 4 | 4  | 16 | ATCT | 30 | 3  |
| 369892 | 112 | 319484 | 319497 | 2 | 7  | 14 | GT   | 28 | 3  |
| 369893 | 112 | 319688 | 319707 | 2 | 10 | 20 | GT   | 12 | 3  |
| 369896 | 112 | 321082 | 321095 | 2 | 7  | 14 | GT   | 10 | 3  |
| 369897 | 112 | 321210 | 321221 | 2 | 6  | 12 | AG   | 33 | 3  |
| 369898 | 112 | 321540 | 321554 | 3 | 5  | 15 | GAG  | 28 | 3  |
| 369900 | 112 | 322397 | 322428 | 4 | 8  | 32 | TCTT | 9  | 6  |
| 369902 | 112 | 324321 | 324346 | 2 | 13 | 26 | AC   | 12 | 13 |
| 369906 | 112 | 324637 | 324672 | 2 | 18 | 36 | GT   | 11 | 10 |
| 369910 | 112 | 324990 | 325007 | 3 | 6  | 18 | CCT  | 7  | 3  |

|        |     |        |        |   |    |    |      |    |    |
|--------|-----|--------|--------|---|----|----|------|----|----|
| 369911 | 112 | 325246 | 325263 | 3 | 6  | 18 | TCT  | 27 | 14 |
| 369919 | 112 | 325822 | 325845 | 2 | 12 | 24 | GA   | 27 | 6  |
| 369920 | 112 | 325971 | 326014 | 2 | 22 | 44 | TG   | 8  | 14 |
| 369921 | 112 | 327475 | 327492 | 2 | 9  | 18 | CT   | 20 | 10 |
| 369934 | 112 | 331367 | 331406 | 2 | 20 | 40 | AC   | 11 | 7  |
| 369935 | 112 | 331427 | 331442 | 2 | 8  | 16 | AC   | 16 | 7  |
| 369939 | 112 | 331667 | 331686 | 2 | 10 | 20 | TG   | 12 | 7  |
| 369940 | 112 | 331711 | 331760 | 2 | 25 | 50 | TG   | 10 | 12 |
| 369941 | 112 | 331864 | 331890 | 3 | 9  | 27 | GGA  | 22 | 5  |
| 369942 | 112 | 334654 | 334675 | 2 | 11 | 22 | AC   | 17 | 9  |
| 369944 | 112 | 334746 | 334765 | 2 | 10 | 20 | CA   | 10 | 3  |
| 369945 | 112 | 334867 | 334896 | 2 | 15 | 30 | AC   | 9  | 12 |
| 369949 | 112 | 338039 | 338056 | 3 | 6  | 18 | TCC  | 22 | 9  |
| 369954 | 112 | 338478 | 338513 | 2 | 18 | 36 | GT   | 11 | 10 |
| 369955 | 112 | 338598 | 338627 | 2 | 15 | 30 | CA   | 16 | 9  |
| 369956 | 112 | 338902 | 338928 | 3 | 9  | 27 | TCT  | 15 | 9  |
| 369957 | 112 | 339257 | 339271 | 3 | 5  | 15 | CTT  | 23 | 5  |
| 369959 | 112 | 339521 | 339542 | 2 | 11 | 22 | TG   | 17 | 8  |
| 369964 | 112 | 339753 | 339784 | 2 | 16 | 32 | GT   | 7  | 3  |
| 369966 | 112 | 340150 | 340173 | 3 | 8  | 24 | GAA  | 24 | 7  |
| 369968 | 112 | 341154 | 341169 | 4 | 4  | 16 | GAGG | 15 | 3  |
| 369969 | 112 | 341323 | 341338 | 2 | 8  | 16 | CT   | 7  | 3  |
| 369972 | 112 | 341690 | 341701 | 2 | 6  | 12 | TC   | 12 | 6  |
| 369974 | 112 | 345231 | 345260 | 2 | 15 | 30 | CA   | 11 | 7  |
| 369975 | 112 | 345334 | 345365 | 2 | 16 | 32 | AG   | 9  | 9  |
| 369977 | 112 | 346678 | 346709 | 2 | 16 | 32 | AC   | 11 | 7  |
| 369978 | 112 | 346833 | 346852 | 2 | 10 | 20 | AC   | 17 | 6  |
| 369981 | 112 | 347133 | 347144 | 2 | 6  | 12 | TG   | 17 | 3  |
| 369982 | 112 | 347209 | 347252 | 2 | 22 | 44 | GT   | 11 | 8  |
| 369983 | 112 | 347379 | 347398 | 2 | 10 | 20 | CA   | 18 | 11 |
| 369984 | 112 | 347430 | 347449 | 2 | 10 | 20 | AC   | 14 | 5  |
| 369987 | 112 | 349013 | 349044 | 2 | 16 | 32 | CA   | 11 | 9  |
| 369989 | 112 | 349155 | 349184 | 2 | 15 | 30 | CA   | 15 | 15 |
| 369991 | 112 | 349396 | 349413 | 3 | 6  | 18 | TTC  | 23 | 7  |
| 369993 | 112 | 350403 | 350418 | 2 | 8  | 16 | TC   | 15 | 4  |
| 369997 | 112 | 350806 | 350841 | 3 | 12 | 36 | AGA  | 12 | 8  |
| 369998 | 112 | 351009 | 351035 | 3 | 9  | 27 | CTT  | 17 | 3  |
| 370000 | 112 | 351406 | 351421 | 4 | 4  | 16 | ATCC | 30 | 3  |
| 370001 | 112 | 351615 | 351646 | 4 | 8  | 32 | CATC | 27 | 9  |
| 370004 | 112 | 351900 | 351927 | 2 | 14 | 28 | GT   | 17 | 10 |
| 370005 | 112 | 351979 | 352000 | 2 | 11 | 22 | AC   | 12 | 13 |
| 370025 | 112 | 354957 | 354980 | 2 | 12 | 24 | CT   | 7  | 6  |
| 370026 | 112 | 355132 | 355145 | 2 | 7  | 14 | CT   | 12 | 7  |
| 370028 | 112 | 356940 | 356975 | 2 | 18 | 36 | GT   | 6  | 8  |
| 370034 | 112 | 359007 | 359018 | 2 | 6  | 12 | AG   | 10 | 3  |
| 370035 | 112 | 359059 | 359080 | 2 | 11 | 22 | GA   | 15 | 8  |
| 370036 | 112 | 359184 | 359215 | 2 | 16 | 32 | CA   | 7  | 7  |
| 370040 | 112 | 360519 | 360534 | 2 | 8  | 16 | AC   | 19 | 7  |
| 370041 | 112 | 360637 | 360668 | 2 | 16 | 32 | AC   | 10 | 7  |
| 370042 | 112 | 360732 | 360759 | 2 | 14 | 28 | AC   | 14 | 7  |
| 370043 | 112 | 360809 | 360832 | 2 | 12 | 24 | AC   | 10 | 7  |

|        |     |        |        |   |    |    |      |    |    |
|--------|-----|--------|--------|---|----|----|------|----|----|
| 370049 | 112 | 362476 | 362493 | 3 | 6  | 18 | CCT  | 21 | 3  |
| 370050 | 112 | 362663 | 362677 | 3 | 5  | 15 | GAG  | 32 | 5  |
| 370051 | 112 | 362820 | 362837 | 3 | 6  | 18 | CCG  | 22 | 16 |
| 370053 | 112 | 364391 | 364405 | 3 | 5  | 15 | CTG  | 30 | 3  |
| 370055 | 112 | 368498 | 368515 | 2 | 9  | 18 | CA   | 12 | 8  |
| 370056 | 112 | 368568 | 368589 | 2 | 11 | 22 | AC   | 17 | 9  |
| 370061 | 112 | 368933 | 368950 | 2 | 9  | 18 | AC   | 13 | 5  |
| 370065 | 112 | 373123 | 373137 | 3 | 5  | 15 | GCT  | 32 | 3  |
| 370066 | 112 | 373896 | 373915 | 2 | 10 | 20 | AC   | 7  | 7  |
| 370070 | 112 | 374207 | 374232 | 2 | 13 | 26 | CA   | 12 | 9  |
| 370071 | 112 | 374362 | 374375 | 2 | 7  | 14 | TG   | 11 | 9  |
| 370073 | 112 | 374524 | 374544 | 3 | 7  | 21 | CTT  | 15 | 9  |
| 370074 | 112 | 374617 | 374632 | 2 | 8  | 16 | GT   | 16 | 8  |
| 370075 | 112 | 374728 | 374745 | 2 | 9  | 18 | AG   | 21 | 5  |
| 370076 | 112 | 374825 | 374856 | 2 | 16 | 32 | CA   | 9  | 10 |
| 370077 | 112 | 375002 | 375028 | 3 | 9  | 27 | AAC  | 28 | 10 |
| 370078 | 112 | 376103 | 376117 | 3 | 5  | 15 | TCT  | 14 | 5  |
| 370085 | 112 | 378995 | 379012 | 2 | 9  | 18 | CA   | 8  | 5  |
| 370086 | 112 | 379125 | 379150 | 2 | 13 | 26 | CA   | 14 | 8  |
| 370088 | 112 | 381156 | 381167 | 2 | 6  | 12 | CA   | 19 | 3  |
| 370093 | 112 | 381384 | 381401 | 2 | 9  | 18 | CA   | 21 | 14 |
| 370094 | 112 | 381577 | 381604 | 2 | 14 | 28 | AC   | 19 | 10 |
| 370095 | 112 | 381657 | 381680 | 2 | 12 | 24 | AC   | 20 | 7  |
| 370096 | 112 | 381747 | 381772 | 2 | 13 | 26 | AC   | 8  | 6  |
| 370097 | 112 | 381870 | 381899 | 2 | 15 | 30 | CT   | 6  | 6  |
| 370098 | 112 | 381995 | 382016 | 2 | 11 | 22 | CA   | 10 | 4  |
| 370101 | 112 | 382889 | 382916 | 2 | 14 | 28 | TG   | 12 | 10 |
| 370102 | 112 | 383725 | 383748 | 2 | 12 | 24 | TC   | 18 | 6  |
| 370103 | 112 | 383845 | 383866 | 2 | 11 | 22 | AC   | 17 | 7  |
| 370107 | 112 | 384028 | 384079 | 2 | 26 | 52 | CT   | 11 | 16 |
| 370110 | 112 | 384487 | 384502 | 2 | 8  | 16 | CA   | 14 | 12 |
| 370111 | 112 | 385567 | 385588 | 2 | 11 | 22 | AC   | 18 | 9  |
| 370113 | 112 | 385734 | 385769 | 2 | 18 | 36 | CA   | 7  | 8  |
| 370114 | 112 | 385808 | 385823 | 2 | 8  | 16 | GT   | 18 | 7  |
| 370115 | 112 | 385936 | 385957 | 2 | 11 | 22 | GT   | 16 | 10 |
| 370120 | 112 | 387516 | 387529 | 2 | 7  | 14 | GT   | 20 | 9  |
| 370121 | 112 | 387531 | 387548 | 2 | 9  | 18 | TG   | 25 | 10 |
| 370122 | 112 | 389995 | 390022 | 2 | 14 | 28 | AC   | 19 | 9  |
| 370123 | 112 | 390145 | 390156 | 2 | 6  | 12 | CA   | 17 | 4  |
| 370124 | 112 | 390350 | 390379 | 2 | 15 | 30 | AC   | 13 | 13 |
| 370125 | 112 | 391634 | 391645 | 2 | 6  | 12 | CA   | 9  | 3  |
| 370126 | 112 | 391780 | 391793 | 2 | 7  | 14 | CT   | 14 | 5  |
| 370128 | 112 | 392255 | 392278 | 2 | 12 | 24 | GT   | 19 | 8  |
| 370132 | 112 | 398170 | 398201 | 2 | 16 | 32 | CA   | 9  | 6  |
| 370133 | 112 | 398316 | 398333 | 2 | 9  | 18 | GT   | 20 | 7  |
| 370134 | 112 | 398407 | 398430 | 2 | 12 | 24 | GT   | 22 | 9  |
| 370135 | 112 | 401724 | 401737 | 2 | 7  | 14 | CT   | 14 | 6  |
| 370136 | 112 | 401829 | 401842 | 2 | 7  | 14 | CT   | 9  | 8  |
| 370137 | 112 | 401919 | 401932 | 2 | 7  | 14 | CT   | 11 | 3  |
| 370140 | 112 | 402277 | 402304 | 4 | 7  | 28 | ATAG | 22 | 8  |
| 370141 | 112 | 402435 | 402450 | 2 | 8  | 16 | TG   | 17 | 10 |

|        |     |        |        |   |    |    |      |    |    |
|--------|-----|--------|--------|---|----|----|------|----|----|
| 370142 | 112 | 402452 | 402467 | 2 | 8  | 16 | GT   | 17 | 8  |
| 370143 | 112 | 402564 | 402578 | 3 | 5  | 15 | GGA  | 26 | 6  |
| 370148 | 112 | 403828 | 403851 | 4 | 6  | 24 | AAAT | 19 | 3  |
| 370149 | 112 | 404069 | 404084 | 2 | 8  | 16 | AC   | 17 | 10 |
| 370150 | 112 | 404144 | 404165 | 2 | 11 | 22 | CA   | 19 | 15 |
| 370151 | 112 | 404235 | 404250 | 2 | 8  | 16 | TG   | 18 | 8  |
| 370152 | 112 | 404420 | 404453 | 2 | 17 | 34 | TG   | 17 | 14 |
| 370153 | 112 | 404588 | 404614 | 3 | 9  | 27 | GAA  | 10 | 11 |
| 370156 | 112 | 404942 | 404955 | 2 | 7  | 14 | AT   | 16 | 9  |
| 370159 | 112 | 406518 | 406547 | 2 | 15 | 30 | CA   | 17 | 15 |
| 370164 | 112 | 407777 | 407792 | 2 | 8  | 16 | AC   | 15 | 4  |
| 370165 | 112 | 407827 | 407882 | 2 | 28 | 56 | CA   | 14 | 16 |
| 370168 | 112 | 408299 | 408316 | 2 | 9  | 18 | AC   | 6  | 7  |
| 370170 | 112 | 409885 | 409912 | 2 | 14 | 28 | GT   | 8  | 11 |
| 370171 | 112 | 410244 | 410259 | 2 | 8  | 16 | CA   | 16 | 9  |
| 370172 | 112 | 410297 | 410308 | 2 | 6  | 12 | AC   | 20 | 3  |
| 370173 | 112 | 410338 | 410369 | 2 | 16 | 32 | CA   | 18 | 9  |
| 370178 | 112 | 411795 | 411826 | 2 | 16 | 32 | CA   | 8  | 8  |
| 370180 | 112 | 413779 | 413814 | 2 | 18 | 36 | AC   | 9  | 7  |
| 370182 | 112 | 415780 | 415797 | 3 | 6  | 18 | AGA  | 11 | 3  |
| 370183 | 112 | 415992 | 416019 | 2 | 14 | 28 | AG   | 10 | 9  |
| 370185 | 112 | 417150 | 417185 | 2 | 18 | 36 | AC   | 14 | 10 |
| 370186 | 112 | 417304 | 417335 | 2 | 16 | 32 | TG   | 20 | 13 |
| 370188 | 112 | 417907 | 417954 | 2 | 24 | 48 | GT   | 8  | 10 |
| 370189 | 112 | 418012 | 418023 | 2 | 6  | 12 | GT   | 14 | 6  |
| 370190 | 112 | 418024 | 418039 | 2 | 8  | 16 | GA   | 18 | 7  |
| 370194 | 112 | 419566 | 419597 | 2 | 16 | 32 | AC   | 13 | 11 |
| 370210 | 112 | 425133 | 425160 | 2 | 14 | 28 | TG   | 16 | 7  |
| 370211 | 112 | 425251 | 425280 | 3 | 10 | 30 | AGG  | 14 | 7  |
| 370215 | 112 | 427016 | 427029 | 2 | 7  | 14 | CT   | 29 | 4  |
| 370217 | 112 | 433345 | 433362 | 3 | 6  | 18 | GAG  | 30 | 4  |
| 370225 | 112 | 441400 | 441443 | 2 | 22 | 44 | AC   | 14 | 14 |
| 370226 | 112 | 442010 | 442047 | 2 | 19 | 38 | CA   | 6  | 8  |
| 370227 | 112 | 442965 | 442982 | 2 | 9  | 18 | CA   | 18 | 10 |
| 370228 | 112 | 445556 | 445567 | 2 | 6  | 12 | CA   | 30 | 3  |
| 370229 | 112 | 447380 | 447419 | 2 | 20 | 40 | CA   | 9  | 12 |
| 370230 | 112 | 447504 | 447527 | 2 | 12 | 24 | CA   | 18 | 6  |
| 370232 | 112 | 448807 | 448846 | 2 | 20 | 40 | AC   | 8  | 10 |
| 370237 | 112 | 457041 | 457060 | 4 | 5  | 20 | AACC | 27 | 4  |
| 370238 | 112 | 462124 | 462141 | 3 | 6  | 18 | CTT  | 26 | 5  |
| 370239 | 112 | 462328 | 462341 | 2 | 7  | 14 | AC   | 20 | 9  |
| 370240 | 112 | 463765 | 463776 | 2 | 6  | 12 | TG   | 22 | 7  |
| 370241 | 112 | 463862 | 463885 | 4 | 6  | 24 | TGTT | 28 | 8  |
| 370255 | 112 | 468108 | 468128 | 3 | 7  | 21 | CCT  | 22 | 3  |
| 370256 | 112 | 470389 | 470402 | 2 | 7  | 14 | AC   | 20 | 8  |
| 370262 | 112 | 488481 | 488494 | 2 | 7  | 14 | AC   | 19 | 6  |
| 370263 | 112 | 496044 | 496057 | 2 | 7  | 14 | AG   | 15 | 6  |
| 370264 | 112 | 496163 | 496192 | 2 | 15 | 30 | TG   | 15 | 9  |
| 370266 | 112 | 503257 | 503280 | 2 | 12 | 24 | CA   | 17 | 14 |
| 370268 | 112 | 515731 | 515745 | 3 | 5  | 15 | GCA  | 28 | 10 |
| 370272 | 112 | 524617 | 524631 | 3 | 5  | 15 | GGA  | 28 | 4  |

|        |     |        |        |   |    |    |      |    |    |
|--------|-----|--------|--------|---|----|----|------|----|----|
| 370277 | 112 | 548610 | 548630 | 3 | 7  | 21 | AGA  | 28 | 17 |
| 370279 | 112 | 551416 | 551436 | 3 | 7  | 21 | CCT  | 26 | 6  |
| 370281 | 112 | 552165 | 552182 | 3 | 6  | 18 | TCT  | 28 | 4  |
| 370282 | 112 | 555000 | 555014 | 3 | 5  | 15 | GAG  | 26 | 3  |
| 370285 | 112 | 559004 | 559025 | 2 | 11 | 22 | GT   | 16 | 10 |
| 370290 | 112 | 569082 | 569095 | 2 | 7  | 14 | AC   | 26 | 9  |
| 370292 | 112 | 571615 | 571647 | 3 | 11 | 33 | GTA  | 18 | 6  |
| 370293 | 112 | 578204 | 578221 | 2 | 9  | 18 | GT   | 19 | 8  |
| 370294 | 112 | 578306 | 578335 | 2 | 15 | 30 | TG   | 8  | 8  |
| 370295 | 112 | 578373 | 578386 | 2 | 7  | 14 | GT   | 13 | 3  |
| 370296 | 112 | 578422 | 578443 | 2 | 11 | 22 | TG   | 13 | 6  |
| 370298 | 112 | 578655 | 578676 | 2 | 11 | 22 | TG   | 16 | 5  |
| 370300 | 112 | 580042 | 580055 | 2 | 7  | 14 | AC   | 22 | 3  |
| 370304 | 112 | 586638 | 586657 | 2 | 10 | 20 | CA   | 14 | 12 |
| 370307 | 112 | 588111 | 588136 | 2 | 13 | 26 | AC   | 22 | 13 |
| 370308 | 112 | 588258 | 588281 | 2 | 12 | 24 | GT   | 15 | 7  |
| 370309 | 112 | 588360 | 588377 | 2 | 9  | 18 | TG   | 12 | 8  |
| 370310 | 112 | 588589 | 588612 | 4 | 6  | 24 | TGAT | 21 | 5  |
| 370313 | 112 | 592420 | 592461 | 2 | 21 | 42 | AC   | 8  | 11 |
| 370316 | 112 | 599743 | 599758 | 2 | 8  | 16 | AC   | 16 | 5  |
| 370318 | 112 | 600264 | 600283 | 2 | 10 | 20 | GT   | 31 | 6  |
| 370320 | 112 | 604147 | 604180 | 2 | 17 | 34 | GT   | 9  | 10 |
| 370321 | 112 | 604365 | 604376 | 2 | 6  | 12 | GA   | 21 | 3  |
| 370322 | 112 | 606926 | 606949 | 2 | 12 | 24 | GT   | 19 | 12 |
| 370323 | 112 | 607075 | 607086 | 2 | 6  | 12 | TG   | 23 | 6  |
| 370324 | 112 | 607134 | 607159 | 2 | 13 | 26 | TG   | 17 | 9  |
| 370325 | 112 | 607310 | 607321 | 2 | 6  | 12 | AC   | 26 | 7  |
| 370331 | 112 | 614838 | 614853 | 2 | 8  | 16 | GT   | 24 | 3  |
| 370332 | 112 | 614972 | 614993 | 2 | 11 | 22 | TG   | 19 | 7  |
| 370333 | 112 | 616121 | 616150 | 2 | 15 | 30 | AC   | 13 | 11 |
| 370334 | 112 | 616299 | 616330 | 2 | 16 | 32 | CA   | 18 | 14 |
| 370335 | 112 | 617604 | 617623 | 4 | 5  | 20 | TCCT | 18 | 7  |
| 370342 | 112 | 619265 | 619306 | 2 | 21 | 42 | CA   | 9  | 12 |
| 370343 | 112 | 619393 | 619416 | 2 | 12 | 24 | CA   | 21 | 7  |
| 370344 | 112 | 619539 | 619552 | 2 | 7  | 14 | TG   | 26 | 4  |
| 370345 | 112 | 619956 | 619994 | 3 | 13 | 39 | TCT  | 20 | 5  |
| 370346 | 112 | 625186 | 625203 | 3 | 6  | 18 | CAG  | 26 | 4  |
| 370347 | 112 | 625353 | 625386 | 2 | 17 | 34 | TG   | 13 | 7  |
| 370348 | 112 | 625482 | 625507 | 2 | 13 | 26 | CA   | 15 | 6  |
| 370349 | 112 | 625606 | 625631 | 2 | 13 | 26 | TG   | 25 | 7  |
| 370351 | 112 | 625820 | 625839 | 2 | 10 | 20 | AC   | 15 | 6  |
| 370352 | 112 | 626006 | 626031 | 2 | 13 | 26 | AC   | 10 | 6  |
| 370353 | 112 | 626187 | 626212 | 2 | 13 | 26 | AC   | 9  | 6  |
| 370354 | 112 | 626598 | 626627 | 2 | 15 | 30 | GT   | 7  | 6  |
| 370357 | 112 | 638026 | 638041 | 2 | 8  | 16 | TG   | 15 | 8  |
| 370359 | 112 | 638164 | 638193 | 2 | 15 | 30 | AC   | 15 | 10 |
| 370360 | 112 | 638289 | 638306 | 2 | 9  | 18 | GT   | 21 | 10 |
| 370363 | 112 | 639080 | 639097 | 2 | 9  | 18 | AC   | 13 | 7  |
| 370364 | 112 | 639157 | 639188 | 2 | 16 | 32 | TG   | 12 | 6  |
| 370369 | 112 | 640514 | 640529 | 2 | 8  | 16 | GT   | 6  | 4  |
| 370371 | 112 | 640681 | 640706 | 2 | 13 | 26 | TG   | 14 | 10 |



|        |     |        |        |   |    |    |     |    |    |
|--------|-----|--------|--------|---|----|----|-----|----|----|
| 370372 | 112 | 640857 | 640880 | 2 | 12 | 24 | AC  | 17 | 7  |
| 370373 | 112 | 641065 | 641094 | 2 | 15 | 30 | CA  | 11 | 5  |
| 370375 | 112 | 642617 | 642638 | 2 | 11 | 22 | CA  | 15 | 15 |
| 370376 | 112 | 642723 | 642758 | 2 | 18 | 36 | AC  | 16 | 18 |
| 370378 | 112 | 644626 | 644667 | 2 | 21 | 42 | AC  | 6  | 6  |
| 370379 | 112 | 644823 | 644862 | 2 | 20 | 40 | AC  | 12 | 13 |
| 370381 | 112 | 649067 | 649100 | 2 | 17 | 34 | GT  | 23 | 8  |
| 370382 | 112 | 649879 | 649902 | 3 | 8  | 24 | TCC | 19 | 6  |
| 370385 | 112 | 650170 | 650183 | 2 | 7  | 14 | TG  | 22 | 3  |
| 370386 | 112 | 650218 | 650253 | 2 | 18 | 36 | AC  | 6  | 7  |
| 370389 | 112 | 652472 | 652510 | 3 | 13 | 39 | GCT | 25 | 10 |
| 370391 | 112 | 654106 | 654121 | 2 | 8  | 16 | TG  | 24 | 3  |
| 370392 | 112 | 654168 | 654185 | 3 | 6  | 18 | CTC | 19 | 4  |
| 370398 | 112 | 655924 | 655955 | 2 | 16 | 32 | CA  | 23 | 16 |
| 370401 | 112 | 659738 | 659759 | 2 | 11 | 22 | AC  | 8  | 7  |
| 370402 | 112 | 660064 | 660081 | 2 | 9  | 18 | TG  | 24 | 6  |
| 370404 | 112 | 663907 | 663930 | 2 | 12 | 24 | CA  | 14 | 7  |
| 370405 | 112 | 664123 | 664156 | 2 | 17 | 34 | GT  | 13 | 12 |
| 370406 | 112 | 664255 | 664268 | 2 | 7  | 14 | GT  | 9  | 6  |
| 370407 | 112 | 664271 | 664286 | 2 | 8  | 16 | GT  | 13 | 8  |
| 370409 | 112 | 665163 | 665194 | 2 | 16 | 32 | GT  | 18 | 9  |
| 370410 | 112 | 665370 | 665387 | 2 | 9  | 18 | AC  | 14 | 6  |
| 370412 | 112 | 665532 | 665559 | 2 | 14 | 28 | CA  | 18 | 11 |
| 370413 | 112 | 665708 | 665719 | 2 | 6  | 12 | TG  | 17 | 12 |
| 370414 | 112 | 665895 | 665918 | 2 | 12 | 24 | GT  | 10 | 11 |
| 370415 | 112 | 665996 | 666027 | 2 | 16 | 32 | GT  | 7  | 6  |
| 370416 | 112 | 666148 | 666163 | 2 | 8  | 16 | GT  | 20 | 10 |
| 370417 | 112 | 666165 | 666182 | 2 | 9  | 18 | TG  | 21 | 10 |
| 370418 | 112 | 667134 | 667151 | 2 | 9  | 18 | CA  | 19 | 4  |
| 370419 | 112 | 667246 | 667269 | 2 | 12 | 24 | AC  | 17 | 10 |
| 370420 | 112 | 667411 | 667432 | 2 | 11 | 22 | TG  | 25 | 17 |
| 370421 | 112 | 667545 | 667576 | 2 | 16 | 32 | TG  | 16 | 10 |
| 370422 | 112 | 667633 | 667650 | 2 | 9  | 18 | GT  | 21 | 6  |
| 370424 | 112 | 667797 | 667824 | 2 | 14 | 28 | GT  | 18 | 11 |
| 370428 | 112 | 672694 | 672721 | 2 | 14 | 28 | CA  | 12 | 7  |
| 370429 | 112 | 675415 | 675428 | 2 | 7  | 14 | GA  | 24 | 5  |
| 370430 | 112 | 675543 | 675570 | 2 | 14 | 28 | CA  | 13 | 5  |
| 370431 | 112 | 675681 | 675706 | 2 | 13 | 26 | TG  | 17 | 9  |
| 370432 | 112 | 679014 | 679031 | 2 | 9  | 18 | TC  | 28 | 4  |
| 370436 | 112 | 680470 | 680481 | 2 | 6  | 12 | CA  | 25 | 8  |
| 370437 | 112 | 680749 | 680772 | 2 | 12 | 24 | AC  | 11 | 7  |
| 370438 | 112 | 680871 | 680894 | 2 | 12 | 24 | TG  | 13 | 12 |
| 370439 | 112 | 680987 | 681012 | 2 | 13 | 26 | AC  | 8  | 10 |
| 370440 | 112 | 681057 | 681080 | 2 | 12 | 24 | CA  | 18 | 8  |
| 370441 | 112 | 681200 | 681239 | 2 | 20 | 40 | TG  | 11 | 16 |
| 370442 | 112 | 682557 | 682576 | 2 | 10 | 20 | GT  | 13 | 8  |
| 370444 | 112 | 684810 | 684827 | 3 | 6  | 18 | GAG | 25 | 12 |
| 370446 | 112 | 687465 | 687504 | 2 | 20 | 40 | GT  | 12 | 8  |
| 370447 | 112 | 687674 | 687697 | 2 | 12 | 24 | TG  | 7  | 10 |
| 370450 | 112 | 688459 | 688476 | 2 | 9  | 18 | TG  | 24 | 6  |
| 370454 | 112 | 692972 | 692993 | 2 | 11 | 22 | AC  | 14 | 9  |

|        |     |        |        |   |    |    |     |    |    |
|--------|-----|--------|--------|---|----|----|-----|----|----|
| 370458 | 112 | 695452 | 695497 | 2 | 23 | 46 | CA  | 8  | 14 |
| 370459 | 112 | 696952 | 696969 | 2 | 9  | 18 | CT  | 24 | 6  |
| 370463 | 112 | 697917 | 697946 | 2 | 15 | 30 | GT  | 6  | 5  |
| 370465 | 112 | 699847 | 699862 | 2 | 8  | 16 | GA  | 27 | 3  |
| 370466 | 112 | 700052 | 700081 | 2 | 15 | 30 | CA  | 13 | 10 |
| 370467 | 112 | 700216 | 700243 | 2 | 14 | 28 | TG  | 19 | 10 |
| 370469 | 112 | 700969 | 701026 | 2 | 29 | 58 | CA  | 7  | 9  |
| 370470 | 112 | 701129 | 701166 | 2 | 19 | 38 | CA  | 11 | 8  |
| 370471 | 112 | 701202 | 701221 | 2 | 10 | 20 | AC  | 13 | 10 |
| 370472 | 112 | 701406 | 701433 | 2 | 14 | 28 | TC  | 11 | 8  |
| 370473 | 112 | 704683 | 704694 | 2 | 6  | 12 | GT  | 16 | 11 |
| 370474 | 112 | 704827 | 704854 | 2 | 14 | 28 | CA  | 7  | 7  |
| 370476 | 112 | 705069 | 705084 | 2 | 8  | 16 | AC  | 9  | 5  |
| 370477 | 112 | 705086 | 705101 | 2 | 8  | 16 | CA  | 8  | 4  |
| 370478 | 112 | 705604 | 705621 | 3 | 6  | 18 | GAG | 24 | 4  |
| 370488 | 112 | 714125 | 714154 | 2 | 15 | 30 | CA  | 12 | 7  |
| 370490 | 112 | 714473 | 714493 | 3 | 7  | 21 | CAG | 24 | 9  |
| 370493 | 112 | 718605 | 718636 | 2 | 16 | 32 | GT  | 15 | 12 |
| 370495 | 112 | 719081 | 719104 | 2 | 12 | 24 | CA  | 18 | 14 |
| 370497 | 112 | 720370 | 720385 | 2 | 8  | 16 | CT  | 27 | 6  |
| 370498 | 112 | 722939 | 722956 | 2 | 9  | 18 | AG  | 15 | 11 |
| 370499 | 112 | 726089 | 726120 | 2 | 16 | 32 | AC  | 18 | 7  |
| 370500 | 112 | 726266 | 726287 | 2 | 11 | 22 | CA  | 18 | 11 |
| 370503 | 112 | 728300 | 728323 | 2 | 12 | 24 | AC  | 23 | 8  |
| 370506 | 112 | 730198 | 730213 | 2 | 8  | 16 | CT  | 19 | 7  |
| 370507 | 112 | 730298 | 730319 | 2 | 11 | 22 | CA  | 19 | 12 |
| 370508 | 112 | 734303 | 734320 | 3 | 6  | 18 | CTT | 25 | 4  |
| 370509 | 112 | 734466 | 734495 | 2 | 15 | 30 | CA  | 20 | 8  |
| 370510 | 112 | 734950 | 734965 | 2 | 8  | 16 | GT  | 20 | 3  |
| 370511 | 112 | 737286 | 737297 | 2 | 6  | 12 | AC  | 23 | 3  |
| 370512 | 112 | 739060 | 739083 | 2 | 12 | 24 | AC  | 20 | 8  |
| 370515 | 112 | 740743 | 740772 | 2 | 15 | 30 | TG  | 11 | 10 |
| 370518 | 112 | 741126 | 741151 | 2 | 13 | 26 | CA  | 11 | 8  |
| 370519 | 112 | 741194 | 741211 | 2 | 9  | 18 | CA  | 21 | 3  |
| 370520 | 112 | 741351 | 741400 | 2 | 25 | 50 | CA  | 7  | 11 |
| 370522 | 112 | 743300 | 743335 | 2 | 18 | 36 | GT  | 8  | 9  |
| 370523 | 112 | 743493 | 743514 | 2 | 11 | 22 | GT  | 16 | 5  |
| 370525 | 112 | 743701 | 743750 | 2 | 25 | 50 | GT  | 8  | 10 |
| 370526 | 112 | 743926 | 743949 | 3 | 8  | 24 | AGA | 16 | 3  |
| 370527 | 112 | 745281 | 745300 | 2 | 10 | 20 | TG  | 19 | 3  |
| 370528 | 112 | 745476 | 745496 | 3 | 7  | 21 | GGA | 7  | 5  |
| 370534 | 112 | 753535 | 753546 | 2 | 6  | 12 | GA  | 29 | 3  |
| 370535 | 112 | 753569 | 753586 | 2 | 9  | 18 | GA  | 22 | 11 |
| 370537 | 112 | 755957 | 755974 | 3 | 6  | 18 | CTC | 14 | 4  |
| 370544 | 112 | 757262 | 757277 | 2 | 8  | 16 | CA  | 6  | 7  |
| 370546 | 112 | 757442 | 757453 | 2 | 6  | 12 | AC  | 10 | 4  |
| 370548 | 112 | 757637 | 757662 | 2 | 13 | 26 | TG  | 13 | 10 |
| 370550 | 112 | 760000 | 760015 | 2 | 8  | 16 | CA  | 20 | 8  |
| 370551 | 112 | 760140 | 760153 | 2 | 7  | 14 | CA  | 23 | 11 |
| 370553 | 112 | 760593 | 760626 | 2 | 17 | 34 | TG  | 19 | 12 |
| 370555 | 112 | 762050 | 762067 | 3 | 6  | 18 | TCT | 26 | 3  |

|        |     |        |        |   |    |    |      |    |    |
|--------|-----|--------|--------|---|----|----|------|----|----|
| 370556 | 112 | 762137 | 762156 | 2 | 10 | 20 | GT   | 24 | 5  |
| 370557 | 112 | 762257 | 762292 | 2 | 18 | 36 | TC   | 12 | 13 |
| 370561 | 112 | 763886 | 763897 | 2 | 6  | 12 | GA   | 6  | 6  |
| 370562 | 112 | 764116 | 764145 | 2 | 15 | 30 | AC   | 6  | 8  |
| 370563 | 112 | 764249 | 764266 | 2 | 9  | 18 | CA   | 19 | 5  |
| 370565 | 112 | 767176 | 767207 | 2 | 16 | 32 | AC   | 16 | 5  |
| 370566 | 112 | 767278 | 767299 | 2 | 11 | 22 | CA   | 15 | 4  |
| 370567 | 112 | 767484 | 767503 | 2 | 10 | 20 | GT   | 16 | 10 |
| 370568 | 112 | 767538 | 767571 | 2 | 17 | 34 | GT   | 13 | 10 |
| 370569 | 112 | 767710 | 767747 | 2 | 19 | 38 | GT   | 12 | 15 |
| 370571 | 112 | 767859 | 767872 | 2 | 7  | 14 | GT   | 9  | 3  |
| 370576 | 112 | 768252 | 768295 | 2 | 22 | 44 | GT   | 10 | 12 |
| 370578 | 112 | 772303 | 772326 | 4 | 6  | 24 | CTCC | 6  | 3  |
| 370579 | 112 | 774527 | 774548 | 2 | 11 | 22 | CA   | 28 | 9  |
| 370580 | 112 | 774711 | 774740 | 2 | 15 | 30 | GT   | 9  | 9  |
| 370582 | 112 | 780977 | 780988 | 2 | 6  | 12 | AC   | 12 | 7  |
| 370584 | 112 | 782616 | 782653 | 2 | 19 | 38 | GT   | 10 | 14 |
| 370585 | 112 | 782692 | 782709 | 2 | 9  | 18 | TG   | 23 | 7  |
| 370586 | 112 | 783146 | 783163 | 2 | 9  | 18 | CT   | 18 | 7  |
| 370588 | 112 | 790668 | 790693 | 2 | 13 | 26 | TG   | 10 | 5  |
| 370589 | 112 | 790907 | 790924 | 2 | 9  | 18 | CA   | 24 | 6  |
| 370597 | 112 | 794975 | 794998 | 2 | 12 | 24 | GT   | 17 | 11 |
| 370598 | 112 | 797219 | 797232 | 2 | 7  | 14 | TG   | 24 | 3  |
| 370599 | 112 | 797380 | 797399 | 2 | 10 | 20 | GT   | 23 | 7  |
| 370600 | 112 | 797485 | 797502 | 2 | 9  | 18 | GT   | 17 | 7  |
| 370601 | 112 | 797662 | 797679 | 3 | 6  | 18 | AAG  | 26 | 3  |
| 370603 | 112 | 798913 | 798928 | 2 | 8  | 16 | CA   | 17 | 5  |
| 370604 | 112 | 800880 | 800891 | 2 | 6  | 12 | CT   | 23 | 4  |
| 370606 | 112 | 801146 | 801161 | 2 | 8  | 16 | GT   | 16 | 4  |
| 370611 | 112 | 807960 | 807987 | 2 | 14 | 28 | CT   | 13 | 10 |
| 370615 | 112 | 821040 | 821059 | 2 | 10 | 20 | TG   | 12 | 6  |
| 370616 | 112 | 821312 | 821325 | 2 | 7  | 14 | GT   | 32 | 3  |
| 370618 | 112 | 826428 | 826443 | 4 | 4  | 16 | CCCT | 15 | 3  |
| 370619 | 112 | 826481 | 826498 | 3 | 6  | 18 | GCT  | 15 | 5  |
| 370621 | 112 | 827837 | 827864 | 2 | 14 | 28 | AC   | 11 | 7  |
| 370632 | 112 | 830612 | 830631 | 2 | 10 | 20 | CA   | 19 | 9  |
| 370633 | 112 | 830766 | 830791 | 2 | 13 | 26 | CA   | 12 | 4  |
| 370634 | 112 | 831664 | 831691 | 2 | 14 | 28 | GT   | 10 | 10 |
| 370643 | 112 | 835535 | 835560 | 2 | 13 | 26 | AC   | 9  | 7  |
| 370644 | 112 | 835722 | 835741 | 2 | 10 | 20 | GT   | 19 | 9  |
| 370645 | 112 | 836624 | 836653 | 3 | 10 | 30 | TCC  | 12 | 9  |
| 370646 | 112 | 836690 | 836717 | 2 | 14 | 28 | GT   | 8  | 9  |
| 370648 | 112 | 837134 | 837151 | 2 | 9  | 18 | TC   | 23 | 5  |
| 370652 | 112 | 837552 | 837583 | 2 | 16 | 32 | GT   | 20 | 10 |
| 370653 | 112 | 837729 | 837772 | 2 | 22 | 44 | GT   | 8  | 12 |
| 370655 | 112 | 837963 | 837988 | 2 | 13 | 26 | AC   | 14 | 9  |
| 370656 | 112 | 838298 | 838348 | 3 | 17 | 51 | TTC  | 10 | 6  |
| 370658 | 112 | 839059 | 839076 | 3 | 6  | 18 | GAG  | 16 | 6  |
| 370659 | 112 | 839118 | 839141 | 2 | 12 | 24 | AC   | 9  | 7  |
| 370661 | 112 | 839266 | 839297 | 2 | 16 | 32 | CA   | 13 | 4  |
| 370667 | 112 | 840659 | 840676 | 3 | 6  | 18 | AGC  | 32 | 4  |

|        |     |        |        |   |    |    |      |    |    |
|--------|-----|--------|--------|---|----|----|------|----|----|
| 370668 | 112 | 840802 | 840815 | 2 | 7  | 14 | TG   | 12 | 3  |
| 370670 | 112 | 841321 | 841352 | 2 | 16 | 32 | AC   | 14 | 8  |
| 370671 | 112 | 842170 | 842203 | 2 | 17 | 34 | CA   | 21 | 11 |
| 370672 | 112 | 842343 | 842375 | 3 | 11 | 33 | GAG  | 9  | 4  |
| 370674 | 112 | 842907 | 842934 | 2 | 14 | 28 | AC   | 8  | 10 |
| 370677 | 112 | 843144 | 843179 | 2 | 18 | 36 | TG   | 16 | 12 |
| 370678 | 112 | 843719 | 843733 | 3 | 5  | 15 | GAA  | 19 | 11 |
| 370679 | 112 | 844272 | 844295 | 3 | 8  | 24 | GAA  | 23 | 5  |
| 370680 | 112 | 844466 | 844517 | 2 | 26 | 52 | GT   | 7  | 11 |
| 370681 | 112 | 844626 | 844643 | 2 | 9  | 18 | GT   | 21 | 10 |
| 370683 | 112 | 846091 | 846120 | 2 | 15 | 30 | TG   | 10 | 11 |
| 370684 | 112 | 846275 | 846286 | 2 | 6  | 12 | GT   | 19 | 4  |
| 370685 | 112 | 847454 | 847467 | 2 | 7  | 14 | TC   | 31 | 5  |
| 370690 | 112 | 851123 | 851134 | 2 | 6  | 12 | GA   | 16 | 5  |
| 370695 | 112 | 864151 | 864198 | 4 | 12 | 48 | TTTC | 7  | 6  |
| 370697 | 112 | 864436 | 864451 | 4 | 4  | 16 | CTTC | 10 | 3  |
| 370700 | 112 | 865210 | 865229 | 2 | 10 | 20 | TG   | 9  | 10 |
| 370701 | 112 | 865256 | 865279 | 2 | 12 | 24 | AC   | 18 | 10 |
| 370702 | 112 | 865419 | 865448 | 2 | 15 | 30 | GT   | 20 | 13 |
| 370712 | 112 | 866933 | 866962 | 2 | 15 | 30 | CA   | 17 | 10 |
| 370713 | 112 | 867962 | 867987 | 2 | 13 | 26 | TG   | 17 | 10 |
| 370714 | 112 | 868716 | 868747 | 2 | 16 | 32 | GT   | 8  | 9  |
| 370716 | 112 | 870293 | 870326 | 2 | 17 | 34 | AC   | 13 | 10 |
| 370717 | 112 | 871582 | 871631 | 2 | 25 | 50 | AC   | 8  | 11 |
| 370718 | 112 | 871715 | 871738 | 2 | 12 | 24 | CA   | 9  | 8  |
| 370721 | 112 | 873300 | 873319 | 2 | 10 | 20 | AC   | 13 | 11 |
| 370722 | 112 | 873351 | 873376 | 2 | 13 | 26 | CA   | 15 | 9  |
| 370726 | 112 | 873742 | 873755 | 2 | 7  | 14 | CA   | 12 | 7  |
| 370728 | 112 | 875920 | 875945 | 2 | 13 | 26 | CA   | 7  | 8  |
| 370729 | 112 | 876167 | 876180 | 2 | 7  | 14 | TG   | 6  | 4  |
| 370733 | 112 | 877986 | 878023 | 2 | 19 | 38 | AC   | 11 | 12 |
| 370736 | 112 | 878281 | 878298 | 2 | 9  | 18 | GA   | 12 | 6  |
| 370738 | 112 | 879511 | 879534 | 2 | 12 | 24 | CA   | 16 | 14 |
| 370740 | 112 | 879672 | 879701 | 2 | 15 | 30 | GT   | 6  | 9  |
| 370743 | 112 | 879850 | 879877 | 2 | 14 | 28 | GT   | 9  | 15 |
| 370744 | 112 | 880005 | 880032 | 2 | 14 | 28 | AC   | 13 | 11 |
| 370745 | 112 | 880147 | 880166 | 4 | 5  | 20 | CTTT | 23 | 9  |
| 370749 | 112 | 881925 | 881939 | 3 | 5  | 15 | CCT  | 7  | 4  |
| 370750 | 112 | 882114 | 882131 | 2 | 9  | 18 | CA   | 26 | 3  |
| 370751 | 112 | 884252 | 884269 | 2 | 9  | 18 | AC   | 26 | 6  |
| 370752 | 112 | 885989 | 886004 | 2 | 8  | 16 | AG   | 23 | 6  |
| 370753 | 112 | 886094 | 886115 | 2 | 11 | 22 | GA   | 12 | 9  |
| 370755 | 112 | 888052 | 888065 | 2 | 7  | 14 | TG   | 18 | 4  |
| 370756 | 112 | 888107 | 888128 | 2 | 11 | 22 | GT   | 22 | 9  |
| 370759 | 112 | 888575 | 888608 | 2 | 17 | 34 | GT   | 12 | 8  |
| 370760 | 112 | 888658 | 888675 | 2 | 9  | 18 | GT   | 19 | 7  |
| 370761 | 112 | 888790 | 888805 | 2 | 8  | 16 | GT   | 23 | 7  |
| 370764 | 112 | 892019 | 892042 | 2 | 12 | 24 | CA   | 13 | 9  |
| 370765 | 112 | 892222 | 892263 | 2 | 21 | 42 | CA   | 7  | 9  |
| 370776 | 112 | 893559 | 893570 | 2 | 6  | 12 | CA   | 6  | 3  |
| 370780 | 112 | 896467 | 896478 | 2 | 6  | 12 | GT   | 19 | 3  |

|        |     |         |         |   |    |    |      |    |    |
|--------|-----|---------|---------|---|----|----|------|----|----|
| 370782 | 112 | 896643  | 896660  | 2 | 9  | 18 | AC   | 19 | 6  |
| 370783 | 112 | 897029  | 897049  | 3 | 7  | 21 | GAG  | 13 | 5  |
| 370785 | 112 | 897385  | 897406  | 2 | 11 | 22 | AC   | 12 | 5  |
| 370786 | 112 | 897496  | 897515  | 2 | 10 | 20 | AC   | 12 | 5  |
| 370800 | 112 | 904619  | 904636  | 2 | 9  | 18 | TG   | 18 | 6  |
| 370802 | 112 | 904897  | 904912  | 2 | 8  | 16 | AC   | 17 | 6  |
| 370803 | 112 | 906257  | 906270  | 2 | 7  | 14 | CA   | 11 | 4  |
| 370807 | 112 | 908039  | 908054  | 2 | 8  | 16 | CA   | 26 | 6  |
| 370808 | 112 | 908216  | 908233  | 2 | 9  | 18 | GT   | 22 | 4  |
| 370809 | 112 | 908714  | 908725  | 2 | 6  | 12 | CA   | 19 | 11 |
| 370810 | 112 | 910480  | 910495  | 2 | 8  | 16 | AC   | 18 | 10 |
| 370815 | 112 | 916850  | 916863  | 2 | 7  | 14 | AG   | 25 | 3  |
| 370816 | 112 | 917537  | 917568  | 2 | 16 | 32 | AC   | 20 | 10 |
| 370817 | 112 | 917916  | 917927  | 2 | 6  | 12 | GT   | 22 | 3  |
| 370819 | 112 | 919419  | 919440  | 2 | 11 | 22 | AC   | 11 | 9  |
| 370827 | 112 | 928967  | 929006  | 2 | 20 | 40 | GT   | 8  | 7  |
| 370828 | 112 | 929052  | 929065  | 2 | 7  | 14 | CA   | 16 | 3  |
| 370829 | 112 | 929395  | 929408  | 2 | 7  | 14 | AC   | 19 | 5  |
| 370831 | 112 | 931150  | 931167  | 2 | 9  | 18 | CA   | 26 | 10 |
| 370835 | 112 | 932746  | 932769  | 2 | 12 | 24 | AC   | 11 | 11 |
| 370836 | 112 | 933026  | 933069  | 2 | 22 | 44 | TG   | 9  | 11 |
| 370839 | 112 | 933399  | 933418  | 2 | 10 | 20 | TG   | 11 | 8  |
| 370841 | 112 | 934870  | 934885  | 2 | 8  | 16 | CA   | 19 | 4  |
| 370846 | 112 | 935509  | 935576  | 2 | 34 | 68 | GT   | 9  | 11 |
| 370848 | 112 | 939096  | 939115  | 2 | 10 | 20 | GT   | 16 | 17 |
| 370849 | 112 | 939228  | 939239  | 2 | 6  | 12 | TG   | 23 | 4  |
| 370853 | 112 | 942788  | 942819  | 2 | 16 | 32 | GT   | 9  | 9  |
| 370854 | 112 | 943501  | 943524  | 3 | 8  | 24 | GGA  | 8  | 7  |
| 370857 | 112 | 943854  | 943895  | 2 | 21 | 42 | GT   | 11 | 11 |
| 370866 | 112 | 950106  | 950131  | 2 | 13 | 26 | AC   | 18 | 9  |
| 370869 | 112 | 952816  | 952837  | 2 | 11 | 22 | TG   | 14 | 10 |
| 370870 | 112 | 952993  | 953008  | 2 | 8  | 16 | AG   | 17 | 11 |
| 370876 | 112 | 956222  | 956235  | 2 | 7  | 14 | AC   | 18 | 9  |
| 370877 | 112 | 956237  | 956254  | 2 | 9  | 18 | CA   | 14 | 9  |
| 370878 | 112 | 956873  | 956886  | 2 | 7  | 14 | AC   | 21 | 3  |
| 370879 | 112 | 960055  | 960074  | 2 | 10 | 20 | AC   | 16 | 11 |
| 370883 | 112 | 961900  | 961913  | 2 | 7  | 14 | GT   | 20 | 6  |
| 370884 | 112 | 961964  | 961975  | 2 | 6  | 12 | AC   | 20 | 4  |
| 370885 | 112 | 962257  | 962270  | 2 | 7  | 14 | AC   | 24 | 3  |
| 370887 | 112 | 963976  | 964011  | 2 | 18 | 36 | CA   | 7  | 6  |
| 370888 | 112 | 964778  | 964809  | 2 | 16 | 32 | GT   | 11 | 5  |
| 370891 | 112 | 970841  | 970858  | 3 | 6  | 18 | GAG  | 17 | 7  |
| 370892 | 112 | 974674  | 974699  | 2 | 13 | 26 | CA   | 23 | 9  |
| 370894 | 112 | 979258  | 979275  | 3 | 6  | 18 | TTC  | 11 | 4  |
| 370895 | 112 | 979278  | 979295  | 3 | 6  | 18 | CTT  | 21 | 5  |
| 370897 | 112 | 987443  | 987466  | 2 | 12 | 24 | CA   | 22 | 7  |
| 370898 | 112 | 993872  | 993891  | 4 | 5  | 20 | AAAG | 22 | 4  |
| 370899 | 112 | 994357  | 994392  | 4 | 9  | 36 | AGAA | 6  | 7  |
| 370903 | 112 | 1002103 | 1002114 | 2 | 6  | 12 | AT   | 22 | 14 |
| 370904 | 112 | 1002829 | 1002846 | 3 | 6  | 18 | ATT  | 16 | 4  |
| 370907 | 112 | 1007553 | 1007567 | 3 | 5  | 15 | AGG  | 24 | 6  |

|        |     |         |         |   |    |    |      |    |    |
|--------|-----|---------|---------|---|----|----|------|----|----|
| 370914 | 112 | 1014081 | 1014126 | 2 | 23 | 46 | AC   | 6  | 9  |
| 370915 | 112 | 1015753 | 1015778 | 2 | 13 | 26 | AC   | 16 | 8  |
| 370917 | 112 | 1020124 | 1020138 | 3 | 5  | 15 | AGG  | 23 | 7  |
| 370921 | 112 | 1024034 | 1024045 | 2 | 6  | 12 | TG   | 6  | 4  |
| 370922 | 112 | 1024996 | 1025010 | 3 | 5  | 15 | GAG  | 28 | 6  |
| 370927 | 113 | 10910   | 10921   | 2 | 6  | 12 | GT   | 22 | 4  |
| 370937 | 113 | 39758   | 39773   | 2 | 8  | 16 | AT   | 10 | 3  |
| 370939 | 113 | 55372   | 55389   | 2 | 9  | 18 | AC   | 12 | 4  |
| 370945 | 113 | 61289   | 61314   | 2 | 13 | 26 | AG   | 9  | 6  |
| 370949 | 113 | 61551   | 61566   | 2 | 8  | 16 | TC   | 22 | 4  |
| 370952 | 113 | 68544   | 68557   | 2 | 7  | 14 | GT   | 24 | 4  |
| 370953 | 113 | 70344   | 70375   | 2 | 16 | 32 | CA   | 11 | 11 |
| 370954 | 113 | 73628   | 73671   | 2 | 22 | 44 | TG   | 14 | 12 |
| 370964 | 113 | 92654   | 92677   | 2 | 12 | 24 | TC   | 11 | 7  |
| 370965 | 113 | 93178   | 93193   | 2 | 8  | 16 | AT   | 22 | 11 |
| 370967 | 113 | 95390   | 95401   | 2 | 6  | 12 | AC   | 25 | 3  |
| 370979 | 113 | 135522  | 135545  | 2 | 12 | 24 | GT   | 13 | 10 |
| 370986 | 113 | 147630  | 147653  | 2 | 12 | 24 | TG   | 21 | 9  |
| 370987 | 113 | 147967  | 148006  | 4 | 10 | 40 | CTGT | 24 | 7  |
| 370993 | 113 | 155331  | 155354  | 3 | 8  | 24 | AGG  | 14 | 4  |
| 370994 | 113 | 157428  | 157453  | 2 | 13 | 26 | AC   | 17 | 7  |
| 370996 | 113 | 158490  | 158515  | 2 | 13 | 26 | TG   | 13 | 5  |
| 370997 | 113 | 159873  | 159886  | 2 | 7  | 14 | TG   | 26 | 7  |
| 370999 | 113 | 164388  | 164411  | 2 | 12 | 24 | AC   | 16 | 11 |
| 371000 | 113 | 166844  | 166859  | 2 | 8  | 16 | TG   | 19 | 11 |
| 371001 | 113 | 167003  | 167018  | 2 | 8  | 16 | AC   | 22 | 3  |
| 371002 | 113 | 167170  | 167189  | 2 | 10 | 20 | AC   | 17 | 4  |
| 371007 | 113 | 168313  | 168336  | 2 | 12 | 24 | CA   | 16 | 6  |
| 371008 | 113 | 168374  | 168387  | 2 | 7  | 14 | CT   | 10 | 6  |
| 371010 | 113 | 168461  | 168476  | 2 | 8  | 16 | CA   | 21 | 4  |
| 371011 | 113 | 168593  | 168614  | 2 | 11 | 22 | TG   | 6  | 8  |
| 371014 | 113 | 170928  | 170951  | 2 | 12 | 24 | CA   | 13 | 12 |
| 371015 | 113 | 171013  | 171026  | 2 | 7  | 14 | AC   | 18 | 7  |
| 371016 | 113 | 171133  | 171162  | 2 | 15 | 30 | AC   | 9  | 5  |
| 371017 | 113 | 171594  | 171621  | 2 | 14 | 28 | GT   | 15 | 14 |
| 371033 | 113 | 177163  | 177186  | 2 | 12 | 24 | TG   | 16 | 5  |
| 371037 | 113 | 179217  | 179276  | 2 | 30 | 60 | CA   | 11 | 15 |
| 371044 | 113 | 189843  | 189869  | 3 | 9  | 27 | AAG  | 14 | 10 |
| 371057 | 113 | 226438  | 226453  | 4 | 4  | 16 | TTTA | 7  | 5  |
| 371059 | 113 | 233295  | 233308  | 2 | 7  | 14 | GA   | 23 | 3  |
| 371064 | 113 | 236287  | 236314  | 2 | 14 | 28 | AC   | 19 | 8  |
| 371067 | 113 | 242280  | 242291  | 2 | 6  | 12 | CA   | 14 | 8  |
| 371068 | 113 | 242294  | 242309  | 2 | 8  | 16 | CA   | 11 | 6  |
| 371072 | 113 | 256055  | 256076  | 2 | 11 | 22 | CA   | 15 | 6  |
| 371077 | 113 | 273192  | 273231  | 2 | 20 | 40 | TG   | 7  | 13 |
| 371078 | 113 | 274350  | 274365  | 4 | 4  | 16 | AGAT | 9  | 4  |
| 371081 | 113 | 280539  | 280552  | 2 | 7  | 14 | TG   | 30 | 3  |
| 371089 | 113 | 302379  | 302390  | 2 | 6  | 12 | TG   | 31 | 4  |
| 371095 | 113 | 307394  | 307409  | 2 | 8  | 16 | CA   | 12 | 6  |
| 371096 | 113 | 307445  | 307476  | 2 | 16 | 32 | TC   | 8  | 8  |
| 371097 | 113 | 309143  | 309160  | 2 | 9  | 18 | AT   | 11 | 8  |

|        |     |        |        |   |    |    |      |    |    |
|--------|-----|--------|--------|---|----|----|------|----|----|
| 371099 | 113 | 309551 | 309564 | 2 | 7  | 14 | CA   | 8  | 7  |
| 371117 | 113 | 356049 | 356066 | 2 | 9  | 18 | CA   | 16 | 9  |
| 371118 | 113 | 356746 | 356769 | 2 | 12 | 24 | TG   | 24 | 6  |
| 371119 | 113 | 357621 | 357644 | 2 | 12 | 24 | CA   | 7  | 6  |
| 371120 | 113 | 357820 | 357835 | 2 | 8  | 16 | GA   | 12 | 6  |
| 371121 | 113 | 358833 | 358888 | 2 | 28 | 56 | AC   | 9  | 10 |
| 371122 | 113 | 362616 | 362627 | 2 | 6  | 12 | CG   | 24 | 21 |
| 371124 | 113 | 362840 | 362855 | 4 | 4  | 16 | AAAC | 17 | 8  |
| 371127 | 113 | 363419 | 363440 | 2 | 11 | 22 | GT   | 18 | 15 |
| 371129 | 113 | 365034 | 365065 | 4 | 8  | 32 | AACC | 22 | 8  |
| 371131 | 113 | 365759 | 365790 | 4 | 8  | 32 | GAAT | 27 | 10 |
| 371136 | 113 | 379952 | 379966 | 3 | 5  | 15 | TTG  | 29 | 5  |
| 371140 | 113 | 383656 | 383677 | 2 | 11 | 22 | CA   | 21 | 3  |
| 371142 | 113 | 385592 | 385615 | 2 | 12 | 24 | TG   | 17 | 6  |
| 371145 | 113 | 388609 | 388640 | 2 | 16 | 32 | TG   | 6  | 7  |
| 371149 | 113 | 393690 | 393711 | 2 | 11 | 22 | TG   | 10 | 9  |
| 371150 | 113 | 393808 | 393827 | 2 | 10 | 20 | TG   | 15 | 6  |
| 371152 | 113 | 393984 | 394015 | 2 | 16 | 32 | GT   | 17 | 10 |
| 371153 | 113 | 394134 | 394147 | 2 | 7  | 14 | GT   | 29 | 3  |
| 371159 | 113 | 403356 | 403385 | 3 | 10 | 30 | AGA  | 29 | 9  |
| 371160 | 113 | 405465 | 405478 | 2 | 7  | 14 | AC   | 35 | 4  |
| 371162 | 113 | 408643 | 408662 | 2 | 10 | 20 | TA   | 13 | 6  |
| 371165 | 113 | 412030 | 412081 | 2 | 26 | 52 | AC   | 9  | 8  |
| 371166 | 113 | 413768 | 413787 | 2 | 10 | 20 | GA   | 22 | 6  |
| 371167 | 113 | 413810 | 413839 | 2 | 15 | 30 | GA   | 11 | 4  |
| 371168 | 113 | 416250 | 416267 | 2 | 9  | 18 | CA   | 12 | 5  |
| 371172 | 113 | 420324 | 420349 | 2 | 13 | 26 | TG   | 14 | 4  |
| 371174 | 113 | 421996 | 422011 | 2 | 8  | 16 | CA   | 11 | 6  |
| 371181 | 113 | 434434 | 434461 | 2 | 14 | 28 | GT   | 11 | 6  |
| 371182 | 113 | 436005 | 436022 | 2 | 9  | 18 | TG   | 18 | 4  |
| 371183 | 113 | 437772 | 437793 | 2 | 11 | 22 | TG   | 8  | 4  |
| 371191 | 113 | 454719 | 454752 | 2 | 17 | 34 | AC   | 6  | 7  |
| 371192 | 113 | 455291 | 455306 | 2 | 8  | 16 | GA   | 30 | 3  |
| 371198 | 113 | 462949 | 462960 | 2 | 6  | 12 | AT   | 22 | 11 |
| 371205 | 113 | 471106 | 471135 | 2 | 15 | 30 | AC   | 19 | 8  |
| 371212 | 113 | 490123 | 490149 | 3 | 9  | 27 | ATT  | 18 | 10 |
| 371232 | 113 | 557919 | 557942 | 2 | 12 | 24 | AC   | 10 | 9  |
| 371233 | 113 | 558212 | 558227 | 4 | 4  | 16 | ATTC | 28 | 4  |
| 371235 | 113 | 559901 | 559926 | 2 | 13 | 26 | TG   | 8  | 9  |
| 371236 | 113 | 561099 | 561112 | 2 | 7  | 14 | GT   | 6  | 3  |
| 371239 | 113 | 564638 | 564663 | 2 | 13 | 26 | GT   | 10 | 6  |
| 371240 | 113 | 564741 | 564760 | 2 | 10 | 20 | TG   | 15 | 5  |
| 371241 | 113 | 566962 | 567001 | 2 | 20 | 40 | GT   | 10 | 8  |
| 371244 | 113 | 567269 | 567294 | 2 | 13 | 26 | GT   | 17 | 8  |
| 371247 | 113 | 568923 | 568972 | 2 | 25 | 50 | CA   | 9  | 10 |
| 371264 | 113 | 581258 | 581302 | 3 | 15 | 45 | CTT  | 20 | 7  |
| 371266 | 113 | 581447 | 581464 | 3 | 6  | 18 | TTG  | 14 | 3  |
| 371269 | 113 | 587038 | 587057 | 2 | 10 | 20 | TG   | 19 | 5  |
| 371271 | 113 | 588212 | 588231 | 2 | 10 | 20 | AC   | 14 | 9  |
| 371276 | 113 | 596060 | 596089 | 3 | 10 | 30 | GCA  | 17 | 5  |
| 371277 | 113 | 598414 | 598427 | 2 | 7  | 14 | TG   | 25 | 5  |

|        |     |        |        |   |    |    |      |    |    |
|--------|-----|--------|--------|---|----|----|------|----|----|
| 371280 | 113 | 601516 | 601573 | 2 | 29 | 58 | GT   | 6  | 6  |
| 371281 | 113 | 602005 | 602028 | 4 | 6  | 24 | TTTC | 15 | 6  |
| 371284 | 113 | 610003 | 610034 | 4 | 8  | 32 | TCTA | 20 | 9  |
| 371291 | 113 | 614286 | 614301 | 2 | 8  | 16 | GT   | 11 | 3  |
| 371292 | 113 | 616079 | 616092 | 2 | 7  | 14 | AT   | 16 | 9  |
| 371298 | 113 | 621755 | 621768 | 2 | 7  | 14 | AC   | 20 | 14 |
| 371299 | 113 | 621944 | 621965 | 2 | 11 | 22 | CA   | 13 | 6  |
| 371304 | 113 | 625466 | 625495 | 2 | 15 | 30 | GT   | 15 | 9  |
| 371306 | 113 | 626601 | 626622 | 2 | 11 | 22 | TG   | 21 | 9  |
| 371308 | 113 | 628494 | 628505 | 2 | 6  | 12 | TG   | 24 | 8  |
| 371309 | 113 | 628508 | 628519 | 2 | 6  | 12 | TG   | 15 | 5  |
| 371310 | 113 | 629422 | 629443 | 2 | 11 | 22 | TG   | 13 | 7  |
| 371311 | 113 | 629503 | 629528 | 2 | 13 | 26 | TG   | 11 | 10 |
| 371312 | 113 | 629638 | 629657 | 2 | 10 | 20 | TG   | 18 | 14 |
| 371316 | 113 | 632259 | 632284 | 2 | 13 | 26 | GT   | 15 | 11 |
| 371320 | 113 | 641751 | 641768 | 2 | 9  | 18 | CA   | 20 | 4  |
| 371322 | 113 | 641978 | 641999 | 2 | 11 | 22 | GT   | 18 | 11 |
| 371323 | 113 | 642113 | 642142 | 2 | 15 | 30 | GT   | 17 | 14 |
| 371324 | 113 | 642295 | 642314 | 2 | 10 | 20 | CA   | 14 | 8  |
| 371328 | 113 | 653703 | 653736 | 2 | 17 | 34 | TG   | 13 | 10 |
| 371329 | 113 | 653761 | 653776 | 2 | 8  | 16 | AC   | 17 | 4  |
| 371330 | 113 | 653894 | 653905 | 2 | 6  | 12 | CA   | 23 | 7  |
| 371332 | 113 | 655989 | 656000 | 2 | 6  | 12 | CA   | 12 | 4  |
| 371333 | 113 | 656440 | 656455 | 2 | 8  | 16 | AC   | 22 | 11 |
| 371334 | 113 | 659834 | 659845 | 2 | 6  | 12 | AC   | 25 | 3  |
| 371335 | 113 | 664229 | 664242 | 2 | 7  | 14 | AC   | 19 | 5  |
| 371337 | 113 | 666717 | 666738 | 2 | 11 | 22 | AC   | 18 | 7  |
| 371339 | 113 | 674176 | 674197 | 2 | 11 | 22 | TG   | 8  | 7  |
| 371342 | 113 | 693473 | 693500 | 2 | 14 | 28 | TG   | 19 | 7  |
| 371343 | 113 | 693894 | 693919 | 2 | 13 | 26 | CA   | 18 | 8  |
| 371344 | 113 | 694214 | 694237 | 2 | 12 | 24 | GT   | 10 | 10 |
| 371345 | 113 | 695646 | 695677 | 2 | 16 | 32 | GT   | 16 | 9  |
| 371346 | 113 | 695824 | 695843 | 2 | 10 | 20 | GT   | 9  | 7  |
| 371350 | 113 | 699935 | 699949 | 3 | 5  | 15 | AAT  | 9  | 4  |
| 371351 | 113 | 700486 | 700497 | 2 | 6  | 12 | GT   | 20 | 8  |
| 371352 | 113 | 700499 | 700512 | 2 | 7  | 14 | TG   | 9  | 3  |
| 371353 | 113 | 700624 | 700637 | 2 | 7  | 14 | GA   | 17 | 4  |
| 371355 | 113 | 701329 | 701356 | 2 | 14 | 28 | GT   | 17 | 7  |
| 371357 | 113 | 702866 | 702892 | 3 | 9  | 27 | AGA  | 29 | 17 |
| 371365 | 113 | 706716 | 706735 | 2 | 10 | 20 | TG   | 21 | 9  |
| 371366 | 113 | 712208 | 712223 | 2 | 8  | 16 | CA   | 13 | 9  |
| 371367 | 113 | 712225 | 712238 | 2 | 7  | 14 | AC   | 8  | 5  |
| 371368 | 113 | 712381 | 712408 | 2 | 14 | 28 | AC   | 17 | 12 |
| 371369 | 113 | 714765 | 714776 | 2 | 6  | 12 | AC   | 30 | 4  |
| 371370 | 113 | 715261 | 715292 | 2 | 16 | 32 | CA   | 12 | 8  |
| 371374 | 113 | 718182 | 718201 | 2 | 10 | 20 | GT   | 14 | 12 |
| 371376 | 113 | 719620 | 719641 | 2 | 11 | 22 | GT   | 27 | 9  |
| 371378 | 113 | 720820 | 720833 | 2 | 7  | 14 | GT   | 16 | 11 |
| 371379 | 113 | 720836 | 720853 | 2 | 9  | 18 | GT   | 19 | 10 |
| 371380 | 113 | 721114 | 721127 | 2 | 7  | 14 | TG   | 11 | 12 |
| 371381 | 113 | 721131 | 721146 | 2 | 8  | 16 | GT   | 8  | 7  |



|        |     |        |        |   |    |    |      |    |    |
|--------|-----|--------|--------|---|----|----|------|----|----|
| 371383 | 113 | 727539 | 727562 | 2 | 12 | 24 | GT   | 23 | 9  |
| 371386 | 113 | 728400 | 728411 | 2 | 6  | 12 | CA   | 22 | 13 |
| 371387 | 113 | 728566 | 728593 | 2 | 14 | 28 | AC   | 18 | 8  |
| 371389 | 113 | 728716 | 728737 | 2 | 11 | 22 | CT   | 6  | 8  |
| 371394 | 113 | 730603 | 730614 | 2 | 6  | 12 | AC   | 29 | 4  |
| 371395 | 113 | 731138 | 731193 | 2 | 28 | 56 | AC   | 6  | 11 |
| 371405 | 113 | 743787 | 743820 | 2 | 17 | 34 | TG   | 22 | 8  |
| 371406 | 113 | 745100 | 745115 | 2 | 8  | 16 | AC   | 15 | 11 |
| 371407 | 113 | 746269 | 746296 | 2 | 14 | 28 | CA   | 21 | 7  |
| 371408 | 113 | 746443 | 746488 | 2 | 23 | 46 | AC   | 14 | 13 |
| 371409 | 113 | 747708 | 747725 | 2 | 9  | 18 | AC   | 24 | 4  |
| 371413 | 113 | 753097 | 753108 | 2 | 6  | 12 | TG   | 25 | 8  |
| 371414 | 113 | 753931 | 753950 | 4 | 5  | 20 | TCCT | 24 | 5  |
| 371415 | 113 | 754515 | 754544 | 2 | 15 | 30 | CA   | 14 | 12 |
| 371416 | 113 | 757348 | 757365 | 2 | 9  | 18 | AC   | 24 | 5  |
| 371417 | 113 | 760953 | 760972 | 2 | 10 | 20 | CA   | 23 | 3  |
| 371418 | 113 | 761103 | 761114 | 2 | 6  | 12 | CA   | 30 | 4  |
| 371419 | 113 | 761343 | 761374 | 2 | 16 | 32 | GA   | 10 | 9  |
| 371421 | 113 | 761502 | 761523 | 2 | 11 | 22 | CA   | 9  | 4  |
| 371422 | 113 | 762903 | 762934 | 2 | 16 | 32 | GT   | 7  | 7  |
| 371423 | 113 | 763199 | 763222 | 2 | 12 | 24 | AC   | 23 | 6  |
| 371424 | 113 | 763673 | 763693 | 3 | 7  | 21 | TCC  | 18 | 4  |
| 371425 | 113 | 763850 | 763869 | 2 | 10 | 20 | AC   | 25 | 5  |
| 371427 | 113 | 765813 | 765826 | 2 | 7  | 14 | AC   | 28 | 4  |
| 371428 | 113 | 767077 | 767088 | 2 | 6  | 12 | TA   | 29 | 8  |
| 371431 | 113 | 769153 | 769164 | 2 | 6  | 12 | CA   | 26 | 6  |
| 371435 | 113 | 771768 | 771785 | 2 | 9  | 18 | TG   | 8  | 6  |
| 371440 | 113 | 774656 | 774671 | 4 | 4  | 16 | CATC | 28 | 3  |
| 371441 | 113 | 776262 | 776275 | 2 | 7  | 14 | CA   | 18 | 3  |
| 371443 | 113 | 779524 | 779547 | 4 | 6  | 24 | TCTT | 12 | 3  |
| 371445 | 113 | 779640 | 779651 | 2 | 6  | 12 | GT   | 8  | 3  |
| 371446 | 113 | 779718 | 779767 | 2 | 25 | 50 | CT   | 6  | 9  |
| 371447 | 113 | 780005 | 780028 | 2 | 12 | 24 | CA   | 8  | 4  |
| 371449 | 113 | 782711 | 782730 | 2 | 10 | 20 | AC   | 16 | 4  |
| 371450 | 113 | 782866 | 782887 | 2 | 11 | 22 | AC   | 19 | 8  |
| 371451 | 113 | 783013 | 783028 | 2 | 8  | 16 | AC   | 15 | 3  |
| 371452 | 113 | 783069 | 783080 | 2 | 6  | 12 | TG   | 6  | 7  |
| 371453 | 113 | 783082 | 783097 | 2 | 8  | 16 | GT   | 6  | 8  |
| 371454 | 113 | 784375 | 784404 | 2 | 15 | 30 | AC   | 21 | 8  |
| 371455 | 113 | 784565 | 784584 | 2 | 10 | 20 | CA   | 20 | 11 |
| 371456 | 113 | 784674 | 784693 | 2 | 10 | 20 | CA   | 15 | 9  |
| 371458 | 113 | 785518 | 785543 | 2 | 13 | 26 | CA   | 15 | 6  |
| 371459 | 113 | 787446 | 787479 | 2 | 17 | 34 | CA   | 13 | 11 |
| 371462 | 113 | 788804 | 788829 | 2 | 13 | 26 | TG   | 12 | 8  |
| 371465 | 113 | 792828 | 792841 | 2 | 7  | 14 | TG   | 15 | 8  |
| 371467 | 113 | 793348 | 793393 | 2 | 23 | 46 | GT   | 6  | 10 |
| 371468 | 113 | 793505 | 793522 | 2 | 9  | 18 | AC   | 15 | 8  |
| 371472 | 113 | 807894 | 807909 | 2 | 8  | 16 | GT   | 15 | 7  |
| 371473 | 113 | 807912 | 807923 | 2 | 6  | 12 | GT   | 18 | 7  |
| 371475 | 113 | 808764 | 808777 | 2 | 7  | 14 | AC   | 22 | 3  |
| 371478 | 113 | 812809 | 812832 | 2 | 12 | 24 | AC   | 10 | 7  |

|        |     |        |        |   |    |    |      |    |    |
|--------|-----|--------|--------|---|----|----|------|----|----|
| 371483 | 113 | 819073 | 819094 | 2 | 11 | 22 | AC   | 19 | 5  |
| 371484 | 113 | 820010 | 820033 | 2 | 12 | 24 | GA   | 16 | 5  |
| 371486 | 113 | 823195 | 823254 | 2 | 30 | 60 | GA   | 8  | 8  |
| 371490 | 113 | 826264 | 826283 | 2 | 10 | 20 | GT   | 15 | 15 |
| 371493 | 113 | 836469 | 836492 | 2 | 12 | 24 | CA   | 18 | 8  |
| 371497 | 113 | 837422 | 837441 | 2 | 10 | 20 | AC   | 20 | 5  |
| 371499 | 113 | 837682 | 837697 | 2 | 8  | 16 | GT   | 18 | 17 |
| 371500 | 113 | 839537 | 839562 | 2 | 13 | 26 | AC   | 15 | 8  |
| 371501 | 113 | 839714 | 839733 | 2 | 10 | 20 | CA   | 20 | 8  |
| 371502 | 113 | 844062 | 844103 | 2 | 21 | 42 | GT   | 14 | 10 |
| 371504 | 113 | 853131 | 853156 | 2 | 13 | 26 | AC   | 9  | 9  |
| 371508 | 113 | 854149 | 854181 | 3 | 11 | 33 | GAG  | 9  | 7  |
| 371514 | 113 | 855204 | 855217 | 2 | 7  | 14 | CA   | 24 | 3  |
| 371515 | 113 | 856229 | 856264 | 2 | 18 | 36 | AC   | 16 | 10 |
| 371519 | 113 | 862305 | 862316 | 2 | 6  | 12 | TG   | 21 | 4  |
| 371520 | 113 | 862987 | 863002 | 2 | 8  | 16 | TG   | 33 | 4  |
| 371525 | 113 | 878525 | 878556 | 2 | 16 | 32 | AC   | 21 | 16 |
| 371527 | 113 | 879400 | 879417 | 3 | 6  | 18 | CTG  | 20 | 5  |
| 371529 | 113 | 881233 | 881276 | 2 | 22 | 44 | GT   | 12 | 13 |
| 371530 | 113 | 882638 | 882653 | 2 | 8  | 16 | AC   | 22 | 8  |
| 371532 | 113 | 887837 | 887851 | 3 | 5  | 15 | GAG  | 16 | 3  |
| 371533 | 113 | 889793 | 889819 | 3 | 9  | 27 | AGG  | 9  | 8  |
| 371535 | 113 | 896290 | 896301 | 2 | 6  | 12 | TG   | 19 | 3  |
| 371538 | 113 | 896868 | 896927 | 2 | 30 | 60 | TG   | 11 | 12 |
| 371545 | 113 | 911351 | 911374 | 2 | 12 | 24 | CA   | 20 | 8  |
| 371554 | 113 | 931802 | 931825 | 3 | 8  | 24 | TCC  | 16 | 4  |
| 371558 | 113 | 939104 | 939117 | 2 | 7  | 14 | TA   | 9  | 4  |
| 371561 | 113 | 947941 | 947952 | 2 | 6  | 12 | TG   | 18 | 3  |
| 371562 | 113 | 949099 | 949122 | 2 | 12 | 24 | TG   | 18 | 5  |
| 371563 | 113 | 950380 | 950395 | 2 | 8  | 16 | AG   | 23 | 5  |
| 371567 | 113 | 958462 | 958505 | 2 | 22 | 44 | CT   | 9  | 8  |
| 371575 | 113 | 966598 | 966619 | 2 | 11 | 22 | TG   | 27 | 9  |
| 371576 | 113 | 966824 | 966837 | 2 | 7  | 14 | CA   | 10 | 3  |
| 371577 | 113 | 966840 | 966853 | 2 | 7  | 14 | CA   | 6  | 5  |
| 371579 | 113 | 970458 | 970489 | 2 | 16 | 32 | CA   | 10 | 8  |
| 371580 | 113 | 970707 | 970724 | 2 | 9  | 18 | GA   | 16 | 7  |
| 371586 | 113 | 982578 | 982591 | 2 | 7  | 14 | TC   | 27 | 3  |
| 371588 | 113 | 983944 | 983977 | 2 | 17 | 34 | CA   | 13 | 10 |
| 371589 | 113 | 984050 | 984101 | 2 | 26 | 52 | TC   | 7  | 9  |
| 371591 | 113 | 984930 | 984943 | 2 | 7  | 14 | CA   | 8  | 4  |
| 371601 | 113 | 987390 | 987401 | 2 | 6  | 12 | AC   | 17 | 3  |
| 371603 | 113 | 993122 | 993133 | 2 | 6  | 12 | AG   | 25 | 3  |
| 371608 | 113 | 998526 | 998553 | 2 | 14 | 28 | TG   | 17 | 8  |
| 371609 | 113 | 998672 | 998691 | 2 | 10 | 20 | GT   | 16 | 10 |
| 371624 | 114 | 53226  | 53251  | 2 | 13 | 26 | GT   | 8  | 11 |
| 371625 | 114 | 54016  | 54035  | 4 | 5  | 20 | AAGC | 29 | 3  |
| 371626 | 114 | 56184  | 56207  | 2 | 12 | 24 | CA   | 23 | 8  |
| 371636 | 114 | 79393  | 79420  | 2 | 14 | 28 | GT   | 16 | 10 |
| 371637 | 114 | 79540  | 79567  | 2 | 14 | 28 | TG   | 18 | 13 |
| 371638 | 114 | 83137  | 83162  | 2 | 13 | 26 | GA   | 14 | 7  |
| 371647 | 114 | 103817 | 103830 | 2 | 7  | 14 | GT   | 10 | 5  |

|        |     |        |        |   |    |    |      |    |    |
|--------|-----|--------|--------|---|----|----|------|----|----|
| 371651 | 114 | 109349 | 109368 | 2 | 10 | 20 | TG   | 14 | 7  |
| 371652 | 114 | 109408 | 109433 | 2 | 13 | 26 | TC   | 14 | 8  |
| 371655 | 114 | 112728 | 112755 | 2 | 14 | 28 | GT   | 17 | 8  |
| 371656 | 114 | 118446 | 118483 | 2 | 19 | 38 | CA   | 8  | 8  |
| 371658 | 114 | 121319 | 121334 | 4 | 4  | 16 | ATTA | 22 | 4  |
| 371659 | 114 | 121900 | 121935 | 2 | 18 | 36 | CA   | 14 | 10 |
| 371661 | 114 | 129328 | 129359 | 2 | 16 | 32 | TG   | 18 | 11 |
| 371662 | 114 | 133783 | 133814 | 2 | 16 | 32 | TG   | 15 | 8  |
| 371664 | 114 | 135611 | 135634 | 2 | 12 | 24 | TG   | 17 | 11 |
| 371665 | 114 | 138691 | 138716 | 2 | 13 | 26 | TG   | 9  | 6  |
| 371667 | 114 | 143872 | 143887 | 4 | 4  | 16 | TGTC | 27 | 3  |
| 371668 | 114 | 148052 | 148077 | 2 | 13 | 26 | AC   | 16 | 6  |
| 371669 | 114 | 148259 | 148276 | 2 | 9  | 18 | GT   | 17 | 6  |
| 371671 | 114 | 151895 | 151916 | 2 | 11 | 22 | GT   | 21 | 10 |
| 371677 | 114 | 171925 | 171952 | 4 | 7  | 28 | TCTG | 29 | 7  |
| 371678 | 114 | 172094 | 172143 | 2 | 25 | 50 | TG   | 7  | 9  |
| 371679 | 114 | 172262 | 172273 | 2 | 6  | 12 | AC   | 20 | 3  |
| 371680 | 114 | 178130 | 178143 | 2 | 7  | 14 | GT   | 24 | 5  |
| 371682 | 114 | 178348 | 178361 | 2 | 7  | 14 | GA   | 9  | 7  |
| 371683 | 114 | 178511 | 178528 | 2 | 9  | 18 | CA   | 24 | 6  |
| 371684 | 114 | 179854 | 179867 | 2 | 7  | 14 | GT   | 18 | 5  |
| 371685 | 114 | 186907 | 186927 | 3 | 7  | 21 | GAG  | 26 | 3  |
| 371690 | 114 | 203919 | 203930 | 2 | 6  | 12 | TG   | 24 | 4  |
| 371691 | 114 | 210446 | 210463 | 3 | 6  | 18 | GCA  | 23 | 5  |
| 371693 | 114 | 221178 | 221195 | 2 | 9  | 18 | CA   | 21 | 6  |
| 371697 | 114 | 230221 | 230259 | 3 | 13 | 39 | TGA  | 22 | 14 |
| 371700 | 114 | 231645 | 231662 | 2 | 9  | 18 | TG   | 20 | 5  |
| 371702 | 114 | 238564 | 238579 | 2 | 8  | 16 | AC   | 22 | 3  |
| 371706 | 114 | 246963 | 246974 | 2 | 6  | 12 | AC   | 19 | 5  |
| 371707 | 114 | 248949 | 248960 | 2 | 6  | 12 | AT   | 13 | 4  |
| 371709 | 114 | 254771 | 254782 | 2 | 6  | 12 | CA   | 29 | 3  |
| 371710 | 114 | 257565 | 257586 | 2 | 11 | 22 | TG   | 12 | 8  |
| 371713 | 114 | 267993 | 268010 | 3 | 6  | 18 | TCT  | 13 | 11 |
| 371714 | 114 | 268011 | 268025 | 3 | 5  | 15 | TAT  | 11 | 11 |
| 371716 | 114 | 270428 | 270445 | 2 | 9  | 18 | CT   | 21 | 3  |
| 371718 | 114 | 275680 | 275695 | 2 | 8  | 16 | GT   | 26 | 7  |
| 371719 | 114 | 275698 | 275709 | 2 | 6  | 12 | GT   | 30 | 9  |
| 371724 | 114 | 287329 | 287362 | 2 | 17 | 34 | CA   | 6  | 8  |
| 371732 | 114 | 310669 | 310707 | 3 | 13 | 39 | GCA  | 30 | 8  |
| 371743 | 114 | 319151 | 319180 | 2 | 15 | 30 | TC   | 14 | 11 |
| 371748 | 114 | 327328 | 327357 | 2 | 15 | 30 | CA   | 19 | 10 |
| 371759 | 114 | 339641 | 339654 | 2 | 7  | 14 | TG   | 17 | 8  |
| 371760 | 114 | 339656 | 339673 | 2 | 9  | 18 | GT   | 21 | 7  |
| 371761 | 114 | 339768 | 339787 | 2 | 10 | 20 | GT   | 21 | 7  |
| 371762 | 114 | 339944 | 339957 | 2 | 7  | 14 | AC   | 23 | 16 |
| 371765 | 114 | 342703 | 342732 | 2 | 15 | 30 | GT   | 14 | 5  |
| 371766 | 114 | 342834 | 342847 | 2 | 7  | 14 | CA   | 17 | 4  |
| 371767 | 114 | 344184 | 344207 | 2 | 12 | 24 | CA   | 19 | 8  |
| 371768 | 114 | 345727 | 345740 | 2 | 7  | 14 | AC   | 22 | 3  |
| 371770 | 114 | 346884 | 346897 | 2 | 7  | 14 | AT   | 12 | 4  |
| 371773 | 114 | 363279 | 363304 | 2 | 13 | 26 | CA   | 18 | 4  |

|        |     |        |        |   |    |    |      |    |    |
|--------|-----|--------|--------|---|----|----|------|----|----|
| 371775 | 114 | 369323 | 369344 | 2 | 11 | 22 | AC   | 6  | 7  |
| 371776 | 114 | 371755 | 371766 | 2 | 6  | 12 | AG   | 28 | 3  |
| 371784 | 114 | 382369 | 382388 | 2 | 10 | 20 | CA   | 10 | 10 |
| 371786 | 114 | 384740 | 384757 | 2 | 9  | 18 | CA   | 18 | 8  |
| 371793 | 114 | 396732 | 396751 | 2 | 10 | 20 | CA   | 22 | 7  |
| 371796 | 114 | 400833 | 400850 | 2 | 9  | 18 | TG   | 9  | 6  |
| 371797 | 114 | 400998 | 401039 | 2 | 21 | 42 | AC   | 6  | 9  |
| 371800 | 114 | 405801 | 405820 | 2 | 10 | 20 | GT   | 17 | 7  |
| 371805 | 114 | 418963 | 418986 | 2 | 12 | 24 | CA   | 17 | 7  |
| 371806 | 114 | 419129 | 419140 | 2 | 6  | 12 | CT   | 33 | 4  |
| 371807 | 114 | 419188 | 419201 | 2 | 7  | 14 | GT   | 32 | 5  |
| 371814 | 114 | 432689 | 432700 | 2 | 6  | 12 | TG   | 30 | 3  |
| 371823 | 114 | 440634 | 440651 | 2 | 9  | 18 | GT   | 18 | 4  |
| 371825 | 114 | 440747 | 440778 | 2 | 16 | 32 | CA   | 12 | 8  |
| 371827 | 114 | 443079 | 443110 | 2 | 16 | 32 | TG   | 15 | 11 |
| 371828 | 114 | 443706 | 443735 | 2 | 15 | 30 | TG   | 10 | 6  |
| 371830 | 114 | 445563 | 445576 | 2 | 7  | 14 | TG   | 23 | 3  |
| 371831 | 114 | 445771 | 445786 | 2 | 8  | 16 | GT   | 16 | 9  |
| 371832 | 114 | 445789 | 445800 | 2 | 6  | 12 | GT   | 16 | 7  |
| 371833 | 114 | 447545 | 447562 | 3 | 6  | 18 | CTC  | 31 | 4  |
| 371834 | 114 | 448349 | 448362 | 2 | 7  | 14 | CA   | 13 | 6  |
| 371837 | 114 | 454545 | 454562 | 2 | 9  | 18 | TC   | 18 | 3  |
| 371841 | 114 | 459074 | 459095 | 2 | 11 | 22 | CT   | 25 | 7  |
| 371844 | 114 | 464452 | 464469 | 3 | 6  | 18 | TGA  | 22 | 4  |
| 371847 | 114 | 467771 | 467788 | 3 | 6  | 18 | TCT  | 21 | 3  |
| 371850 | 114 | 469834 | 469863 | 2 | 15 | 30 | TG   | 9  | 9  |
| 371854 | 114 | 480712 | 480745 | 2 | 17 | 34 | TG   | 12 | 7  |
| 371857 | 114 | 482658 | 482675 | 3 | 6  | 18 | ACT  | 31 | 5  |
| 371858 | 114 | 484875 | 484890 | 4 | 4  | 16 | ATCC | 23 | 4  |
| 371864 | 114 | 523004 | 523023 | 4 | 5  | 20 | TATT | 22 | 10 |
| 371867 | 114 | 539705 | 539734 | 2 | 15 | 30 | GT   | 9  | 8  |
| 371876 | 114 | 562656 | 562673 | 2 | 9  | 18 | AC   | 18 | 6  |
| 371883 | 114 | 565934 | 565947 | 2 | 7  | 14 | CA   | 18 | 7  |
| 371884 | 114 | 565950 | 565963 | 2 | 7  | 14 | CA   | 18 | 8  |
| 371887 | 114 | 571108 | 571135 | 2 | 14 | 28 | AC   | 16 | 11 |
| 371888 | 114 | 571649 | 571672 | 2 | 12 | 24 | TG   | 21 | 4  |
| 371896 | 114 | 581599 | 581642 | 2 | 22 | 44 | CA   | 8  | 10 |
| 371903 | 114 | 594663 | 594677 | 3 | 5  | 15 | GCA  | 30 | 4  |
| 371909 | 114 | 597326 | 597337 | 2 | 6  | 12 | AC   | 26 | 4  |
| 371917 | 114 | 606210 | 606221 | 2 | 6  | 12 | CA   | 23 | 5  |
| 371946 | 114 | 674504 | 674527 | 4 | 6  | 24 | AACA | 22 | 5  |
| 371951 | 114 | 690940 | 690959 | 4 | 5  | 20 | AGAC | 20 | 7  |
| 371961 | 114 | 732680 | 732697 | 2 | 9  | 18 | CA   | 26 | 3  |
| 371962 | 114 | 739685 | 739702 | 3 | 6  | 18 | TGC  | 28 | 4  |
| 371964 | 114 | 743621 | 743636 | 2 | 8  | 16 | TG   | 27 | 6  |
| 371969 | 114 | 756237 | 756250 | 2 | 7  | 14 | AC   | 23 | 8  |
| 371970 | 114 | 756252 | 756265 | 2 | 7  | 14 | CA   | 21 | 8  |
| 371972 | 114 | 761775 | 761792 | 2 | 9  | 18 | AC   | 21 | 3  |
| 371980 | 114 | 771527 | 771546 | 4 | 5  | 20 | ATTT | 26 | 3  |
| 371983 | 114 | 775769 | 775786 | 2 | 9  | 18 | AC   | 22 | 4  |
| 371984 | 114 | 775894 | 775923 | 2 | 15 | 30 | AC   | 19 | 13 |

|        |     |        |        |   |    |    |      |    |    |
|--------|-----|--------|--------|---|----|----|------|----|----|
| 371987 | 114 | 776964 | 776977 | 2 | 7  | 14 | TG   | 25 | 4  |
| 371988 | 114 | 780349 | 780374 | 2 | 13 | 26 | AC   | 9  | 8  |
| 371989 | 114 | 780513 | 780534 | 2 | 11 | 22 | AC   | 7  | 6  |
| 371991 | 114 | 780672 | 780699 | 2 | 14 | 28 | CT   | 17 | 6  |
| 371992 | 114 | 781179 | 781194 | 2 | 8  | 16 | TA   | 6  | 3  |
| 371995 | 114 | 781378 | 781399 | 2 | 11 | 22 | CA   | 13 | 7  |
| 371998 | 114 | 783464 | 783491 | 2 | 14 | 28 | GT   | 9  | 12 |
| 371999 | 114 | 783555 | 783570 | 2 | 8  | 16 | AC   | 19 | 5  |
| 372002 | 114 | 789371 | 789384 | 2 | 7  | 14 | AC   | 24 | 7  |
| 372003 | 114 | 792438 | 792459 | 2 | 11 | 22 | CA   | 7  | 5  |
| 372004 | 114 | 792612 | 792639 | 2 | 14 | 28 | GT   | 18 | 7  |
| 372005 | 114 | 792792 | 792817 | 2 | 13 | 26 | CA   | 7  | 5  |
| 372007 | 114 | 792955 | 792968 | 2 | 7  | 14 | AC   | 23 | 5  |
| 372008 | 114 | 793146 | 793165 | 4 | 5  | 20 | CAGA | 29 | 6  |
| 372019 | 114 | 796700 | 796717 | 2 | 9  | 18 | AC   | 15 | 4  |
| 372020 | 114 | 796882 | 796915 | 2 | 17 | 34 | GT   | 14 | 9  |
| 372022 | 114 | 797431 | 797442 | 2 | 6  | 12 | AC   | 20 | 6  |
| 372026 | 114 | 801128 | 801153 | 2 | 13 | 26 | TG   | 12 | 5  |
| 372034 | 114 | 818052 | 818081 | 2 | 15 | 30 | GT   | 13 | 10 |
| 372041 | 114 | 826592 | 826615 | 2 | 12 | 24 | GT   | 13 | 11 |
| 372042 | 114 | 826698 | 826718 | 3 | 7  | 21 | GCT  | 16 | 7  |
| 372045 | 114 | 827403 | 827420 | 3 | 6  | 18 | CTG  | 27 | 4  |
| 372046 | 114 | 827585 | 827610 | 2 | 13 | 26 | AC   | 20 | 5  |
| 372052 | 114 | 835616 | 835631 | 2 | 8  | 16 | TG   | 14 | 4  |
| 372053 | 114 | 835685 | 835704 | 2 | 10 | 20 | AT   | 17 | 7  |
| 372054 | 114 | 837044 | 837081 | 2 | 19 | 38 | AC   | 9  | 10 |
| 372055 | 114 | 840491 | 840506 | 2 | 8  | 16 | TG   | 8  | 6  |
| 372056 | 114 | 840881 | 840894 | 2 | 7  | 14 | AC   | 31 | 5  |
| 372058 | 114 | 843369 | 843383 | 3 | 5  | 15 | CTG  | 36 | 3  |
| 372062 | 114 | 845761 | 845787 | 3 | 9  | 27 | TCA  | 14 | 5  |
| 372063 | 114 | 847282 | 847293 | 2 | 6  | 12 | AC   | 20 | 7  |
| 372064 | 114 | 851166 | 851213 | 2 | 24 | 48 | CA   | 14 | 9  |
| 372065 | 114 | 853290 | 853304 | 3 | 5  | 15 | CAC  | 31 | 4  |
| 372069 | 114 | 861013 | 861024 | 2 | 6  | 12 | AG   | 7  | 4  |
| 372070 | 114 | 861123 | 861146 | 2 | 12 | 24 | TG   | 10 | 7  |
| 372071 | 114 | 861301 | 861312 | 2 | 6  | 12 | TG   | 18 | 3  |
| 372074 | 114 | 866210 | 866230 | 3 | 7  | 21 | CCA  | 10 | 4  |
| 372078 | 114 | 867651 | 867674 | 4 | 6  | 24 | AATA | 17 | 5  |
| 372079 | 114 | 868848 | 868861 | 2 | 7  | 14 | CT   | 23 | 6  |
| 372084 | 114 | 905258 | 905275 | 2 | 9  | 18 | CT   | 25 | 6  |
| 372087 | 114 | 911929 | 911946 | 2 | 9  | 18 | TG   | 18 | 9  |
| 372090 | 114 | 916538 | 916551 | 2 | 7  | 14 | AT   | 16 | 16 |
| 372091 | 114 | 918173 | 918188 | 4 | 4  | 16 | ATTT | 27 | 4  |
| 372092 | 114 | 922220 | 922237 | 3 | 6  | 18 | ATT  | 20 | 6  |
| 372097 | 114 | 937314 | 937328 | 3 | 5  | 15 | CGG  | 28 | 9  |
| 372098 | 114 | 940111 | 940126 | 2 | 8  | 16 | TG   | 19 | 4  |
| 372101 | 114 | 941713 | 941724 | 2 | 6  | 12 | GT   | 23 | 3  |
| 372102 | 114 | 945512 | 945526 | 3 | 5  | 15 | CAA  | 22 | 3  |
| 372103 | 114 | 947488 | 947505 | 2 | 9  | 18 | AC   | 27 | 7  |
| 372106 | 114 | 950392 | 950415 | 4 | 6  | 24 | TTTC | 22 | 9  |
| 372108 | 114 | 954453 | 954466 | 2 | 7  | 14 | TG   | 28 | 9  |

|        |     |         |         |   |    |    |      |    |    |
|--------|-----|---------|---------|---|----|----|------|----|----|
| 372109 | 114 | 954701  | 954714  | 2 | 7  | 14 | CA   | 19 | 3  |
| 372113 | 114 | 965725  | 965738  | 2 | 7  | 14 | AT   | 21 | 8  |
| 372115 | 114 | 974589  | 974608  | 4 | 5  | 20 | AAAT | 25 | 9  |
| 372116 | 114 | 978074  | 978087  | 2 | 7  | 14 | AC   | 22 | 6  |
| 372120 | 114 | 983841  | 983856  | 2 | 8  | 16 | CA   | 7  | 8  |
| 372122 | 114 | 995881  | 995895  | 3 | 5  | 15 | CTT  | 28 | 8  |
| 372132 | 114 | 1003886 | 1003905 | 2 | 10 | 20 | GT   | 8  | 6  |
| 372137 | 114 | 1004961 | 1004974 | 2 | 7  | 14 | TG   | 15 | 4  |
| 372138 | 114 | 1005038 | 1005055 | 2 | 9  | 18 | GT   | 21 | 11 |
| 372139 | 114 | 1005057 | 1005070 | 2 | 7  | 14 | TG   | 18 | 7  |
| 372140 | 114 | 1005172 | 1005183 | 2 | 6  | 12 | GT   | 24 | 3  |
| 372879 | 116 | 13196   | 13207   | 2 | 6  | 12 | TA   | 16 | 6  |
| 372880 | 116 | 25932   | 25946   | 3 | 5  | 15 | TAG  | 28 | 3  |
| 372882 | 116 | 34525   | 34542   | 2 | 9  | 18 | AC   | 20 | 7  |
| 372883 | 116 | 34932   | 34947   | 2 | 8  | 16 | CA   | 28 | 16 |
| 372885 | 116 | 41527   | 41550   | 4 | 6  | 24 | TGAT | 15 | 10 |
| 372886 | 116 | 42473   | 42496   | 4 | 6  | 24 | AATT | 14 | 3  |
| 372895 | 116 | 144929  | 144942  | 2 | 7  | 14 | GT   | 22 | 4  |
| 372897 | 116 | 165344  | 165358  | 3 | 5  | 15 | AGG  | 35 | 3  |
| 372899 | 116 | 173882  | 173909  | 4 | 7  | 28 | ATGG | 30 | 3  |
| 372903 | 116 | 195627  | 195641  | 3 | 5  | 15 | CTG  | 28 | 16 |
| 372919 | 116 | 220468  | 220485  | 3 | 6  | 18 | CTC  | 17 | 6  |
| 372920 | 116 | 220486  | 220503  | 3 | 6  | 18 | CTG  | 28 | 12 |
| 372921 | 116 | 223999  | 224010  | 2 | 6  | 12 | AG   | 7  | 3  |
| 372928 | 116 | 226727  | 226744  | 2 | 9  | 18 | CT   | 16 | 3  |
| 372930 | 116 | 227048  | 227075  | 2 | 14 | 28 | AC   | 8  | 8  |
| 372931 | 116 | 227095  | 227108  | 2 | 7  | 14 | GT   | 21 | 3  |
| 372933 | 116 | 227980  | 227997  | 3 | 6  | 18 | TGA  | 23 | 6  |
| 372934 | 116 | 228660  | 228707  | 2 | 24 | 48 | TG   | 8  | 13 |
| 372937 | 116 | 229457  | 229480  | 2 | 12 | 24 | CA   | 11 | 6  |
| 372939 | 116 | 229624  | 229647  | 2 | 12 | 24 | TG   | 12 | 8  |
| 372942 | 116 | 231363  | 231392  | 2 | 15 | 30 | AC   | 23 | 12 |
| 372943 | 116 | 231608  | 231643  | 2 | 18 | 36 | AC   | 7  | 7  |
| 372944 | 116 | 234067  | 234094  | 2 | 14 | 28 | CA   | 10 | 13 |
| 372950 | 116 | 237607  | 237639  | 3 | 11 | 33 | CCT  | 16 | 7  |
| 372951 | 116 | 237859  | 237876  | 2 | 9  | 18 | AC   | 15 | 9  |
| 372969 | 116 | 259753  | 259778  | 2 | 13 | 26 | AC   | 17 | 12 |
| 372981 | 116 | 267031  | 267090  | 2 | 30 | 60 | AC   | 6  | 7  |
| 372991 | 116 | 277301  | 277342  | 2 | 21 | 42 | CA   | 9  | 13 |
| 372995 | 116 | 277632  | 277655  | 2 | 12 | 24 | CA   | 16 | 9  |
| 373005 | 116 | 280057  | 280084  | 2 | 14 | 28 | GT   | 9  | 8  |
| 373012 | 116 | 282919  | 282958  | 4 | 10 | 40 | TTCC | 6  | 5  |
| 373014 | 116 | 283214  | 283227  | 2 | 7  | 14 | CA   | 22 | 6  |
| 373015 | 116 | 283322  | 283360  | 3 | 13 | 39 | ATG  | 25 | 20 |
| 373027 | 116 | 288350  | 288385  | 4 | 9  | 36 | TTGA | 30 | 6  |
| 373035 | 116 | 289447  | 289466  | 2 | 10 | 20 | TG   | 10 | 16 |
| 373036 | 116 | 290263  | 290286  | 2 | 12 | 24 | AC   | 8  | 11 |
| 373040 | 116 | 291104  | 291118  | 3 | 5  | 15 | CTG  | 26 | 3  |
| 373041 | 116 | 291663  | 291674  | 2 | 6  | 12 | AC   | 15 | 3  |
| 373043 | 116 | 291842  | 291887  | 2 | 23 | 46 | GT   | 6  | 9  |
| 373044 | 116 | 292513  | 292530  | 3 | 6  | 18 | CCG  | 24 | 16 |

|        |     |        |        |   |    |    |      |    |    |
|--------|-----|--------|--------|---|----|----|------|----|----|
| 373046 | 116 | 292847 | 292876 | 2 | 15 | 30 | AC   | 10 | 7  |
| 373053 | 116 | 296823 | 296858 | 2 | 18 | 36 | AC   | 9  | 11 |
| 373056 | 116 | 297113 | 297136 | 2 | 12 | 24 | GT   | 7  | 9  |
| 373060 | 116 | 299024 | 299063 | 2 | 20 | 40 | TG   | 13 | 9  |
| 373062 | 116 | 299707 | 299730 | 2 | 12 | 24 | GT   | 20 | 9  |
| 373063 | 116 | 301943 | 301972 | 2 | 15 | 30 | AC   | 17 | 8  |
| 373068 | 116 | 303641 | 303696 | 2 | 28 | 56 | CA   | 14 | 16 |
| 373072 | 116 | 306537 | 306572 | 2 | 18 | 36 | AC   | 7  | 4  |
| 373079 | 116 | 310303 | 310347 | 3 | 15 | 45 | GAA  | 6  | 6  |
| 373080 | 116 | 310491 | 310514 | 3 | 8  | 24 | TGA  | 30 | 5  |
| 373081 | 116 | 312292 | 312337 | 2 | 23 | 46 | TG   | 11 | 10 |
| 373083 | 116 | 313215 | 313241 | 3 | 9  | 27 | AGA  | 18 | 5  |
| 373116 | 116 | 331538 | 331595 | 2 | 29 | 58 | TG   | 6  | 8  |
| 373143 | 116 | 340568 | 340617 | 2 | 25 | 50 | TG   | 6  | 7  |
| 373146 | 116 | 342003 | 342016 | 2 | 7  | 14 | AC   | 7  | 7  |
| 373148 | 116 | 342176 | 342199 | 3 | 8  | 24 | TCC  | 12 | 6  |
| 373154 | 116 | 345349 | 345363 | 3 | 5  | 15 | AGG  | 17 | 6  |
| 373161 | 116 | 347656 | 347685 | 3 | 10 | 30 | CAG  | 25 | 6  |
| 373165 | 116 | 348531 | 348554 | 2 | 12 | 24 | GT   | 25 | 11 |
| 373166 | 116 | 348604 | 348619 | 2 | 8  | 16 | TG   | 22 | 7  |
| 373168 | 116 | 348913 | 348936 | 2 | 12 | 24 | CA   | 17 | 8  |
| 373170 | 116 | 350344 | 350367 | 2 | 12 | 24 | TG   | 7  | 9  |
| 373172 | 116 | 350540 | 350551 | 2 | 6  | 12 | TG   | 8  | 8  |
| 373179 | 116 | 351165 | 351230 | 3 | 22 | 66 | TTC  | 8  | 8  |
| 373189 | 116 | 355574 | 355589 | 2 | 8  | 16 | AC   | 6  | 5  |
| 373194 | 116 | 357031 | 357064 | 2 | 17 | 34 | CA   | 17 | 18 |
| 373196 | 116 | 359514 | 359537 | 2 | 12 | 24 | CA   | 14 | 9  |
| 373198 | 116 | 359642 | 359655 | 2 | 7  | 14 | GT   | 7  | 7  |
| 373210 | 116 | 365681 | 365700 | 2 | 10 | 20 | GT   | 11 | 12 |
| 373211 | 116 | 368906 | 368929 | 4 | 6  | 24 | TCAA | 23 | 4  |
| 373215 | 116 | 370089 | 370106 | 3 | 6  | 18 | CCT  | 24 | 4  |
| 373217 | 116 | 373351 | 373374 | 2 | 12 | 24 | GT   | 14 | 14 |
| 373218 | 116 | 373702 | 373737 | 3 | 12 | 36 | GAG  | 17 | 5  |
| 373223 | 116 | 376720 | 376745 | 2 | 13 | 26 | AC   | 9  | 8  |
| 373233 | 116 | 379876 | 379905 | 3 | 10 | 30 | TCC  | 13 | 8  |
| 373237 | 116 | 381327 | 381364 | 2 | 19 | 38 | AC   | 12 | 9  |
| 373277 | 116 | 406047 | 406067 | 3 | 7  | 21 | CCT  | 6  | 5  |
| 373285 | 116 | 408959 | 408986 | 2 | 14 | 28 | AC   | 6  | 9  |
| 373297 | 116 | 412815 | 412854 | 2 | 20 | 40 | AC   | 15 | 13 |
| 373318 | 116 | 432343 | 432372 | 2 | 15 | 30 | CA   | 12 | 10 |
| 373328 | 116 | 440433 | 440466 | 2 | 17 | 34 | AC   | 12 | 13 |
| 373333 | 116 | 443204 | 443233 | 2 | 15 | 30 | AC   | 23 | 8  |
| 373337 | 116 | 449719 | 449734 | 2 | 8  | 16 | AC   | 20 | 10 |
| 373338 | 116 | 450777 | 450812 | 2 | 18 | 36 | AC   | 6  | 6  |
| 373339 | 116 | 451854 | 451871 | 3 | 6  | 18 | TGT  | 25 | 3  |
| 373341 | 116 | 454634 | 454648 | 3 | 5  | 15 | GGA  | 32 | 3  |
| 373348 | 116 | 455860 | 455885 | 2 | 13 | 26 | AC   | 7  | 8  |
| 373353 | 116 | 456172 | 456195 | 2 | 12 | 24 | GT   | 16 | 10 |
| 373354 | 116 | 457956 | 457973 | 2 | 9  | 18 | CA   | 22 | 6  |
| 373355 | 116 | 458681 | 458712 | 2 | 16 | 32 | GT   | 16 | 6  |
| 373358 | 116 | 458978 | 458993 | 2 | 8  | 16 | CA   | 18 | 4  |

|        |     |        |        |   |    |    |      |    |    |
|--------|-----|--------|--------|---|----|----|------|----|----|
| 373360 | 116 | 459039 | 459064 | 2 | 13 | 26 | GT   | 22 | 8  |
| 373364 | 116 | 466515 | 466552 | 2 | 19 | 38 | GT   | 12 | 10 |
| 373372 | 116 | 468757 | 468776 | 2 | 10 | 20 | AC   | 26 | 11 |
| 373373 | 116 | 469487 | 469500 | 2 | 7  | 14 | GT   | 14 | 6  |
| 373374 | 116 | 469503 | 469518 | 2 | 8  | 16 | GT   | 13 | 7  |
| 373375 | 116 | 473052 | 473078 | 3 | 9  | 27 | GAG  | 15 | 5  |
| 373376 | 116 | 475143 | 475168 | 2 | 13 | 26 | AC   | 20 | 7  |
| 373377 | 116 | 475317 | 475334 | 2 | 9  | 18 | AC   | 20 | 5  |
| 373378 | 116 | 475391 | 475402 | 2 | 6  | 12 | AC   | 30 | 4  |
| 373379 | 116 | 476598 | 476618 | 3 | 7  | 21 | TCC  | 21 | 3  |
| 373380 | 116 | 476708 | 476731 | 3 | 8  | 24 | CTC  | 24 | 3  |
| 373392 | 116 | 480370 | 480395 | 2 | 13 | 26 | GT   | 14 | 6  |
| 373393 | 116 | 481597 | 481612 | 2 | 8  | 16 | AC   | 18 | 3  |
| 373395 | 116 | 484502 | 484541 | 2 | 20 | 40 | TG   | 10 | 9  |
| 373396 | 116 | 484690 | 484711 | 2 | 11 | 22 | AC   | 27 | 22 |
| 373398 | 116 | 486056 | 486100 | 3 | 15 | 45 | TCT  | 14 | 17 |
| 373399 | 116 | 486419 | 486454 | 2 | 18 | 36 | CA   | 13 | 9  |
| 373406 | 116 | 490237 | 490252 | 4 | 4  | 16 | TTTG | 19 | 6  |
| 373416 | 116 | 490953 | 490976 | 3 | 8  | 24 | ATA  | 11 | 3  |
| 373417 | 116 | 491390 | 491407 | 2 | 9  | 18 | AC   | 18 | 13 |
| 373418 | 116 | 491908 | 491922 | 3 | 5  | 15 | CAG  | 33 | 3  |
| 373421 | 116 | 492934 | 492947 | 2 | 7  | 14 | AC   | 26 | 10 |
| 373423 | 116 | 496816 | 496839 | 4 | 6  | 24 | CTGT | 26 | 3  |
| 373424 | 116 | 502158 | 502175 | 2 | 9  | 18 | GT   | 20 | 6  |
| 373425 | 116 | 503526 | 503551 | 2 | 13 | 26 | GT   | 20 | 7  |
| 373426 | 116 | 504616 | 504649 | 2 | 17 | 34 | TG   | 15 | 10 |
| 373427 | 116 | 504795 | 504828 | 2 | 17 | 34 | AC   | 7  | 8  |
| 373428 | 116 | 505838 | 505849 | 2 | 6  | 12 | AC   | 27 | 7  |
| 373429 | 116 | 506211 | 506242 | 2 | 16 | 32 | GT   | 25 | 13 |
| 373432 | 116 | 508302 | 508333 | 4 | 8  | 32 | TGTC | 18 | 4  |
| 373433 | 116 | 508816 | 508841 | 2 | 13 | 26 | GT   | 9  | 8  |
| 373436 | 116 | 512547 | 512567 | 3 | 7  | 21 | TGA  | 20 | 7  |
| 373443 | 116 | 516045 | 516064 | 2 | 10 | 20 | TG   | 27 | 13 |
| 373446 | 116 | 517217 | 517230 | 2 | 7  | 14 | CA   | 20 | 4  |
| 373447 | 116 | 517959 | 517976 | 3 | 6  | 18 | GAT  | 28 | 7  |
| 373451 | 116 | 519936 | 519953 | 3 | 6  | 18 | GAG  | 10 | 5  |
| 373461 | 116 | 525825 | 525856 | 2 | 16 | 32 | TG   | 12 | 9  |
| 373463 | 116 | 526628 | 526647 | 2 | 10 | 20 | TG   | 13 | 11 |
| 373464 | 116 | 526767 | 526806 | 2 | 20 | 40 | AC   | 10 | 9  |
| 373465 | 116 | 526982 | 527013 | 2 | 16 | 32 | TG   | 11 | 13 |
| 373466 | 116 | 527181 | 527216 | 2 | 18 | 36 | AC   | 10 | 12 |
| 373468 | 116 | 528161 | 528205 | 3 | 15 | 45 | GAT  | 6  | 9  |
| 373471 | 116 | 528330 | 528347 | 3 | 6  | 18 | TGA  | 6  | 3  |
| 373475 | 116 | 534444 | 534483 | 2 | 20 | 40 | GT   | 6  | 8  |
| 373478 | 116 | 535834 | 535873 | 2 | 20 | 40 | CA   | 9  | 14 |
| 373479 | 116 | 535967 | 536000 | 2 | 17 | 34 | AC   | 14 | 11 |
| 373480 | 116 | 536171 | 536184 | 2 | 7  | 14 | AC   | 19 | 7  |
| 373486 | 116 | 542009 | 542032 | 4 | 6  | 24 | AAAC | 22 | 3  |
| 373487 | 116 | 542229 | 542244 | 4 | 4  | 16 | CAAT | 22 | 4  |
| 373488 | 116 | 542541 | 542568 | 2 | 14 | 28 | GT   | 23 | 12 |
| 373491 | 116 | 546368 | 546382 | 3 | 5  | 15 | AGA  | 18 | 6  |



|        |     |        |        |   |    |    |      |    |    |
|--------|-----|--------|--------|---|----|----|------|----|----|
| 373493 | 116 | 548747 | 548764 | 3 | 6  | 18 | GAG  | 10 | 9  |
| 373495 | 116 | 549228 | 549245 | 3 | 6  | 18 | TTC  | 30 | 3  |
| 373498 | 116 | 552225 | 552245 | 3 | 7  | 21 | CTT  | 19 | 6  |
| 373502 | 116 | 553293 | 553312 | 2 | 10 | 20 | TG   | 25 | 7  |
| 373506 | 116 | 554986 | 555007 | 2 | 11 | 22 | AC   | 21 | 5  |
| 373507 | 116 | 555102 | 555135 | 2 | 17 | 34 | CA   | 11 | 7  |
| 373508 | 116 | 555252 | 555267 | 2 | 8  | 16 | AC   | 19 | 5  |
| 373510 | 116 | 555843 | 555857 | 3 | 5  | 15 | ACT  | 12 | 6  |
| 373521 | 116 | 560603 | 560634 | 2 | 16 | 32 | AC   | 15 | 13 |
| 373527 | 116 | 561252 | 561287 | 2 | 18 | 36 | AC   | 16 | 16 |
| 373531 | 116 | 561755 | 561786 | 2 | 16 | 32 | CA   | 18 | 11 |
| 373532 | 116 | 562693 | 562719 | 3 | 9  | 27 | CAT  | 27 | 8  |
| 373533 | 116 | 563295 | 563334 | 2 | 20 | 40 | GT   | 6  | 9  |
| 373534 | 116 | 563414 | 563451 | 2 | 19 | 38 | CA   | 8  | 9  |
| 373543 | 116 | 569416 | 569437 | 2 | 11 | 22 | GT   | 12 | 10 |
| 373544 | 116 | 570011 | 570030 | 2 | 10 | 20 | GA   | 23 | 5  |
| 373555 | 116 | 576827 | 576850 | 4 | 6  | 24 | TGAT | 24 | 10 |
| 373558 | 116 | 586031 | 586060 | 3 | 10 | 30 | ATG  | 26 | 4  |
| 373560 | 116 | 589071 | 589090 | 2 | 10 | 20 | GT   | 19 | 9  |
| 373561 | 116 | 589138 | 589159 | 2 | 11 | 22 | AC   | 17 | 8  |
| 373563 | 116 | 589334 | 589373 | 2 | 20 | 40 | AC   | 10 | 11 |
| 373565 | 116 | 592290 | 592309 | 2 | 10 | 20 | AC   | 15 | 16 |
| 373566 | 116 | 593348 | 593363 | 2 | 8  | 16 | AC   | 18 | 16 |
| 373590 | 116 | 601100 | 601111 | 2 | 6  | 12 | CA   | 25 | 13 |
| 373596 | 116 | 602380 | 602399 | 2 | 10 | 20 | CA   | 13 | 13 |
| 373597 | 116 | 602523 | 602548 | 2 | 13 | 26 | CA   | 12 | 7  |
| 373598 | 116 | 603355 | 603376 | 2 | 11 | 22 | CA   | 12 | 8  |
| 373599 | 116 | 603466 | 603495 | 2 | 15 | 30 | GT   | 12 | 7  |
| 373607 | 116 | 610474 | 610503 | 3 | 10 | 30 | GAG  | 17 | 7  |
| 373610 | 116 | 615296 | 615321 | 2 | 13 | 26 | AC   | 15 | 7  |
| 373612 | 116 | 615507 | 615560 | 3 | 18 | 54 | AGA  | 19 | 12 |
| 373621 | 116 | 619389 | 619434 | 2 | 23 | 46 | AC   | 12 | 9  |
| 373622 | 116 | 620346 | 620365 | 2 | 10 | 20 | GT   | 15 | 6  |
| 373623 | 116 | 620944 | 620965 | 2 | 11 | 22 | GT   | 17 | 10 |
| 373625 | 116 | 622092 | 622121 | 2 | 15 | 30 | AC   | 18 | 13 |
| 373626 | 116 | 622536 | 622559 | 2 | 12 | 24 | CA   | 16 | 8  |
| 373629 | 116 | 623948 | 623959 | 2 | 6  | 12 | TG   | 16 | 14 |
| 373633 | 116 | 624745 | 624778 | 2 | 17 | 34 | CA   | 20 | 16 |
| 373634 | 116 | 625617 | 625637 | 3 | 7  | 21 | AAC  | 24 | 7  |
| 373640 | 116 | 637165 | 637185 | 3 | 7  | 21 | TTA  | 9  | 6  |
| 373652 | 116 | 647950 | 647985 | 2 | 18 | 36 | TG   | 19 | 15 |
| 373661 | 116 | 648910 | 648935 | 2 | 13 | 26 | GT   | 23 | 10 |
| 373663 | 116 | 649725 | 649742 | 3 | 6  | 18 | GAT  | 27 | 5  |
| 373665 | 116 | 657421 | 657450 | 2 | 15 | 30 | AC   | 18 | 7  |
| 373667 | 116 | 661091 | 661114 | 2 | 12 | 24 | AC   | 24 | 9  |
| 373679 | 116 | 669290 | 669305 | 2 | 8  | 16 | TG   | 8  | 8  |
| 373680 | 116 | 669521 | 669556 | 2 | 18 | 36 | TG   | 11 | 12 |
| 373681 | 116 | 670071 | 670100 | 2 | 15 | 30 | CA   | 16 | 8  |
| 373682 | 116 | 670971 | 670992 | 2 | 11 | 22 | CA   | 16 | 7  |
| 373683 | 116 | 671053 | 671072 | 2 | 10 | 20 | TG   | 13 | 12 |
| 373686 | 116 | 672865 | 672908 | 2 | 22 | 44 | GT   | 13 | 17 |

|        |     |        |        |   |    |    |     |    |    |
|--------|-----|--------|--------|---|----|----|-----|----|----|
| 373687 | 116 | 673002 | 673015 | 2 | 7  | 14 | GT  | 10 | 10 |
| 373690 | 116 | 677524 | 677557 | 2 | 17 | 34 | CA  | 7  | 9  |
| 373691 | 116 | 679192 | 679206 | 3 | 5  | 15 | AGA | 25 | 12 |
| 373692 | 116 | 680911 | 680942 | 2 | 16 | 32 | TG  | 10 | 8  |
| 373695 | 116 | 682784 | 682823 | 2 | 20 | 40 | AC  | 9  | 9  |
| 373714 | 116 | 754364 | 754379 | 2 | 8  | 16 | CA  | 35 | 4  |
| 373715 | 116 | 758433 | 758448 | 2 | 8  | 16 | AC  | 30 | 7  |
| 373721 | 116 | 781239 | 781250 | 2 | 6  | 12 | GA  | 30 | 5  |
| 373749 | 116 | 830802 | 830825 | 2 | 12 | 24 | GT  | 14 | 6  |
| 373750 | 116 | 832639 | 832682 | 2 | 22 | 44 | GT  | 14 | 18 |
| 373753 | 116 | 833966 | 833997 | 2 | 16 | 32 | GT  | 8  | 8  |
| 373754 | 116 | 834048 | 834077 | 3 | 10 | 30 | TTC | 18 | 14 |
| 373755 | 116 | 837272 | 837283 | 2 | 6  | 12 | TG  | 31 | 3  |
| 373757 | 116 | 837922 | 837959 | 2 | 19 | 38 | AC  | 10 | 10 |
| 373758 | 116 | 838057 | 838088 | 2 | 16 | 32 | AC  | 16 | 10 |
| 373759 | 116 | 838172 | 838201 | 2 | 15 | 30 | TG  | 11 | 7  |
| 373762 | 116 | 839963 | 839988 | 2 | 13 | 26 | GT  | 15 | 5  |
| 373763 | 116 | 841616 | 841665 | 2 | 25 | 50 | GT  | 16 | 13 |
| 373765 | 116 | 842125 | 842140 | 2 | 8  | 16 | AC  | 25 | 3  |
| 373766 | 116 | 842202 | 842213 | 2 | 6  | 12 | GT  | 8  | 3  |
| 373767 | 116 | 842217 | 842234 | 2 | 9  | 18 | TG  | 12 | 3  |
| 373770 | 116 | 843167 | 843192 | 2 | 13 | 26 | TG  | 16 | 10 |
| 373771 | 116 | 843814 | 843837 | 2 | 12 | 24 | TG  | 8  | 6  |
| 373774 | 116 | 844220 | 844237 | 2 | 9  | 18 | CA  | 7  | 6  |
| 373775 | 116 | 844387 | 844426 | 2 | 20 | 40 | CA  | 16 | 10 |
| 373777 | 116 | 849607 | 849622 | 2 | 8  | 16 | AC  | 23 | 4  |
| 373778 | 116 | 850218 | 850249 | 2 | 16 | 32 | TG  | 15 | 7  |
| 373780 | 116 | 852825 | 852850 | 2 | 13 | 26 | GT  | 15 | 11 |
| 373782 | 116 | 852912 | 852931 | 2 | 10 | 20 | TG  | 12 | 6  |
| 373786 | 116 | 859185 | 859210 | 2 | 13 | 26 | GT  | 17 | 7  |
| 373787 | 116 | 860783 | 860812 | 2 | 15 | 30 | AC  | 23 | 9  |
| 373788 | 116 | 862417 | 862436 | 2 | 10 | 20 | AC  | 28 | 6  |
| 373789 | 116 | 862604 | 862627 | 2 | 12 | 24 | AC  | 23 | 8  |
| 373790 | 116 | 863152 | 863189 | 2 | 19 | 38 | AC  | 9  | 8  |
| 373791 | 116 | 863245 | 863266 | 2 | 11 | 22 | TG  | 22 | 8  |
| 373798 | 116 | 866300 | 866323 | 2 | 12 | 24 | TG  | 20 | 4  |
| 373799 | 116 | 866496 | 866549 | 2 | 27 | 54 | CA  | 11 | 8  |
| 373801 | 116 | 866840 | 866855 | 2 | 8  | 16 | AC  | 23 | 3  |
| 373802 | 116 | 868620 | 868633 | 2 | 7  | 14 | AC  | 21 | 3  |
| 373804 | 116 | 869446 | 869460 | 3 | 5  | 15 | ACG | 22 | 14 |
| 373805 | 116 | 869461 | 869478 | 3 | 6  | 18 | ATG | 26 | 16 |
| 373809 | 116 | 880768 | 880789 | 2 | 11 | 22 | AC  | 24 | 6  |
| 373814 | 116 | 883611 | 883662 | 2 | 26 | 52 | CA  | 7  | 11 |
| 373815 | 116 | 883758 | 883789 | 2 | 16 | 32 | TG  | 13 | 10 |
| 373816 | 116 | 885809 | 885826 | 2 | 9  | 18 | GT  | 27 | 6  |
| 373819 | 116 | 888471 | 888486 | 2 | 8  | 16 | CA  | 19 | 4  |
| 373821 | 116 | 889382 | 889403 | 2 | 11 | 22 | AC  | 26 | 8  |
| 373822 | 116 | 889633 | 889648 | 2 | 8  | 16 | TG  | 22 | 5  |
| 373823 | 116 | 890589 | 890612 | 3 | 8  | 24 | GAG | 21 | 5  |
| 373825 | 116 | 891270 | 891293 | 2 | 12 | 24 | GT  | 20 | 10 |
| 373826 | 116 | 896404 | 896424 | 3 | 7  | 21 | TTG | 30 | 4  |

|        |     |         |         |   |    |    |      |    |    |
|--------|-----|---------|---------|---|----|----|------|----|----|
| 373830 | 116 | 897320  | 897343  | 2 | 12 | 24 | TG   | 18 | 5  |
| 373836 | 116 | 903552  | 903577  | 2 | 13 | 26 | TG   | 27 | 7  |
| 373837 | 116 | 904666  | 904711  | 2 | 23 | 46 | AC   | 13 | 12 |
| 373838 | 116 | 904911  | 904962  | 2 | 26 | 52 | AC   | 6  | 7  |
| 373839 | 116 | 906237  | 906254  | 2 | 9  | 18 | TG   | 14 | 13 |
| 373842 | 116 | 907556  | 907571  | 2 | 8  | 16 | AG   | 20 | 3  |
| 373853 | 116 | 921732  | 921746  | 3 | 5  | 15 | GAA  | 19 | 6  |
| 373856 | 116 | 922609  | 922636  | 2 | 14 | 28 | GT   | 6  | 9  |
| 373858 | 116 | 933989  | 934006  | 3 | 6  | 18 | GAT  | 29 | 5  |
| 373859 | 116 | 934065  | 934082  | 2 | 9  | 18 | TG   | 22 | 6  |
| 373860 | 116 | 934137  | 934151  | 3 | 5  | 15 | GAG  | 25 | 3  |
| 373861 | 116 | 936400  | 936421  | 2 | 11 | 22 | CA   | 20 | 12 |
| 373863 | 116 | 936915  | 936935  | 3 | 7  | 21 | ATG  | 14 | 8  |
| 373912 | 116 | 955660  | 955686  | 3 | 9  | 27 | TTA  | 15 | 7  |
| 373918 | 116 | 976031  | 976066  | 4 | 9  | 36 | TCTA | 15 | 9  |
| 373925 | 116 | 989320  | 989333  | 2 | 7  | 14 | CA   | 25 | 3  |
| 373926 | 116 | 991732  | 991761  | 2 | 15 | 30 | CA   | 25 | 8  |
| 373930 | 116 | 1007247 | 1007270 | 3 | 8  | 24 | TGA  | 11 | 6  |
| 373933 | 116 | 1008261 | 1008278 | 3 | 6  | 18 | TGA  | 15 | 4  |
| 373937 | 116 | 1010335 | 1010354 | 2 | 10 | 20 | GT   | 17 | 14 |
| 373939 | 116 | 1014365 | 1014380 | 2 | 8  | 16 | CG   | 24 | 9  |
| 373940 | 116 | 1014381 | 1014392 | 2 | 6  | 12 | CA   | 9  | 4  |
| 373941 | 116 | 1021304 | 1021318 | 3 | 5  | 15 | GAT  | 26 | 4  |
| 373943 | 116 | 1026236 | 1026261 | 2 | 13 | 26 | AT   | 8  | 7  |
| 373951 | 116 | 1039641 | 1039672 | 2 | 16 | 32 | AC   | 10 | 12 |
| 373954 | 116 | 1041057 | 1041072 | 2 | 8  | 16 | AC   | 14 | 9  |
| 373964 | 116 | 1054806 | 1054837 | 2 | 16 | 32 | TG   | 7  | 6  |
| 373968 | 116 | 1061683 | 1061720 | 2 | 19 | 38 | GT   | 7  | 6  |
| 373971 | 116 | 1063770 | 1063817 | 2 | 24 | 48 | AC   | 6  | 6  |
| 373989 | 116 | 1077179 | 1077202 | 3 | 8  | 24 | GGA  | 19 | 3  |
| 373990 | 116 | 1080945 | 1080966 | 2 | 11 | 22 | GA   | 10 | 6  |
| 374679 | 118 | 31064   | 31089   | 2 | 13 | 26 | TG   | 12 | 11 |
| 374681 | 118 | 41686   | 41711   | 2 | 13 | 26 | AC   | 8  | 10 |
| 374694 | 118 | 120457  | 120494  | 2 | 19 | 38 | TG   | 6  | 5  |
| 374701 | 118 | 135548  | 135571  | 4 | 6  | 24 | AAAT | 15 | 3  |
| 374709 | 118 | 152898  | 152917  | 2 | 10 | 20 | TG   | 18 | 4  |
| 374711 | 118 | 167396  | 167410  | 3 | 5  | 15 | TTG  | 20 | 3  |
| 374719 | 118 | 193102  | 193137  | 2 | 18 | 36 | AC   | 8  | 8  |
| 374722 | 118 | 199970  | 199999  | 2 | 15 | 30 | TA   | 7  | 6  |
| 374723 | 118 | 202154  | 202165  | 2 | 6  | 12 | CA   | 29 | 4  |
| 374724 | 118 | 204526  | 204571  | 2 | 23 | 46 | AC   | 6  | 6  |
| 374737 | 118 | 236593  | 236614  | 2 | 11 | 22 | GT   | 22 | 7  |
| 374742 | 118 | 240585  | 240624  | 2 | 20 | 40 | CA   | 8  | 8  |
| 374747 | 118 | 256019  | 256030  | 2 | 6  | 12 | GT   | 14 | 3  |
| 374751 | 118 | 281027  | 281046  | 4 | 5  | 20 | TATC | 20 | 5  |
| 374754 | 118 | 288311  | 288346  | 2 | 18 | 36 | GT   | 6  | 7  |
| 374763 | 118 | 315319  | 315334  | 2 | 8  | 16 | AC   | 28 | 4  |
| 374768 | 118 | 333356  | 333373  | 2 | 9  | 18 | AC   | 23 | 5  |
| 374783 | 118 | 362318  | 362349  | 4 | 8  | 32 | AAAC | 21 | 8  |
| 374784 | 118 | 363979  | 364000  | 2 | 11 | 22 | GT   | 13 | 7  |
| 374797 | 118 | 394644  | 394657  | 2 | 7  | 14 | TA   | 19 | 6  |

|        |     |         |         |   |    |    |      |    |    |
|--------|-----|---------|---------|---|----|----|------|----|----|
| 374808 | 118 | 430308  | 430335  | 4 | 7  | 28 | AGAT | 22 | 4  |
| 374811 | 118 | 435598  | 435629  | 2 | 16 | 32 | TG   | 18 | 6  |
| 374815 | 118 | 442300  | 442323  | 2 | 12 | 24 | CA   | 13 | 10 |
| 374825 | 118 | 476882  | 476903  | 2 | 11 | 22 | AC   | 19 | 5  |
| 374826 | 118 | 479410  | 479425  | 2 | 8  | 16 | CA   | 17 | 14 |
| 374828 | 118 | 488155  | 488188  | 2 | 17 | 34 | CA   | 15 | 8  |
| 374833 | 118 | 492368  | 492379  | 2 | 6  | 12 | TG   | 34 | 3  |
| 374845 | 118 | 534965  | 535002  | 2 | 19 | 38 | TC   | 8  | 7  |
| 374848 | 118 | 544818  | 544841  | 4 | 6  | 24 | TGAG | 24 | 3  |
| 374855 | 118 | 558789  | 558812  | 4 | 6  | 24 | ATTC | 24 | 3  |
| 374857 | 118 | 561278  | 561329  | 4 | 13 | 52 | ATAG | 16 | 9  |
| 374869 | 118 | 583585  | 583624  | 2 | 20 | 40 | TG   | 23 | 12 |
| 374870 | 118 | 586512  | 586537  | 2 | 13 | 26 | CA   | 14 | 7  |
| 374879 | 118 | 593175  | 593188  | 2 | 7  | 14 | TG   | 12 | 4  |
| 374881 | 118 | 600178  | 600193  | 4 | 4  | 16 | CTGT | 21 | 3  |
| 374884 | 118 | 613320  | 613351  | 4 | 8  | 32 | AAAG | 13 | 7  |
| 374893 | 118 | 648637  | 648662  | 2 | 13 | 26 | GT   | 15 | 4  |
| 374896 | 118 | 654977  | 654994  | 3 | 6  | 18 | GCT  | 26 | 3  |
| 374897 | 118 | 657177  | 657204  | 2 | 14 | 28 | TG   | 9  | 9  |
| 374903 | 118 | 674279  | 674304  | 2 | 13 | 26 | CA   | 20 | 6  |
| 374924 | 118 | 702611  | 702630  | 4 | 5  | 20 | TCAC | 13 | 4  |
| 374933 | 118 | 740896  | 740951  | 4 | 14 | 56 | ACAT | 18 | 9  |
| 374947 | 118 | 795517  | 795534  | 2 | 9  | 18 | AC   | 22 | 6  |
| 374950 | 118 | 800855  | 800892  | 2 | 19 | 38 | TG   | 6  | 8  |
| 374955 | 118 | 809174  | 809215  | 2 | 21 | 42 | AC   | 8  | 7  |
| 374959 | 118 | 816967  | 816978  | 2 | 6  | 12 | TG   | 30 | 3  |
| 374968 | 118 | 838990  | 839005  | 2 | 8  | 16 | TC   | 27 | 6  |
| 374970 | 118 | 843517  | 843544  | 2 | 14 | 28 | CA   | 14 | 11 |
| 374980 | 118 | 852666  | 852677  | 2 | 6  | 12 | AT   | 12 | 5  |
| 374989 | 118 | 884292  | 884305  | 2 | 7  | 14 | TG   | 27 | 5  |
| 374996 | 118 | 899721  | 899744  | 4 | 6  | 24 | AAAT | 15 | 5  |
| 375023 | 118 | 924203  | 924234  | 2 | 16 | 32 | AC   | 11 | 13 |
| 375043 | 118 | 984188  | 984213  | 2 | 13 | 26 | AC   | 15 | 7  |
| 375045 | 118 | 998977  | 998992  | 2 | 8  | 16 | CT   | 25 | 5  |
| 375072 | 118 | 1094034 | 1094065 | 4 | 8  | 32 | TCTT | 12 | 9  |
| 375081 | 118 | 1112109 | 1112122 | 2 | 7  | 14 | CA   | 6  | 6  |
| 375088 | 118 | 1144429 | 1144452 | 3 | 8  | 24 | AAT  | 7  | 5  |
| 375092 | 118 | 1178847 | 1178860 | 2 | 7  | 14 | AT   | 21 | 4  |
| 375094 | 118 | 1183334 | 1183348 | 3 | 5  | 15 | CCA  | 28 | 3  |
| 375095 | 118 | 1186001 | 1186022 | 2 | 11 | 22 | TG   | 21 | 12 |
| 375098 | 118 | 1187785 | 1187808 | 3 | 8  | 24 | ATT  | 12 | 6  |
| 375107 | 118 | 1238924 | 1238941 | 2 | 9  | 18 | AT   | 10 | 5  |
| 375108 | 118 | 1241131 | 1241154 | 3 | 8  | 24 | TGT  | 18 | 4  |
| 375126 | 118 | 1308607 | 1308620 | 2 | 7  | 14 | TG   | 19 | 3  |
| 375129 | 118 | 1335392 | 1335415 | 2 | 12 | 24 | CA   | 20 | 12 |
| 375132 | 118 | 1347705 | 1347722 | 2 | 9  | 18 | TG   | 19 | 7  |
| 375133 | 118 | 1347846 | 1347869 | 2 | 12 | 24 | TG   | 11 | 10 |
| 375136 | 118 | 1362977 | 1363010 | 2 | 17 | 34 | GT   | 6  | 10 |
| 375138 | 118 | 1367834 | 1367847 | 2 | 7  | 14 | TC   | 27 | 3  |
| 375141 | 118 | 1369064 | 1369091 | 2 | 14 | 28 | AC   | 13 | 11 |
| 375147 | 118 | 1400254 | 1400271 | 2 | 9  | 18 | CA   | 18 | 9  |

|        |     |         |         |   |    |    |      |    |    |
|--------|-----|---------|---------|---|----|----|------|----|----|
| 375148 | 118 | 1400408 | 1400423 | 4 | 4  | 16 | ATTT | 18 | 4  |
| 375149 | 118 | 1400424 | 1400439 | 4 | 4  | 16 | GTTT | 17 | 5  |
| 375155 | 118 | 1416183 | 1416208 | 2 | 13 | 26 | CA   | 7  | 9  |
| 375162 | 118 | 1435655 | 1435666 | 2 | 6  | 12 | GT   | 11 | 4  |
| 375178 | 118 | 1484795 | 1484810 | 4 | 4  | 16 | AACA | 21 | 3  |
| 375181 | 118 | 1490950 | 1490991 | 2 | 21 | 42 | CA   | 11 | 14 |
| 375183 | 118 | 1497049 | 1497074 | 2 | 13 | 26 | AC   | 16 | 10 |
| 375185 | 118 | 1504147 | 1504178 | 2 | 16 | 32 | CA   | 17 | 8  |
| 375189 | 118 | 1510864 | 1510875 | 2 | 6  | 12 | TG   | 26 | 3  |
| 375191 | 118 | 1514574 | 1514603 | 2 | 15 | 30 | TG   | 10 | 7  |
| 375195 | 118 | 1534337 | 1534358 | 2 | 11 | 22 | TG   | 17 | 6  |
| 375200 | 118 | 1560033 | 1560044 | 2 | 6  | 12 | CA   | 25 | 4  |
| 375201 | 118 | 1560081 | 1560106 | 2 | 13 | 26 | AG   | 14 | 6  |
| 375206 | 118 | 1577460 | 1577475 | 4 | 4  | 16 | GATG | 13 | 4  |
| 375211 | 118 | 1589093 | 1589110 | 3 | 6  | 18 | AAC  | 29 | 3  |
| 375214 | 118 | 1597706 | 1597717 | 2 | 6  | 12 | AT   | 12 | 3  |
| 375218 | 118 | 1603382 | 1603401 | 4 | 5  | 20 | AGGC | 18 | 5  |
| 375220 | 118 | 1623313 | 1623344 | 2 | 16 | 32 | TG   | 8  | 10 |
| 375231 | 118 | 1648726 | 1648747 | 2 | 11 | 22 | TG   | 9  | 12 |
| 375233 | 118 | 1650732 | 1650753 | 2 | 11 | 22 | CA   | 14 | 10 |
| 375250 | 118 | 1696842 | 1696863 | 2 | 11 | 22 | AC   | 20 | 4  |
| 375254 | 118 | 1712313 | 1712326 | 2 | 7  | 14 | GA   | 20 | 6  |
| 386673 | 138 | 33389   | 33422   | 2 | 17 | 34 | GT   | 9  | 12 |
| 386674 | 138 | 33529   | 33556   | 2 | 14 | 28 | TG   | 15 | 10 |
| 386675 | 138 | 33608   | 33623   | 2 | 8  | 16 | TG   | 17 | 3  |
| 386677 | 138 | 41229   | 41240   | 2 | 6  | 12 | CT   | 29 | 5  |
| 386678 | 138 | 42624   | 42669   | 2 | 23 | 46 | GT   | 8  | 12 |
| 386679 | 138 | 43610   | 43623   | 2 | 7  | 14 | GT   | 30 | 4  |
| 386681 | 138 | 52052   | 52079   | 2 | 14 | 28 | CA   | 17 | 11 |
| 386682 | 138 | 55404   | 55433   | 2 | 15 | 30 | CA   | 10 | 10 |
| 386684 | 138 | 58011   | 58038   | 2 | 14 | 28 | CA   | 20 | 7  |
| 386689 | 138 | 61947   | 61978   | 2 | 16 | 32 | TG   | 9  | 12 |
| 386699 | 138 | 74565   | 74582   | 2 | 9  | 18 | GT   | 7  | 10 |
| 386701 | 138 | 78843   | 78866   | 3 | 8  | 24 | CAG  | 25 | 7  |
| 386706 | 138 | 90385   | 90398   | 2 | 7  | 14 | CA   | 27 | 7  |
| 386707 | 138 | 93234   | 93259   | 2 | 13 | 26 | TG   | 15 | 7  |
| 386708 | 138 | 100103  | 100128  | 2 | 13 | 26 | GT   | 24 | 17 |
| 386709 | 138 | 102992  | 103033  | 3 | 14 | 42 | GAG  | 9  | 10 |
| 386711 | 138 | 103394  | 103417  | 2 | 12 | 24 | CA   | 16 | 9  |
| 386713 | 138 | 103800  | 103819  | 2 | 10 | 20 | AC   | 7  | 6  |
| 386715 | 138 | 106656  | 106681  | 2 | 13 | 26 | GT   | 16 | 13 |
| 386724 | 138 | 115330  | 115361  | 2 | 16 | 32 | AC   | 8  | 9  |
| 386725 | 138 | 116660  | 116679  | 4 | 5  | 20 | AATA | 9  | 4  |
| 386727 | 138 | 122081  | 122098  | 3 | 6  | 18 | TAA  | 31 | 3  |
| 386730 | 138 | 124066  | 124080  | 3 | 5  | 15 | ACA  | 22 | 3  |
| 386731 | 138 | 124208  | 124222  | 3 | 5  | 15 | AGG  | 23 | 4  |
| 386734 | 138 | 126011  | 126025  | 3 | 5  | 15 | TAA  | 31 | 3  |
| 386735 | 138 | 126178  | 126195  | 3 | 6  | 18 | CTG  | 32 | 7  |
| 386744 | 138 | 135286  | 135319  | 2 | 17 | 34 | GT   | 13 | 13 |
| 386749 | 138 | 136099  | 136132  | 2 | 17 | 34 | TG   | 17 | 14 |
| 386756 | 138 | 150786  | 150809  | 3 | 8  | 24 | GGA  | 30 | 4  |

|        |     |        |        |   |    |    |      |    |    |
|--------|-----|--------|--------|---|----|----|------|----|----|
| 386757 | 138 | 153768 | 153781 | 2 | 7  | 14 | AC   | 21 | 7  |
| 386761 | 138 | 165678 | 165689 | 2 | 6  | 12 | AT   | 9  | 3  |
| 386766 | 138 | 176566 | 176586 | 3 | 7  | 21 | TCC  | 9  | 6  |
| 386768 | 138 | 186917 | 186936 | 2 | 10 | 20 | GA   | 21 | 5  |
| 386770 | 138 | 187500 | 187515 | 4 | 4  | 16 | CTAC | 20 | 4  |
| 386771 | 138 | 187517 | 187532 | 4 | 4  | 16 | TACC | 18 | 4  |
| 386775 | 138 | 200196 | 200221 | 2 | 13 | 26 | AC   | 6  | 6  |
| 386776 | 138 | 201648 | 201667 | 2 | 10 | 20 | CA   | 17 | 8  |
| 386777 | 138 | 206222 | 206239 | 3 | 6  | 18 | CGG  | 19 | 11 |
| 386786 | 138 | 209677 | 209724 | 2 | 24 | 48 | GT   | 11 | 11 |
| 386787 | 138 | 212473 | 212530 | 2 | 29 | 58 | GT   | 6  | 8  |
| 386789 | 138 | 217430 | 217441 | 2 | 6  | 12 | AC   | 29 | 4  |
| 386800 | 138 | 239682 | 239697 | 2 | 8  | 16 | TG   | 11 | 11 |
| 386801 | 138 | 242944 | 242958 | 3 | 5  | 15 | TCC  | 32 | 7  |
| 386803 | 138 | 244193 | 244210 | 3 | 6  | 18 | TGT  | 22 | 5  |
| 386804 | 138 | 244379 | 244400 | 2 | 11 | 22 | TG   | 12 | 10 |
| 386805 | 138 | 251185 | 251205 | 3 | 7  | 21 | GAT  | 28 | 5  |
| 386806 | 138 | 260027 | 260041 | 3 | 5  | 15 | AAT  | 26 | 3  |
| 386807 | 138 | 265709 | 265728 | 2 | 10 | 20 | CA   | 14 | 9  |
| 386811 | 138 | 273631 | 273646 | 2 | 8  | 16 | AC   | 24 | 4  |
| 386812 | 138 | 273785 | 273820 | 2 | 18 | 36 | GT   | 9  | 10 |
| 386818 | 138 | 292339 | 292362 | 2 | 12 | 24 | GT   | 9  | 9  |
| 386819 | 138 | 294313 | 294334 | 2 | 11 | 22 | GT   | 22 | 8  |
| 386820 | 138 | 294409 | 294432 | 2 | 12 | 24 | AC   | 15 | 6  |
| 386821 | 138 | 295930 | 295961 | 2 | 16 | 32 | CA   | 12 | 11 |
| 386822 | 138 | 298303 | 298348 | 2 | 23 | 46 | TG   | 14 | 12 |
| 386824 | 138 | 301032 | 301067 | 2 | 18 | 36 | GT   | 13 | 16 |
| 386826 | 138 | 302303 | 302322 | 2 | 10 | 20 | AC   | 24 | 17 |
| 386827 | 138 | 306370 | 306389 | 2 | 10 | 20 | TG   | 26 | 7  |
| 386828 | 138 | 307707 | 307722 | 2 | 8  | 16 | CA   | 22 | 7  |
| 386845 | 138 | 311920 | 311937 | 3 | 6  | 18 | AAC  | 18 | 11 |
| 386846 | 138 | 312069 | 312098 | 3 | 10 | 30 | GGA  | 23 | 4  |
| 386853 | 138 | 313747 | 313778 | 2 | 16 | 32 | TG   | 11 | 14 |
| 386864 | 138 | 324177 | 324204 | 2 | 14 | 28 | AC   | 15 | 11 |
| 386867 | 138 | 325970 | 325999 | 2 | 15 | 30 | CA   | 6  | 8  |
| 386868 | 138 | 329904 | 329929 | 2 | 13 | 26 | GT   | 16 | 13 |
| 386869 | 138 | 333575 | 333590 | 2 | 8  | 16 | AC   | 24 | 6  |
| 386871 | 138 | 334946 | 334960 | 3 | 5  | 15 | AGG  | 26 | 3  |
| 386873 | 138 | 342764 | 342795 | 4 | 8  | 32 | CAAT | 26 | 3  |
| 386879 | 138 | 346606 | 346627 | 2 | 11 | 22 | GT   | 13 | 7  |
| 386880 | 138 | 350468 | 350495 | 2 | 14 | 28 | CA   | 15 | 6  |
| 386881 | 138 | 352488 | 352537 | 2 | 25 | 50 | AC   | 6  | 7  |
| 386892 | 138 | 355600 | 355637 | 2 | 19 | 38 | GT   | 8  | 10 |
| 386893 | 138 | 355975 | 356004 | 3 | 10 | 30 | CTT  | 21 | 10 |
| 386895 | 138 | 360133 | 360164 | 2 | 16 | 32 | CA   | 7  | 6  |
| 386896 | 138 | 364884 | 364911 | 2 | 14 | 28 | GT   | 12 | 12 |
| 386897 | 138 | 366542 | 366569 | 2 | 14 | 28 | CA   | 10 | 5  |
| 386898 | 138 | 369281 | 369318 | 2 | 19 | 38 | AC   | 9  | 11 |
| 386899 | 138 | 376136 | 376150 | 3 | 5  | 15 | GCA  | 11 | 3  |
| 386900 | 138 | 377811 | 377834 | 2 | 12 | 24 | GT   | 19 | 8  |
| 386901 | 138 | 378791 | 378817 | 3 | 9  | 27 | GAG  | 19 | 10 |

|        |     |        |        |   |    |    |      |    |    |
|--------|-----|--------|--------|---|----|----|------|----|----|
| 386902 | 138 | 379644 | 379658 | 3 | 5  | 15 | AGA  | 30 | 5  |
| 386903 | 138 | 380598 | 380627 | 2 | 15 | 30 | GT   | 13 | 8  |
| 386904 | 138 | 380765 | 380790 | 2 | 13 | 26 | GT   | 9  | 11 |
| 386906 | 138 | 381359 | 381388 | 2 | 15 | 30 | AC   | 16 | 17 |
| 386914 | 138 | 386170 | 386197 | 4 | 7  | 28 | CAGT | 30 | 5  |
| 386917 | 138 | 391044 | 391061 | 2 | 9  | 18 | GT   | 21 | 4  |
| 386924 | 138 | 408038 | 408059 | 2 | 11 | 22 | GT   | 16 | 5  |
| 386928 | 138 | 414056 | 414099 | 4 | 11 | 44 | TTCT | 15 | 14 |
| 386929 | 138 | 414215 | 414230 | 4 | 4  | 16 | CTTT | 8  | 3  |
| 386930 | 138 | 414330 | 414365 | 4 | 9  | 36 | TCCT | 19 | 12 |
| 386939 | 138 | 415746 | 415761 | 2 | 8  | 16 | TG   | 23 | 3  |
| 386942 | 138 | 416083 | 416130 | 2 | 24 | 48 | CA   | 8  | 12 |
| 386944 | 138 | 419332 | 419367 | 2 | 18 | 36 | TG   | 10 | 12 |
| 386951 | 138 | 420667 | 420696 | 3 | 10 | 30 | ATT  | 14 | 7  |
| 386956 | 138 | 423362 | 423375 | 2 | 7  | 14 | CT   | 16 | 8  |
| 386957 | 138 | 425071 | 425100 | 2 | 15 | 30 | TG   | 8  | 8  |
| 386959 | 138 | 425343 | 425384 | 2 | 21 | 42 | AC   | 7  | 5  |
| 386962 | 138 | 425459 | 425490 | 2 | 16 | 32 | AC   | 18 | 7  |
| 386964 | 138 | 427033 | 427050 | 2 | 9  | 18 | CA   | 22 | 5  |
| 386970 | 138 | 444205 | 444220 | 2 | 8  | 16 | AG   | 26 | 11 |
| 386974 | 138 | 447249 | 447268 | 2 | 10 | 20 | CT   | 20 | 6  |
| 386975 | 138 | 447936 | 447961 | 2 | 13 | 26 | TG   | 20 | 9  |
| 386980 | 138 | 457960 | 458007 | 2 | 24 | 48 | GT   | 7  | 8  |
| 386984 | 138 | 458333 | 458372 | 2 | 20 | 40 | AC   | 9  | 11 |
| 386985 | 138 | 460247 | 460264 | 3 | 6  | 18 | TCT  | 21 | 4  |
| 386987 | 138 | 461425 | 461450 | 2 | 13 | 26 | GT   | 15 | 7  |
| 386989 | 138 | 465790 | 465819 | 2 | 15 | 30 | AC   | 9  | 6  |
| 386992 | 138 | 466385 | 466400 | 4 | 4  | 16 | TGCC | 26 | 4  |
| 386993 | 138 | 466577 | 466610 | 2 | 17 | 34 | AC   | 12 | 7  |
| 386999 | 138 | 492334 | 492354 | 3 | 7  | 21 | CAA  | 23 | 10 |
| 387005 | 138 | 523017 | 523044 | 2 | 14 | 28 | AC   | 15 | 7  |
| 387008 | 138 | 527222 | 527243 | 2 | 11 | 22 | CA   | 19 | 9  |
| 387009 | 138 | 529297 | 529336 | 2 | 20 | 40 | TG   | 10 | 11 |
| 387012 | 138 | 529915 | 529944 | 2 | 15 | 30 | GT   | 20 | 8  |
| 387013 | 138 | 532540 | 532569 | 3 | 10 | 30 | TGA  | 24 | 6  |
| 387019 | 138 | 543625 | 543654 | 2 | 15 | 30 | GT   | 12 | 10 |
| 387020 | 138 | 543795 | 543808 | 2 | 7  | 14 | TG   | 13 | 8  |
| 387022 | 138 | 543998 | 544018 | 3 | 7  | 21 | AGG  | 20 | 6  |
| 387023 | 138 | 544082 | 544096 | 3 | 5  | 15 | AGG  | 16 | 3  |
| 387025 | 138 | 548537 | 548557 | 3 | 7  | 21 | GAG  | 31 | 3  |
| 387039 | 138 | 561523 | 561538 | 2 | 8  | 16 | GT   | 21 | 6  |
| 387045 | 138 | 583991 | 584008 | 3 | 6  | 18 | CCA  | 34 | 3  |
| 387046 | 138 | 585135 | 585146 | 2 | 6  | 12 | TG   | 19 | 9  |
| 387048 | 138 | 591903 | 591924 | 2 | 11 | 22 | CA   | 20 | 9  |
| 387050 | 138 | 602268 | 602319 | 2 | 26 | 52 | AC   | 10 | 13 |
| 387052 | 138 | 606869 | 606882 | 2 | 7  | 14 | TG   | 22 | 4  |
| 387053 | 138 | 606885 | 606896 | 2 | 6  | 12 | TG   | 13 | 3  |
| 387057 | 138 | 616238 | 616251 | 2 | 7  | 14 | TG   | 19 | 11 |
| 387063 | 138 | 623667 | 623684 | 2 | 9  | 18 | CA   | 19 | 7  |
| 387069 | 138 | 630537 | 630568 | 2 | 16 | 32 | CA   | 10 | 8  |
| 387072 | 138 | 640515 | 640534 | 2 | 10 | 20 | TG   | 21 | 11 |

|        |     |         |         |   |    |    |      |    |    |
|--------|-----|---------|---------|---|----|----|------|----|----|
| 387074 | 138 | 641181  | 641208  | 2 | 14 | 28 | CA   | 8  | 5  |
| 387075 | 138 | 641463  | 641476  | 2 | 7  | 14 | AC   | 26 | 3  |
| 387076 | 138 | 644783  | 644798  | 2 | 8  | 16 | TG   | 23 | 4  |
| 387081 | 138 | 655407  | 655424  | 3 | 6  | 18 | CCT  | 29 | 4  |
| 387083 | 138 | 655972  | 655995  | 4 | 6  | 24 | ACCG | 28 | 7  |
| 387085 | 138 | 656670  | 656681  | 2 | 6  | 12 | AG   | 23 | 3  |
| 387093 | 138 | 668195  | 668226  | 2 | 16 | 32 | CA   | 17 | 12 |
| 387095 | 138 | 669129  | 669154  | 2 | 13 | 26 | AC   | 16 | 13 |
| 387096 | 138 | 669187  | 669204  | 2 | 9  | 18 | GT   | 9  | 6  |
| 387099 | 138 | 671296  | 671329  | 2 | 17 | 34 | AC   | 12 | 7  |
| 387100 | 138 | 671683  | 671694  | 2 | 6  | 12 | GT   | 26 | 4  |
| 387101 | 138 | 671884  | 671913  | 2 | 15 | 30 | AC   | 21 | 8  |
| 387102 | 138 | 672111  | 672134  | 2 | 12 | 24 | AC   | 25 | 5  |
| 387103 | 138 | 672323  | 672342  | 2 | 10 | 20 | GT   | 30 | 6  |
| 387104 | 138 | 672417  | 672446  | 2 | 15 | 30 | TG   | 18 | 5  |
| 387106 | 138 | 676404  | 676425  | 2 | 11 | 22 | CA   | 15 | 10 |
| 387108 | 138 | 681582  | 681605  | 3 | 8  | 24 | GGA  | 11 | 6  |
| 387111 | 138 | 682013  | 682026  | 2 | 7  | 14 | TG   | 21 | 9  |
| 387112 | 138 | 682173  | 682196  | 2 | 12 | 24 | AC   | 14 | 12 |
| 387121 | 138 | 714857  | 714884  | 2 | 14 | 28 | AC   | 8  | 4  |
| 387134 | 138 | 748843  | 748868  | 2 | 13 | 26 | GA   | 16 | 4  |
| 387149 | 138 | 774442  | 774457  | 2 | 8  | 16 | AC   | 28 | 3  |
| 387152 | 138 | 783390  | 783407  | 2 | 9  | 18 | AC   | 22 | 3  |
| 387160 | 138 | 802475  | 802489  | 3 | 5  | 15 | TAA  | 17 | 3  |
| 387162 | 138 | 804069  | 804092  | 4 | 6  | 24 | TCAA | 30 | 3  |
| 387165 | 138 | 810550  | 810603  | 3 | 18 | 54 | TTA  | 7  | 6  |
| 387183 | 138 | 843384  | 843399  | 2 | 8  | 16 | CT   | 18 | 3  |
| 387191 | 138 | 864883  | 864900  | 3 | 6  | 18 | CAG  | 25 | 4  |
| 387193 | 138 | 866966  | 866989  | 2 | 12 | 24 | AC   | 19 | 5  |
| 387215 | 138 | 920543  | 920570  | 4 | 7  | 28 | TATC | 24 | 5  |
| 387224 | 138 | 942469  | 942508  | 4 | 10 | 40 | ATGG | 17 | 3  |
| 387225 | 138 | 943116  | 943147  | 2 | 16 | 32 | GT   | 13 | 10 |
| 387244 | 138 | 990923  | 990938  | 2 | 8  | 16 | TC   | 22 | 4  |
| 387245 | 138 | 990939  | 990954  | 2 | 8  | 16 | AC   | 20 | 6  |
| 387257 | 138 | 1020962 | 1020973 | 2 | 6  | 12 | CA   | 20 | 3  |
| 387258 | 138 | 1022350 | 1022363 | 2 | 7  | 14 | TG   | 19 | 3  |
| 387259 | 138 | 1024701 | 1024728 | 2 | 14 | 28 | GT   | 12 | 10 |
| 387265 | 138 | 1047078 | 1047093 | 4 | 4  | 16 | GATG | 13 | 4  |
| 387280 | 138 | 1090939 | 1090954 | 4 | 4  | 16 | TGGC | 20 | 4  |
| 387283 | 138 | 1096716 | 1096742 | 3 | 9  | 27 | TTA  | 11 | 4  |
| 387316 | 138 | 1183285 | 1183326 | 2 | 21 | 42 | TG   | 6  | 6  |
| 387323 | 138 | 1206985 | 1206996 | 2 | 6  | 12 | CA   | 22 | 3  |
| 387335 | 138 | 1255120 | 1255147 | 4 | 7  | 28 | TCTA | 13 | 7  |
| 387345 | 138 | 1273539 | 1273565 | 3 | 9  | 27 | TCT  | 19 | 5  |
| 387346 | 138 | 1274299 | 1274352 | 3 | 18 | 54 | TCT  | 17 | 8  |

ID: SSR ID; SCAF: scaffold number; START: motif start point; END: motif end point; TYPE: motif type; REPEAT: the number of motif repeats; LEN: motif length; N: the number of the number of genotyped individuals; Na: the number of alleles per locus called by HipSTR
