# Supplementary material for: Microsatellite Genome-Wide Database Development for the Commercial Blackhead Seabream (Acanthopagrus schlegelii)
Source: MDPI journal article supplement (doi:10.3390/genes14030620), 2023-03-01
Supplement: s1 [file s1]

Table S8. Comparison of genotyping consistency between PCR and HipSTR

| loci          | Same<br>samples | heterozygotes | homozygotes | same<br>genotype |
|---------------|-----------------|---------------|-------------|------------------|
| AS3           | 6               | 4             | 2           | 6                |
| AS26          | 6               | 4             | 2           | 4                |
| AS31          | 10              | 2             | 8           | 7                |
| AS27          | 5               | 4             | 1           | 4                |
| AS20          | 9               | 3             | 6           | 8                |
| AS9           | 6               | 5             | 1           | 5                |
| AS8           | 11              | 10            | 1           | 11               |
| AS34          | 10              | 7             | 3           | 10               |
| SSR137989     | 12              | 10            | 2           | 11               |
| SSR99580      | 8               | 6             | 2           | 8                |
| SSR153041     | 10              | 8             | 2           | 9                |
| SSR143492     | 11              | 10            | 1           | 9                |
| SSR5381       | 8               | 5             | 3           | 7                |
| SSR145663     | 11              | 9             | 2           | 8                |
| SSR183796     | 12              | 6             | 6           | 11               |
| SSR359082     | 13              | 8             | 5           | 12               |
| SSR24062      | 9               | 9             | 0           | 8                |
| SSR21025      | 11              | 3             | 8           | 11               |
| SSR232706     | 13              | 8             | 5           | 10               |
| SSR274142     | 11              | 11            | 0           | 11               |
| SSR244447     | 12              | 10            | 2           | 12               |
| SSR246842     | 9               | 4             | 5           | 9                |
| Total         | 213             | 146           | 67          | 191              |
| Proportion(%) | 100             | 68.54         | 31.46       | 89.67            |
