# Supplementary material for: Microsatellite Genome-Wide Database Development for the Commercial Blackhead Seabream (Acanthopagrus schlegelii)
Source: MDPI journal article supplement (doi:10.3390/genes14030620), 2023-03-01
Supplement: s1 [file s1]

Table S4. Distribution of called microsatellite loci on the scaffold of the genome

| Scaffold | Number of microsatellites | Total(ratio)  | Scaffold length(bp) |
|----------|---------------------------|---------------|---------------------|
| 1        | 5851                      | 44077(28.24%) | 182,321,725         |
| 2        | 5588                      |               |                     |
| 3        | 4660                      |               |                     |
| 4        | 4304                      |               |                     |
| 5        | 4040                      |               |                     |
| 6        | 3387                      |               |                     |
| 7        | 5703                      |               |                     |
| 8        | 2823                      |               |                     |
| 9        | 4244                      |               |                     |
| 10       | 3477                      |               |                     |
| 11       | 4014                      | 28999(18.58%) | 108,318,484         |
| 12       | 4332                      |               |                     |
| 13       | 3122                      |               |                     |
| 14       | 2845                      |               |                     |
| 15       | 2636                      |               |                     |
| 16       | 2914                      |               |                     |
| 17       | 3014                      |               |                     |
| 18       | 2185                      |               |                     |
| 19       | 1795                      |               |                     |
| 20       | 2142                      |               |                     |
| 21       | 1915                      | 20062(12.85%) | 75,395,736          |
| 22       | 3505                      |               |                     |
| 23       | 1923                      |               |                     |
| 24       | 1910                      |               |                     |
| 25       | 1444                      |               |                     |
| 26       | 2818                      |               |                     |
| 27       | 2091                      |               |                     |
| 28       | 1161                      |               |                     |
| 29       | 1742                      |               |                     |
| 30       | 1553                      |               |                     |
| 31       | 4094                      | 16702(10.70%) | 68,101,658          |
| 32       | 1279                      |               |                     |
| 33       | 1435                      |               |                     |
| 34       | 1562                      |               |                     |
| 35       | 1923                      |               |                     |
| 36       | 1599                      |               |                     |
| 37       | 1156                      |               |                     |
| 38       | 1437                      |               |                     |
| 39       | 1007                      |               |                     |
| 40       | 1210                      |               |                     |
| 41       | 946                       |               |                     |
| 42       | 743                       |               |                     |

|    |      |       |            |
|----|------|-------|------------|
| 43 | 1135 | 10025 | 40,827,991 |
| 44 | 808  |       |            |
| 45 | 865  |       |            |
| 46 | 1415 |       |            |
| 47 | 1485 |       |            |
| 48 | 896  |       |            |
| 49 | 1053 |       |            |
| 50 | 679  |       |            |
| 51 | 874  | 7292  | 32,876,149 |
| 52 | 986  |       |            |
| 53 | 636  |       |            |
| 54 | 920  |       |            |
| 55 | 580  |       |            |
| 56 | 540  |       |            |
| 57 | 410  |       |            |
| 58 | 1184 |       |            |
| 59 | 610  | 6583  |            |
| 60 | 552  |       |            |
| 61 | 503  |       |            |
| 62 | 537  |       |            |
| 63 | 558  |       |            |
| 64 | 688  |       |            |
| 65 | 588  |       |            |
| 66 | 675  |       |            |
| 67 | 962  |       |            |
| 68 | 802  |       |            |
| 69 | 916  | 6577  |            |
| 70 | 354  |       |            |
| 71 | 720  |       |            |
| 72 | 440  |       |            |
| 73 | 693  |       |            |
| 74 | 473  |       |            |
| 75 | 417  |       |            |
| 76 | 579  |       |            |
| 77 | 1197 |       |            |
| 78 | 550  |       |            |
| 79 | 422  | 5503  |            |
| 80 | 1086 |       |            |
| 81 | 702  |       |            |
| 82 | 364  |       |            |
| 83 | 825  |       |            |
| 84 | 249  |       |            |
| 85 | 579  |       |            |
| 86 | 525  |       |            |
| 87 | 567  |       |            |
| 88 | 469  |       |            |
| 89 | 623  |       |            |

|       |        |  |  |
|-------|--------|--|--|
| 90    | 600    |  |  |
| 91    | 432    |  |  |
| 92    | 260    |  |  |
| 93    | 271    |  |  |
| 94    | 425    |  |  |
| 95    | 607    |  |  |
| 96    | 258    |  |  |
| 97    | 528    |  |  |
| 98    | 590    |  |  |
| 99    | 230    |  |  |
| 100   | 457    |  |  |
| 101   | 257    |  |  |
| 102   | 489    |  |  |
| 103   | 293    |  |  |
| 104   | 405    |  |  |
| 105   | 955    |  |  |
| 106   | 329    |  |  |
| 107   | 156    |  |  |
| 108   | 133    |  |  |
| 109   | 377    |  |  |
| 110   | 195    |  |  |
| 111   | 452    |  |  |
| 112   | 768    |  |  |
| 113   | 336    |  |  |
| 114   | 225    |  |  |
| 115   | 0      |  |  |
| 116   | 421    |  |  |
| 117   | 0      |  |  |
| 118   | 138    |  |  |
| 119   | 0      |  |  |
| 120   | 0      |  |  |
| 138   | 279    |  |  |
| Total | 156086 |  |  |
